# Supplementary material for: The maintenance of oocytes in the mammalian ovary involves extreme protein longevity
Source: PubMed Central journal article supplement (PMC11252011; doi:10.1038/s41556-024-01442-7), 2024-06-20

**A0A087WPF7**  
**GN=Auts2**  
autism susceptibility candidate 2

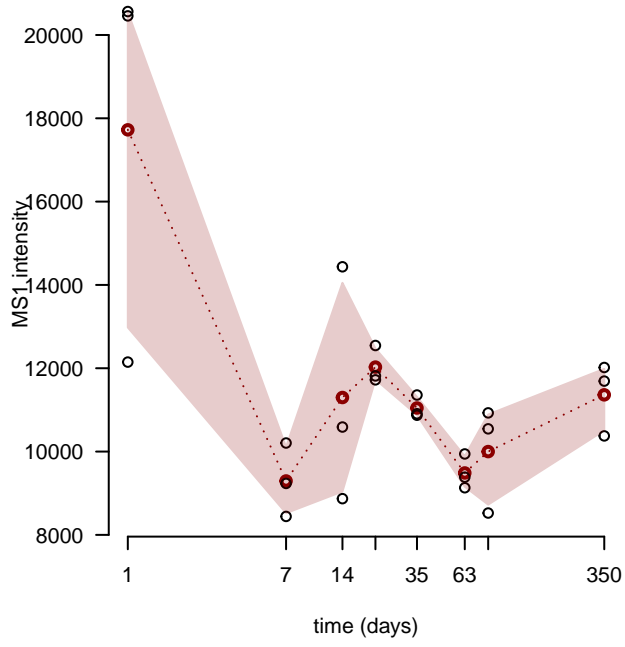

**A0A0M3U1B0**  
**GN=Sycp2l**  
synaptonemal complex protein 2-like

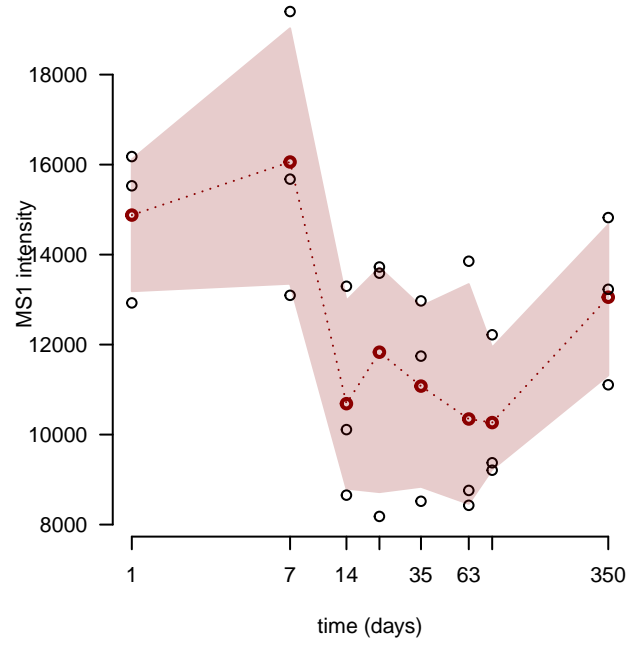

**A1A5B6**  
**GN=Tbc1d25**  
TBC1 domain family, member 25

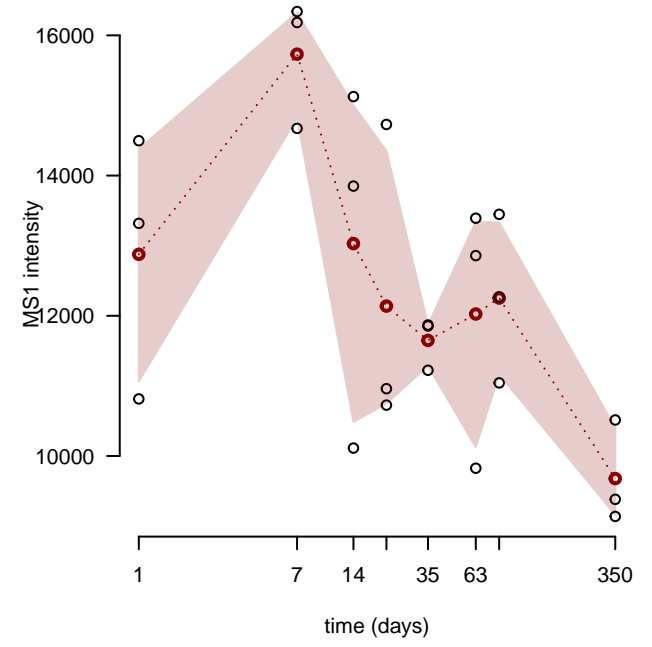

**A1L314**  
**GN=Mpeg1**  
macrophage expressed gene 1

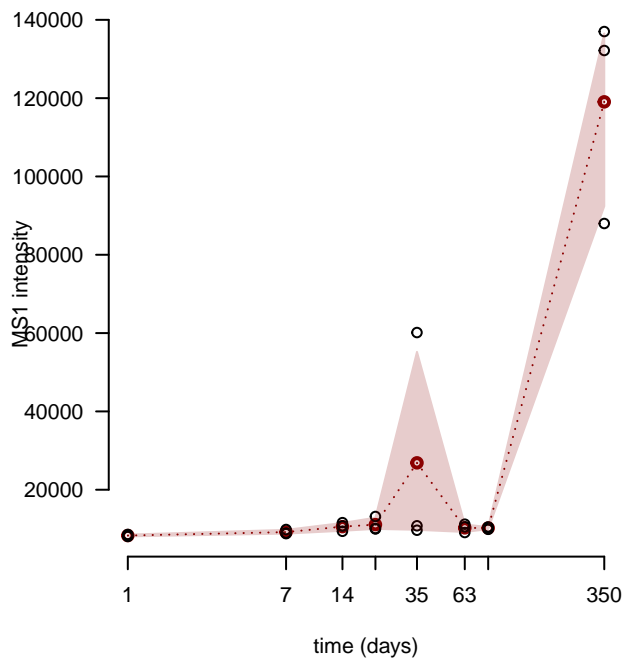

**A1L317**  
**GN=Krt24**  
keratin 24

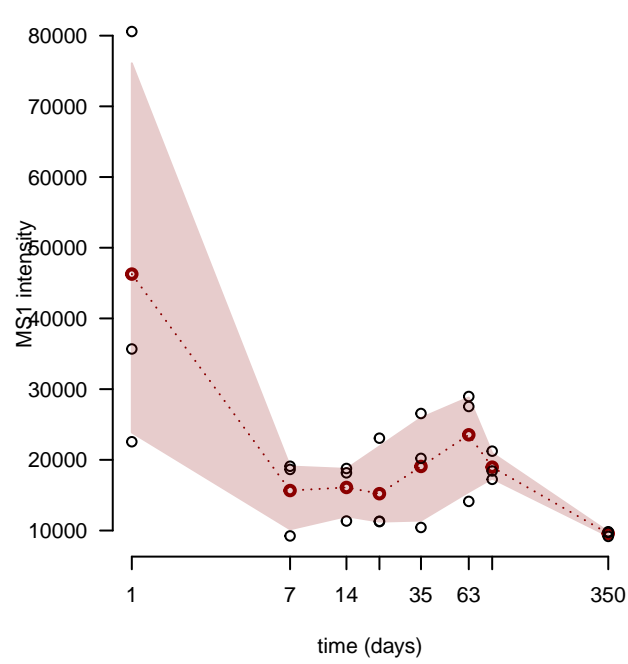

**A2A3V1**  
**GN=Akap17b**  
A kinase (PRKA) anchor protein 17B

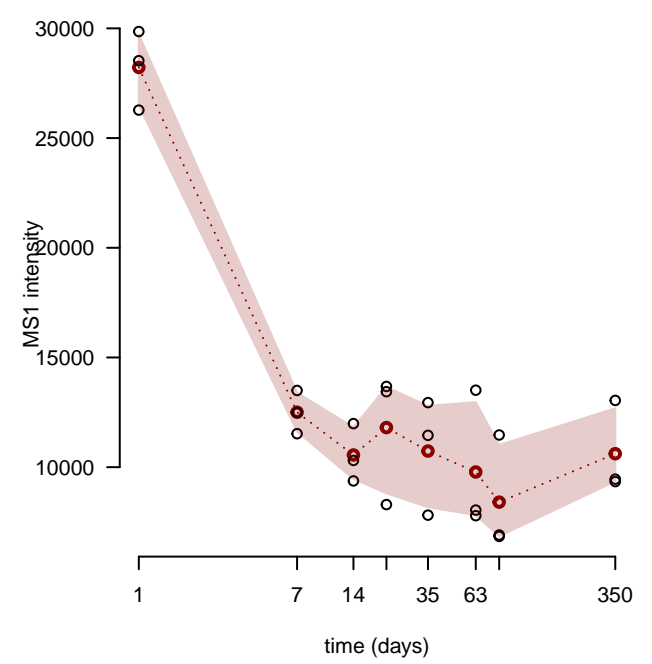

**A2A432**  
**GN=Cul4b**  
cullin 4B

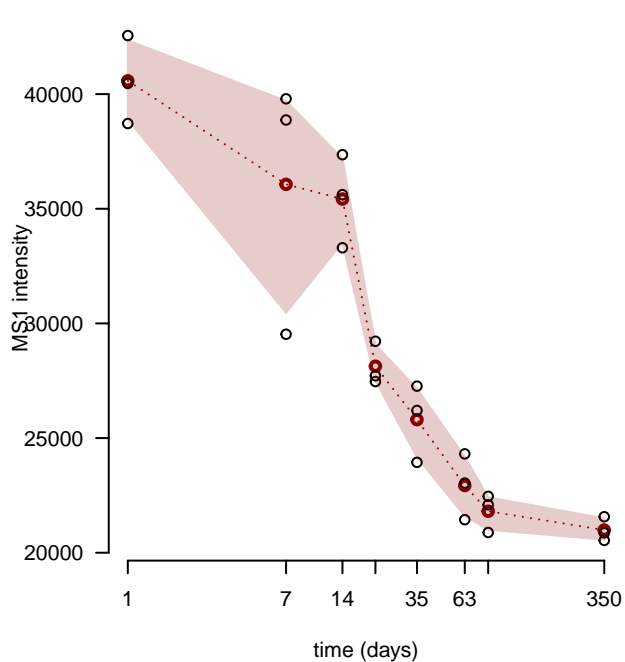

**A2A4P0**  
**GN=Dhx8**  
DEAH (Asp-Glu-Ala-His) box polypeptide 8

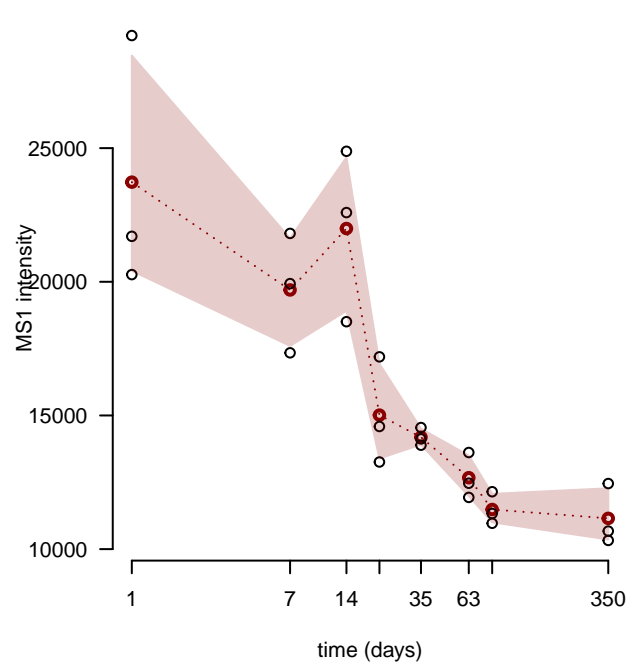

**A2A5R2**  
**GN=Argef2**  
ADP-ribosylation factor guanine nucleoti ...

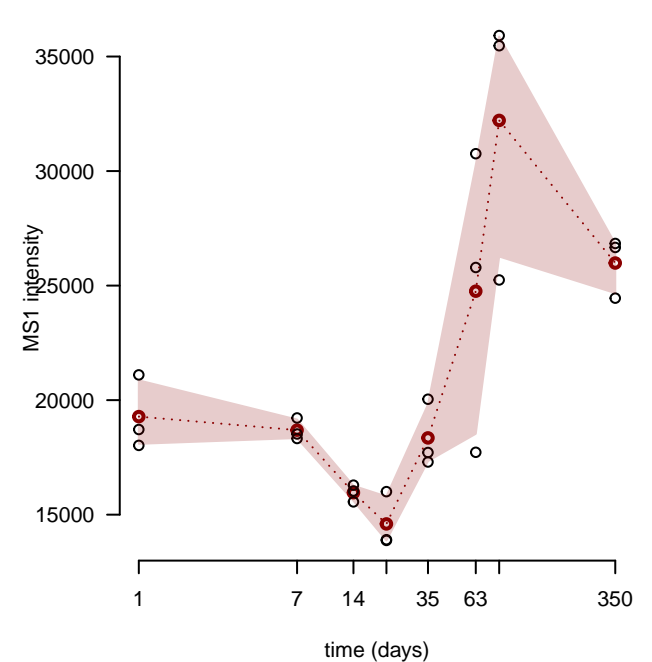

**A2A5Z6**  
GN=Smurf2  
SMAD specific E3 ubiquitin protein ligas ...

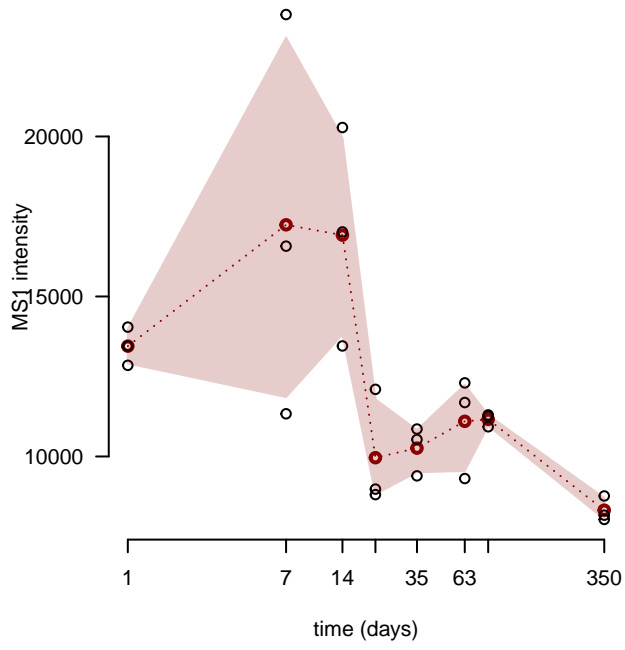

**A2A690**  
GN=Tanc2  
tetratricopeptide repeat, ankyrin repeat ...

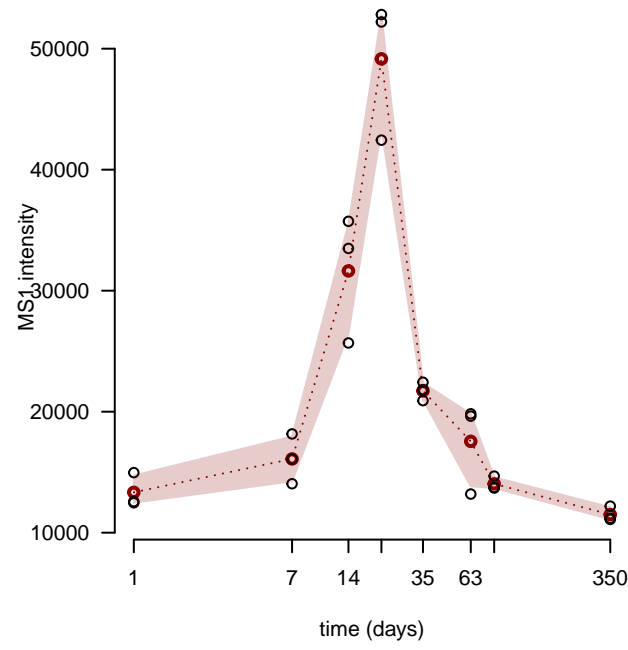

**A2A699**  
GN=Fam171a2  
family with sequence similarity 171, mem ...

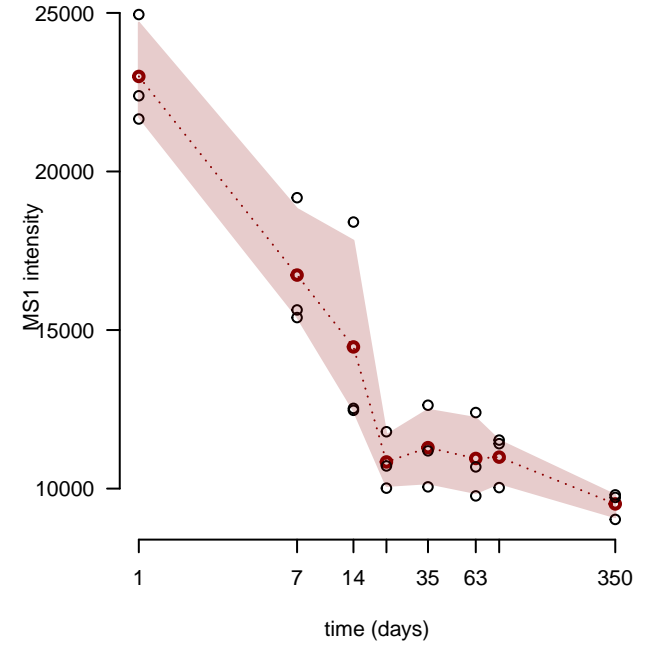

**A2A6A1**  
GN=Gpatch8  
G patch domain containing 8

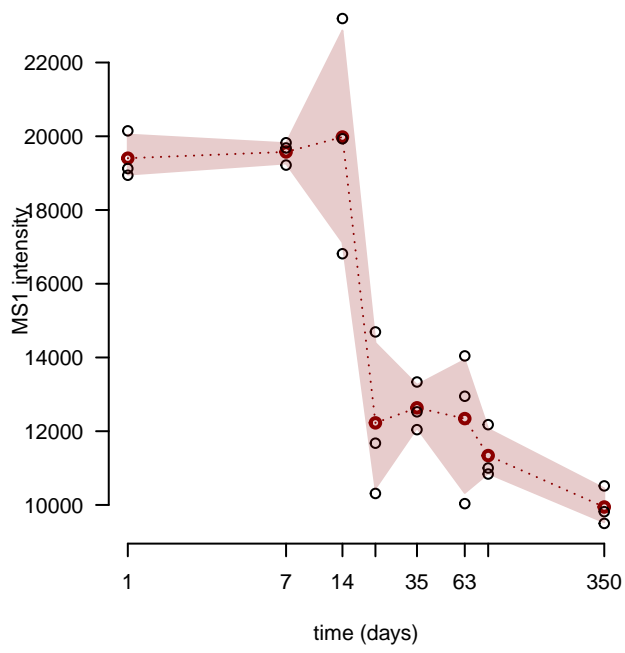

**A2A6Q5**  
GN=Cdc27  
cell division cycle 27

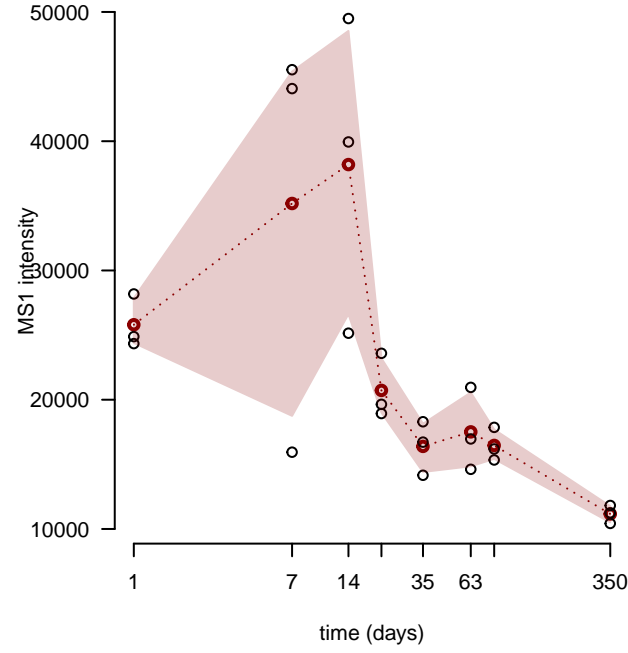

**A2A6Q5**  
GN=Cdc27  
cell division cycle 27

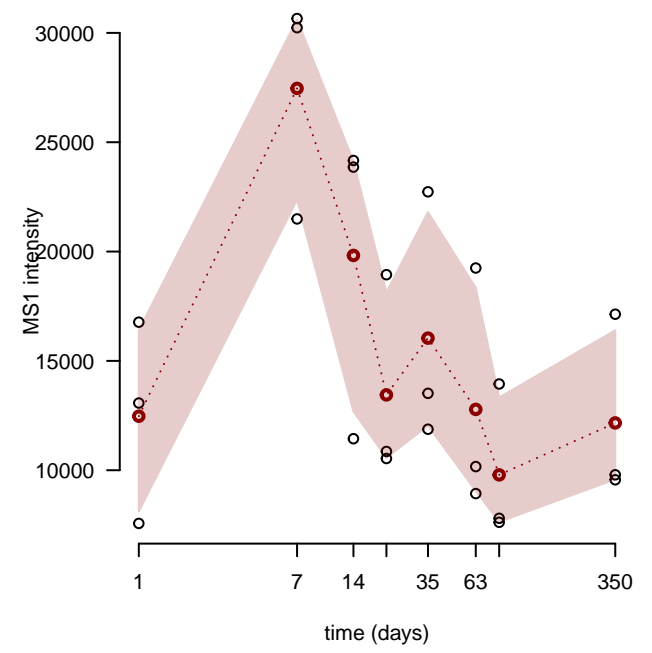

**A2A6T1**  
GN=Cdr2l  
cerebellar degeneration-related protein ...

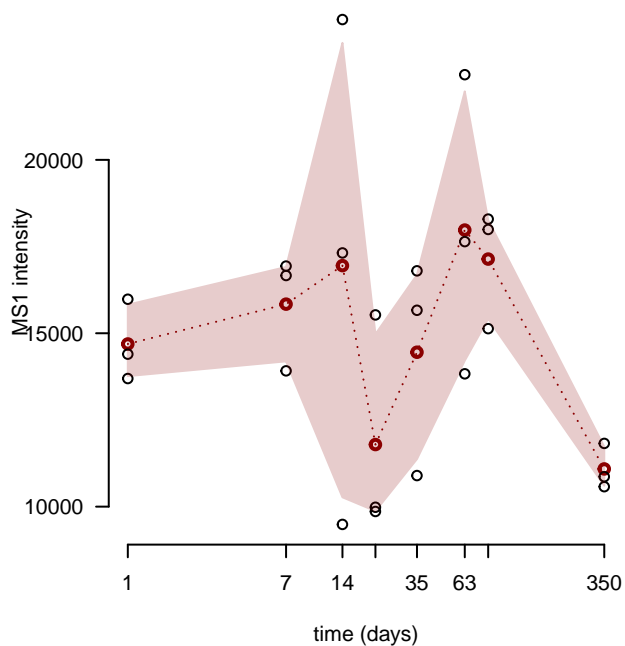

**A2A791**  
GN=Zmym4  
zinc finger, MYM-type 4

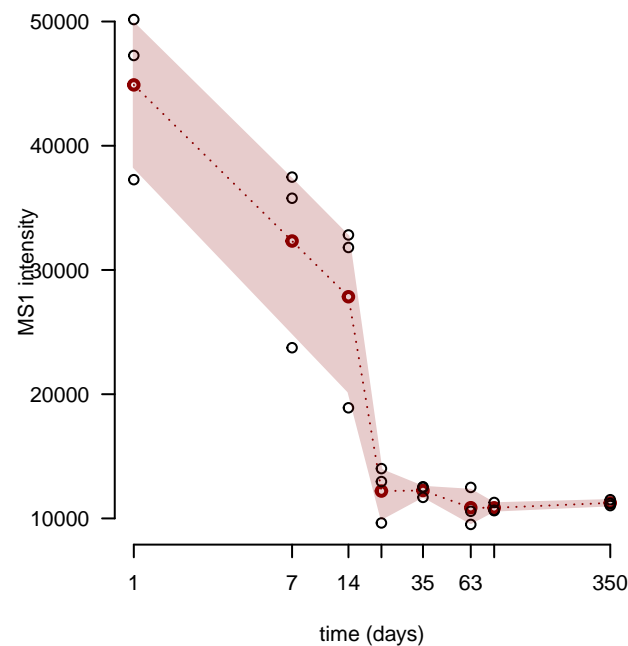

**A2A7S8**  
GN=Kiaa1522

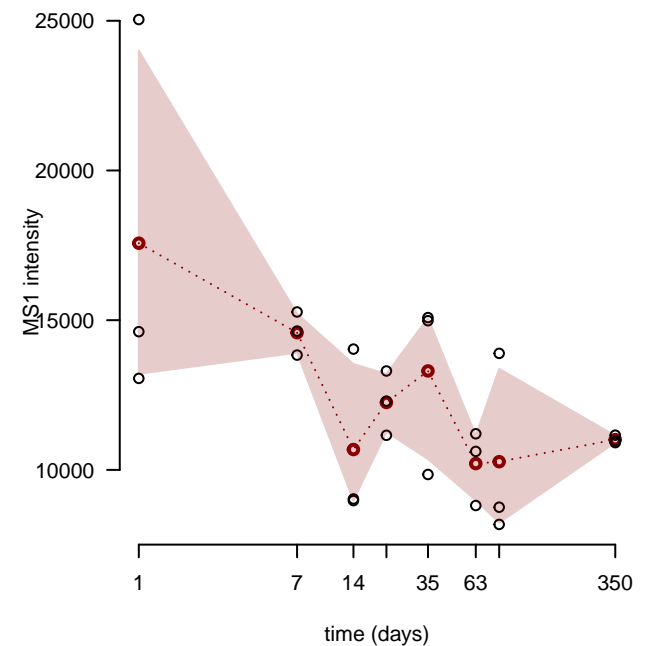

**A2A863**  
GN=Itgb4  
integrin beta 4

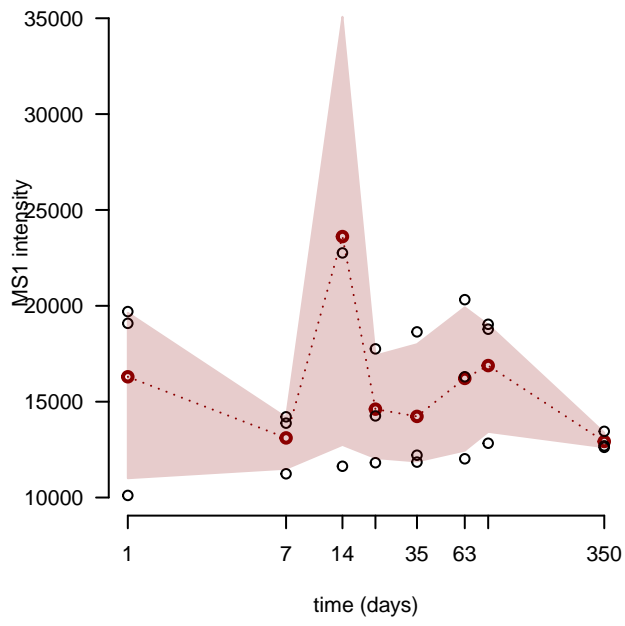

**A2A8L1**  
GN=Chd5  
chromodomain helicase DNA binding protei ...

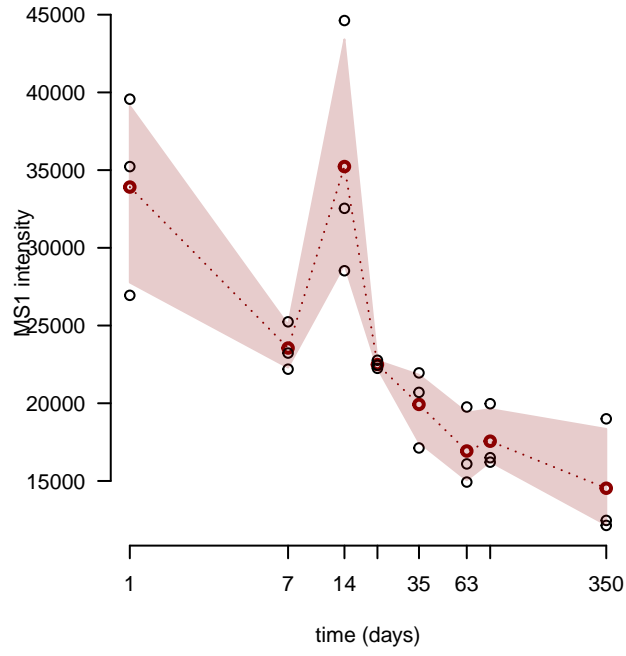

**A2A8L5**  
GN=Ptpf  
protein tyrosine phosphatase, receptor t ...

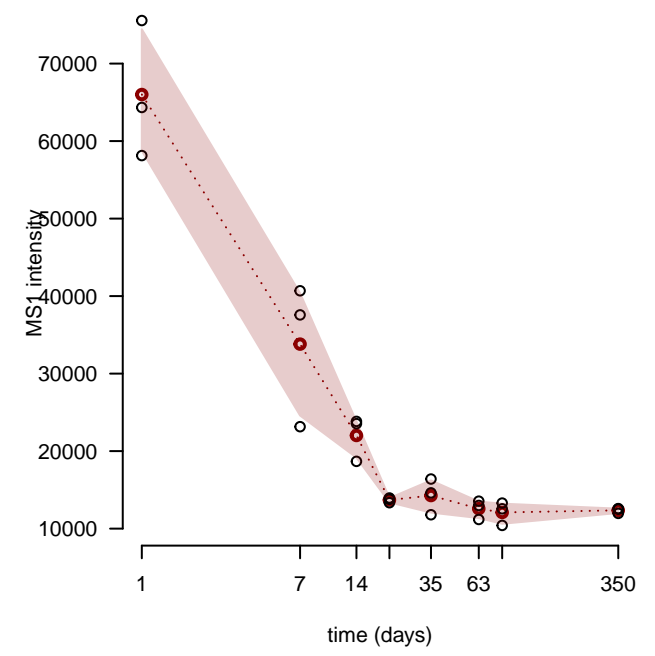

**A2A8U2**  
GN=Tmem201  
transmembrane protein 201

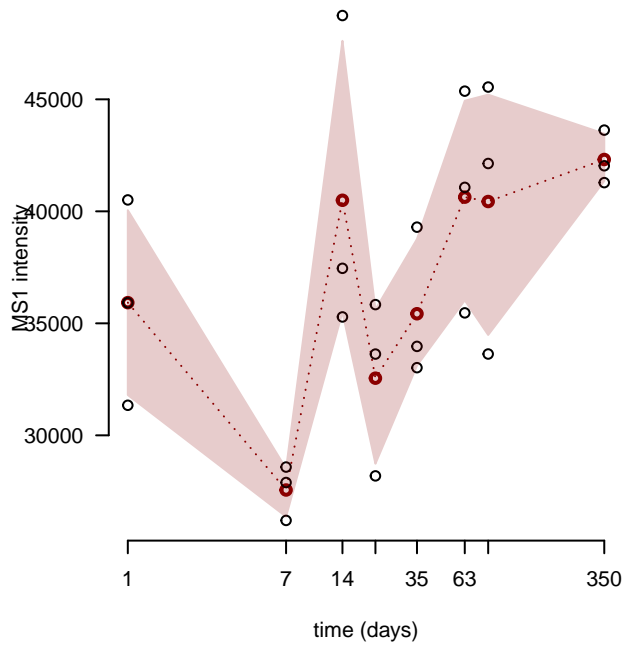

**A2A8Z1**  
GN=Osbp19  
oxysterol binding protein-like 9

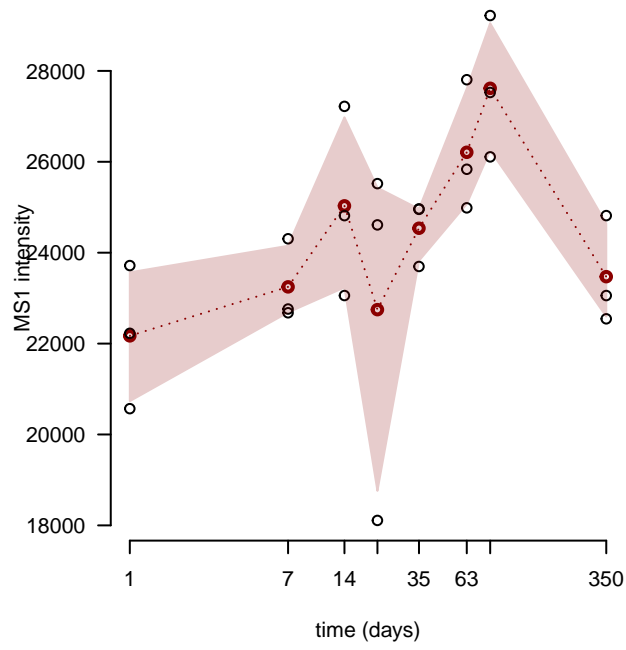

**A2A9C3**  
GN=Szt2  
SZT2 subunit of KICSTOR complex

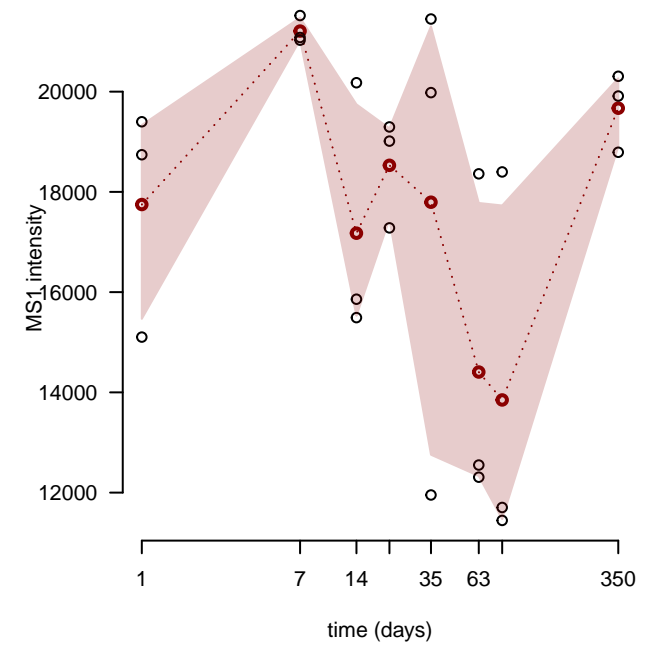

**A2A9R3**  
GN=Mageb4  
MAGE family member B4

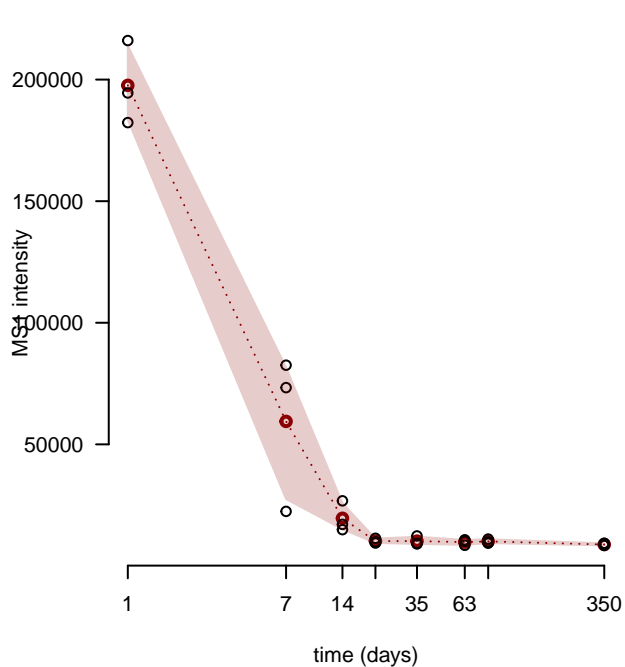

**A2AAE1**  
GN=Kiaa1109

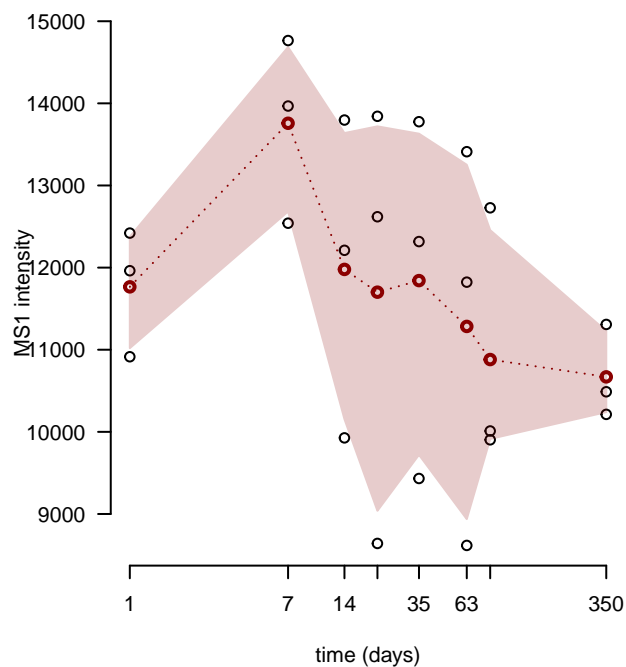

**A2AAX3**  
GN=Klh15  
kelch-like 15

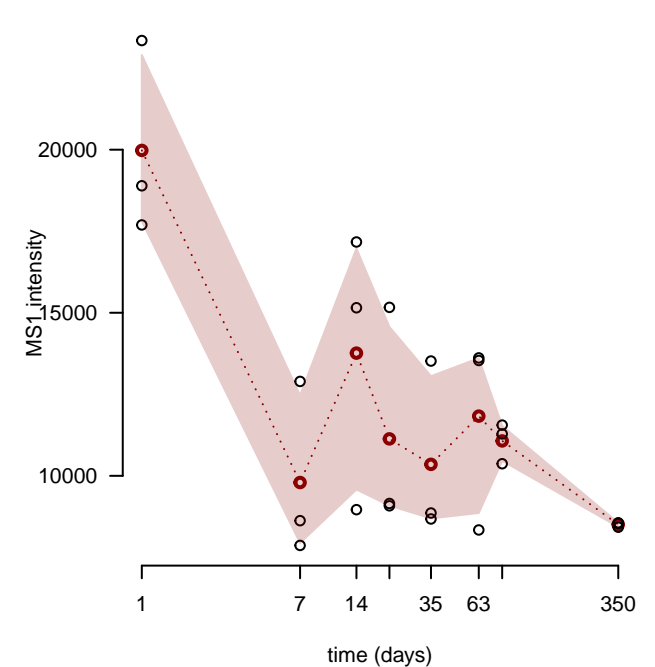

**A2AAY5**  
GN=Sh3pxd2b  
SH3 and PX domains 2B

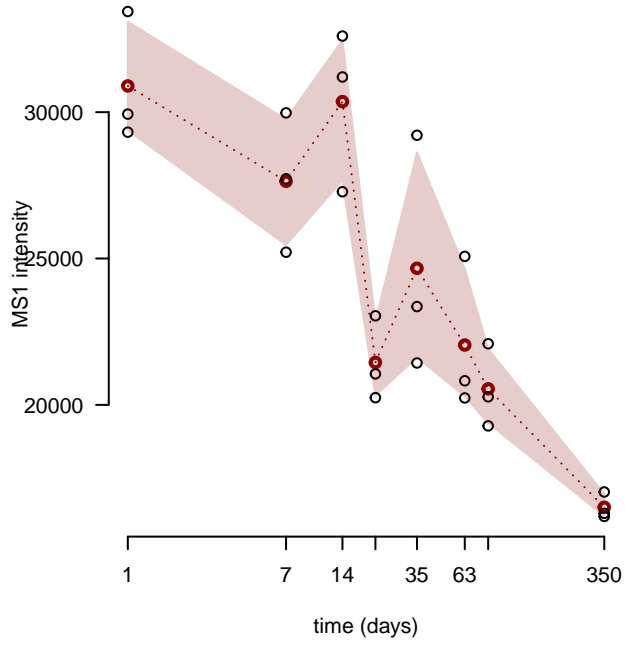

**A2ABU4**  
GN=Myom3  
myomesin family, member 3

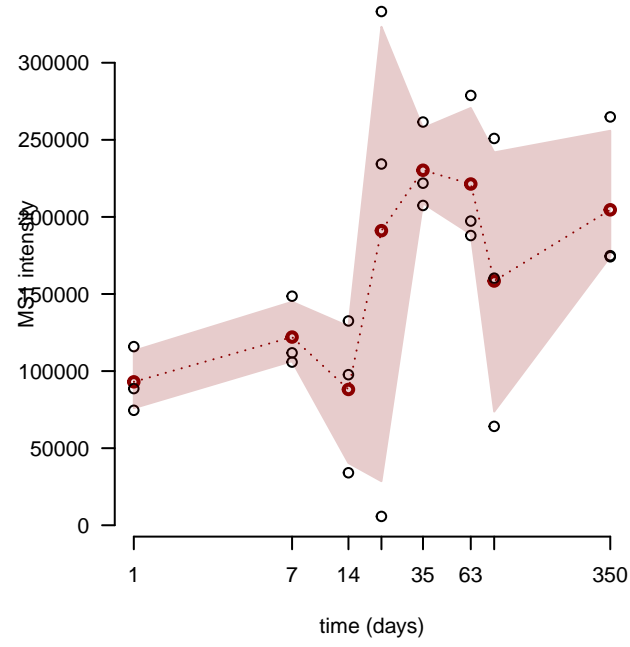

**A2ABV5**  
GN=Med14  
mediator complex subunit 14

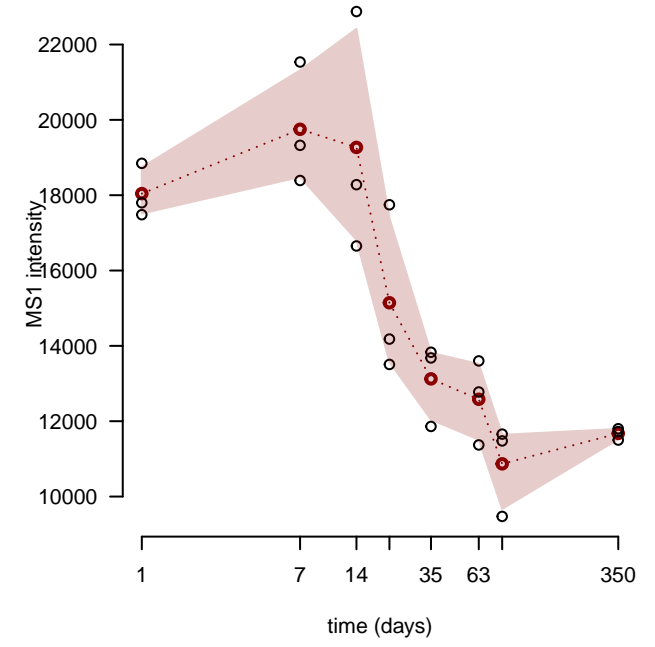

**A2ACJ2**  
GN=Faap100  
Fanconi anemia core complex associated p ...

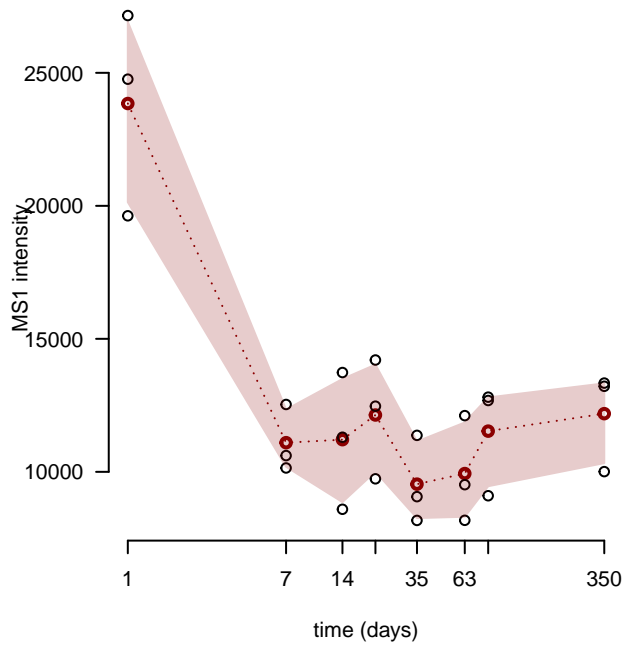

**A2ACP1**  
GN=Ttc39a  
tetratricopeptide repeat domain 39A

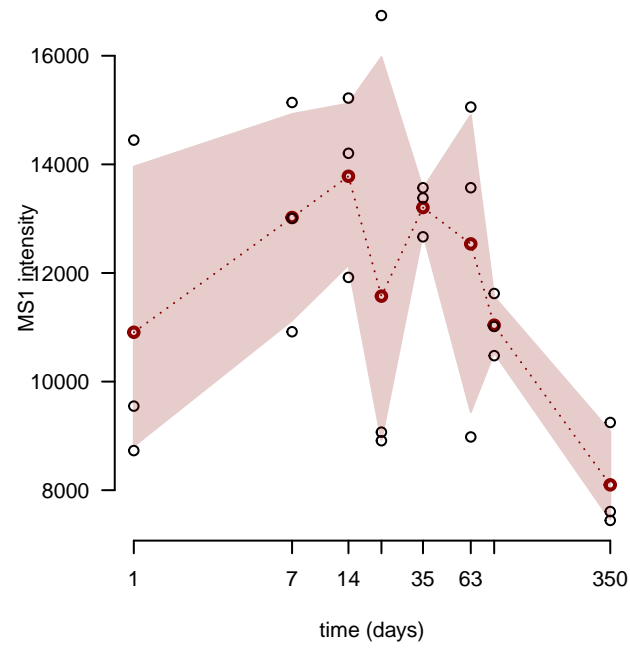

**A2ADA5**  
GN=Pus1  
pseudouridylate synthase-like 1

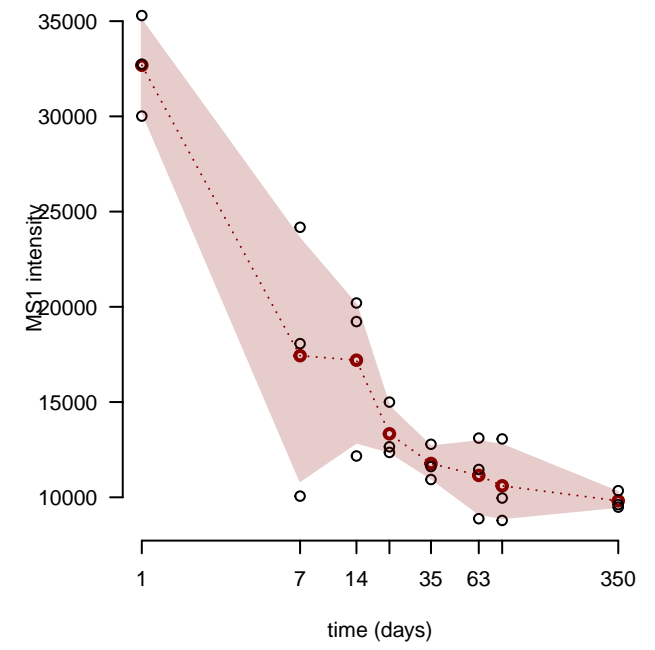

**A2ADF7**  
GN=Slc25a34  
solute carrier family 25, member 34

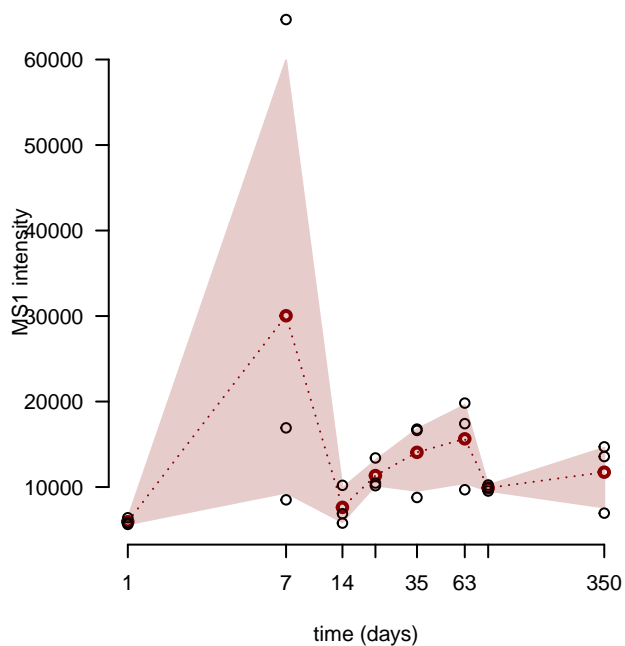

**A2ADY9**  
GN=Ddi2  
DNA-damage inducible protein 2

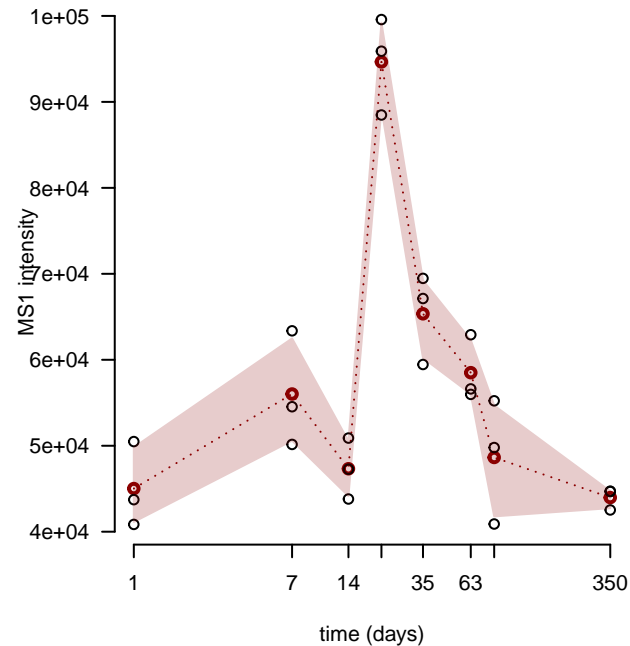

**A2AEV7**  
GN=Ccdc120  
coiled-coil domain containing 120

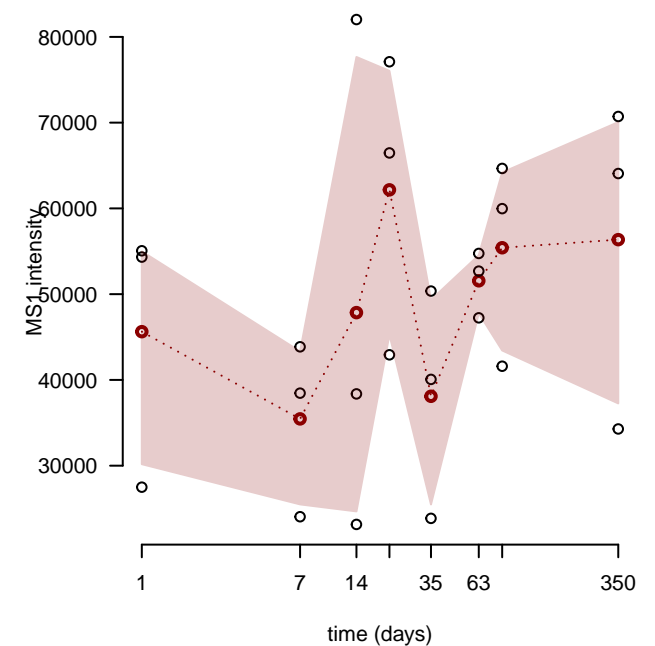

**A2AEY4**  
GN=Map7d3  
MAP7 domain containing 3

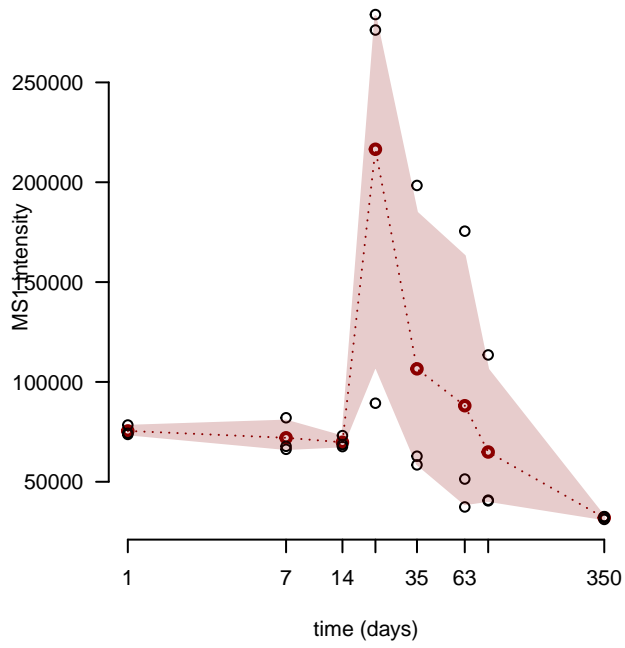

**A2AF47**  
GN=Dock11  
dedicator of cytokinesis 11

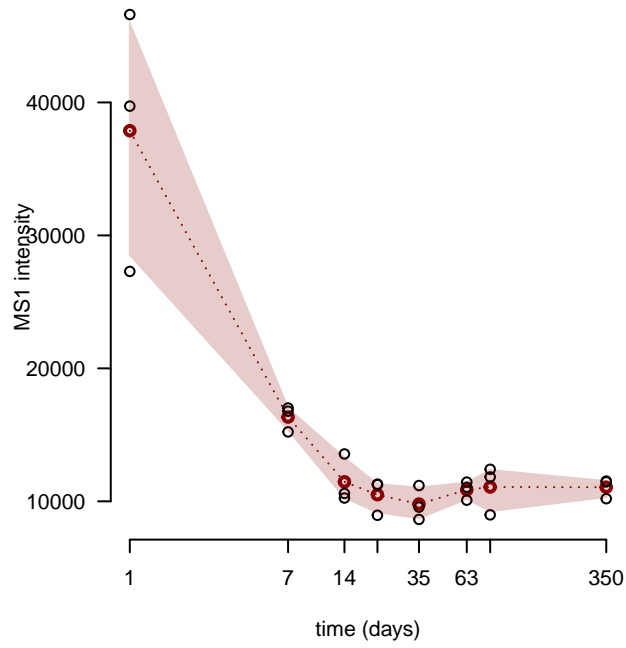

**A2AG06**  
GN=Meioc  
meiosis specific with coiled-coil domain

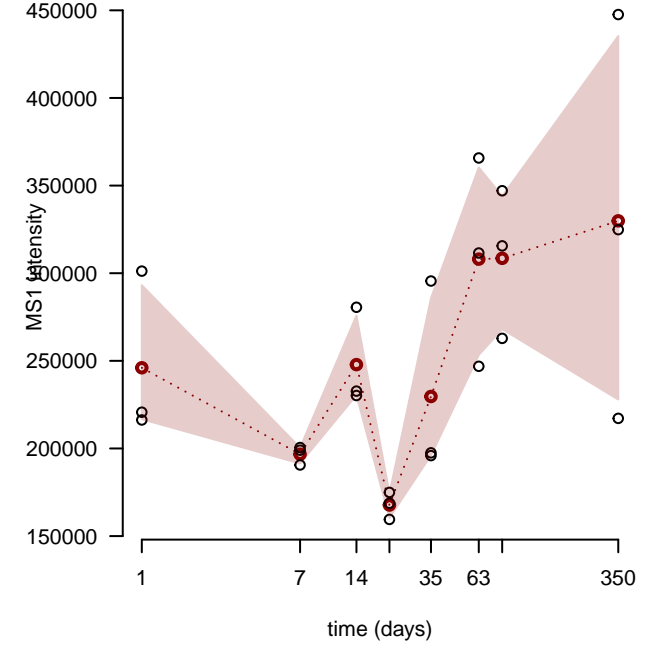

**A2AG50**  
GN=Map7d2  
MAP7 domain containing 2

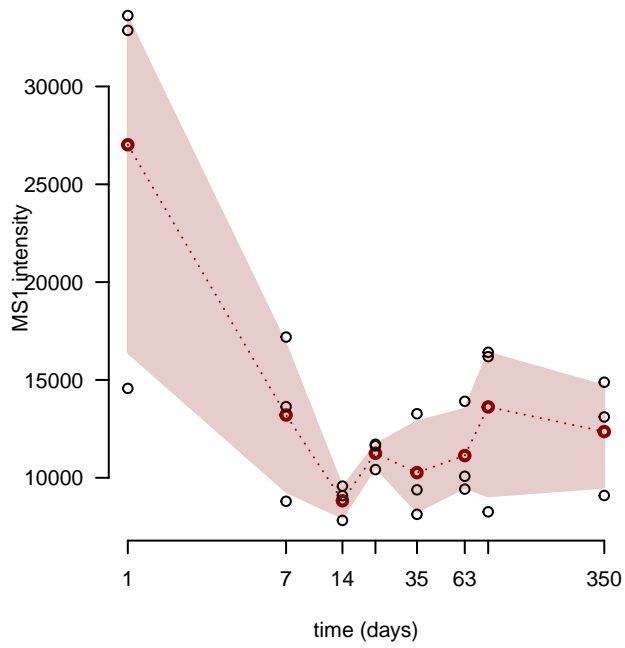

**A2AG58**  
GN=Bclaf3  
Bclaf1 and Thrap3 family member 3

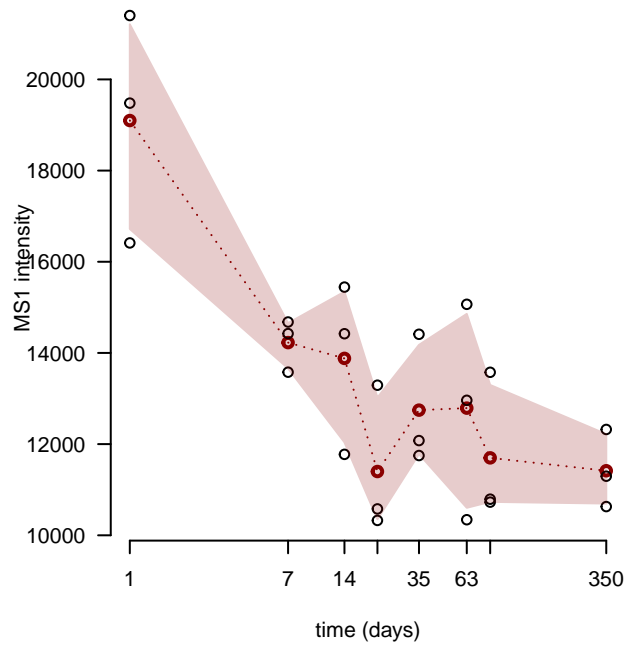

**A2AGH6**  
GN=Med12  
mediator complex subunit 12

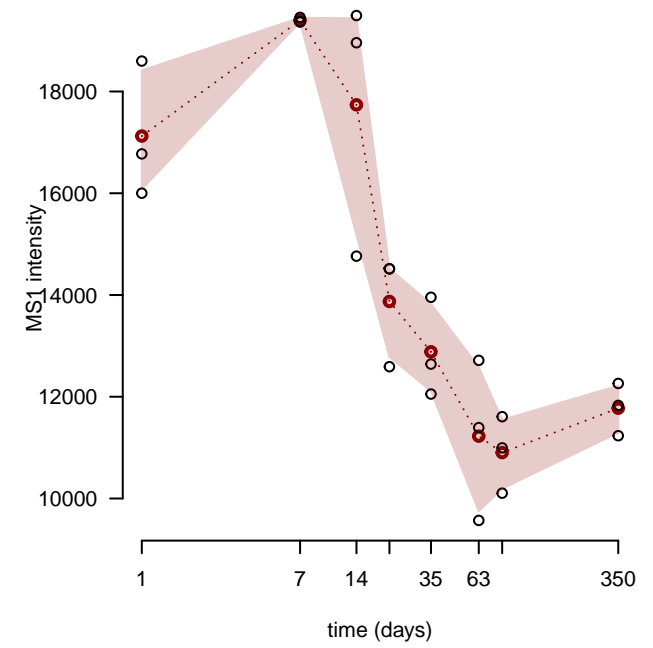

**A2AGT5**  
GN=Ckap5  
cytoskeleton associated protein 5

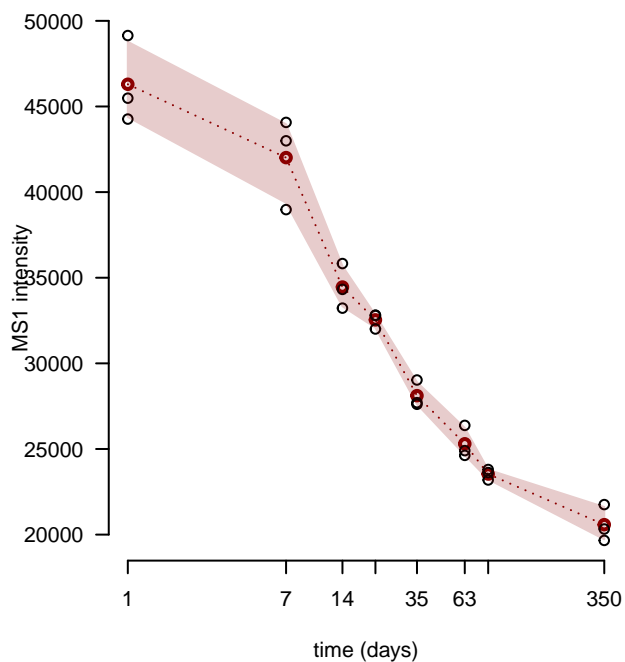

**A2AGX3**  
GN=Prdm11  
PR domain containing 11

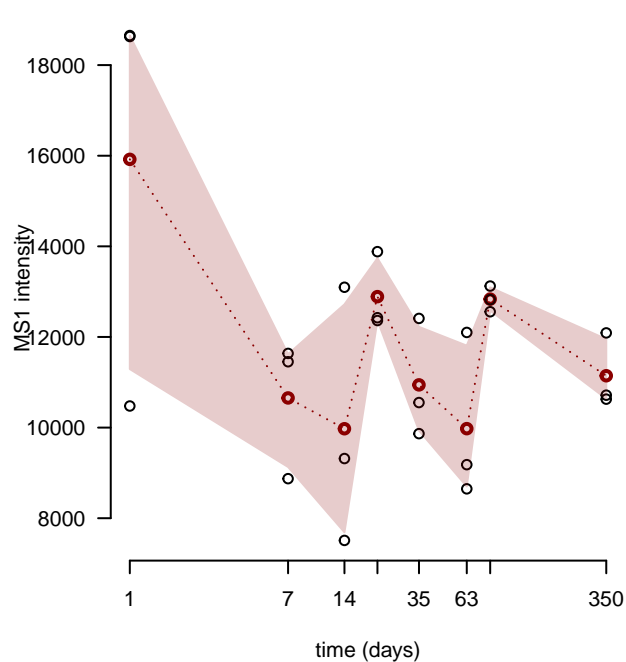

**A2AH22**  
GN=Ambra1  
autophagy/beclin 1 regulator 1

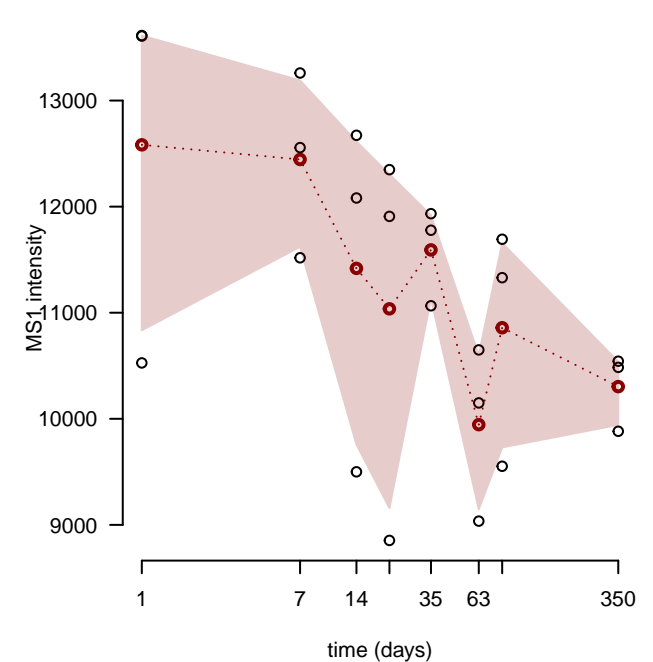

**A2AHC3**  
GN=Camsap1  
calmodulin regulated spectrin-associated ...

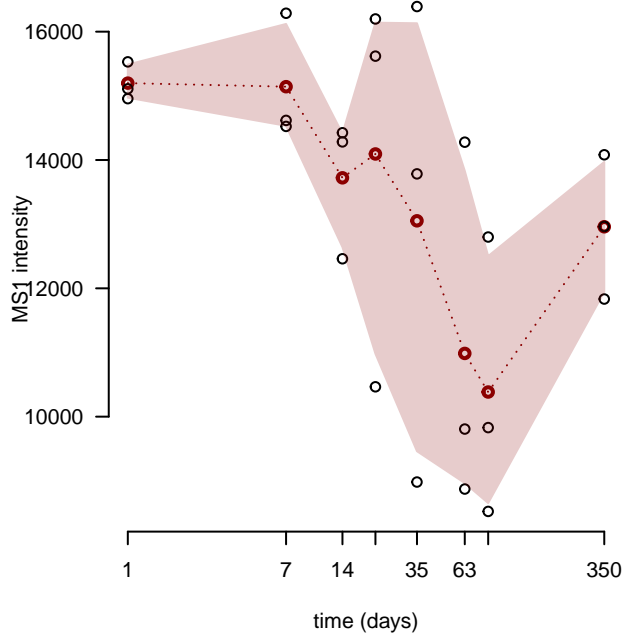

**A2AHJ4**  
GN=Brwd3  
bromodomain and WD repeat domain contain ...

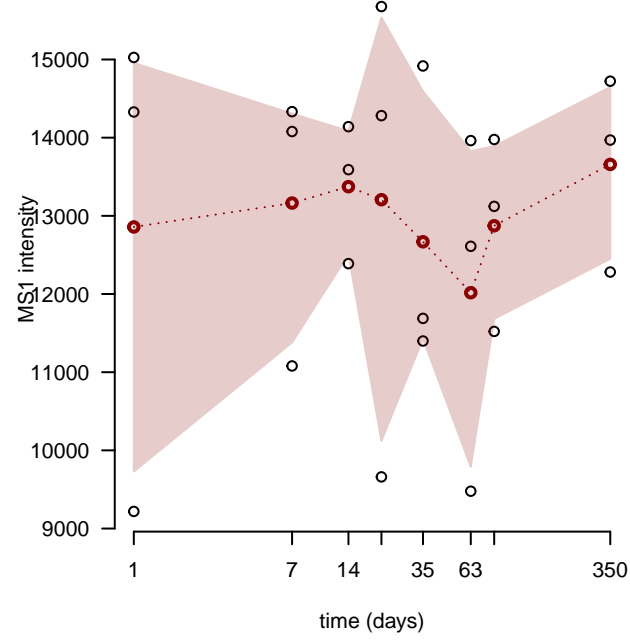

**A2AI05**  
GN=Ndor1  
NADPH dependent diflavin oxidoreductase ...

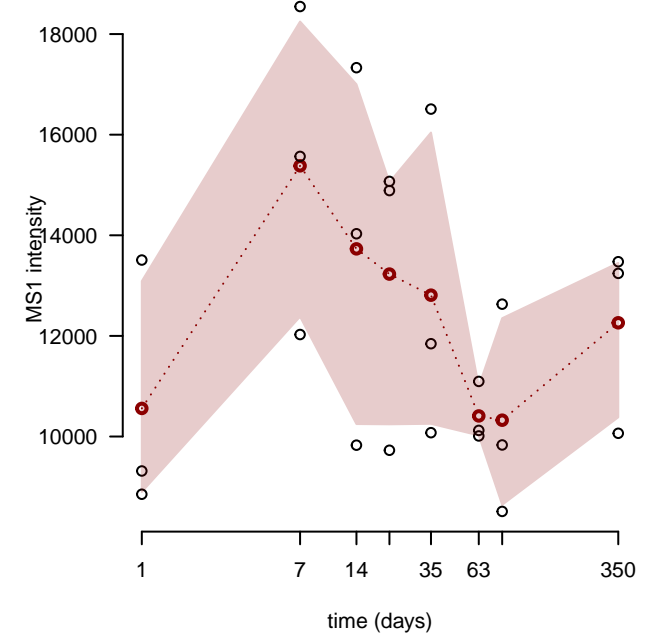

**A2AI08**  
GN=Tprn  
taperin

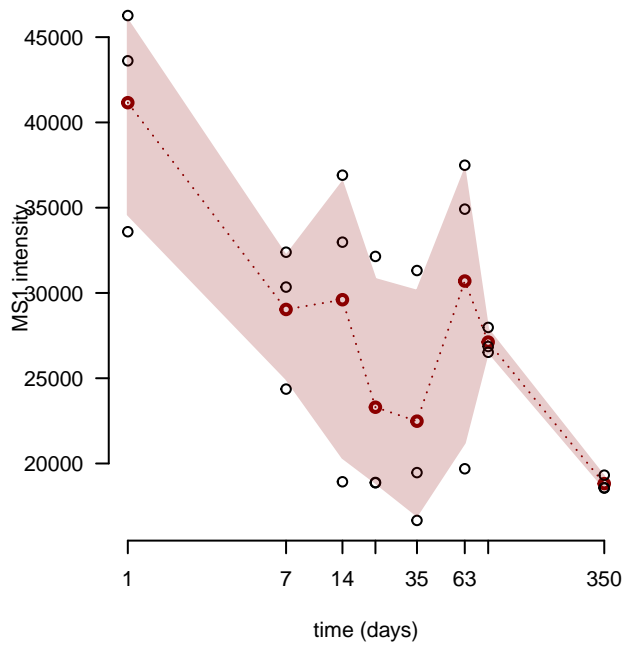

**A2AIG8**  
GN=Accs  
1-aminocyclopropane-1-carboxylate syntha ...

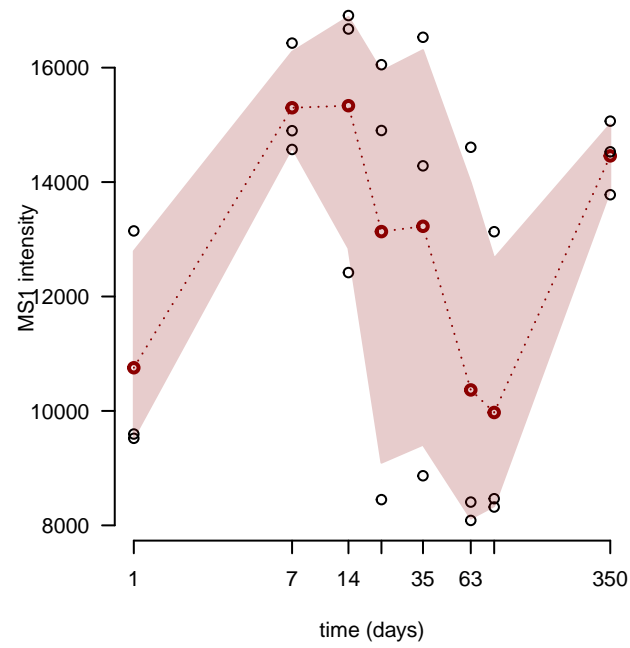

**A2AIL4**  
GN=Ndufaf6  
NADH:ubiquinone oxidoreductase complex a ...

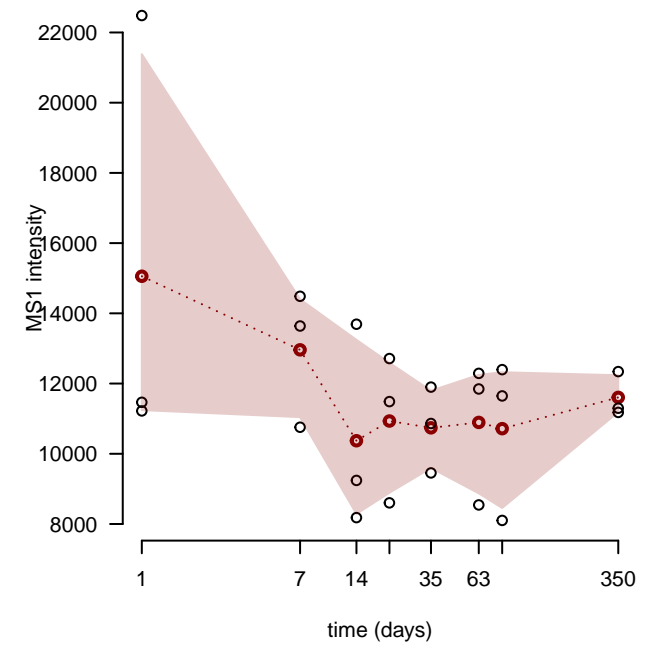

**A2AIV2**  
GN=Virma  
vir like m6A methyltransferase associate ...

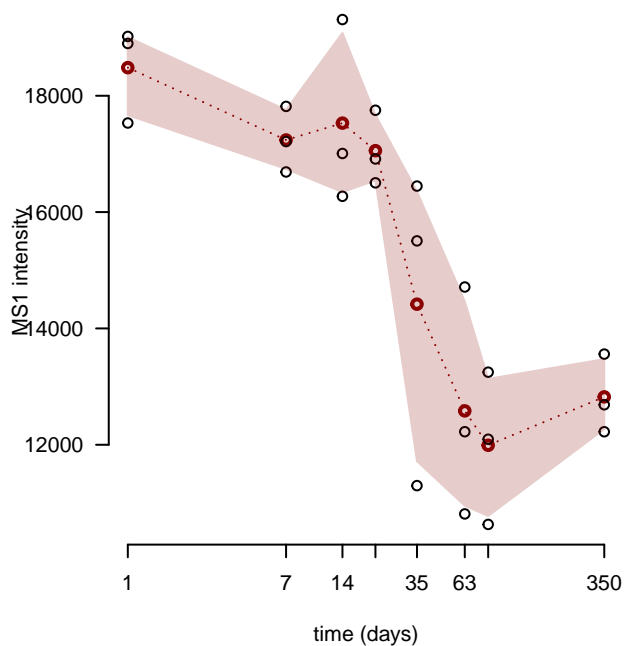

**A2AJ15**  
GN=Man1b1  
mannosidase, alpha, class 1B, member 1

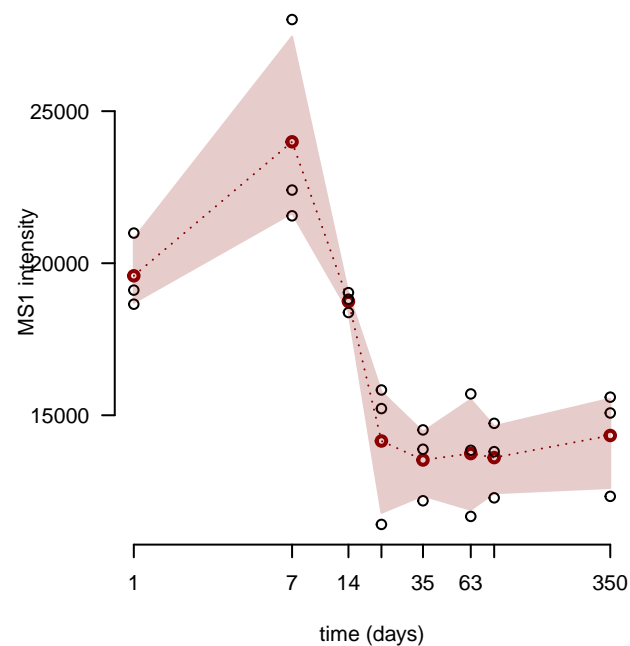

**A2AJ88**  
GN=Pnpla7  
patatin-like phospholipase domain contai ...

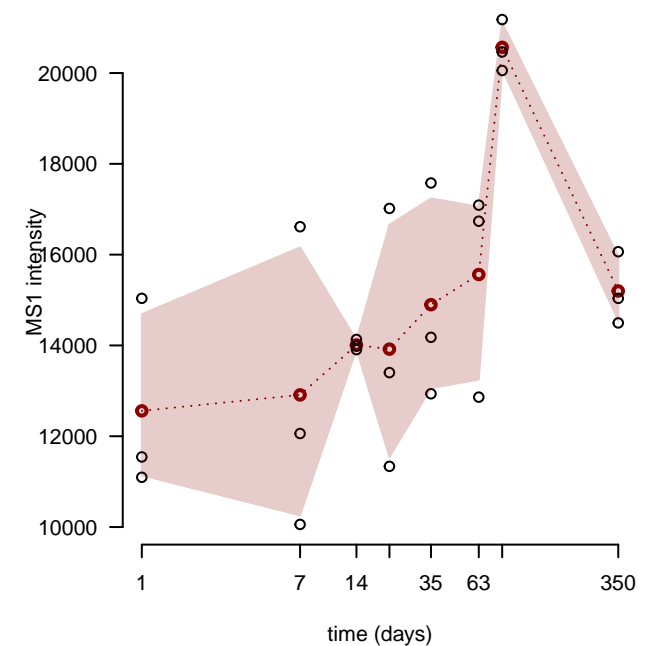

**A2AJA7**  
GN=Mamdc4  
MAM domain containing 4

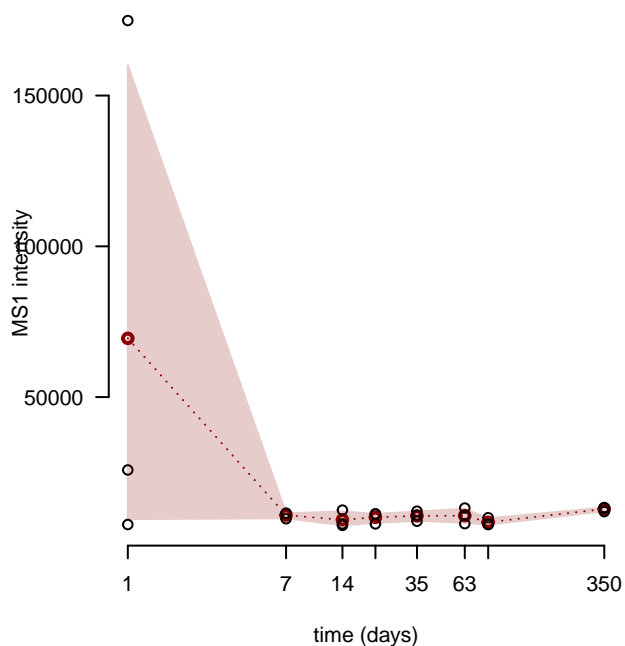

**A2AJI0**  
GN=Map7d1  
MAP7 domain containing 1

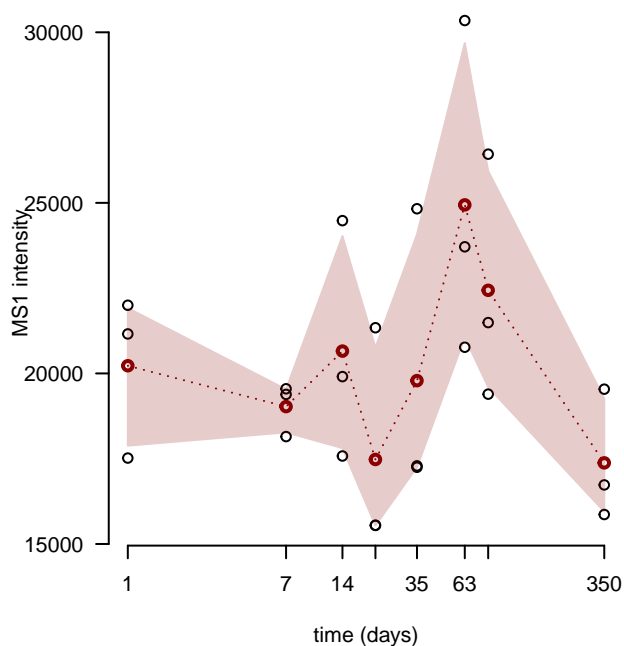

**A2AJK6**  
GN=Chd7  
chromodomain helicase DNA binding protei ...

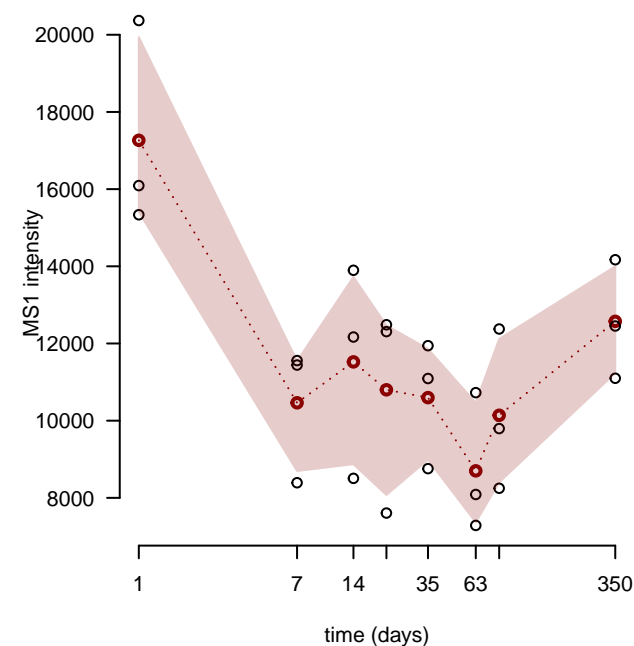

**A2AJL3**  
GN=Fggy  
FGGY carbohydrate kinase domain containi ...

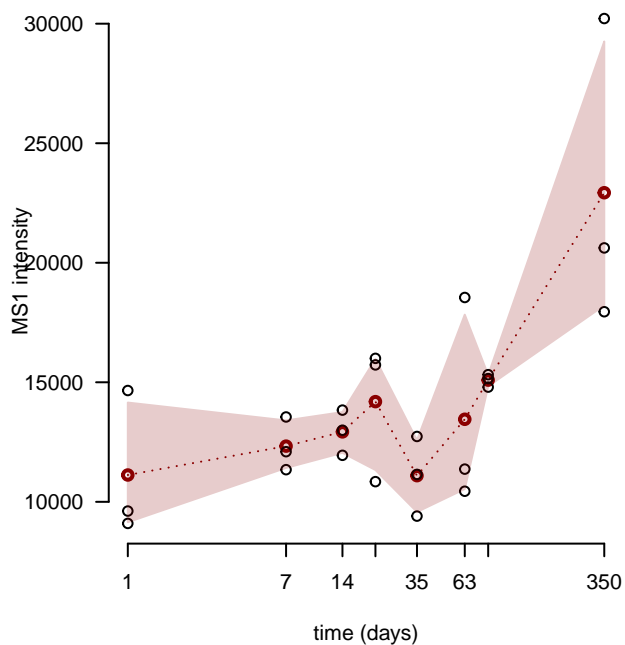

**A2AJQ3**  
GN=Dpy19I4  
dpy-19-like 4 (C. elegans)

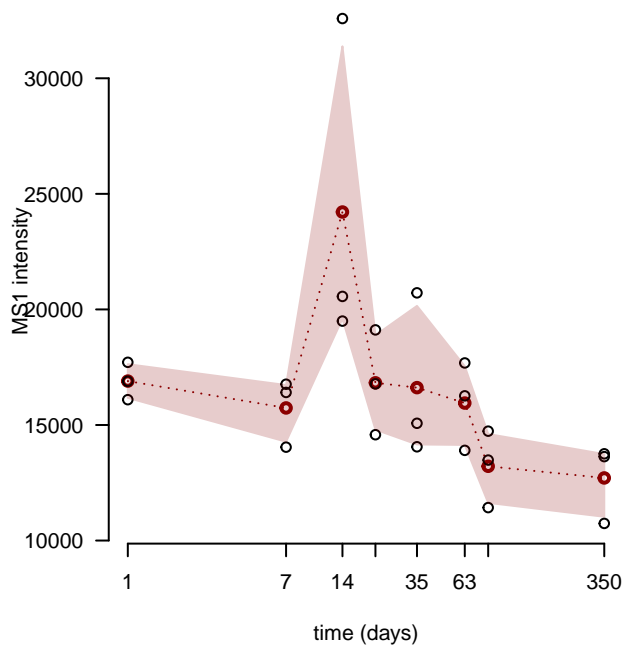

**A2AJT4**  
GN=Pnlsr  
PNN interacting serine/arginine-rich

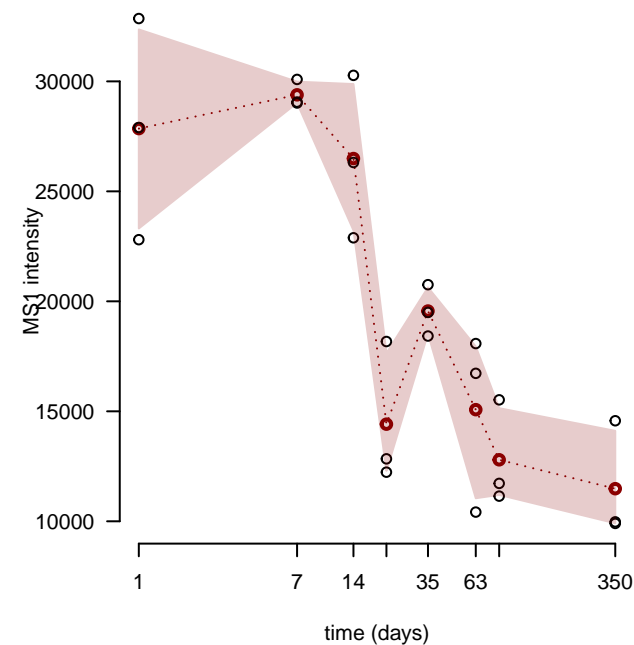

**A2AKB9**  
GN=Dcaf10  
DDB1 and CUL4 associated factor 10

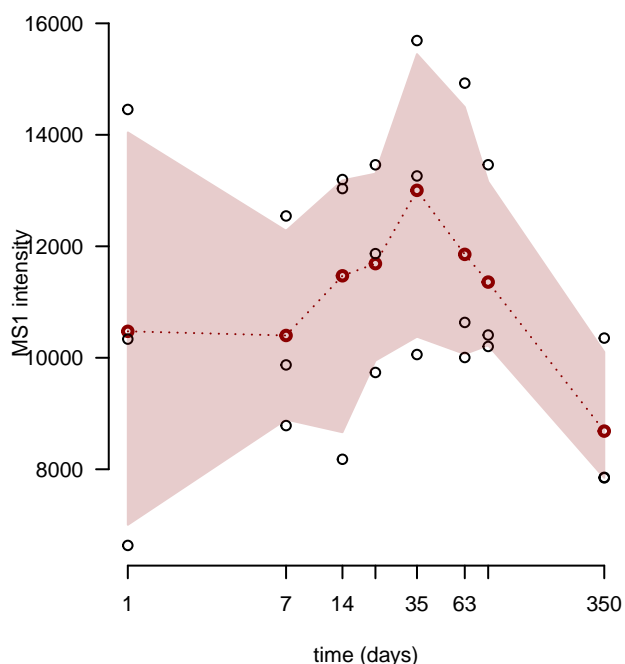

**A2AKG8**  
GN=Focad  
focadhesin

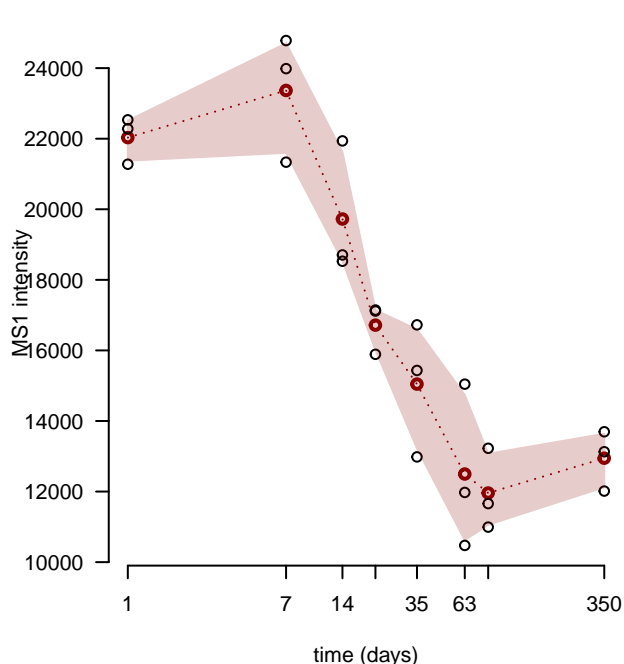

**A2AKQ0**  
GN=Slc35d1  
solute carrier family 35 (UDP-glucuronic ...

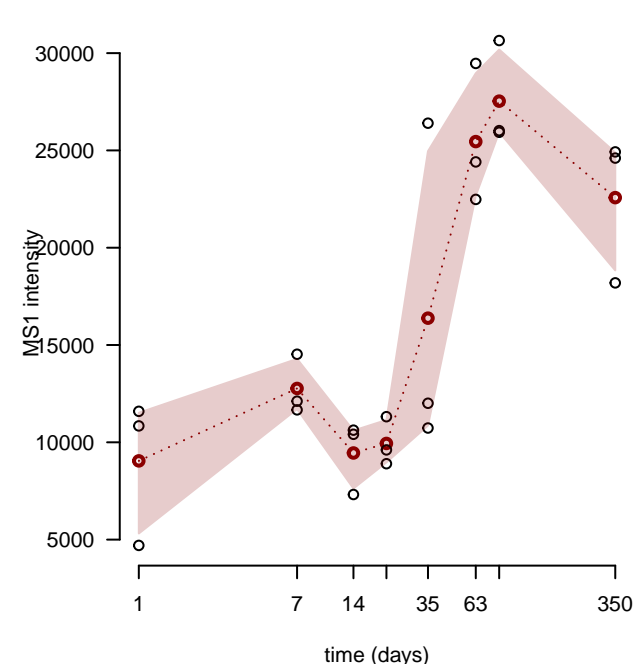

**A2AKX3**  
GN=Setx  
senataxin

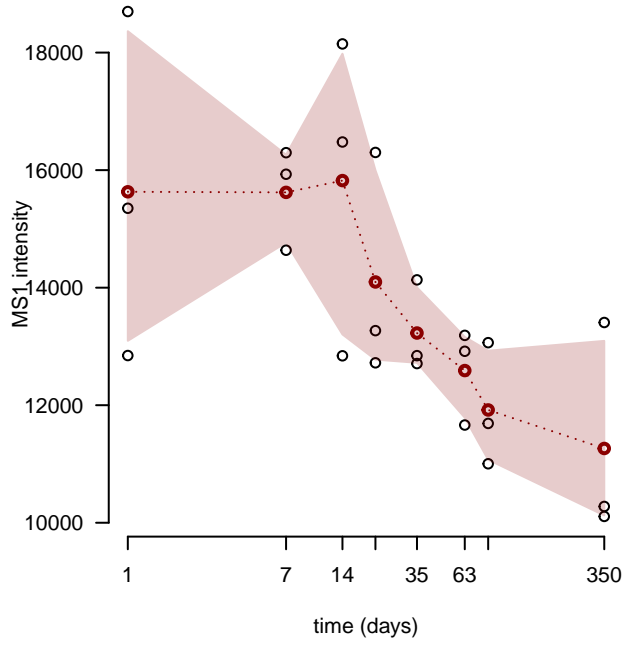

**A2AL36**  
GN=Cntrl  
centriolin

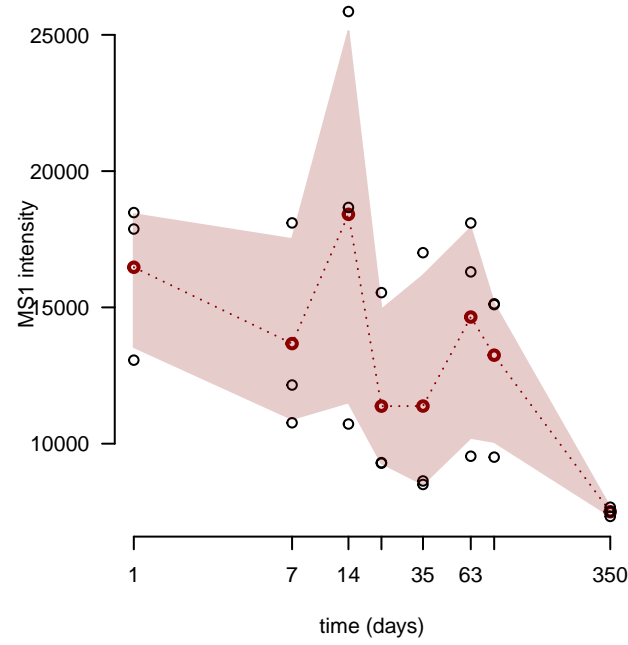

**A2ALK8**  
GN=Ptpn3  
protein tyrosine phosphatase, non-recept ...

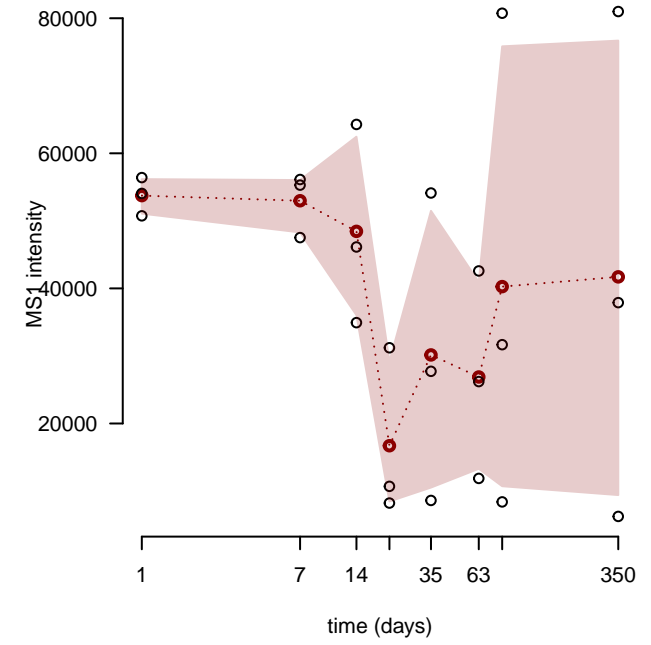

**A2ALS5**  
GN=Rap1gap  
Rap1 GTPase-activating protein

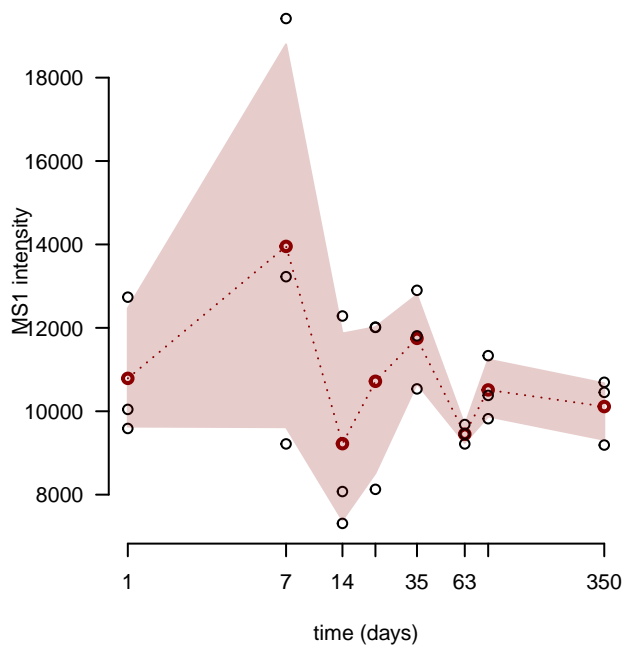

**A2ALU4**  
GN=Shroom2  
shroom family member 2

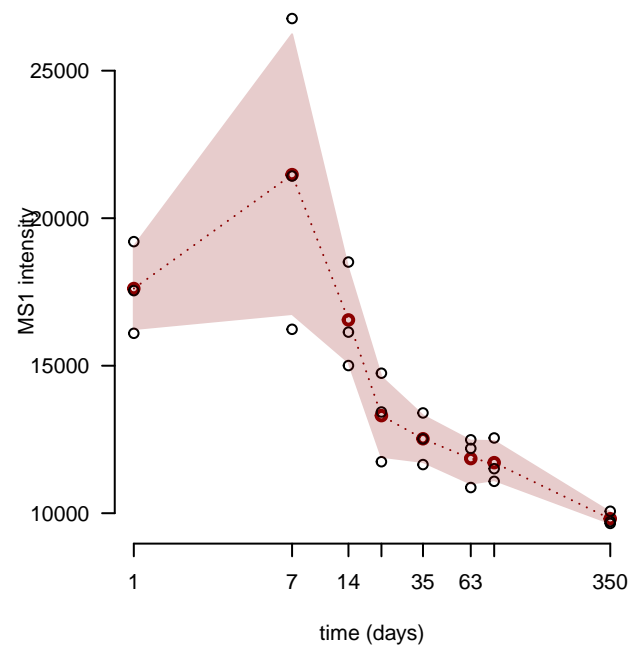

**A2ALW5**  
GN=Dnajc25  
DnaJ heat shock protein family (Hsp40) m ...

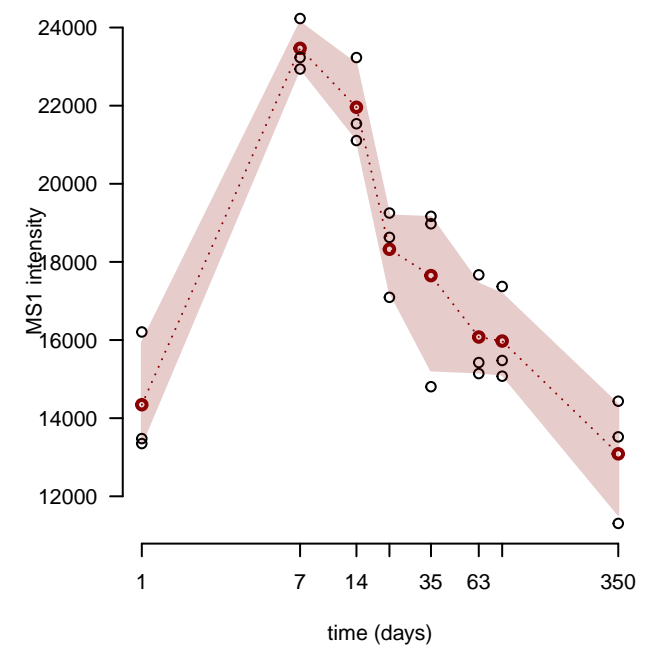

**A2AM05**  
GN=Cntrl  
centlein, centrosomal protein

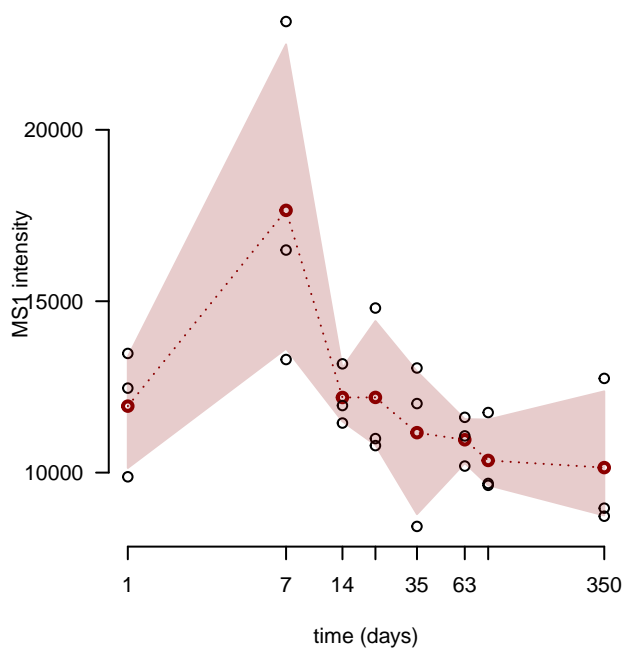

**A2AM29**  
GN=Mllt3  
myeloid/lymphoid or mixed-lineage leukem ...

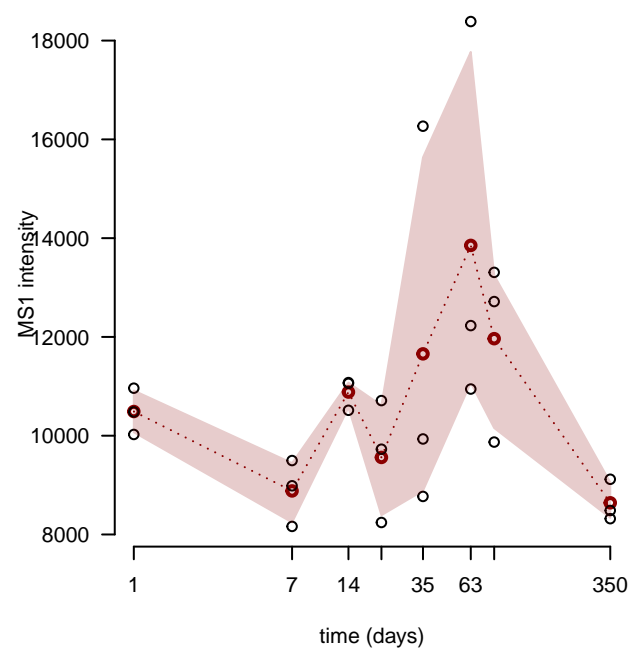

**A2AN08**  
GN=Ubr4  
ubiquitin protein ligase E3 component n- ...

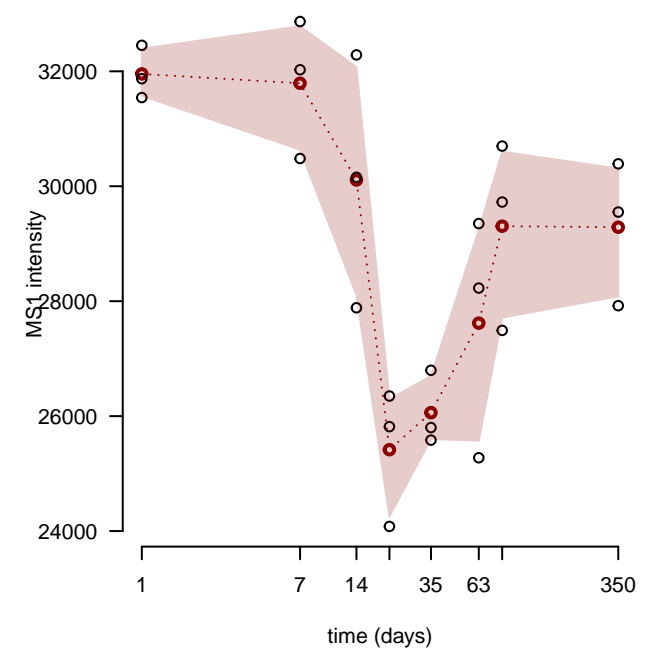



**A2APB8**  
GN=Txp2  
TPX2, microtubule-associated

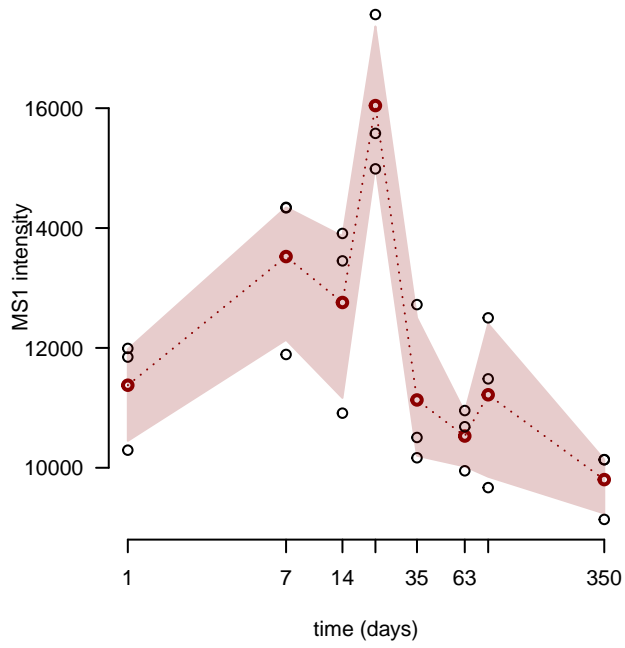

**A2APT9**  
GN=Klhdc7a  
kelch domain containing 7A

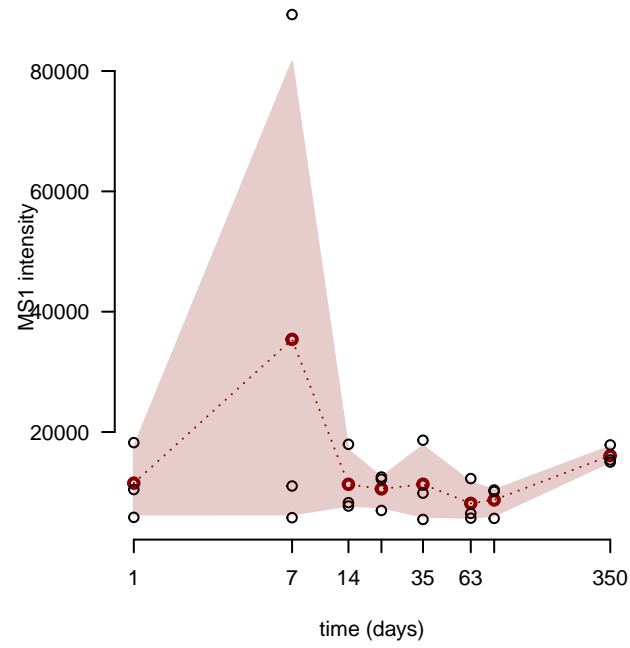

**A2APV2**  
GN=Fmnl2  
formin-like 2

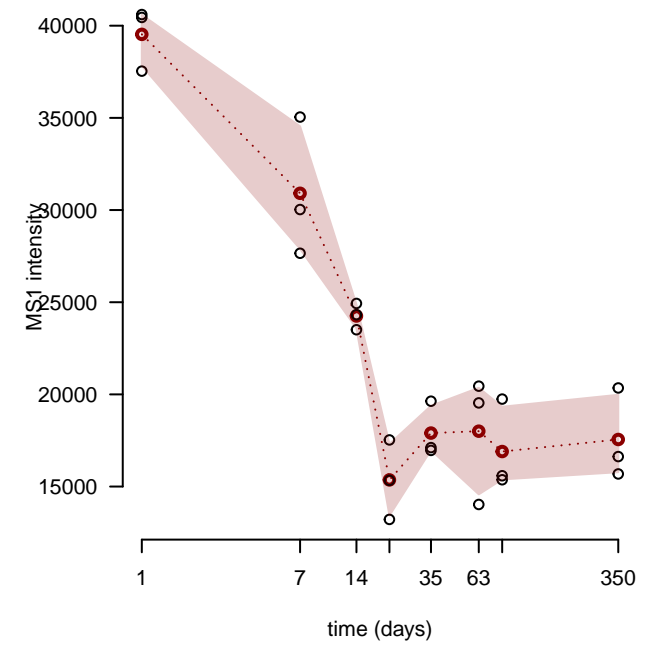

**A2APY7**  
GN=Ndufaf5  
NADH:ubiquinone oxidoreductase complex a ...

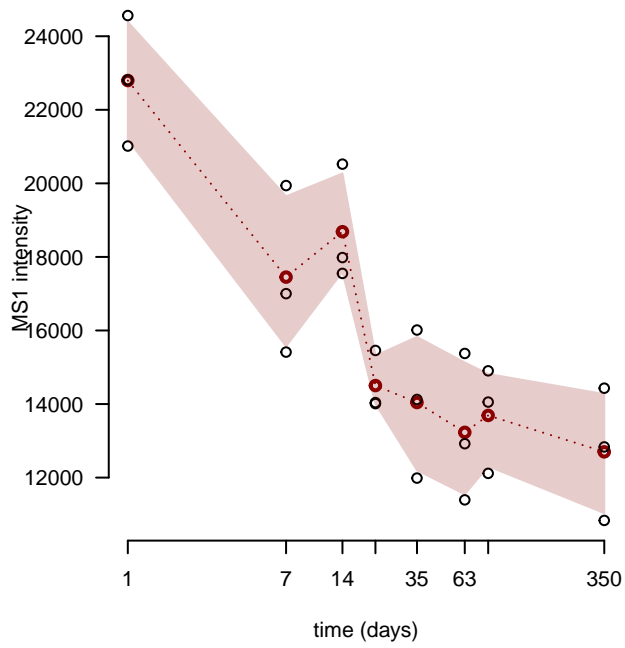

**A2AQ07**  
GN=Tubb1  
tubulin, beta 1 class VI

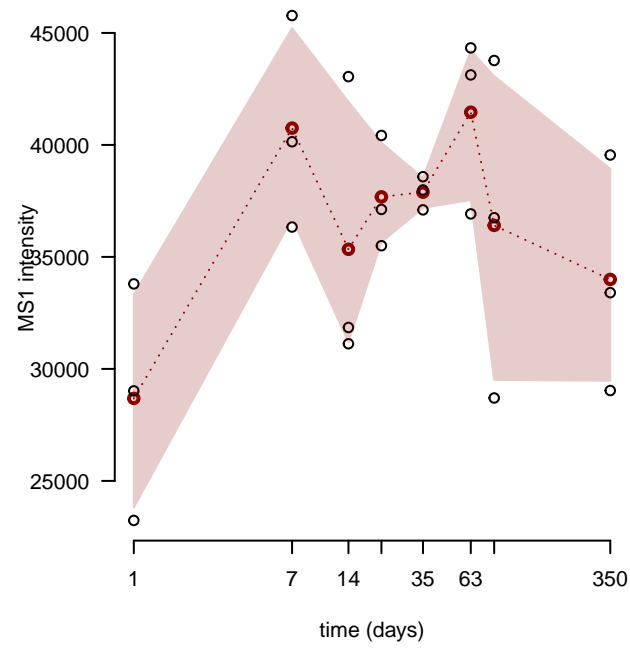

**A2AQ19**  
GN=Rtf1  
RTF1, Paf1/RNA polymerase II complex com ...

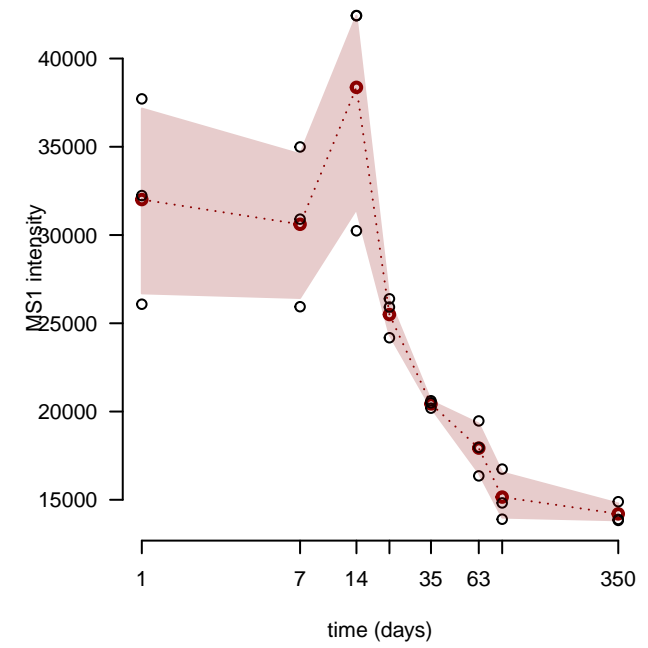

**A2AQ25**  
GN=Skt

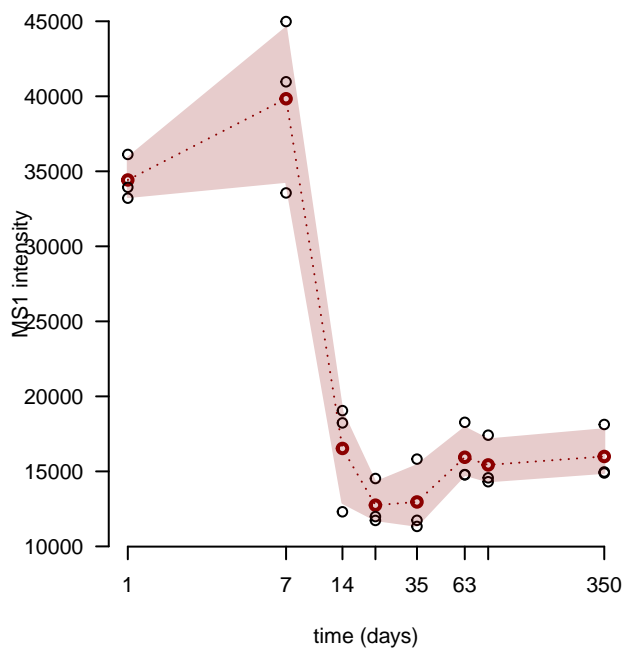

**A2AR02**  
GN=Ppig  
peptidyl-prolyl isomerase G (cyclophilin ...

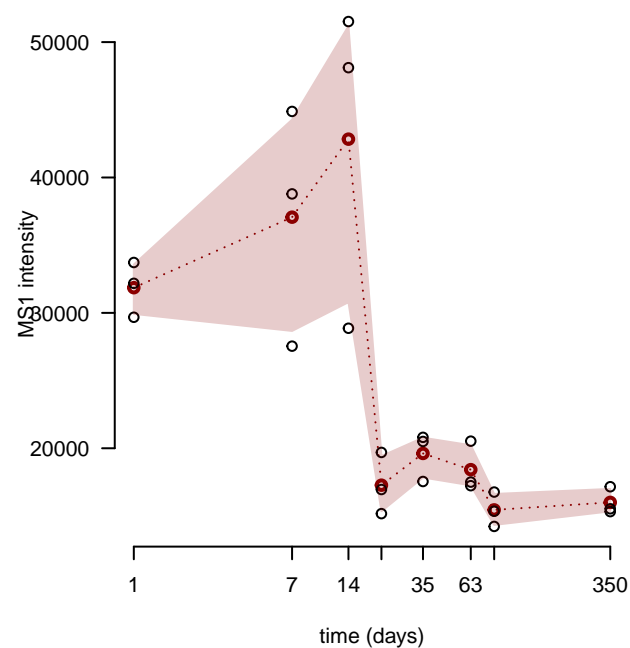

**A2ARA8**  
GN=Itga8  
integrin alpha 8

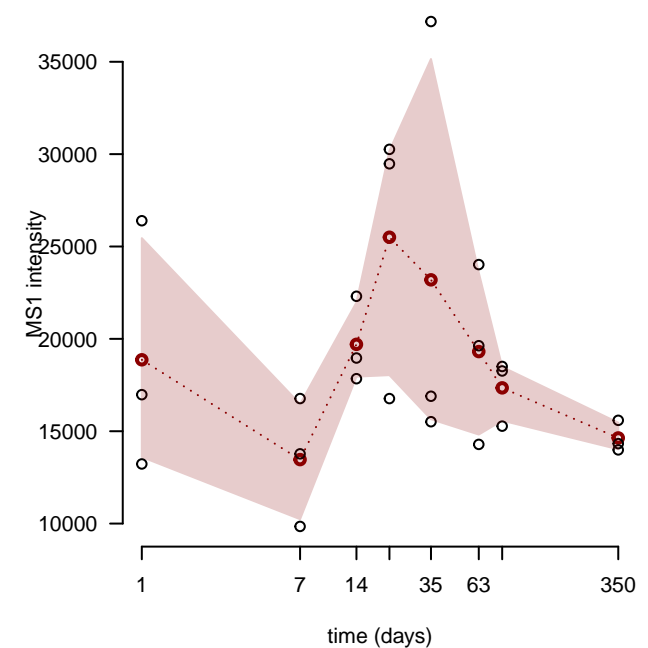

**A2ARI4**  
GN=Lgr4

leucine-rich repeat-containing G protein ...

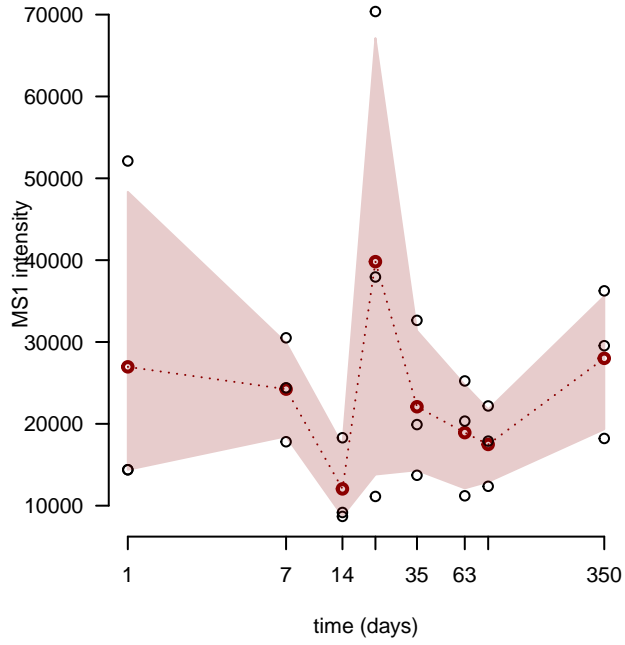

**A2ARM1**  
GN=Patl2

protein associated with topoisomerase II ...

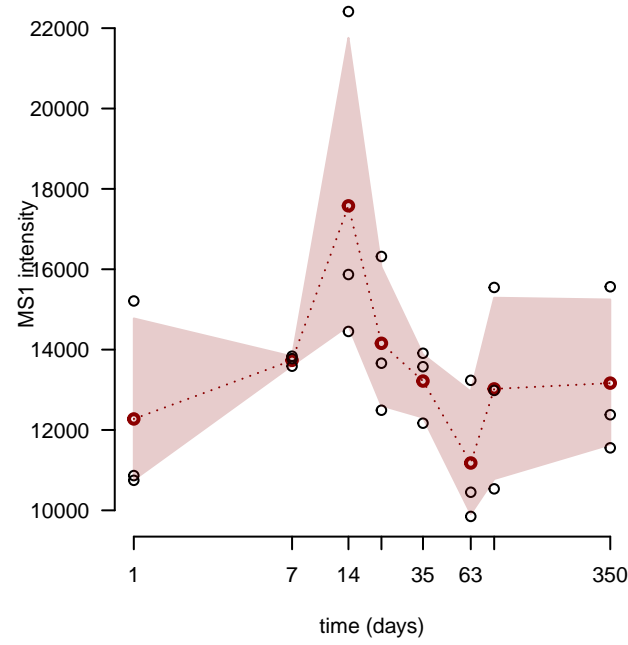

**A2ARV4**  
GN=Lrp2

low density lipoprotein receptor-related ...

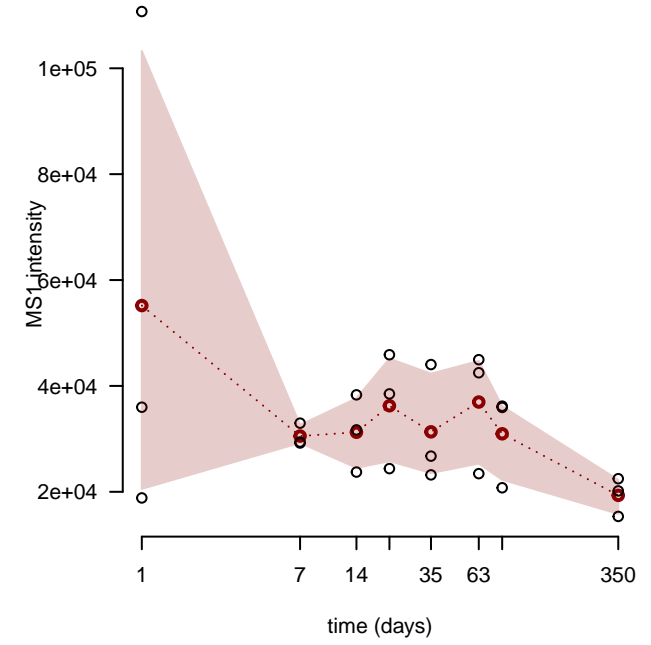

**A2ASQ1**  
GN=Agrn

agrin

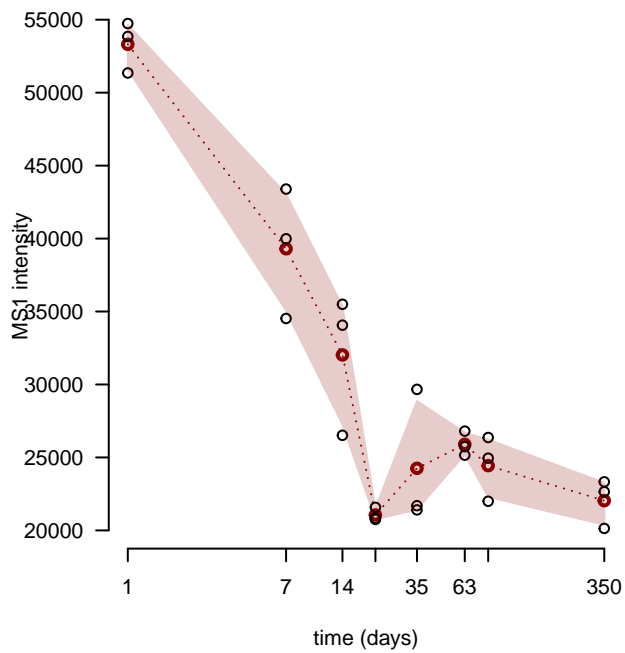

**A2ASS6**  
GN=Ttn

titin

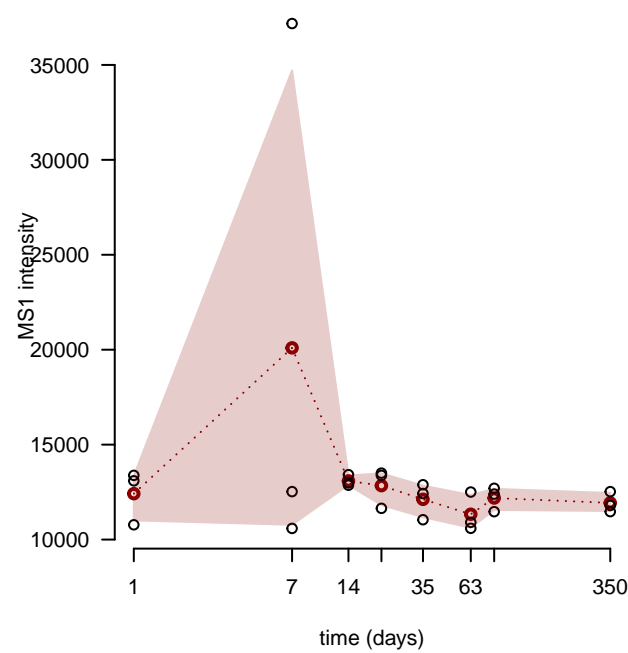

**A2ASZ8**  
GN=Slc25a25

solute carrier family 25 (mitochondrial ...

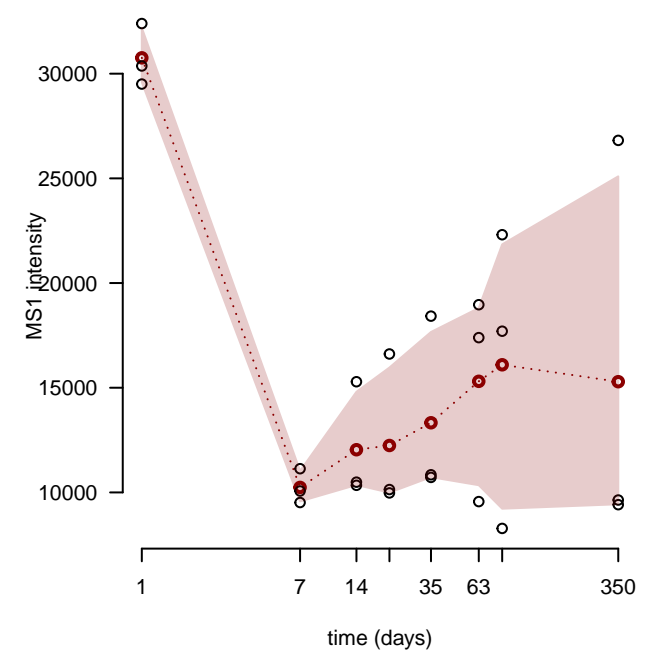

**A2AT37**  
GN=

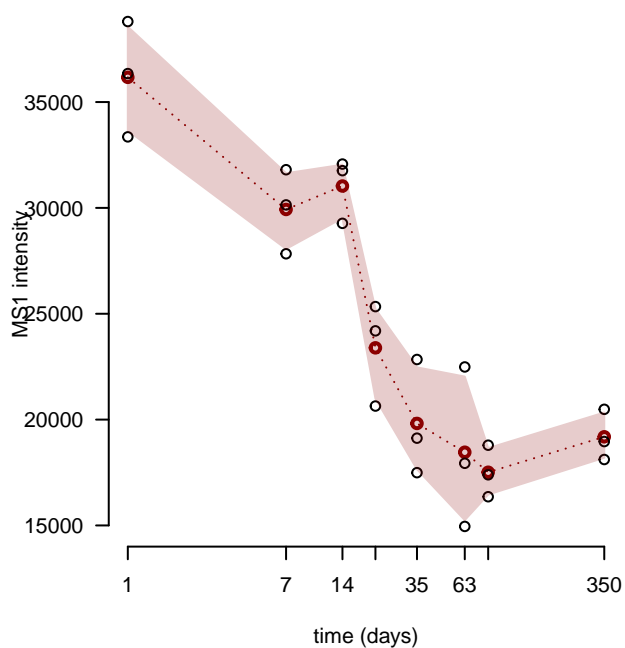

**A2ATU0**  
GN=Dhtkd1

dehydrogenase E1 and transketolase domai ...

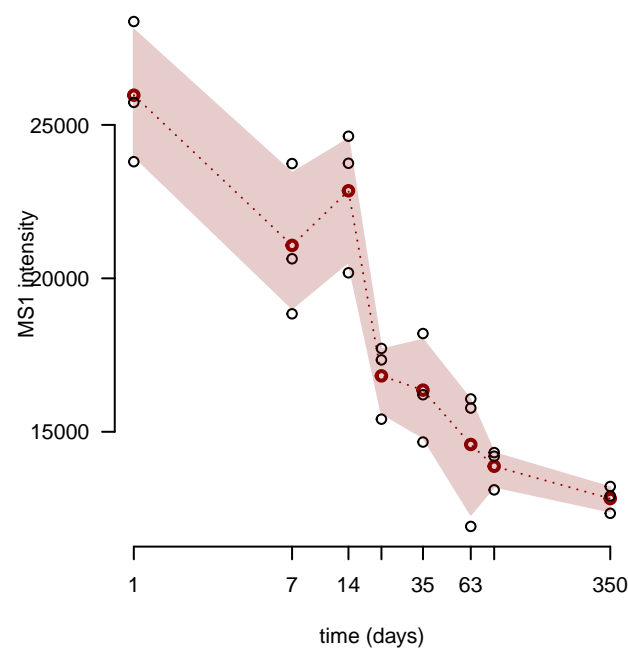

**A2AUM9**  
GN=Cep152

centrosomal protein 152

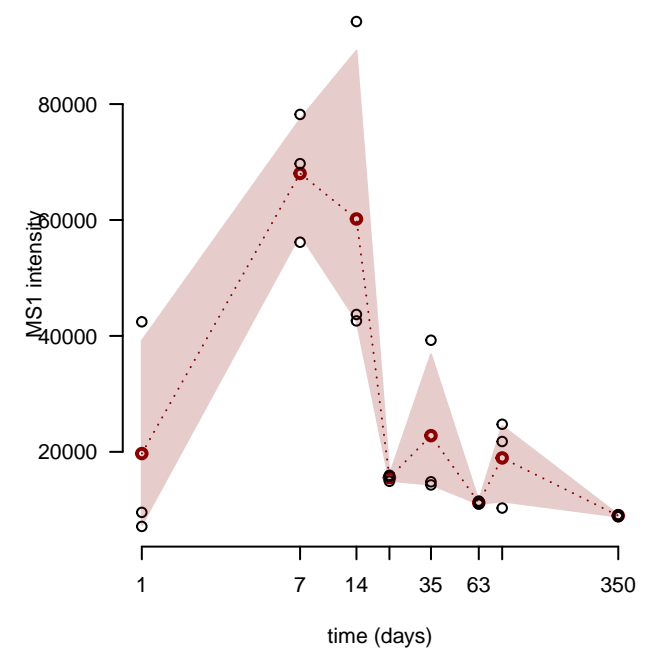

**A2AUU0**  
GN=Mettl8  
methyltransferase like 8

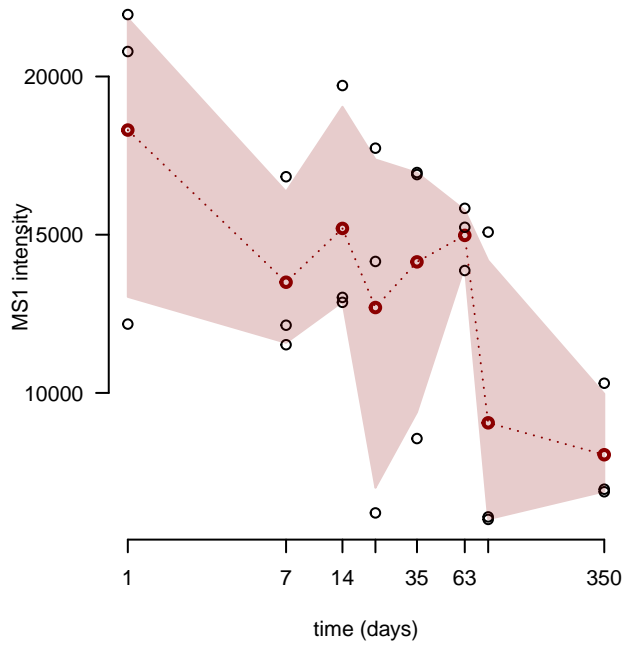

**A2AUY4**  
GN=

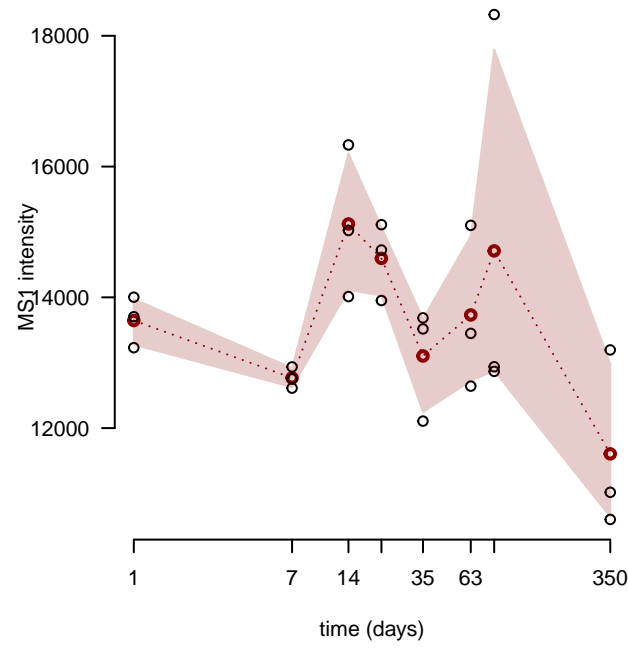

**A2AVZ9**  
GN=Slc43a3  
solute carrier family 43, member 3

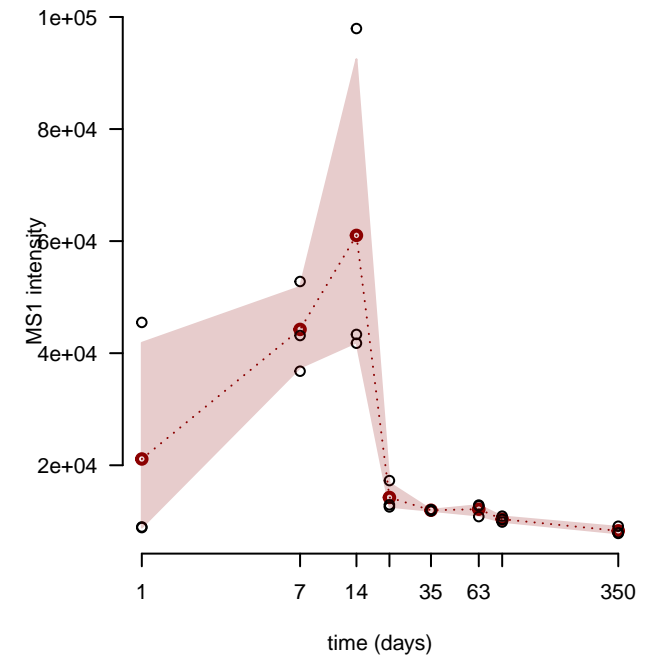

**A2AWA9**  
GN=Rabgap1  
RAB GTPase activating protein 1

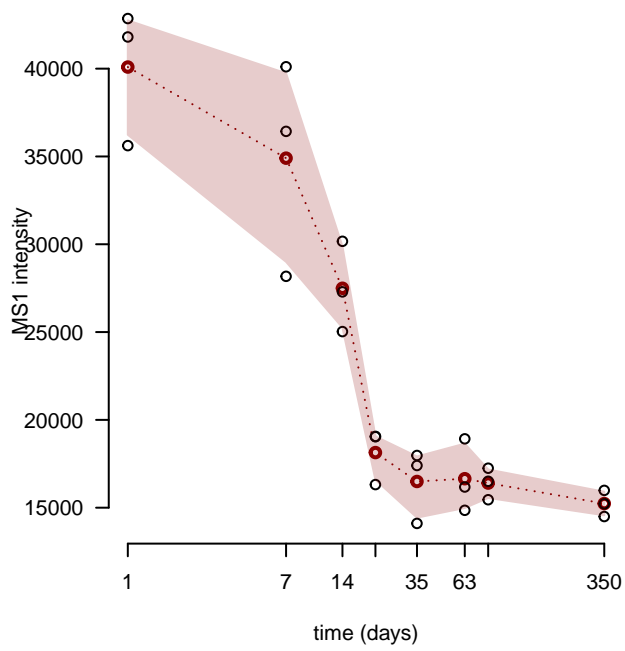

**A2AWL7**  
GN=Mga  
MAX gene associated

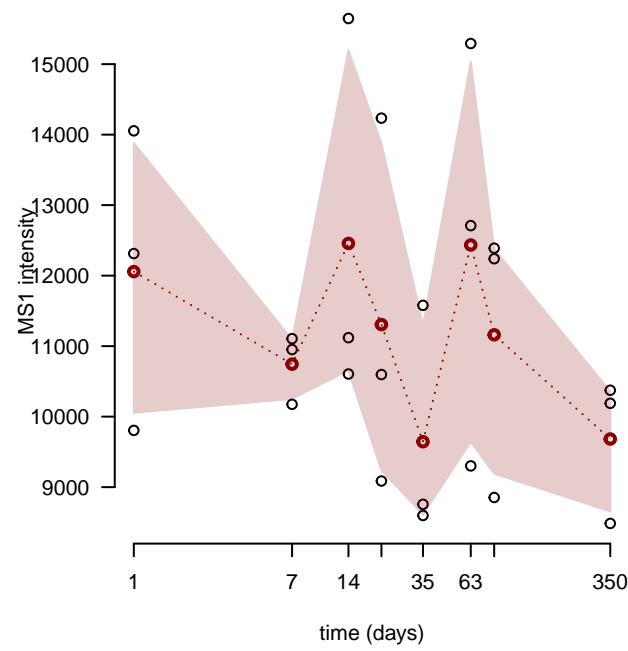

**A2AX52**  
GN=Col6a4  
collagen, type VI, alpha 4

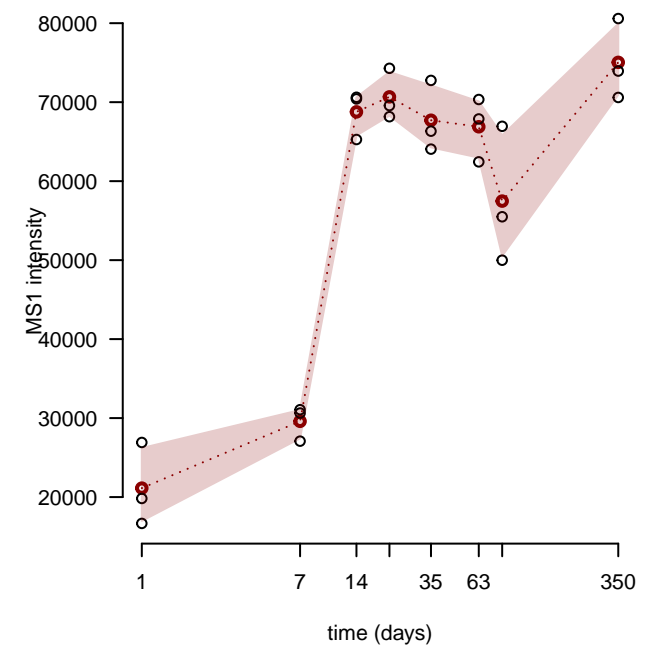

**A2BDX3**  
GN=Mocs3  
molybdenum cofactor synthesis 3

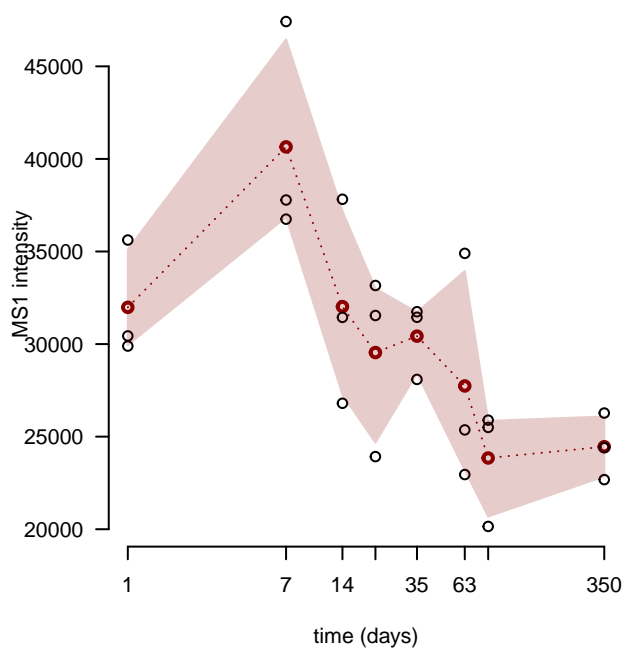

**A2BE28**  
GN=Las1l  
LAS1-like (S. cerevisiae)

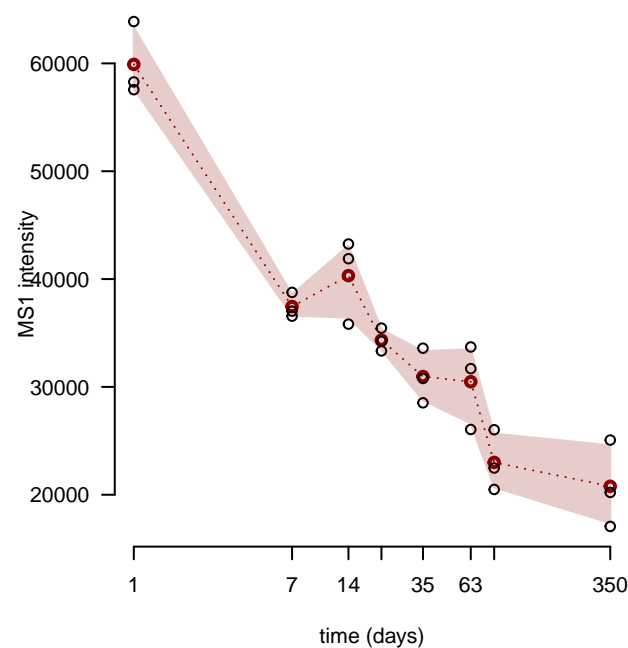

**A2BH40**  
GN=Arid1a  
AT rich interactive domain 1A (SWI-like)

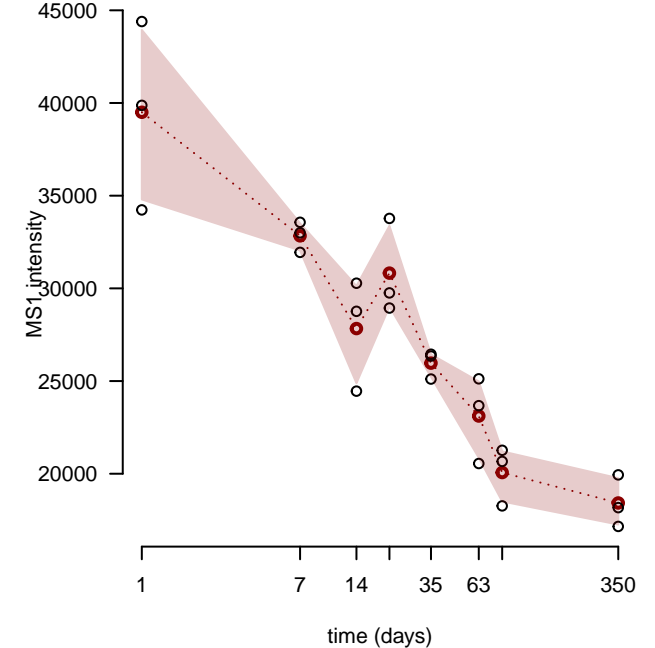

**A2BH40**  
GN=Arid1a  
AT rich interactive domain 1A (SWI-like)

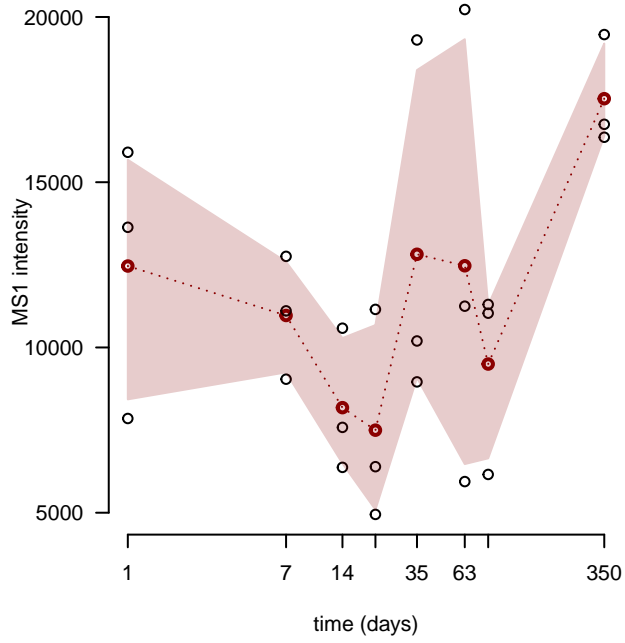

**A2BIM8**  
GN=Mup18  
major urinary protein 18

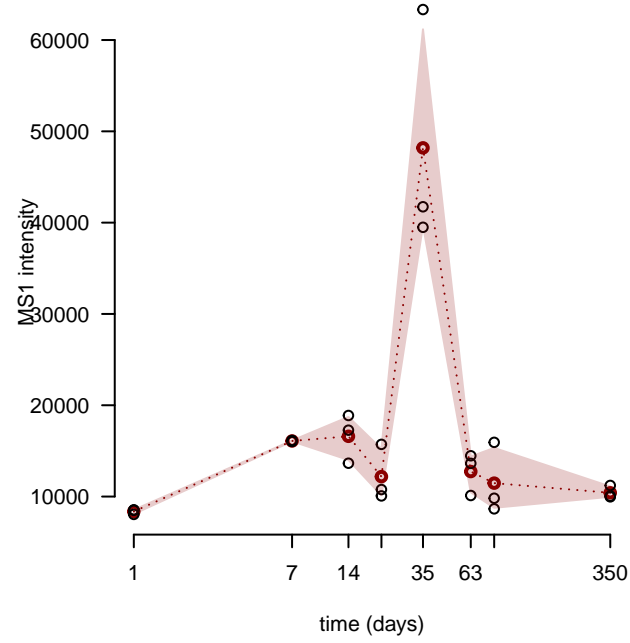

**A2CG49**  
GN=Kalrn  
kalirin, RhoGEF kinase

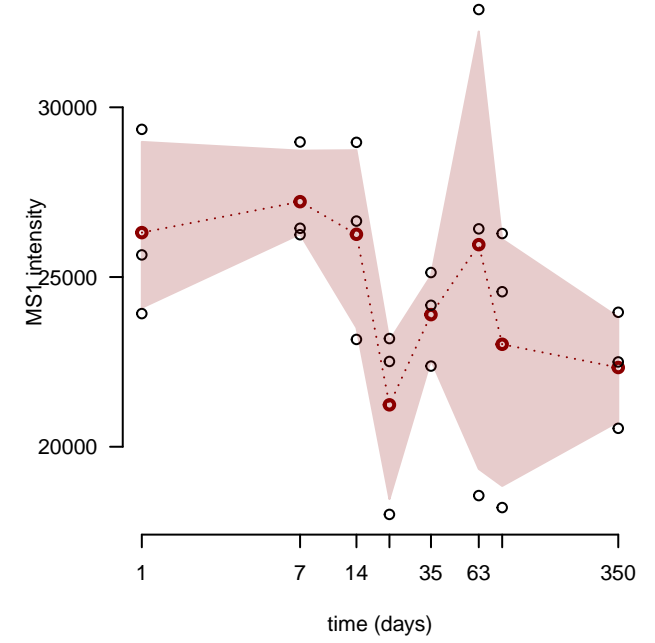

**A2CG63**  
GN=Arid4b  
AT rich interactive domain 4B (RBP1-like ...

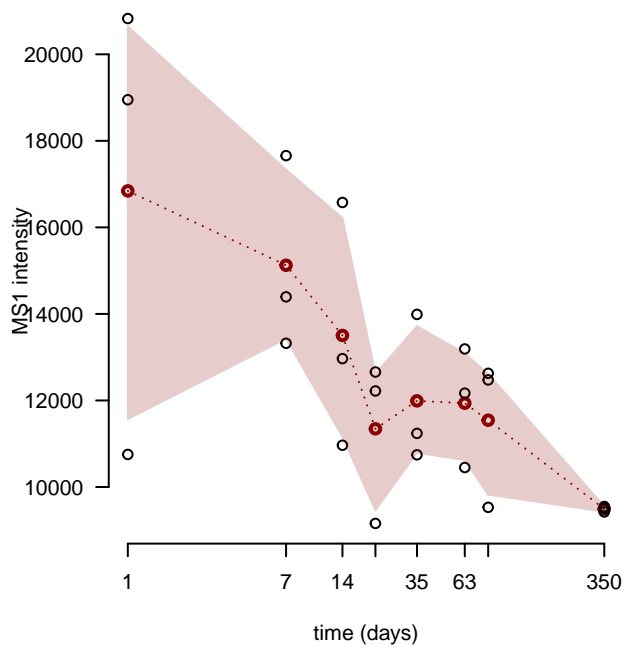

**A2RSJ4**  
GN=Uhrf1bp1l  
UHRF1 (ICBP90) binding protein 1-like

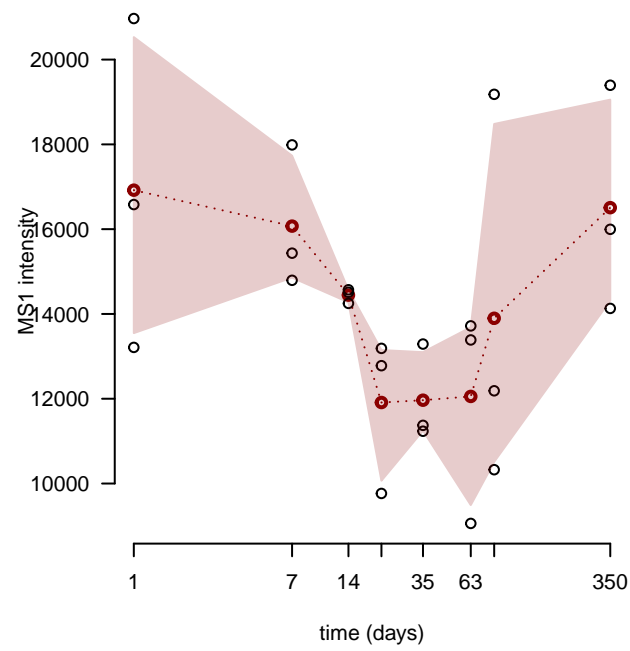

**A2RSQ0**  
GN=Dennd5b  
DENN/MADD domain containing 5B

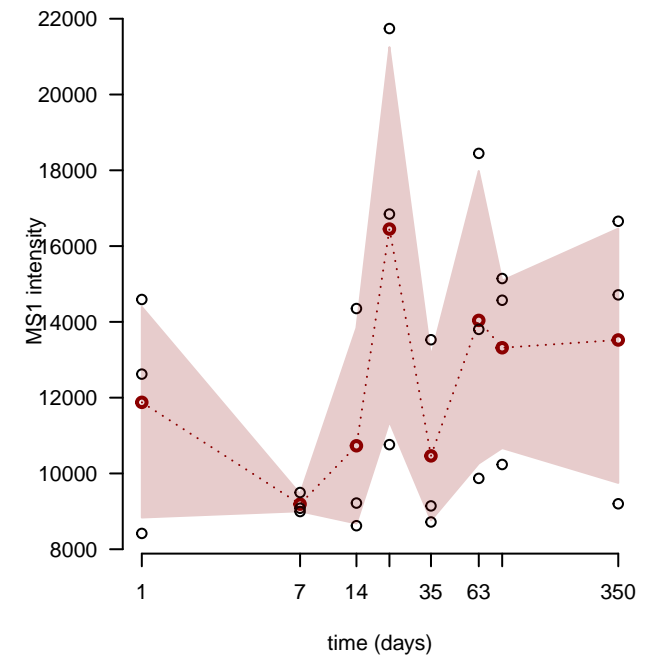

**A2RST1**  
GN=

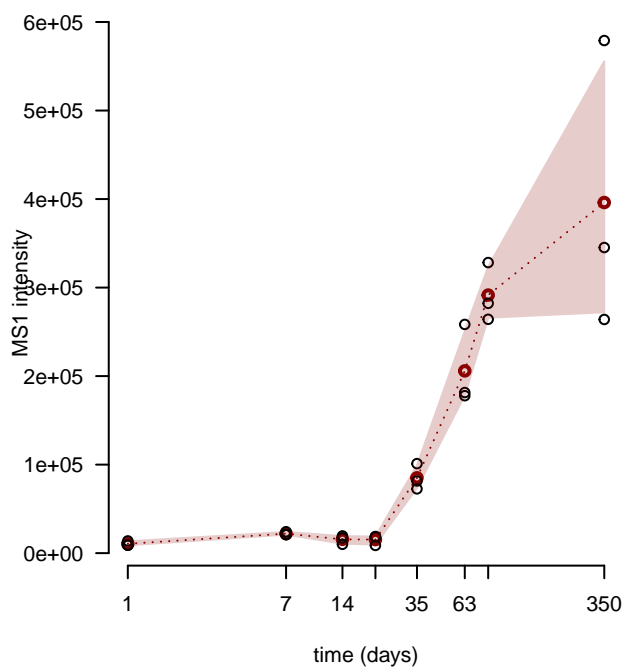

**A2RSX7**  
GN=Tyw5  
tRNA-yW synthesizing protein 5

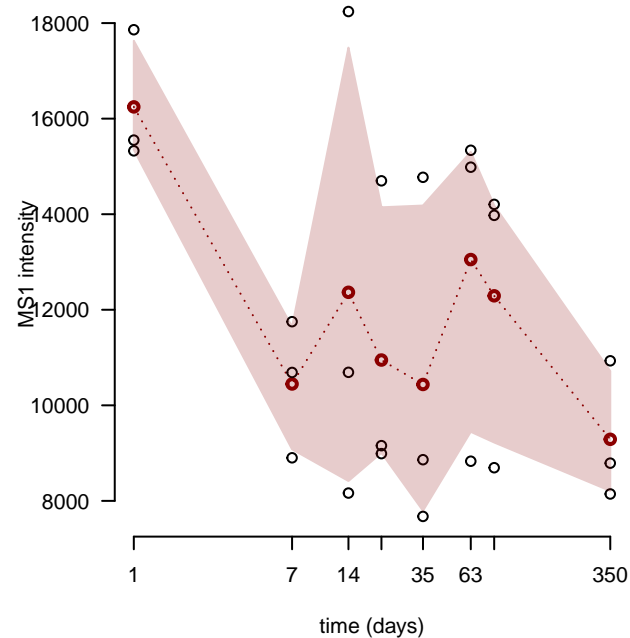

**A2RSY1**  
GN=Kansl3  
KAT8 regulatory NSL complex subunit 3

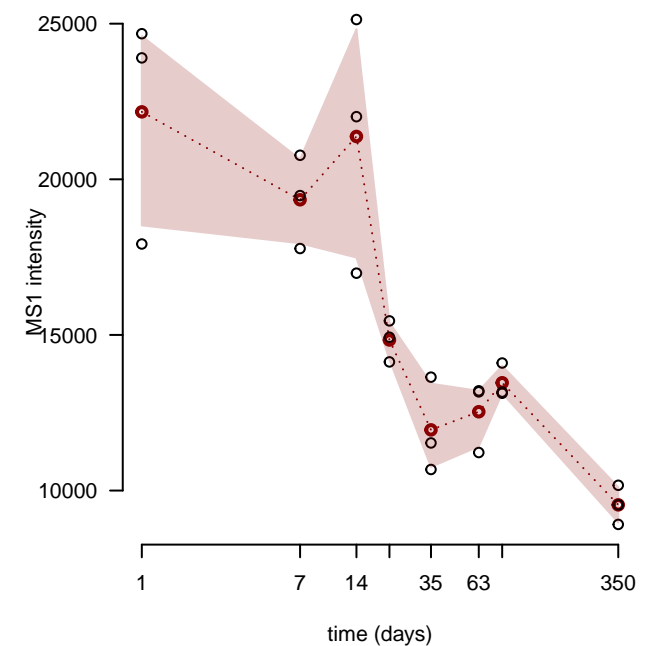

**A2RSY6**  
GN=Trmt11  
tRNA methyltransferase 1 like

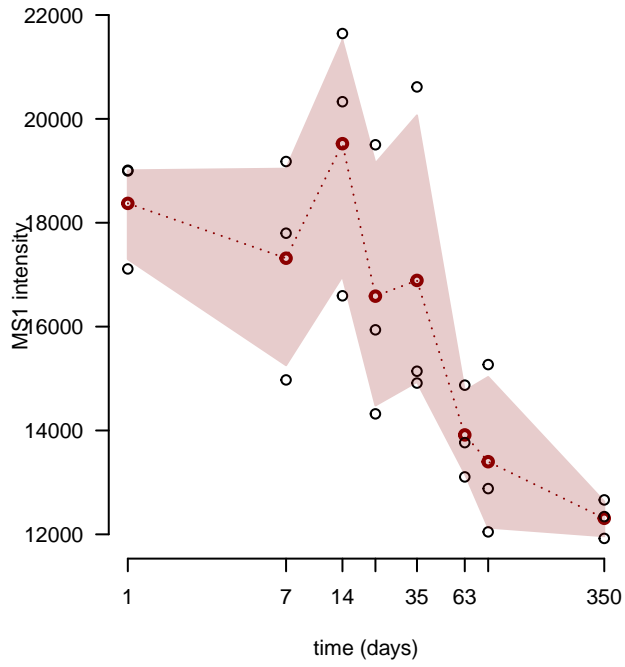

**A2RT60**  
GN=Htra4  
HtrA serine peptidase 4

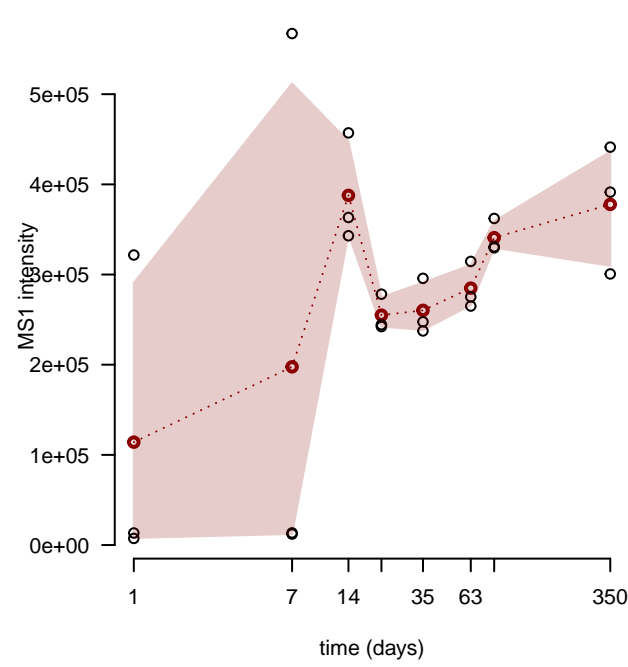

**A2RT67**  
GN=Dennd3  
DENN/MADD domain containing 3

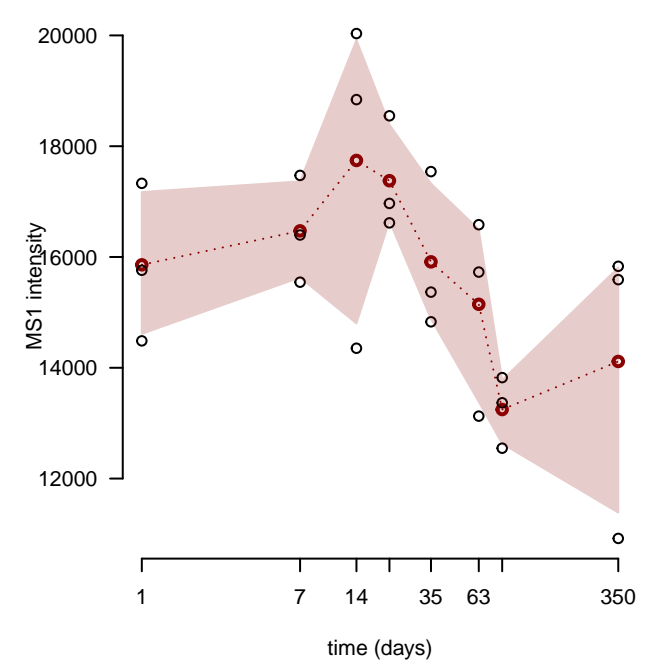

**A2RTL5**  
GN=Rsrc2  
arginine/serine-rich coiled-coil 2

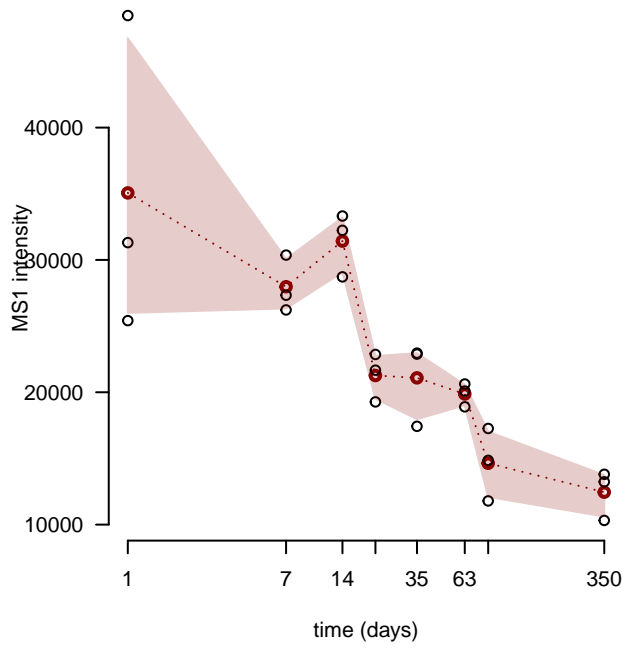

**A2TJV2**  
GN=Palm3  
paralemmin 3

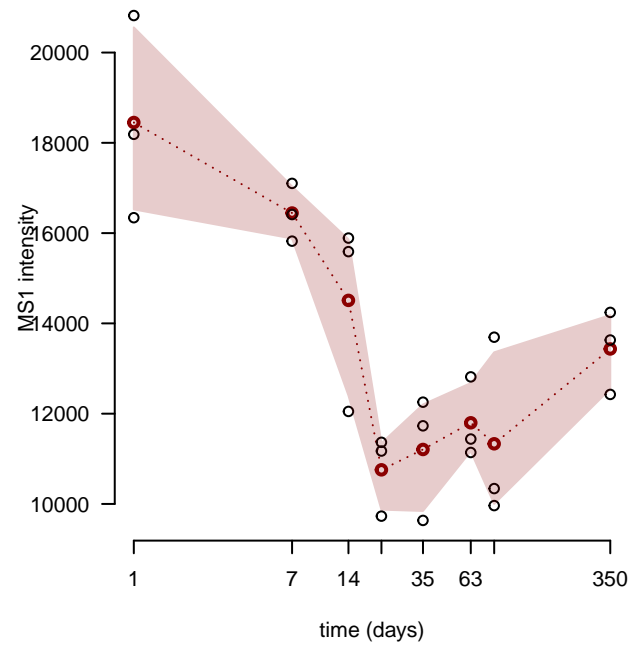

**A3KFM7**  
GN=Chd6  
chromodomain helicase DNA binding protei ...

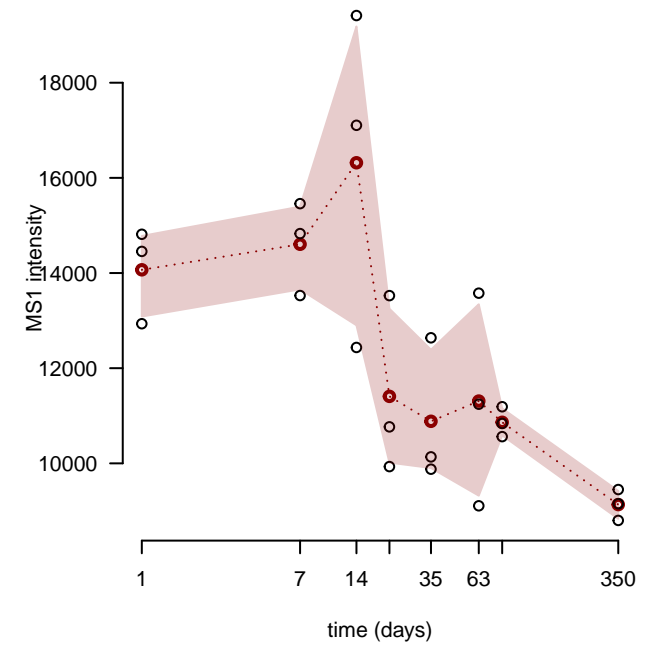

**A3KG59**  
GN=Pm20d2  
peptidase M20 domain containing 2

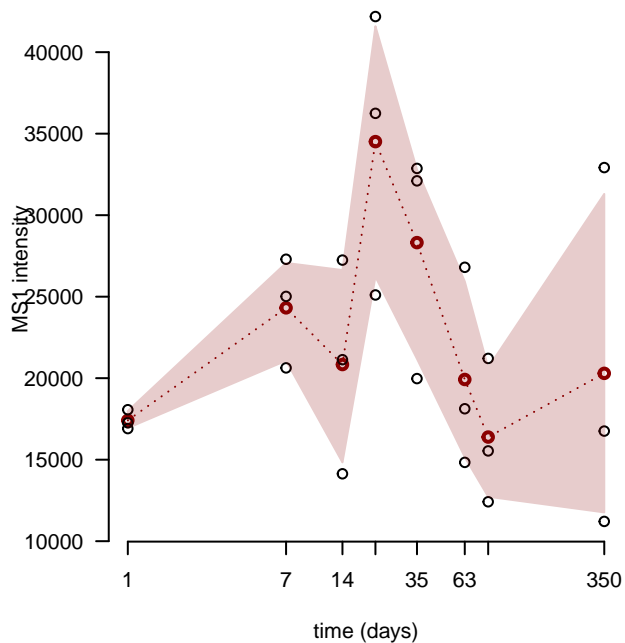

**A3KGB4**  
GN=Tbc1d8b  
TBC1 domain family, member 8B

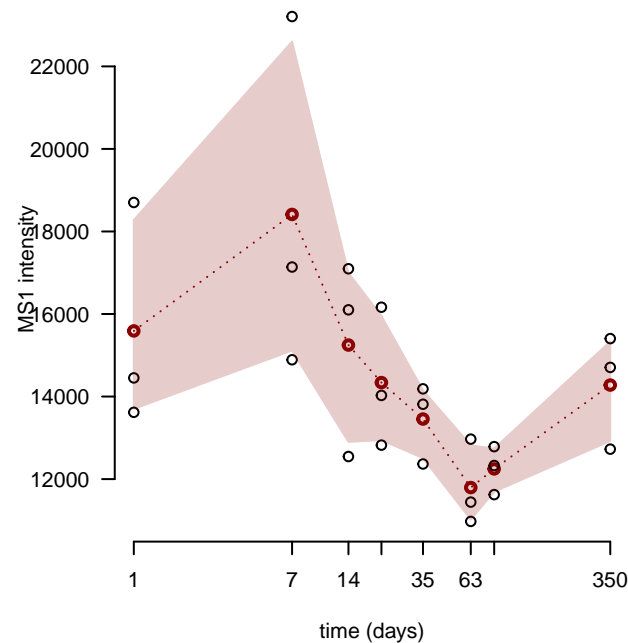

**A3KGS3**  
GN=Ralgapa2  
Ral GTPase activating protein, alpha sub ...

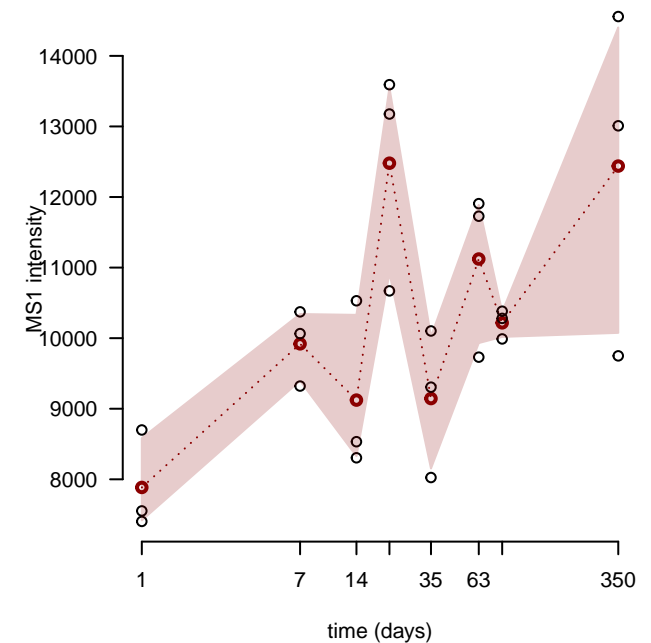

**A3KGV1**  
GN=Odf2  
outer dense fiber of sperm tails 2

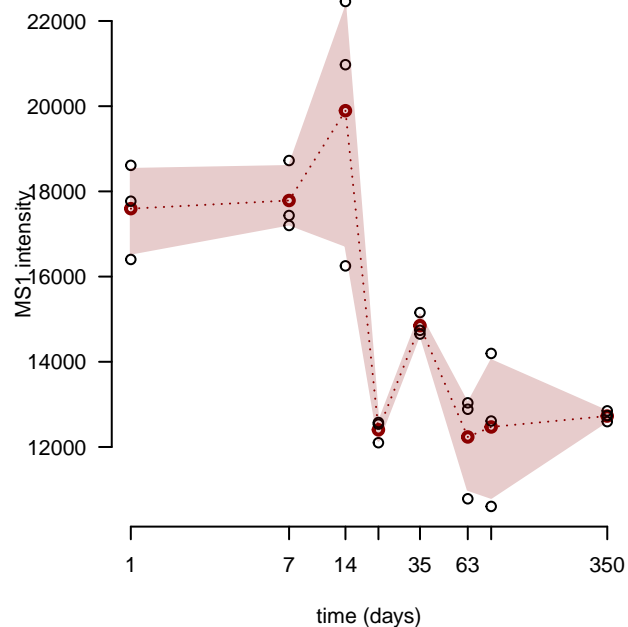

**A3KGW5**  
GN=Cercam  
cerebral endothelial cell adhesion molec ...

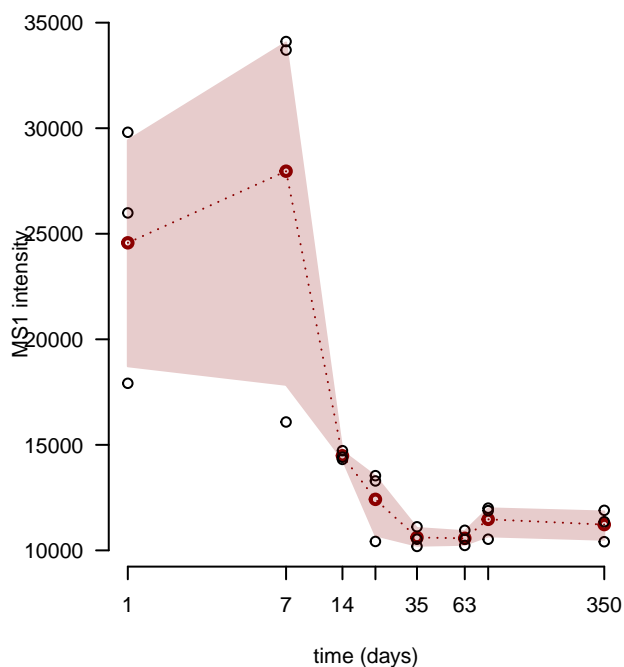

**A3KMP2**  
GN=Ttc38  
tetratricopeptide repeat domain 38

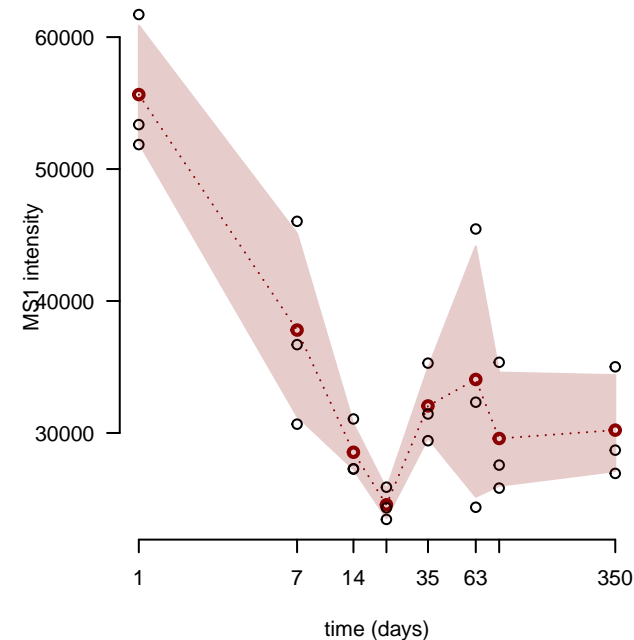

**A6H584**  
GN=Col6a5  
collagen, type VI, alpha 5

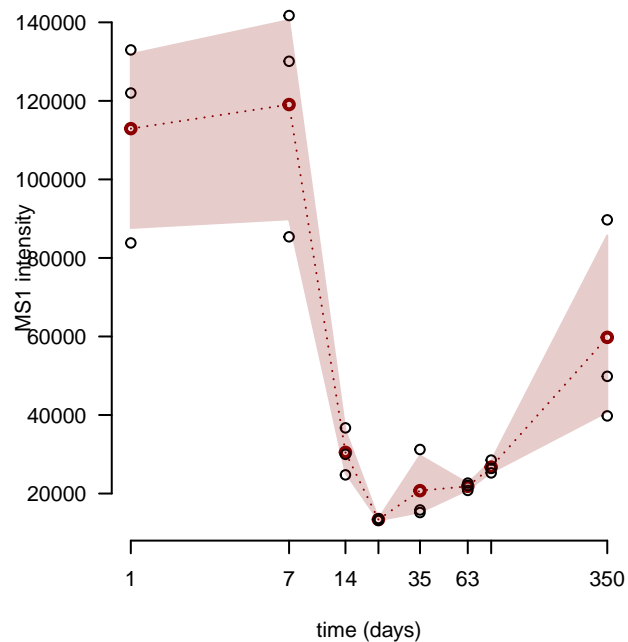

**A6H5X4**  
GN=Phf11

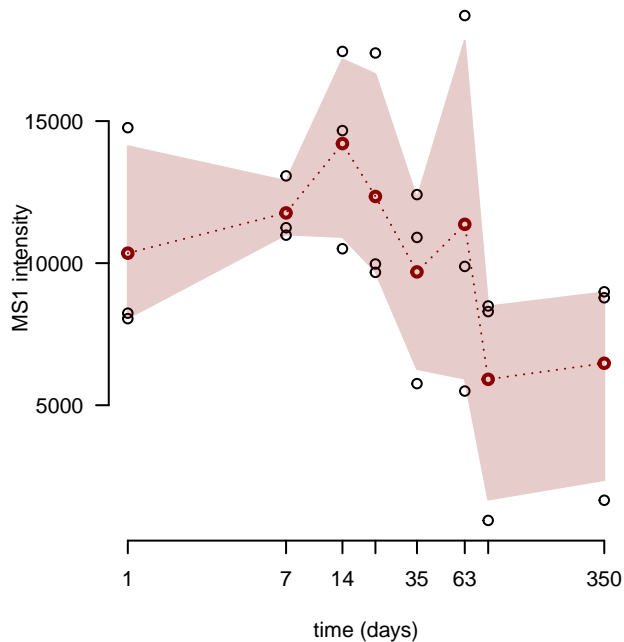

**A6H5Y3**  
GN=Mtr  
5-methyltetrahydrofolate-homocysteine me ...

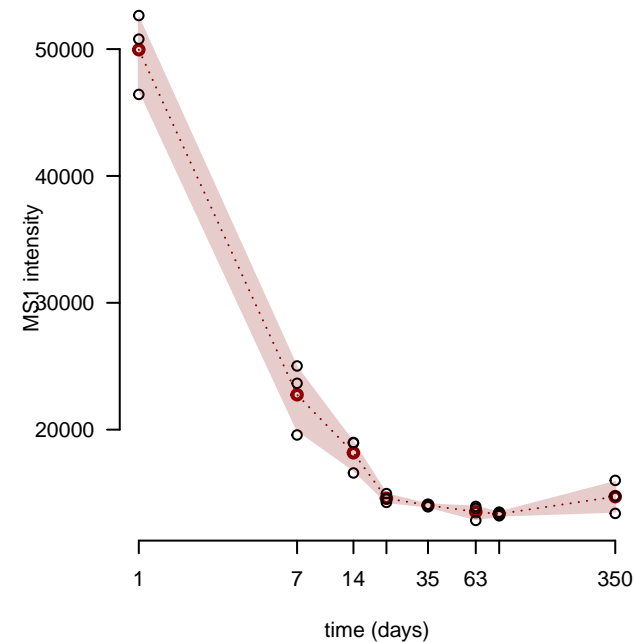

**A6H5Z3**  
GN=Exoc6b  
exocyst complex component 6B

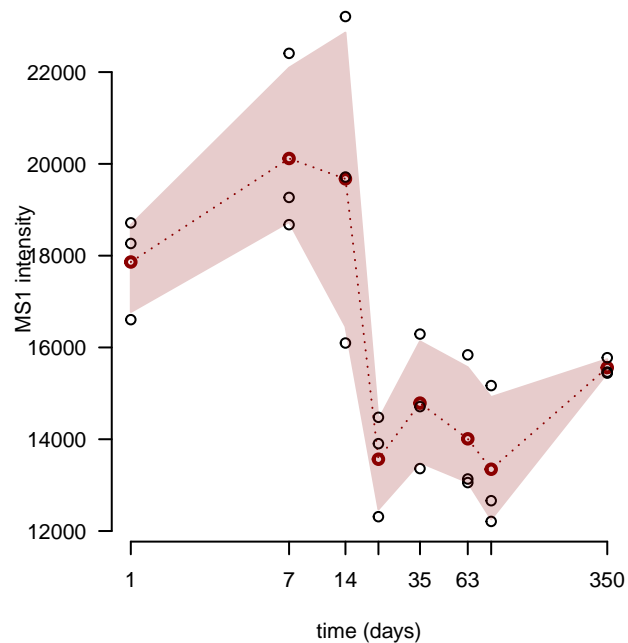

**A6H611**  
GN=Mipep  
mitochondrial intermediate peptidase

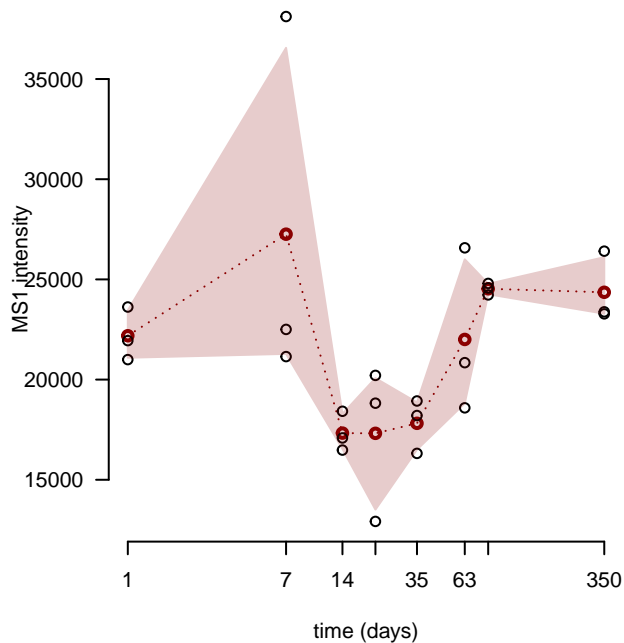

**A6H619**  
GN=Phrf1  
PHD and ring finger domains 1

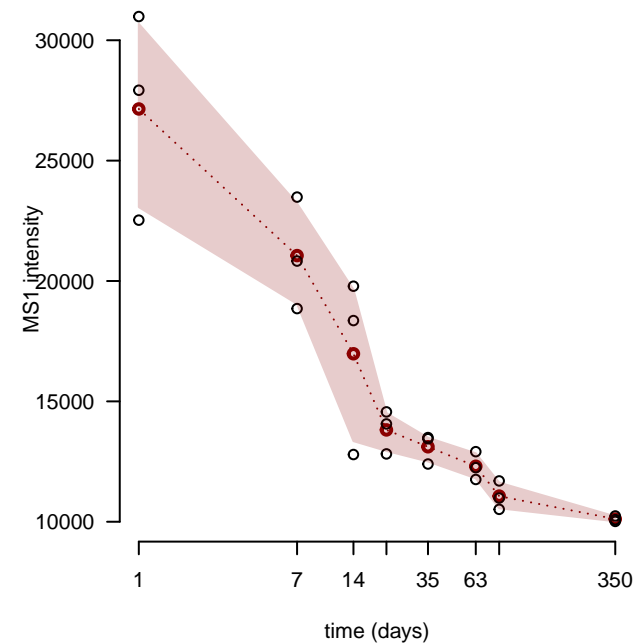

**A6H630**  
**GN=Armt1**  
acidic residue methyltransferase 1

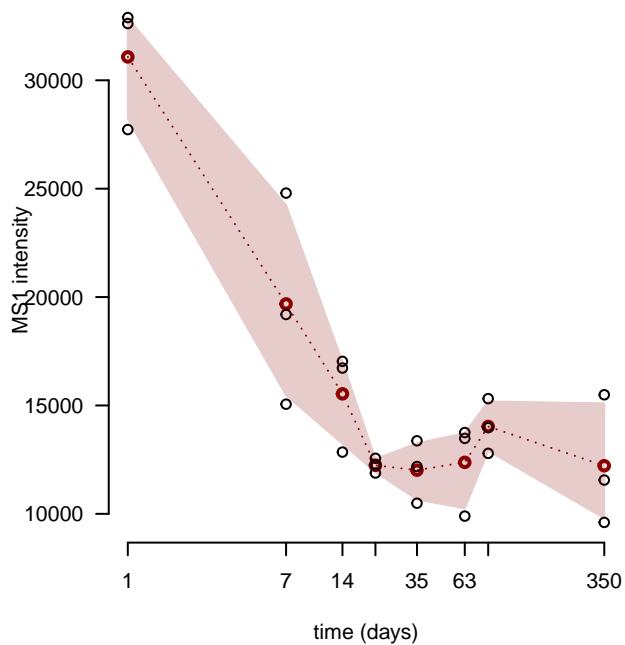

**A6H6A9**  
**GN=Rabgap1l**  
RAB GTPase activating protein 1-like

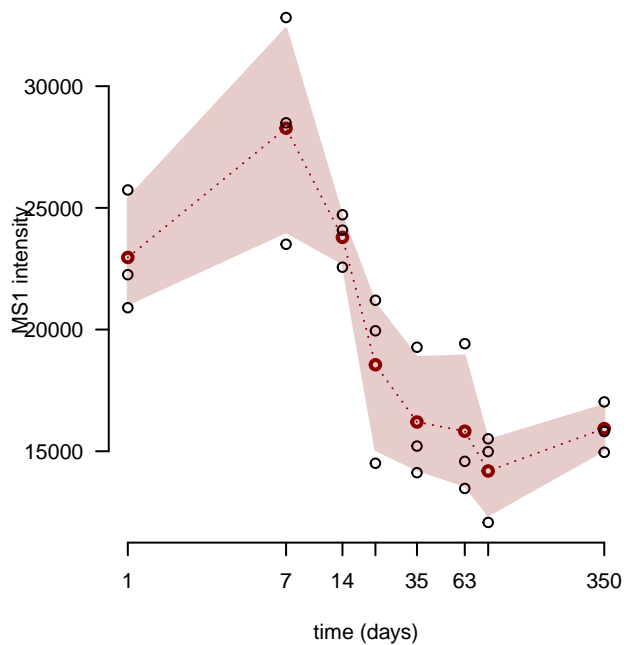

**A6H6A9**  
**GN=Rabgap1l**  
RAB GTPase activating protein 1-like

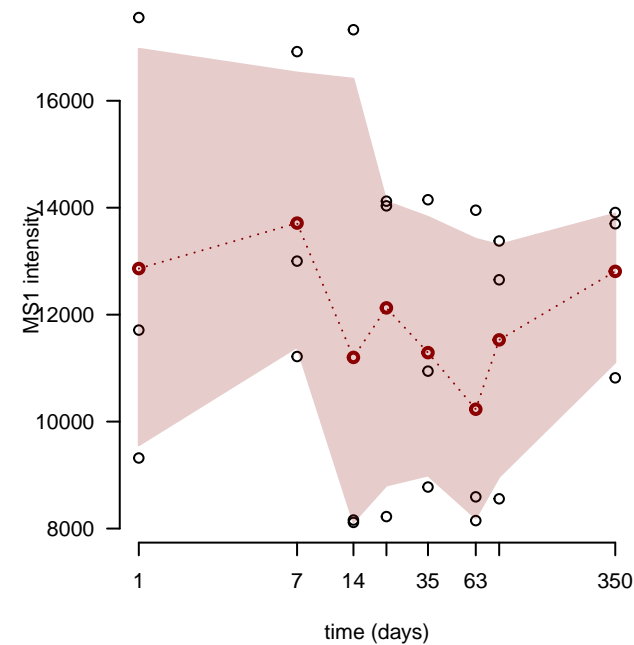

**A6H6E2**  
**GN=Mmrn2**  
multimerin 2

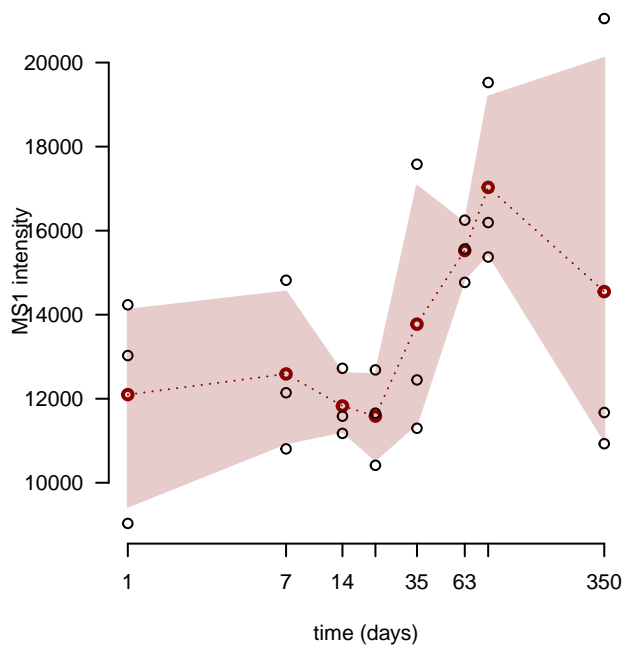

**A6H8H2**  
**GN=Dennd4c**  
DENN/MADD domain containing 4C

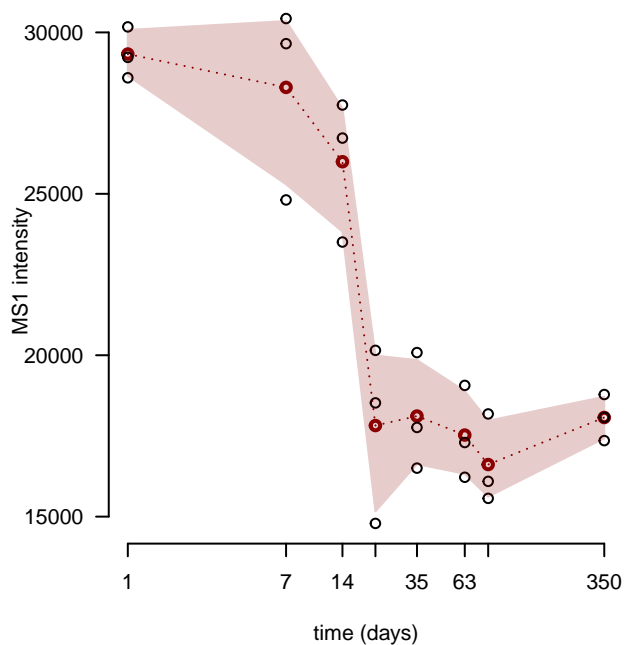

**A6PWY4**  
**GN=Wdr76**  
WD repeat domain 76

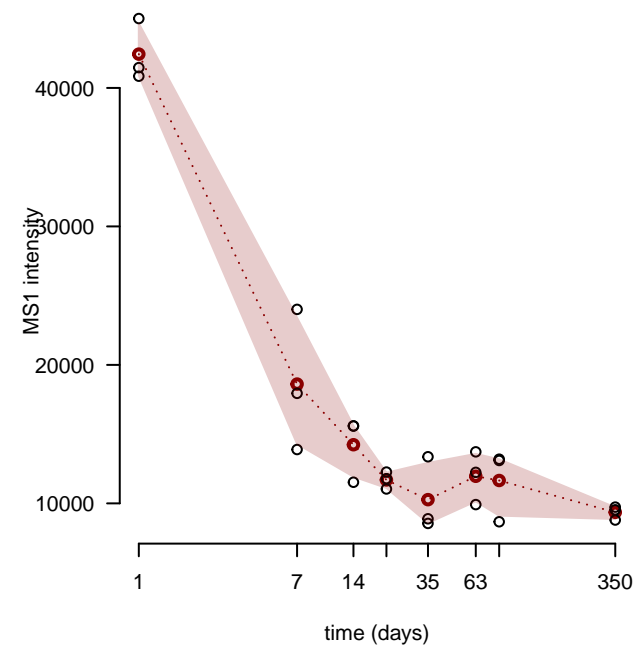

**A6X8Z5**  
**GN=Arhgap31**  
Rho GTPase activating protein 31

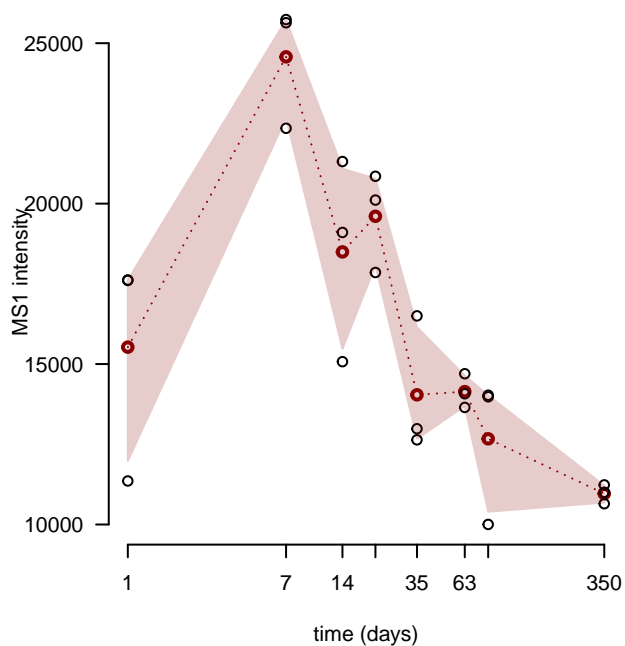

**A6X919**  
**GN=Dpy191l**  
dpy-19-like 1 (C. elegans)

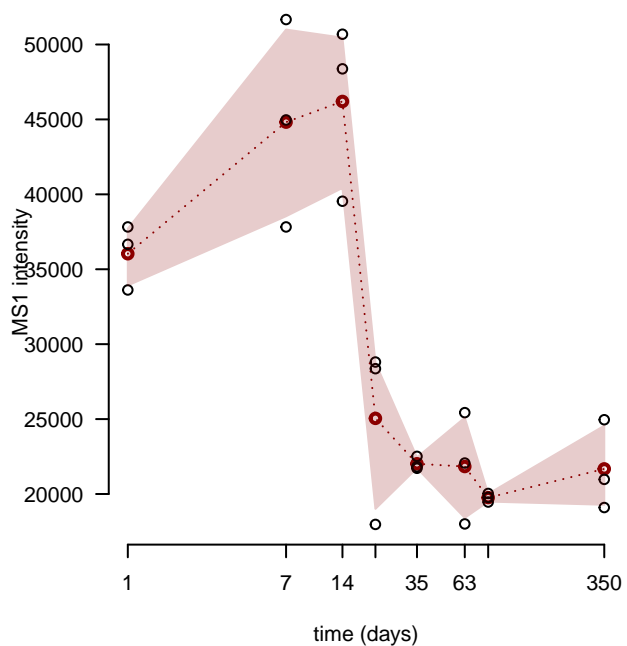

**A6X935**  
**GN=Itih4**  
inter alpha-trypsin inhibitor, heavy cha ...

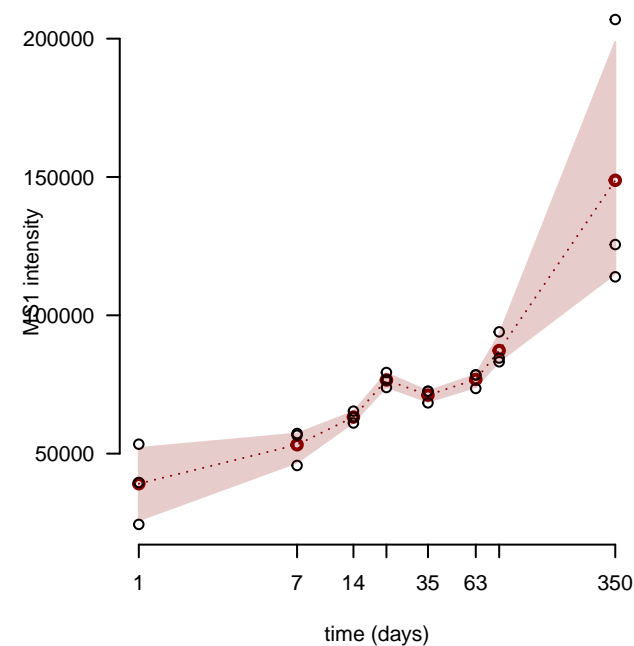

**A7MCT6**  
GN=Etnk2  
ethanolamine kinase 2

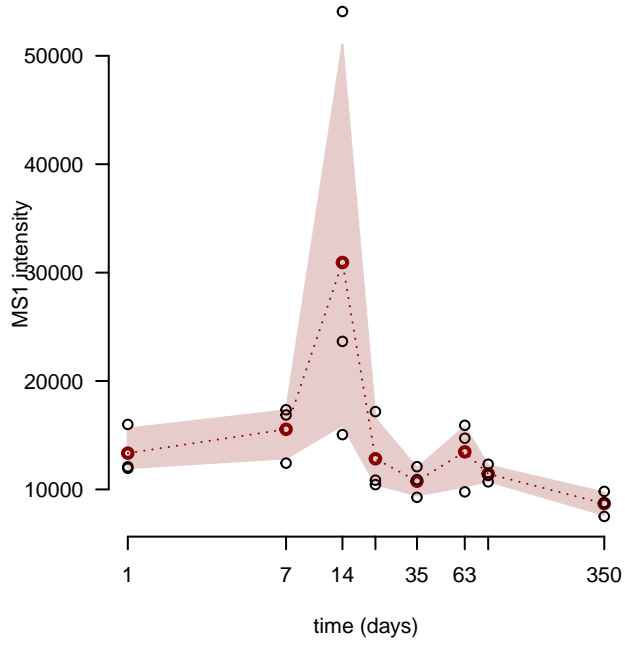

**A7RDN6**  
GN=Rnls  
renalase, FAD-dependent amine oxidase

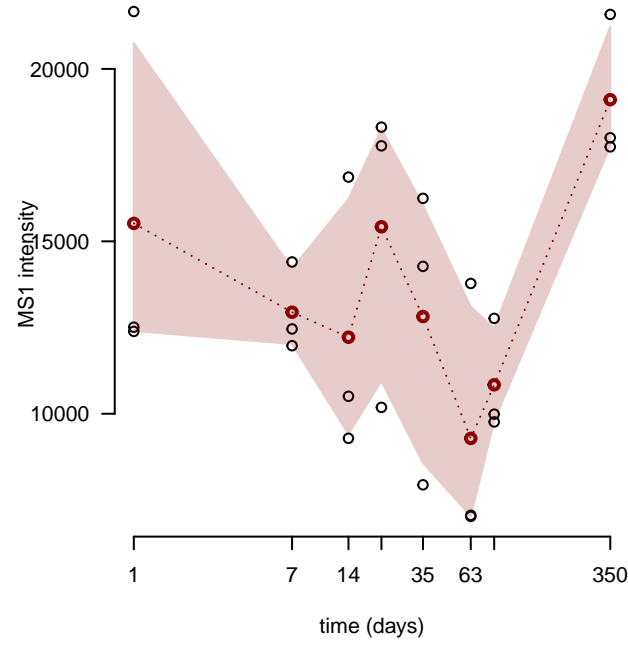

**A8C756**  
GN=Thada  
thyroid adenoma associated

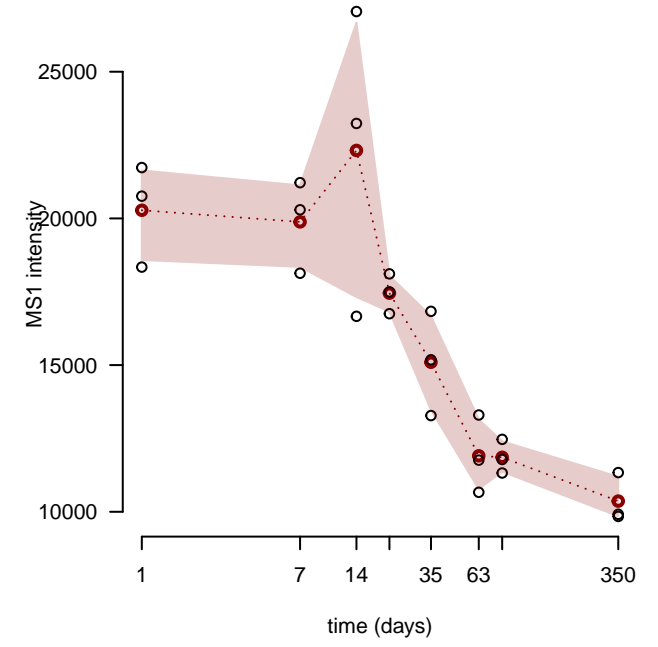

**A9Z1V5**  
GN=Vwa5b1  
von Willebrand factor A domain containin ...

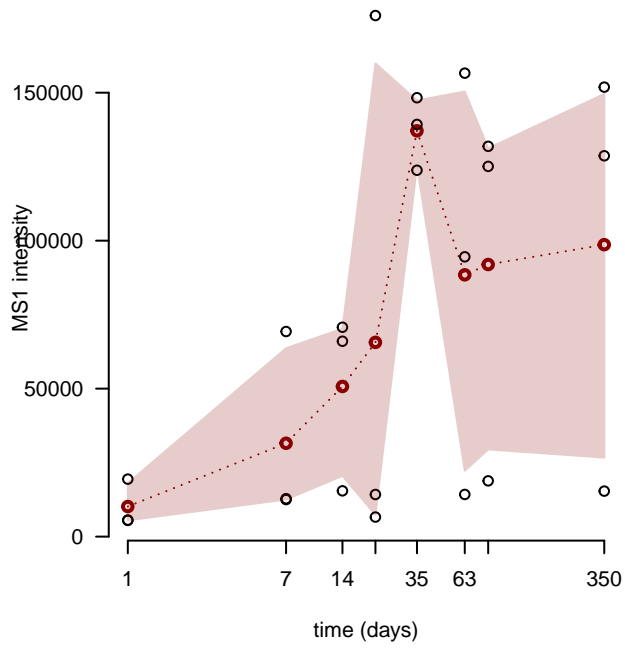

**B0V2N1**  
GN=Ptpns  
protein tyrosine phosphatase, receptor t ...

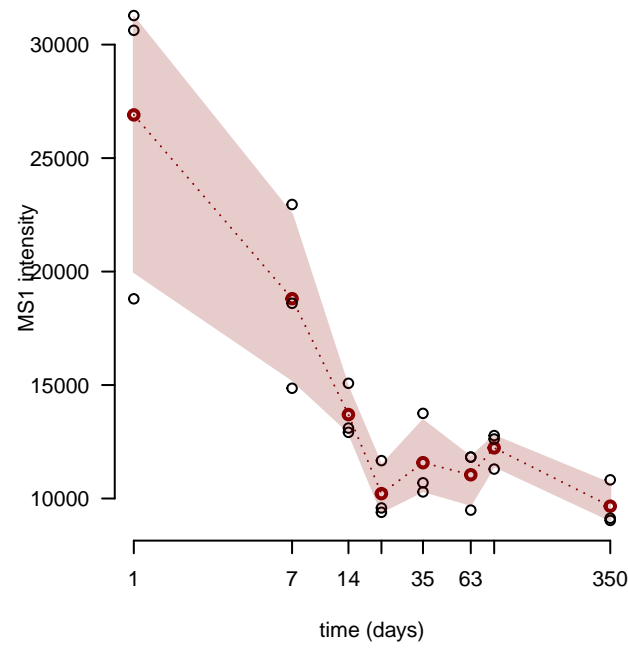

**B1AQ75**  
GN=Krt36  
keratin 36

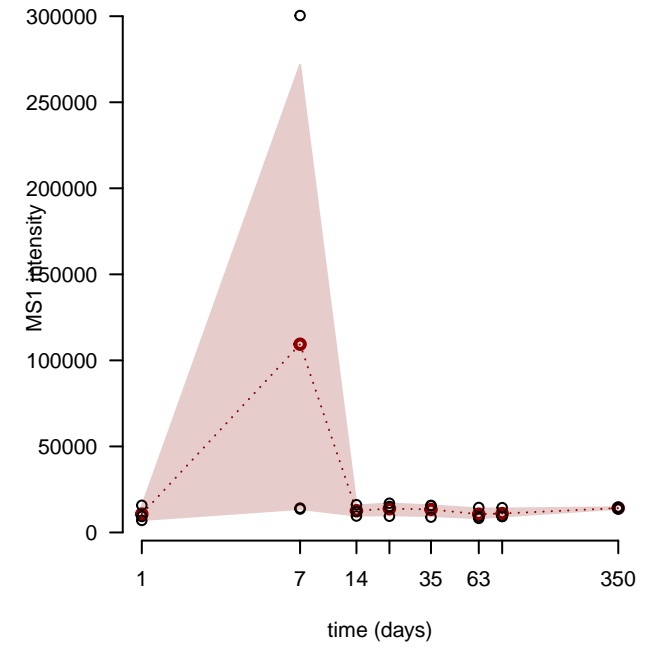

**B1AQJ2**  
GN=Usp36  
ubiquitin specific peptidase 36

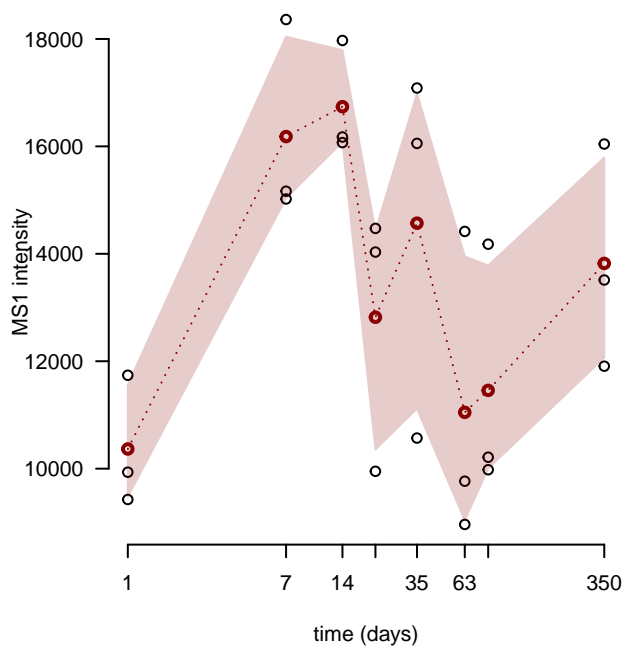

**B1AR13**  
GN=Cisd3  
CDGSH iron sulfur domain 3

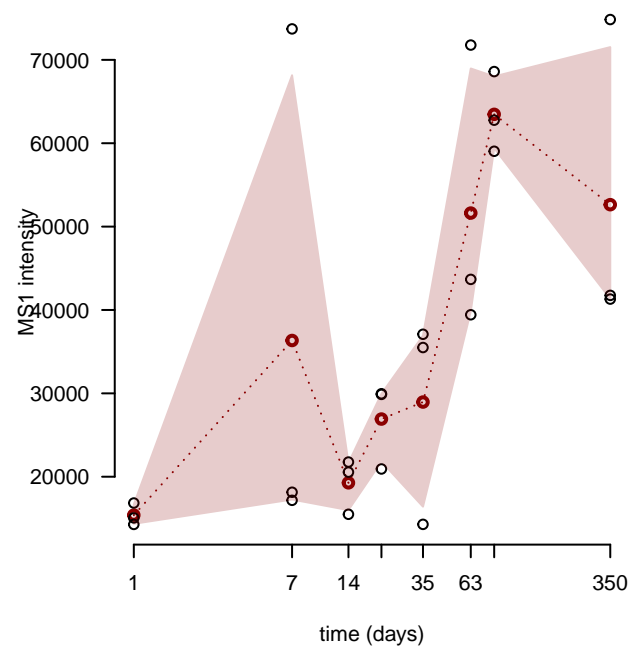

**B1ARD6**  
GN=Slfn9  
schlafen 9

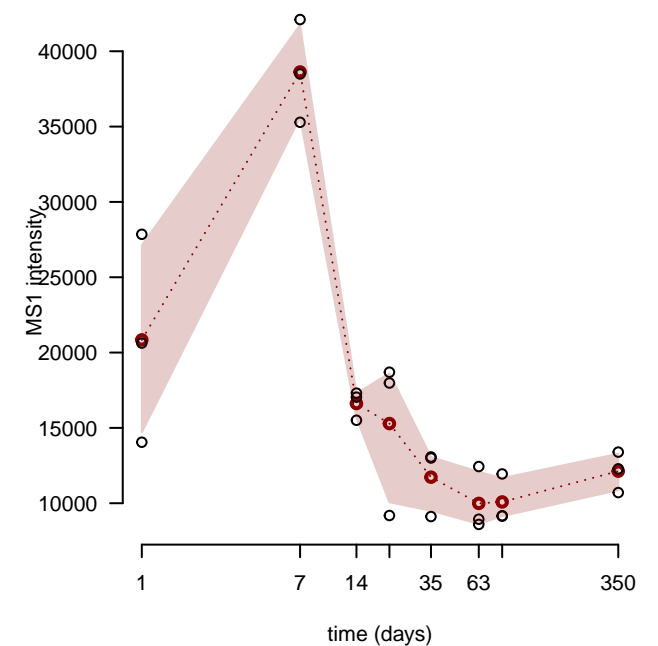



**B1ARW8**  
GN=

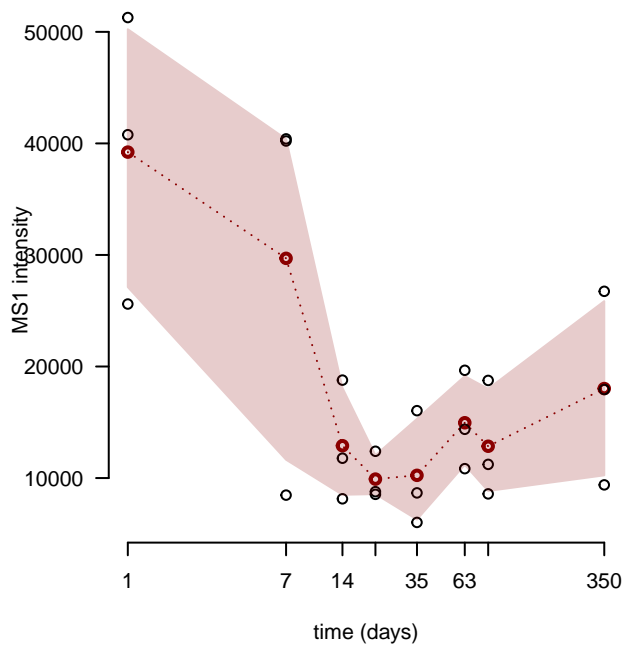

**B1ASB6**  
GN=

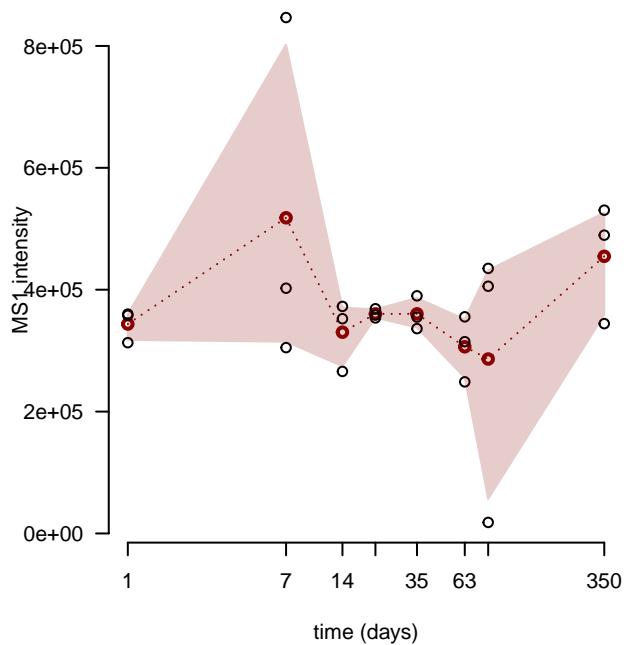

**B1AUE5**  
GN=Pex10  
peroxisomal biogenesis factor 10

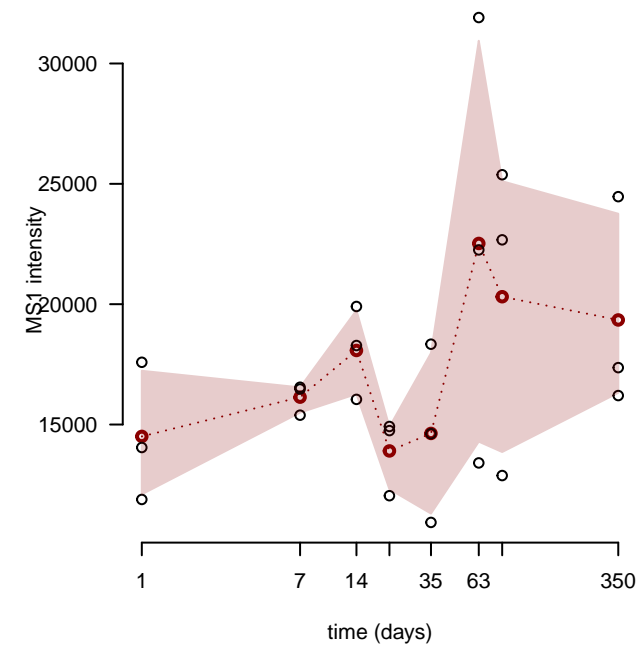

**B1AUR6**  
GN=Mms22l  
MMS22-like, DNA repair protein

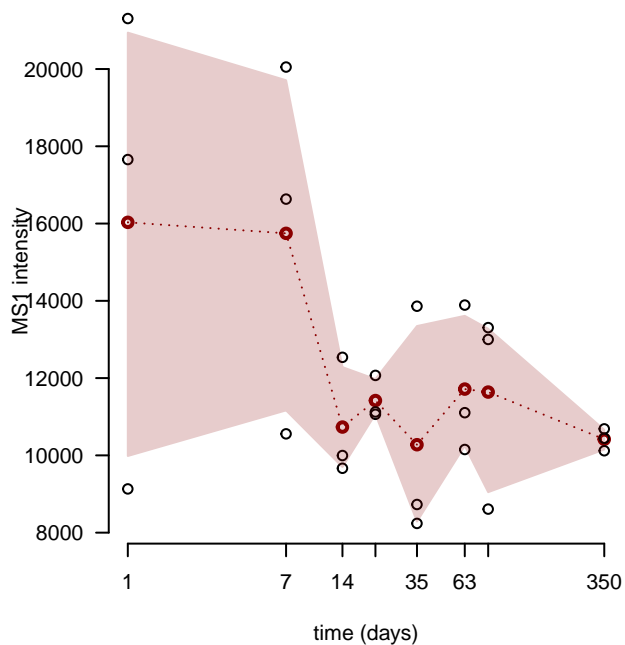

**B1AVY7**  
GN=Kif16b  
kinesin family member 16B

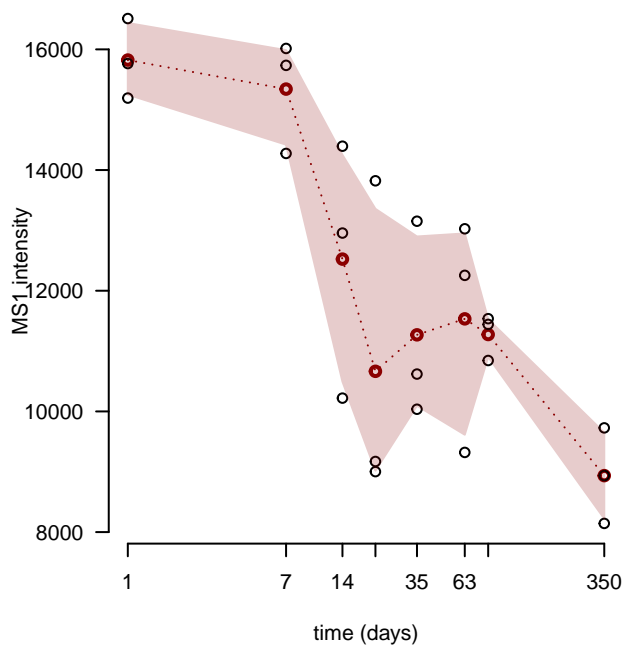

**B1AVZ0**  
GN=Uprt  
uracil phosphoribosyltransferase

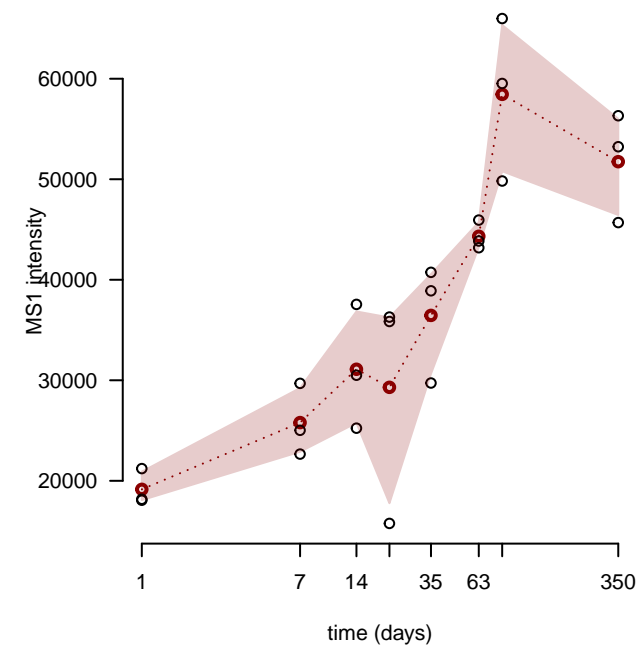

**B1AWL2**  
GN=Znf462

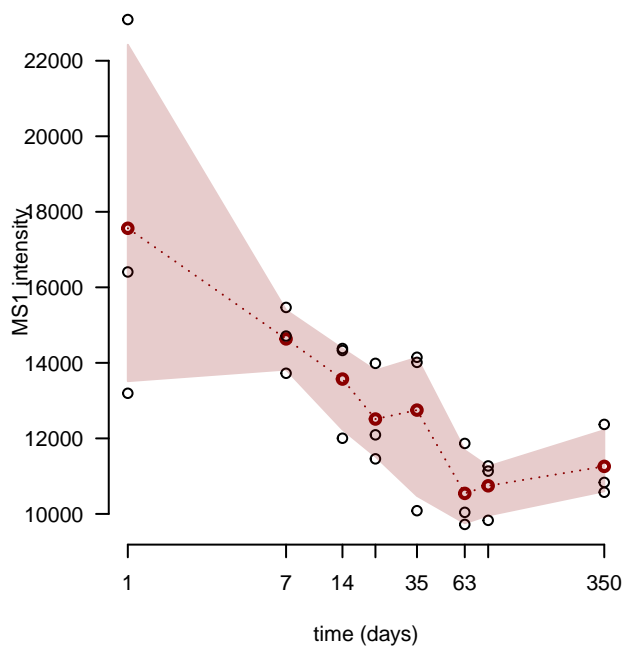

**B1AXH1**  
GN=Nhs12  
NHS-like 2

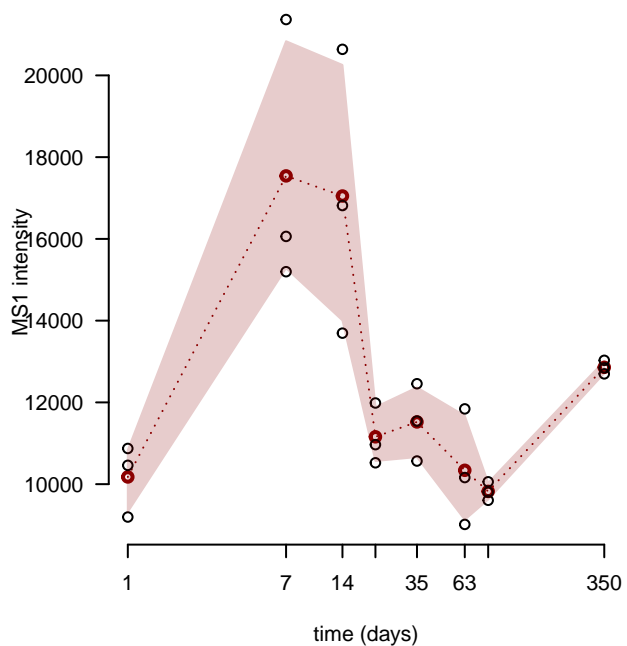

**B1AXP6**  
GN=Tomm5  
translocase of outer mitochondrial membr ...

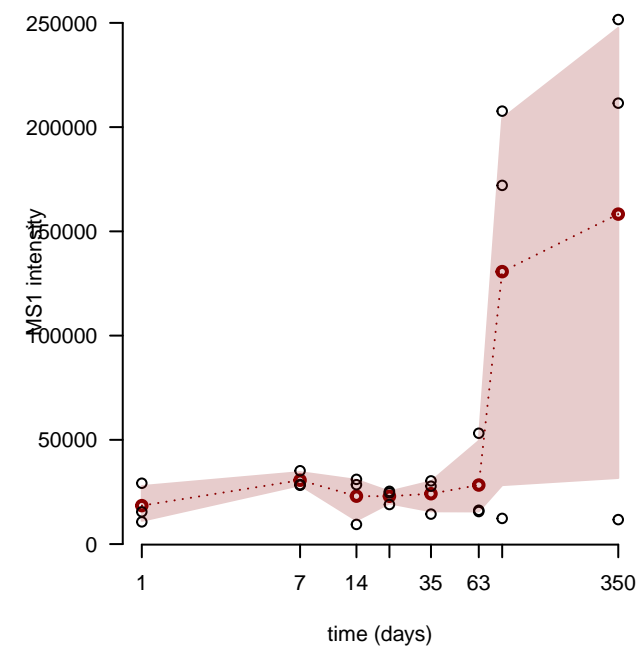

**B1AY10**  
GN=Nfx1  
nuclear transcription factor, X-box bind ...

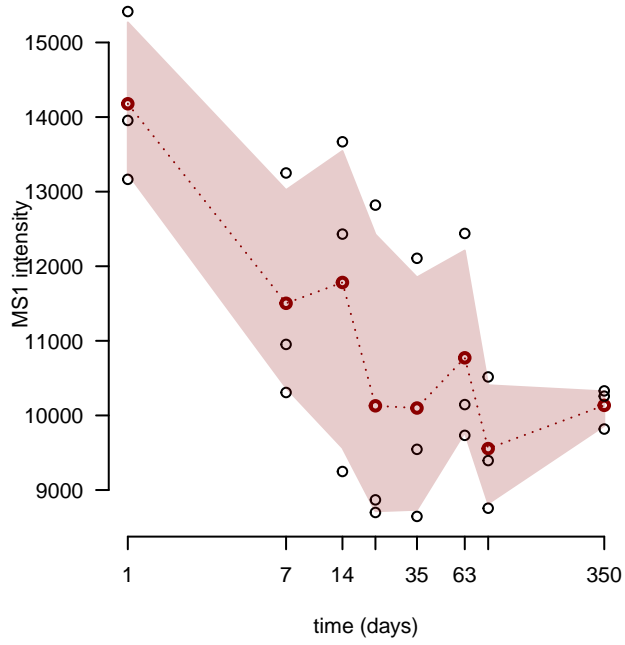

**B1AY13**  
GN=Usp24  
ubiquitin specific peptidase 24

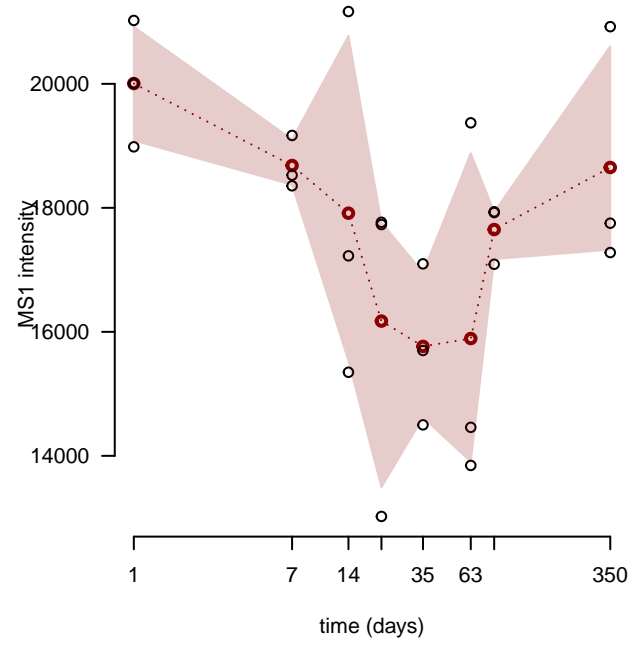

**B1AZA5**  
GN=Tmem245  
transmembrane protein 245

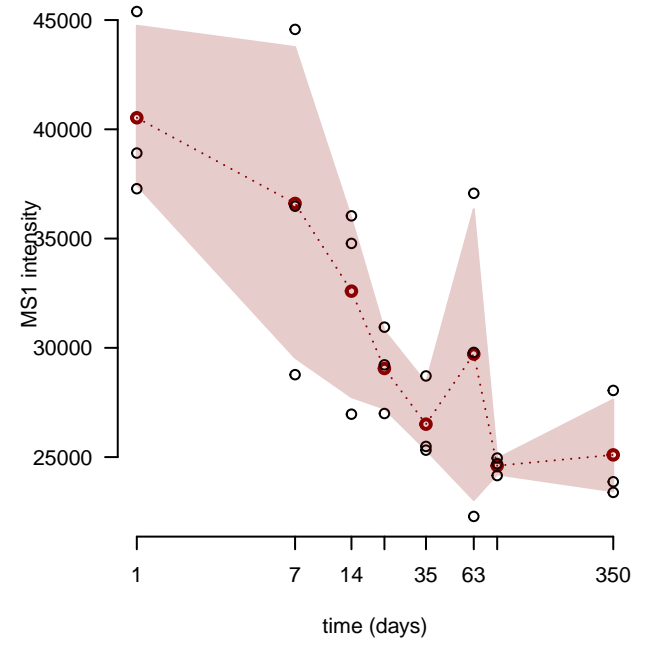

**B1AZI6**  
GN=Thoc2  
THO complex 2

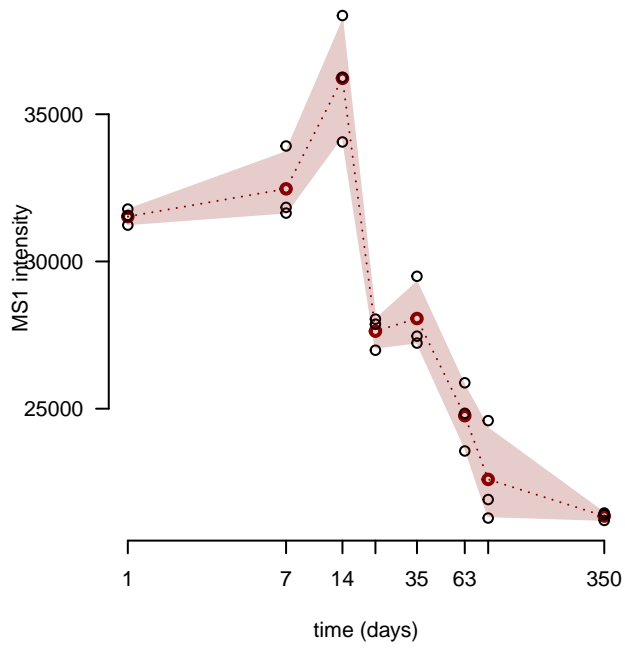

**B1AZP2**  
GN=Dlgap4  
DLG associated protein 4

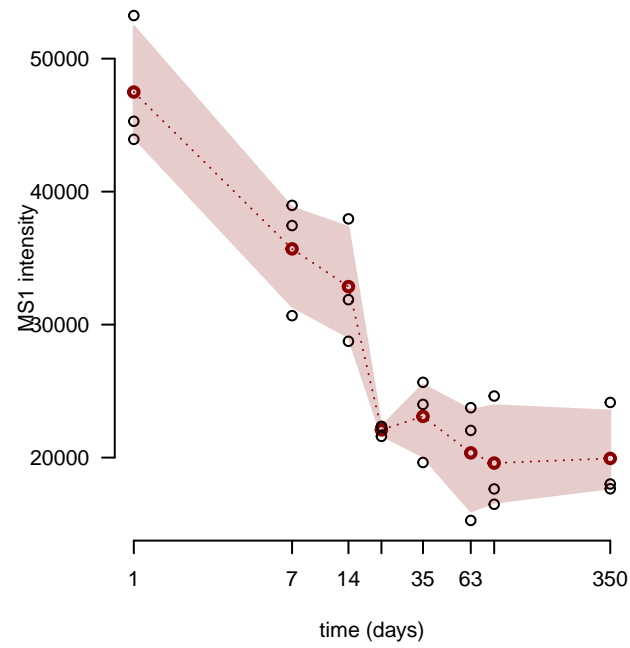

**B1B0V2**  
GN=

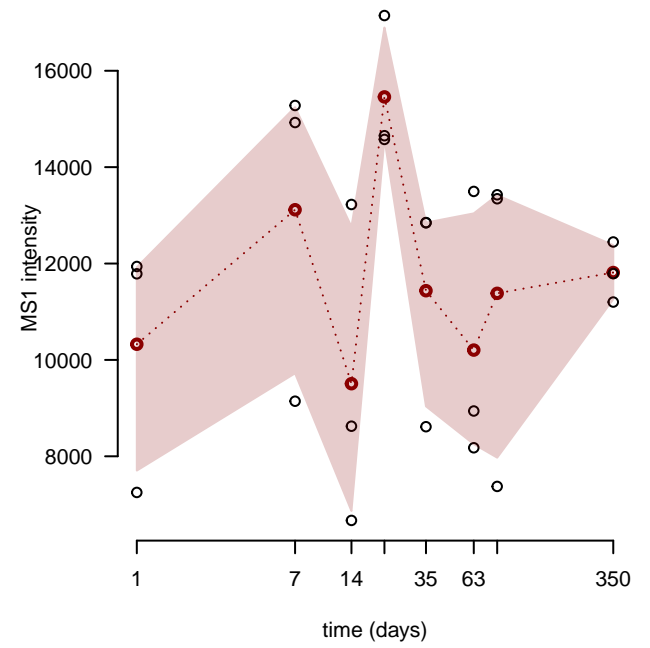

**B2B9E1**  
GN=Triqk  
triple QxxK/R motif containing

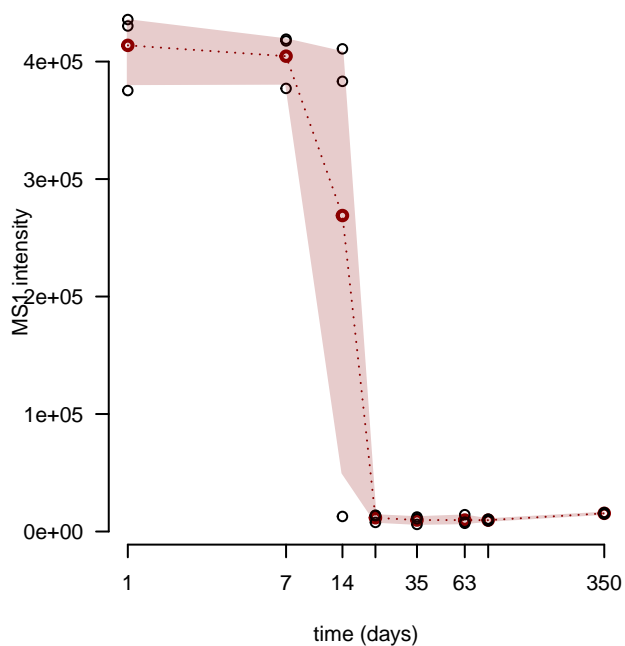

**B2KF05**  
GN=

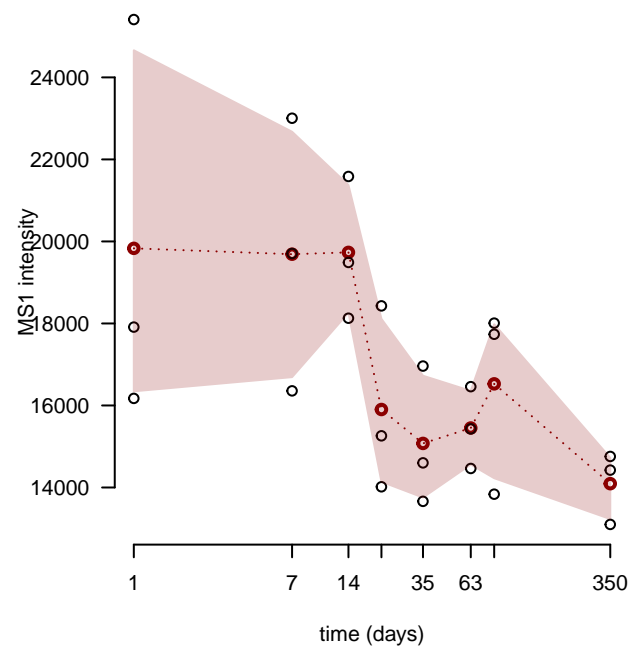

**B2RQC2**  
GN=Usp42  
ubiquitin specific peptidase 42

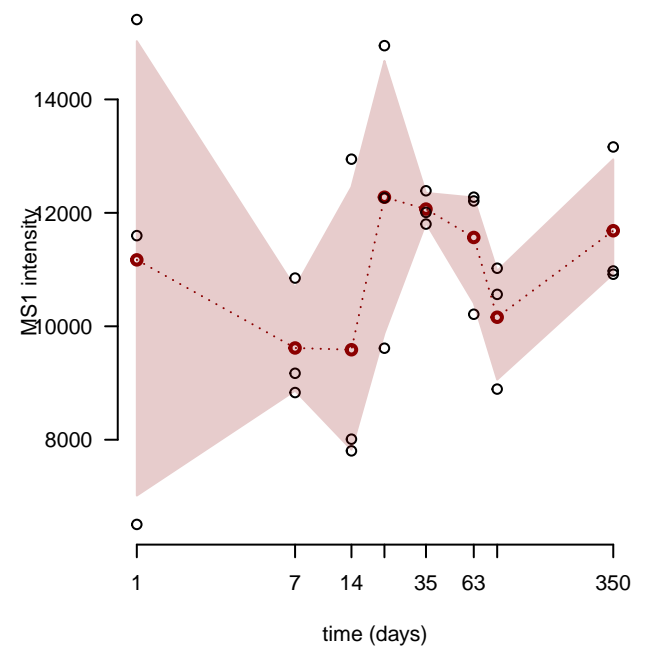

**B2RQC6**  
GN=Cad  
carbamoyl-phosphate synthase 2, aspart ...

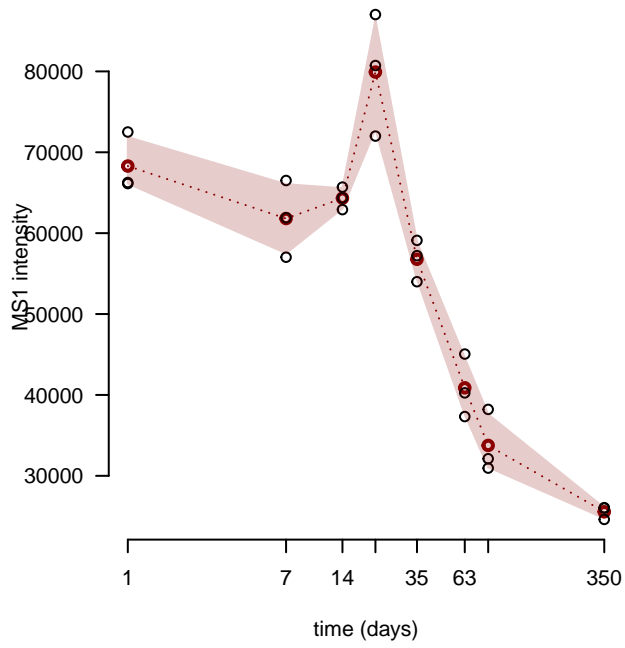

**B2RQE8**  
GN=Arhgap42  
Rho GTPase activating protein 42

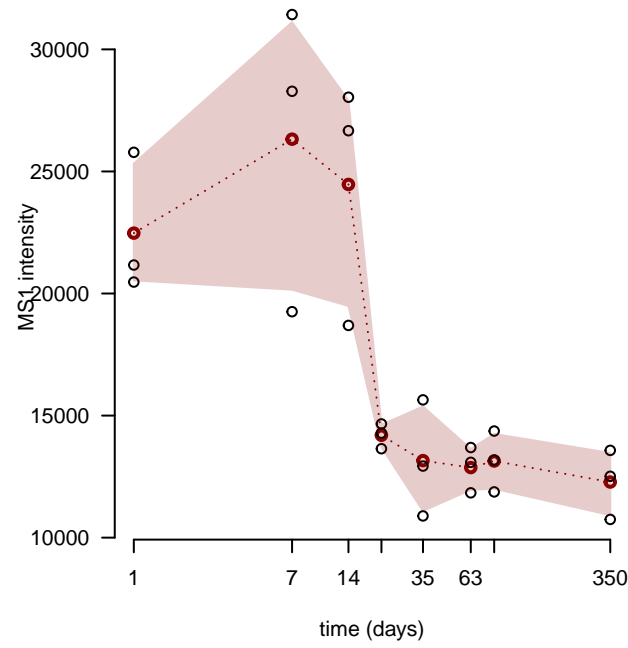

**B2RR83**  
GN=Ythdc2  
YTH domain containing 2

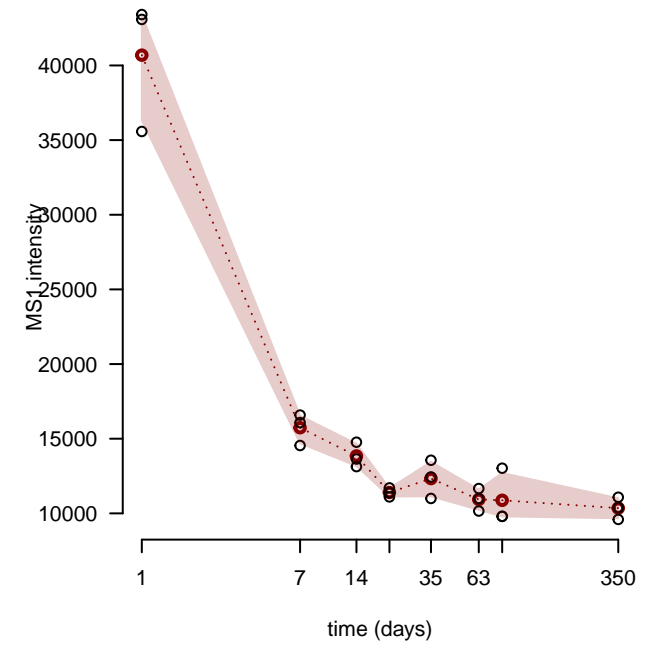

**B2RRD7**  
GN=Brpf1  
bromodomain and PHD finger containing, 1

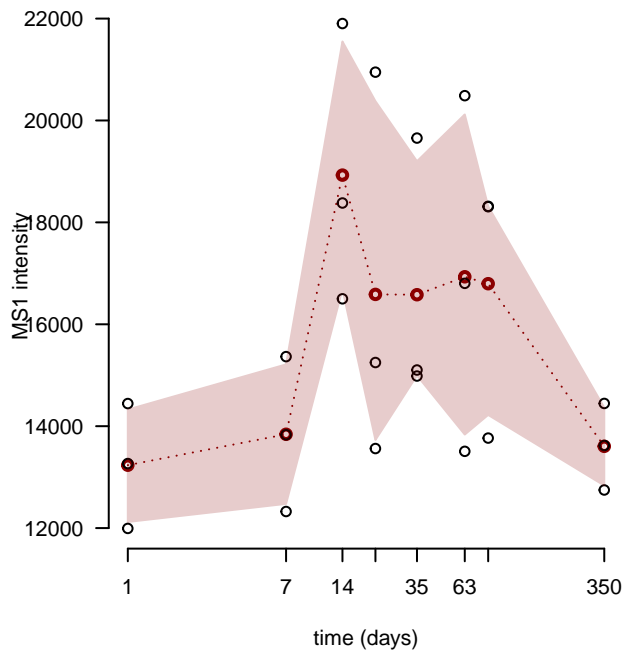

**B2RRE7**  
GN=Otud4  
OTU domain containing 4

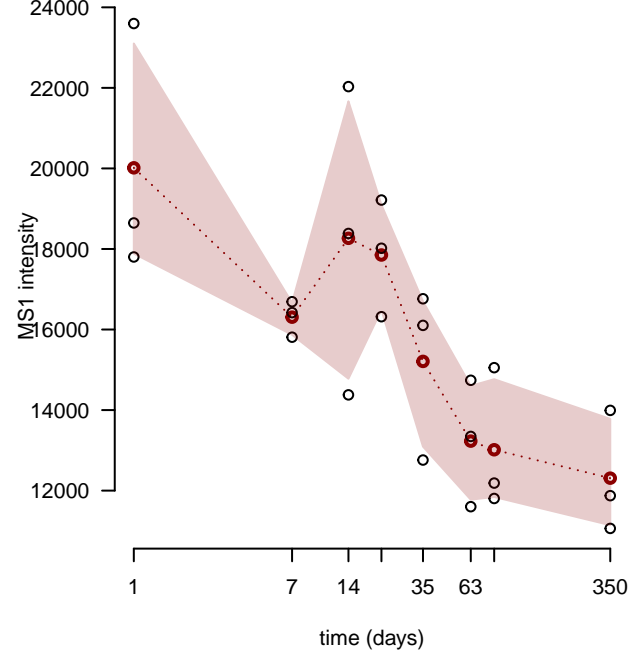

**B2RRF6**  
GN=Znf518a

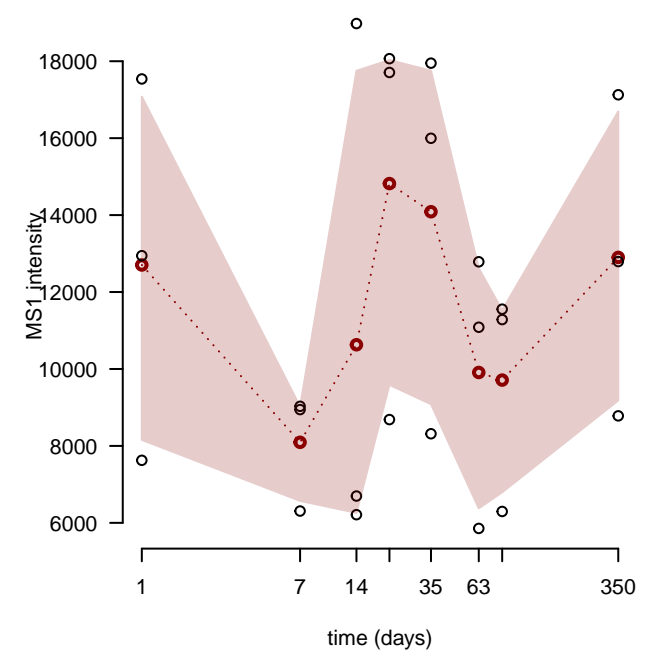

**B2RS91**  
GN=Rrn3  
RRN3 RNA polymerase I transcription fact ...

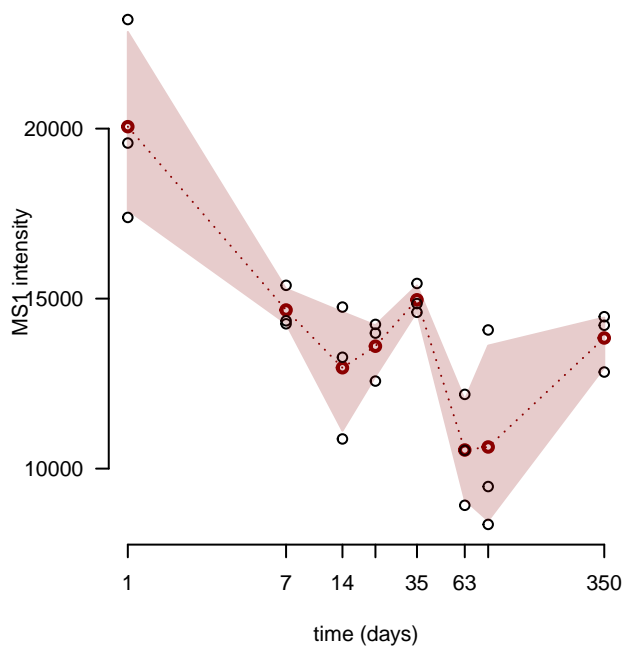

**B2RSH2**  
GN=Gnai1  
guanine nucleotide binding protein (G pr ...

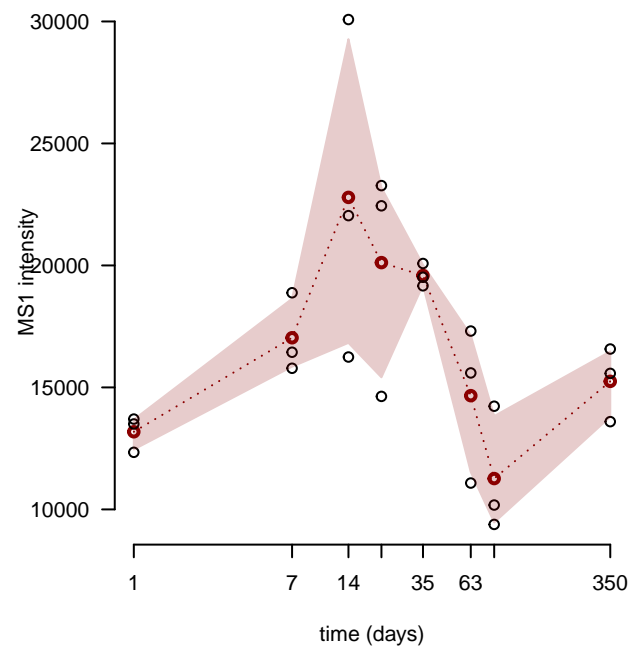

**B2RUP2**  
GN=Unc13d  
unc-13 homolog D

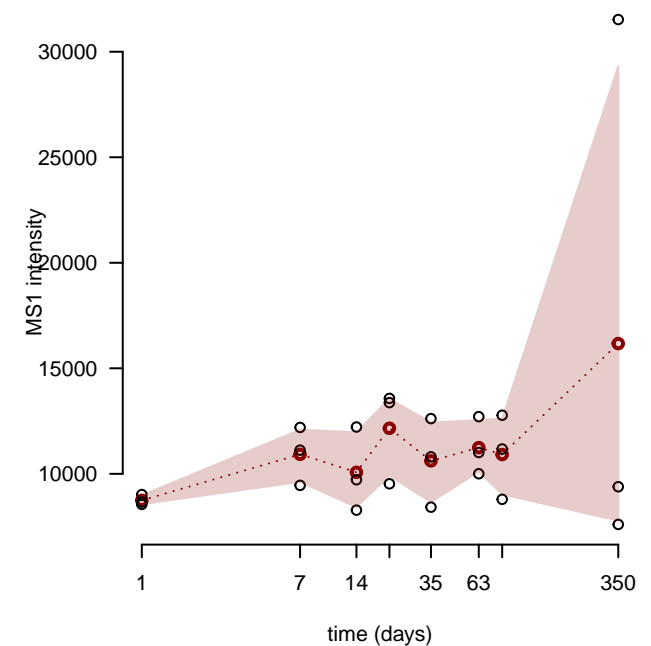

**B2RUR8**  
GN=Otud7b  
OTU domain containing 7B

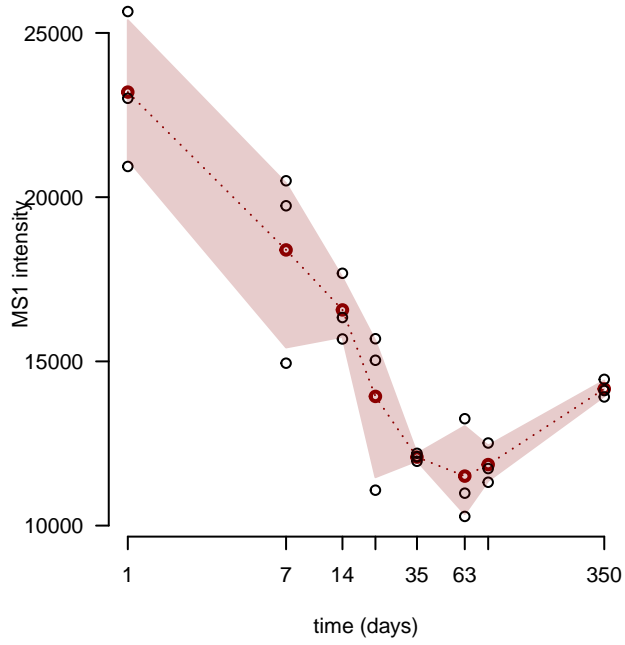

**B2RVL6**  
GN=Zcchc24  
zinc finger, CCHC domain containing 24

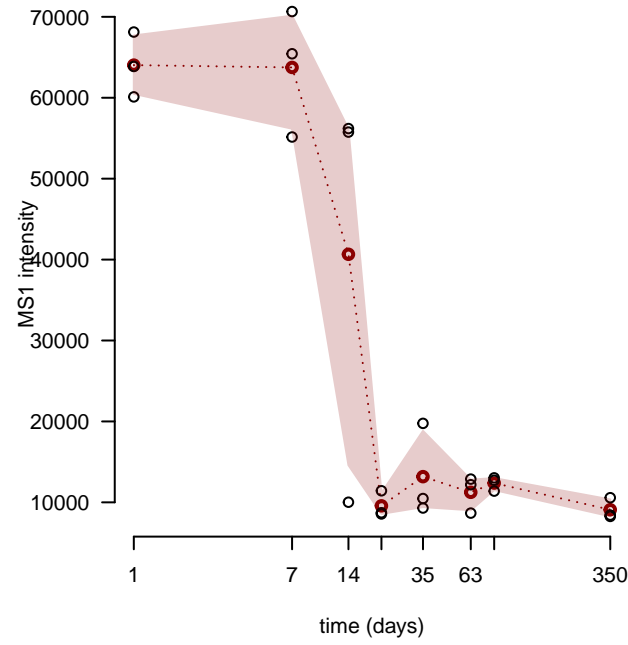

**B2RWS6**  
GN=Ep300  
E1A binding protein p300

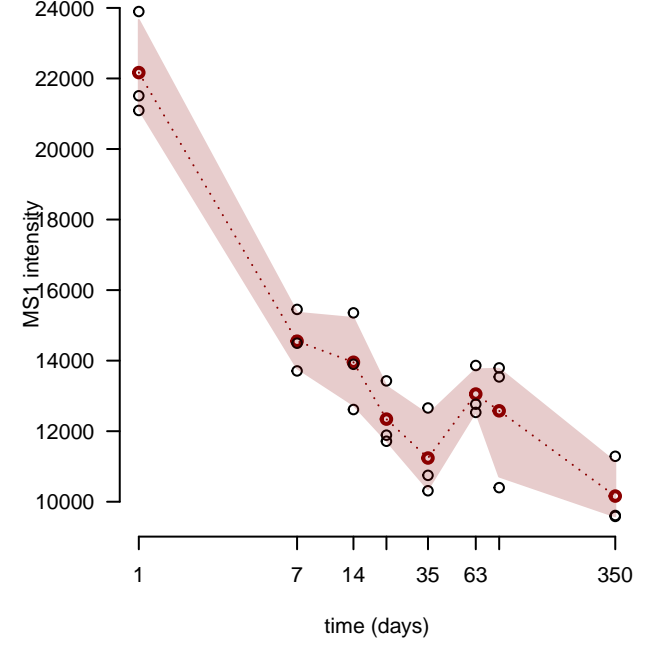

**B2RX14**  
GN=Tut4  
terminal uridylyl transferase 4

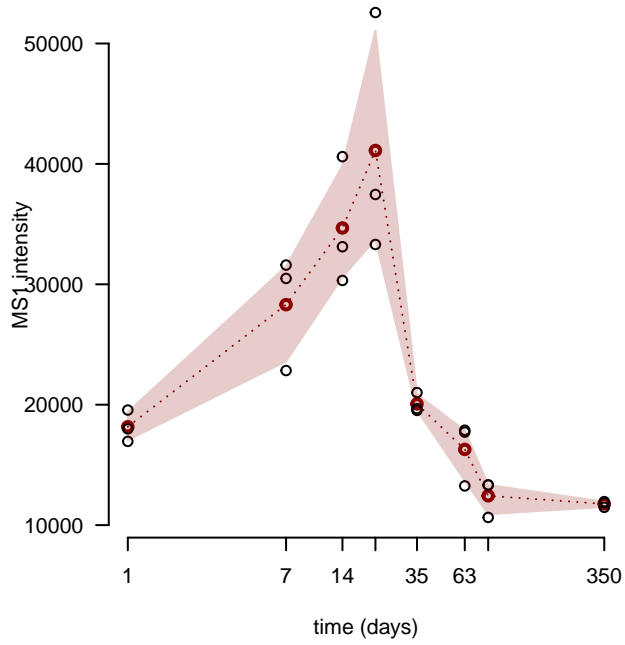

**B2RXC1**  
GN=Trappc1  
trafficking protein particle complex 11

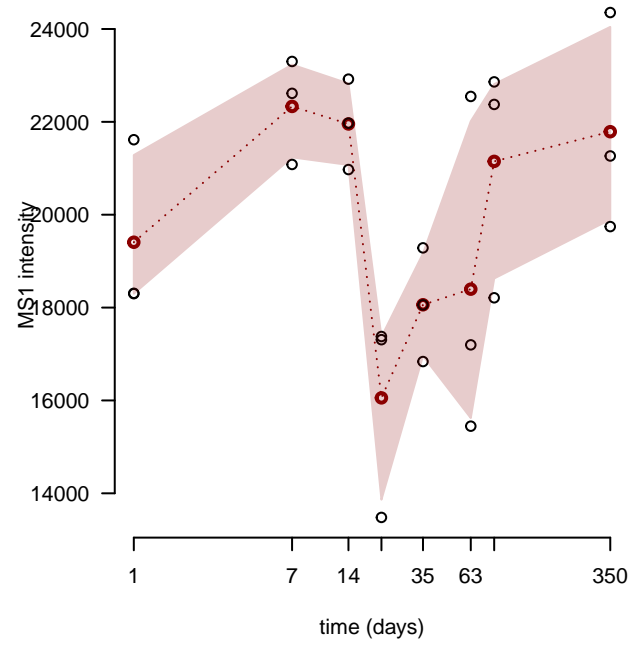

**B2RXR6**  
GN=Ankrd44  
ankyrin repeat domain 44

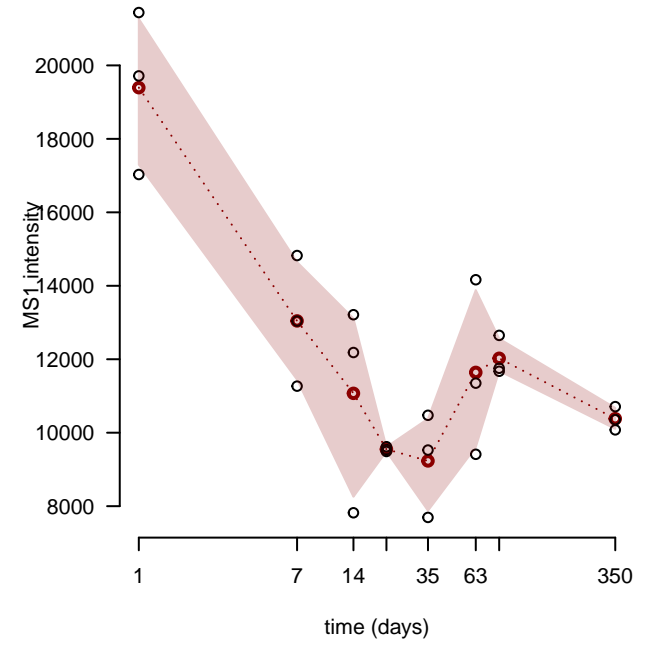

**B2RXS4**  
GN=Plxnb2  
plexin B2

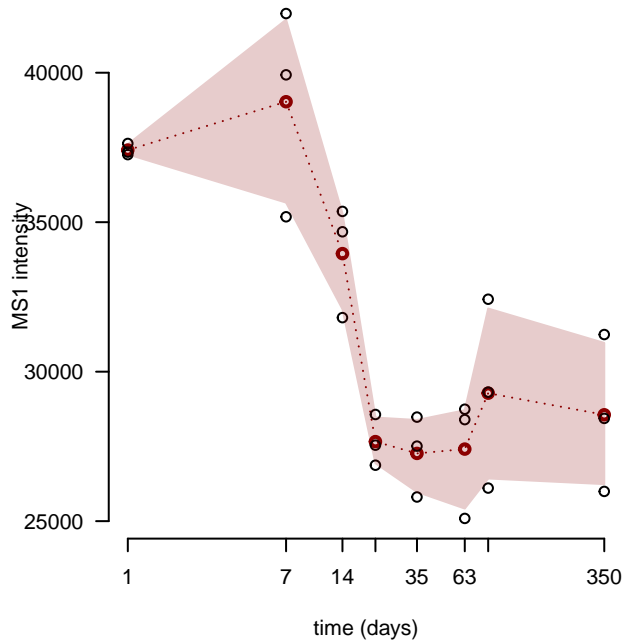

**B2RY04**  
GN=Dock5  
dedicator of cytokinesis 5

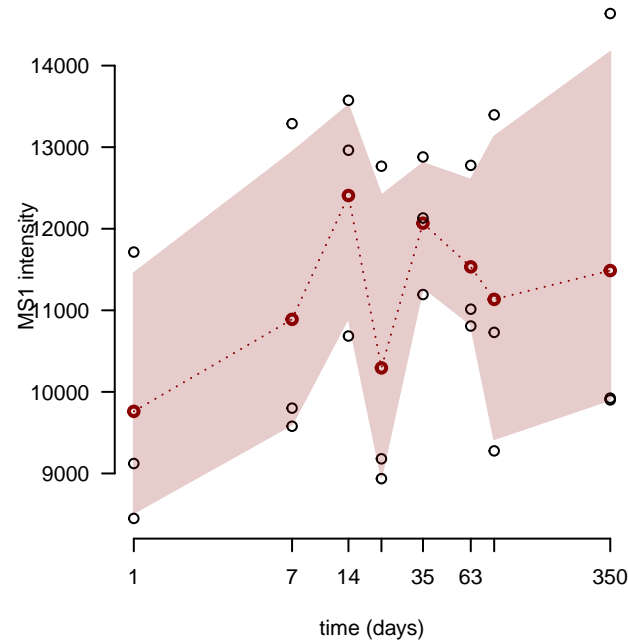

**B2RY56**  
GN=Rbm25  
RNA binding motif protein 25

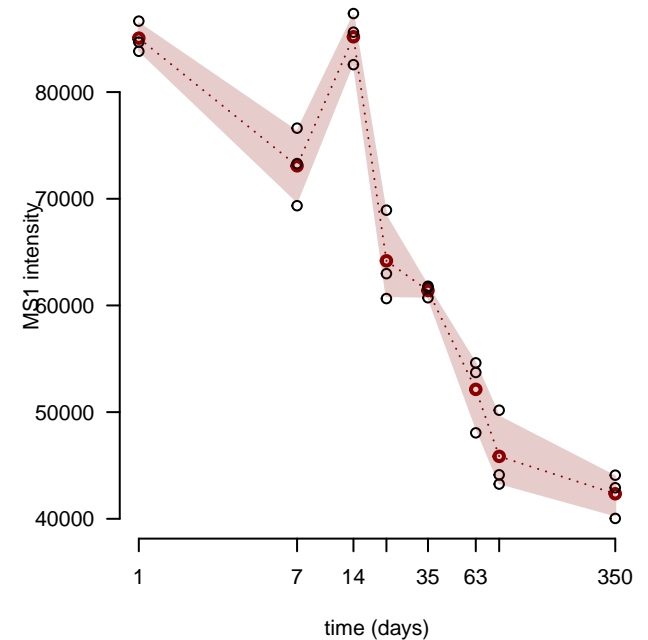

**B7ZMP1**  
**GN=Xpnpep3**

X-prolyl aminopeptidase 3, mitochondrial

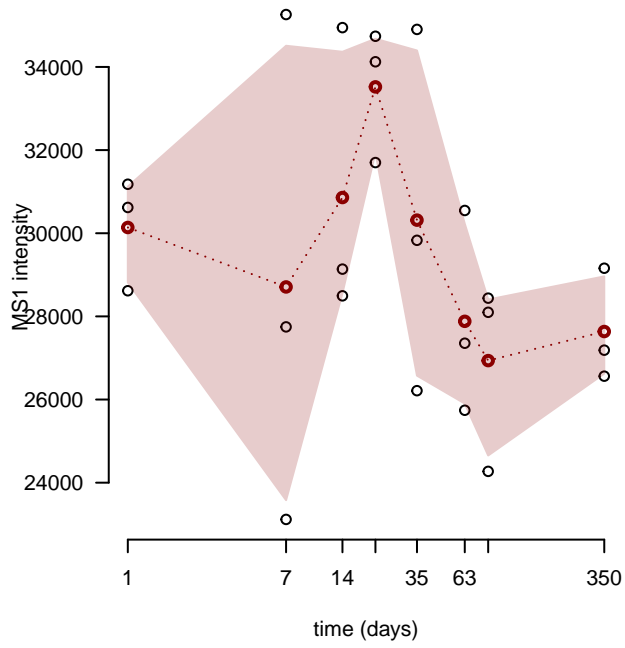

**B7ZNG0**  
**GN=Kif7**

kinesin family member 7

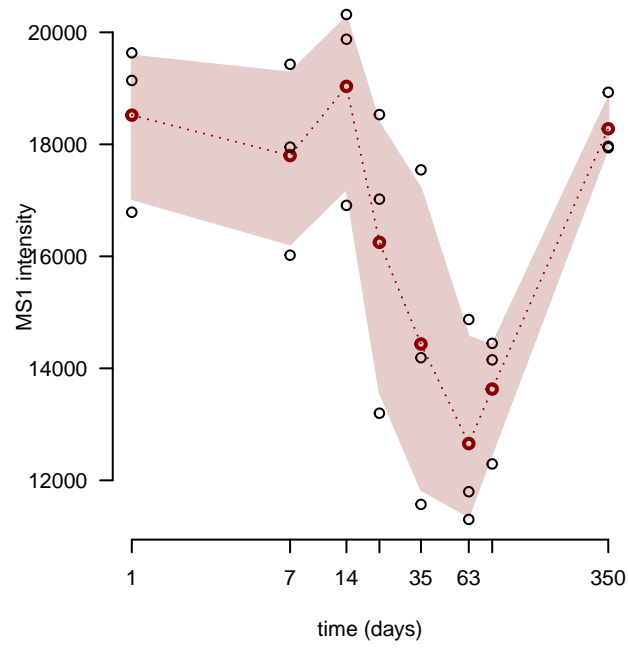

**B8JK39**  
**GN=Itga9**

integrin alpha 9

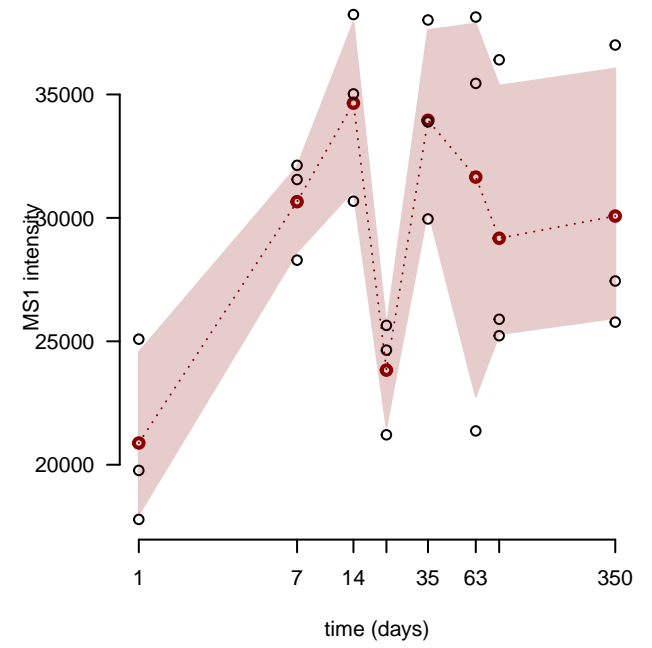

**B8ZX11**  
**GN=Qtrt2**

queuine tRNA-ribosyltransferase accessor ...

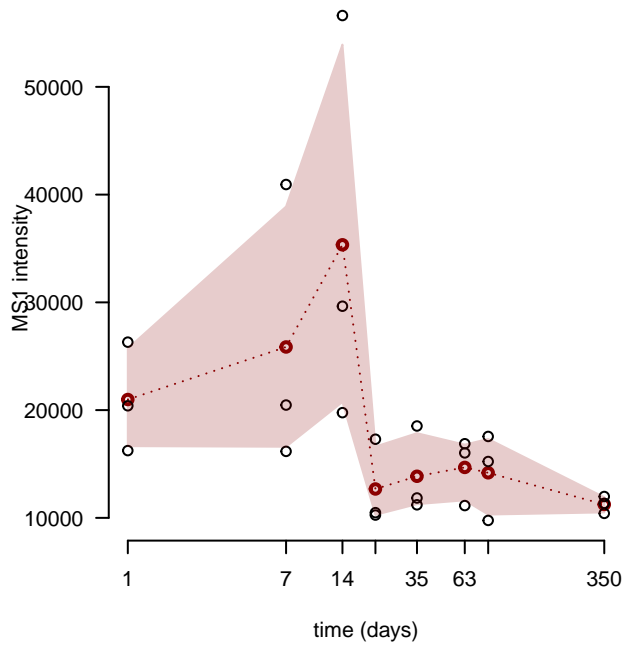

**B9EJ80**  
**GN=Pdzd8**

PDZ domain containing 8

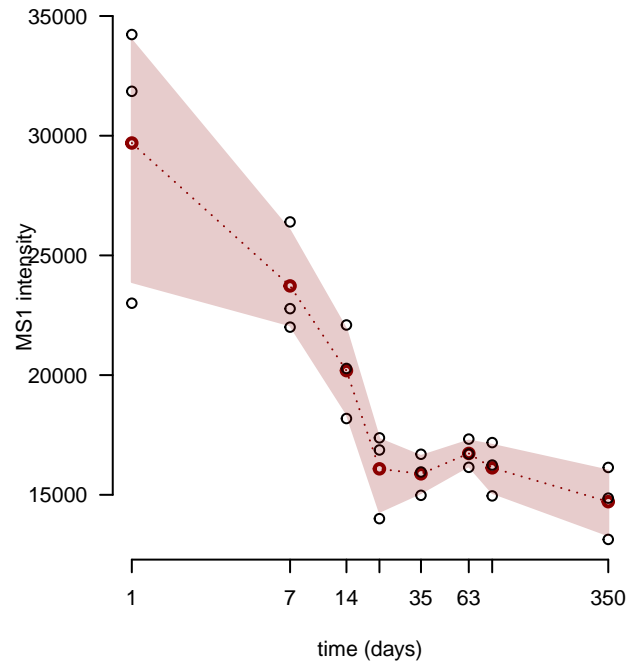

**B9EJ86**  
**GN=Osbp18**

oxysterol binding protein-like 8

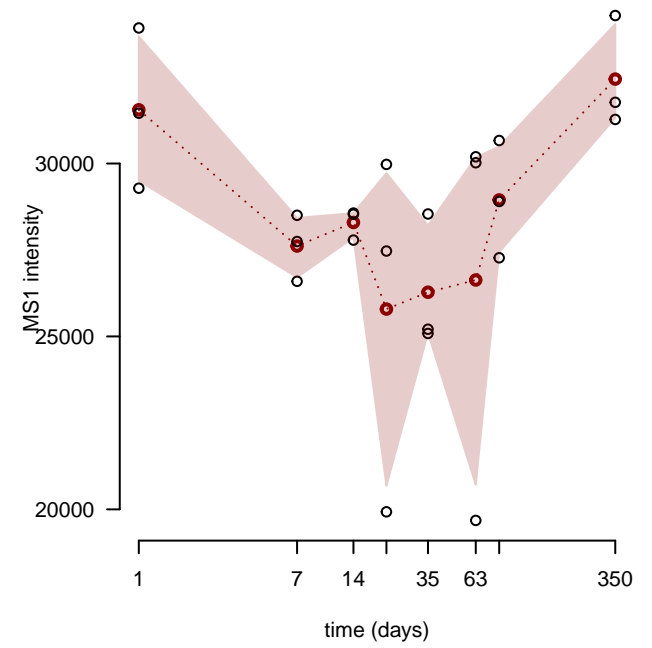

**B9EJA2**  
**GN=Ctnbp2**

cortactin binding protein 2

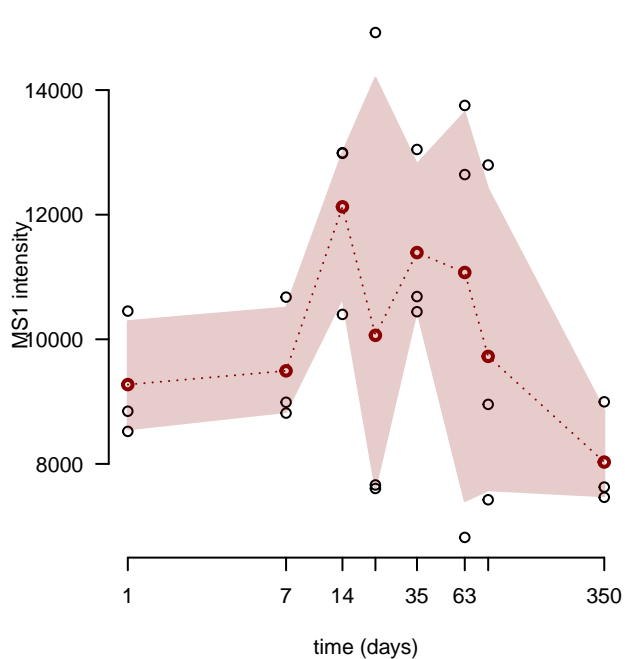

**B9EJR8**  
**GN=Dnaaf5**

dynein, axonemal assembly factor 5

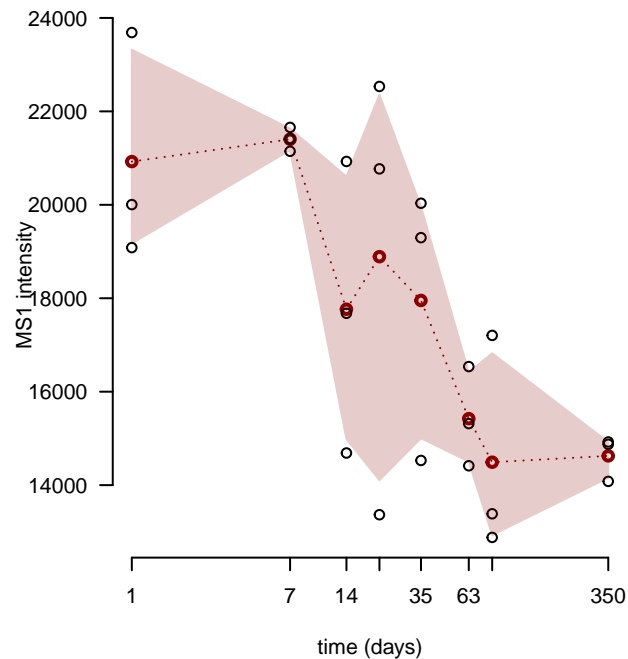

**B9EJV3**  
**GN=Greb1l**

growth regulation by estrogen in breast ...

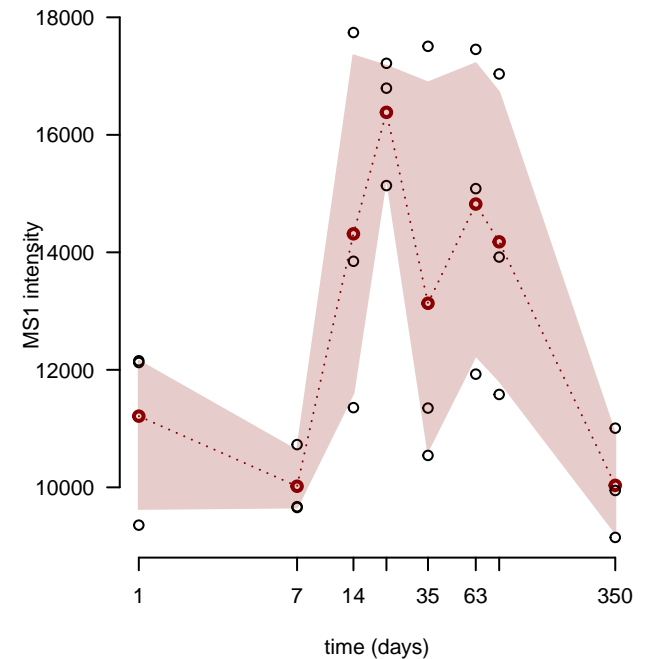

**B9EKI3**  
GN=Tmf1  
TATA element modulatory factor 1

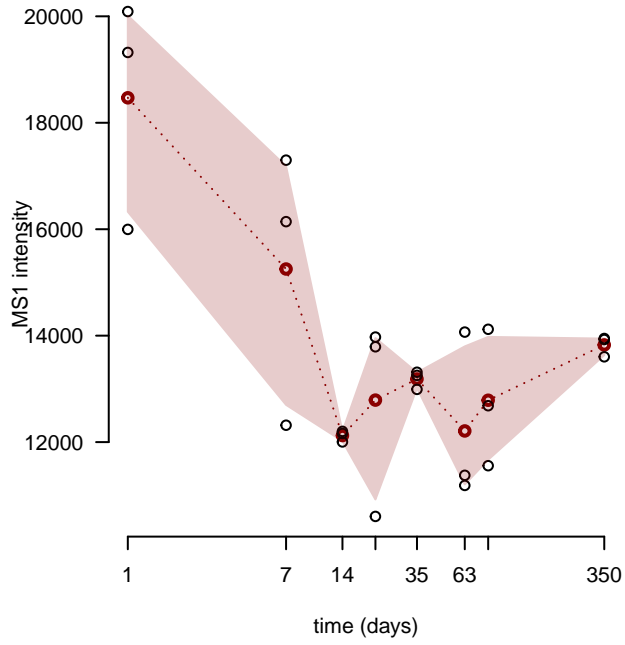

**C0HK79**  
GN=Arxes1  
adipocyte-related X-chromosome expressed ...

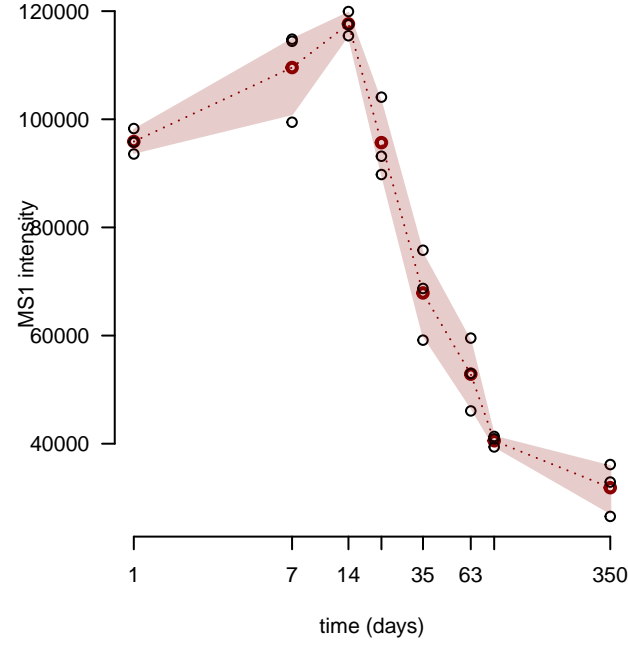

**C0HKD8**  
GN=Mfap1a  
microfibrillar-associated protein 1A

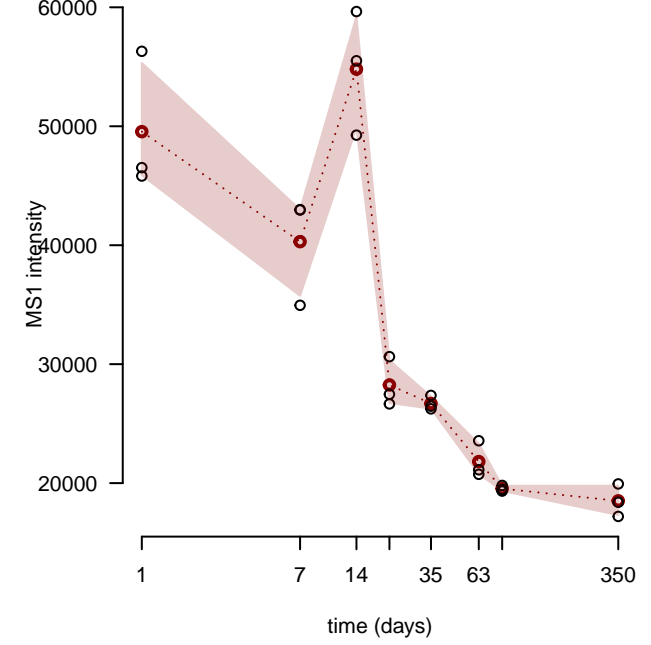

**C0HKE1**  
GN=Hist1h2ab

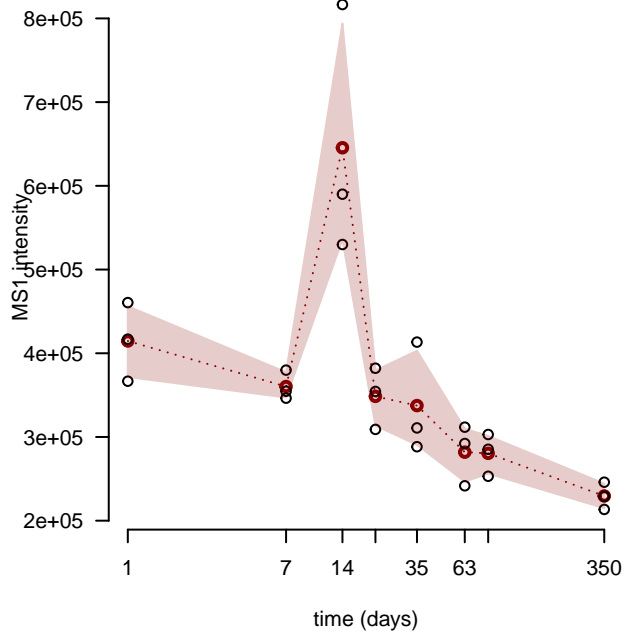

**C0HKG5**  
GN=Rnaset2a  
ribonuclease T2A

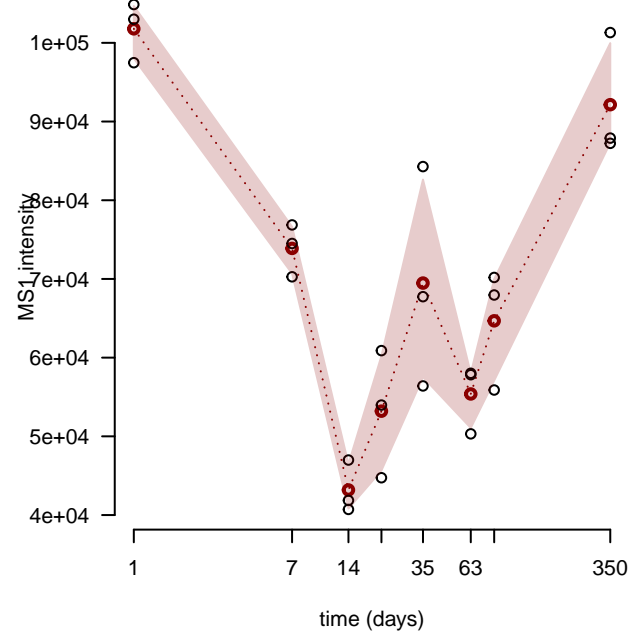

**C0LLJ0**  
GN=Kpna7  
karyopherin alpha 7 (importin alpha 8)

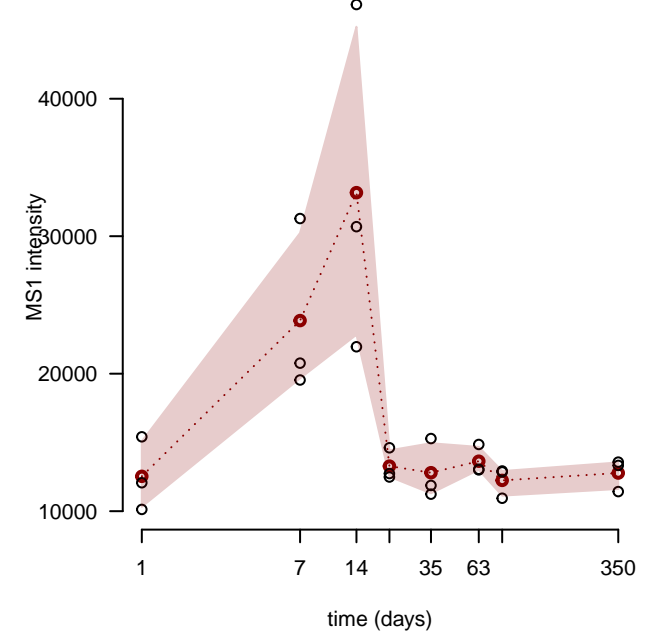

**D2EAC2**  
GN=Zbed6  
zinc finger, BED type containing 6

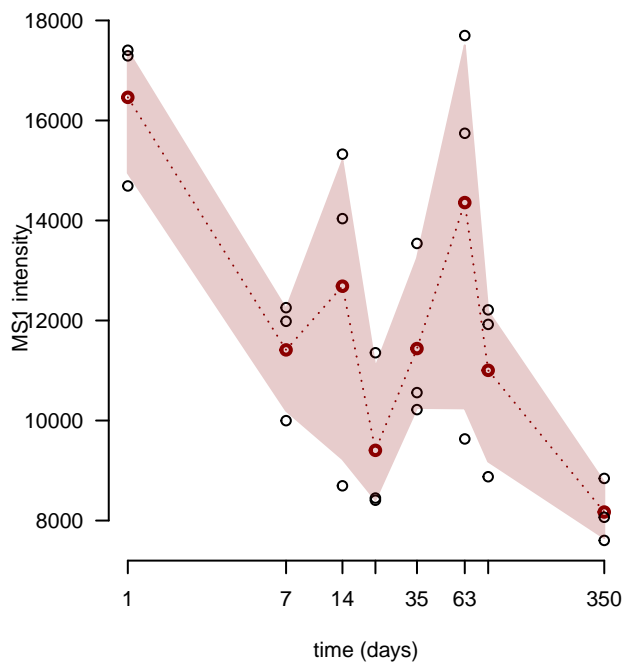

**D3YVF0**  
GN=Akap5  
A kinase (PRKA) anchor protein 5

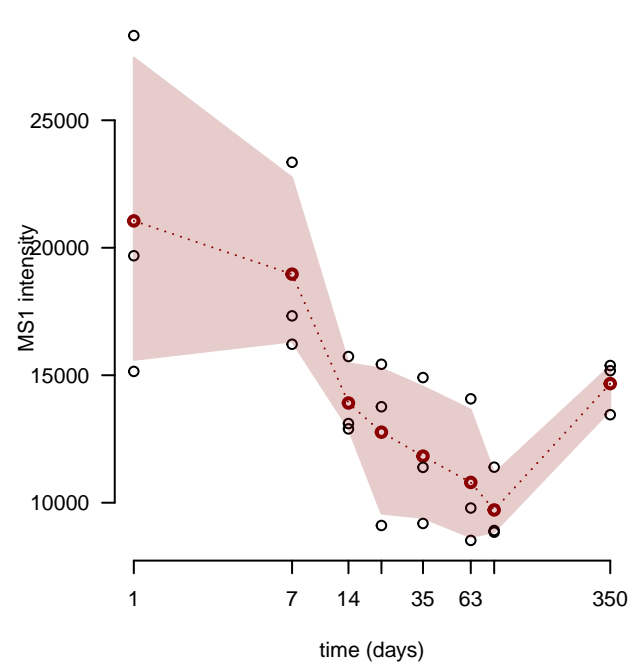

**D3YX43**  
GN=Vsig10  
V-set and immunoglobulin domain containi ...

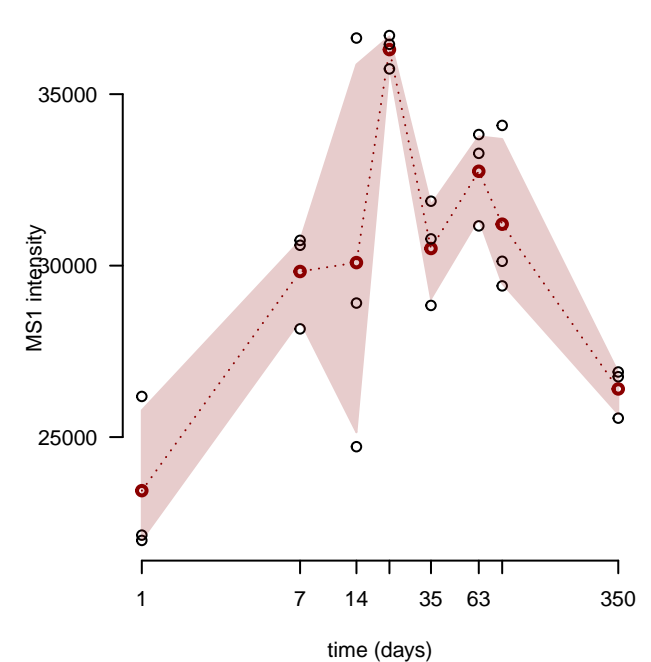

**D3YXG0**  
GN=Hmcn1  
hemocentin 1

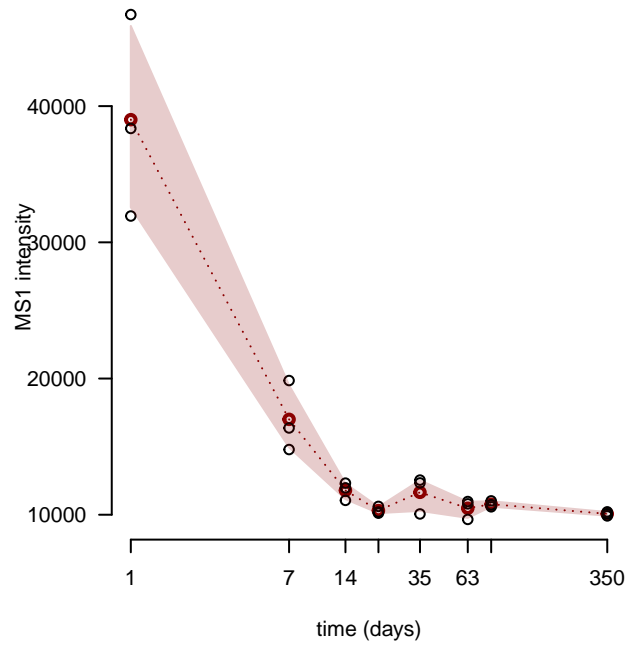

**D3YXK1**  
GN=Samd1  
sterile alpha motif domain containing 1

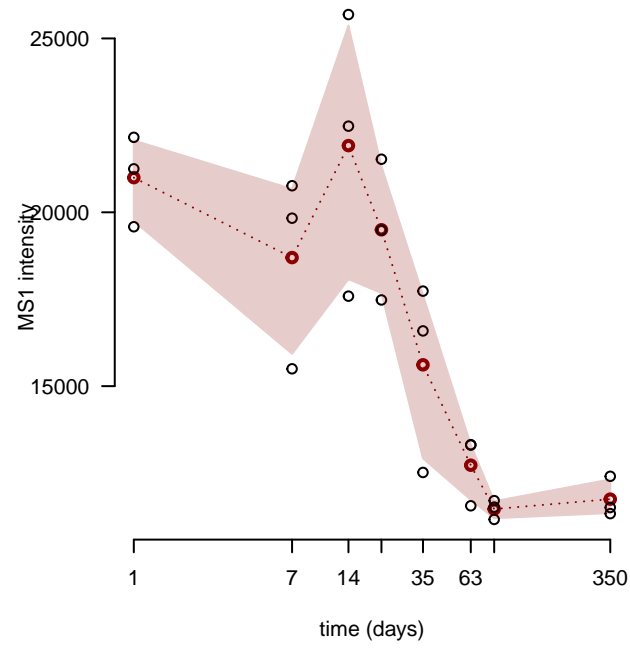

**D3YXK2**  
GN=Safb  
scaffold attachment factor B

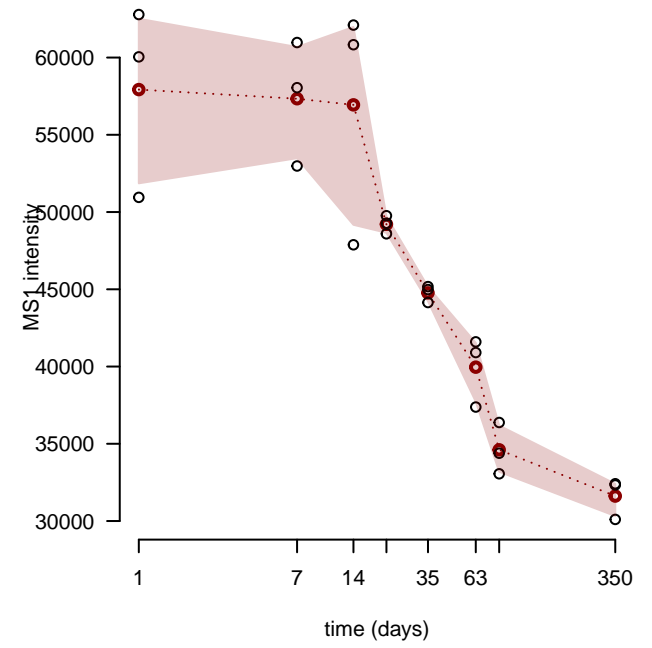

**D3YYU8**  
GN=Obsl1  
obscurin-like 1

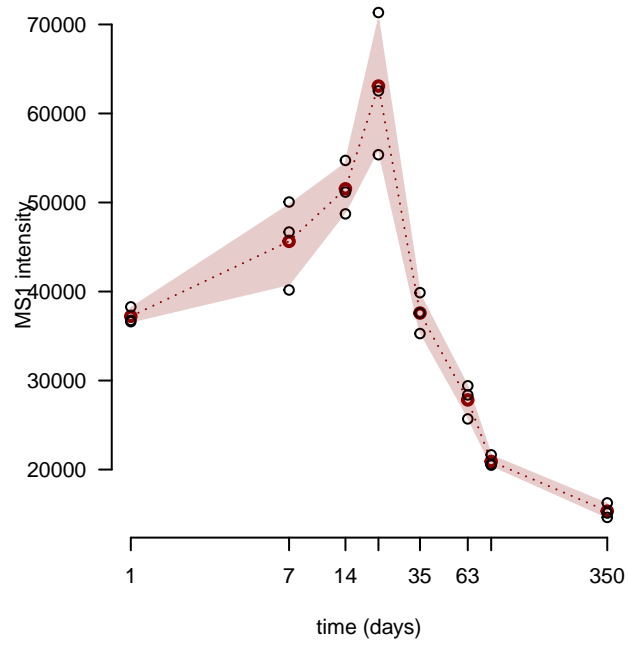

**D3YYU8**  
GN=Obsl1  
obscurin-like 1

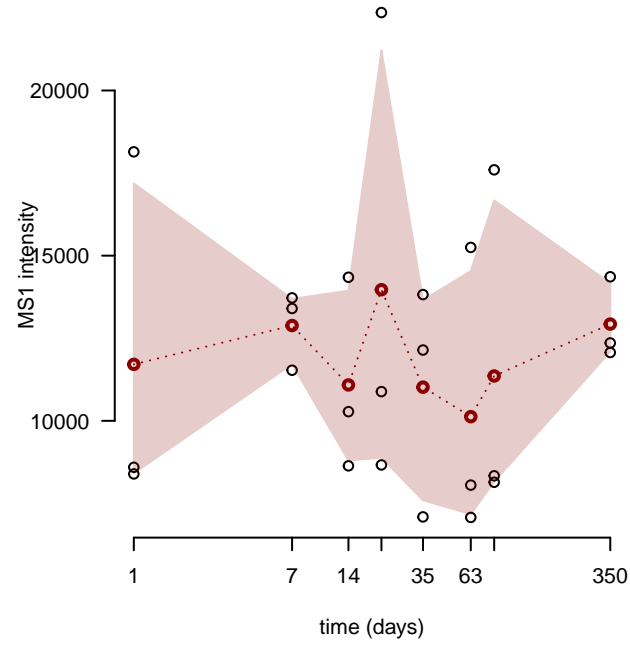

**D3YZG8**  
GN=Mthfd2l  
methylenetetrahydrofolate dehydrogenase ...

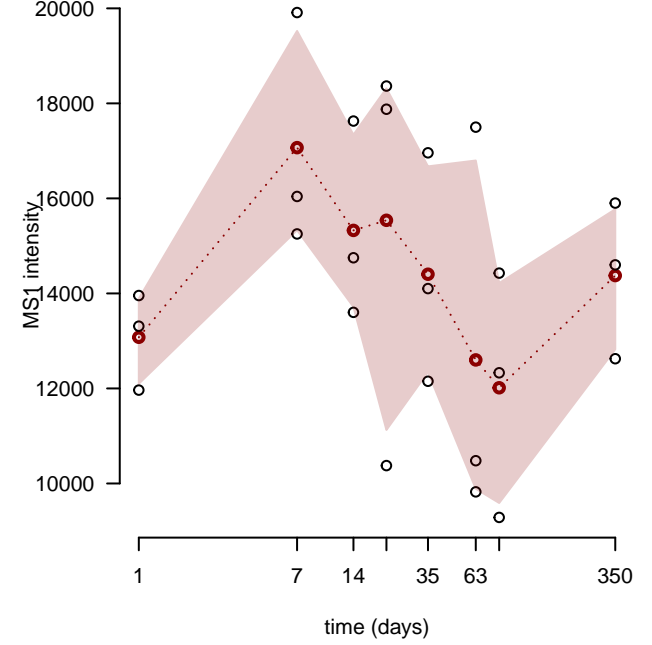

**D3YZP9**  
GN=Ccdc6  
coiled-coil domain containing 6

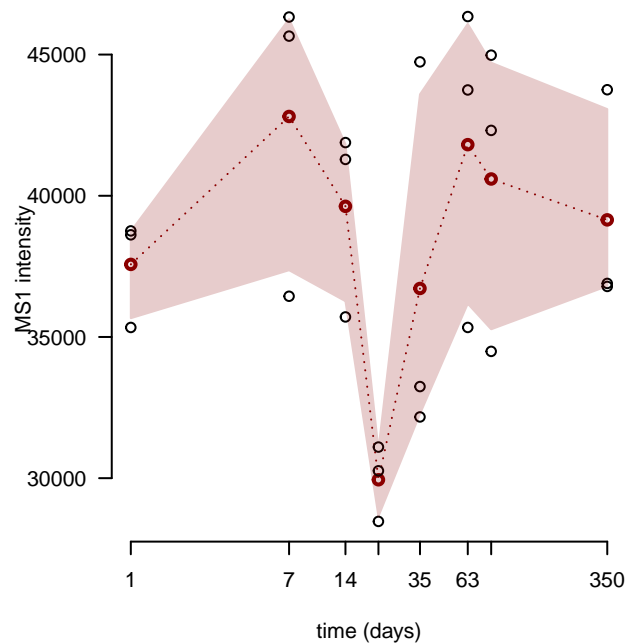

**D3YZV8**  
GN=Ccdc8  
coiled-coil domain containing 8

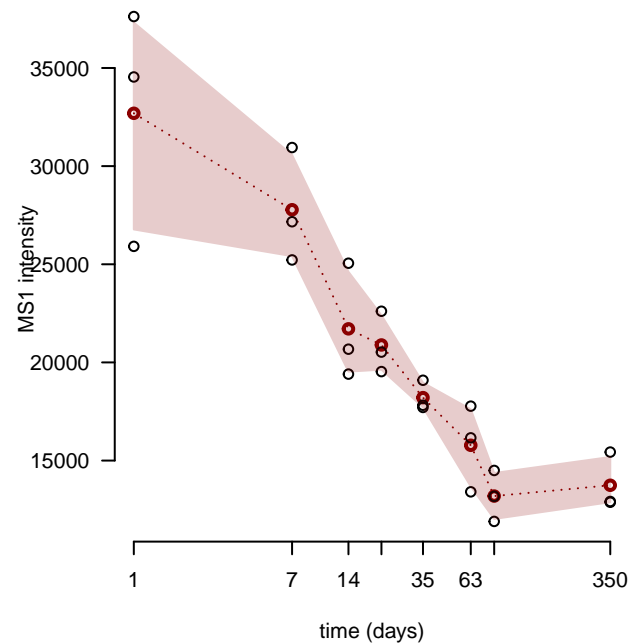

**D3Z2R5**  
GN=Selenon  
selenoprotein N

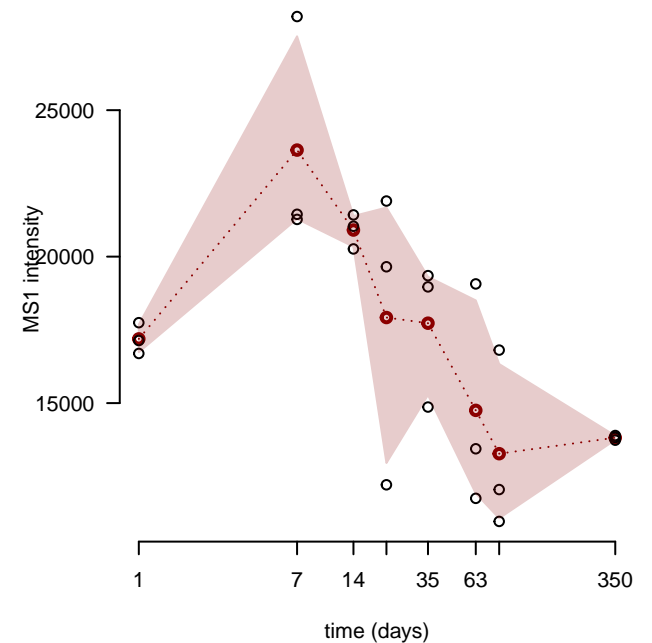

**D3Z3K2**  
GN=Ccnb1ip1  
cyclin B1 interacting protein 1

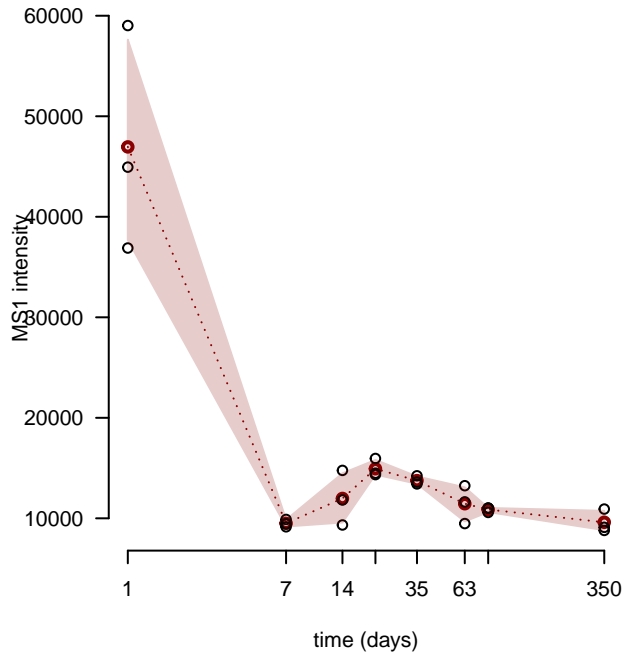

**D3Z4I3**  
GN=Rbm24  
RNA binding motif protein 24

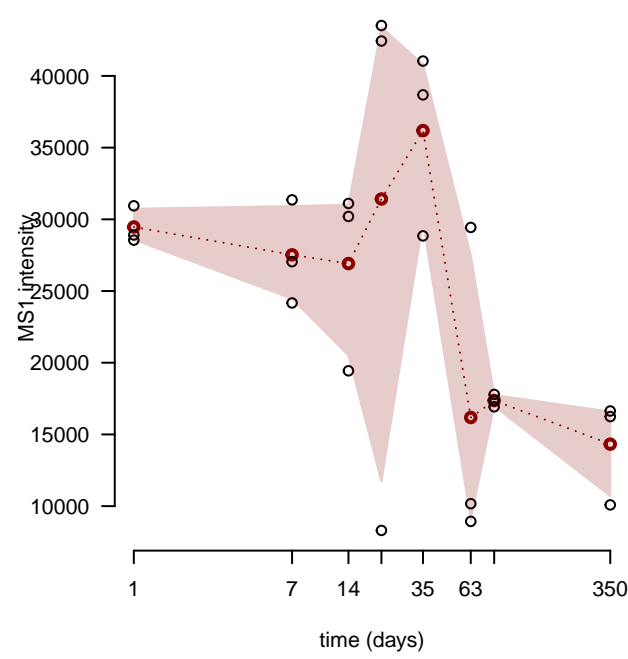

**D3Z4S3**  
GN=Ptrhd1  
peptidyl-tRNA hydrolase domain containin ...

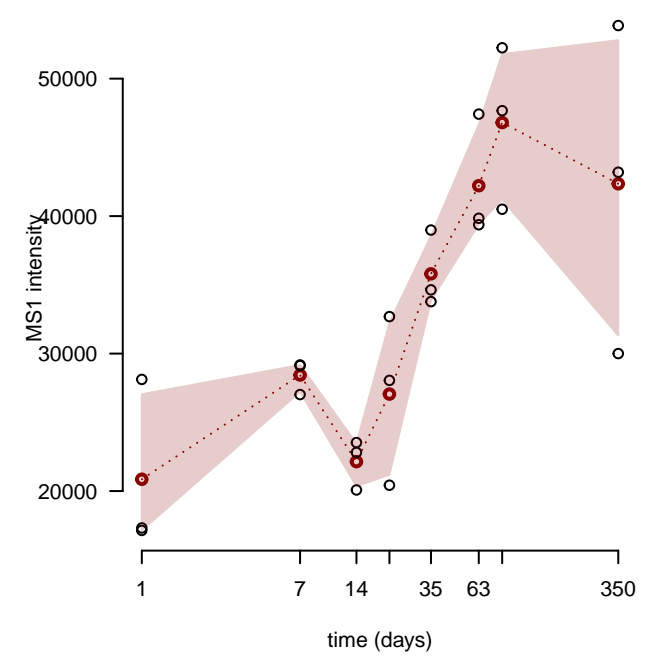

**D3Z6P0**  
GN=Pdia2  
protein disulfide isomerase associated 2

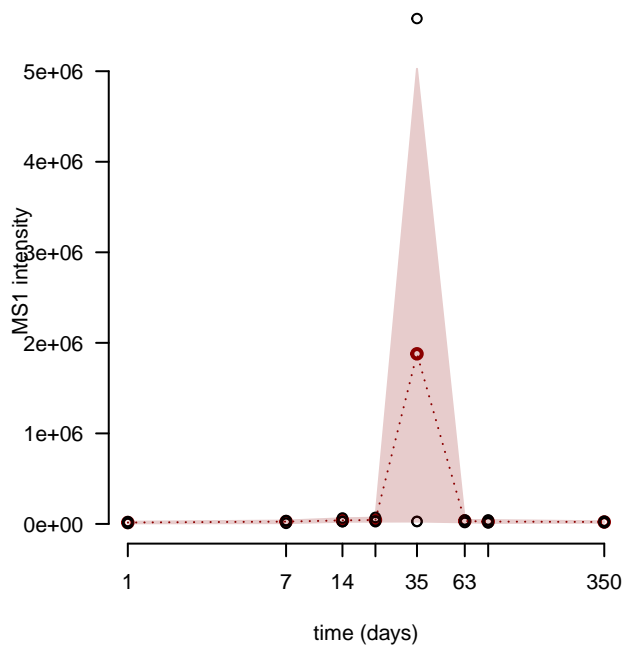

**D3Z6Q9**  
GN=Bin2  
bridging integrator 2

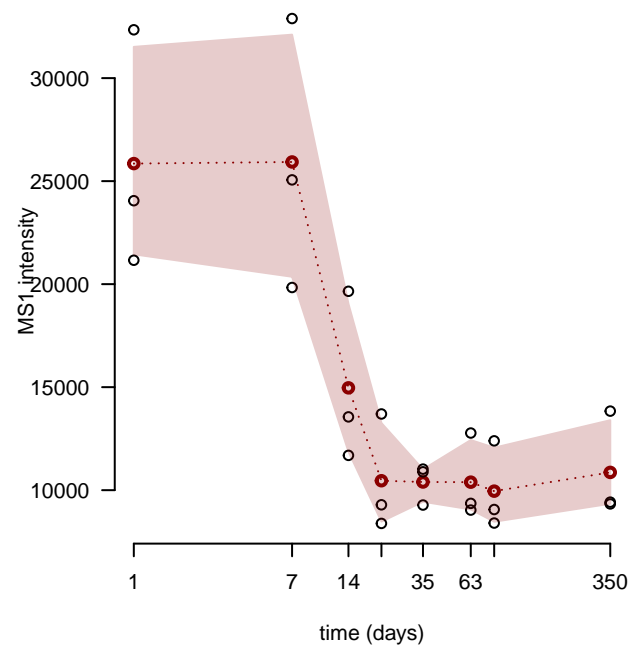

**D3Z7P3**  
GN=Gls  
glutaminase

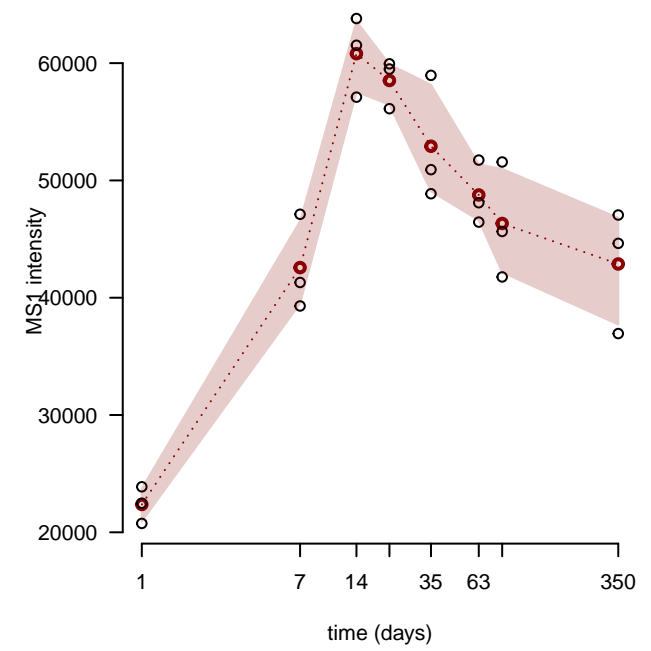

**D3Z7P3**  
GN=Gls  
glutaminase

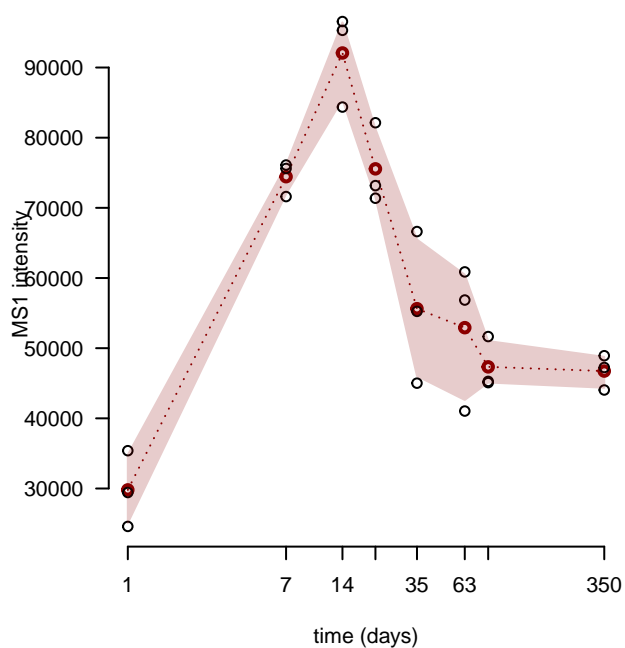

**D3Z7Q2**  
GN=

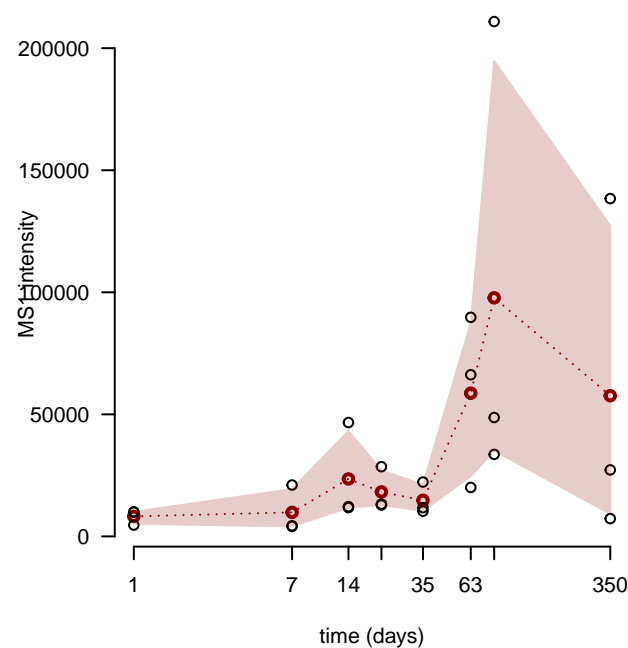

**E1U8D0**  
GN=Soga1  
suppressor of glucose, autophagy associa ...

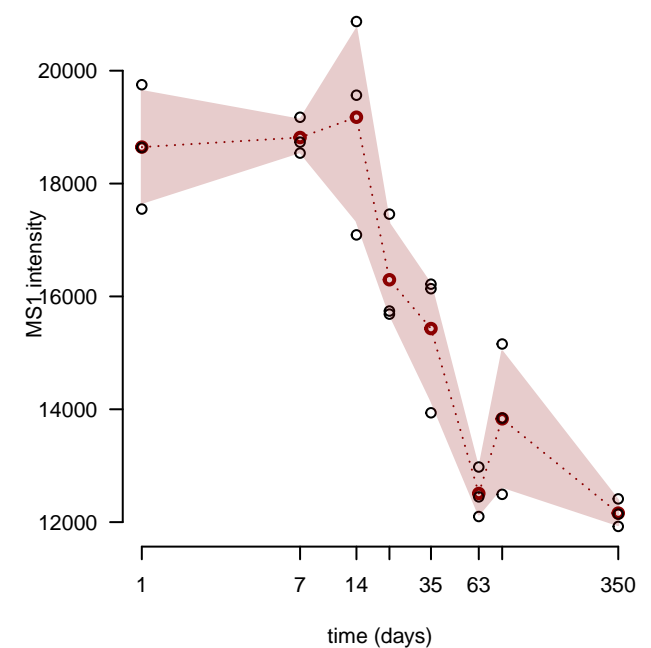



**E2JF22**  
**GN=Piezo1**  
piezo-type mechanosensitive ion channel ...

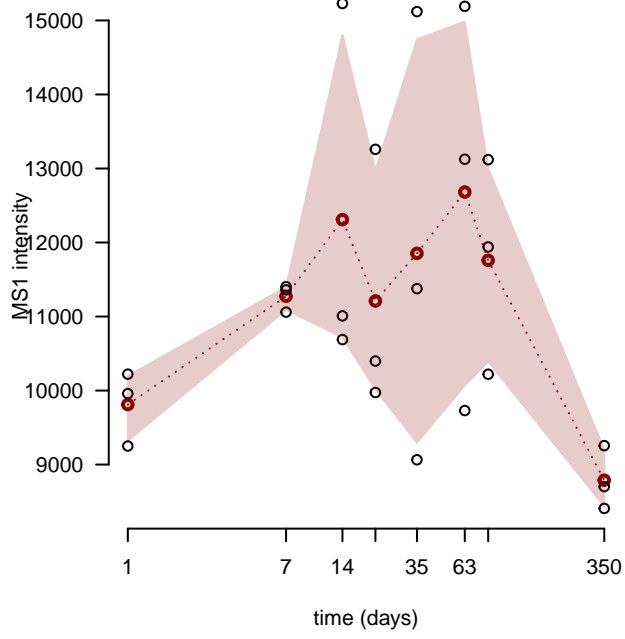

**E9PV24**  
**GN=Fga**  
fibrinogen alpha chain

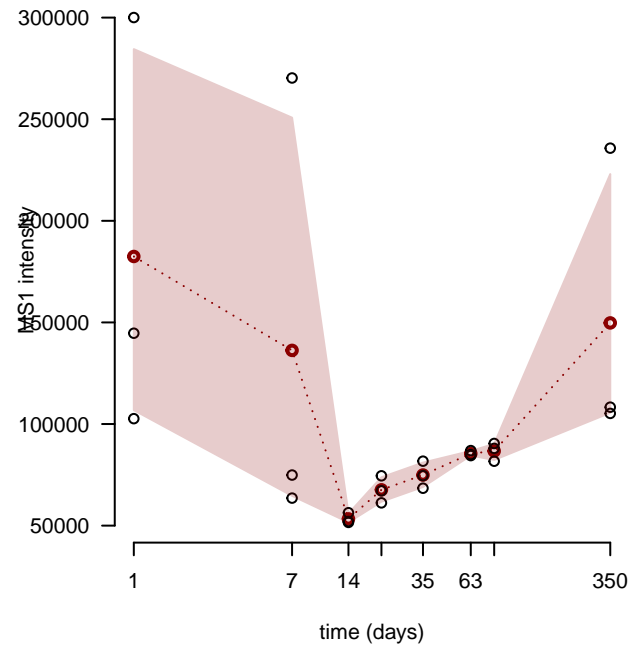

**E9PV82**  
**GN=Fam53a**  
family with sequence similarity 53, memb ...

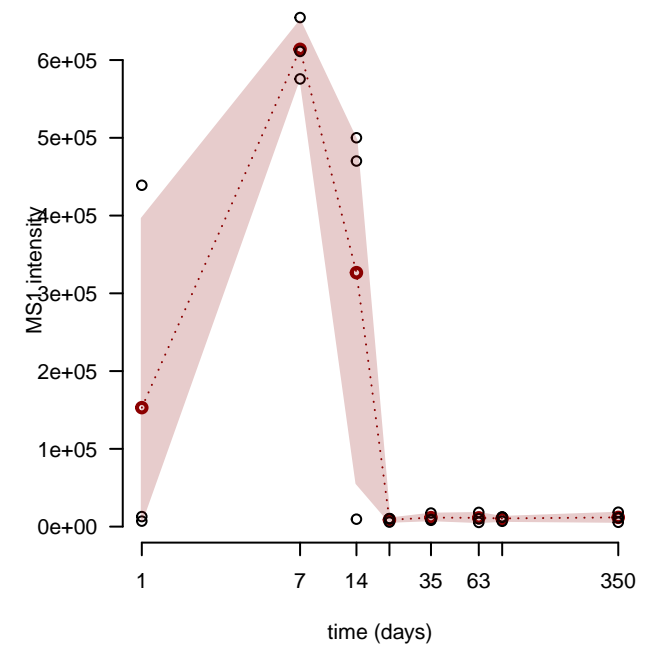

**E9PVA8**  
**GN=Gcn1**  
GCN1 activator of EIF2AK4

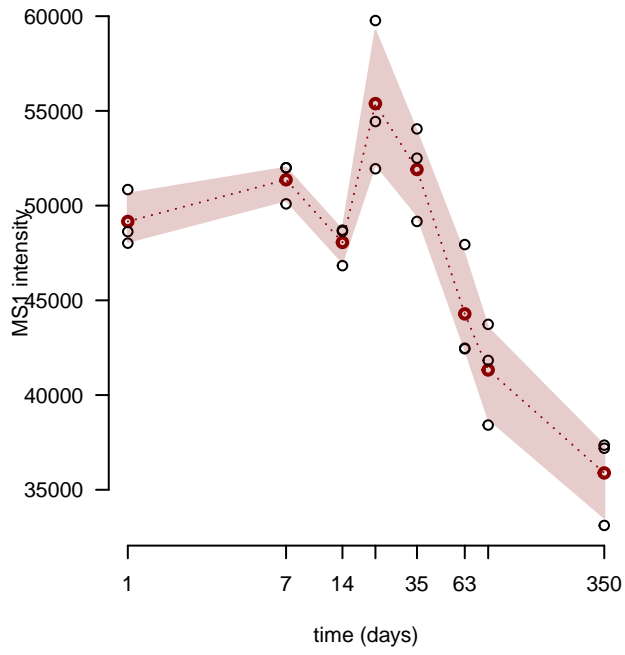

**E9PVB5**  
**GN=Ttc17**  
tetratricopeptide repeat domain 17

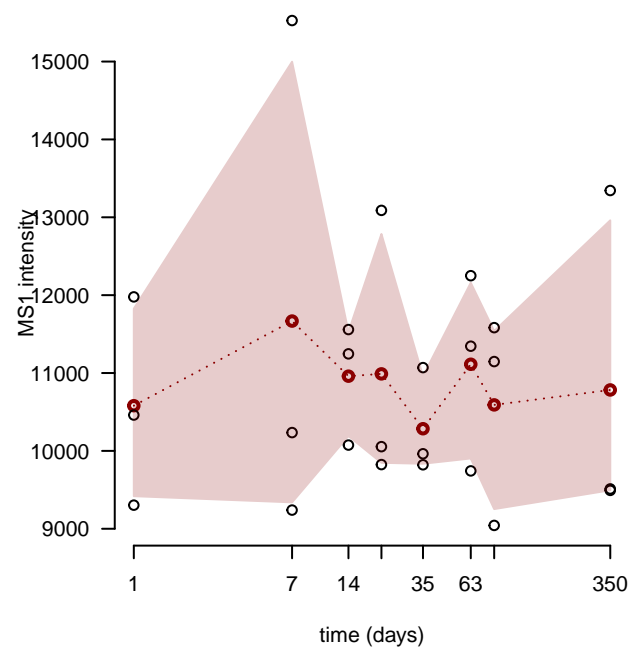

**E9PVD3**  
**GN=Dchs1**  
dachous cadherin related 1

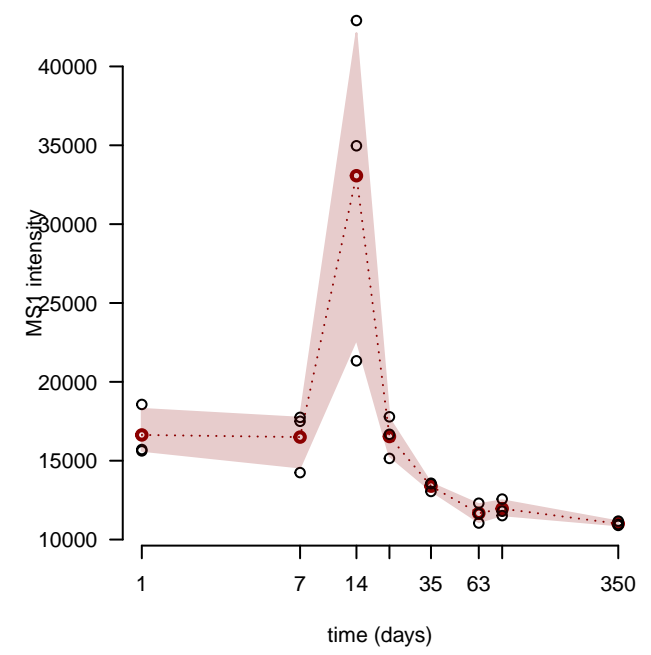

**E9PVX6**  
**GN=Mki67**  
antigen identified by monoclonal antibod ...

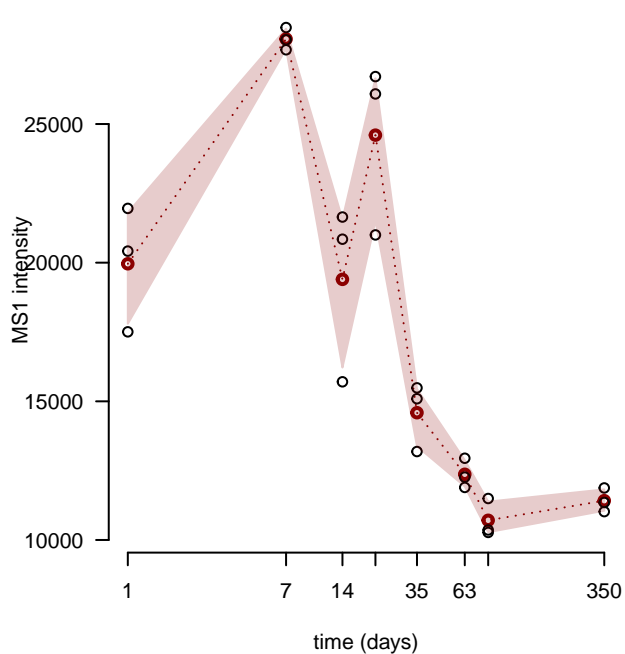

**E9PXF8**  
**GN=Sbf2**  
SET binding factor 2

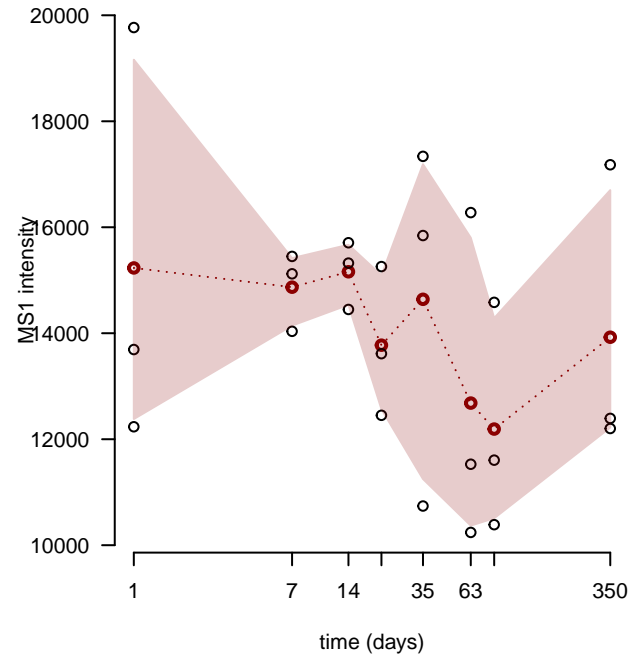

**E9PY46**  
**GN=Ift140**  
intraflagellar transport 140

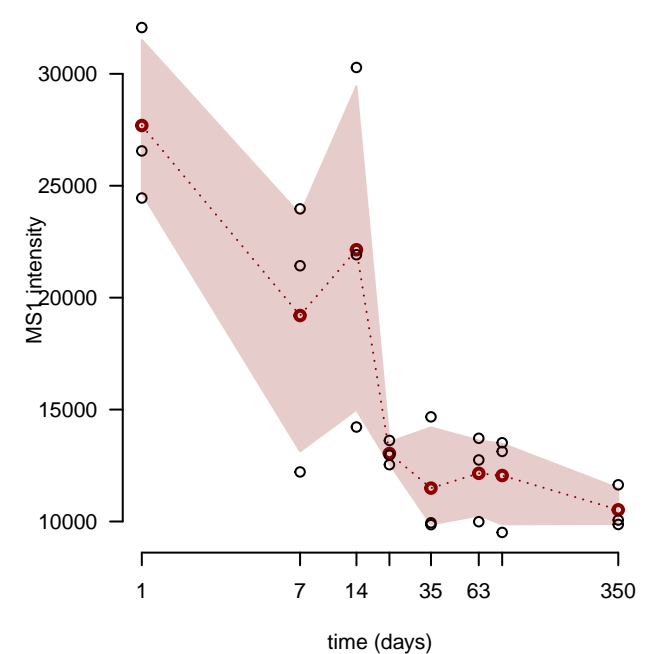

**E9PYH6**  
GN=Setd1a  
SET domain containing 1A

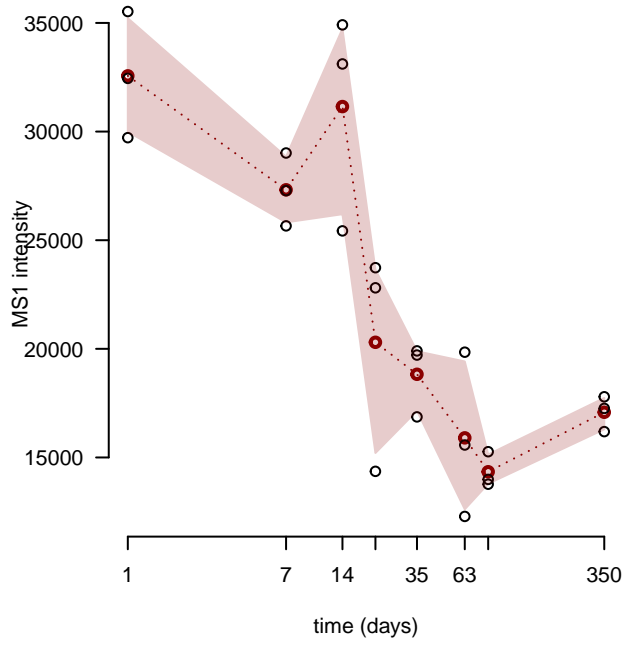

**E9PYI1**  
GN=Znf568

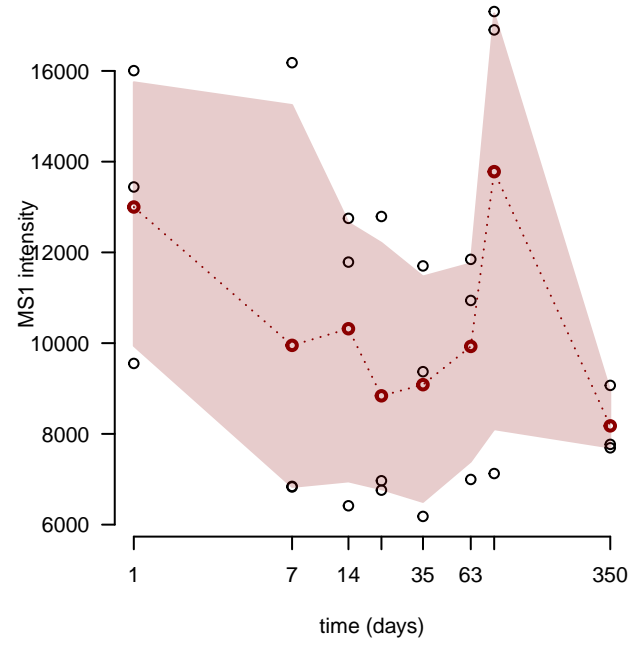

**E9PYK3**  
GN=Parp4  
poly (ADP-ribose) polymerase family, mem ...

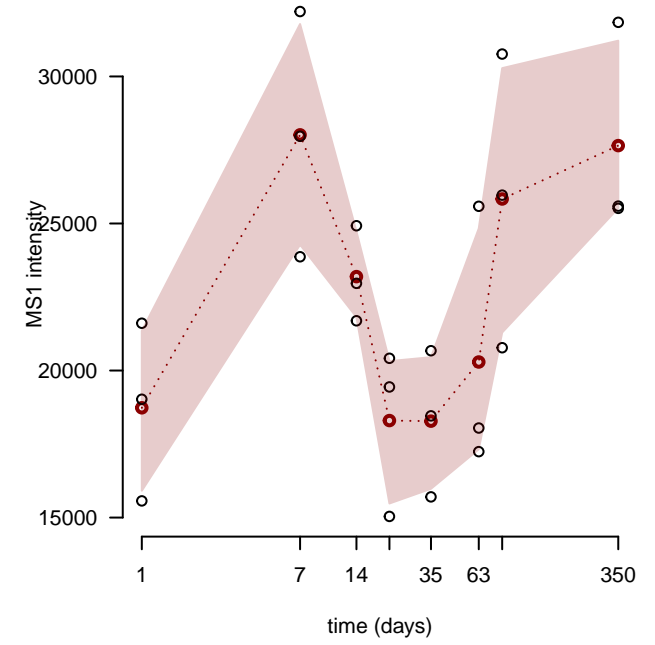

**E9PYL2**  
GN=Prr12  
proline rich 12

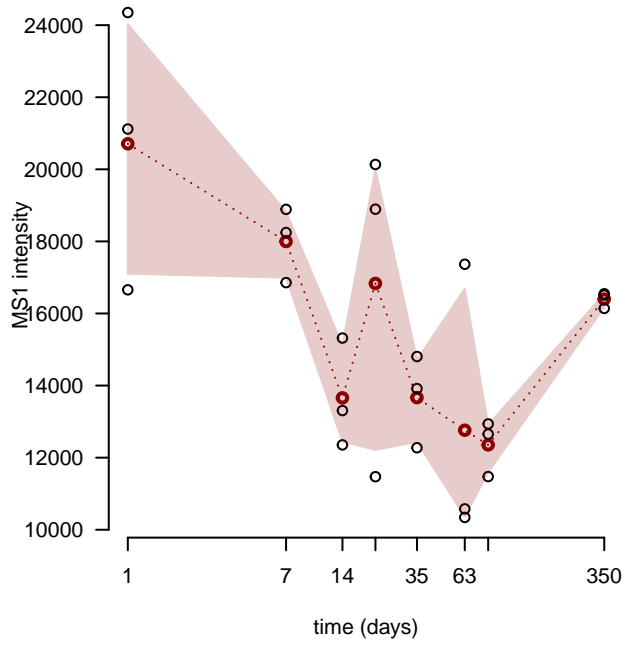

**E9PZ36**  
GN=

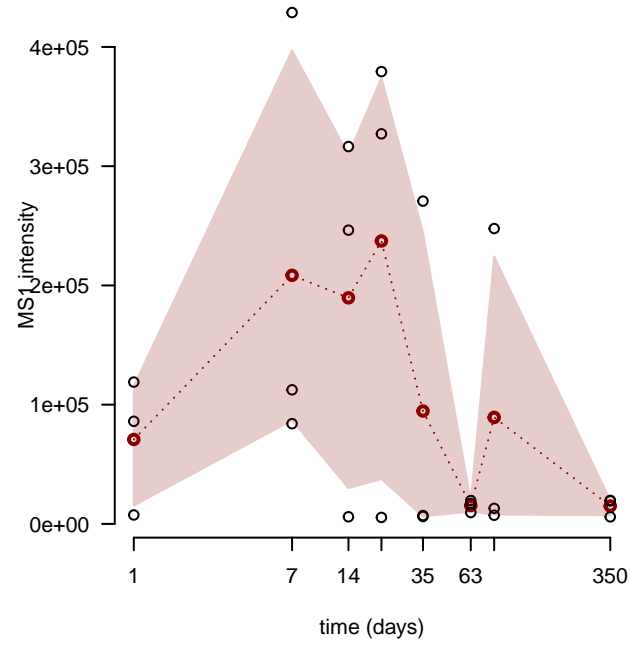

**E9PZJ8**  
GN=Ascc3  
activating signal cointegrator 1 complex ...

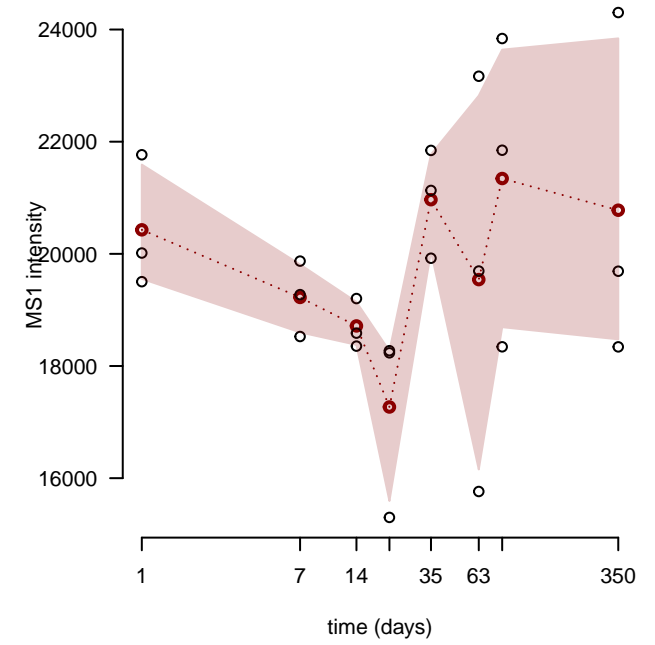

**E9PZM4**  
GN=Chd2  
chromodomain helicase DNA binding protei ...

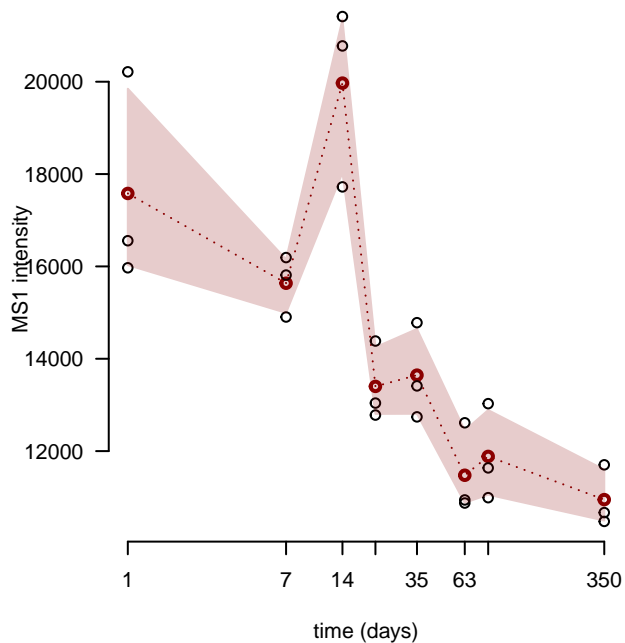

**E9Q137**  
GN=

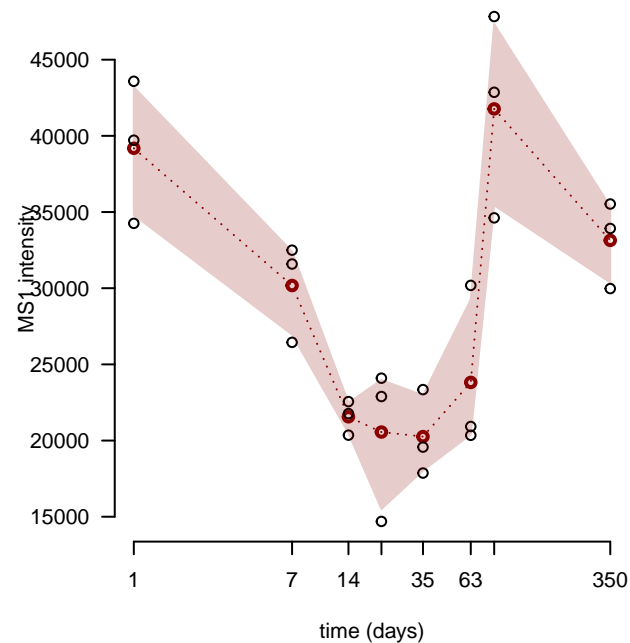

**E9Q1P8**  
GN=Irf2bp2  
interferon regulatory factor 2 binding p ...

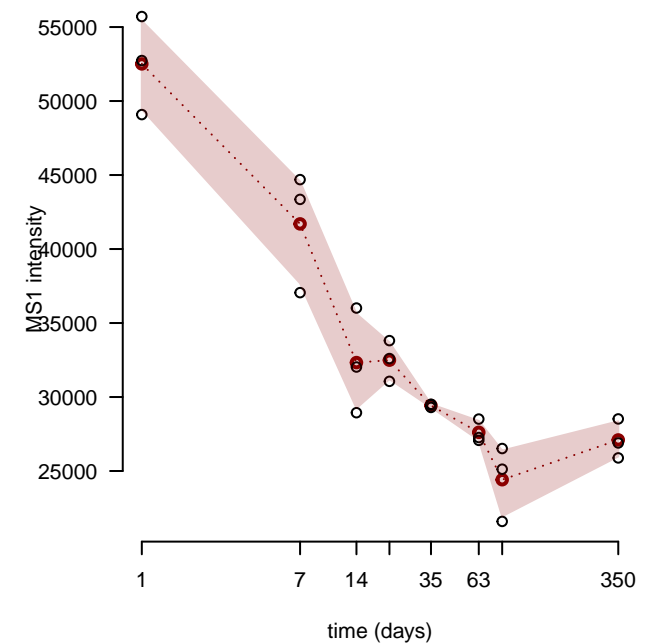

E9Q236  
GN=

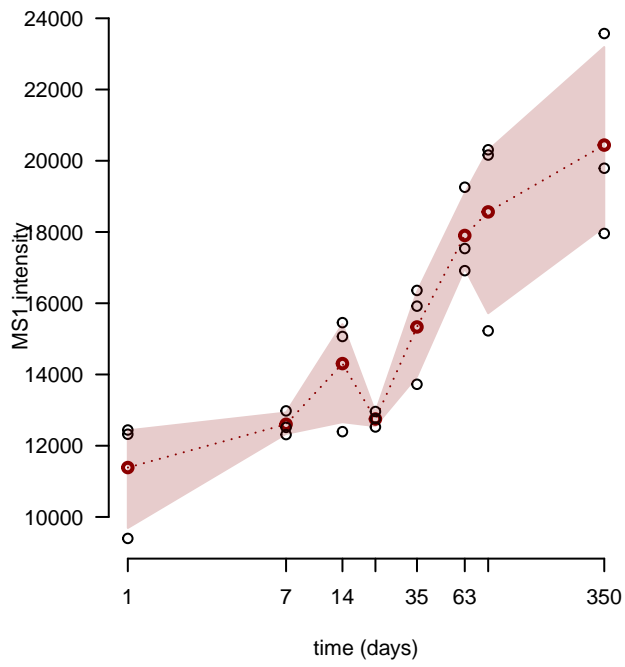

E9Q286  
GN=Ice1  
interactor of little elongation complex ...

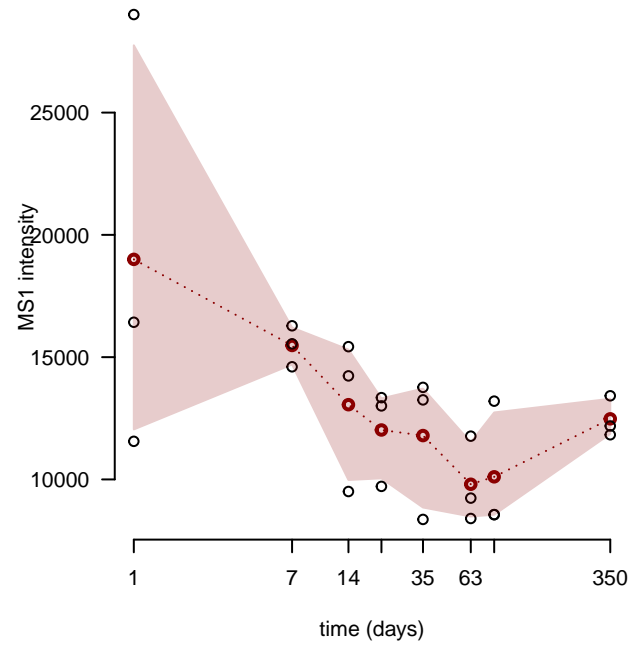

E9Q2M9  
GN=

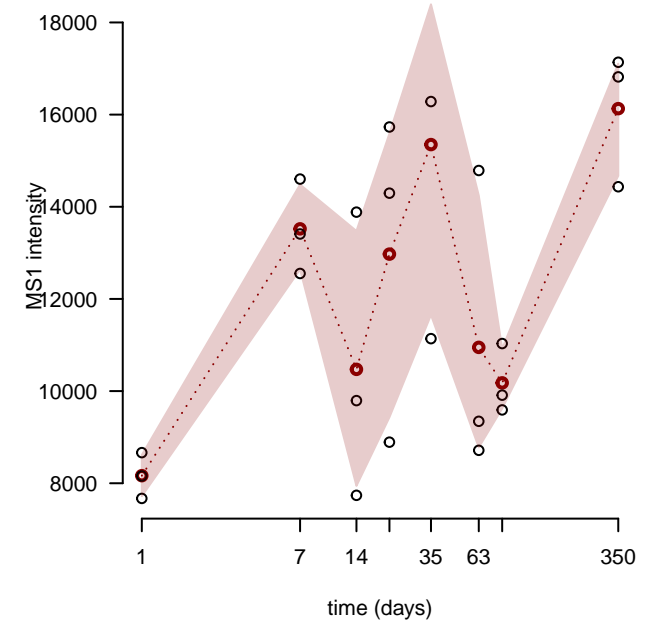

E9Q394  
GN=Akap13  
A kinase (PRKA) anchor protein 13

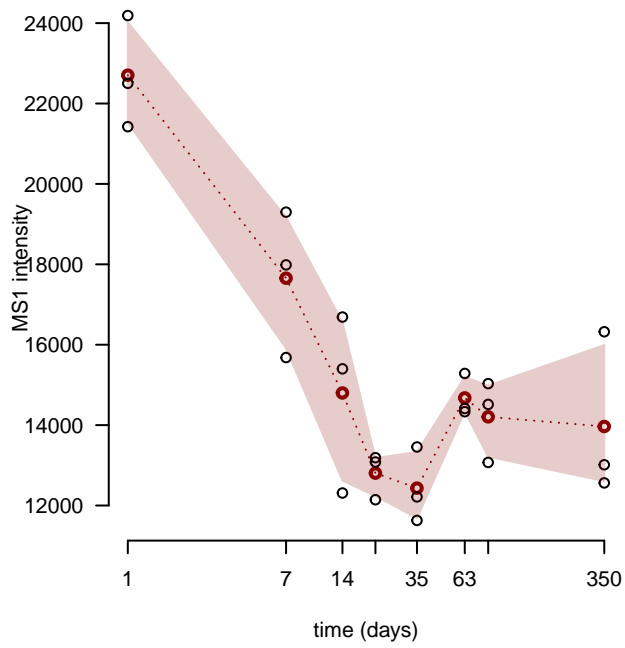

E9Q3C1  
GN=C2cd2  
C2 calcium-dependent domain containing 2

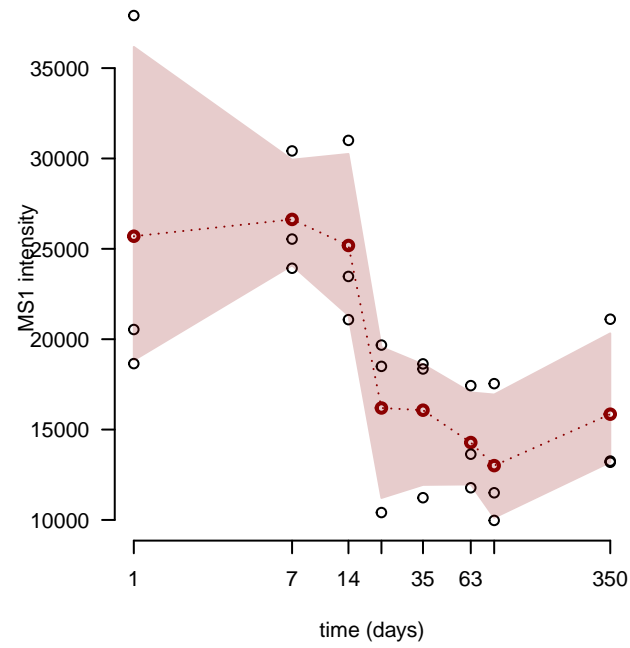

E9Q3E1  
GN=Aldh3b2  
aldehyde dehydrogenase 3 family, member ...

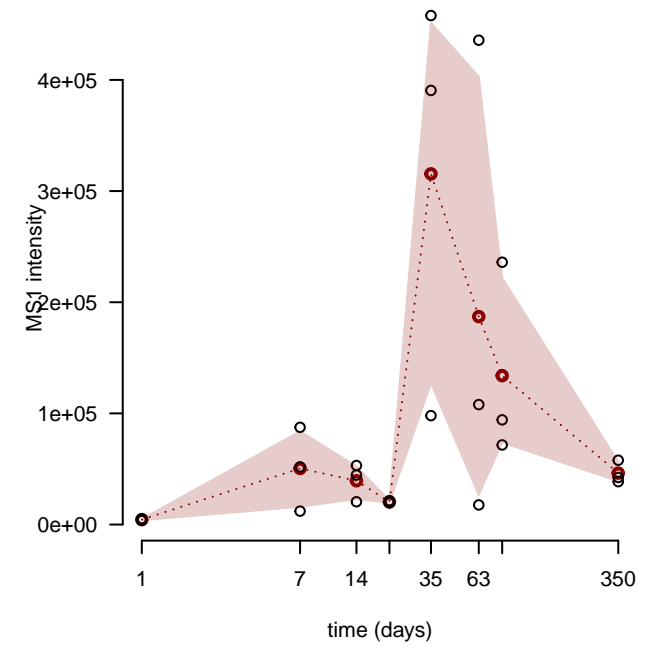

E9Q3L2  
GN=Pi4ka  
phosphatidylinositol 4-kinase alpha

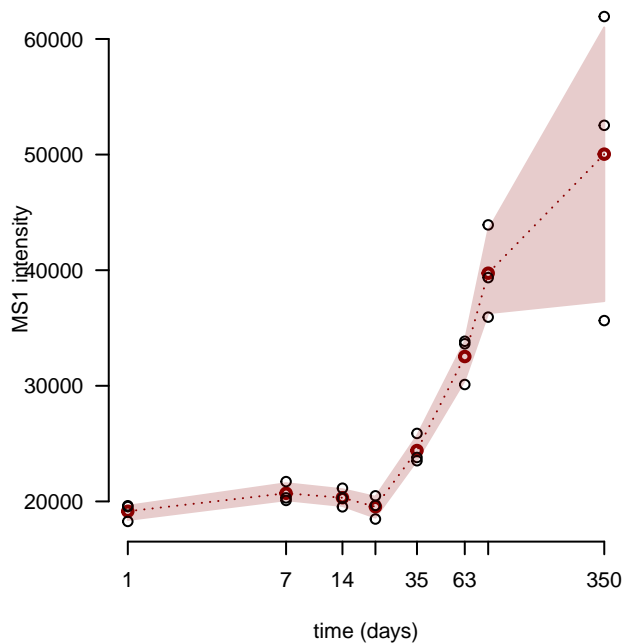

E9Q3S4  
GN=Map3k19  
mitogen-activated protein kinase kinase ...

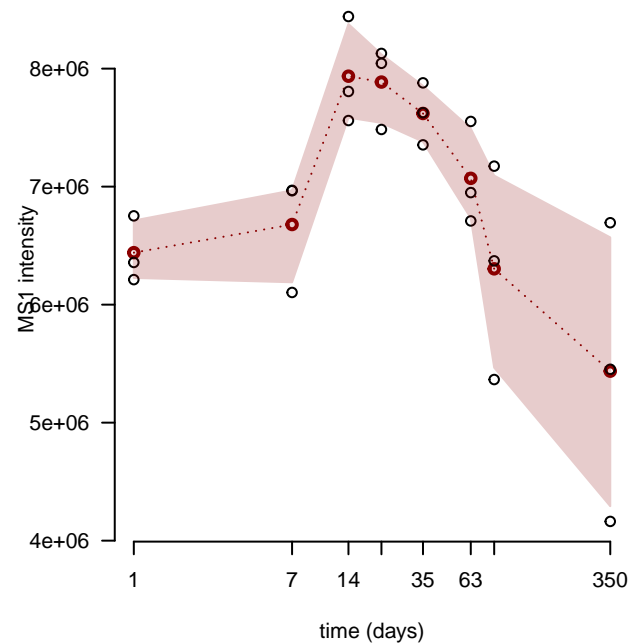

E9Q414  
GN=Apob  
apolipoprotein B

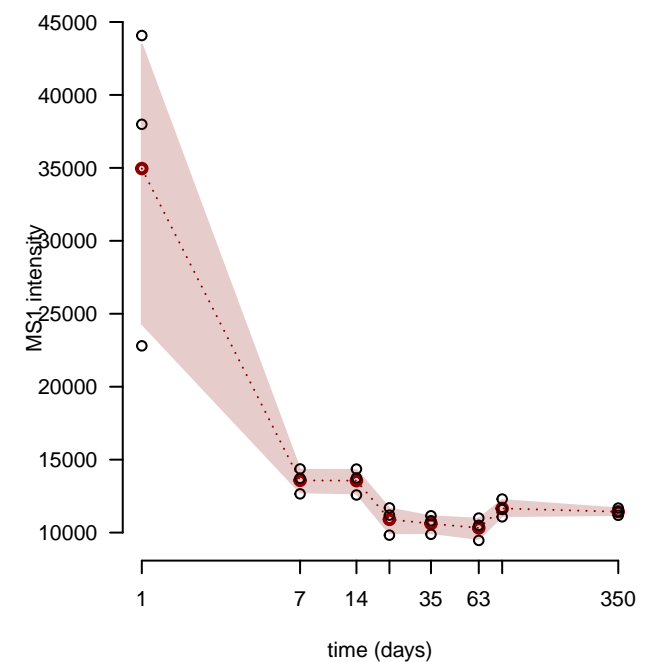

**E9Q4F7**  
GN=Ankrd11  
ankyrin repeat domain 11

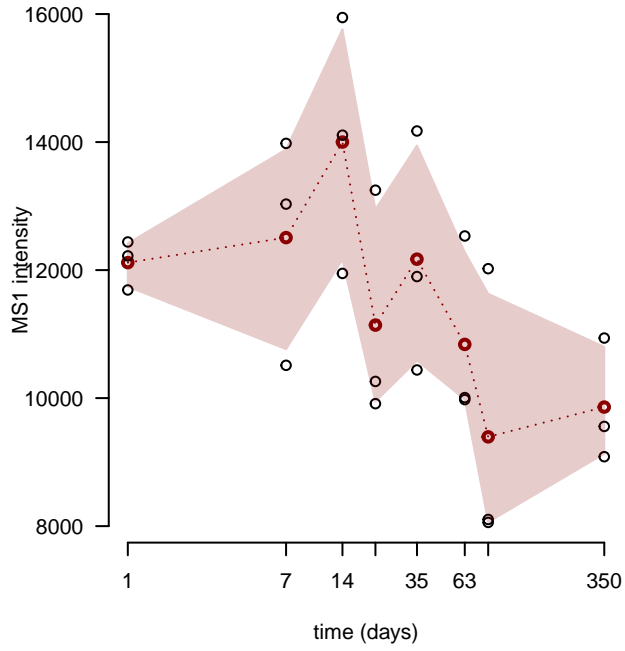

**E9Q4N7**  
GN=Arid1b  
AT rich interactive domain 1B (SWI-like)

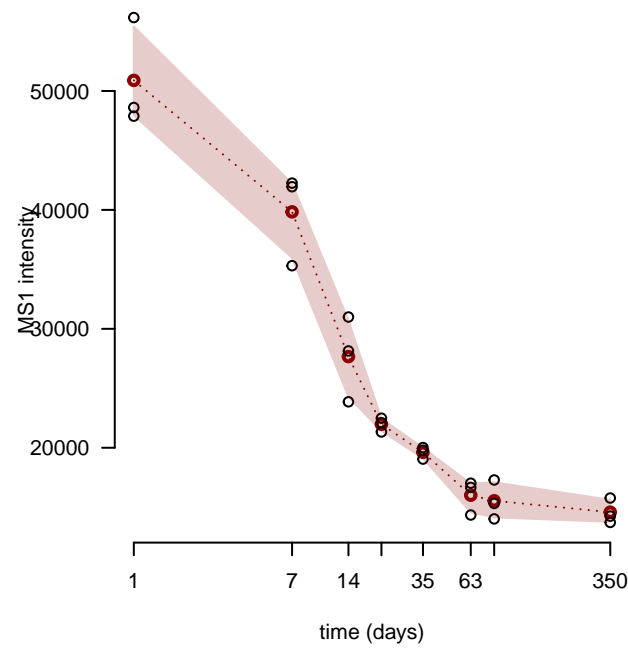

**E9Q4P1**  
GN=Wdfy1  
WD repeat and FYVE domain containing 1

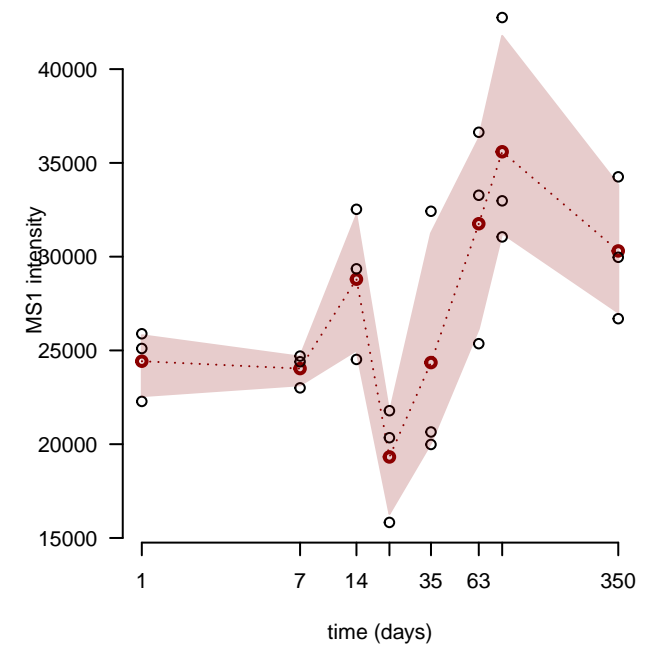

**E9Q4Z2**  
GN=Acacb  
acetyl-Coenzyme A carboxylase beta

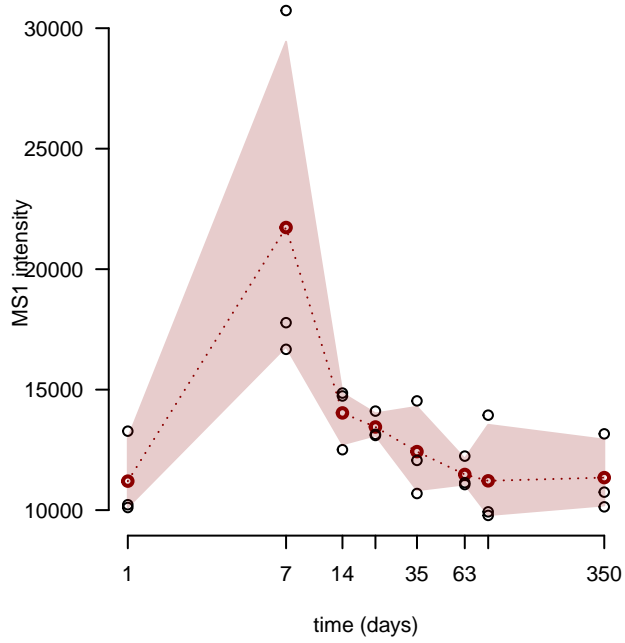

**E9Q555**  
GN=Rnf213  
ring finger protein 213

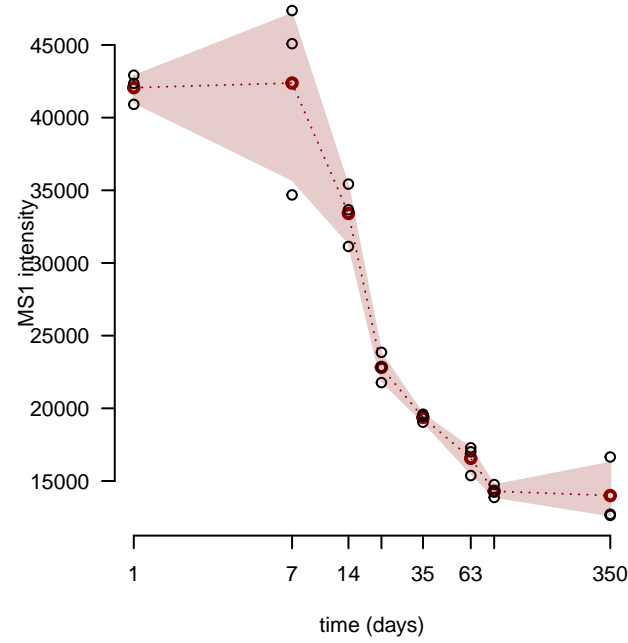

**E9Q557**  
GN=Dsp  
desmoplakin

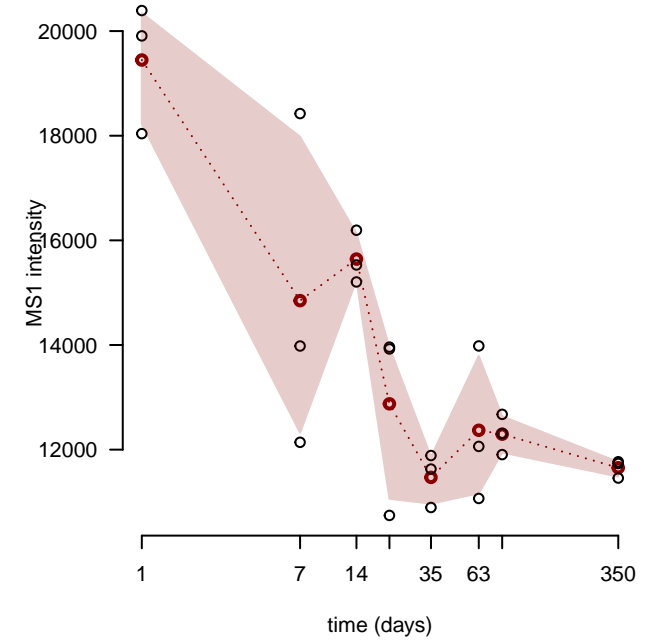

**E9Q5C9**  
GN=Nolc1  
nucleolar and coiled-body phosphoprotein ...

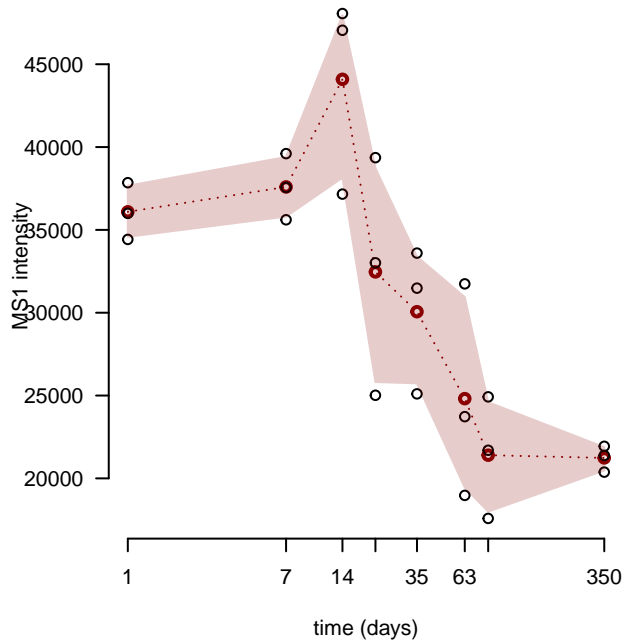

**E9Q5F9**  
GN=Setd2  
SET domain containing 2

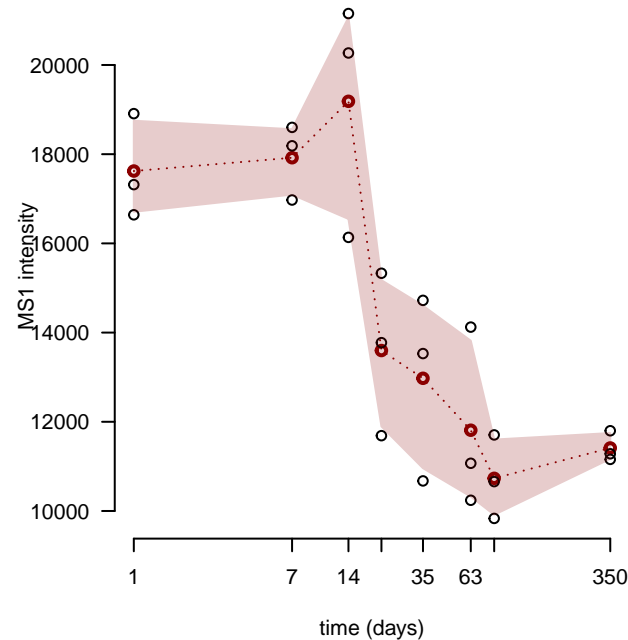

**E9Q5G3**  
GN=Kif23  
kinesin family member 23

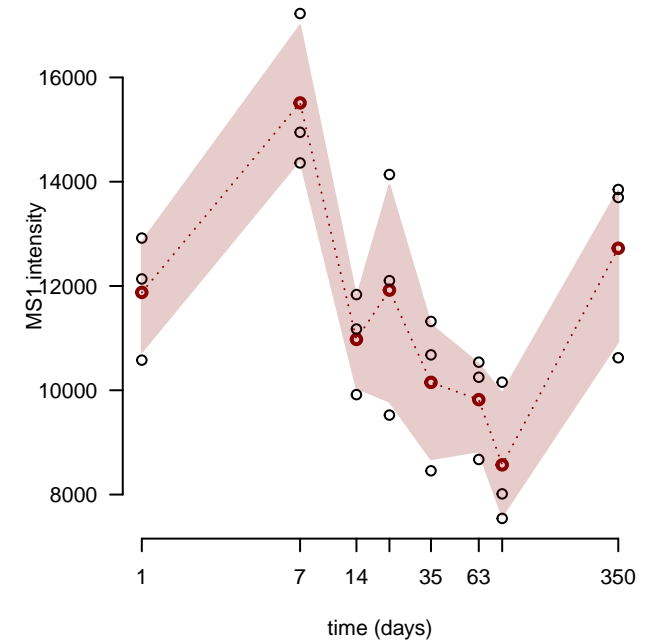

**E9Q5G7**  
GN=Oog1  
oogenesis 1

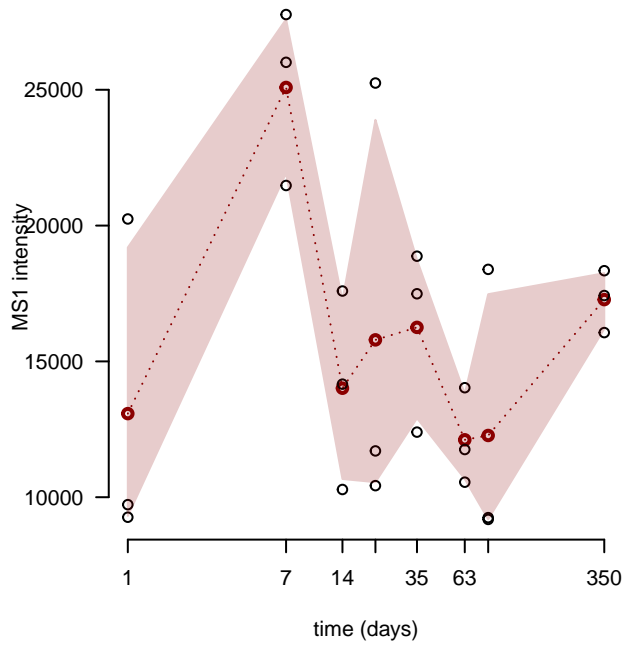

**E9Q5K9**  
GN=Ythdc1  
YTH domain containing 1

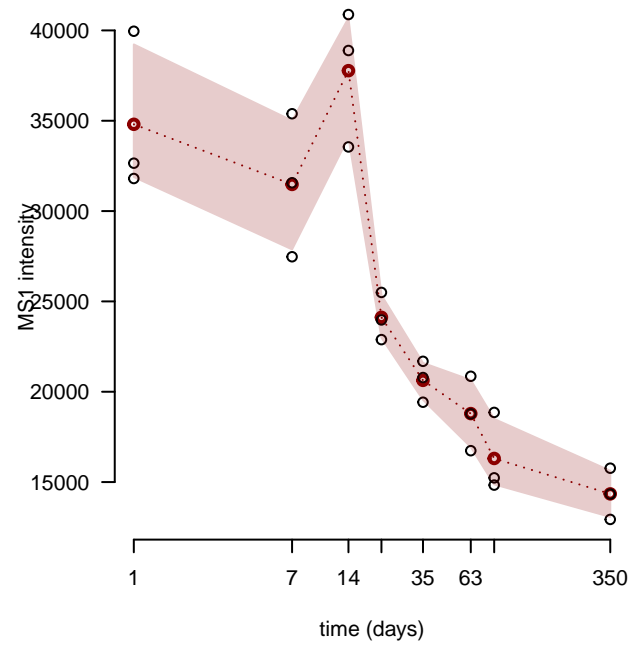

**E9Q634**  
GN=Myo1e  
myosin IE

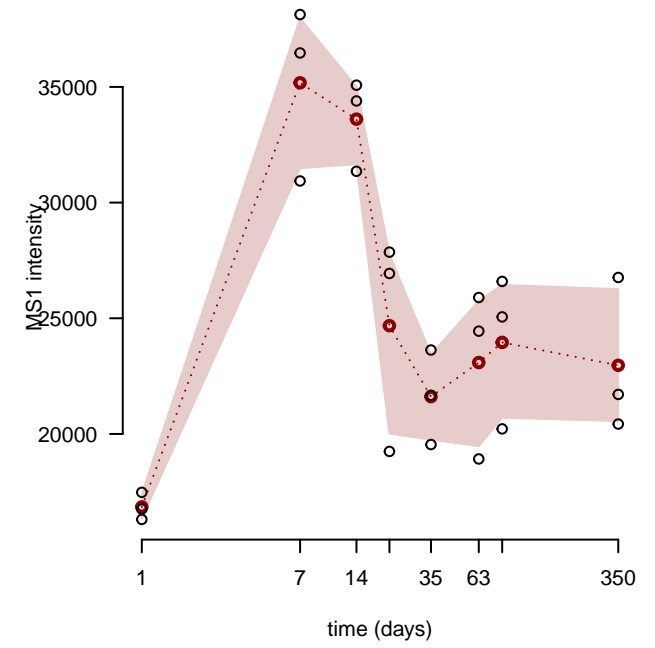

**E9Q649**  
GN=Gcnt4  
glucosaminyl (N-acetyl) transferase 4, c ...

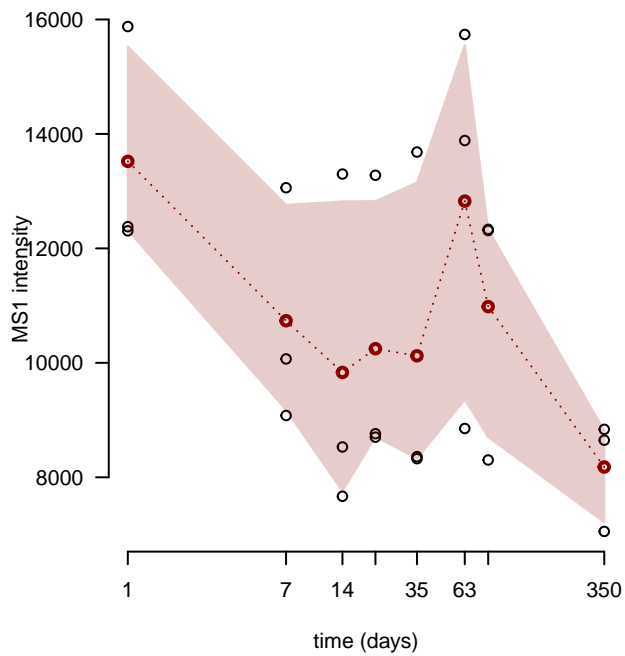

**E9Q6B2**  
GN=Ccdc85c  
coiled-coil domain containing 85C

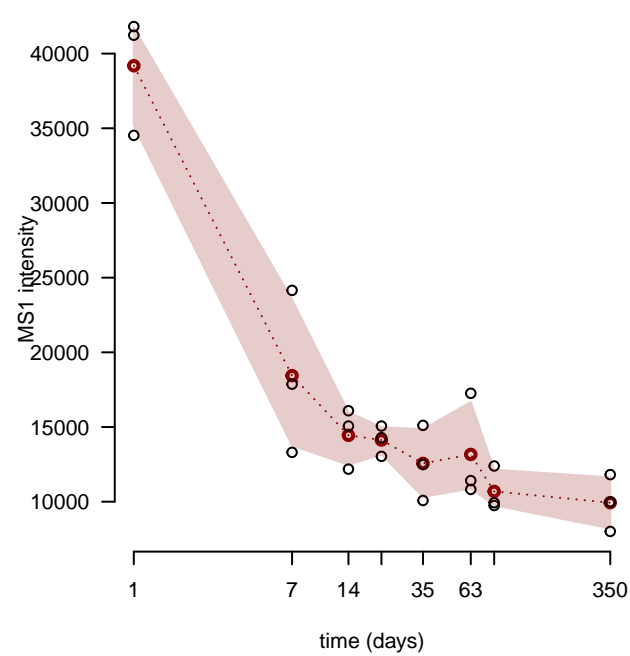

**E9Q6J5**  
GN=Bod1l  
biorientation of chromosomes in cell div ...

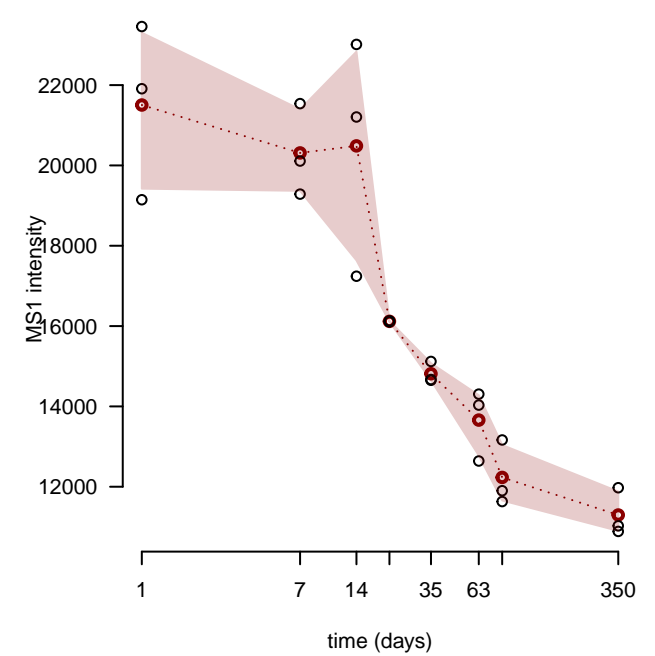

**E9Q6P5**  
GN=Ttc7b  
tetratricopeptide repeat domain 7B

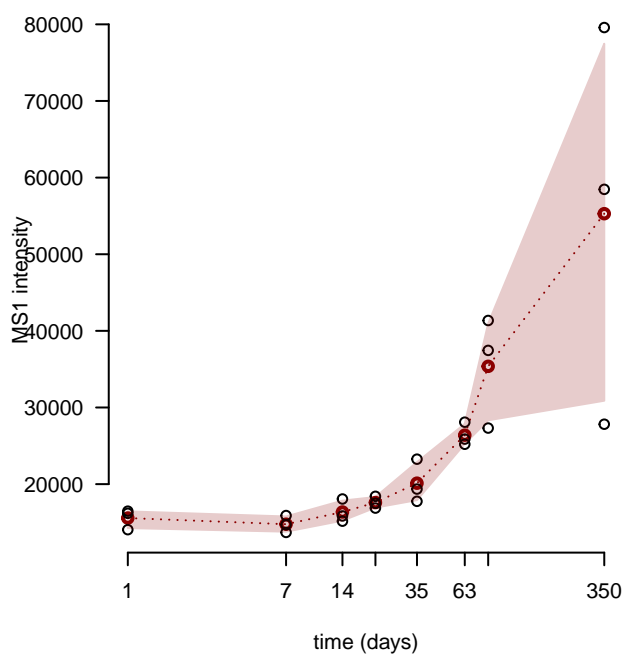

**E9Q735**  
GN=Ube4a  
ubiquitination factor E4A

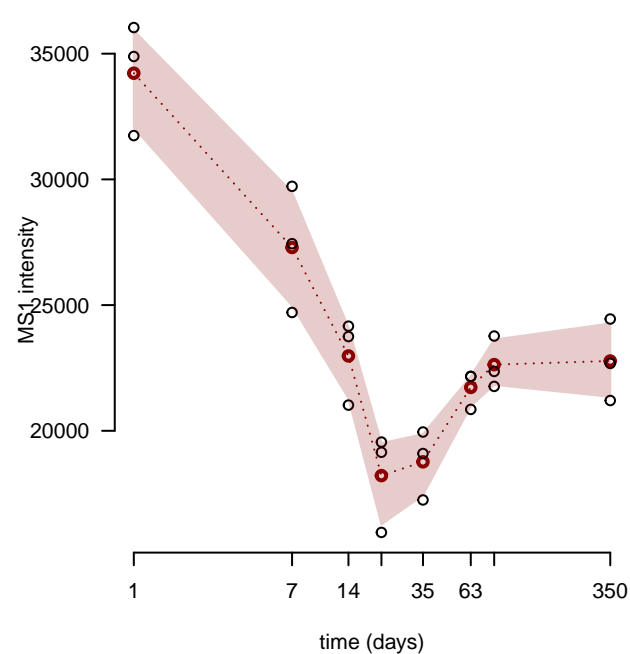

**E9Q784**  
GN=Zc3h13  
zinc finger CCCH type containing 13

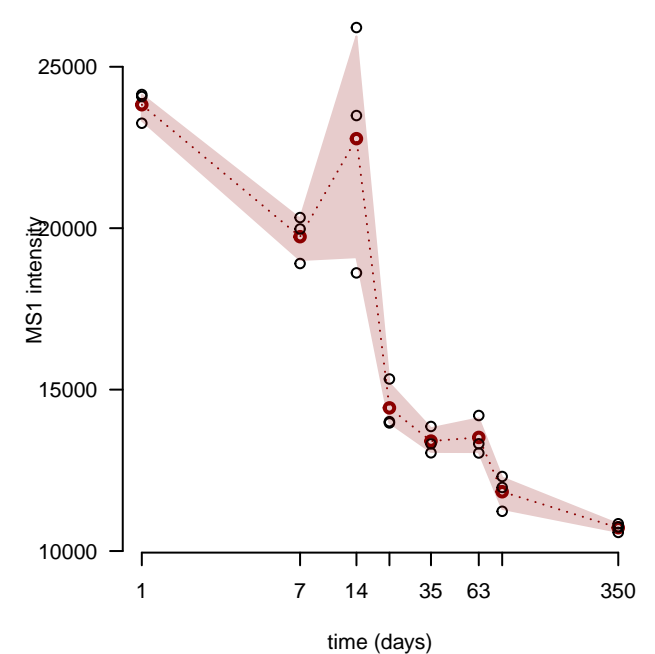

**E9Q7D5**  
**GN=Arhgef5**

Rho guanine nucleotide exchange factor ( ...

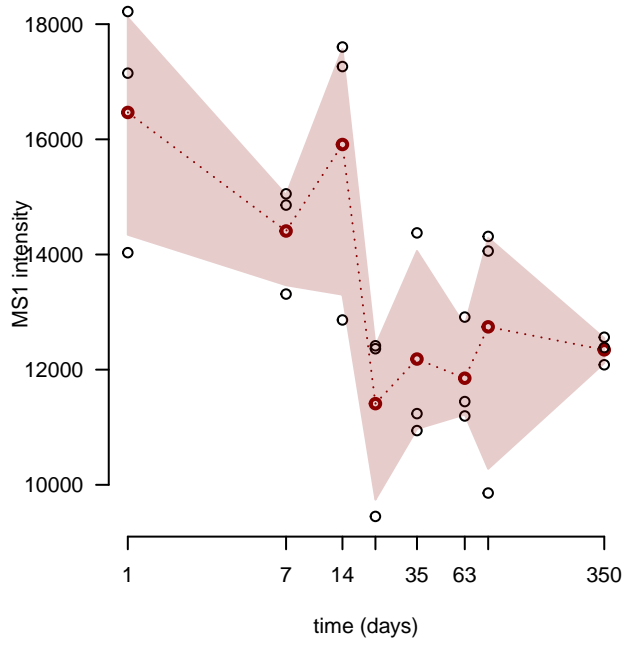

**E9Q7E2**  
**GN=Arid2**

AT rich interactive domain 2 (ARID, RFX- ...

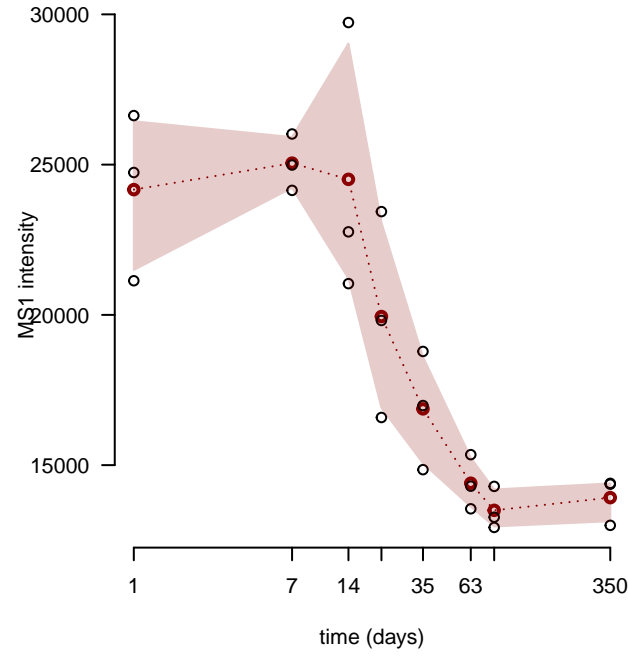

**E9Q7F2**  
**GN=Rnf169**

ring finger protein 169

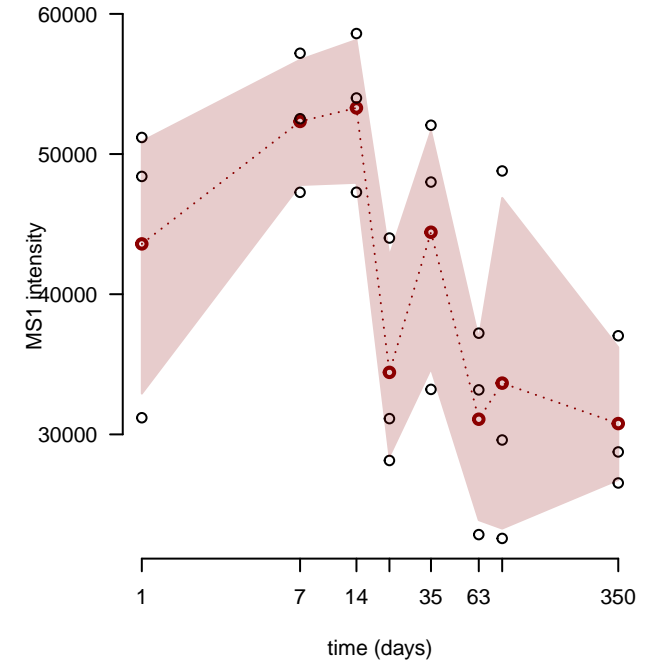

**E9Q7G0**  
**GN=Numa1**

nuclear mitotic apparatus protein 1

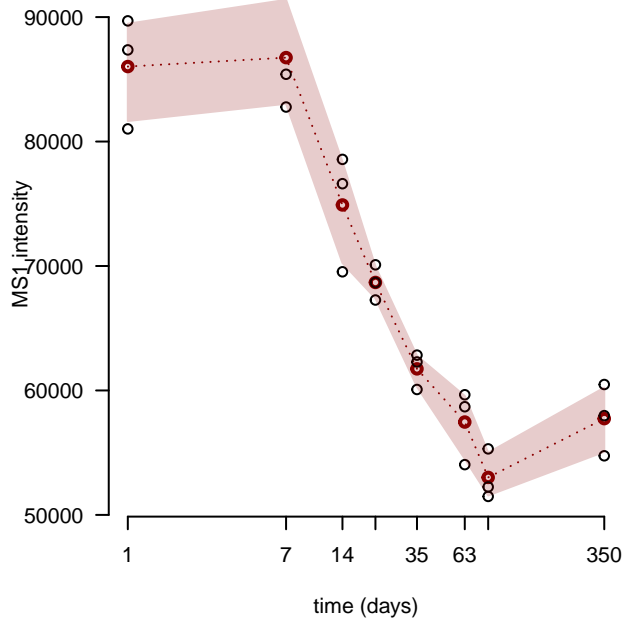

**E9Q7X6**  
**GN=Heg1**

heart development protein with EGF-like ...

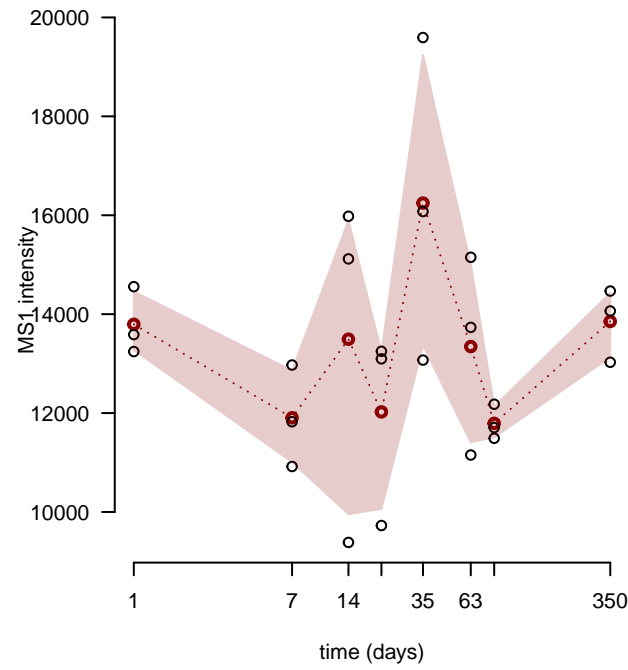

**E9Q8D0**  
**GN=Dnajc21**

DnaJ heat shock protein family (Hsp40) m ...

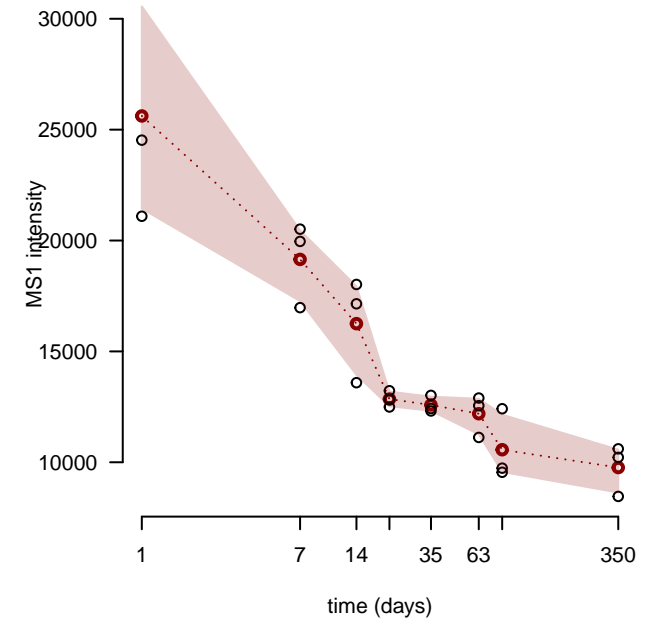

**E9Q8I9**  
**GN=Fry**

FRY microtubule binding protein

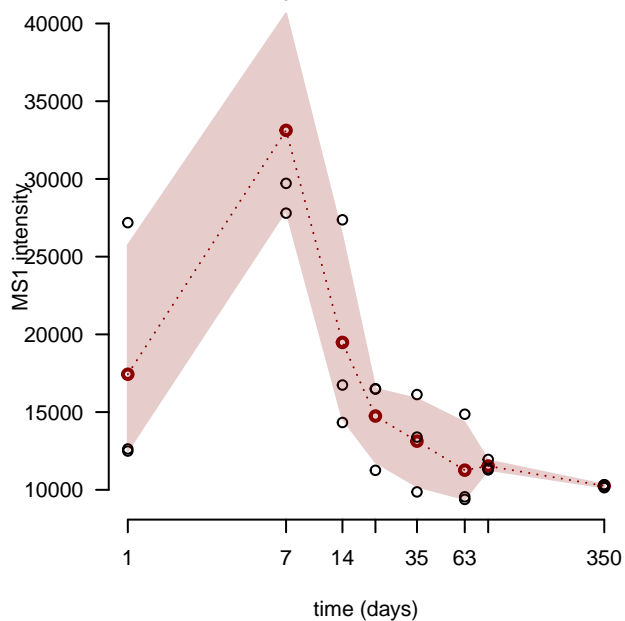

**E9Q912**  
**GN=**

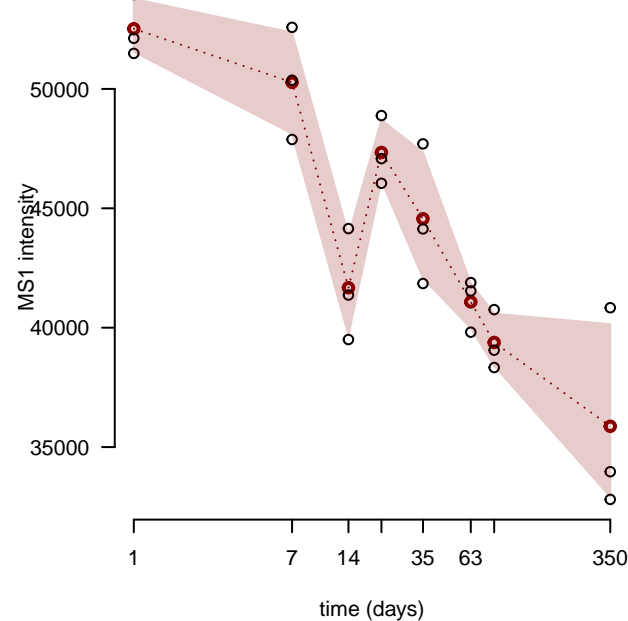

**E9Q942**  
**GN=Smim13**

small integral membrane protein 13

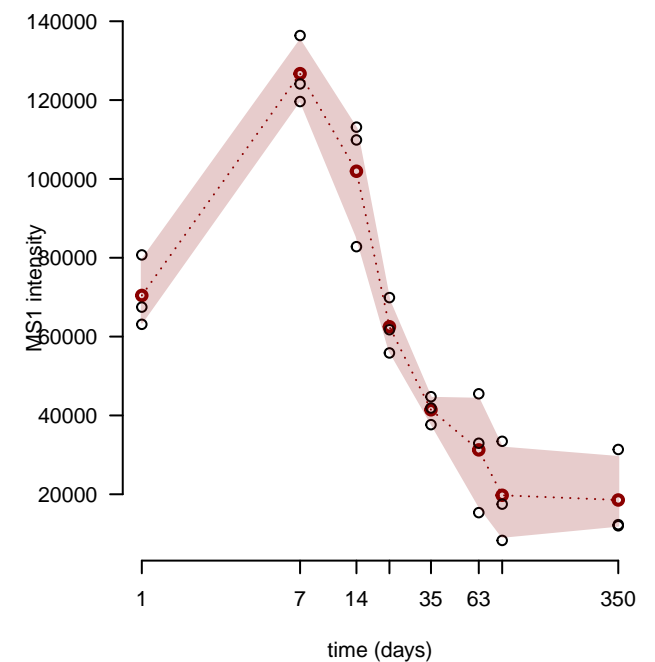

**E9Q9W4**  
GN=

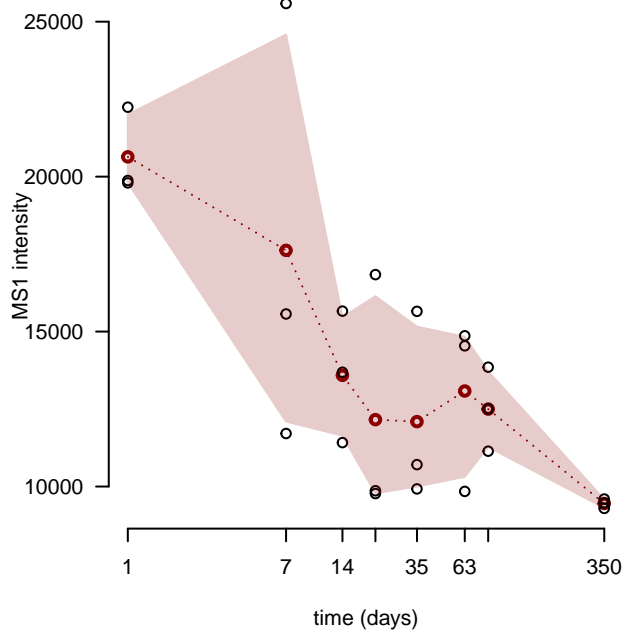

**E9QAG8**  
GN=Znf431

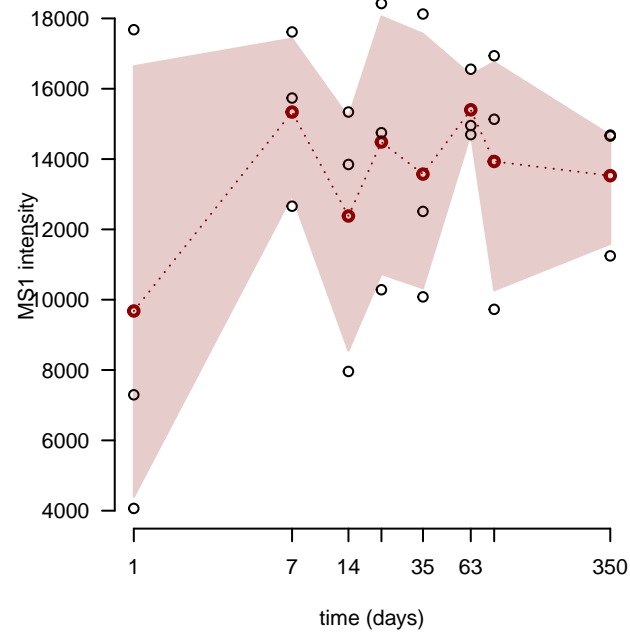

**E9QAM5**  
GN=Helz2  
helicase with zinc finger 2, transcripti ...

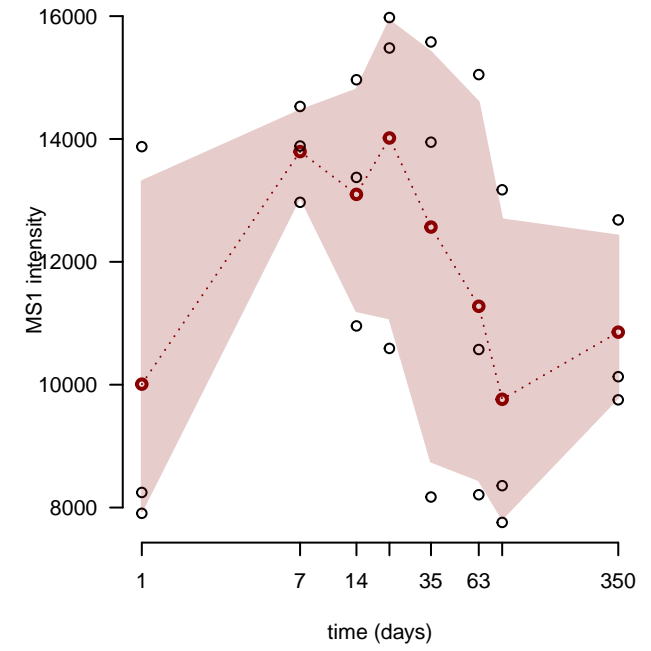

**E9QAT4**  
GN=Sec16a

SEC16 homolog A, endoplasmic reticulum e ...

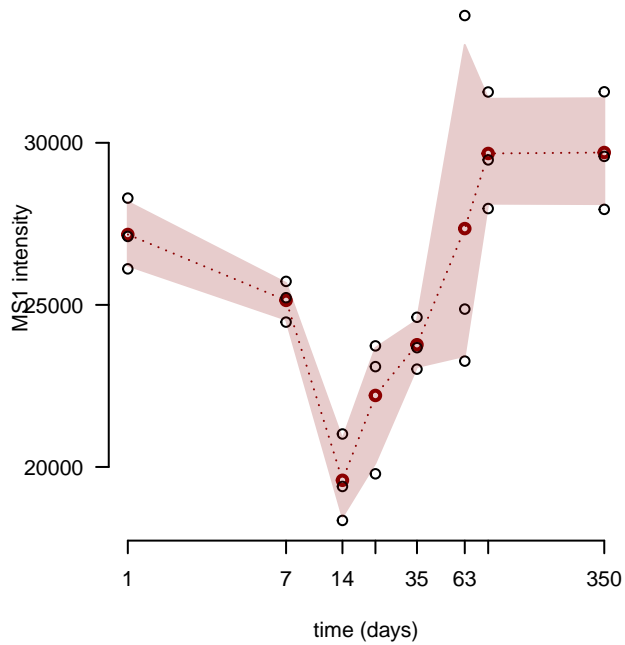

**F2Z461**  
GN=Herc6

hect domain and RLD 6

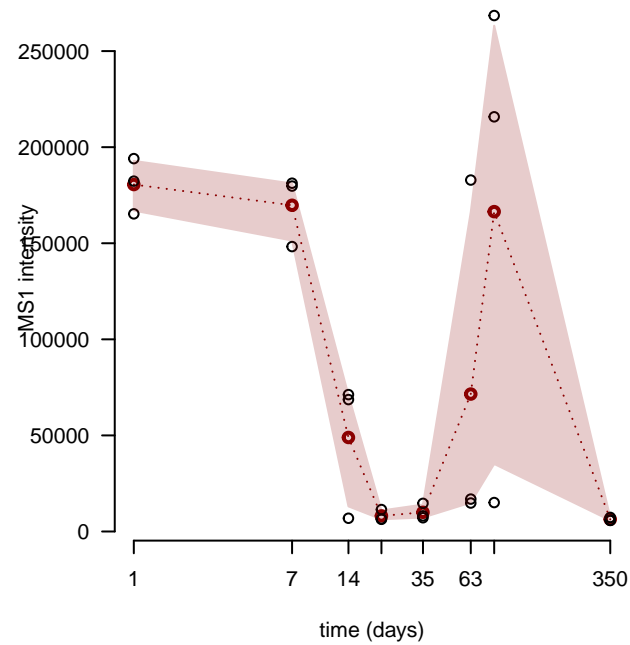

**F6XLV1**  
GN=

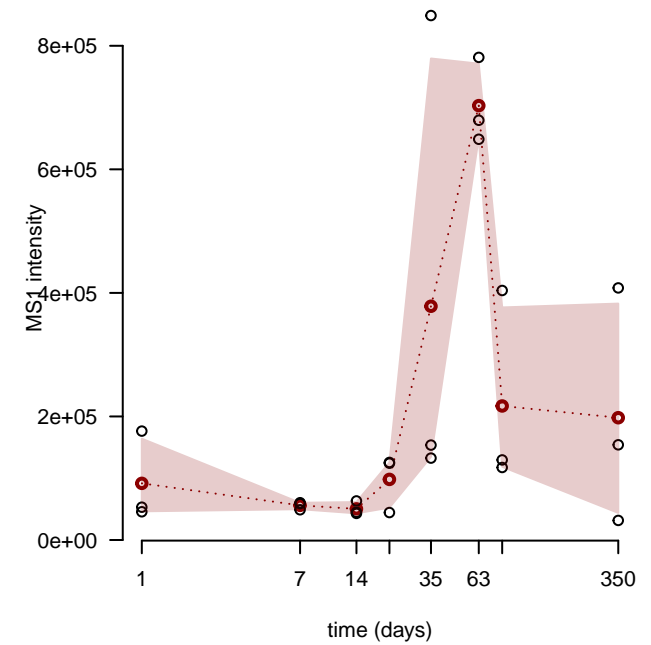

**F6ZDS4**  
GN=Tpr

translocated promoter region, nuclear ba ...

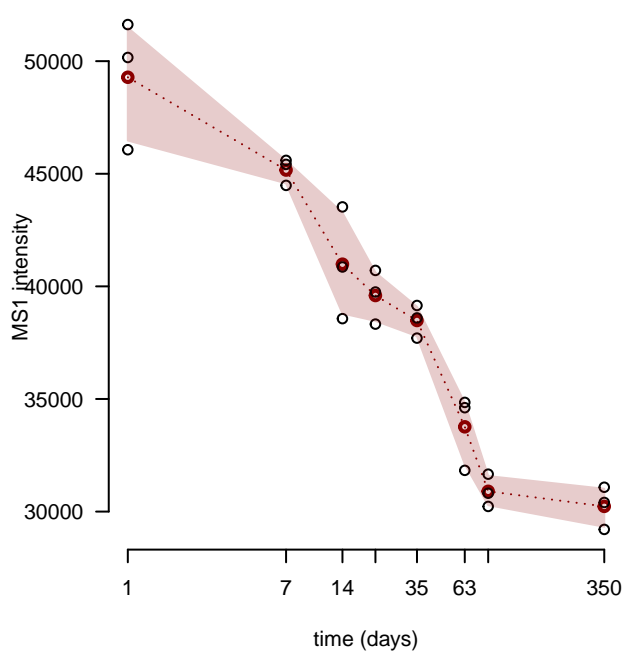

**F7BJB9**  
GN=Morc3

microchidia 3

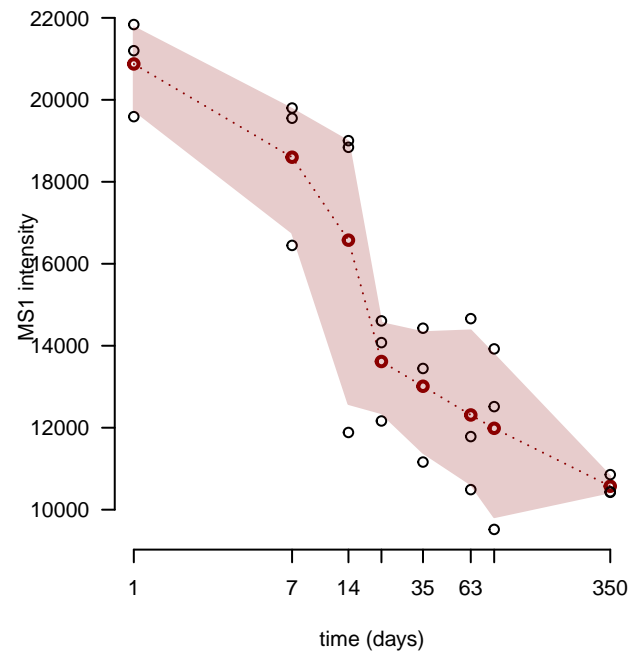

**F7BWT7**  
GN=Tspan15

tetraspanin 15

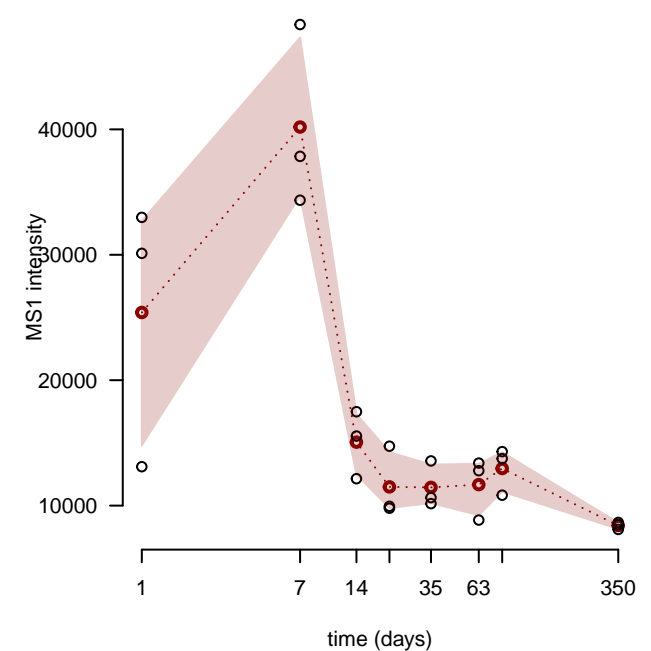

**F8VPQ2**  
GN=Arid4a  
AT rich interactive domain 4A (RBP1-like ...

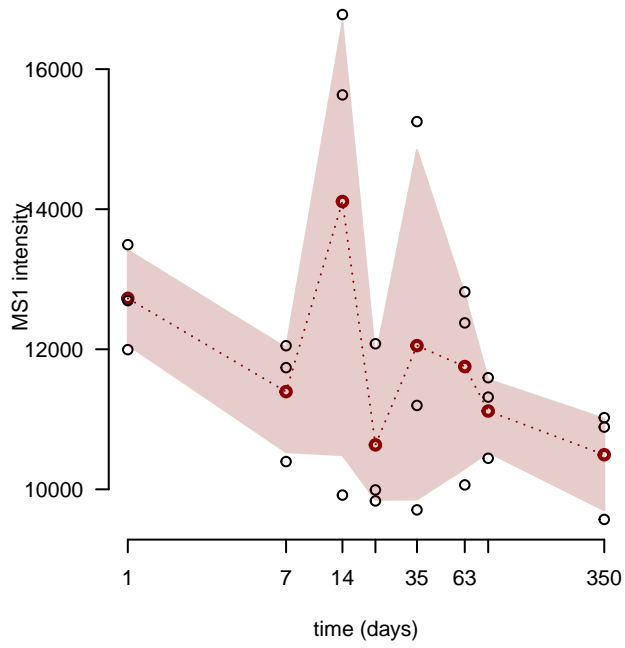

**F8VPU2**  
GN=Farp1  
FERM, RhoGEF (Arhgef) and pleckstrin dom ...

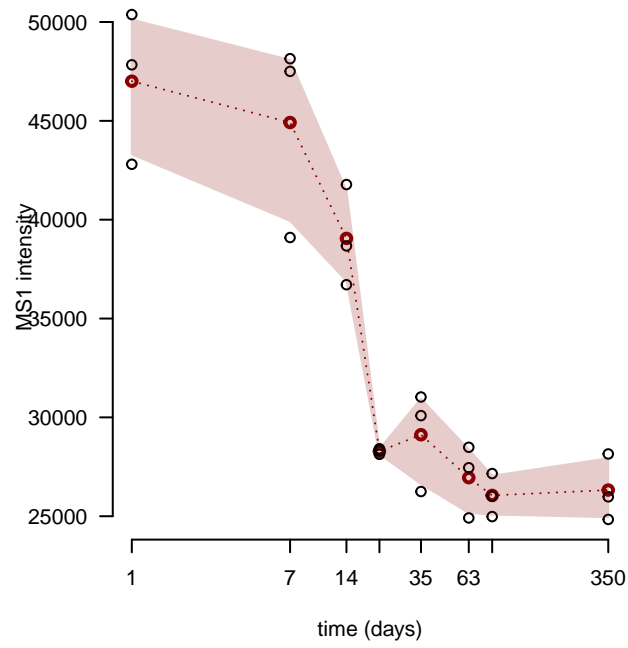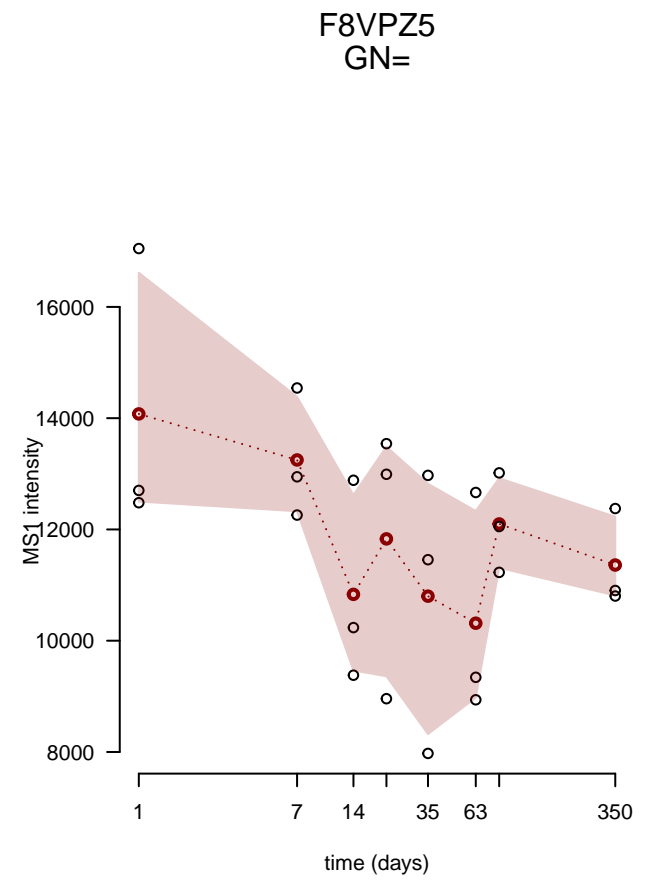

**F8VPZ9**  
GN=Bicra  
BRD4 interacting chromatin remodeling co ...

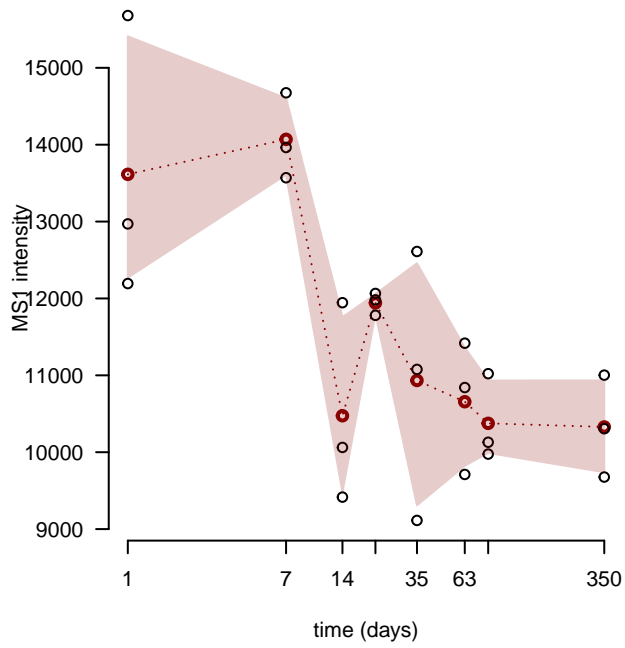

**F8VQB6**  
GN=Myo10  
myosin X

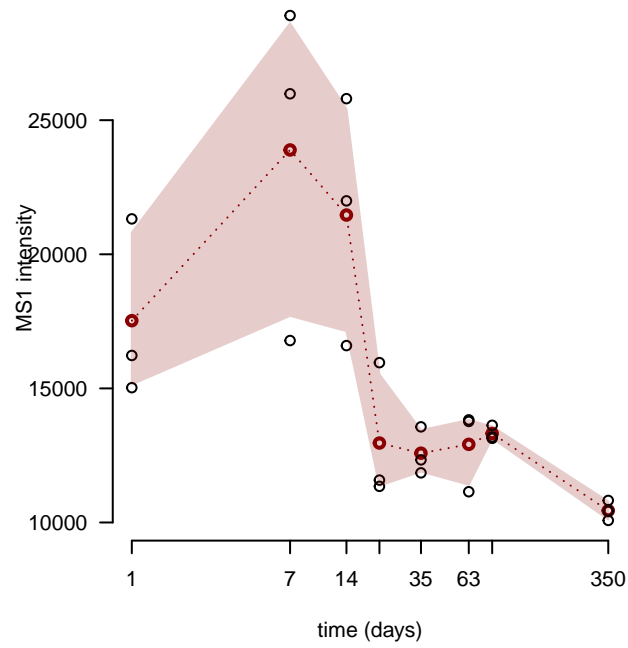

**G3X982**  
GN=Aox3  
aldehyde oxidase 3

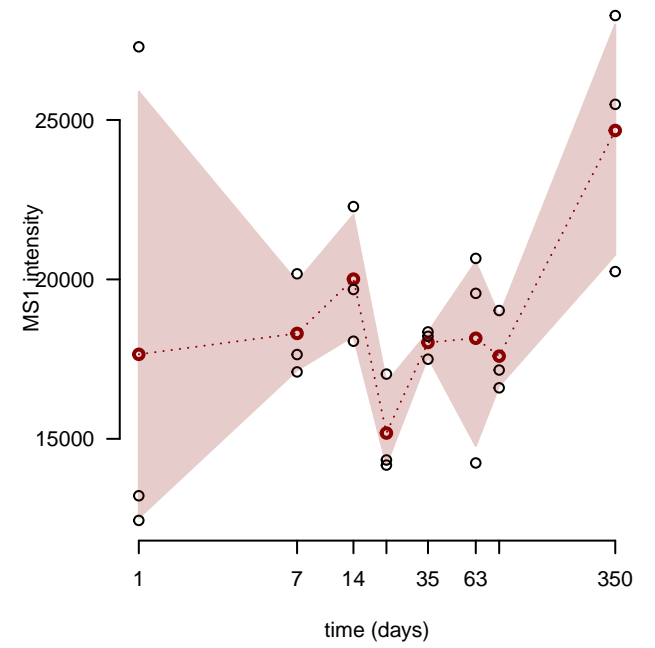

**G3X9C2**  
GN=Nccrp1  
non-specific cytotoxic cell receptor pro ...

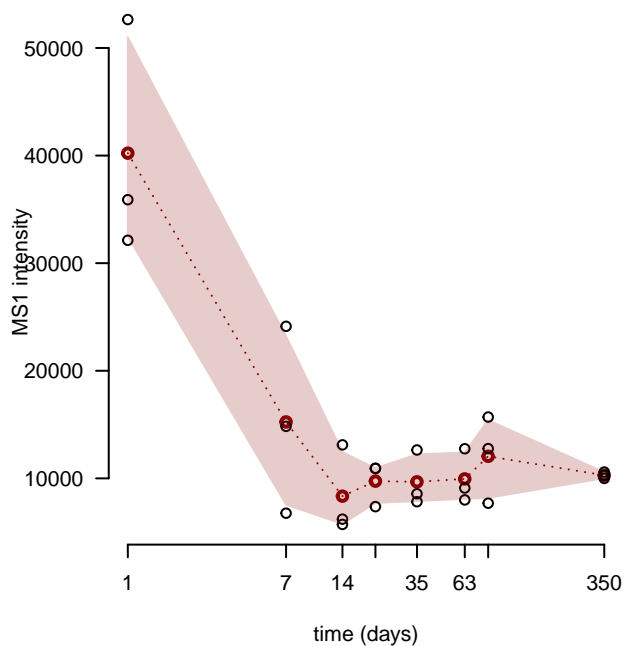

**G3X9J0**  
GN=Sipa113  
signal-induced proliferation-associated ...

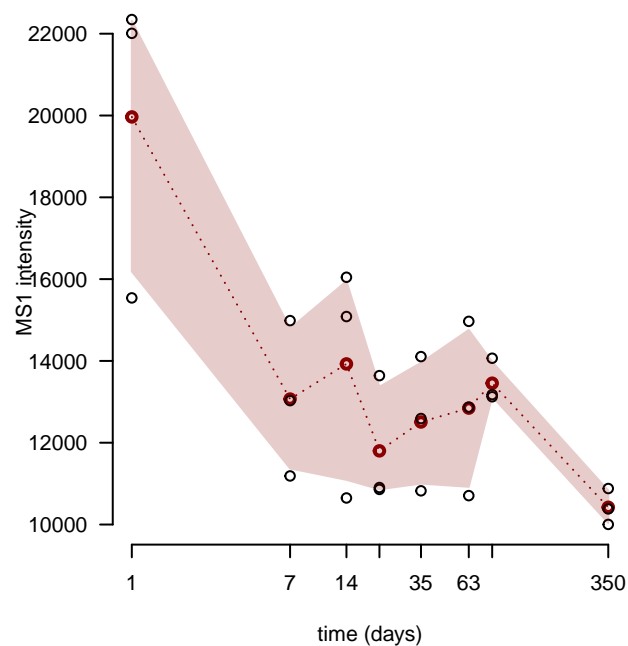

**G3X9K3**  
GN=Argef1  
ADP-ribosylation factor guanine nucleoti ...

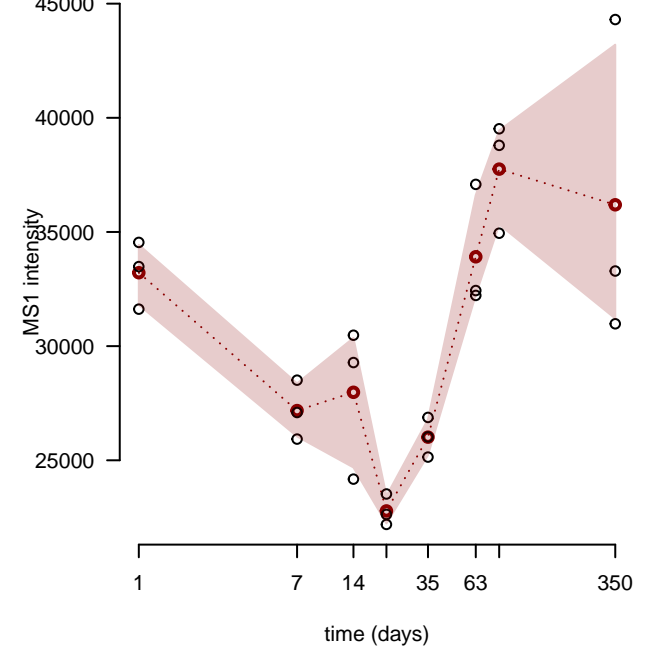



**G3XA57**  
GN=Rab11fip2  
RAB11 family interacting protein 2 (clas ...

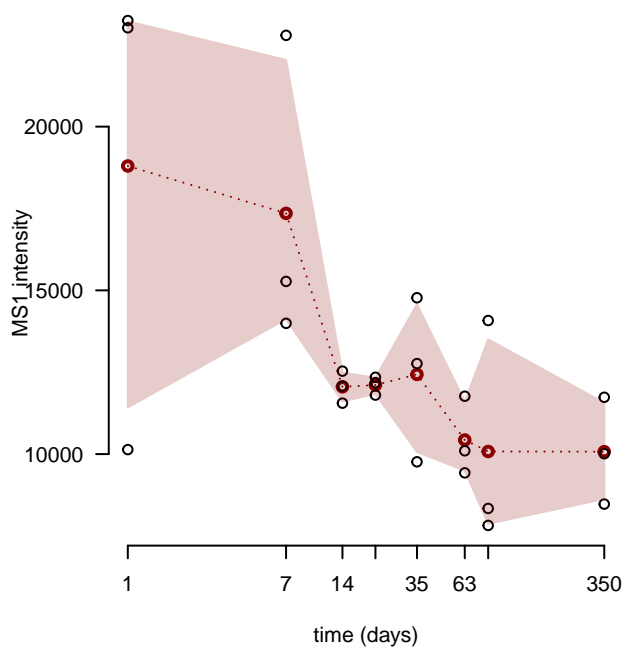

**G3XA59**  
GN=Lrrc32  
leucine rich repeat containing 32

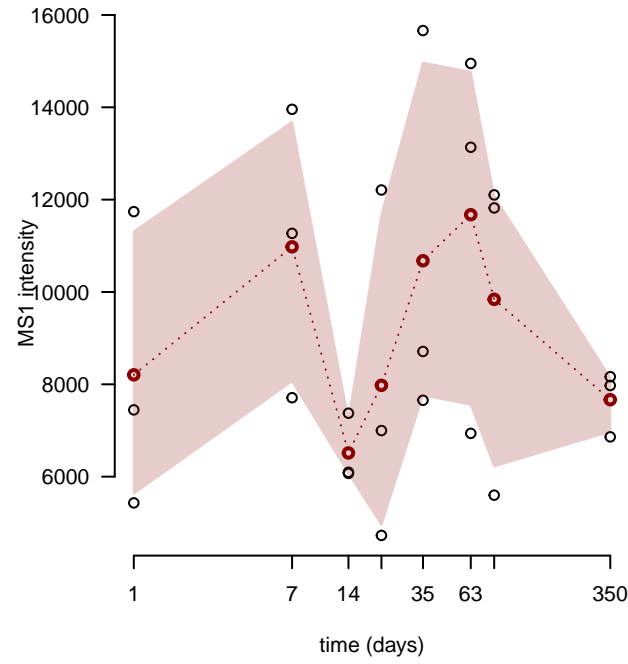

**G5E829**  
GN=Atp2b1  
ATPase, Ca++ transporting, plasma membra ...

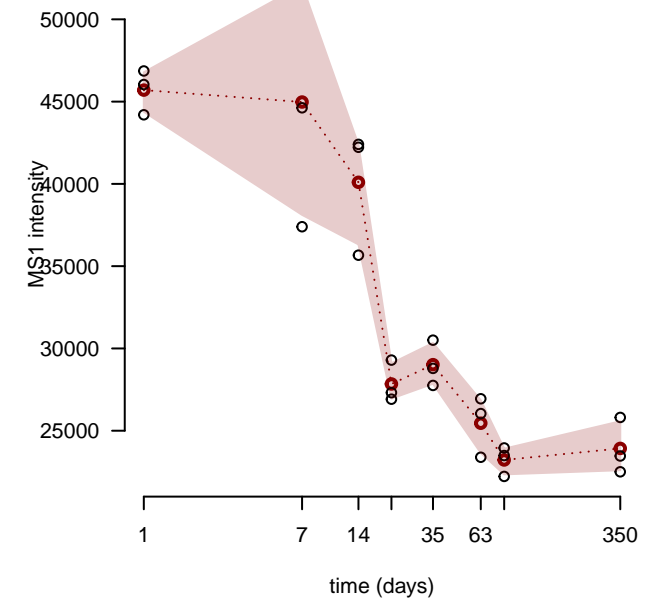

**G5E861**  
GN=Sclt1  
sodium channel and clathrin linker 1

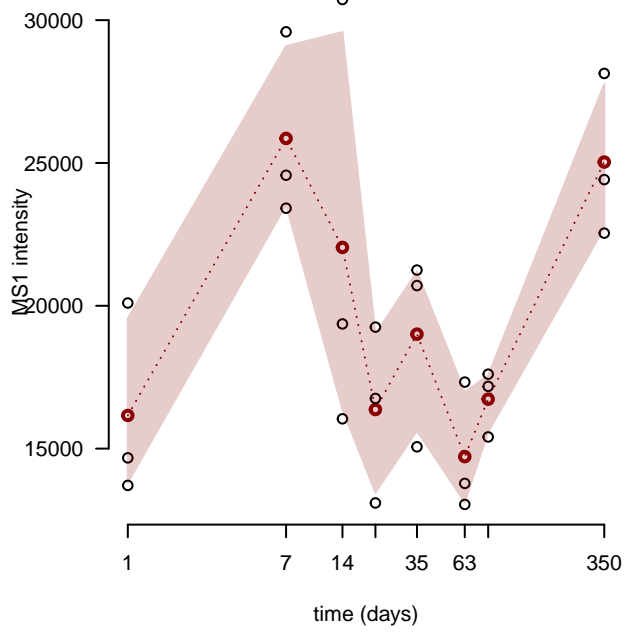

**G5E870**  
GN=Trip12  
thyroid hormone receptor interactor 12

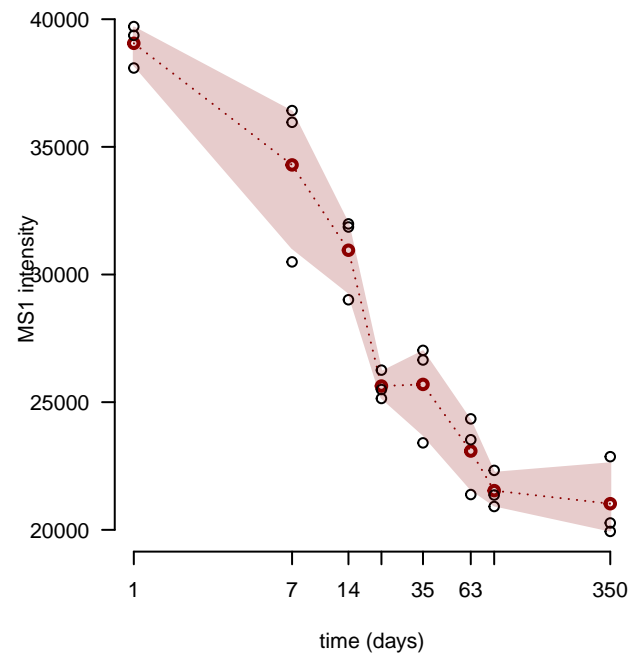

**G5E897**  
GN=Poglut3  
protein O-glycosyltransferase 3

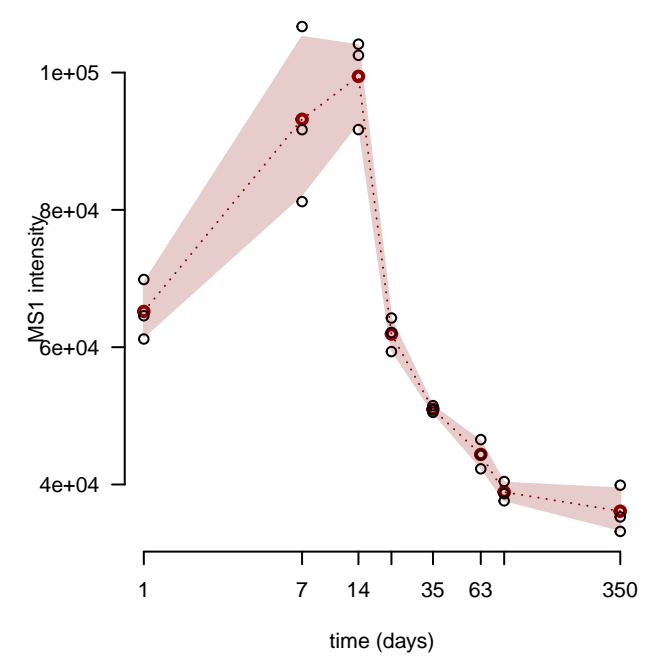

**G5E8F4**  
GN=Fpgt  
fucose-1-phosphate guanylyltransferase

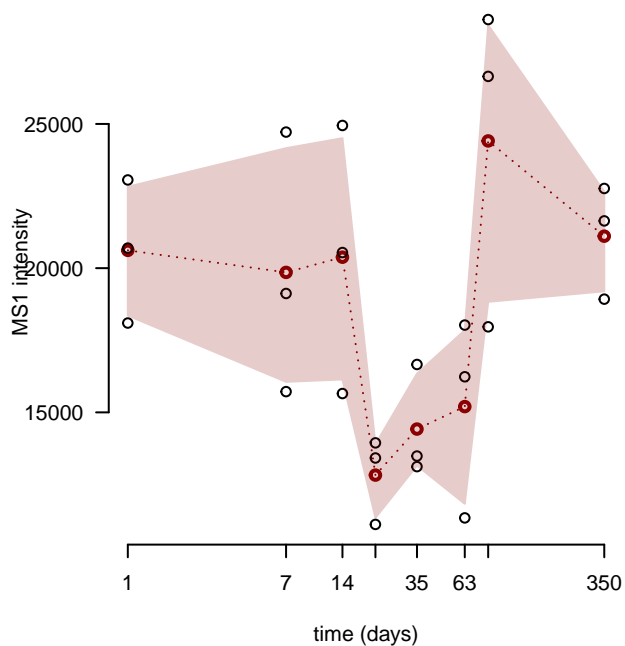

**G5E8K5**  
GN=Ank3  
ankyrin 3, epithelial

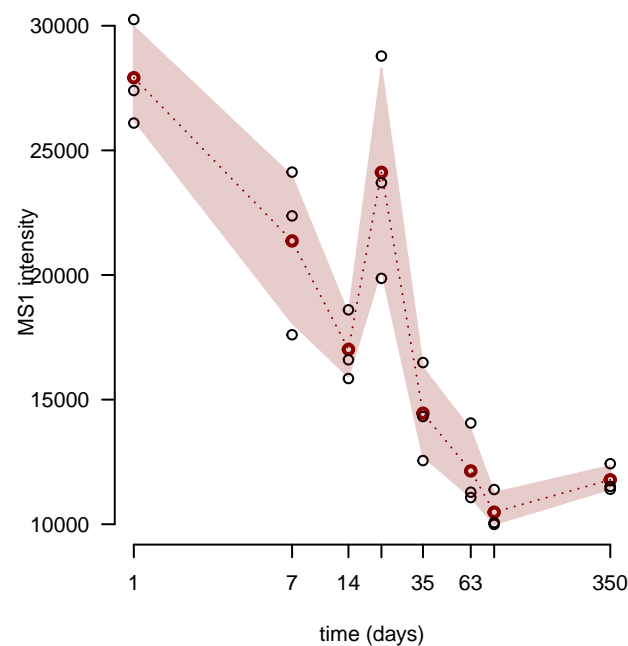

**G5E8P0**  
GN=Tubgcp6  
tubulin, gamma complex associated protei ...

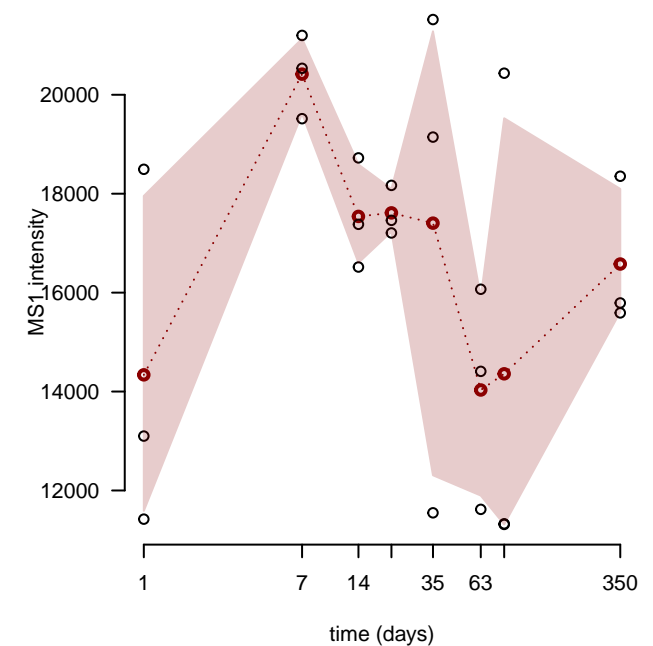

G5E8P1  
GN=

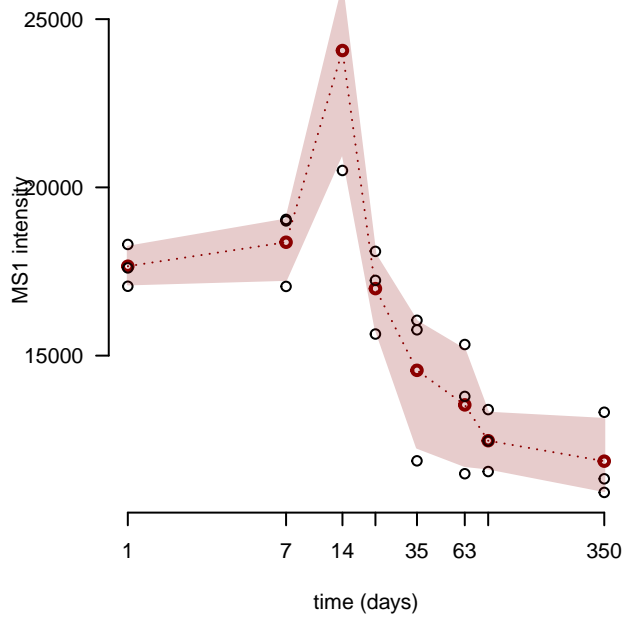

G5E8Q8  
GN=Adgrf5  
adhesion G protein-coupled receptor F5

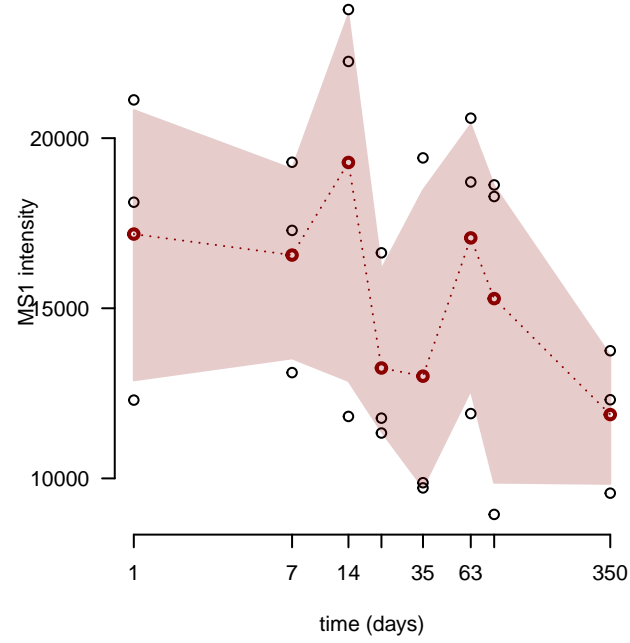

G5E8Z2  
GN=Taf4b  
TATA-box binding protein associated fact ...

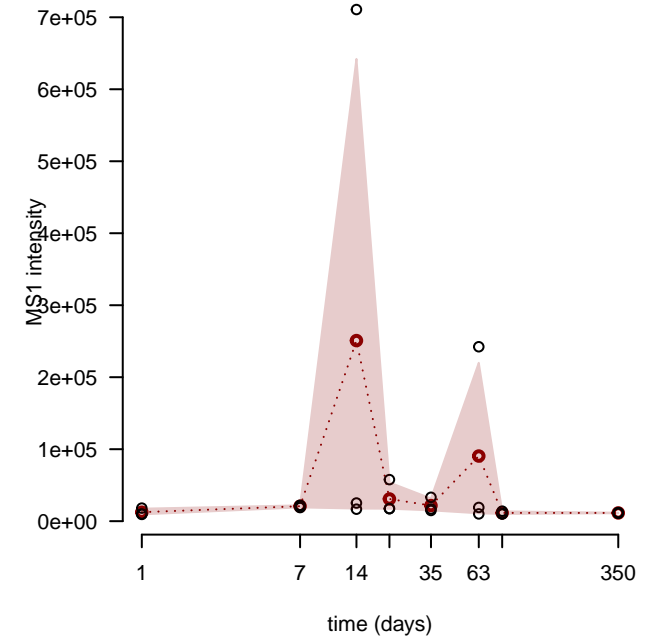

J3QMK6  
GN=Aldh3b3  
aldehyde dehydrogenase 3 family, member ...

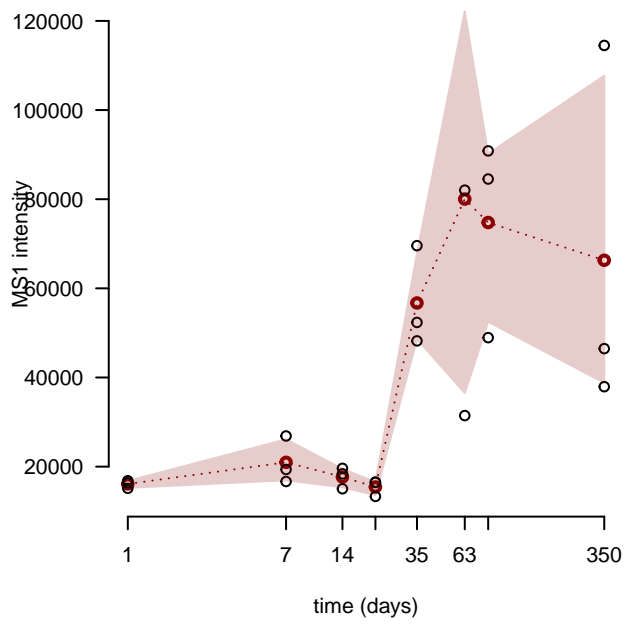

L0N7N1  
GN=Kif14  
kinesin family member 14

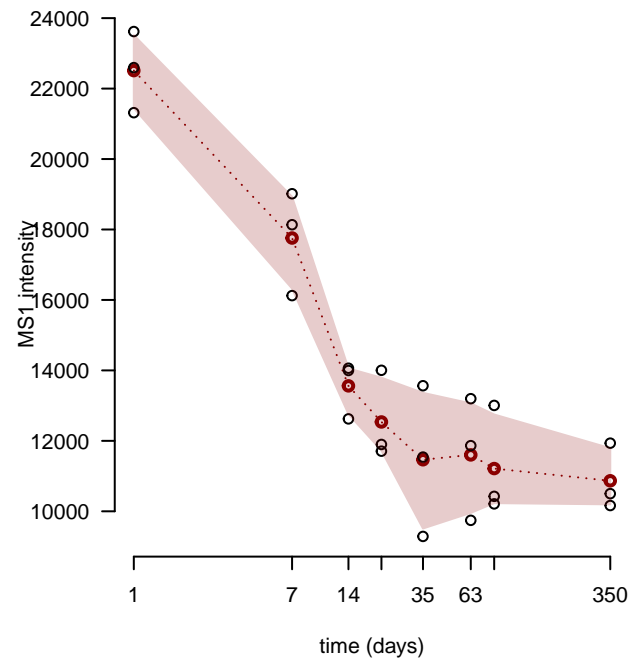

L7N1X6  
GN=Fbxw15  
F-box and WD-40 domain protein 15

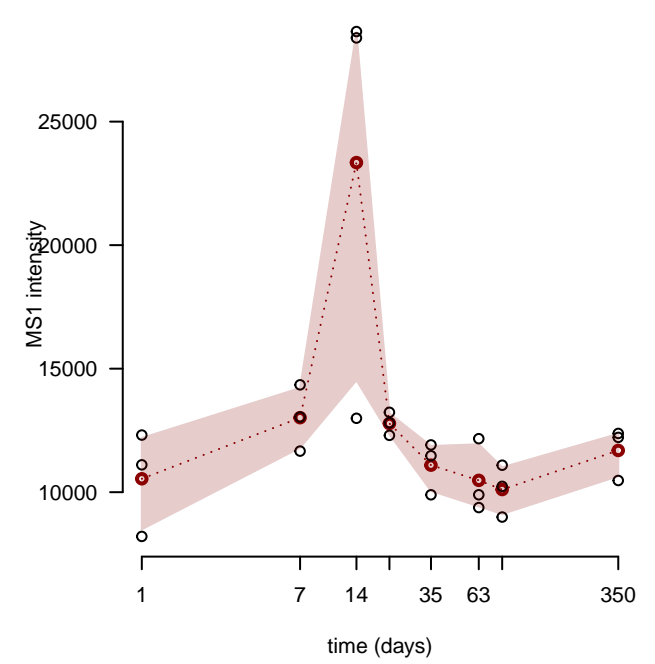

O08528  
GN=Hk2  
hexokinase 2

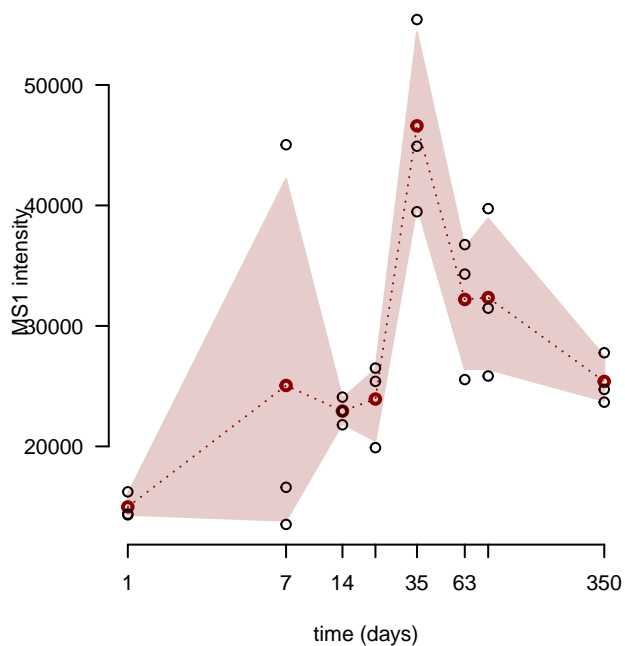

O08529  
GN=Capn2  
calpain 2

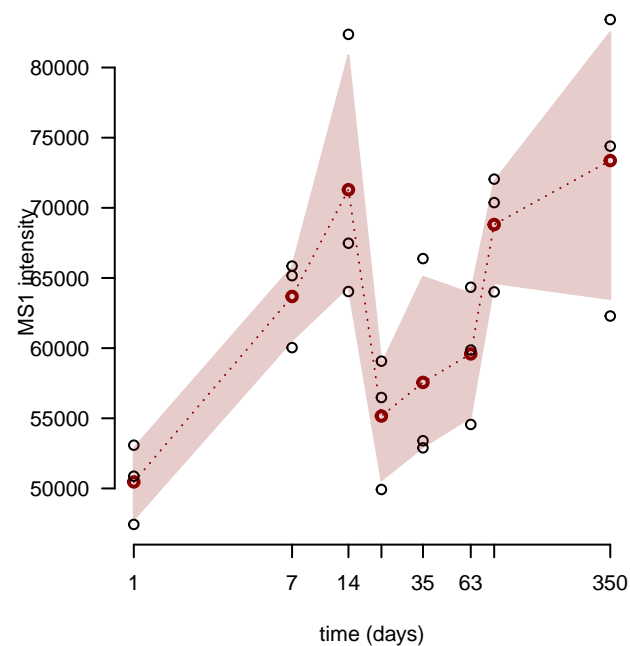

O08530  
GN=S1pr1  
sphingosine-1-phosphate receptor 1

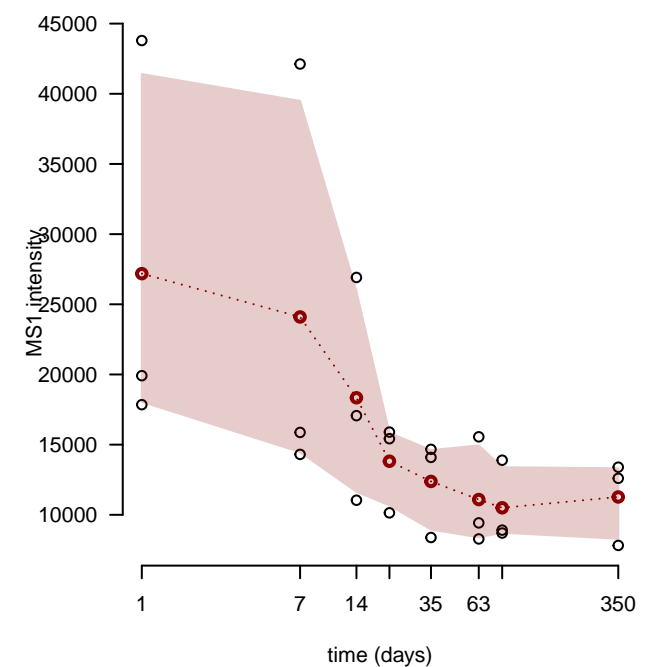

O08532  
GN=Cacna2d1  
calcium channel, voltage-dependent, alpha ...

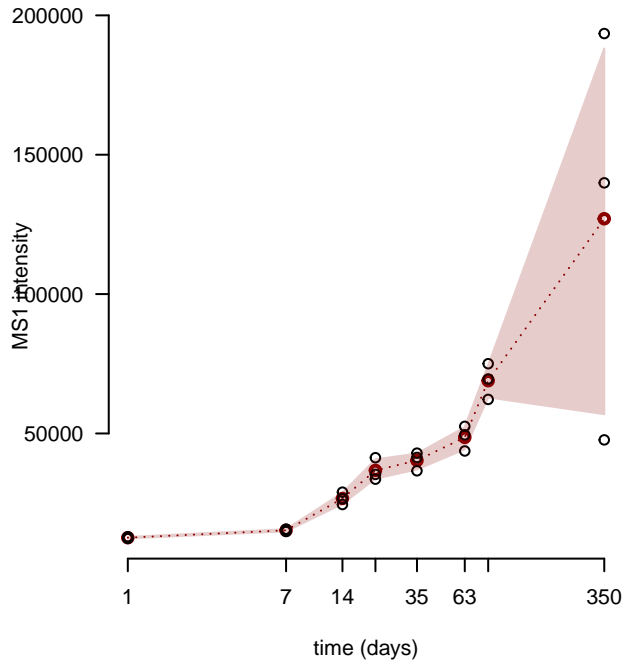

O08532  
GN=Cacna2d1  
calcium channel, voltage-dependent, alpha ...

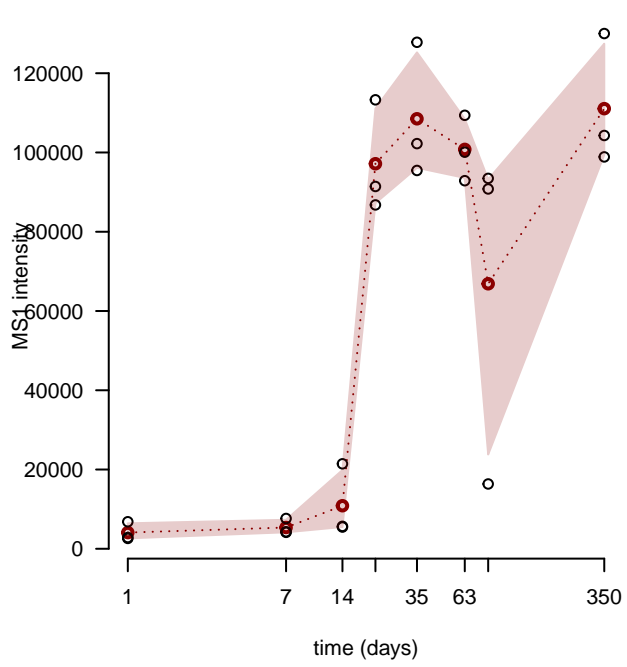

O08537  
GN=Esr2  
estrogen receptor 2 (beta)

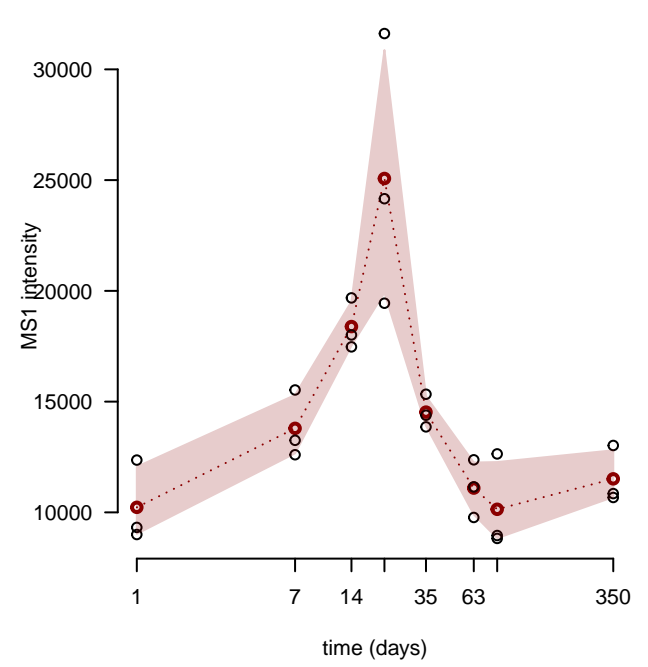

O08539  
GN=Bin1  
bridging integrator 1

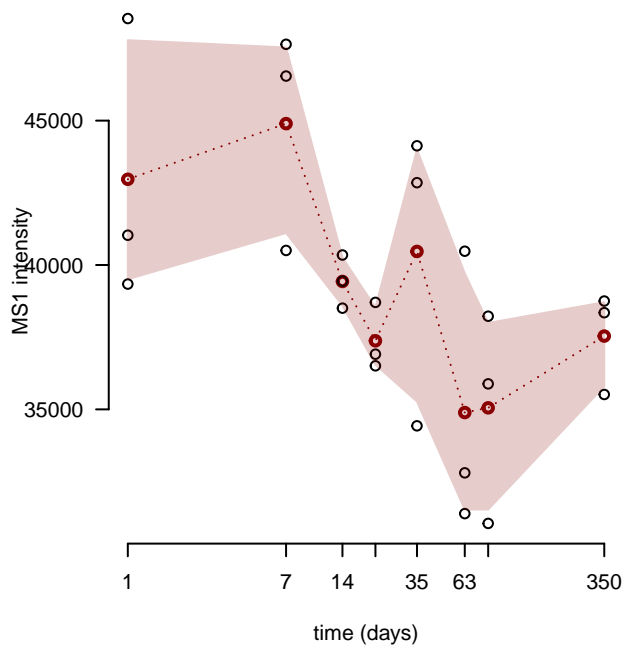

O08539  
GN=Bin1  
bridging integrator 1

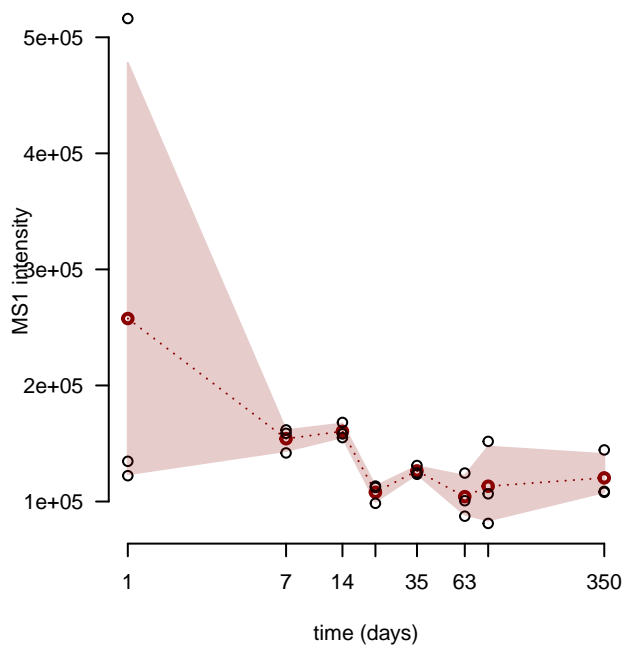

O08547  
GN=Sec22b  
SEC22 homolog B, vesicle trafficking pro ...

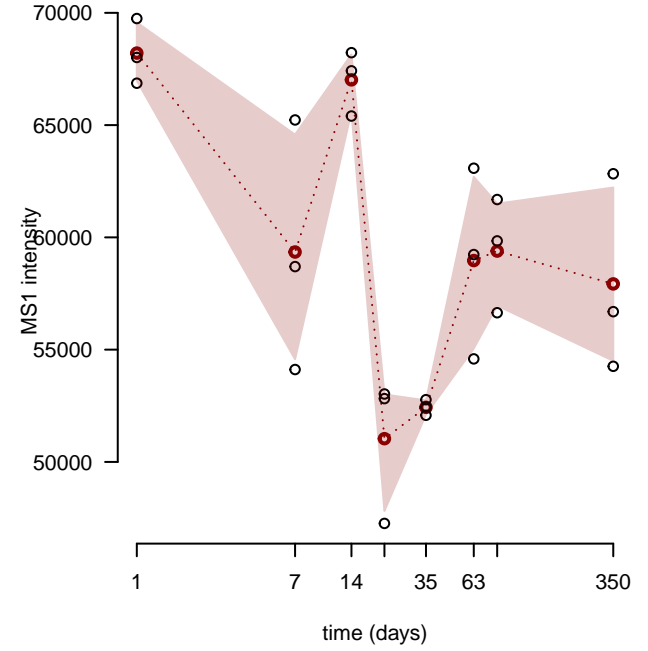

O08550  
GN=Kmt2b  
lysine (K)-specific methyltransferase 2B

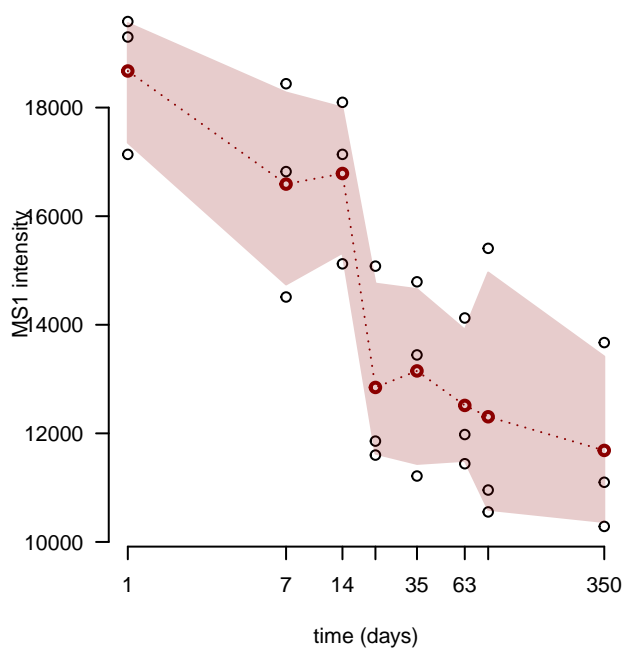

O08553  
GN=Dpysl2  
dihydropyrimidinase-like 2

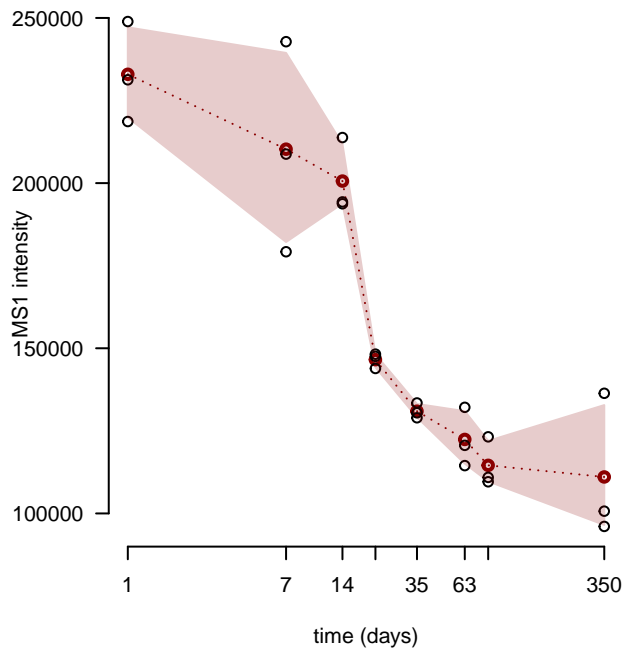

O08573  
GN=Lgals9  
lectin, galactose binding, soluble 9

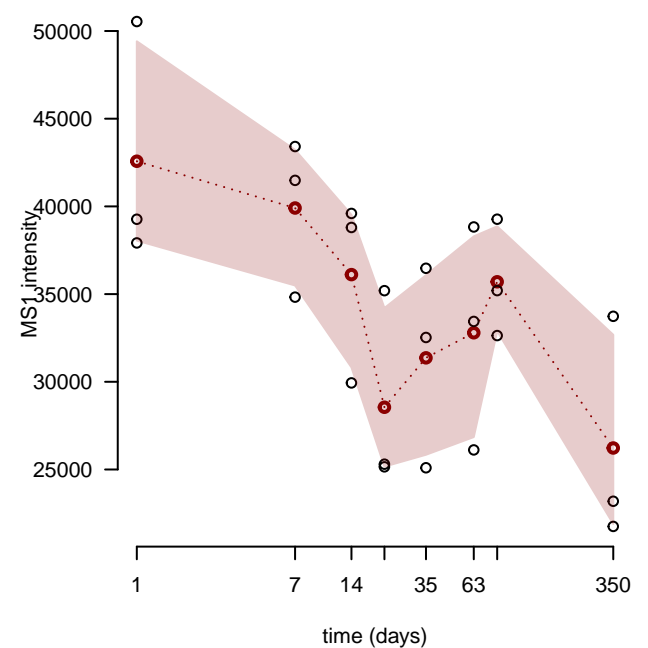

O08579  
GN=Emd  
emerin

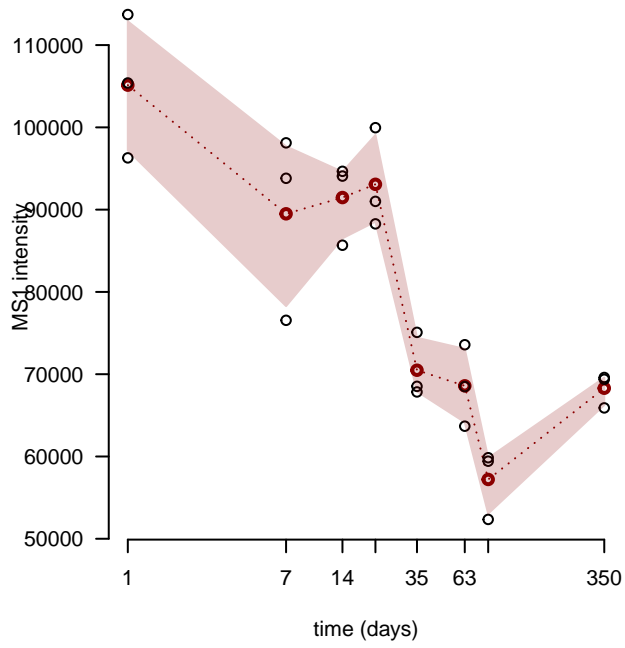

O08580  
GN=Esrra  
estrogen related receptor, alpha

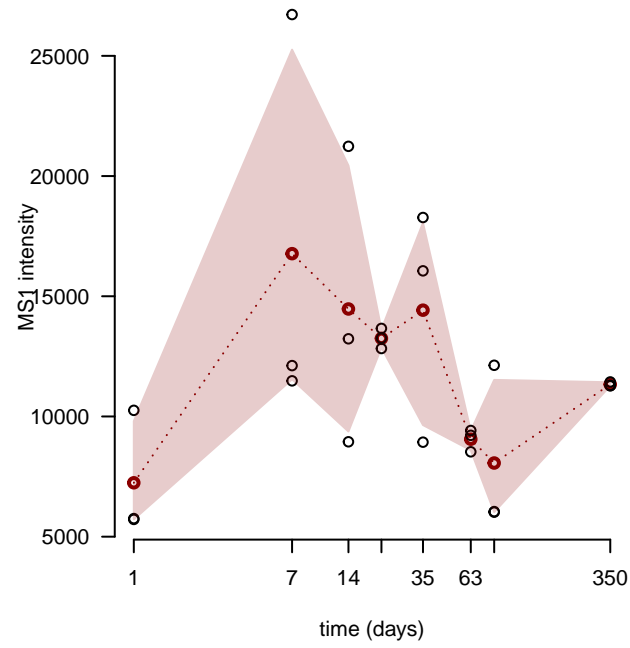

O08582  
GN=Gtpbp1  
GTP binding protein 1

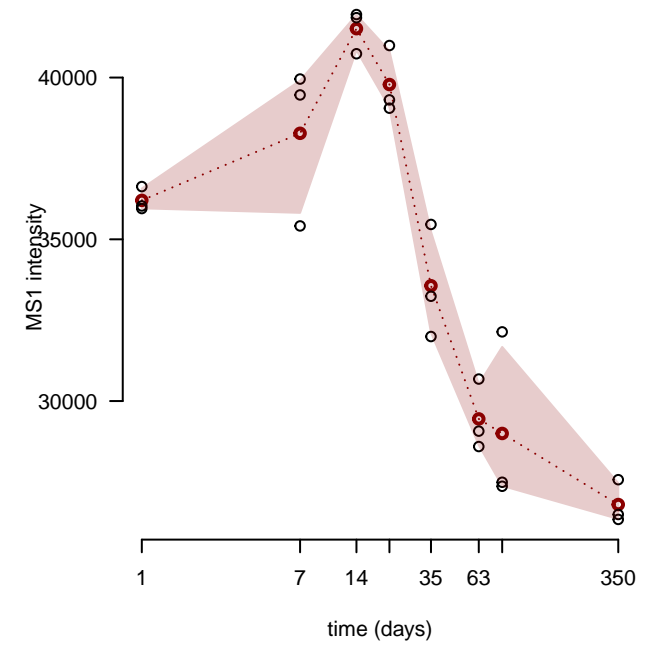

O08583  
GN=Alyref  
Aly/REF export factor

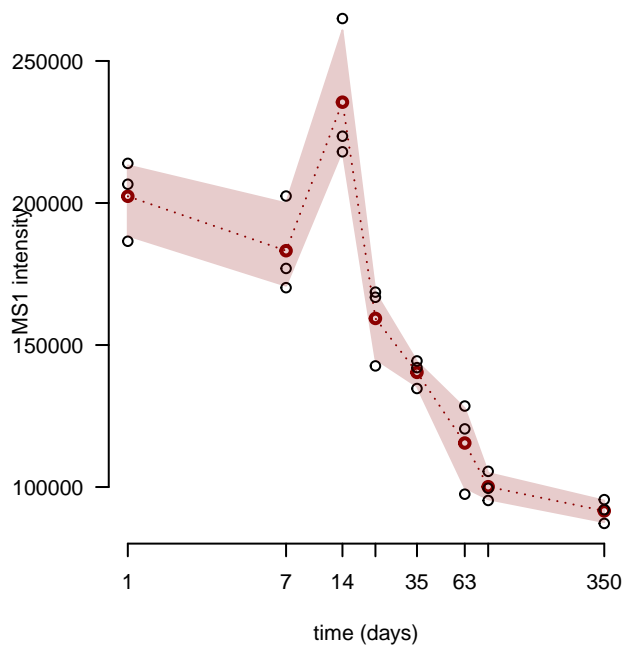

O08585  
GN=Cltc  
clathrin, light polypeptide (Lca)

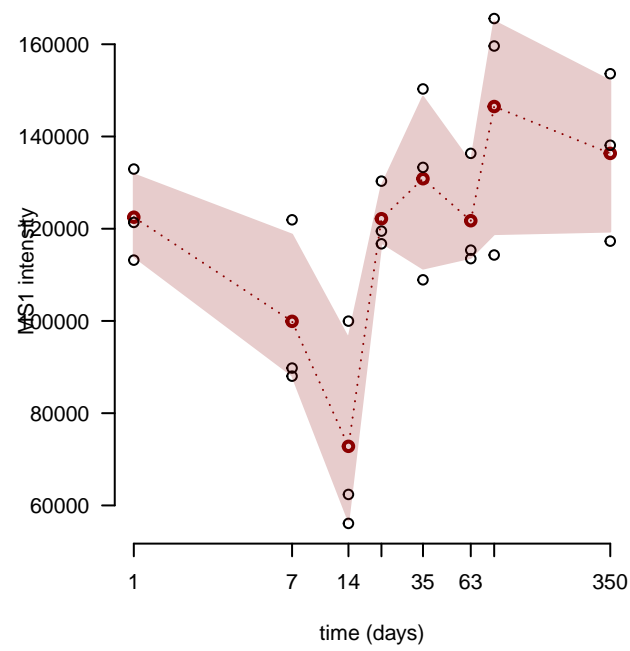

O08586  
GN=Pten  
phosphatase and tensin homolog

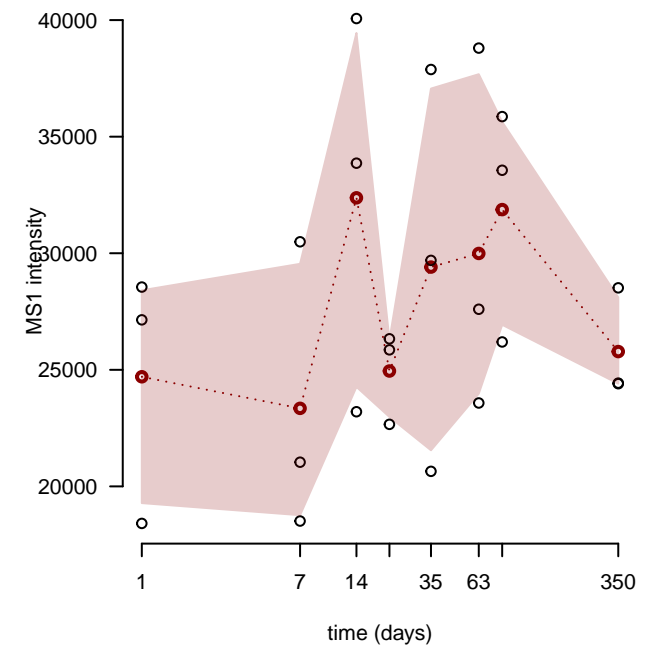

O08599  
GN=Stxbp1  
syntaxin binding protein 1

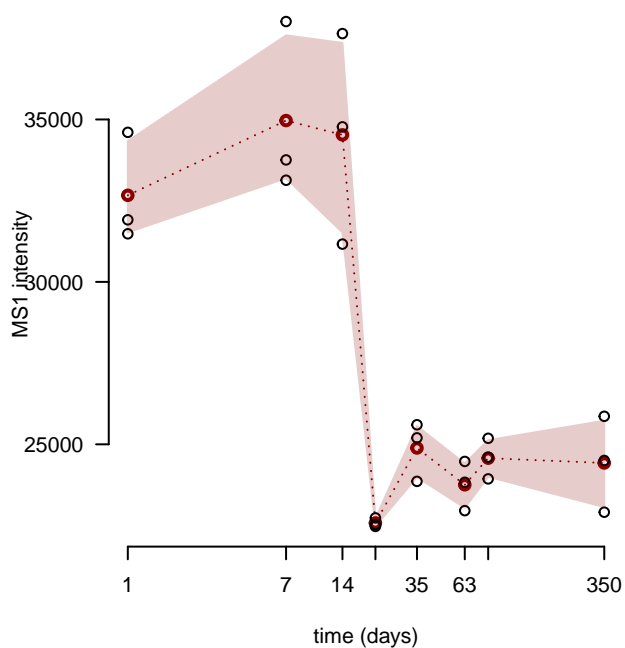

O08600  
GN=Endog  
endonuclease G

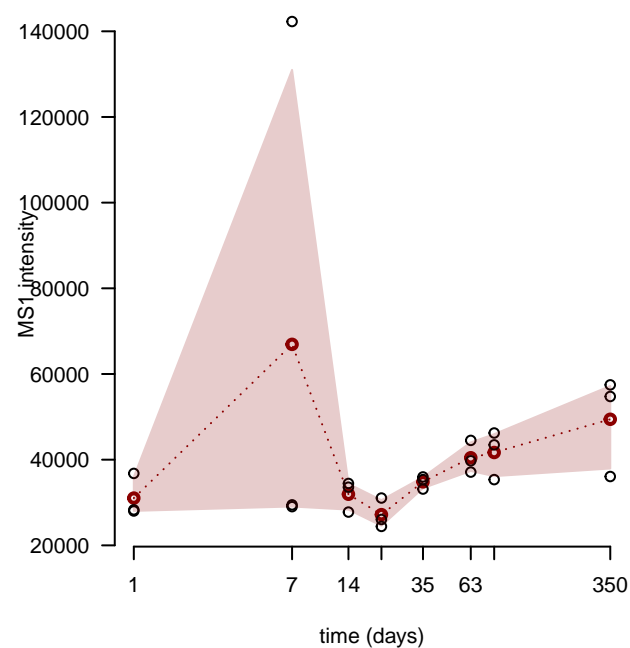

O08601  
GN=Mttp  
microsomal triglyceride transfer protein

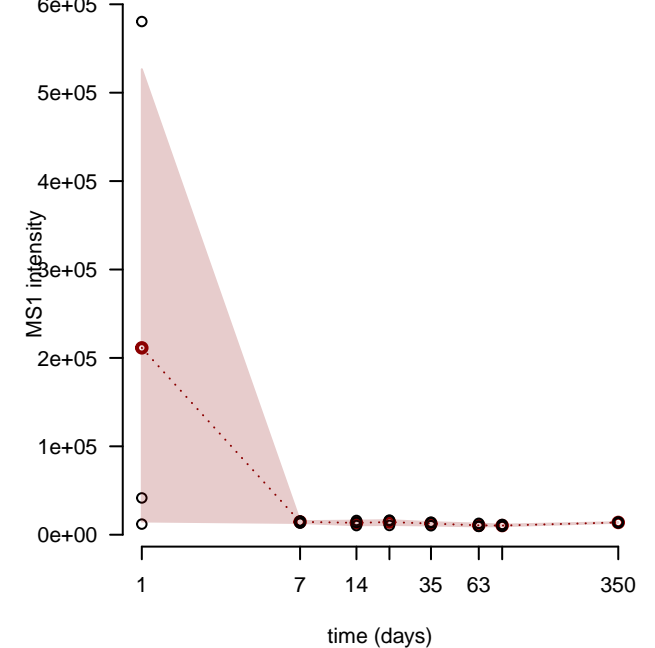

O08609  
GN=Mlx  
MAX-like protein X

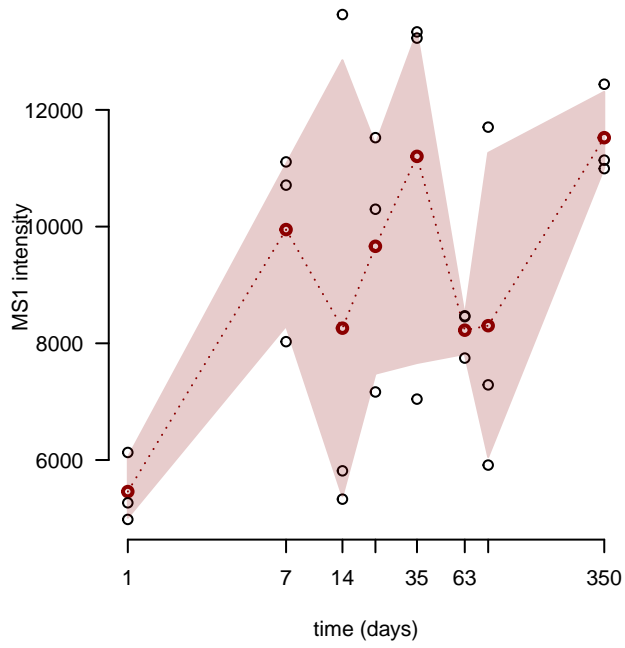

O08638  
GN=Myh11  
myosin, heavy polypeptide 11, smooth mus ...

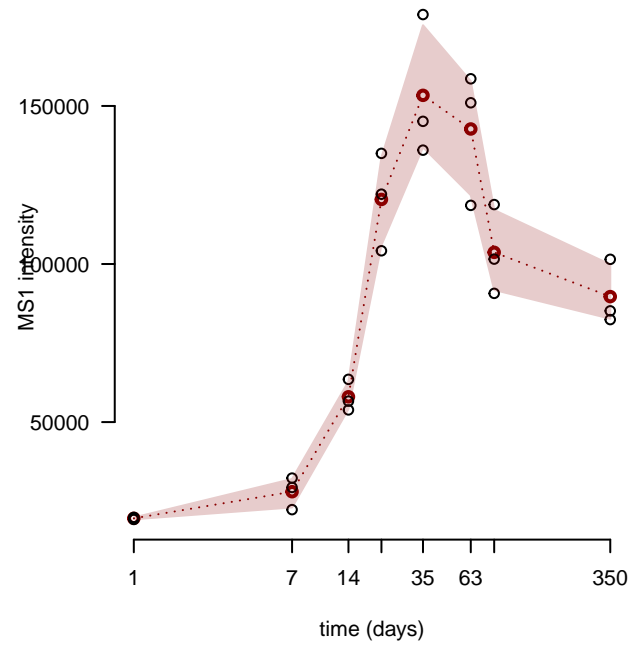

O08638  
GN=Myh11  
myosin, heavy polypeptide 11, smooth mus ...

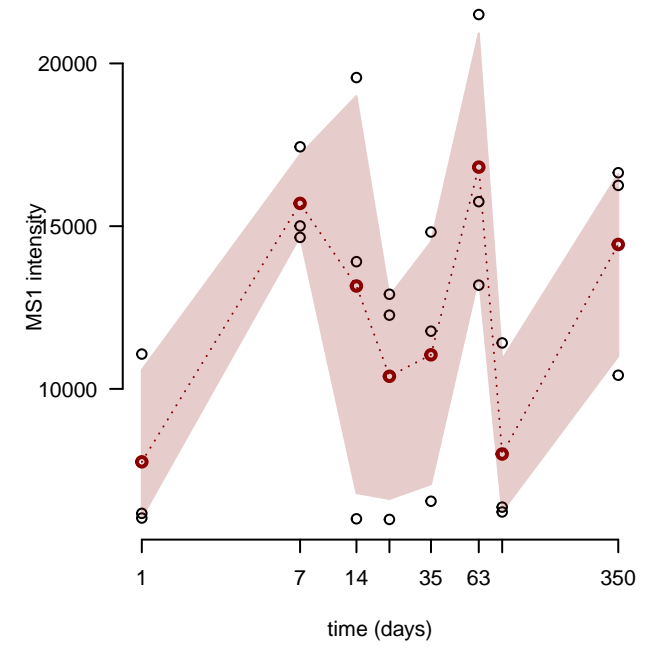

O08644  
GN=Ephb6  
Eph receptor B6

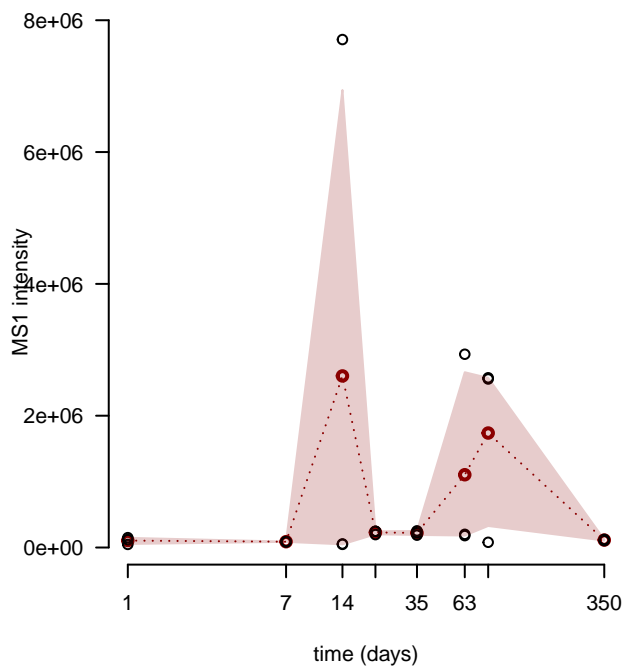

O08648  
GN=Map3k4  
mitogen-activated protein kinase kinase ...

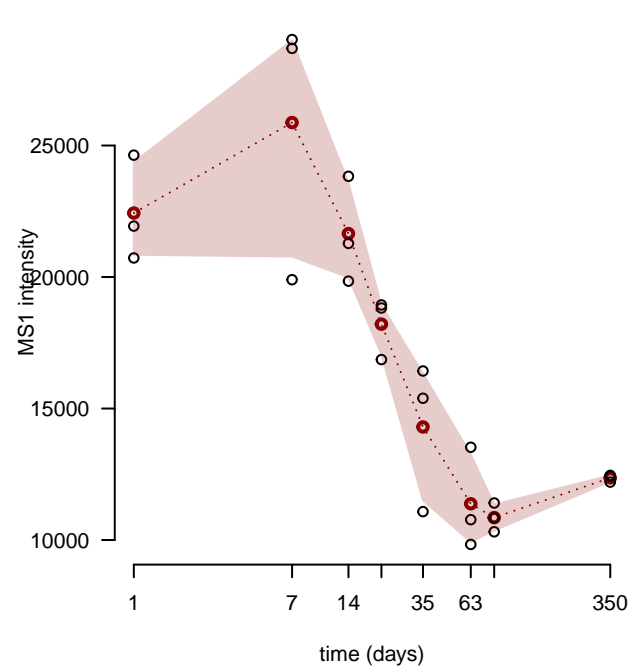

O08663  
GN=Metap2  
methionine aminopeptidase 2

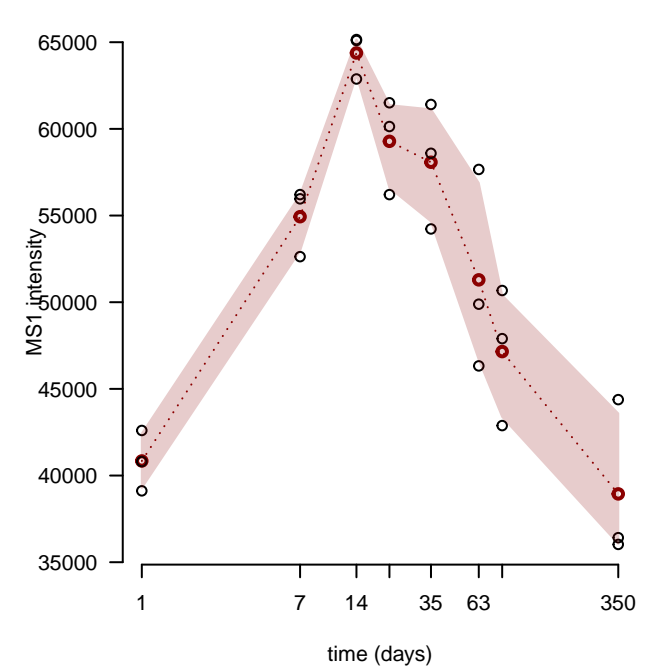

O08664  
GN=Bcl7c  
B cell CLL/lymphoma 7C

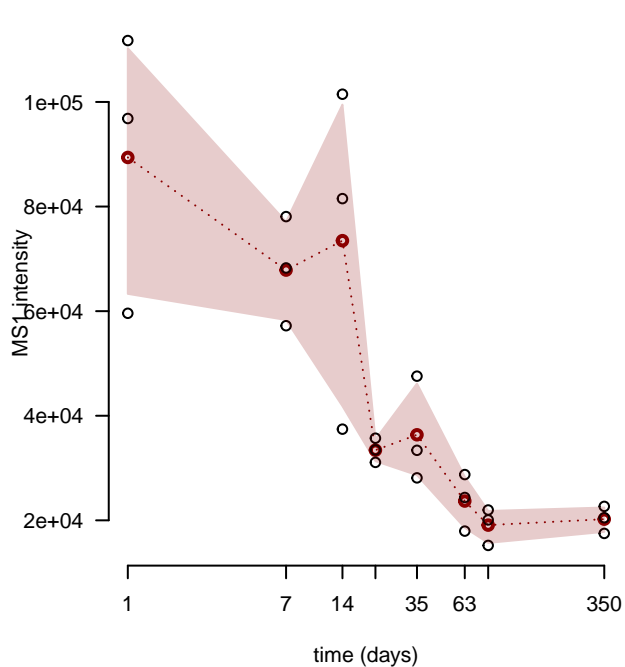

O08677  
GN=Kng1  
kininogen 1

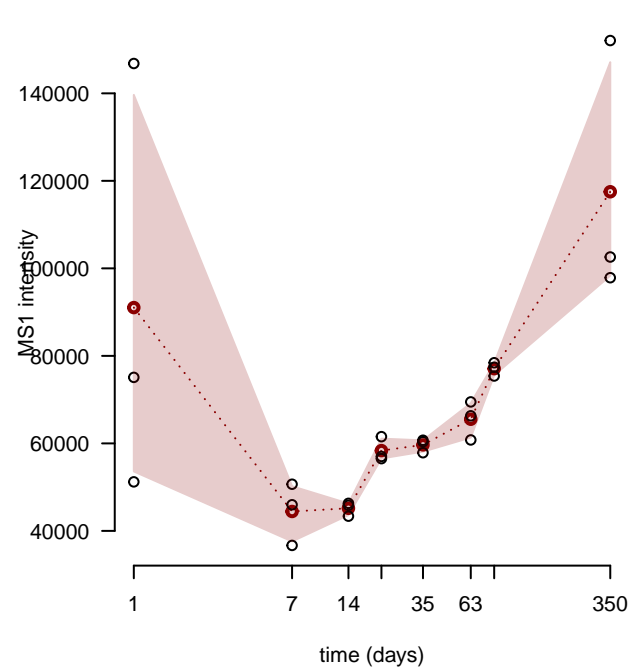

O08688  
GN=Capn5  
calpain 5

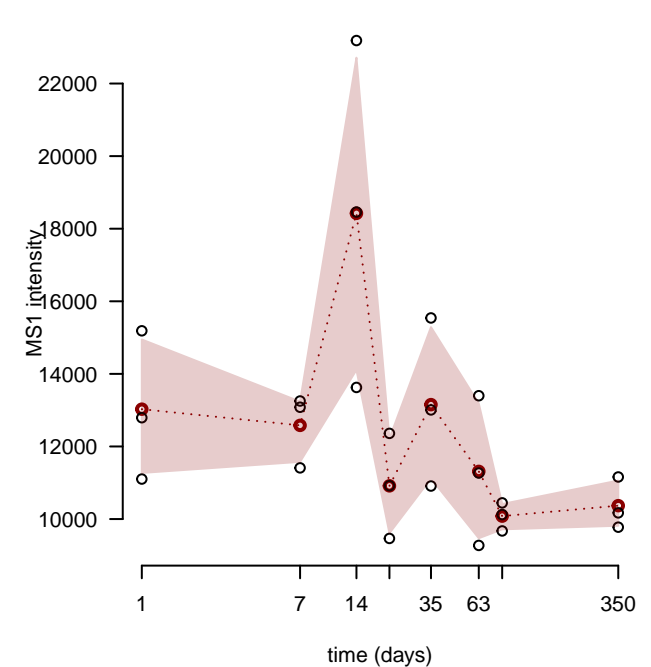

O08691  
GN=Arg2  
arginase type II

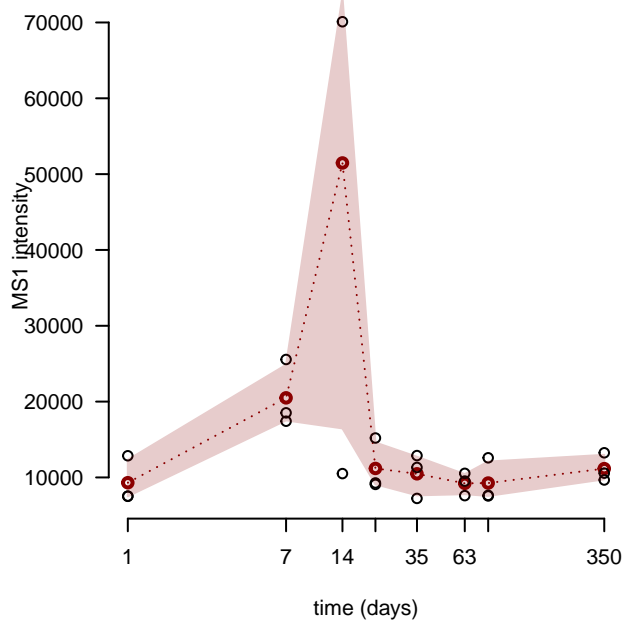

O08692  
GN=Ngp  
neutrophilic granule protein

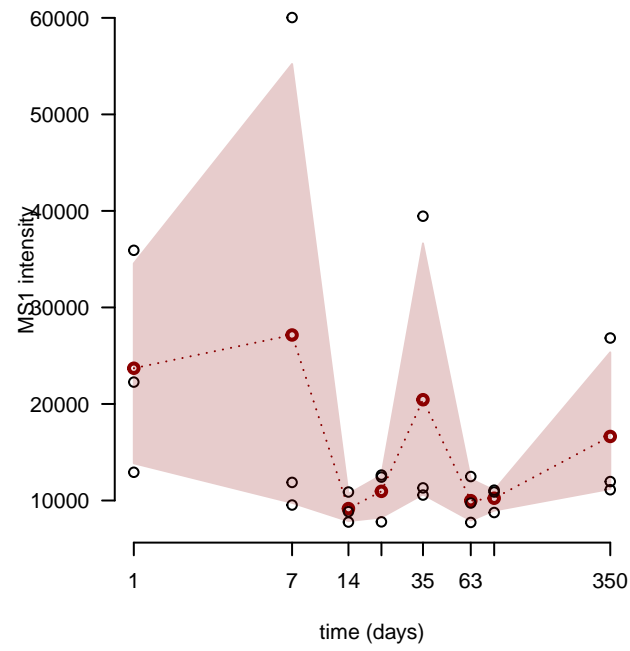

O08709  
GN=Prdx6  
peroxiredoxin 6

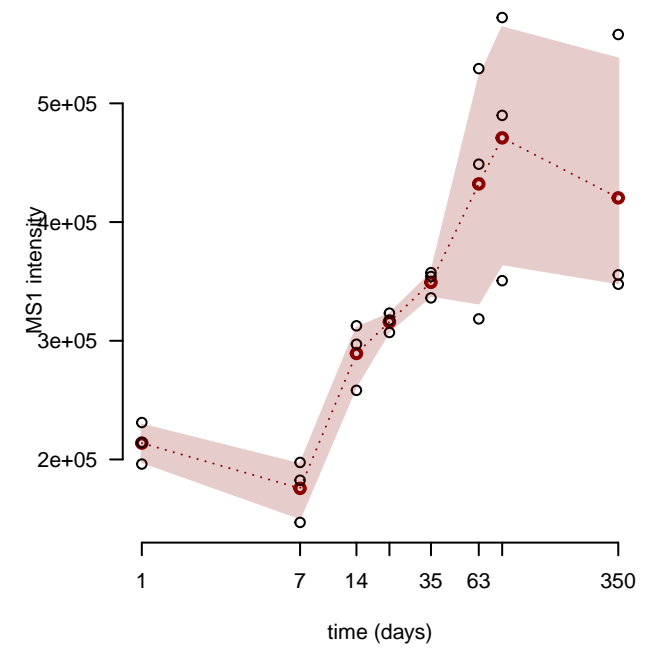

O08715  
GN=Akap1  
A kinase (PRKA) anchor protein 1

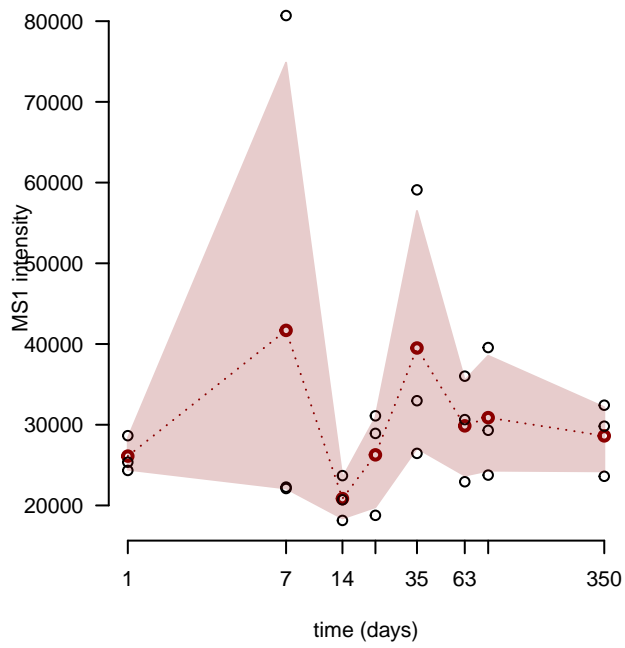

O08734  
GN=Bak1  
BCL2-antagonist/killer 1

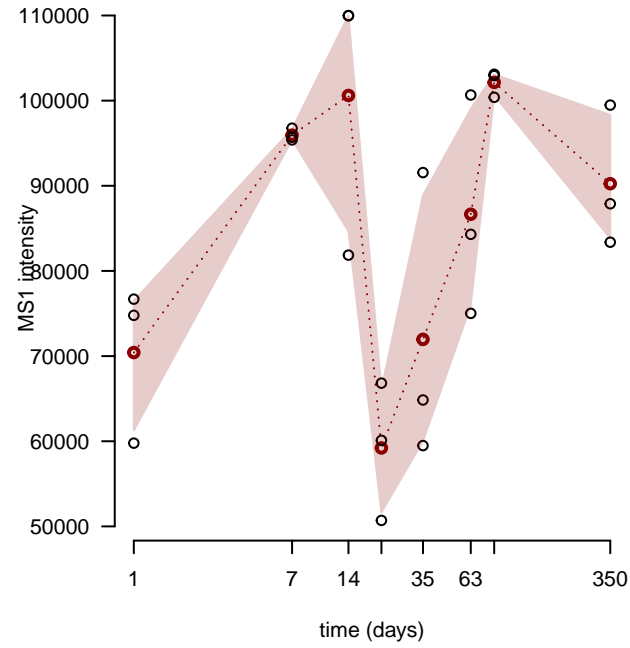

O08736  
GN=Casp12  
caspase 12

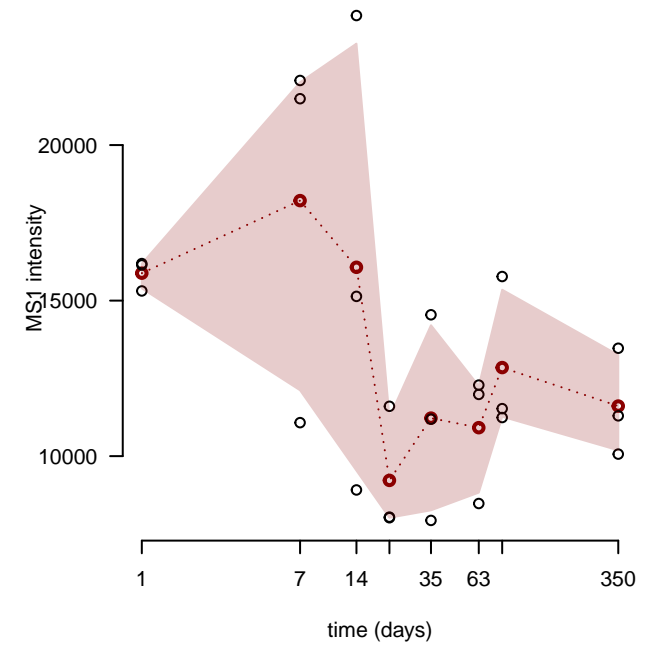

O08738  
GN=Casp6  
caspase 6

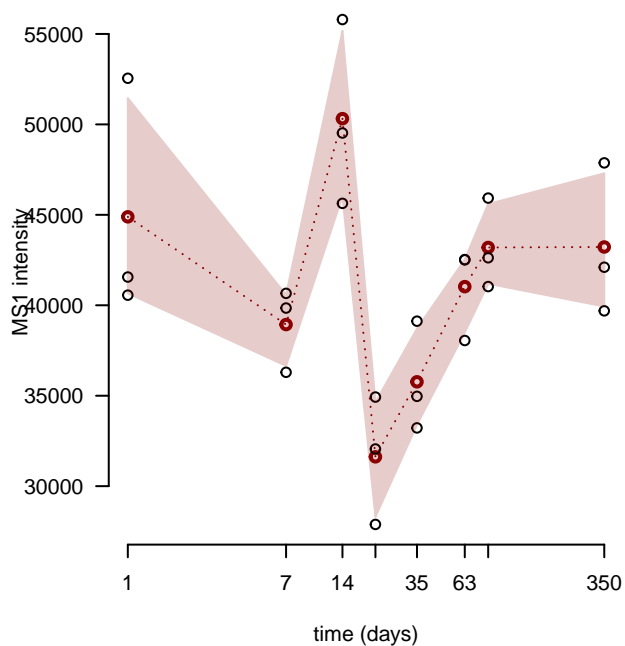

O08739  
GN=Ampd3  
adenosine monophosphate deaminase 3

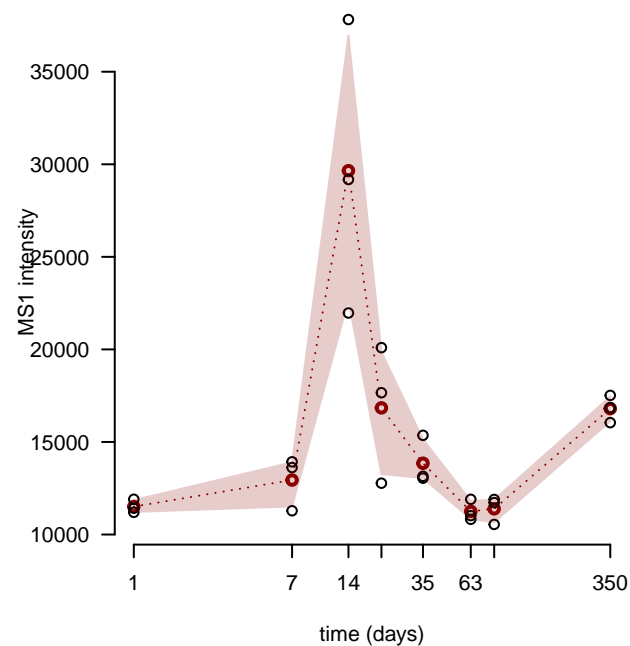

O08740  
GN=Polr2j  
polymerase (RNA) II (DNA directed) polyp ...

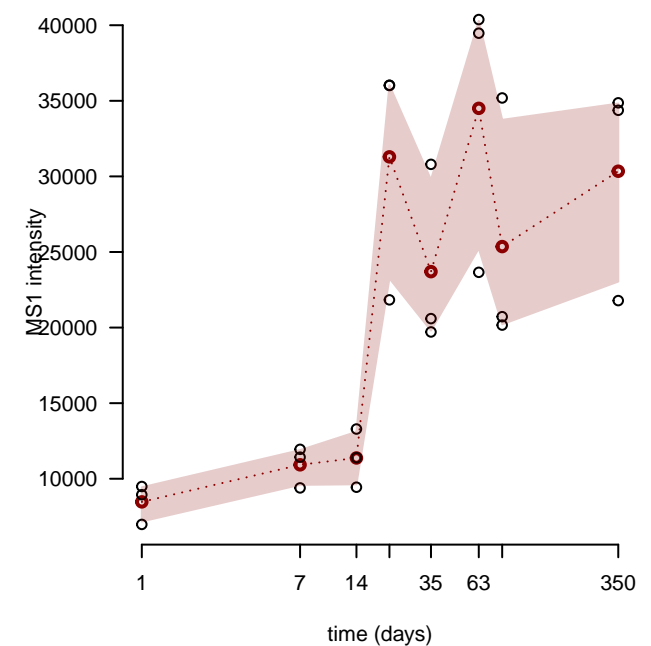

O08746  
GN=Matn2  
matrilin 2

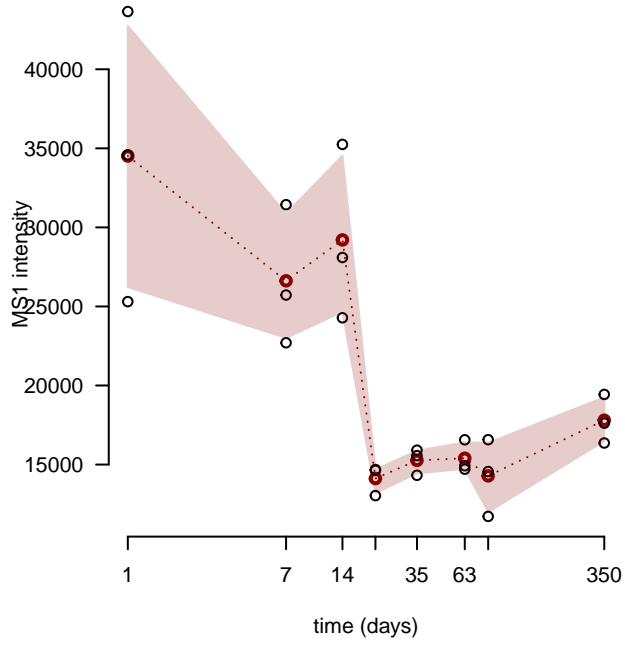

O08749  
GN=Dld  
dihydroipoamide dehydrogenase

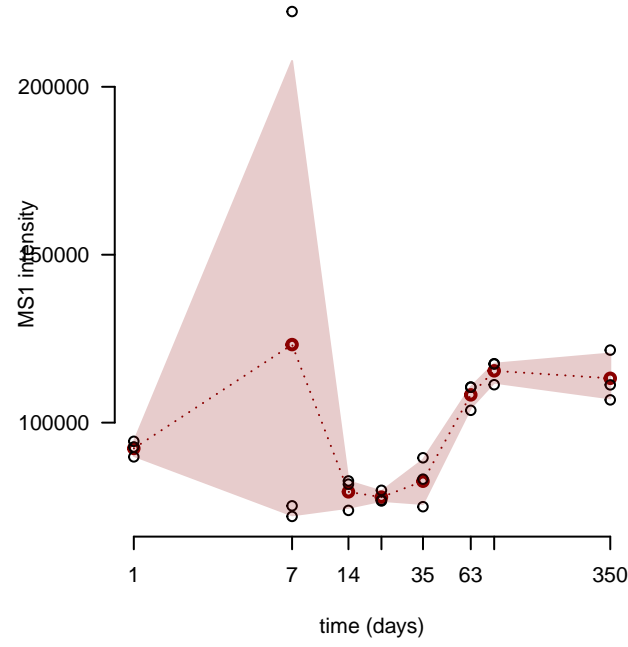

O08756  
GN=Hsd17b10  
hydroxysteroid (17-beta) dehydrogenase 1 ...

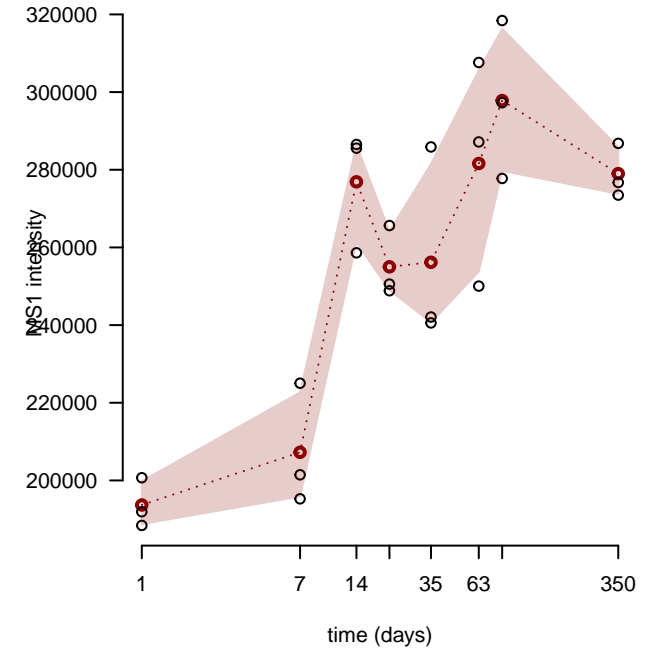

O08759  
GN=Ube3a  
ubiquitin protein ligase E3A

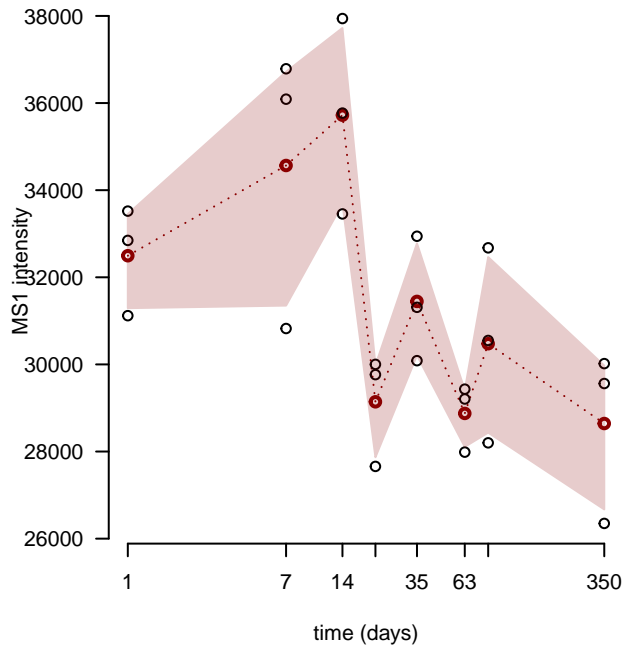

O08784  
GN=Tcof1  
treacle ribosome biogenesis factor 1

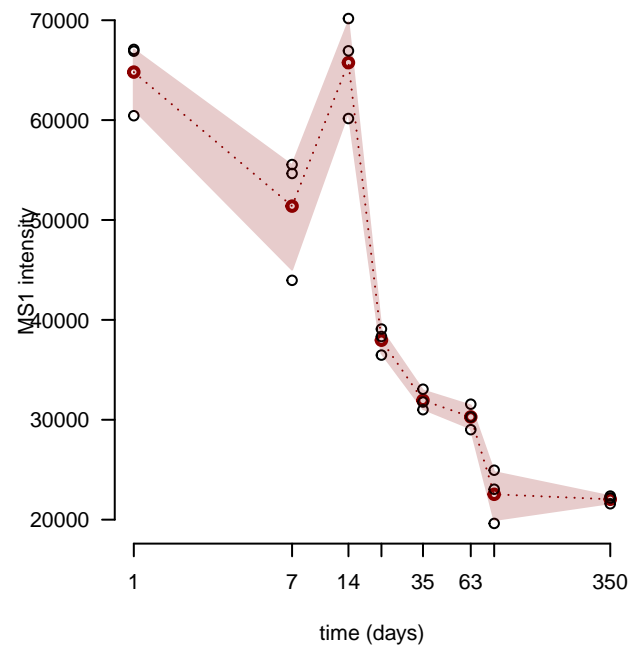

O08788  
GN=Dctn1  
dynactin 1

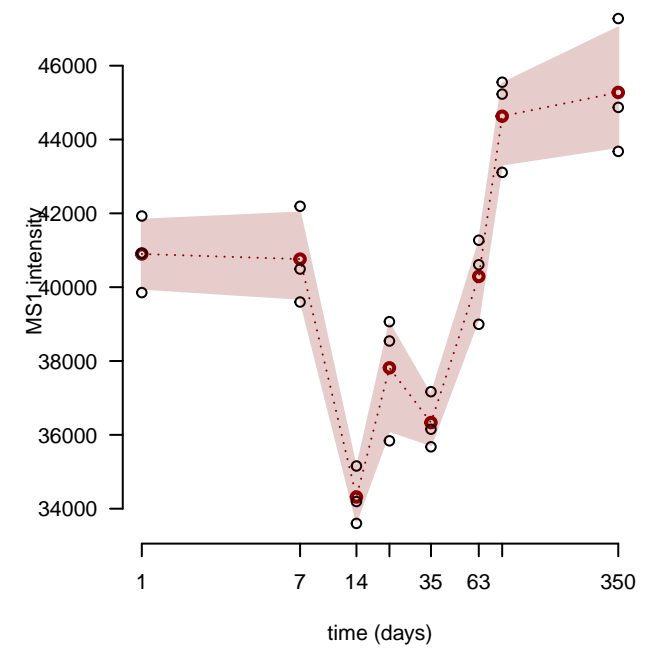

O08789  
GN=Mnt  
max binding protein

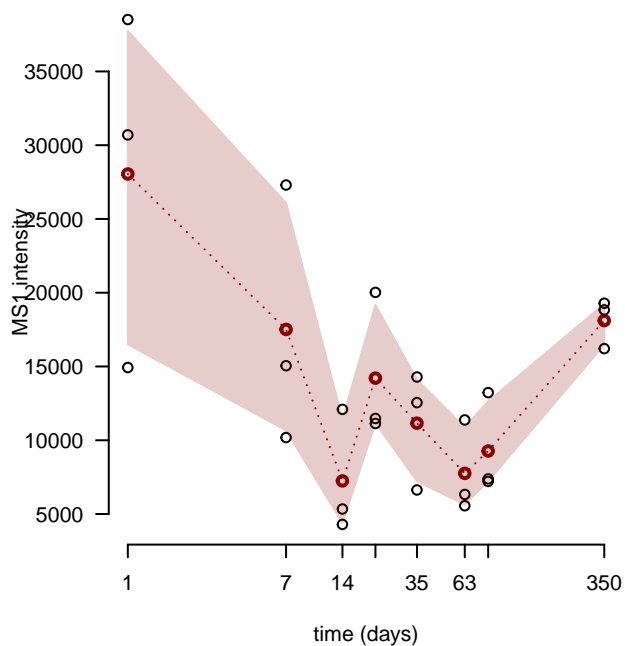

O08792  
GN=Ebf2  
early B cell factor 2

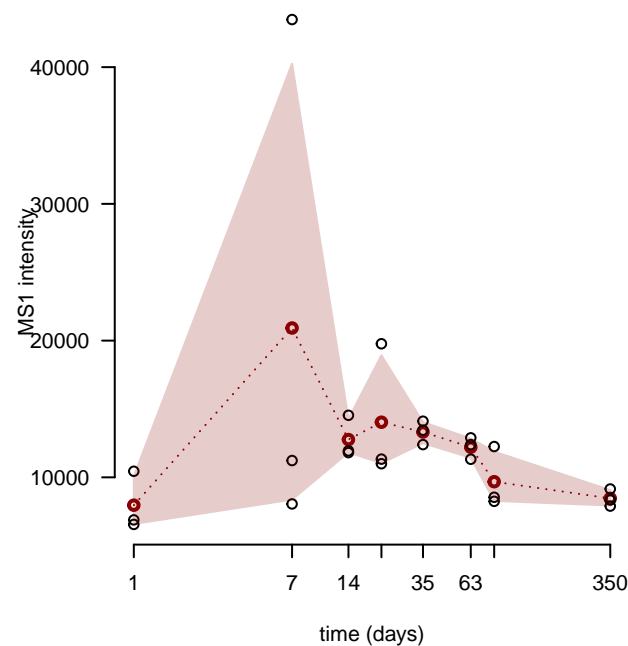

O08795  
GN=Prkcsh  
protein kinase C substrate 80K-H

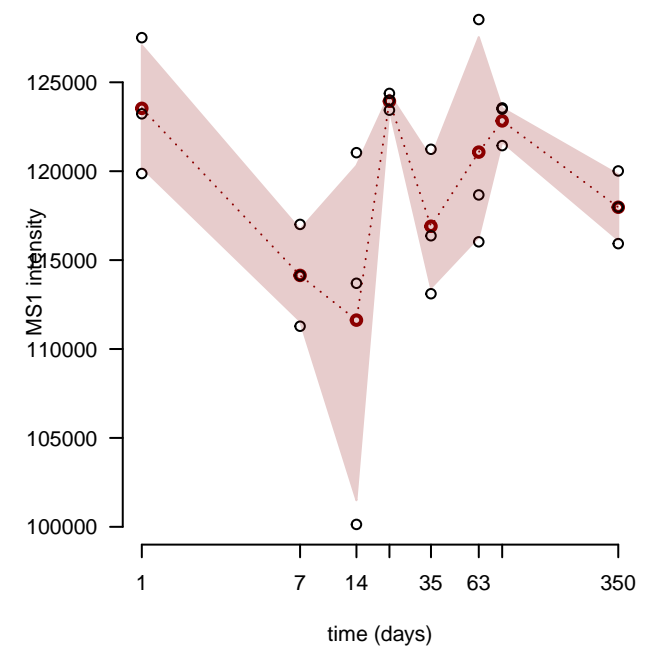

**O08796**  
**GN=Eef2k**  
eukaryotic elongation factor-2 kinase

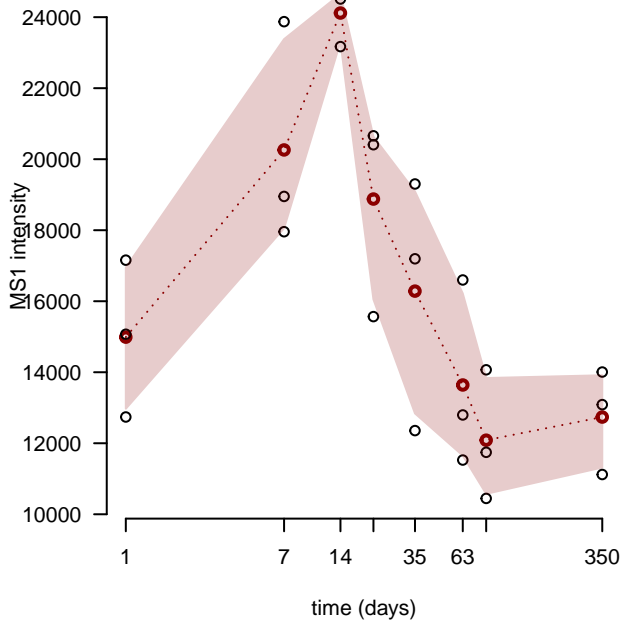

**O08807**  
**GN=Prdx4**  
peroxiredoxin 4

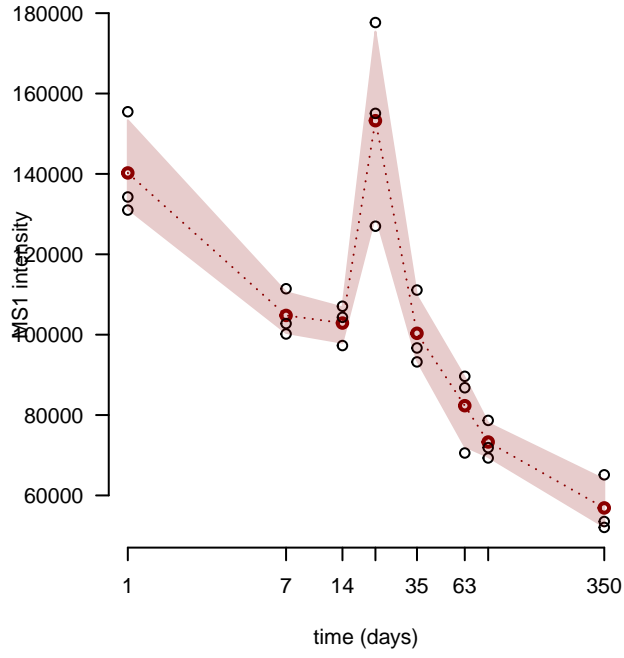

**O08808**  
**GN=Diaph1**  
diaphanous related formin 1

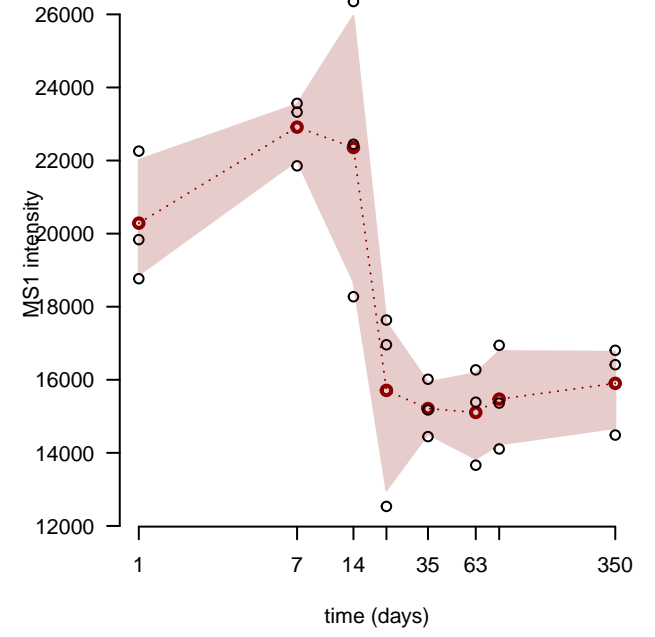

**O08810**  
**GN=Eftud2**  
elongation factor Tu GTP binding domain ...

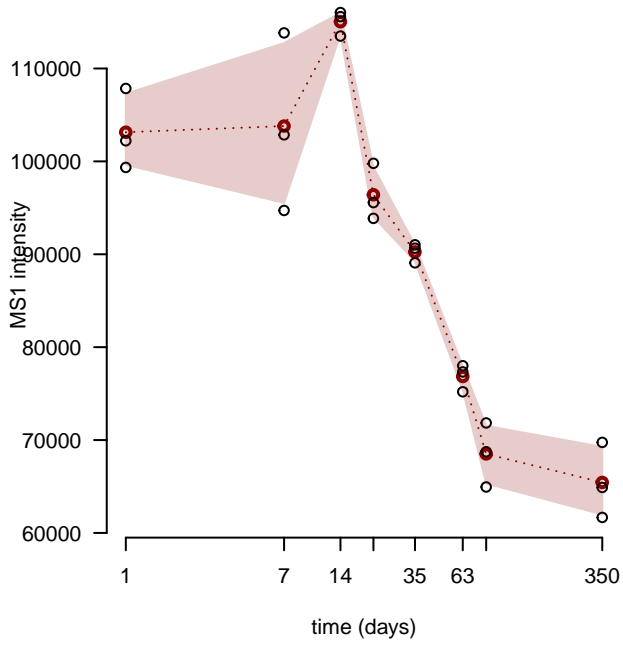

**O08811**  
**GN=Ercc2**  
excision repair cross-complementing rode ...

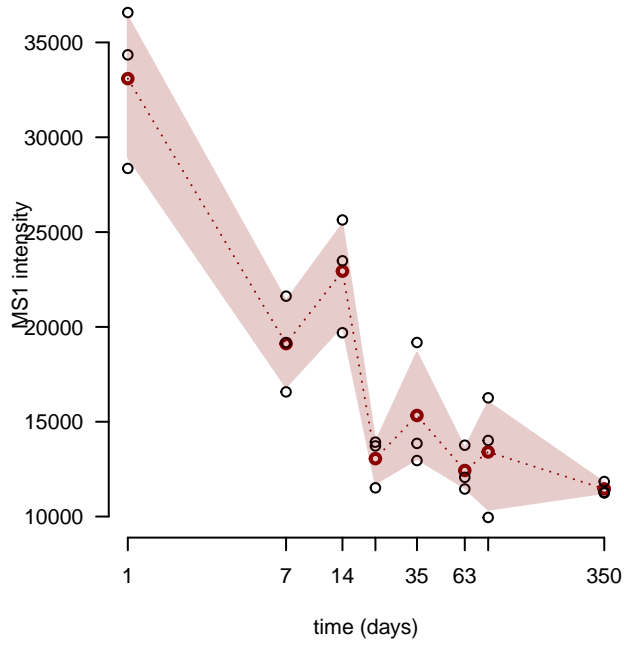

**O08832**  
**GN=Galnt4**  
polypeptide N-acetylgalactosaminyltransf ...

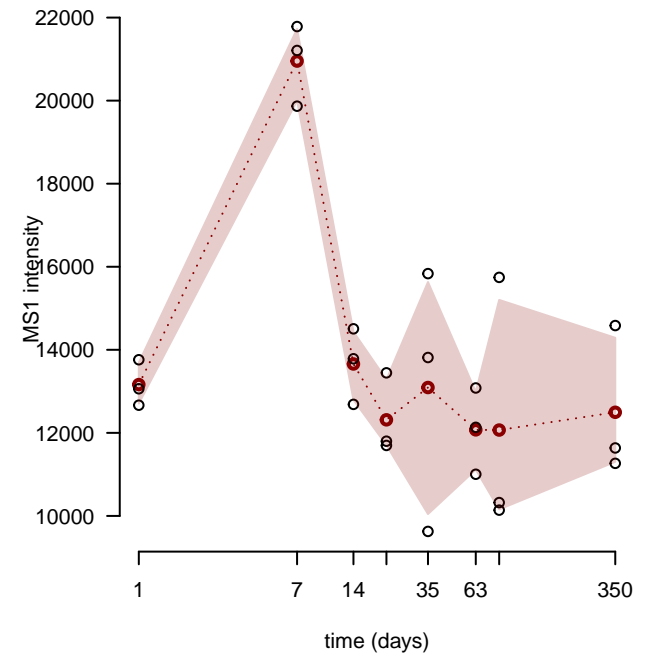

**O08842**  
**GN=Gfra2**  
glial cell line derived neurotrophic fac ...

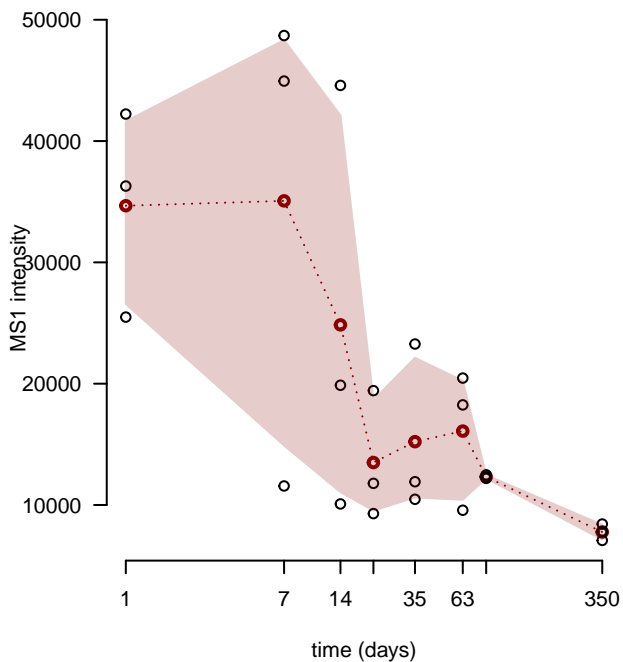

**O08848**  
**GN=RO60**

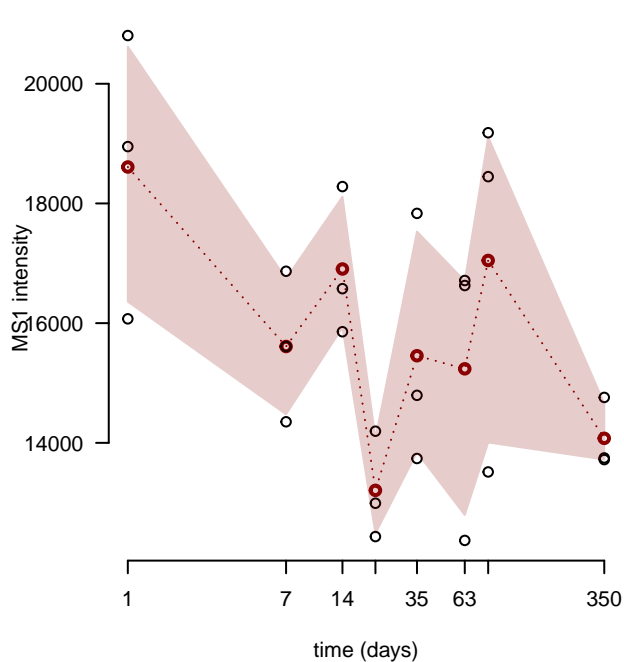

**O08849**  
**GN=Rgs2**  
regulator of G-protein signaling 2

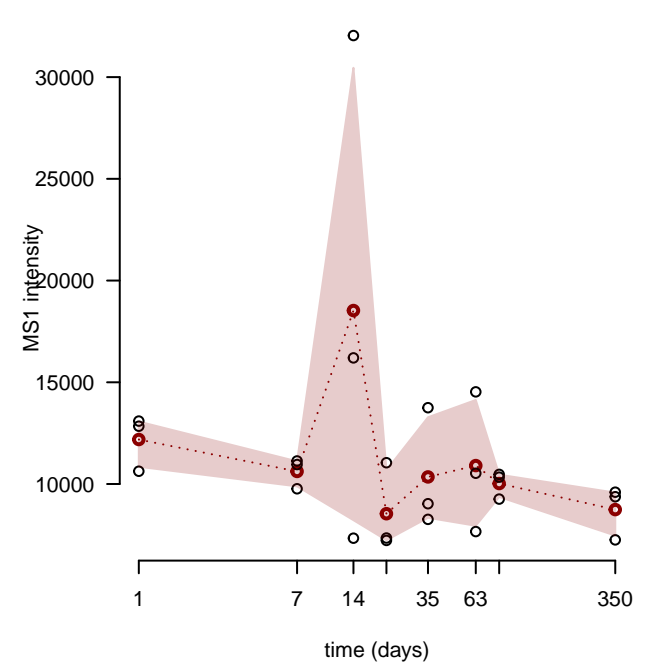



**O08856**  
**GN=EII**  
elongation factor RNA polymerase II

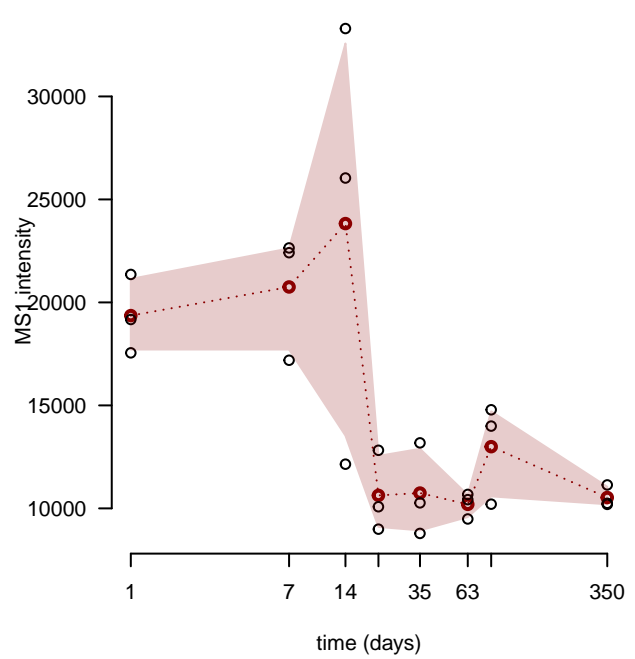

**O08901**  
**GN=Bub1**  
BUB1, mitotic checkpoint serine/threonin ...

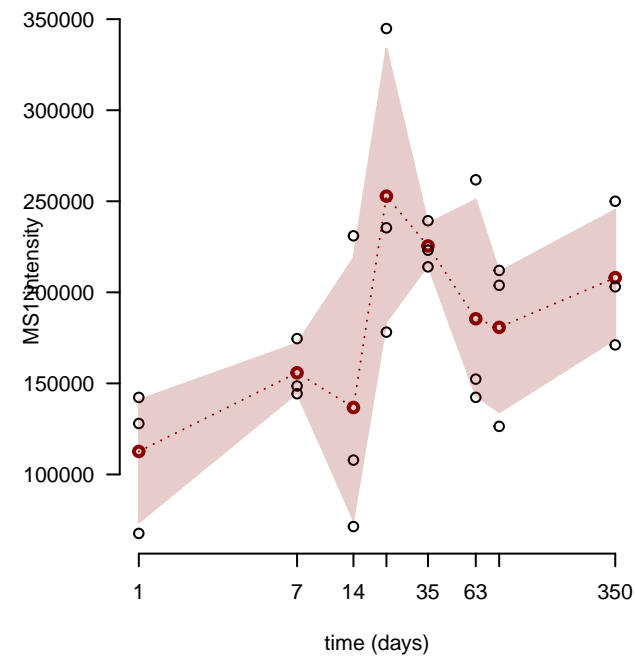

**O08908**  
**GN=Pik3r2**  
phosphoinositide-3-kinase regulatory sub ...

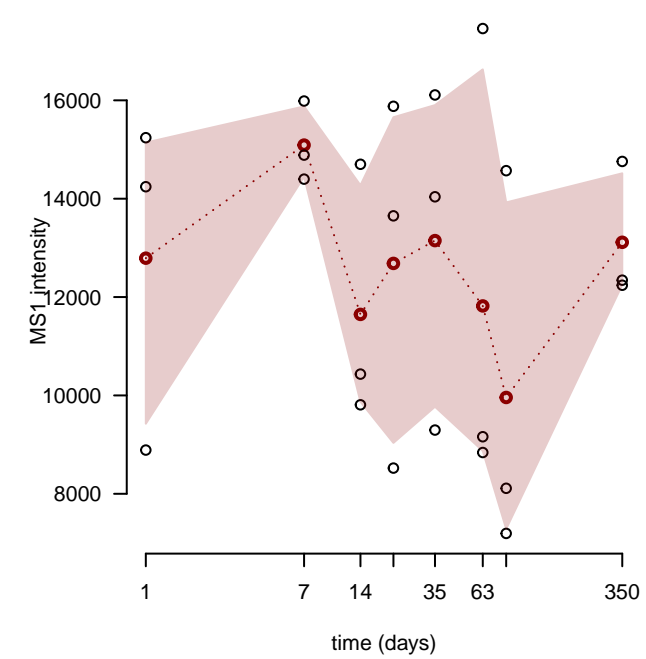

**O08912**  
**GN=Galnt1**  
polypeptide N-acetylgalactosaminyltransf ...

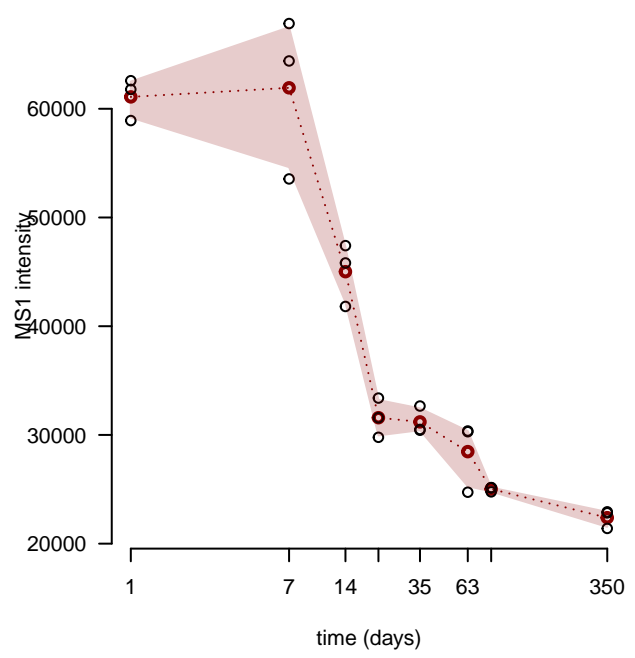

**O08914**  
**GN=Faah**  
fatty acid amide hydrolase

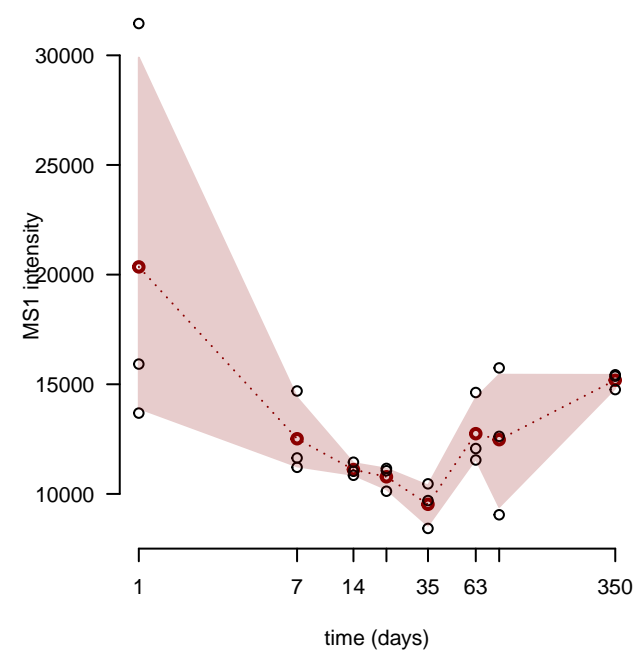

**O08915**  
**GN=Aip**  
aryl-hydrocarbon receptor-interacting pr ...

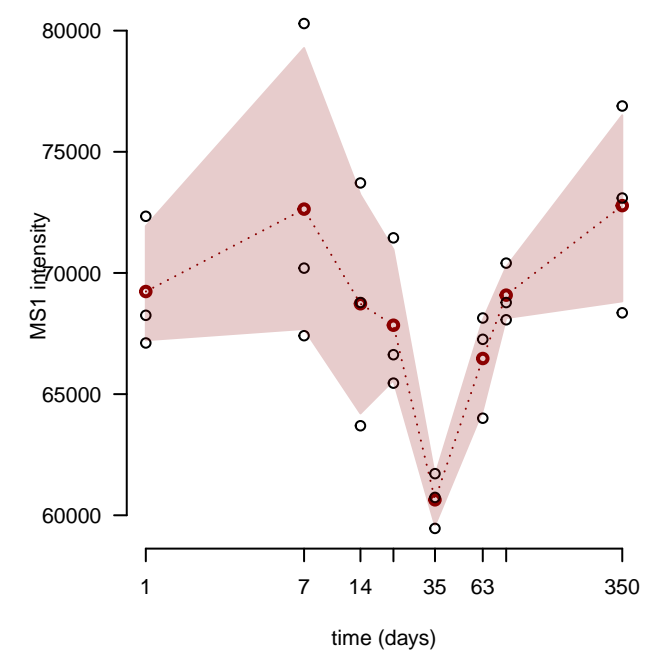

**O08917**  
**GN=Flot1**  
flotillin 1

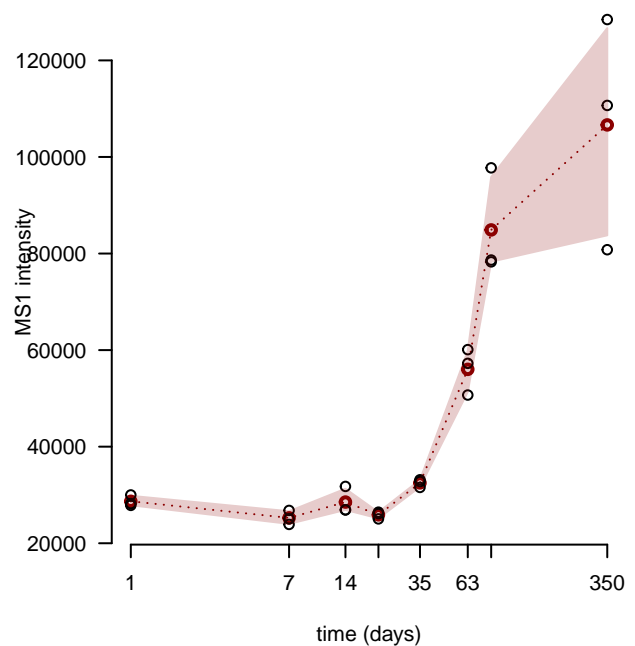

**O08919**  
**GN=Numbl**  
numb-like

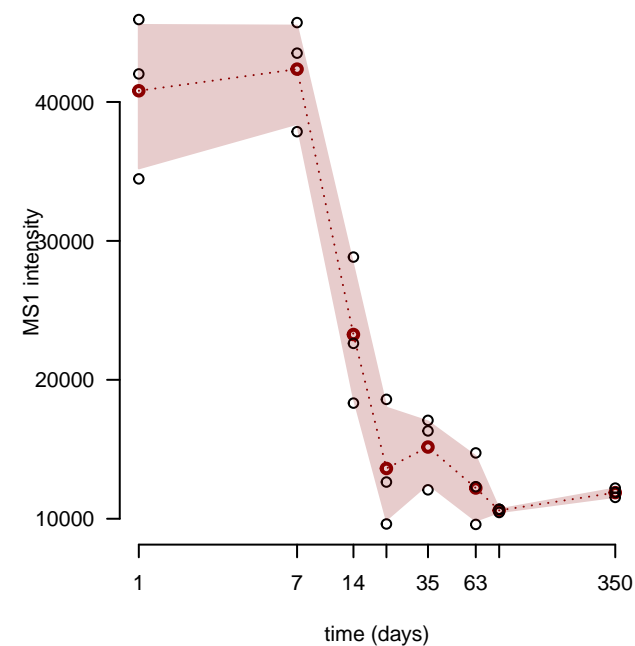

**O08966**  
**GN=Slc22a1**  
solute carrier family 22 (organic cation ...

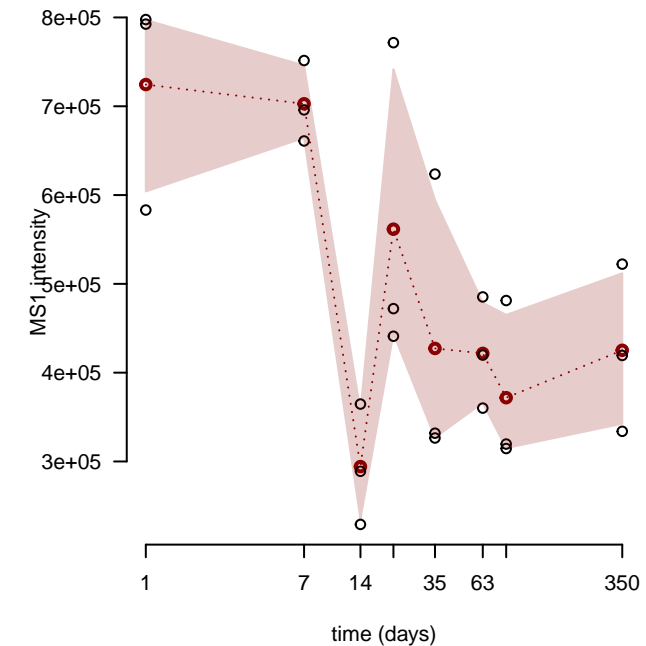

O08967  
GN=Cyth3  
cytohesin 3

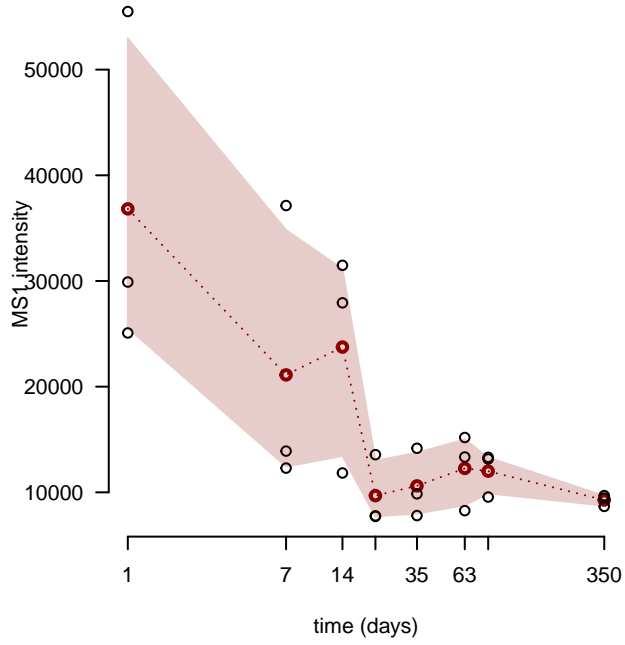

O08970  
GN=Tuft1  
tuftelin 1

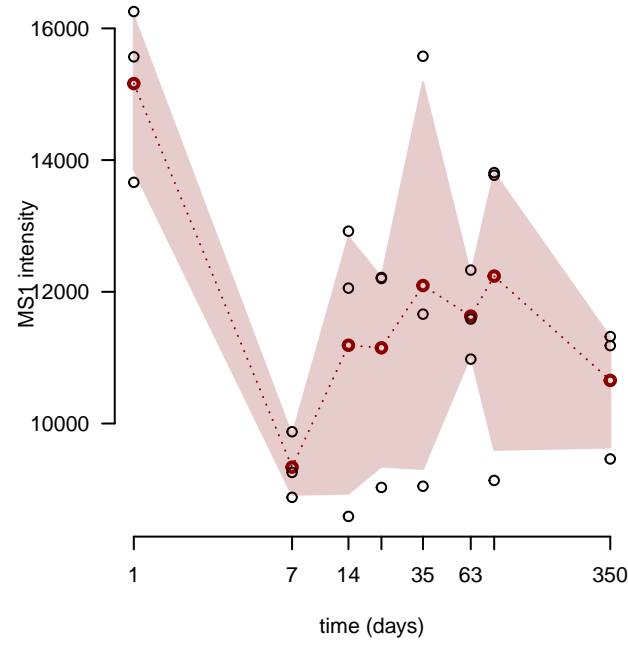

O08989  
GN=Mras  
muscle and microspikes RAS

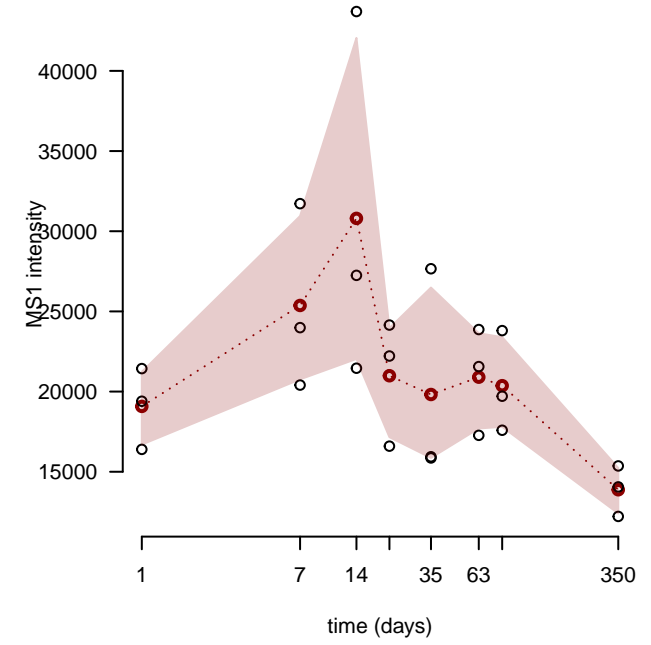

O08992  
GN=Sdcbp  
syndecan binding protein

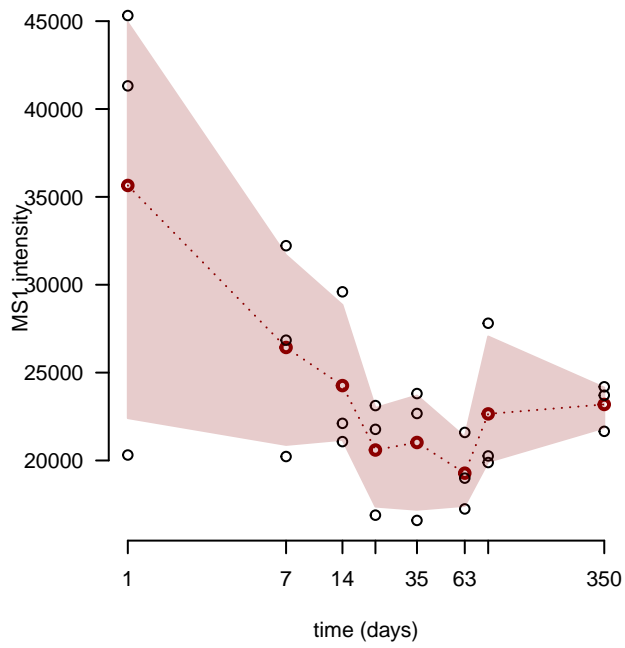

O08997  
GN=Atox1  
antioxidant 1 copper chaperone

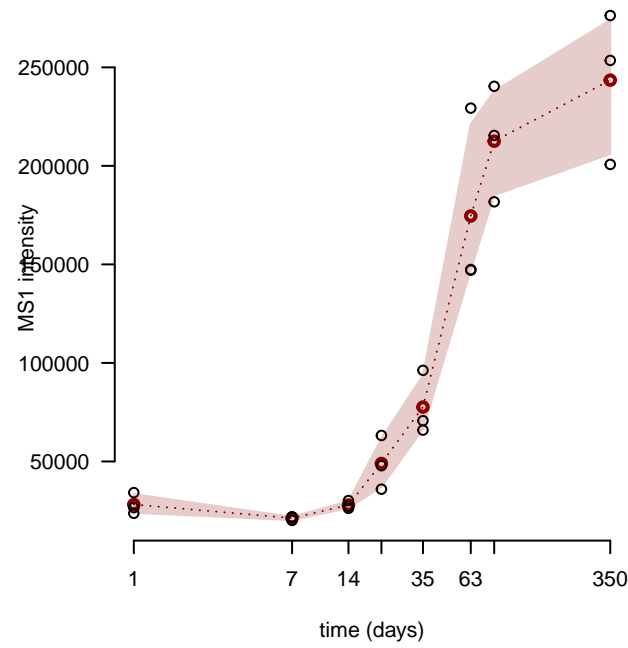

O09000  
GN=Ncoa3  
nuclear receptor coactivator 3

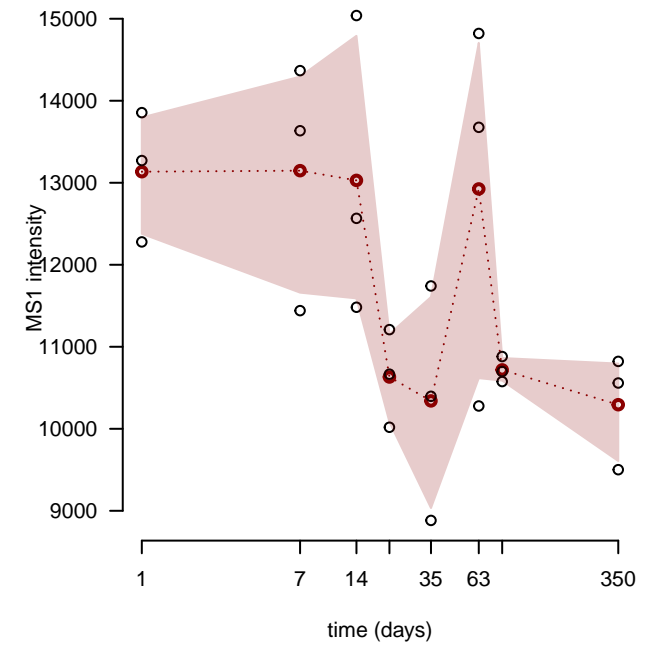

O09005  
GN=Degs1  
delta(4)-desaturase, sphingolipid 1

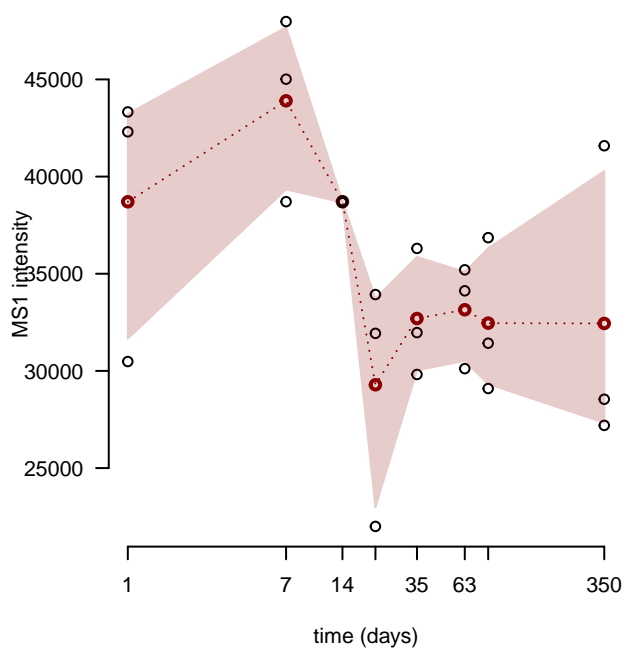

O09012  
GN=Pex5  
peroxisomal biogenesis factor 5

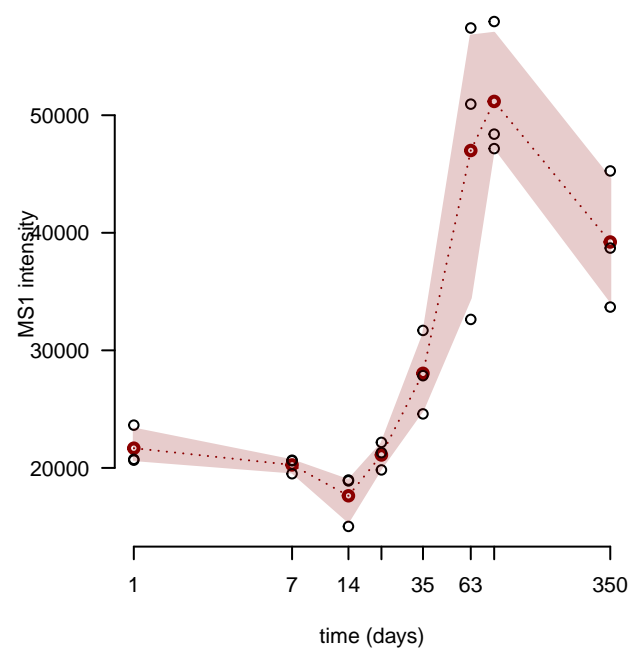

O09044  
GN=Snap23  
synaptosomal-associated protein 23

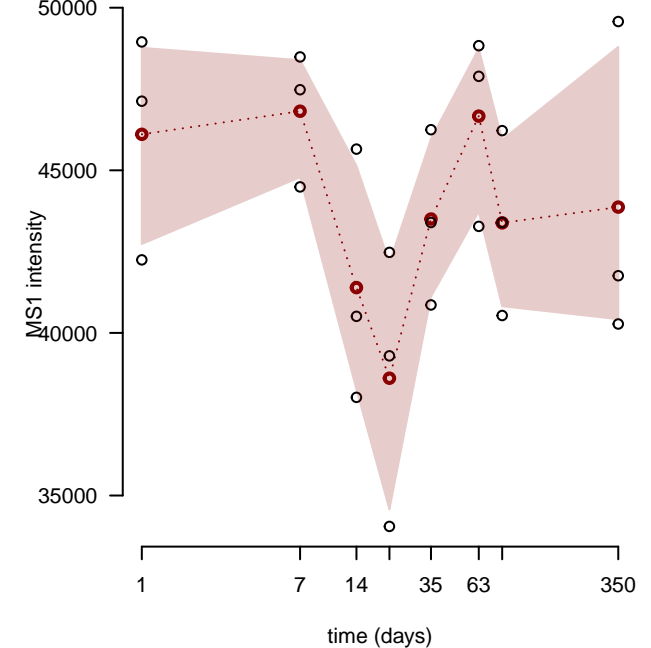

**O09061**  
**GN=Psmb1**  
proteasome (prosome, macropain) subunit, ...

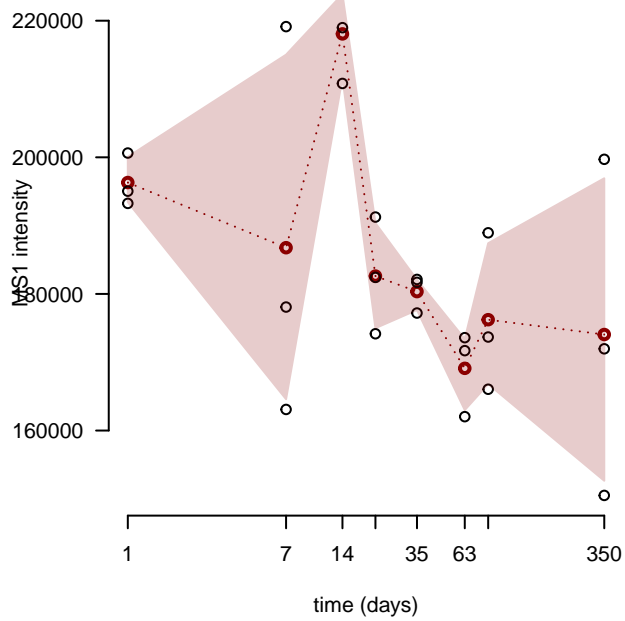

**O09106**  
**GN=Hdac1**  
histone deacetylase 1

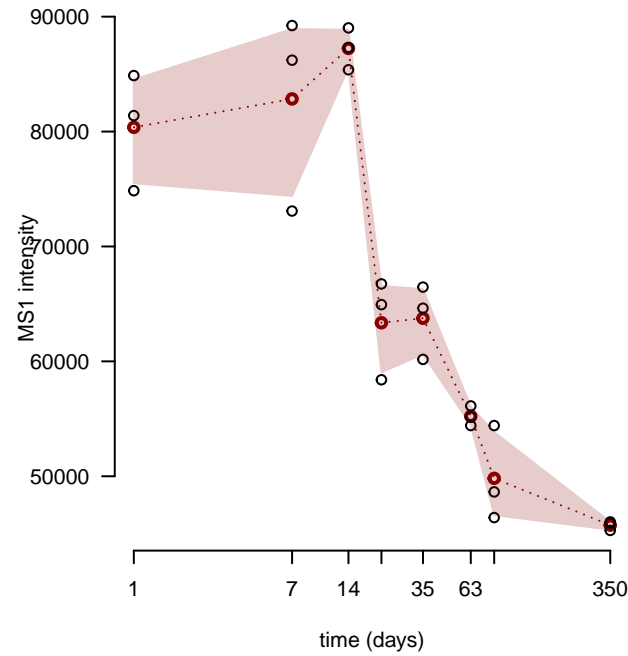

**O09110**  
**GN=Map2k3**  
mitogen-activated protein kinase kinase ...

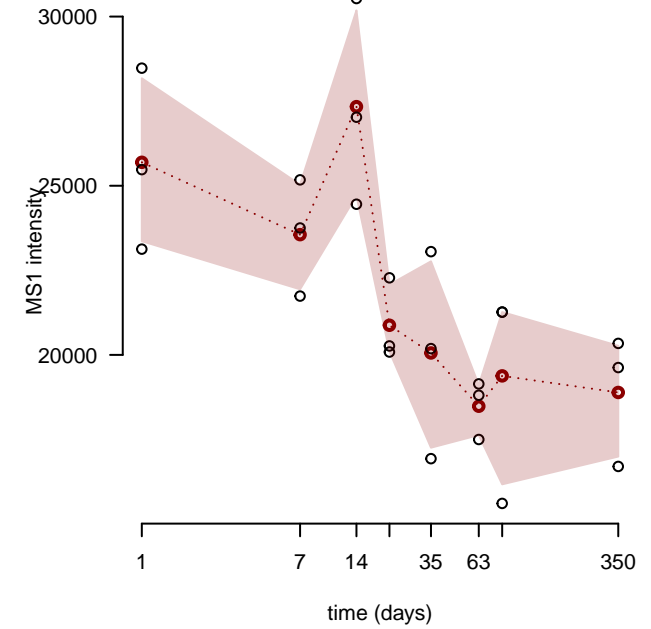

**O09111**  
**GN=Ndufb1**  
NADH:ubiquinone oxidoreductase subunit B ...

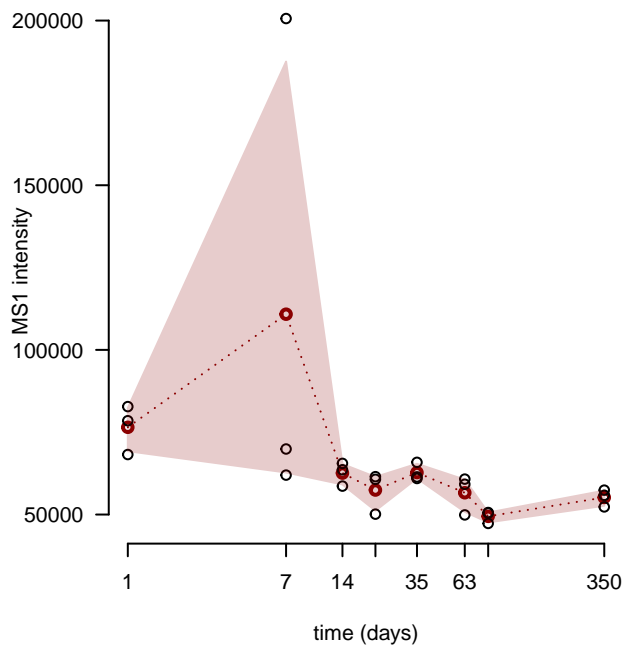

**O09117**  
**GN=Sypl1**

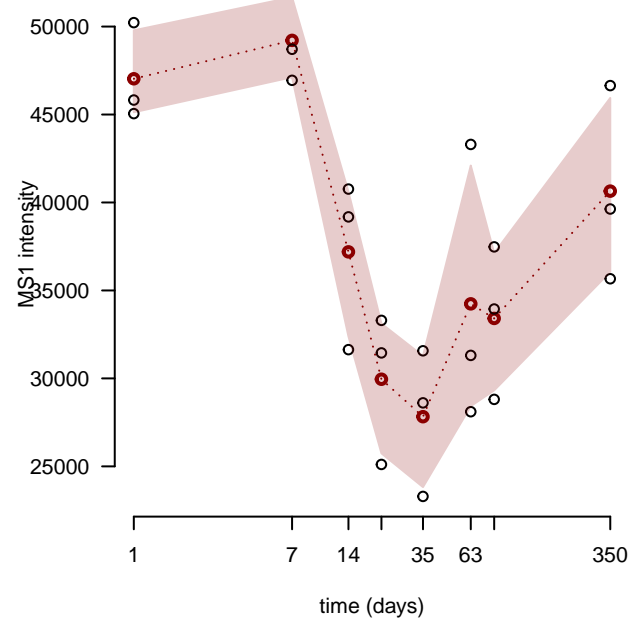

**O09130**  
**GN=Nfatc2ip**  
nuclear factor of activated T cells, cyt ...

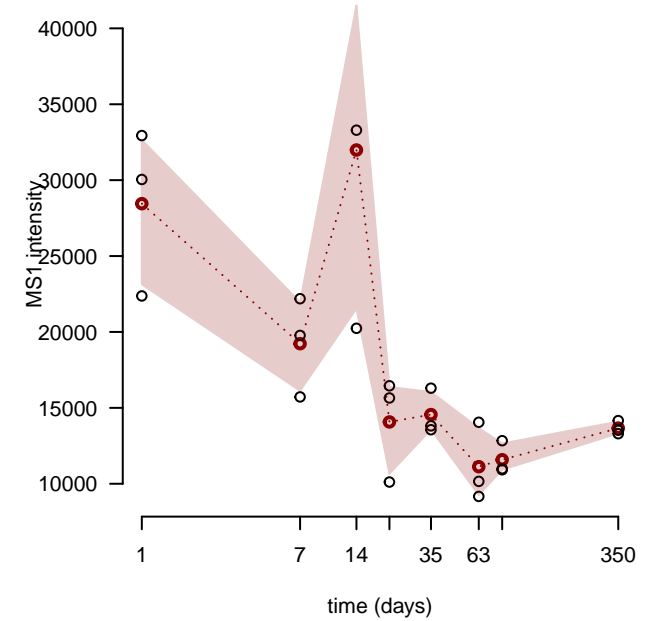

**O09131**  
**GN=Gsto1**  
glutathione S-transferase omega 1

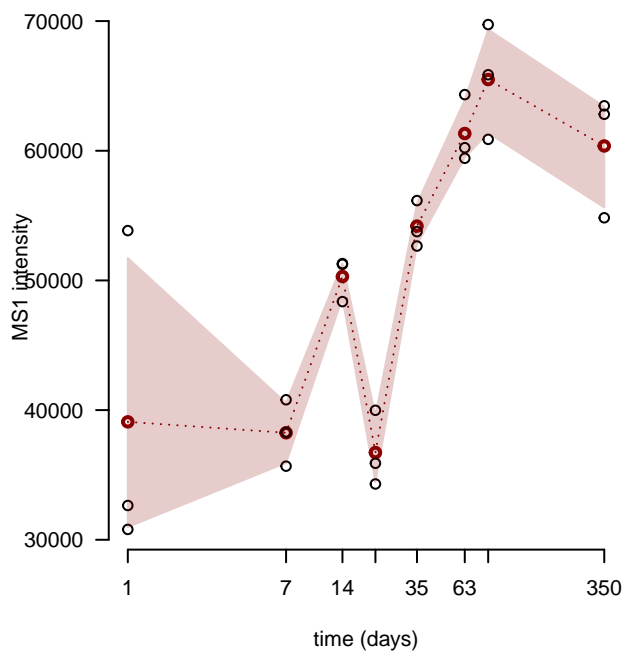

**O09159**  
**GN=Man2b1**  
mannosidase 2, alpha B1

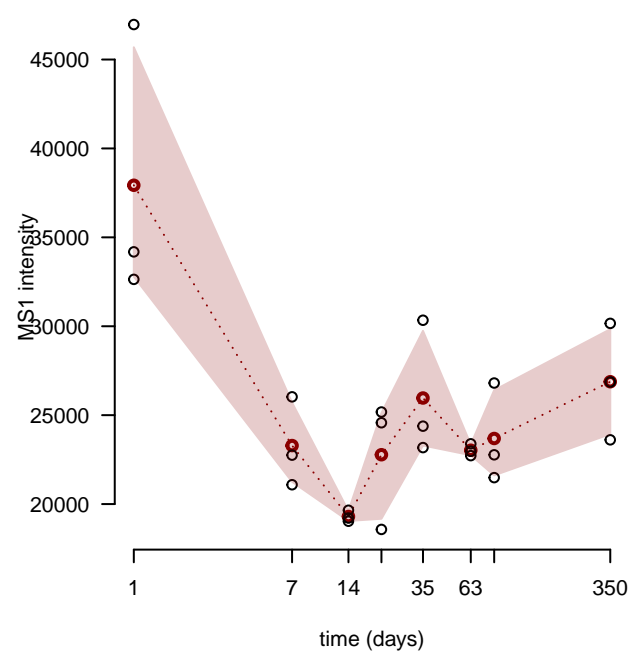

**O09161**  
**GN=Casq2**  
calsequestrin 2

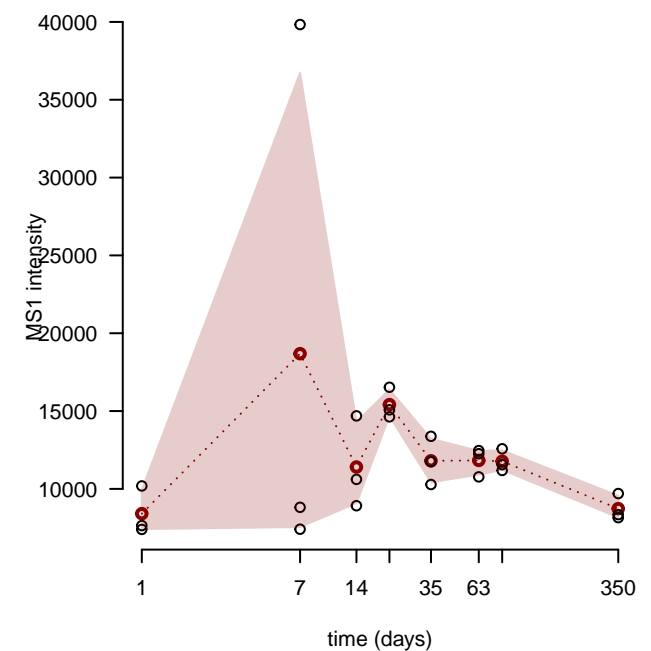

**O09164**  
**GN=Sod3**  
superoxide dismutase 3, extracellular

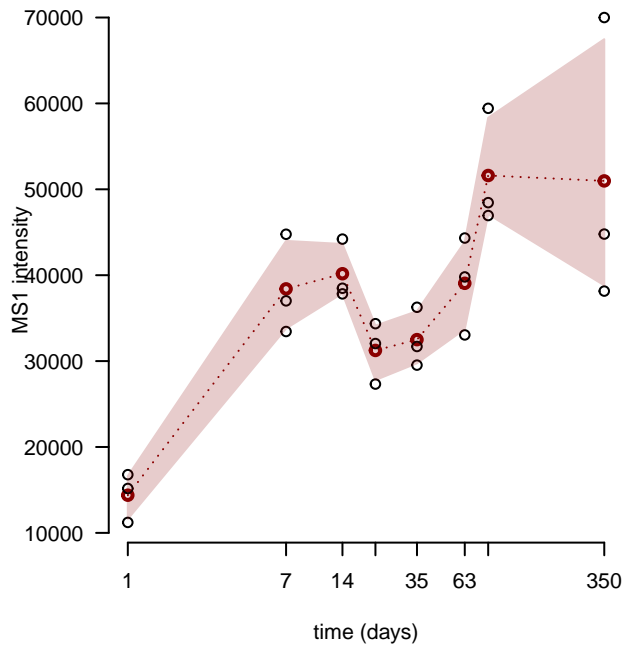

**O09167**  
**GN=Rpl21**  
ribosomal protein L21

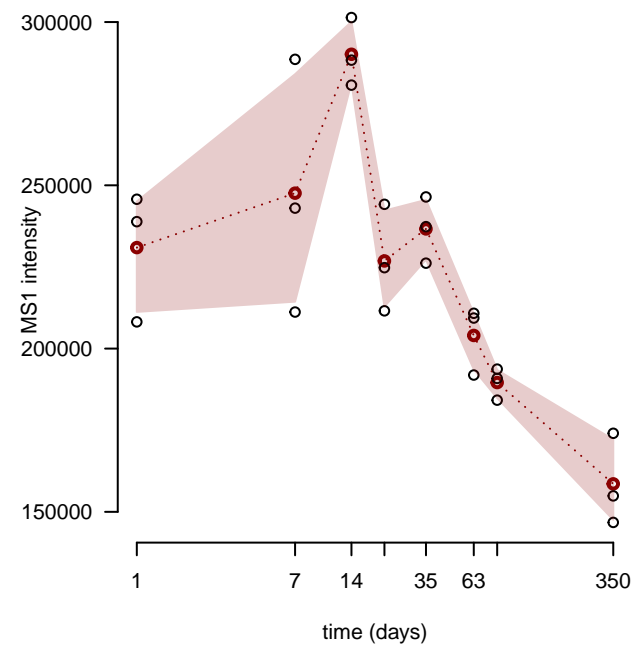

**O09172**  
**GN=Gclm**  
glutamate-cysteine ligase, modifier subu ...

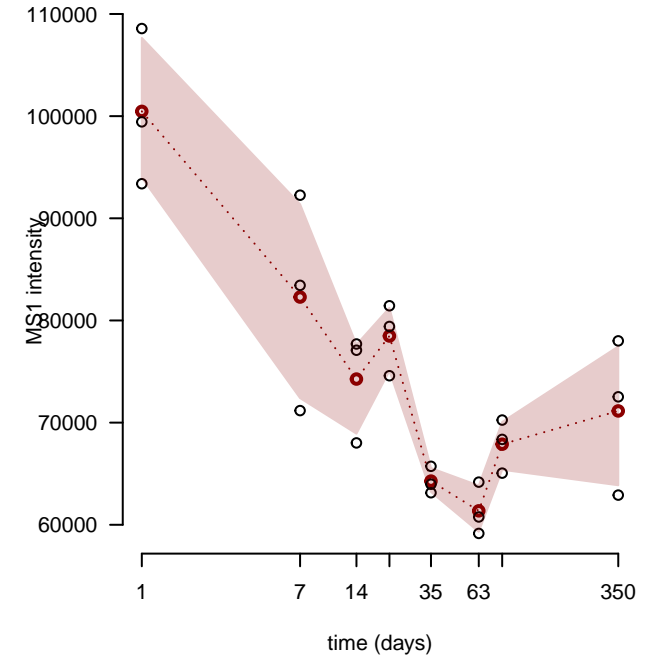

**O09174**  
**GN=Amacr**  
alpha-methylacyl-CoA racemase

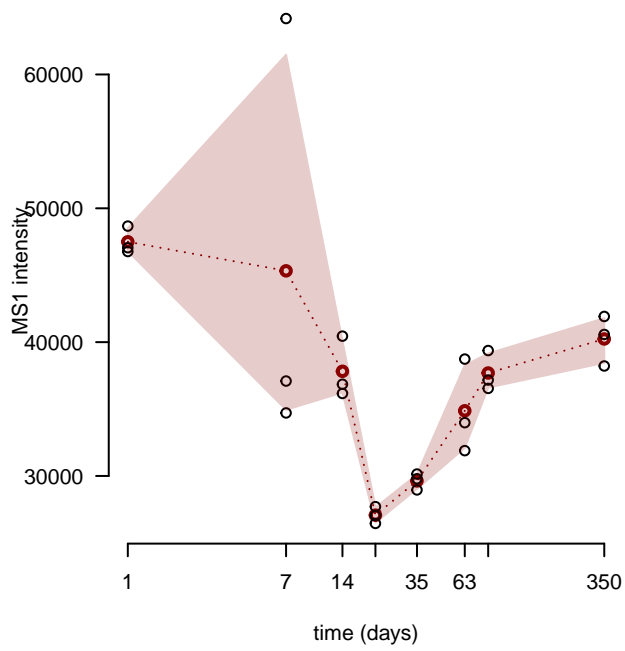

**O35047**  
**GN=Psmc3ip**  
proteasome (prosome, macropain) 26S subu ...

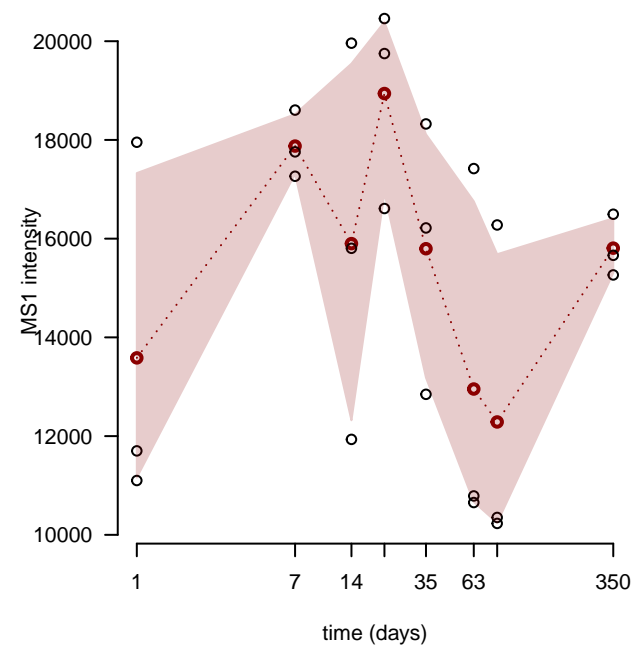

**O35071**  
**GN=Kif1c**  
kinesin family member 1C

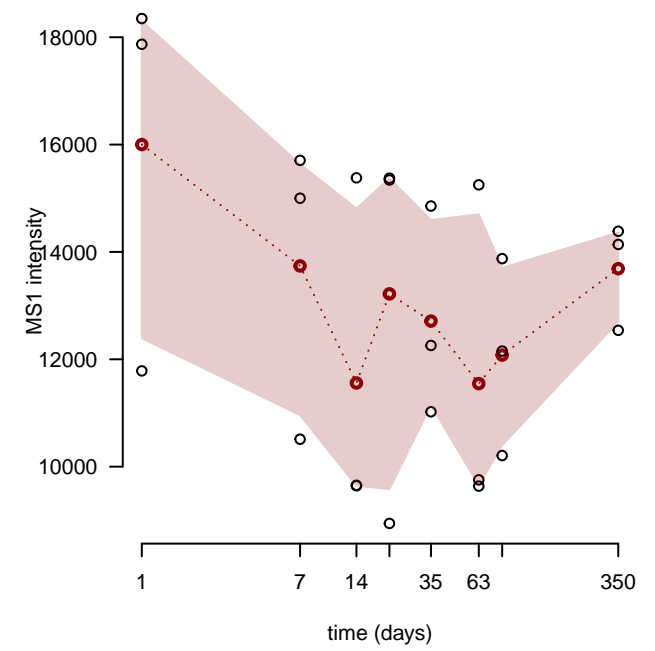

**O35074**  
**GN=Ptgis**  
prostaglandin I2 (prostacyclin) synthase

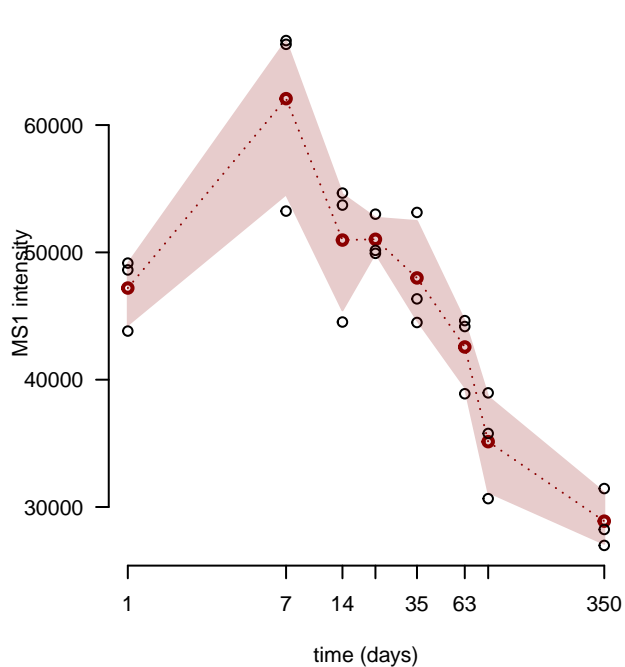

**O35075**  
**GN=Vps26c**  
VPS26 endosomal protein sorting factor C

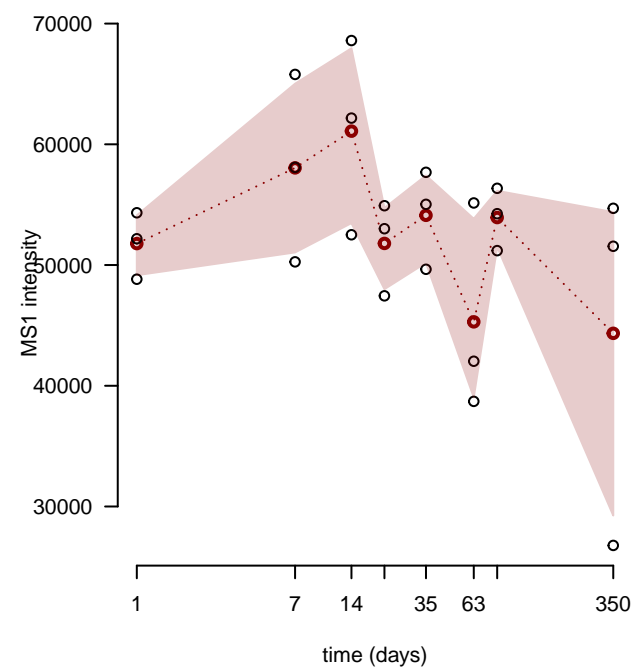

**O35083**  
**GN=Agpat1**  
1-acylglycerol-3-phosphate O-acyltransfe ...

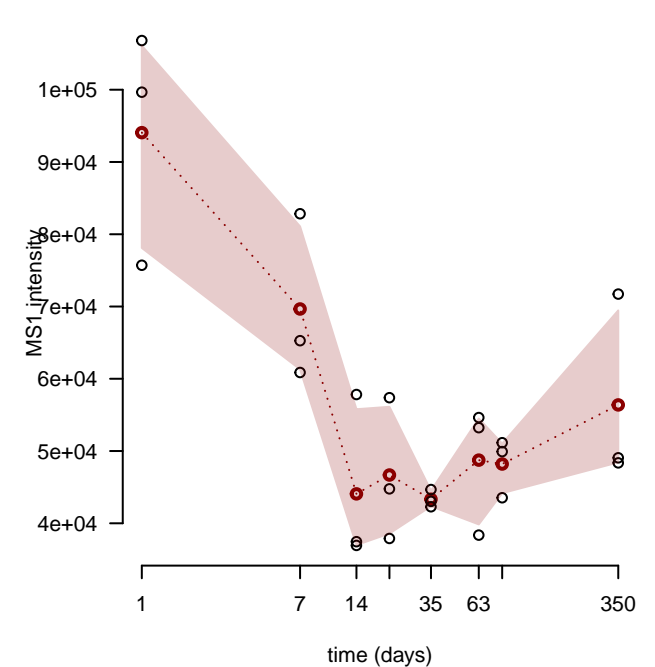

O35085  
GN=Arx  
aristaless related homeobox

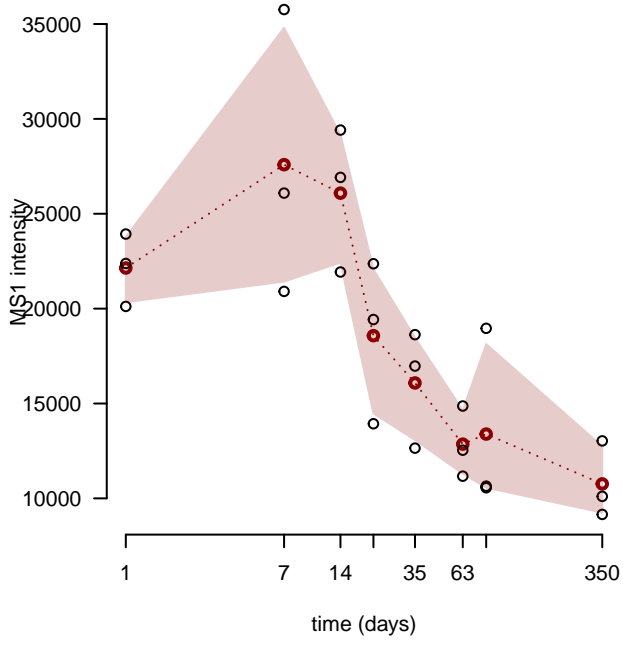

O35098  
GN=Dpysl4  
dihydropyrimidinase-like 4

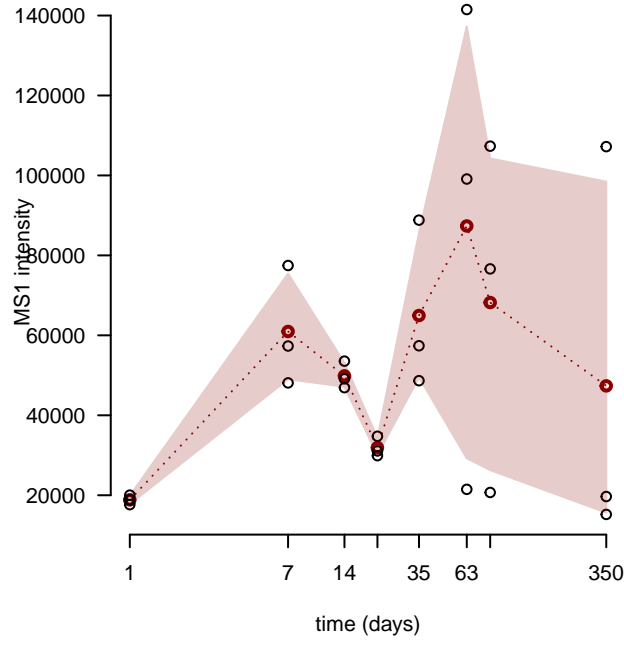

O35099  
GN=Map3k5  
mitogen-activated protein kinase kinase ...

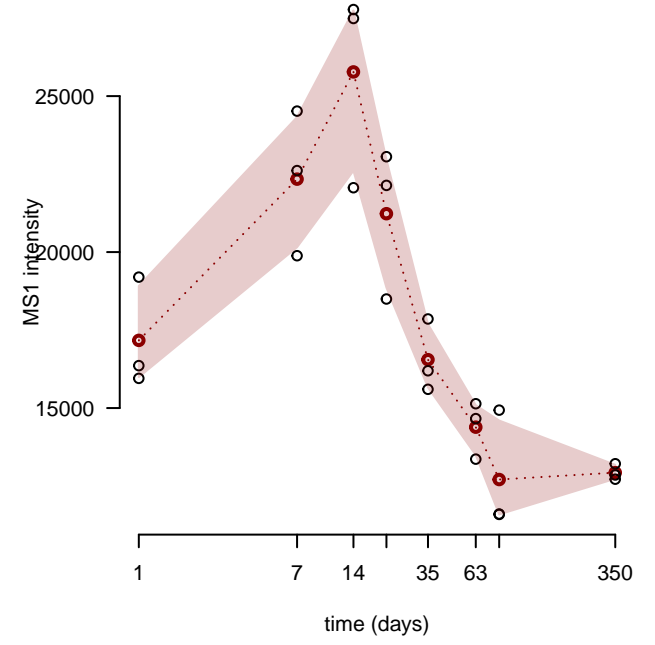

O35114  
GN=Scarb2  
scavenger receptor class B, member 2

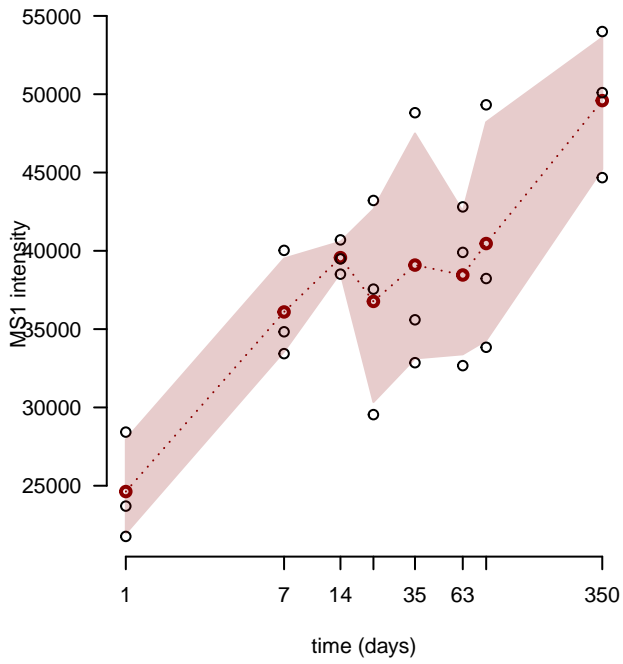

O35126  
GN=Atn1  
atrophin 1

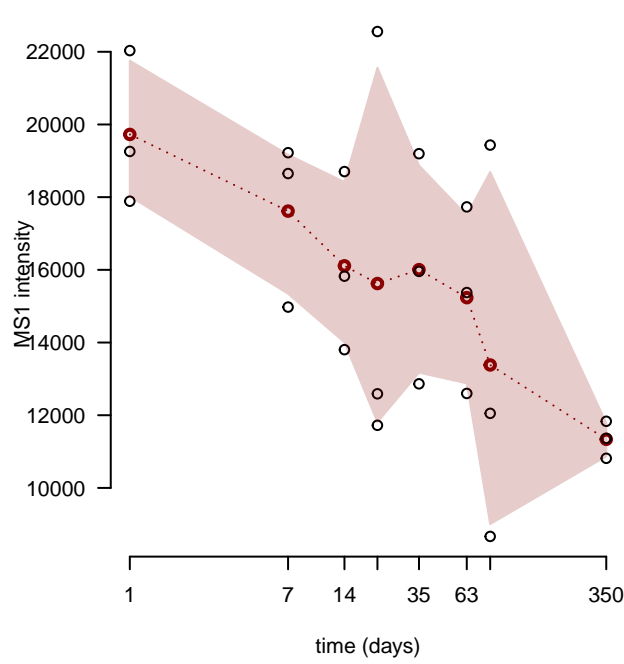

O35127  
GN=Grcc10  
gene rich cluster, C10 gene

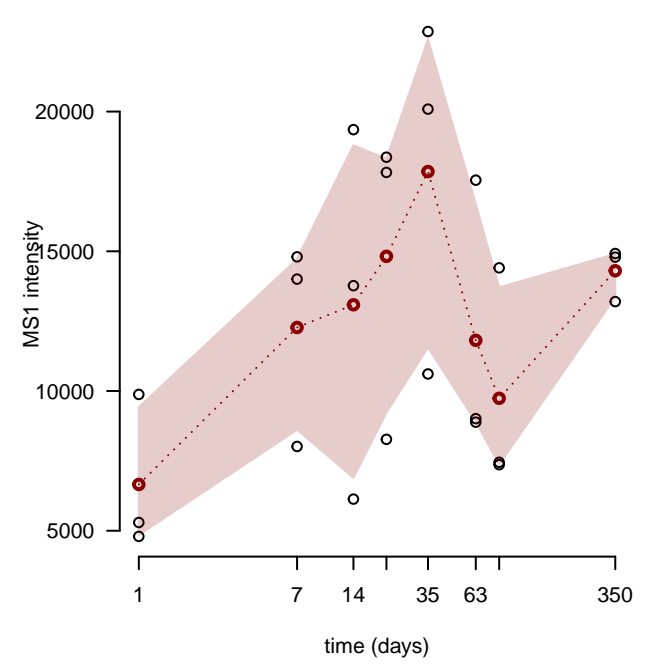

O35129  
GN=Phb2  
prohibitin 2

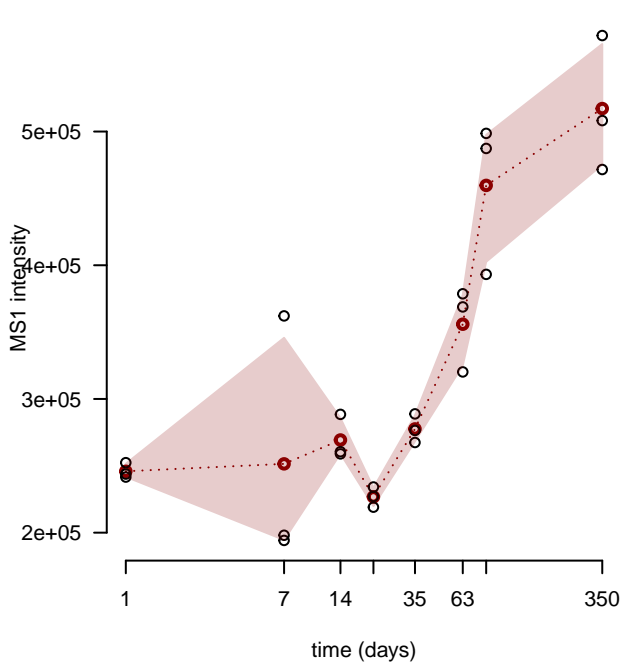

O35130  
GN=Emg1  
EMG1 N1-specific pseudouridine methyltra ...

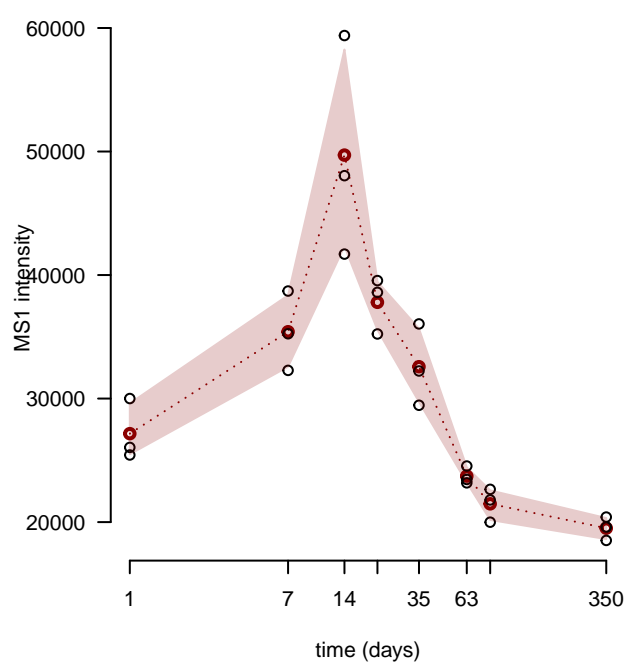

O35134  
GN=Polr1a  
polymerase (RNA) I polypeptide A

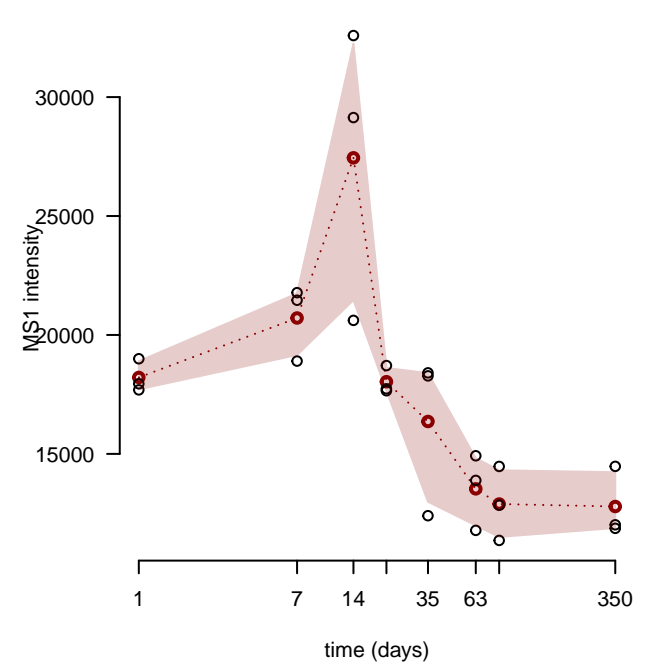

O35143  
GN=ATP5IF1

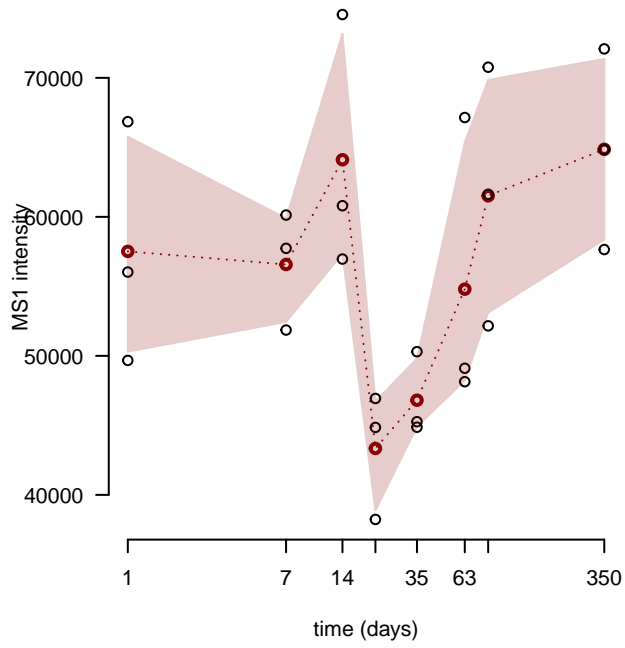

O35144  
GN=Terf2  
telomeric repeat binding factor 2

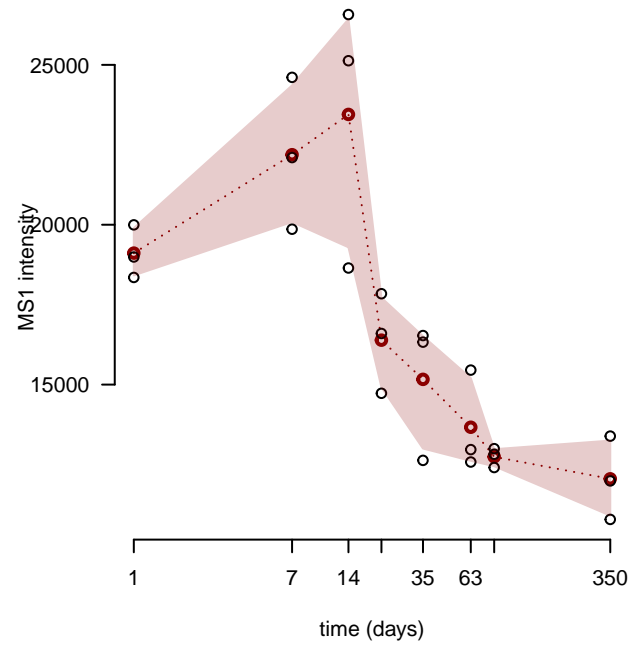

O35153  
GN=Bet1l  
Bet1 golgi vesicular membrane traffickin ...

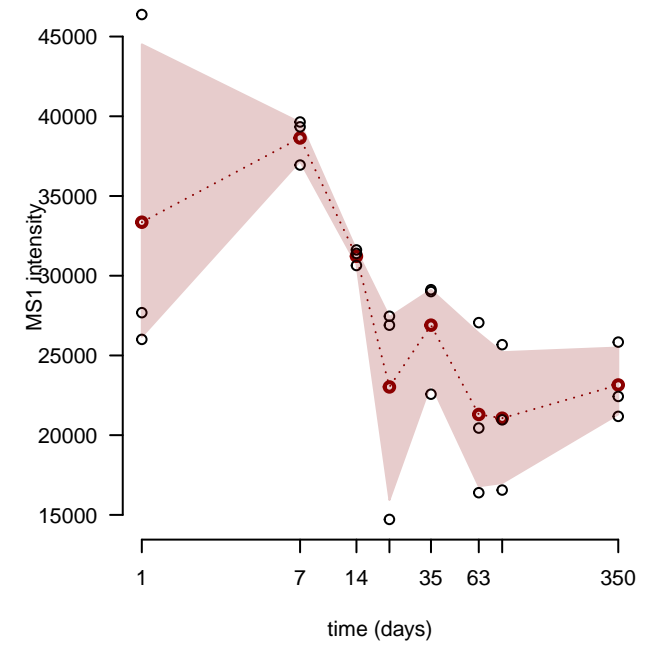

O35161  
GN=Celsr1  
cadherin, EGF LAG seven-pass G-type rece ...

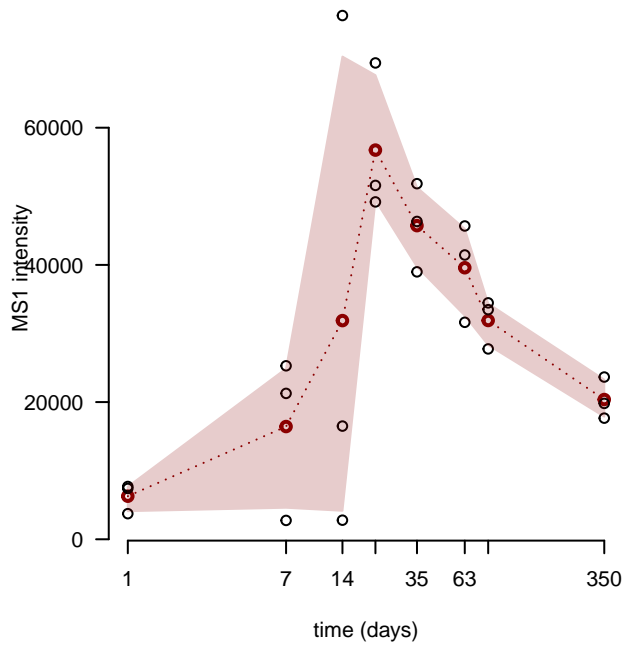

O35166  
GN=Gosr2  
golgi SNAP receptor complex member 2

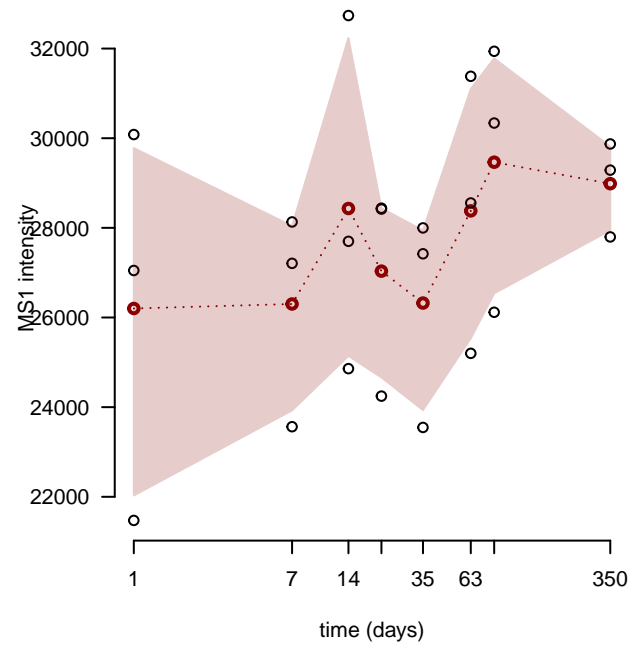

O35188  
GN=Cx3cl1  
chemokine (C-X3-C motif) ligand 1

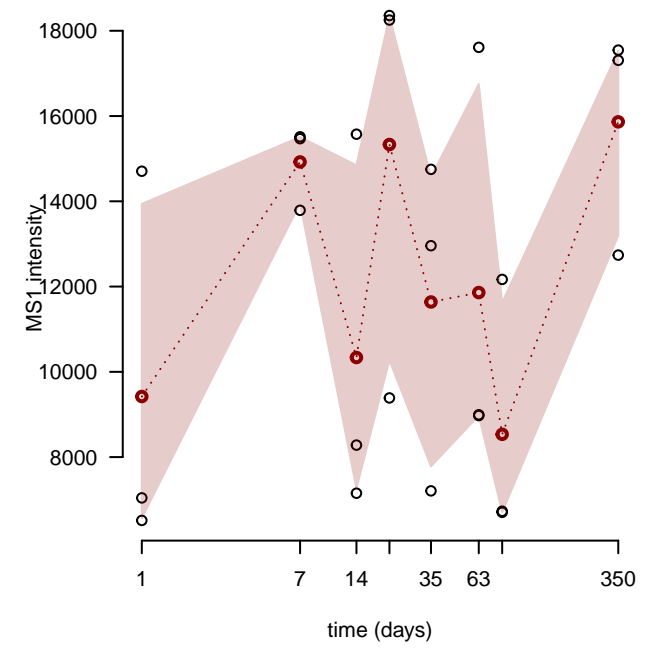

O35206  
GN=Col15a1  
collagen, type XV, alpha 1

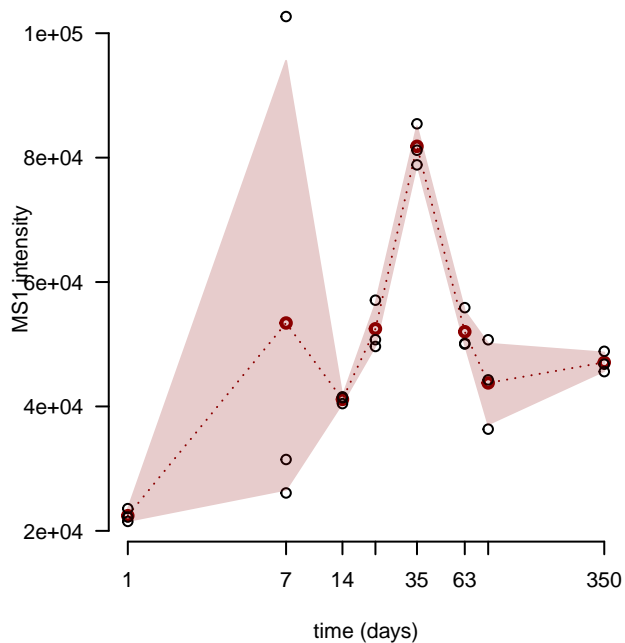

O35207  
GN=Cdk2ap1  
CDK2 (cyclin-dependent kinase 2)-associa ...

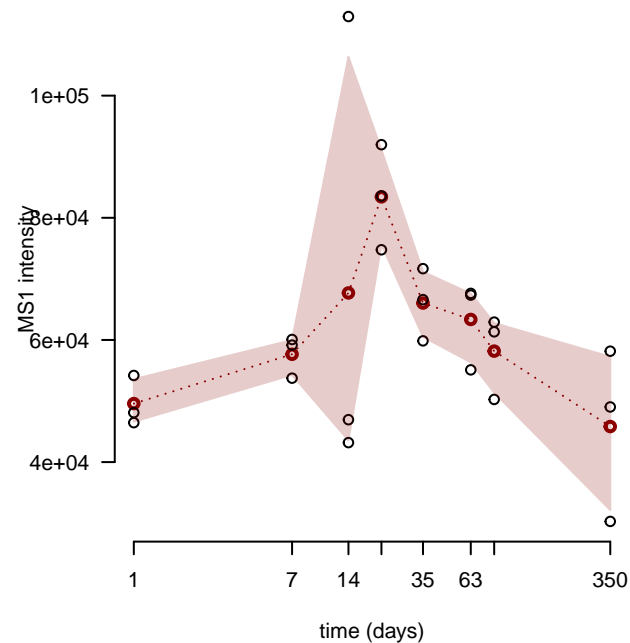

O35215  
GN=Ddt  
D-dopachrome tautomerase

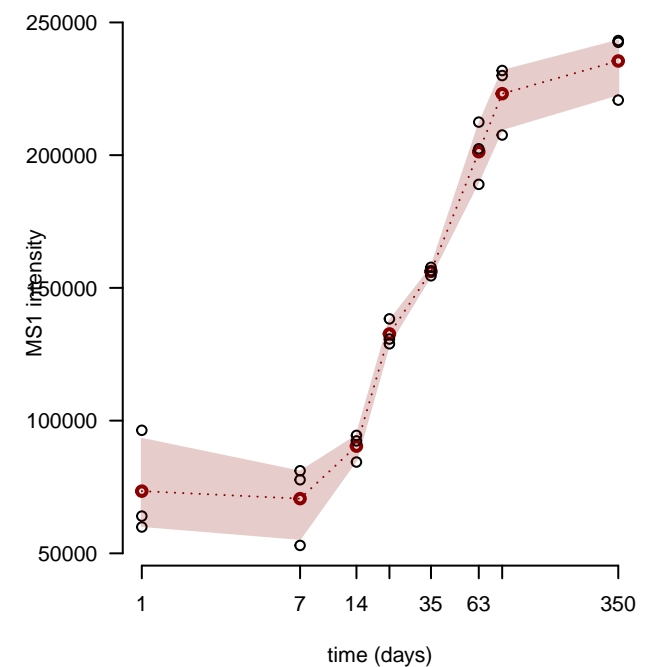

O35216  
GN=Cenpa  
centromere protein A

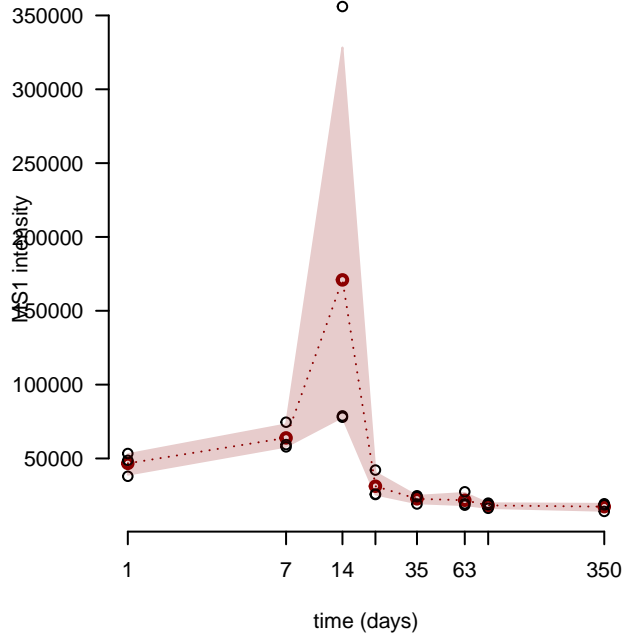

O35218  
GN=Cpsf2  
cleavage and polyadenylation specific fa ...

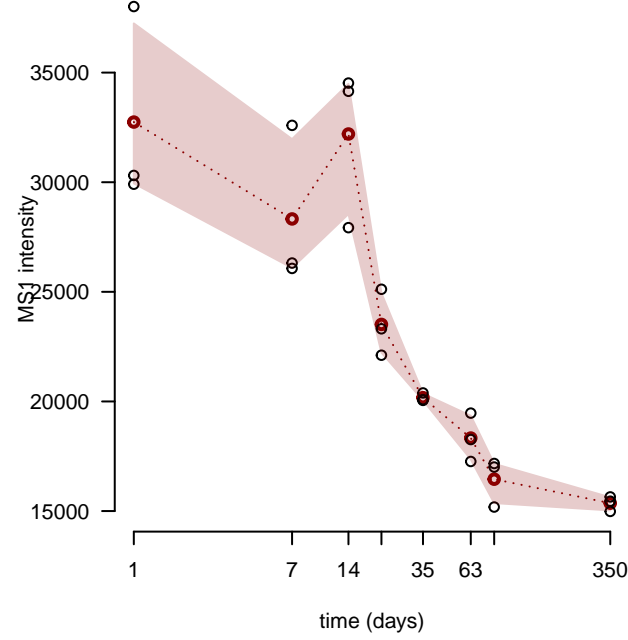

O35226  
GN=Psm4  
proteasome (prosome, macropain) 26S subu ...

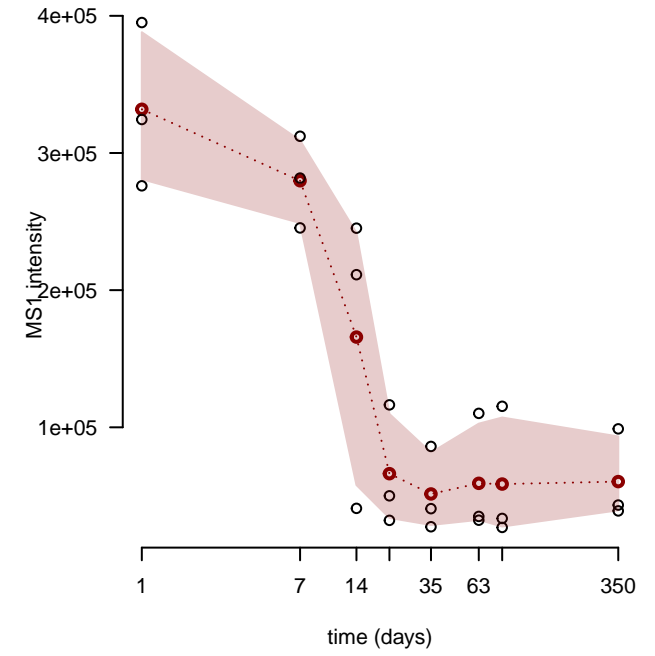

O35226  
GN=Psm4  
proteasome (prosome, macropain) 26S subu ...

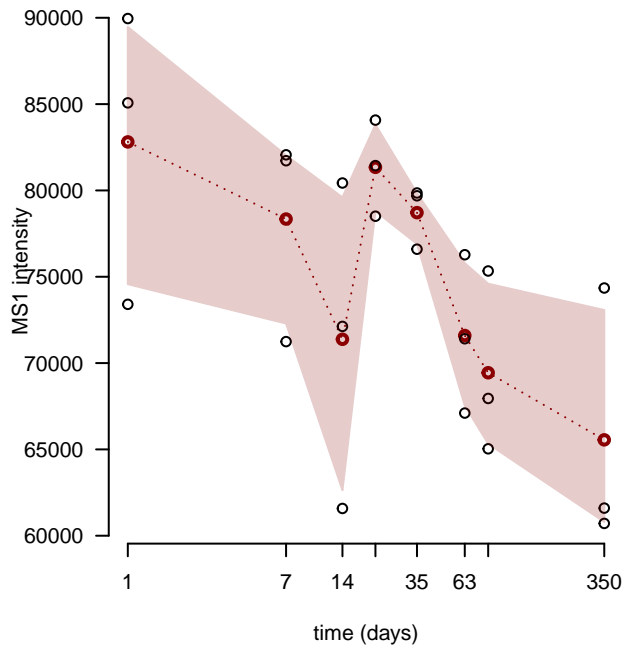

O35231  
GN=Kifc3  
kinesin family member C3

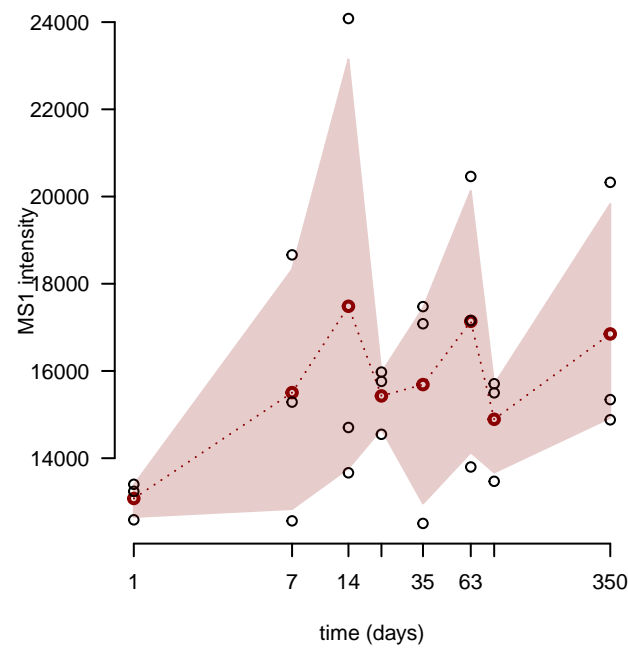

O35239  
GN=Ptpn9  
protein tyrosine phosphatase, non-recept ...

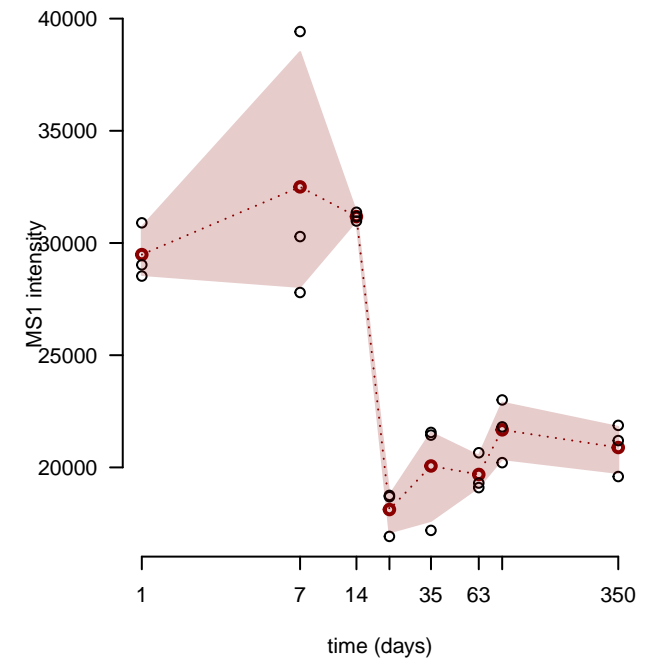

O35242  
GN=Nsmf  
neutral sphingomyelinase (N-SMase) activ ...

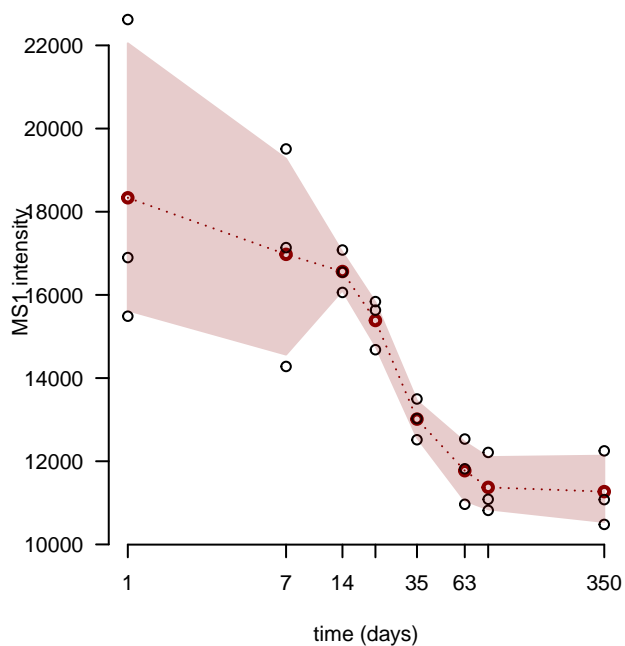

O35245  
GN=Pkd2  
polycystin 2, transient receptor potenti ...

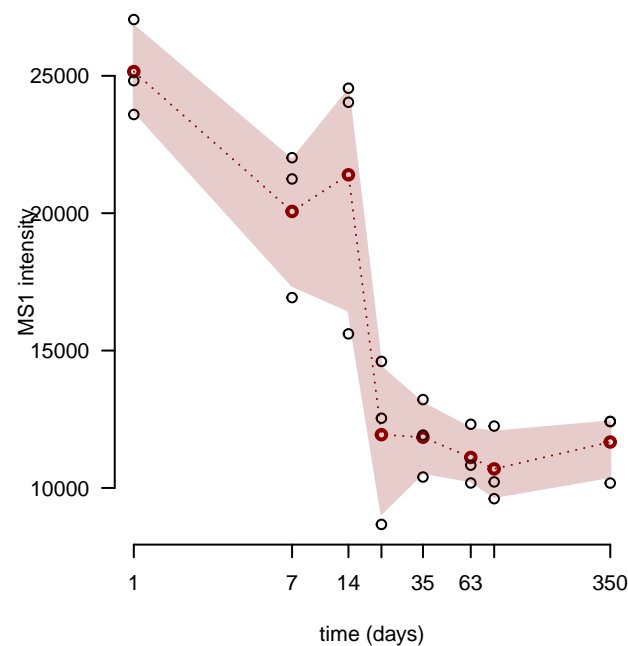

O35250  
GN=Exoc7  
exocyst complex component 7

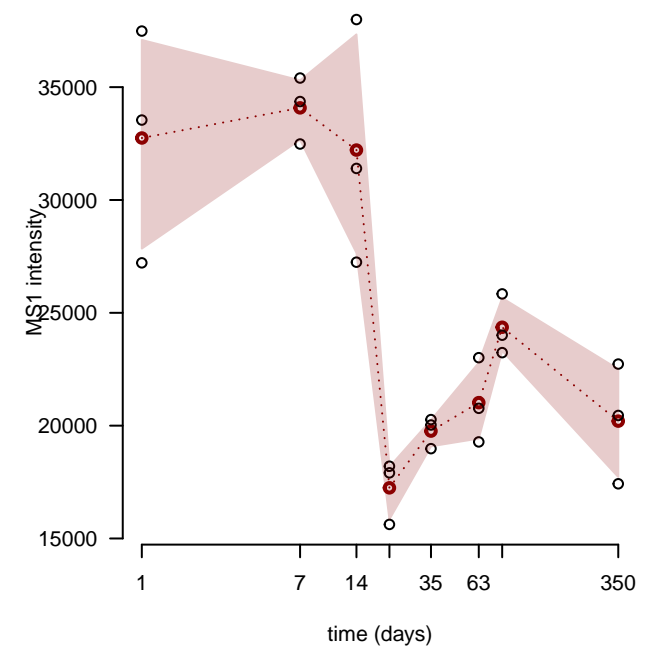

**O35261**  
**GN=E2f3**  
E2F transcription factor 3

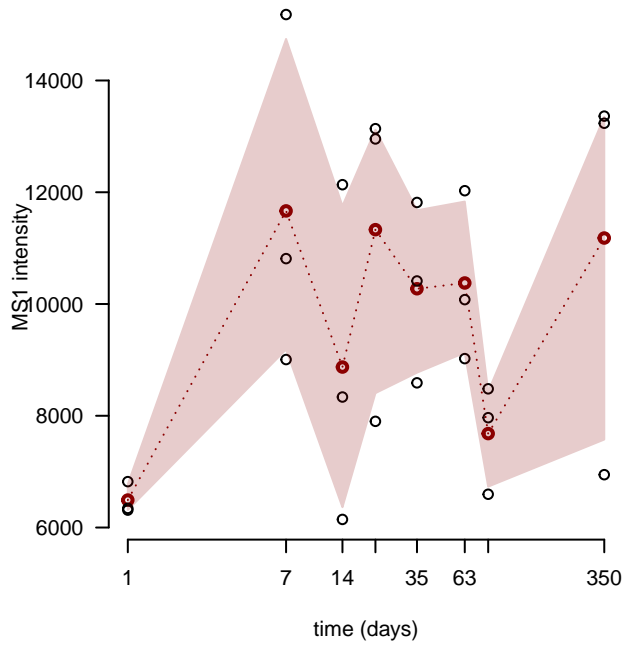

**O35280**  
**GN=Chek1**  
checkpoint kinase 1

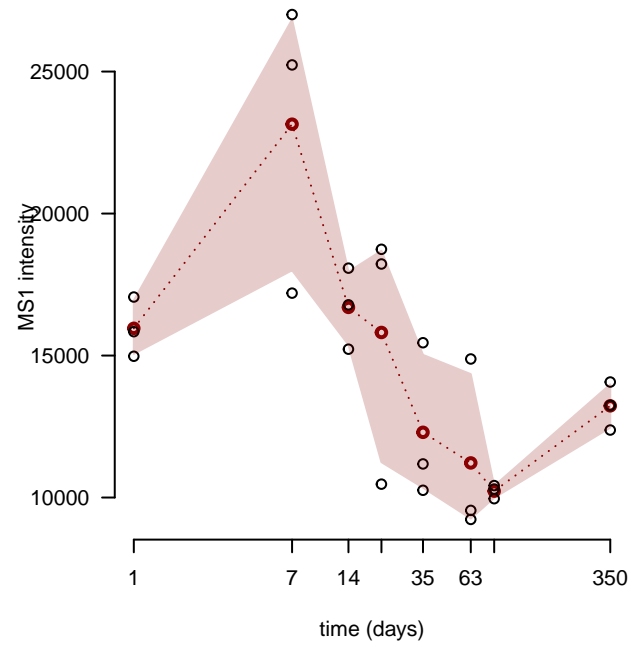

**O35286**  
**GN=Dhx15**  
DEAH (Asp-Glu-Ala-His) box polypeptide 1 ...

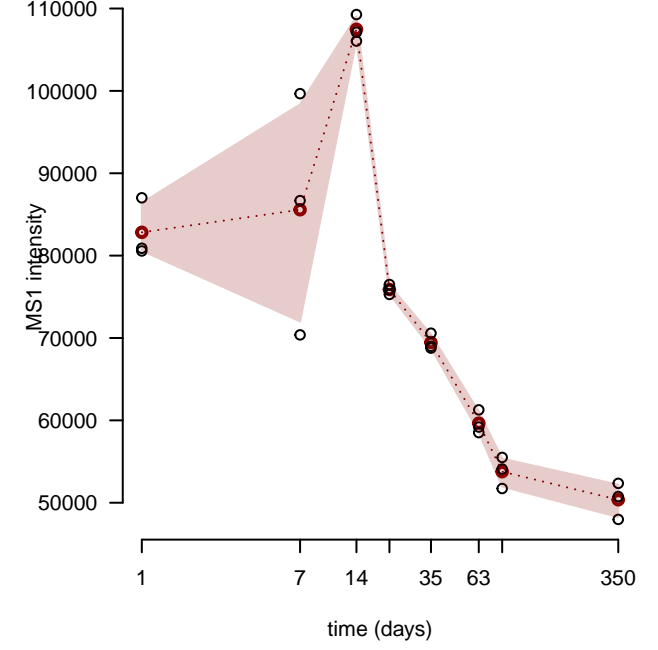

**O35295**  
**GN=Purb**  
purine rich element binding protein B

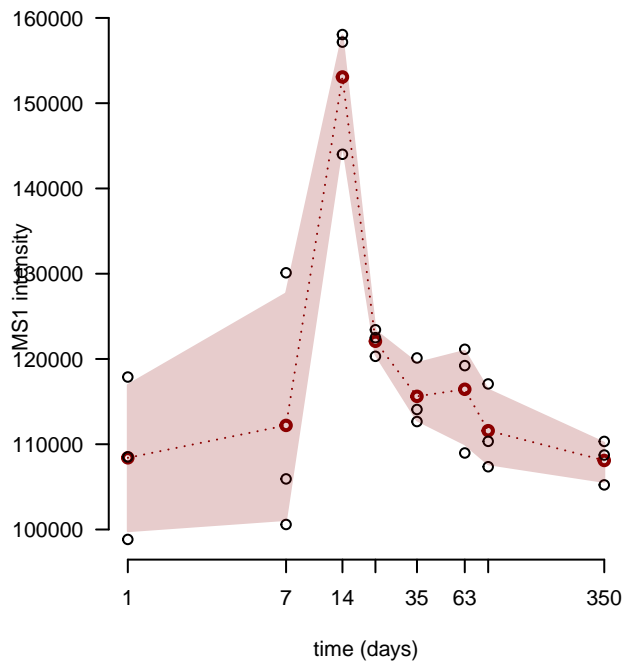

**O35309**  
**GN=Nmi**  
N-myc (and STAT) interactor

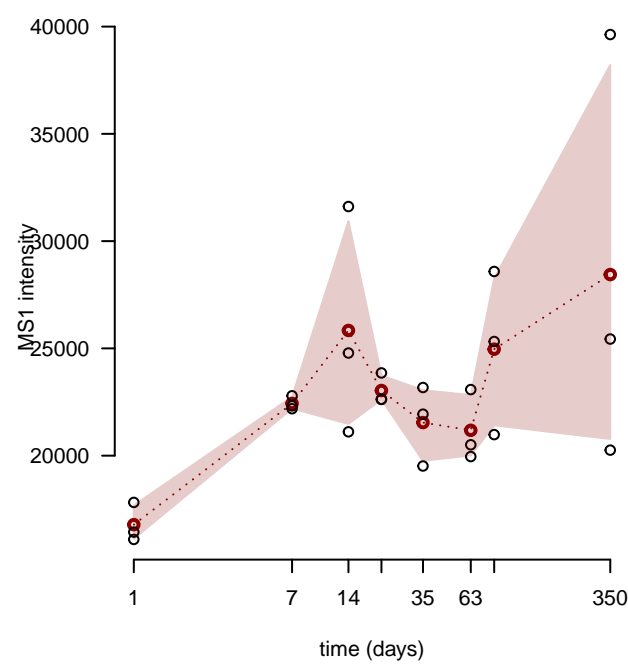

**O35316**  
**GN=Slc6a6**  
solute carrier family 6 (neurotransmitte ...

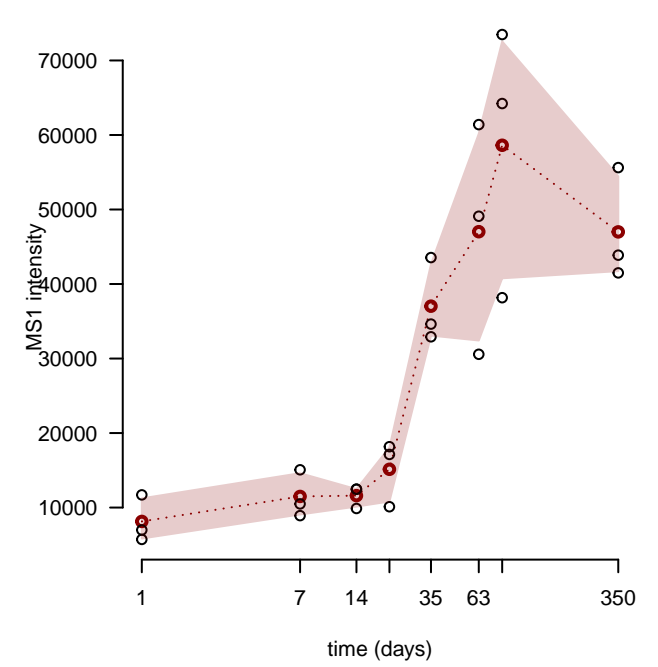

**O35317**  
**GN=Pbx3**  
pre B cell leukemia homeobox 3

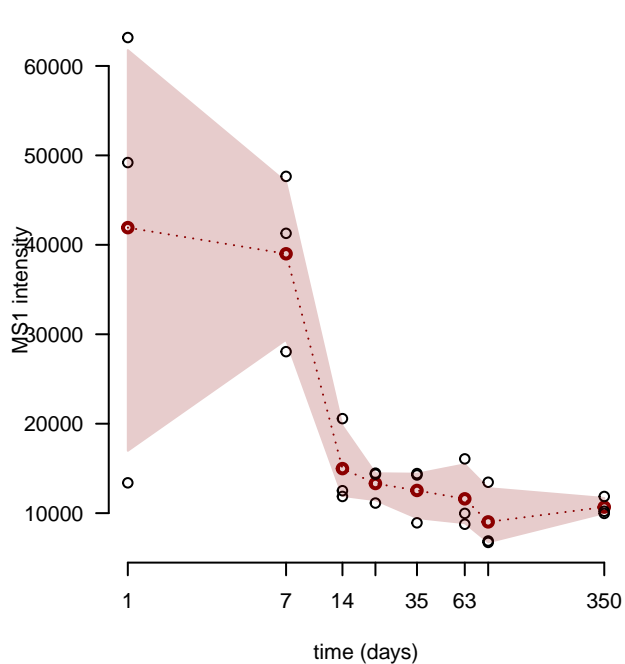

**O35326**  
**GN=Srsf5**  
serine and arginine-rich splicing factor ...

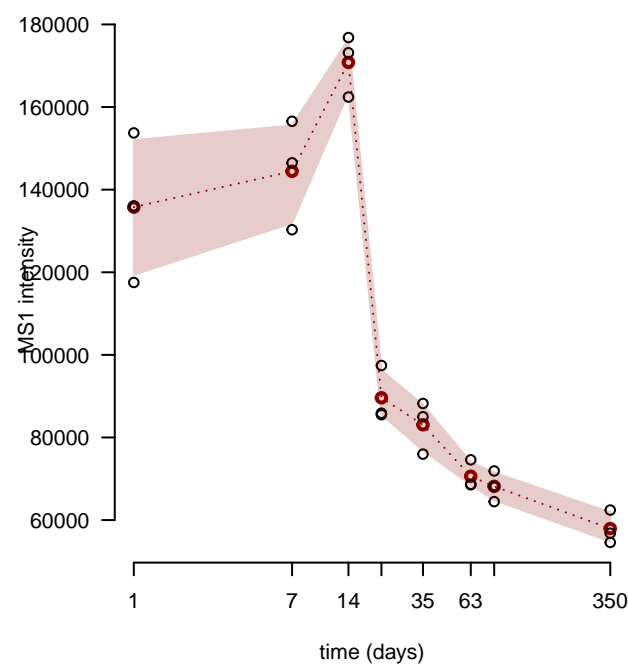

**O35343**  
**GN=Kpna4**  
karyopherin (importin) alpha 4

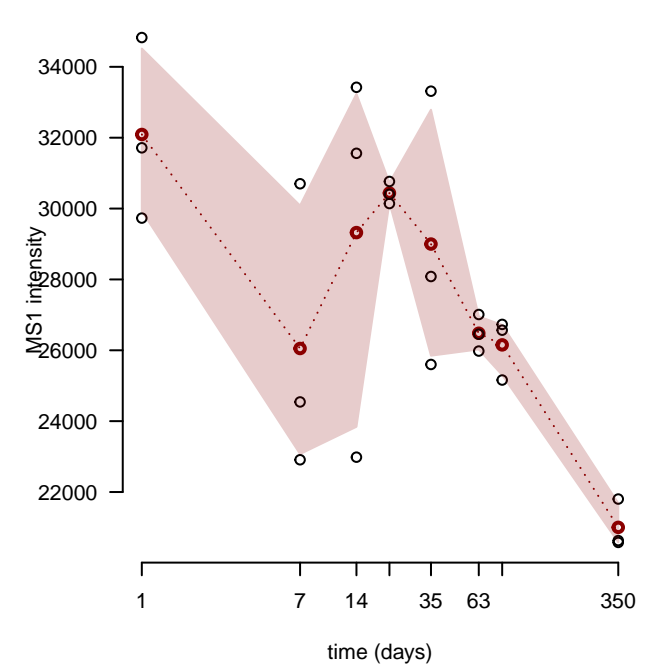



O35344  
GN=Kpna3  
karyopherin (importin) alpha 3

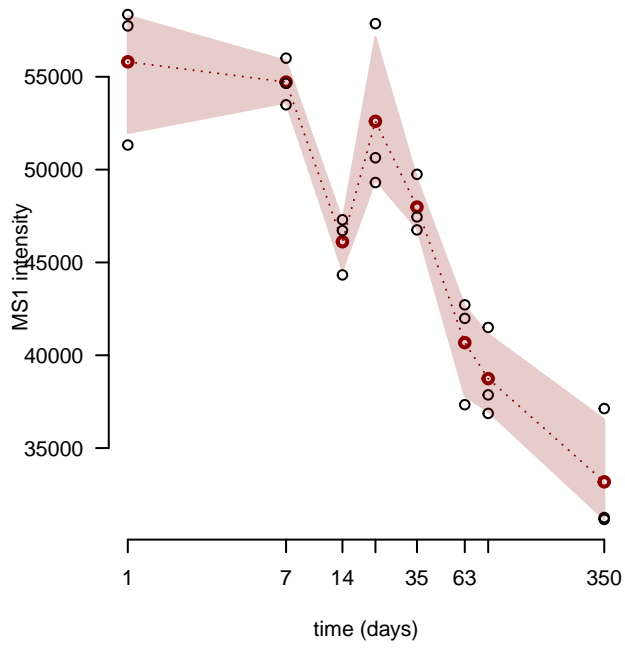

O35345  
GN=Kpna6  
karyopherin (importin) alpha 6

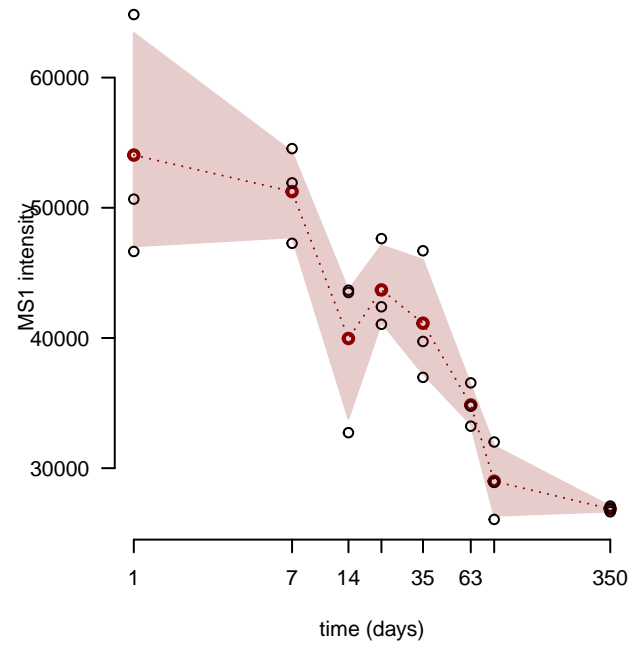

O35350  
GN=Capn1  
calpain 1

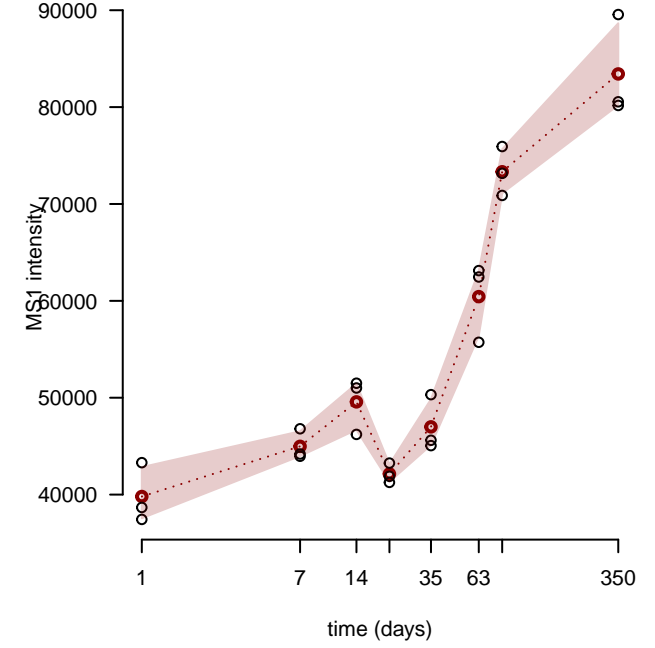

O35368  
GN=Ifi203  
interferon activated gene 203

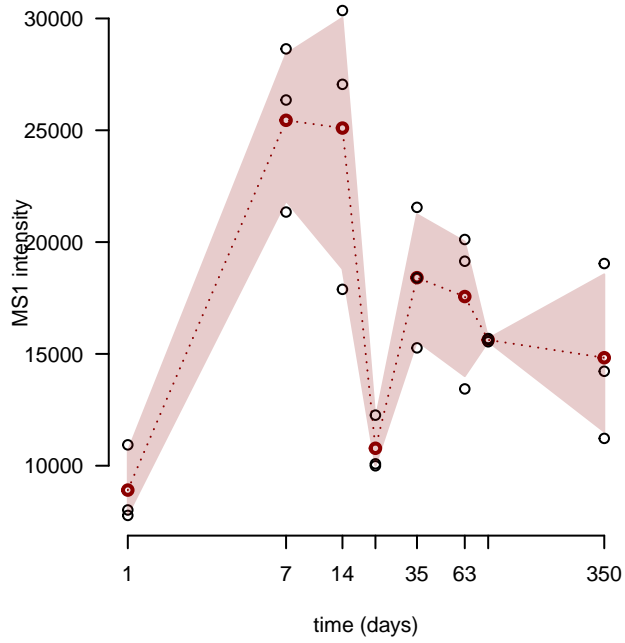

O35375  
GN=Nrp2  
neuropilin 2

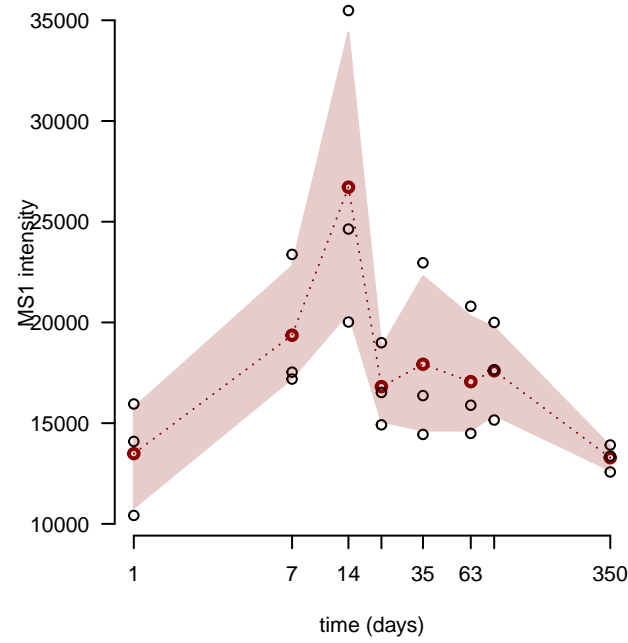

O35379  
GN=Abcc1  
ATP-binding cassette, sub-family C (CFTR ...

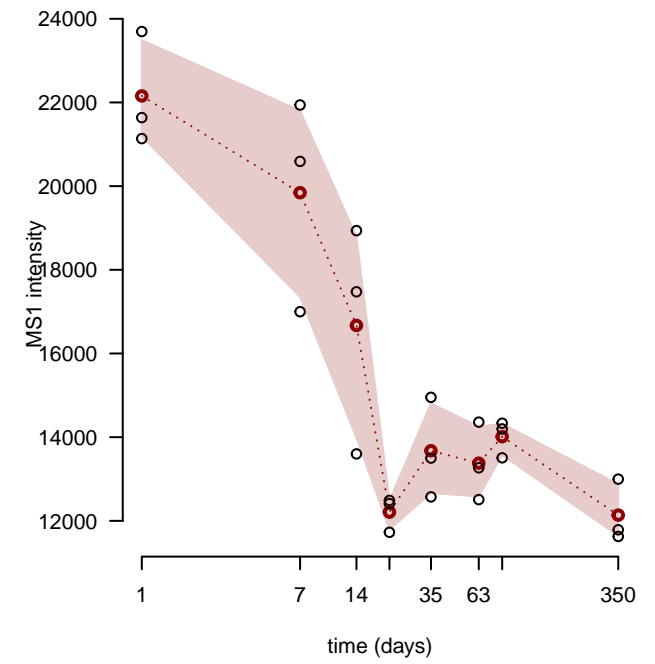

O35381  
GN=Anp32a  
acidic (leucine-rich) nuclear phosphopro ...

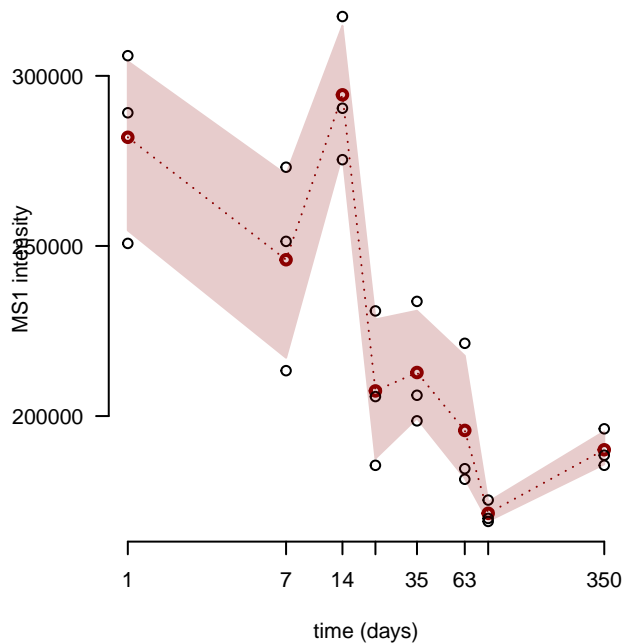

O35382  
GN=Exoc4  
exocyst complex component 4

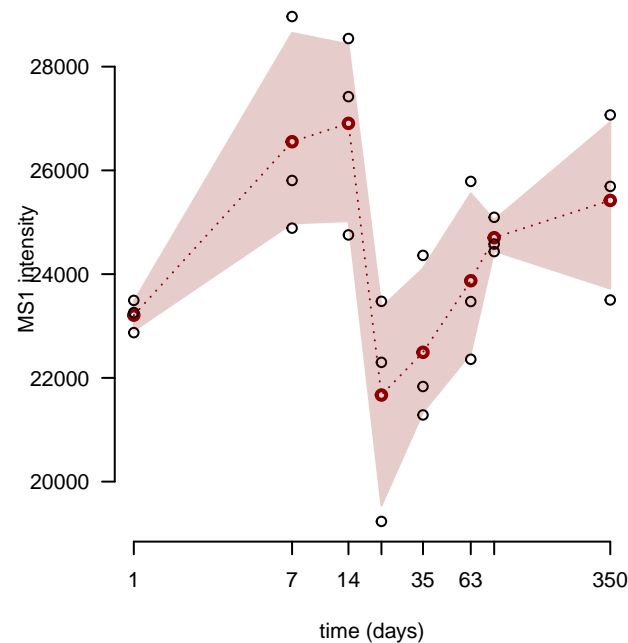

O35385  
GN=Ppf2  
protein phosphatase, EF hand calcium-bin ...

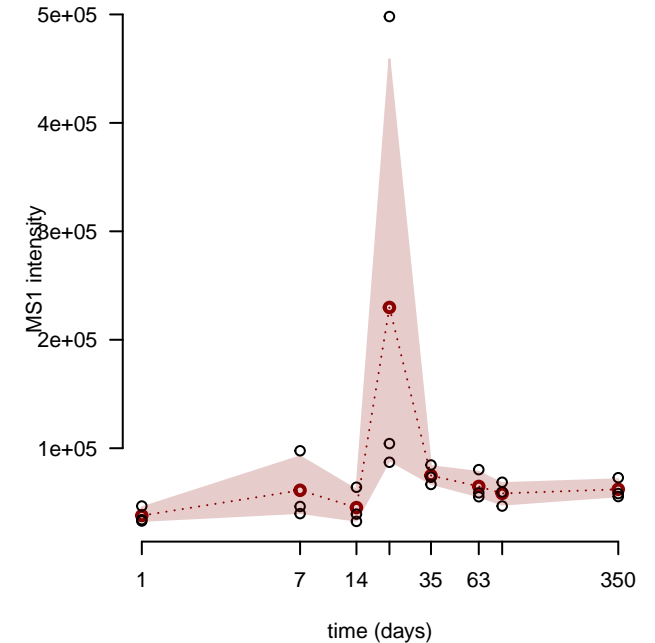

**O35386**  
**GN=Phyh**  
phytanoyl-CoA hydroxylase

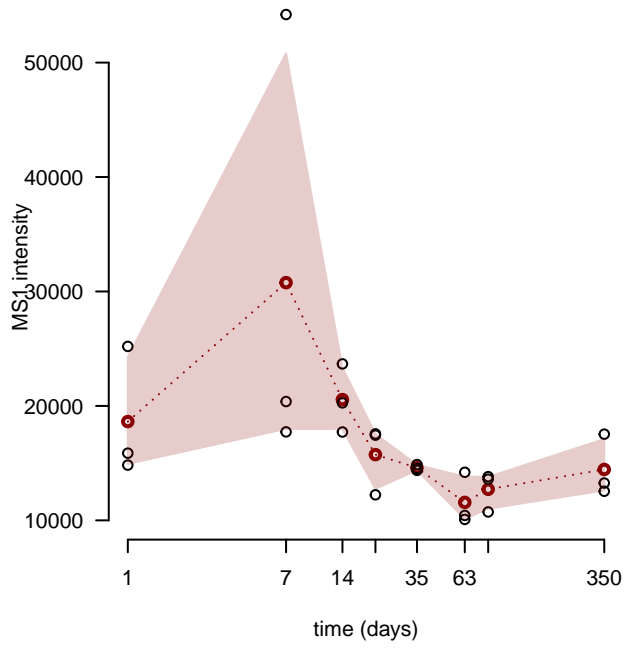

**O35387**  
**GN=Hax1**  
HCLS1 associated X-1

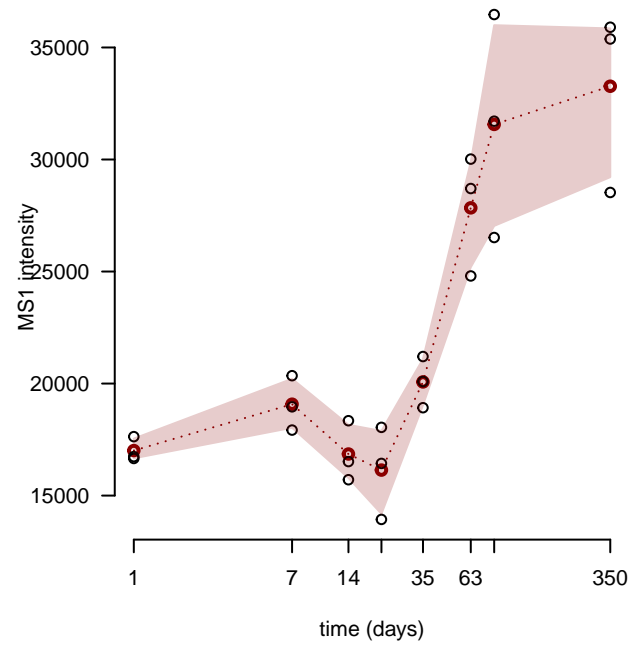

**O35393**  
**GN=Efnb3**  
ephrin B3

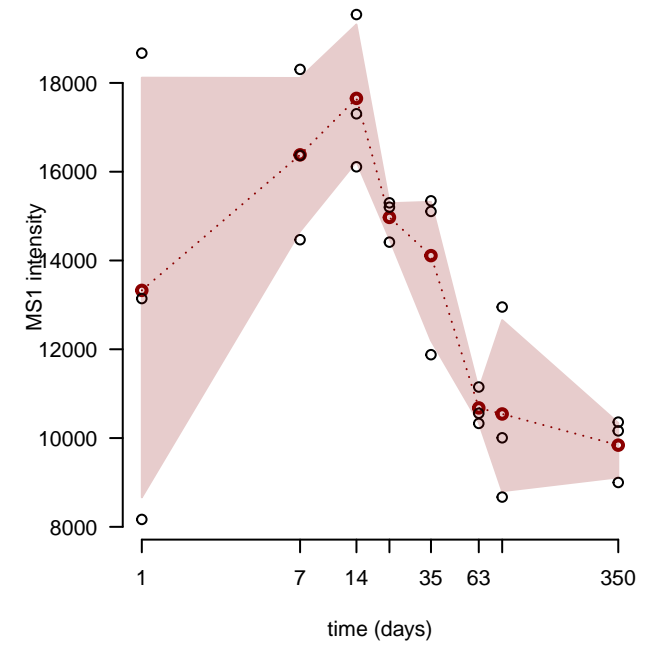

**O35405**  
**GN=Pld3**  
phospholipase D family, member 3

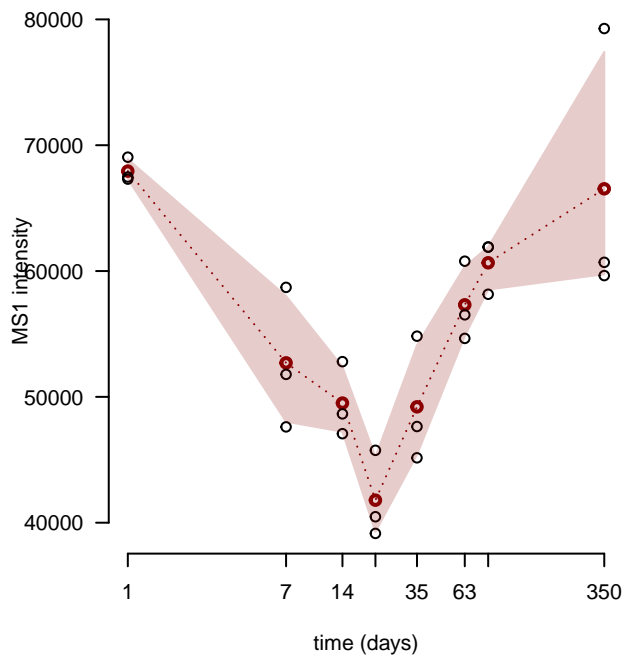

**O35425**  
**GN=Bok**  
BCL2-related ovarian killer

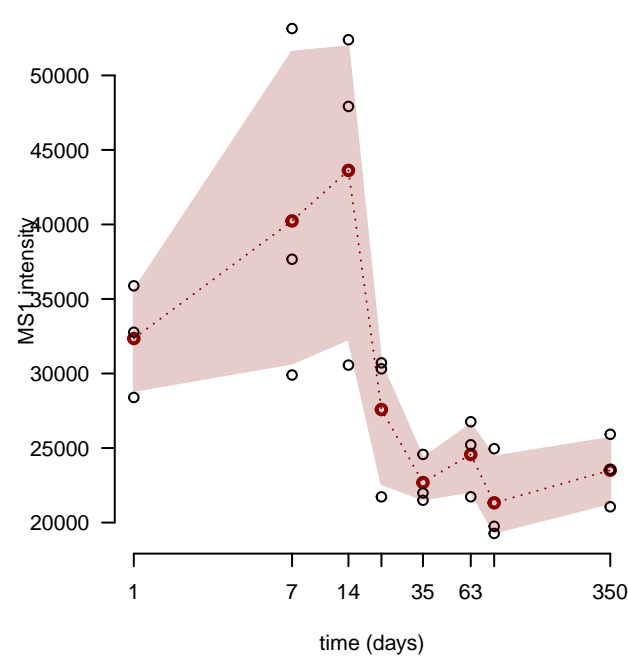

**O35427**  
**GN=Crcp**  
calcitonin gene-related peptide-receptor ...

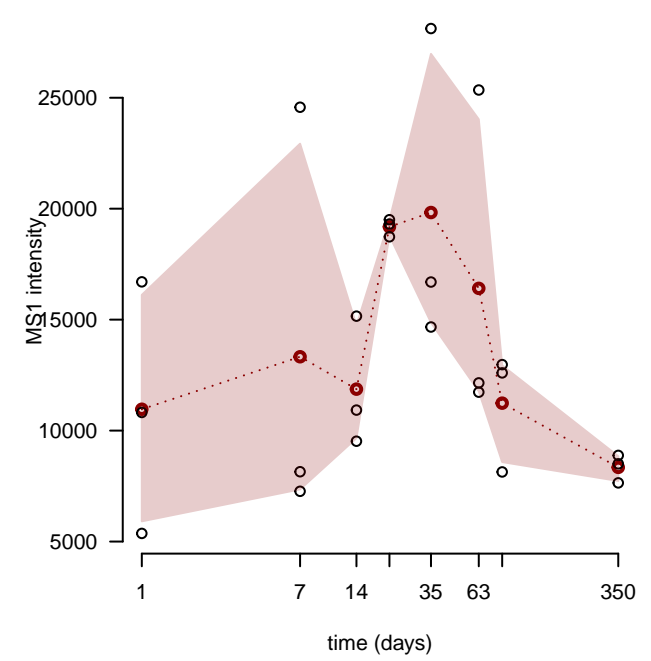

**O35435**  
**GN=Dhodh**  
dihydroorotate dehydrogenase

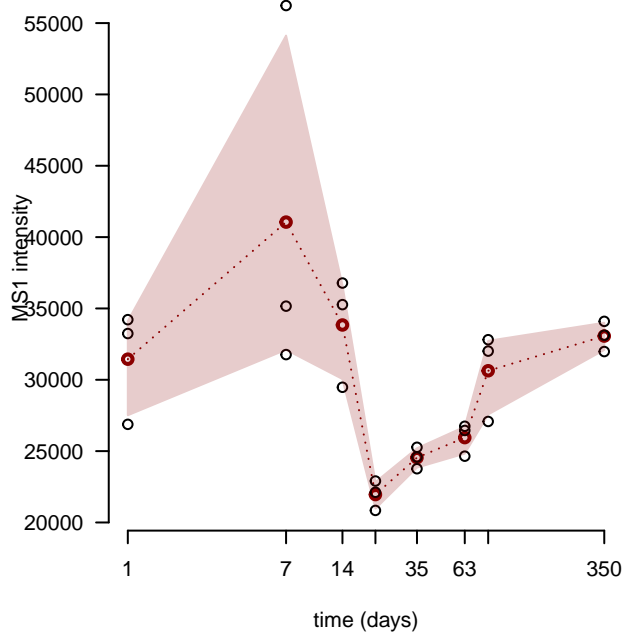

**O35437**  
**GN=Tcf21**  
transcription factor 21

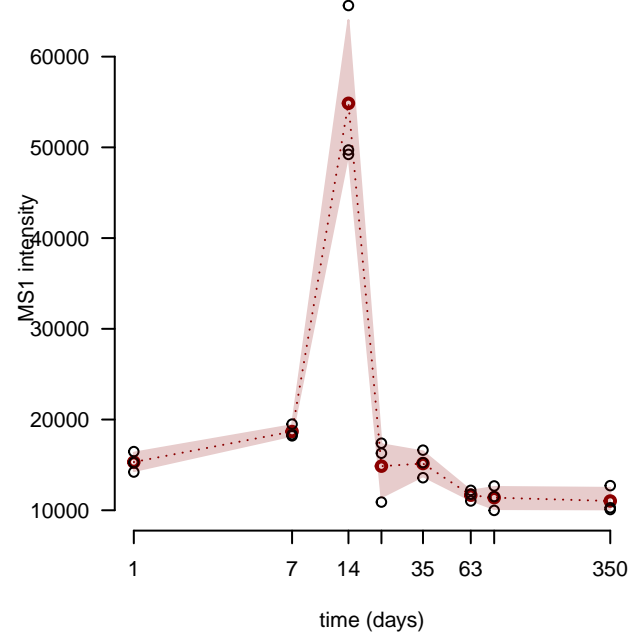

**O35445**  
**GN=Rnf5**  
ring finger protein 5

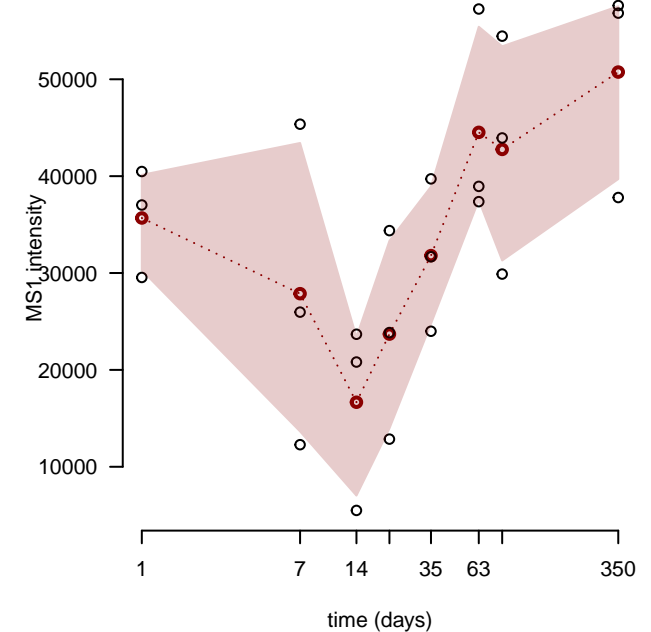

**O35448**  
**GN=Ppt2**  
palmitoyl-protein thioesterase 2

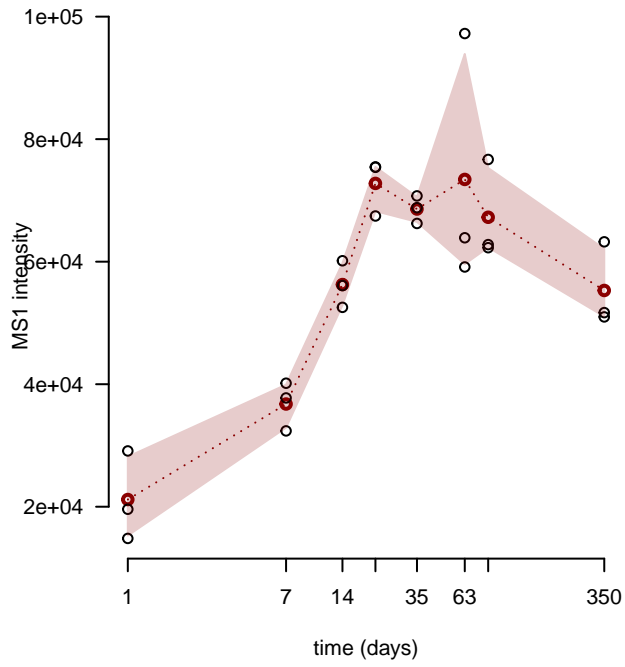

**O35450**  
**GN=Fkbp1**  
FK506 binding protein-like

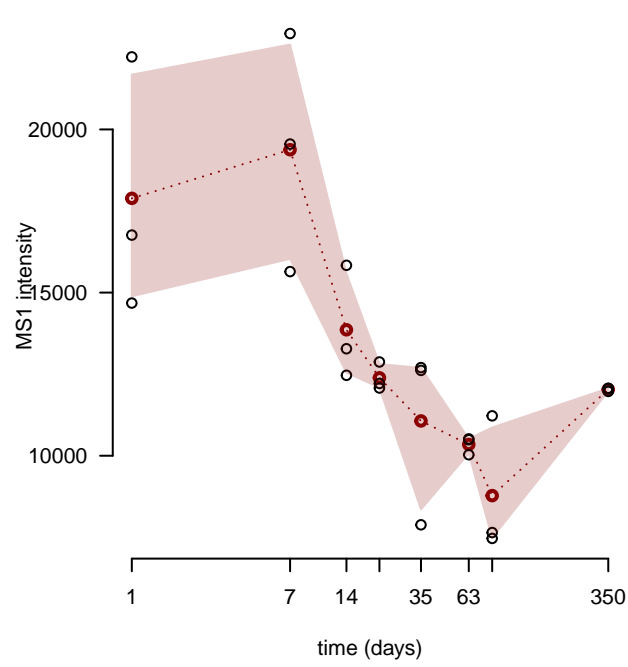

**O35451**  
**GN=Atf6b**  
activating transcription factor 6 beta

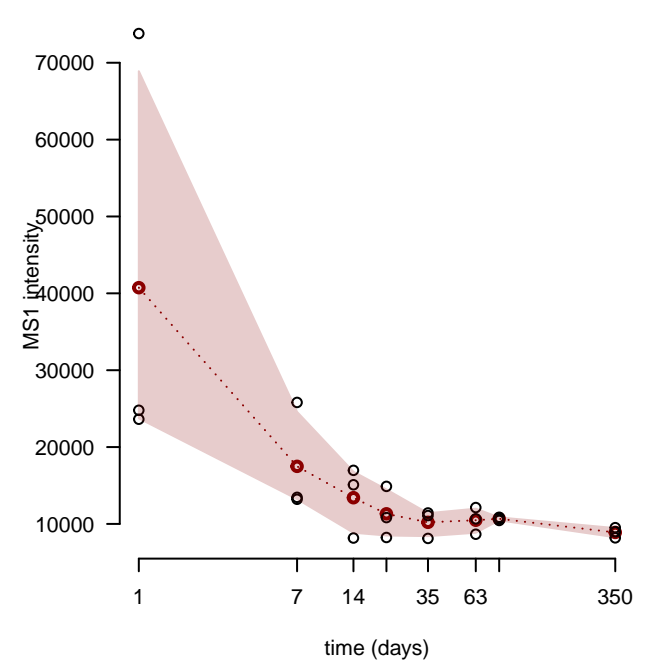

**O35454**  
**GN=Clcn6**  
chloride channel, voltage-sensitive 6

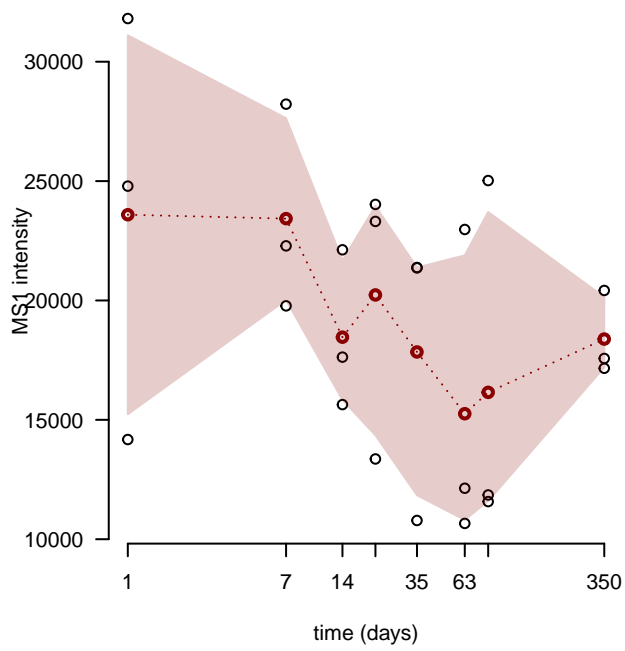

**O35459**  
**GN=Ech1**  
enoyl coenzyme A hydratase 1, peroxisoma ...

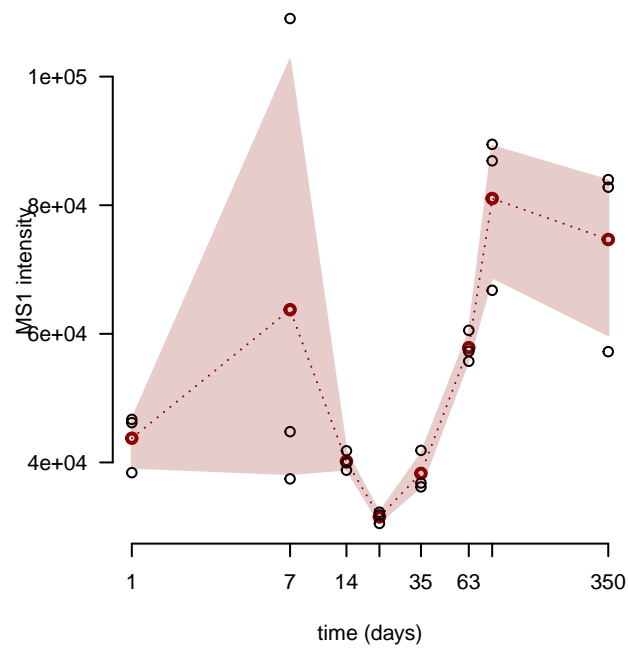

**O35465**  
**GN=Fkbp8**  
FK506 binding protein 8

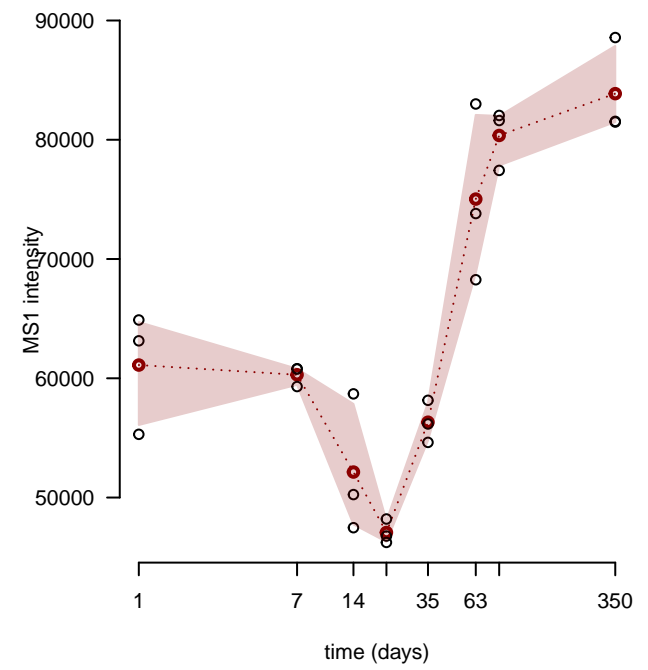

**O35469**  
**GN=Hsd3b6**  
hydroxy-delta-5-steroid dehydrogenase, 3 ...

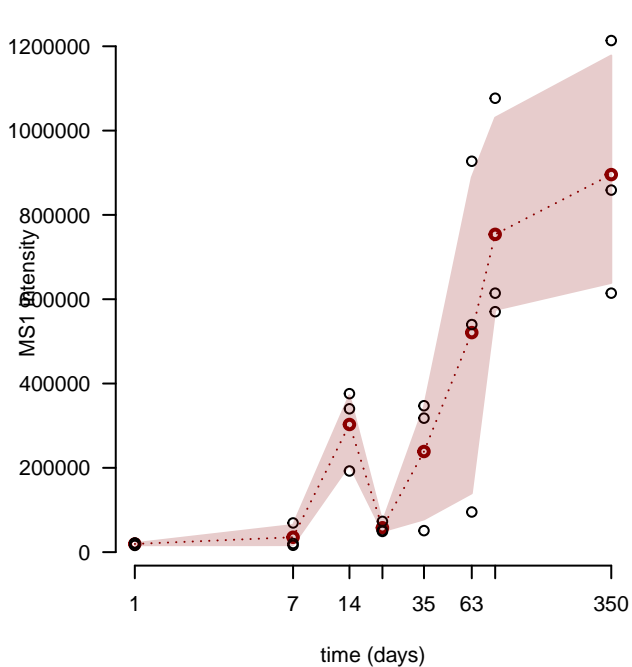

**O35473**  
**GN=C1d**  
C1D nuclear receptor co-repressor

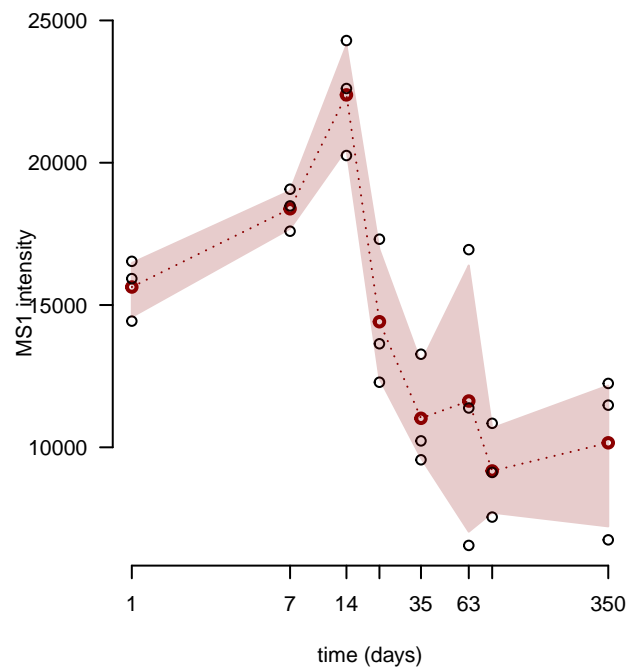

**O35488**  
**GN=Slc27a2**  
solute carrier family 27 (fatty acid tra ...

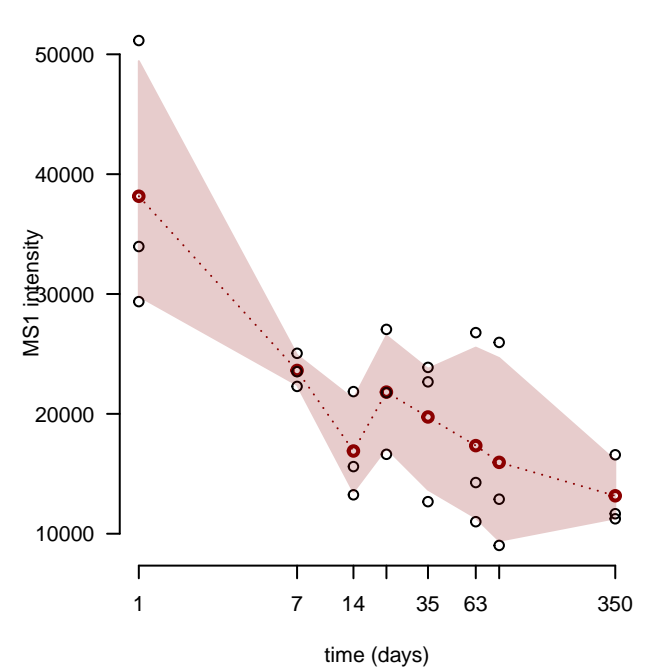

O35490  
GN=Bhmt  
betaine-homocysteine methyltransferase

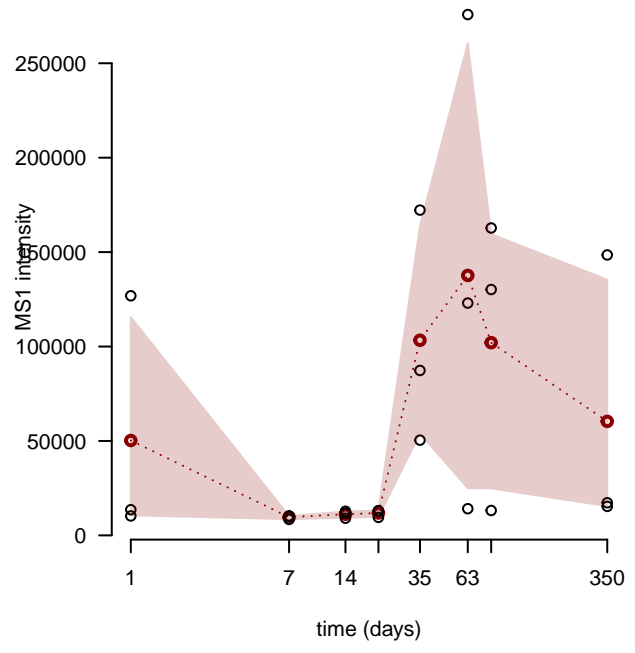

O35492  
GN=Cik3  
CDC-like kinase 3

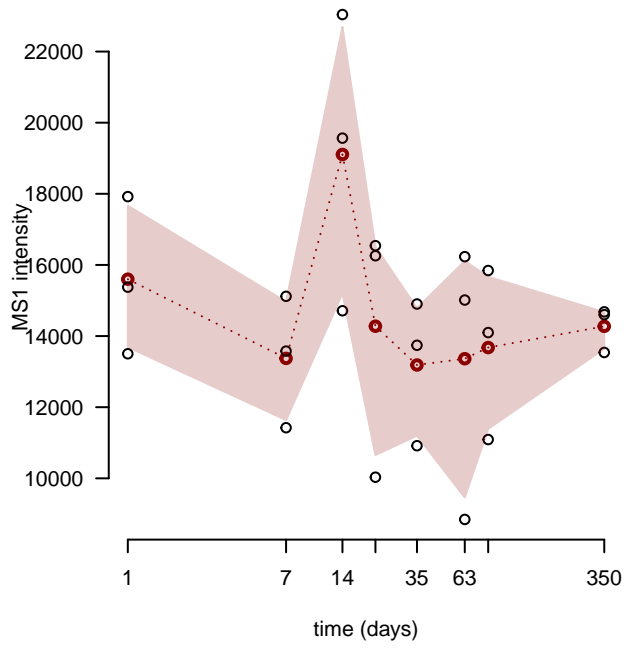

O35495  
GN=Cdk14  
cyclin-dependent kinase 14

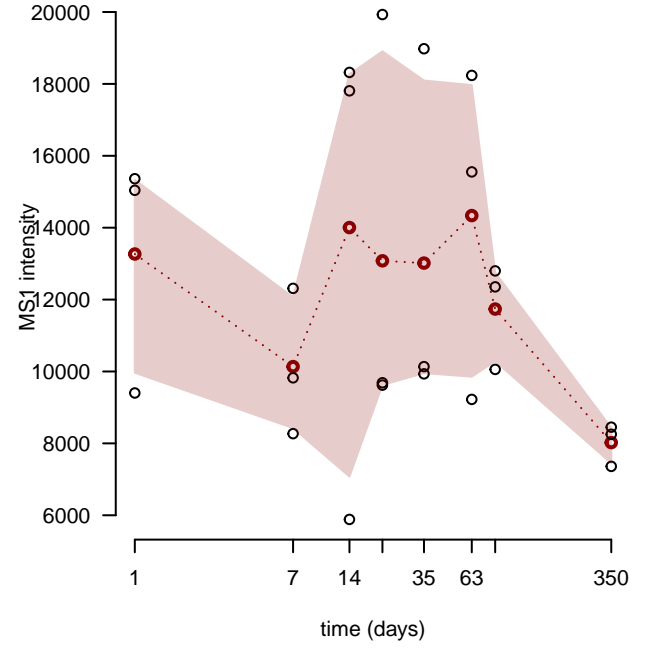

O35516  
GN=Notch2  
notch 2

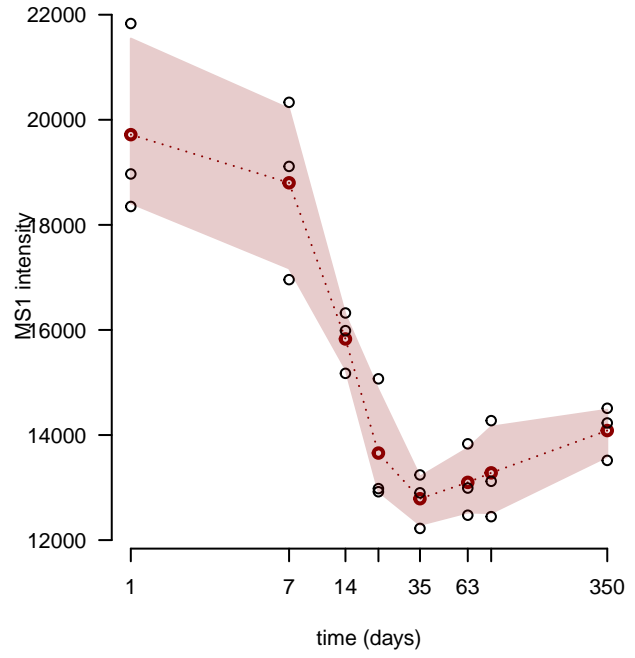

O35551  
GN=Rabep1  
rabaptin, RAB GTPase binding effector pr ...

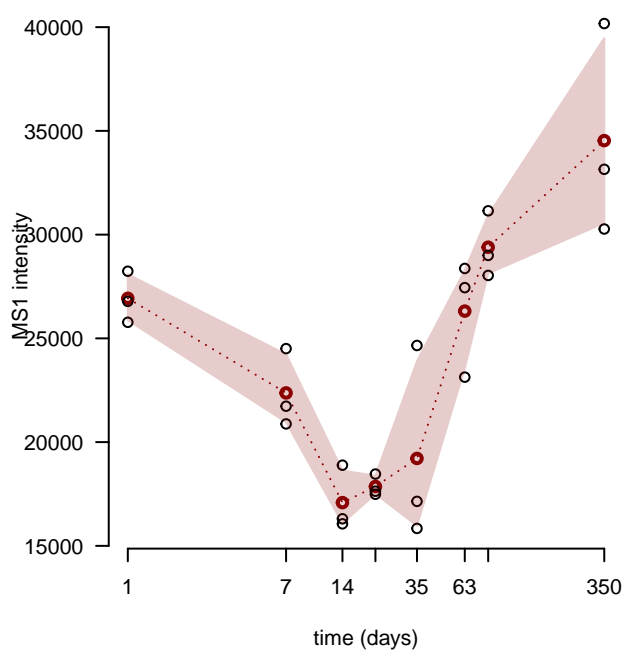

O35566  
GN=Cd151  
CD151 antigen

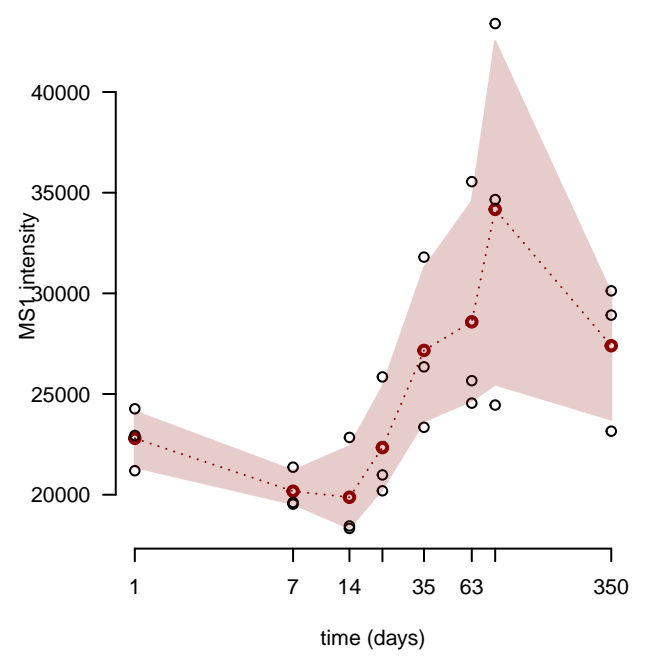

O35593  
GN=Psm14  
proteasome (prosome, macropain) 26S subu ...

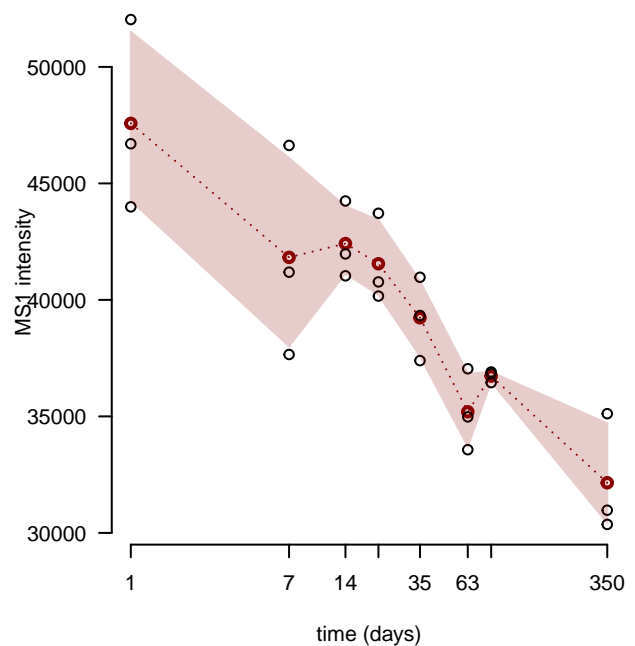

O35594  
GN=Ift81  
intraflagellar transport 81

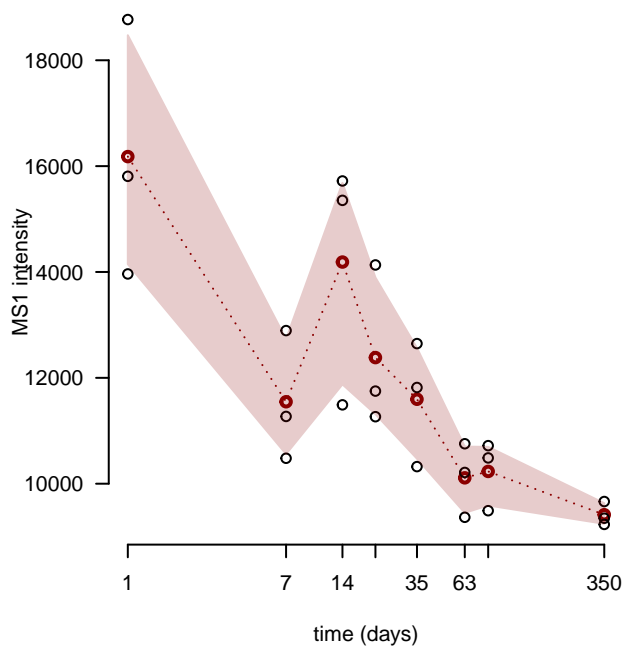

O35598  
GN=Adam10  
a disintegrin and metallopeptidase domai ...

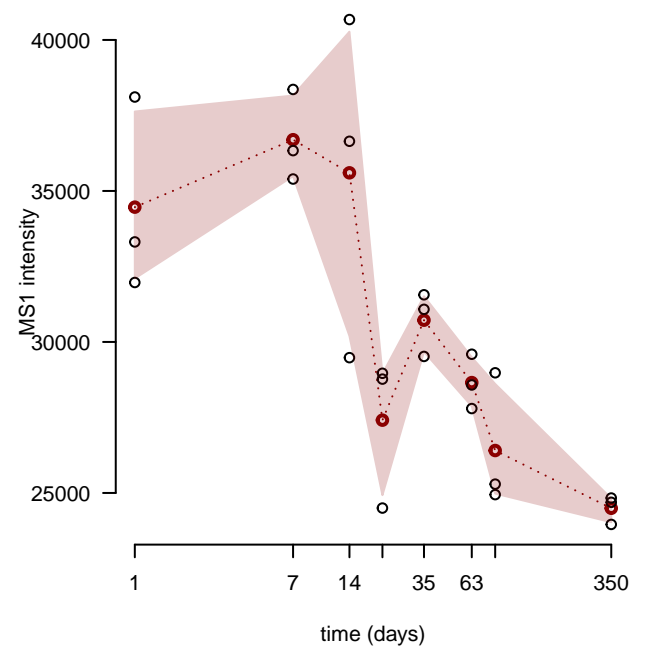

O35601  
GN=Fyb1

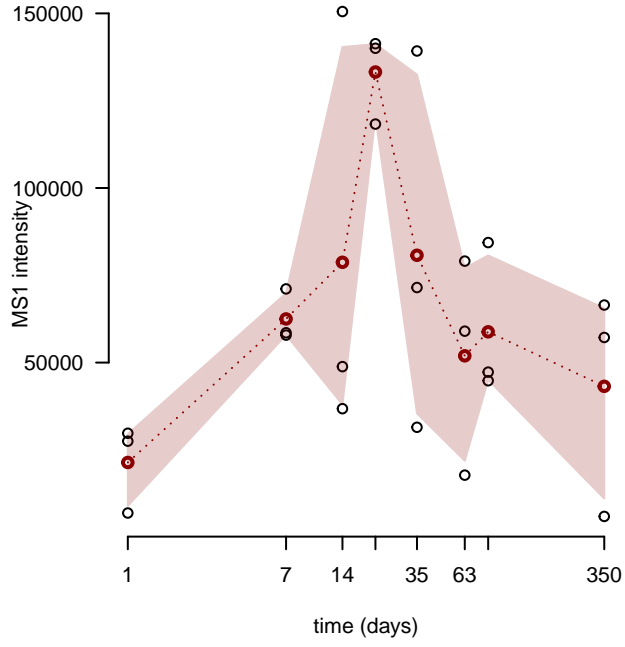

O35604  
GN=Npc1  
NPC intracellular cholesterol transporte ...

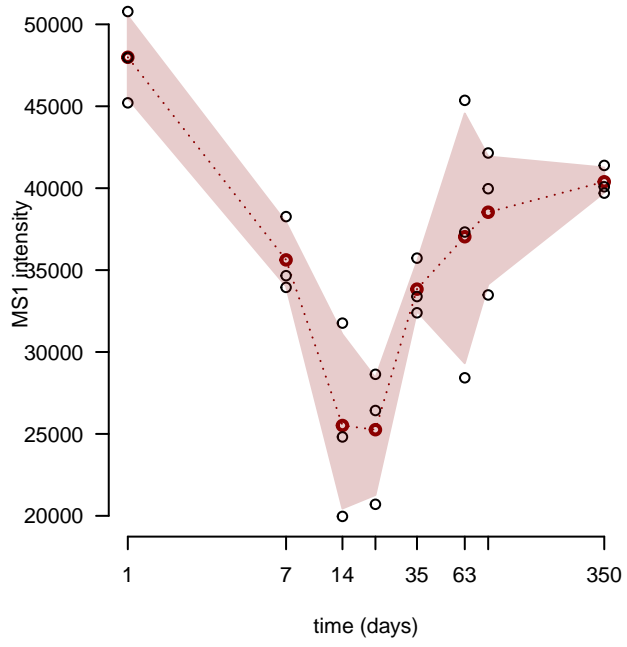

O35607  
GN=Bmpr2  
bone morphogenetic protein receptor, typ ...

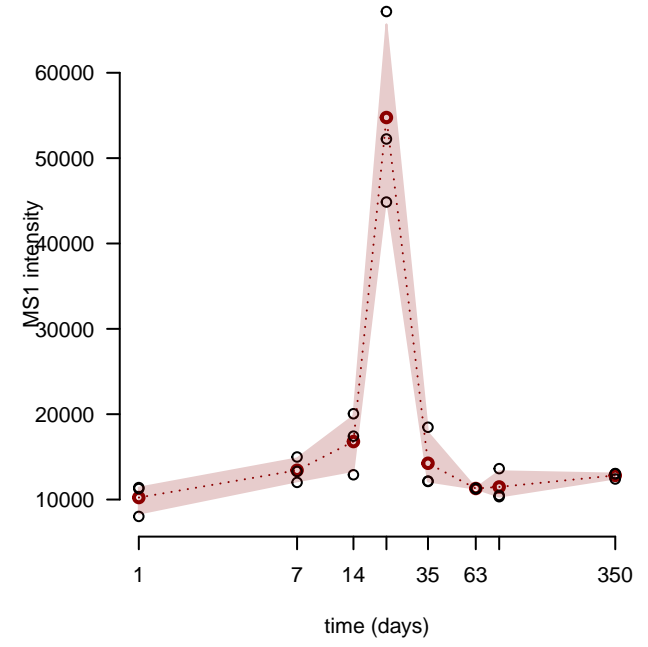

O35609  
GN=Scamp3  
secretory carrier membrane protein 3

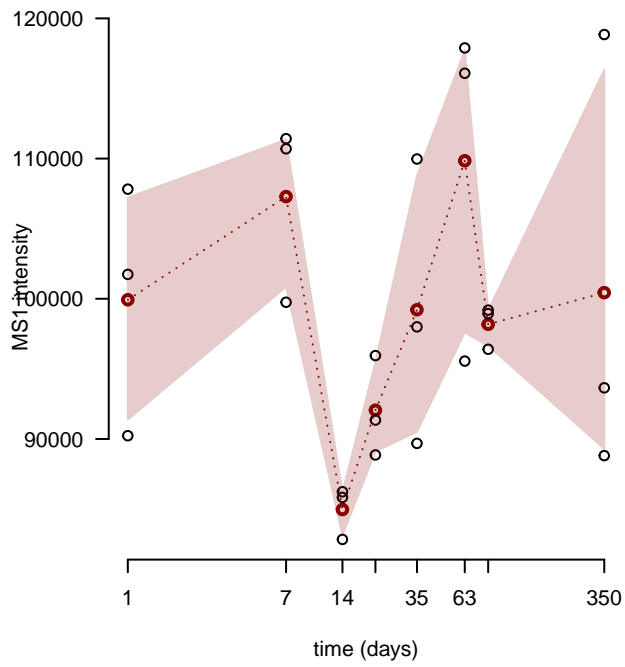

O35613  
GN=Daxx  
Fas death domain-associated protein

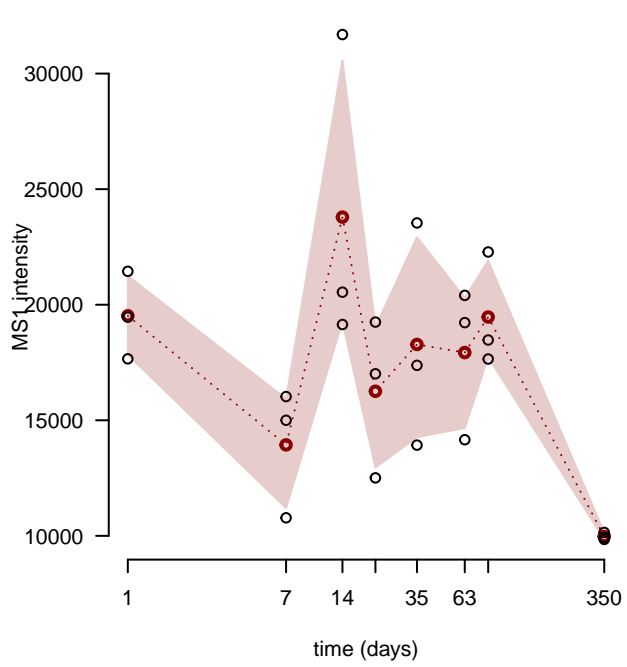

O35615  
GN=Zfp1  
zinc finger protein, multitype 1

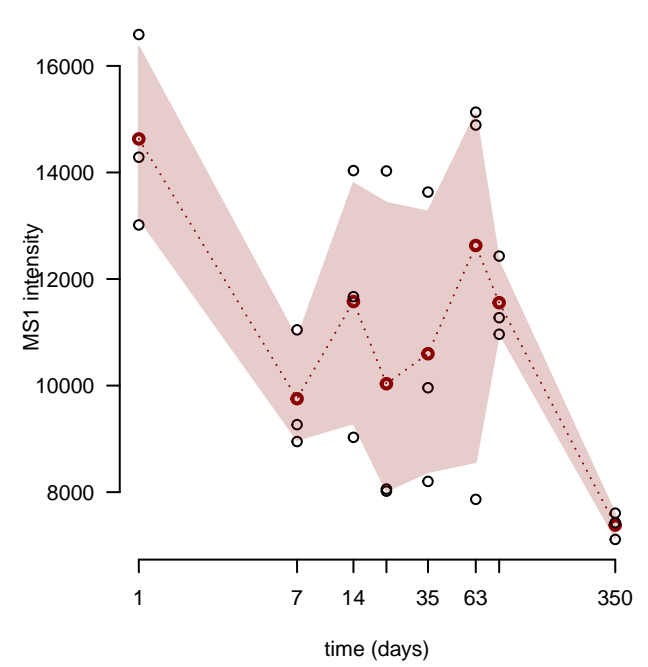

O35623  
GN=Bet1  
Bet1 golgi vesicular membrane traffickin ...

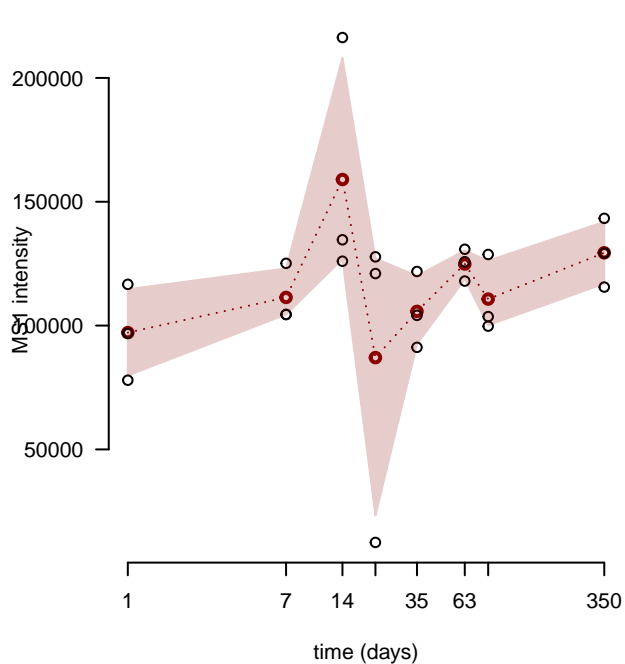

O35625  
GN=Axin1  
axin 1

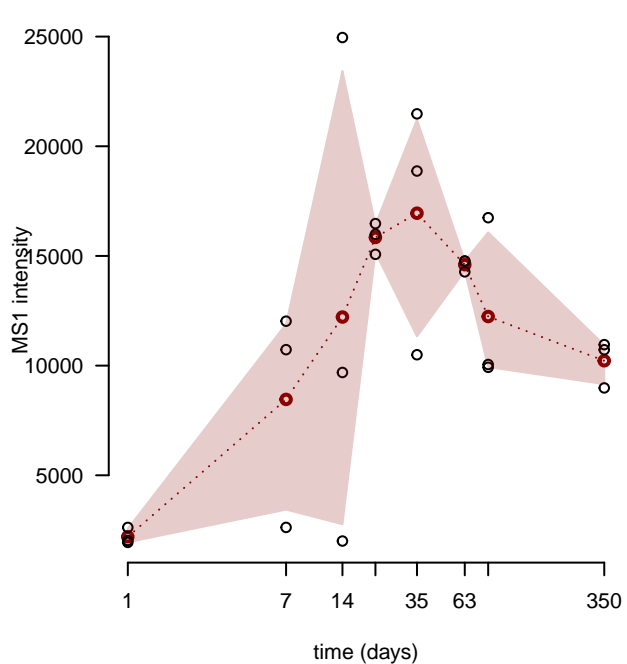

O35632  
GN=Hyal2  
hyaluronoglucosaminidase 2

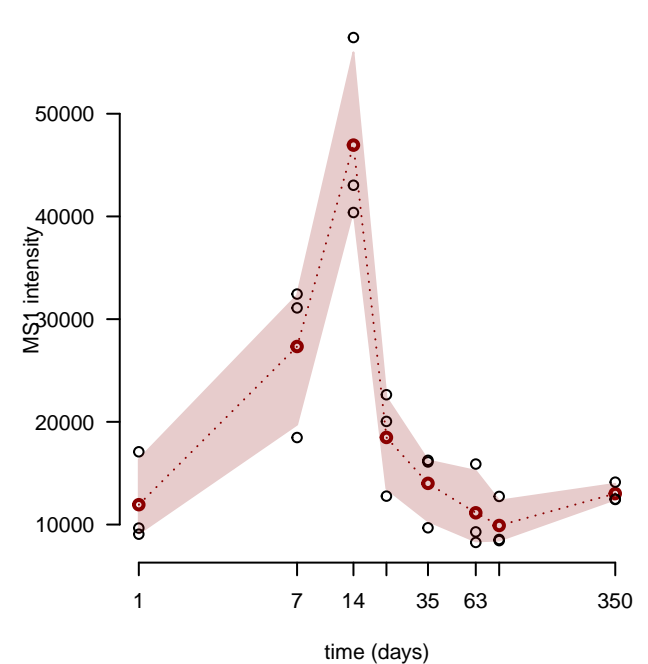

O35638  
GN=Stag2  
stromal antigen 2

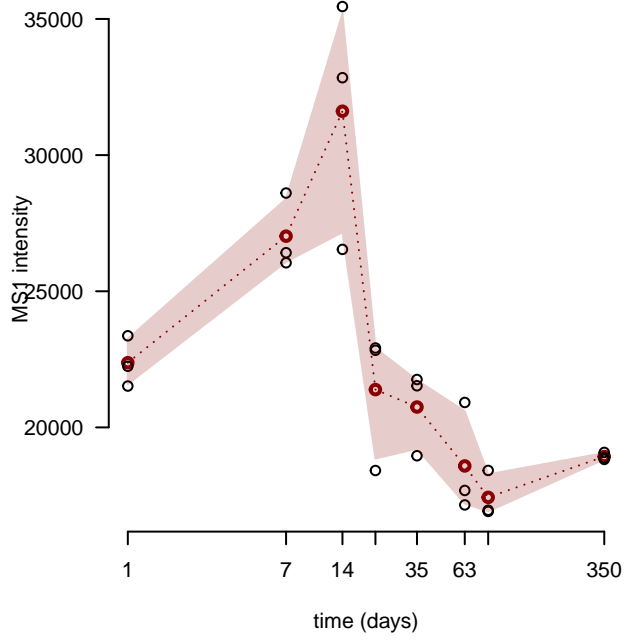

O35639  
GN=Anxa3  
annexin A3

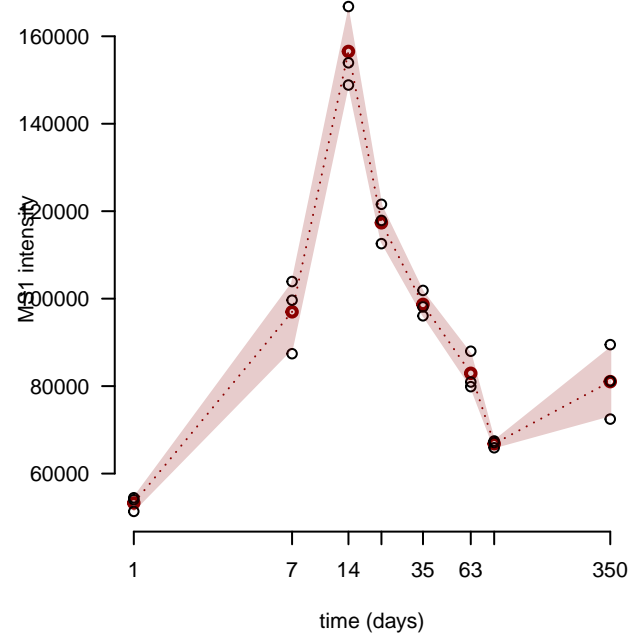

O35643  
GN=Ap1b1  
adaptor protein complex AP-1, beta 1 sub ...

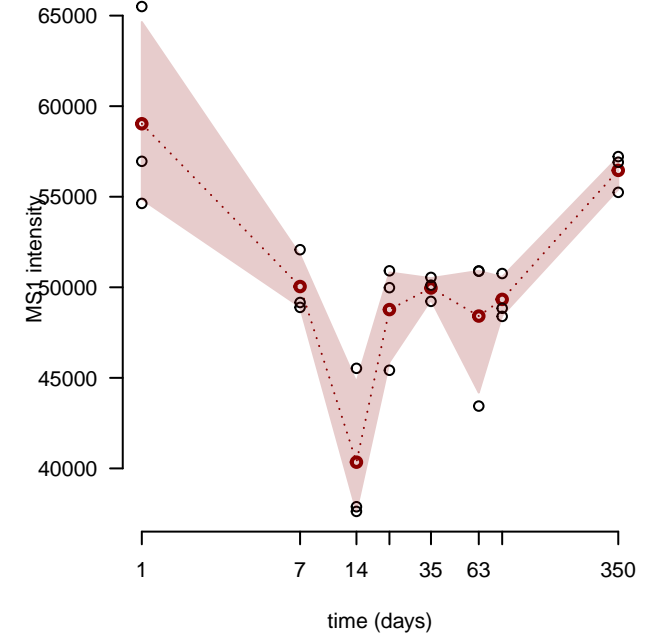

O35646  
GN=Capn6  
calpain 6

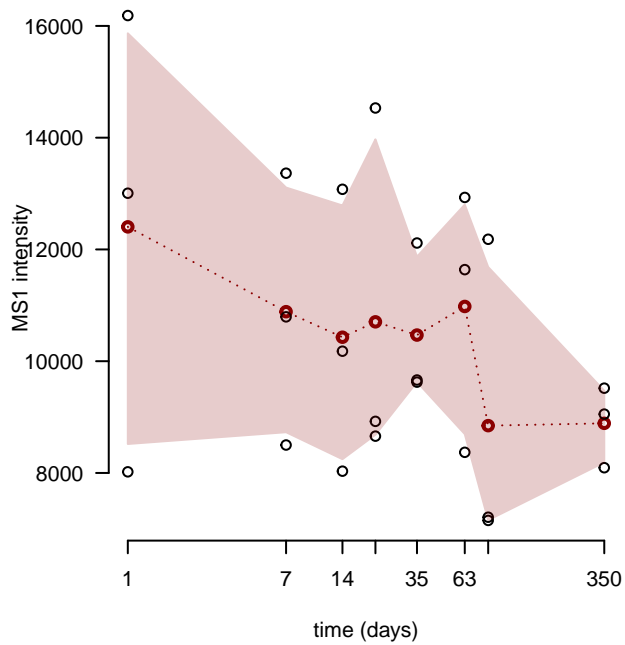

O35648  
GN=Cetn3  
centrin 3

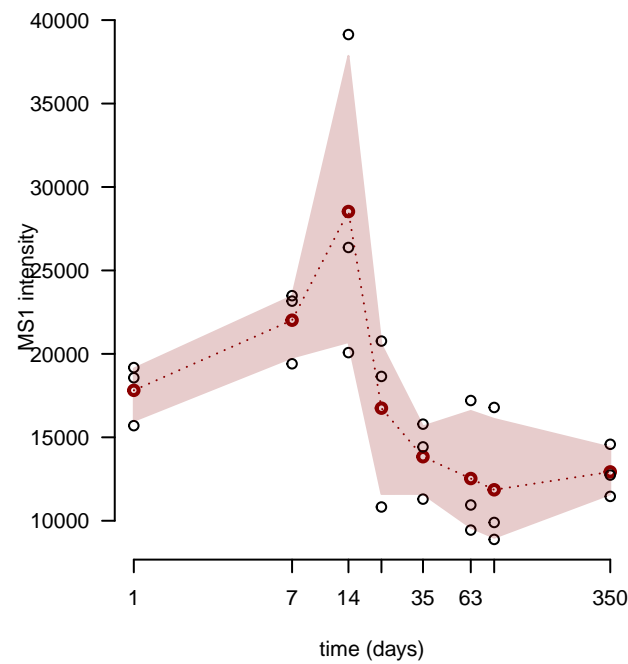

O35652  
GN=Lhx8  
LIM homeobox protein 8

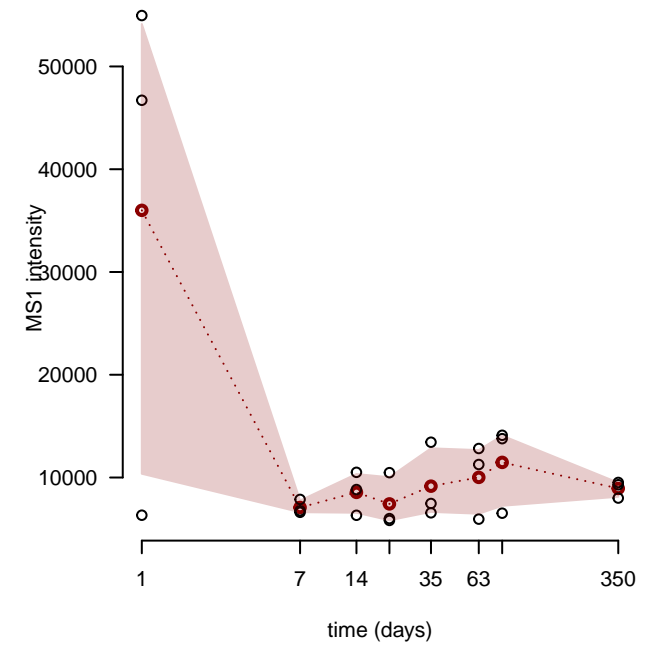

O35654  
GN=Pold2  
polymerase (DNA directed), delta 2, regu ...

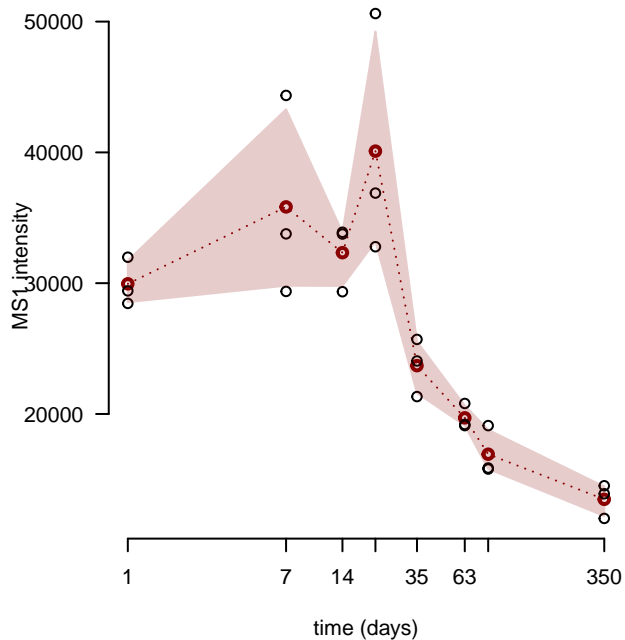

O35657  
GN=Neu1  
neuraminidase 1

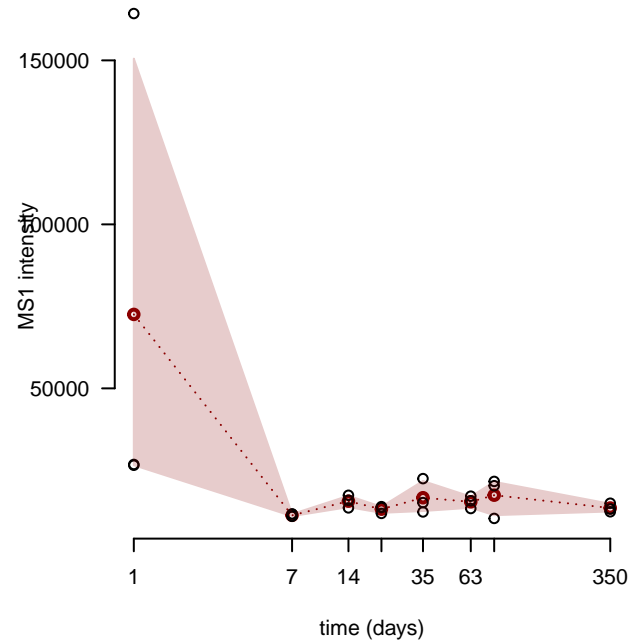

O35658  
GN=C1qbp  
complement component 1, q subcomponent b ...

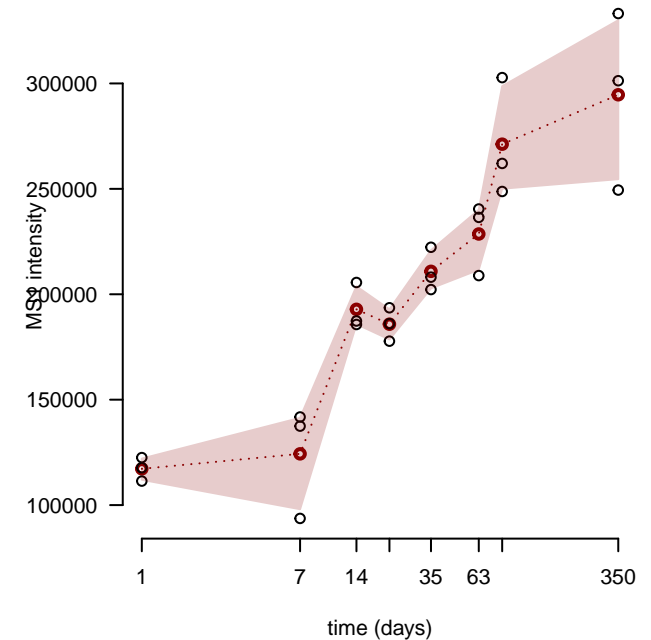

**O35660**  
**GN=Gstm6**  
glutathione S-transferase, mu 6

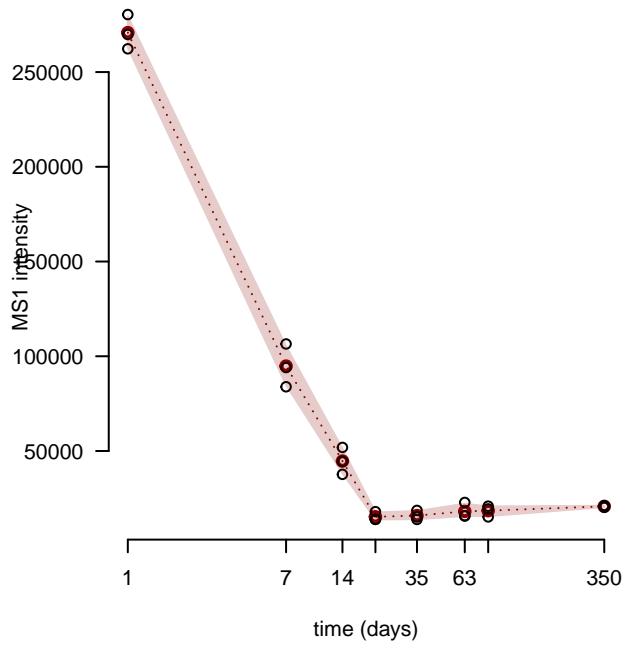

**O35678**  
**GN=Mgll**  
monoglyceride lipase

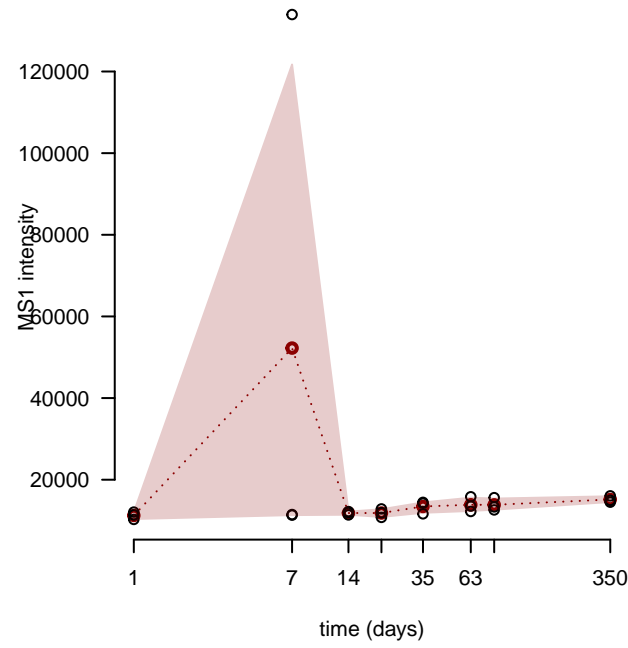

**O35680**  
**GN=Mrps12**  
mitochondrial ribosomal protein S12

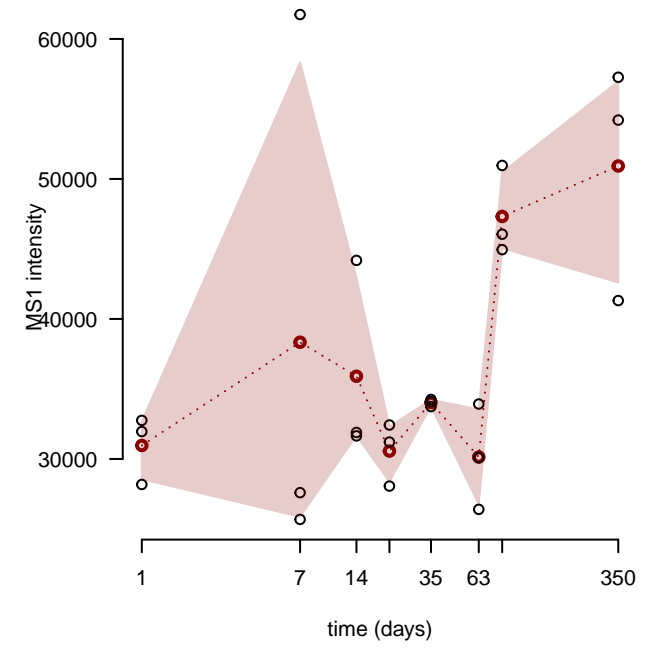

**O35682**  
**GN=Myadm**  
myeloid-associated differentiation marke ...

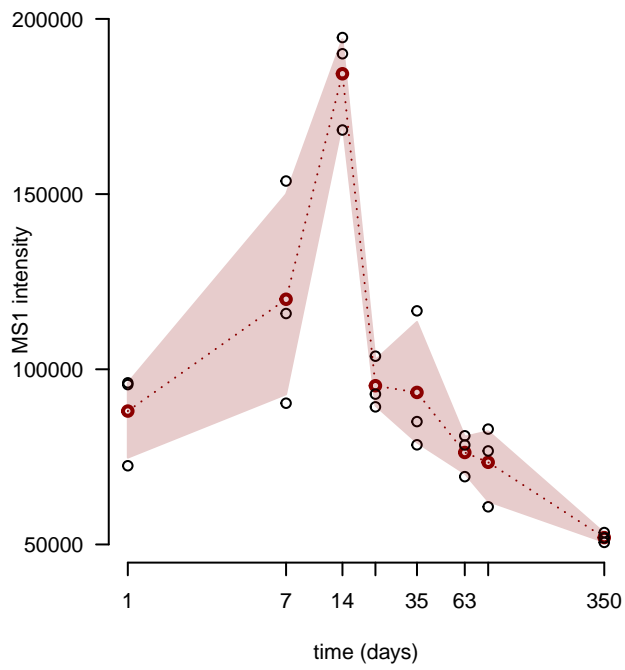

**O35683**  
**GN=Ndufa1**  
NADH:ubiquinone oxidoreductase subunit A ...

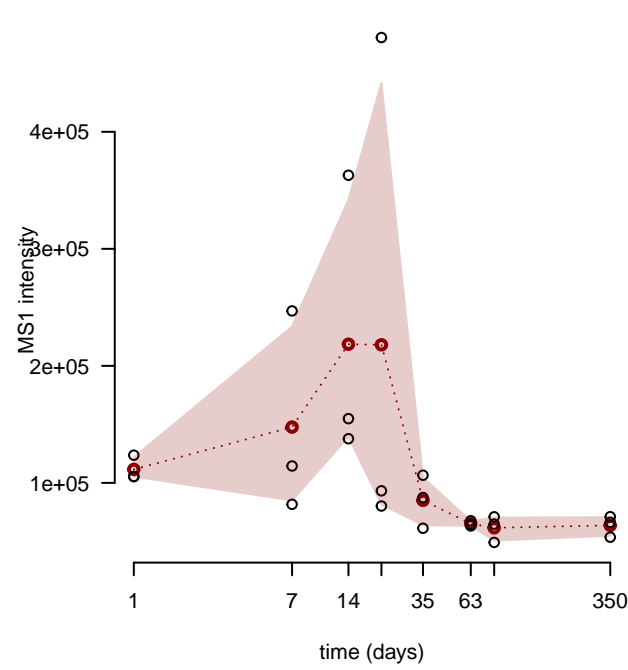

**O35685**  
**GN=Nudc**  
nudC nuclear distribution protein

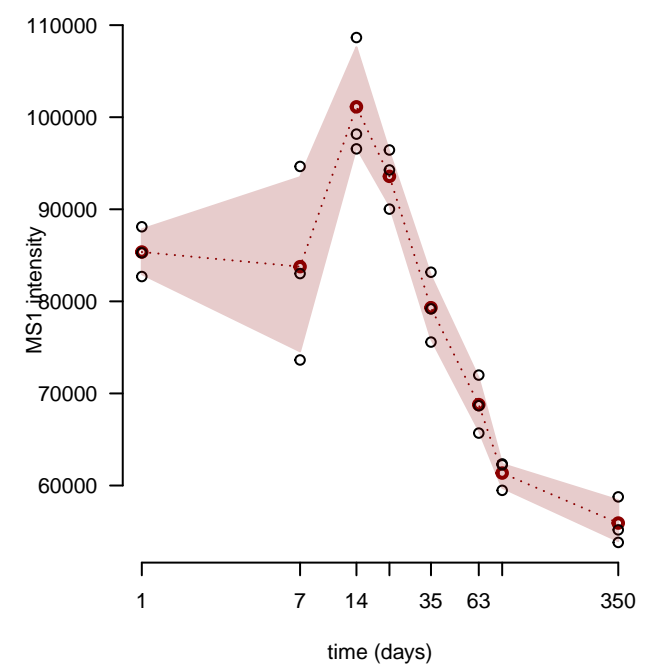

**O35690**  
**GN=Phox2b**  
paired-like homeobox 2b

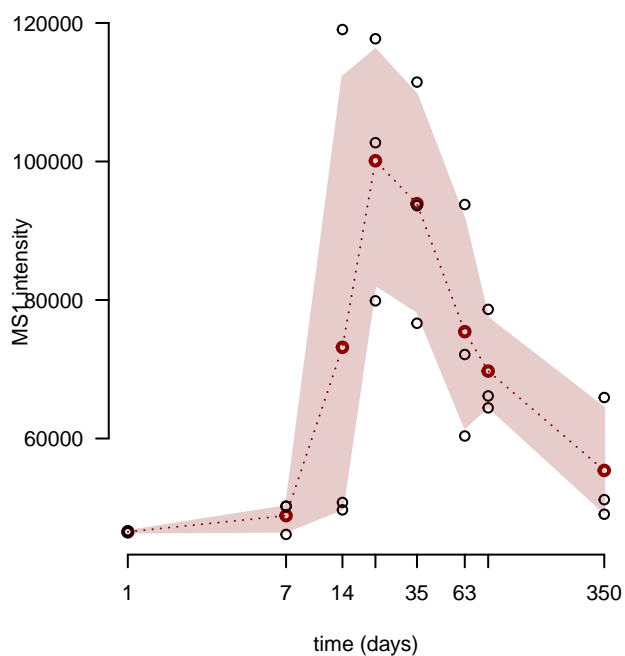

**O35691**  
**GN=Pnn**  
pinin

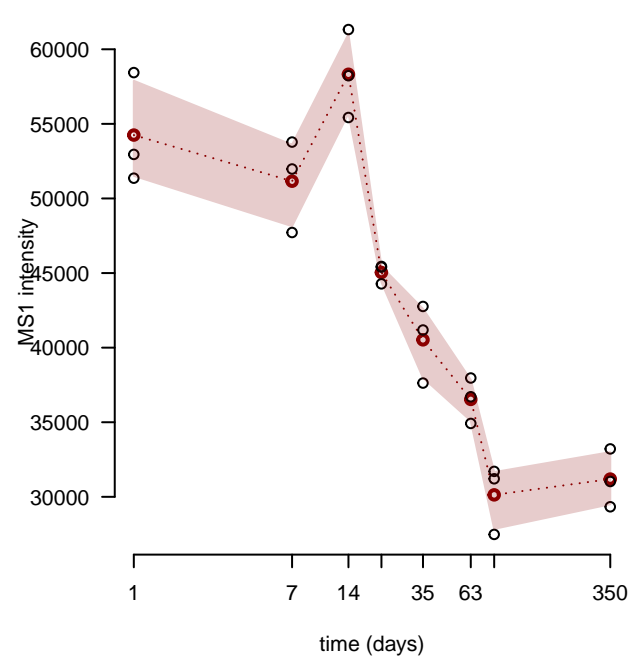

**O35704**  
**GN=Sptlc1**  
serine palmitoyltransferase, long chain ...

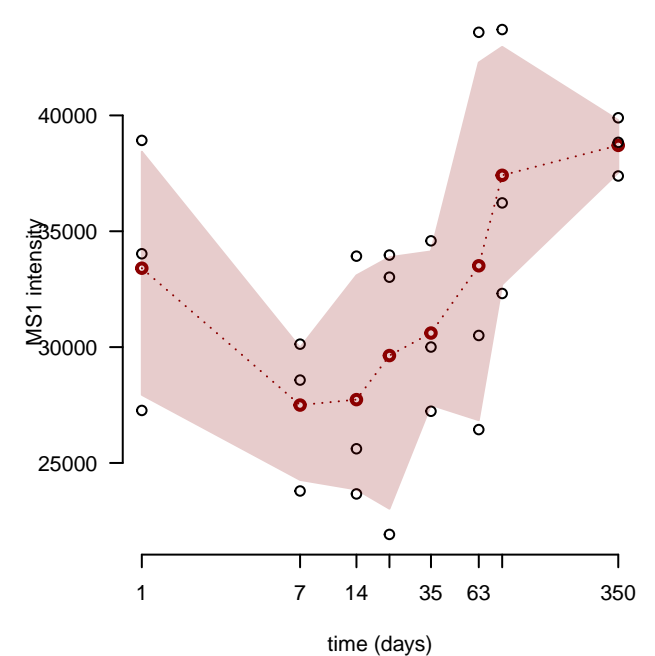

**O35711**  
GN=Ppfibp2  
PTPRF interacting protein, binding prote ...

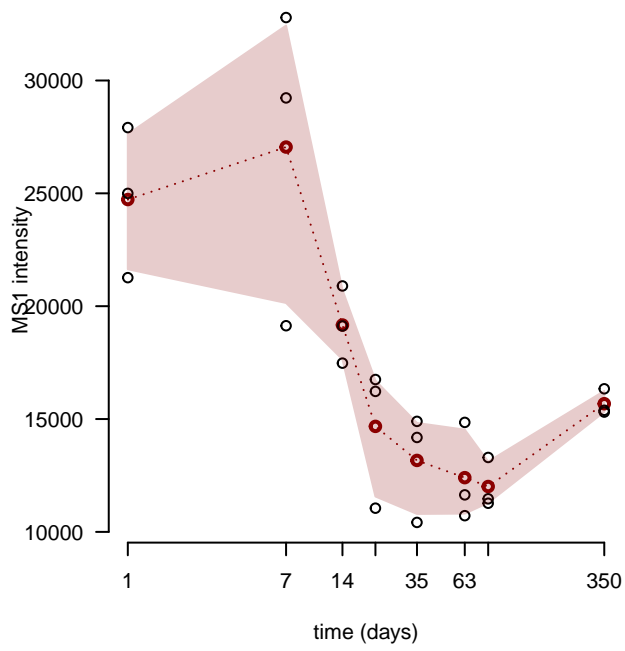

**O35717**  
GN=Socs2  
suppressor of cytokine signaling 2

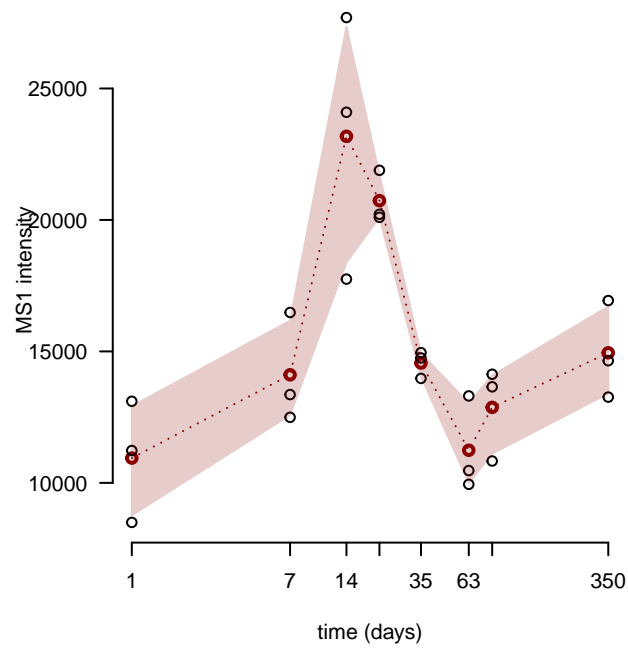

**O35719**  
GN=Rad51b  
RAD51 paralog B

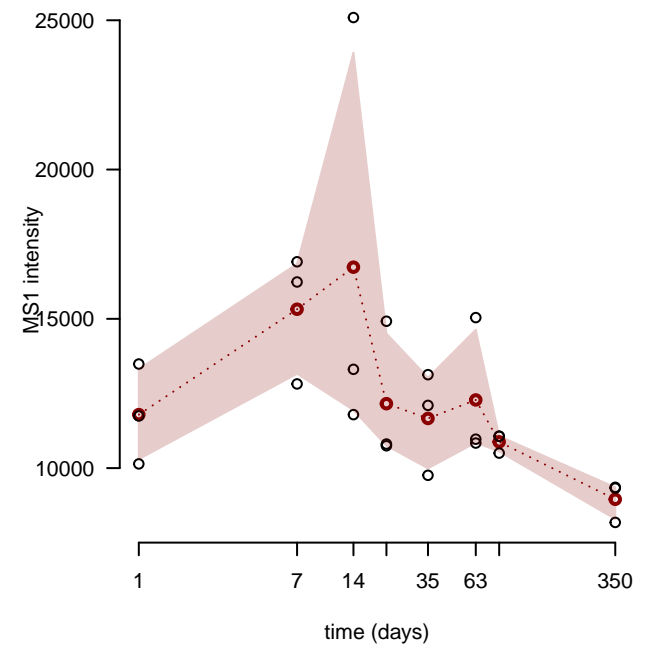

**O35730**  
GN=Ring1  
ring finger protein 1

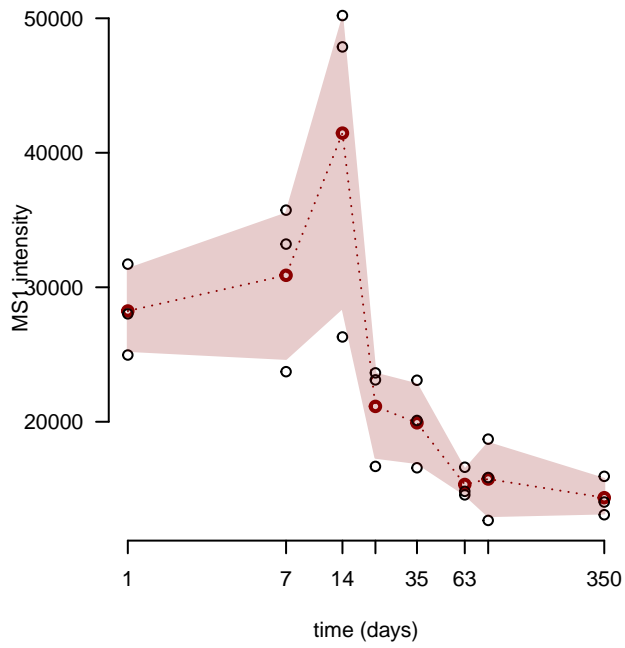

**O35737**  
GN=Hnrnp1  
heterogeneous nuclear ribonucleoprotein ...

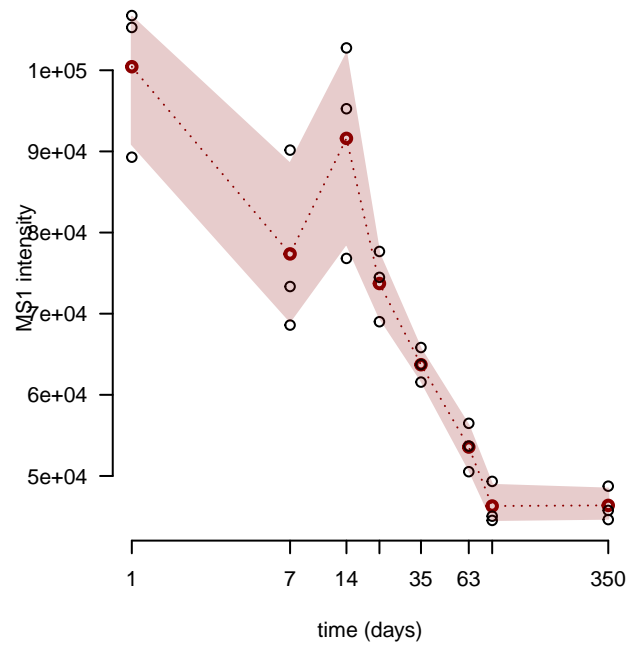

**O35738**  
GN=Klf12  
Kruppel-like factor 12

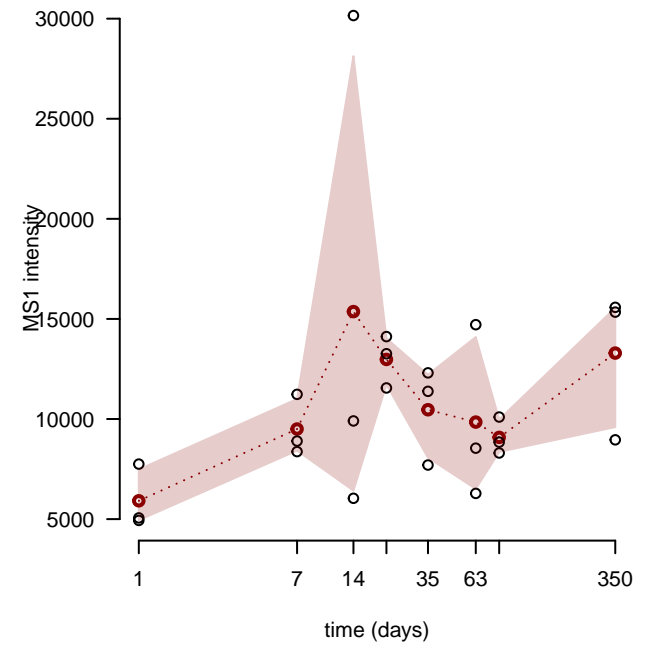

**O35744**  
GN=Chil3  
chitinase-like 3

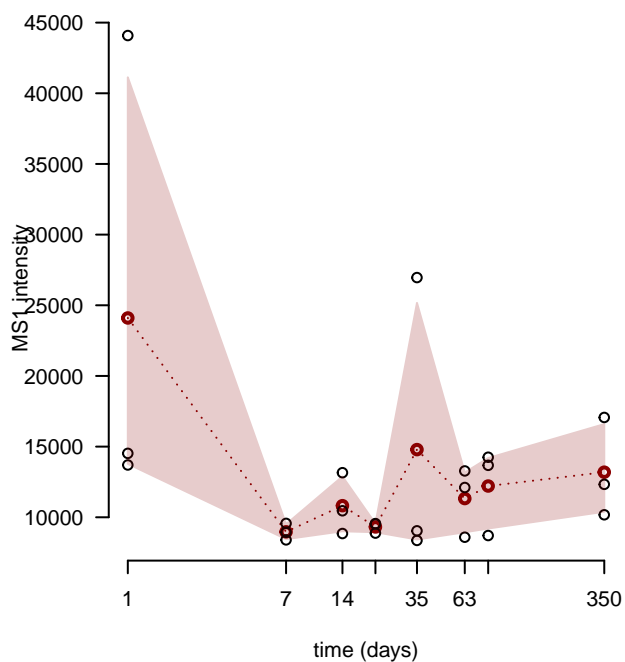

**O35841**  
GN=Api5  
apoptosis inhibitor 5

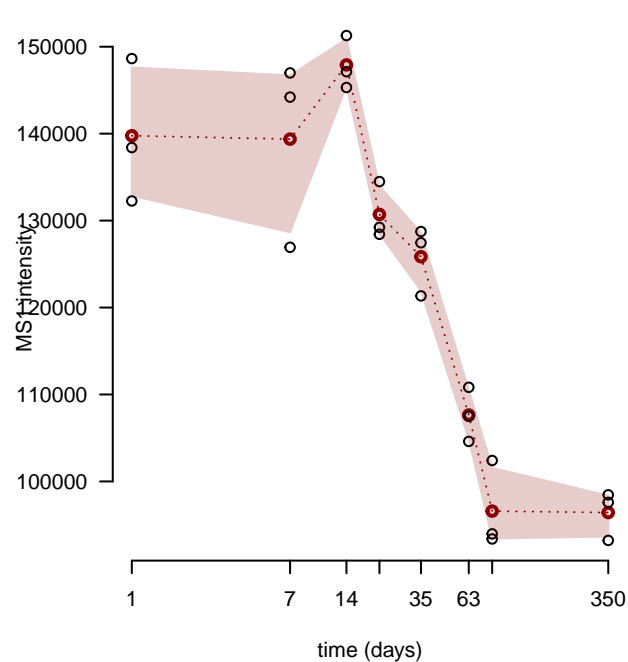

**O35855**  
GN=Bcat2  
branched chain aminotransferase 2, mitoc ...

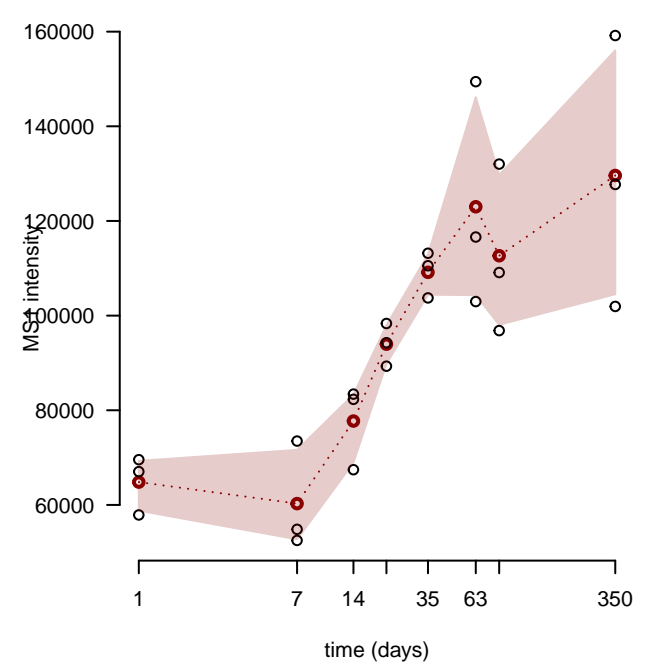



**O35857**  
**GN=Timm44**  
translocase of inner mitochondrial membr ...

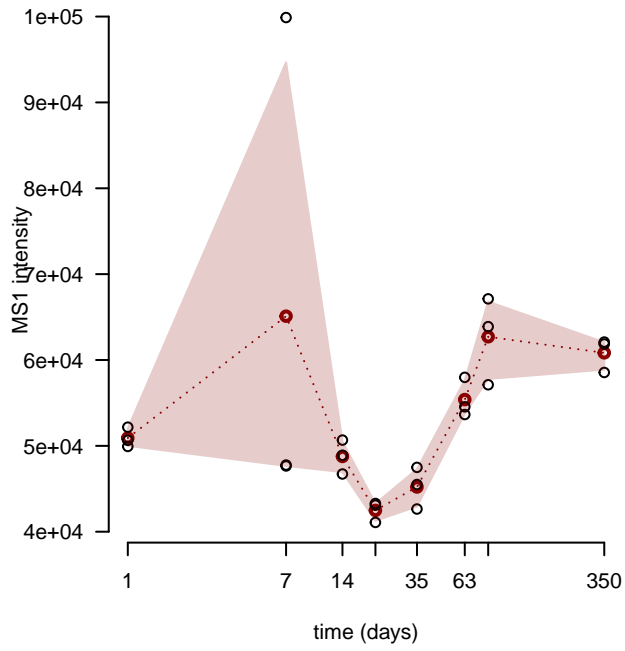

**O35864**  
**GN=Cops5**  
COP9 signalosome subunit 5

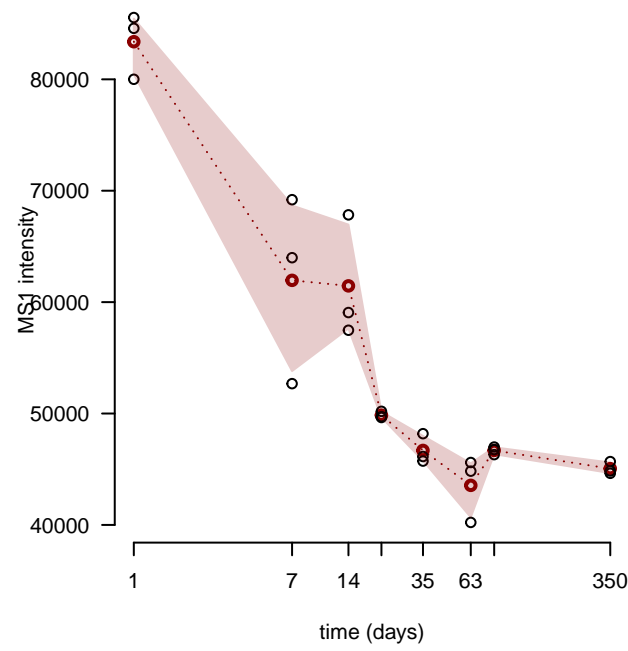

**O35874**  
**GN=Slc1a4**  
solute carrier family 1 (glutamate/neutr ...

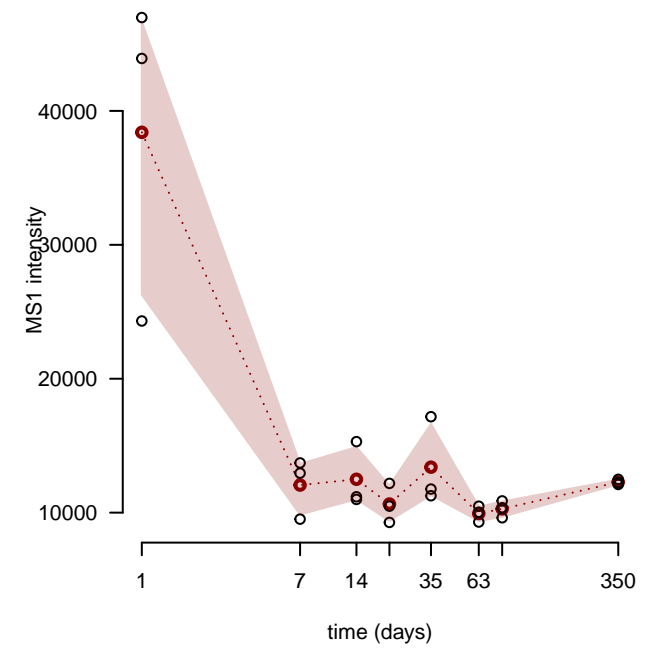

**O35887**  
**GN=Calu**  
calumenin

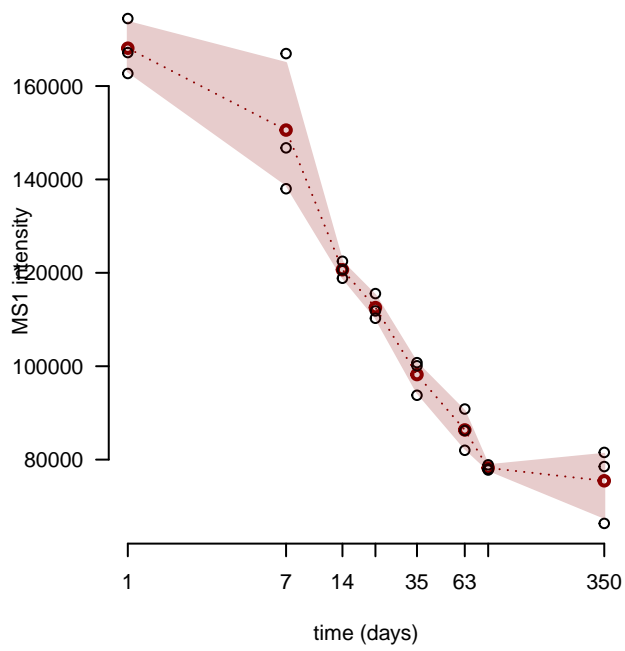

**O35892**  
**GN=Sp100**  
nuclear antigen Sp100

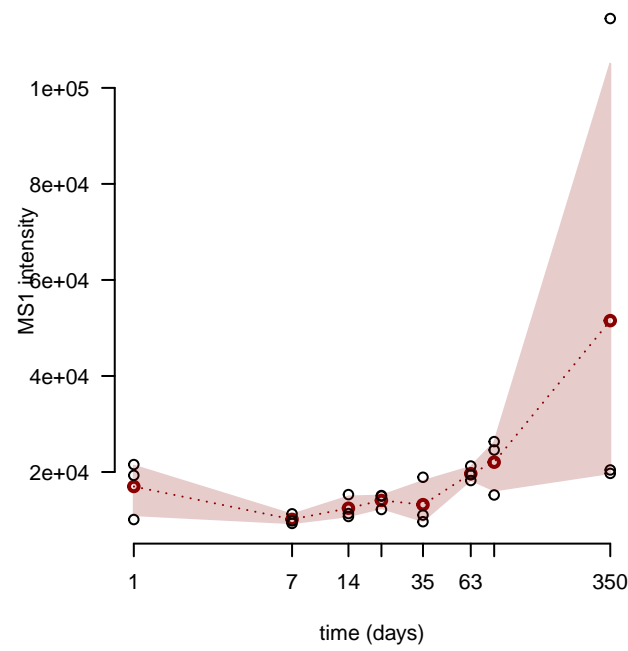

**O35900**  
**GN=Lsm2**  
LSM2 homolog, U6 small nuclear RNA and m ...

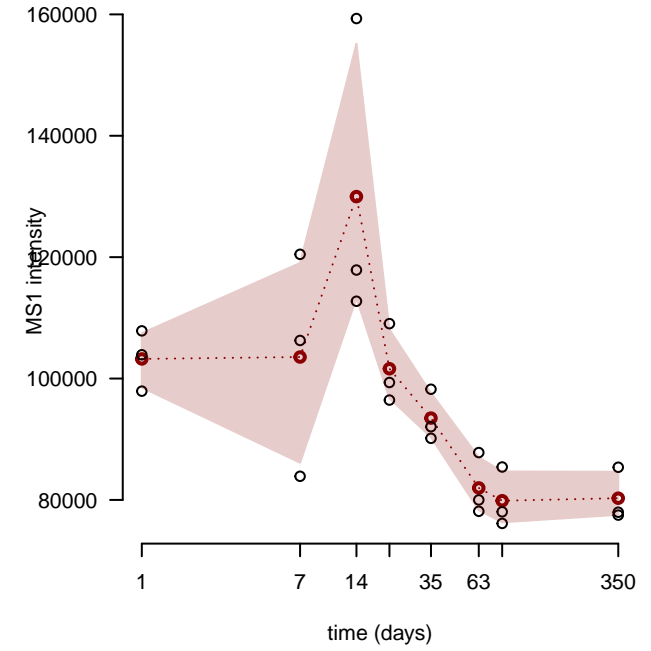

**O35912**  
**GN=Emp3**  
epithelial membrane protein 3

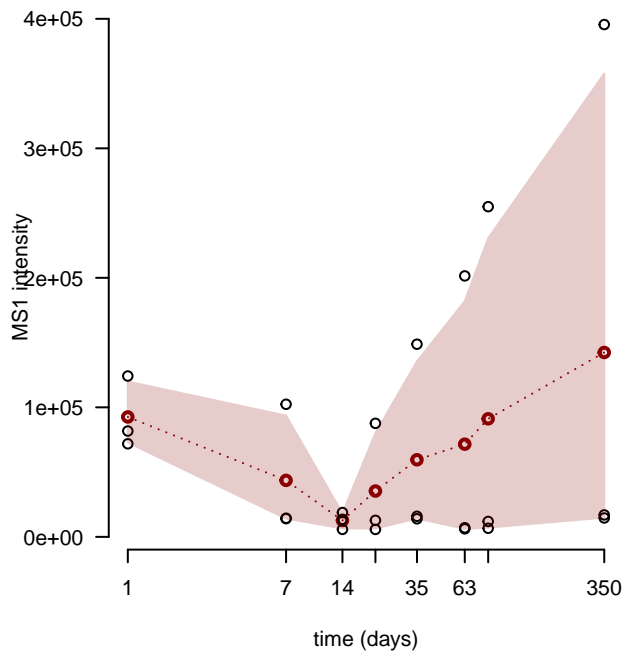

**O35914**  
**GN=Bnc1**  
basenuclin 1

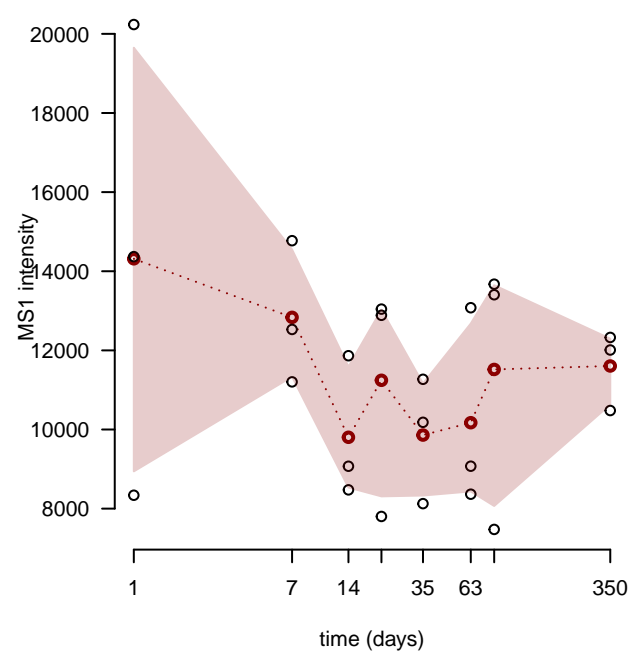

**O35929**  
**GN=Rem1**  
rad and gem related GTP binding protein ...

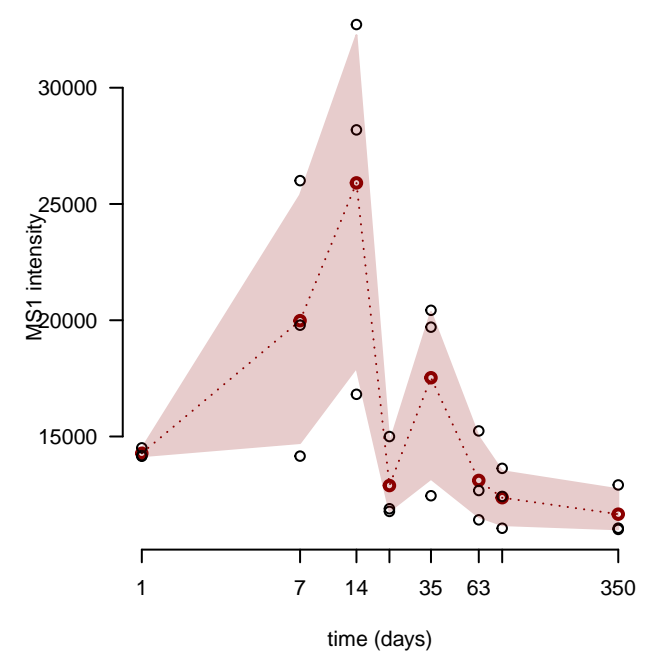

**O35930**  
**GN=Gp1ba**  
glycoprotein 1b, alpha polypeptide

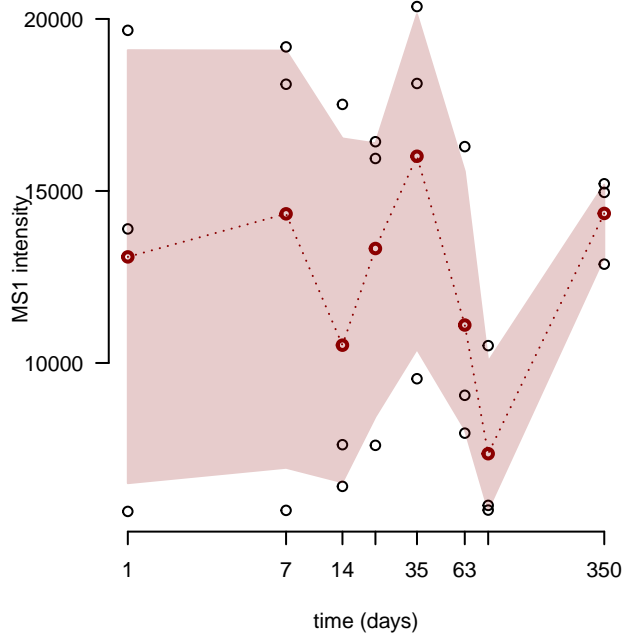

**O35943**  
**GN=Fxn**  
frataxin

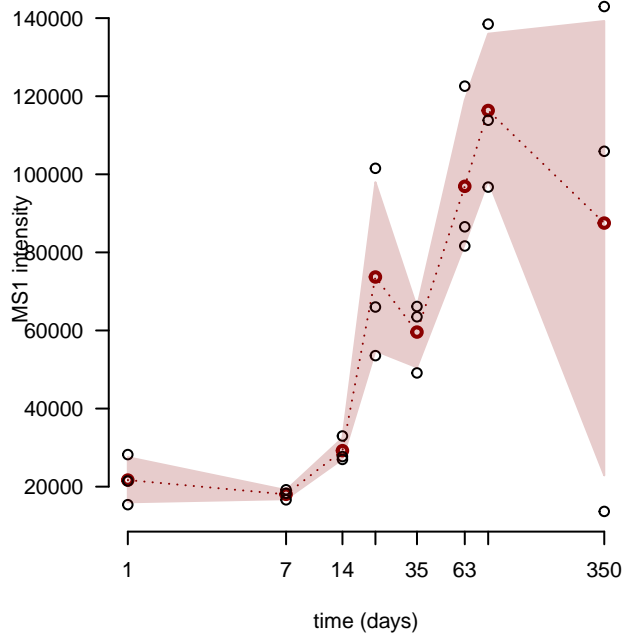

**O35945**  
**GN=Aldh1a7**  
aldehyde dehydrogenase family 1, subfam ...

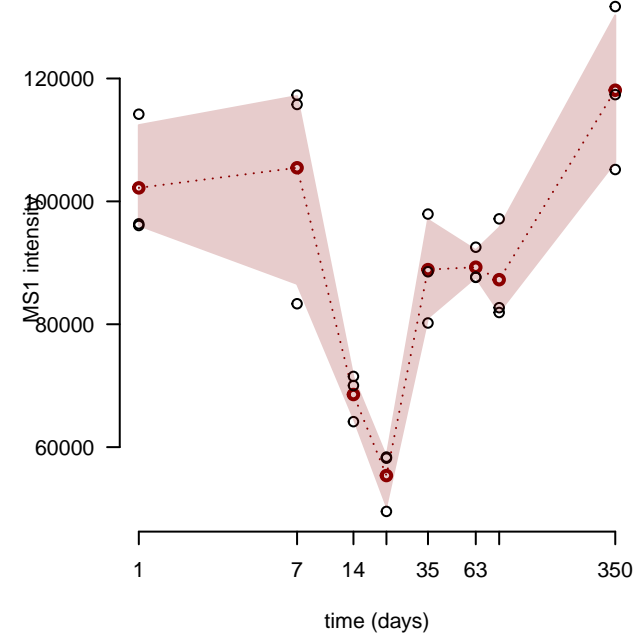

**O35954**  
**GN=Pitpm1**  
phosphatidylinositol transfer protein, m ...

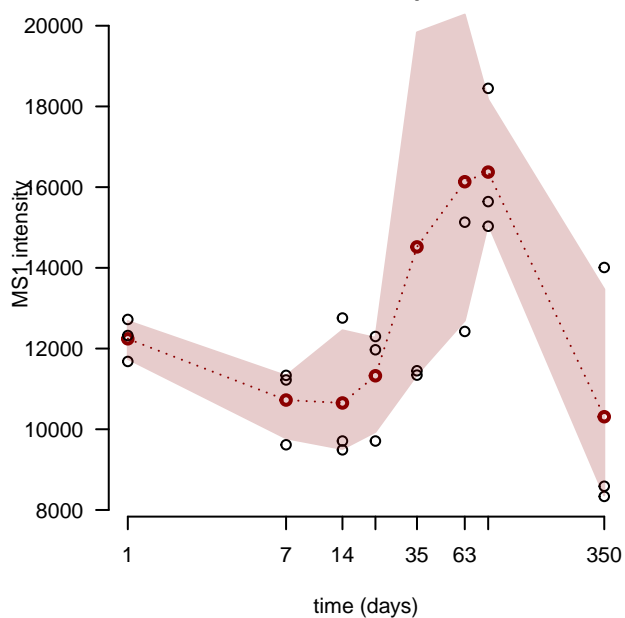

**O35955**  
**GN=Psmb10**  
proteasome (prosome, macropain) subunit, ...

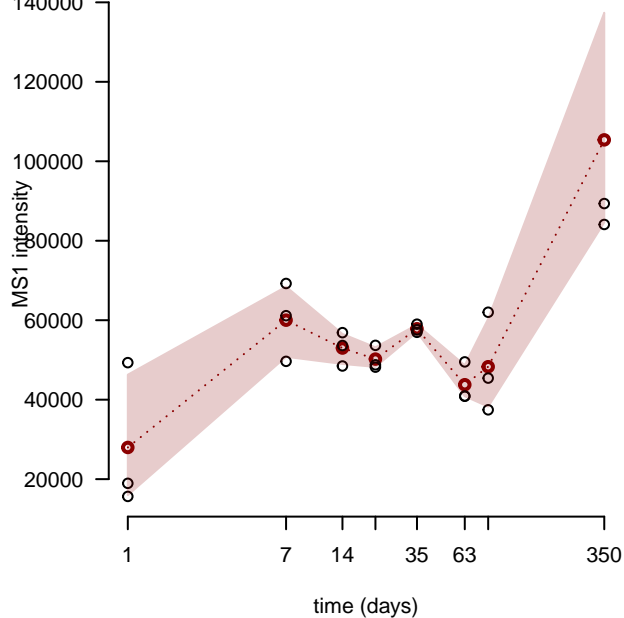

**O35963**  
**GN=Rab33b**  
RAB33B, member RAS oncogene family

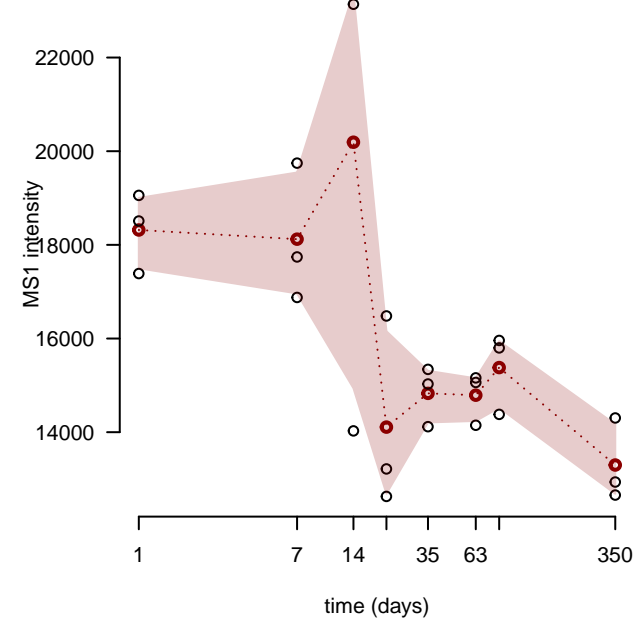

**O35969**  
**GN=Gamt**  
guanidinoacetate methyltransferase

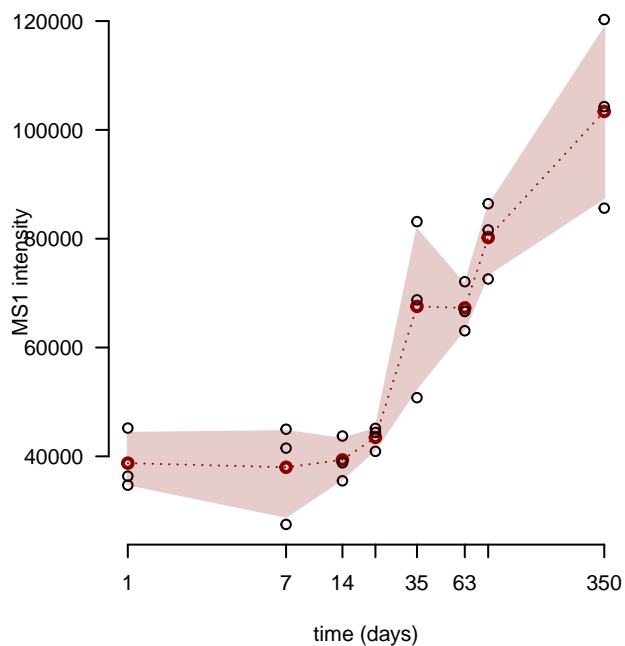

**O35972**  
**GN=Mrpl23**  
mitochondrial ribosomal protein L23

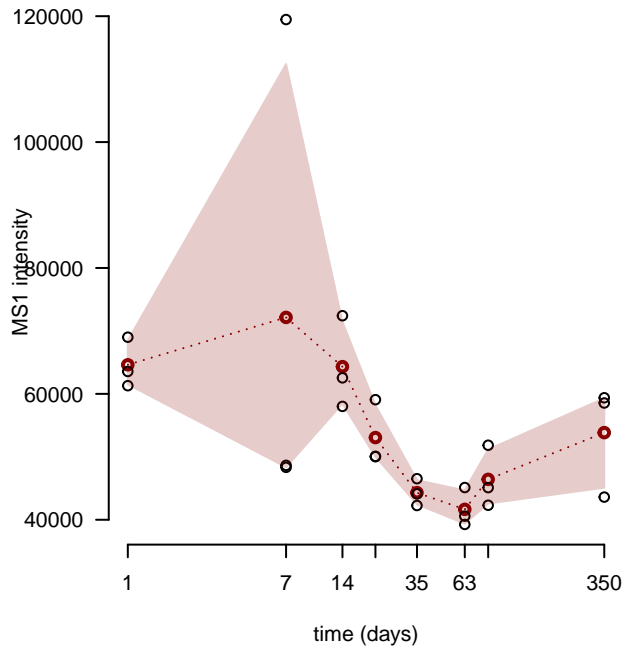

**O35980**  
**GN=Nth11**  
nth (endonuclease III)-like 1 (E.coli)

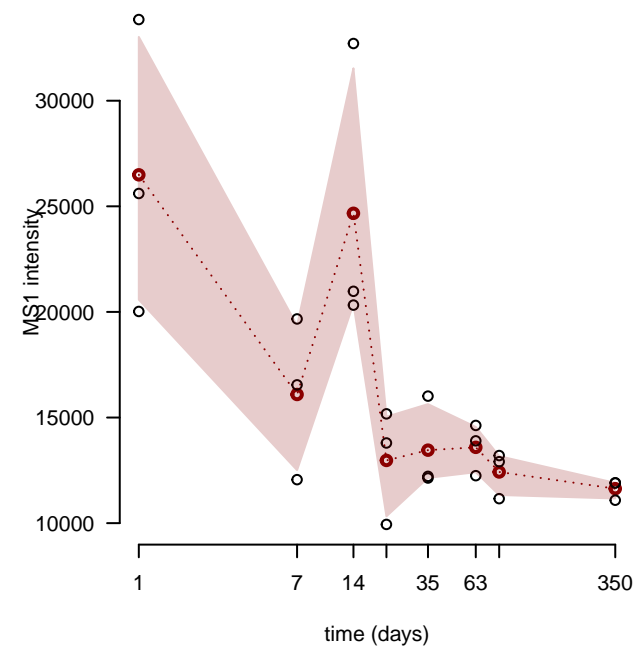

**O35984**  
**GN=Pbx2**  
pre B cell leukemia homeobox 2

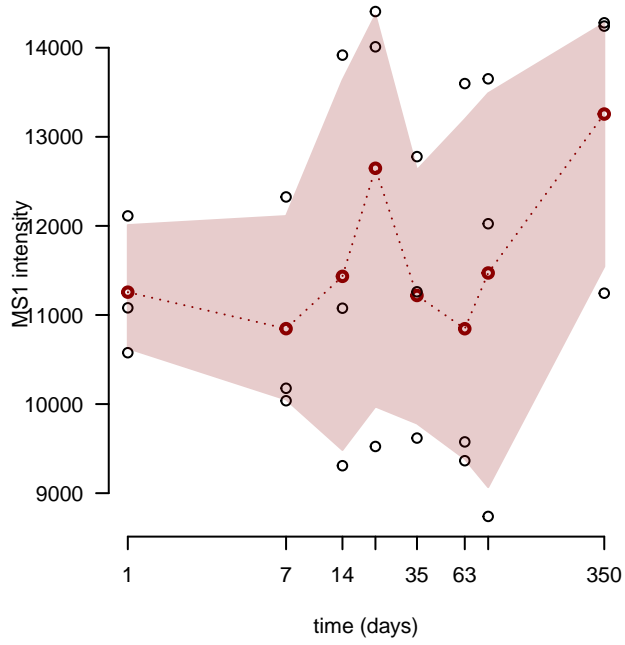

**O35988**  
**GN=Sdc4**  
syndecan 4

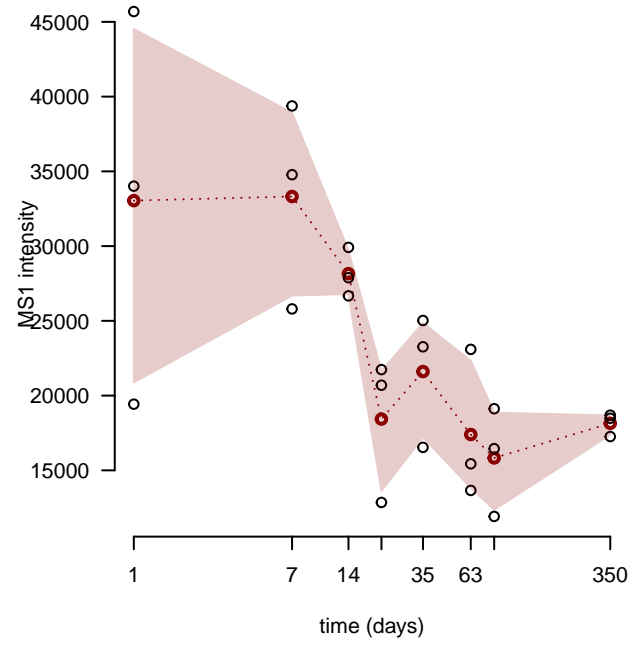

**O54692**  
**GN=Zw10**  
zw10 kinetochore protein

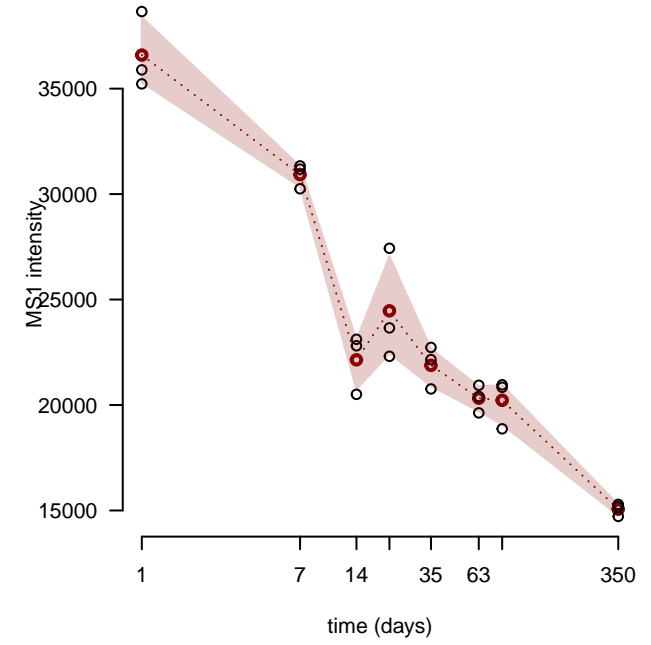

**O54724**  
**GN=Cavin1**  
caveolae associated 1

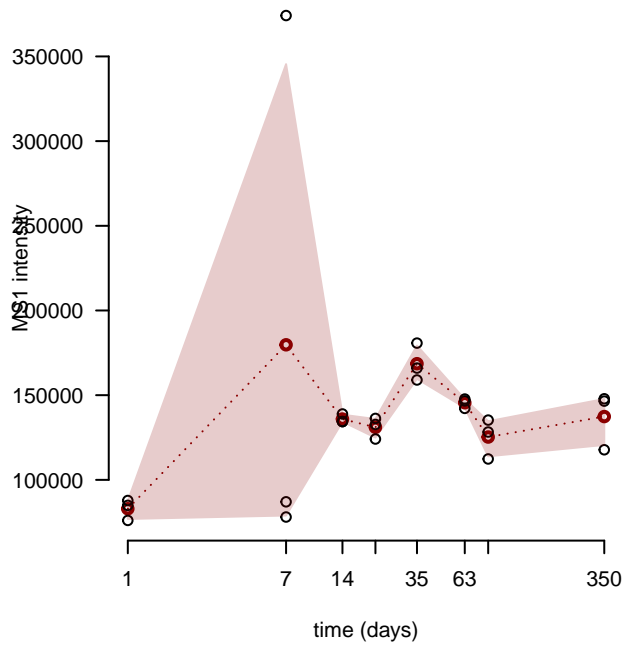

**O54734**  
**GN=Ddost**  
dolichyl-di-phosphooligosaccharide-prote ...

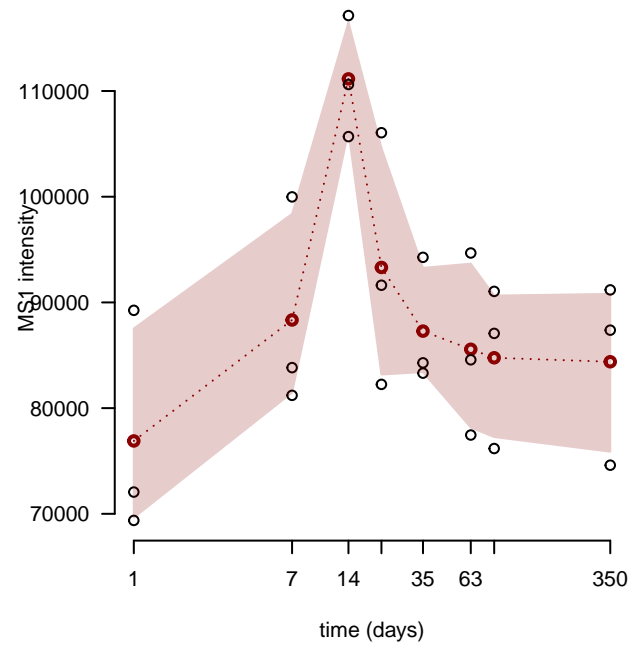

**O54750**  
**GN=Cyp2j6**  
cytochrome P450, family 2, subfamily j, ...

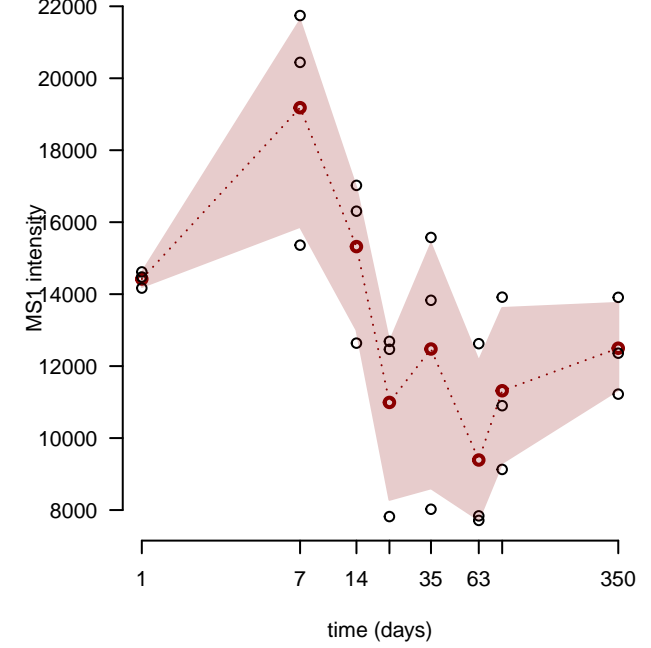

**O54774**  
**GN=Ap3d1**  
adaptor-related protein complex 3, delta ...

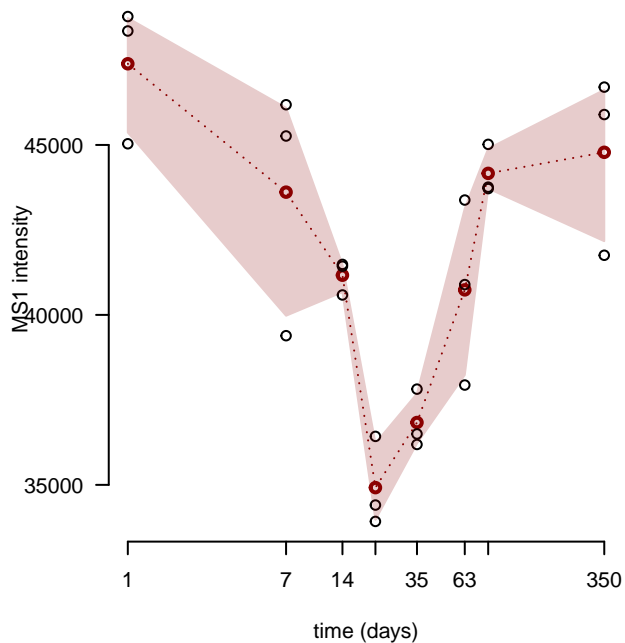

**O54781**  
**GN=Srpk2**  
serine/arginine-rich protein specific ki ...

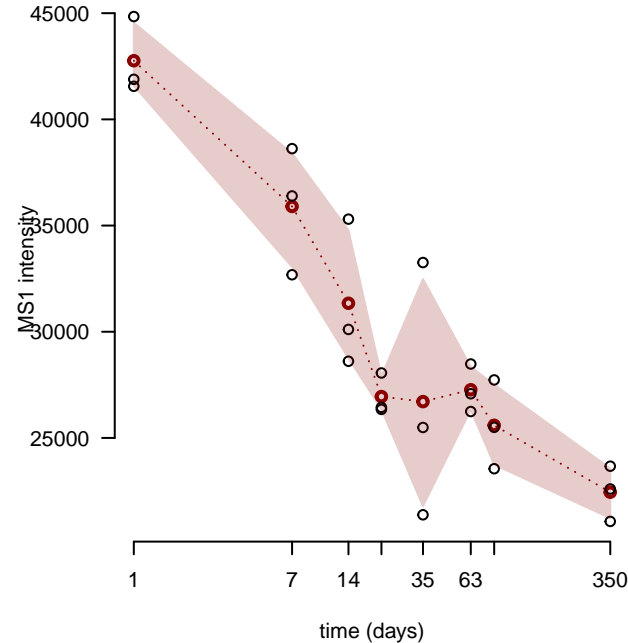

**O54782**  
**GN=Man2b2**  
mannosidase 2, alpha B2

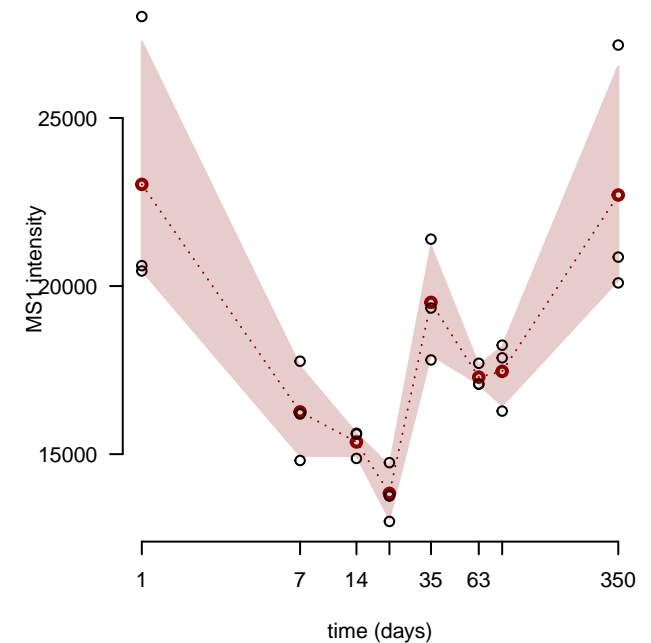

**O54784**  
**GN=Dapk3**  
death-associated protein kinase 3

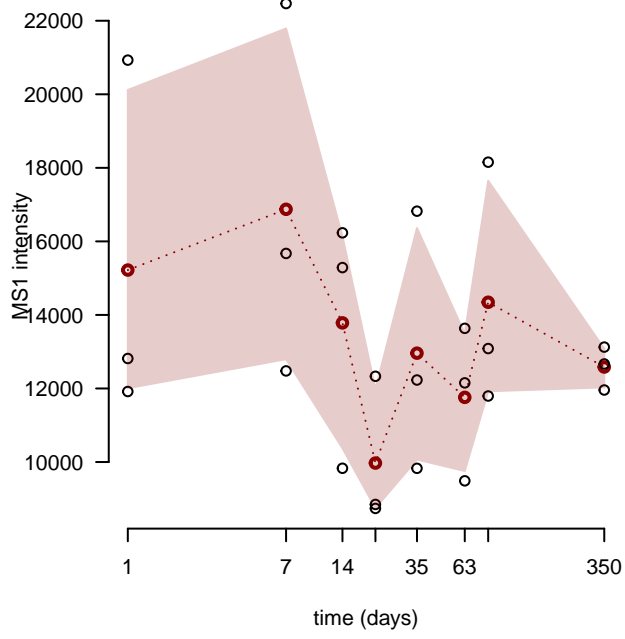

**O54785**  
**GN=Limk2**  
LIM motif-containing protein kinase 2

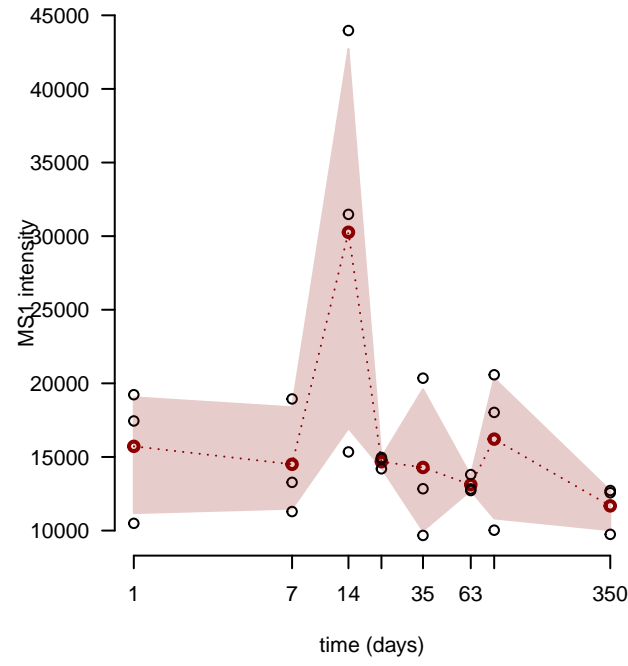

**O54786**  
**GN=Dffa**  
DNA fragmentation factor, alpha subunit

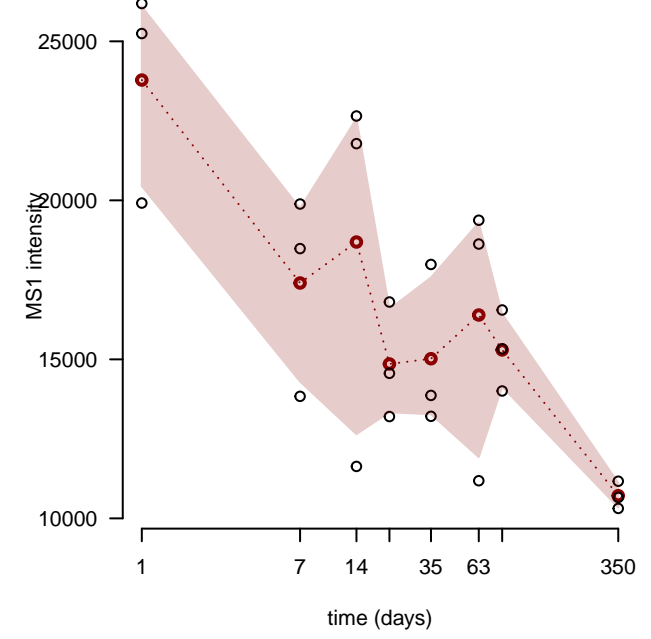

**O54790**  
**GN=Mafg**  
v-maf musculoaponeurotic fibrosarcoma on ...

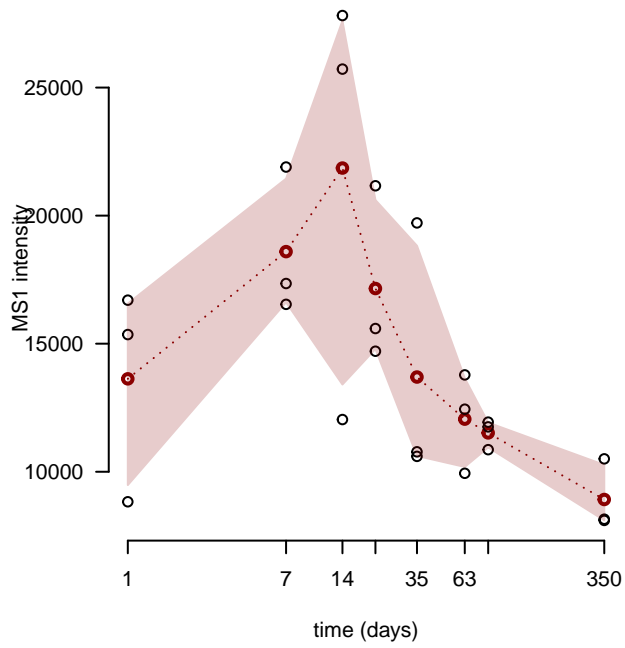

**O54804**  
**GN=Chka**  
choline kinase alpha

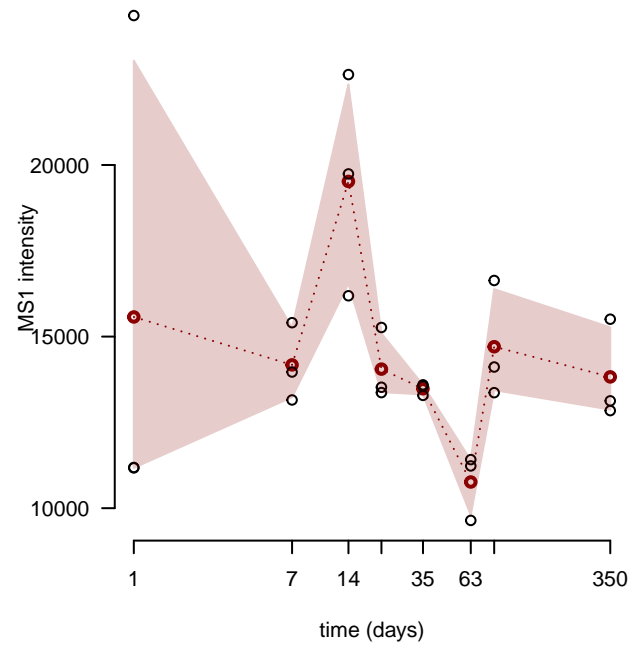

**O54818**  
**GN=Tpd5211**  
tumor protein D52-like 1

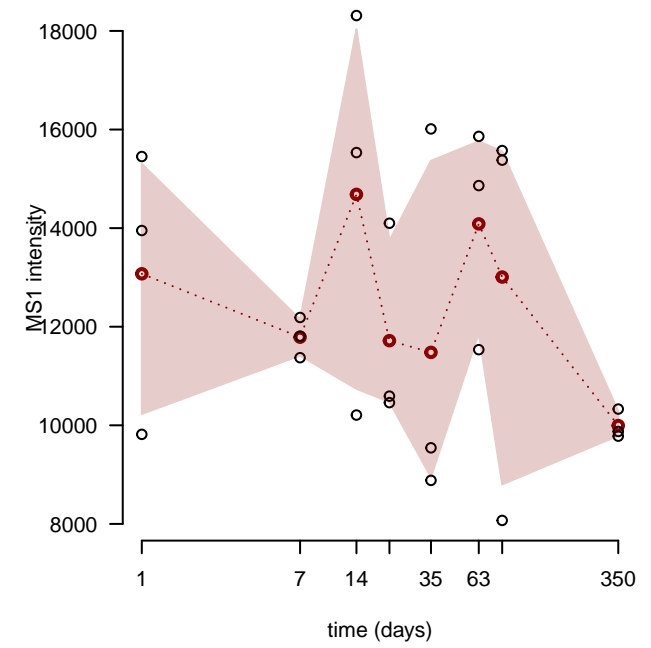

**O54824**  
**GN=Il16**  
interleukin 16

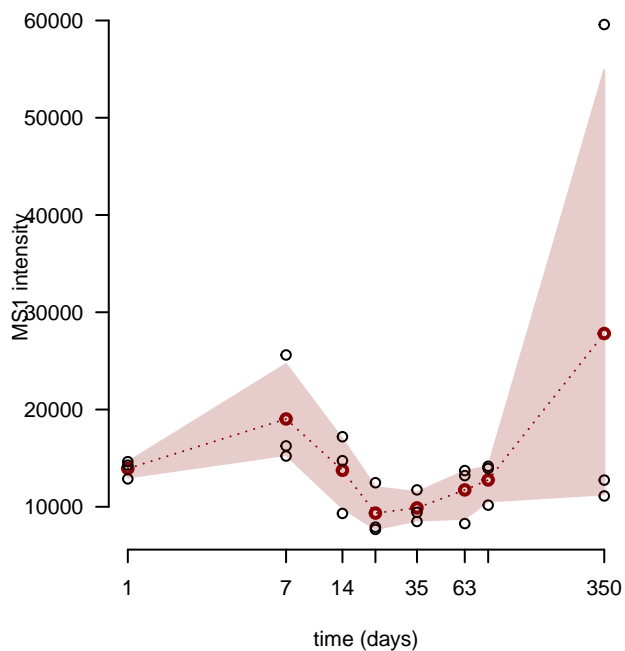

**O54825**  
**GN=Bysl**  
bystin-like

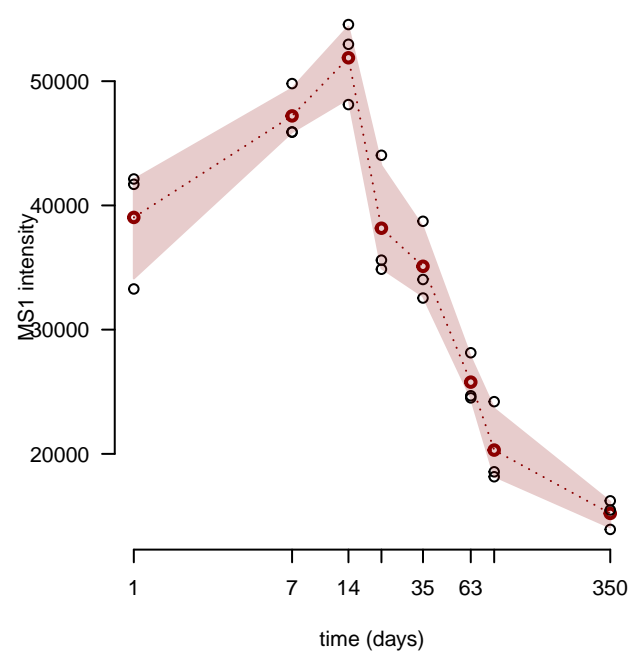

**O54826**  
**GN=Milt10**  
myeloid/lymphoid or mixed-lineage leukem ...

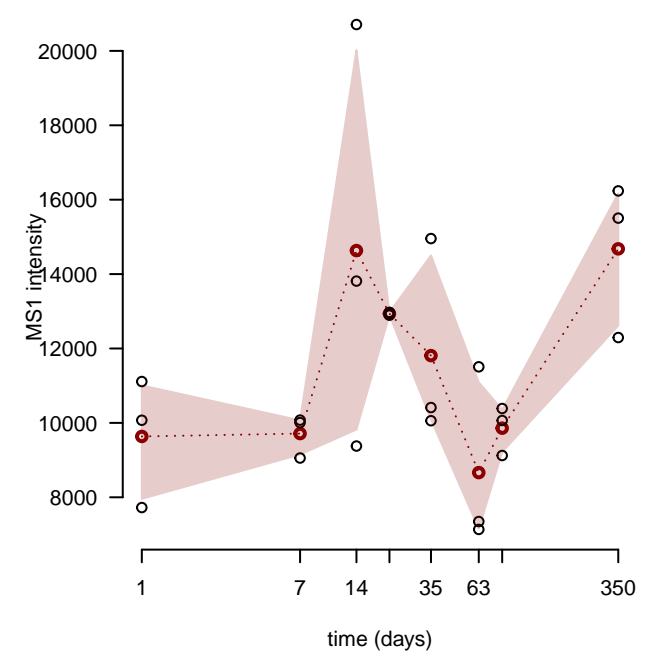

**O54833**  
**GN=Csnk2a2**  
casein kinase 2, alpha prime polypeptide

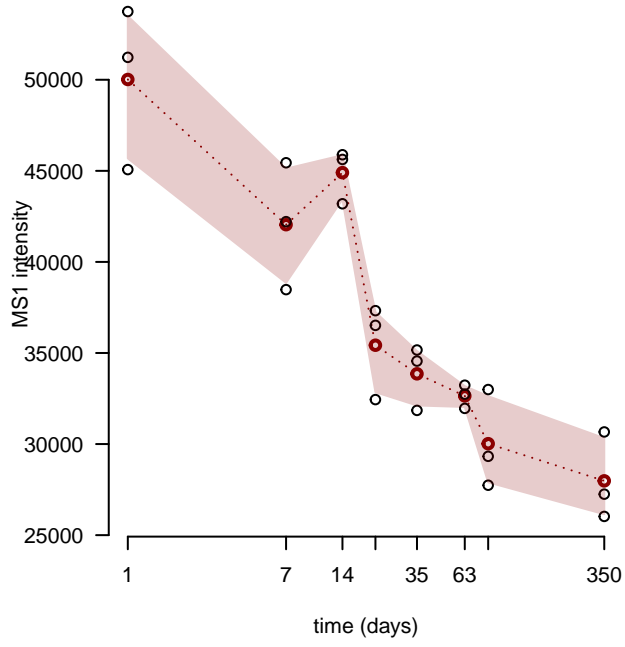

**O54834**  
**GN=Arhgap6**  
Rho GTPase activating protein 6

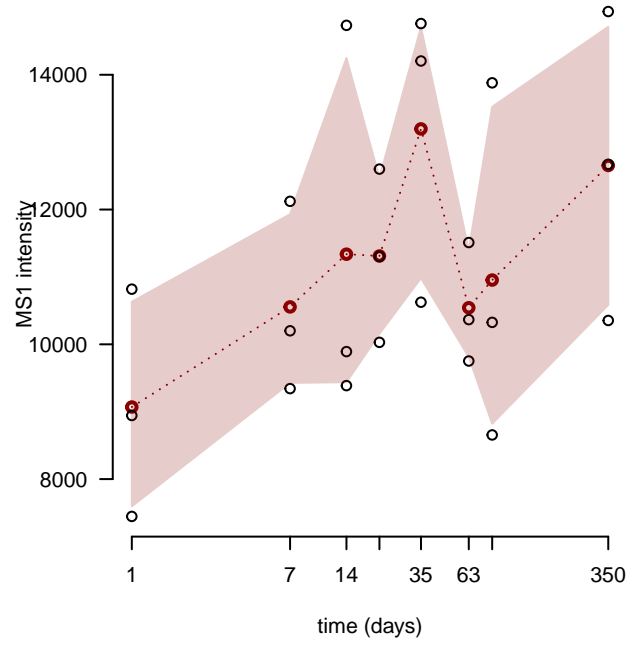

**O54864**  
**GN=Suv39h1**  
suppressor of variegation 3-9 1

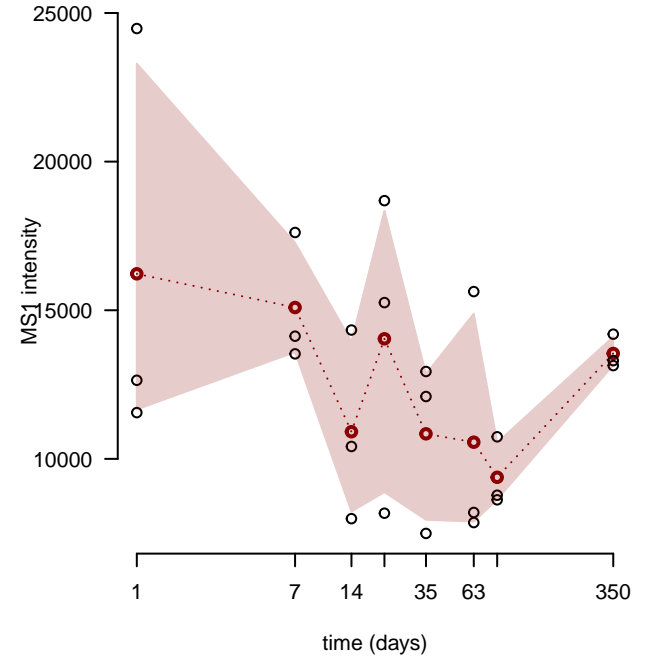

**O54865**  
**GN=Gucy1b1**  
guanylate cyclase 1, soluble, beta 1

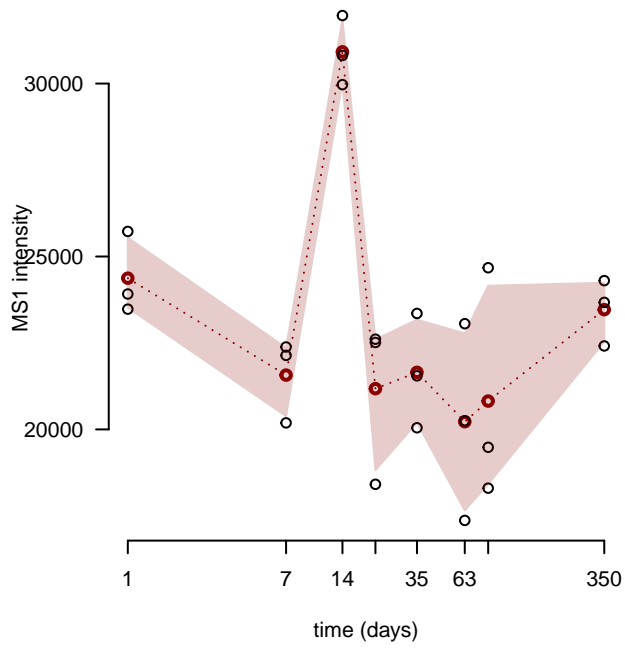

**O54879**  
**GN=Hmgb3**  
high mobility group box 3

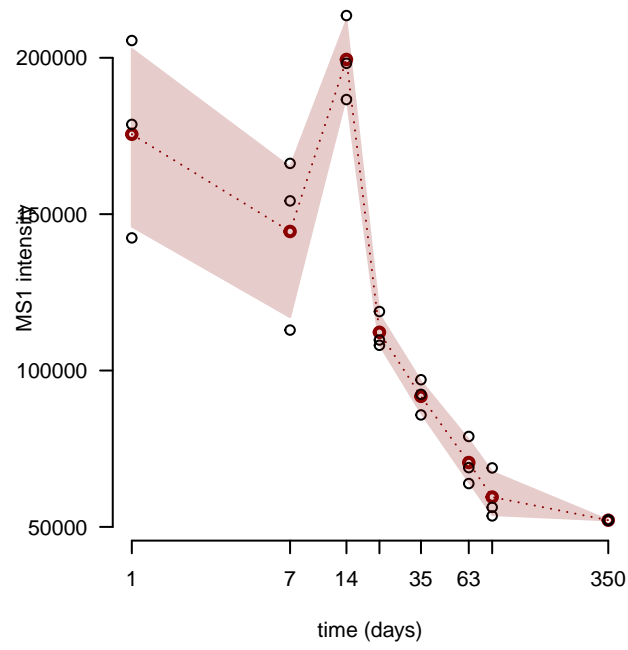

**O54890**  
**GN=Itgb3**  
integrin beta 3

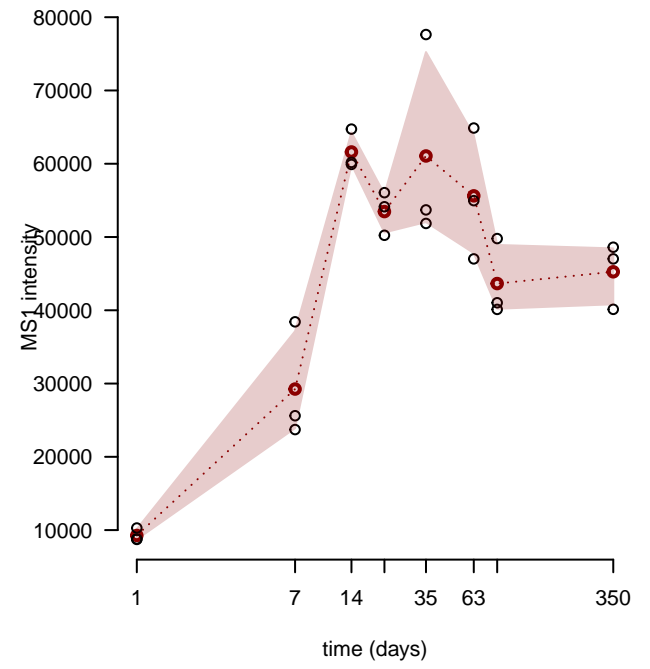

**O54901**  
**GN=Cd200**  
CD200 antigen

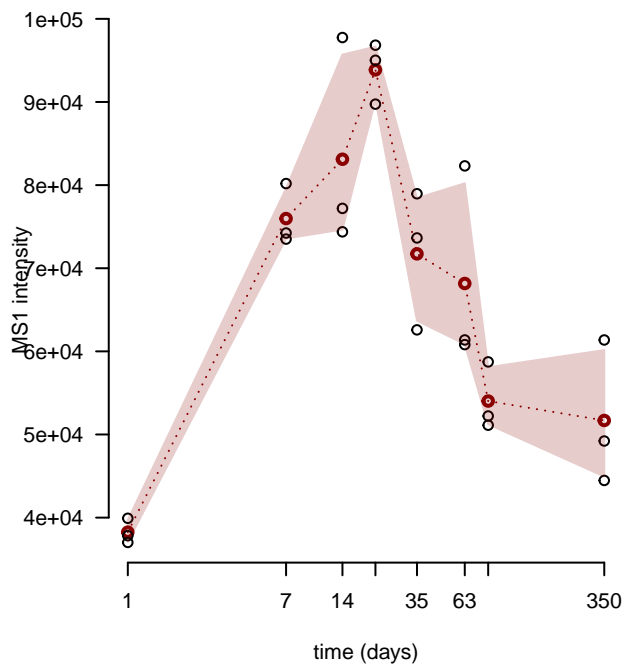

**O54909**  
**GN=Rdh16**  
retinol dehydrogenase 16

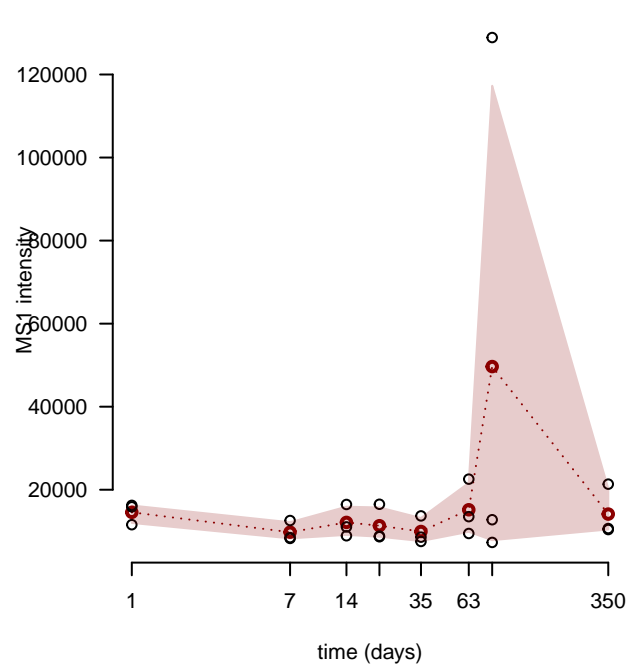

**O54916**  
**GN=Reps1**  
RalBP1 associated Eps domain containing ...

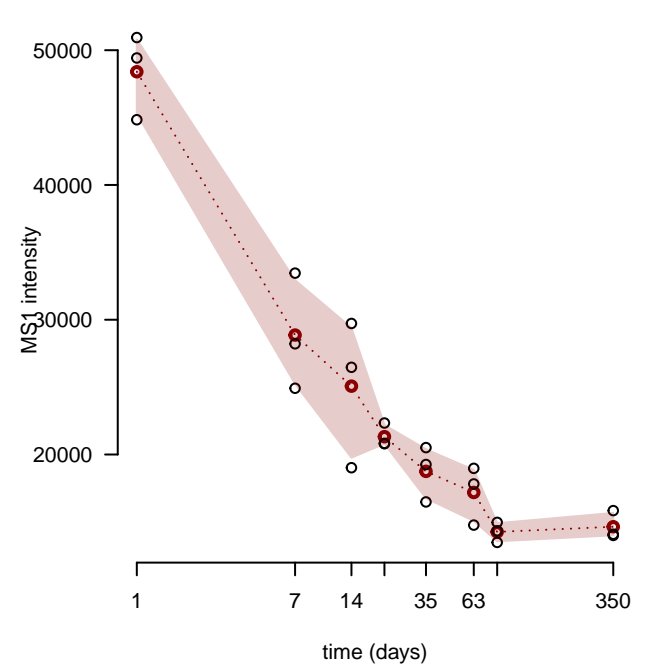

O54918  
GN=Bcl2l11  
BCL2-like 11 (apoptosis facilitator)

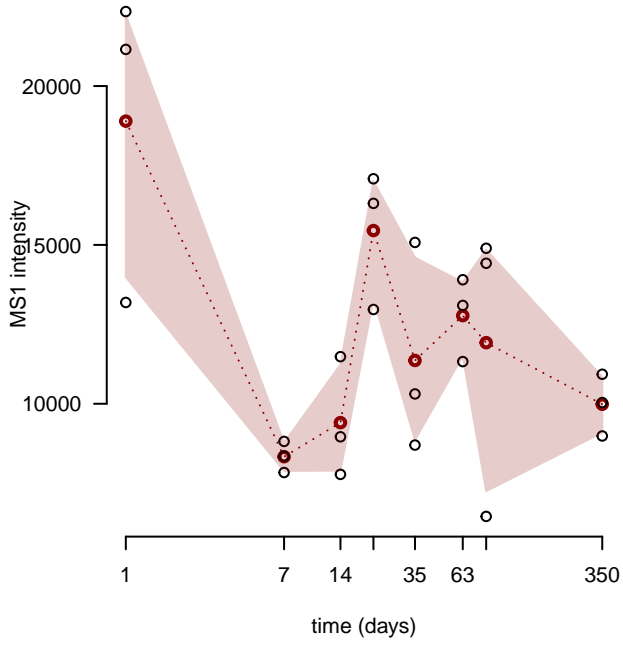

O54931  
GN=Akap2

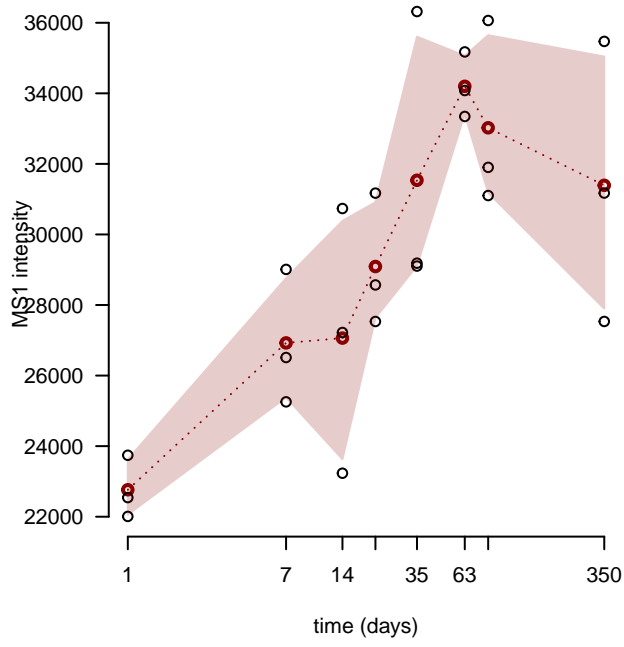

O54940  
GN=Bnip2  
BCL2/adenovirus E1B interacting protein ...

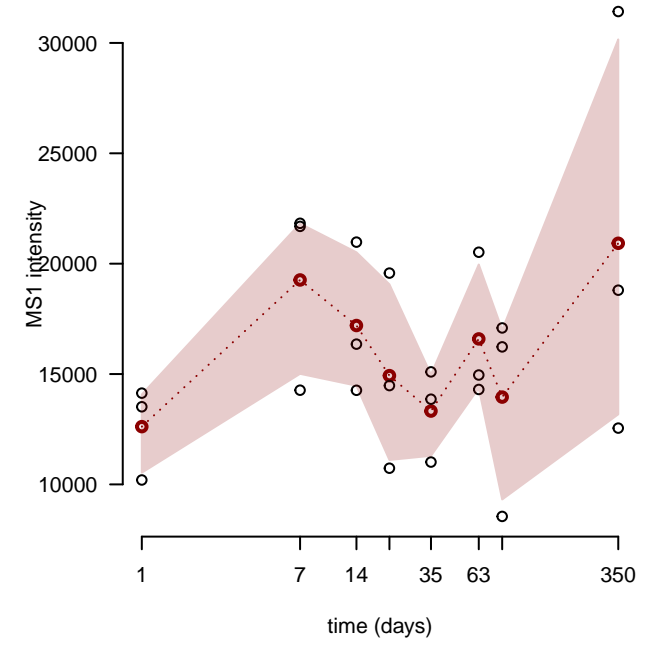

O54941  
GN=Smarca1  
SWI/SNF related, matrix associated, acti ...

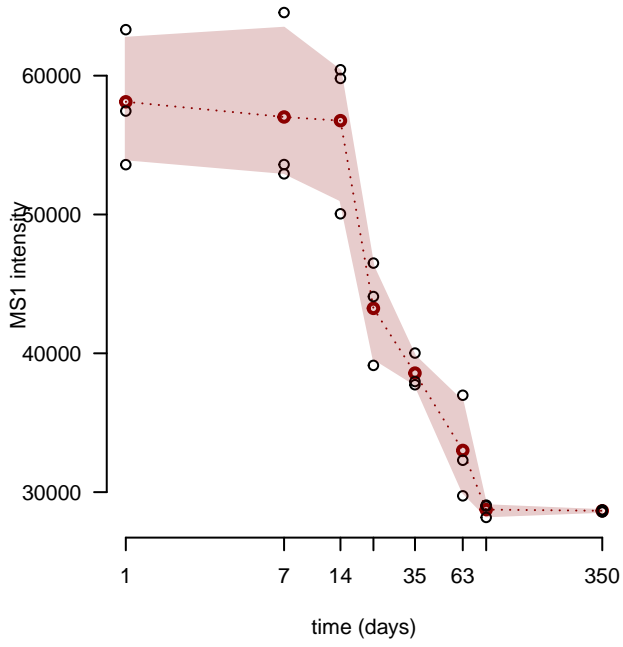

O54942  
GN=Cldn5  
claudin 5

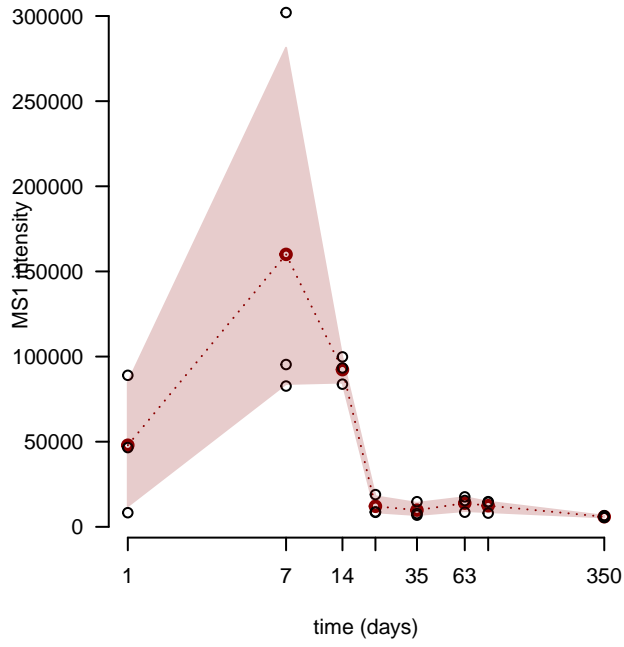

O54946  
GN=Dnajb6  
DnaJ heat shock protein family (Hsp40) m ...

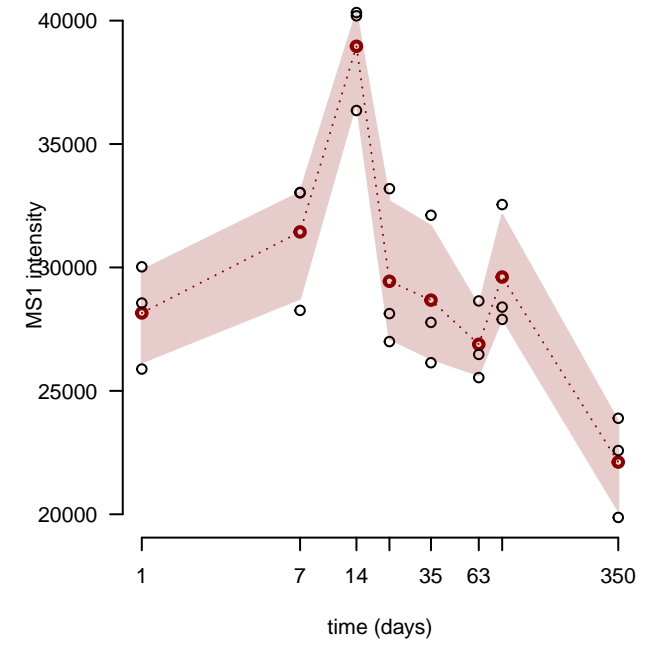

O54950  
GN=Prkag1  
protein kinase, AMP-activated, gamma 1 n ...

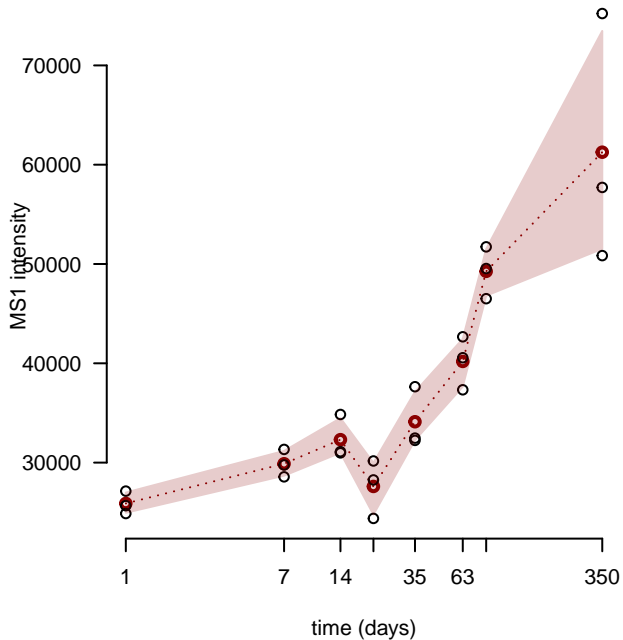

O54962  
GN=Banf1  
BAF nuclear assembly factor 1

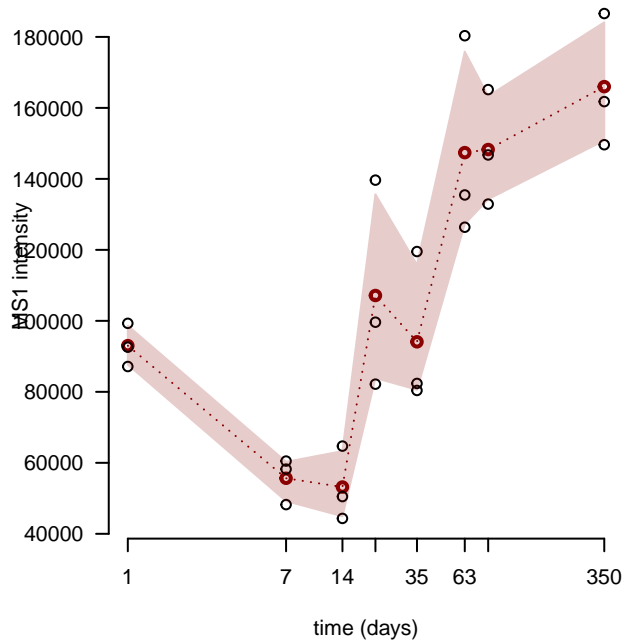

O54967  
GN=Trk2  
tyrosine kinase, non-receptor, 2

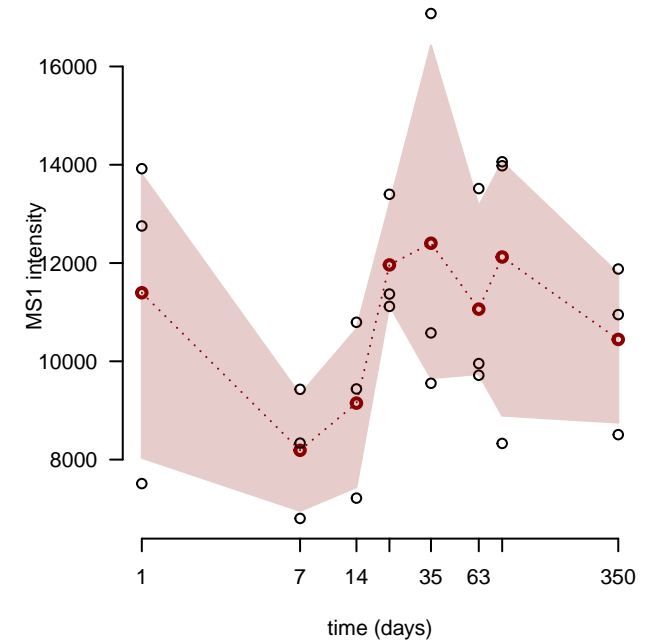

**O54974**  
**GN=Lgals7**  
lectin, galactose binding, soluble 7

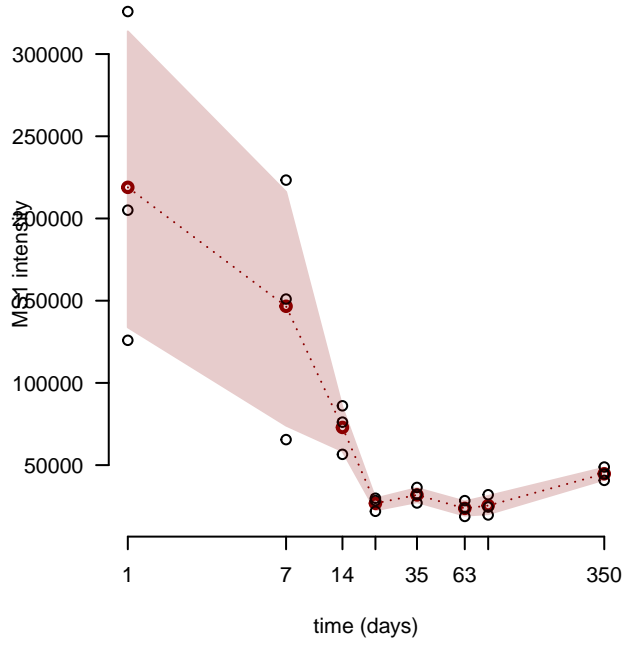

**O54984**  
**GN=Asna1**

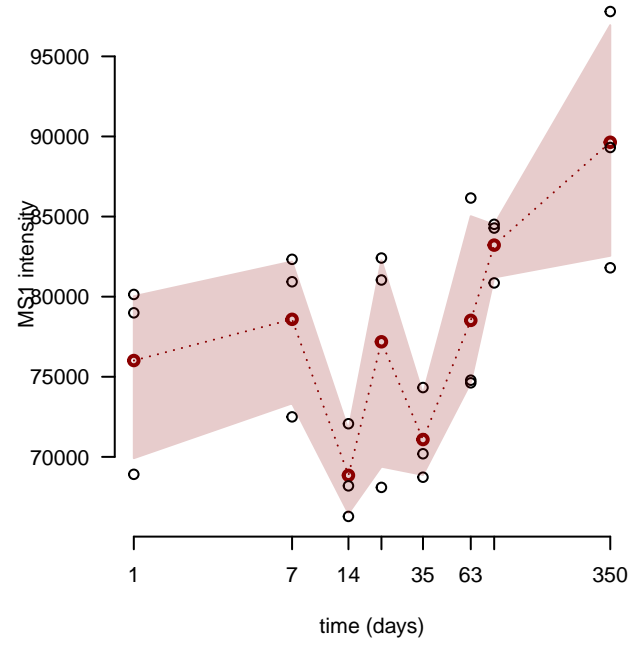

**O54988**  
**GN=Slk**  
STE20-like kinase

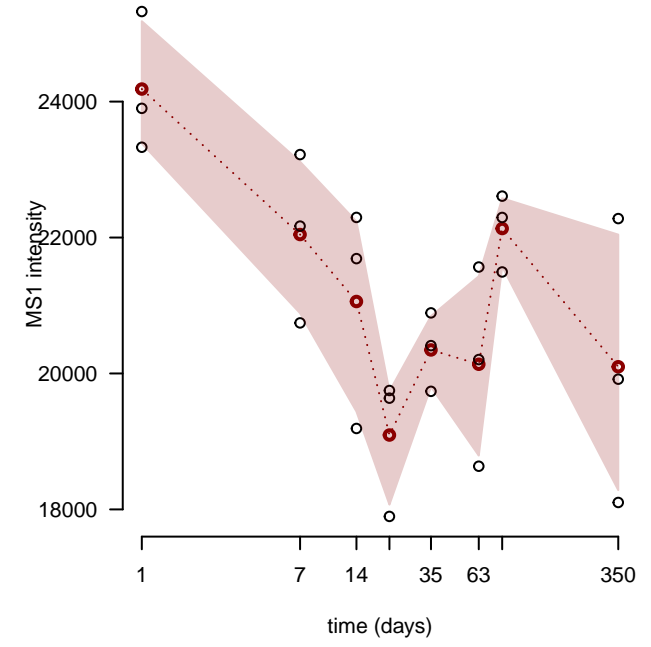

**O54991**  
**GN=Cntnap1**  
contactin associated protein-like 1

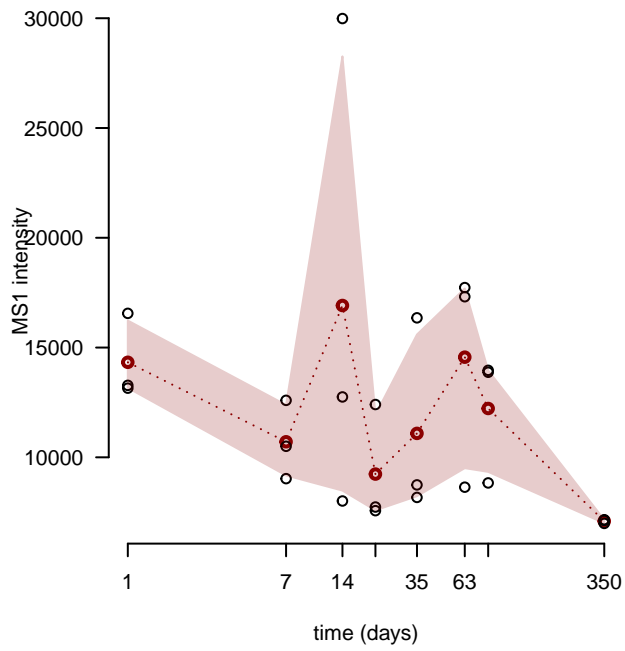

**O54998**  
**GN=Fkbp7**  
FK506 binding protein 7

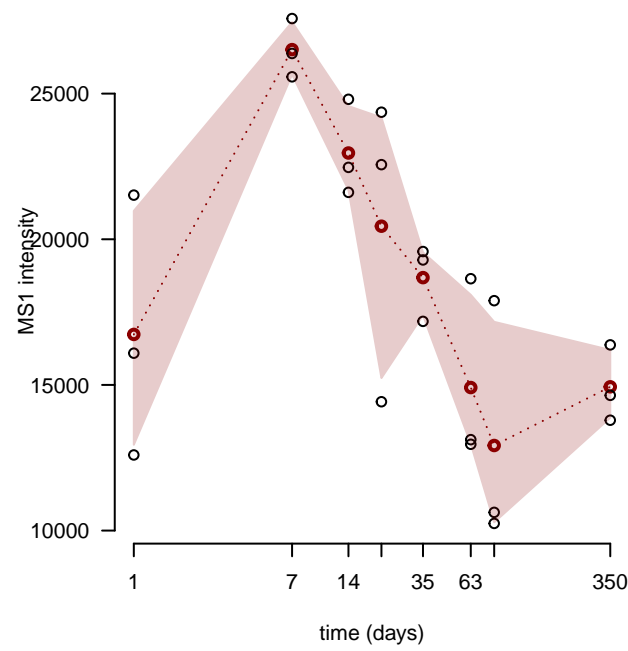

**O55003**  
**GN=Bnip3**  
BCL2/adenovirus E1B interacting protein ...

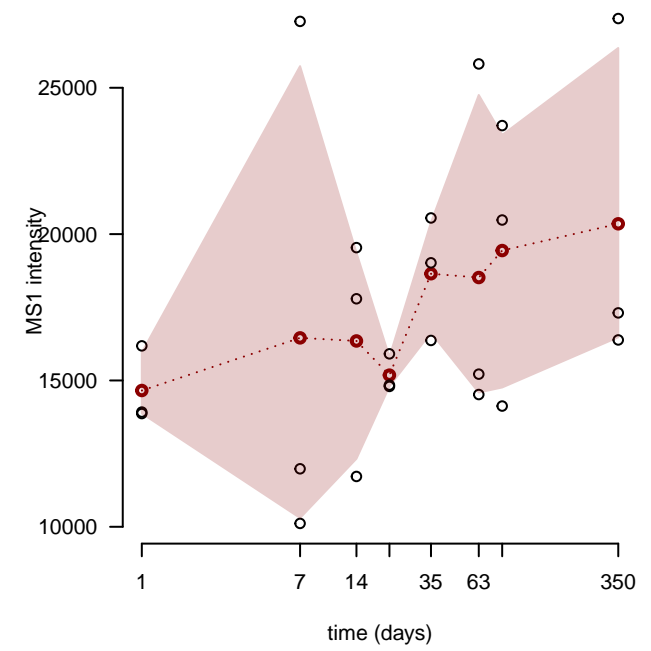

**O55013**  
**GN=Trappc3**  
trafficking protein particle complex 3

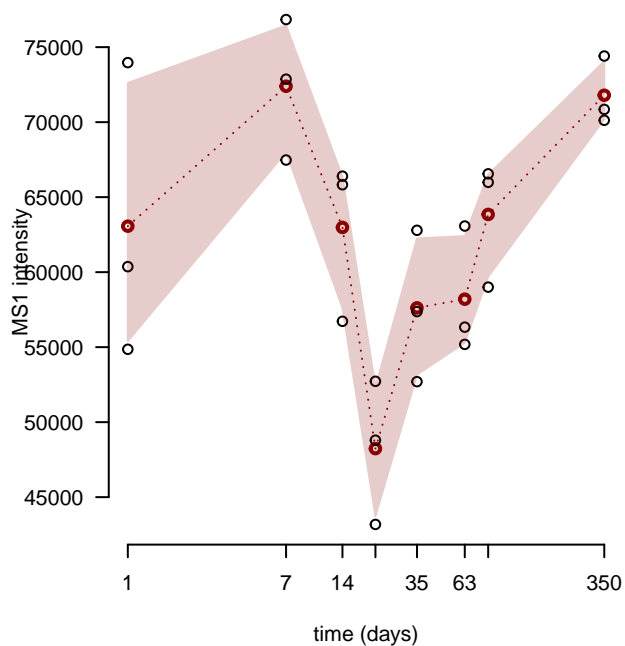

**O55022**  
**GN=Pgrmc1**  
progesterone receptor membrane component ...

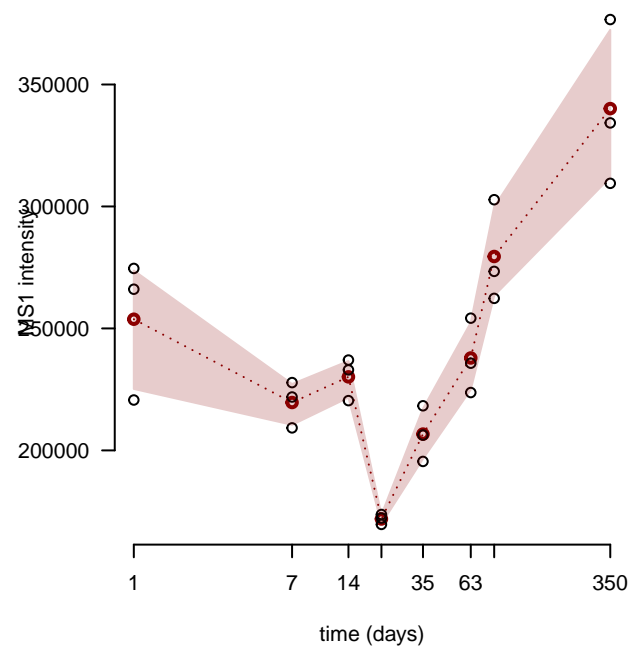

**O55023**  
**GN=Impa1**  
inositol (myo)-1(or 4)-monophosphatase 1

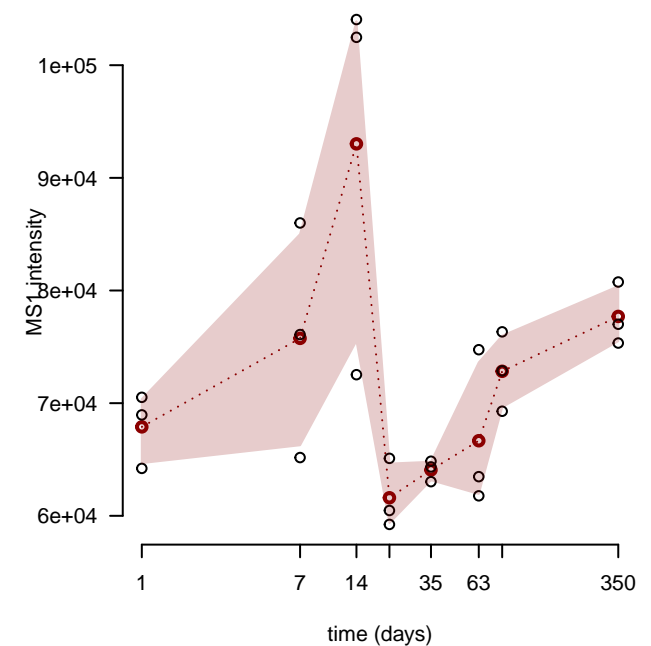

**O55026**  
**GN=Entpd2**  
ectonucleoside triphosphate diphosphohyd ...

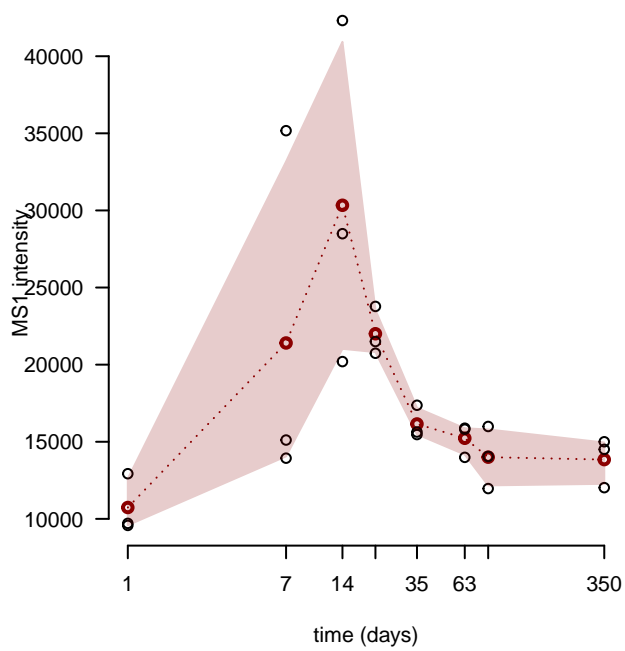

**O55028**  
**GN=Bckdk**  
branched chain ketoacid dehydrogenase ki ...

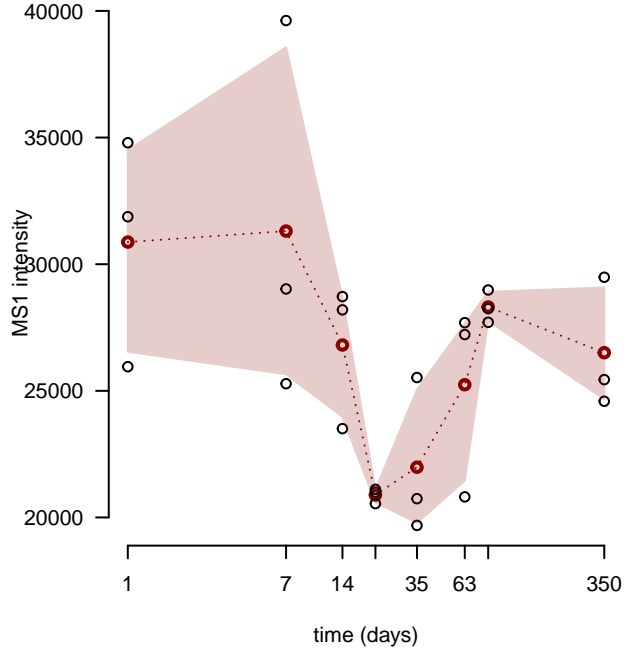

**O55029**  
**GN=Copb2**  
coatamer protein complex, subunit beta 2 ...

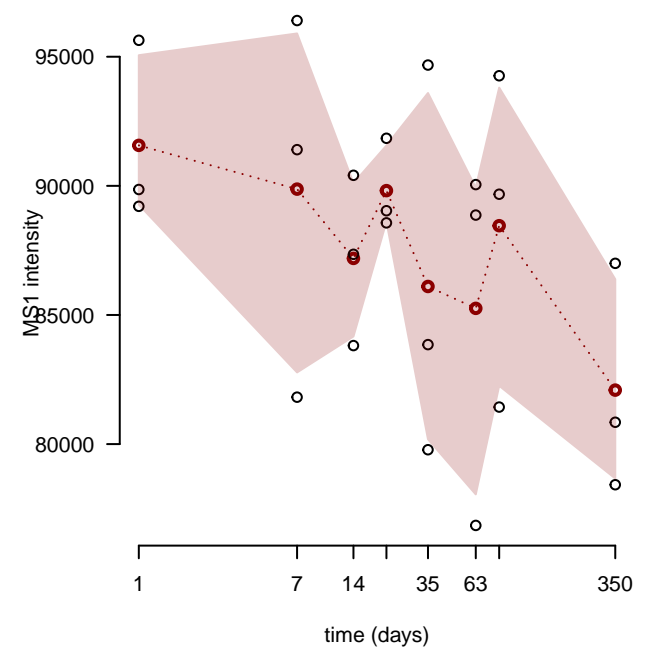

**O55033**  
**GN=Nck2**  
non-catalytic region of tyrosine kinase ...

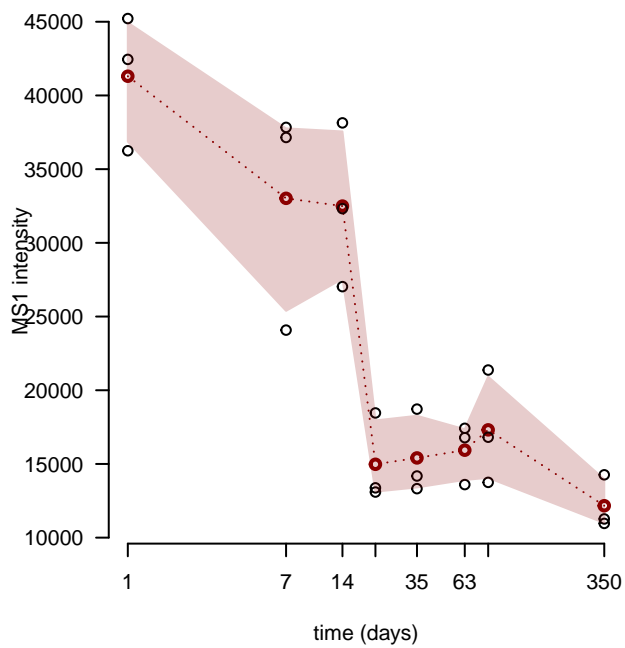

**O55042**  
**GN=Snca**  
synuclein, alpha

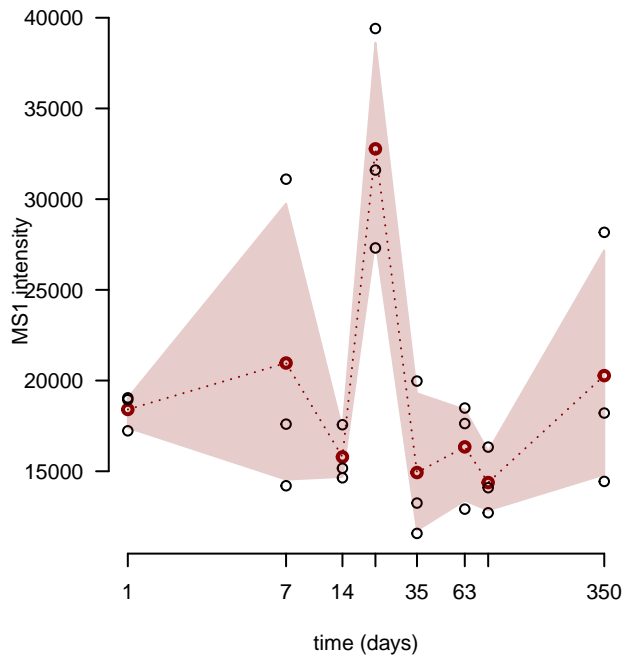

**O55047**  
**GN=Tik2**  
tousled-like kinase 2 (Arabidopsis)

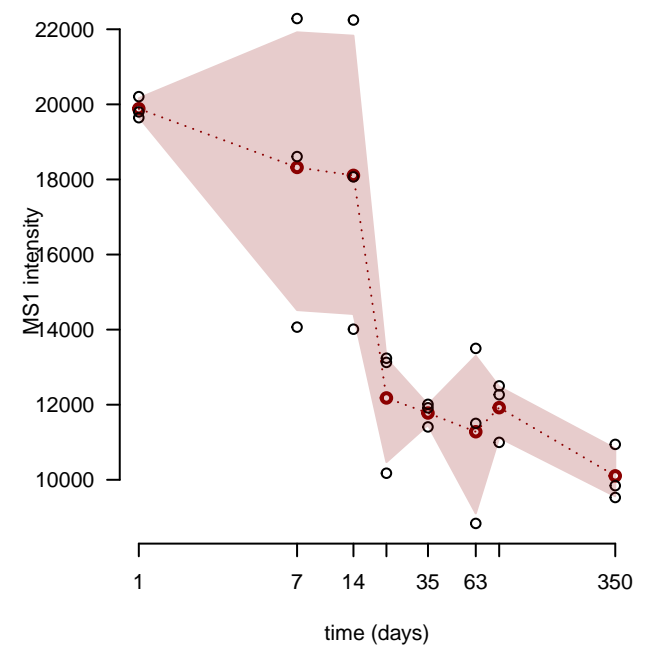

**O55057**  
**GN=Pde6d**  
phosphodiesterase 6D, cGMP-specific, rod ...

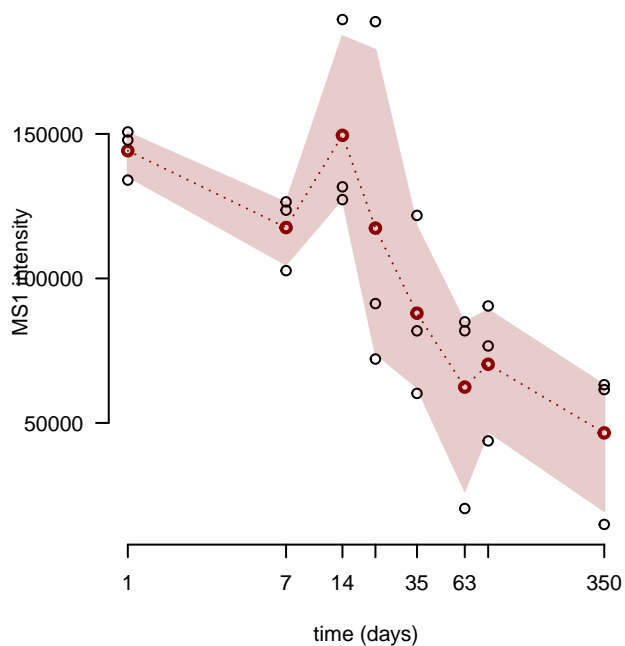

**O55060**  
**GN=Tpmt**  
thiopurine methyltransferase

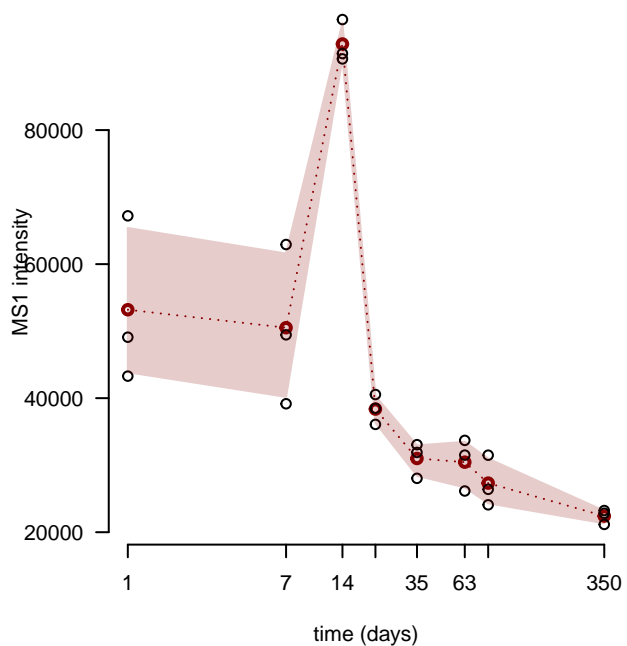

**O55091**  
**GN=Impact**  
impact, RWD domain protein

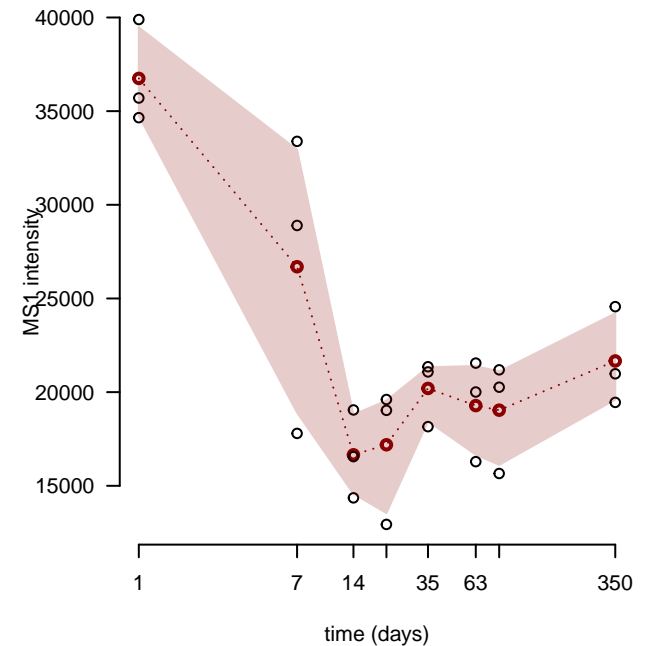



**O55098**  
**GN=Stk10**  
serine/threonine kinase 10

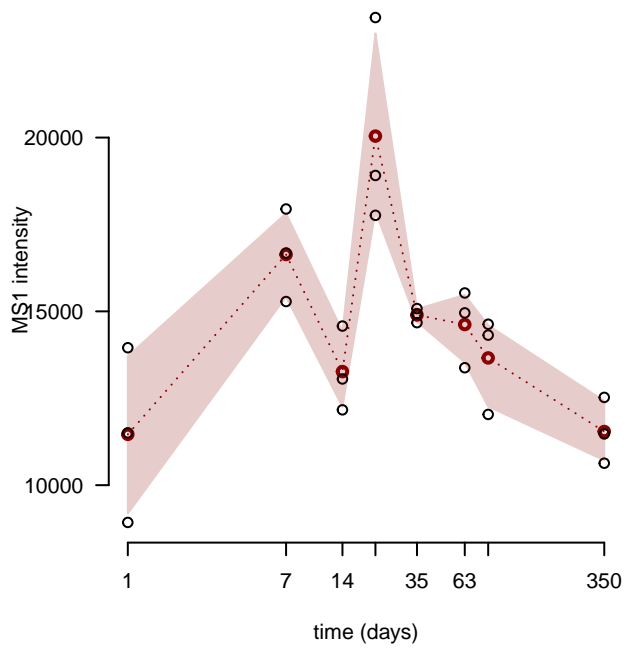

**O55100**  
**GN=Syngr1**  
synaptogyrin 1

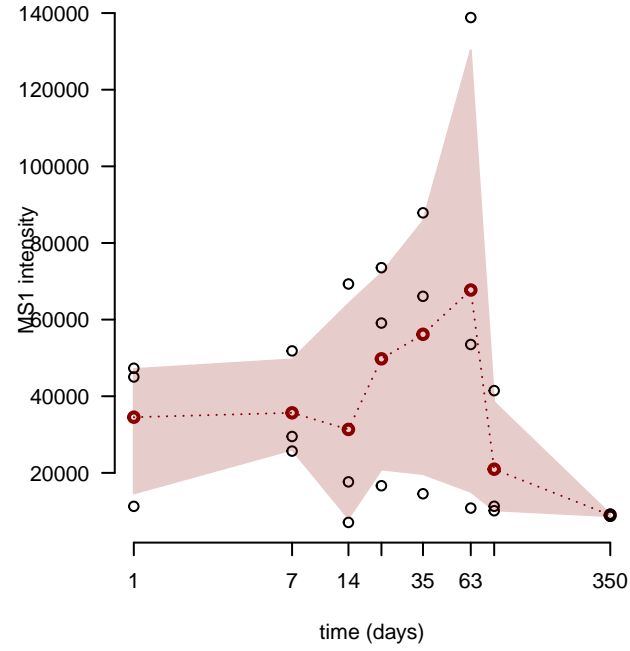

**O55101**  
**GN=Syngr2**  
synaptogyrin 2

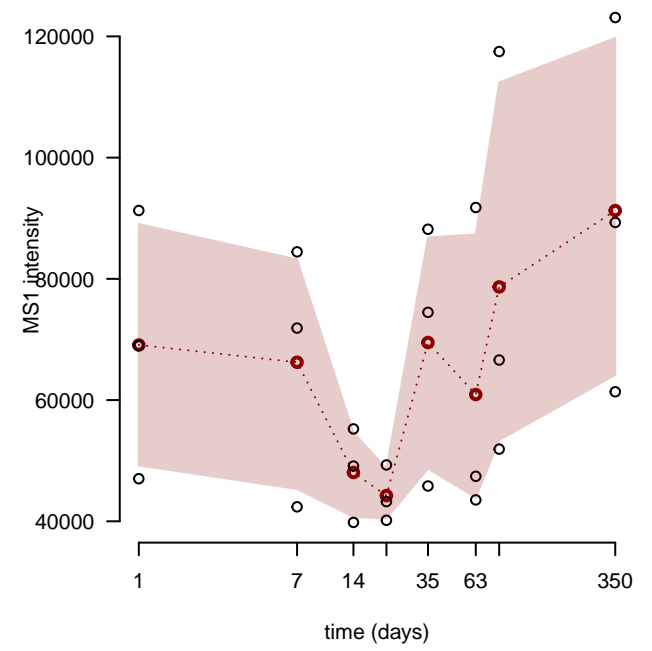

**O55102**  
**GN=Bloc1s1**  
biogenesis of lysosomal organelles compl ...

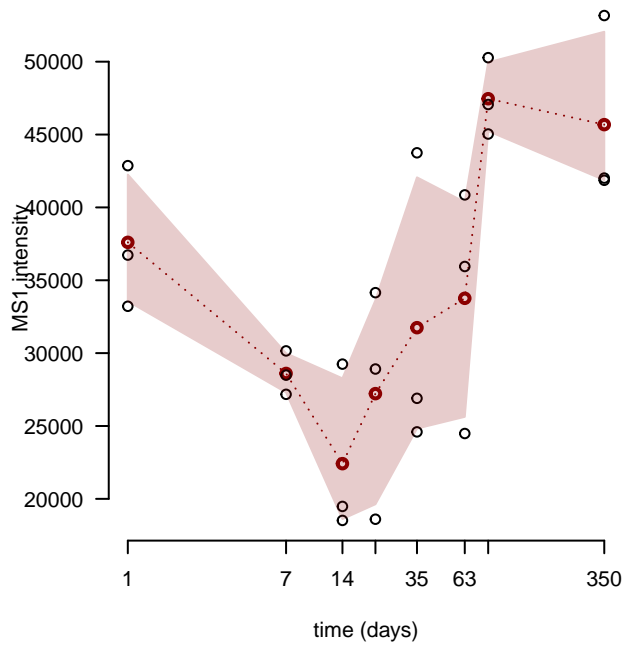

**O55106**  
**GN=Strn**  
striatin, calmodulin binding protein

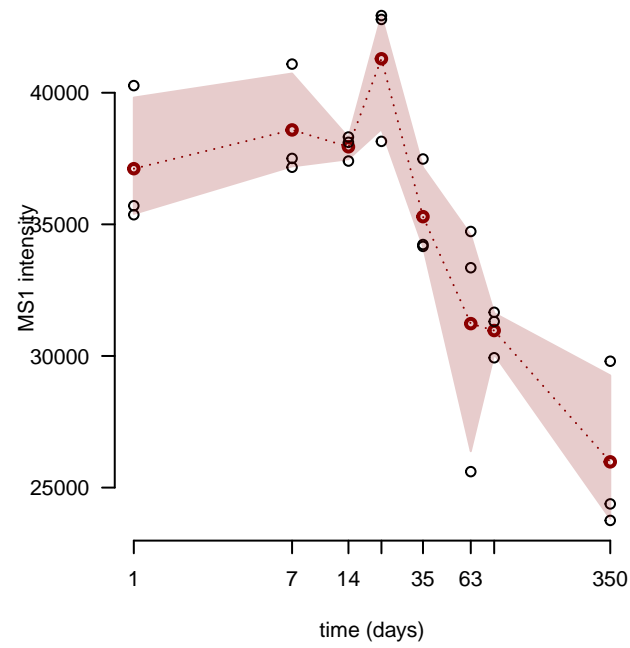

**O55111**  
**GN=Dsg2**  
desmoglein 2

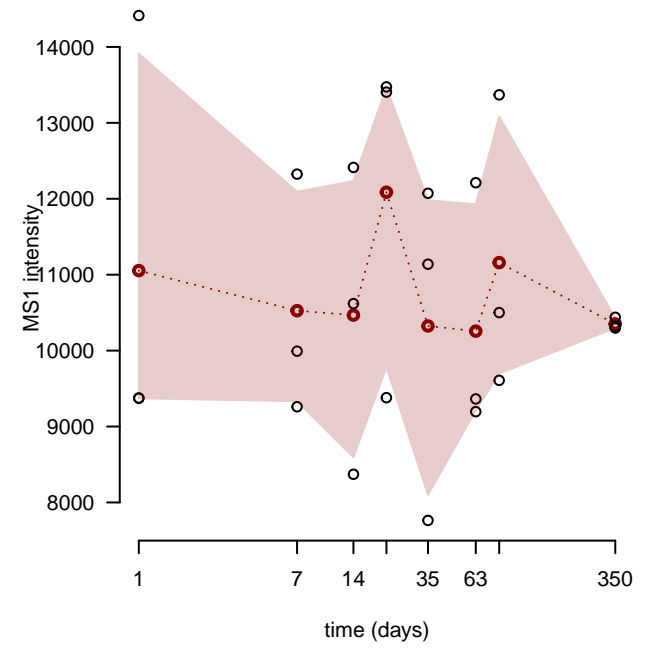

**O55125**  
**GN=Nipsnap1**  
nipsnap homolog 1

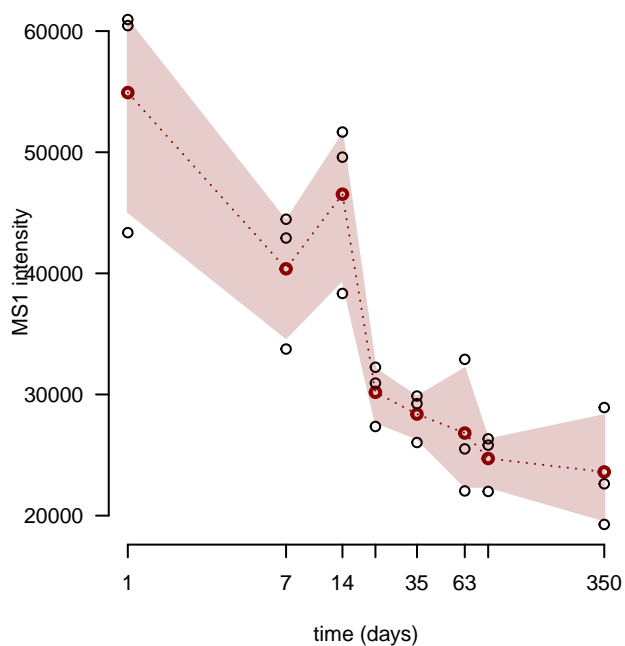

**O55126**  
**GN=Nipsnap2**  
nipsnap homolog 2

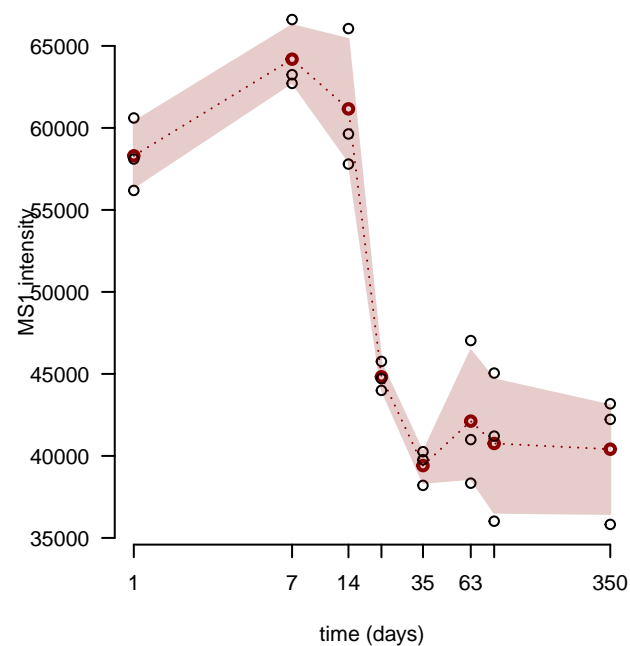

**O55128**  
**GN=Sap18**  
Sin3-associated polypeptide 18

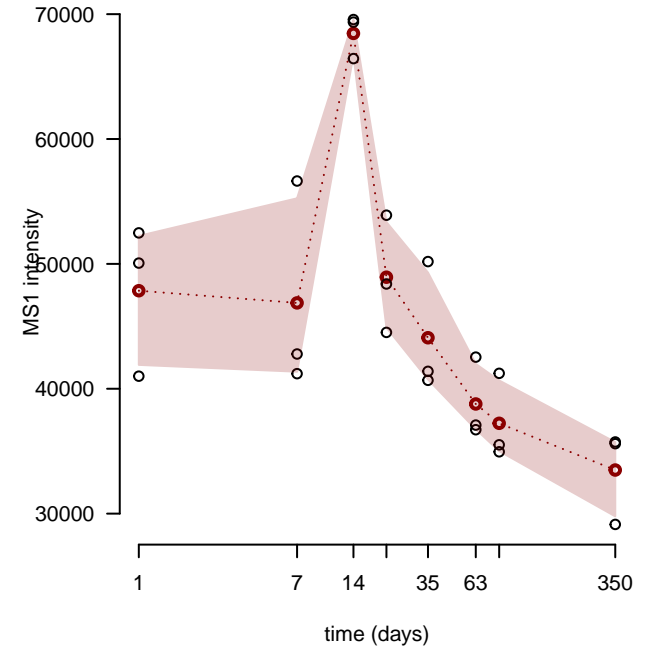

O55131  
GN=Sept7

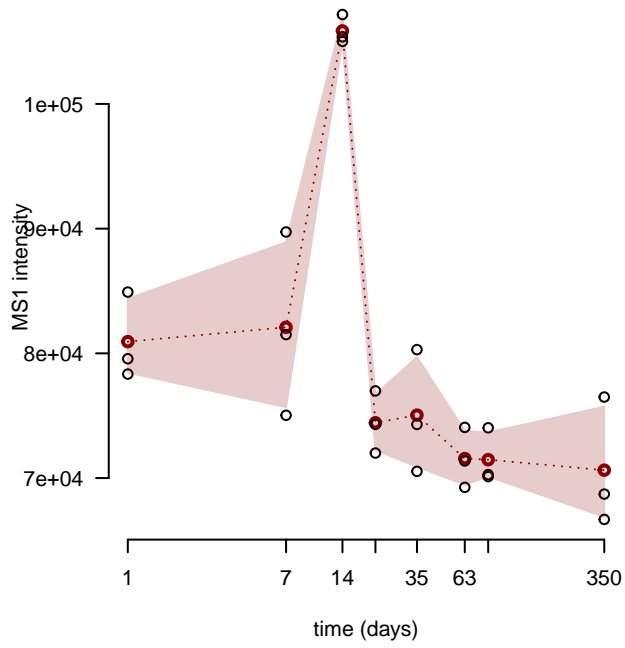

O55134  
GN=Pcdh12  
protocadherin 12

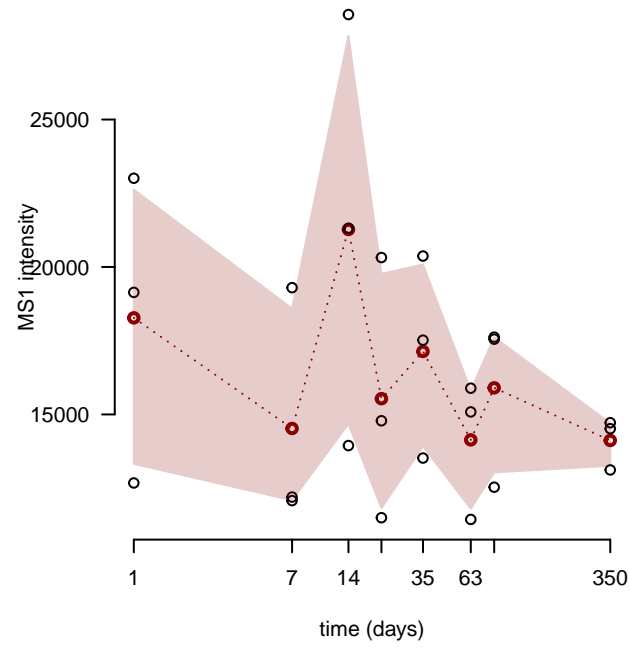

O55135  
GN=Eif6  
eukaryotic translation initiation factor ...

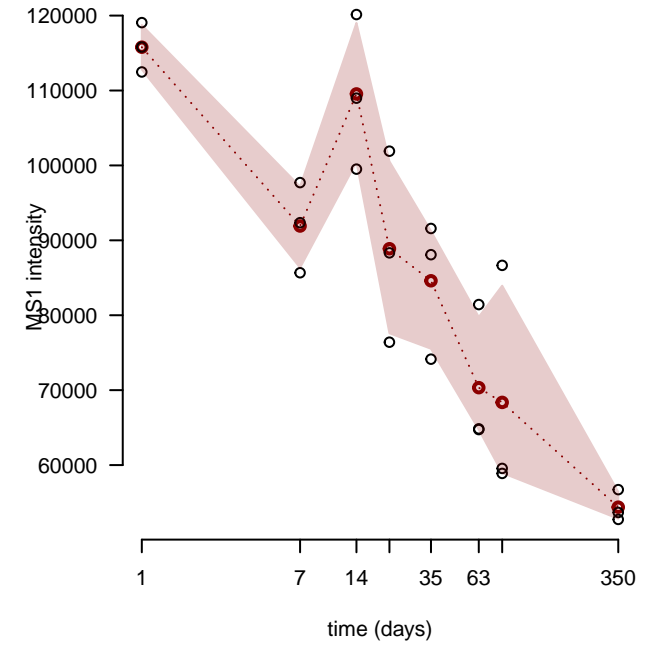

O55137  
GN=Acot1  
acyl-CoA thioesterase 1

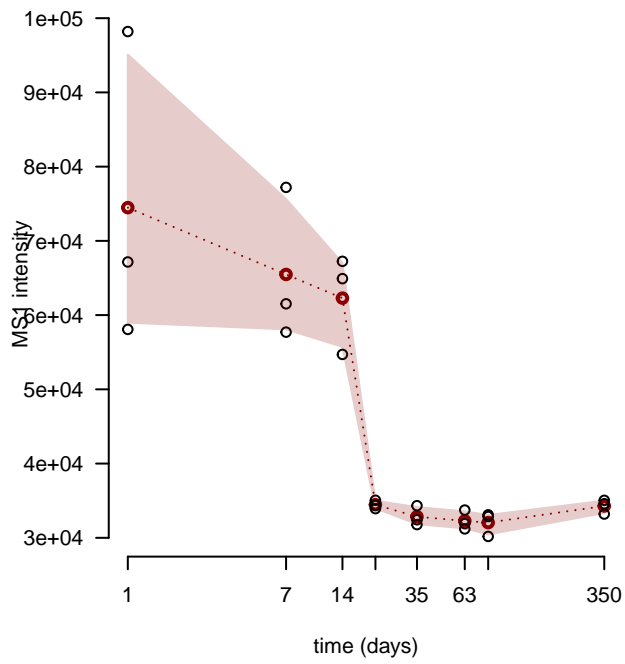

O55142  
GN=Rpl35a  
ribosomal protein L35A

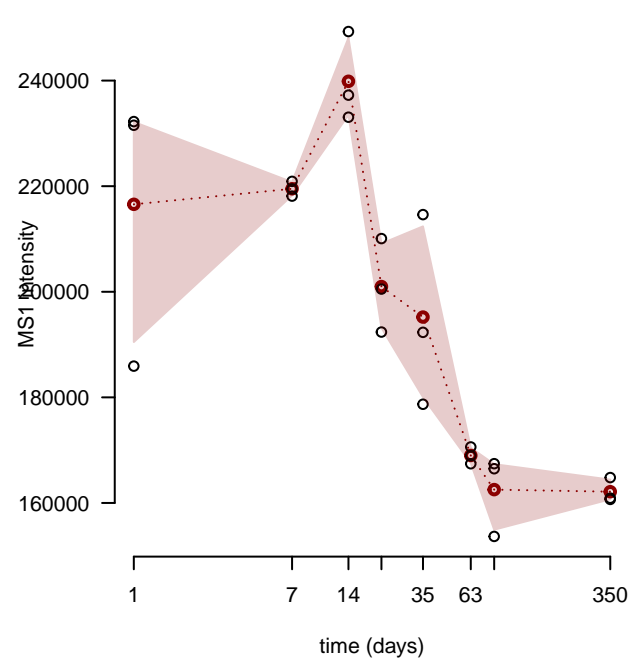

O55143  
GN=Atp2a2  
ATPase, Ca++ transporting, cardiac muscl ...

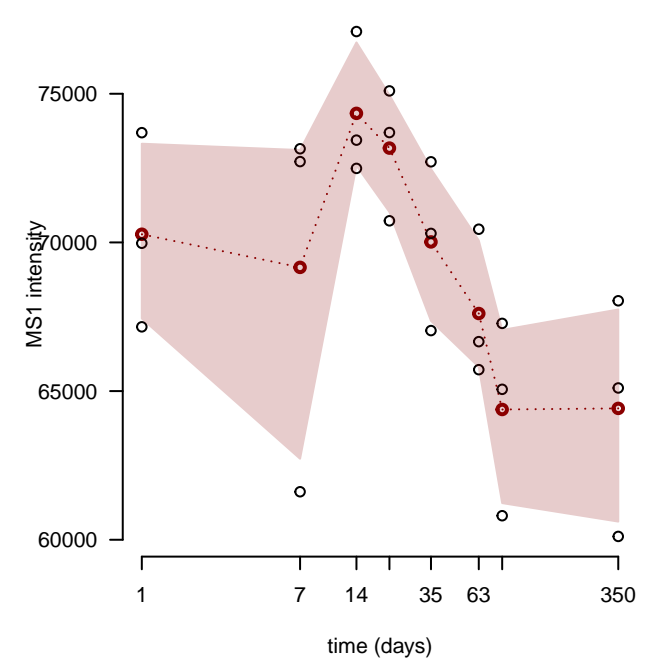

O55176  
GN=Pja1  
praja ring finger ubiquitin ligase 1

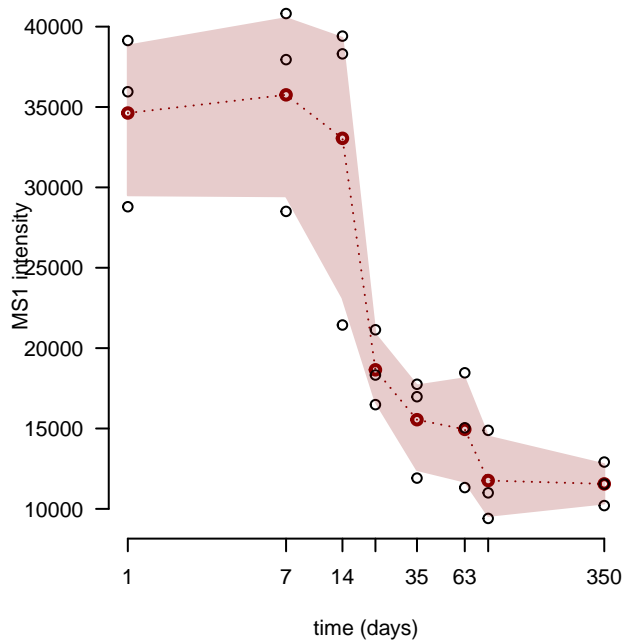

O55187  
GN=Cbx4  
chromobox 4

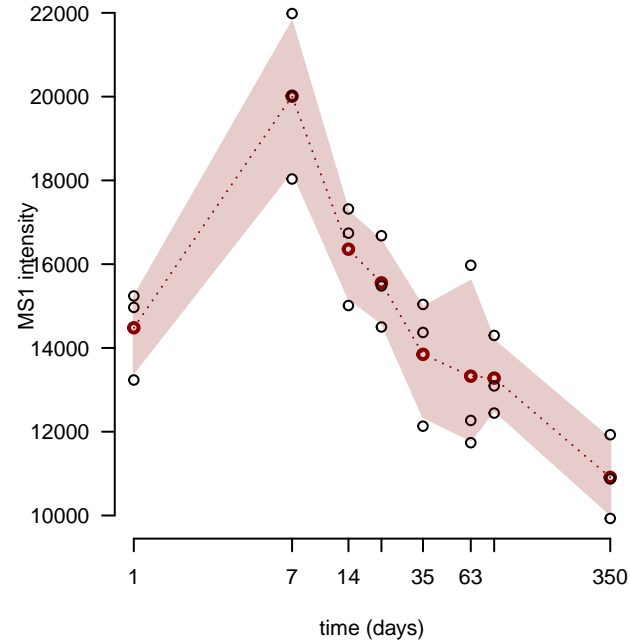

O55189  
GN=Ambn  
ameloblastin

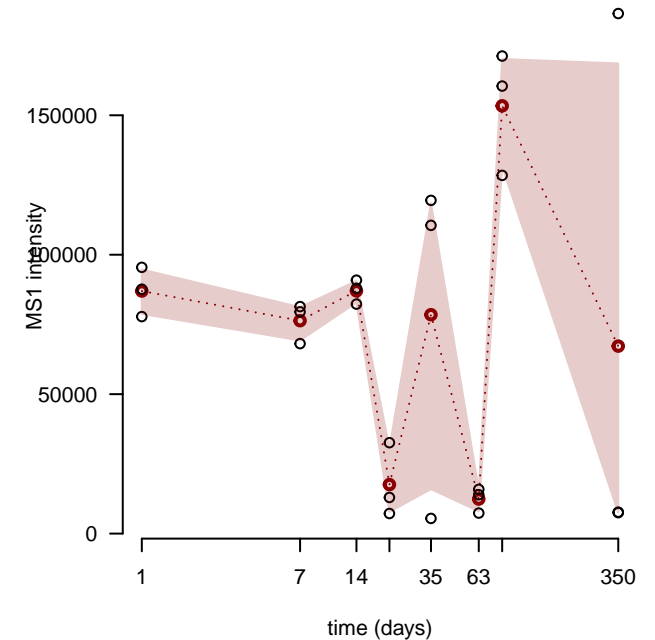

O55201  
GN=Supt5h

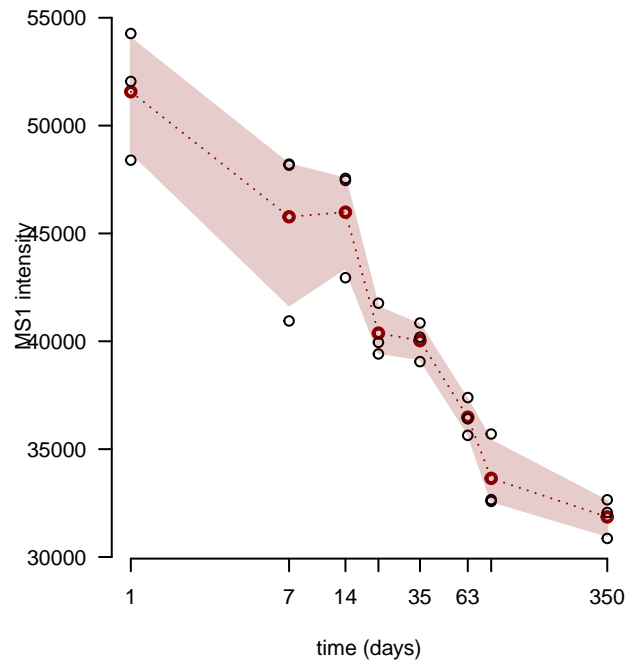

O55208  
GN=Figla  
folliculogenesis specific basic helix-lo ...

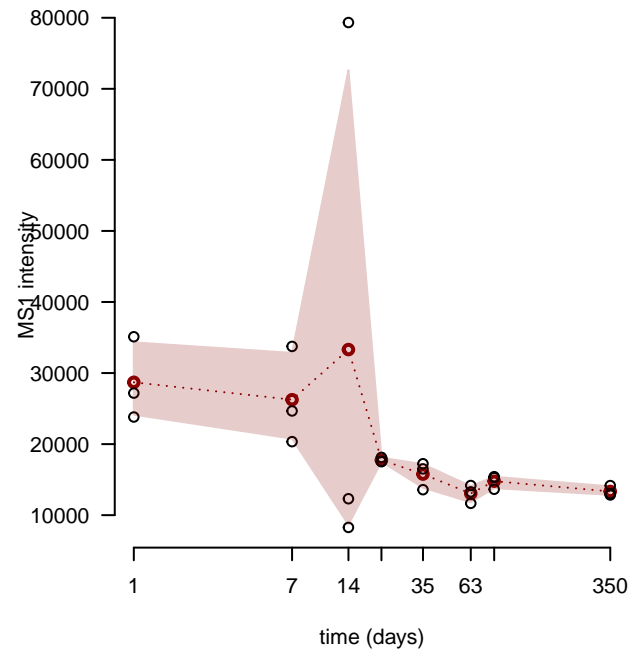

O55222  
GN=Ilk  
integrin linked kinase

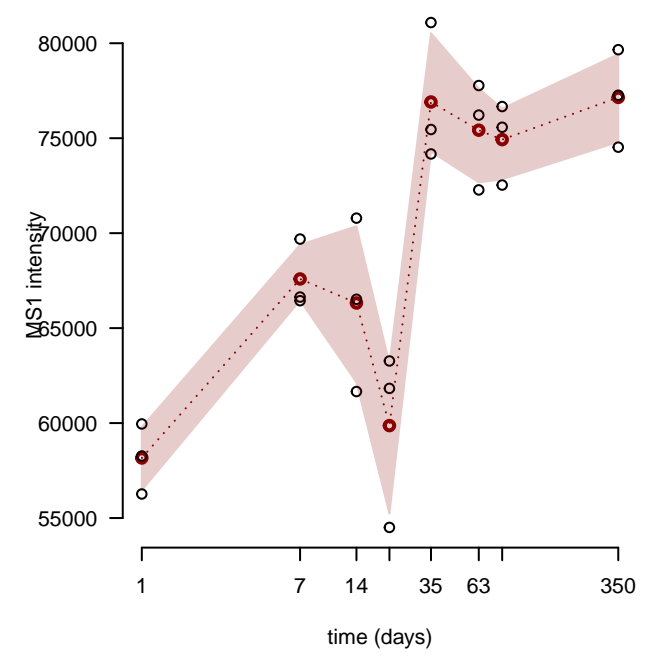

O55229  
GN=Chkb  
choline kinase beta

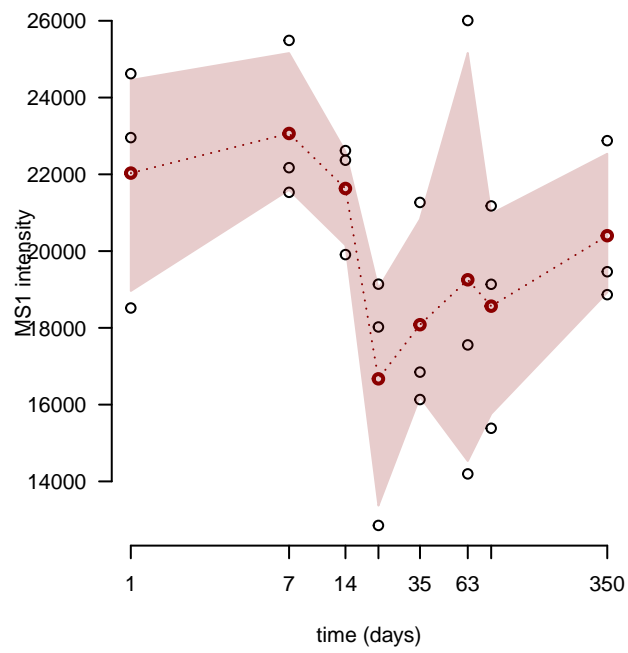

O55234  
GN=Psmb5  
proteasome (prosome, macropain) subunit, ...

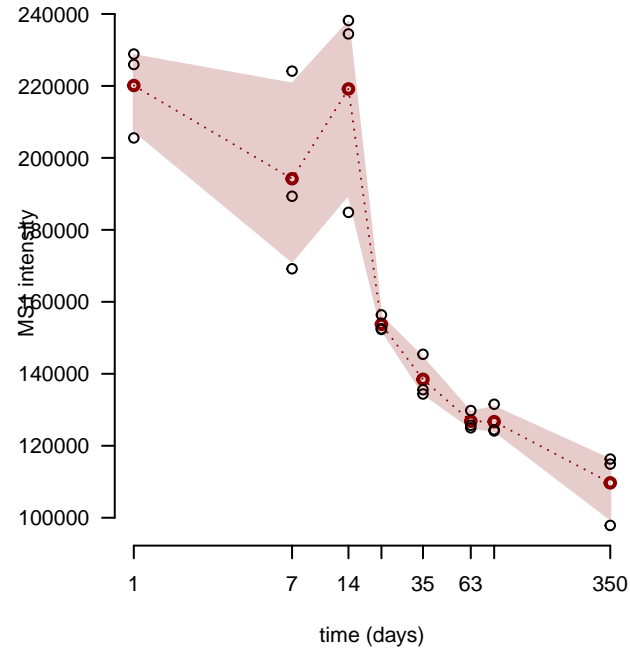

O55236  
GN=Rngtt  
RNA guanylyltransferase and 5'-phosphata ...

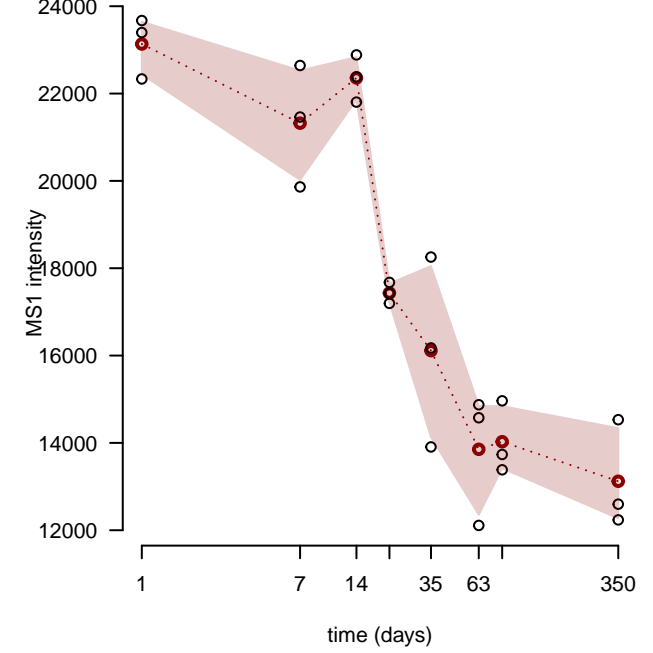

O55242  
GN=Sigmar1  
sigma non-opioid intracellular receptor ...

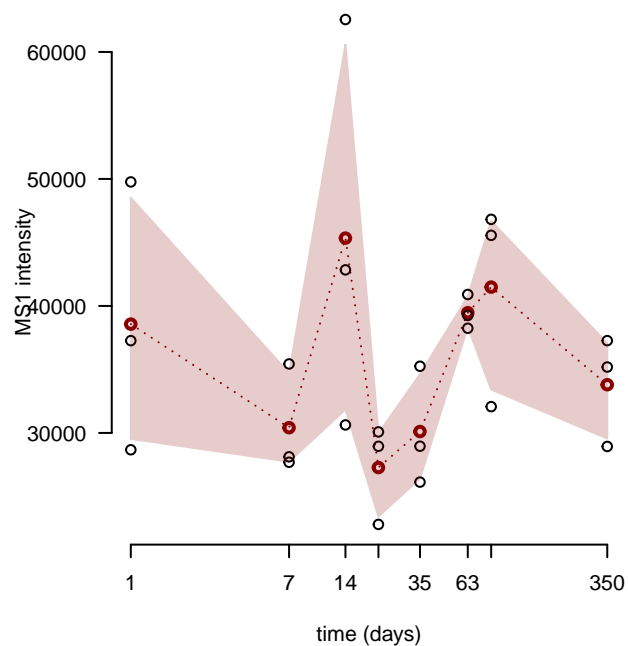

O70126  
GN=Aurkb  
aurora kinase B

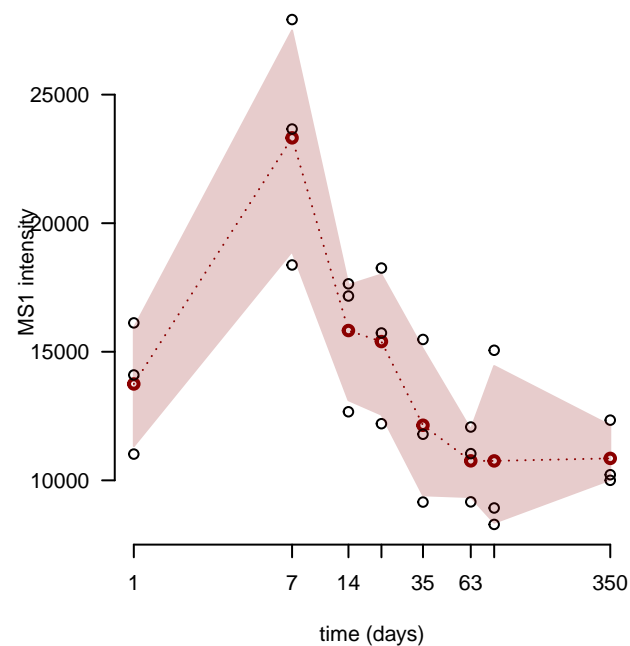

O70131  
GN=Ninj1  
ninjurin 1

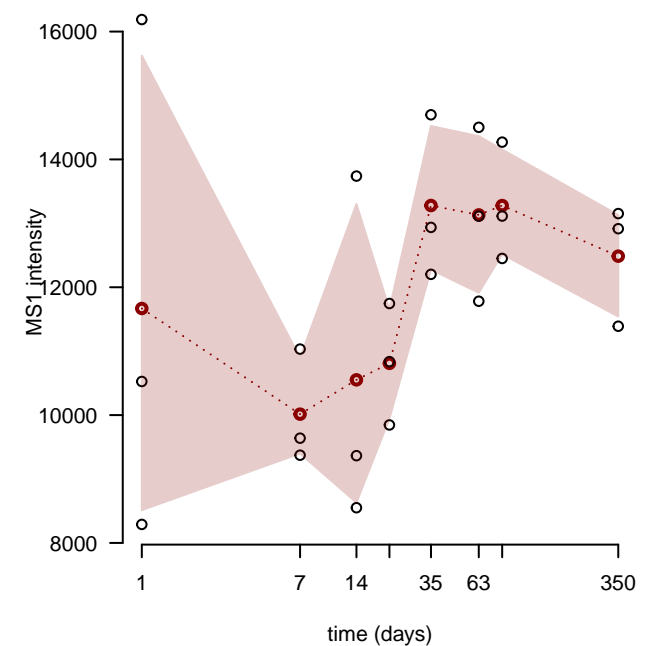

**O70133**  
**GN=Dhx9**  
DEAH (Asp-Glu-Ala-His) box polypeptide 9

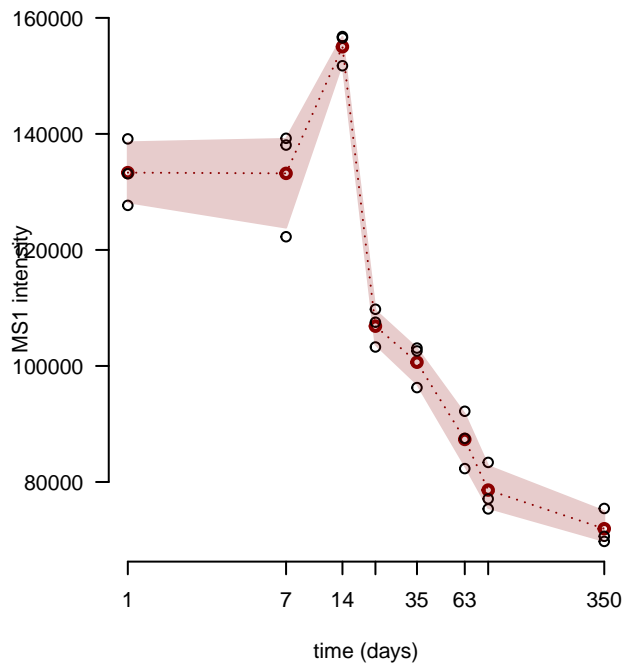

**O70133**  
**GN=Dhx9**  
DEAH (Asp-Glu-Ala-His) box polypeptide 9

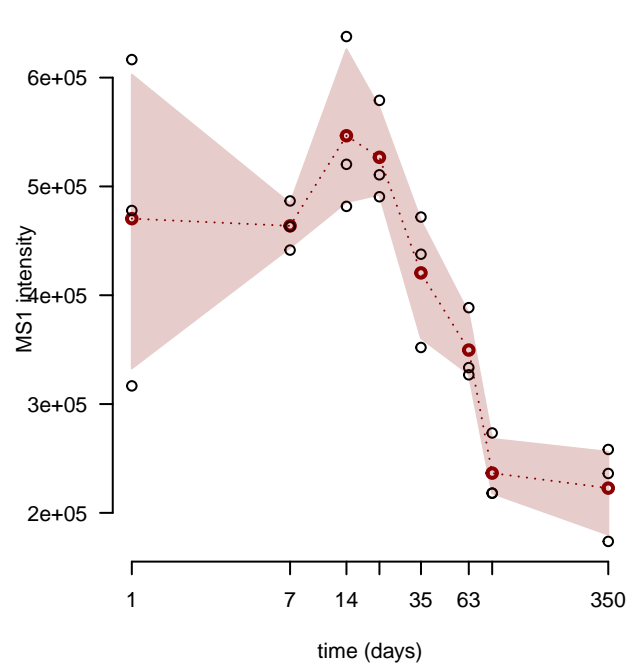

**O70145**  
**GN=Ncf2**  
neutrophil cytosolic factor 2

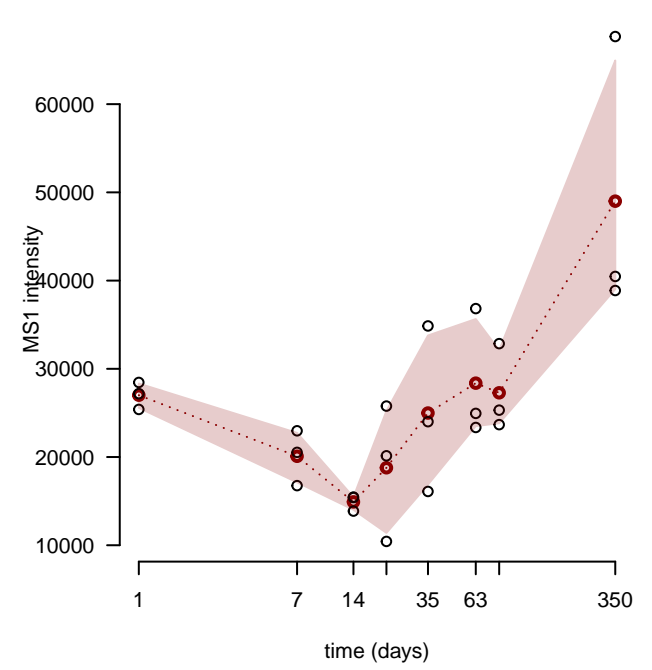

**O70152**  
**GN=Dpm1**  
dolichol-phosphate (beta-D) mannosyltran ...

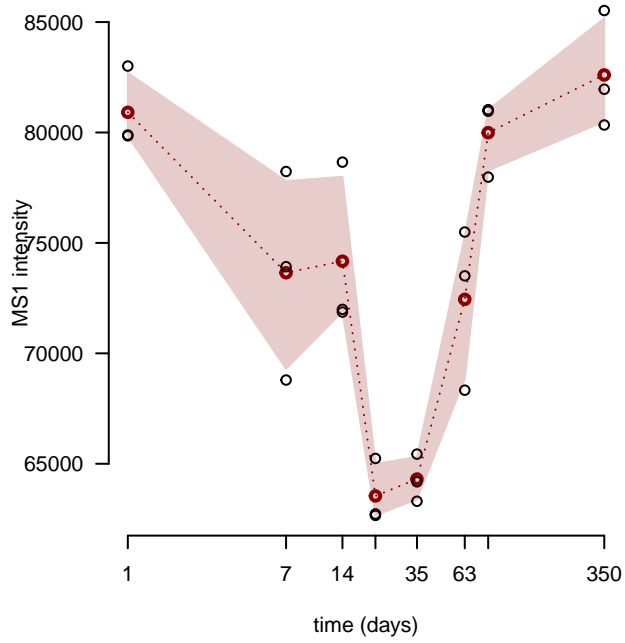

**O70157**  
**GN=Top3a**  
topoisomerase (DNA) III alpha

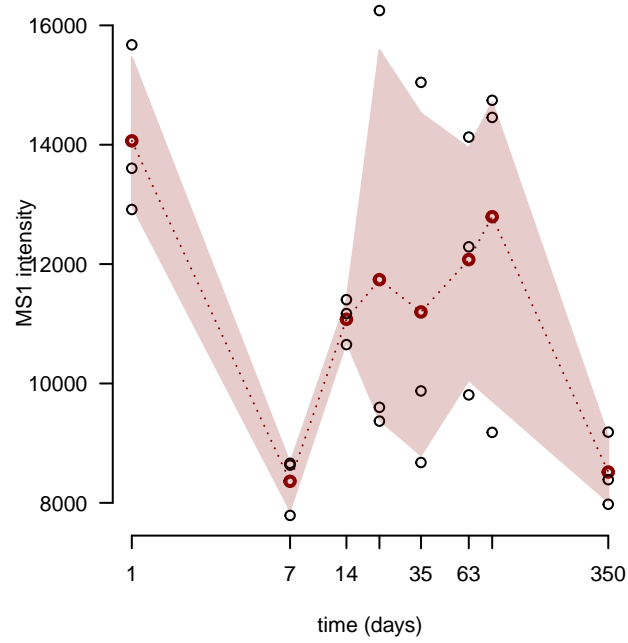

**O70161**  
**GN=Pip5k1c**  
phosphatidylinositol-4-phosphate 5-kinas ...

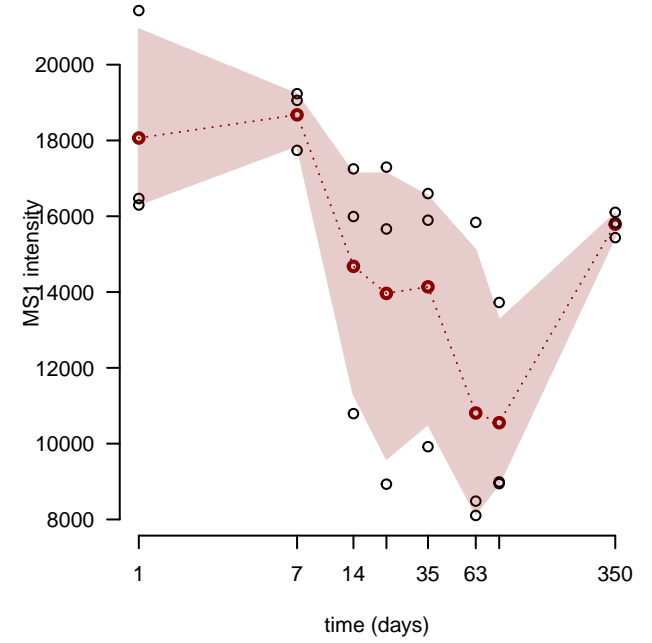

**O70165**  
**GN=Fcn1**

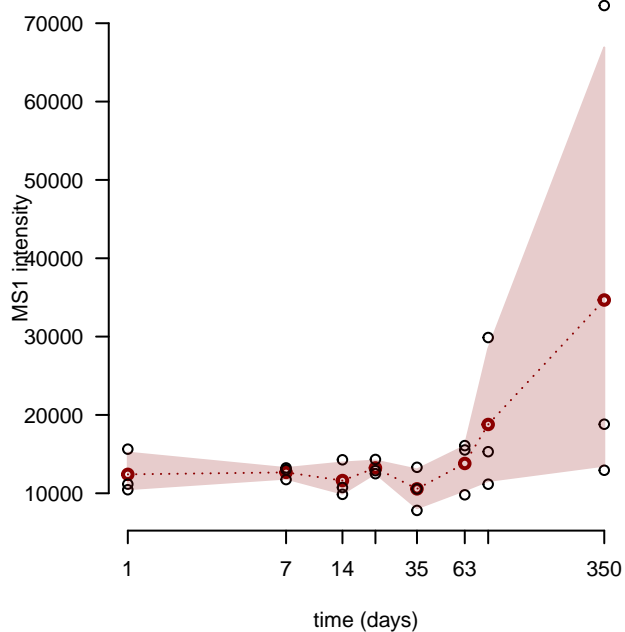

**O70172**  
**GN=Pip4k2a**  
phosphatidylinositol-5-phosphate 4-kinas ...

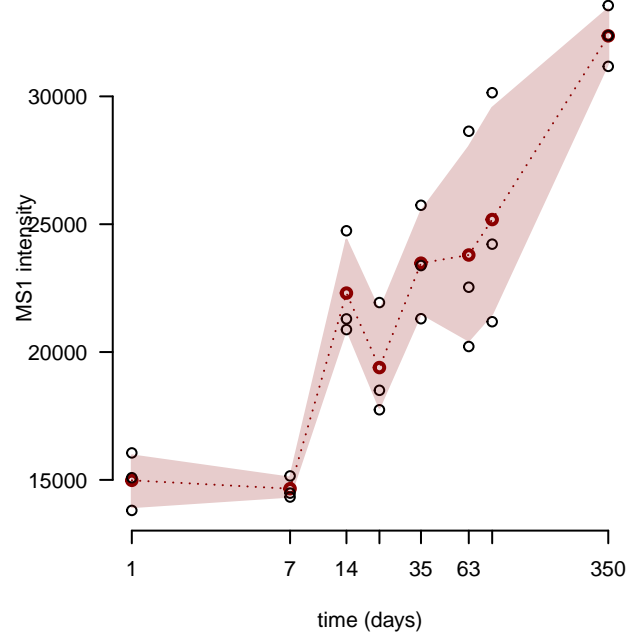

**O70194**  
**GN=Eif3d**  
eukaryotic translation initiation factor ...

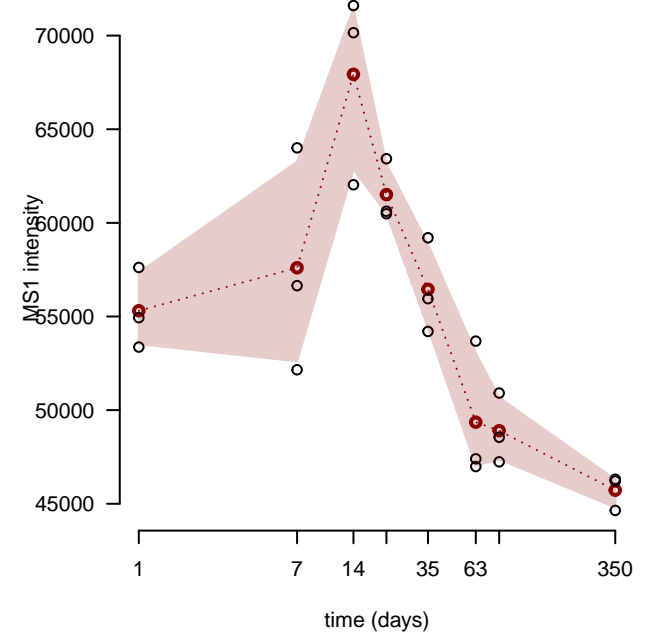

O70200  
GN=Aif1  
allograft inflammatory factor 1

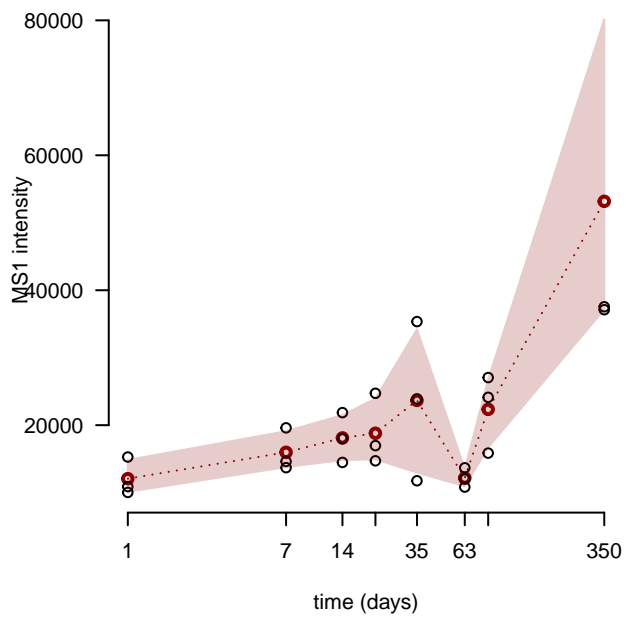

O70209  
GN=Pdlim3  
PDZ and LIM domain 3

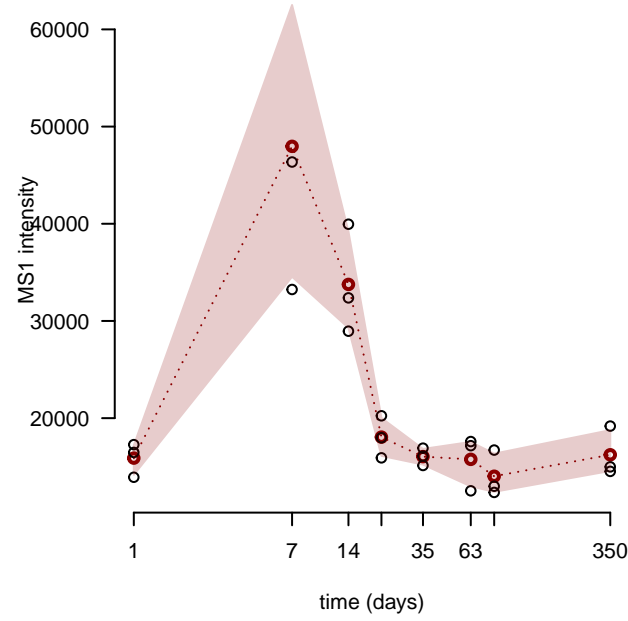

O70228  
GN=Atp9a  
ATPase, class II, type 9A

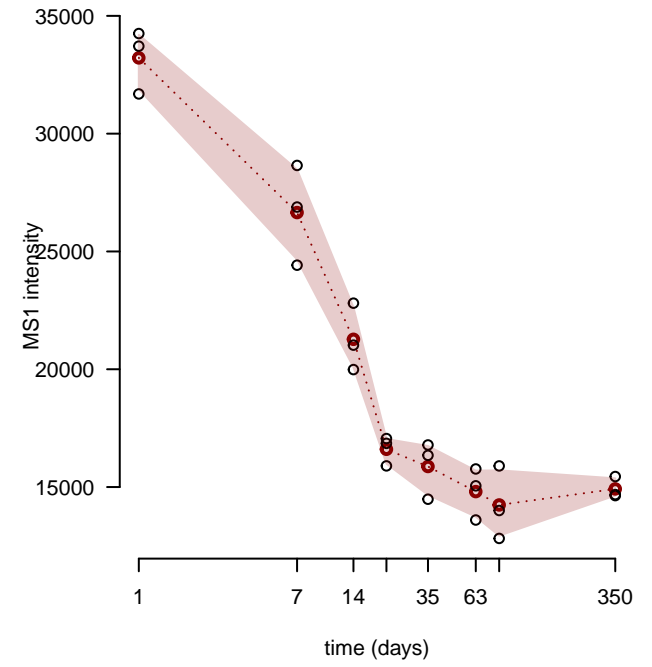

O70230  
GN=Znf143

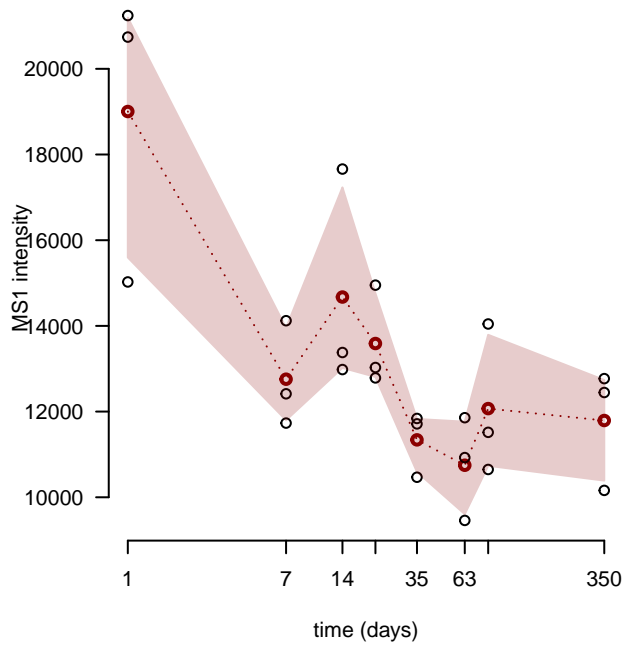

O70250  
GN=Pgam2  
phosphoglycerate mutase 2

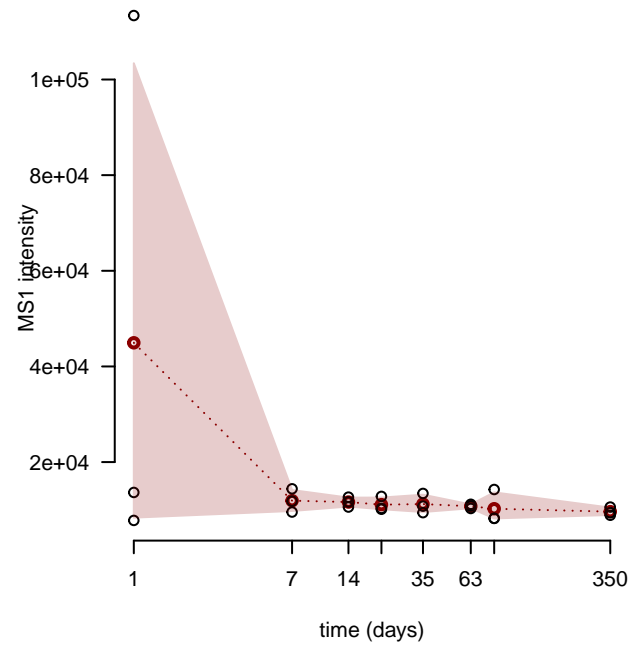

O70251  
GN=Eef1b

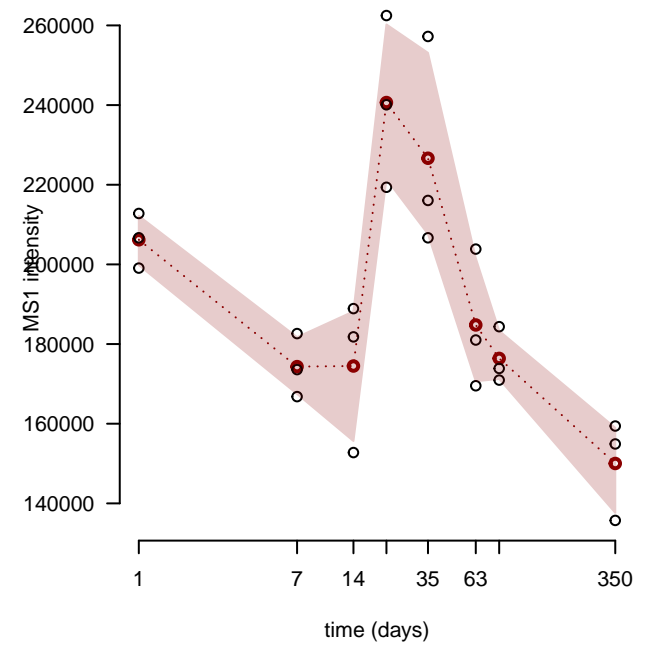

O70252  
GN=Hmox2  
heme oxygenase 2

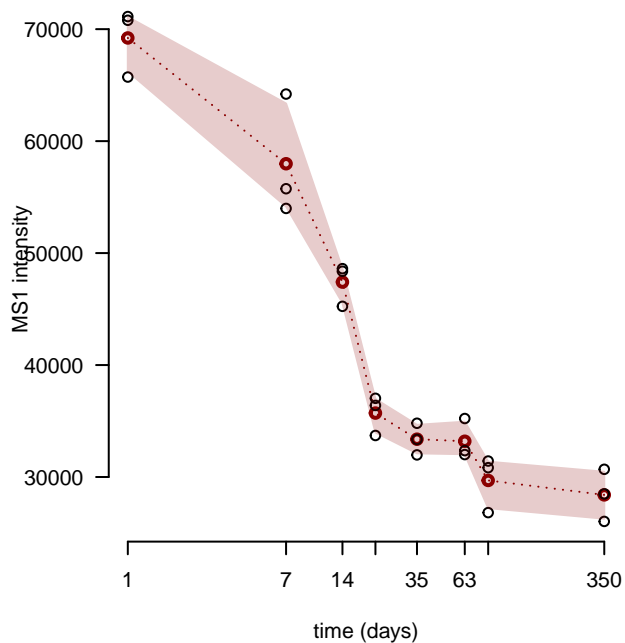

O70258  
GN=Sgce  
sarcoglycan, epsilon

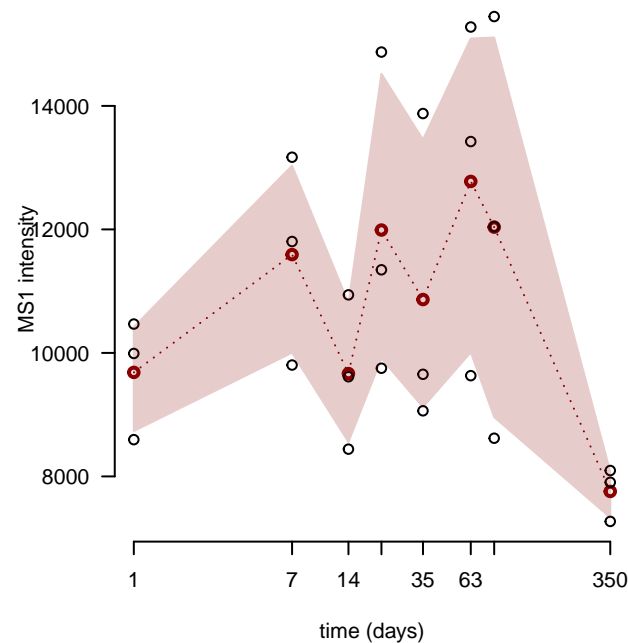

O70274  
GN=Ptp4a2  
protein tyrosine phosphatase 4a2

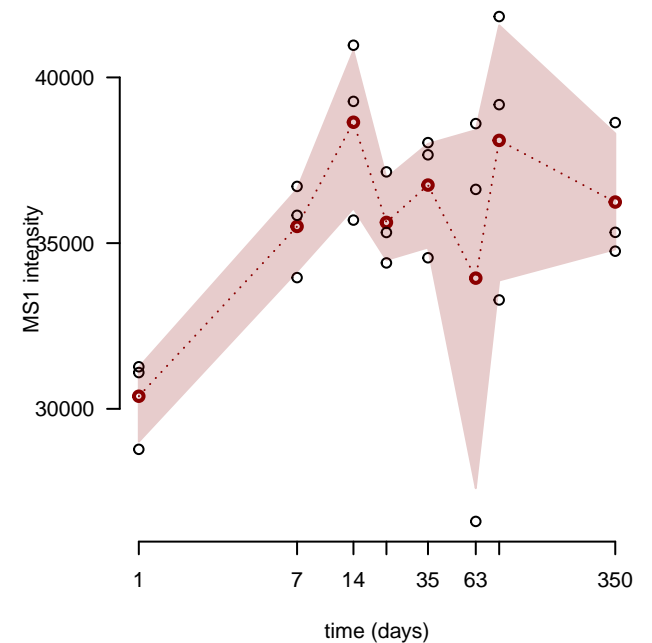

O70279  
GN=Ess2  
ess-2 splicing factor

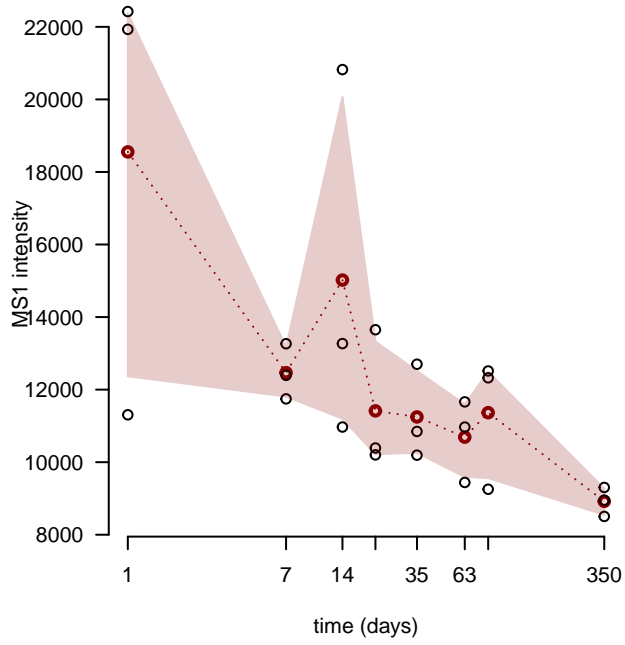

O70281  
GN=Tpst1  
protein-tyrosine sulfotransferase 1

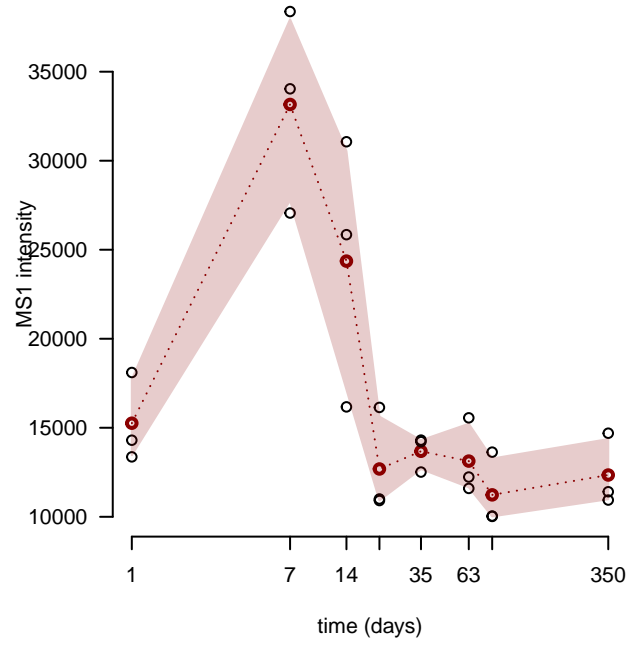

O70283  
GN=Wnt2b  
wingless-type MMTV integration site fami ...

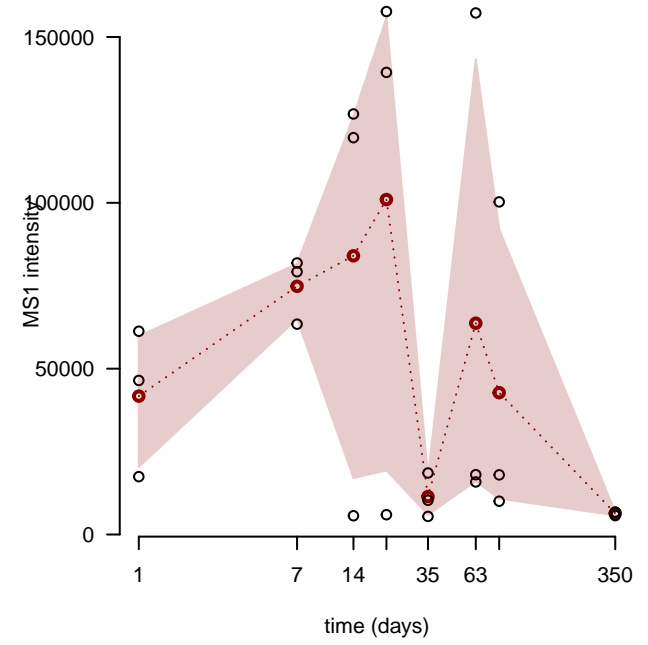

O70293  
GN=Grk6  
G protein-coupled receptor kinase 6

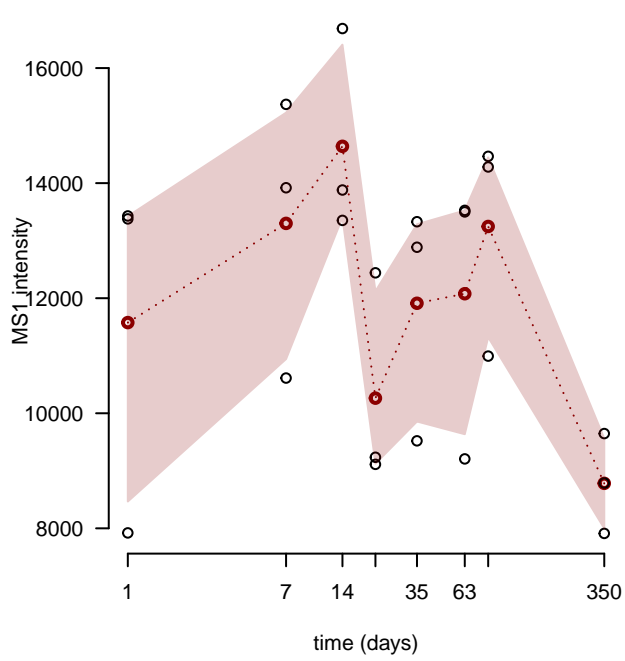

O70305  
GN=Atxn2  
ataxin 2

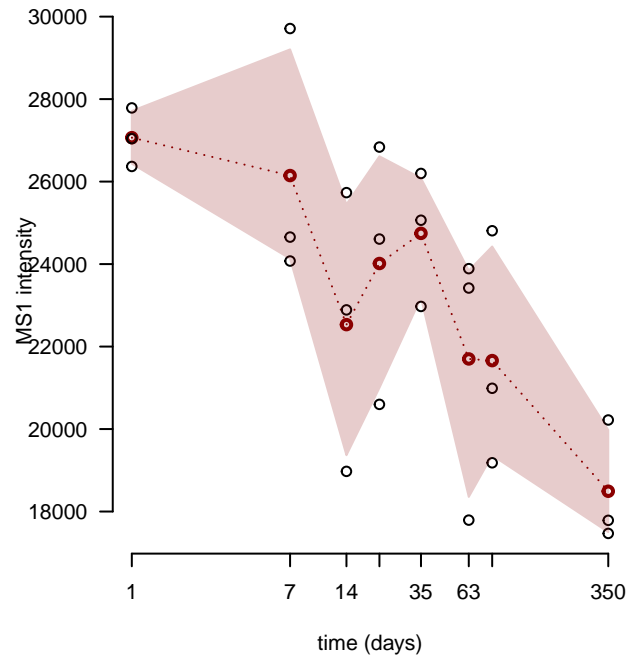

O70309  
GN=Itgb5  
integrin beta 5

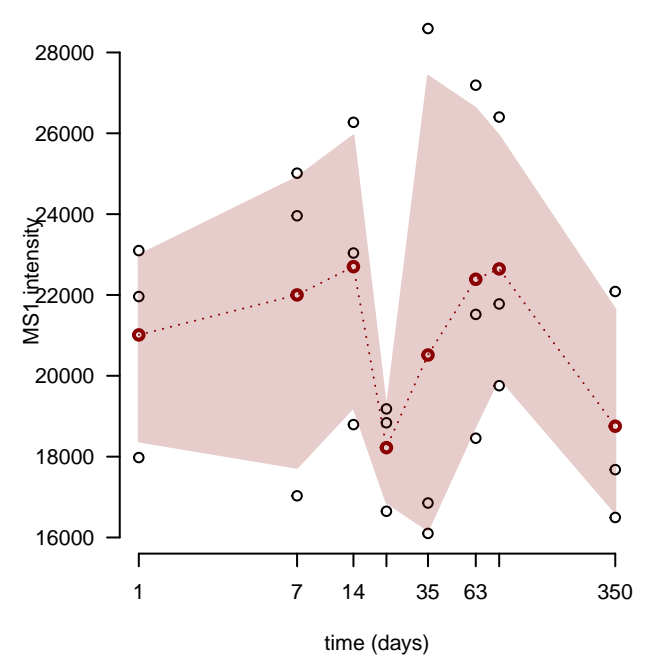

O70310  
GN=Nmt1  
N-myristoyltransferase 1

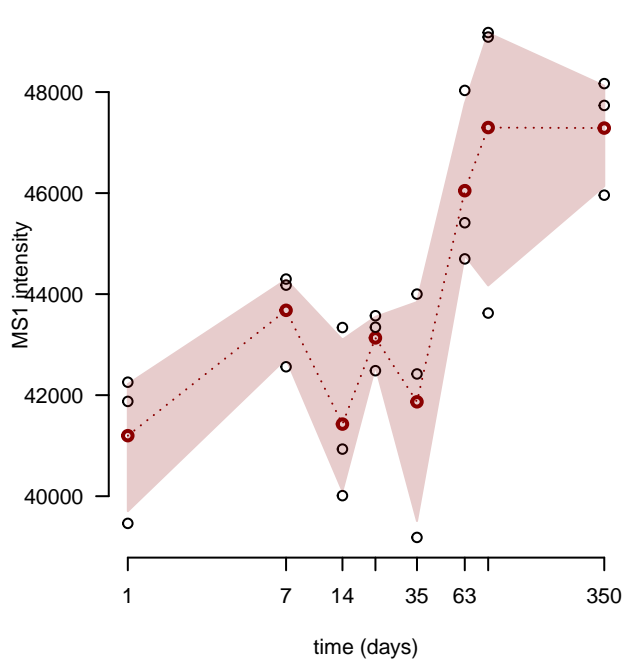

O70311  
GN=Nmt2  
N-myristoyltransferase 2

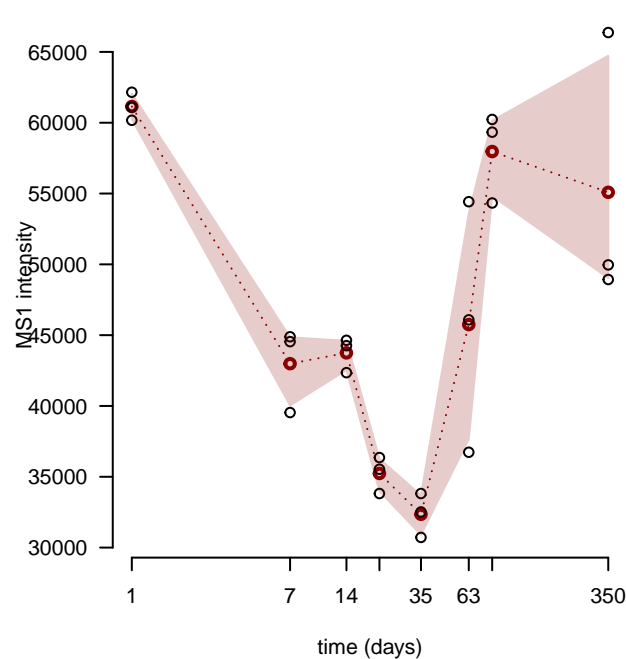

O70318  
GN=Epb4112  
erythrocyte membrane protein band 4.1 li ...

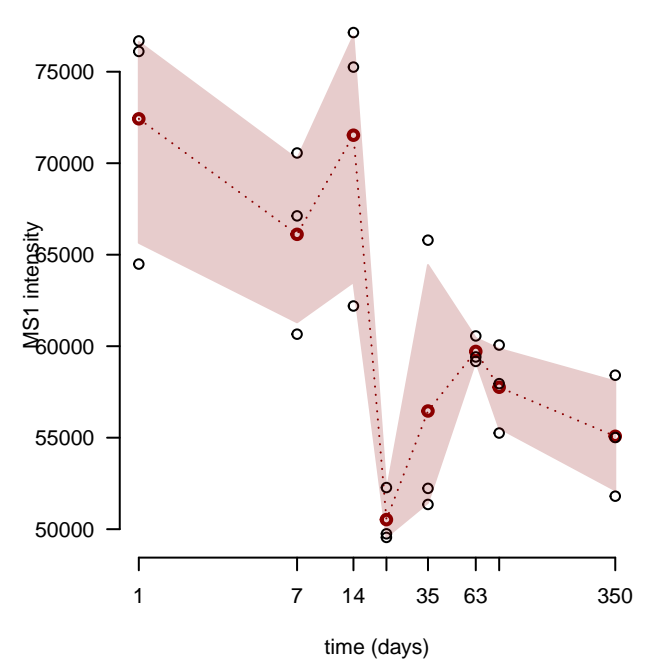

**O70324**  
**GN=Slc16a2**  
solute carrier family 16 (monocarboxylic ...

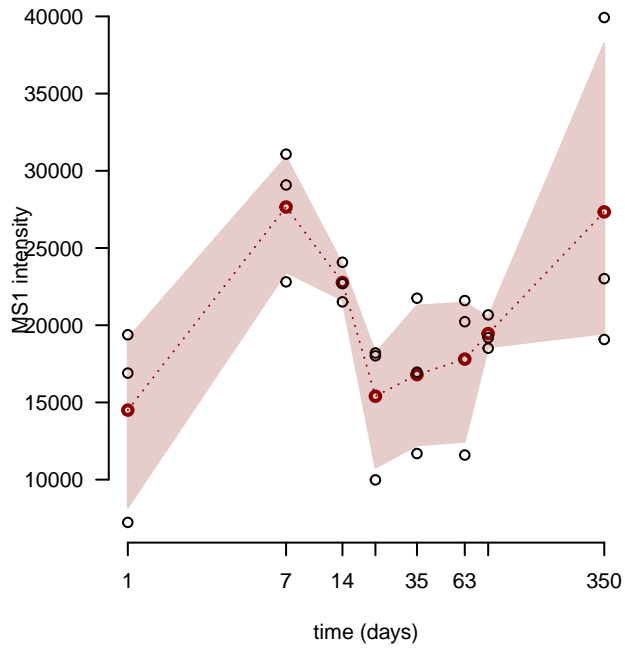

**O70325**  
**GN=Gpx4**  
glutathione peroxidase 4

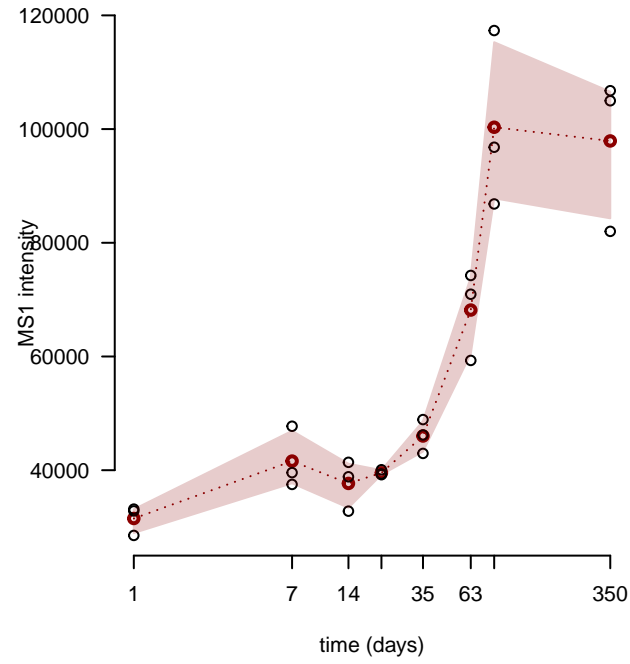

**O70326**  
**GN=Grem1**  
gremlin 1, DAN family BMP antagonist

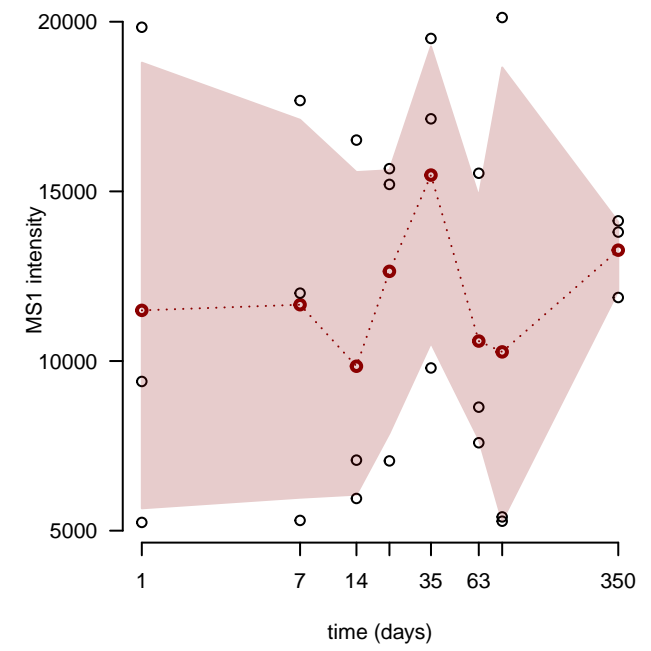

**O70338**  
**GN=Rnaseh1**  
ribonuclease H1

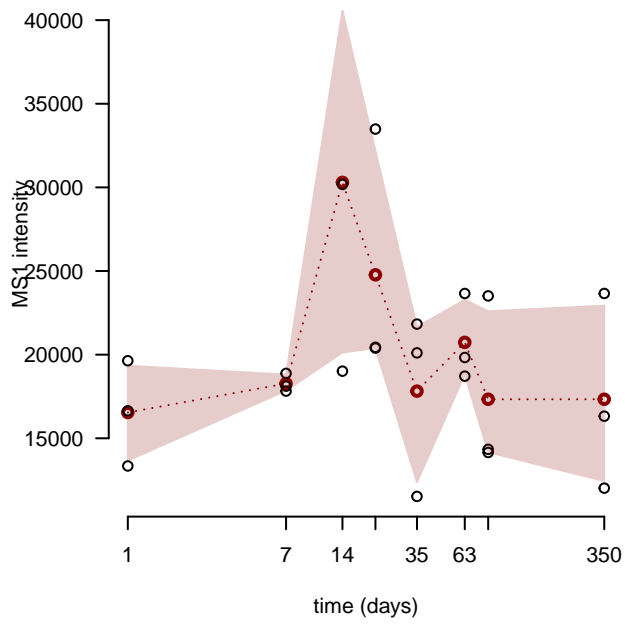

**O70348**  
**GN=Dxo**  
decapping exoribonuclease

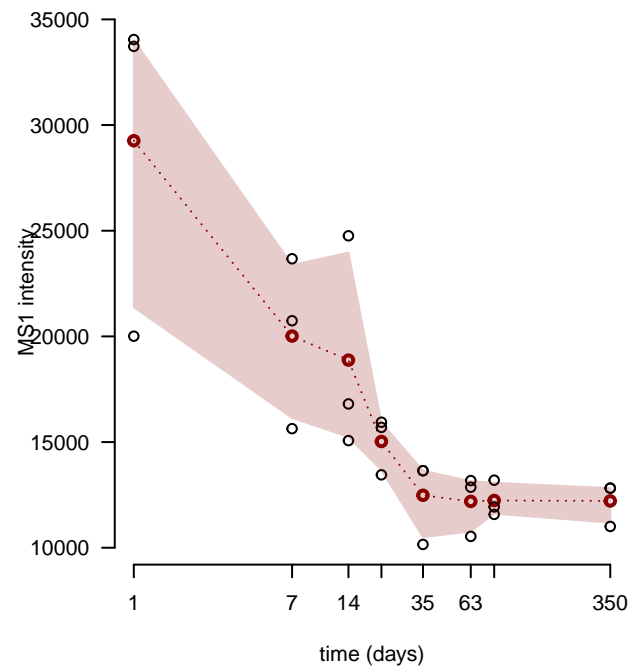

**O70362**  
**GN=Gpld1**  
glycosylphosphatidylinositol specific ph ...

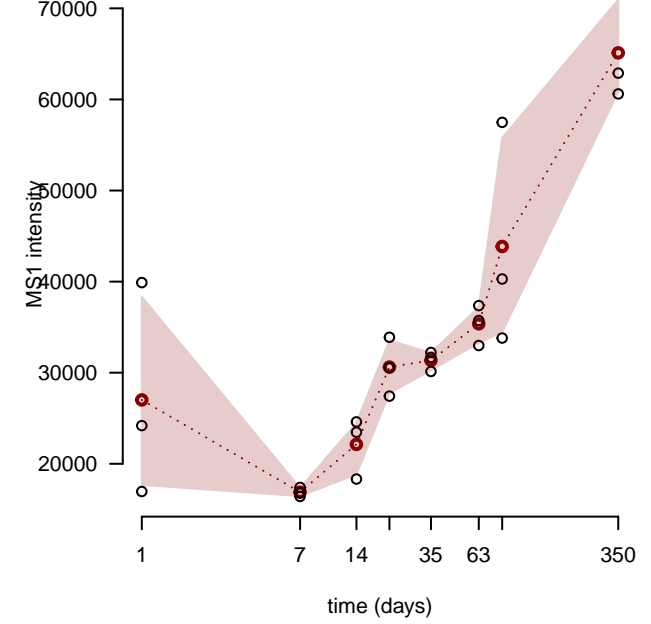

**O70370**  
**GN=Ctss**  
cathepsin S

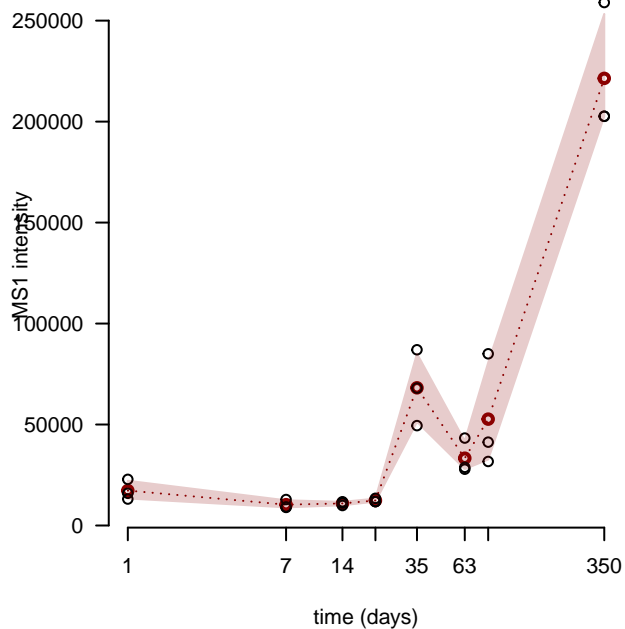

**O70374**  
**GN=Cbfa2t2**  
CBFA2/RUNX1 translocation partner 2

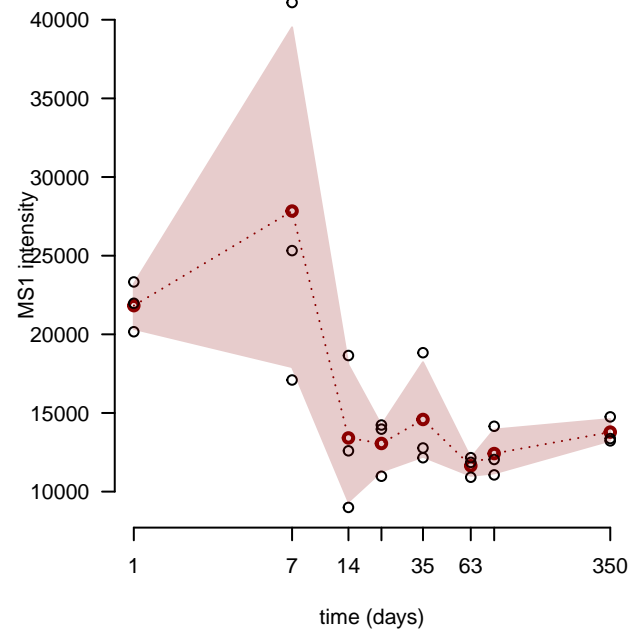

**O70378**  
**GN=Emc8**  
ER membrane protein complex subunit 8

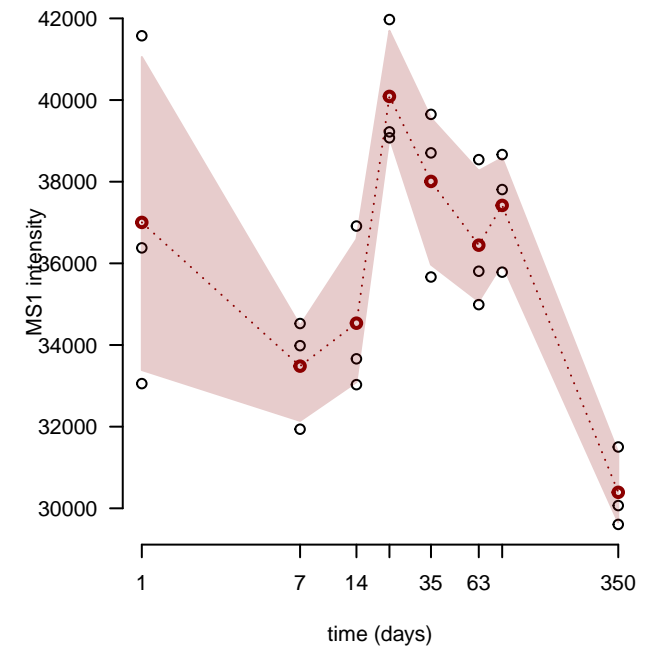

O70400  
GN=Pdlim1  
PDZ and LIM domain 1 (elfin)

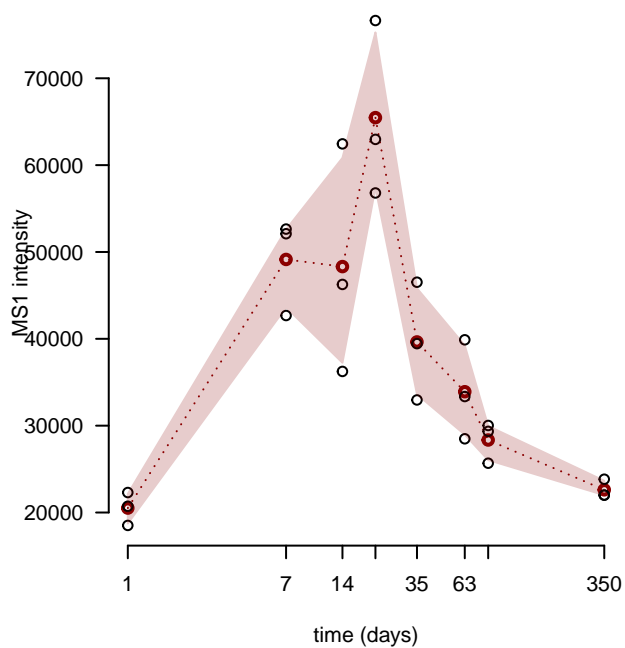

O70401  
GN=Tspan6  
tetraspanin 6

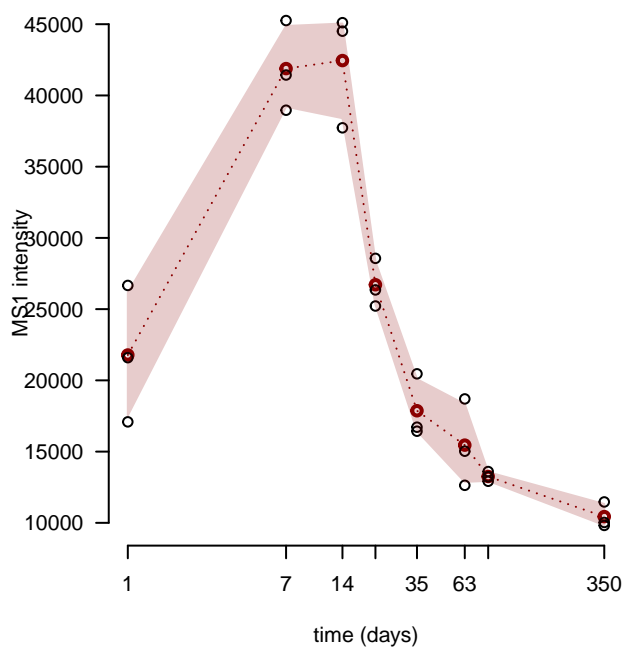

O70404  
GN=Vamp8  
vesicle-associated membrane protein 8

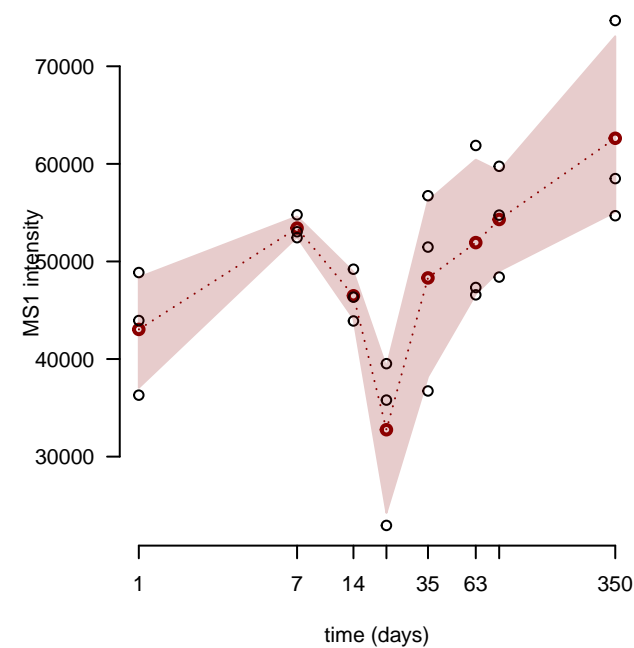

O70405  
GN=Ulk1  
unc-51 like kinase 1

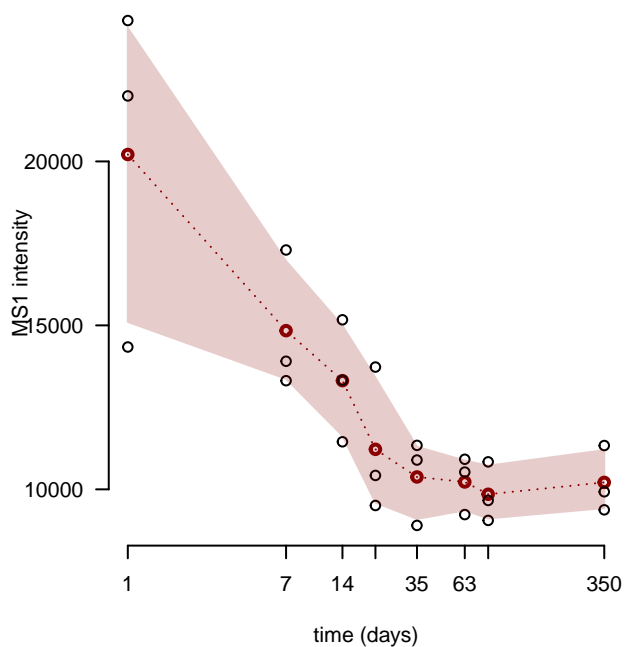

O70410  
GN=Vmn2r1  
vomeronasal 2, receptor 1

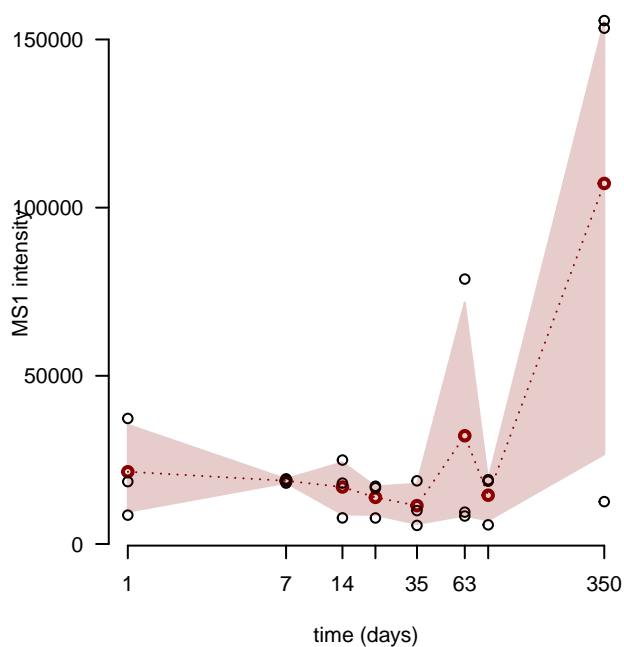

O70421  
GN=Fzd1  
frizzled class receptor 1

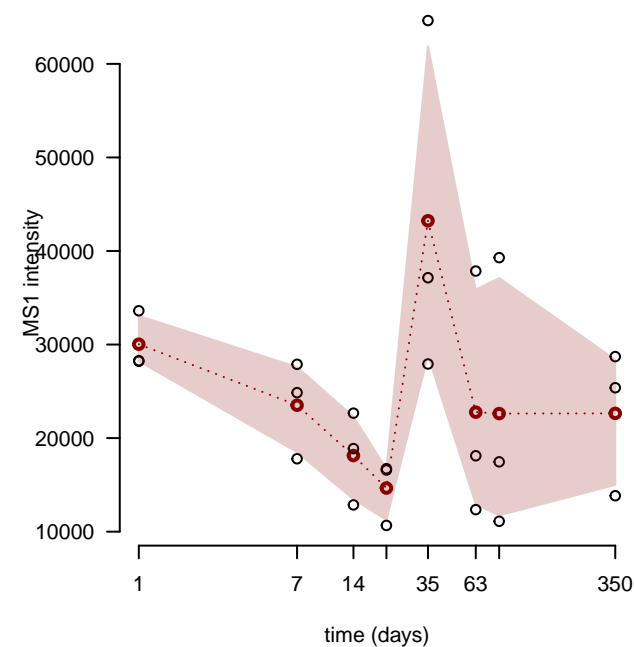

O70422  
GN=Gtf2h4  
general transcription factor II H, polyp ...

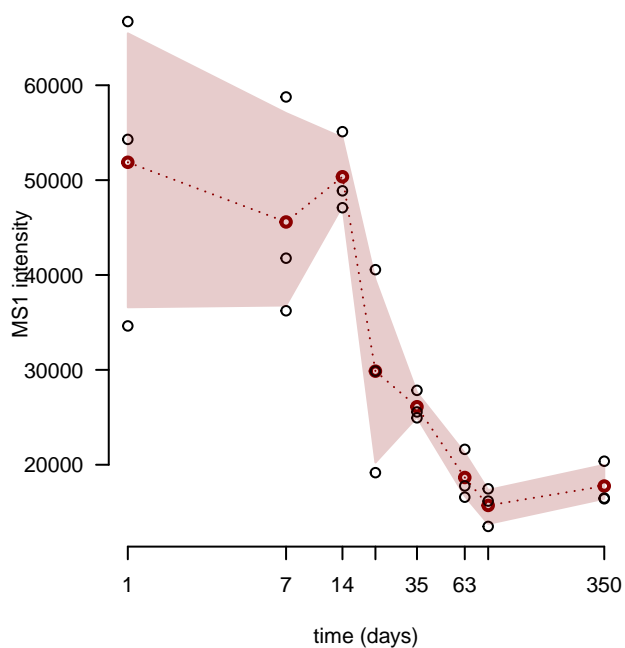

O70423  
GN=Aoc3  
amine oxidase, copper containing 3

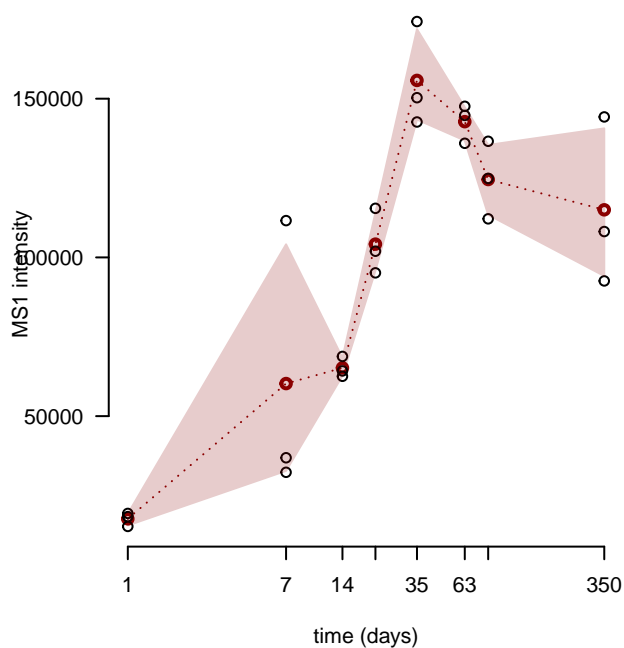

O70433  
GN=Fhl2  
four and a half LIM domains 2

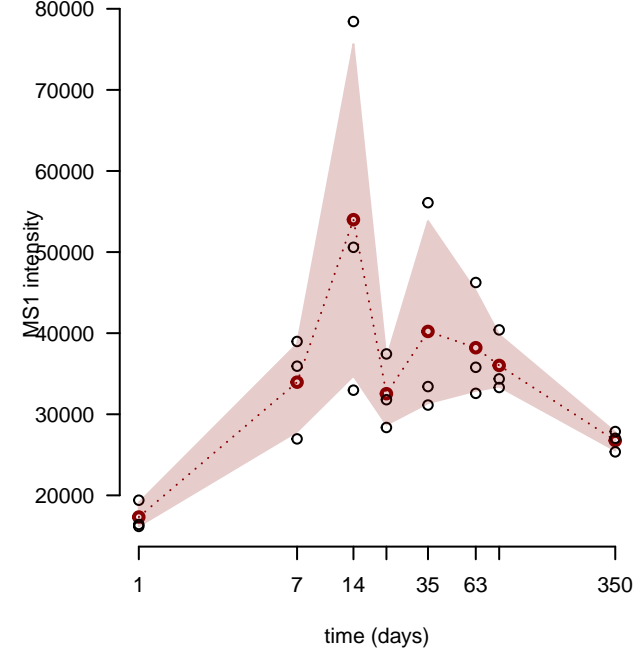



O70435  
GN=Psm3  
proteasome subunit alpha 3

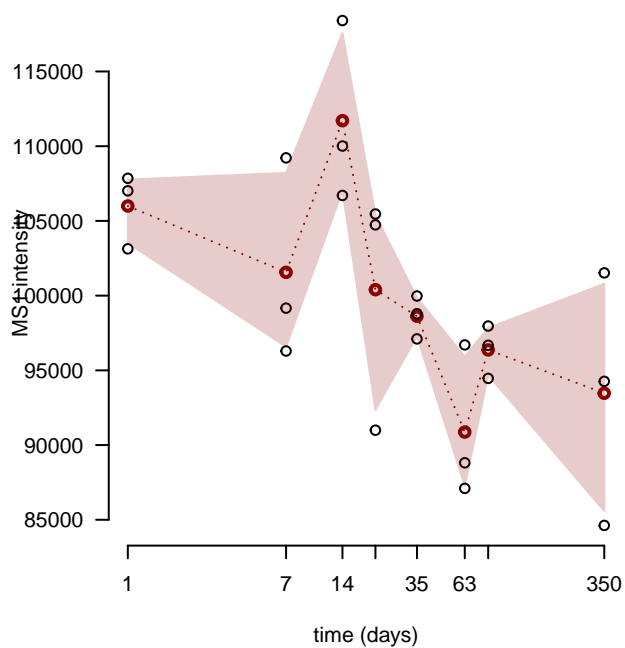

O70439  
GN=Stx7  
syntaxin 7

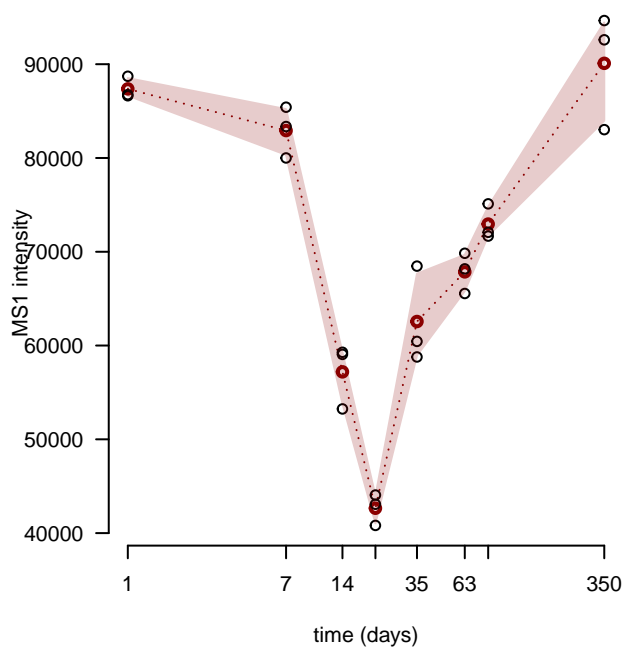

O70443  
GN=Gnaz  
guanine nucleotide binding protein, alpha ...

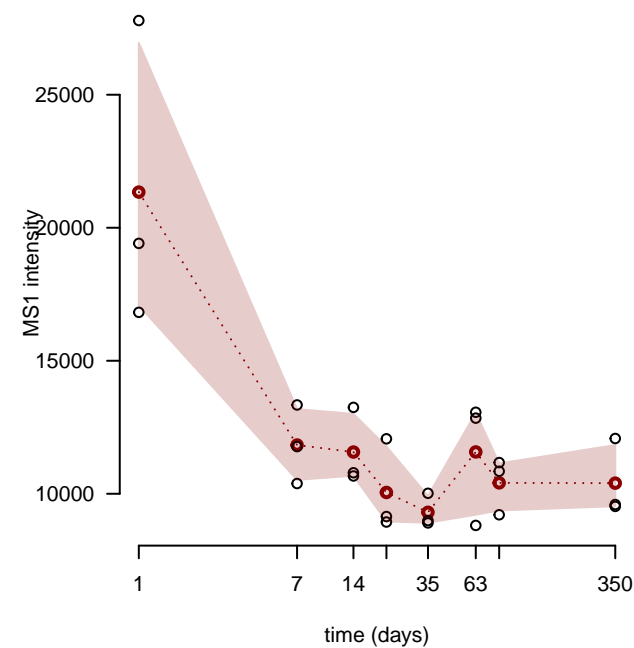

O70445  
GN=Bard1  
BRCA1 associated RING domain 1

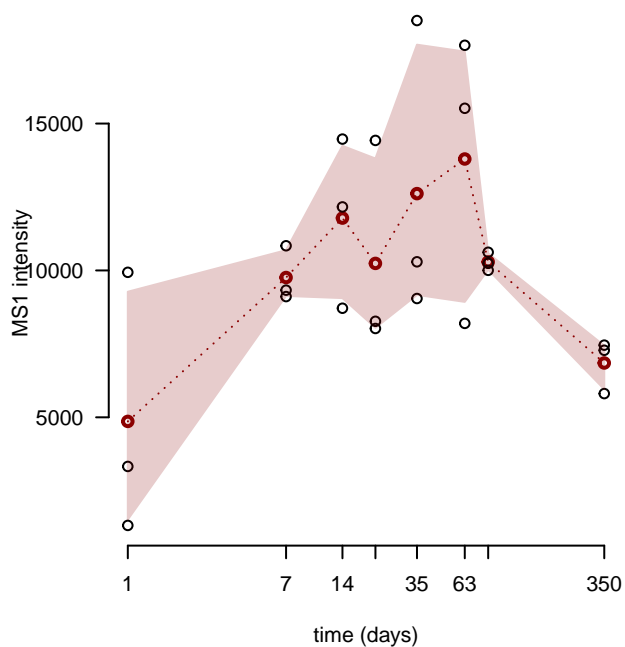

O70456  
GN=Sfn  
stratifin

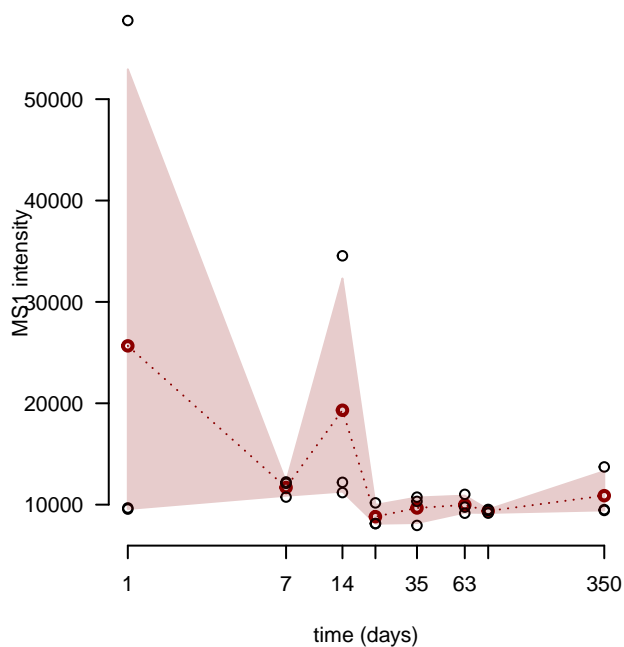

O70472  
GN=Tmem131  
transmembrane protein 131

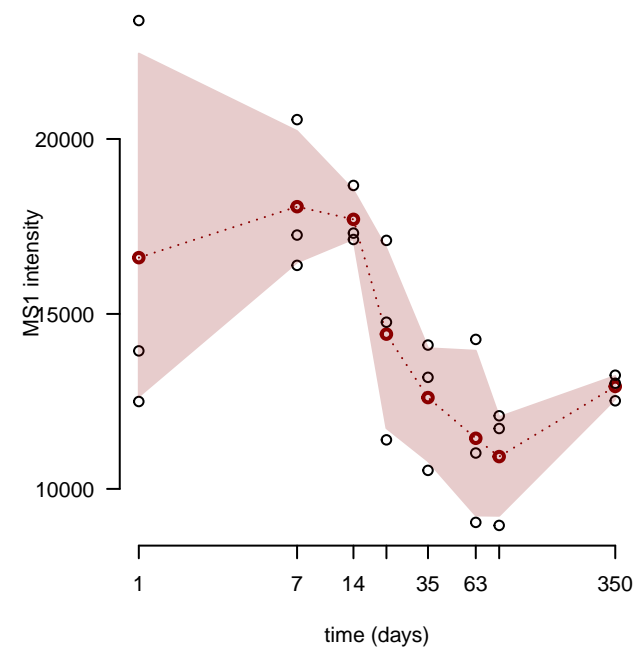

O70475  
GN=Ugdh  
UDP-glucose dehydrogenase

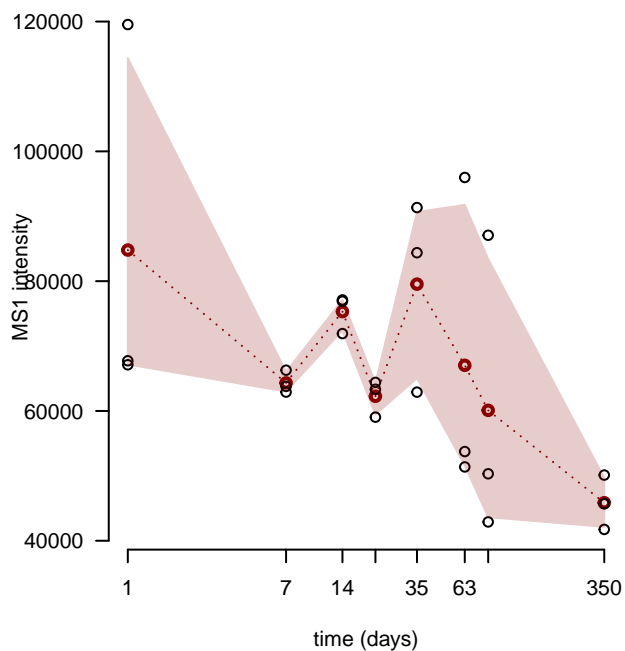

O70479  
GN=Tnfaip1  
tumor necrosis factor, alpha-induced pro ...

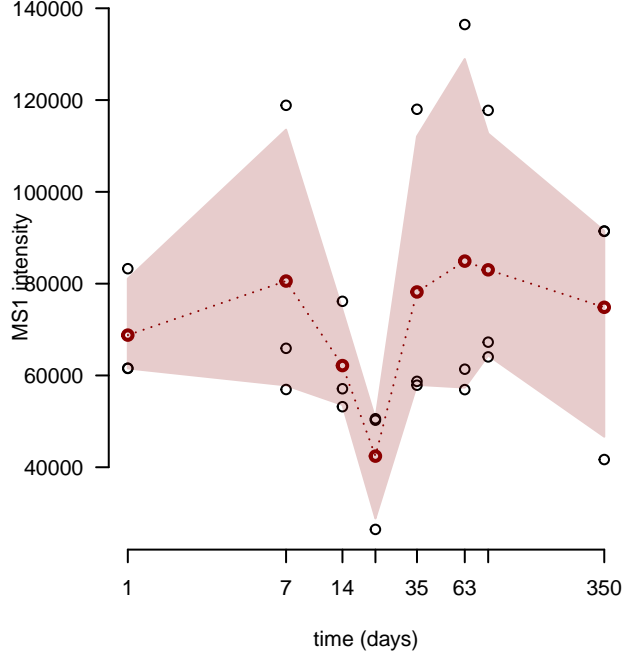

O70480  
GN=Vamp4  
vesicle-associated membrane protein 4

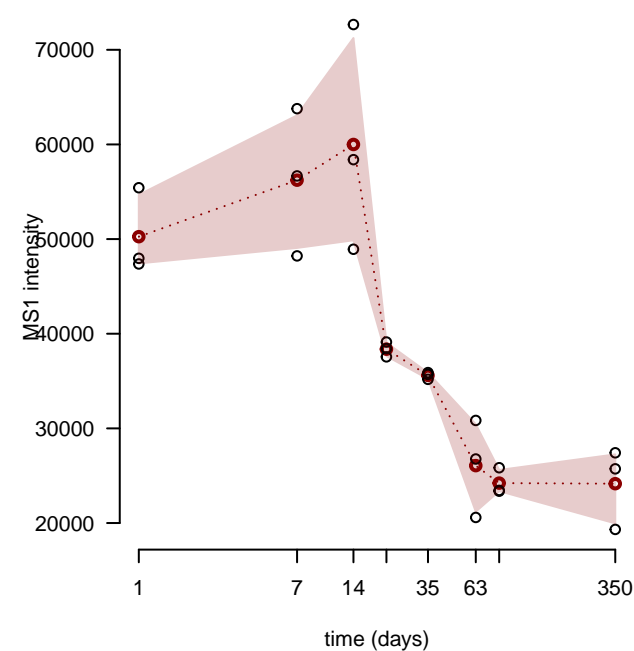

**O70481**  
**GN=Ubr1**  
ubiquitin protein ligase E3 component n- ...

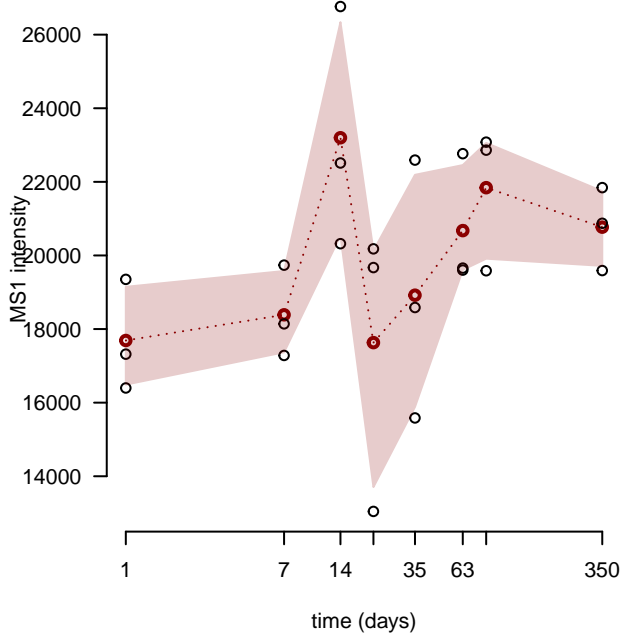

**O70492**  
**GN=Snx3**  
sorting nexin 3

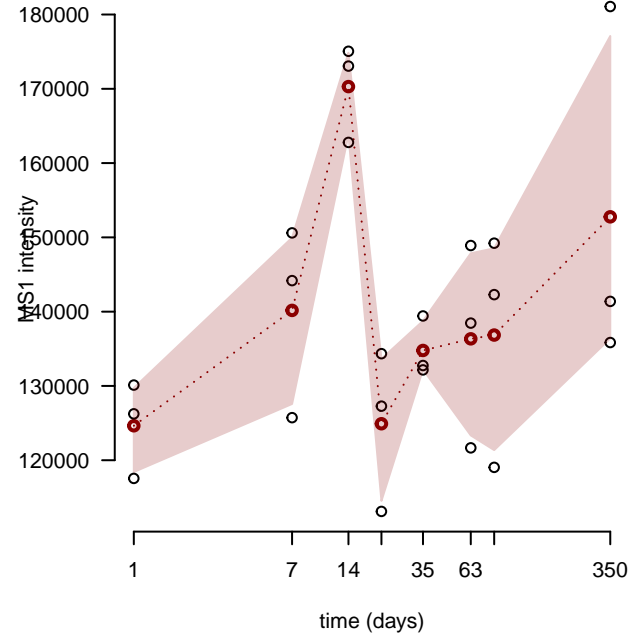

**O70493**  
**GN=Snx12**  
sorting nexin 12

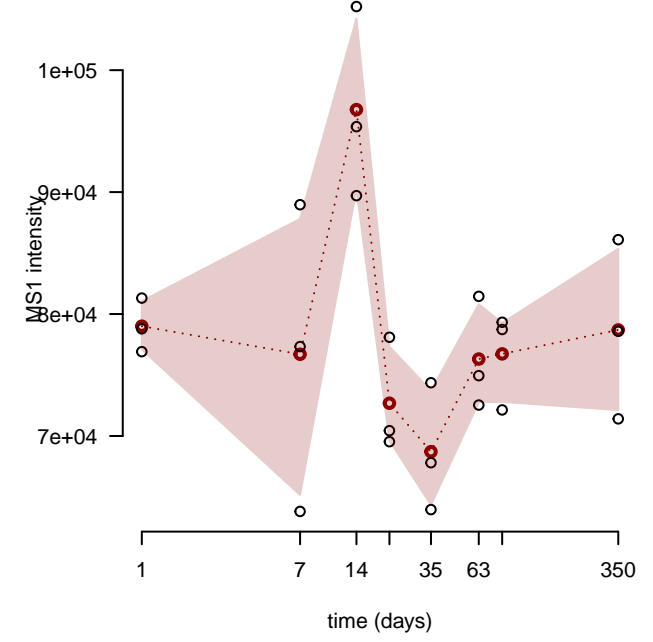

**O70494**  
**GN=Sp3**  
trans-acting transcription factor 3

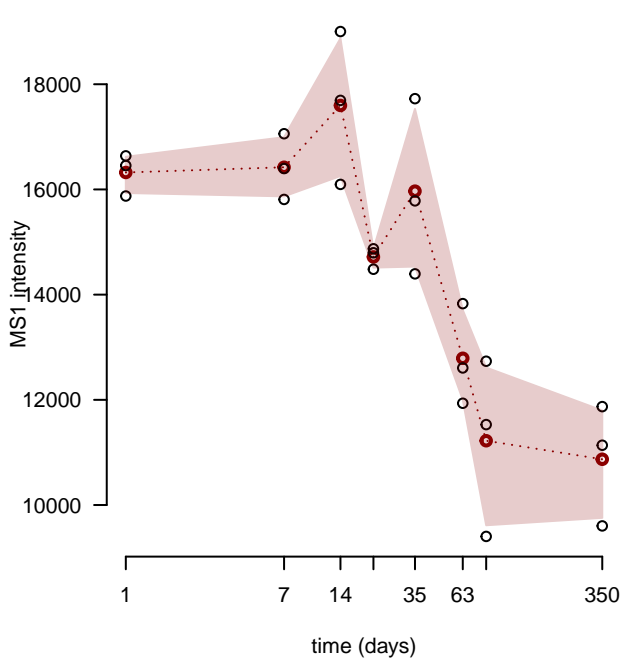

**O70496**  
**GN=Clcn7**  
chloride channel, voltage-sensitive 7

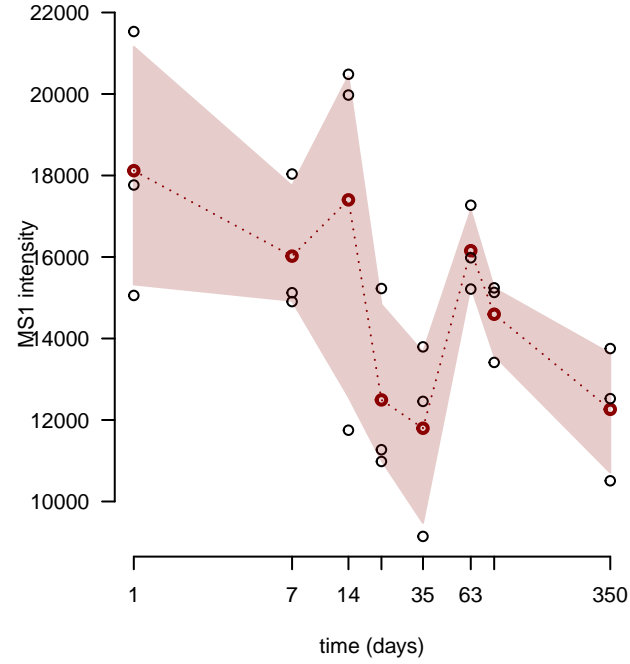

**O70503**  
**GN=Hsd17b12**  
hydroxysteroid (17-beta) dehydrogenase 1 ...

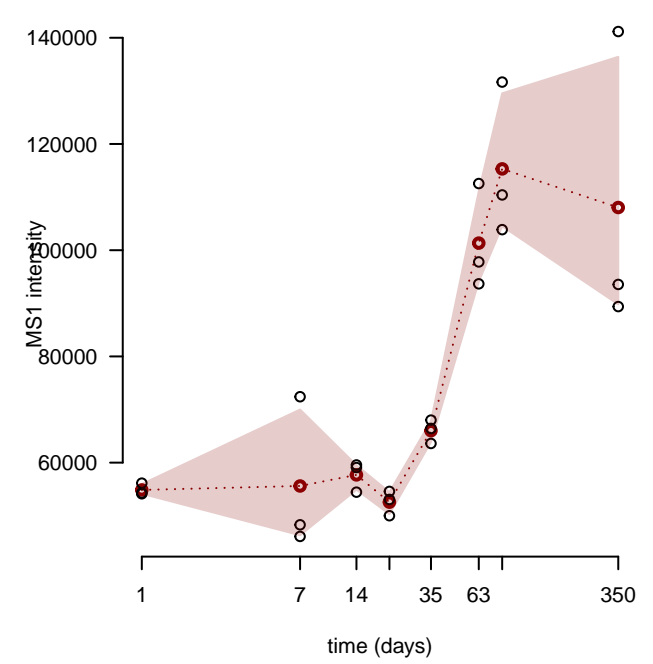

**O70546**  
**GN=Kdm6a**  
lysine (K)-specific demethylase 6A

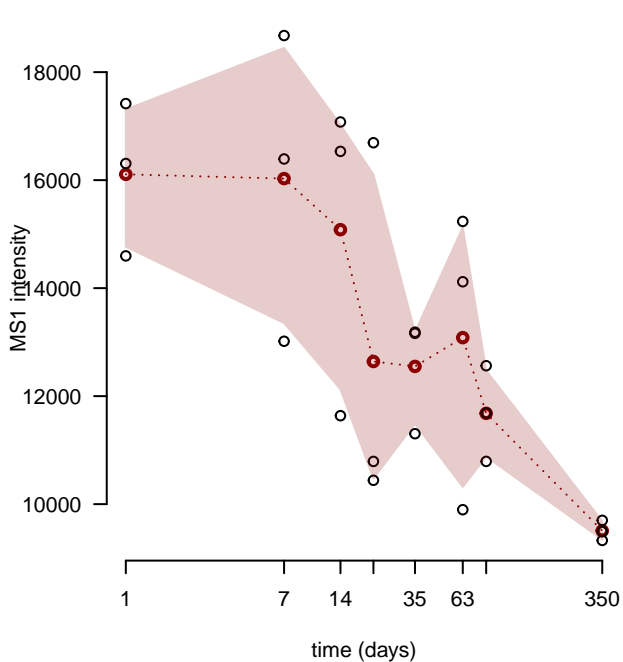

**O70551**  
**GN=Srpk1**  
serine/arginine-rich protein specific ki ...

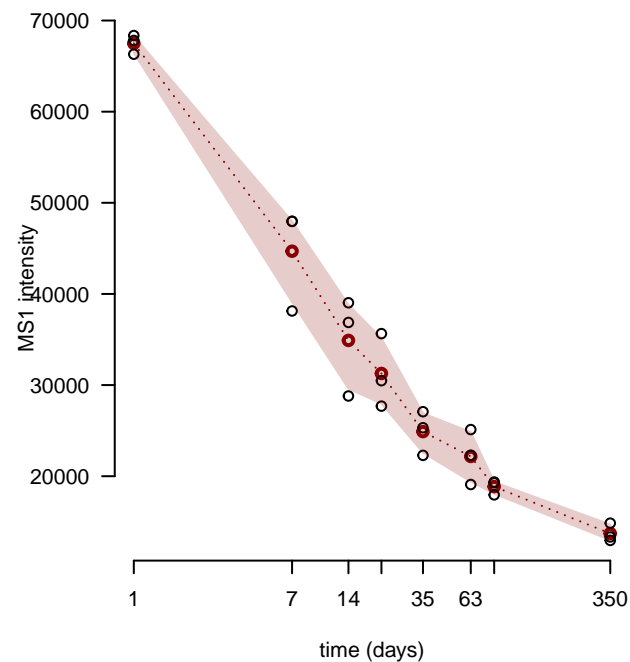

**O70554**  
**GN=Sprr2b**  
small proline-rich protein 2B

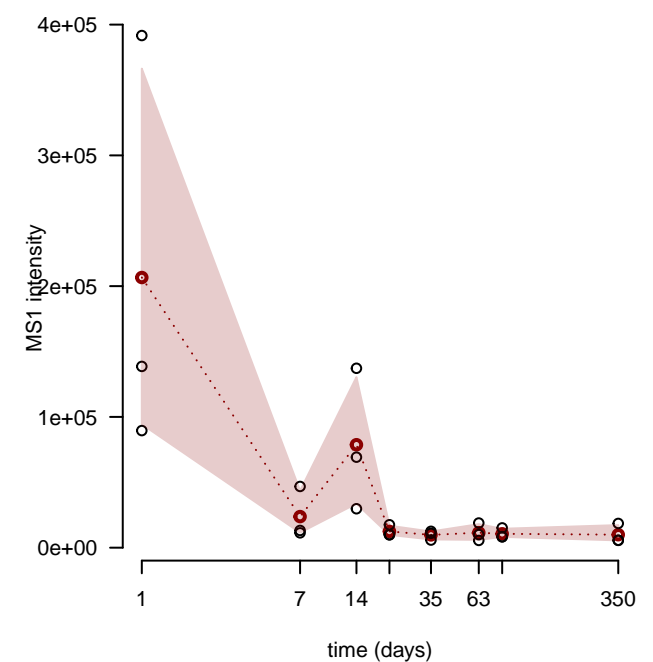

**O70566**  
**GN=Diaph2**  
diaphanous related formin 2

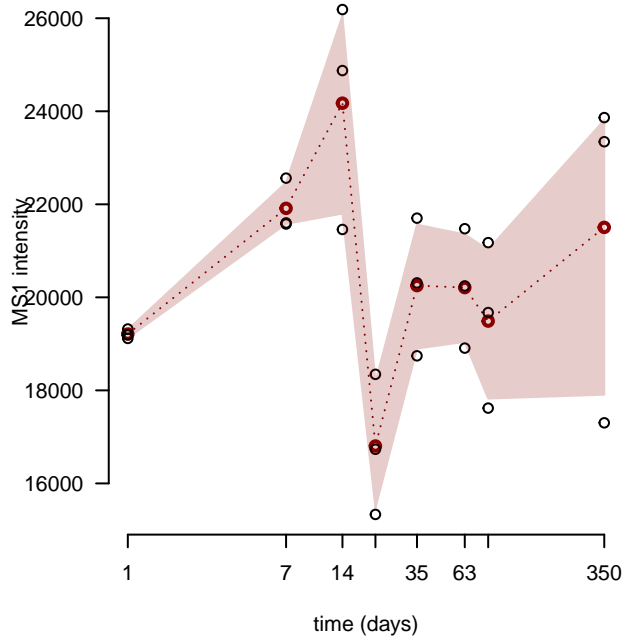

**O70570**  
**GN=Pigr**  
polymeric immunoglobulin receptor

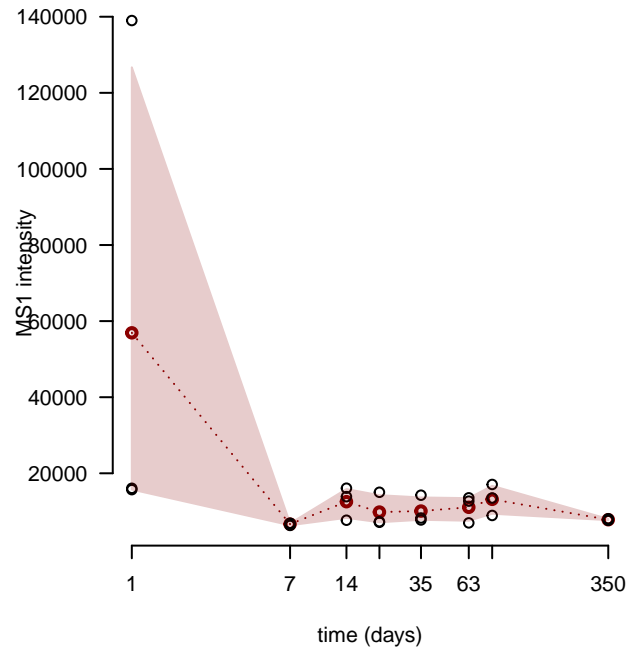

**O70571**  
**GN=Pdk4**  
pyruvate dehydrogenase kinase, isoenzyme ...

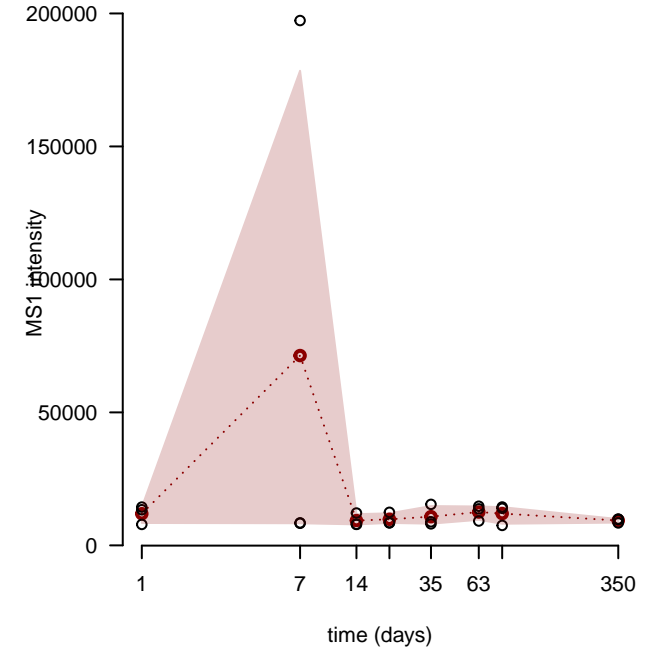

**O70572**  
**GN=Smpd2**  
sphingomyelin phosphodiesterase 2, neutr ...

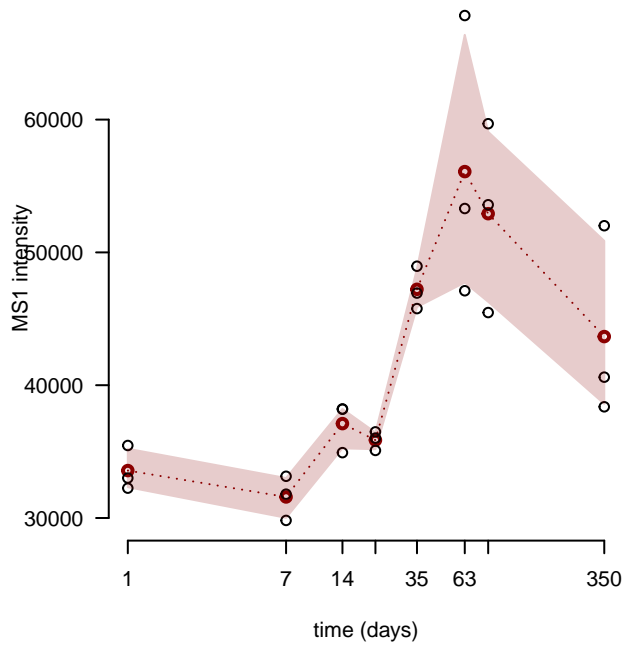

**O70576**  
**GN=Stag3**  
stromal antigen 3

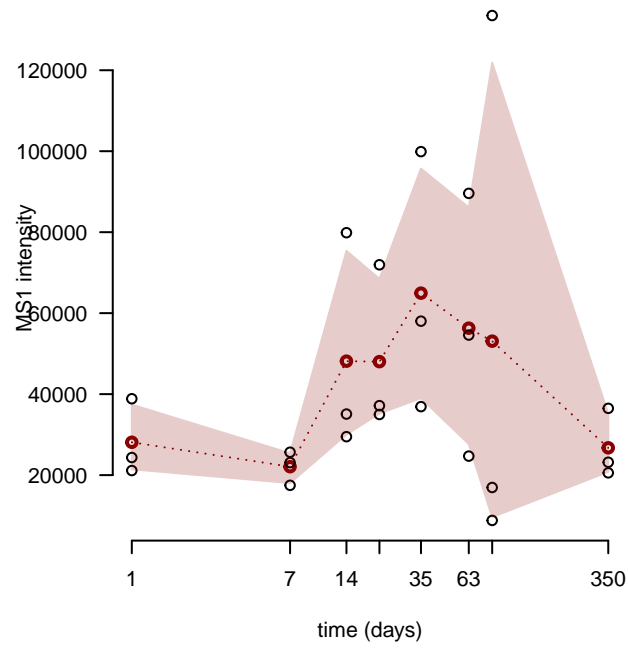

**O70579**  
**GN=Slc25a17**  
solute carrier family 25 (mitochondrial ...

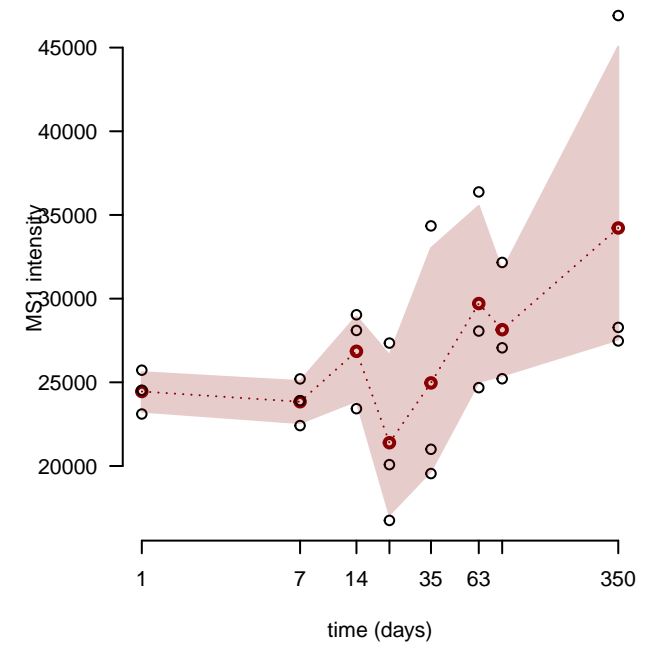

**O70583**  
**GN=Mid1**  
midline 1

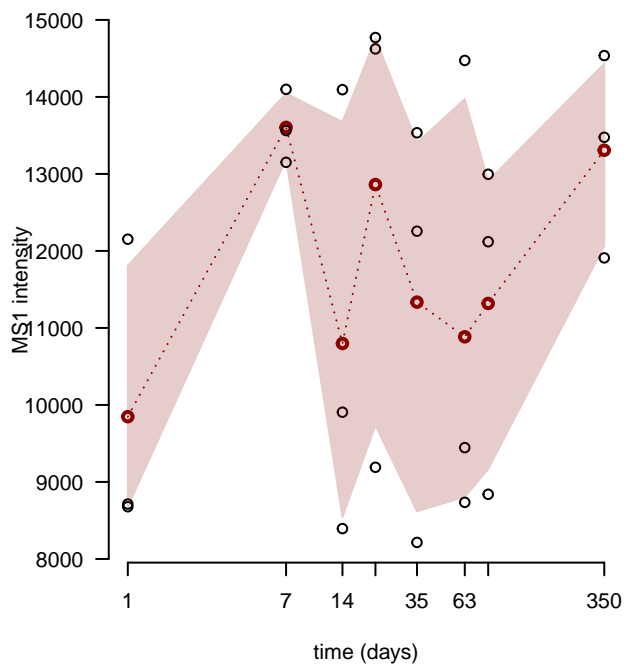

**O70585**  
**GN=Dtnb**  
dystrobrevin, beta

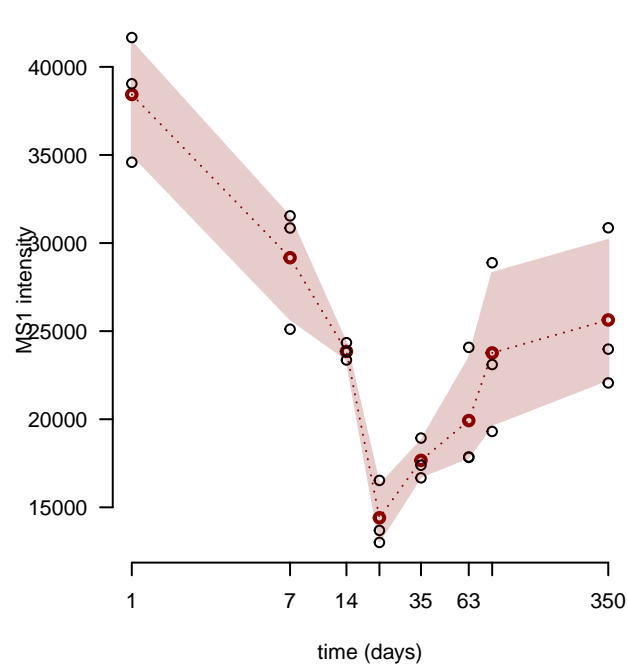

**O70589**  
**GN=Cask**  
calcium/calmodulin-dependent serine prot ...

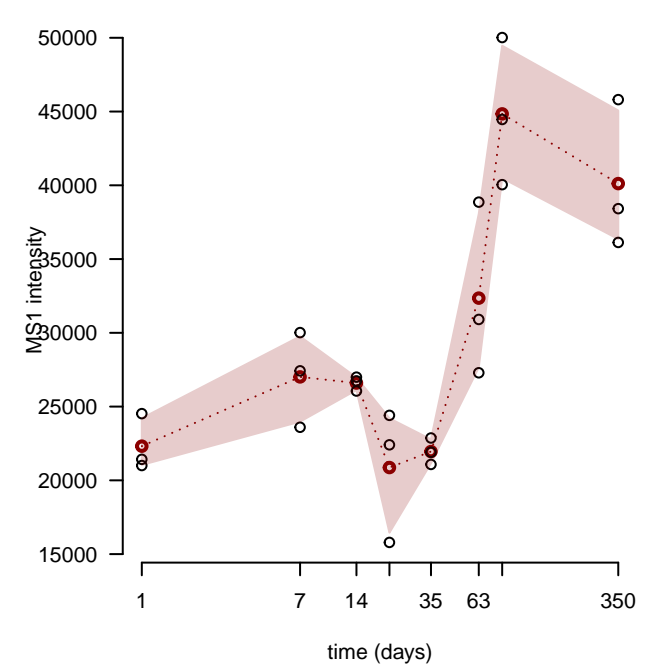

O70591  
GN=Pfdn2  
prefoldin 2

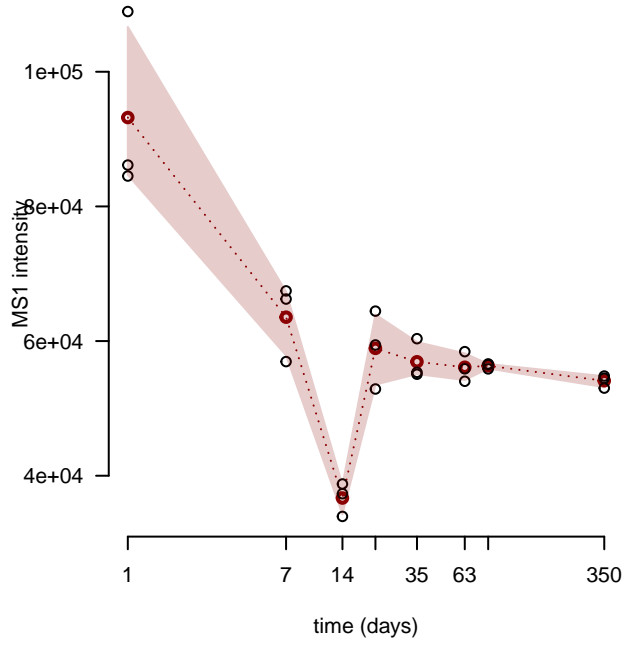

O70622  
GN=Rtn2  
reticulon 2 (Z-band associated protein)

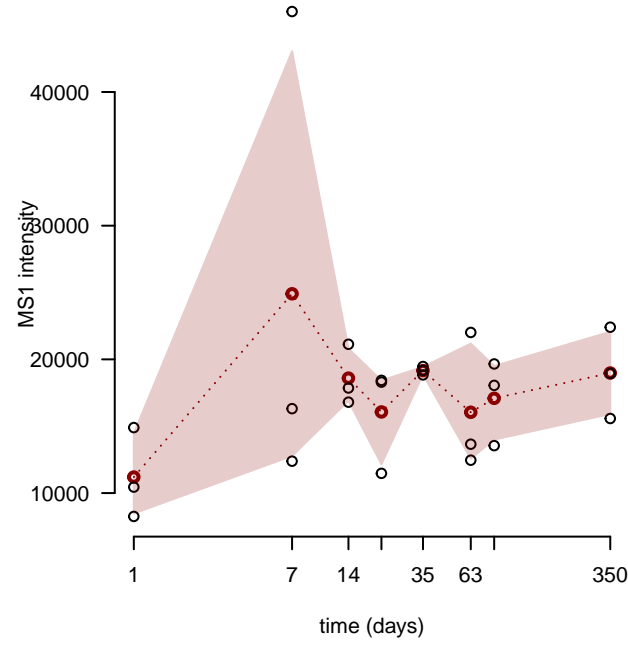

O70628  
GN=Pde9a  
phosphodiesterase 9A

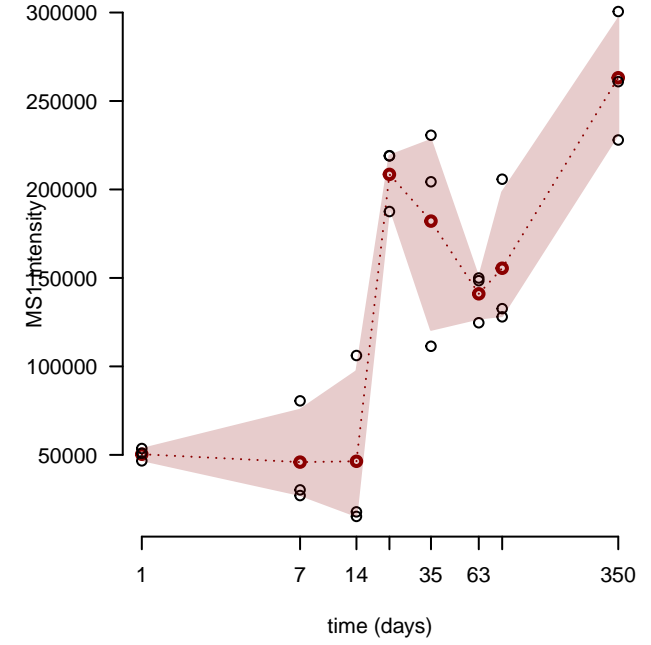

O88196  
GN=Ttc3  
tetratricopeptide repeat domain 3

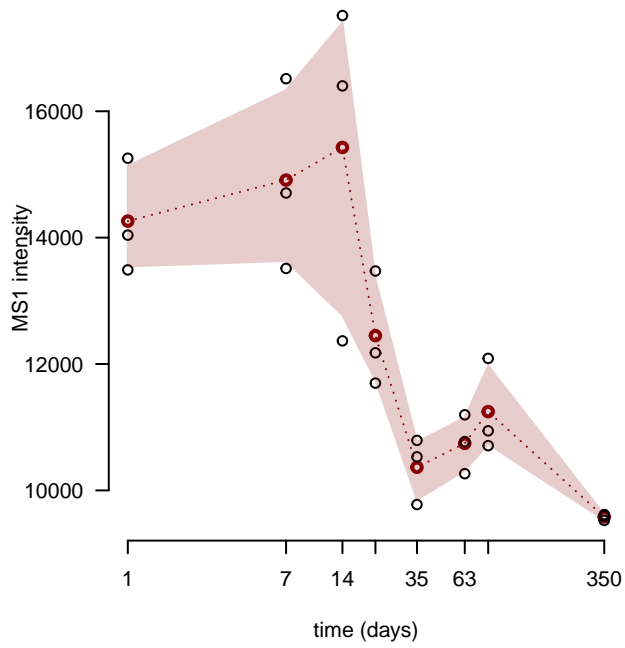

O88200  
GN=Clec11a  
C-type lectin domain family 11, member a

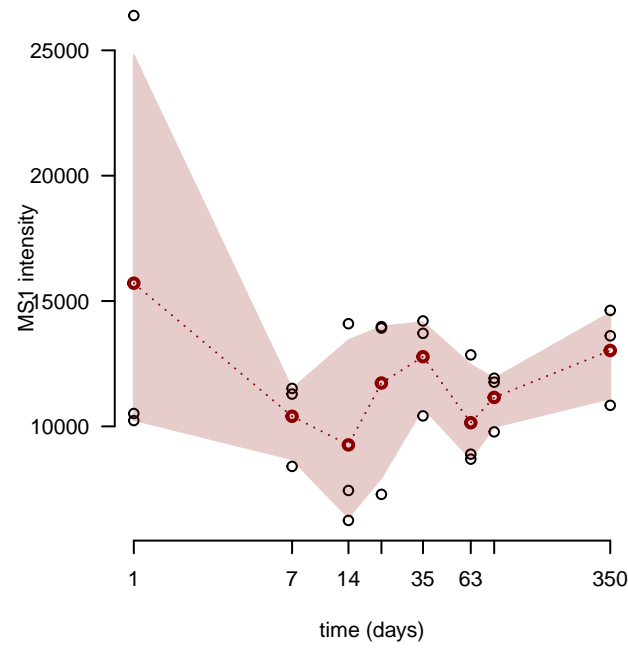

O88207  
GN=Col5a1  
collagen, type V, alpha 1

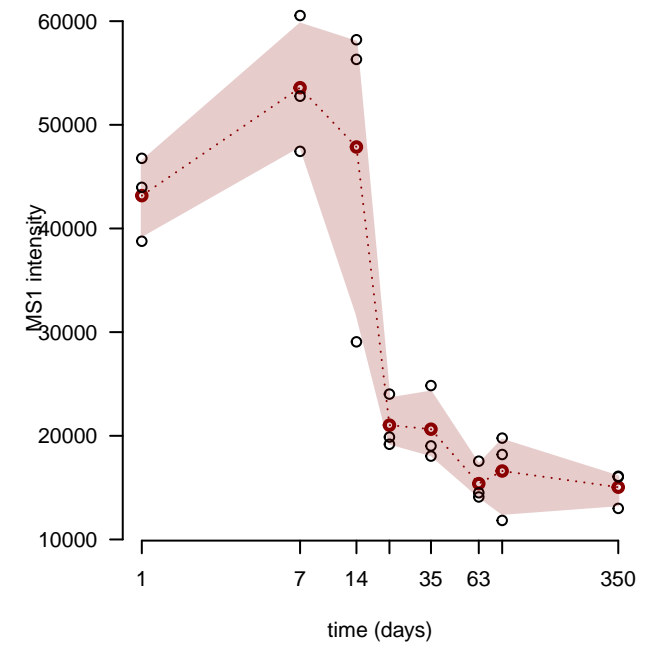

O88271  
GN=Cfdp1  
craniofacial development protein 1

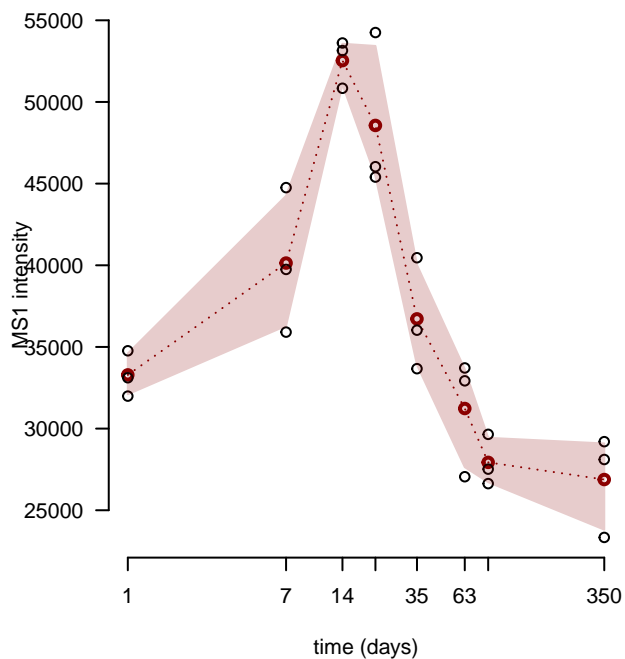

O88286  
GN=Wiz  
widely-interspaced zinc finger motifs

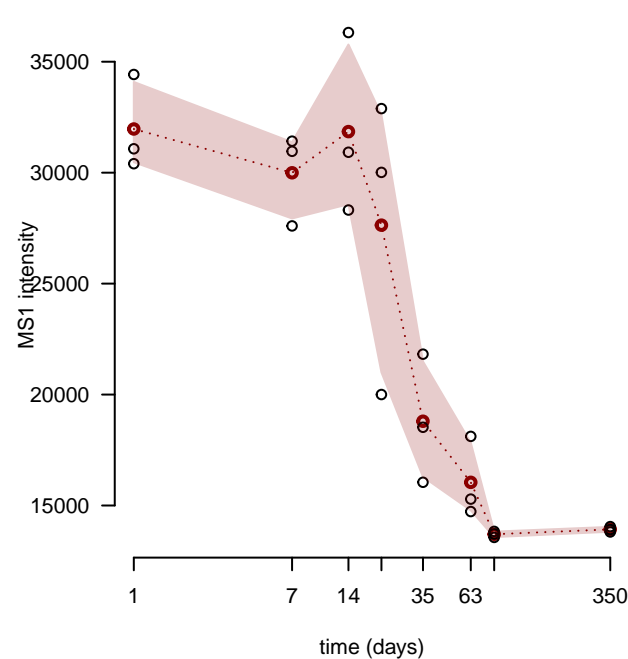

O88291  
GN=Znf326

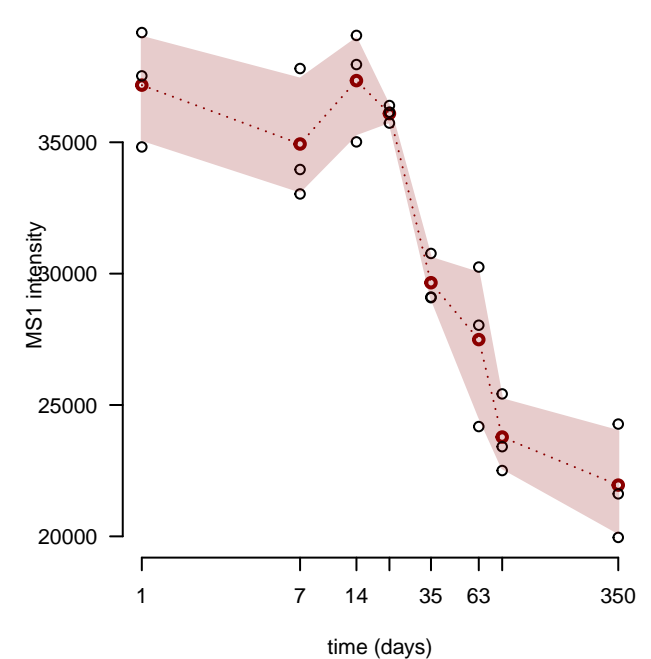

O88291  
GN=Znf326

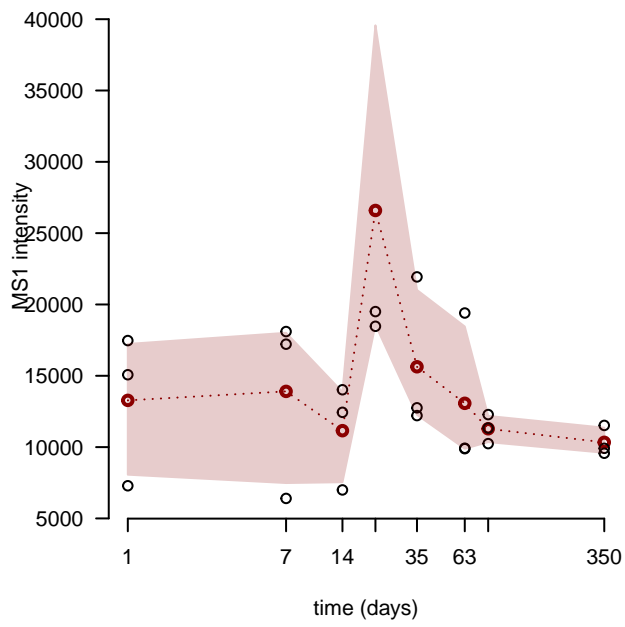

O88307  
GN=Sort1  
sortilin-related receptor, LDLR class A ...

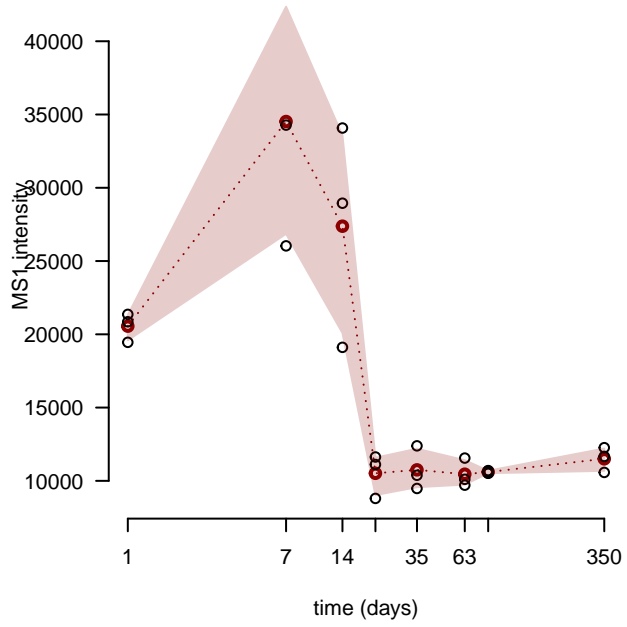

O88322  
GN=Nid2  
nidogen 2

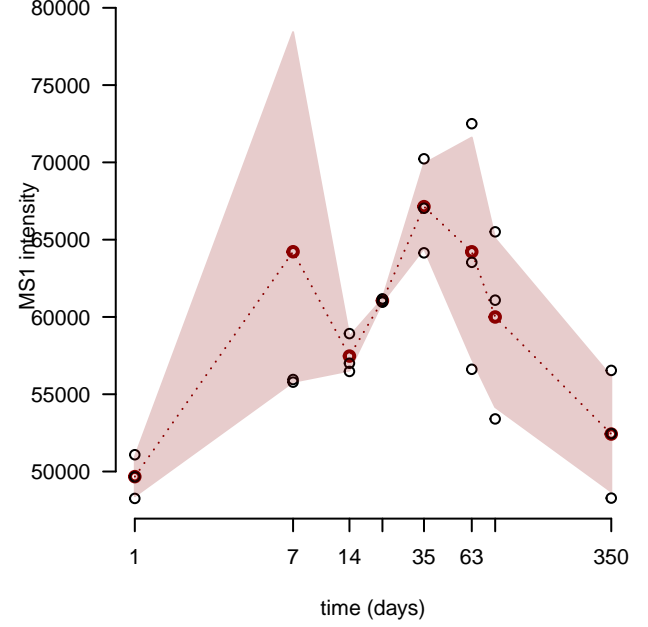

O88327  
GN=Ctnn1  
catenin (cadherin associated protein), a ...

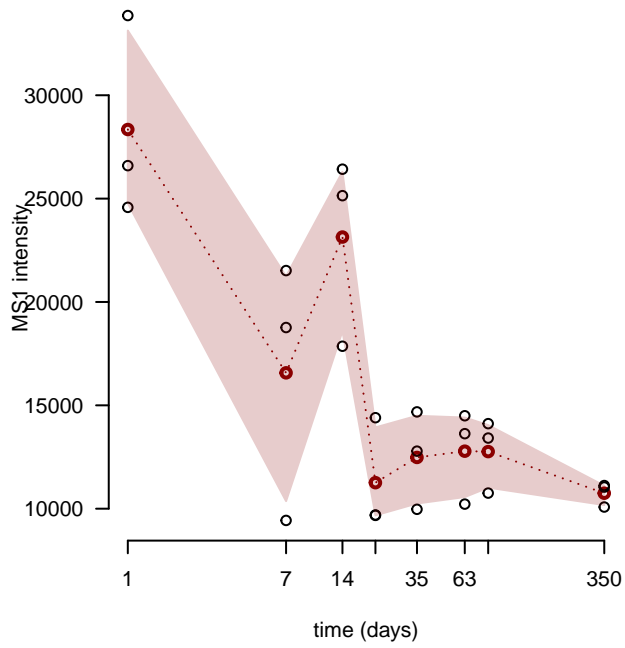

O88338  
GN=Cdh16  
cadherin 16

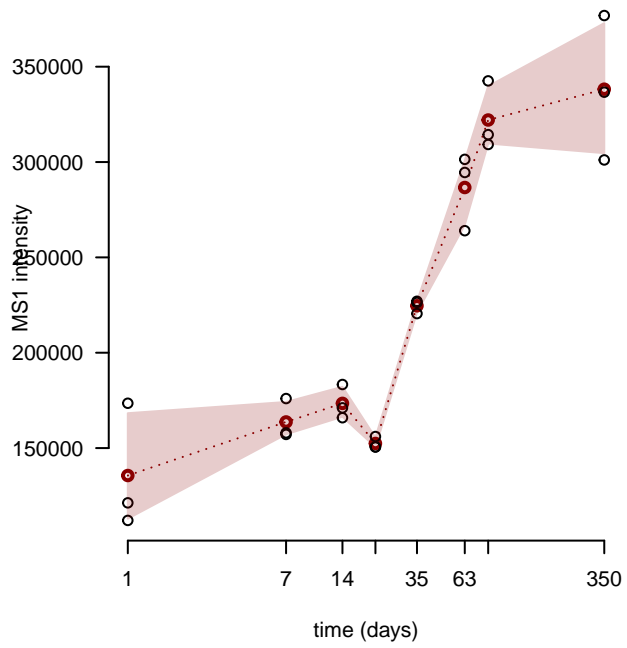

O88342  
GN=Wdr1  
WD repeat domain 1

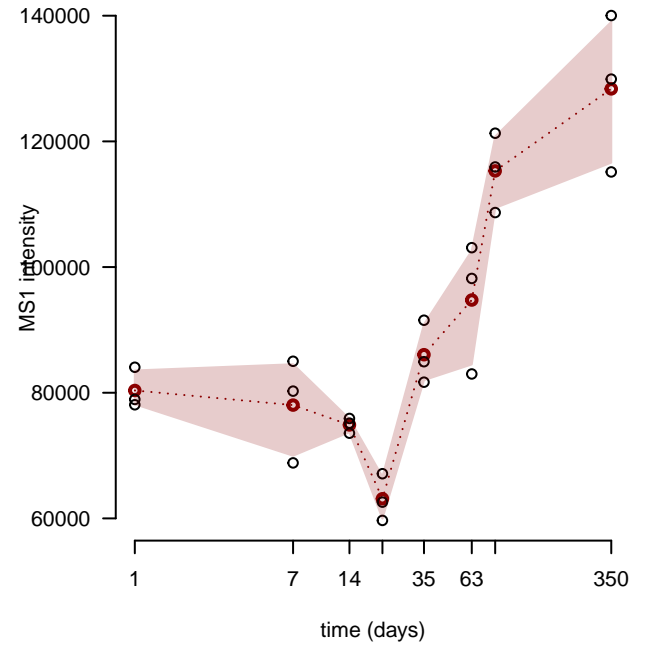

O88343  
GN=Slc4a4  
solute carrier family 4 (anion exchanger ...

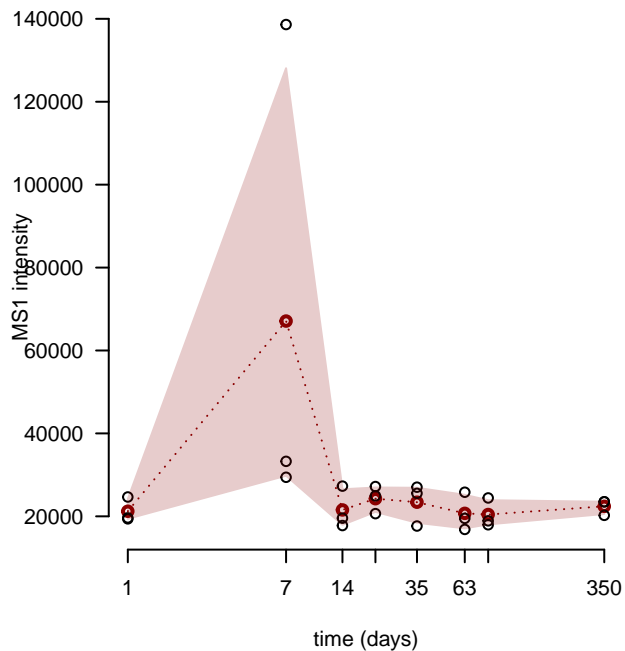

O88351  
GN=Ikbkb  
inhibitor of kappaB kinase beta

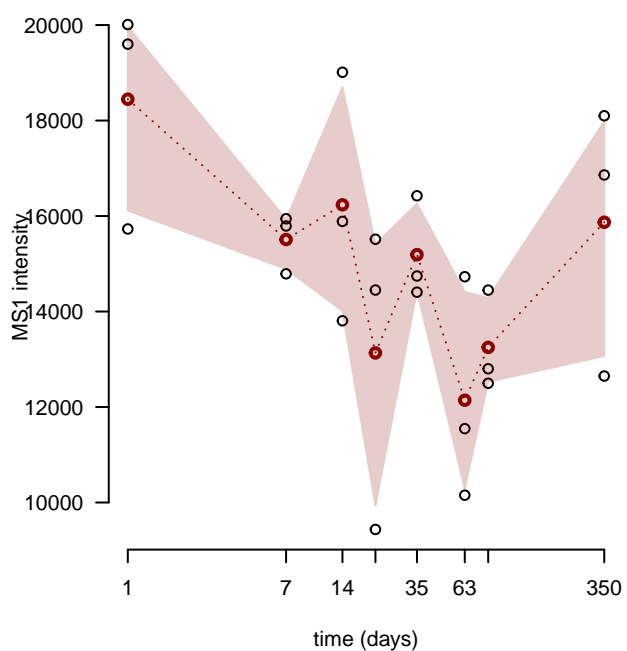

O88379  
GN=Baz1a  
bromodomain adjacent to zinc finger doma ...

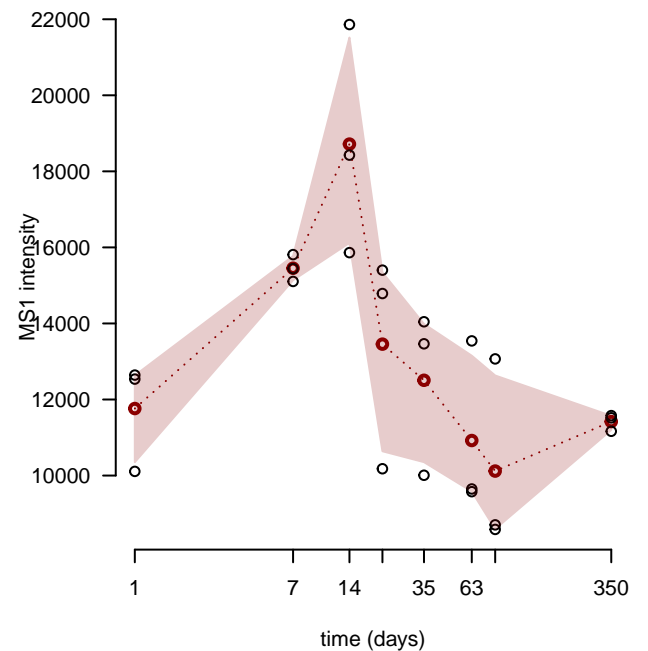

O88384  
GN=Vti1b  
vesicle transport through interaction wi ...

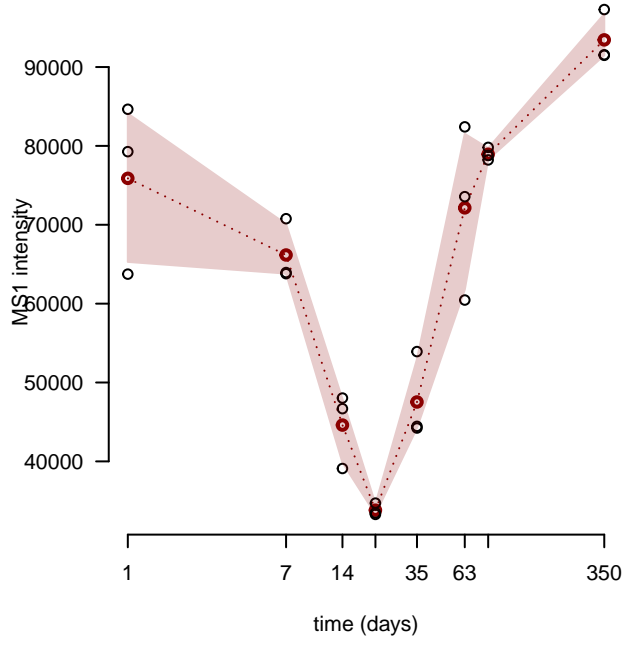

O88393  
GN=Tgfbr3  
transforming growth factor, beta recepto ...

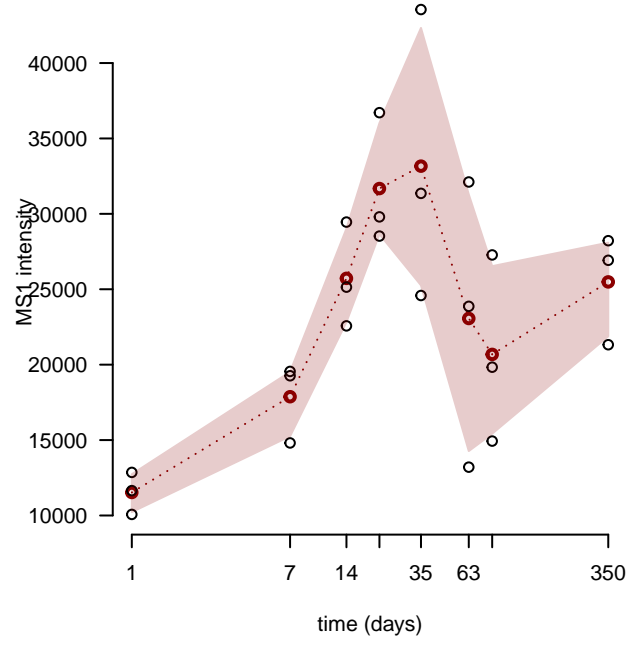

O88396  
GN=Grpel2  
GrpE-like 2, mitochondrial

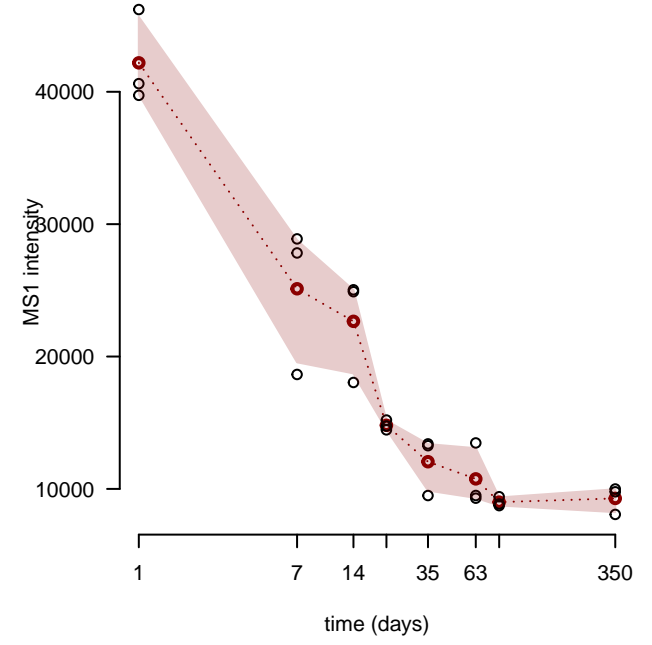

O88398  
GN=Avil  
advillin

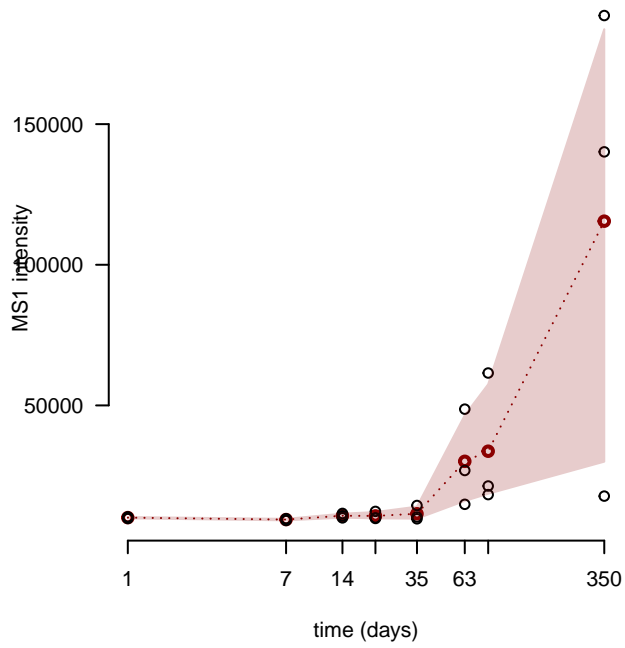

O88413  
GN=Tulp3  
tubby-like protein 3

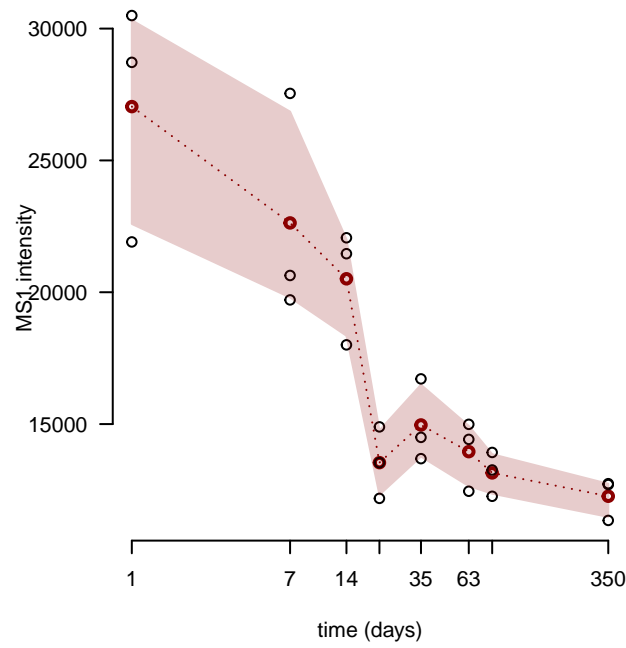

O88425  
GN=Nme6  
NME/NM23 nucleoside diphosphate kinase 6

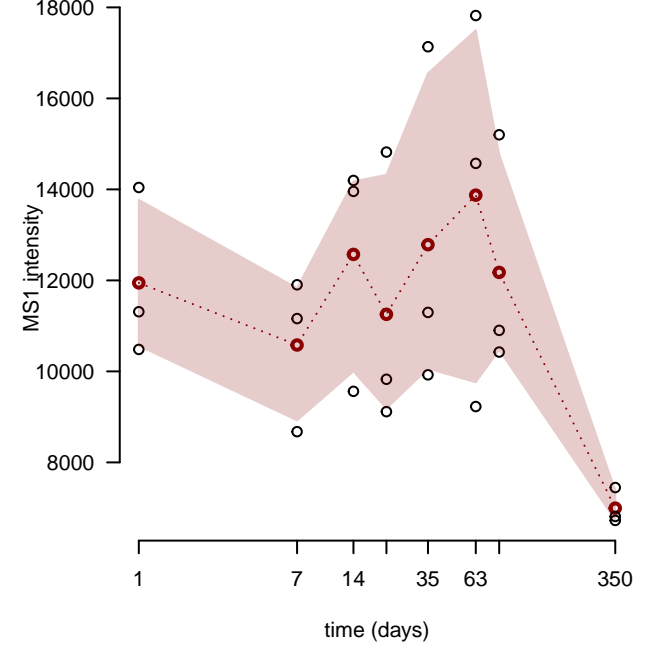

O88428  
GN=Papss2  
3'-phosphoadenosine 5'-phosphosulfate sy ...

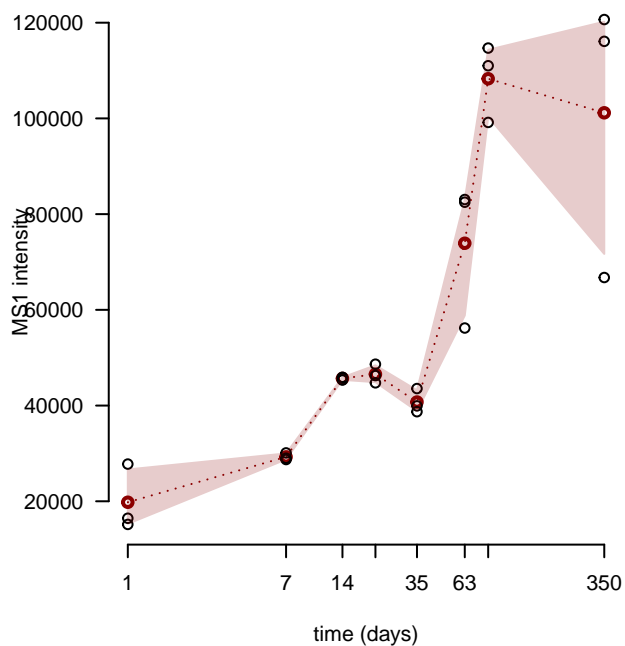

O88441  
GN=Mtx2  
metaxin 2

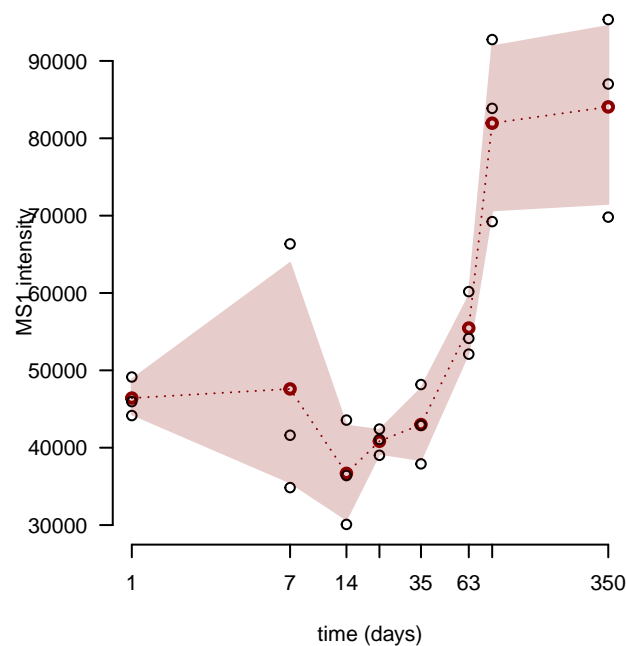

O88447  
GN=Klc1  
kinesin light chain 1

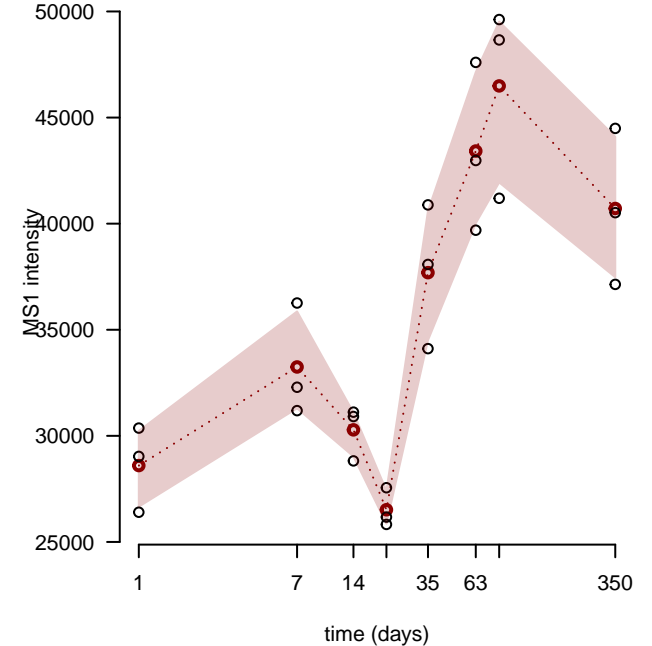

**O88448**  
GN=Klc2  
kinesin light chain 2

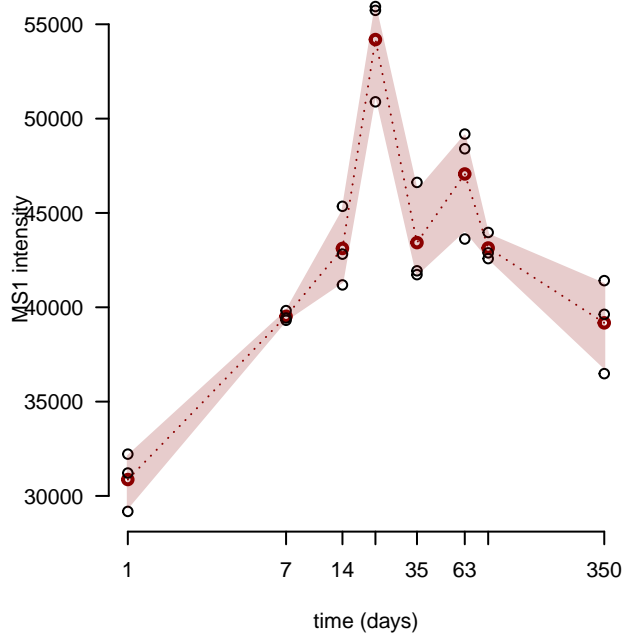

**O88451**  
GN=Rdh7  
retinol dehydrogenase 7

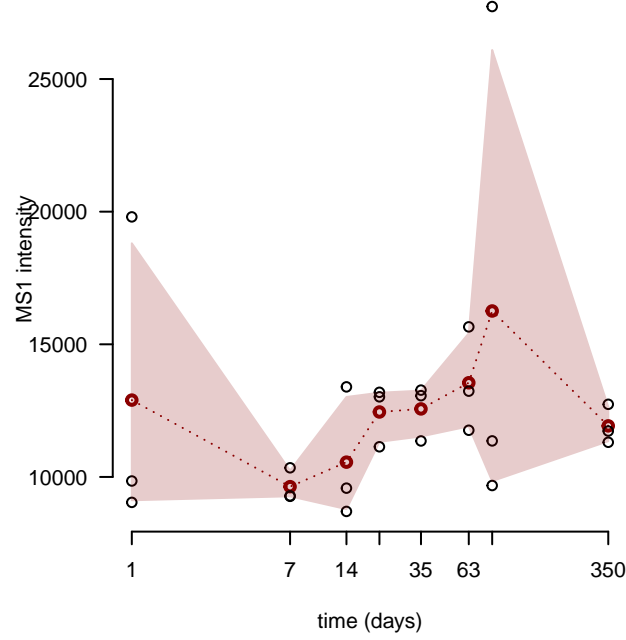

**O88455**  
GN=Dhcr7  
7-dehydrocholesterol reductase

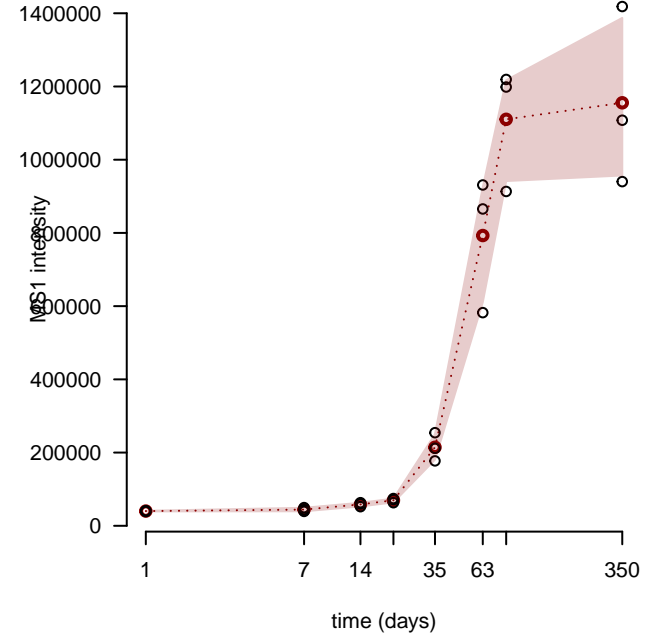

**O88456**  
GN=Capns1  
calpain, small subunit 1

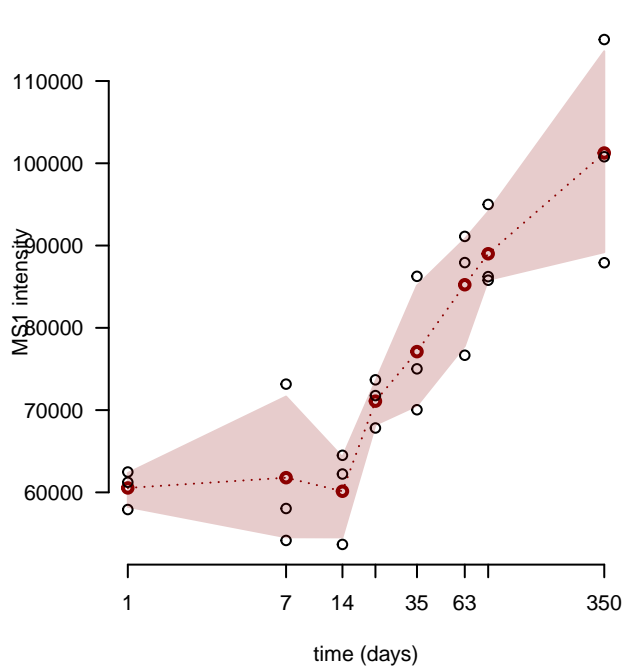

**O88466**  
GN=Znf106

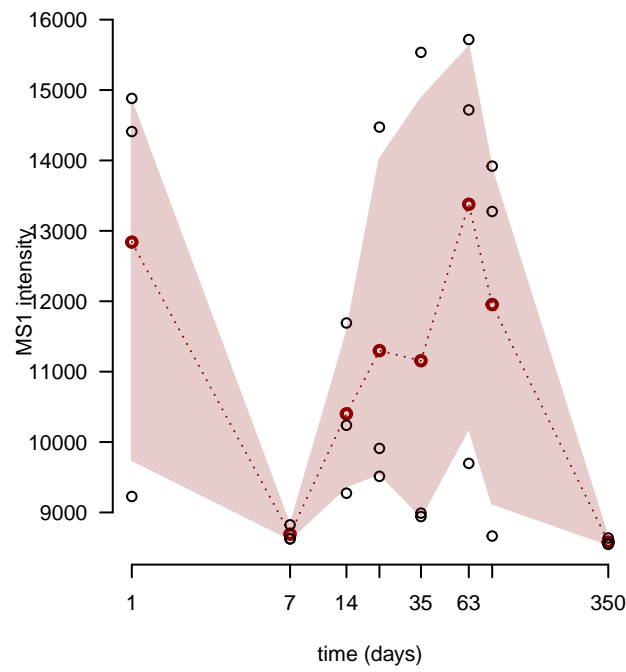

**O88470**  
GN=Foxl2  
forkhead box L2

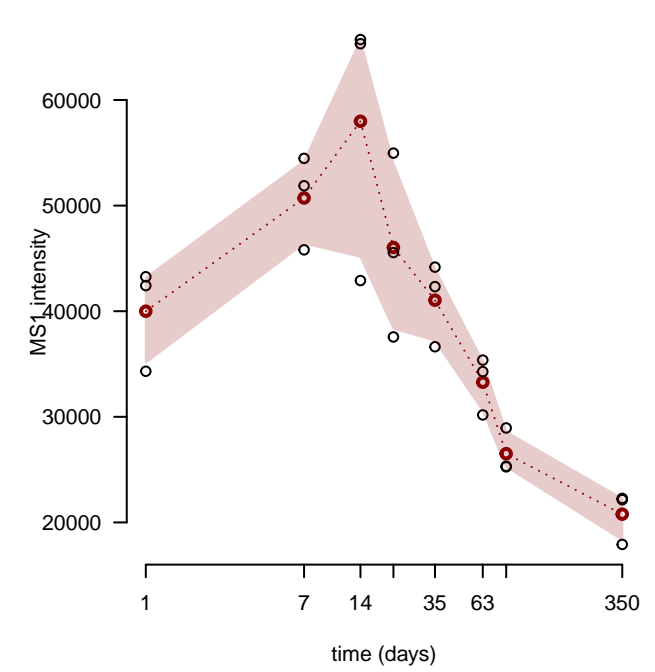

**O88477**  
GN=Igf2bp1  
insulin-like growth factor 2 mRNA bindin ...

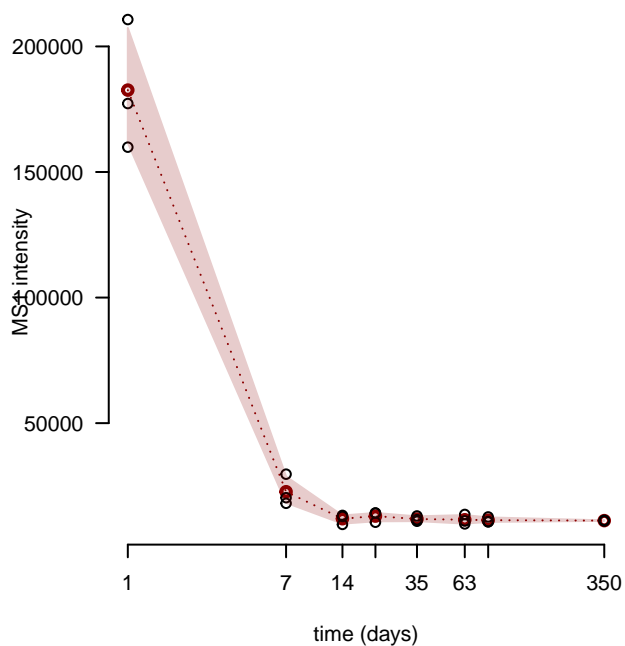

**O88485**  
GN=Dync1i1  
dynein cytoplasmic 1 intermediate chain ...

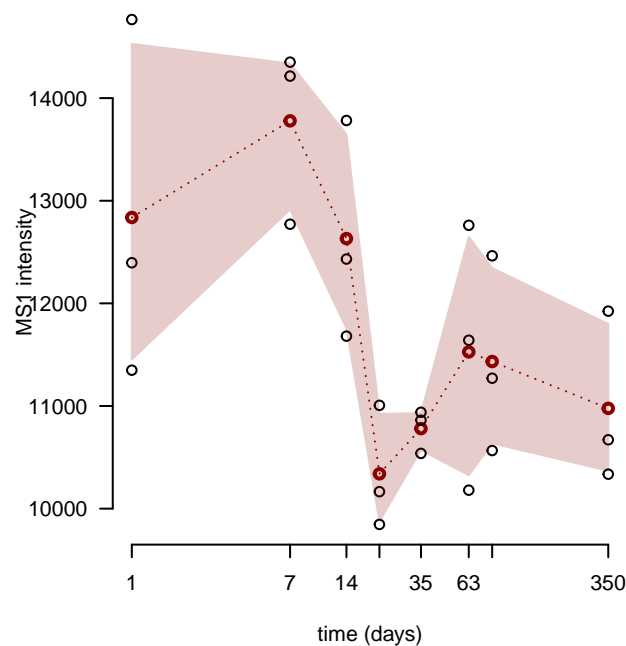

**O88487**  
GN=Dync1i2  
dynein cytoplasmic 1 intermediate chain ...

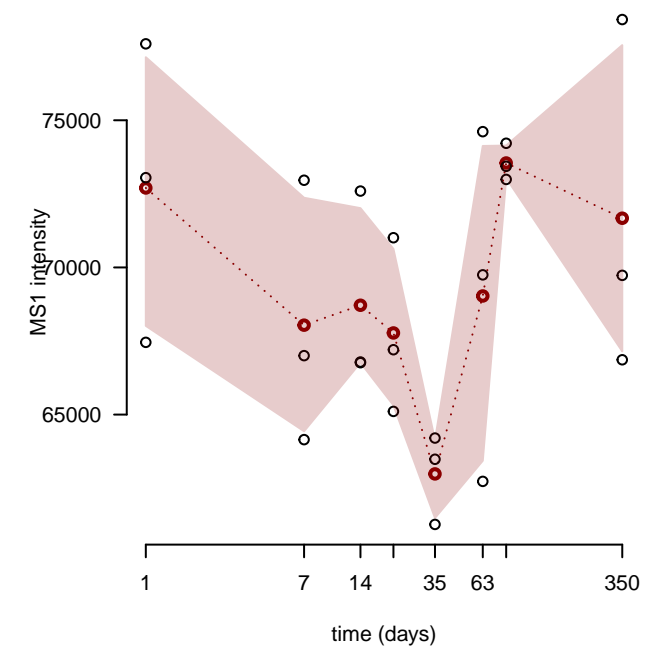

**O88491**  
**GN=Nsd1**  
nuclear receptor-binding SET-domain prot ...

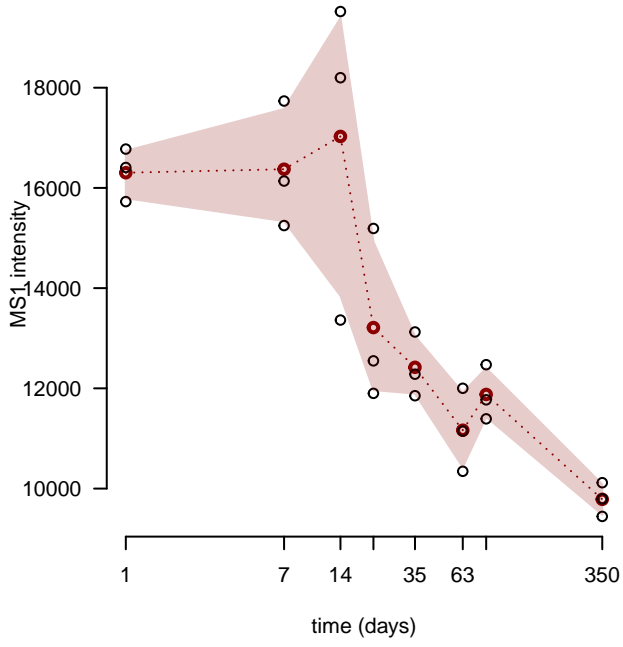

**O88492**  
**GN=Plin4**  
perilipin 4

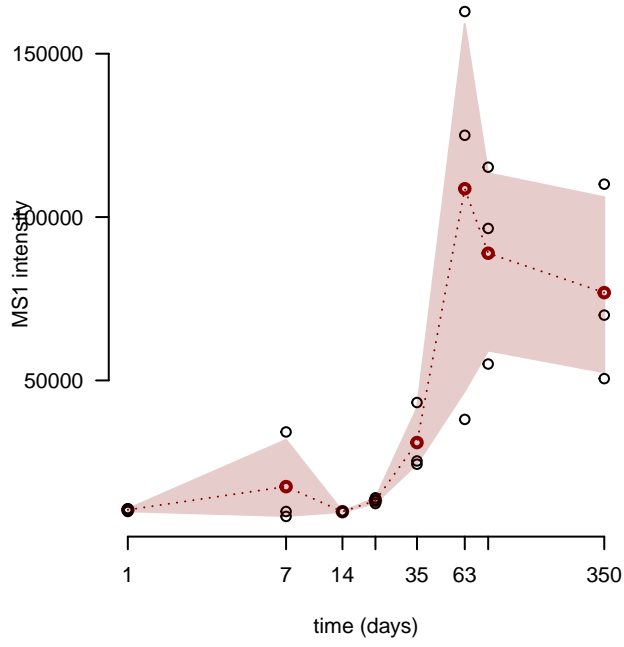

**O88502**  
**GN=Pde8a**  
phosphodiesterase 8A

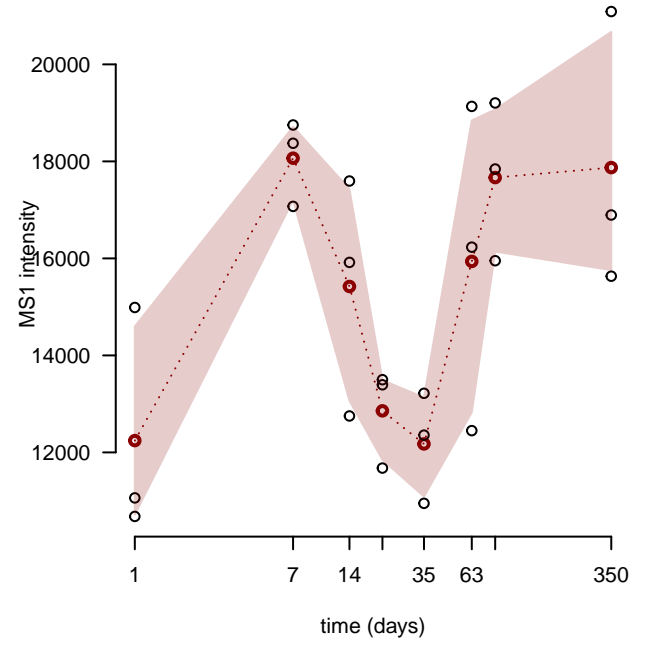

**O88507**  
**GN=Cntfr**  
ciliary neurotrophic factor receptor

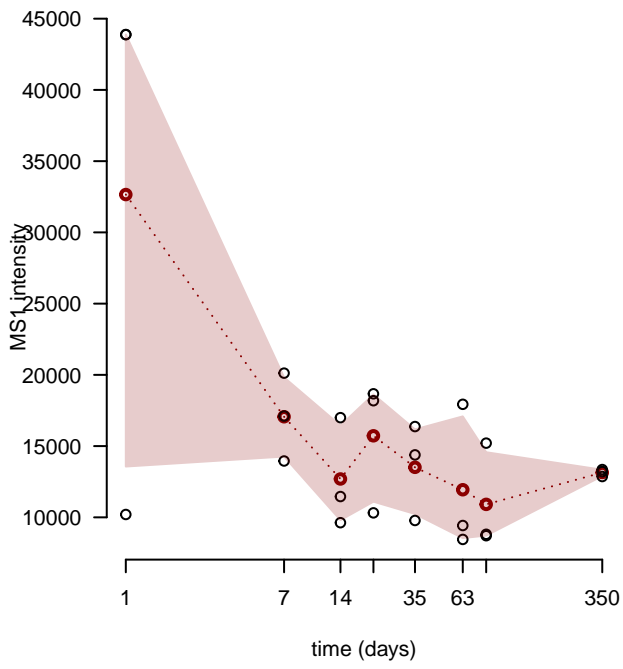

**O88508**  
**GN=Dnmt3a**  
DNA methyltransferase 3A

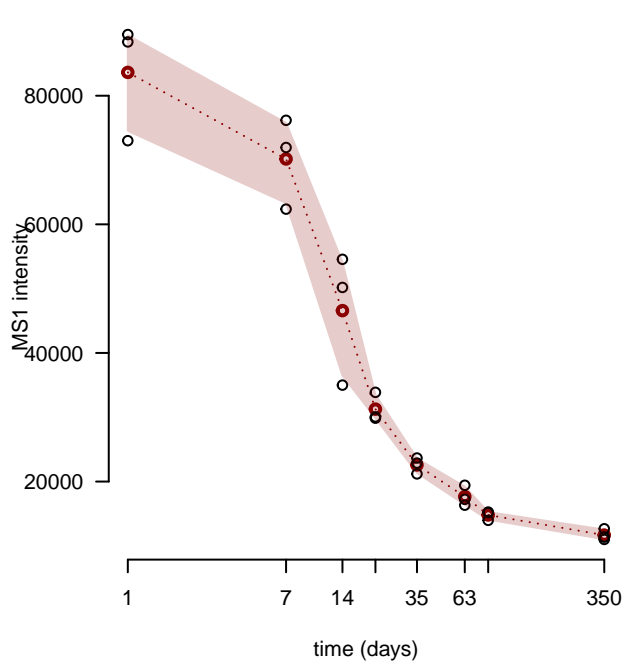

**O88512**  
**GN=Ap1g2**  
adaptor protein complex AP-1, gamma 2 su ...

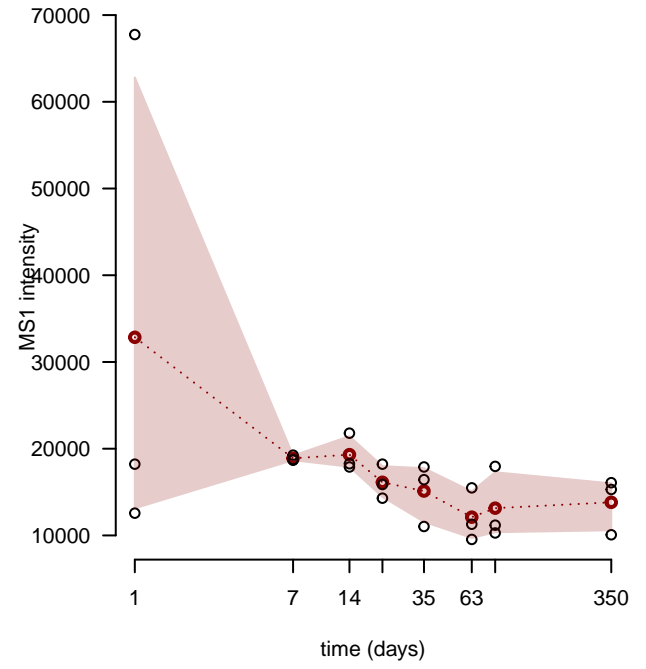

**O88520**  
**GN=Shoc2**  
Shoc2, leucine rich repeat scaffold prot ...

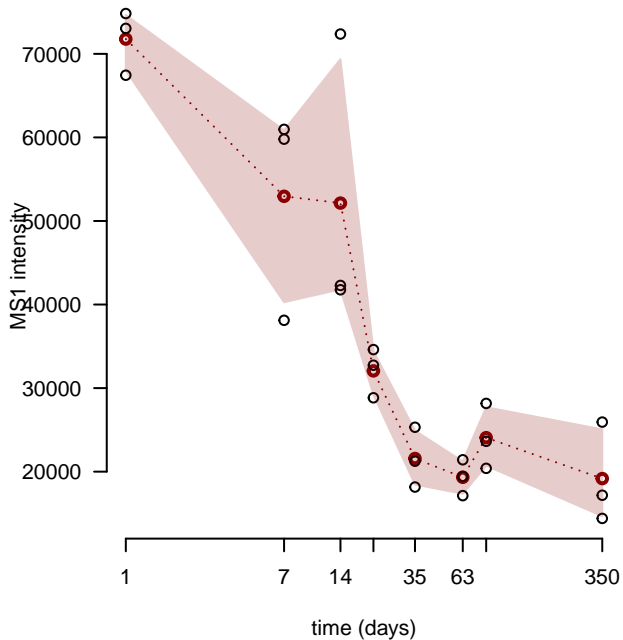

**O88522**  
**GN=Ikbkg**  
inhibitor of kappaB kinase gamma

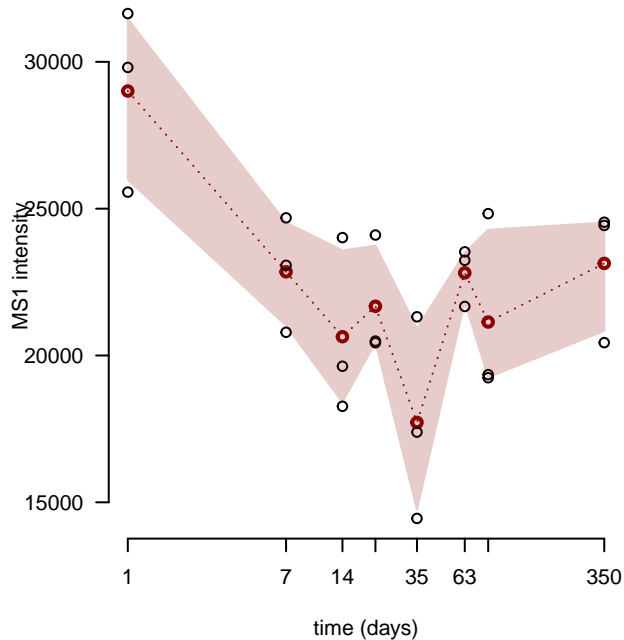

**O88531**  
**GN=Ppt1**  
palmitoyl-protein thioesterase 1

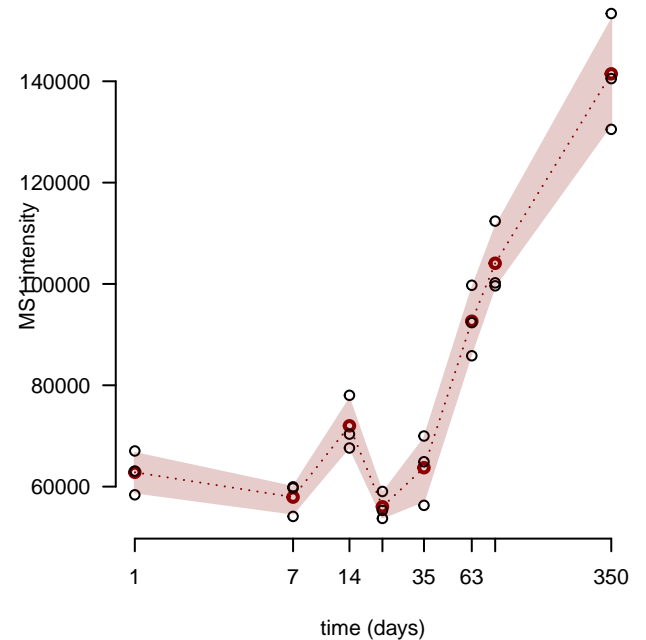



**O88532**  
**GN=Zfr**  
zinc finger RNA binding protein

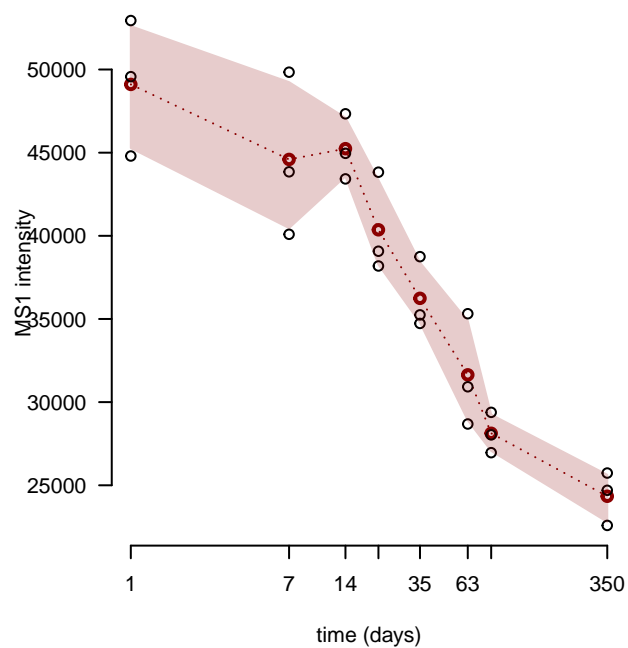

**O88533**  
**GN=Ddc**  
dopa decarboxylase

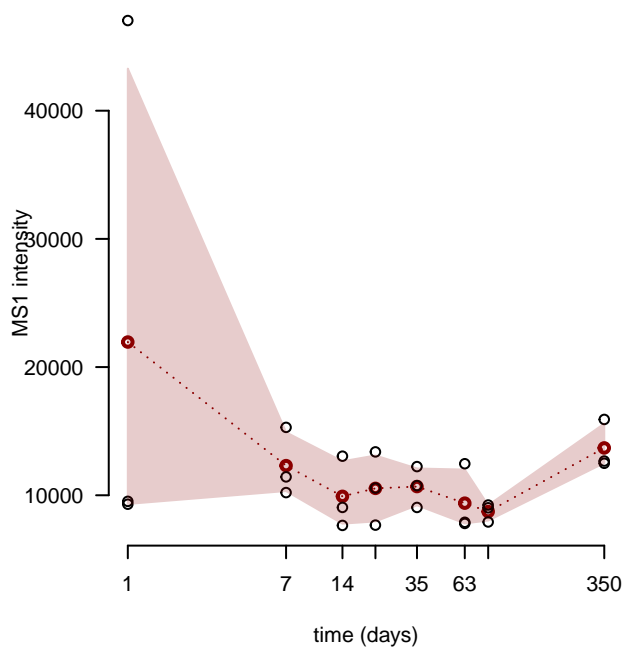

**O88543**  
**GN=Cops3**  
COP9 signalosome subunit 3

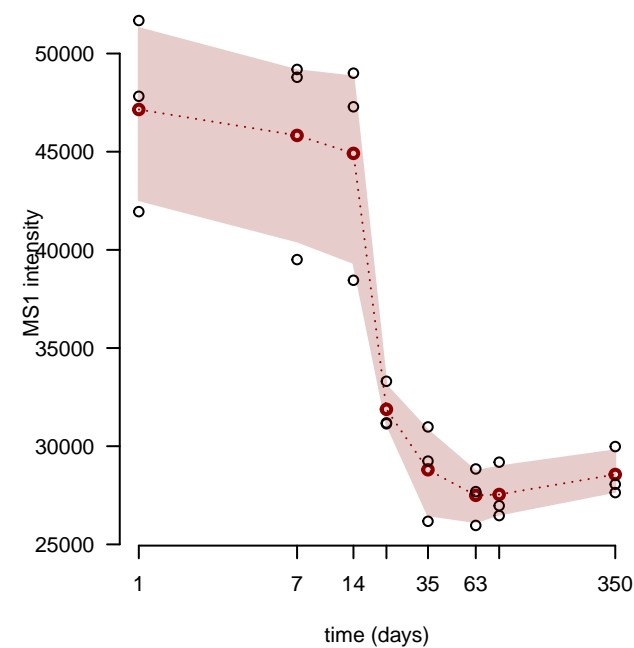

**O88544**  
**GN=Cops4**  
COP9 signalosome subunit 4

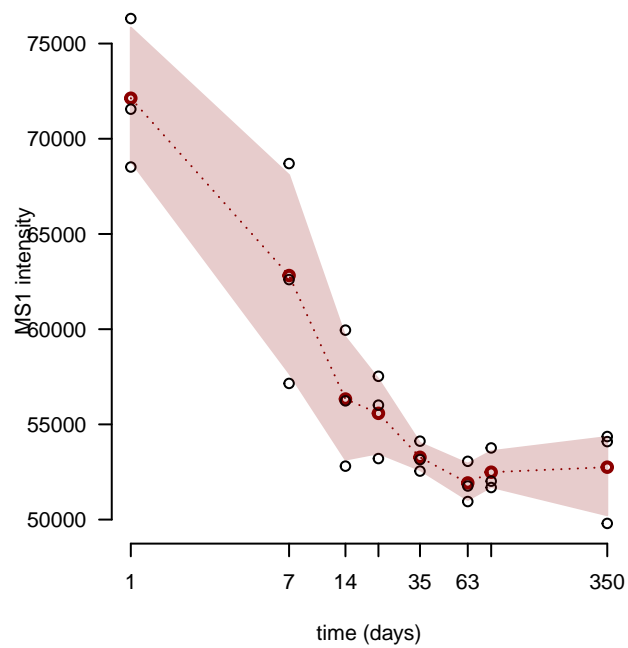

**O88545**  
**GN=Cops6**  
COP9 signalosome subunit 6

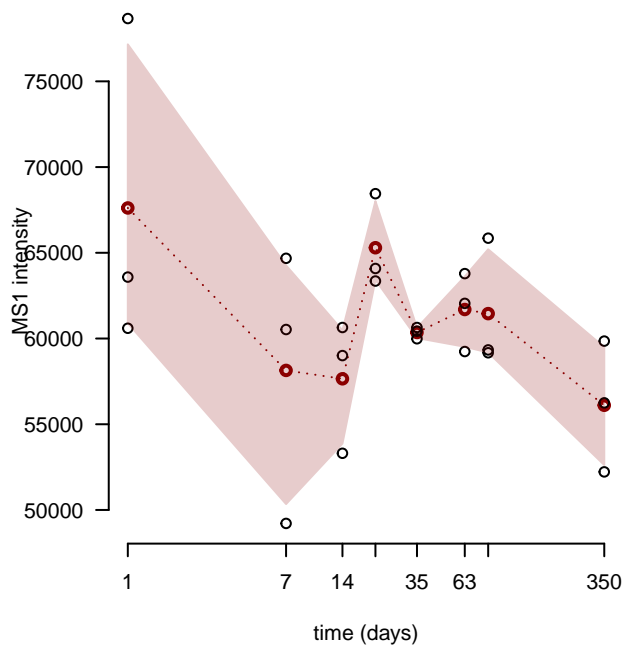

**O88554**  
**GN=Parp2**  
poly (ADP-ribose) polymerase family, mem ...

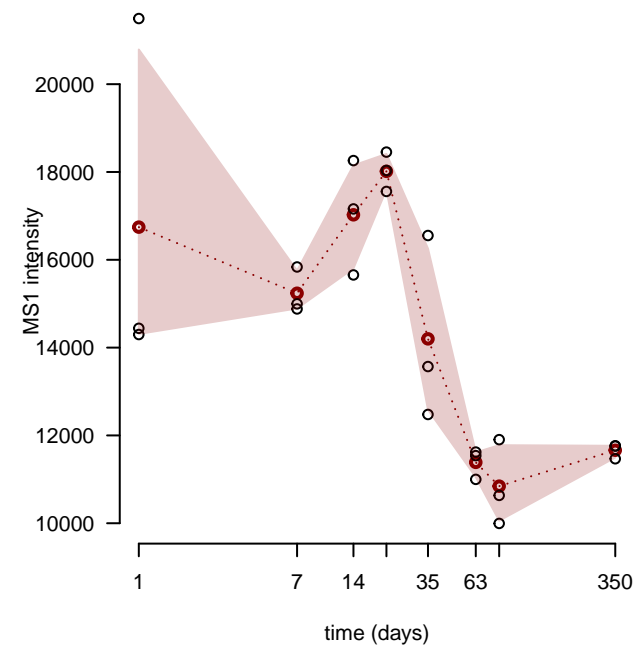

**O88559**  
**GN=Men1**  
multiple endocrine neoplasia 1

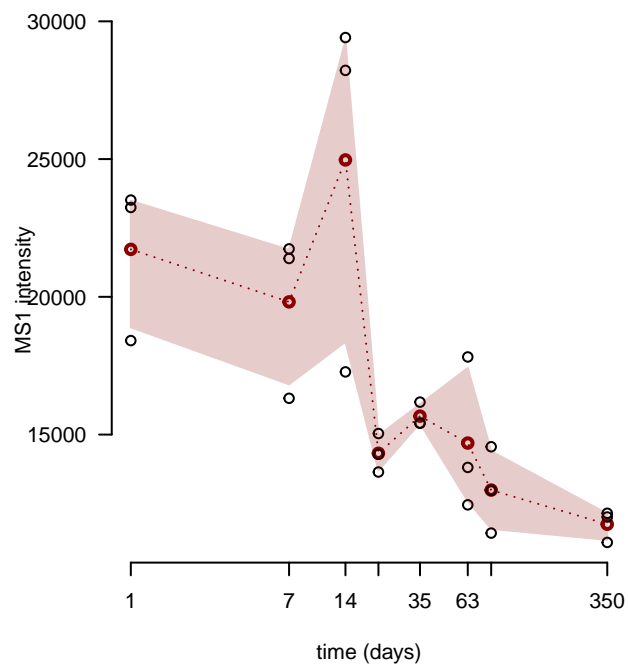

**O88561**  
**GN=Slc27a3**  
solute carrier family 27 (fatty acid tra ...

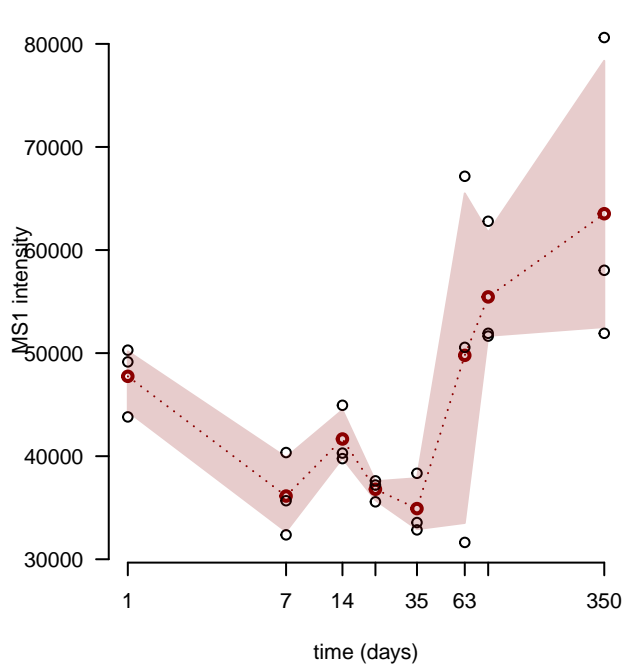

**O88569**  
**GN=Hnrnpa2b1**  
heterogeneous nuclear ribonucleoprotein ...

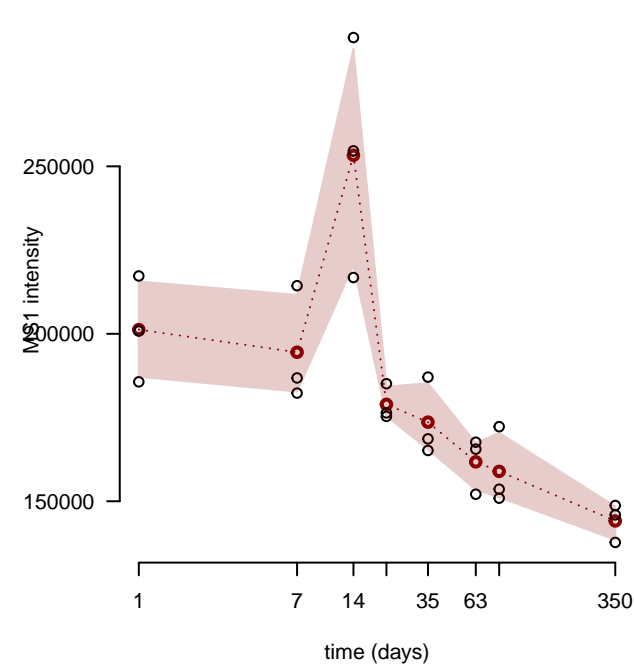

**O88572**  
GN=Lrp6  
low density lipoprotein receptor-related ...

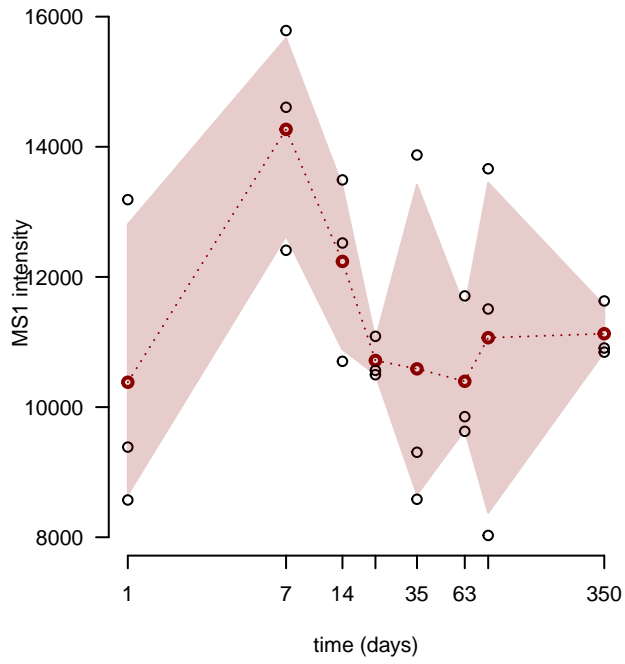

**O88574**  
GN=Sap30  
sin3 associated polypeptide

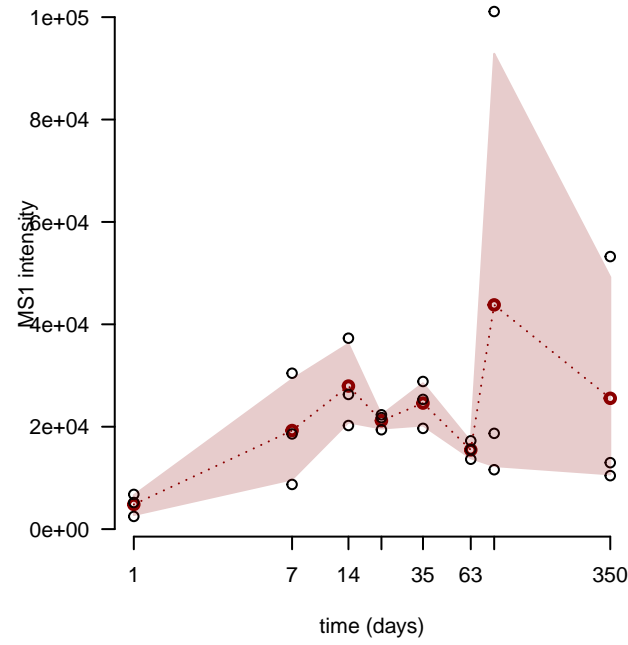

**O88587**  
GN=Comt  
catechol-O-methyltransferase

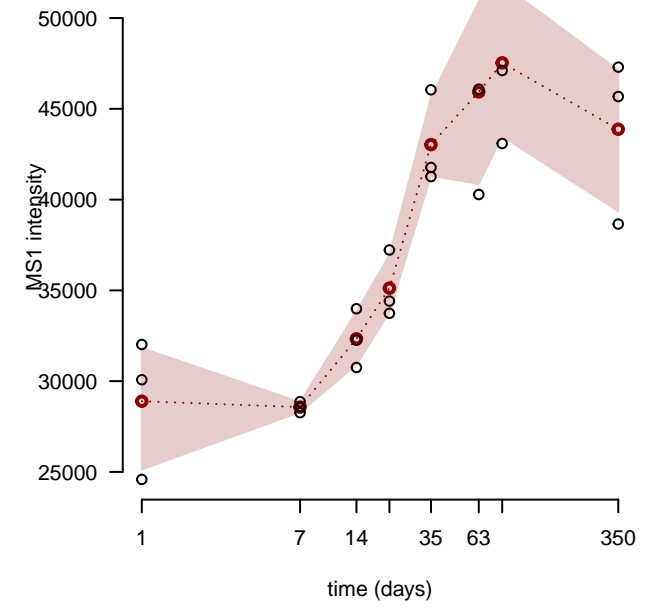

**O88597**  
GN=Becn1  
beclin 1, autophagy related

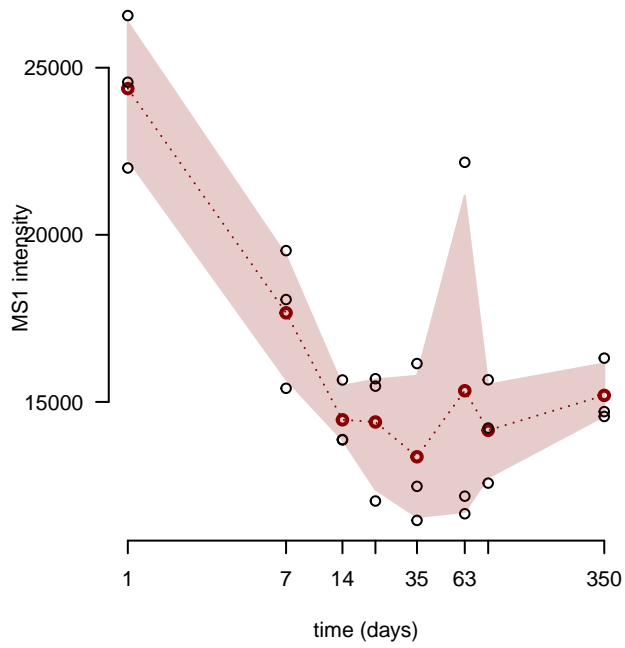

**O88622**  
GN=Parg  
poly (ADP-ribose) glycohydrolase

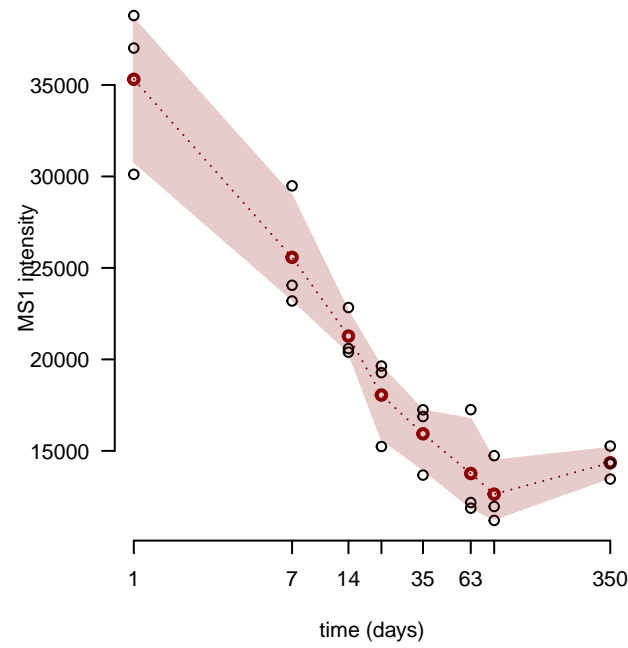

**O88630**  
GN=Gosr1  
golgi SNAP receptor complex member 1

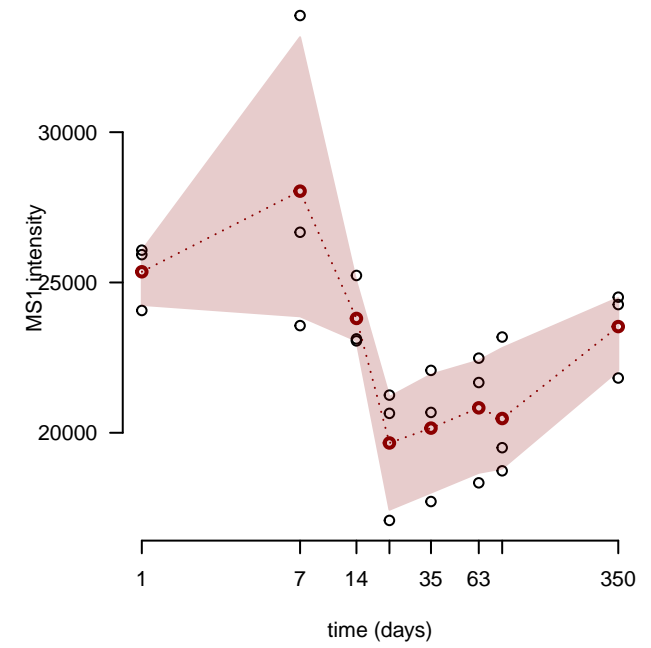

**O88643**  
GN=Pak1  
p21 (RAC1) activated kinase 1

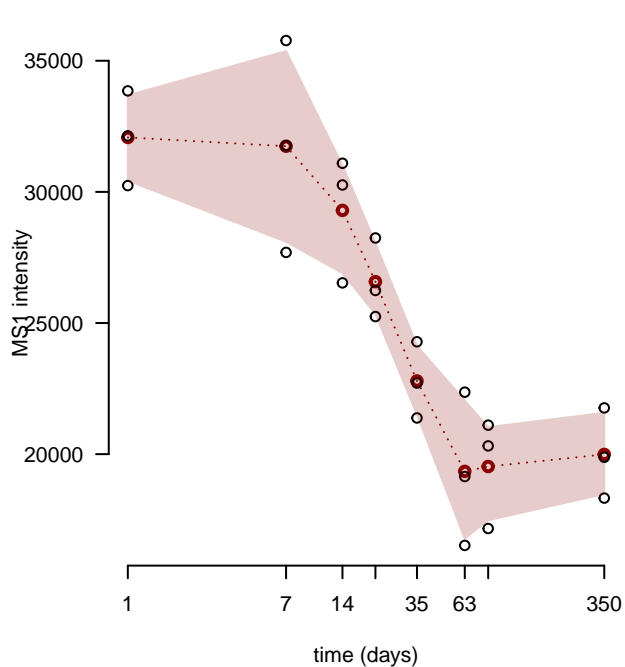

**O88653**  
GN=Lamtor3  
late endosomal/lysosomal adaptor, MAPK a ...

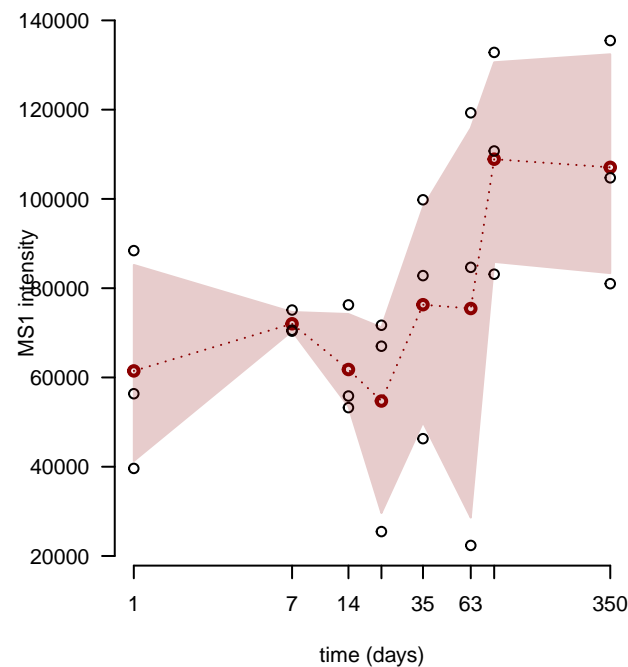

**O88665**  
GN=Brd7  
bromodomain containing 7

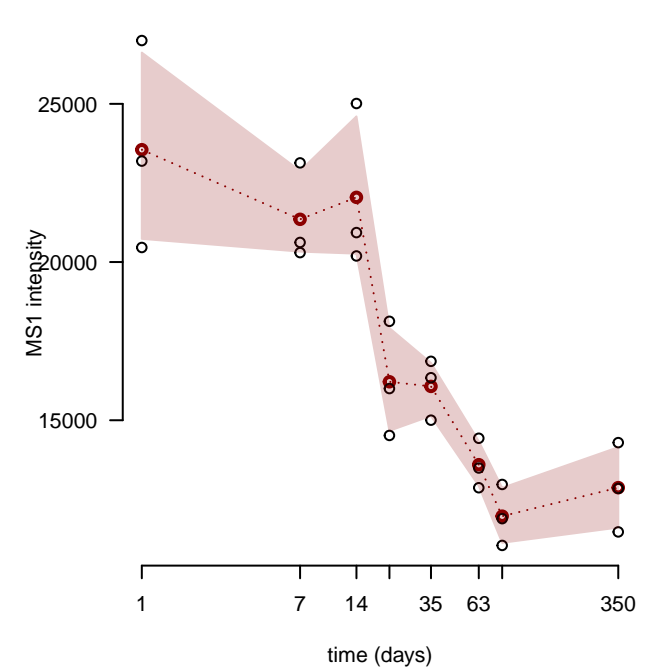

**O88668**  
**GN=Creg1**

cellular repressor of E1A-stimulated gen ...

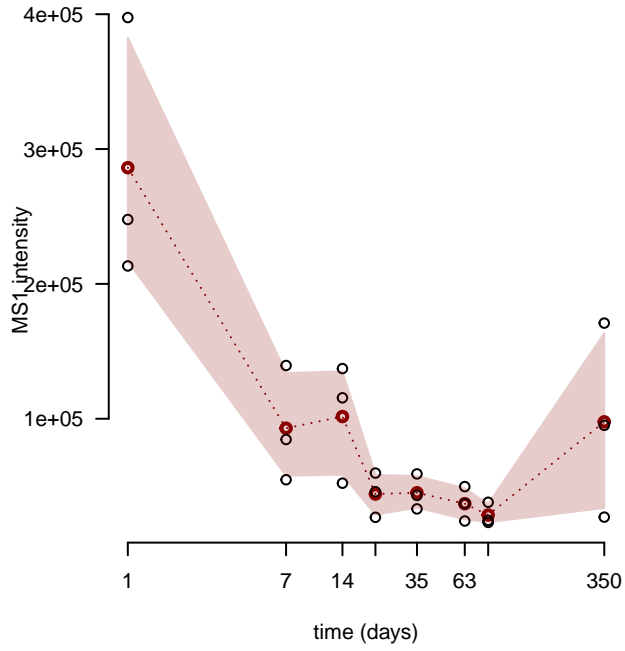

**O88685**  
**GN=Psmc3**

proteasome (prosome, macropain) 26S subu ...

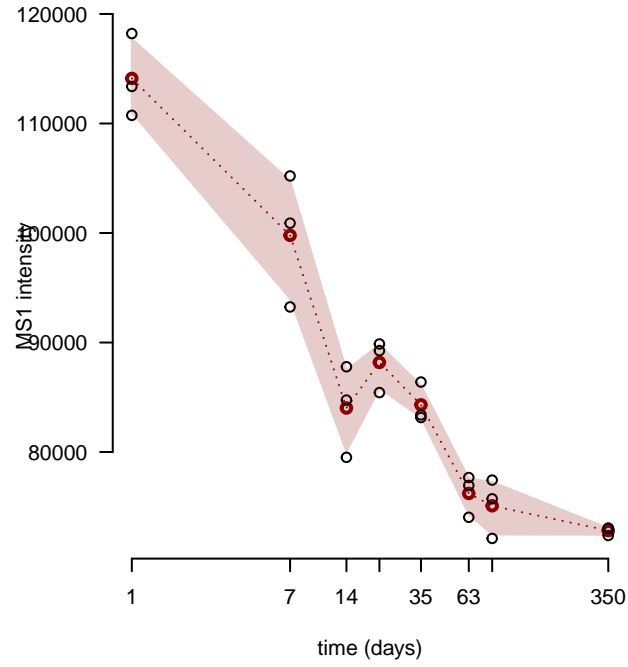

**O88693**  
**GN=Ugcg**

UDP-glucose ceramide glucosyltransferase

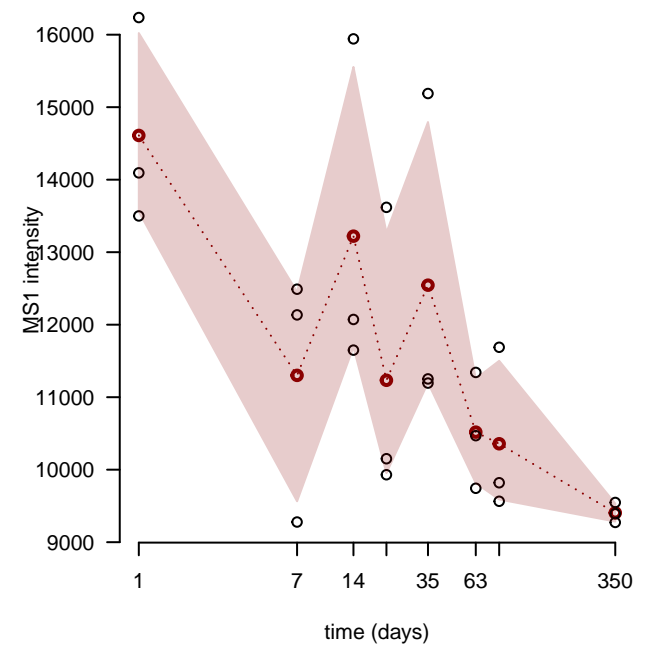

**O88696**  
**GN=C1pp**

caseinolytic mitochondrial matrix peptid ...

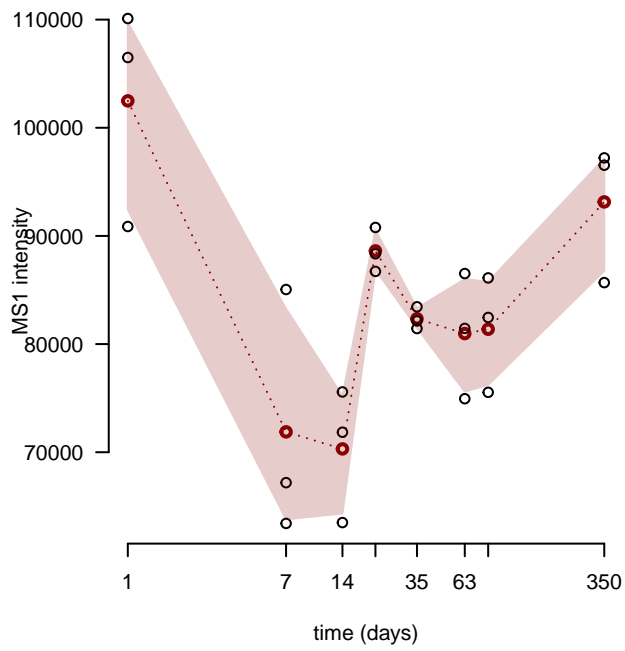

**O88697**  
**GN=Stk16**

serine/threonine kinase 16

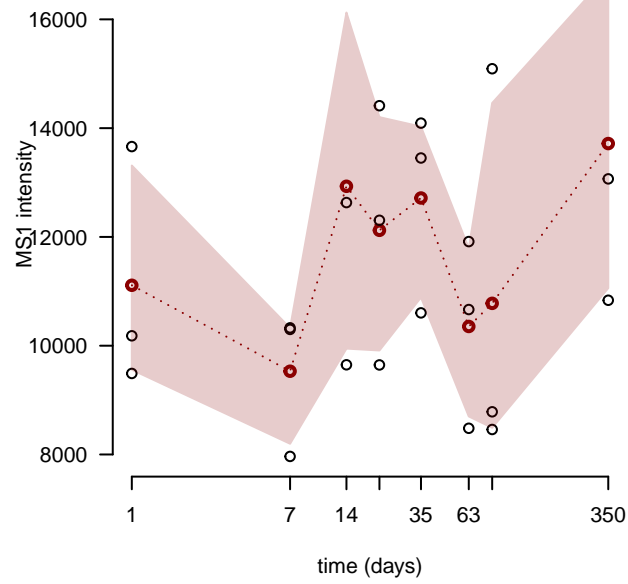

**O88708**  
**GN=Orc4**

origin recognition complex, subunit 4

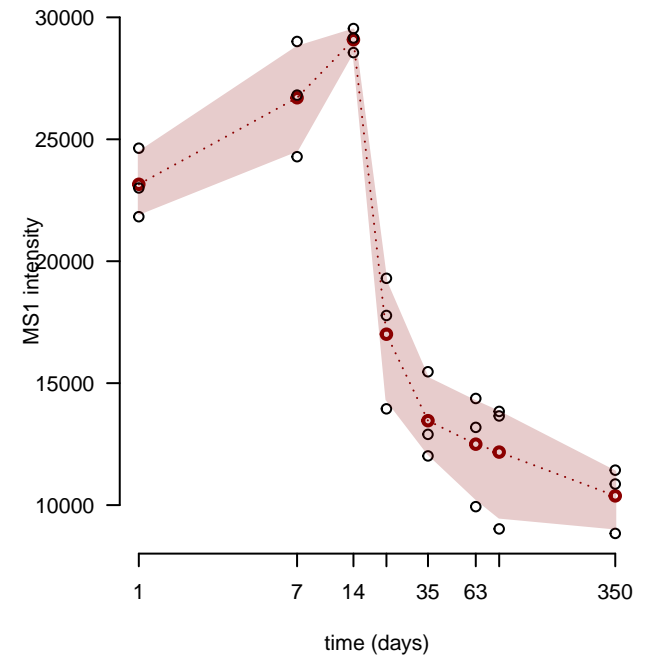

**O88712**  
**GN=Ctbp1**

C-terminal binding protein 1

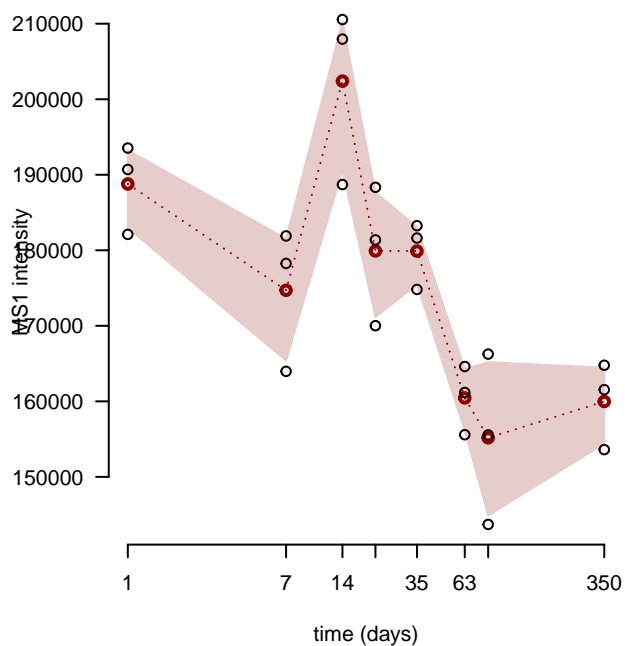

**O88736**  
**GN=Hsd17b7**

hydroxysteroid (17-beta) dehydrogenase 7

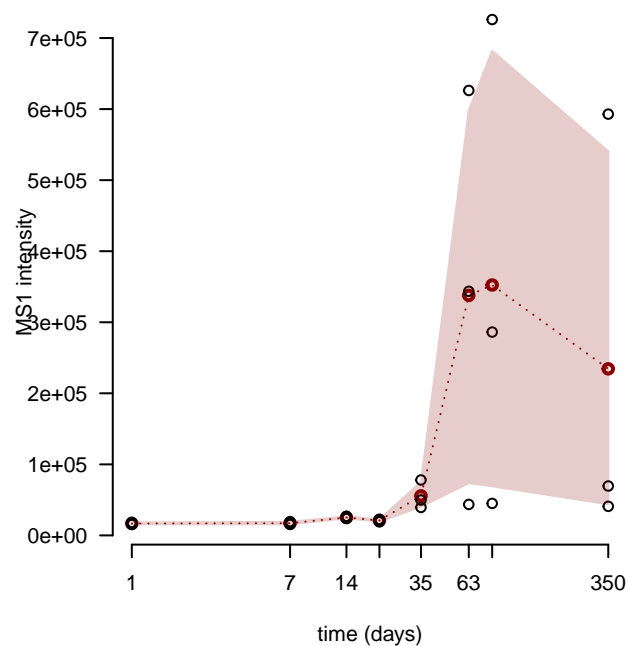

**O88738**  
**GN=Birc6**

baculoviral IAP repeat-containing 6

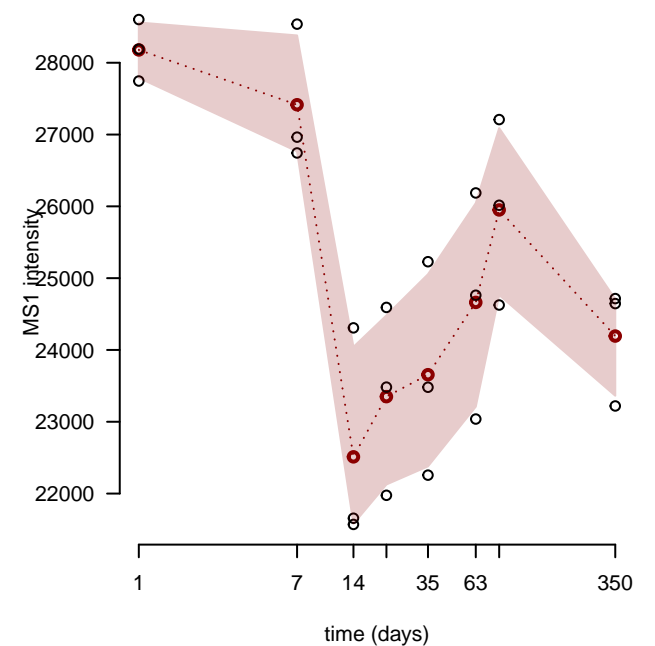

**O88746**  
GN=Tom1  
target of myb1 trafficking protein

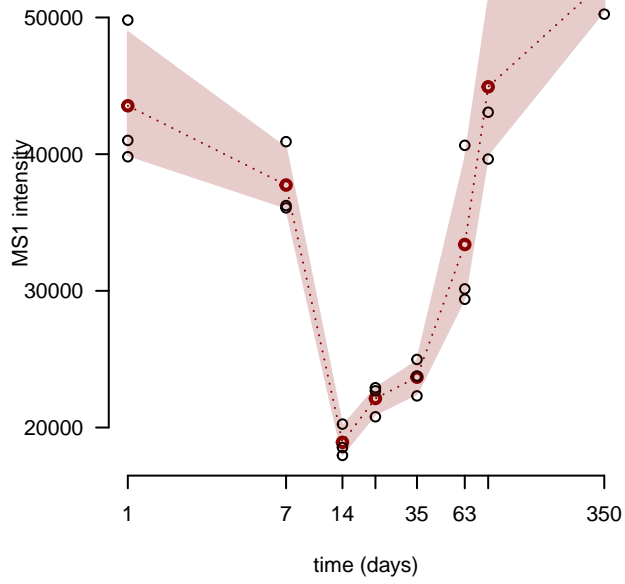

**O88783**  
GN=F5  
coagulation factor V

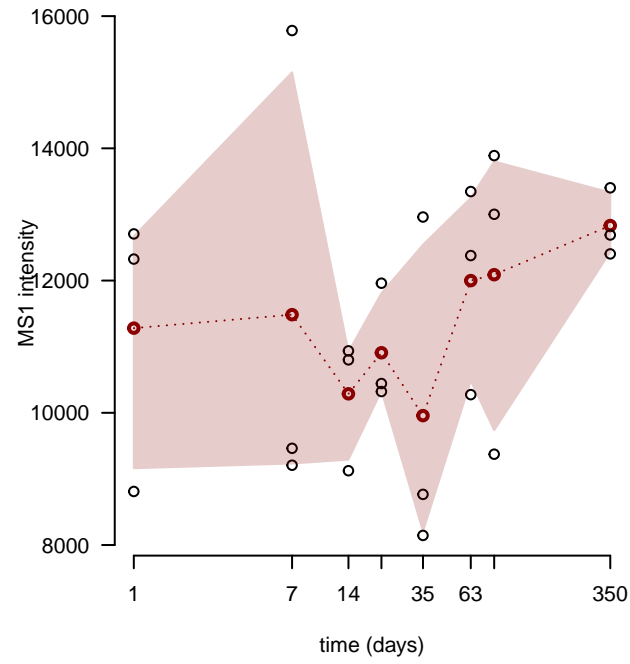

**O88792**  
GN=F11r  
F11 receptor

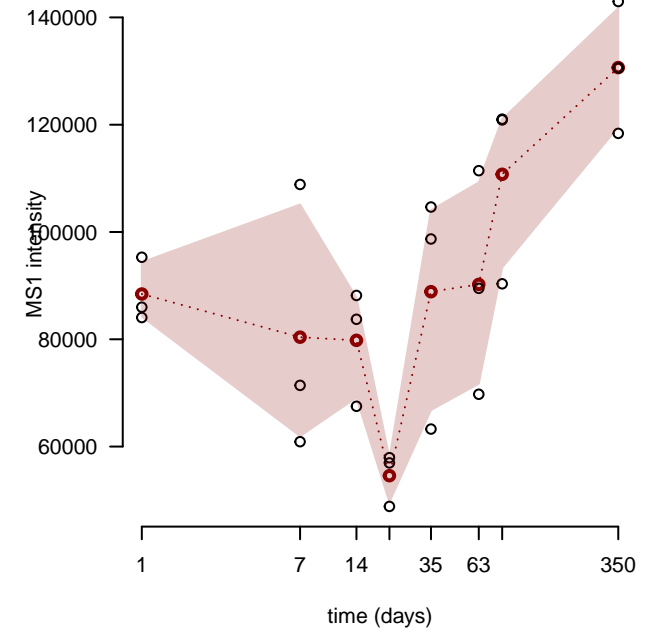

**O88796**  
GN=Rpp30  
ribonuclease P/MRP 30 subunit

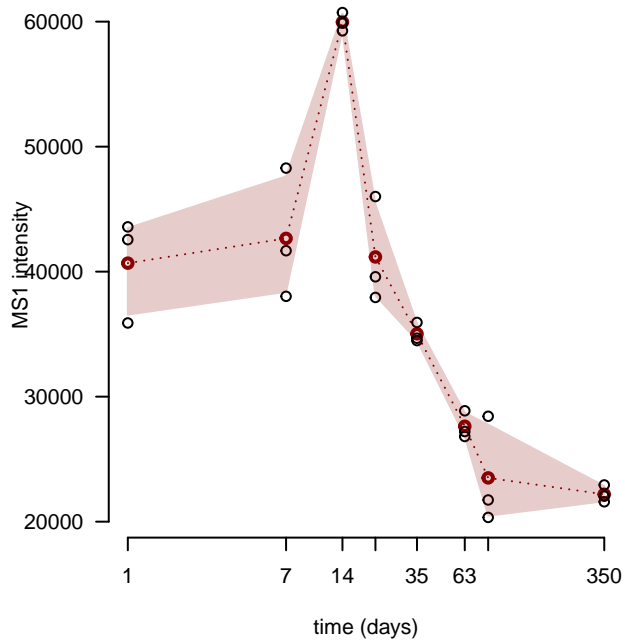

**O88811**  
GN=Stam2  
signal transducing adaptor molecule (SH3 ...

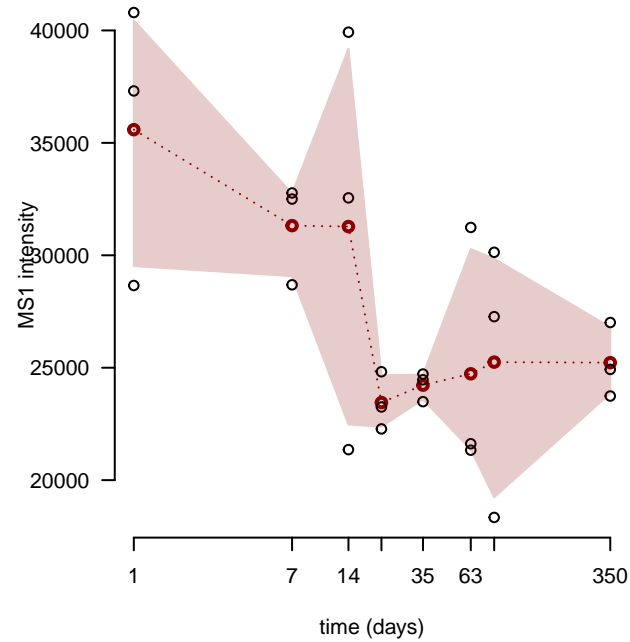

**O88822**  
GN=Sc5d  
sterol-C5-desaturase

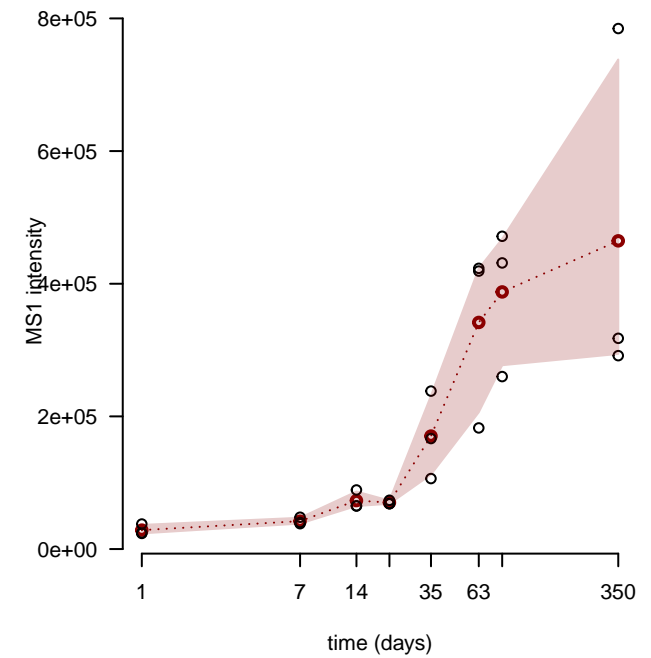

**O88824**  
GN=Jtb  
jumping translocation breakpoint

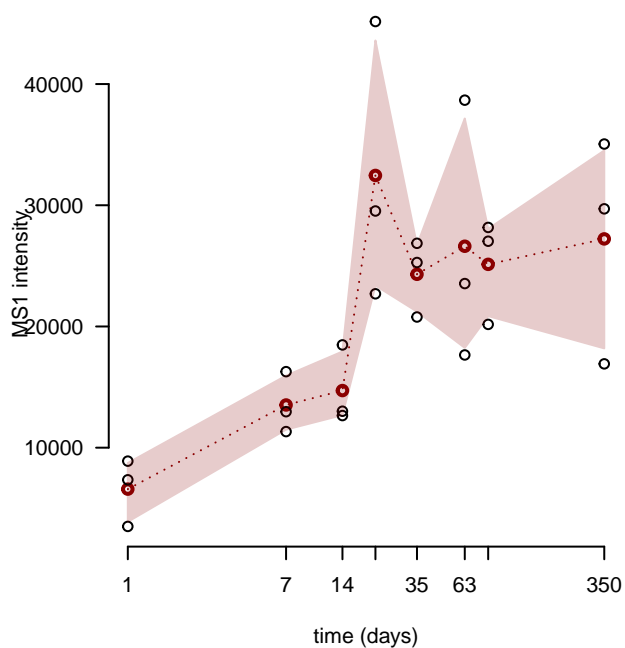

**O88829**  
GN=St3gal5  
ST3 beta-galactoside alpha-2,3-sialyltra ...

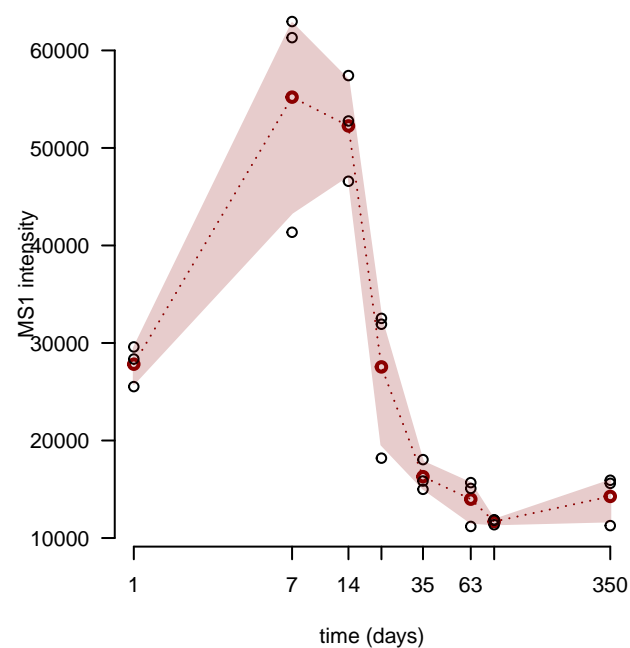

**O88843**  
GN=Cradd  
CASP2 and RIPK1 domain containing adapto ...

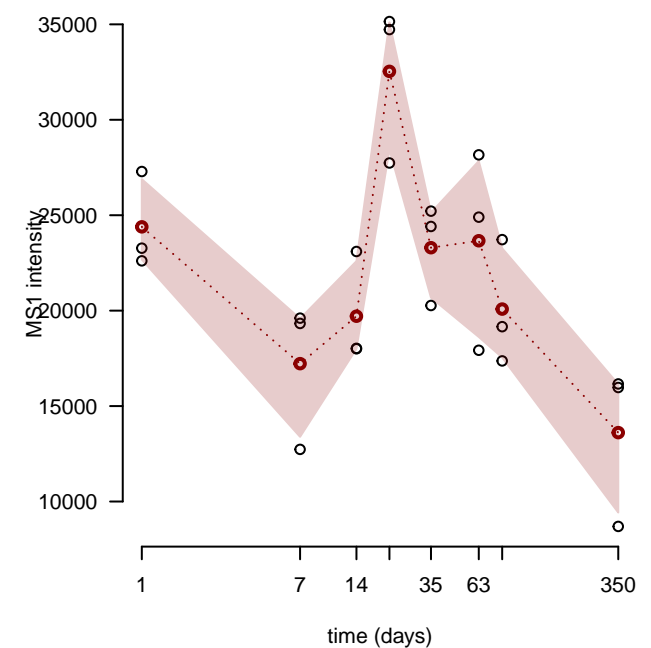

**O88844**  
**GN=Idh1**  
isocitrate dehydrogenase 1 (NADP+), solu ...

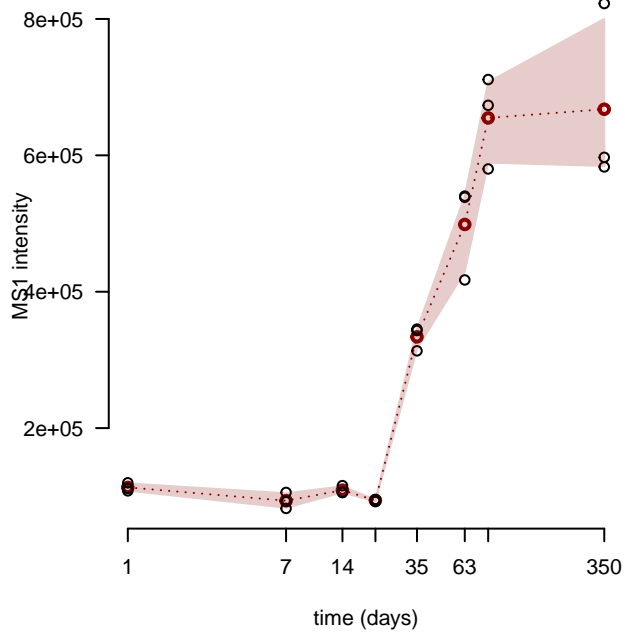

**O88845**  
**GN=Akap10**  
A kinase (PRKA) anchor protein 10

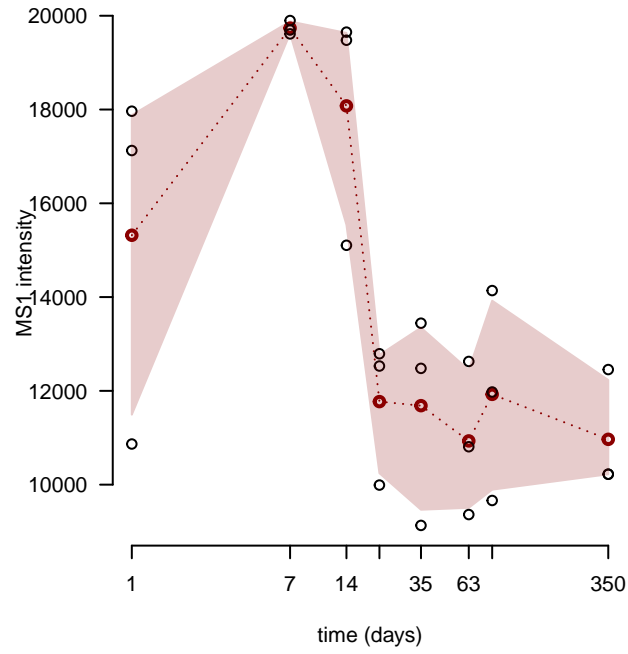

**O88848**  
**GN=Arl6**  
ADP-ribosylation factor-like 6

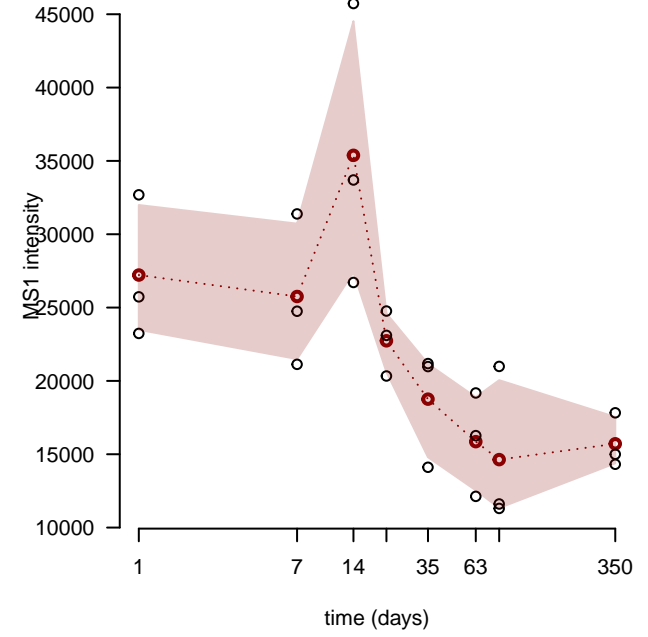

**O88851**  
**GN=Rbbp9**  
retinoblastoma binding protein 9, serine ...

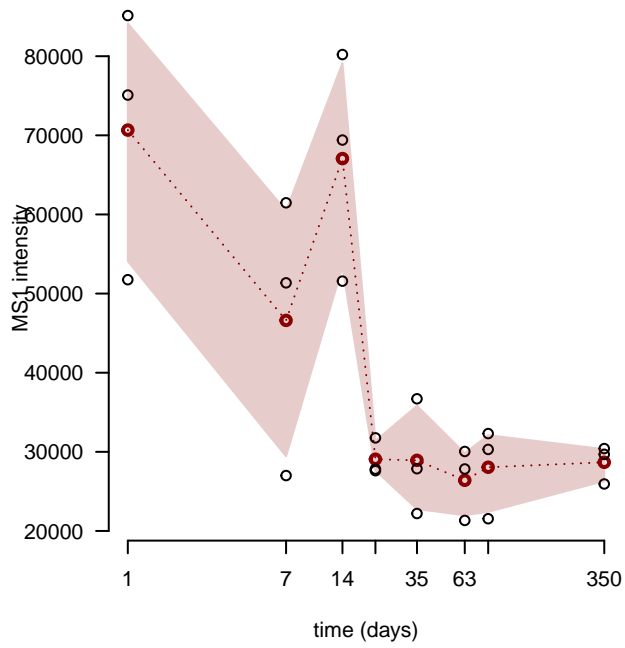

**O88852**  
**GN=Tspyl1**  
testis-specific protein, Y-encoded-like ...

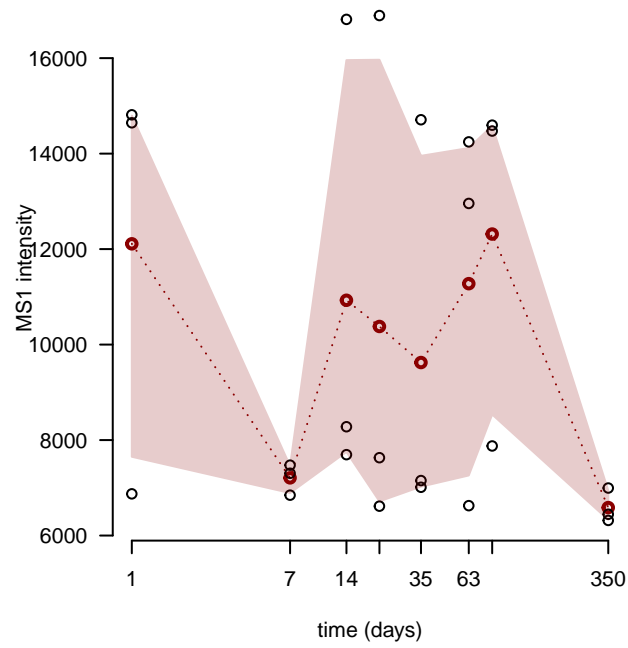

**O88856**  
**GN=Tpst2**  
protein-tyrosine sulfotransferase 2

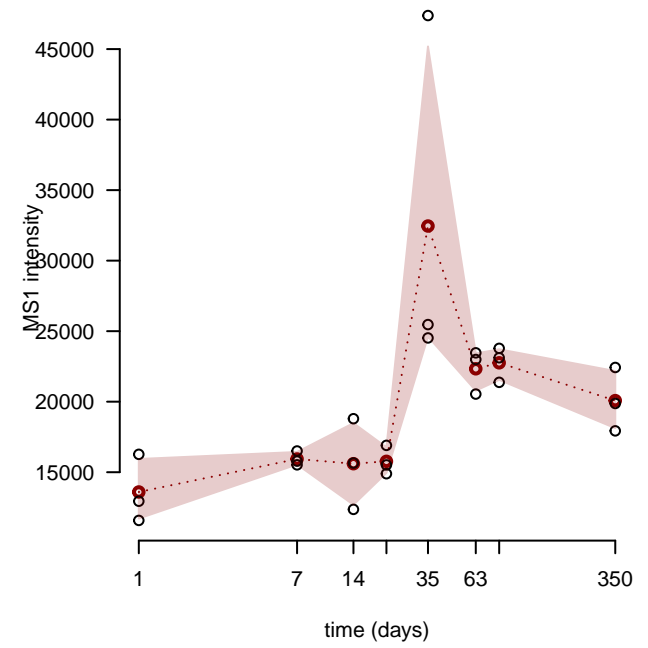

**O88874**  
**GN=Ccnk**  
cyclin K

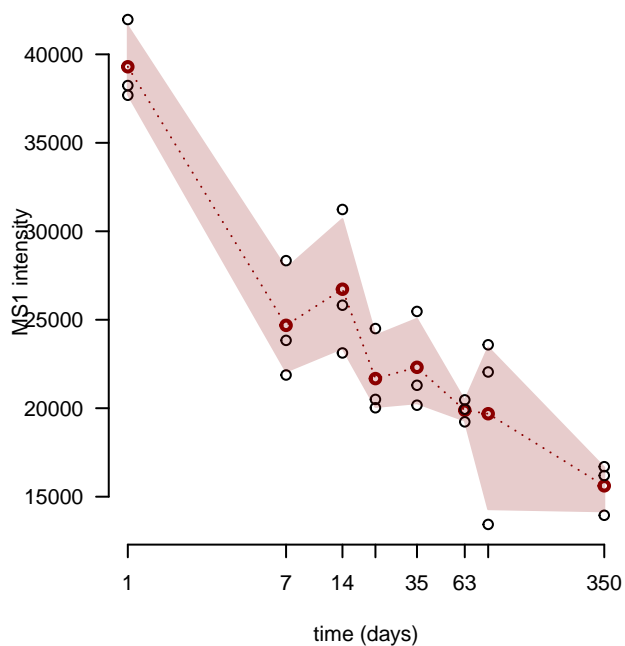

**O88876**  
**GN=Dhrs3**  
dehydrogenase/reductase (SDR family) mem ...

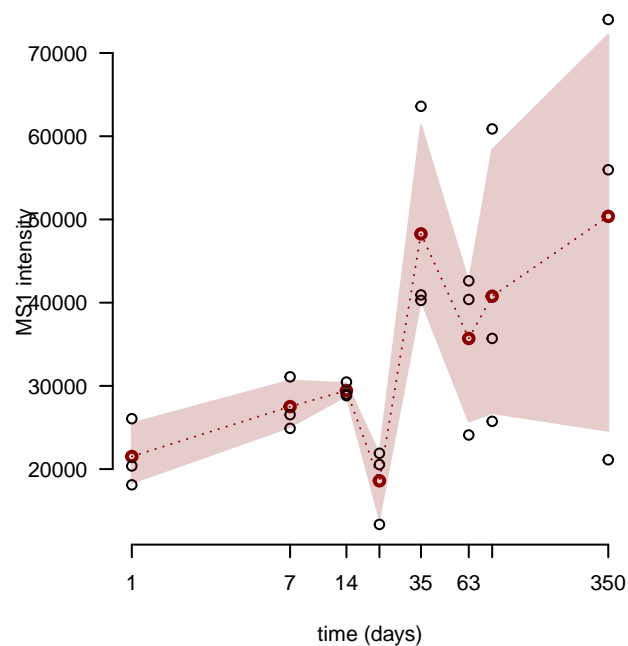

**O88878**  
**GN=Zfand5**  
zinc finger, AN1-type domain 5

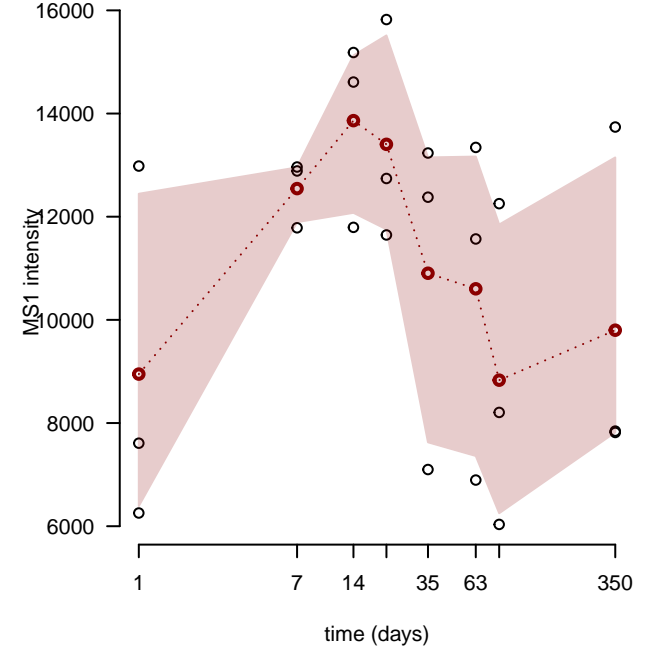

**O88879**  
GN=Apaf1  
apoptotic peptidase activating factor 1

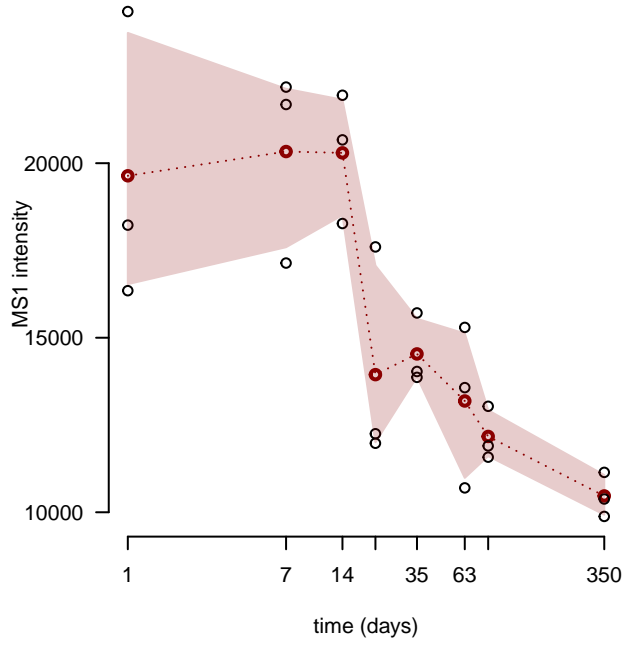

**O88888**  
GN=Apba3  
amyloid beta (A4) precursor protein-bind ...

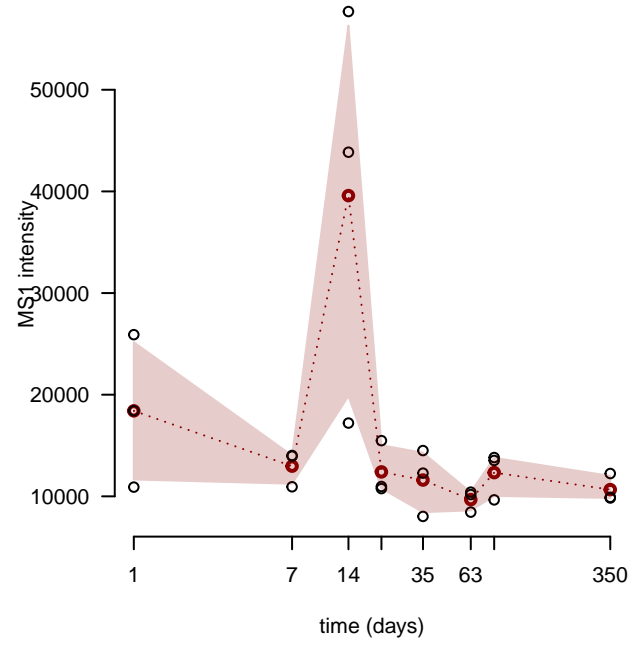

**O88895**  
GN=Hdac3  
histone deacetylase 3

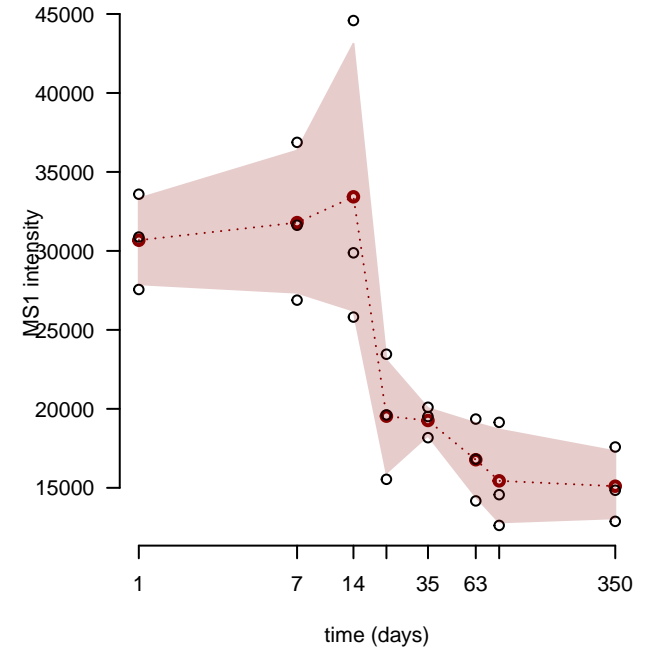

**O88898**  
GN=Tp63

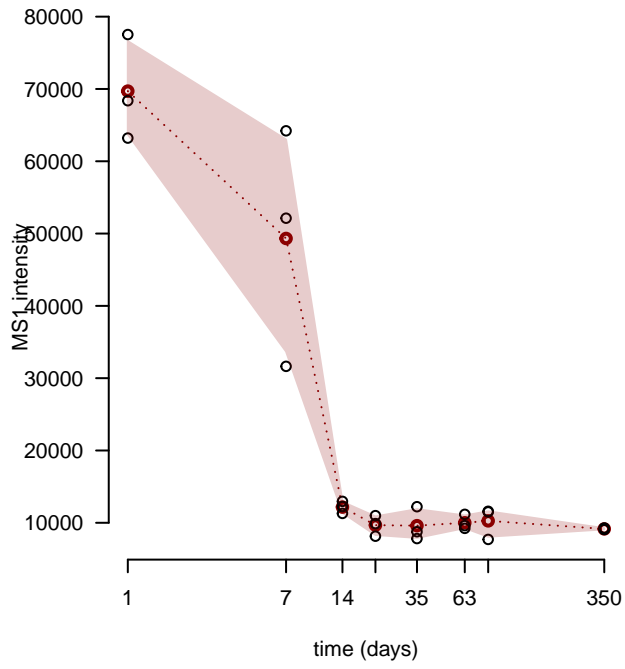

**O88904**  
GN=Hipk1  
homeodomain interacting protein kinase 1

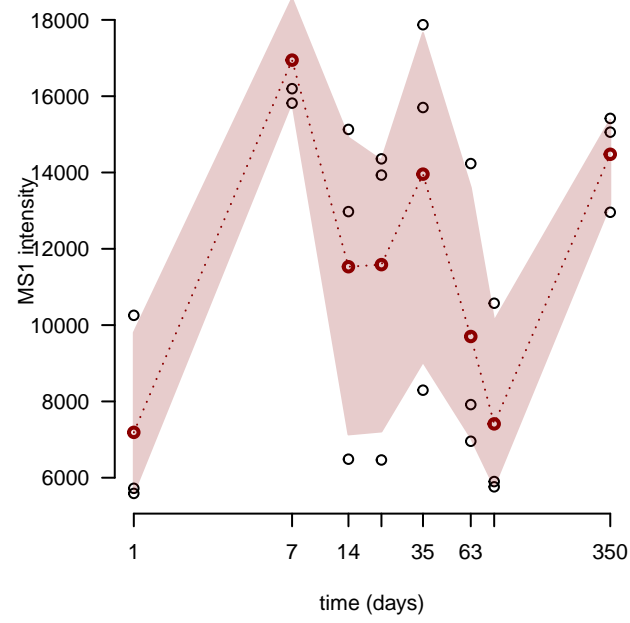

**O88907**  
GN=Pias1  
protein inhibitor of activated STAT 1

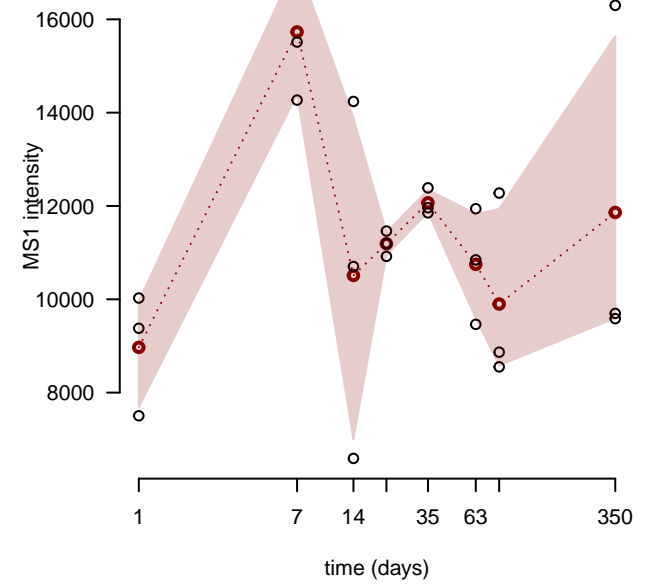

**O88939**  
GN=Zbtb7a  
zinc finger and BTB domain containing 7a

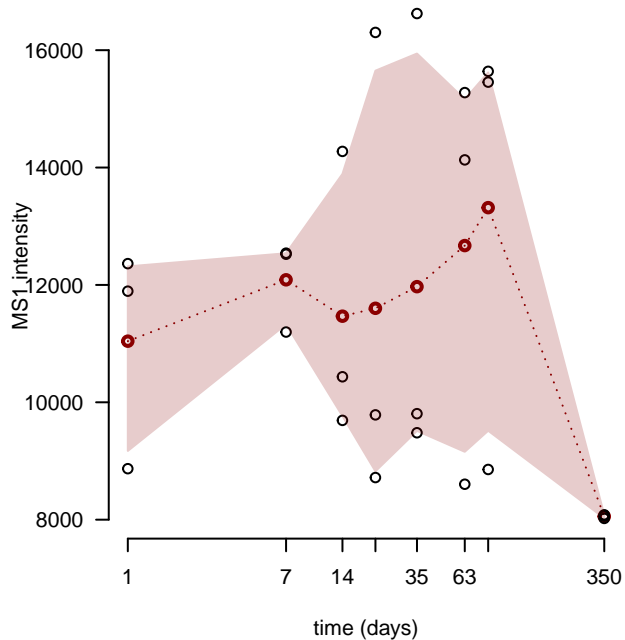

**O88947**  
GN=F10  
coagulation factor X

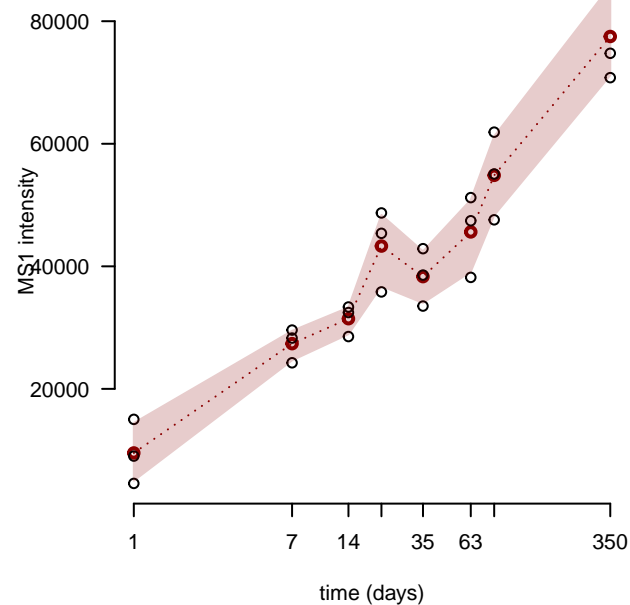

**O88951**  
GN=Lin7b  
lin-7 homolog B, crumbs cell polarity co ...

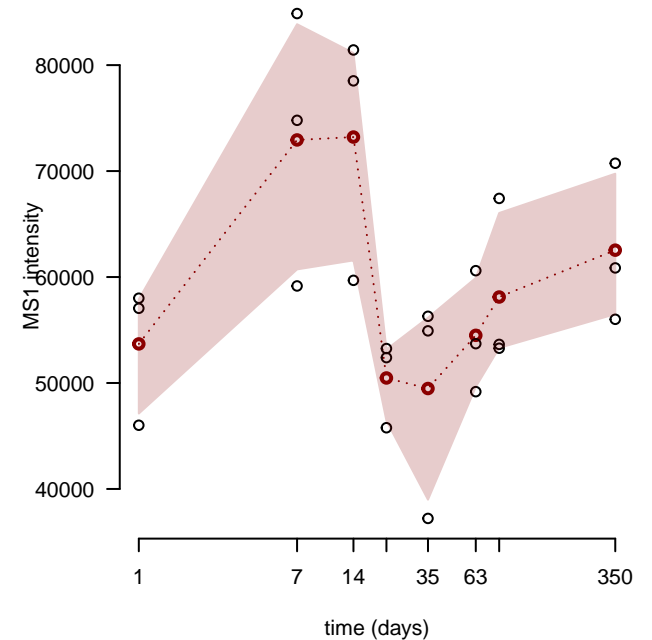

**O88952**  
**GN=Lin7c**  
lin-7 homolog C, crumbs cell polarity co ...

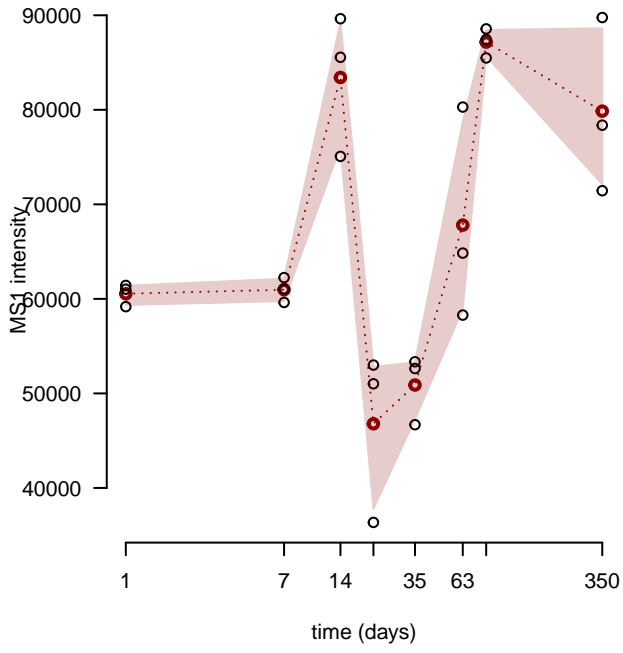

**O88958**  
**GN=Gnpda1**  
glucosamine-6-phosphate deaminase 1

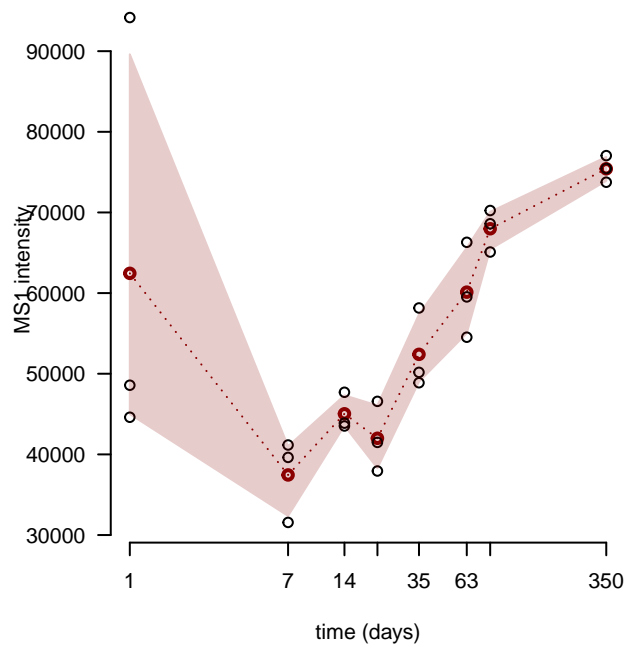

**O88967**  
**GN=Yme111**  
YME1-like 1 (*S. cerevisiae*)

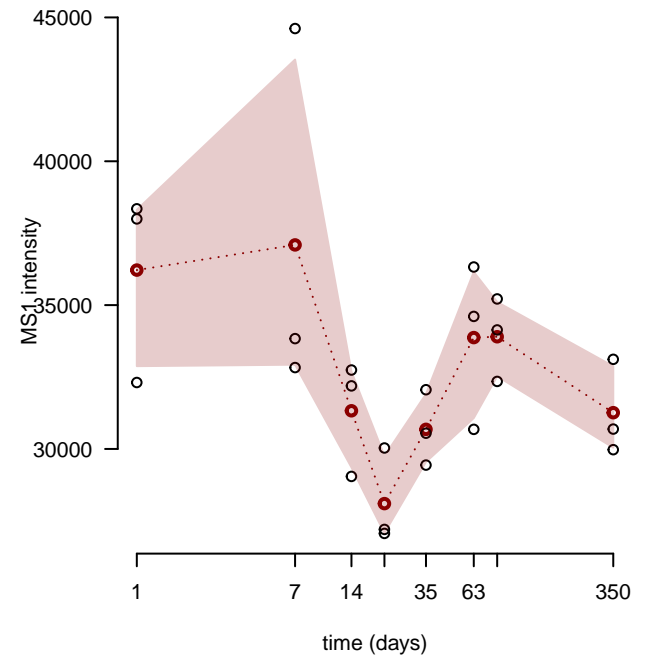

**O88968**  
**GN=Tcn2**  
transcobalamin 2

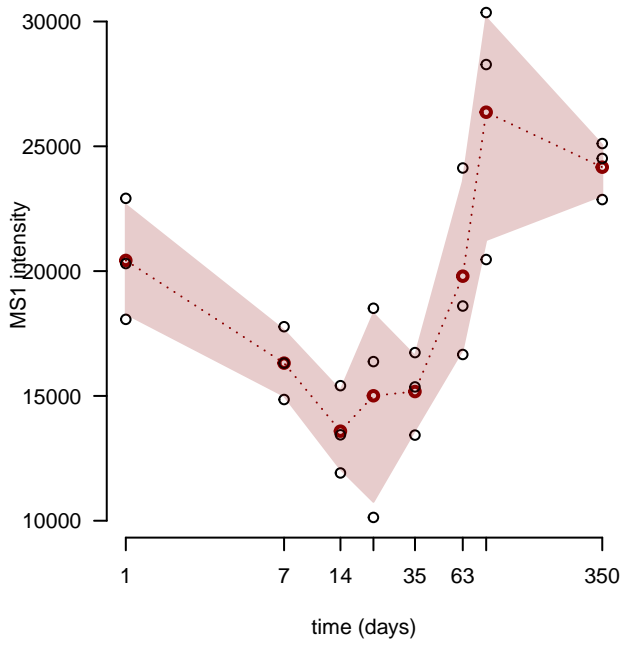

**O88974**  
**GN=Setdb1**  
SET domain, bifurcated 1

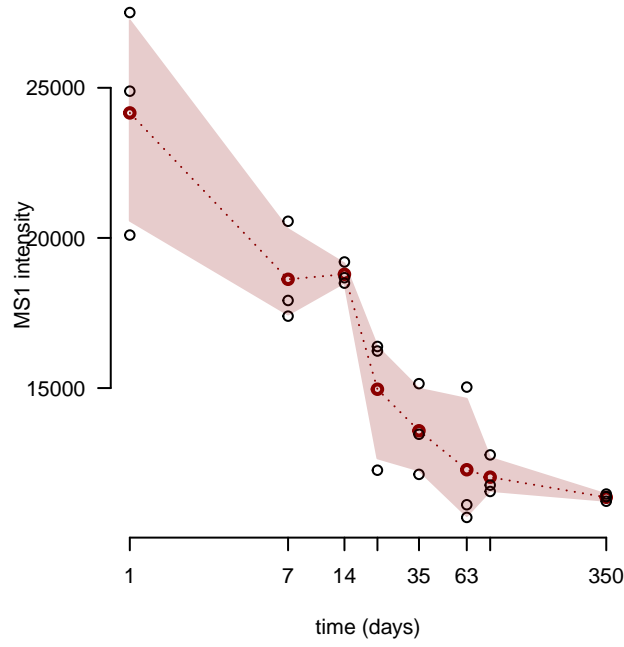

**O88983**  
**GN=Stx8**  
syntaxin 8

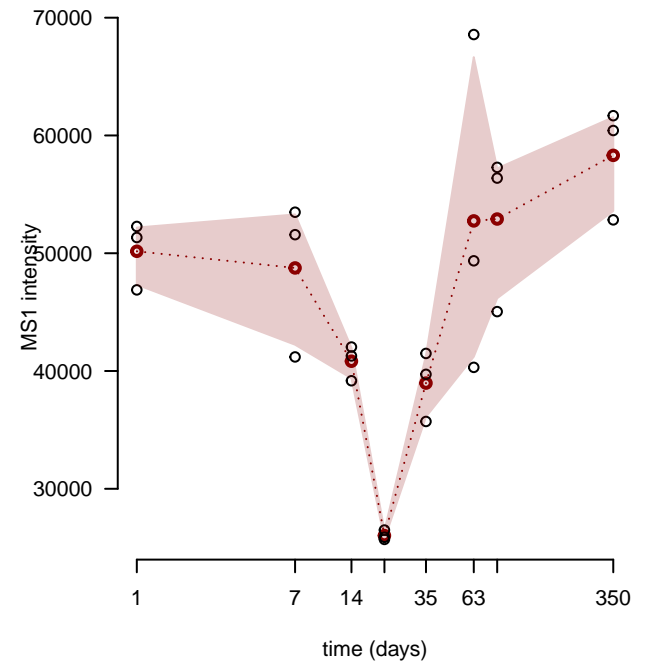

**O88986**  
**GN=Gcat**  
glycine C-acetyltransferase (2-amino-3-k ...

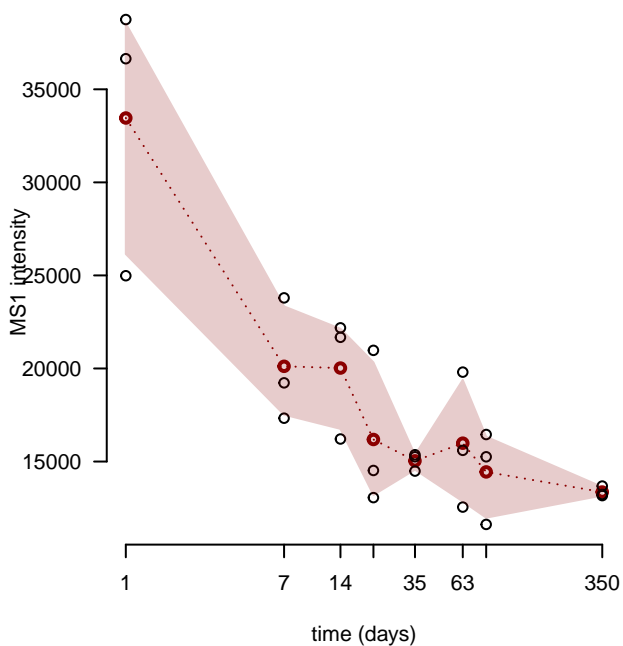

**O88990**  
**GN=Actn3**  
actinin alpha 3

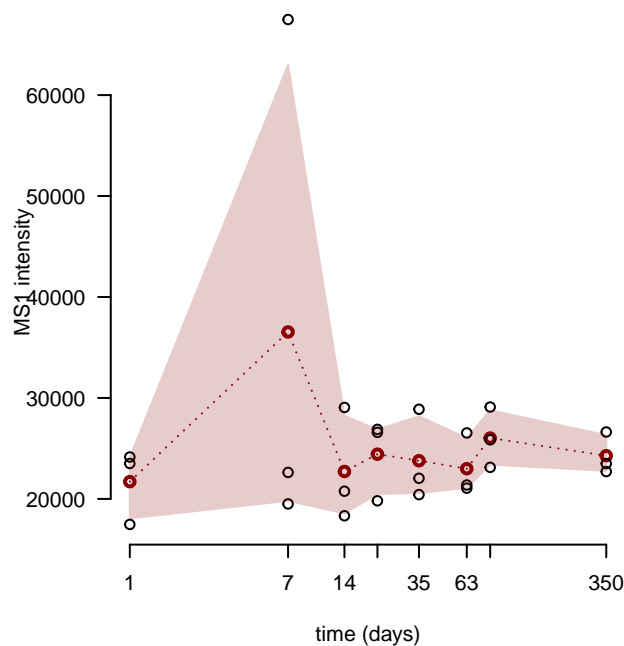

**O88998**  
**GN=Olfm1**  
olfactomedin 1

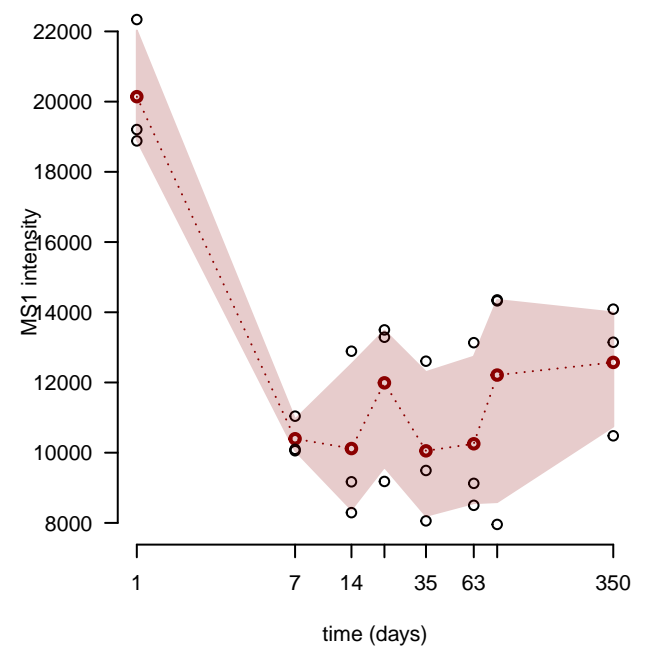

O89001  
GN=Cpd  
carboxypeptidase D

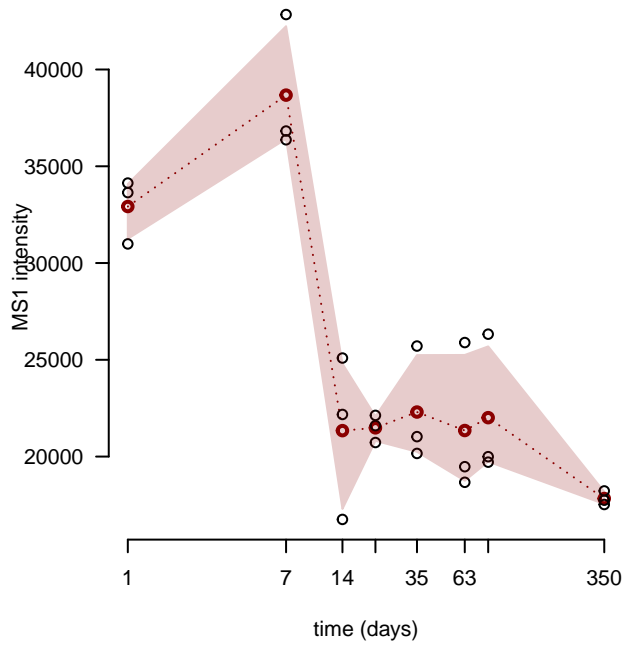

O89013  
GN=Leprot  
leptin receptor overlapping transcript

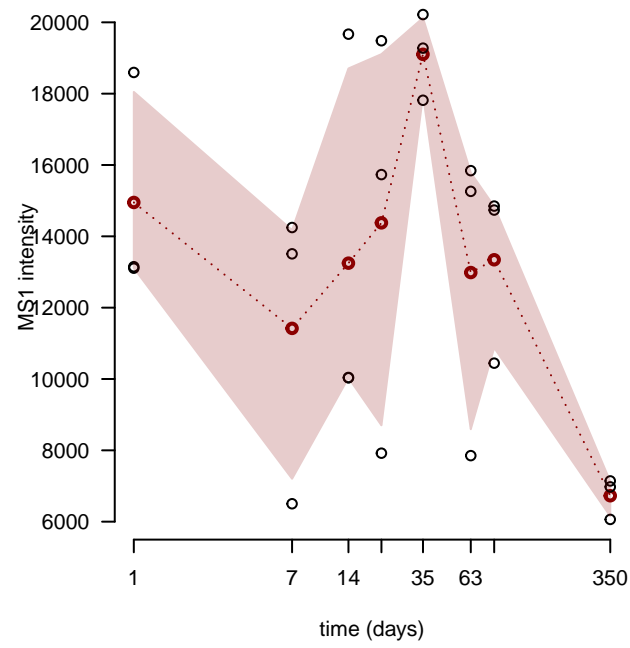

O89016  
GN=Abcd4  
ATP-binding cassette, sub-family D (ALD) ...

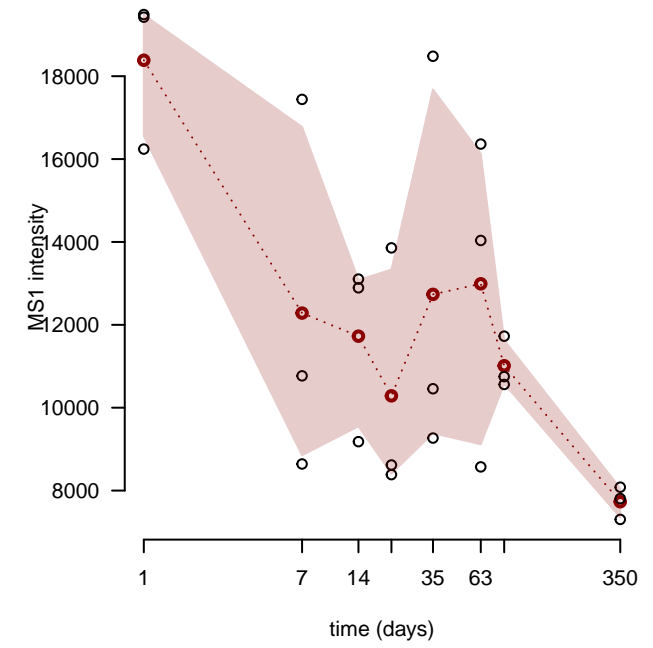

O89017  
GN=Lgmn  
legumain

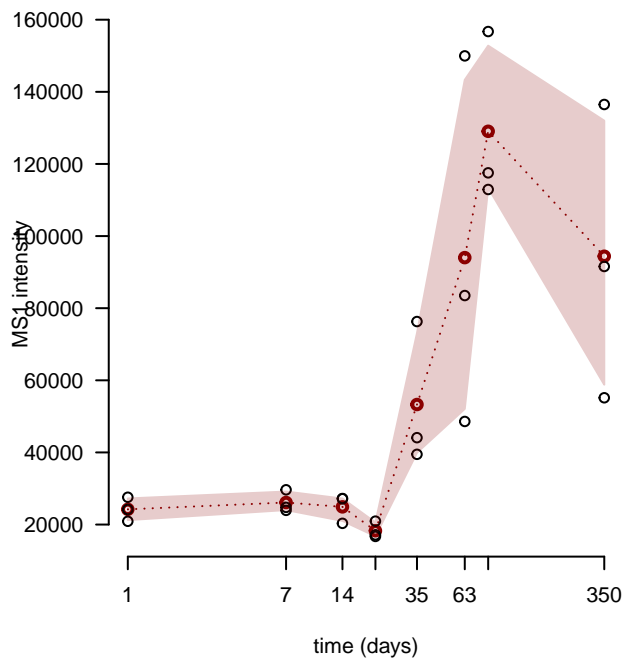

O89020  
GN=Afm  
afamin

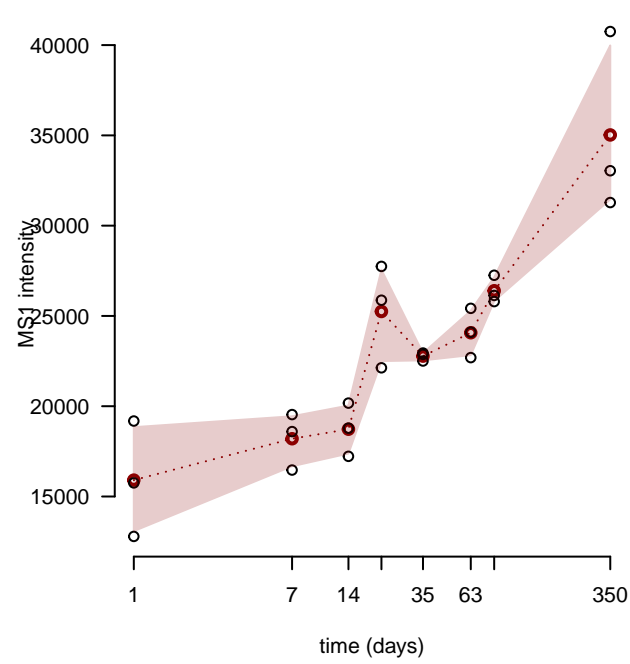

O89023  
GN=Tpp1  
tripeptidyl peptidase I

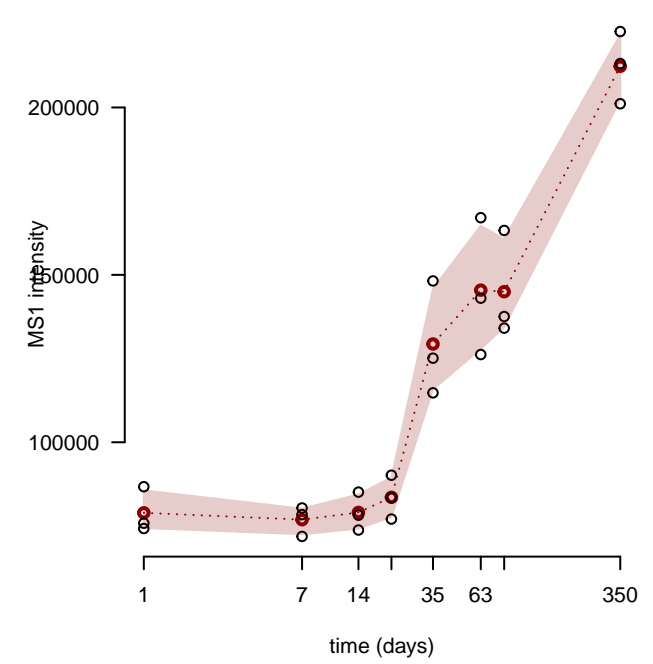

O89026  
GN=Robo1  
roundabout guidance receptor 1

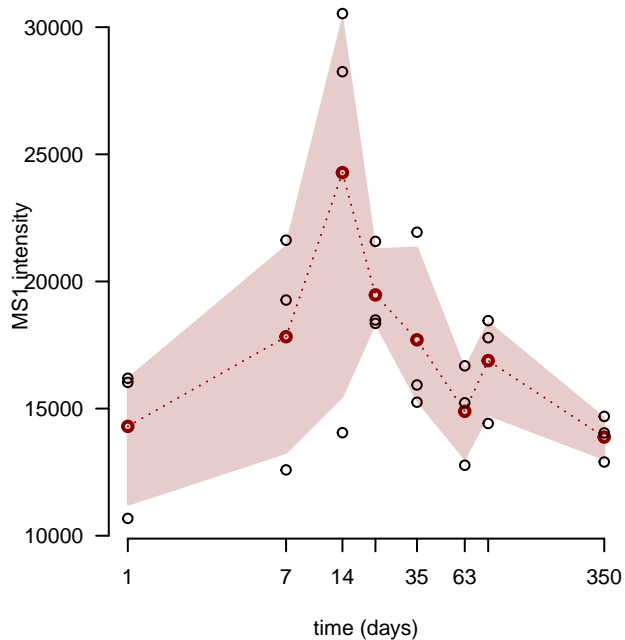

O89032  
GN=Sh3pxd2a  
SH3 and PX domains 2A

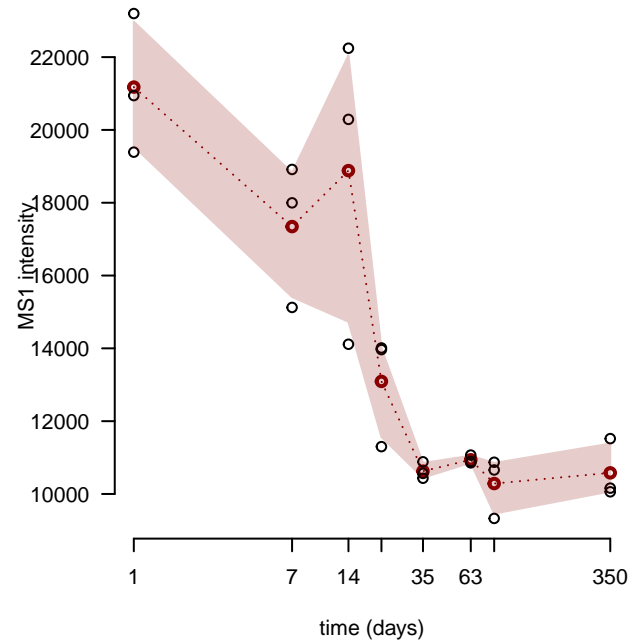

O89050  
GN=Mkin1  
muskelin 1, intracellular mediator conta ...

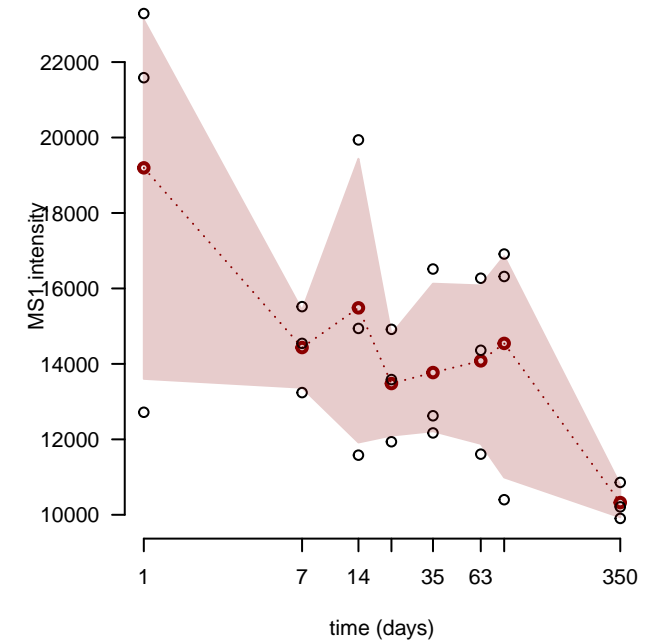



**O89051**  
**GN=Itm2b**  
integral membrane protein 2B

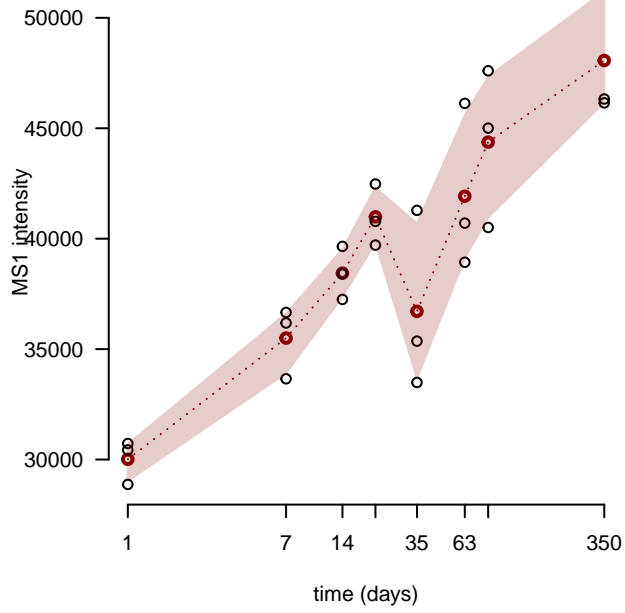

**O89053**  
**GN=Coro1a**  
coronin, actin binding protein 1A

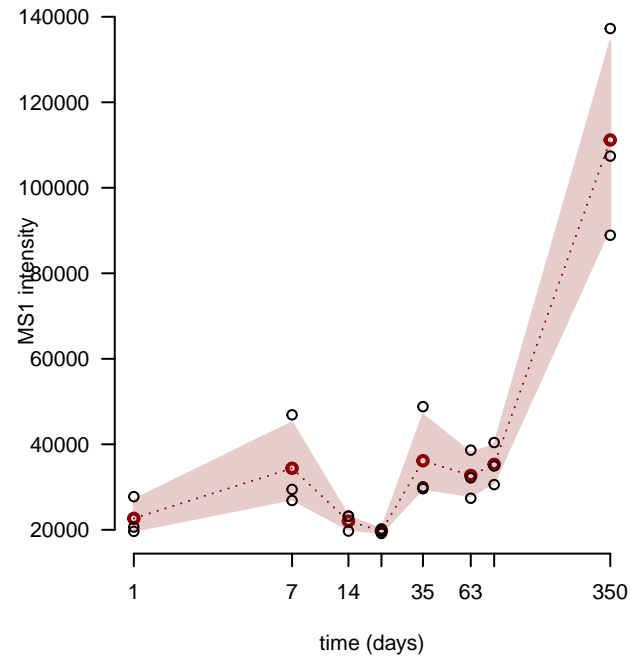

**O89079**  
**GN=Cope**  
coatamer protein complex, subunit epsilo ...

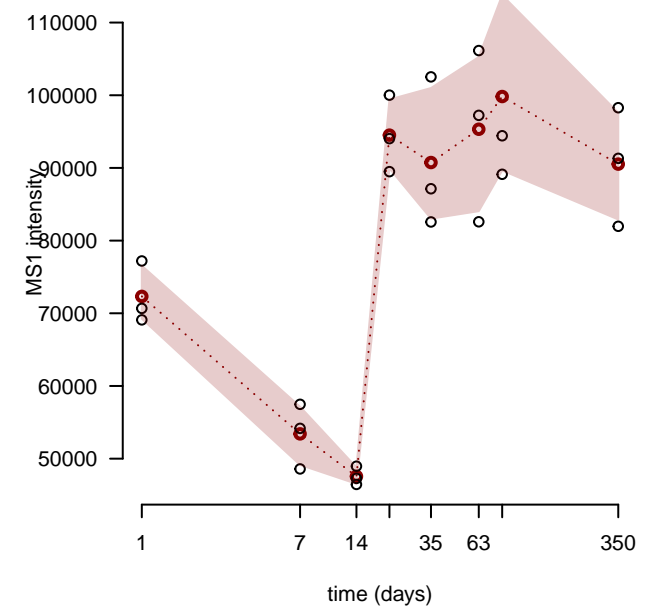

**O89086**  
**GN=Rbm3**  
RNA binding motif (RNP1, RRM) protein 3

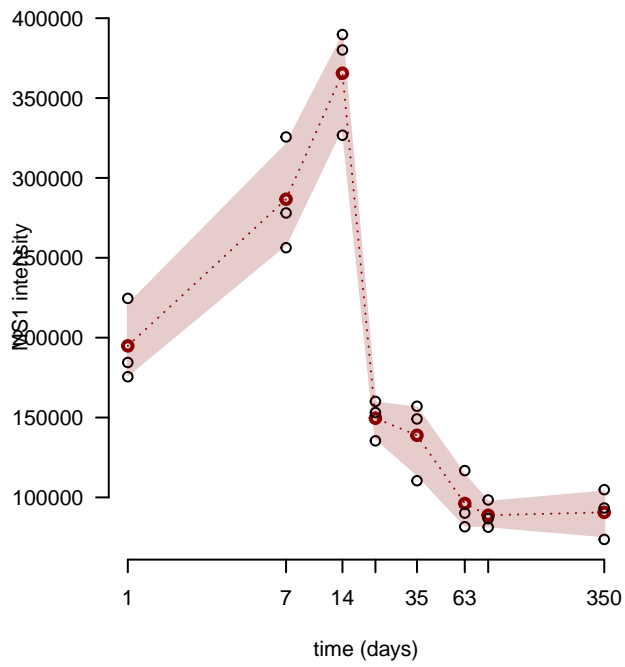

**O89090**  
**GN=Sp1**  
trans-acting transcription factor 1

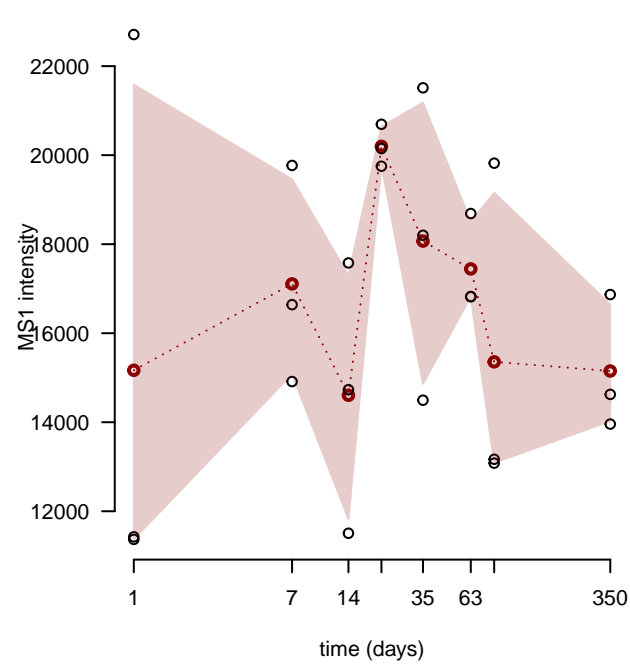

**O89103**  
**GN=Cd93**  
CD93 antigen

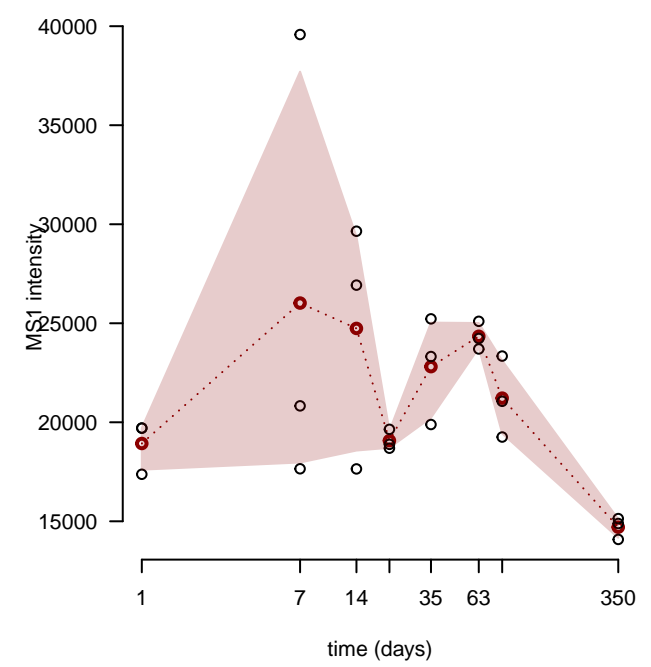

**O89106**  
**GN=Fhit**  
fragile histidine triad gene

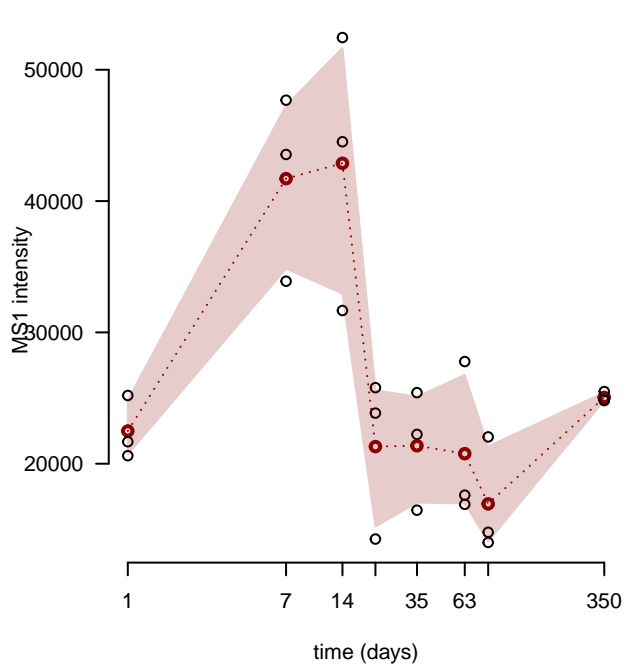

**O89110**  
**GN=Casp8**  
caspase 8

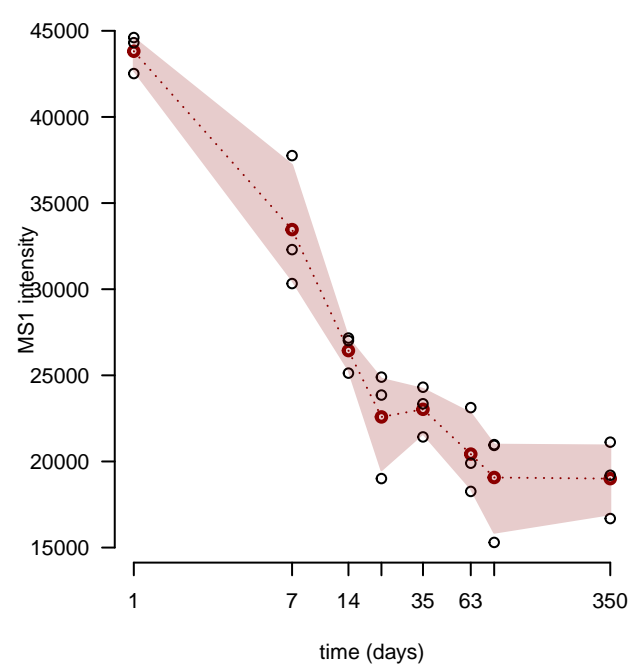

**O89112**  
**GN=LanC1**  
LanC (bacterial lantibiotic synthetase c ...

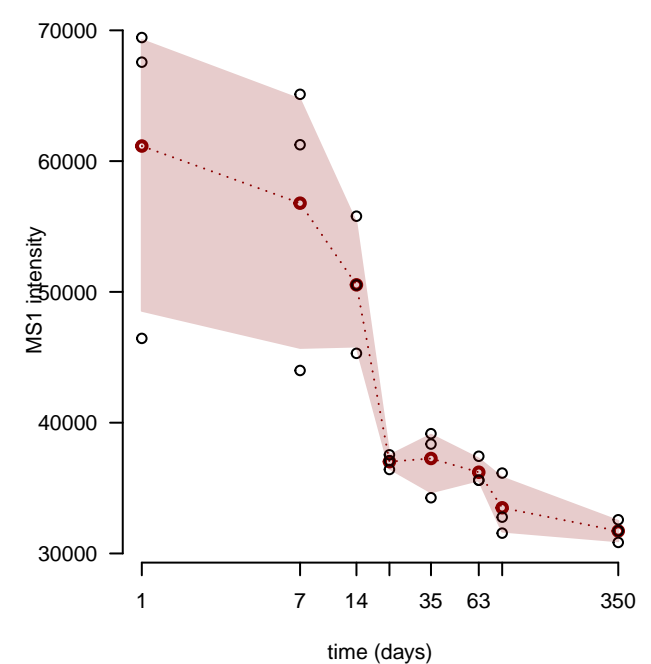

**O89116**  
GN=Vti1a  
vesicle transport through interaction wi ...

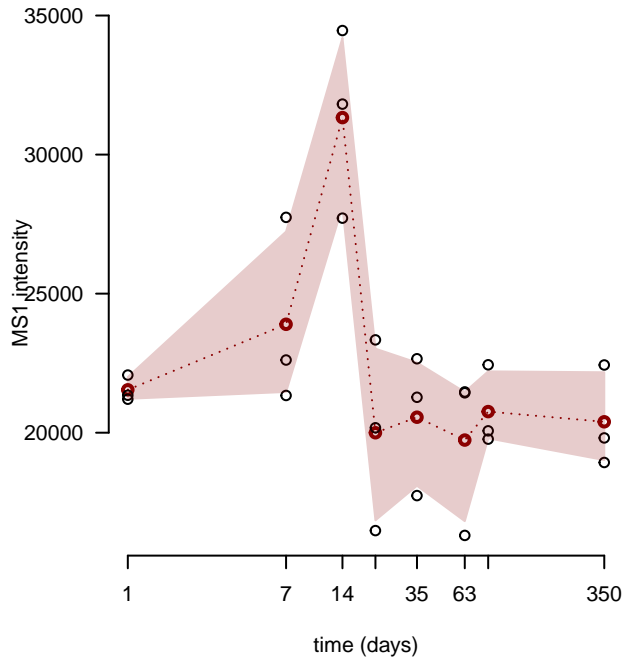

**P00015**  
GN=Cyct  
cytochrome c, testis

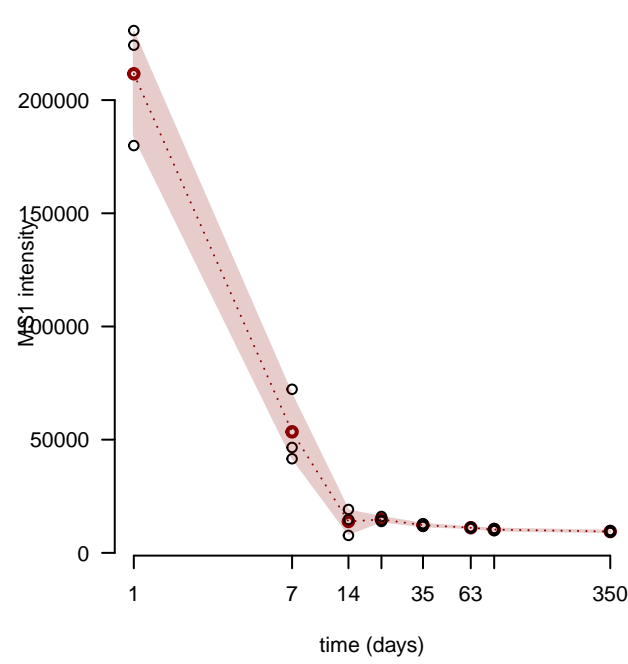

**P00158**  
GN=Mt-Cyb

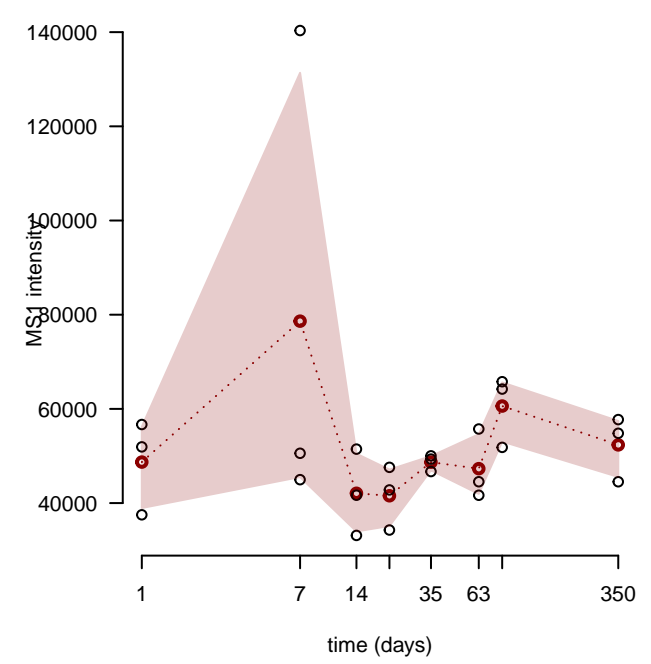

**P00329**  
GN=Adh1  
alcohol dehydrogenase 1 (class I)

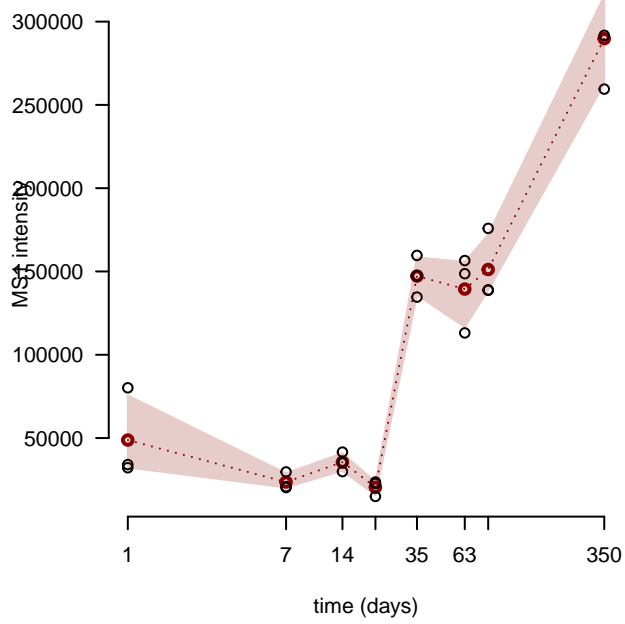

**P00342**  
GN=Ldhc  
lactate dehydrogenase C

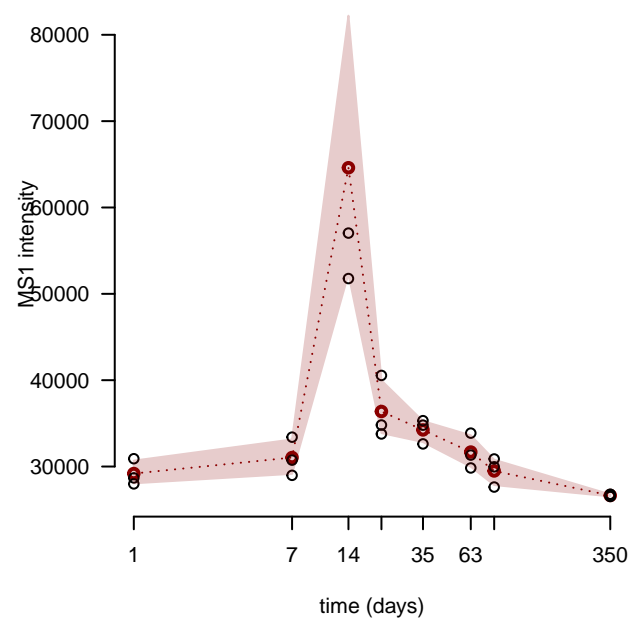

**P00375**  
GN=Dhfr  
dihydrofolate reductase

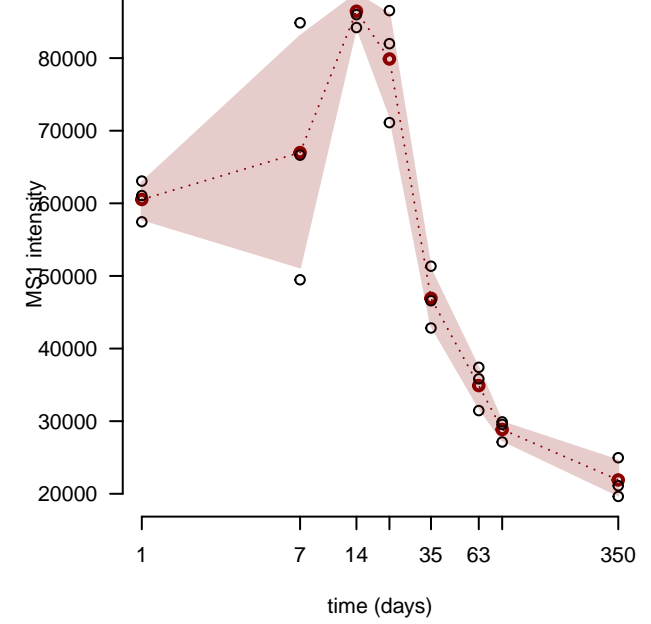

**P00397**  
GN=Mtco1

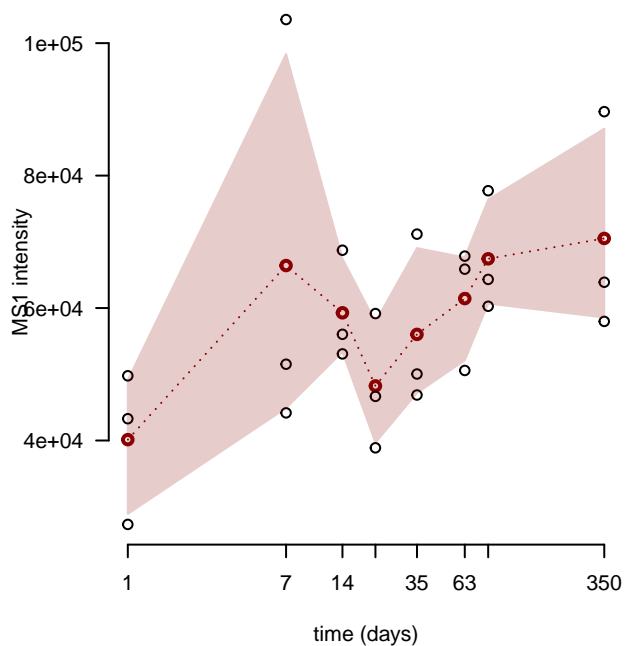

**P00405**  
GN=Mtco2

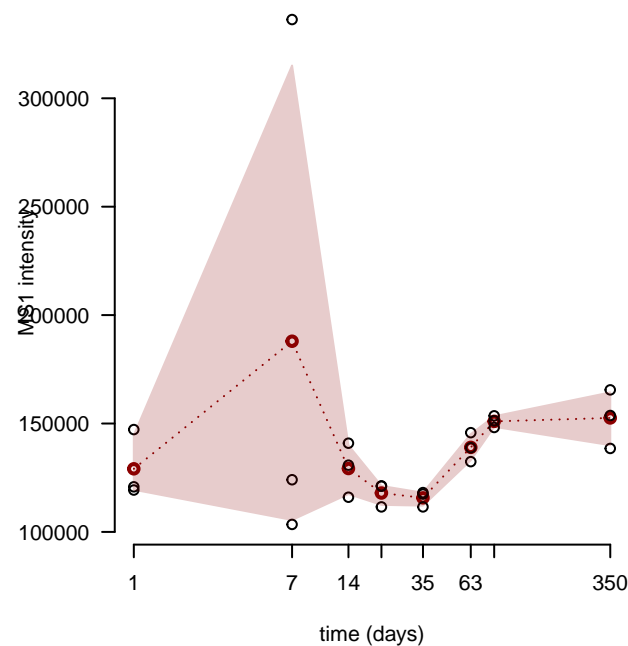

**P00416**  
GN=mt-Co3  
mitochondrially encoded cytochrome c oxi ...

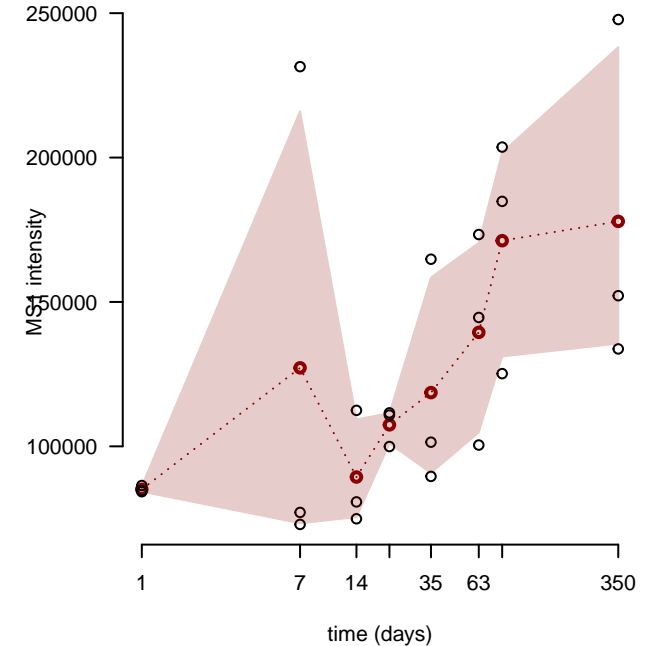

P00493  
GN=Hprt1

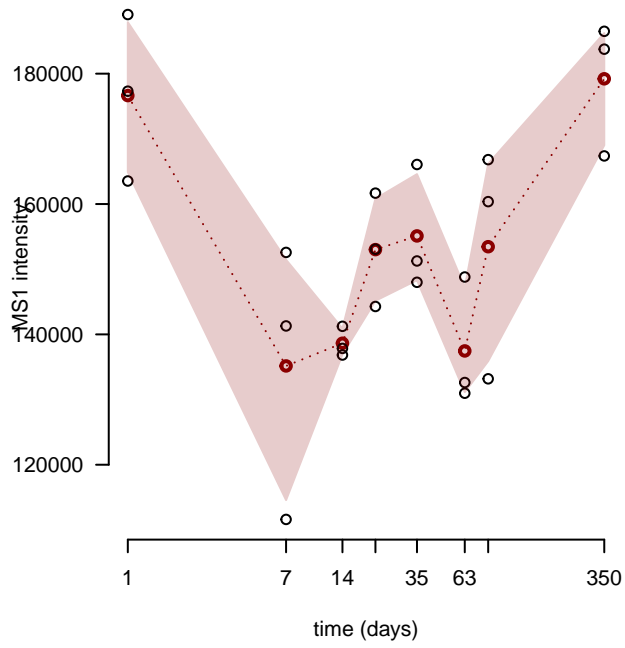

P00520  
GN=Abl1  
c-abl oncogene 1, non-receptor tyrosine ...

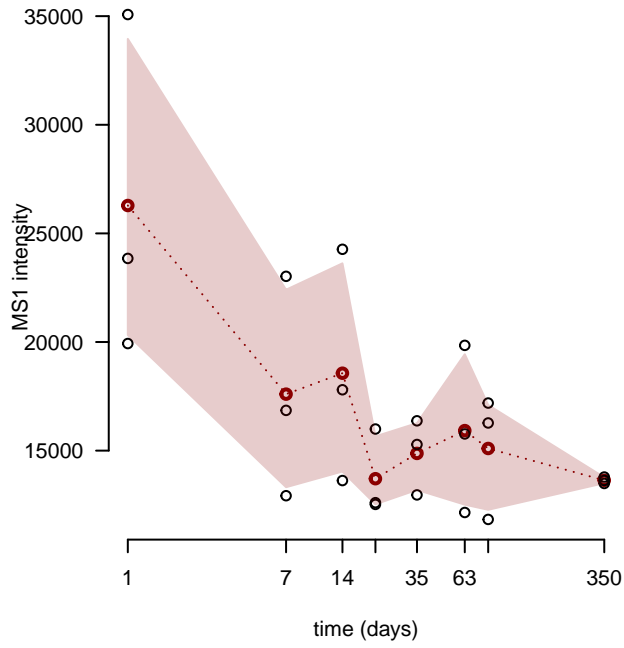

P00687  
GN=Amy1  
amylase 1, salivary

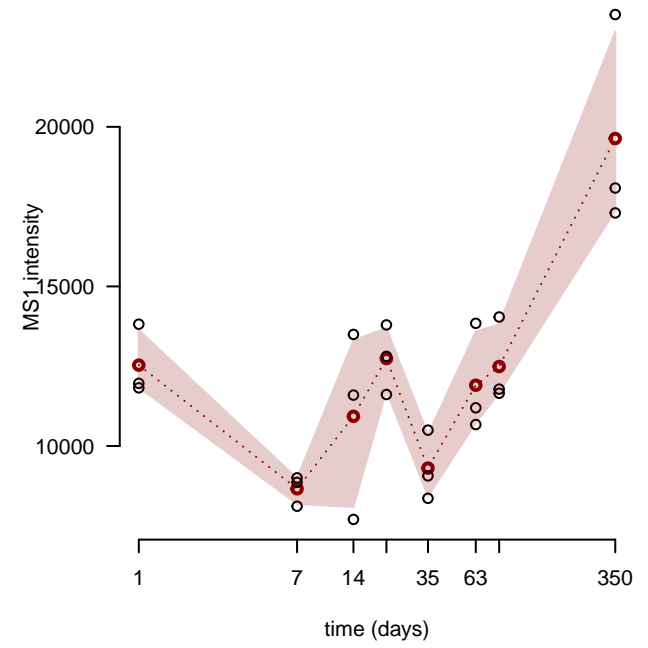

P00688  
GN=Amy2

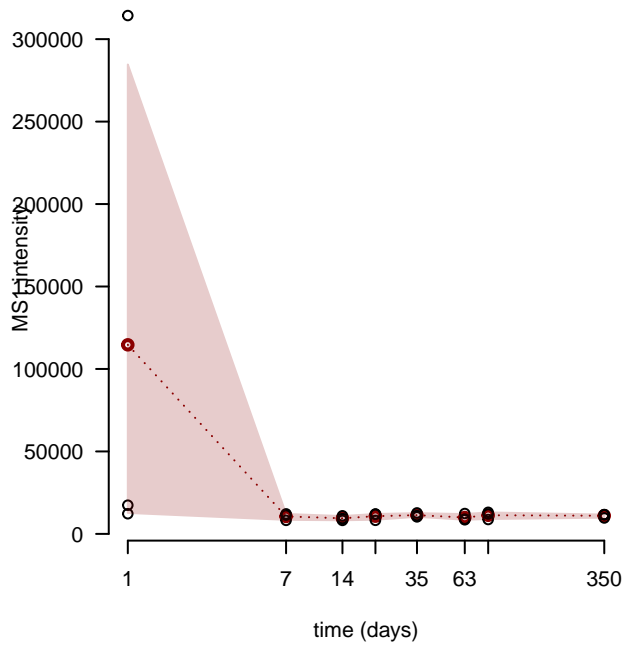

P00848  
GN=Mtstp6

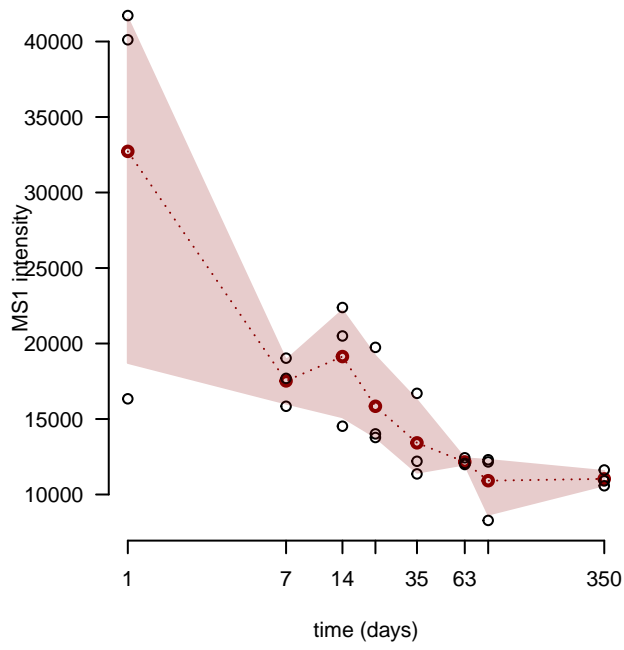

P00920  
GN=Ca2

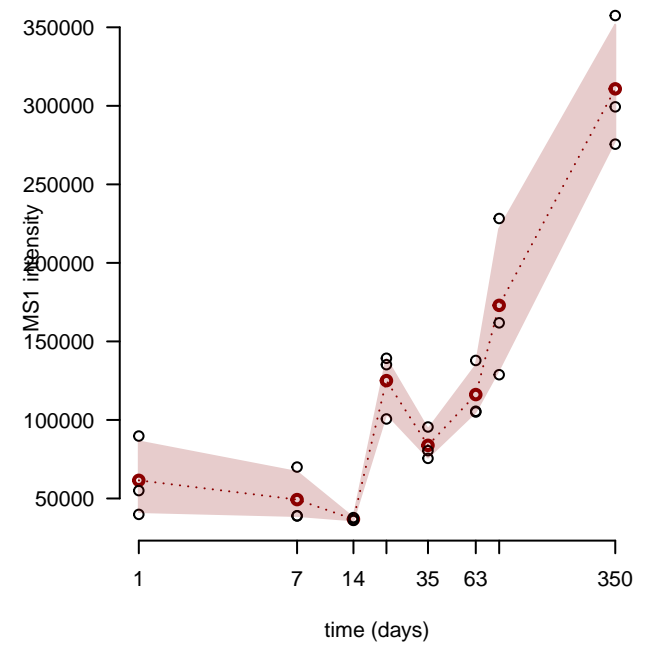

P01027  
GN=C3  
complement component 3

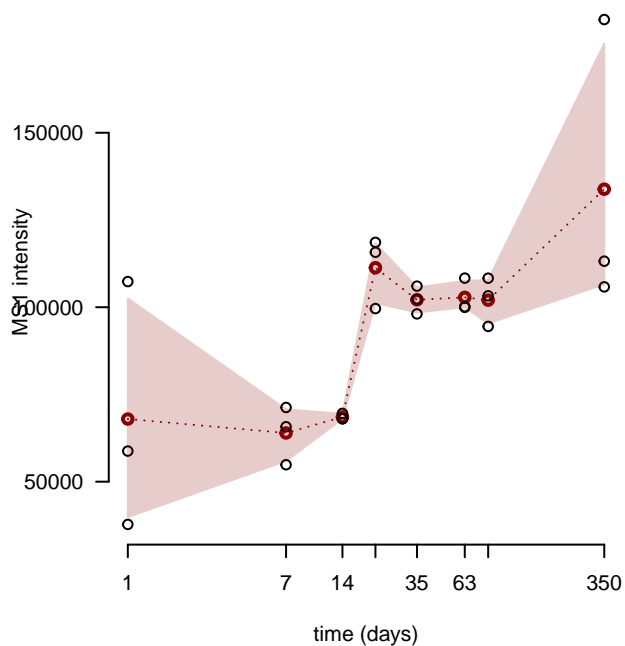

P01029  
GN=C4b  
complement component 4B (Chido blood gro ...

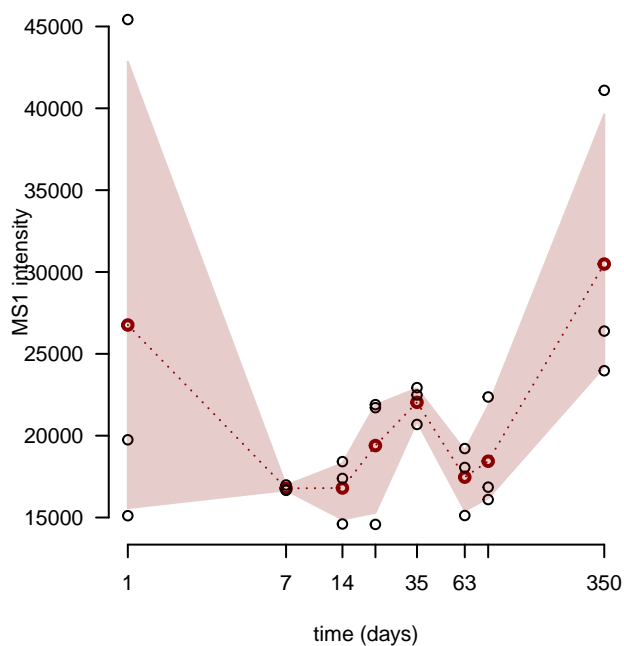

P01592  
GN=Jchain  
immunoglobulin joining chain

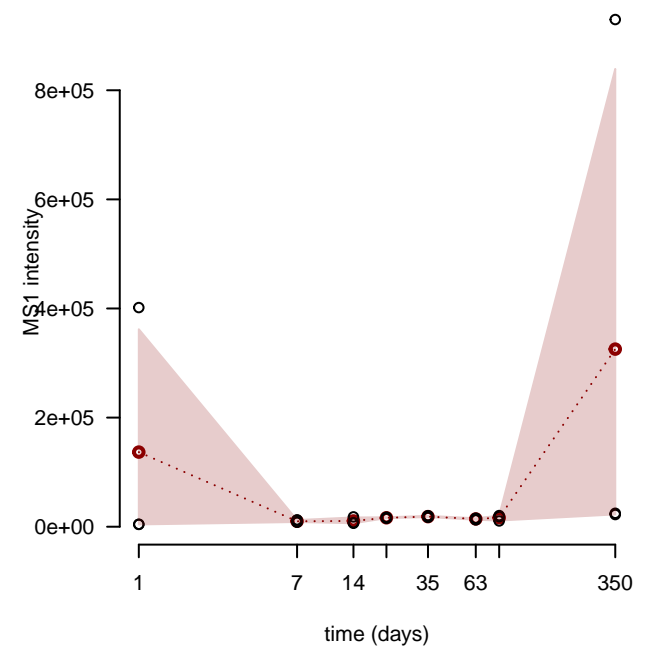

P01630  
GN=

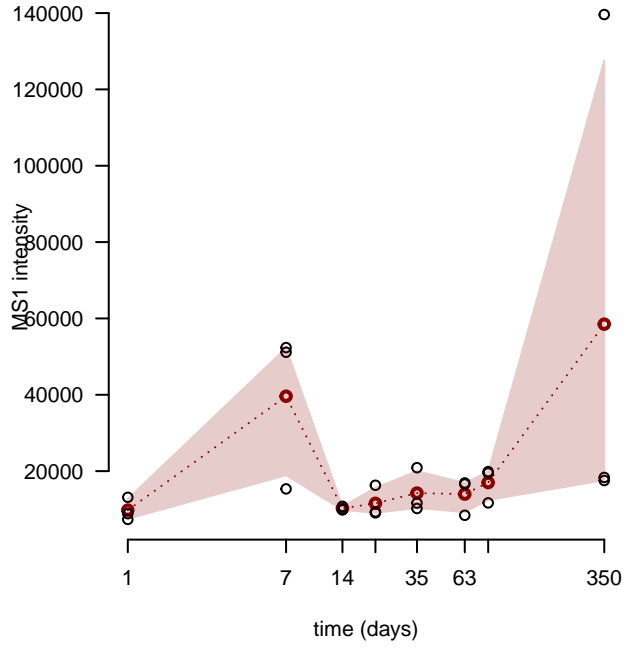

P01631  
GN=

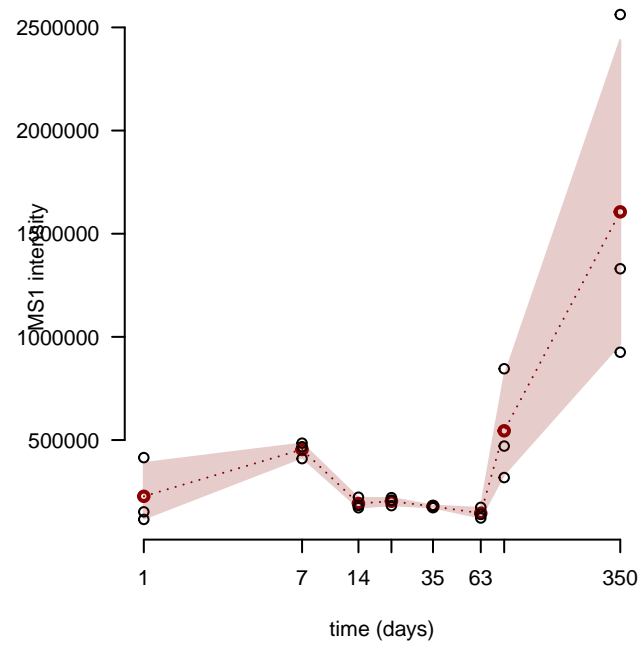

P01633  
GN=lgk-V19-17

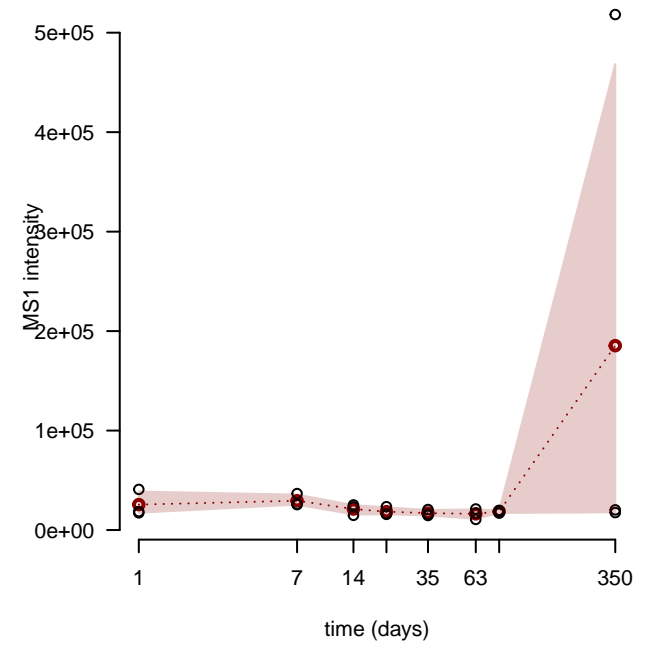

P01635  
GN=

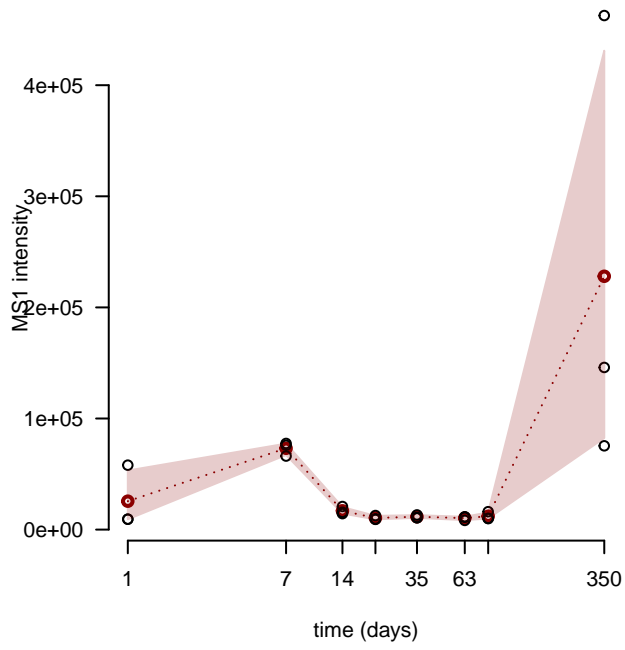

P01636  
GN=

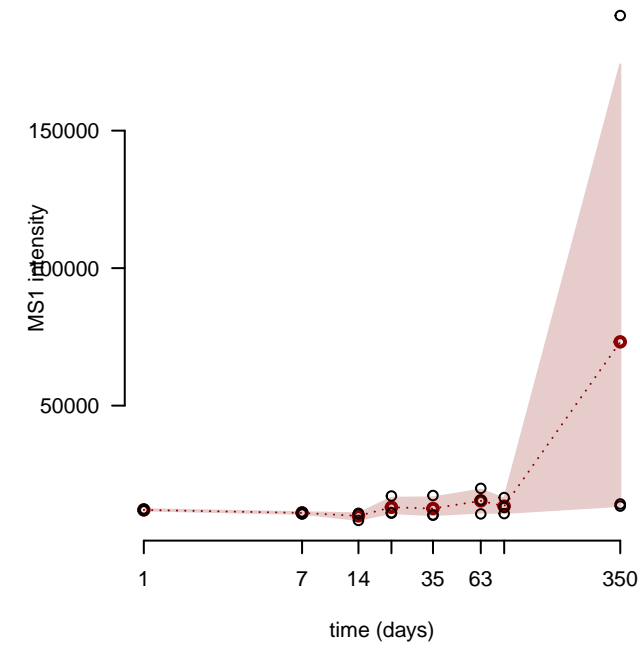

P01638  
GN=

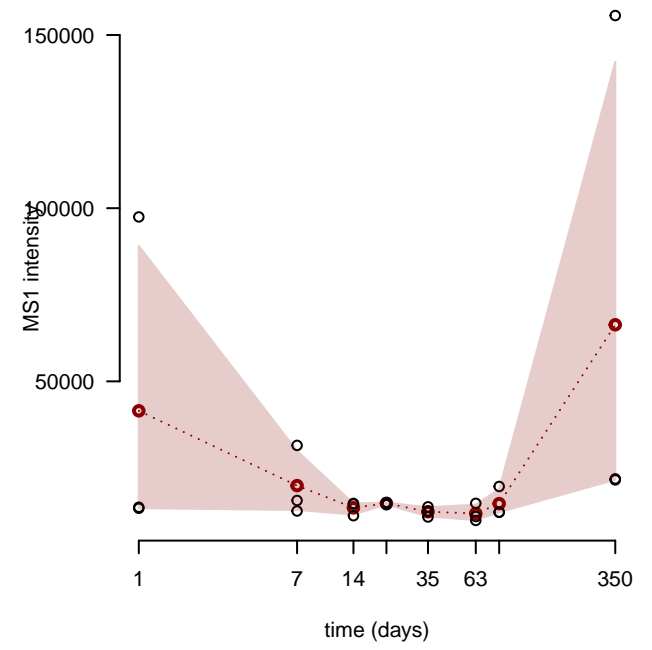

P01639  
GN=Gm5571

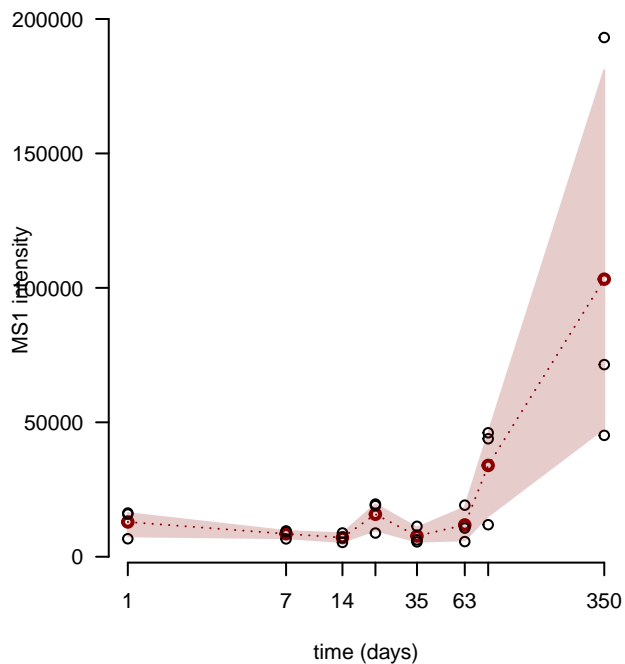

P01642  
GN=Gm10881

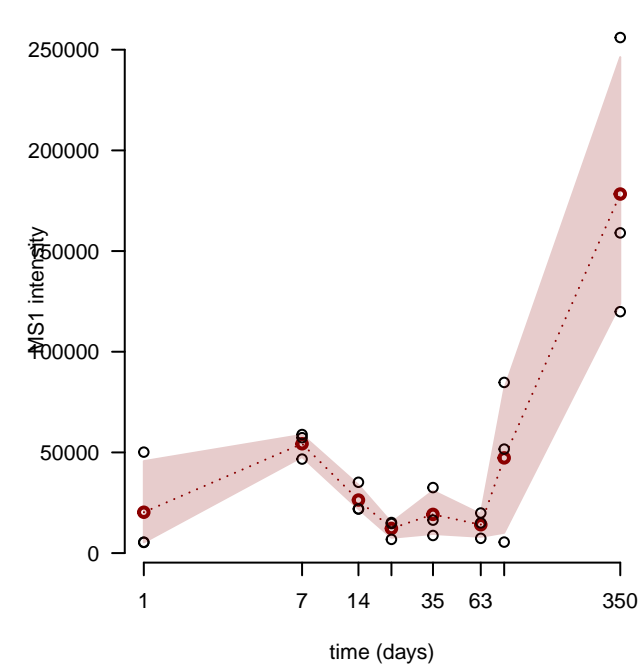

P01644  
GN=

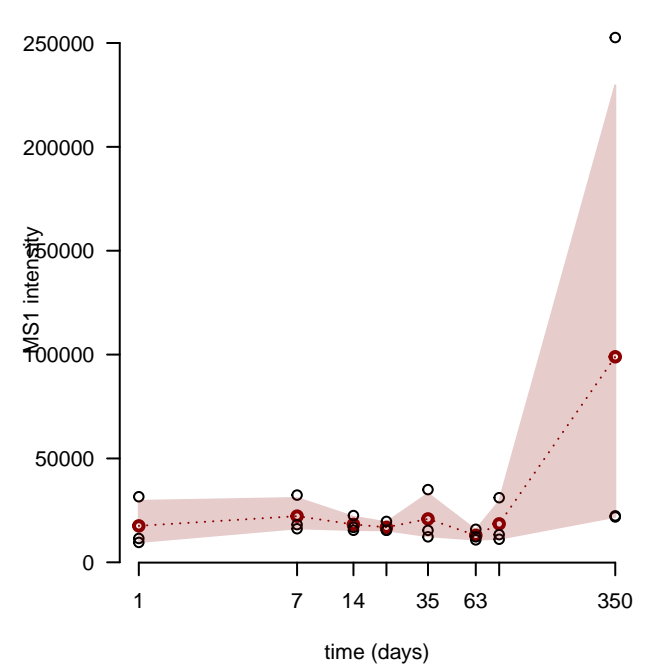

P01646  
GN=

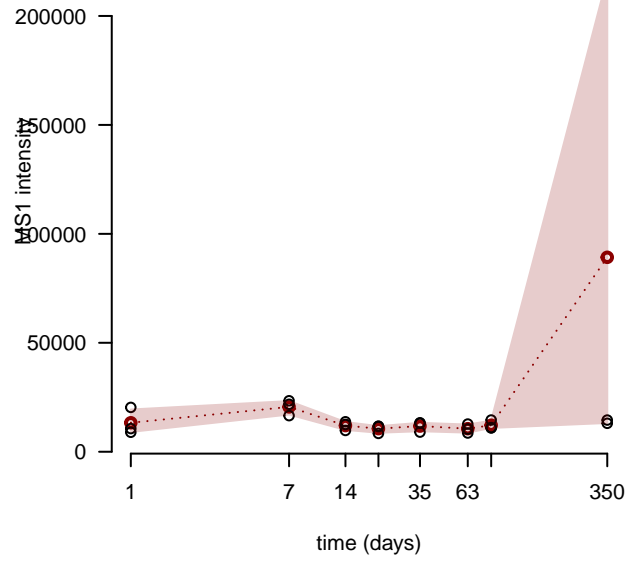

P01649  
GN=

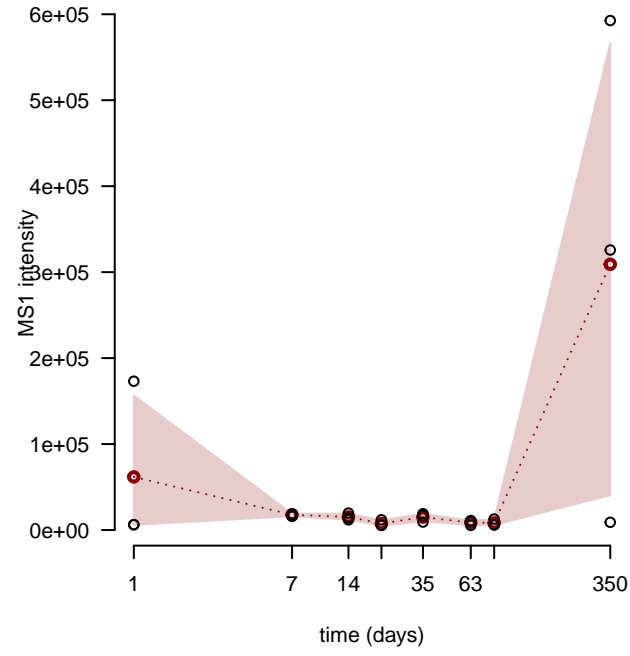

P01652  
GN=

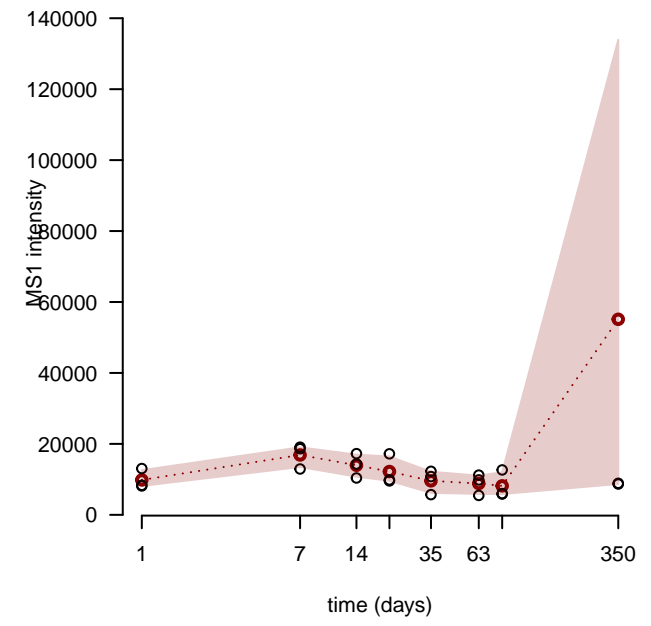

P01654  
GN=

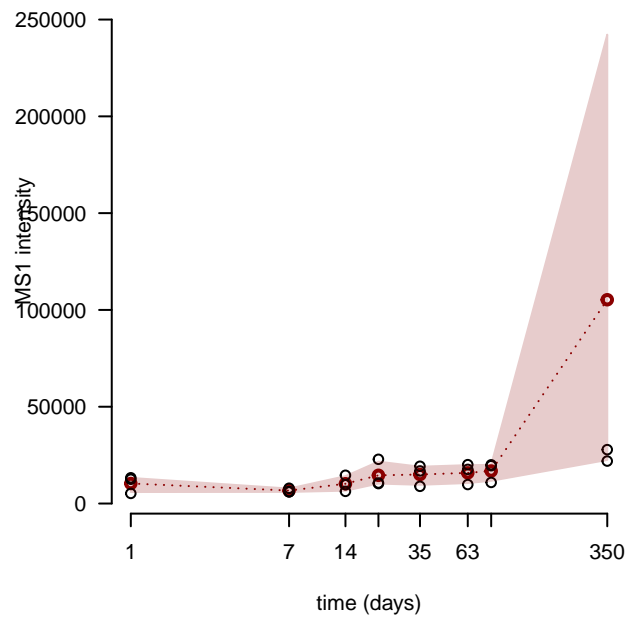

P01660  
GN=

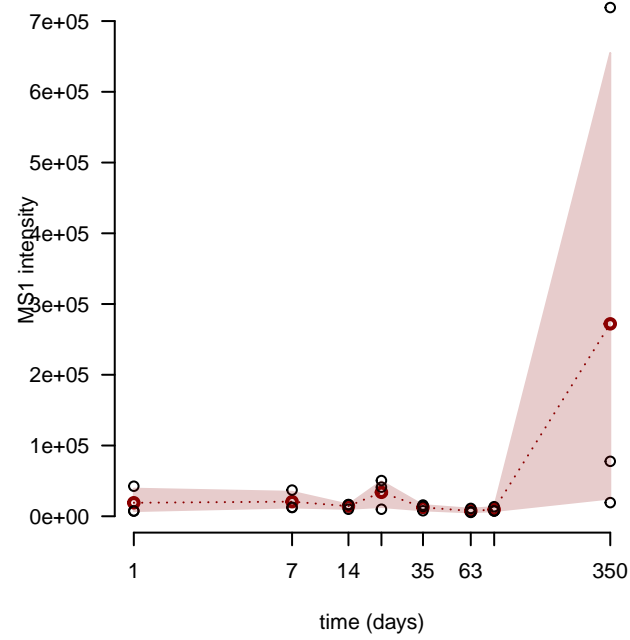

P01662  
GN=

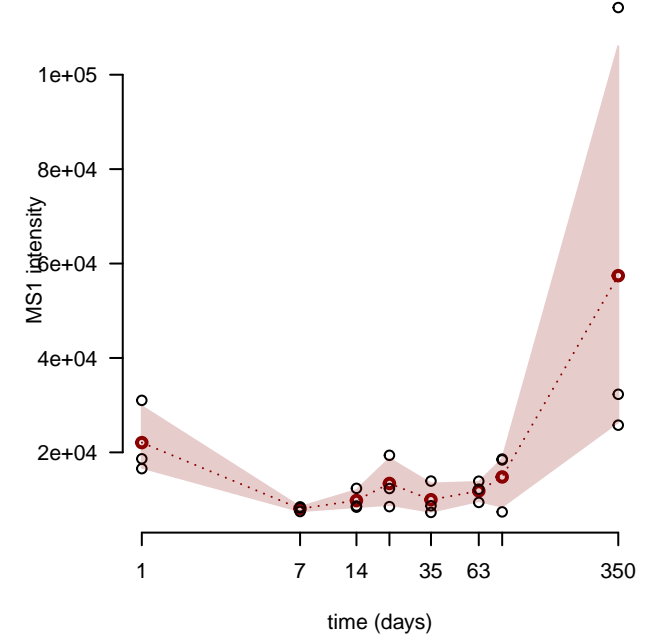

P01665  
GN=

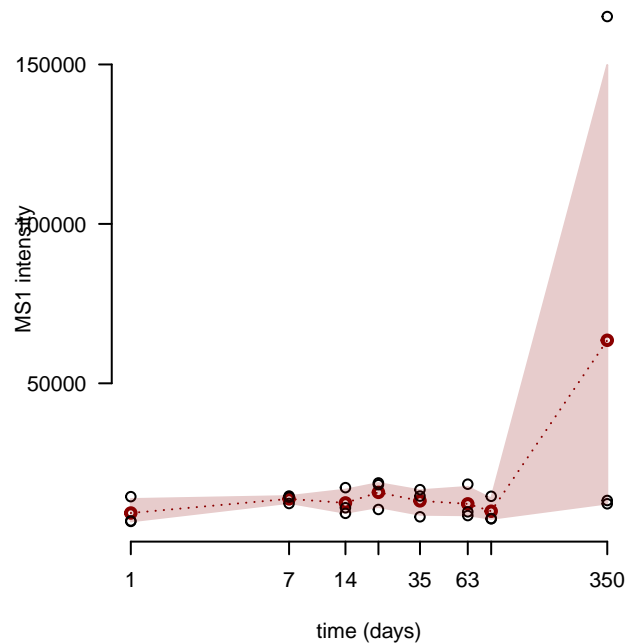

P01671  
GN=

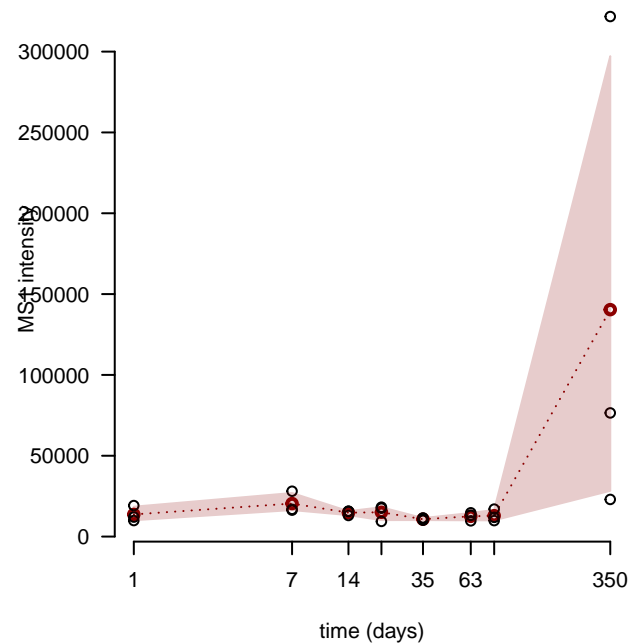

P01674  
GN=

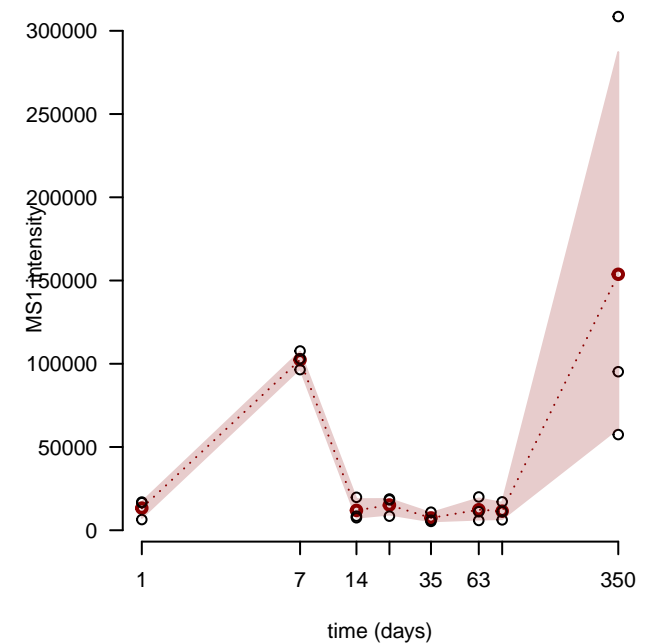

P01675  
GN=

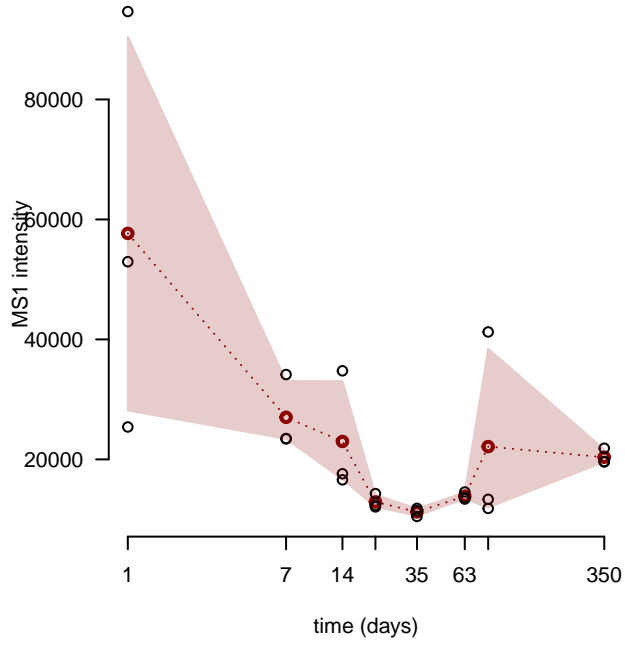

P01680  
GN=

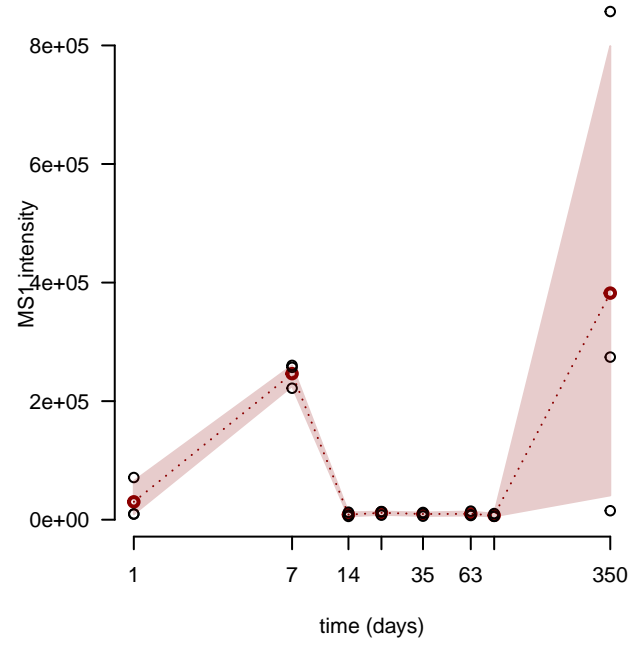

P01741  
GN=

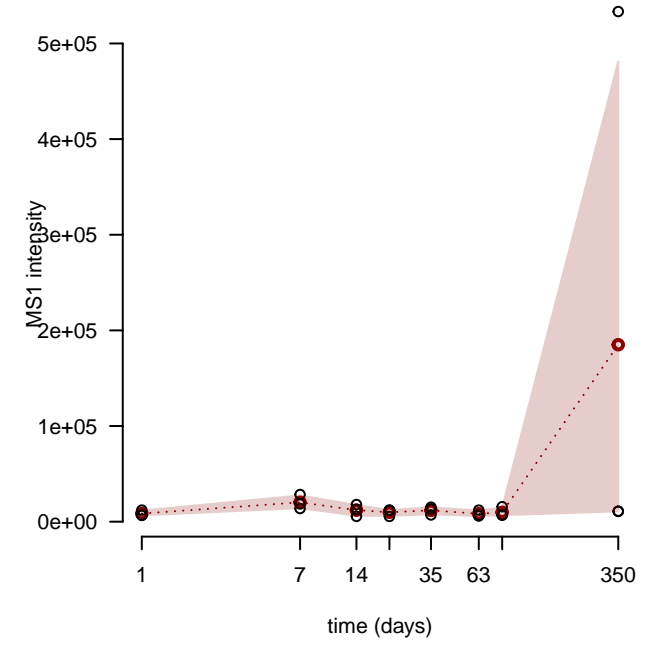

P01749  
GN=Ighv1-61  
immunoglobulin heavy variable 1-61

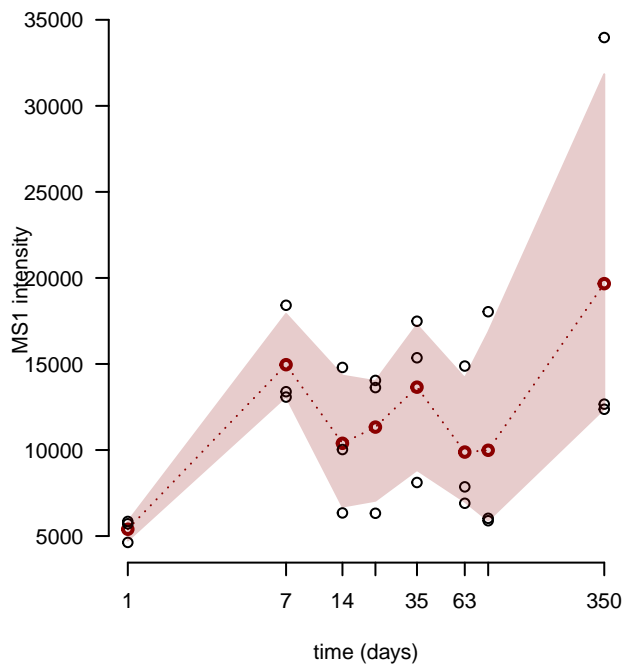

P01758  
GN=Igh-VJ558  
immunoglobulin heavy chain (J558 family)

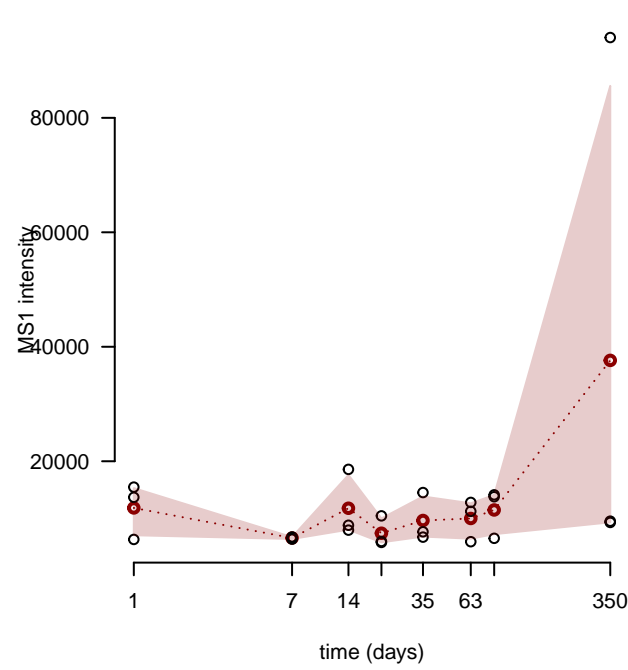

P01786  
GN=

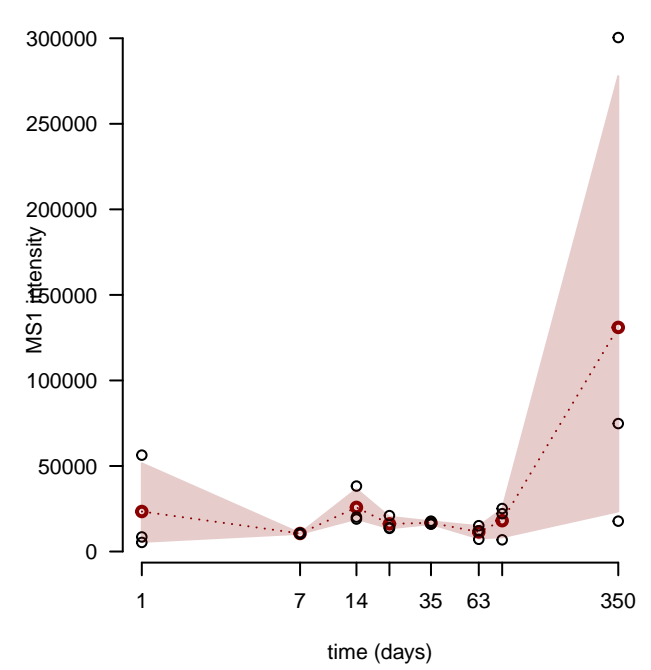

P01801  
GN=

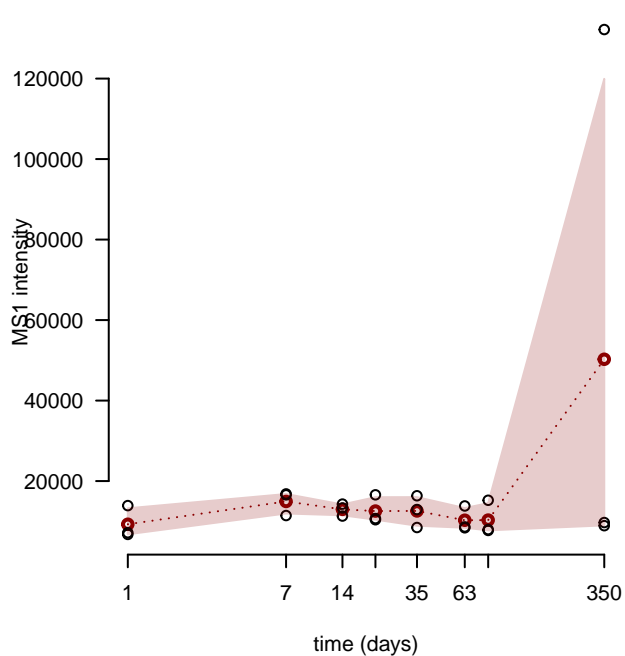

P01806  
GN=

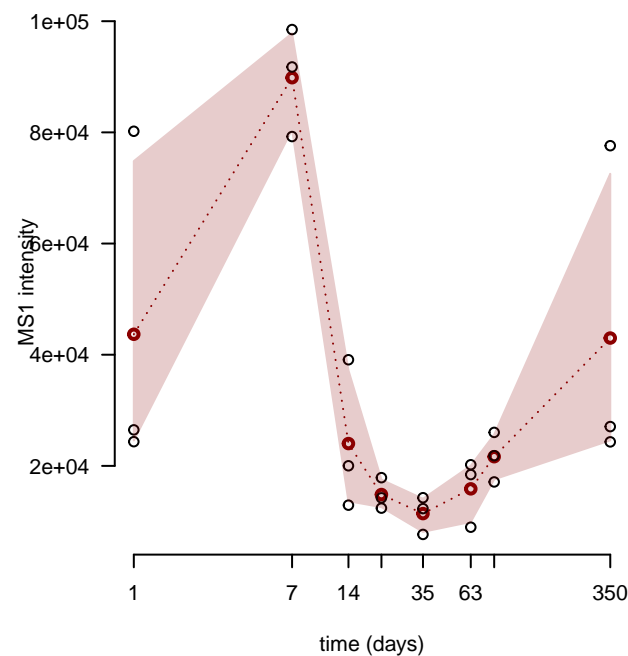

P01819  
GN=

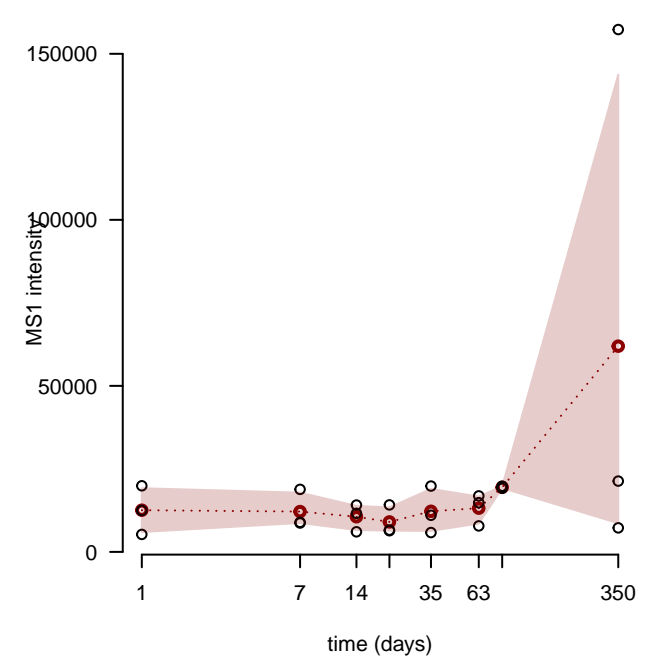

P01831  
GN=Thy1  
thymus cell antigen 1, theta

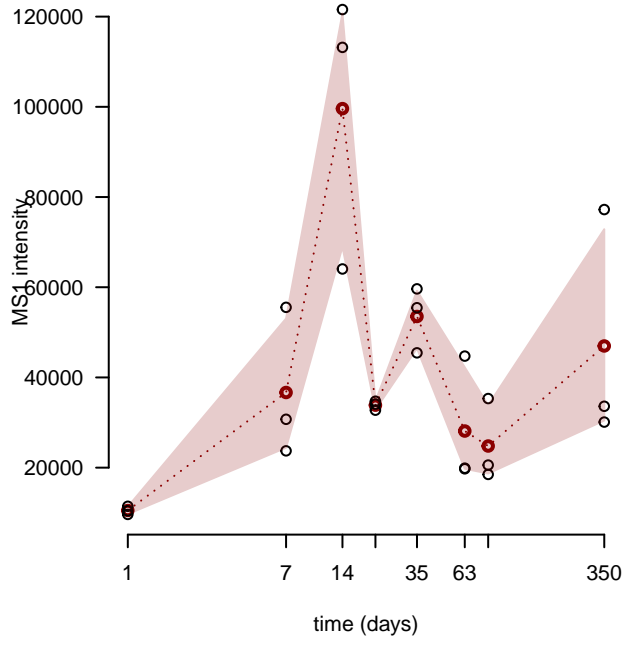

P01837  
GN=lgkc  
immunoglobulin kappa constant

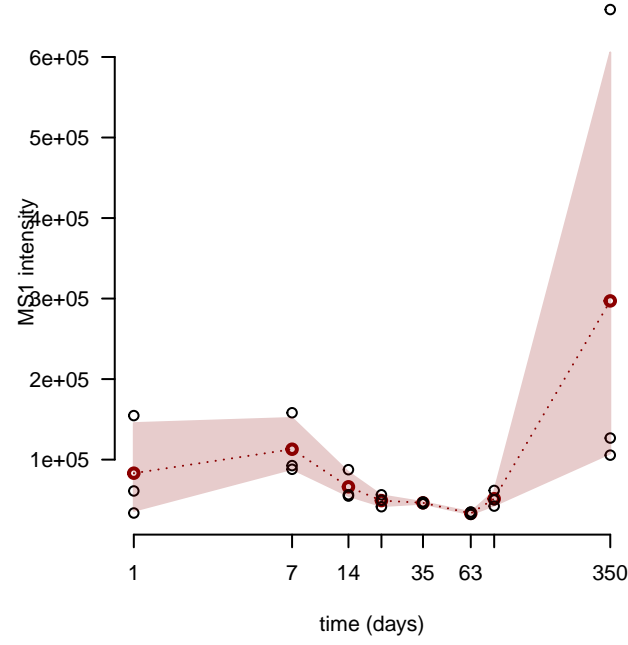

P01863  
GN=Ighg  
Immunoglobulin heavy chain (gamma polype ...

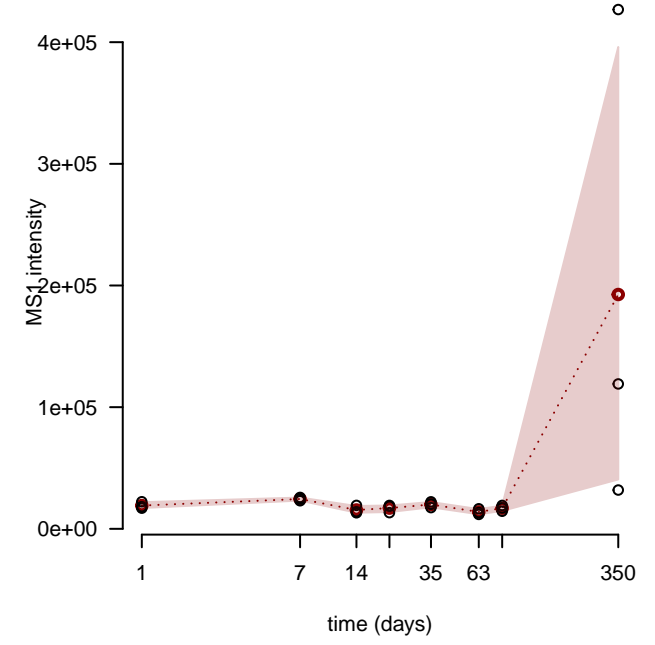

P01867  
GN=Igh-3

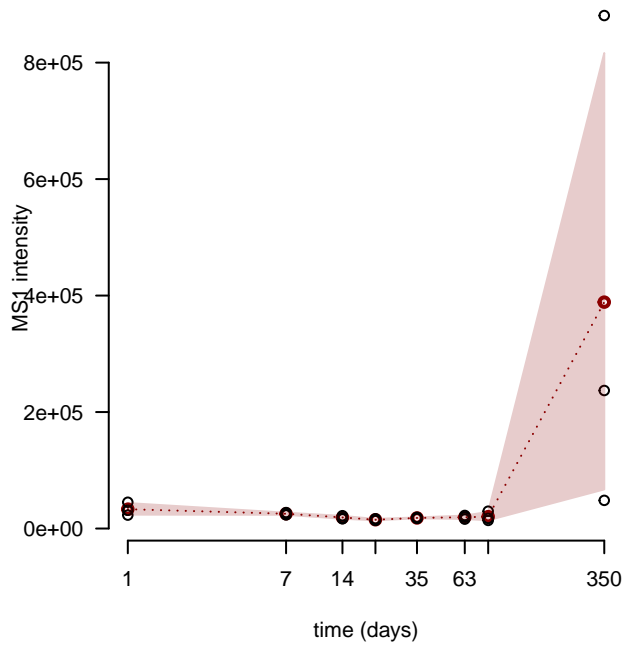

P01868  
GN=Ighg1

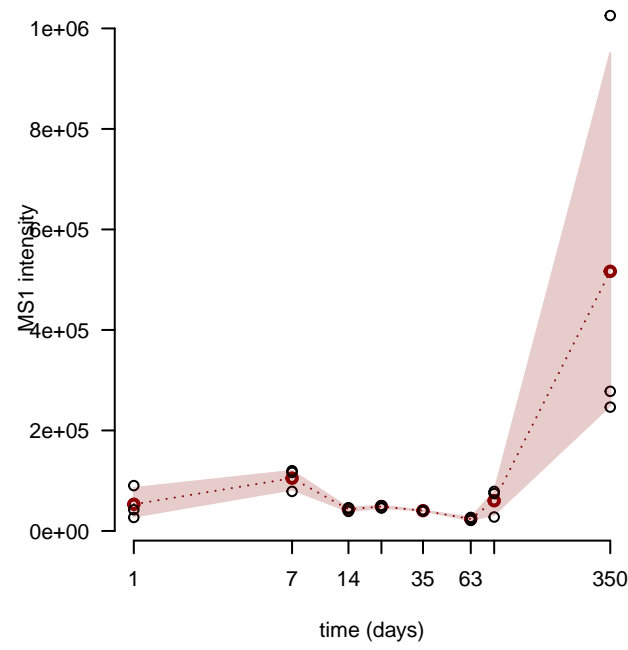

P01872  
GN=Ighm  
immunoglobulin heavy constant mu

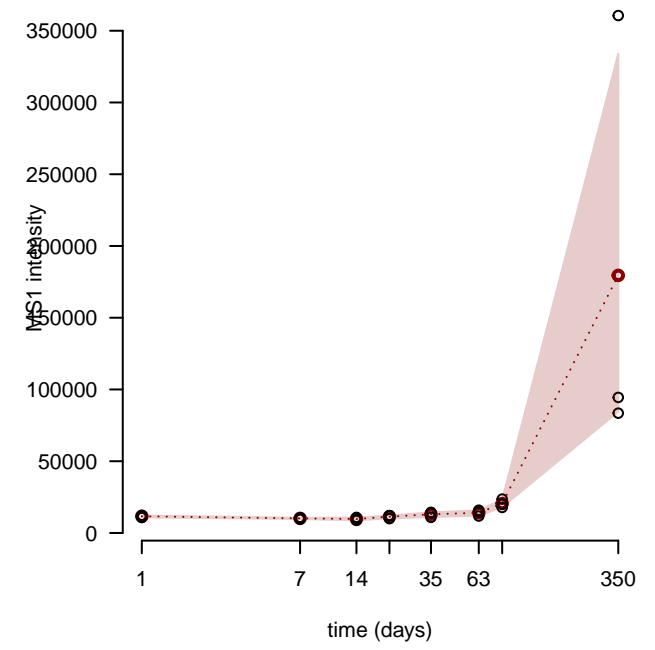

P01878  
GN=

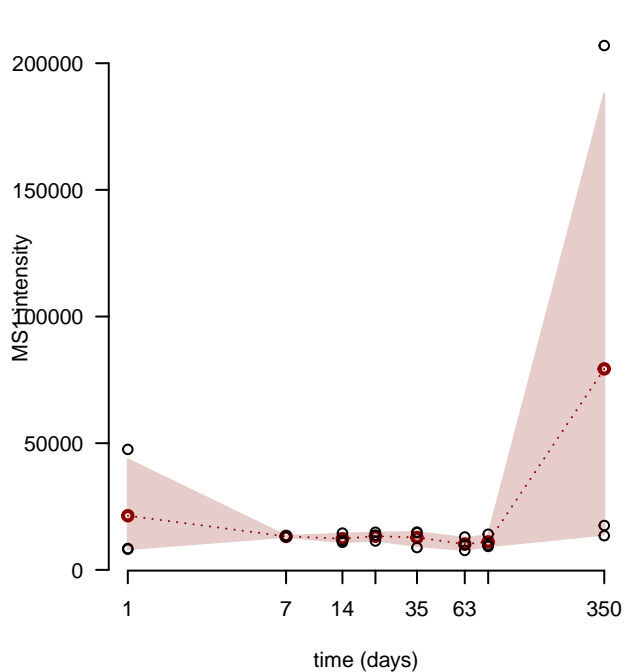

P01887  
GN=B2m  
beta-2 microglobulin

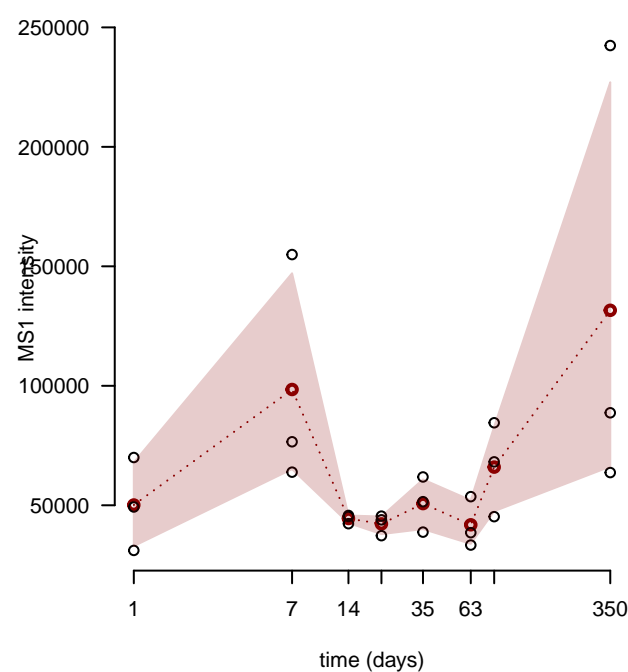

P01897  
GN=H2-L  
histocompatibility 2, D region locus L

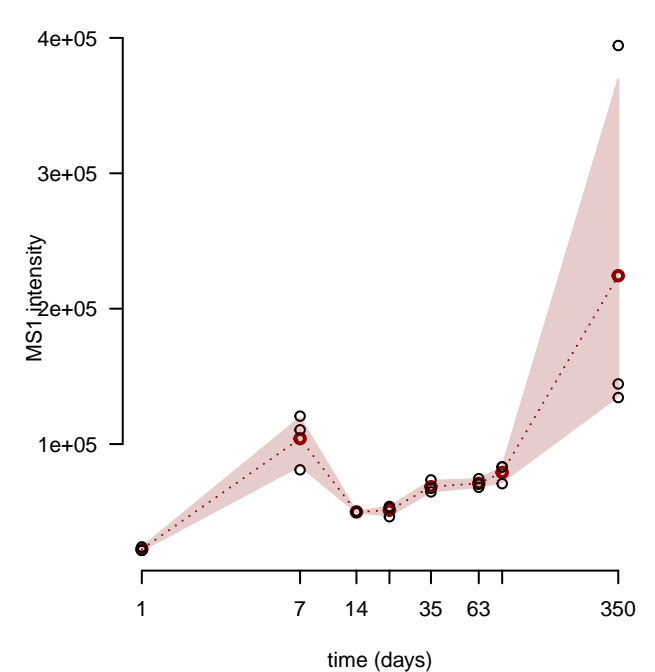

**P01898**  
**GN=H2-Q10**  
histocompatibility 2, Q region locus 10

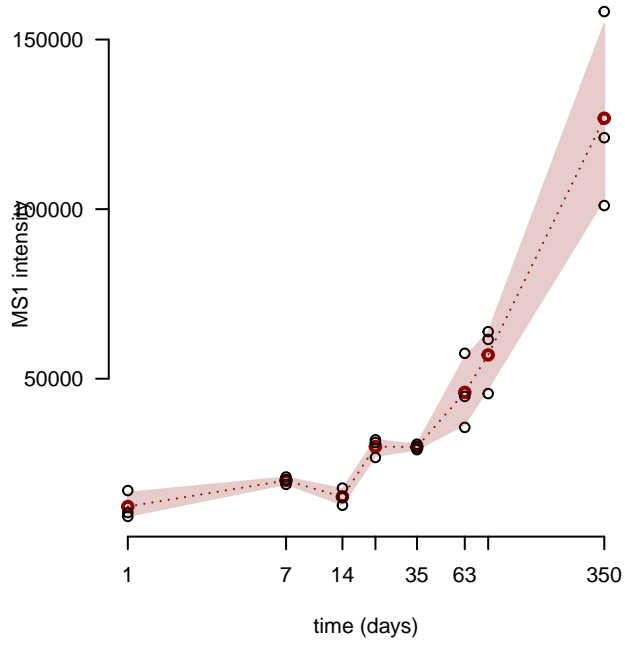

**P01902**  
**GN=H2-K1**

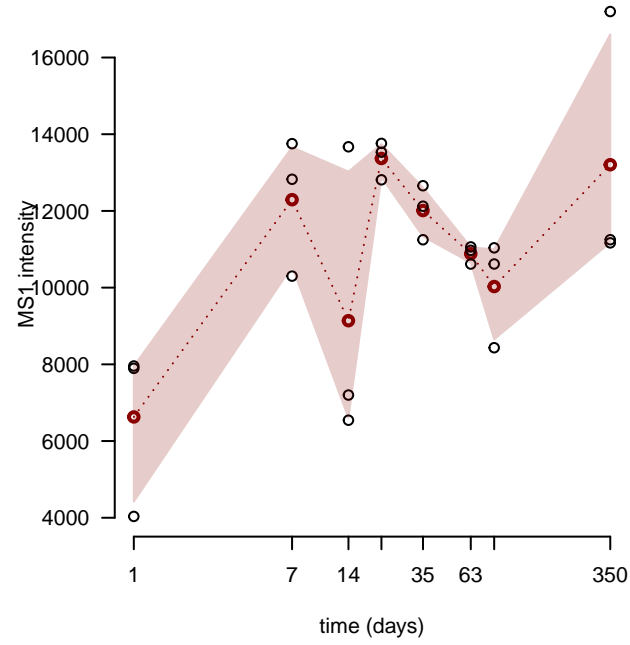

**P01942**  
**GN=Hba**

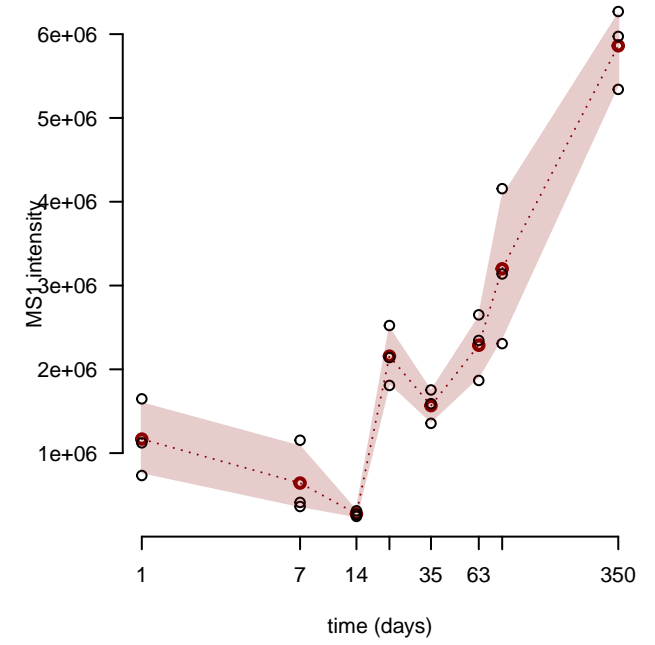

**P02088**  
**GN=Hbb-b1**  
hemoglobin, beta adult major chain

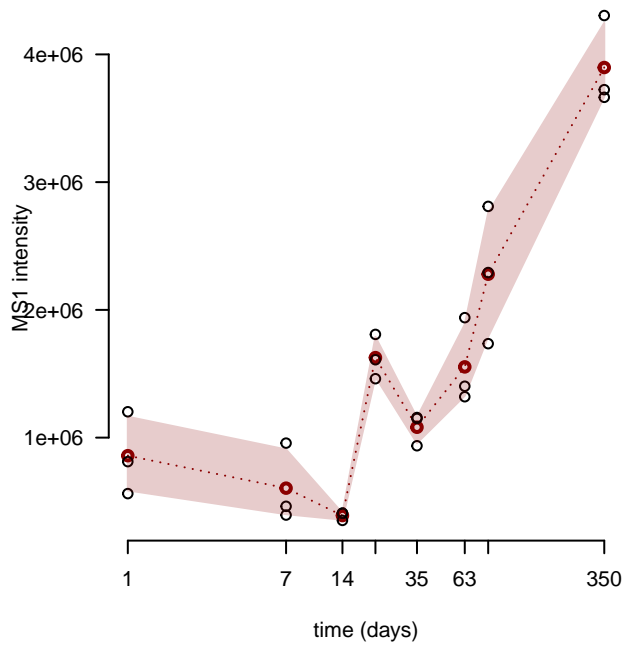

**P02089**  
**GN=Hbb-b2**  
hemoglobin, beta adult minor chain

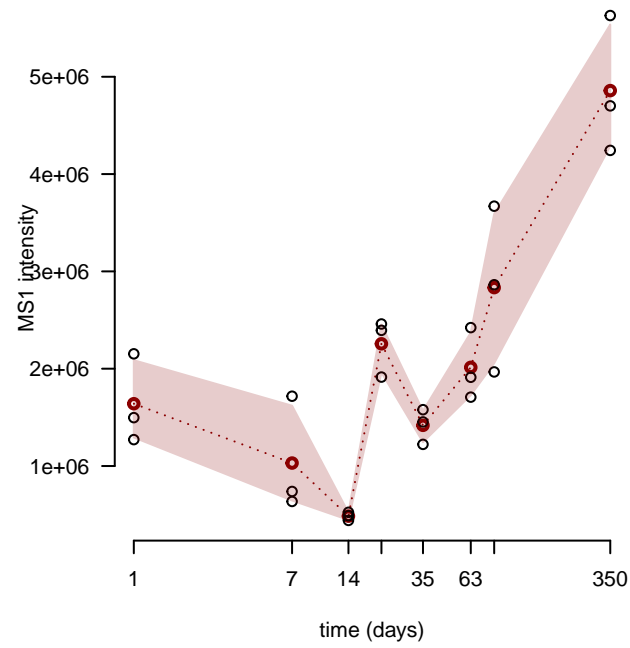

**P02104**  
**GN=Hbb-y**  
hemoglobin Y, beta-like embryonic chain

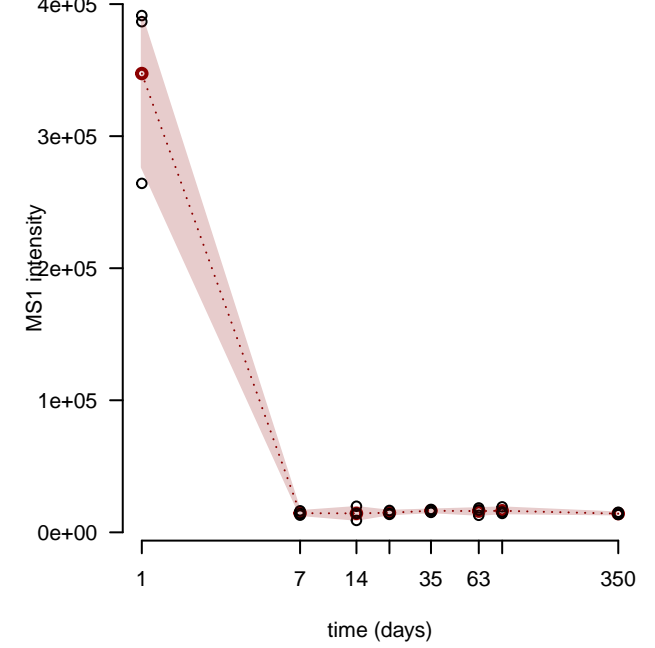

**P02301**  
**GN=H3f3c**  
H3 histone, family 3C

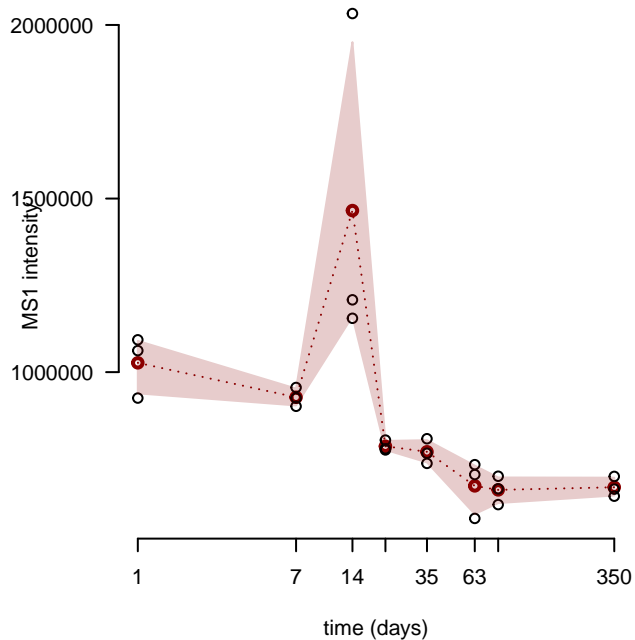

**P02463**  
**GN=Col4a1**  
collagen, type IV, alpha 1

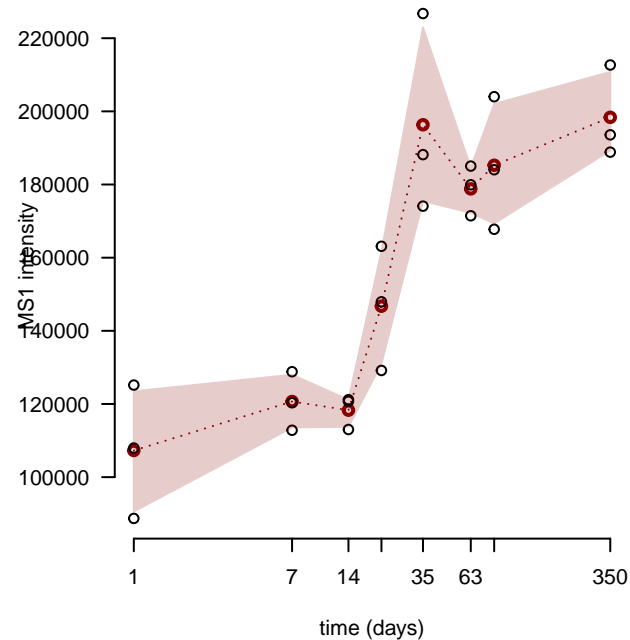

**P02468**  
**GN=Lamc1**  
laminin, gamma 1

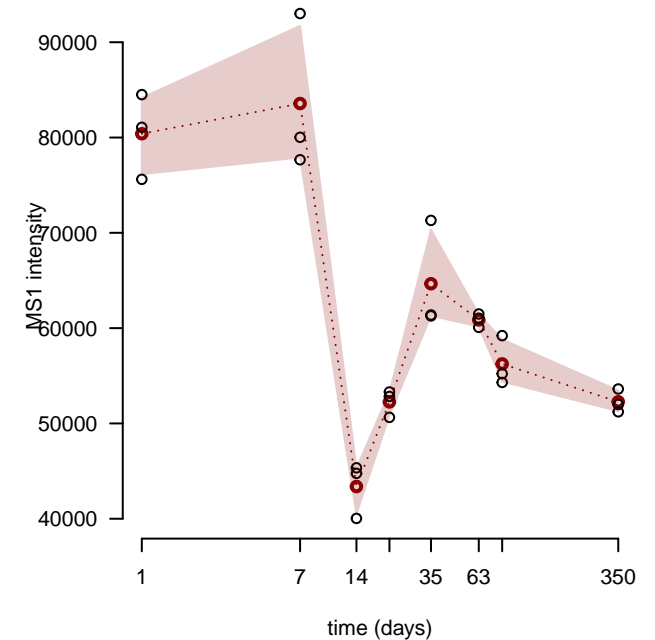



P02469  
GN=Lamb1  
laminin B1

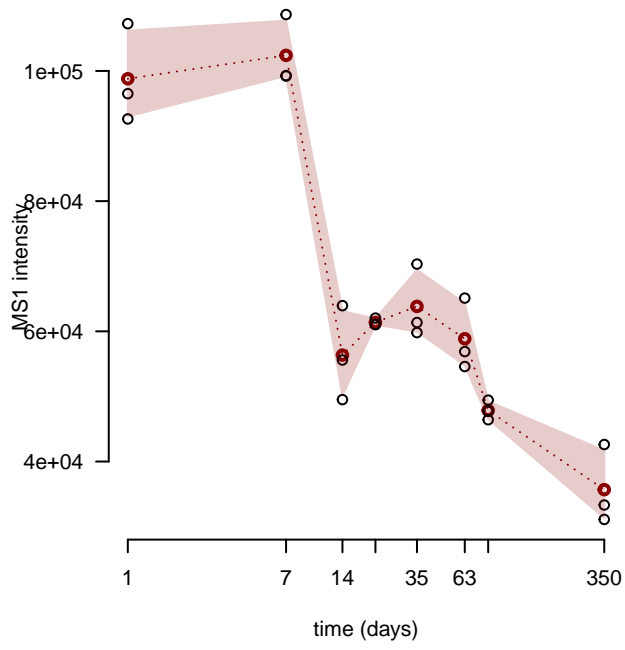

P02535  
GN=Krt10  
keratin 10

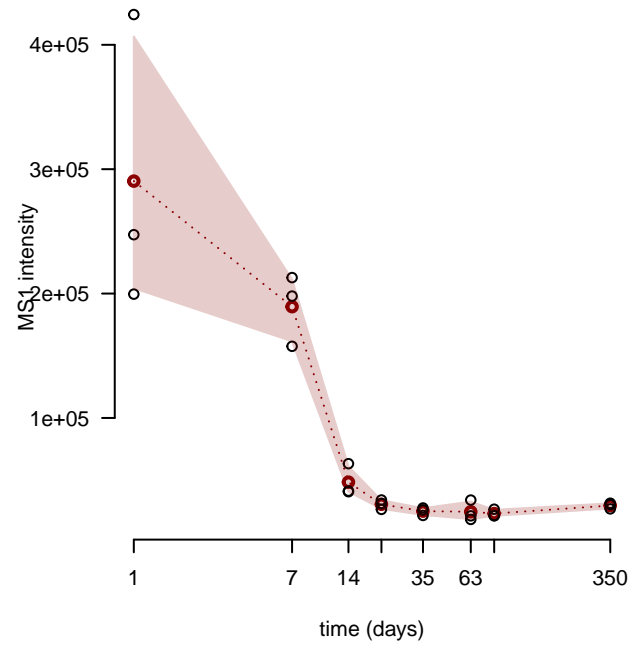

P02772  
GN=Afp  
alpha fetoprotein

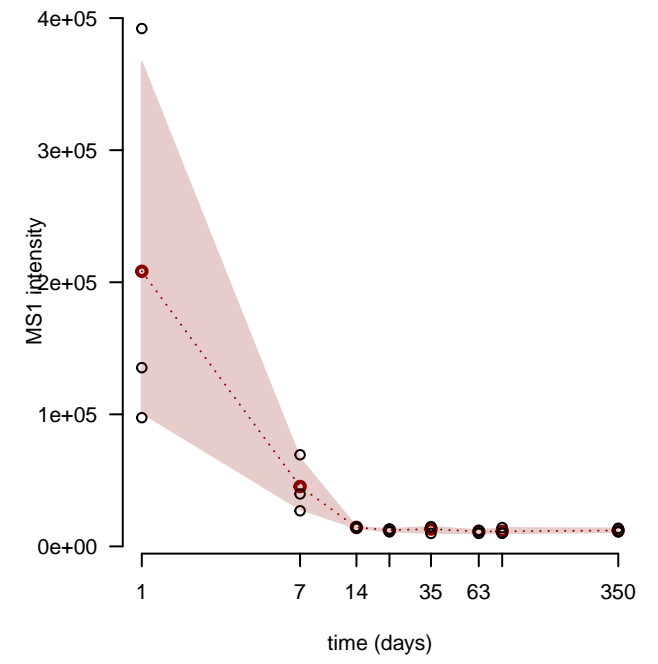

P02798  
GN=Mt2  
metallothionein 2

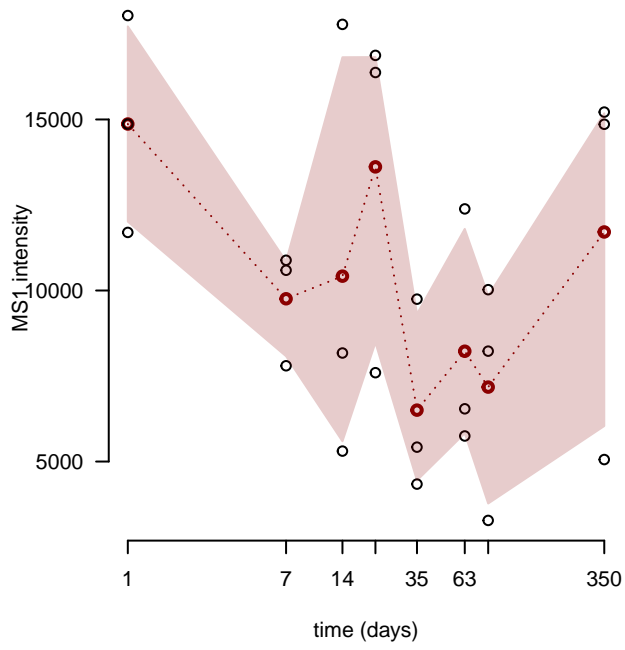

P02802  
GN=Mt1  
metallothionein 1

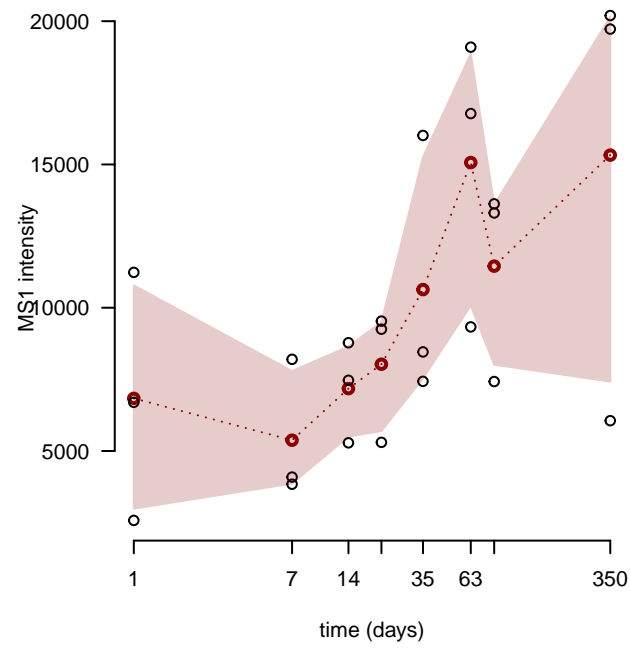

P03888  
GN=Mtnd1

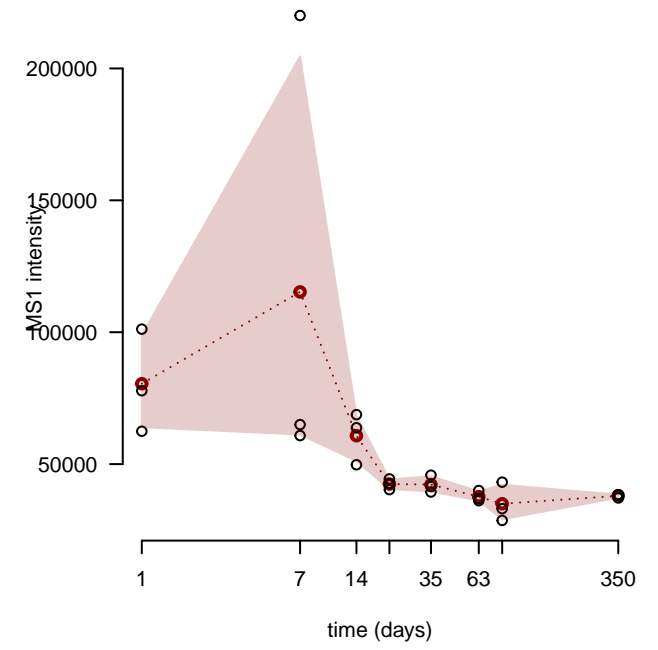

P03893  
GN=Mtnd2

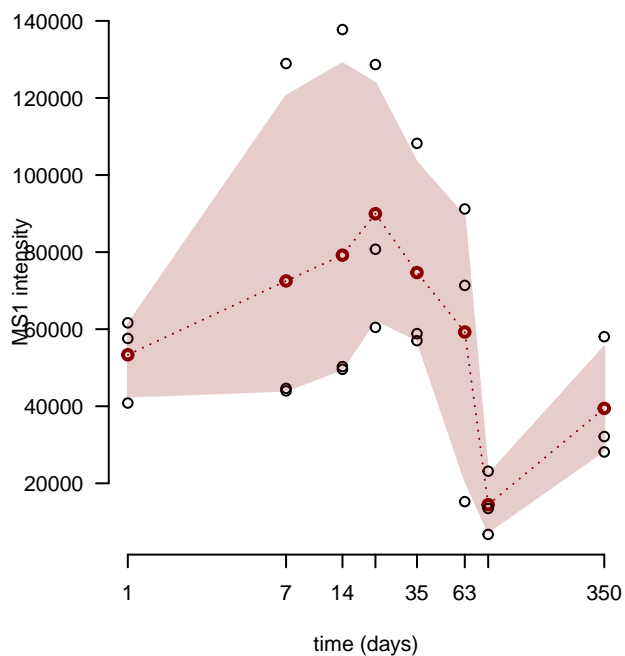

P03899  
GN=Mtnd3

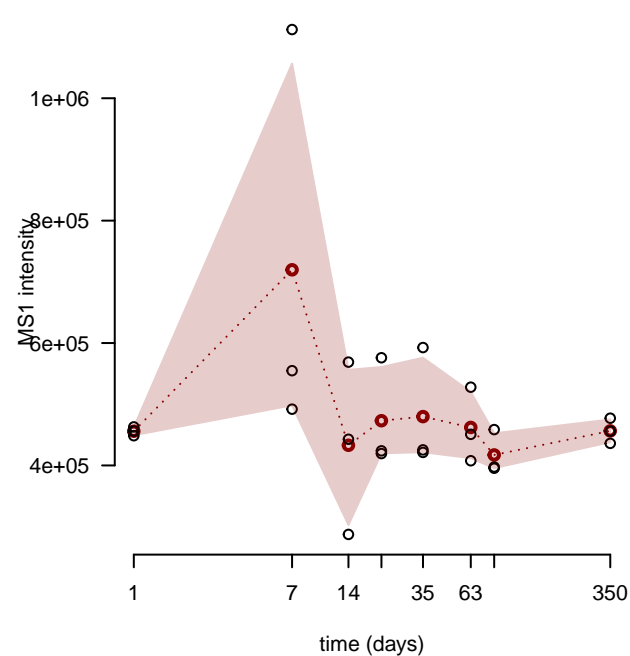

P03911  
GN=Mtnd4

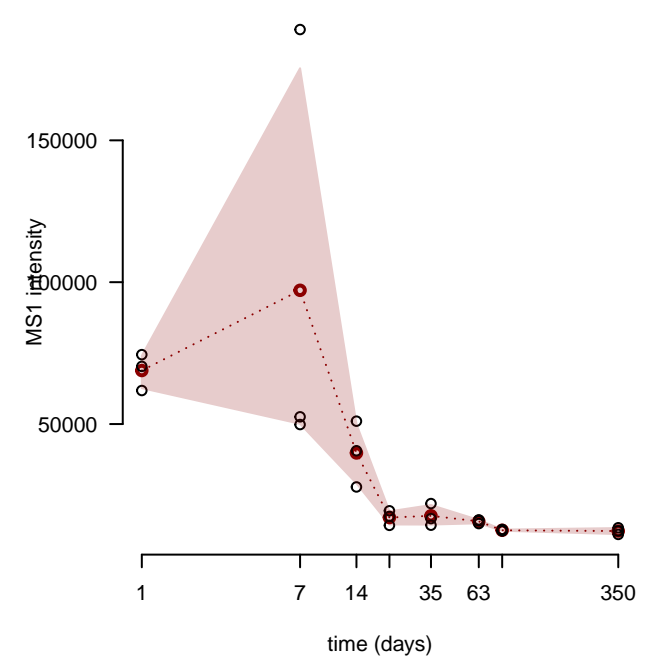

P03921  
GN=Mtnd5

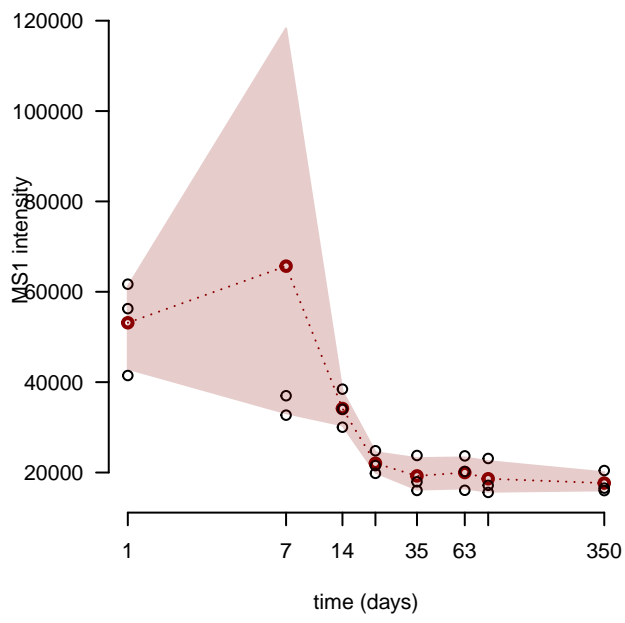

P03930  
GN=Mtntp8

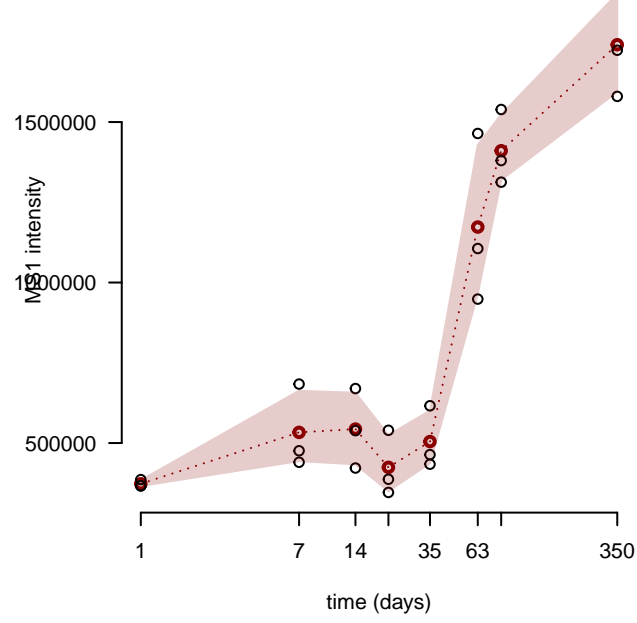

P03953  
GN=Cfd  
complement factor D (adipsin)

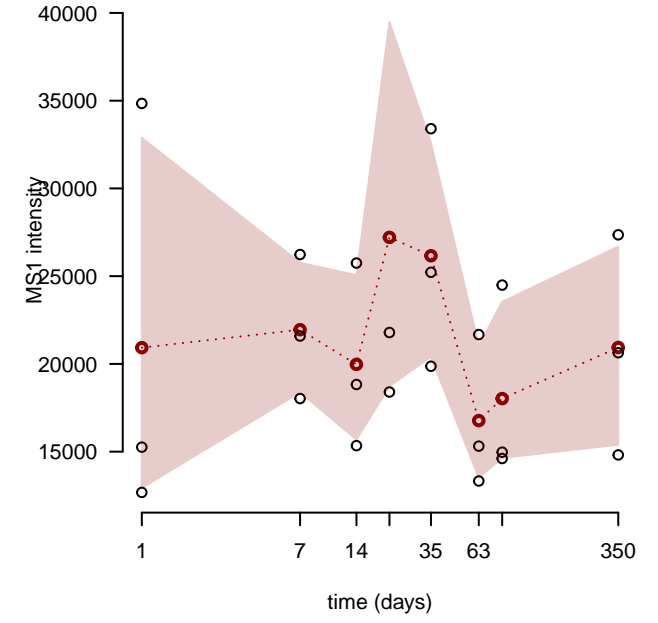

P03958  
GN=Ada  
adenosine deaminase

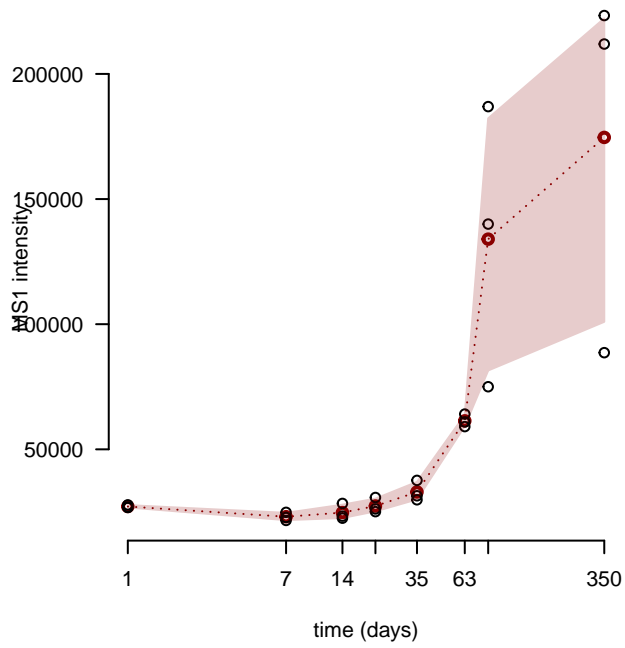

P03975  
GN=lap  
intracisternal A particles

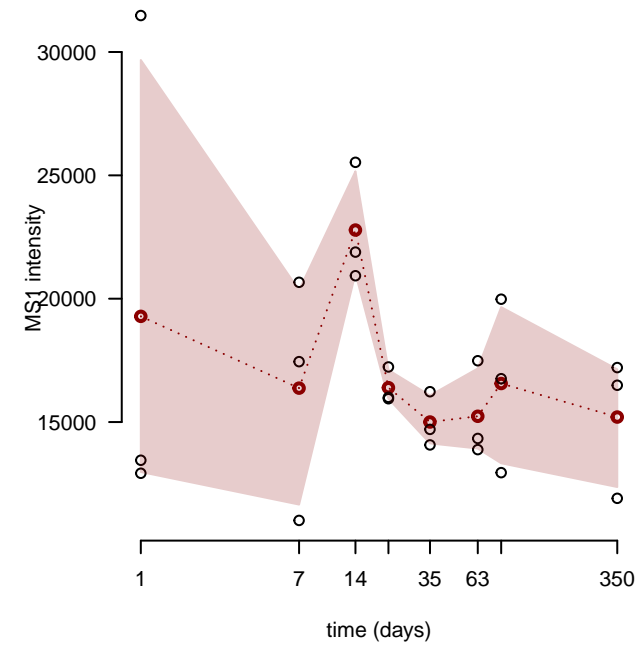

P03976  
GN=

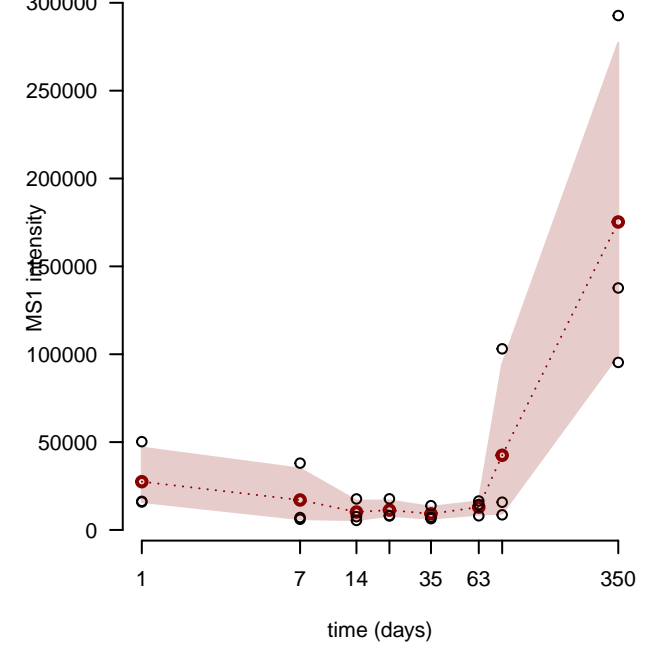

P03987  
GN=

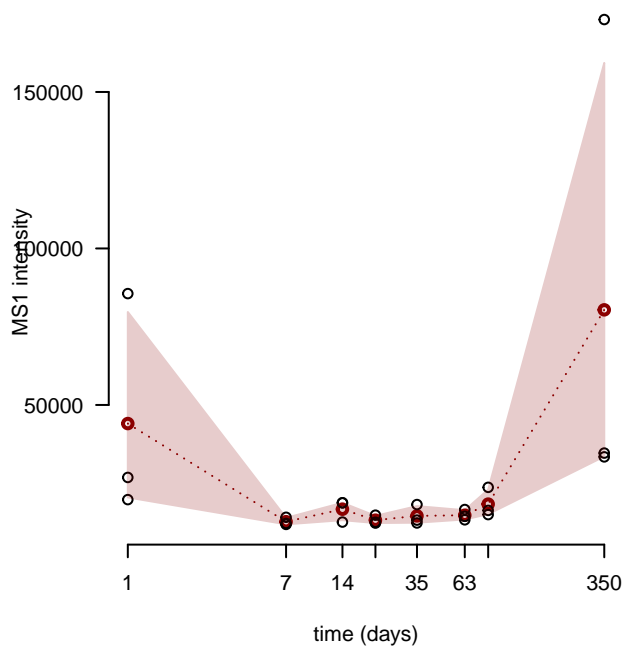

P03991  
GN=H2-K1

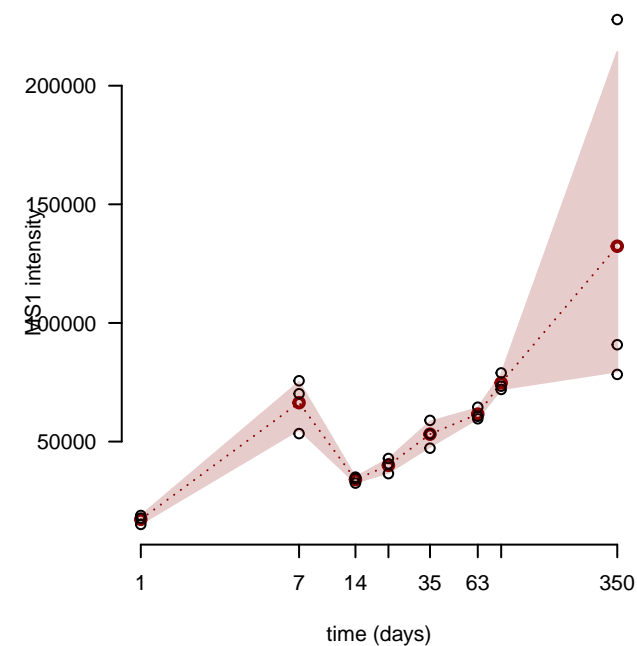

P04104  
GN=Krt1  
keratin 1

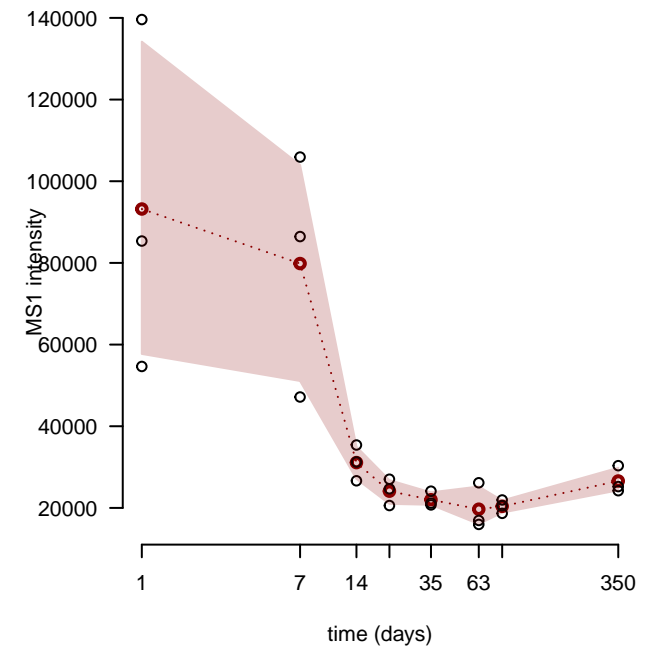

**P04117**  
GN=Fabp4  
fatty acid binding protein 4, adipocyte

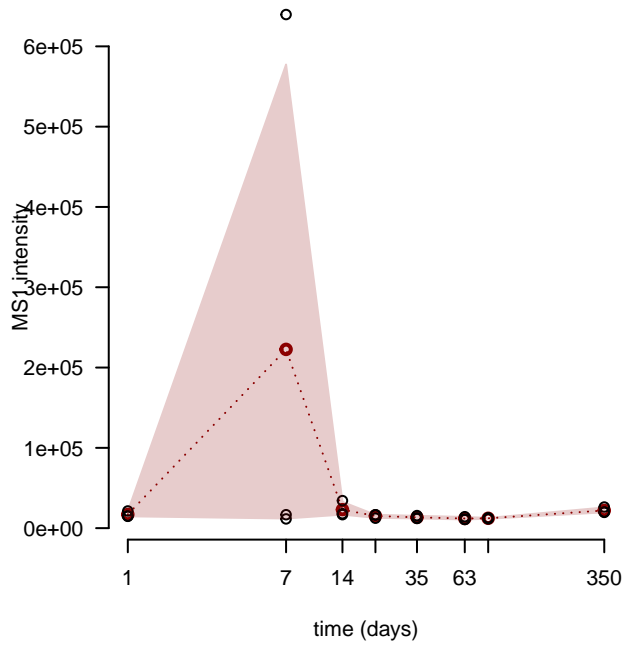

**P04184**  
GN=Tk1  
thymidine kinase 1

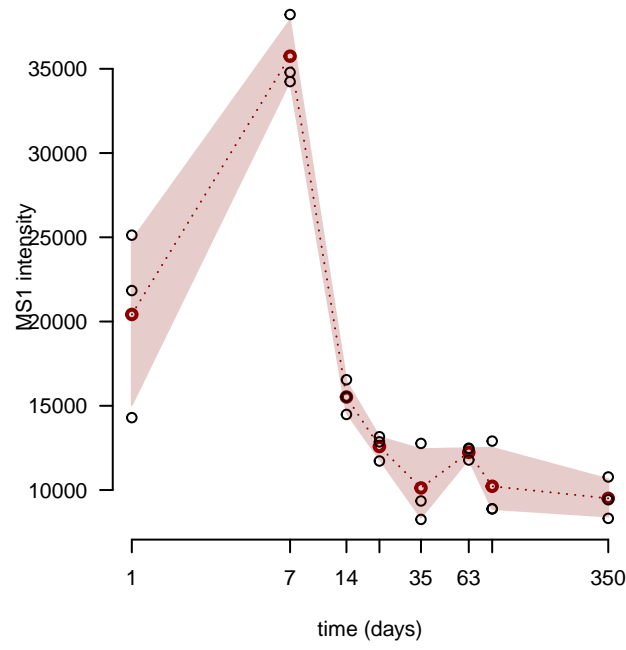

**P04186**  
GN=Cfb  
complement factor B

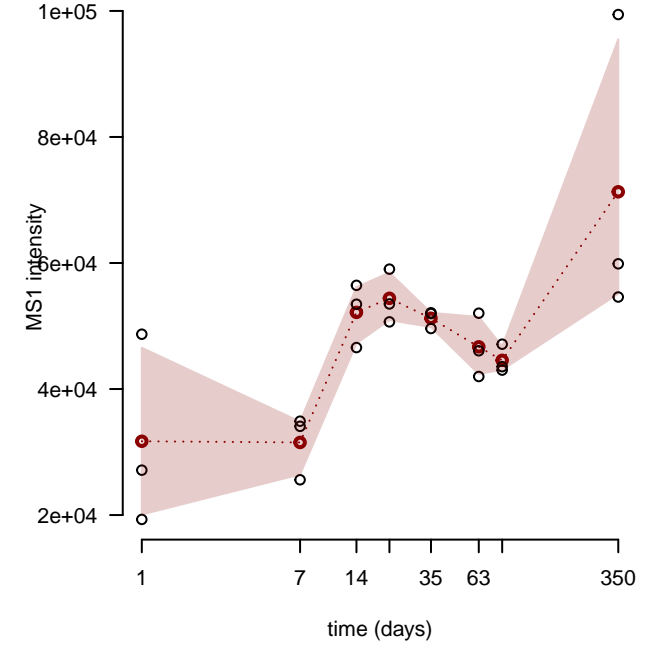

**P04202**  
GN=Tgfb1  
transforming growth factor, beta 1

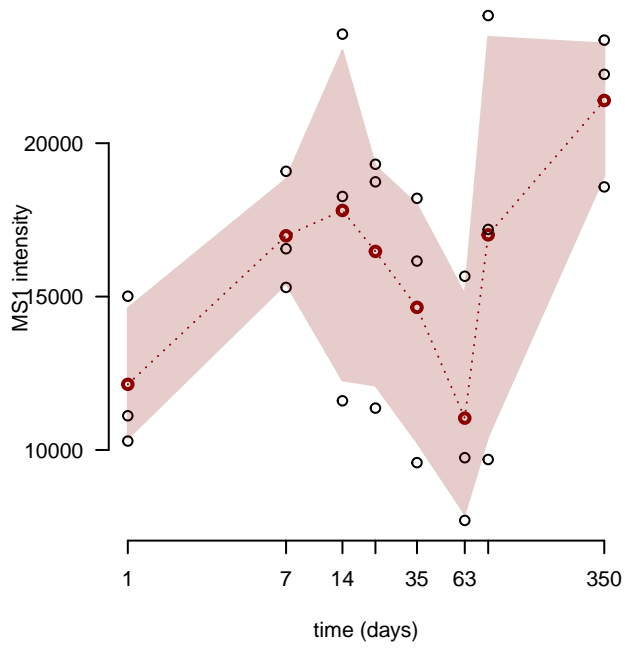

**P04227**  
GN=H2-Aa

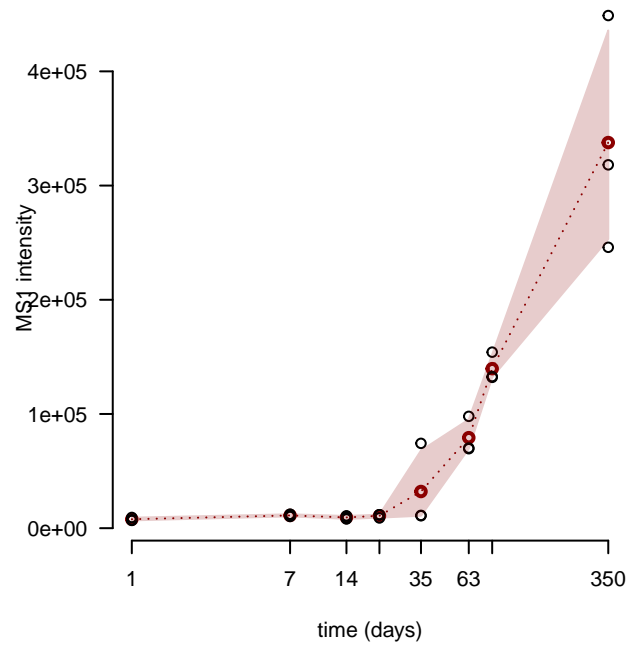

**P04344**  
GN=Crygb  
crystallin, gamma B

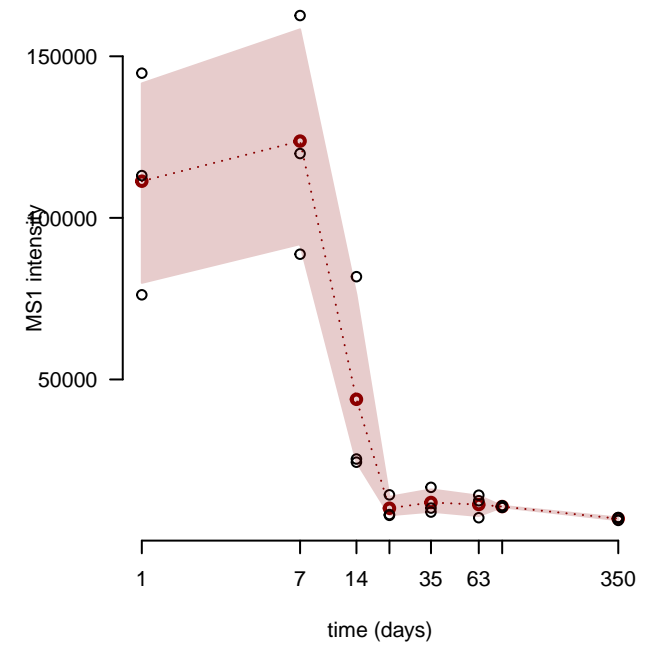

**P04345**  
GN=Cryga  
crystallin, gamma A

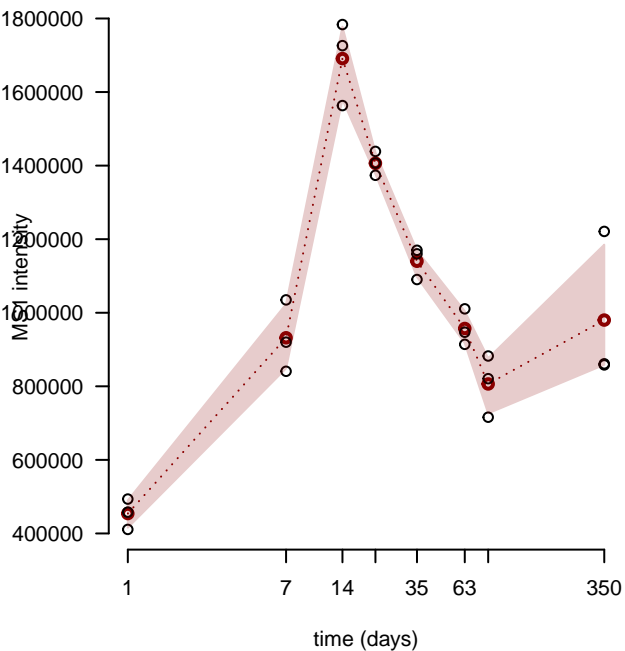

**P04370**  
GN=Mbp  
myelin basic protein

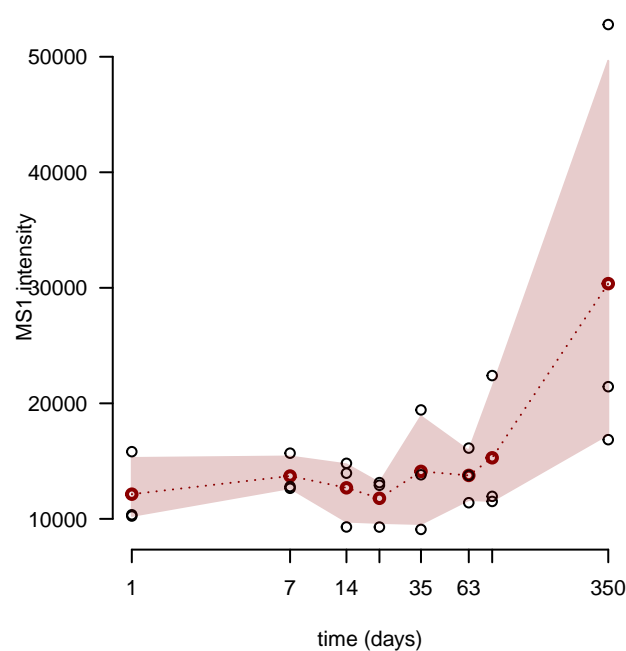

**P04441**  
GN=Cd74  
CD74 antigen (invariant polypeptide of m ...

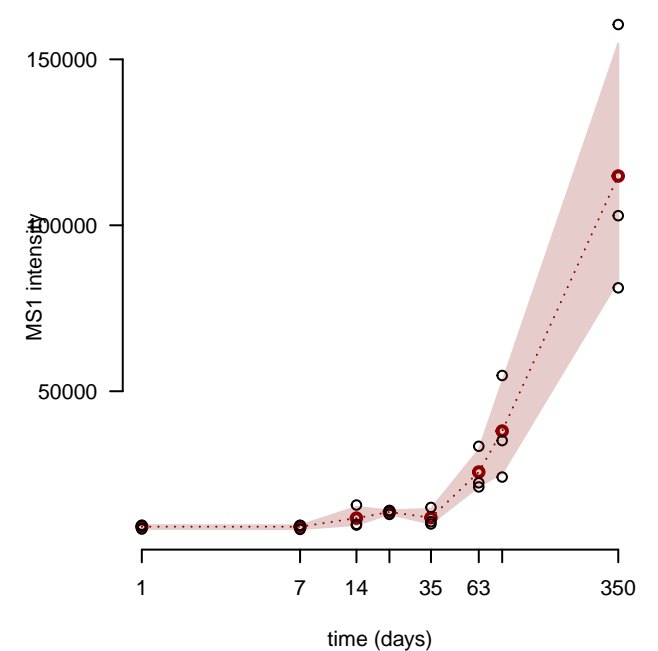

**P04444**  
**GN=Hbb-bh1**  
hemoglobin Z, beta-like embryonic chain

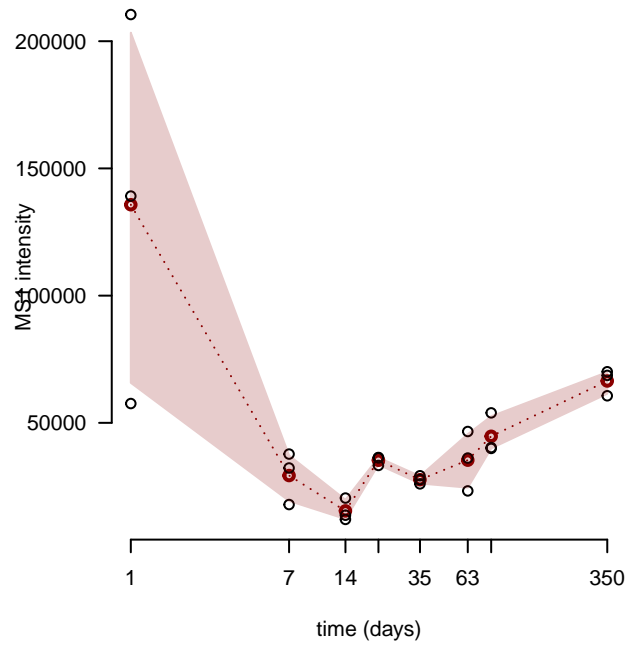

**P04627**  
**GN=Araf**  
Araf proto-oncogene, serine/threonine ki ...

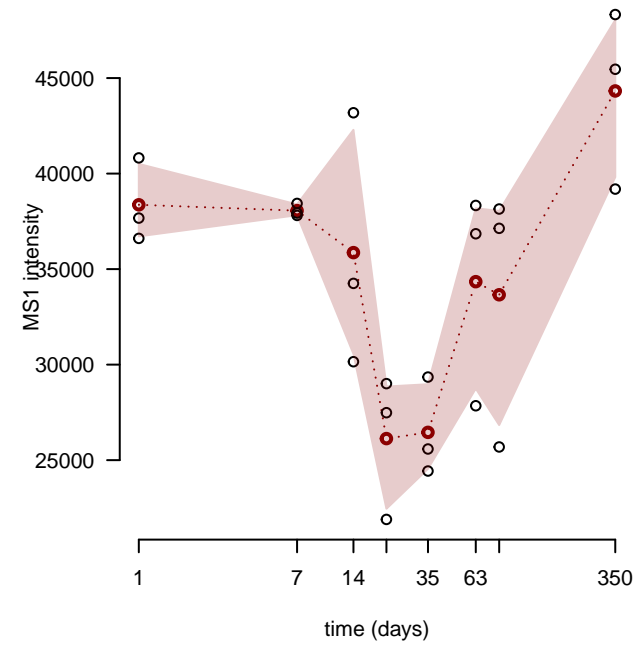

**P04919**  
**GN=Slc4a1**  
solute carrier family 4 (anion exchanger ...

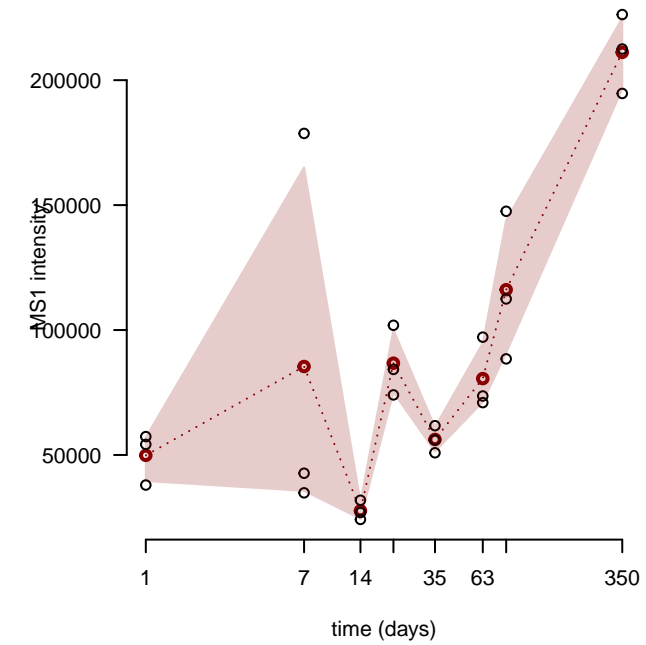

**P04925**  
**GN=Prnp**  
prion protein

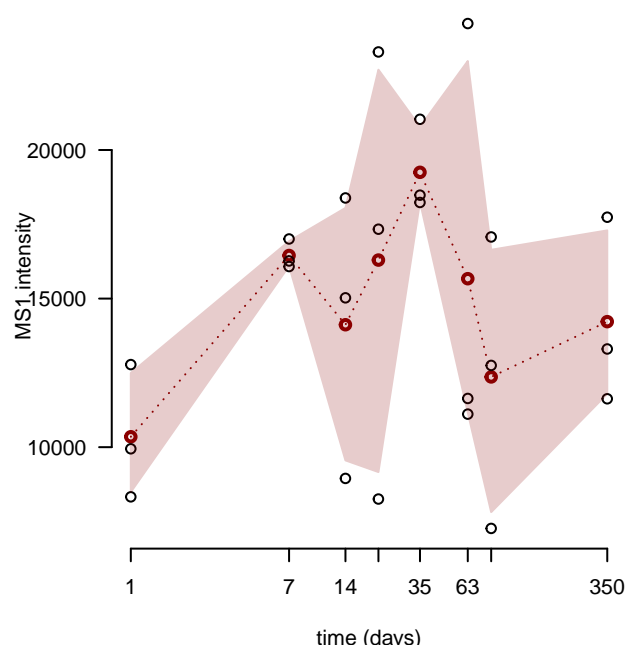

**P04940**  
**GN=**

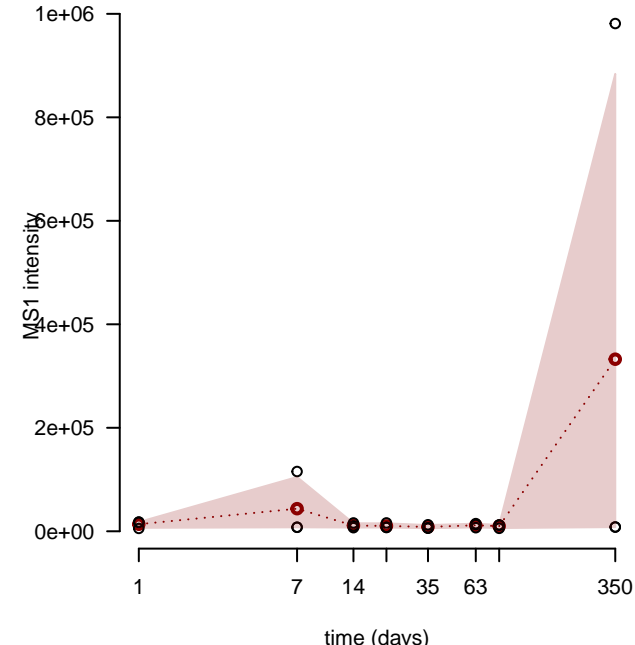

**P04945**  
**GN=**

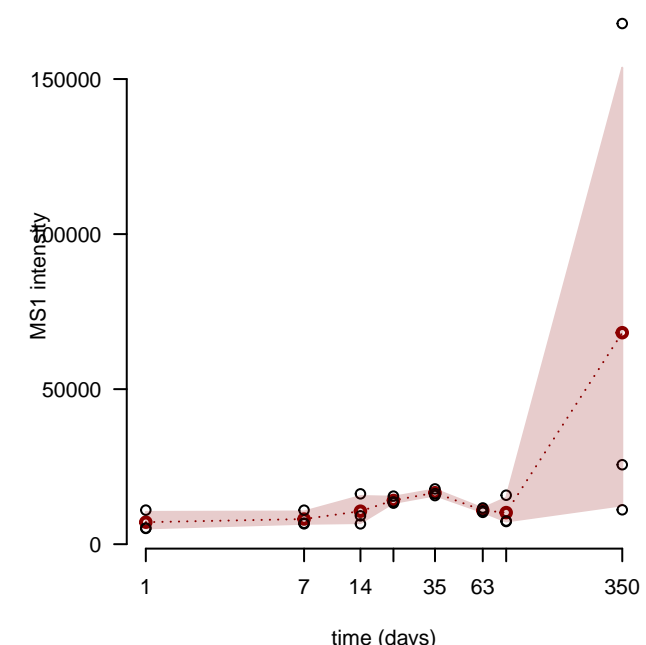

**P05063**  
**GN=Aldoc**  
aldolase C, fructose-bisphosphate

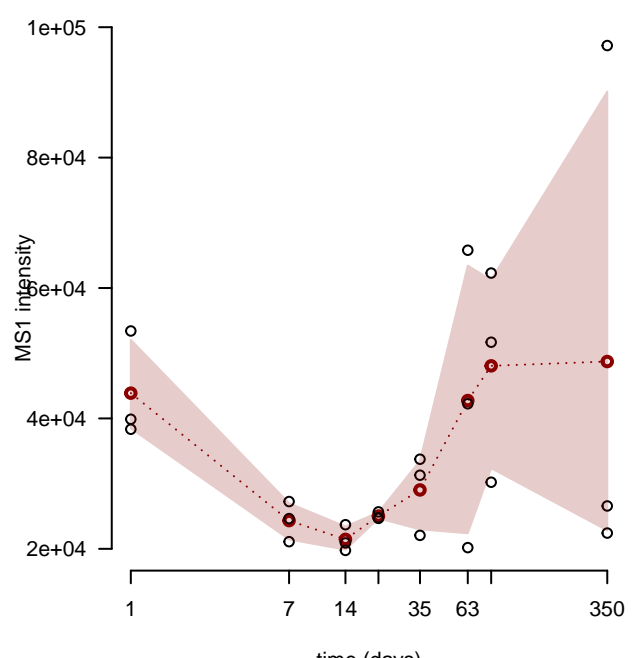

**P05064**  
**GN=Aldoa**  
aldolase A, fructose-bisphosphate

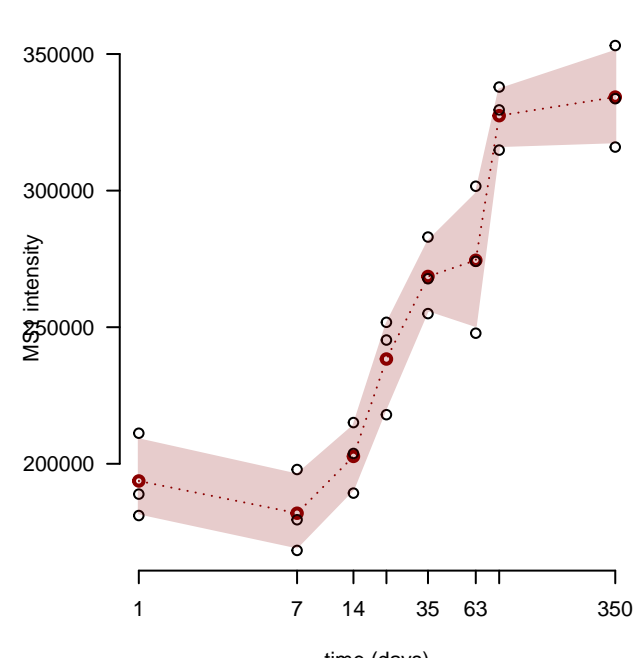

**P05132**  
**GN=Prkaca**  
protein kinase, cAMP dependent, catalyti ...

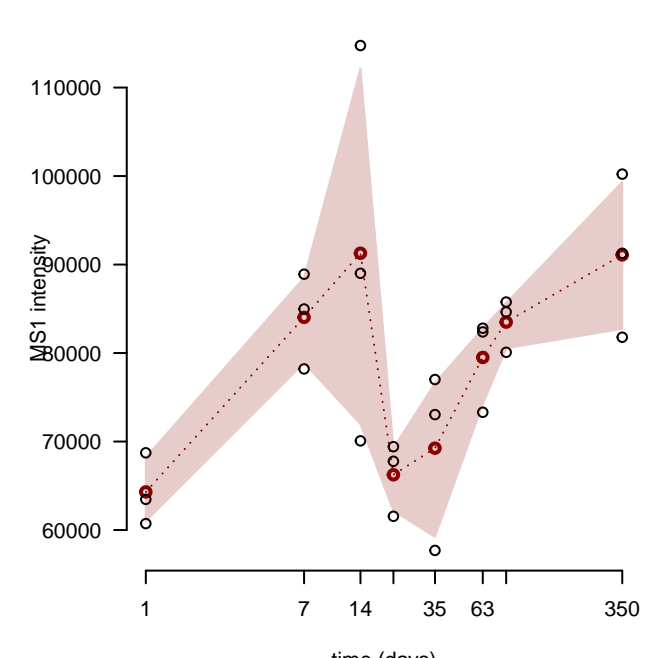

**P05201**  
**GN=Got1**  
glutamic-oxaloacetic transaminase 1, sol ...

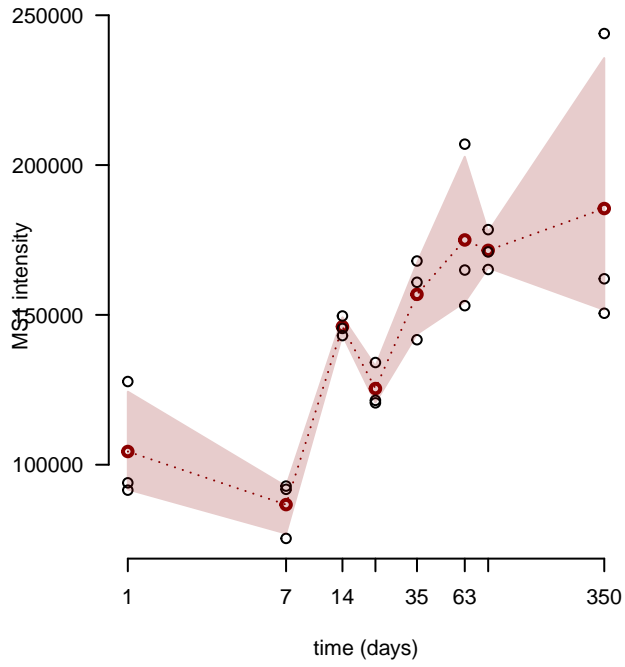

**P05202**  
**GN=Got2**  
glutamic-oxaloacetic transaminase 2, m ...

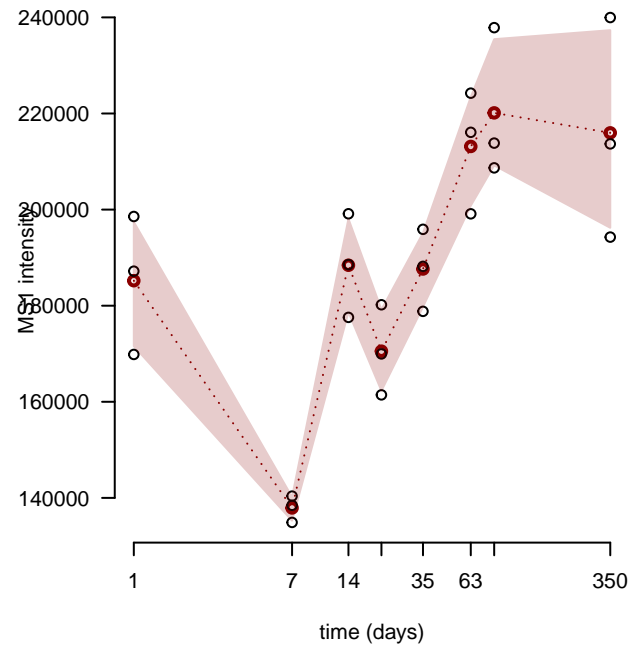

**P05208**  
**GN=Cela2a**  
chymotrypsin-like elastase family, membe ...

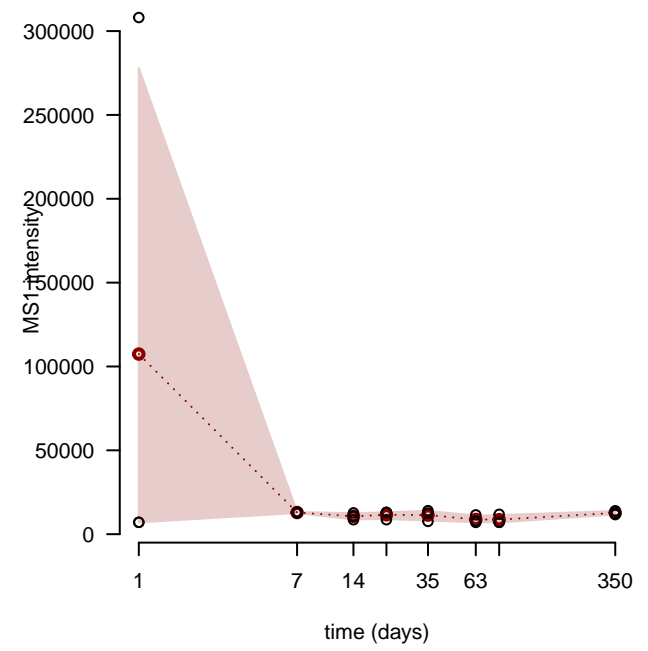

**P05214**  
**GN=Tuba3a**

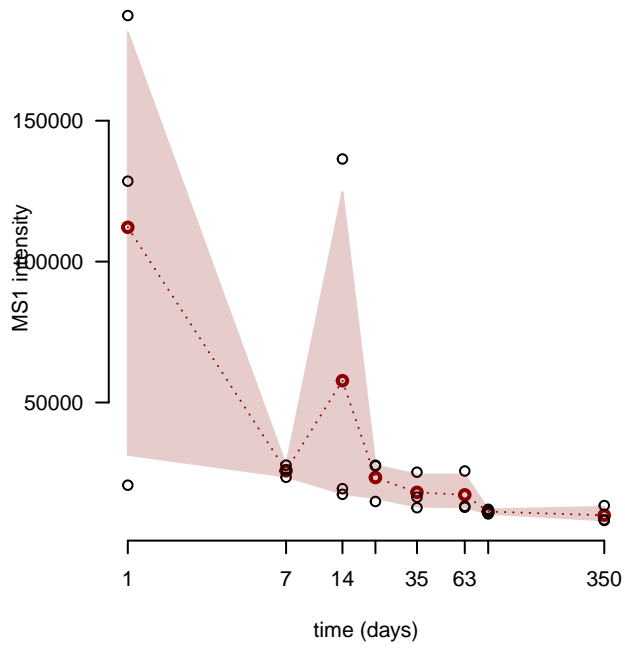

**P05366**  
**GN=Saa1**  
serum amyloid A 1

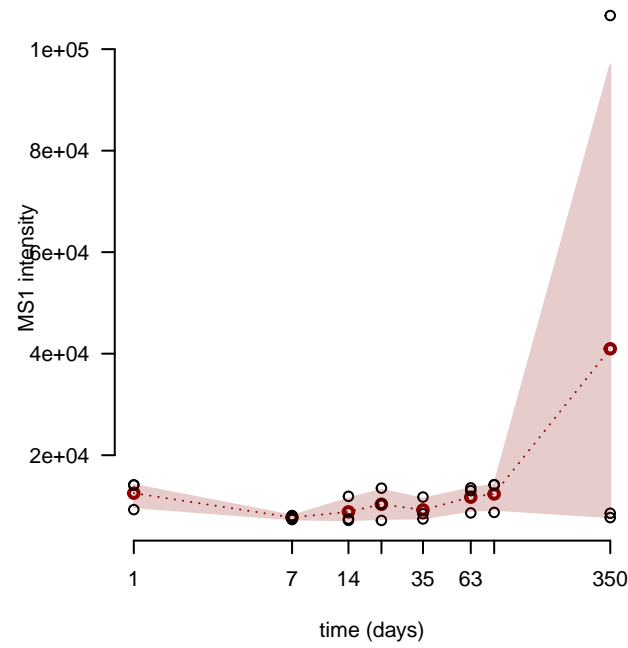

**P05480**  
**GN=Src**  
Rous sarcoma oncogene

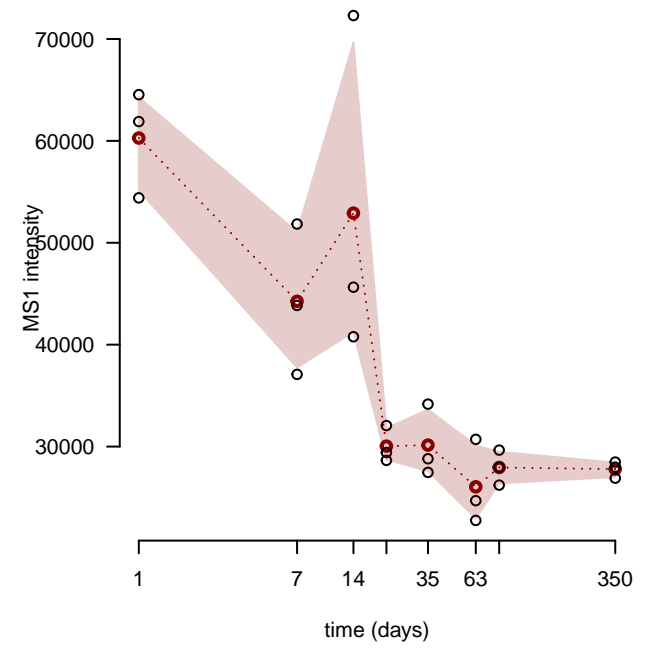

**P05531**  
**GN=Xlr**  
X-linked lymphocyte-regulated

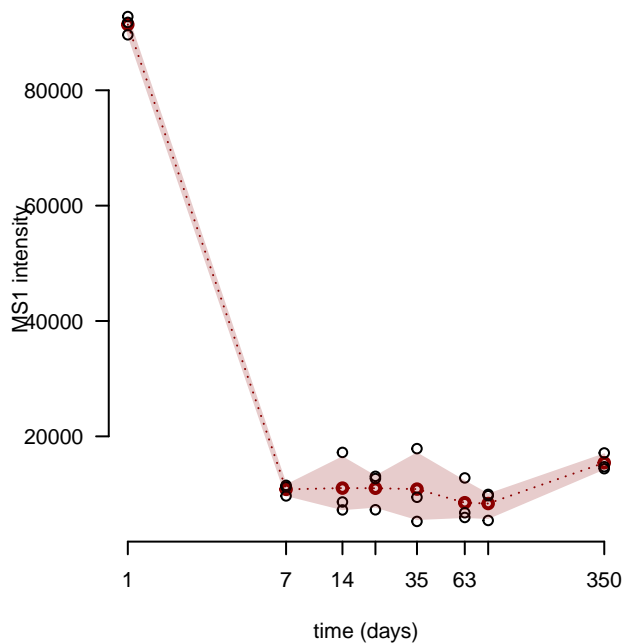

**P05532**  
**GN=Kit**  
KIT proto-oncogene receptor tyrosine kin ...

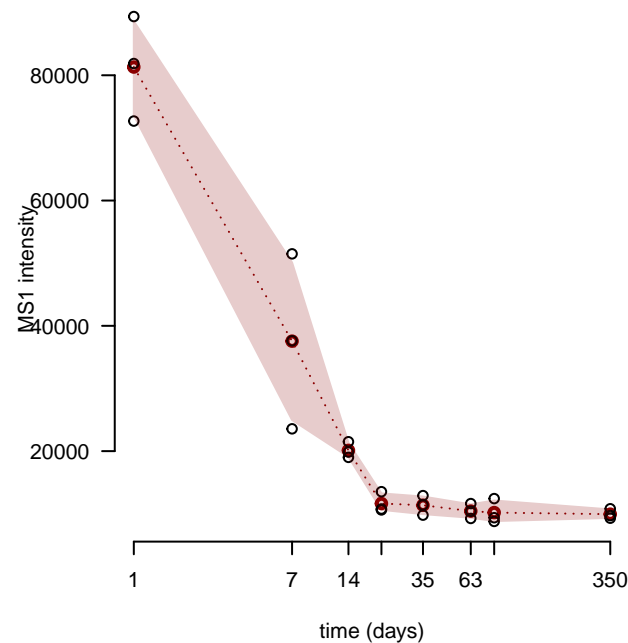

**P05555**  
**GN=Itgam**  
integrin alpha M

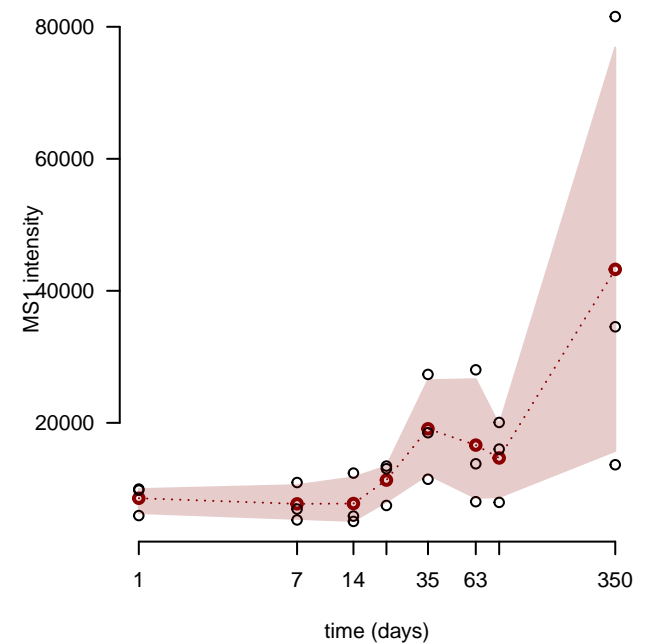

**P05622**  
GN=Pdgfrb  
platelet derived growth factor receptor, ...

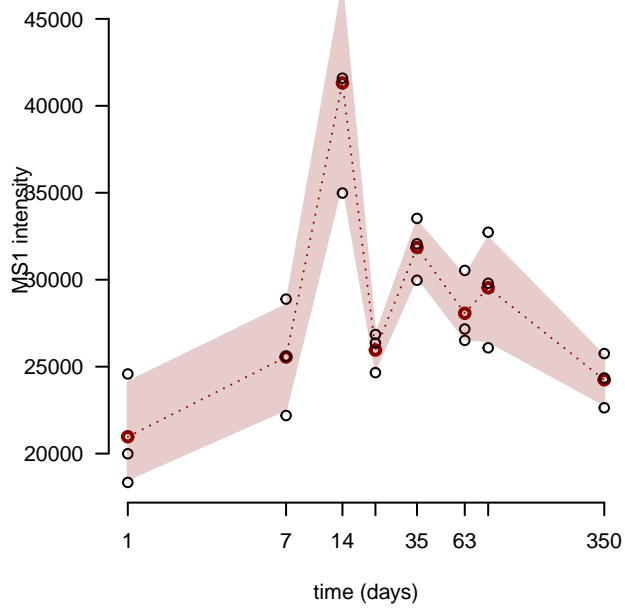

**P05784**  
GN=Krt18  
keratin 18

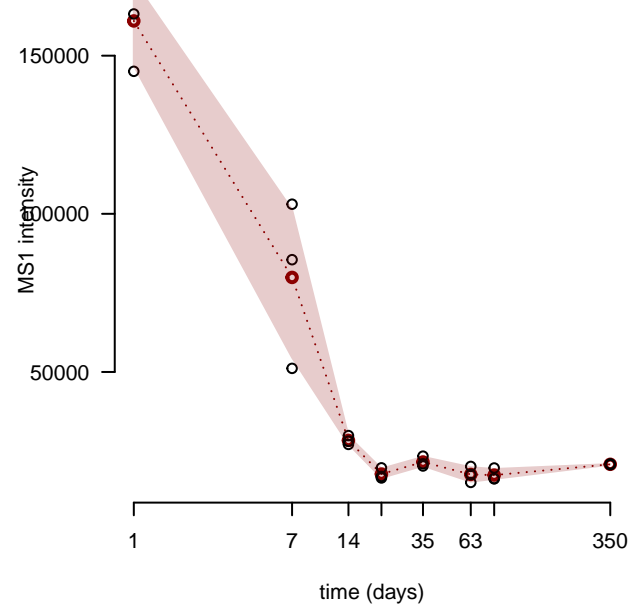

**P05977**  
GN=Myl1  
myosin, light polypeptide 1

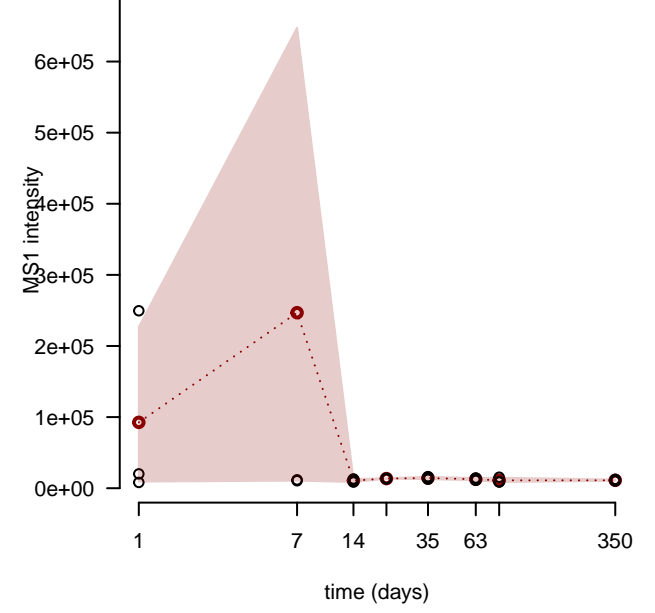

**P06151**  
GN=Ldha  
lactate dehydrogenase A

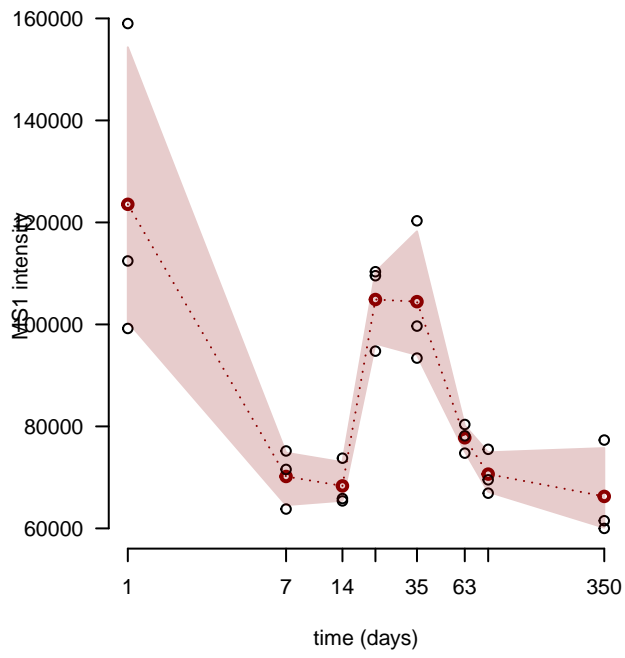

**P06240**  
GN=Lck  
lymphocyte protein tyrosine kinase

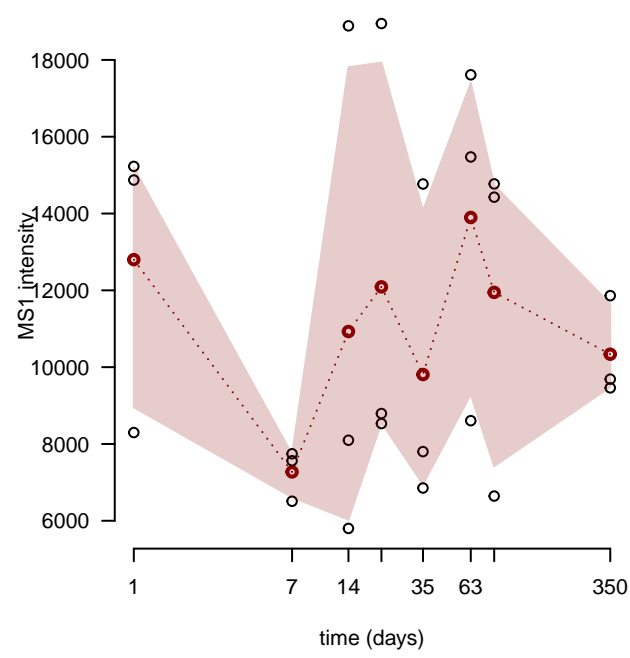

**P06330**  
GN=

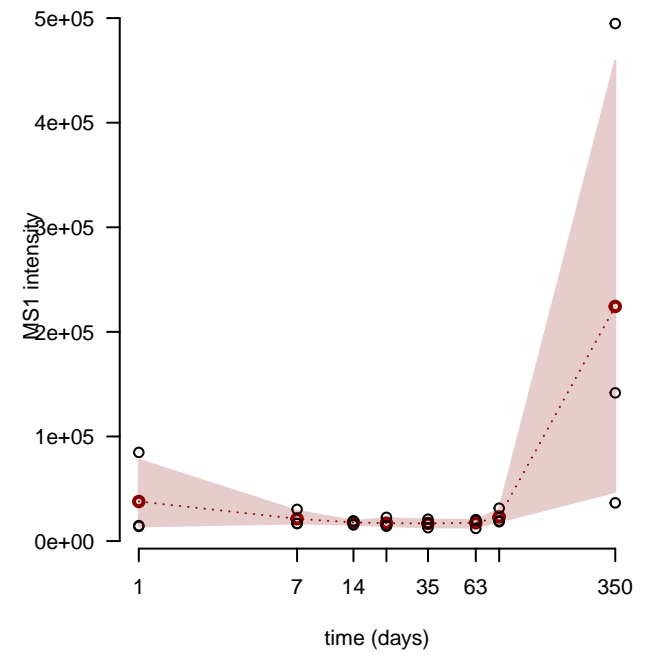

**P06342**  
GN=H2-Ab1

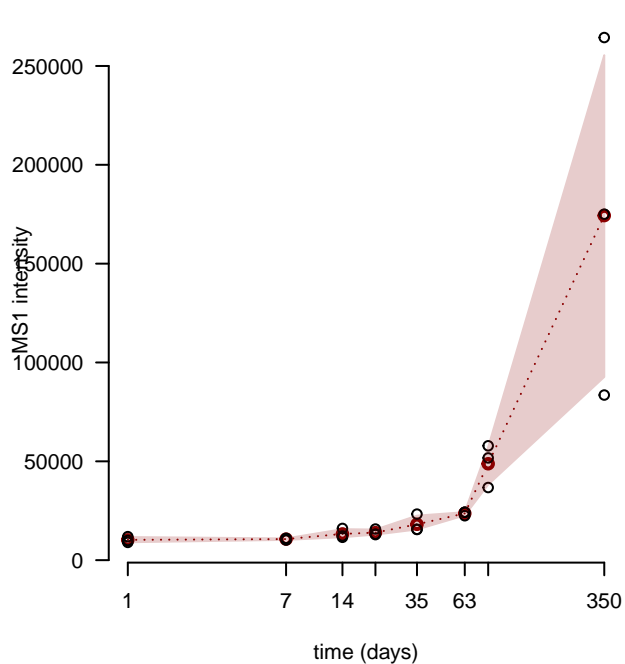

**P06343**  
GN=H2-Ab1

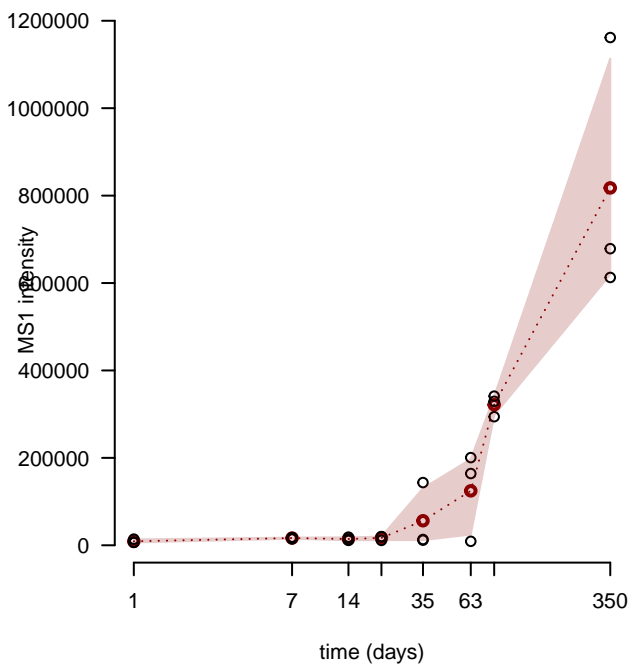

**P06467**  
GN=Hbz

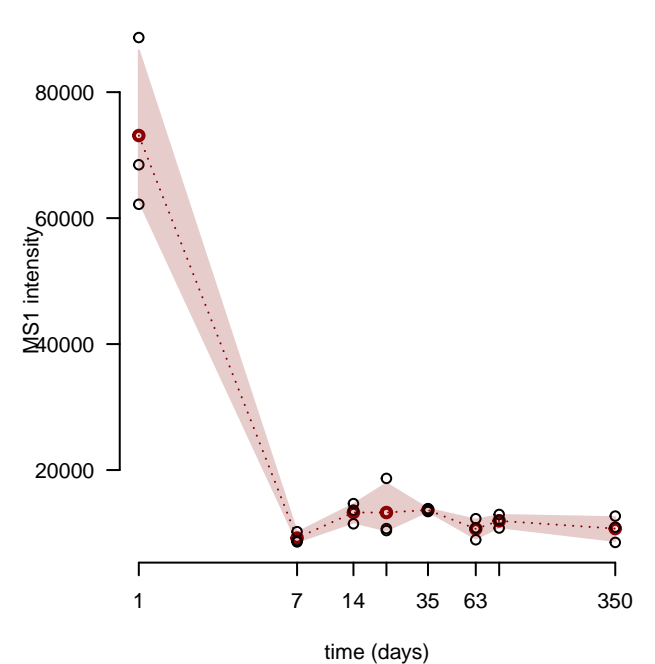

**P06537**  
**GN=Nr3c1**  
nuclear receptor subfamily 3, group C, m ...

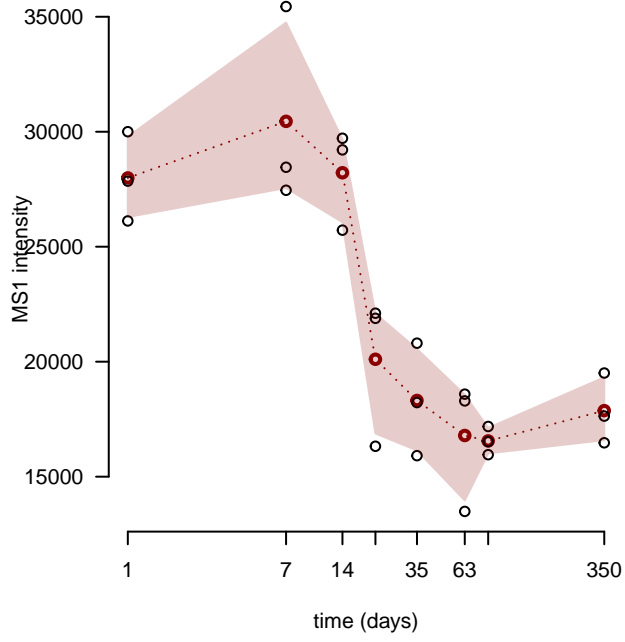

**P06683**  
**GN=C9**  
complement component 9

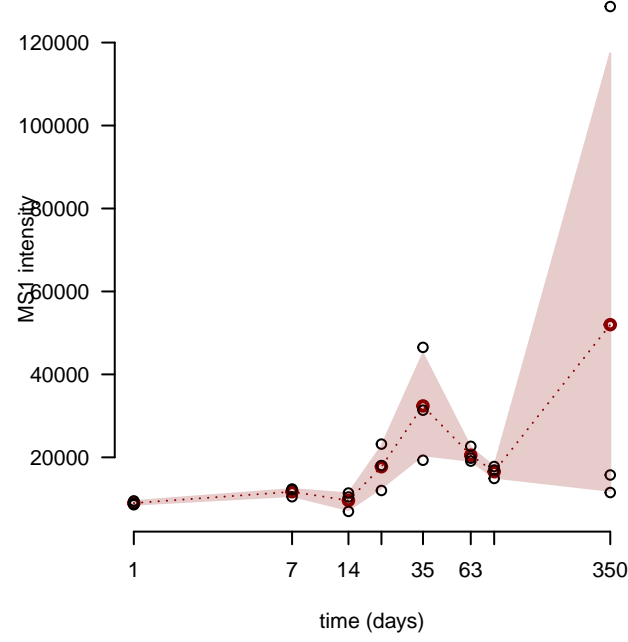

**P06728**  
**GN=Apoa4**  
apolipoprotein A-IV

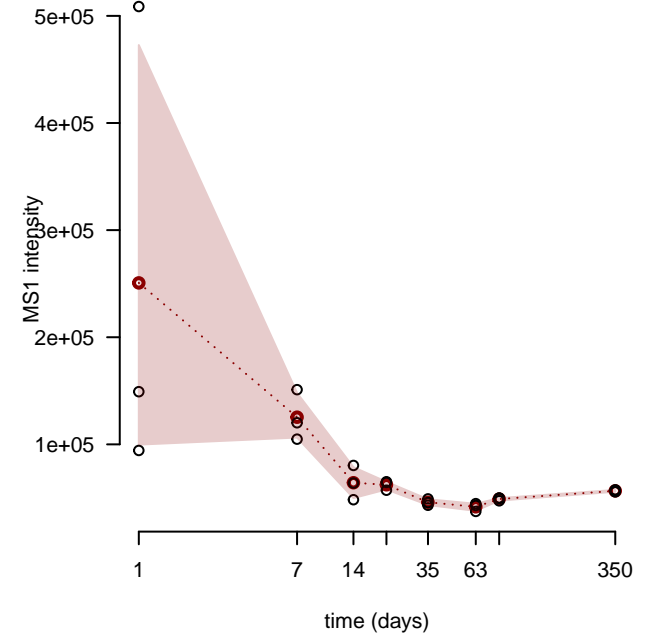

**P06745**  
**GN=Gpi**

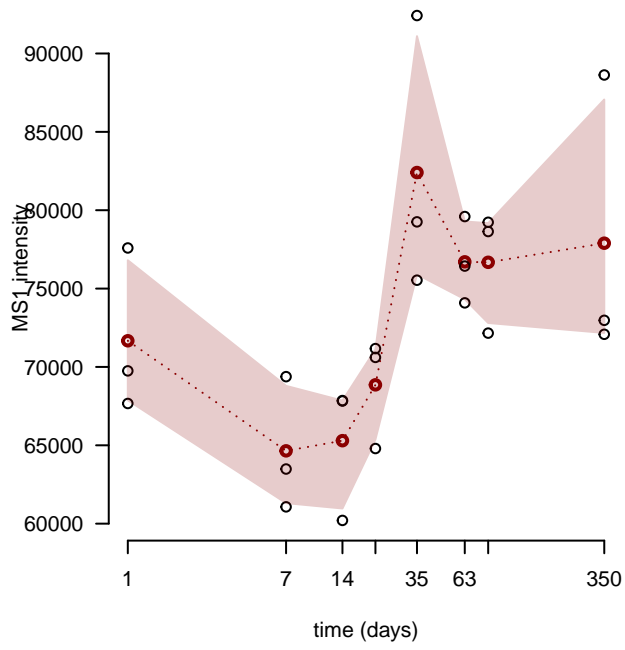

**P06795**  
**GN=Abcb1b**  
ATP-binding cassette, sub-family B (MDR/ ...

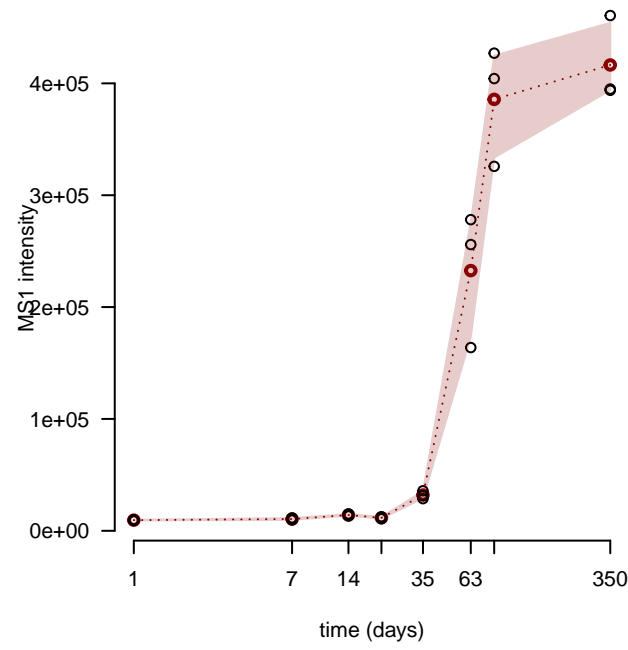

**P06797**  
**GN=Ctsl**  
cathepsin L

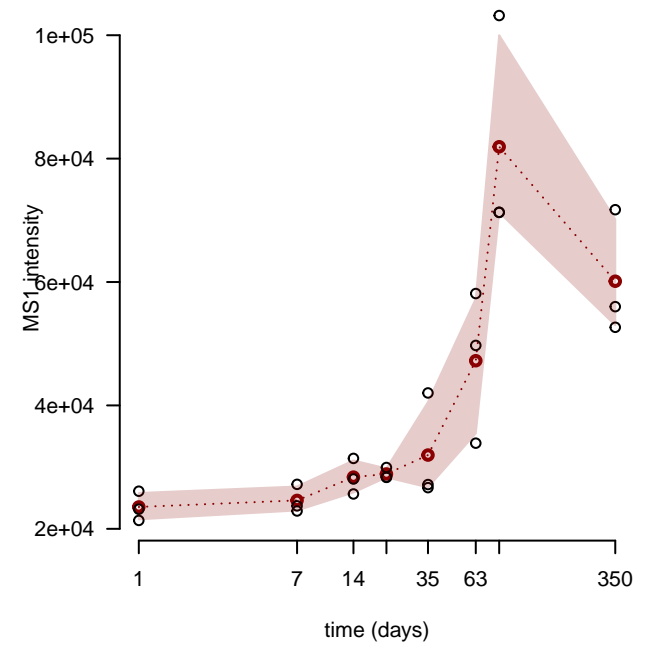

**P06800**  
**GN=Ptprc**  
protein tyrosine phosphatase, receptor t ...

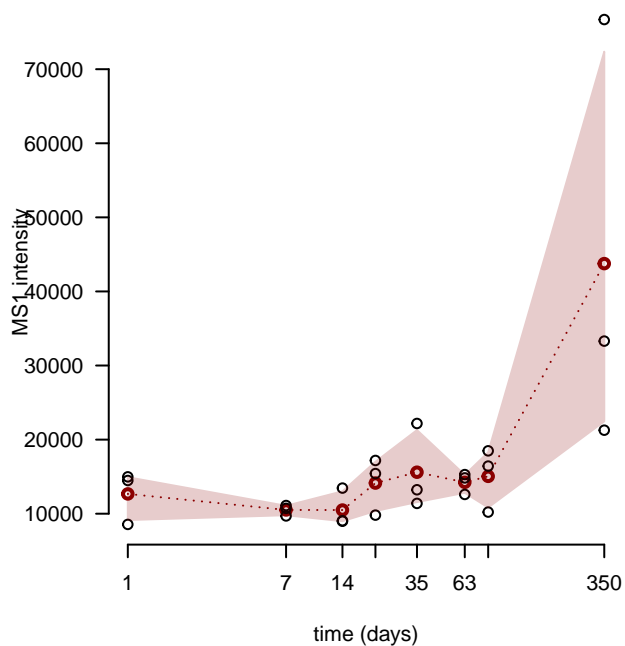

**P06801**  
**GN=Me1**  
malic enzyme 1, NADP(+)-dependent, cytos ...

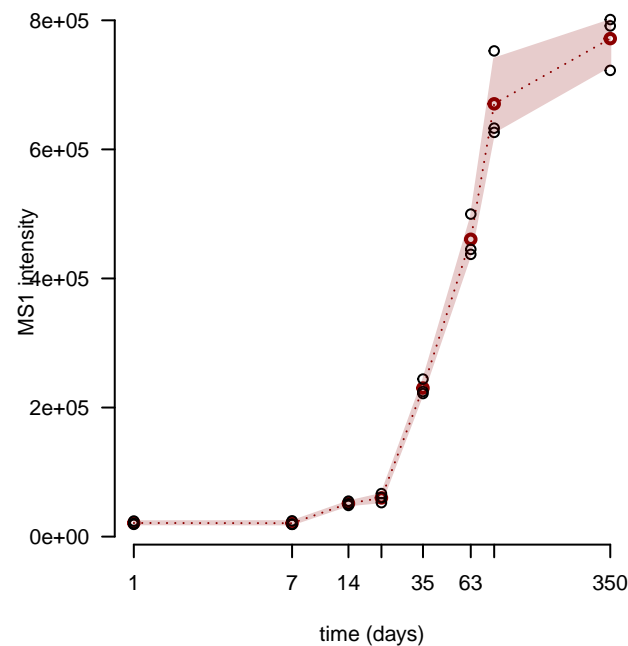

**P06802**  
**GN=Enpp1**  
ectonucleotide pyrophosphatase/phosphodi ...

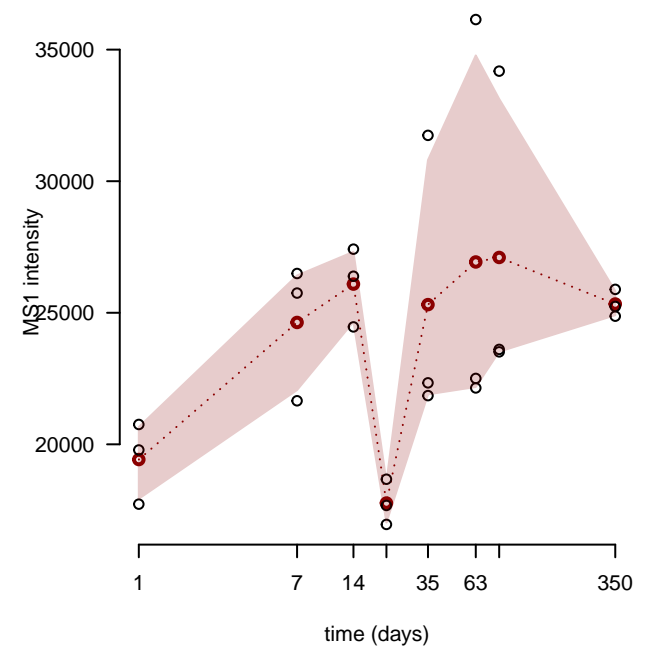

**P06837**  
**GN=Gap43**  
growth associated protein 43

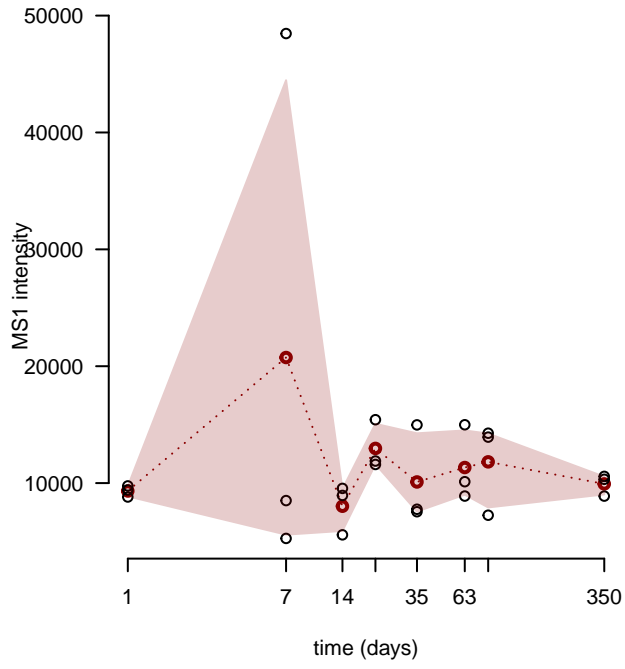

**P06869**  
**GN=Plau**  
plasminogen activator, urokinase

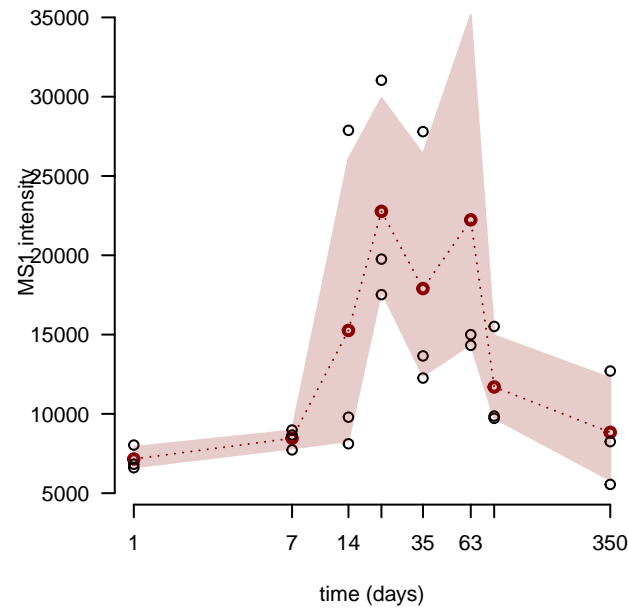

**P06909**  
**GN=Cfh**  
complement component factor h

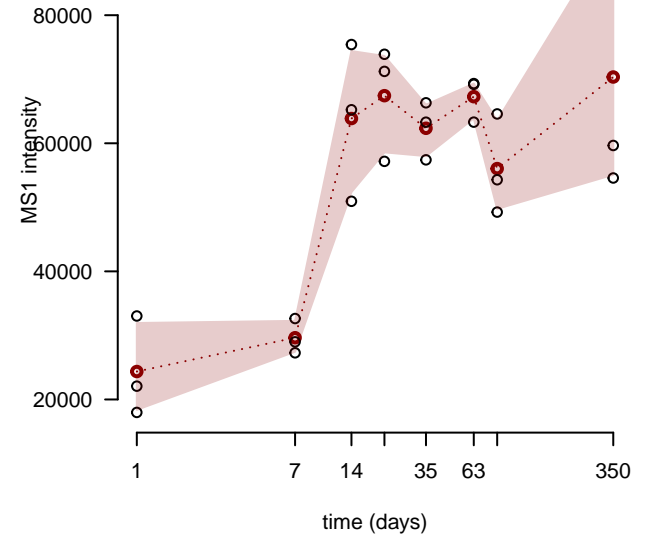

**P07091**  
**GN=S100a4**  
S100 calcium binding protein A4

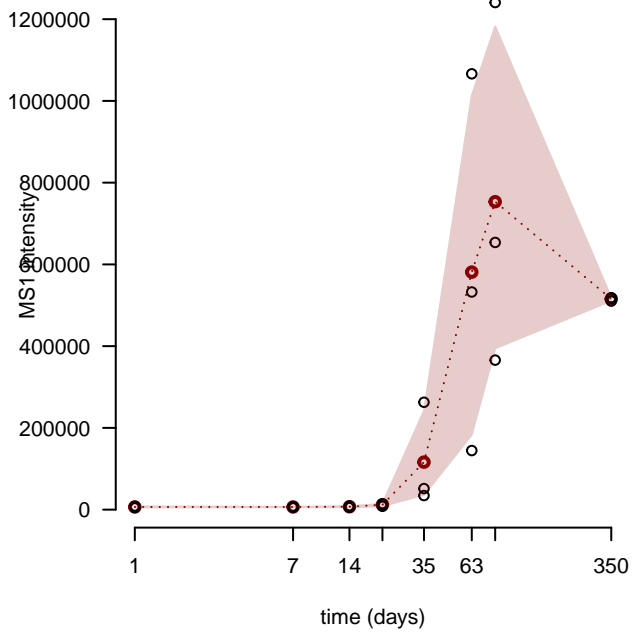

**P07146**  
**GN=Prss2**  
protease, serine 2

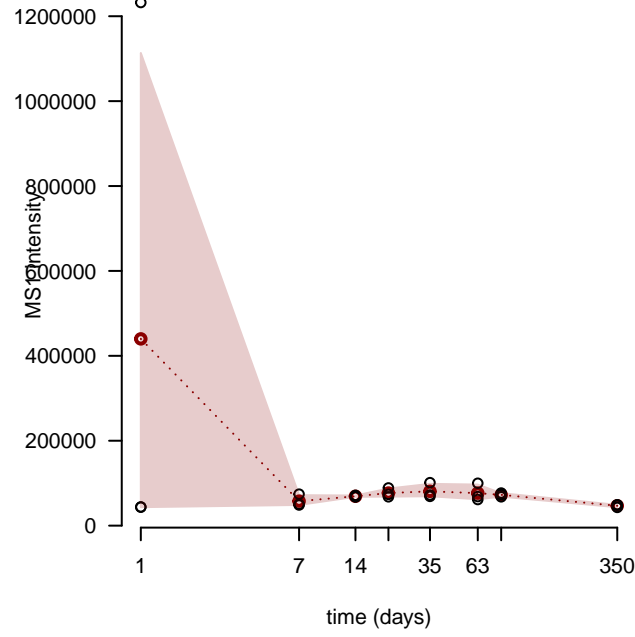

**P07214**  
**GN=Sparc**  
secreted acidic cysteine rich glycoprote ...

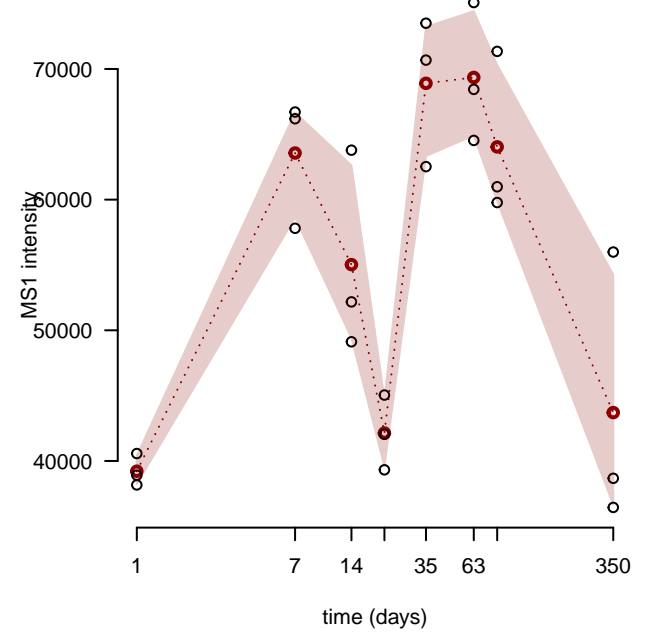

**P07309**  
**GN=Ttr**  
transthyretin

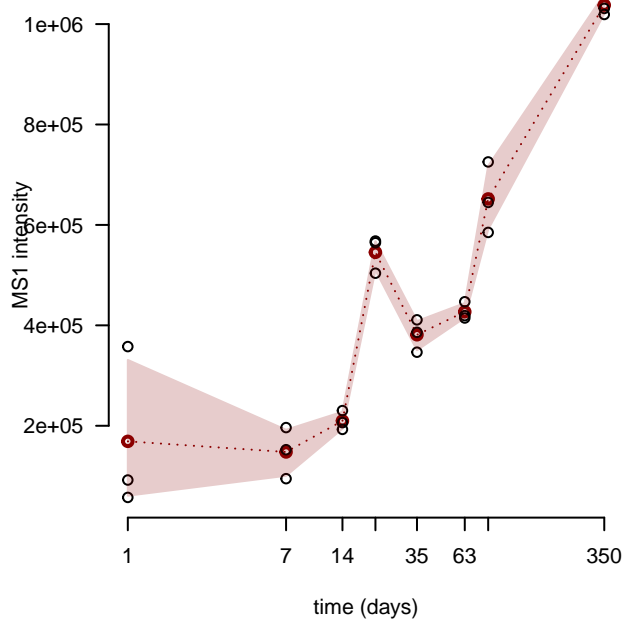

**P07310**  
**GN=Ckm**  
creatine kinase, muscle

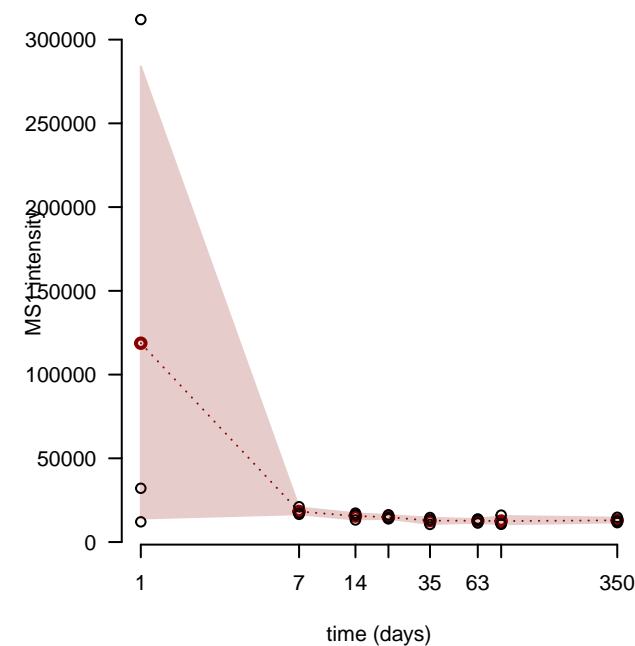

**P07356**  
**GN=Anxa2**  
annexin A2

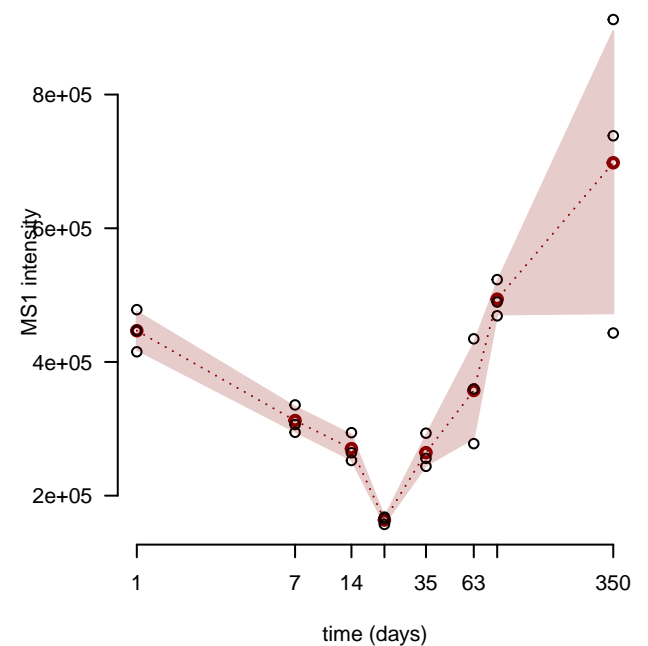



**P07361**  
GN=Orm2  
orosomucoid 2

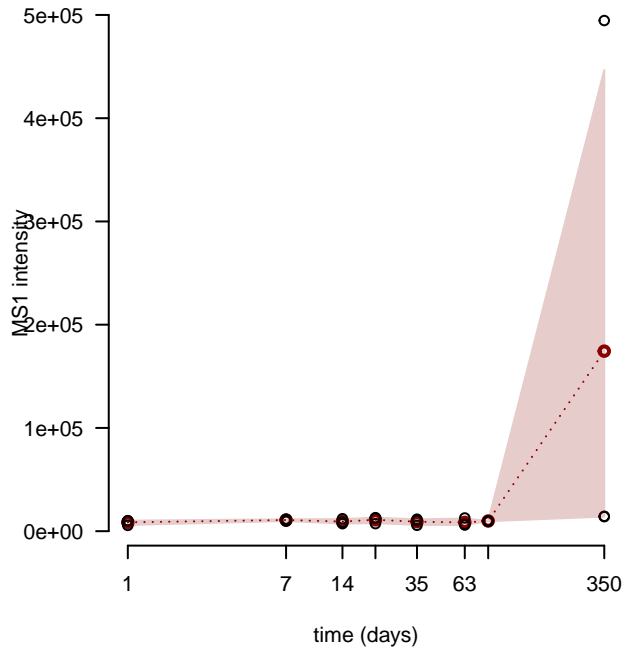

**P07607**  
GN=Tyms  
thymidylate synthase

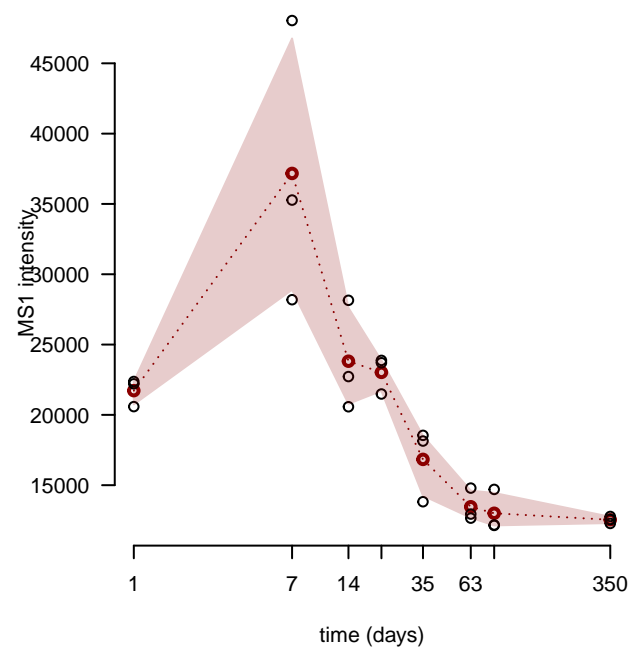

**P07724**  
GN=Alb  
albumin

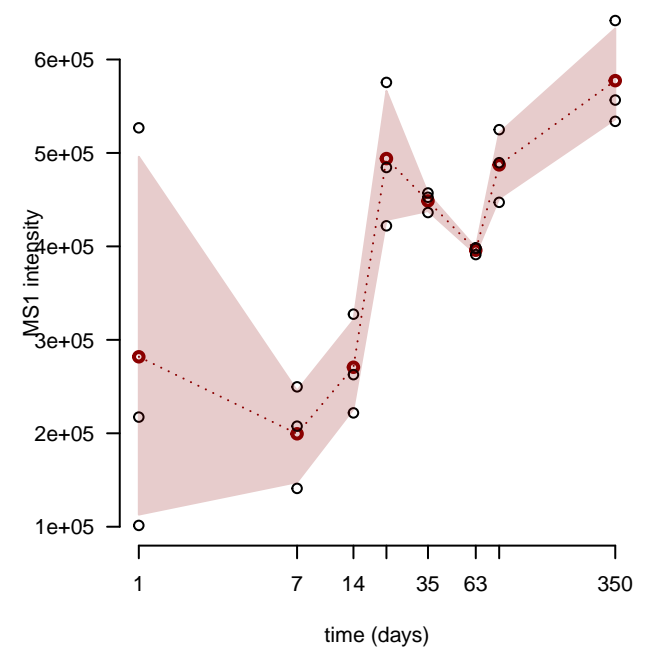

**P07742**  
GN=Rrm1  
ribonucleotide reductase M1

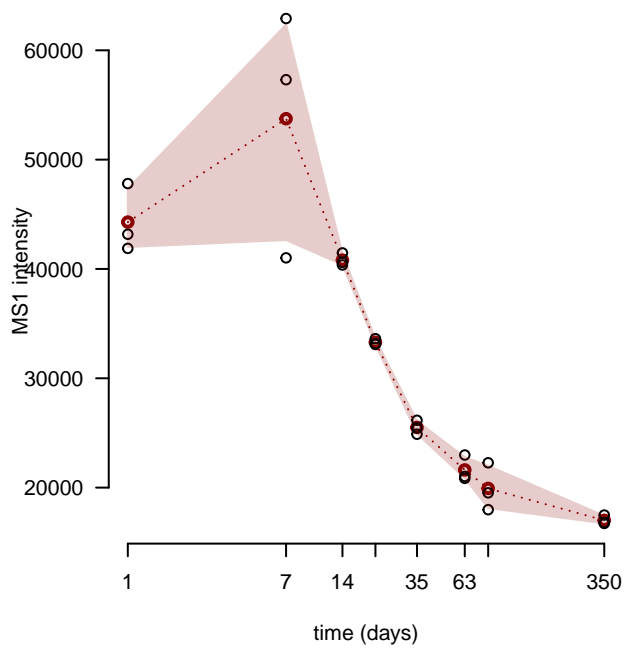

**P07743**  
GN=Bpifa2  
BPI fold containing family A, member 2

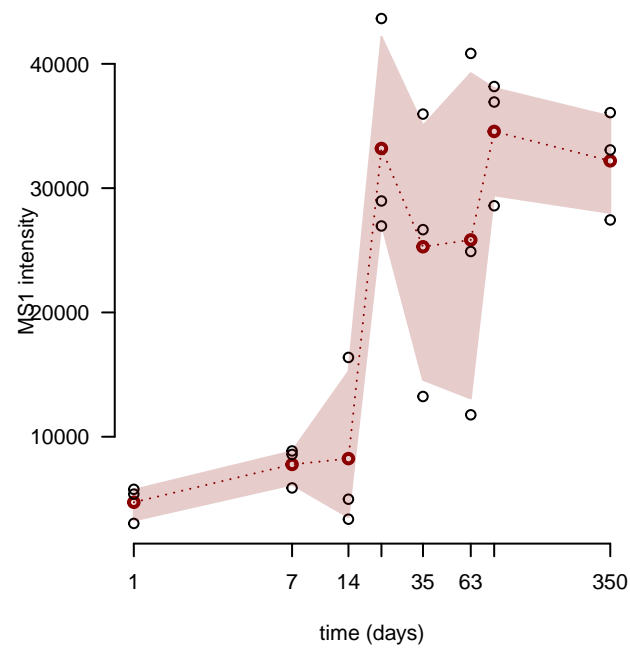

**P07744**  
GN=Krt4  
keratin 4

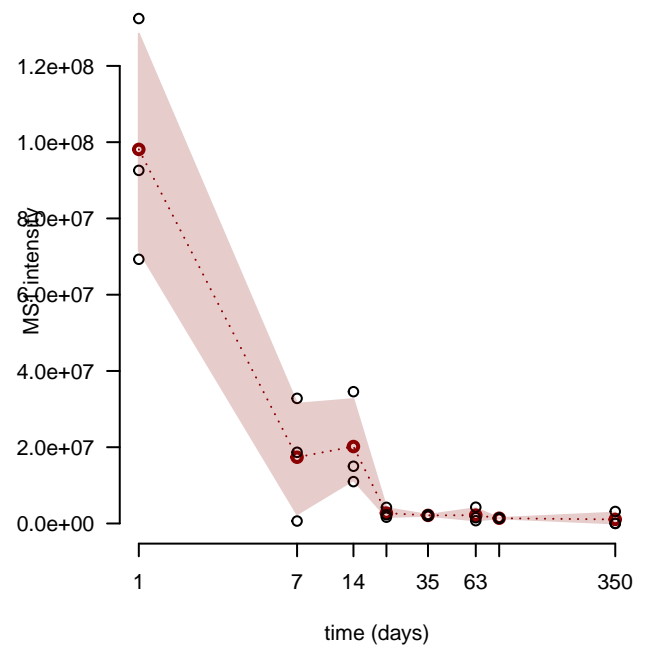

**P07758**  
GN=Serpina1a  
serine (or cysteine) peptidase inhibitor ...

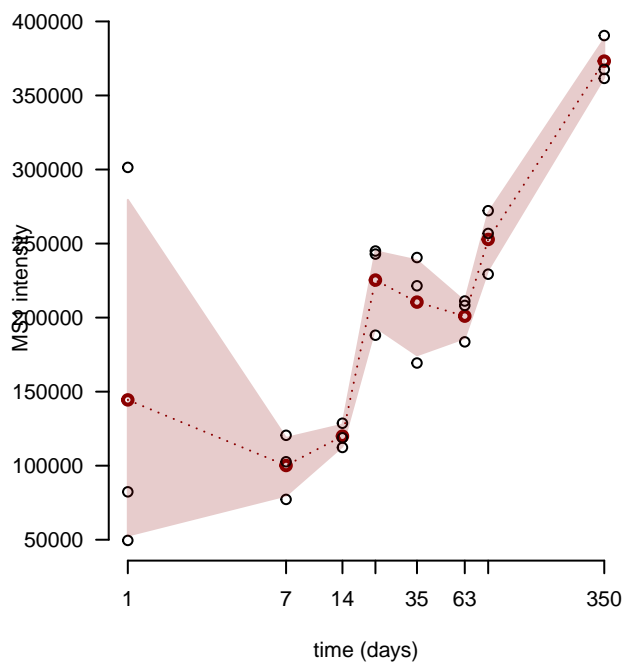

**P07759**  
GN=Serpina3k  
serine (or cysteine) peptidase inhibitor ...

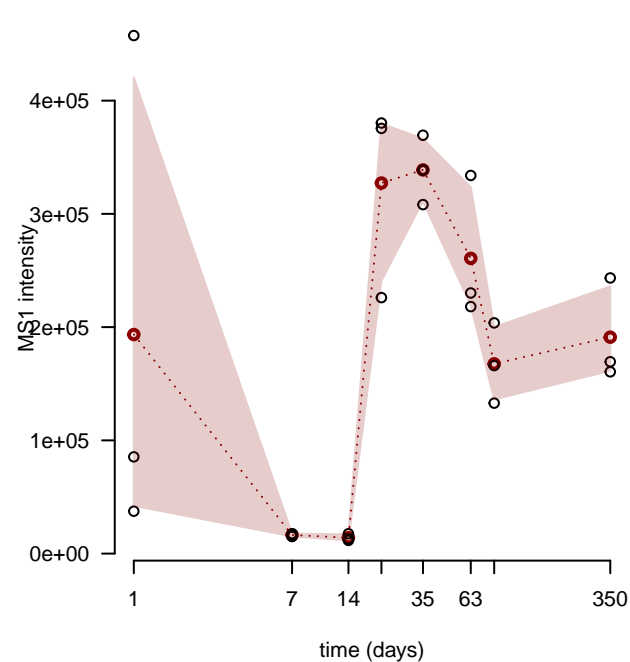

**P07901**  
GN=Hsp90aa1  
heat shock protein 90, alpha (cytosolic) ...

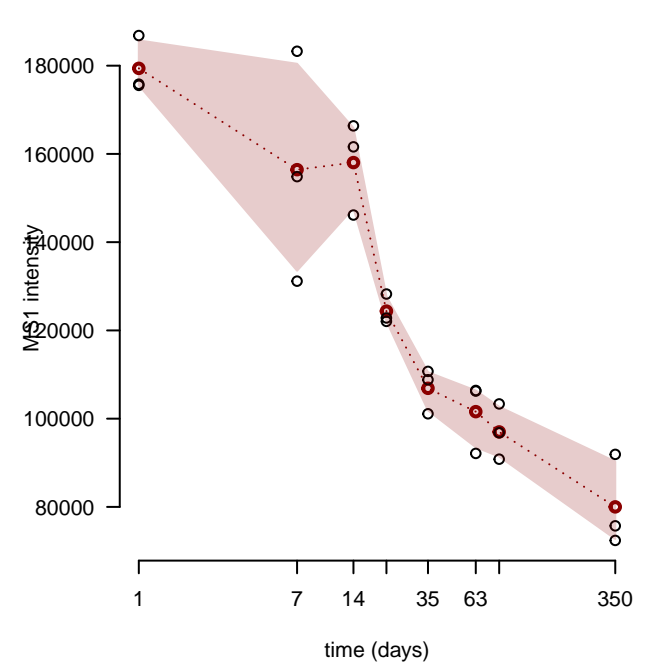

**P07903**  
GN=Ercc1  
excision repair cross-complementing rode ...

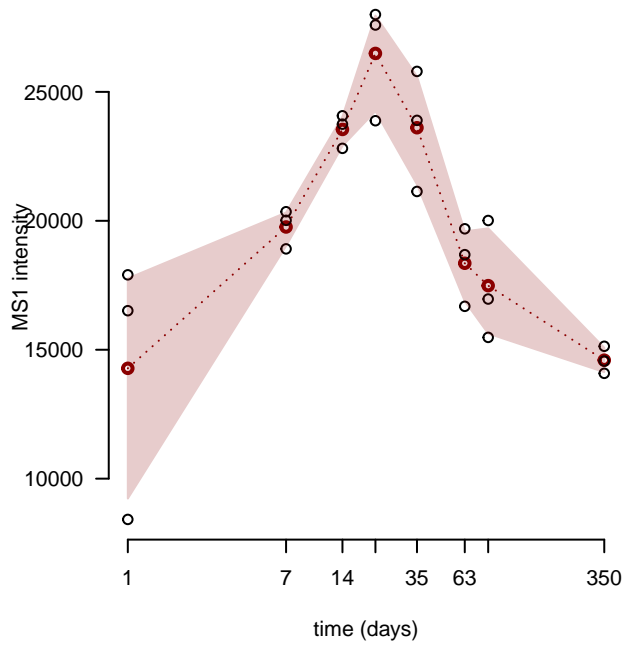

**P08003**  
GN=Pdia4  
protein disulfide isomerase associated 4

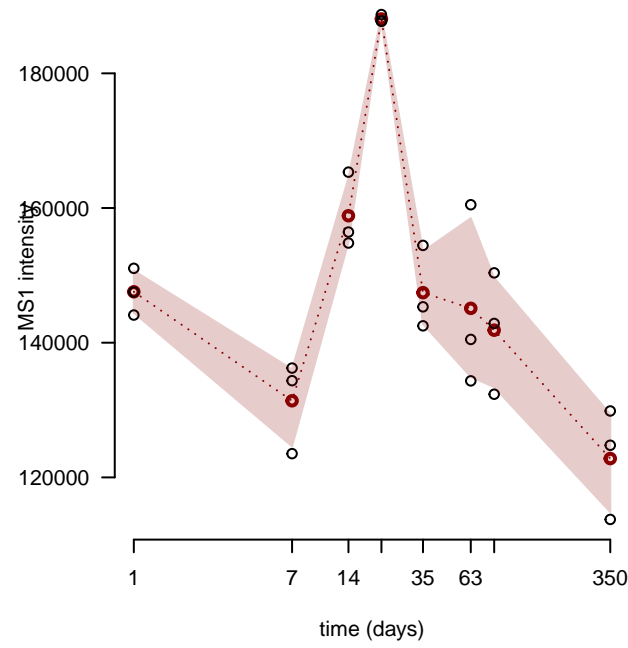

**P08030**  
GN=Aprt  
adenine phosphoribosyl transferase

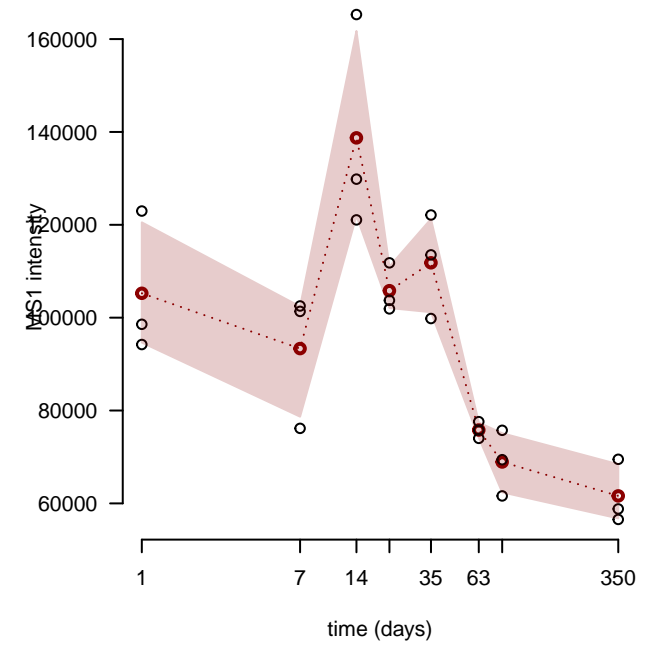

**P08032**  
GN=Spta1  
spectrin alpha, erythrocytic 1

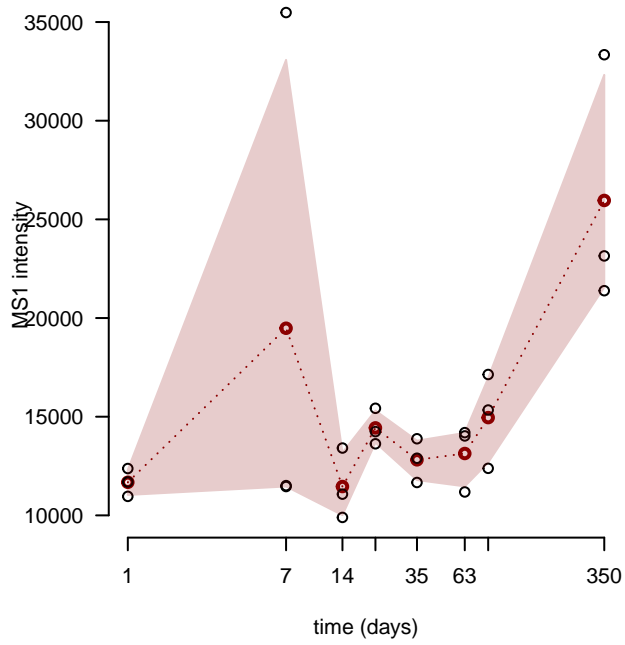

**P08043**  
GN=Zfp2  
zinc finger protein 2

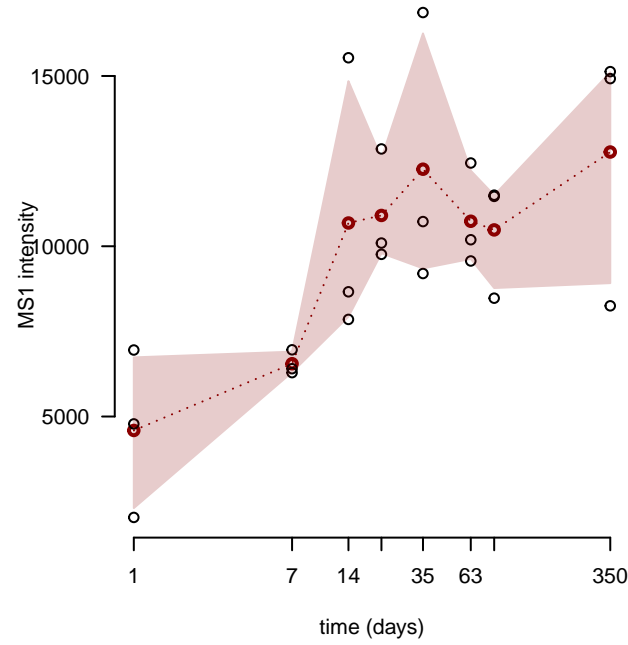

**P08071**  
GN=Ltf  
lactotransferrin

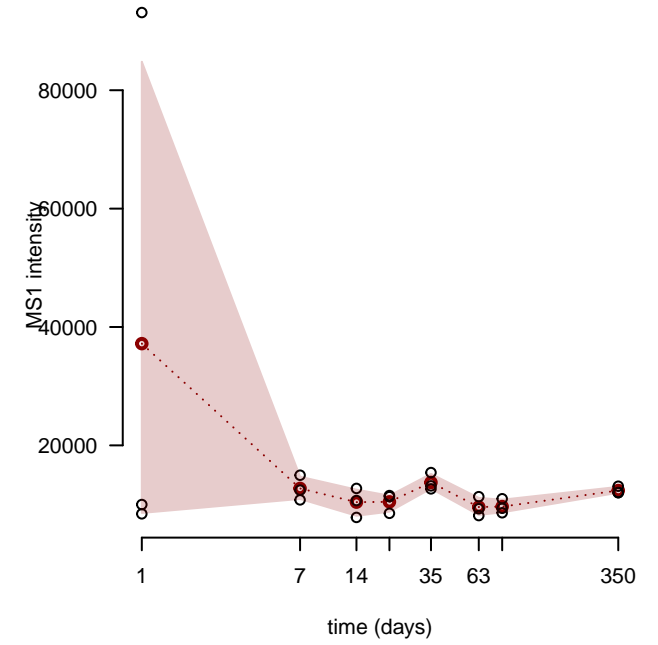

**P08074**  
GN=Cbr2  
carbonyl reductase 2

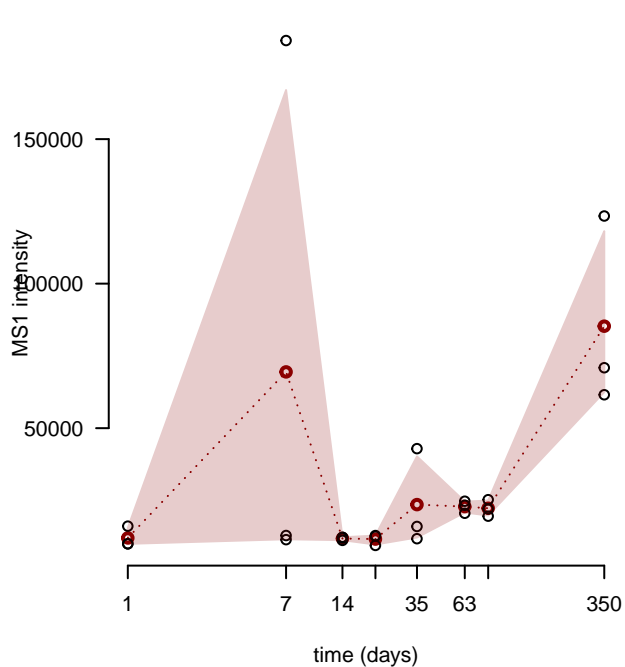

**P08101**  
GN=Fcgr2  
Fc gamma R2

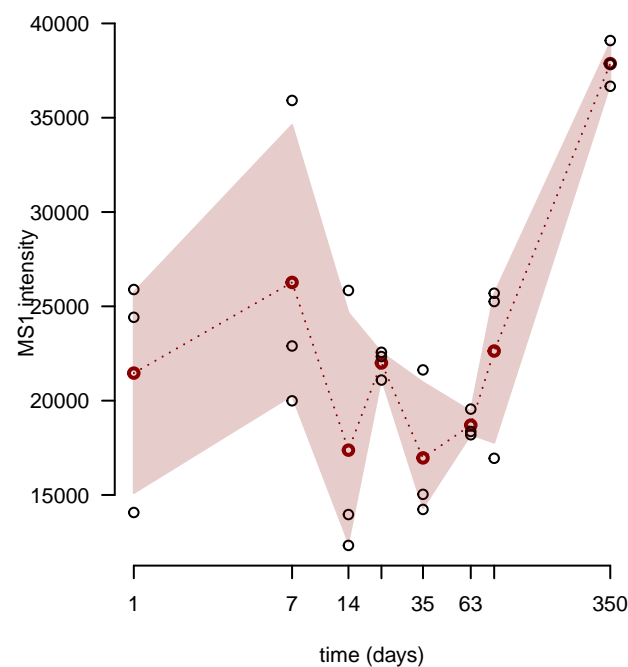

**P08113**  
GN=Hsp90b1  
heat shock protein 90, beta (Grp94), mem ...

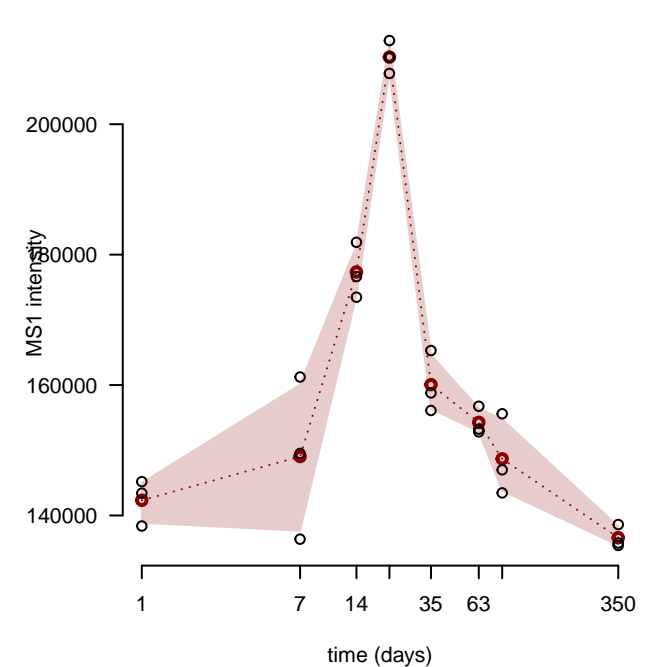

**P08121**  
**GN=Col3a1**  
collagen, type III, alpha 1

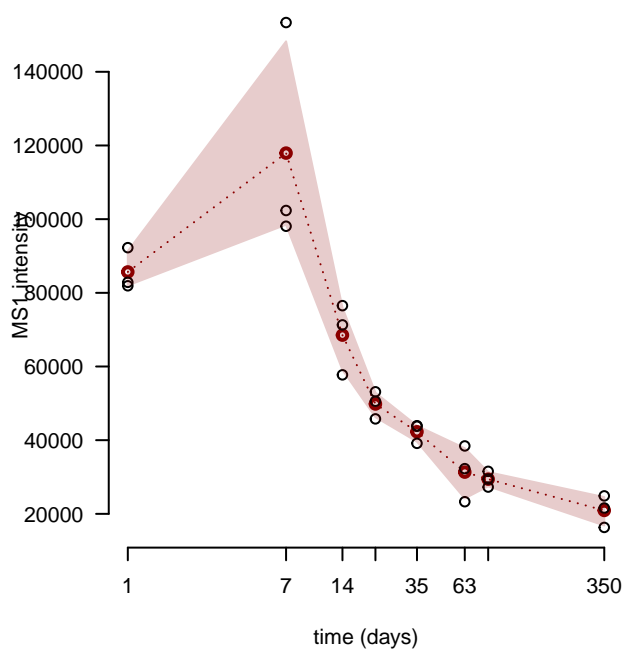

**P08122**  
**GN=Col4a2**  
collagen, type IV, alpha 2

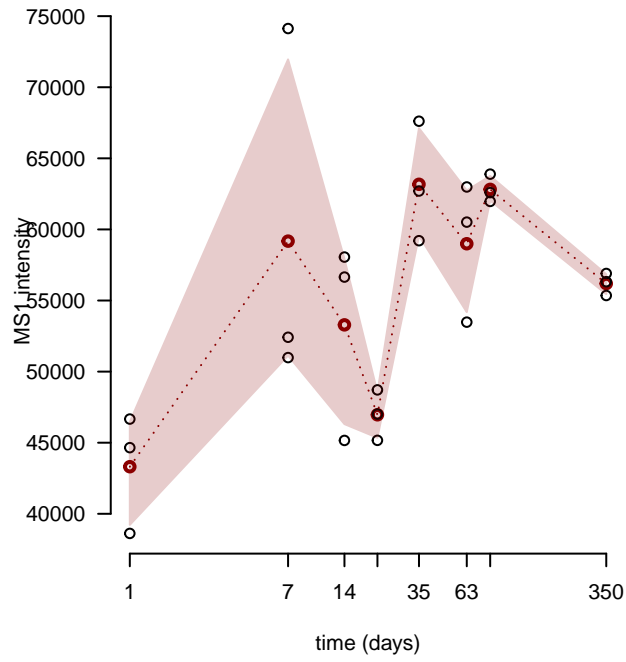

**P08207**  
**GN=S100a10**  
S100 calcium binding protein A10 (calpac ...

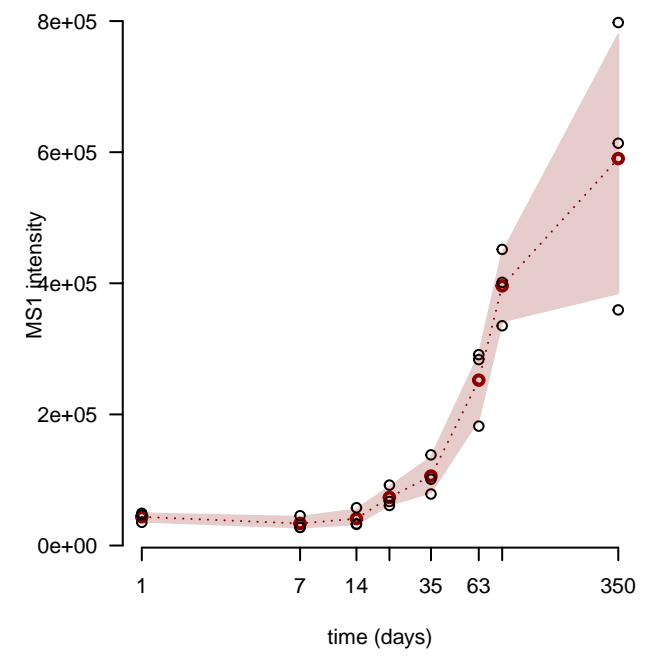

**P08226**  
**GN=Apoe**  
apolipoprotein E

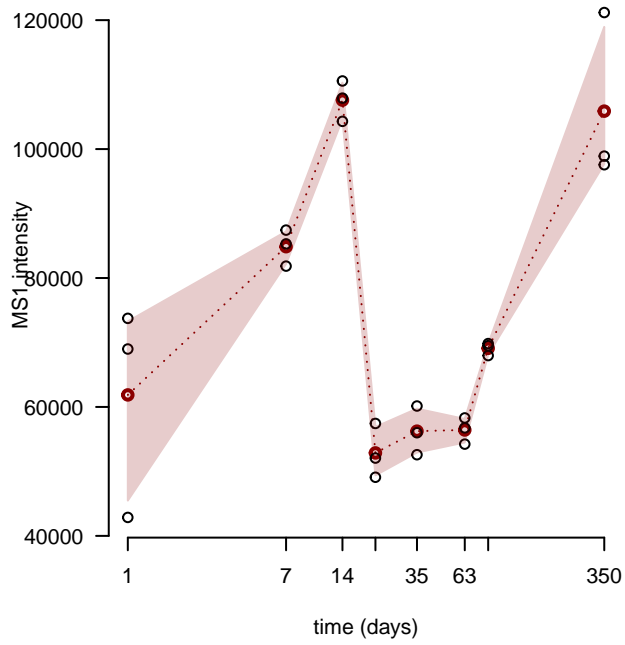

**P08228**  
**GN=Sod1**  
superoxide dismutase 1, soluble

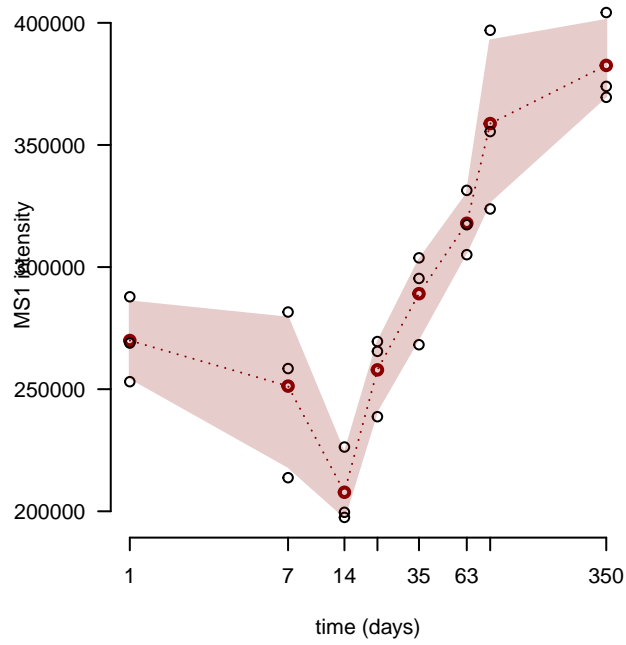

**P08249**  
**GN=Mdh2**  
malate dehydrogenase 2, NAD (mitochondri ...

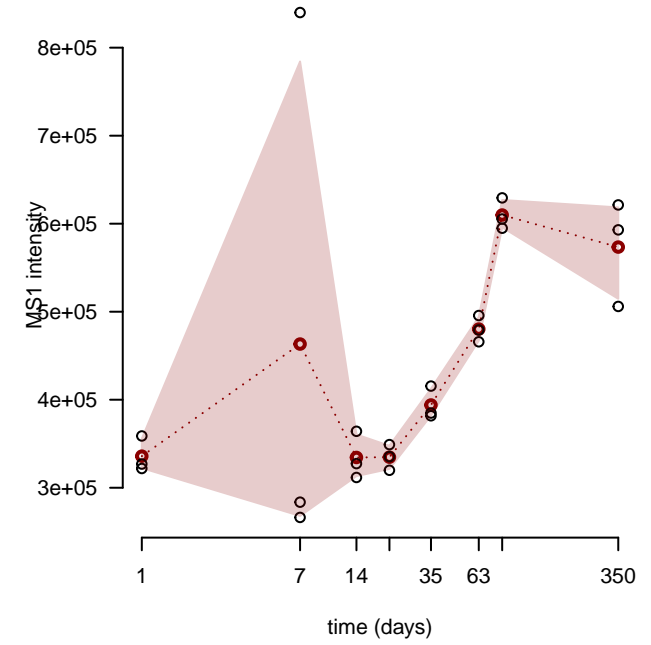

**P08414**  
**GN=Camk4**  
calcium/calmodulin-dependent protein kin ...

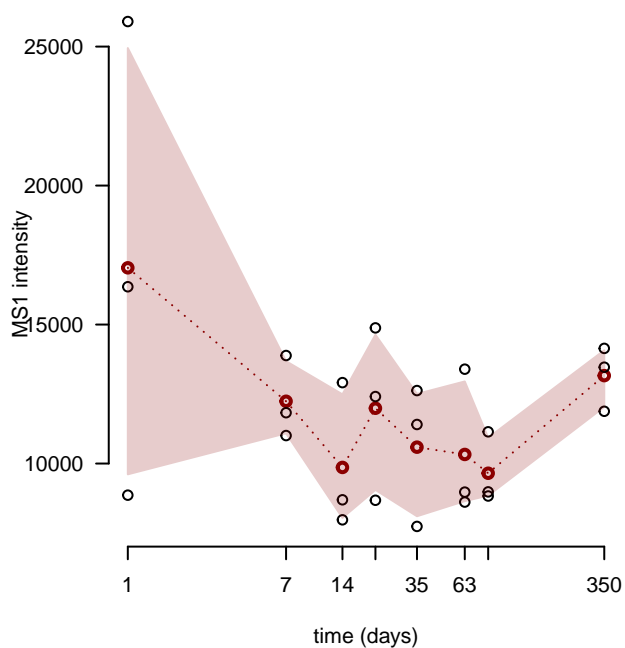

**P08551**  
**GN=Nefl**  
neurofilament, light polypeptide

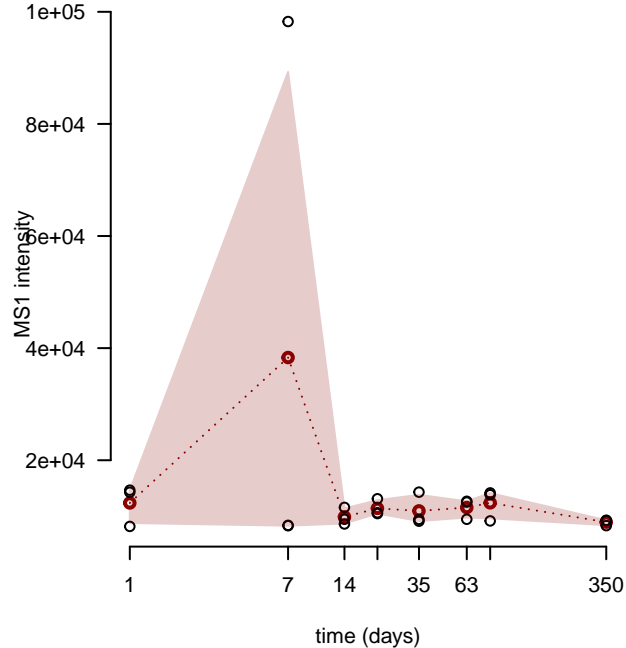

**P08553**  
**GN=Nefm**  
neurofilament, medium polypeptide

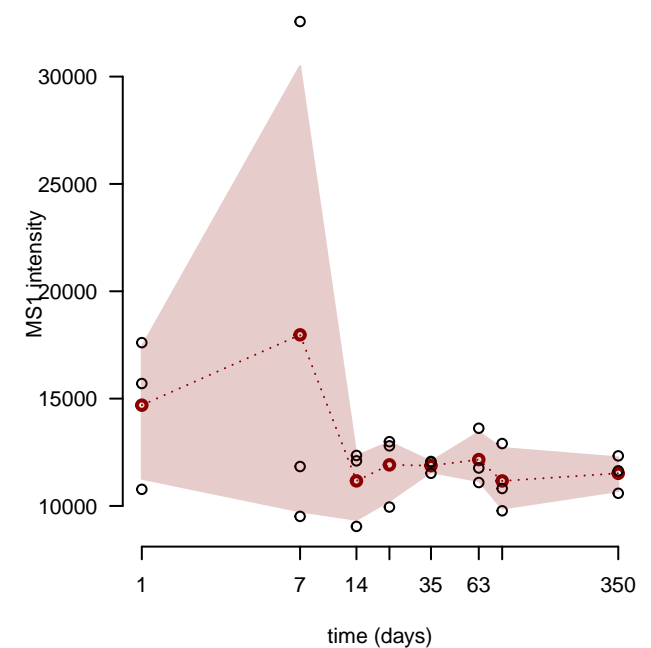

**P08556**  
**GN=Nras**  
neuroblastoma ras oncogene

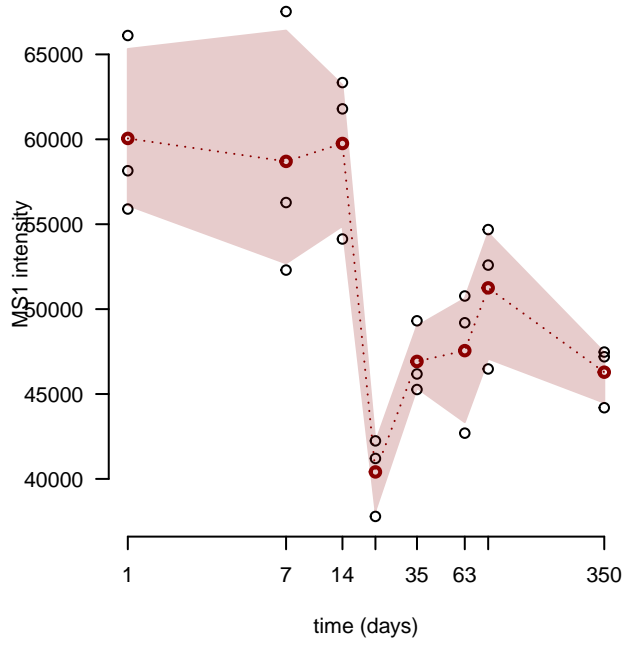

**P08607**  
**GN=C4bpa**

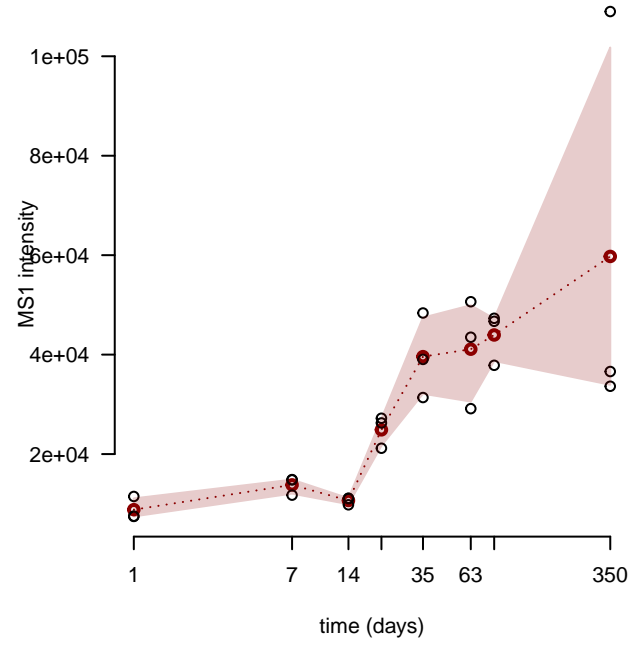

**P08730**  
**GN=Krt13**  
keratin 13

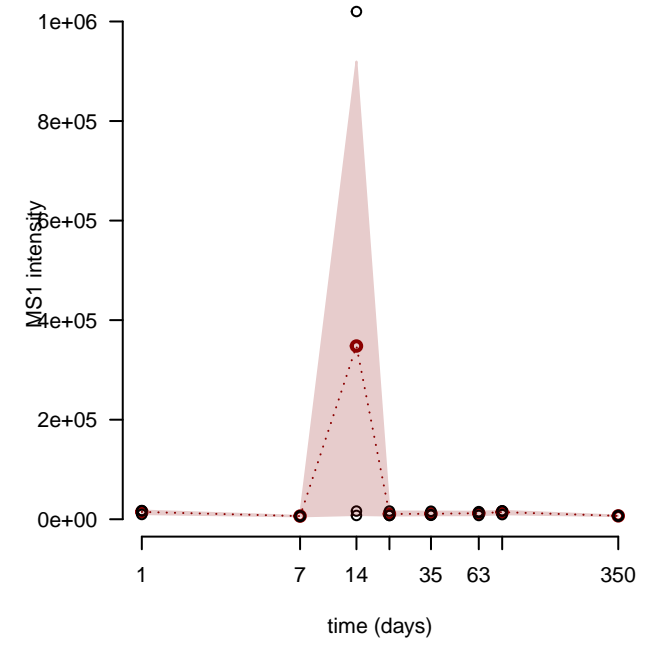

**P08752**  
**GN=Gnai2**  
guanine nucleotide binding protein (G pr ...

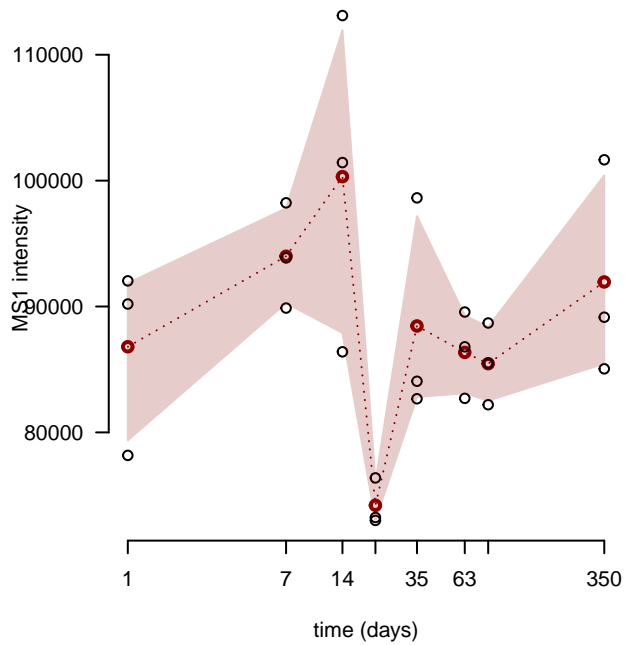

**P08775**  
**GN=Polr2a**  
polymerase (RNA) II (DNA directed) polyp ...

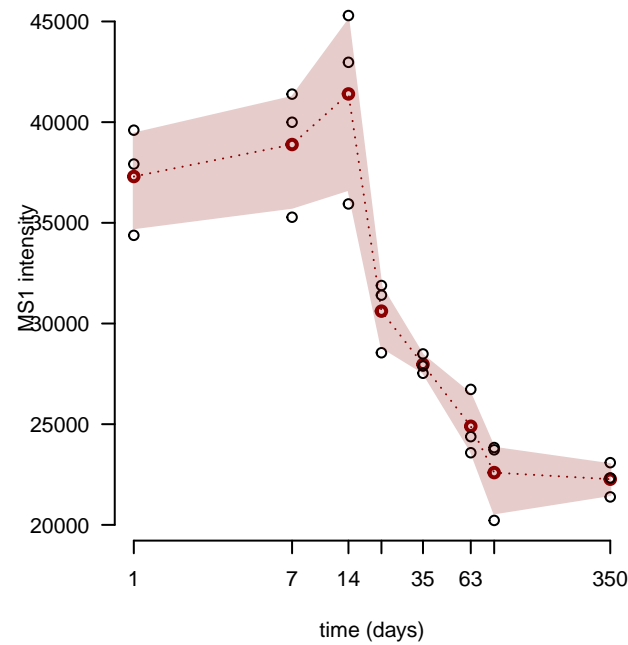

**P08905**  
**GN=Lyz2**  
lysozyme 2

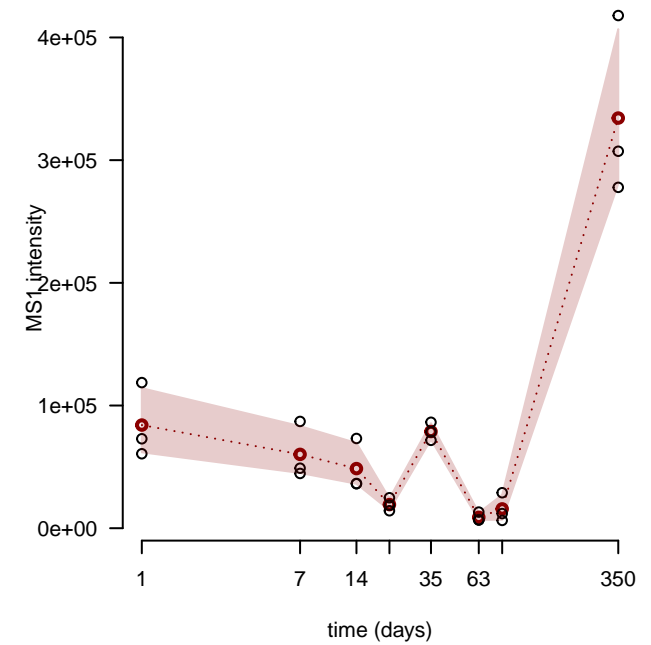

**P09025**  
**GN=Hoxc8**  
homeobox C8

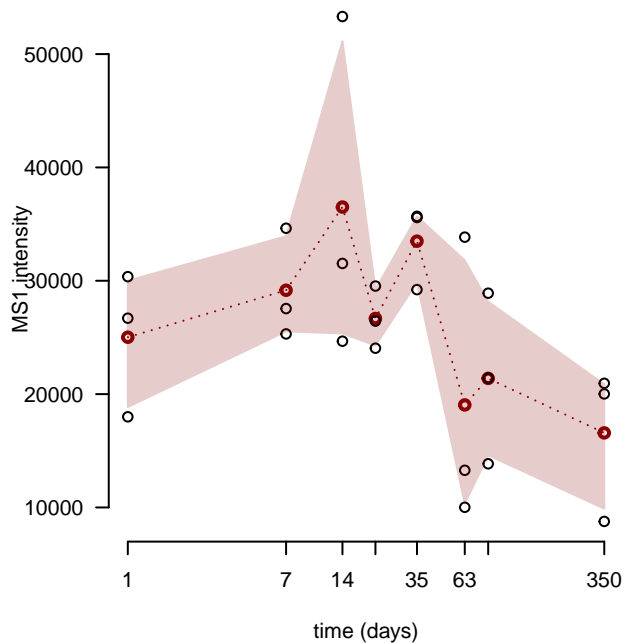

**P09041**  
**GN=Pgk2**  
phosphoglycerate kinase 2

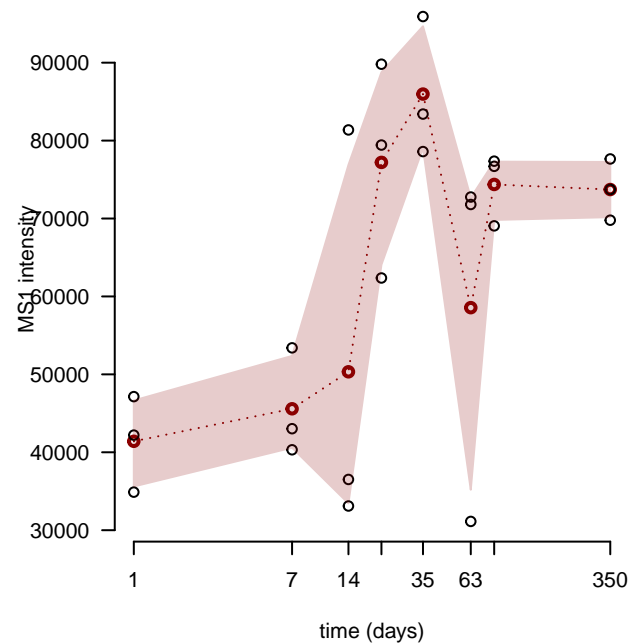

**P09055**  
**GN=Itgb1**  
integrin beta 1 (fibronectin receptor be ...

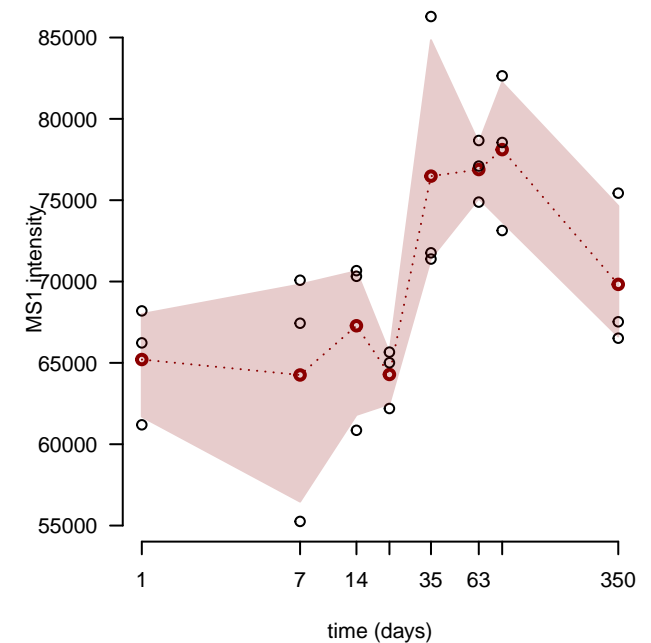

**P09103**  
**GN=P4hb**  
prolyl 4-hydroxylase, beta polypeptide

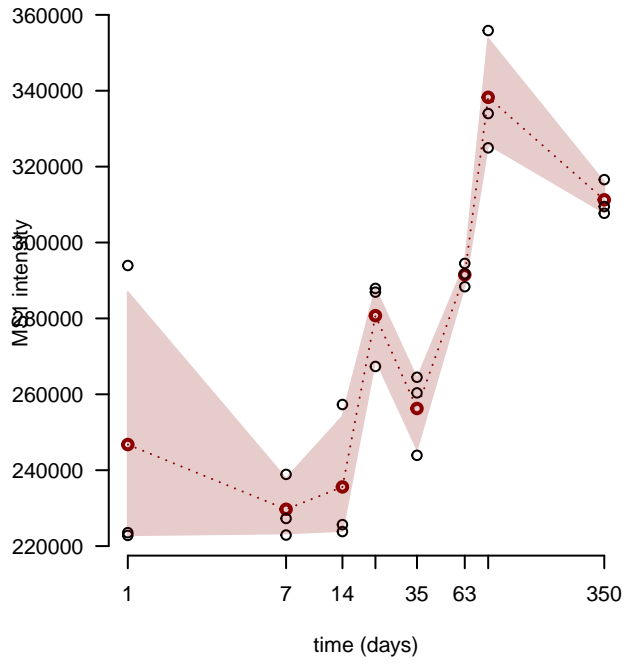

**P09242**  
**GN=Alpl**  
alkaline phosphatase, liver/bone/kidney

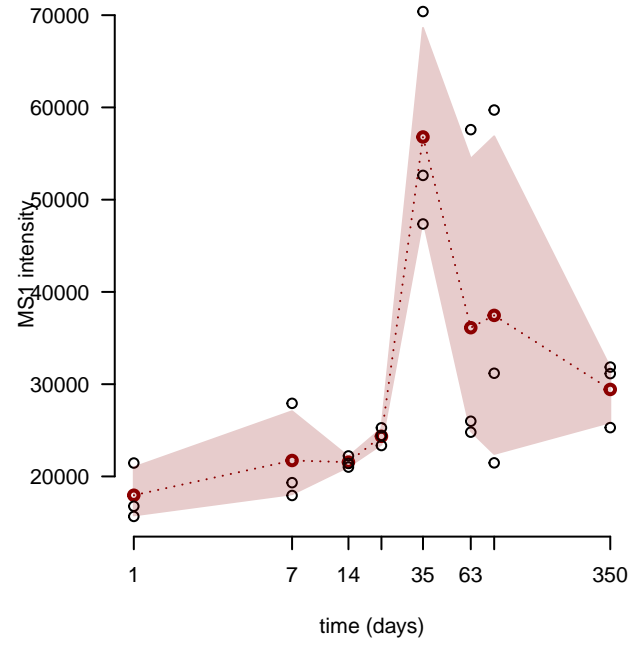

**P09405**  
**GN=Ncl**  
nucleolin

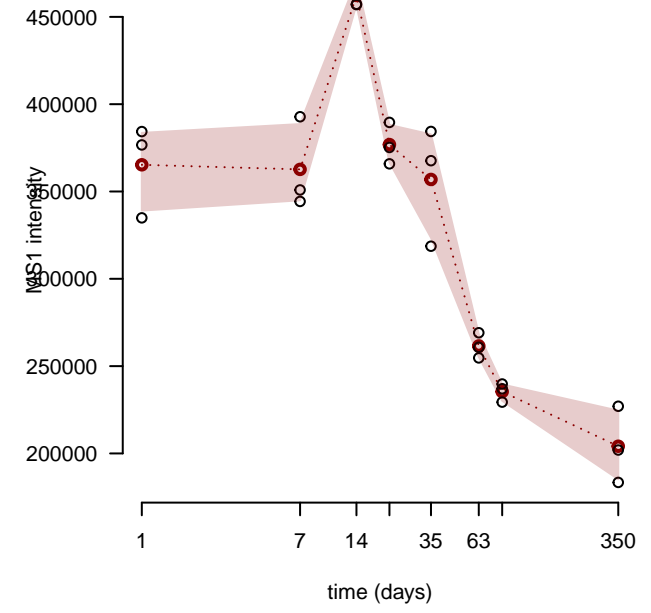

**P09411**  
**GN=Pgk1**  
phosphoglycerate kinase 1

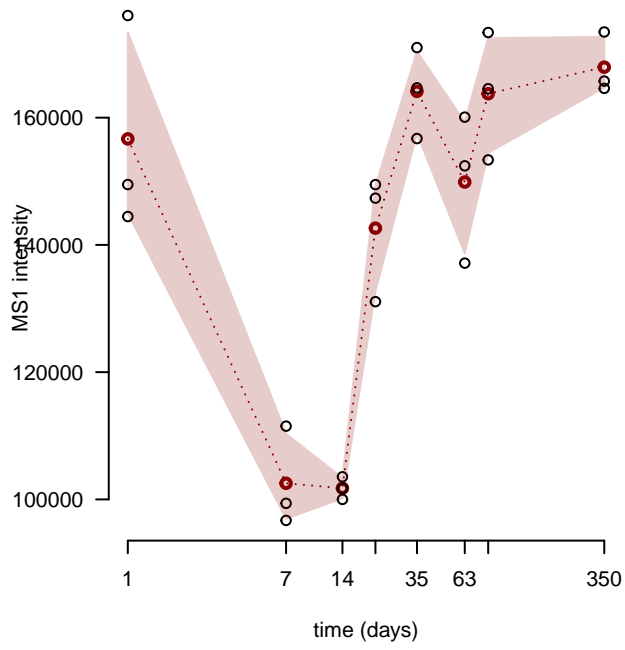

**P09470**  
**GN=Ace**  
angiotensin I converting enzyme (peptidy ...

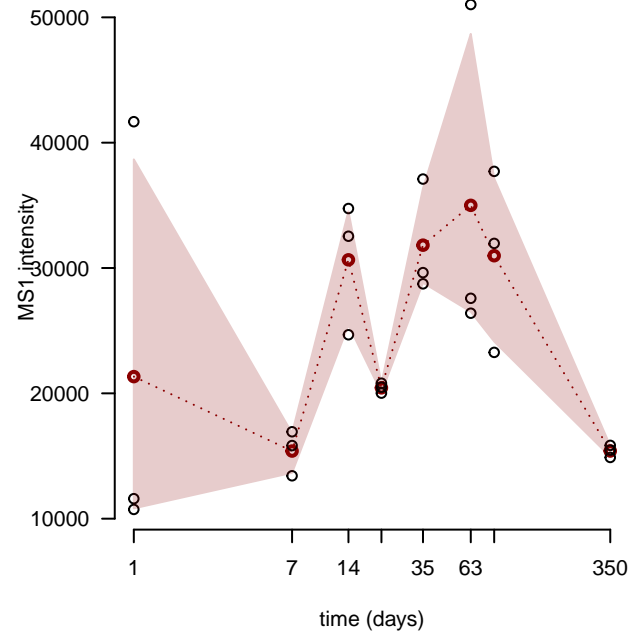

**P09528**  
**GN=Fth1**  
ferritin heavy polypeptide 1

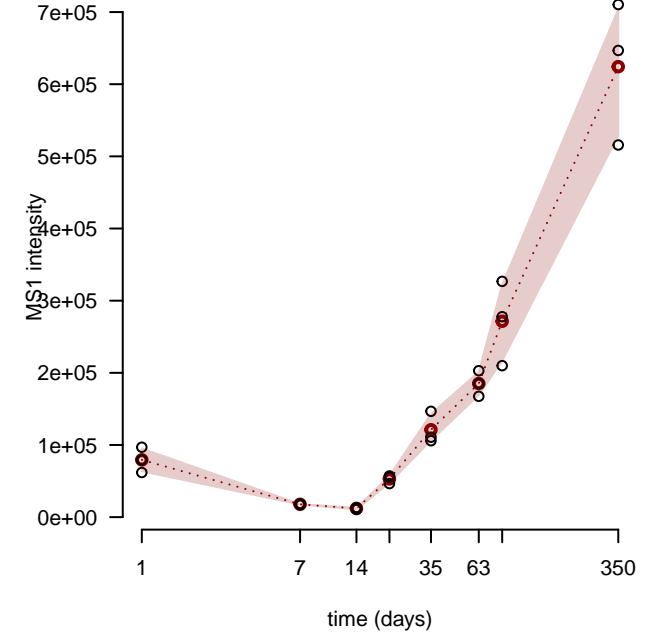

**P09535**  
**GN=Igf2**  
insulin-like growth factor 2

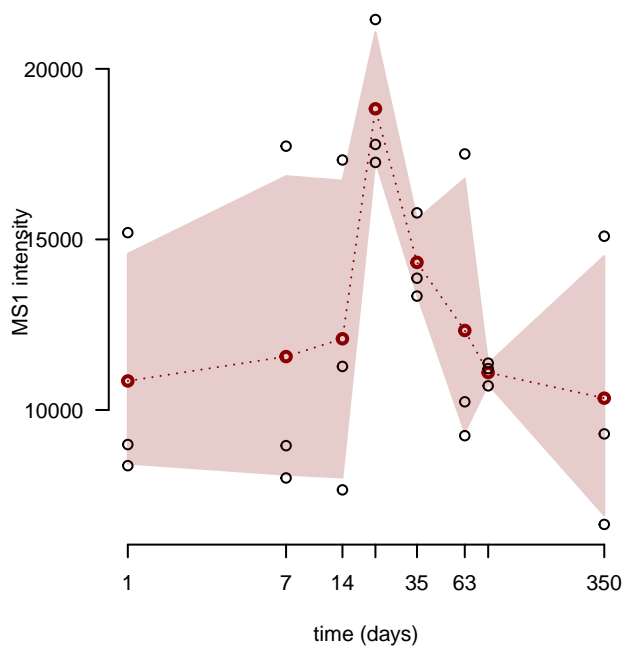

**P09541**  
**GN=Myl4**  
myosin, light polypeptide 4

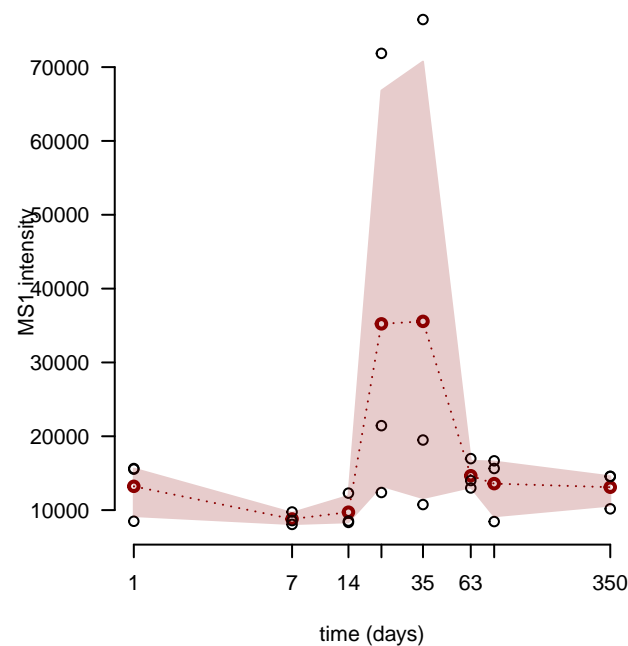

**P09581**  
**GN=Csf1r**  
colony stimulating factor 1 receptor

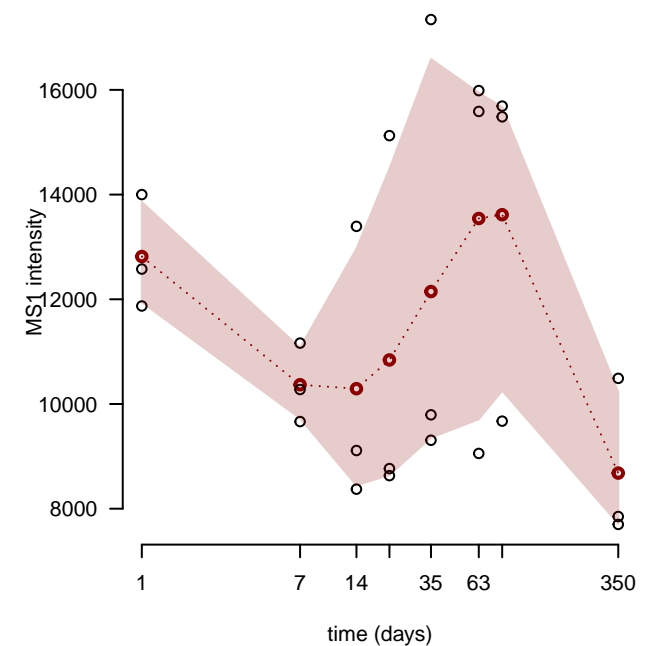

**P09602**  
GN=Hmgn2  
high mobility group nucleosomal binding ...

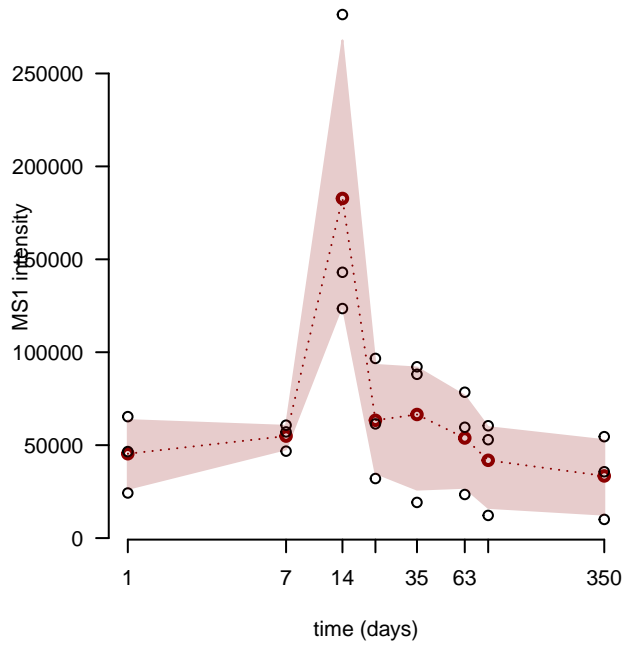

**P09671**  
GN=Sod2  
superoxide dismutase 2, mitochondrial

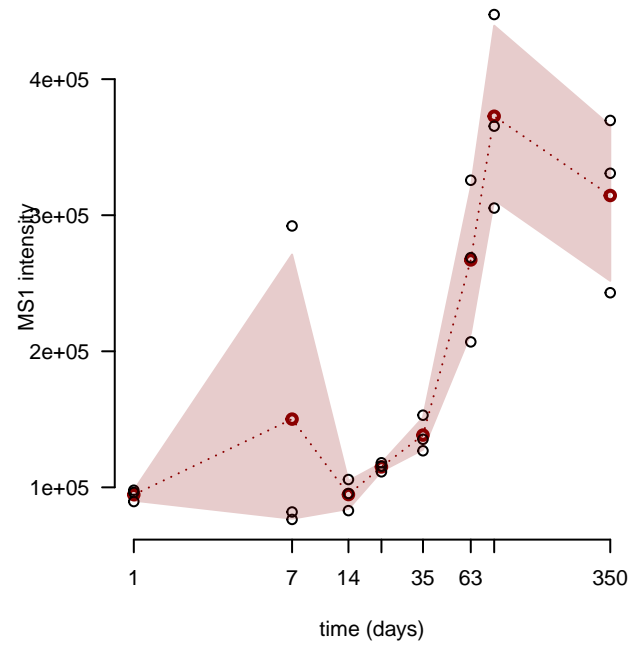

**P09803**  
GN=Cdh1  
cadherin 1

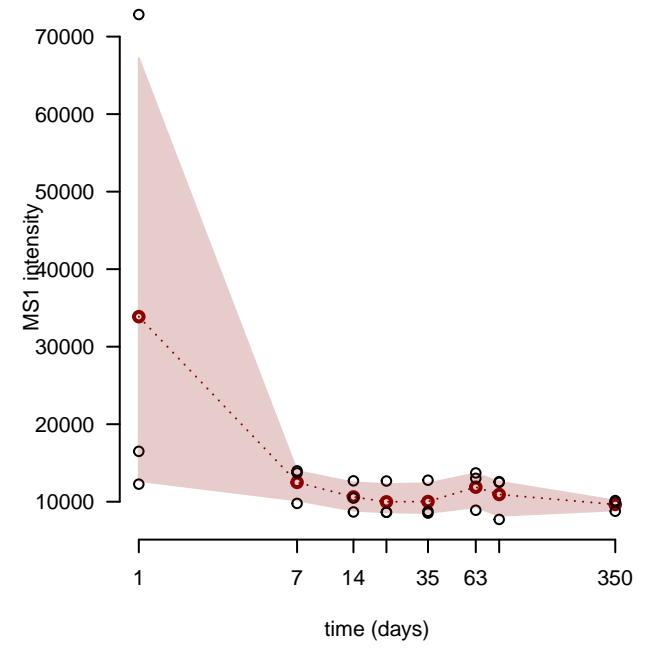

**P09813**  
GN=Apoa2  
apolipoprotein A-II

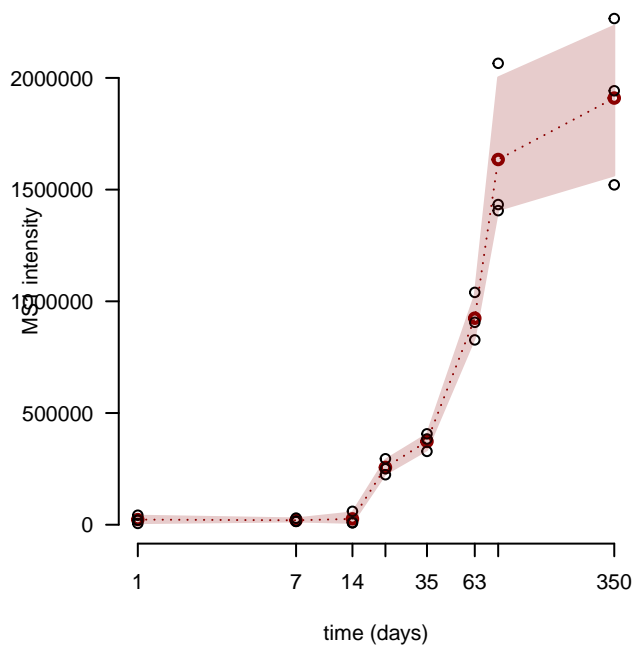

**P09925**  
GN=Surf1  
surfeit gene 1

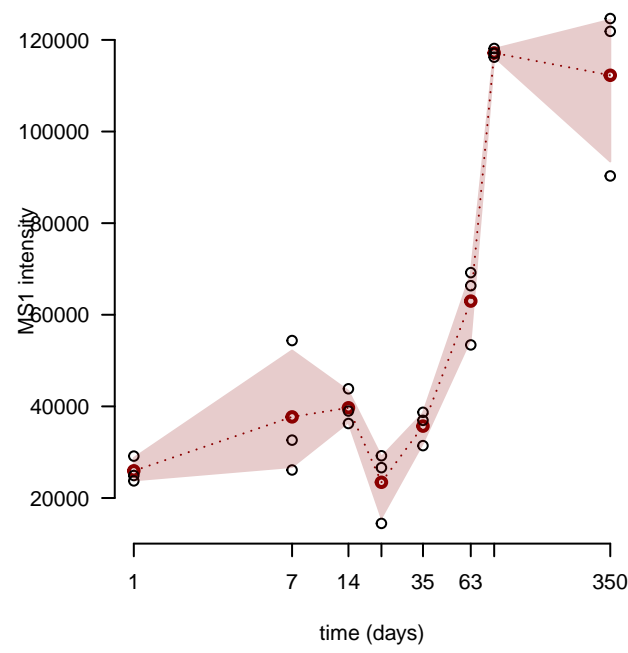

**P09926**  
GN=Surf2  
surfeit gene 2

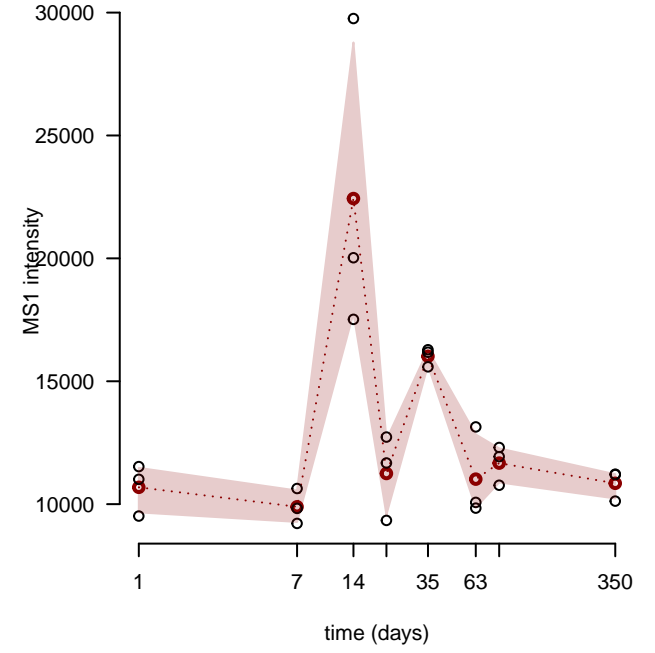

**P0C027**  
GN=Nudt10  
nudix (nucleoside diphosphate linked moi ...

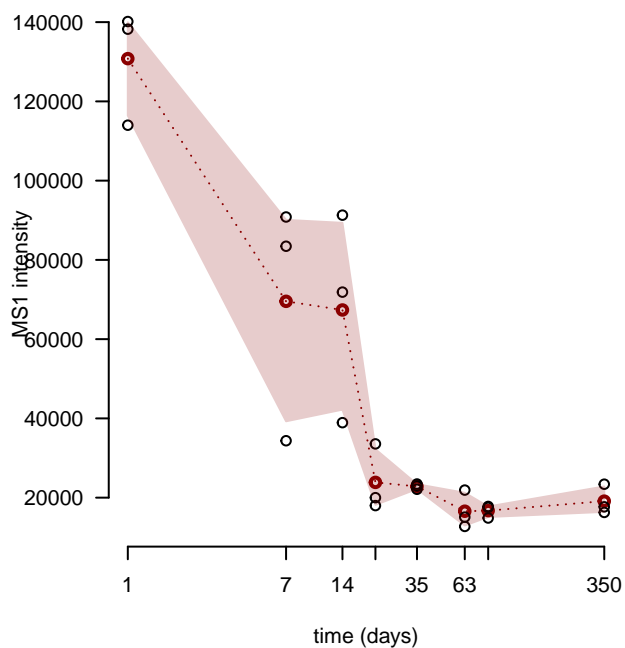

**P0C090**  
GN=Rc3h2  
ring finger and CCCH-type zinc finger do ...

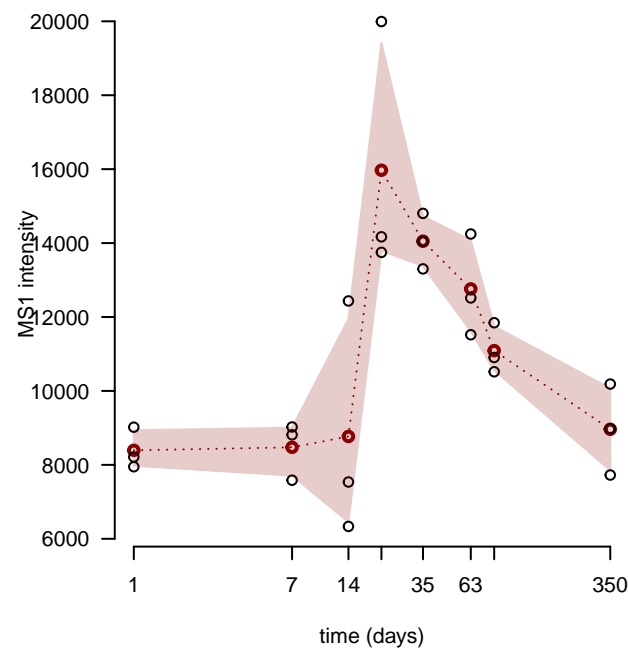

**P0C0A3**  
GN=Chmp6  
charged multivesicular body protein 6

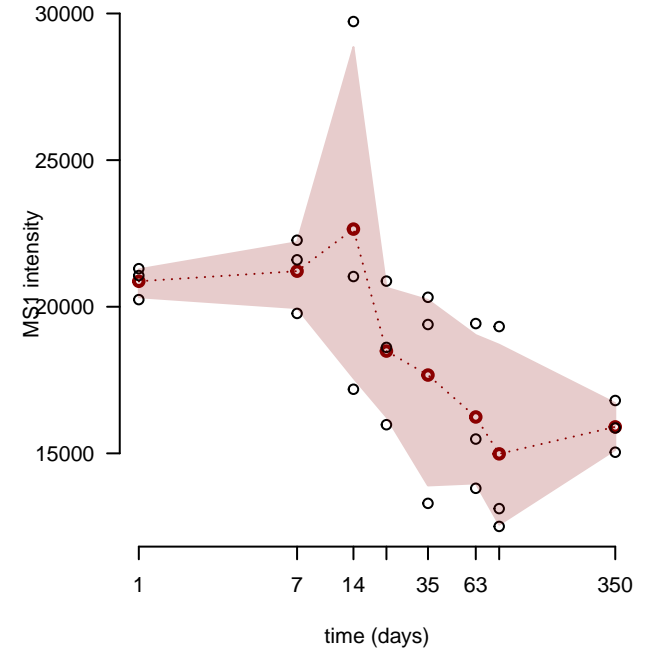

P0C0S6  
GN=H2afz

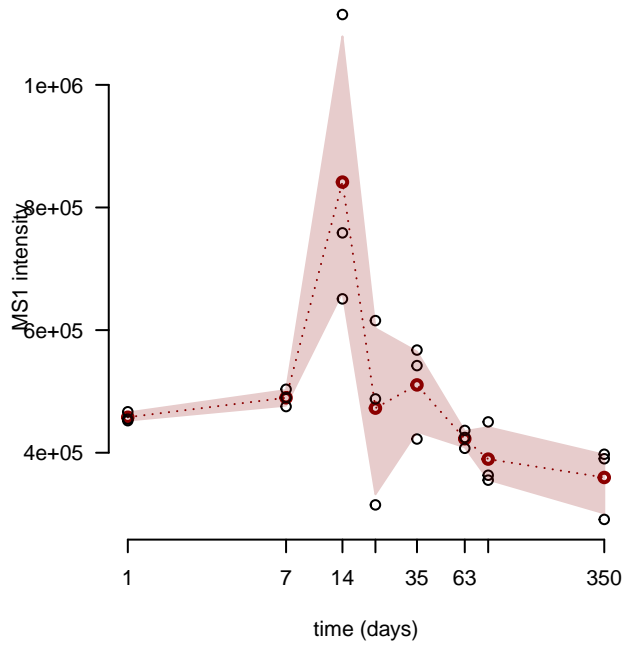

P0C673  
GN=Igsf11  
immunoglobulin superfamily, member 11

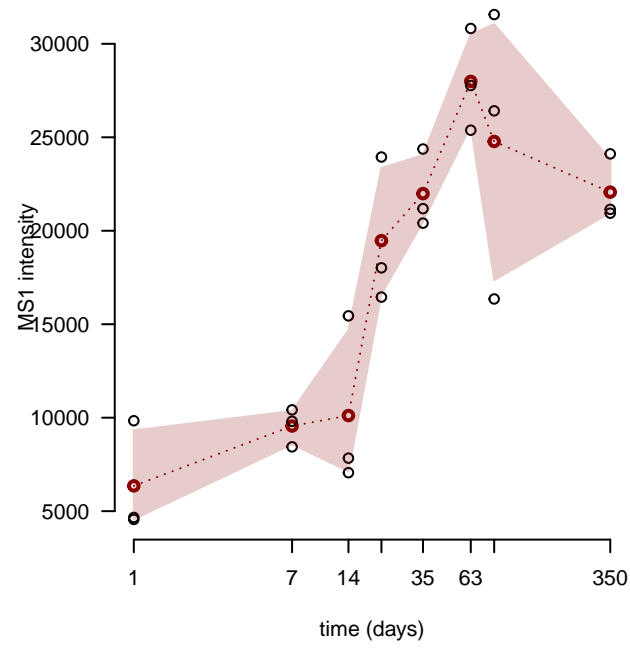

P0C6A2  
GN=Maml1  
mastermind-like domain containing 1

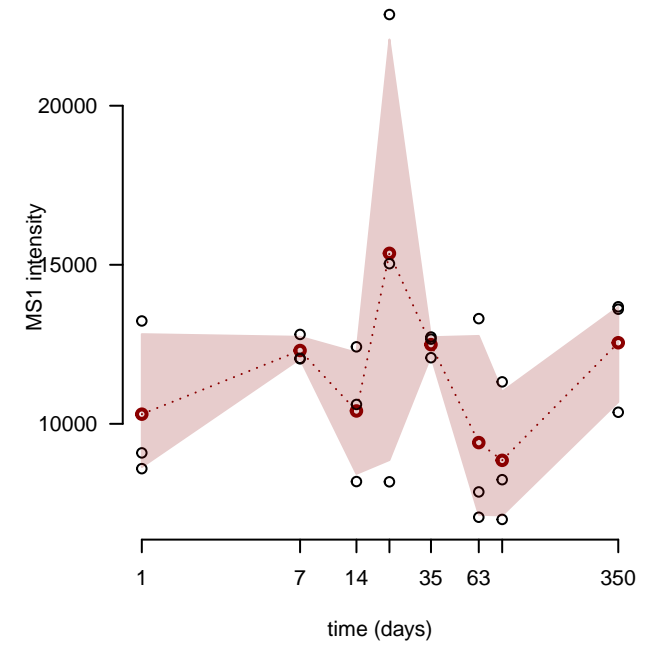

P0C7L0  
GN=Wipf3  
WAS/WASL interacting protein family, mem ...

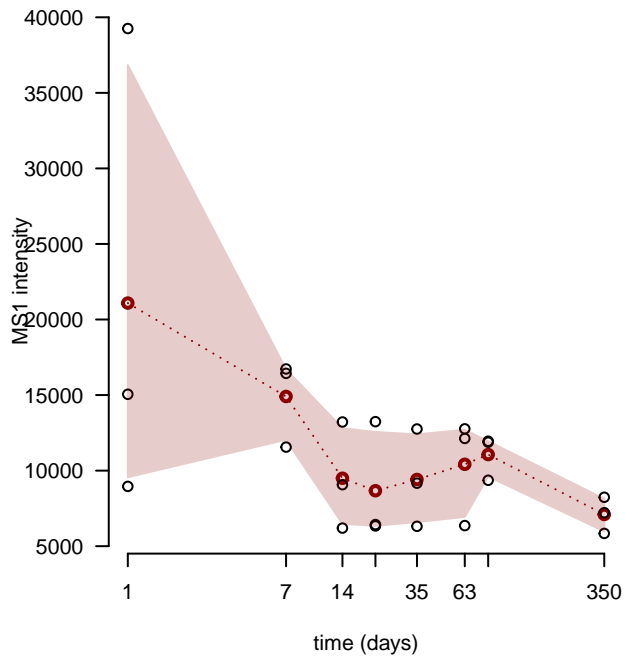

P0C7N9  
GN=Psmg4  
proteasome (prosome, macropain) assembly ...

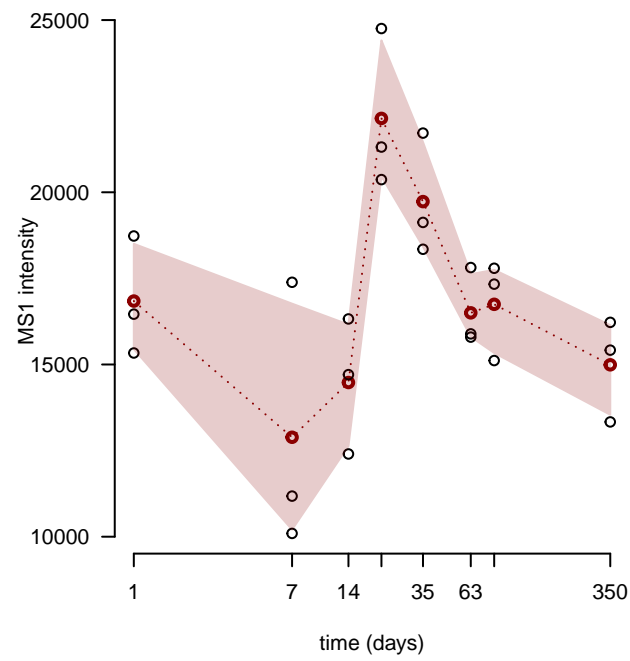

P0C7T6  
GN=Atxn1l  
ataxin 1-like

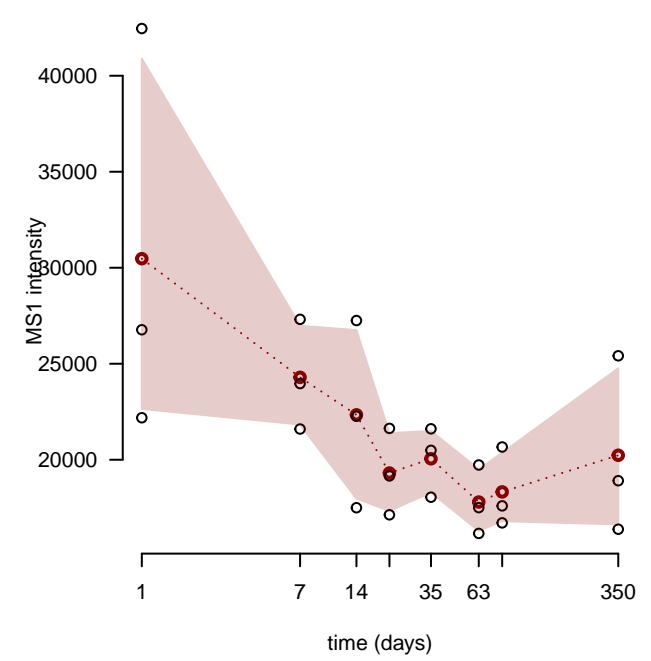

P0C872  
GN=Jmjd7  
jumonji domain containing 7

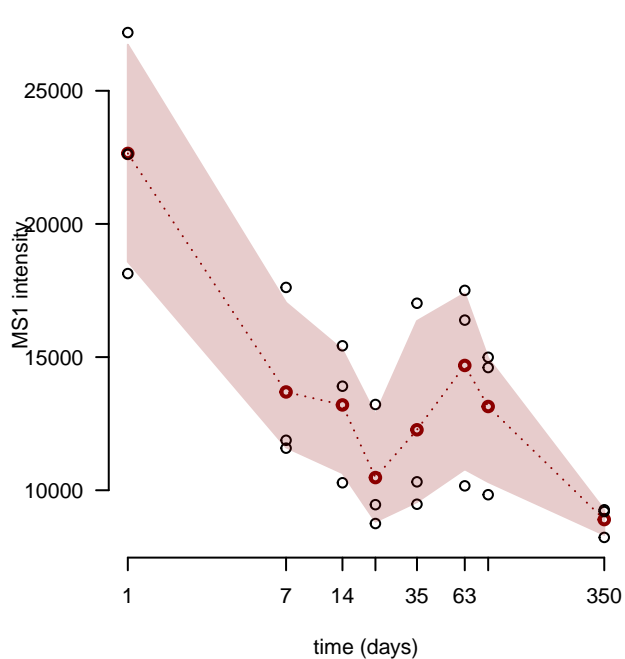

P0C8K7  
GN=Smim1  
small integral membrane protein 1

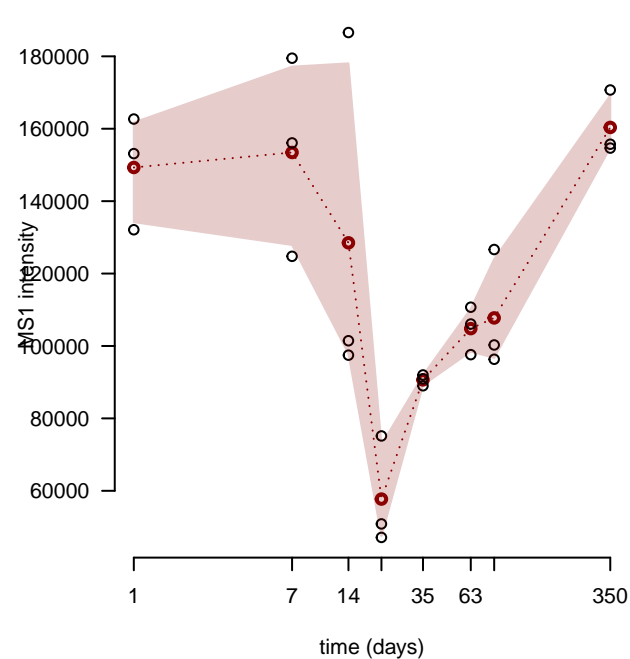

P0CG14  
GN=Derpc

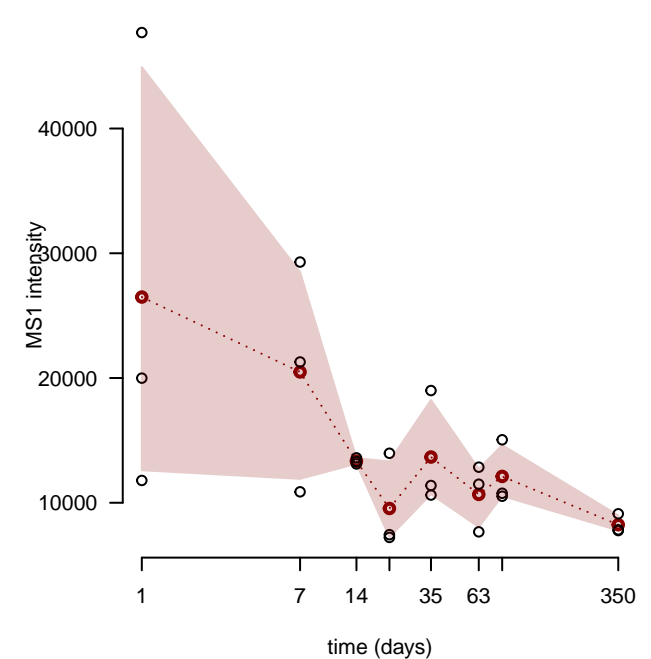

**P0CG15**  
GN=Chtf8  
CTF8, chromosome transmission fidelity f ...

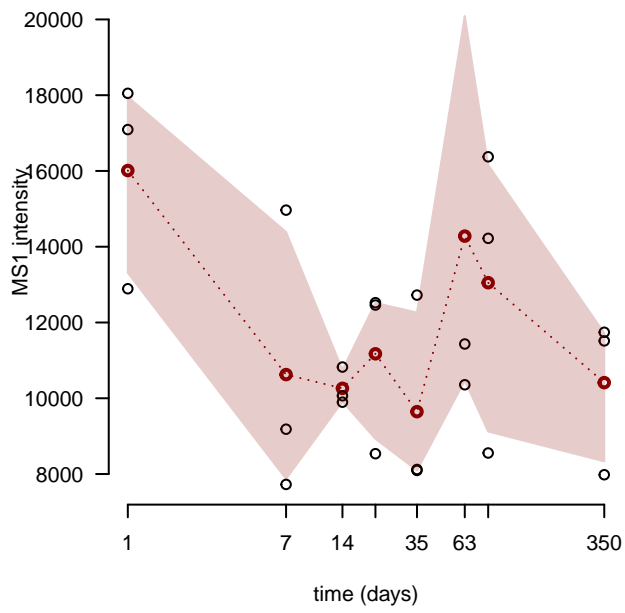

**P0CL69**  
GN=Znf703

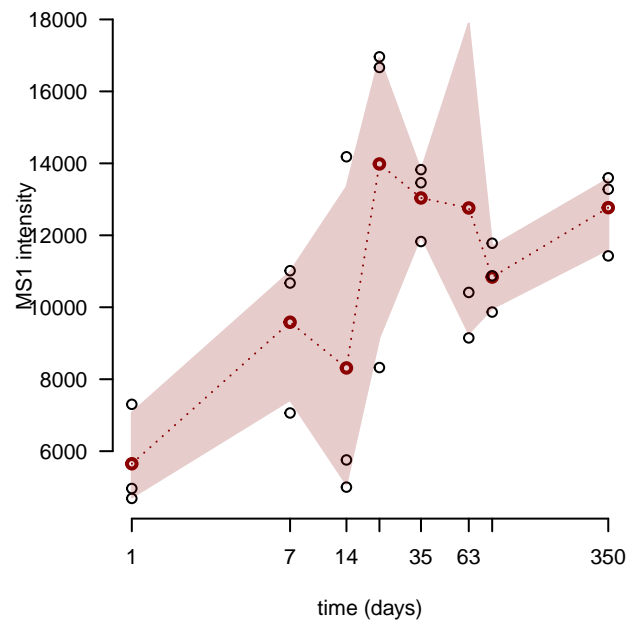

**P0DJF2**  
GN=Pet117  
PET117 homolog

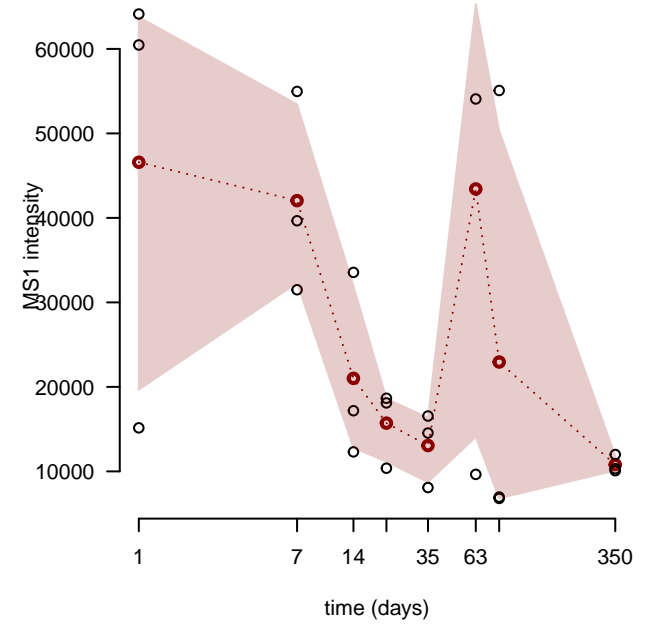

**P0DN34**  
GN=Ndufb1  
NADH:ubiquinone oxidoreductase subunit B ...

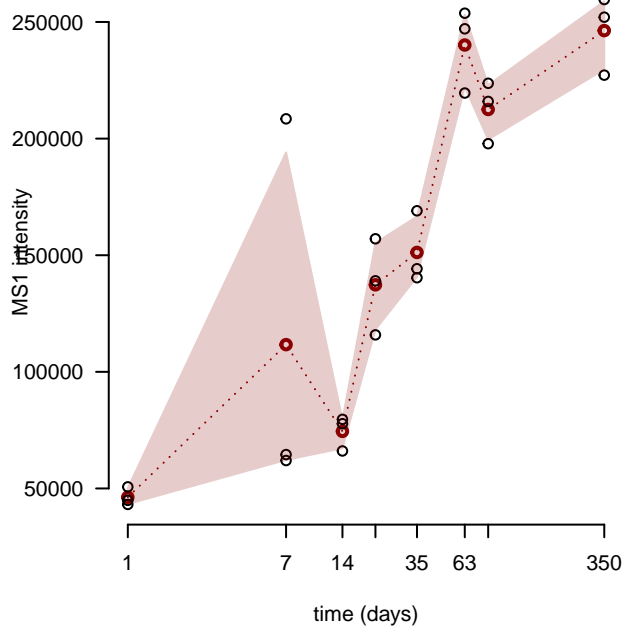

**P0DN89**  
GN=Tmem254a

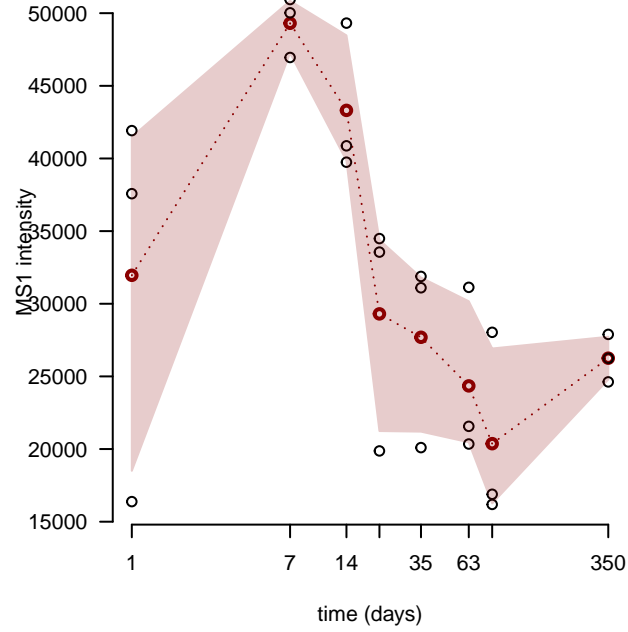

**P0DOV2**  
GN=Ifi204  
interferon activated gene 204

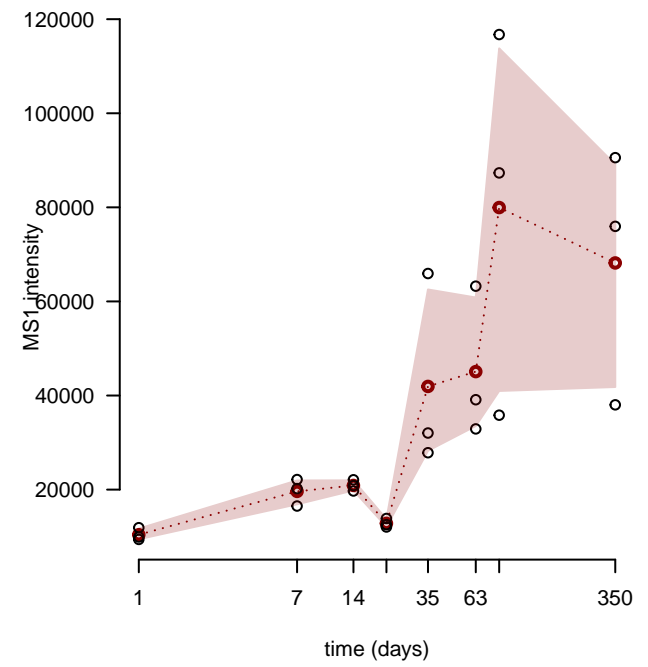

**P0DP26**  
GN=Calm1  
calmodulin 1

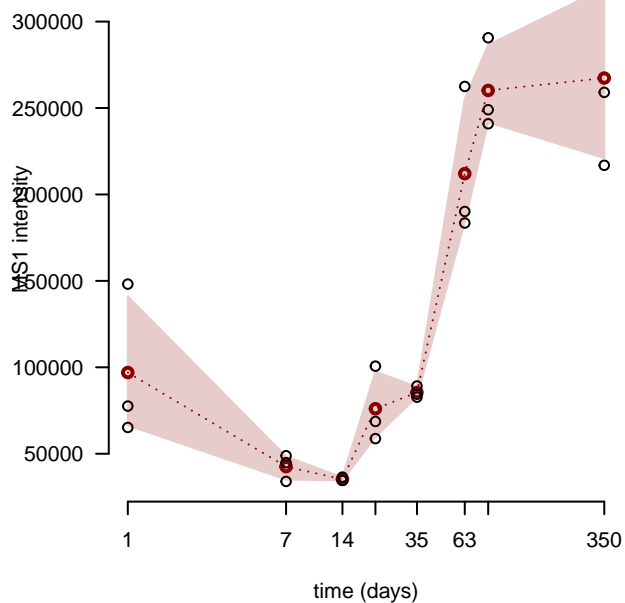

**P10107**  
GN=Anxa1  
annexin A1

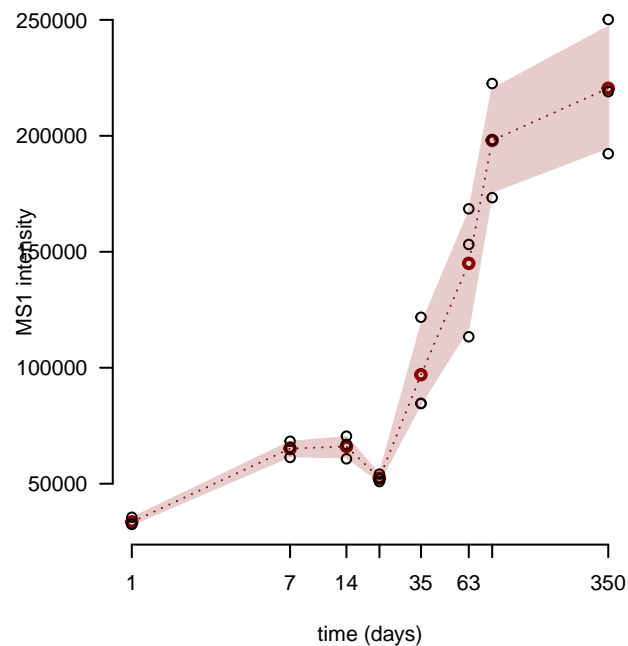

**P10126**  
GN=Eef1a1  
eukaryotic translation elongation factor ...

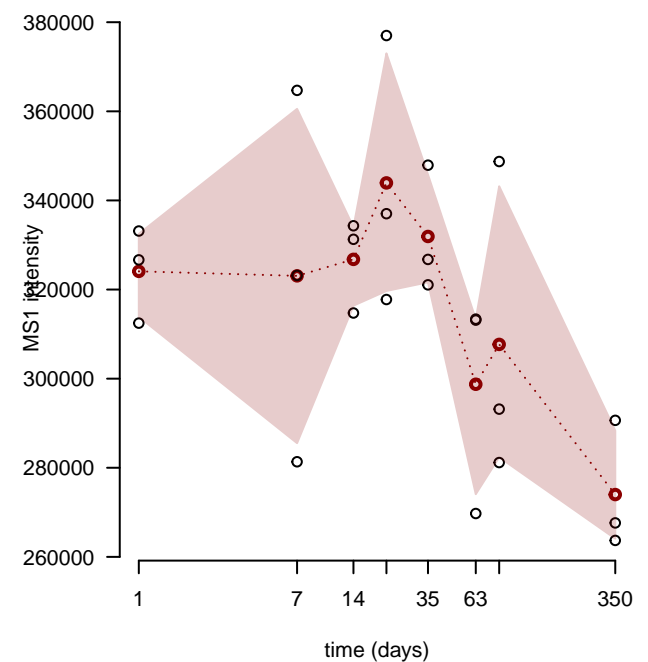



**P10287**  
GN=Cdh3  
cadherin 3

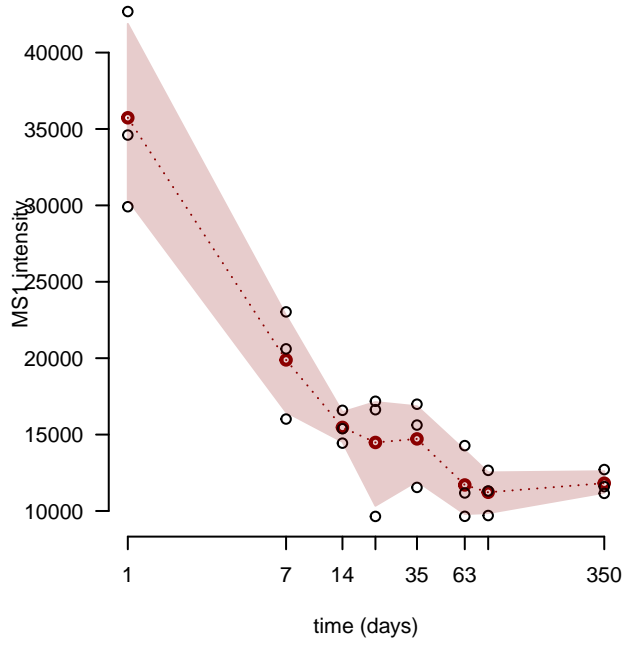

**P10404**  
GN=

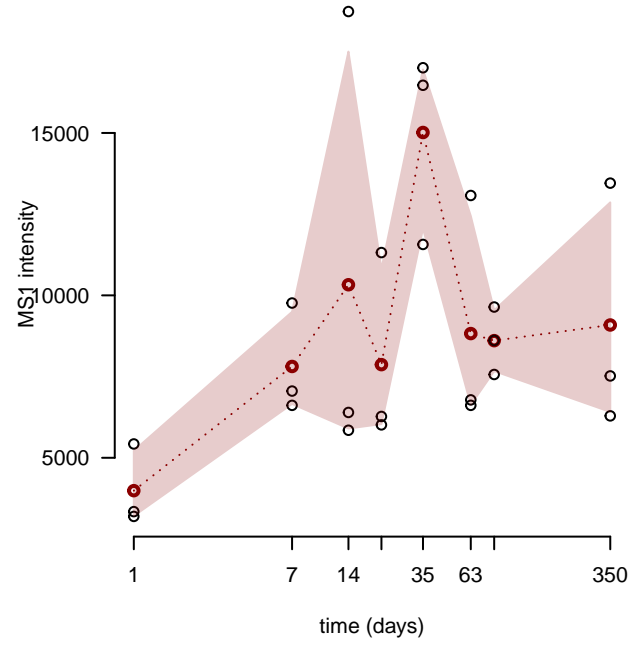

**P10417**  
GN=Bcl2  
B cell leukemia/lymphoma 2

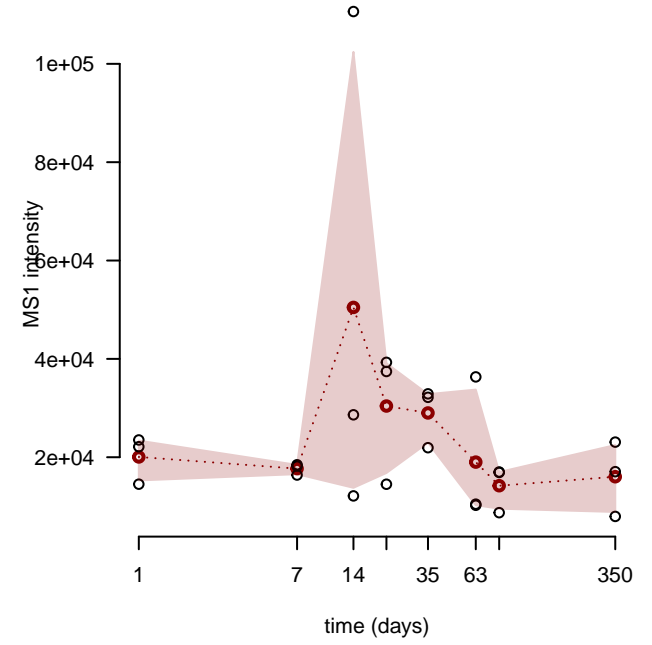

**P10493**  
GN=Nid1  
nidogen 1

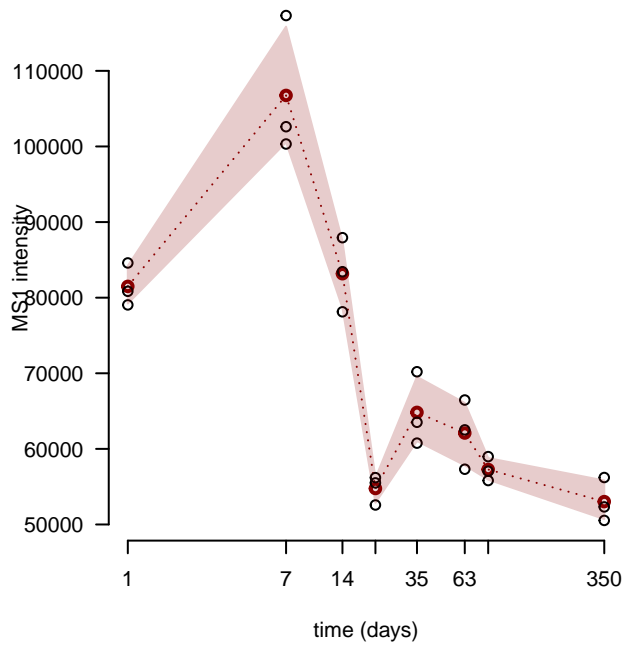

**P10518**  
GN=Alad  
aminolevulinatase, delta-, dehydratase

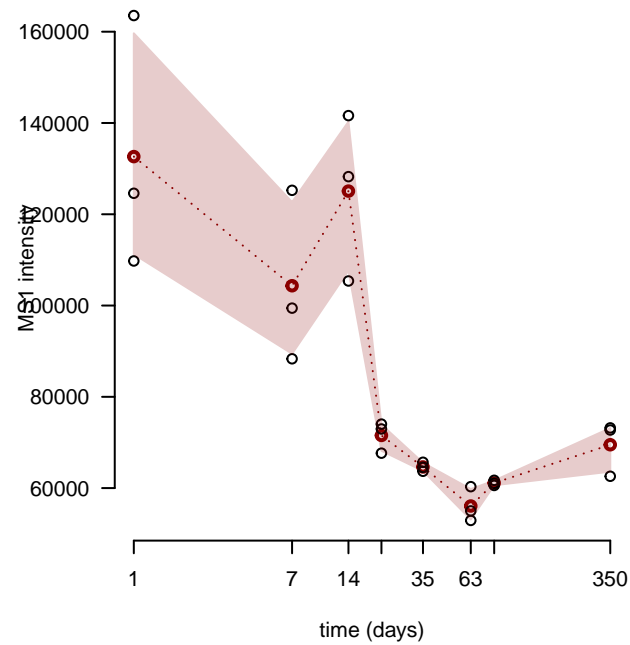

**P10605**  
GN=Ctsb  
cathepsin B

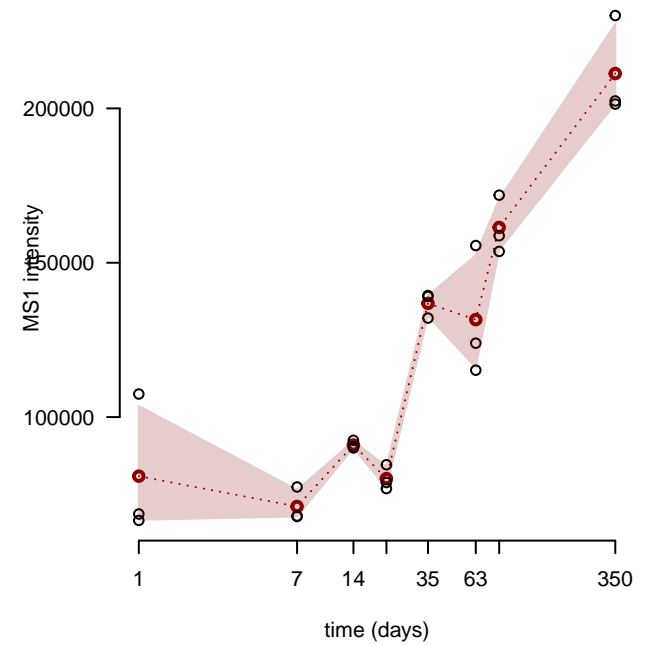

**P10629**  
GN=Hoxc6  
homeobox C6

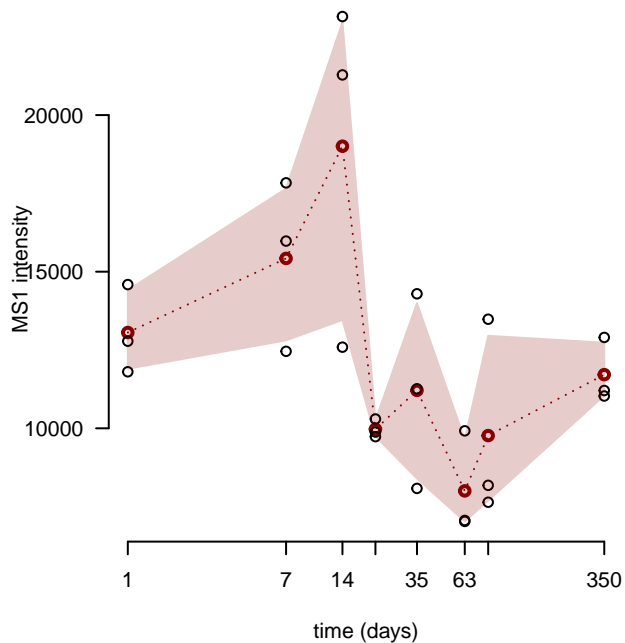

**P10630**  
GN=Eif4a2  
eukaryotic translation initiation factor ...

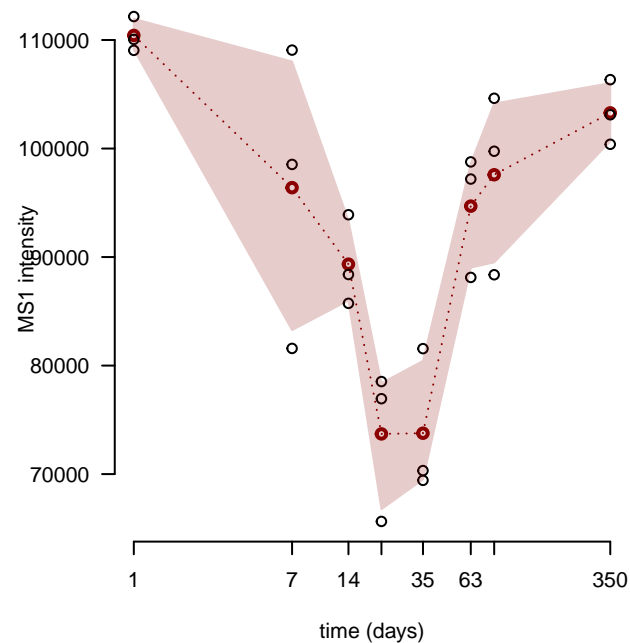

**P10637**  
GN=Mapt  
microtubule-associated protein tau

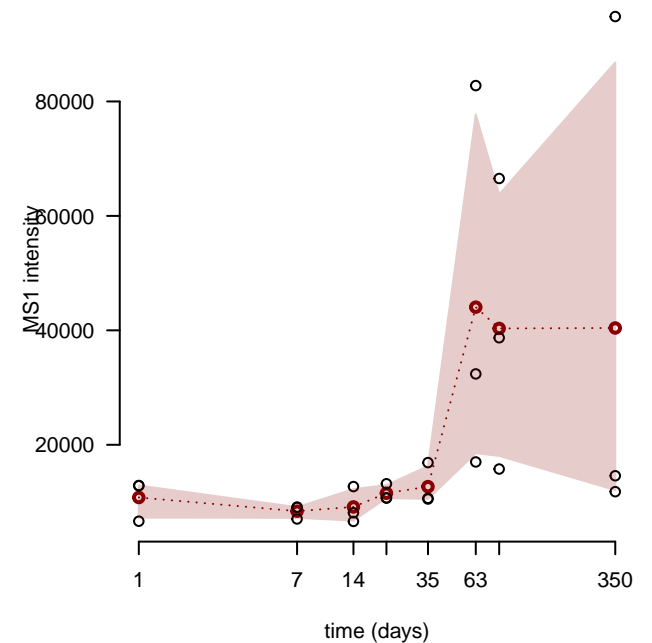

P10639  
GN=Txn

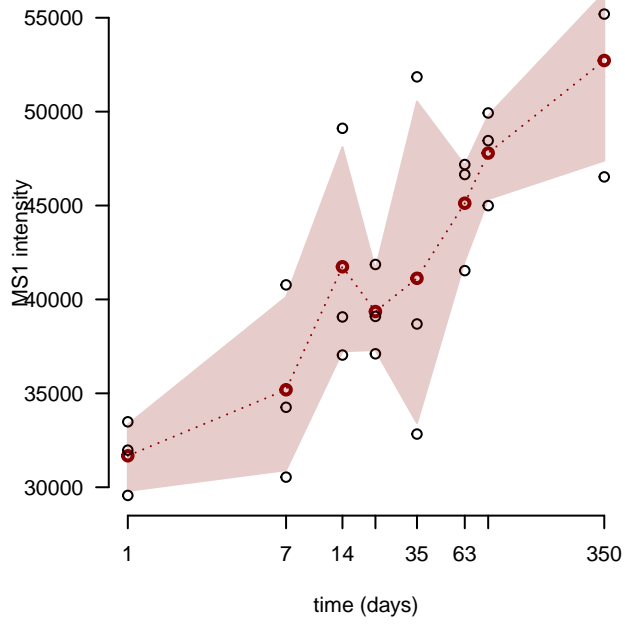

P10649  
GN=Gstm1  
glutathione S-transferase, mu 1

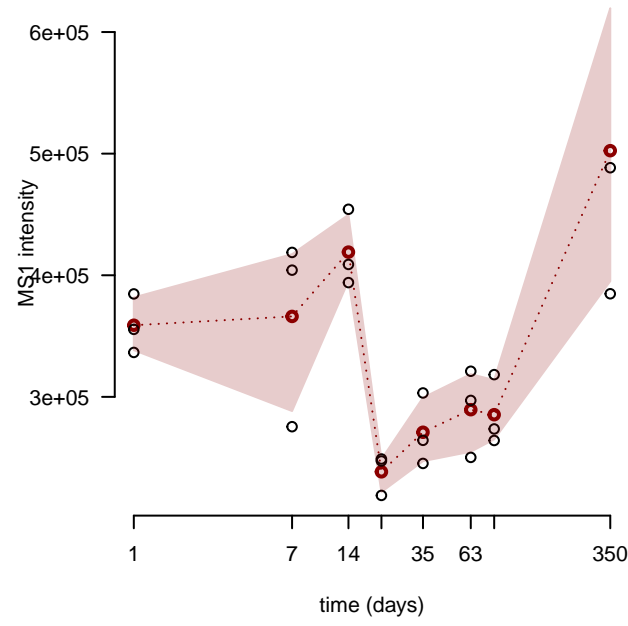

P10711  
GN=Tcea1  
transcription elongation factor A (SII) ...

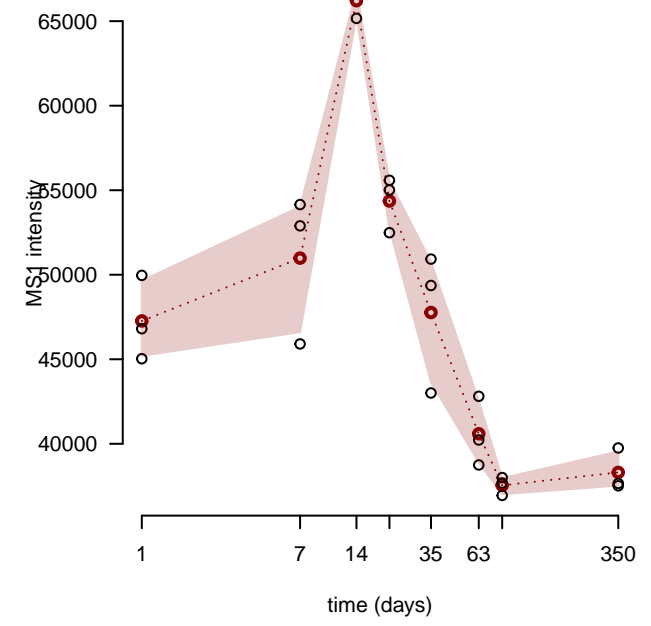

P10761  
GN=Zp3  
zona pellucida glycoprotein 3

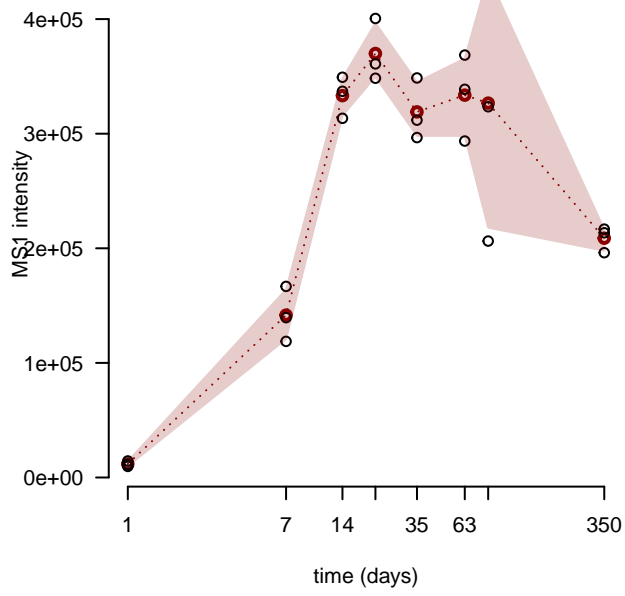

P10810  
GN=Cd14  
CD14 antigen

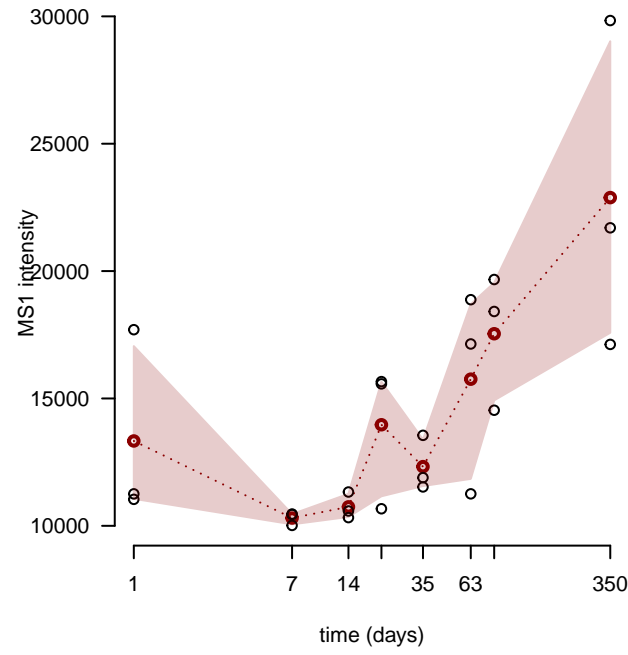

P10833  
GN=Rras  
related RAS viral (r-ras) oncogene

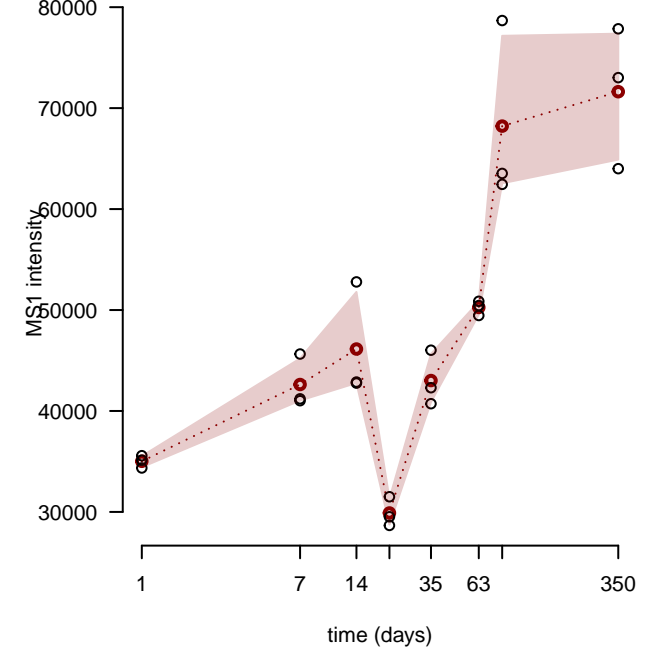

P10852  
GN=Slc3a2  
solute carrier family 3 (activators of d ...

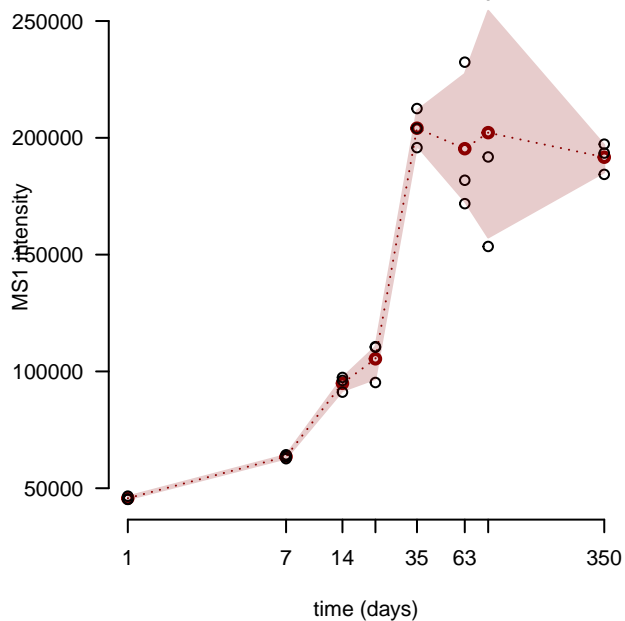

P10852  
GN=Slc3a2  
solute carrier family 3 (activators of d ...

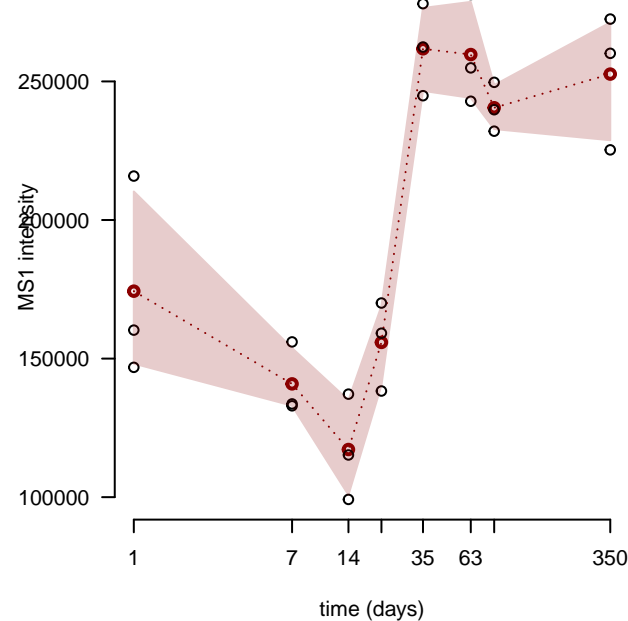

P10922  
GN=H1f0  
H1.0 linker histone

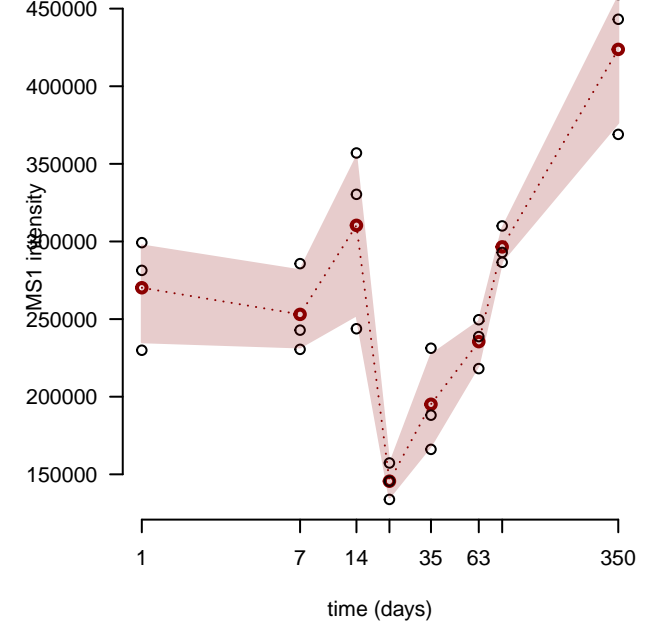

**P11031**  
**GN=Sub1**  
SUB1 homolog, transcriptional regulator

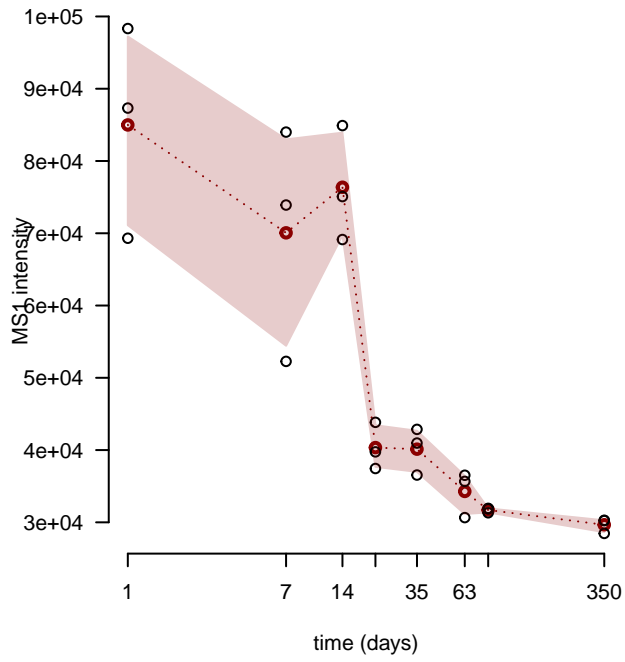

**P11087**  
**GN=Col1a1**  
collagen, type I, alpha 1

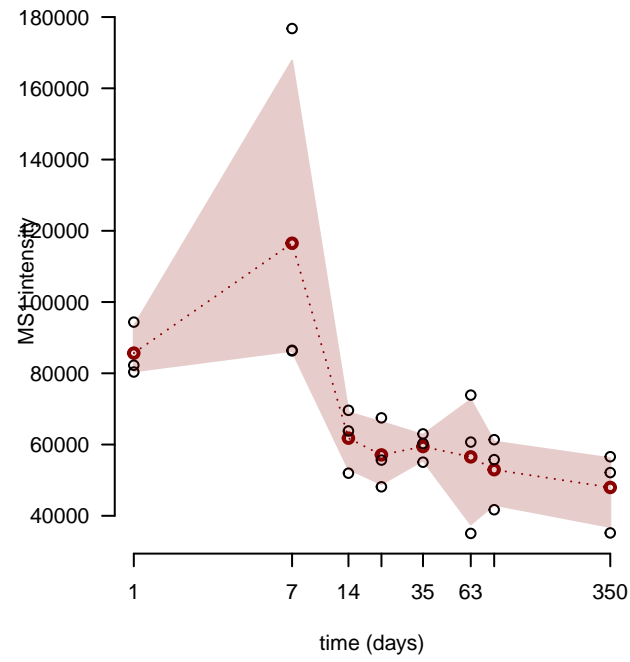

**P11088**  
**GN=Flg**  
filaggrin

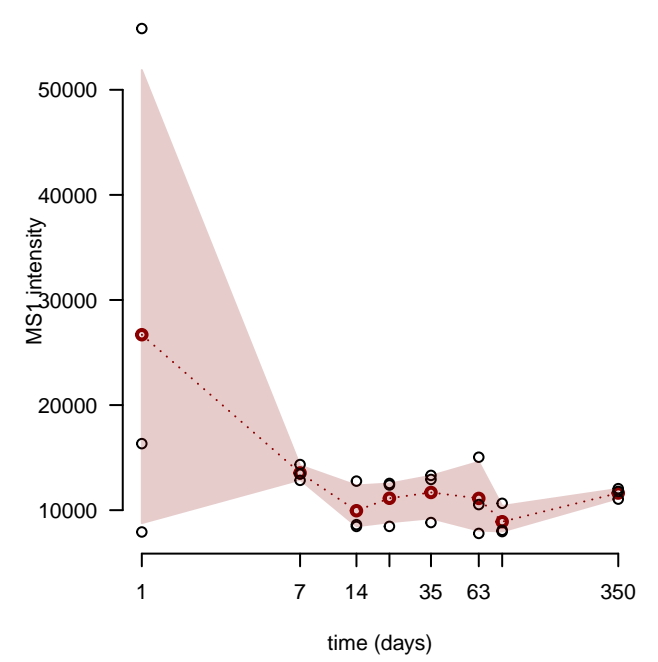

**P11103**  
**GN=Parp1**  
poly (ADP-ribose) polymerase family, mem ...

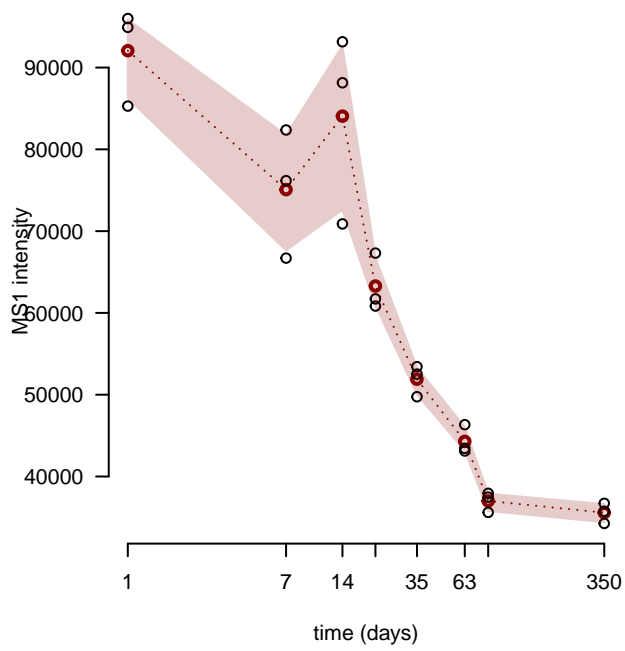

**P11152**  
**GN=Lpl**  
lipoprotein lipase

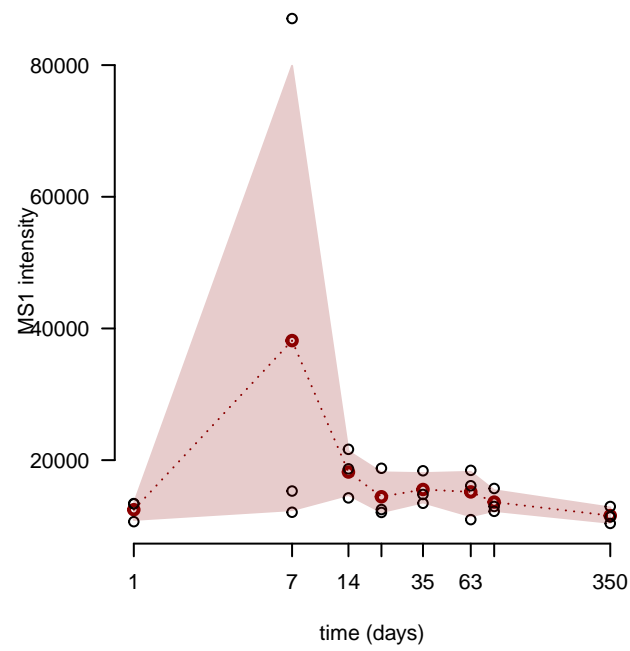

**P11157**  
**GN=Rrm2**  
ribonucleotide reductase M2

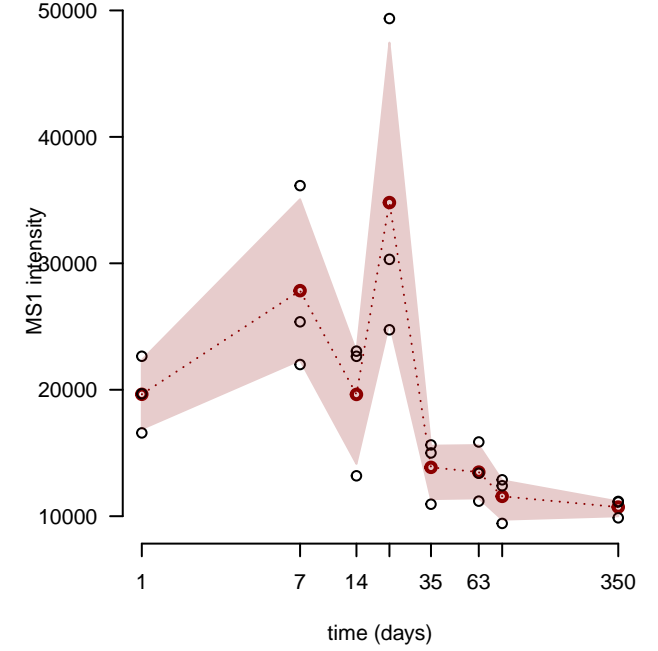

**P11247**  
**GN=Mpo**  
myeloperoxidase

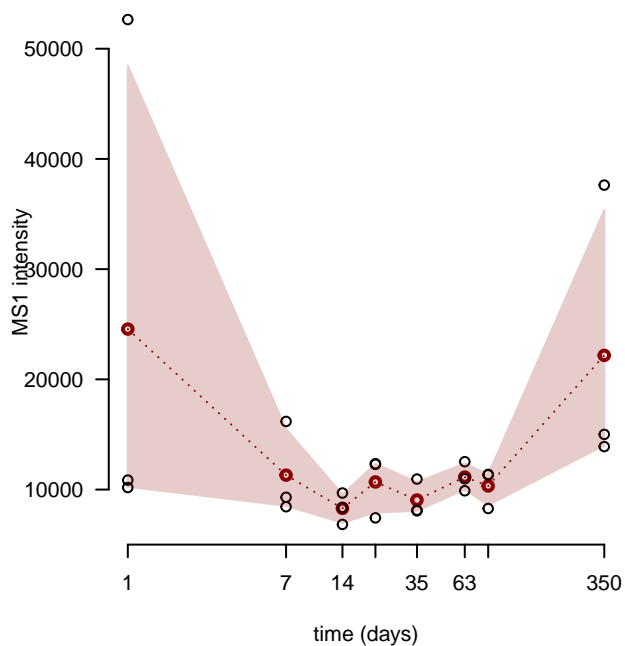

**P11276**  
**GN=Fn1**  
fibronectin 1

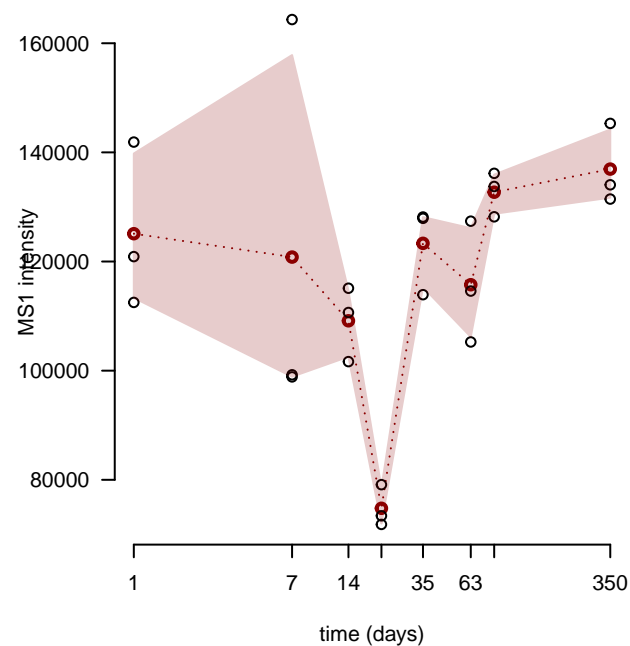

**P11352**  
**GN=Gpx1**  
glutathione peroxidase 1

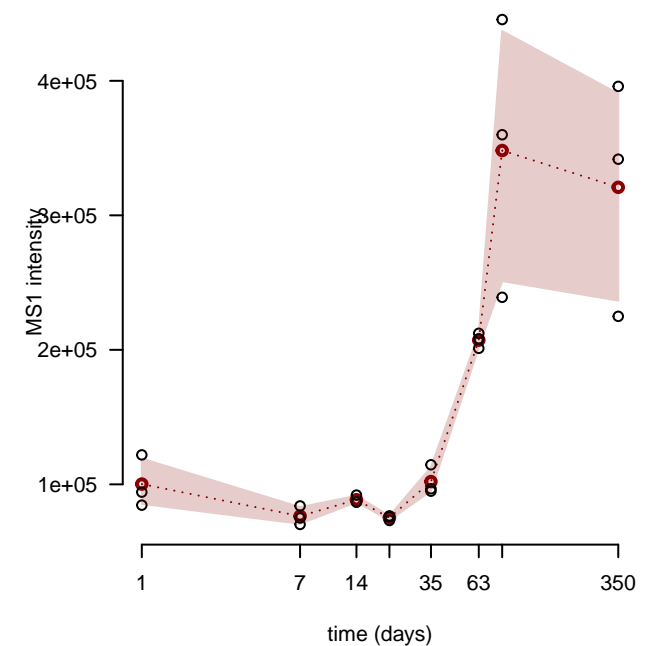

**P11404**  
GN=Fabp3  
fatty acid binding protein 3, muscle and ...

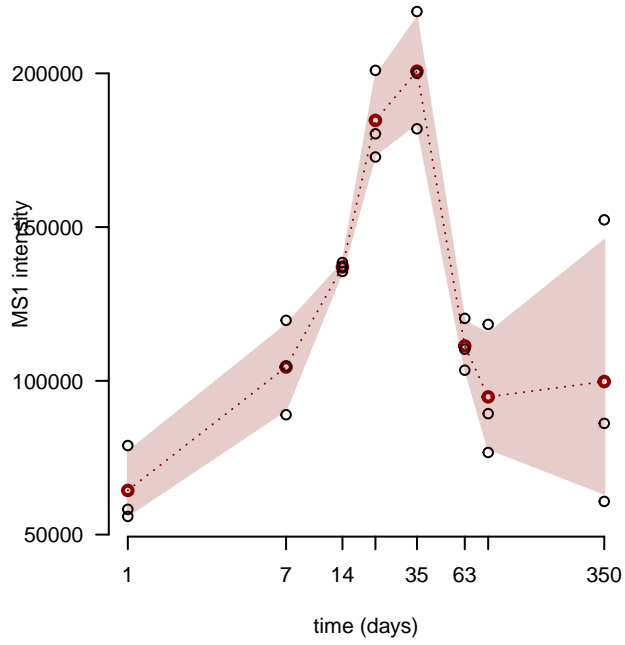

**P11438**  
GN=Lamp1  
lysosomal-associated membrane protein 1

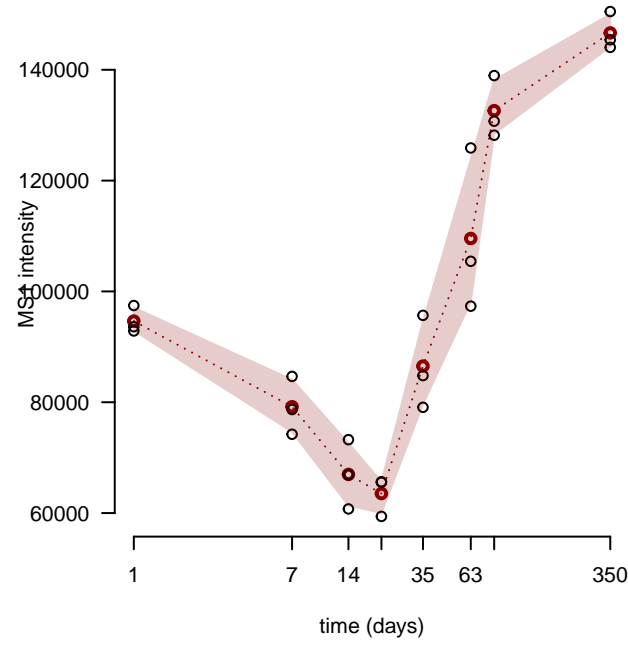

**P11440**  
GN=Cdk1  
cyclin-dependent kinase 1

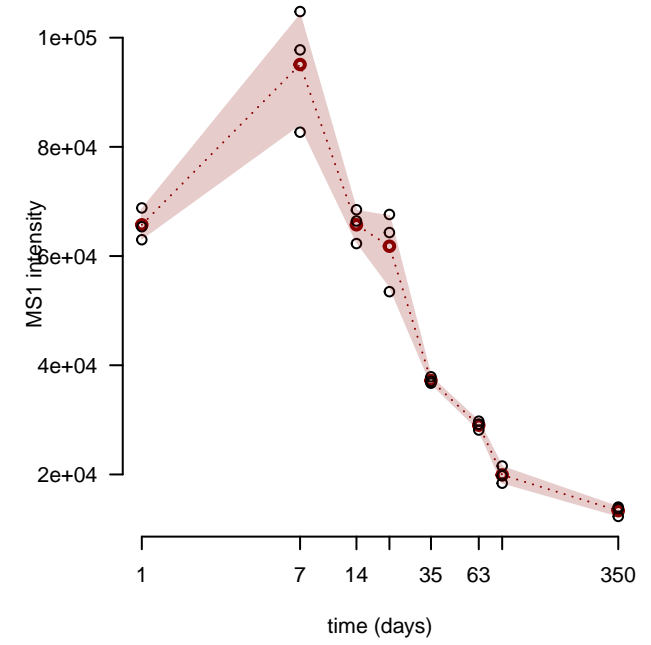

**P11499**  
GN=Hsp90ab1  
heat shock protein 90 alpha (cytosolic), ...

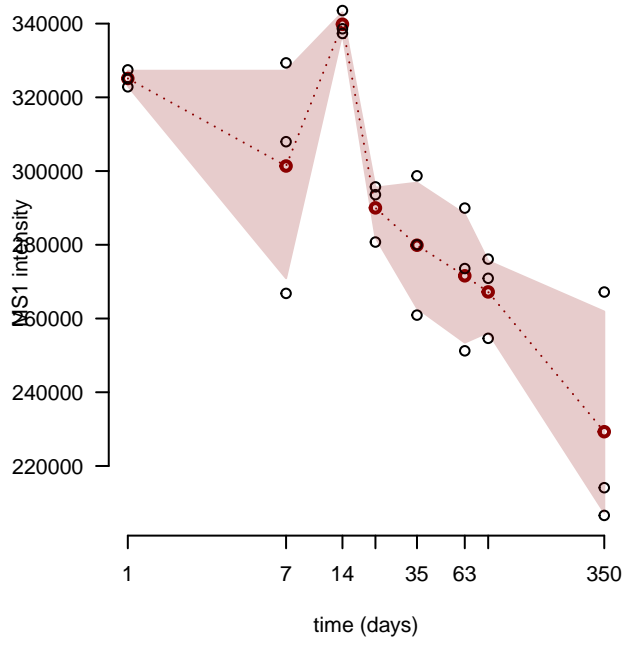

**P11531**  
GN=Dmd  
dystrophin, muscular dystrophy

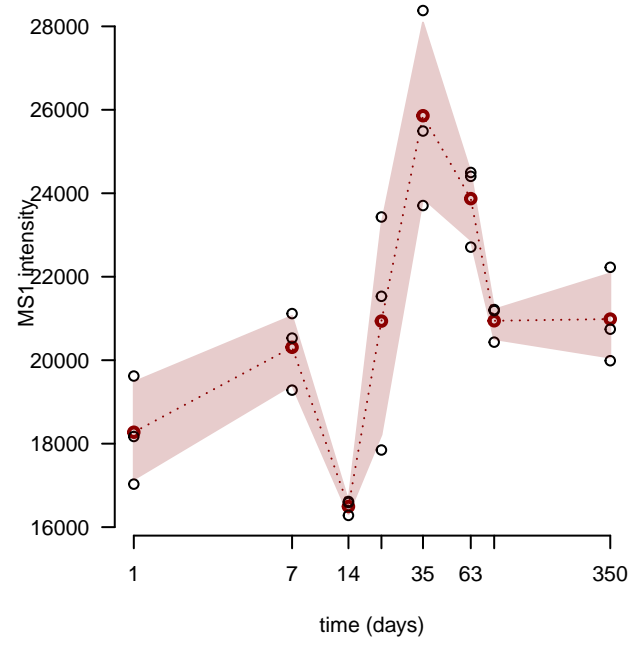

**P11589**  
GN=Mup2  
major urinary protein 2

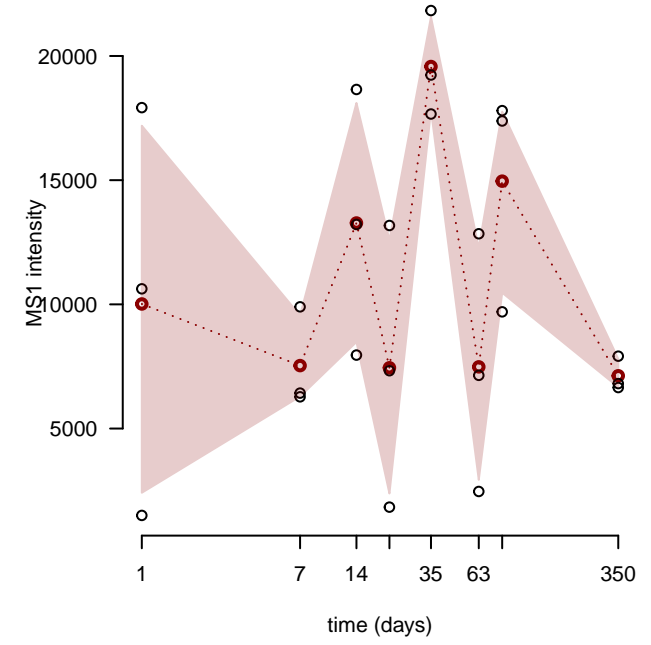

**P11609**  
GN=Cd1d1  
CD1d1 antigen

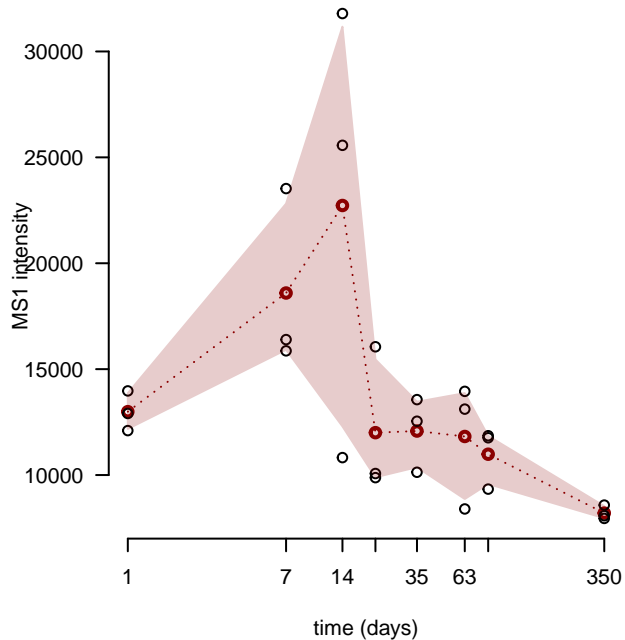

**P11672**  
GN=Lcn2  
lipocalin 2

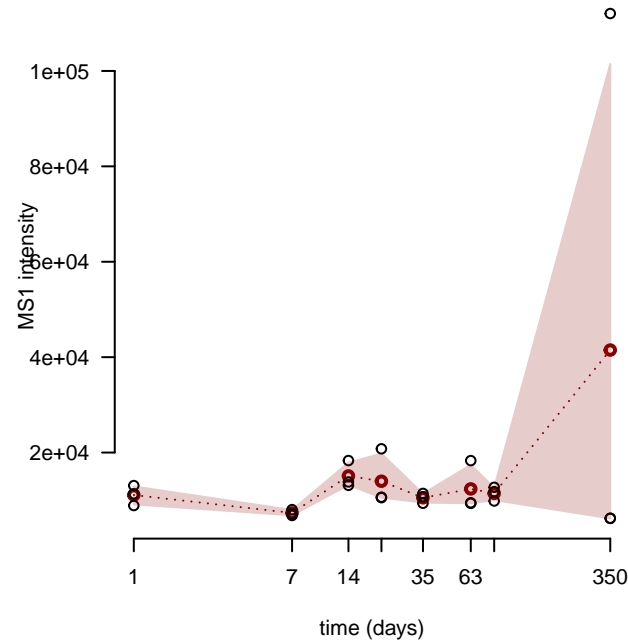

**P11679**  
GN=Krt8  
keratin 8

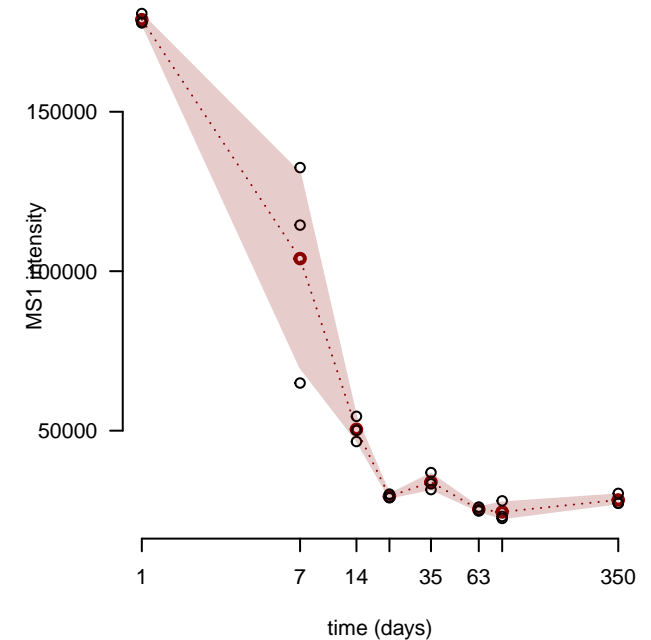

**P11680**  
GN=Cfp  
complement factor properdin

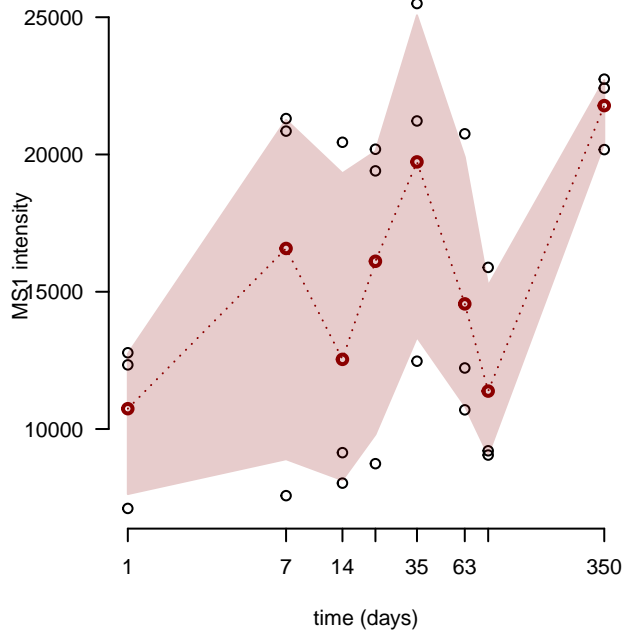

**P11688**  
GN=Itga5  
integrin alpha 5 (fibronectin receptor a ...

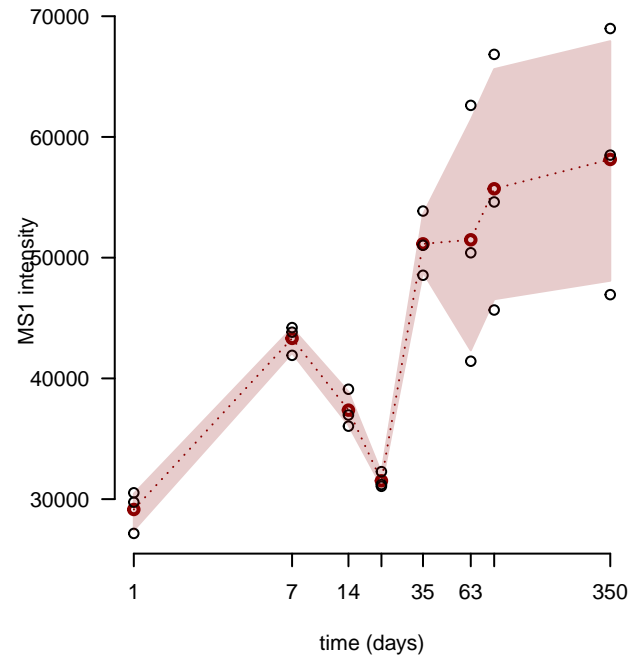

**P11725**  
GN=Otc  
ornithine transcarbamylase

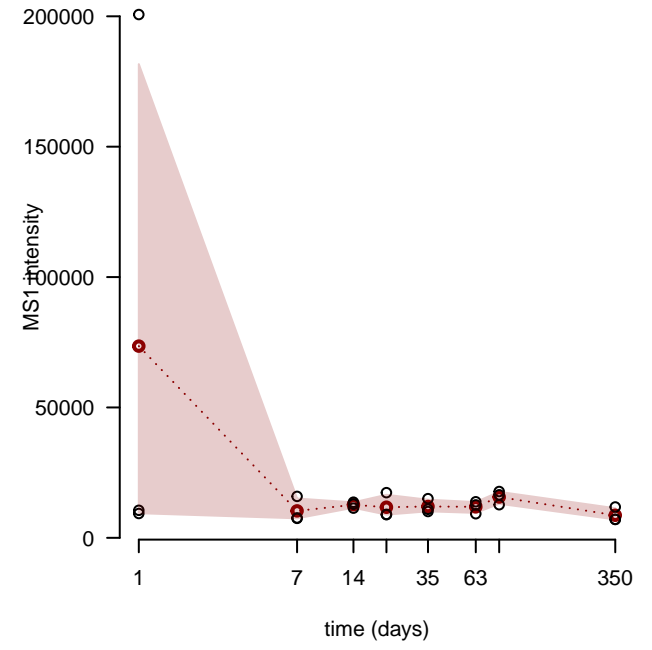

**P11835**  
GN=Itgb2  
integrin beta 2

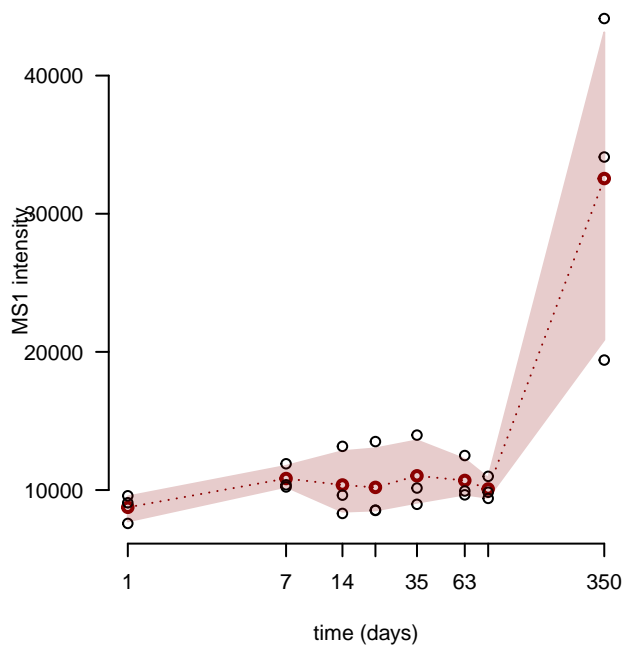

**P11859**  
GN=Agt  
angiotensinogen (serpin peptidase inhibi ...

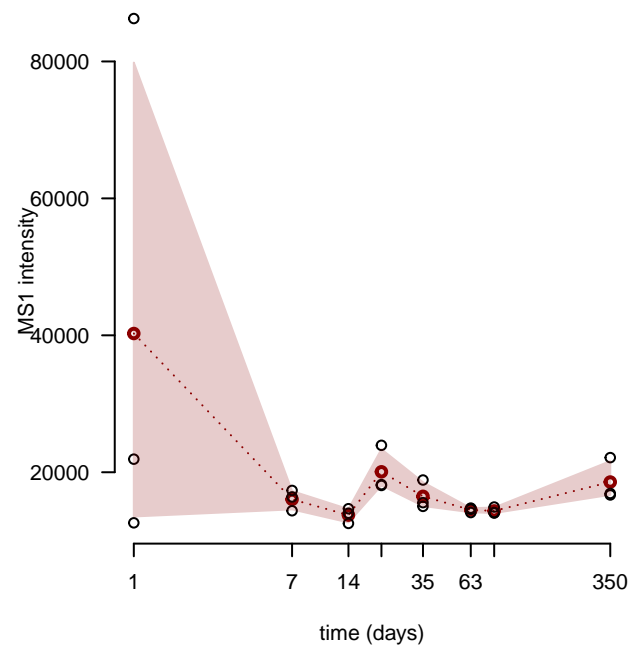

**P11862**  
GN=Gas2  
growth arrest specific 2

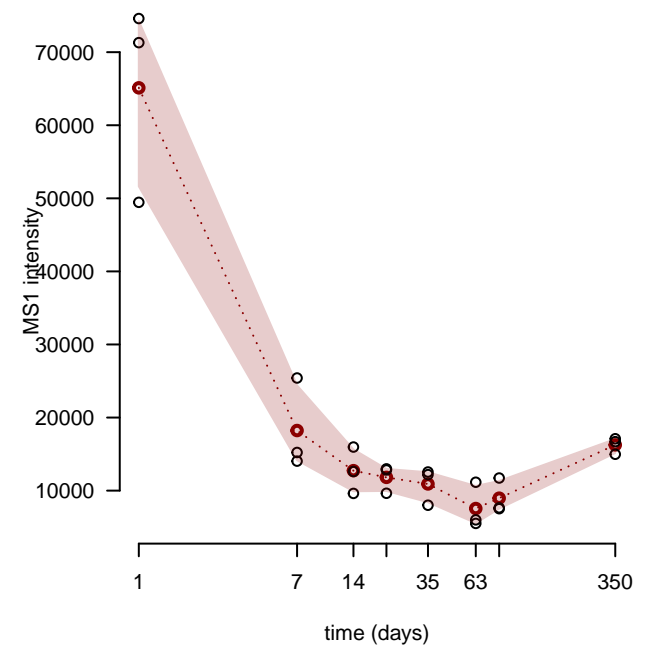

**P11881**  
GN=Itpr1  
inositol 1,4,5-trisphosphate receptor 1

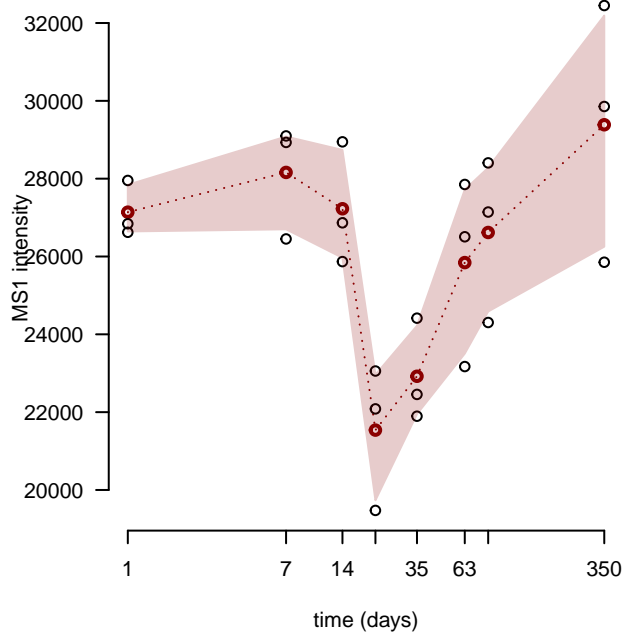

**P11930**  
GN=Nudt19  
nudix (nucleoside diphosphate linked moi ...

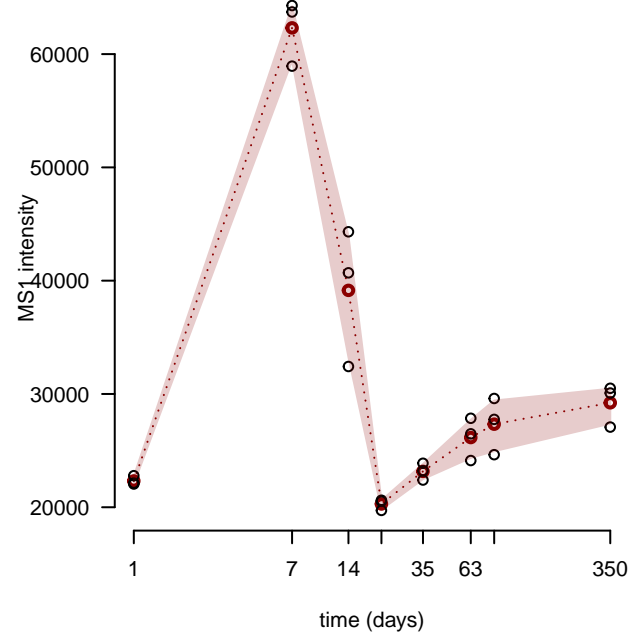

**P11983**  
GN=Tcp1  
t-complex protein 1

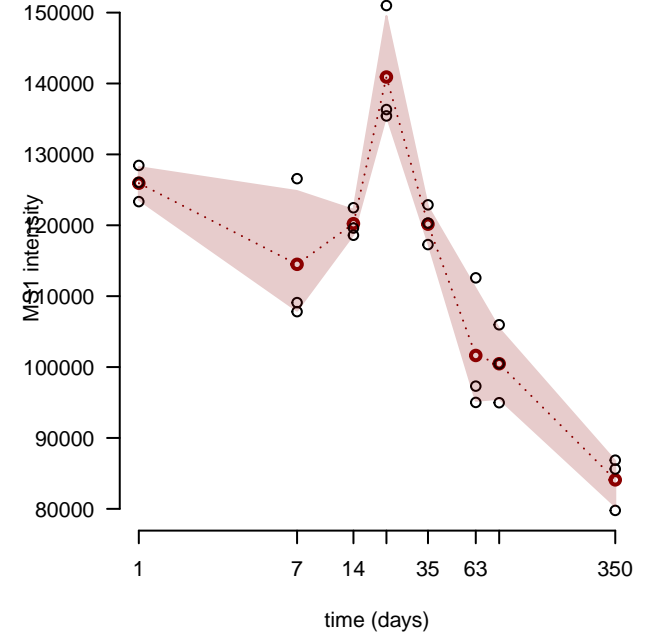

**P12023**  
GN=App  
amyloid beta (A4) precursor protein

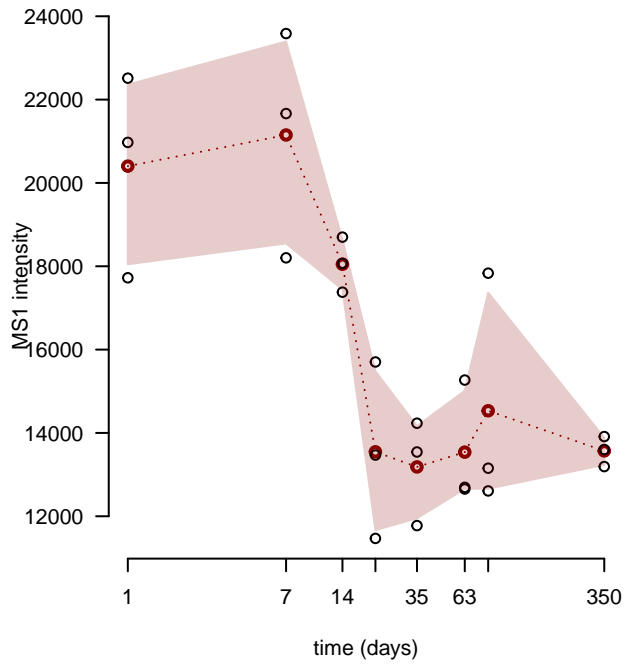

**P12025**  
GN=Mdk  
midkine

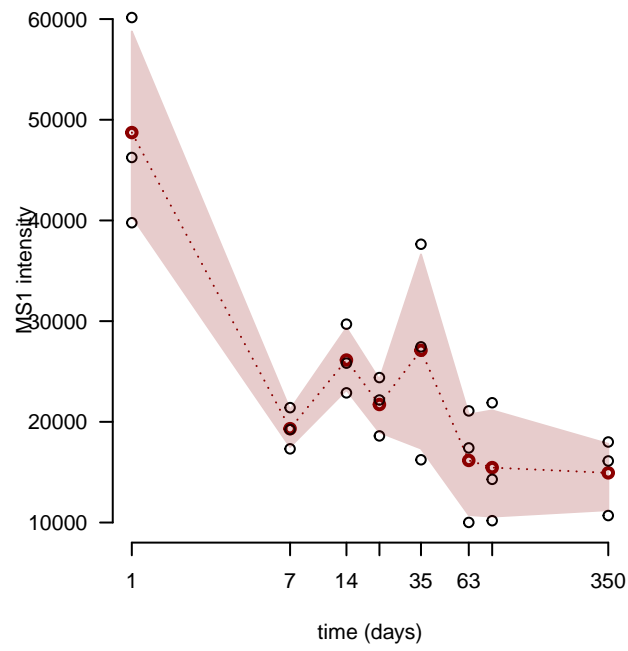

**P12032**  
GN=Timp1  
tissue inhibitor of metalloproteinase 1

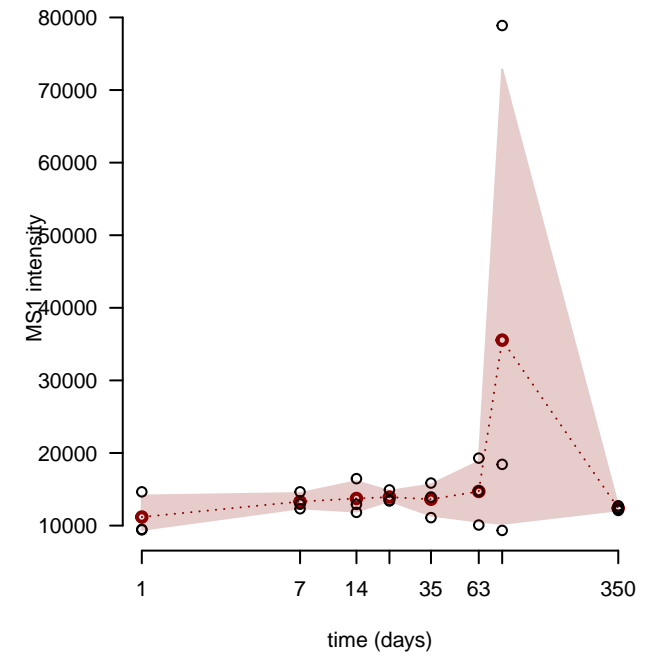

**P12242**  
GN=Ucp1  
uncoupling protein 1 (mitochondrial, pro ...

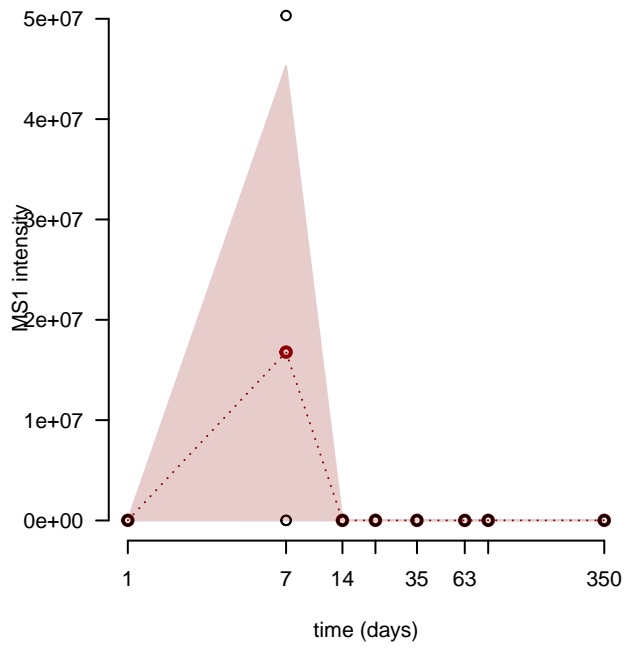

**P12246**  
GN=Apcs  
amyloid P component, serum

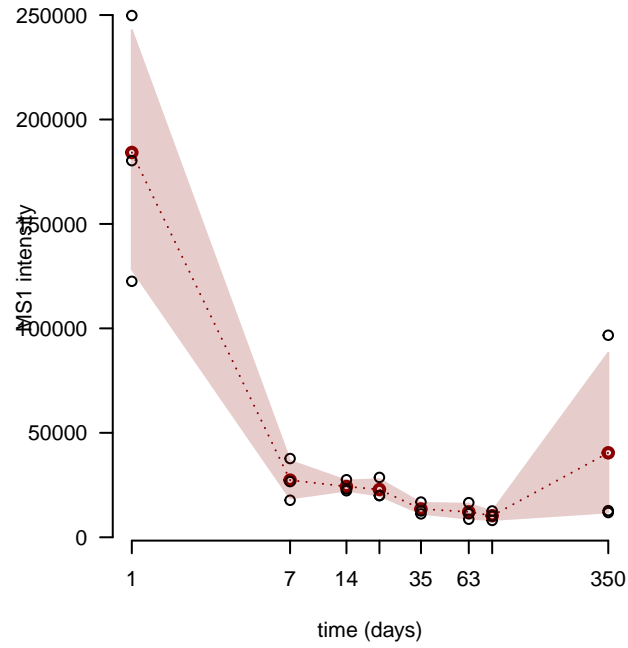

**P12265**  
GN=Gusb  
glucuronidase, beta

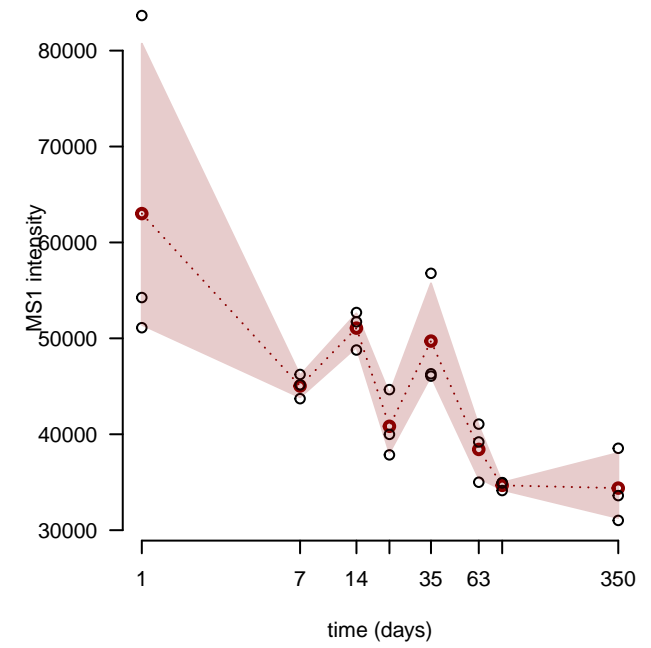

**P12367**  
GN=Prkar2a  
protein kinase, cAMP dependent regulator ...

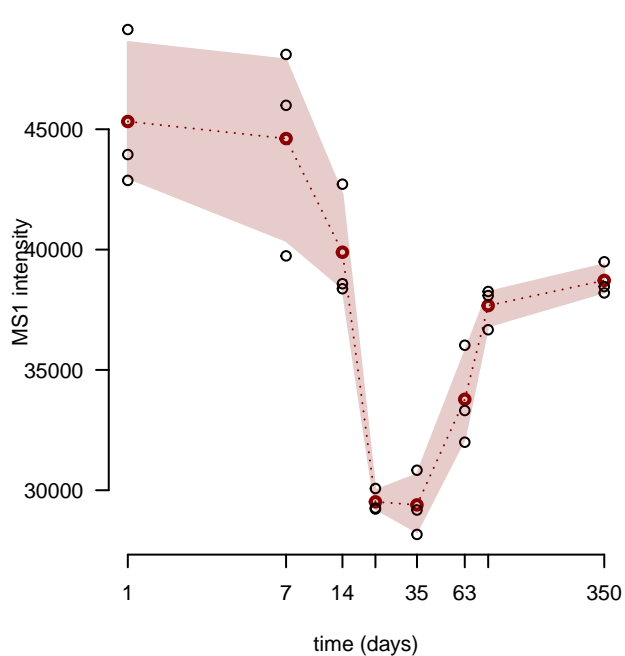

**P12382**  
GN=Pfkf  
phosphofructokinase, liver, B-type

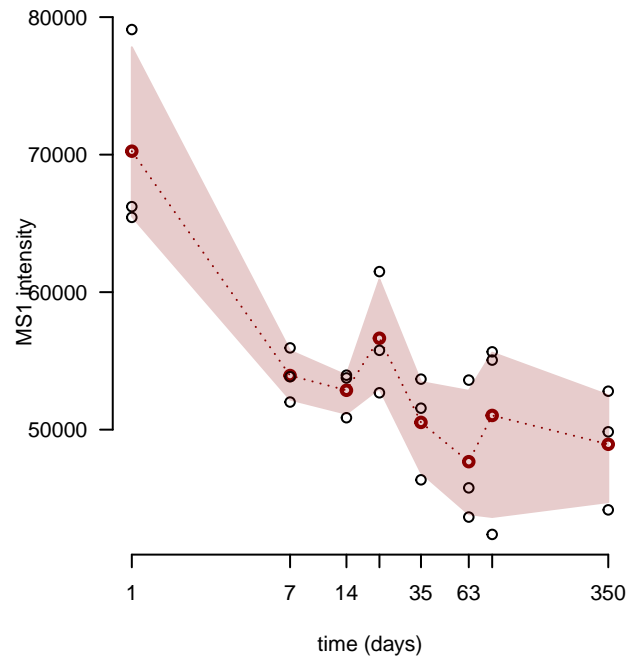

**P12658**  
GN=Calb1  
calbindin 1

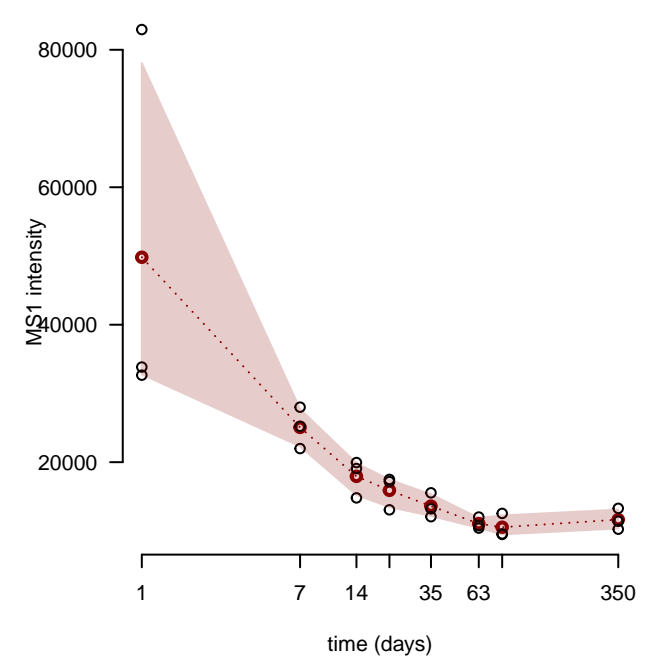

**P12710**  
**GN=Fabp1**  
fatty acid binding protein 1, liver

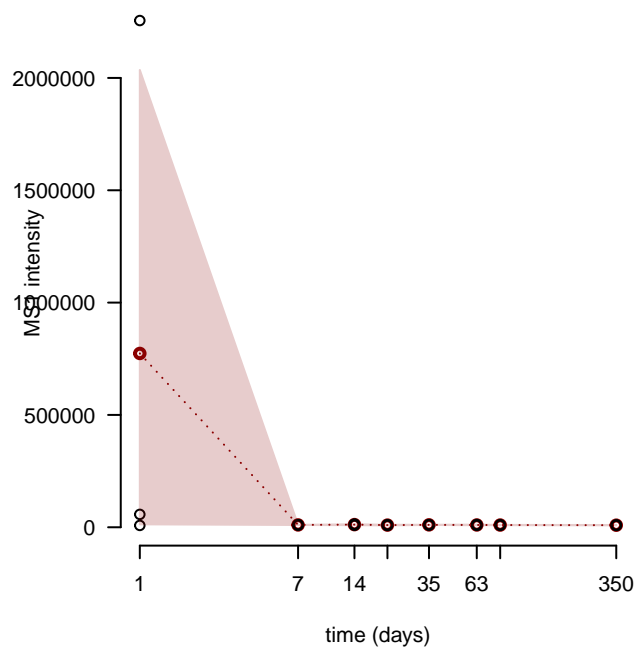

**P12787**  
**GN=Cox5a**  
cytochrome c oxidase subunit 5A

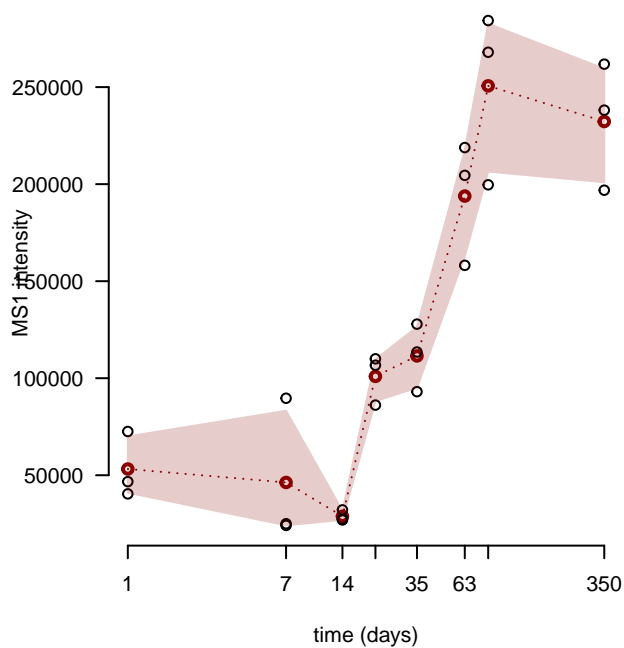

**P12804**  
**GN=Fgl2**  
fibrinogen-like protein 2

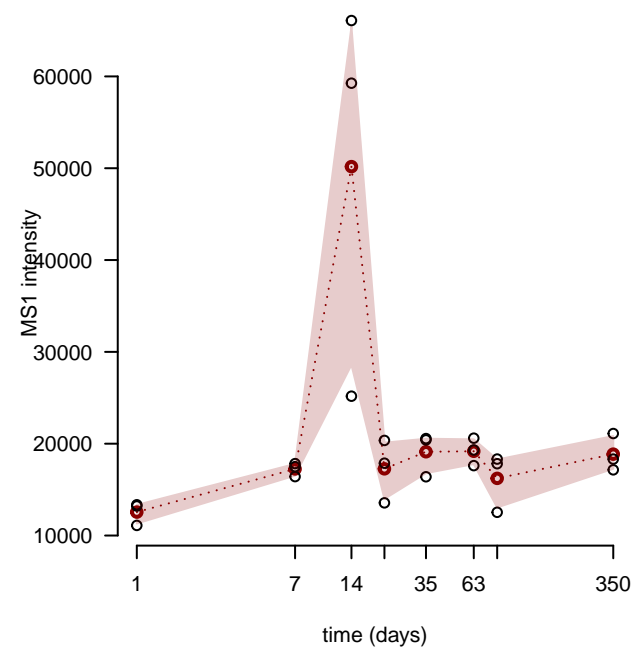

**P12813**  
**GN=Nr4a1**  
nuclear receptor subfamily 4, group A, m ...

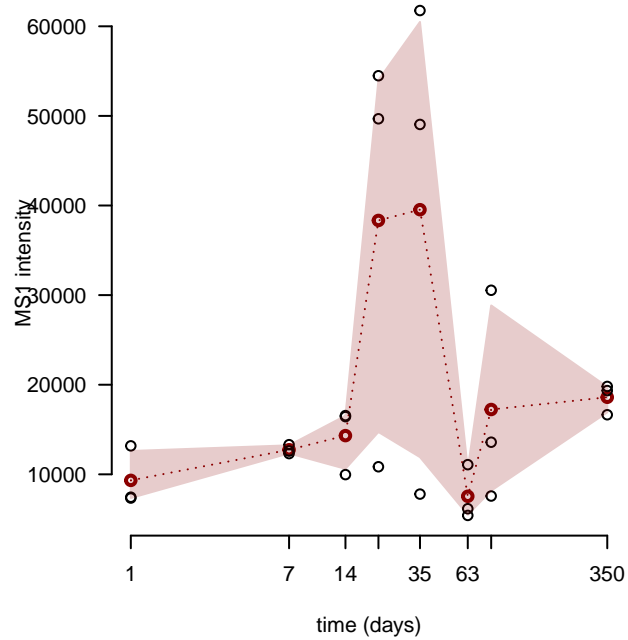

**P12815**  
**GN=Pdcd6**  
programmed cell death 6

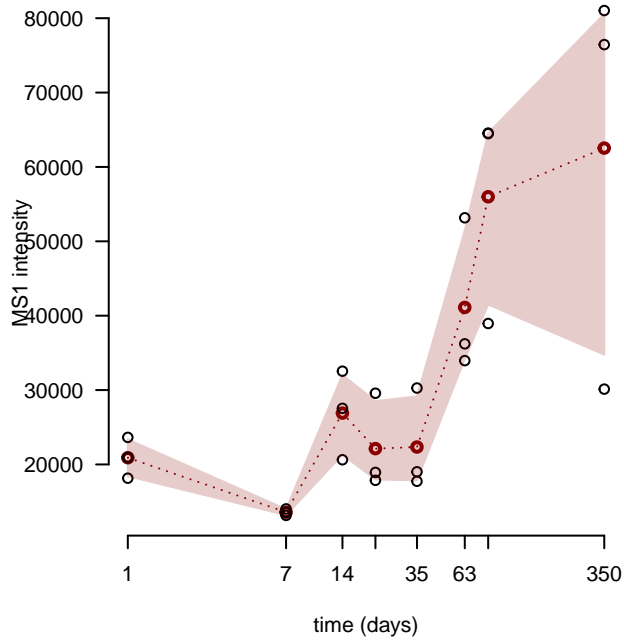

**P12970**  
**GN=Rpl7a**  
ribosomal protein L7A

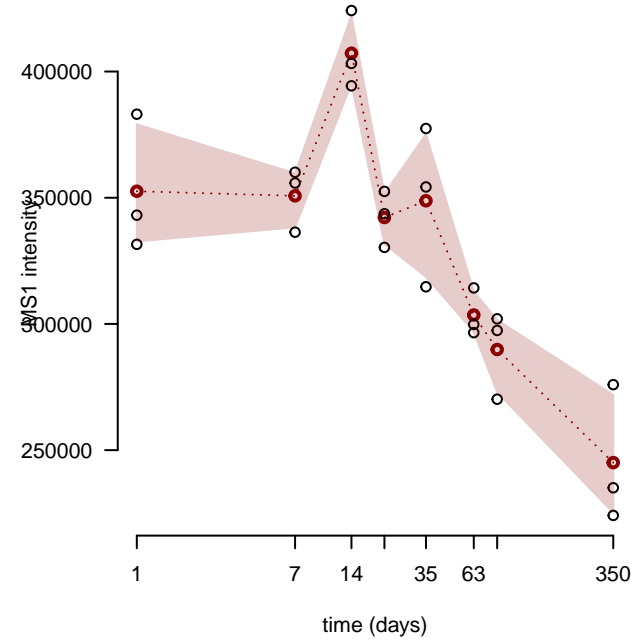

**P13011**  
**GN=Scd2**  
stearoyl-Coenzyme A desaturase 2

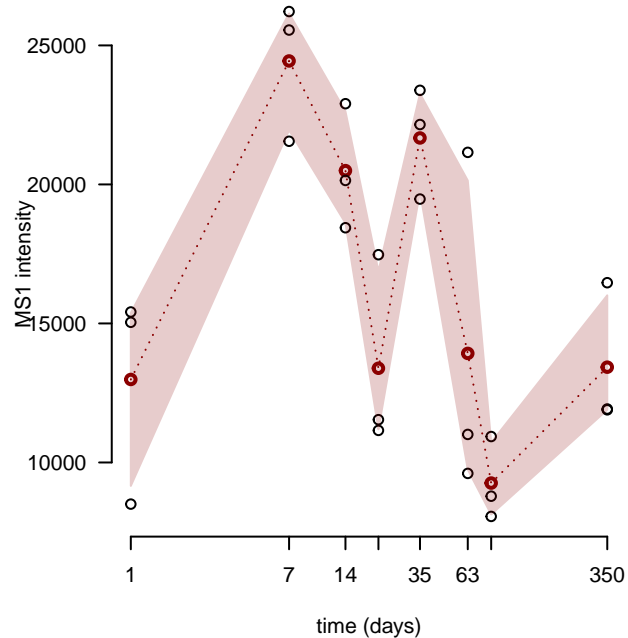

**P13020**  
**GN=Gsn**  
gelsolin

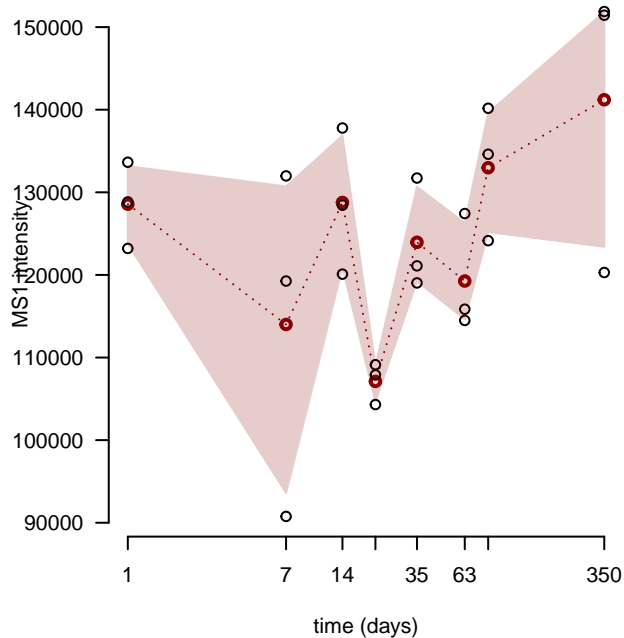

**P13020**  
**GN=Gsn**  
gelsolin

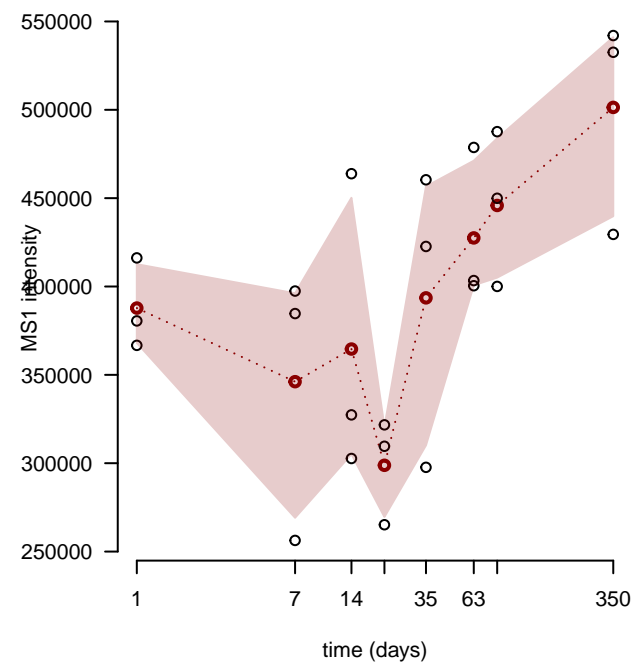

**P13297**  
**GN=Msx1**  
msh homeobox 1

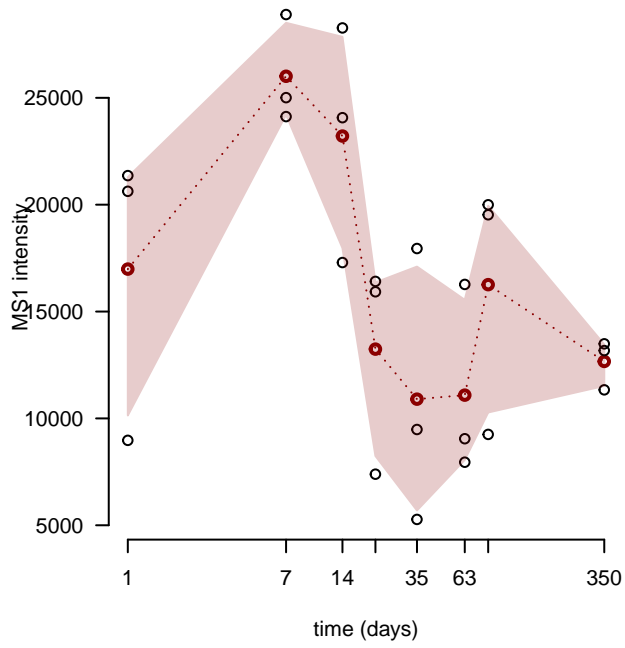

**P13405**  
**GN=Rb1**  
RB transcriptional corepressor 1

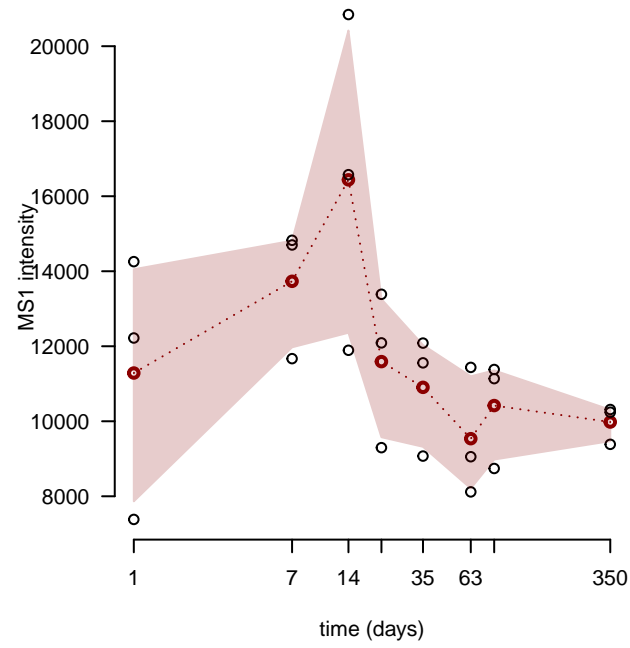

**P13412**  
**GN=Tnni2**  
troponin I, skeletal, fast 2

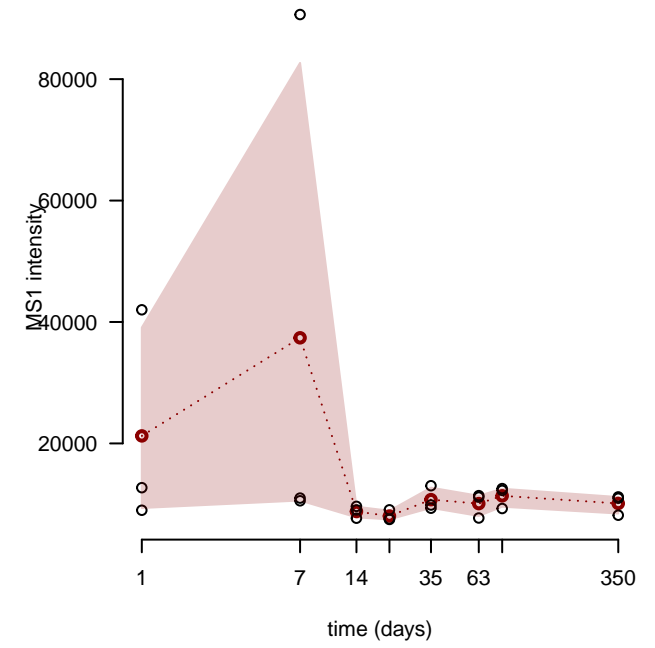

**P13439**  
**GN=Umps**  
uridine monophosphate synthetase

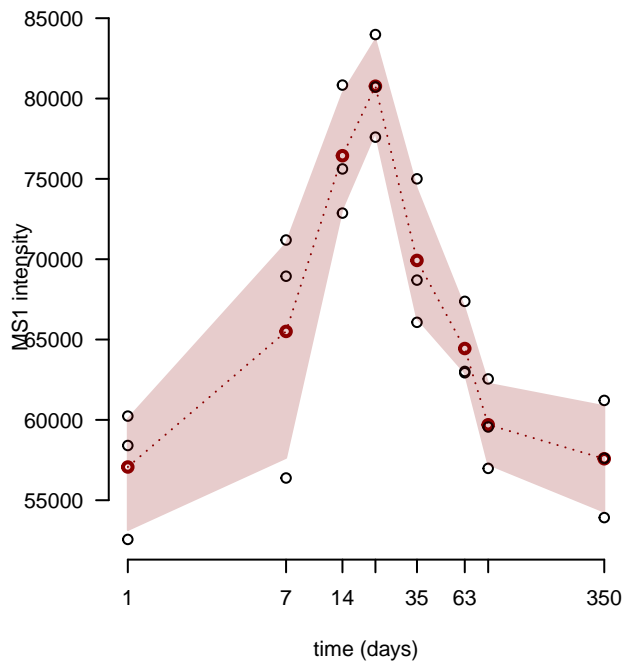

**P13541**  
**GN=Myh3**  
myosin, heavy polypeptide 3, skeletal mu ...

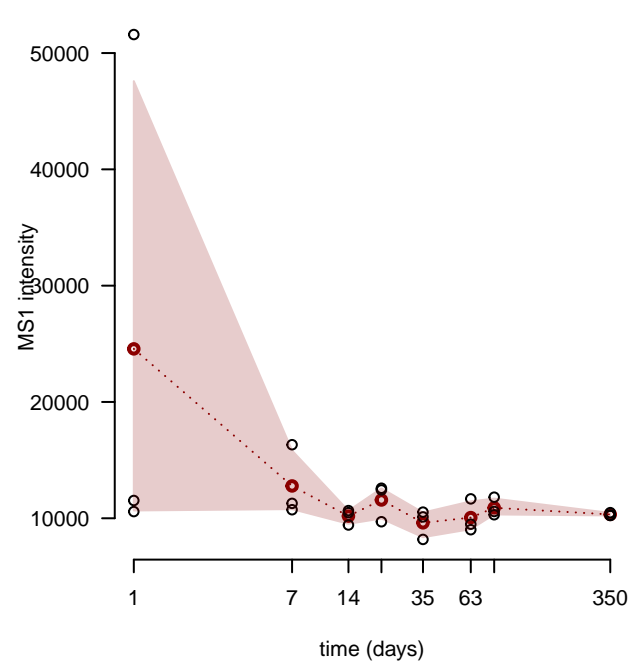

**P13542**  
**GN=Myh8**  
myosin, heavy polypeptide 8, skeletal mu ...

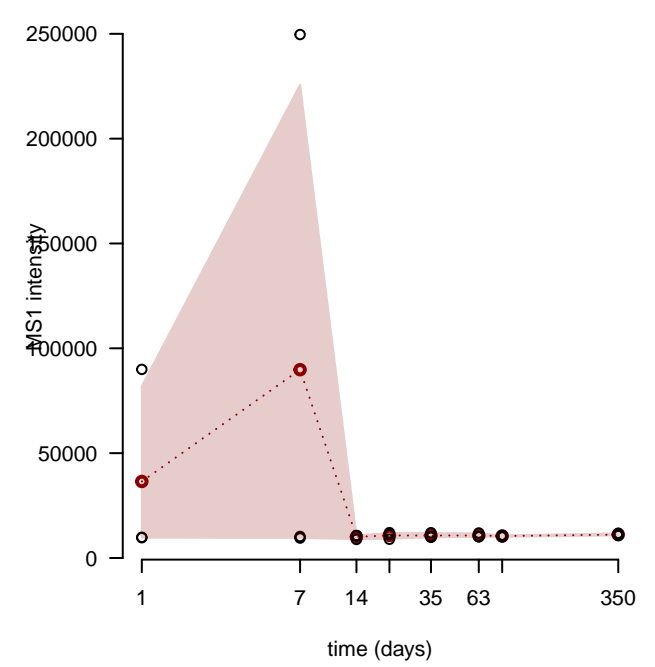

**P13595**  
**GN=Ncam1**  
neural cell adhesion molecule 1

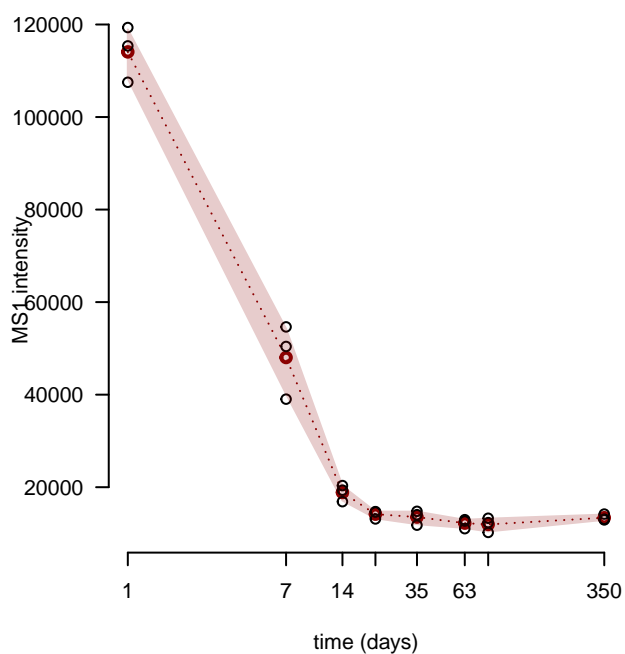

**P13595**  
**GN=Ncam1**  
neural cell adhesion molecule 1

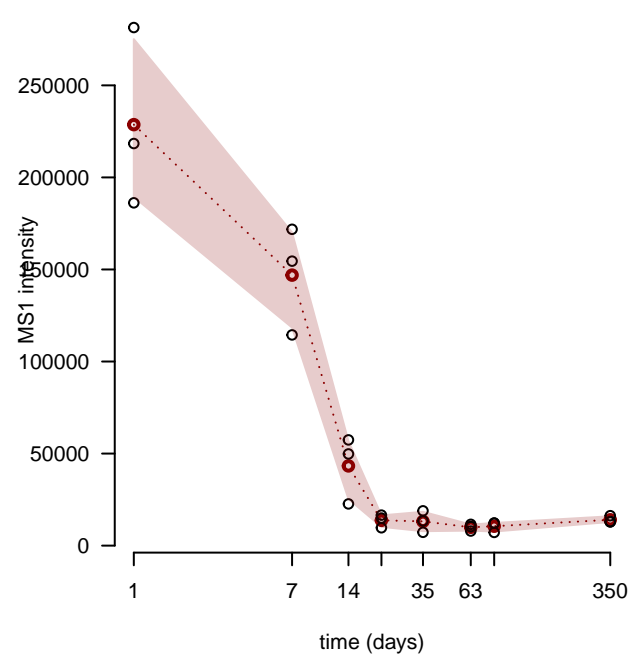

**P13597**  
**GN=Icam1**  
intercellular adhesion molecule 1

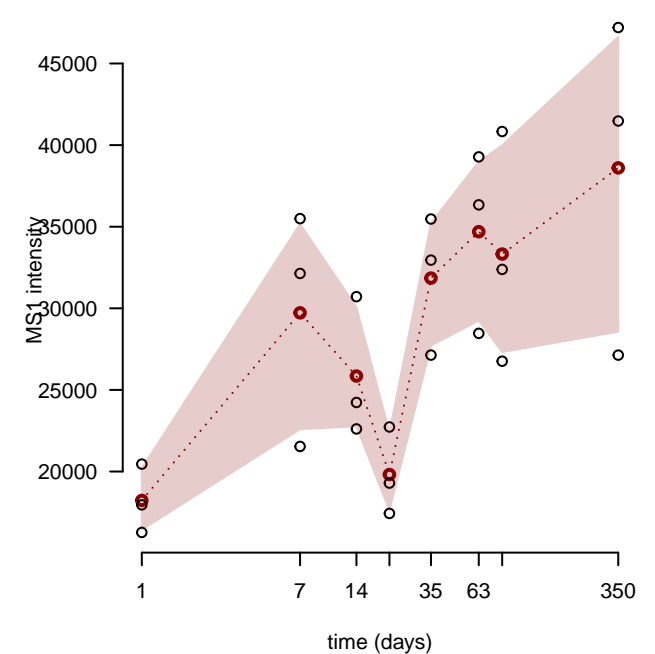



**P13634**  
GN=Ca1

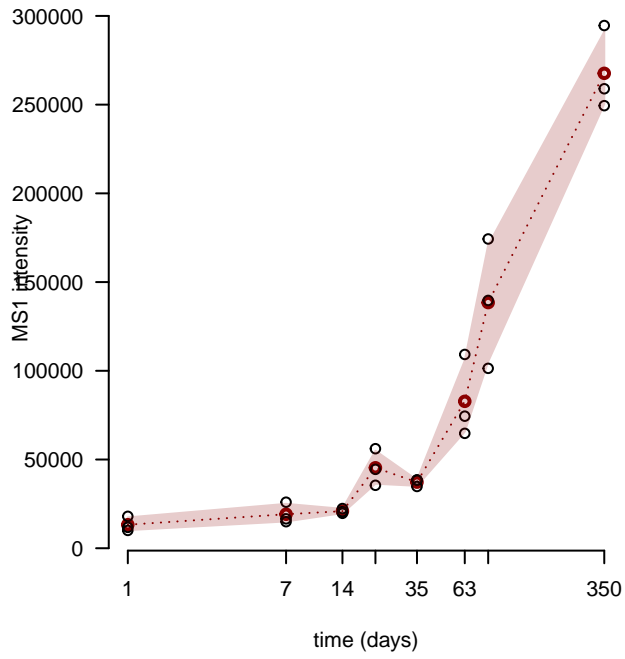

**P13705**  
GN=Msh3  
mutS homolog 3

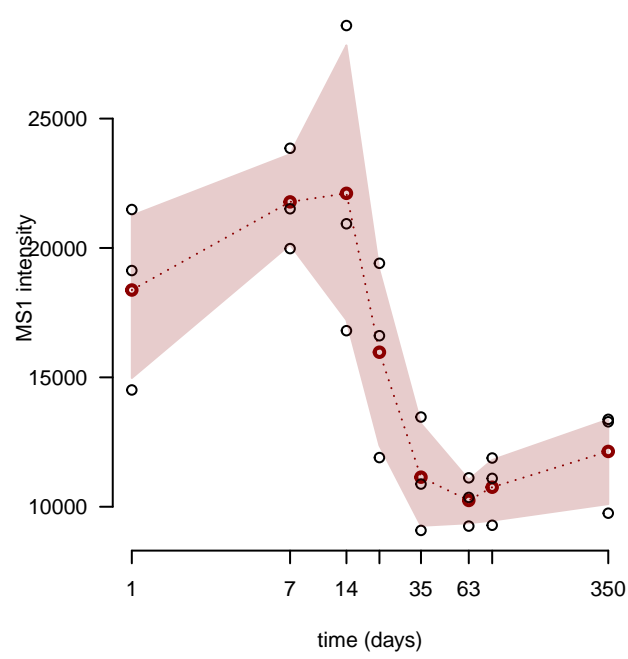

**P13707**  
GN=Gpd1  
glycerol-3-phosphate dehydrogenase 1 (so ...

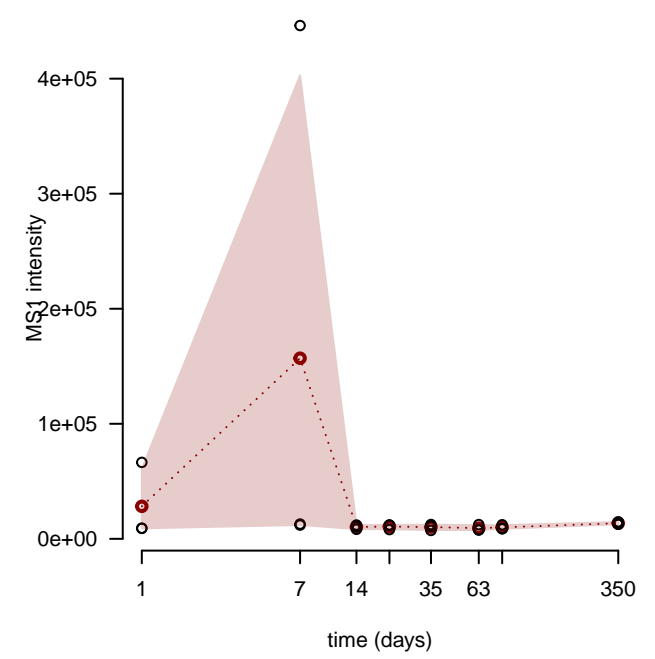

**P13745**  
GN=Gsta1  
glutathione S-transferase, alpha 1 (Ya)

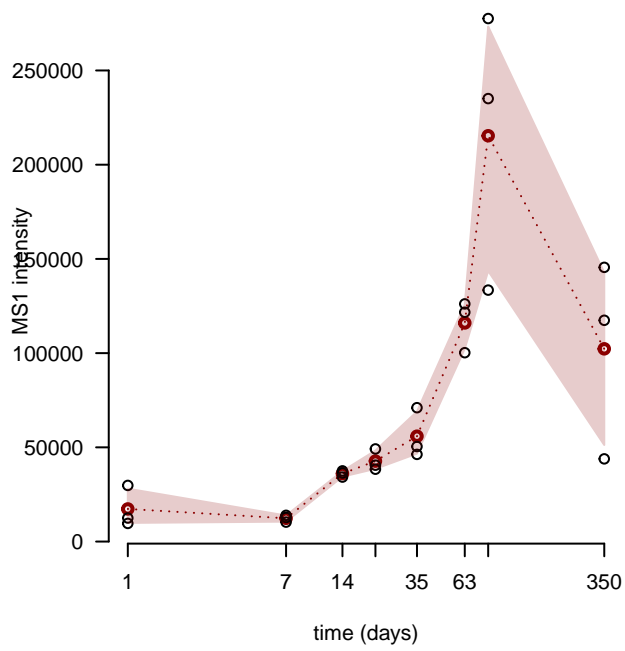

**P13808**  
GN=Slc4a2  
solute carrier family 4 (anion exchanger ...

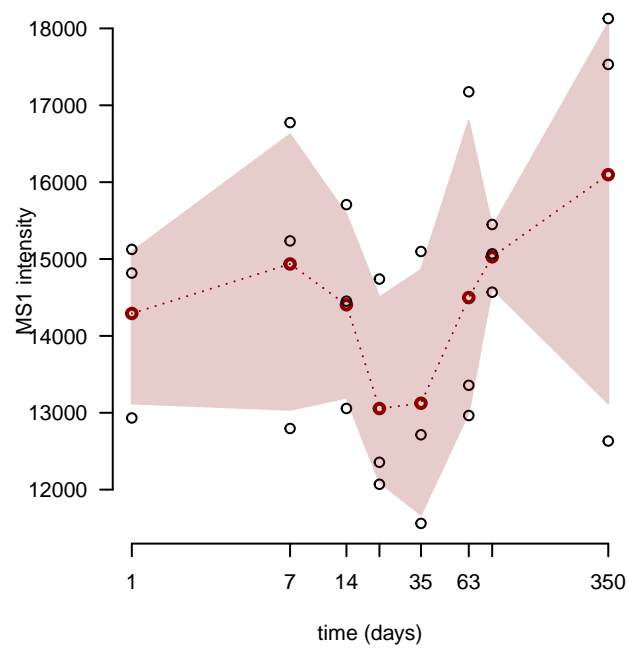

**P13864**  
GN=Dnmt1  
DNA methyltransferase (cytosine-5) 1

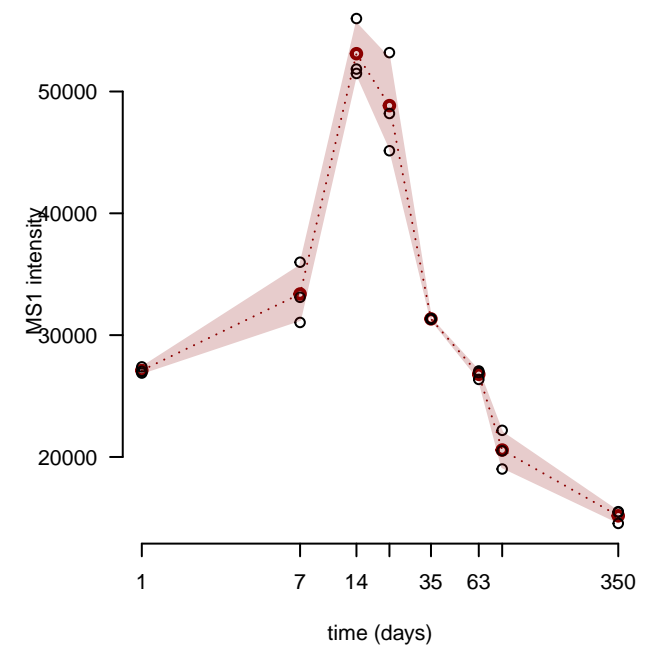

**P14069**  
GN=S100a6  
S100 calcium binding protein A6 (calcycl ...

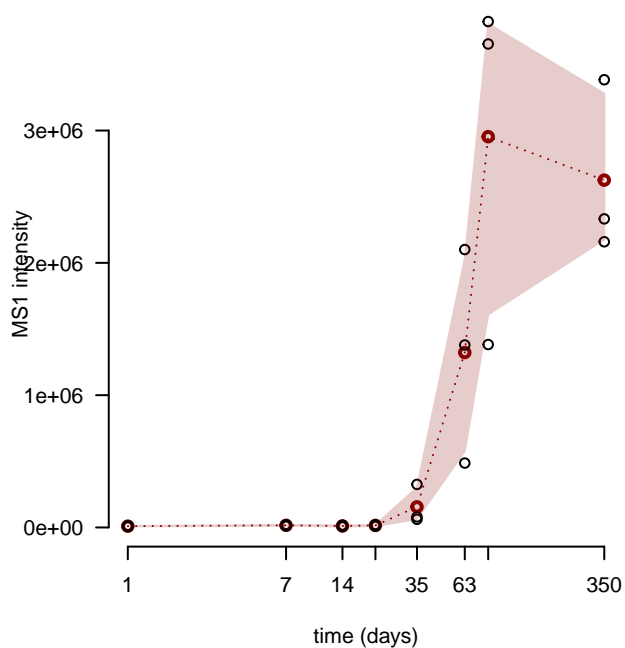

**P14094**  
GN=Atp1b1  
ATPase, Na+/K+ transporting, beta 1 poly ...

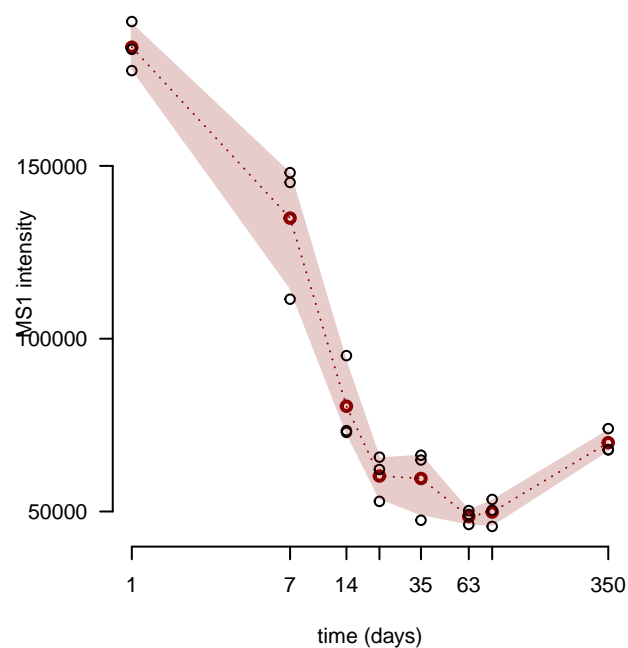

**P14106**  
GN=C1qb  
complement component 1, q subcomponent, ...

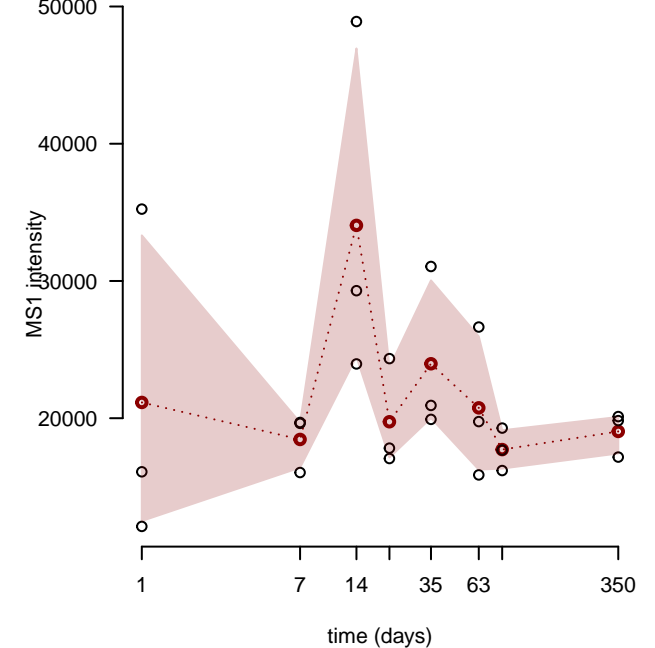

**P14115**  
**GN=Rpl27a**  
ribosomal protein L27A

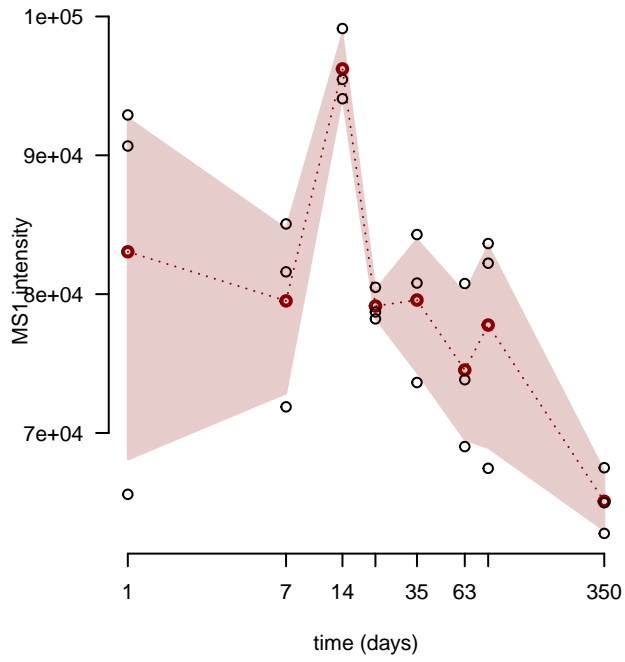

**P14131**  
**GN=Rps16**  
ribosomal protein S16

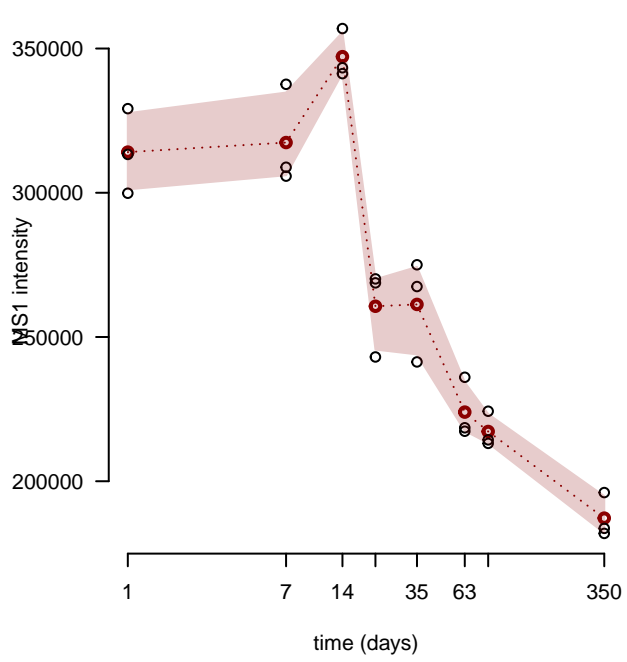

**P14142**  
**GN=Slc2a4**  
solute carrier family 2 (facilitated glu ...

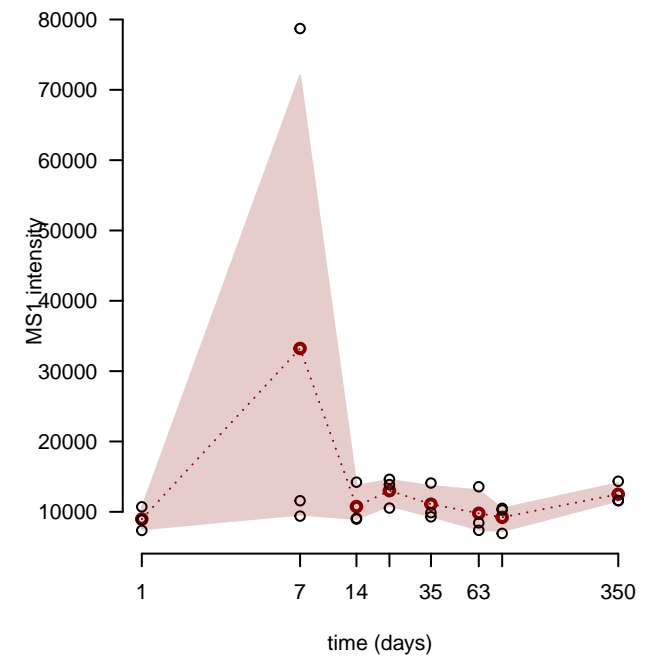

**P14148**  
**GN=Rpl7**  
ribosomal protein L7

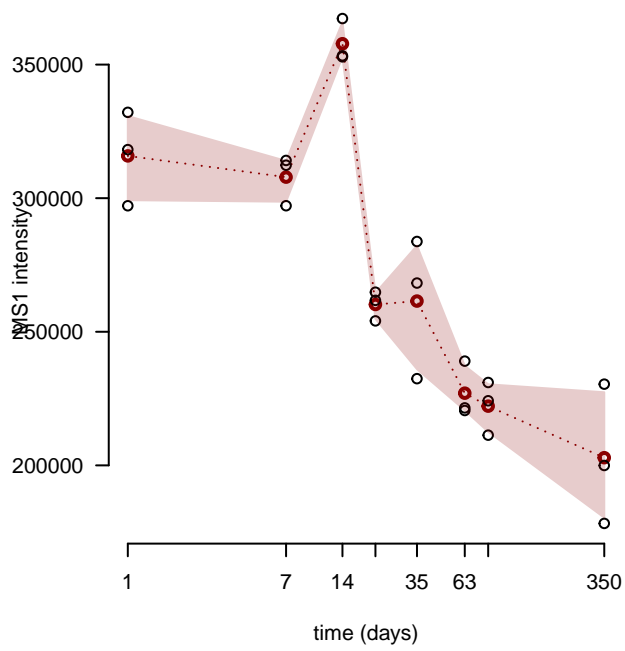

**P14152**  
**GN=Mdh1**  
malate dehydrogenase 1, NAD (soluble)

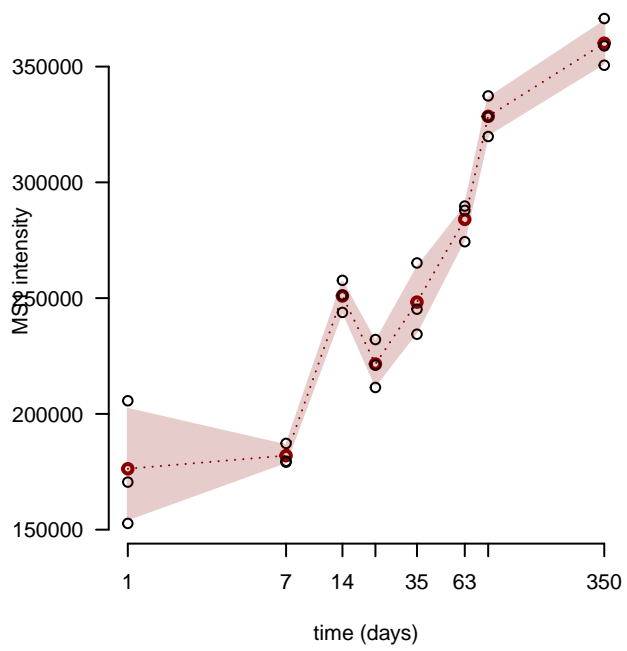

**P14206**  
**GN=Rpsa**  
ribosomal protein SA

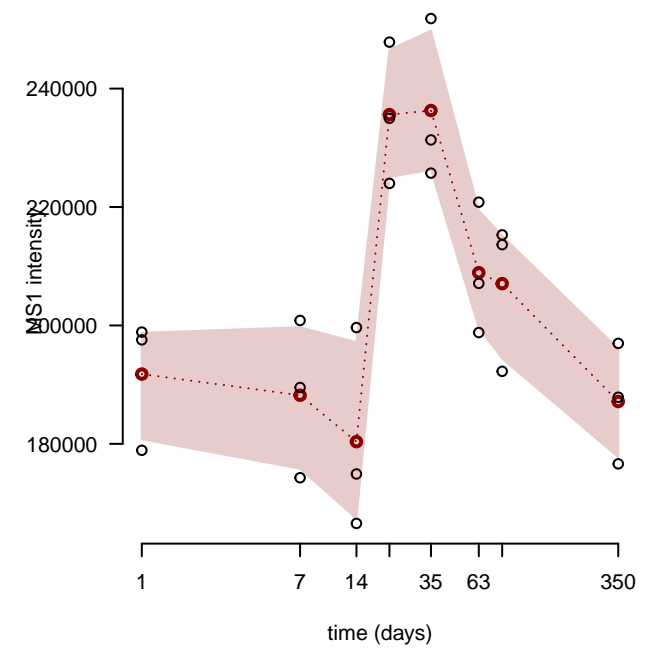

**P14211**  
**GN=Calr**  
calreticulin

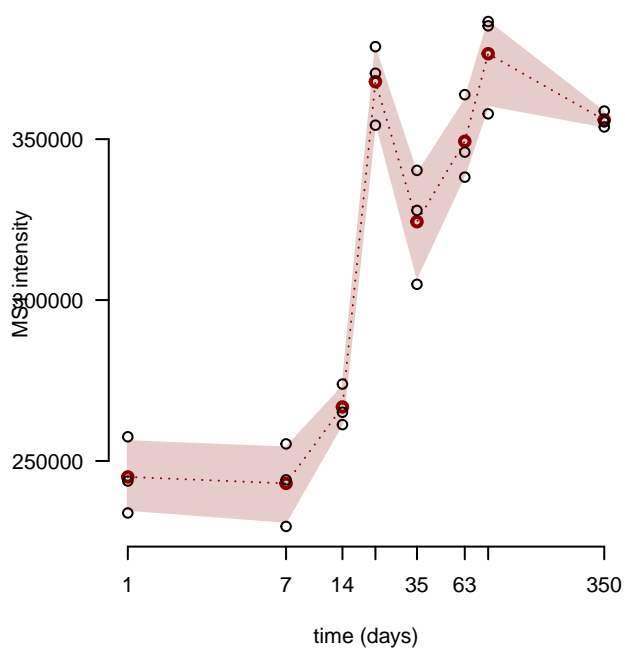

**P14231**  
**GN=Atp1b2**  
ATPase, Na+/K+ transporting, beta 2 poly ...

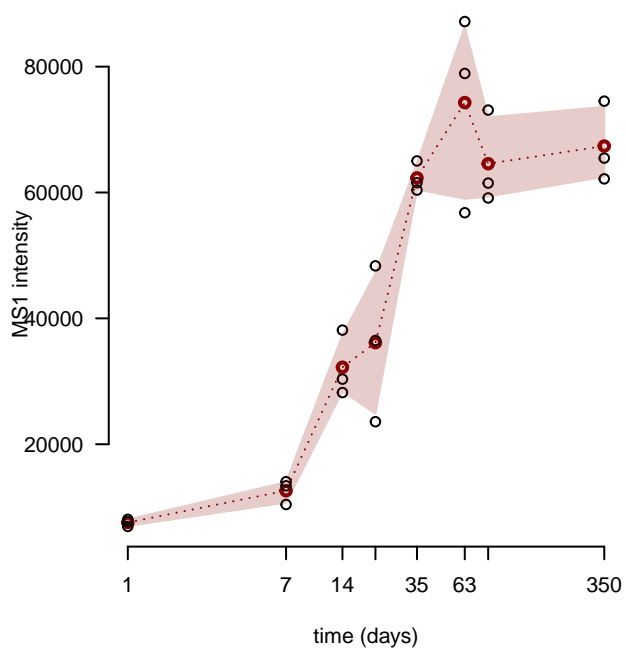

**P14426**  
**GN=H2-D1**

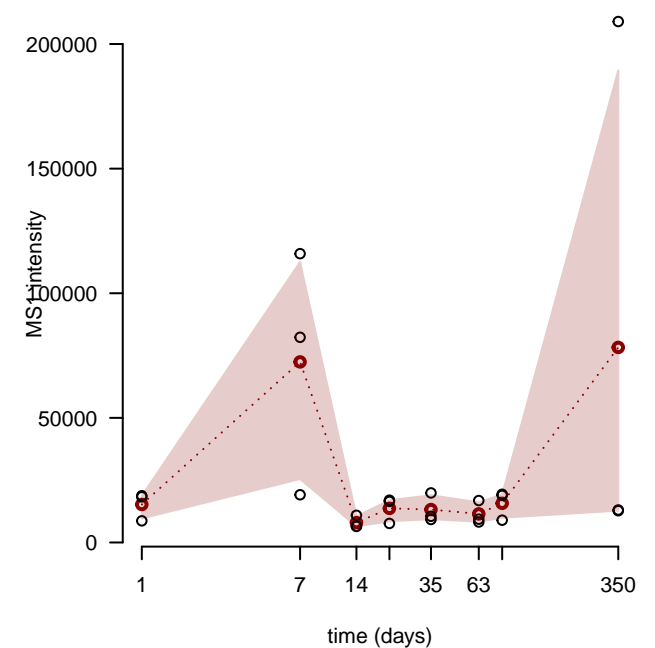

P14576  
GN=Srp54

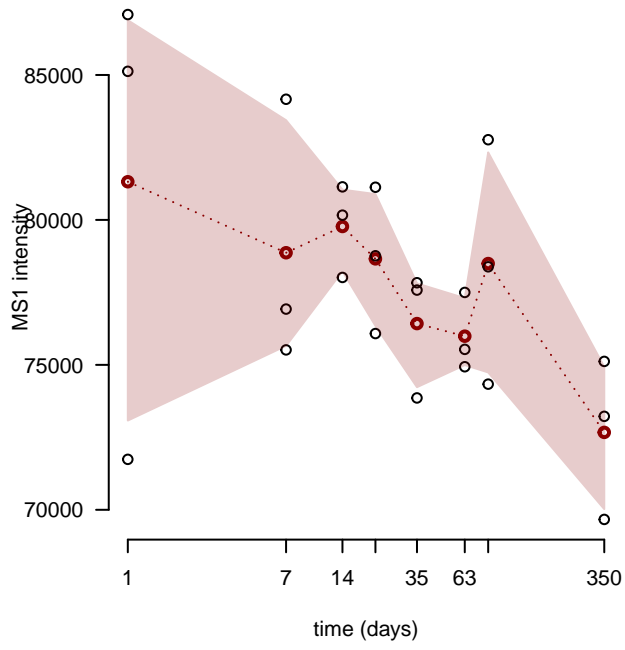

P14602  
GN=Hspb1  
heat shock protein 1

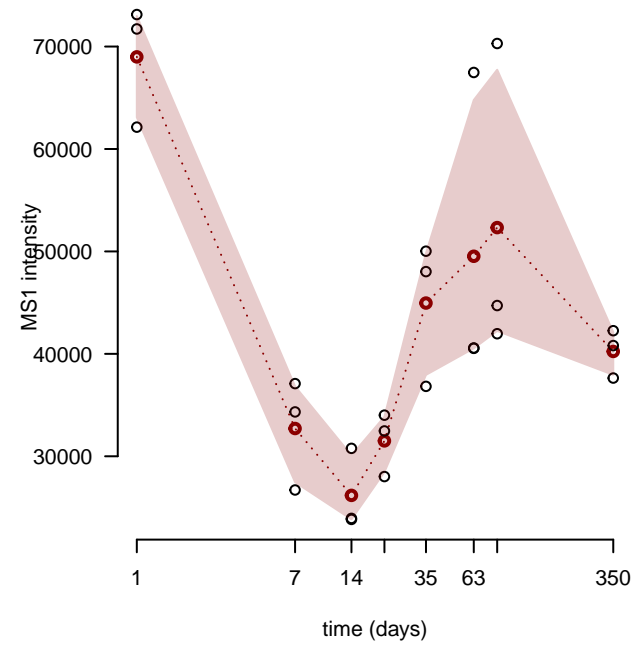

P14685  
GN=Psm3  
proteasome (prosome, macropain) 26S subu ...

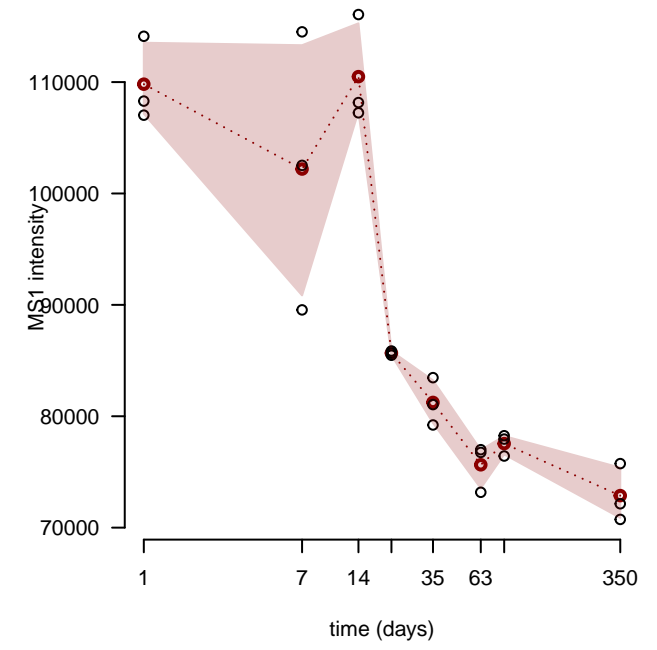

P14733  
GN=Lmnb1  
lamin B1

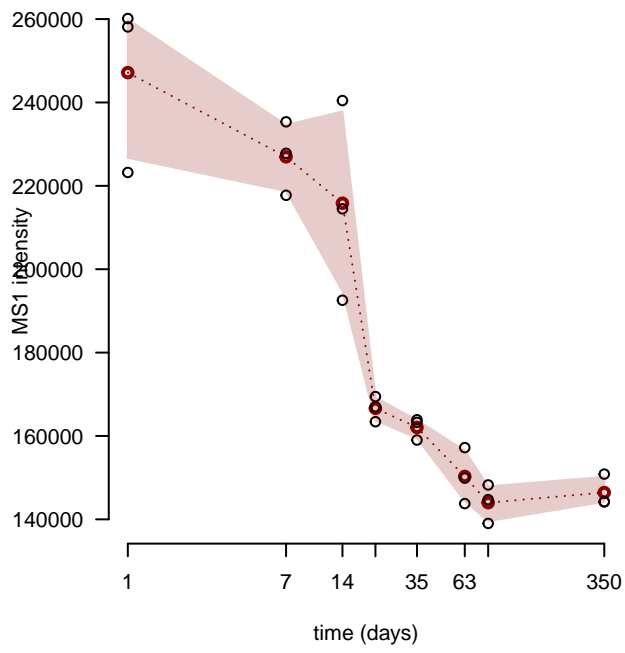

P14824  
GN=Anxa6  
annexin A6

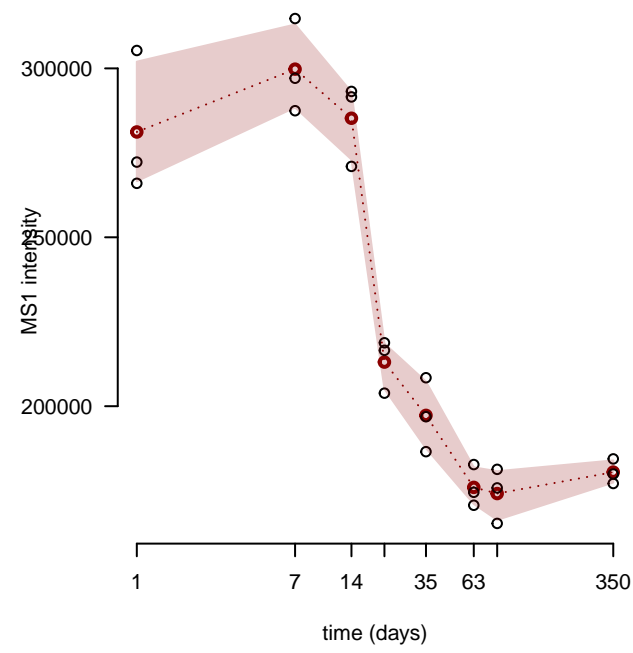

P14847  
GN=Crp  
C-reactive protein, pentraxin-related

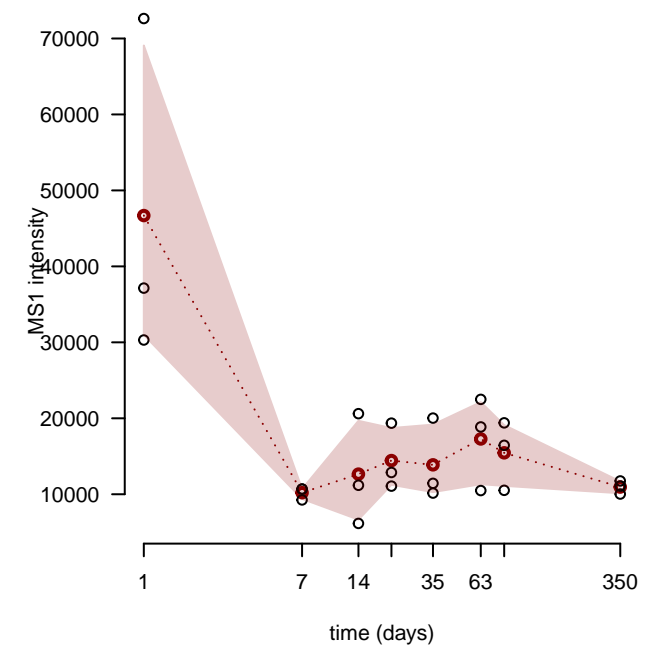

P14869  
GN=Rplp0  
ribosomal protein, large, P0

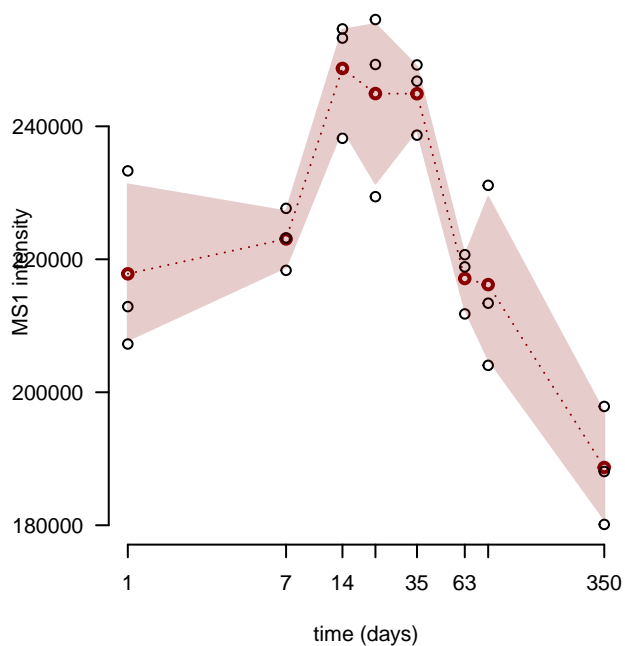

P14873  
GN=Map1b  
microtubule-associated protein 1B

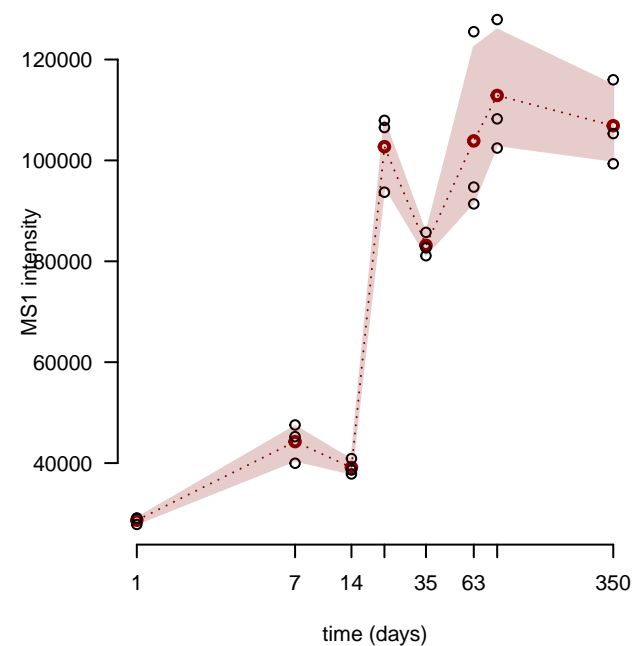

P14901  
GN=Hmox1  
heme oxygenase 1

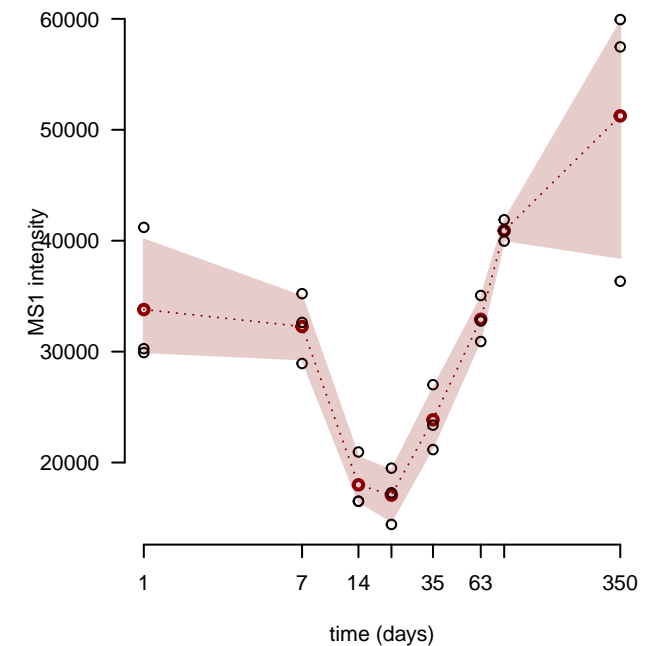

**P15066**  
GN=Jund  
jun D proto-oncogene

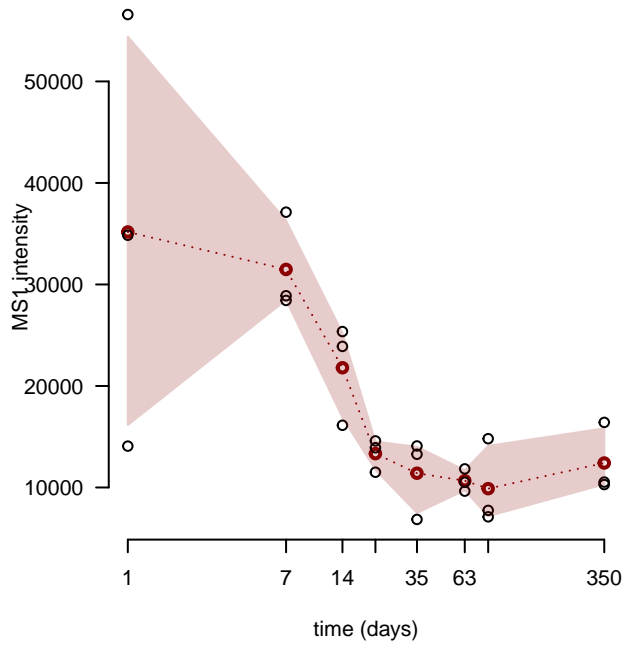

**P15089**  
GN=Cpa3  
carboxypeptidase A3, mast cell

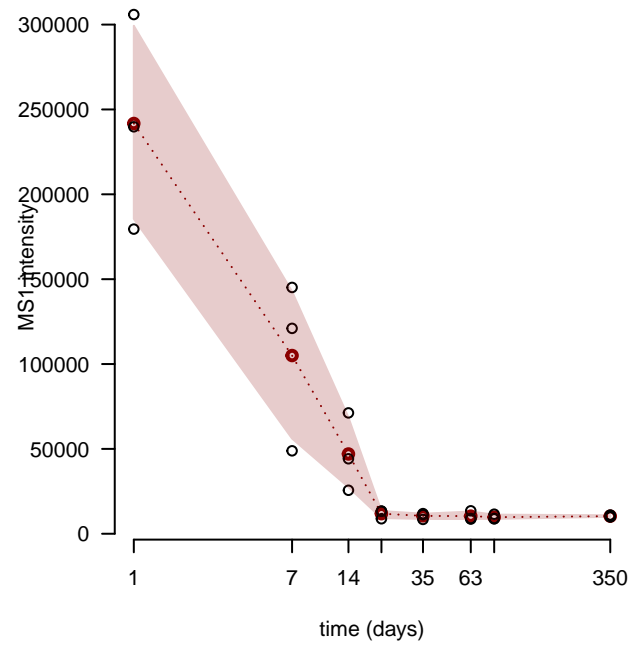

**P15105**  
GN=Glul  
glutamate-ammonia ligase (glutamine synt ...

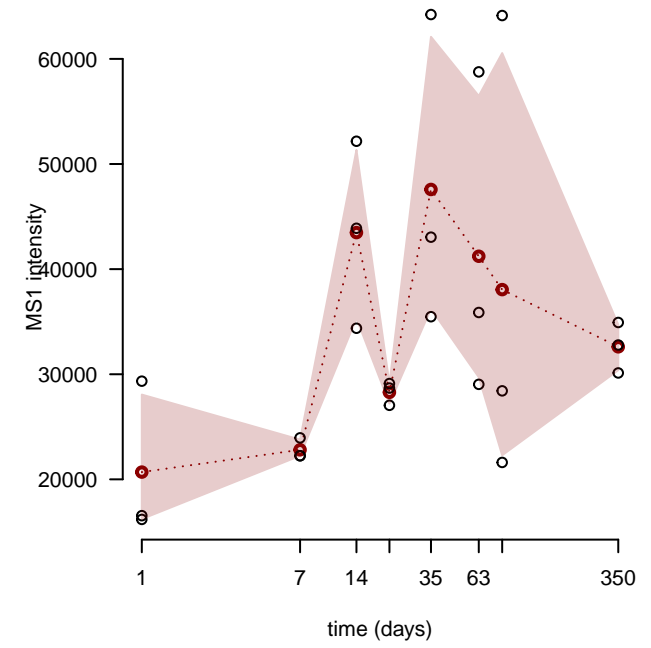

**P15116**  
GN=Cdh2  
cadherin 2

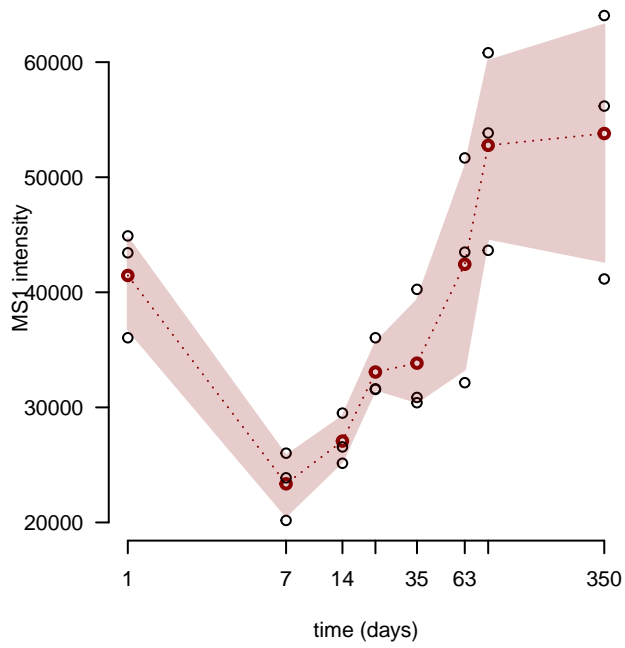

**P15208**  
GN=Insr  
insulin receptor

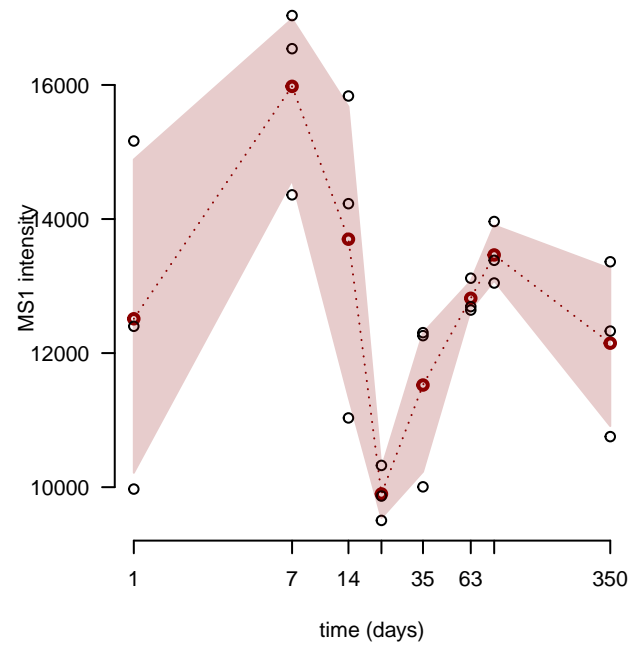

**P15261**  
GN=Ifngr1  
interferon gamma receptor 1

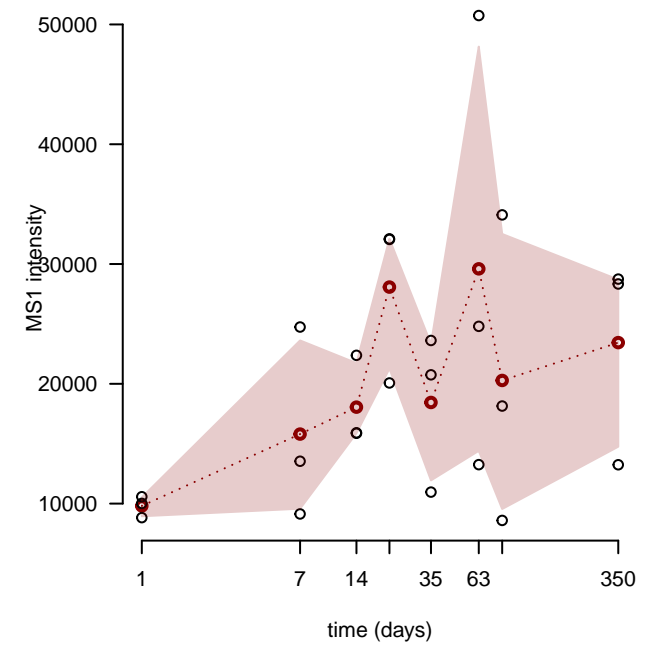

**P15306**  
GN=Thbd  
thrombomodulin

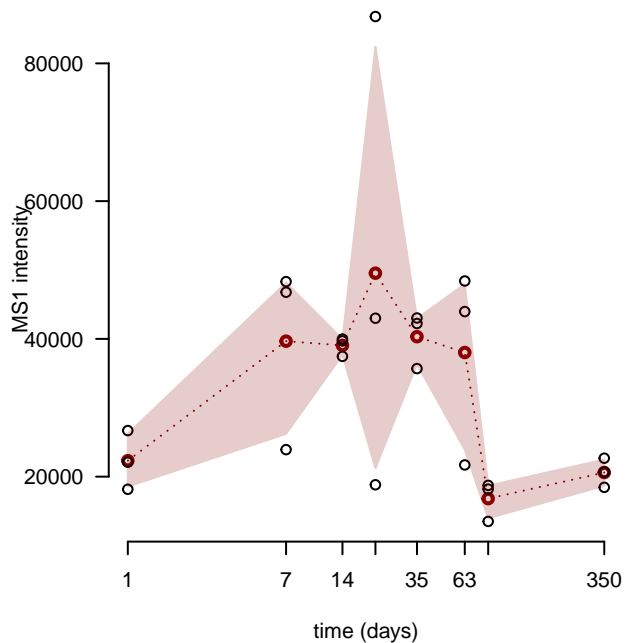

**P15307**  
GN=Rel  
reticuloendotheliosis oncogene

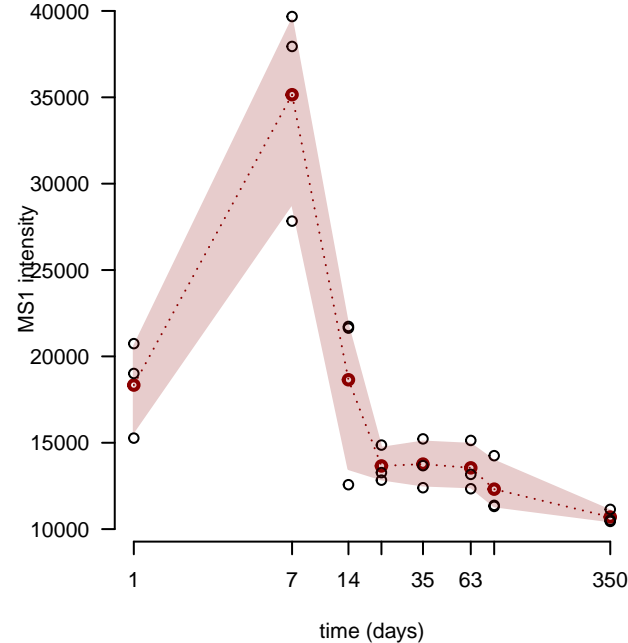

**P15327**  
GN=Bpgm  
2,3-bisphosphoglycerate mutase

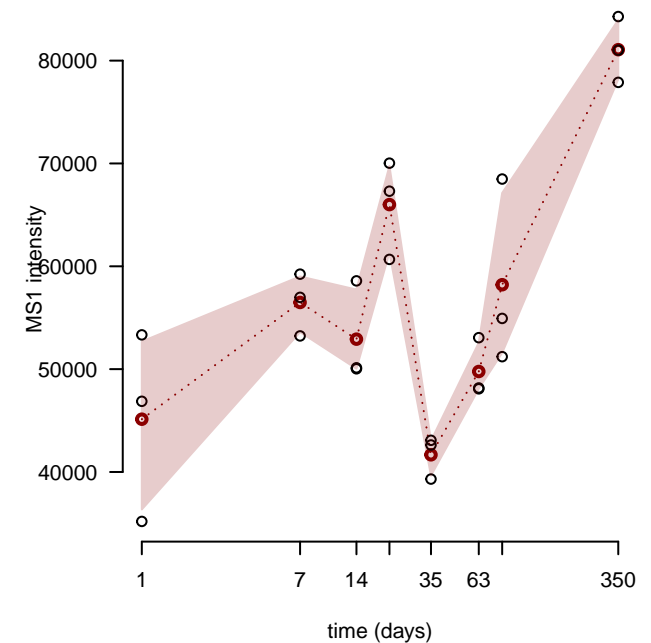

**P15331**  
GN=Prph  
peripherin

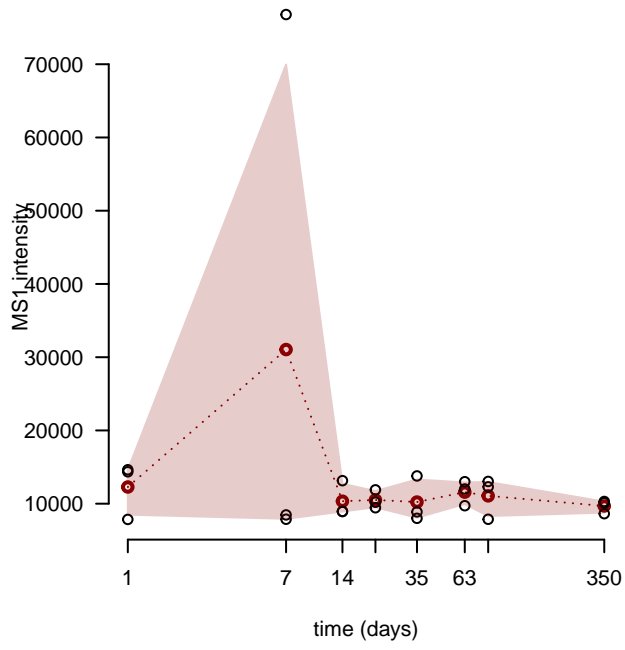

**P15379**  
GN=Cd44  
CD44 antigen

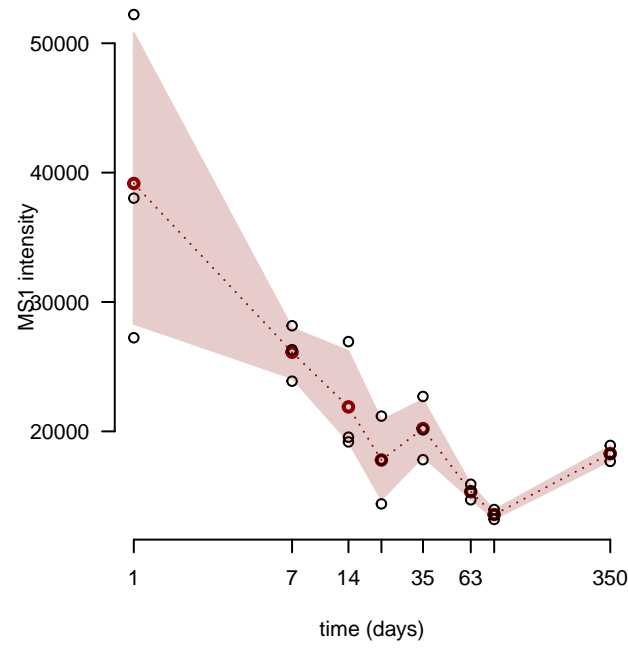

**P15508**  
GN=Sptb  
spectrin beta, erythrocytic

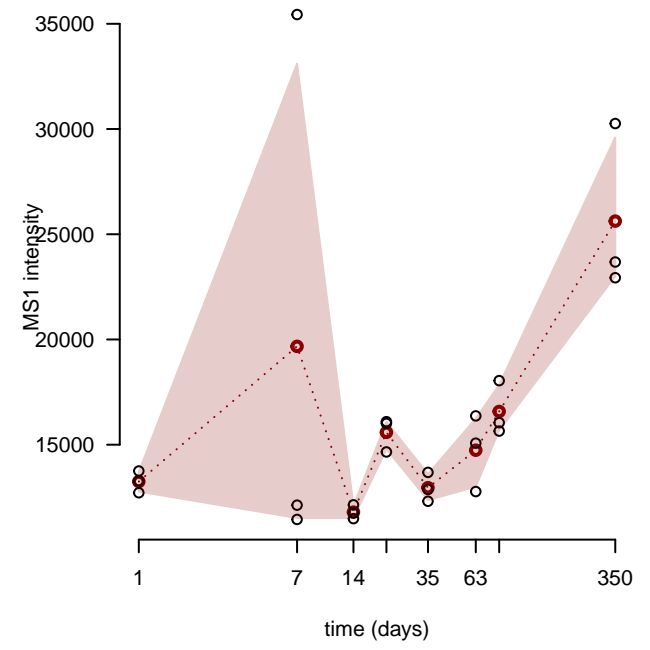

**P15532**  
GN=Nme1  
NME/NM23 nucleoside diphosphate kinase 1

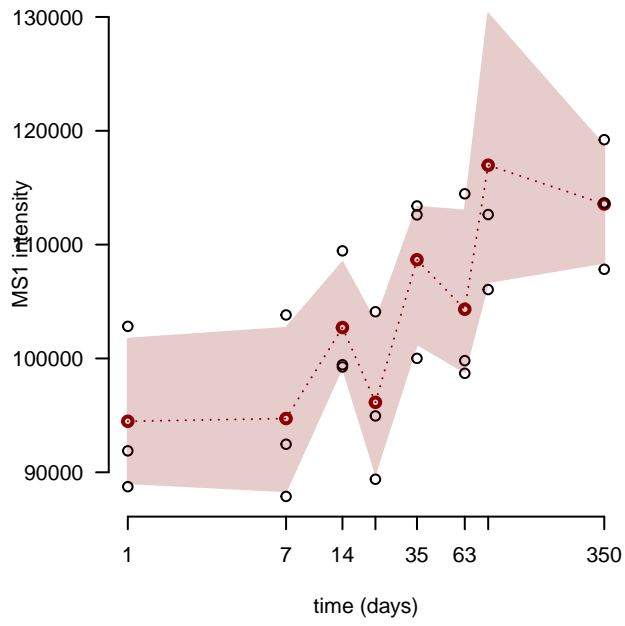

**P15535**  
GN=B4galt1  
UDP-Gal:betaGlcNAc beta 1,4- galactosylt ...

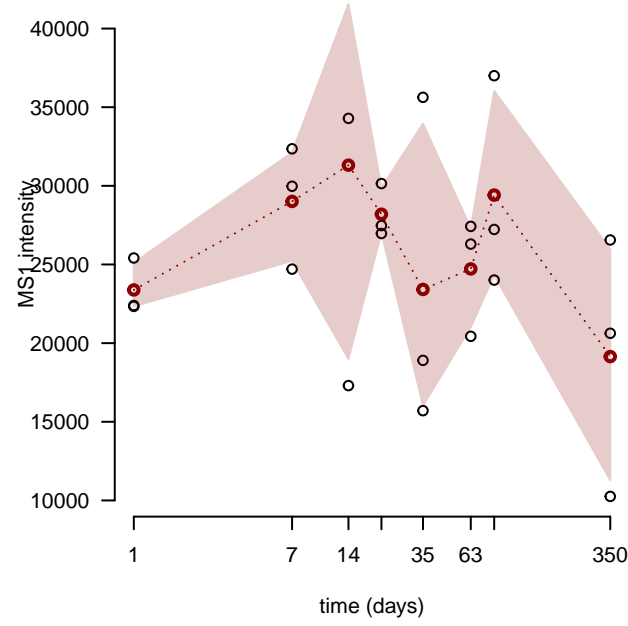

**P15626**  
GN=Gstm2  
glutathione S-transferase, mu 2

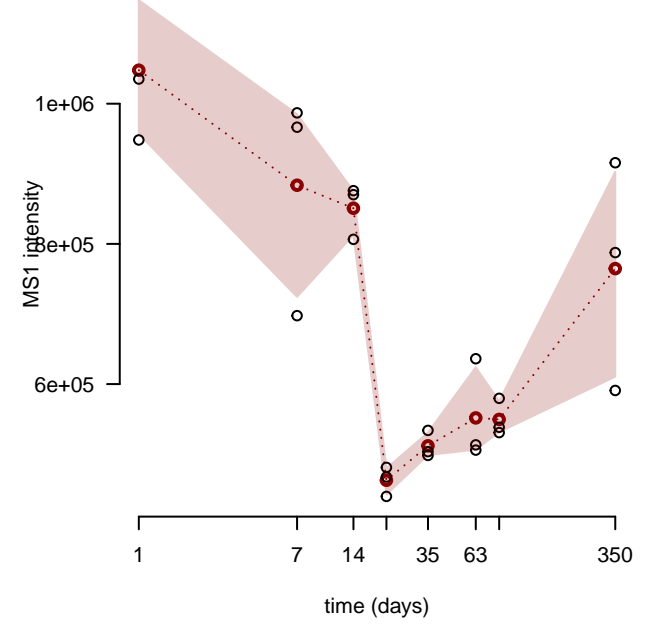

**P15655**  
GN=Fgf2  
fibroblast growth factor 2

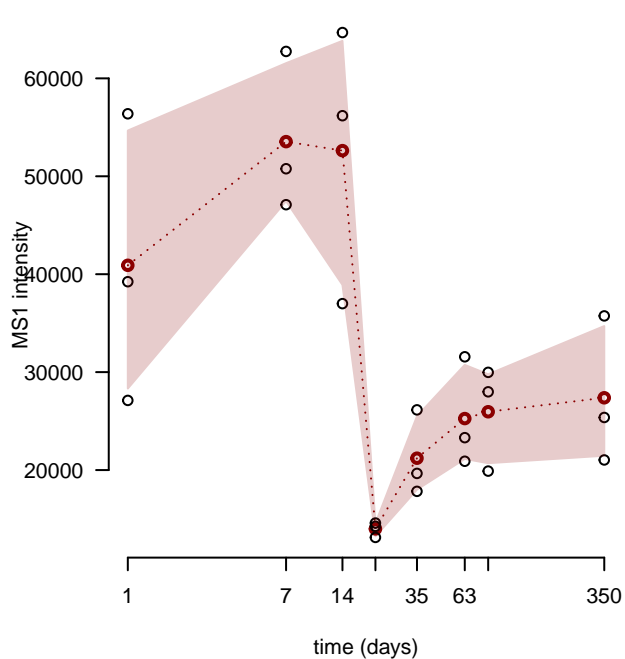

**P15702**  
GN=Spn  
sialophorin

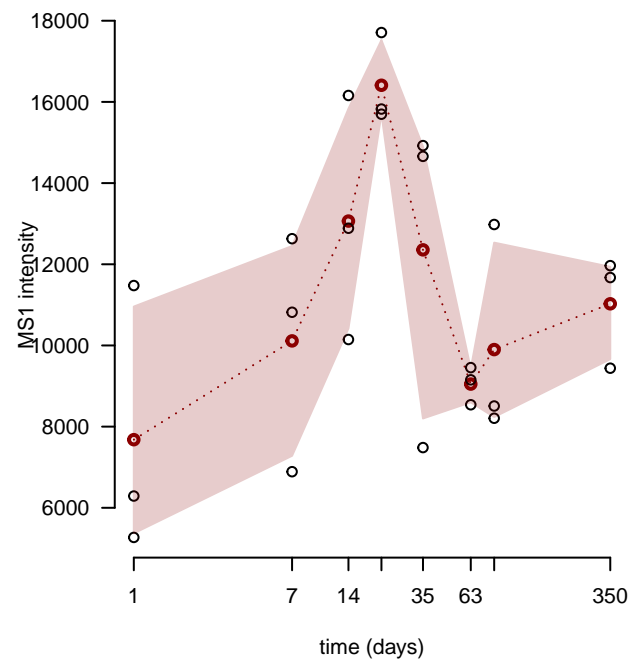

**P15806**  
GN=Tcf3  
transcription factor 3

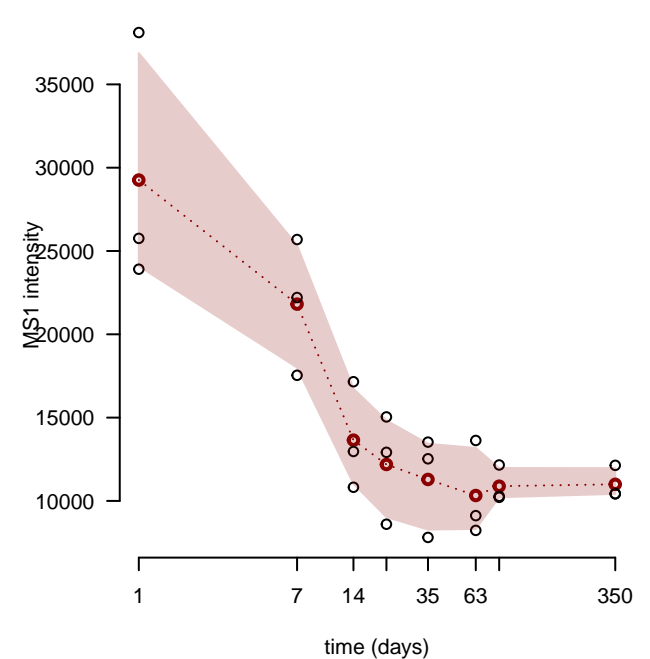

**P15864**  
GN=Hist1h1c

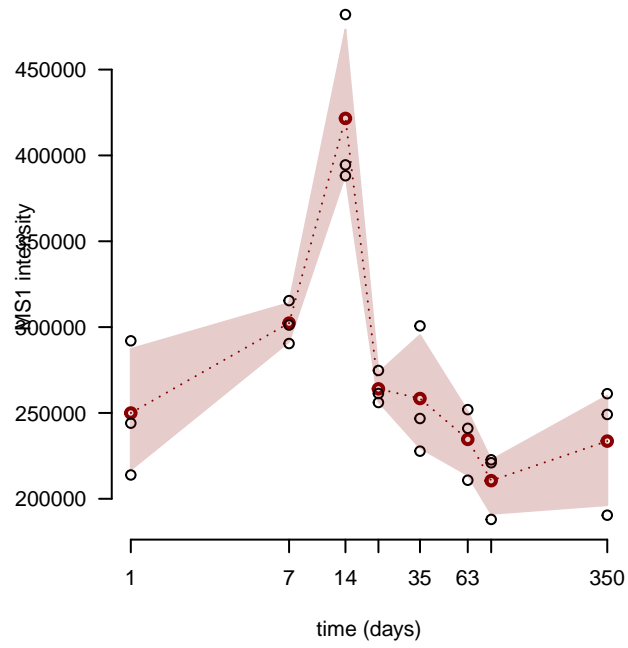

**P15920**  
GN=Atp6v0a2  
ATPase, H+ transporting, lysosomal V0 su ...

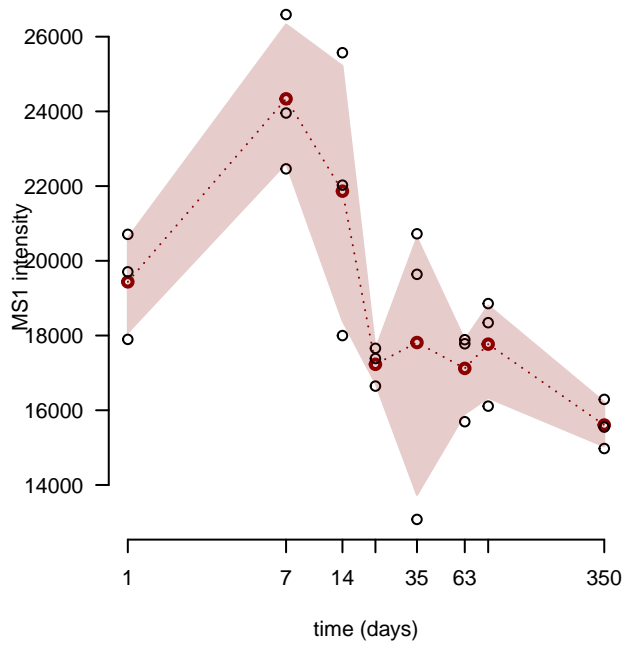

**P16015**  
GN=Ca3

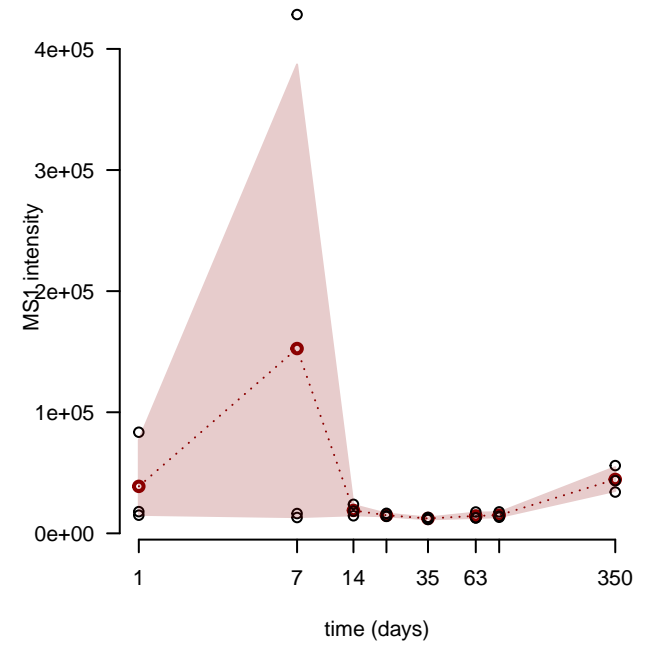

**P16045**  
GN=Lgals1  
lectin, galactose binding, soluble 1

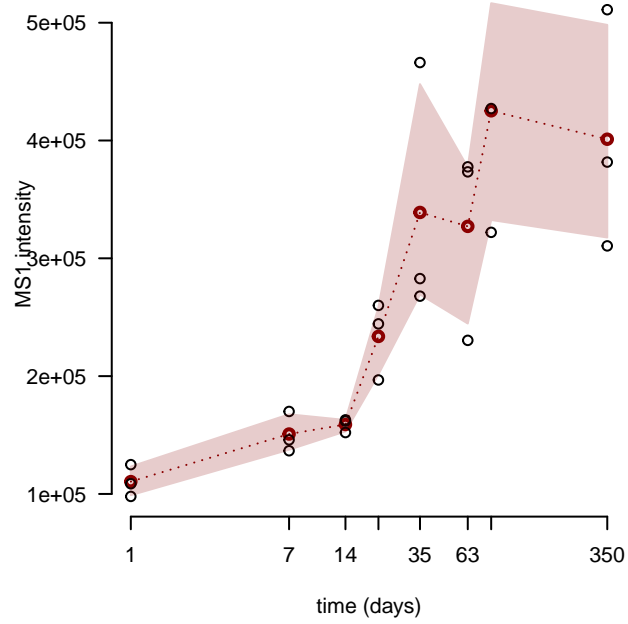

**P16054**  
GN=Prkce  
protein kinase C, epsilon

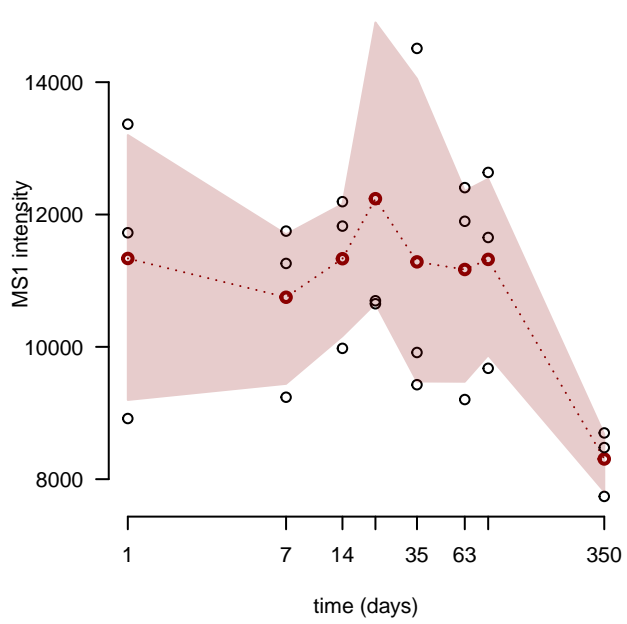

**P16110**  
GN=Lgals3  
lectin, galactose binding, soluble 3

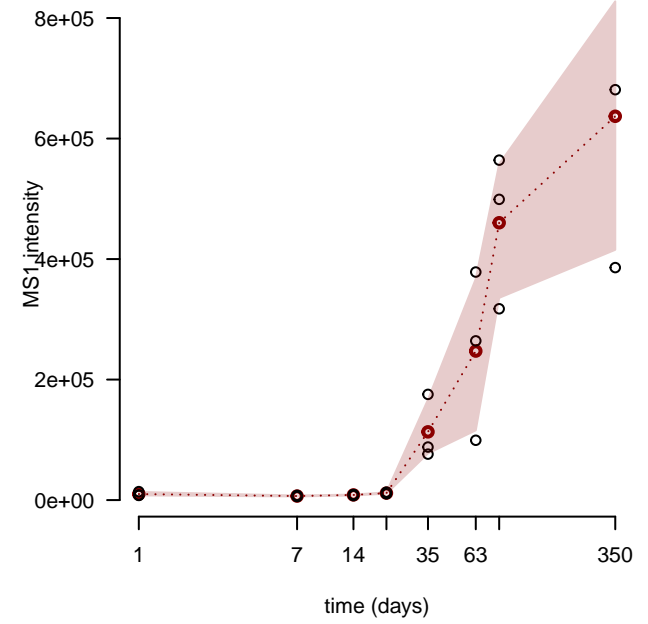

**P16125**  
GN=Ldhb  
lactate dehydrogenase B

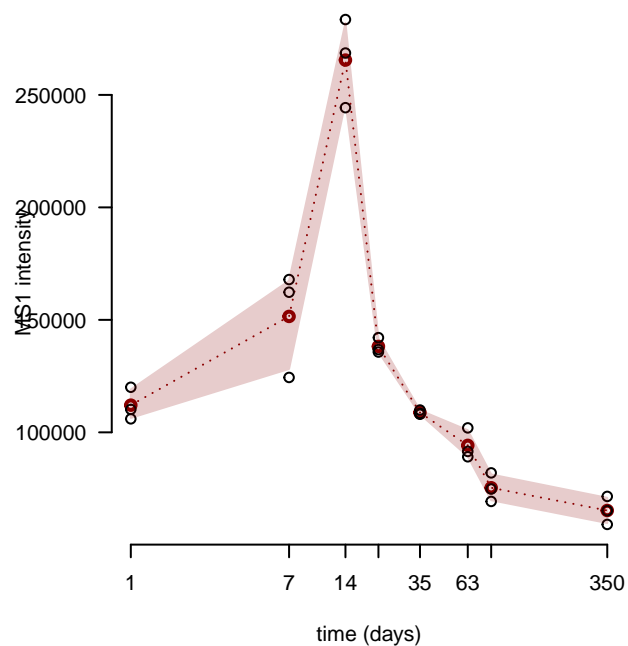

**P16254**  
GN=Srp14  
signal recognition particle 14

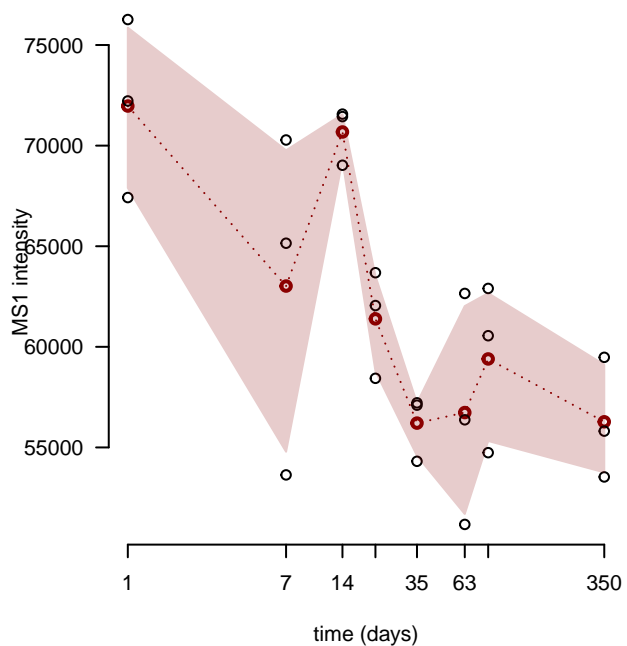

**P16294**  
GN=F9  
coagulation factor IX

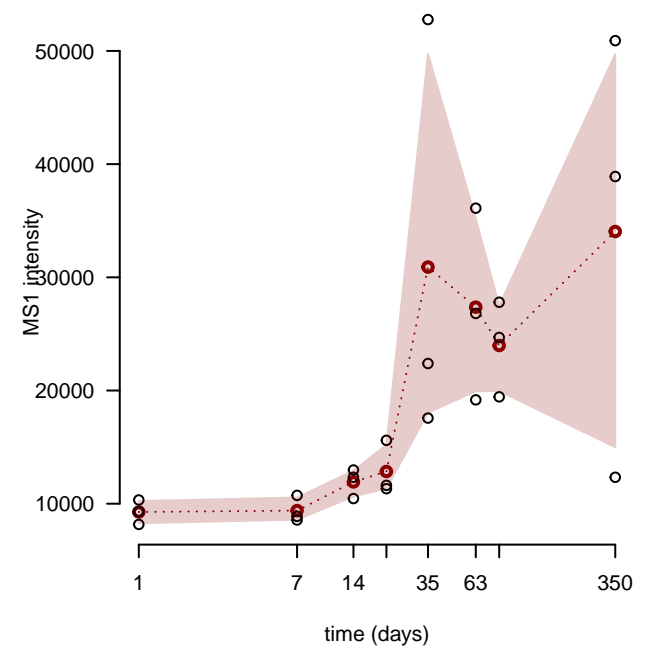

**P16301**  
**GN=Lcat**  
lecithin cholesterol acyltransferase

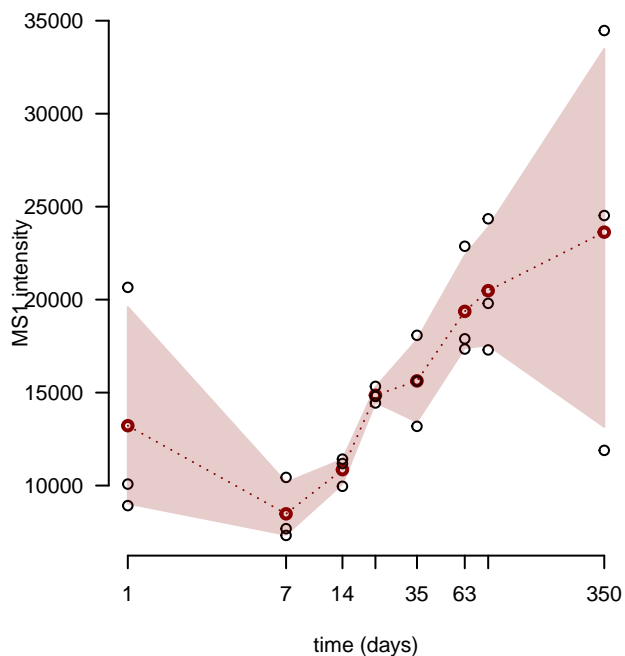

**P16330**  
**GN=Cnp**  
2',3'-cyclic nucleotide 3' phosphodiesterase

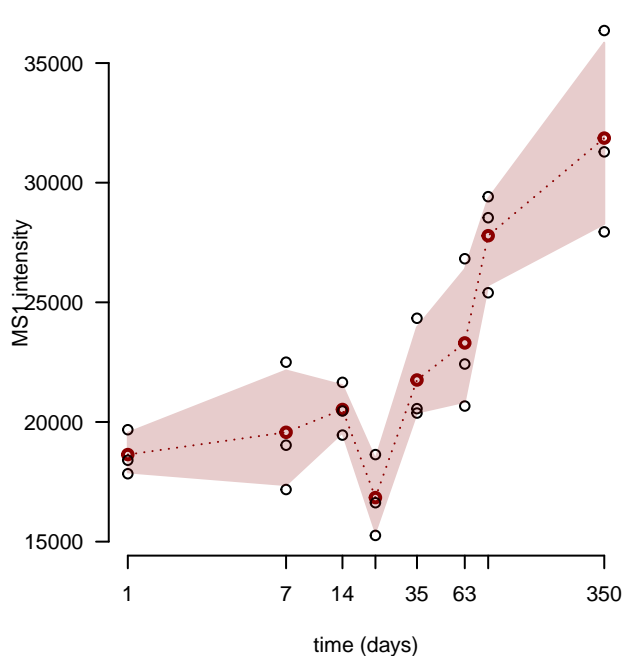

**P16331**  
**GN=Pah**  
phenylalanine hydroxylase

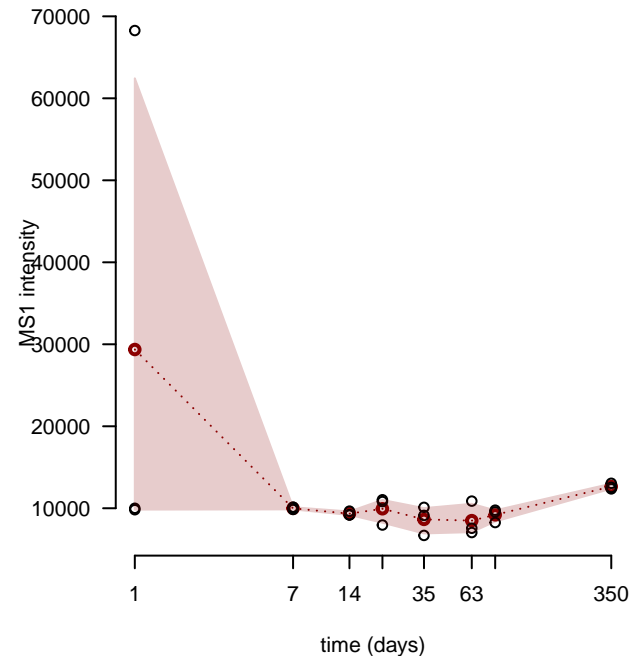

**P16332**  
**GN=Mmut**  
methylmalonyl-Coenzyme A mutase

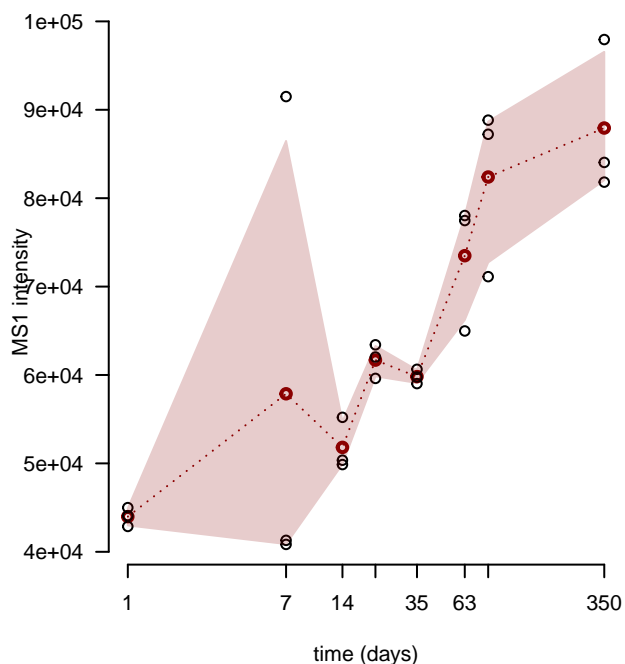

**P16374**  
**GN=Zfp60**  
zinc finger protein 60

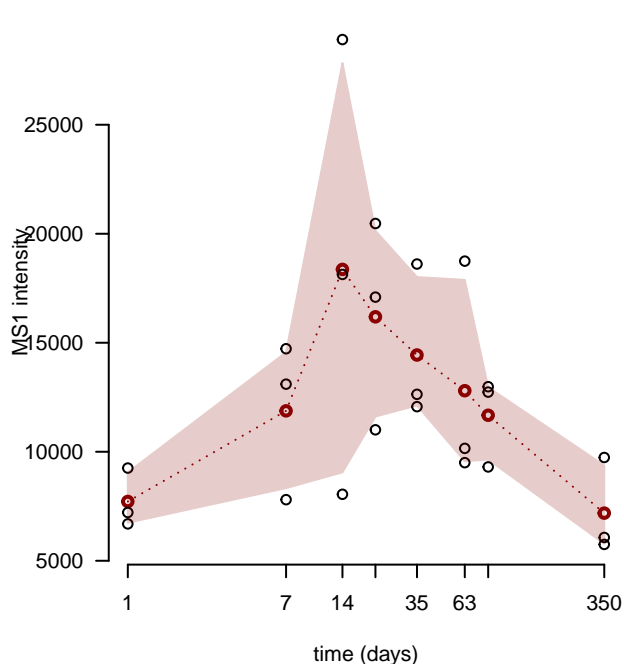

**P16406**  
**GN=Enpep**  
glutamyl aminopeptidase

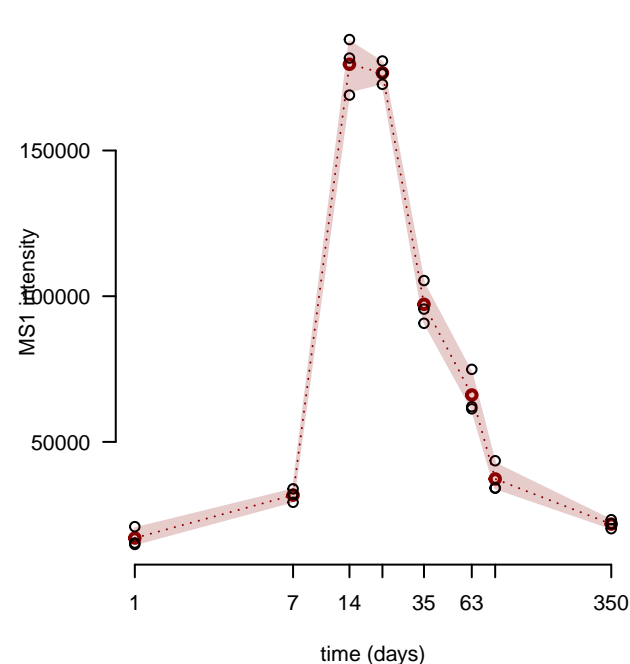

**P16460**  
**GN=Ass1**  
argininosuccinate synthetase 1

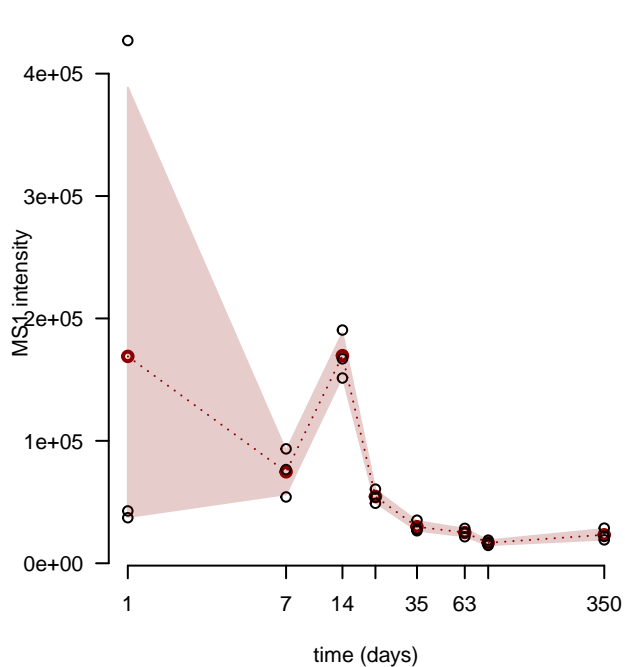

**P16546**  
**GN=Sptan1**  
spectrin alpha, non-erythrocytic 1

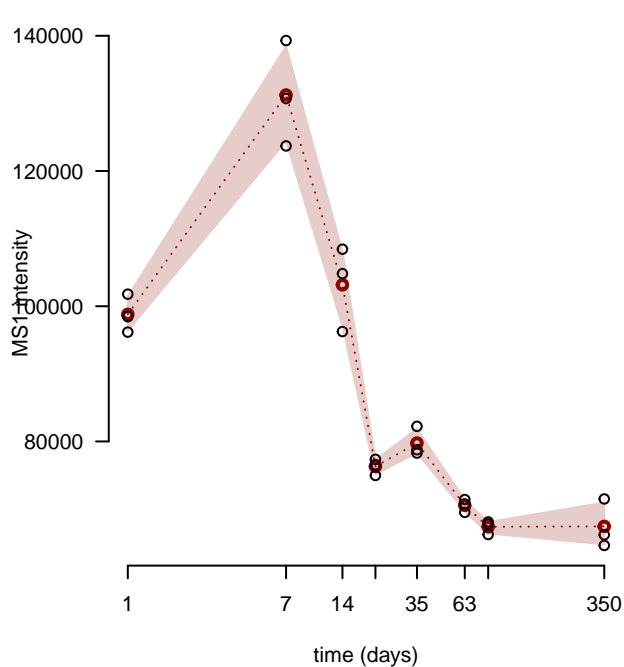

**P16546**  
**GN=Sptan1**  
spectrin alpha, non-erythrocytic 1

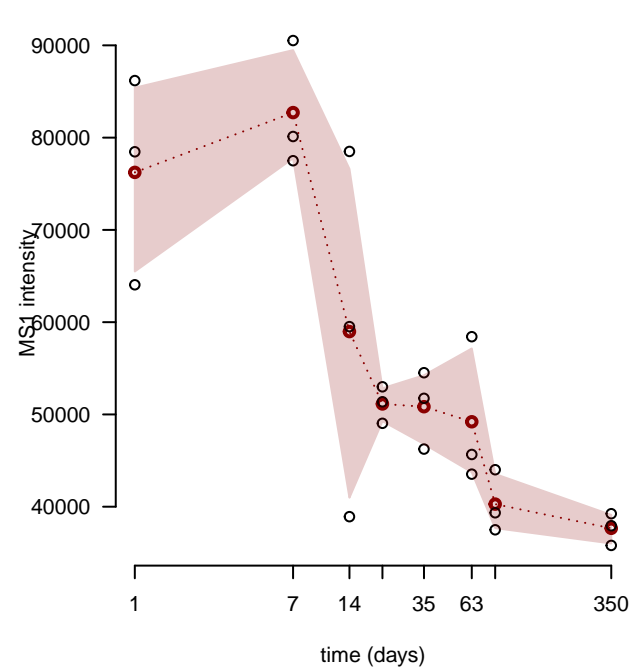

**P16627**  
GN=Hspa1l  
heat shock protein 1-like

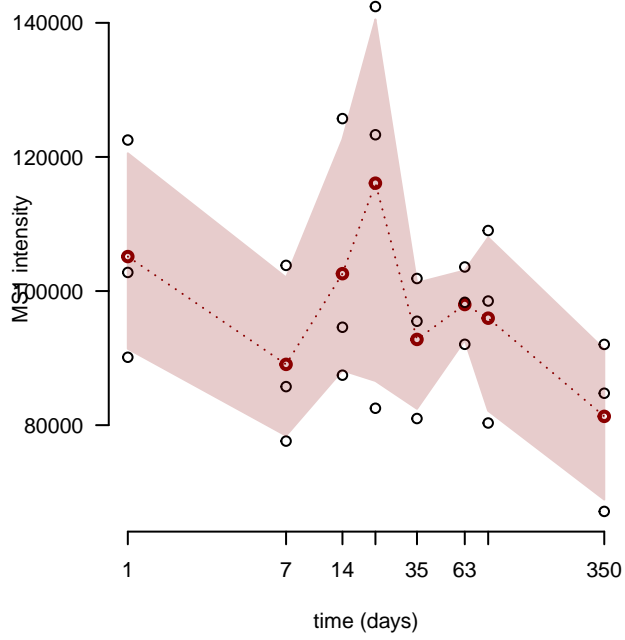

**P16675**  
GN=Ctsa  
cathepsin A

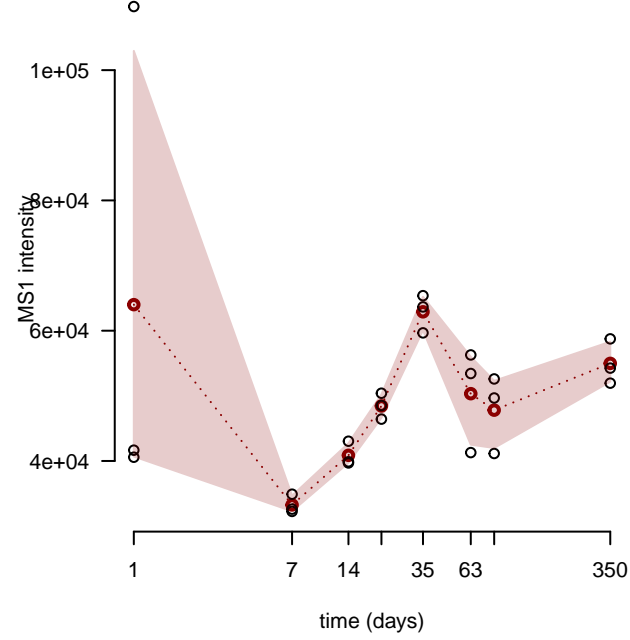

**P16858**  
GN=Gapdh  
glyceraldehyde-3-phosphate dehydrogenase

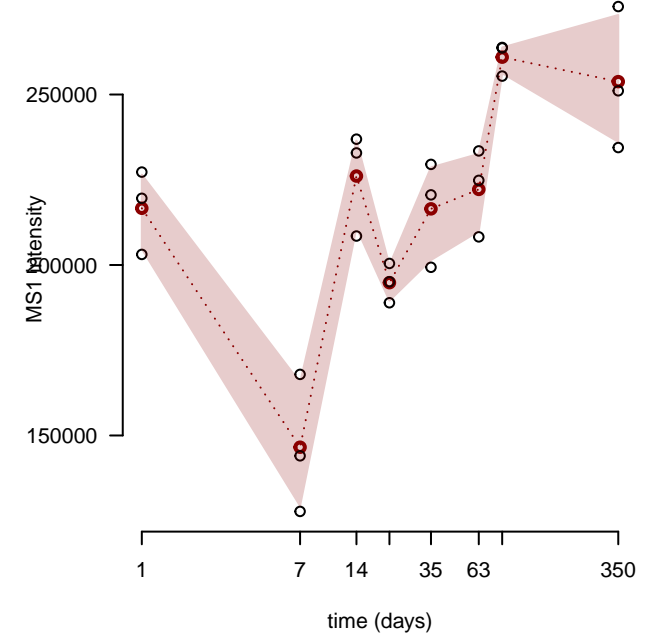

**P16951**  
GN=Atf2  
activating transcription factor 2

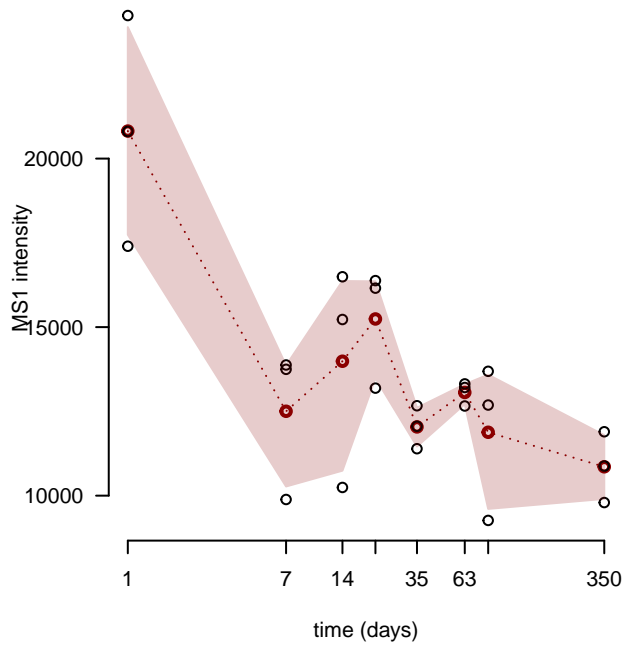

**P17012**  
GN=Zfx  
zinc finger protein X-linked

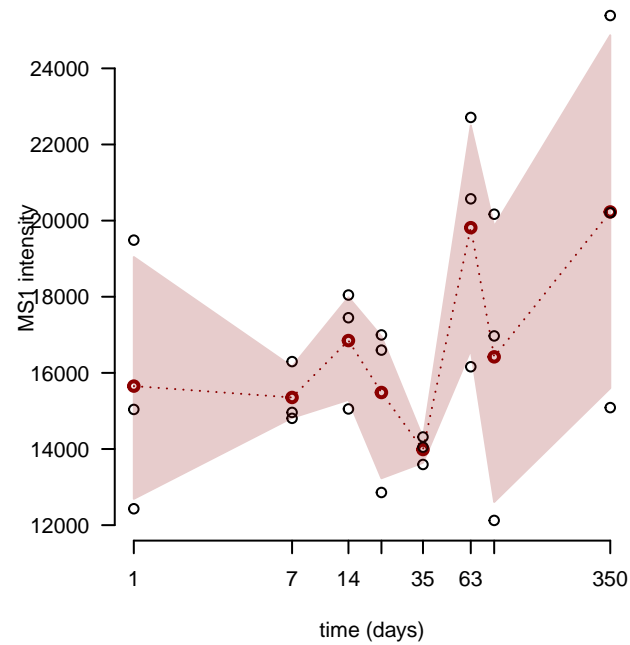

**P17047**  
GN=Lamp2  
lysosomal-associated membrane protein 2

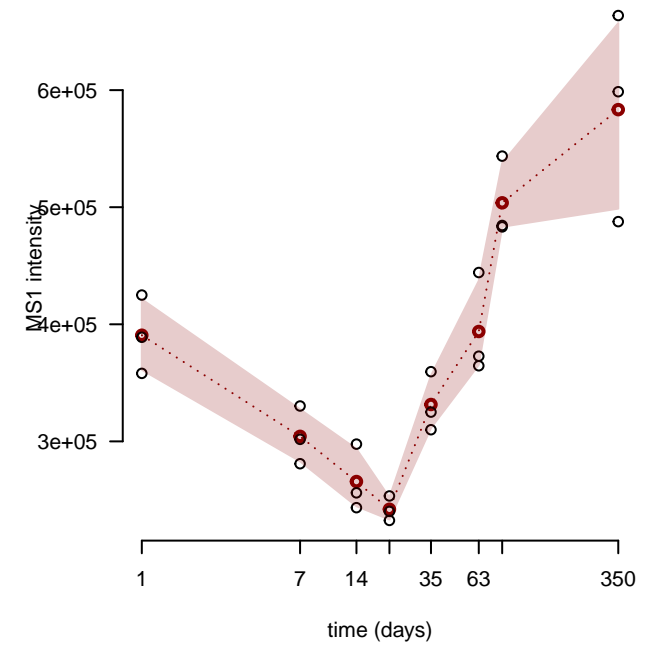

**P17095**  
GN=Hmga1  
high mobility group AT-hook 1

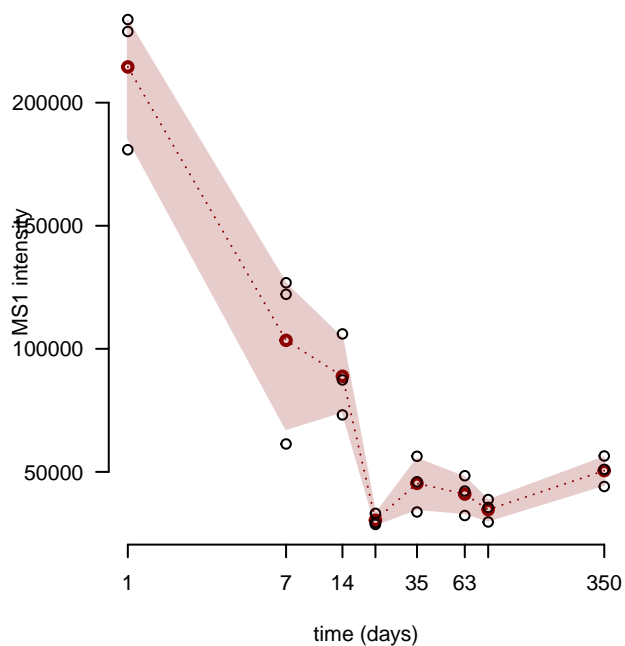

**P17095**  
GN=Hmga1  
high mobility group AT-hook 1

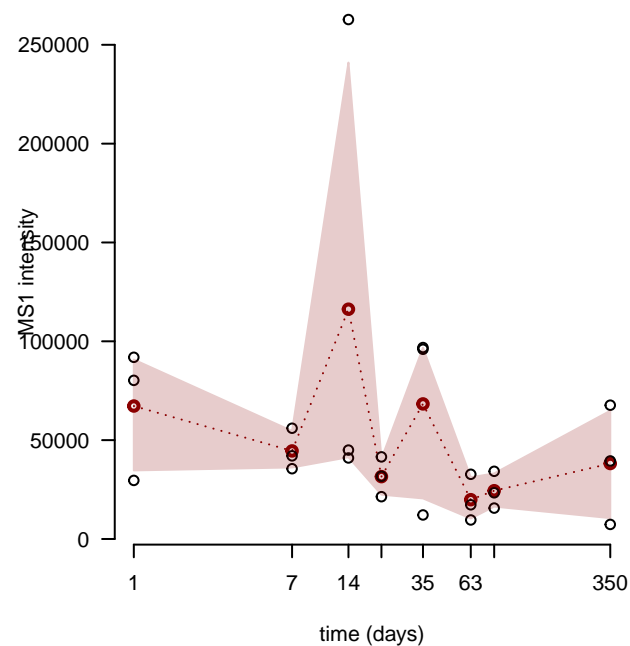

**P17125**  
GN=Tgfb3  
transforming growth factor, beta 3

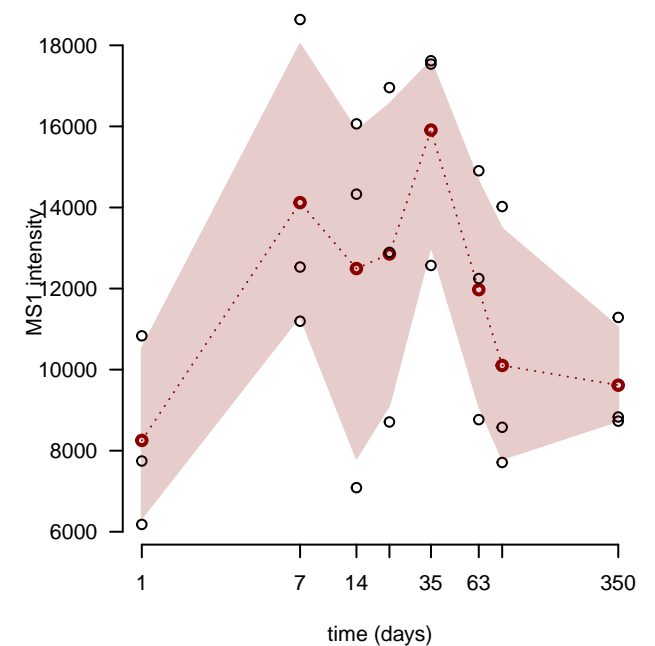



**P17141**  
**GN=Zfp37**  
zinc finger protein 37

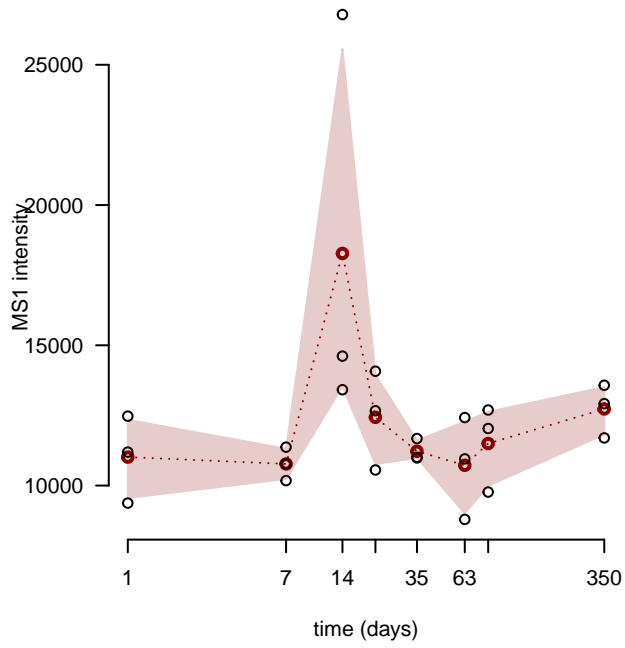

**P17156**  
**GN=Hspa2**  
heat shock protein 2

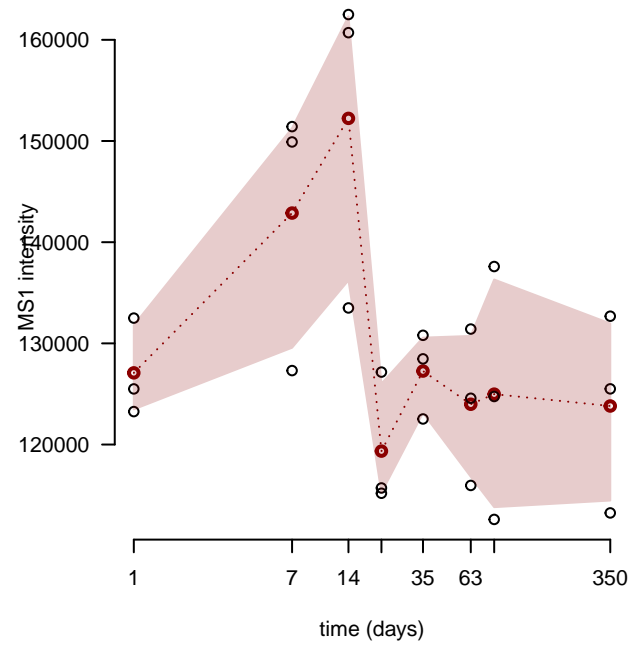

**P17182**  
**GN=Eno1**  
enolase 1, alpha non-neuron

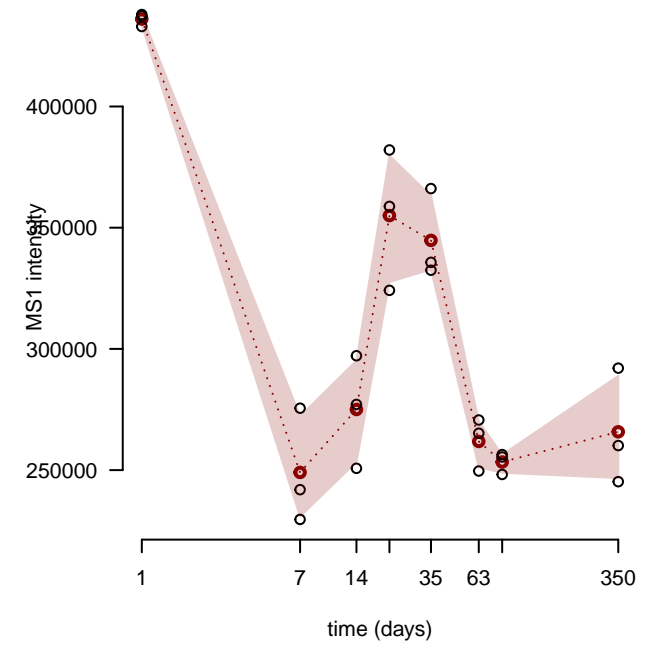

**P17183**  
**GN=Eno2**  
enolase 2, gamma neuronal

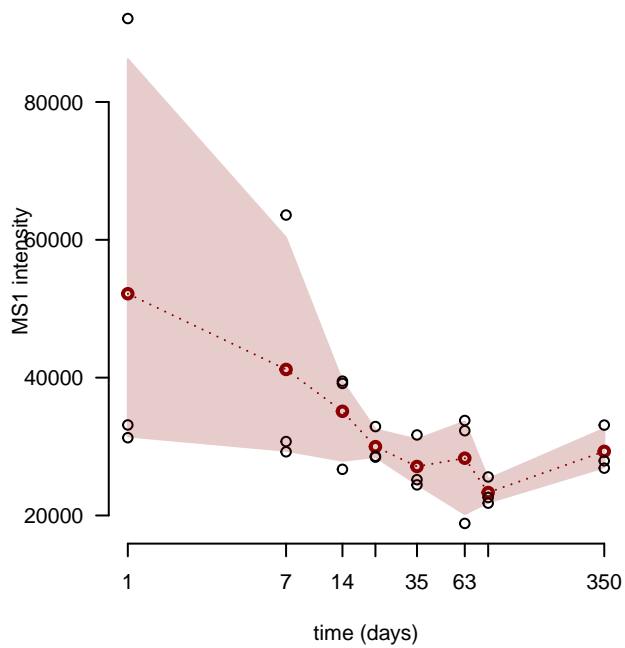

**P17225**  
**GN=Ptbp1**  
polypyrimidine tract binding protein 1

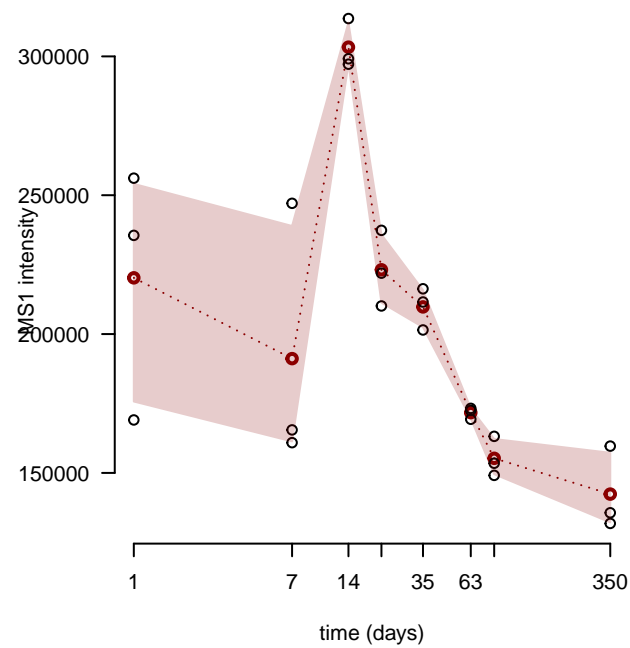

**P17426**  
**GN=Ap2a1**  
adaptor-related protein complex 2, alpha ...

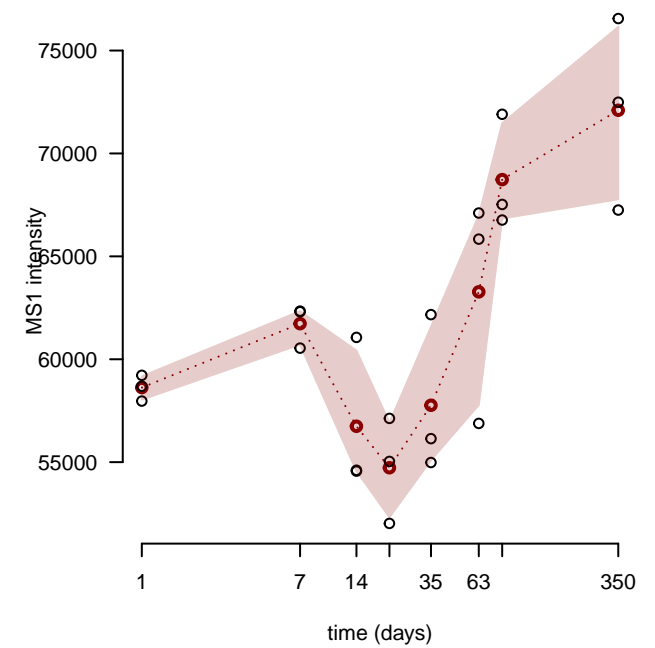

**P17427**  
**GN=Ap2a2**  
adaptor-related protein complex 2, alpha ...

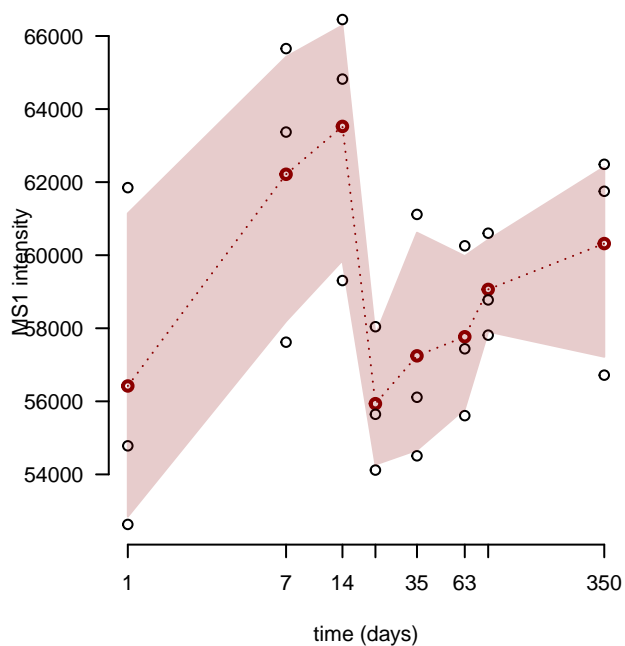

**P17439**  
**GN=Gba**  
glucosidase, beta, acid

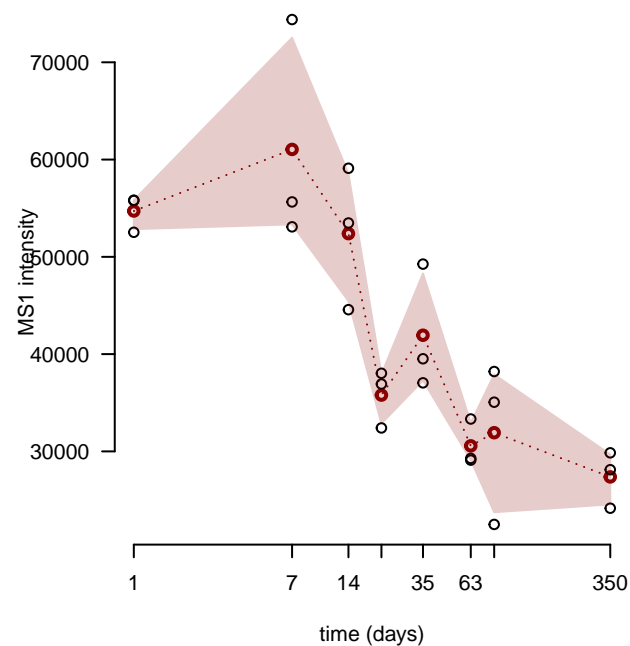

**P17563**  
**GN=Selenbp1**  
selenium binding protein 1

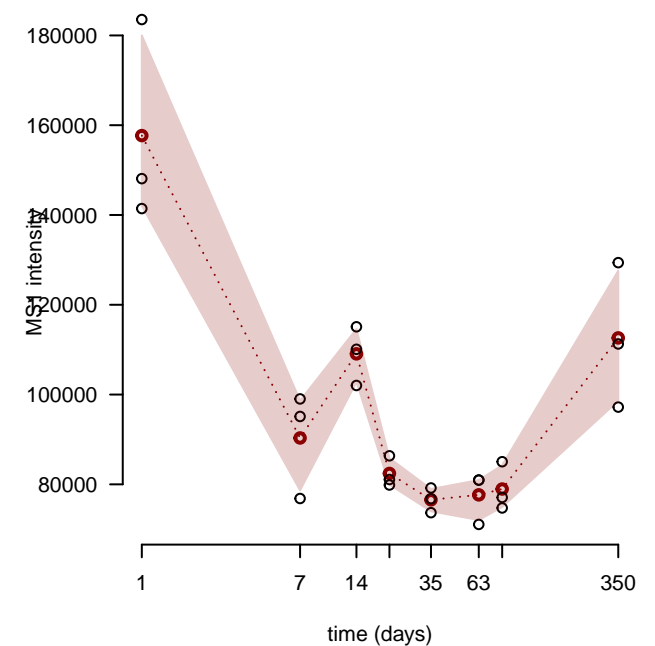

**P17665**  
**GN=Cox7c**  
cytochrome c oxidase subunit 7C

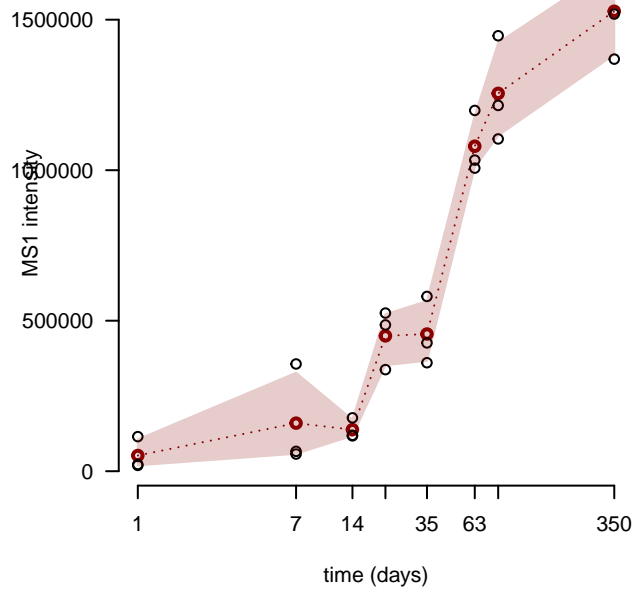

**P17710**  
**GN=Hk1**  
hexokinase 1

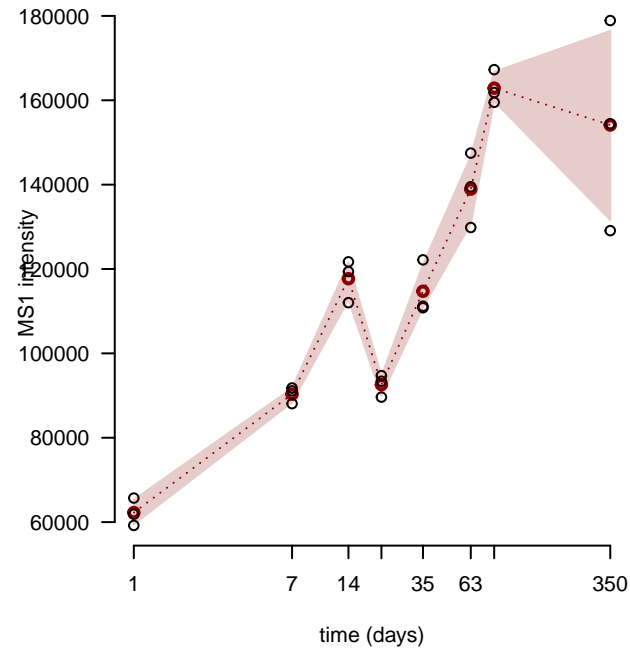

**P17742**  
**GN=Ppia**  
peptidylprolyl isomerase A

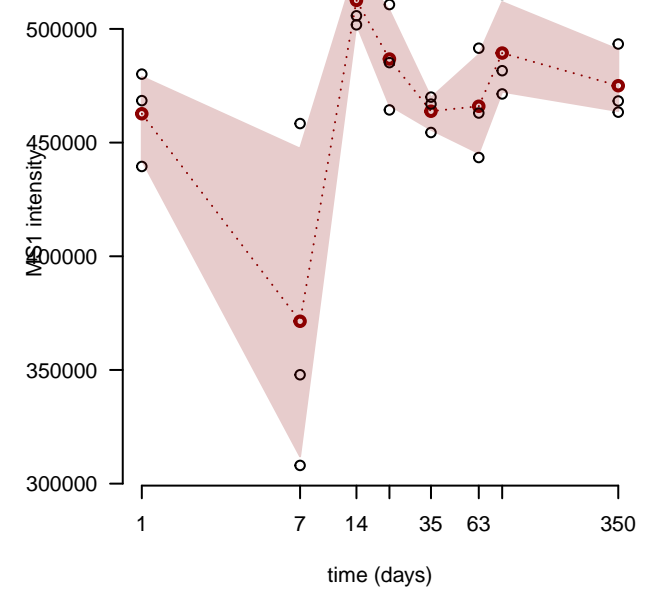

**P17751**  
**GN=Tpi1**  
triosephosphate isomerase 1

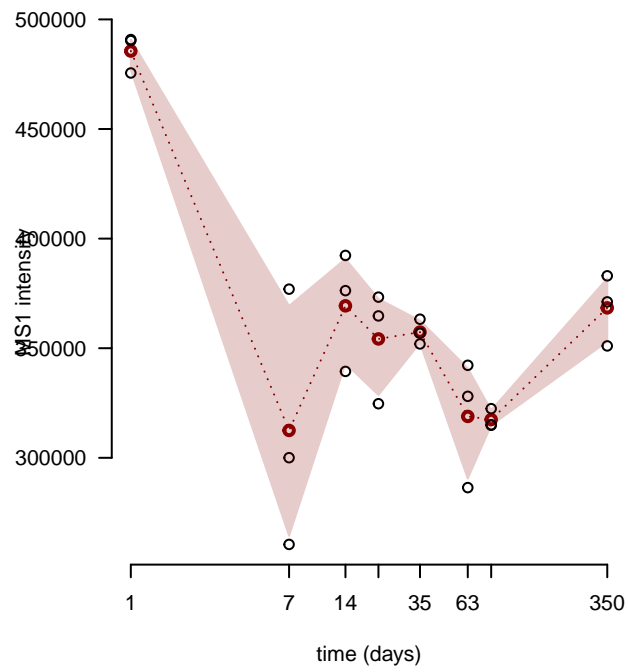

**P17809**  
**GN=Slc2a1**  
solute carrier family 2 (facilitated glu ...

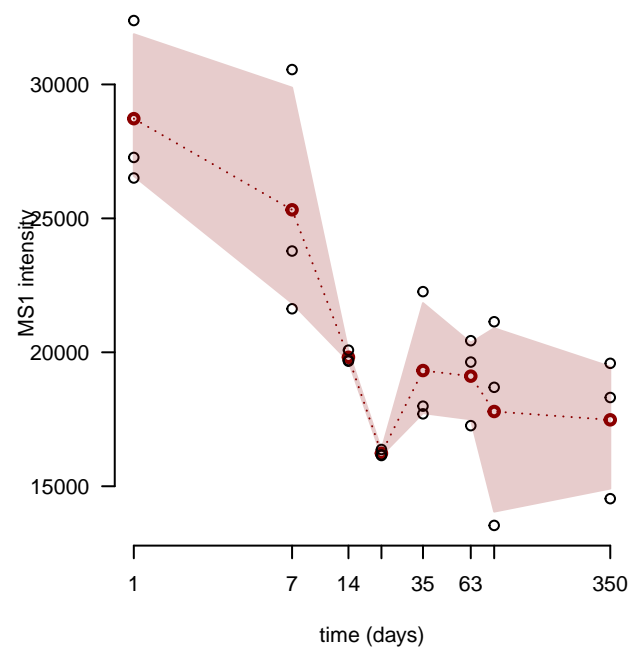

**P17879**  
**GN=Hspa1b**  
heat shock protein 1B

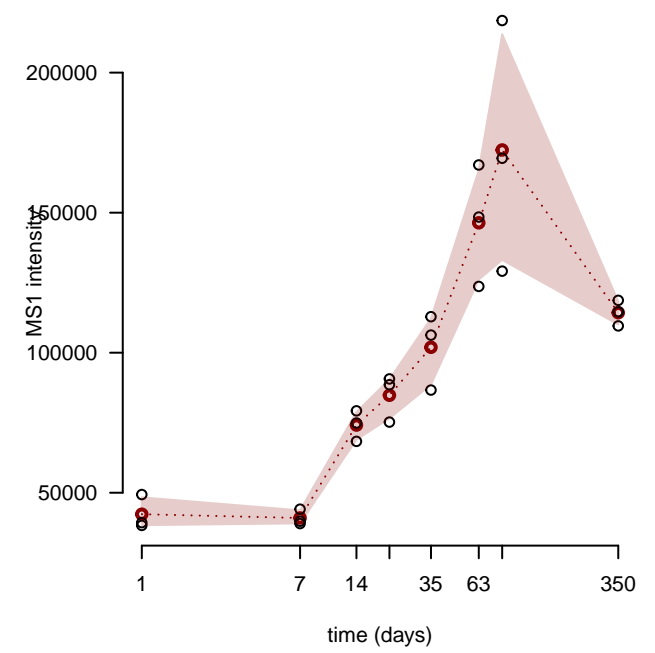

**P17897**  
**GN=Lyz1**  
lysozyme 1

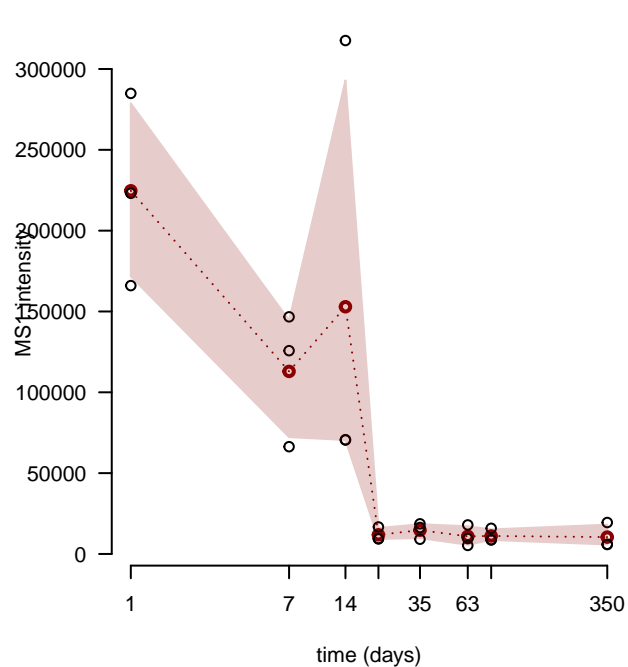

**P17918**  
**GN=Pcna**  
proliferating cell nuclear antigen

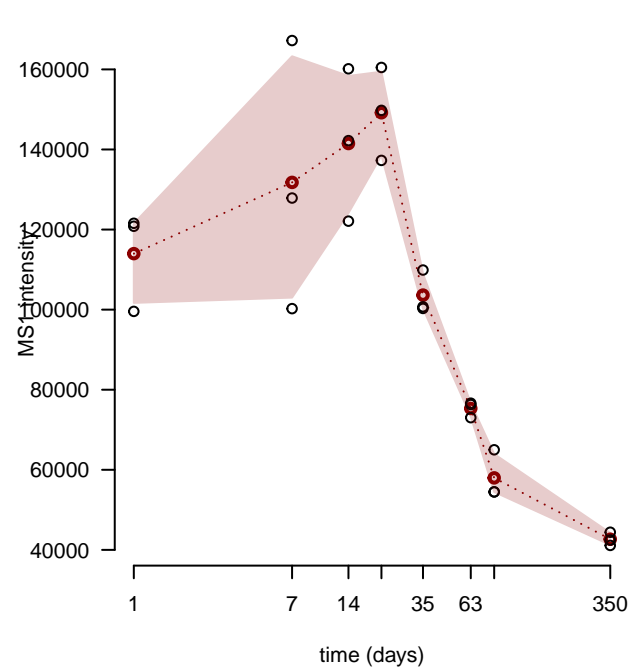

**P18052**  
**GN=Ptpa**  
protein tyrosine phosphatase, receptor t ...

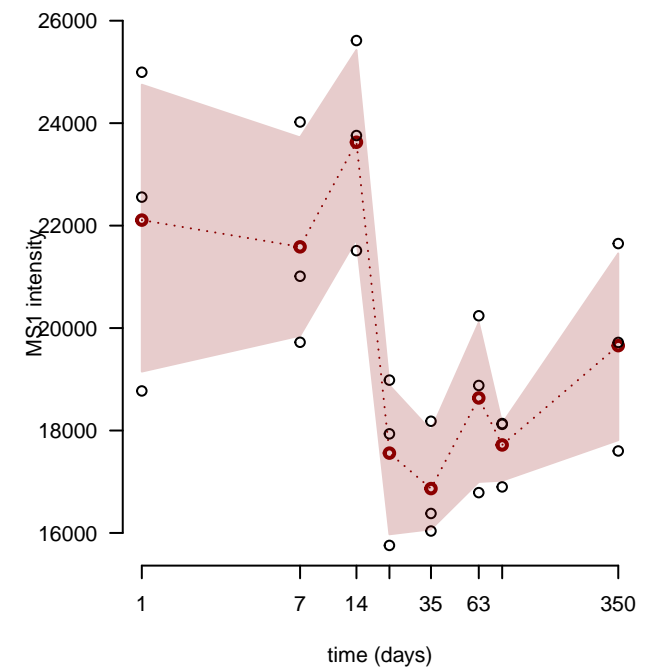

**P18155**  
GN=Mthfd2  
methylenetetrahydrofolate dehydrogenase ...

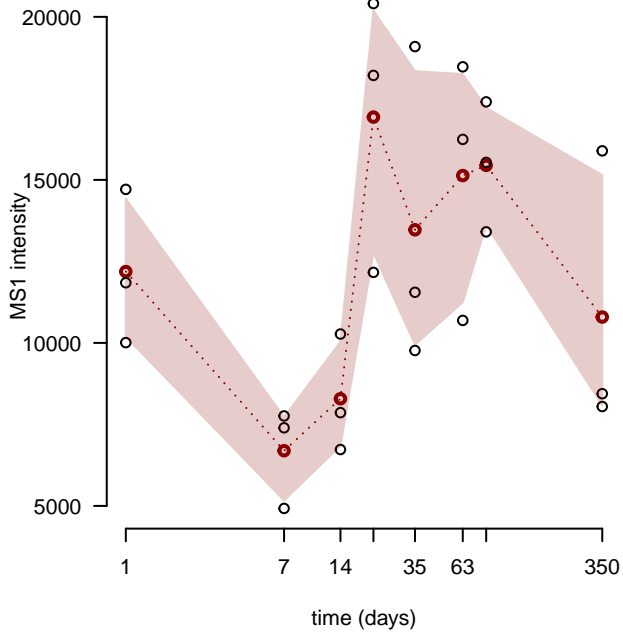

**P18242**  
GN=Ctsd  
cathepsin D

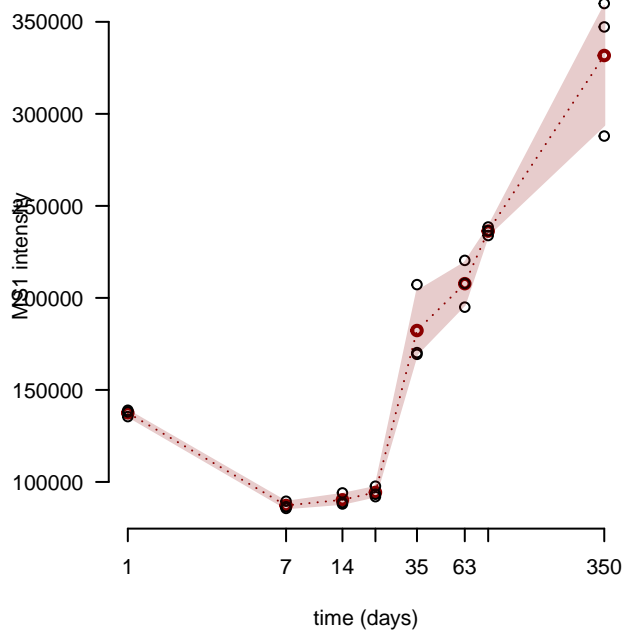

**P18293**  
GN=Npr1  
natriuretic peptide receptor 1

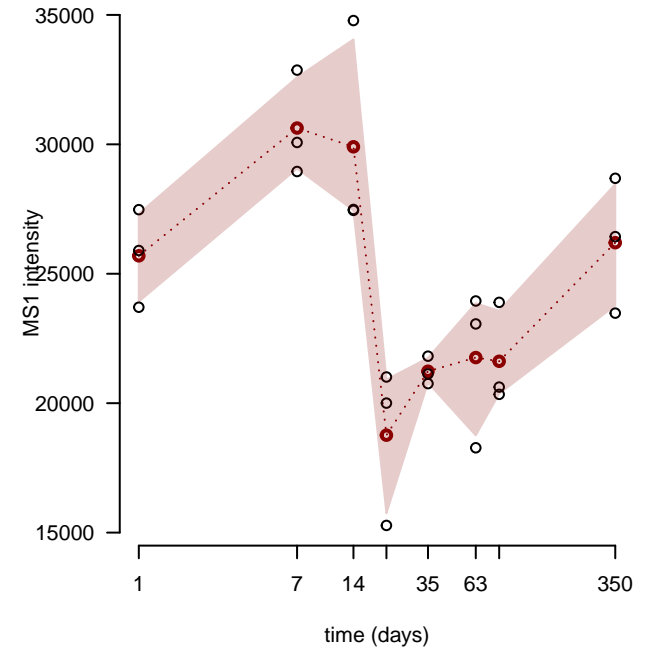

**P18527**  
GN=

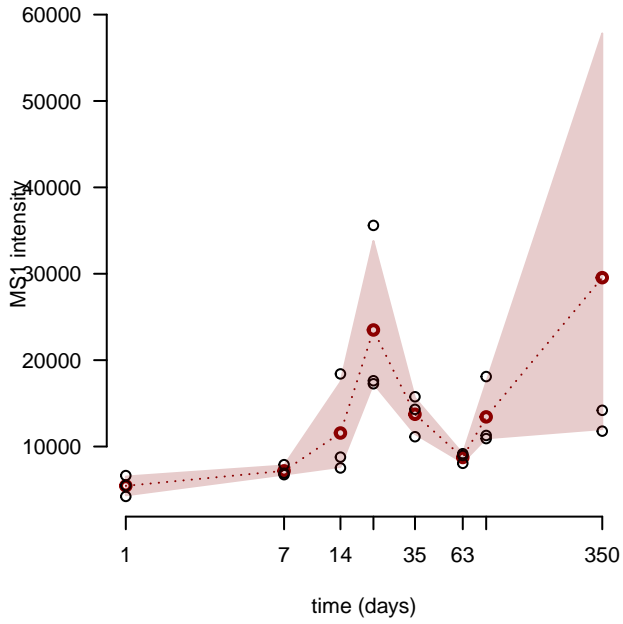

**P18528**  
GN=

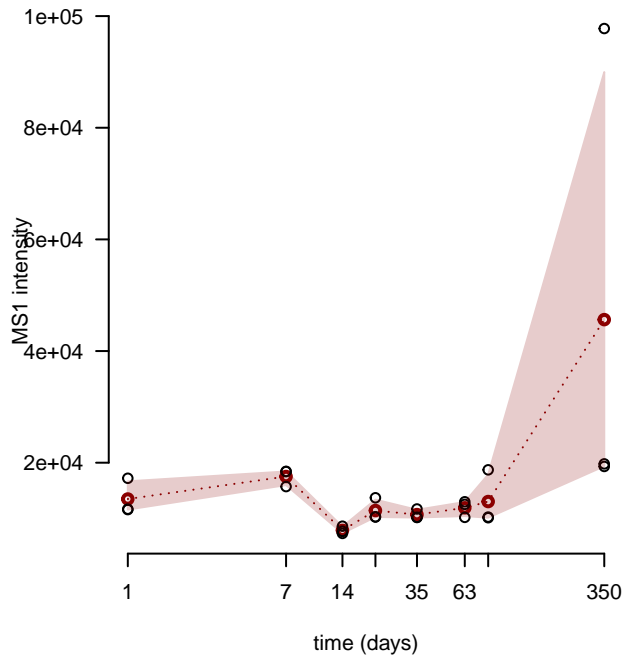

**P18572**  
GN=Bsg  
basigin

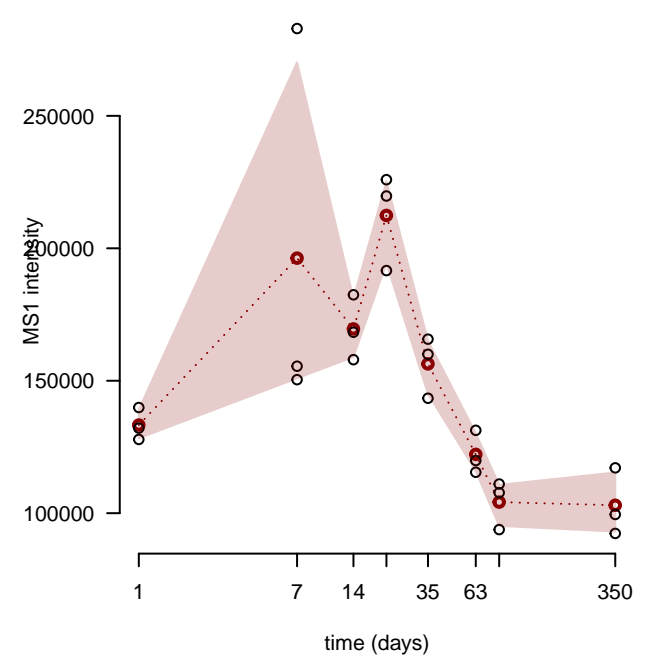

**P18581**  
GN=Slc7a2  
solute carrier family 7 (cationic amino ...

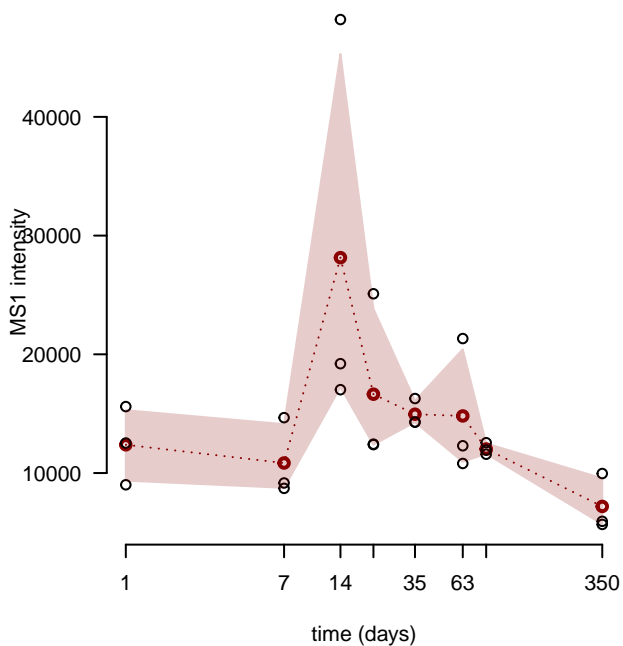

**P18608**  
GN=Hmgn1  
high mobility group nucleosomal binding ...

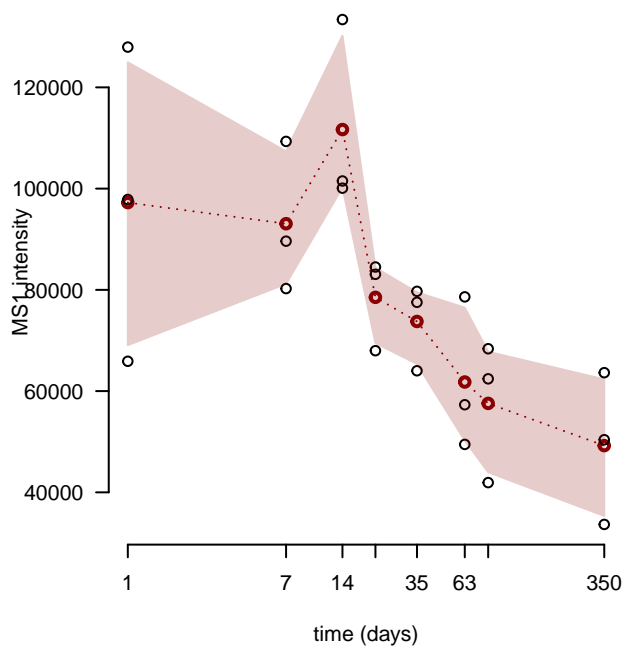

**P18653**  
GN=Rps6ka1  
ribosomal protein S6 kinase polypeptide ...

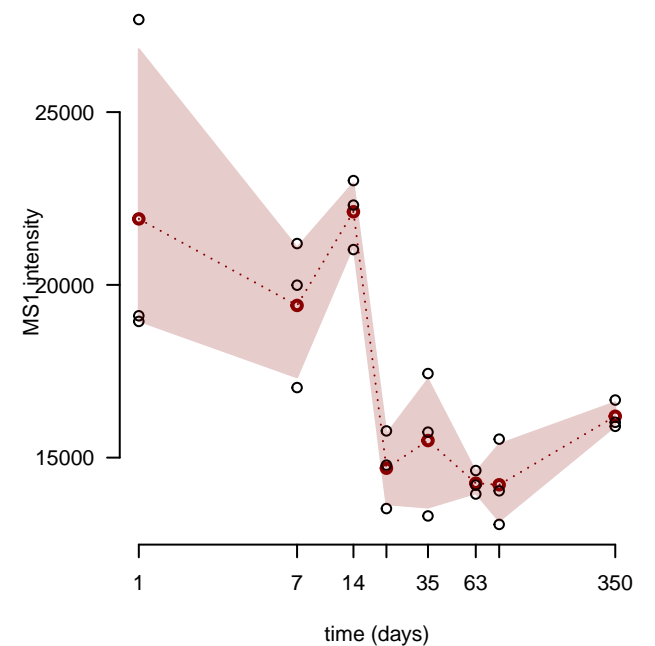

**P18654**  
**GN=Rps6ka3**  
ribosomal protein S6 kinase polypeptide ...

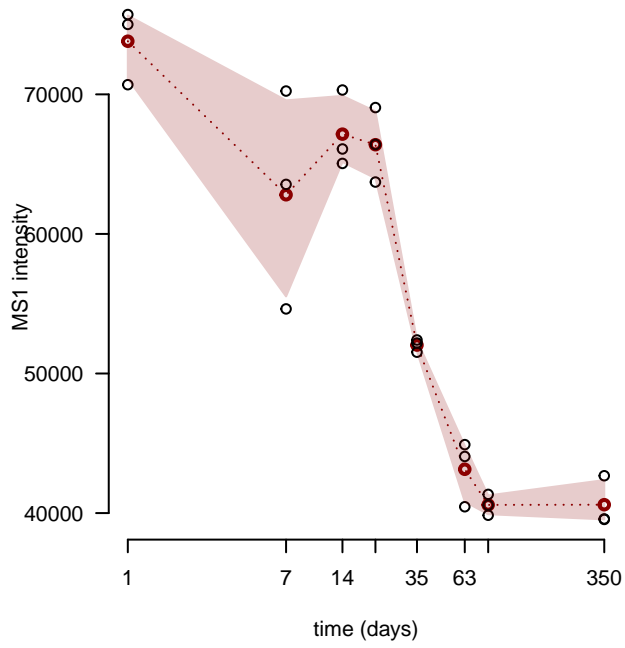

**P18760**  
**GN=Cfl1**  
cofilin 1, non-muscle

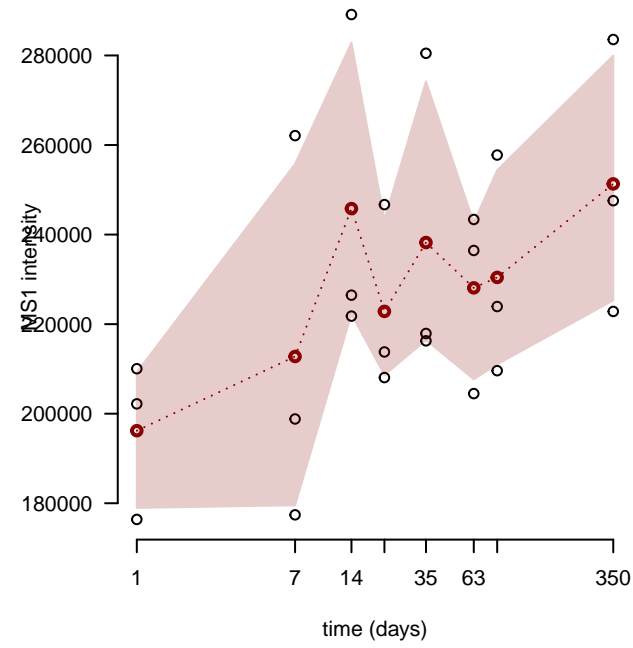

**P18826**  
**GN=Phka1**  
phosphorylase kinase alpha 1

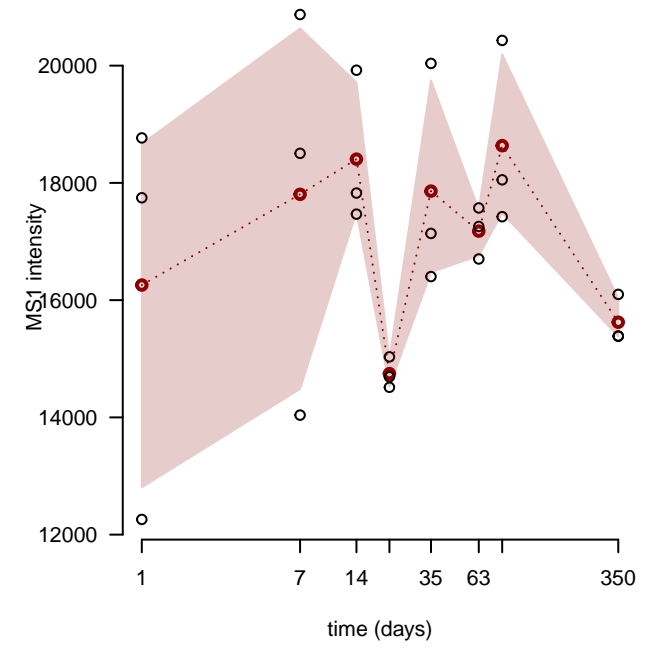

**P18828**  
**GN=Sdc1**  
syndecan 1

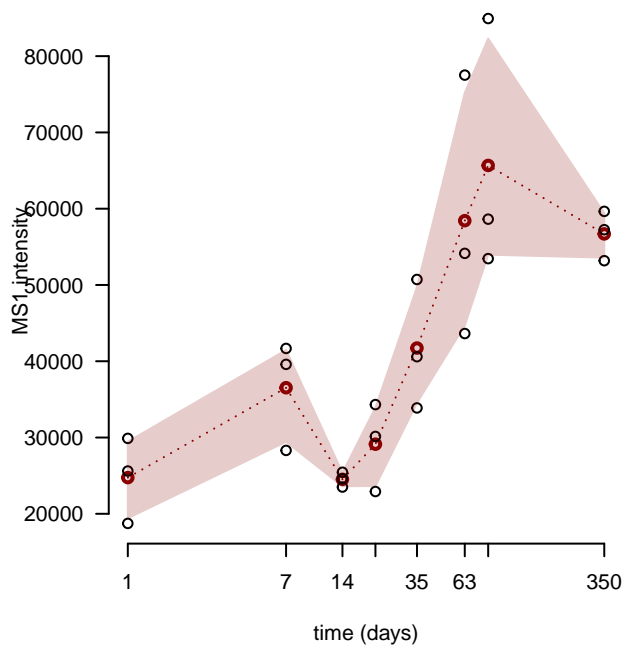

**P18872**  
**GN=Gnao1**  
guanine nucleotide binding protein, alpha ...

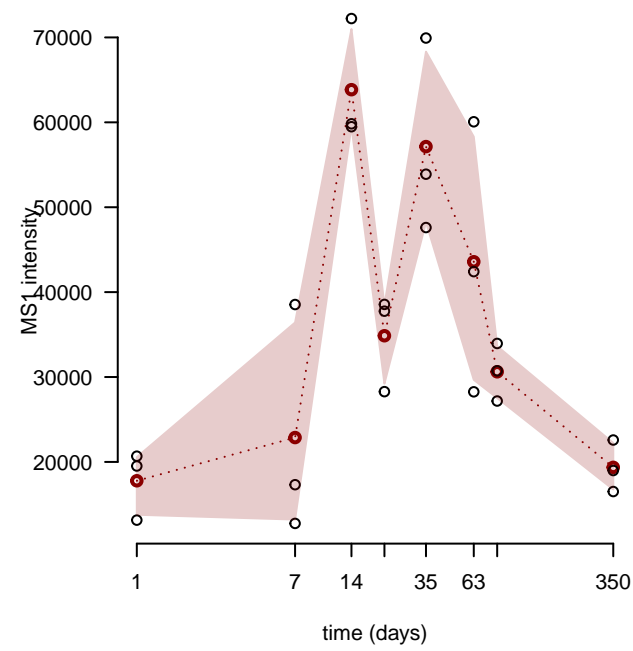

**P18911**  
**GN=Rarg**  
retinoic acid receptor, gamma

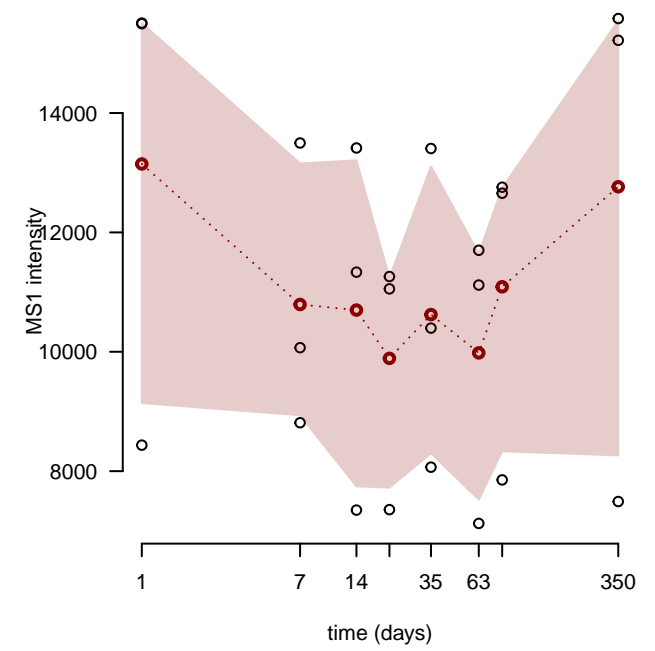

**P19001**  
**GN=Krt19**  
keratin 19

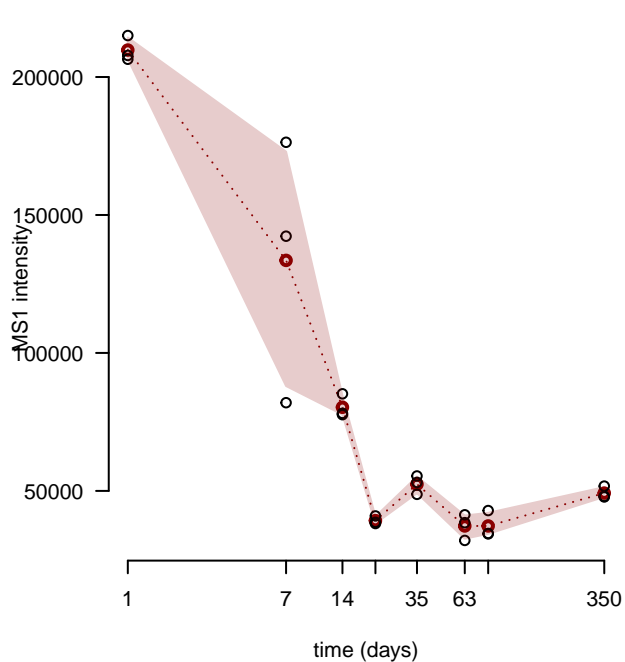

**P19091**  
**GN=Ar**  
androgen receptor

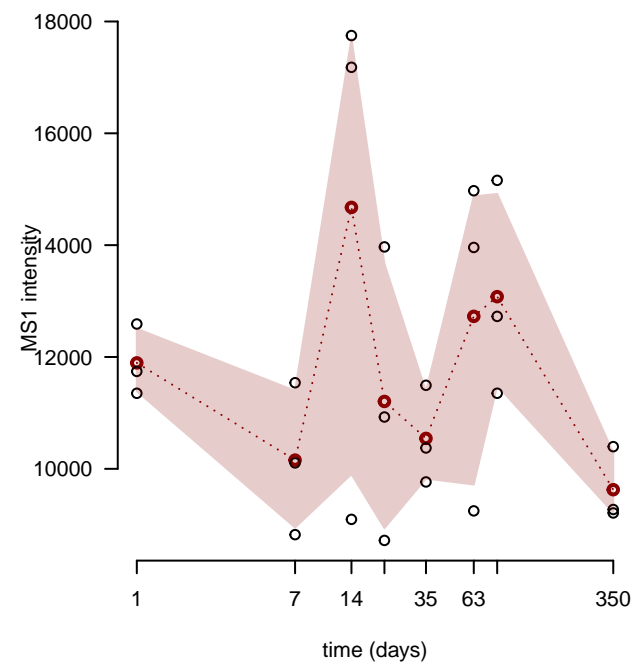

**P19096**  
**GN=Fasn**  
fatty acid synthase

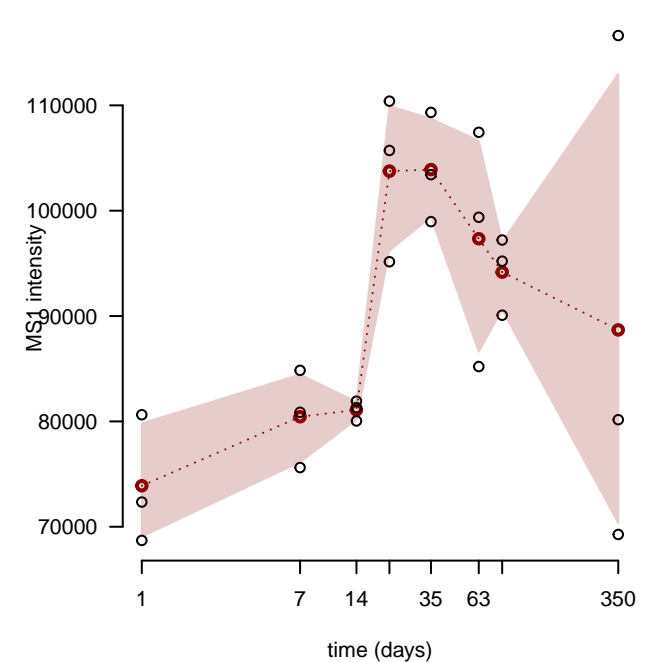

**P19137**  
GN=Lama1  
laminin, alpha 1

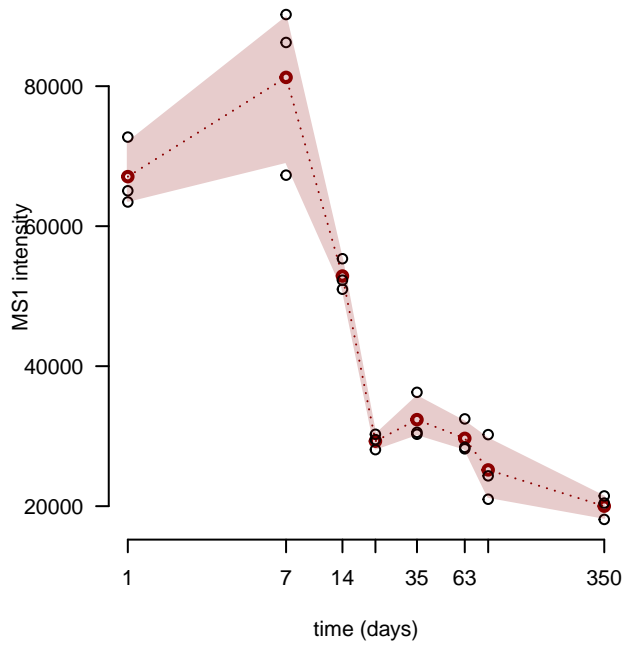

**P19157**  
GN=Gstp1  
glutathione S-transferase, pi 1

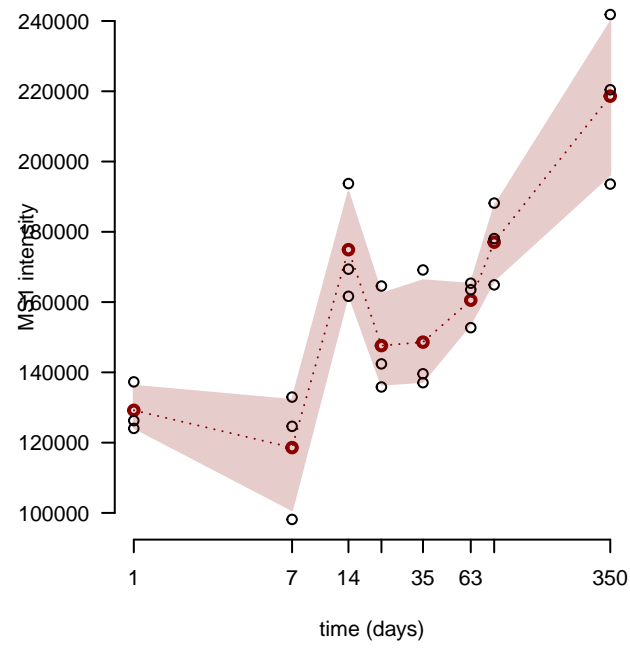

**P19182**  
GN=lfrd1  
interferon-related developmental regulat ...

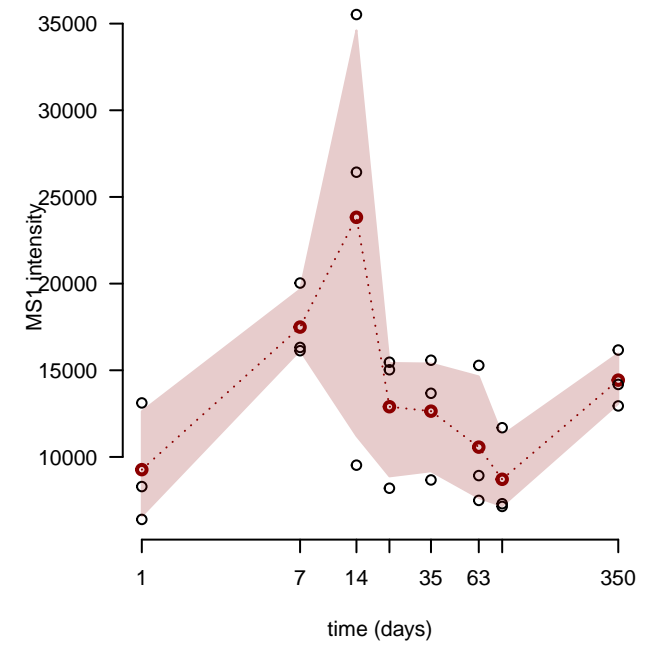

**P19221**  
GN=F2  
coagulation factor II

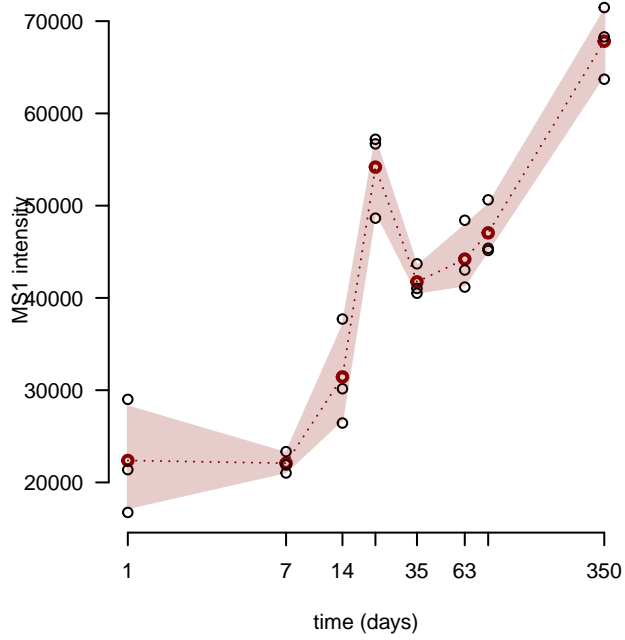

**P19253**  
GN=Rpl13a  
ribosomal protein L13A

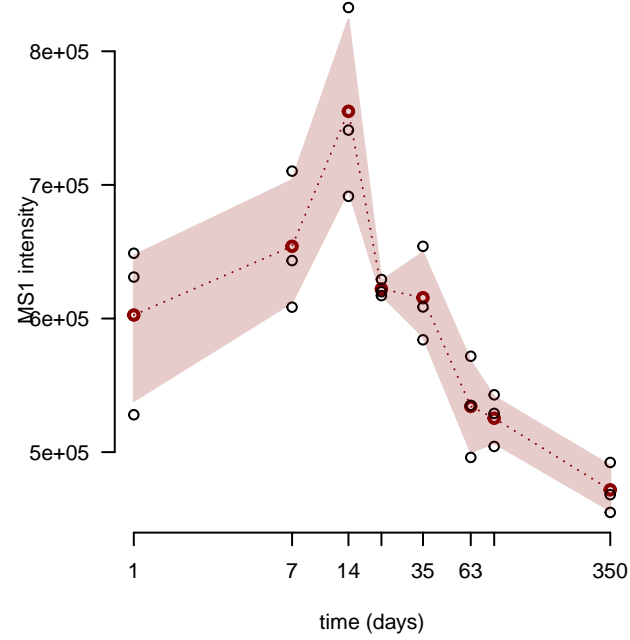

**P19258**  
GN=Mpv17  
Mpv17 mitochondrial inner membrane prote ...

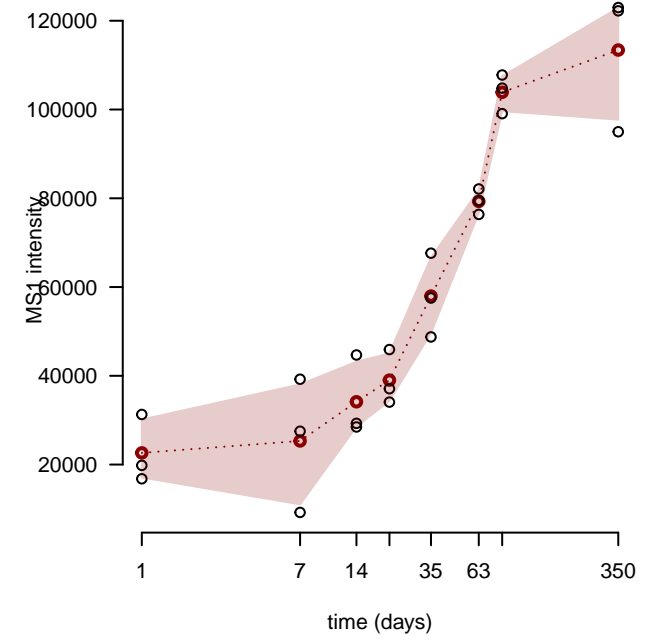

**P19324**  
GN=Serpinh1  
serine (or cysteine) peptidase inhibitor ...

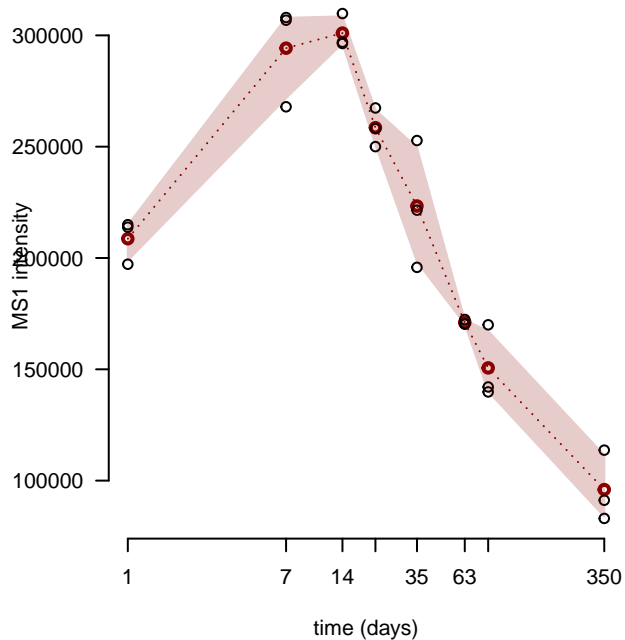

**P19426**  
GN=Nelfe  
negative elongation factor complex membe ...

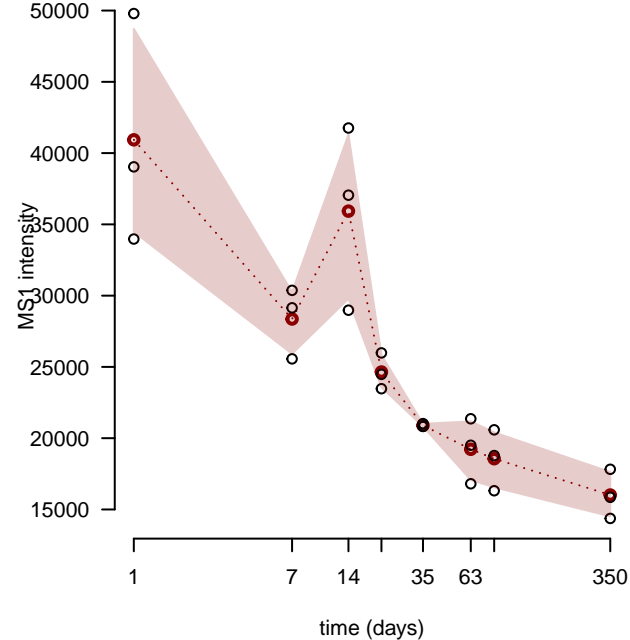

**P19467**  
GN=Muc13  
mucin 13, epithelial transmembrane

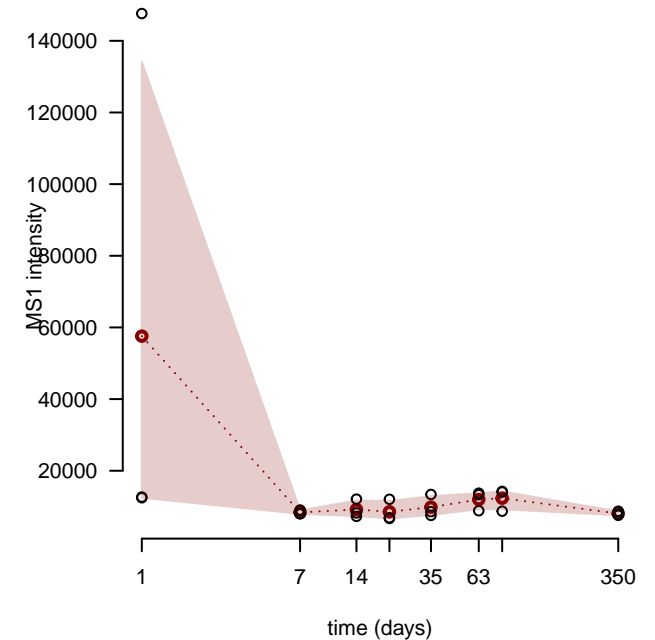

**P19536**  
**GN=Cox5b**  
cytochrome c oxidase subunit 5B

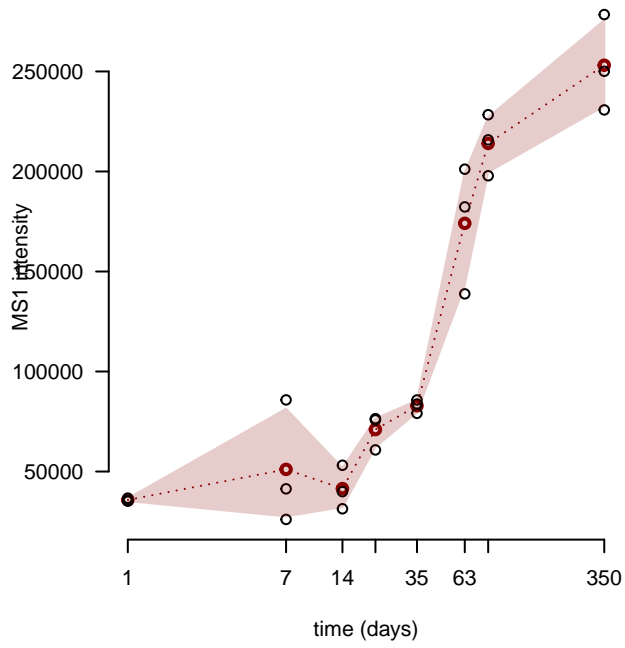

**P19783**  
**GN=Cox4i1**  
cytochrome c oxidase subunit 4i1

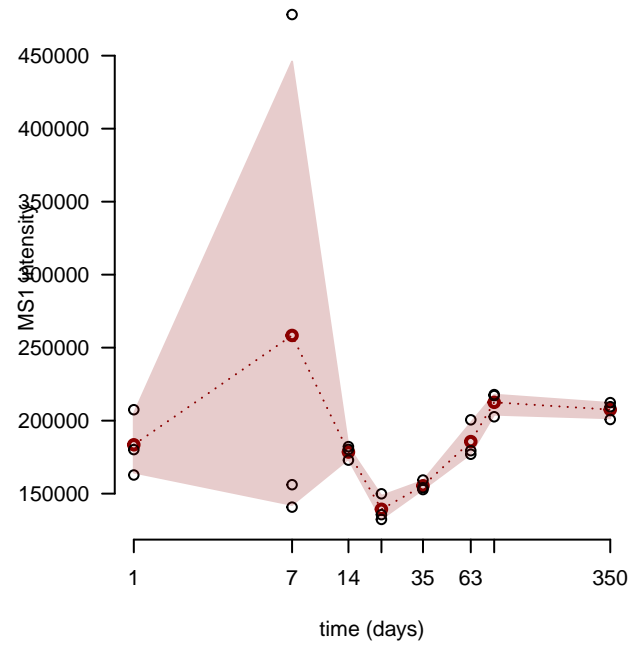

**P19785**  
**GN=Esr1**  
estrogen receptor 1 (alpha)

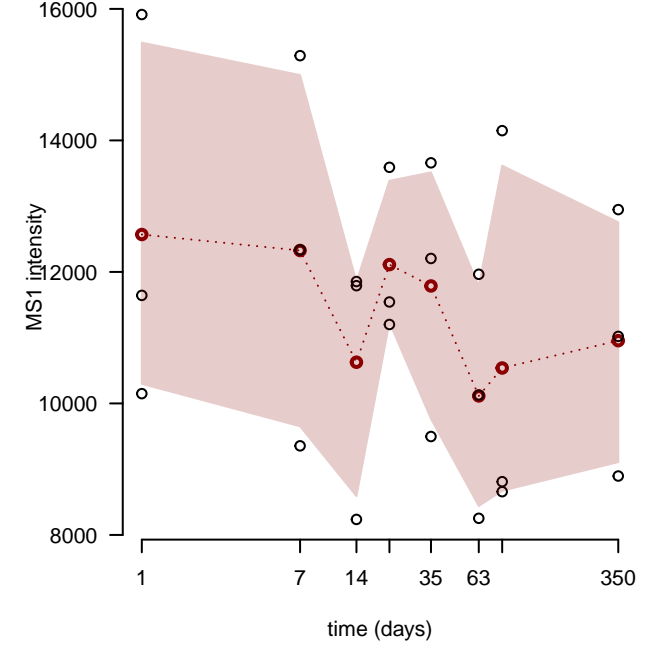

**P19973**  
**GN=Lsp1**  
lymphocyte specific 1

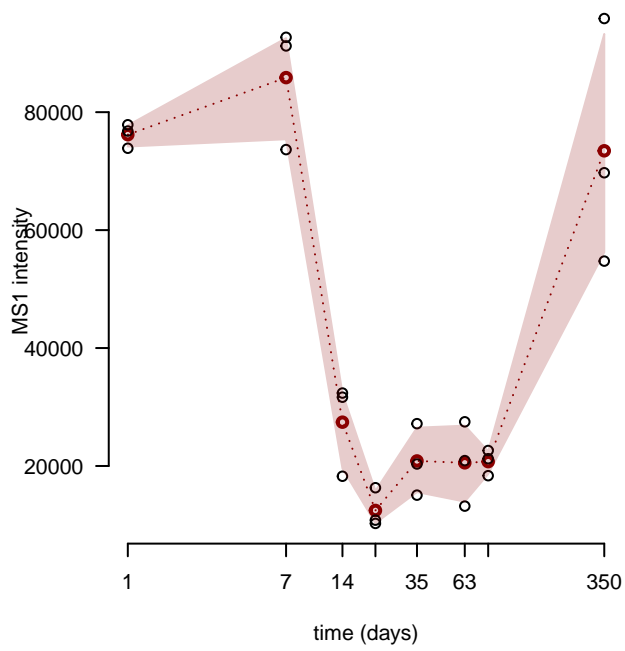

**P20029**  
**GN=Hspa5**  
heat shock protein 5

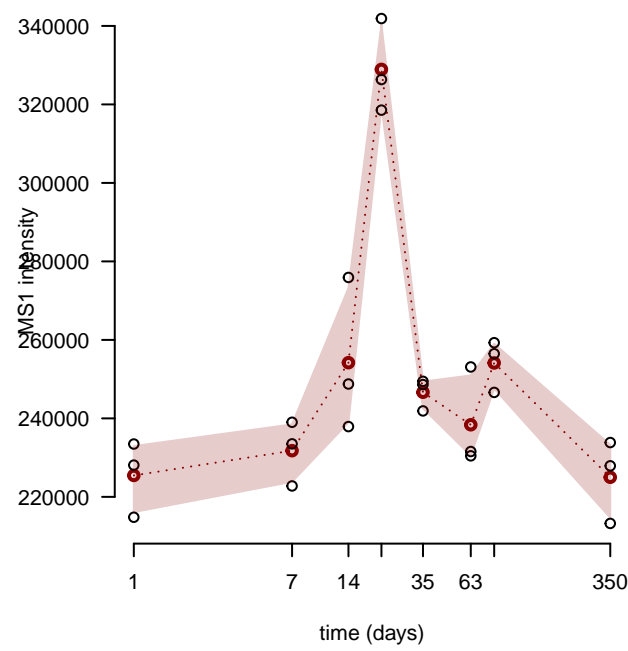

**P20060**  
**GN=Hexb**  
hexosaminidase B

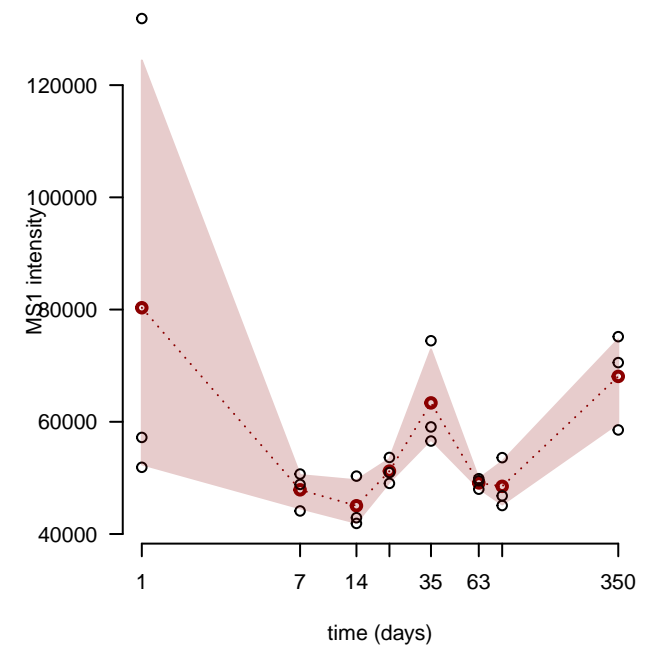

**P20065**  
**GN=Tmsb4x**  
thymosin, beta 4, X chromosome

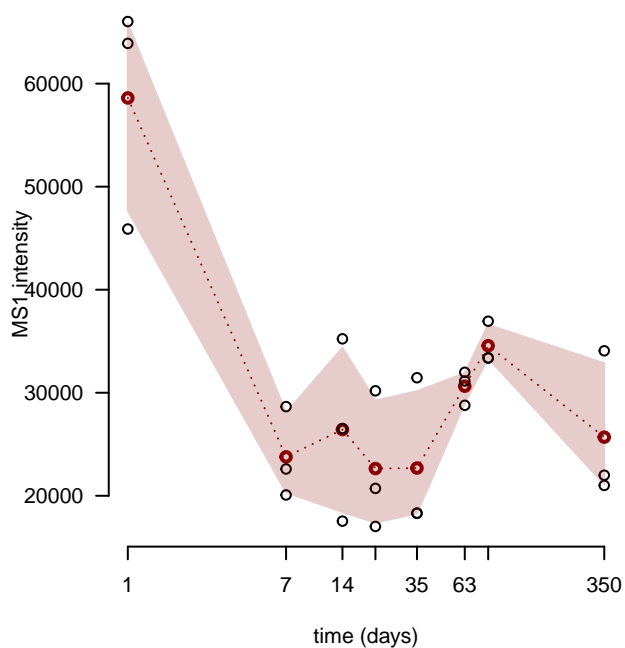

**P20108**  
**GN=Prdx3**  
peroxiredoxin 3

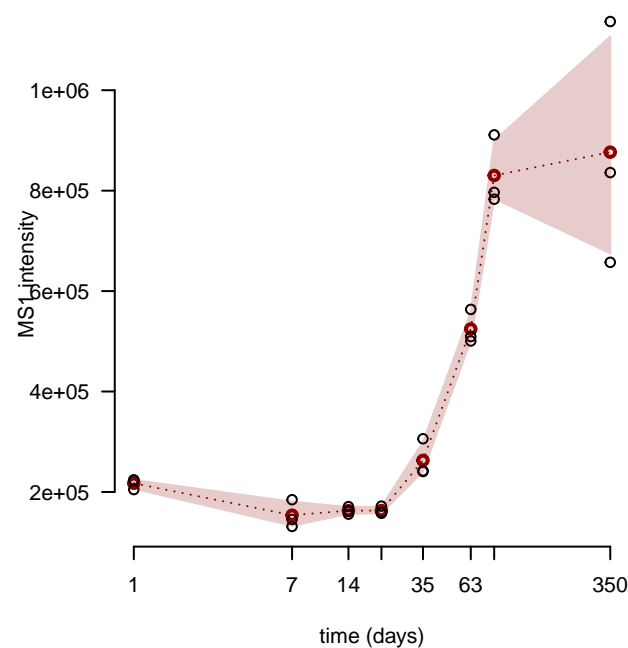

**P20152**  
**GN=Vim**  
vimentin

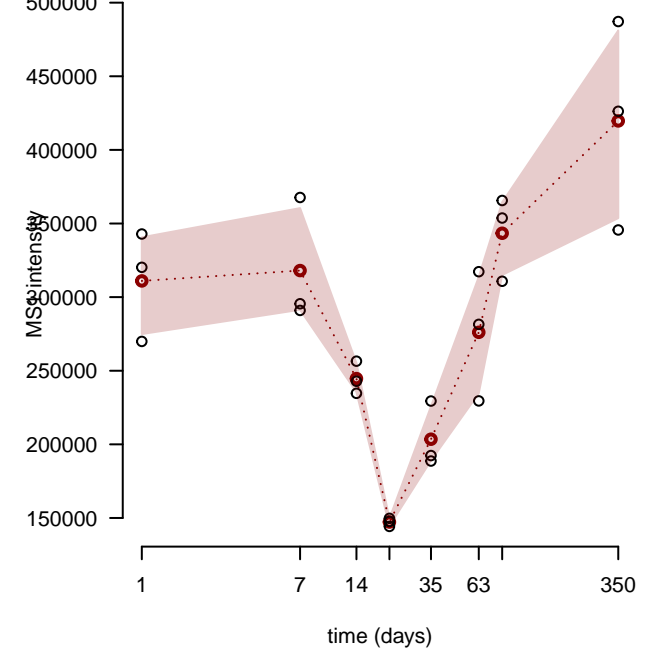

**P20239**  
GN=Zp2  
zona pellucida glycoprotein 2

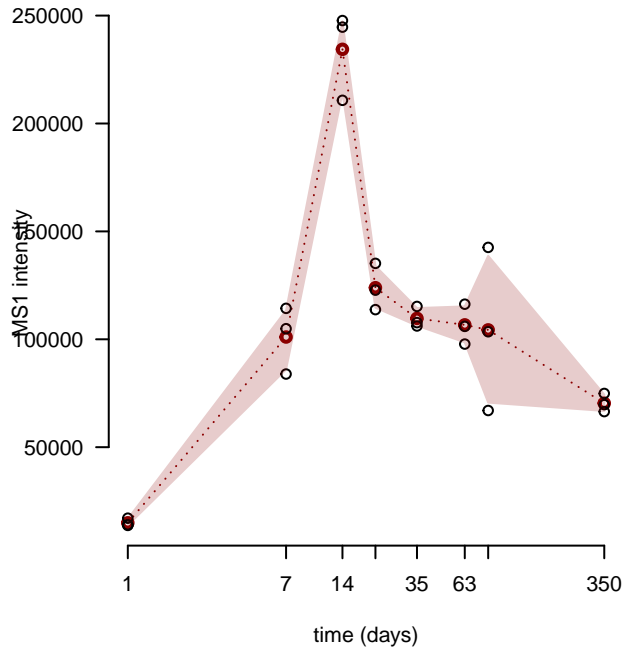

**P20352**  
GN=F3  
coagulation factor III

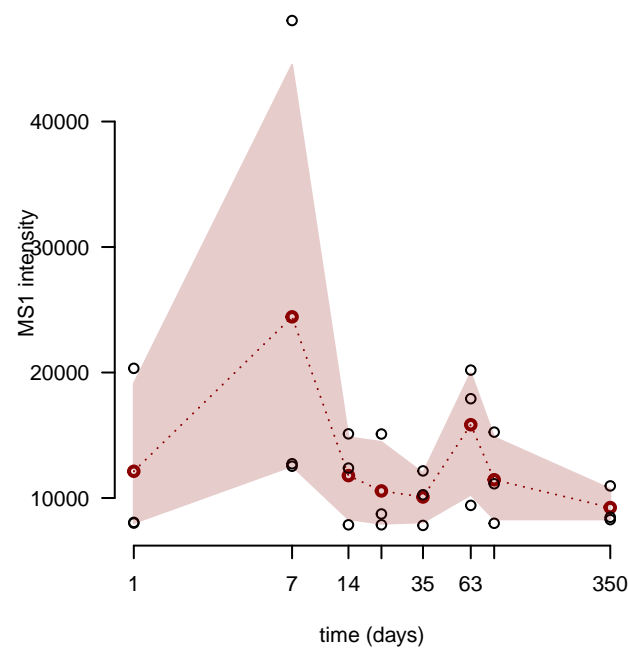

**P20357**  
GN=Map2  
microtubule-associated protein 2

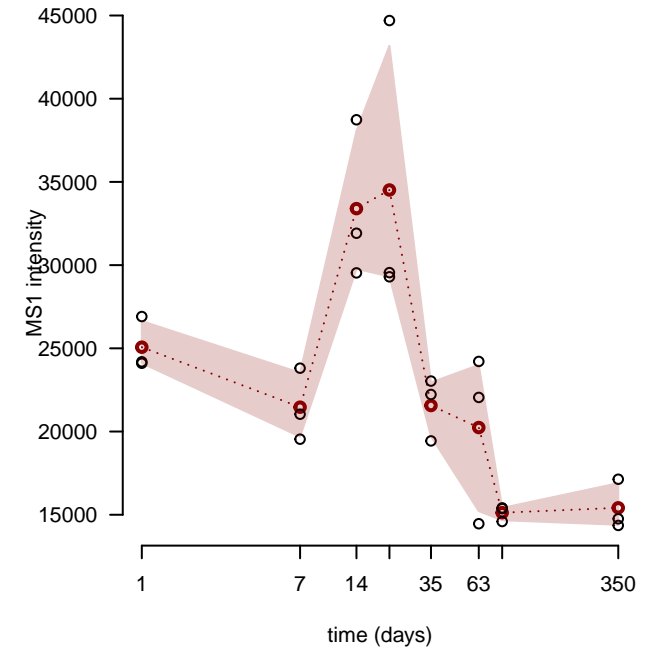

**P20444**  
GN=Prkca  
protein kinase C, alpha

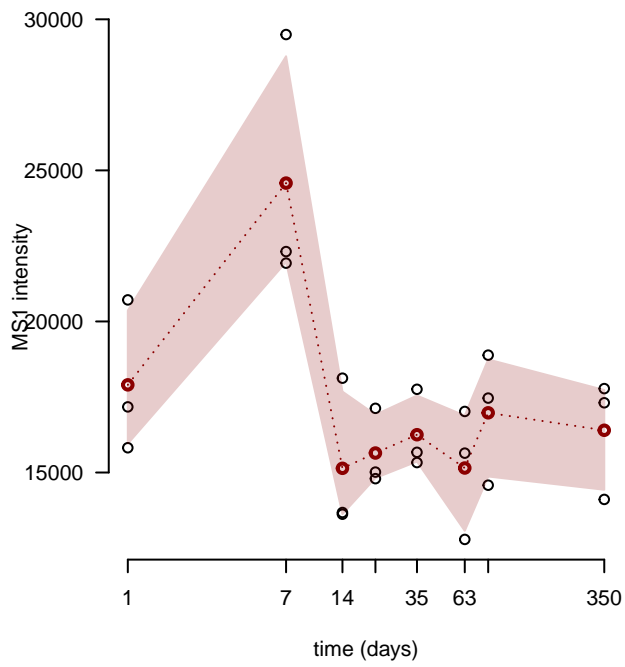

**P20664**  
GN=Prim1  
DNA primase, p49 subunit

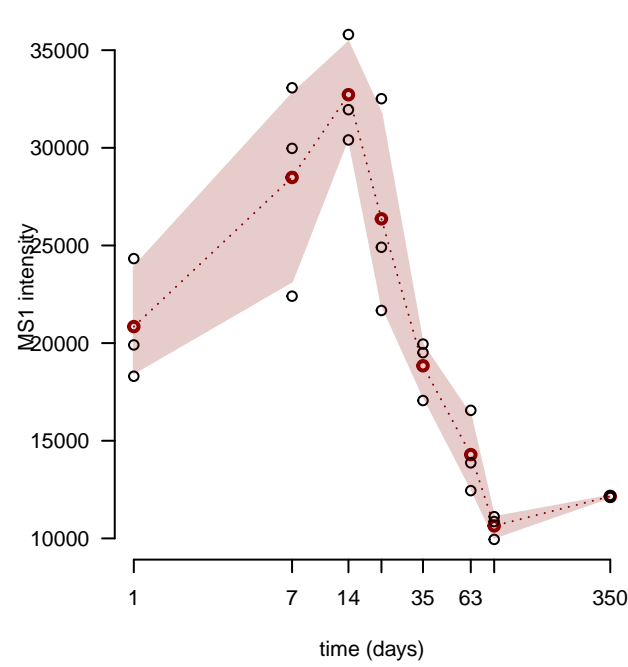

**P20801**  
GN=Tnnc2  
troponin C2, fast

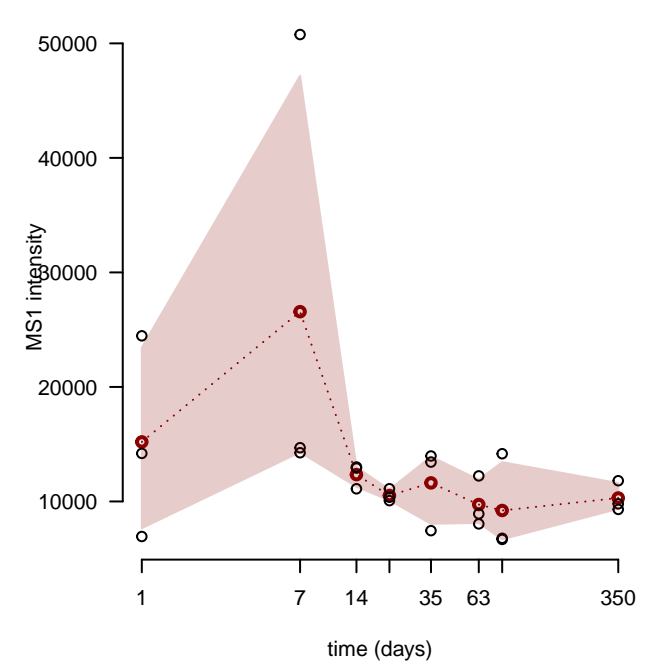

**P20918**  
GN=Plg  
plasminogen

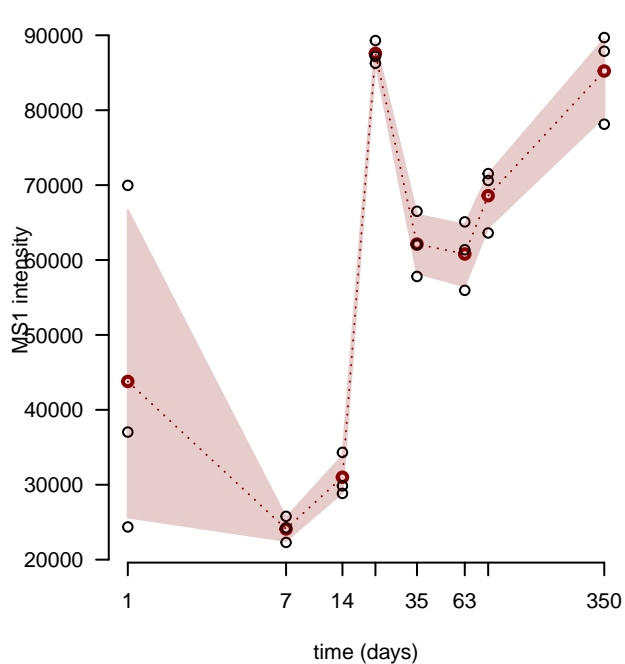

**P21107**  
GN=Tpm3  
tropomyosin 3, gamma

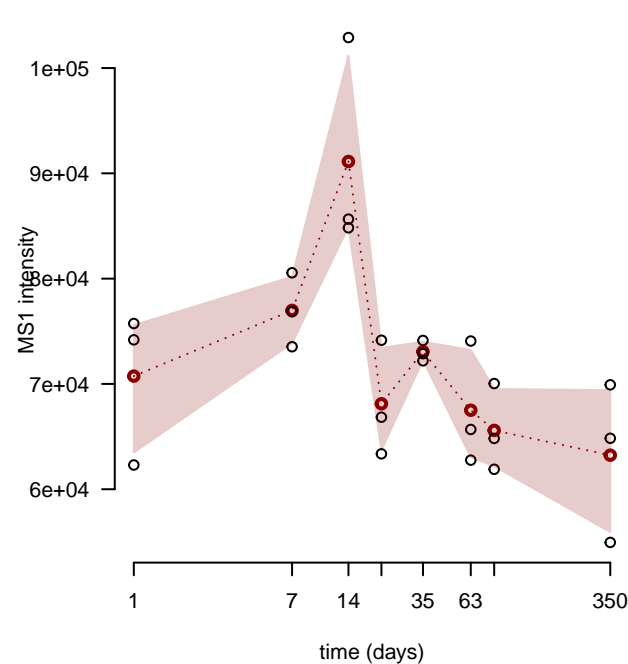

**P21107**  
GN=Tpm3  
tropomyosin 3, gamma

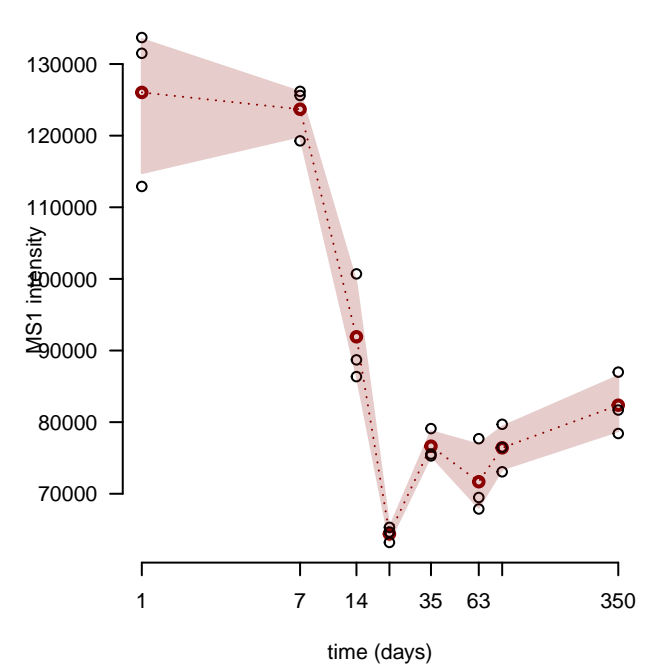

**P21126**  
GN=Ubl4a  
ubiquitin-like 4A

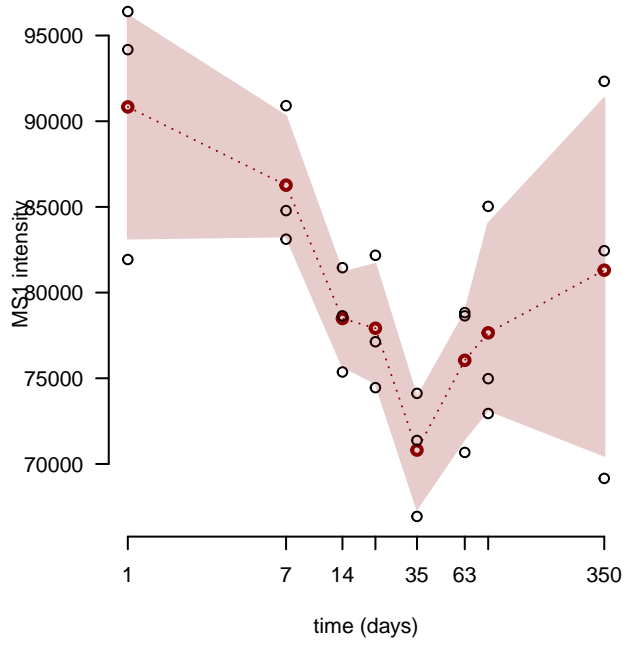

**P21180**  
GN=C2  
complement component 2 (within H-2S)

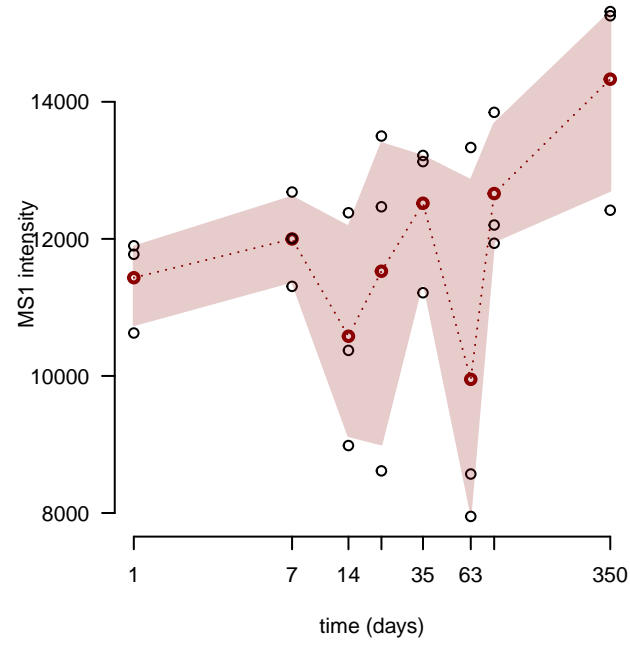

**P21271**  
GN=Myo5b  
myosin VB

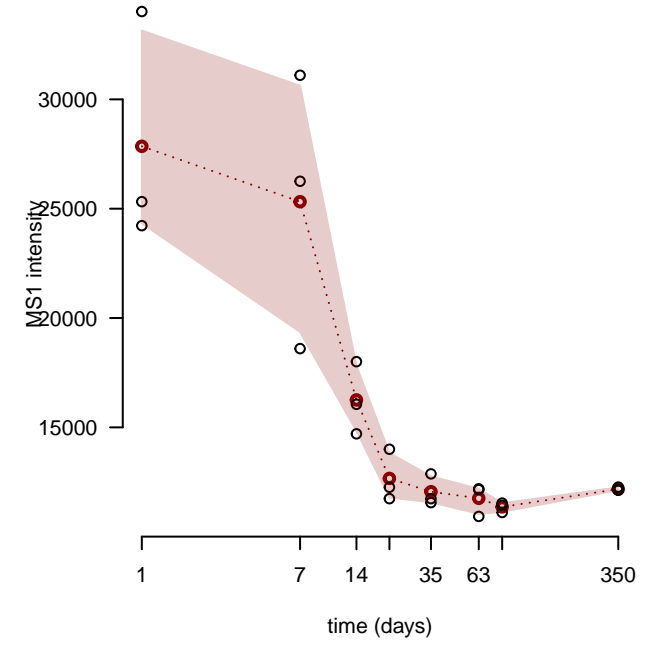

**P21278**  
GN=Gna11  
guanine nucleotide binding protein, alpha ...

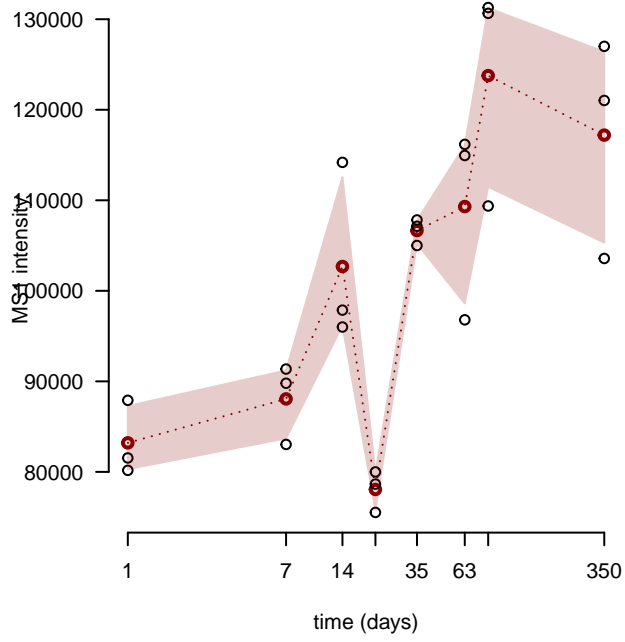

**P21279**  
GN=Gnaq  
guanine nucleotide binding protein, alpha ...

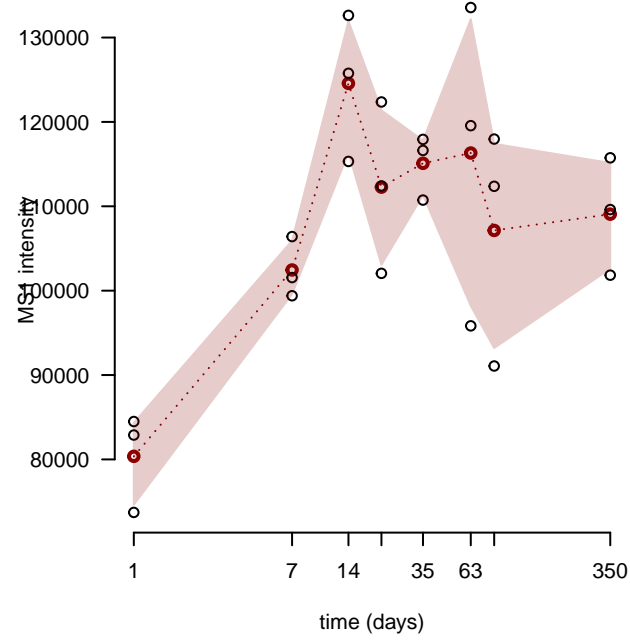

**P21300**  
GN=Akr1b7  
aldo-keto reductase family 1, member B7

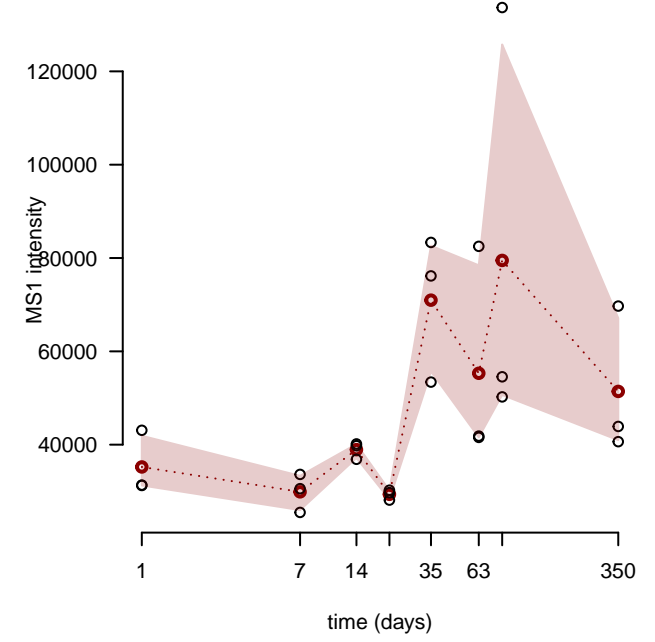

**P21440**  
GN=Abcb4  
ATP-binding cassette, sub-family B (MDR/ ...

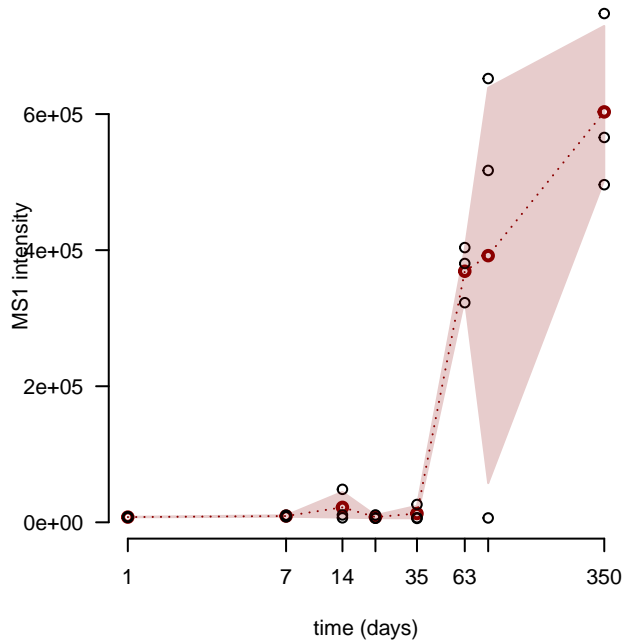

**P21447**  
GN=Abcb1a  
ATP-binding cassette, sub-family B (MDR/ ...

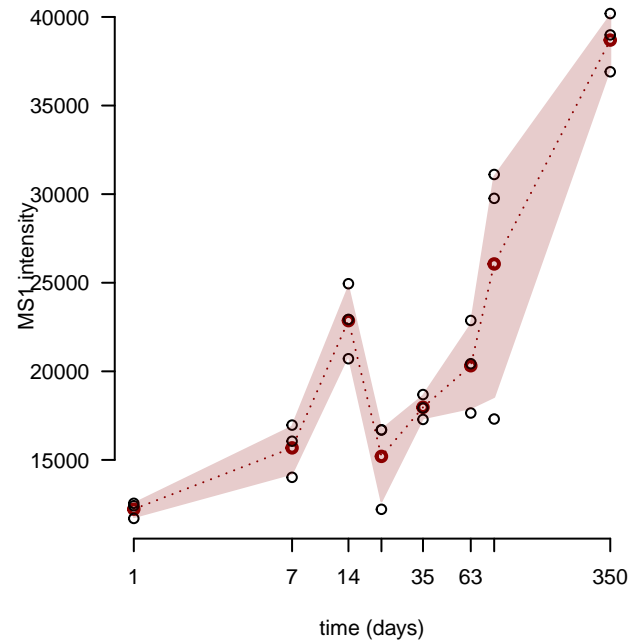

**P21460**  
GN=Cst3  
cystatin C

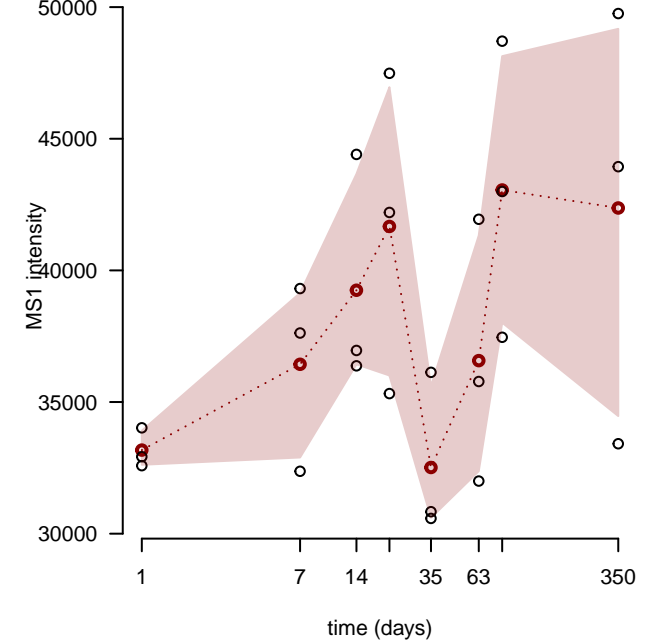



**P21550**  
**GN=Eno3**  
enolase 3, beta muscle

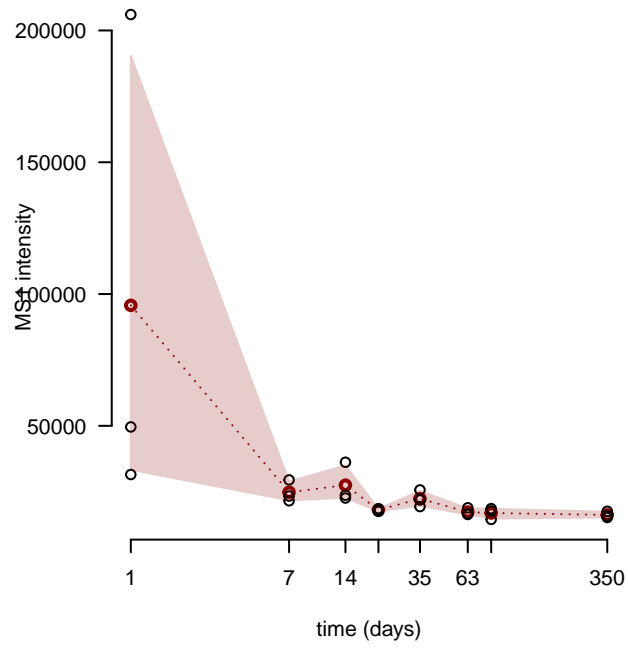

**P21570**  
**GN=Ang**  
angiogenin, ribonuclease, RNase A family ...

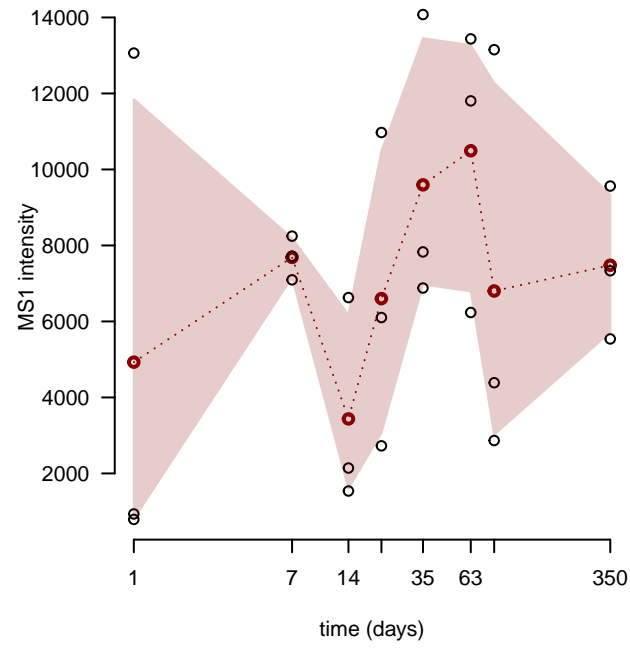

**P21614**  
**GN=Gc**  
vitamin D binding protein

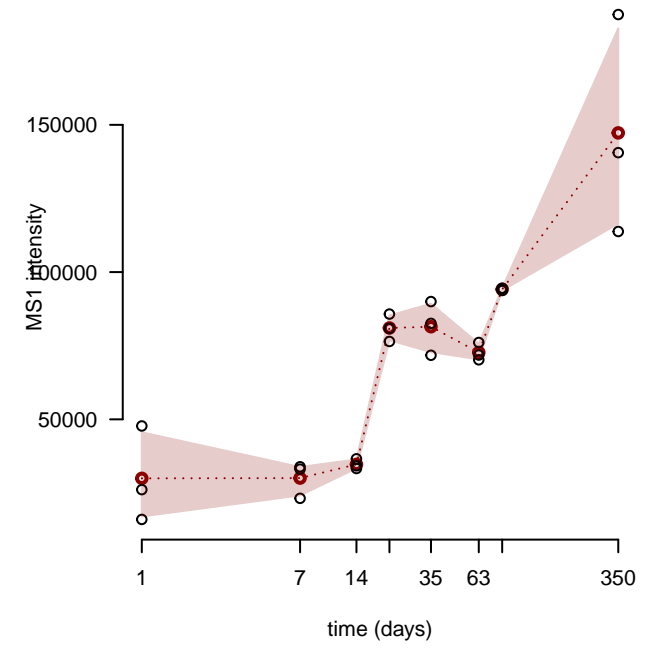

**P21619**  
**GN=Lmnb2**  
lamin B2

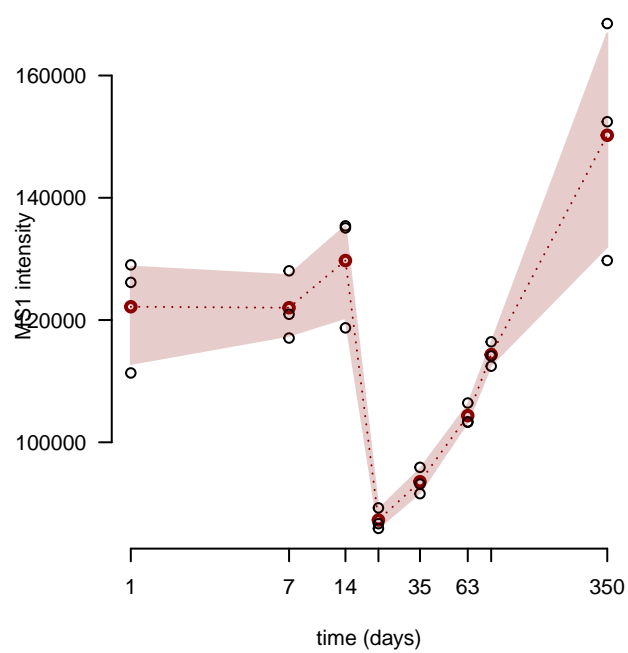

**P21812**  
**GN=Mcpt4**  
mast cell protease 4

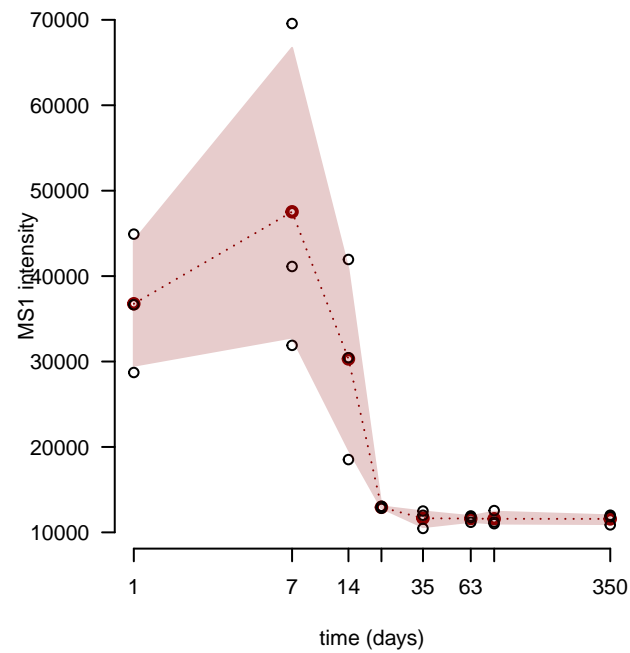

**P21843**  
**GN=Mcpt3**

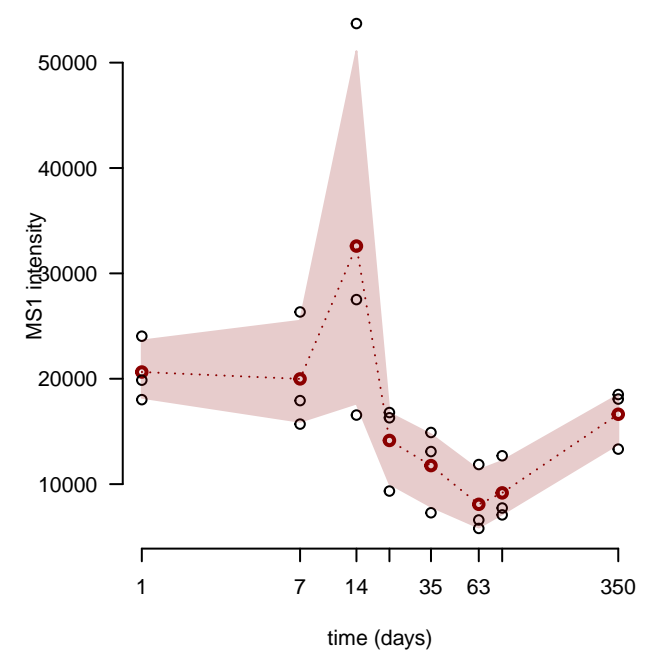

**P21844**  
**GN=Cma1**  
chymase 1, mast cell

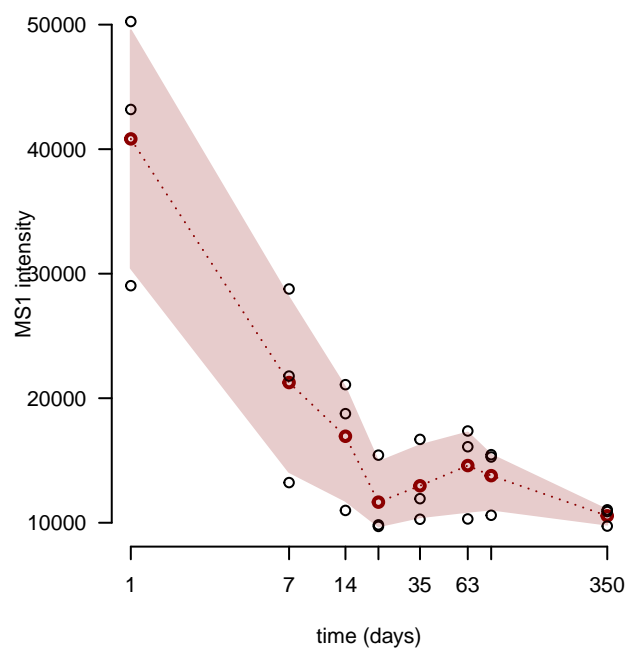

**P21845**  
**GN=Tpsb2**  
tryptase beta 2

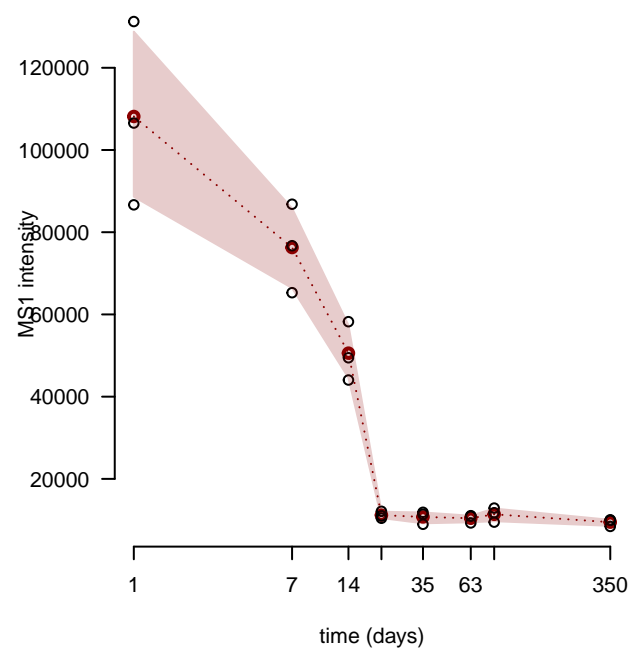

**P21956**  
**GN=Mfge8**  
milk fat globule EGF and factor V/VIII d ...

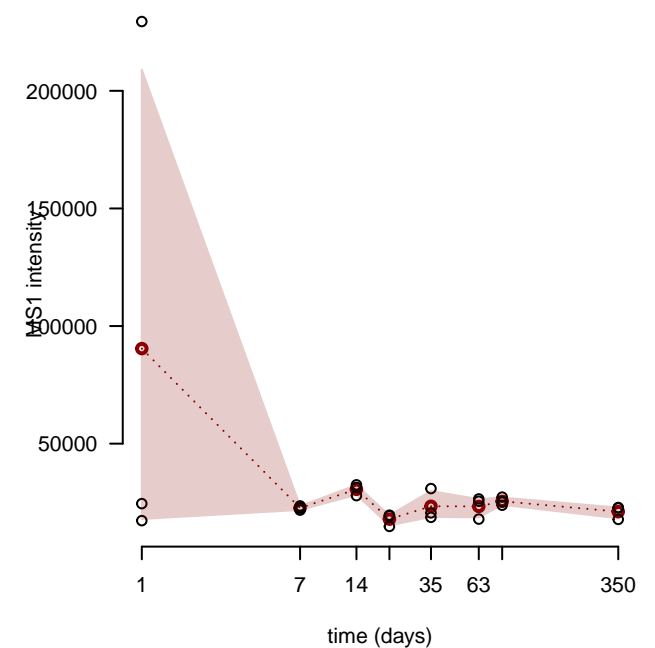

**P21958**  
GN=Tap1  
transporter 1, ATP-binding cassette, sub ...

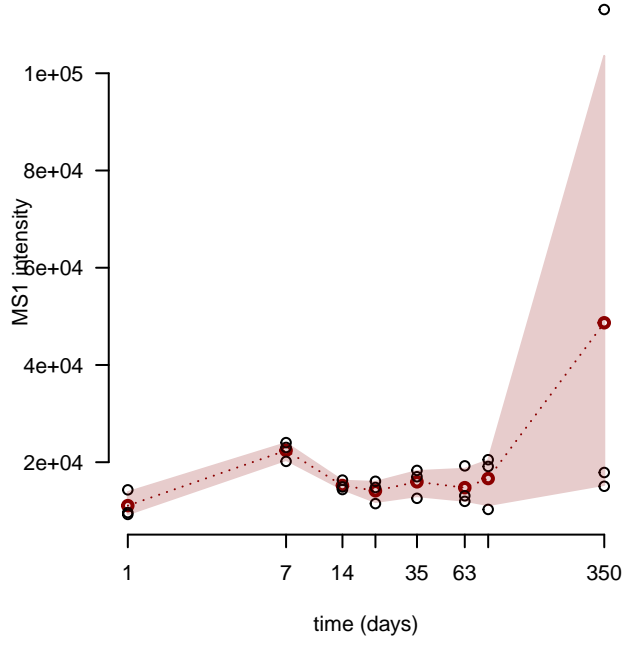

**P21981**  
GN=Tgm2  
transglutaminase 2, C polypeptide

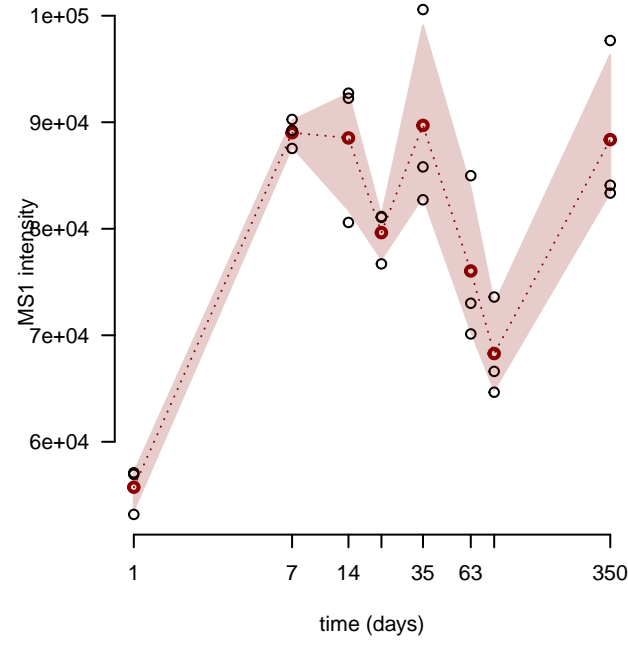

**P21995**  
GN=Emb  
embigin

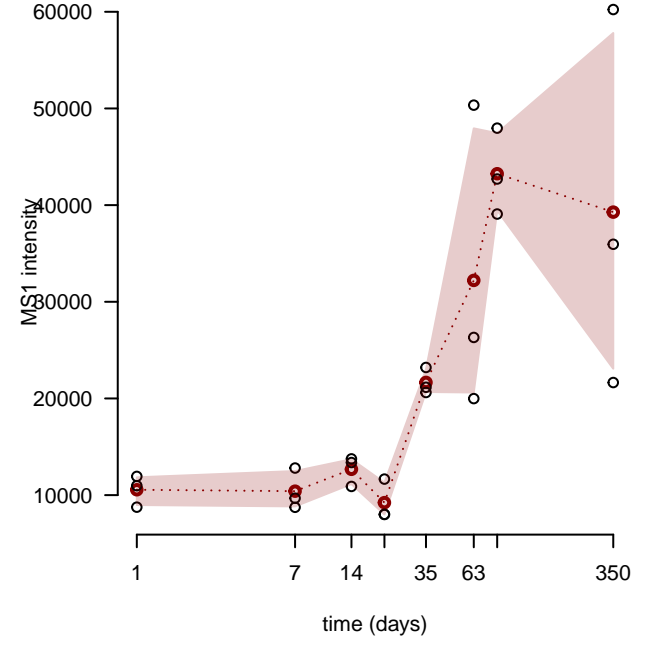

**P22315**  
GN=Fech  
ferrochelatase

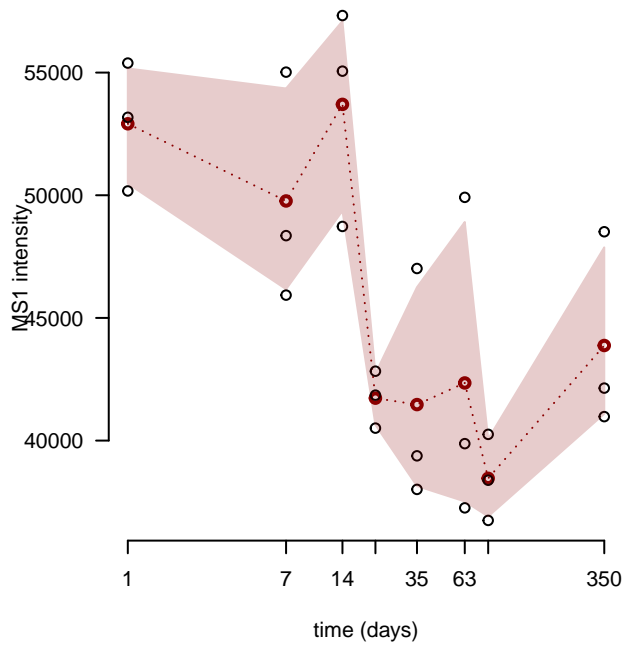

**P22366**  
GN=Myd88  
myeloid differentiation primary response ...

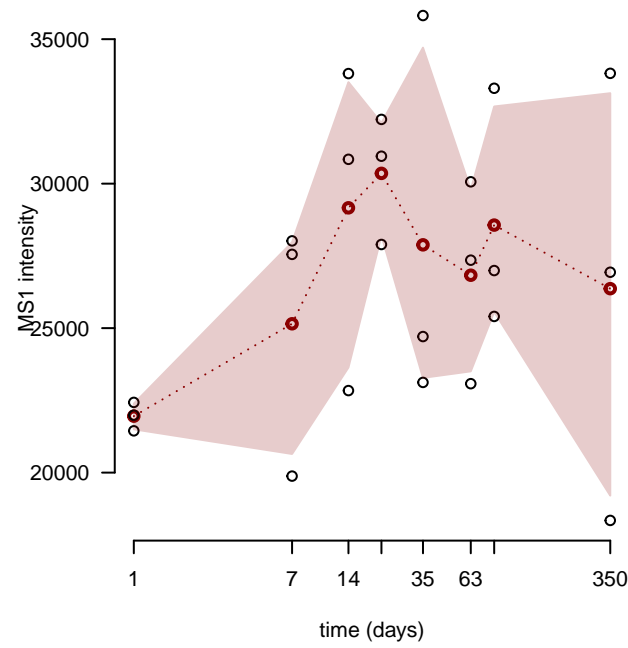

**P22437**  
GN=Ptgs1  
prostaglandin-endoperoxide synthase 1

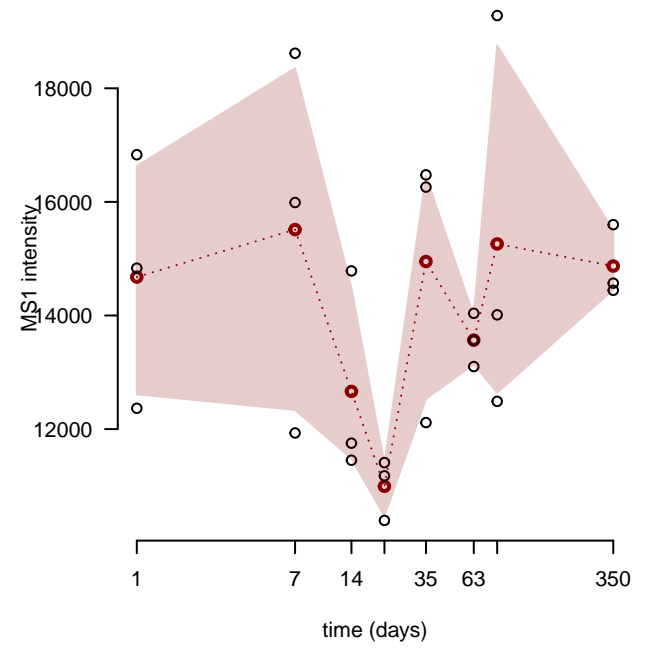

**P22518**  
GN=Cik1  
CDC-like kinase 1

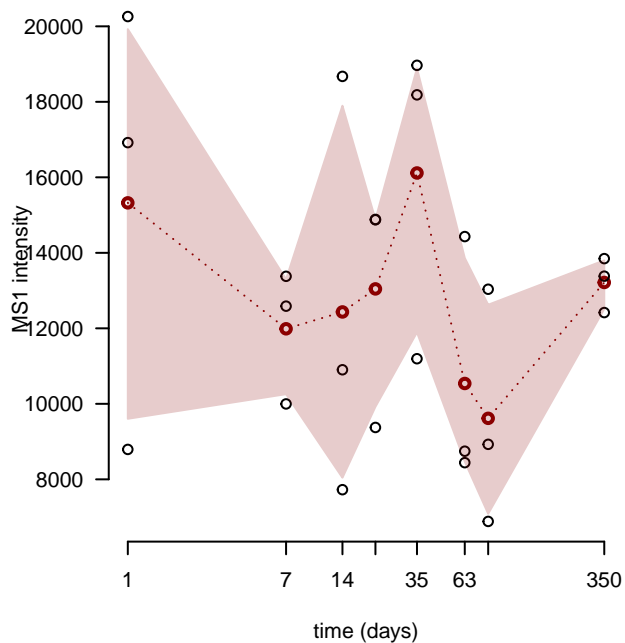

**P22561**  
GN=Wt1  
WT1 transcription factor

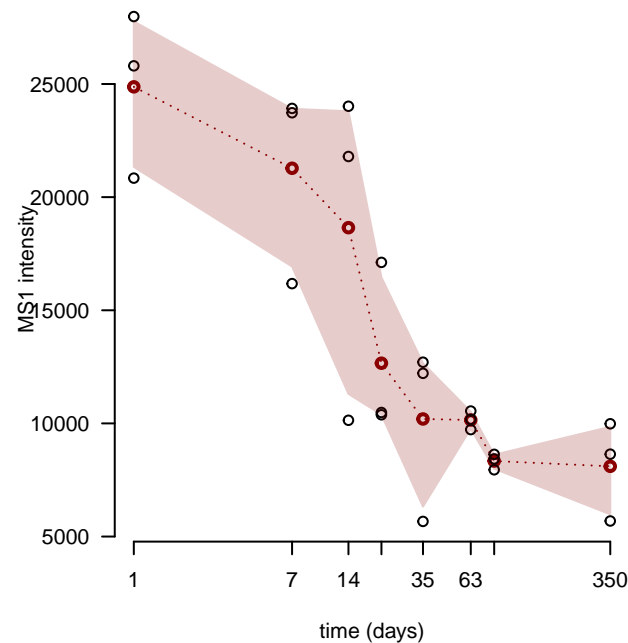

**P22561**  
GN=Wt1  
WT1 transcription factor

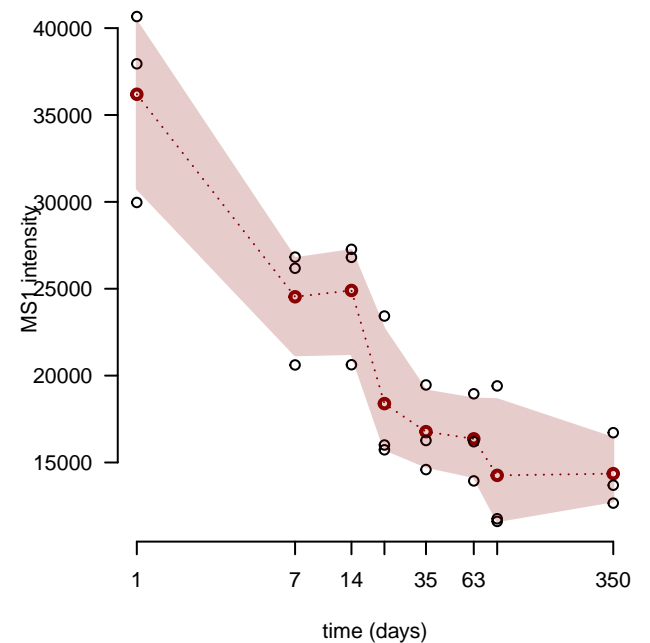

**P22599**  
GN=Serpina1b  
serine (or cysteine) peptidase inhibito ...

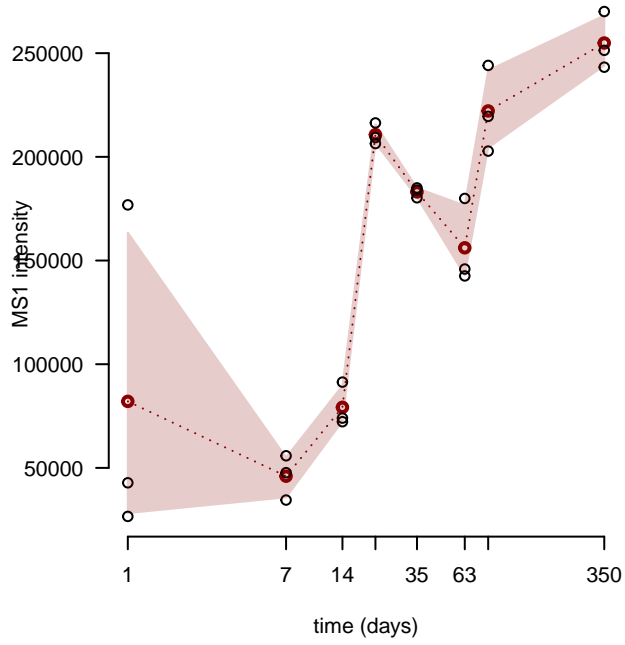

**P22682**  
GN=Cbl  
Casitas B-lineage lymphoma

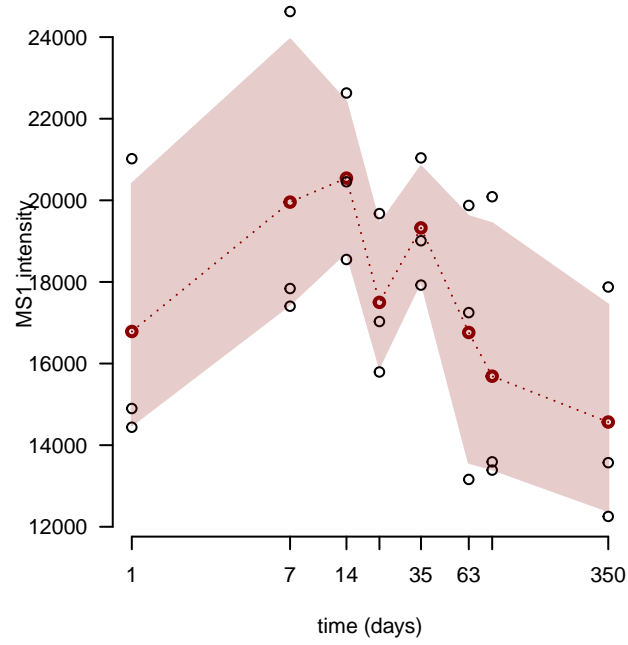

**P22724**  
GN=Wnt4  
wingless-type MMTV integration site fami ...

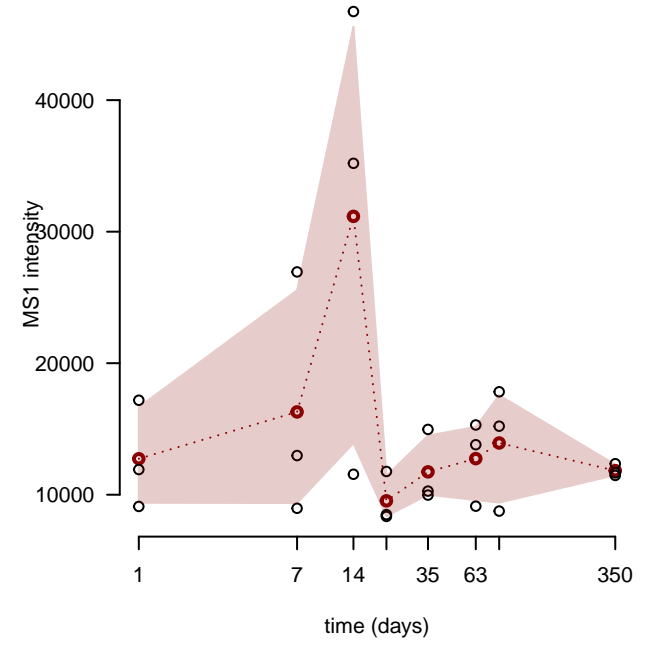

**P22725**  
GN=Wnt5a  
wingless-type MMTV integration site fami ...

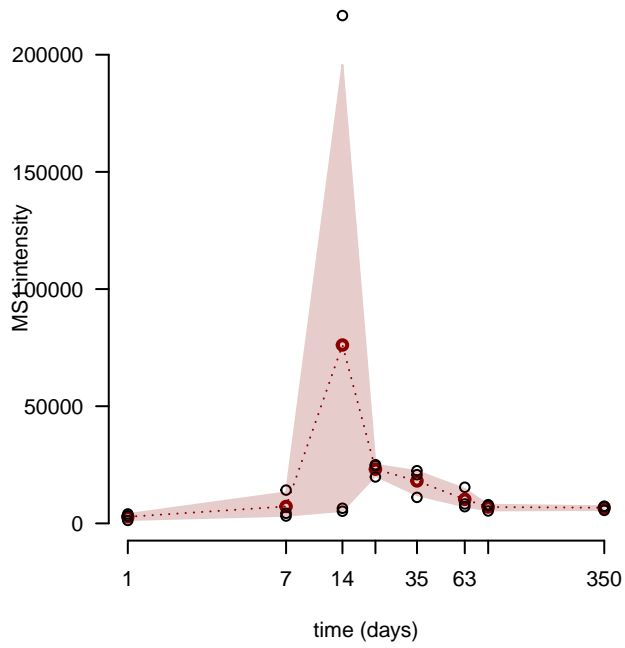

**P22727**  
GN=Wnt6  
wingless-type MMTV integration site fami ...

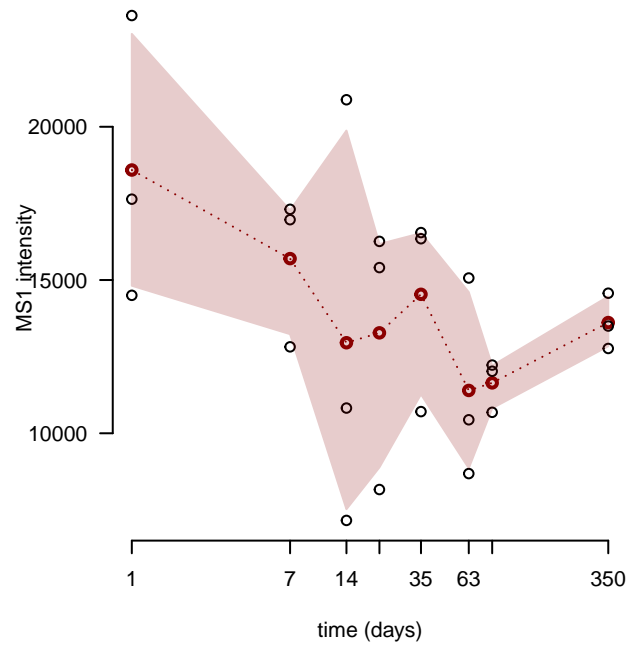

**P22892**  
GN=Ap1g1  
adaptor protein complex AP-1, gamma 1 su ...

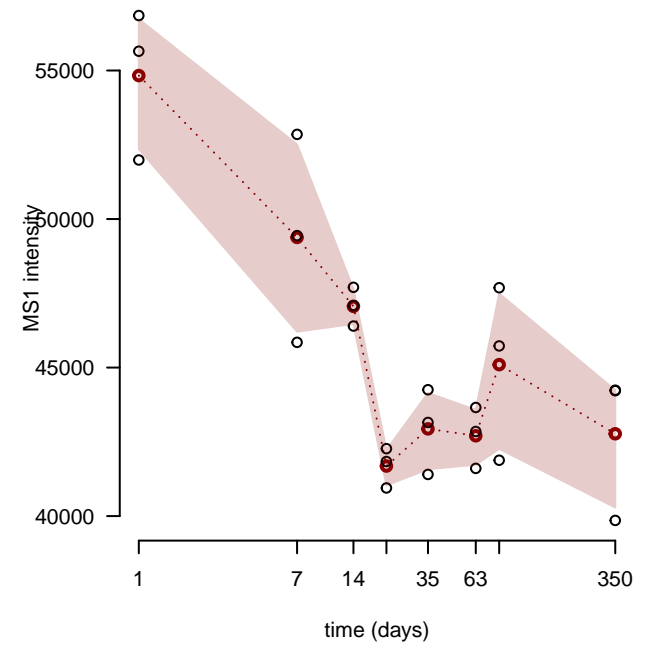

**P22907**  
GN=Hmbs  
hydroxymethylbilane synthase

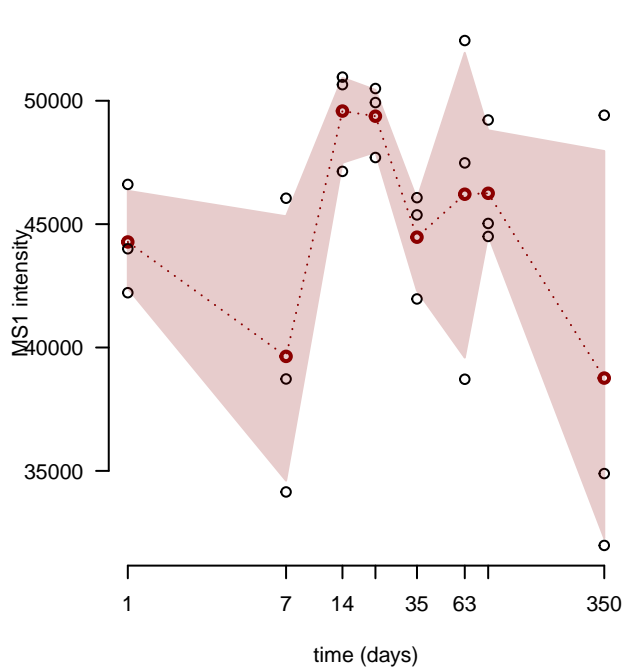

**P22935**  
GN=Crabp2  
cellular retinoic acid binding protein I ...

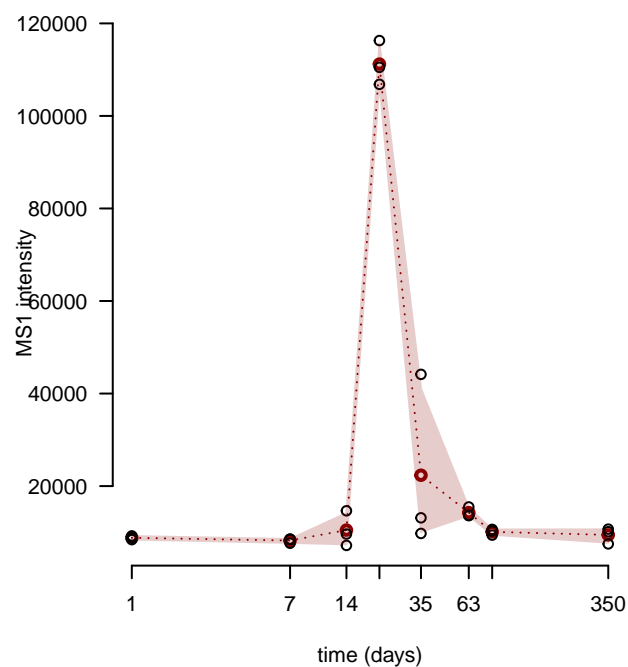

**P23116**  
GN=Eif3a  
eukaryotic translation initiation factor ...

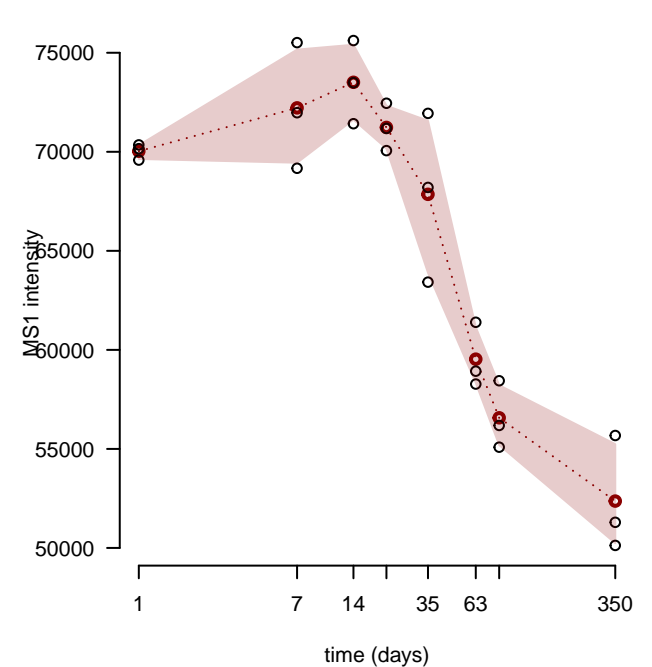

**P23198**  
GN=Cbx3  
chromobox 3

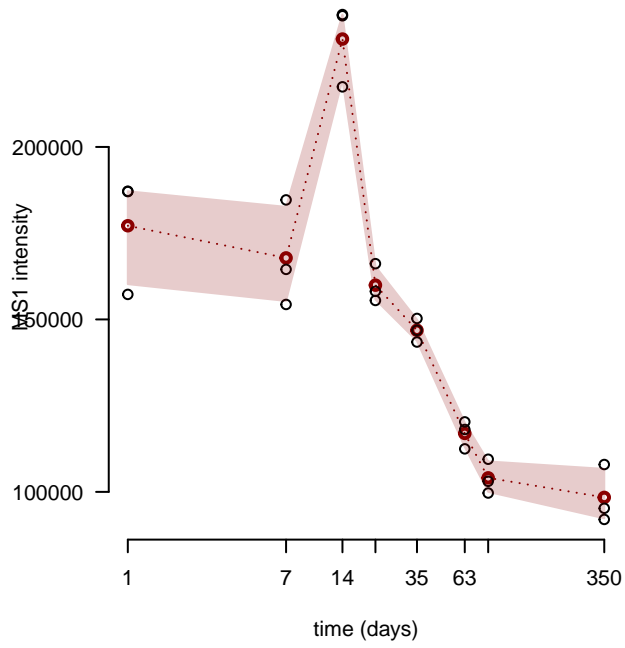

**P23242**  
GN=Gja1  
gap junction protein, alpha 1

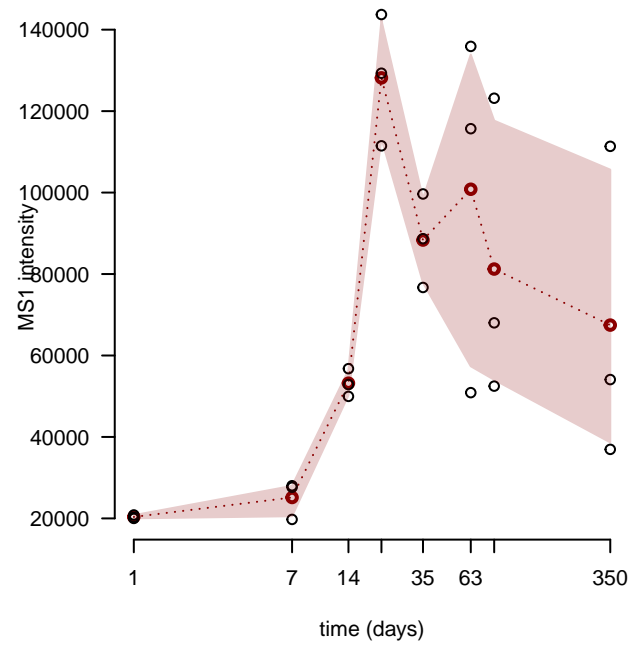

**P23249**  
GN=Mov10  
Mov10 RISC complex RNA helicase

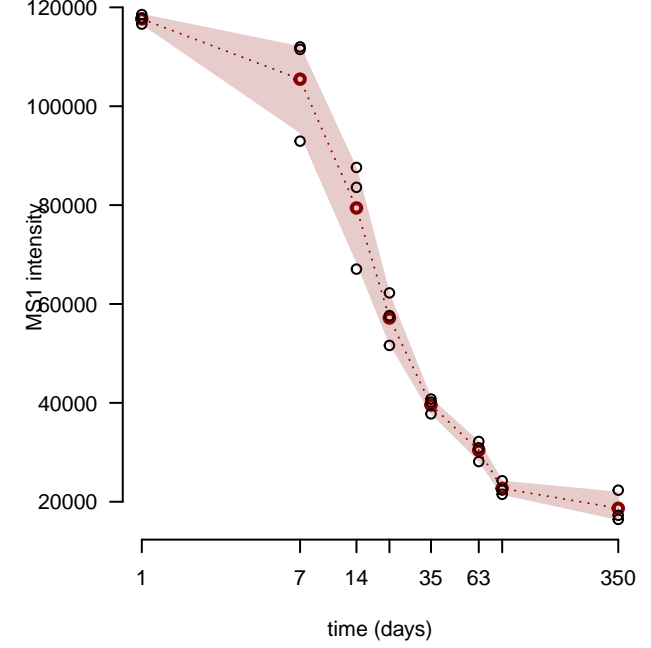

**P23298**  
GN=Prkch  
protein kinase C, eta

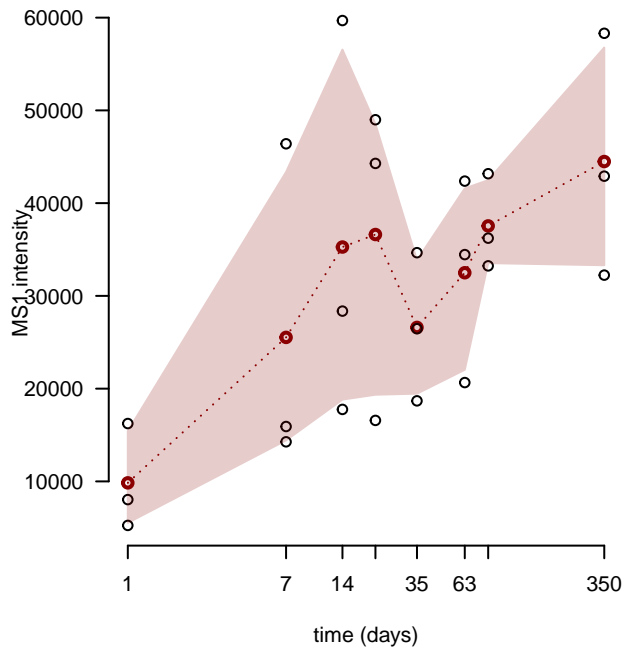

**P23359**  
GN=Bmp7  
bone morphogenetic protein 7

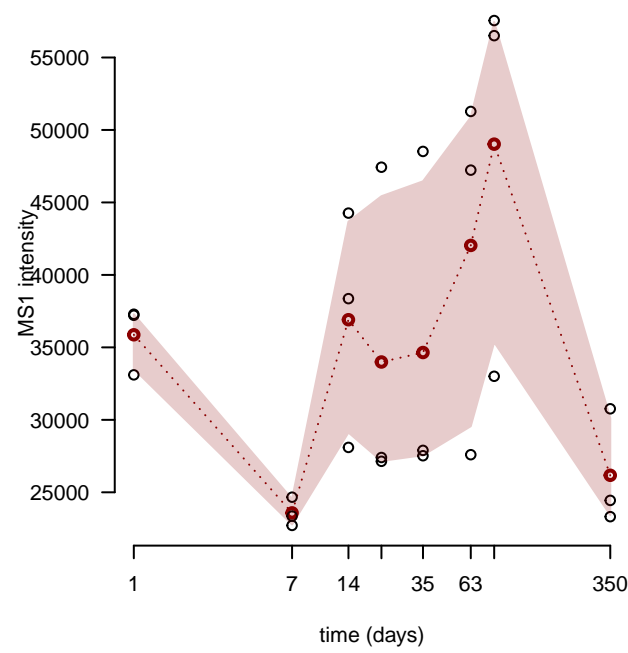

**P23475**  
GN=Xrcc6  
X-ray repair complementing defective rep ...

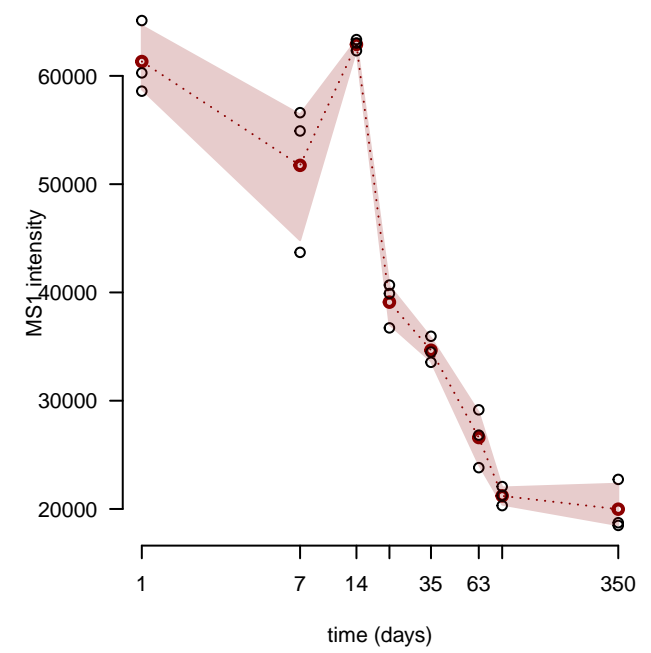

**P23492**  
GN=Pnp  
purine-nucleoside phosphorylase

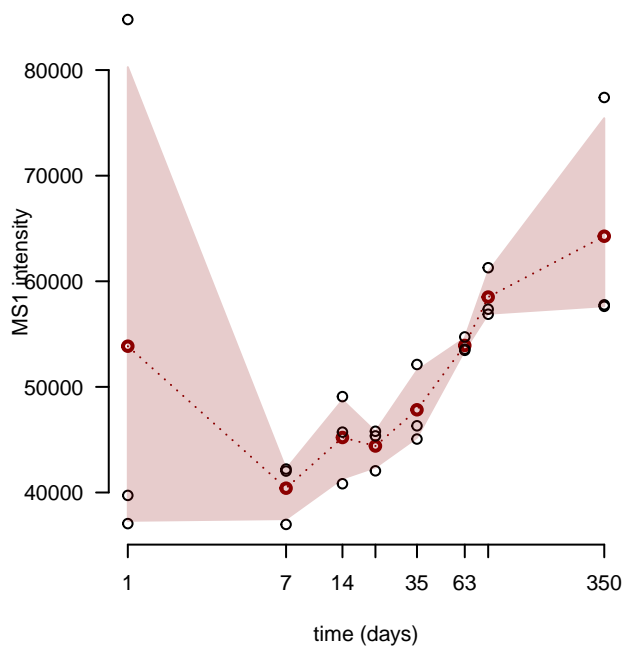

**P23506**  
GN=Pcmt1  
protein-L-isoaspartate (D-aspartate) O-m ...

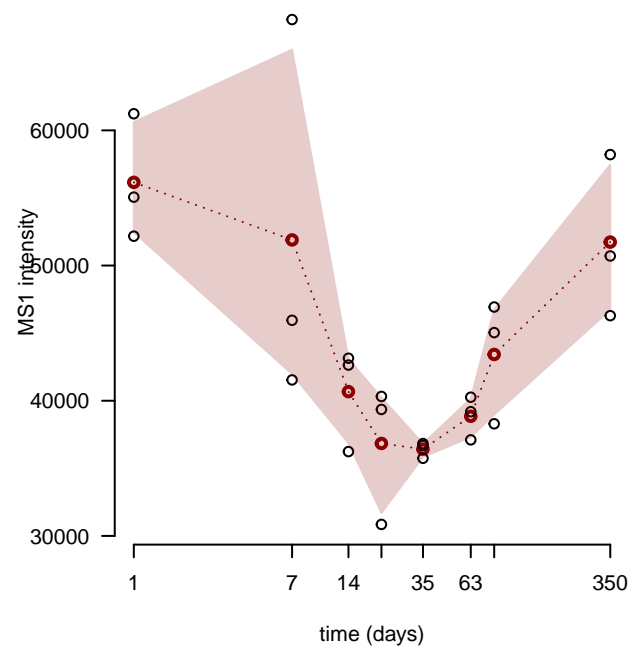

**P23591**  
GN=Tsta3

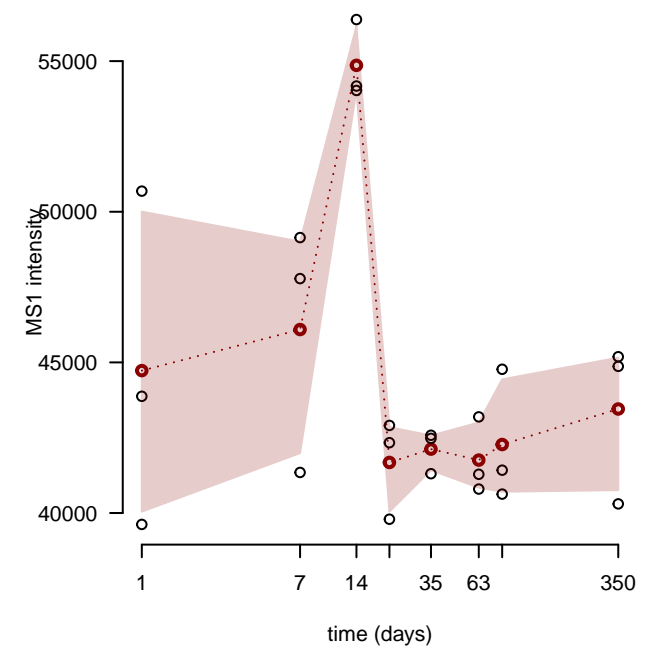

**P23708**  
GN=Nfya  
nuclear transcription factor-Y alpha

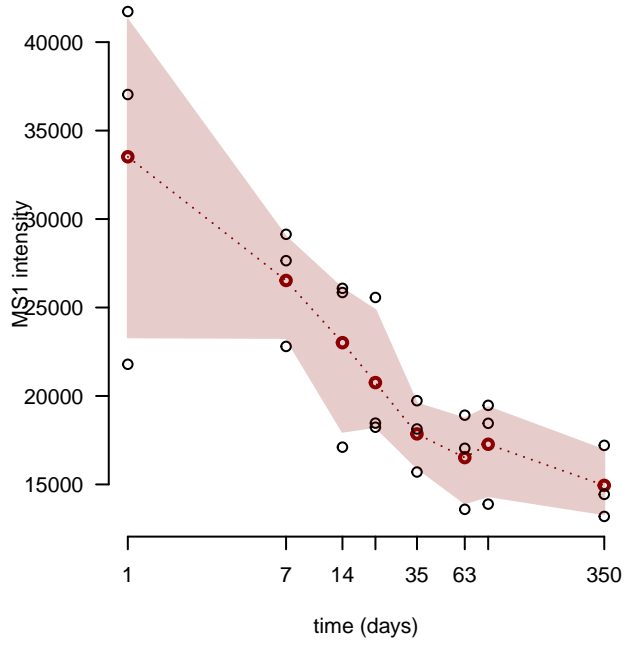

**P23780**  
GN=Glb1  
galactosidase, beta 1

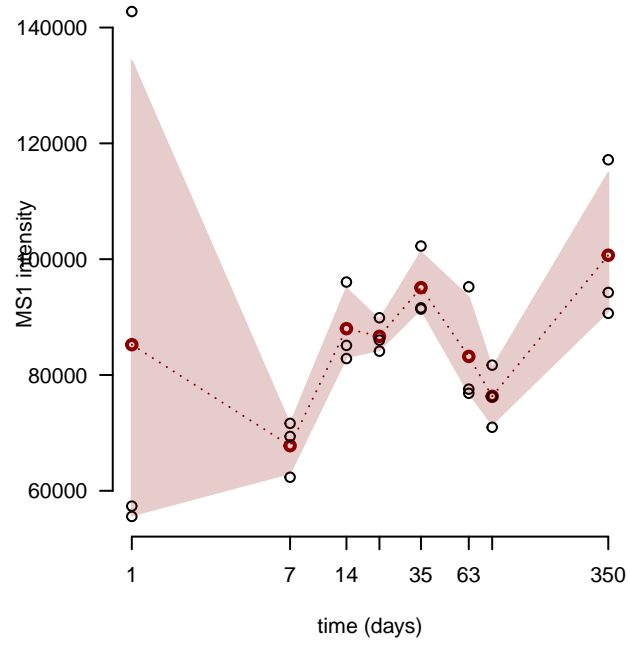

**P23798**  
GN=Pcgf2  
polycomb group ring finger 2

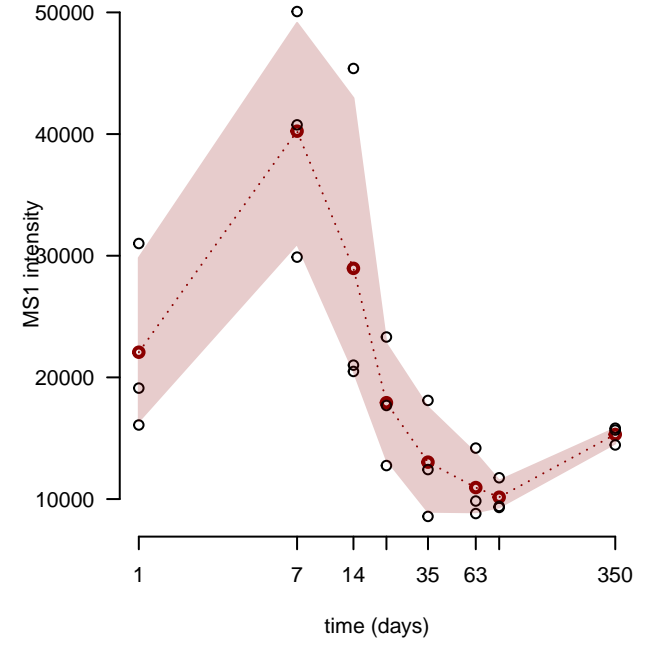

**P23881**  
GN=Tcea3  
transcription elongation factor A (SII), ...

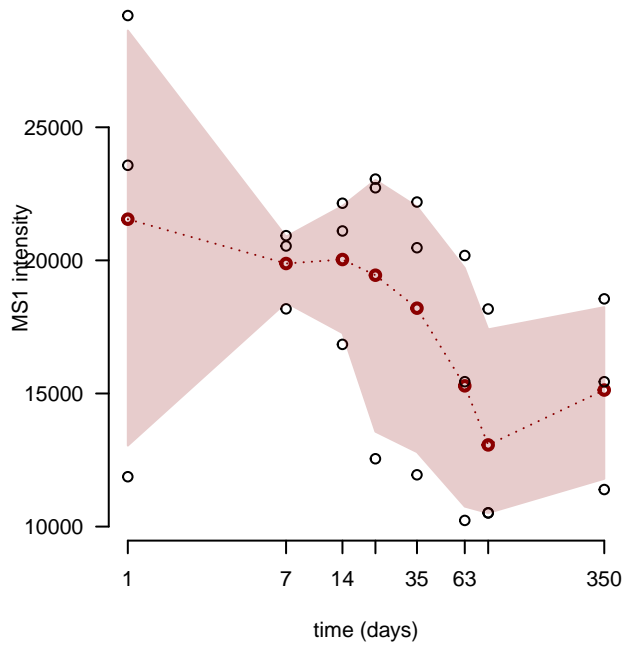

**P23906**  
GN=Irf2  
interferon regulatory factor 2

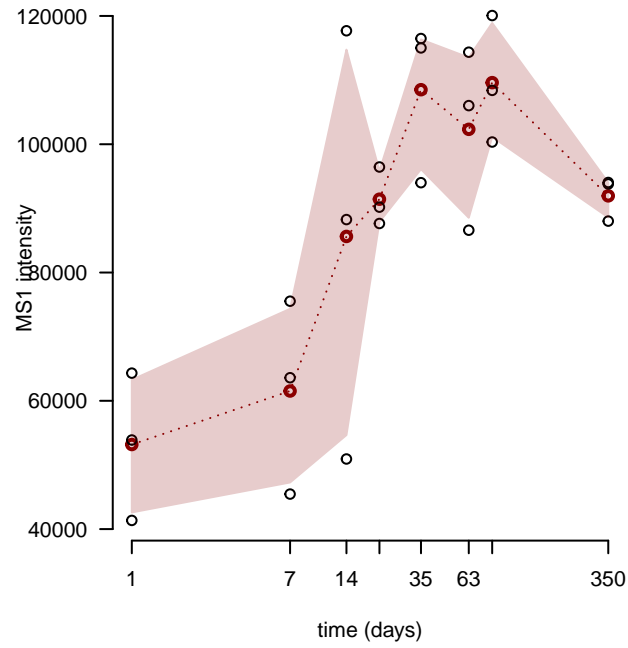

**P23949**  
GN=Zfp36l2  
zinc finger protein 36, C3H type-like 2

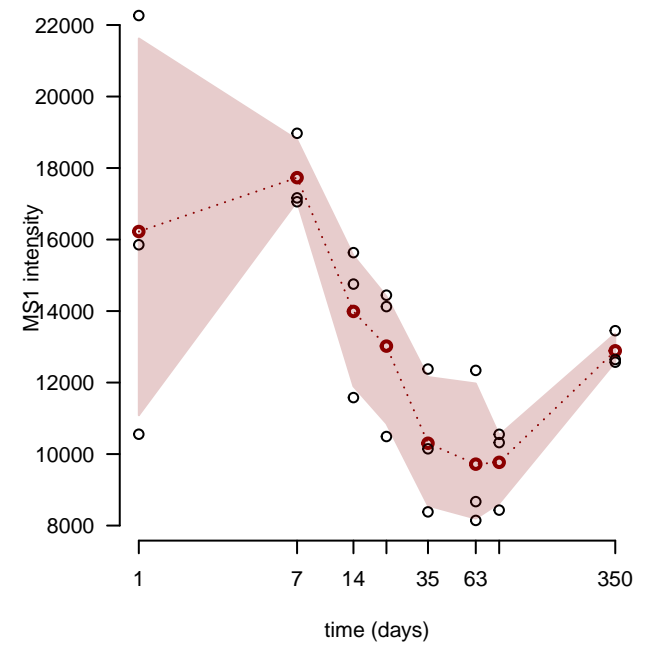

**P23950**  
GN=Zfp36l1  
zinc finger protein 36, C3H type-like 1

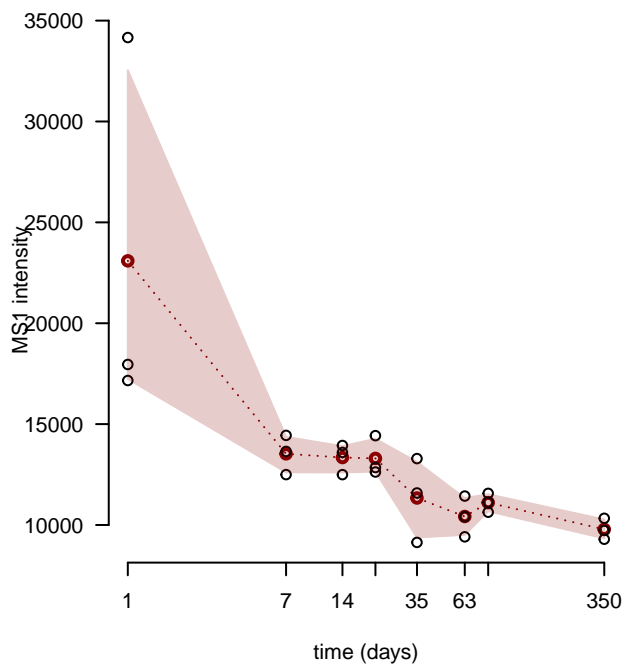

**P23953**  
GN=Ces1c  
carboxylesterase 1C

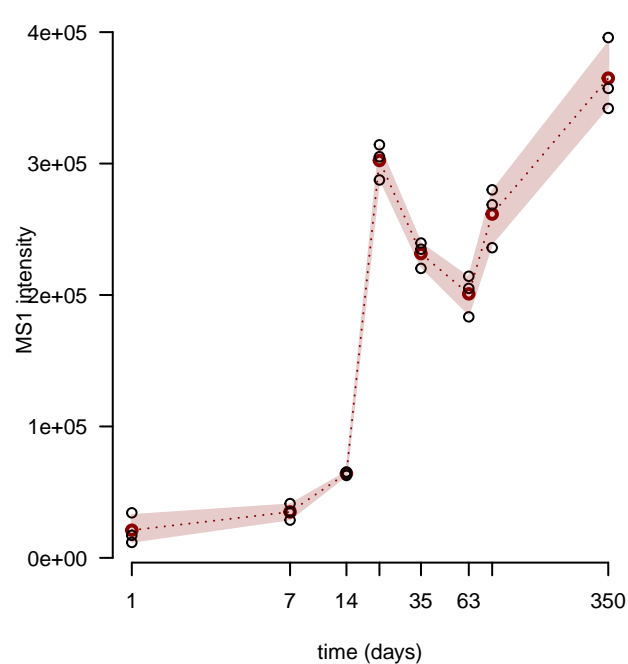

**P24063**  
GN=Itgal  
integrin alpha L

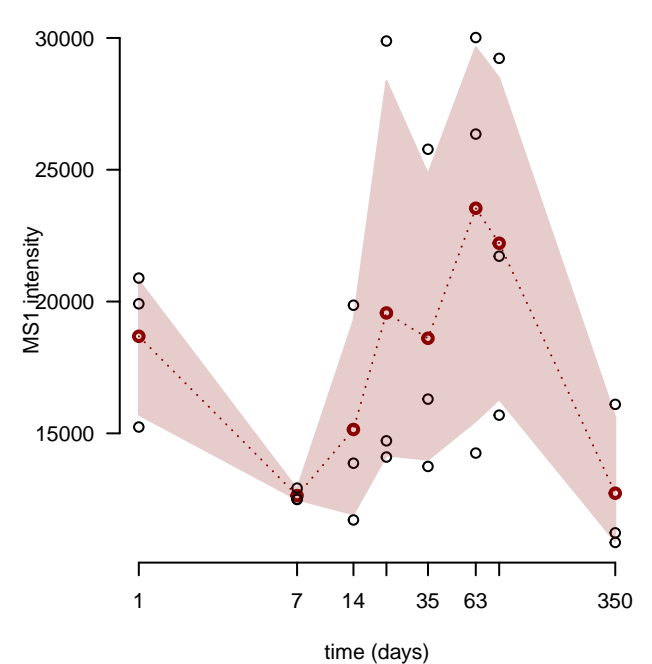

**P24270**  
GN=Cat  
catalase

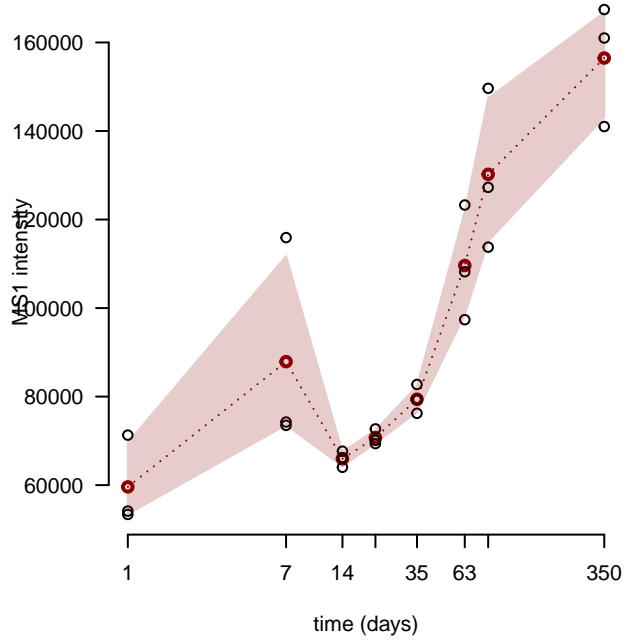

**P24288**  
GN=Bcat1  
branched chain aminotransferase 1, cytos...

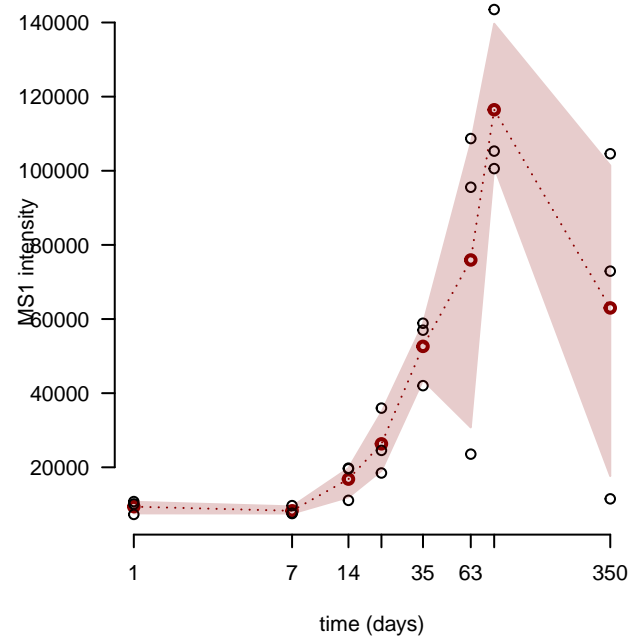

**P24369**  
GN=Ppib  
peptidylprolyl isomerase B

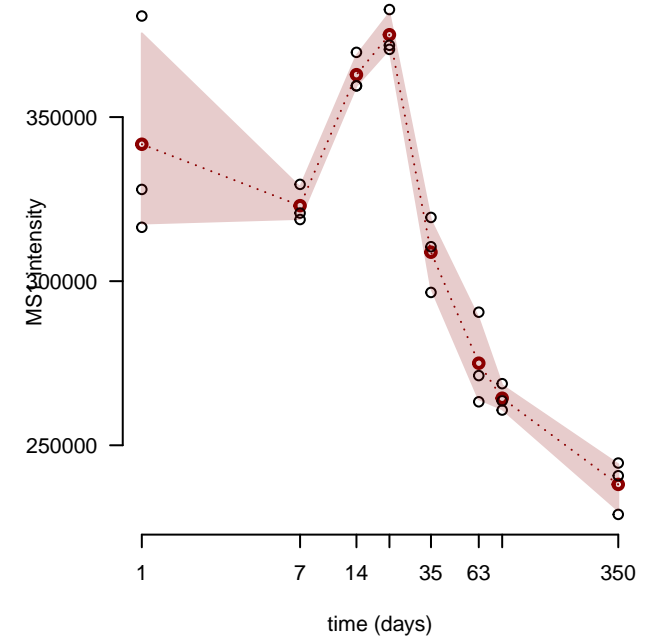

**P24452**  
GN=Capg  
capping protein (actin filament), gelsol ...

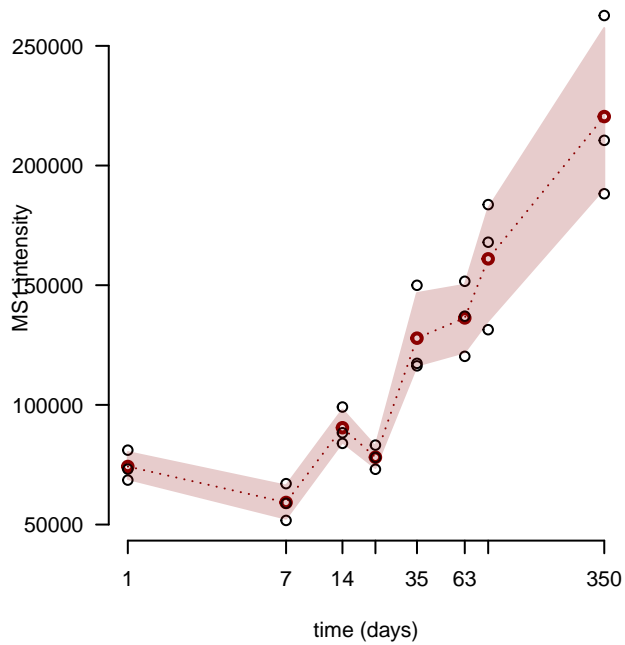

**P24457**  
GN=Cyp2d11  
cytochrome P450, family 2, subfamily d, ...

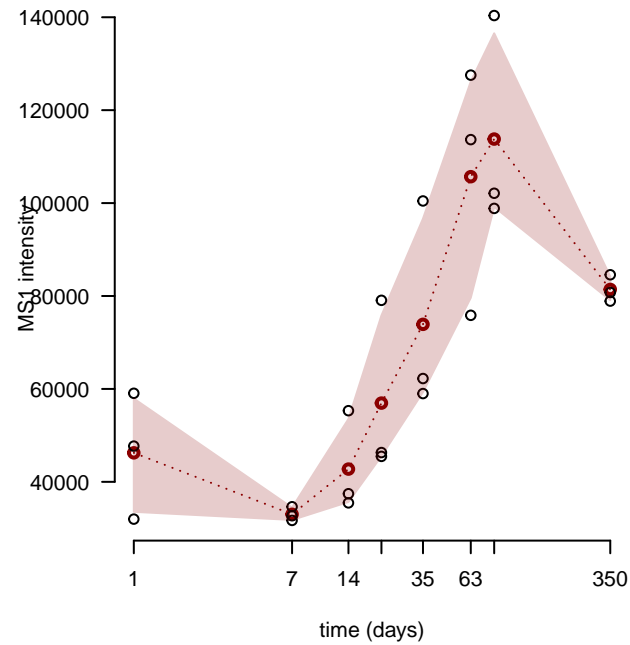

**P24472**  
GN=Gsta4  
glutathione S-transferase, alpha 4

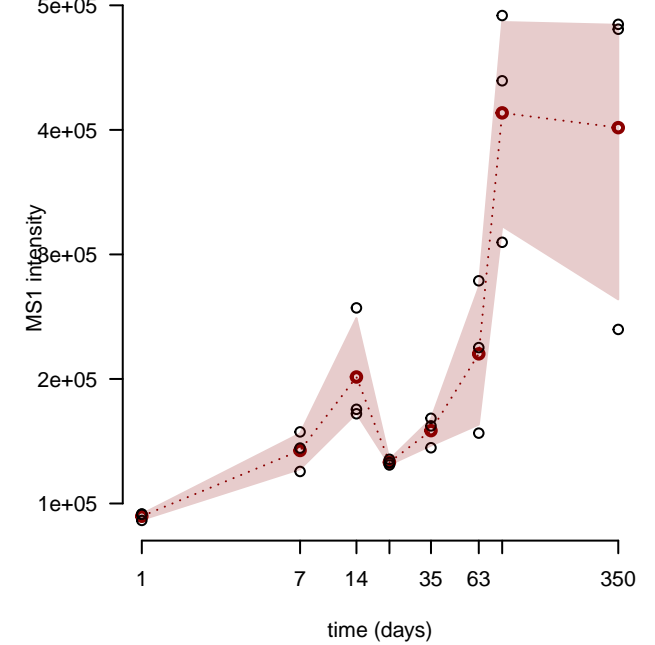

**P24527**  
GN=Lta4h  
leukotriene A4 hydrolase

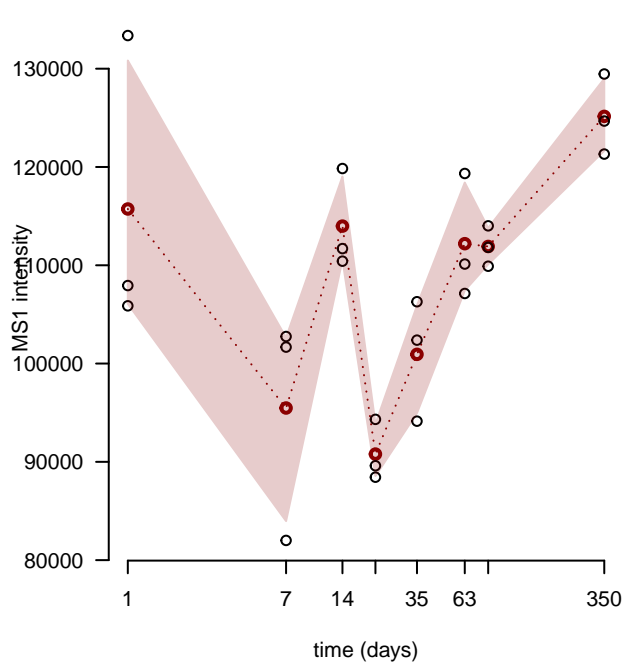

**P24547**  
GN=Impdh2  
inosine monophosphate dehydrogenase 2

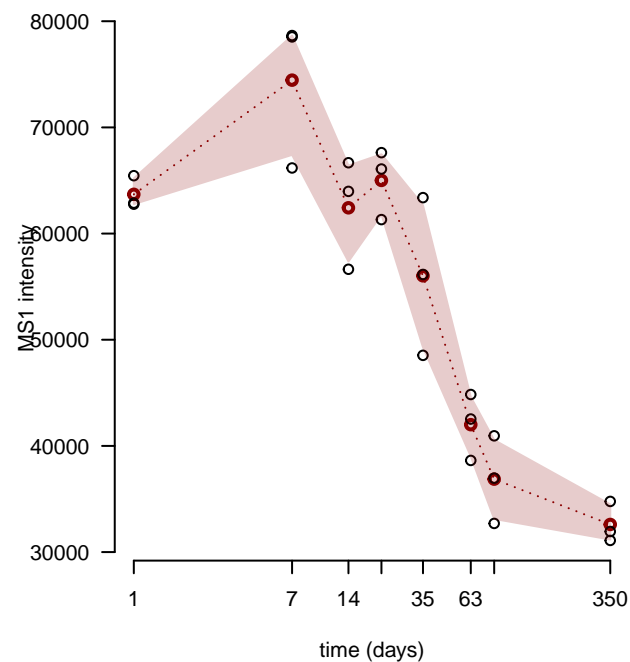

**P24549**  
GN=Aldh1a1  
aldehyde dehydrogenase family 1, subfami ...

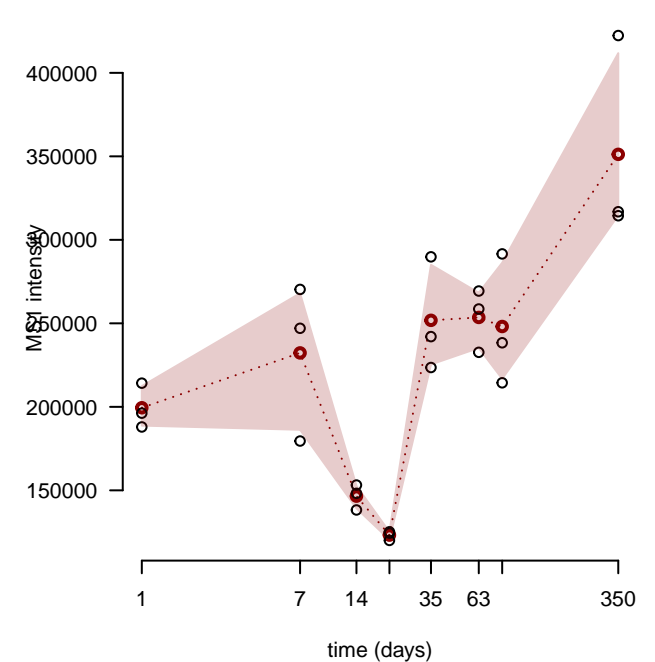

**P24638**  
GN=Acp2  
acid phosphatase 2, lysosomal

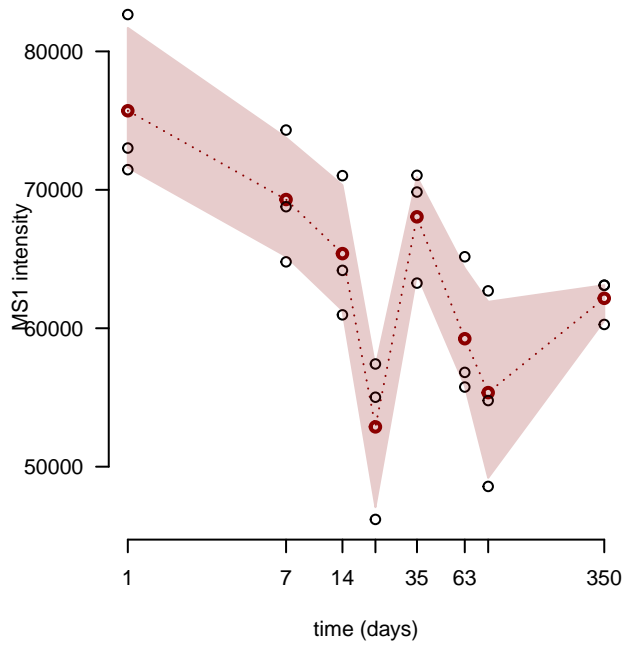

**P24668**  
GN=M6pr  
mannose-6-phosphate receptor, cation dep ...

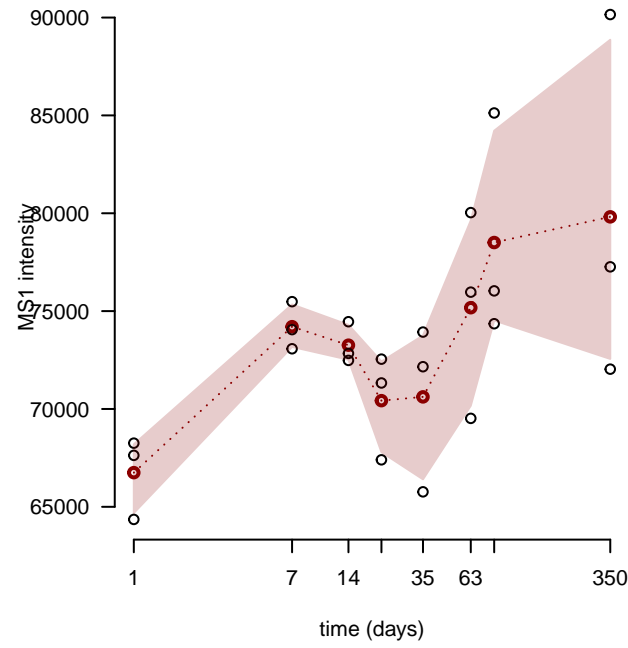

**P24788**  
GN=Cdk11b  
cyclin-dependent kinase 11B

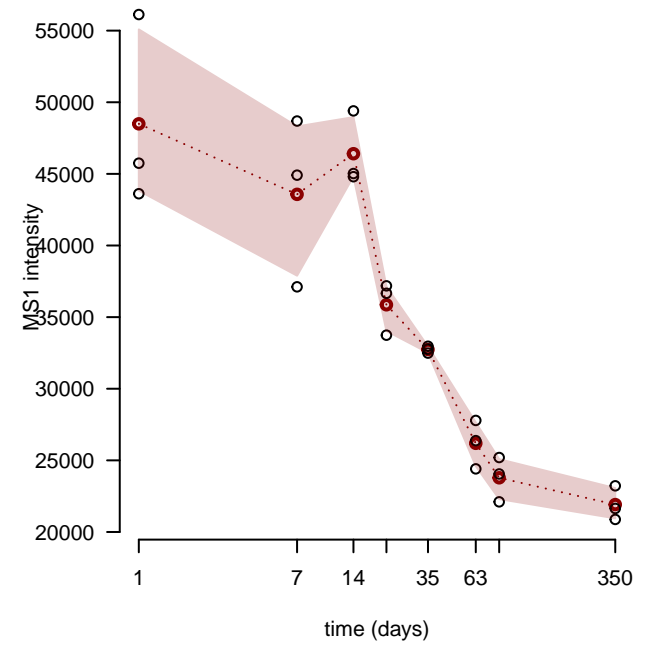

**P24815**  
GN=Hsd3b1  
hydroxy-delta-5-steroid dehydrogenase, 3 ...

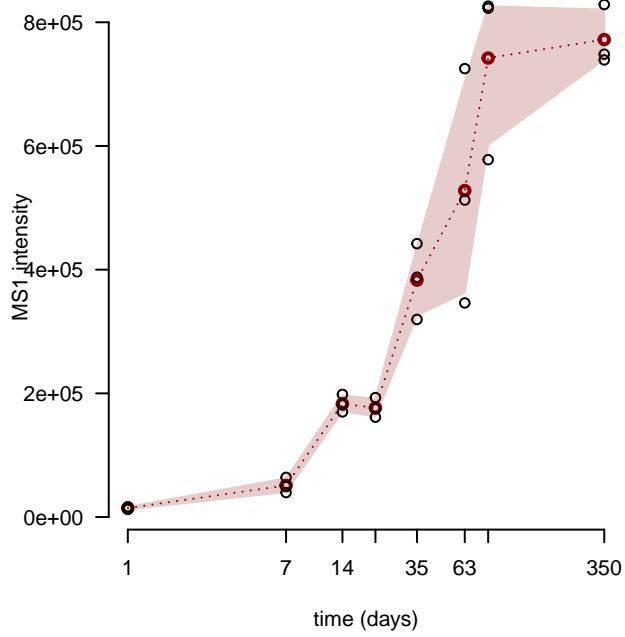

**P24822**  
GN=lap

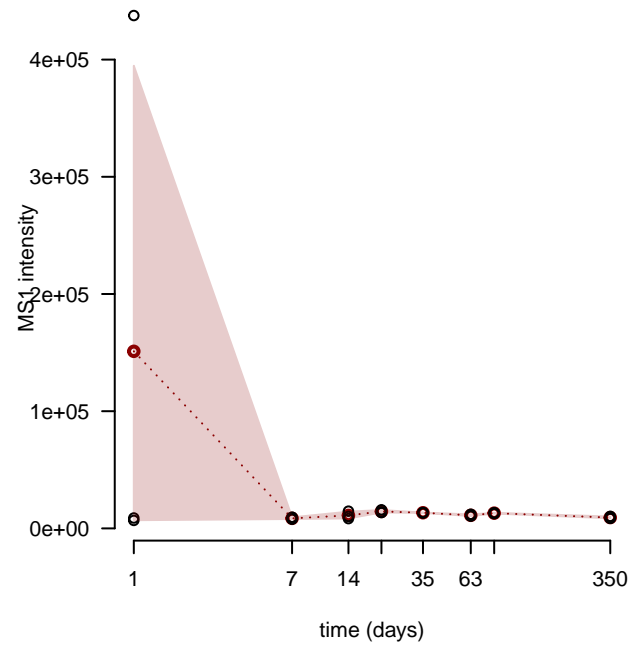

**P24860**  
GN=Ccnb1  
cyclin B1

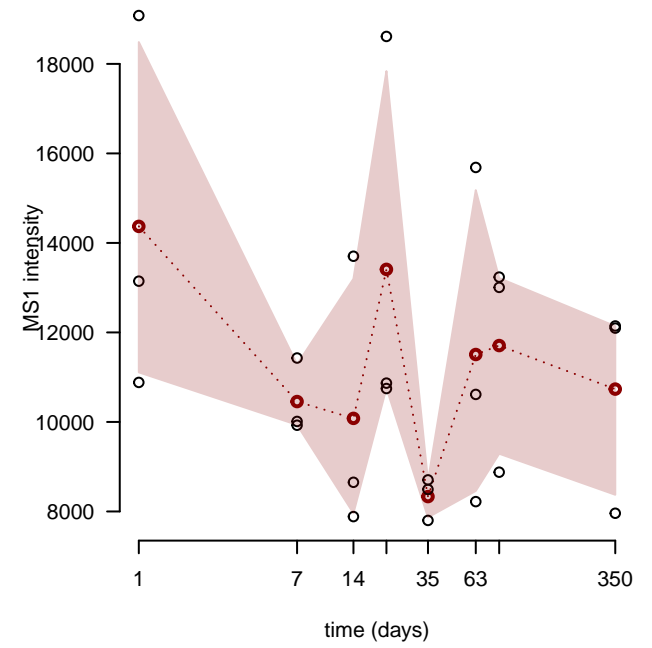

**P25206**  
GN=Mcm3  
minichromosome maintenance complex compo ...

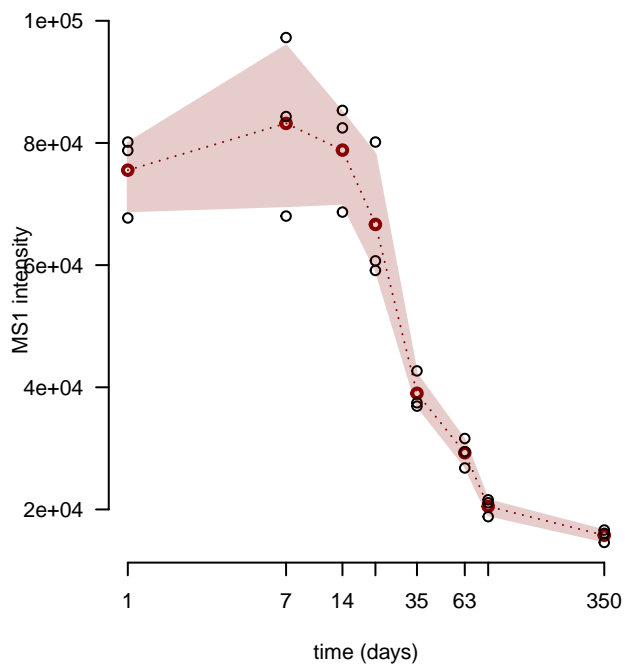

**P25233**  
GN=Ndn  
necdin, MAGE family member

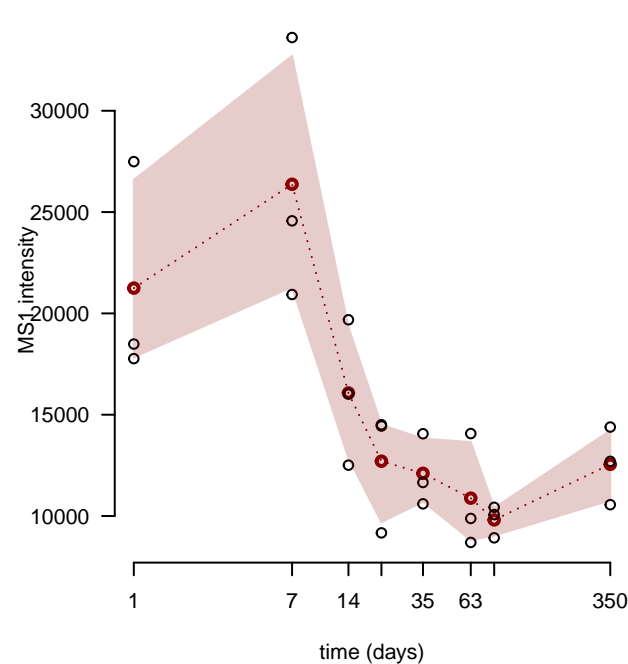

**P25425**  
GN=Pou2f1  
POU domain, class 2, transcription facto ...

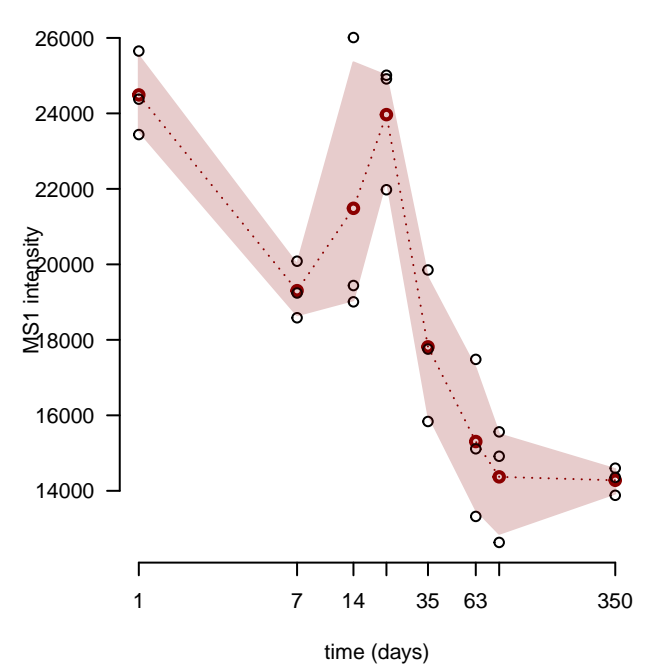

**P25444**  
**GN=Rps2**  
ribosomal protein S2

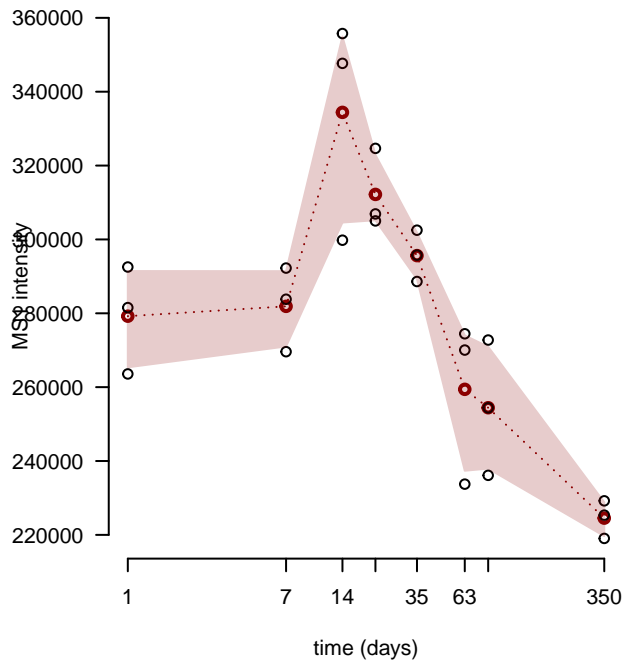

**P25688**  
**GN=Uox**  
urate oxidase

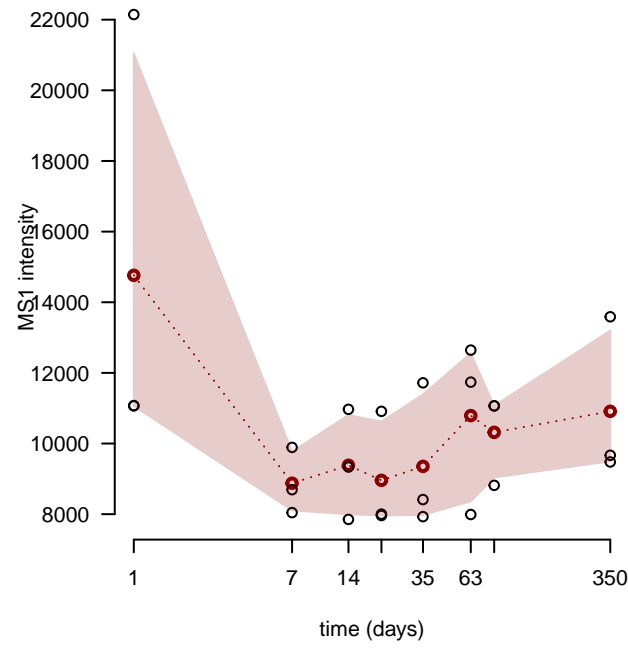

**P25785**  
**GN=Timp2**  
tissue inhibitor of metalloproteinase 2

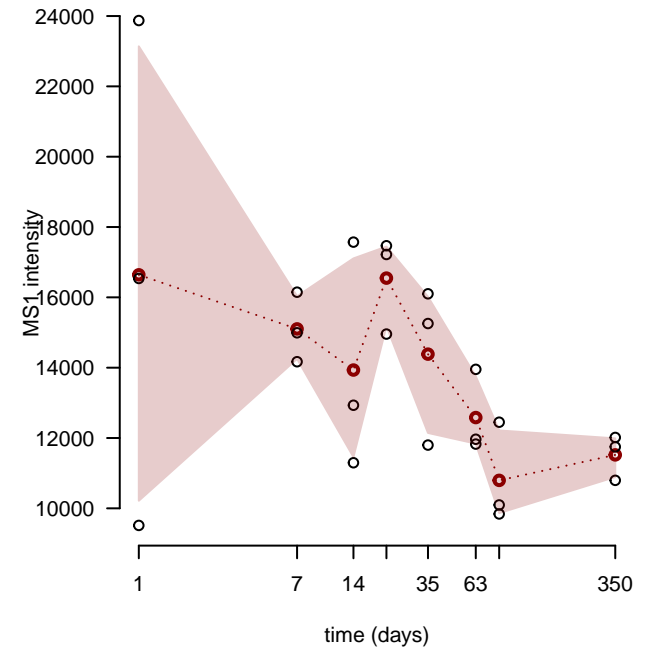

**P25799**  
**GN=Nfkb1**  
nuclear factor of kappa light polypeptid ...

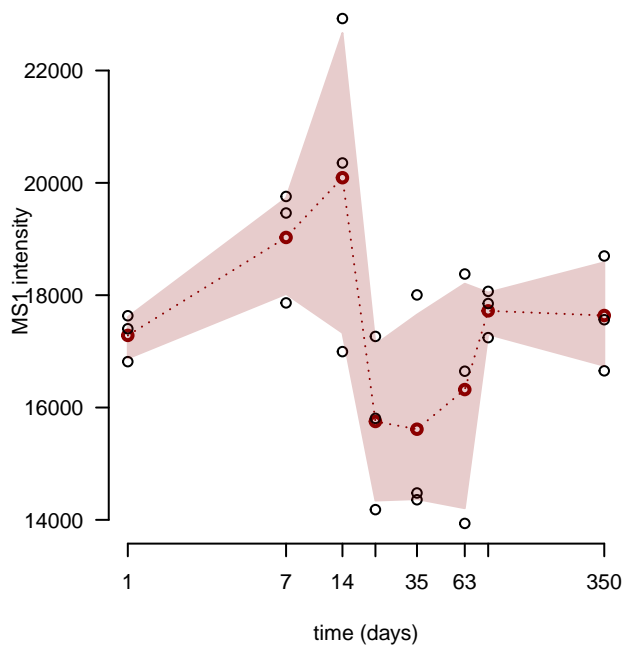

**P25911**  
**GN=Lyn**  
LYN proto-oncogene, Src family tyrosine ...

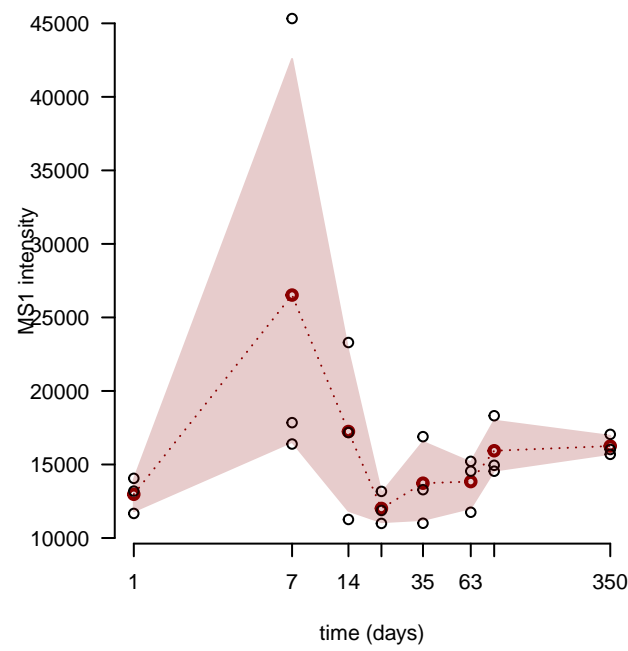

**P25911**  
**GN=Lyn**  
LYN proto-oncogene, Src family tyrosine ...

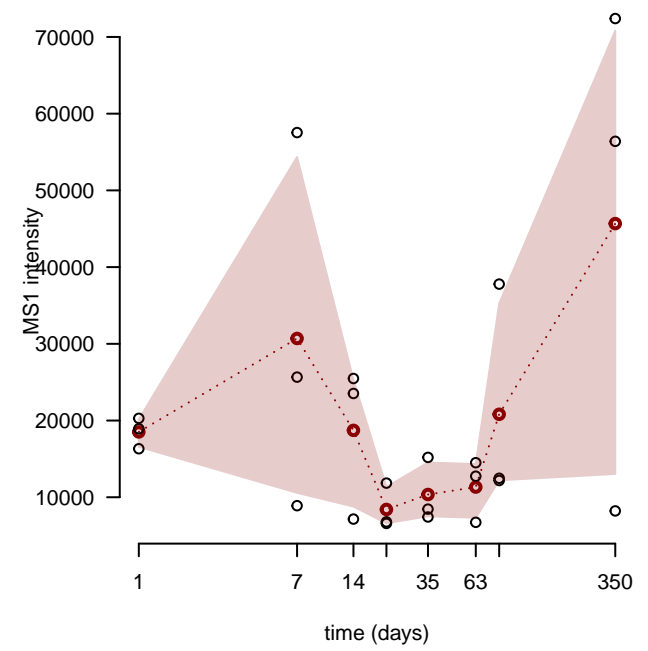

**P25976**  
**GN=Ubtf**  
upstream binding transcription factor, R ...

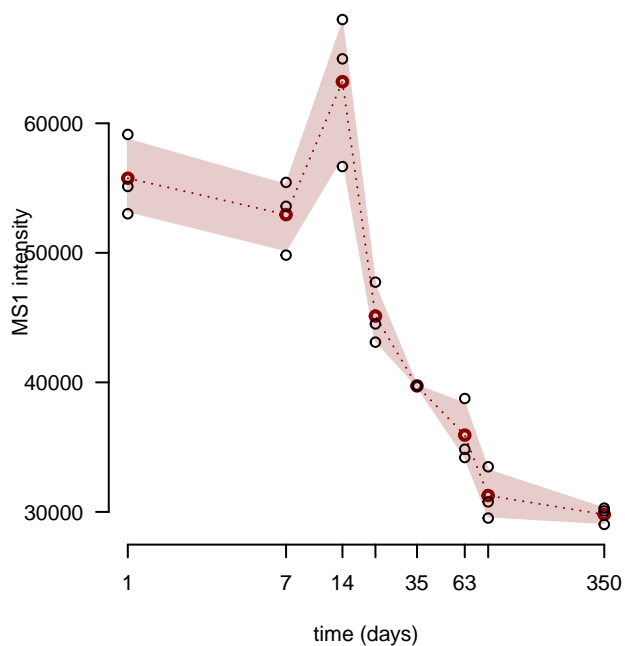

**P25976**  
**GN=Ubtf**  
upstream binding transcription factor, R ...

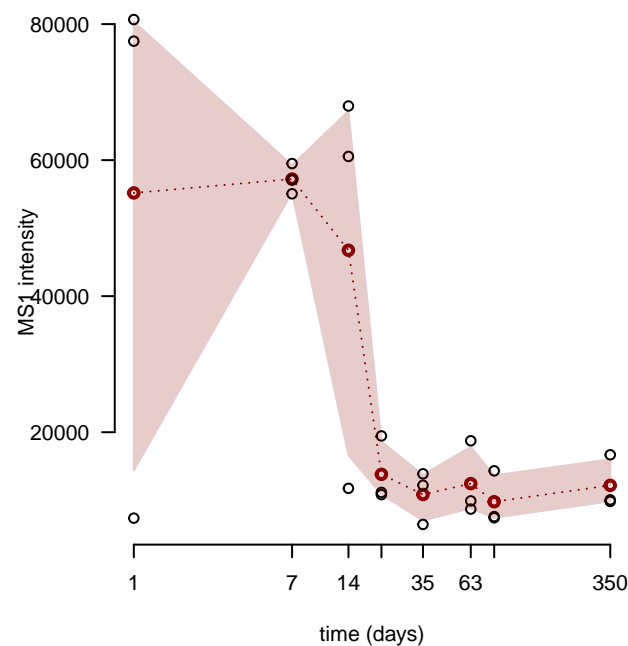

**P26039**  
**GN=Tln1**  
talin 1

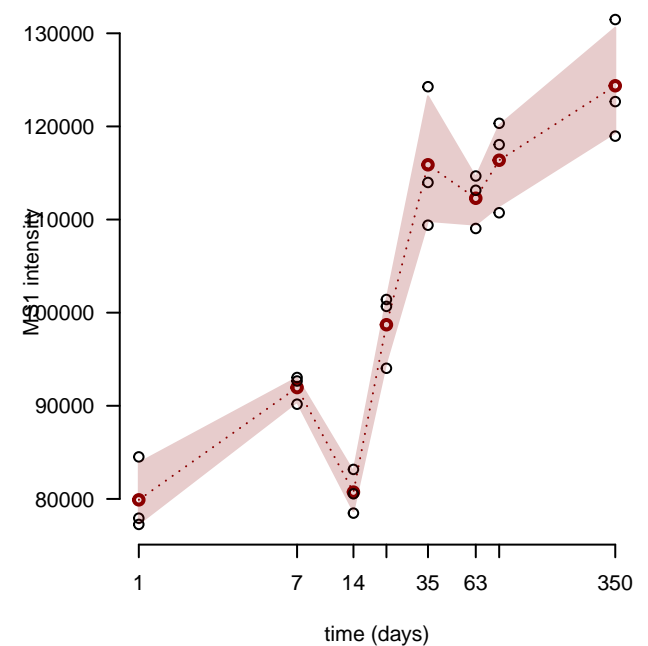



P26040  
GN=Ezr  
ezrin

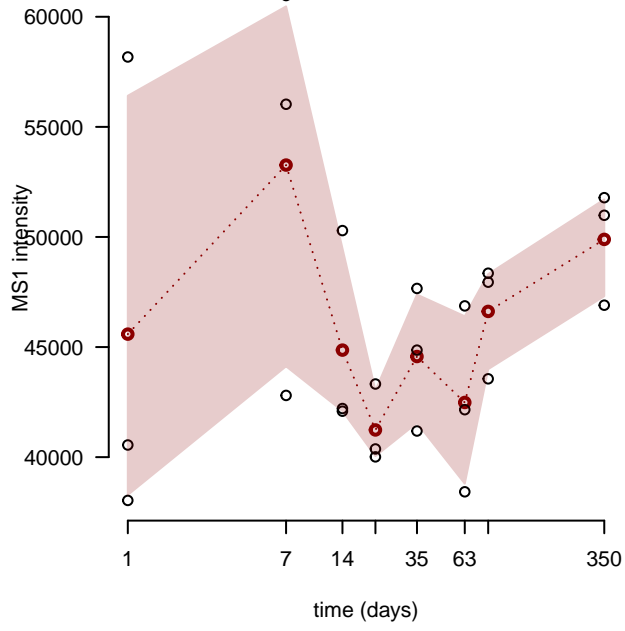

P26041  
GN=Msn  
moesin

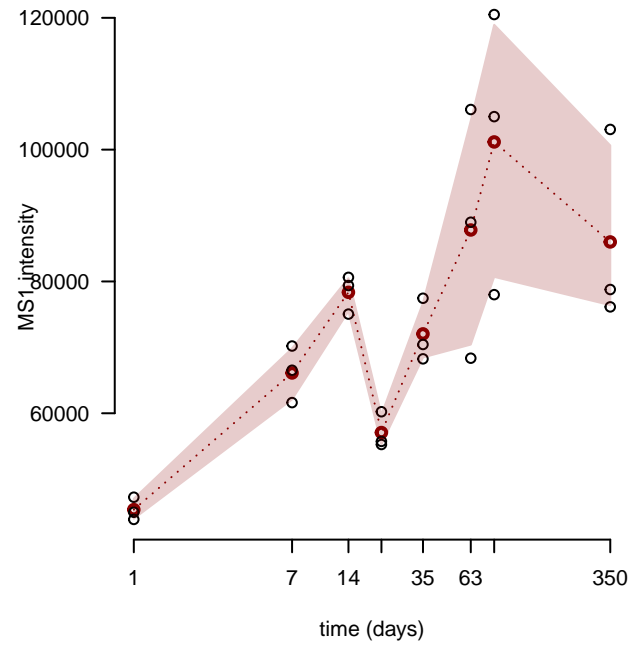

P26043  
GN=Rdx  
radixin

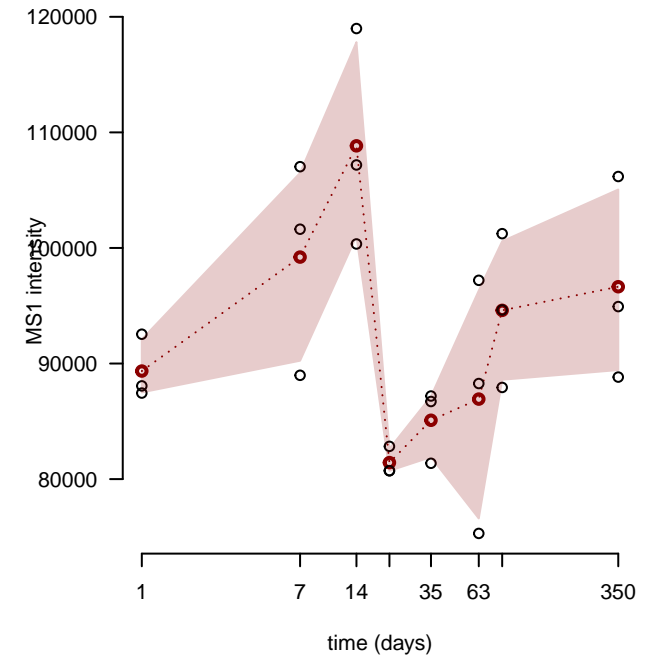

P26187  
GN=Mgmt  
O-6-methylguanine-DNA methyltransferase

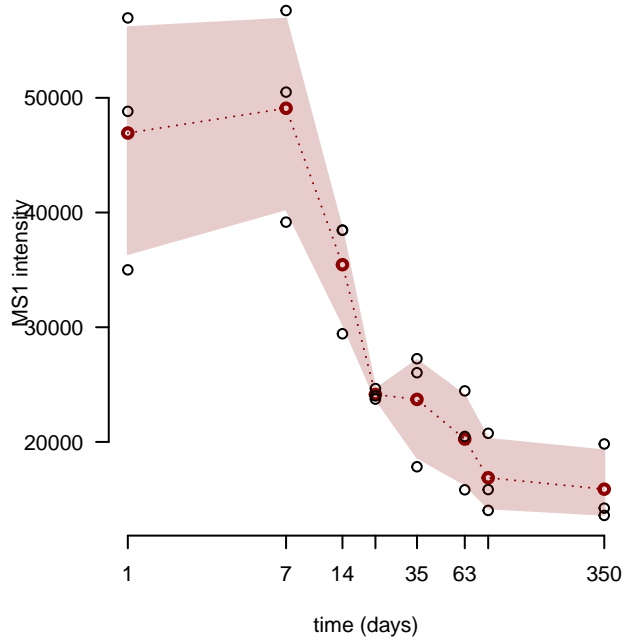

P26231  
GN=Ctnna1  
catenin (cadherin associated protein), a ...

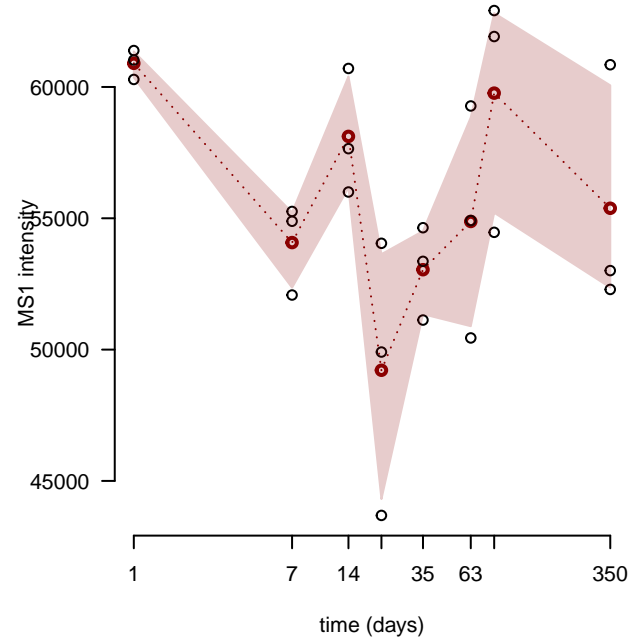

P26262  
GN=Klk1  
kallikrein B, plasma 1

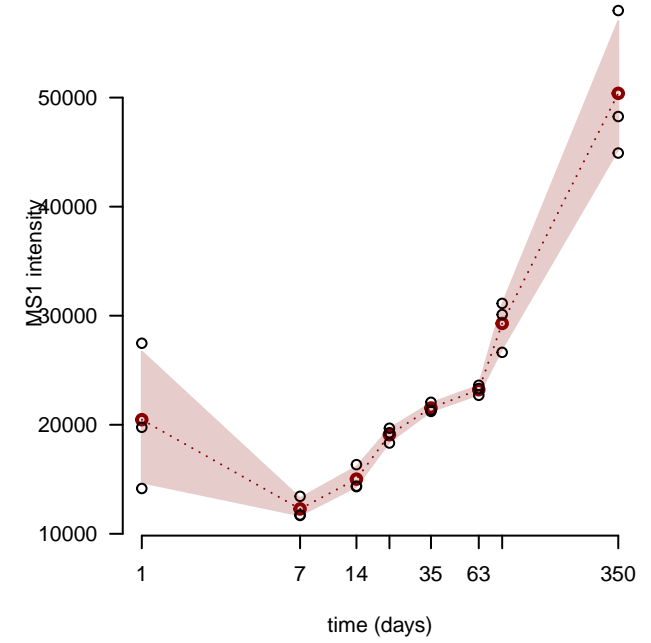

P26323  
GN=Flt1  
Friend leukemia integration 1

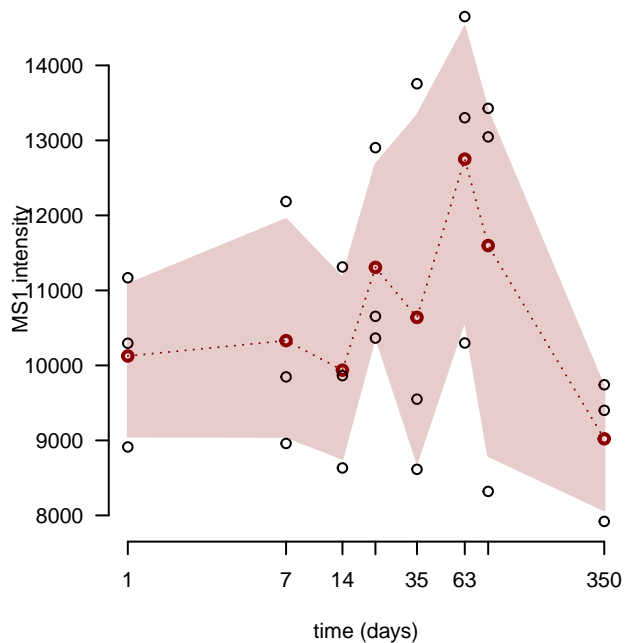

P26339  
GN=Chga  
chromogranin A

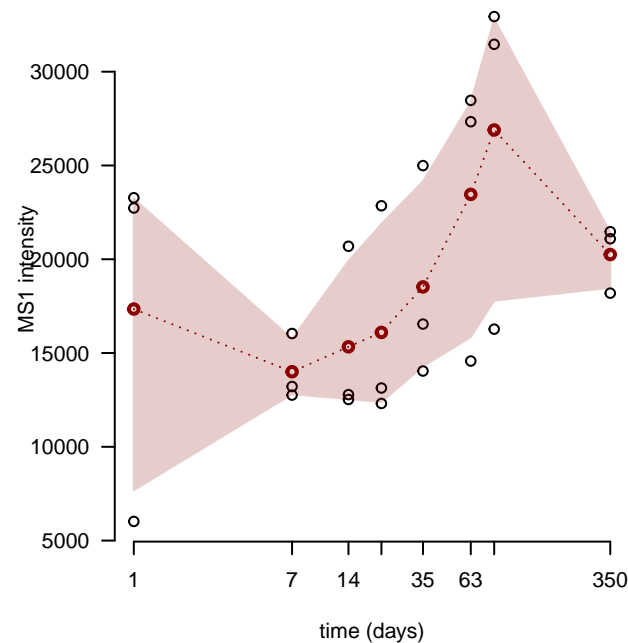

P26350  
GN=Ptma  
prothymosin alpha

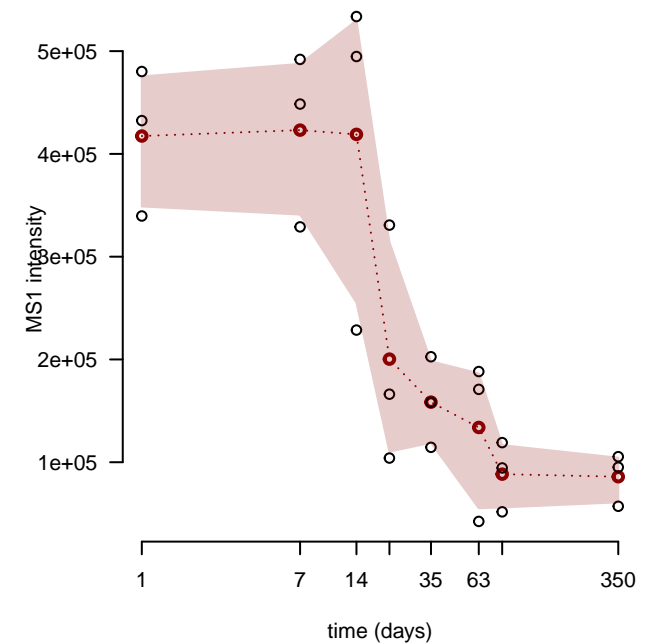

**P26369**  
**GN=U2af2**  
U2 small nuclear ribonucleoprotein auxil ...

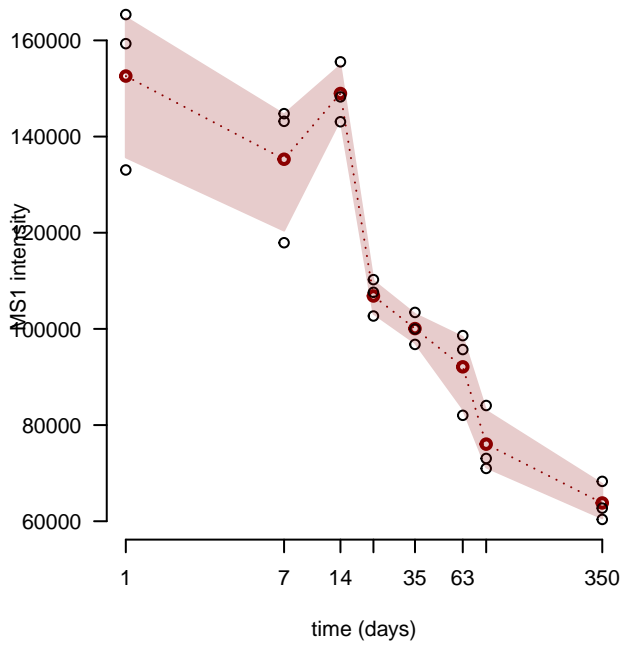

**P26443**  
**GN=Glud1**  
glutamate dehydrogenase 1

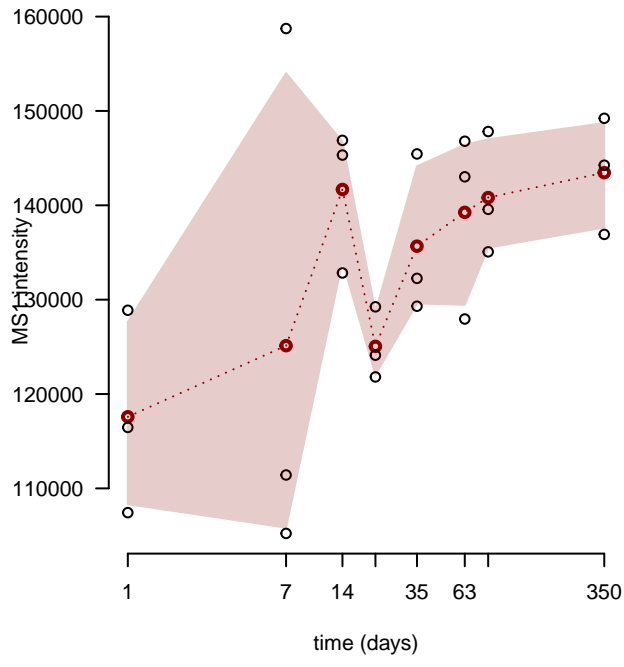

**P26450**  
**GN=Pik3r1**  
phosphoinositide-3-kinase regulatory sub ...

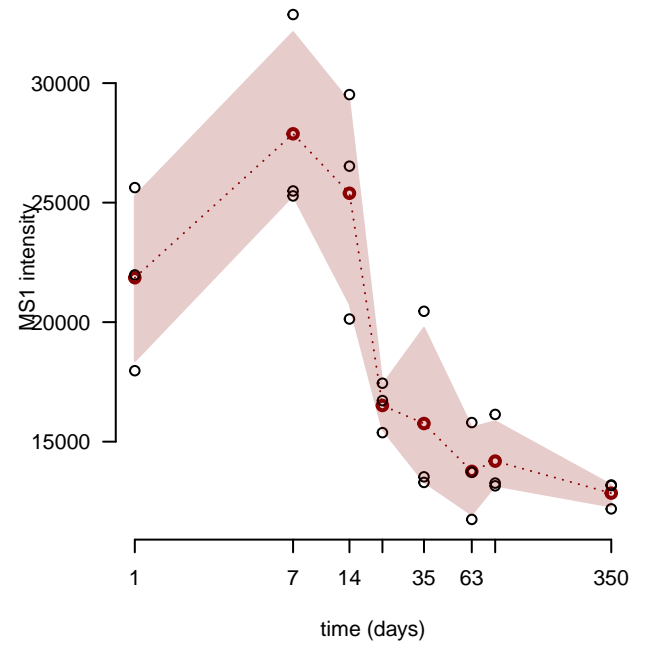

**P26516**  
**GN=Psmc7**  
proteasome (prosome, macropain) 26S subu ...

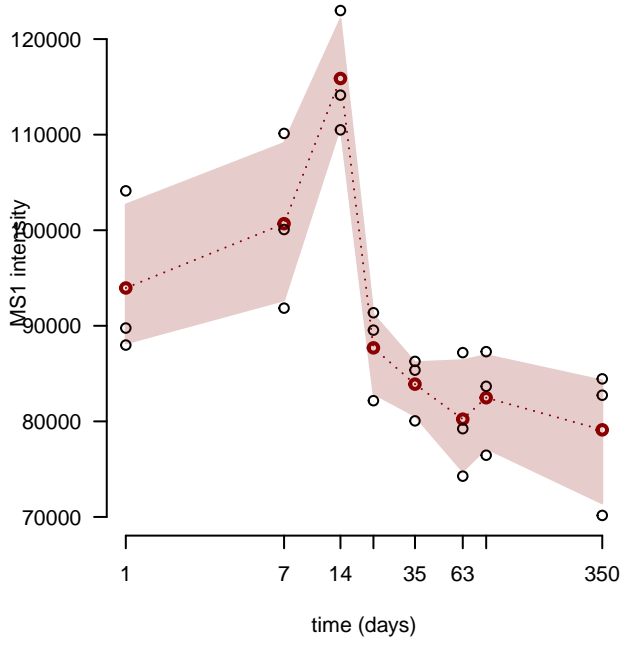

**P26618**  
**GN=Pdgfra**  
platelet derived growth factor receptor, ...

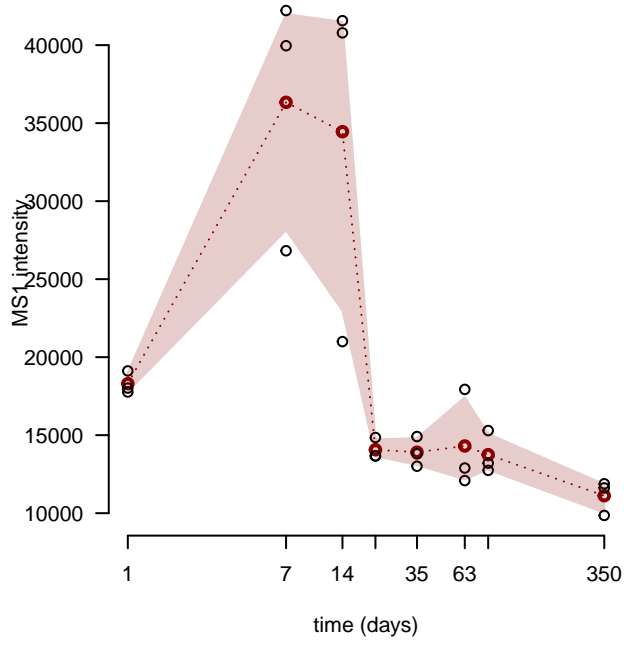

**P26638**  
**GN=Sars**  
seryl-aminoacyl-tRNA synthetase

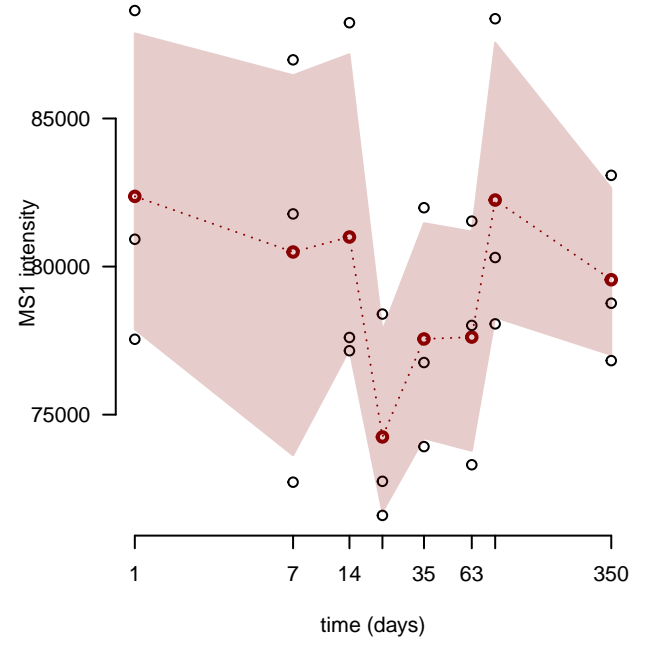

**P26645**  
**GN=Marcks**  
myristoylated alanine rich protein kinas ...

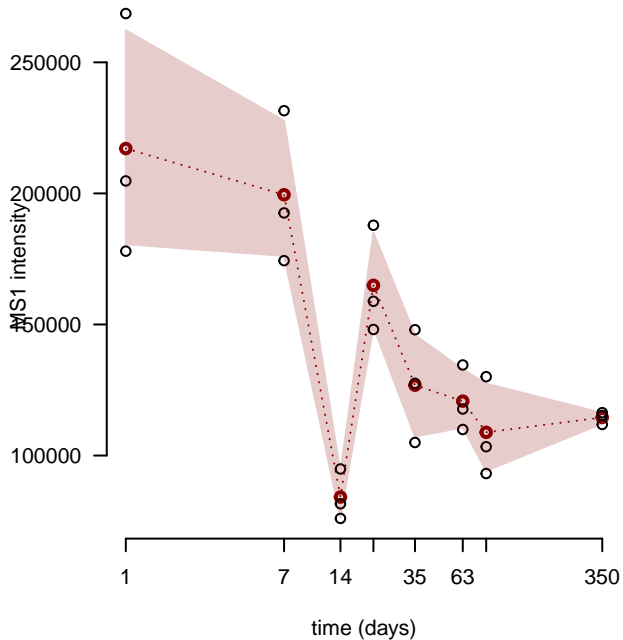

**P26883**  
**GN=Fkbp1a**  
FK506 binding protein 1a

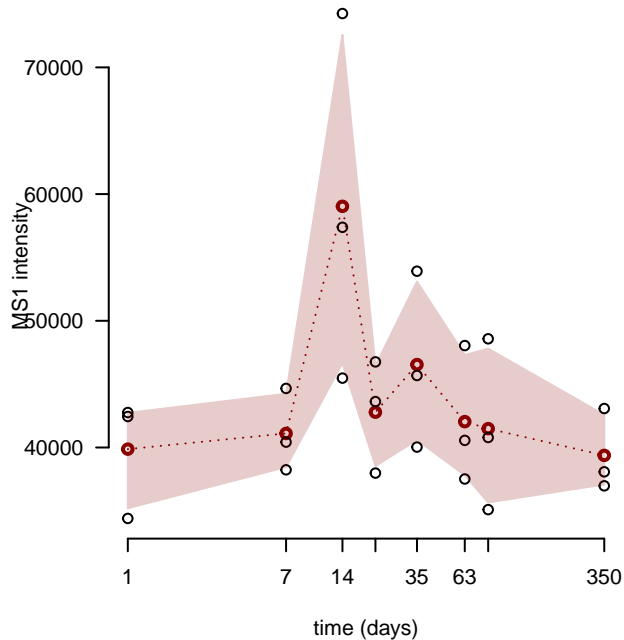

**P26952**  
**GN=Il3ra**  
interleukin 3 receptor, alpha chain

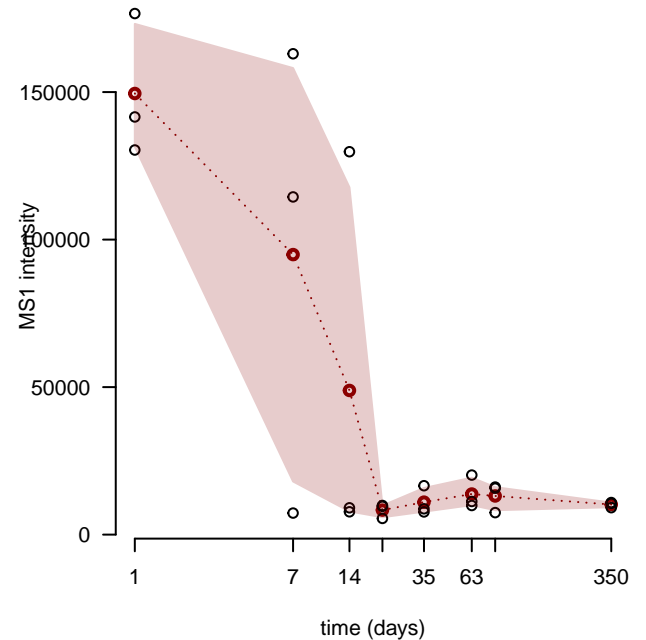

**P27046**  
**GN=Man2a1**  
mannosidase 2, alpha 1

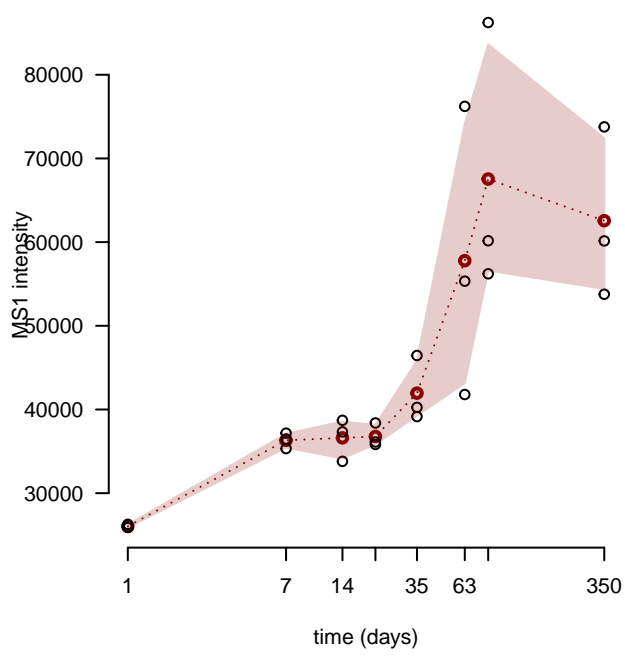

**P27048**  
**GN=Snrpb**  
small nuclear ribonucleoprotein B

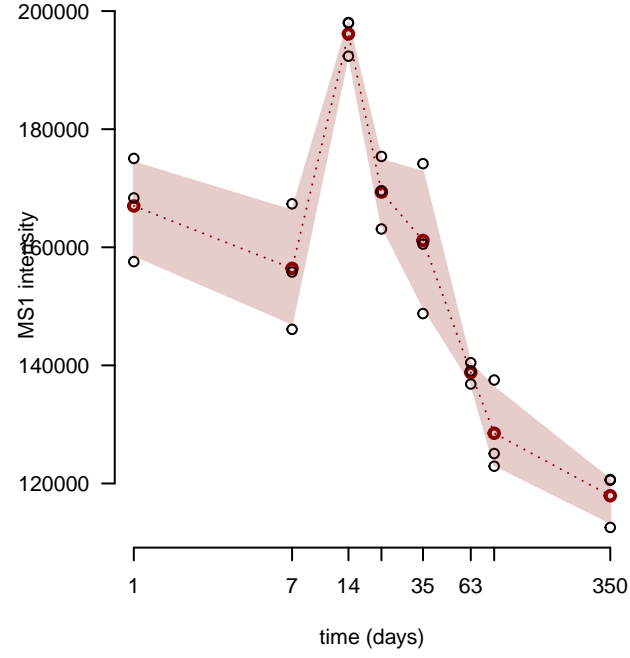

**P27090**  
**GN=Tgfb2**  
transforming growth factor, beta 2

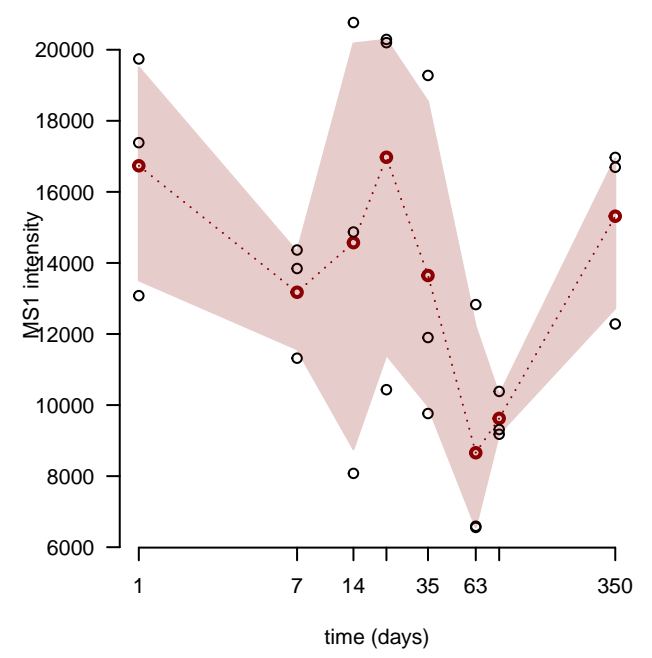

**P27106**  
**GN=Amh**  
anti-Mullerian hormone

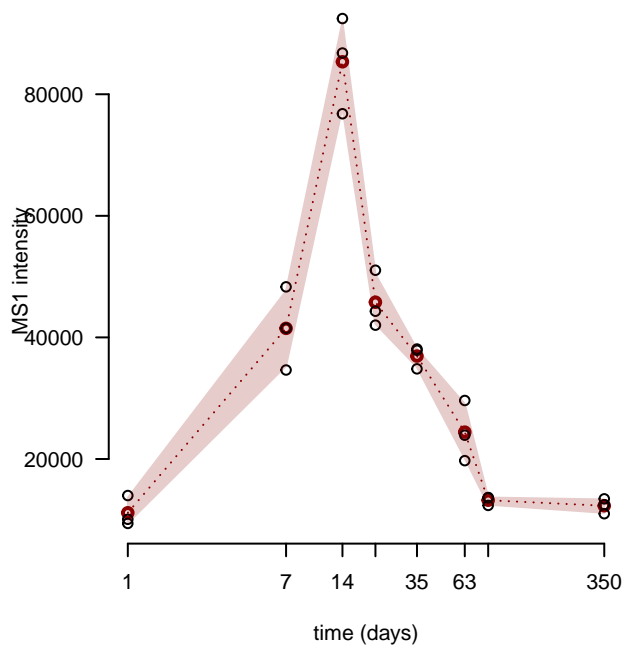

**P27546**  
**GN=Map4**  
microtubule-associated protein 4

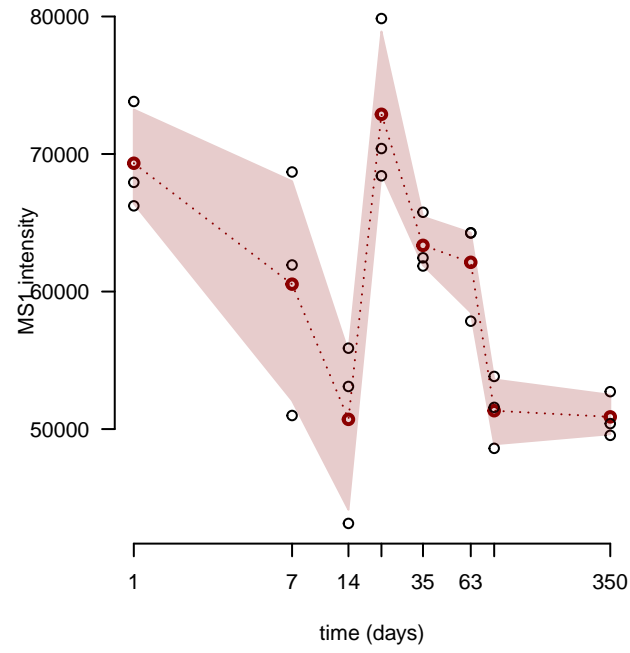

**P27600**  
**GN=Gna12**  
guanine nucleotide binding protein, alpha 12

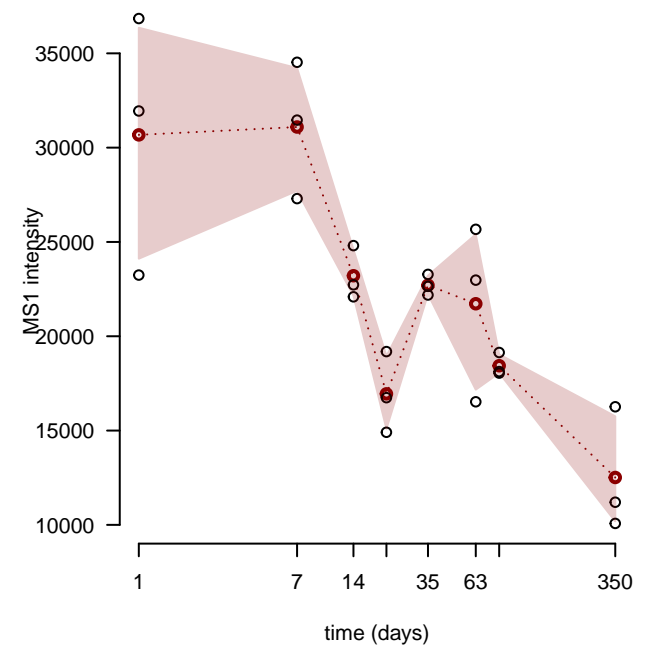

**P27601**  
**GN=Gna13**  
guanine nucleotide binding protein, alpha 13

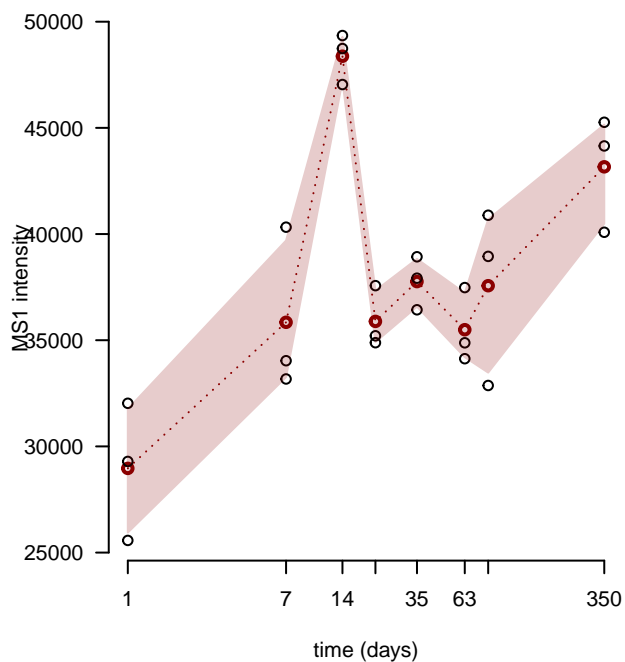

**P27612**  
**GN=Plaa**  
phospholipase A2, activating protein

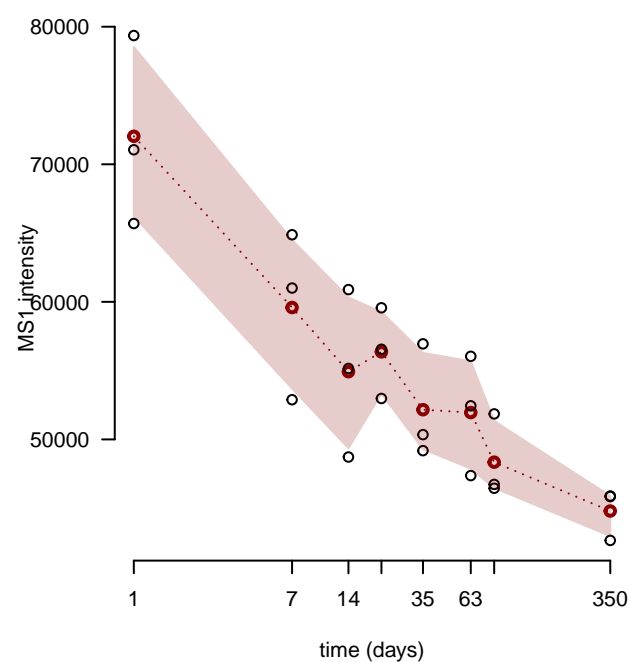

**P27641**  
**GN=Xrcc5**  
X-ray repair complementing defective replication 5

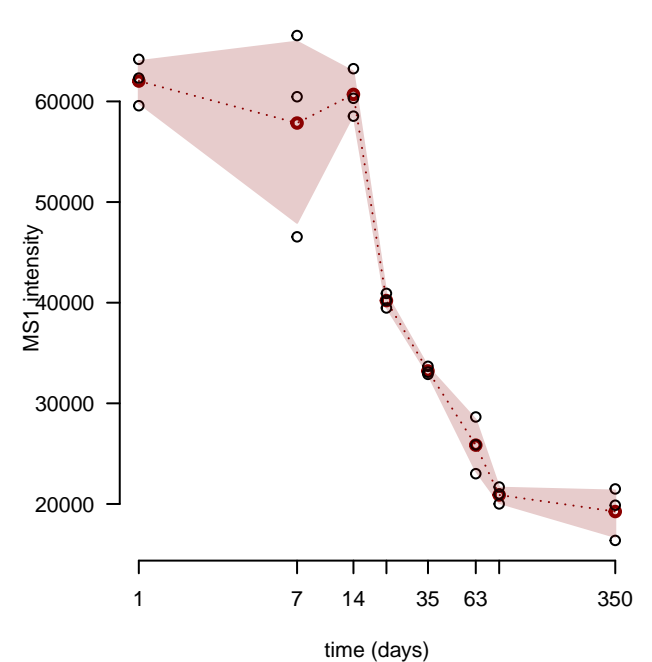

**P27659**  
GN=Rpl3  
ribosomal protein L3

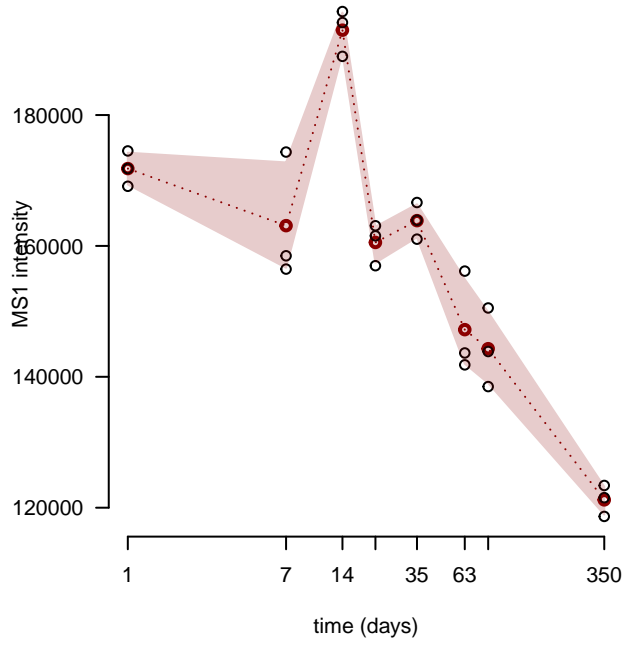

**P27773**  
GN=Pdia3  
protein disulfide isomerase associated 3

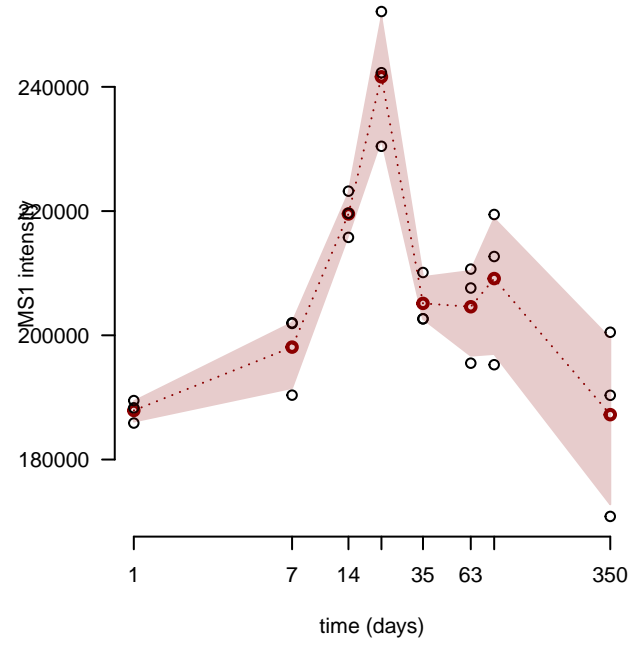

**P27786**  
GN=Cyp17a1  
cytochrome P450, family 17, subfamily a, ...

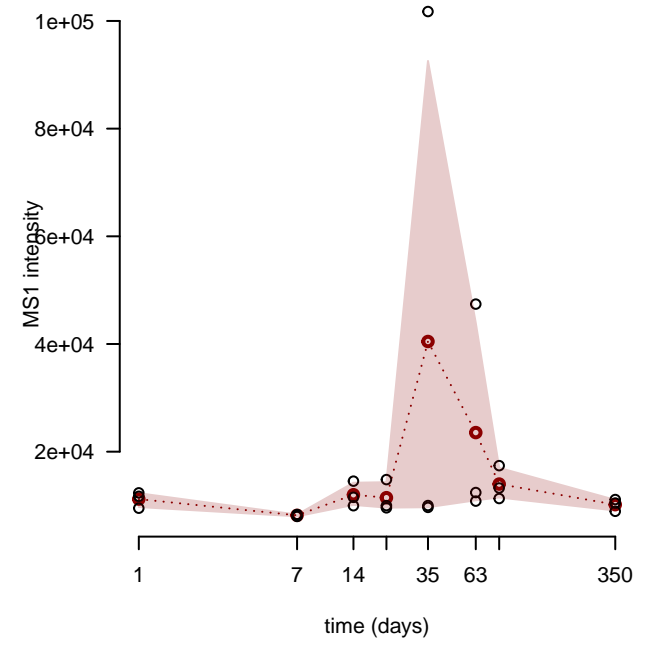

**P27790**  
GN=Cenpb  
centromere protein B

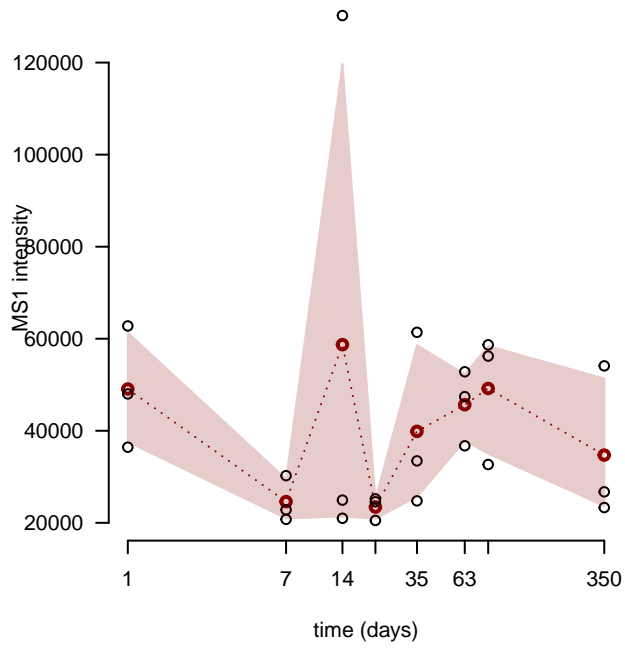

**P27808**  
GN=Mgat1  
mannoside acetylglucosaminyltransferase ...

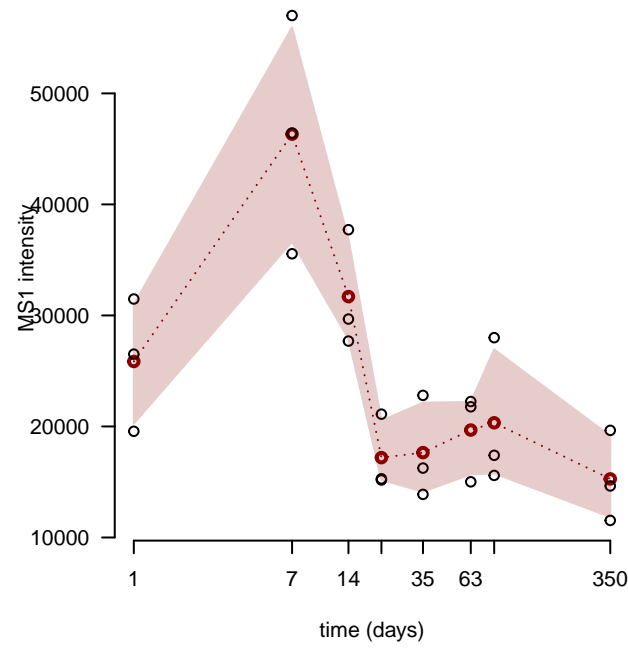

**P27870**  
GN=Vav1  
vav 1 oncogene

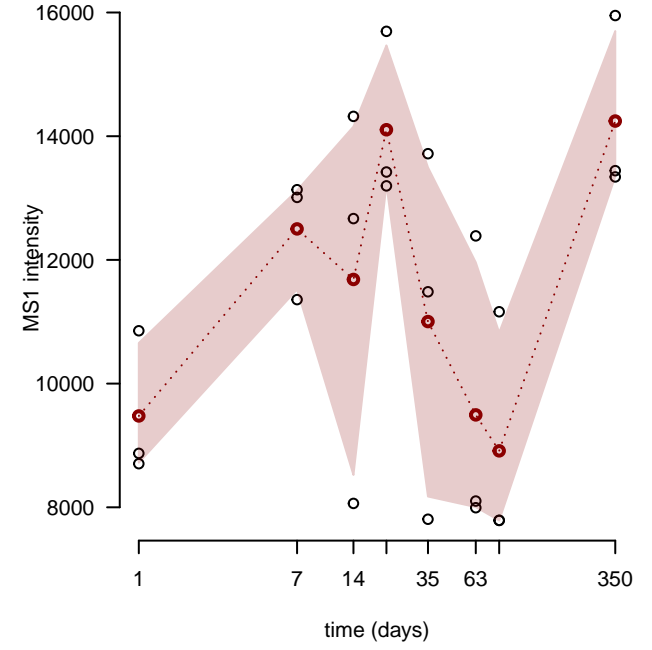

**P28028**  
GN=Braf  
Braf transforming gene

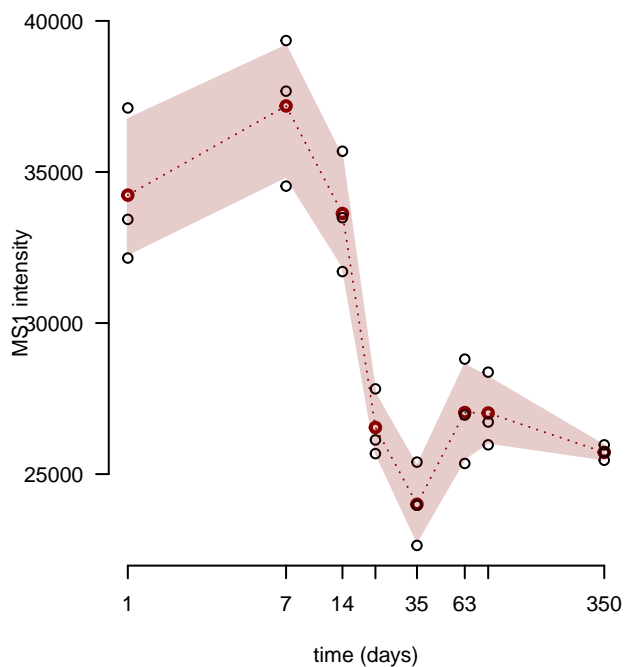

**P28033**  
GN=Cebpb  
CCAAT/enhancer binding protein (C/EBP), ...

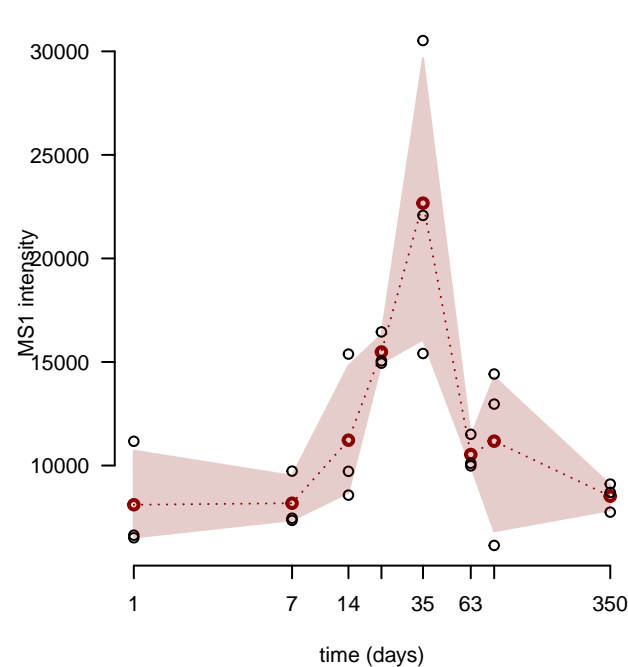

**P28063**  
GN=Psmb8  
proteasome (prosome, macropain) subunit, ...

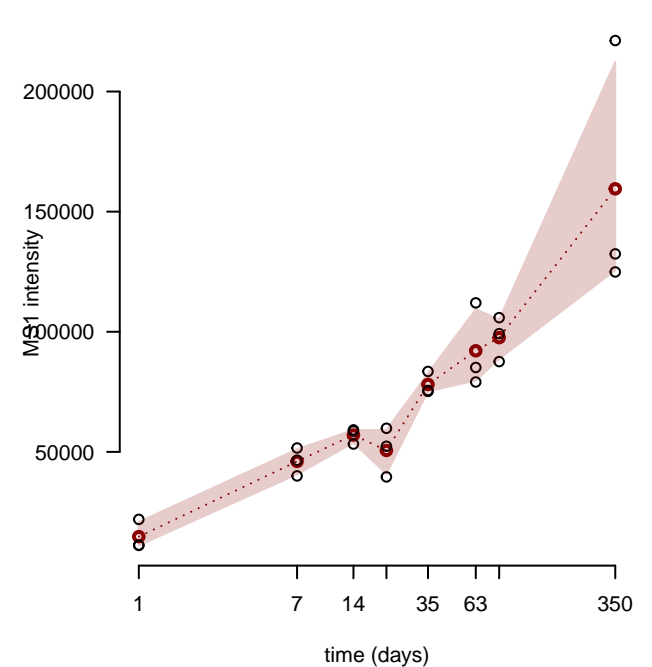

P28076  
GN=Psmb9

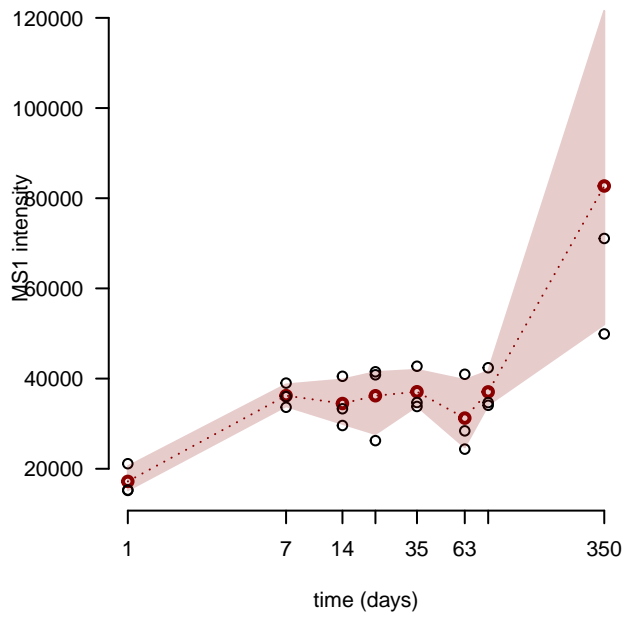

P28271  
GN=Aco1  
aconitase 1

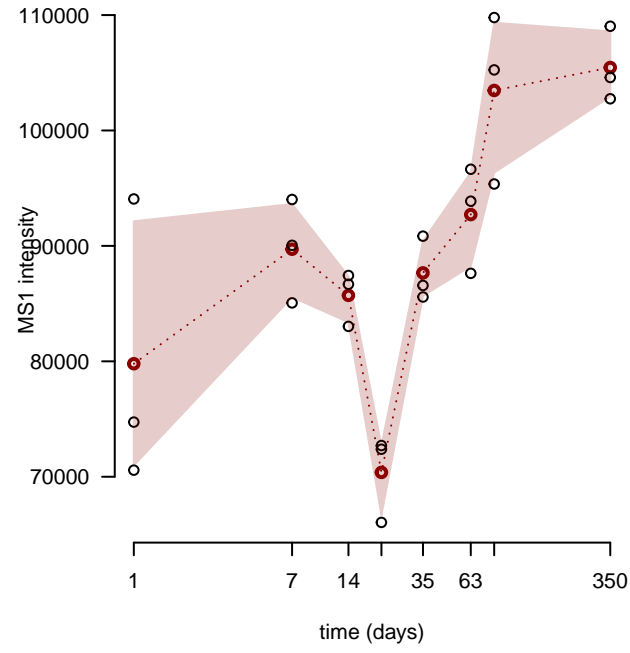

P28301  
GN=Lox  
lysyl oxidase

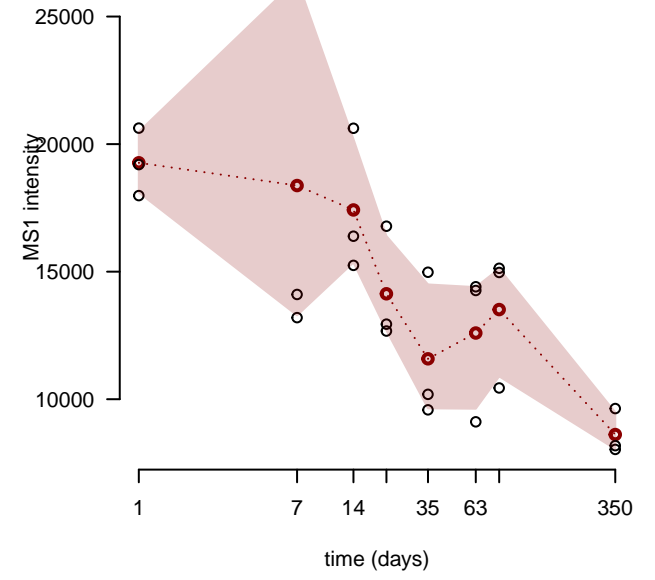

P28352  
GN=Apex1  
apurinic/aprimidinic endonuclease 1

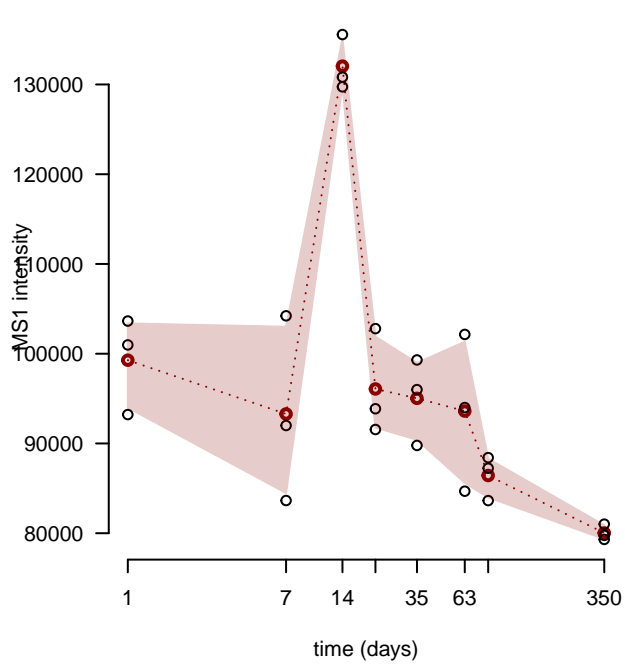

P28357  
GN=Hoxd9  
homeobox D9

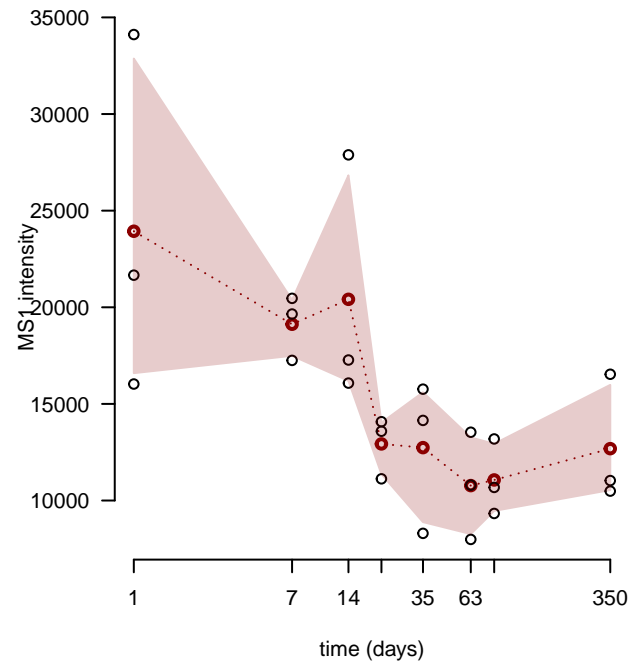

P28474  
GN=Adh5  
alcohol dehydrogenase 5 (class III), chi ...

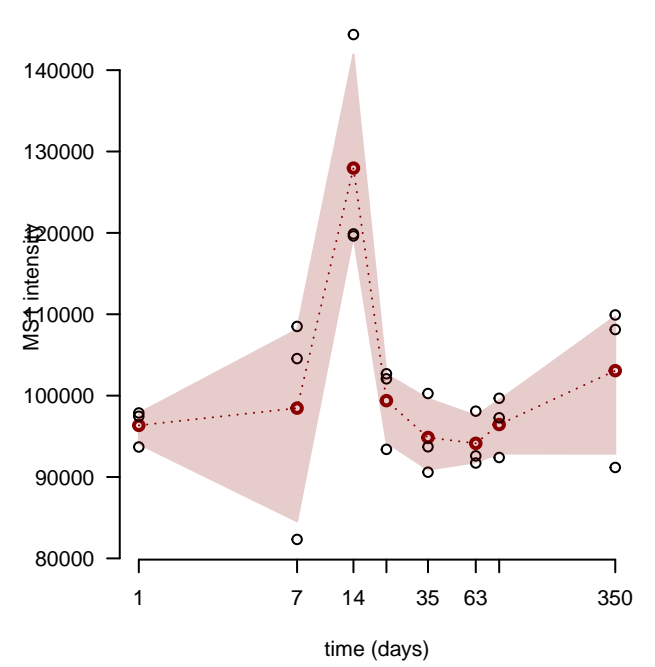

P28571  
GN=Slc6a9  
solute carrier family 6 (neurotransmitte ...

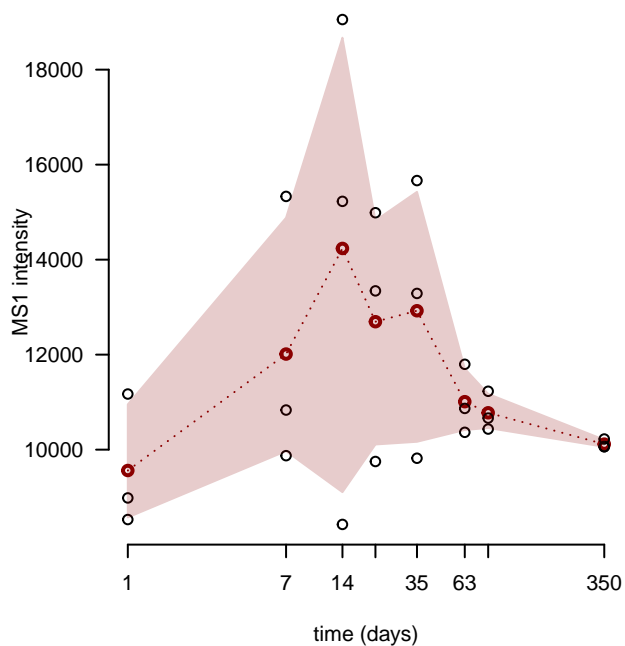

P28574  
GN=Max  
Max protein

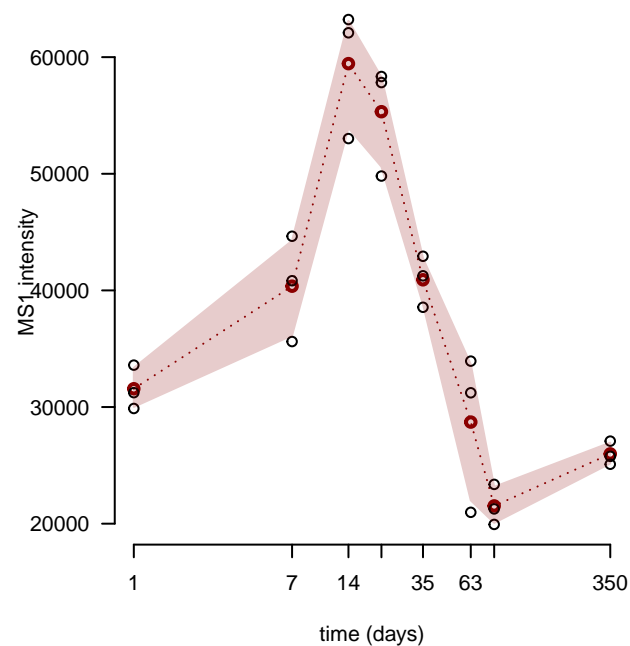

P28649  
GN=Cyp19a1  
cytochrome P450, family 19, subfamily a, ...

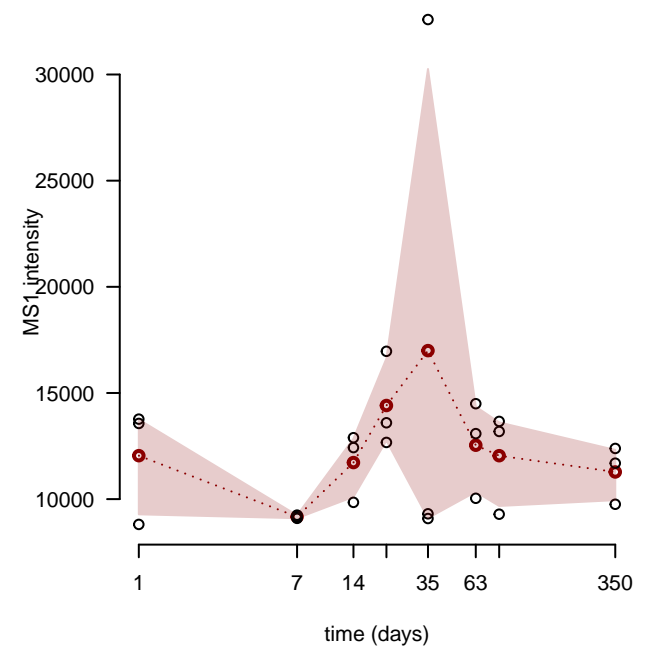

**P28650**  
GN=Adss1  
adenylosuccinate synthetase like 1

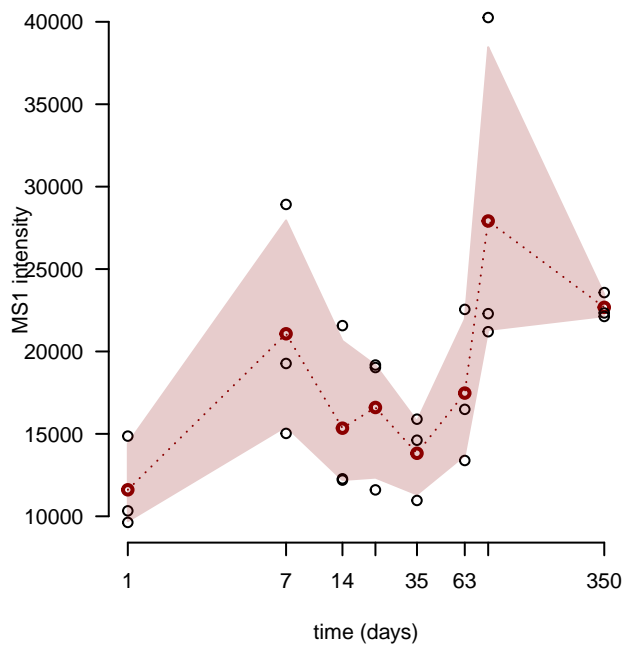

**P28652**  
GN=Camk2b  
calcium/calmodulin-dependent protein kin ...

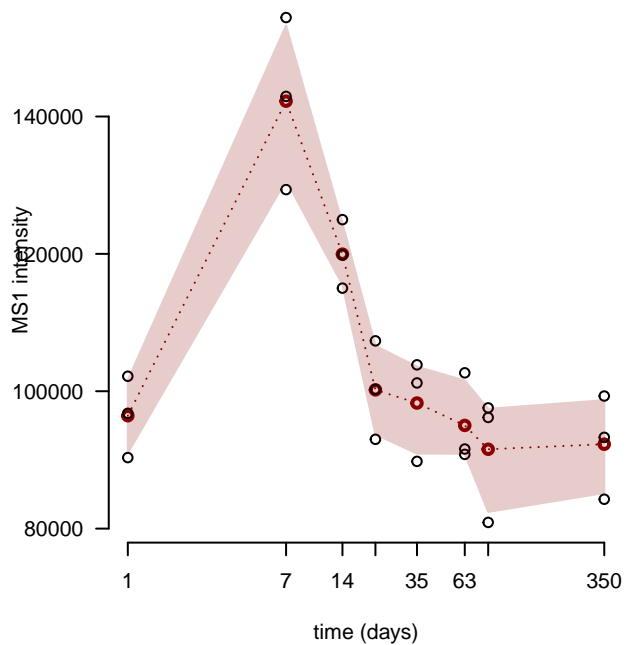

**P28653**  
GN=Bgn  
biglycan

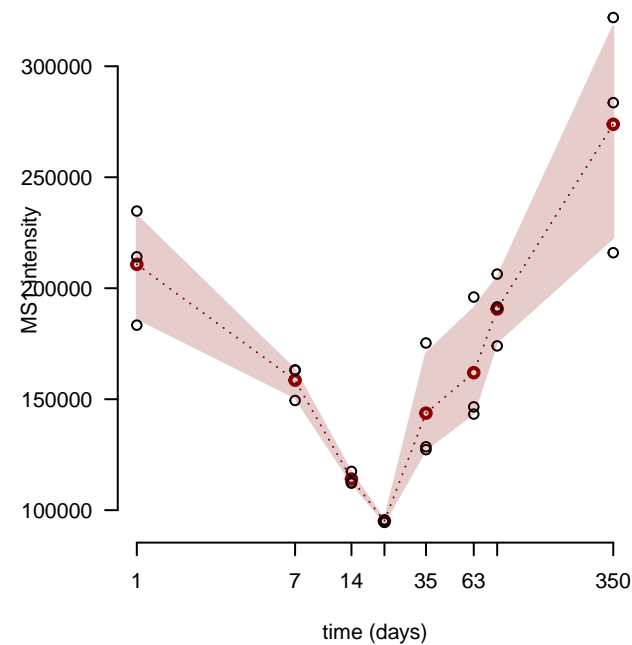

**P28654**  
GN=Dcn  
decorin

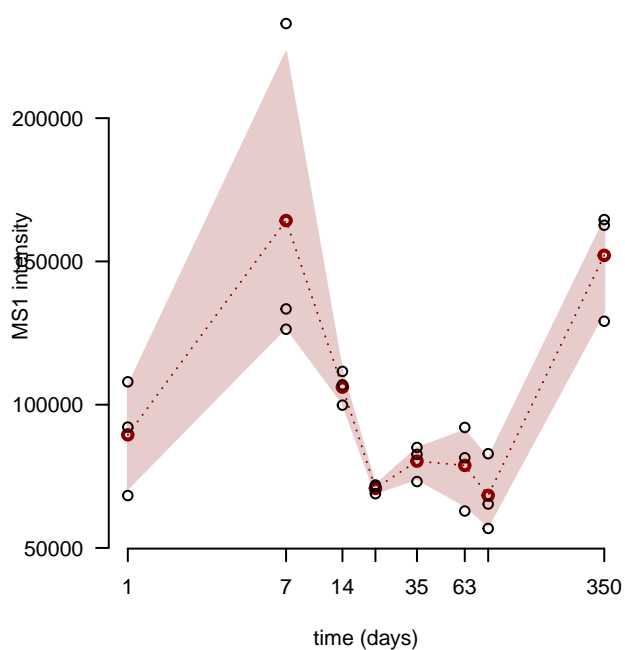

**P28656**  
GN=Nap111  
nucleosome assembly protein 1-like 1

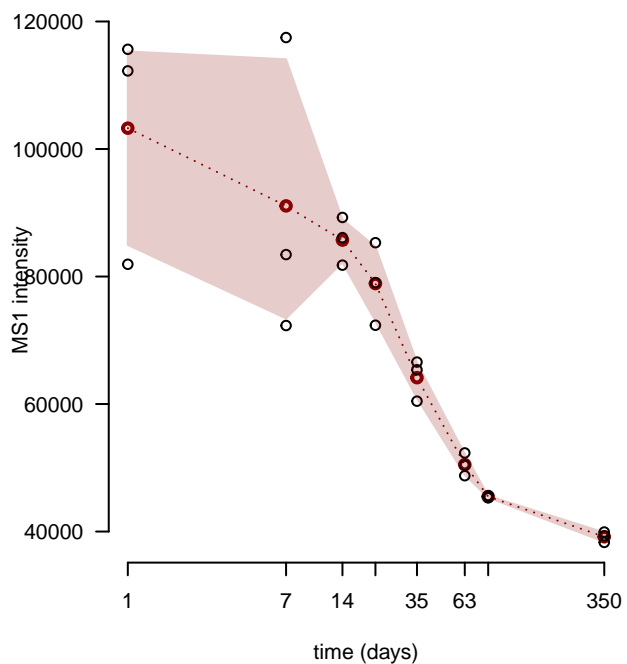

**P28658**  
GN=Atxn10  
ataxin 10

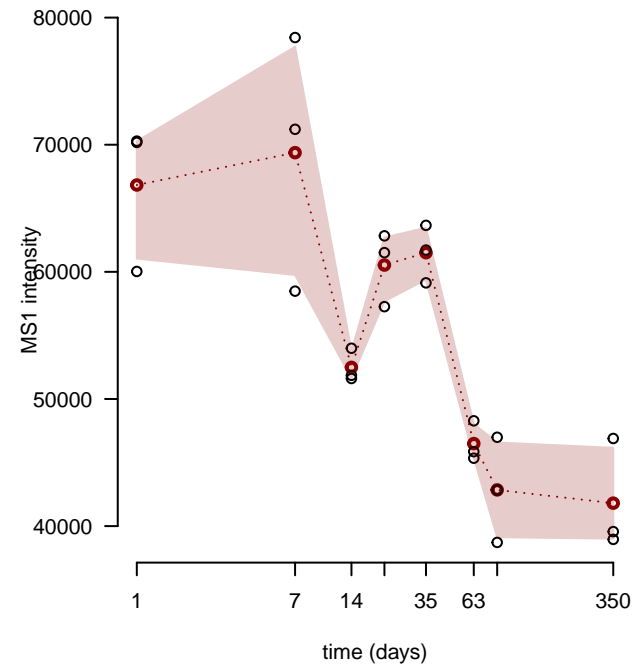

**P28659**  
GN=Celf1  
CUGBP, Elav-like family member 1

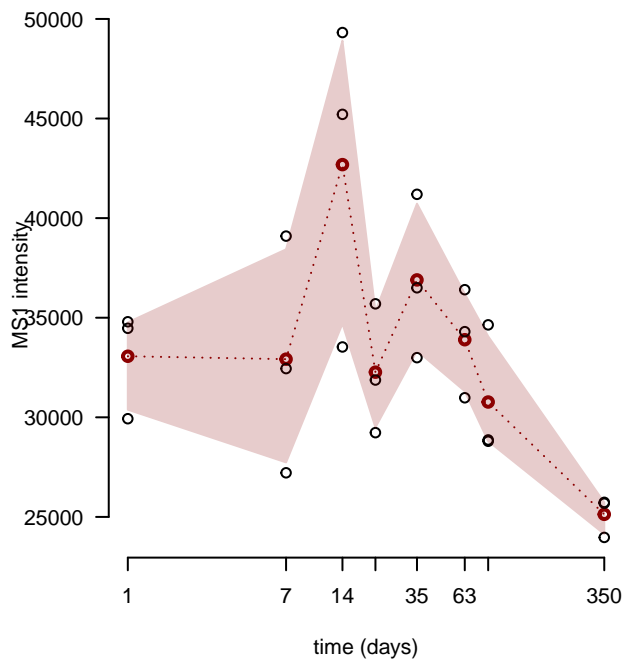

**P28660**  
GN=Nckap1  
NCK-associated protein 1

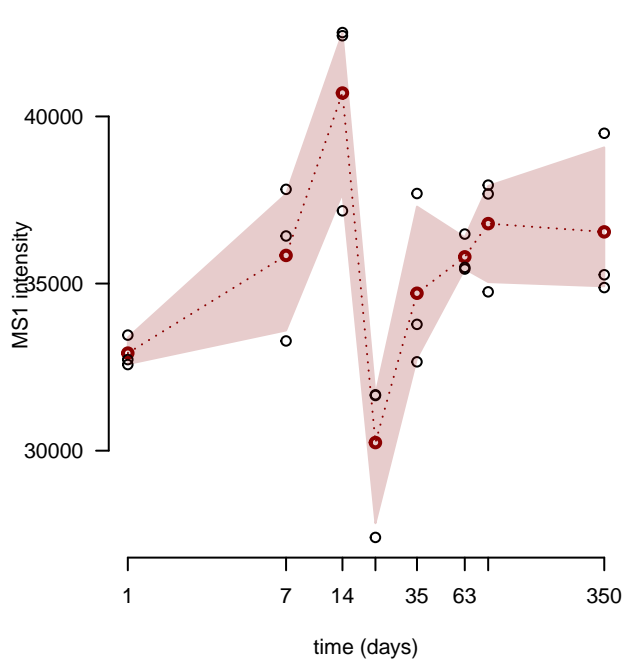

**P28661**  
GN=Sept4

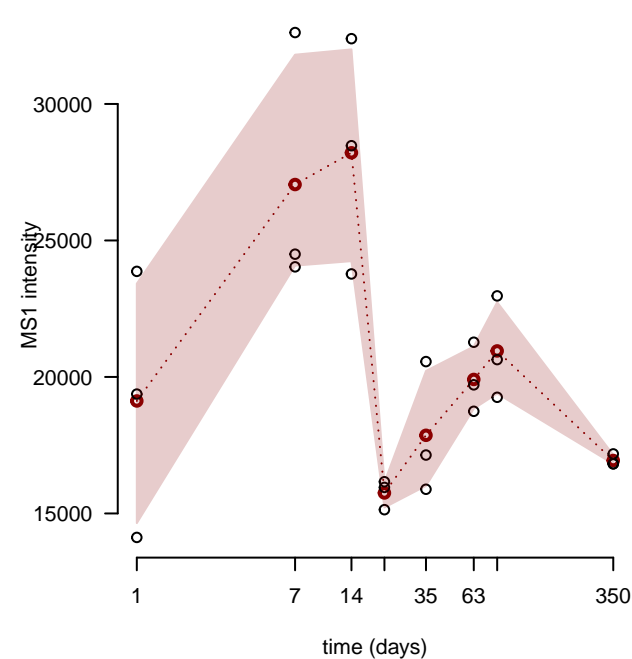

P28661  
GN=Sept4

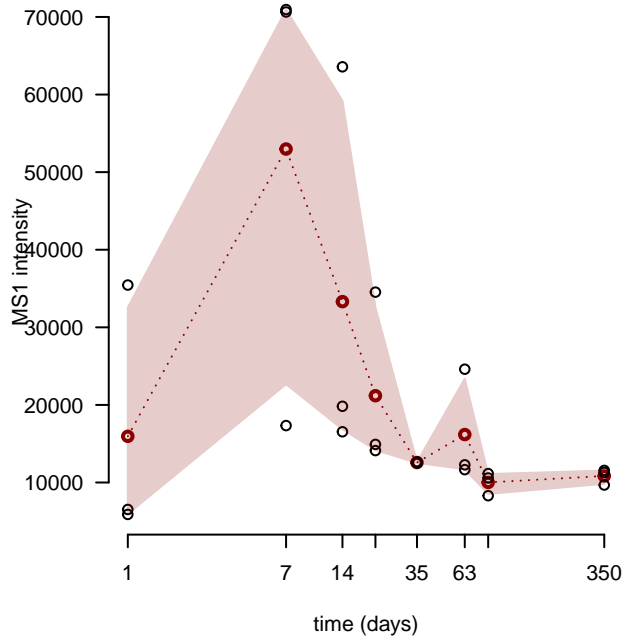

P28665  
GN=Mug1  
muringlobulin 1

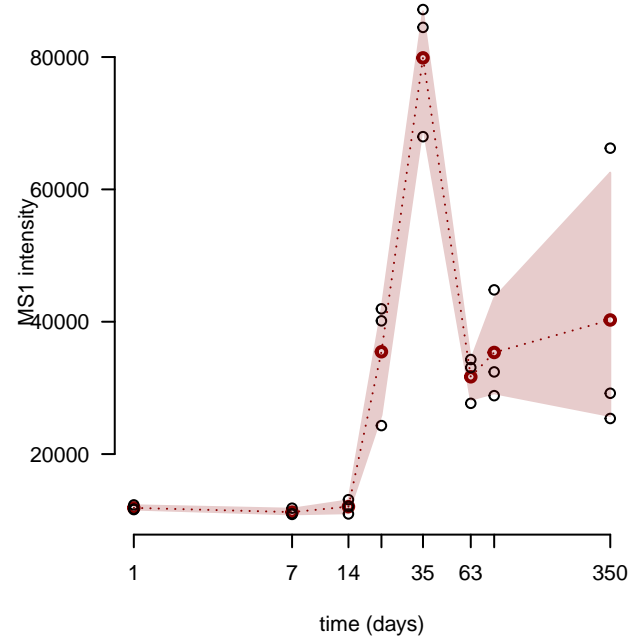

P28667  
GN=Marcks1  
MARCKS-like 1

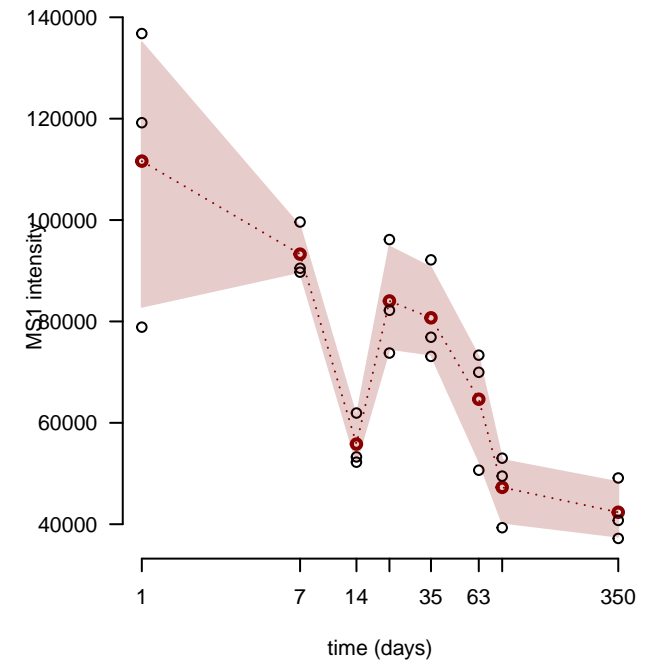

P28700  
GN=Rxra  
retinoid X receptor alpha

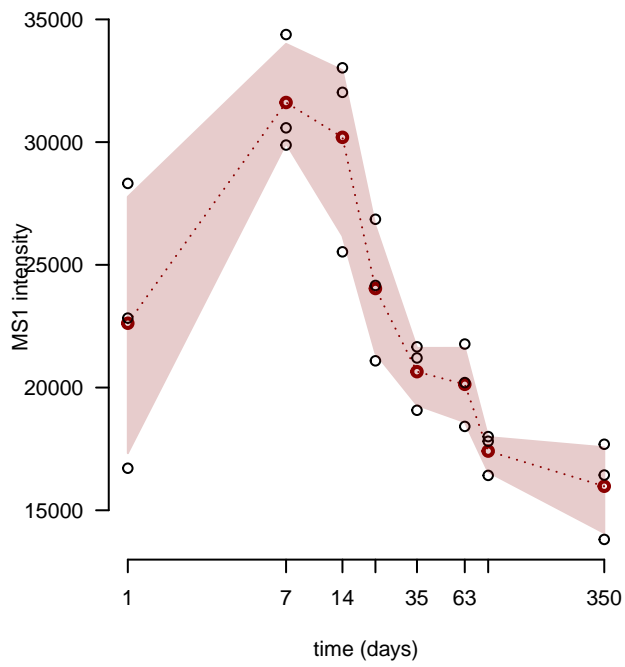

P28704  
GN=Rxb  
retinoid X receptor beta

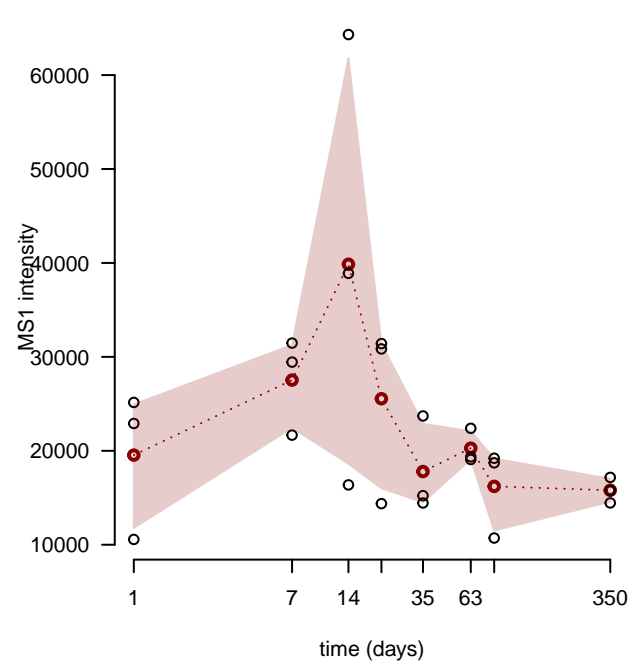

P28738  
GN=Kif5c  
kinesin family member 5C

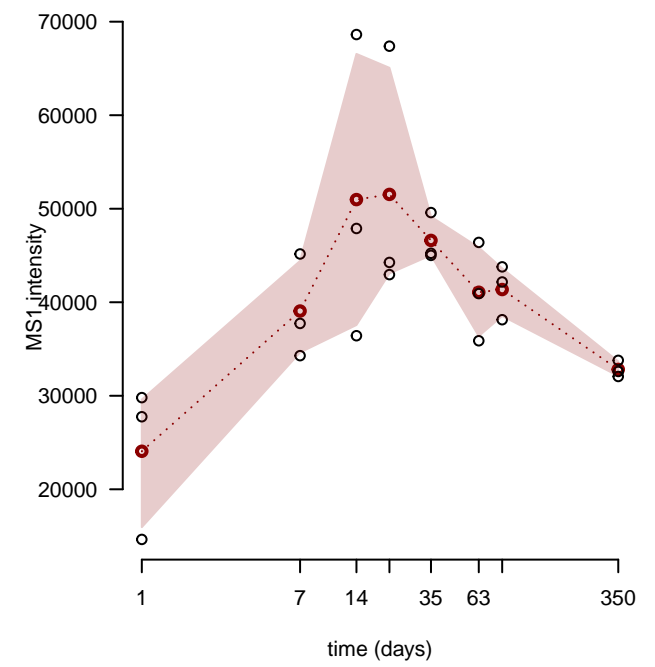

P28740  
GN=Kif2a  
kinesin family member 2A

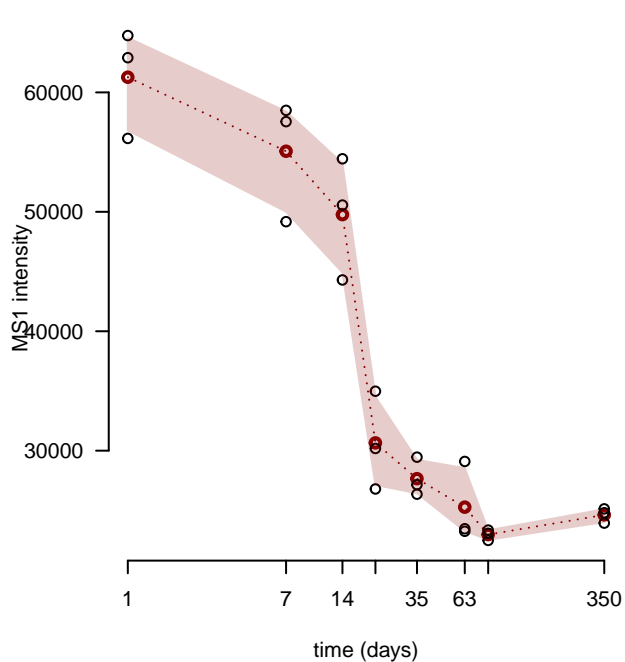

P28740  
GN=Kif2a  
kinesin family member 2A

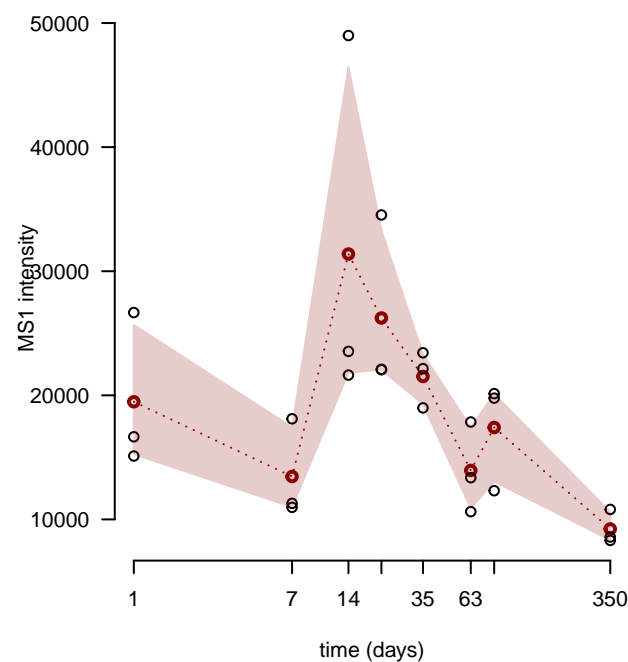

P28741  
GN=Kif3a  
kinesin family member 3A

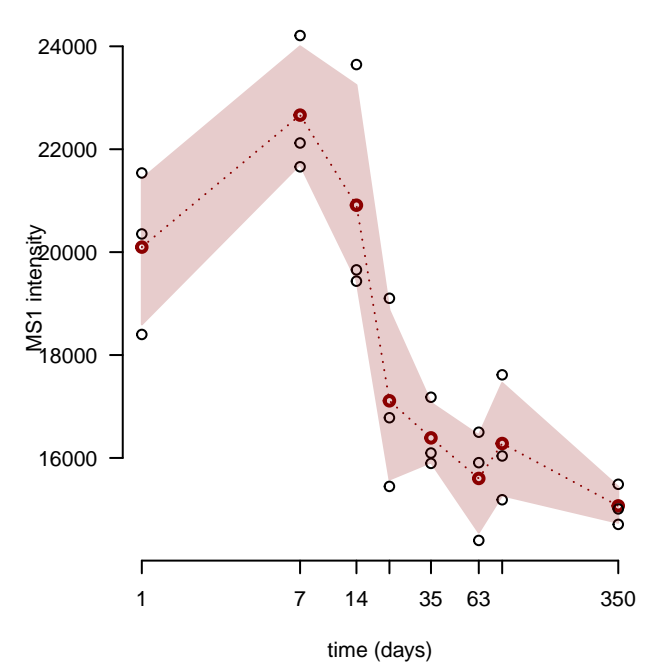

**P28798**  
GN=Grn  
granulin

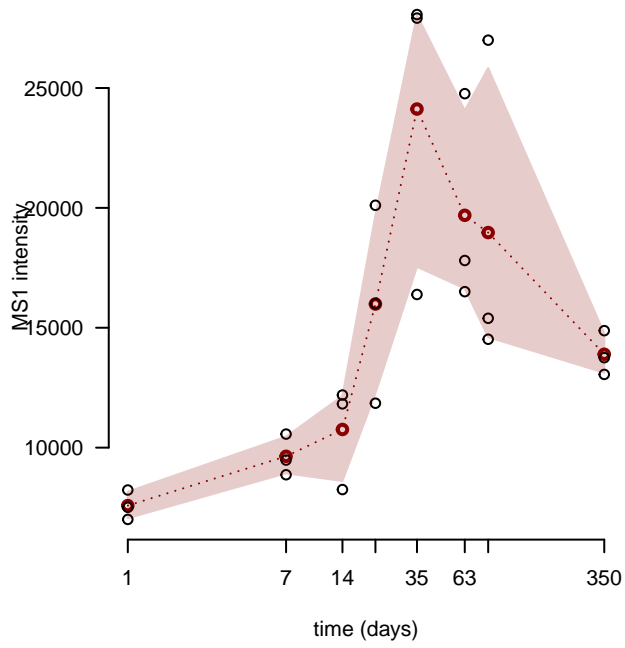

**P28828**  
GN=Ptpm  
protein tyrosine phosphatase, receptor t...

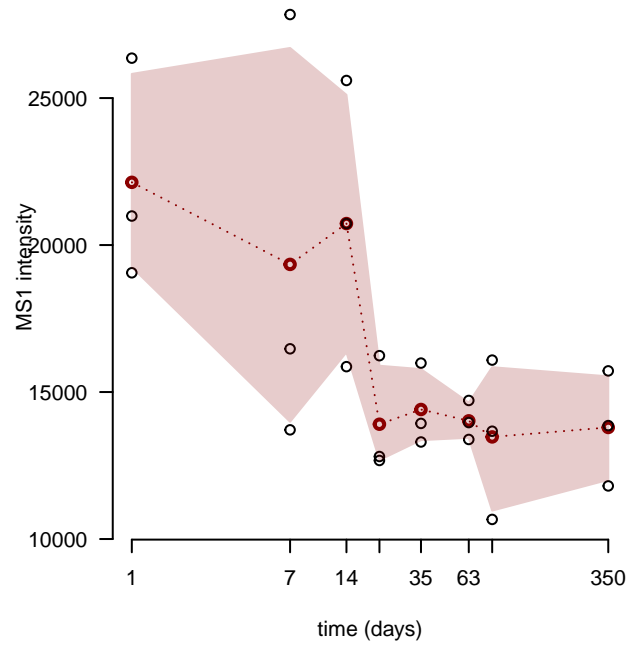

**P28843**  
GN=Dpp4  
dipeptidylpeptidase 4

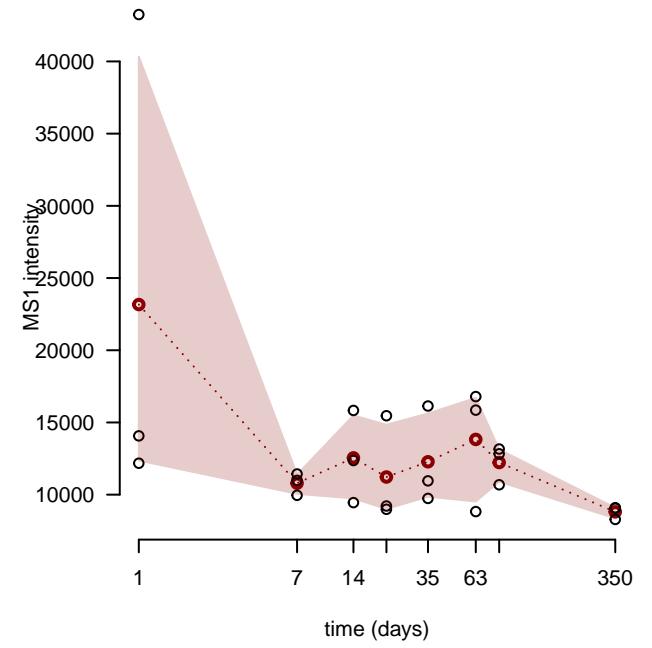

**P28867**  
GN=Prkcd  
protein kinase C, delta

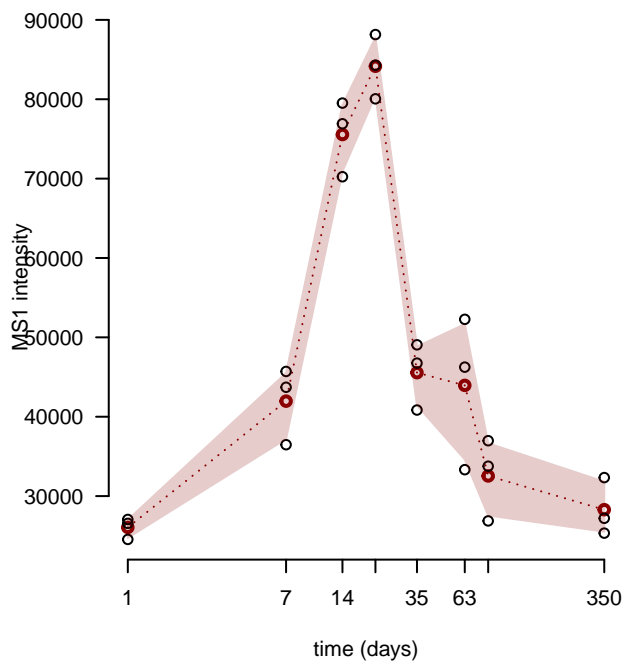

**P29037**  
GN=Tbp  
TATA box binding protein

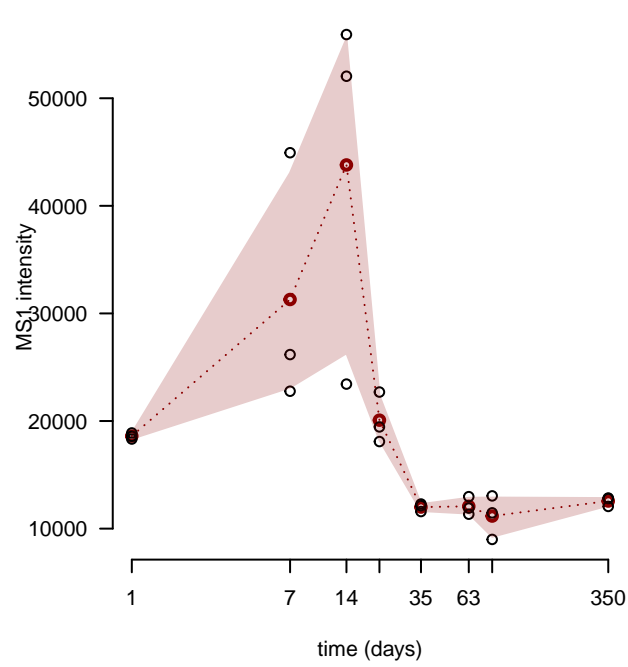

**P29341**  
GN=Pabpc1  
poly(A) binding protein, cytoplasmic 1

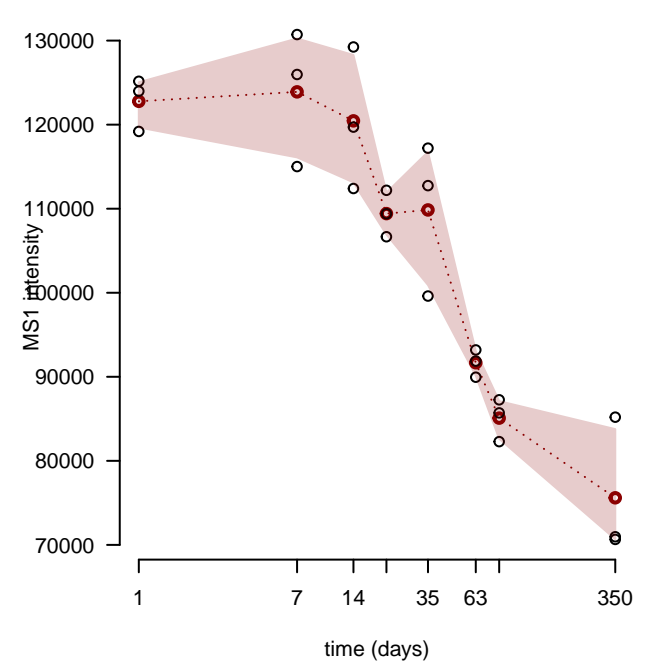

**P29351**  
GN=Ptpn6  
protein tyrosine phosphatase, non-recept ...

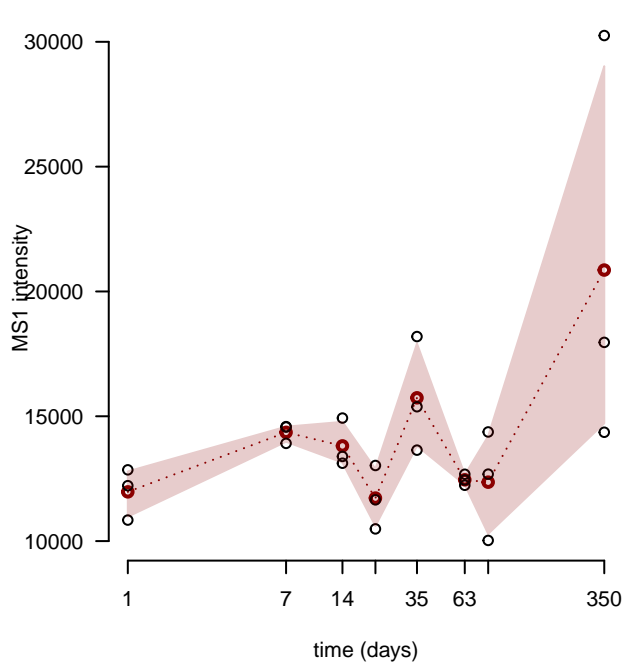

**P29387**  
GN=Gnb4  
guanine nucleotide binding protein (G pr ...

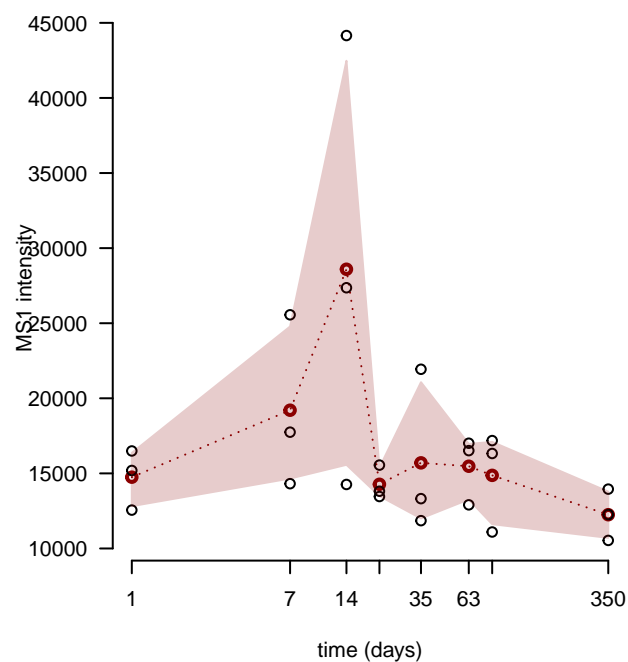

**P29391**  
GN=Ftl1  
ferritin light polypeptide 1

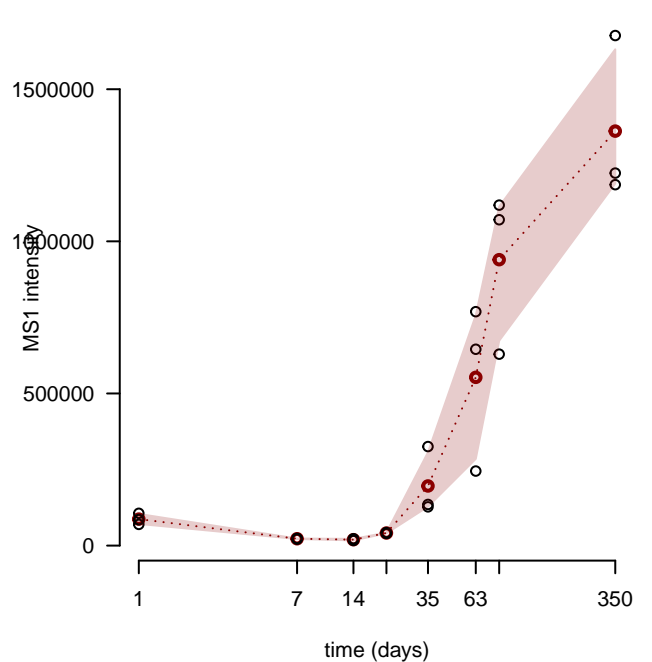



**P29416**  
GN=Hexa  
hexosaminidase A

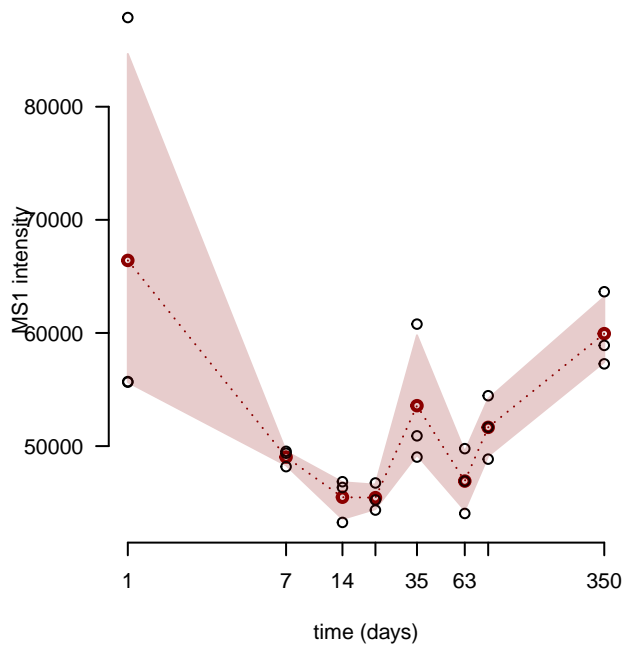

**P29452**  
GN=Casp1  
caspase 1

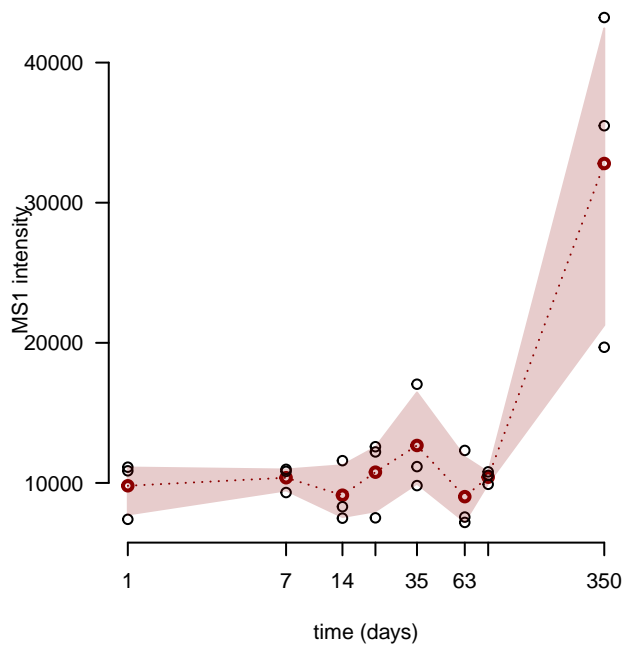

**P29533**  
GN=Vcam1  
vascular cell adhesion molecule 1

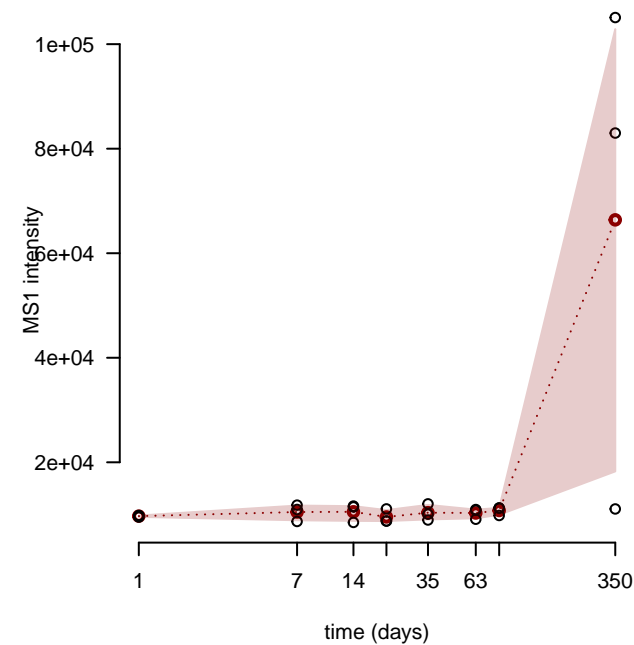

**P29594**  
GN=Casp2  
caspase 2

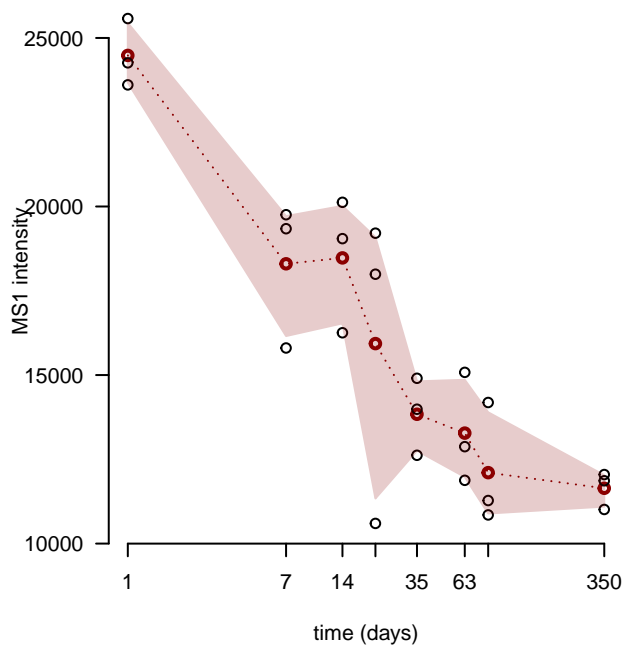

**P29595**  
GN=Nedd8  
neural precursor cell expressed, develop ...

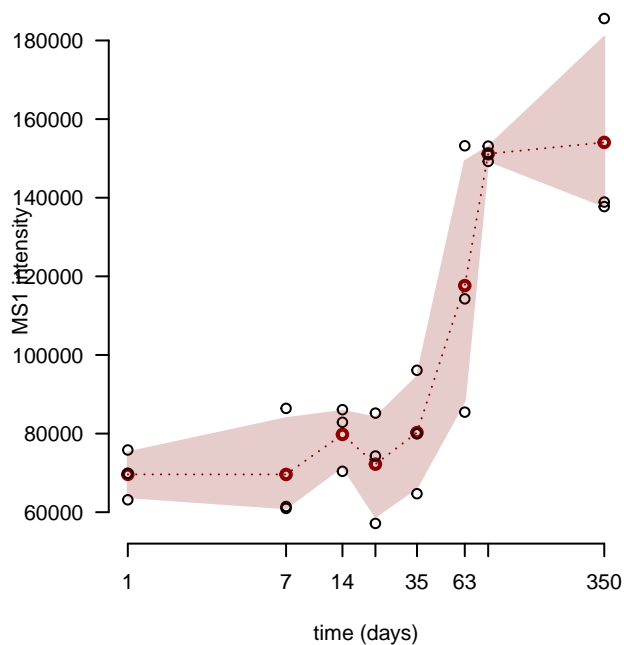

**P29699**  
GN=Ahsg  
alpha-2-HS-glycoprotein

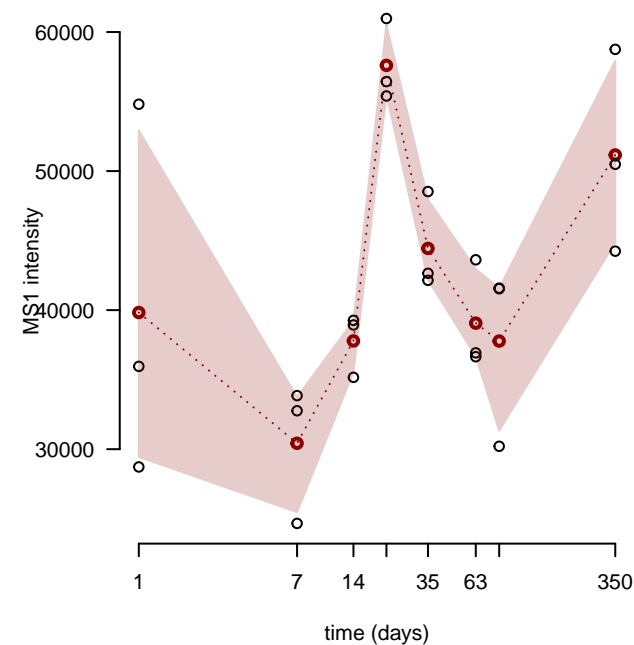

**P29758**  
GN=Oat  
ornithine aminotransferase

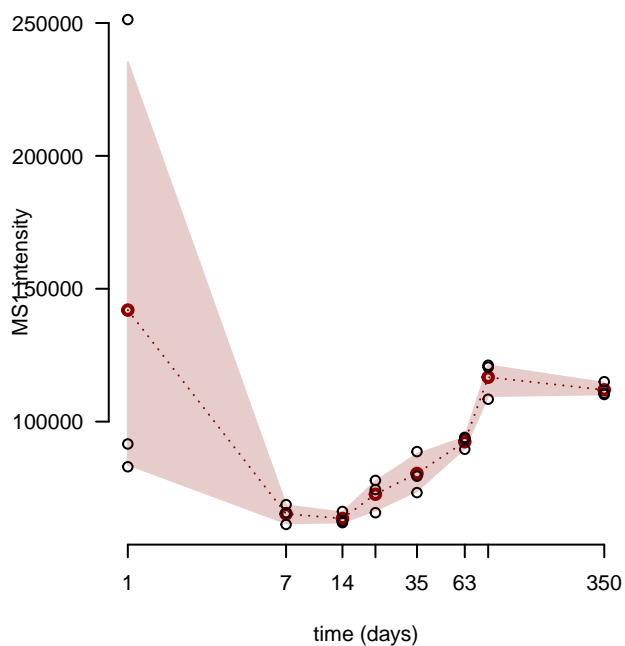

**P29788**  
GN=Vtn  
vitronectin

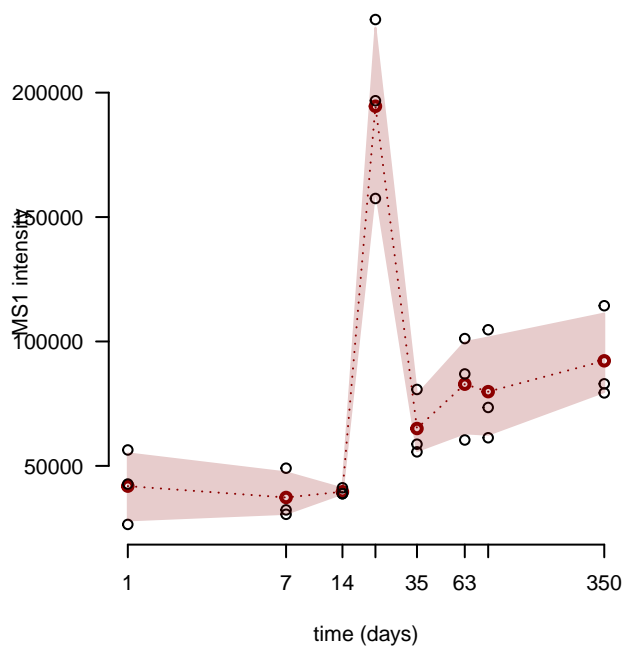

**P30051**  
GN=Tead1  
TEA domain family member 1

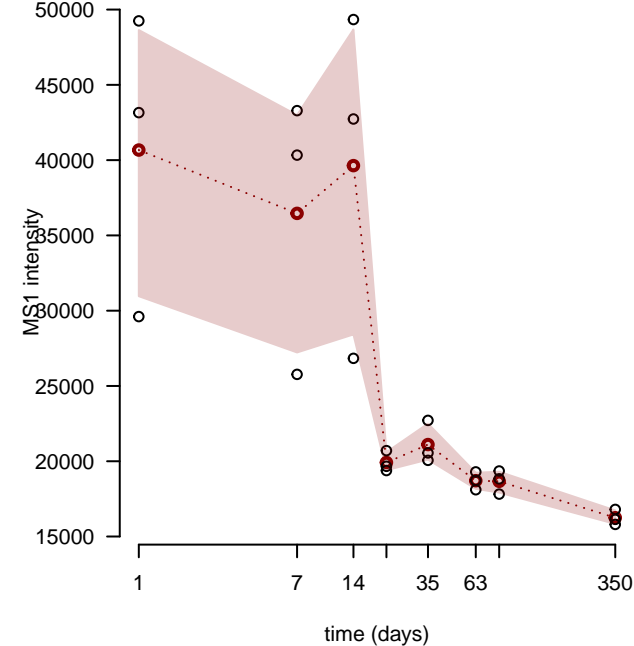

**P30115**  
**GN=Gsta3**  
glutathione S-transferase, alpha 3

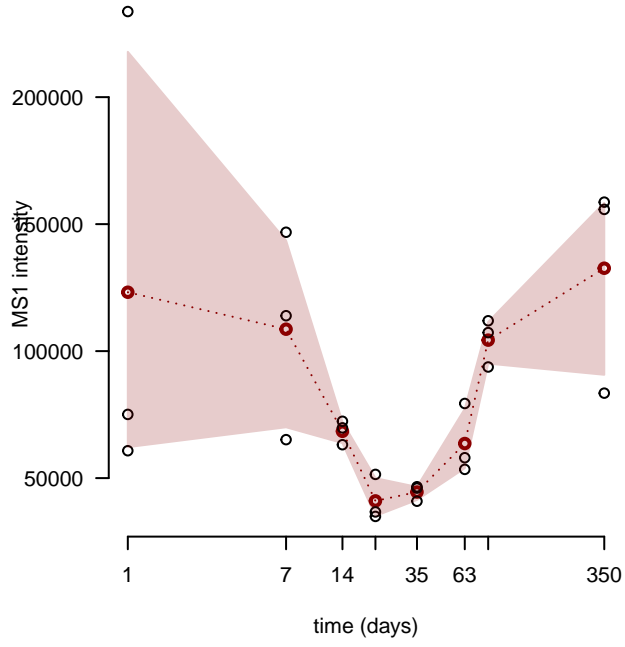

**P30275**  
**GN=Ckmt1**  
creatine kinase, mitochondrial 1, ubiqui ...

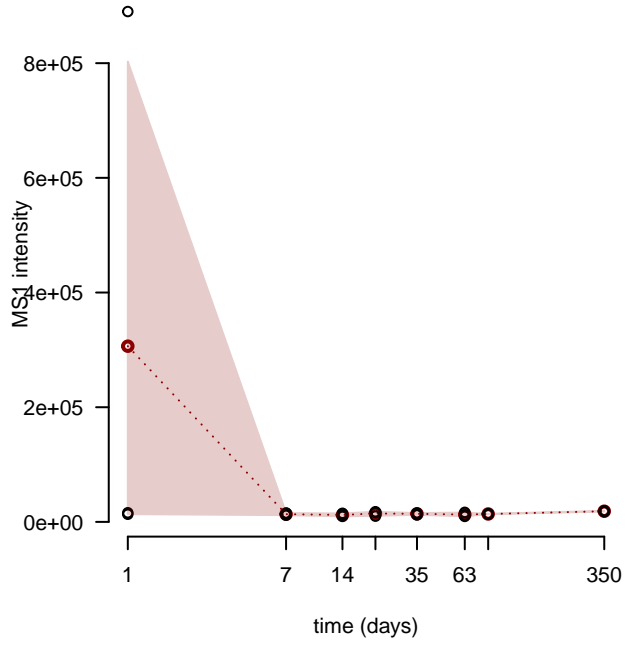

**P30280**  
**GN=Ccnd2**  
cyclin D2

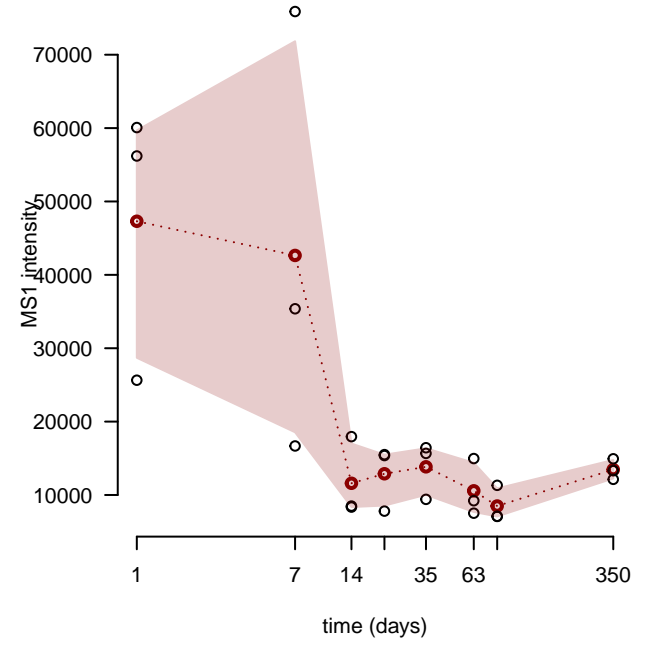

**P30282**  
**GN=Ccnd3**  
cyclin D3

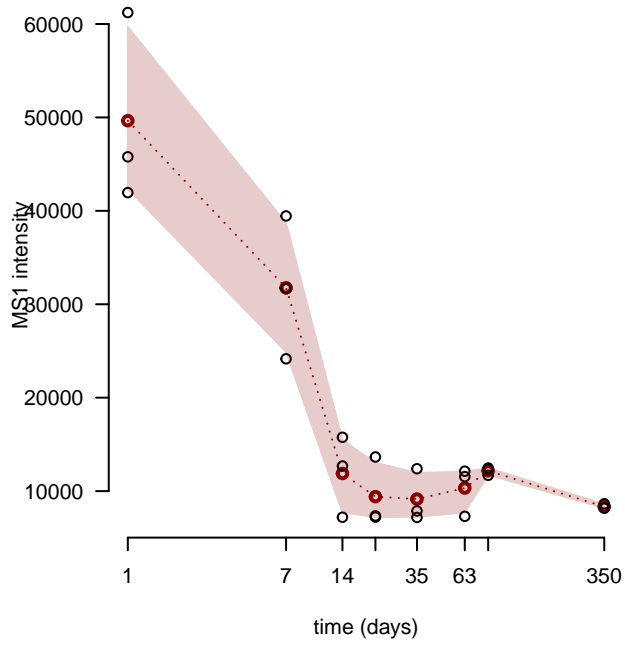

**P30285**  
**GN=Cdk4**  
cyclin-dependent kinase 4

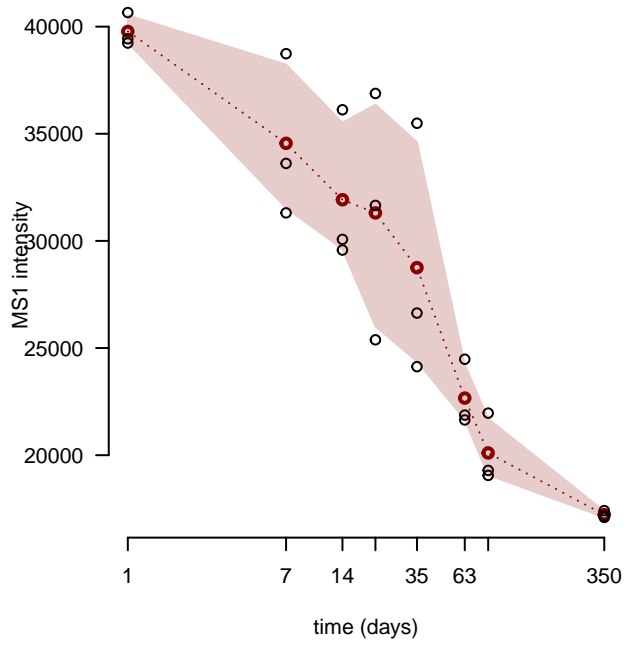

**P30412**  
**GN=Ppic**  
peptidylprolyl isomerase C

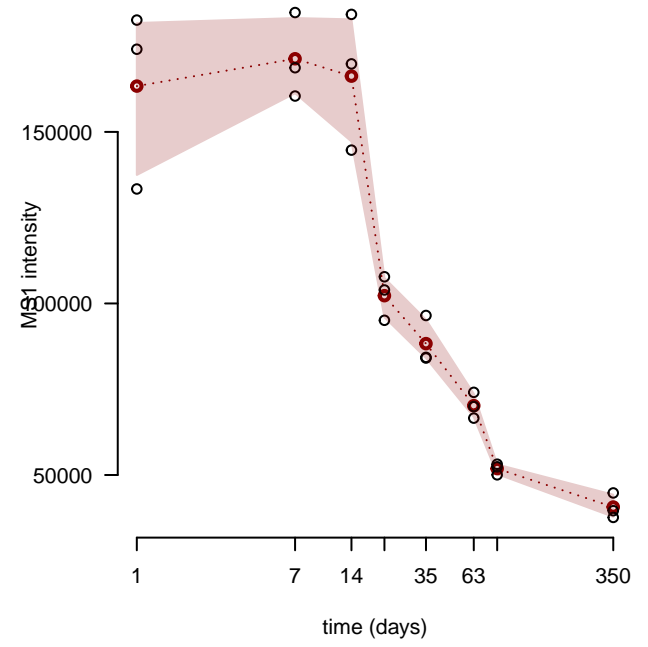

**P30415**  
**GN=Nktr**  
natural killer tumor recognition sequenc ...

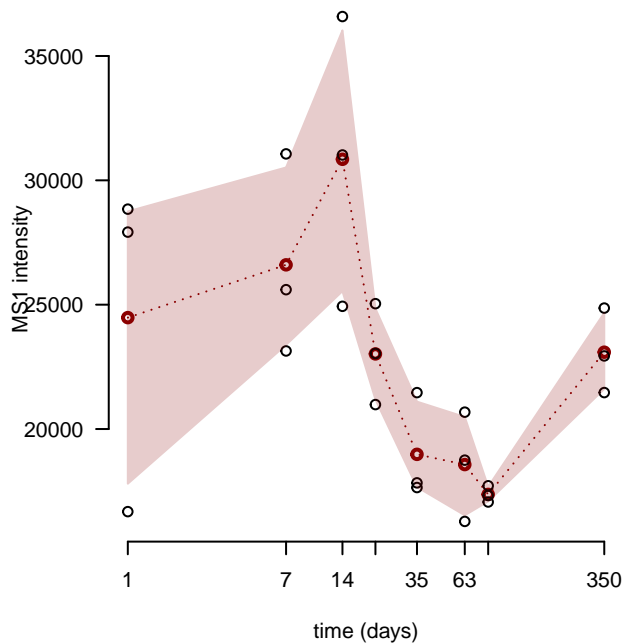

**P30416**  
**GN=Fkbp4**  
FK506 binding protein 4

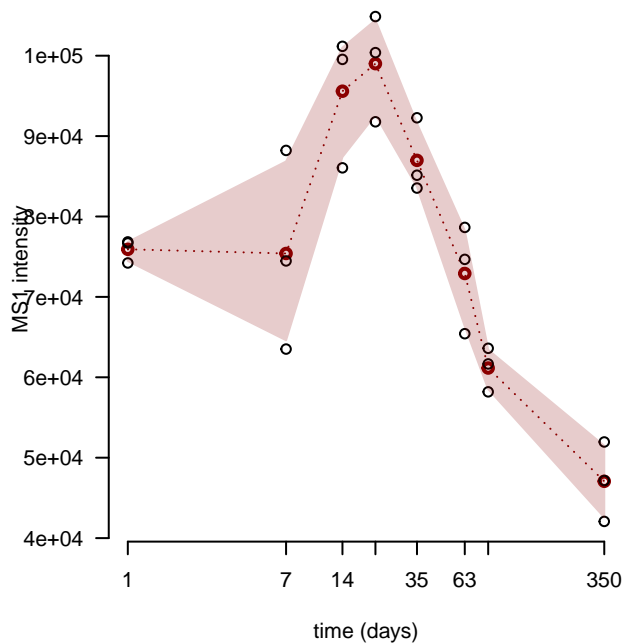

**P30658**  
**GN=Cbx2**  
chromobox 2

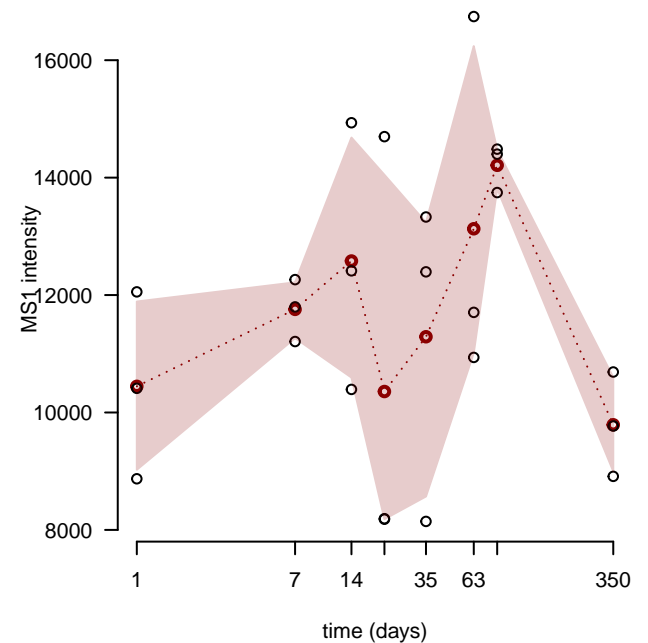

**P30677**  
**GN=Gna14**  
guanine nucleotide binding protein, alpha ...

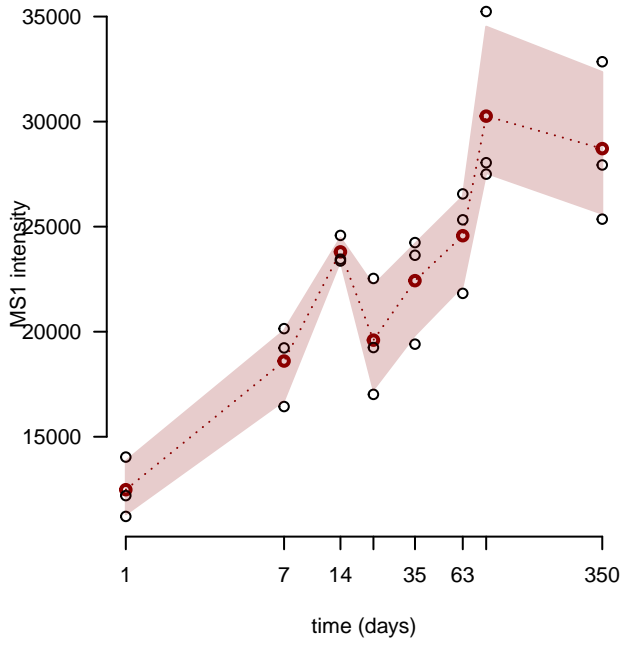

**P30681**  
**GN=Hmgb2**  
high mobility group box 2

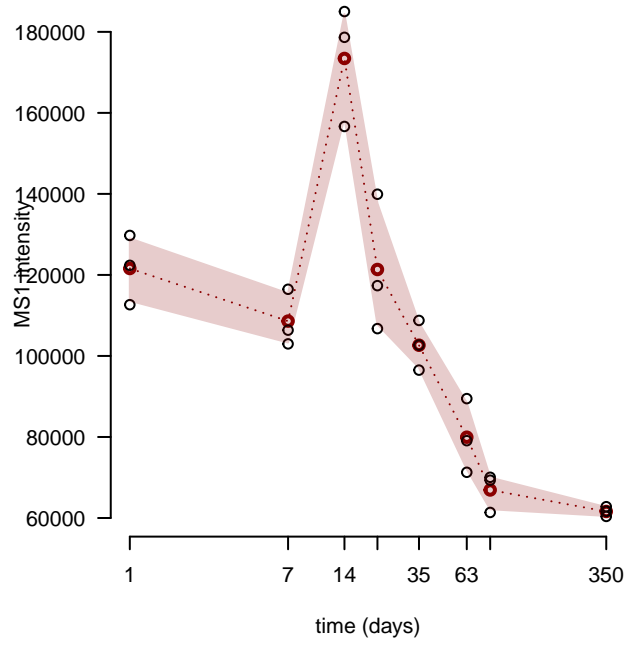

**P30730**  
**GN=Lhcgr**  
luteinizing hormone/choriogonadotropin r ...

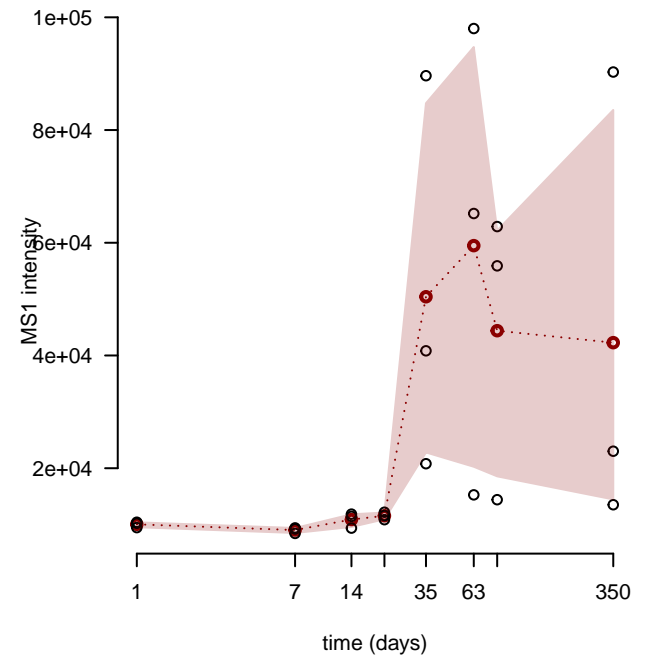

**P30999**  
**GN=Ctnnd1**  
catenin (cadherin associated protein), d ...

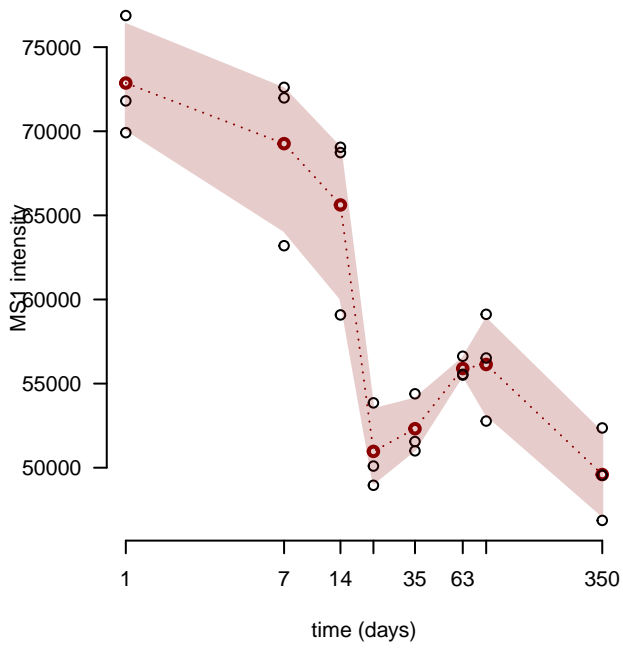

**P30999**  
**GN=Ctnnd1**  
catenin (cadherin associated protein), d ...

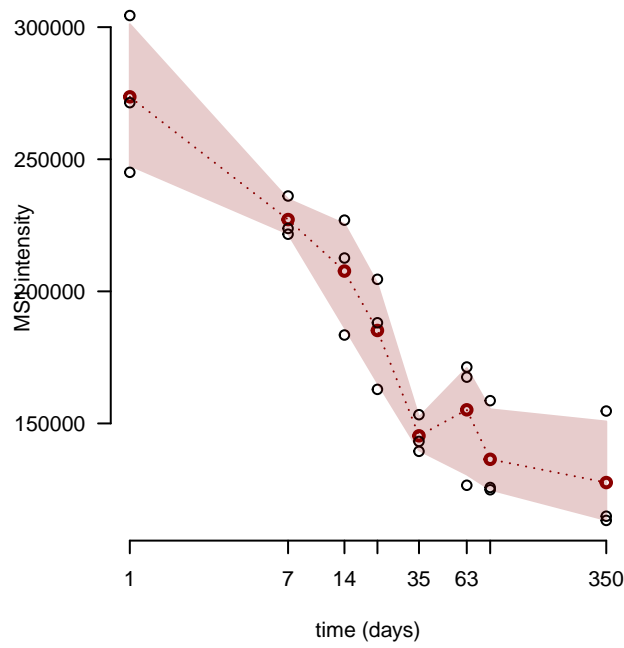

**P31001**  
**GN=Des**  
desmin

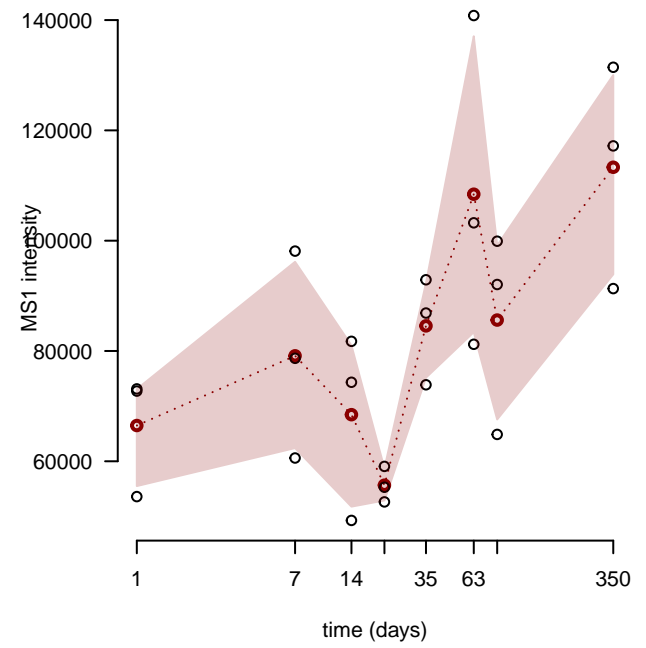

**P31230**  
**GN=Aimp1**  
aminoacyl tRNA synthetase complex-intera ...

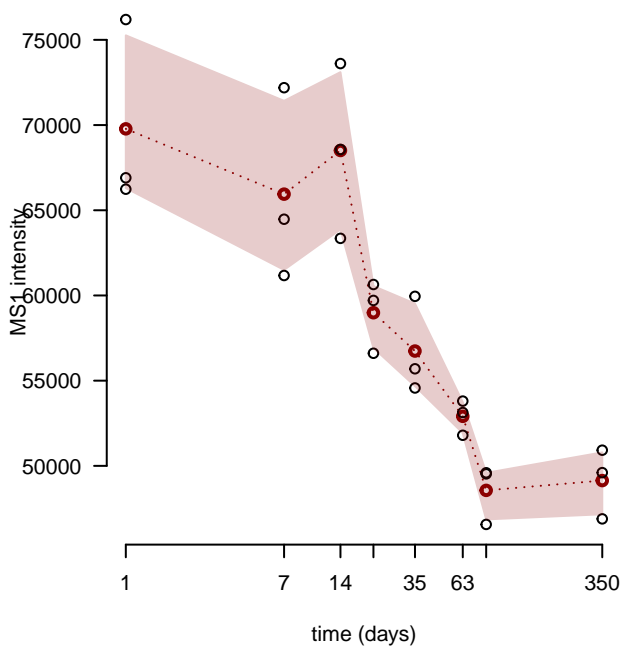

**P31266**  
**GN=Rbpj**  
recombination signal binding protein for ...

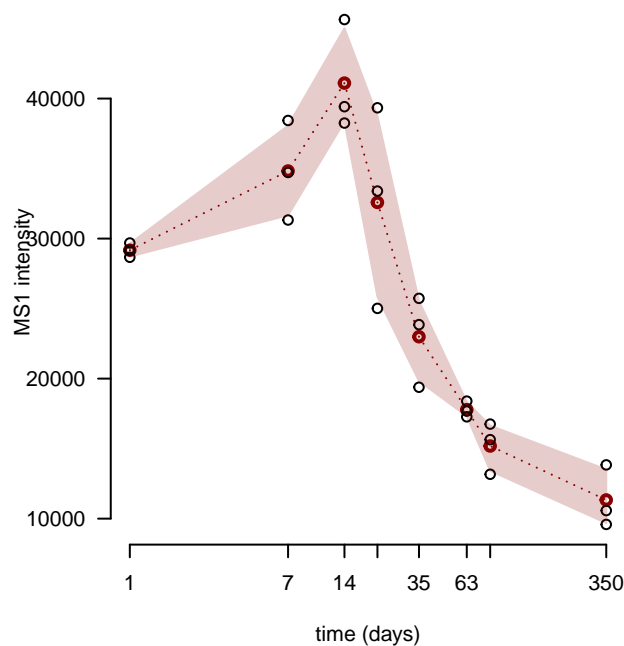

**P31324**  
**GN=Prkar2b**  
protein kinase, cAMP dependent regulator ...

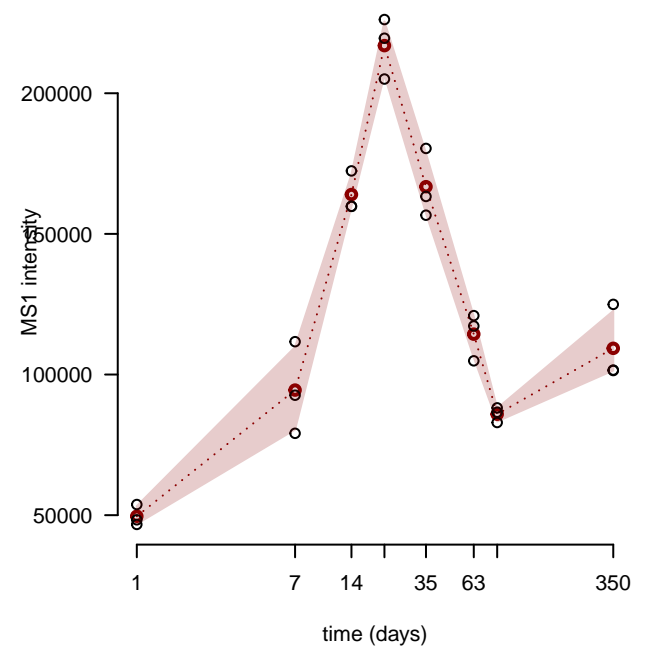

**P31428**  
GN=Dpep1  
dipeptidase 1

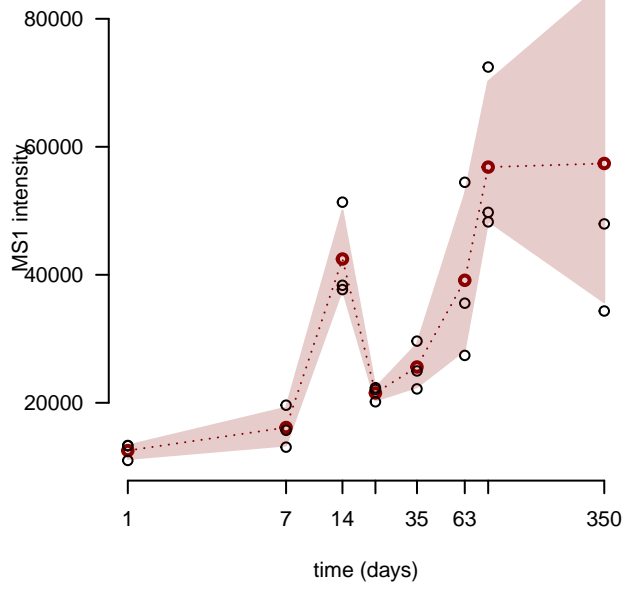

**P31532**  
GN=Saa4  
serum amyloid A 4

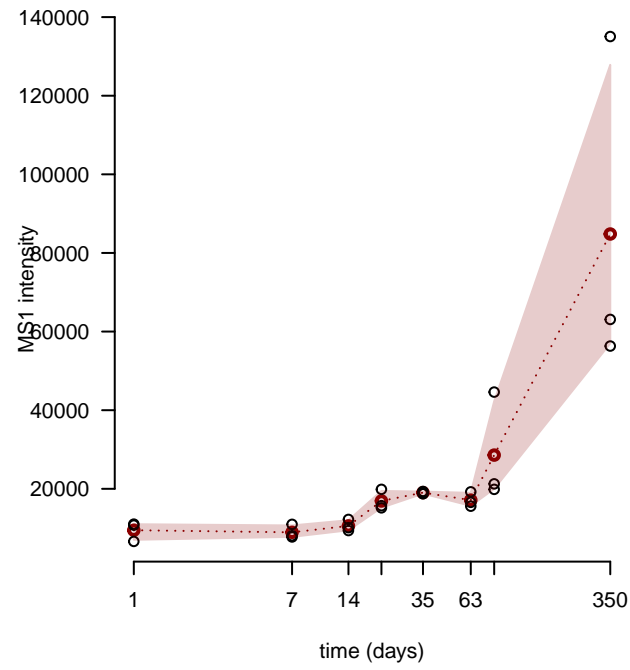

**P31650**  
GN=Slc6a11  
solute carrier family 6 (neurotransmitte ...

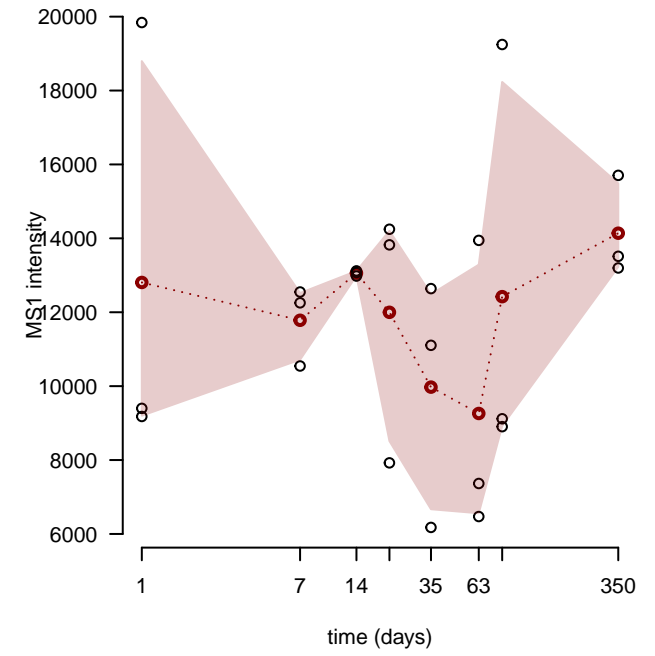

**P31725**  
GN=S100a9  
S100 calcium binding protein A9 (calgran ...

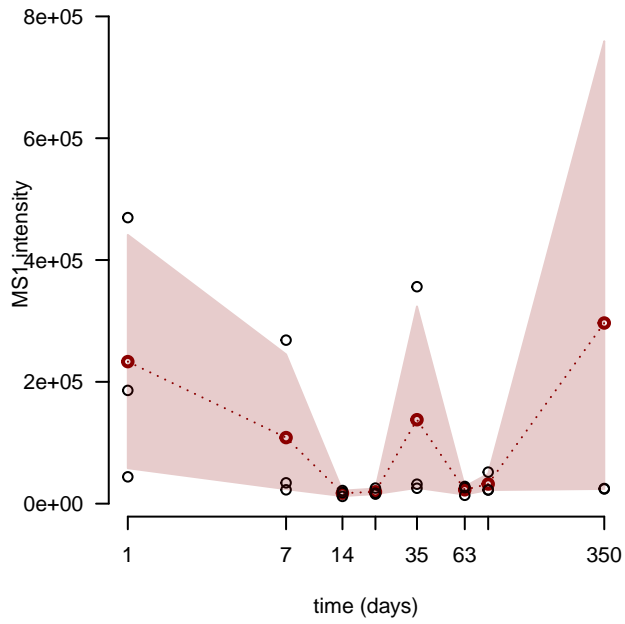

**P31750**  
GN=Akt1  
thymoma viral proto-oncogene 1

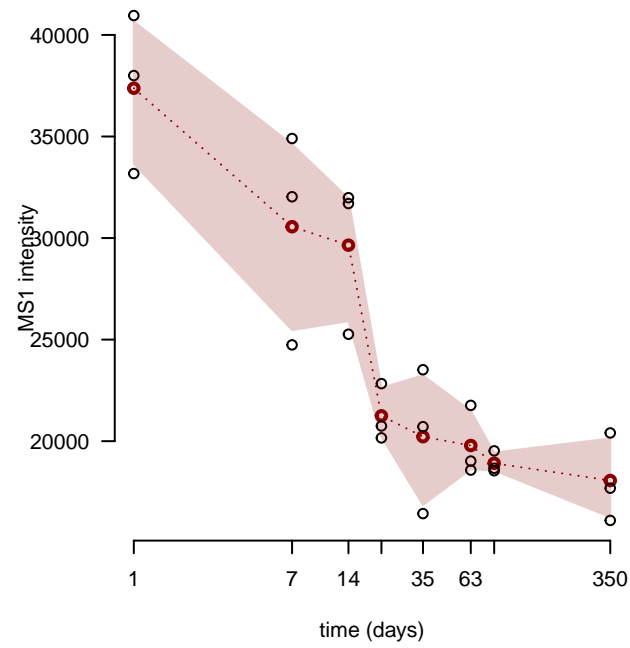

**P31786**  
GN=Dbi  
diazepam binding inhibitor

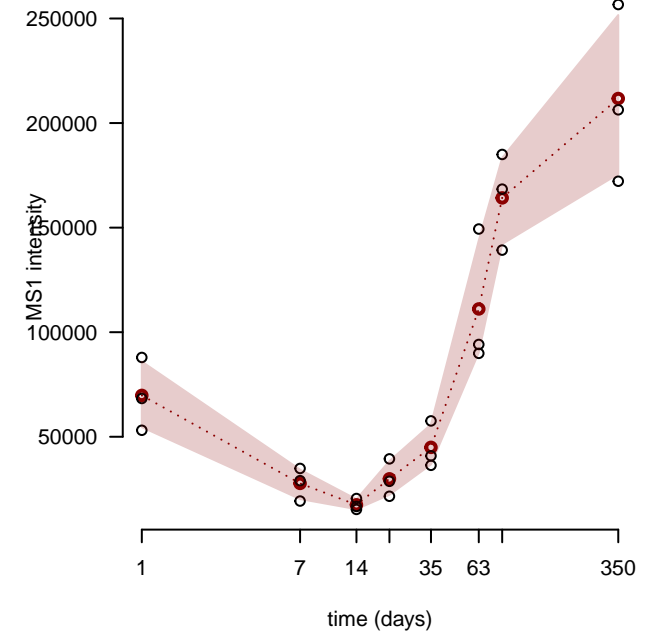

**P31938**  
GN=Map2k1  
mitogen-activated protein kinase kinase ...

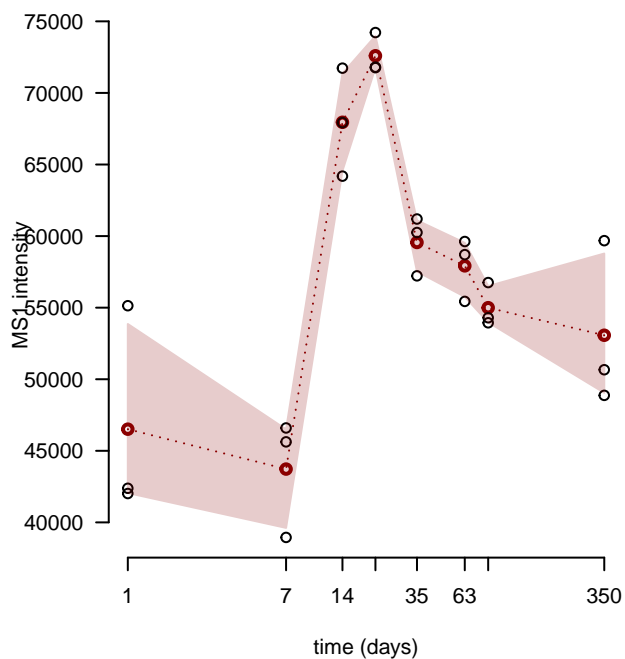

**P31996**  
GN=Cd68  
CD68 antigen

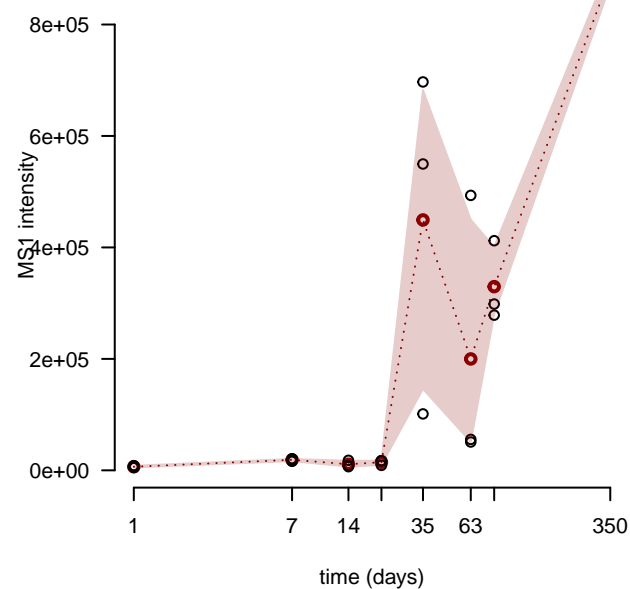

**P32020**  
GN=Scp2  
sterol carrier protein 2, liver

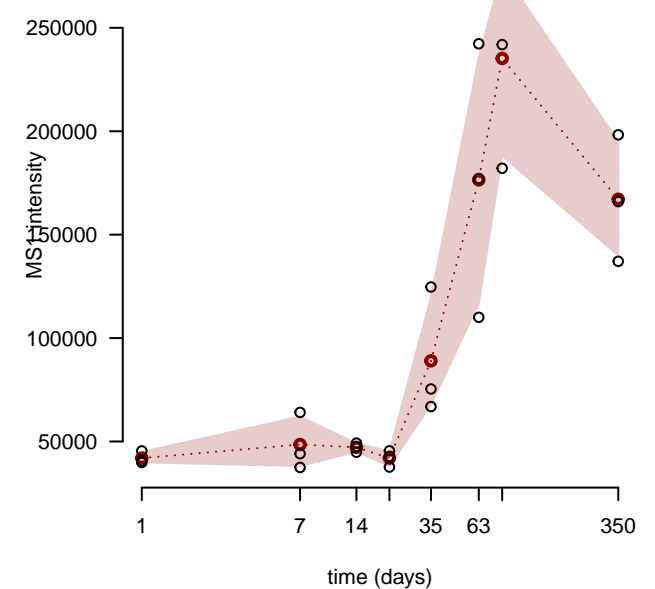

**P32067**  
GN=Ssb  
small RNA binding exonuclease protection ...

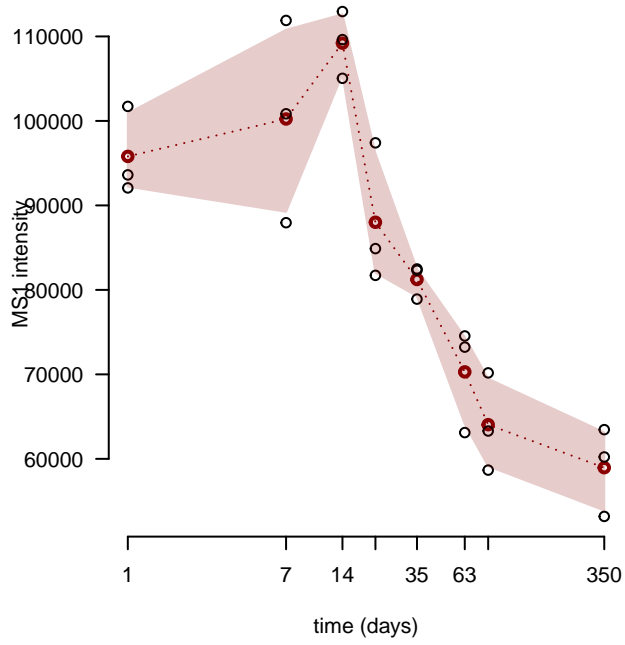

**P32233**  
GN=Drg1  
developmentally regulated GTP binding pr ...

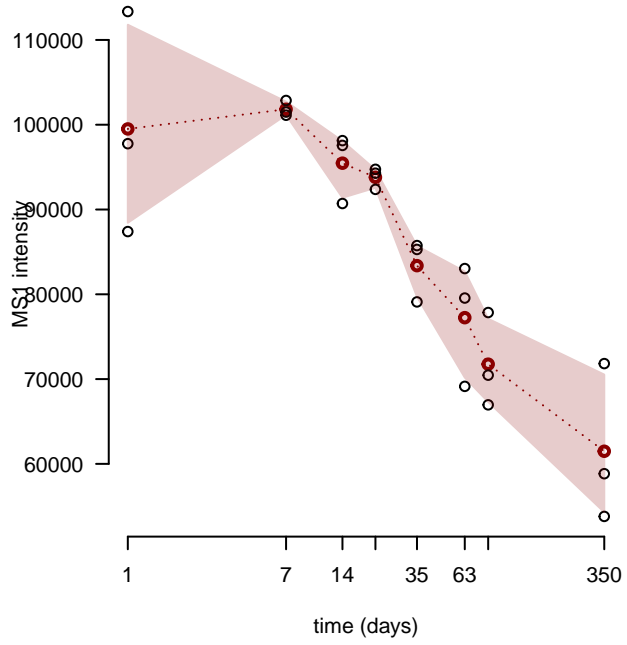

**P32240**  
GN=Ptger4  
prostaglandin E receptor 4 (subtype EP4)

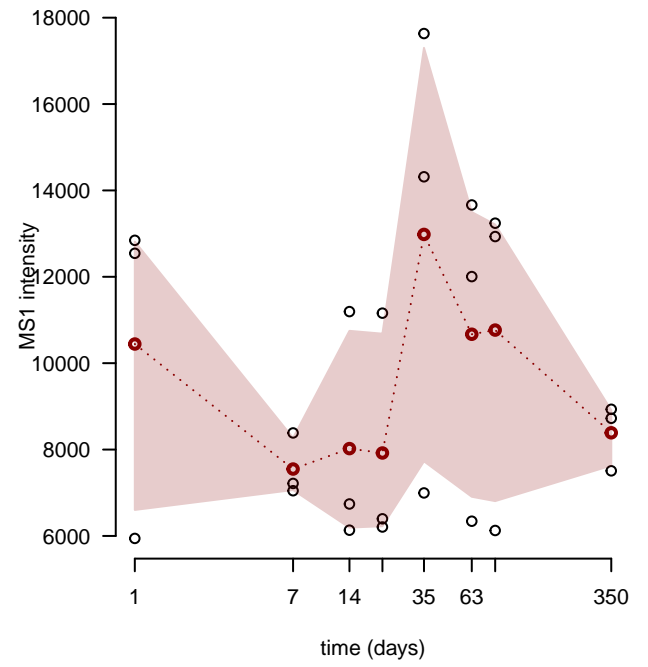

**P32261**  
GN=Serpinc1  
serine (or cysteine) peptidase inhibitor ...

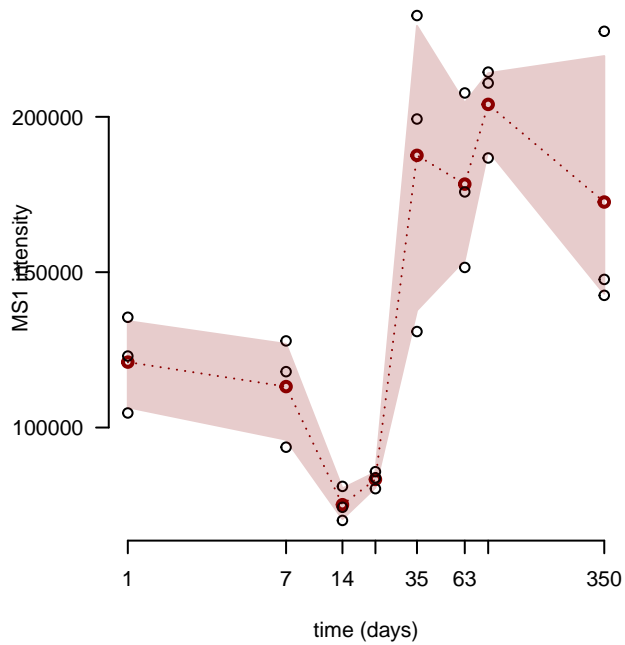

**P32507**  
GN=Nectin2  
nectin cell adhesion molecule 2

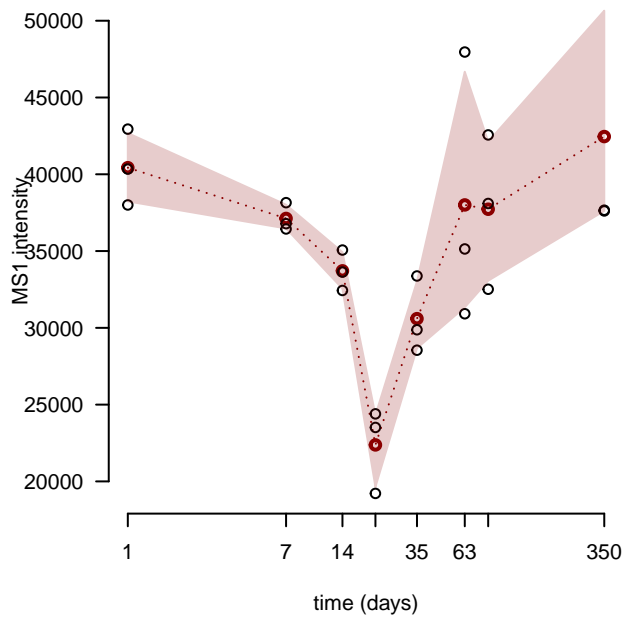

**P32883**  
GN=Kras  
Kirsten rat sarcoma viral oncogene homol ...

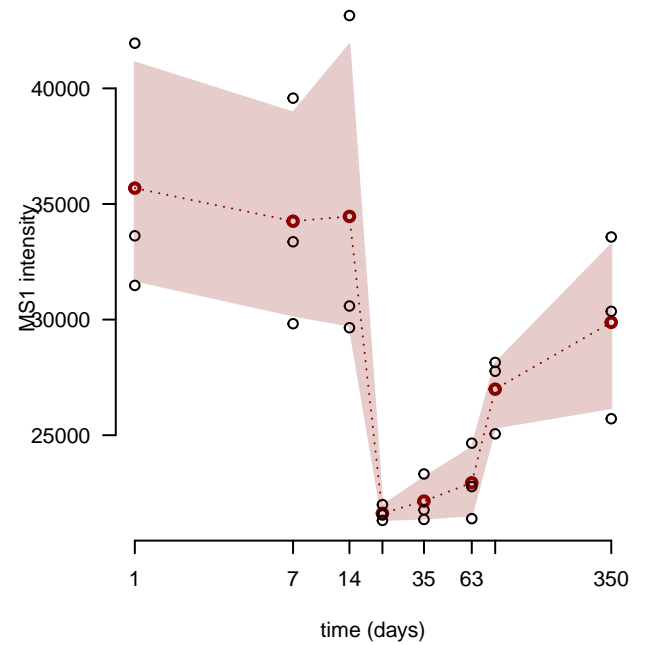

**P32921**  
GN=Wars

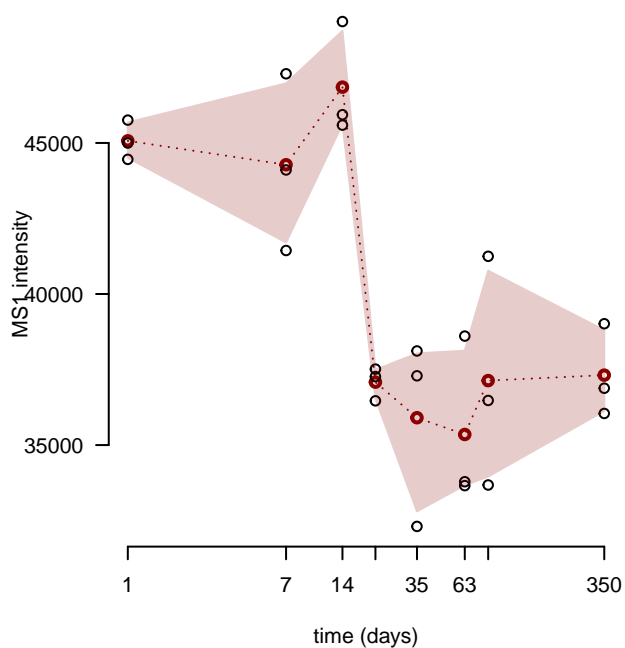

**P33146**  
GN=Cdh15  
cadherin 15

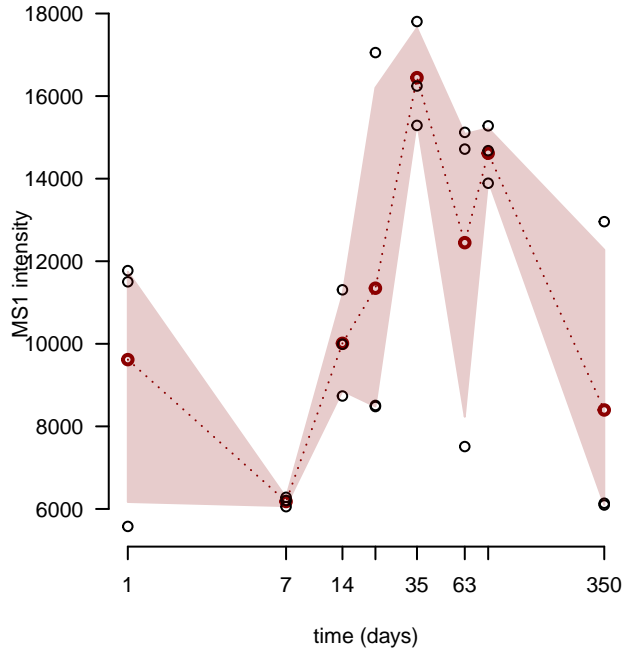

**P33174**  
GN=Kif4  
kinesin family member 4

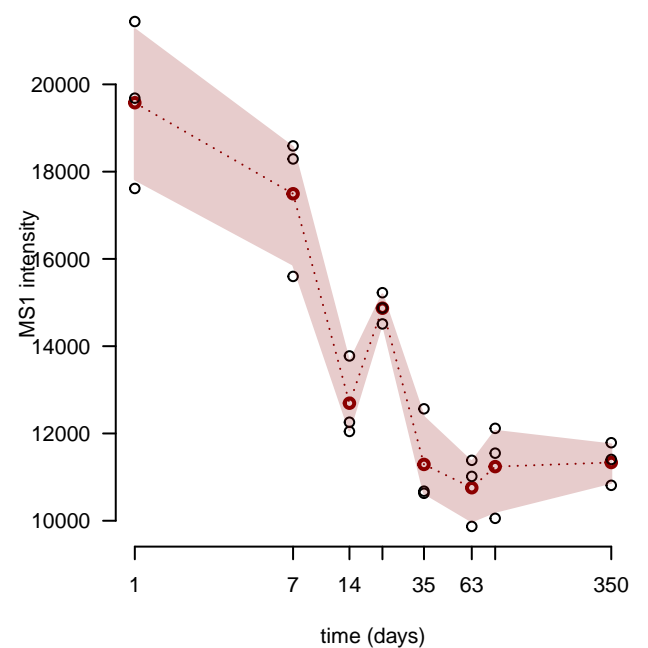

**P33215**  
**GN=Nedd1**  
neural precursor cell expressed, develop ...

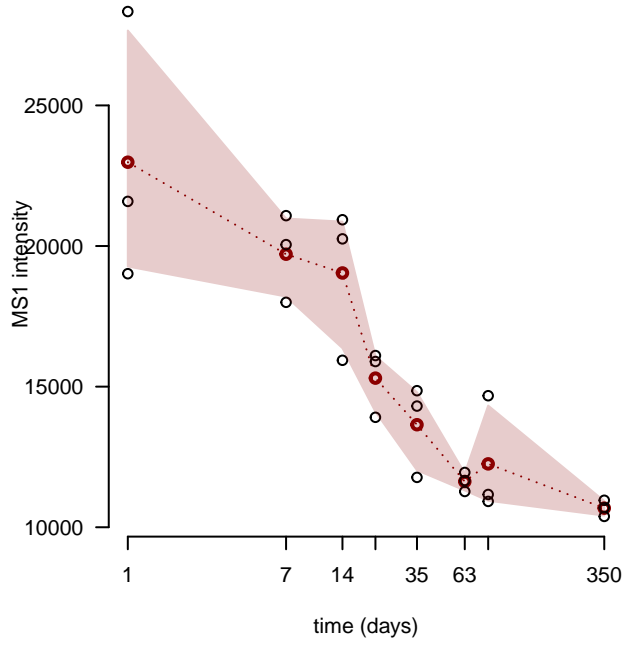

**P33242**  
**GN=Nr5a1**  
nuclear receptor subfamily 5, group A, m ...

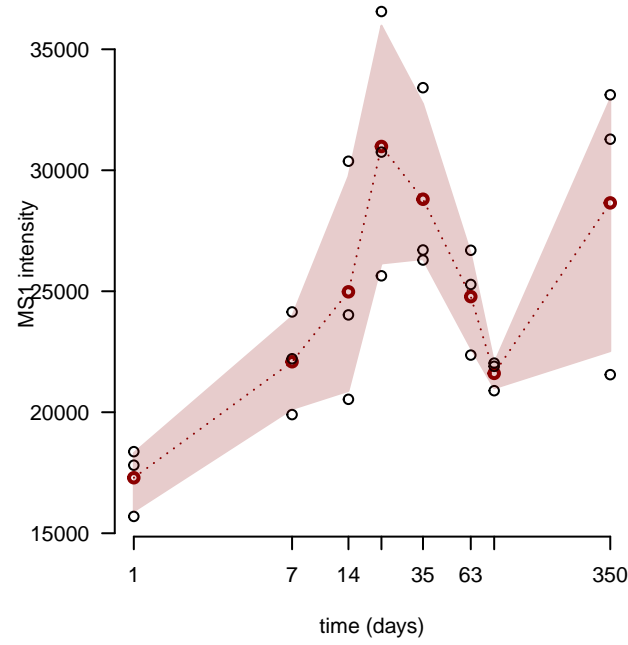

**P33434**  
**GN=Mmp2**  
matrix metallopeptidase 2

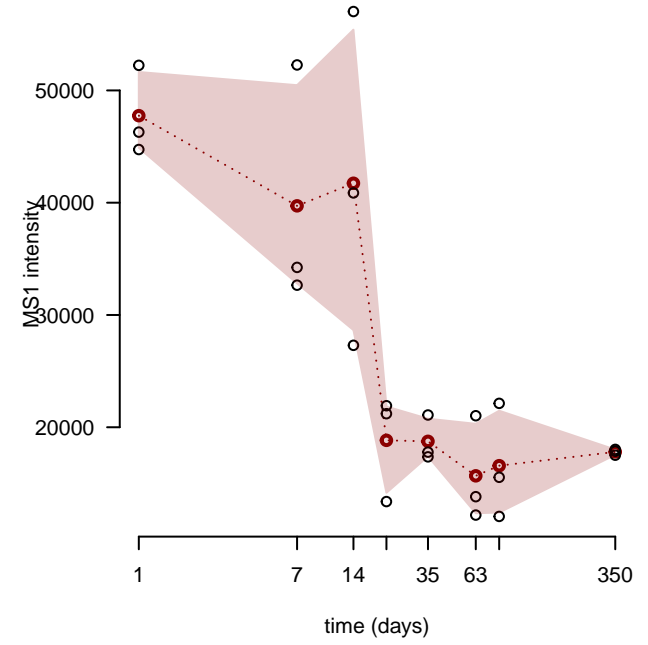

**P33587**  
**GN=Proc**  
protein C

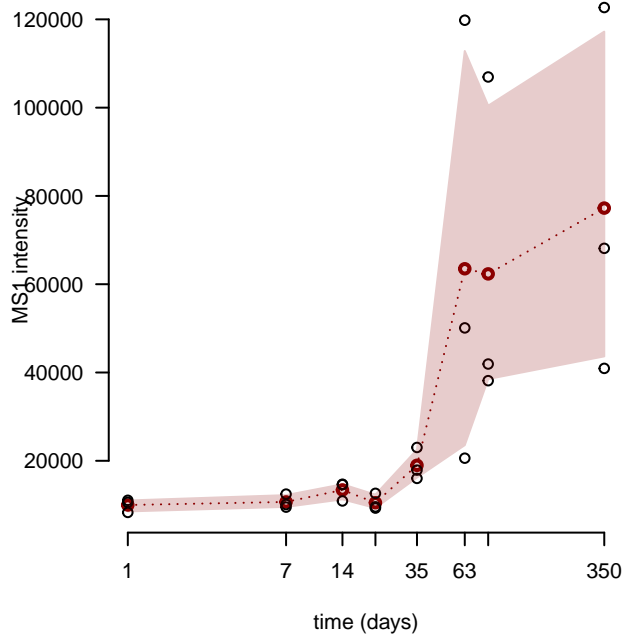

**P33609**  
**GN=Pola1**  
polymerase (DNA directed), alpha 1

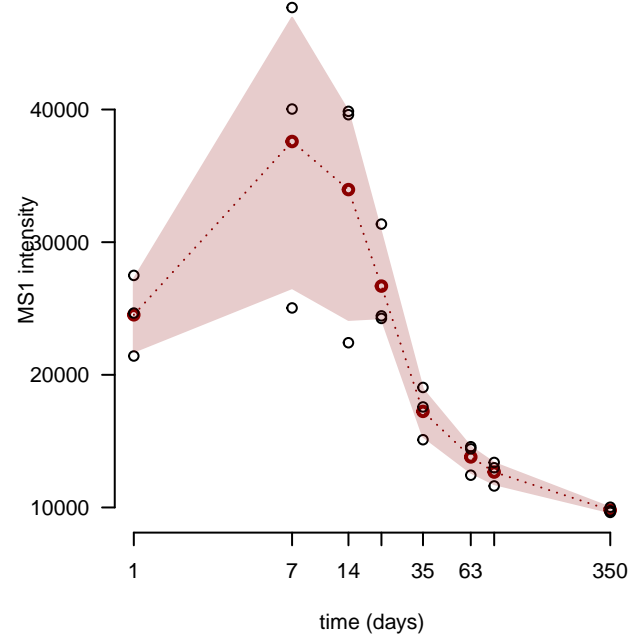

**P33610**  
**GN=Prim2**  
DNA primase, p58 subunit

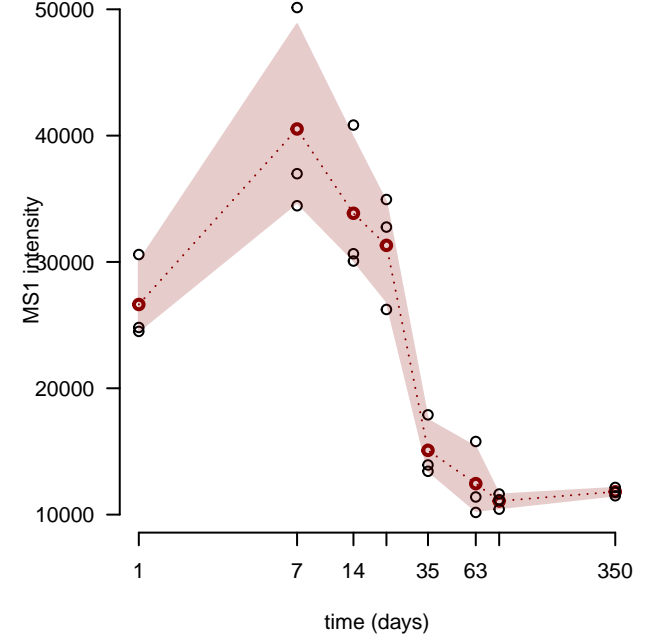

**P33611**  
**GN=Pola2**  
polymerase (DNA directed), alpha 2

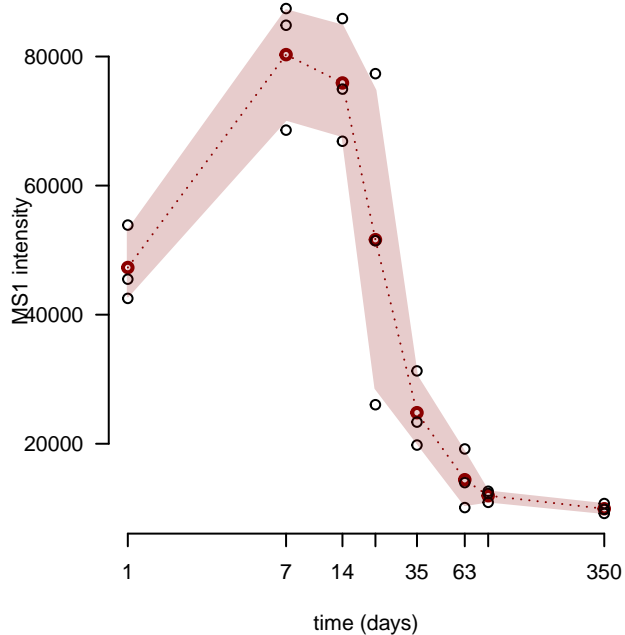

**P33622**  
**GN=Apoc3**  
apolipoprotein C-III

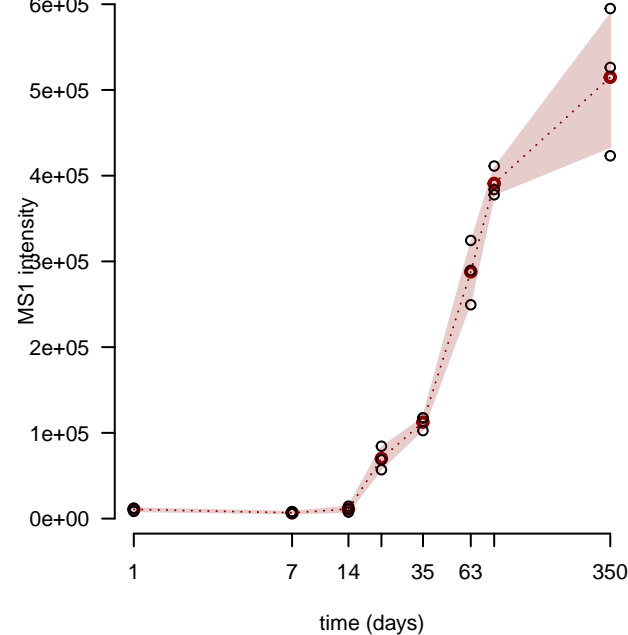

**P34022**  
**GN=Ranbp1**  
RAN binding protein 1

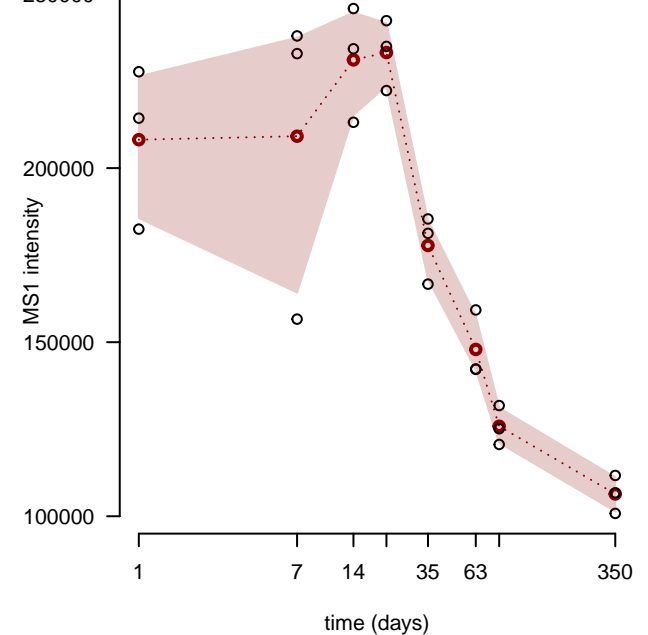

**P34152**  
**GN=Ptk2**  
PTK2 protein tyrosine kinase 2

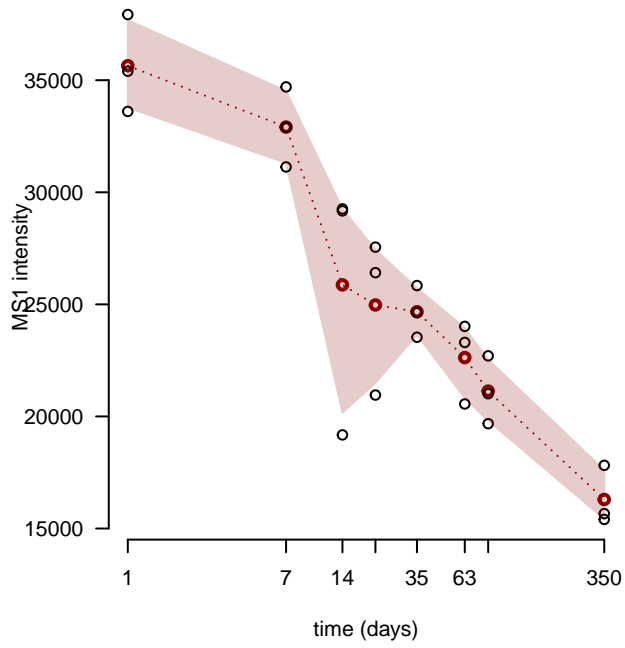

**P34884**  
**GN=Mif**  
macrophage migration inhibitory factor ( ...

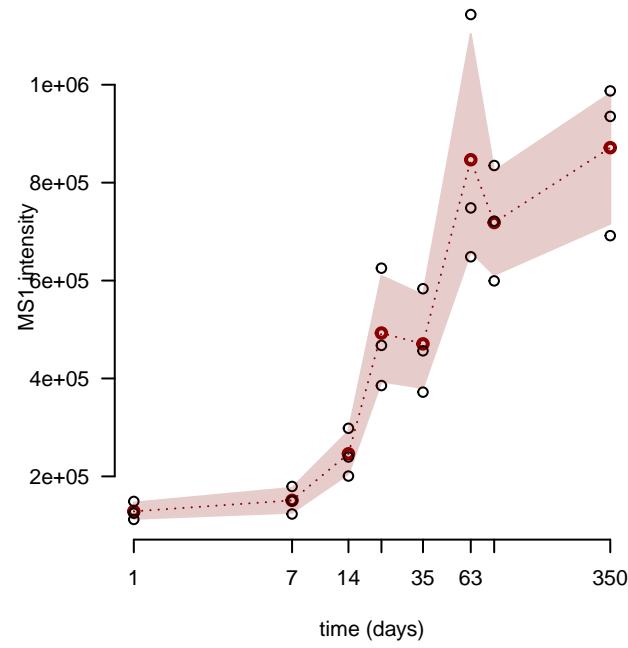

**P34914**  
**GN=Ephx2**  
epoxide hydrolase 2, cytoplasmic

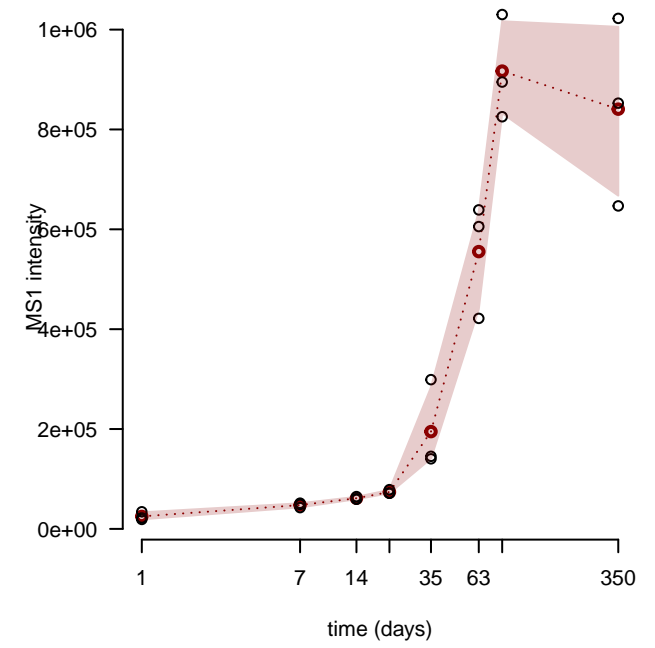

**P34928**  
**GN=Apoc1**  
apolipoprotein C-I

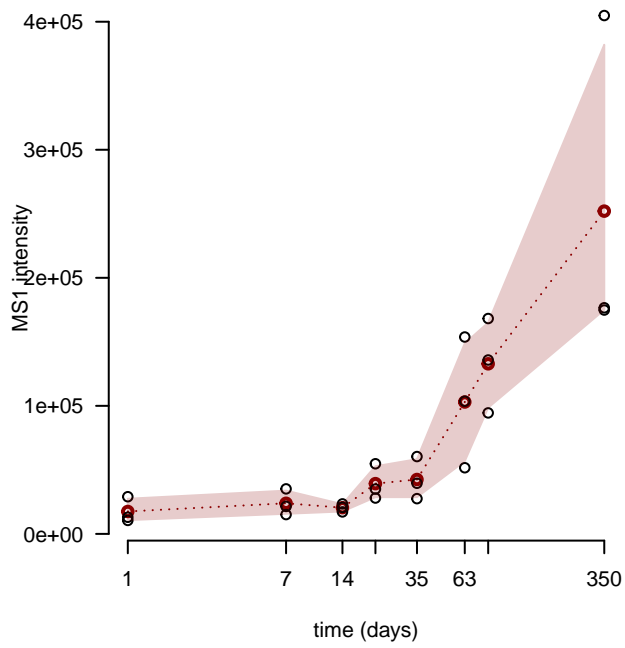

**P35123**  
**GN=Usp4**  
ubiquitin specific peptidase 4 (proto-on ...

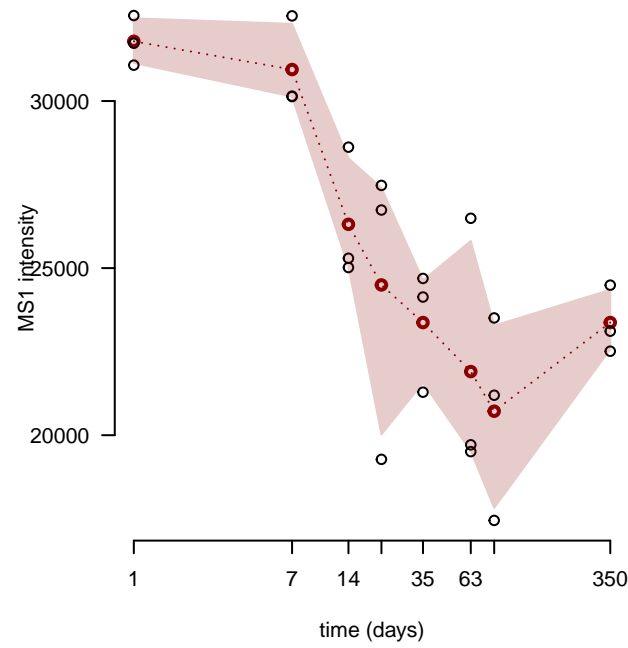

**P35174**  
**GN=Stfa2**  
stefin A2

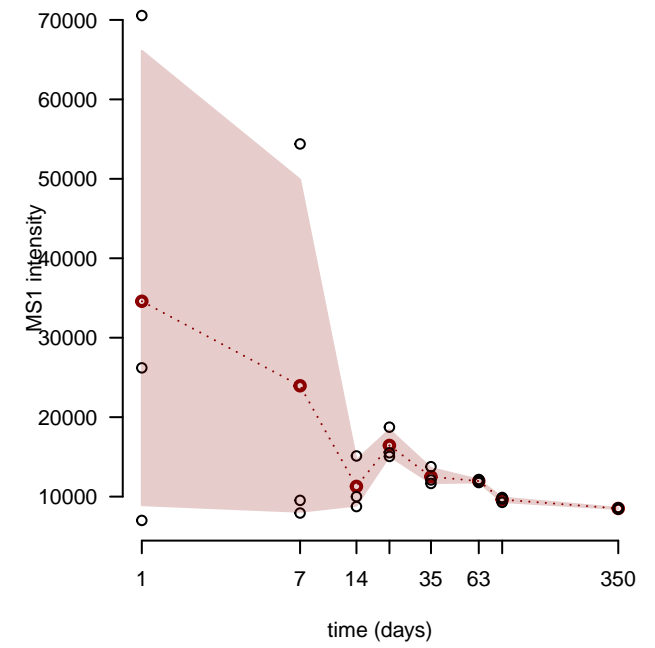

**P35175**  
**GN=Stfa1**  
stefin A1

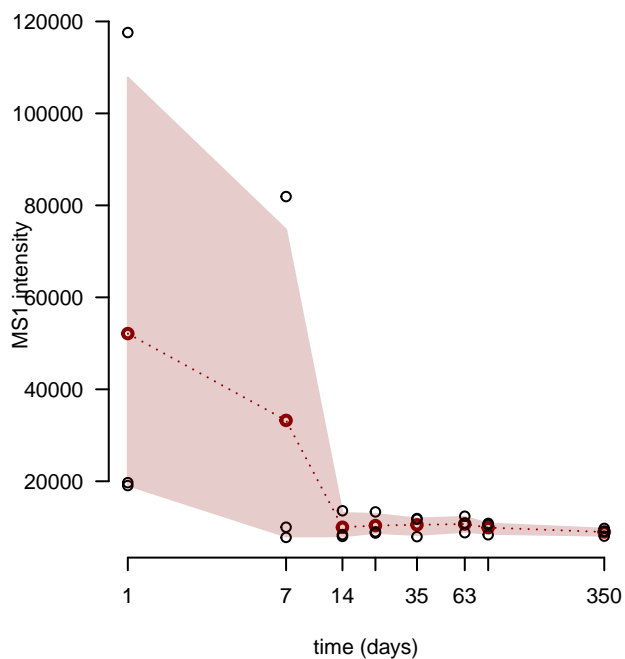

**P35235**  
**GN=Ptpn11**  
protein tyrosine phosphatase, non-recept ...

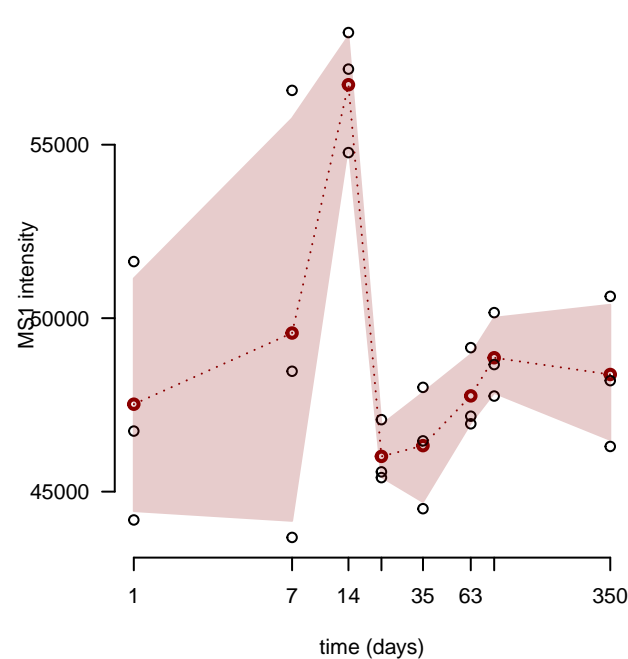

**P35276**  
**GN=Rab3d**  
RAB3D, member RAS oncogene family

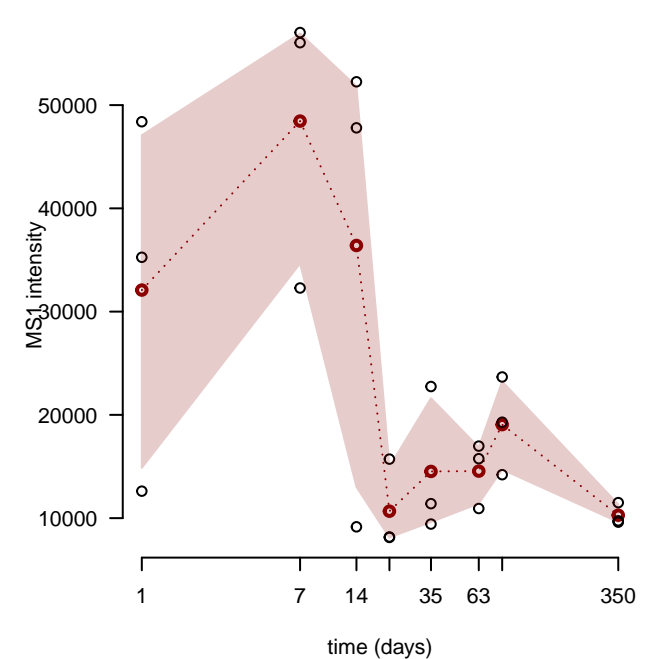

**P35278**  
**GN=Rab5c**  
RAB5C, member RAS oncogene family

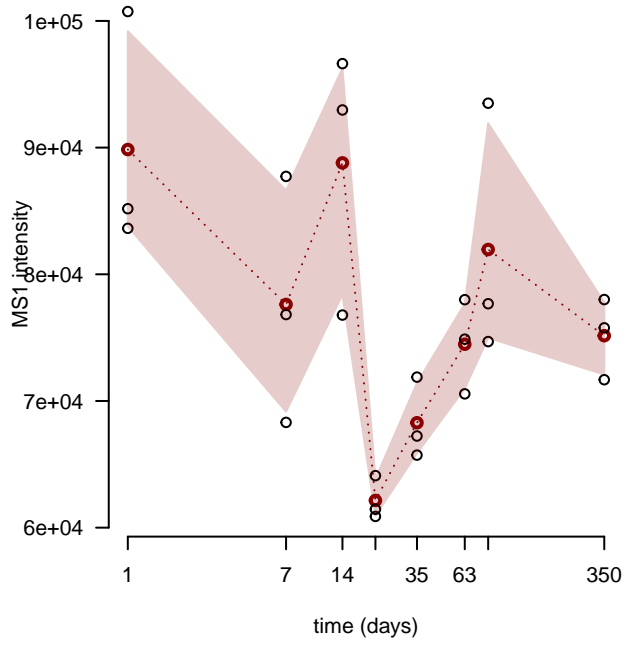

**P35279**  
**GN=Rab6a**  
RAB6A, member RAS oncogene family

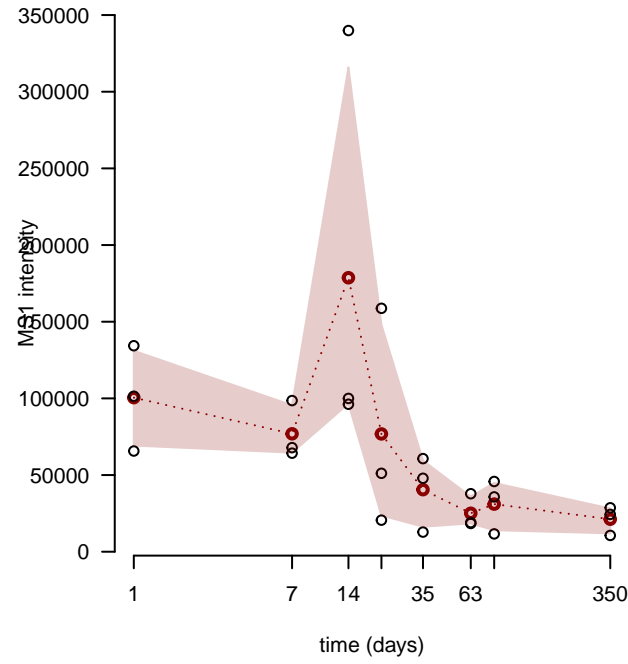

**P35279**  
**GN=Rab6a**  
RAB6A, member RAS oncogene family

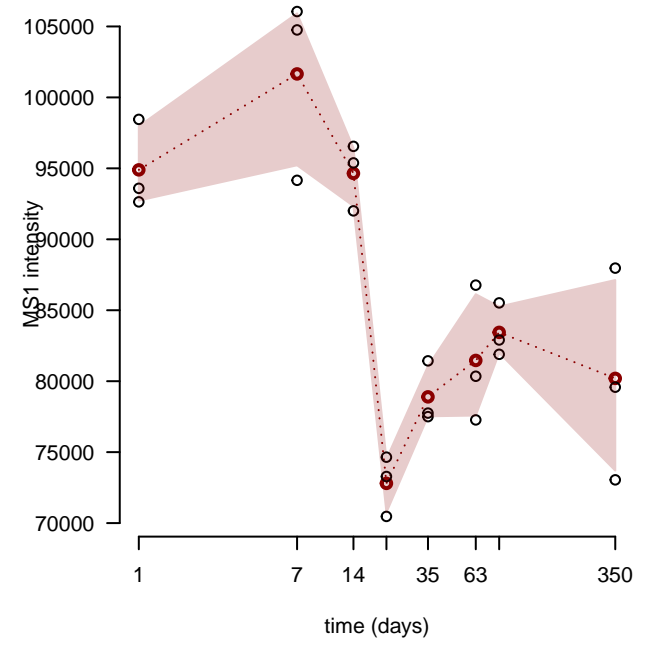

**P35282**  
**GN=Rab21**  
RAB21, member RAS oncogene family

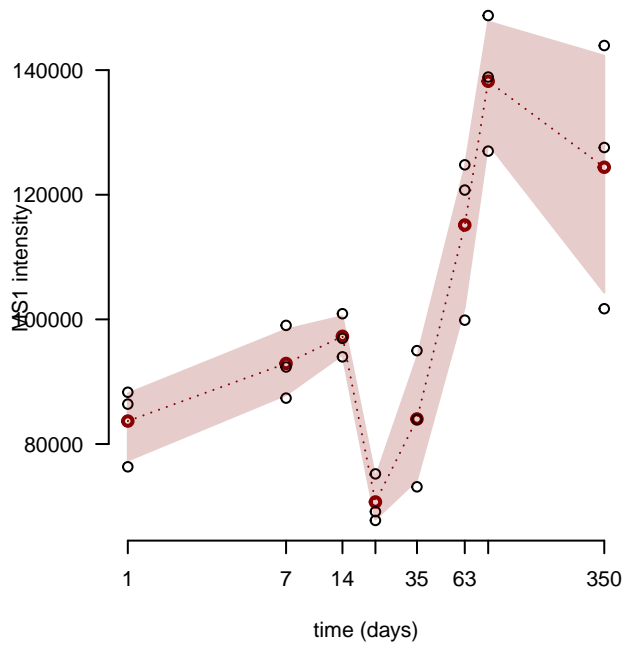

**P35283**  
**GN=Rab12**  
RAB12, member RAS oncogene family

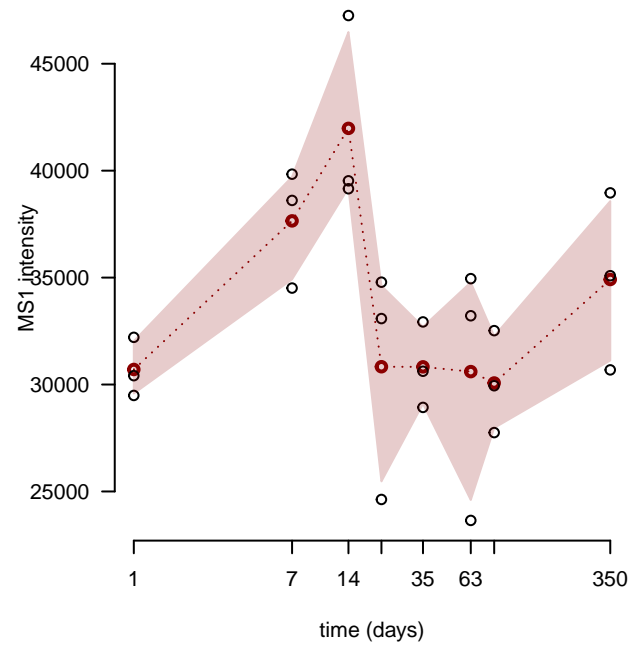

**P35285**  
**GN=Rab22a**  
RAB22A, member RAS oncogene family

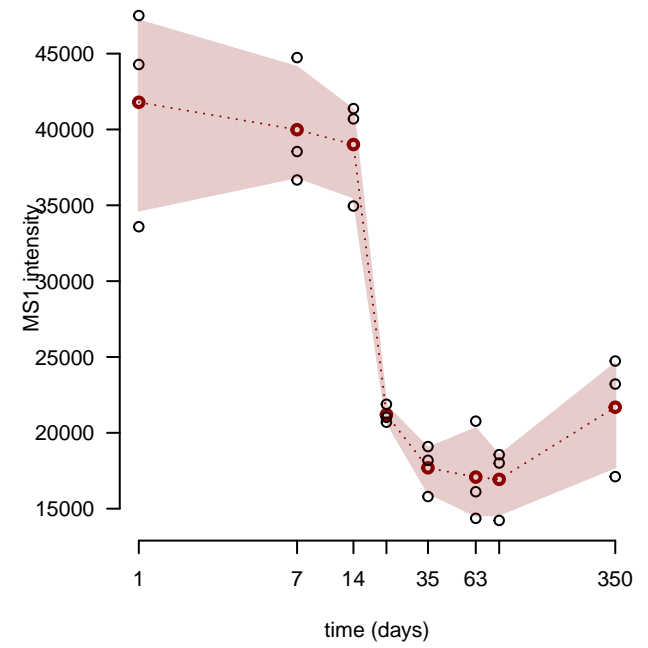

**P35288**  
**GN=Rab23**  
RAB23, member RAS oncogene family

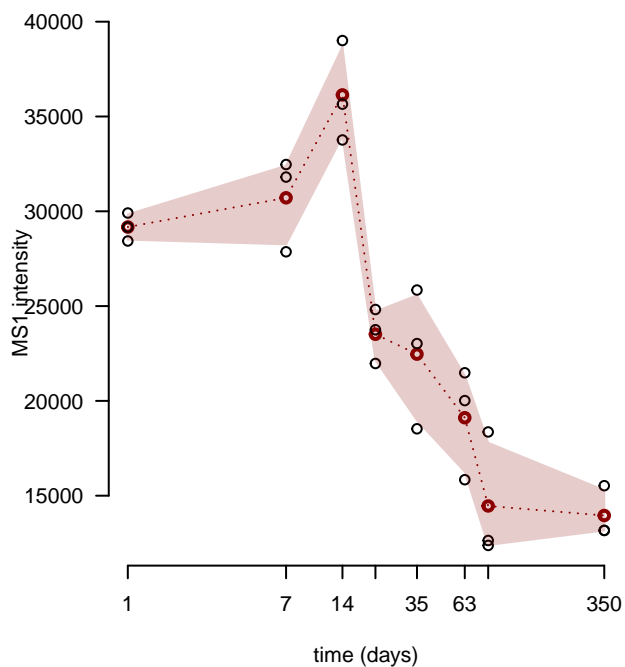

**P35290**  
**GN=Rab24**  
RAB24, member RAS oncogene family

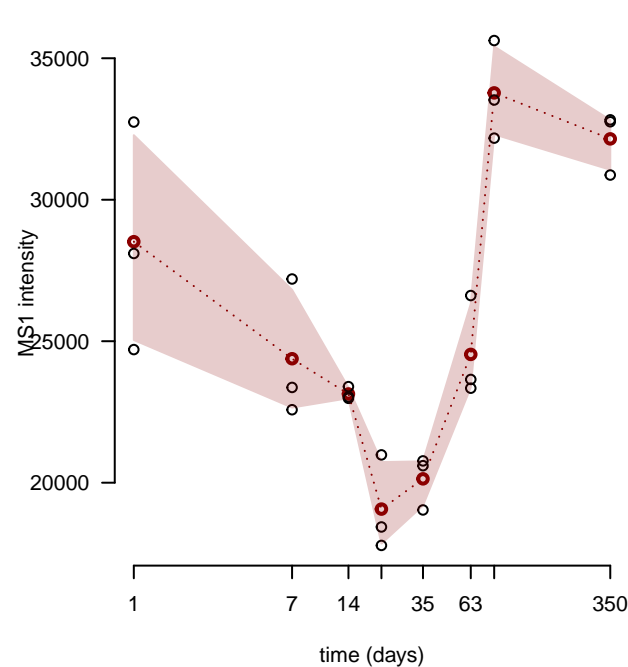

**P35293**  
**GN=Rab18**  
RAB18, member RAS oncogene family

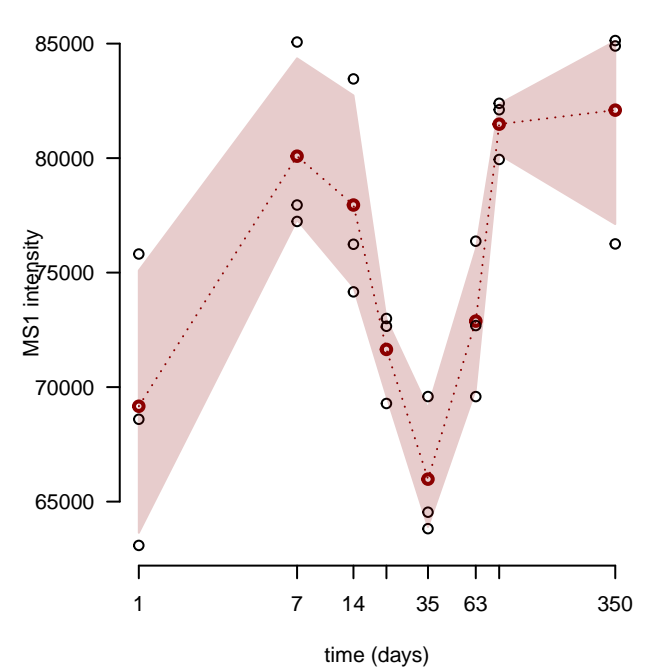



**P35330**  
**GN=Icam2**  
intercellular adhesion molecule 2

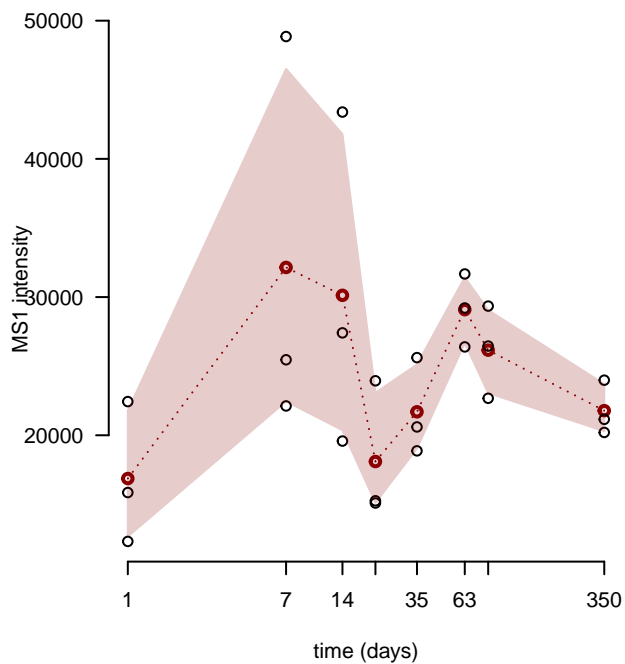

**P35441**  
**GN=Thbs1**  
thrombospondin 1

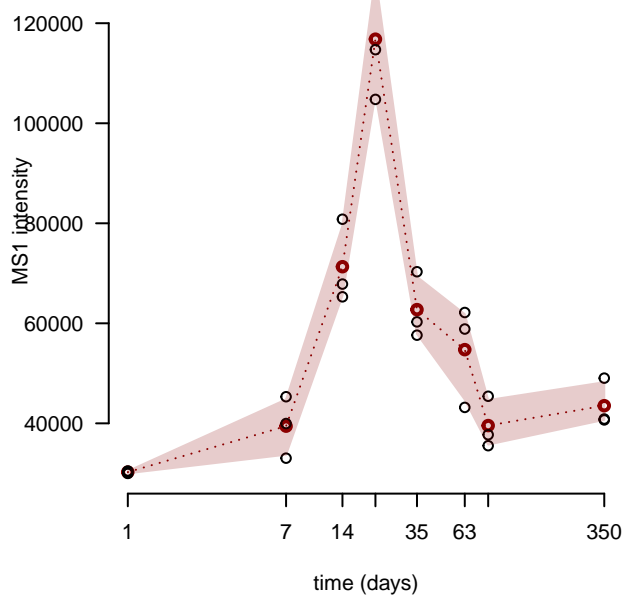

**P35486**  
**GN=Pdha1**  
pyruvate dehydrogenase E1 alpha 1

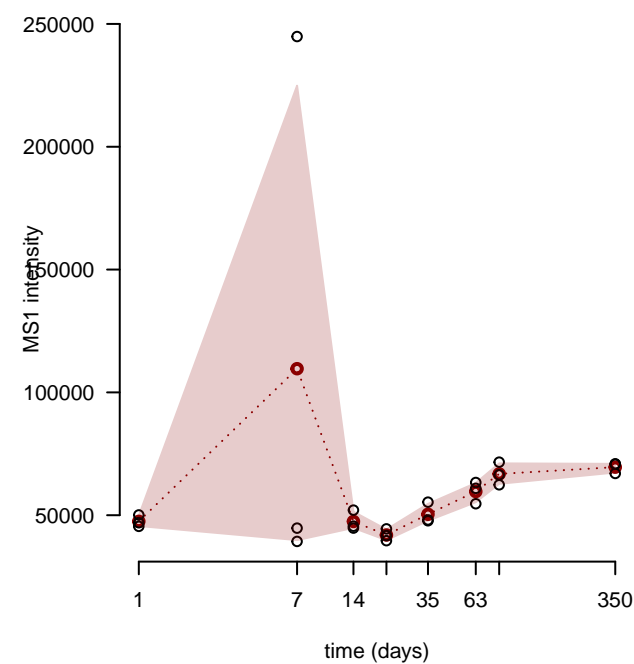

**P35487**  
**GN=Pdha2**  
pyruvate dehydrogenase E1 alpha 2

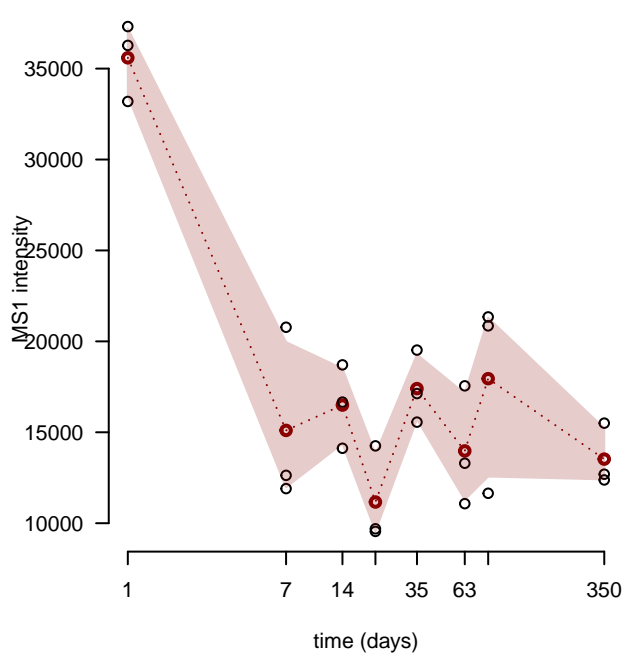

**P35492**  
**GN=Hal**  
histidine ammonia lyase

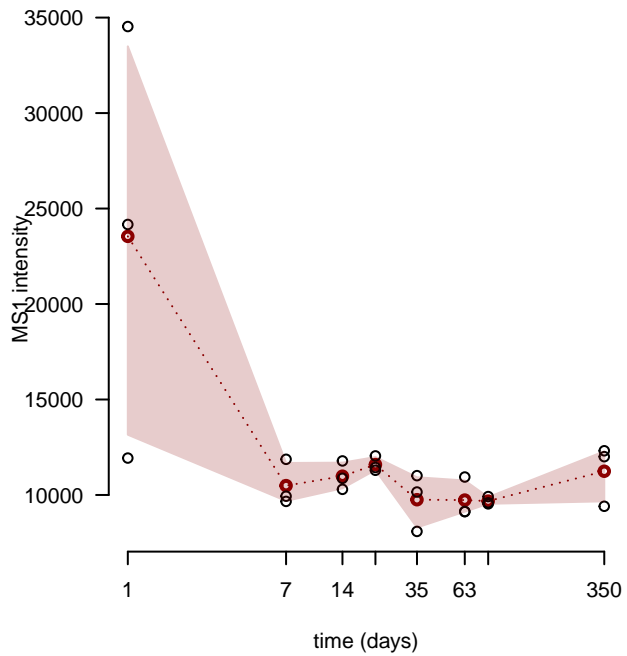

**P35505**  
**GN=Fah**  
fumarylacetoacetate hydrolase

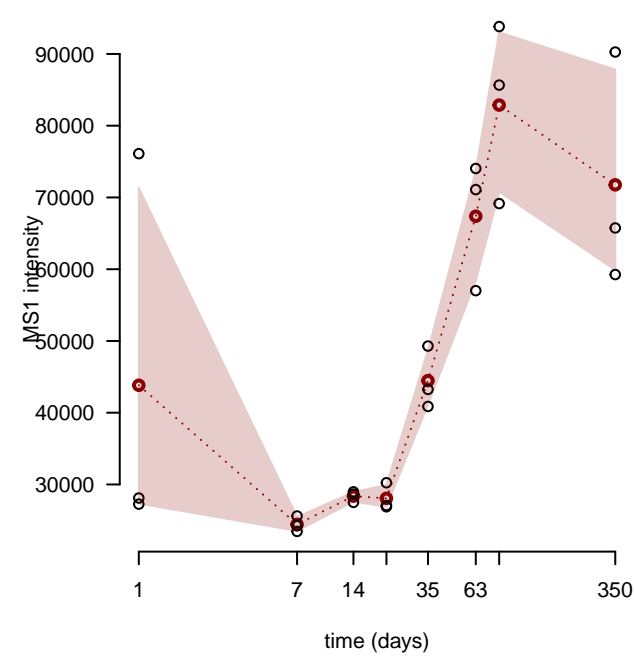

**P35550**  
**GN=Fbl**  
fibrillarin

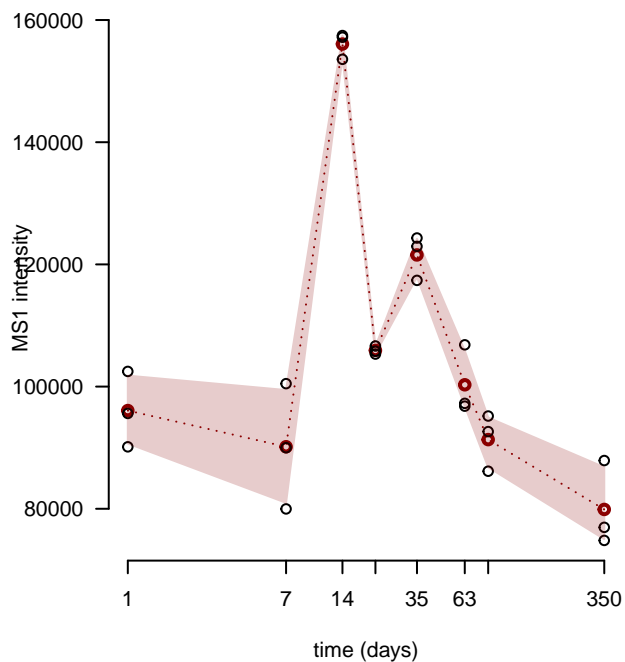

**P35564**  
**GN=Canx**  
calnexin

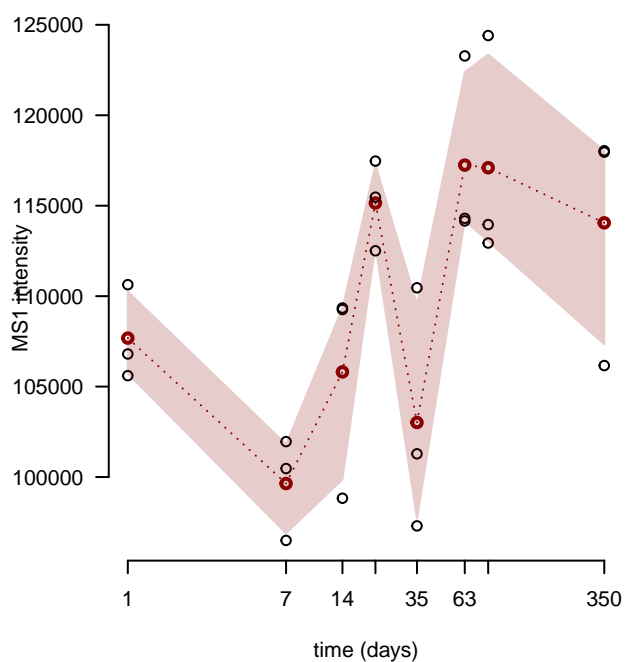

**P35569**  
**GN=Irs1**  
insulin receptor substrate 1

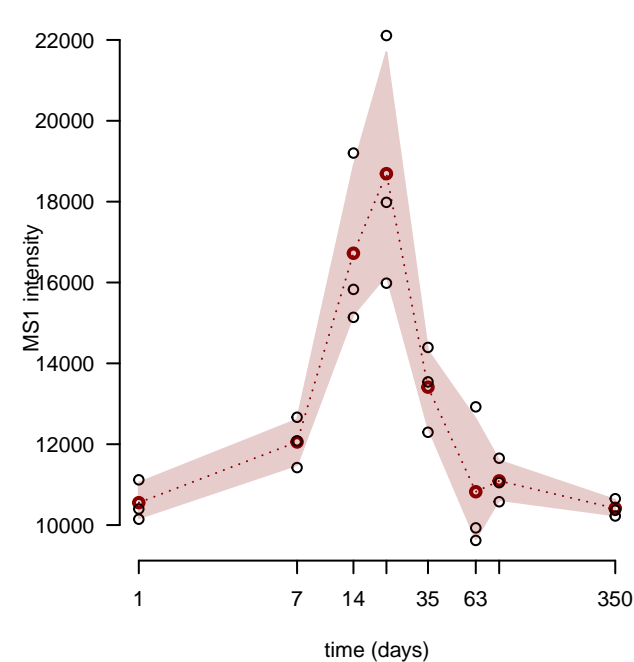

**P35585**  
**GN=Ap1m1**  
adaptor-related protein complex AP-1, mu ...

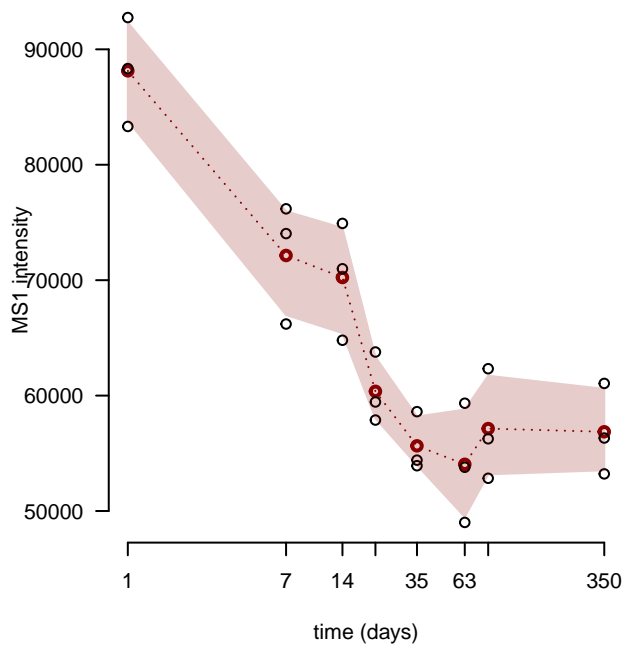

**P35601**  
**GN=Rfc1**  
replication factor C (activator 1) 1

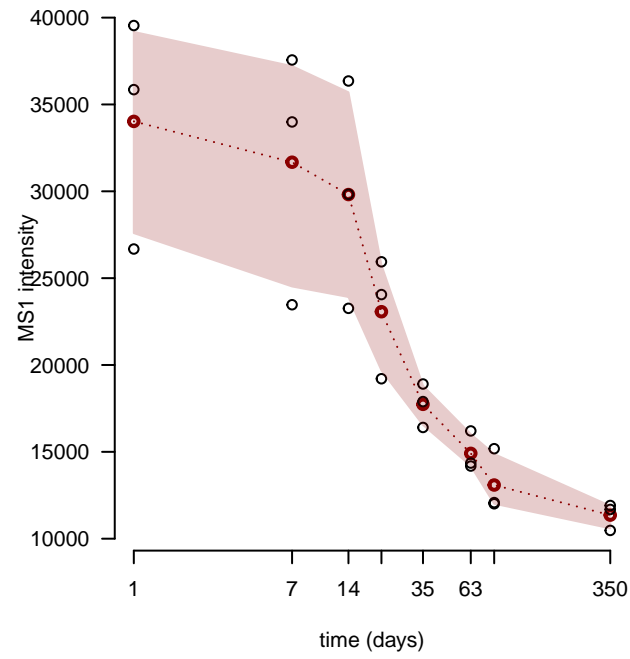

**P35689**  
**GN=Ercc5**  
excision repair cross-complementing rode ...

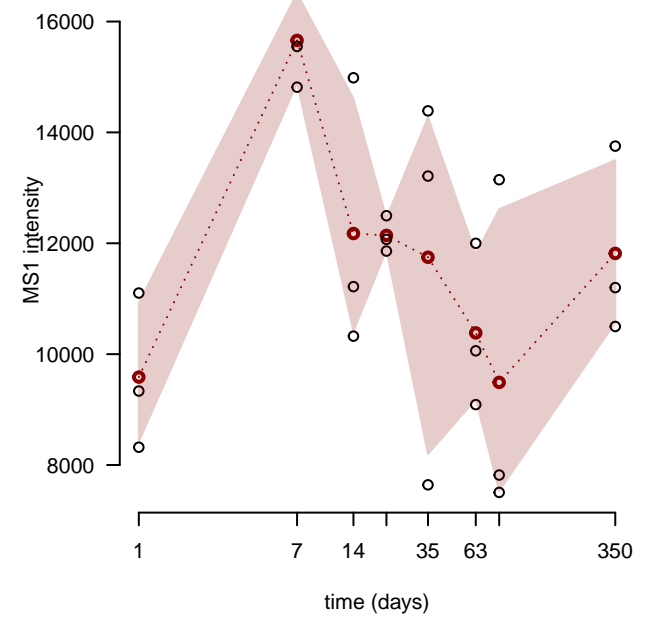

**P35700**  
**GN=Prdx1**  
peroxiredoxin 1

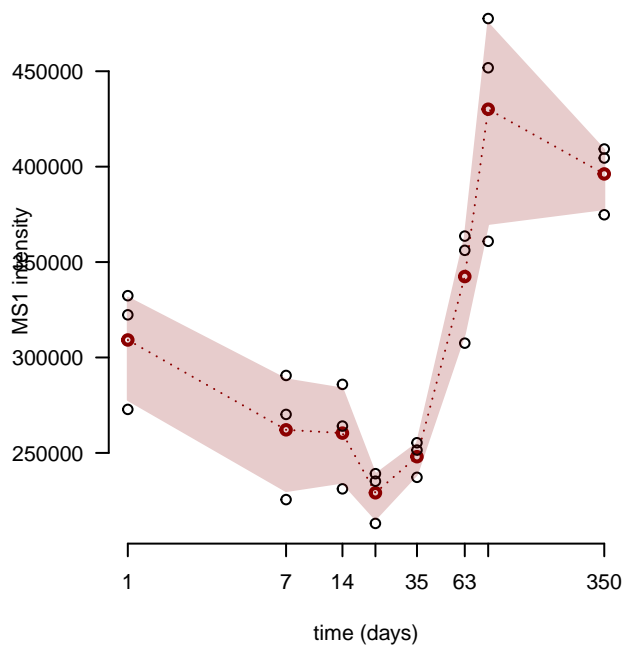

**P35710**  
**GN=Sox5**  
SRY (sex determining region Y)-box 5

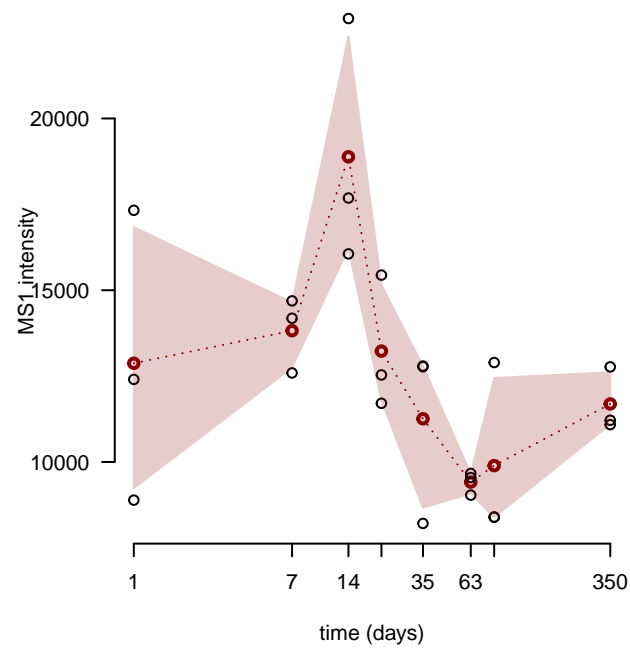

**P35737**  
**GN=H2-DMb1**  
histocompatibility 2, class II, locus Mb ...

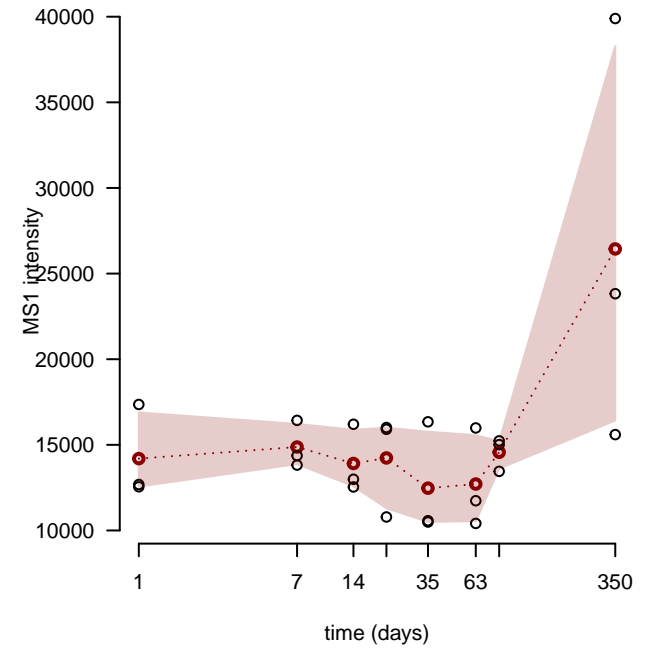

**P35761**  
**GN=Ttk**  
Ttk protein kinase

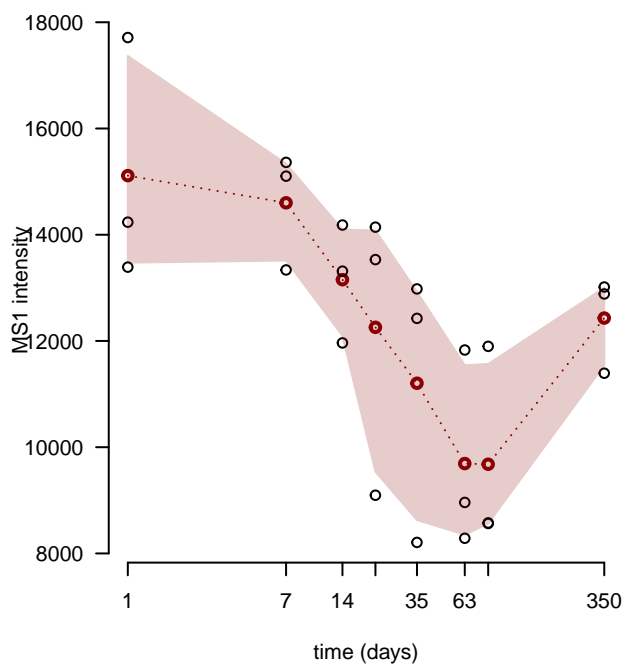

**P35762**  
**GN=Cd81**  
CD81 antigen

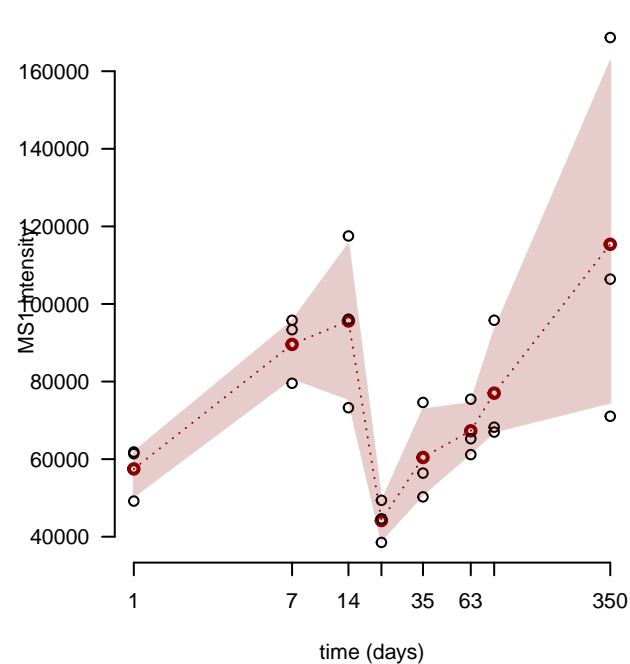

**P35802**  
**GN=Gpm6a**  
glycoprotein m6a

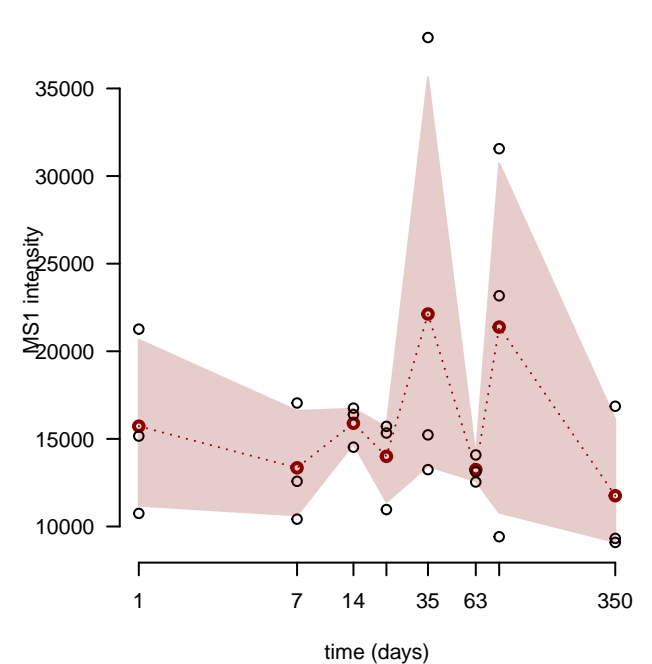

**P35803**  
GN=Gpm6b  
glycoprotein m6b

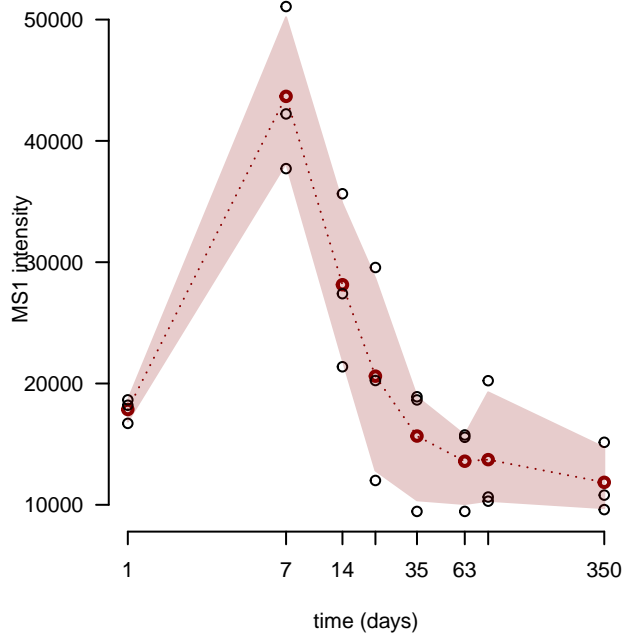

**P35821**  
GN=Ptpn1  
protein tyrosine phosphatase, non-recept ...

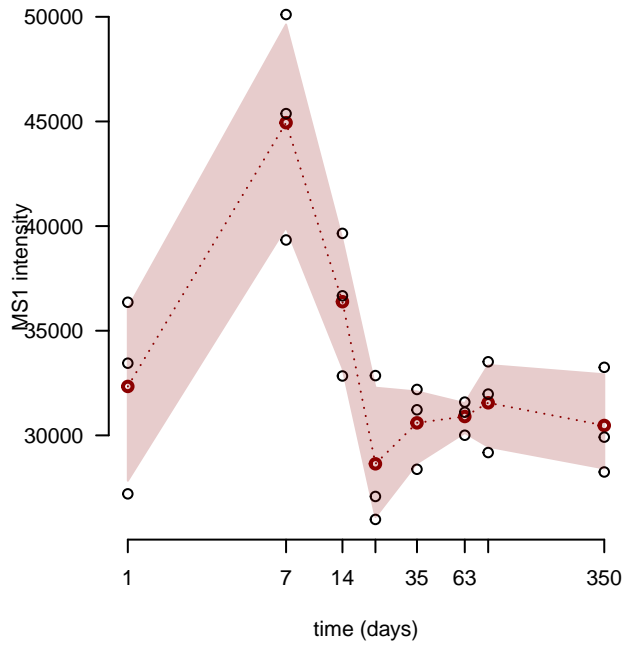

**P35822**  
GN=Ptpk  
protein tyrosine phosphatase, receptor t ...

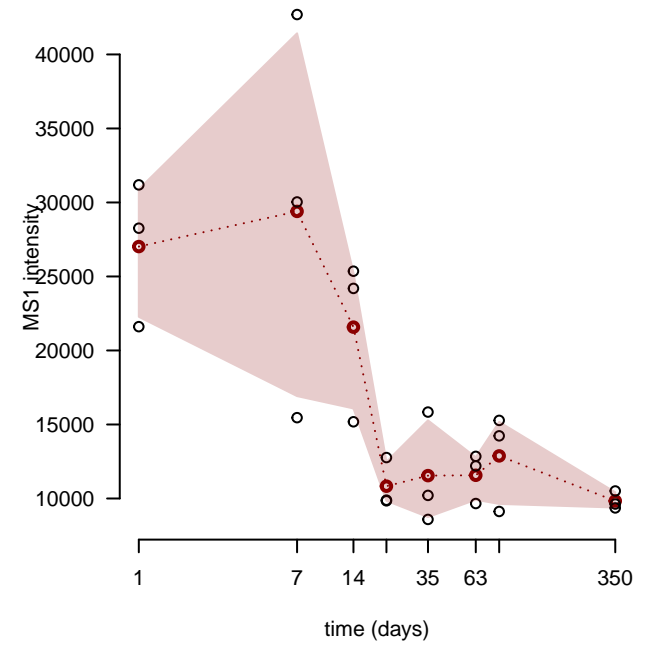

**P35831**  
GN=Ptpn12  
protein tyrosine phosphatase, non-recept ...

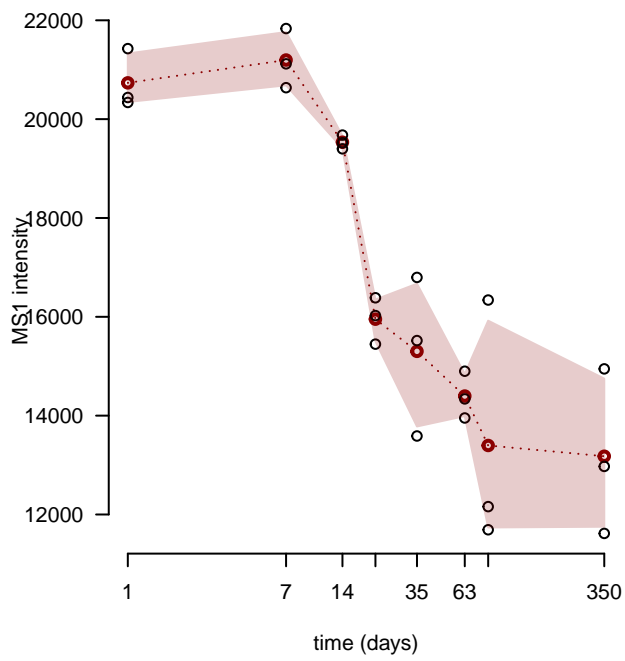

**P35846**  
GN=Folr1  
folate receptor 1 (adult)

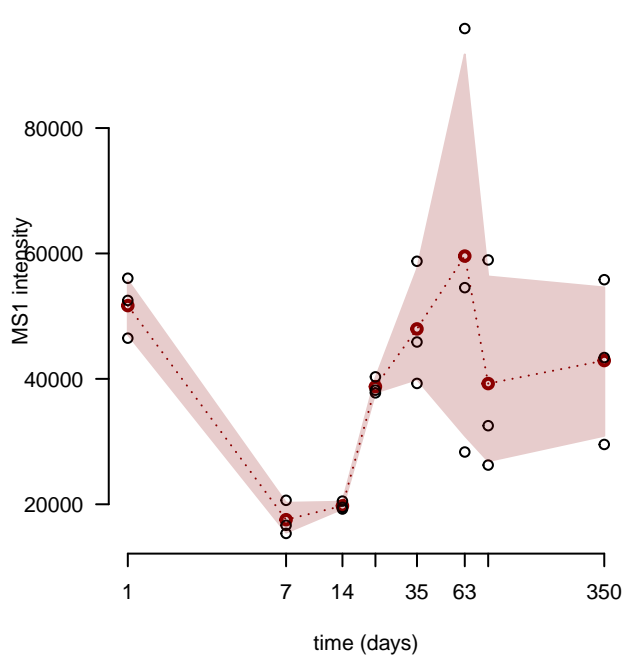

**P35922**  
GN=Fmr1  
fragile X messenger ribonucleoprotein 1

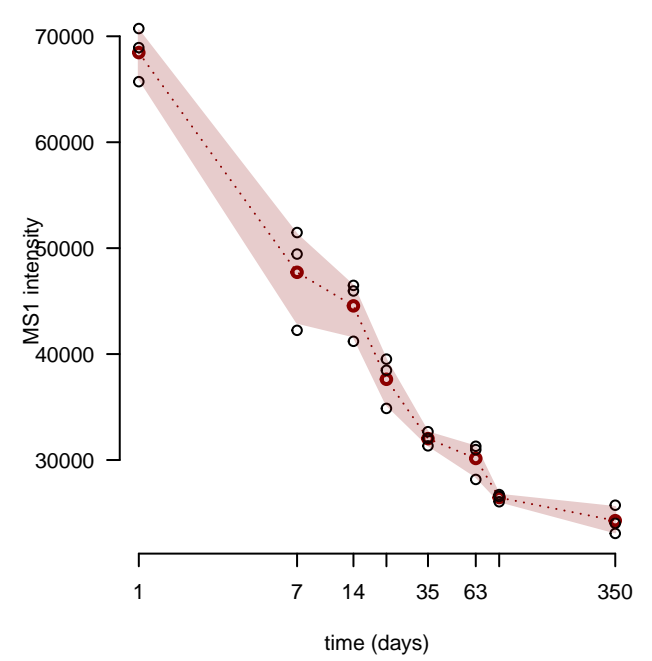

**P35951**  
GN=Ldlr  
low density lipoprotein receptor

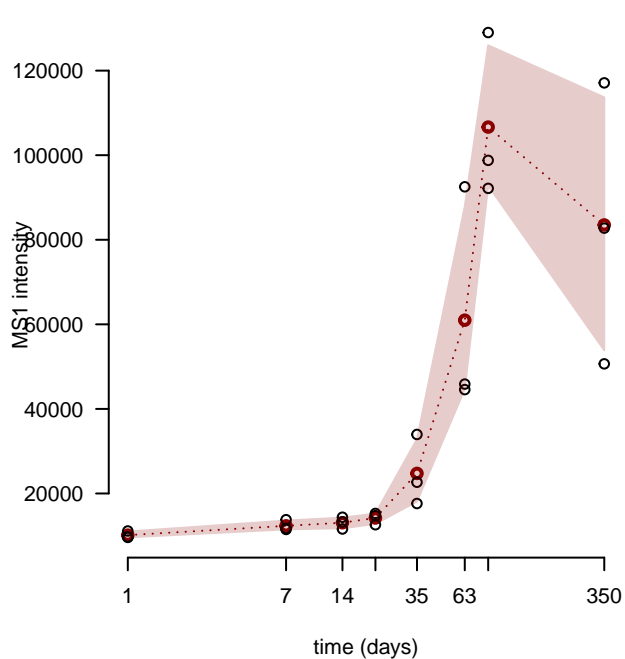

**P35979**  
GN=Rpl12  
ribosomal protein L12

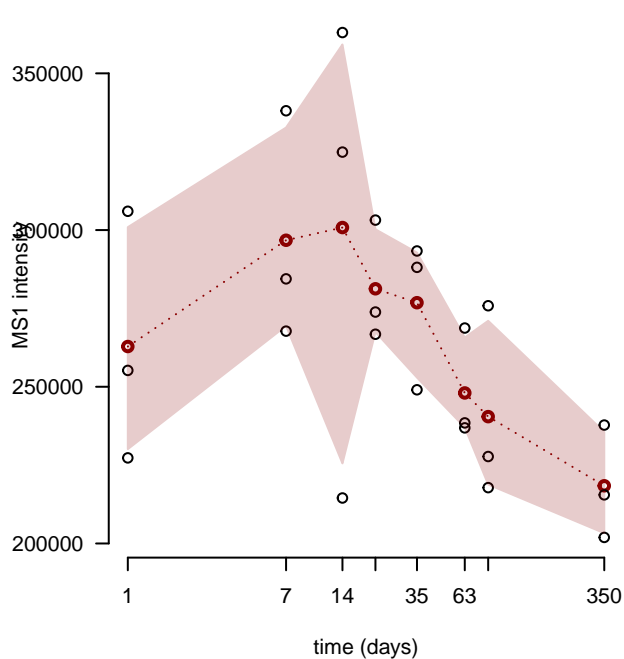

**P35980**  
GN=Rpl18  
ribosomal protein L18

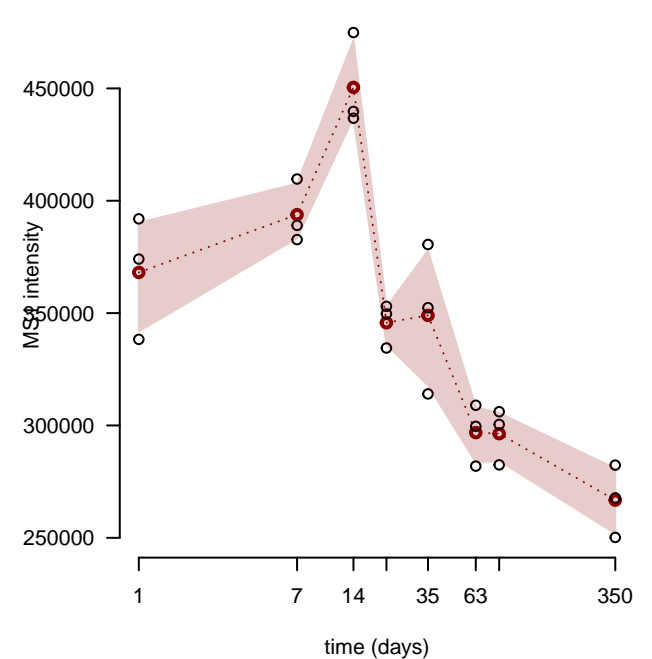

**P36371**  
GN=Tap2  
transporter 2, ATP-binding cassette, sub ...

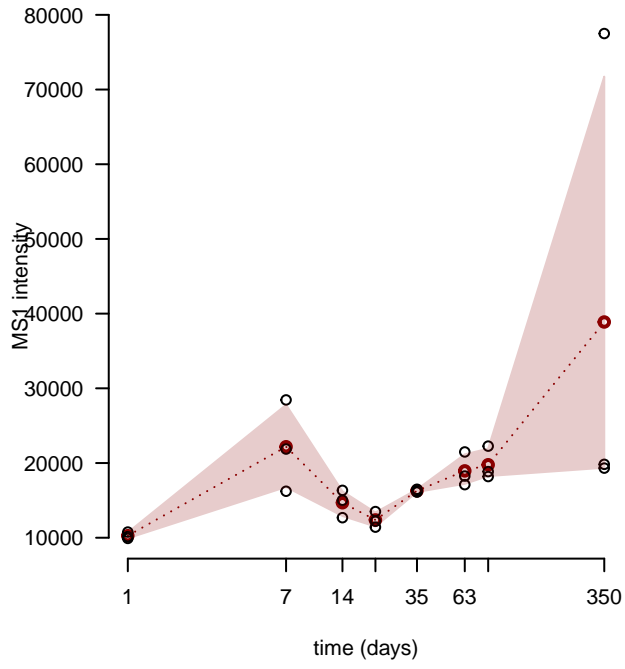

**P36423**  
GN=Tbxas1  
thromboxane A synthase 1, platelet

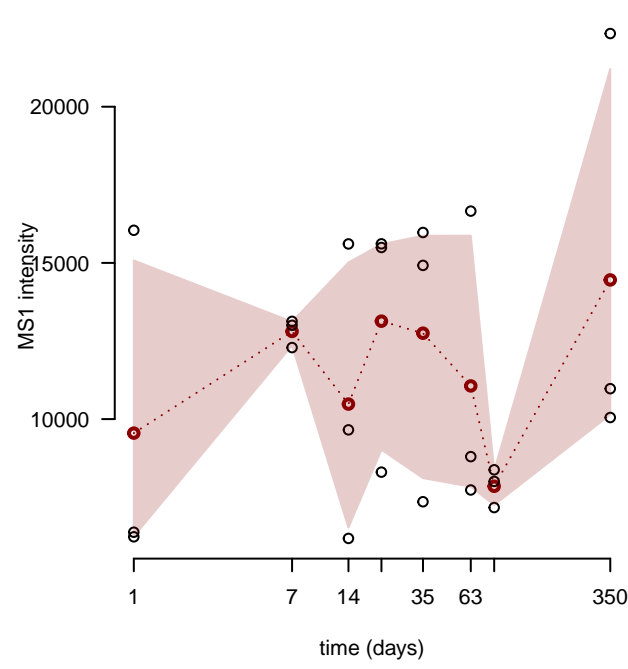

**P36536**  
GN=Sar1a  
secretion associated Ras related GTPase ...

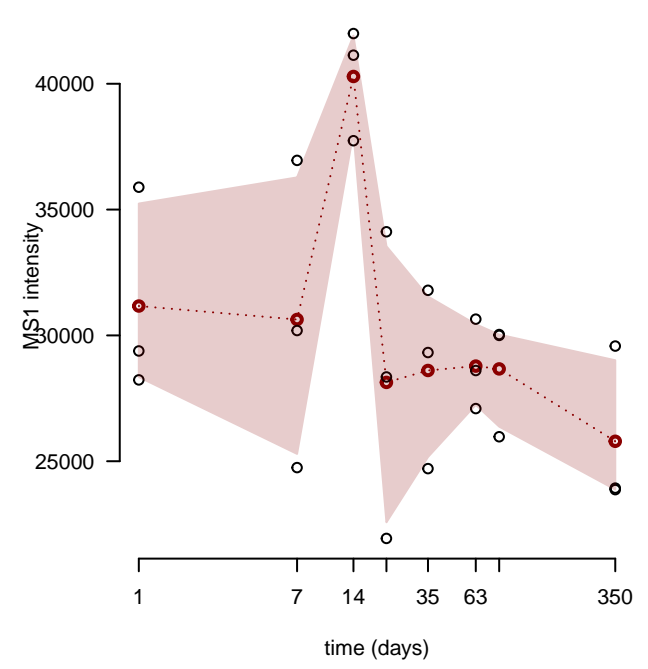

**P36552**  
GN=Cpox  
coproporphyrinogen oxidase

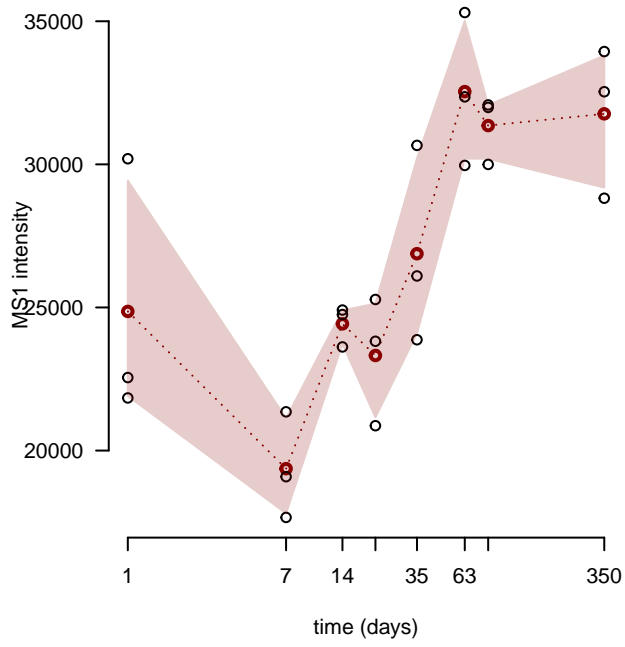

**P36895**  
GN=Bmpr1a  
bone morphogenetic protein receptor, typ ...

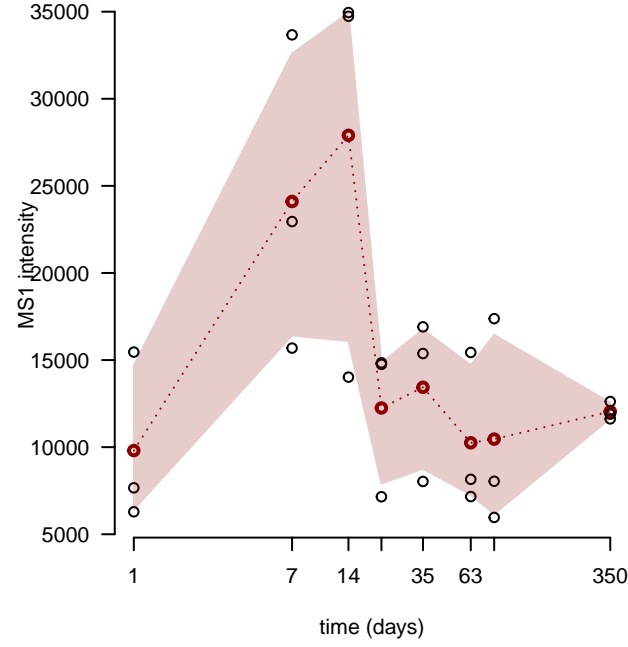

**P36916**  
GN=Gnl1  
guanine nucleotide binding protein-like ...

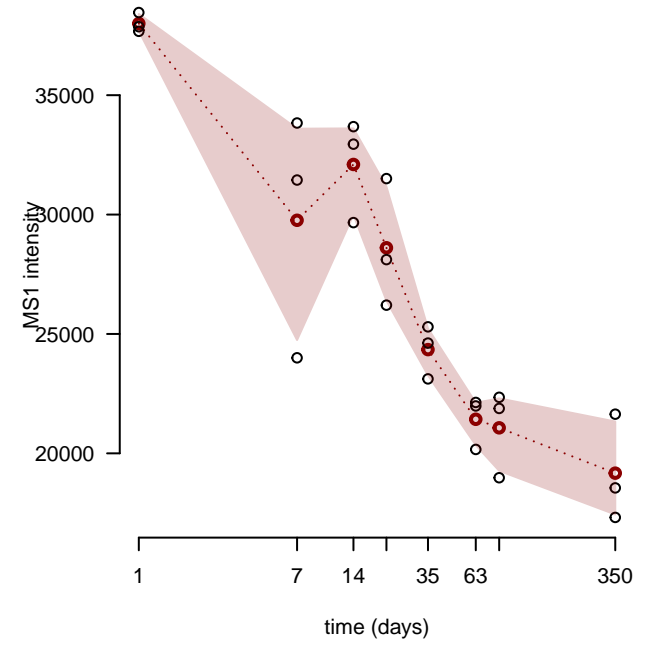

**P36993**  
GN=Ppm1b  
protein phosphatase 1B, magnesium depend ...

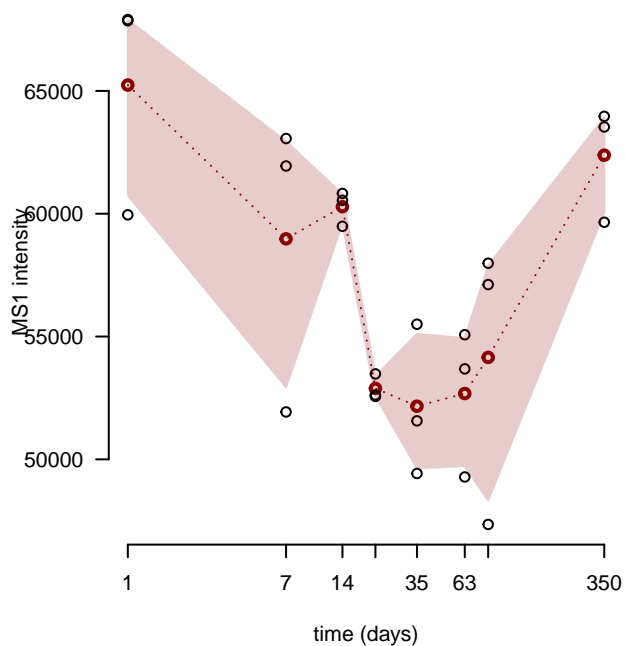

**P37040**  
GN=Por  
cytochrome p450 oxidoreductase

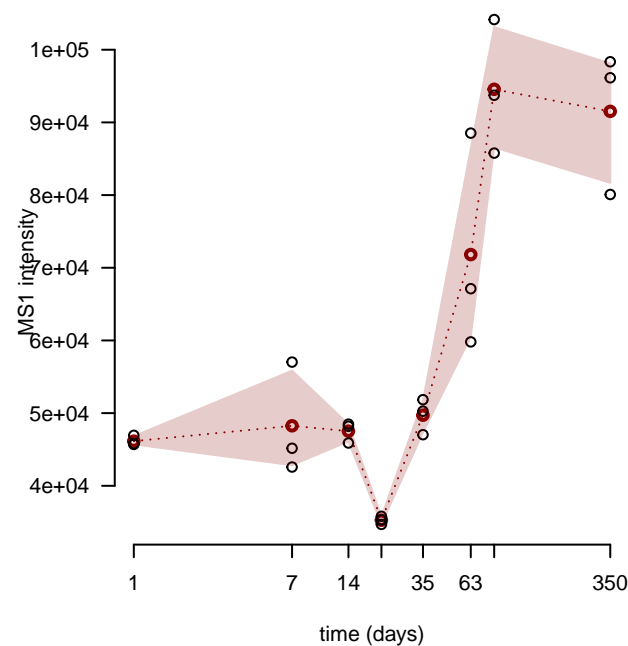

**P37172**  
GN=Acvr1  
activin A receptor, type 1

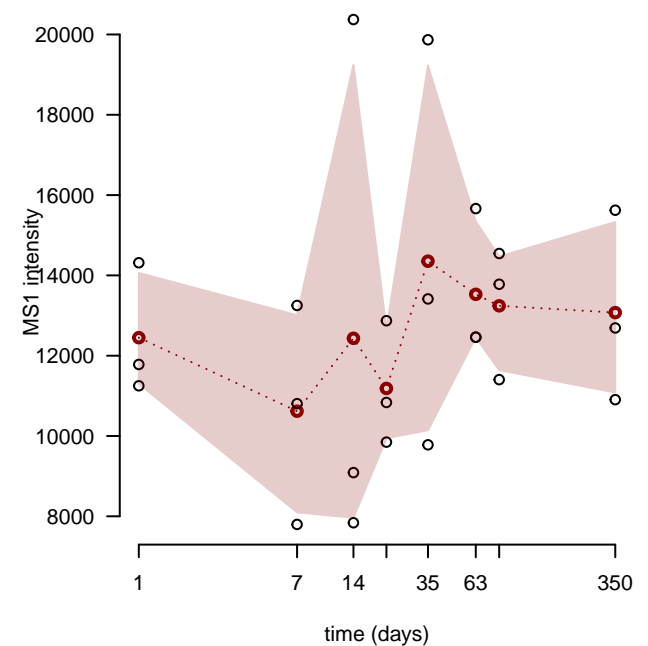

**P37242**  
GN=Thrb  
thyroid hormone receptor beta

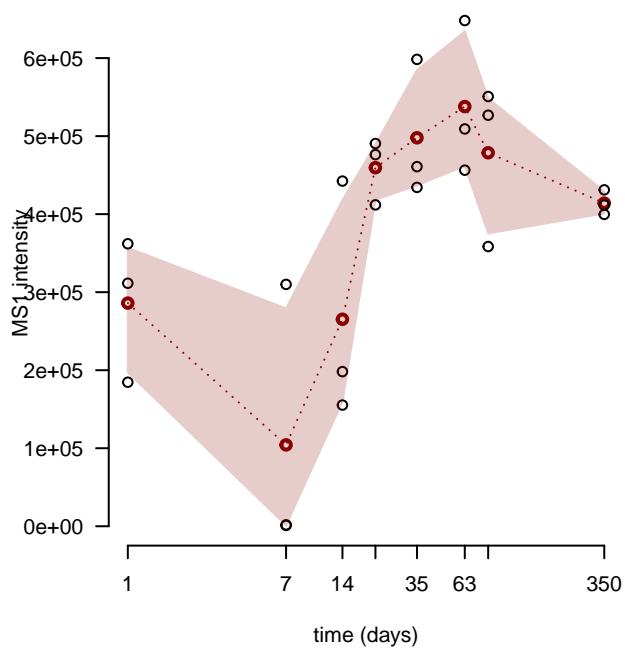

**P37804**  
GN=Tagln  
transgelin

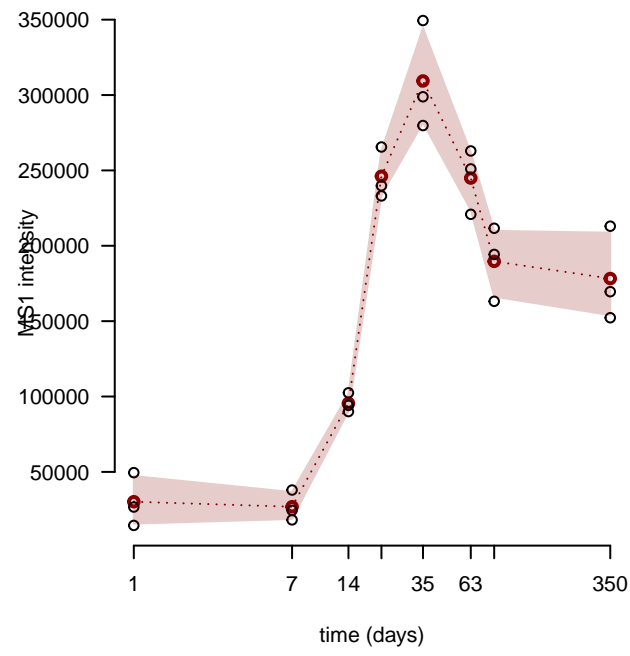

**P37889**  
GN=Fbln2  
fibulin 2

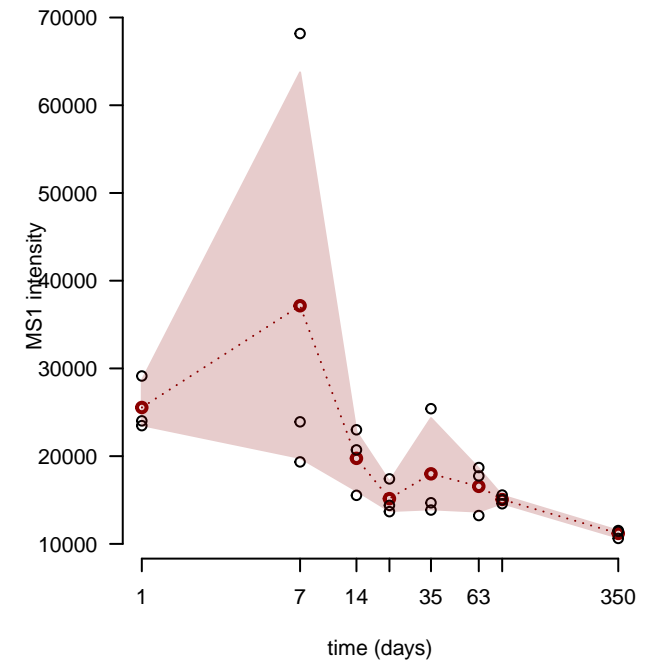

**P37913**  
GN=Lig1  
ligase I, DNA, ATP-dependent

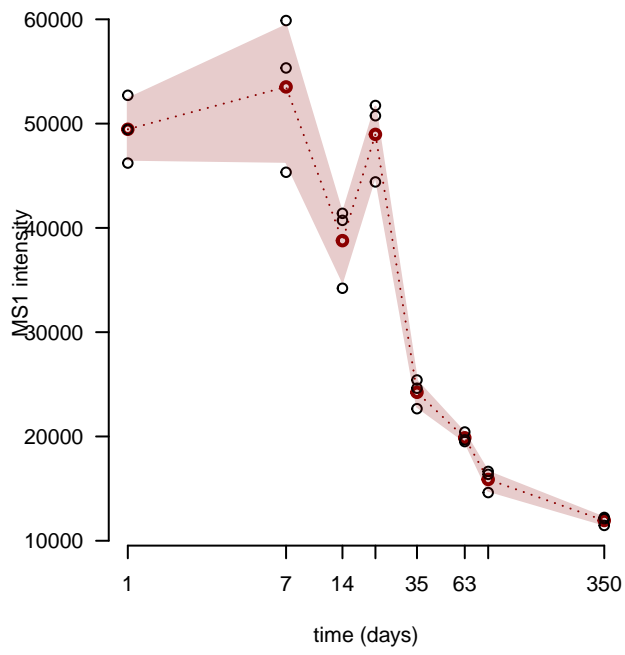

**P38060**  
GN=Hmgcl  
3-hydroxy-3-methylglutaryl-Coenzyme A ly ...

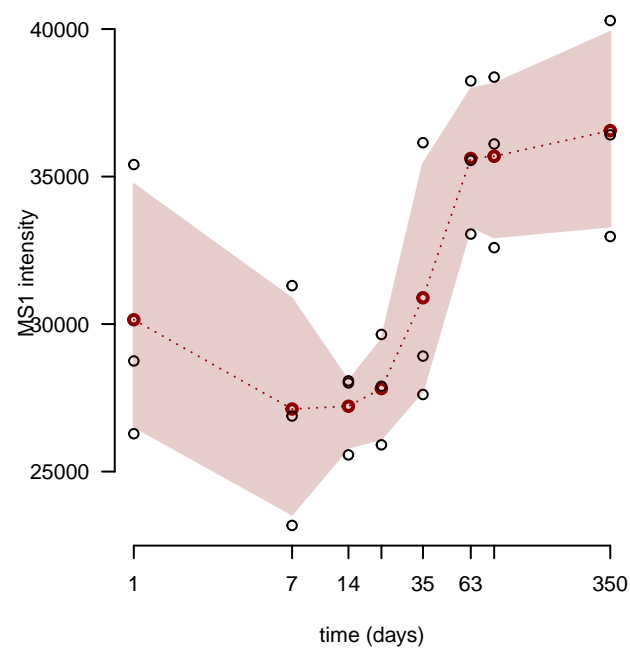

**P38532**  
GN=Hsf1  
heat shock factor 1

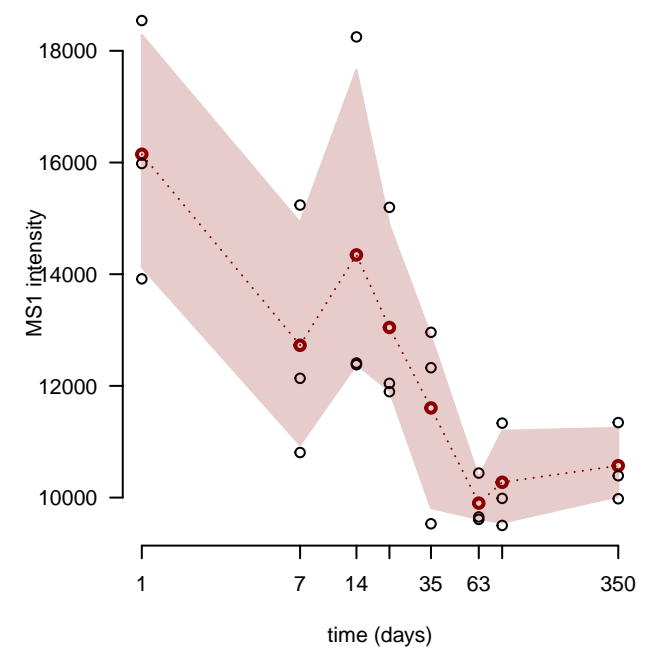

**P38585**  
GN=Ttl  
tubulin tyrosine ligase

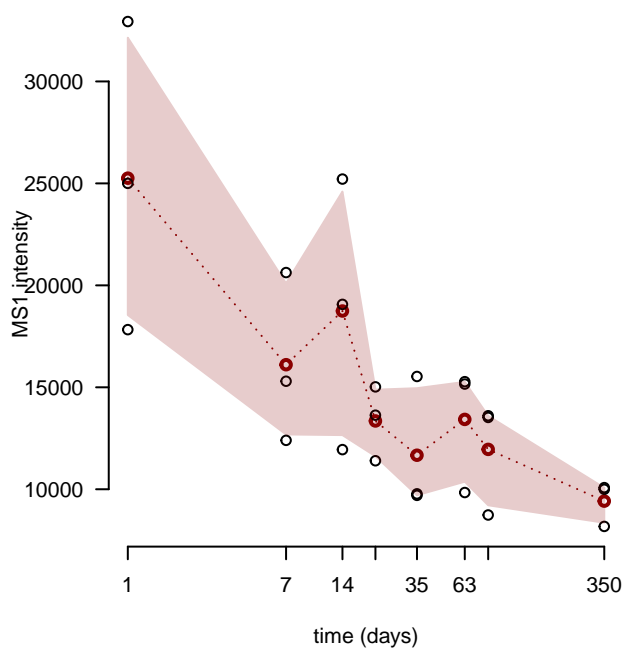

**P38647**  
GN=Hspa9  
heat shock protein 9

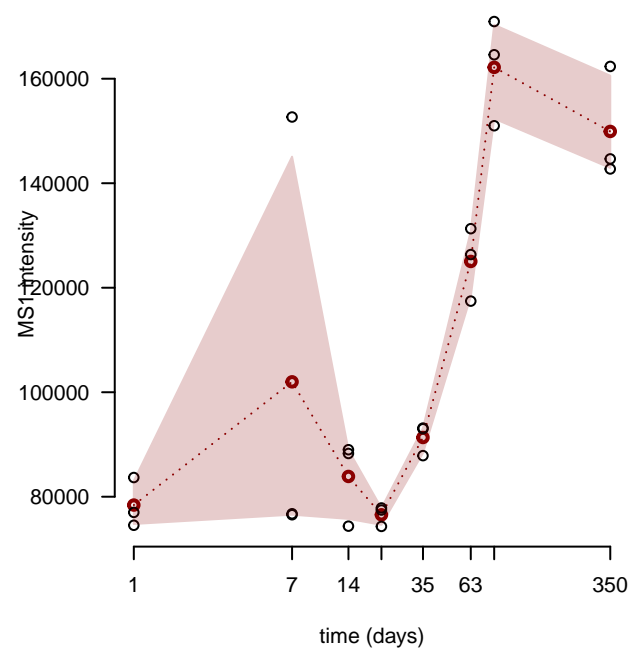

**P39039**  
GN=Mbl1  
mannose-binding lectin (protein A) 1

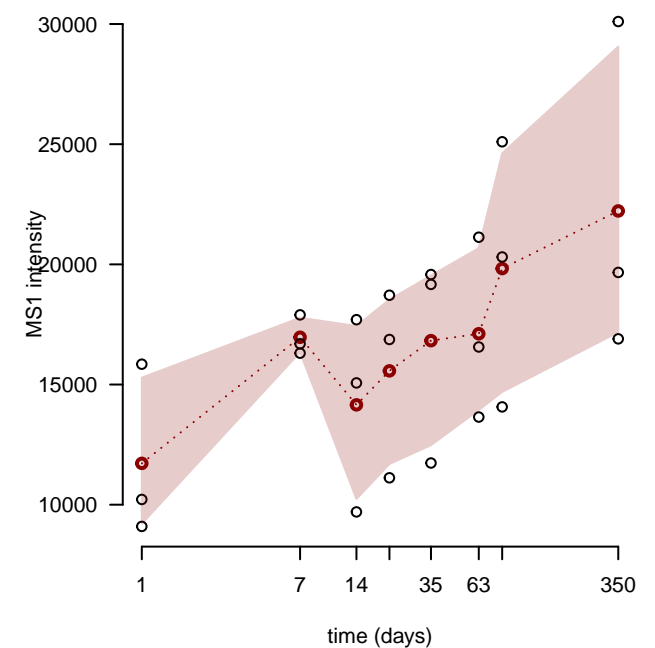

**P39053**  
GN=Dnm1  
dynamin 1

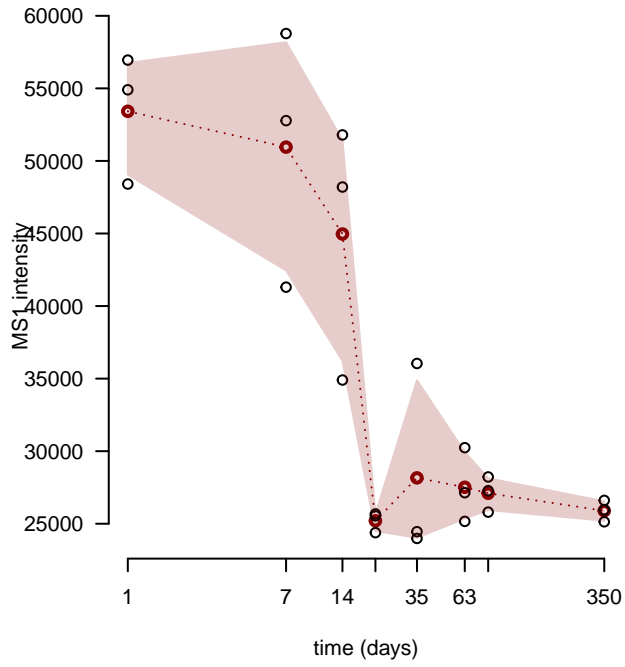

**P39054**  
GN=Dnm2  
dynamin 2

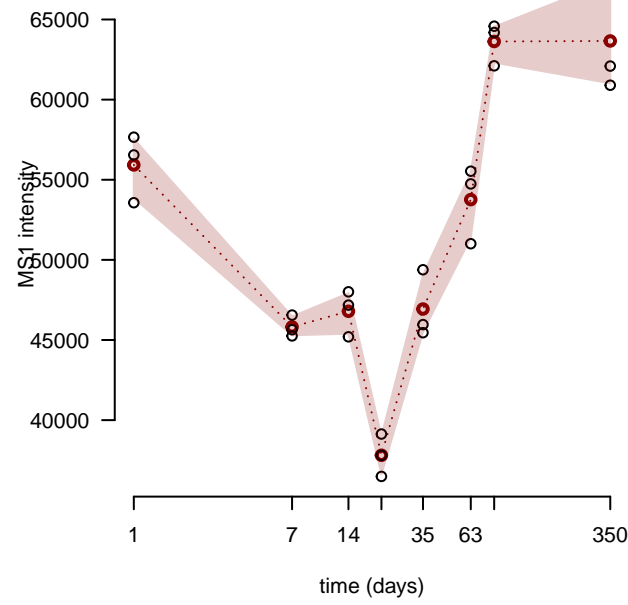

**P39061**  
GN=Col18a1  
collagen, type XVIII, alpha 1

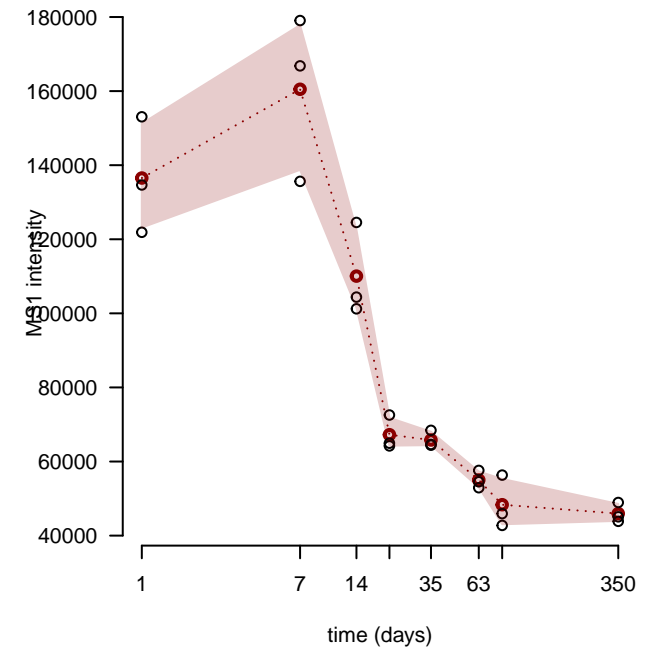

**P39098**  
GN=Man1a2  
mannosidase, alpha, class 1A, member 2

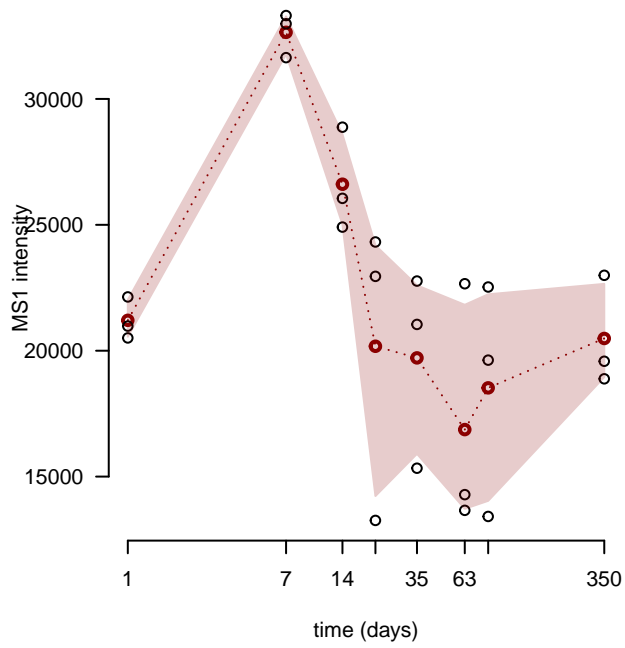

**P39429**  
GN=Traf2  
TNF receptor-associated factor 2

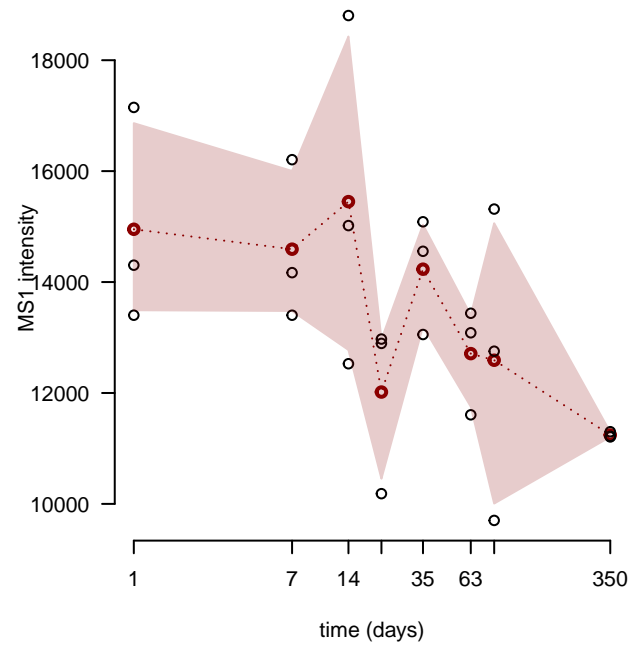

**P39447**  
GN=Tjp1  
tight junction protein 1

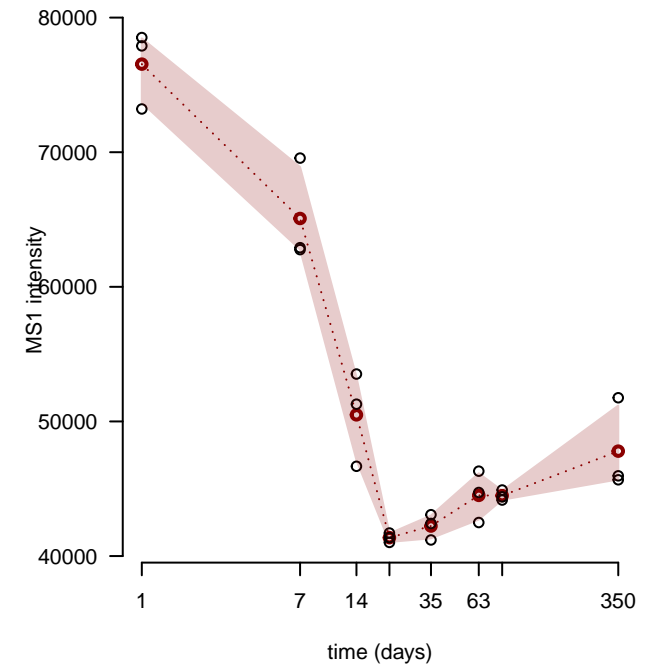

**P39655**  
GN=Alox12  
arachidonate 12-lipoxygenase

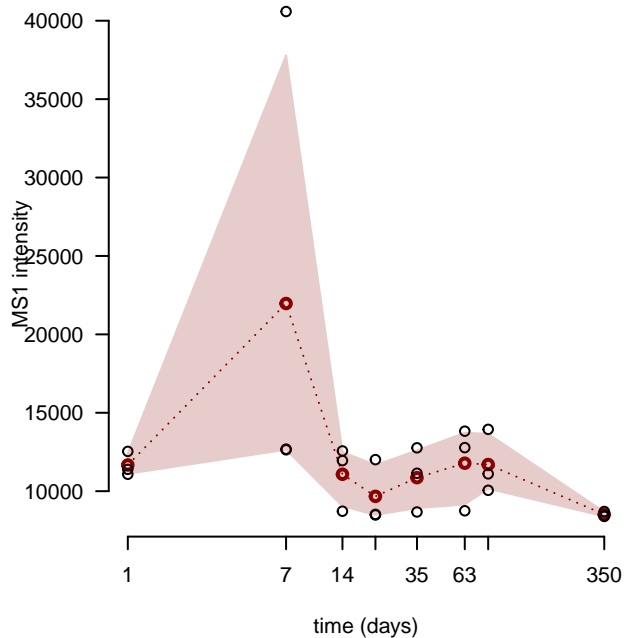

**P39688**  
GN=Fyn  
Fyn proto-oncogene

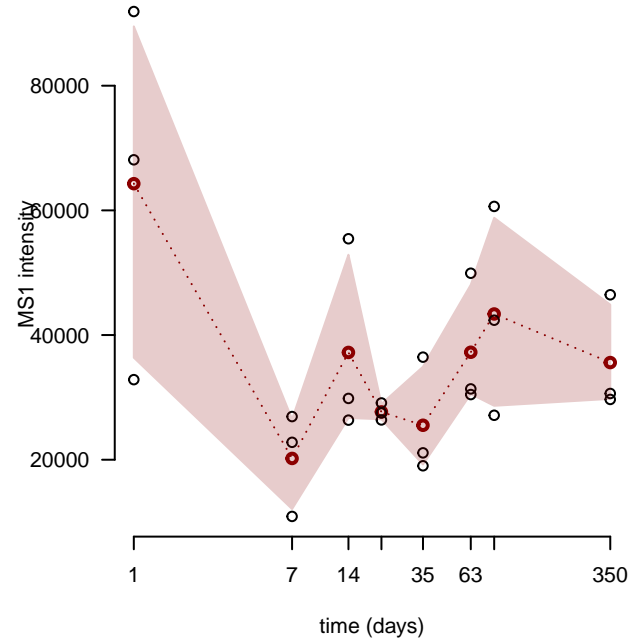

**P39688**  
GN=Fyn  
Fyn proto-oncogene

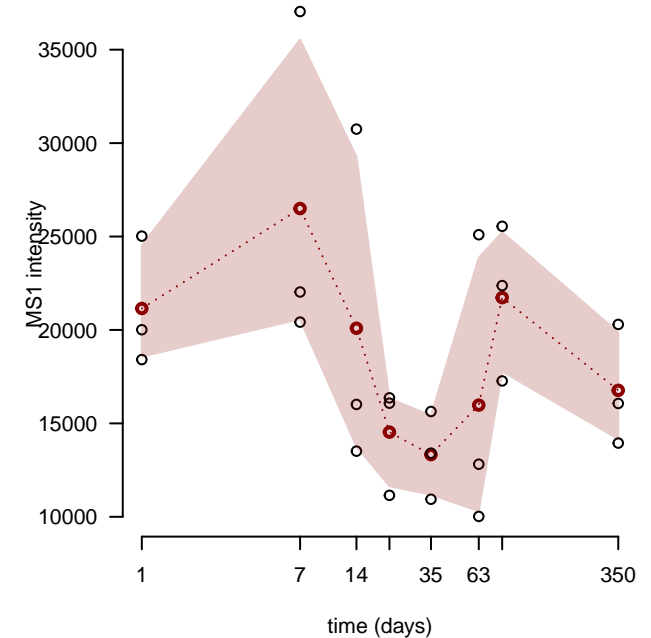

**P39749**  
**GN=Fen1**  
flap structure specific endonuclease 1

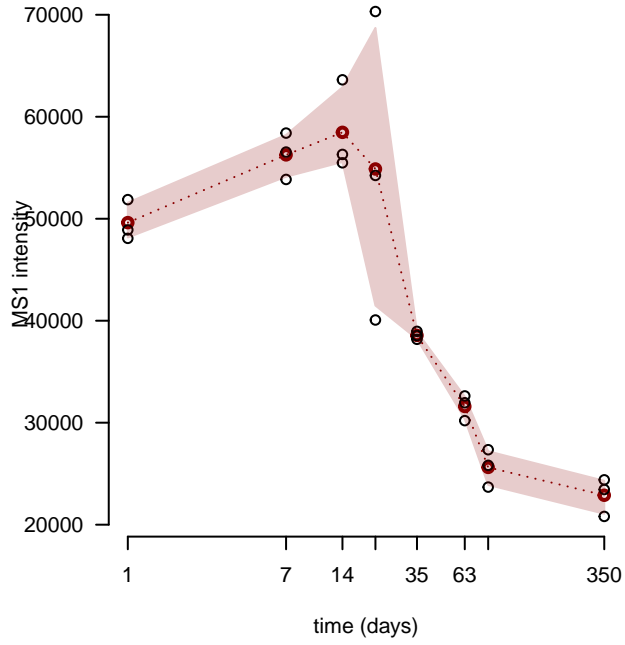

**P39876**  
**GN=Timp3**  
tissue inhibitor of metalloproteinase 3

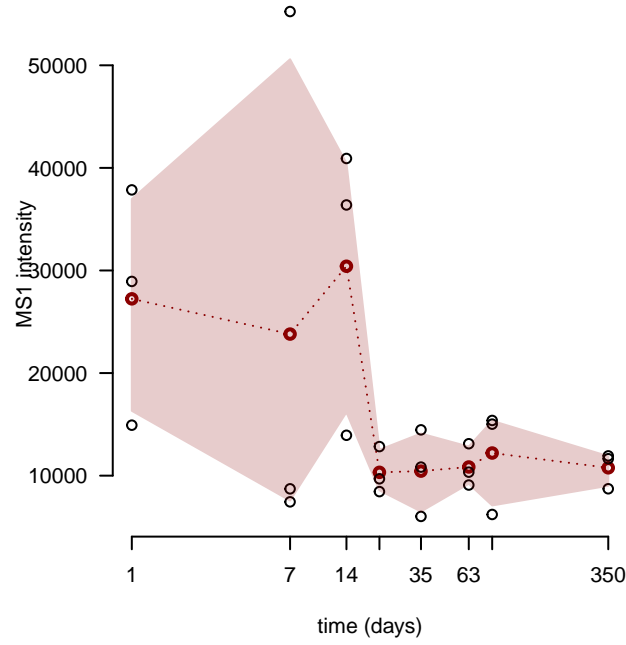

**P40124**  
**GN=Cap1**  
CAP, adenylate cyclase-associated protei ...

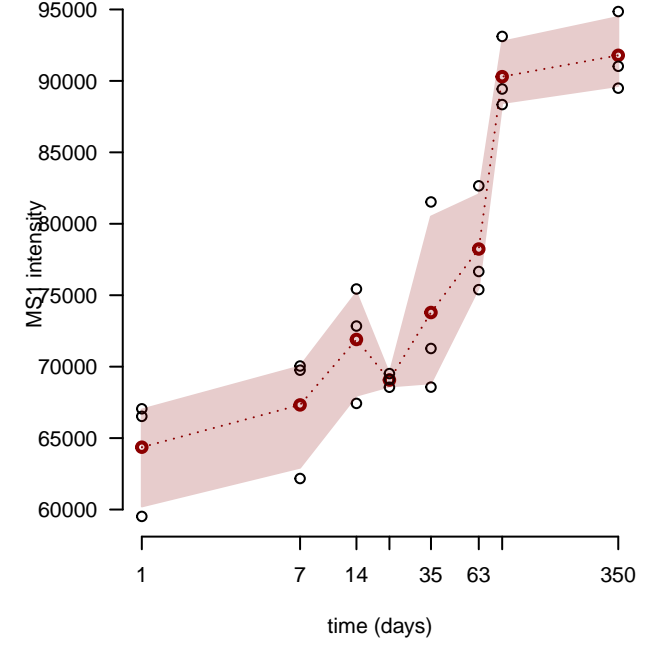

**P40142**  
**GN=Tkt**  
transketolase

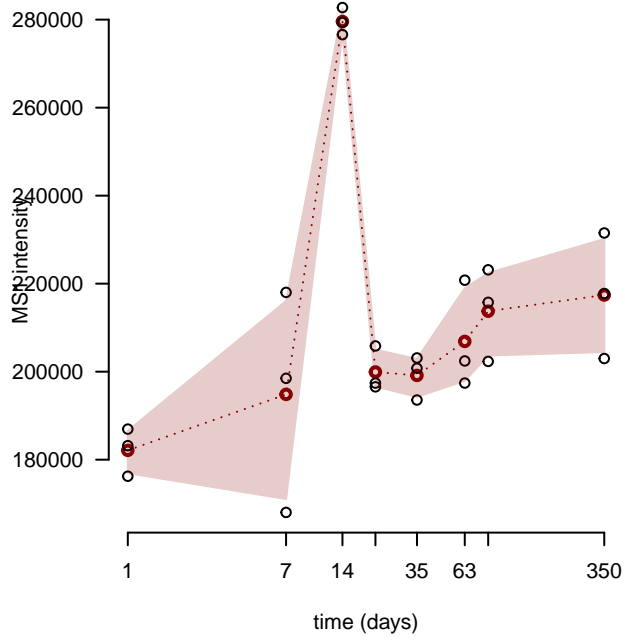

**P40201**  
**GN=Chd1**  
chromodomain helicase DNA binding protei ...

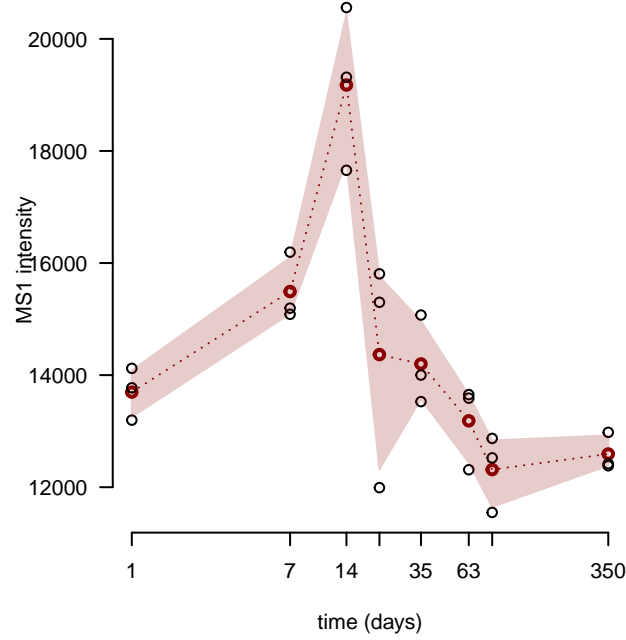

**P40237**  
**GN=Cd82**  
CD82 antigen

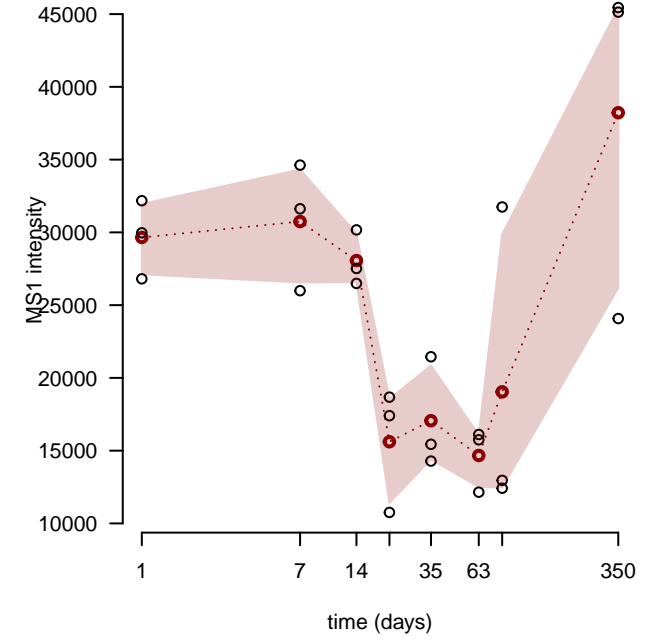

**P40240**  
**GN=Cd9**  
CD9 antigen

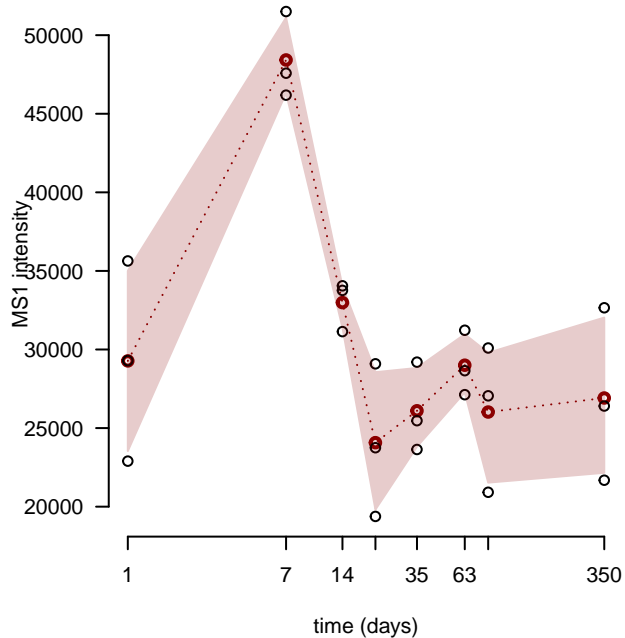

**P40336**  
**GN=Vps26a**  
VPS26 retromer complex component A

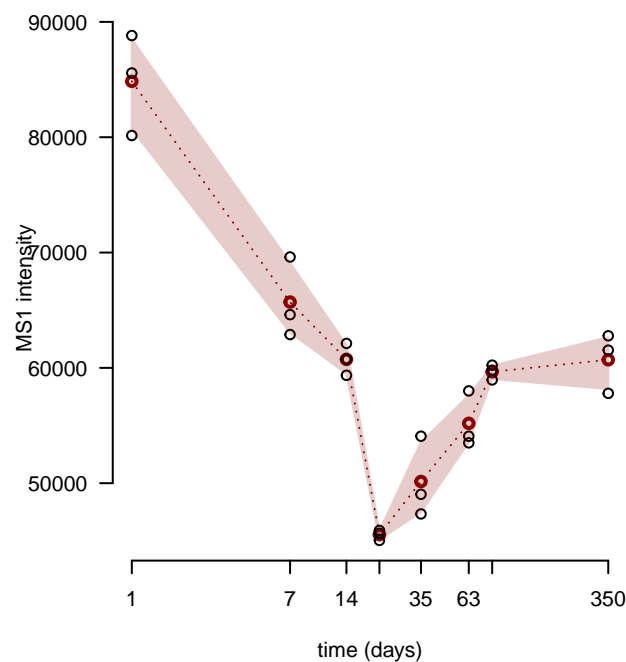

**P40338**  
**GN=Vhl**  
von Hippel-Lindau tumor suppressor

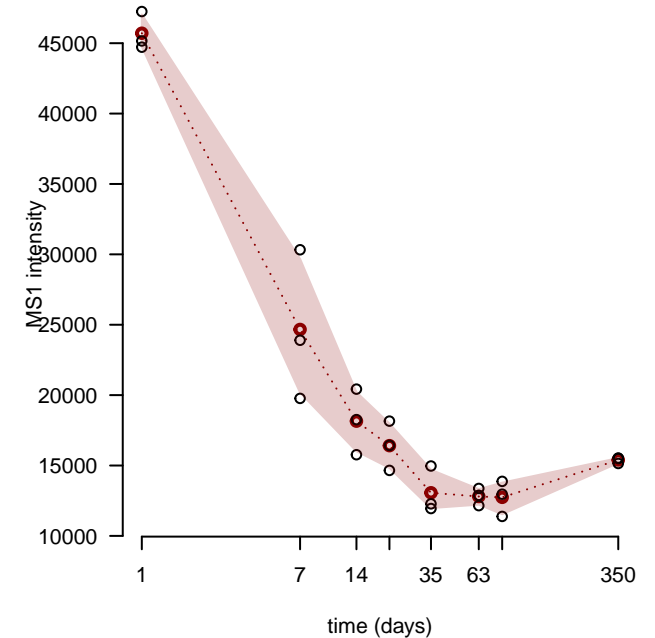

**P40630**  
**GN=Tfam**  
transcription factor A, mitochondrial

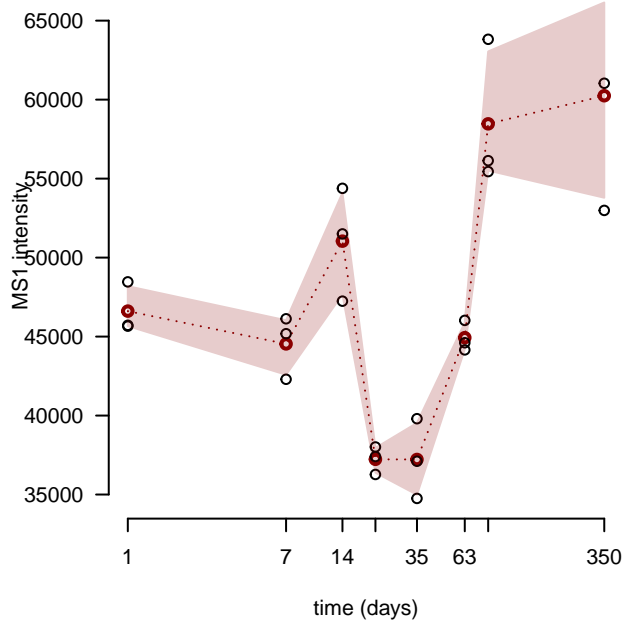

**P40694**  
**GN=Ighmbp2**  
immunoglobulin mu binding protein 2

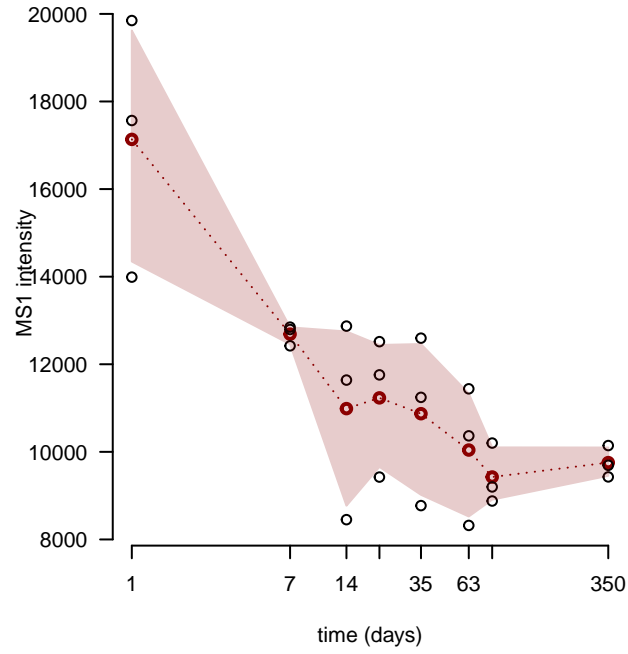

**P40935**  
**GN=Pnmt**  
phenylethanolamine-N-methyltransferase

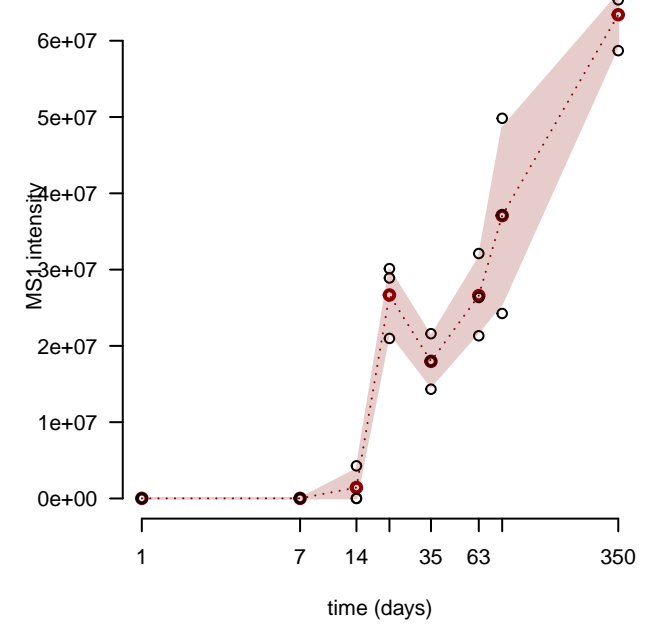

**P41105**  
**GN=Rpl28**  
ribosomal protein L28

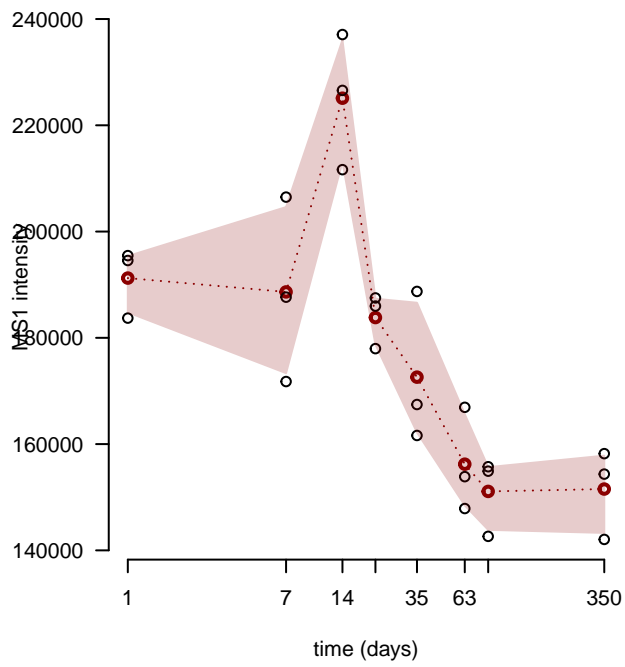

**P41216**  
**GN=Acsl1**  
acyl-CoA synthetase long-chain family me ...

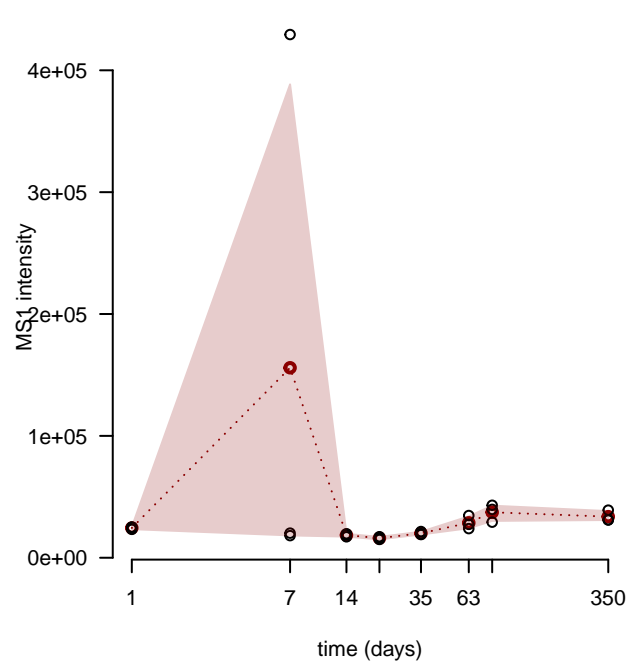

**P41230**  
**GN=Kdm5c**  
lysine (K)-specific demethylase 5C

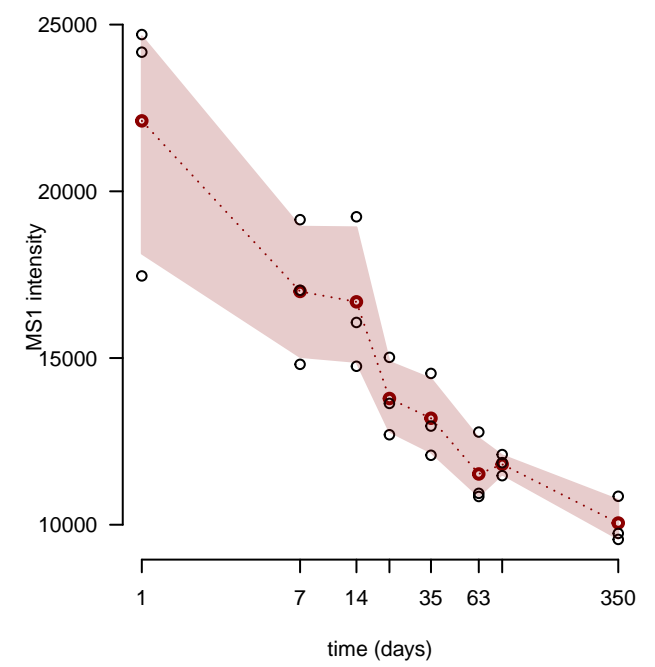

**P41233**  
**GN=Abca1**  
ATP-binding cassette, sub-family A (ABC1 ...

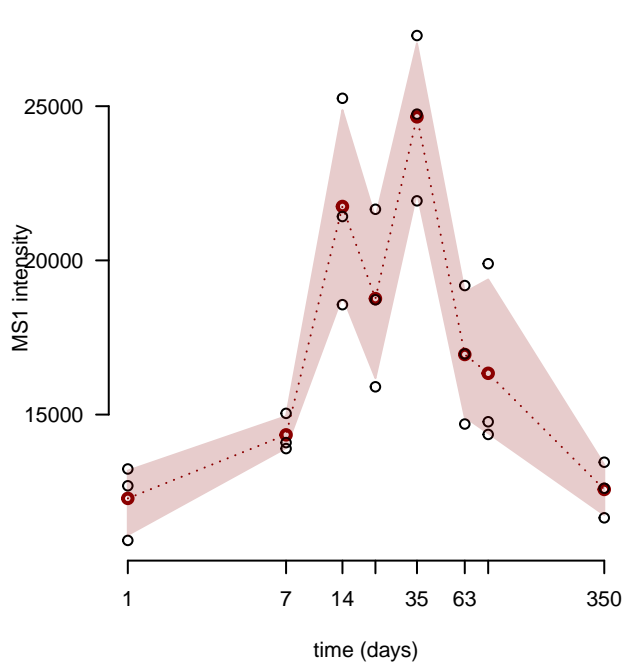

**P41234**  
**GN=Abca2**  
ATP-binding cassette, sub-family A (ABC1 ...

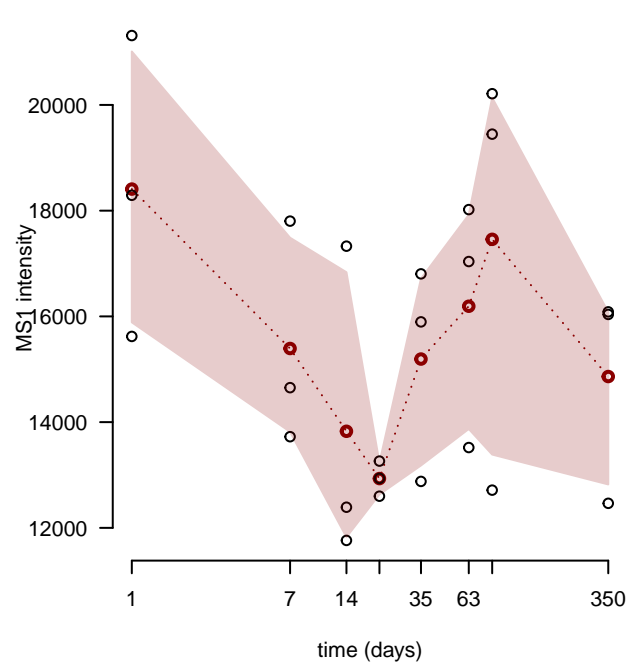

**P41241**  
**GN=Csk**  
c-src tyrosine kinase

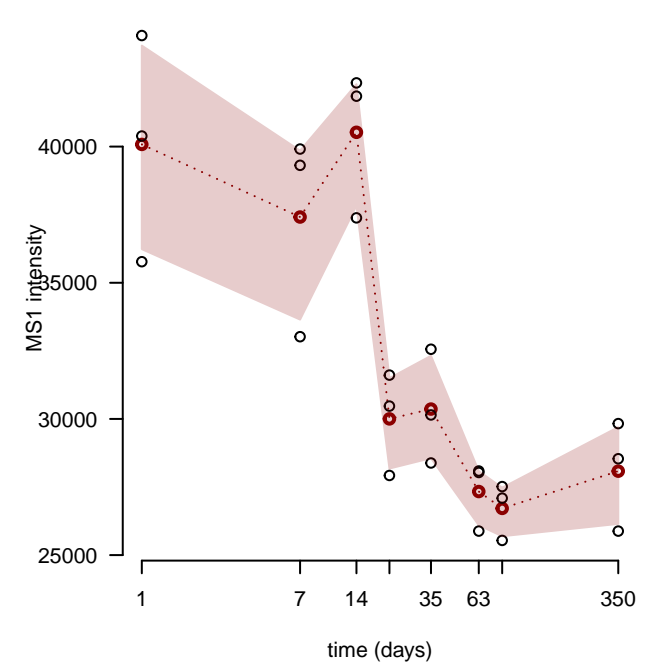



**P41317**  
**GN=Mbl2**  
mannose-binding lectin (protein C) 2

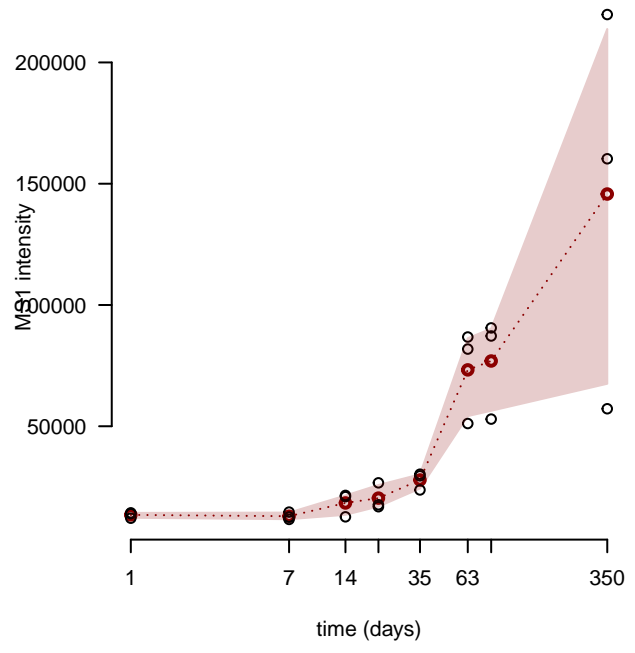

**P41731**  
**GN=Cd63**  
CD63 antigen

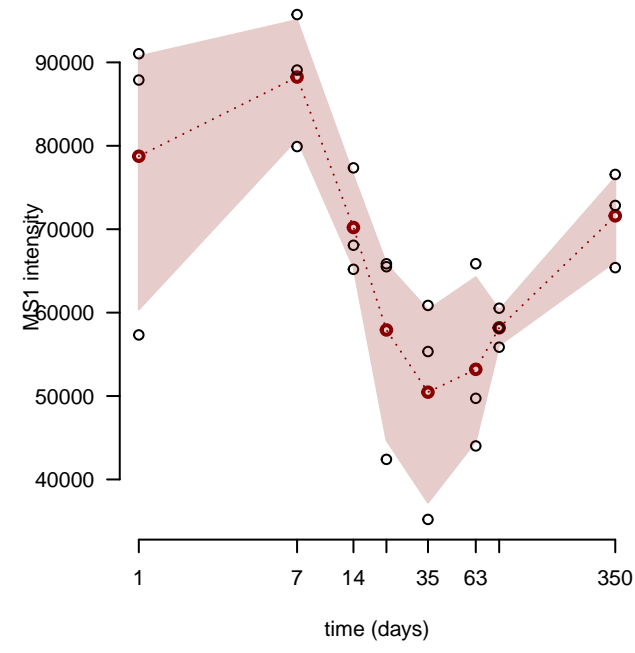

**P41778**  
**GN=Pbx1**  
pre B cell leukemia homeobox 1

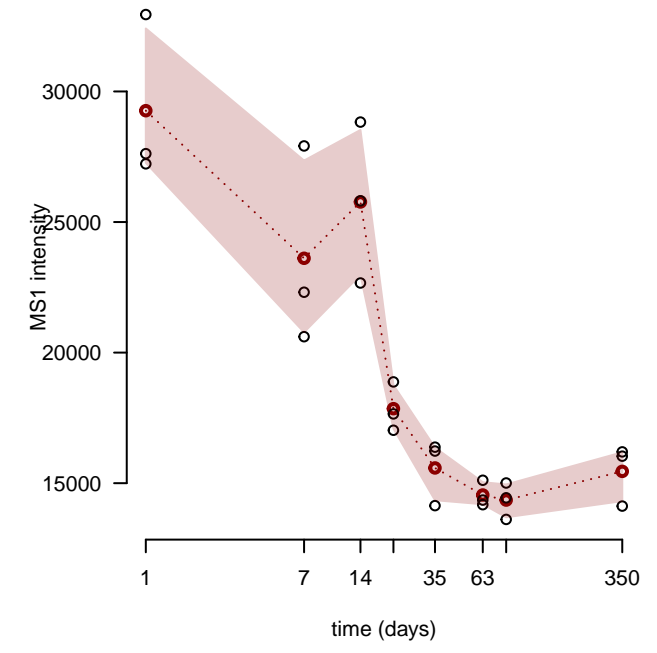

**P41969**  
**GN=Elk1**  
ELK1, member of ETS oncogene family

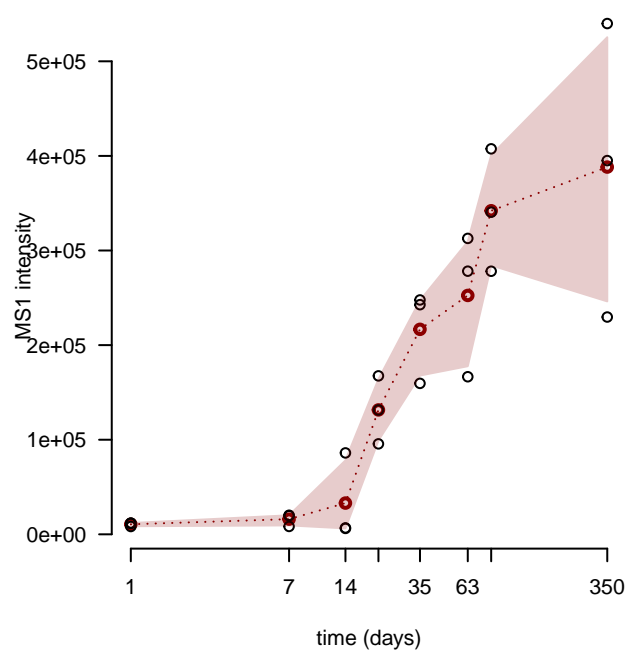

**P41971**  
**GN=Elk3**  
ELK3, member of ETS oncogene family

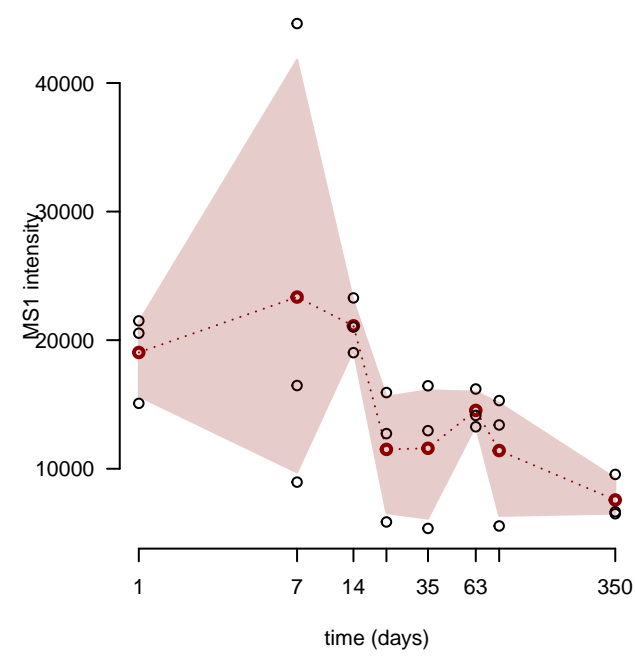

**P42125**  
**GN=Eci1**  
enoyl-Coenzyme A delta isomerase 1

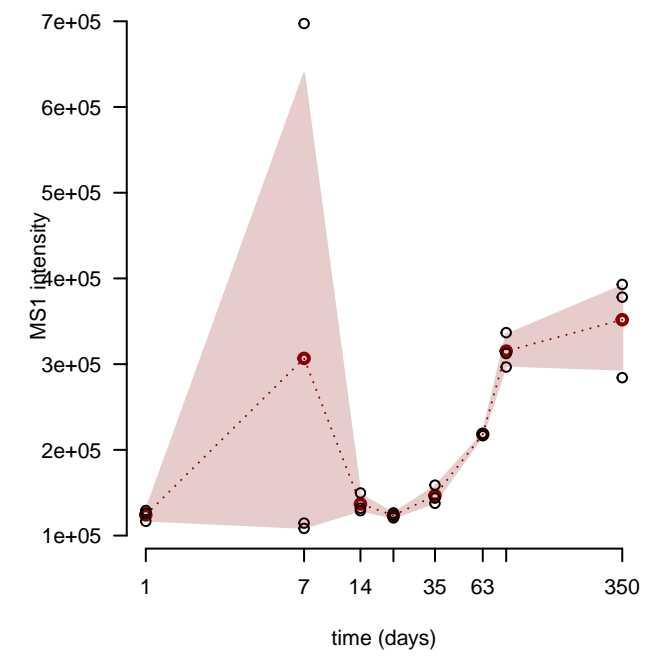

**P42128**  
**GN=Foxk1**  
forkhead box K1

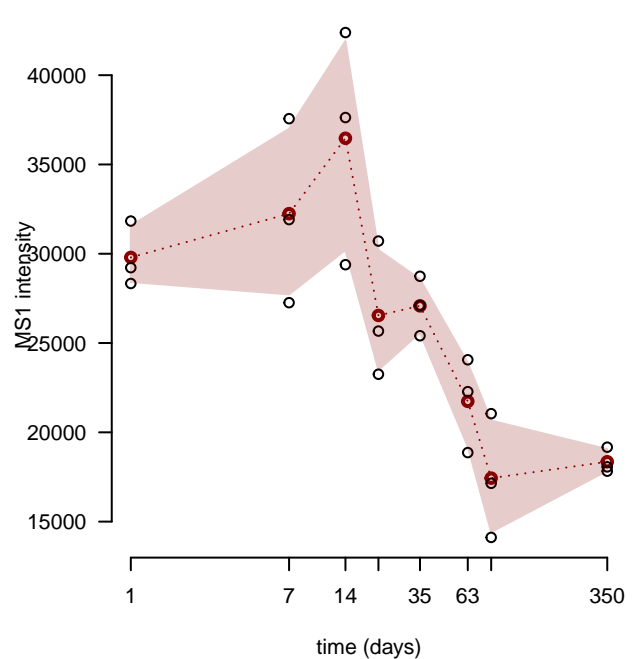

**P42208**  
**GN=Sept2**

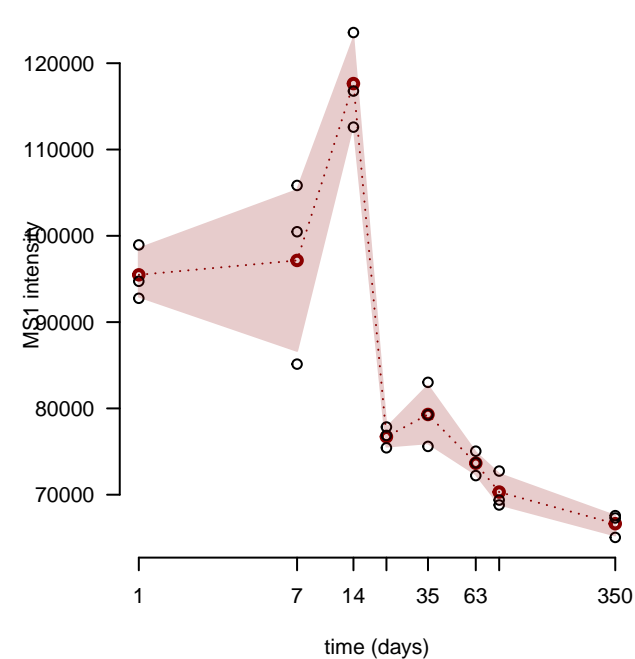

**P42209**  
**GN=Sept1**

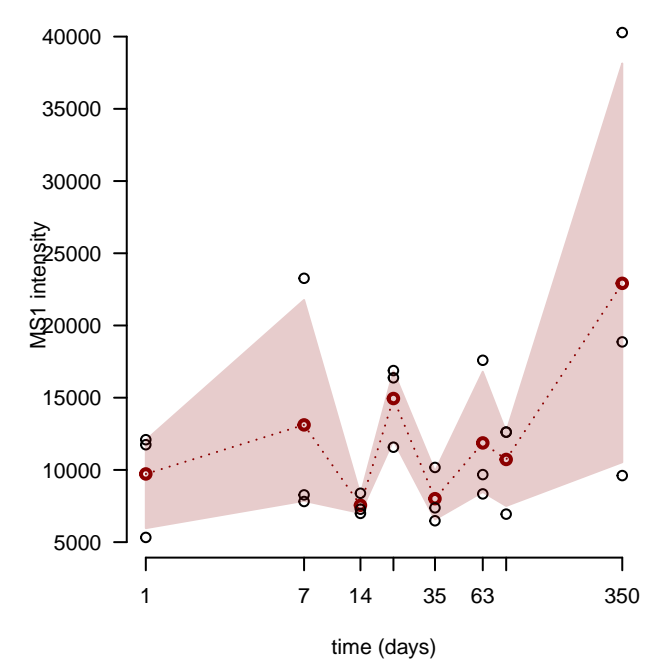

**P42225**  
**GN=Stat1**  
signal transducer and activator of trans ...

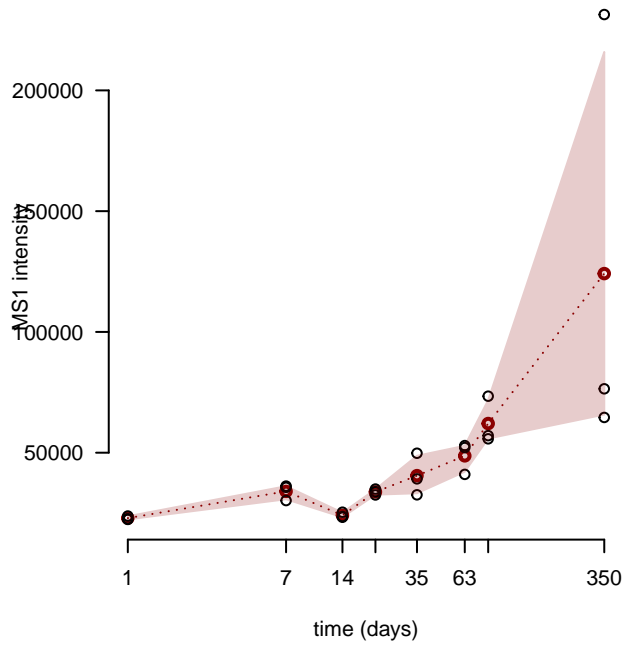

**P42227**  
**GN=Stat3**  
signal transducer and activator of trans ...

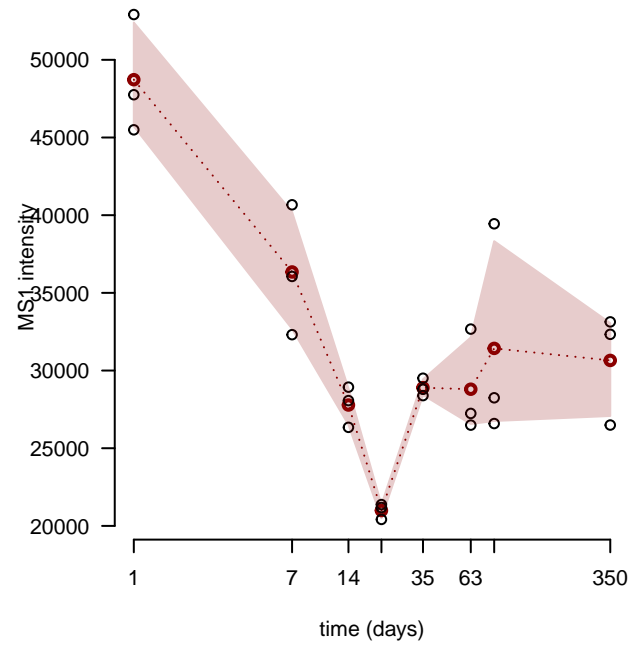

**P42230**  
**GN=Stat5a**  
signal transducer and activator of trans ...

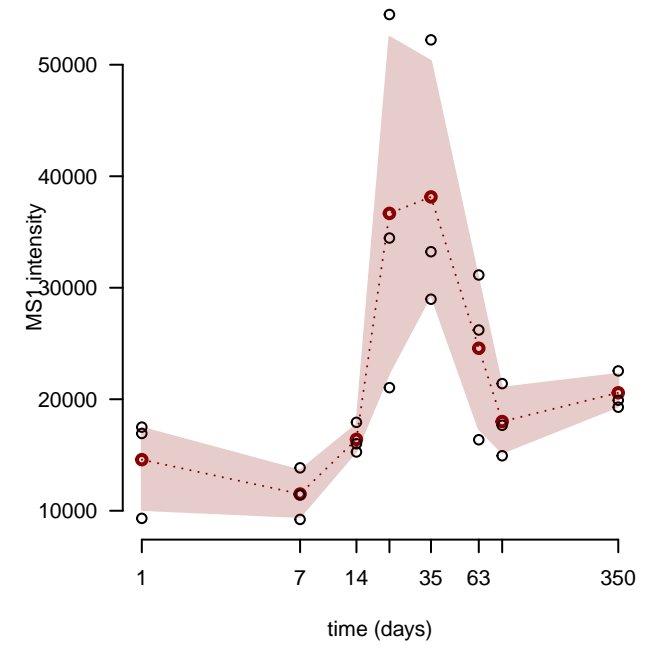

**P42232**  
**GN=Stat5b**  
signal transducer and activator of trans ...

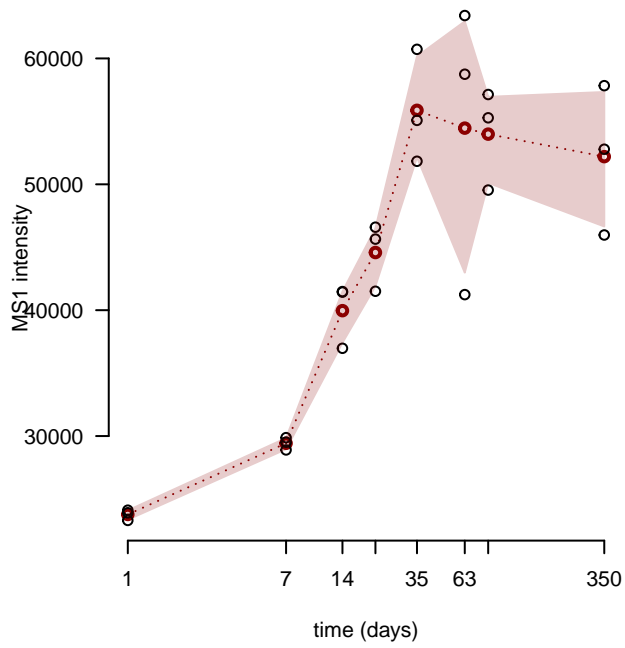

**P42337**  
**GN=Pik3ca**  
phosphatidylinositol-4,5-bisphosphate 3-

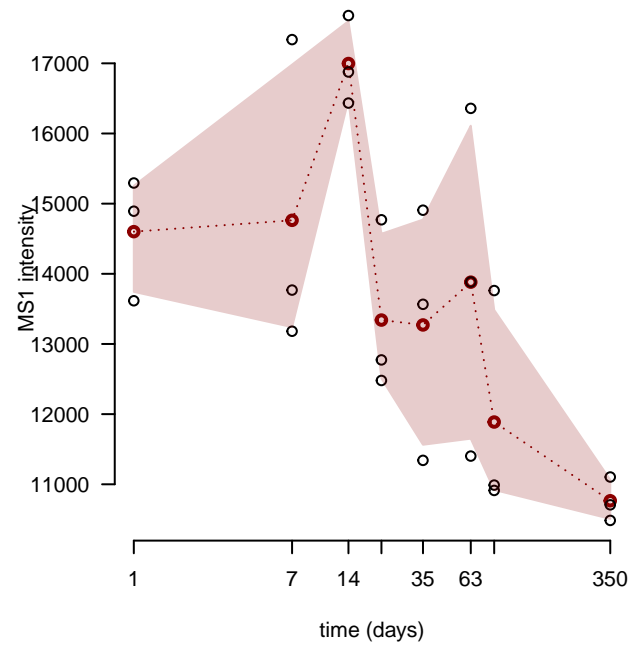

**P42567**  
**GN=Eps15**  
epidermal growth factor receptor pathway ...

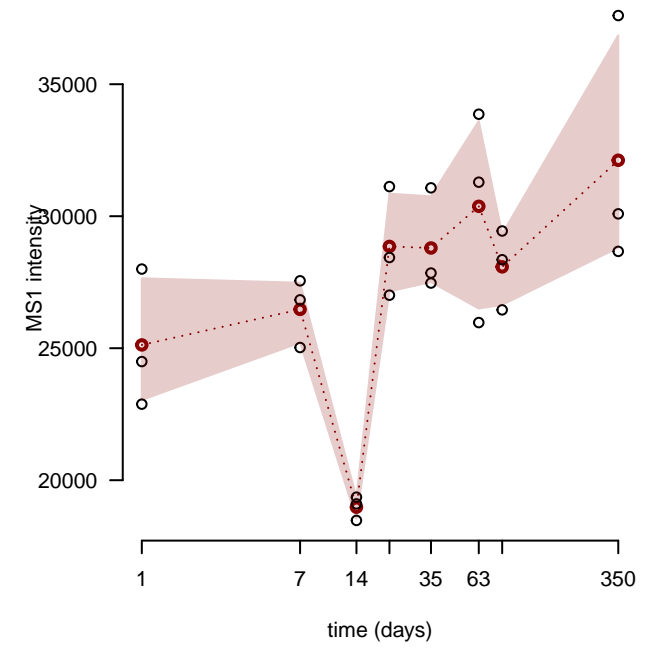

**P42669**  
**GN=Pura**  
purine rich element binding protein A

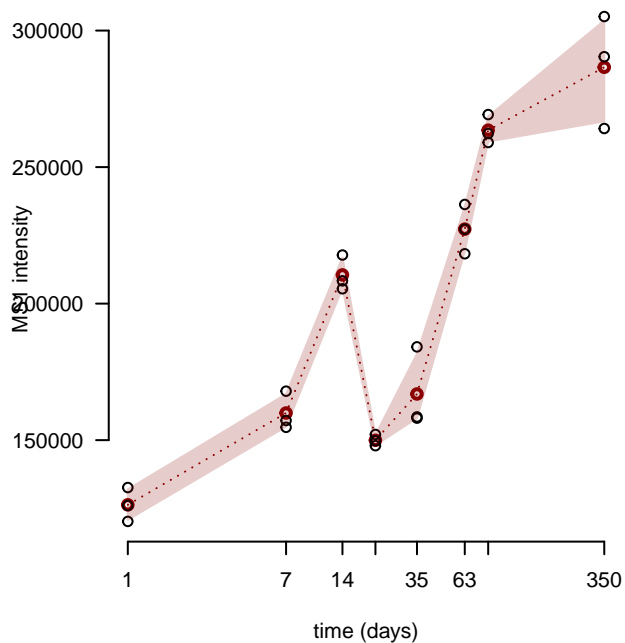

**P42703**  
**GN=Lifr**  
LIF receptor alpha

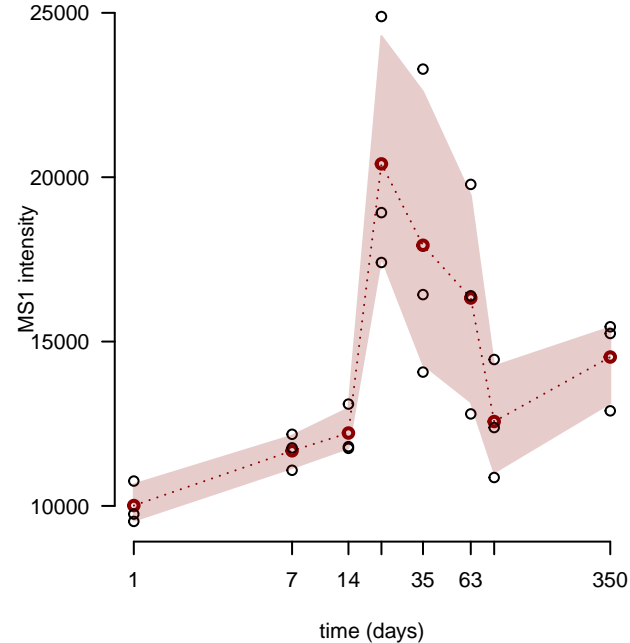

**P42859**  
**GN=Htt**  
huntingtin

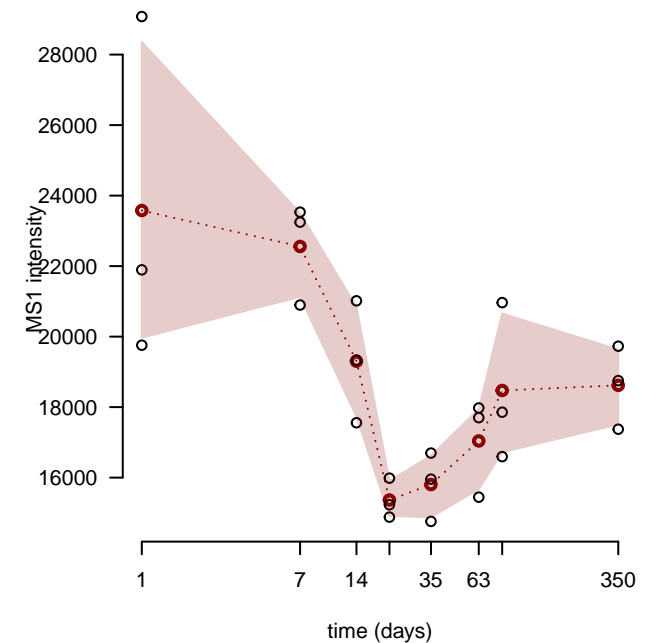

**P42867**  
GN=Dpagt1  
dolichyl-phosphate N-acetylglucosamineph ...

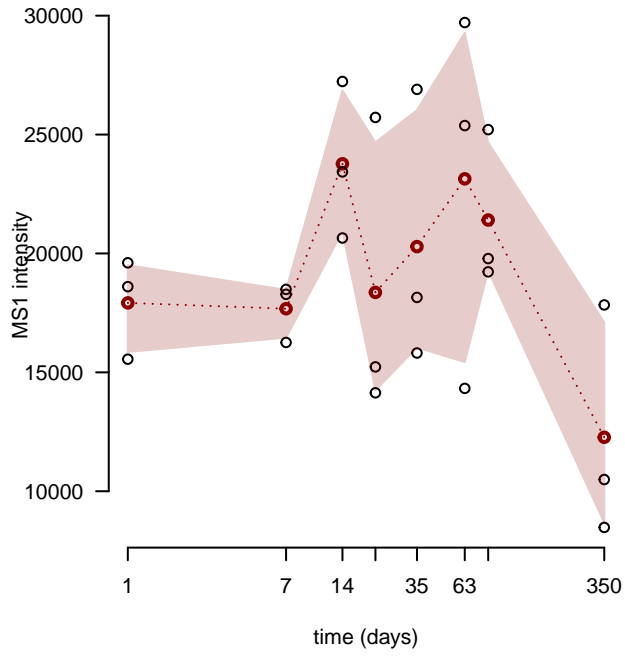

**P42925**  
GN=Pxmp2  
peroxisomal membrane protein 2

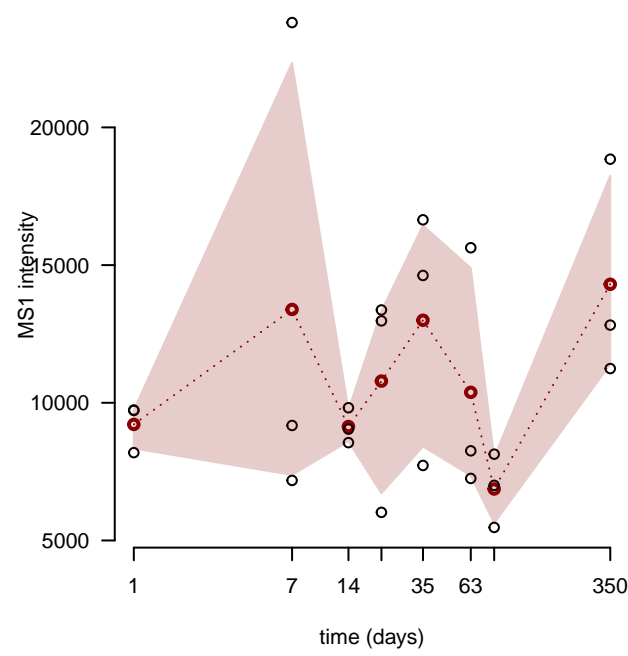

**P42932**  
GN=Cct8  
chaperonin containing Tcp1, subunit 8 (t ...

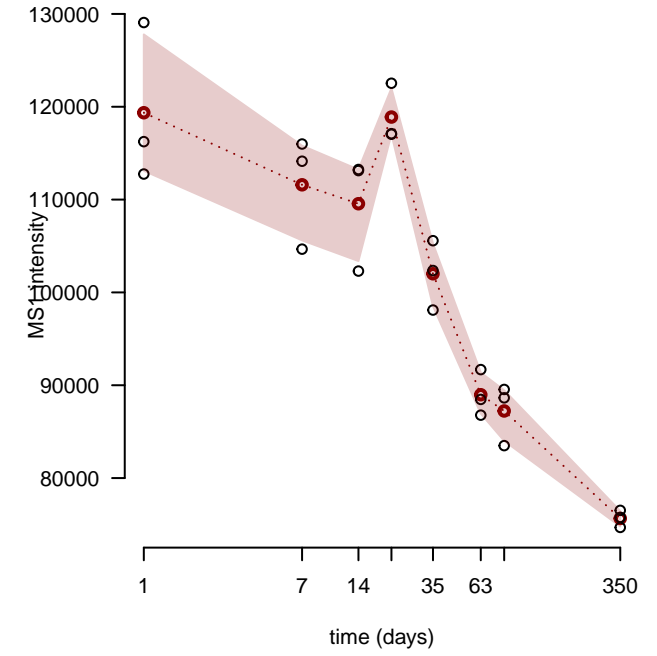

**P43024**  
GN=Cox6a1  
cytochrome c oxidase subunit 6A1

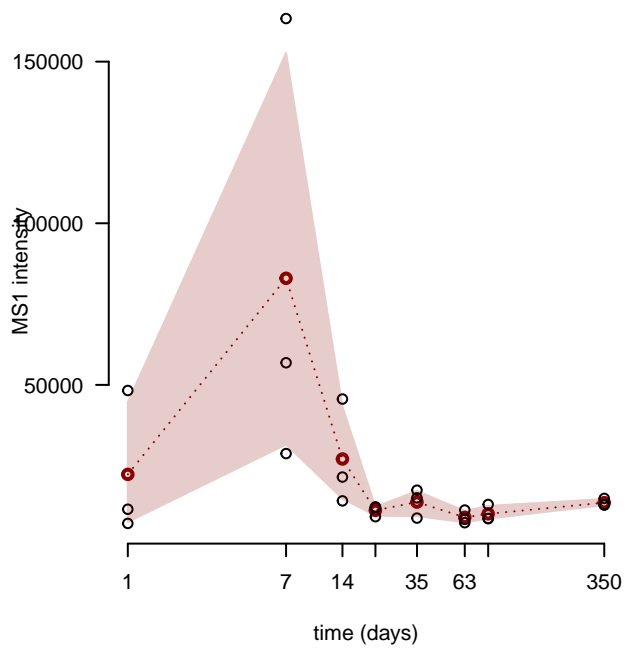

**P43025**  
GN=Clec3b  
C-type lectin domain family 3, member b

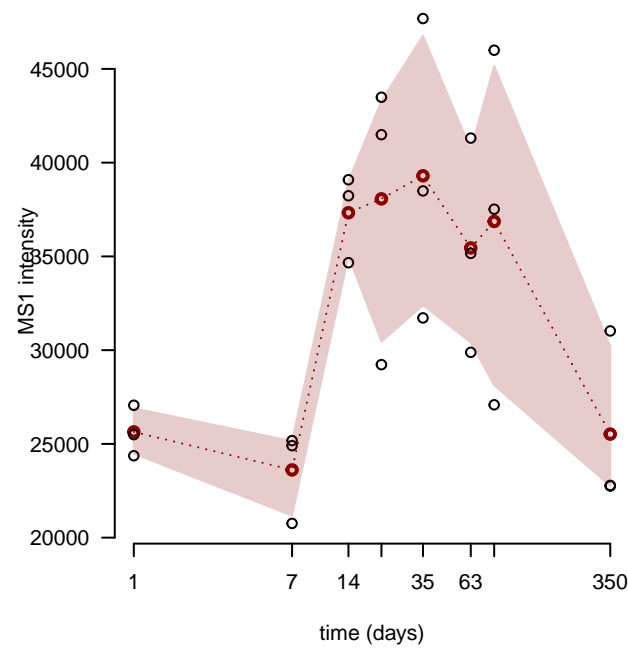

**P43117**  
GN=Ptgfr  
prostaglandin F receptor

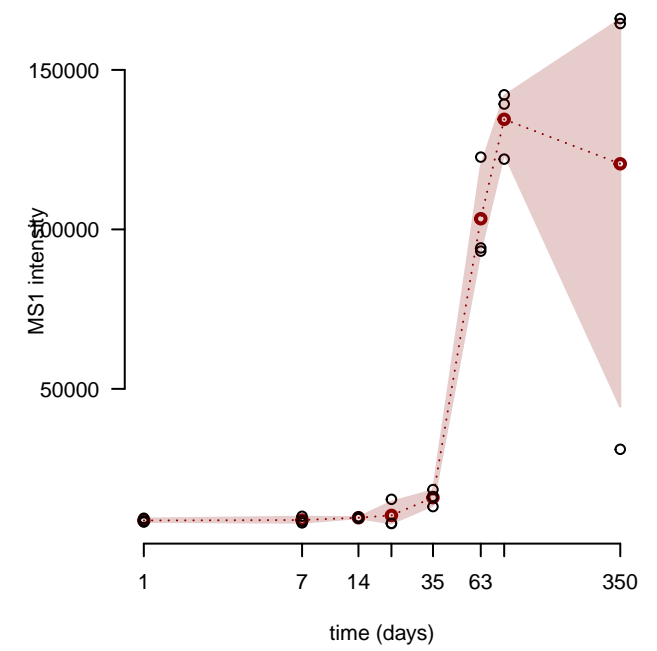

**P43135**  
GN=Nr2f2  
nuclear receptor subfamily 2, group F, m ...

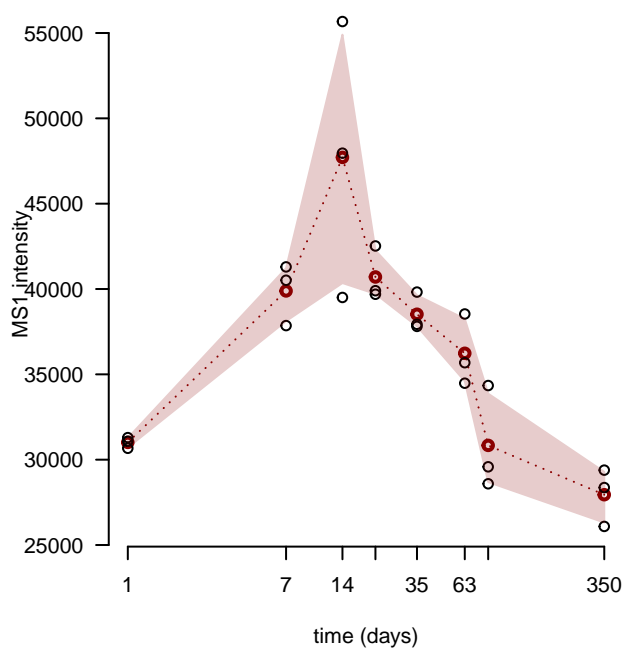

**P43136**  
GN=Nr2f6  
nuclear receptor subfamily 2, group F, m ...

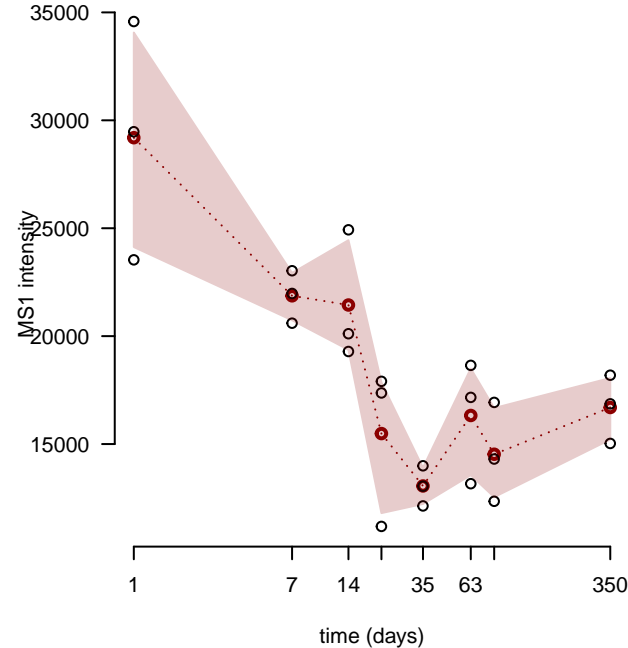

**P43247**  
GN=Msh2  
mutS homolog 2

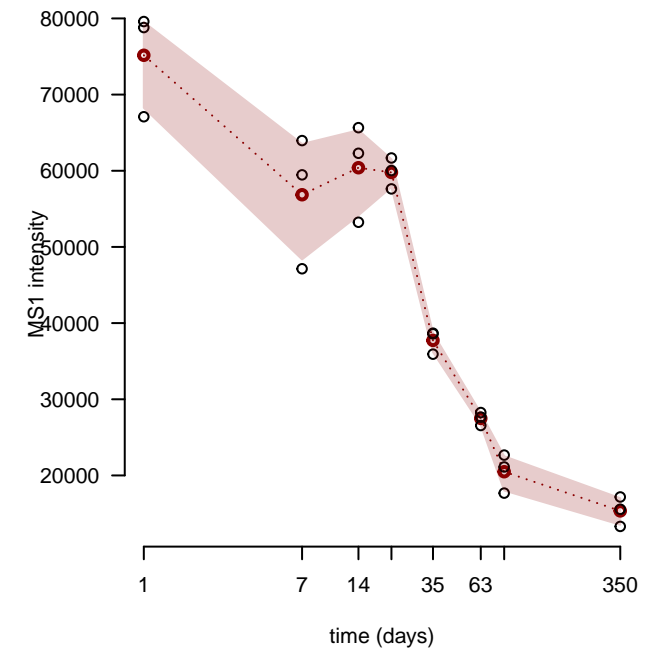

P43274  
GN=Hist1h1e

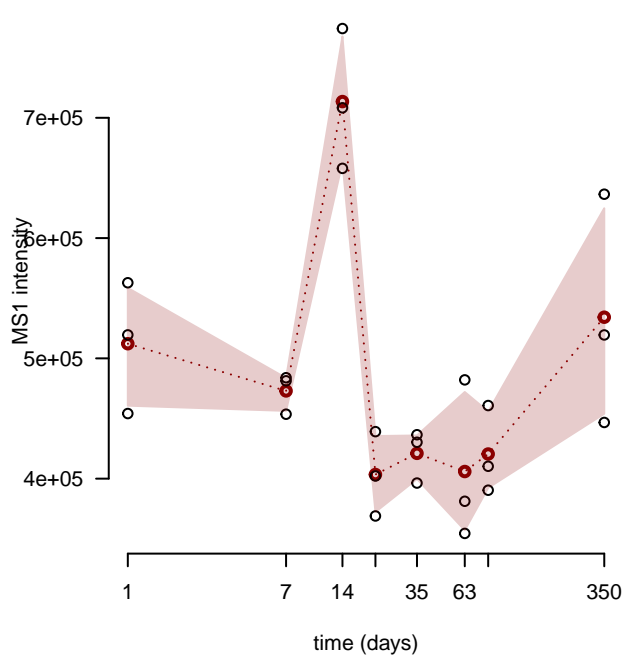

P43275  
GN=Hist1h1a

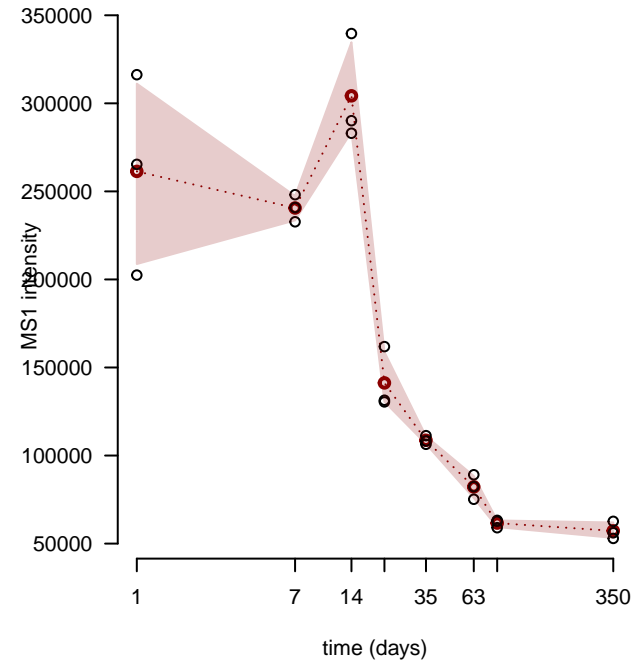

P43276  
GN=Hist1h1b

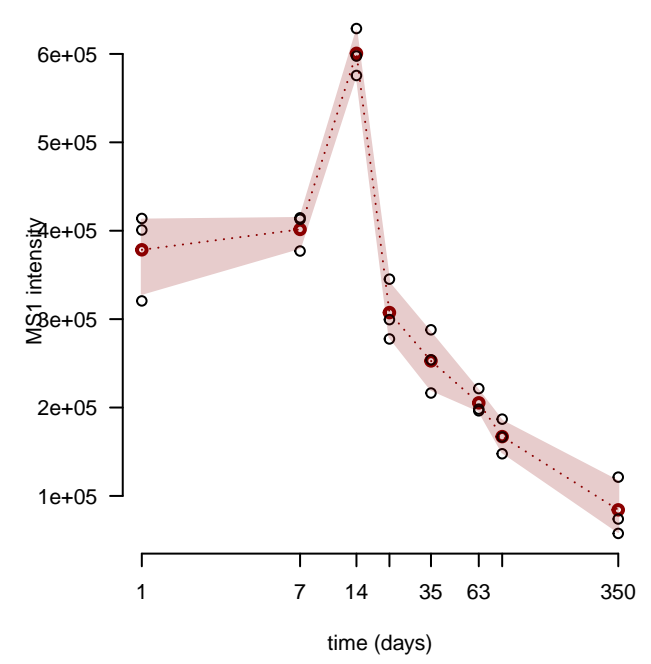

P43277  
GN=Hist1h1d

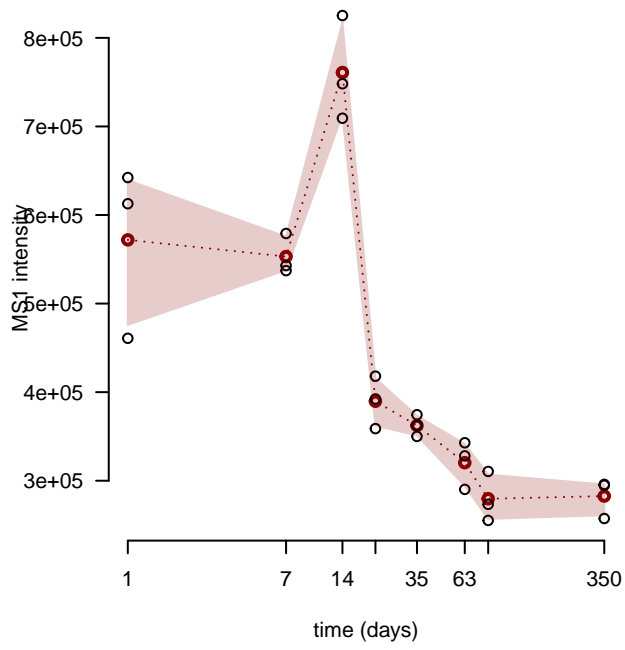

P43346  
GN=Dck  
deoxycytidine kinase

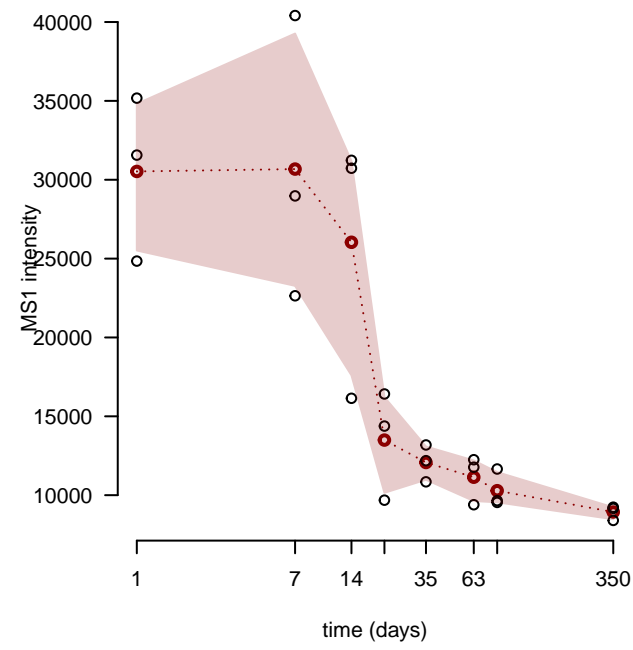

P43404  
GN=Zap70  
zeta-chain (TCR) associated protein kina ...

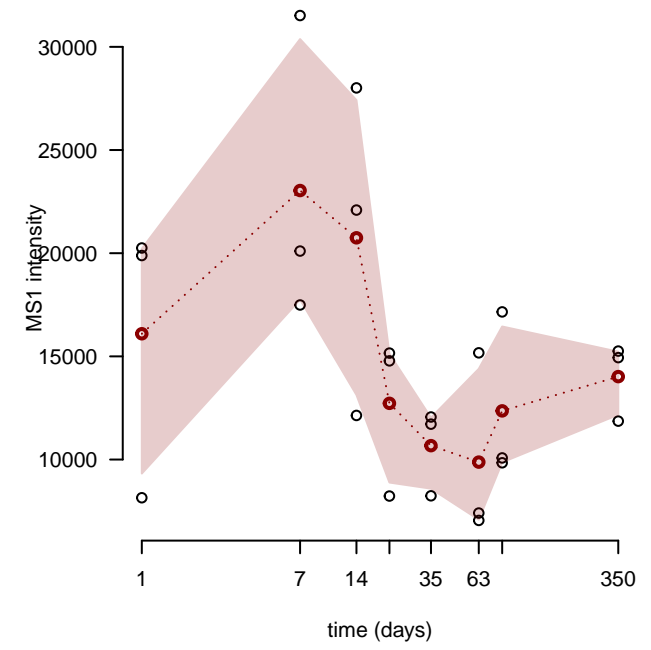

P43406  
GN=Itgav  
integrin alpha V

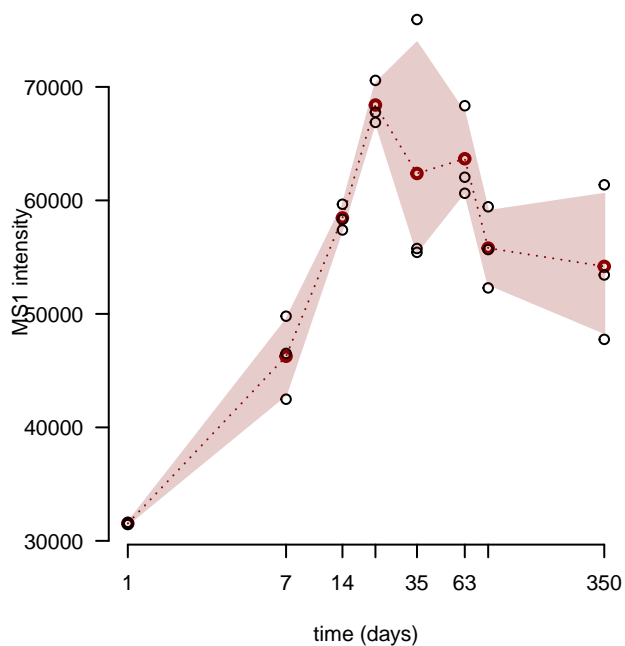

P43407  
GN=Sdc2  
syndecan 2

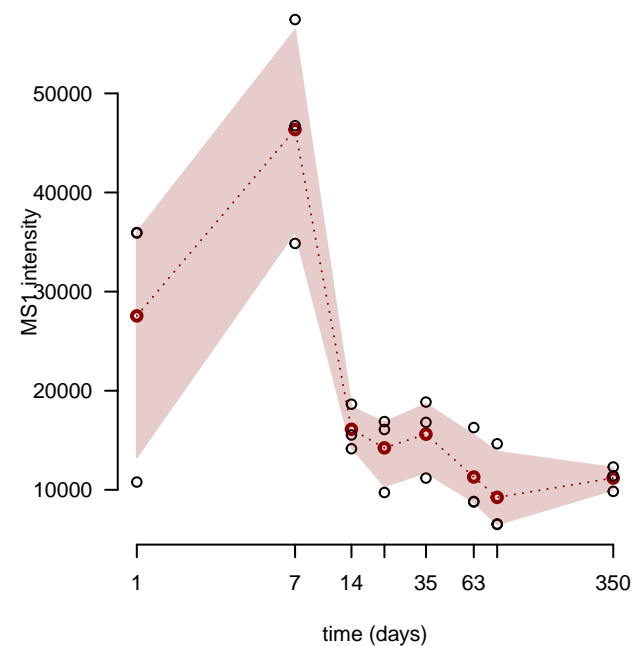

P43883  
GN=Plin2  
perilipin 2

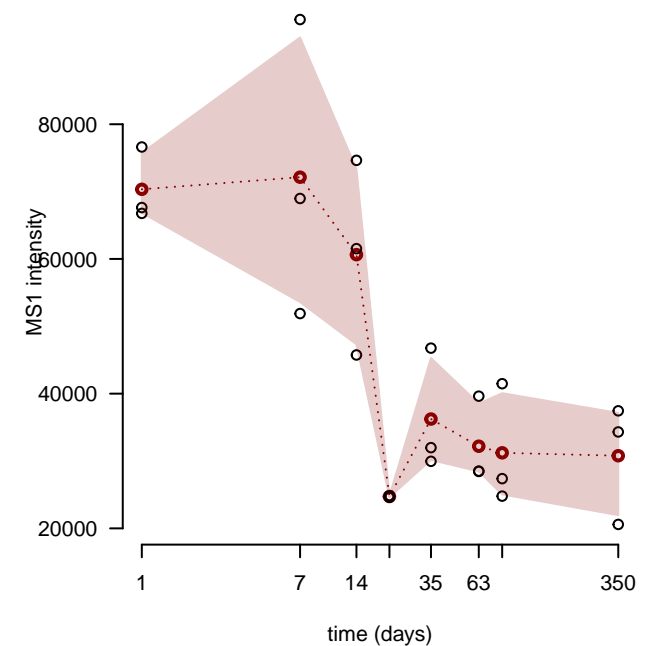

**P45376**  
GN=Akr1b1

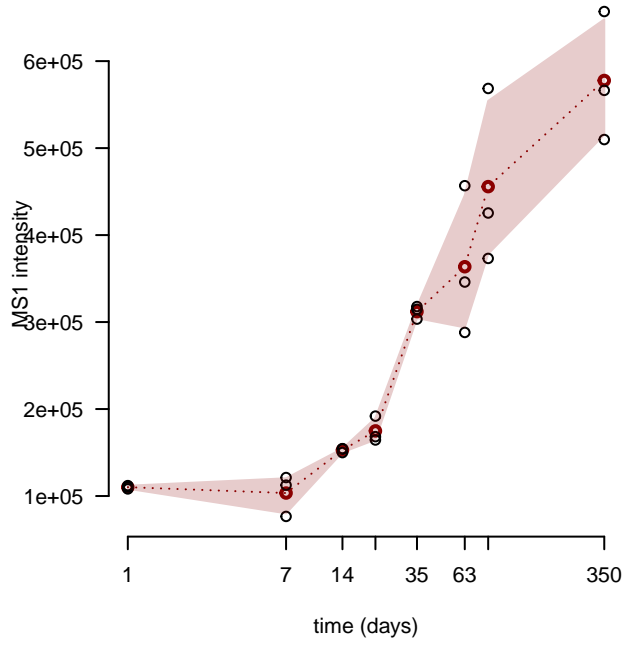

**P45377**  
GN=Akr1b8  
aldo-keto reductase family 1, member B8

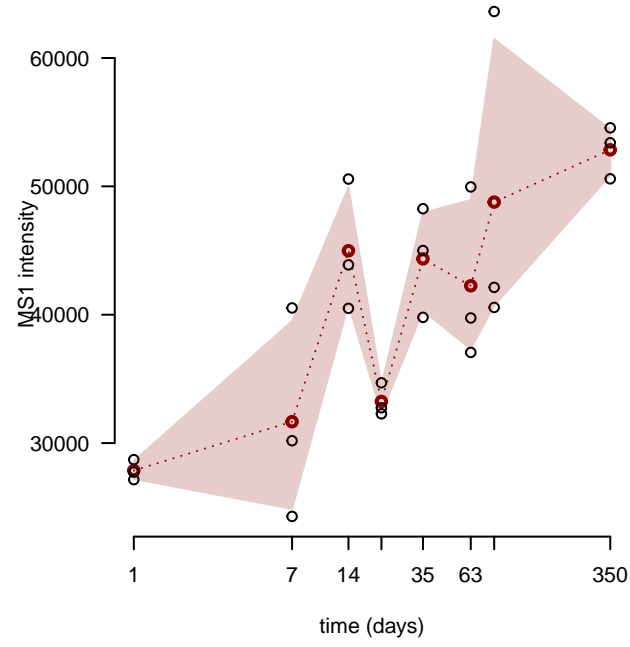

**P45448**  
GN=Nr5a2  
nuclear receptor subfamily 5, group A, m ...

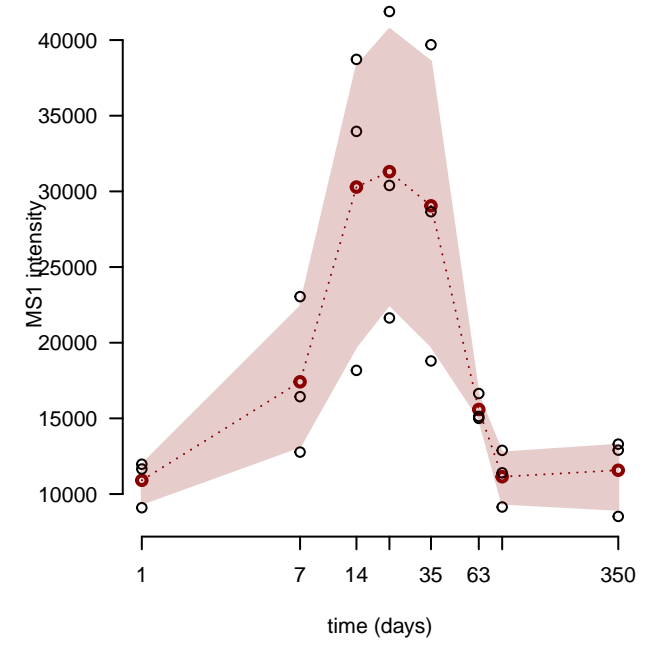

**P45481**  
GN=Crebbp  
CREB binding protein

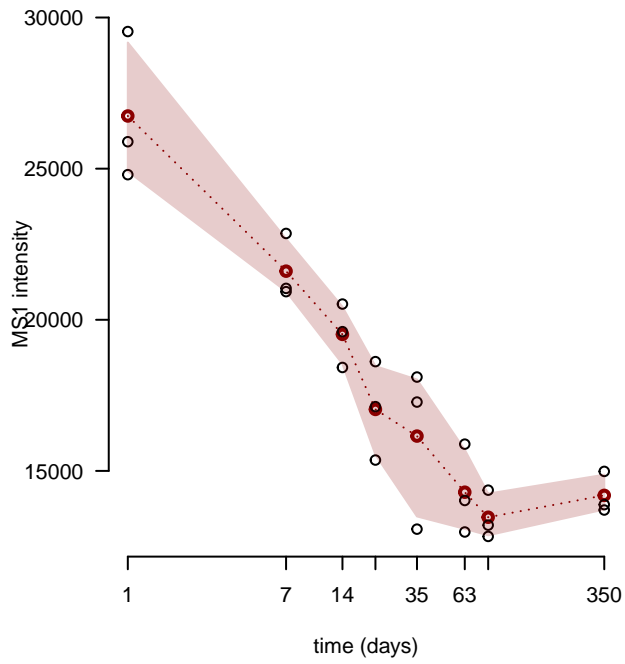

**P45591**  
GN=Cfl2  
cofilin 2, muscle

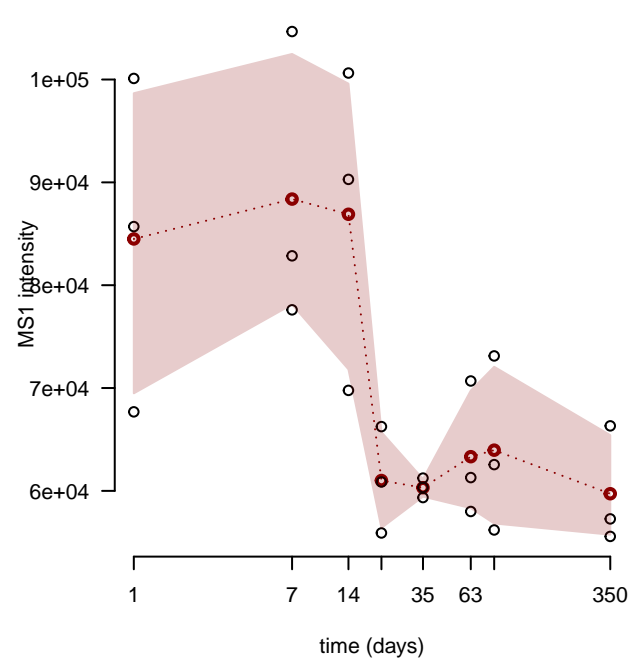

**P45700**  
GN=Man1a1

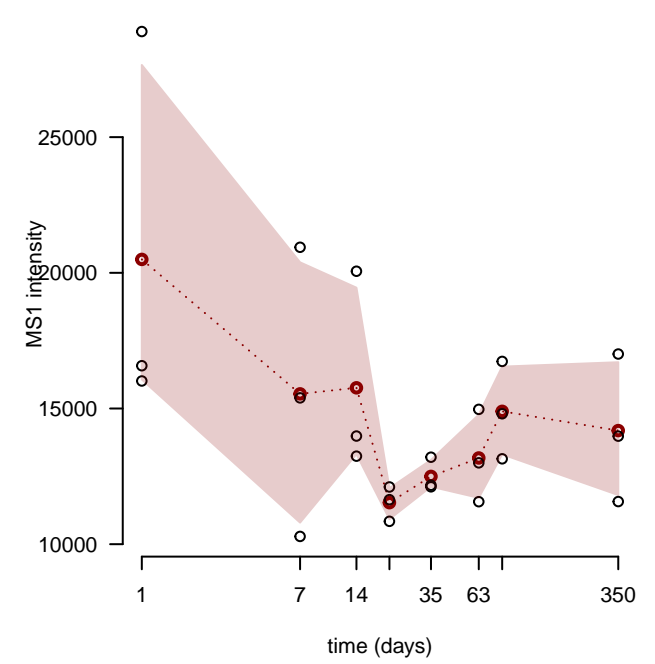

**P45878**  
GN=Fkbp2  
FK506 binding protein 2

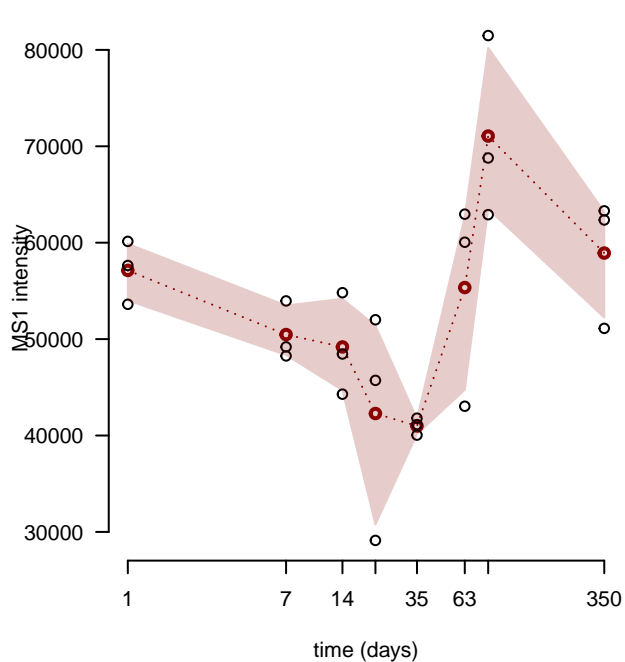

**P45952**  
GN=Acadm  
acyl-Coenzyme A dehydrogenase, medium ch ...

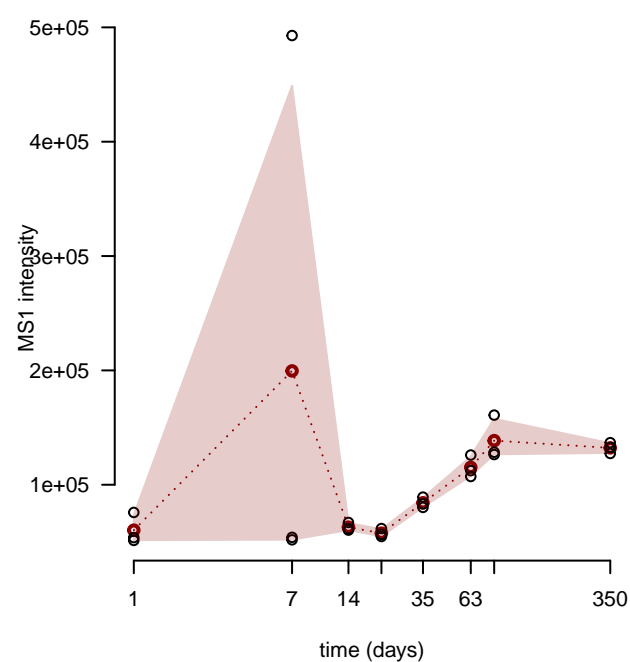

**P46061**  
GN=Rangap1  
RAN GTPase activating protein 1

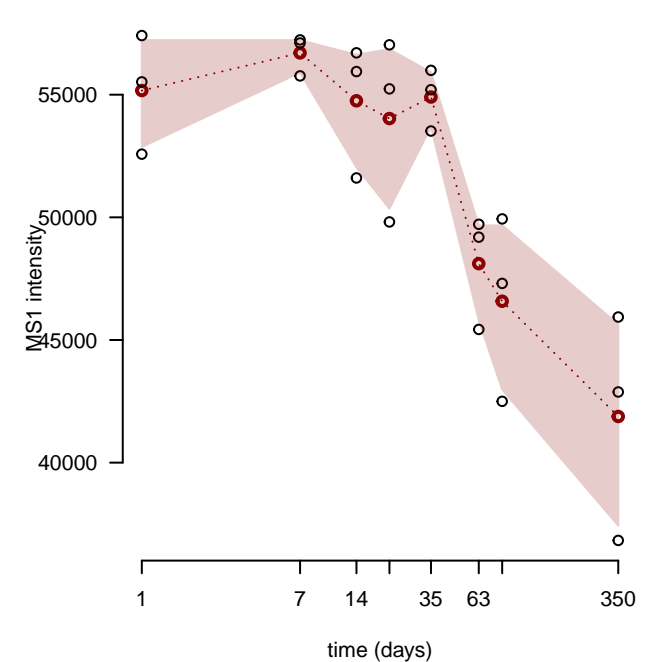

**P46062**  
GN=Sipa1  
signal-induced proliferation associated ...

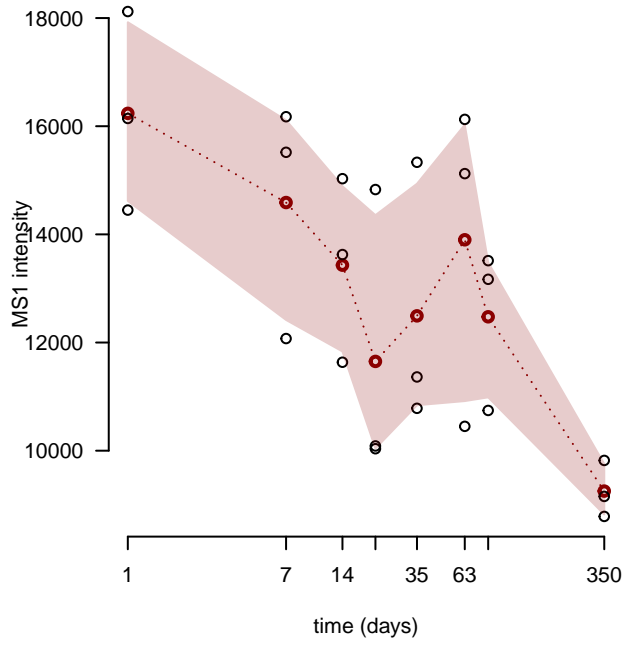

**P46096**  
GN=Syt1  
synaptotagmin I

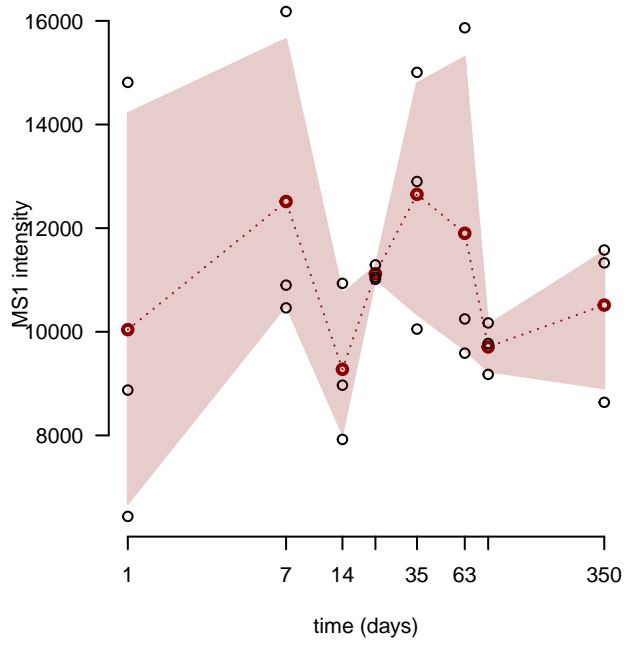

**P46412**  
GN=Gpx3  
glutathione peroxidase 3

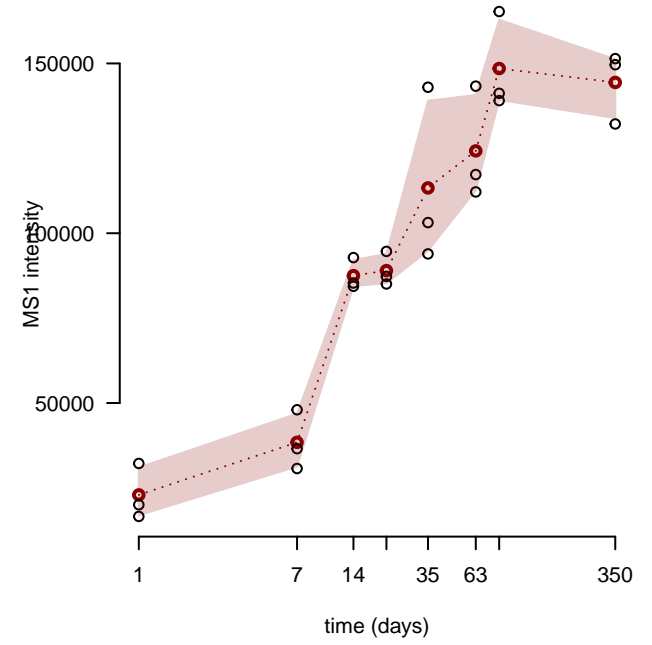

**P46414**  
GN=Cdkn1b  
cyclin-dependent kinase inhibitor 1B

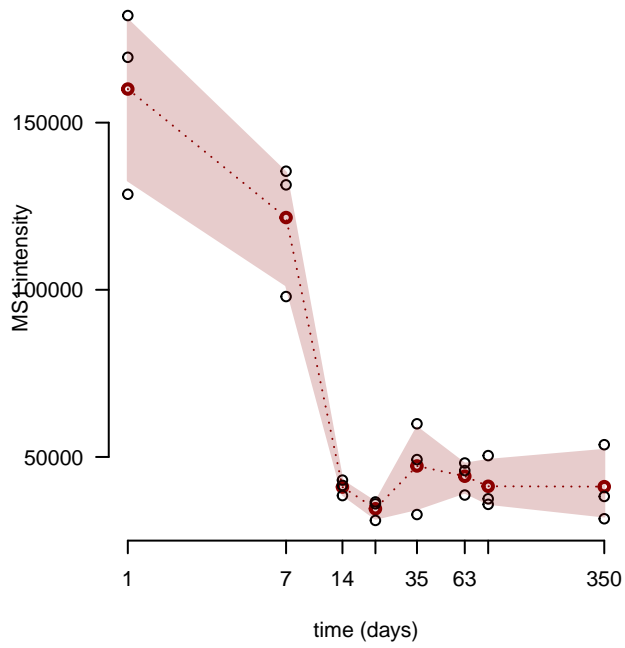

**P46425**  
GN=Gstp2  
glutathione S-transferase, pi 2

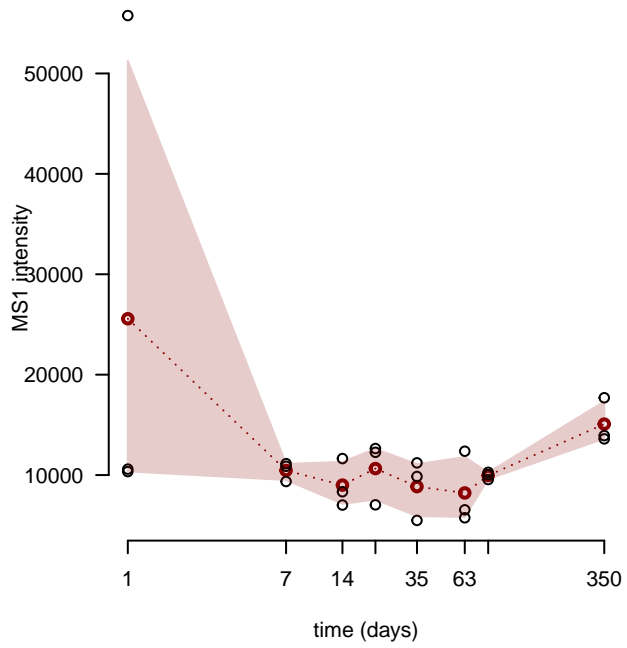

**P46460**  
GN=Nsf  
N-ethylmaleimide sensitive fusion protei ...

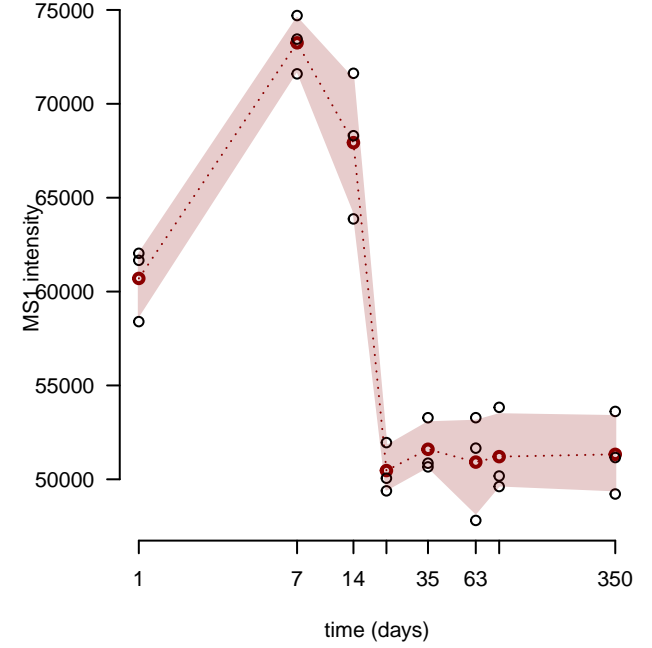

**P46467**  
GN=Vps4b  
vacuolar protein sorting 4B

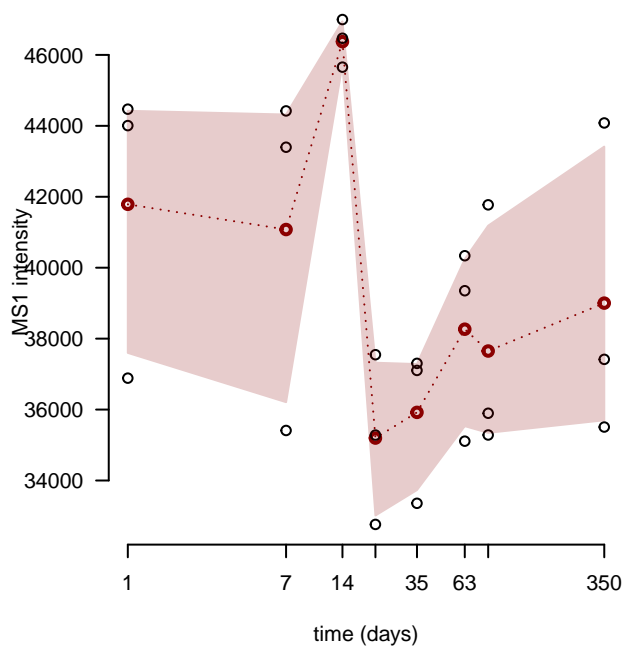

**P46471**  
GN=Psmc2  
proteasome (prosome, macropain) 26S subu ...

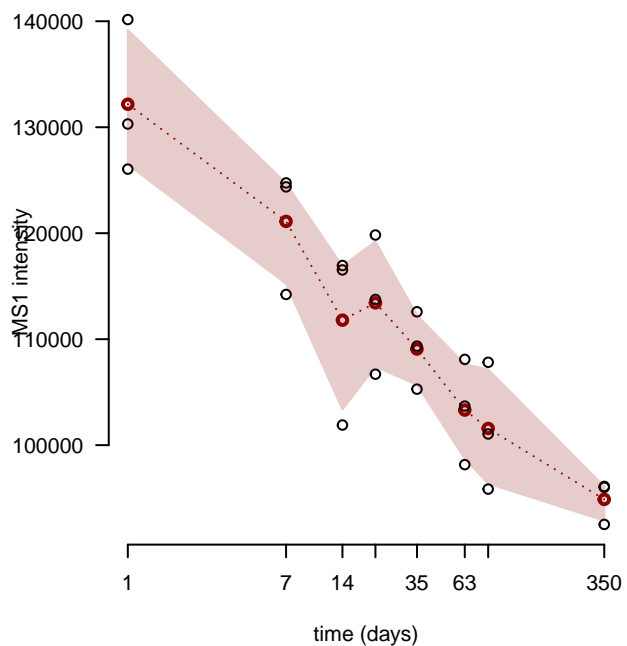

**P46638**  
GN=Rab11b  
RAB11B, member RAS oncogene family

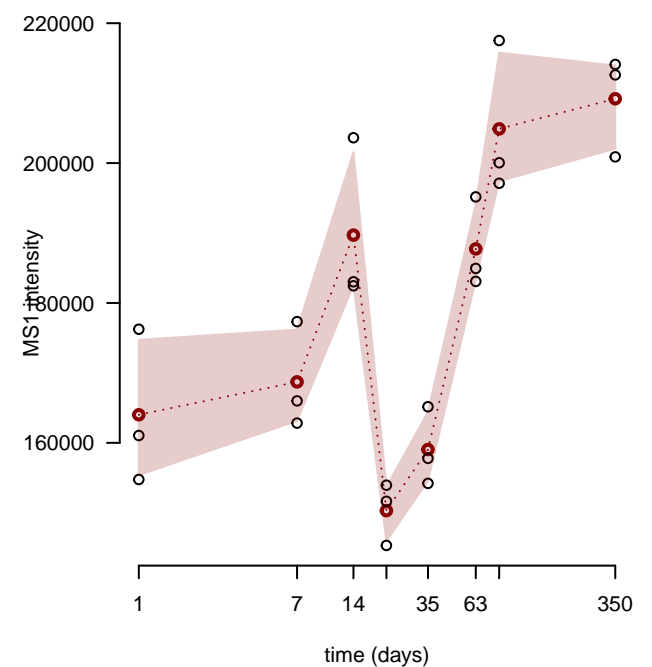

**P46656**  
GN=Fdx1  
ferredoxin 1

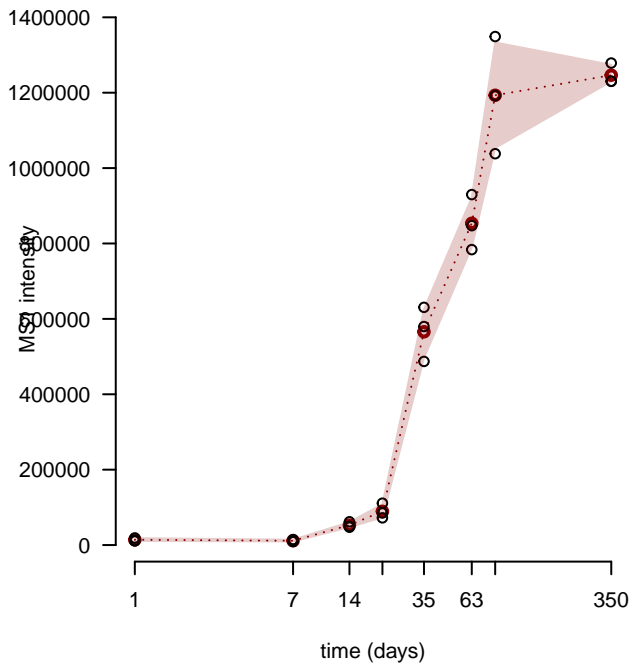

**P46660**  
GN=Ina  
internexin neuronal intermediate filamen ...

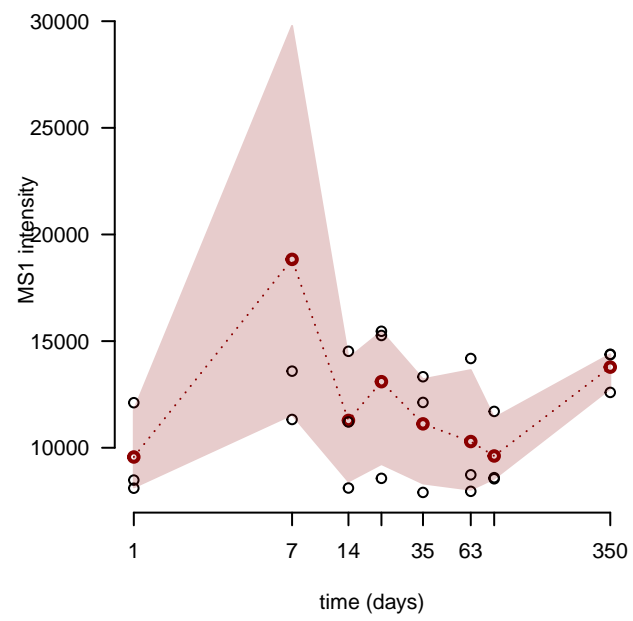

**P46662**  
GN=Nf2  
neurofibromin 2

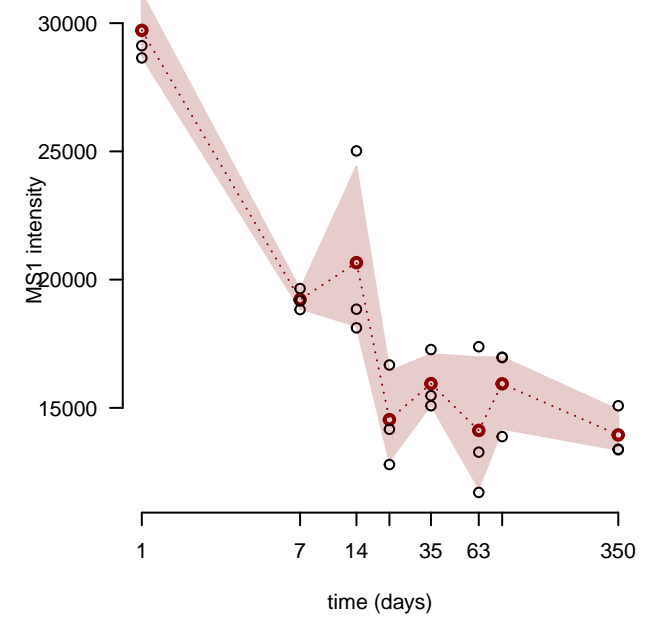

**P46664**  
GN=Adss  
adenylosuccinate synthetase, non muscle

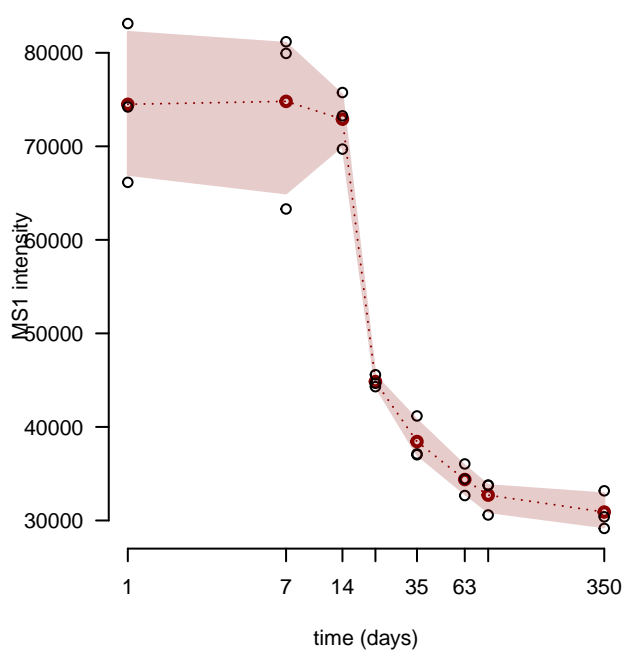

**P46718**  
GN=Pdcd2  
programmed cell death 2

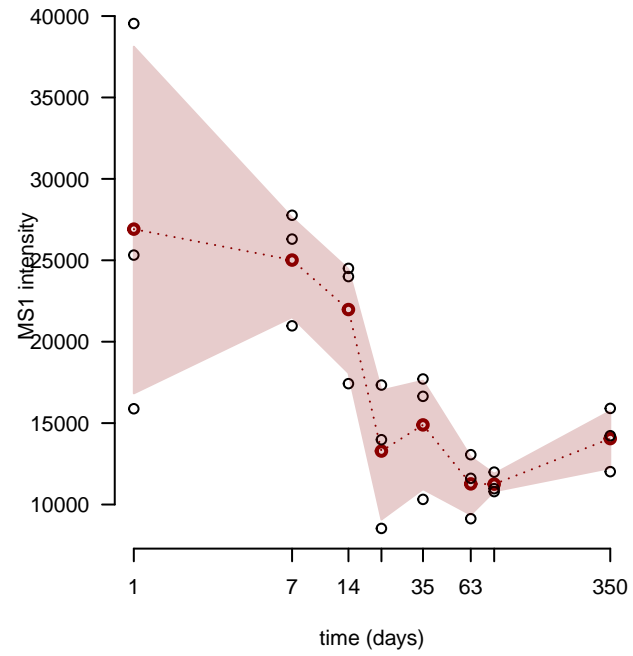

**P46735**  
GN=Myo1b  
myosin IB

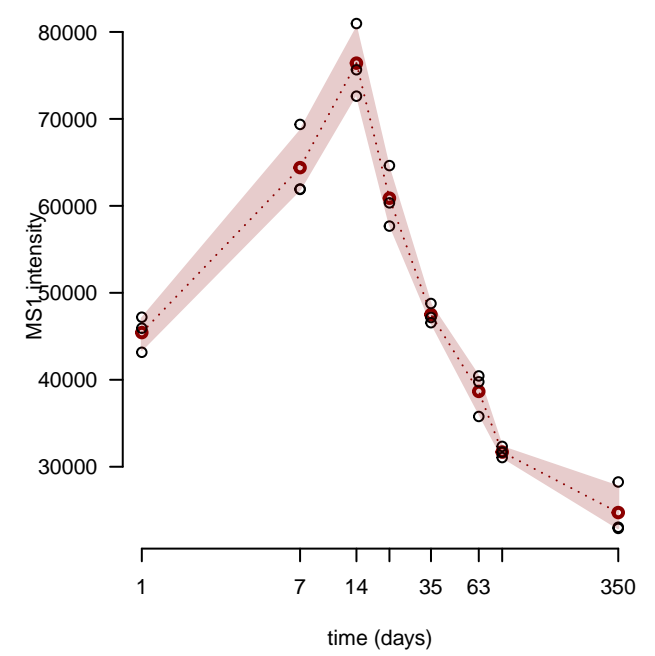

**P46737**  
GN=Brcc3  
BRCA1/BRCA2-containing complex, subunit ...

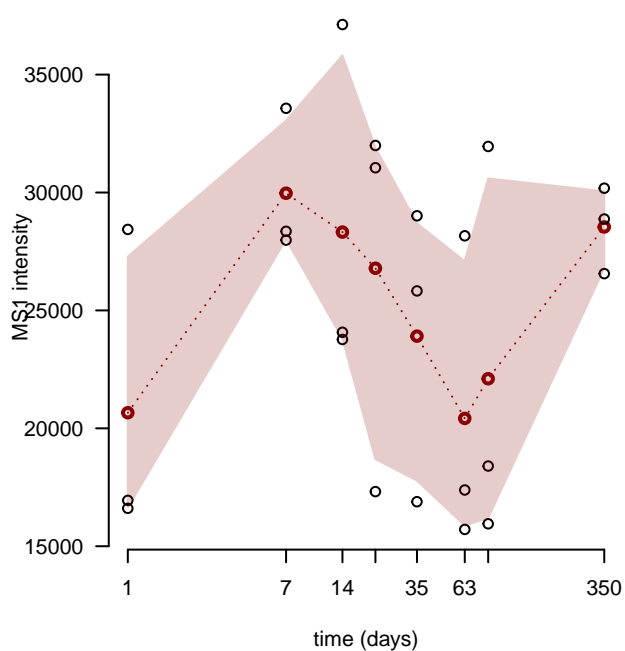

**P46935**  
GN=Nedd4  
neural precursor cell expressed, develop ...

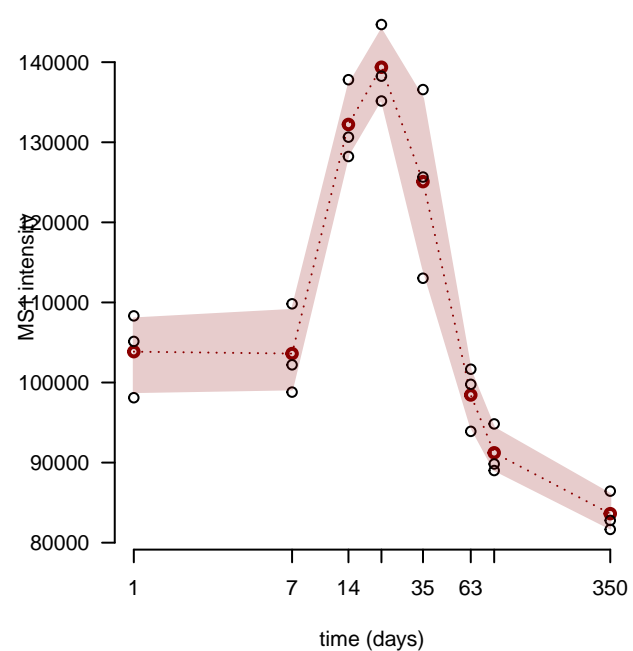

**P46938**  
GN=Yap1  
yes-associated protein 1

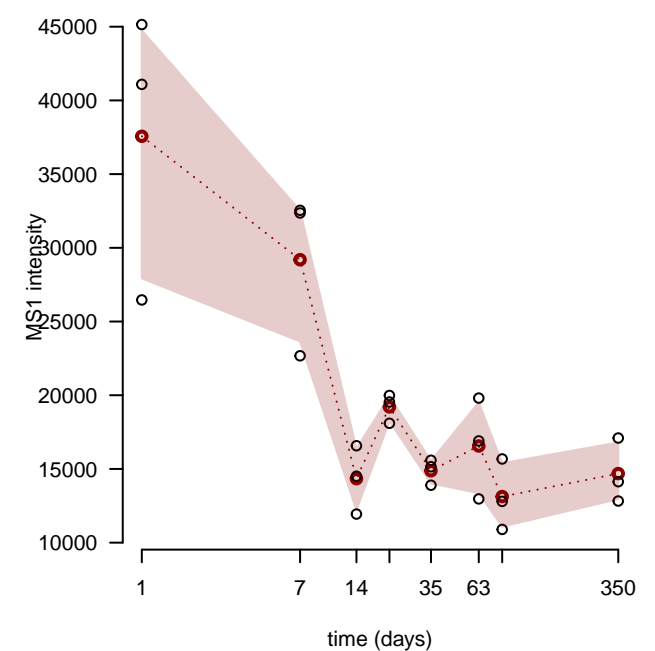

**P46978**  
**GN=Stt3a**  
STT3, subunit of the oligosaccharyltrans ...

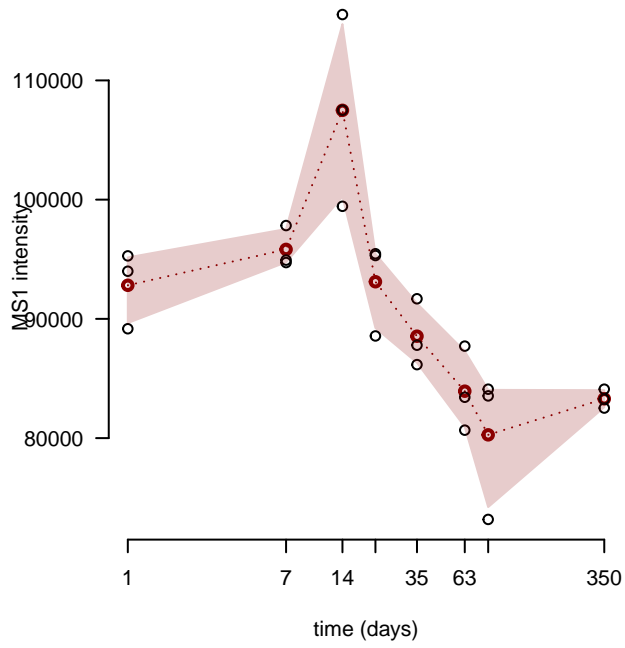

**P47199**  
**GN=Cryz**  
crystallin, zeta

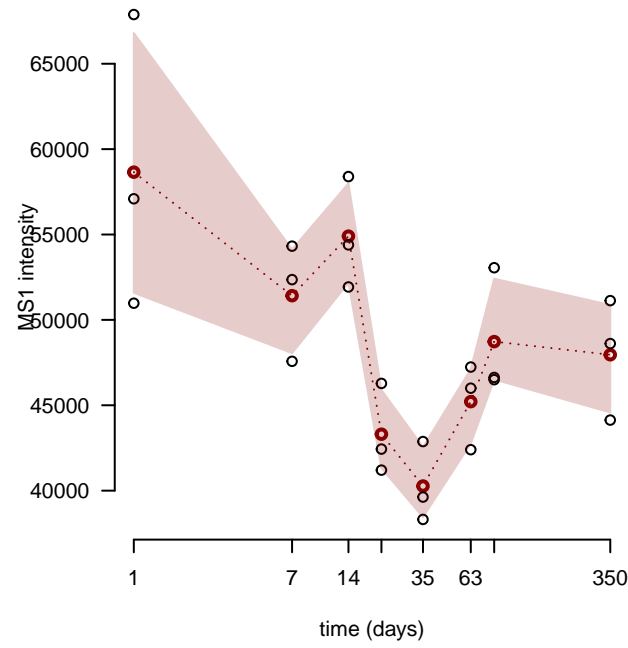

**P47226**  
**GN=Tes**  
testin LIM domain protein

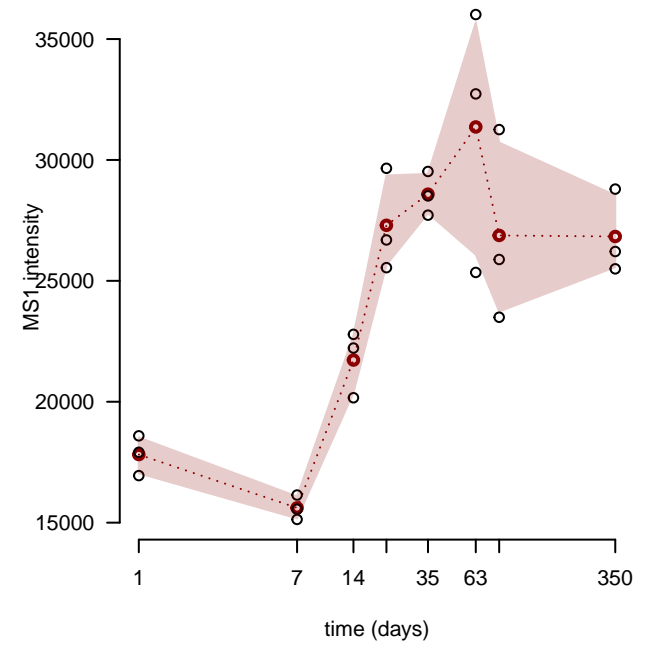

**P47713**  
**GN=Pla2g4a**  
phospholipase A2, group IVA (cytosolic, ...

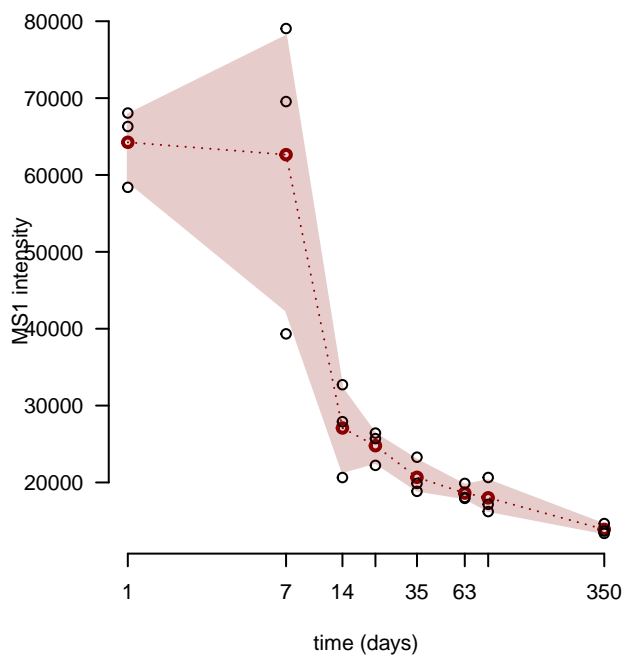

**P47738**  
**GN=Aldh2**  
aldehyde dehydrogenase 2, mitochondrial

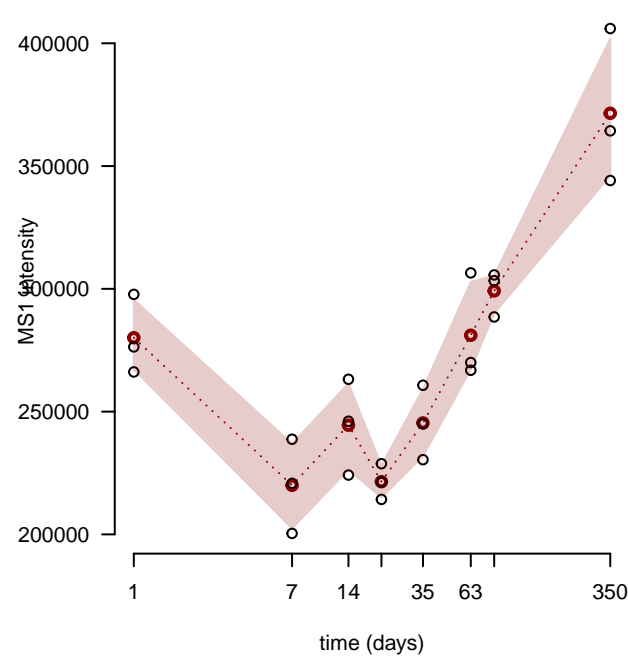

**P47740**  
**GN=Aldh3a2**  
aldehyde dehydrogenase family 3, subfami ...

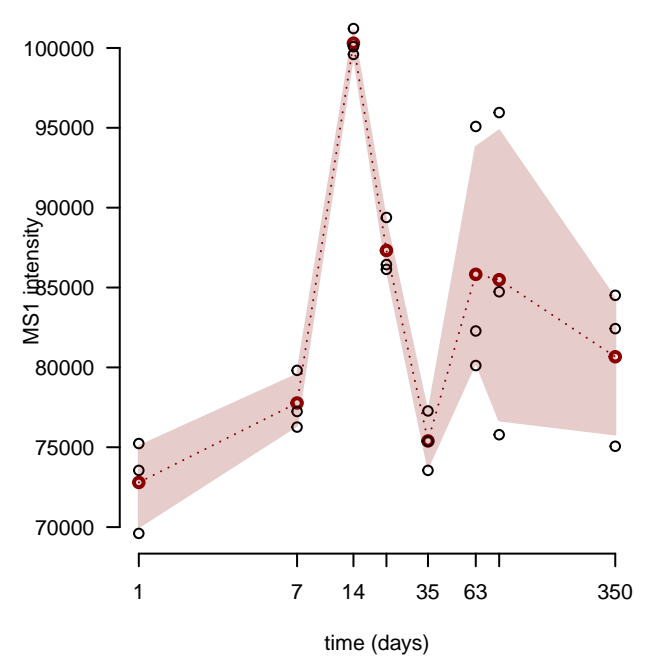

**P47753**  
**GN=Capza1**  
capping actin protein of muscle Z-line s ...

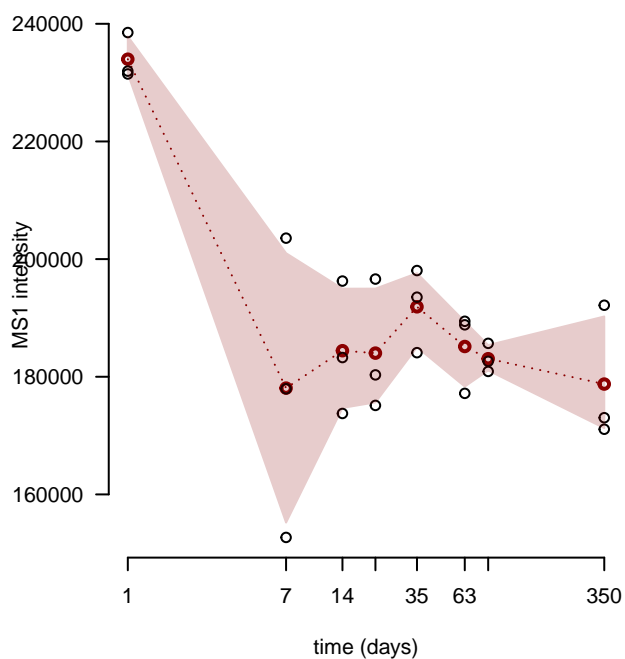

**P47754**  
**GN=Capza2**  
capping actin protein of muscle Z-line s ...

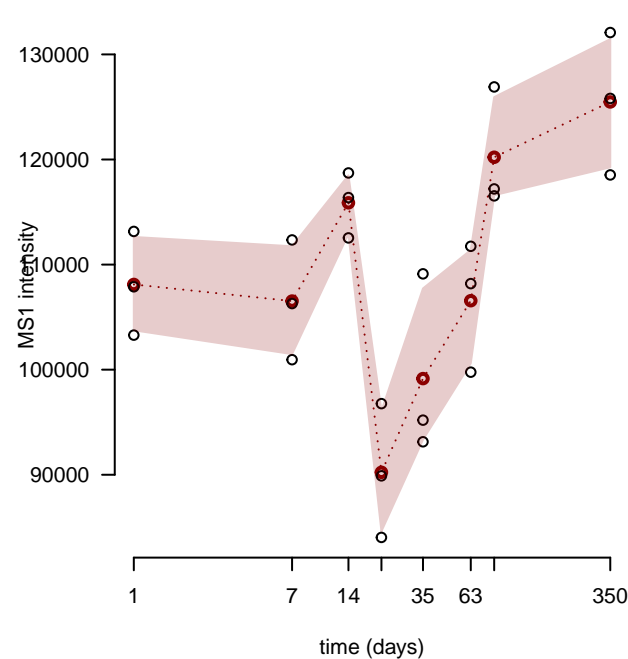

**P47757**  
**GN=Capzb**  
capping actin protein of muscle Z-line s ...

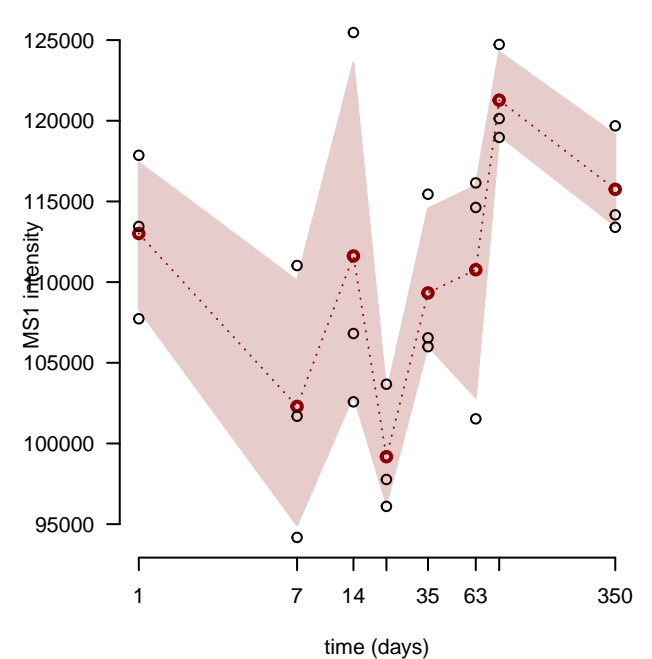



**P47757**  
GN=Capzb  
capping actin protein of muscle Z-line s ...

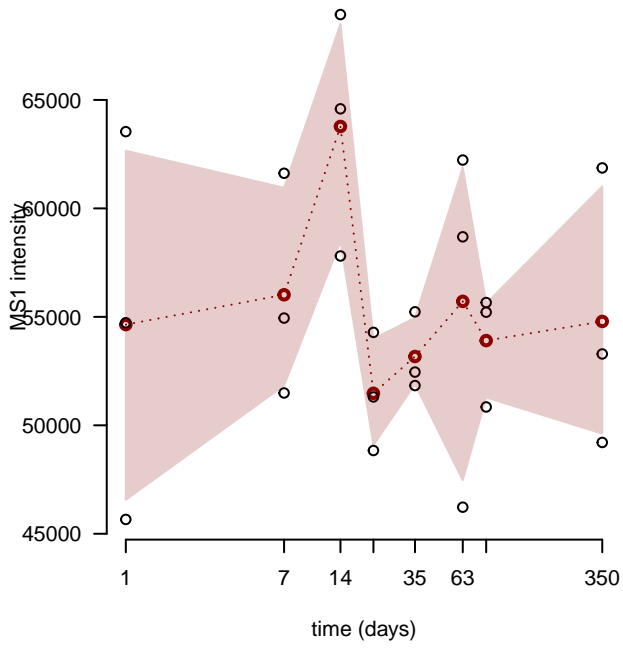

**P47758**  
GN=Srprb  
signal recognition particle receptor, B ...

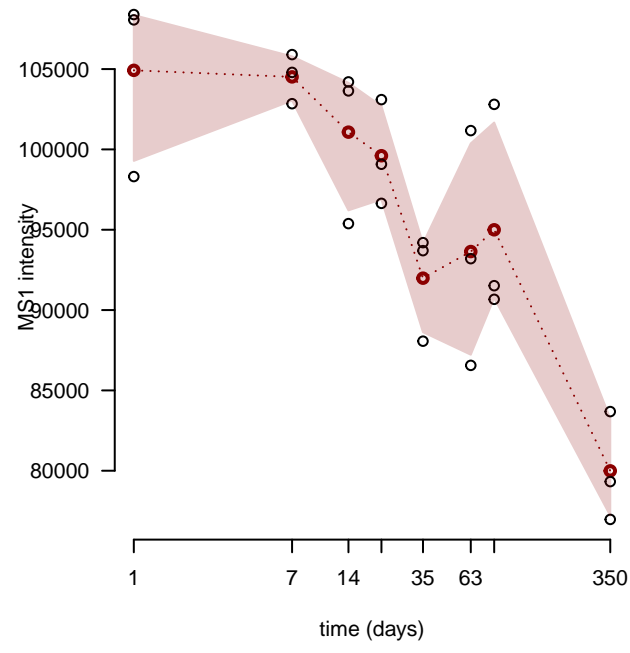

**P47791**  
GN=Gsr  
glutathione reductase

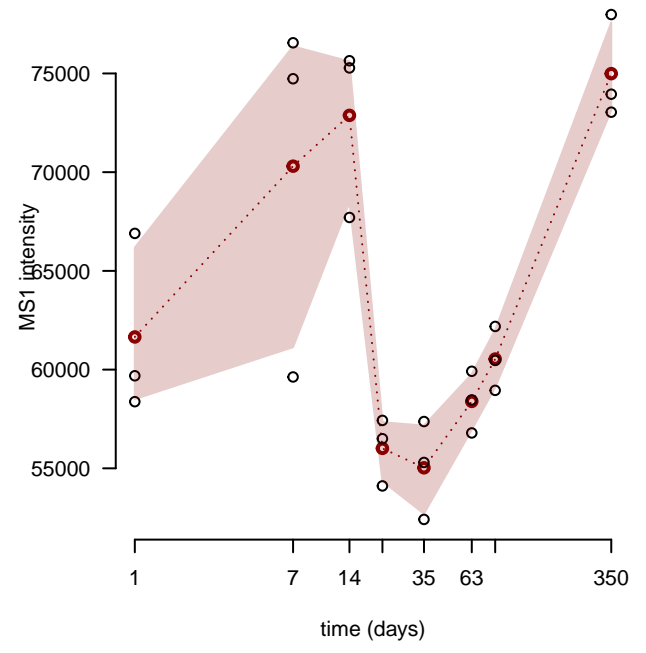

**P47791**  
GN=Gsr  
glutathione reductase

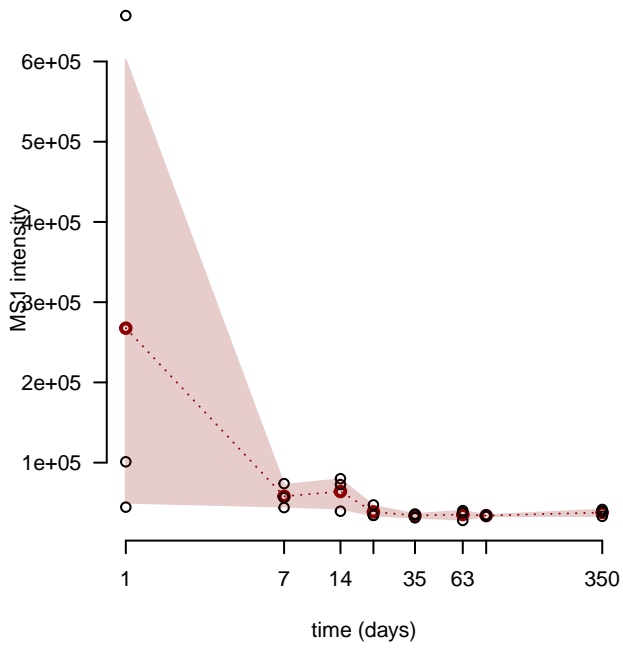

**P47802**  
GN=Mtx1  
metaxin 1

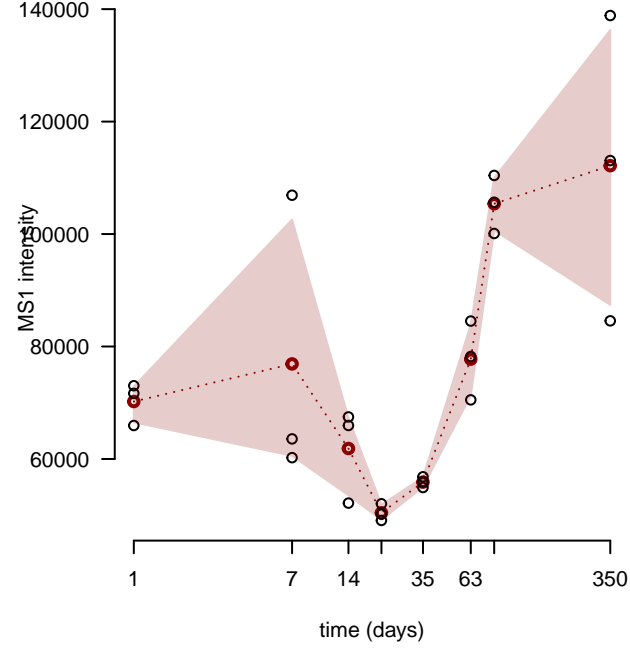

**P47809**  
GN=Map2k4  
mitogen-activated protein kinase ...

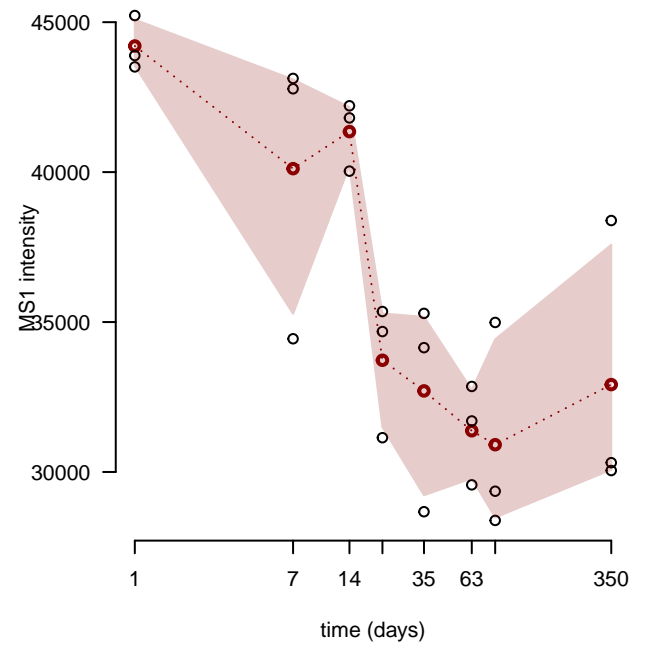

**P47810**  
GN=Wee1  
WEE 1 homolog 1 (S. pombe)

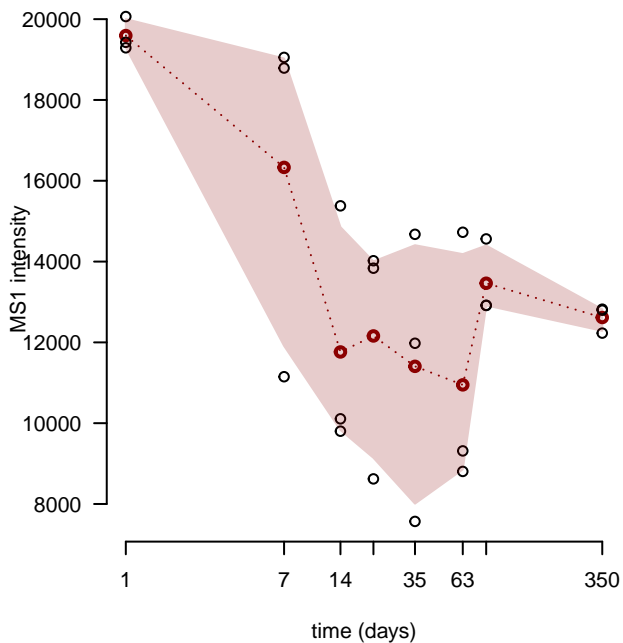

**P47811**  
GN=Mapk14  
mitogen-activated protein kinase 14

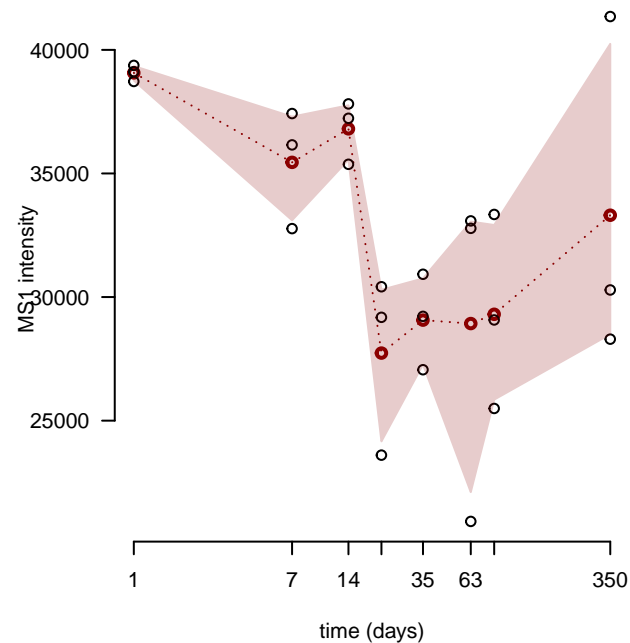

**P47811**  
GN=Mapk14  
mitogen-activated protein kinase 14

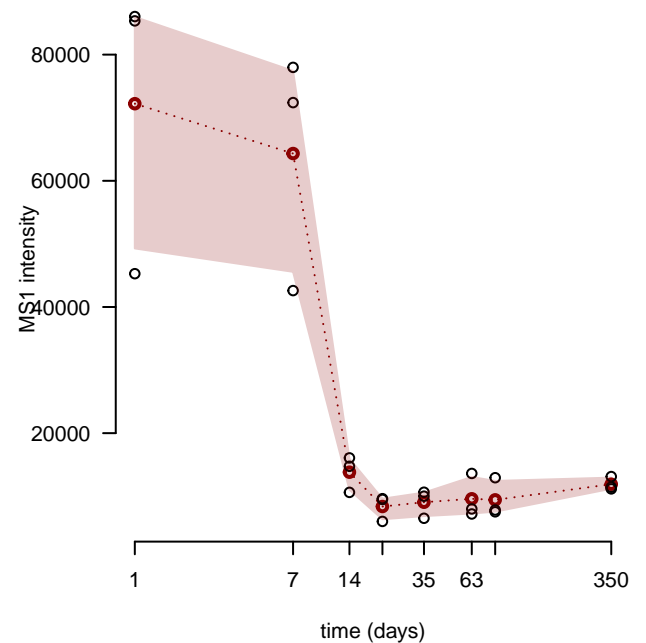

**P47856**  
GN=Gfpt1  
glutamine fructose-6-phosphate transaminase...

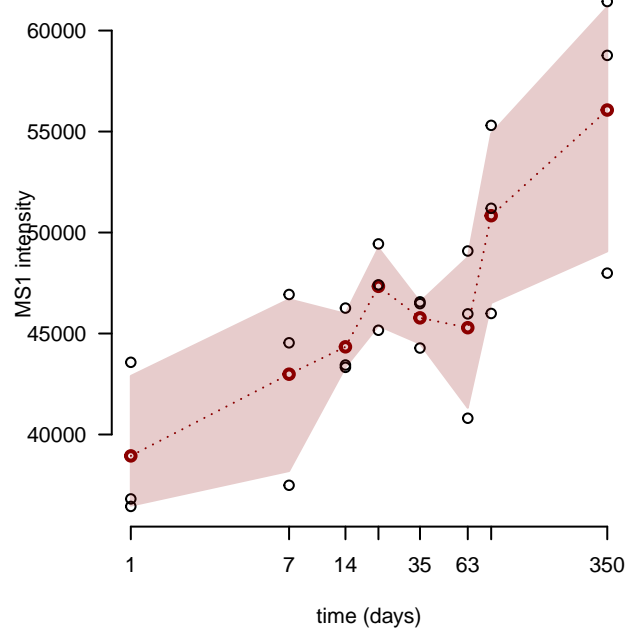

**P47857**  
GN=Pfkm  
phosphofructokinase, muscle

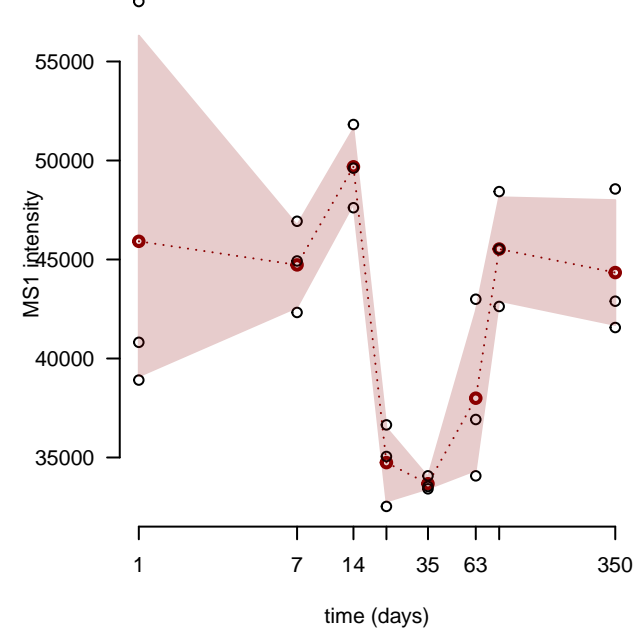

**P47877**  
GN=Igfbp2  
insulin-like growth factor binding prote...

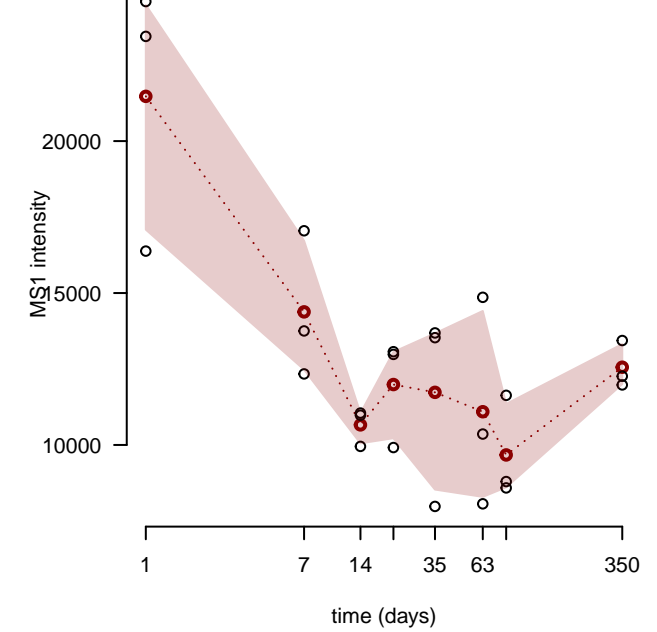

**P47878**  
GN=Igfbp3  
insulin-like growth factor binding prote...

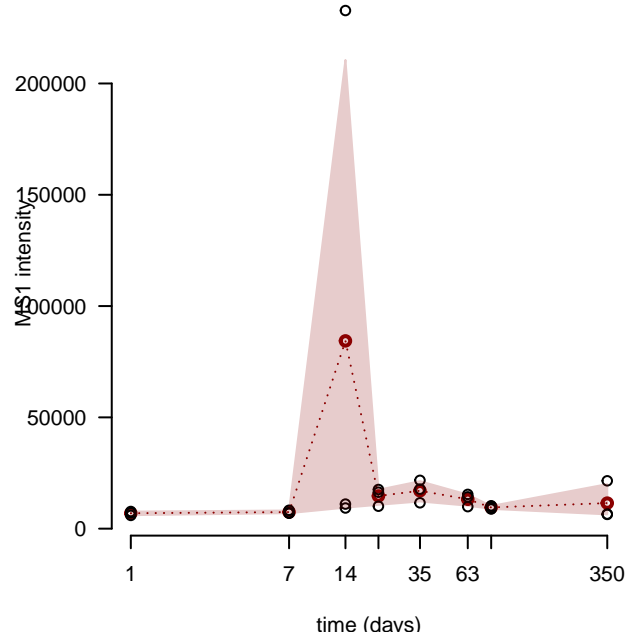

**P47879**  
GN=Igfbp4  
insulin-like growth factor binding prote...

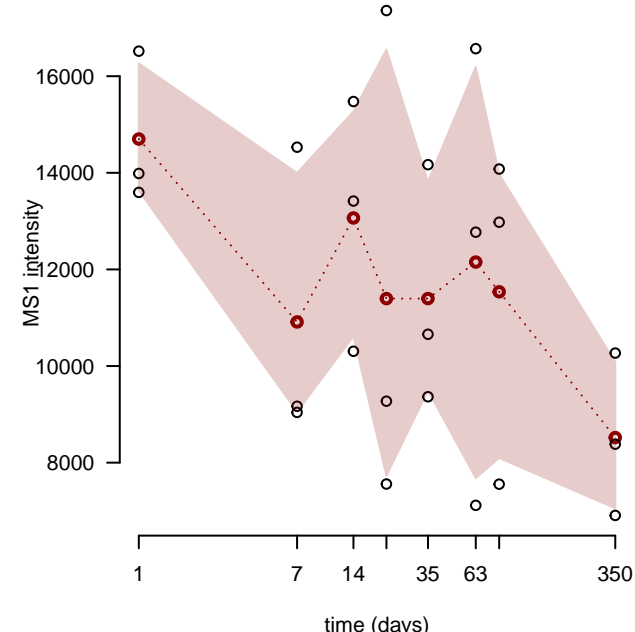

**P47911**  
GN=Rpl6  
ribosomal protein L6

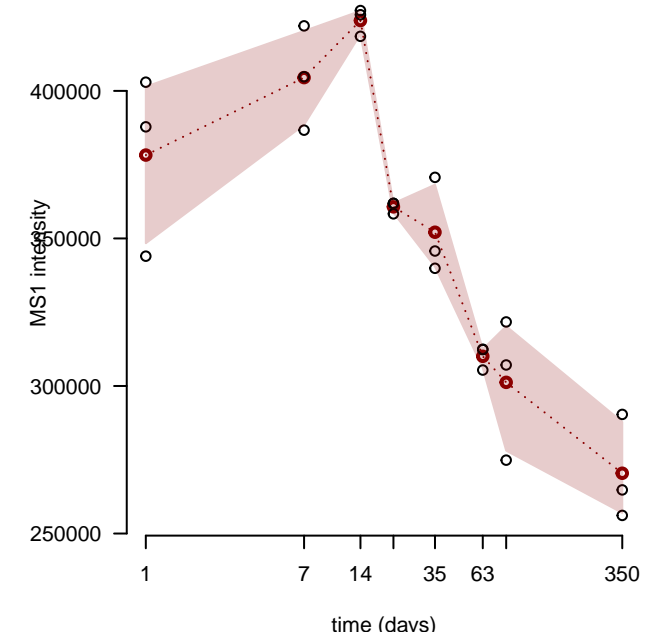

**P47915**  
GN=Rpl29  
ribosomal protein L29

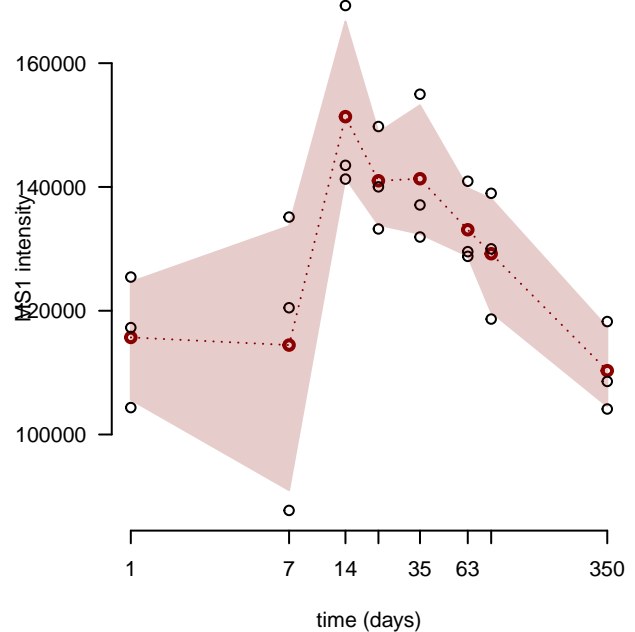

**P47930**  
GN=Fosl2  
fos-like antigen 2

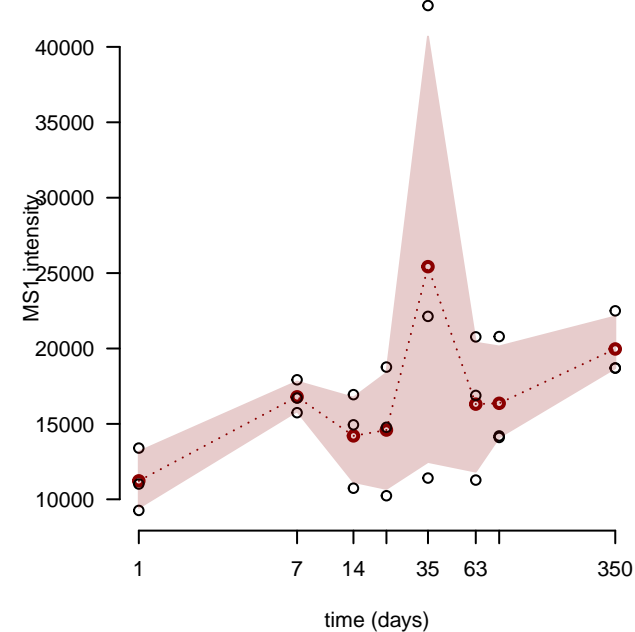

**P47931**  
GN=Fst  
follistatin

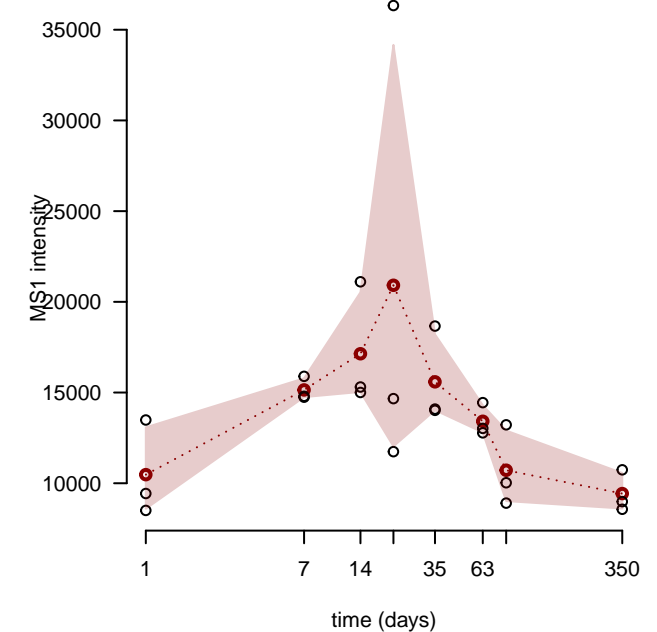

**P47934**  
**GN=Crat**  
carnitine acetyltransferase

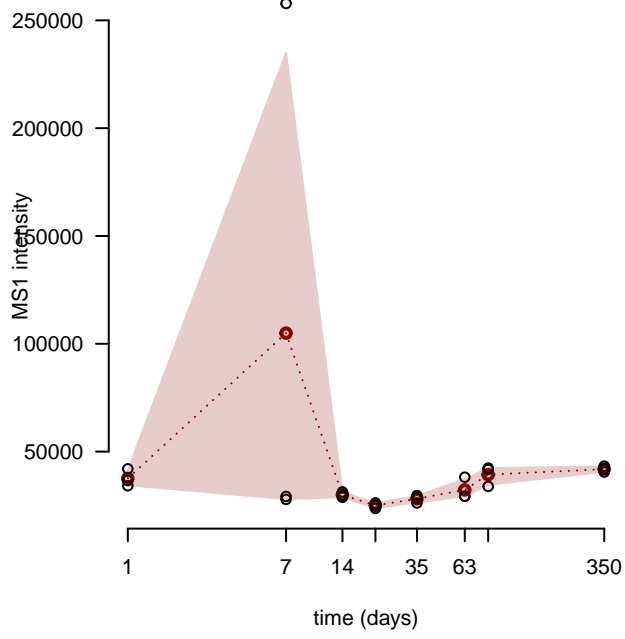

**P47941**  
**GN=Crkl**  
v-crkl avian sarcoma virus CT10 oncogene ...

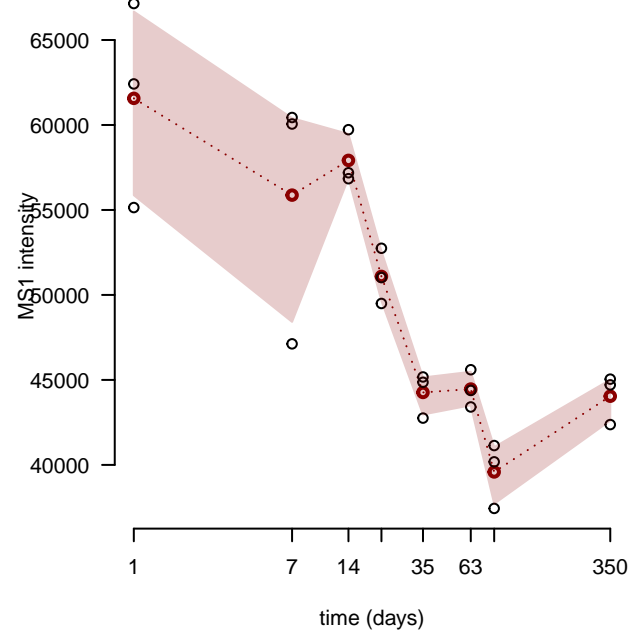

**P47955**  
**GN=Rplp1**  
ribosomal protein, large, P1

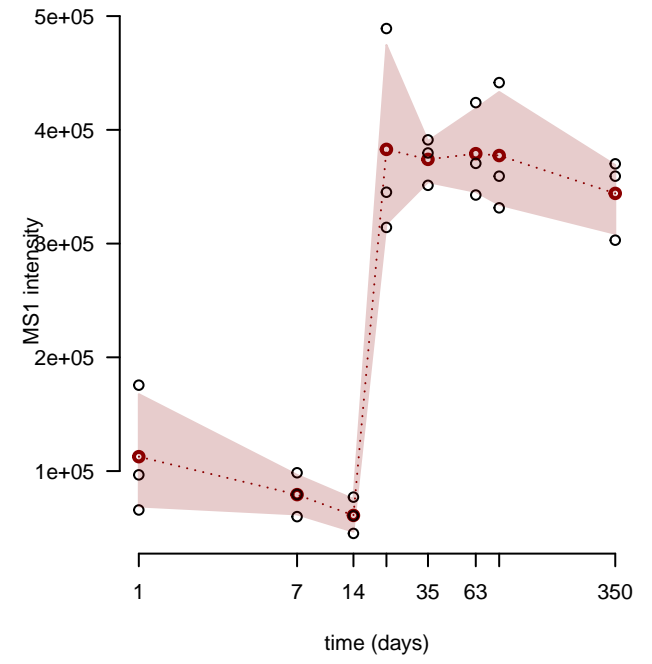

**P47962**  
**GN=Rpl5**  
ribosomal protein L5

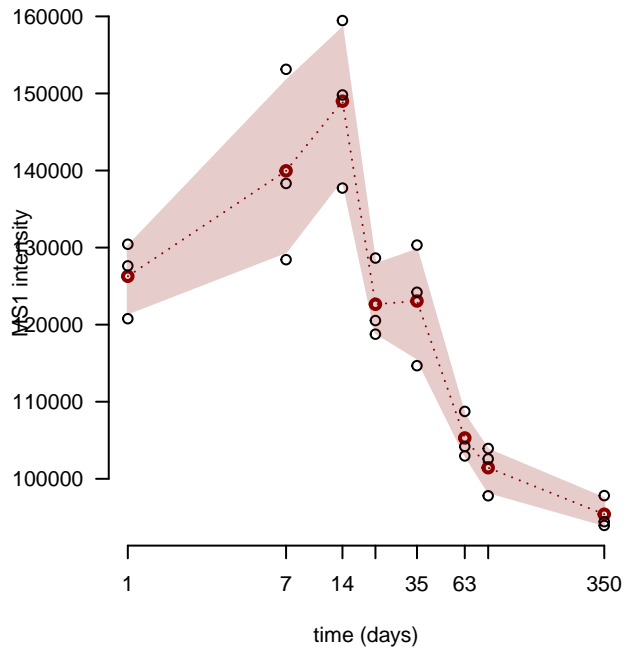

**P47963**  
**GN=Rpl13**  
ribosomal protein L13

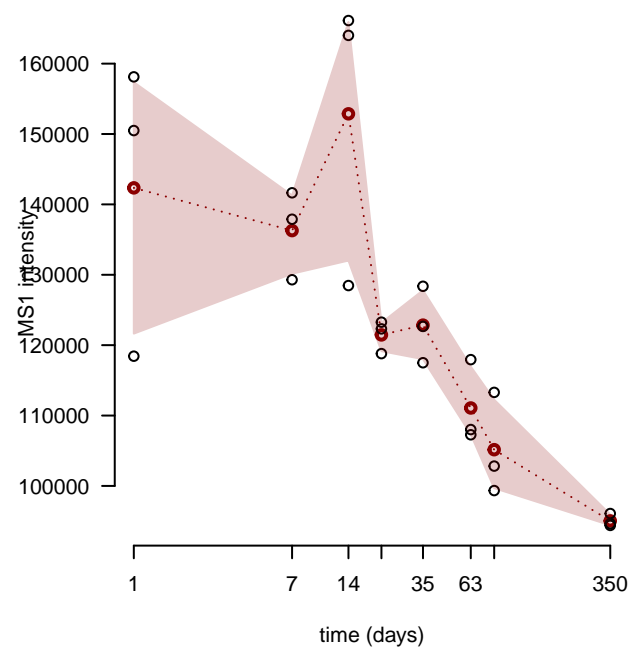

**P47964**  
**GN=Rpl36**  
ribosomal protein L36

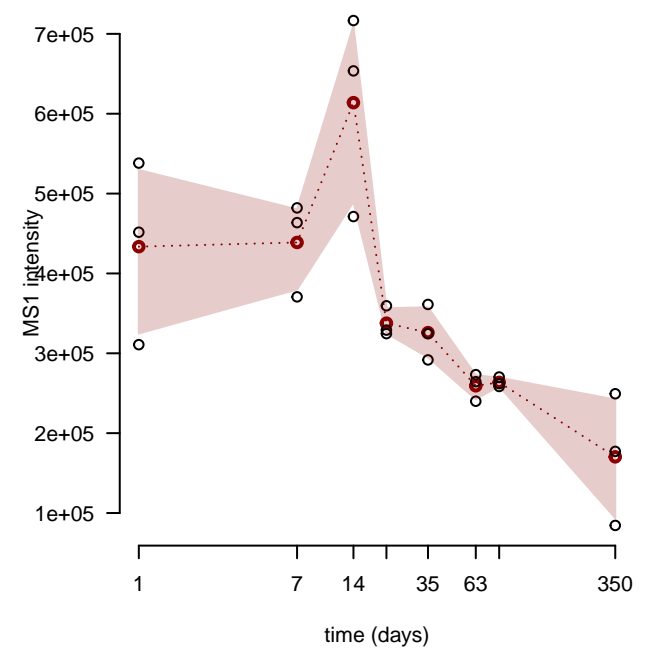

**P47968**  
**GN=Rpia**  
ribose 5-phosphate isomerase A

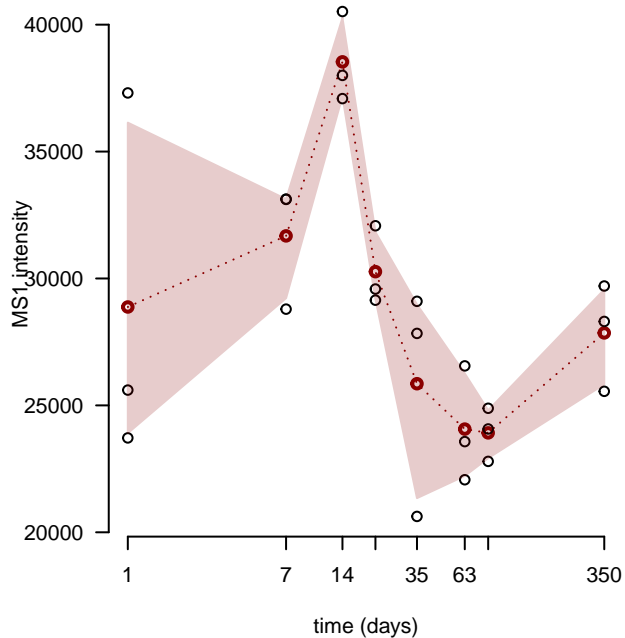

**P48024**  
**GN=Eif1**  
eukaryotic translation initiation factor ...

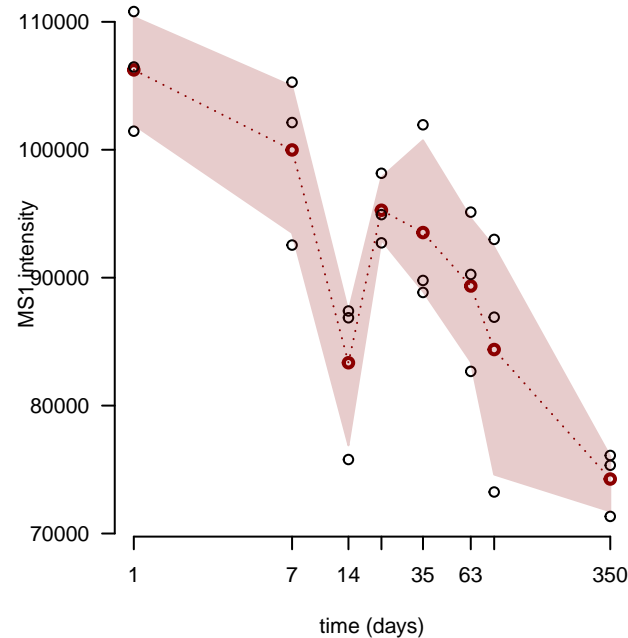

**P48025**  
**GN=Syk**  
spleen tyrosine kinase

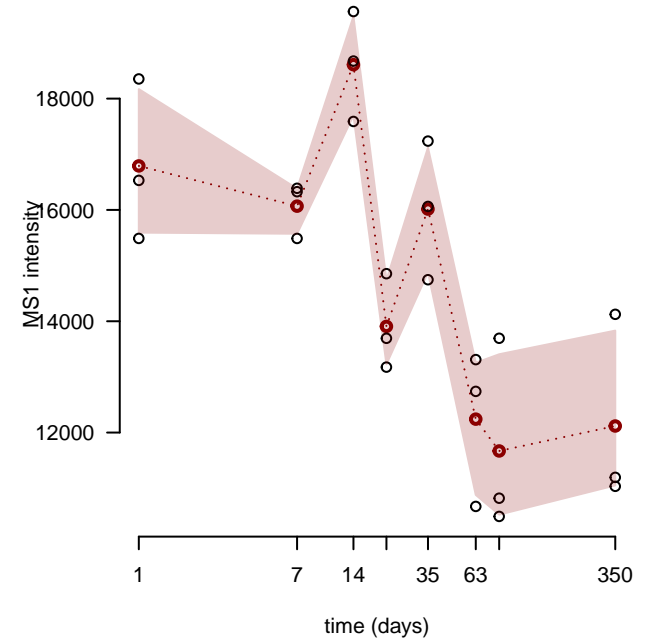

**P48036**  
GN=Anxa5  
annexin A5

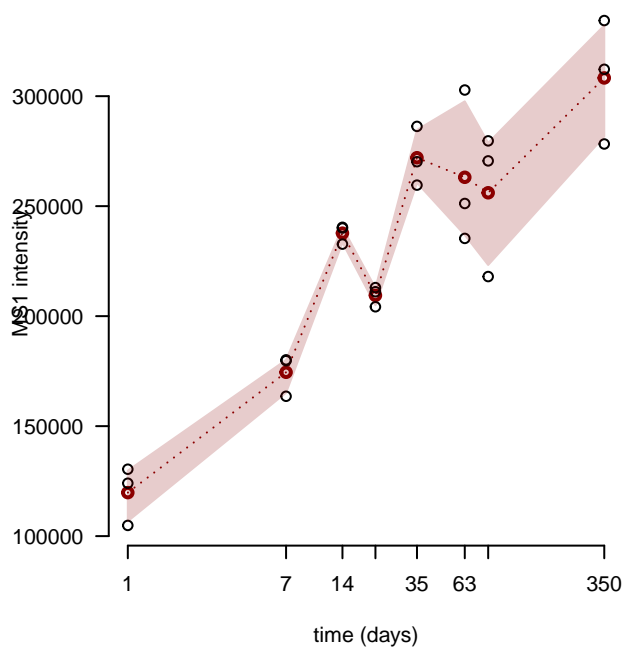

**P48193**  
GN=Epb41  
erythrocyte membrane protein band 4.1

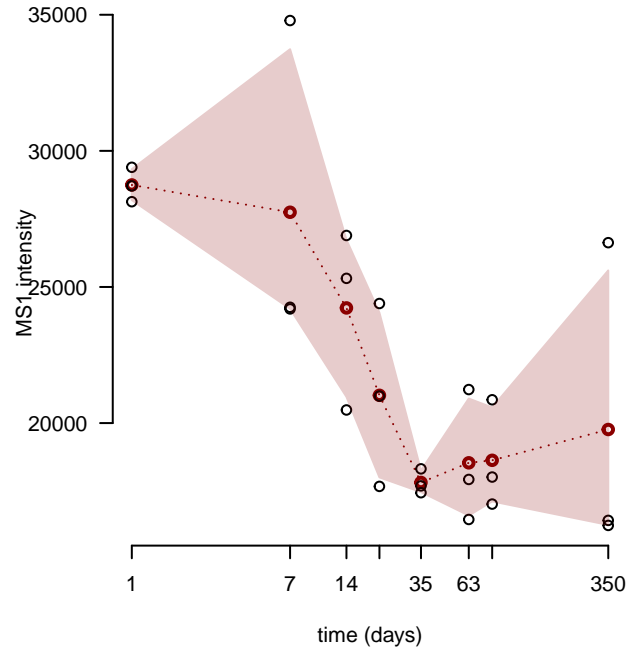

**P48377**  
GN=Rfx1  
regulatory factor X, 1 (influences HLA c ...

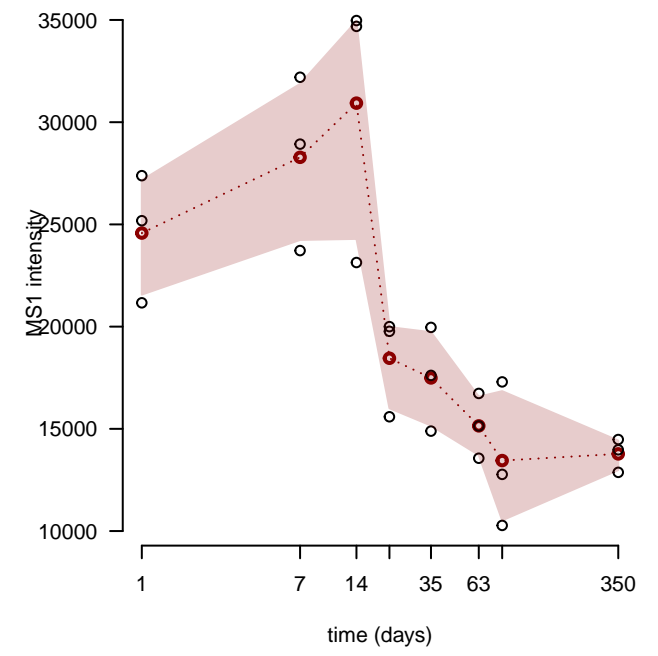

**P48381**  
GN=Rfx3  
regulatory factor X, 3 (influences HLA c ...

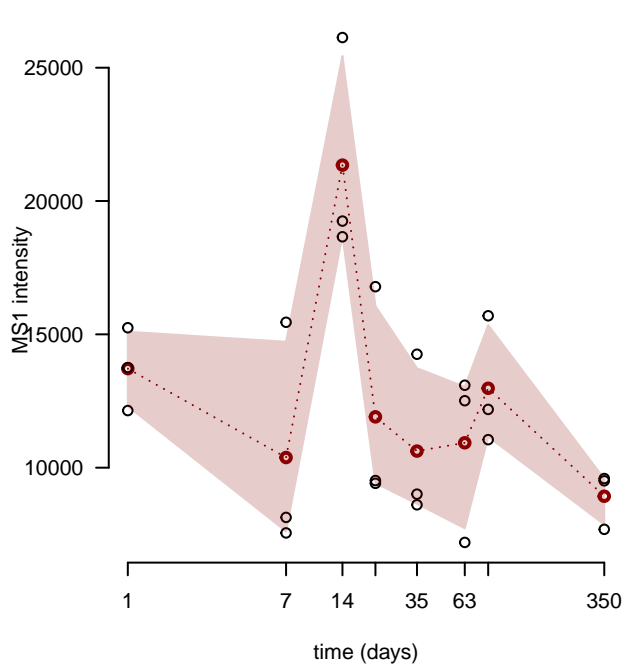

**P48410**  
GN=Abcd1  
ATP-binding cassette, sub-family D (ALD) ...

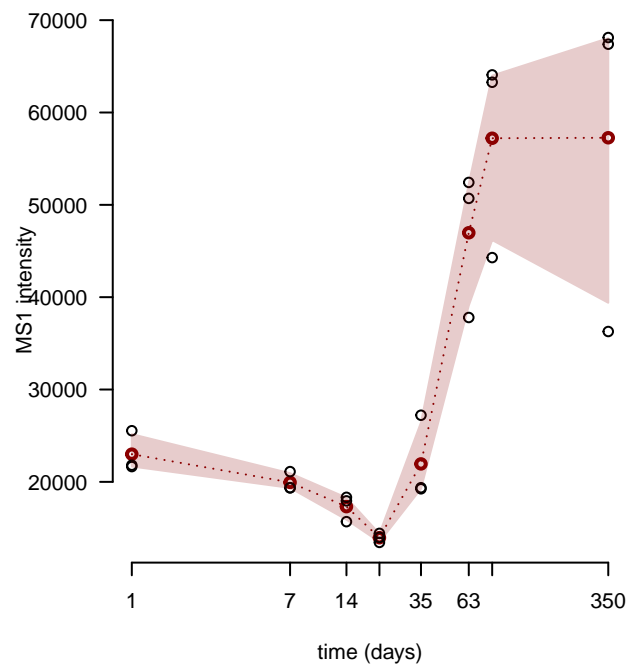

**P48428**  
GN=Tbca  
tubulin cofactor A

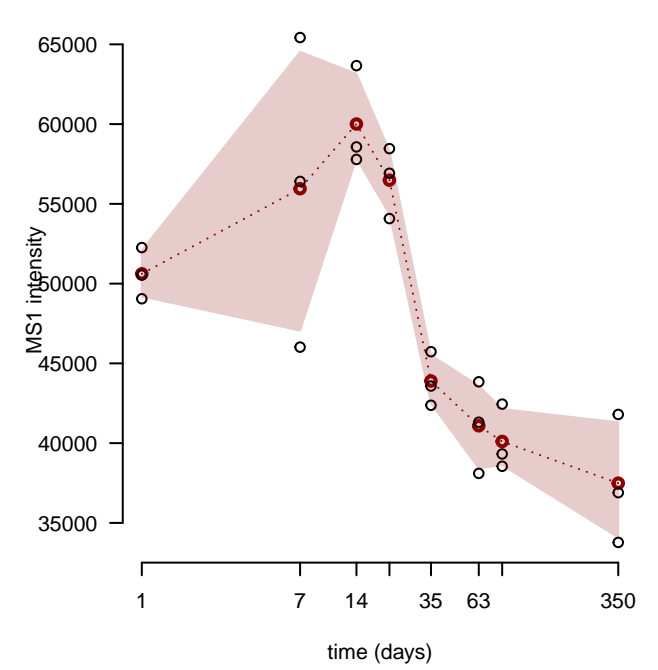

**P48441**  
GN=Idua  
iduronidase, alpha-L

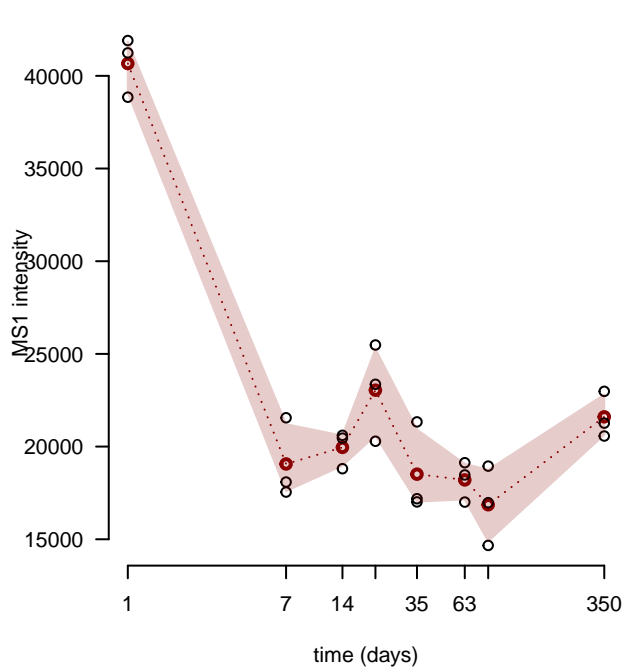

**P48453**  
GN=Ppp3cb  
protein phosphatase 3, catalytic subunit ...

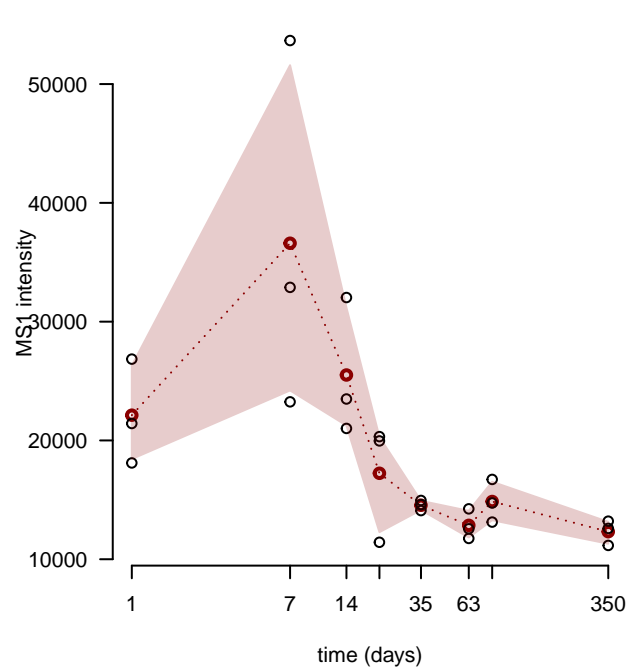

**P48455**  
GN=Ppp3cc  
protein phosphatase 3, catalytic subunit ...

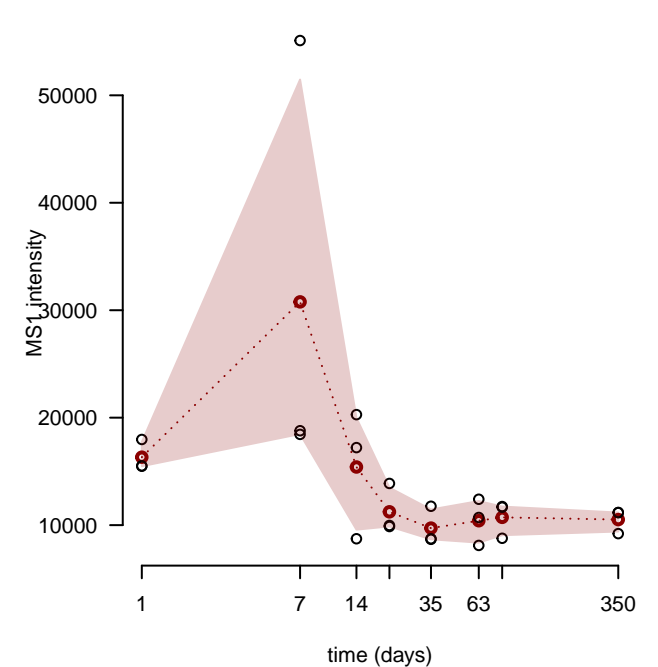

**P48678**  
GN=Lmna  
lamin A

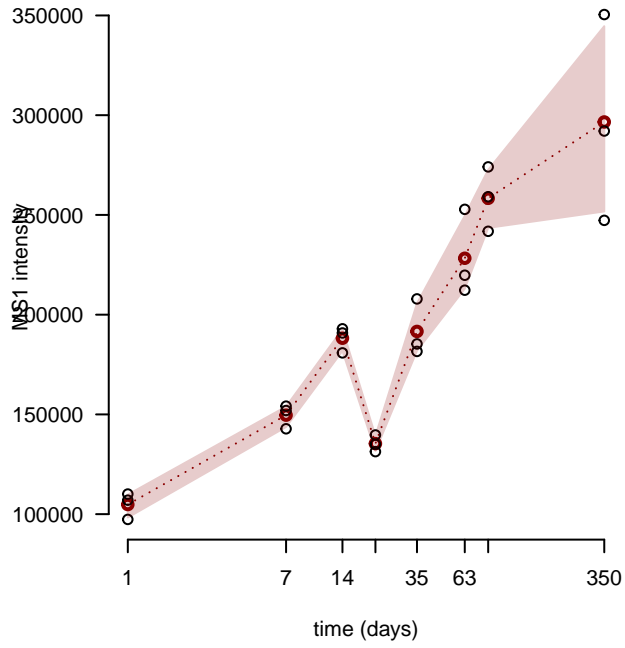

**P48722**  
GN=Hspa4l  
heat shock protein 4 like

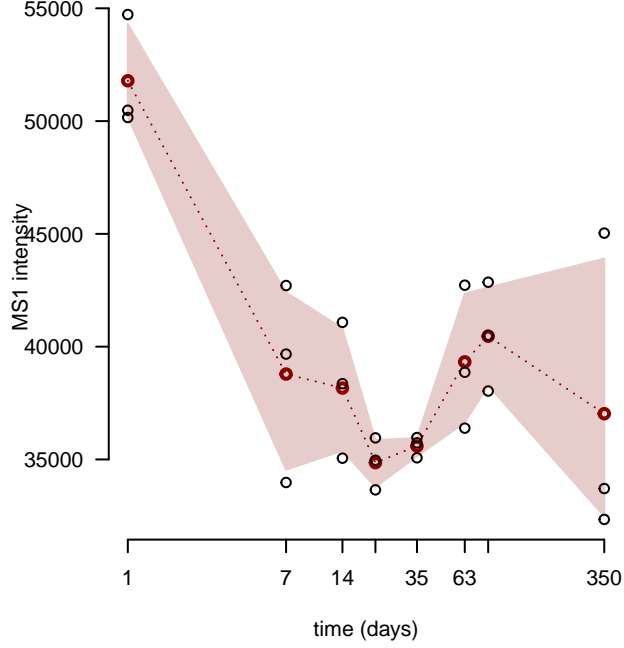

**P48725**  
GN=Pcnt  
pericentrin (kendrin)

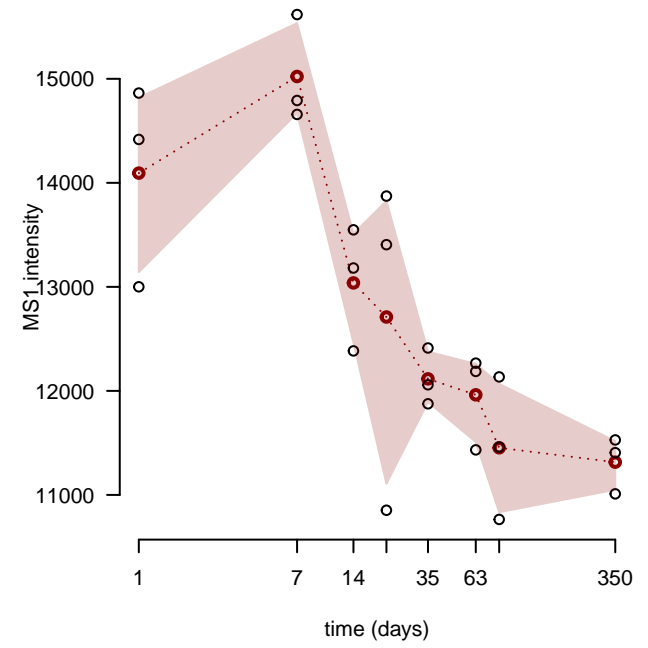

**P48758**  
GN=Cbr1  
carbonyl reductase 1

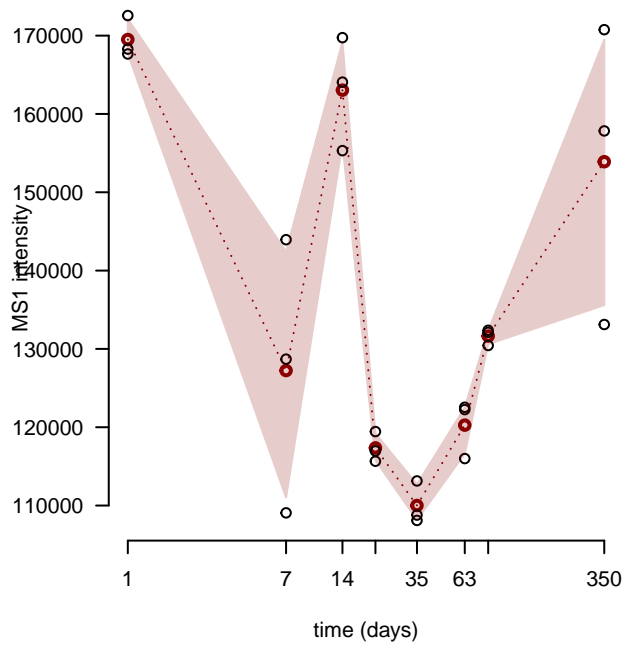

**P48760**  
GN=Fpgs  
folylpolyglutamyl synthetase

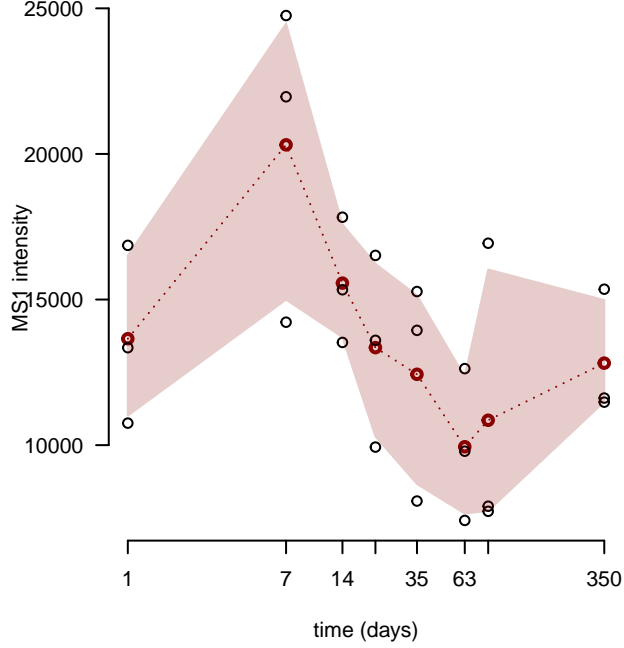

**P48771**  
GN=Cox7a2  
cytochrome c oxidase subunit 7A2

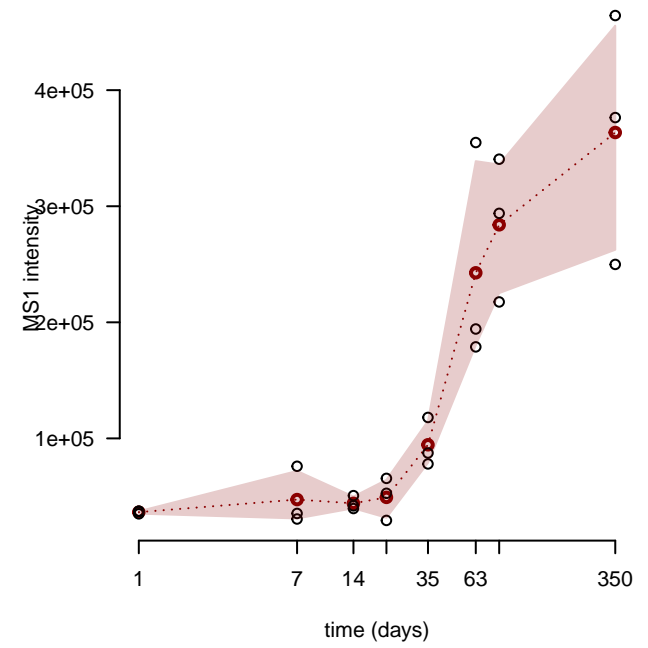

**P48774**  
GN=Gstm5  
glutathione S-transferase, mu 5

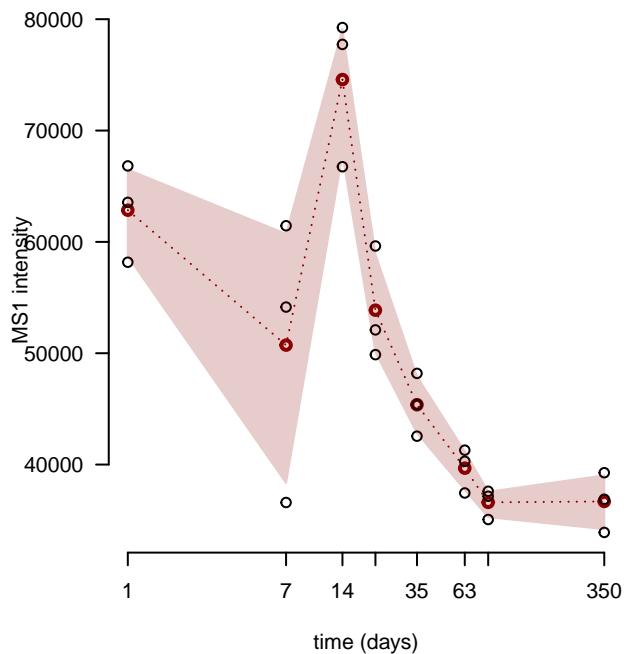

**P48962**  
GN=Slc25a4  
solute carrier family 25 (mitochondrial ...

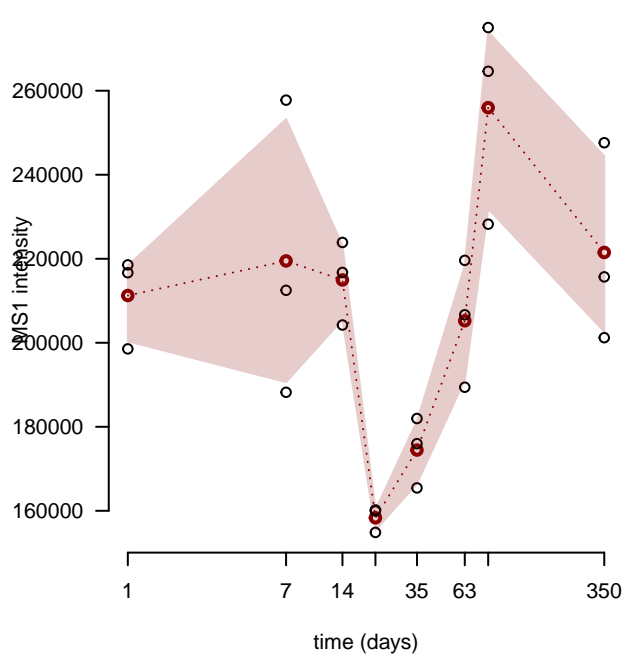

**P49025**  
GN=Cit  
citron

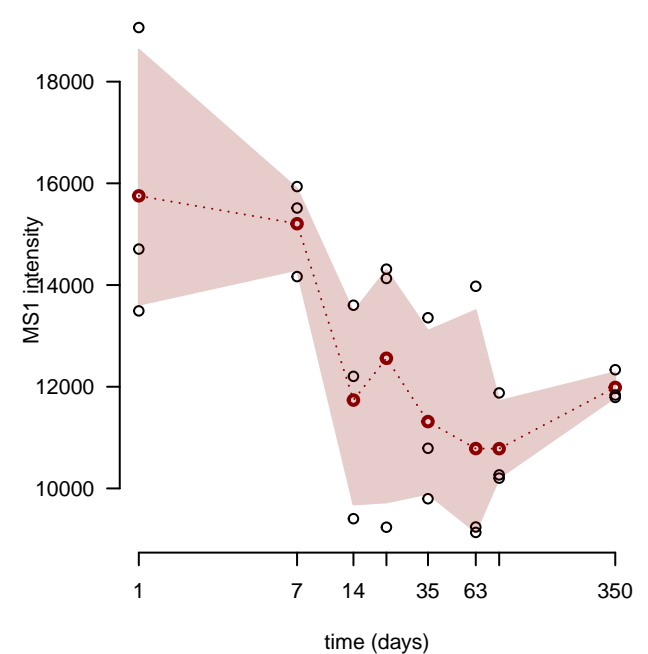

**P49070**  
GN=Camlg

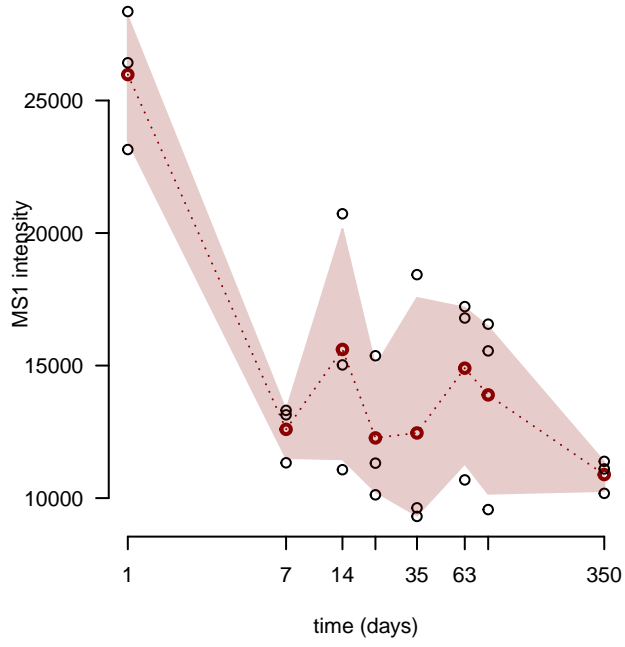

**P49117**  
GN=Nr2c2  
nuclear receptor subfamily 2, group C, m ...

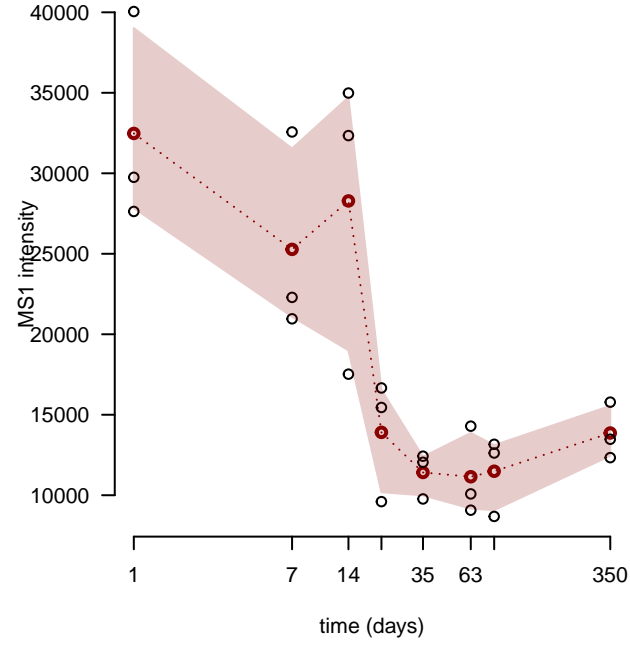

**P49135**  
GN=Ercc3  
excision repair cross-complementing rode ...

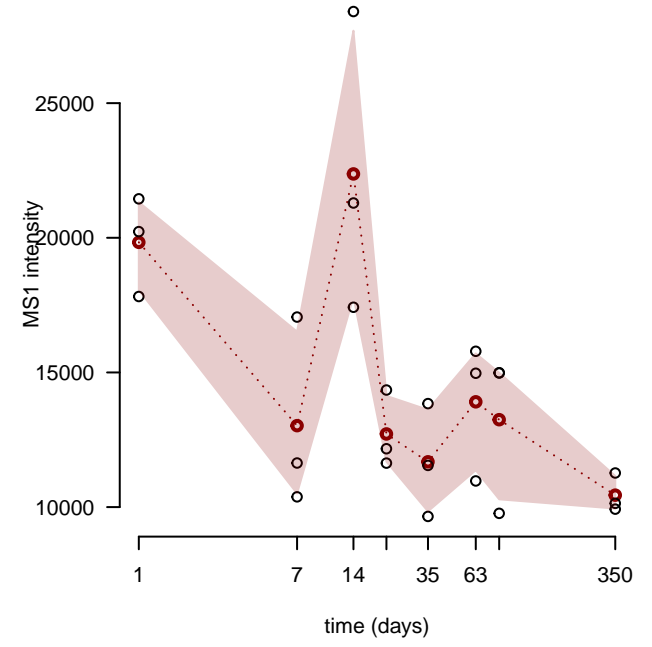

**P49138**  
GN=Mapkapk2  
MAP kinase-activated protein kinase 2

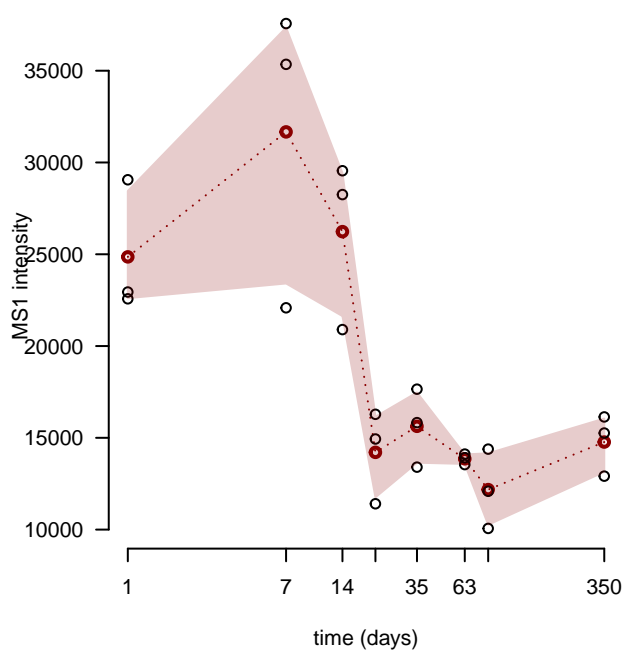

**P49182**  
GN=Serpind1  
serine (or cysteine) peptidase inhibitor ...

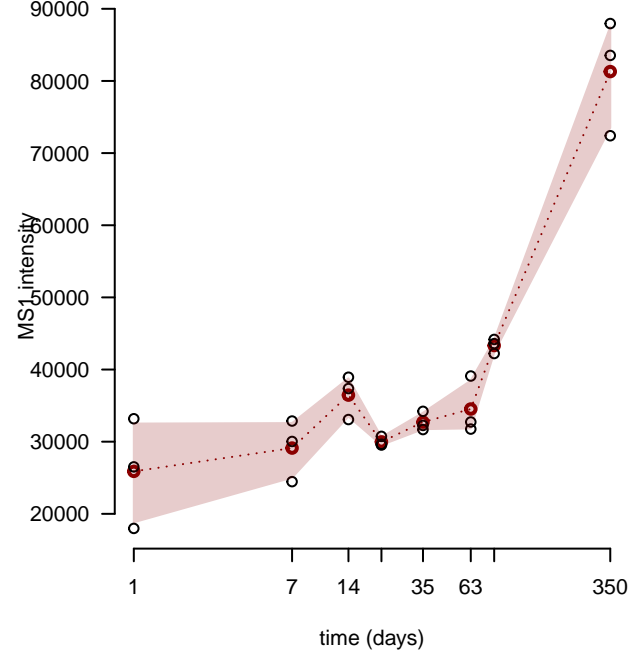

**P49222**  
GN=Epb42  
erythrocyte membrane protein band 4.2

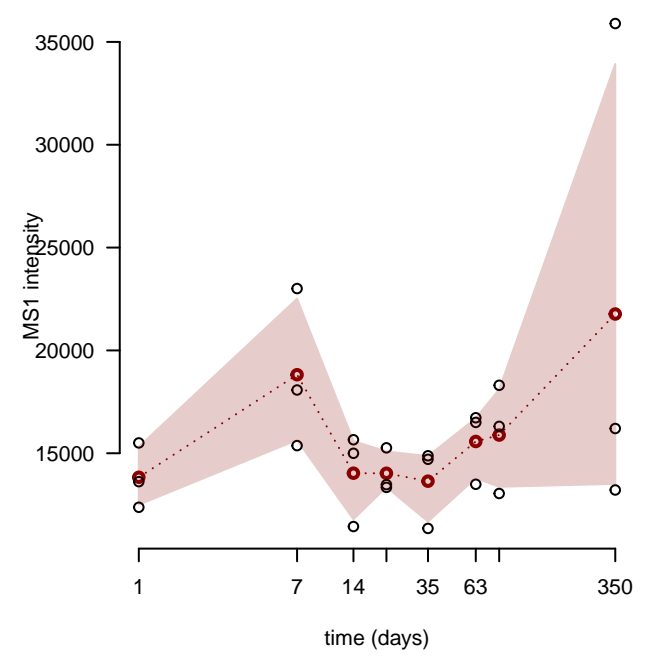

**P49290**  
GN=Epx  
eosinophil peroxidase

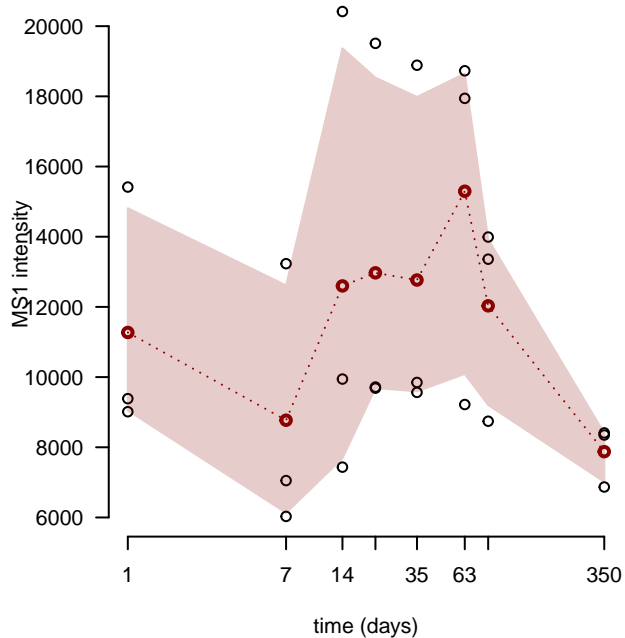

**P49300**  
GN=Clec10a  
C-type lectin domain family 10, member A

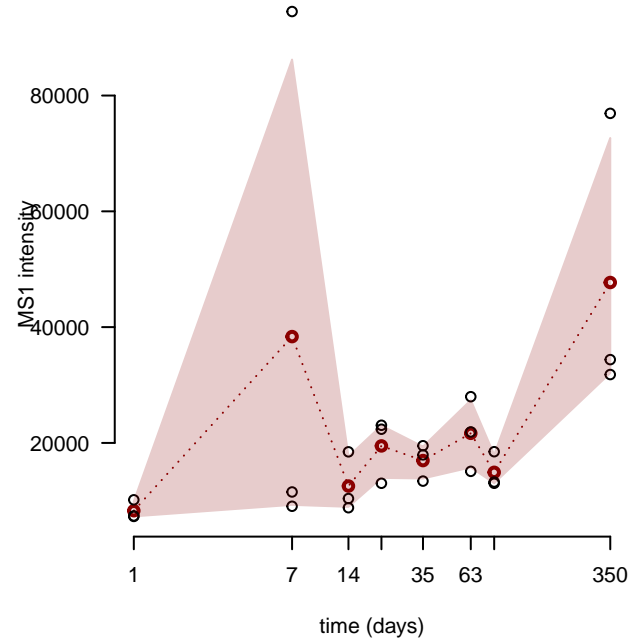

**P49312**  
GN=Hnrnpa1  
heterogeneous nuclear ribonucleoprotein ...

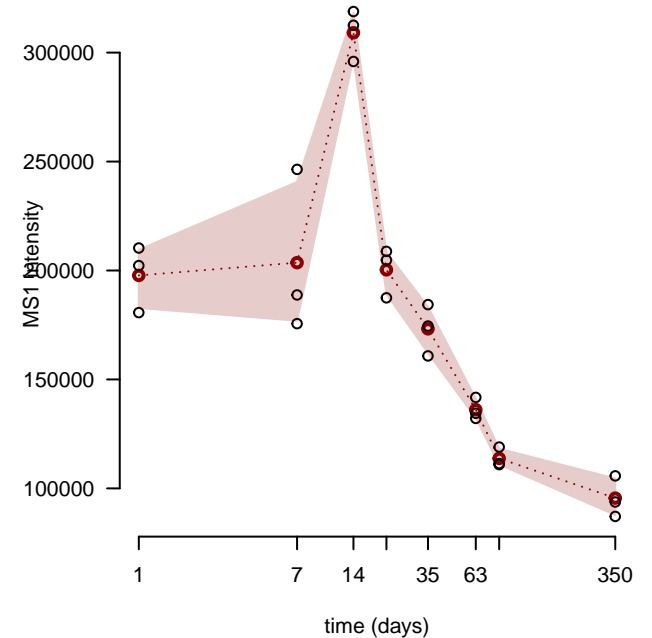

**P49429**  
GN=Hp  
4-hydroxyphenylpyruvic acid dioxygenase

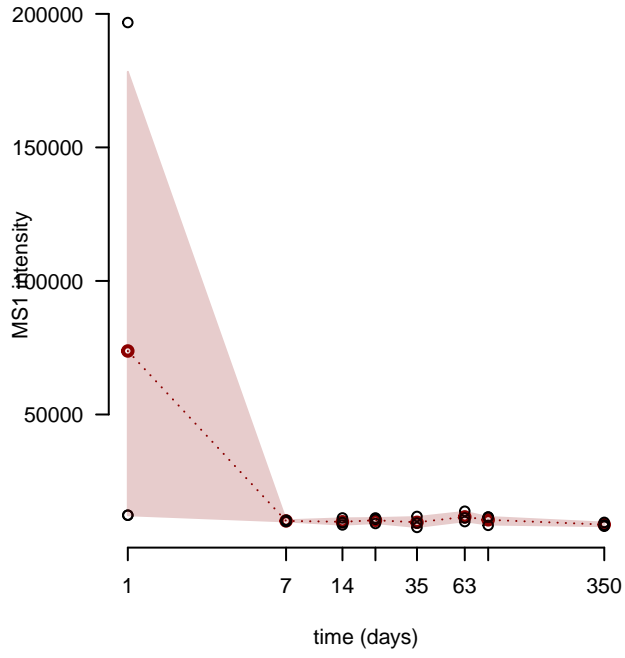

**P49442**  
GN=Inpp1  
inositol polyphosphate-1-phosphatase

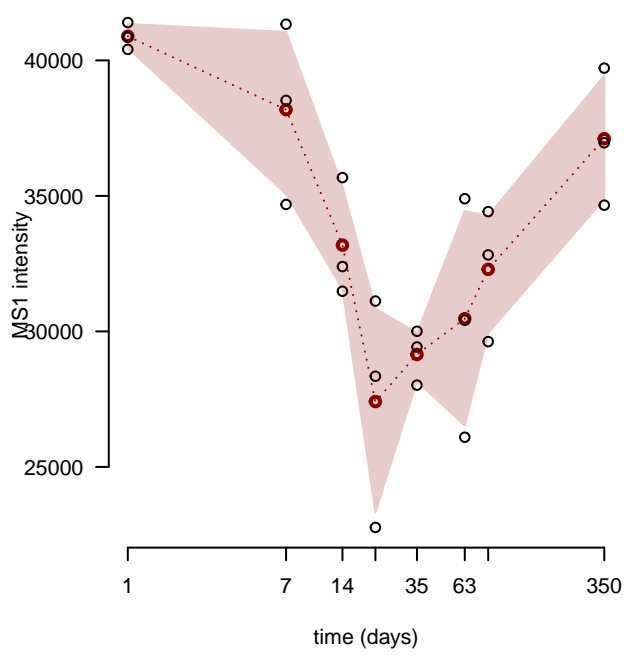

**P49443**  
GN=Ppm1a  
protein phosphatase 1A, magnesium depend ...

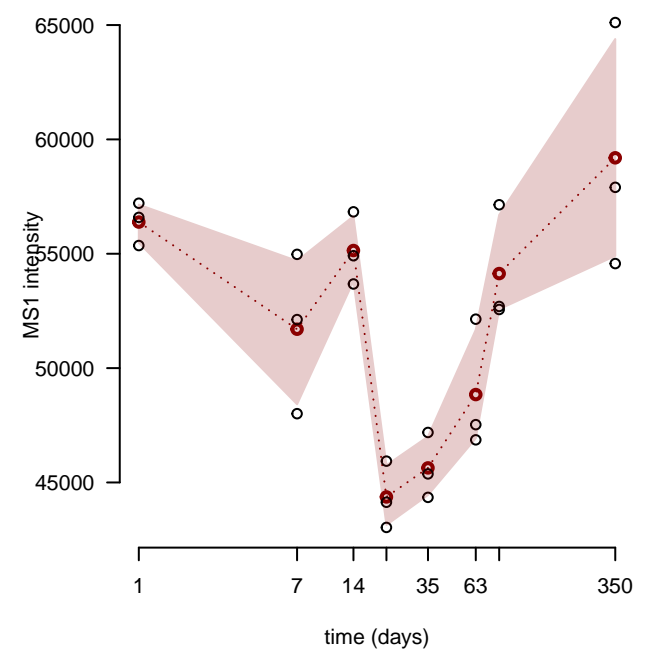

**P49446**  
GN=Ptpre  
protein tyrosine phosphatase, receptor t ...

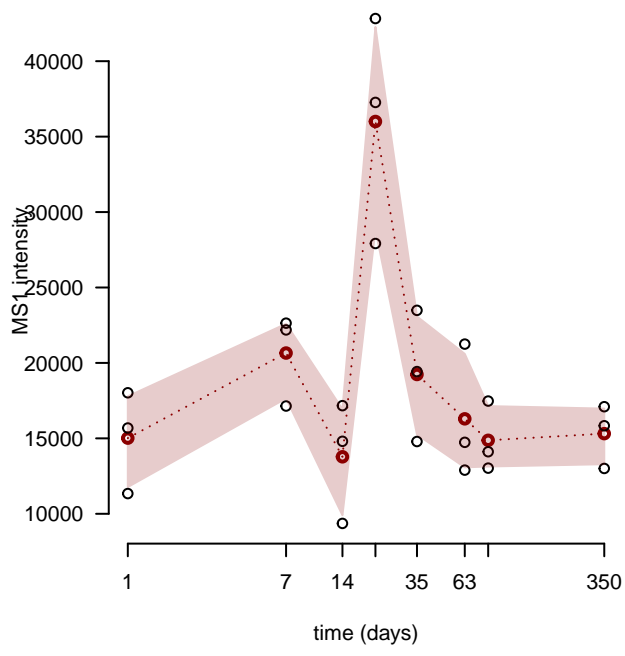

**P49452**  
GN=Cenpc  
centromere protein C

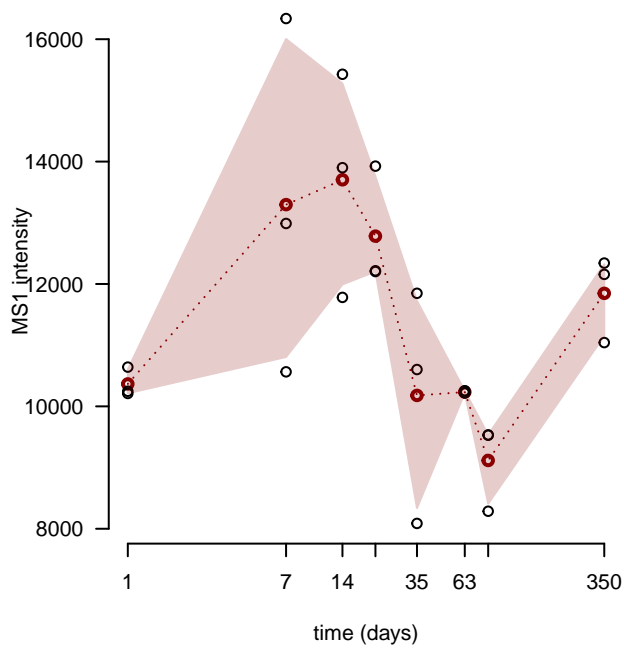

**P49586**  
GN=Pcyt1a  
phosphate cytidyltransferase 1, cholin ...

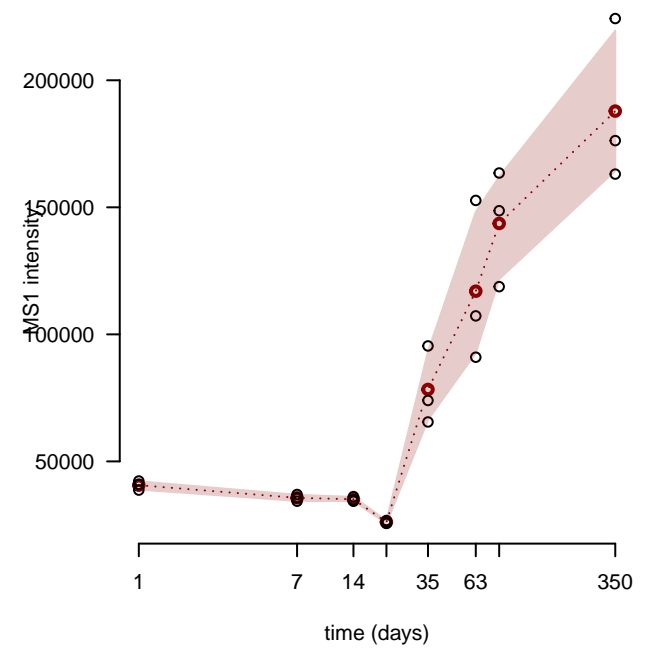

**P49615**  
GN=Cdk5  
cyclin-dependent kinase 5

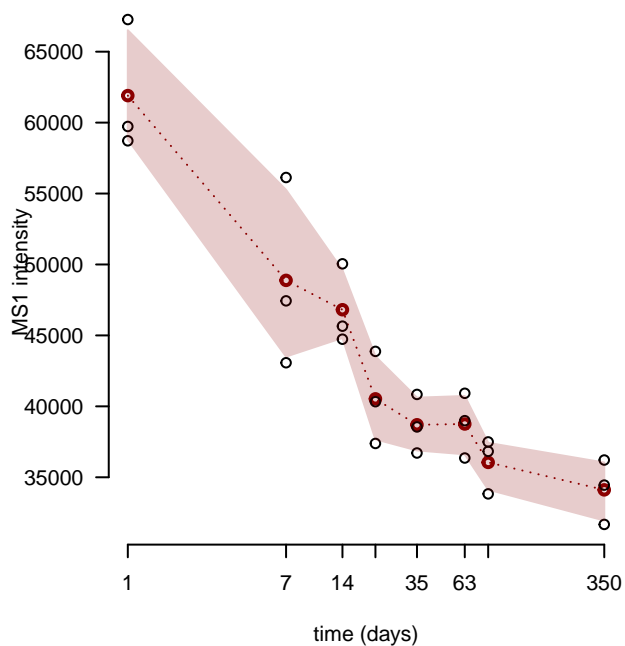

**P49710**  
GN=Hcls1  
hematopoietic cell specific Lyn substrat ...

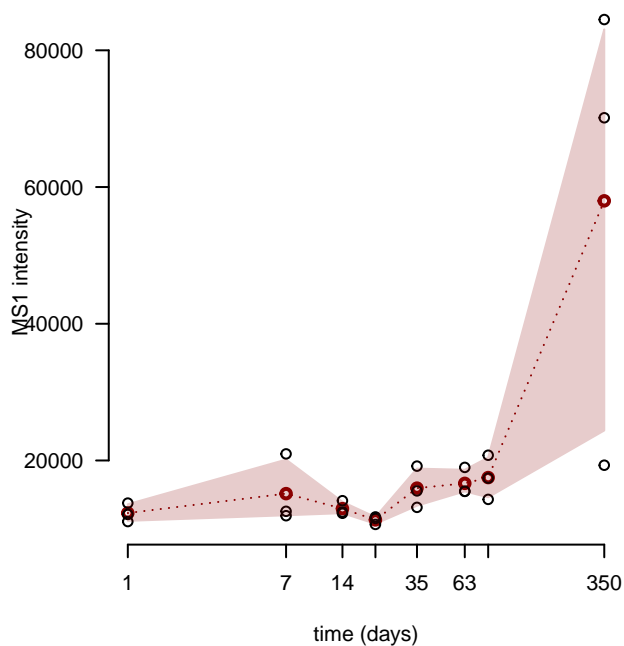

**P49717**  
GN=Mcm4  
minichromosome maintenance complex compo ...

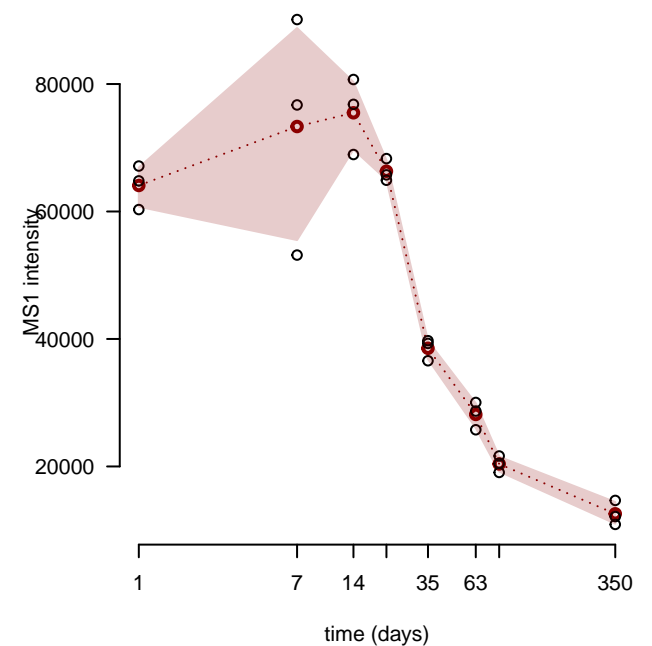

**P49718**  
**GN=Mcm5**  
minichromosome maintenance complex compo ...

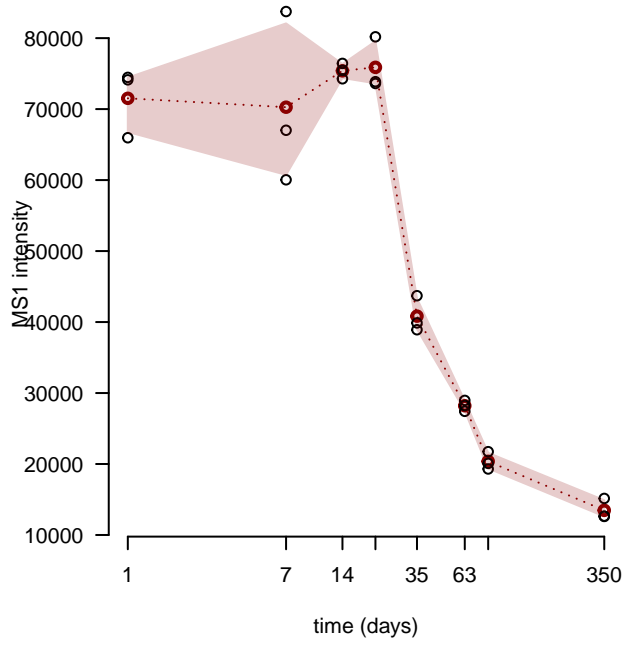

**P49722**  
**GN=Psm2**  
proteasome subunit alpha 2

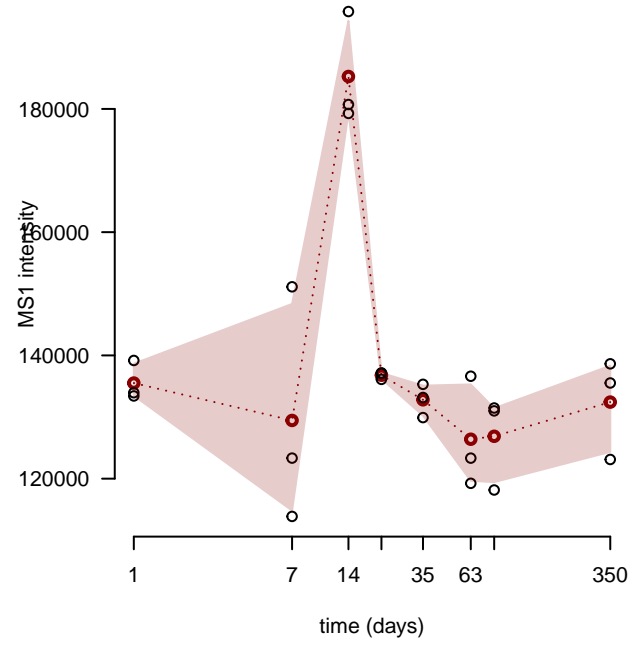

**P49769**  
**GN=Psen1**  
presenilin 1

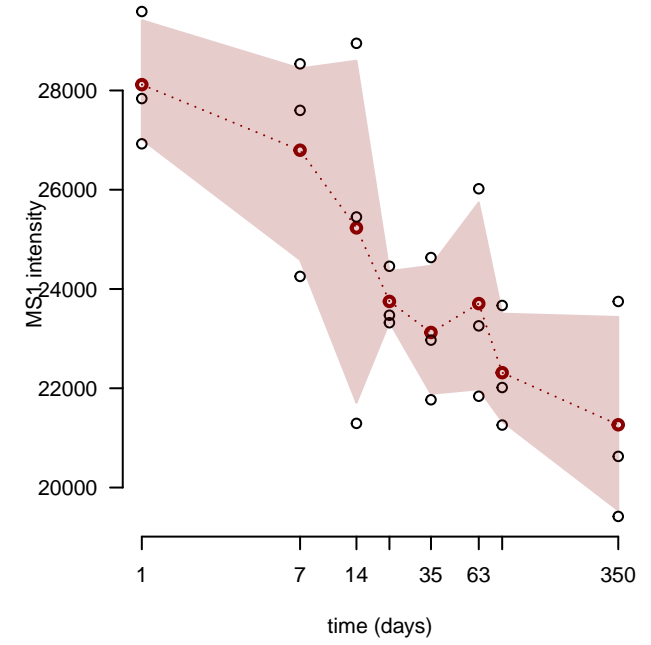

**P49813**  
**GN=Tmod1**  
tropomodulin 1

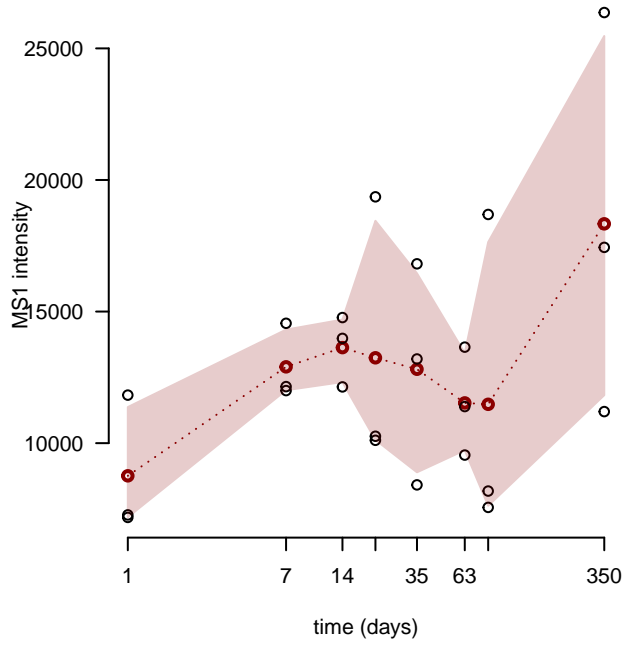

**P49817**  
**GN=Cav1**  
caveolin 1, caveolae protein

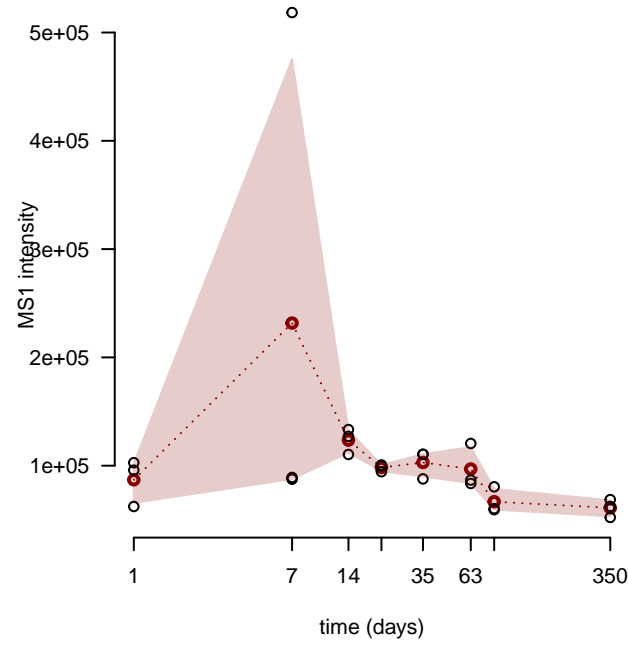

**P49817**  
**GN=Cav1**  
caveolin 1, caveolae protein

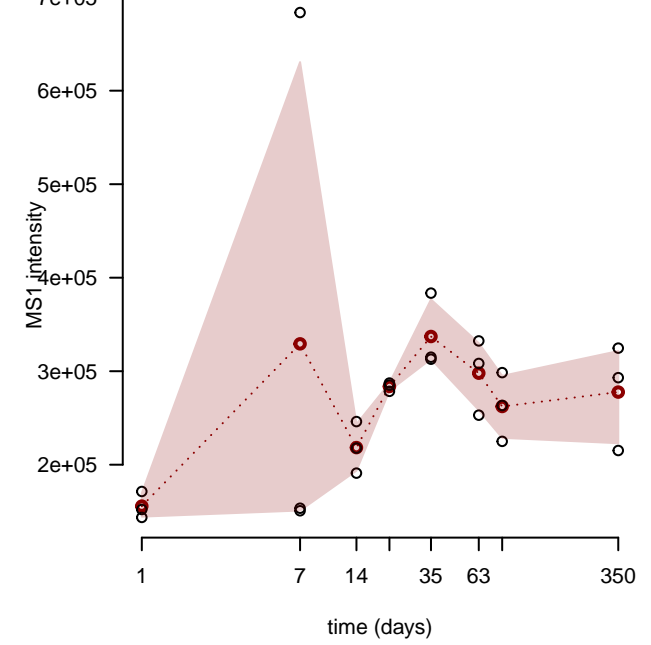

**P49919**  
**GN=Cdkn1c**  
cyclin-dependent kinase inhibitor 1C (P5 ...

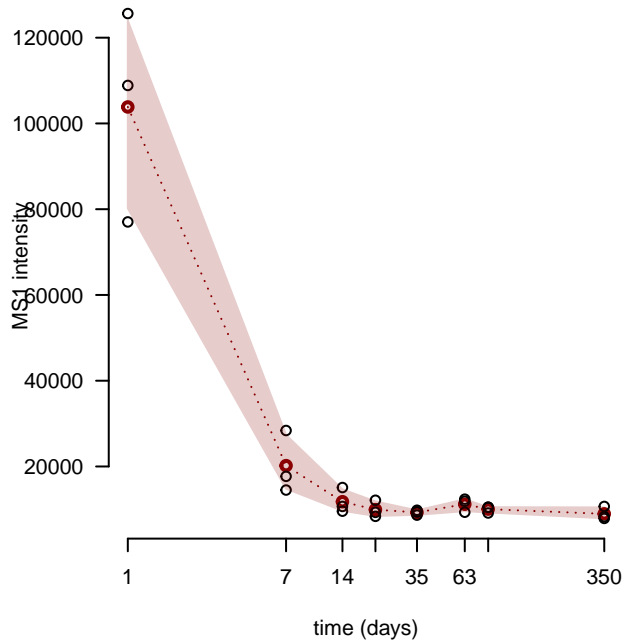

**P49935**  
**GN=Ctsh**  
cathepsin H

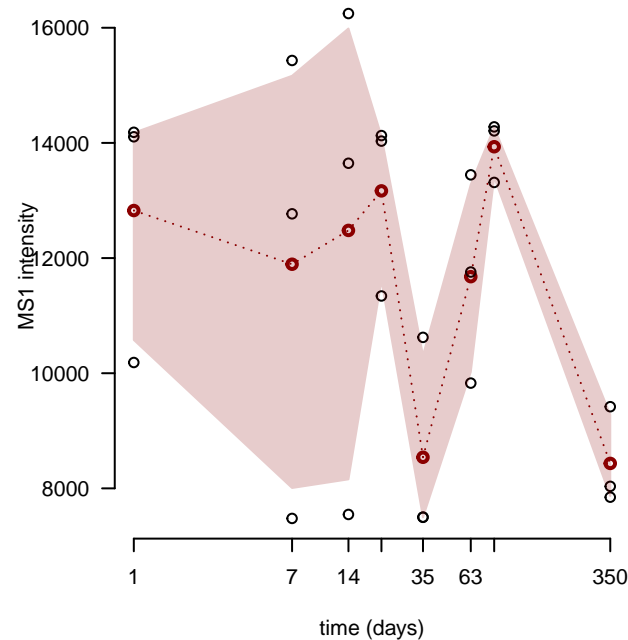

**P49962**  
**GN=Srp9**  
signal recognition particle 9

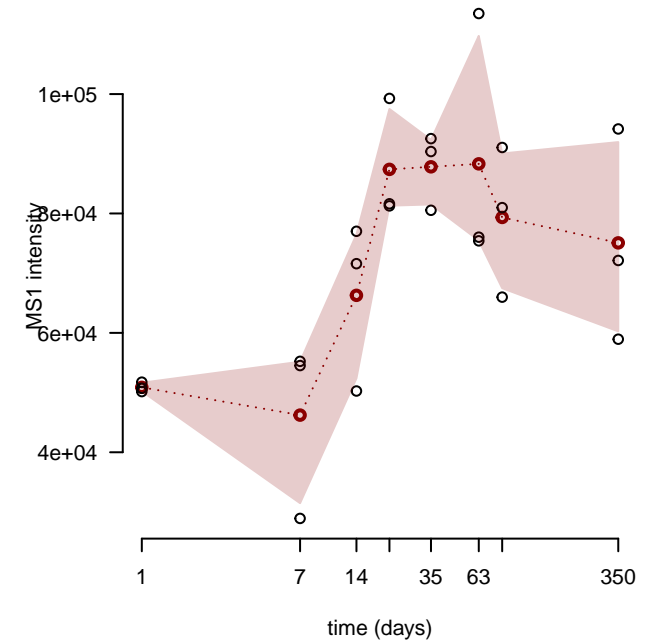



**P50096**  
**GN=Impdh1**  
inosine monophosphate dehydrogenase 1

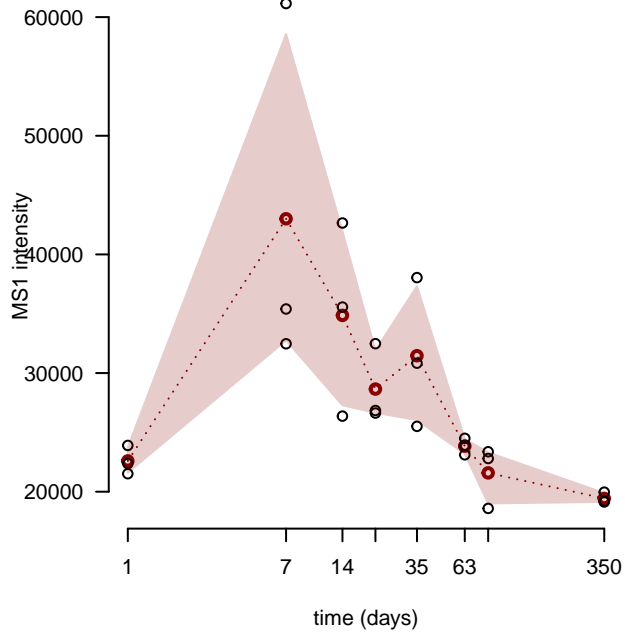

**P50114**  
**GN=S100b**  
S100 protein, beta polypeptide, neural

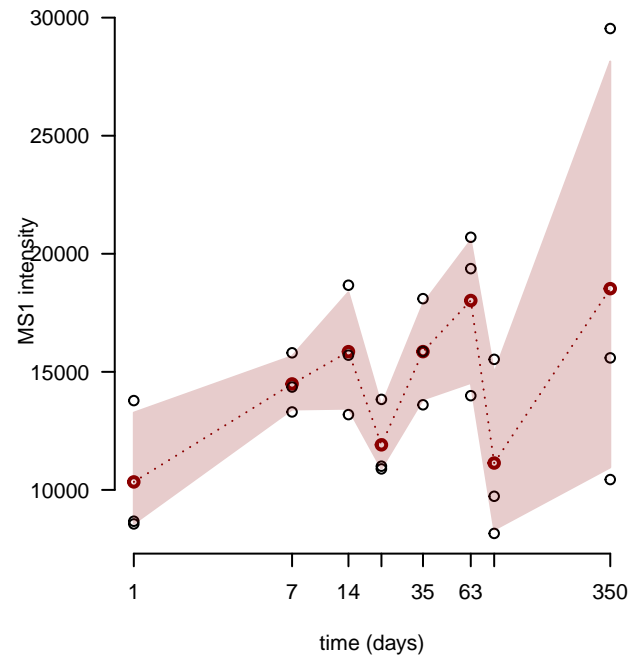

**P50136**  
**GN=Bckdha**  
branched chain ketoacid dehydrogenase E1 ...

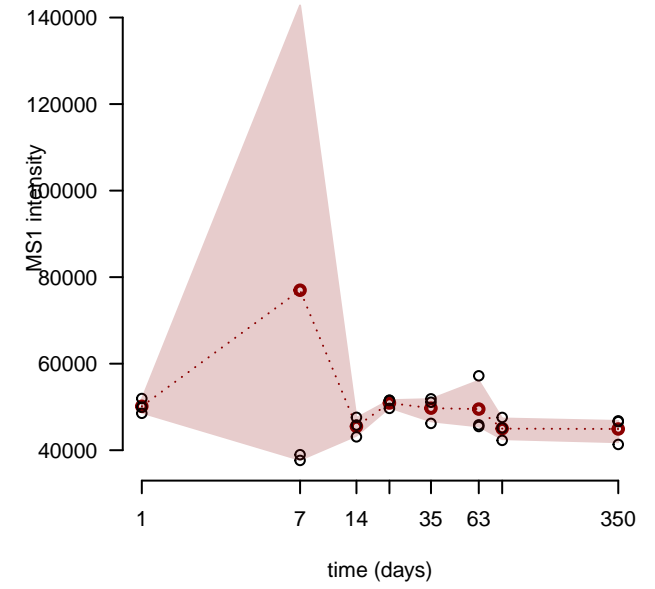

**P50171**  
**GN=Hsd17b8**

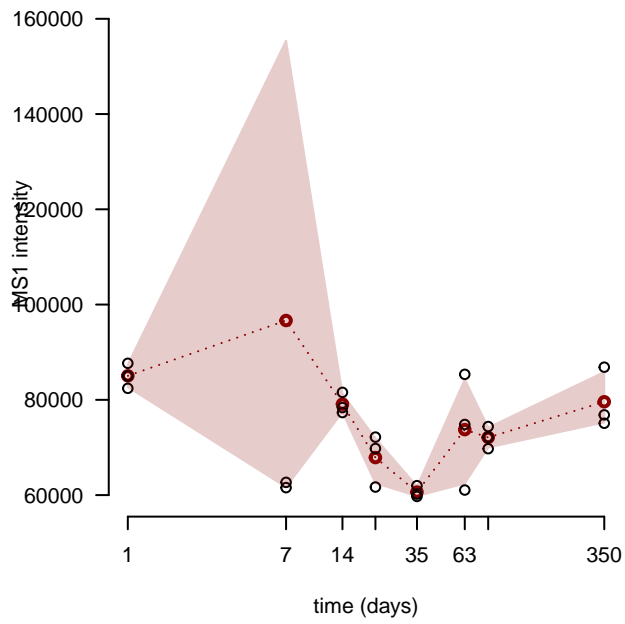

**P50172**  
**GN=Hsd11b1**  
hydroxysteroid 11-beta dehydrogenase 1

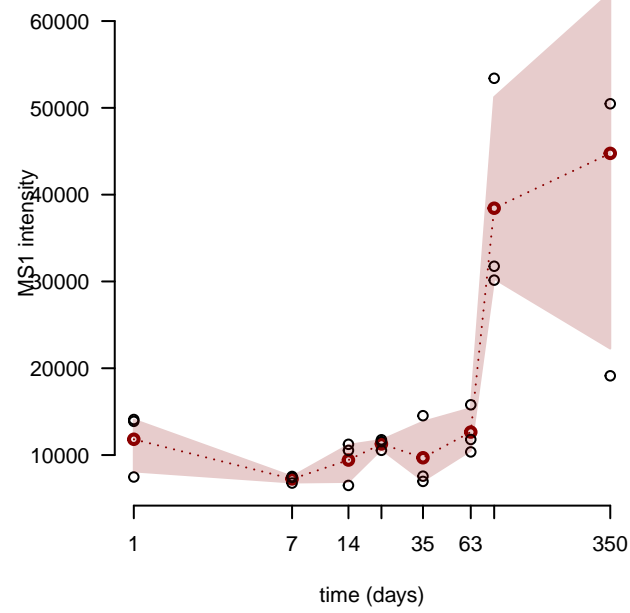

**P50247**  
**GN=Ahcy**  
S-adenosylhomocysteine hydrolase

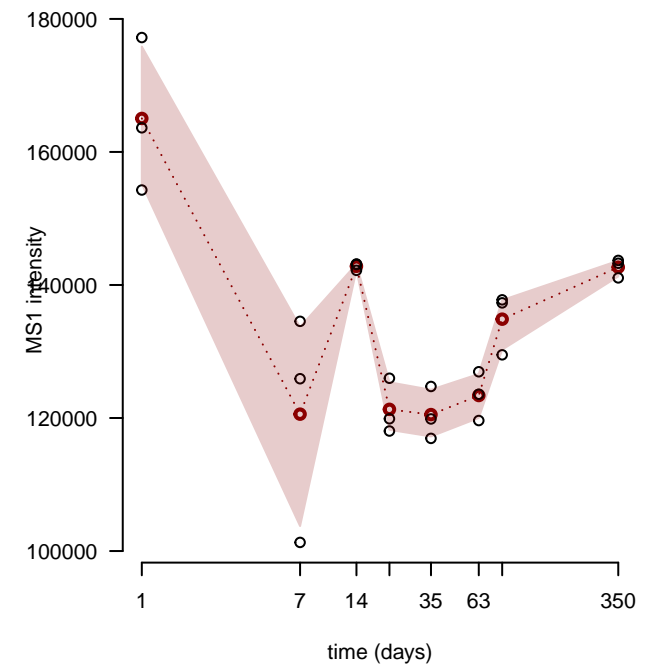

**P50285**  
**GN=Fmo1**  
flavin containing monooxygenase 1

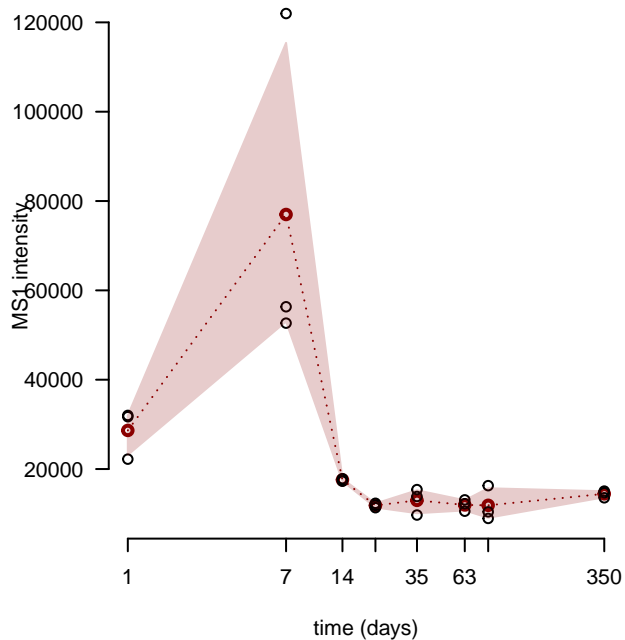

**P50295**  
**GN=Nat2**  
N-acetyltransferase 2 (arylamine N-acety ...

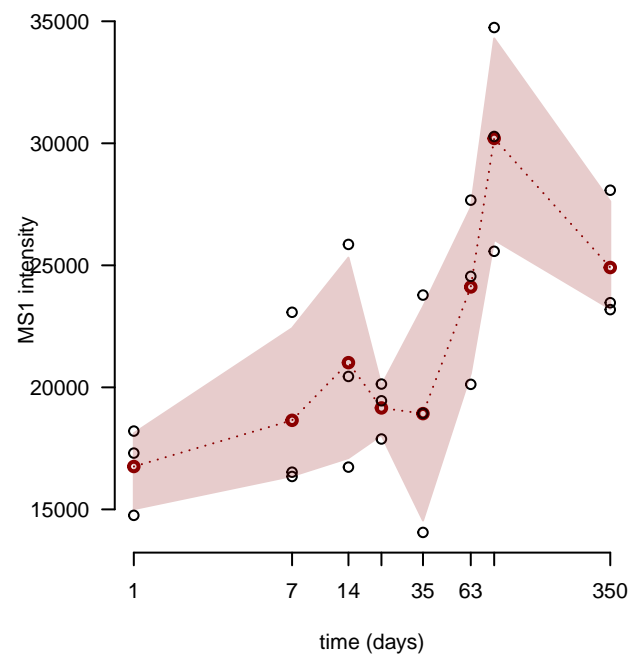

**P50396**  
**GN=Gdi1**  
guanosine diphosphate (GDP) dissociation ...

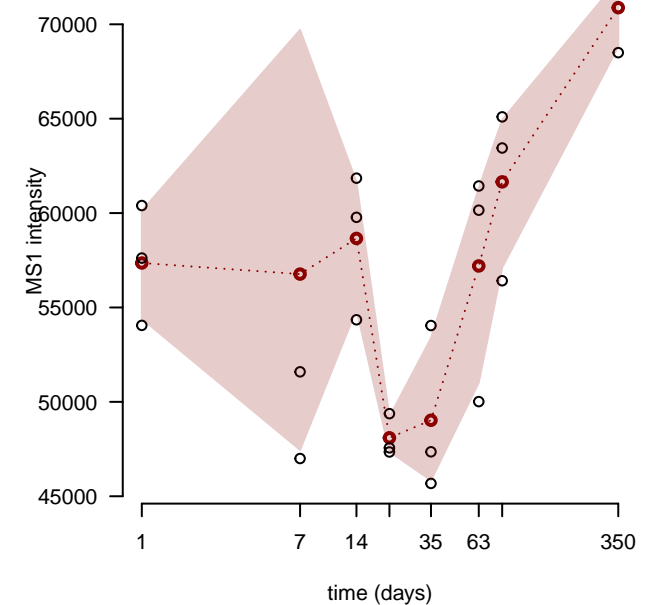

P50427  
GN=Sts  
steroid sulfatase

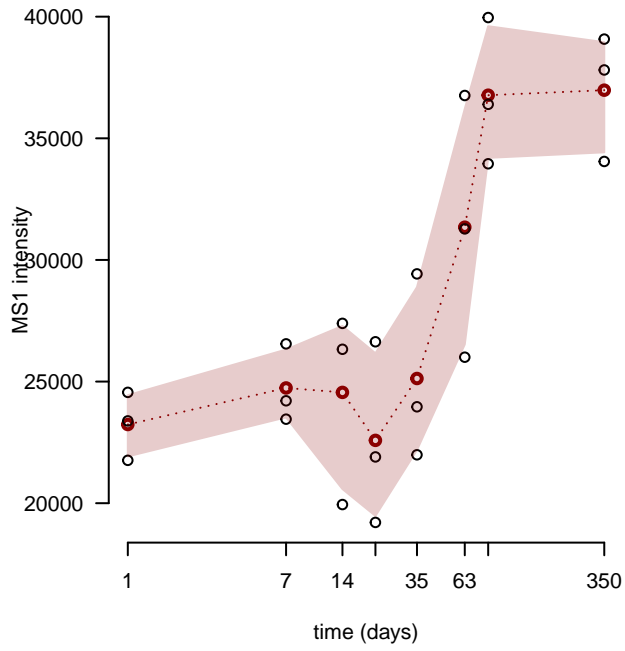

P50428  
GN=Arsa  
arylsulfatase A

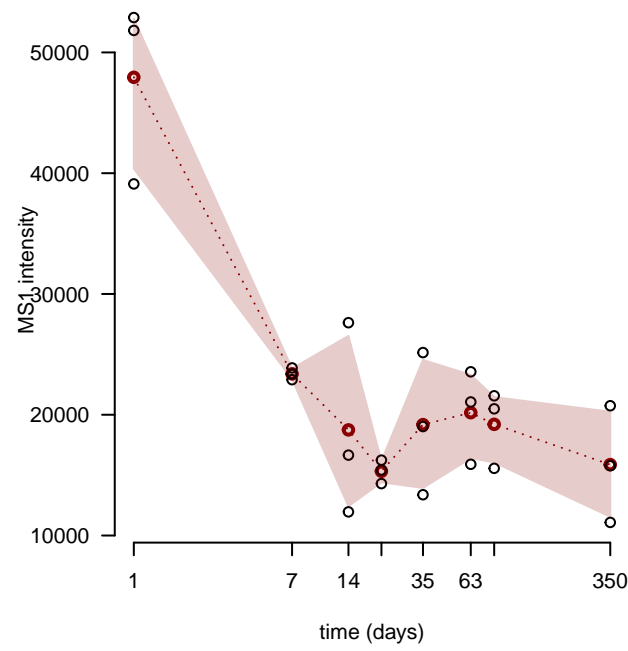

P50429  
GN=Arsb  
arylsulfatase B

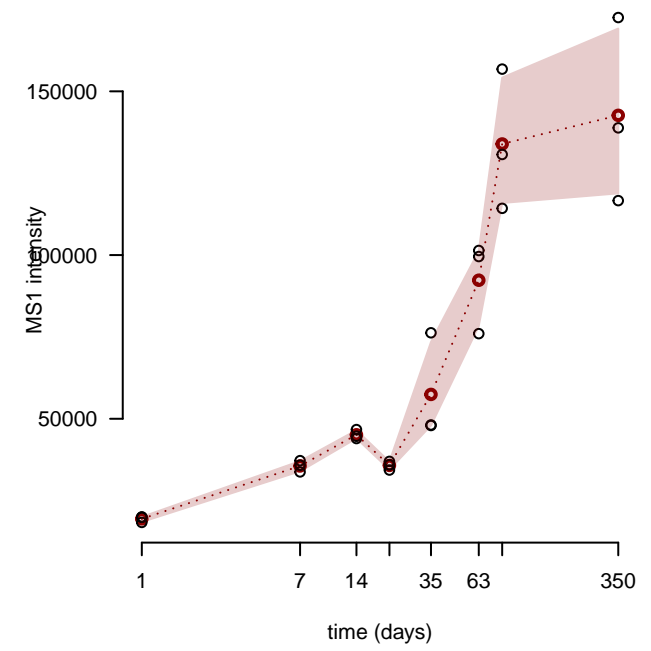

P50431  
GN=Shmt1  
serine hydroxymethyltransferase 1 (solub ...

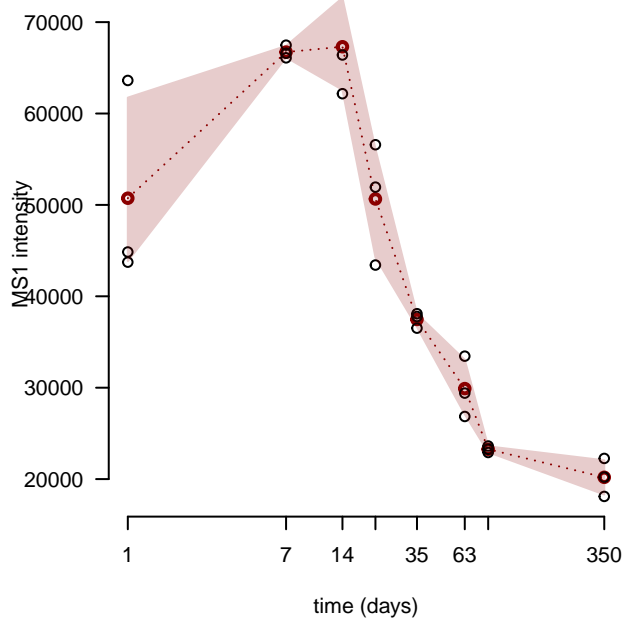

P50446  
GN=Krt6a  
keratin 6A

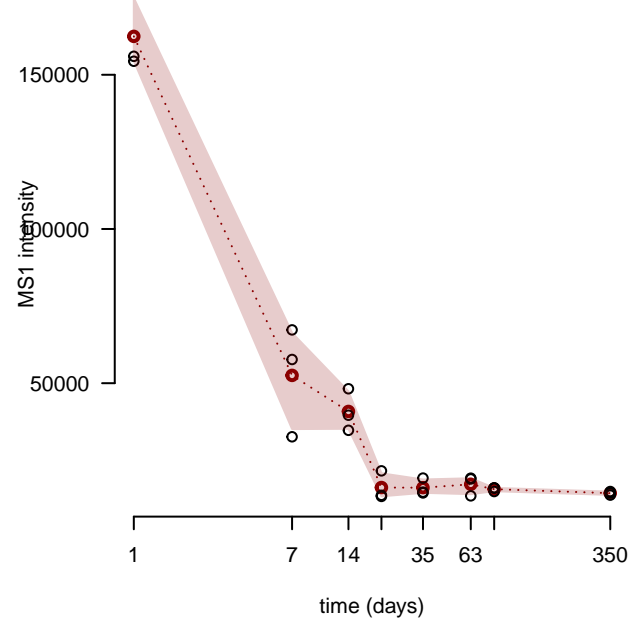

P50516  
GN=Atp6v1a  
ATPase, H+ transporting, lysosomal V1 su ...

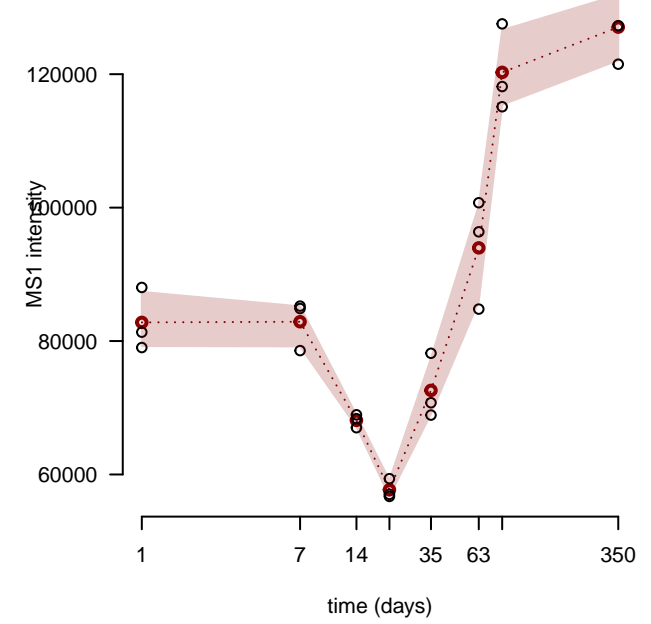

P50518  
GN=Atp6v1e1  
ATPase, H+ transporting, lysosomal V1 su ...

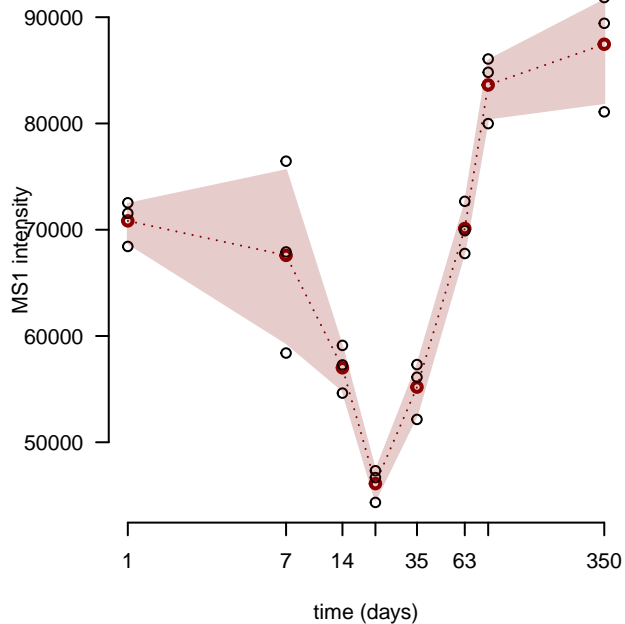

P50543  
GN=S100a11  
S100 calcium binding protein A11

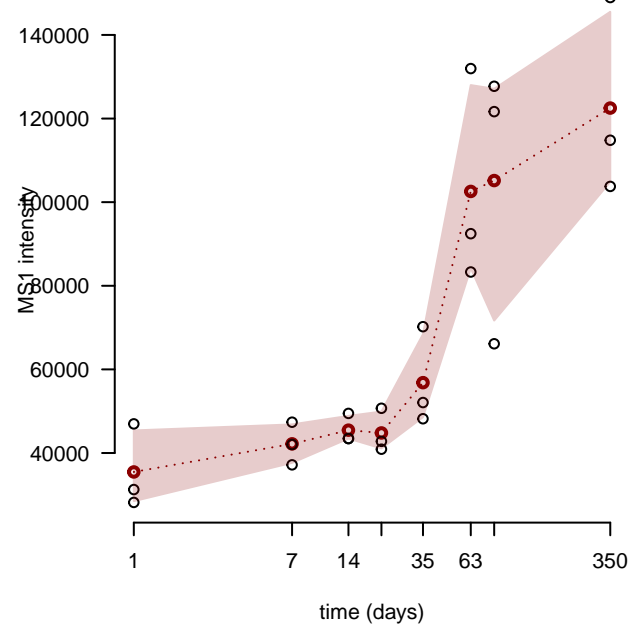

P50544  
GN=Acadvl  
acyl-Coenzyme A dehydrogenase, very long ...

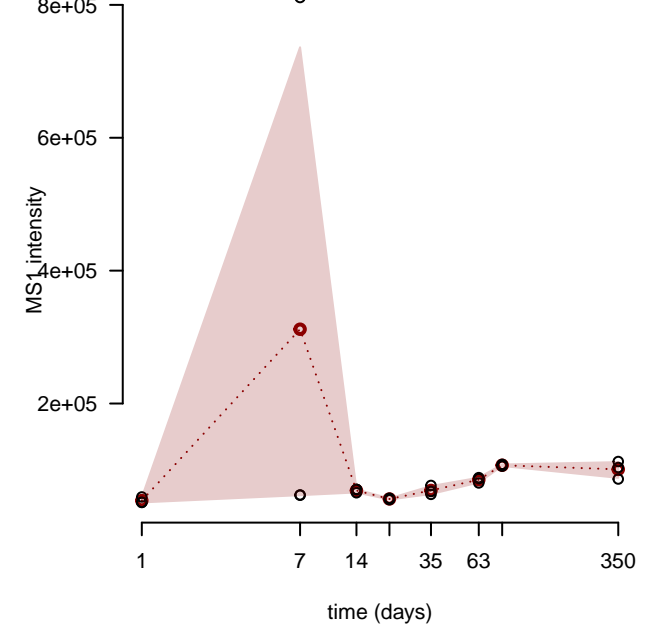

**P50580**  
GN=Pa2g4  
proliferation-associated 2G4

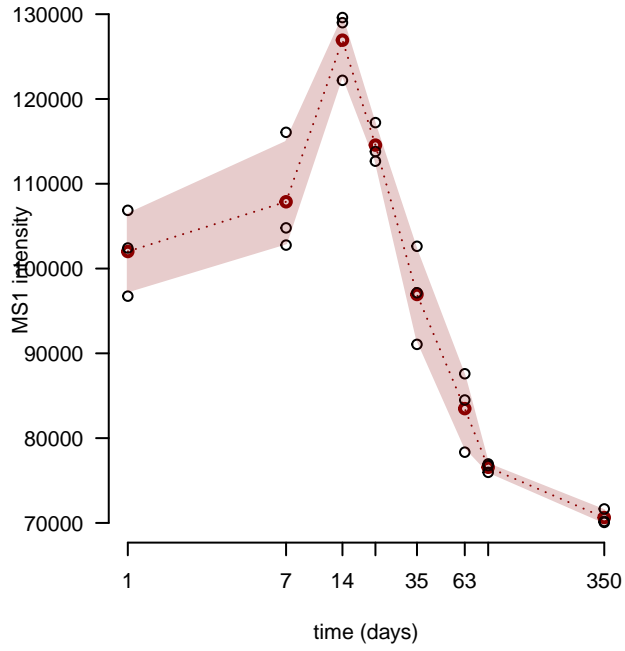

**P50608**  
GN=Fmod  
fibromodulin

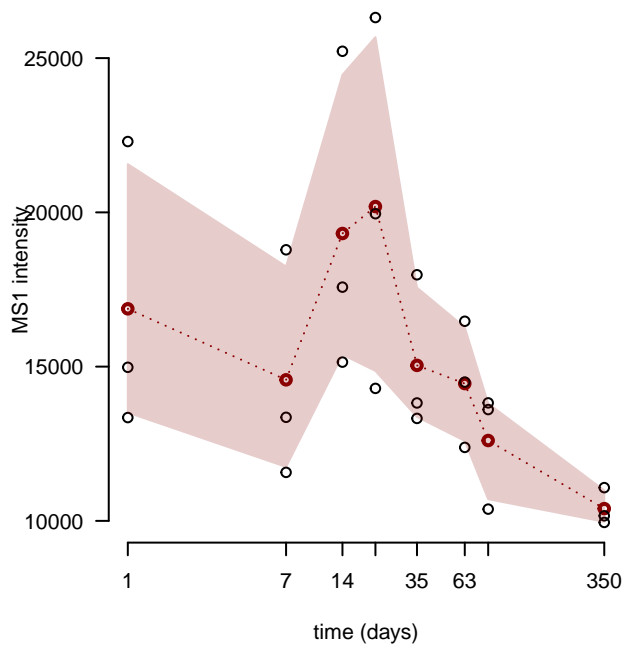

**P50615**  
GN=Btg3  
BTG anti-proliferation factor 3

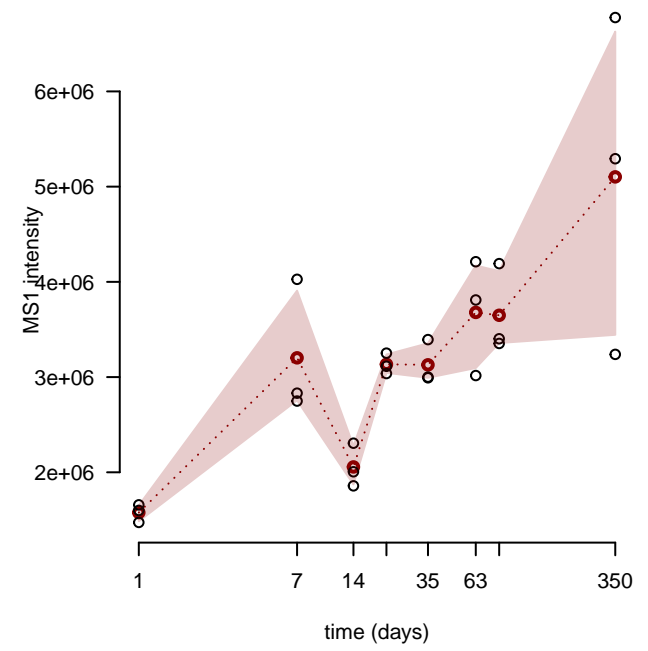

**P50637**  
GN=Tspo  
translocator protein

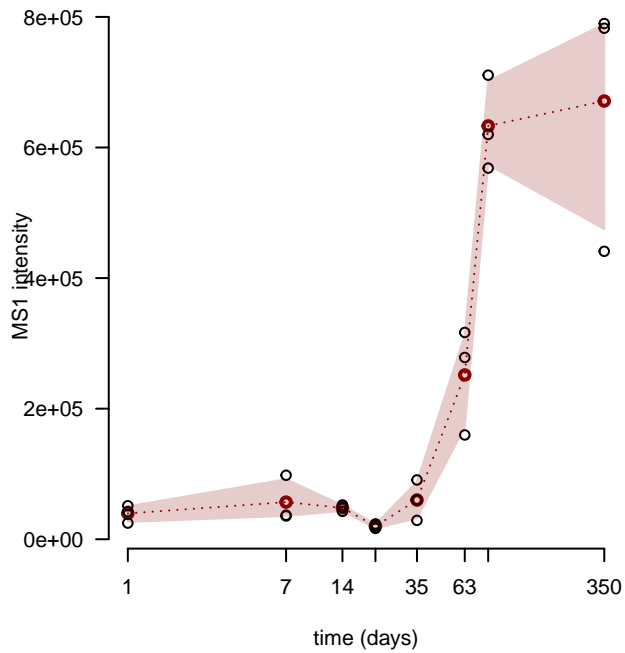

**P51125**  
GN=Cast  
calpastatin

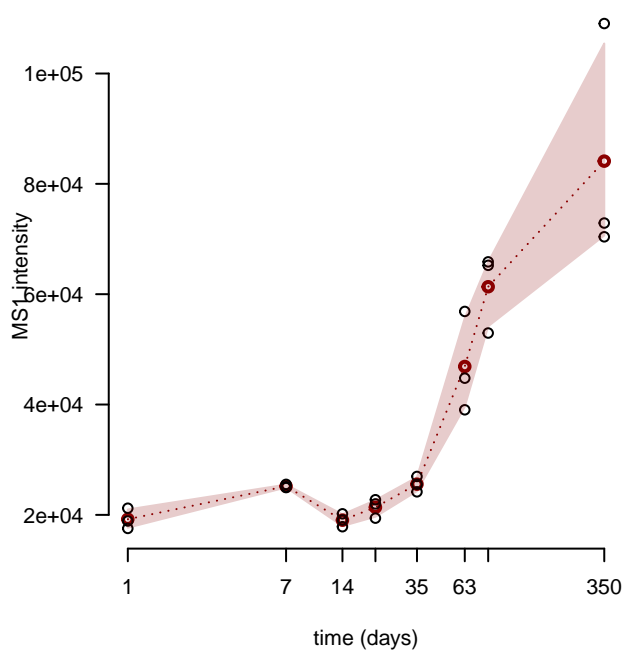

**P51150**  
GN=Rab7a

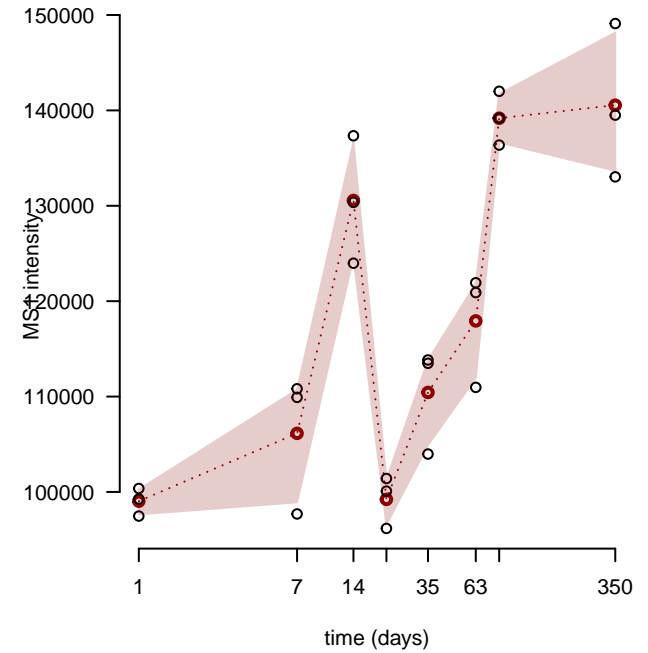

**P51162**  
GN=Fabp6  
fatty acid binding protein 6

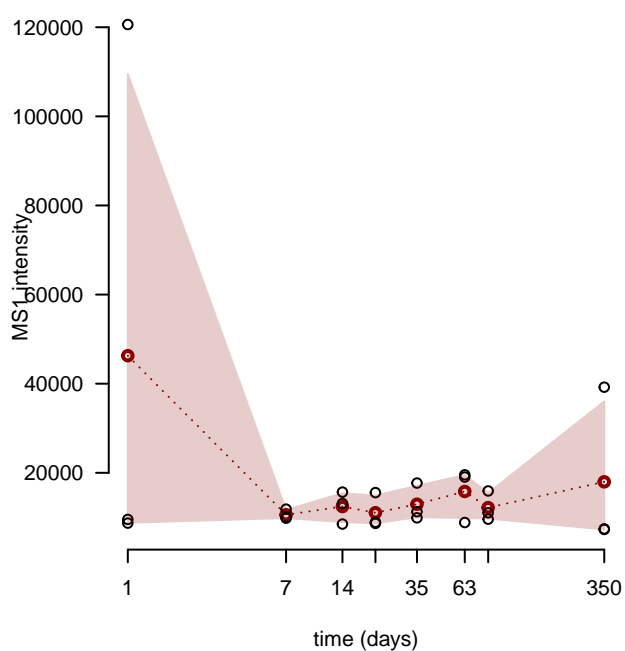

**P51163**  
GN=Uros  
uroporphyrinogen III synthase

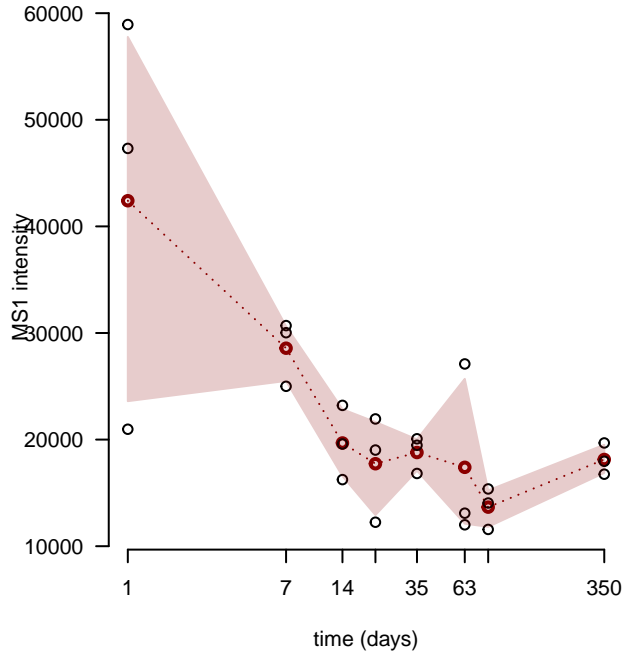

**P51174**  
GN=Acadl  
acyl-Coenzyme A dehydrogenase, long-chain ...

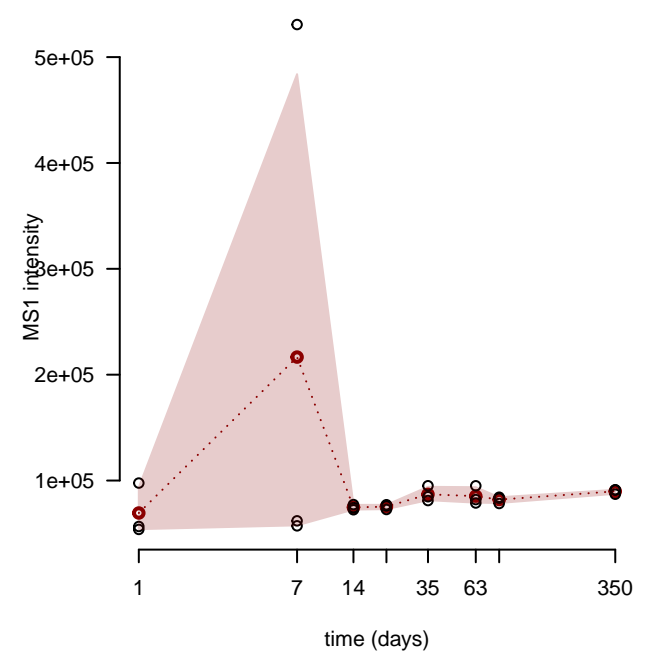

**P51175**  
GN=Ppox  
protoporphyrinogen oxidase

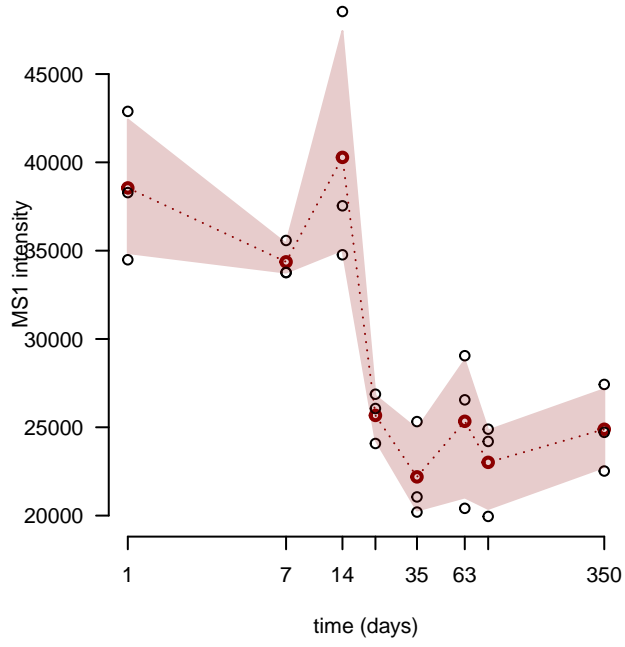

**P51410**  
GN=Rpl9  
ribosomal protein L9

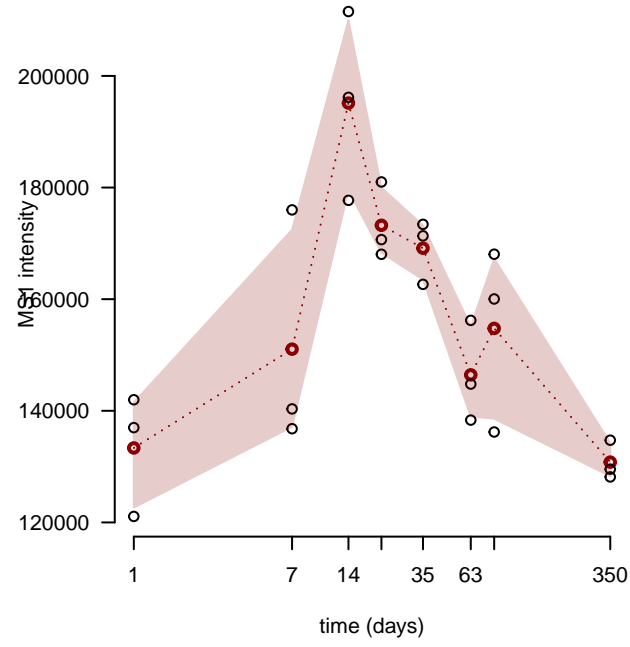

**P51432**  
GN=Plcb3  
phospholipase C, beta 3

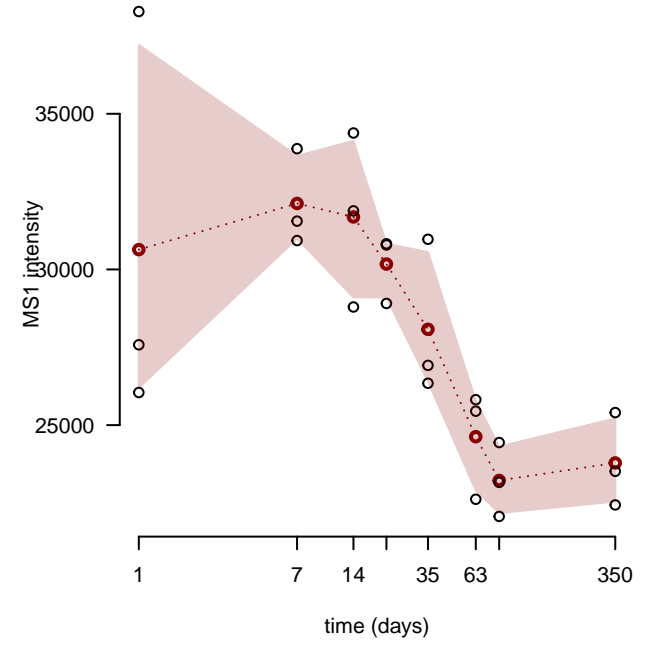

**P51437**  
GN=Camp  
cathelicidin antimicrobial peptide

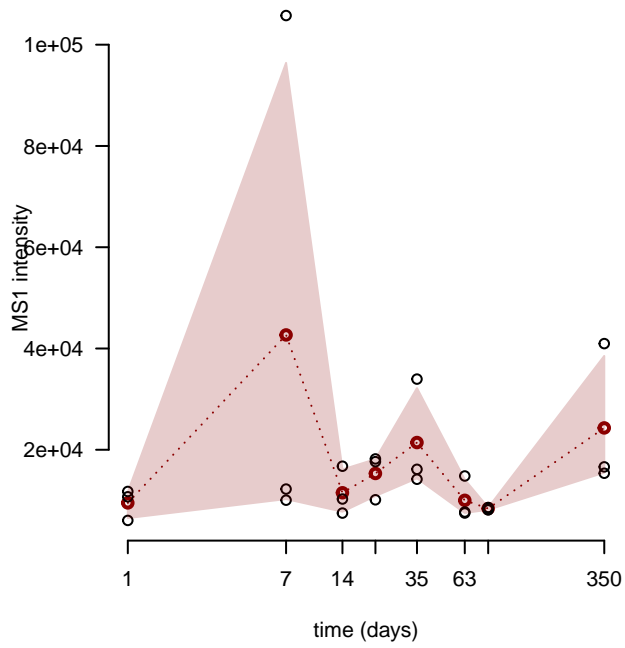

**P51557**  
GN=Star  
steroidogenic acute regulatory protein

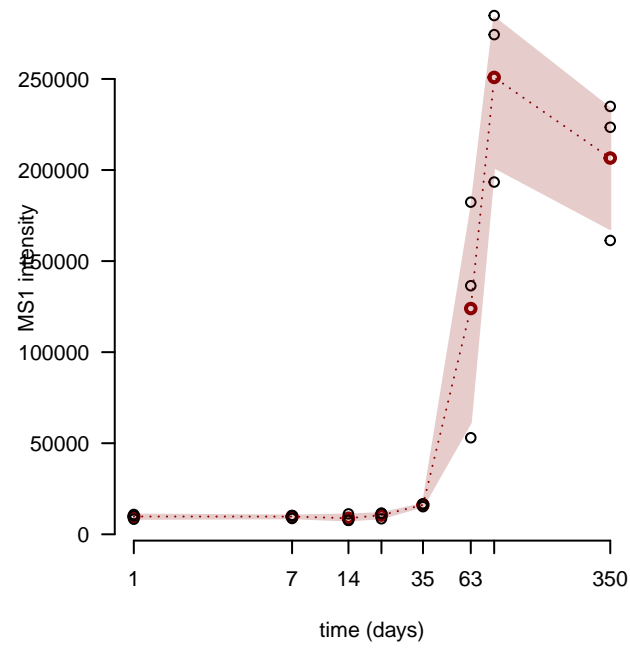

**P51569**  
GN=Gla  
galactosidase, alpha

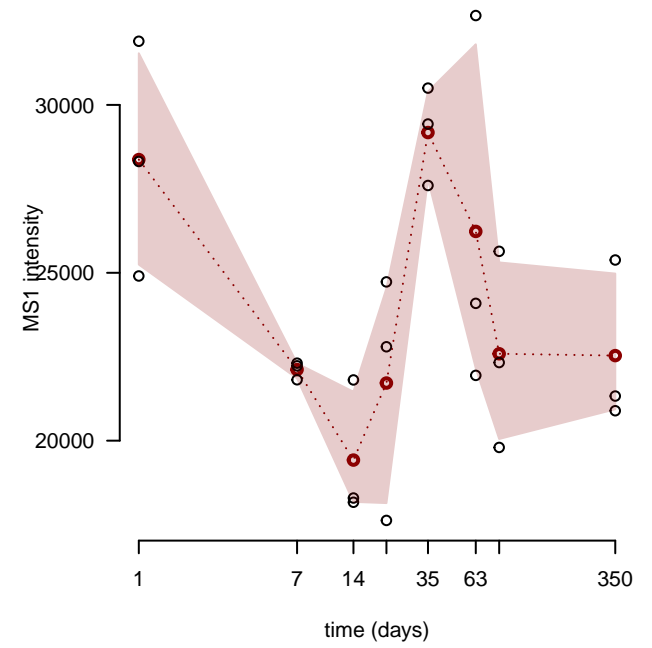

**P51612**  
GN=Xpc  
xeroderma pigmentosum, complementation g ...

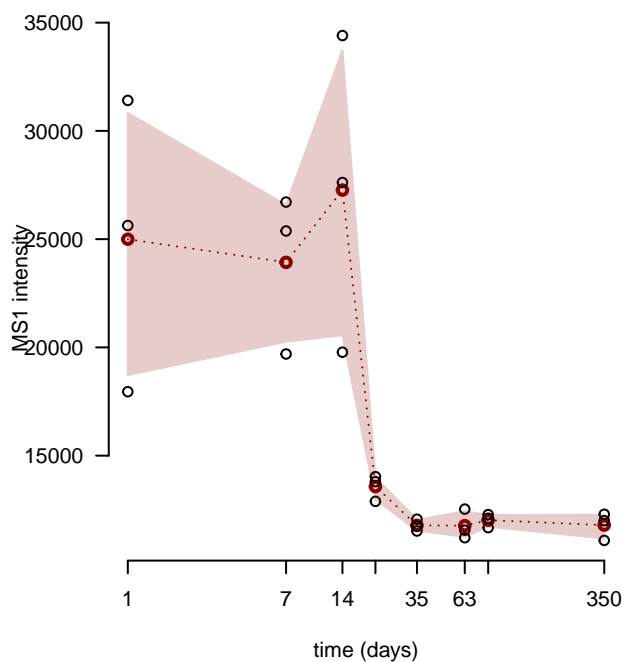

**P51655**  
GN=Gpc4  
glypican 4

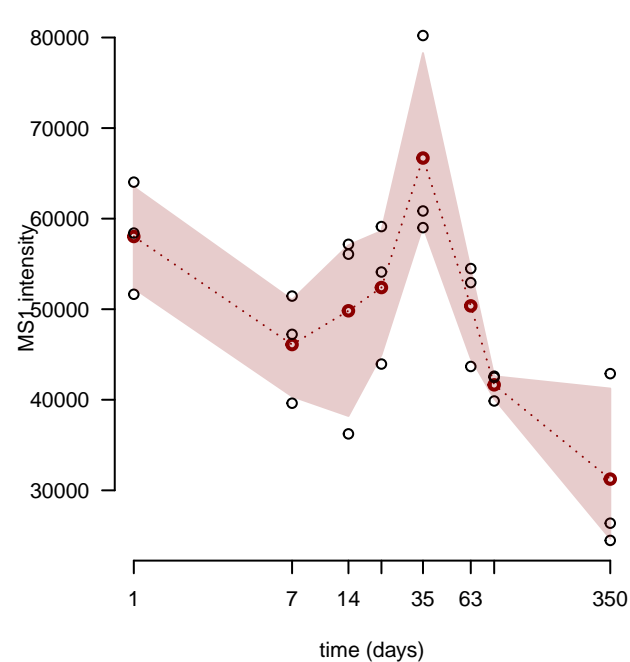

**P51656**  
GN=Hsd17b1  
hydroxysteroid (17-beta) dehydrogenase 1

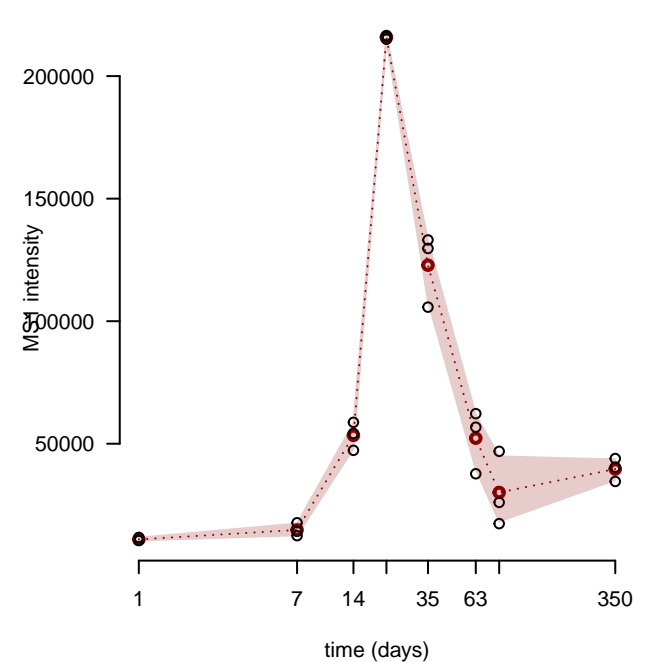

**P51658**  
**GN=Hsd17b2**  
hydroxysteroid (17-β) dehydrogenase 2

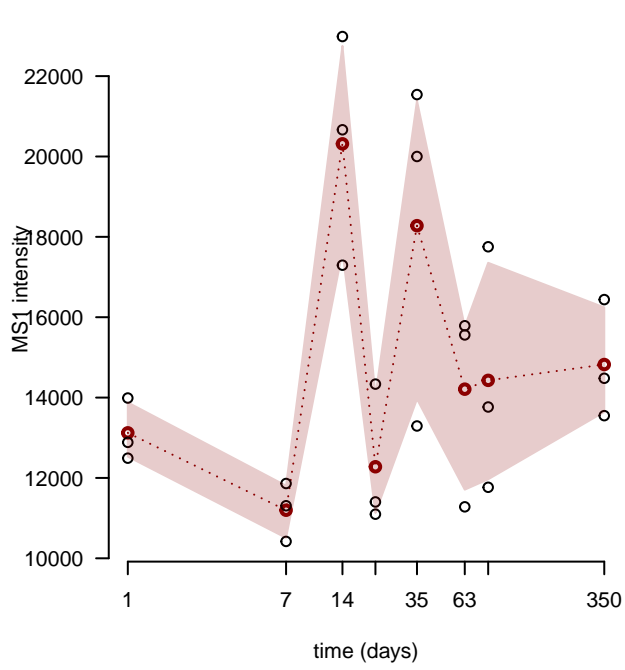

**P51660**  
**GN=Hsd17b4**  
hydroxysteroid (17-β) dehydrogenase 4

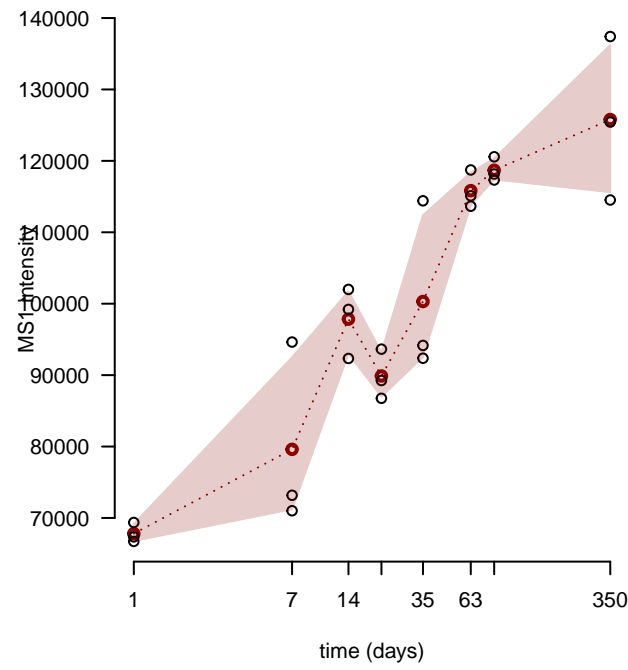

**P51661**  
**GN=Hsd11b2**  
hydroxysteroid 11-β dehydrogenase 2

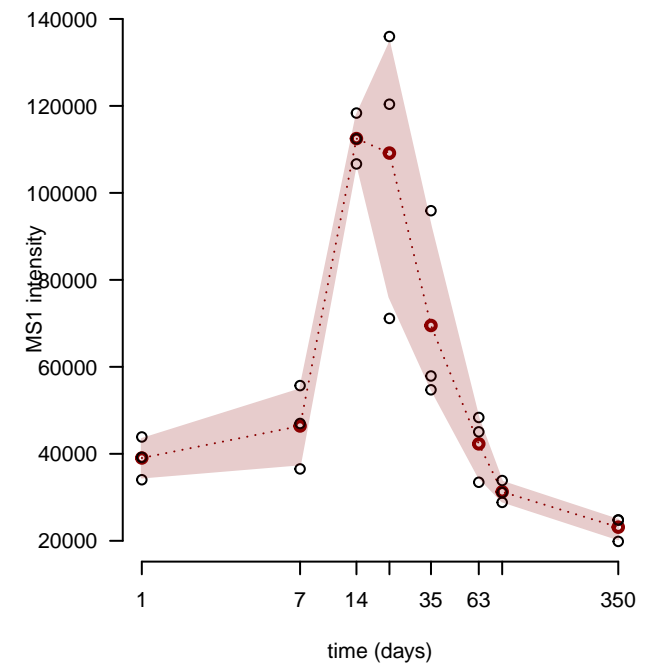

**P51667**  
**GN=Myl2**  
myosin, light polypeptide 2, regulatory, ...

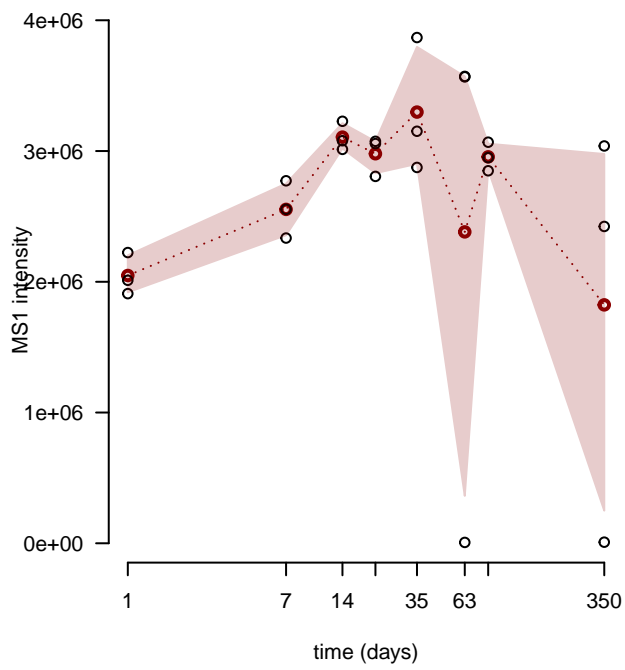

**P51791**  
**GN=Clcn3**  
chloride channel, voltage-sensitive 3

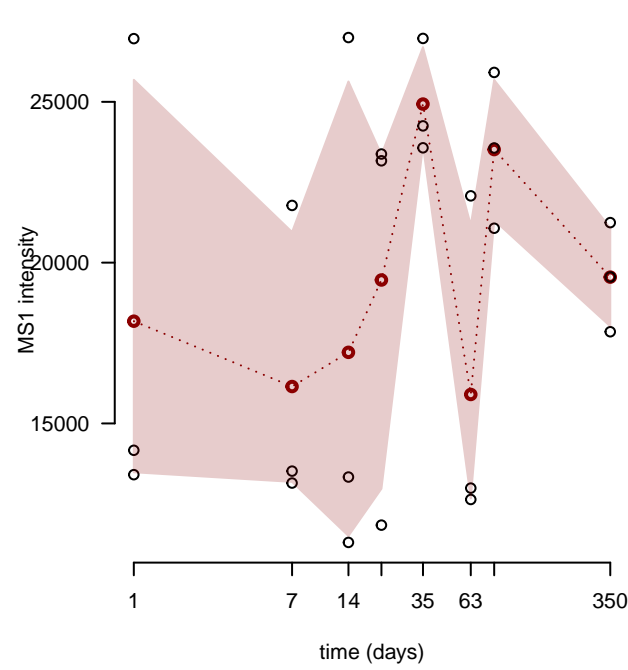

**P51807**  
**GN=Dynlt1**

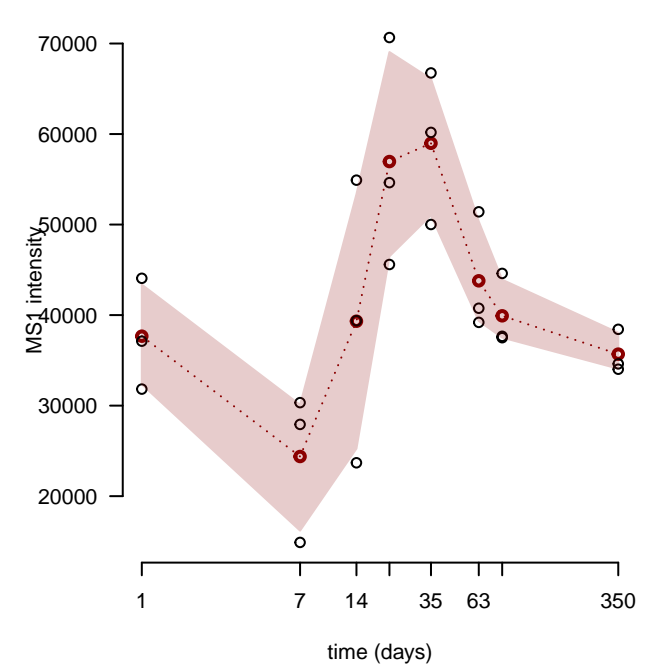

**P51827**  
**GN=Aff3**  
AF4/FMR2 family, member 3

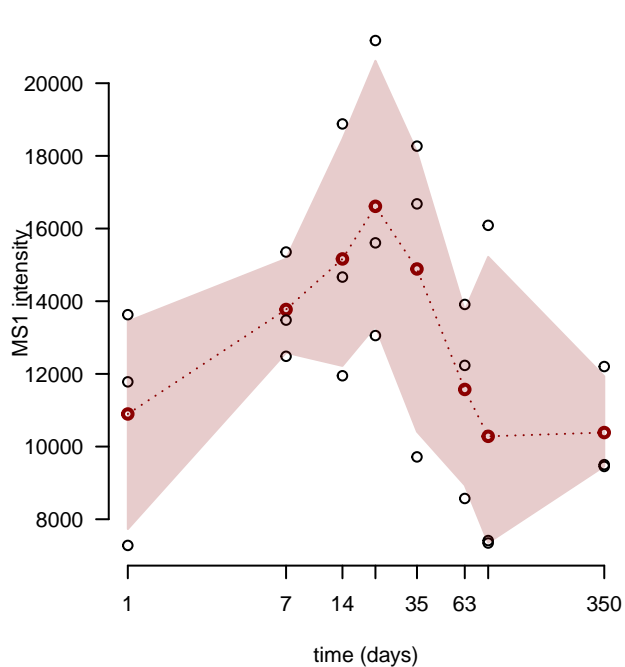

**P51829**  
**GN=Adcy7**  
adenylate cyclase 7

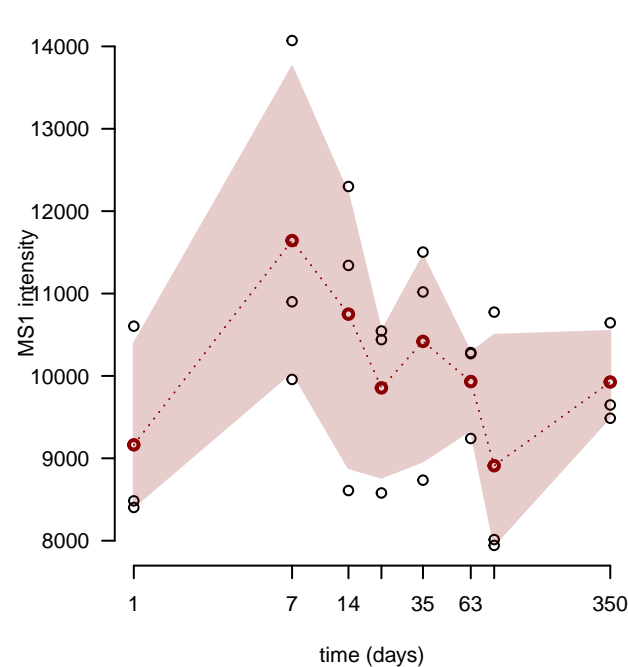

**P51830**  
**GN=Adcy9**  
adenylate cyclase 9

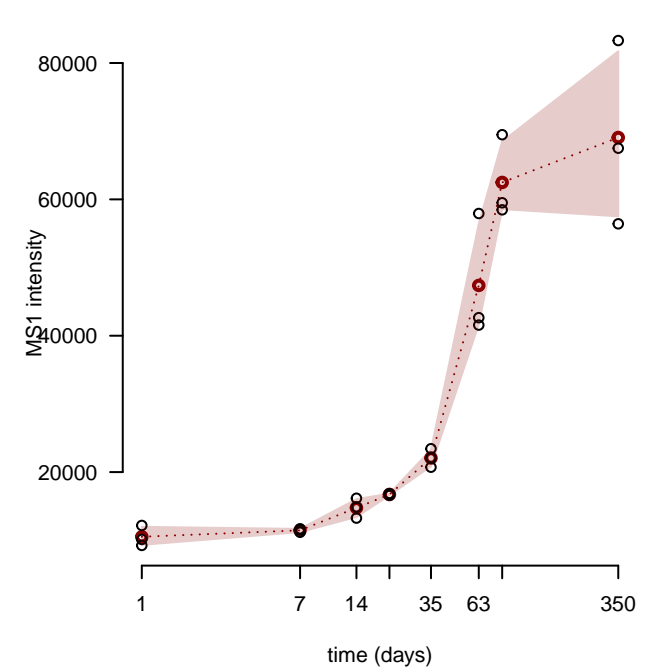

**P51855**  
**GN=Gss**  
glutathione synthetase

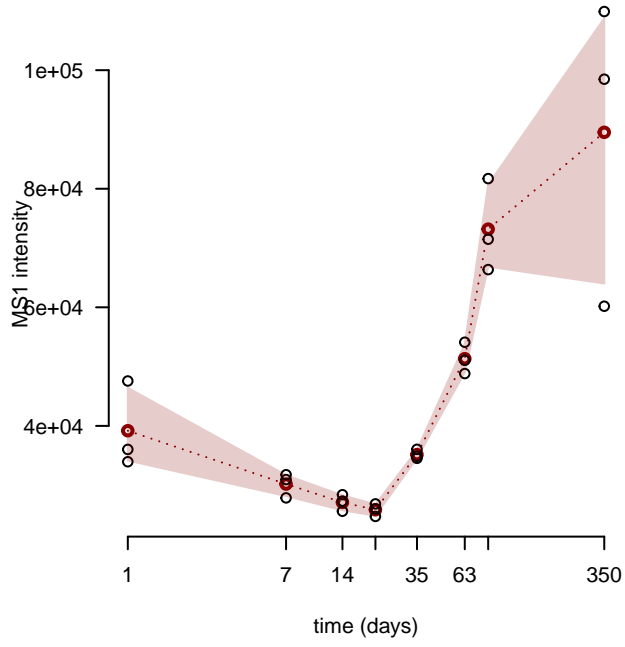

**P51859**  
**GN=Hdgf**  
heparin binding growth factor

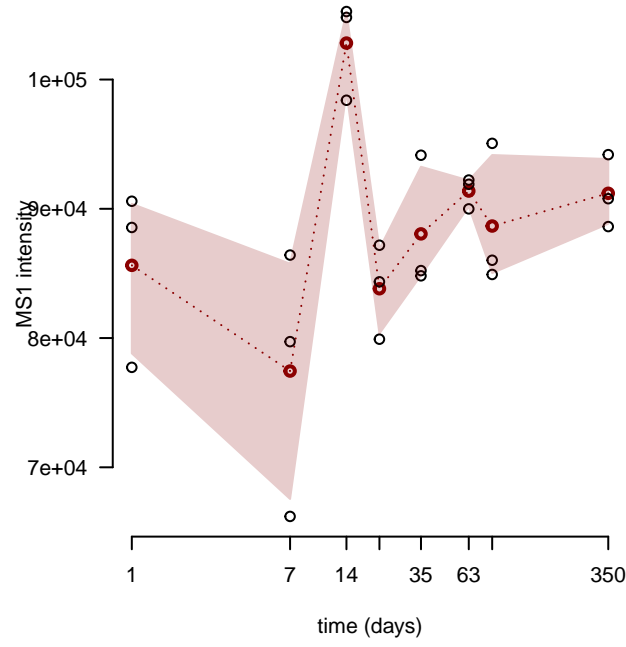

**P51863**  
**GN=Atp6v0d1**  
ATPase, H+ transporting, lysosomal V0 su ...

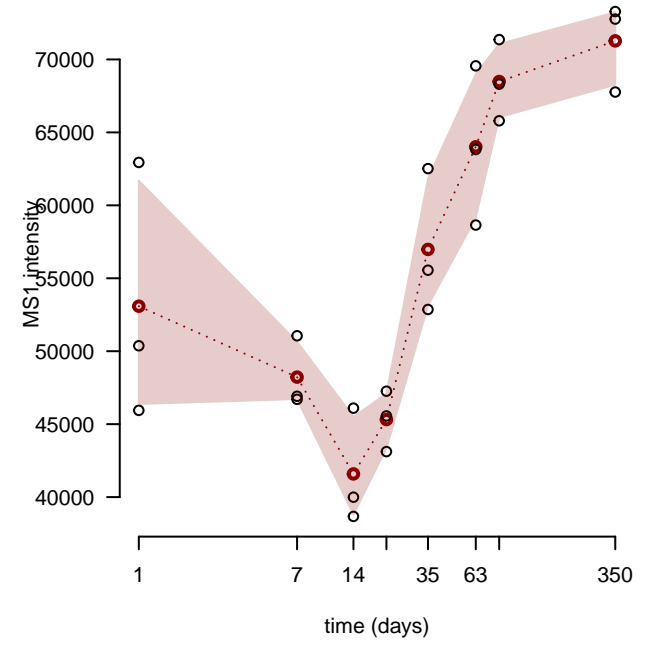

**P51880**  
**GN=Fabp7**  
fatty acid binding protein 7, brain

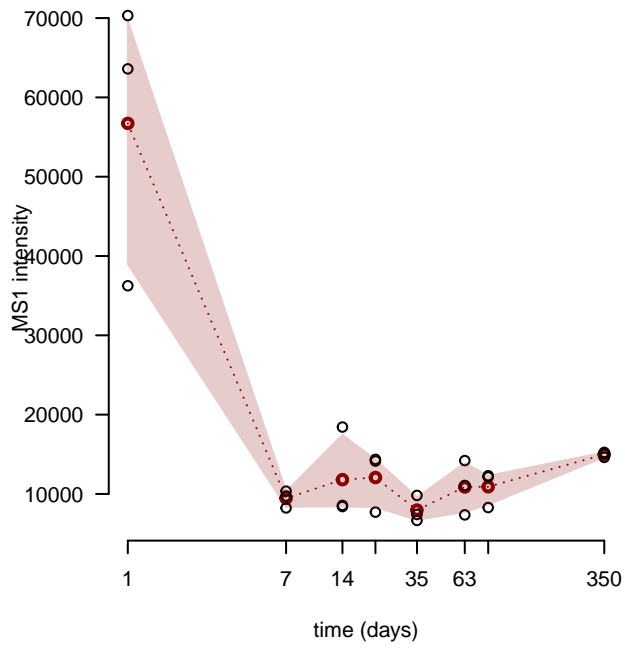

**P51881**  
**GN=Slc25a5**  
solute carrier family 25 (mitochondrial ...

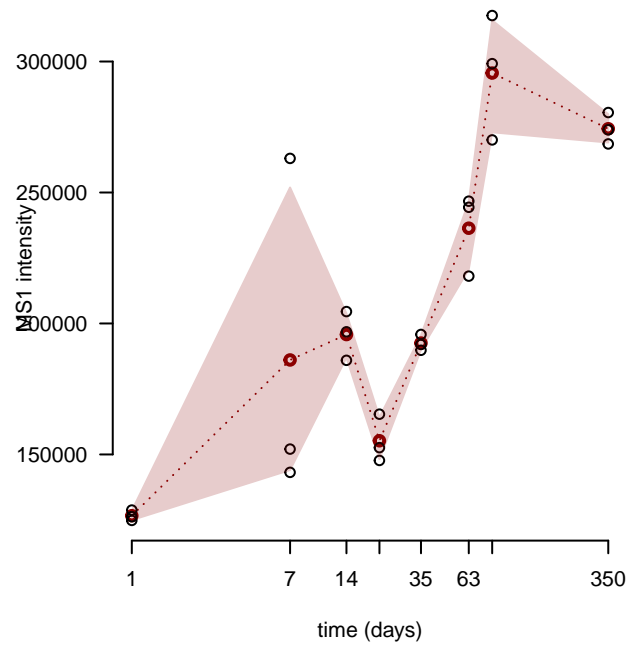

**P51885**  
**GN=Lum**  
lumican

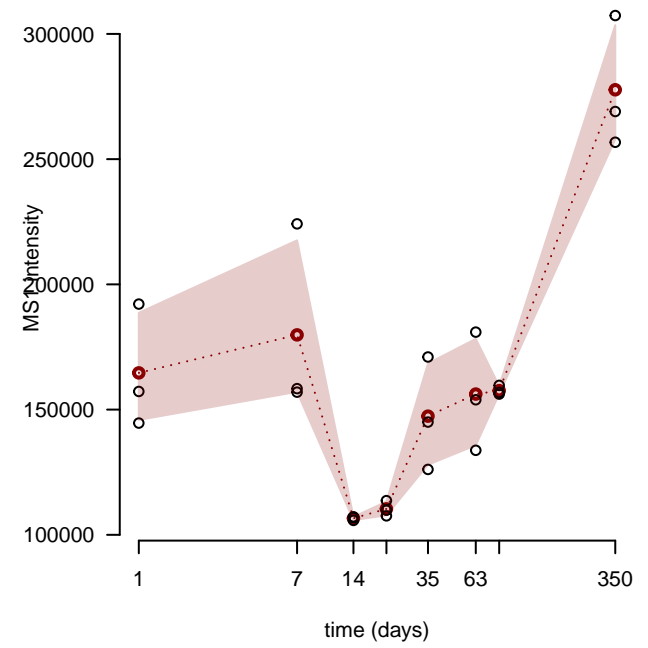

**P51912**  
**GN=Slc1a5**  
solute carrier family 1 (neutral amino a ...

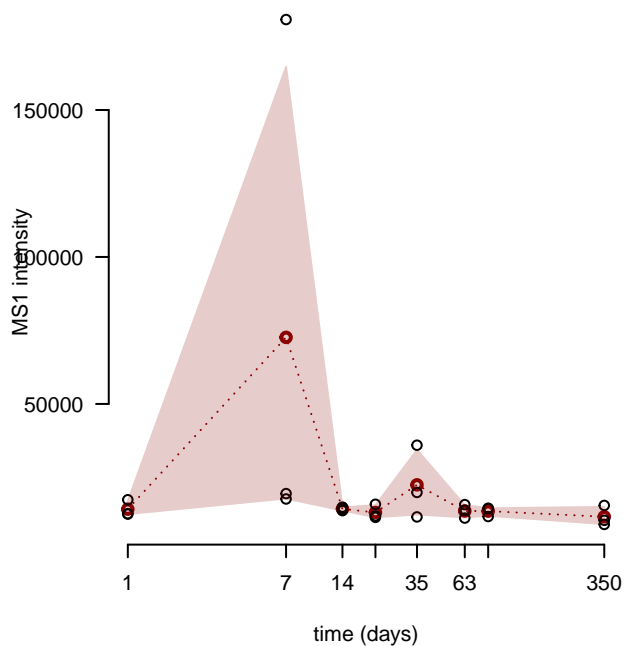

**P51949**  
**GN=Mnat1**  
menage a trois 1

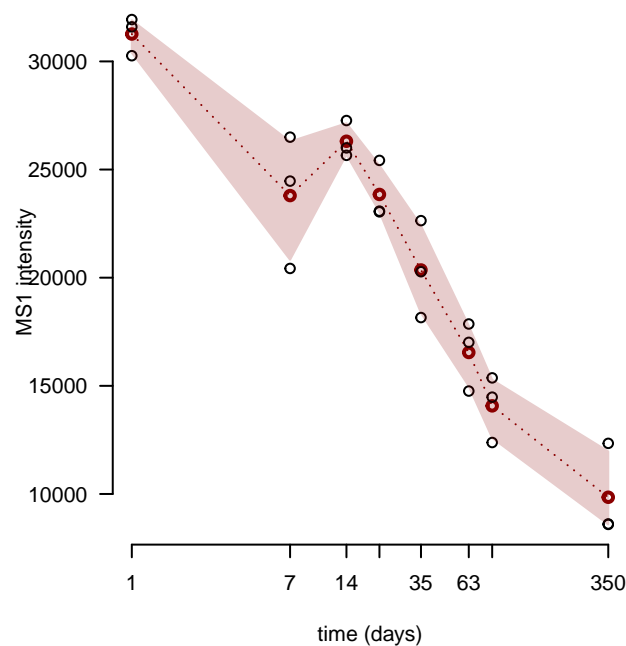

**P51954**  
**GN=Nek1**  
NIMA (never in mitosis gene a)-related e ...

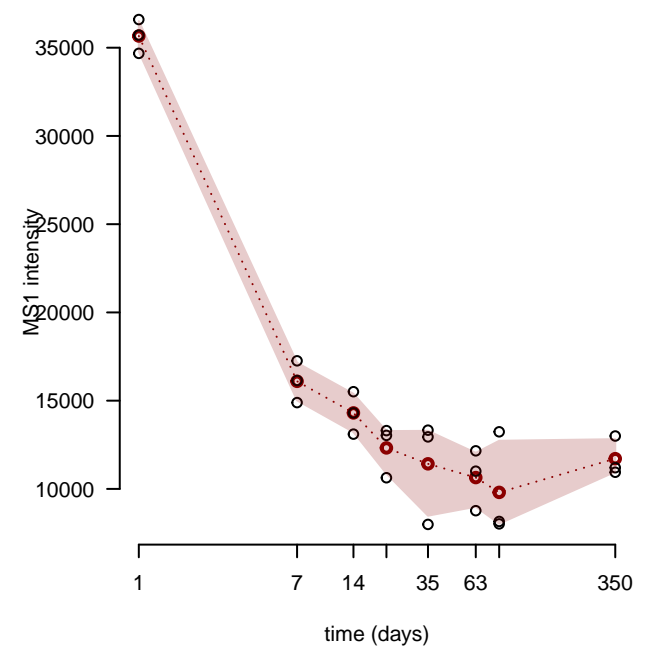

**P52019**  
**GN=Sqle**  
squalene epoxidase

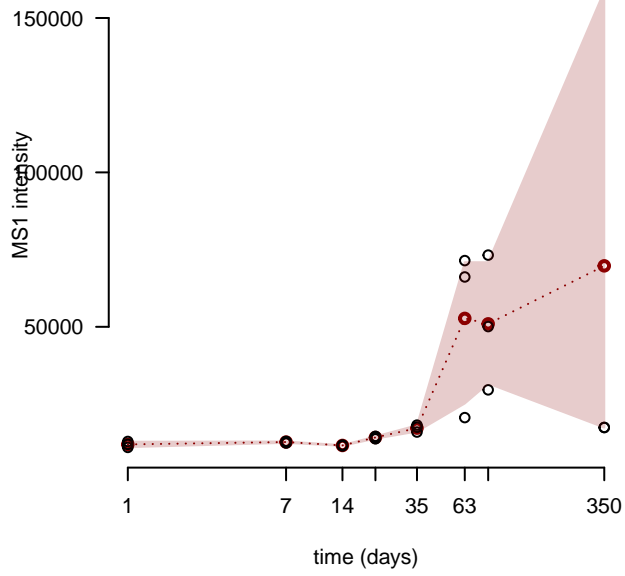

**P52196**  
**GN=Tst**  
thiosulfate sulfurtransferase, mitochond...

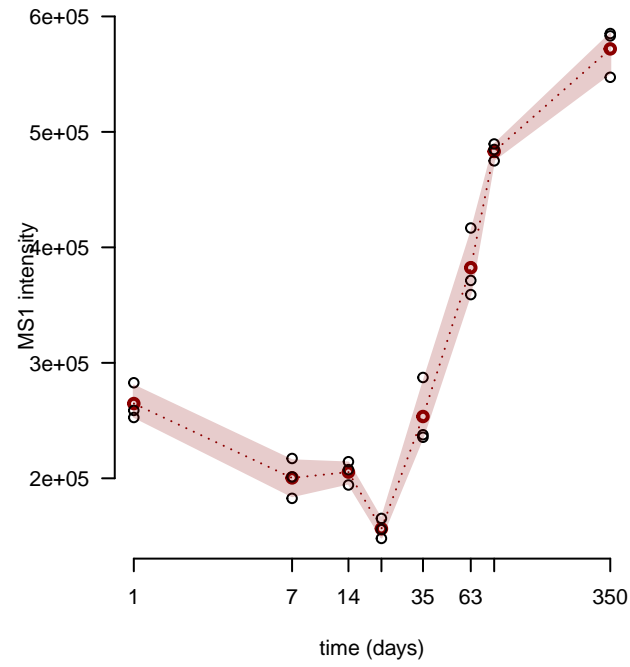

**P52293**  
**GN=Kpna2**  
karyopherin (importin) alpha 2

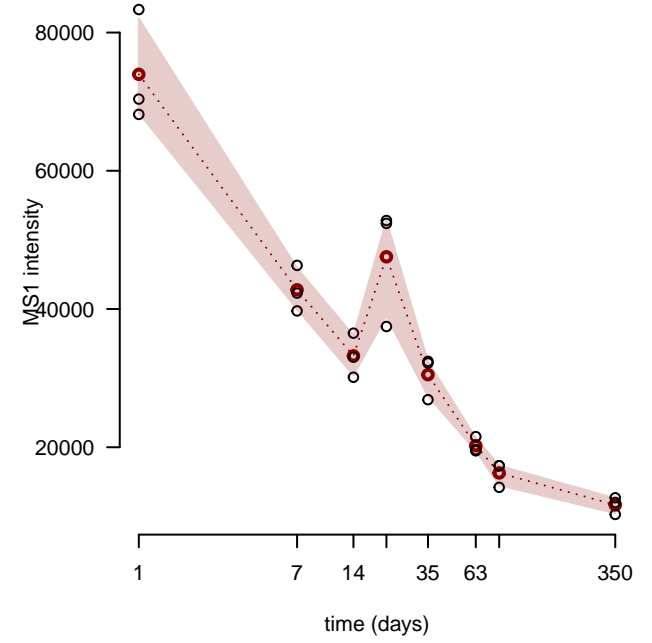

**P52332**  
**GN=Jak1**  
Janus kinase 1

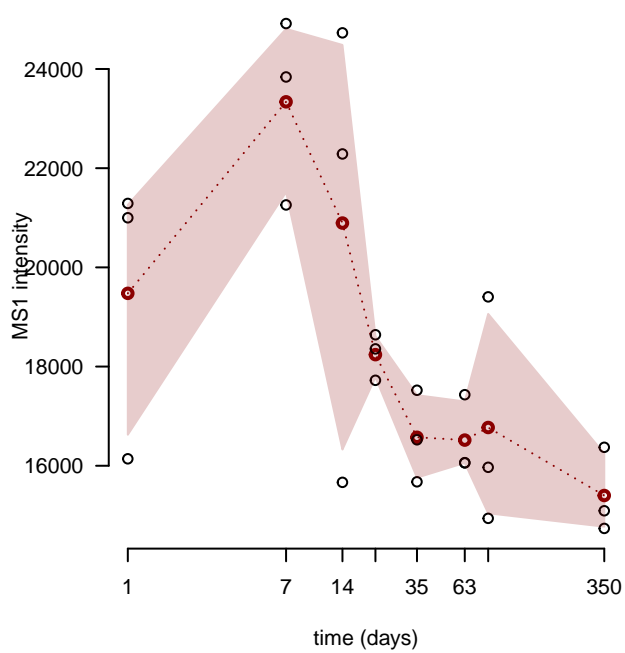

**P52430**  
**GN=Pon1**  
paraoxonase 1

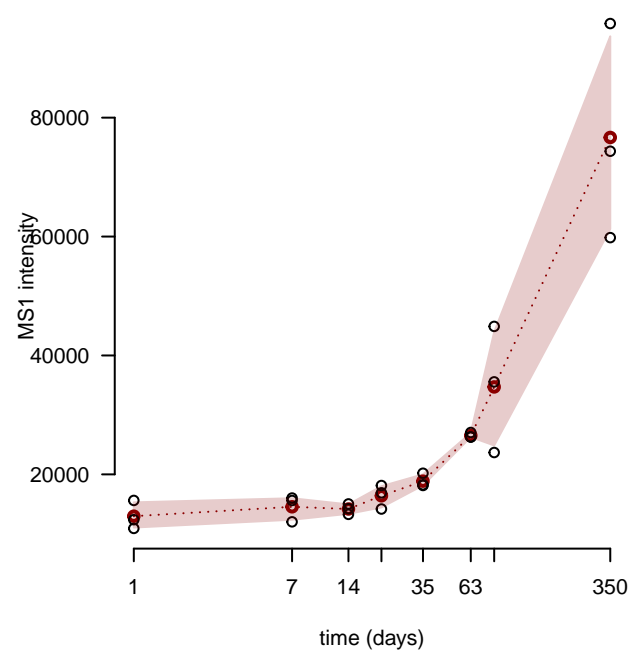

**P52431**  
**GN=Pold1**  
polymerase (DNA directed), delta 1, cata ...

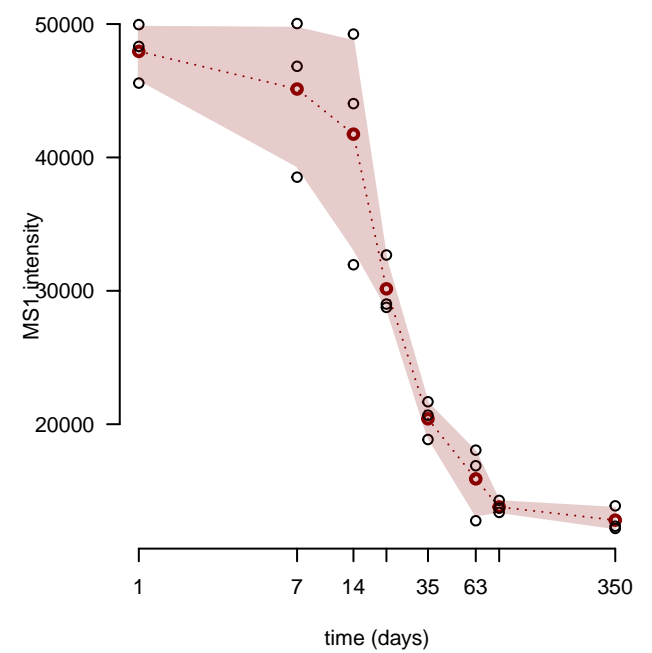

**P52432**  
**GN=Polr1c**  
polymerase (RNA) I polypeptide C

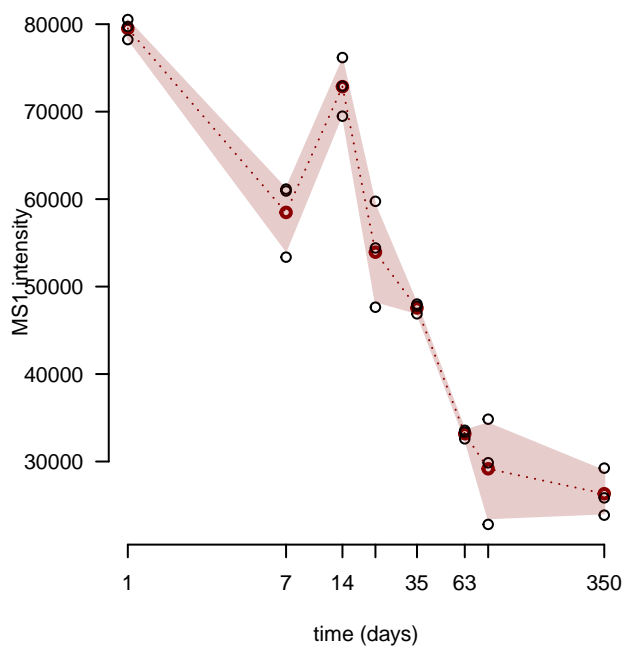

**P52479**  
**GN=Usp10**  
ubiquitin specific peptidase 10

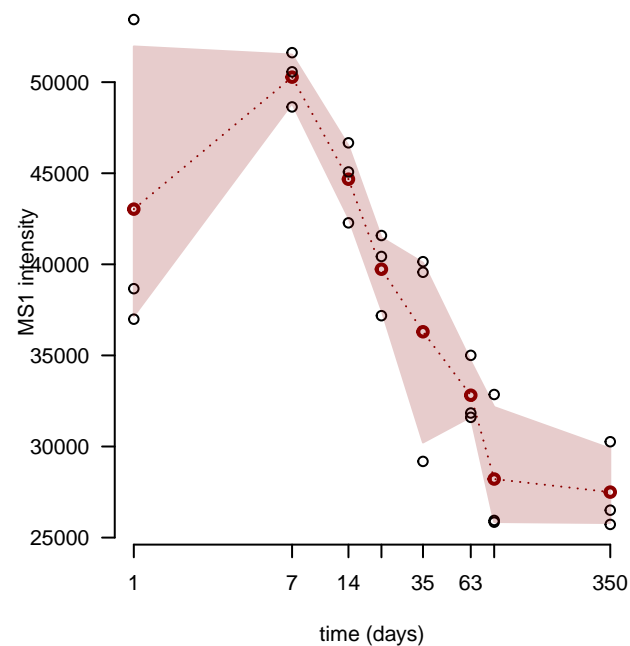

**P52480**  
**GN=Pkm**  
pyruvate kinase, muscle

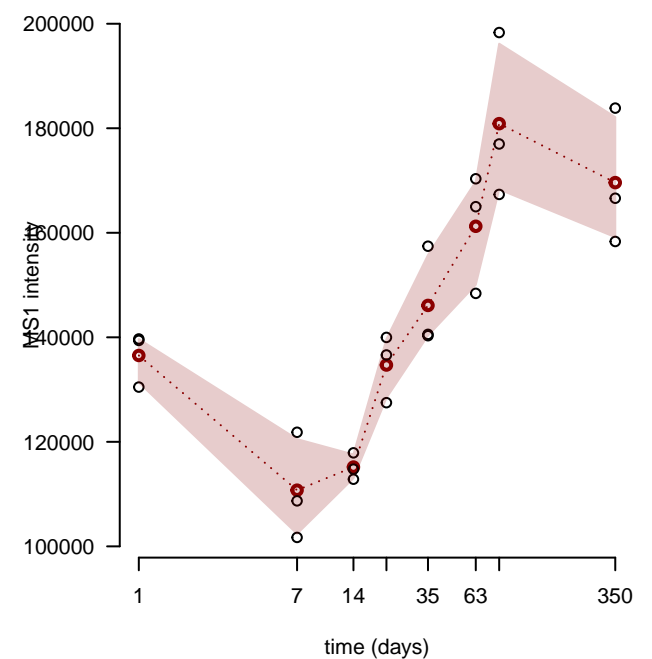

**P52480**  
**GN=Pkm**  
pyruvate kinase, muscle

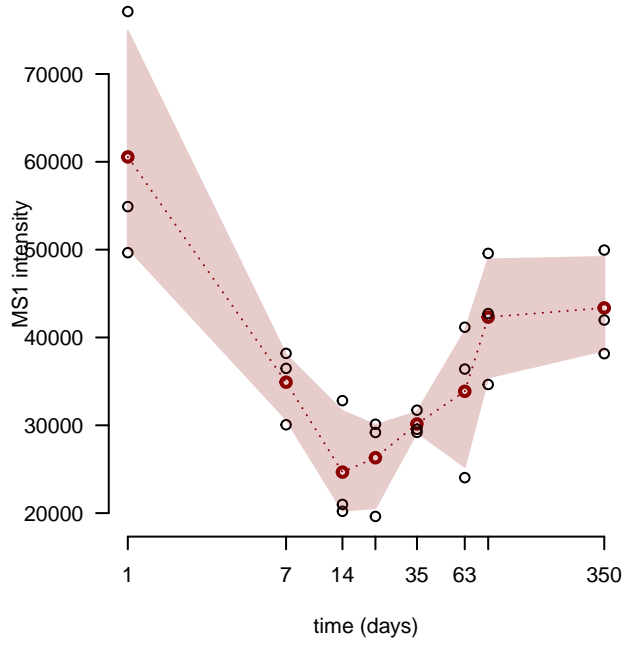

**P52483**  
**GN=Ube2e3**  
ubiquitin-conjugating enzyme E2E 3

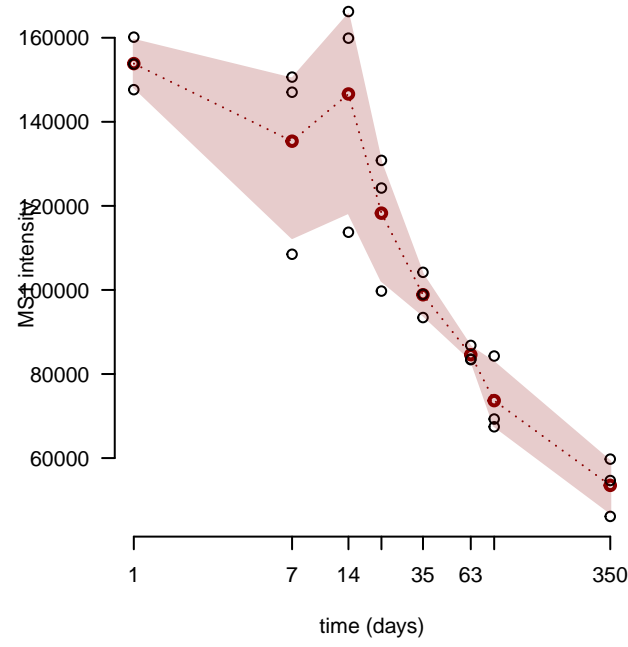

**P52503**  
**GN=Ndufs6**  
NADH:ubiquinone oxidoreductase core subu ...

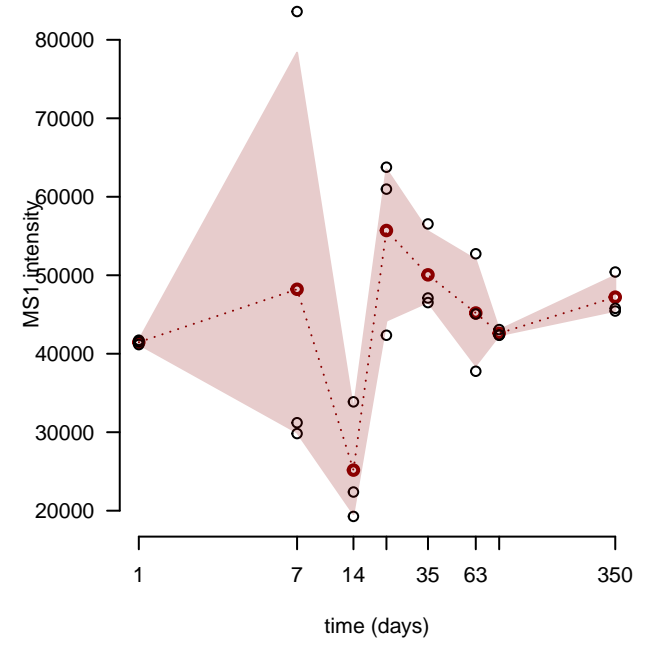

**P52592**  
**GN=S1pr2**  
sphingosine-1-phosphate receptor 2

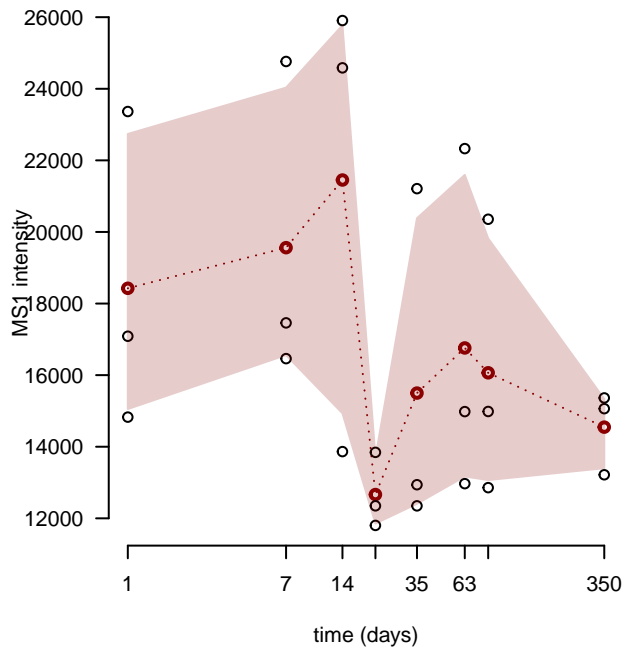

**P52623**  
**GN=Uck1**  
uridine-cytidine kinase 1

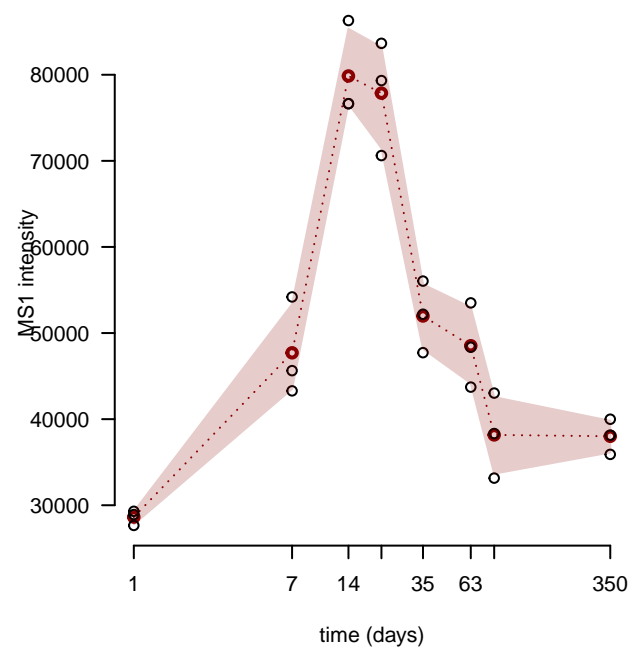

**P52624**  
**GN=Upp1**  
uridine phosphorylase 1

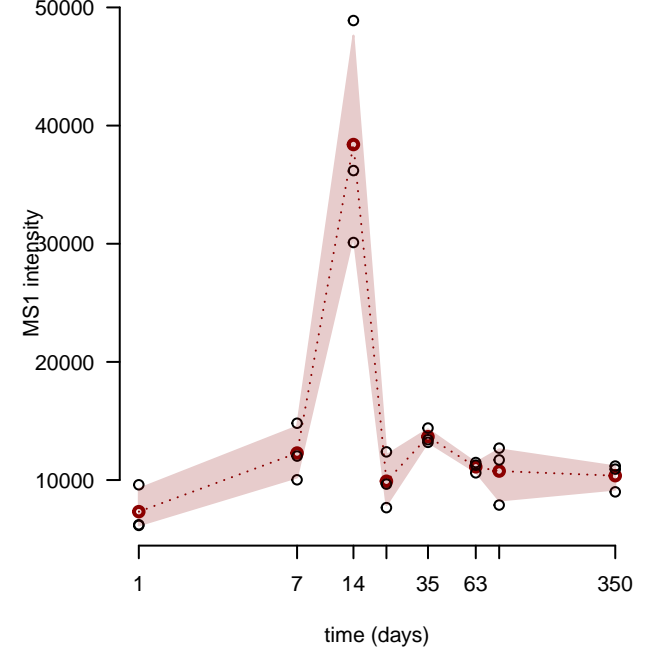

**P52633**  
**GN=Stat6**  
signal transducer and activator of trans ...

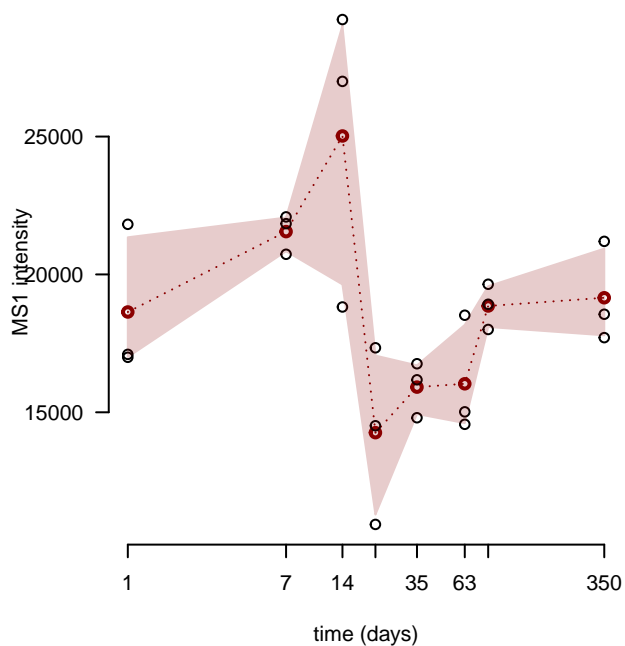

**P52734**  
**GN=Fgd1**  
FYVE, RhoGEF and PH domain containing 1

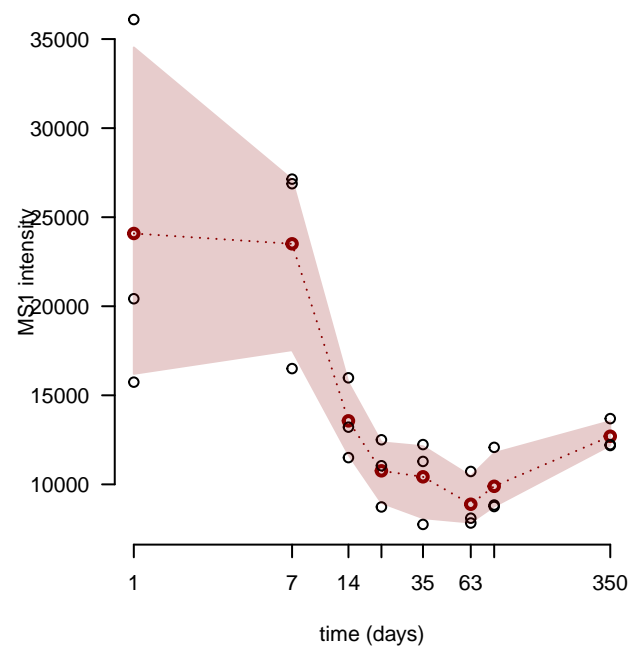

**P52760**  
**GN=Rida**  
reactive intermediate imine deaminase A ...

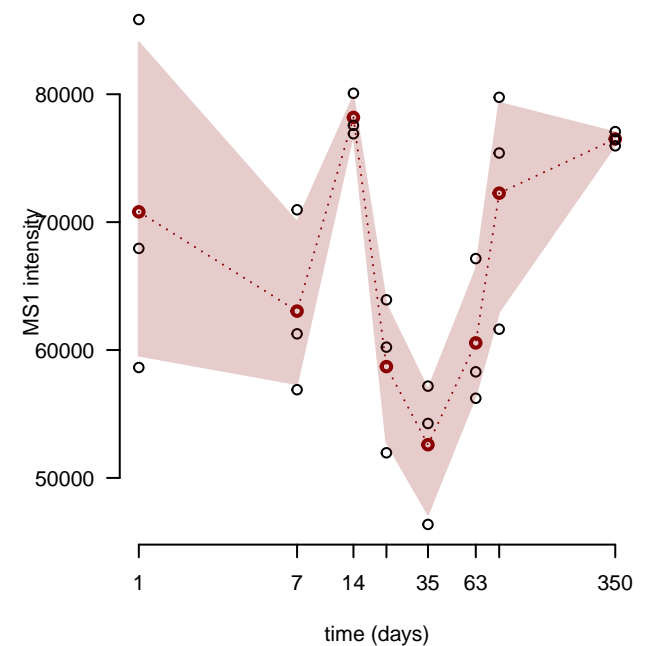



**P52795**  
GN=Efnb1  
ephrin B1

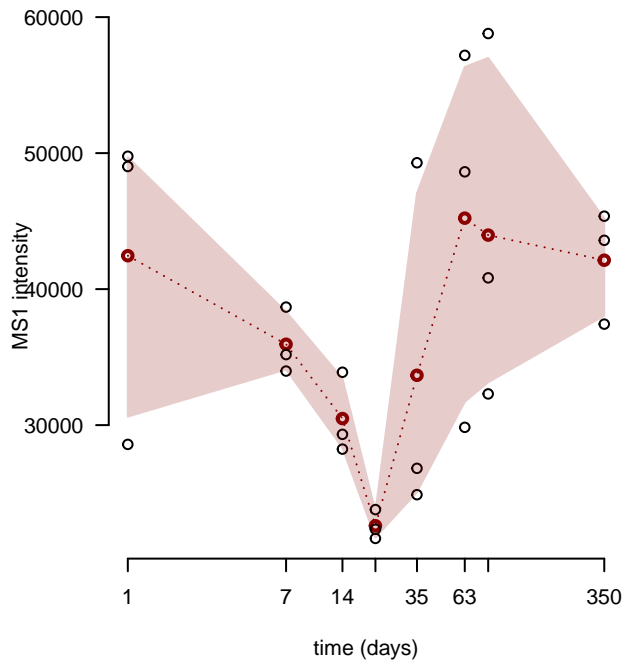

**P52800**  
GN=Efnb2  
ephrin B2

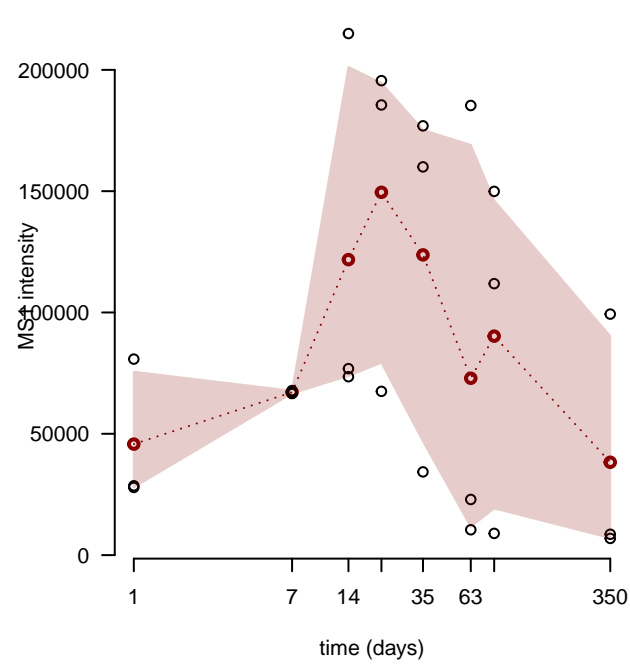

**P52825**  
GN=Cpt2  
carnitine palmitoyltransferase 2

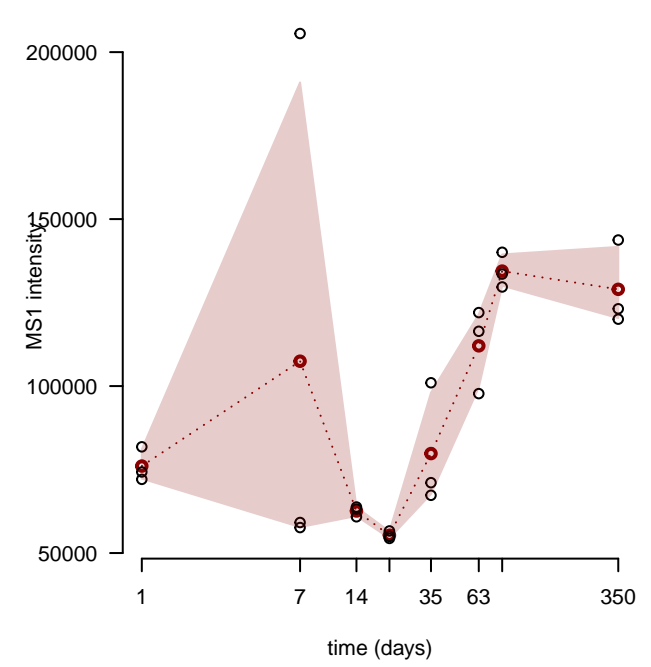

**P52840**  
GN=Sult1a1  
sulfotransferase family 1A, phenol-prefe ...

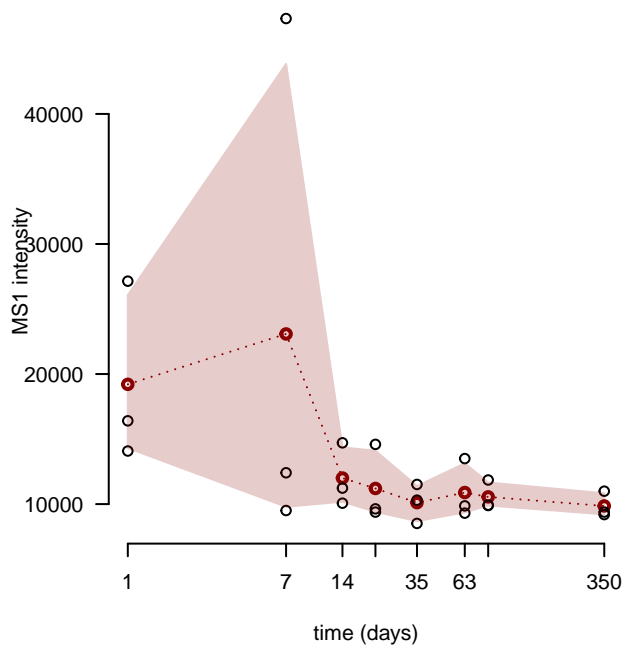

**P52850**  
GN=Ndst2  
N-deacetylase/N-sulfotransferase (hepara ...

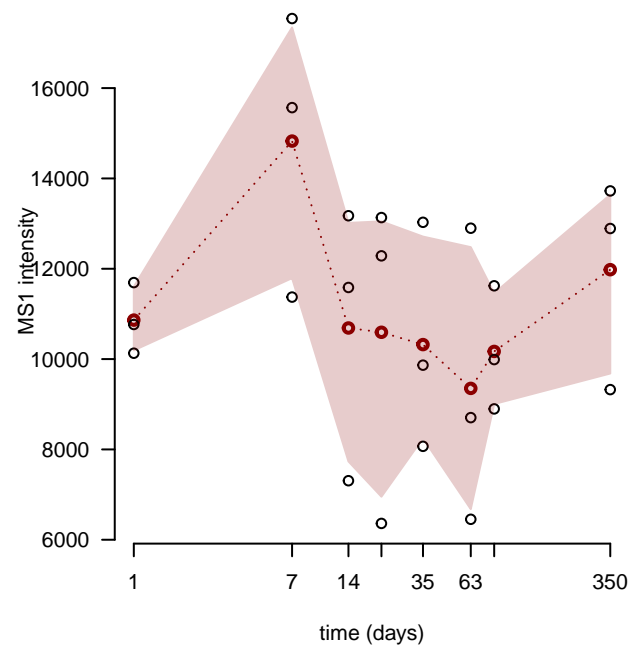

**P52875**  
GN=Tmem165  
transmembrane protein 165

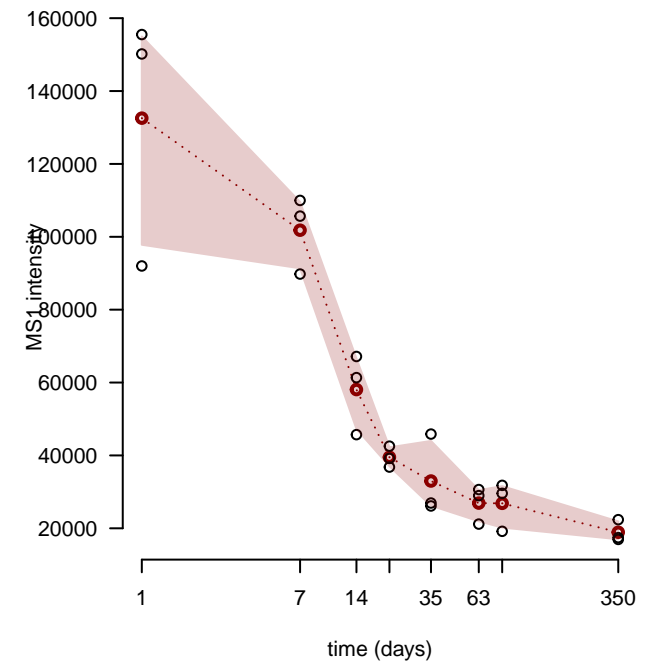

**P52912**  
GN=Tia1  
cytotoxic granule-associated RNA binding ...

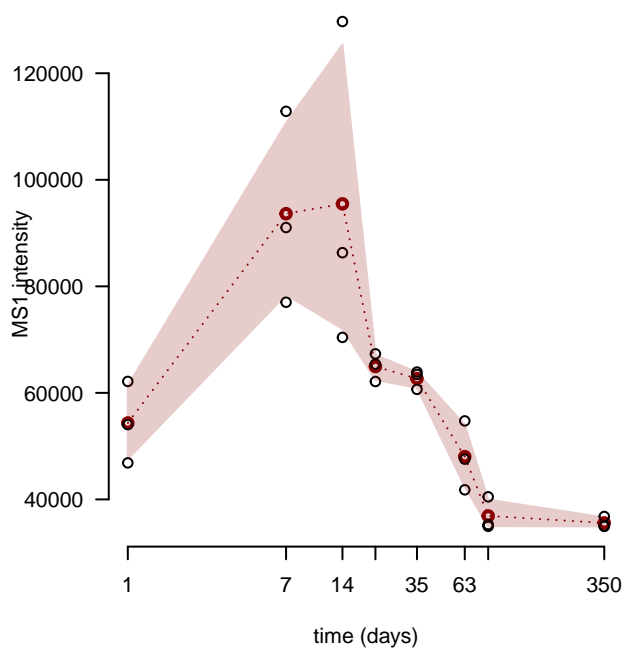

**P52927**  
GN=Hmga2  
high mobility group AT-hook 2

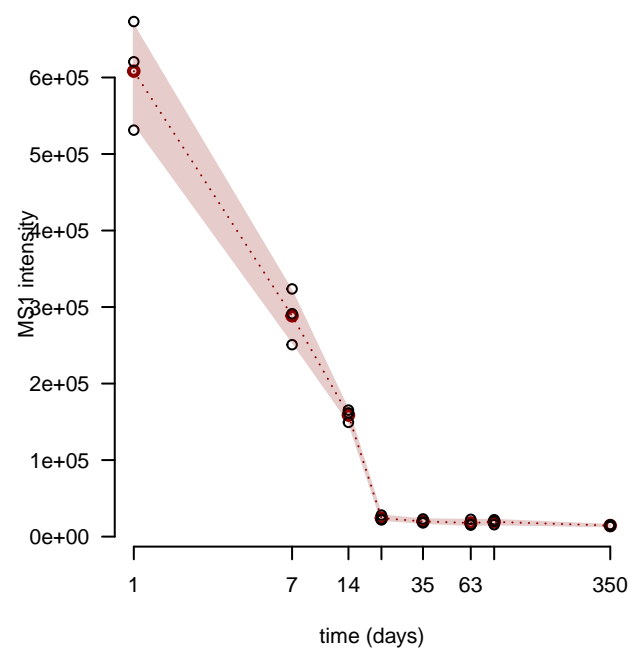

**P53026**  
GN=Rpl10a  
ribosomal protein L10A

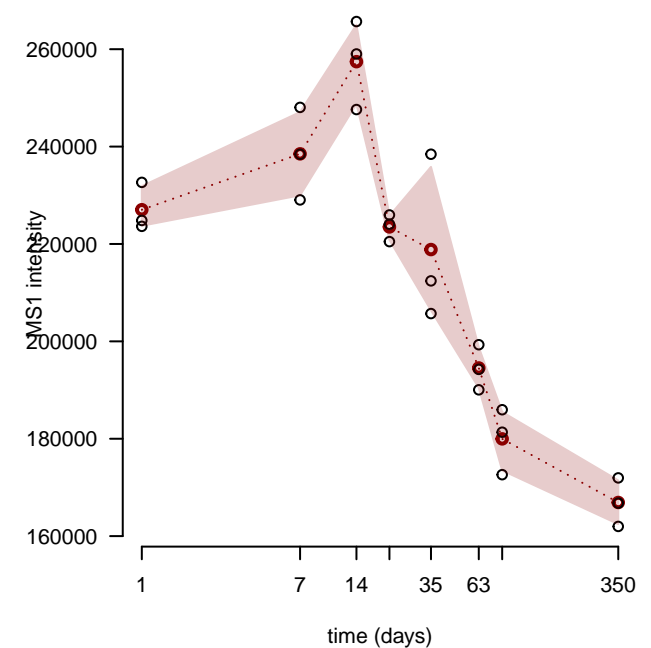

**P53349**  
GN=Map3k1  
mitogen-activated protein kinase kinase ...

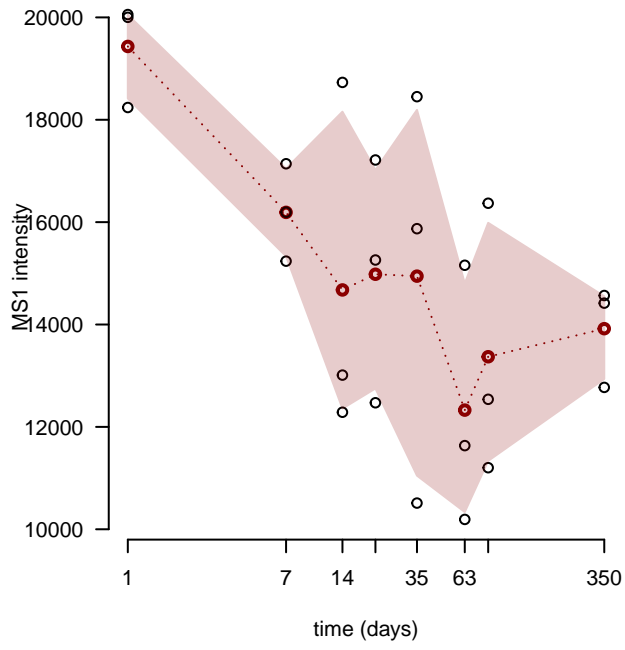

**P53395**  
GN=Dbt  
dihydrolipoamide branched chain transacy ...

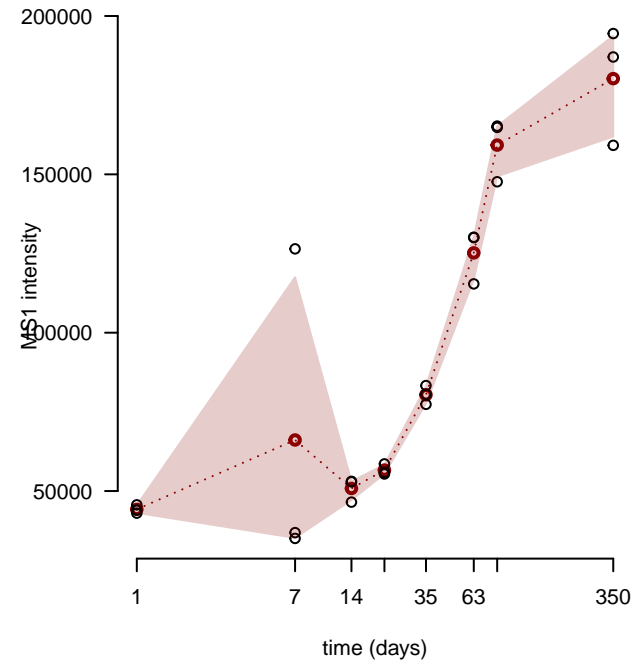

**P53564**  
GN=Cux1  
cut-like homeobox 1

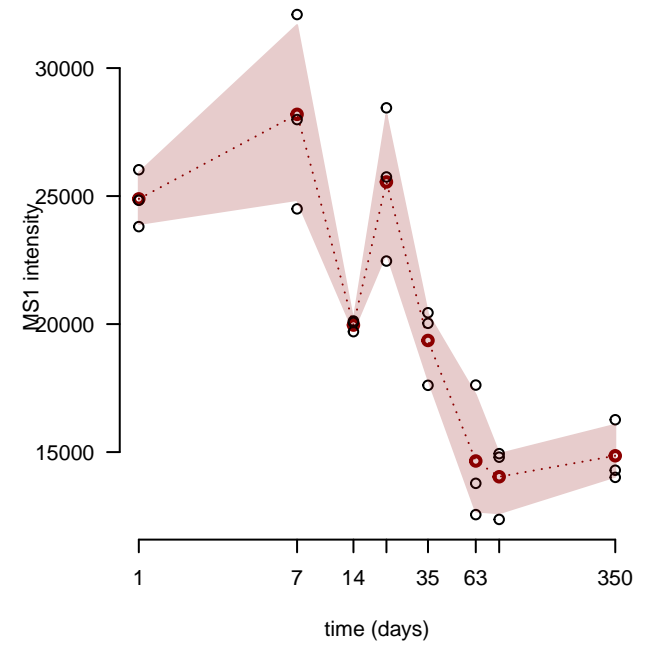

**P53569**  
GN=Cebpz  
CCAAT/enhancer binding protein zeta

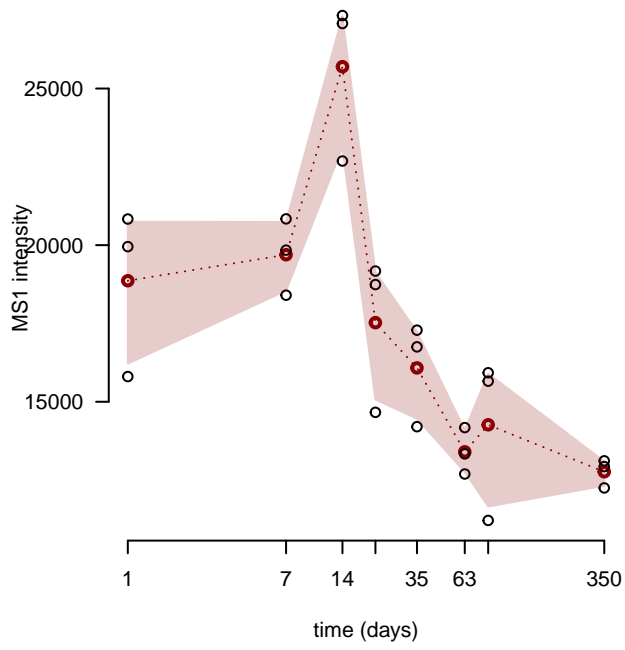

**P53612**  
GN=Rabggtb  
Rab geranylgeranyl transferase, b subuni ...

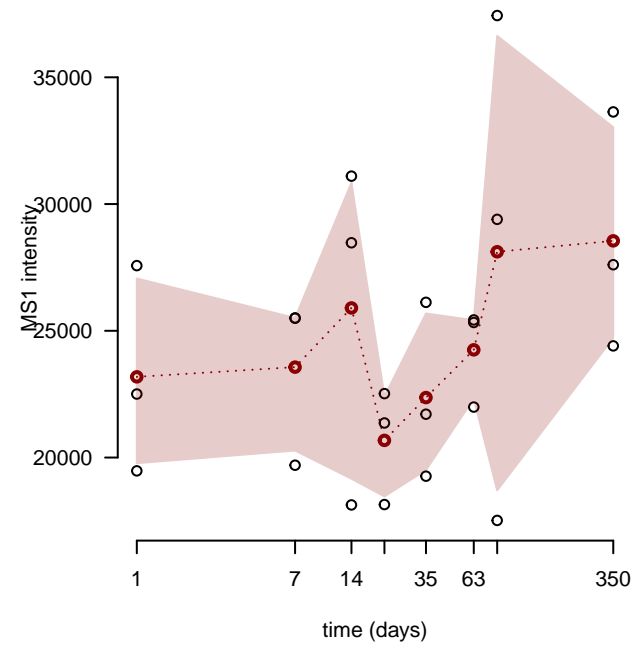

**P53657**  
GN=Pklr  
pyruvate kinase liver and red blood cell

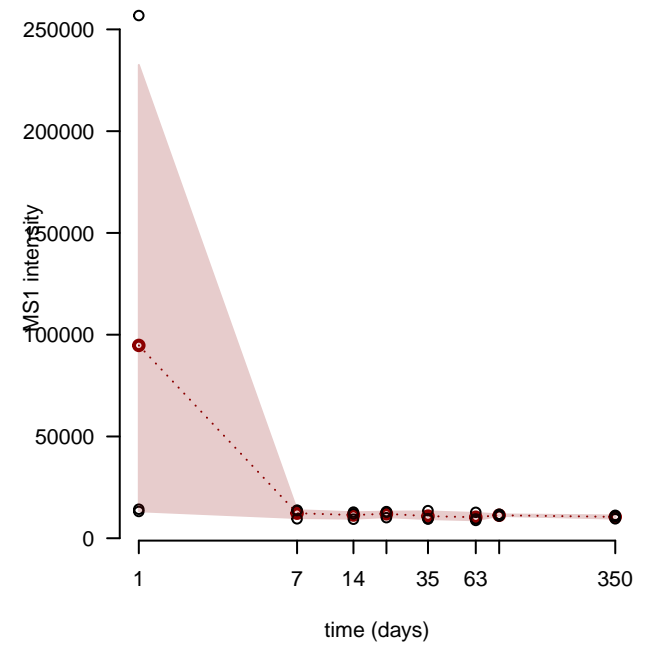

**P53668**  
GN=Limk1  
LIM-domain containing, protein kinase

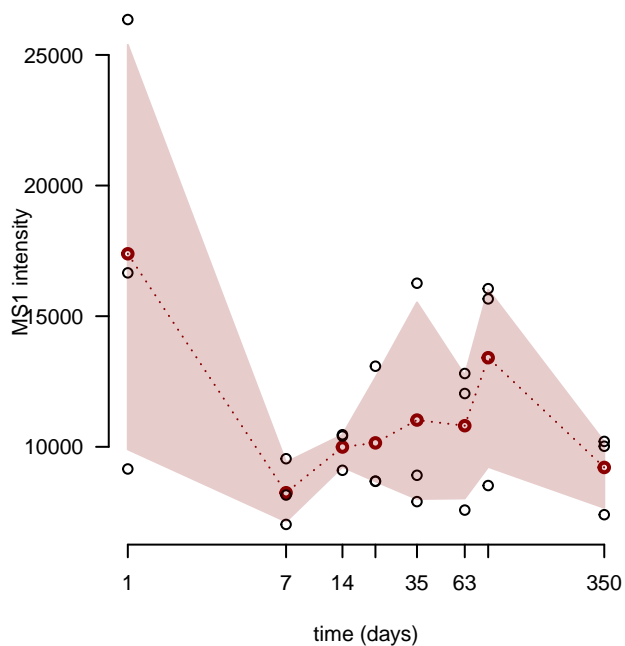

**P53690**  
GN=Mmp14  
matrix metalloproteinase 14 (membrane-ins ...

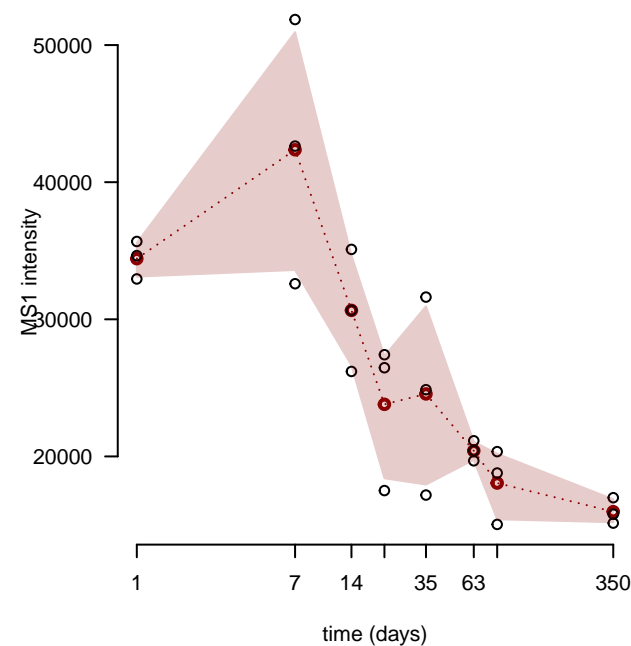

**P53702**  
GN=Hccs  
holocytochrome c synthetase

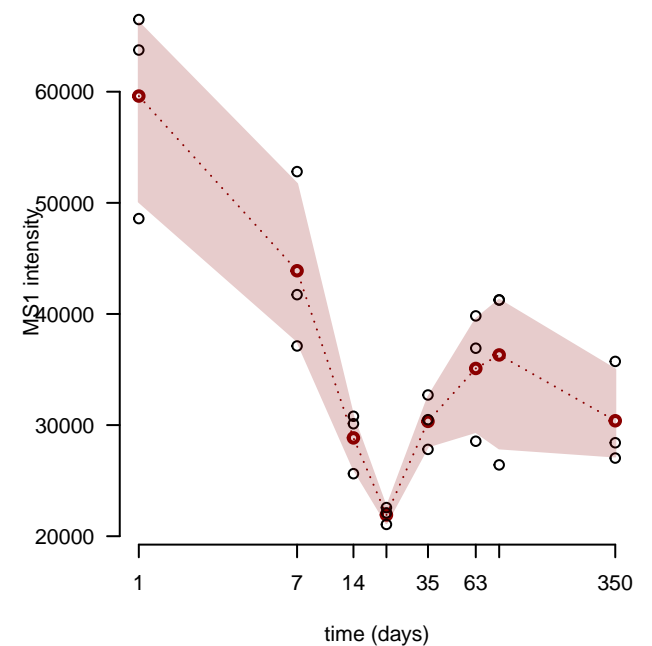

**P53762**  
GN=Arnt  
aryl hydrocarbon receptor nuclear transl ...

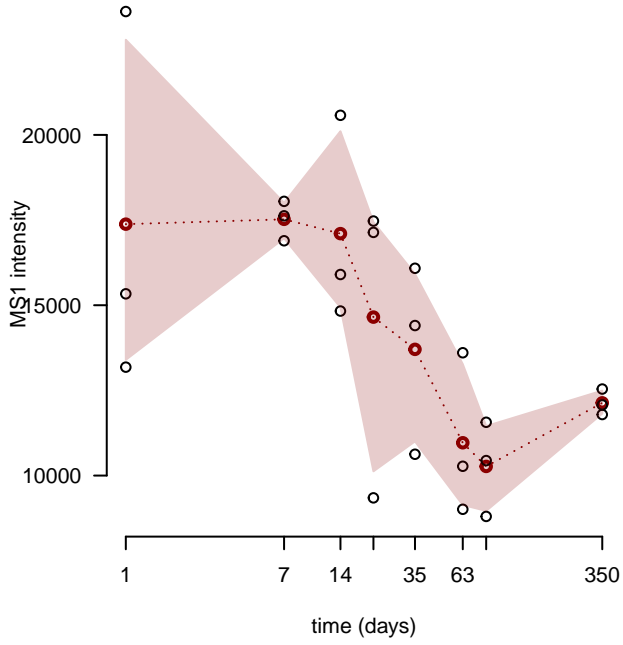

**P53798**  
GN=Fdft1  
farnesyl diphosphate farnesyl transferas ...

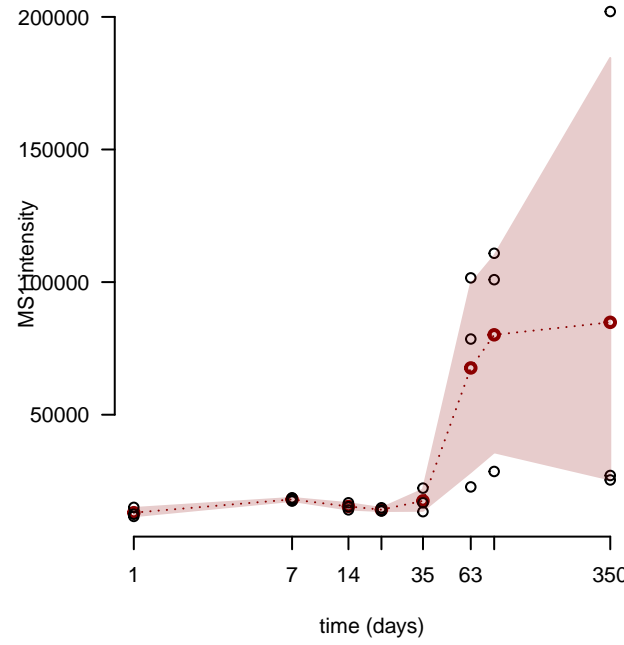

**P53808**  
GN=Pctp  
phosphatidylcholine transfer protein

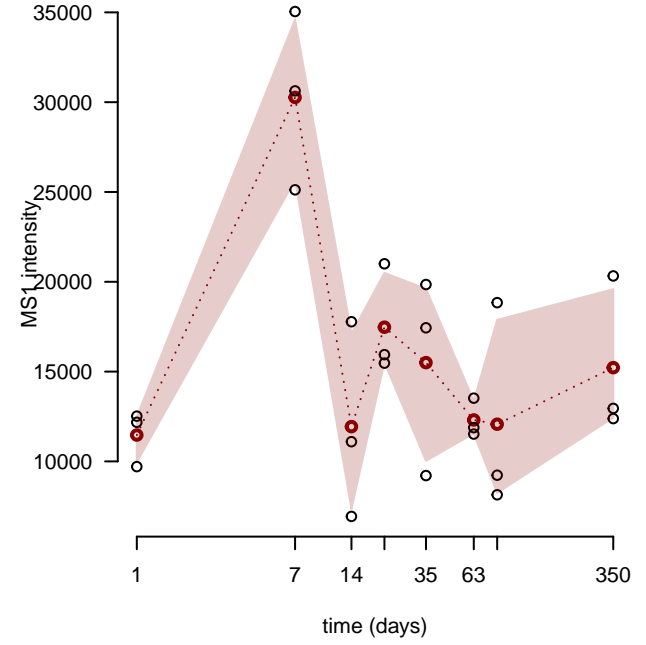

**P53810**  
GN=Sitpna  
phosphatidylinositol transfer protein, a ...

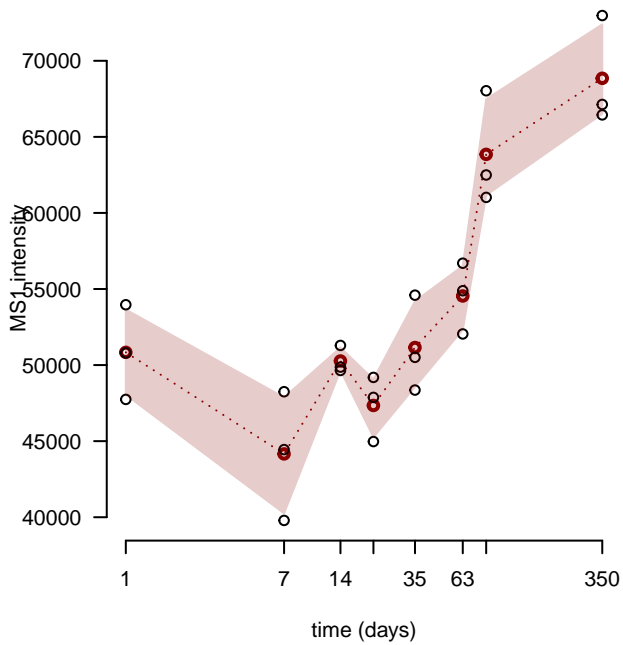

**P53811**  
GN=Sitpnb  
phosphatidylinositol transfer protein, b ...

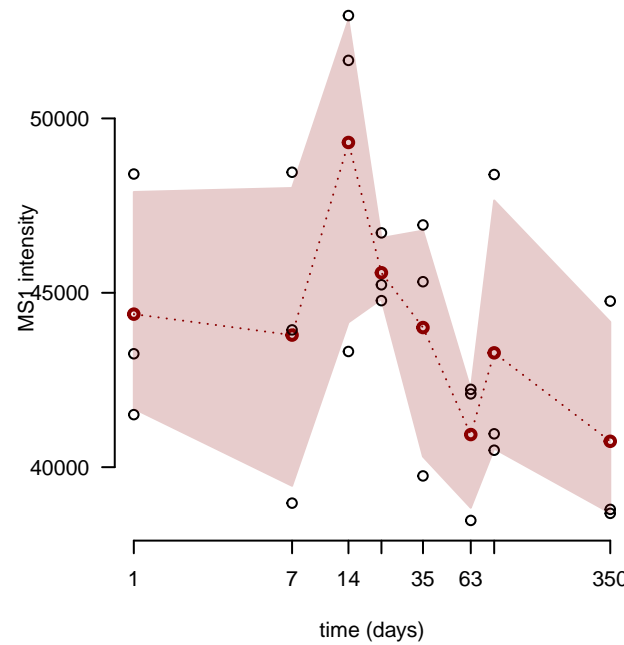

**P53986**  
GN=Slc16a1  
solute carrier family 16 (monocarboxylic ...

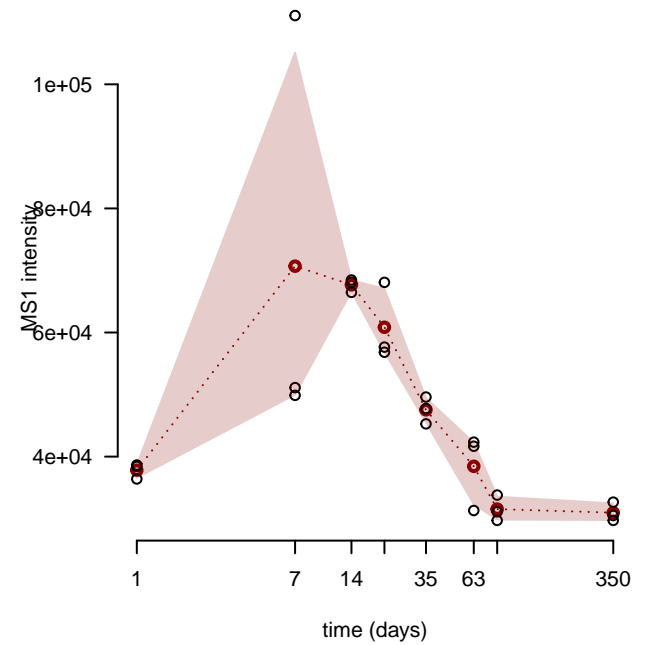

**P53994**  
GN=Rab2a  
RAB2A, member RAS oncogene family

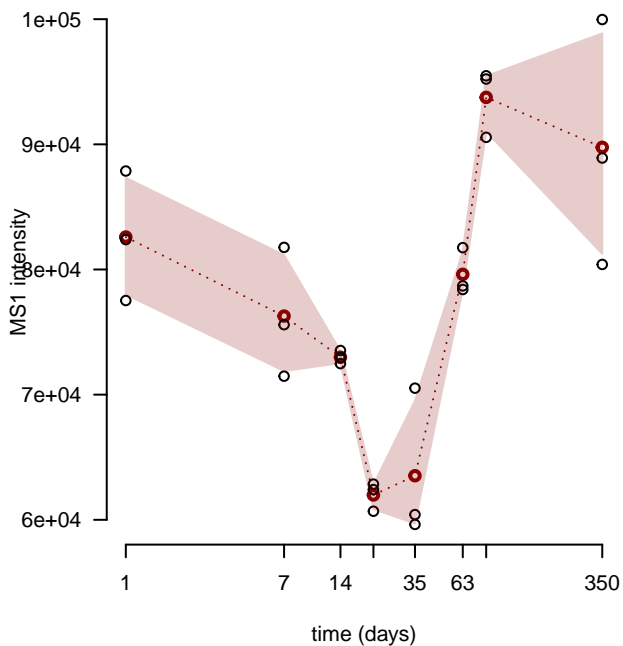

**P53995**  
GN=Anapc1  
anaphase promoting complex subunit 1

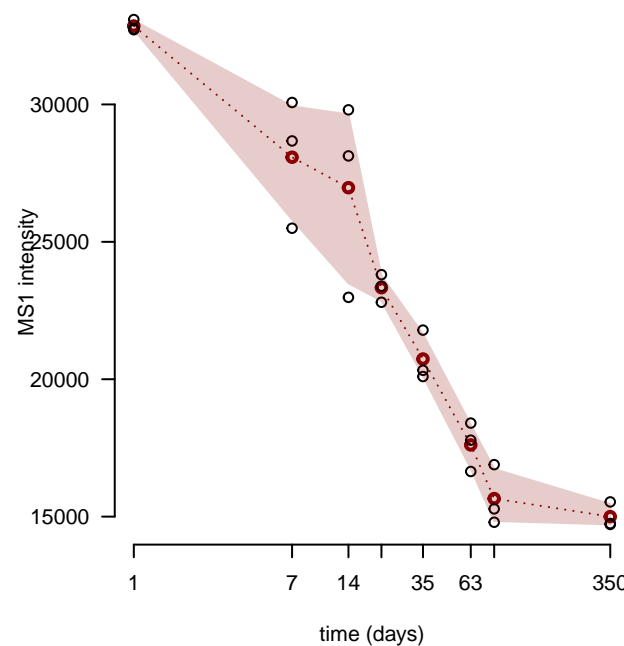

**P53996**  
GN=Cnbp  
cellular nucleic acid binding protein

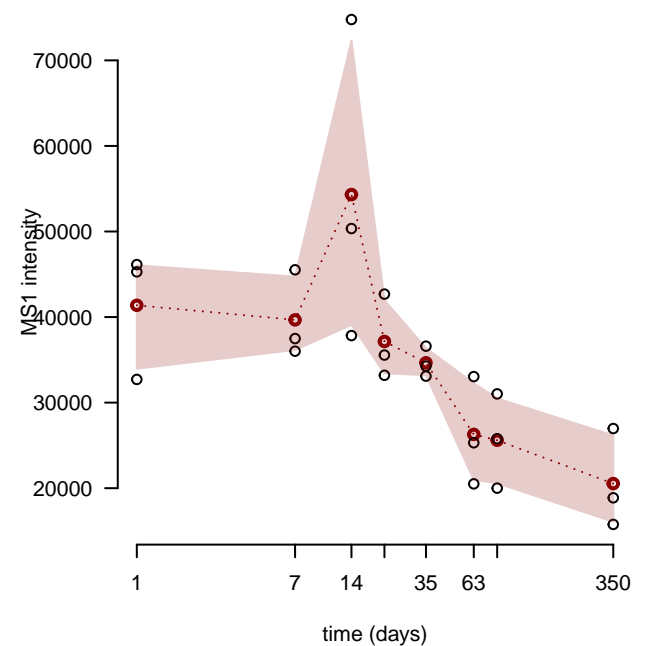

**P53996**  
GN=Cnbp  
cellular nucleic acid binding protein

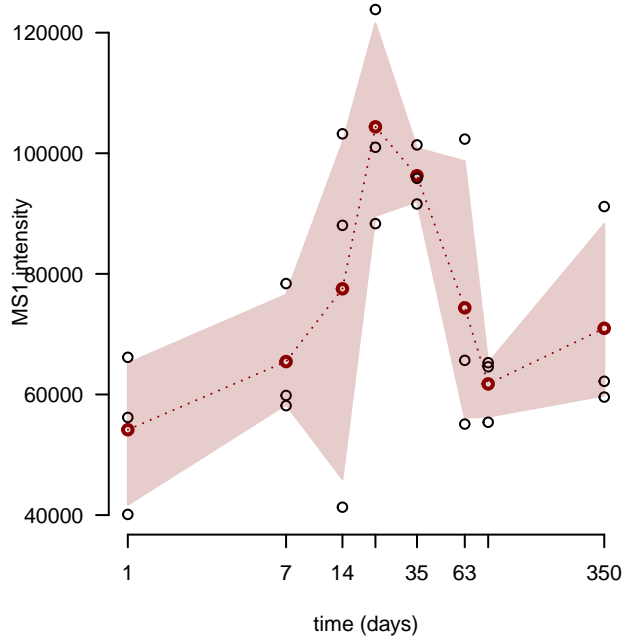

**P54071**  
GN=Idh2  
isocitrate dehydrogenase 2 (NADP+), mito ...

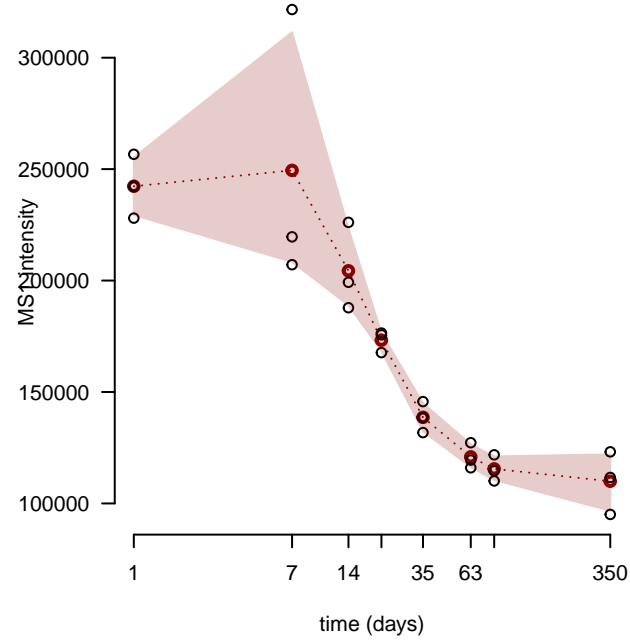

**P54099**  
GN=Polg  
polymerase (DNA directed), gamma

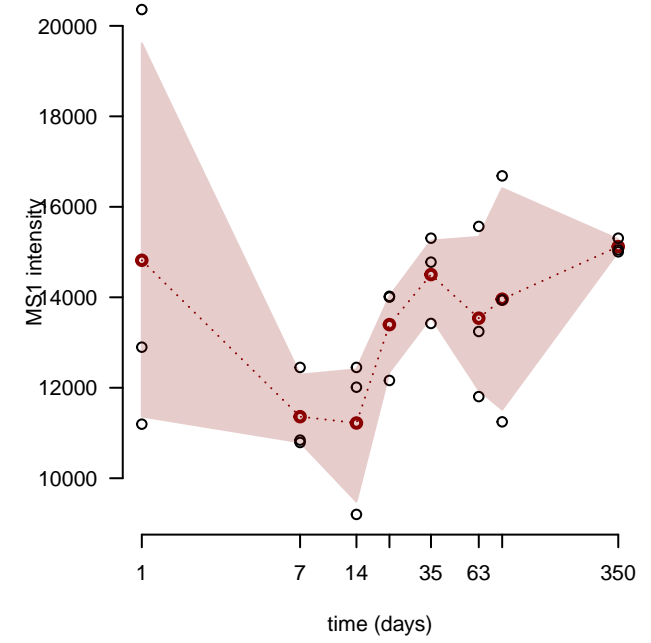

**P54103**  
GN=Dnajc2  
DnaJ heat shock protein family (Hsp40) m ...

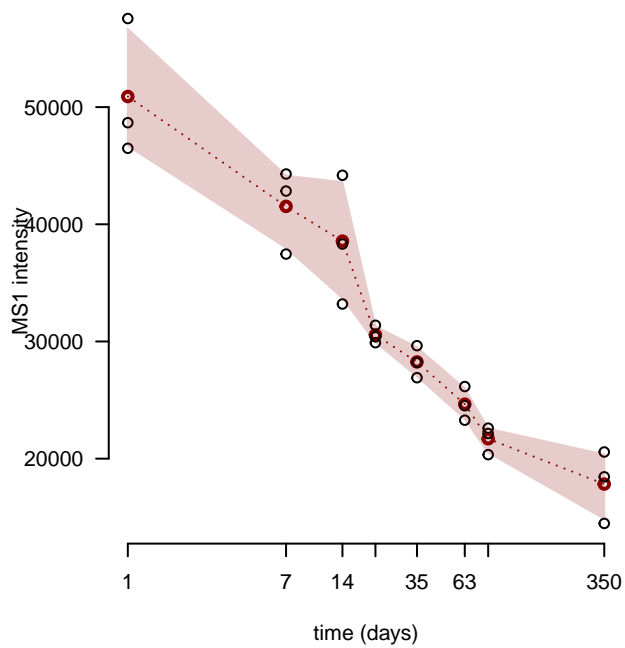

**P54116**  
GN=Stom  
stomatin

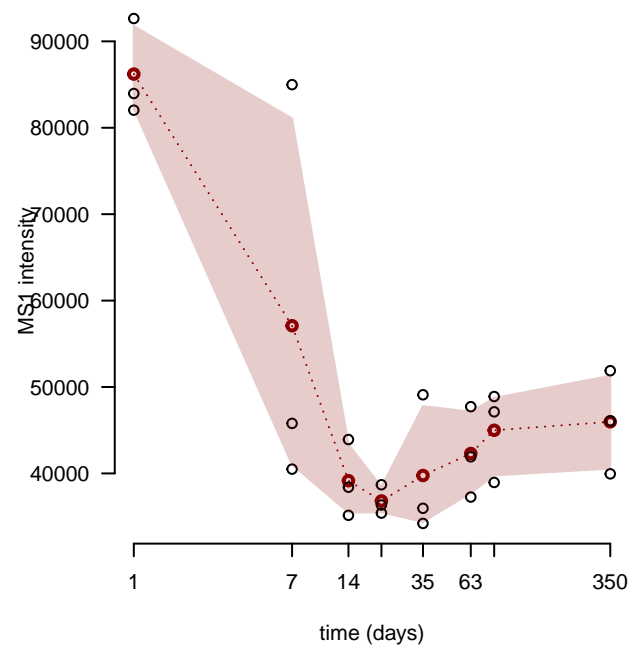

**P54227**  
GN=Stmn1  
stathmin 1

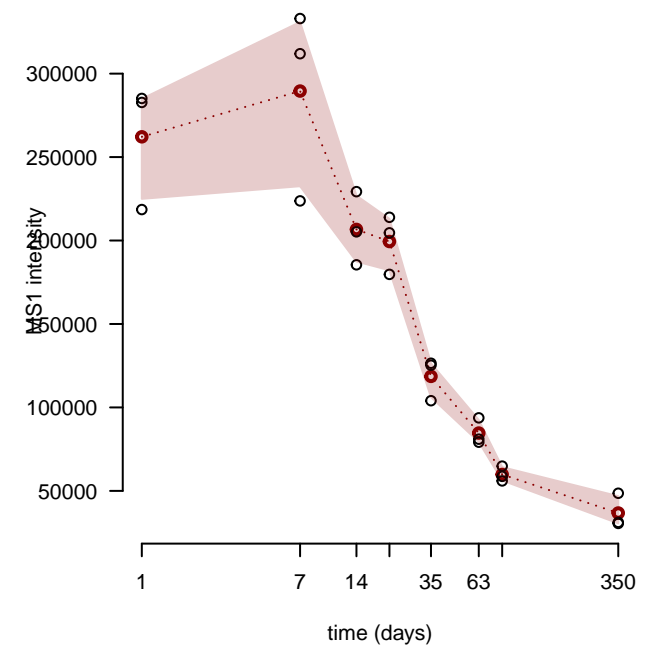

**P54276**  
GN=Msh6  
mutS homolog 6

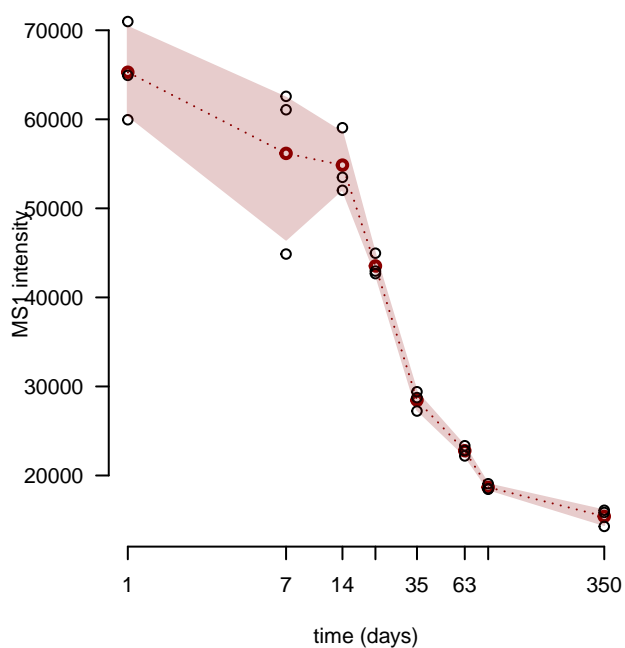

**P54279**  
GN=Pms2  
PMS1 homolog2, mismatch repair system co ...

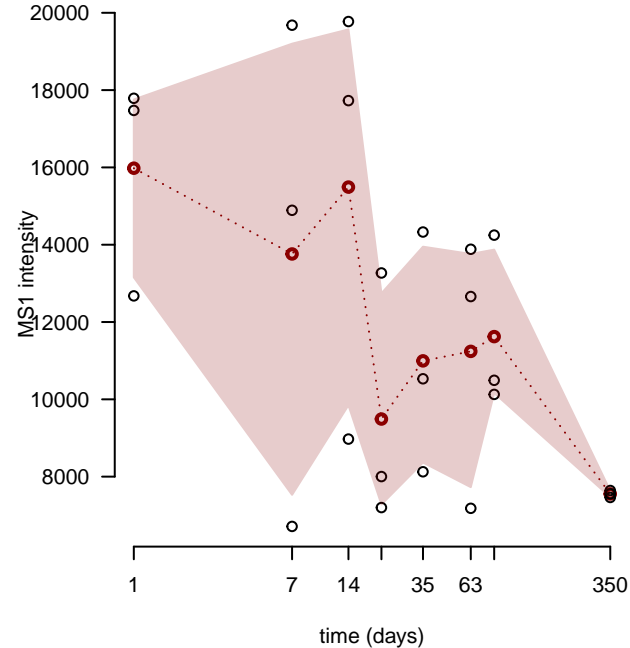

**P54285**  
GN=Cacnb3  
calcium channel, voltage-dependent, beta ...

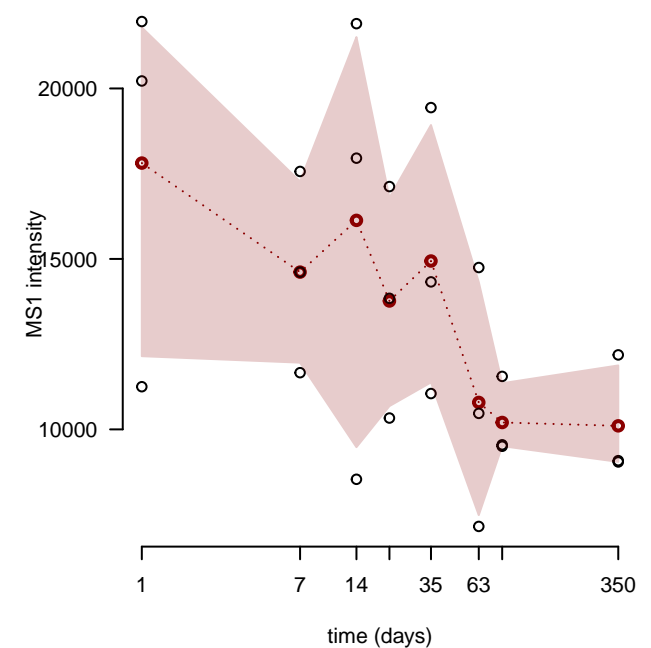

**P54310**  
GN=Lipe  
lipase, hormone sensitive

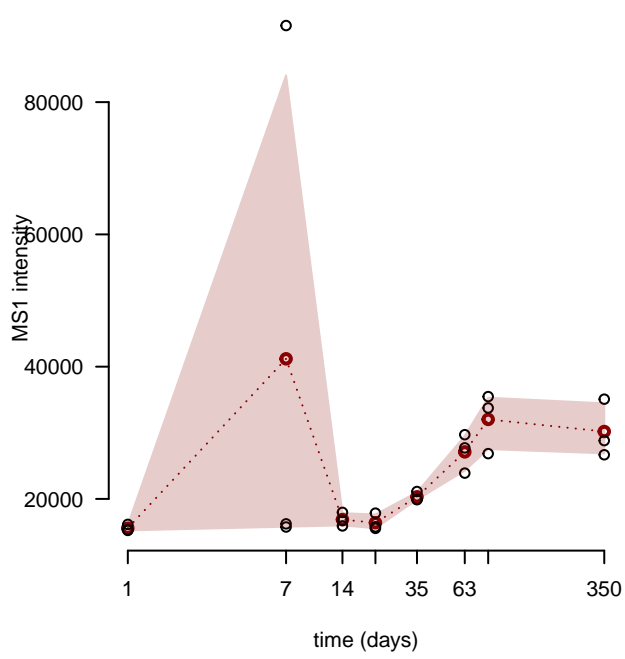

**P54320**  
GN=Eln  
elastin

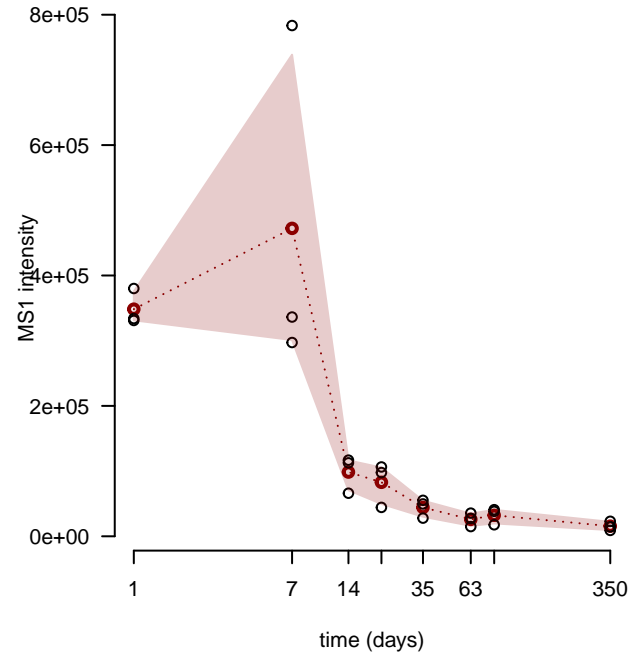

**P54726**  
GN=Rad23a  
RAD23 homolog A, nucleotide excision rep ...

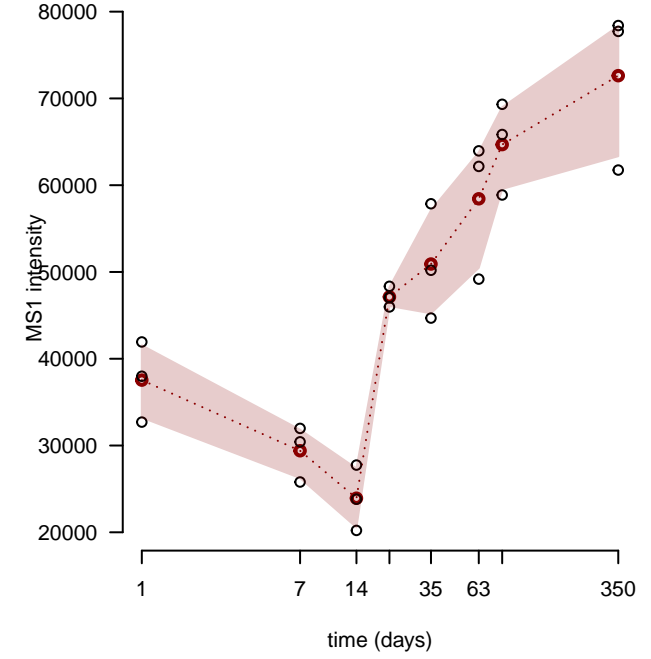

**P54728**  
GN=Rad23b  
RAD23 homolog B, nucleotide excision rep ...

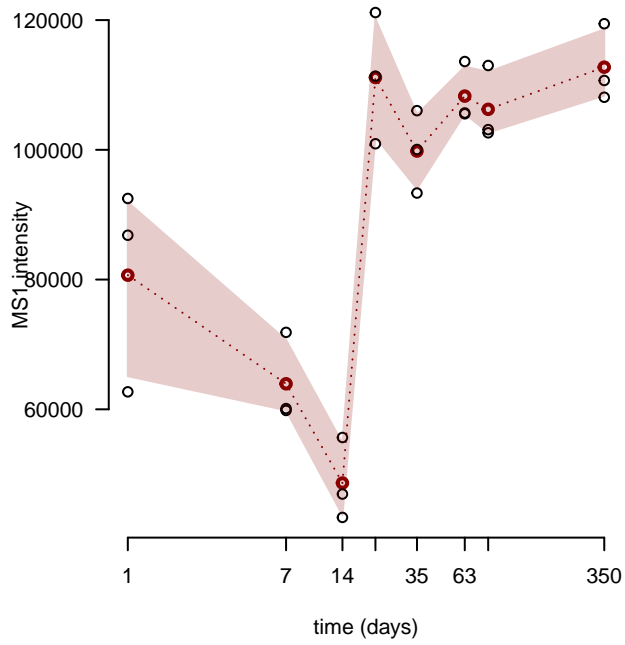

**P54729**  
GN=Nub1  
negative regulator of ubiquitin-like pro ...

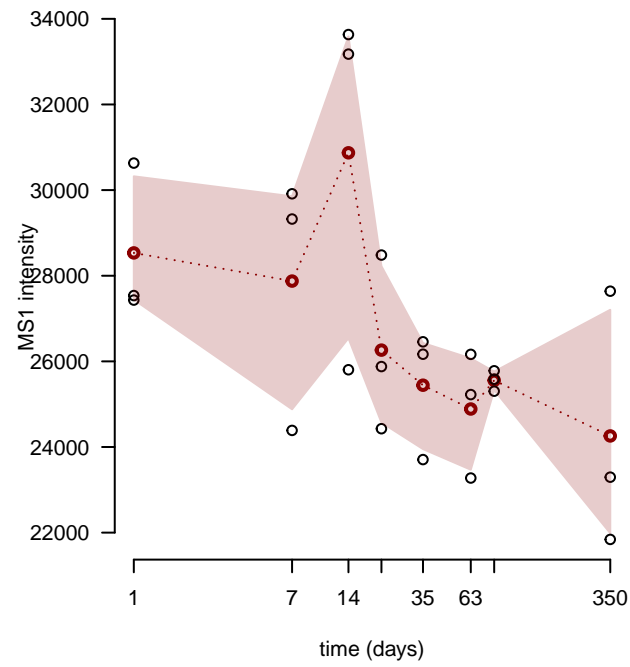

**P54731**  
GN=Faf1  
Fas-associated factor 1

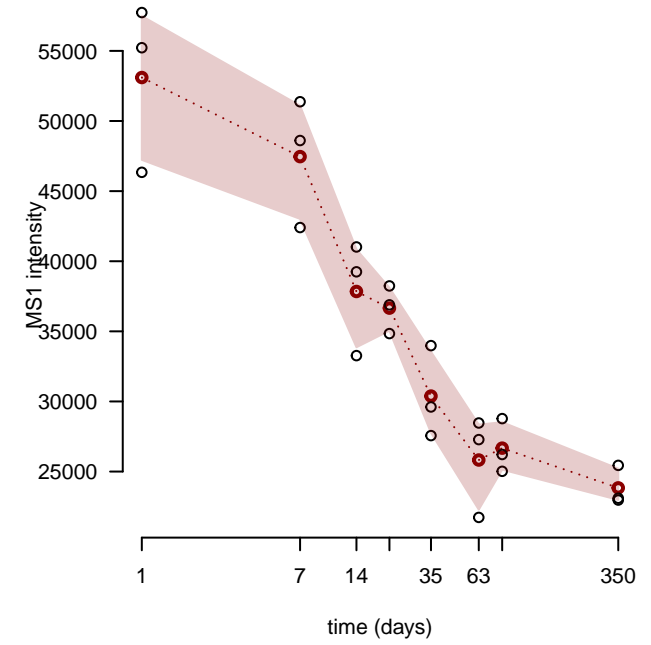

**P54751**  
GN=St3gal1  
ST3 beta-galactoside alpha-2,3-sialyltra ...

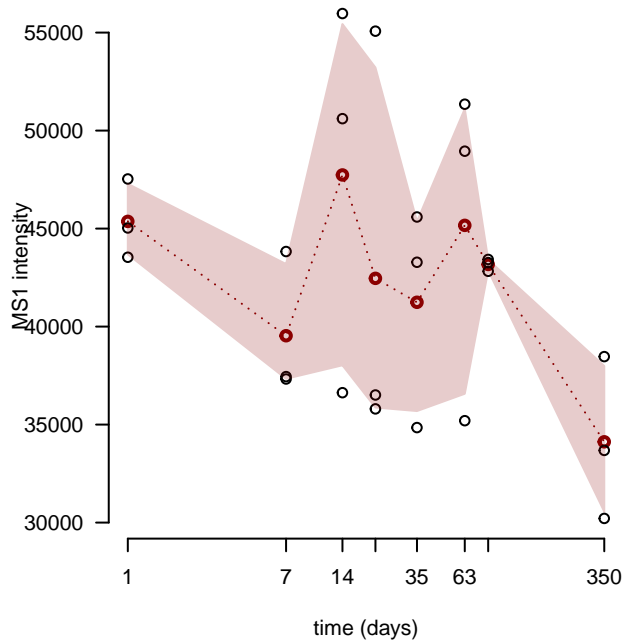

**P54754**  
GN=Ephb3  
Eph receptor B3

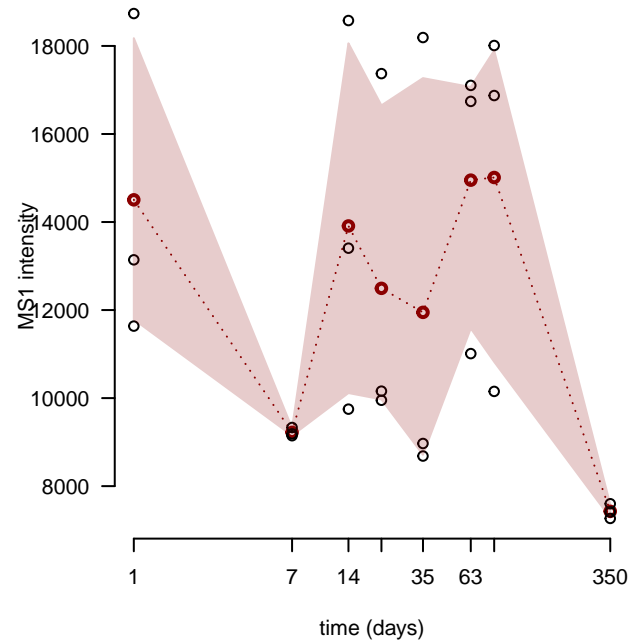

**P54761**  
GN=Ephb4  
Eph receptor B4

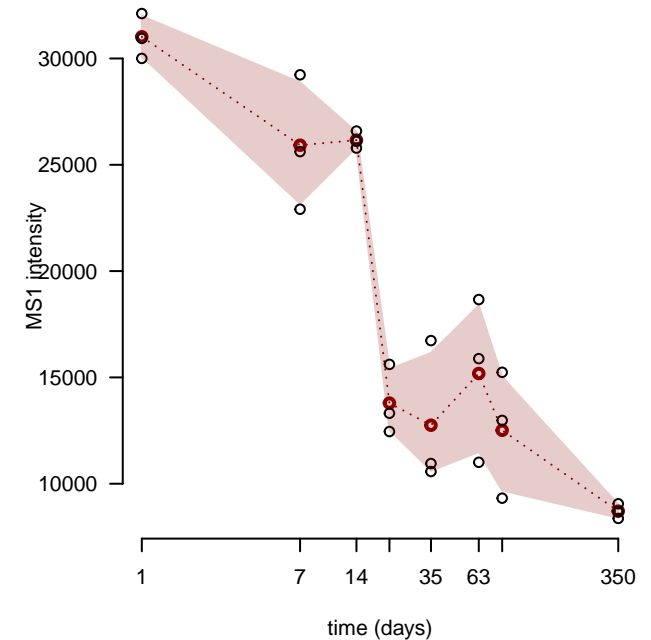

**P54763**  
GN=Ephb2  
Eph receptor B2

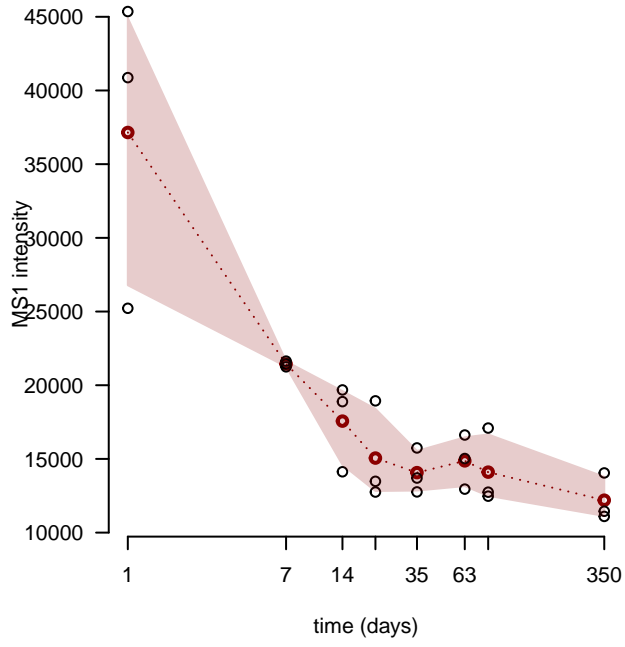

**P54775**  
GN=Psmc4  
proteasome (prosome, macropain) 26S subu ...

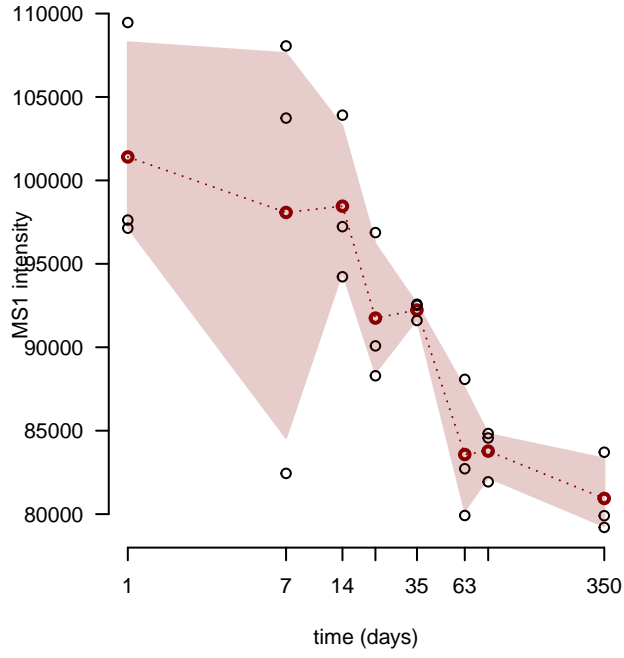

**P54797**  
GN=Tango2  
transport and golgi organization 2

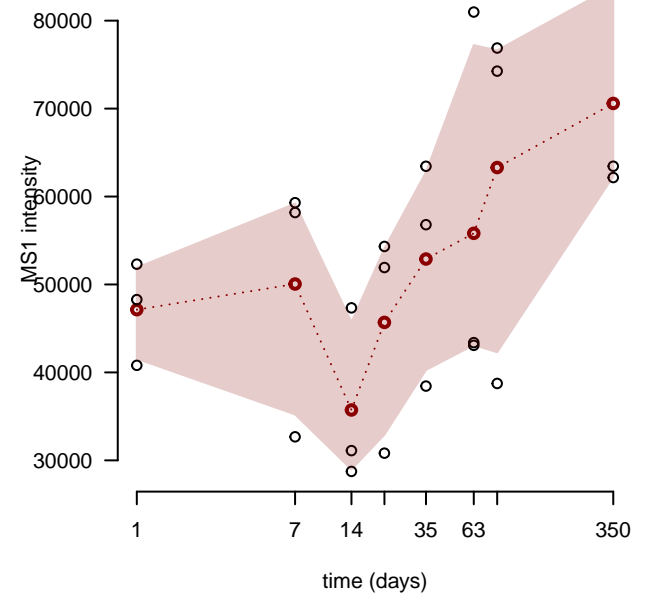

**P54818**  
GN=Galc  
galactosylceramidase

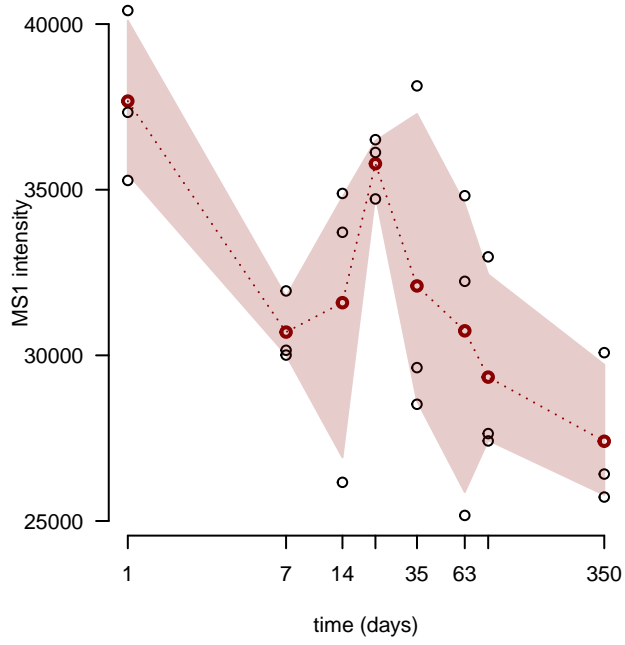

**P54822**  
GN=Adsl  
adenylosuccinate lyase

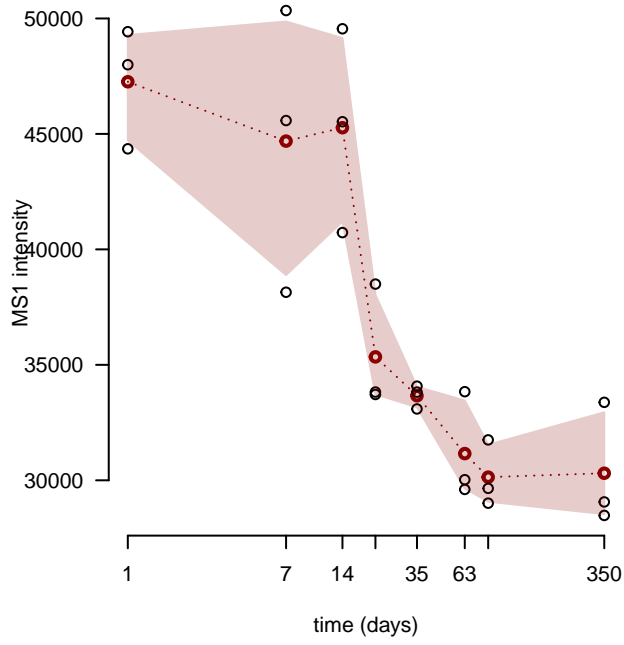

**P54823**  
GN=Ddx6  
DEAD (Asp-Glu-Ala-Asp) box polypeptide 6

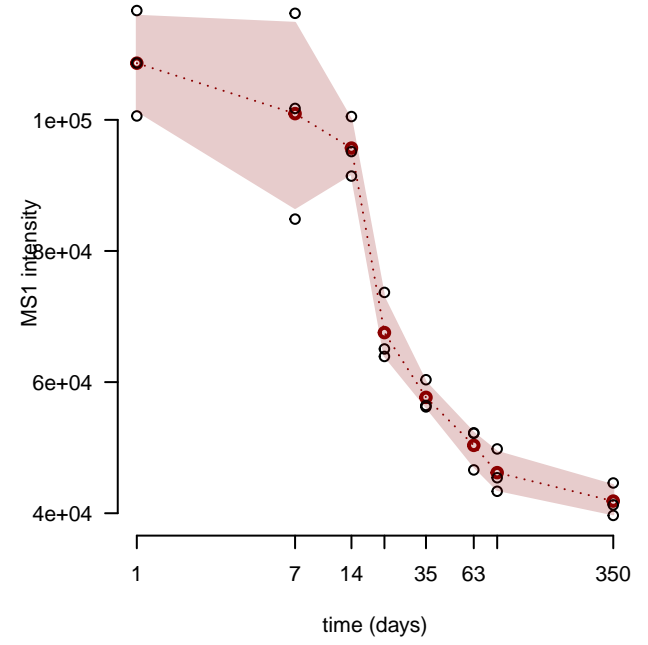

**P54869**  
GN=Hmgcs2  
3-hydroxy-3-methylglutaryl-Coenzyme A sy ...

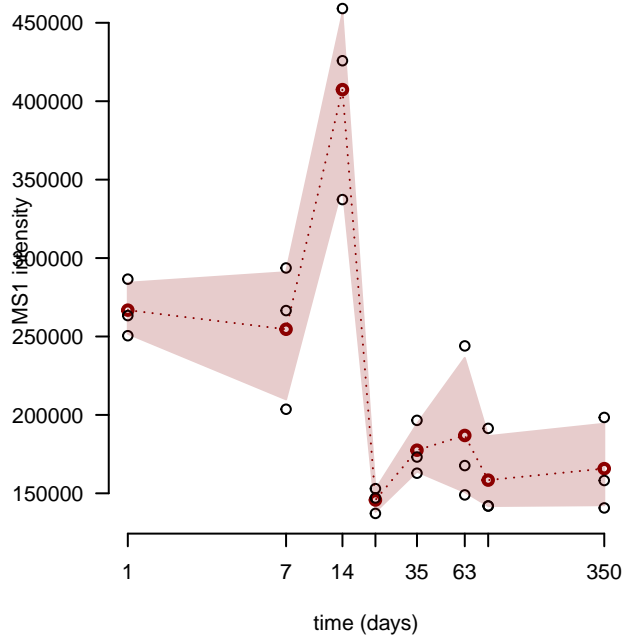

**P54923**  
GN=Adprh  
ADP-ribosylarginine hydrolase

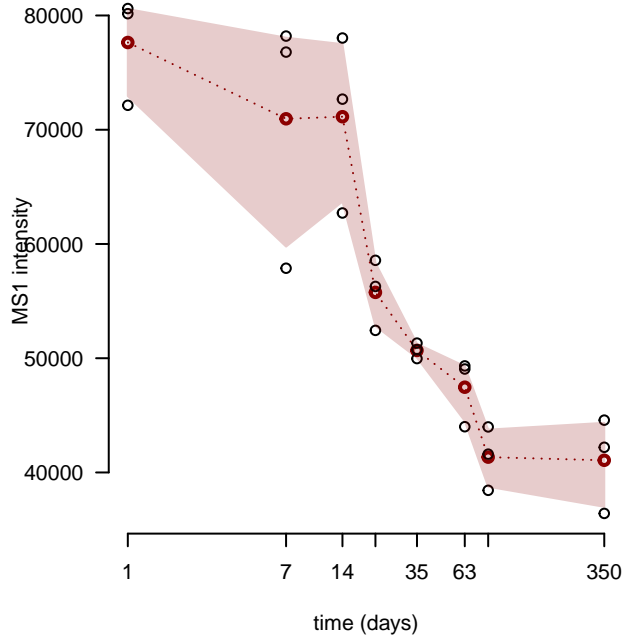

**P55002**  
GN=Mfap2  
microfibrillar-associated protein 2

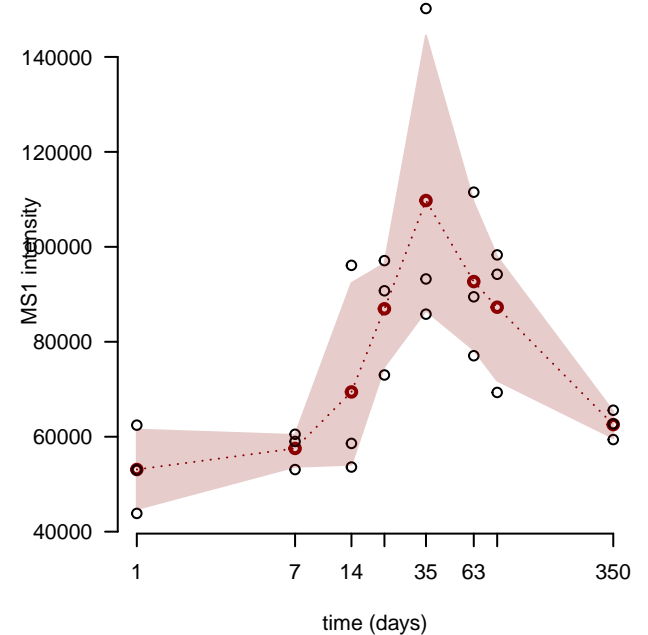

**P55012**  
**GN=Slc12a2**  
solute carrier family 12, member 2

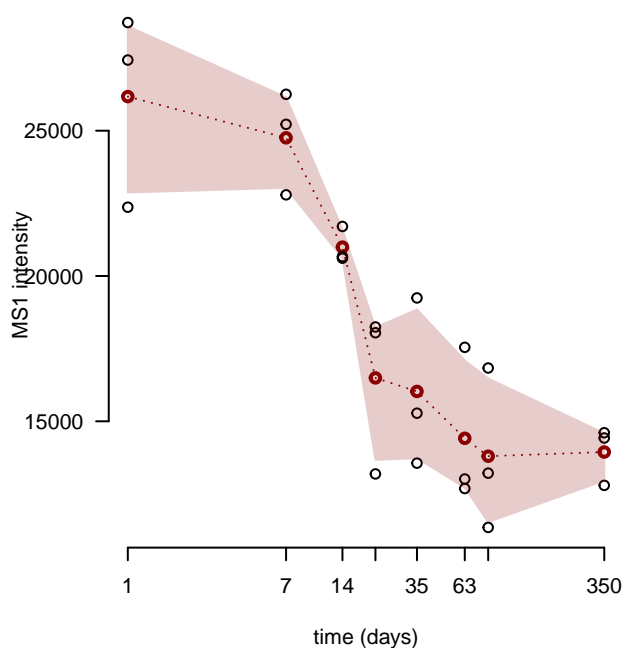

**P55050**  
**GN=Fabp2**  
fatty acid binding protein 2, intestinal

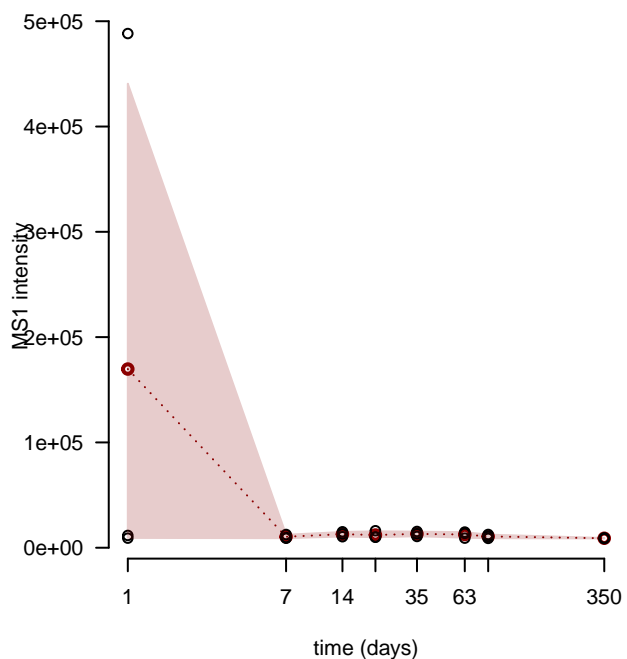

**P55065**  
**GN=Pltp**  
phospholipid transfer protein

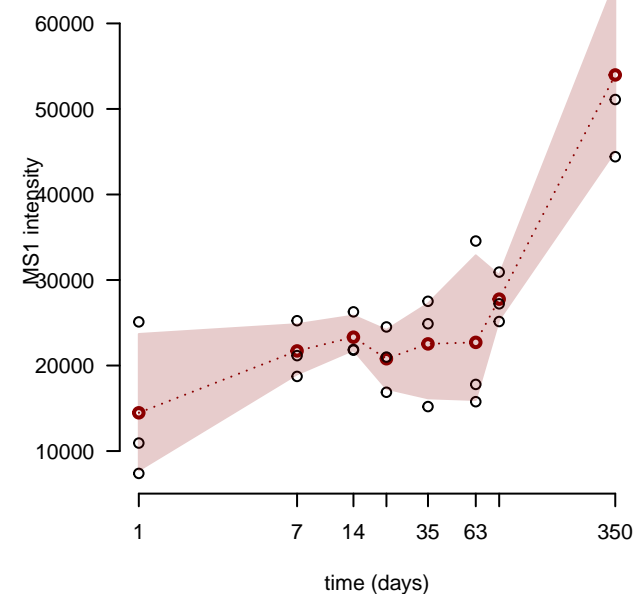

**P55096**  
**GN=Abcd3**  
ATP-binding cassette, sub-family D (ALD) ...

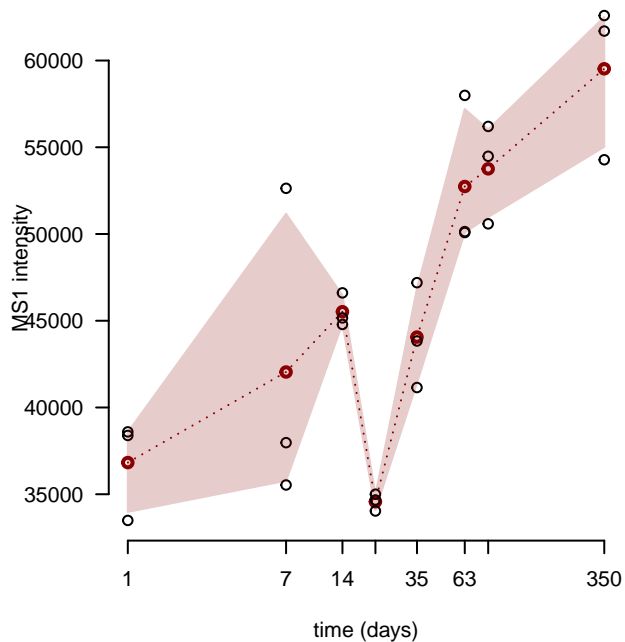

**P55097**  
**GN=Ctsk**  
cathepsin K

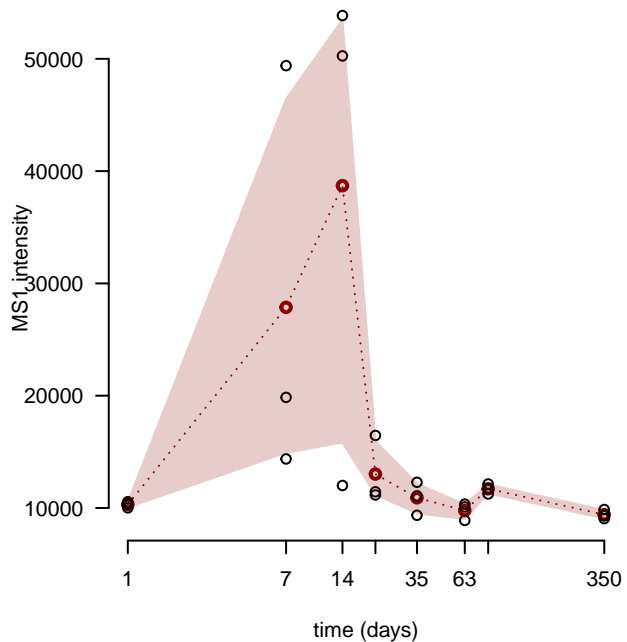

**P55144**  
**GN=Tyro3**  
TYRO3 protein tyrosine kinase 3

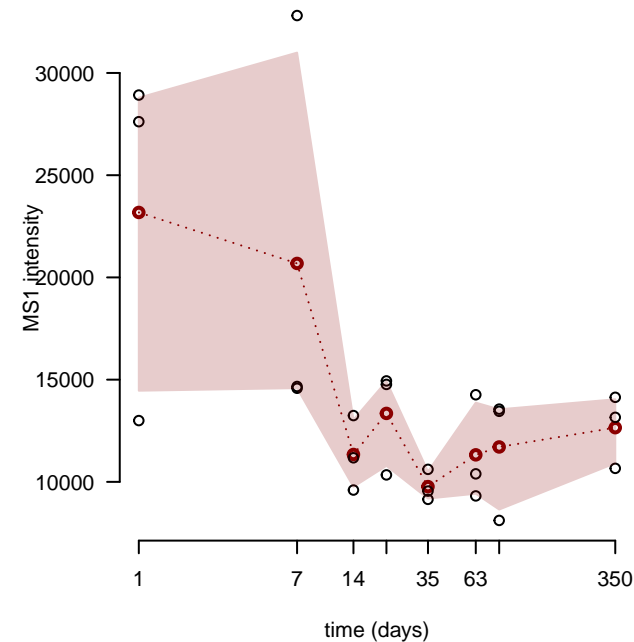

**P55194**  
**GN=Sh3bp1**  
SH3-domain binding protein 1

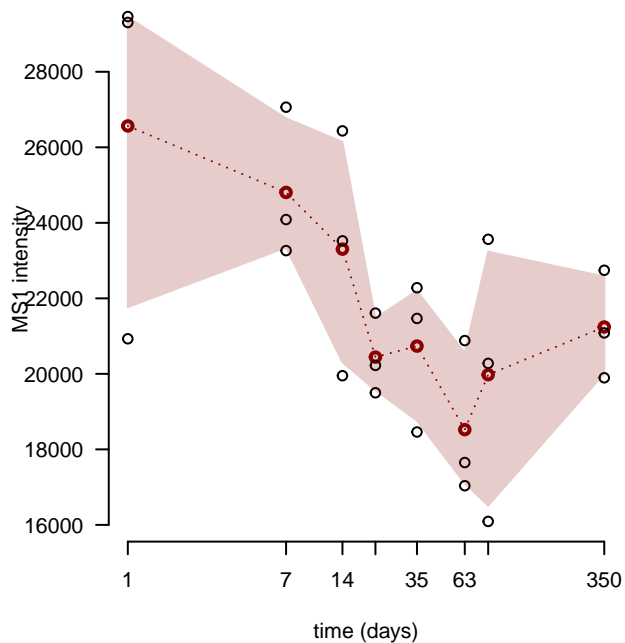

**P55200**  
**GN=Kmt2a**  
lysine (K)-specific methyltransferase 2A

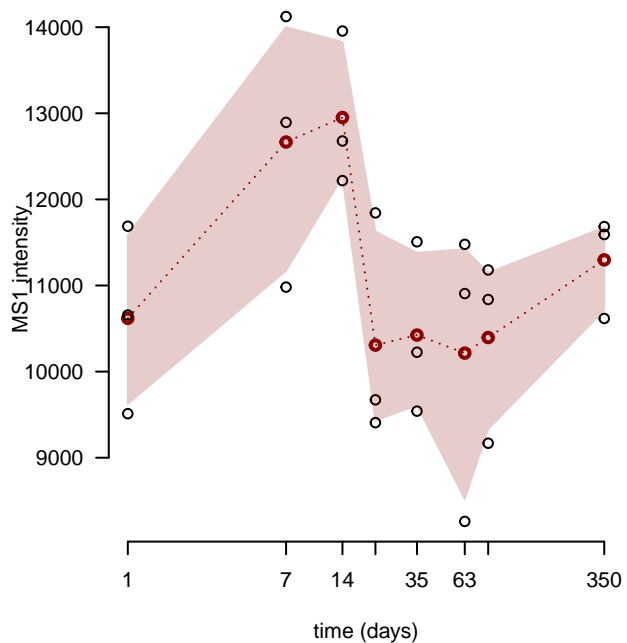

**P55258**  
**GN=Rab8a**  
RAB8A, member RAS oncogene family

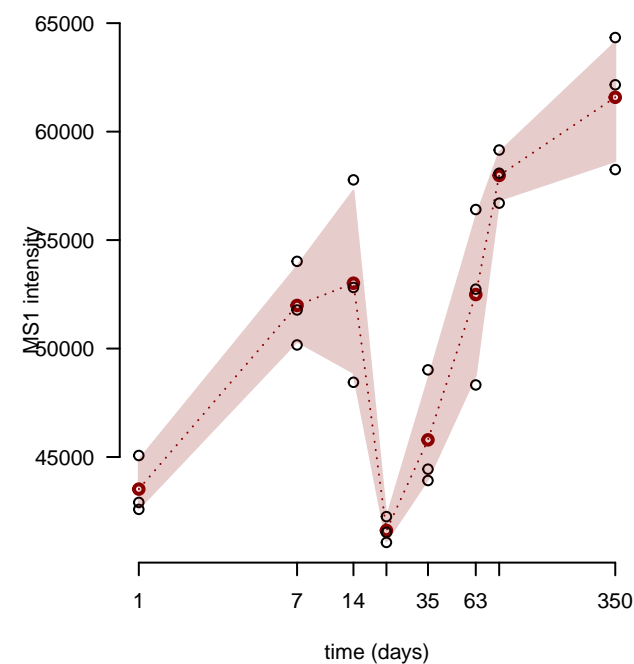

**P55264**  
GN=Adk  
adenosine kinase

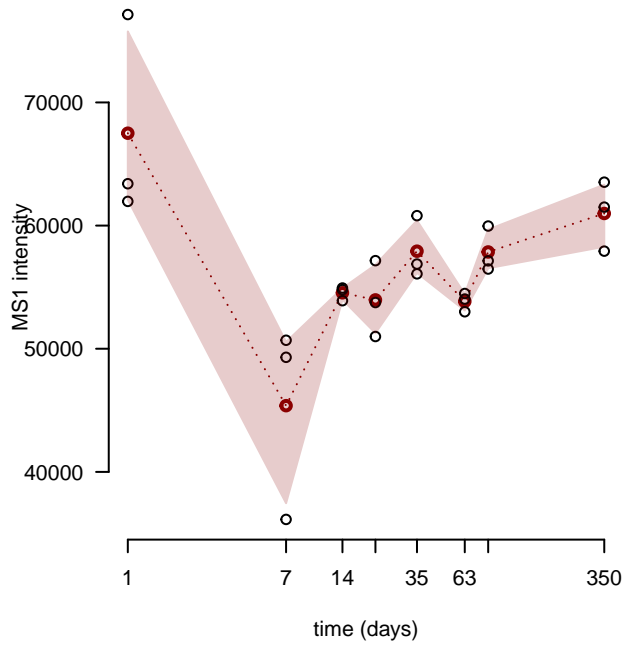

**P55271**  
GN=Cdkn2b  
cyclin dependent kinase inhibitor 2B

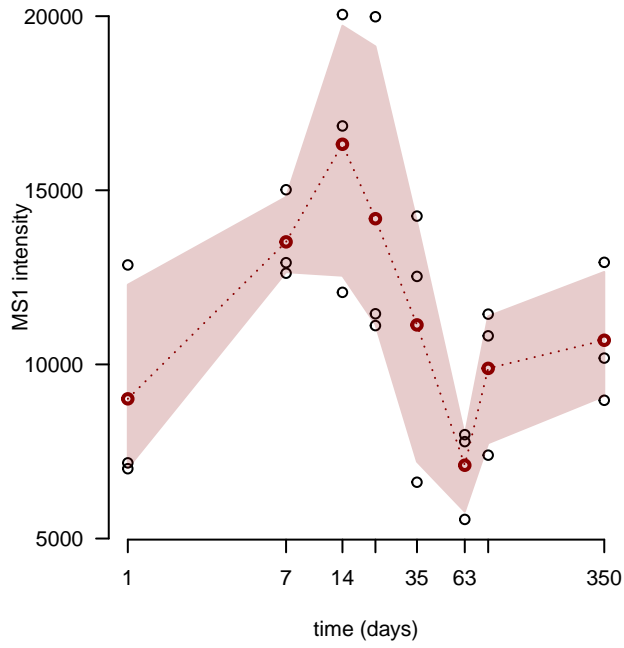

**P55284**  
GN=Cdh5  
cadherin 5

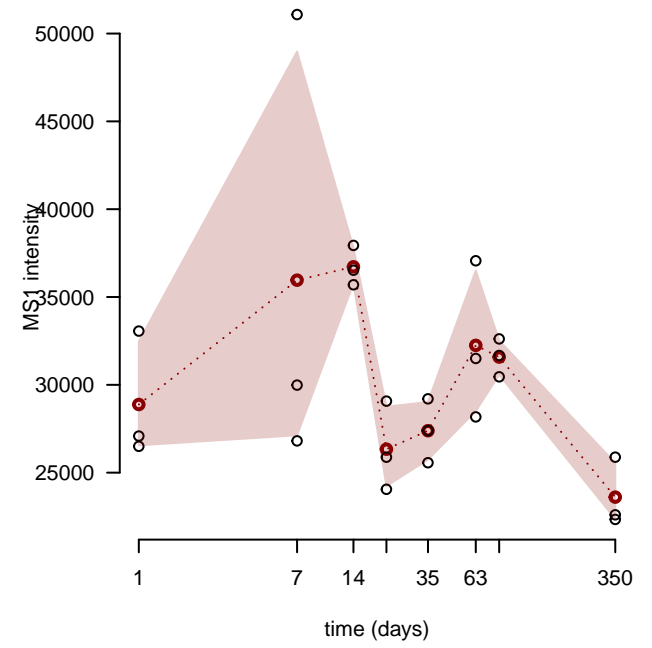

**P55288**  
GN=Cdh11  
cadherin 11

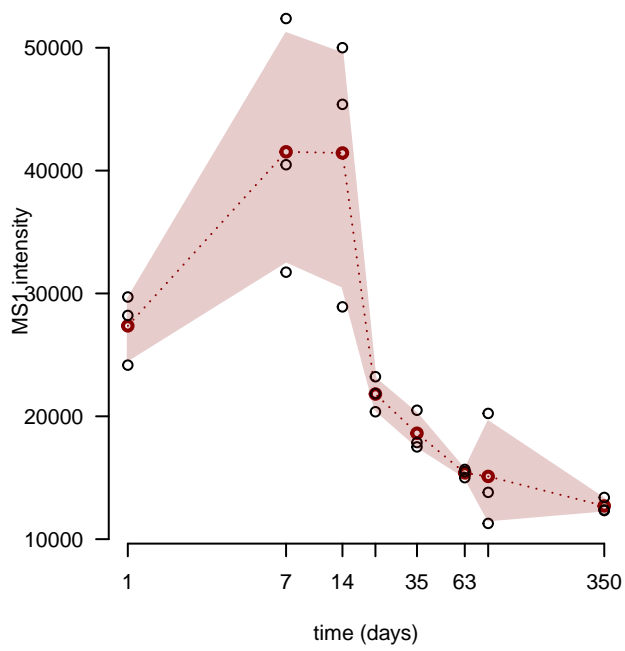

**P55292**  
GN=Dsc2  
desmocollin 2

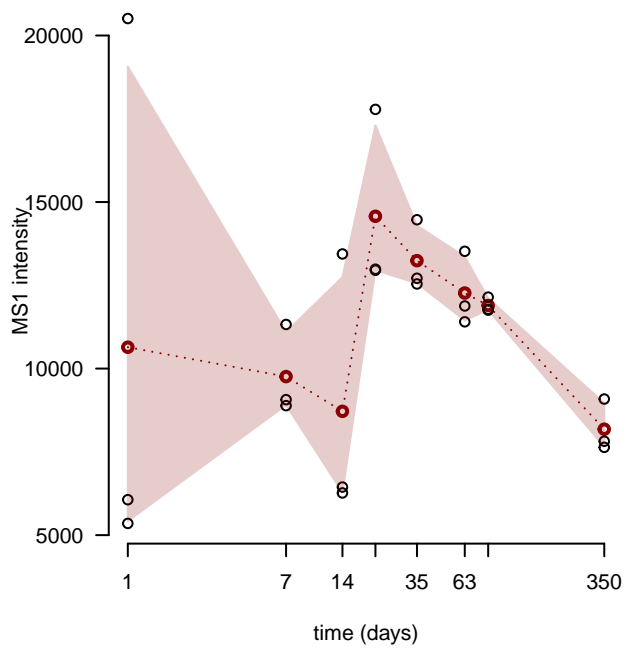

**P55302**  
GN=Lrpap1  
low density lipoprotein receptor-related ...

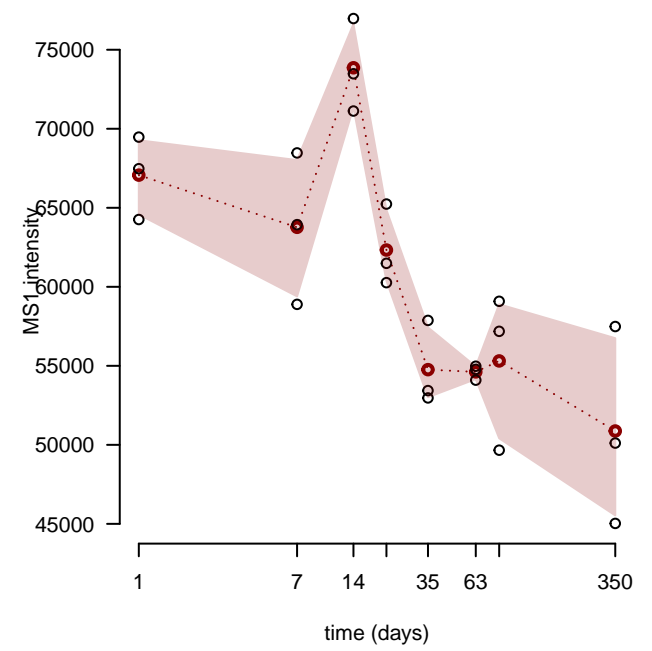

**P55772**  
GN=Entpd1  
ectonucleoside triphosphate diphosphohyd ...

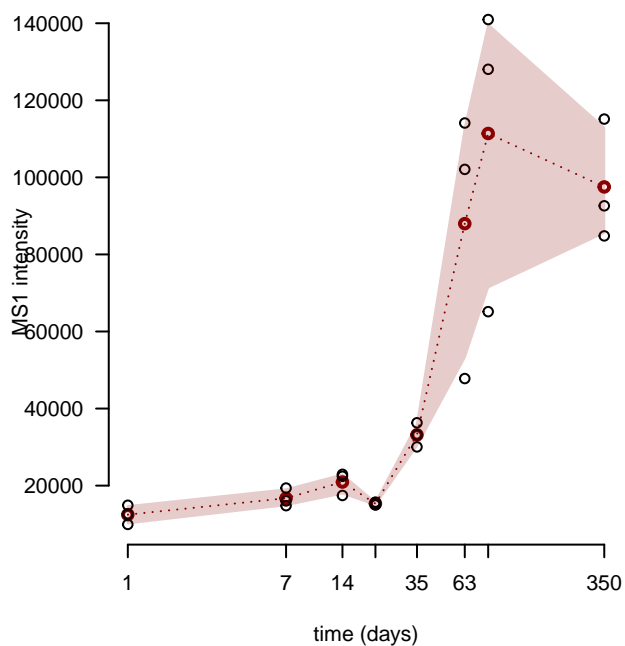

**P55849**  
GN=Dsc1  
desmocollin 1

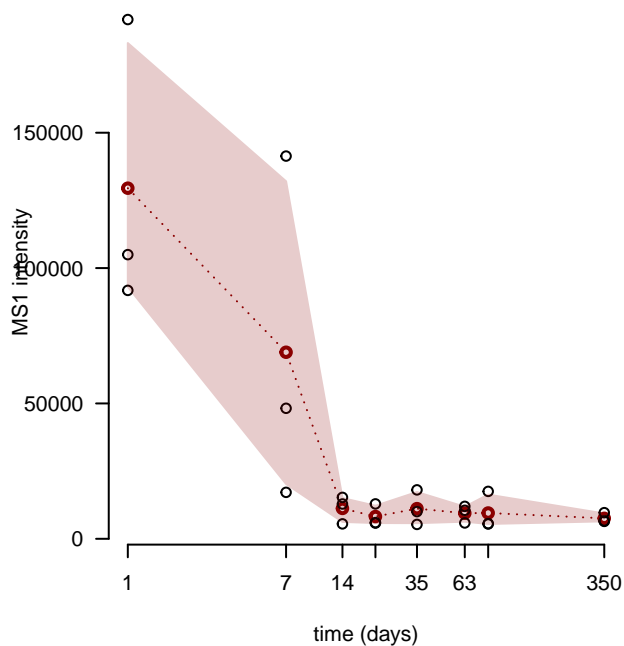

**P55937**  
GN=Golga3  
golgi autoantigen, golgin subfamily a, 3

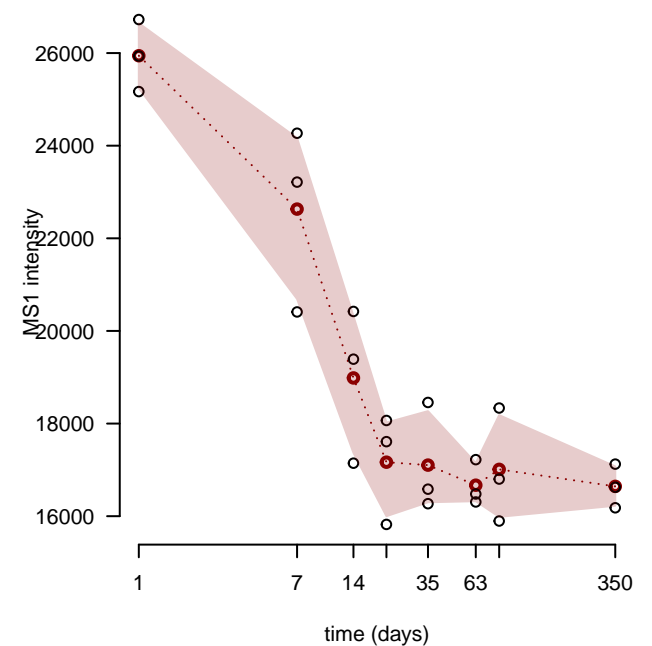



**P56135**  
GN=Atp5mf

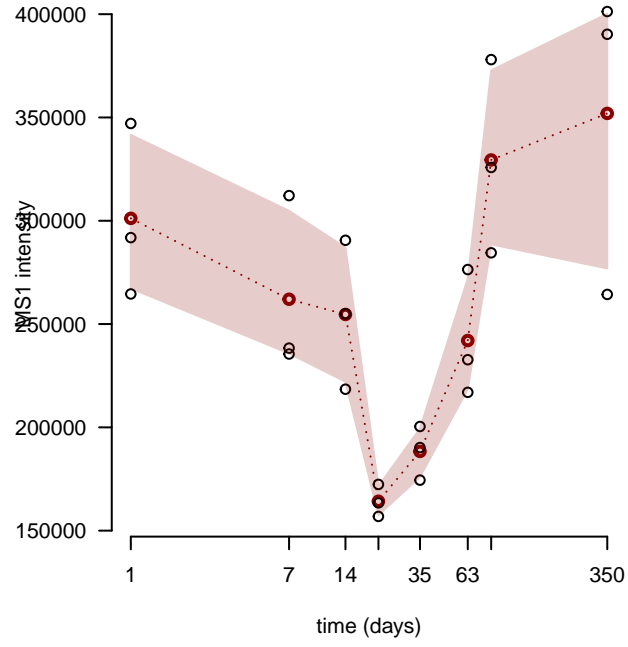

**P56183**  
GN=Rrp1  
ribosomal RNA processing 1

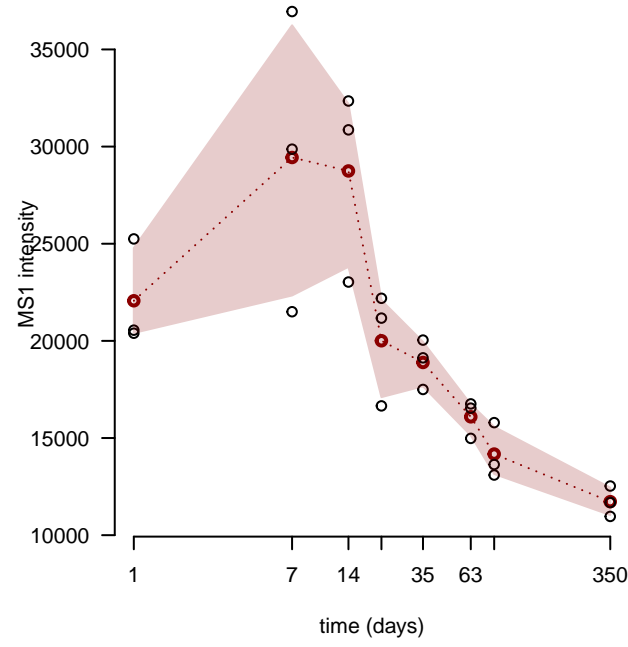

**P56212**  
GN=Arpp19  
cAMP-regulated phosphoprotein 19

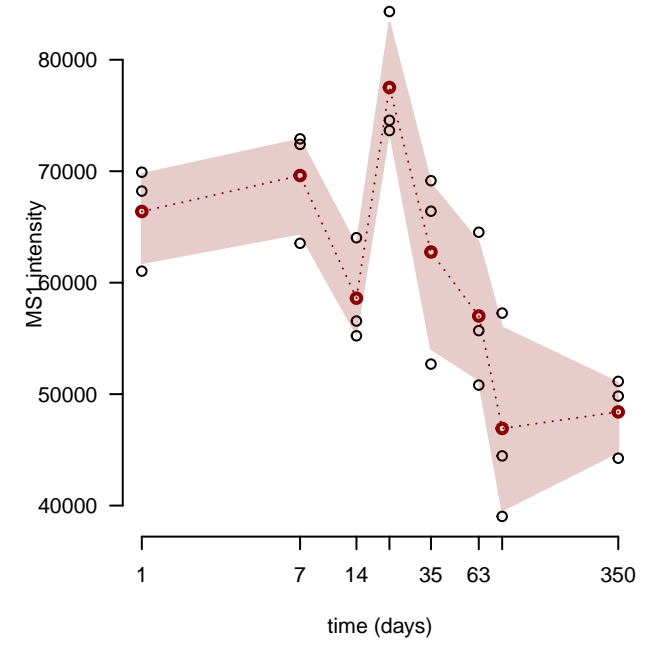

**P56213**  
GN=Gfer  
growth factor, augments liver regene ...

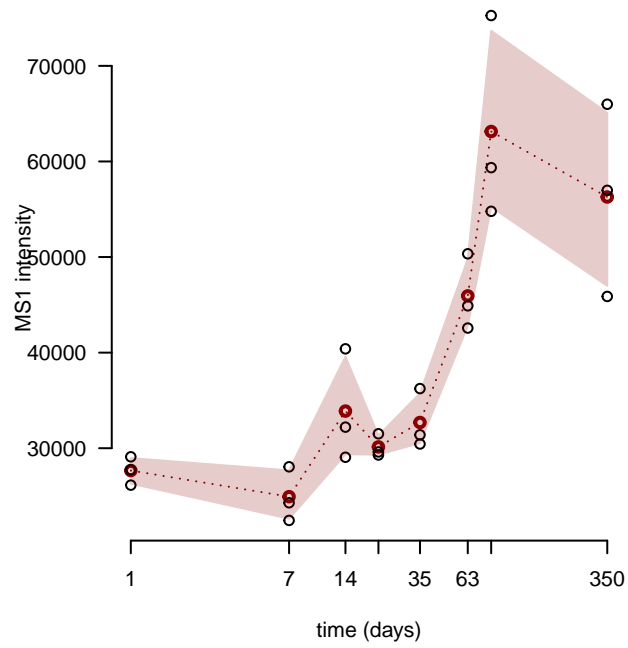

**P56280**  
GN=Tcl1a

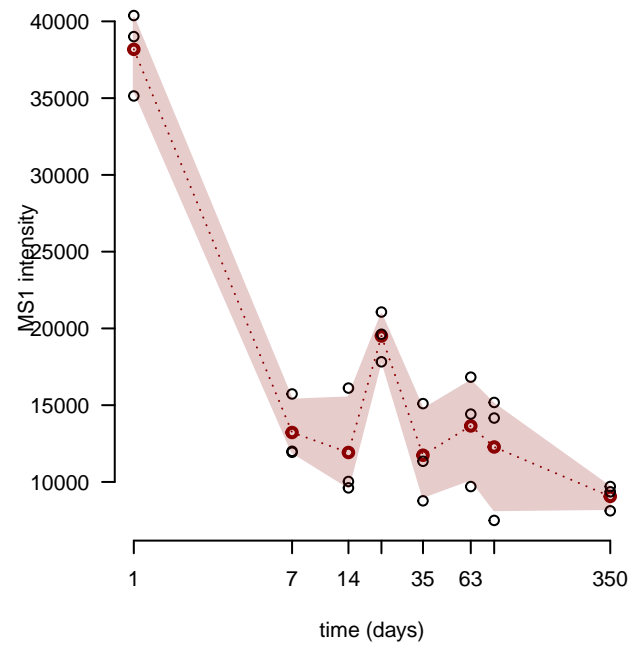

**P56371**  
GN=Rab4a  
RAB4A, member RAS oncogene family

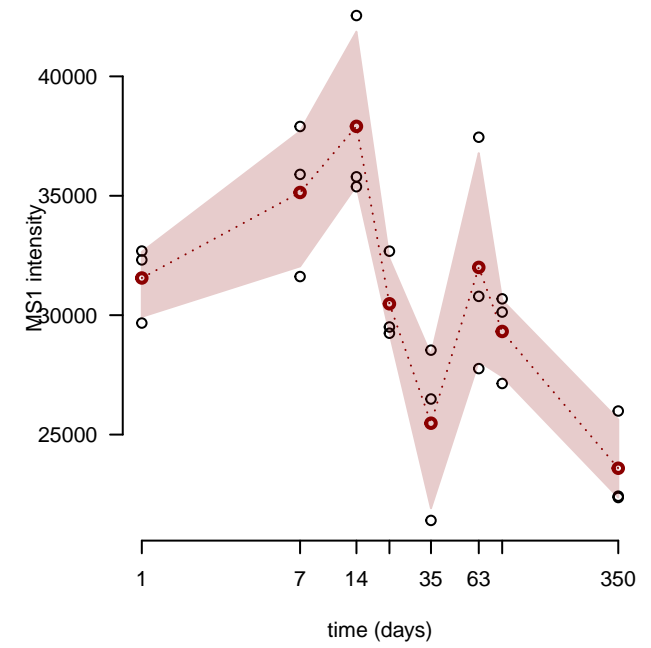

**P56375**  
GN=Acyp2  
acylphosphatase 2, muscle type

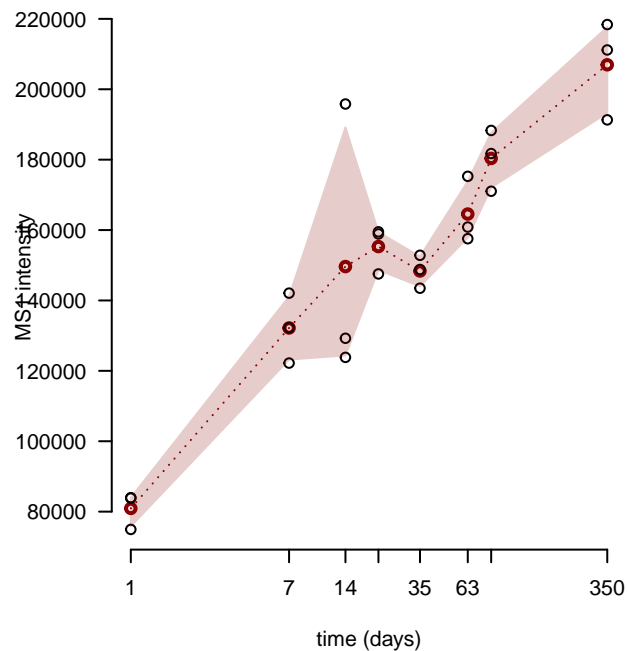

**P56376**  
GN=Acyp1  
acylphosphatase 1, erythrocyte (common) ...

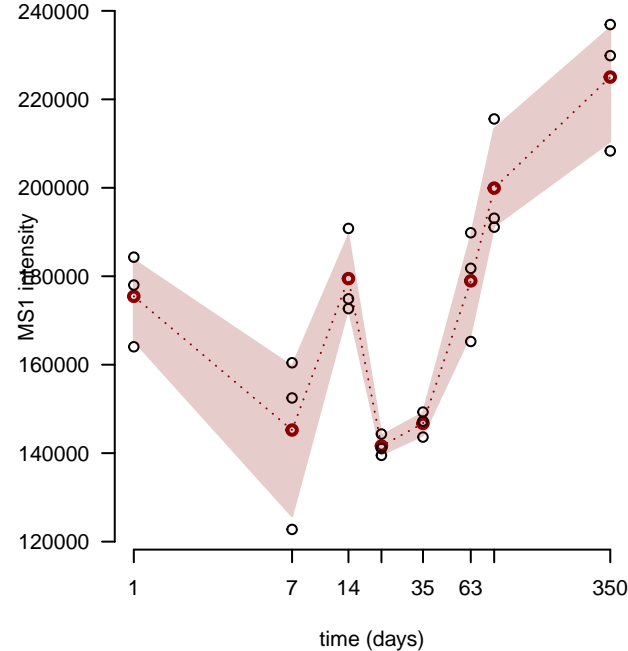

**P56379**  
GN=Atp5mpl  
ATP synthase membrane subunit 6.8PL

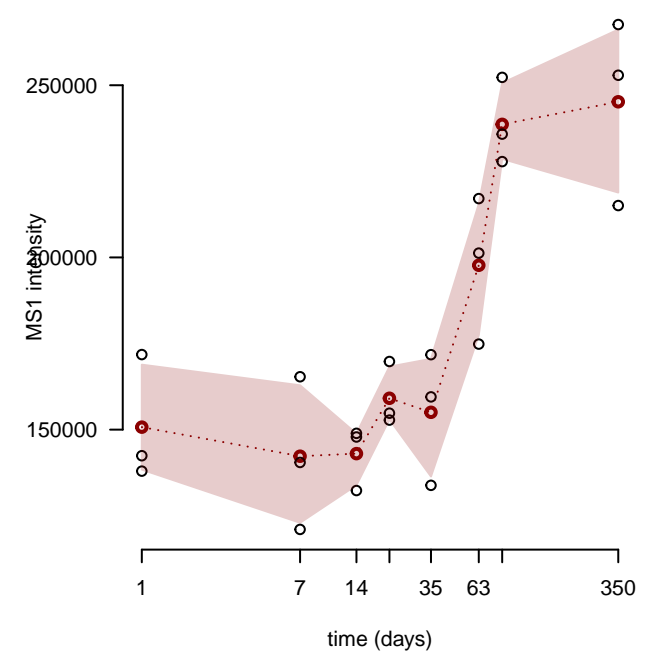

**P56380**  
**GN=Nudt2**  
nudix (nucleoside diphosphate linked moi ...

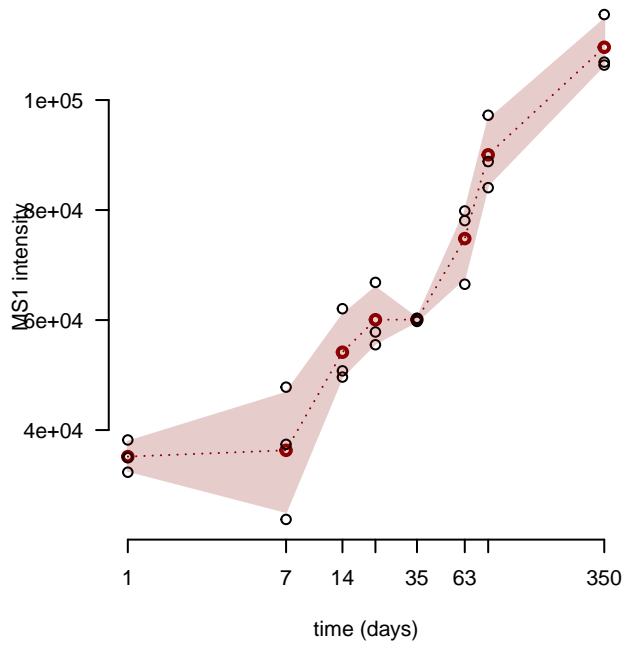

**P56382**  
**GN=Atp5f1e**

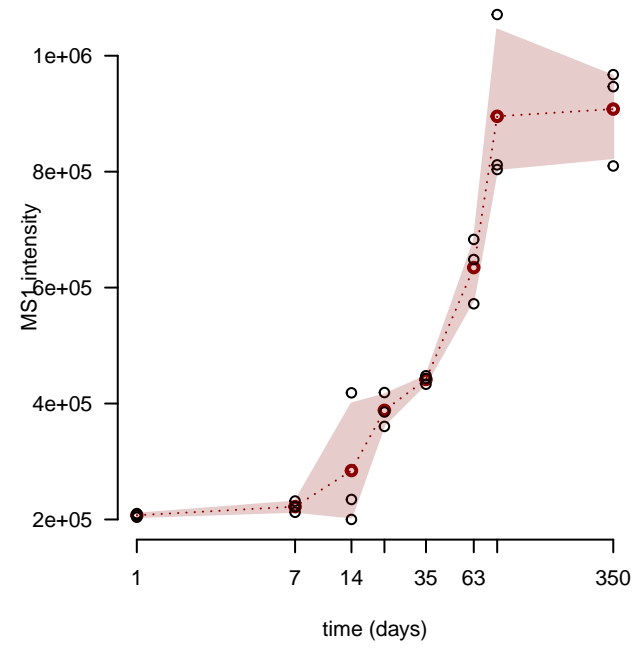

**P56383**  
**GN=Atp5mc2**

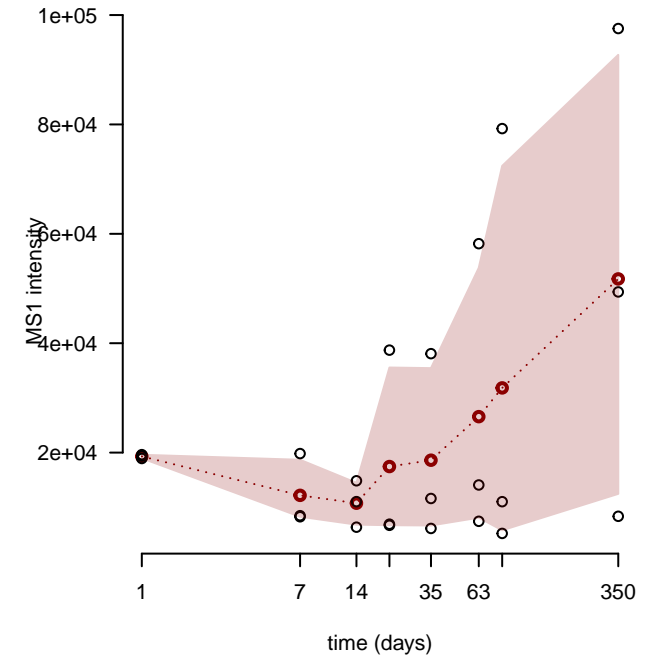

**P56390**  
**GN=Cks2**  
CDC28 protein kinase regulatory subunit ...

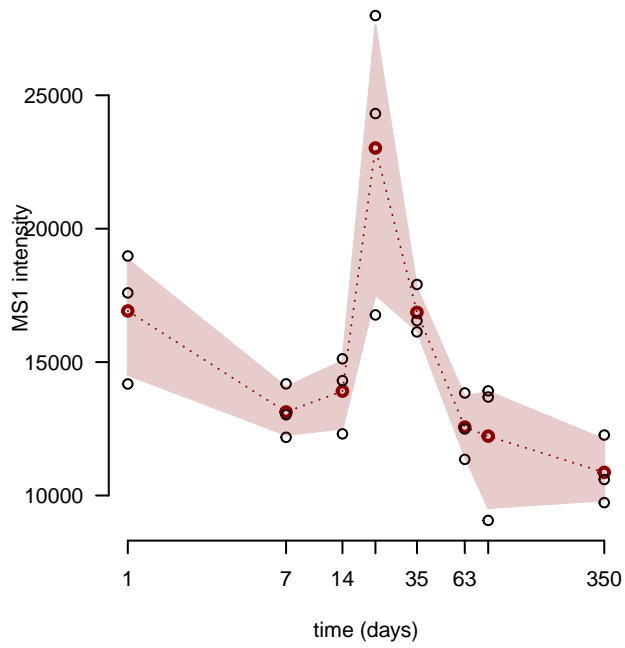

**P56391**  
**GN=Cox6b1**  
cytochrome c oxidase, subunit 6B1

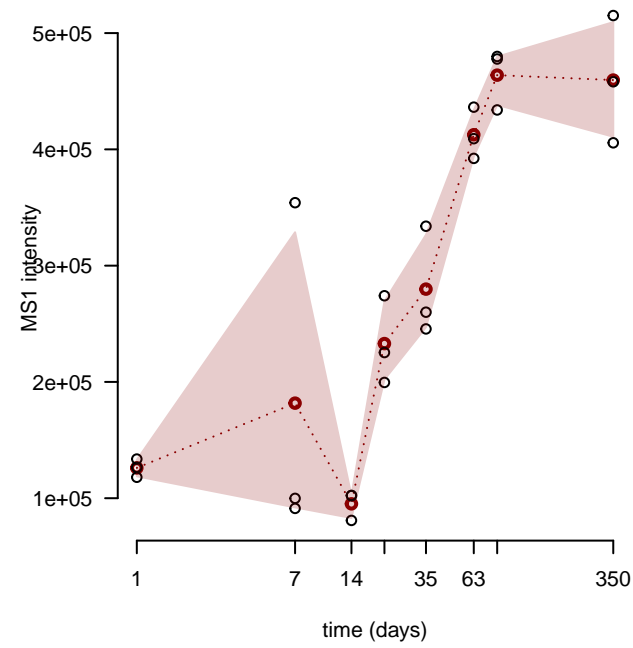

**P56392**  
**GN=Cox7a1**  
cytochrome c oxidase subunit 7A1

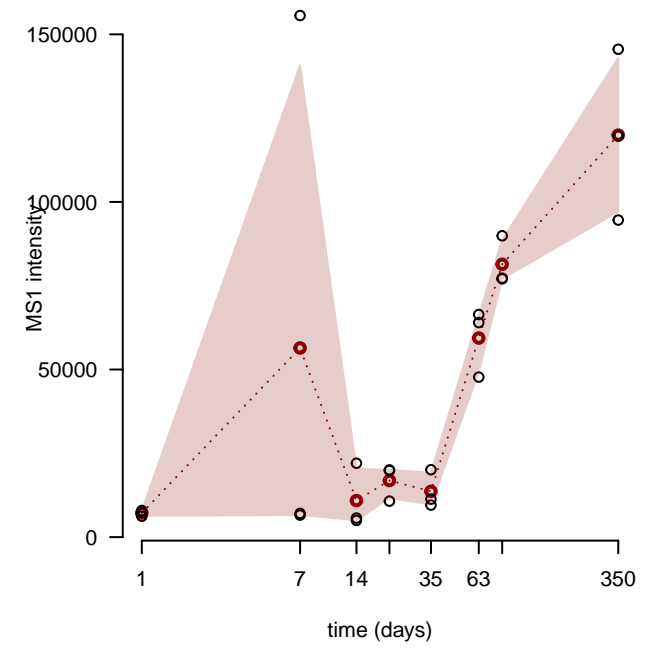

**P56394**  
**GN=Cox17**  
cytochrome c oxidase assembly protein 17 ...

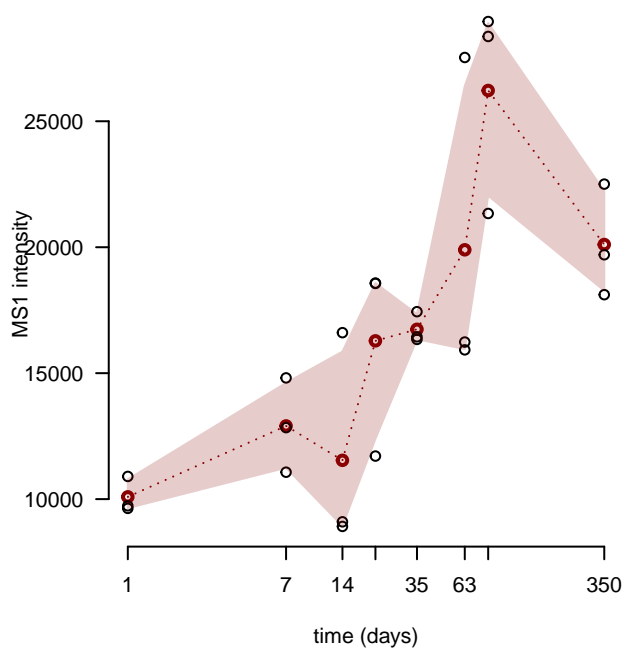

**P56395**  
**GN=Cyb5a**  
cytochrome b5 type A (microsomal)

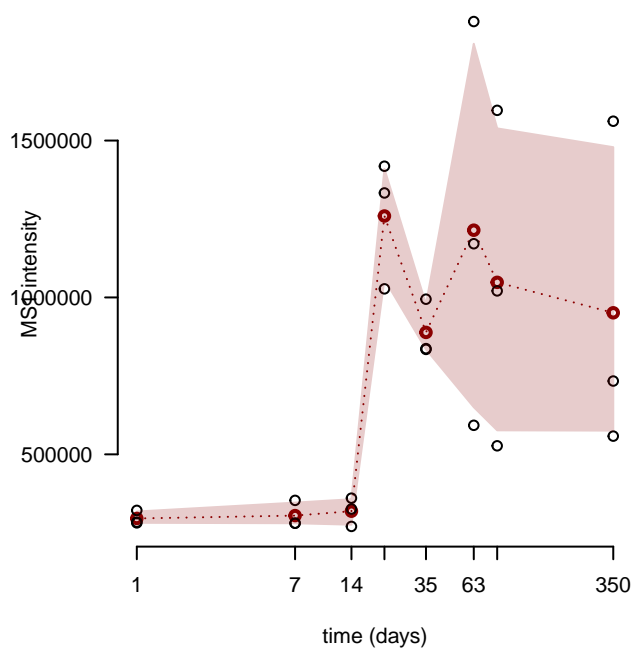

**P56399**  
**GN=Usp5**  
ubiquitin specific peptidase 5 (isopepti ...

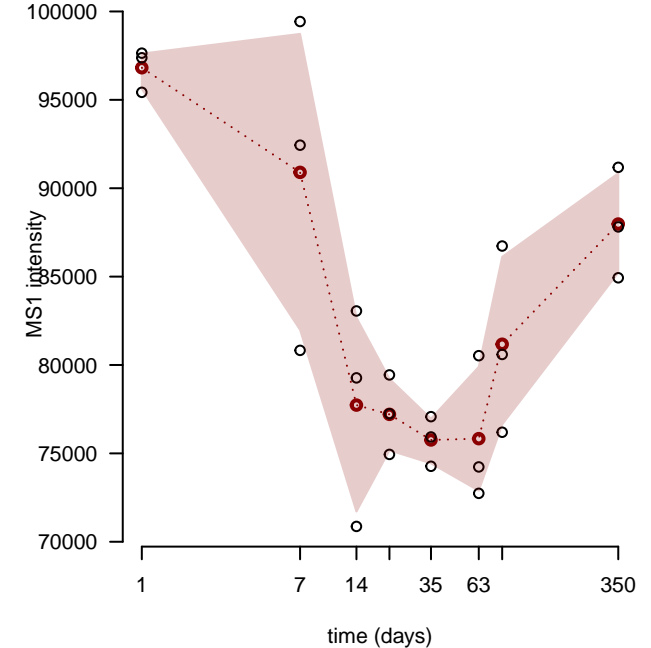

P56480  
GN=Atp5f1b

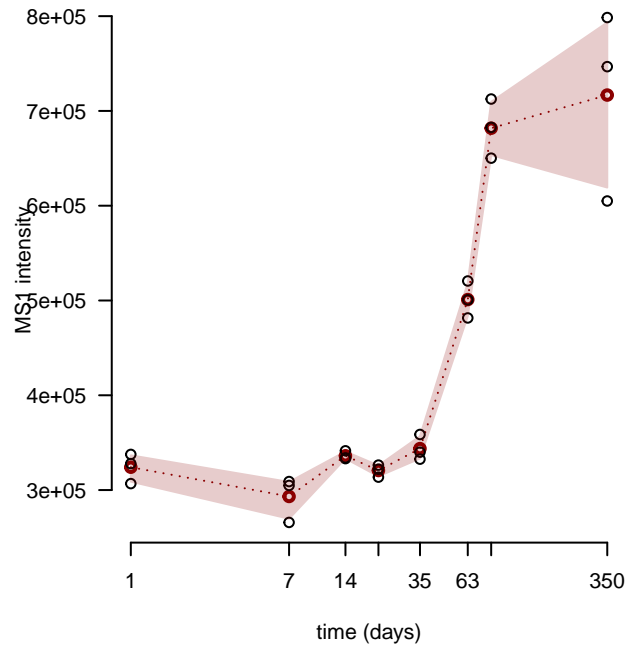

P56528  
GN=Cd38  
CD38 antigen

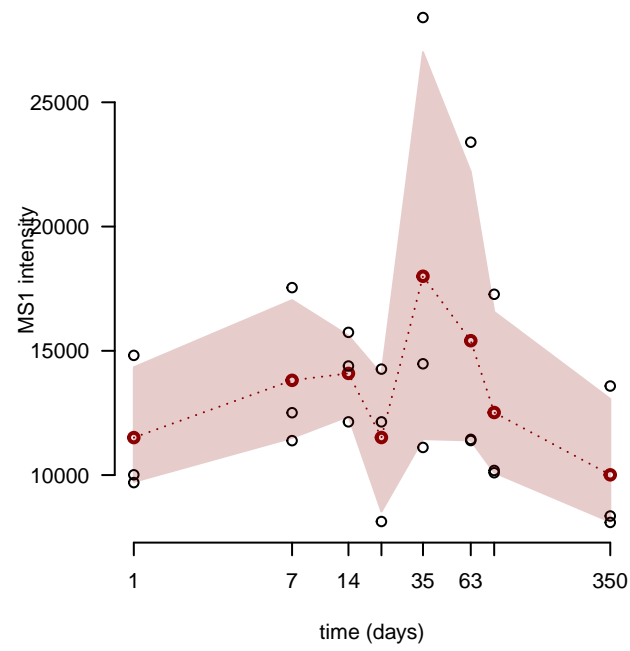

P56542  
GN=Dnase2

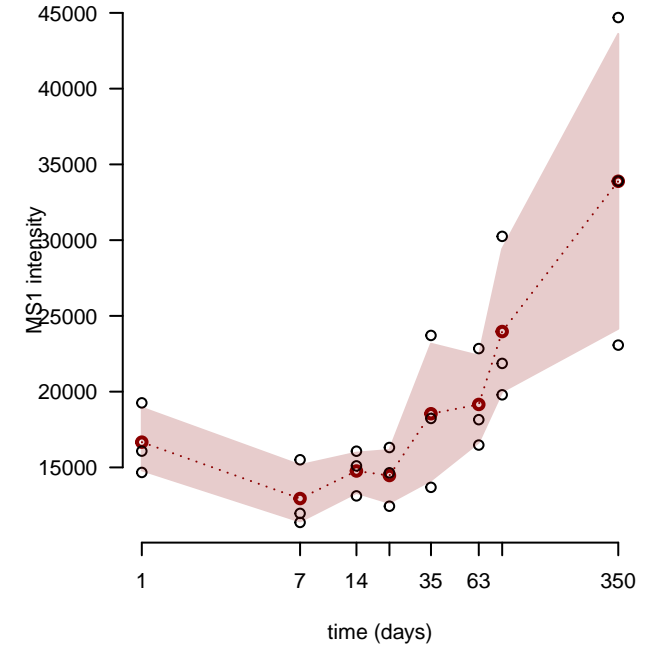

P56546  
GN=Ctbp2  
C-terminal binding protein 2

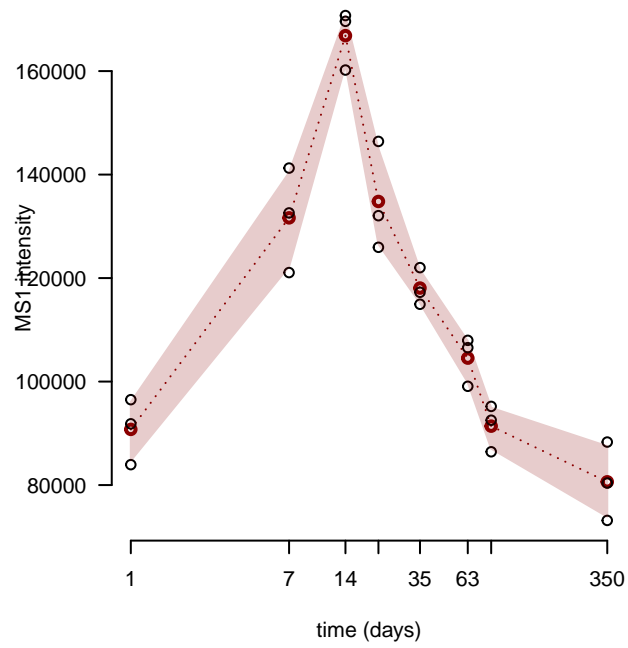

P56565  
GN=S100a1  
S100 calcium binding protein A1

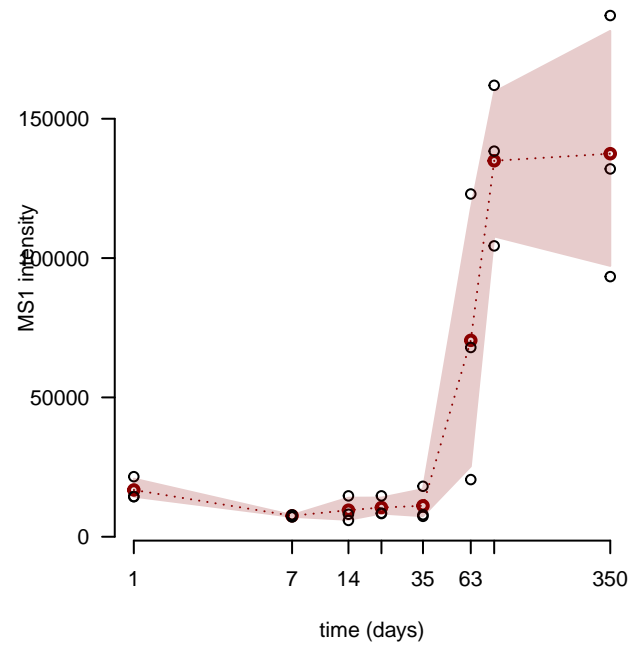

P56581  
GN=Tdg  
thymine DNA glycosylase

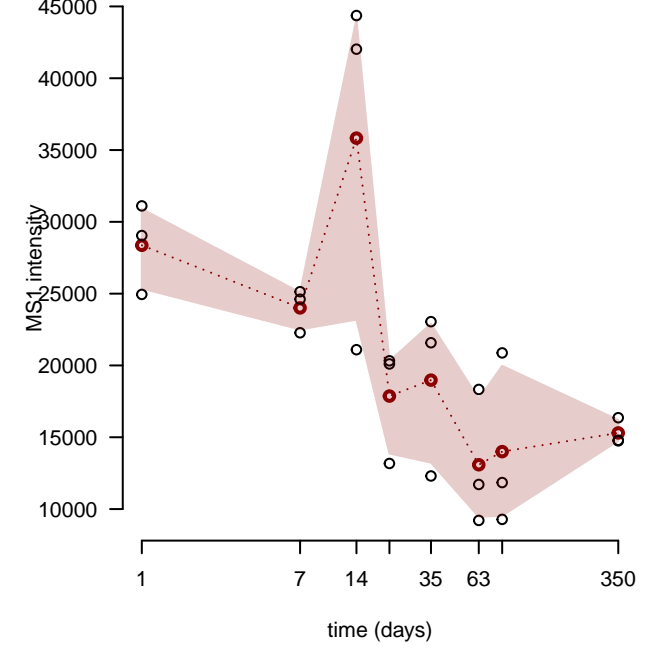

P56671  
GN=Maz  
MYC-associated zinc finger protein (puri ...

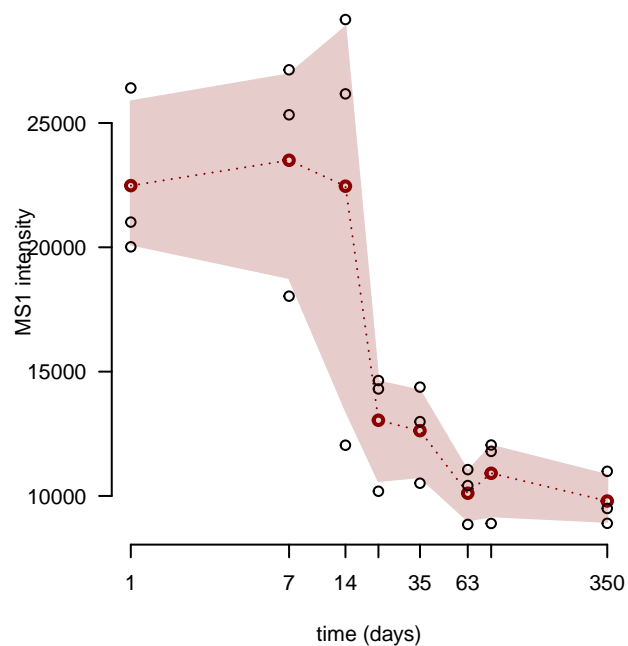

P56695  
GN=Wfs1  
wolframin ER transmembrane glycoprotein

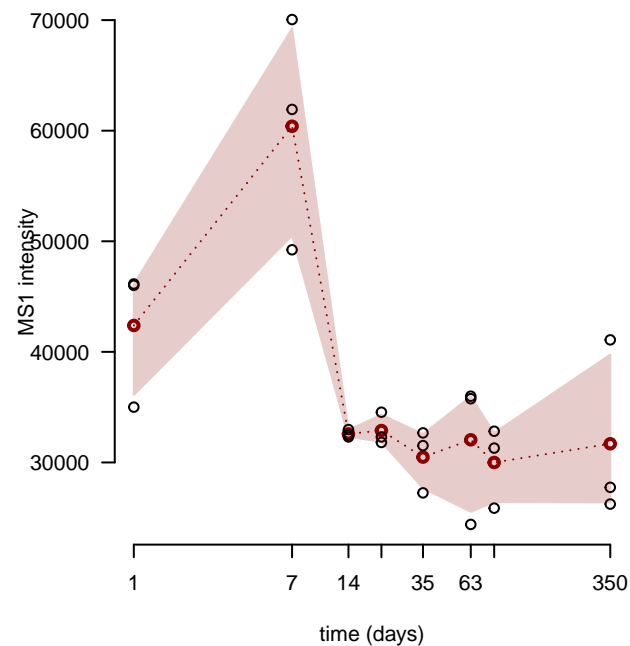

P56812  
GN=Pcd5  
programmed cell death 5

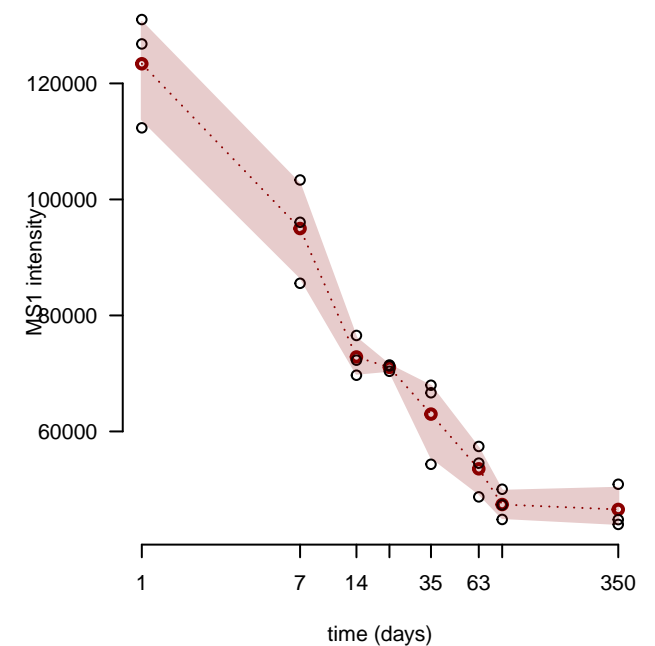

**P56959**  
**GN=Fus**  
fused in sarcoma

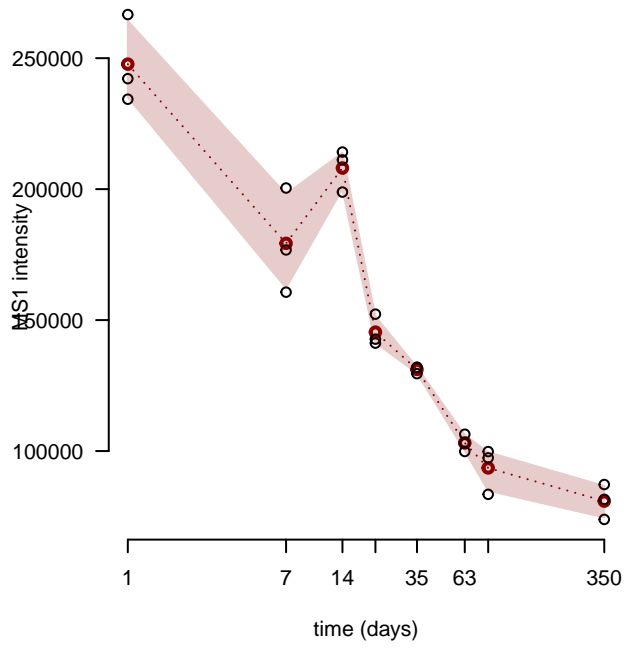

**P56960**  
**GN=Exosc10**  
exosome component 10

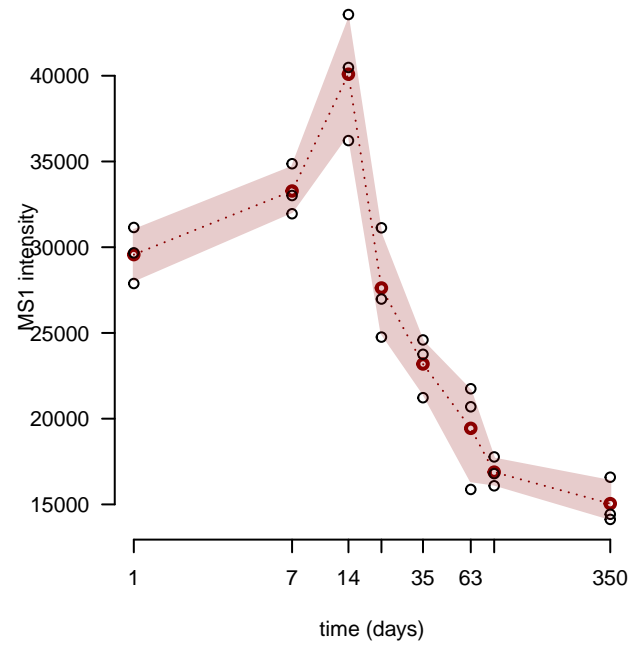

**P57016**  
**GN=Lad1**  
ladinin

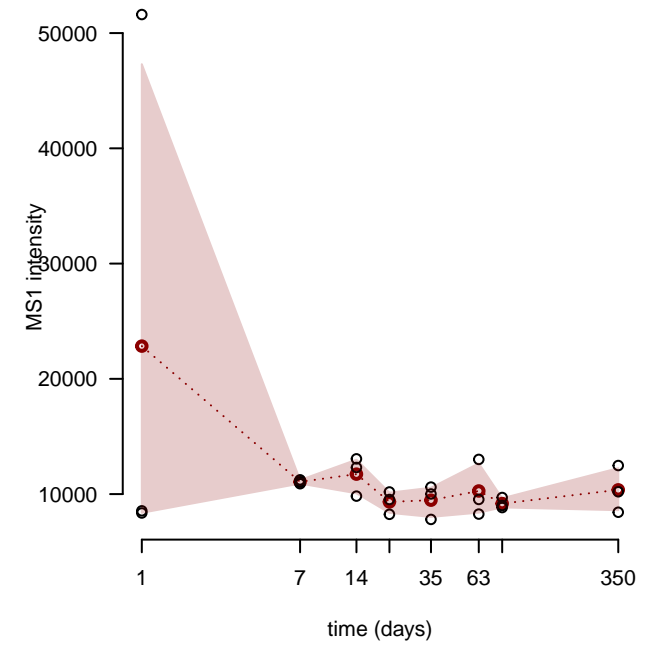

**P57080**  
**GN=Usp25**  
ubiquitin specific peptidase 25

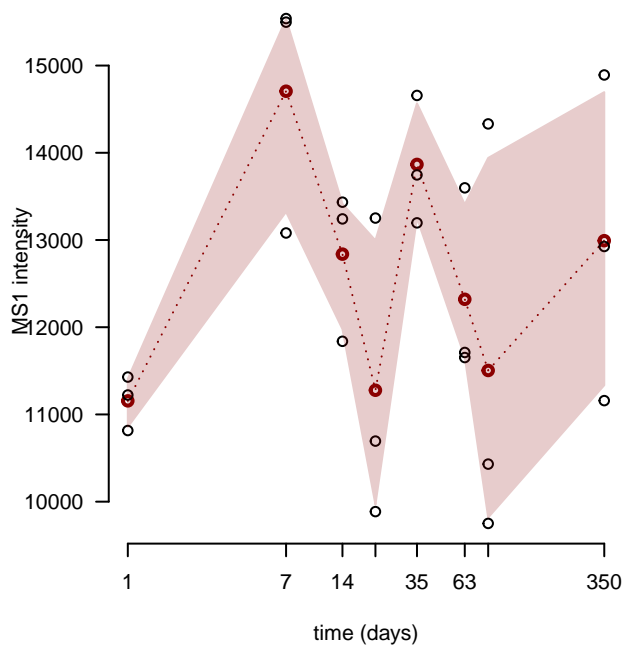

**P57680**  
**GN=Evc**  
EvC ciliary complex subunit 1

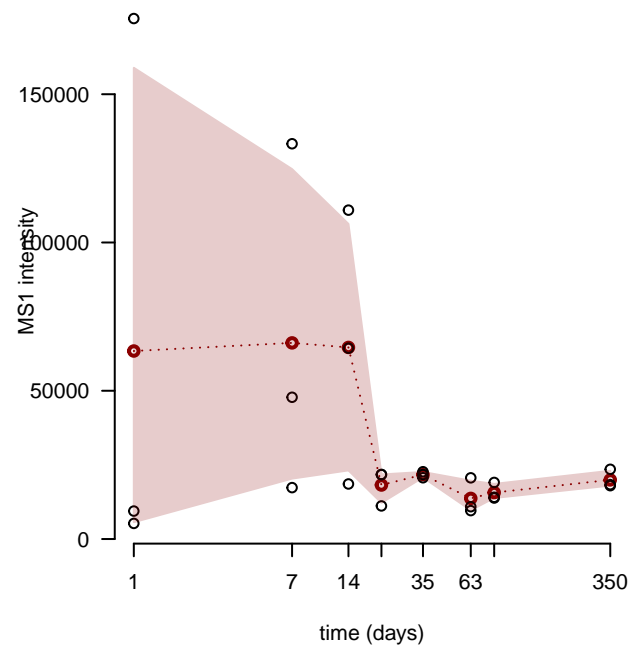

**P57716**  
**GN=Ncstn**  
nicastrin

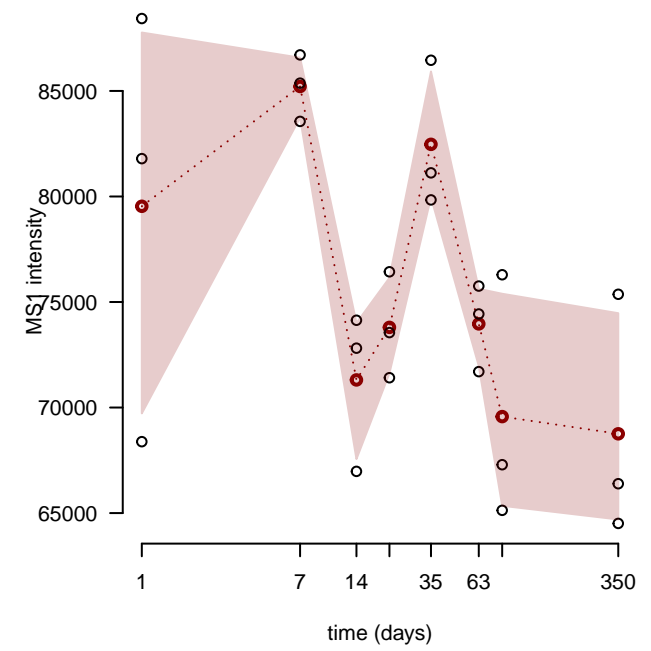

**P57722**  
**GN=Pcbp3**  
poly(rC) binding protein 3

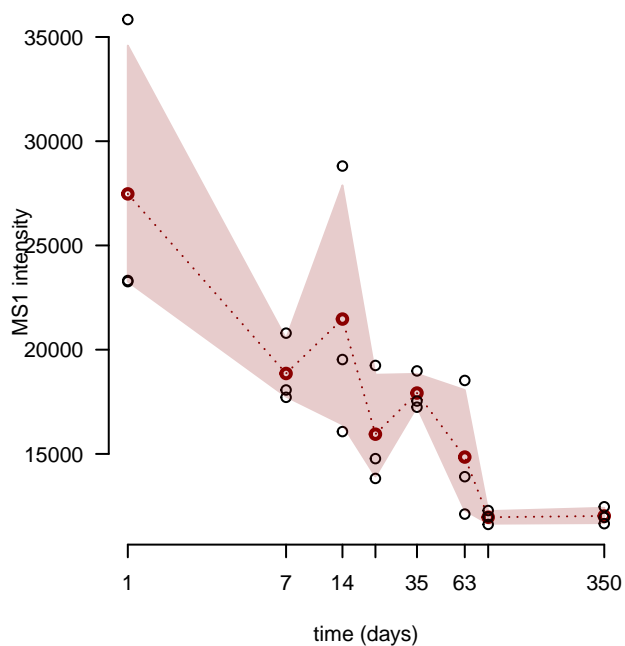

**P57724**  
**GN=Pcbp4**  
poly(rC) binding protein 4

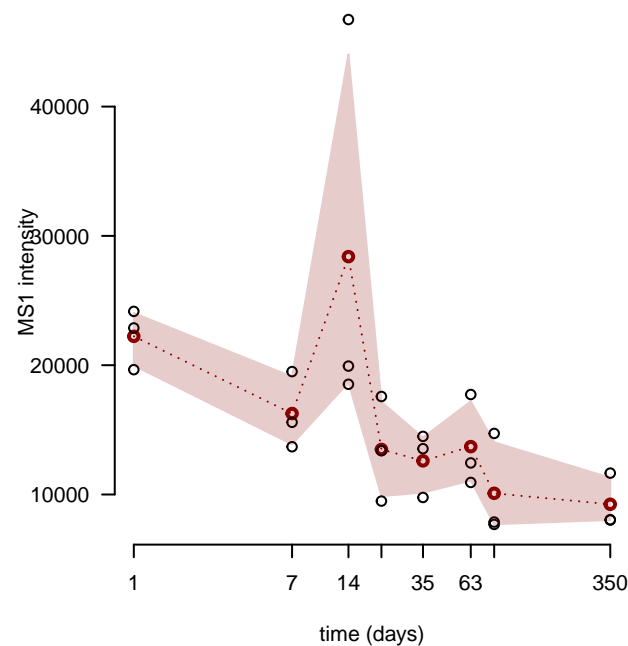

**P57746**  
**GN=Atp6v1d**  
ATPase, H+ transporting, lysosomal V1 su ...

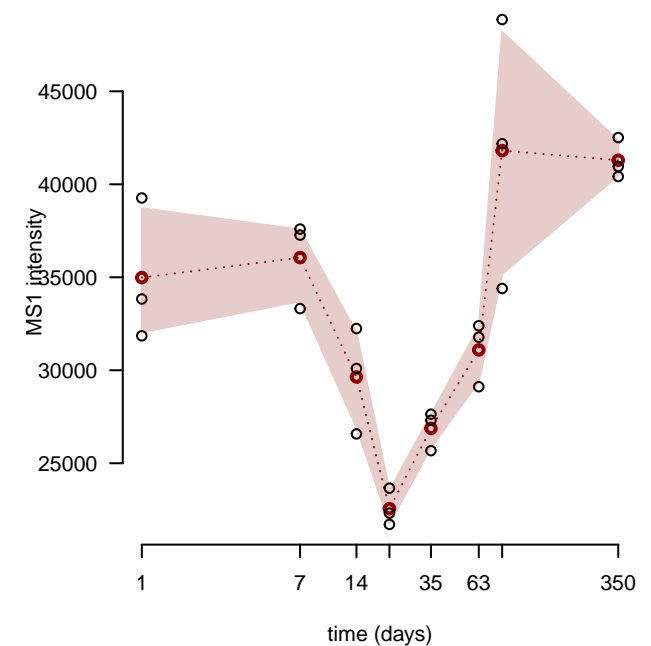

**P57759**  
**GN=Erp29**  
endoplasmic reticulum protein 29

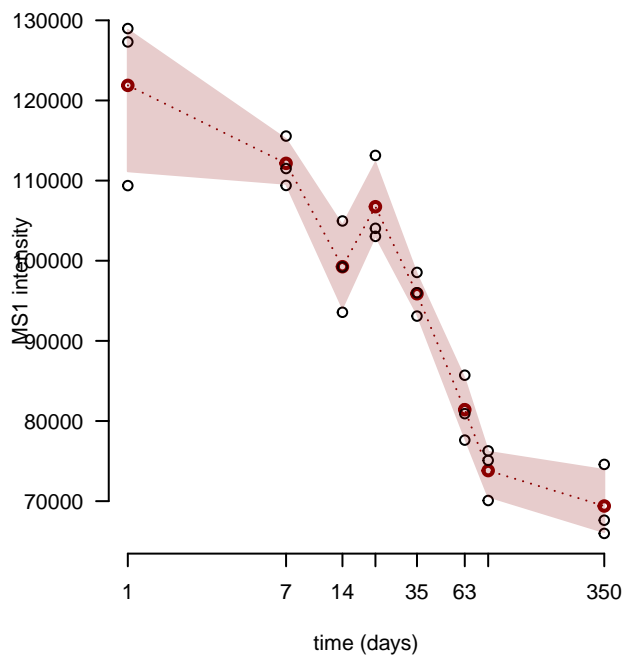

**P57776**  
**GN=Eef1d**  
eukaryotic translation elongation factor ...

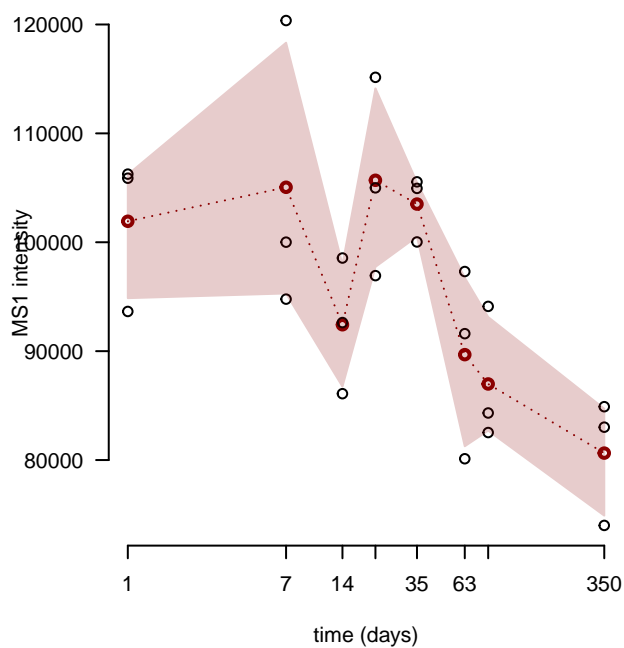

**P57776**  
**GN=Eef1d**  
eukaryotic translation elongation factor ...

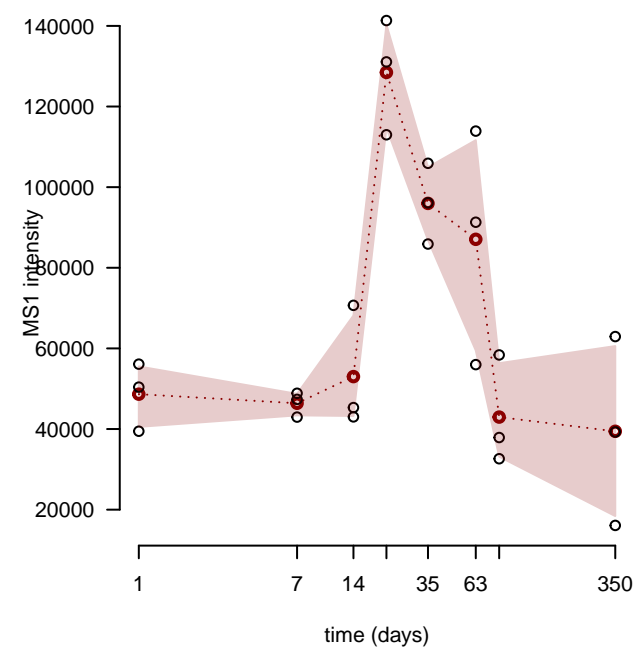

**P57780**  
**GN=Actn4**  
actinin alpha 4

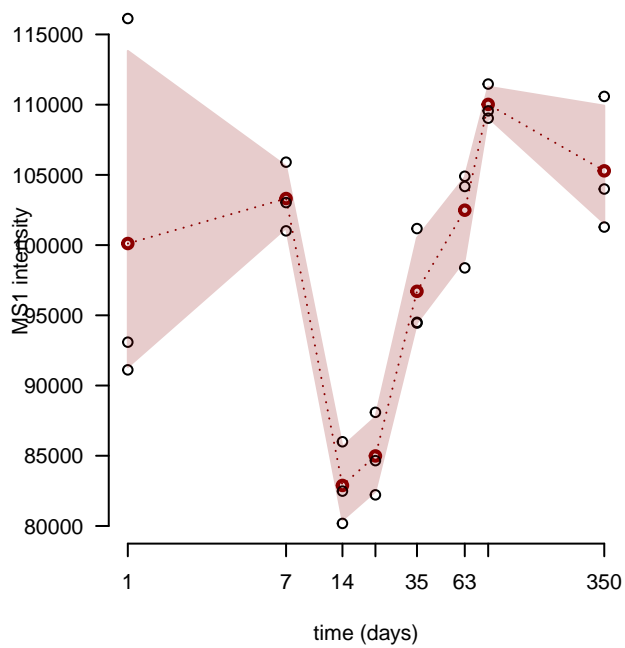

**P57784**  
**GN=Snrpa1**  
small nuclear ribonucleoprotein polypept ...

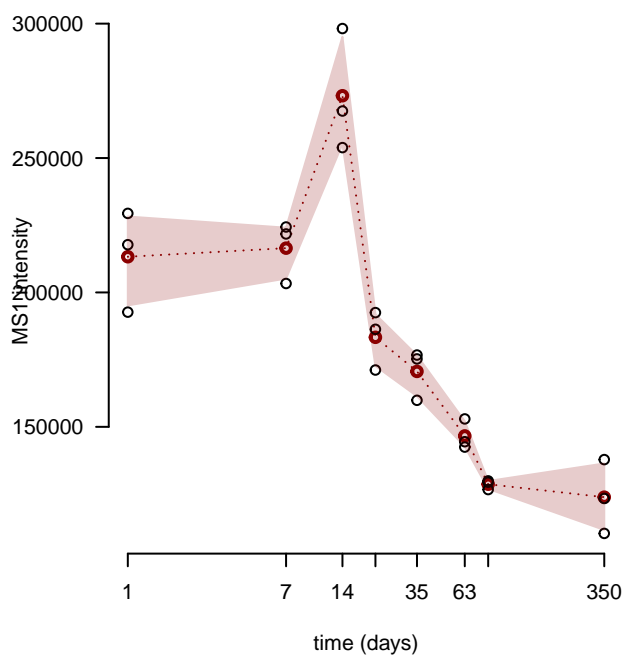

**P57787**  
**GN=Slc16a3**  
solute carrier family 16 (monocarboxylic ...

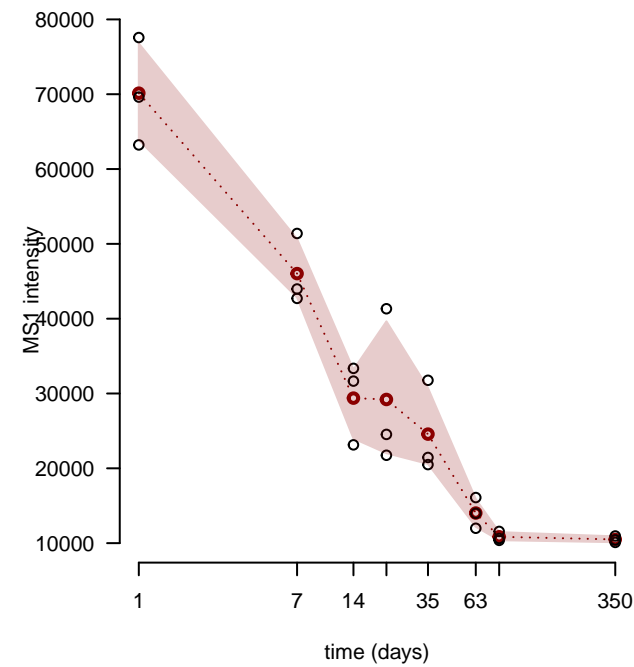

**P57791**  
**GN=Rce1**  
Ras converting CAAX endopeptidase 1

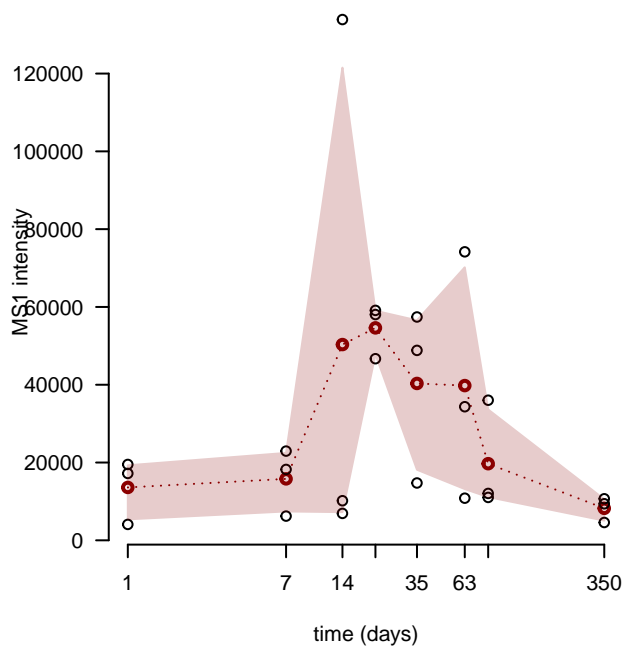

**P58006**  
**GN=Sesn1**  
sestrin 1

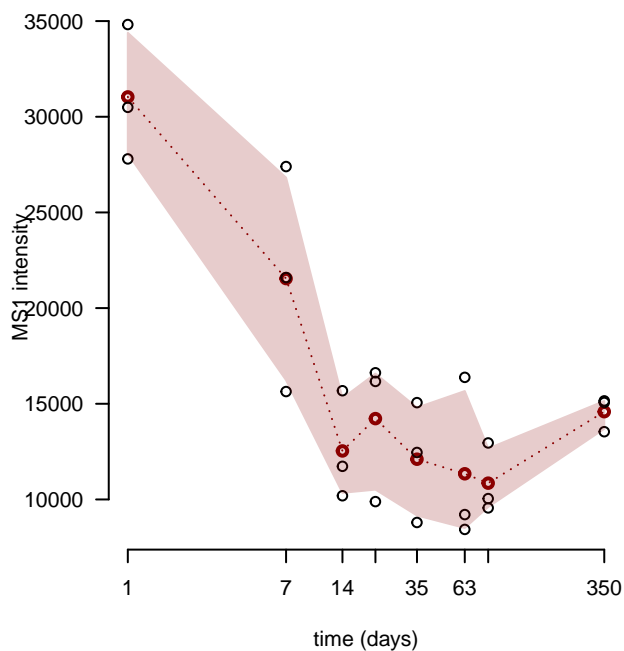

**P58021**  
**GN=Tm9sf2**  
transmembrane 9 superfamily member 2

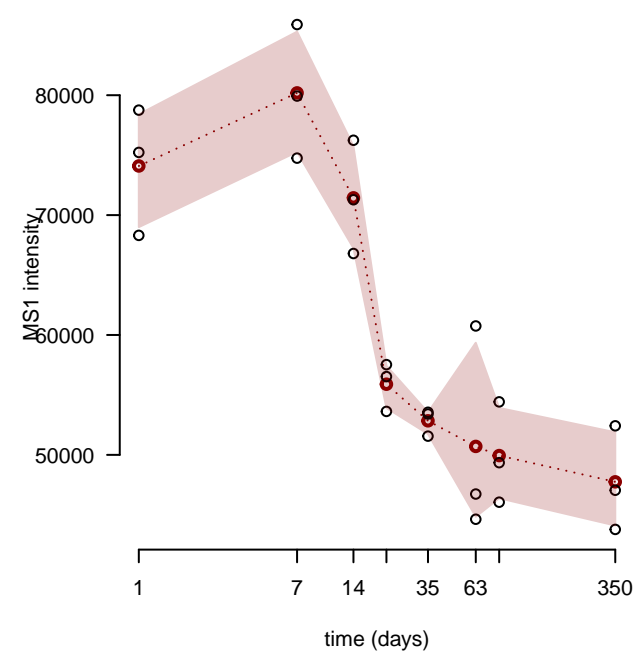

**P58022**  
**GN=Loxl2**  
lysyl oxidase-like 2

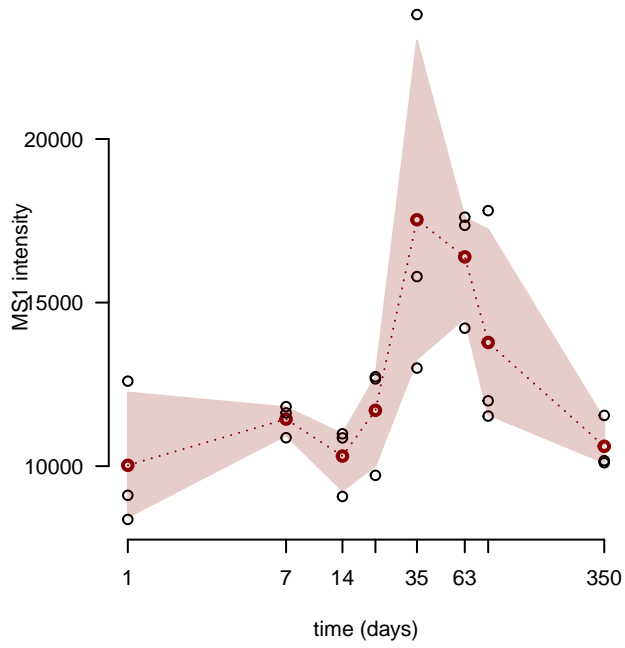

**P58044**  
**GN=Idi1**  
isopentenyl-diphosphate delta isomerase

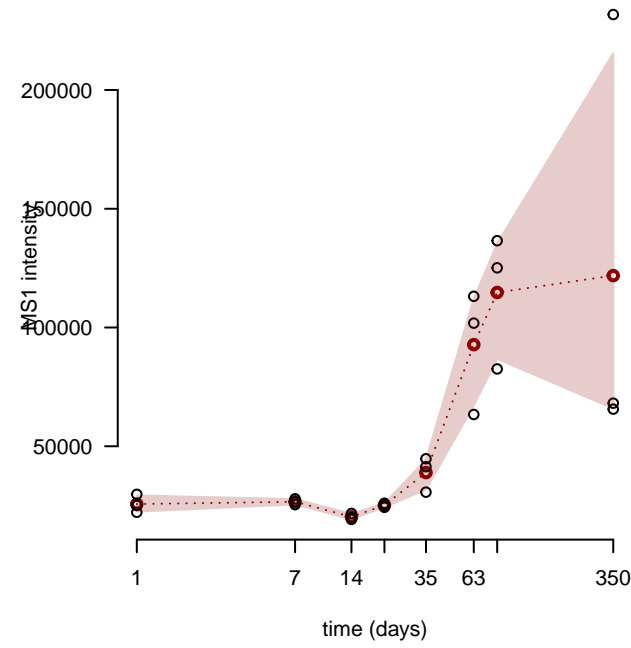

**P58058**  
**GN=Nadk**  
NAD kinase

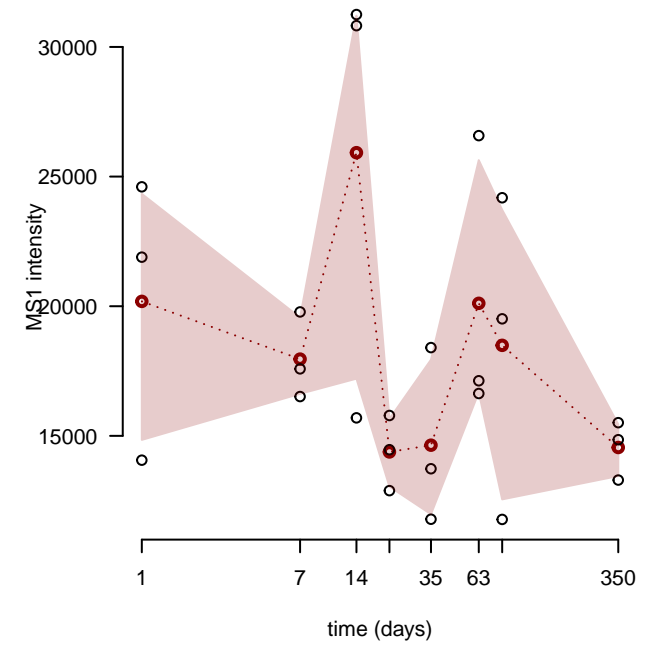

**P58059**  
**GN=Mrps21**  
mitochondrial ribosomal protein S21

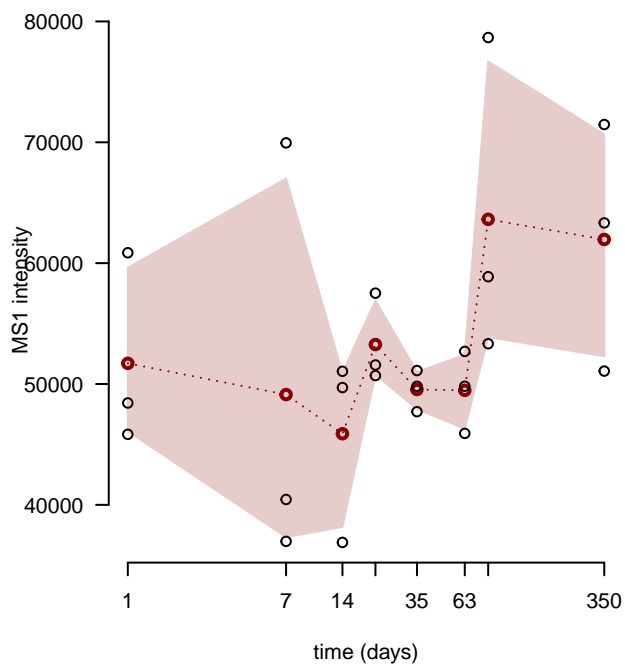

**P58064**  
**GN=Mrps6**  
mitochondrial ribosomal protein S6

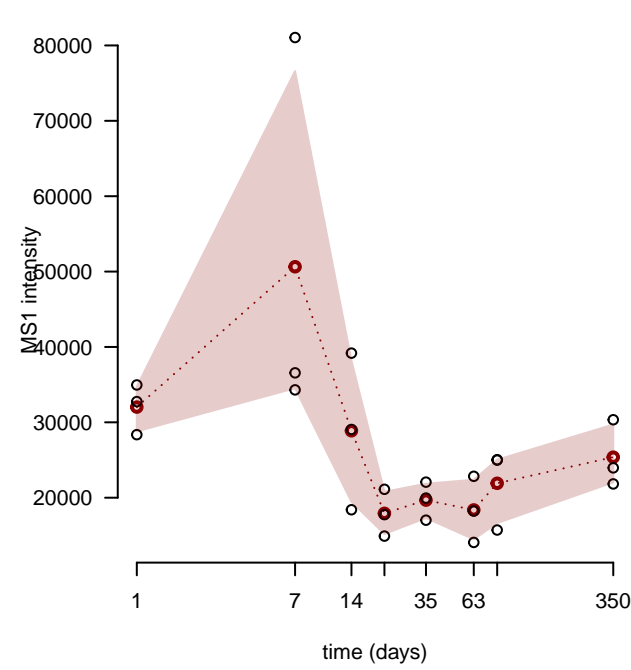

**P58069**  
**GN=Rasa2**  
RAS p21 protein activator 2

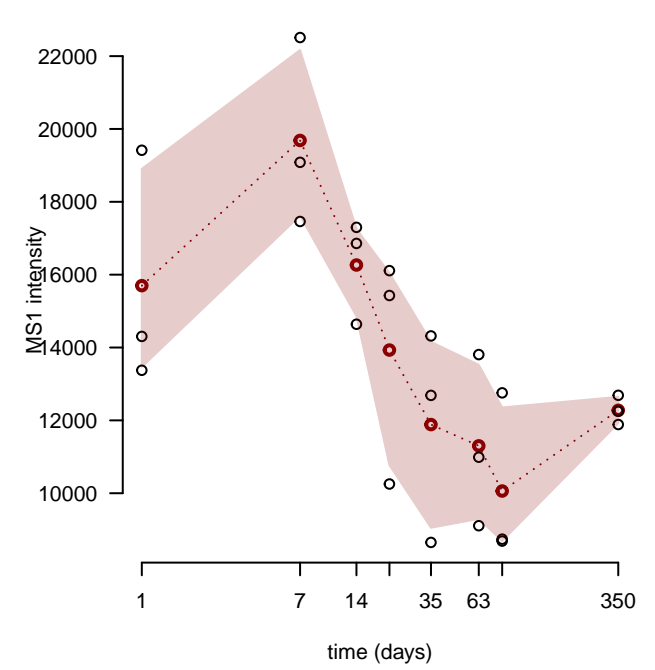

**P58137**  
**GN=Acot8**  
acyl-CoA thioesterase 8

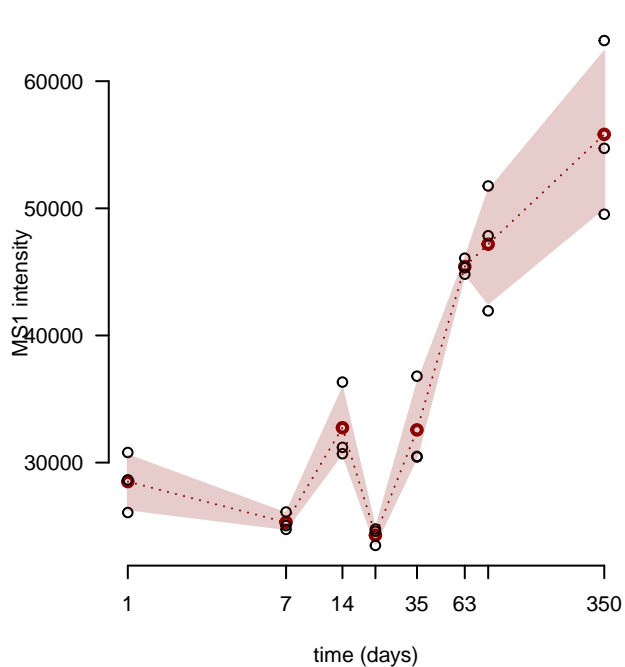

**P58158**  
**GN=B3gat3**  
beta-1,3-glucuronyltransferase 3 (glucur ...

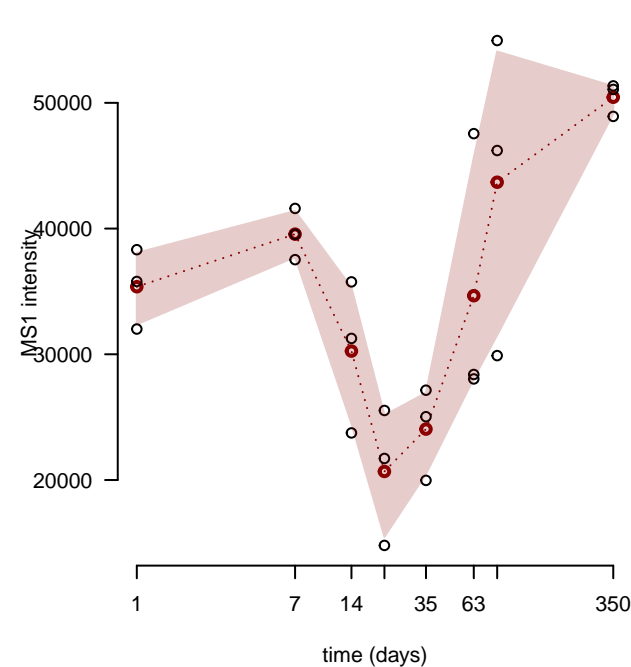

**P58196**  
**GN=Plscr4**  
phospholipid scramblase 4

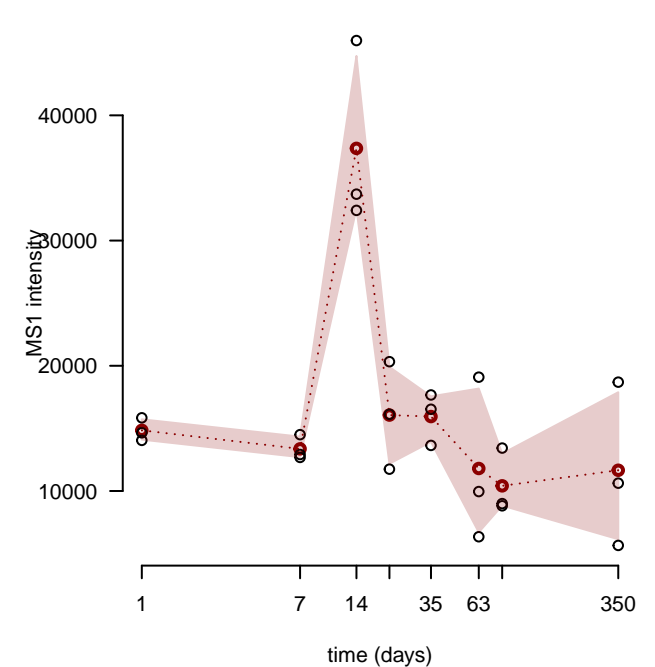

**P58242**  
**GN=Smpd13b**  
sphingomyelin phosphodiesterase, acid-li ...

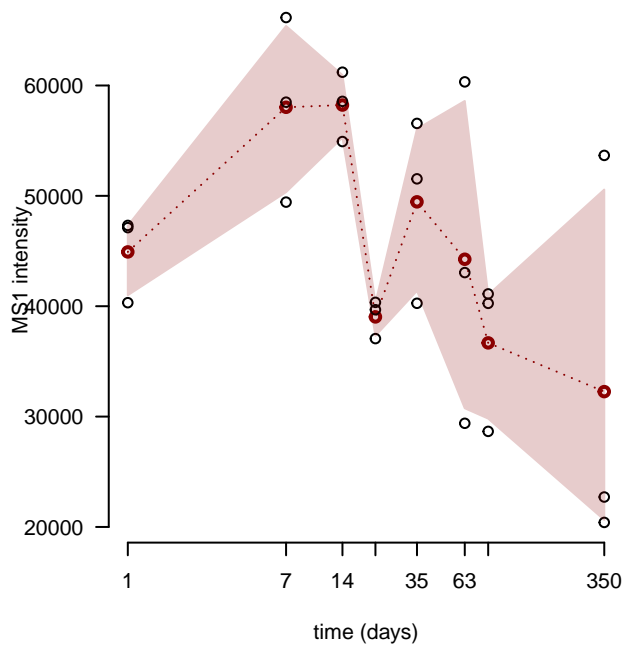

**P58252**  
**GN=Eef2**  
eukaryotic translation elongation factor ...

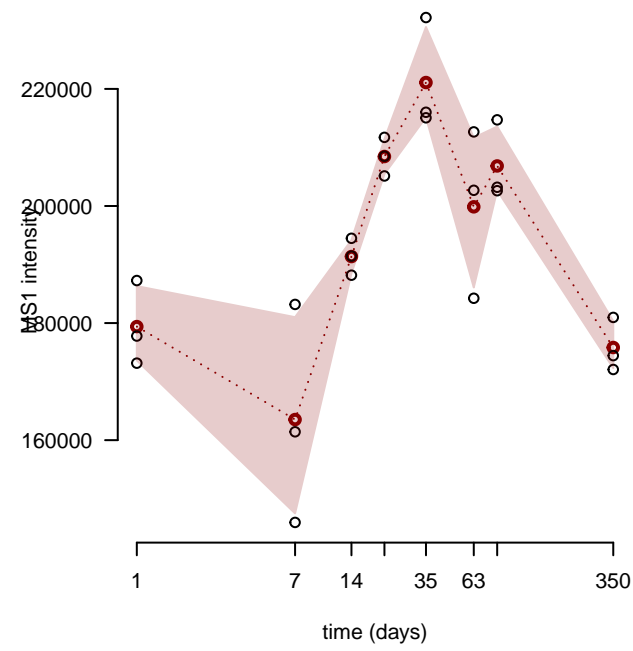

**P58269**  
**GN=Dpf3**  
double PHD fingers 3

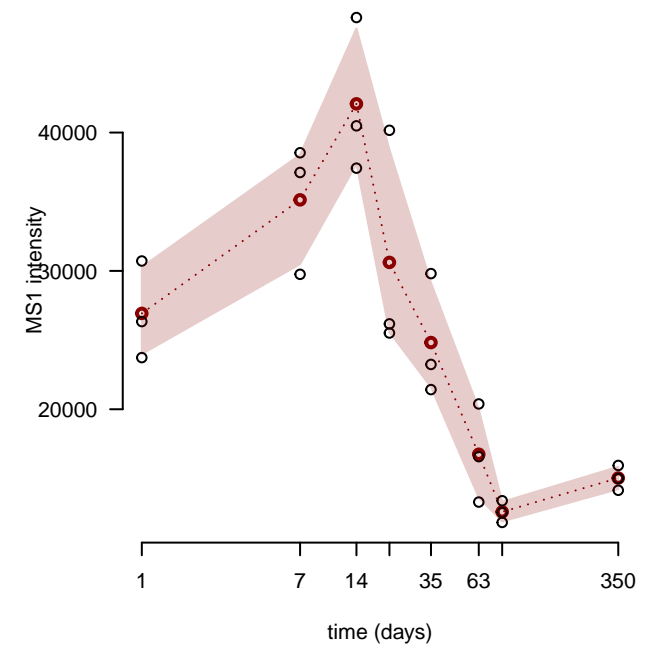

**P58281**  
**GN=Opa1**  
OPA1, mitochondrial dynamin like GTPase

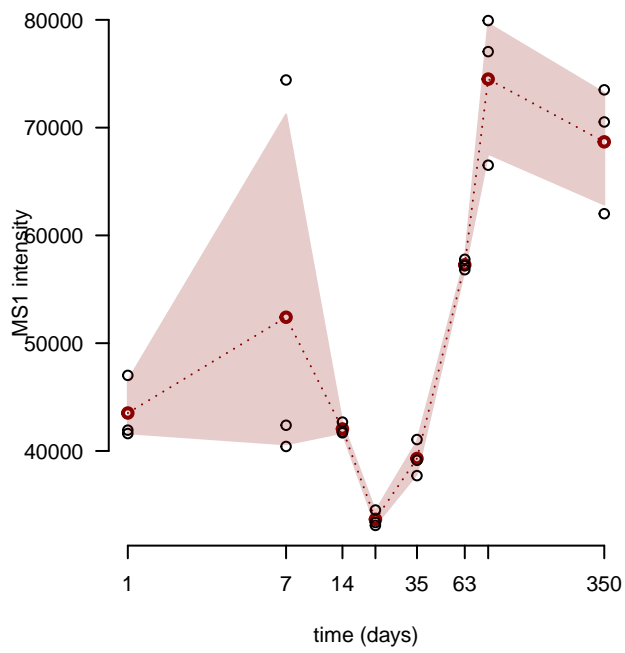

**P58334**  
**GN=Klf16**  
Kruppel-like factor 16

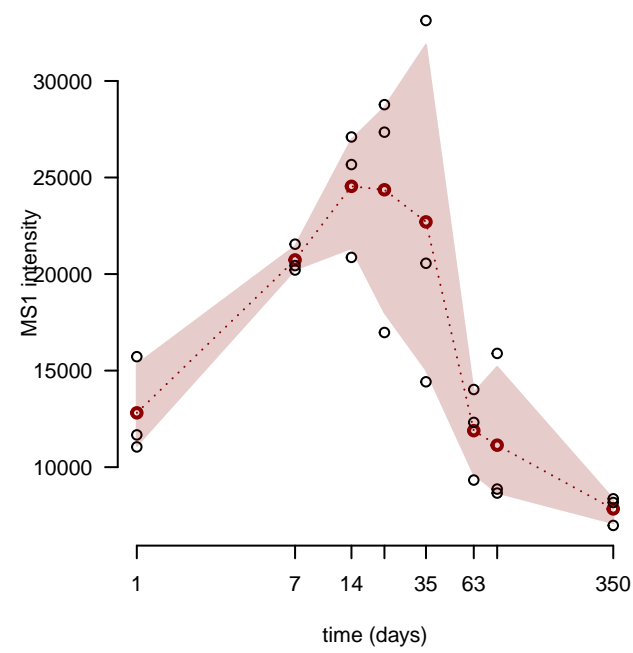

**P58389**  
**GN=Ptpa**  
protein phosphatase 2 protein activator

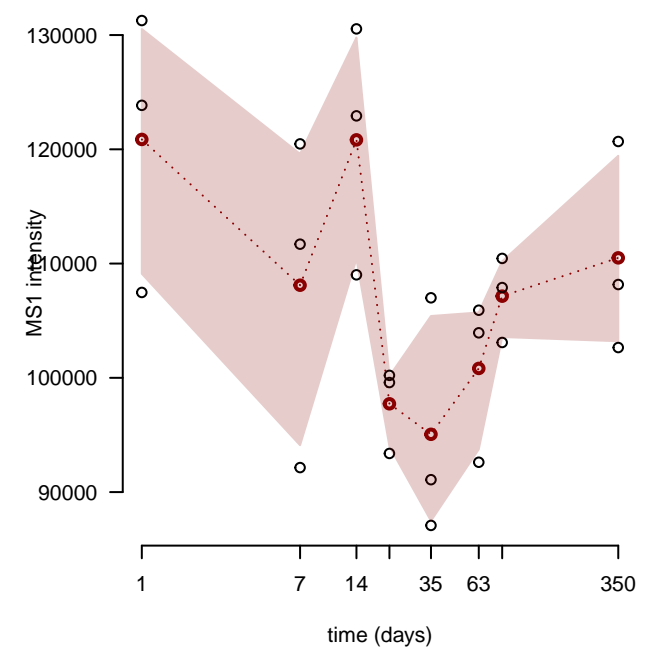

**P58404**  
**GN=Strn4**  
striatin, calmodulin binding protein 4

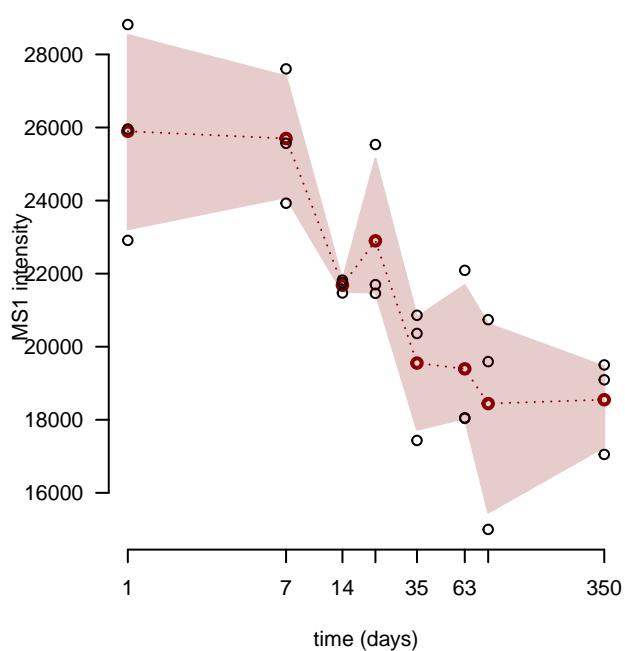

**P58462**  
**GN=Foxp1**  
forkhead box P1

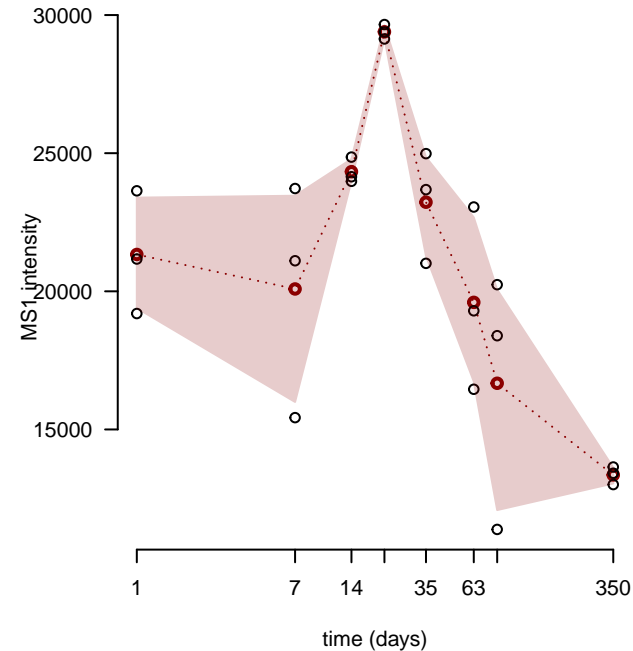

**P58465**  
**GN=Ctdspl**  
CTD (carboxy-terminal domain, RNA polyme ...

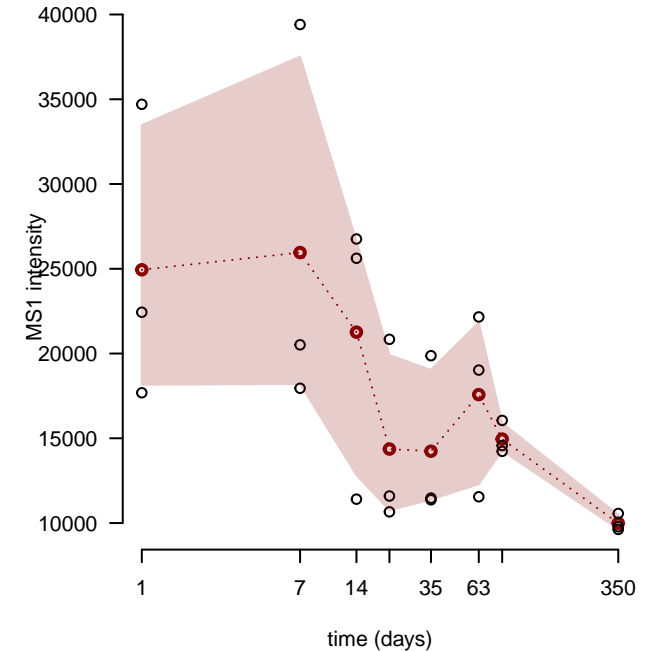

**P58466**  
**GN=Ctdsp1**

CTD (carboxy-terminal domain, RNA polyme ...

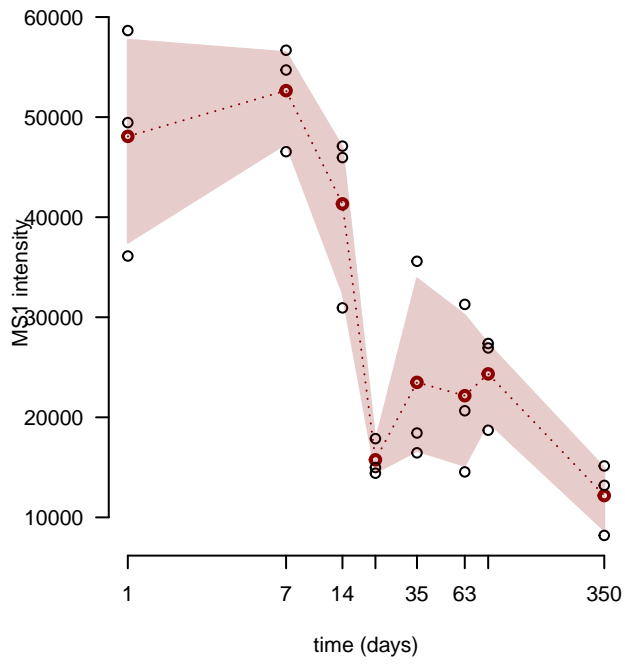

**P58468**  
**GN=Fam207a**

family with sequence similarity 207, mem ...

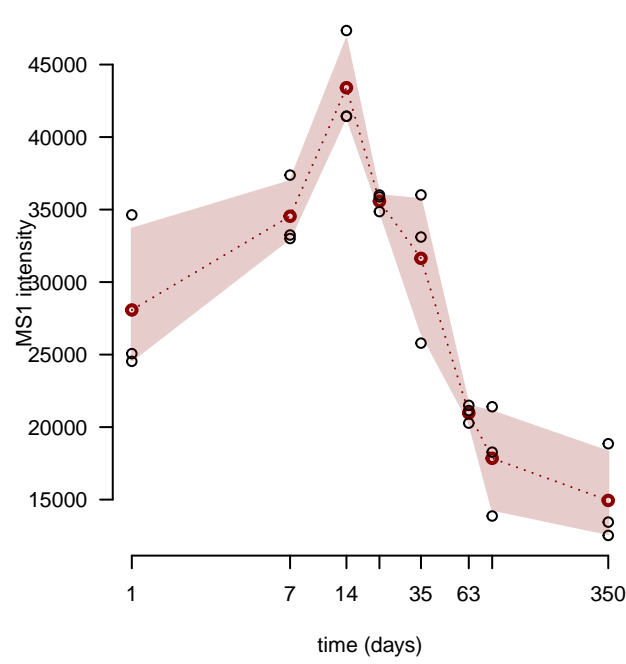

**P58501**  
**GN=Paxbp1**

PAX3 and PAX7 binding protein 1

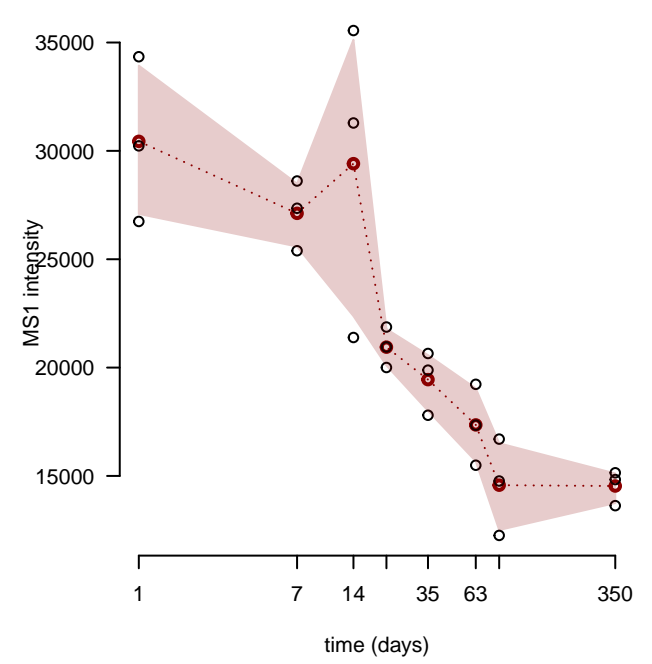

**P58544**  
**GN=Btbd1**

BTB (POZ) domain containing 1

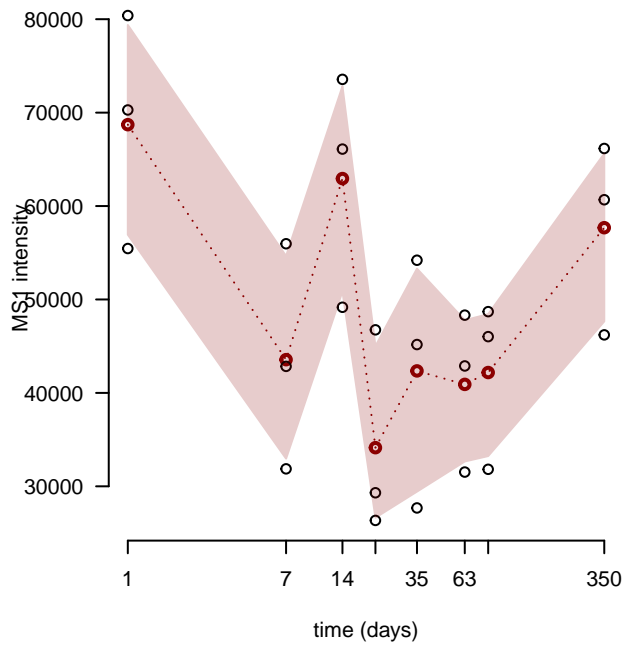

**P58710**  
**GN=Gulo**

gulonolactone (L-) oxidase

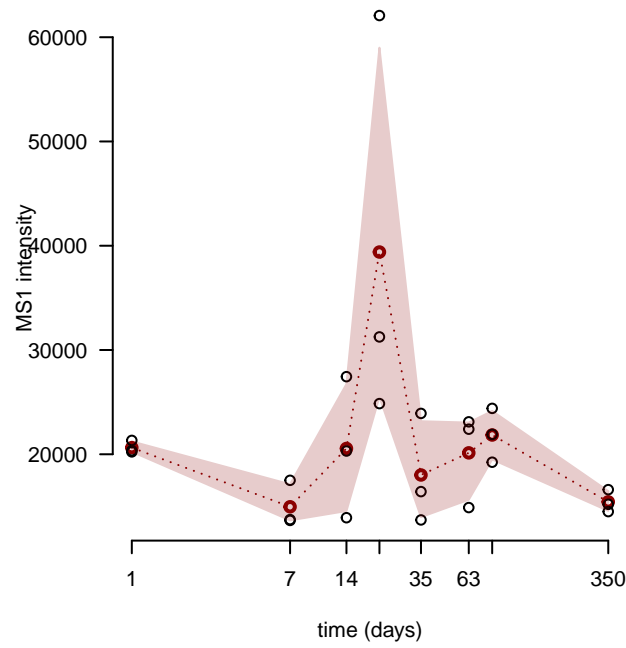

**P58742**  
**GN=Aaas**

achalasia, adrenocortical insufficiency, ...

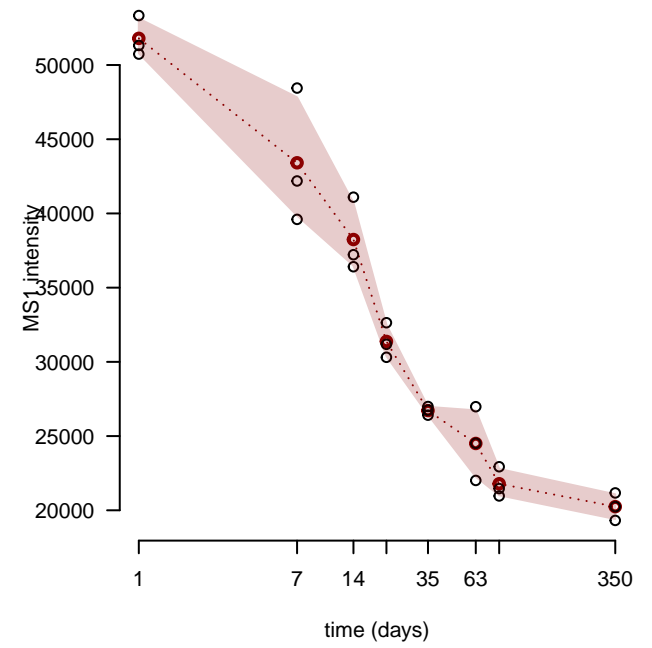

**P58771**  
**GN=Tpm1**

tropomyosin 1, alpha

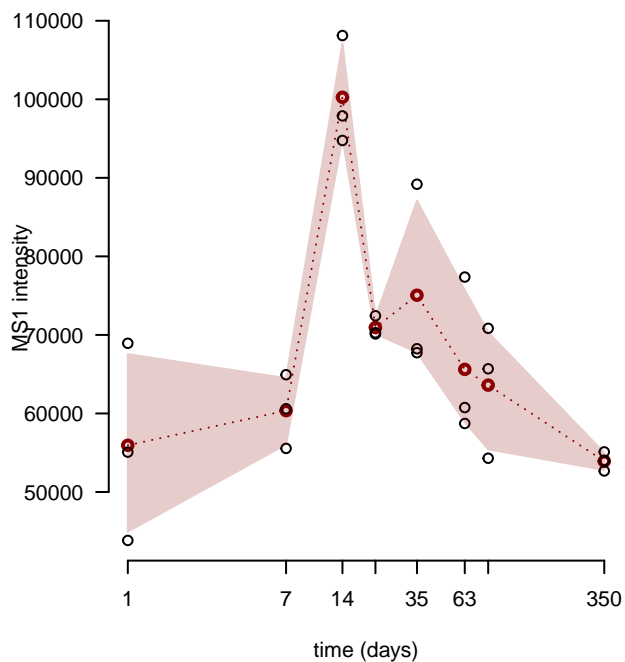

**P58771**  
**GN=Tpm1**

tropomyosin 1, alpha

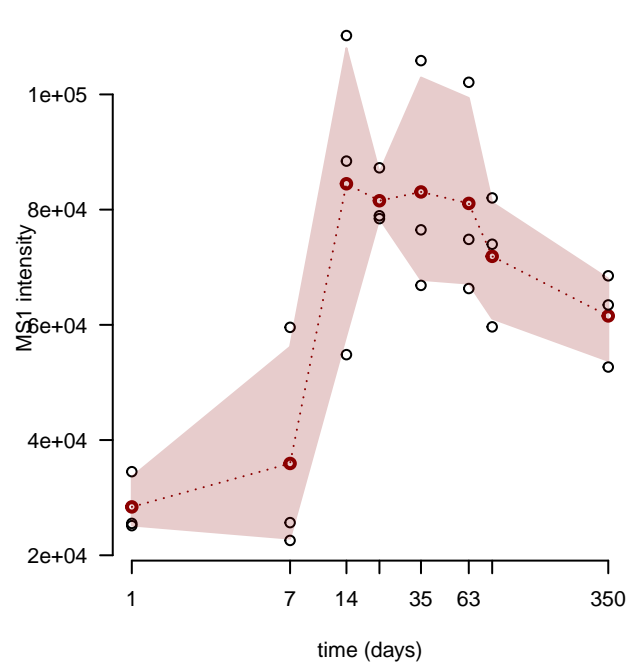

**P58774**  
**GN=Tpm2**

tropomyosin 2, beta

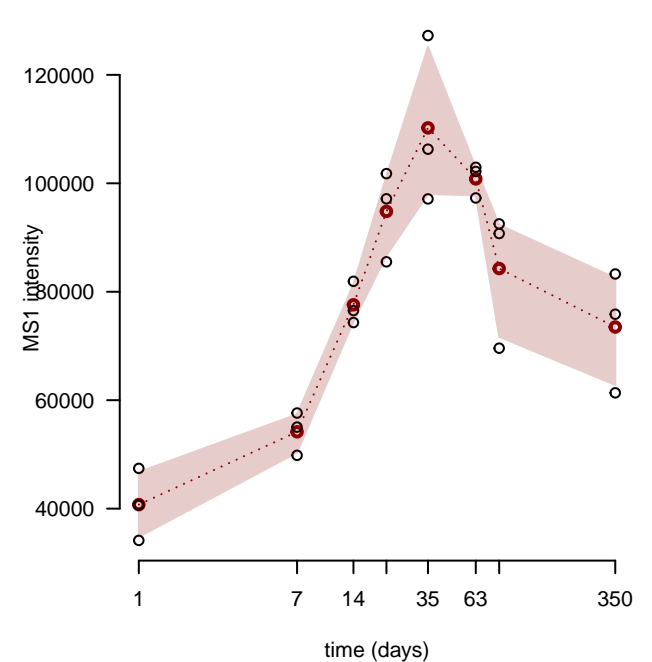



**P58774**  
GN=Tpm2  
tropomyosin 2, beta

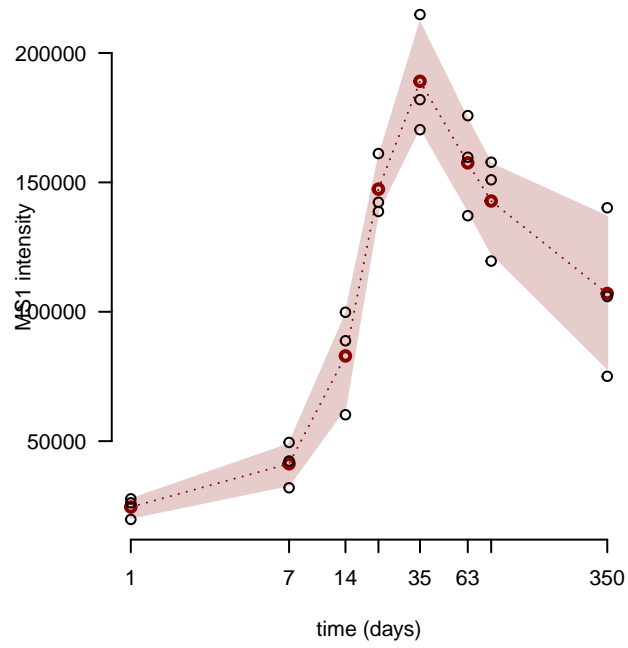

**P58801**  
GN=Ripk2  
receptor (TNFRSF)-interacting serine-thr ...

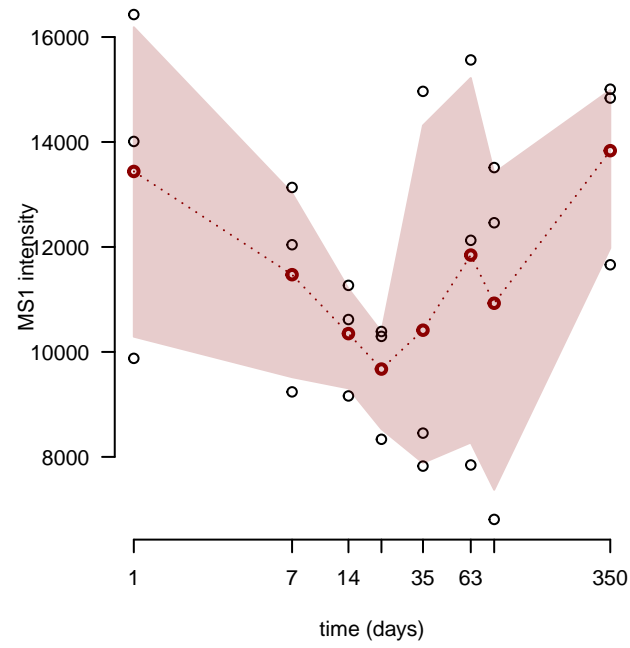

**P58802**  
GN=Tbc1d10a  
TBC1 domain family, member 10a

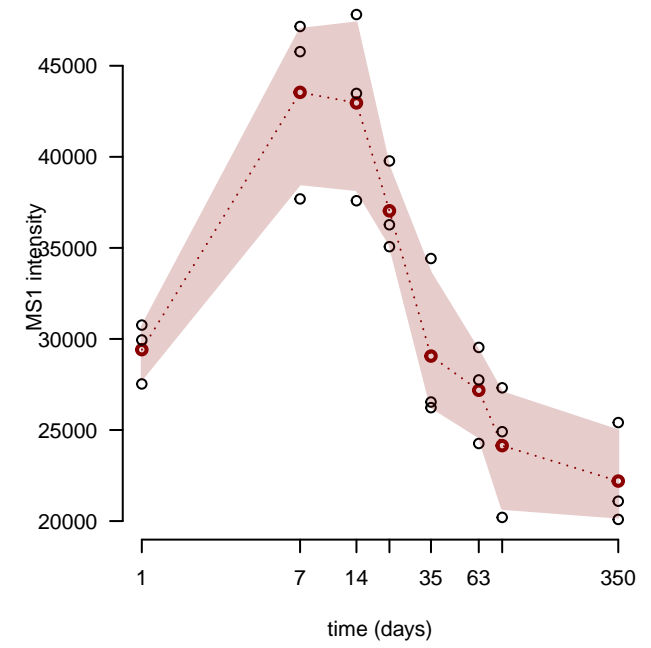

**P58854**  
GN=Tubgcp3  
tubulin, gamma complex associated protei ...

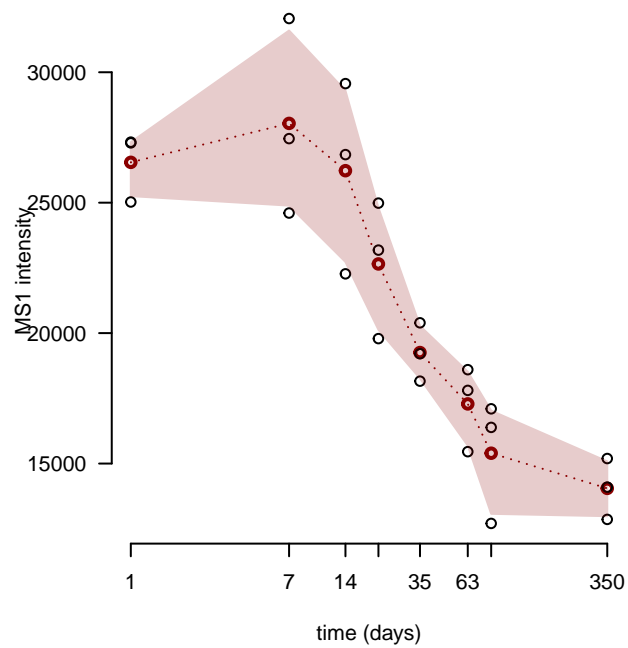

**P58871**  
GN=Tnks1bp1  
tankyrase 1 binding protein 1

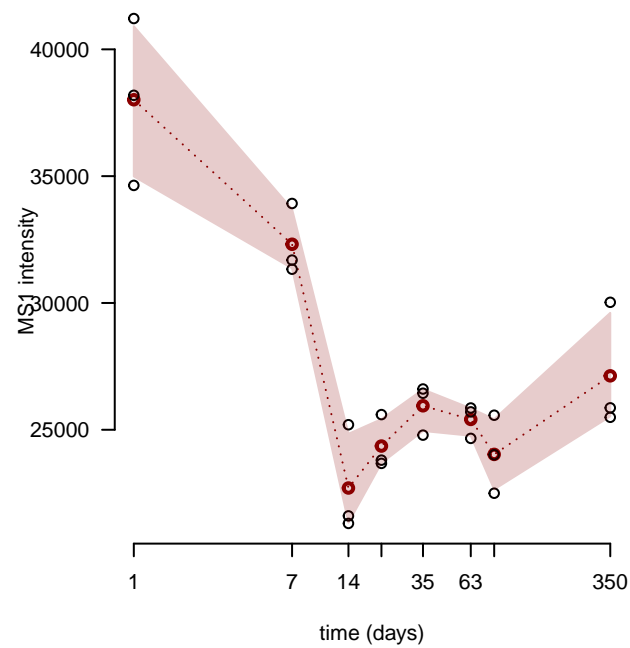

**P58929**  
GN=Gmeb2  
glucocorticoid modulatory element bindin ...

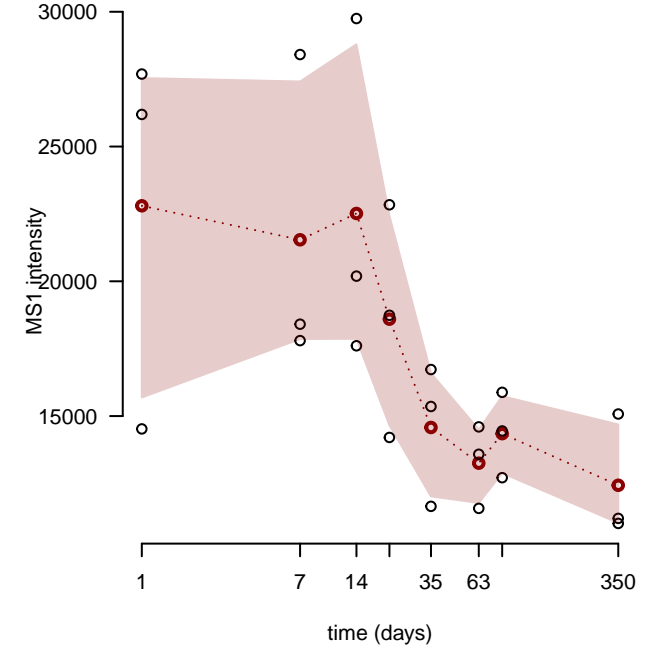

**P59016**  
GN=Vps33b  
vacuolar protein sorting 33B

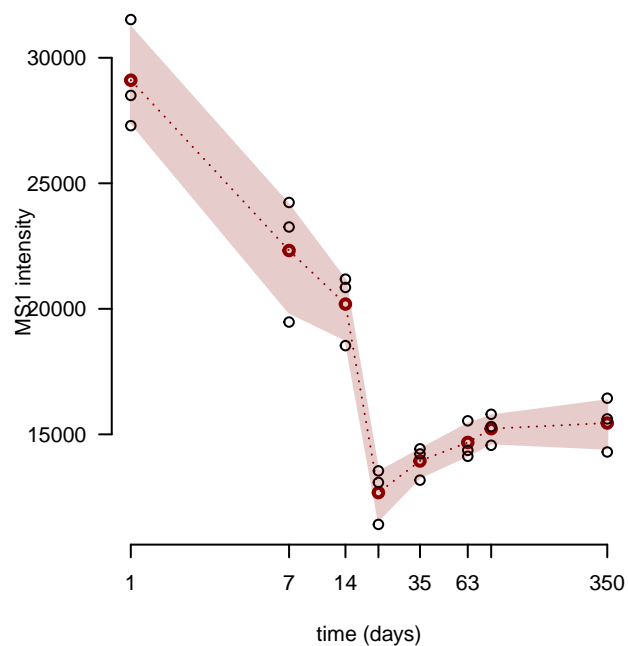

**P59017**  
GN=Bcl2l13  
BCL2-like 13 (apoptosis facilitator)

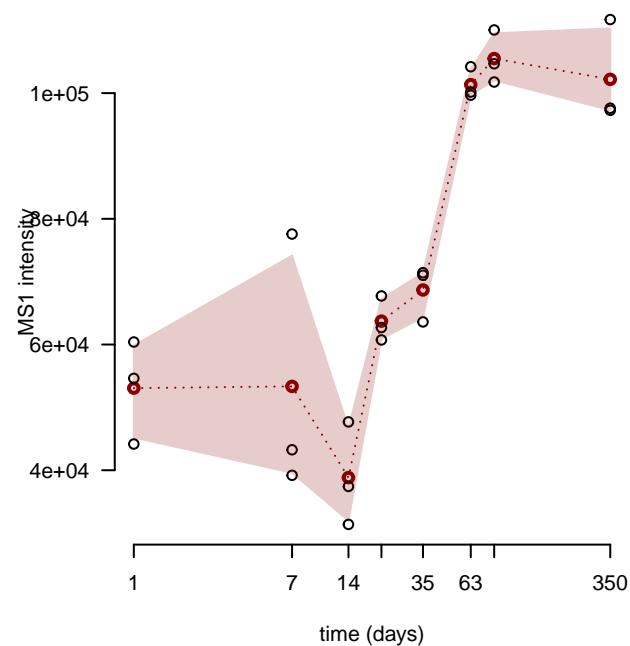

**P59024**  
GN=Fkbp14  
FK506 binding protein 14

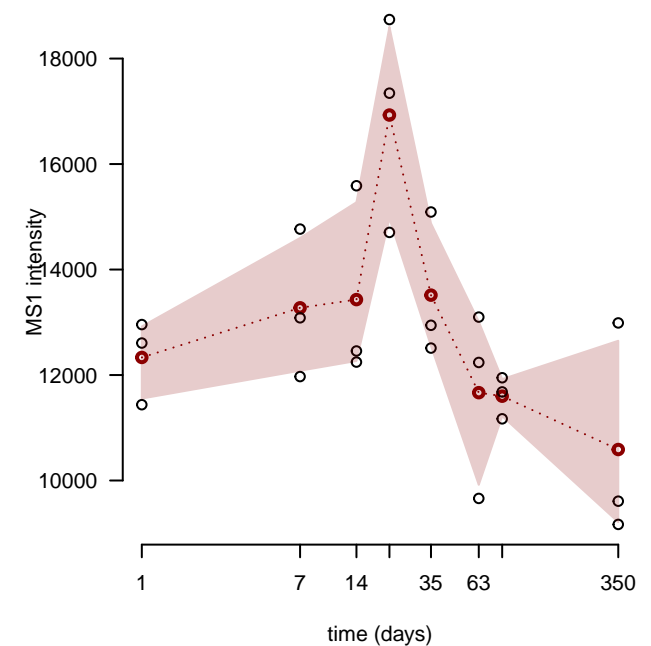

**P59108**  
GN=Cpne2  
copine II

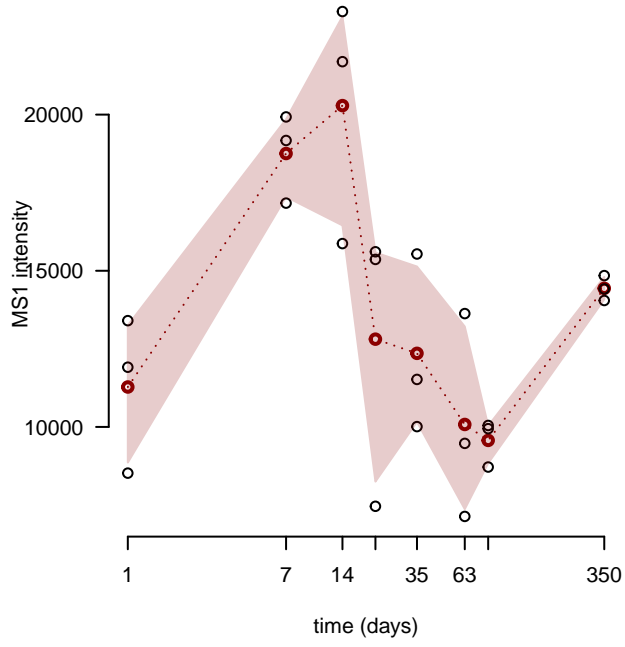

**P59110**  
GN=Senp1  
SUMO1/sentrin specific peptidase 1

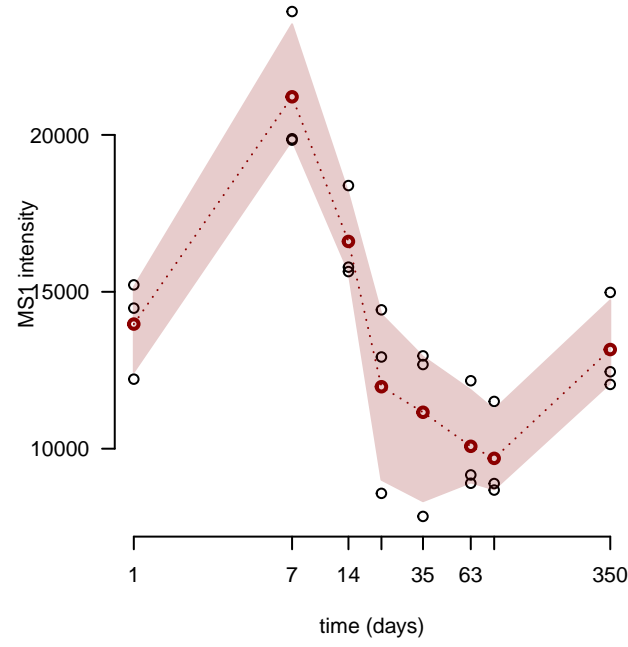

**P59114**  
GN=Pcif1  
phosphorylated CTD interacting factor 1

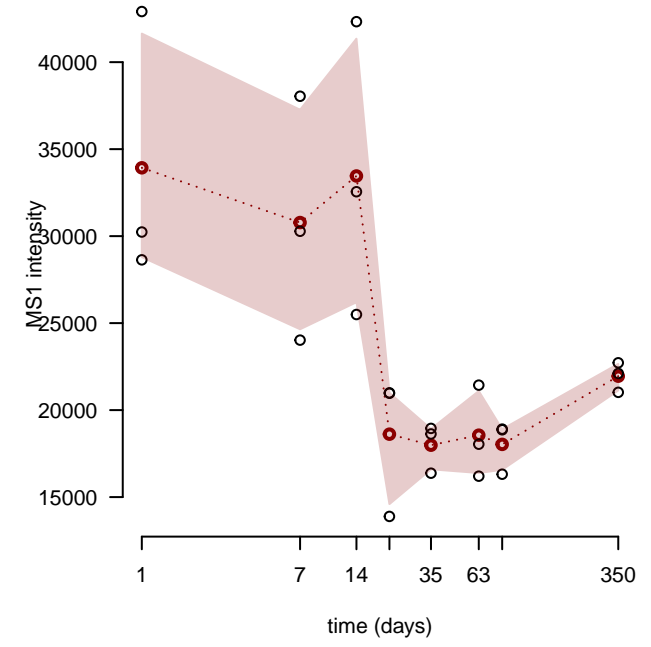

**P59222**  
GN=Scarf2  
scavenger receptor class F, member 2

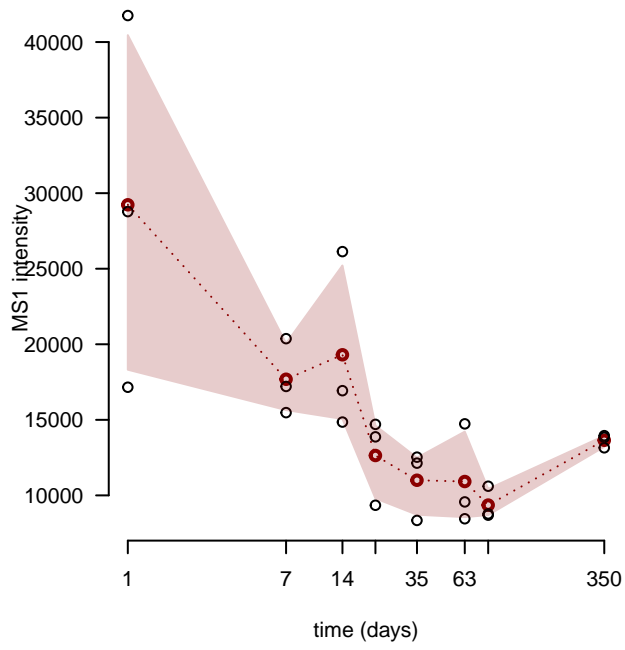

**P59235**  
GN=Nup43  
nucleoporin 43

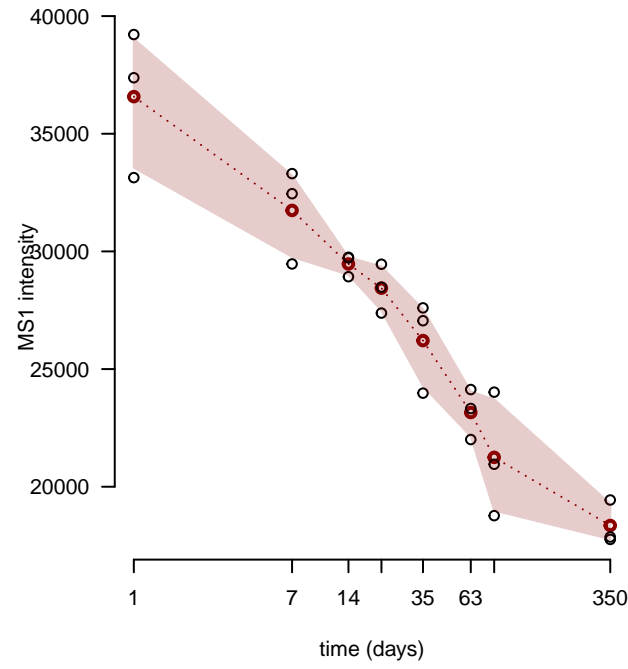

**P59242**  
GN=Cgn  
cingulin

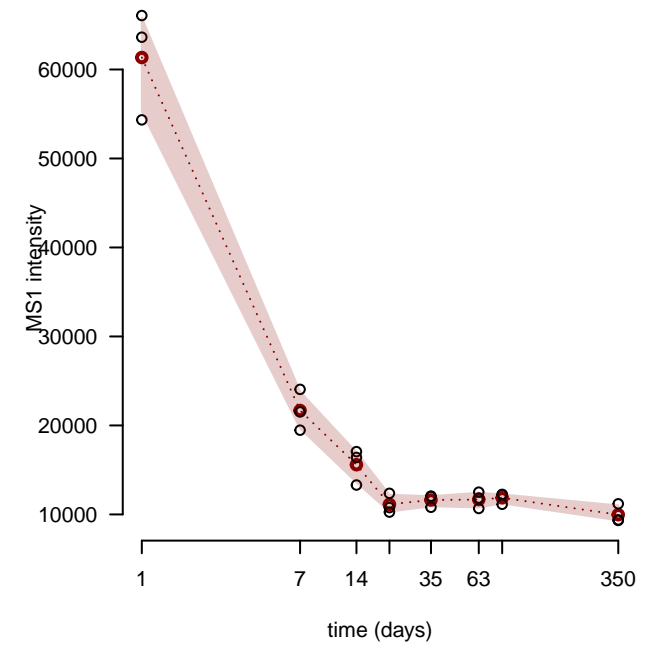

**P59266**  
GN=Fitm2  
fat storage-inducing transmembrane prote ...

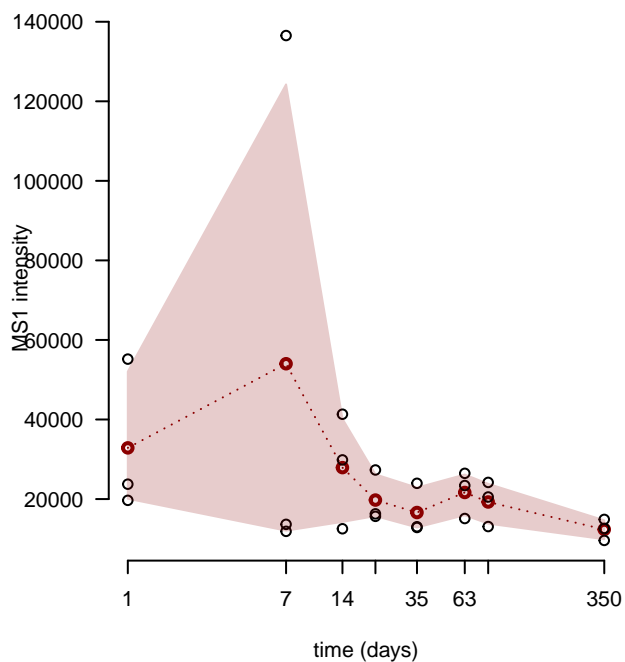

**P59279**  
GN=Rab2b  
RAB2B, member RAS oncogene family

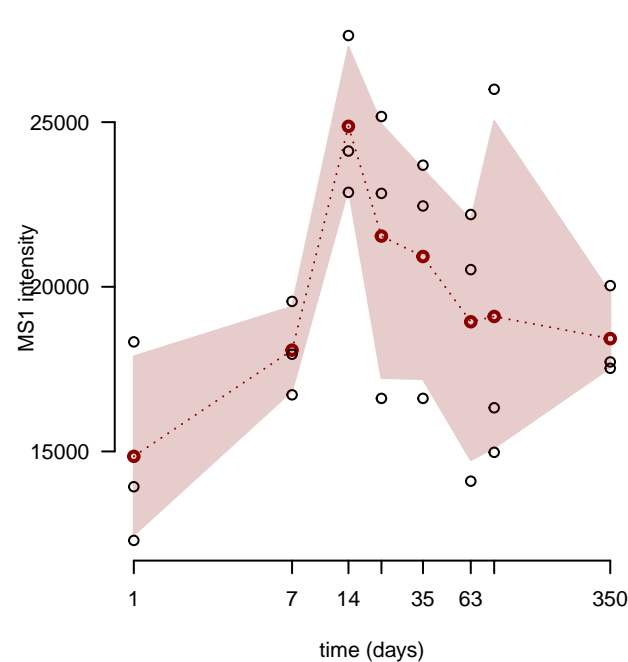

**P59281**  
GN=Arhgap39  
Rho GTPase activating protein 39

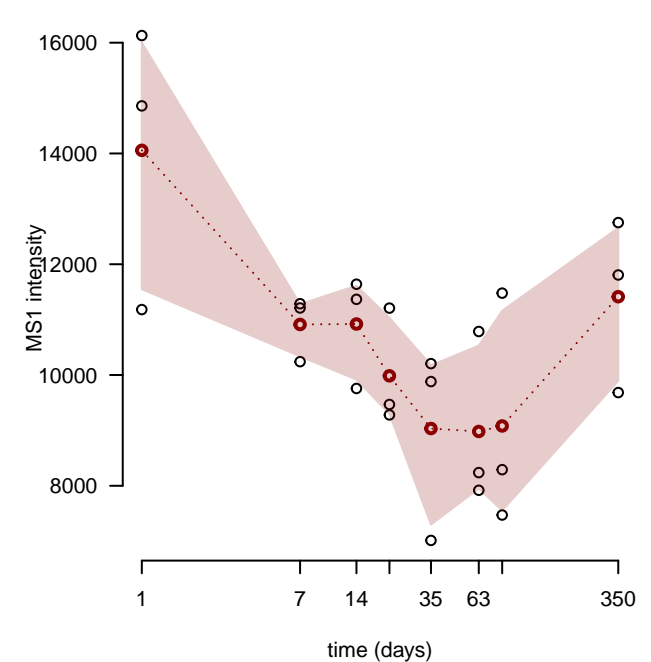

**P59325**  
**GN=Eif5**  
eukaryotic translation initiation factor ...

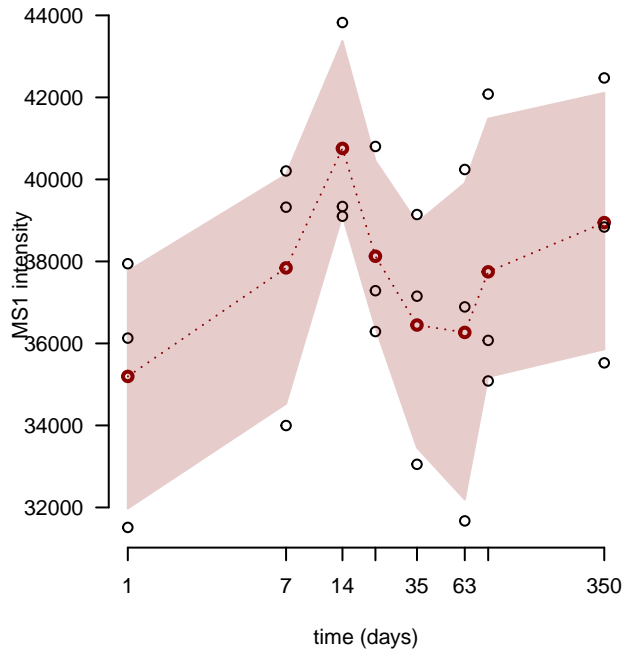

**P59326**  
**GN=Ythdf1**  
YTH N6-methyladenosine RNA binding prote ...

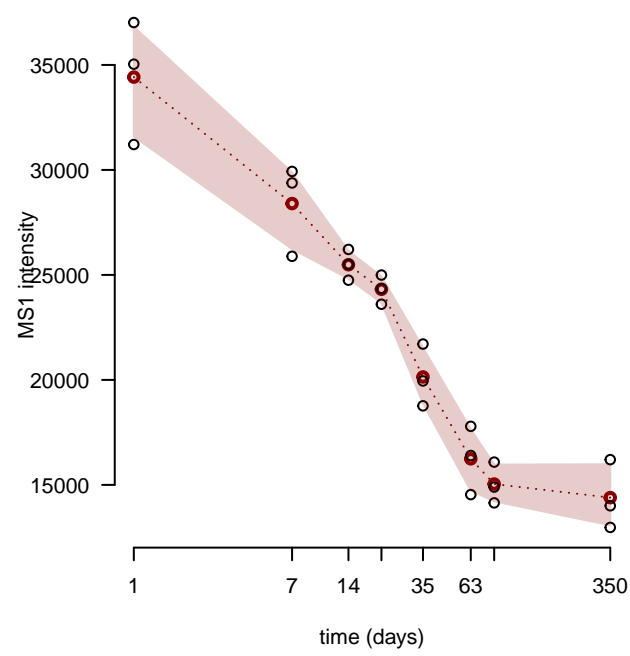

**P59328**  
**GN=Wdhd1**  
WD repeat and HMG-box DNA binding protei ...

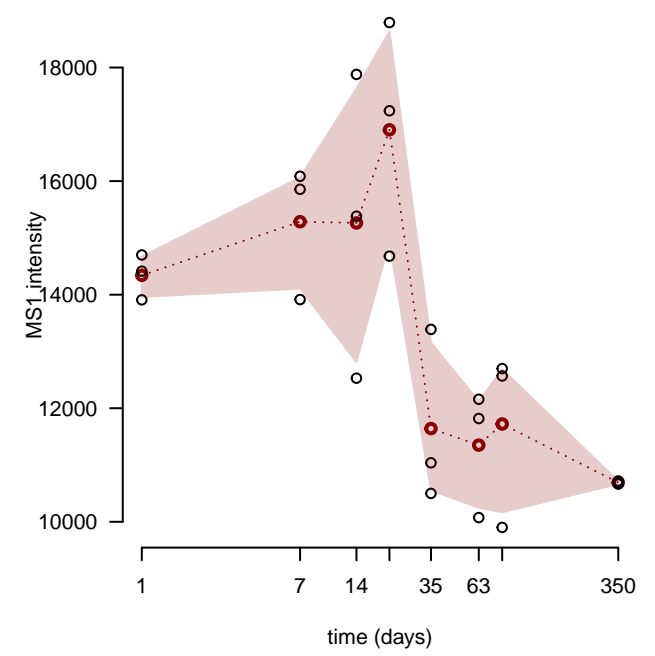

**P59383**  
**GN=Lrrn4**  
leucine rich repeat neuronal 4

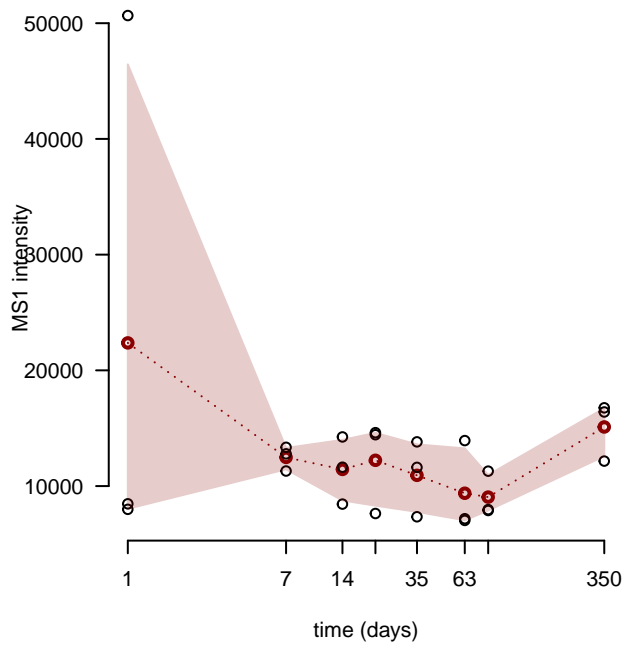

**P59438**  
**GN=Hps5**  
HPS5, biogenesis of lysosomal organelles ...

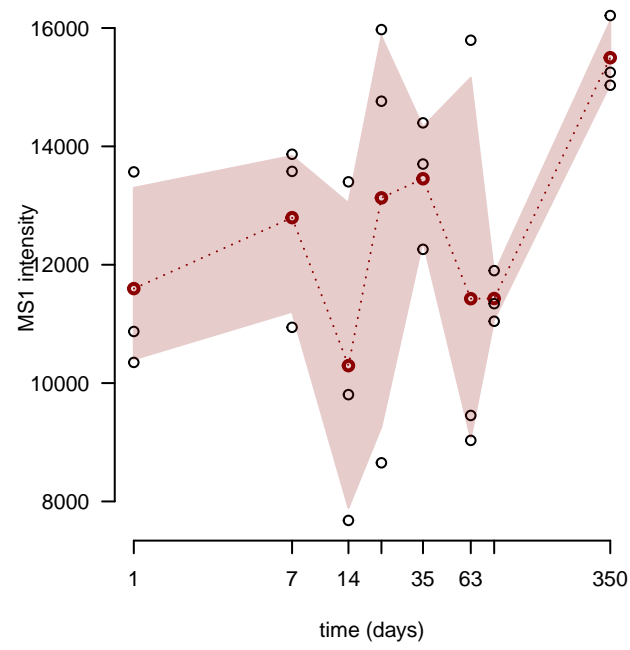

**P59470**  
**GN=Polr3b**  
polymerase (RNA) III (DNA directed) poly ...

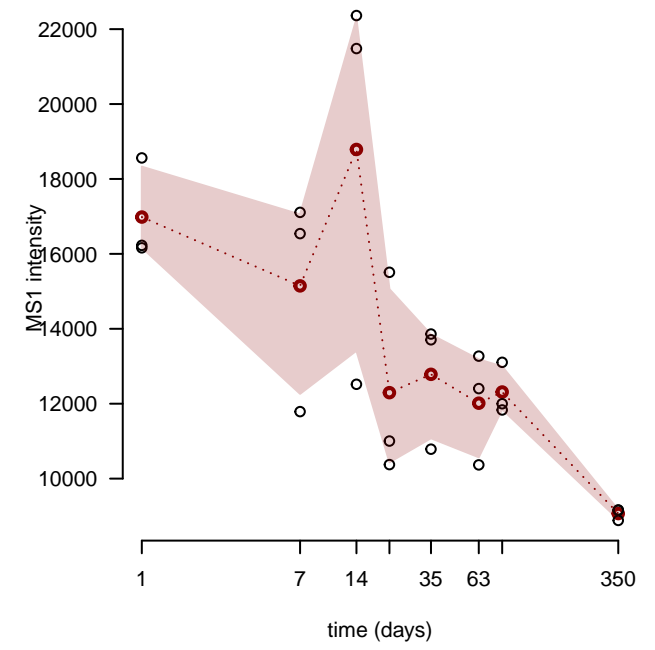

**P59481**  
**GN=Lman2l**  
lectin, mannose-binding 2-like

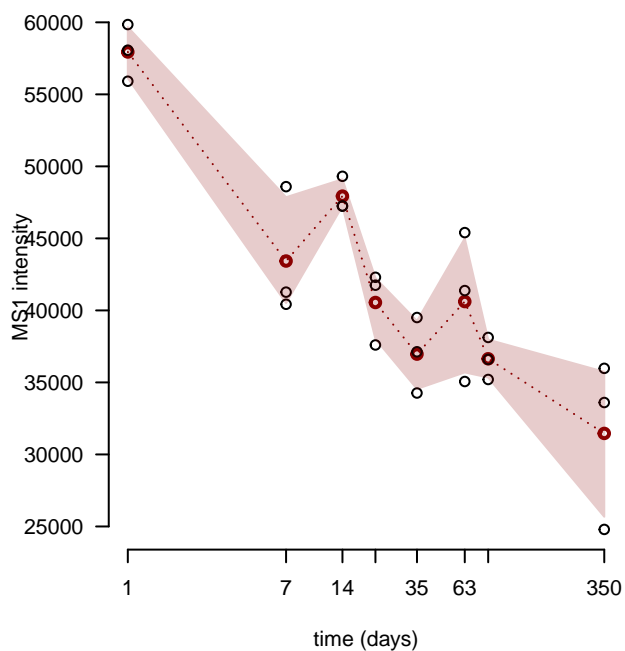

**P59644**  
**GN=Inpp5j**  
inositol polyphosphate 5-phosphatase J

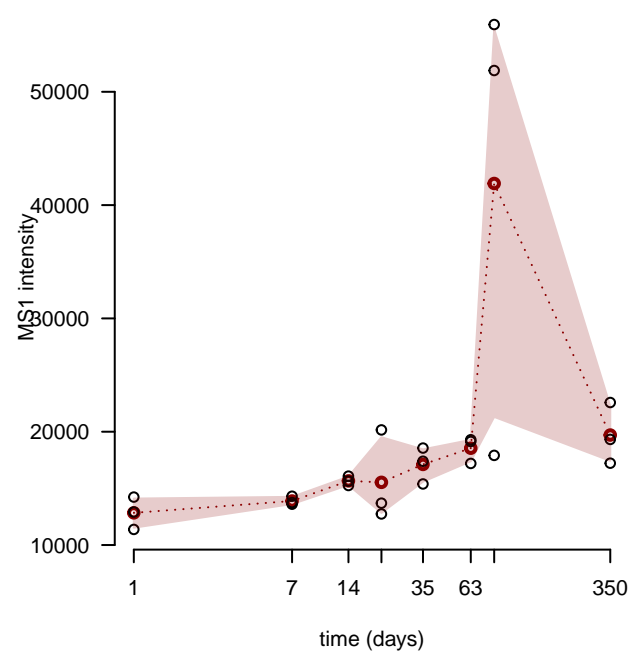

**P59672**  
**GN=Anks1a**

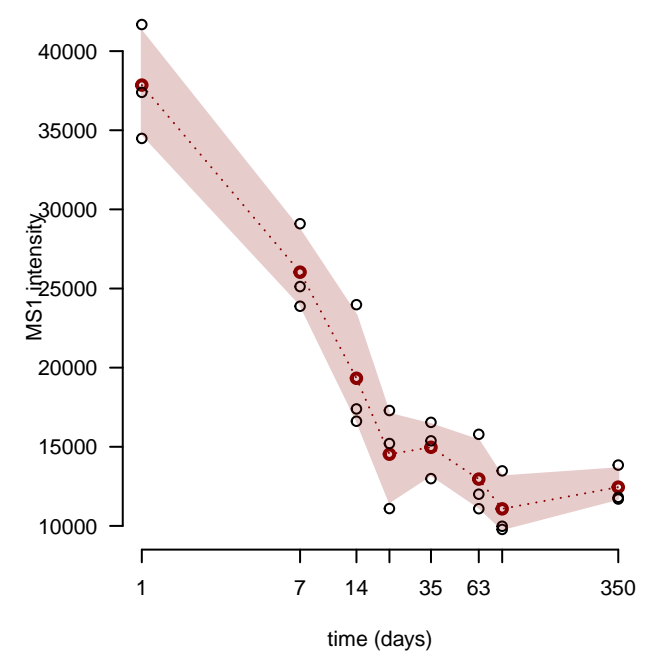

**P59708**  
**GN=Sf3b6**  
splicing factor 3B, subunit 6

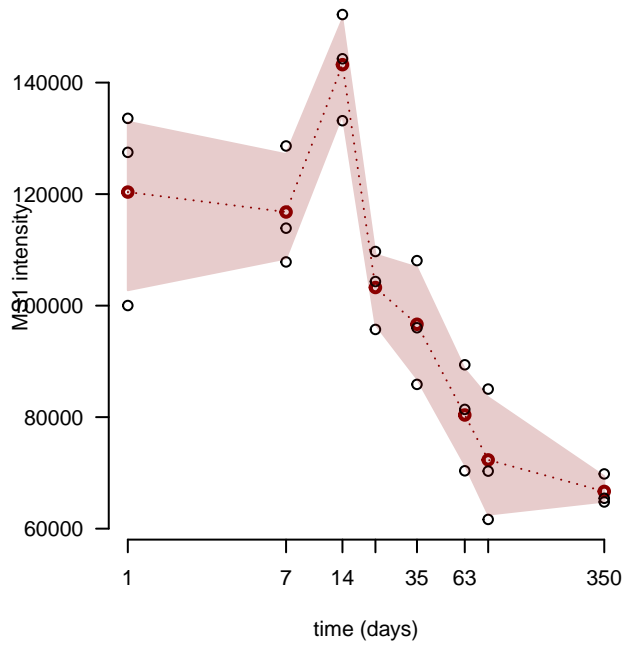

**P59729**  
**GN=Rin3**  
Ras and Rab interactor 3

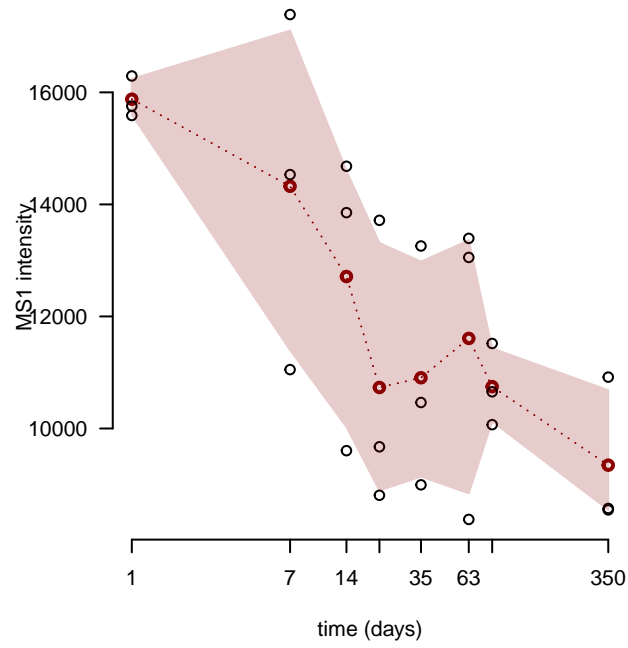

**P59759**  
**GN=Mrtfb**  
myocardin related transcription factor B

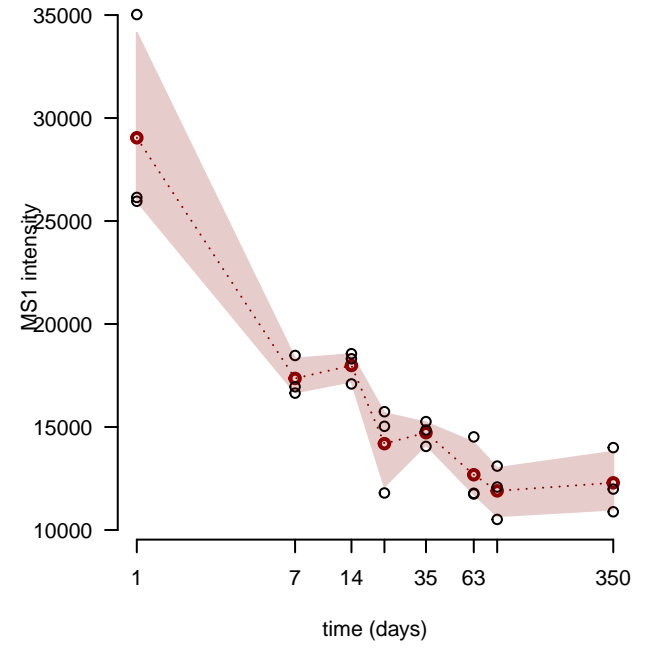

**P59764**  
**GN=Dock4**  
dedicator of cytokinesis 4

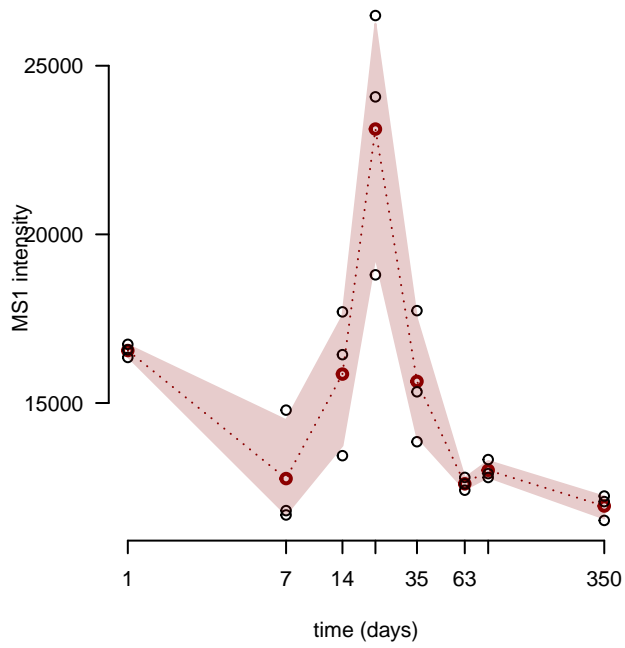

**P59808**  
**GN=Sash1**  
SAM and SH3 domain containing 1

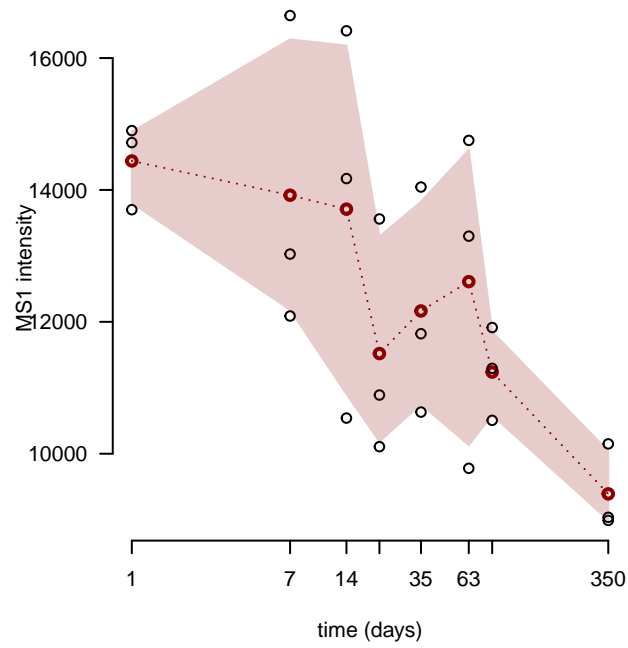

**P59900**  
**GN=Emilin3**  
elastin microfibril interfacier 3

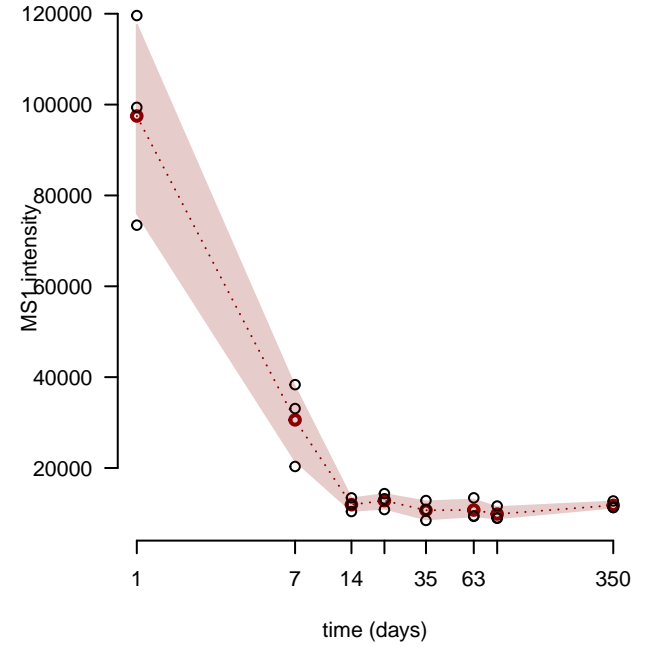

**P59913**  
**GN=Pcmt1**  
protein-L-isoaspartate (D-aspartate) O-m ...

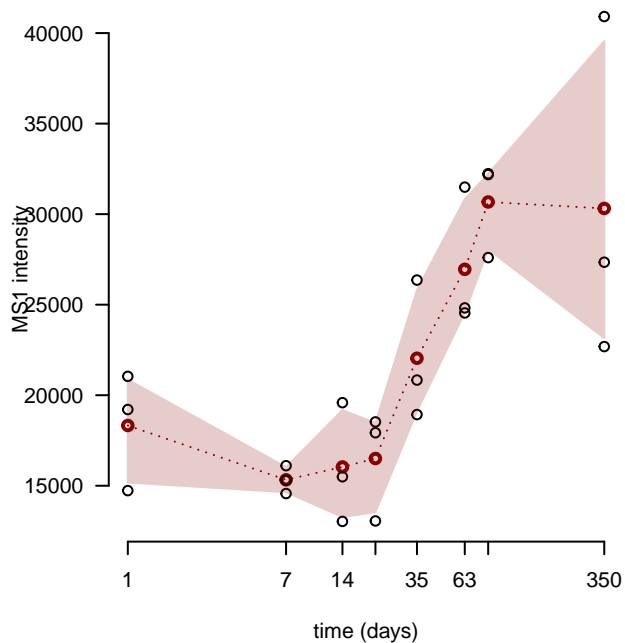

**P59941**  
**GN=Sirt6**  
sirtuin 6

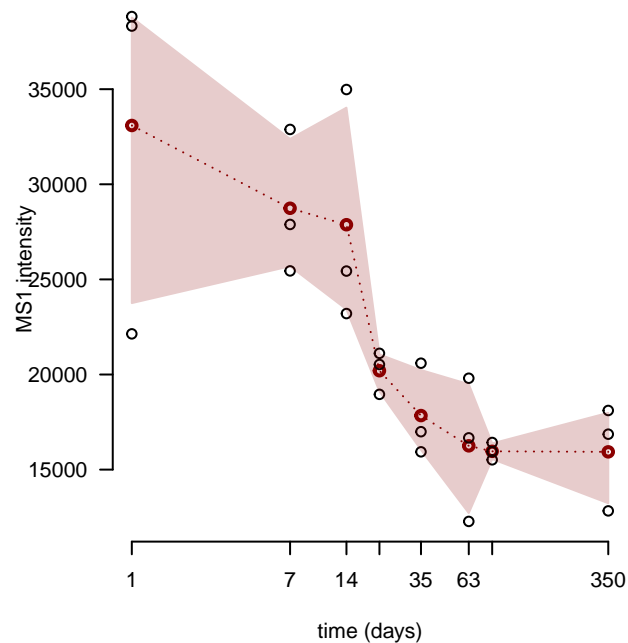

**P59997**  
**GN=Kdm2a**  
lysine (K)-specific demethylase 2A

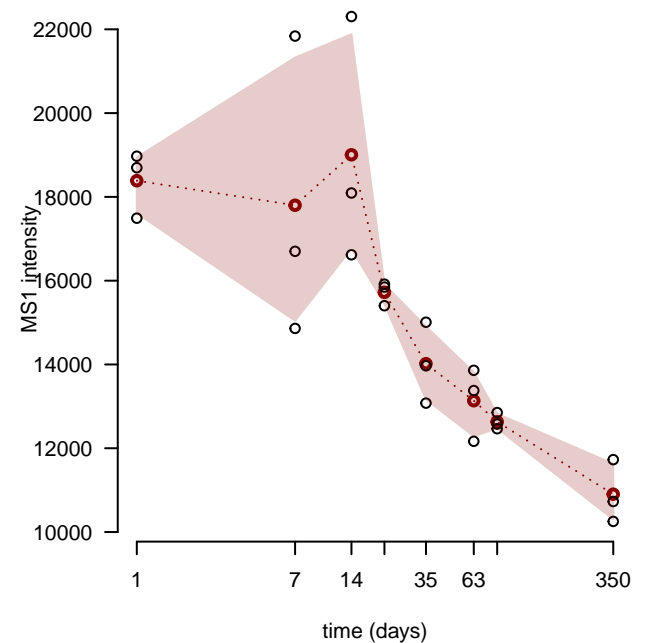

**P59999**  
**GN=Arpc4**  
actin related protein 2/3 complex, subun ...

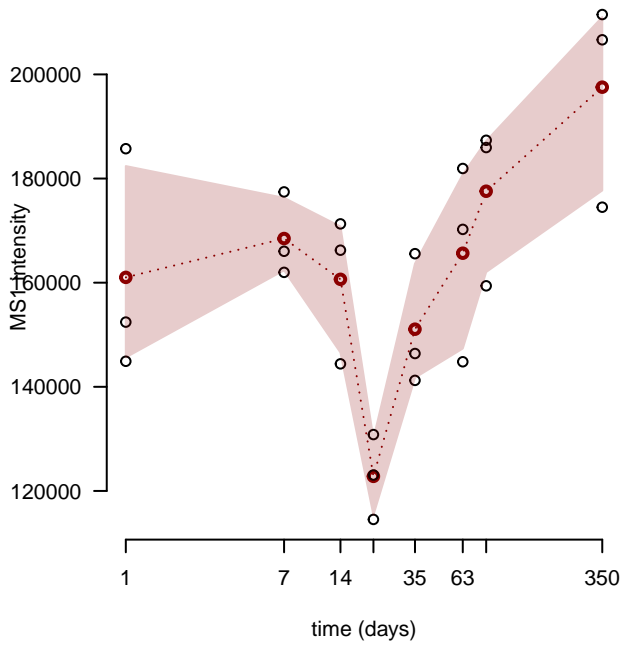

**P60060**  
**GN=Sec61g**  
SEC61, gamma subunit

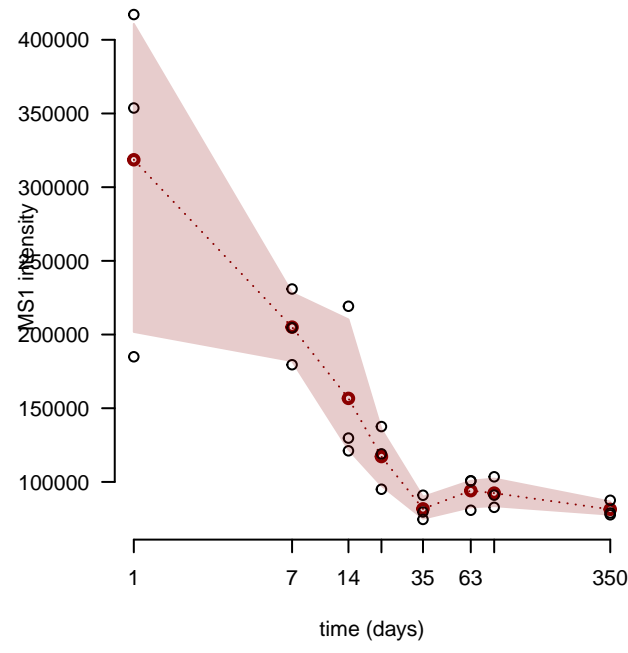

**P60122**  
**GN=Ruvb1l**  
RuvB-like protein 1

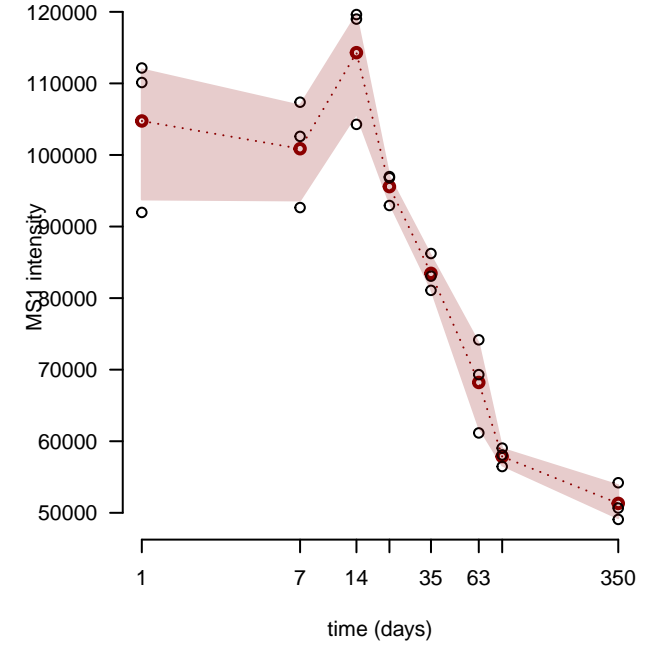

**P60202**  
**GN=Plp1**  
proteolipid protein (myelin) 1

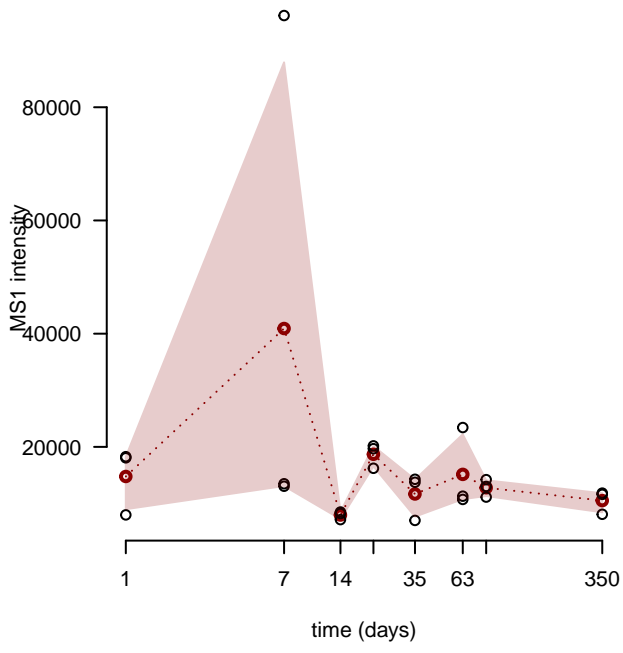

**P60229**  
**GN=Eif3e**  
eukaryotic translation initiation factor ...

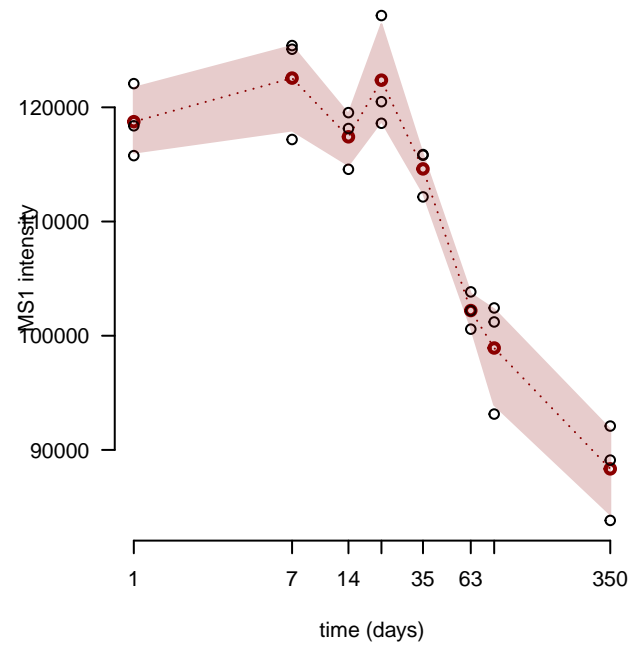

**P60330**  
**GN=Esp1l**  
extra spindle pole bodies 1, separate

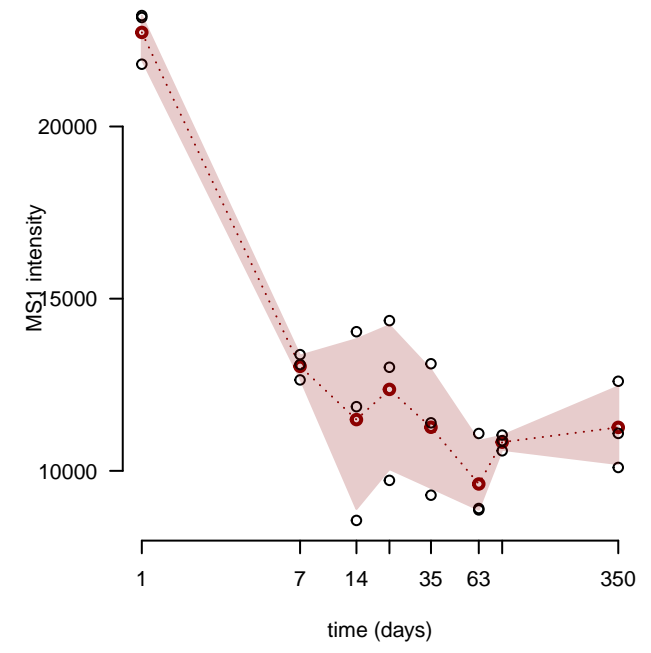

**P60335**  
**GN=Pcbp1**  
poly(rC) binding protein 1

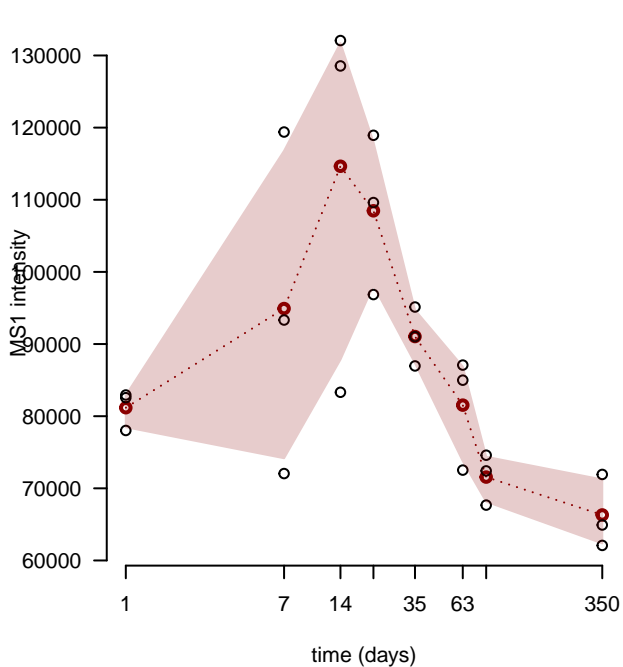

**P60469**  
**GN=Ppfia3**  
protein tyrosine phosphatase, receptor t ...

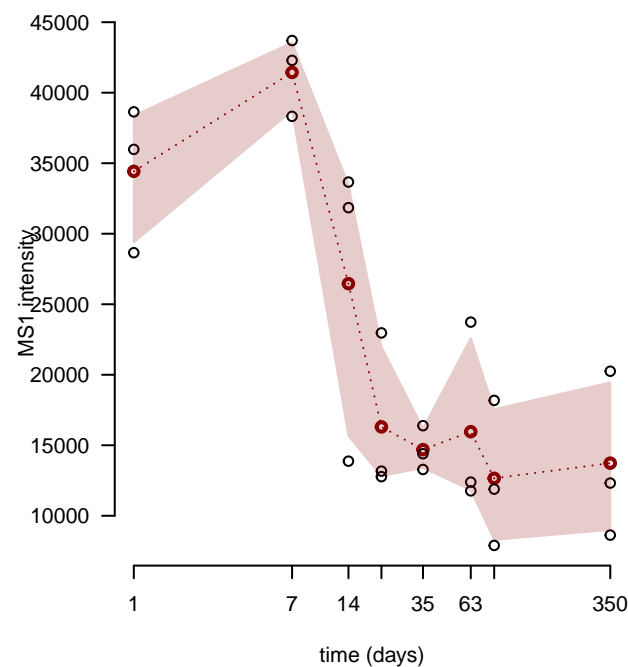

**P60487**  
**GN=Pdxp**  
pyridoxal (pyridoxine, vitamin B6) phosph ...

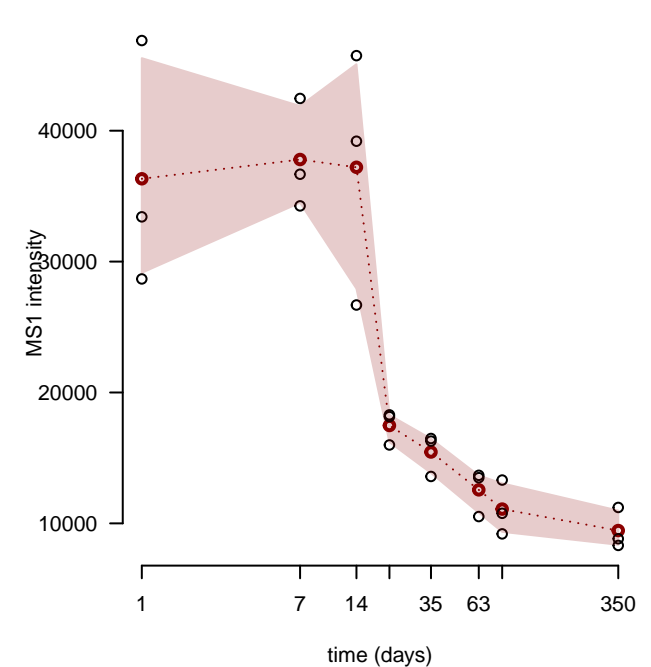

**P60521**  
**GN=Gabarapl2**

gamma-aminobutyric acid (GABA) A recepto ...

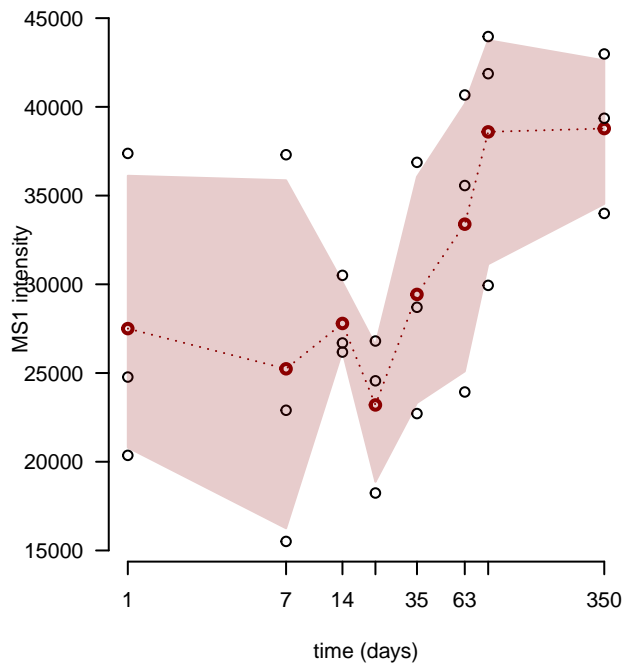

**P60603**  
**GN=Romo1**

reactive oxygen species modulator 1

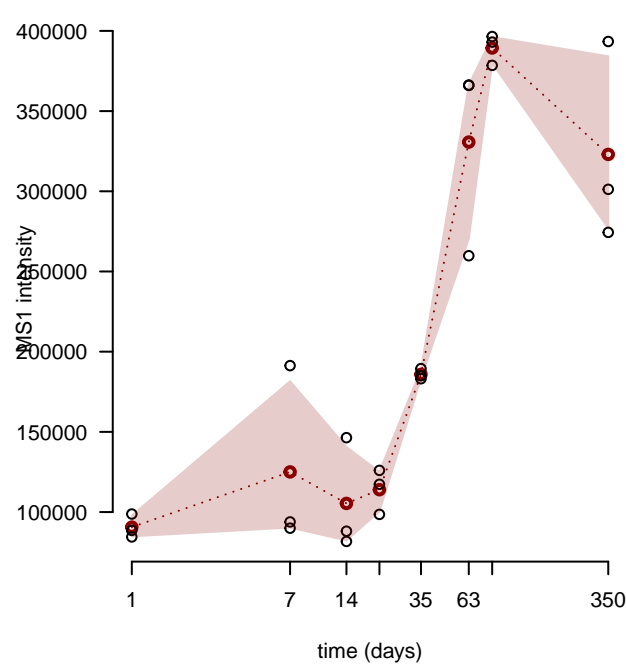

**P60670**  
**GN=Nploc4**

NPL4 homolog, ubiquitin recognition fact ...

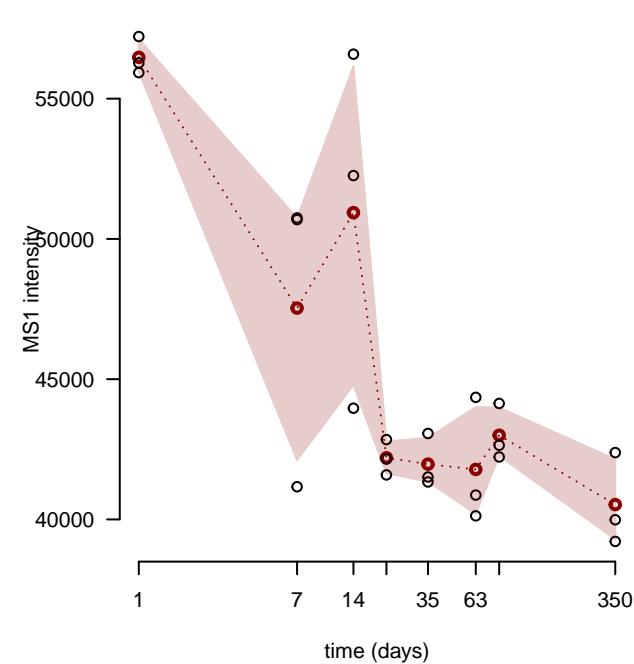

**P60710**  
**GN=Actb**

actin, beta

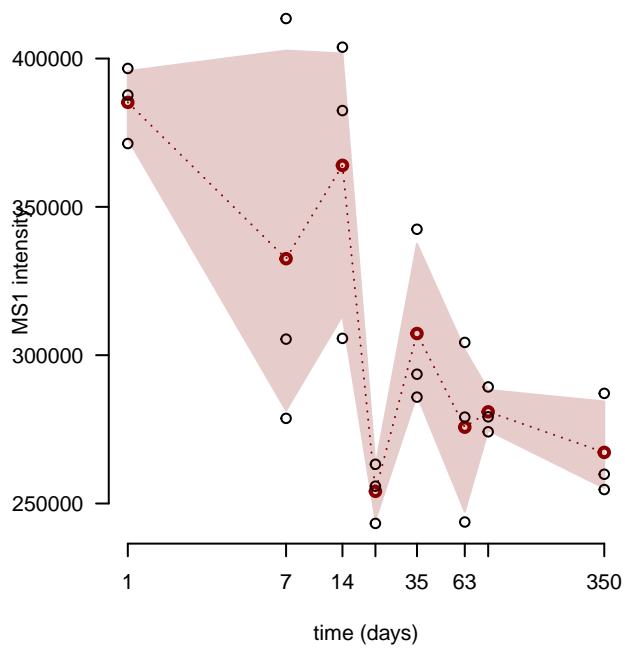

**P60762**  
**GN=Morf411**

mortality factor 4 like 1

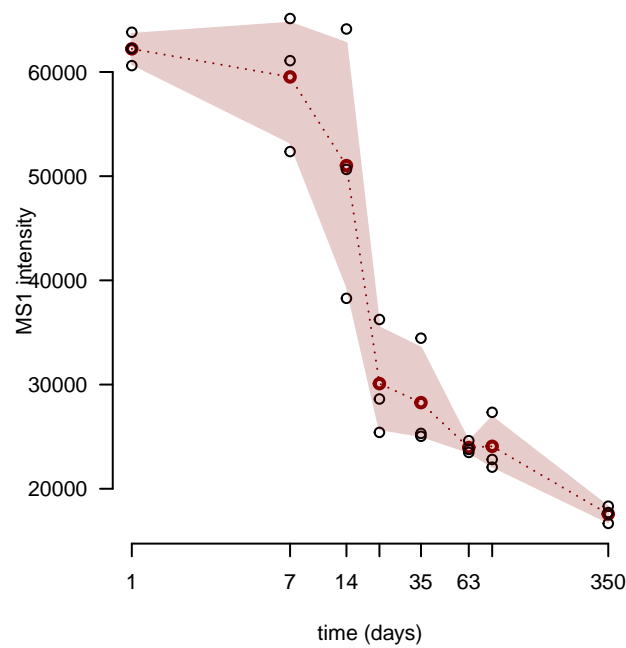

**P60764**  
**GN=Rac3**

Rac family small GTPase 3

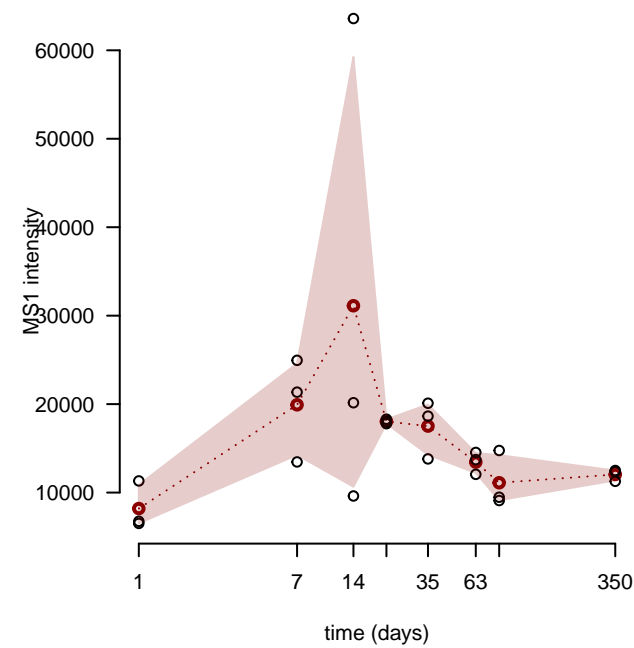

**P60766**  
**GN=Cdc42**

cell division cycle 42

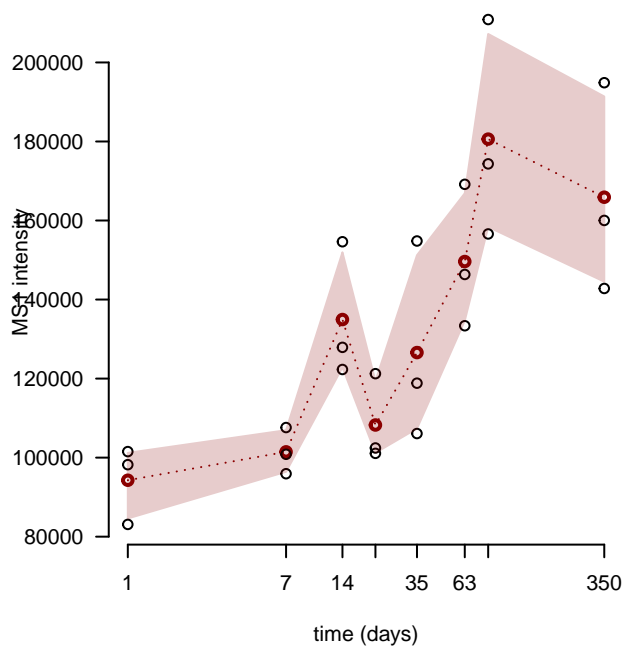

**P60766**  
**GN=Cdc42**

cell division cycle 42

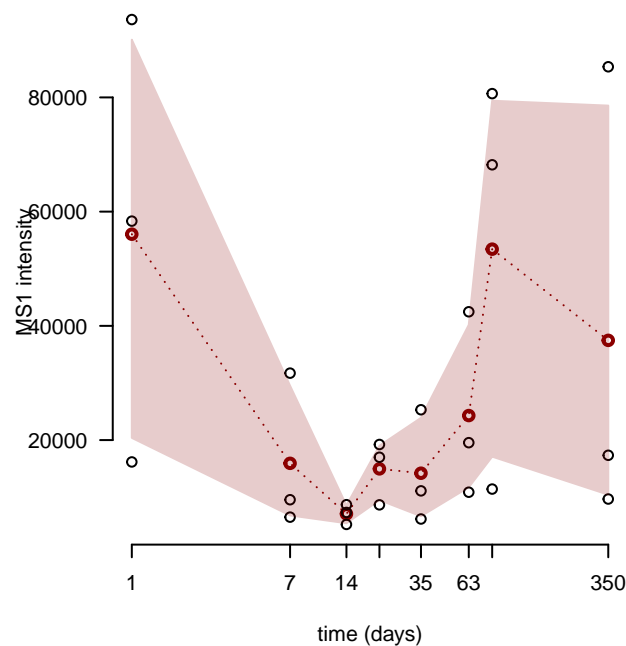

**P60824**  
**GN=Cirbp**

cold inducible RNA binding protein

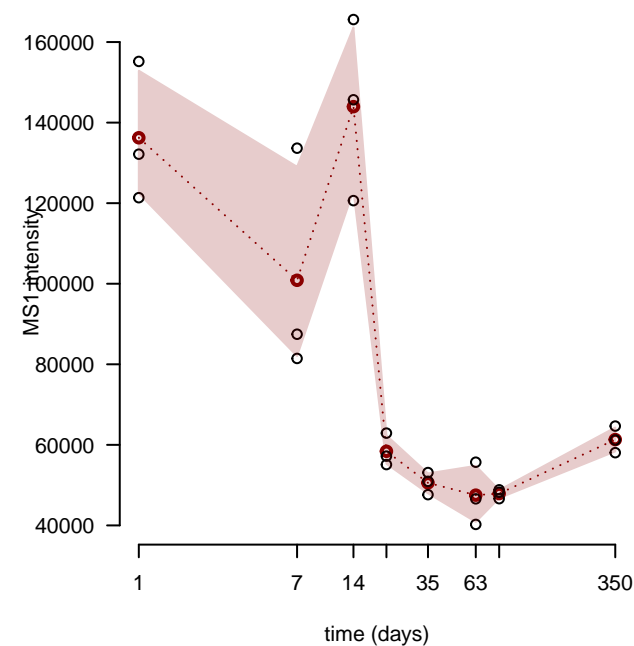

**P60840**  
GN=Ensa  
endosulfine alpha

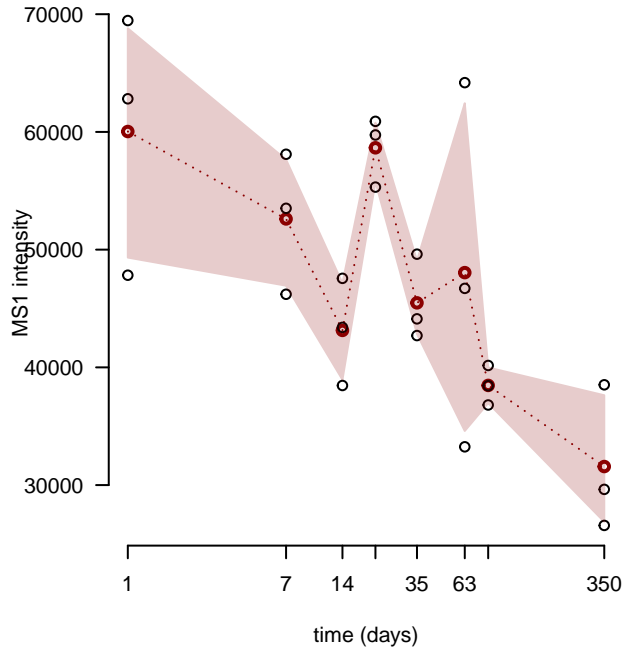

**P60843**  
GN=Eif4a1  
eukaryotic translation initiation factor ...

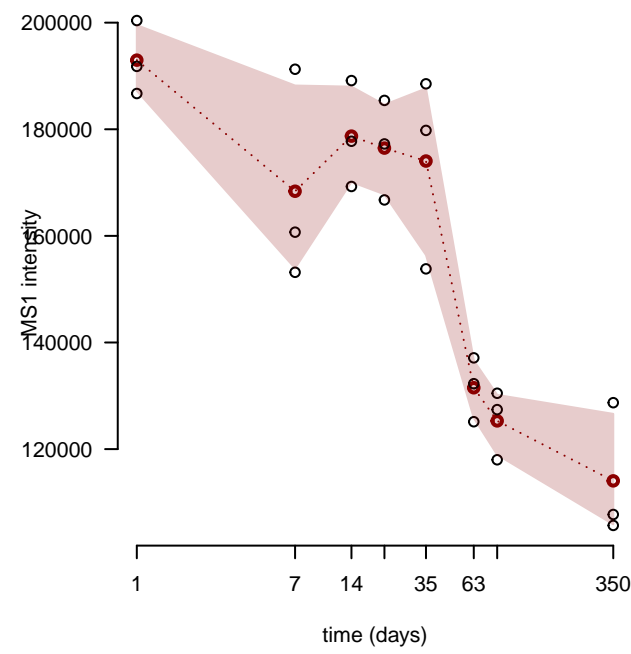

**P60853**  
GN=Lzts1  
leucine zipper, putative tumor suppresso ...

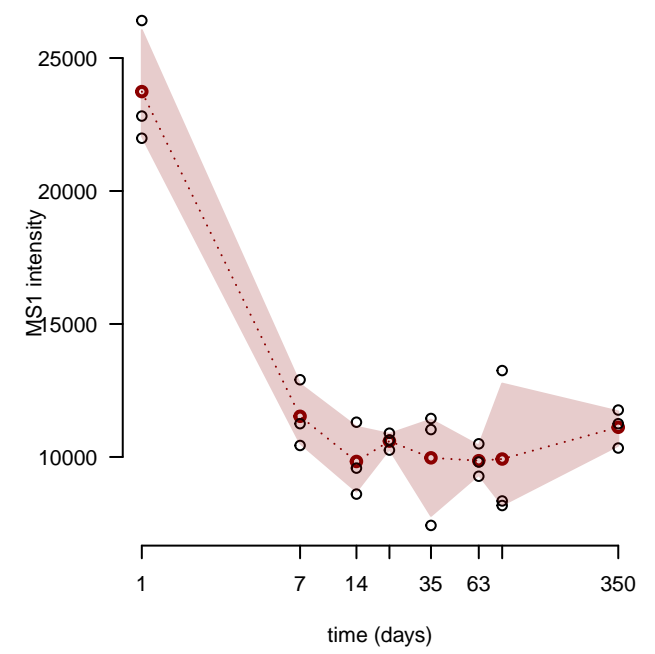

**P60867**  
GN=Rps20  
ribosomal protein S20

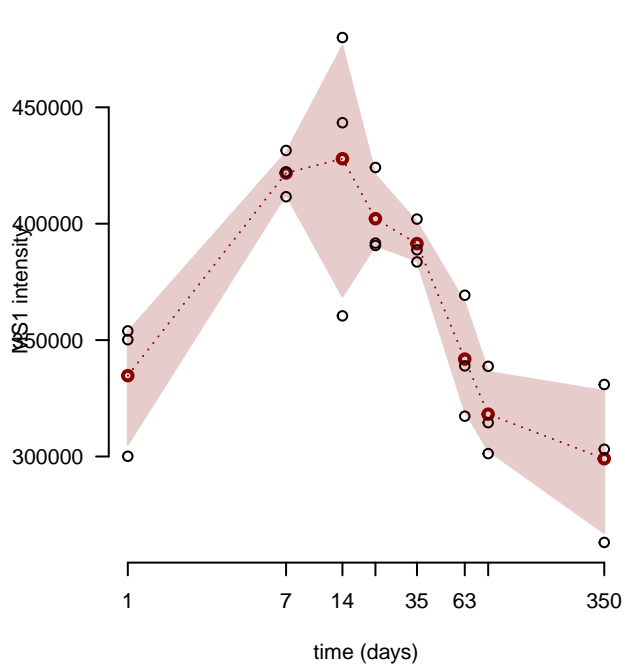

**P60898**  
GN=Polr2i  
polymerase (RNA) II (DNA directed) polyp ...

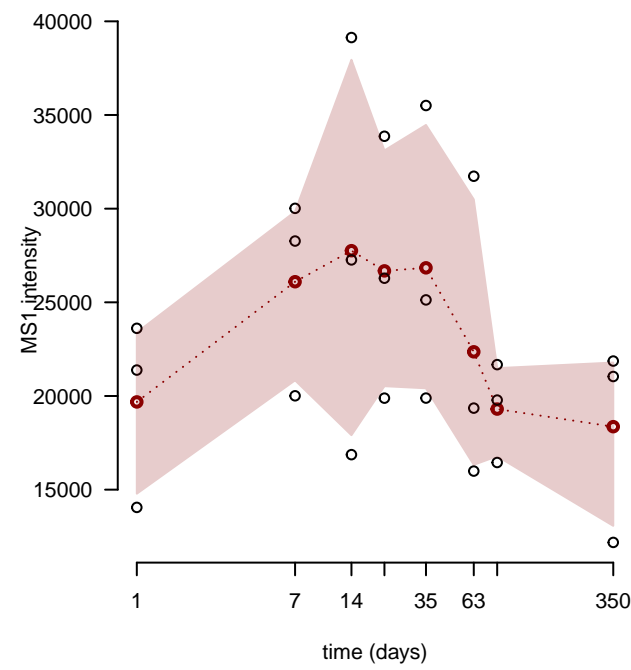

**P60904**  
GN=Dnajc5  
DnaJ heat shock protein family (Hsp40) m ...

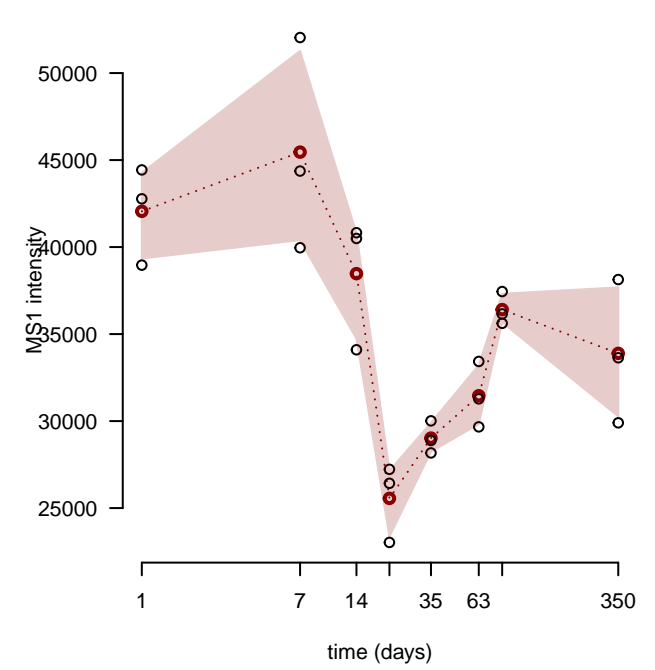

**P61014**  
GN=Pln  
phospholamban

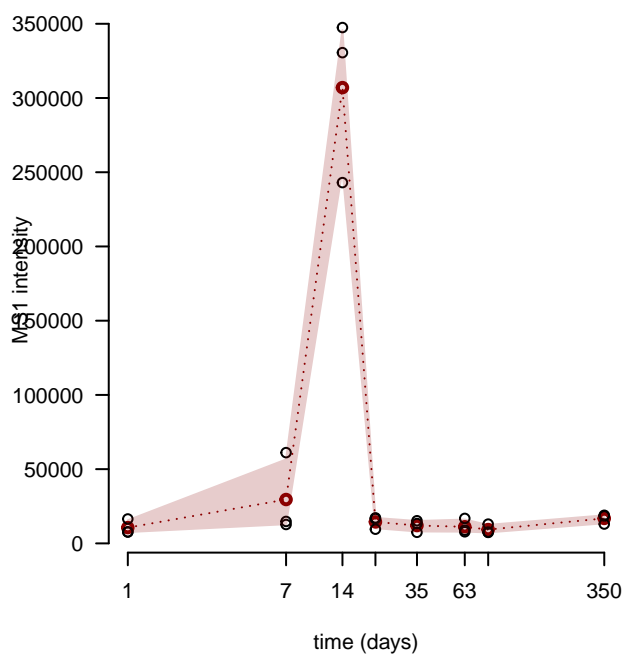

**P61021**  
GN=Rab5b  
RAB5B, member RAS oncogene family

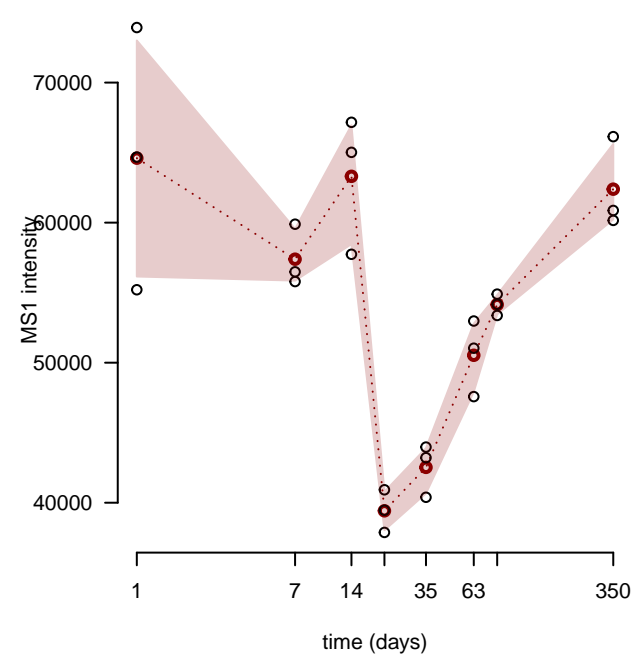

**P61022**  
GN=Chp1  
calcineurin-like EF hand protein 1

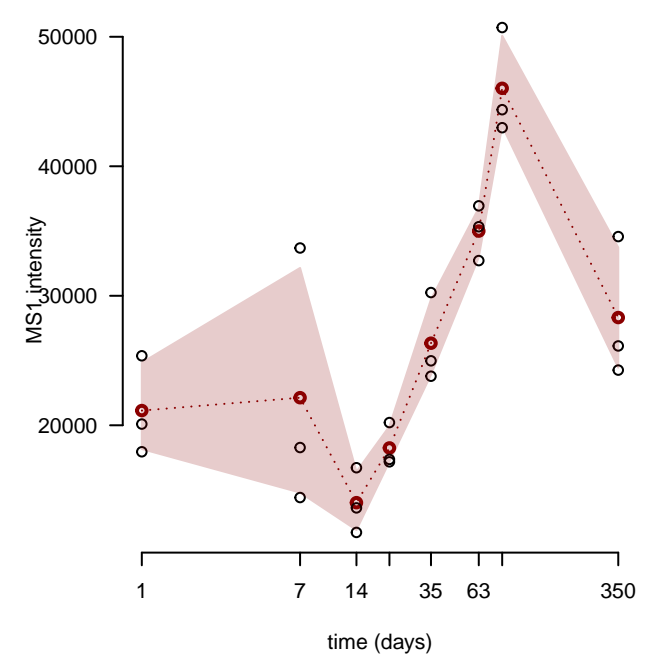

**P61025**  
**GN=Cks1b**  
CDC28 protein kinase 1b

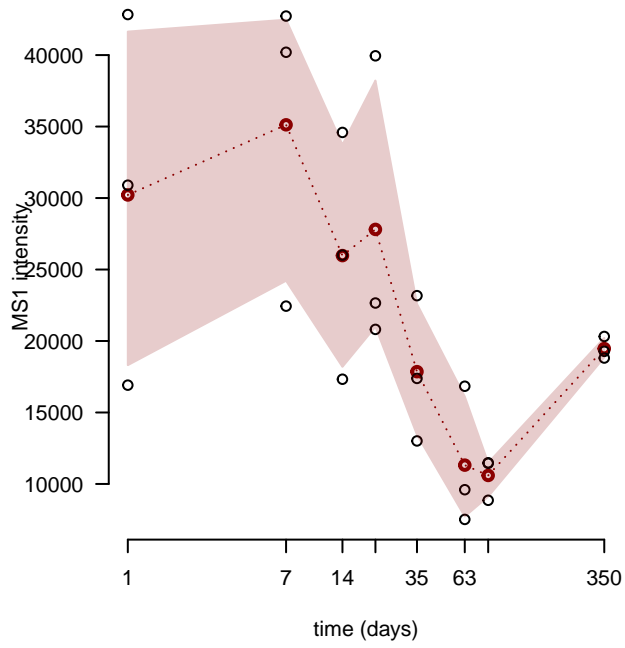

**P61027**  
**GN=Rab10**  
RAB10, member RAS oncogene family

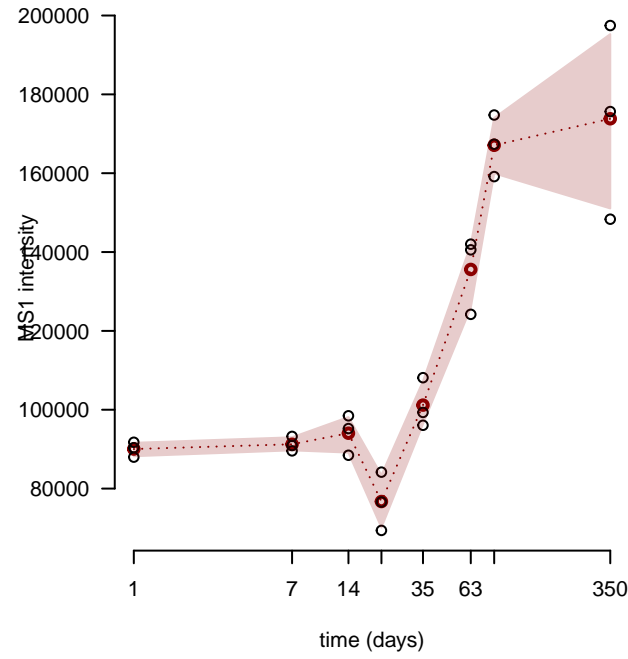

**P61028**  
**GN=Rab8b**  
RAB8B, member RAS oncogene family

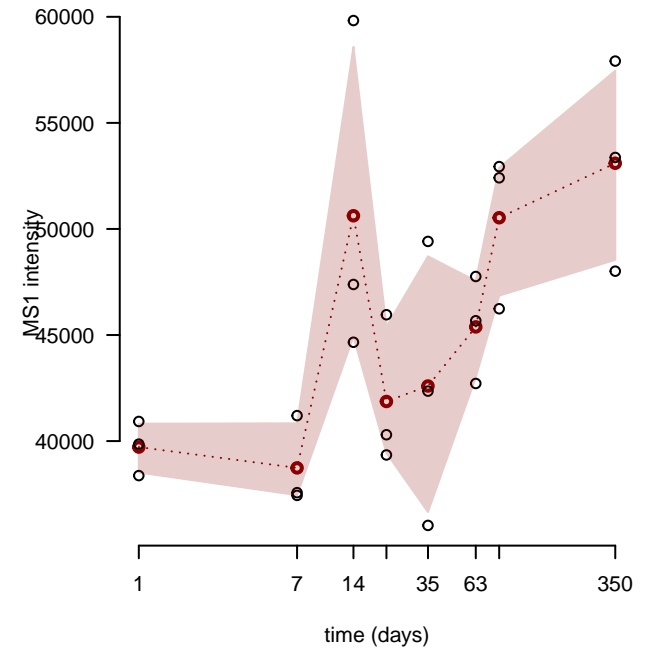

**P61079**  
**GN=Ube2d3**  
ubiquitin-conjugating enzyme E2D 3

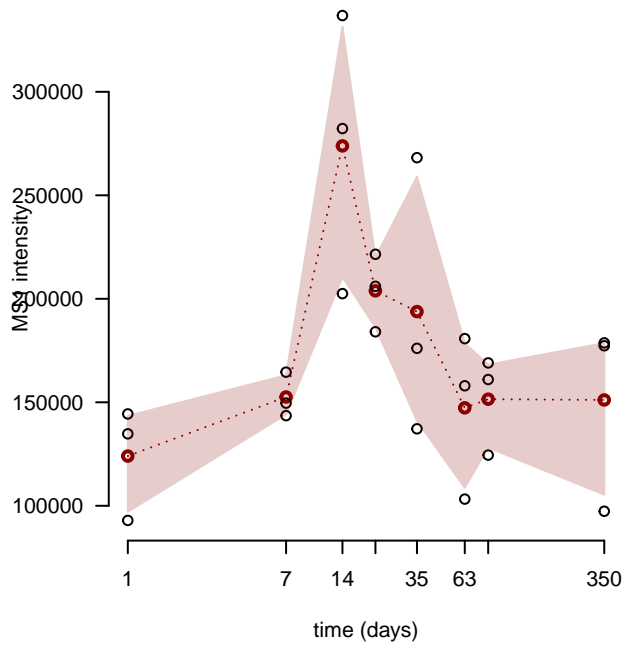

**P61080**  
**GN=Ube2d1**  
ubiquitin-conjugating enzyme E2D 1

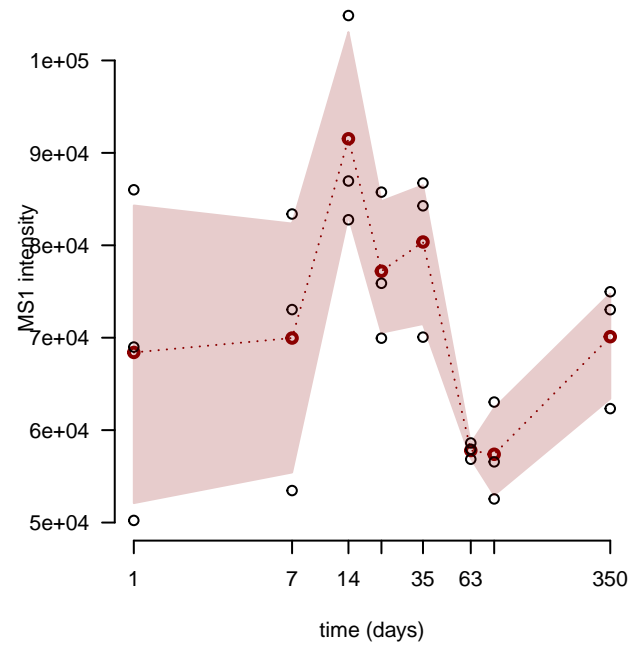

**P61082**  
**GN=Ube2m**  
ubiquitin-conjugating enzyme E2M

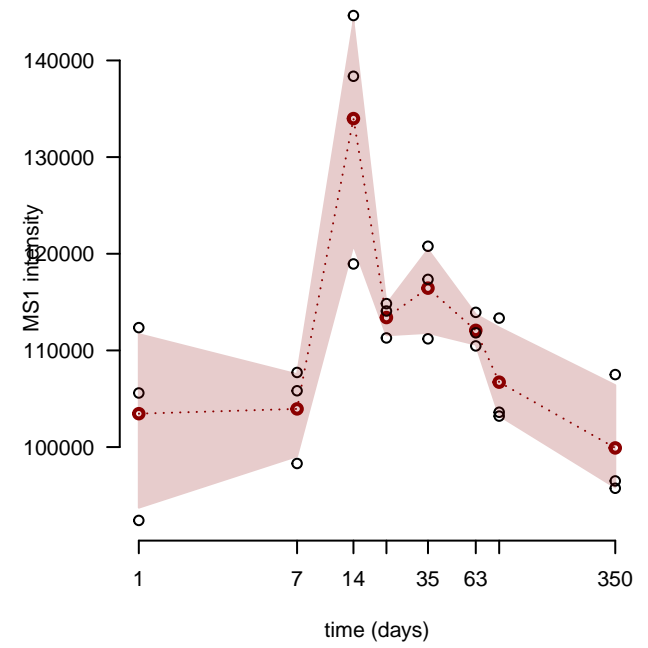

**P61087**  
**GN=Ube2k**  
ubiquitin-conjugating enzyme E2K

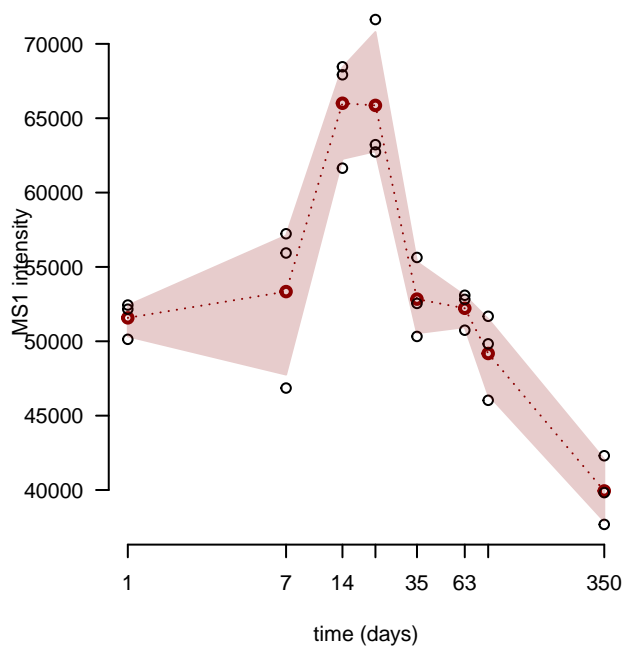

**P61089**  
**GN=Ube2n**  
ubiquitin-conjugating enzyme E2N

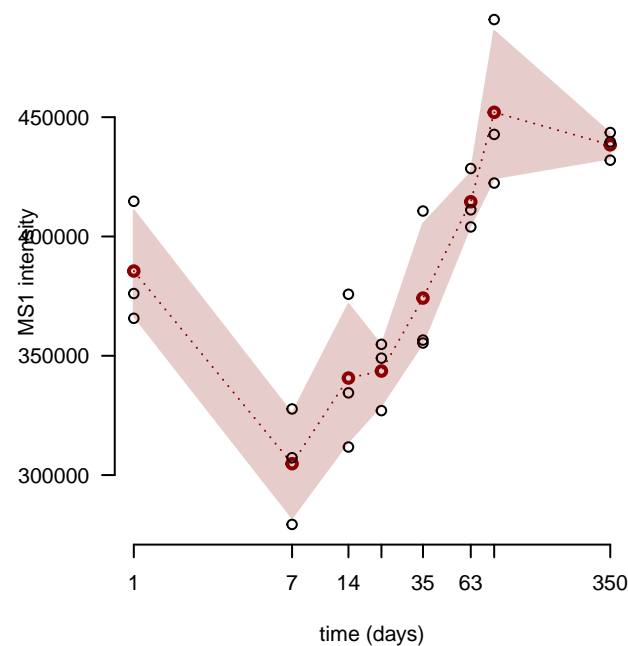

**P61161**  
**GN=Actr2**  
ARP2 actin-related protein 2

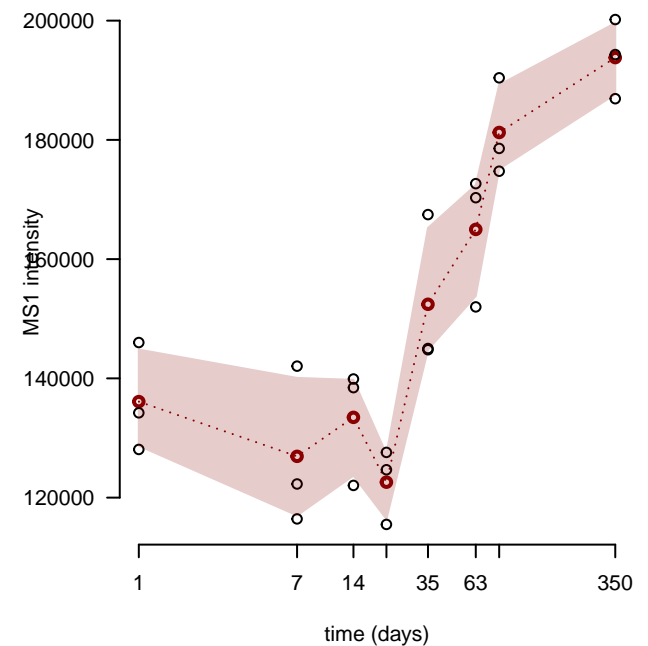



**P61164**  
**GN=Actr1a**  
ARP1 actin-related protein 1A, centractin ...

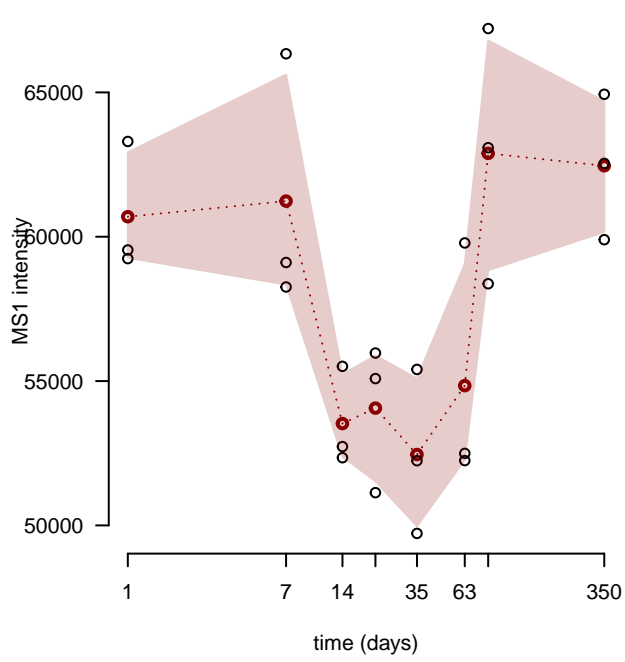

**P61166**  
**GN=Tmem258**  
transmembrane protein 258

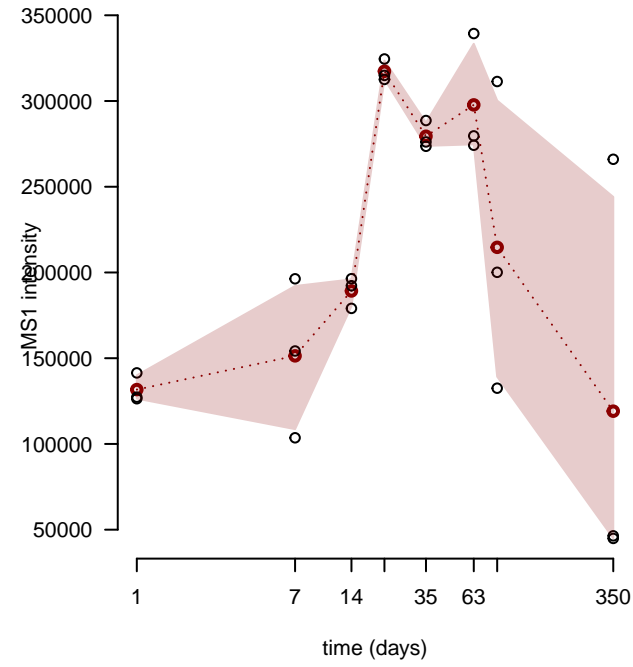

**P61202**  
**GN=Cops2**  
COP9 signalosome subunit 2

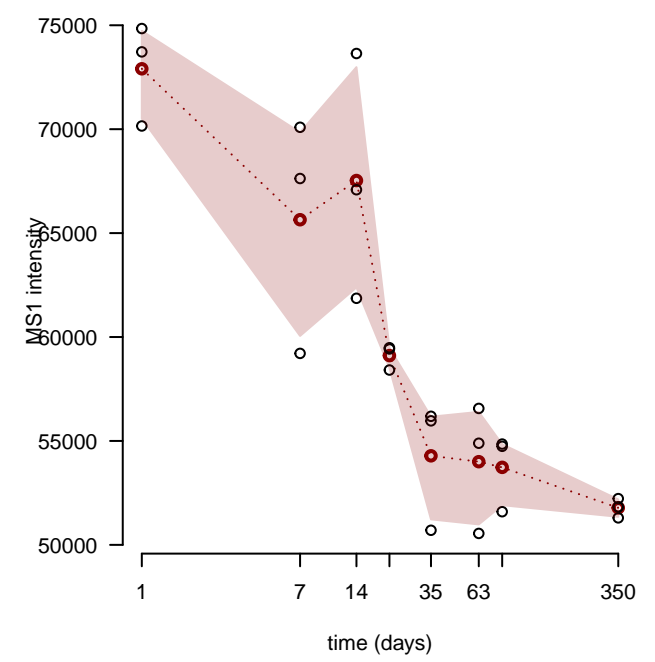

**P61211**  
**GN=Arl1**  
ADP-ribosylation factor-like 1

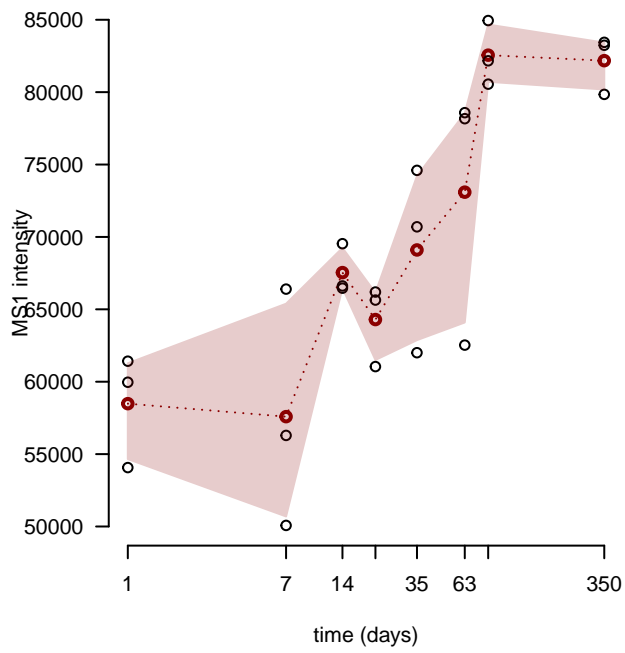

**P61216**  
**GN=Taf13**  
TATA-box binding protein associated fact ...

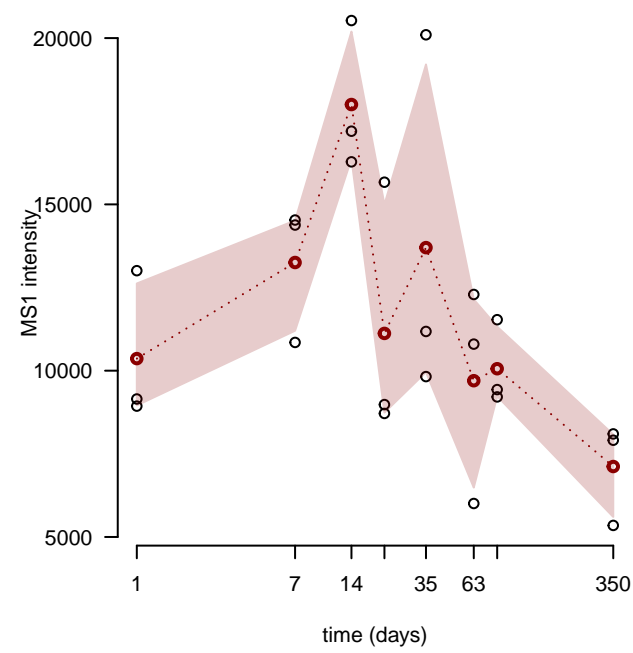

**P61219**  
**GN=Polr2f**  
polymerase (RNA) II (DNA directed) polyp ...

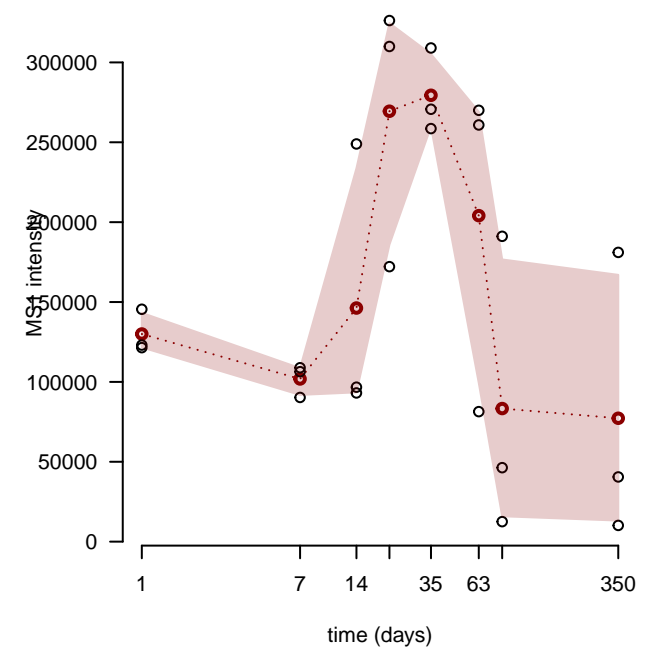

**P61222**  
**GN=Abce1**  
ATP-binding cassette, sub-family E (OABP ...

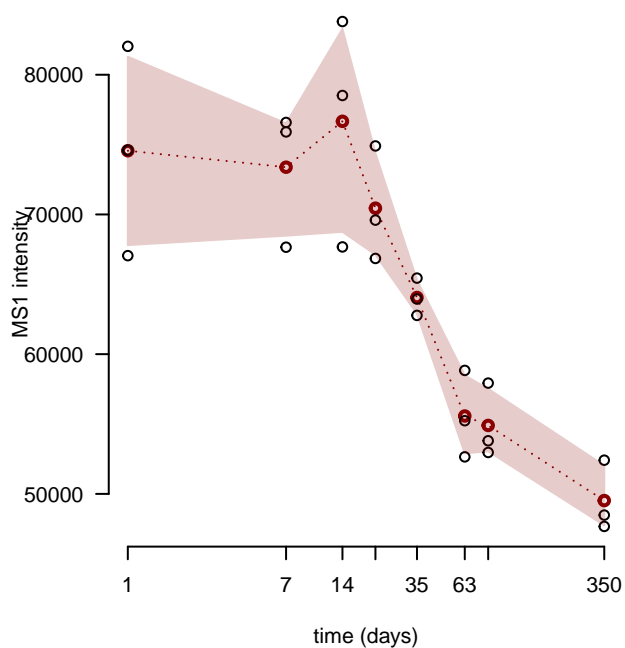

**P61226**  
**GN=Rap2b**  
RAP2B, member of RAS oncogene family

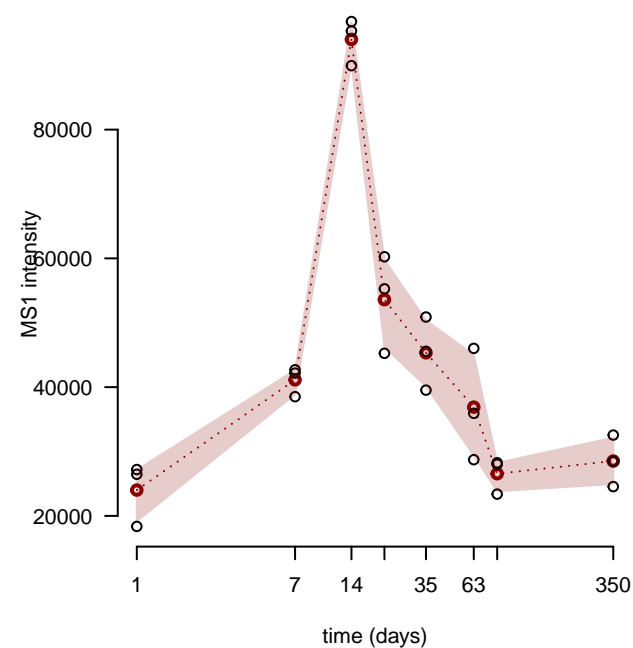

**P61255**  
**GN=Rpl26**  
ribosomal protein L26

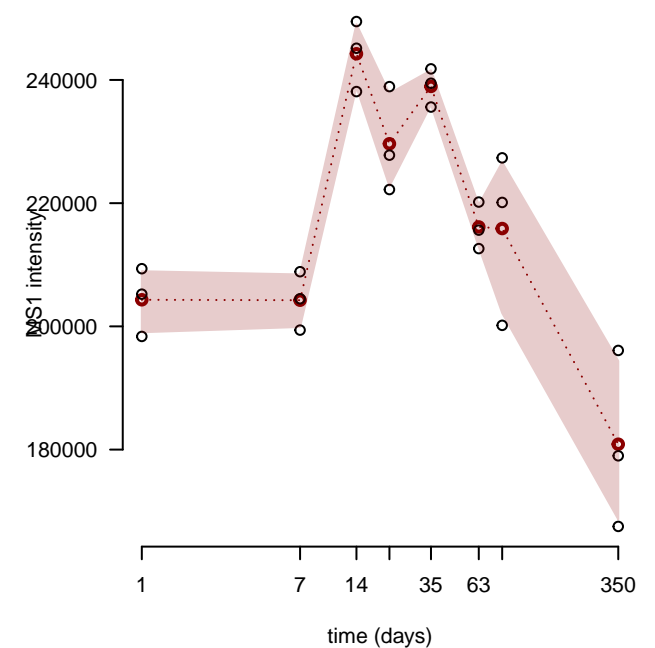

**P61264**  
GN=Stx1b  
syntaxin 1B

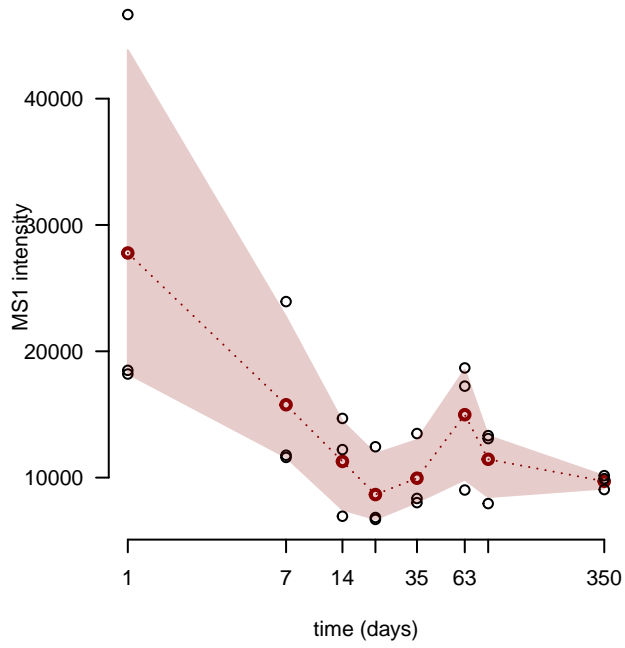

**P61290**  
GN=Psme3  
proteasome (prosome, macropain) activat ...

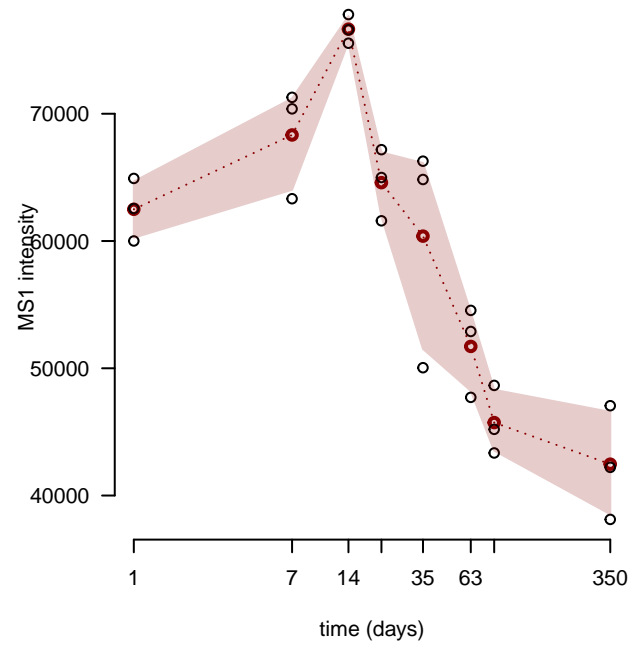

**P61327**  
GN=Magoh  
mago homolog, exon junction complex core ...

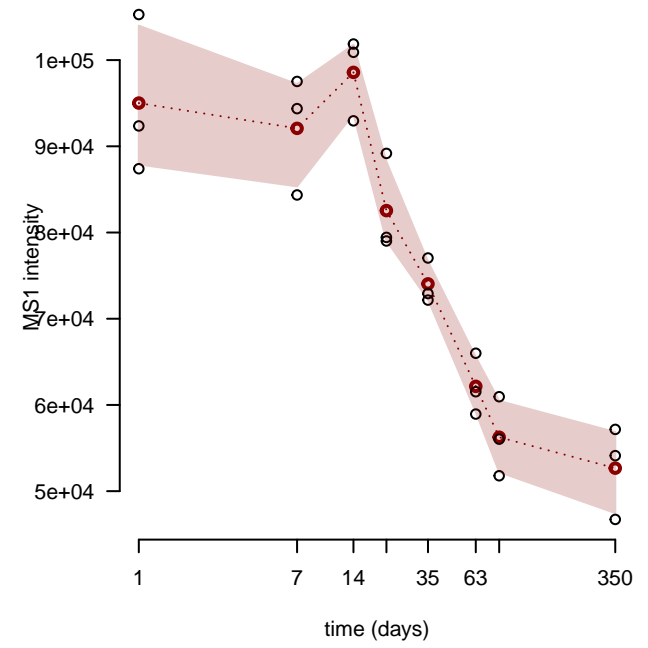

**P61358**  
GN=Rpl27  
ribosomal protein L27

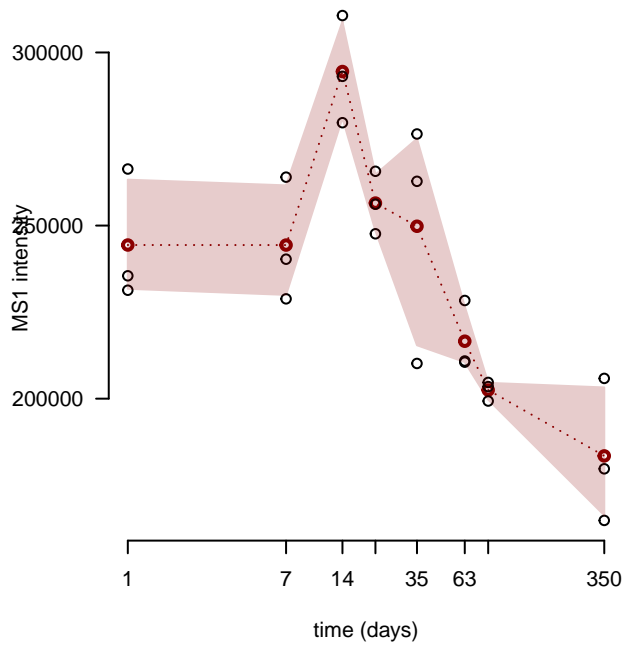

**P61406**  
GN=Smg6  
SMG6 nonsense mediated mRNA decay factor

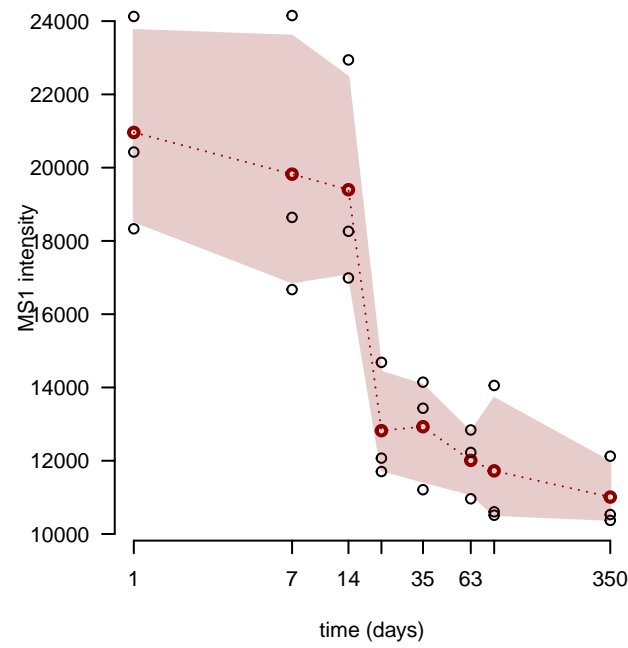

**P61458**  
GN=Pcbd1  
pterin 4 alpha carbinolamine dehydratase ...

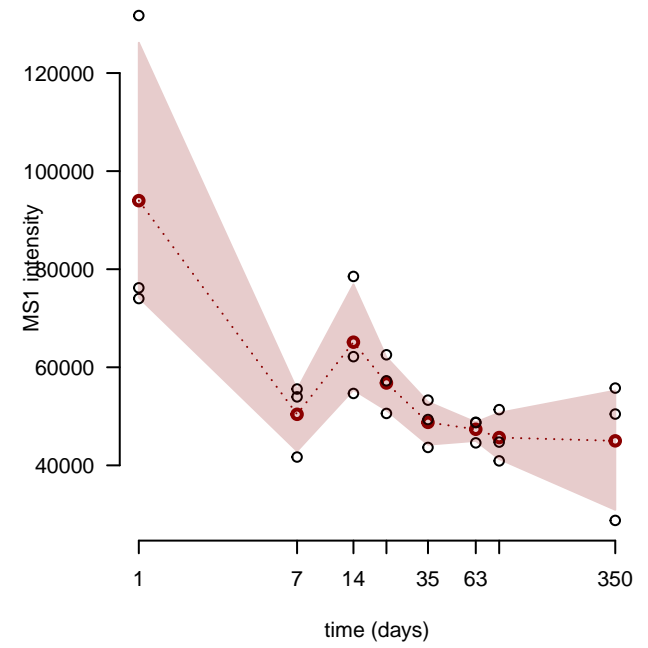

**P61460**  
GN=Depdc5  
DEP domain containing 5

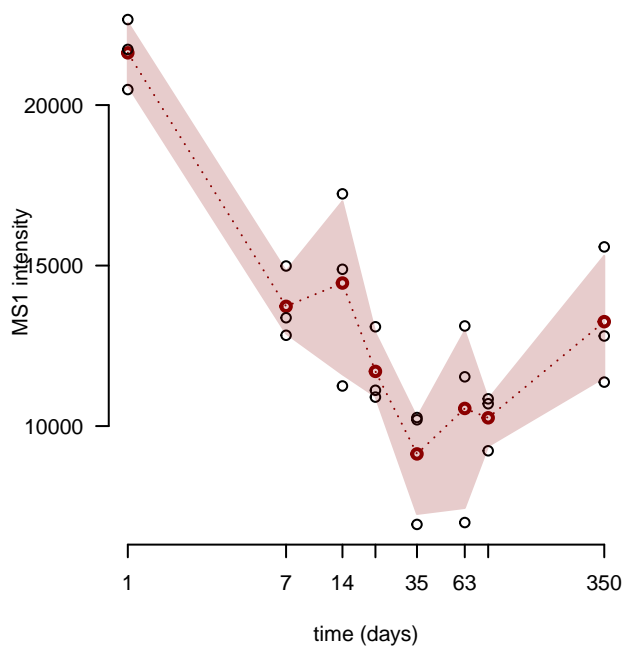

**P61514**  
GN=Rpl37a  
ribosomal protein L37a

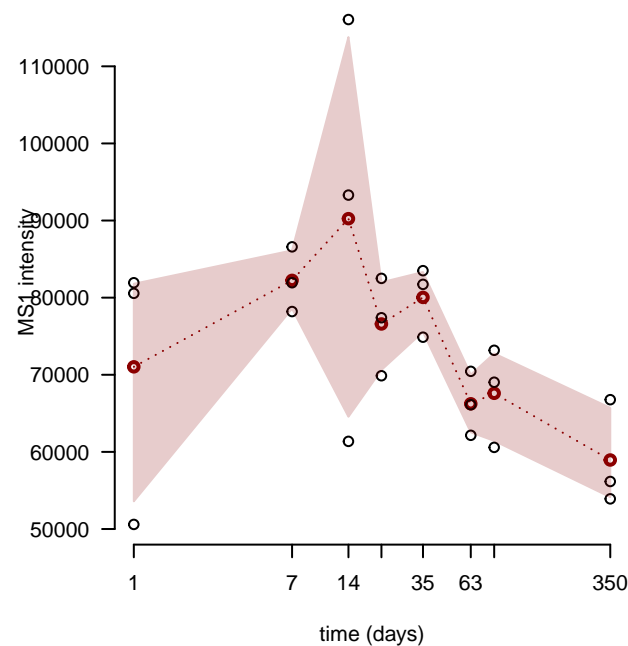

**P61588**  
GN=Rnd3  
Rho family GTPase 3

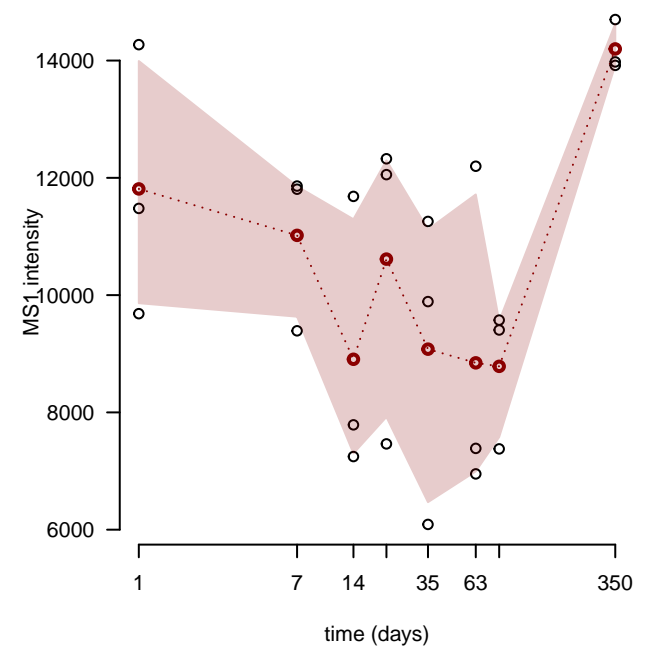

**P61600**  
**GN=Naa20**  
N(alpha)-acetyltransferase 20, NatB cata ...

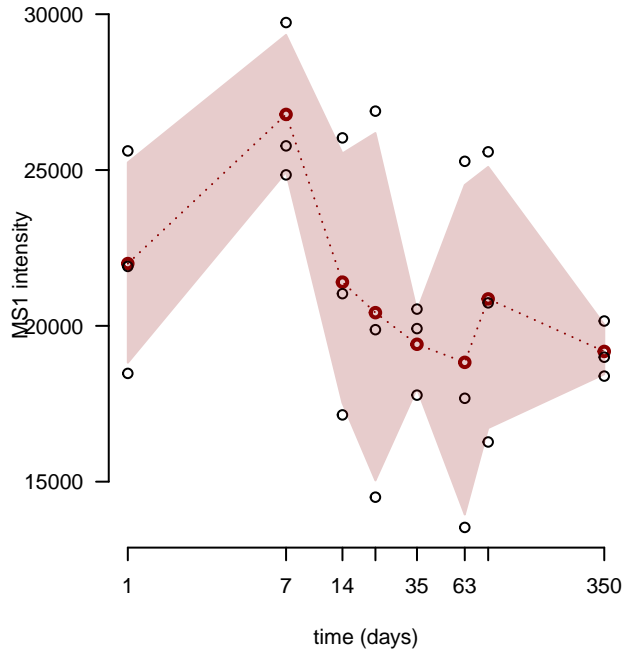

**P61620**  
**GN=Sec61a1**  
Sec61 alpha 1 subunit (*S. cerevisiae*)

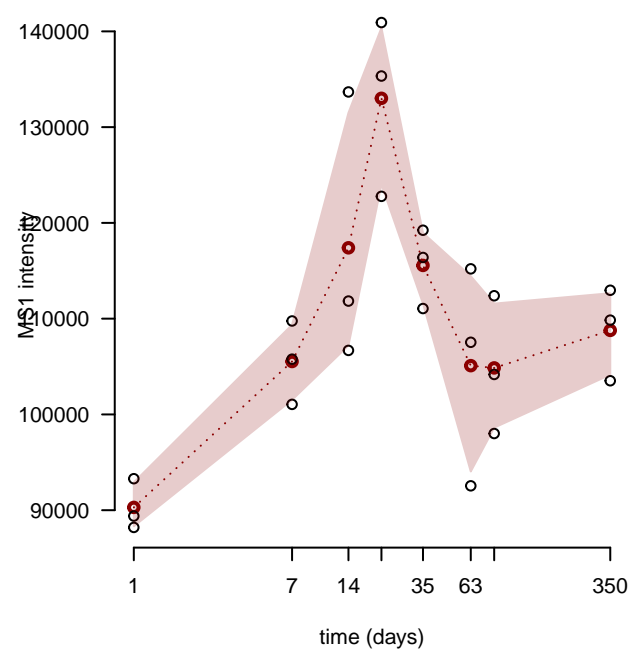

**P61622**  
**GN=Itga11**  
integrin alpha 11

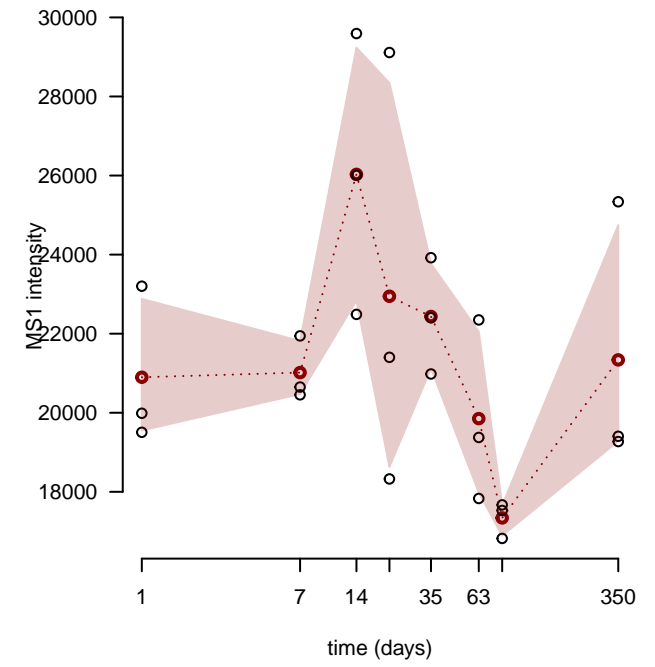

**P61750**  
**GN=Arf4**  
ADP-ribosylation factor 4

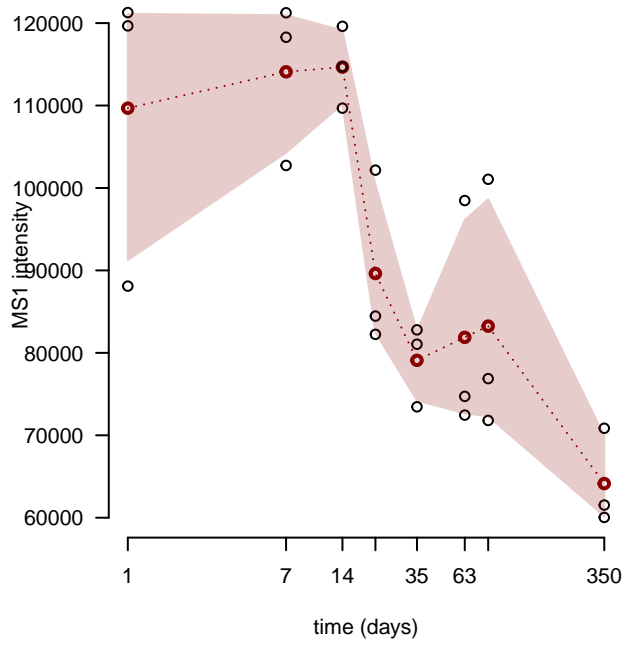

**P61759**  
**GN=Vbp1**  
von Hippel-Lindau binding protein 1

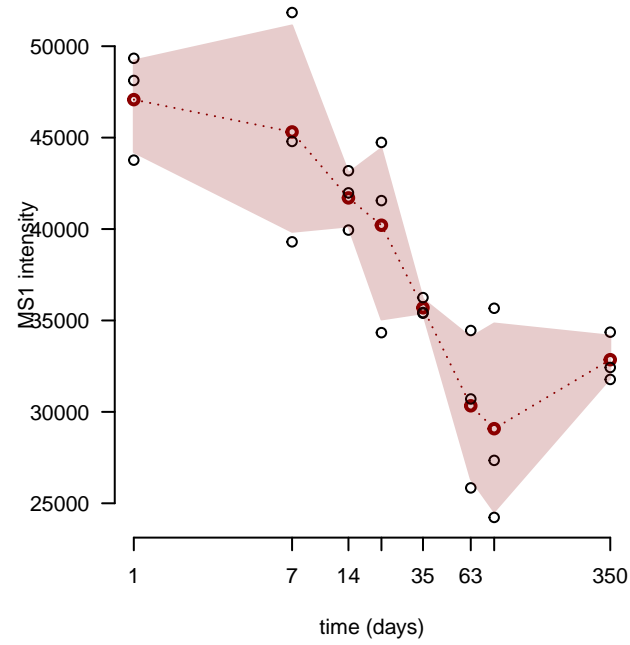

**P61793**  
**GN=Lpar1**  
lysophosphatidic acid receptor 1

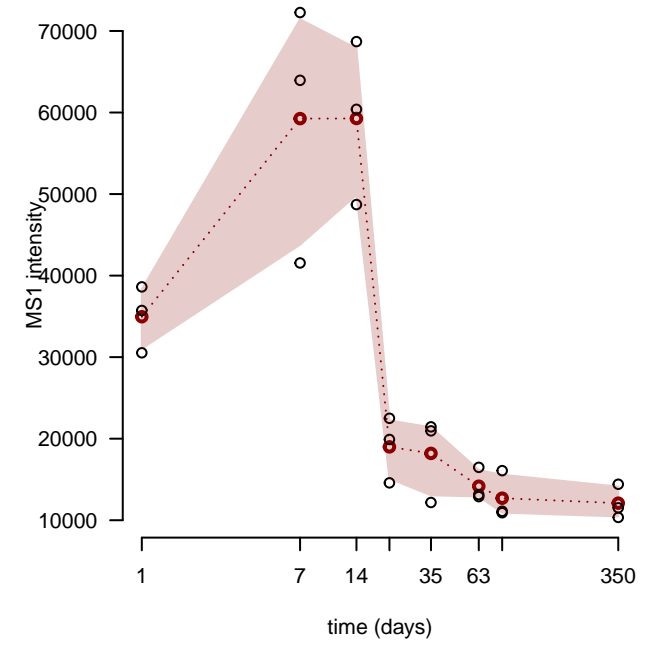

**P61804**  
**GN=Dad1**  
defender against cell death 1

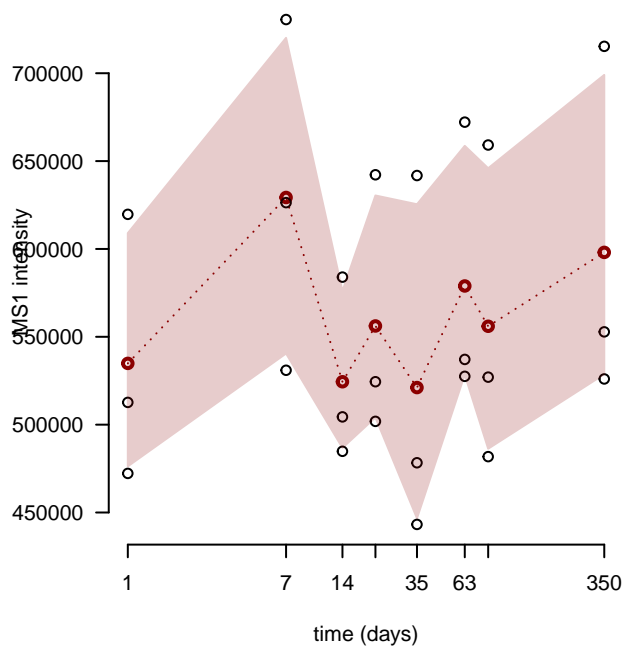

**P61922**  
**GN=Abat**  
4-aminobutyrate aminotransferase

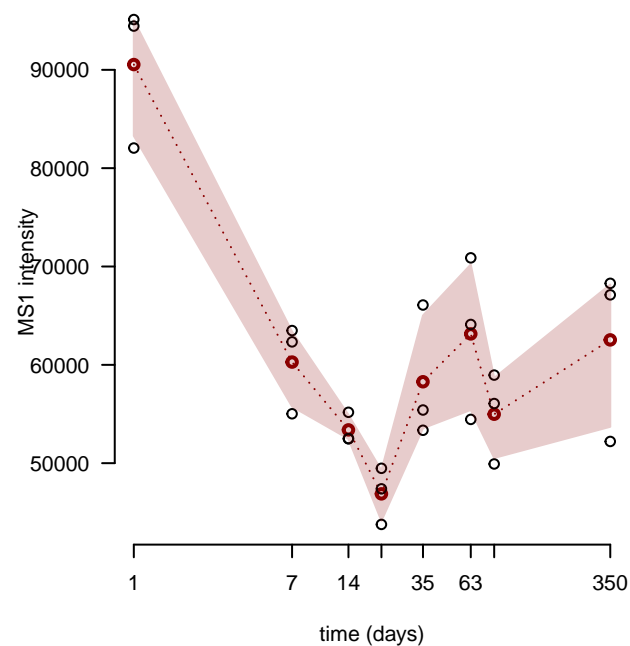

**P61924**  
**GN=Copz1**  
coatamer protein complex, subunit zeta 1

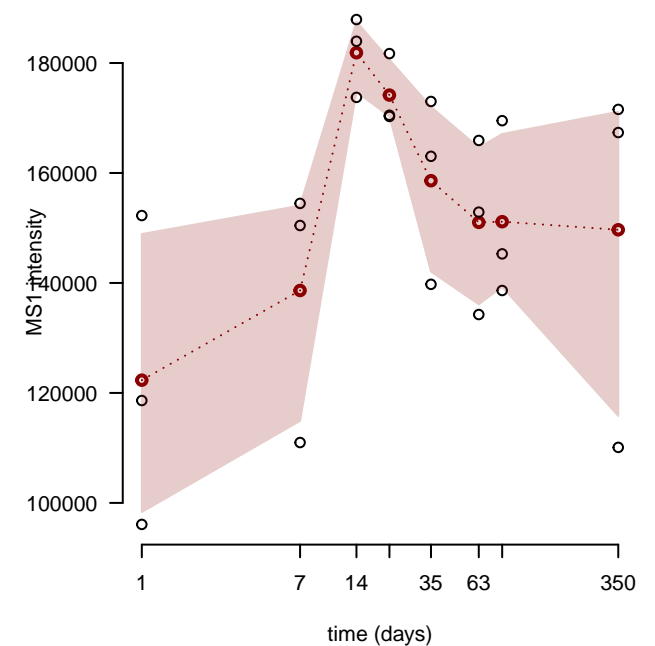

**P61939**  
**GN=Serpina7**  
serine (or cysteine) peptidase inhibitor ...

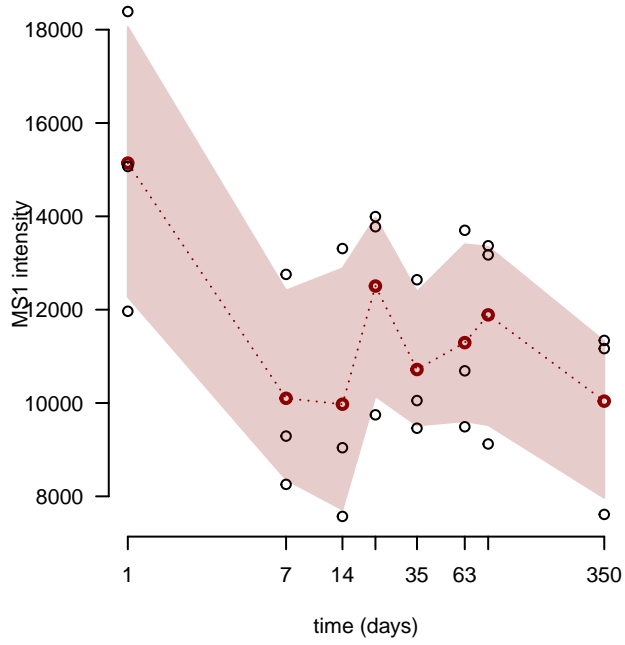

**P61957**  
**GN=Sumo2**  
small ubiquitin-like modifier 2

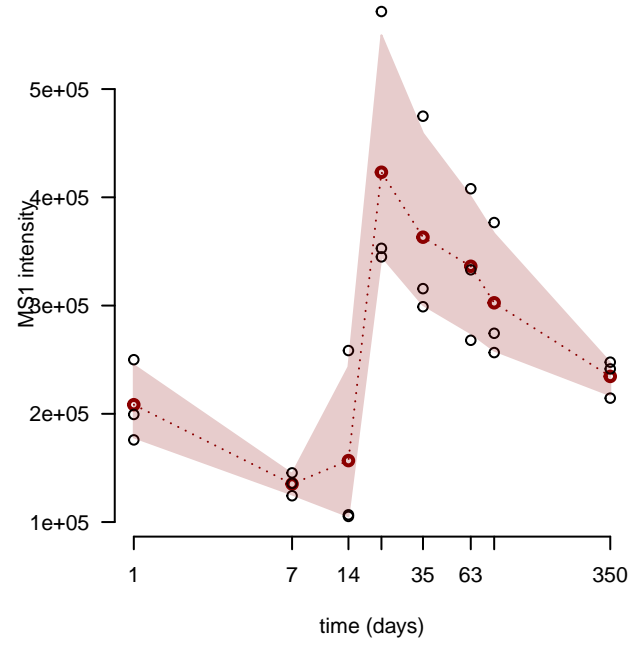

**P61961**  
**GN=Ufm1**  
ubiquitin-fold modifier 1

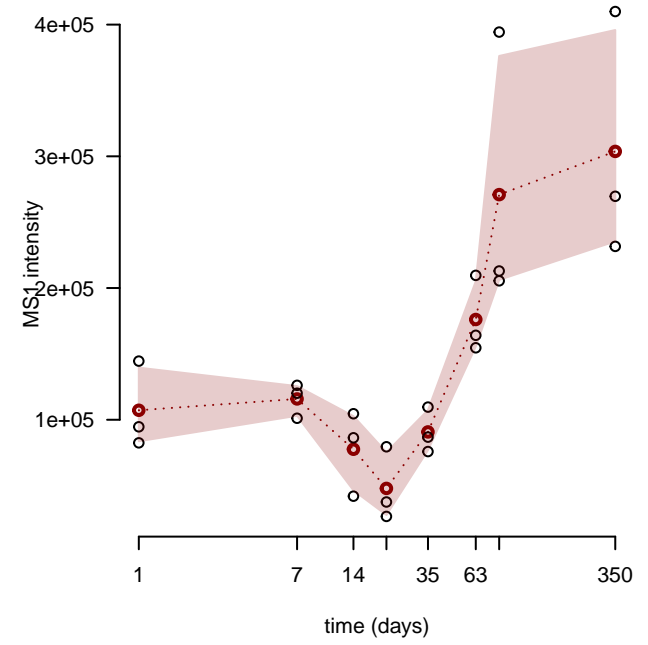

**P61963**  
**GN=Dcaf7**  
DDB1 and CUL4 associated factor 7

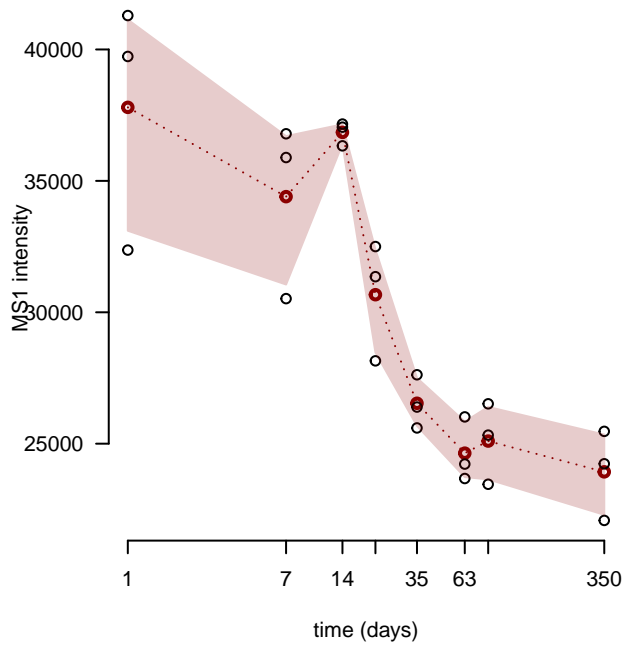

**P61965**  
**GN=Wdr5**  
WD repeat domain 5

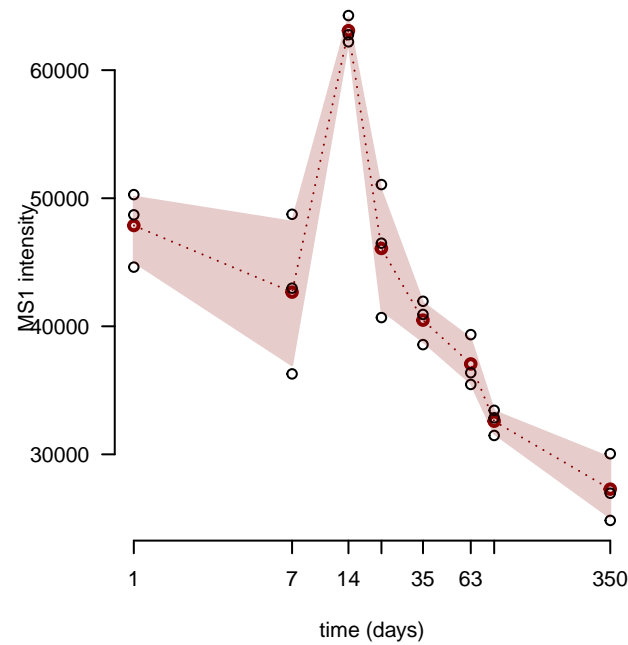

**P61967**  
**GN=Ap1s1**  
adaptor protein complex AP-1, sigma 1

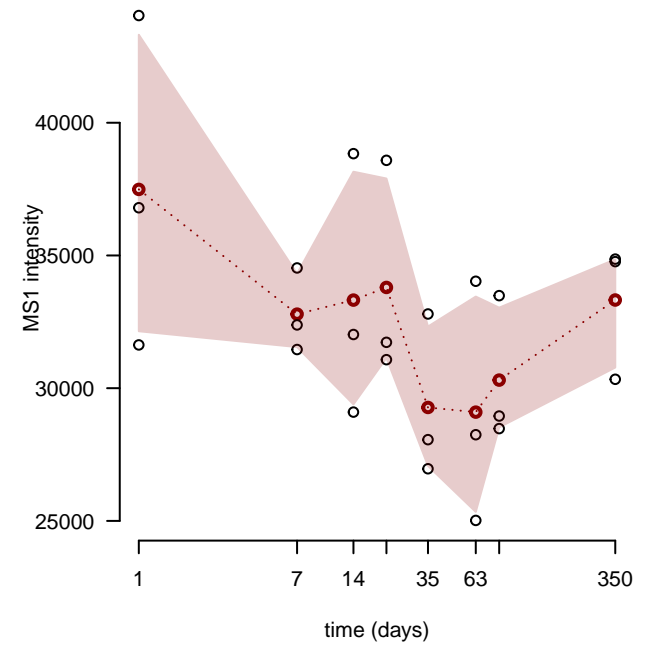

**P61971**  
**GN=Nutf2**  
nuclear transport factor 2

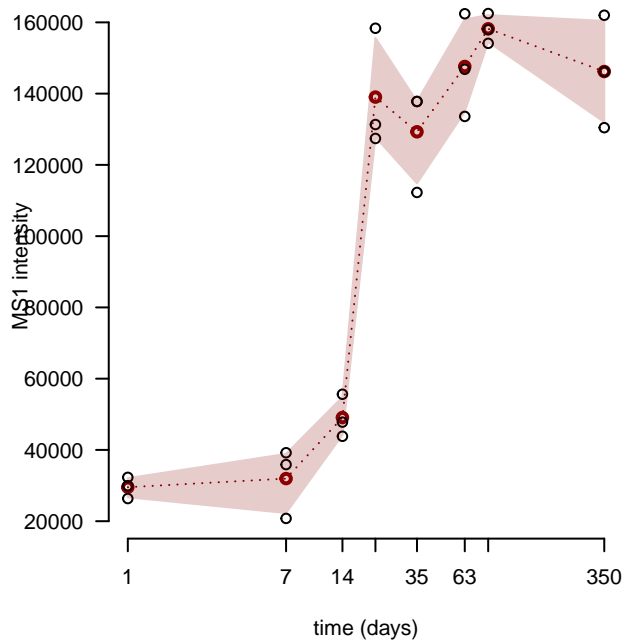

**P61979**  
**GN=Hnrnpk**  
heterogeneous nuclear ribonucleoprotein ...

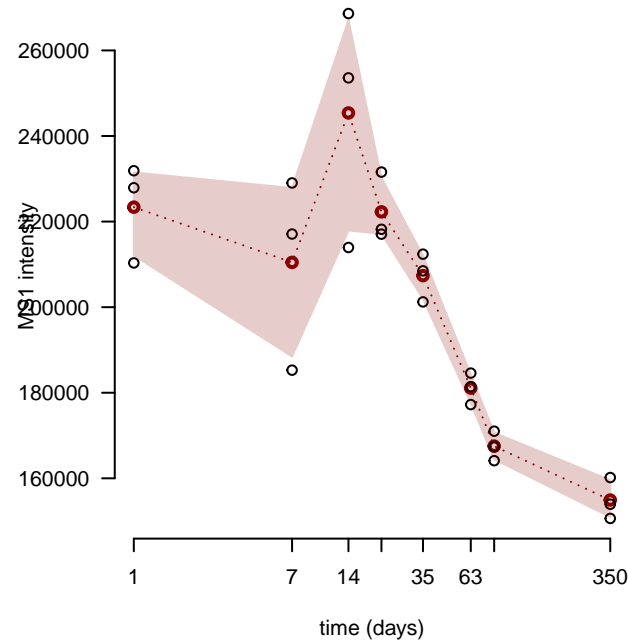

**P61979**  
**GN=Hnrnpk**  
heterogeneous nuclear ribonucleoprotein ...

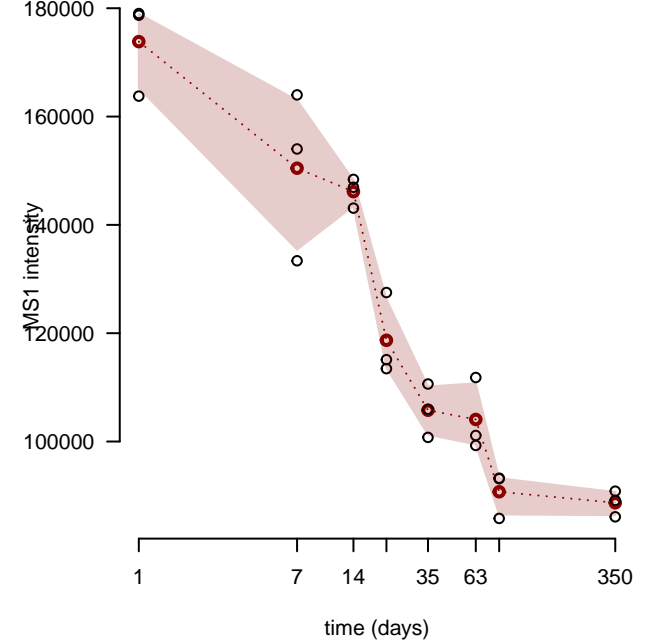

**P61982**  
GN=Ywhag

tyrosine 3-monooxygenase/tryptophan 5-mo ...

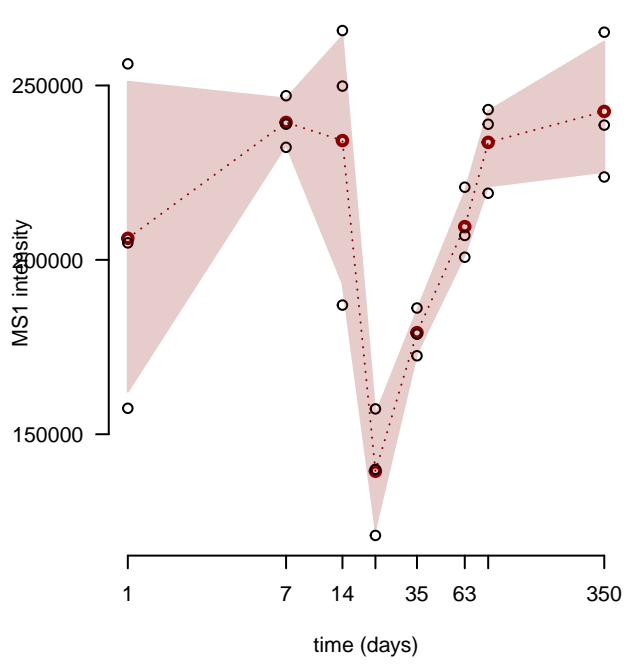

**P62046**  
GN=Lrch1

leucine-rich repeats and calponin homolo ...

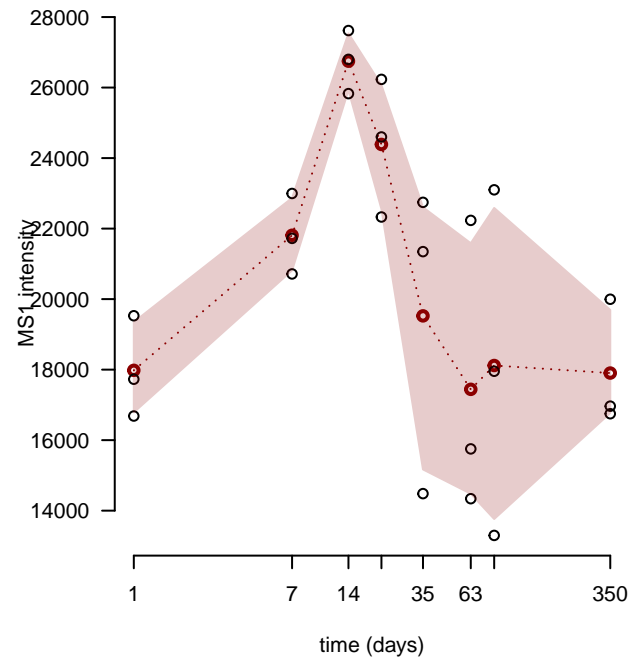

**P62069**  
GN=Usp46

ubiquitin specific peptidase 46

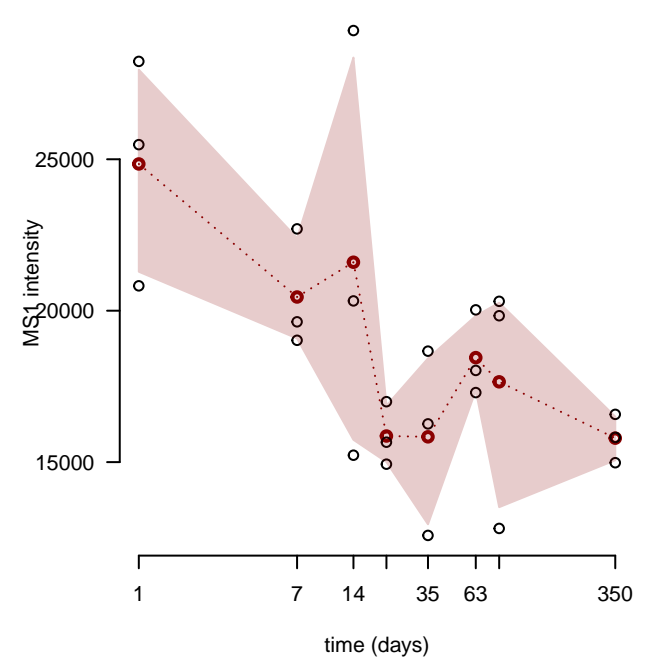

**P62071**  
GN=Rras2

related RAS viral (r-ras) oncogene 2

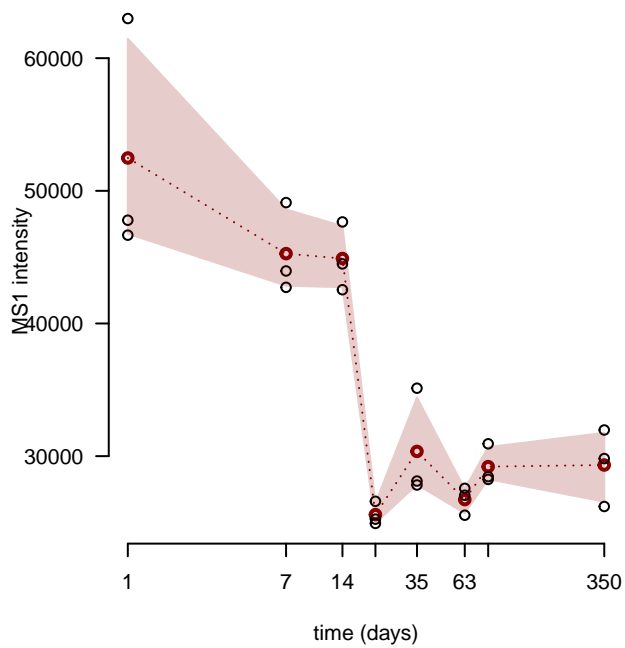

**P62073**  
GN=Timm10

translocase of inner mitochondrial membr ...

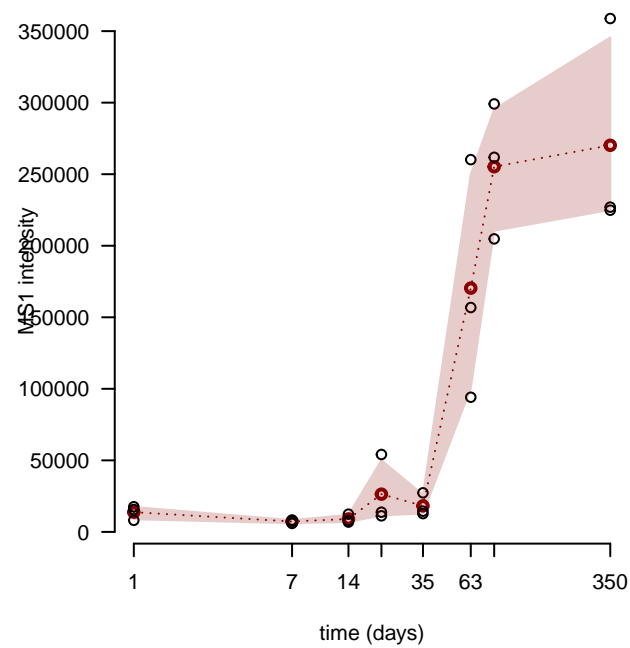

**P62075**  
GN=Timm13

translocase of inner mitochondrial membr ...

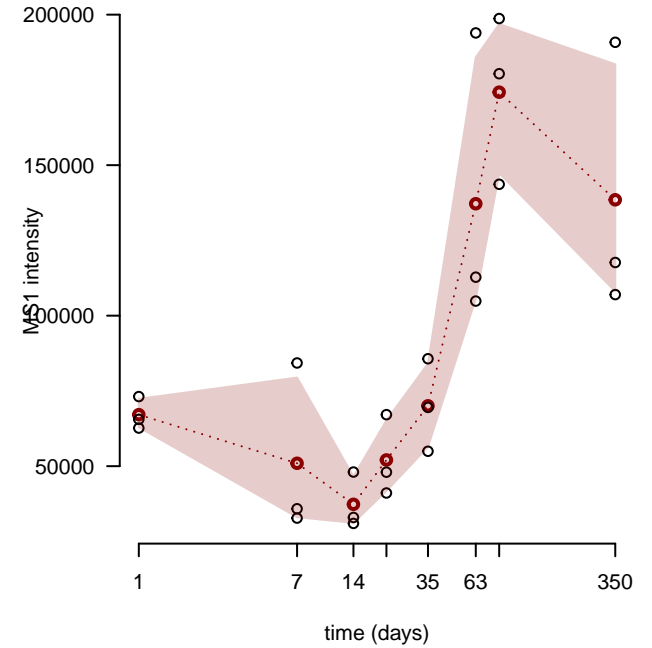

**P62077**  
GN=Timm8b

translocase of inner mitochondrial membr ...

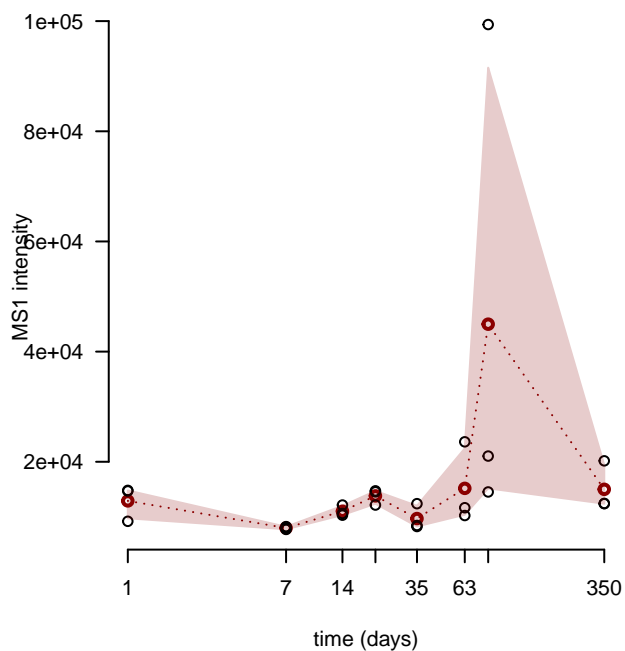

**P62082**  
GN=Rps7

ribosomal protein S7

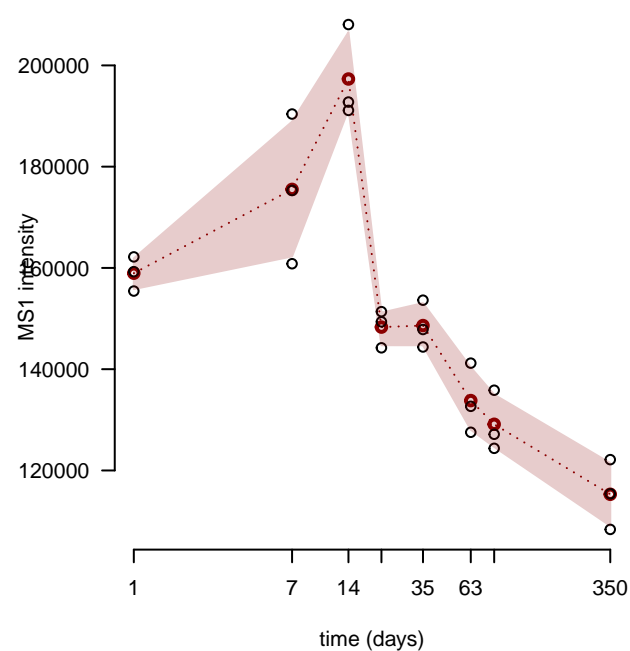

**P62137**  
GN=Ppp1ca

protein phosphatase 1 catalytic subunit ...

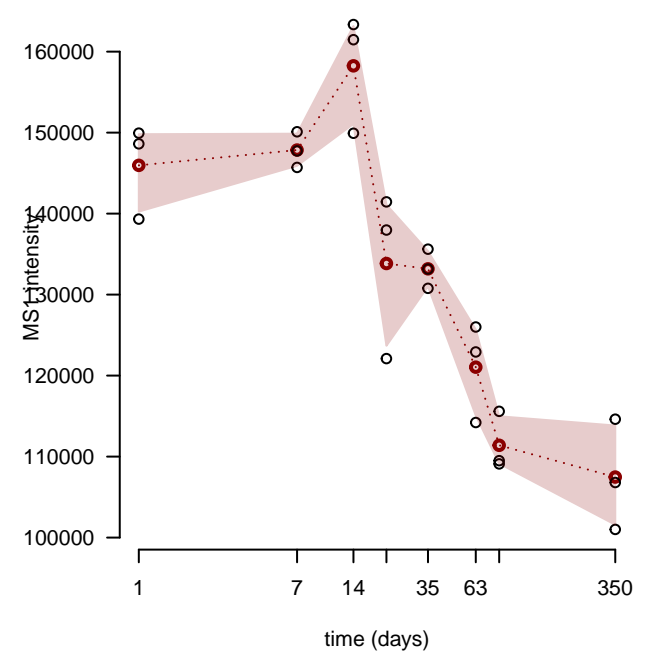

**P62141**  
**GN=Ppp1cb**  
protein phosphatase 1 catalytic subunit ...

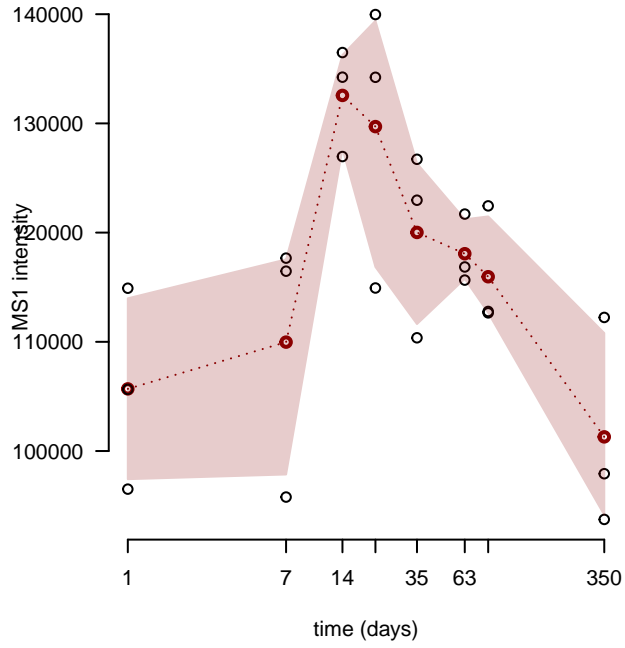

**P62192**  
**GN=Psmc1**  
protease (prosome, macropain) 26S subuni ...

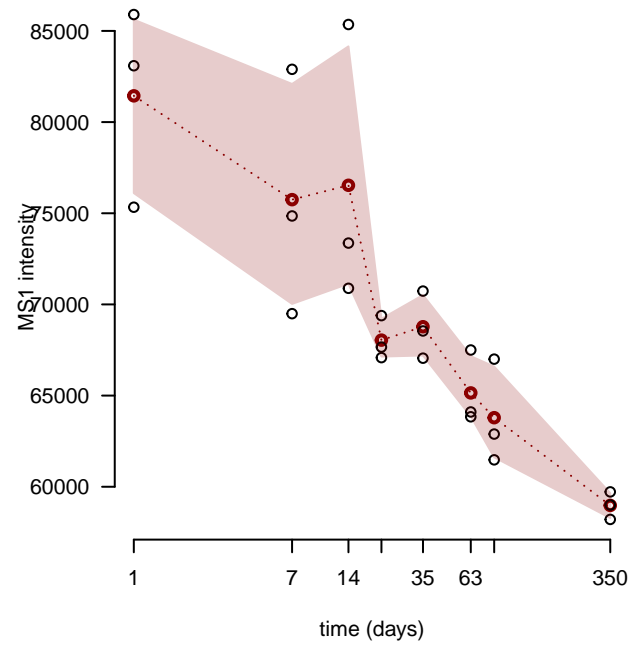

**P62196**  
**GN=Psmc5**  
protease (prosome, macropain) 26S subuni ...

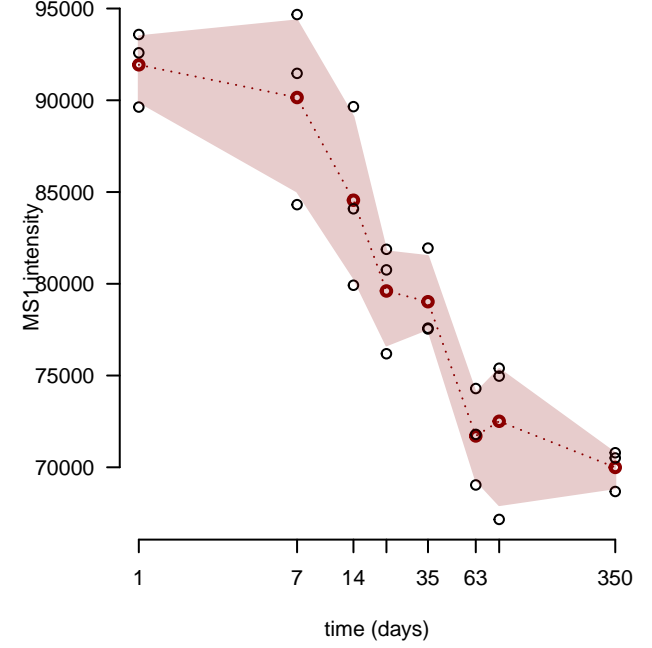

**P62242**  
**GN=Rps8**  
ribosomal protein S8

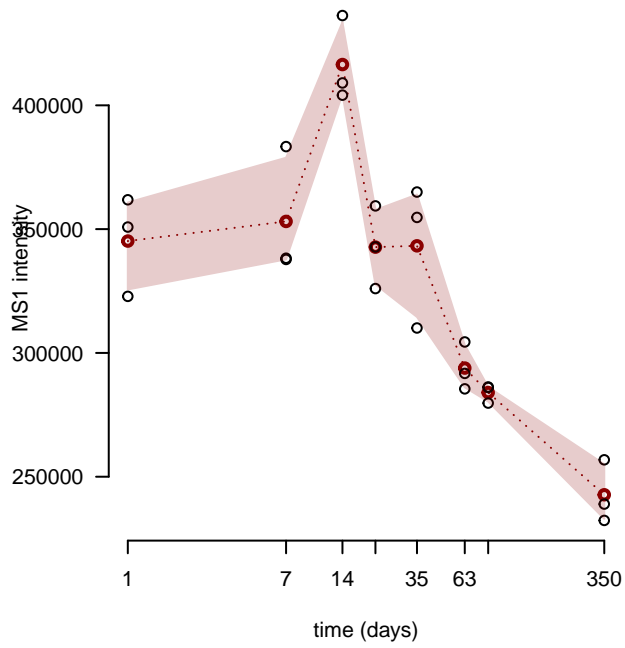

**P62245**  
**GN=Rps15a**  
ribosomal protein S15A

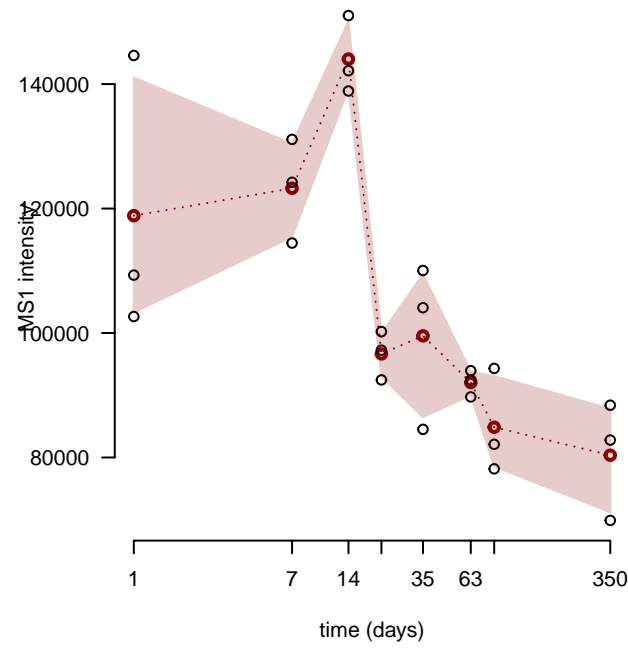

**P62254**  
**GN=Ube2g1**  
ubiquitin-conjugating enzyme E2G 1

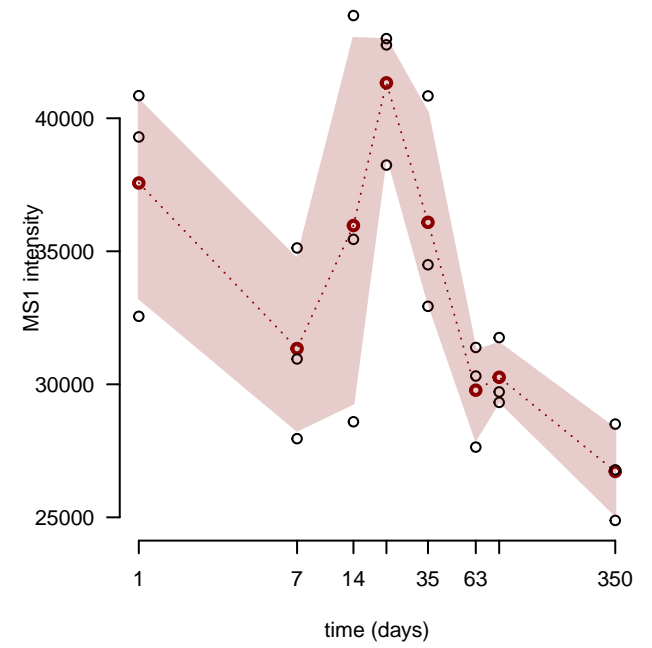

**P62257**  
**GN=Ube2h**  
ubiquitin-conjugating enzyme E2H

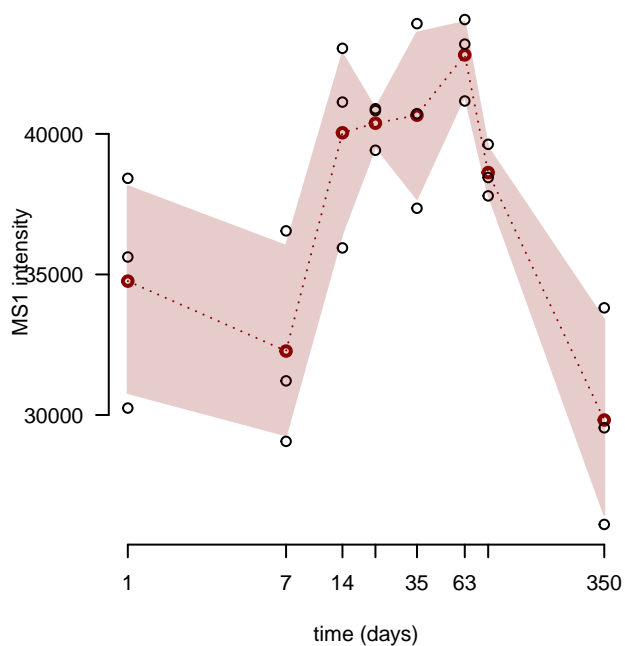

**P62259**  
**GN=Ywhae**  
tyrosine 3-monooxygenase/tryptophan 5-mo ...

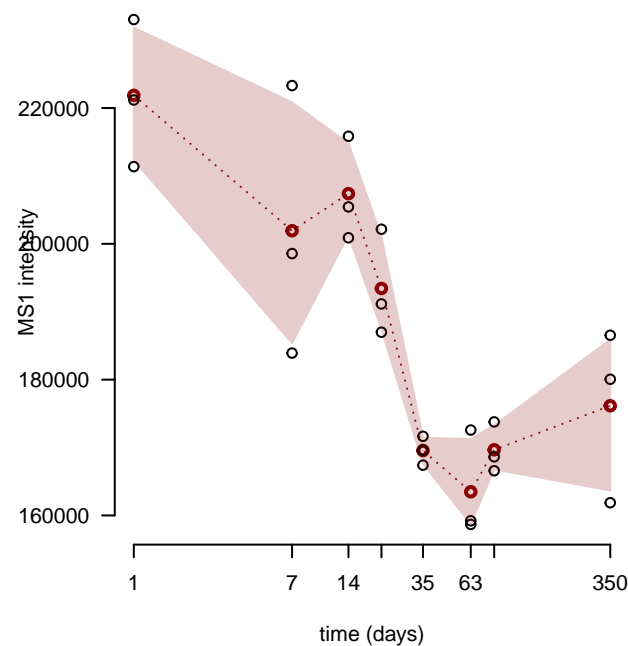

**P62264**  
**GN=Rps14**  
ribosomal protein S14

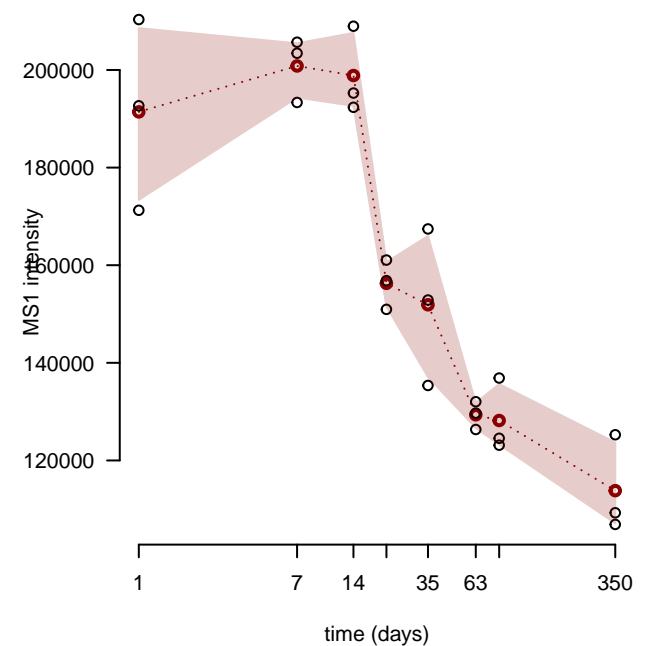

**P62267**  
**GN=Rps23**  
ribosomal protein S23

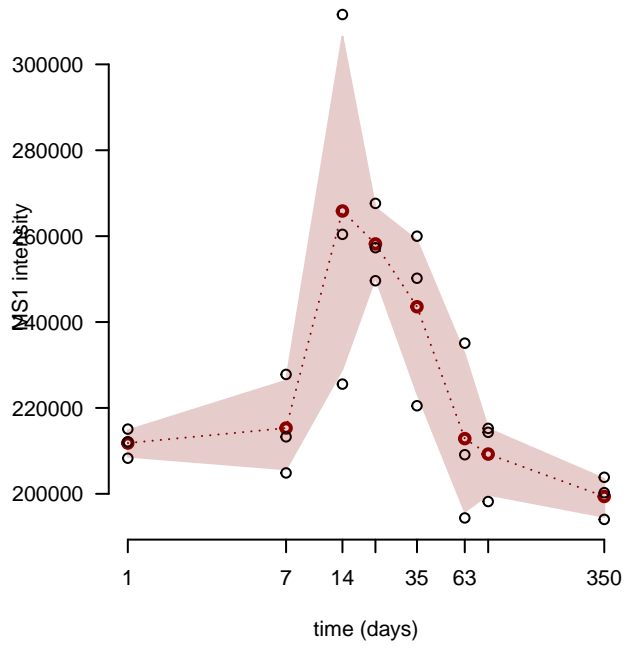

**P62270**  
**GN=Rps18**  
ribosomal protein S18

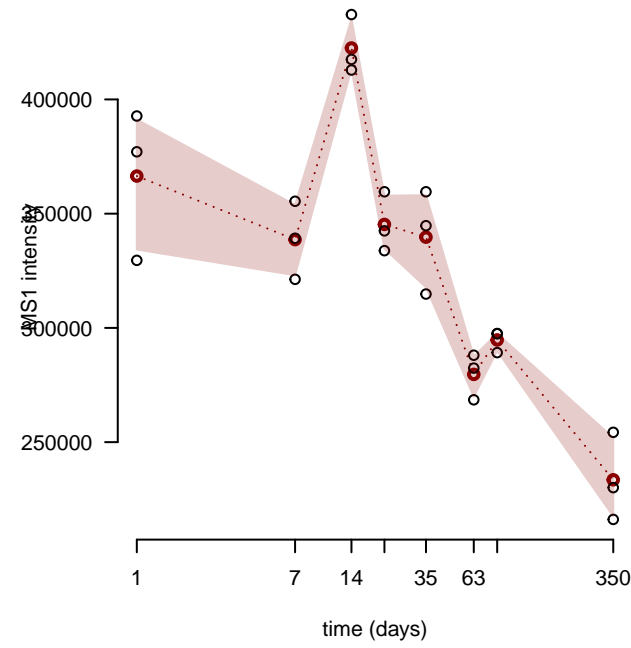

**P62274**  
**GN=Rps29**  
ribosomal protein S29

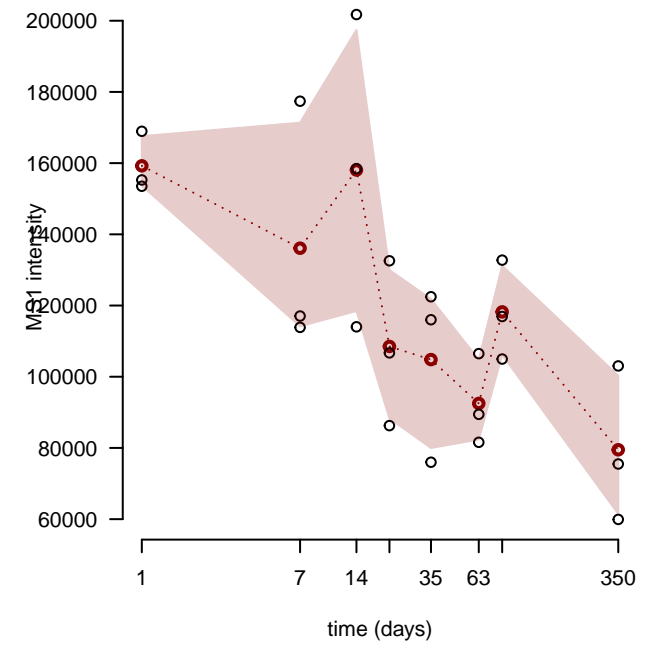

**P62281**  
**GN=Rps11**  
ribosomal protein S11

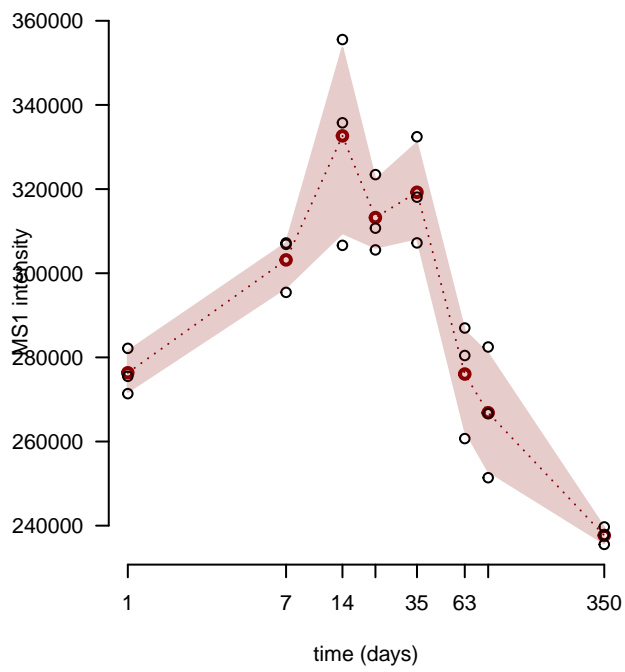

**P62301**  
**GN=Rps13**  
ribosomal protein S13

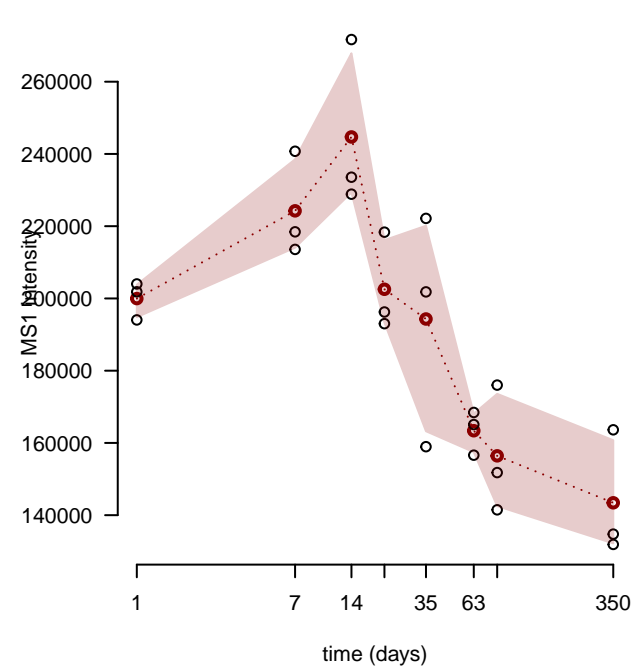

**P62305**  
**GN=Snrpe**  
small nuclear ribonucleoprotein E

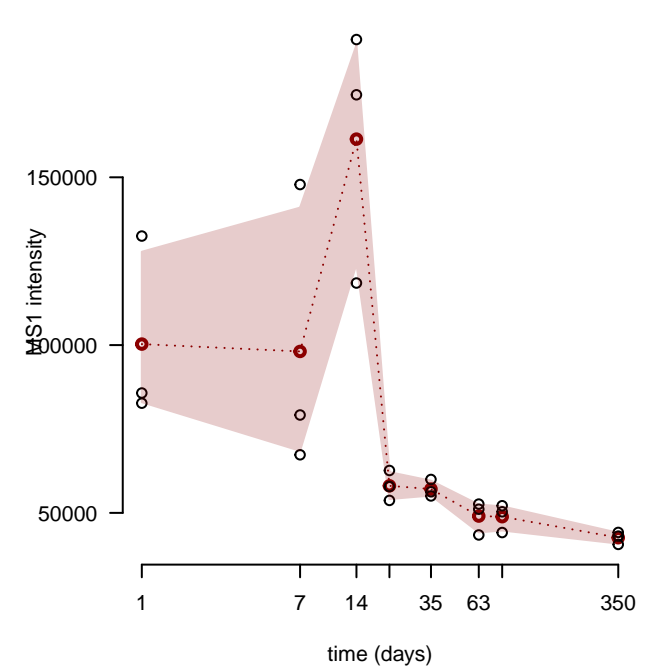

**P62307**  
**GN=Snrpf**  
small nuclear ribonucleoprotein polypept ...

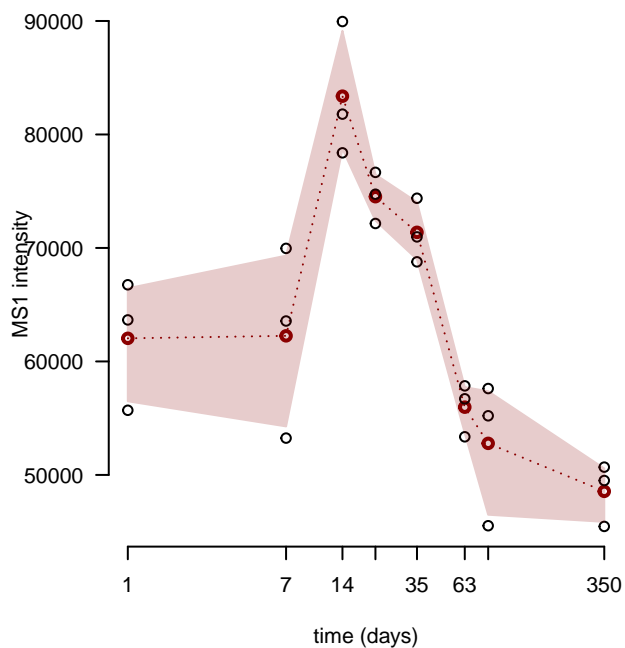

**P62309**  
**GN=Snrpg**  
small nuclear ribonucleoprotein polypept ...

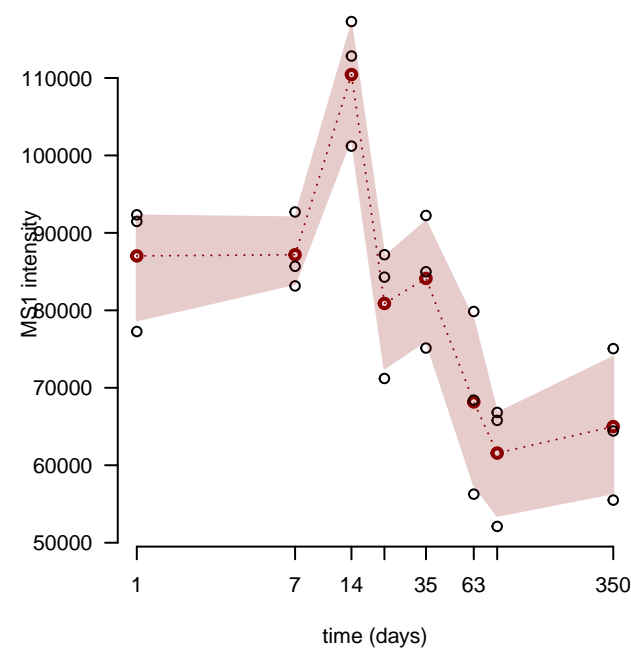

**P62311**  
**GN=Lsm3**  
LSM3 homolog, U6 small nuclear RNA and m ...

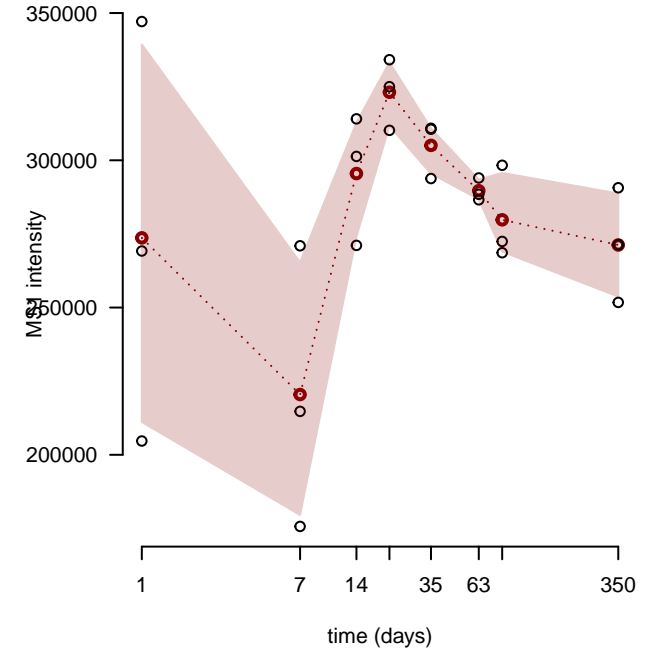

**P62313**  
**GN=Lsm6**

LSM6 homolog, U6 small nuclear RNA and m ...

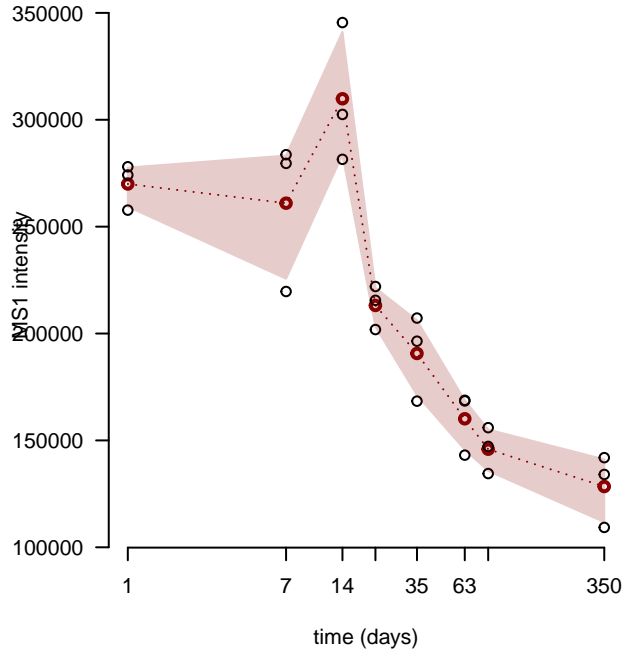

**P62315**  
**GN=Snrpd1**

small nuclear ribonucleoprotein D1

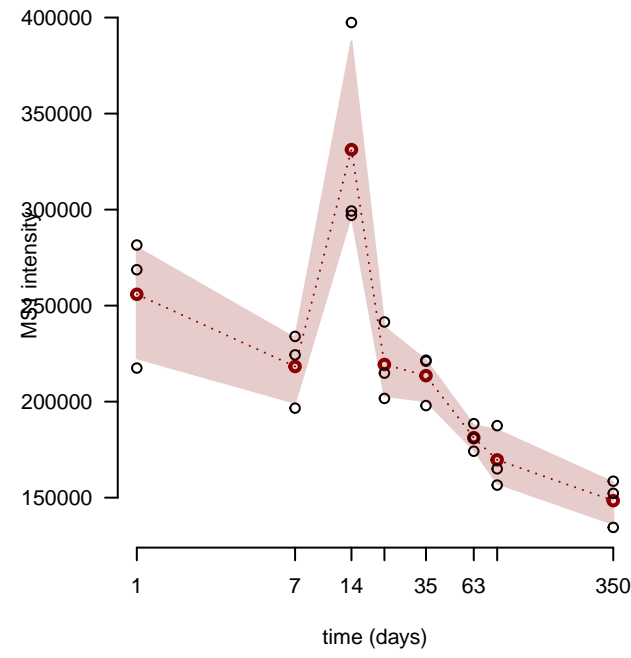

**P62317**  
**GN=Snrpd2**

small nuclear ribonucleoprotein D2

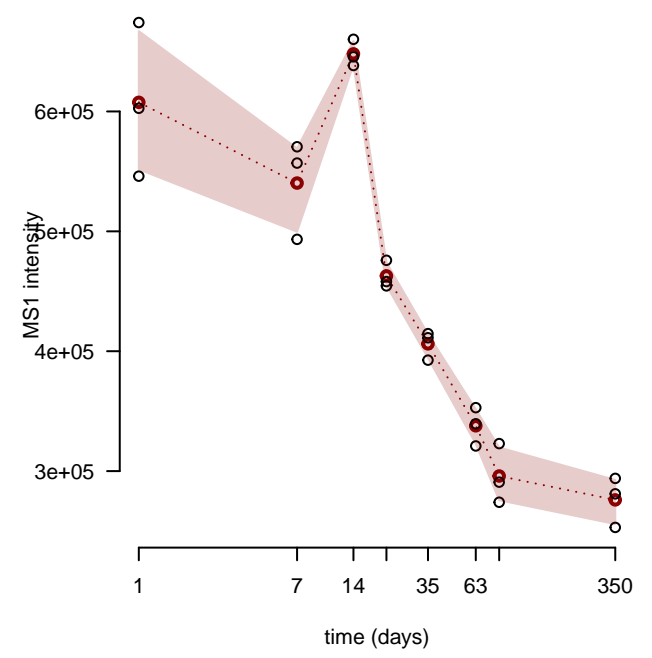

**P62320**  
**GN=Snrpd3**

small nuclear ribonucleoprotein D3

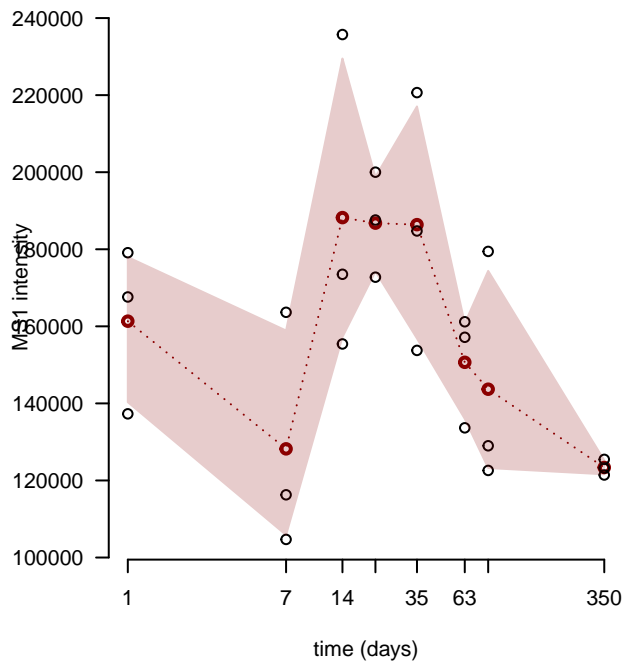

**P62322**  
**GN=Lsm5**

LSM5 homolog, U6 small nuclear RNA and m ...

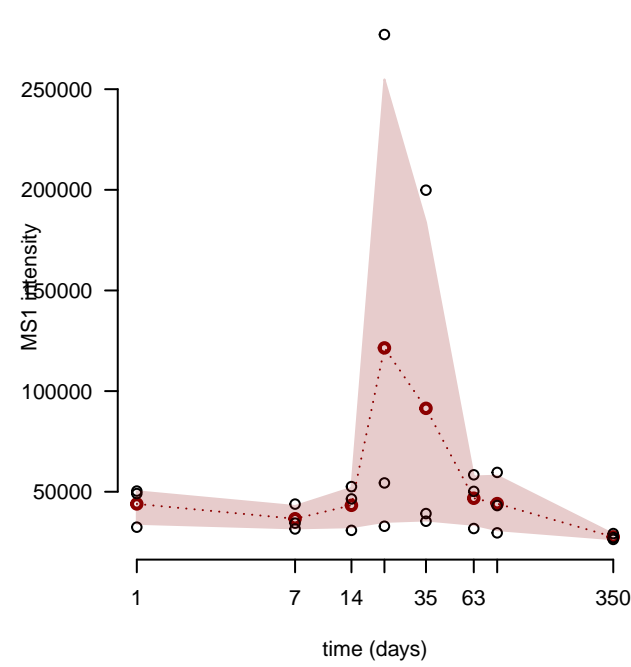

**P62331**  
**GN=Arf6**

ADP-ribosylation factor 6

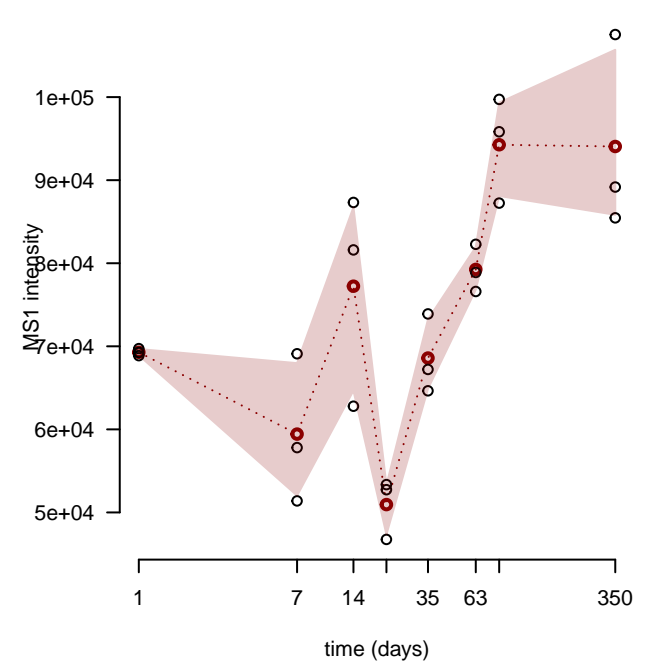

**P62334**  
**GN=Psmc6**

proteasome (prosome, macropain) 26S subu ...

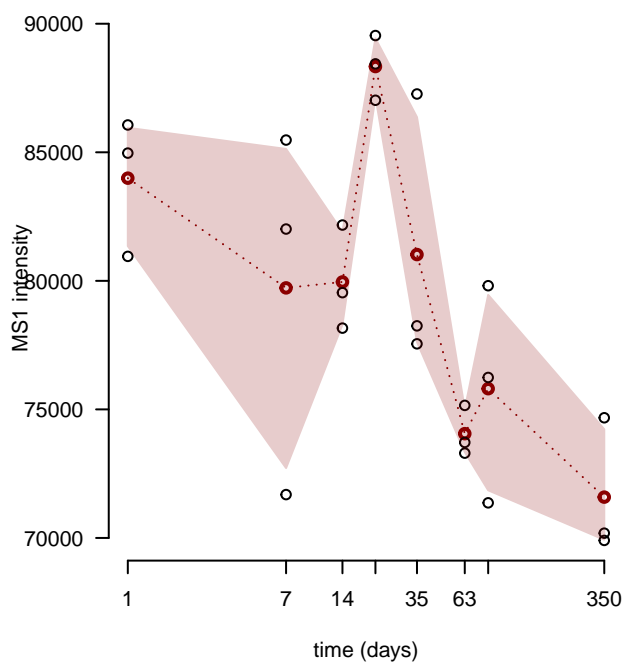

**P62340**  
**GN=Tbpl1**

TATA box binding protein-like 1

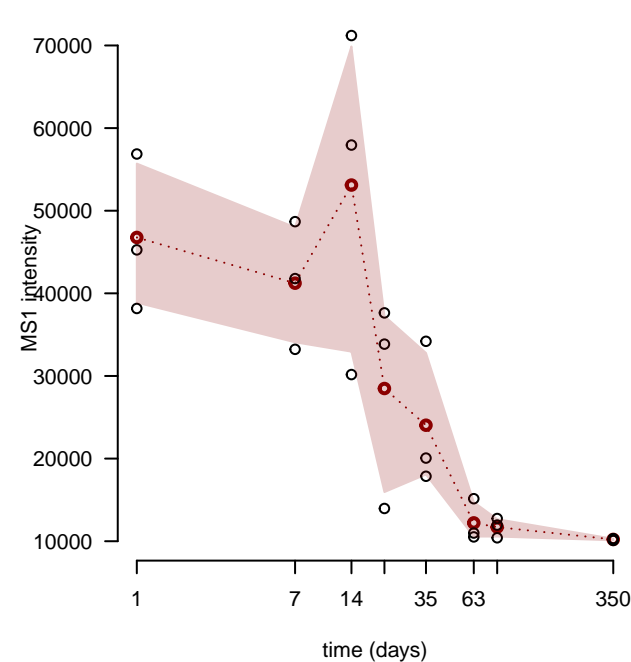

**P62342**  
**GN=Selenot**

selenoprotein T

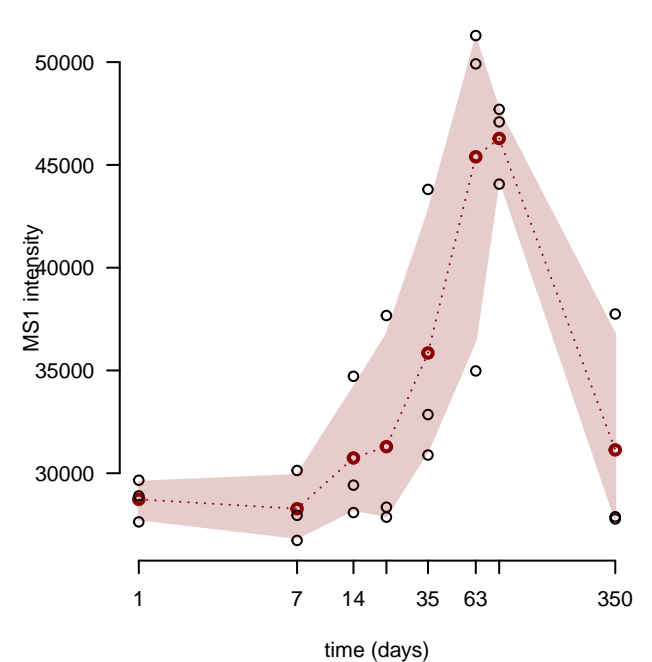



**P62484**  
GN=Abi2  
abl interactor 2

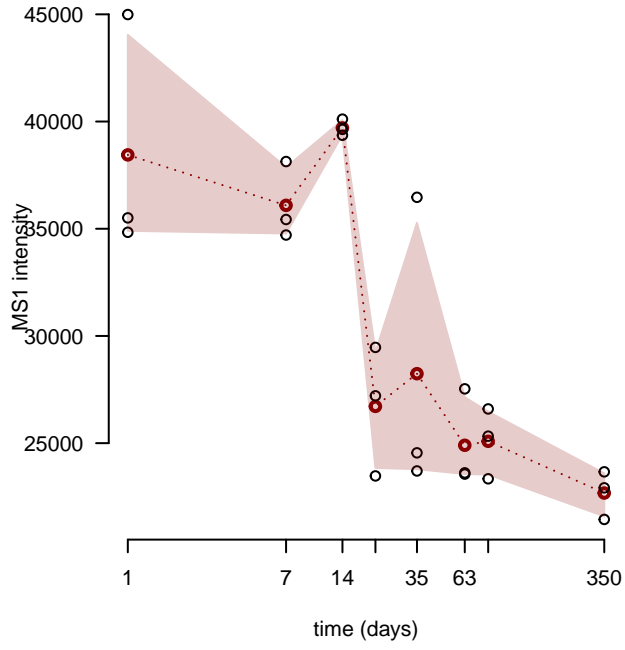

**P62488**  
GN=Polr2g  
polymerase (RNA) II (DNA directed) polyp ...

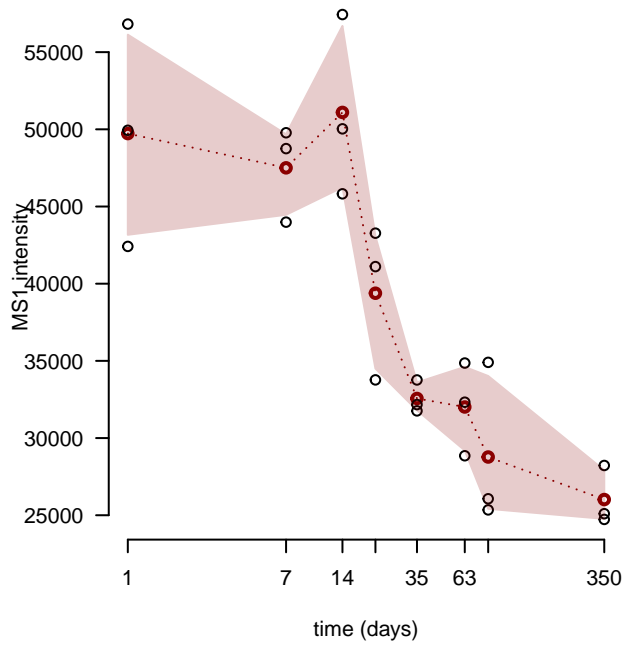

**P62500**  
GN=Tsc22d1  
TSC22 domain family, member 1

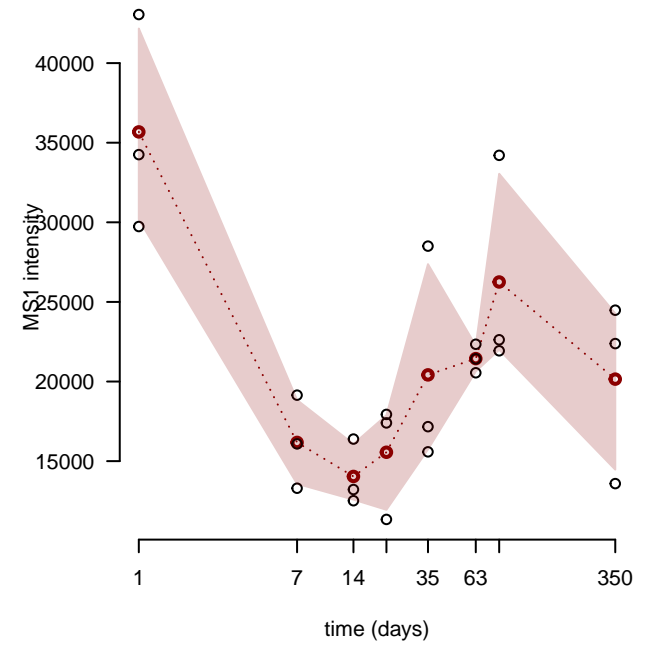

**P62627**  
GN=Dynlrb1  
dynein light chain roadblock-type 1

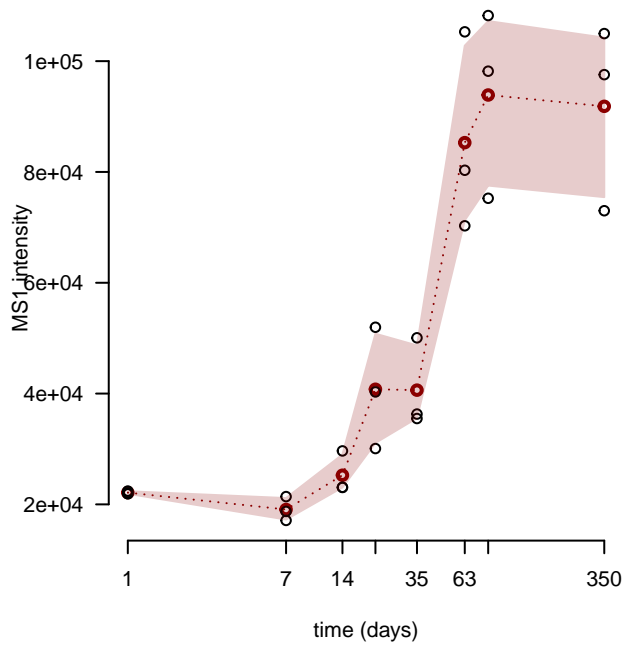

**P62700**  
GN=Ypel5  
yippee like 5

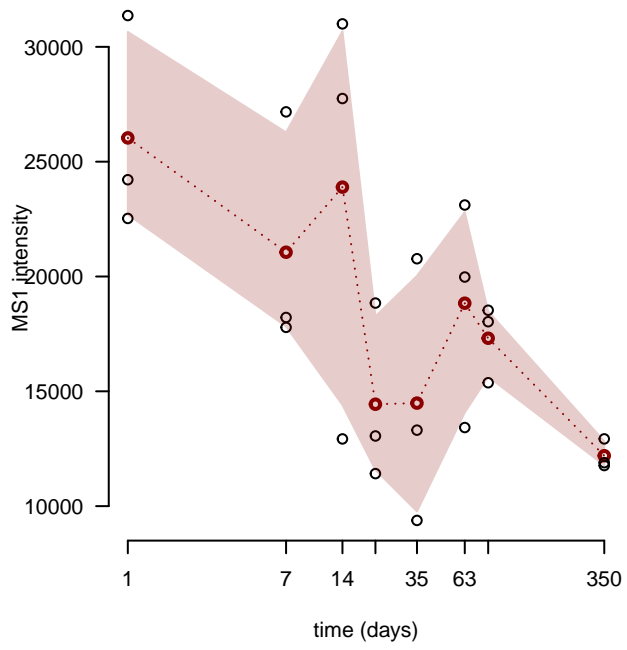

**P62702**  
GN=Rps4x  
ribosomal protein S4, X-linked

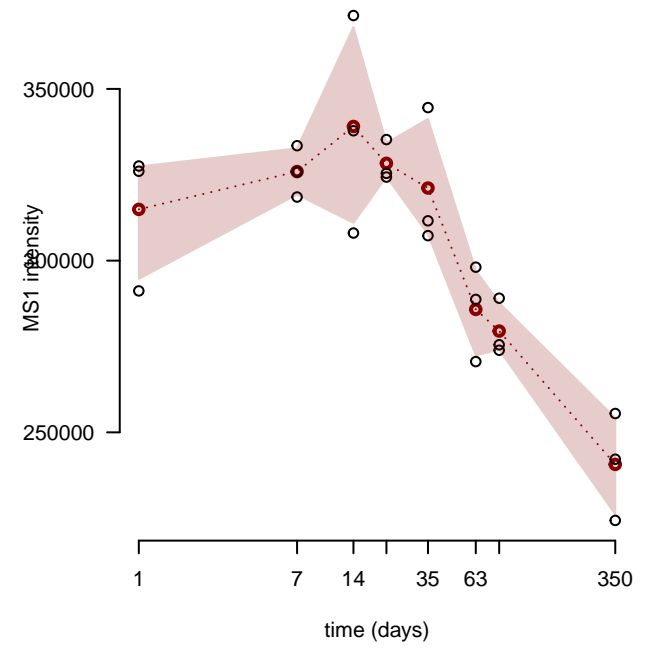

**P62715**  
GN=Ppp2cb  
protein phosphatase 2 (formerly 2A), cat ...

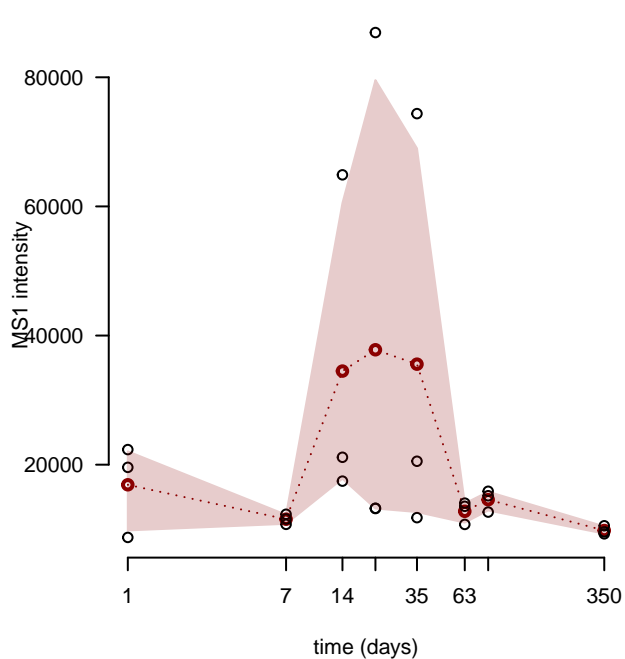

**P62717**  
GN=Rpl18a  
ribosomal protein L18A

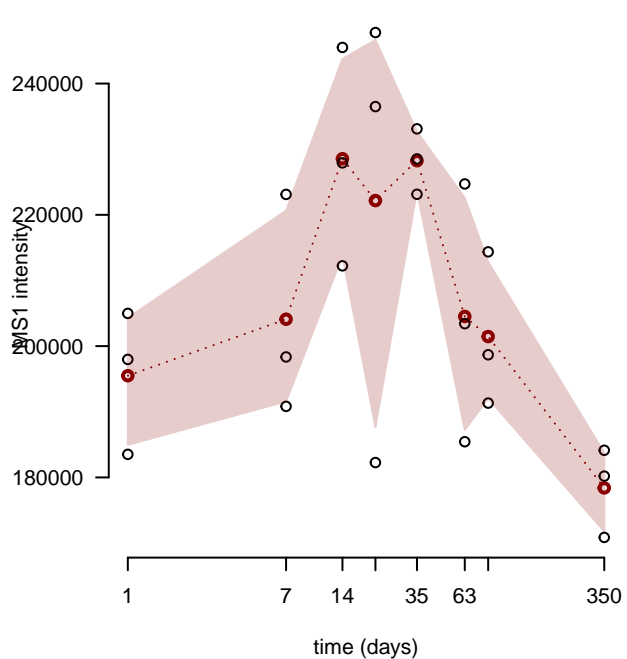

**P62737**  
GN=Acta2  
actin alpha 2, smooth muscle, aorta

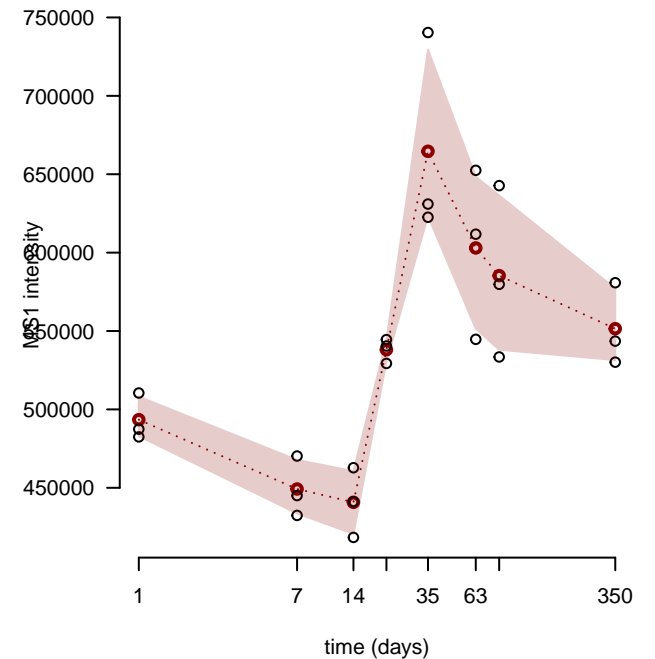

**P62743**  
GN=Ap2s1  
adaptor-related protein complex 2, sigma ...

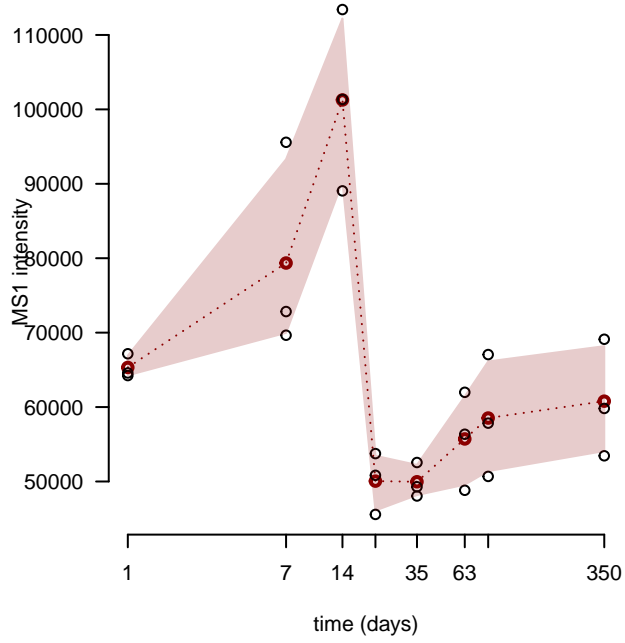

**P62746**  
GN=Rhob  
ras homolog family member B

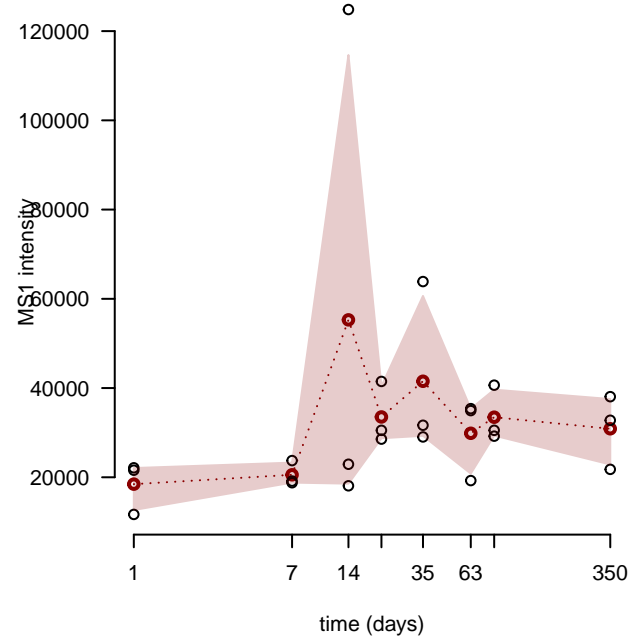

**P62748**  
GN=Hpcal1  
hippocalcin-like 1

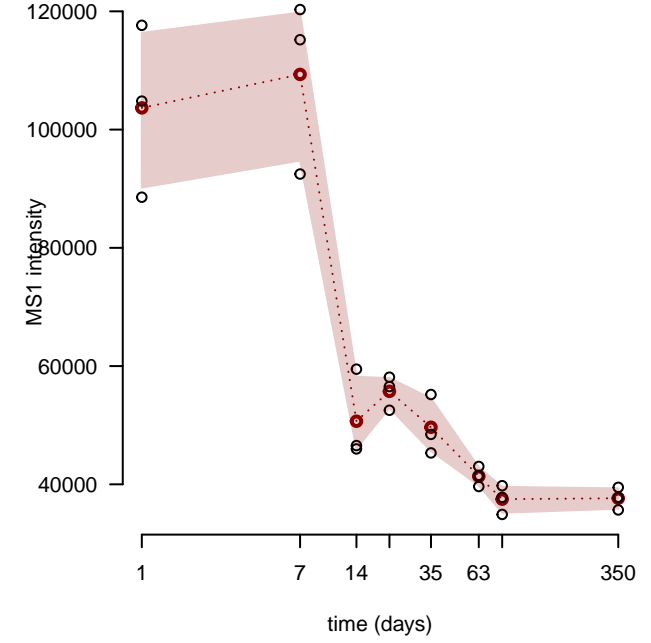

**P62751**  
GN=Rpl23a  
ribosomal protein L23A

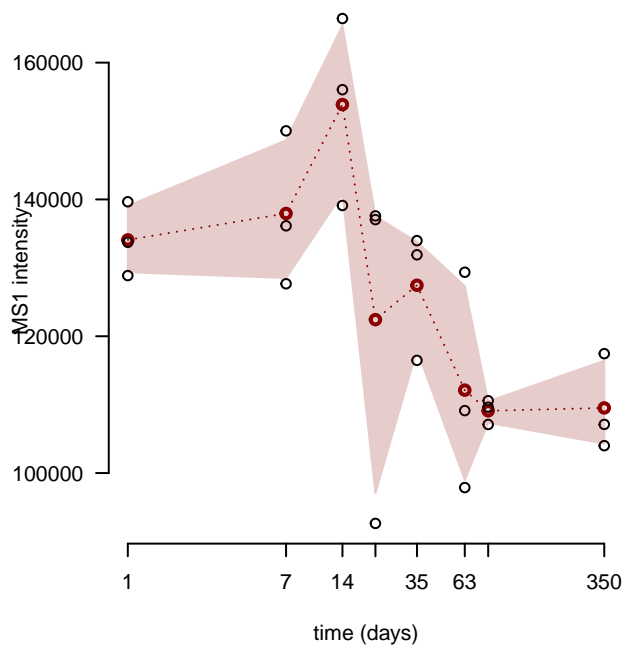

**P62754**  
GN=Rps6  
ribosomal protein S6

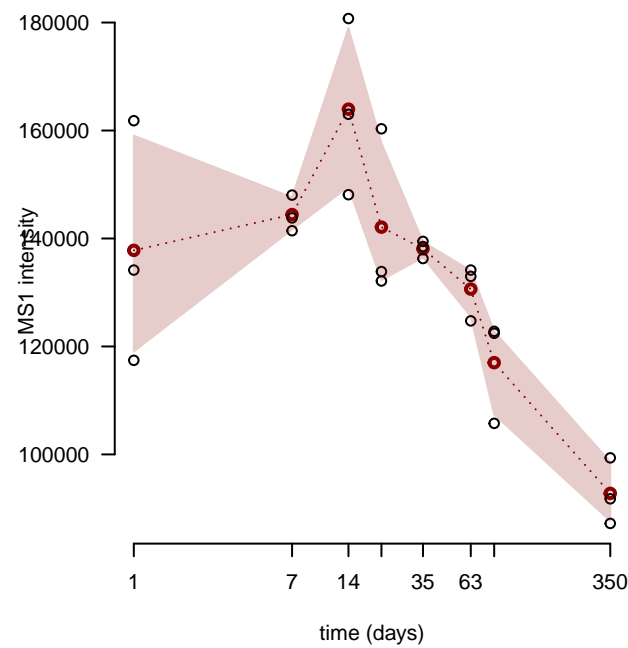

**P62761**  
GN=Vsnl1  
visinin-like 1

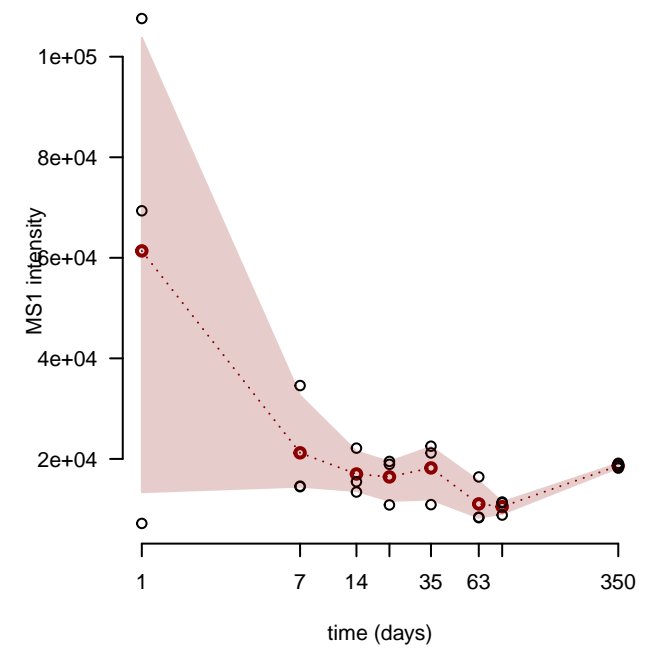

**P62774**  
GN=Mtpn  
myotrophin

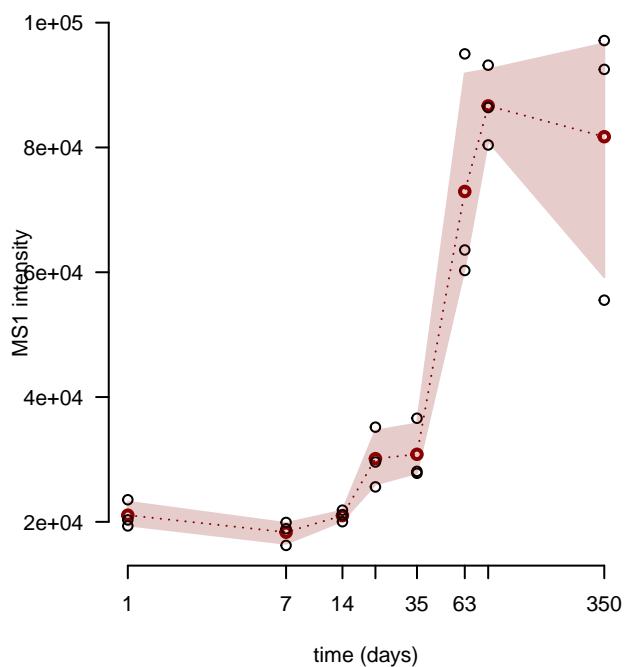

**P62806**  
GN=Hist1h4a

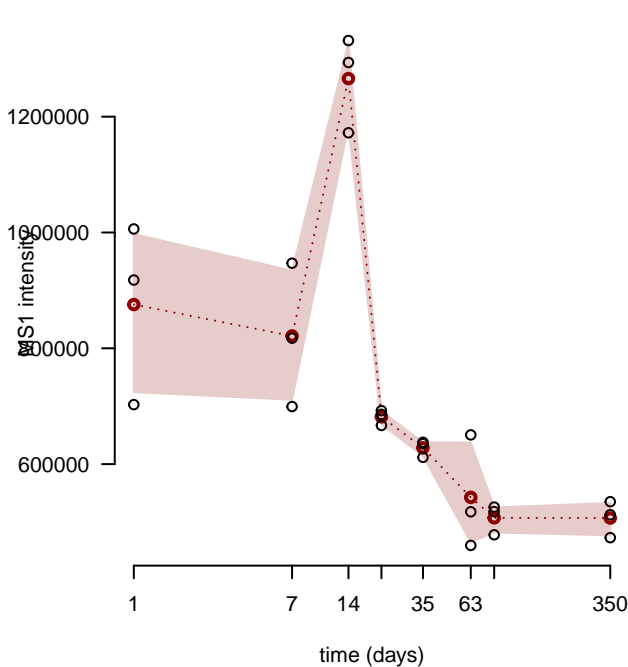

**P62814**  
GN=Atp6v1b2  
ATPase, H+ transporting, lysosomal V1 su ...

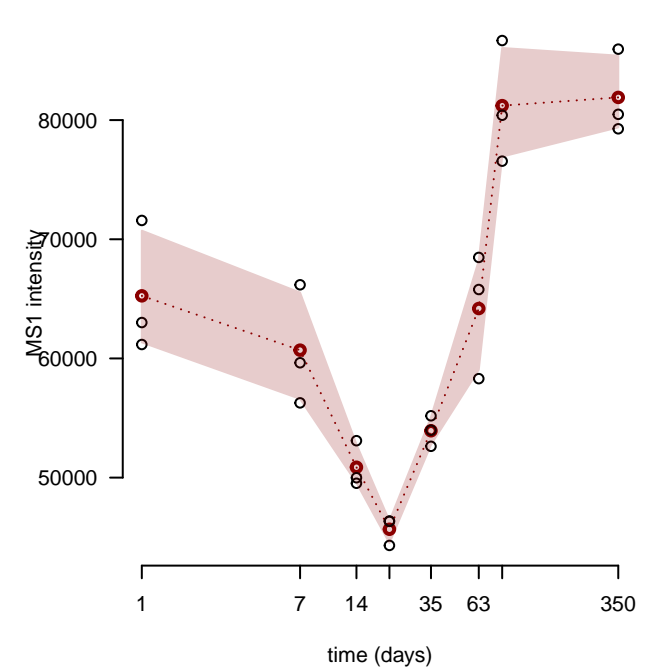

**P62821**  
GN=Rab1A

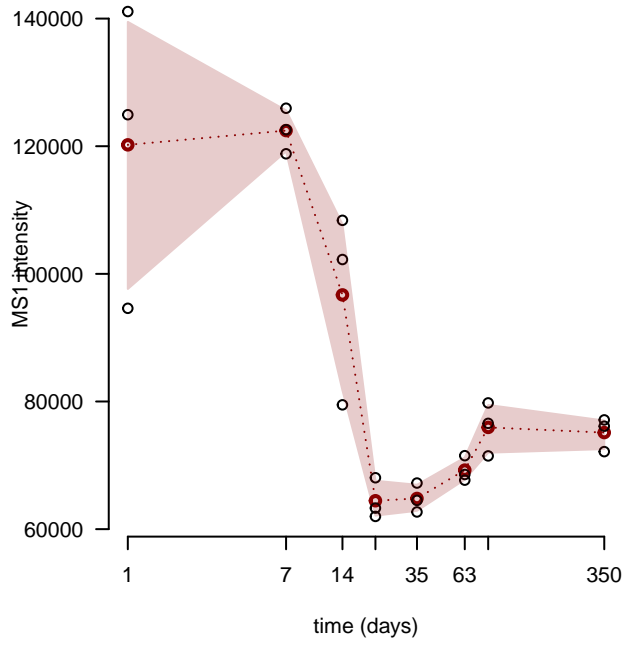

**P62827**  
GN=Ran  
RAN, member RAS oncogene family

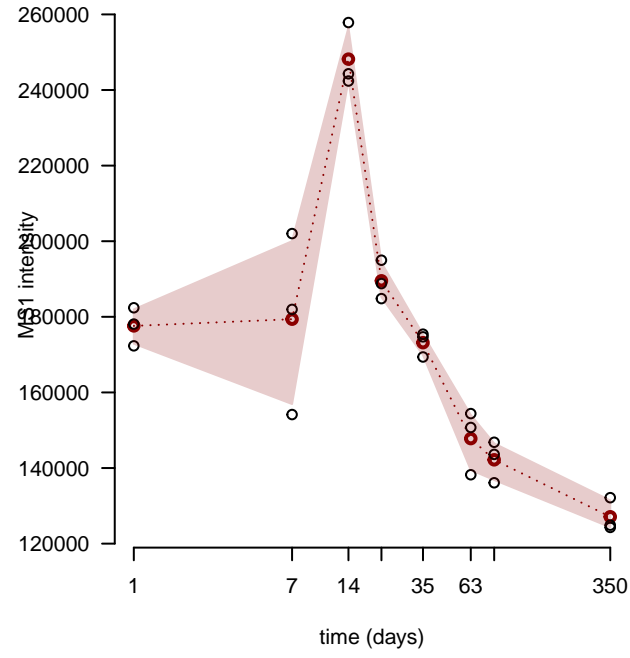

**P62830**  
GN=Rpl23  
ribosomal protein L23

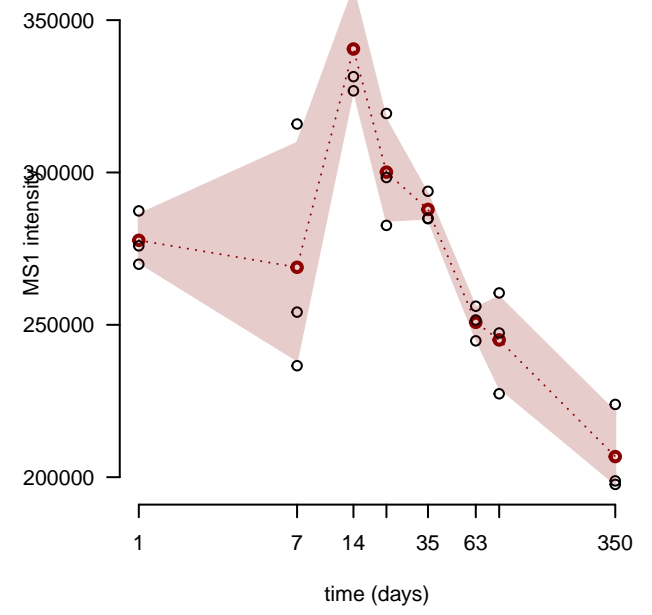

**P62835**  
GN=Rap1a  
RAS-related protein 1a

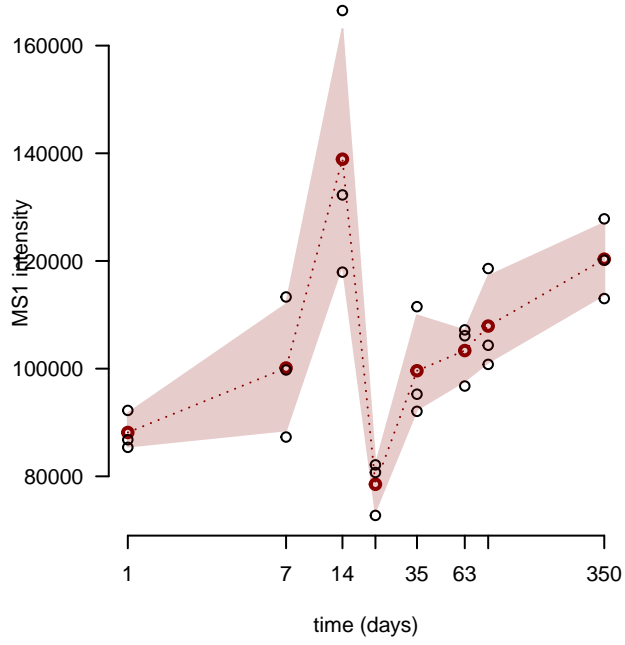

**P62838**  
GN=Ube2d2

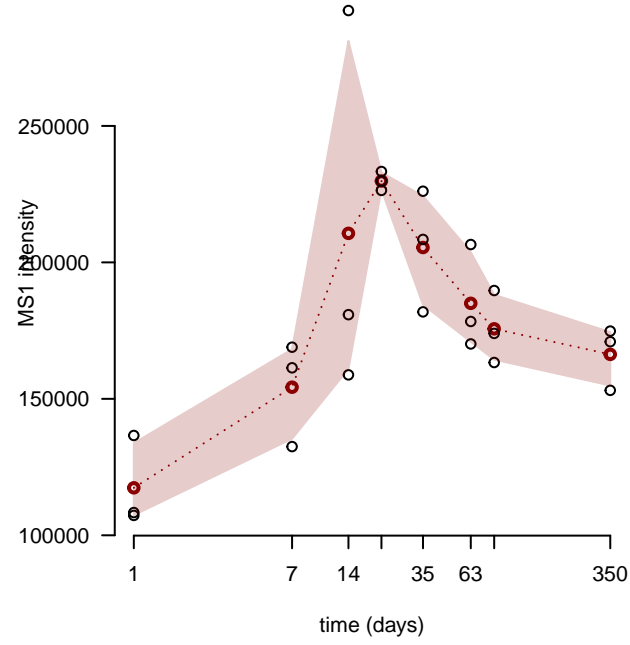

**P62843**  
GN=Rps15  
ribosomal protein S15

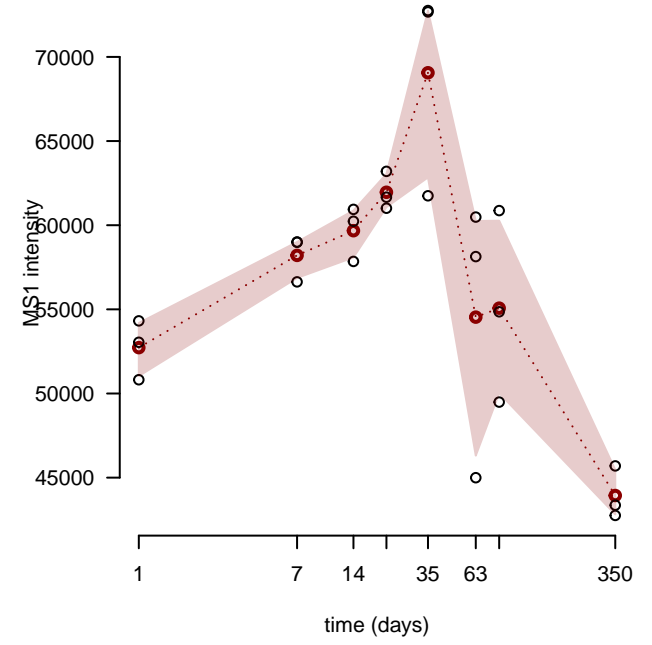

**P62849**  
GN=Rps24  
ribosomal protein S24

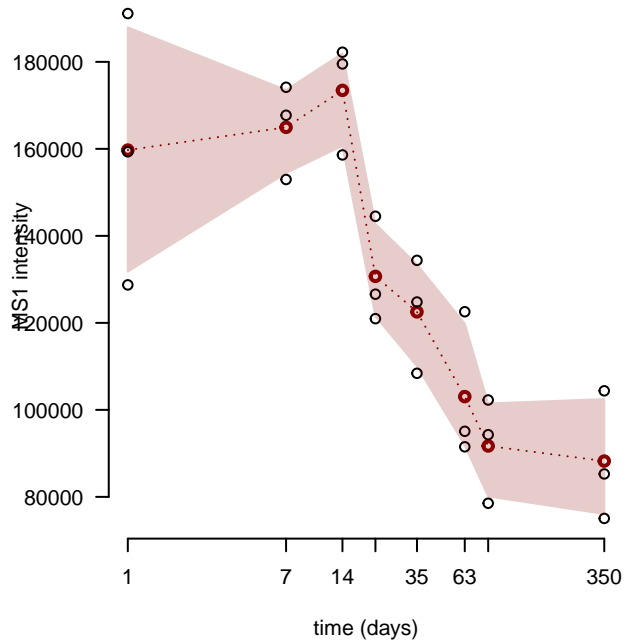

**P62852**  
GN=Rps25  
ribosomal protein S25

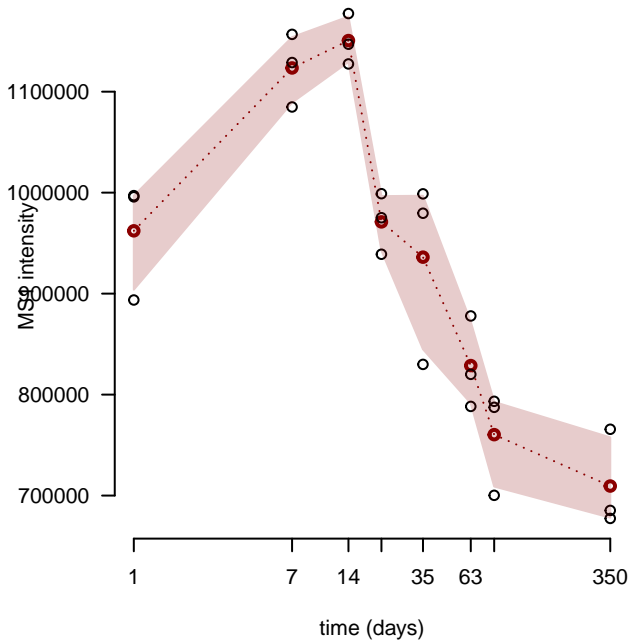

**P62855**  
GN=Rps26  
ribosomal protein S26

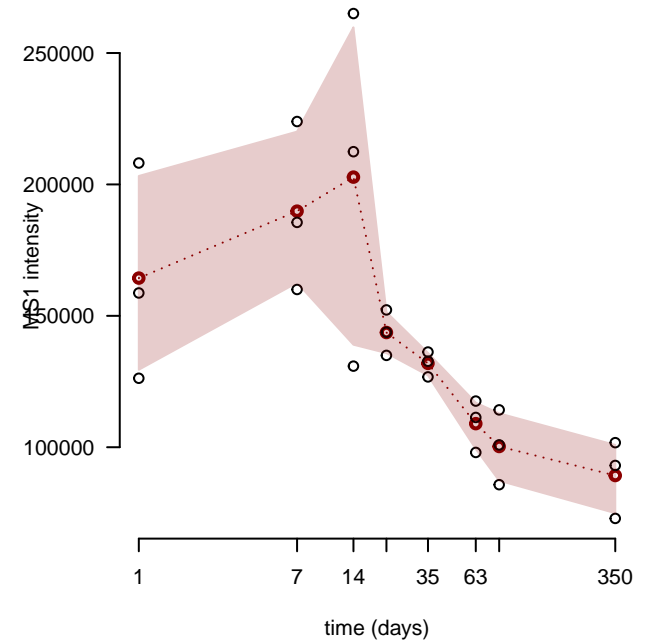

**P62858**  
**GN=Rps28**  
ribosomal protein S28

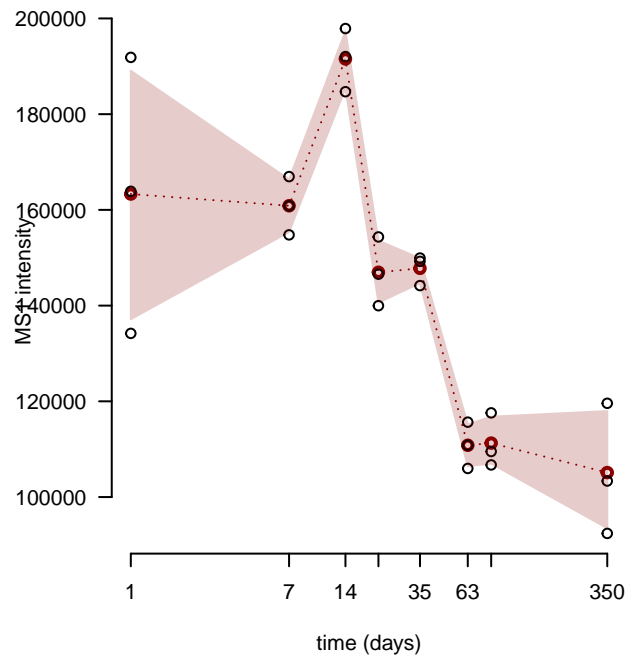

**P62862**  
**GN=Fau**

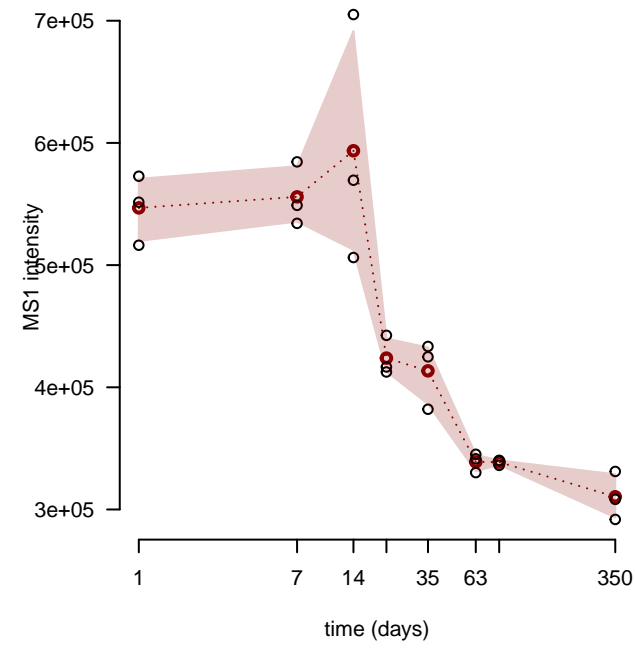

**P62869**  
**GN=Elob**  
elongin B

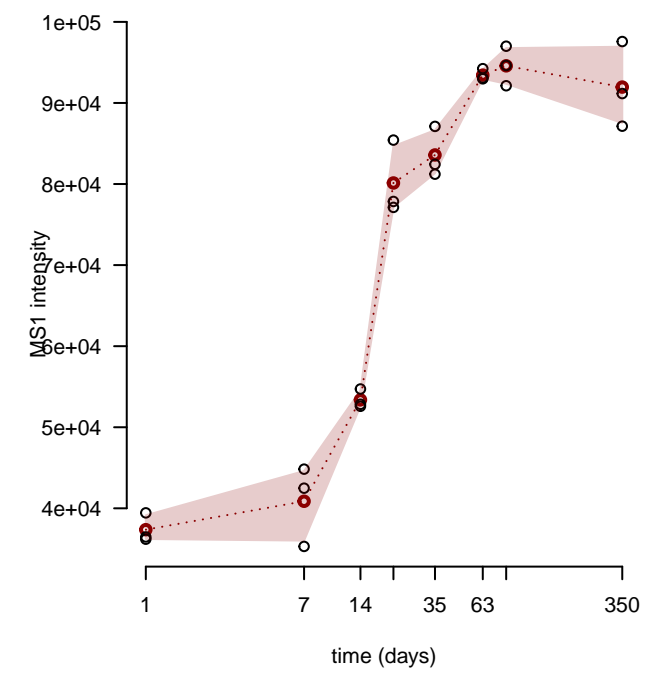

**P62874**  
**GN=Gnb1**  
guanine nucleotide binding protein (G pr ...

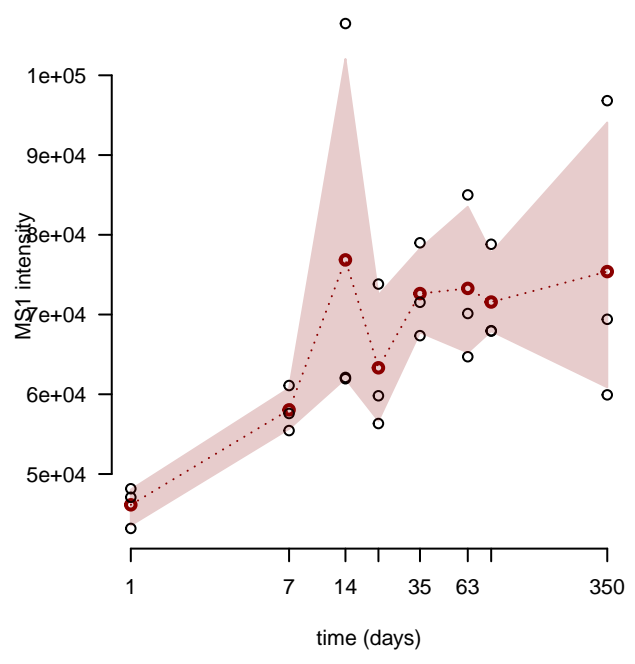

**P62876**  
**GN=Polr2l**  
polymerase (RNA) II (DNA directed) polyp ...

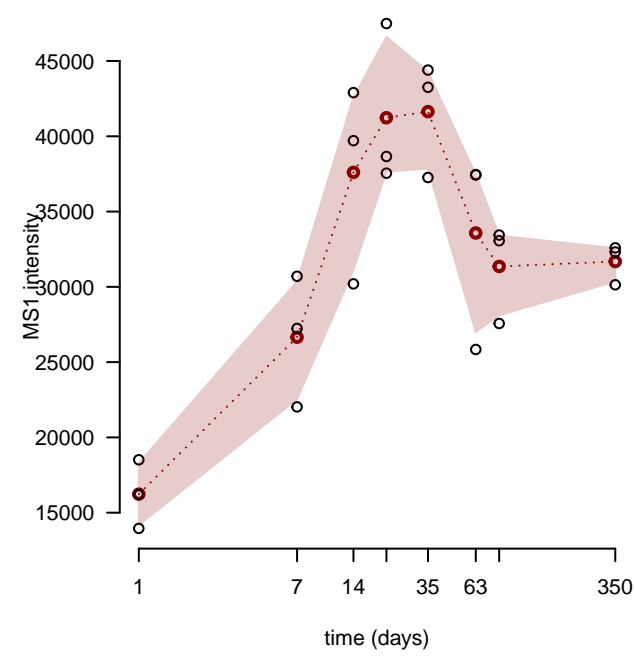

**P62878**  
**GN=Rbx1**  
ring-box 1

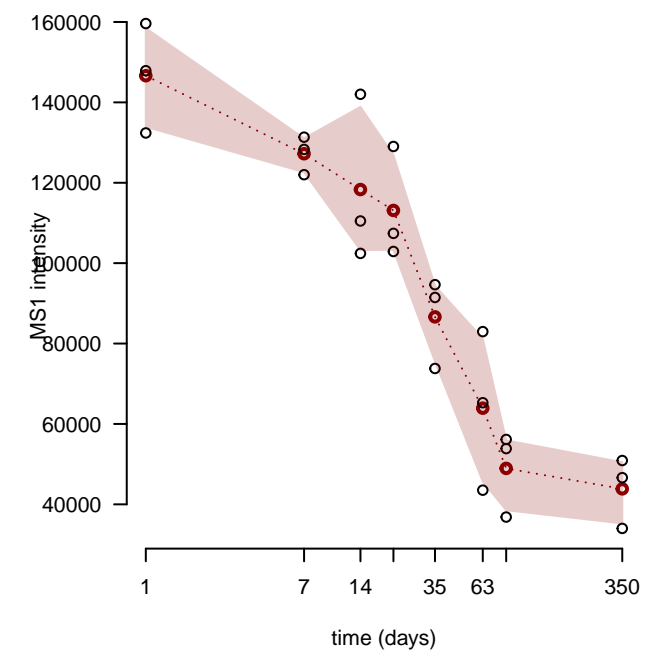

**P62880**  
**GN=Gnb2**  
guanine nucleotide binding protein (G pr ...

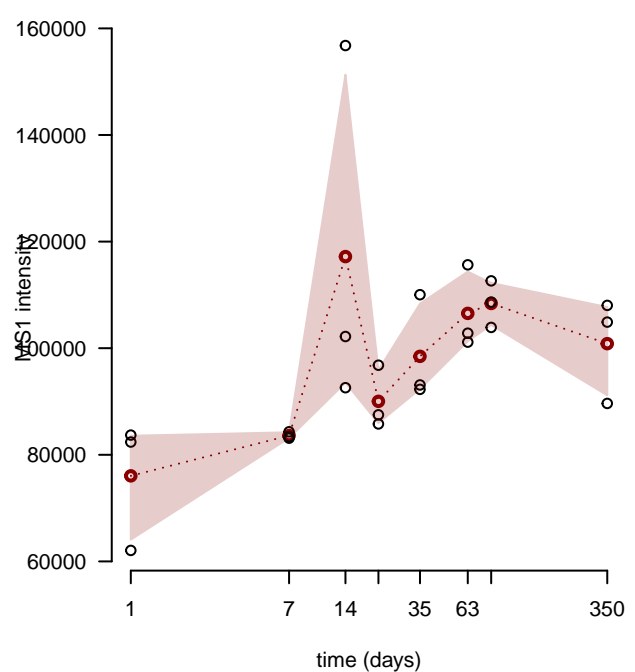

**P62889**  
**GN=Rpl30**  
ribosomal protein L30

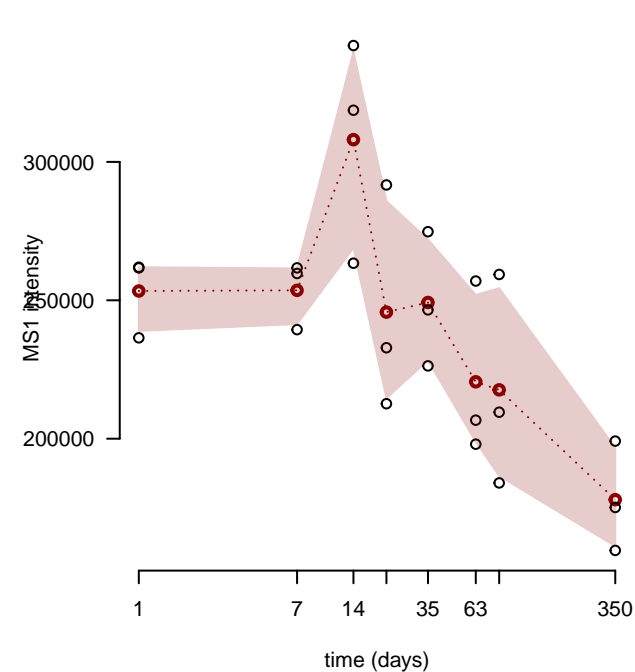

**P62892**  
**GN=Rpl39**  
ribosomal protein L39

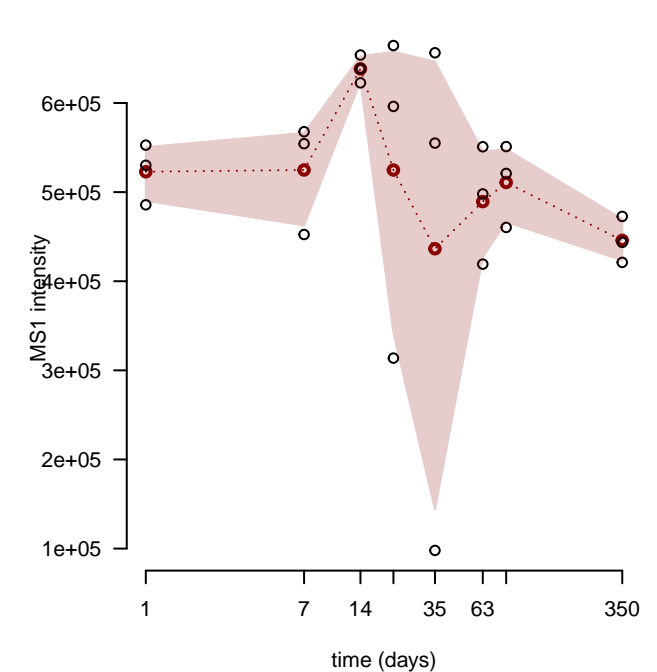

**P62897**  
**GN=Cycc**  
cytochrome c, somatic

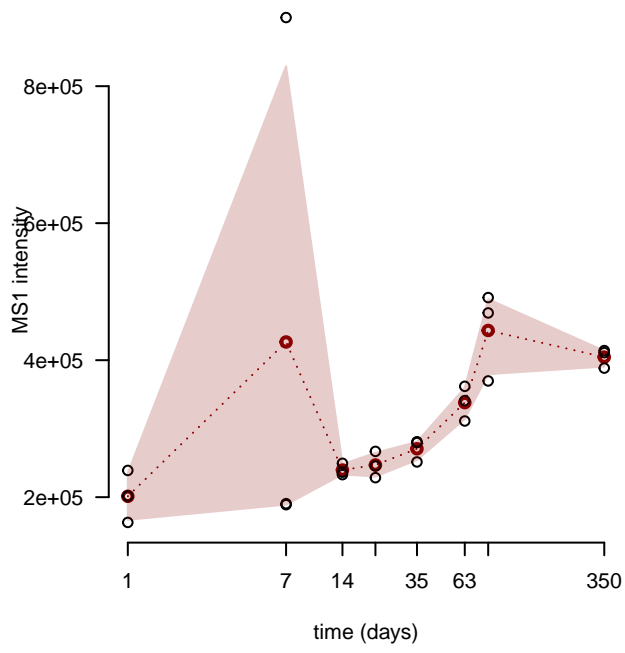

**P62900**  
**GN=Rpl31**  
ribosomal protein L31

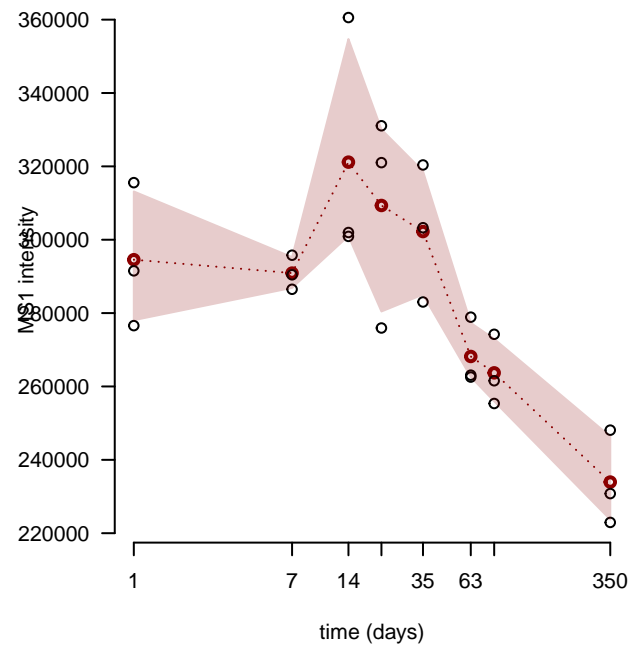

**P62908**  
**GN=Rps3**  
ribosomal protein S3

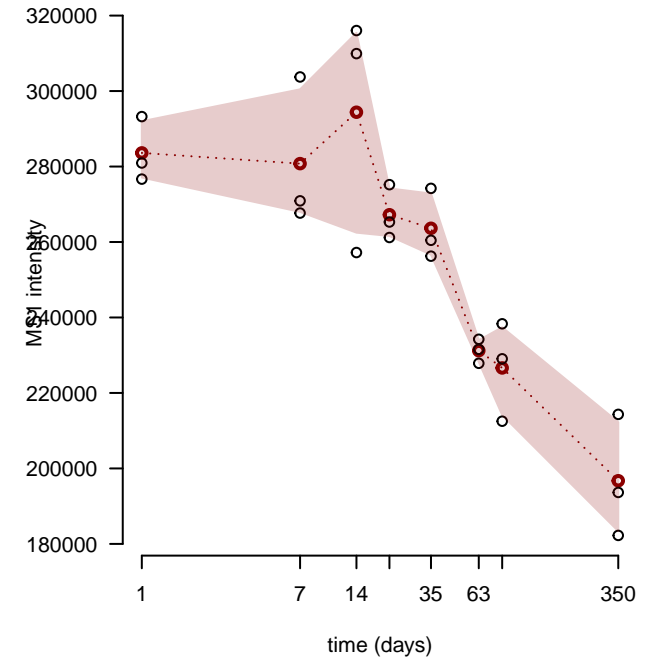

**P62911**  
**GN=Rpl32**  
ribosomal protein L32

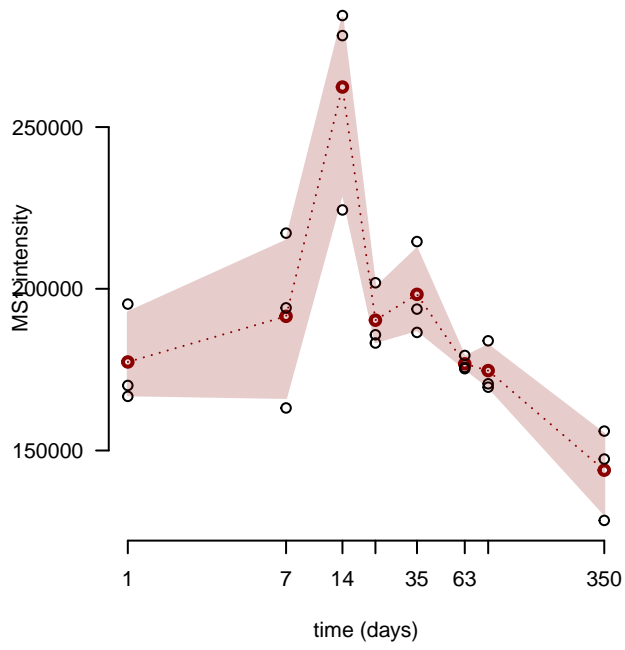

**P62915**  
**GN=Gtf2b**  
general transcription factor IIB

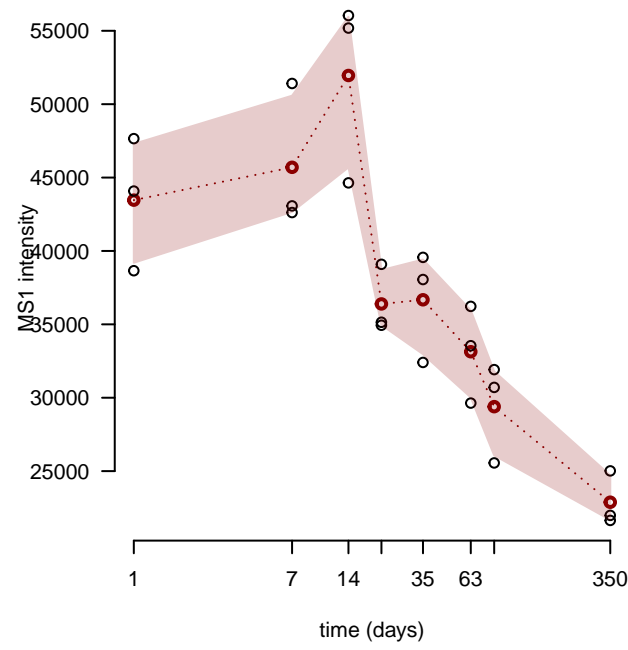

**P62918**  
**GN=Rpl8**  
ribosomal protein L8

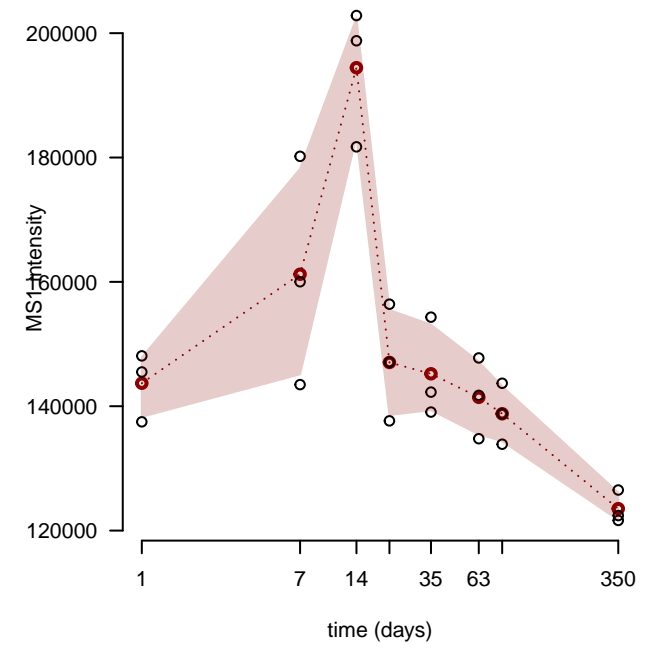

**P62932**  
**GN=Fbxo40**  
F-box protein 40

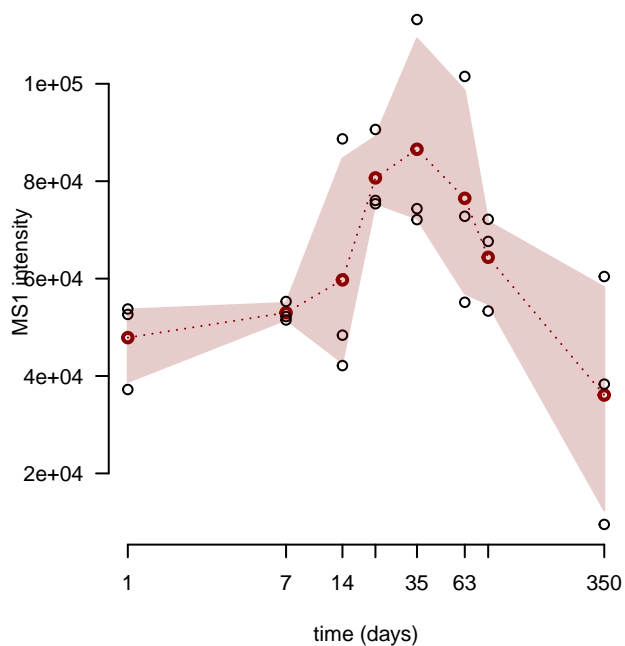

**P62960**  
**GN=Ybx1**  
Y box protein 1

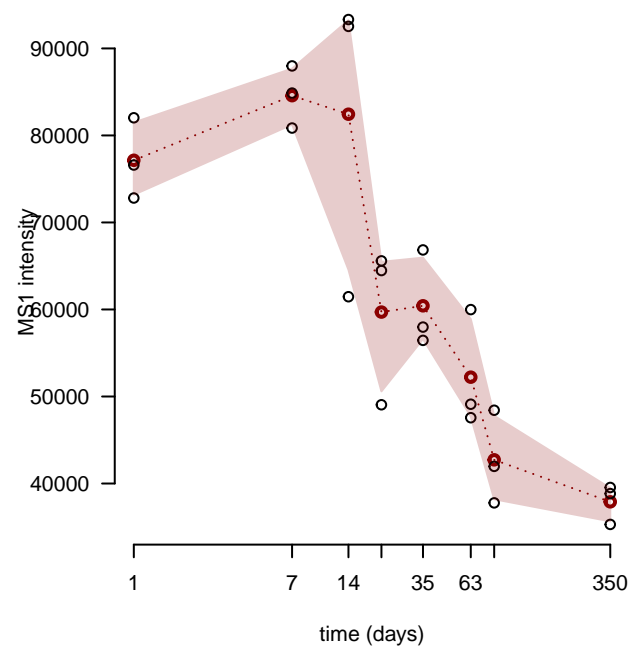

**P62962**  
**GN=Pfn1**  
profilin 1

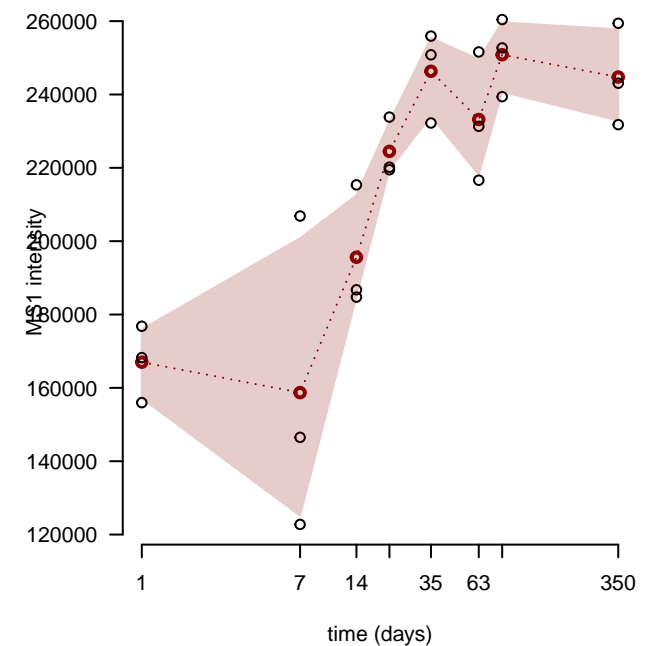

**P62965**  
**GN=Crabp1**  
cellular retinoic acid binding protein I

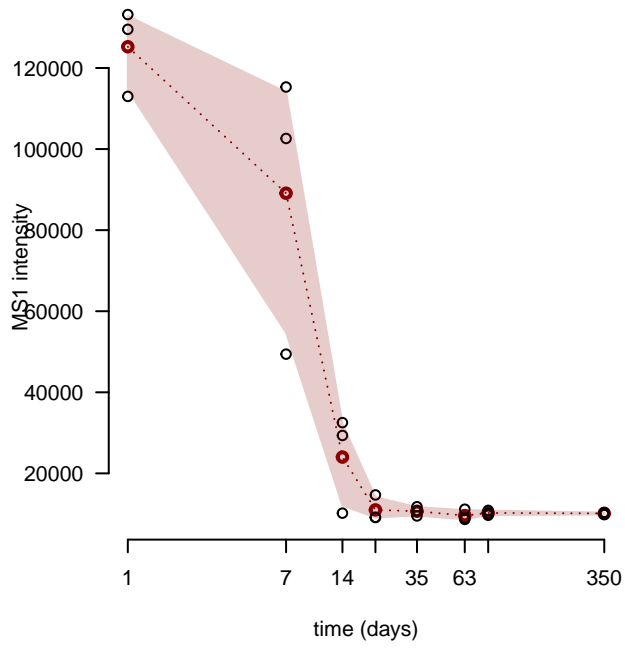

**P62983**  
**GN=Rps27a**  
ribosomal protein S27A

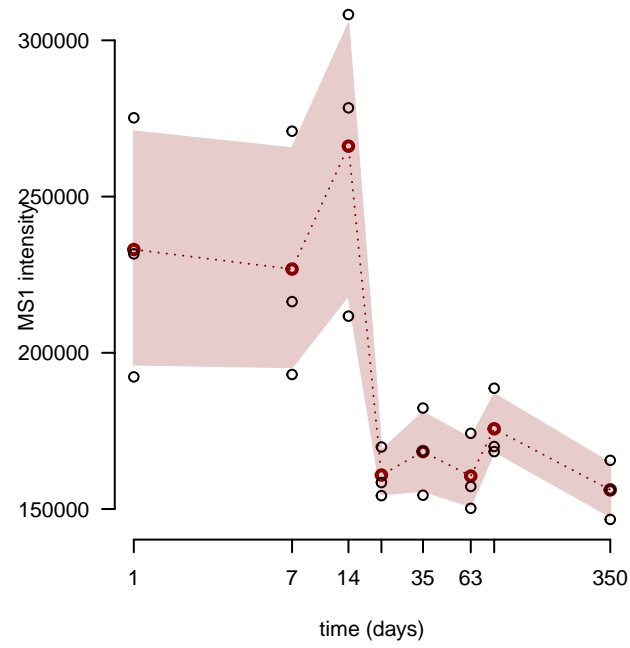

**P62996**  
**GN=Tra2b**  
transformer 2 beta

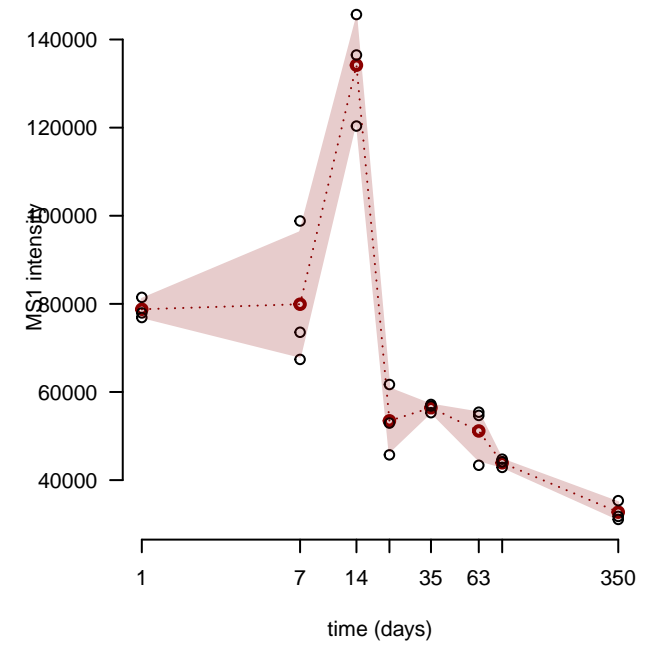

**P63001**  
**GN=Rac1**  
Rac family small GTPase 1

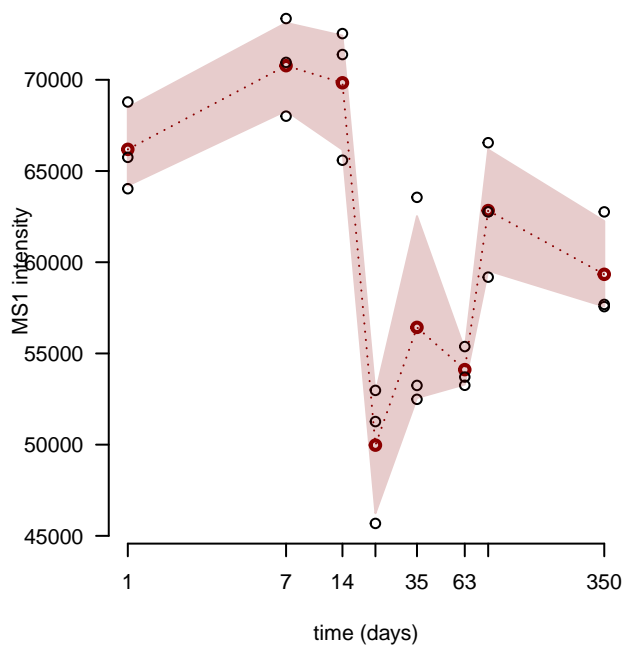

**P63002**  
**GN=Tle5**  
TLE family member 5, transcriptional mod ...

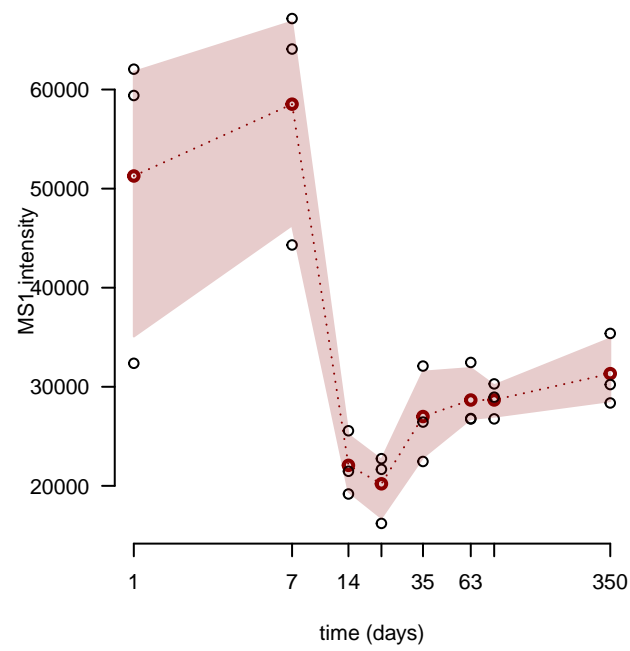

**P63005**  
**GN=Pafah1b1**  
platelet-activating factor acetylhydrola ...

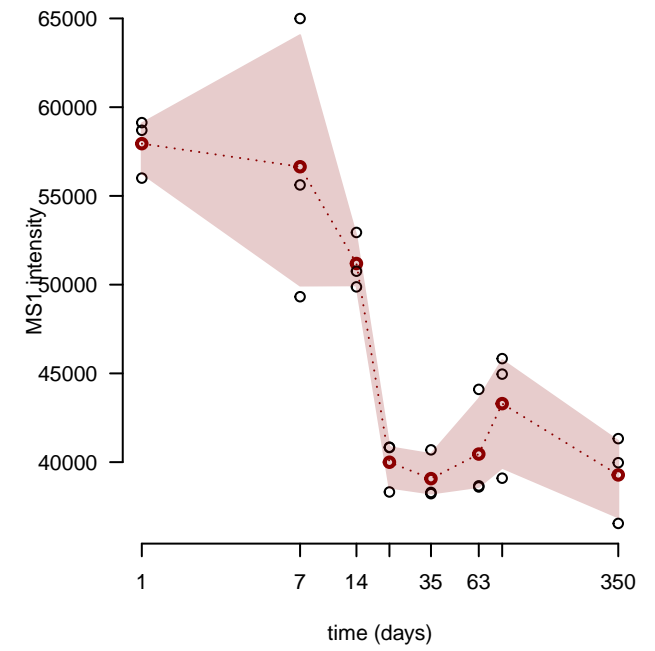

**P63011**  
**GN=Rab3a**  
RAB3A, member RAS oncogene family

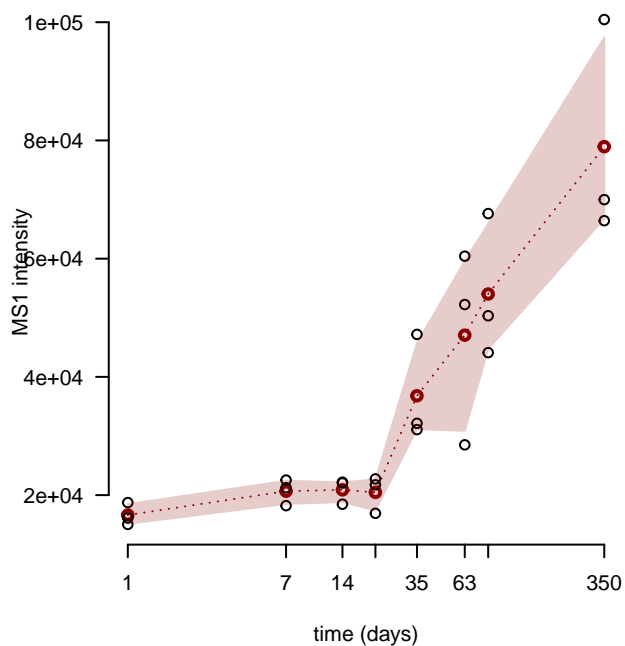

**P63013**  
**GN=Prrx1**  
paired related homeobox 1

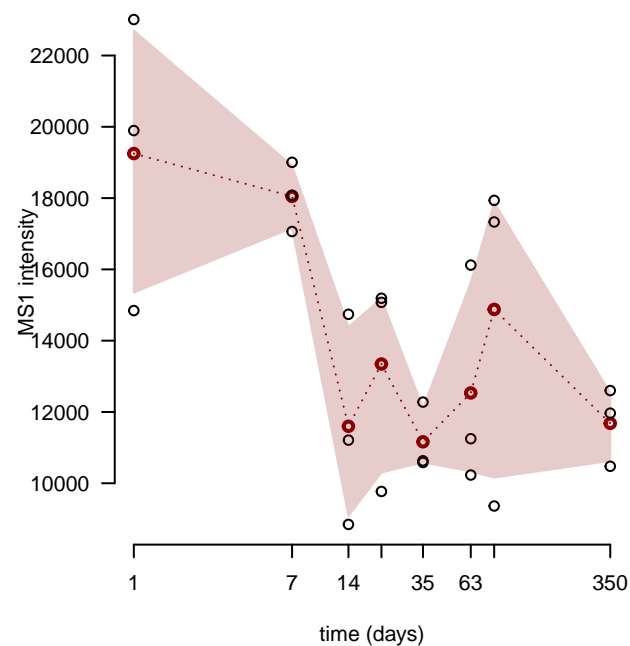

**P63017**  
**GN=Hspa8**  
heat shock protein 8

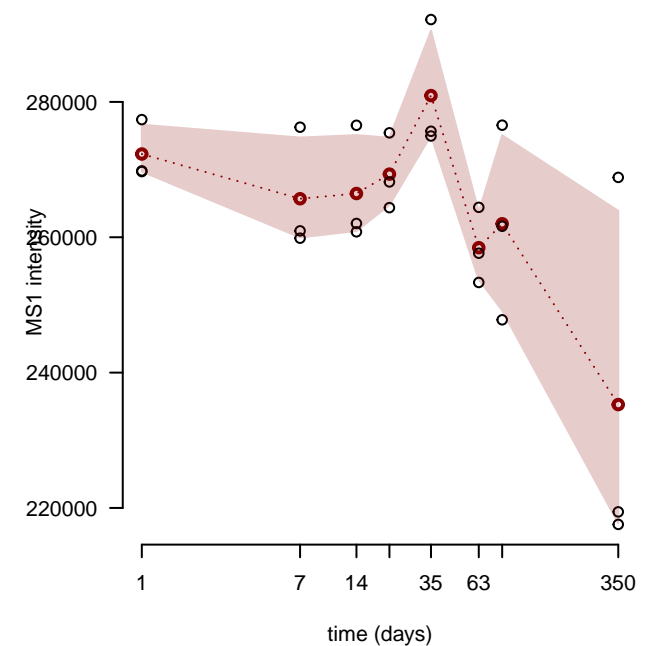

**P63024**  
GN=Vamp3  
vesicle-associated membrane protein 3

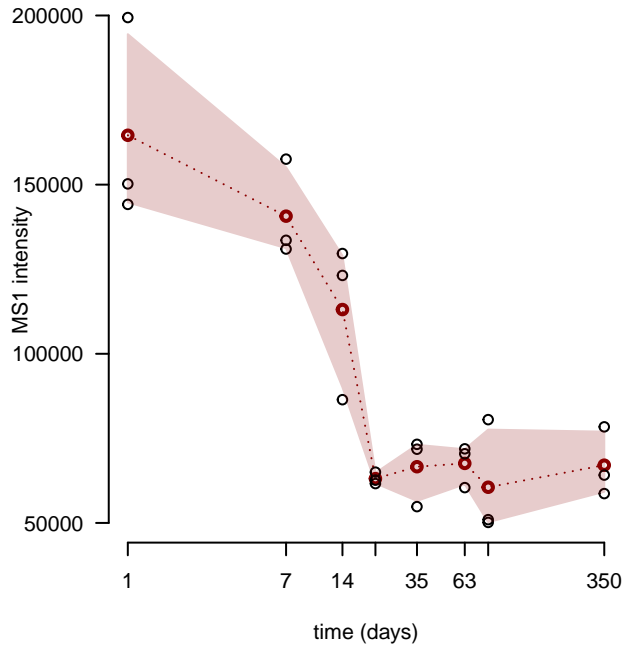

**P63028**  
GN=Tpt1  
tumor protein, translationally-controlled ...

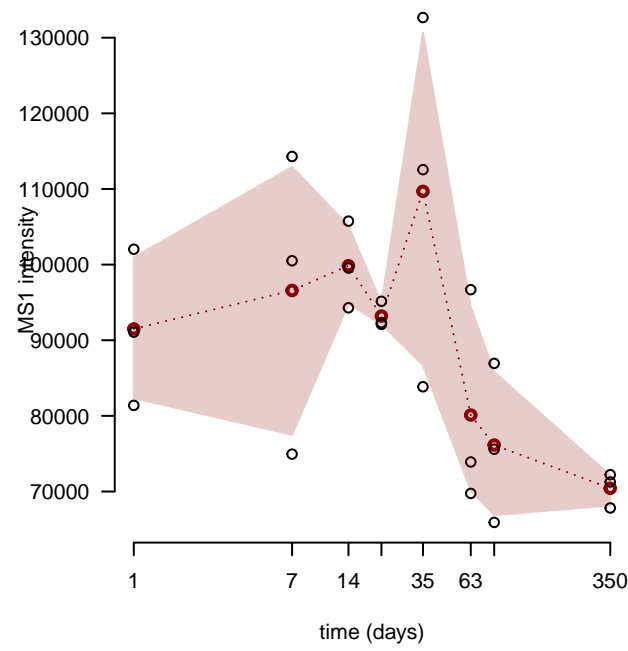

**P63030**  
GN=Mpc1  
mitochondrial pyruvate carrier 1

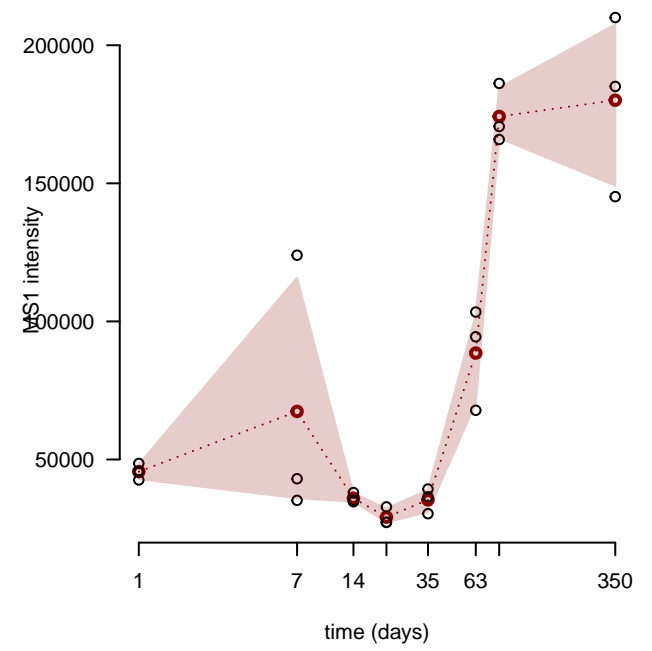

**P63037**  
GN=Dnaja1  
DnaJ heat shock protein family (Hsp40) m ...

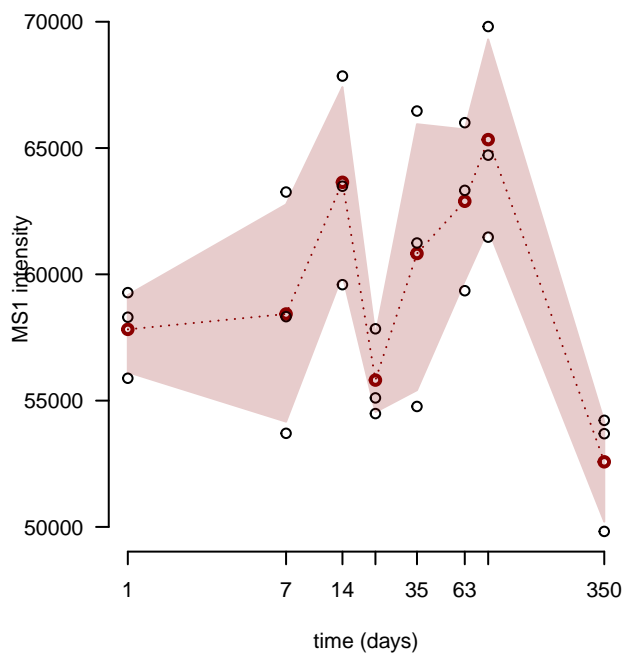

**P63038**  
GN=Hspd1  
heat shock protein 1 (chaperonin)

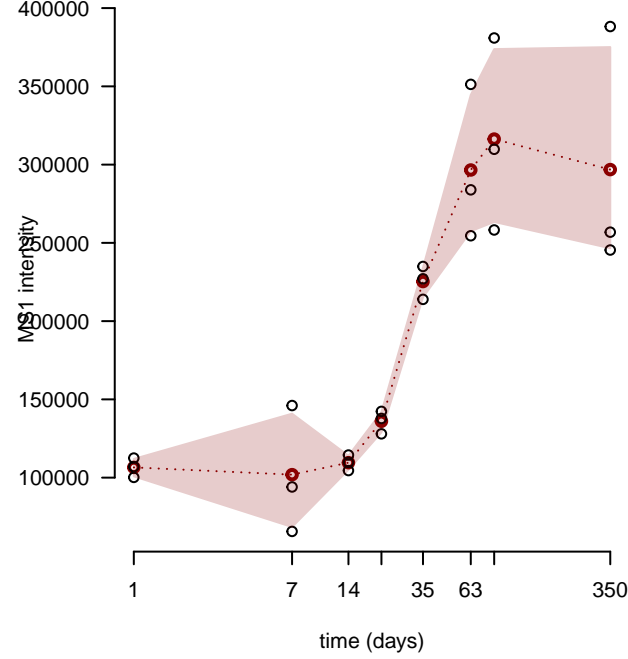

**P63040**  
GN=Cplx1  
complexin 1

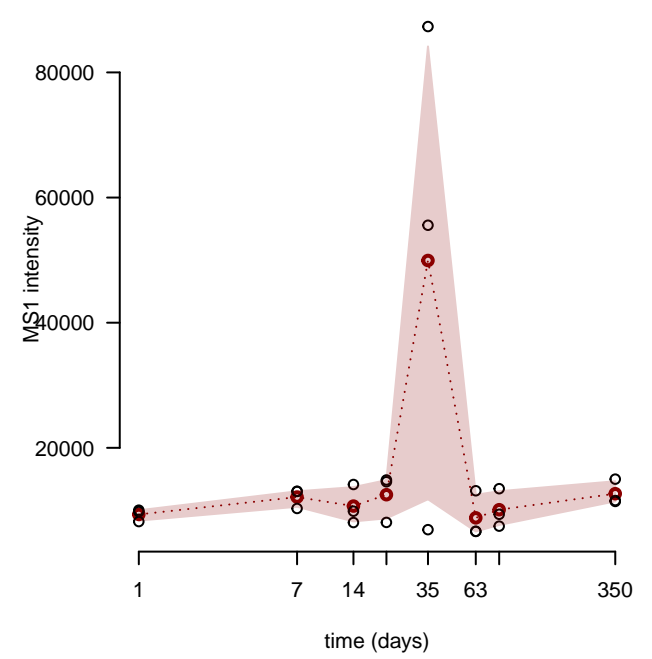

**P63044**  
GN=Vamp2  
vesicle-associated membrane protein 2

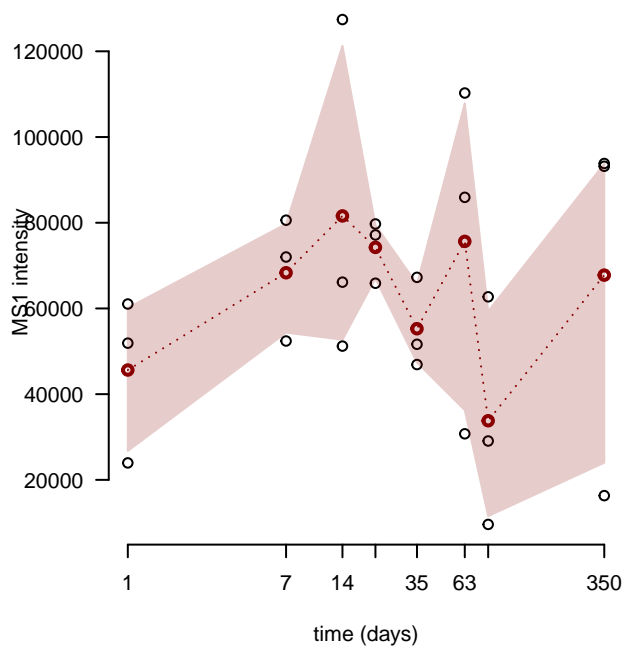

**P63073**  
GN=Eif4e  
eukaryotic translation initiation factor ...

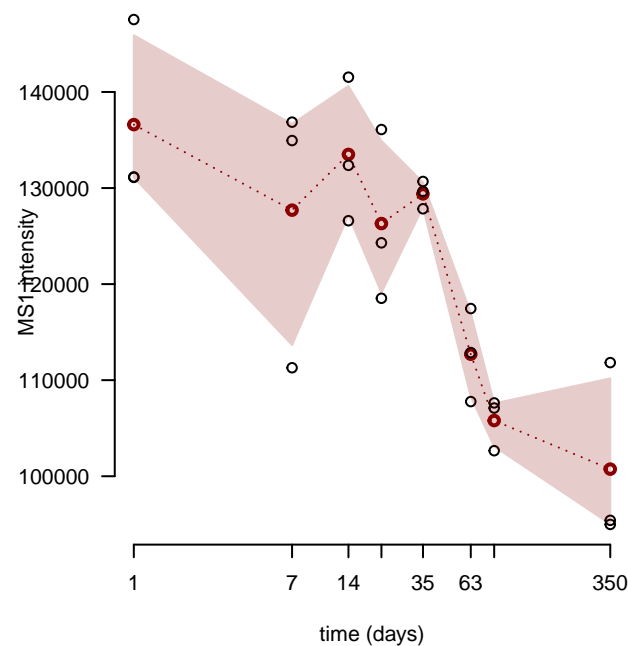

**P63082**  
GN=Atp6v0c  
ATPase, H+ transporting, lysosomal V0 su ...

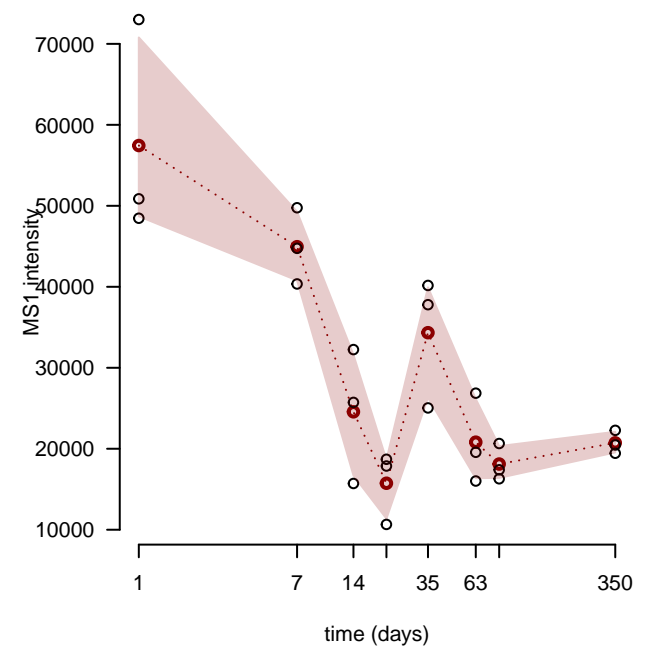

**P63085**  
**GN=Mapk1**  
mitogen-activated protein kinase 1

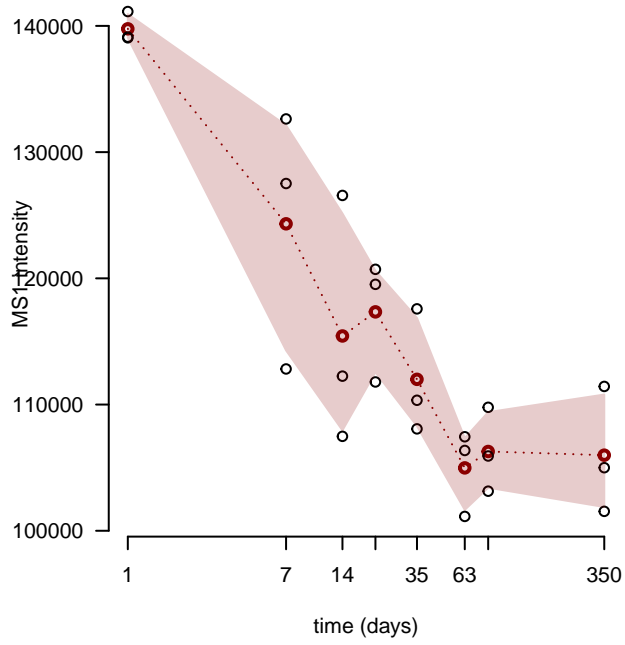

**P63087**  
**GN=Ppp1cc**  
protein phosphatase 1 catalytic subunit ...

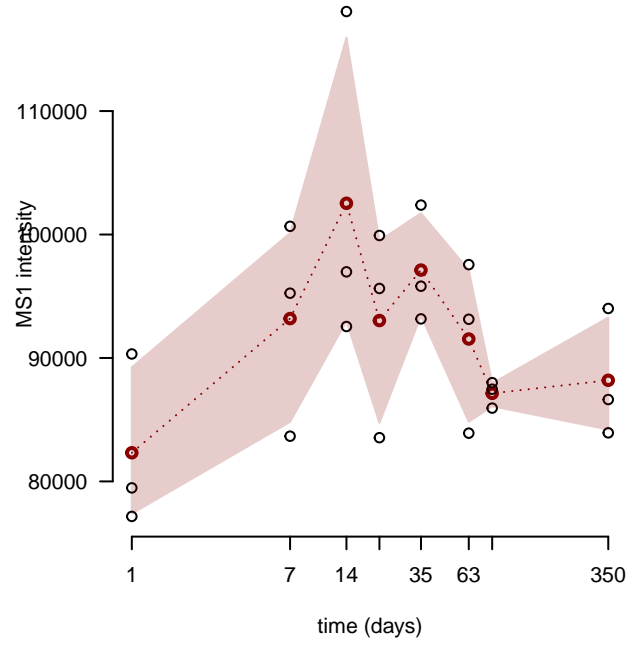

**P63089**  
**GN=Ptn**  
pleiotrophin

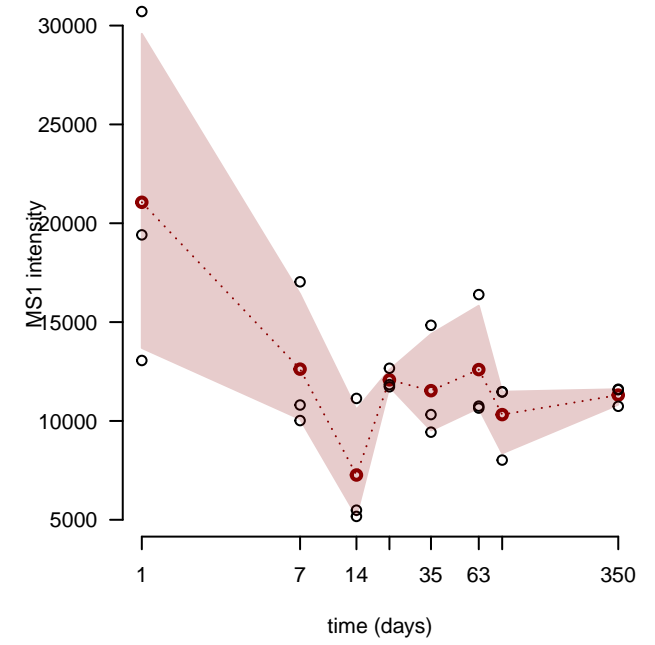

**P63094**  
**GN=Gnas**  
GNAS (guanine nucleotide binding protein ...

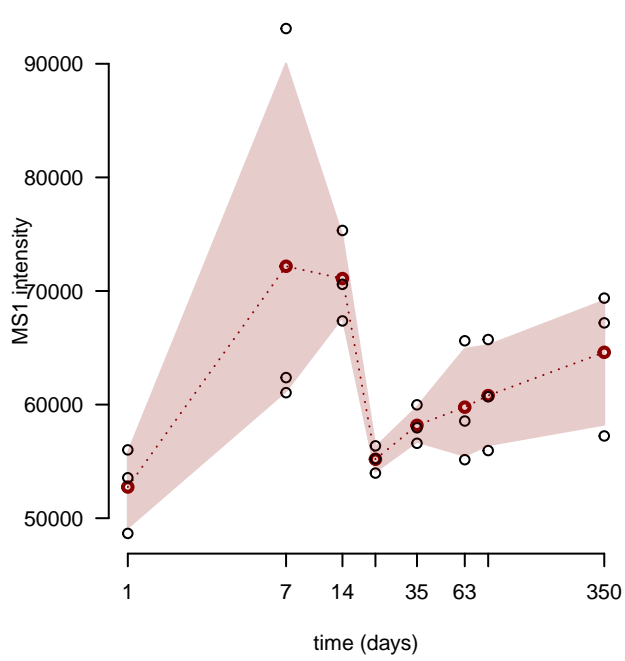

**P63101**  
**GN=Ywhaz**  
tyrosine 3-monooxygenase/tryptophan 5-mo ...

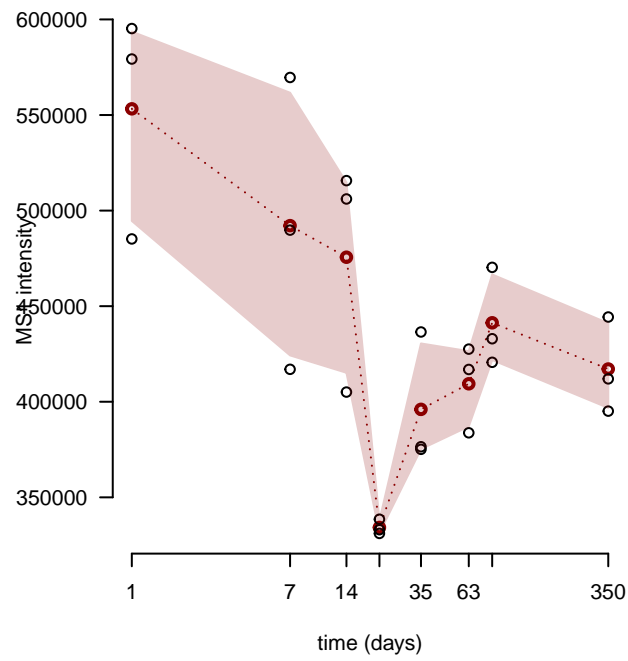

**P63139**  
**GN=Nfyb**  
nuclear transcription factor-Y beta

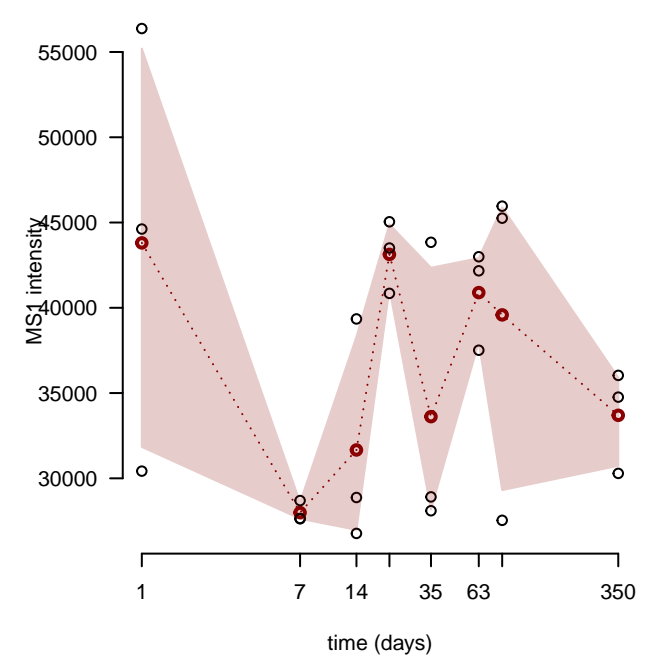

**P63147**  
**GN=Ube2b**  
ubiquitin-conjugating enzyme E2B

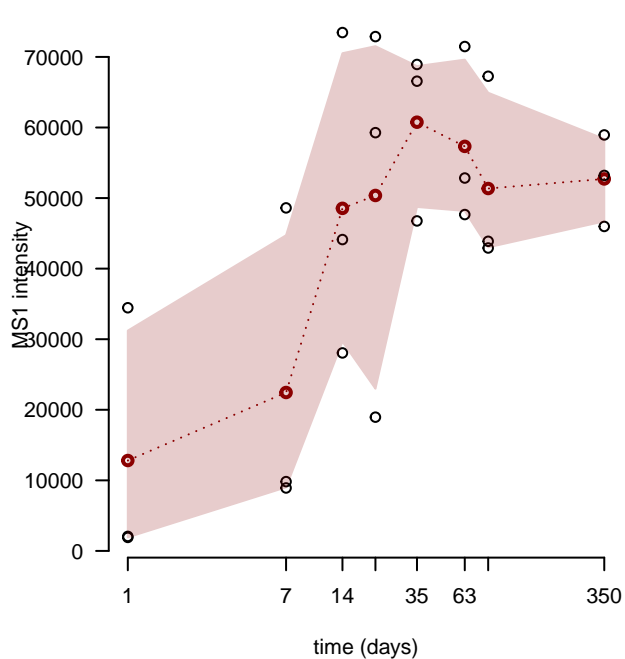

**P63154**  
**GN=Crnk1l**  
crooked neck pre-mRNA splicing factor 1

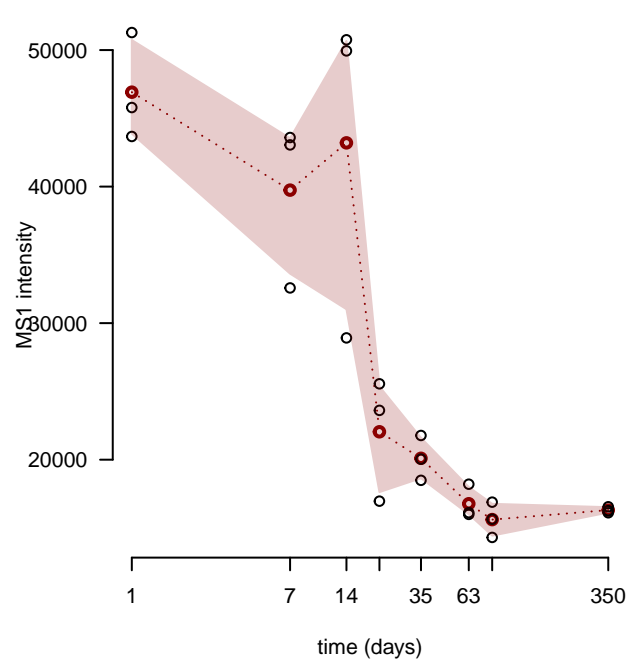

**P63158**  
**GN=Hmgb1**  
high mobility group box 1

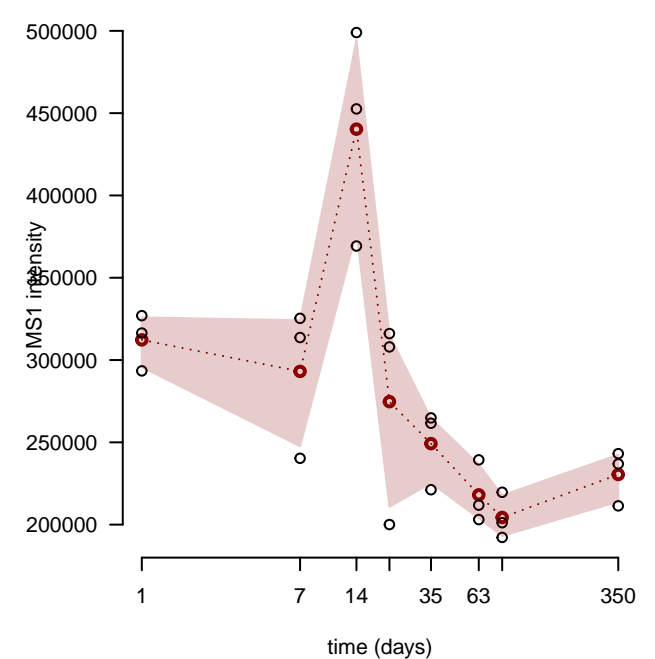



**P63166**  
GN=Sumo1  
small ubiquitin-like modifier 1

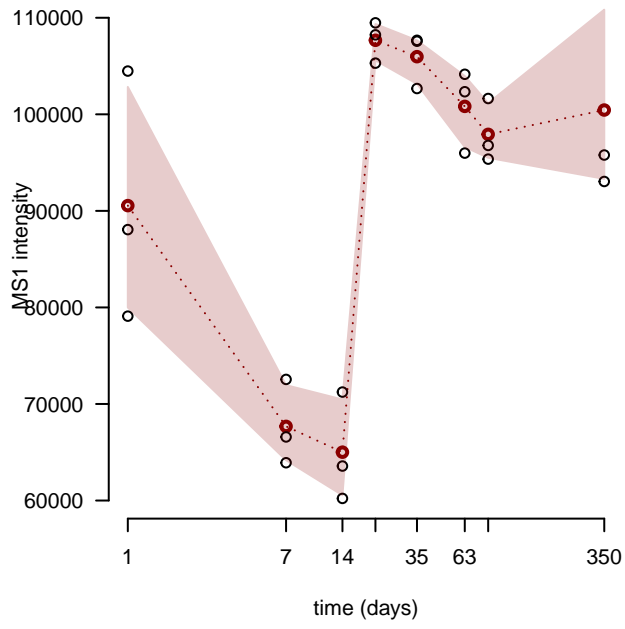

**P63168**  
GN=Dynll1  
dynein light chain LC8-type 1

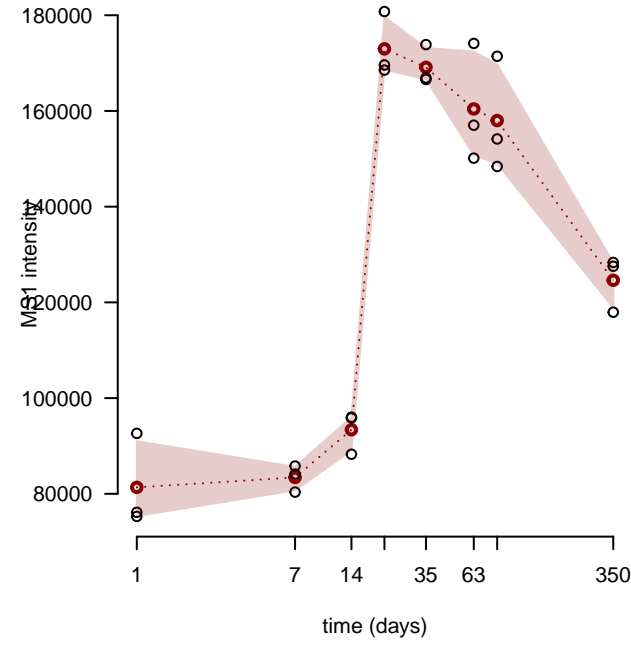

**P63213**  
GN=Gng2  
guanine nucleotide binding protein (G pr ...

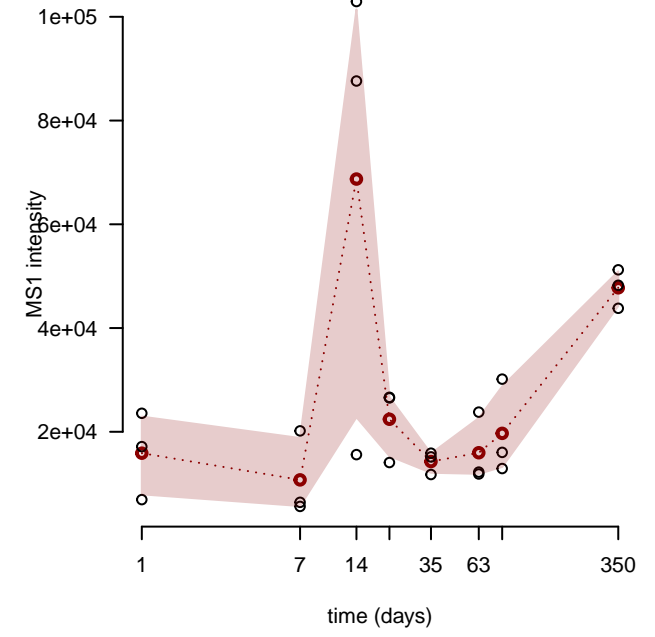

**P63242**  
GN=Eif5a  
eukaryotic translation initiation factor ...

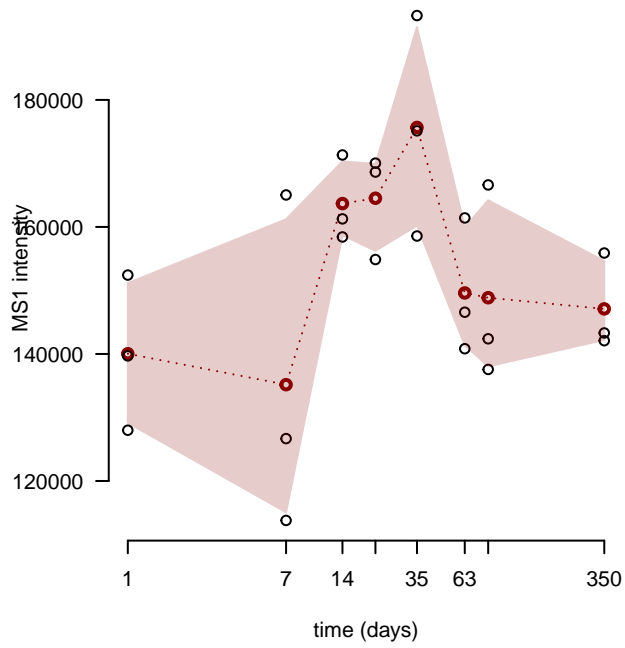

**P63254**  
GN=Crip1  
cysteine-rich protein 1 (intestinal)

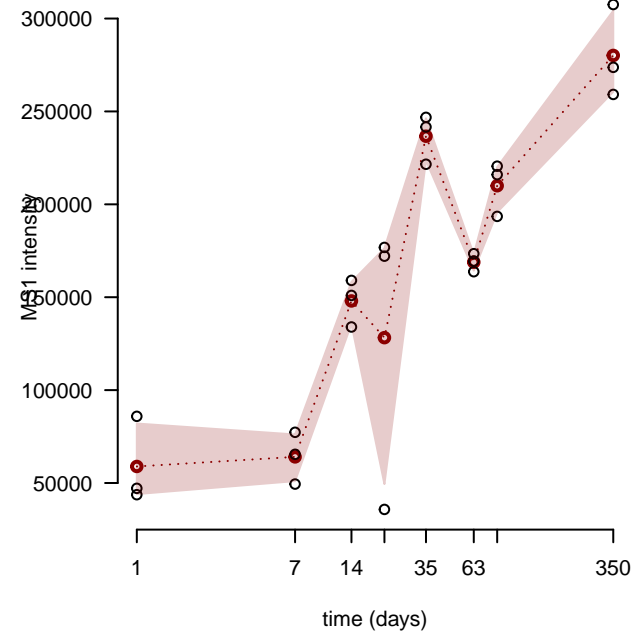

**P63260**  
GN=Actg1  
actin, gamma, cytoplasmic 1

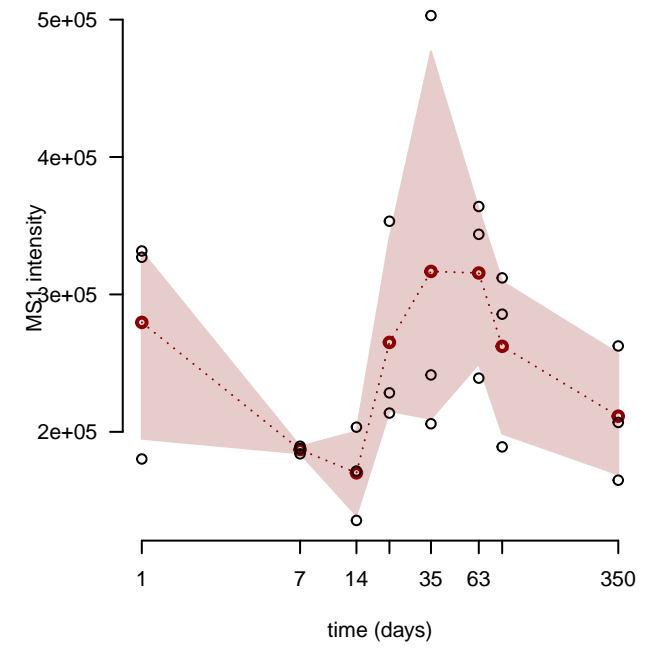

**P63268**  
GN=Actg2  
actin, gamma 2, smooth muscle, enteric

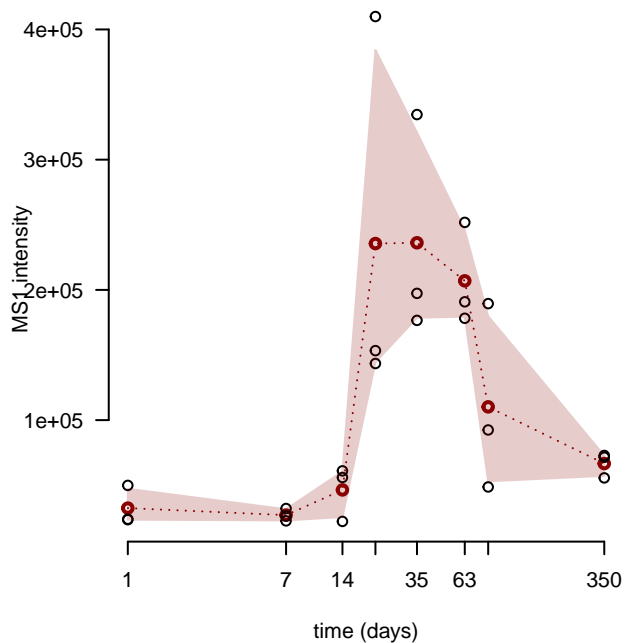

**P63271**  
GN=Supt4h1a

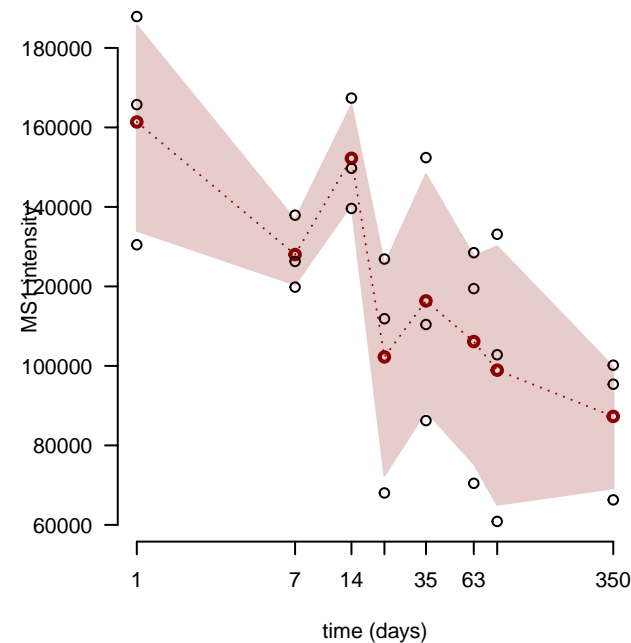

**P63276**  
GN=Rps17  
ribosomal protein S17

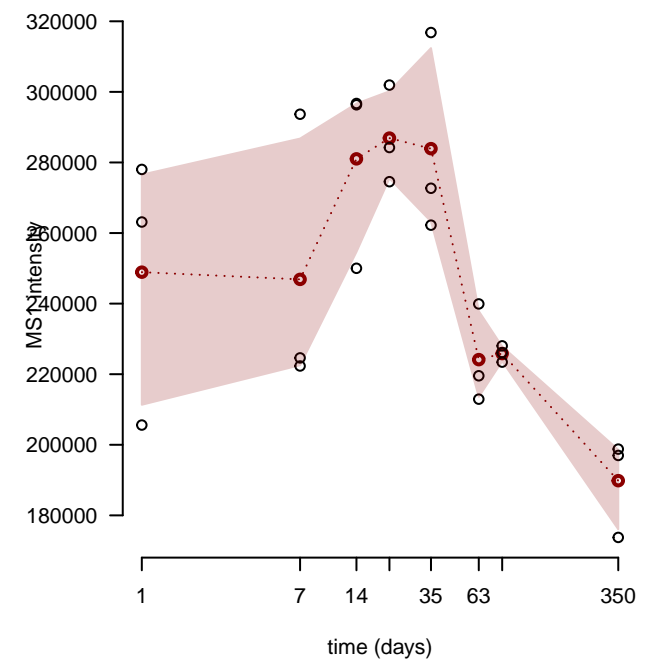

**P63280**  
**GN=Ube2i**  
ubiquitin-conjugating enzyme E2i

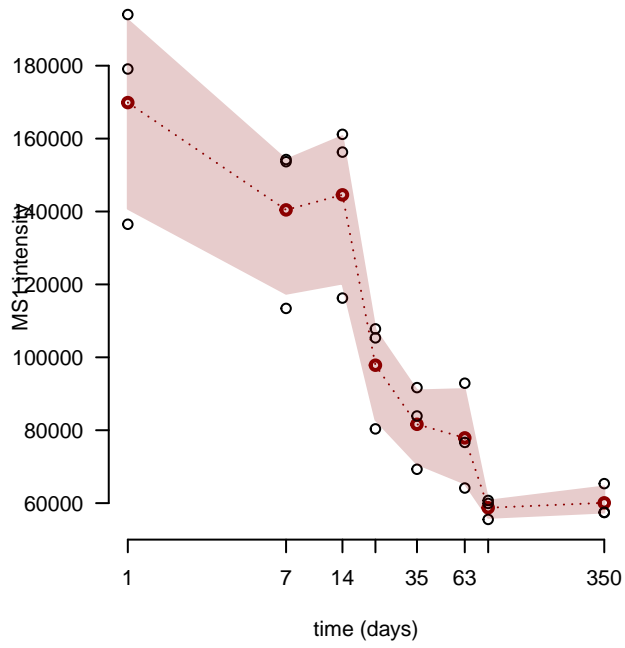

**P63300**  
**GN=Selenow**  
selenoprotein W

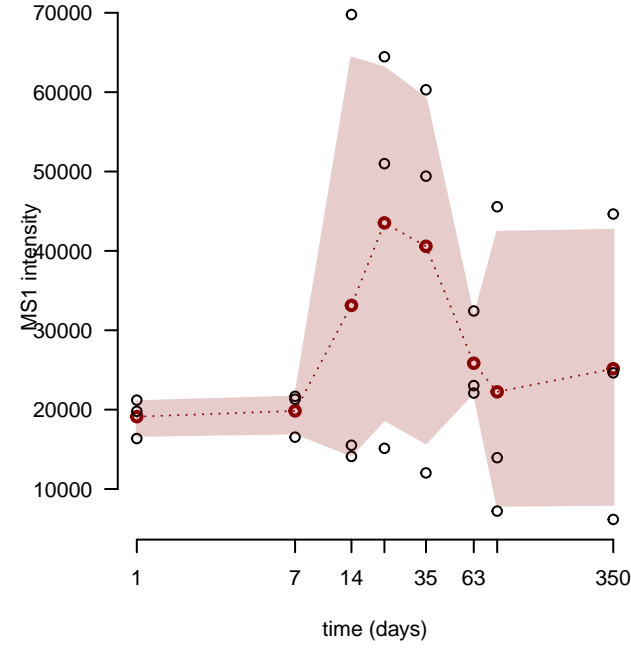

**P63321**  
**GN=Rala**  
v-ral simian leukemia viral oncogene A ( ...

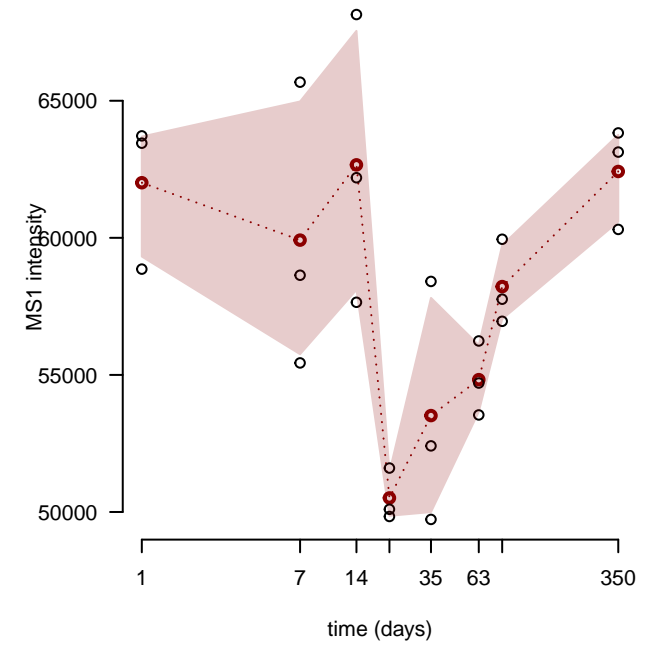

**P63323**  
**GN=Rps12**  
ribosomal protein S12

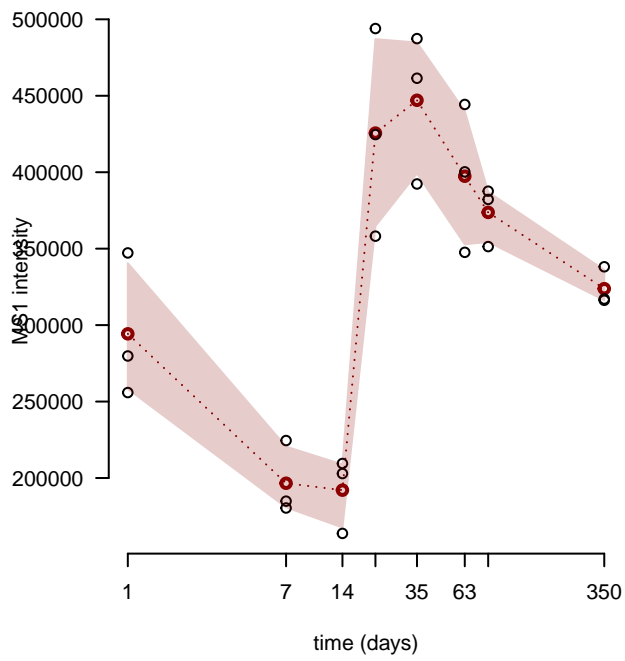

**P63325**  
**GN=Rps10**  
ribosomal protein S10

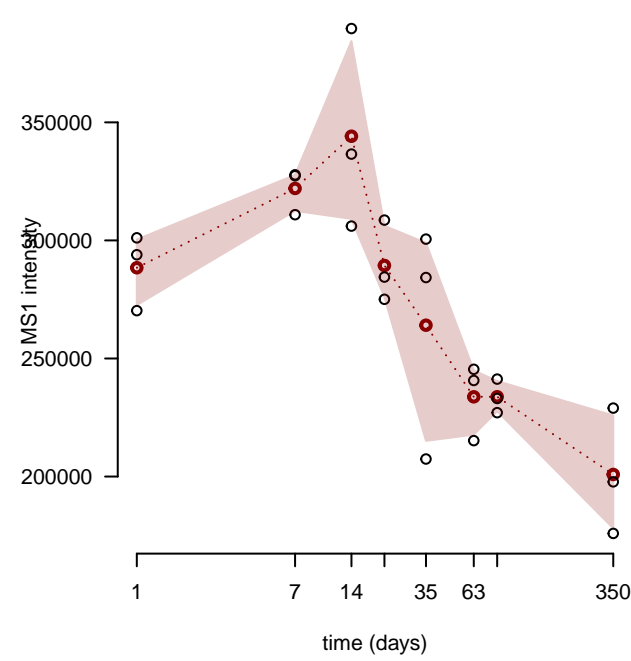

**P63328**  
**GN=Ppp3ca**  
protein phosphatase 3, catalytic subunit ...

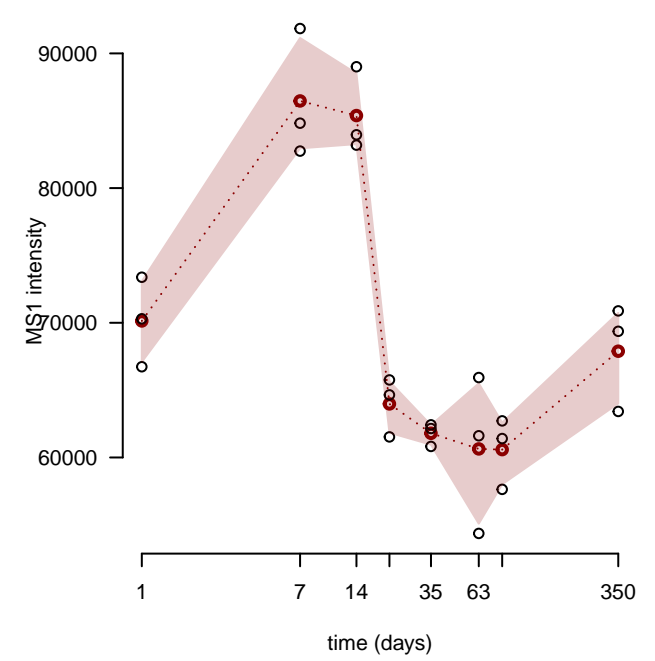

**P63330**  
**GN=Ppp2ca**  
protein phosphatase 2 (formerly 2A), cat ...

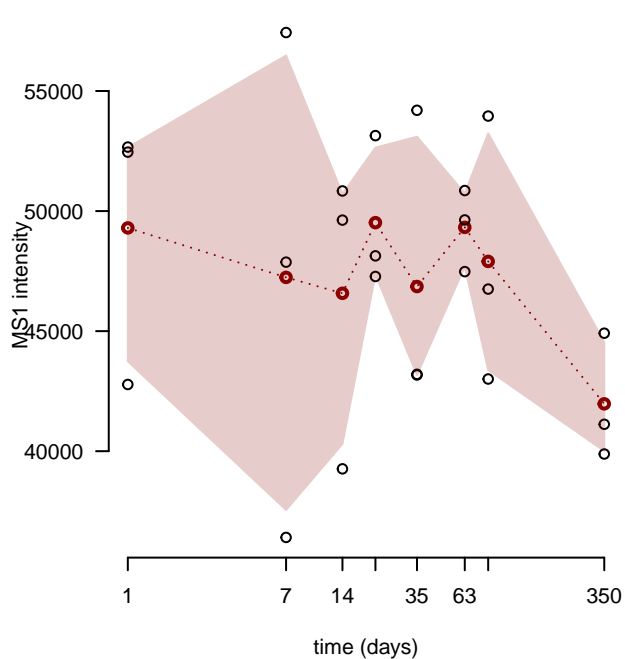

**P67778**  
**GN=Phb**  
prohibitin

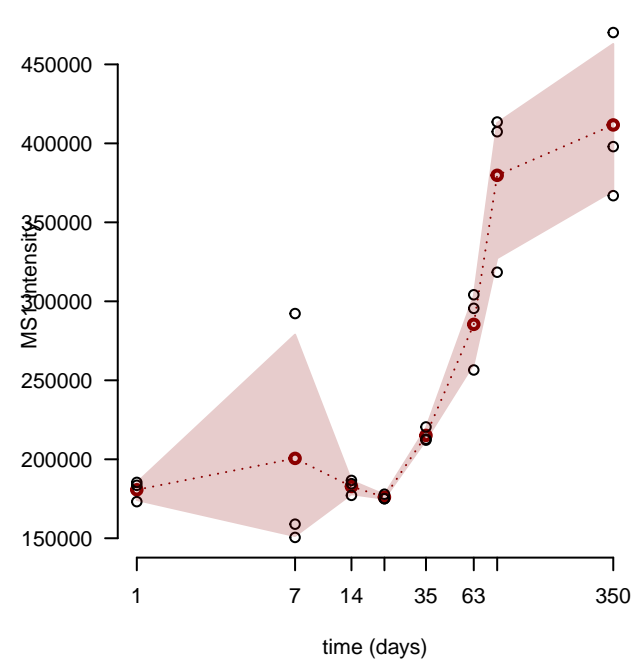

**P67871**  
**GN=Csnk2b**  
casein kinase 2, beta polypeptide

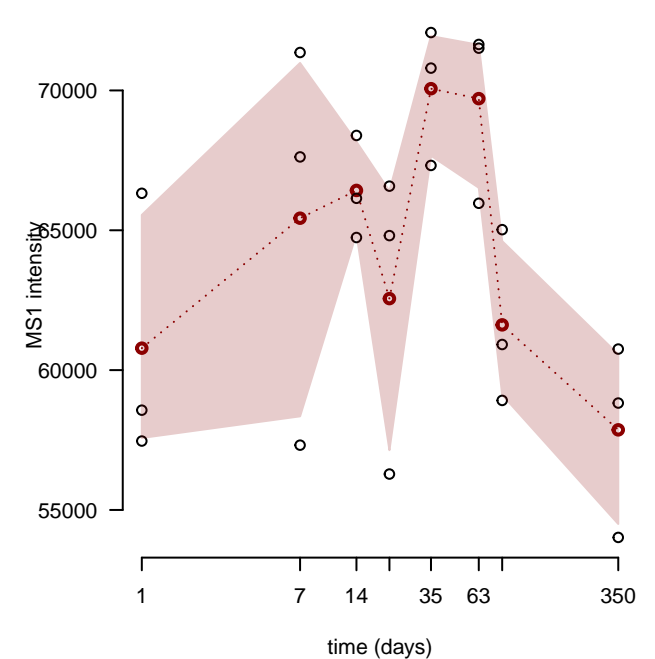

**P67984**  
**GN=Rpl22**  
ribosomal protein L22

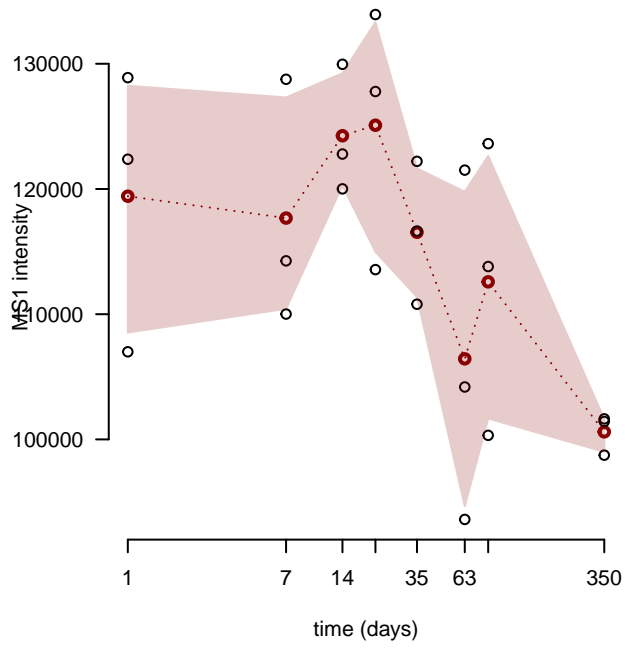

**P68037**  
**GN=Ube2l3**  
ubiquitin-conjugating enzyme E2L 3

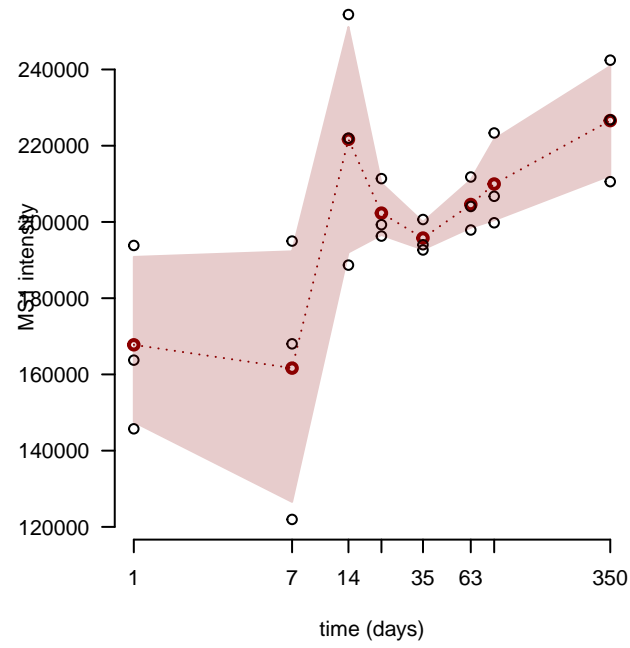

**P68040**  
**GN=Rack1**  
receptor for activated C kinase 1

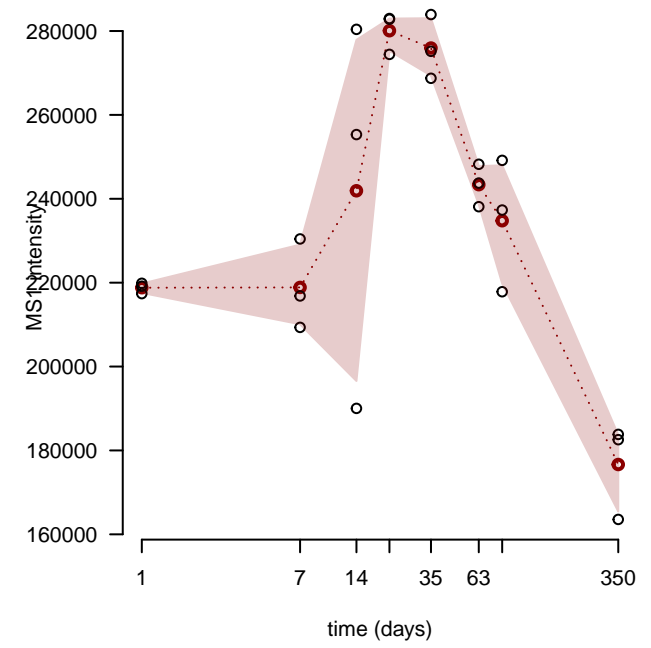

**P68134**  
**GN=Acta1**  
actin alpha 1, skeletal muscle

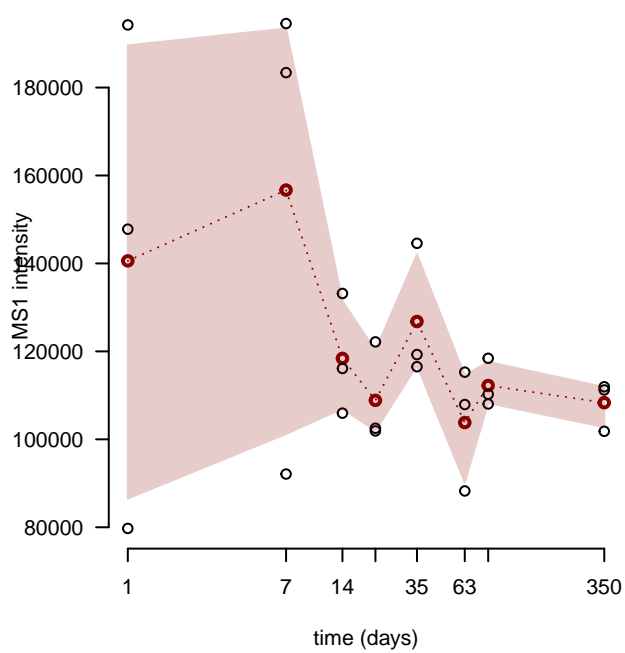

**P68181**  
**GN=Prkacb**  
protein kinase, cAMP dependent, catalyti ...

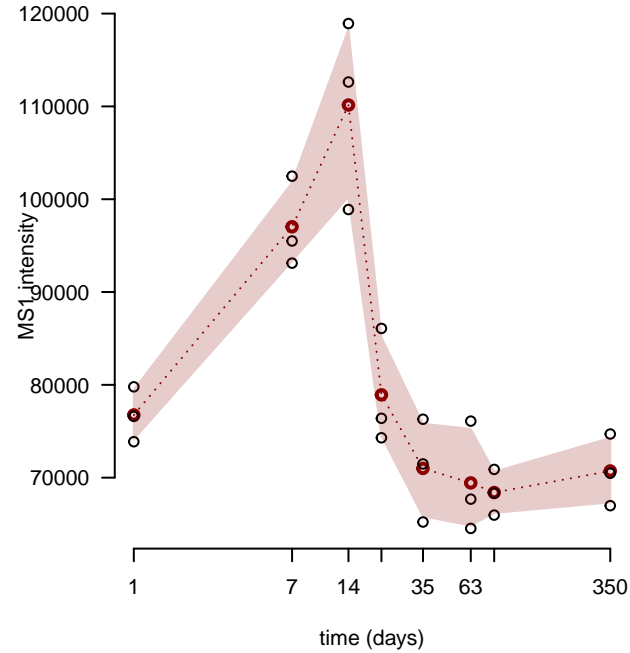

**P68254**  
**GN=Ywhaq**  
tyrosine 3-monooxygenase/tryptophan 5-mo ...

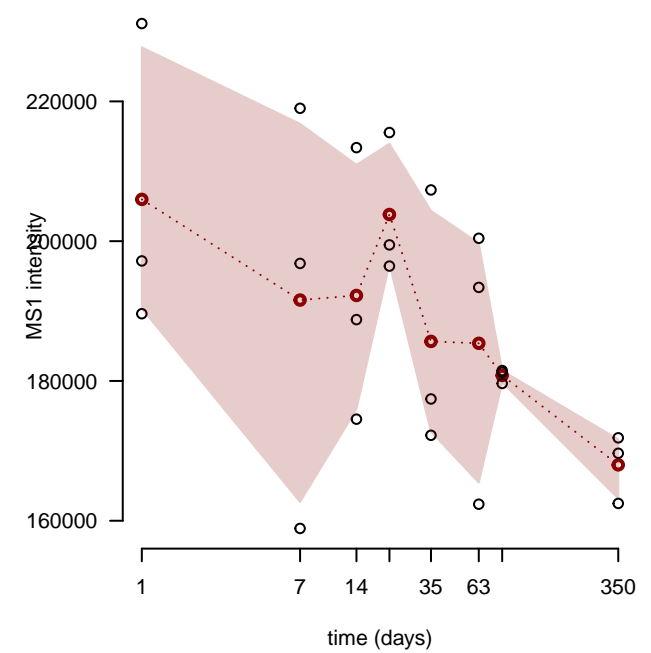

**P68368**  
**GN=Tuba4a**  
tubulin, alpha 4A

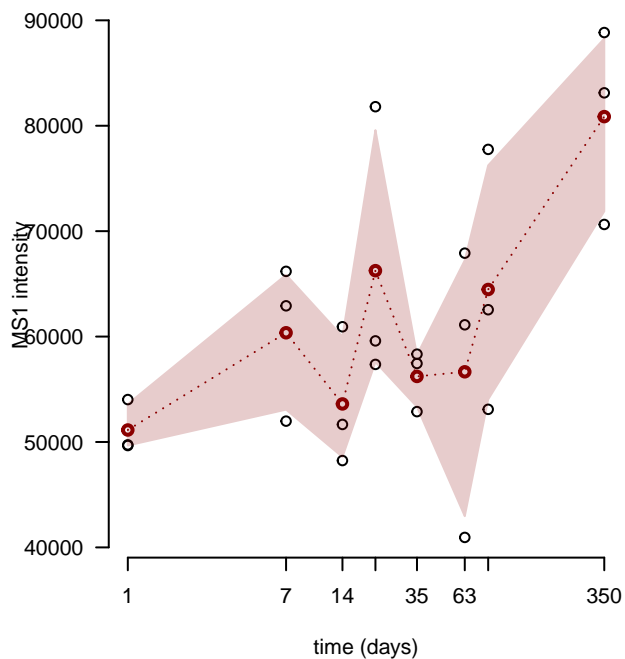

**P68369**  
**GN=Tuba1a**  
tubulin, alpha 1A

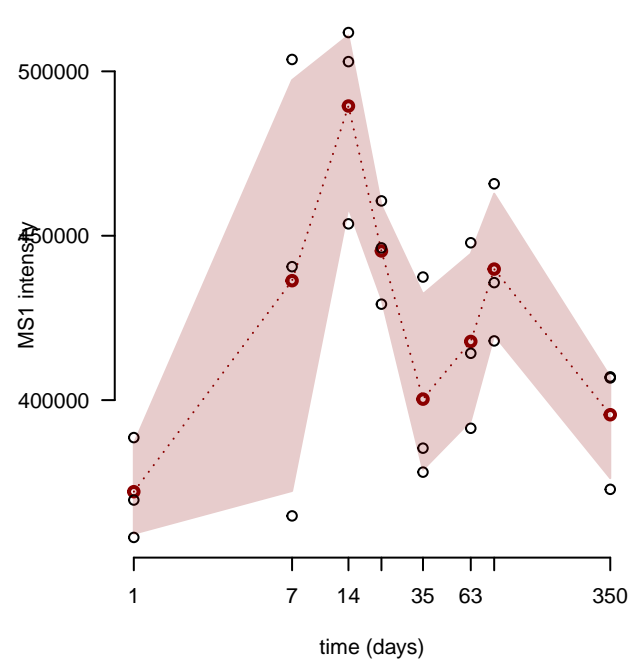

**P68372**  
**GN=Tubb4b**  
tubulin, beta 4B class IVB

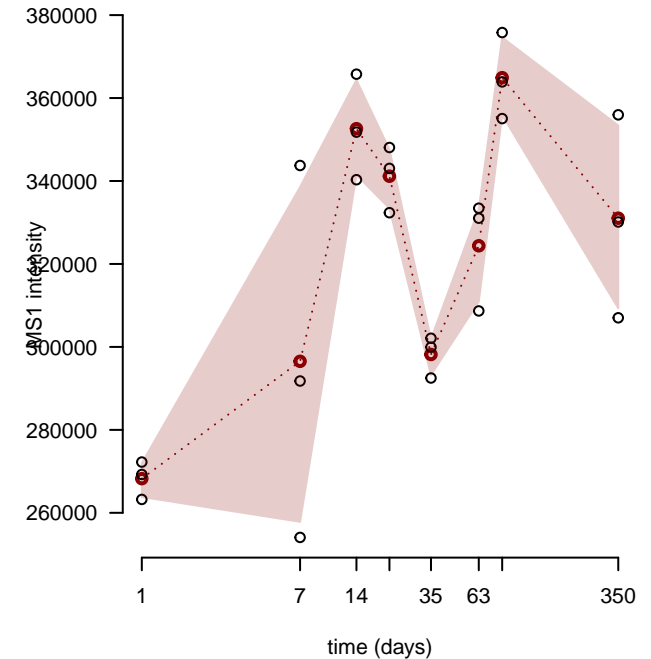

**P68373**  
GN=Tuba1c  
tubulin, alpha 1C

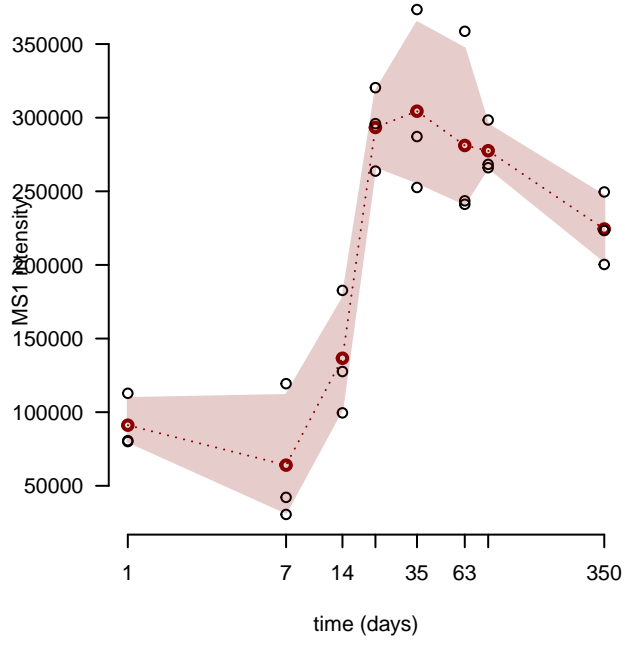

**P68404**  
GN=Prkcb  
protein kinase C, beta

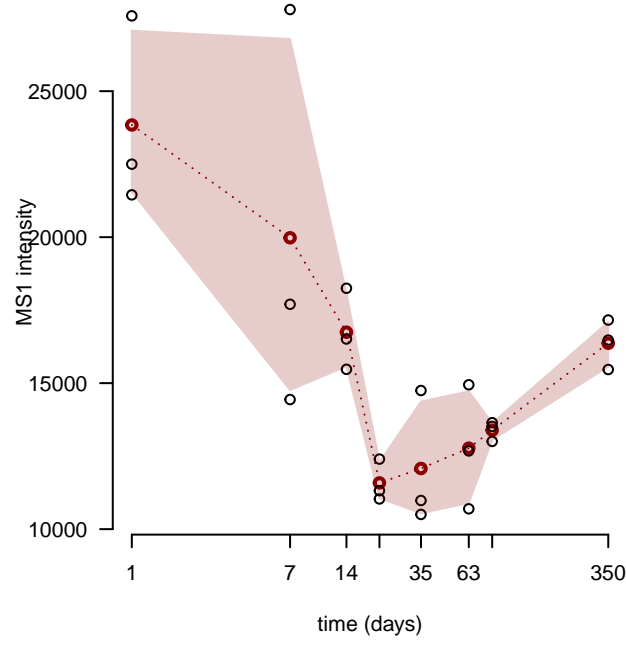

**P68510**  
GN=Ywhah  
tyrosine 3-monoxygenase/tryptophan 5-mo ...

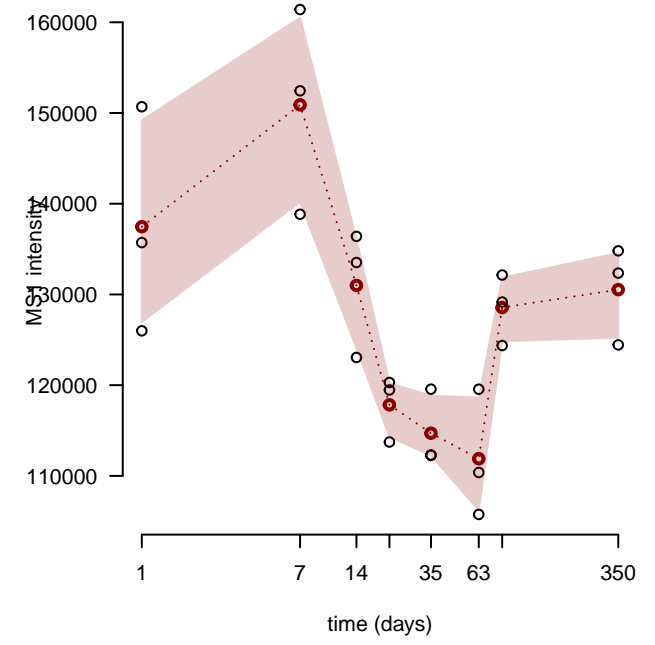

**P69566**  
GN=Ranbp9  
RAN binding protein 9

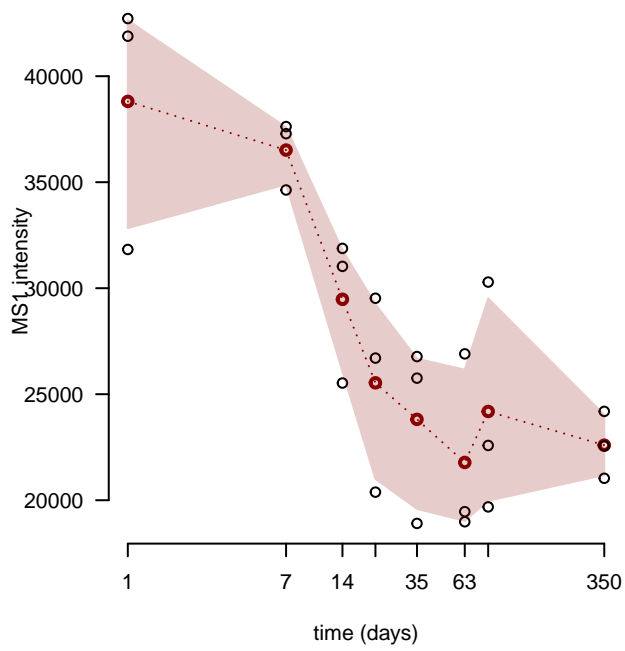

**P70121**  
GN=Zhx1  
zinc fingers and homeoboxes 1

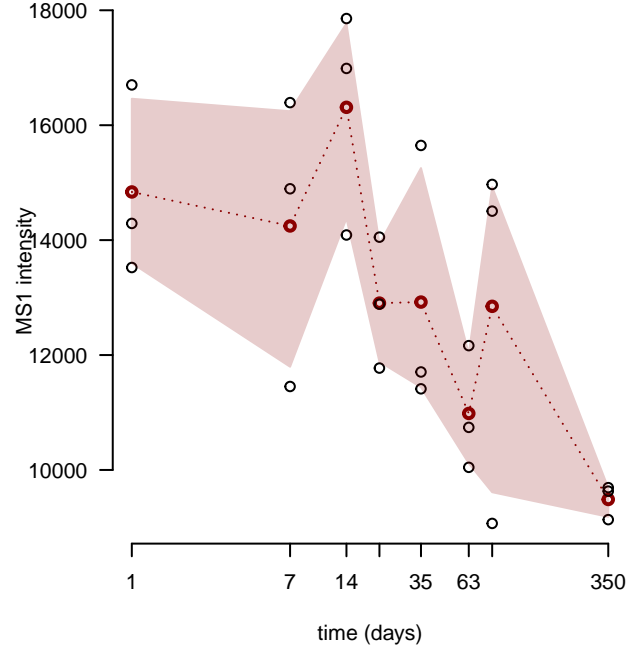

**P70122**  
GN=Sbds  
SBDS ribosome maturation factor

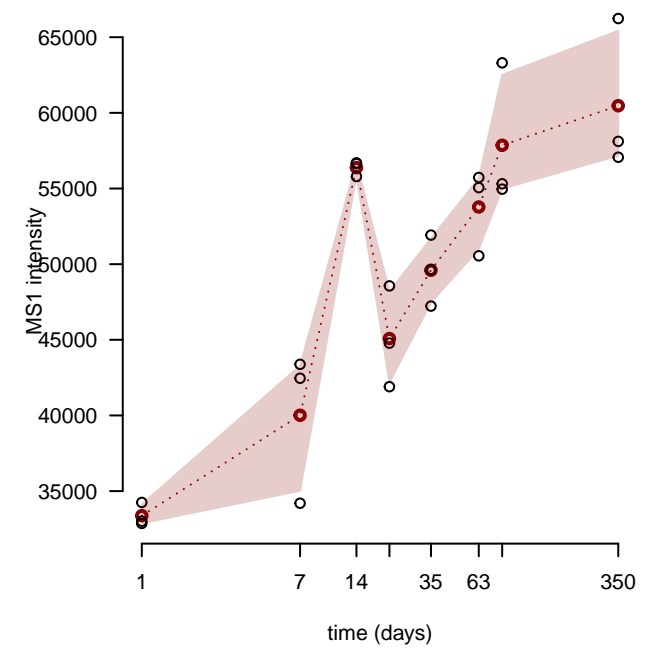

**P70158**  
GN=Smpd13a  
sphingomyelin phosphodiesterase, acid-li ...

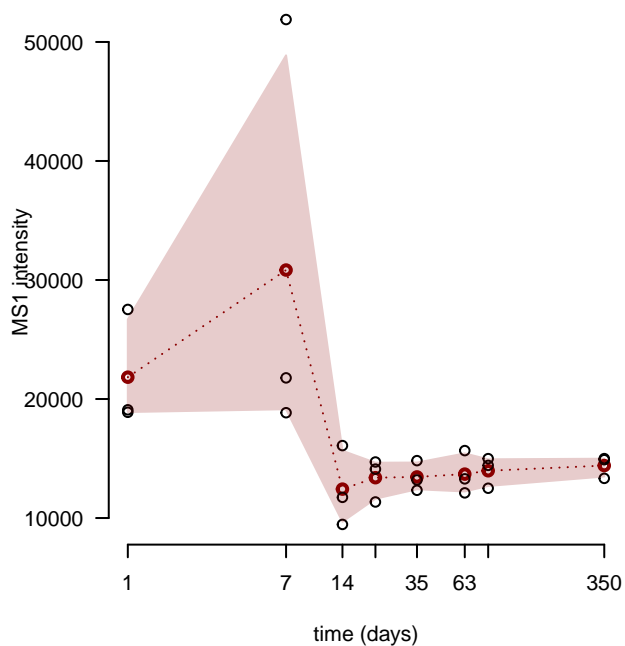

**P70166**  
GN=Cpeb1  
cytoplasmic polyadenylation element bind ...

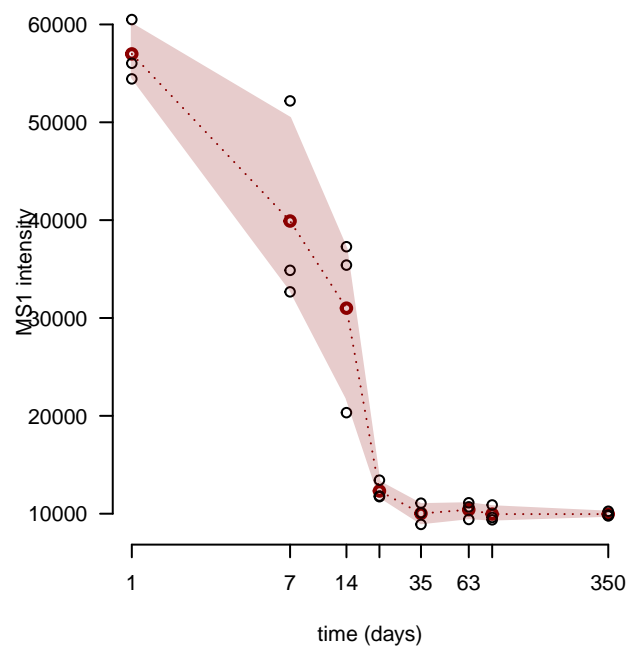

**P70168**  
GN=Kpnb1  
karyopherin (importin) beta 1

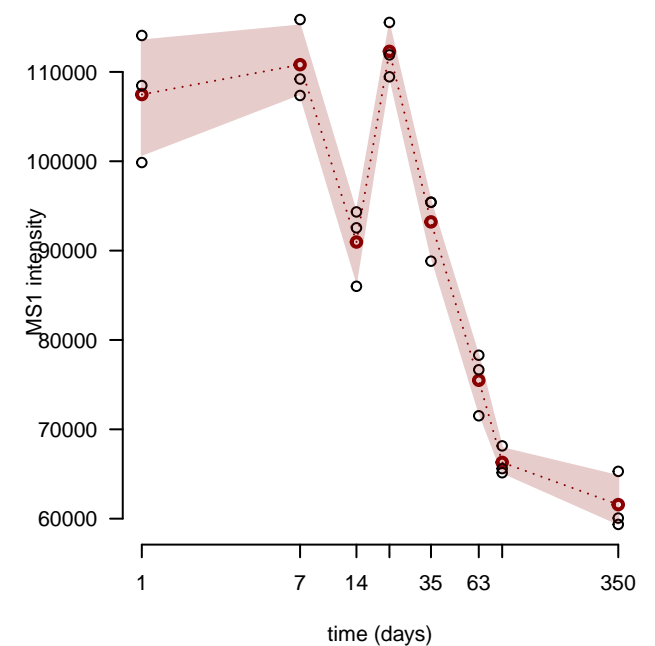

**P70169**  
GN=Doc2b  
double C2, beta

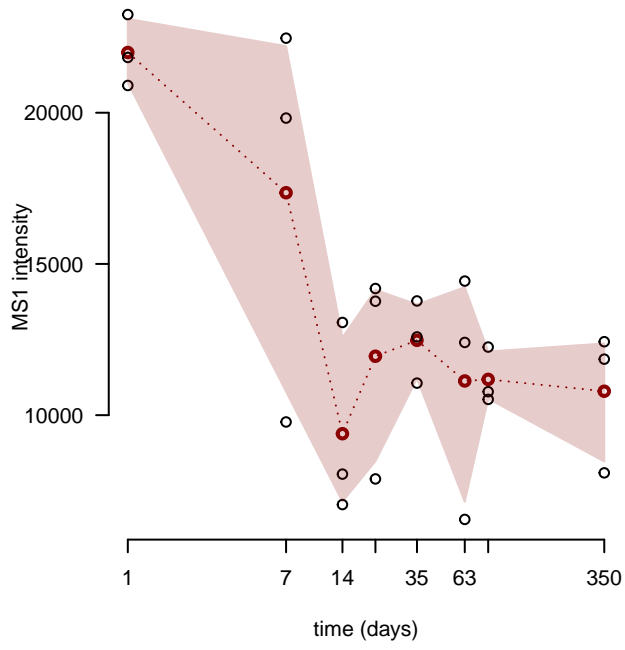

**P70170**  
GN=Abcc9  
ATP-binding cassette, sub-family C (CFTR ...

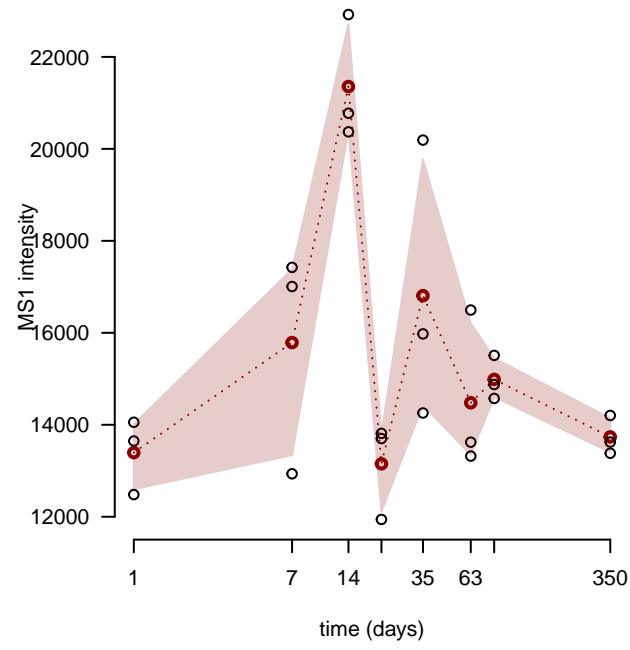

**P70175**  
GN=Dlg3  
discs large MAGUK scaffold protein 3

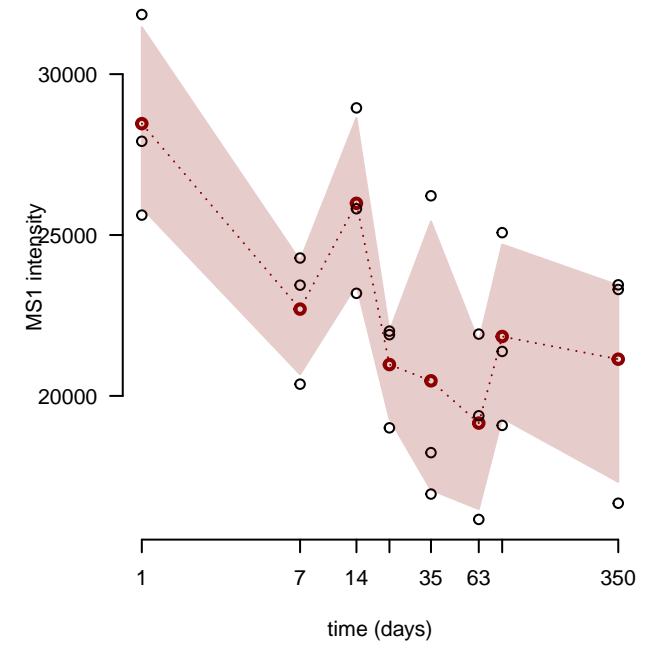

**P70178**  
GN=Six5  
sine oculis-related homeobox 5

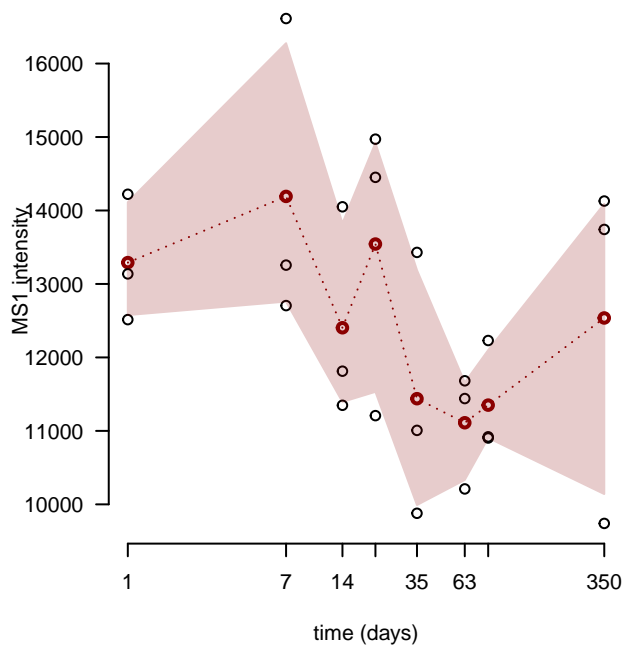

**P70180**  
GN=Npr3  
natriuretic peptide receptor 3

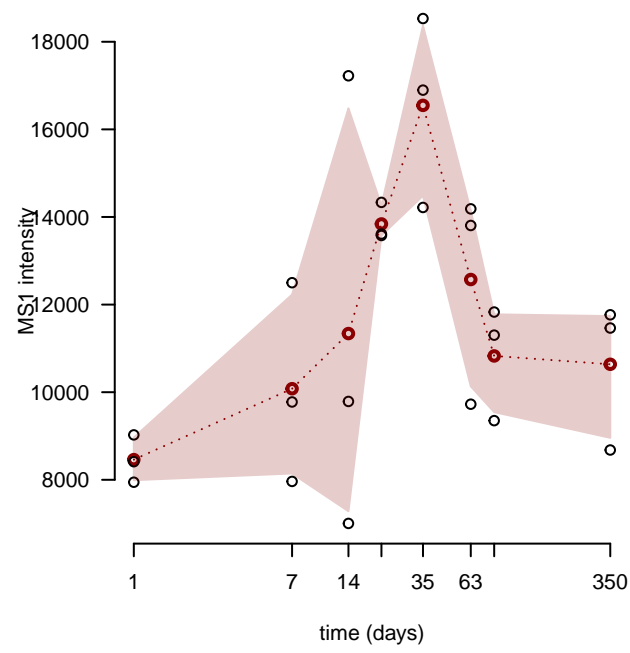

**P70182**  
GN=Pip5k1a  
phosphatidylinositol-4-phosphate 5-kinas ...

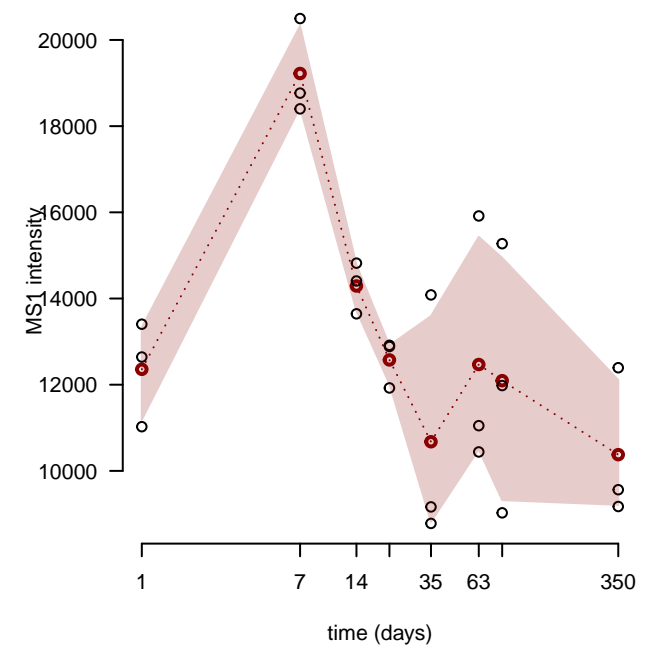

**P70188**  
GN=Kifap3  
kinesin-associated protein 3

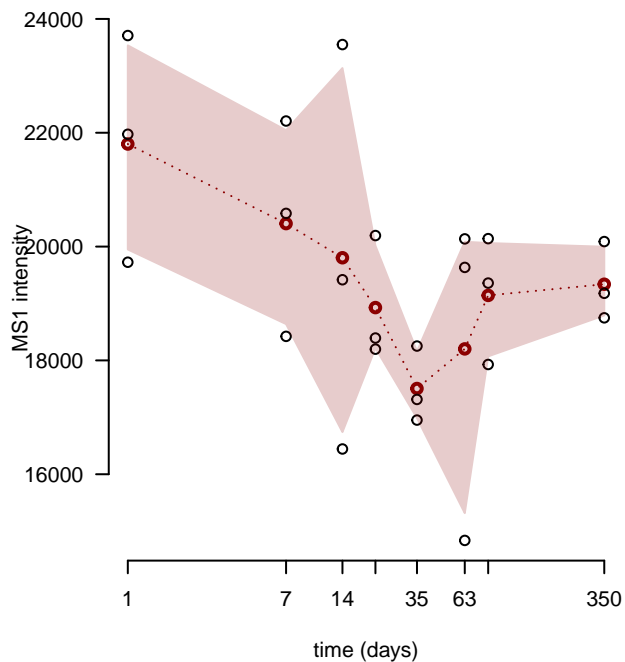

**P70195**  
GN=Psmb7  
proteasome (prosome, macropain) subunit, ...

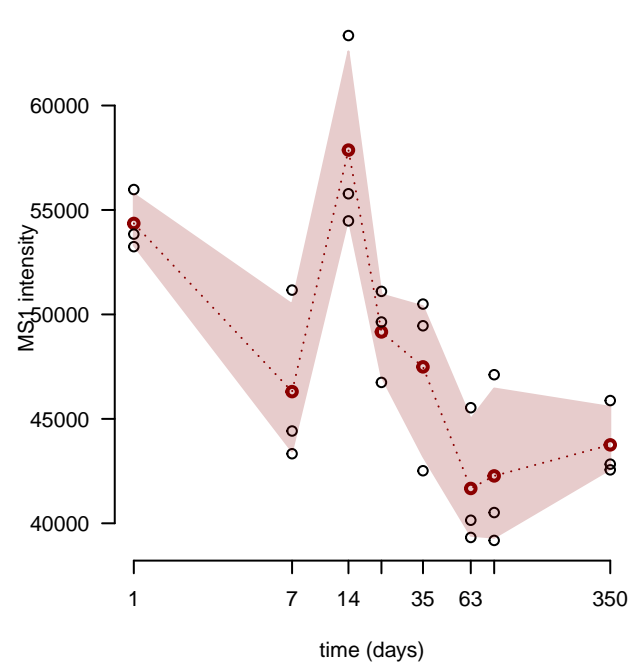

**P70196**  
GN=Traf6  
TNF receptor-associated factor 6

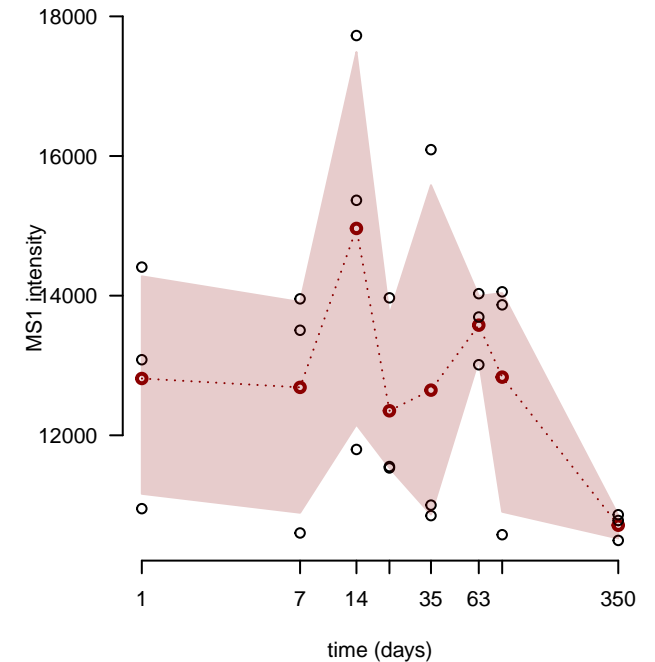

P70202  
GN=Lxn  
latexin

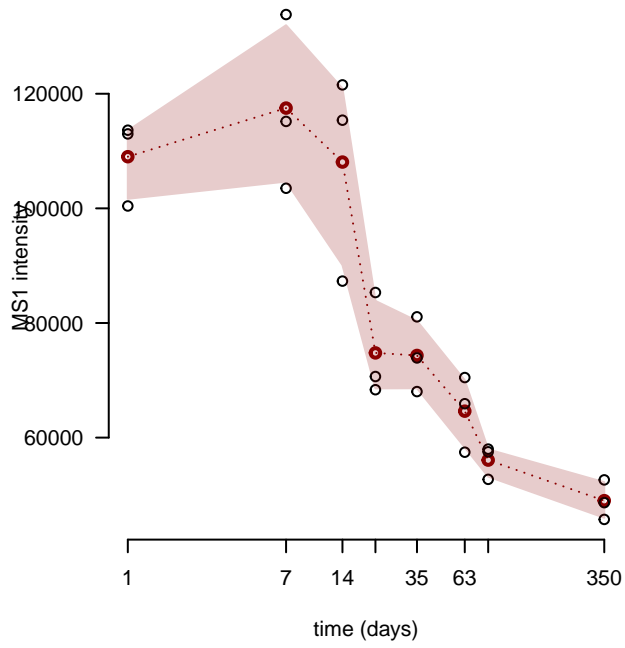

P70206  
GN=Plxna1  
plexin A1

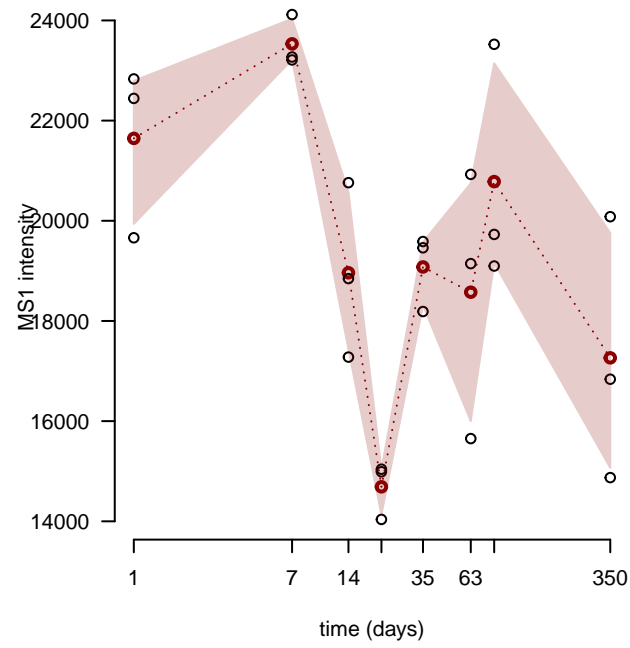

P70207  
GN=Plxna2  
plexin A2

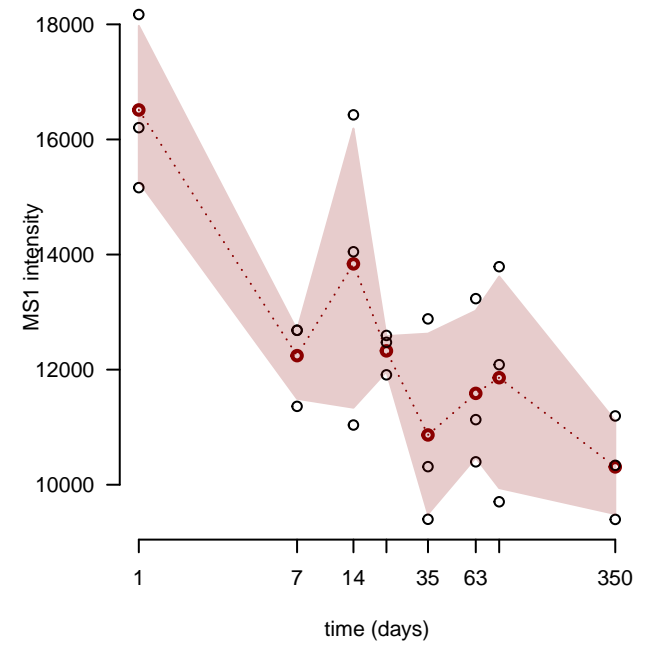

P70208  
GN=Plxna3  
plexin A3

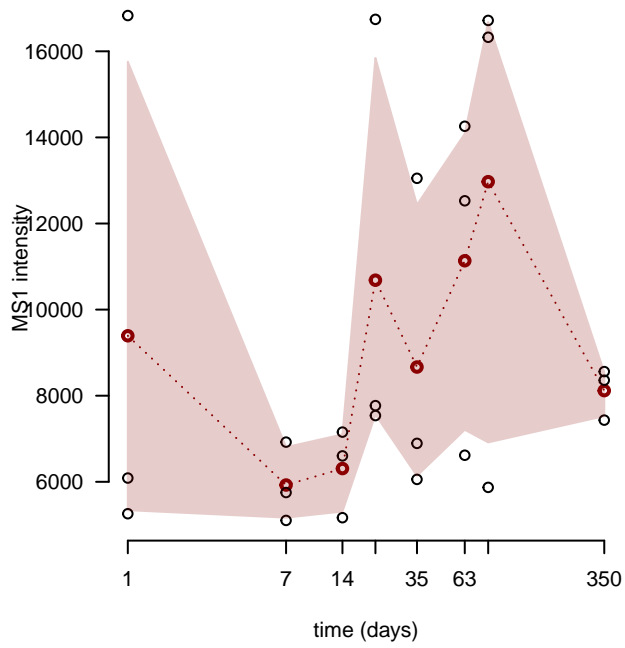

P70210  
GN=Tead3  
TEA domain family member 3

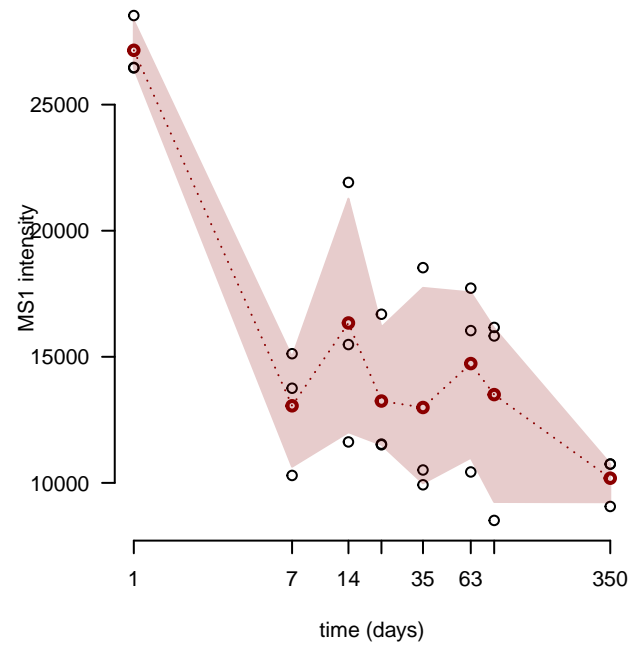

P70218  
GN=Map4k1  
mitogen-activated protein kinase kinase ...

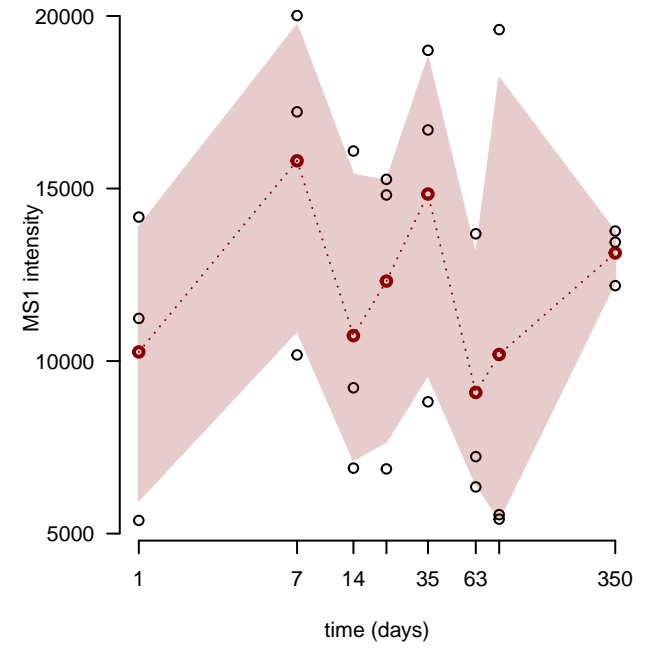

P70224  
GN=Gimap1  
GTPase, IMAP family member 1

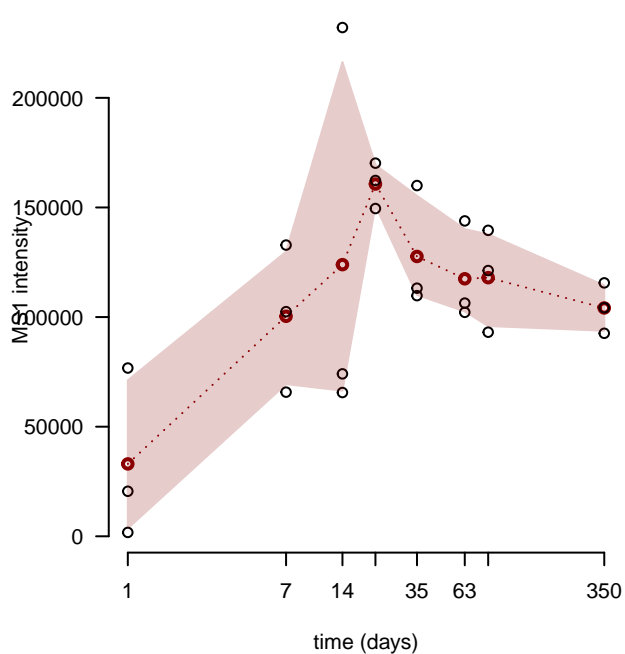

P70227  
GN=Itpr3  
inositol 1,4,5-triphosphate receptor 3

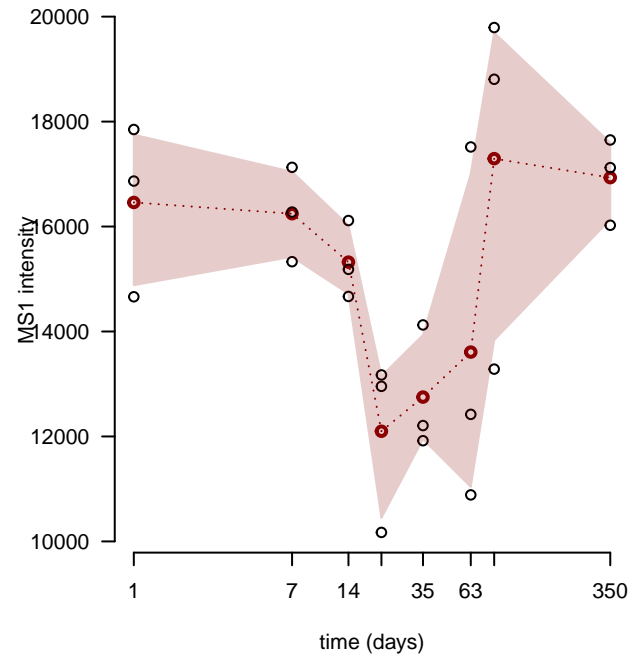

P70236  
GN=Map2k6  
mitogen-activated protein kinase kinase ...

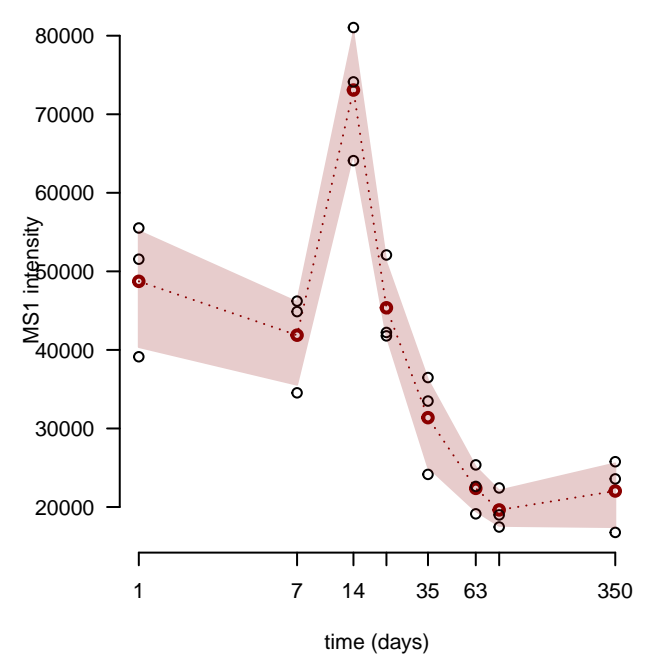

**P70245**  
GN=Ebp  
phenylalkylamine Ca<sup>2+</sup> antagonist (emopam ...

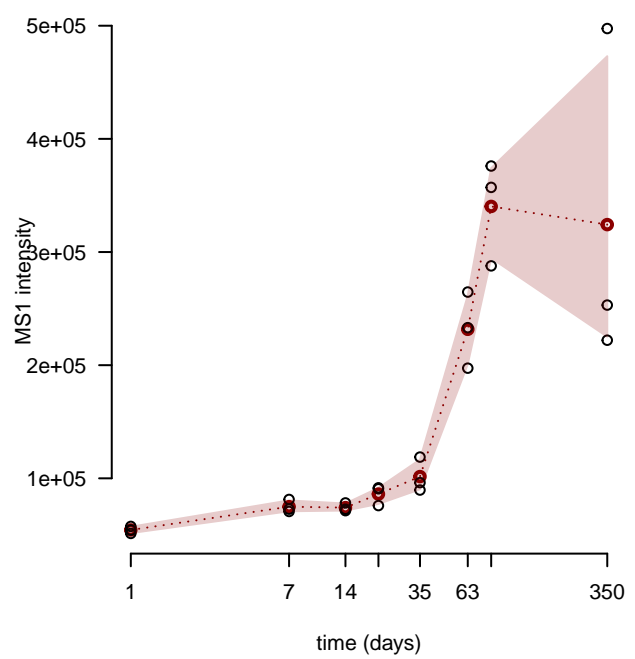

**P70255**  
GN=Nfic  
nuclear factor I/C

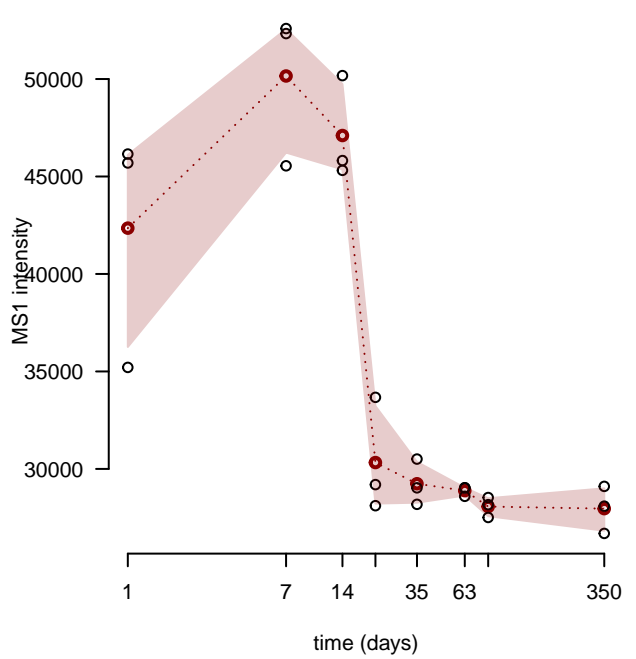

**P70257**  
GN=Nfix  
nuclear factor I/X

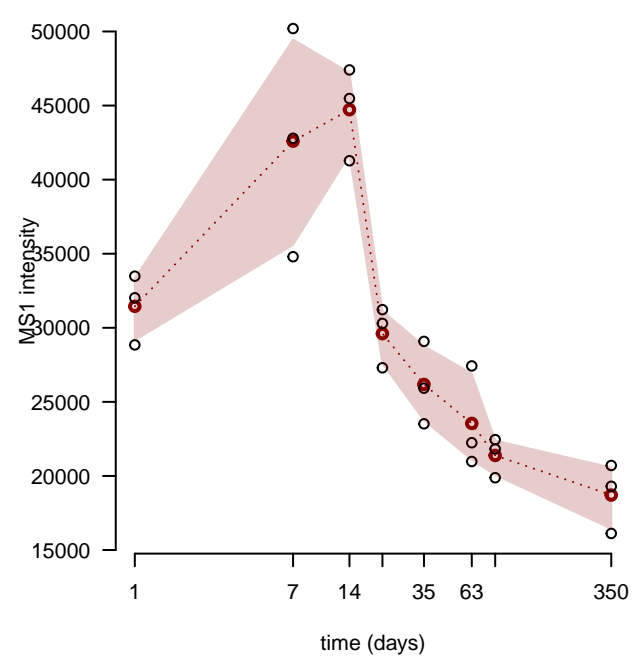

**P70257**  
GN=Nfix  
nuclear factor I/X

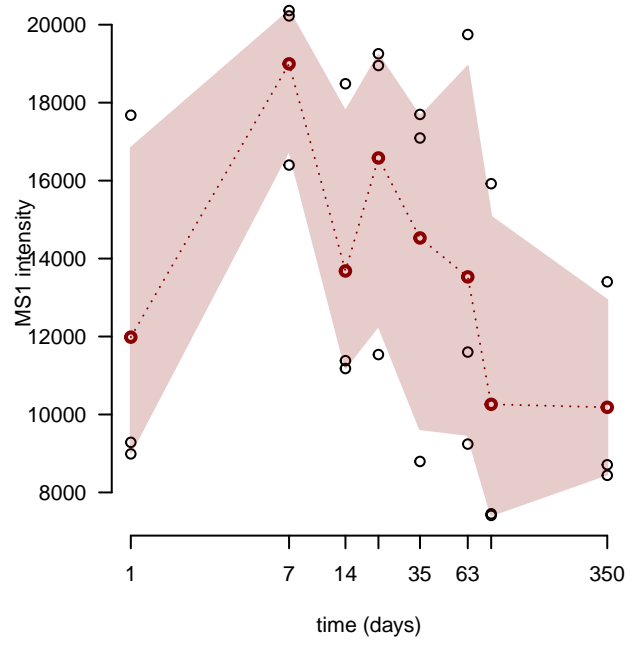

**P70261**  
GN=Palid1  
phosphatase domain containing, paladin 1

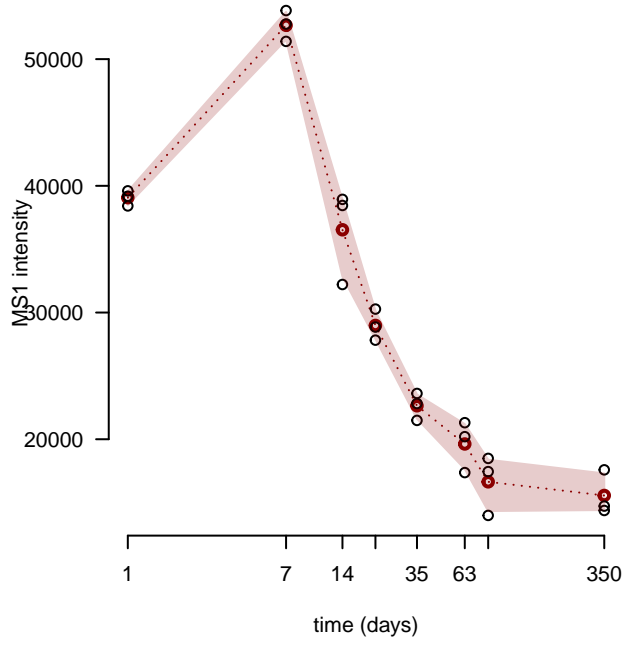

**P70265**  
GN=Pfkfb2  
6-phosphofructo-2-kinase/fructose-2,6-bi ...

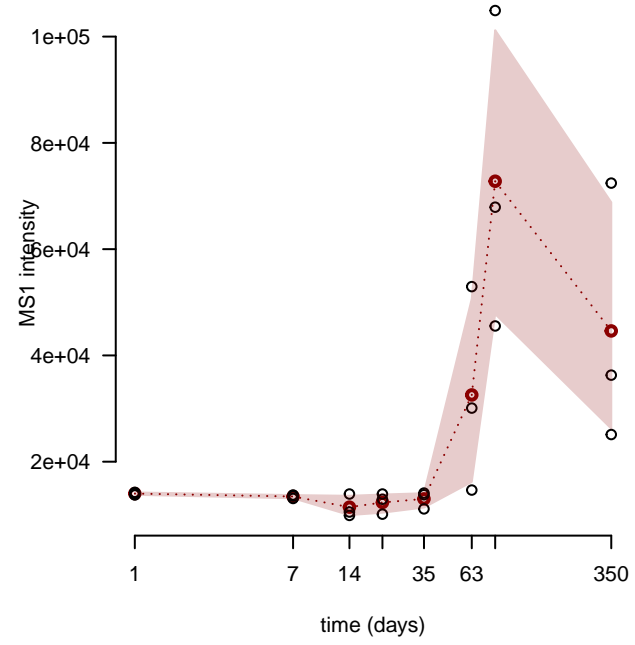

**P70266**  
GN=Pfkfb1  
6-phosphofructo-2-kinase/fructose-2,6-bi ...

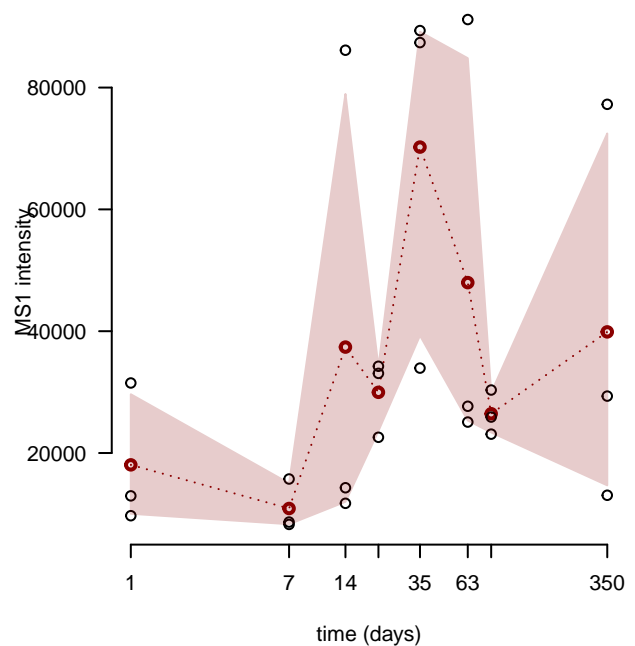

**P70268**  
GN=Pkn1  
protein kinase N1

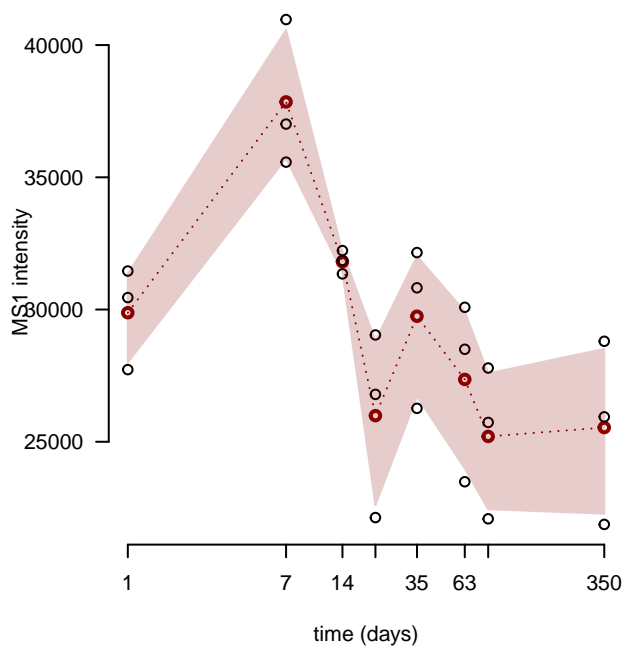

**P70269**  
GN=Ctse  
cathepsin E

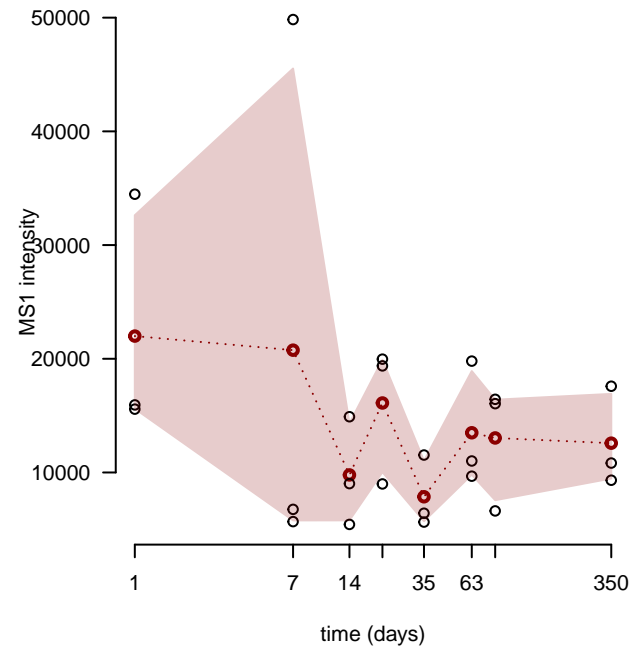

**P70271**  
GN=Pdlim4  
PDZ and LIM domain 4

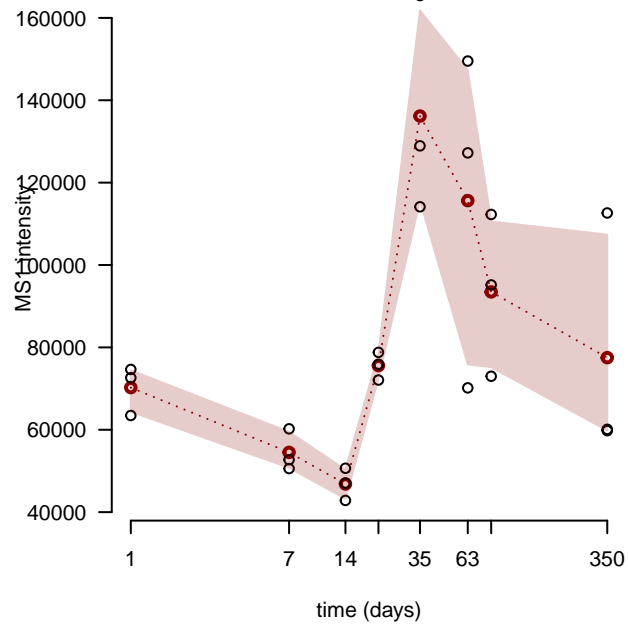

**P70274**  
GN=Selenop  
selenoprotein P

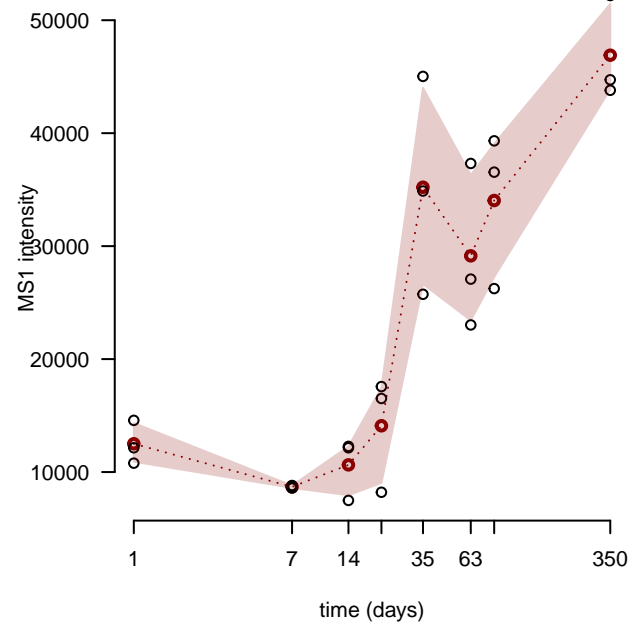

**P70279**  
GN=Surf6  
surfeit gene 6

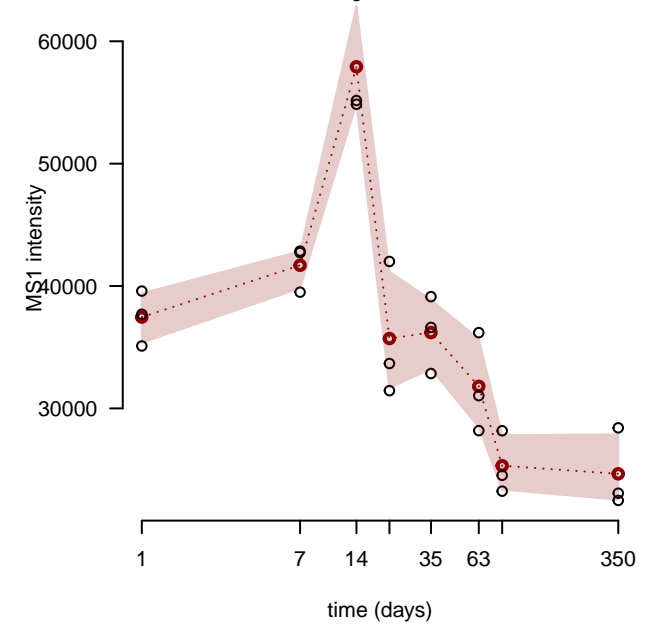

**P70280**  
GN=Vamp7  
vesicle-associated membrane protein 7

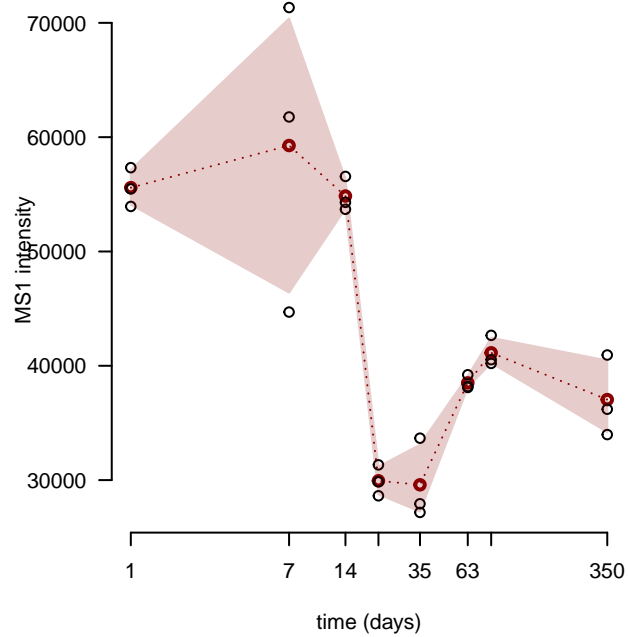

**P70281**  
GN=Sycp3  
synaptonemal complex protein 3

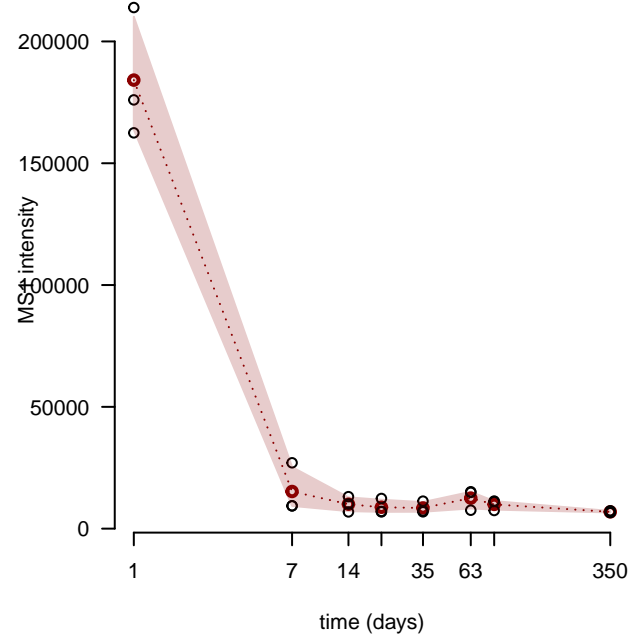

**P70284**  
GN=Tgif1  
TGFB-induced factor homeobox 1

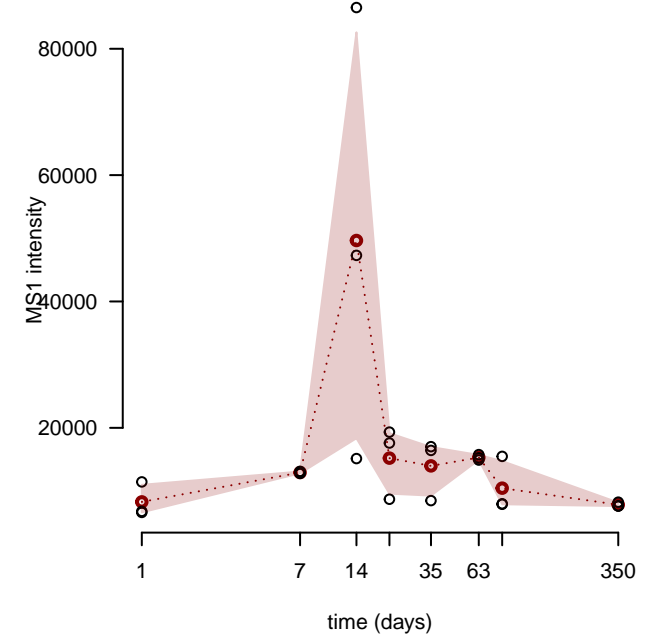

**P70288**  
GN=Hdac2  
histone deacetylase 2

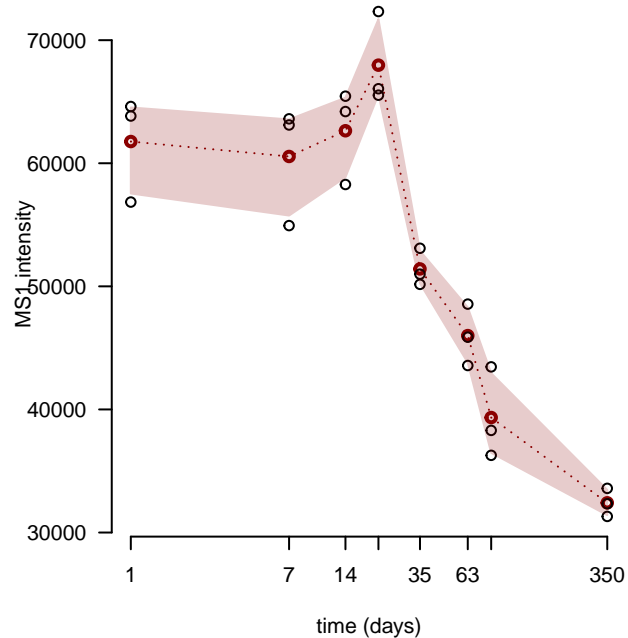

**P70290**  
GN=Mpp1  
membrane protein, palmitoylated

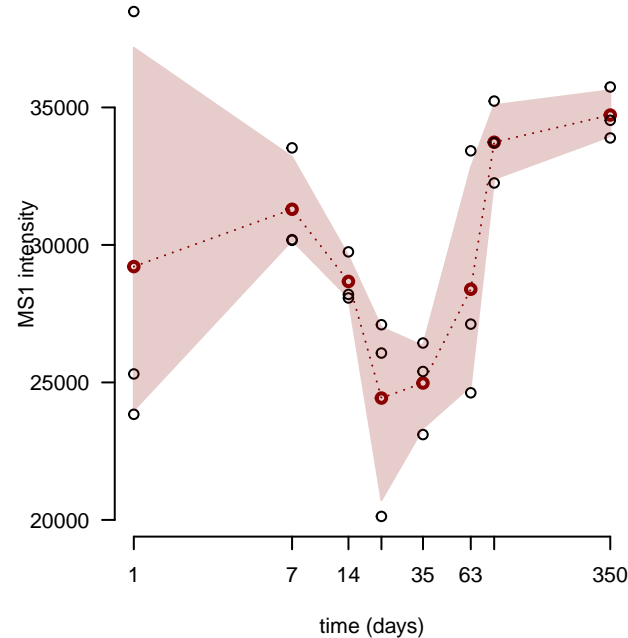

**P70295**  
GN=Aup1  
ancient ubiquitous protein 1

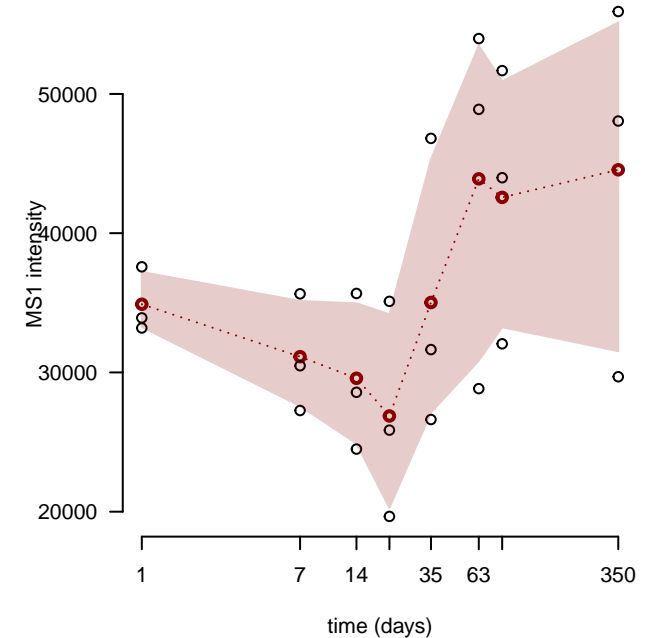



**P70296**  
**GN=Pebp1**  
phosphatidylethanolamine binding protein ...

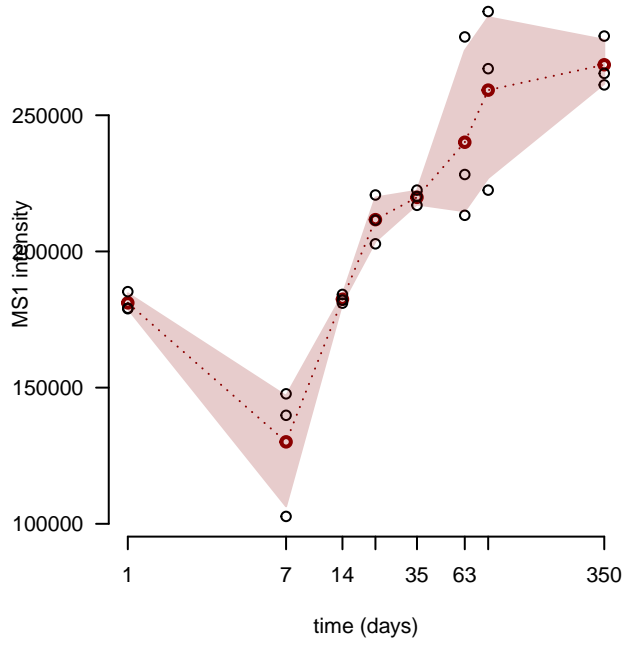

**P70297**  
**GN=Stam**  
signal transducing adaptor molecule (SH3 ...

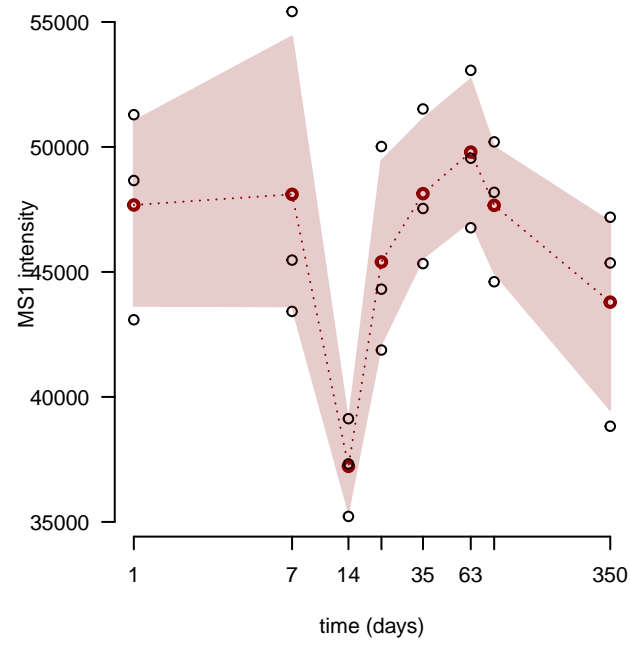

**P70302**  
**GN=Stim1**  
stromal interaction molecule 1

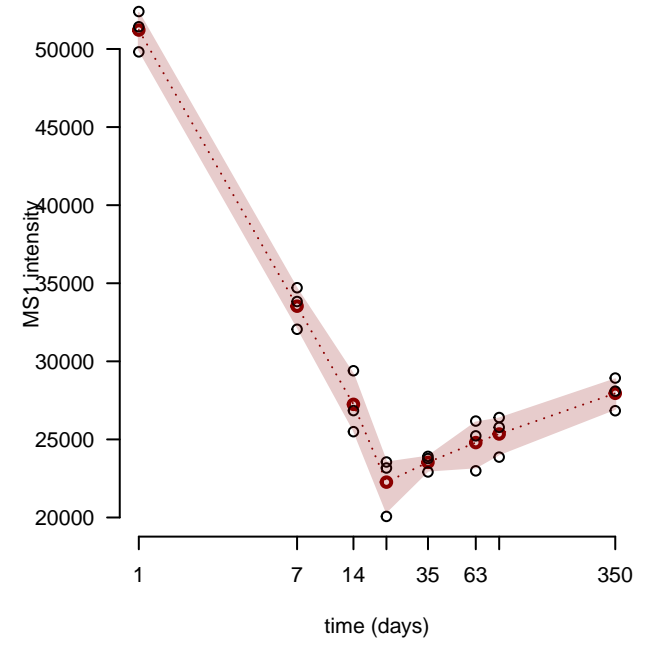

**P70303**  
**GN=Ctps2**  
cytidine 5'-triphosphate synthase 2

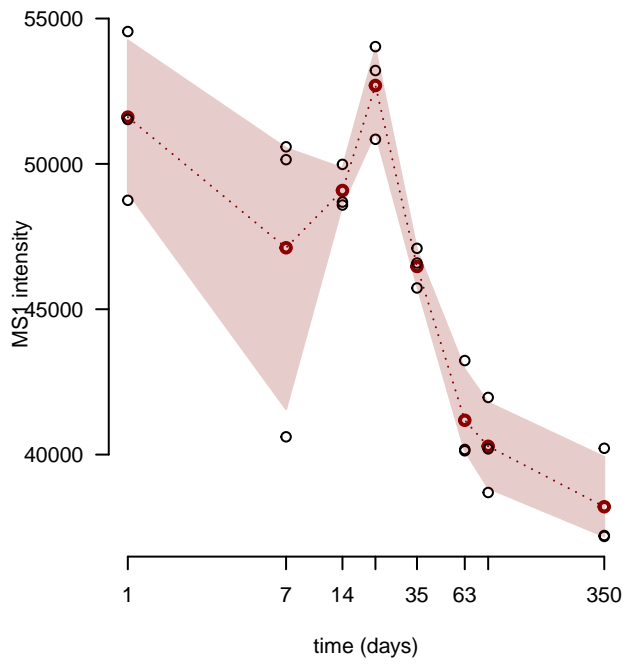

**P70313**  
**GN=Nos3**  
nitric oxide synthase 3, endothelial cel ...

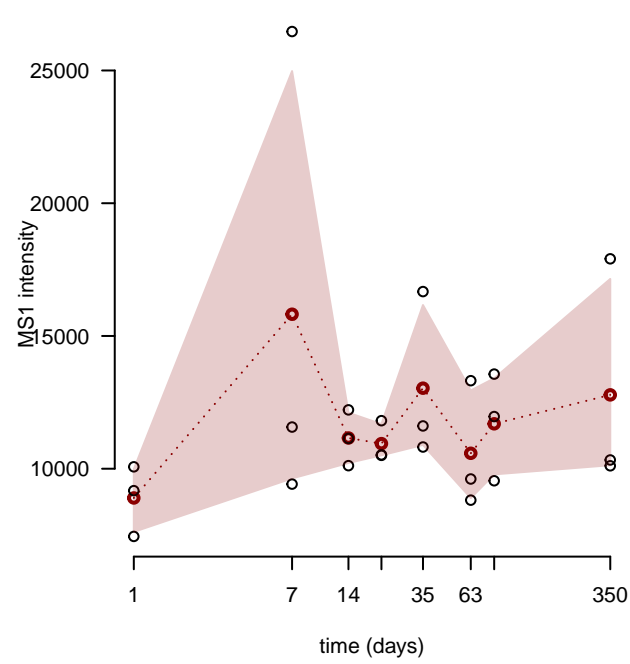

**P70318**  
**GN=Tia1**  
Tia1 cytototoxic granule-associated RNA bi ...

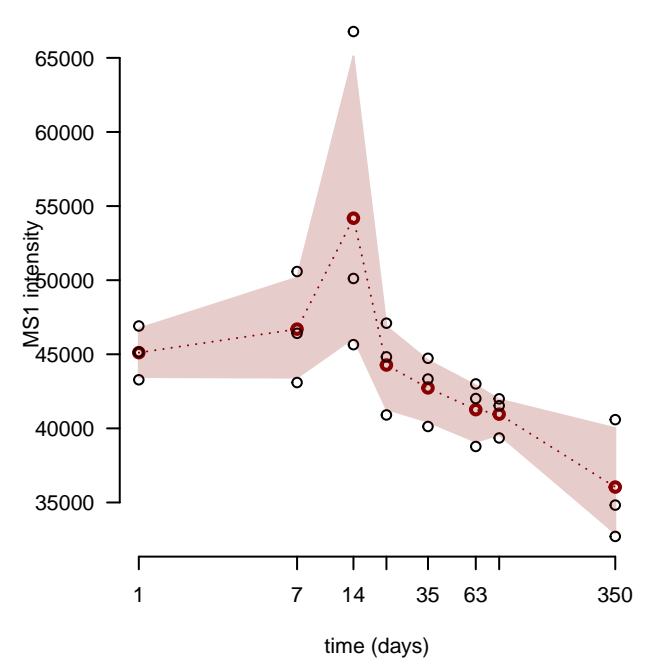

**P70333**  
**GN=Hnrnp2**  
heterogeneous nuclear ribonucleoprotein ...

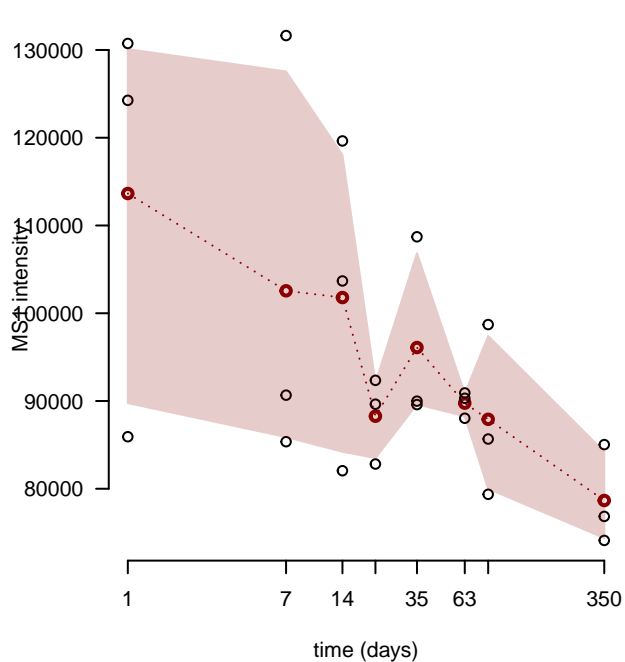

**P70335**  
**GN=Rock1**  
Rho-associated coiled-coil containing pr ...

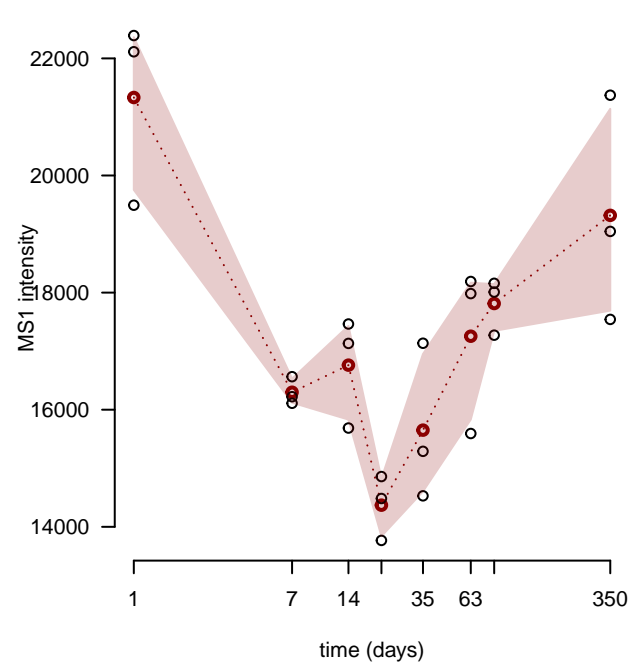

**P70336**  
**GN=Rock2**  
Rho-associated coiled-coil containing pr ...

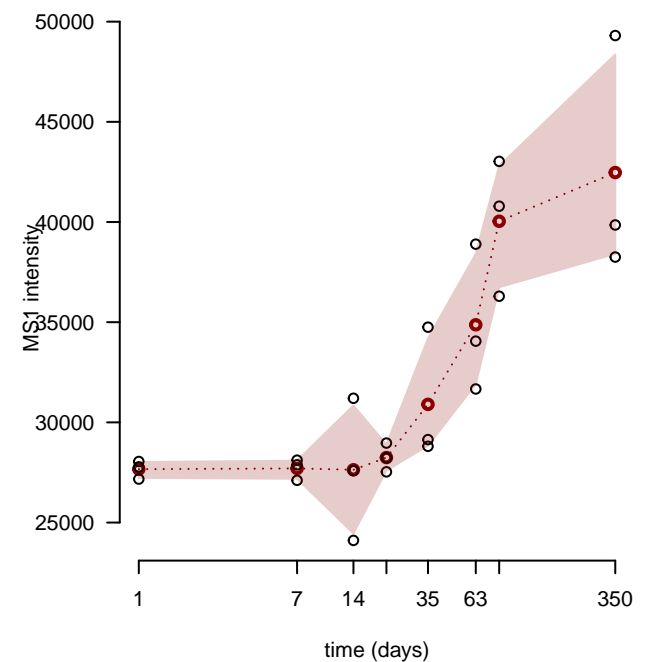

**P70340**  
**GN=Smad1**  
SMAD family member 1

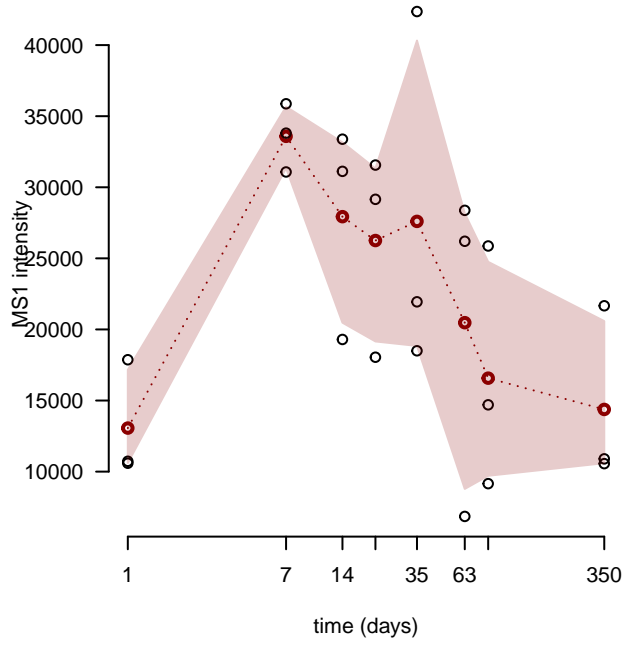

**P70345**  
**GN=Bcl2l2**  
BCL2-like 2

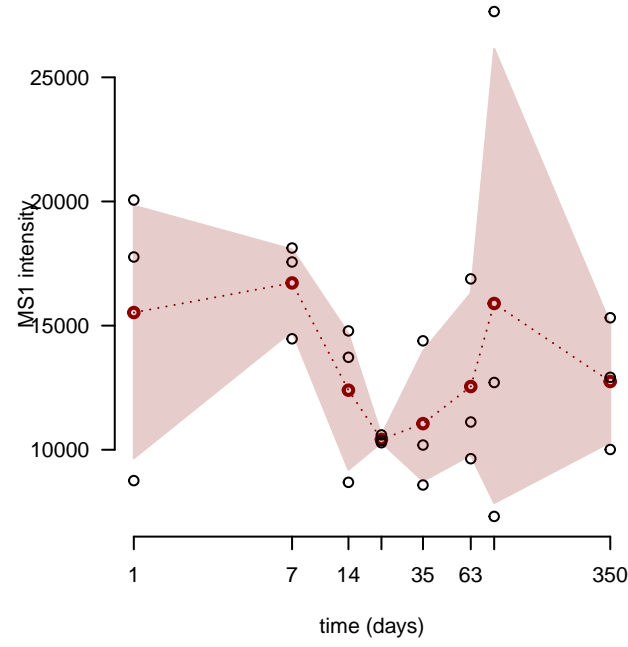

**P70349**  
**GN=Hint1**  
histidine triad nucleotide binding prote ...

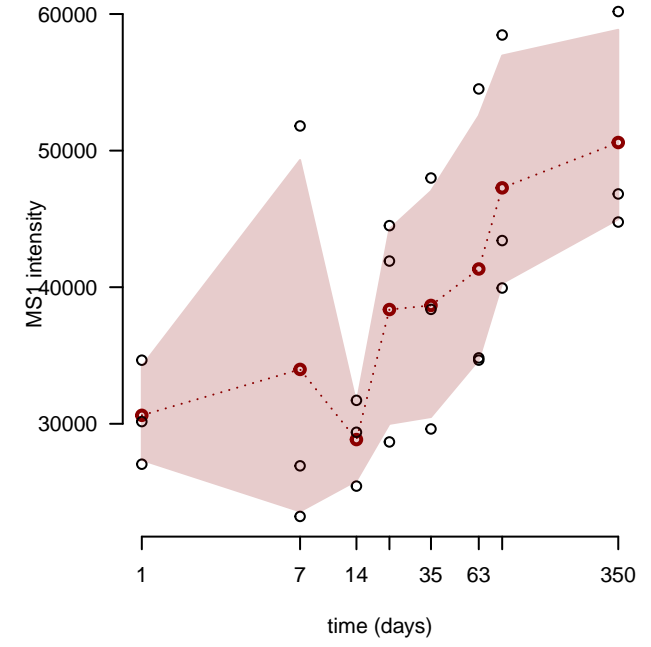

**P70351**  
**GN=Ezh1**  
enhancer of zeste 1 polycomb repressive ...

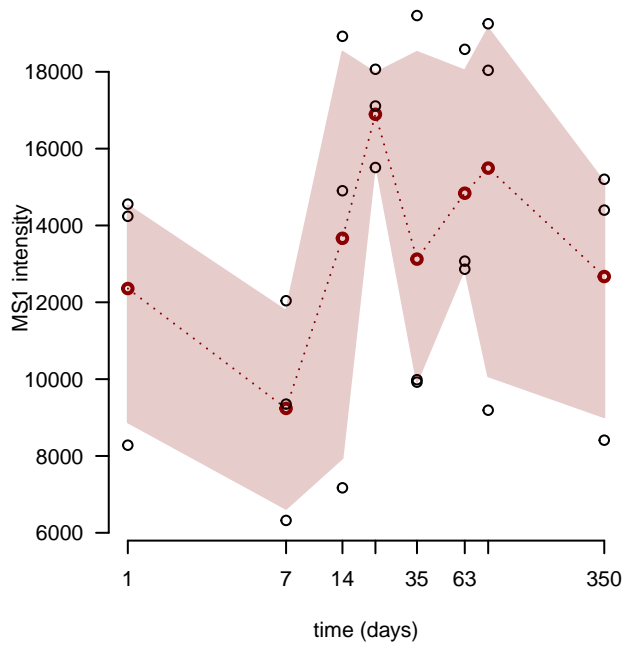

**P70353**  
**GN=Nfyc**  
nuclear transcription factor-Y gamma

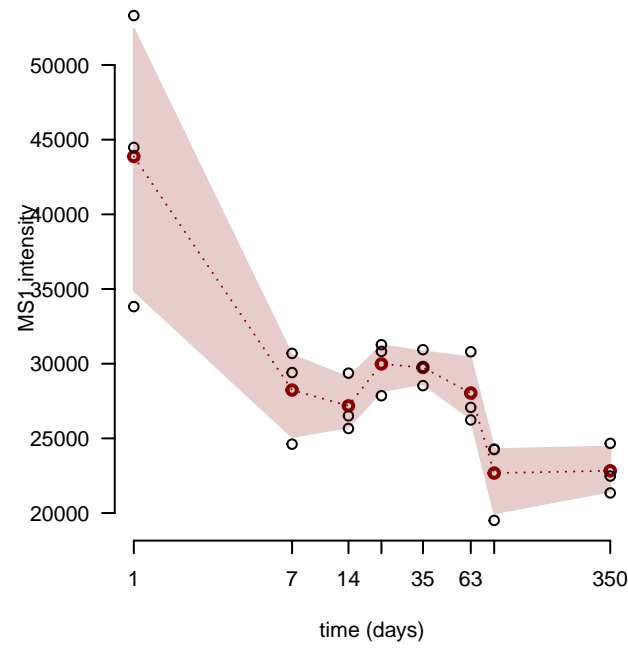

**P70362**  
**GN=Ufd1**  
ubiquitin recognition factor in ER-assoc ...

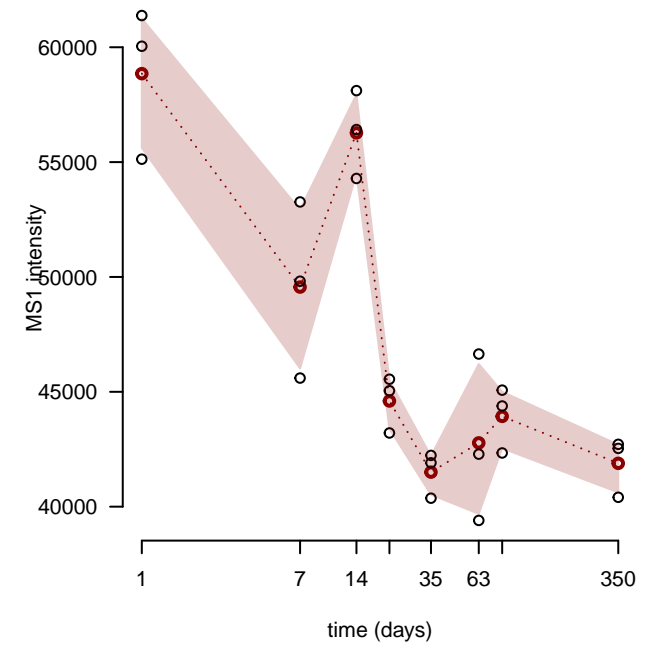

**P70365**  
**GN=Ncoa1**  
nuclear receptor coactivator 1

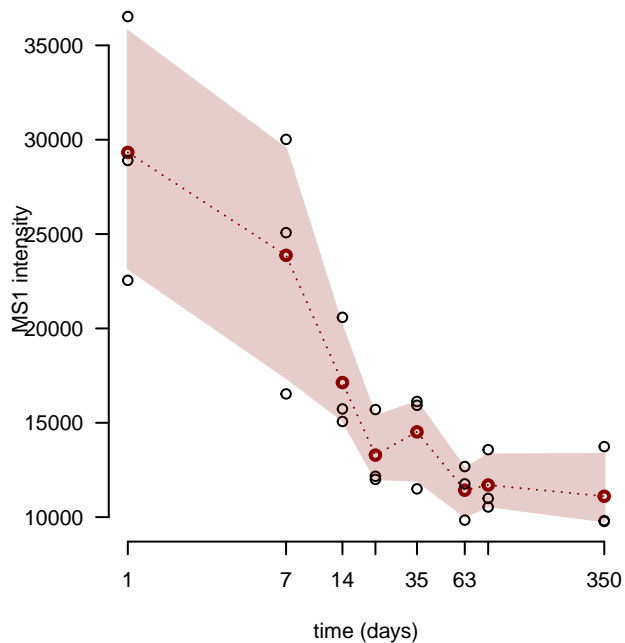

**P70371**  
**GN=Terf1**  
telomeric repeat binding factor 1

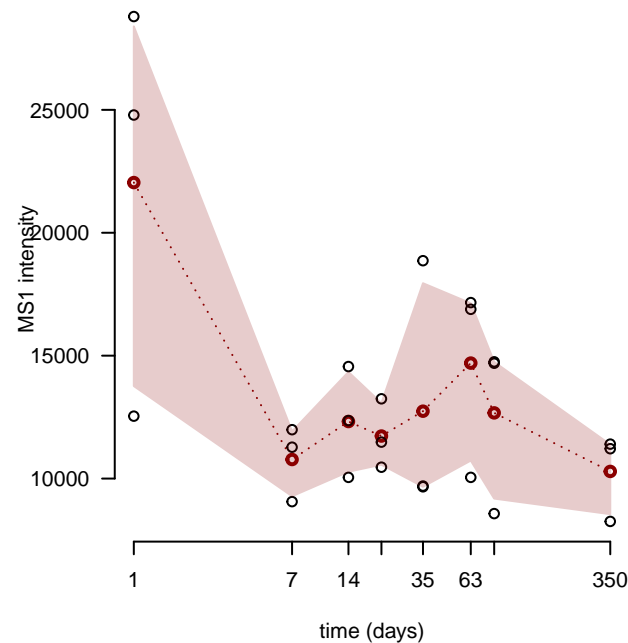

**P70372**  
**GN=Elavl1**  
ELAV (embryonic lethal, abnormal vision) ...

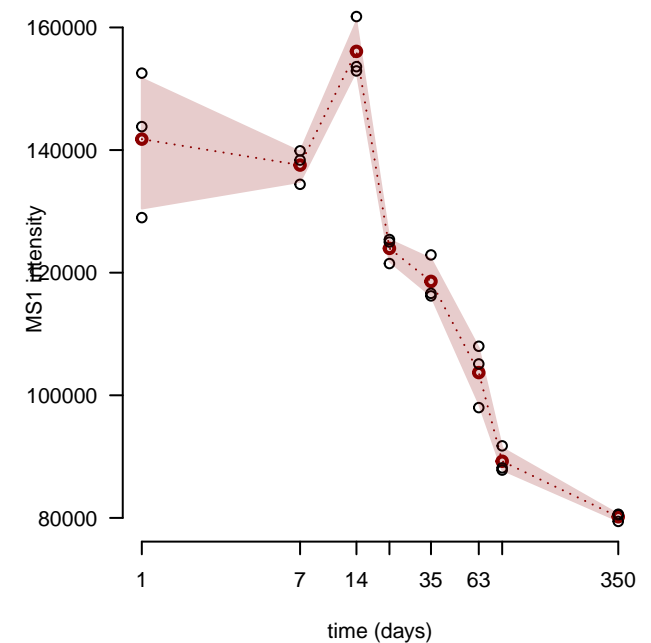

**P70387**  
GN=Hfe  
homeostatic iron regulator

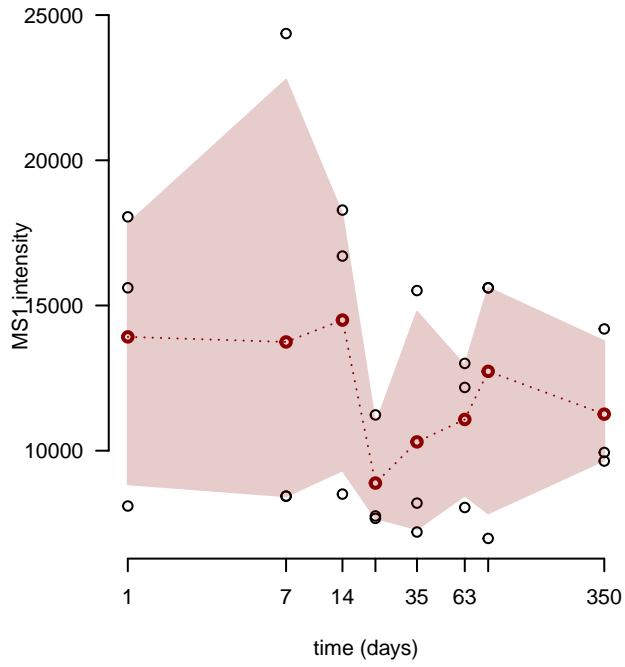

**P70388**  
GN=Rad50  
RAD50 double strand break repair protein

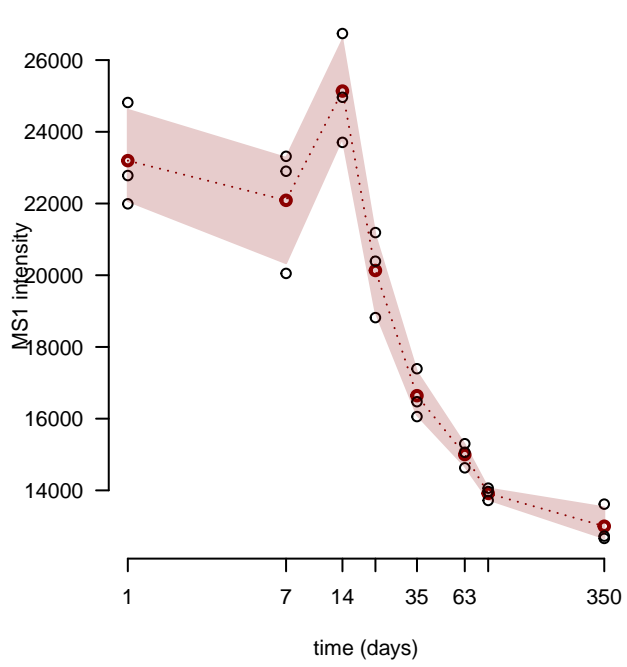

**P70389**  
GN=Igfals  
insulin-like growth factor binding prote ...

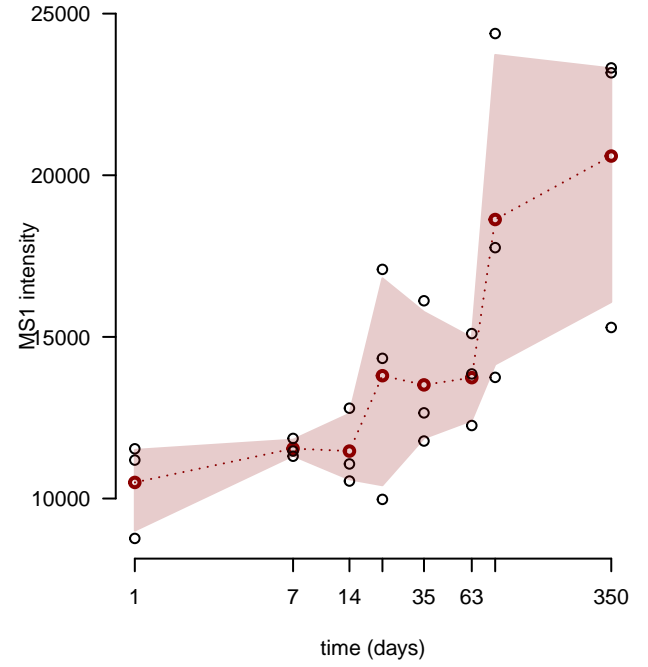

**P70398**  
GN=Usp9x  
ubiquitin specific peptidase 9, X chromo ...

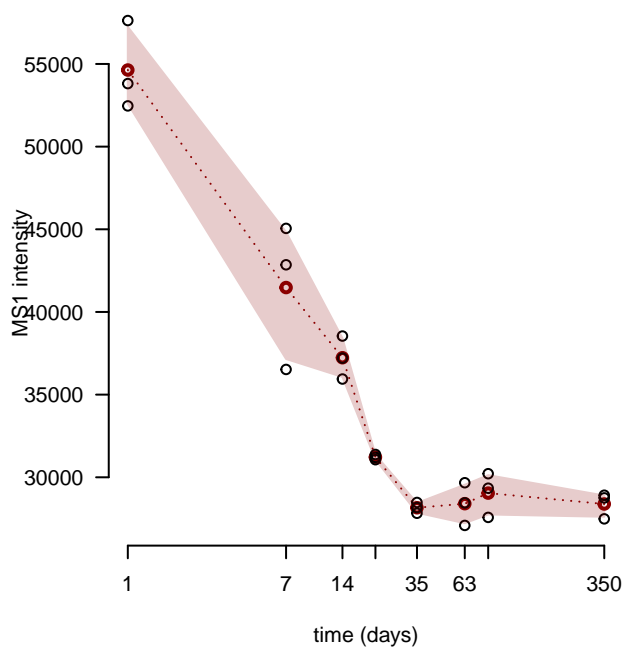

**P70399**  
GN=Tp53bp1

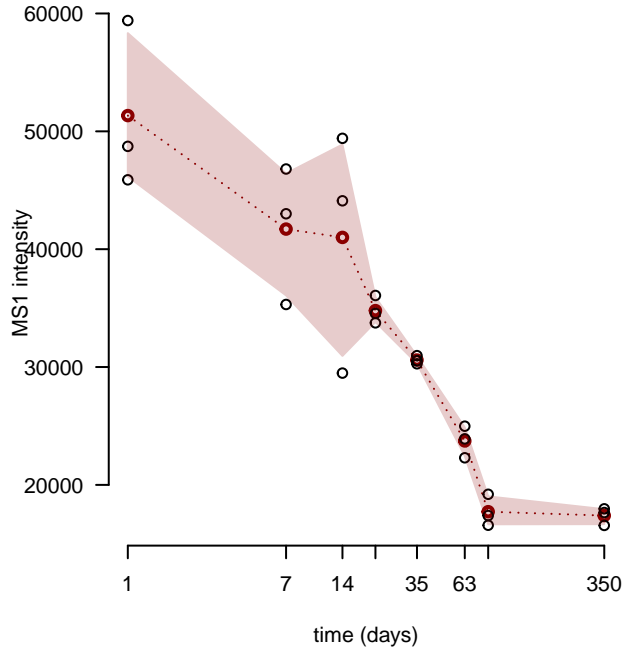

**P70403**  
GN=Cux1

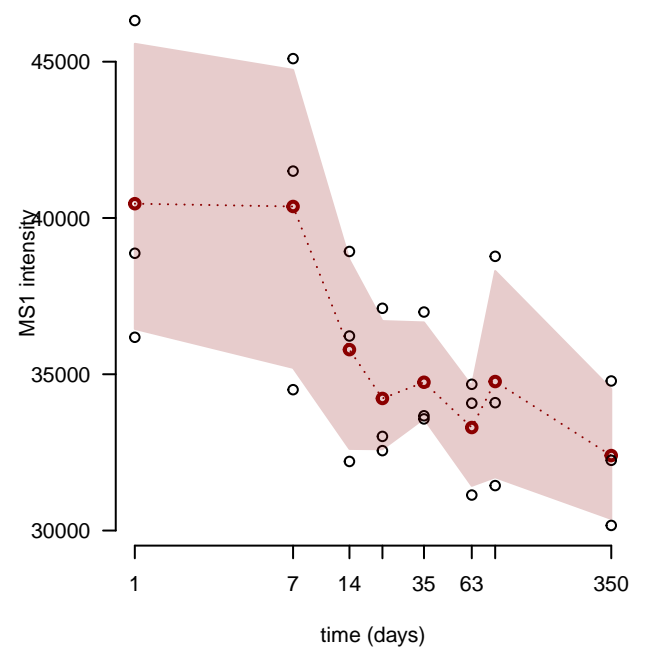

**P70404**  
GN=Idh3g  
isocitrate dehydrogenase 3 (NAD+), gamma

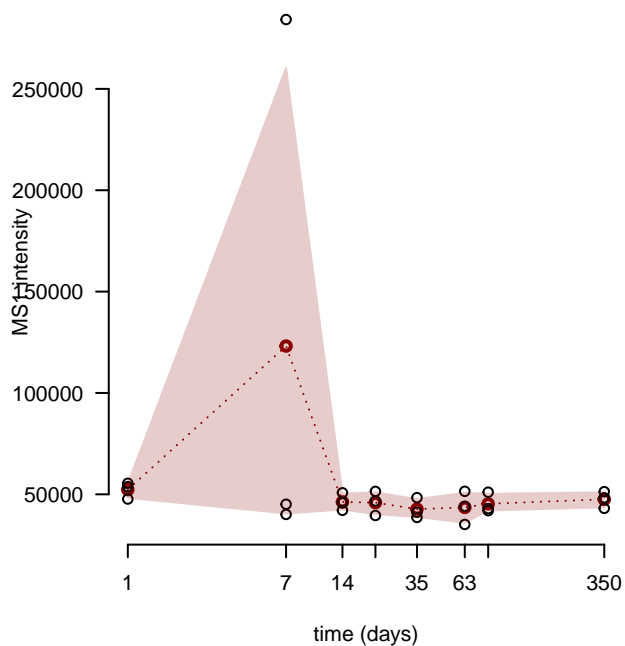

**P70406**  
GN=Ucp2  
uncoupling protein 2 (mitochondrial, pro ...

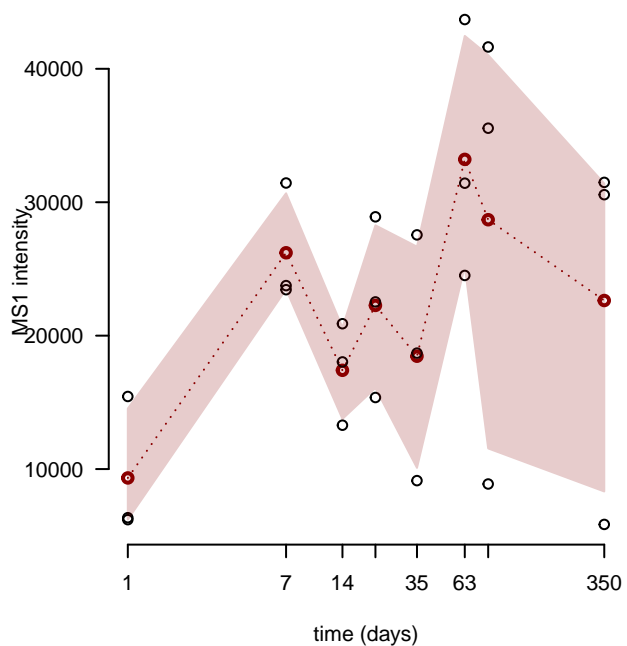

**P70414**  
GN=Slc8a1  
solute carrier family 8 (sodium/calcium ...

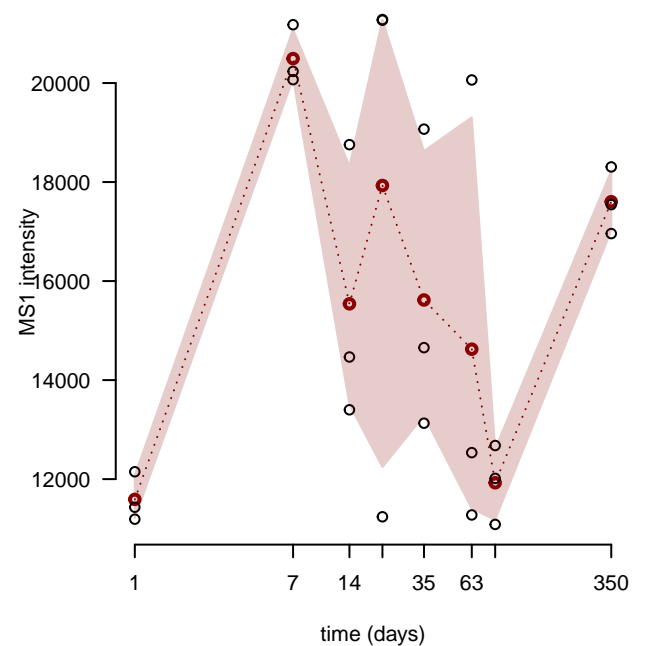

**P70424**  
**GN=ErbB2**  
erb-b2 receptor tyrosine kinase 2

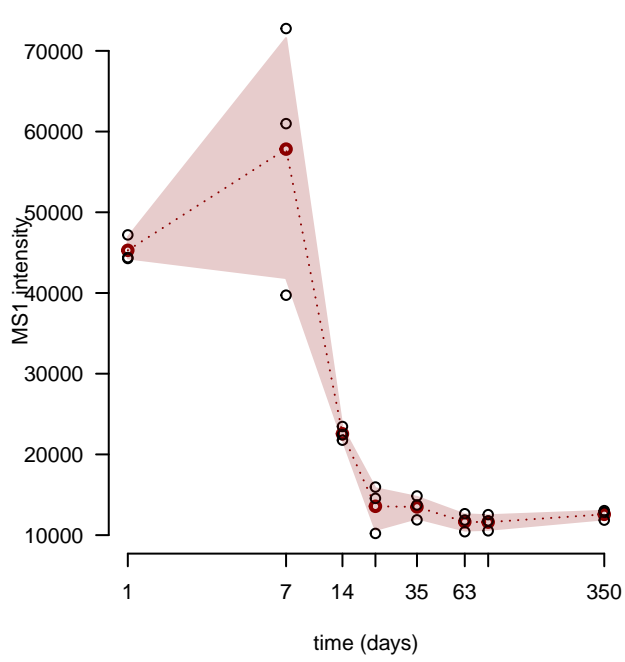

**P70426**  
**GN=Rit1**  
Ras-like without CAAX 1

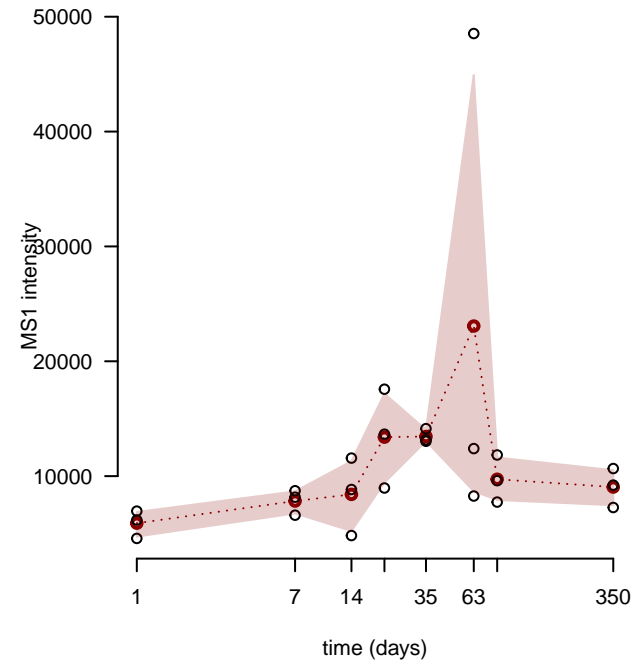

**P70428**  
**GN=Ext2**  
exostosin glycosyltransferase 2

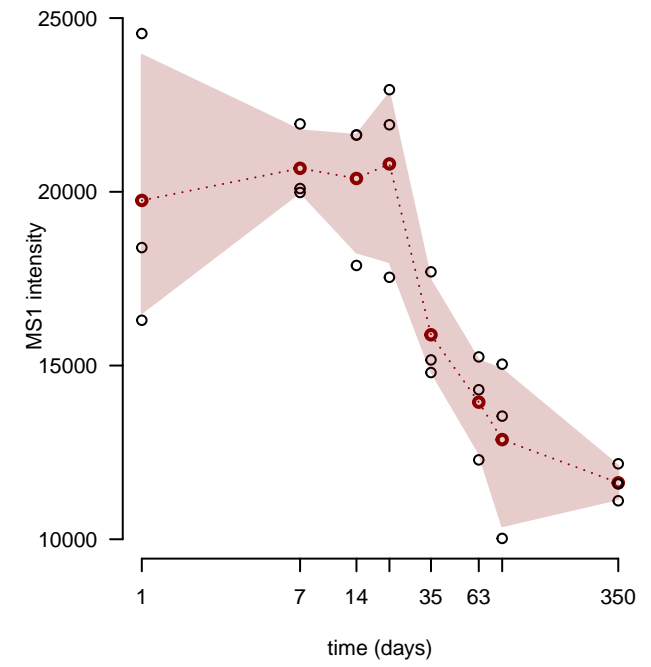

**P70429**  
**GN=EvI**  
Ena-vasodilator stimulated phosphoprotei ...

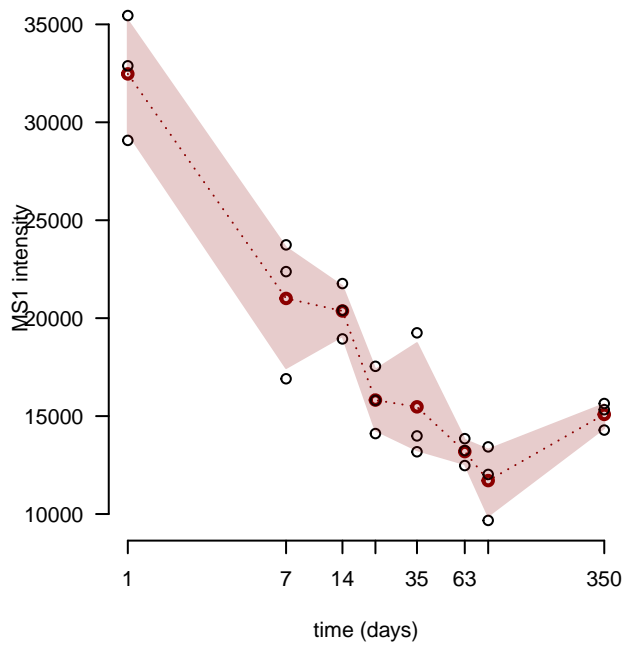

**P70441**  
**GN=Slc9a3r1**  
solute carrier family 9 (sodium/hydrogen ...

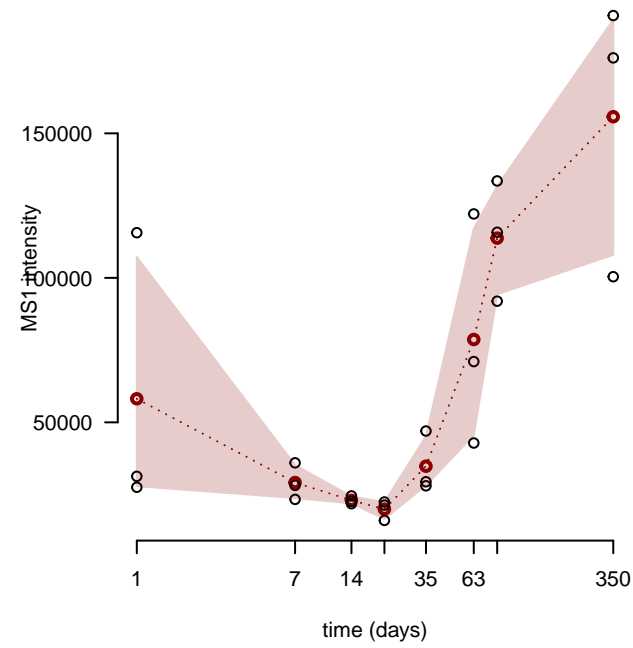

**P70444**  
**GN=Bid**  
BH3 interacting domain death agonist

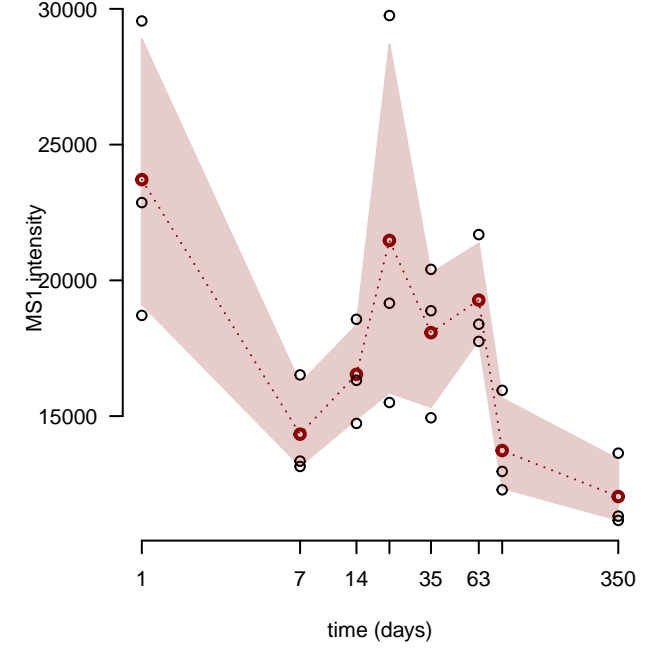

**P70451**  
**GN=Fer**  
fer (fms/fps related) protein kinase

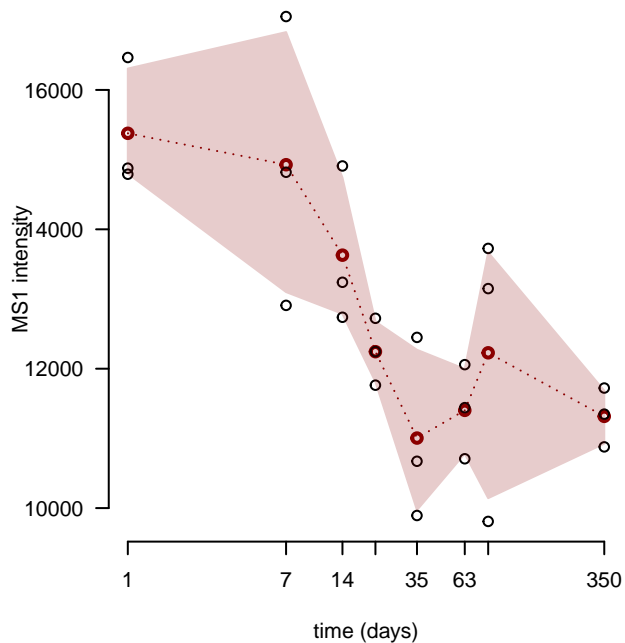

**P70452**  
**GN=Stx4**

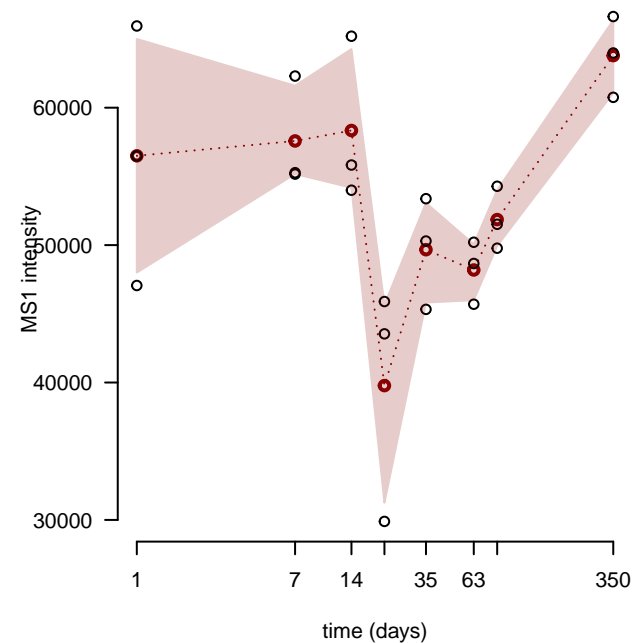

**P70459**  
**GN=Erf**  
Ets2 repressor factor

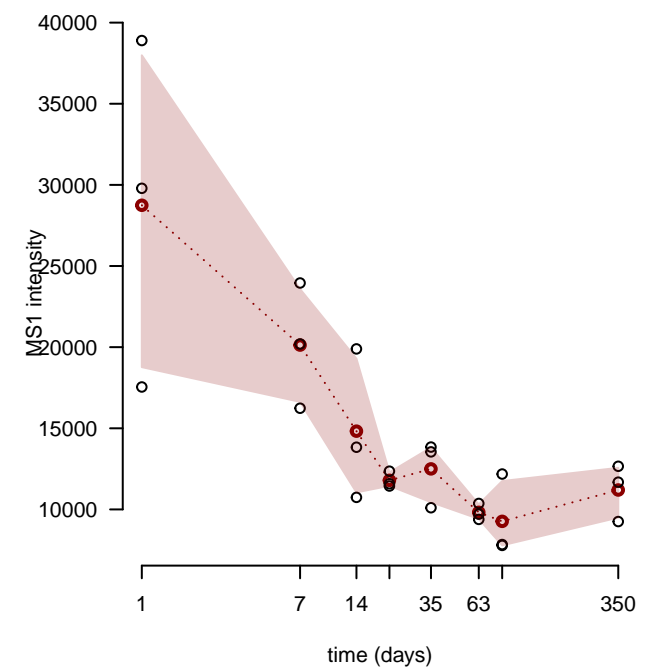

**P70460**  
GN=Vasp  
vasodilator-stimulated phosphoprotein

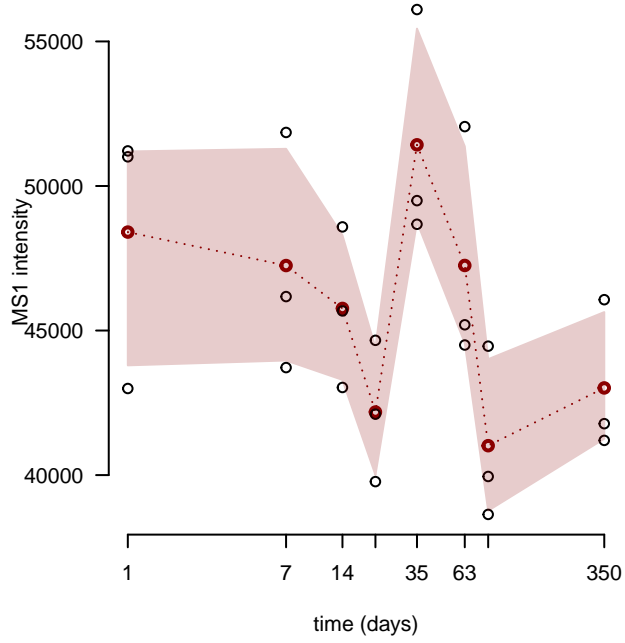

**P70662**  
GN=Ldb1  
LIM domain binding 1

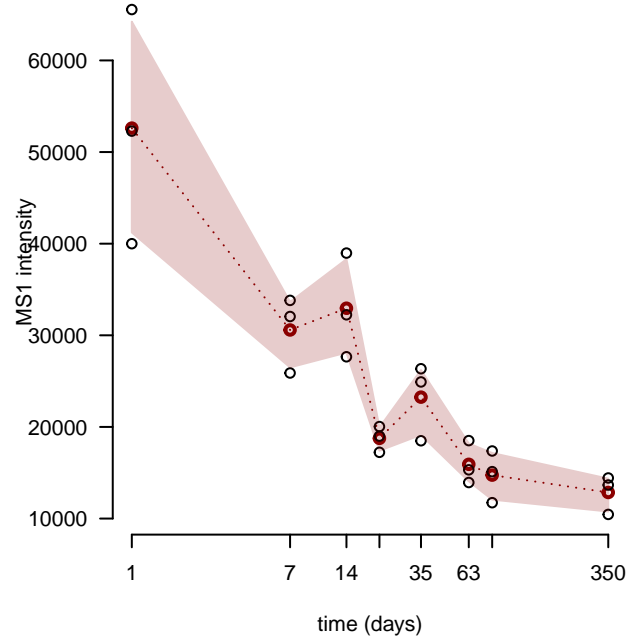

**P70663**  
GN=Sparcl1  
SPARC-like 1

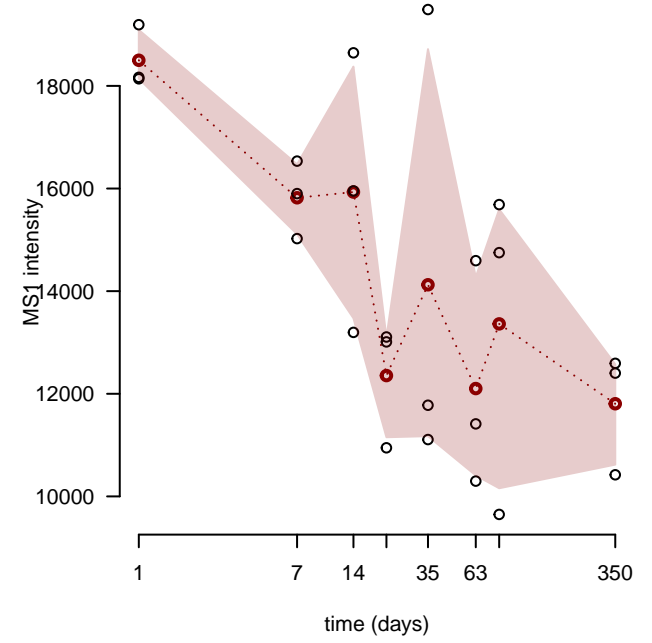

**P70665**  
GN=Siae  
sialic acid acetyltransferase

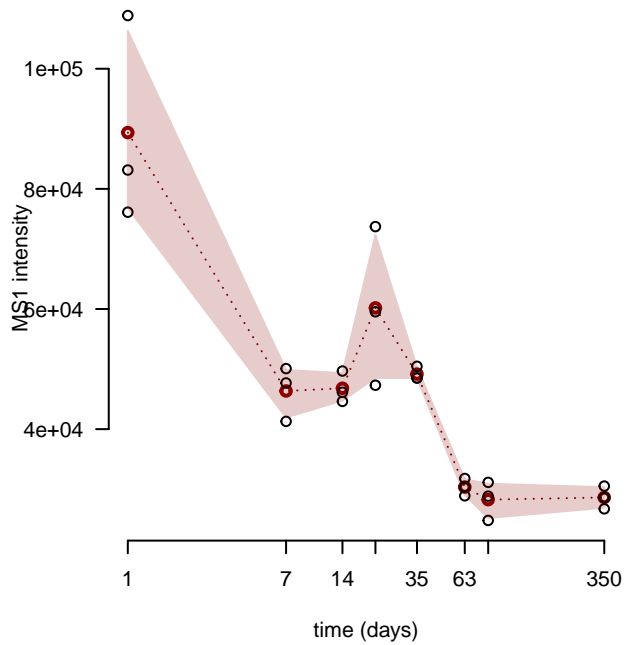

**P70669**  
GN=Phex  
phosphate regulating endopeptidase homol ...

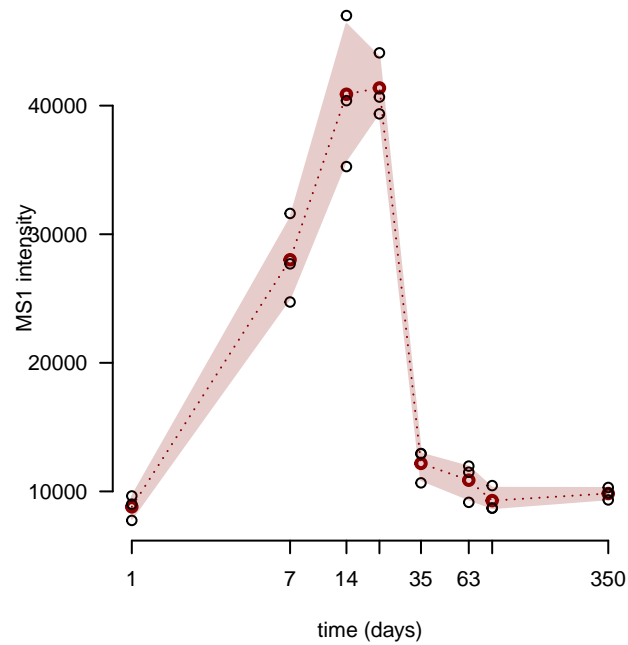

**P70670**  
GN=Naca  
nascent polypeptide-associated complex a ...

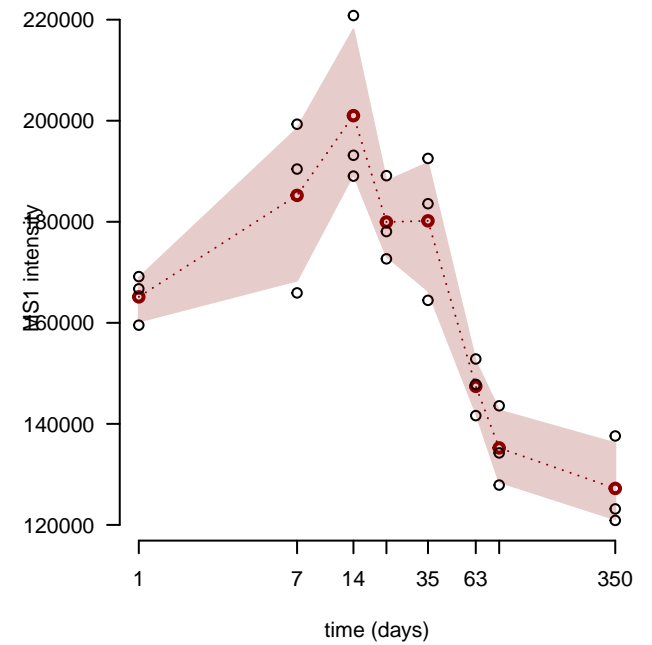

**P70671**  
GN=Irf3  
interferon regulatory factor 3

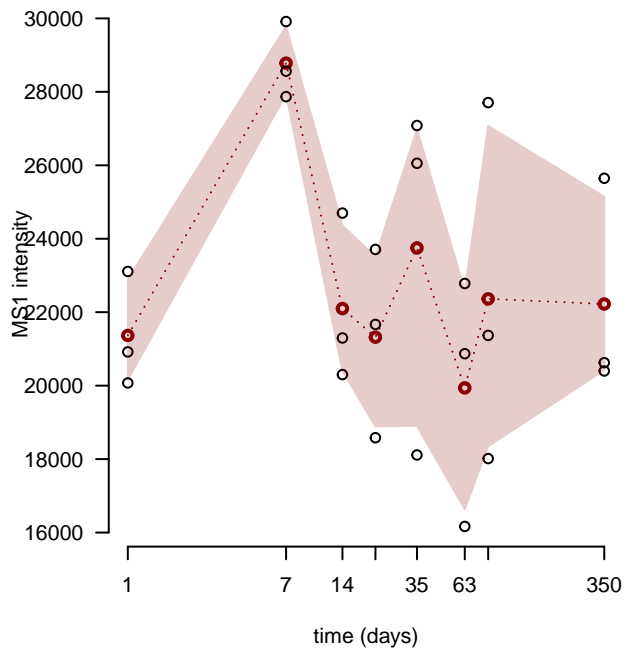

**P70677**  
GN=Casp3  
caspase 3

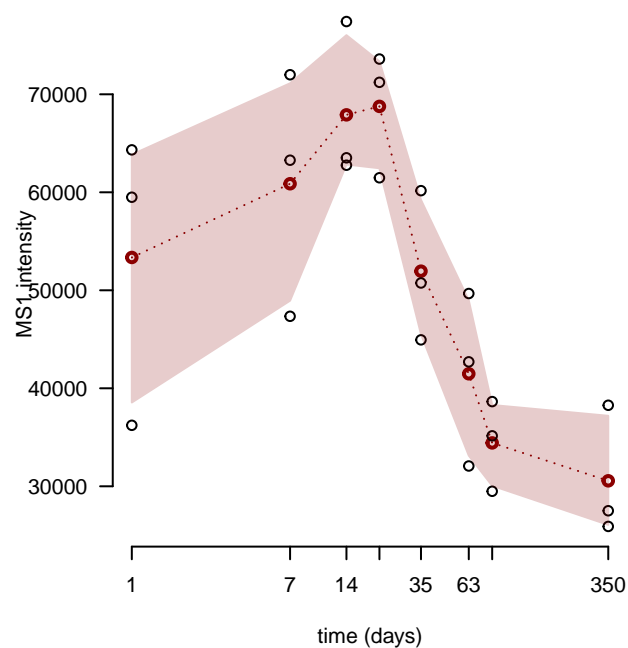

**P70694**  
GN=Akr1c6  
aldo-keto reductase family 1, member C6

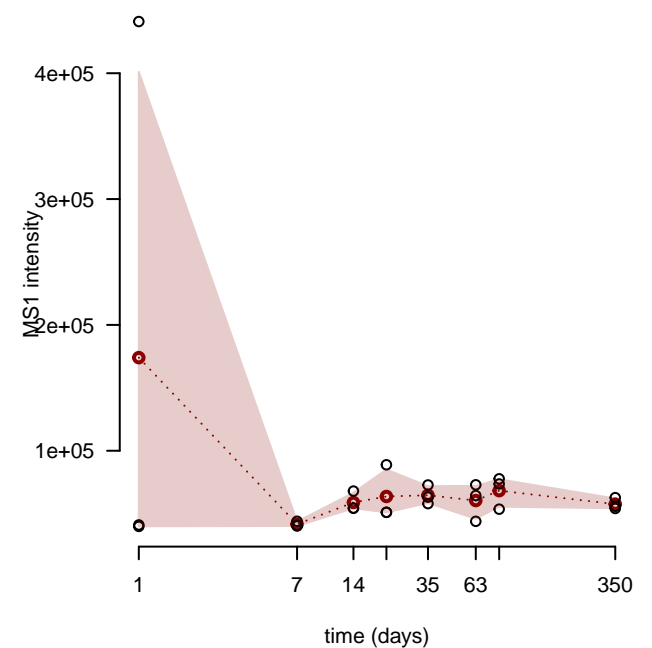

**P70695**  
GN=Fbp2  
fructose biphosphatase 2

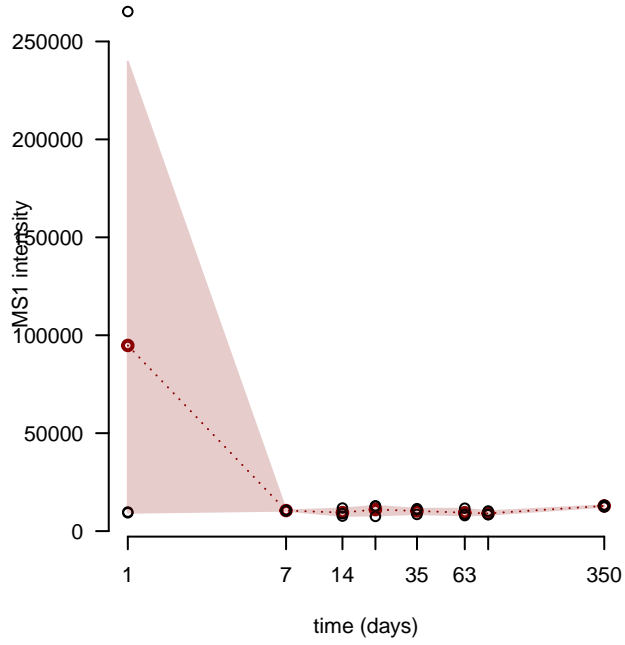

**P70696**  
GN=Hist1h2ba

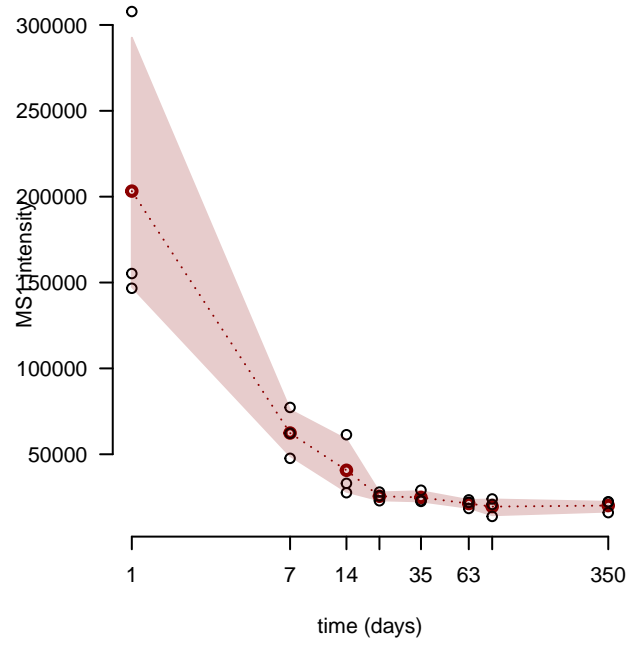

**P70697**  
GN=Urod  
uroporphyrinogen decarboxylase

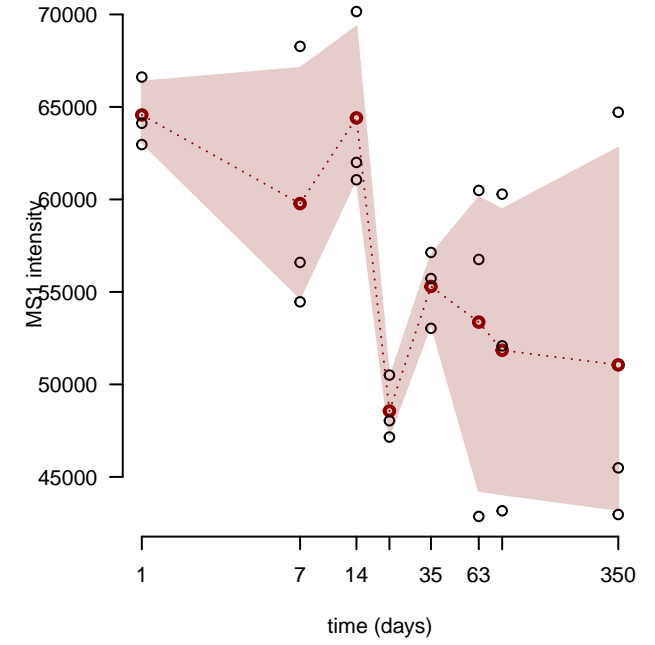

**P70698**  
GN=Ctps1

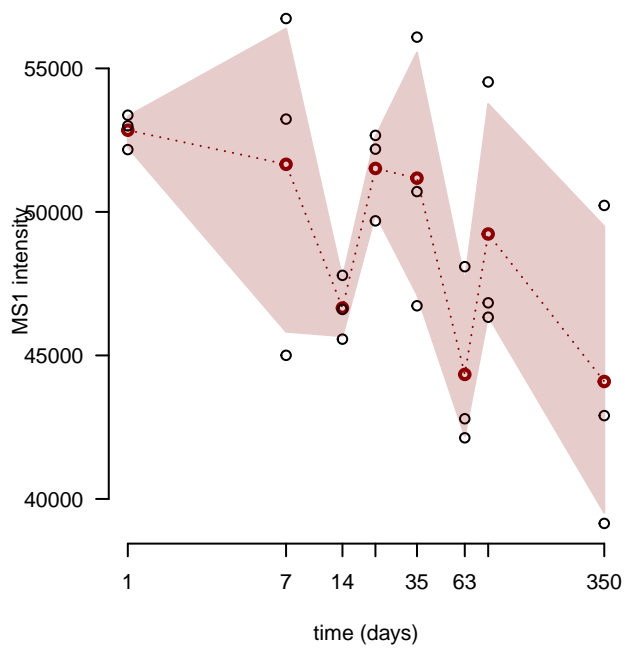

**P70699**  
GN=Gaa  
glucosidase, alpha, acid

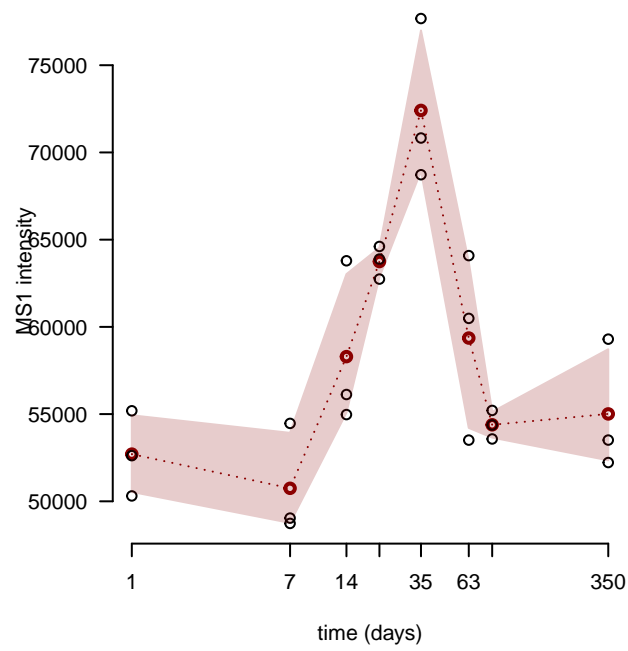

**P70700**  
GN=Polr1b  
polymerase (RNA) I polypeptide B

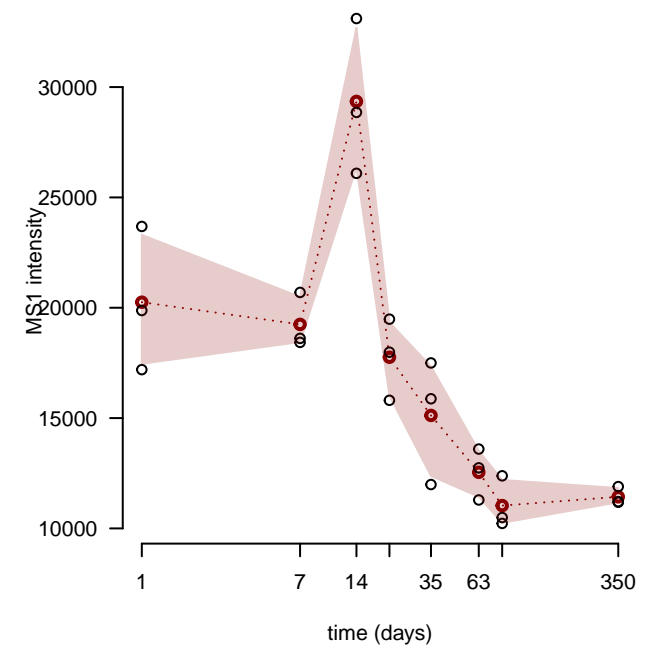

**P70704**  
GN=Atp8a1  
ATPase, aminophospholipid transporter (A ...

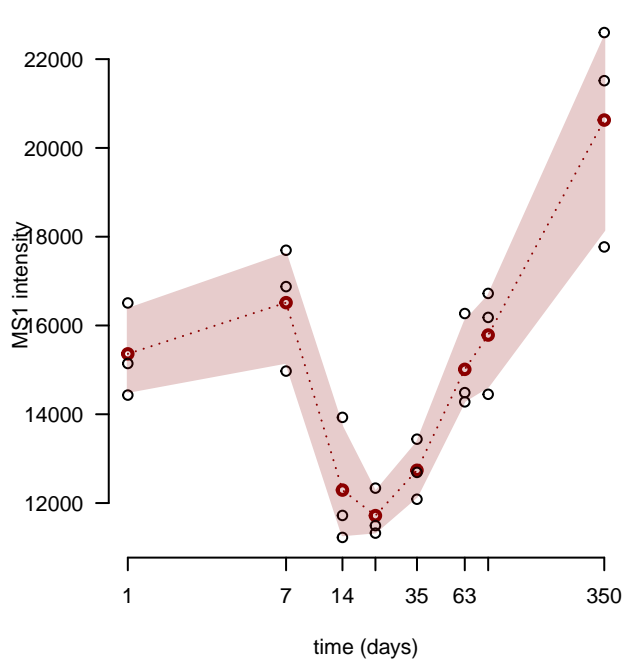

**P80313**  
GN=Cct7  
chaperonin containing Tcp1, subunit 7 (e ...

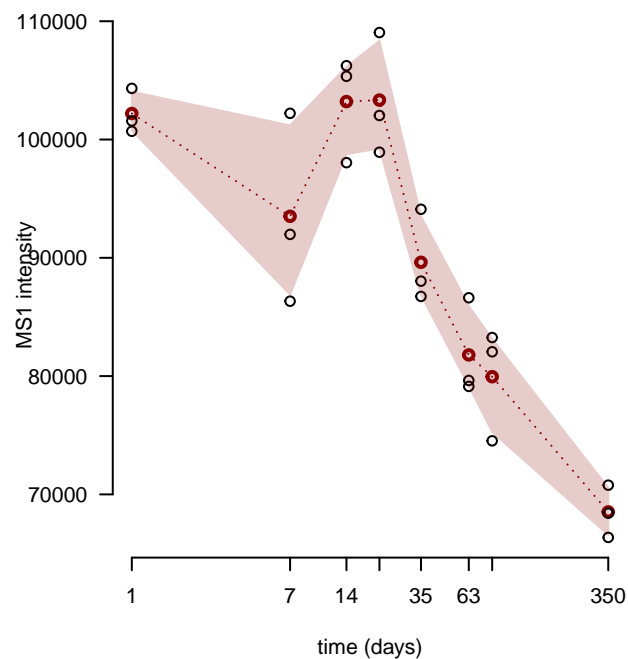

**P80314**  
GN=Cct2  
chaperonin containing Tcp1, subunit 2 (b ...

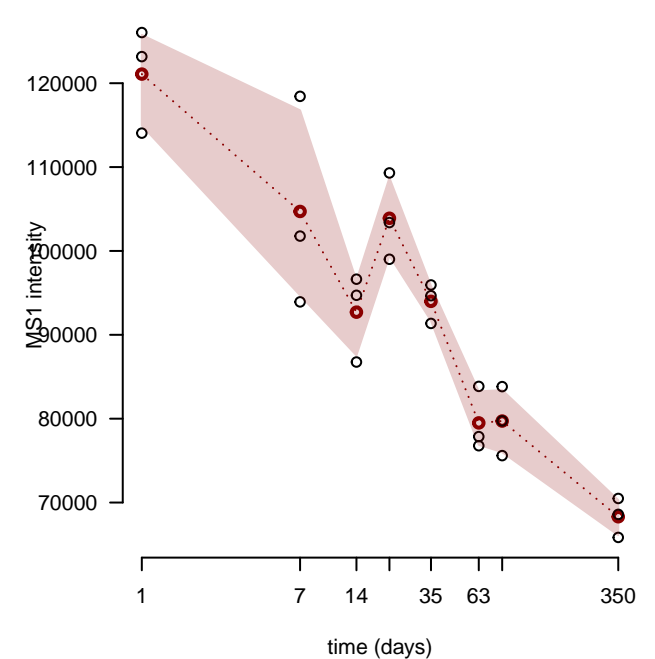

**P80315**  
GN=Cct4  
chaperonin containing Tcp1, subunit 4 (d ...

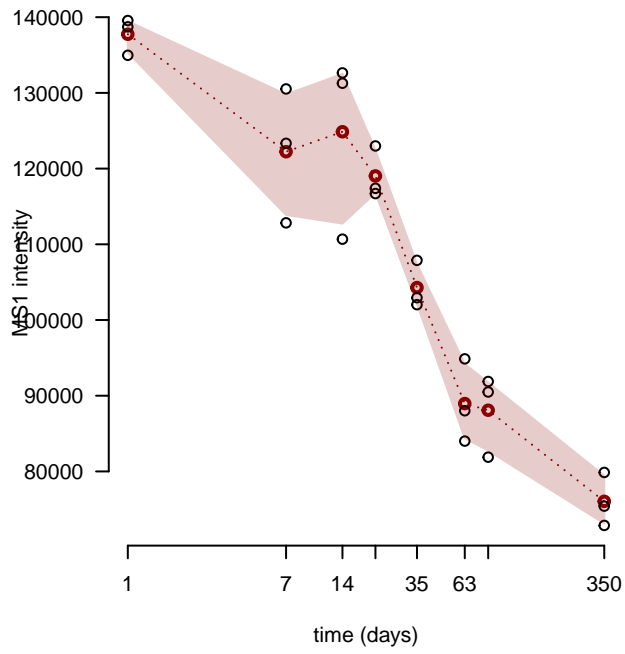

**P80316**  
GN=Cct5  
chaperonin containing Tcp1, subunit 5 (e ...

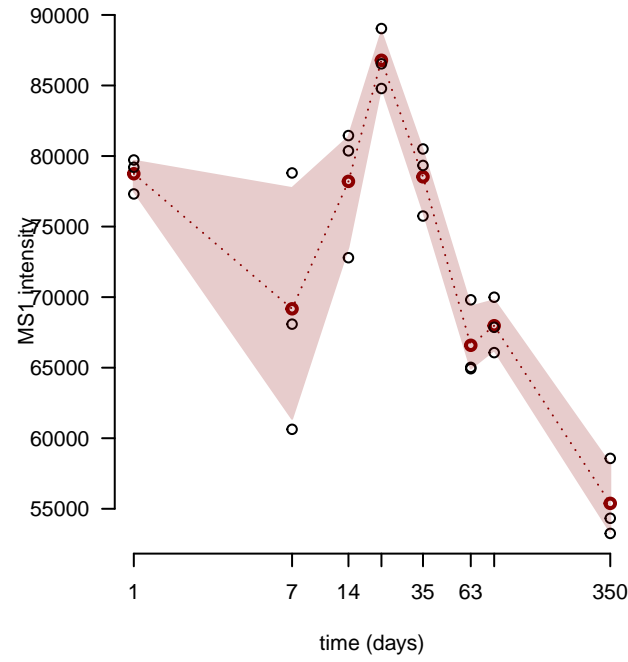

**P80317**  
GN=Cct6a  
chaperonin containing Tcp1, subunit 6a ( ...

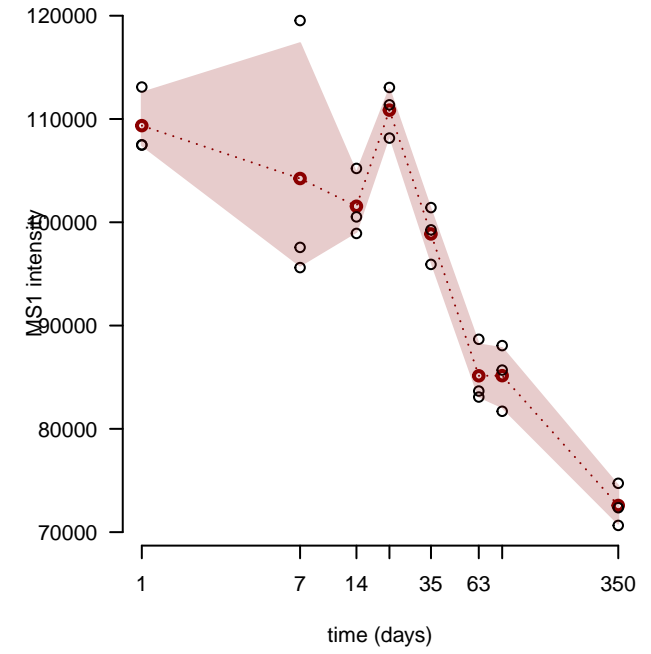

**P80318**  
GN=Cct3  
chaperonin containing Tcp1, subunit 3 (g ...

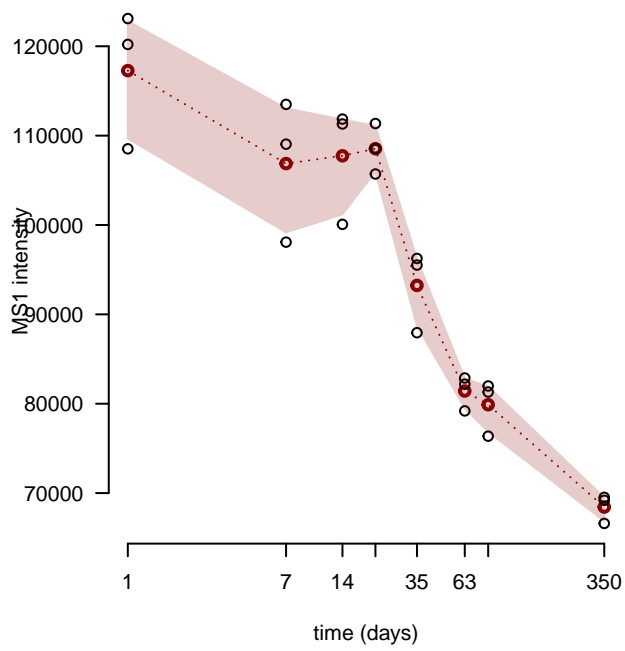

**P81069**  
GN=Gabpb2  
GA repeat binding protein, beta 2

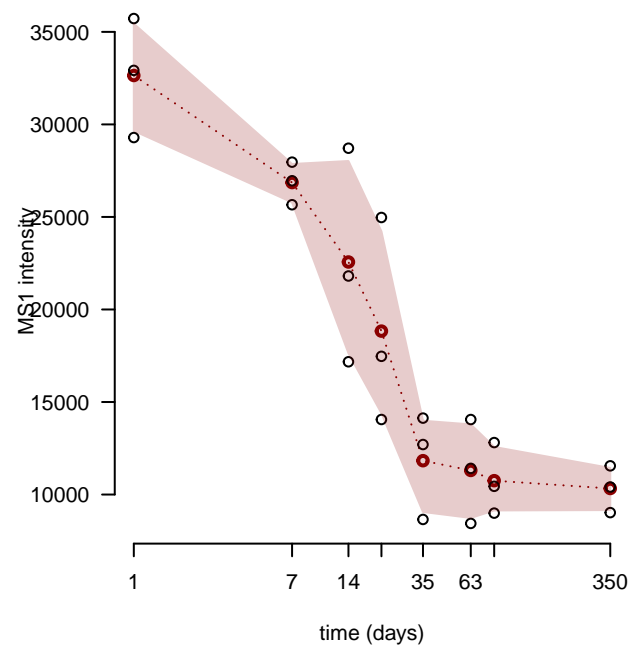

**P81117**  
GN=Nucb2  
nucleobindin 2

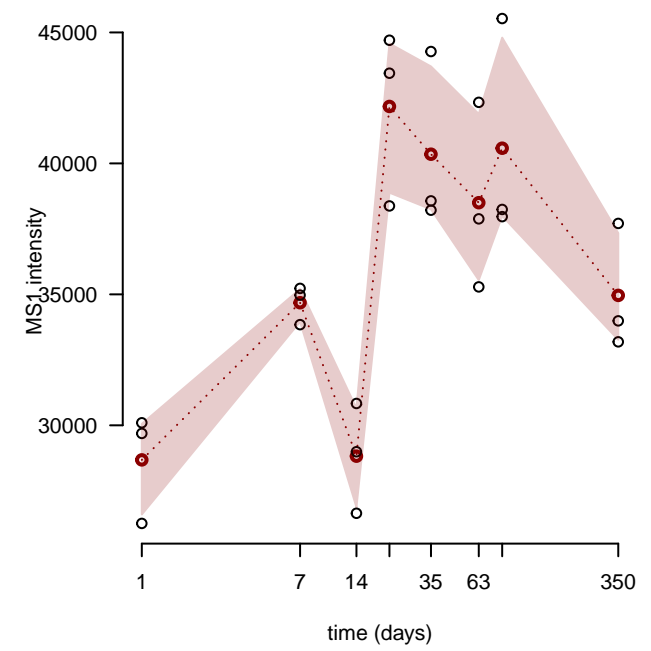

**P81269**  
GN=Atf1  
activating transcription factor 1

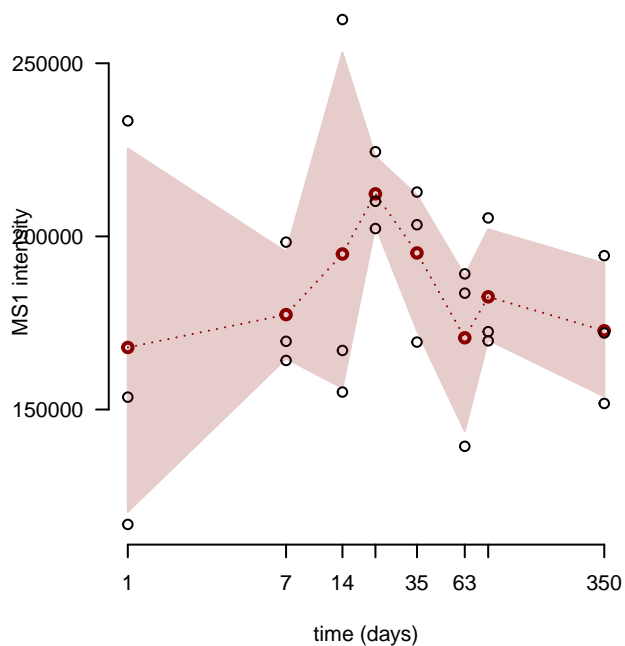

**P81270**  
GN=Erg  
ETS transcription factor

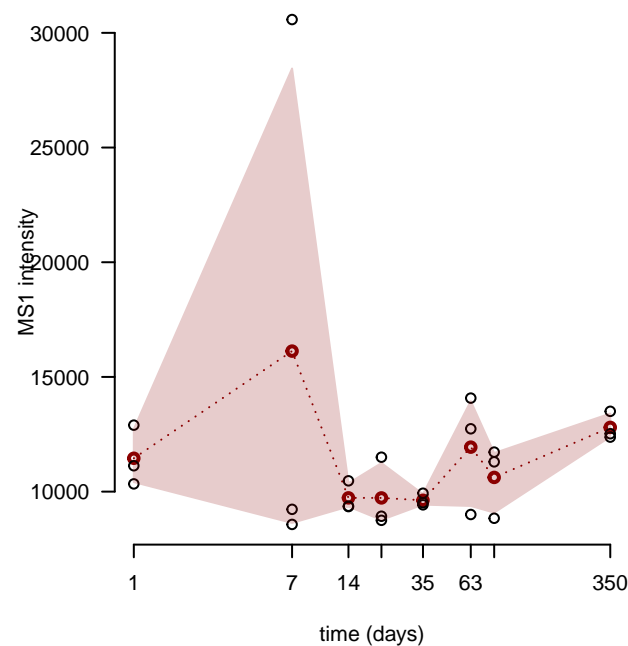

**P82198**  
GN=Tgfb1  
transforming growth factor, beta induced

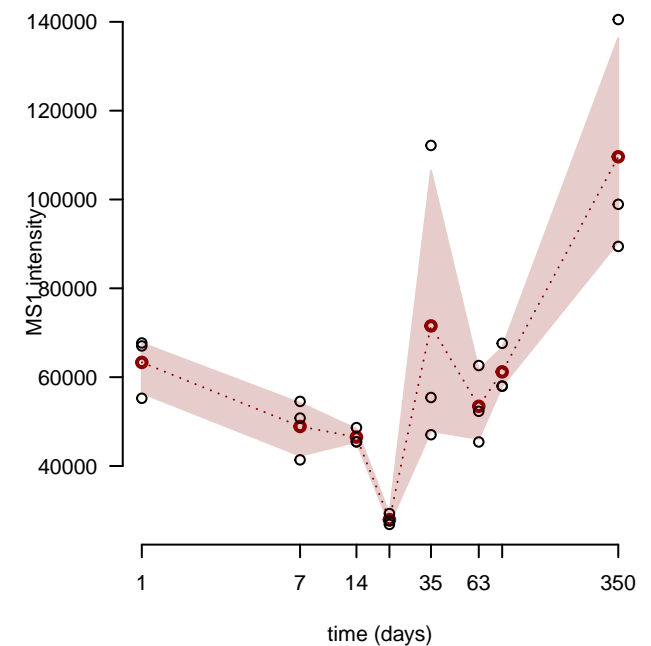

**P82343**  
GN=Renbp  
renin binding protein

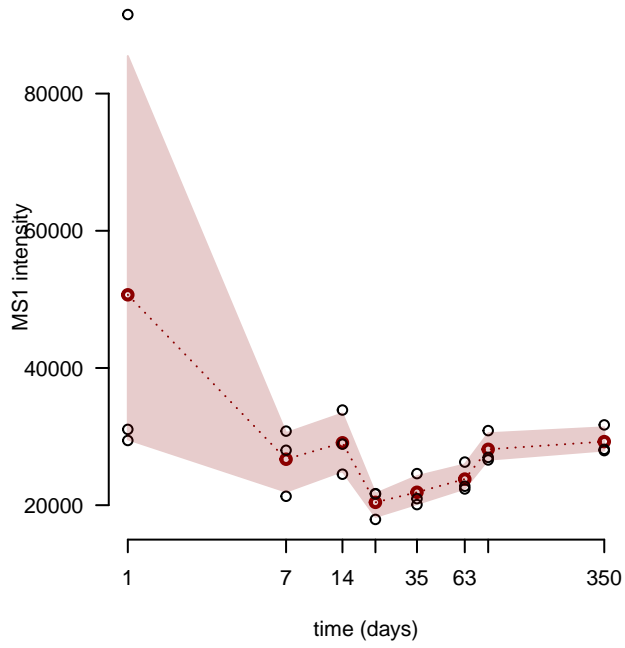

**P82347**  
GN=Sgcd  
sarcoglycan, delta (dystrophin-associate ...

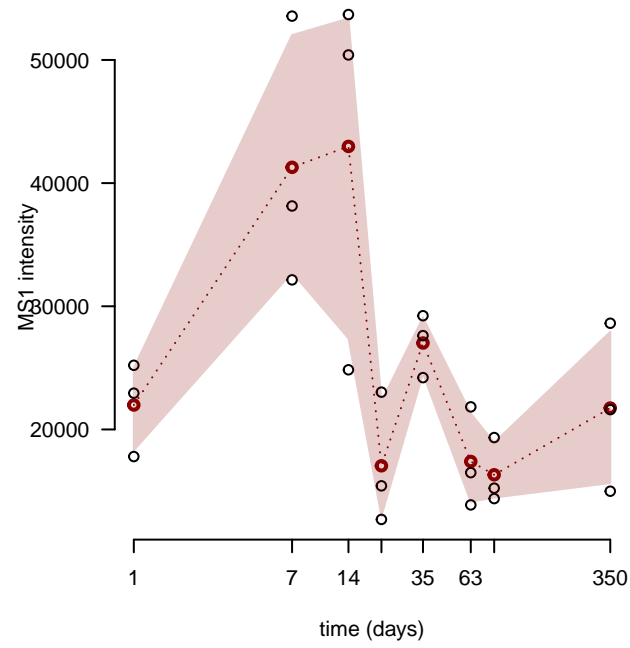

**P83093**  
GN=Stim2  
stromal interaction molecule 2

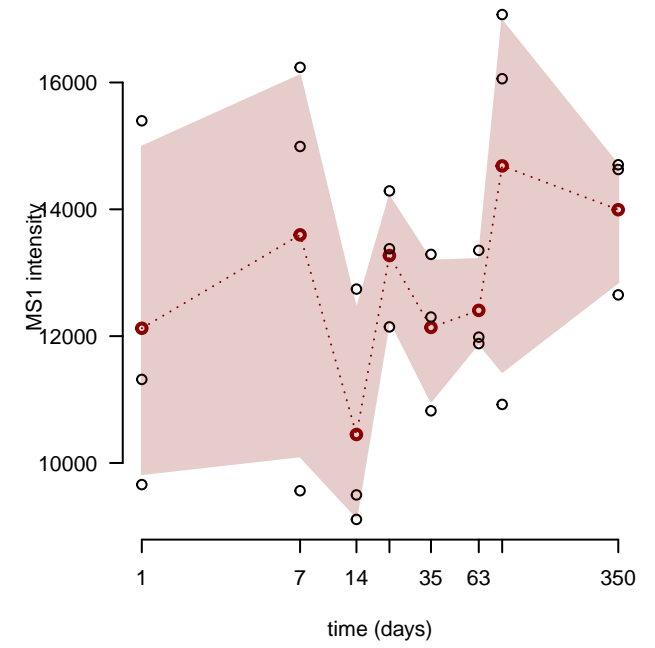

**P83510**  
GN=Tnik  
TRAF2 and NCK interacting kinase

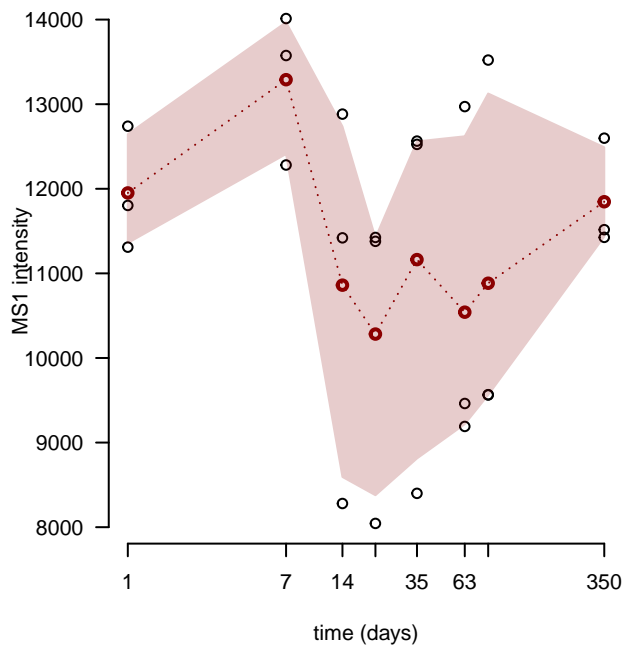

**P83741**  
GN=Wnk1  
WNK lysine deficient protein kinase 1

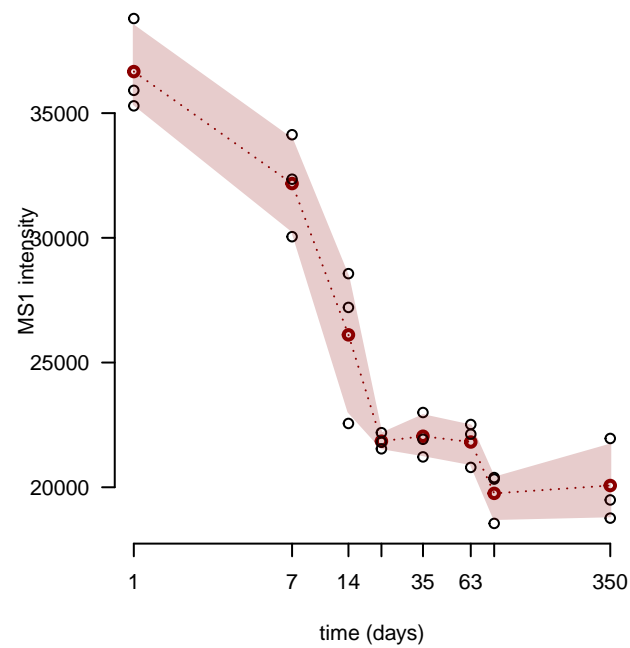

**P83870**  
GN=Phf5a  
PHD finger protein 5A

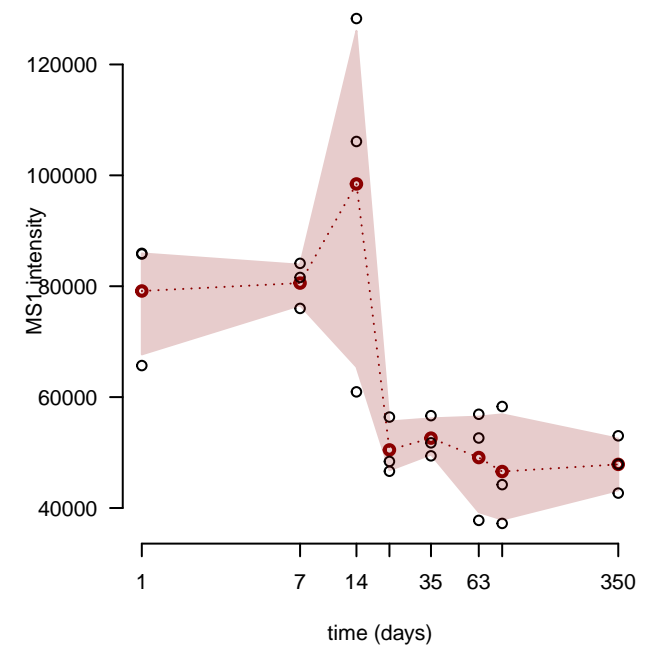

**P83877**  
GN=Txn14a  
thioredoxin-like 4A

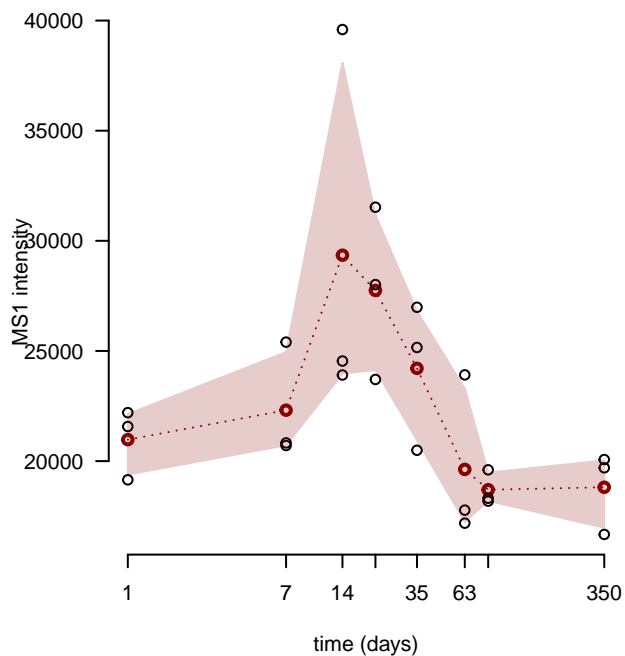

**P83882**  
GN=Rpl36a  
ribosomal protein L36A

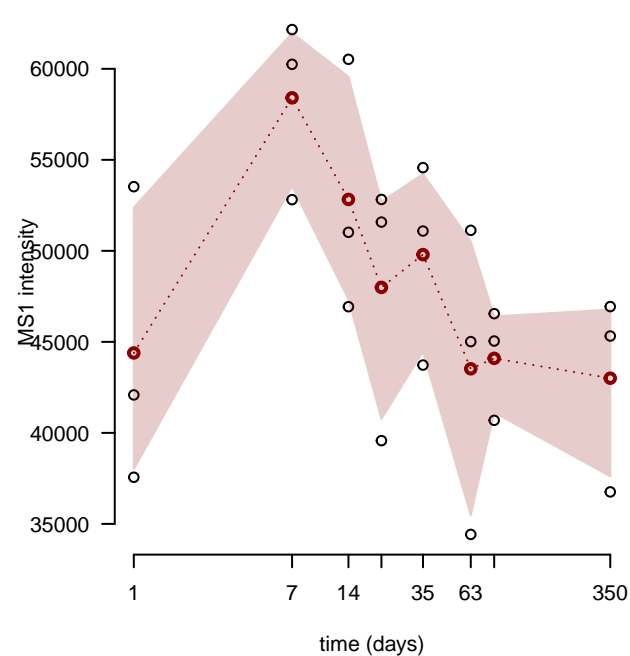

**P83887**  
GN=Tubg1  
tubulin, gamma 1

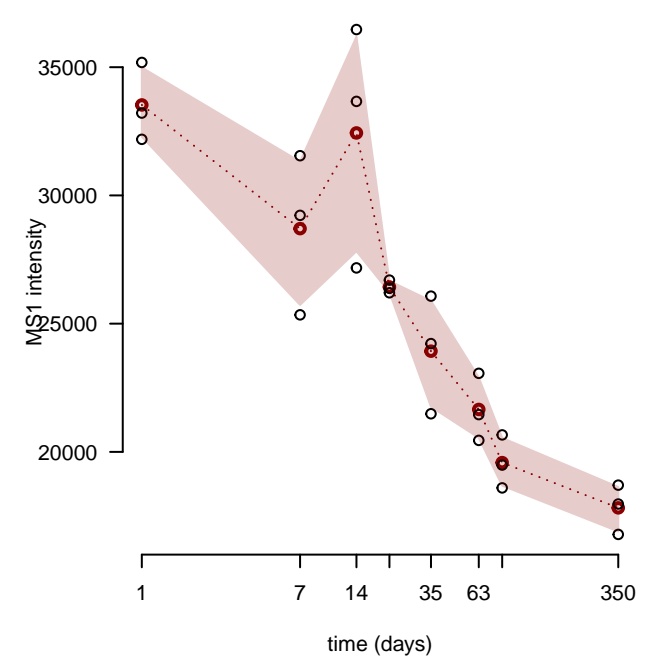



**P83917**  
GN=Cbx1  
chromobox 1

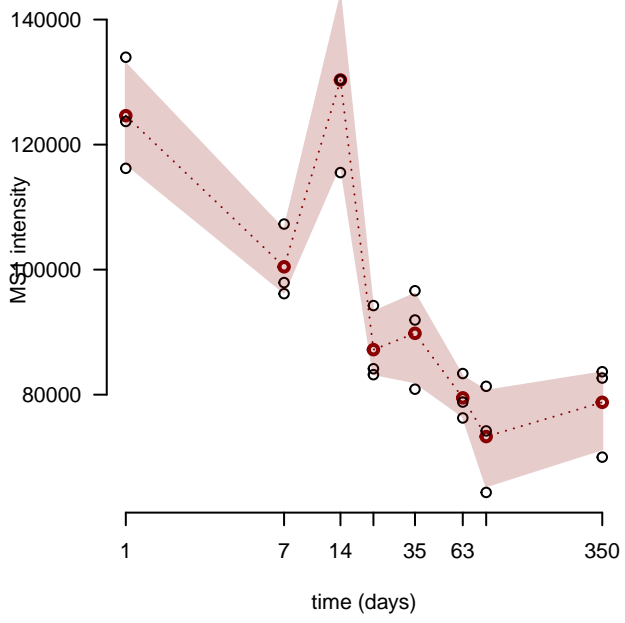

**P83940**  
GN=Eloc  
elongin C

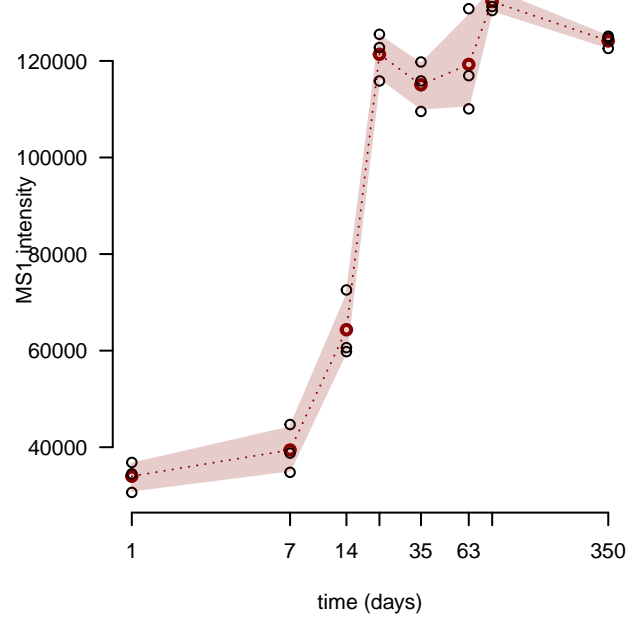

**P84078**  
GN=Arf1  
ADP-ribosylation factor 1

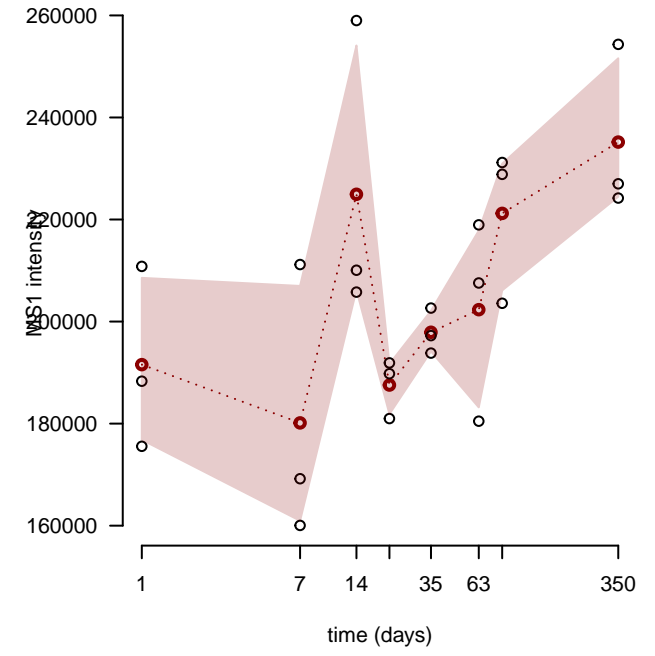

**P84084**  
GN=Arf5  
ADP-ribosylation factor 5

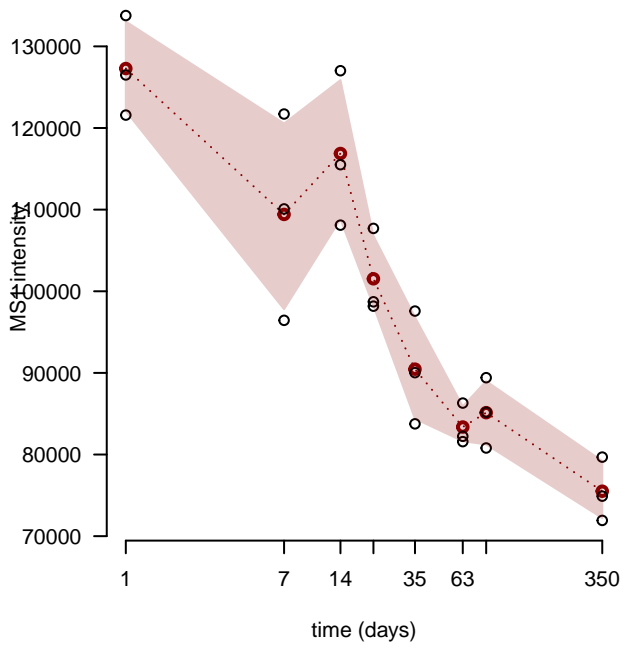

**P84086**  
GN=Cplx2  
complexin 2

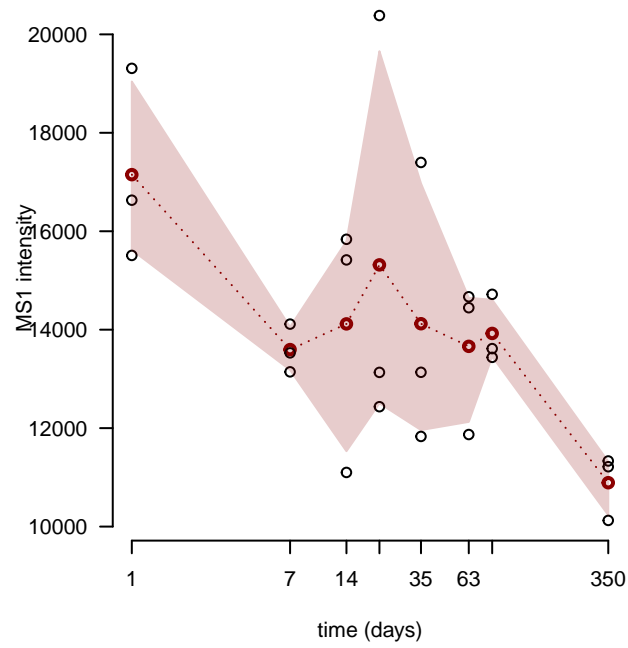

**P84089**  
GN=Erh  
ERH mRNA splicing and mitosis factor

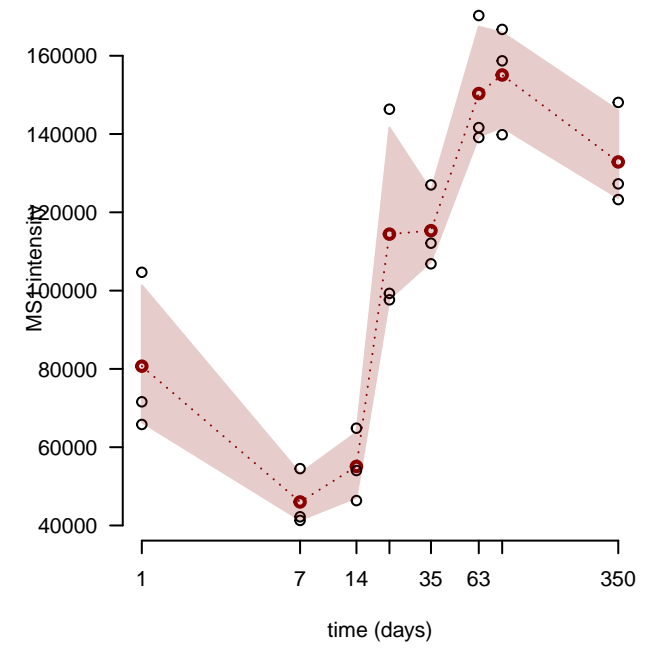

**P84091**  
GN=Ap2m1  
adaptor-related protein complex 2, mu 1 ...

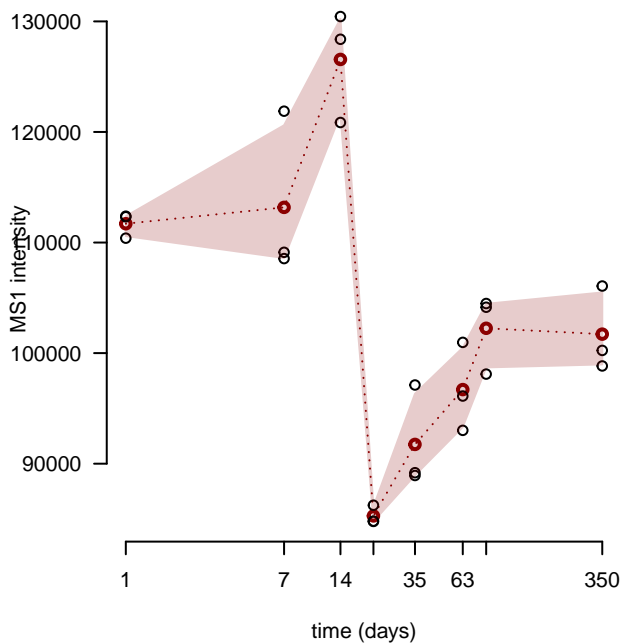

**P84096**  
GN=Rhog  
ras homolog family member G

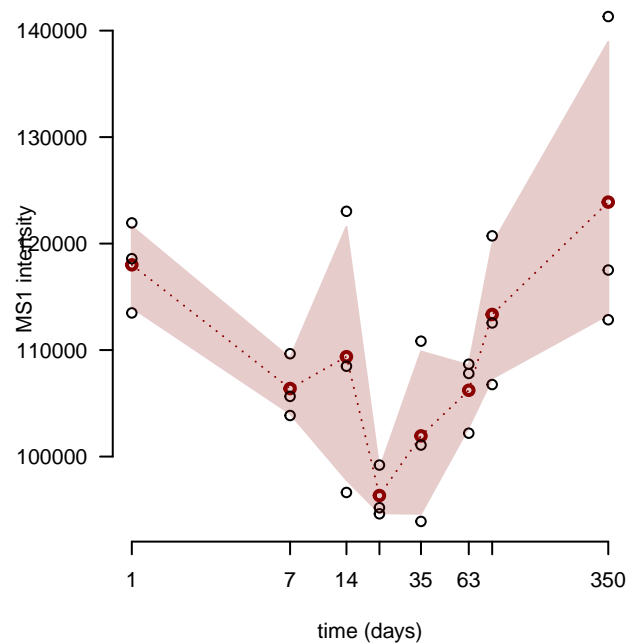

**P84099**  
GN=Rpl19  
ribosomal protein L19

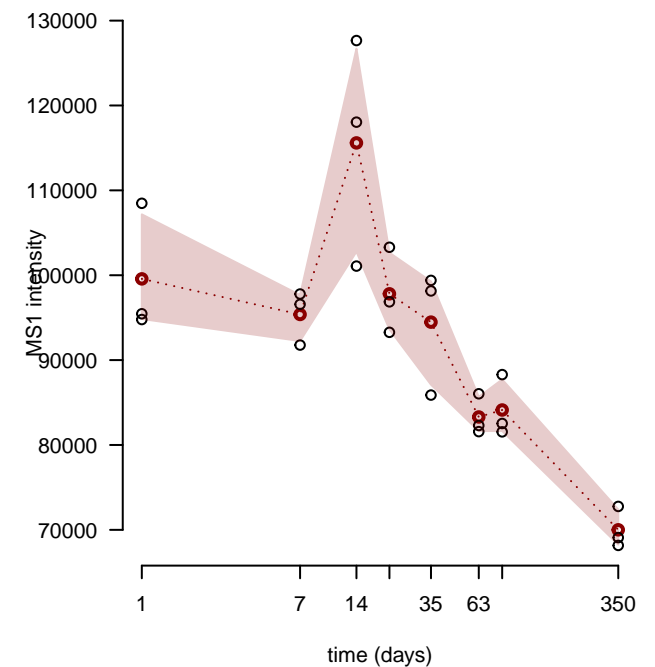

**P84102**  
**GN=Serf2**  
 small EDRK-rich factor 2

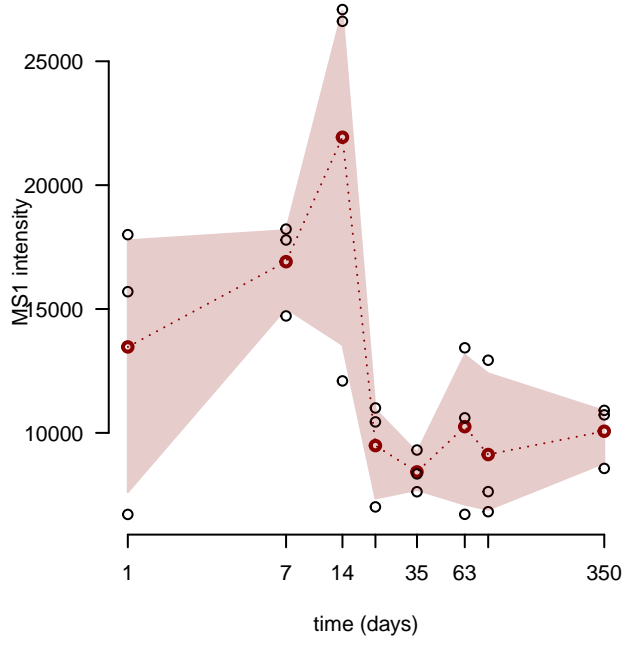

**P84104**  
**GN=Srsf3**  
 serine and arginine-rich splicing factor ...

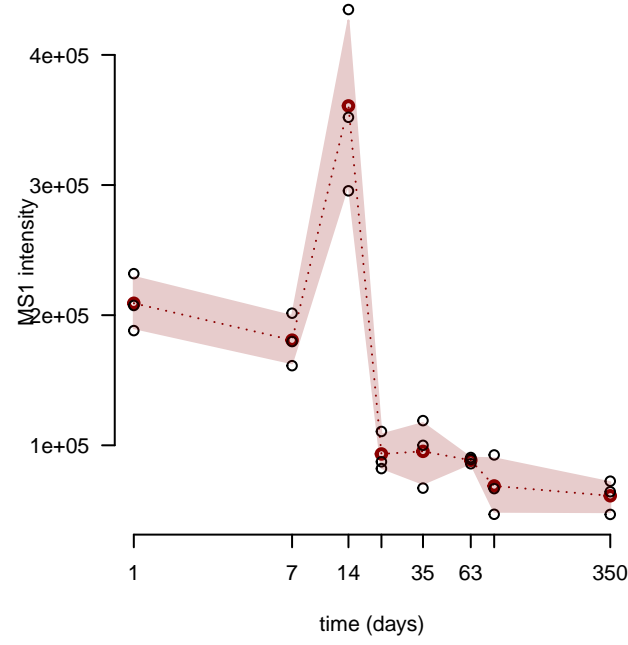

**P84228**  
**GN=Hist1h3b**

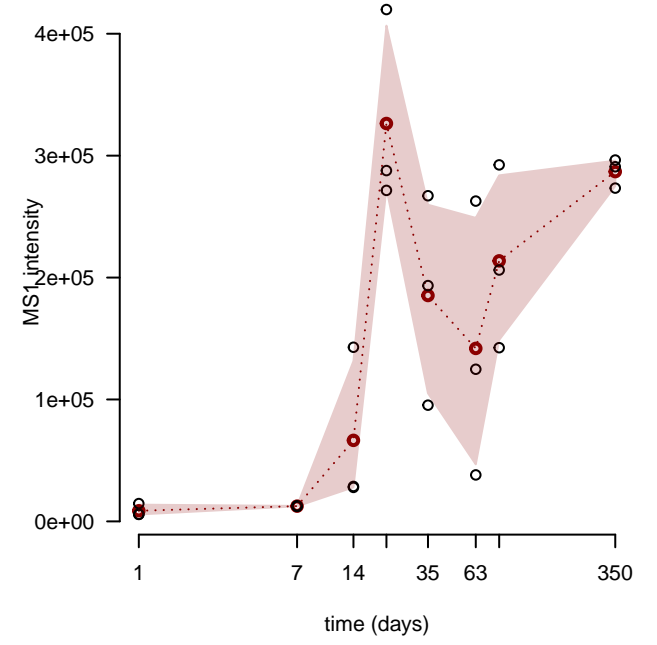

**P84309**  
**GN=Adcy5**  
 adenylate cyclase 5

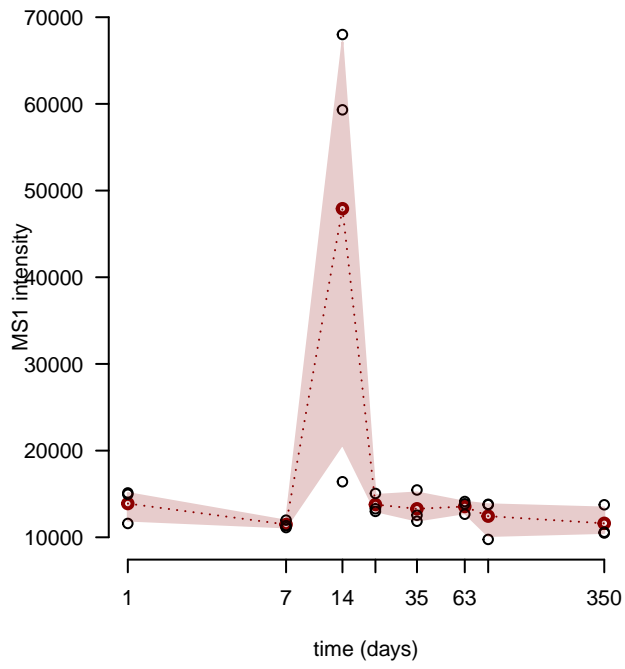

**P84444**  
**GN=Ccl21a**  
 chemokine (C-C motif) ligand 21A (serine ...)

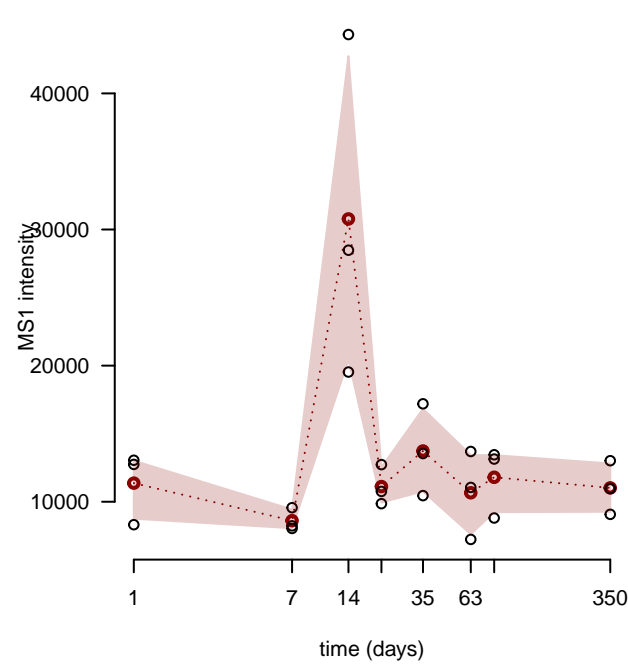

**P85094**  
**GN=Isoc2a**  
 isochorismatase domain containing 2a

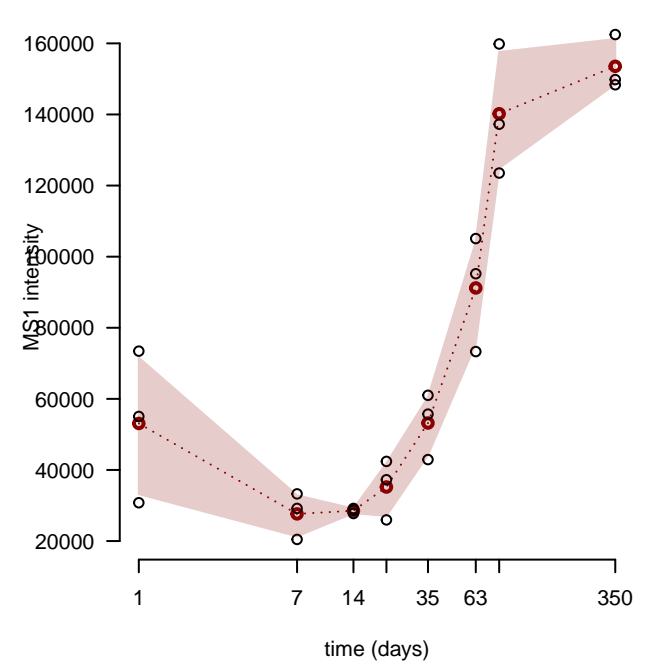

**P86048**  
**GN=Rpl10l**  
 ribosomal protein L10-like

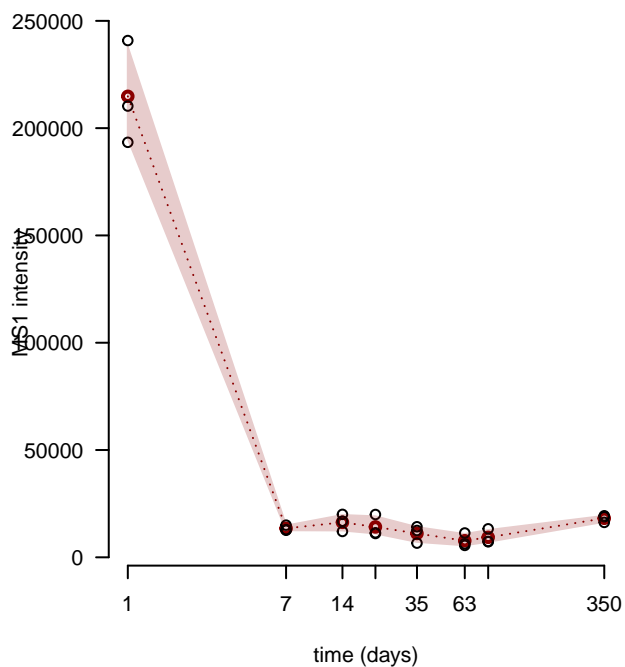

**P97287**  
**GN=Mcl1**  
 myeloid cell leukemia sequence 1

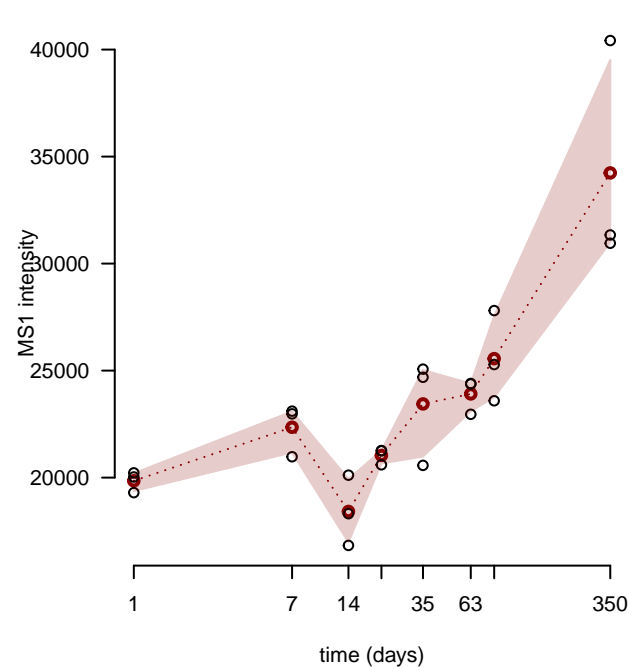

**P97290**  
**GN=Serping1**  
 serine (or cysteine) peptidase inhibitor ...

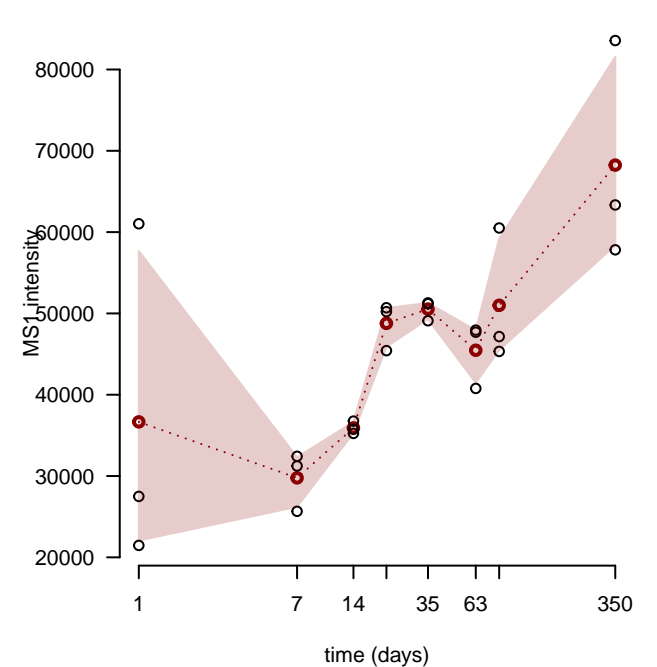

**P97298**  
**GN=Serpinf1**  
serine (or cysteine) peptidase inhibitor ...

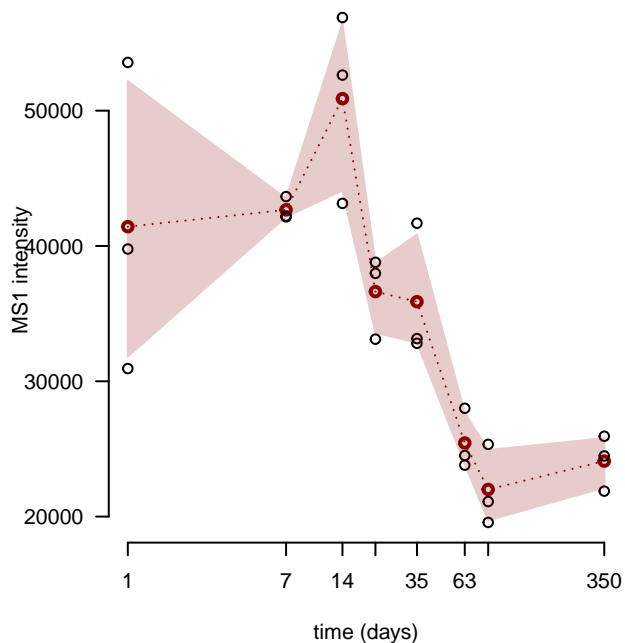

**P97300**  
**GN=Nptn**  
neuroplastin

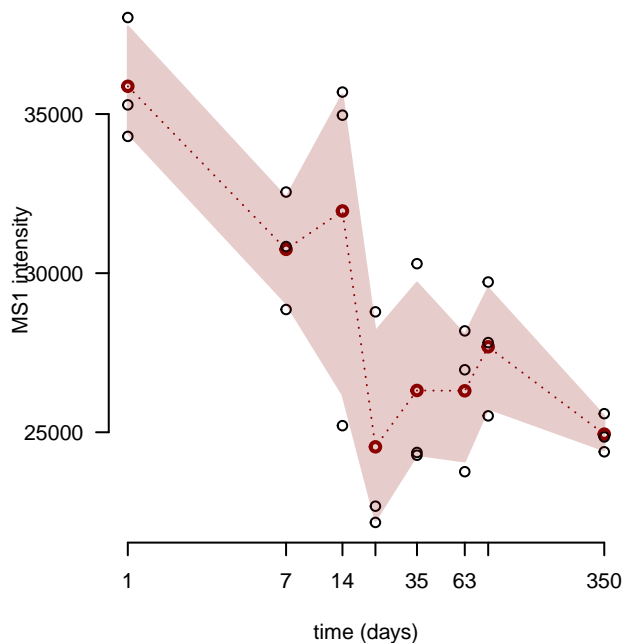

**P97304**  
**GN=Polr1d**  
polymerase (RNA) I polypeptide D

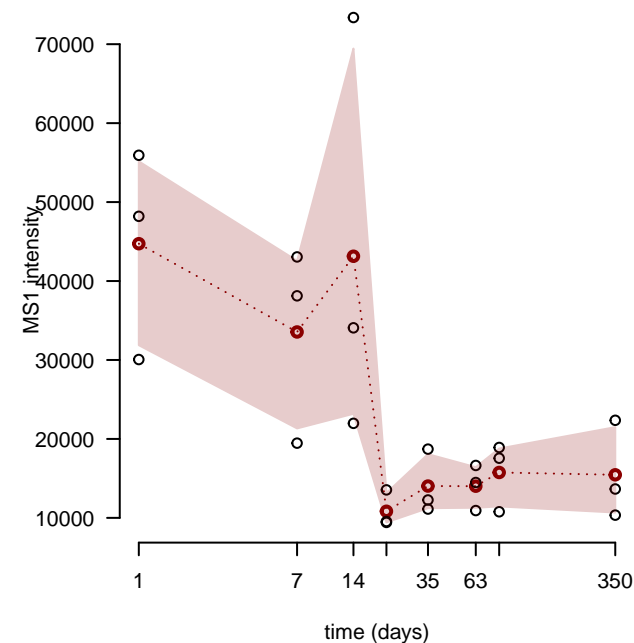

**P97305**  
**GN=Nfatc3**  
nuclear factor of activated T cells, cyt ...

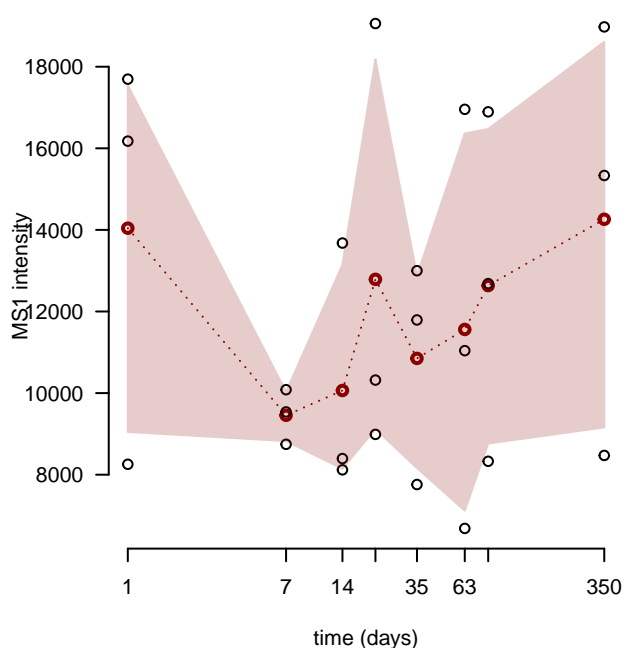

**P97310**  
**GN=Mcm2**  
minichromosome maintenance complex compo ...

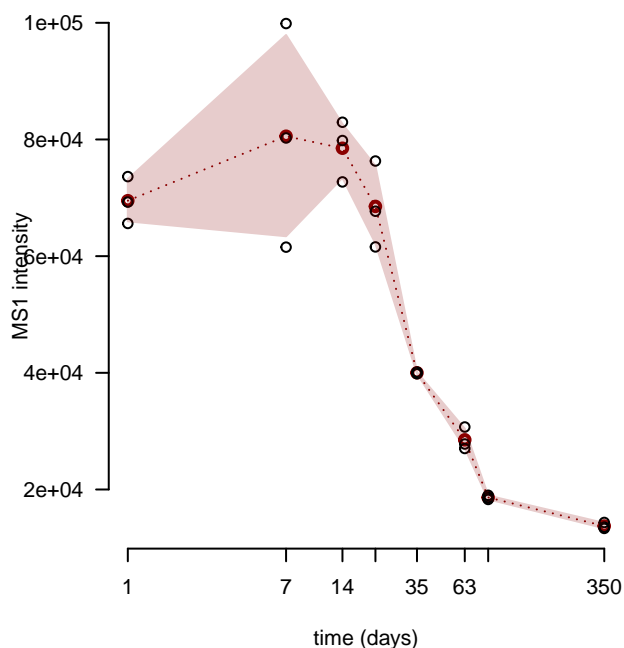

**P97311**  
**GN=Mcm6**  
minichromosome maintenance complex compo ...

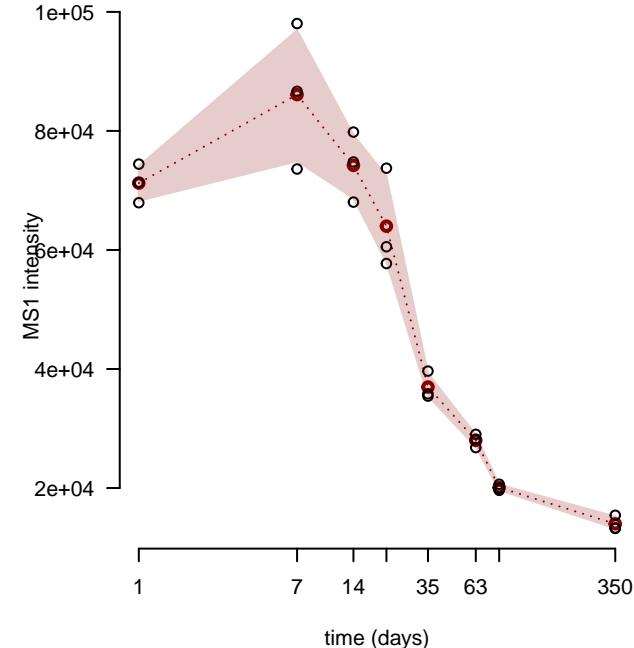

**P97313**  
**GN=Prkdc**  
protein kinase, DNA activated, catalytic ...

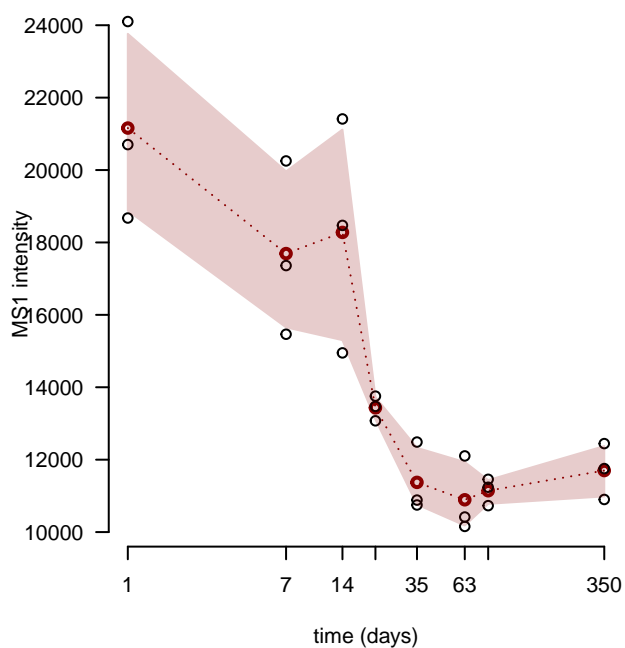

**P97314**  
**GN=Csrp2**  
cysteine and glycine-rich protein 2

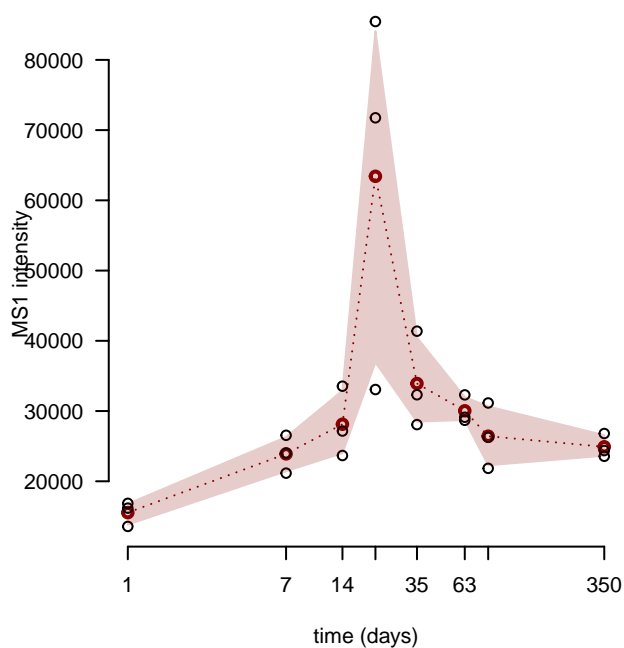

**P97315**  
**GN=Csrp1**  
cysteine and glycine-rich protein 1

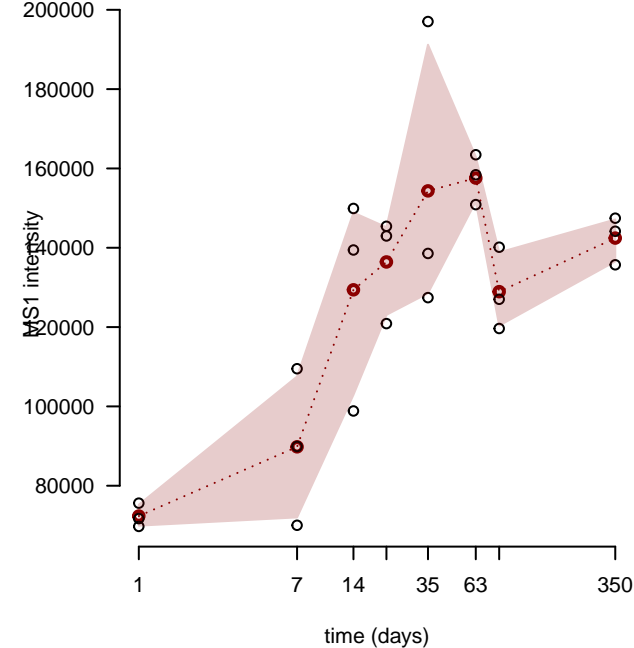

**P97318**  
GN=Dab1  
disabled 1

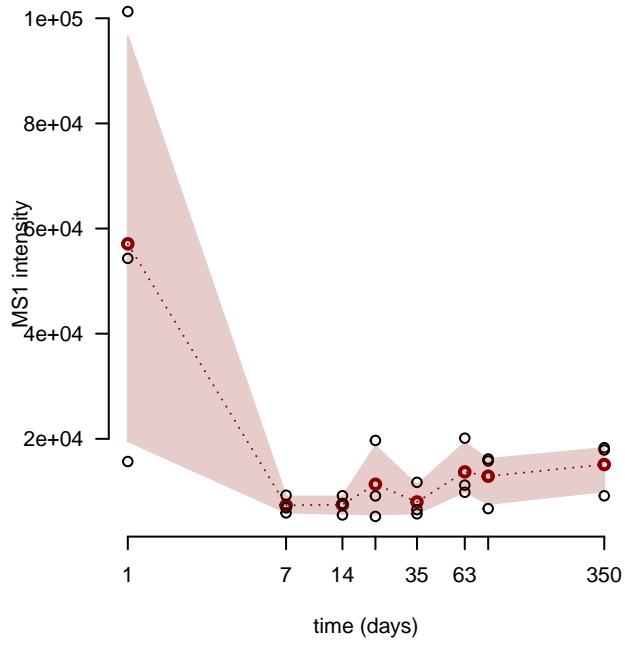

**P97321**  
GN=Fap  
fibroblast activation protein

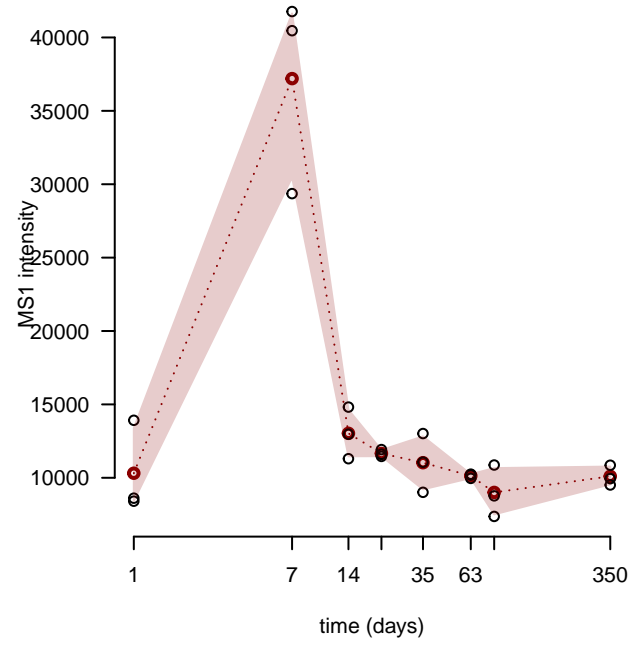

**P97326**  
GN=Cdh6  
cadherin 6

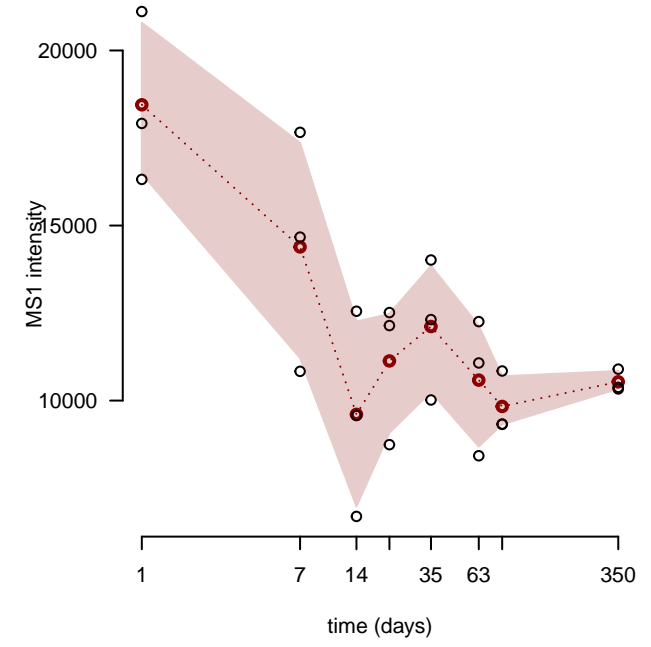

**P97328**  
GN=Khk  
ketoheokinase

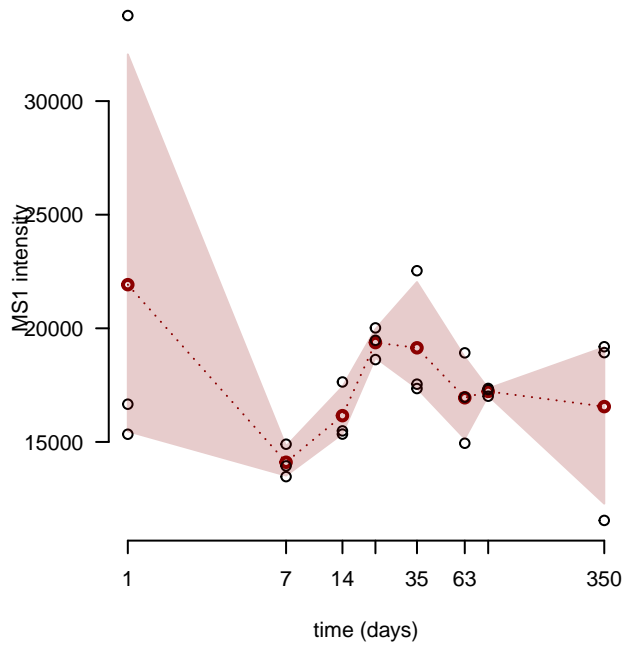

**P97329**  
GN=Kif20a  
kinesin family member 20A

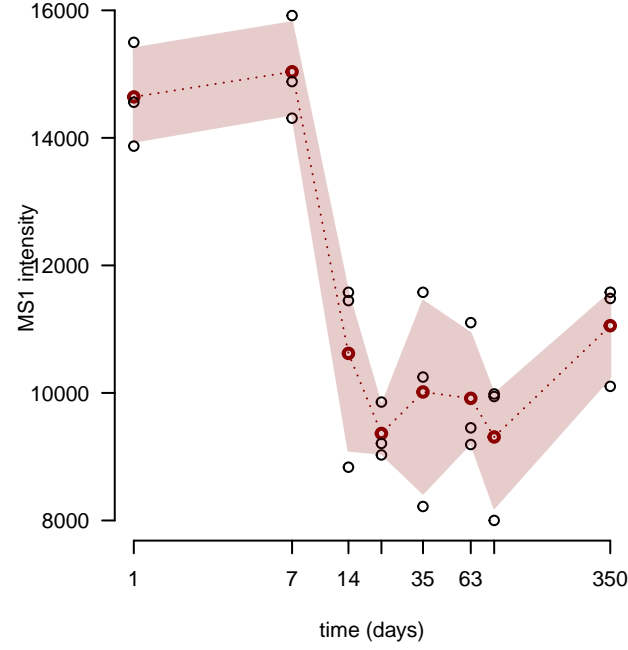

**P97333**  
GN=Nrp1  
neuropilin 1

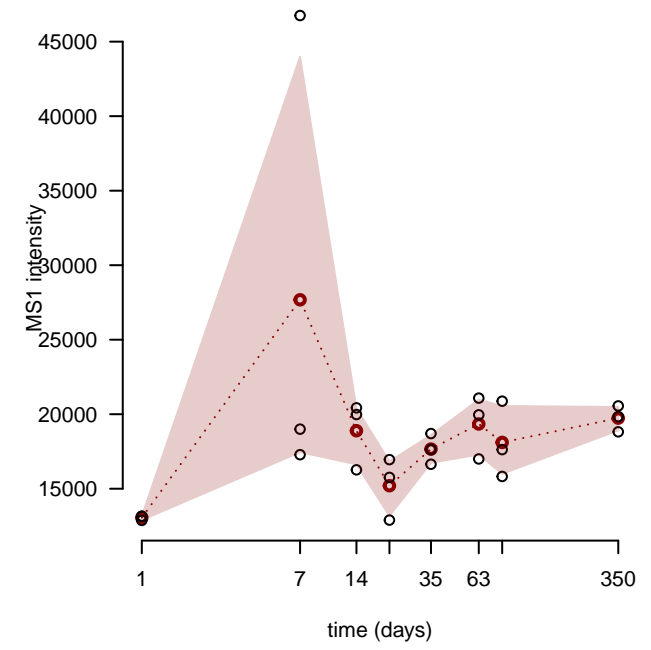

**P97346**  
GN=Nxn  
nucleoredoxin

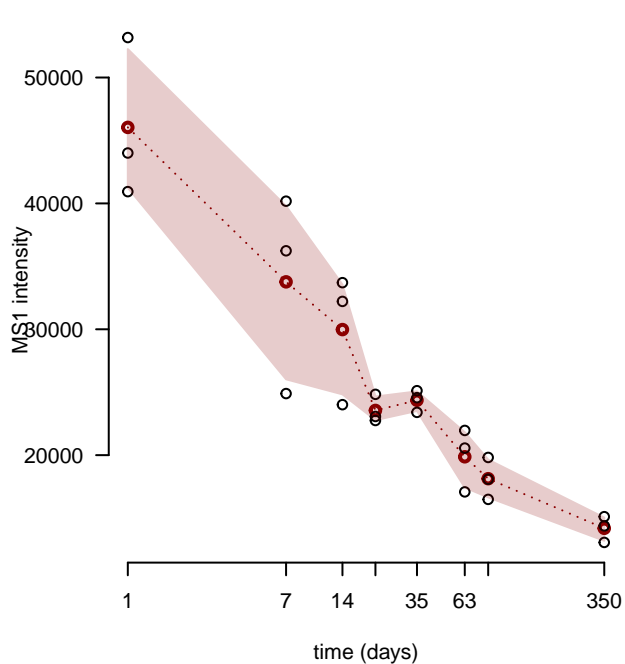

**P97348**  
GN=Rhod  
ras homolog family member D

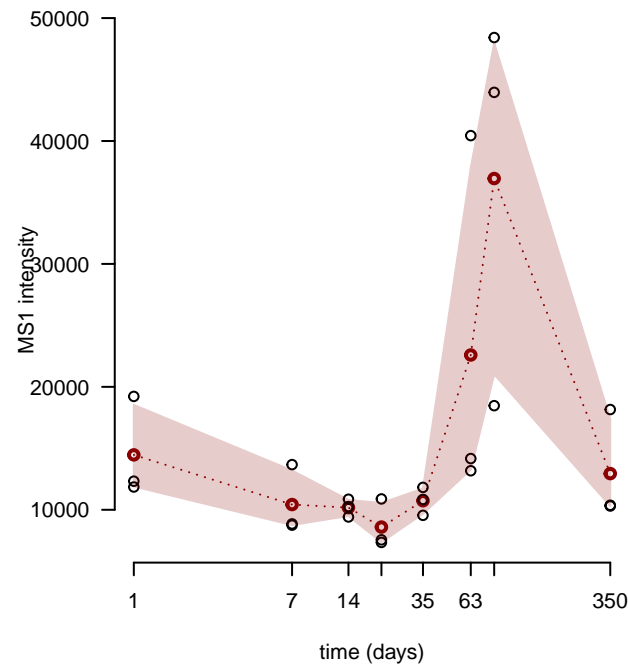

**P97350**  
GN=Pkp1  
plakophilin 1

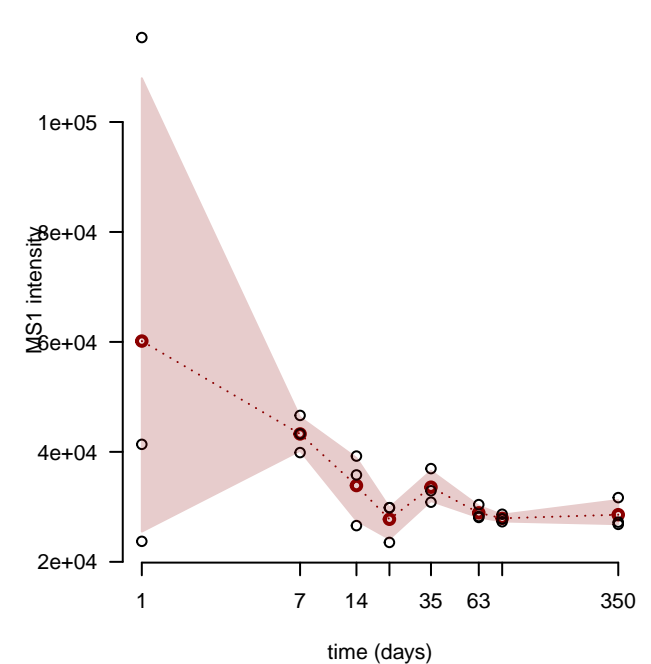

**P97351**  
GN=Rps3a

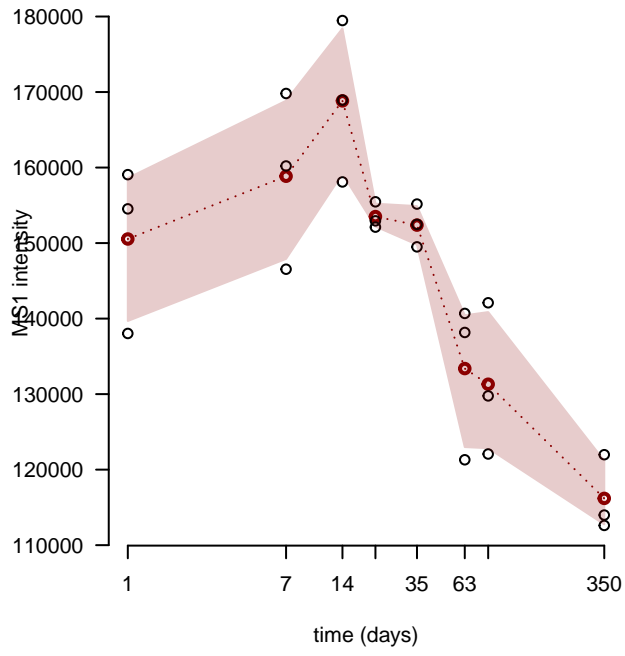

**P97352**  
GN=S100a13  
S100 calcium binding protein A13

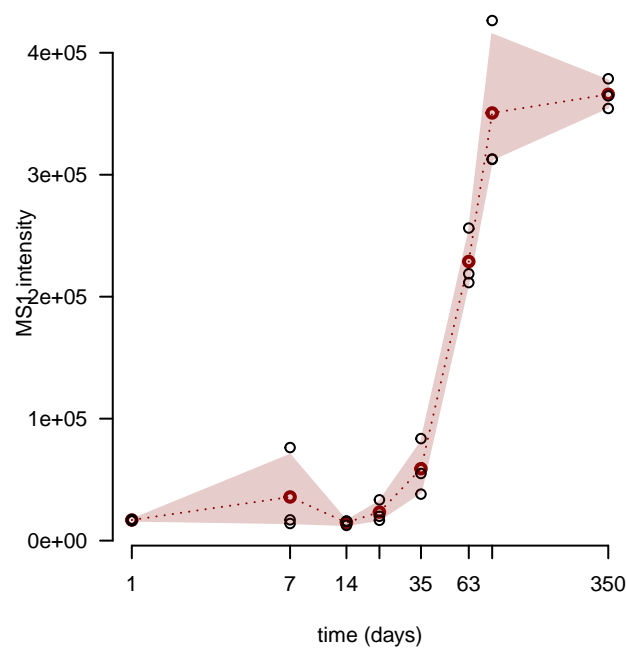

**P97355**  
GN=Sms  
spermine synthase

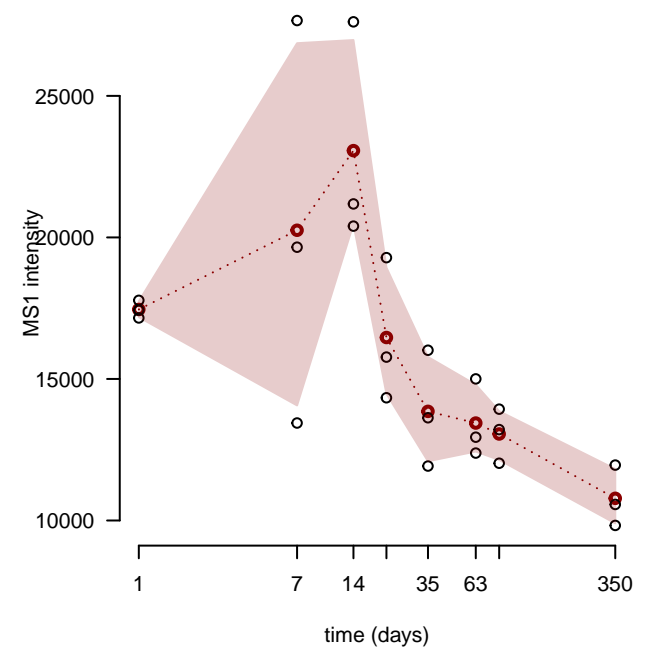

**P97360**  
GN=Etv6  
ets variant 6

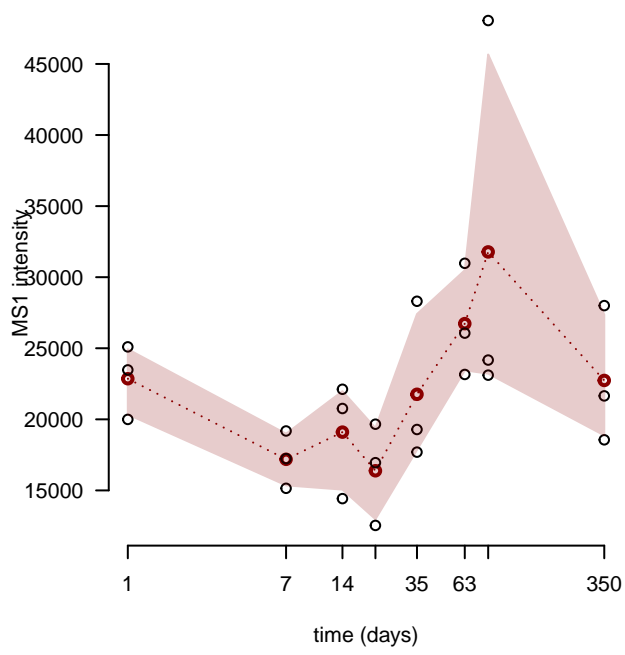

**P97363**  
GN=Sptlc2  
serine palmitoyltransferase, long chain ...

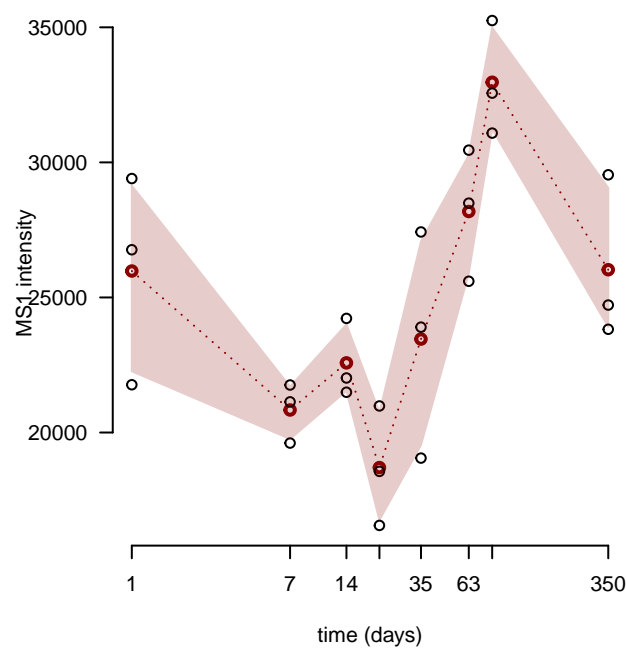

**P97364**  
GN=Sephs2  
selenophosphate synthetase 2

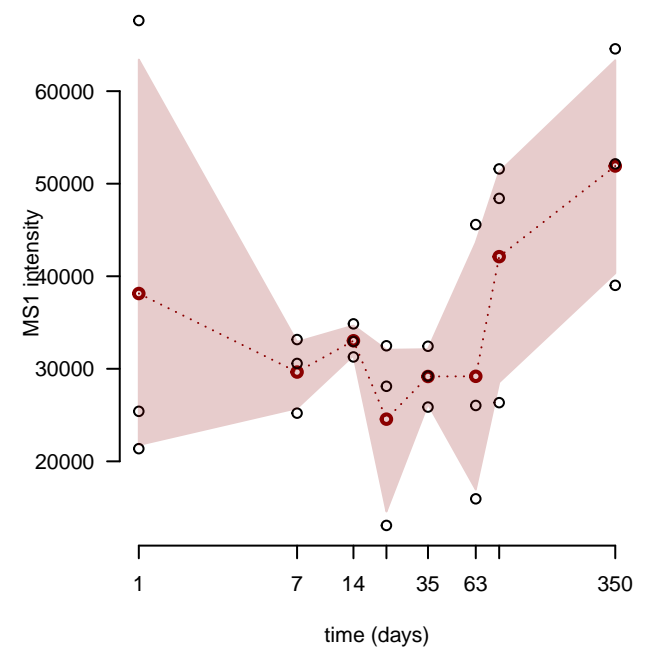

**P97366**  
GN=Evi5  
ecotropic viral integration site 5

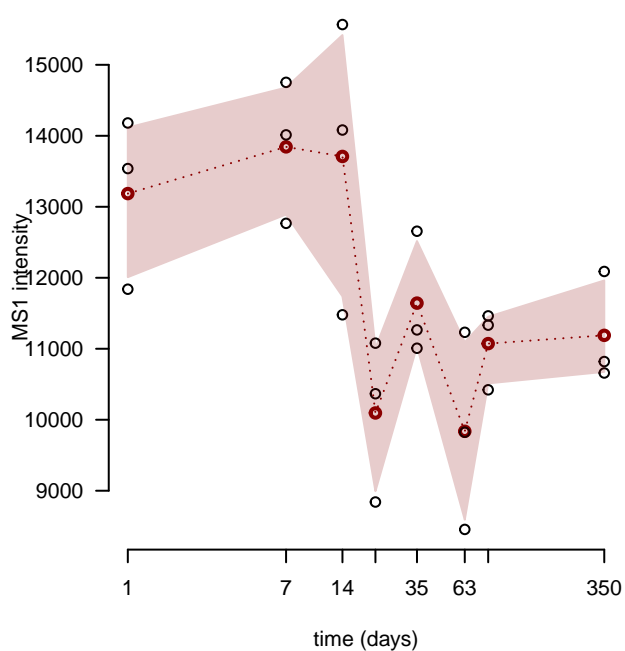

**P97370**  
GN=Atp1b3  
ATPase, Na+/K+ transporting, beta 3 poly ...

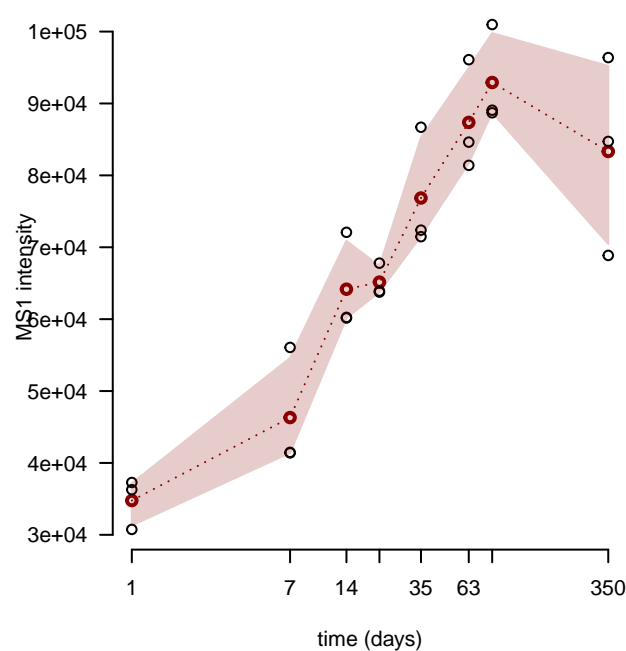

**P97371**  
GN=Psme1  
proteasome (prosome, macropain) activato ...

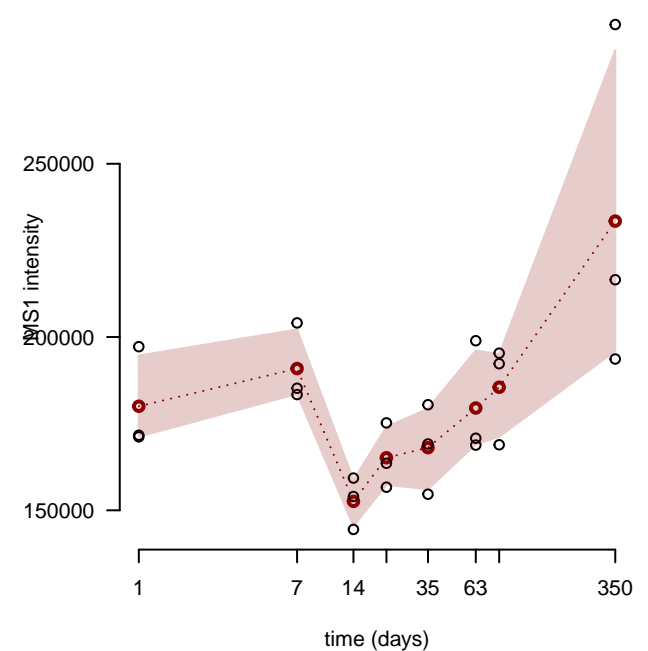

**P97372**  
**GN=Psme2**  
proteasome (prosome, macropain) activato ...

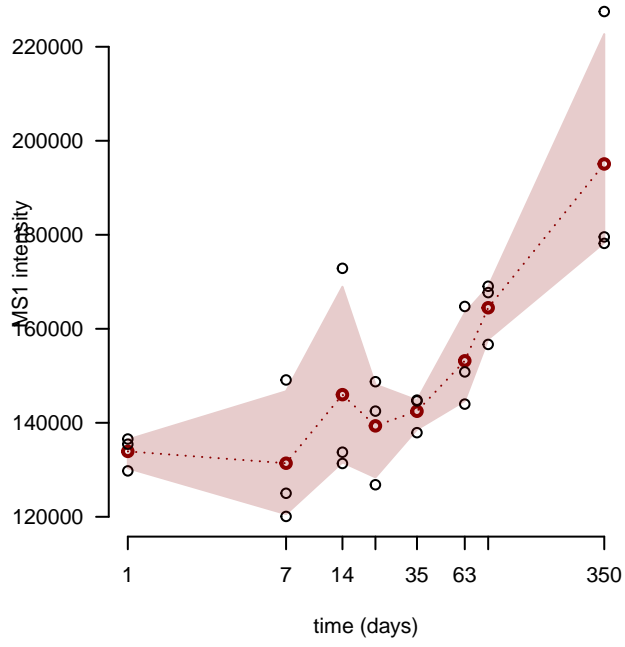

**P97376**  
**GN=Frg1**  
FSDH region gene 1

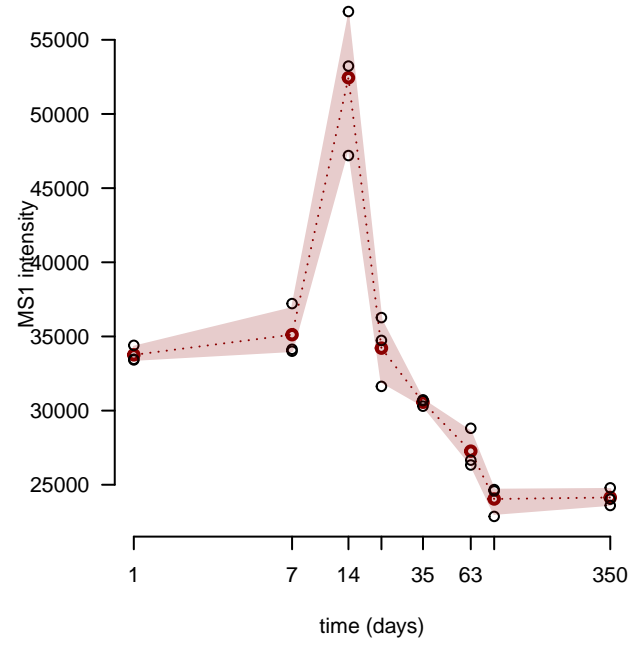

**P97377**  
**GN=Cdk2**  
cyclin-dependent kinase 2

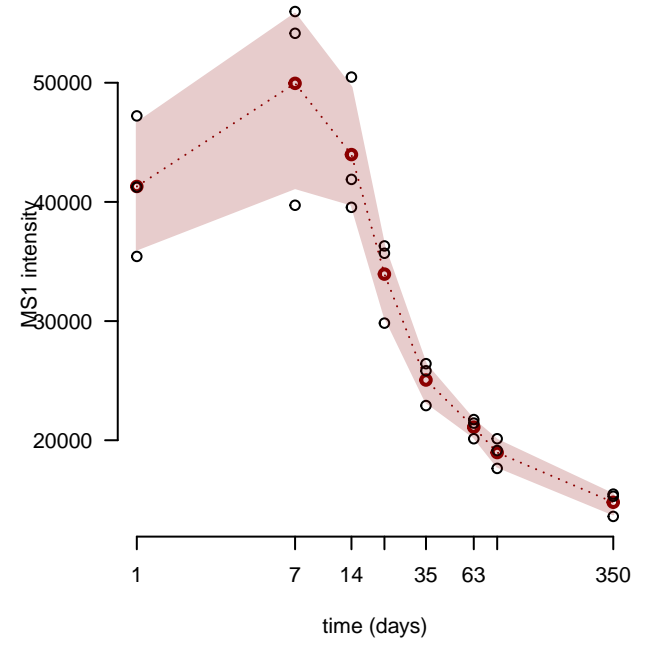

**P97379**  
**GN=G3bp2**  
GTPase activating protein (SH3 domain) b ...

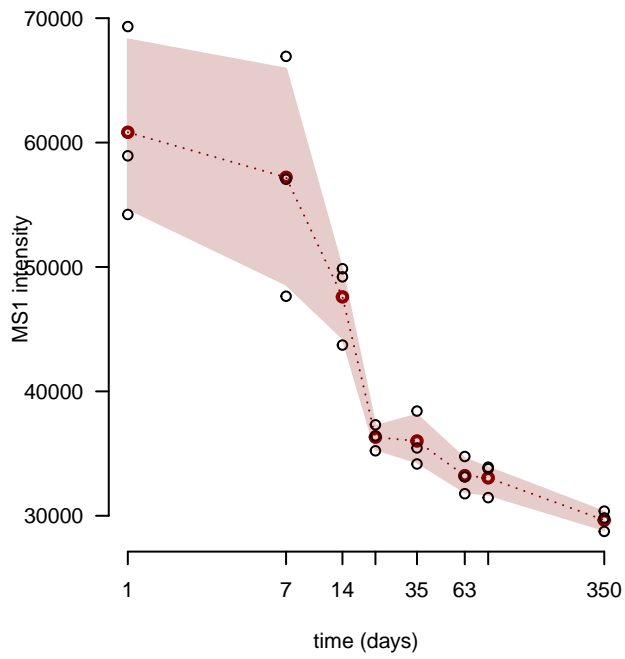

**P97379**  
**GN=G3bp2**  
GTPase activating protein (SH3 domain) b ...

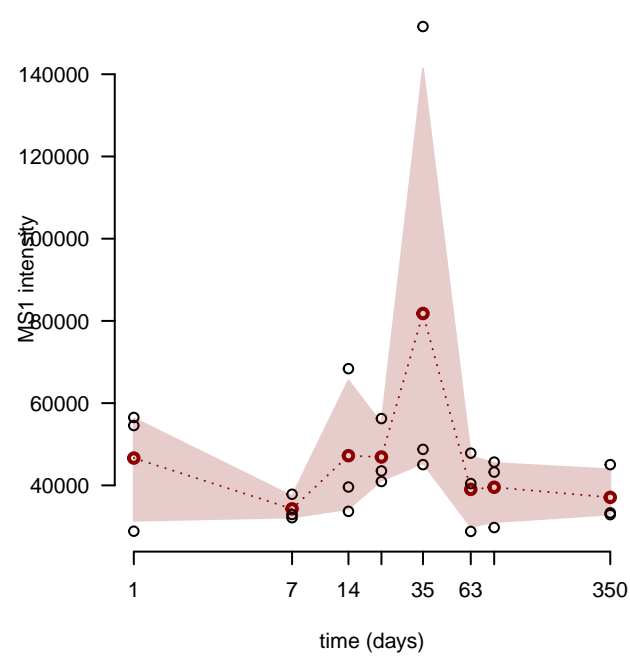

**P97384**  
**GN=Anxa11**  
annexin A11

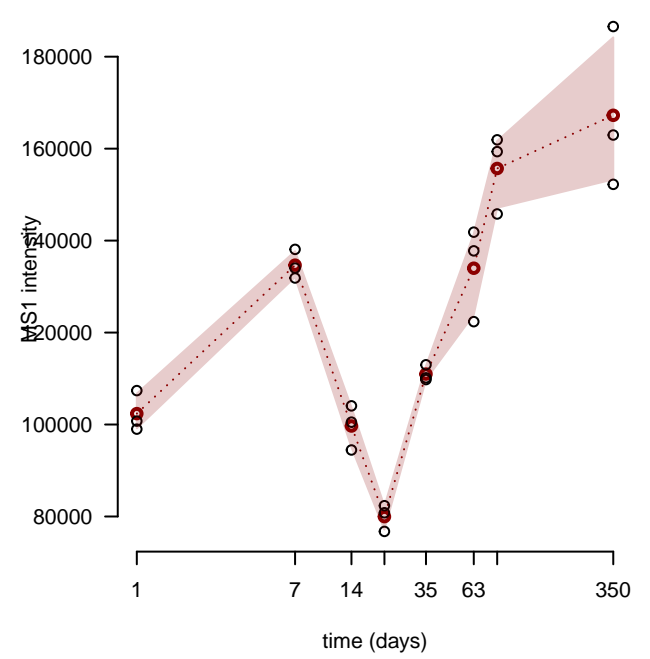

**P97386**  
**GN=Lig3**  
ligase III, DNA, ATP-dependent

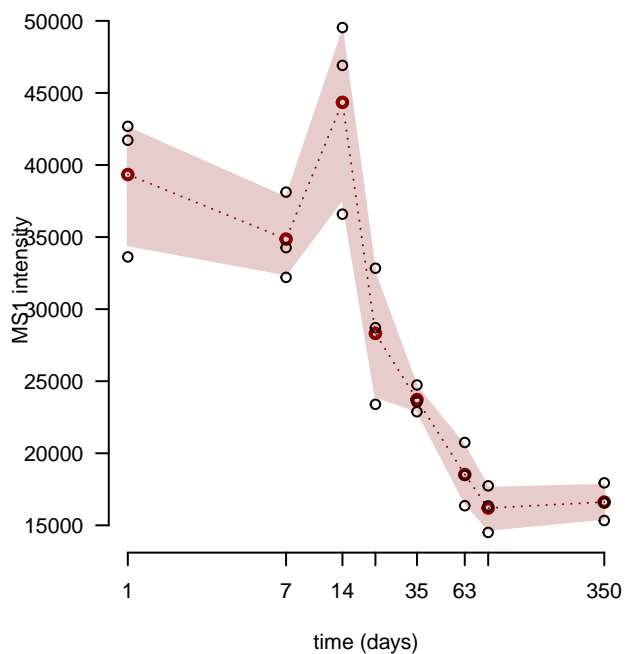

**P97390**  
**GN=Vps45**  
vacuolar protein sorting 45

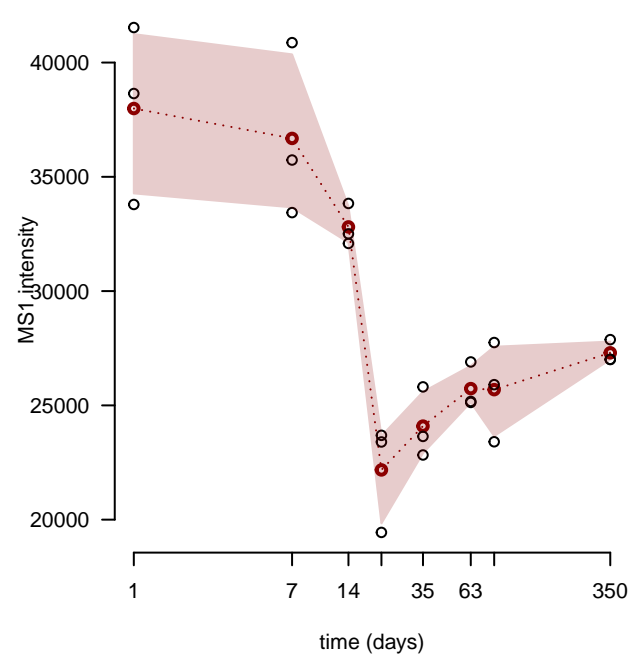

**P97393**  
**GN=Arhgap5**  
Rho GTPase activating protein 5

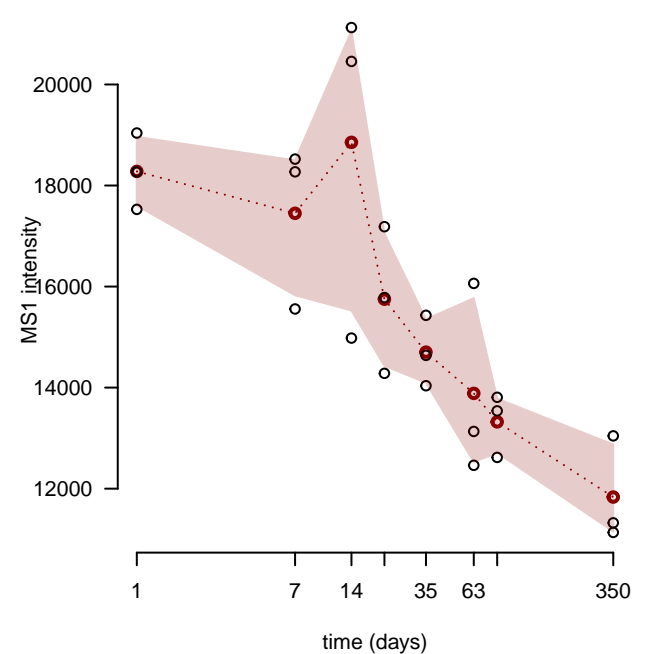

**P97411**  
**GN=lca1**  
islet cell autoantigen 1

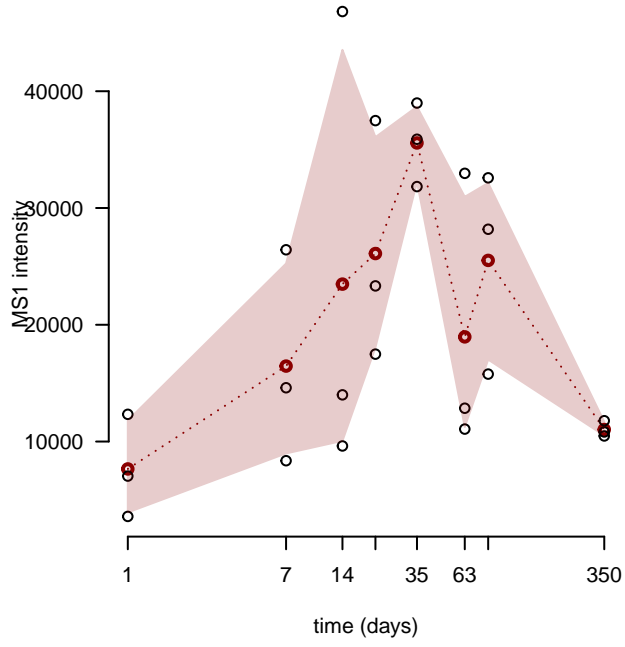

**P97412**  
**GN=Lyst**  
lysosomal trafficking regulator

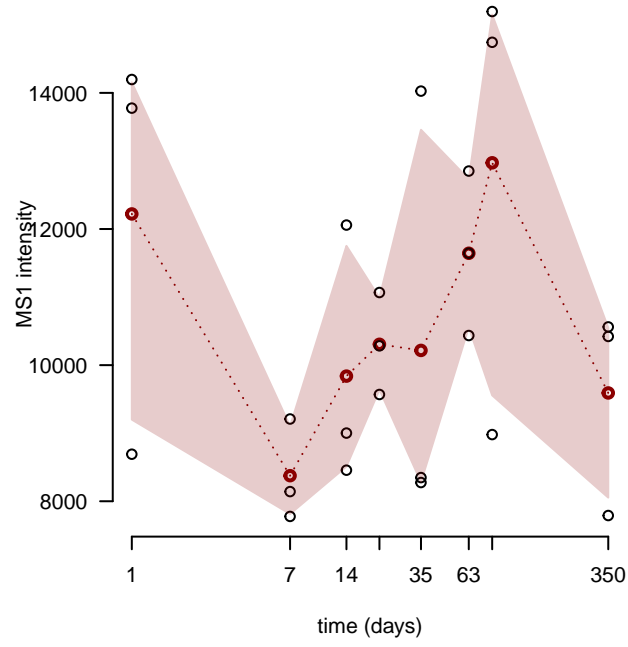

**P97414**  
**GN=Kcnq1**  
potassium voltage-gated channel, subfam...

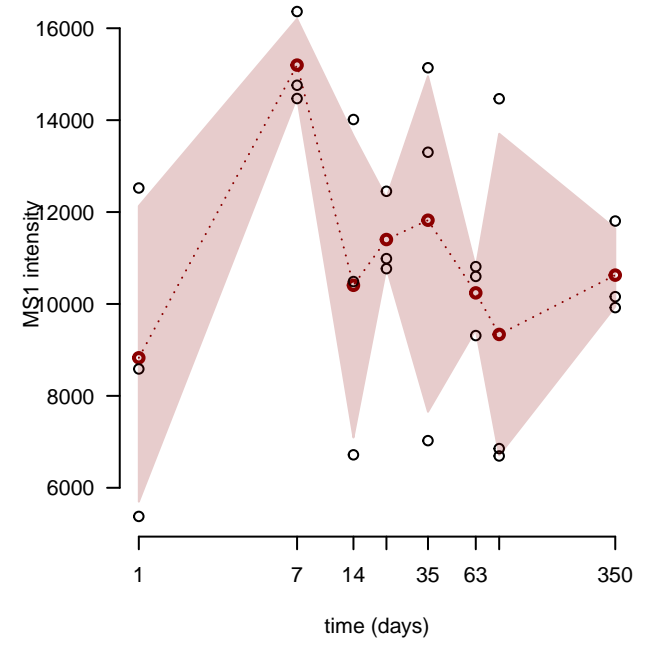

**P97427**  
**GN=Crmp1**  
collapsin response mediator protein 1

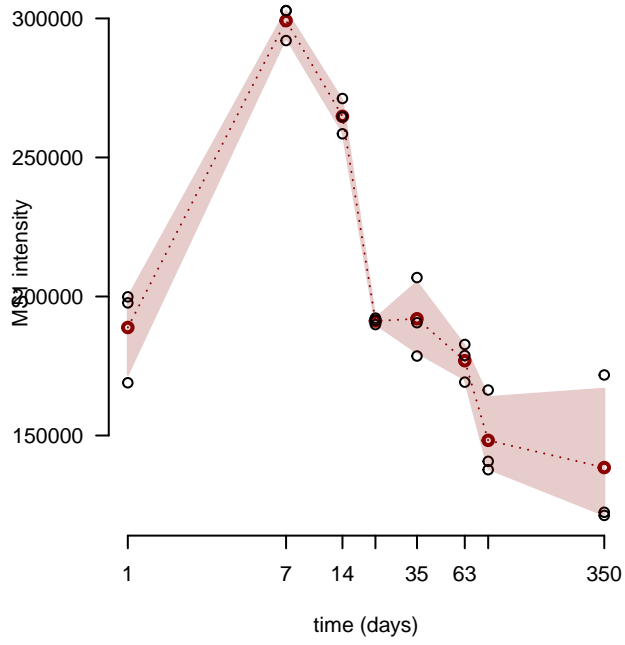

**P97429**  
**GN=Anxa4**  
annexin A4

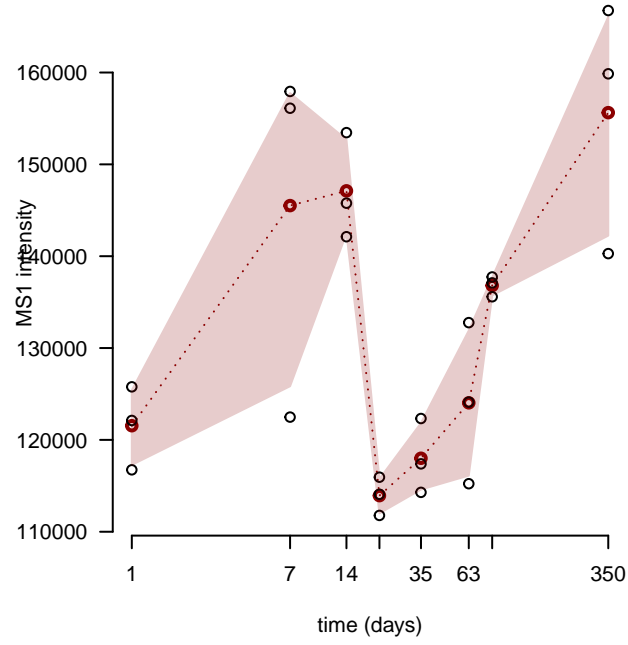

**P97432**  
**GN=Nbr1**  
NBR1, autophagy cargo receptor

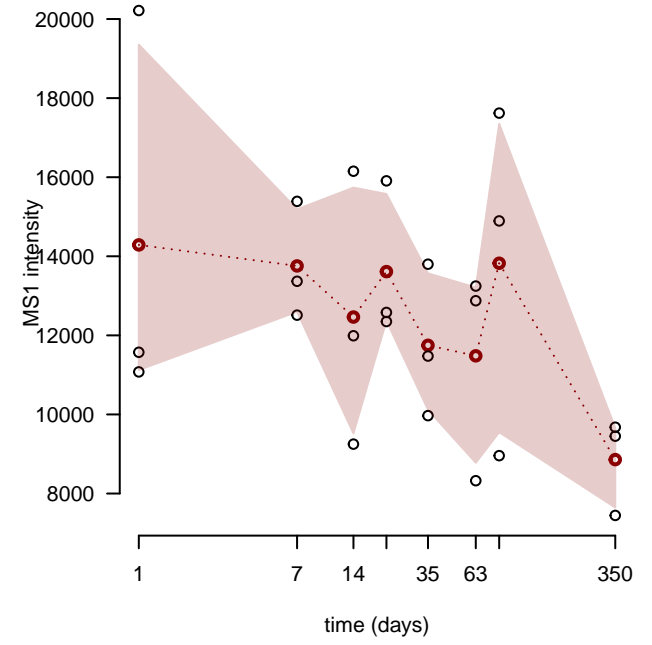

**P97433**  
**GN=Arhgef28**  
Rho guanine nucleotide exchange factor (...)

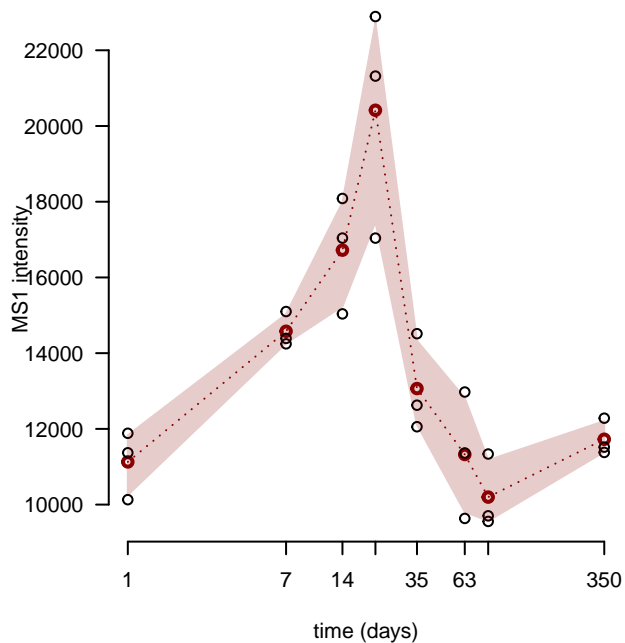

**P97434**  
**GN=Mrip**  
myosin phosphatase Rho interacting prote ...

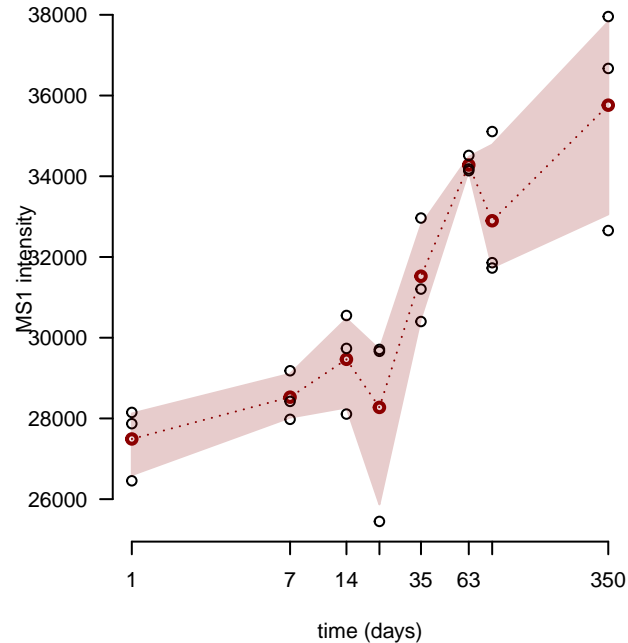

**P97440**  
**GN=Slbp**  
stem-loop binding protein

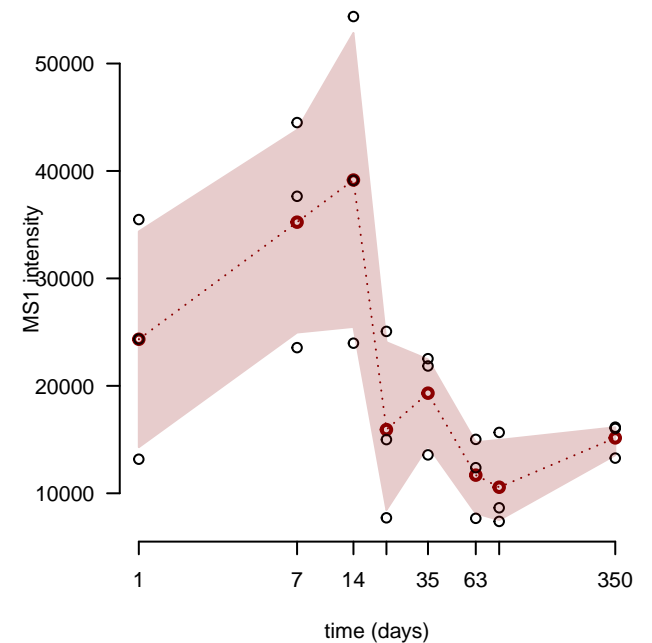

**P97441**  
**GN=Slc30a3**  
solute carrier family 30 (zinc transport ...

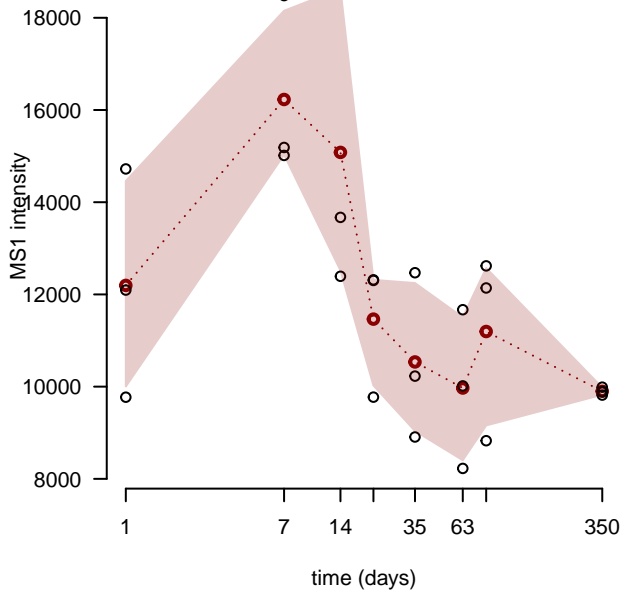

**P97447**  
**GN=Fhl1**  
four and a half LIM domains 1

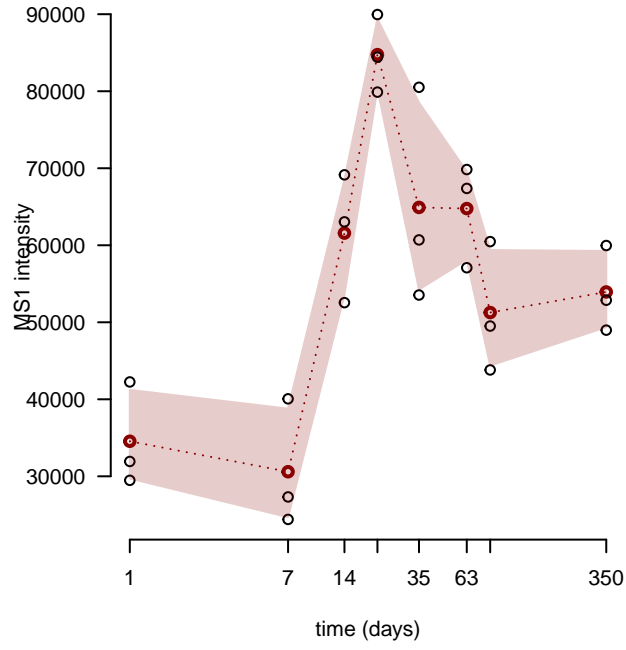

**P97449**  
**GN=Anpep**  
alanyl (membrane) aminopeptidase

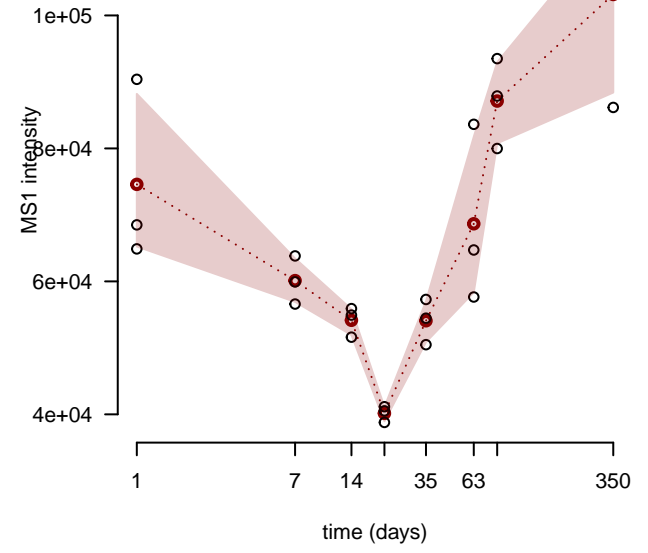

**P97450**  
**GN=Atp5pf**

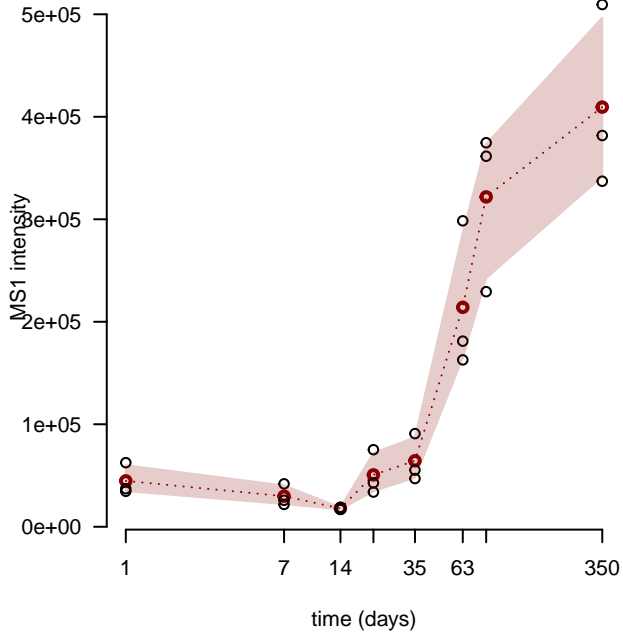

**P97452**  
**GN=Bop1**  
block of proliferation 1

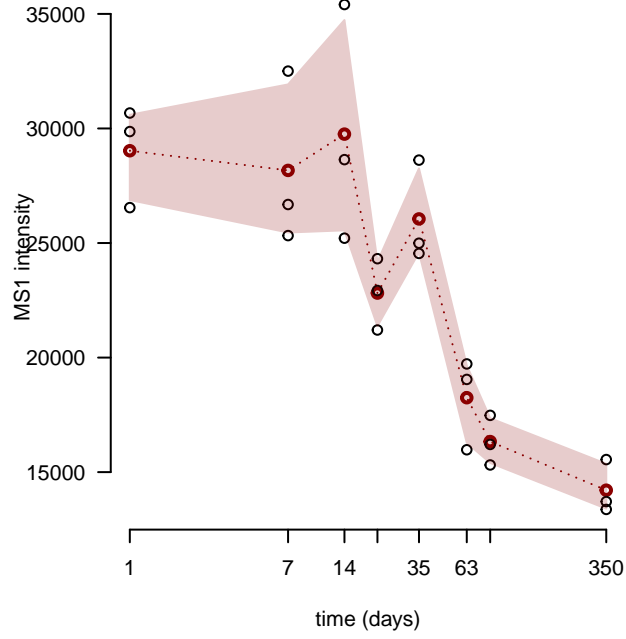

**P97454**  
**GN=Smad5**  
SMAD family member 5

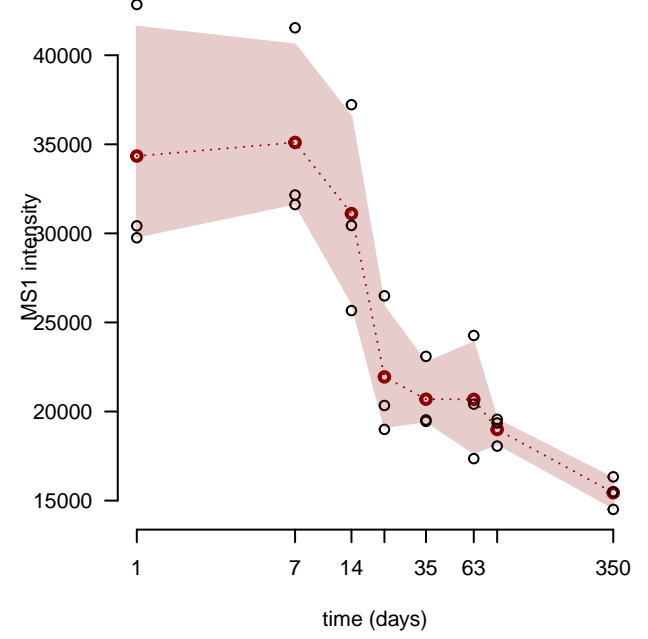

**P97457**  
**GN=Mylpf**  
myosin light chain, phosphorylatable, fa ...

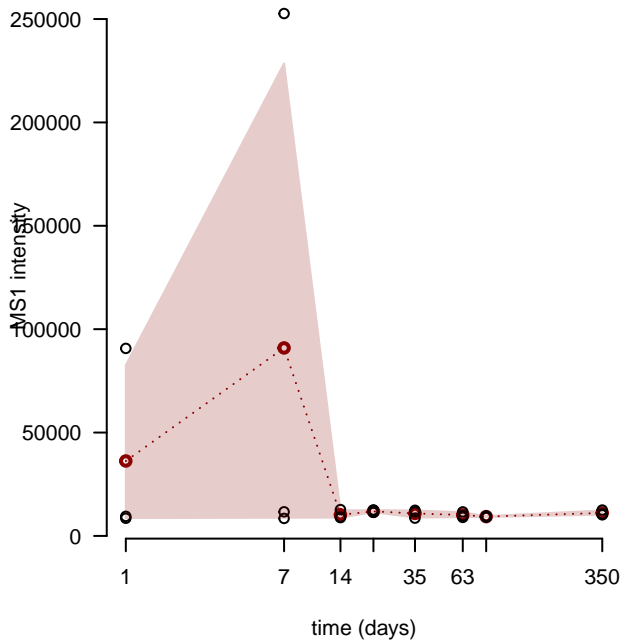

**P97461**  
**GN=Rps5**  
ribosomal protein S5

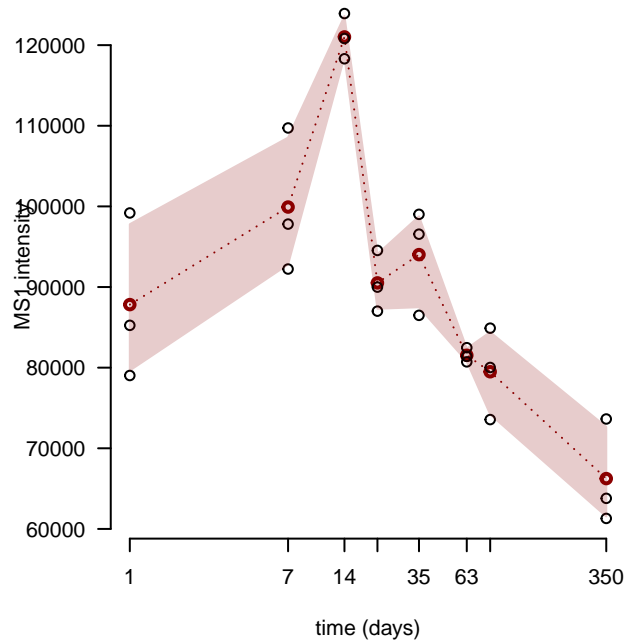

**P97464**  
**GN=Ext1**  
exostosin glycosyltransferase 1

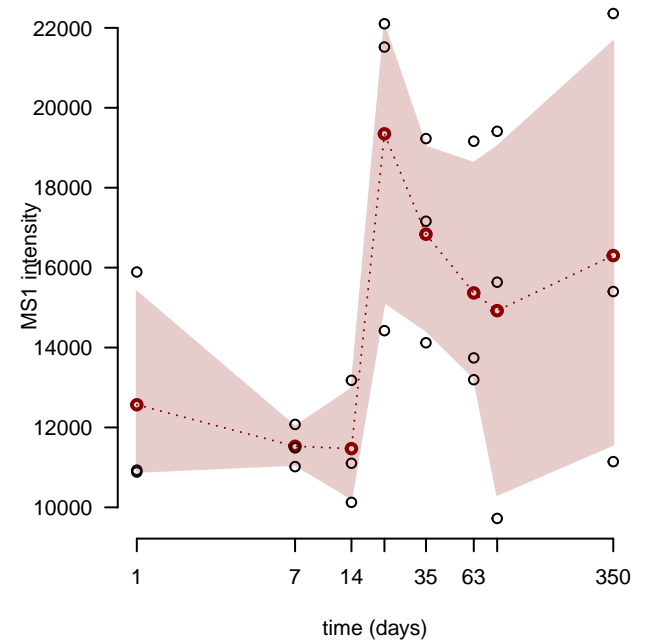



**P97467**  
GN=Pam  
peptidylglycine alpha-amidating monooxyg ...

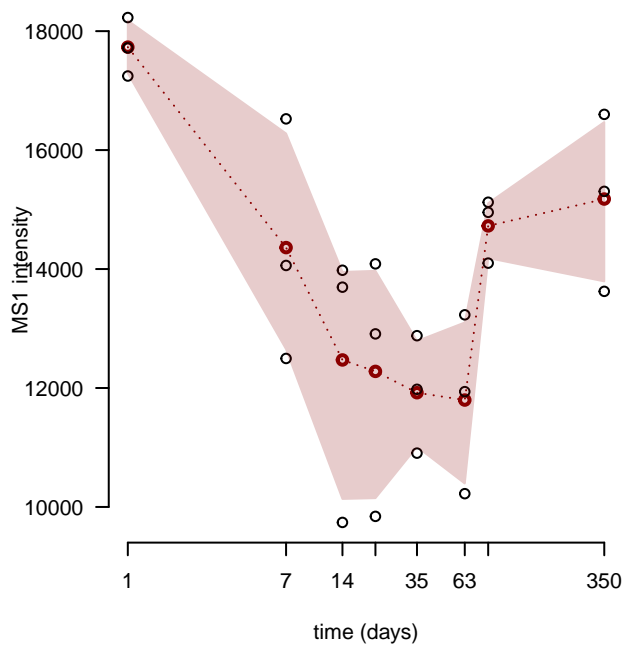

**P97470**  
GN=Ppp4c  
protein phosphatase 4, catalytic subunit

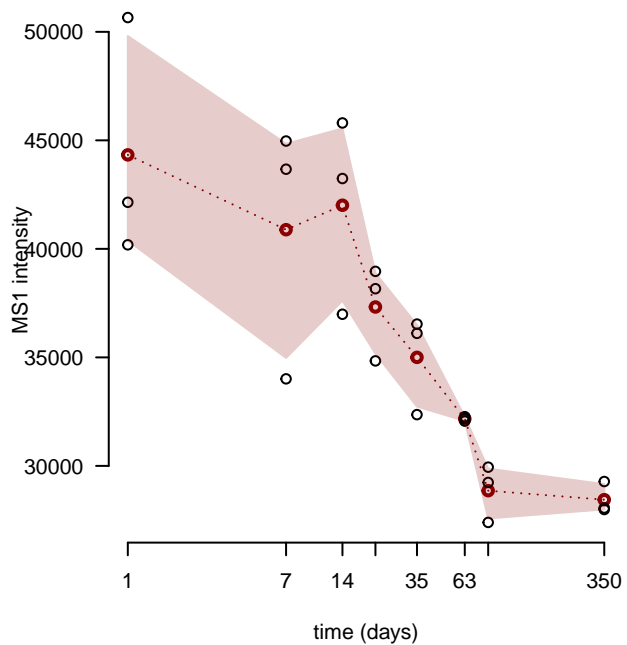

**P97471**  
GN=Smad4  
SMAD family member 4

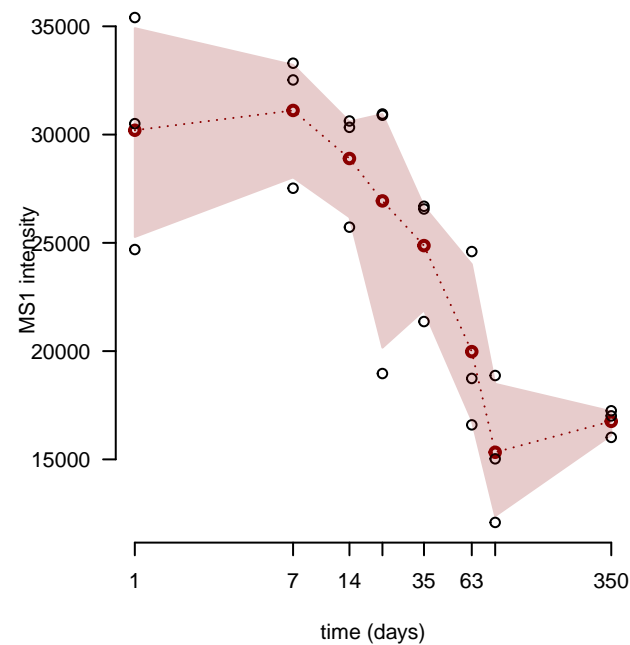

**P97473**  
GN=Tarbp2  
TARBP2, RISC loading complex RNA binding ...

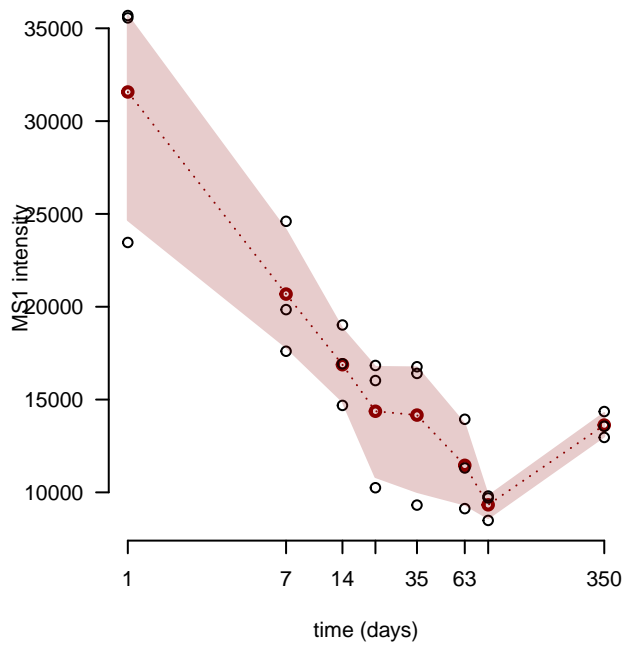

**P97477**  
GN=Aurka  
aurora kinase A

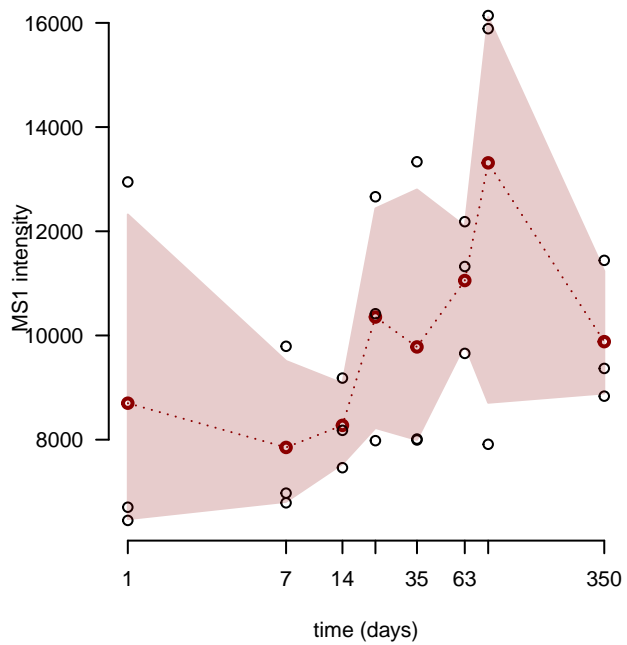

**P97478**  
GN=Coq7  
demethyl-Q 7

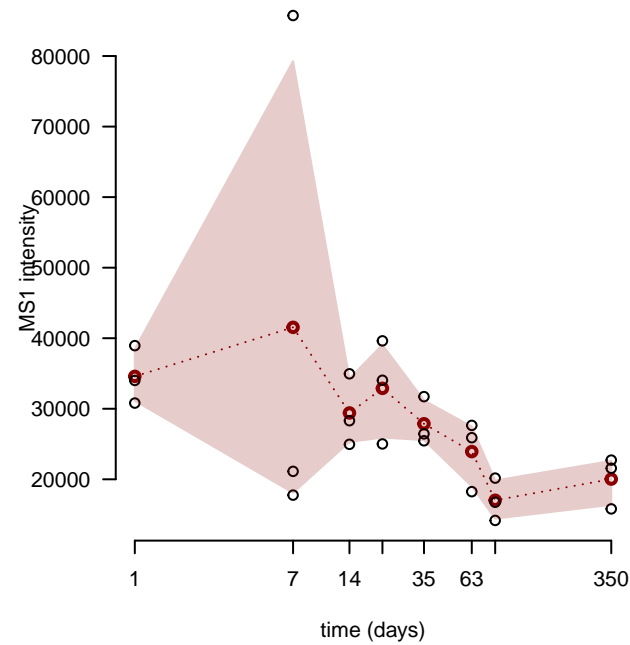

**P97479**  
GN=Myo7a  
myosin VIIA

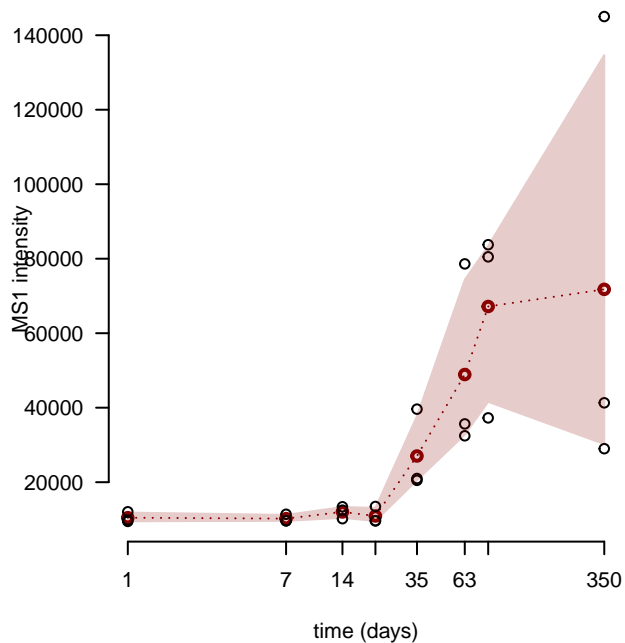

**P97480**  
GN=Eya3  
EYA transcriptional coactivator and phos ...

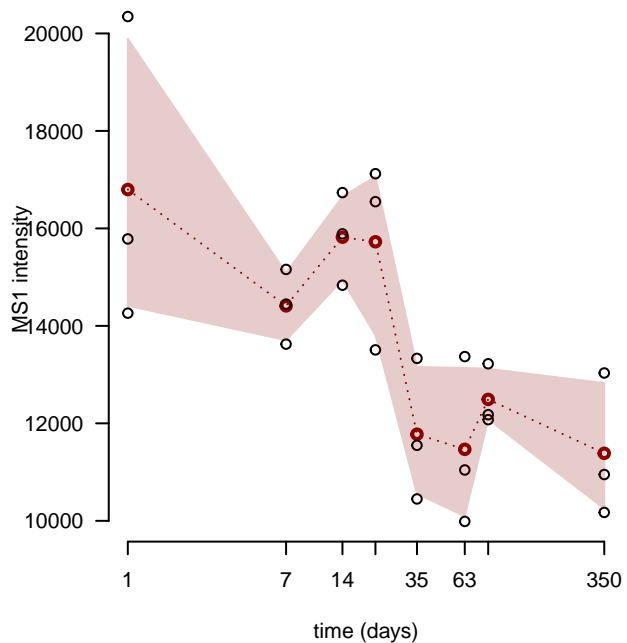

**P97493**  
GN=Txn2  
thioredoxin 2

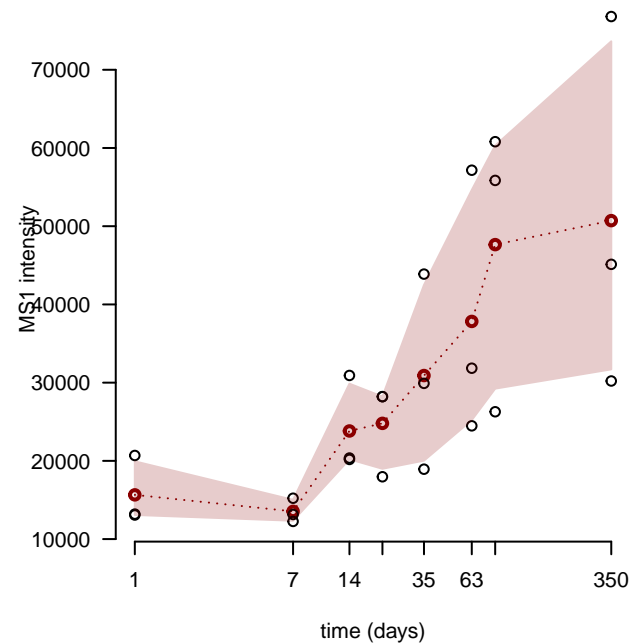

**P97494**  
**GN=Gclc**  
glutamate-cysteine ligase, catalytic sub ...

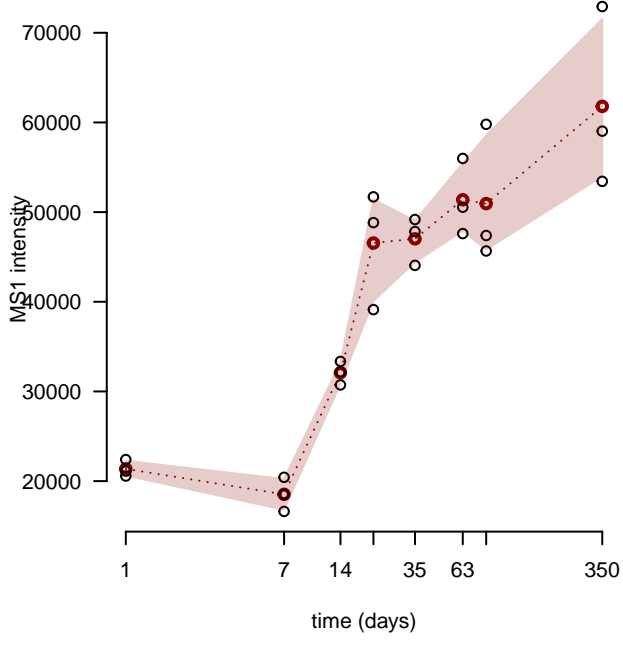

**P97496**  
**GN=Smarcc1**  
SWI/SNF related, matrix associated, acti ...

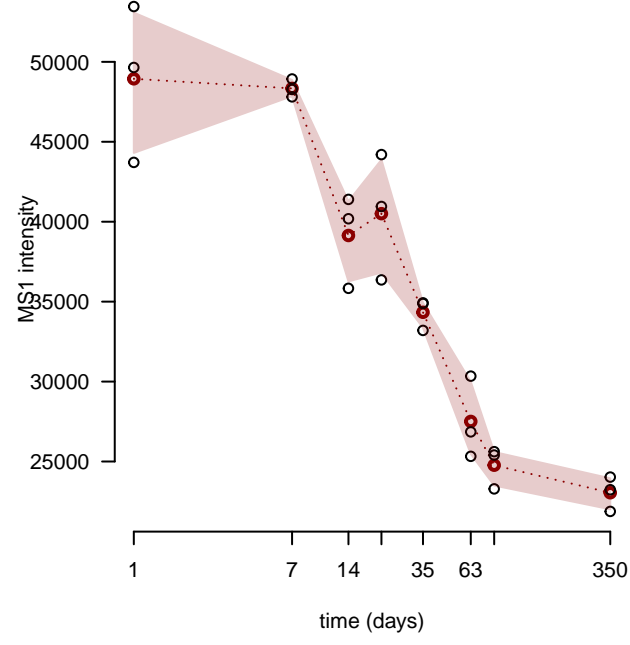

**P97499**  
**GN=Tep1**  
telomerase associated protein 1

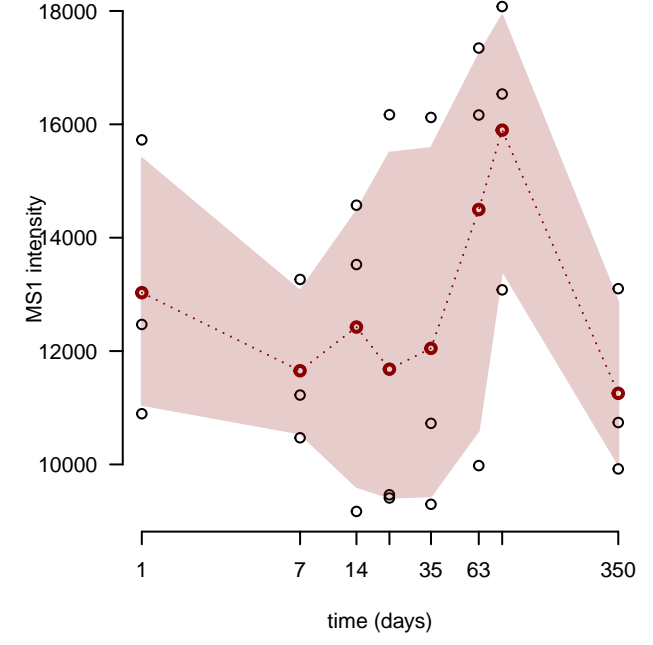

**P97742**  
**GN=Cpt1a**  
carnitine palmitoyltransferase 1a, liver

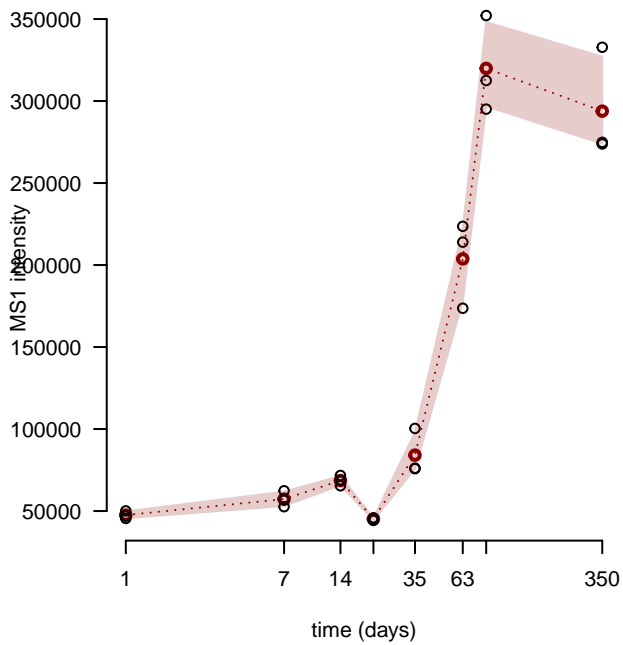

**P97760**  
**GN=Polr2c**  
polymerase (RNA) II (DNA directed) polyp ...

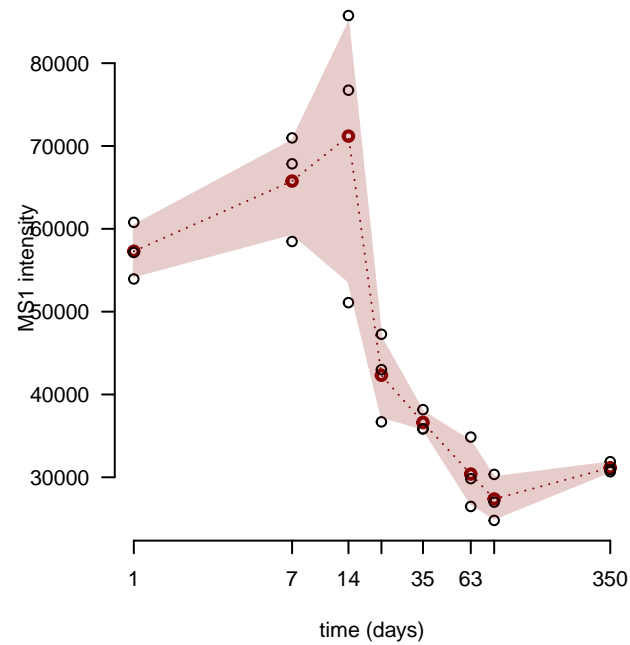

**P97762**  
**GN=rp9**

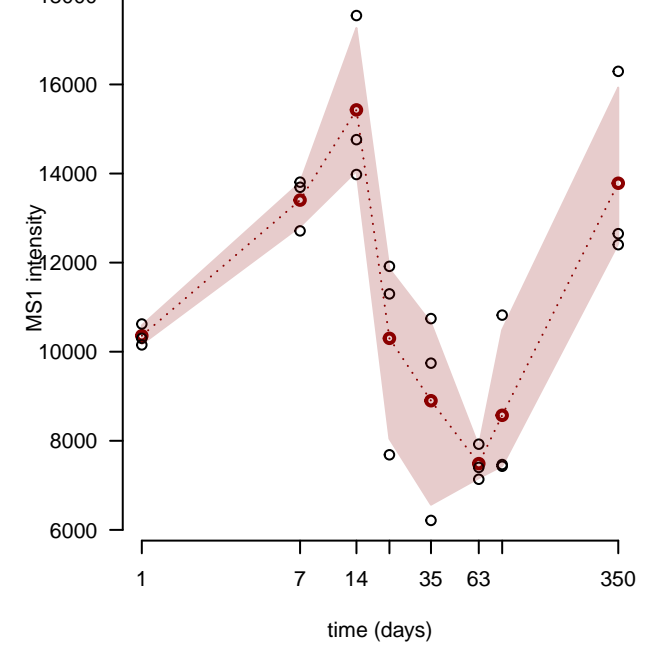

**P97765**  
**GN=Wbp2**  
WW domain binding protein 2

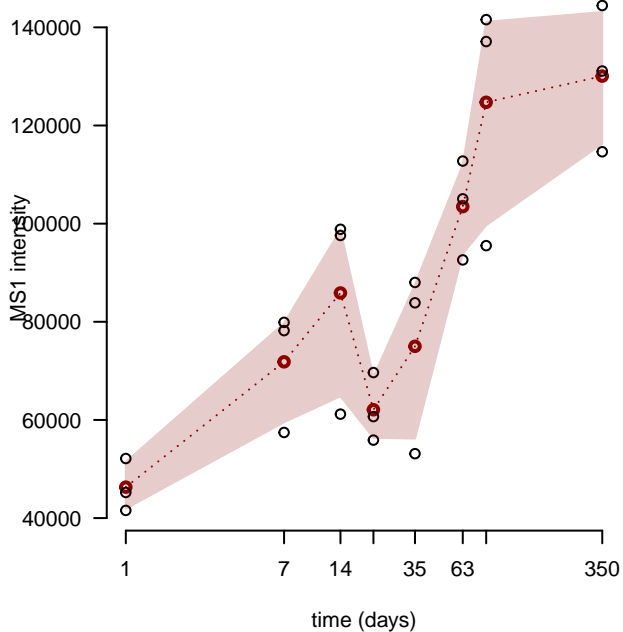

**P97770**  
**GN=Thumpd3**  
THUMP domain containing 3

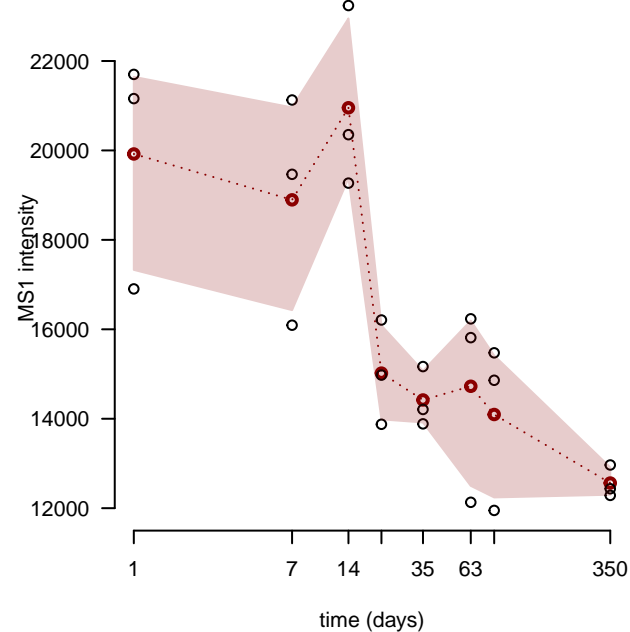

**P97772**  
**GN=Grm1**  
glutamate receptor, metabotropic 1

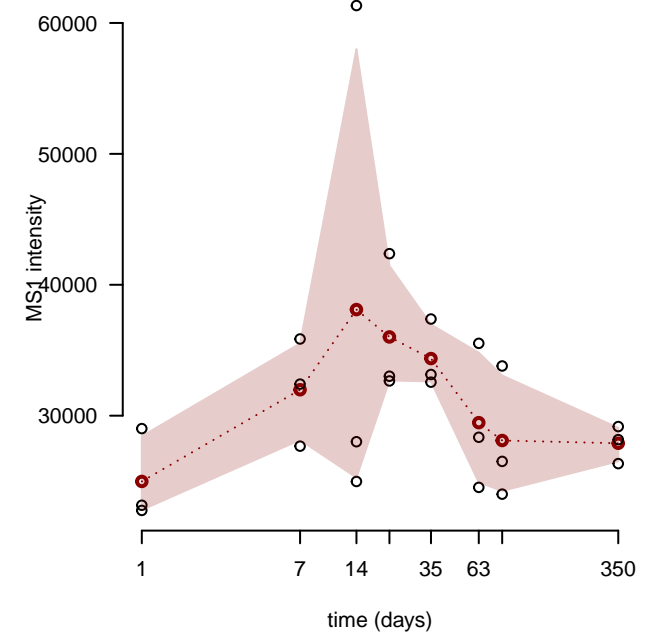

**P97789**  
**GN=Xrn1**  
5'-3' exoribonuclease 1

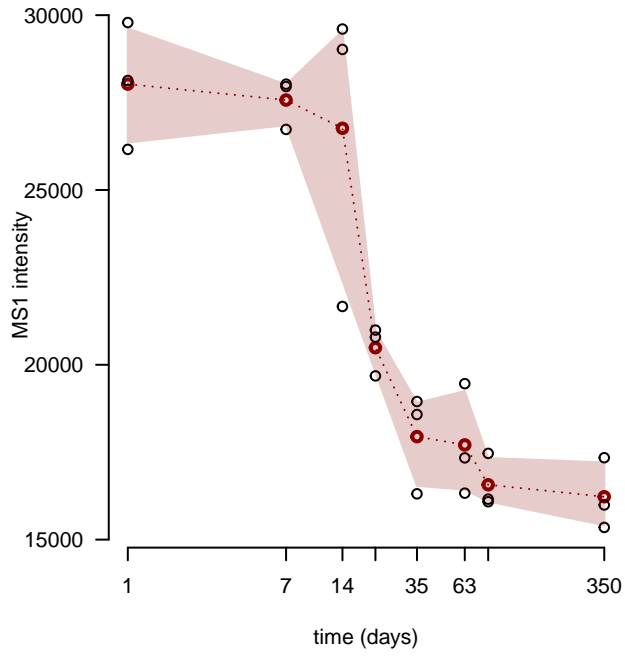

**P97792**  
**GN=Cxadr**  
coxsackie virus and adenovirus receptor

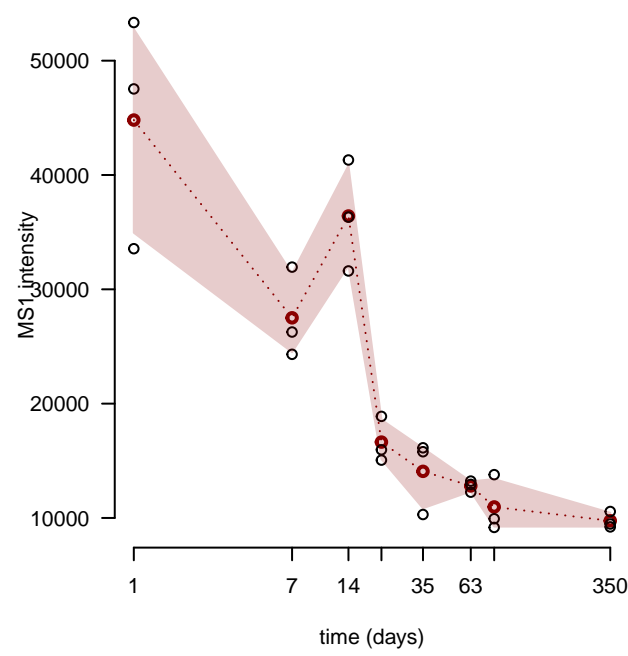

**P97797**  
**GN=Sirpa**  
signal-regulatory protein alpha

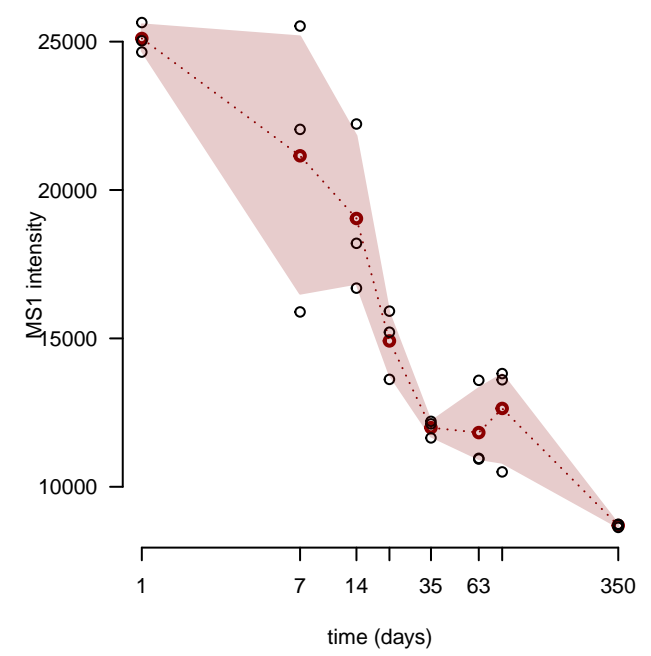

**P97798**  
**GN=Neo1**  
neogenin

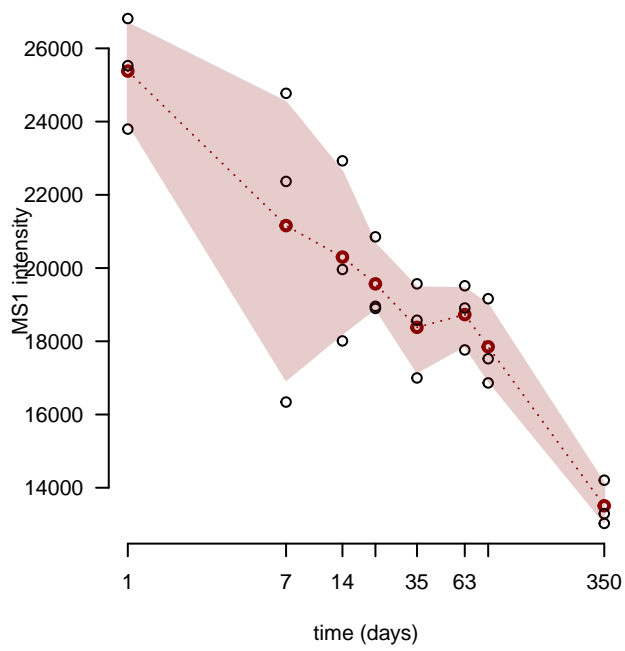

**P97801**  
**GN=Smn1**  
survival motor neuron 1

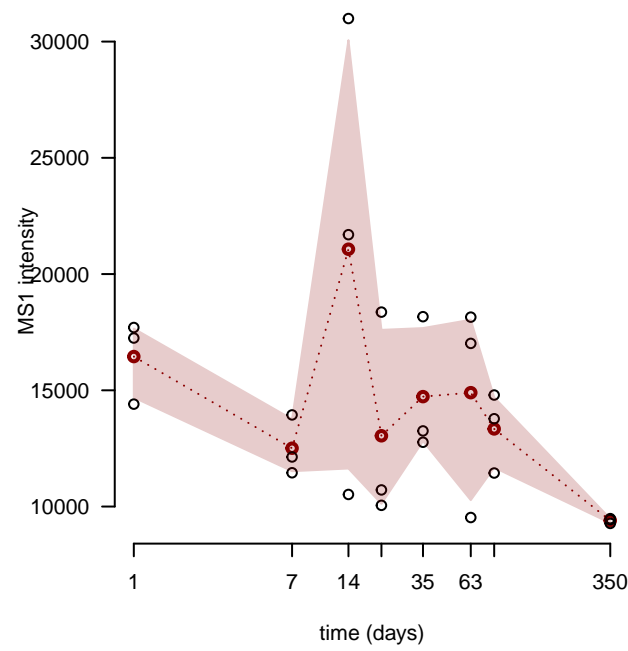

**P97807**  
**GN=Fh**

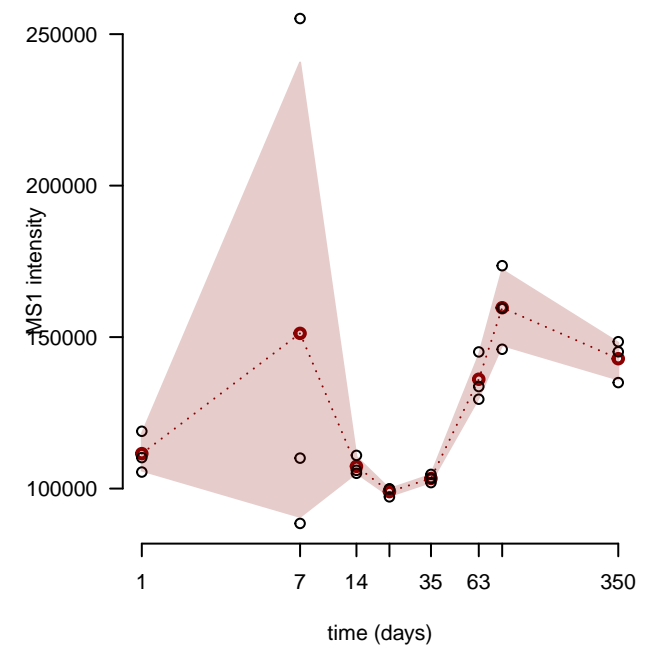

**P97814**  
**GN=Pstpip1**  
proline-serine-threonine phosphatase-int ...

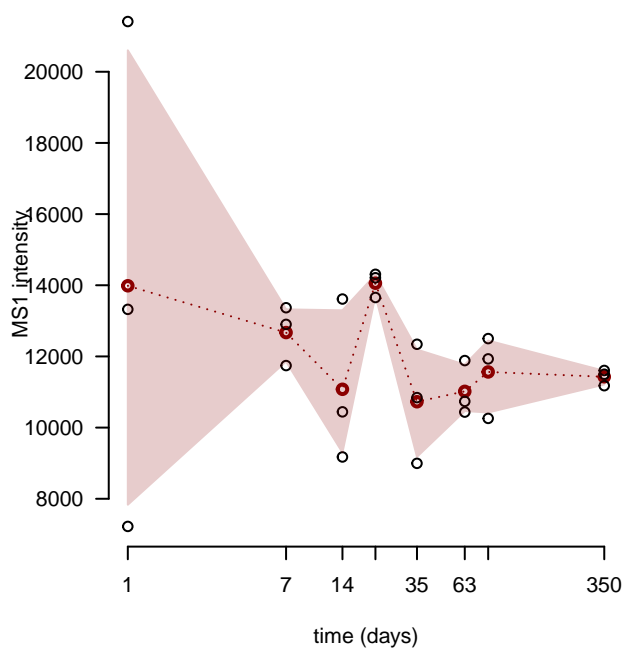

**P97816**  
**GN=S100g**  
S100 calcium binding protein G

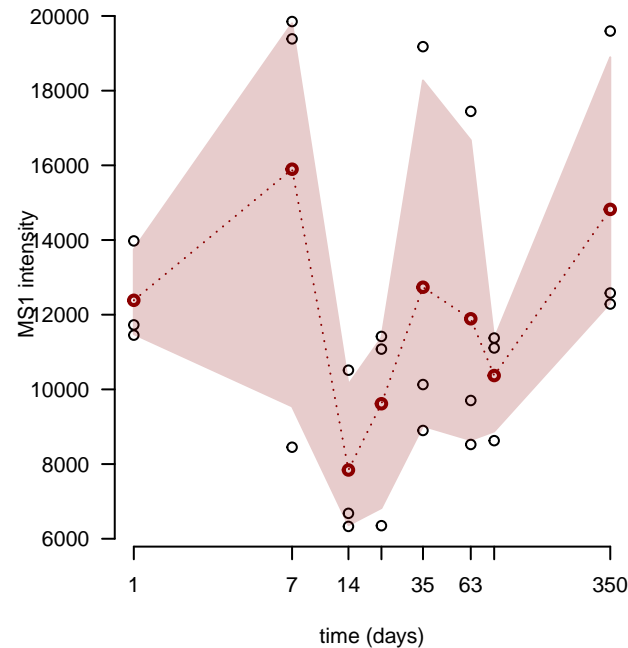

**P97819**  
**GN=Pla2g6**  
phospholipase A2, group VI

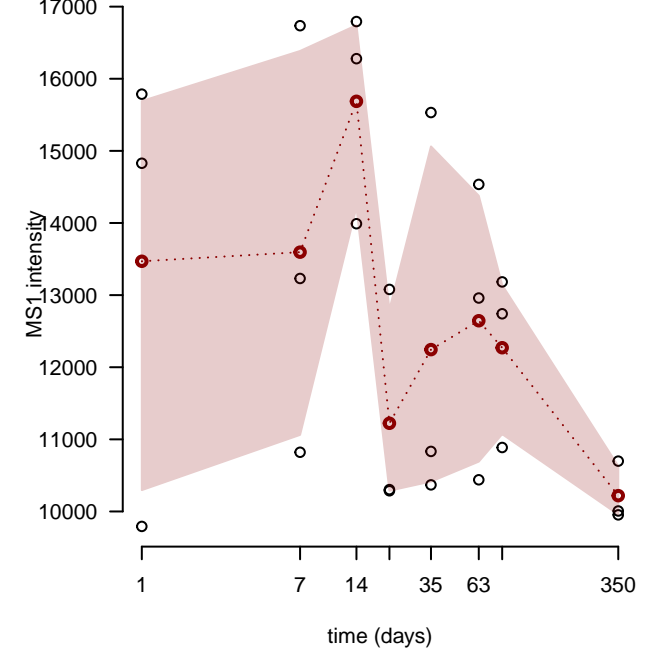

**P97820**  
**GN=Map4k4**  
mitogen-activated protein kinase kinase ...

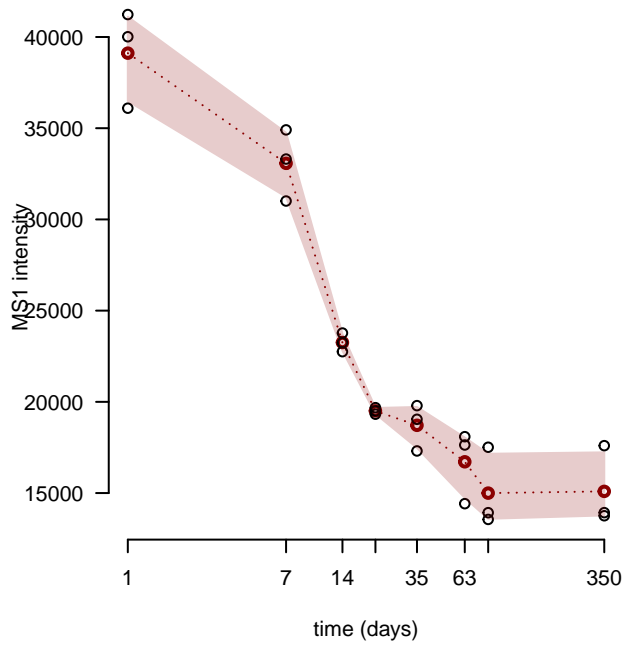

**P97821**  
**GN=Ctsc**  
cathepsin C

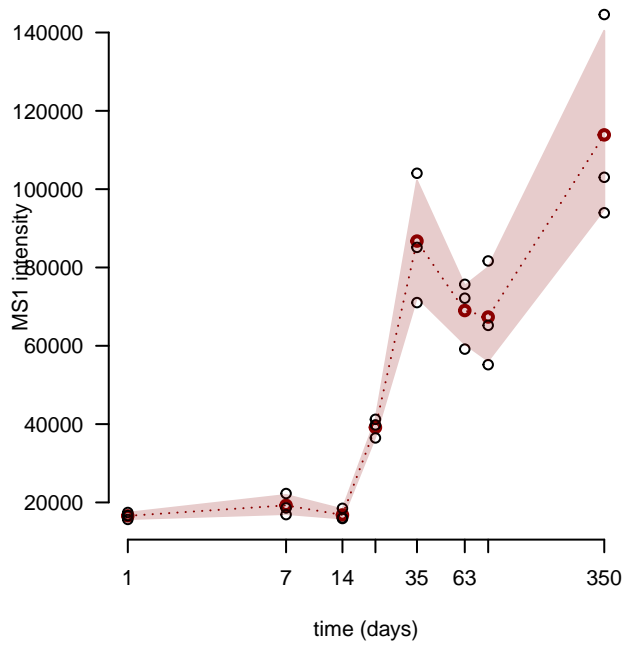

**P97822**  
**GN=Anp32e**  
acidic (leucine-rich) nuclear phosphopro ...

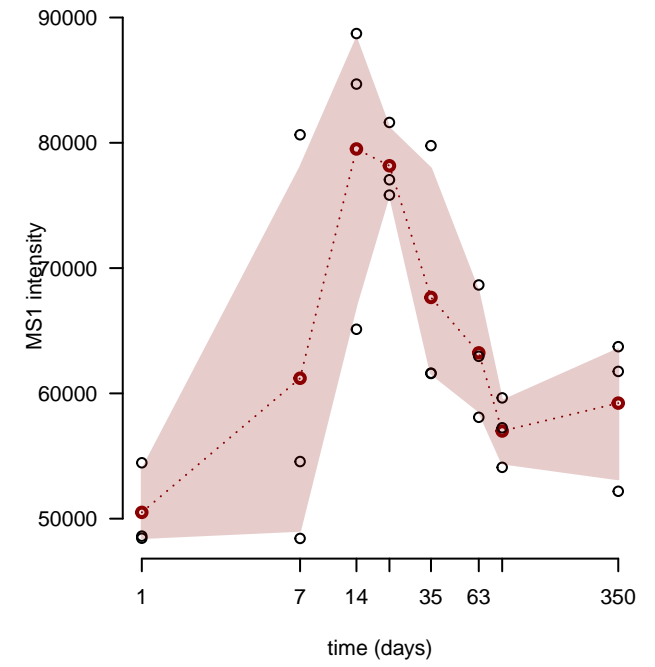

**P97823**  
**GN=Lypla1**  
lysophospholipase 1

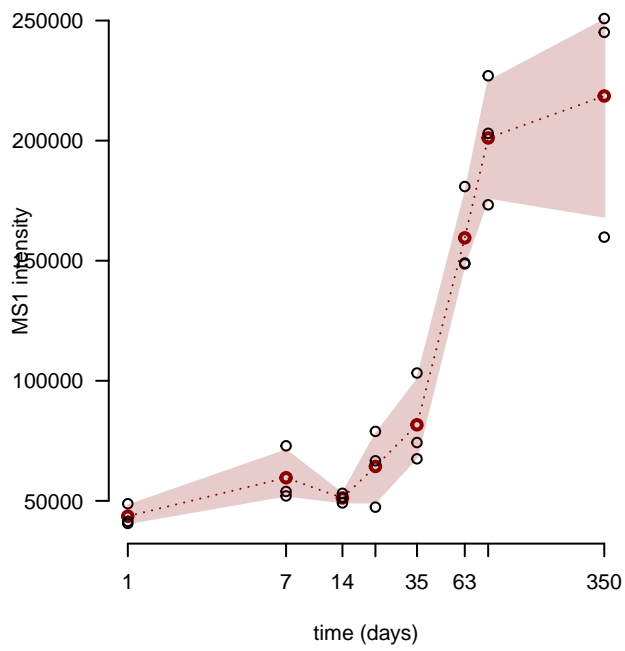

**P97825**  
**GN=Jpt1**  
Jupiter microtubule associated homolog 1

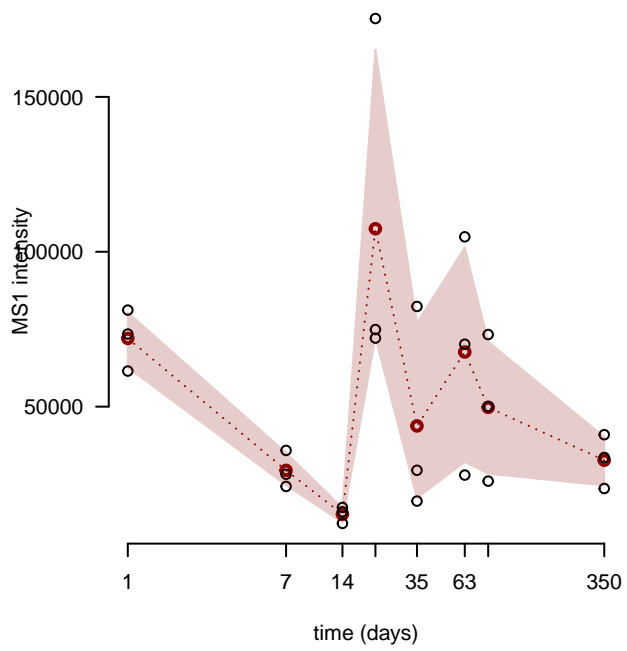

**P97855**  
**GN=G3bp1**  
GTPase activating protein (SH3 domain) b ...

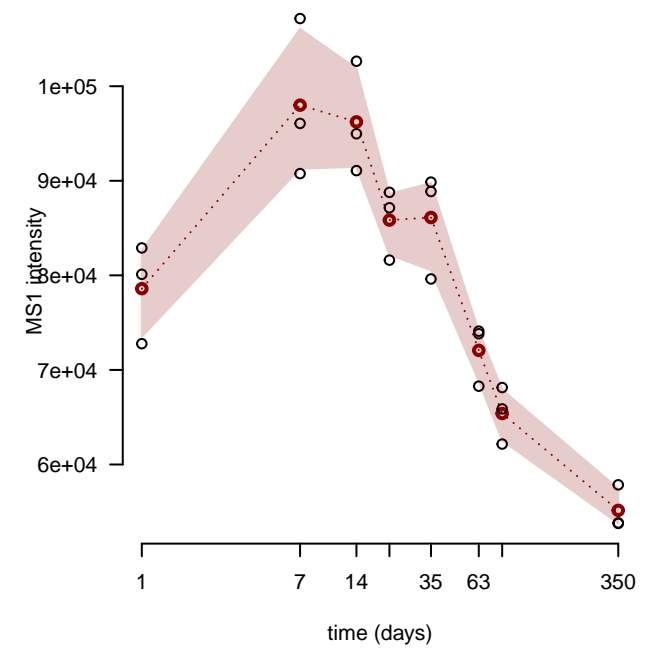

**P97858**  
**GN=Slc35b1**  
solute carrier family 35, member B1

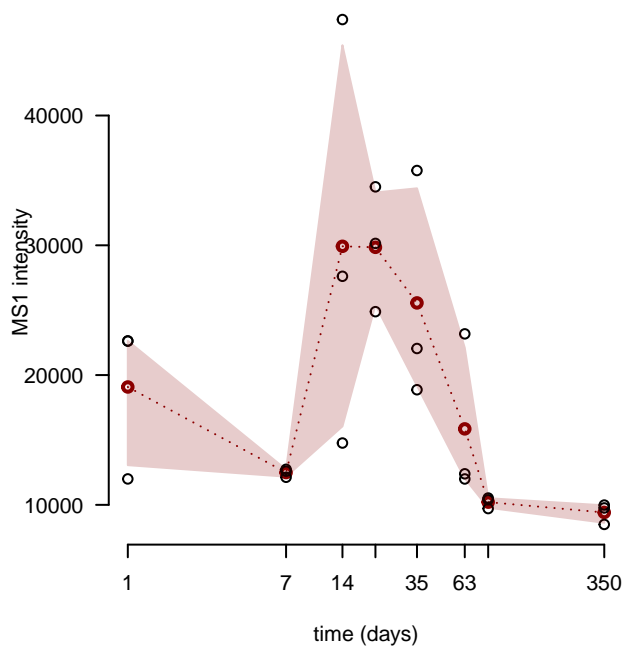

**P97863**  
**GN=Nfib**  
nuclear factor I/B

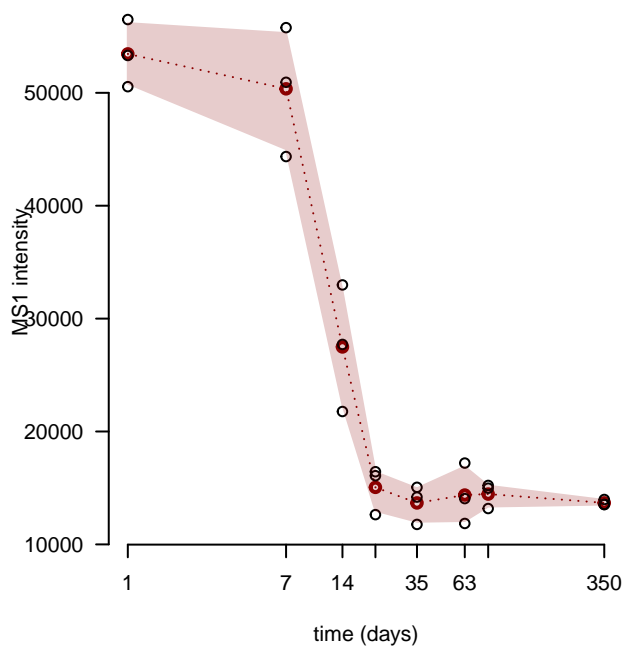

**P97864**  
**GN=Casp7**  
caspase 7

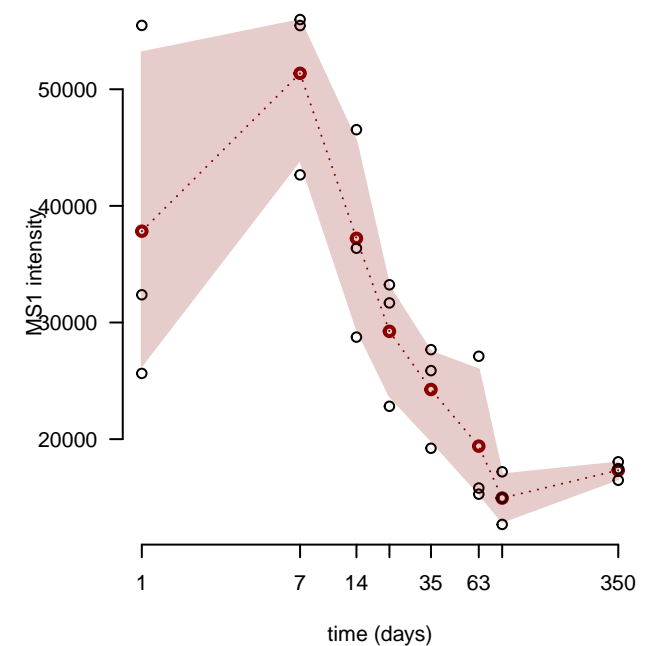

**P97865**  
**GN=Pex7**  
peroxisomal biogenesis factor 7

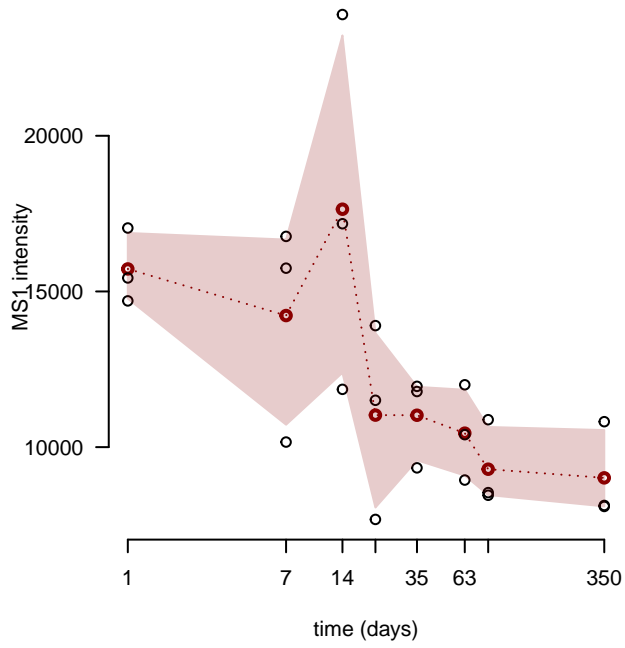

**P97868**  
**GN=Rbbp6**  
retinoblastoma binding protein 6, ubiqui ...

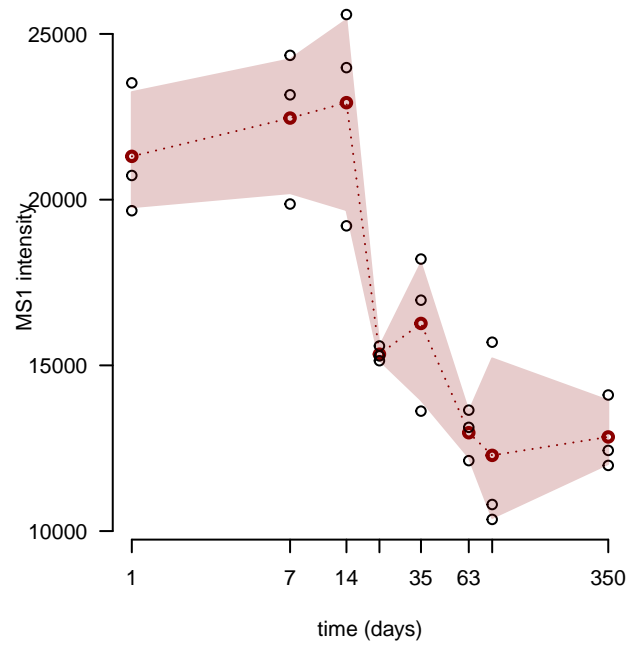

**P97872**  
**GN=Fmo5**  
flavin containing monooxygenase 5

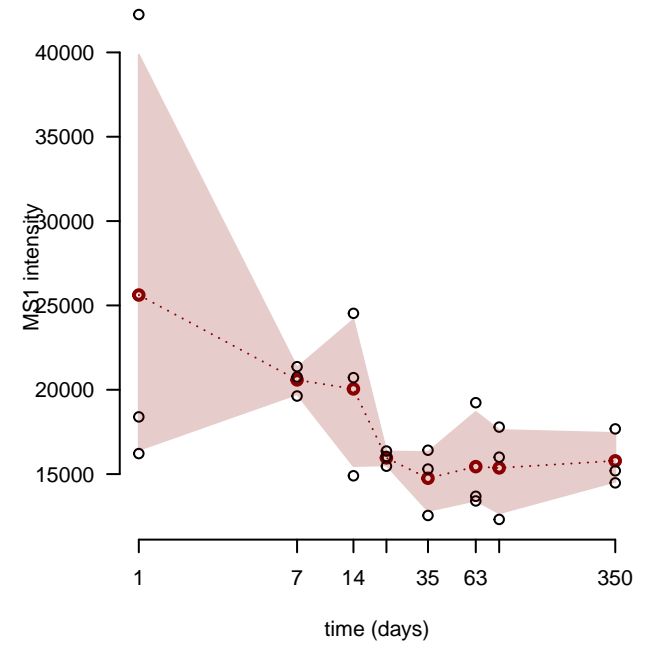

**P97873**  
**GN=Lox11**  
lysyl oxidase-like 1

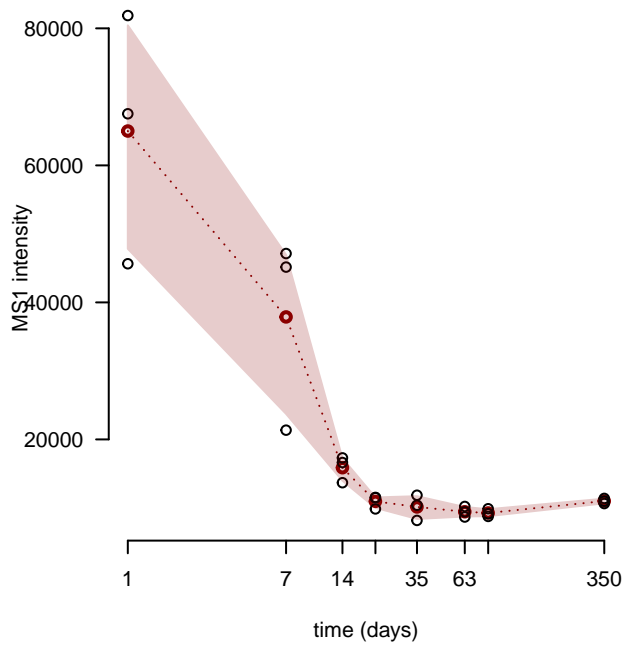

**P97926**  
**GN=Oxtr**  
oxytocin receptor

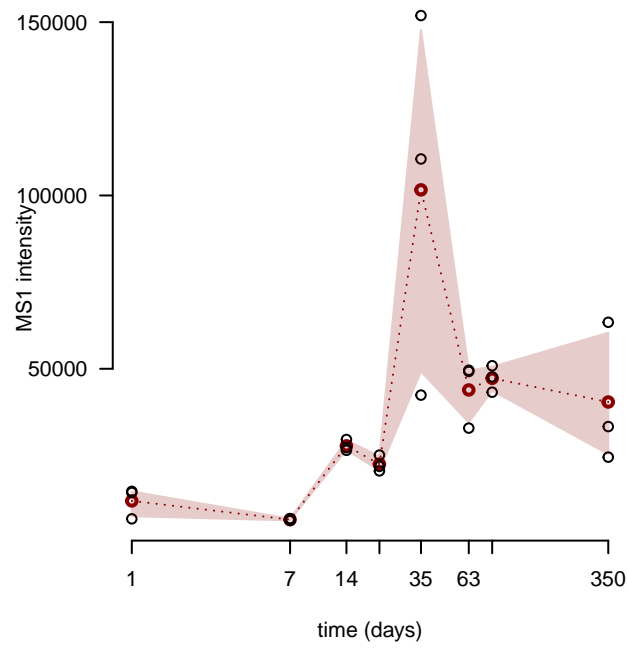

**P97927**  
**GN=Lama4**  
laminin, alpha 4

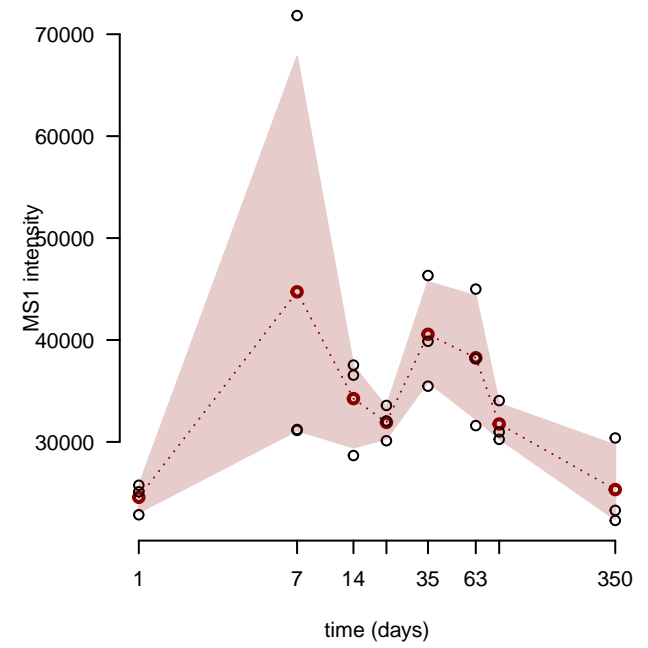

**P97930**  
**GN=Dtymk**  
deoxythymidylate kinase

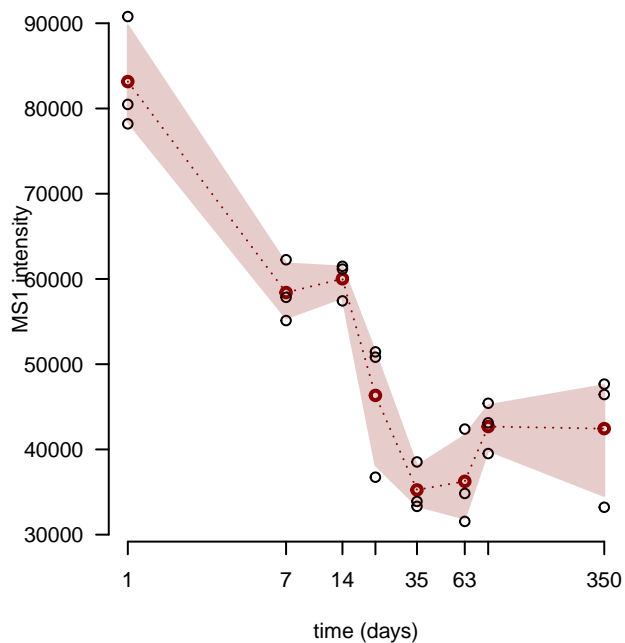

**P97931**  
**GN=Ung**  
uracil DNA glycosylase

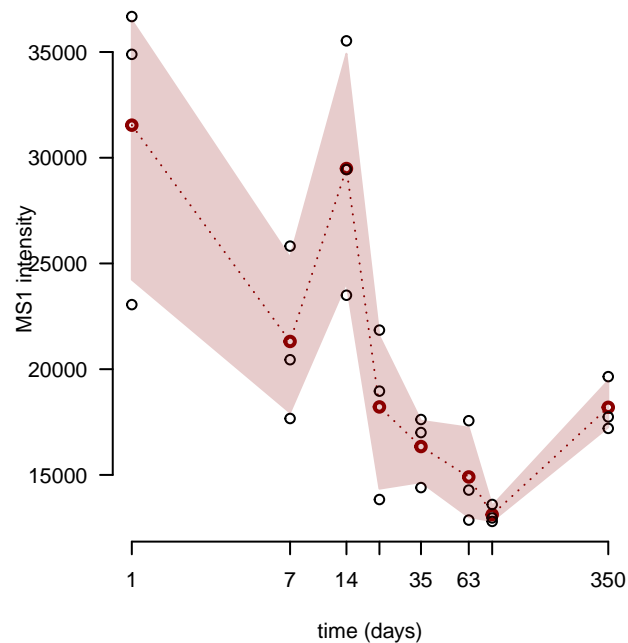

**P97950**  
**GN=Rab33a**  
RAB33A, member RAS oncogene family

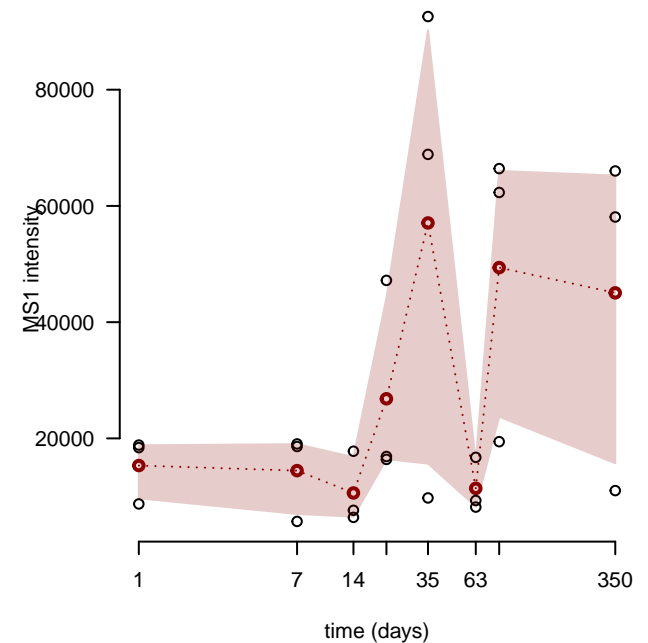

**P98063**  
**GN=Bmp1**  
bone morphogenetic protein 1

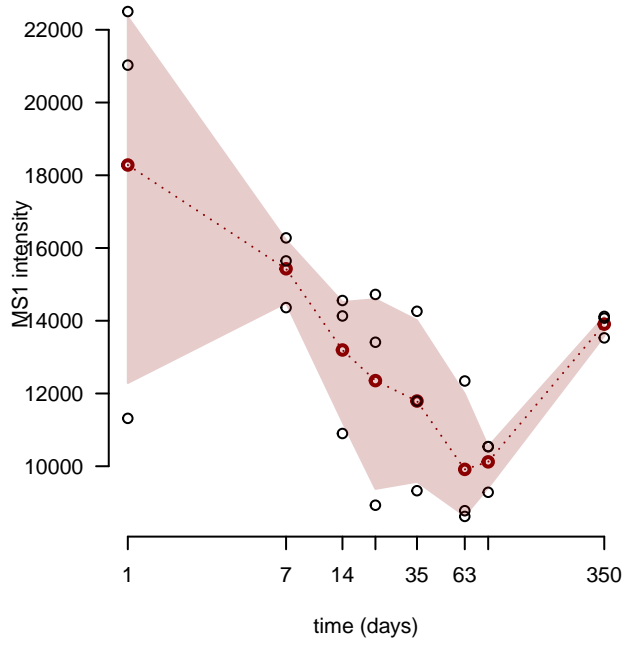

**P98064**  
**GN=Masp1**  
mannan-binding lectin serine peptidase 1

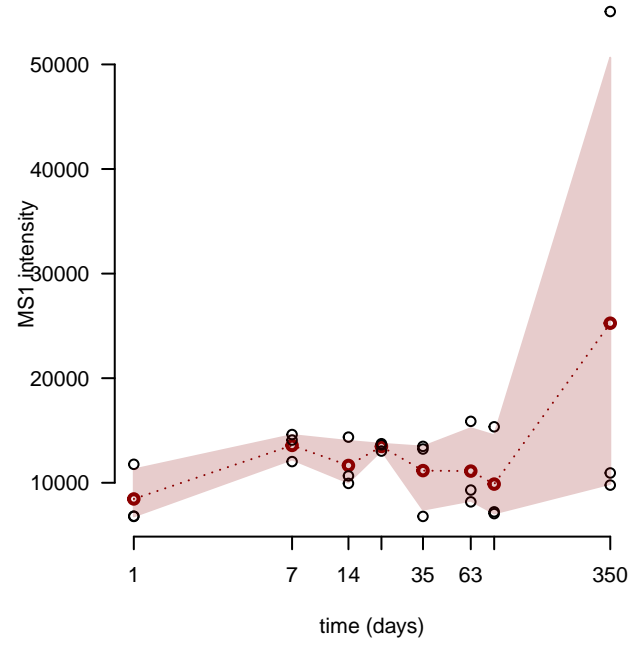

**P98078**  
**GN=Dab2**  
disabled 2, mitogen-responsive phosphopr ...

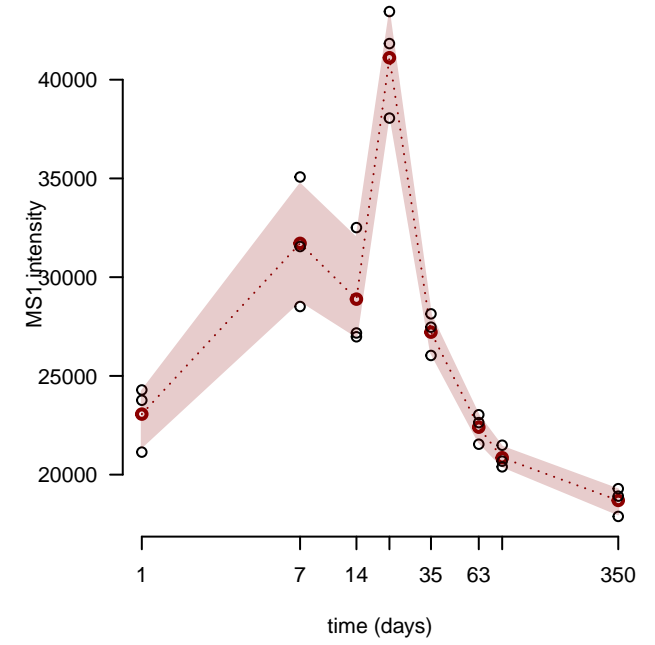

**P98083**  
**GN=Shc1**  
src homology 2 domain-containing transfo ...

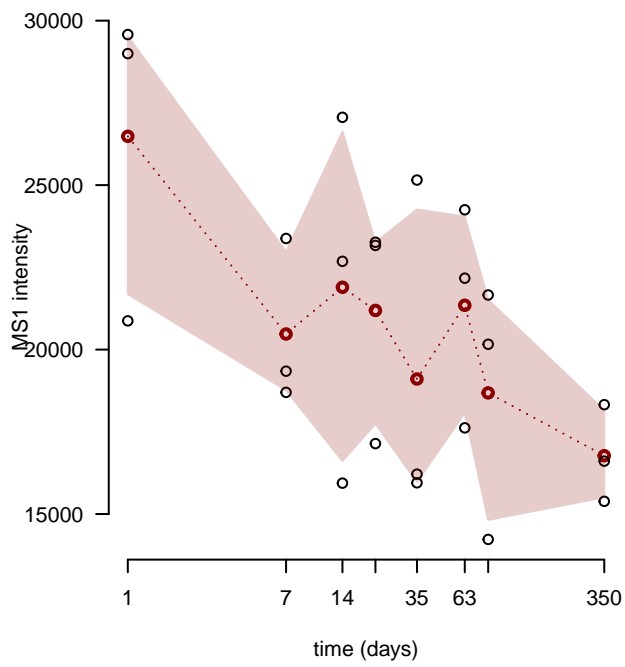

**P98086**  
**GN=C1qa**  
complement component 1, q subcomponent, ...

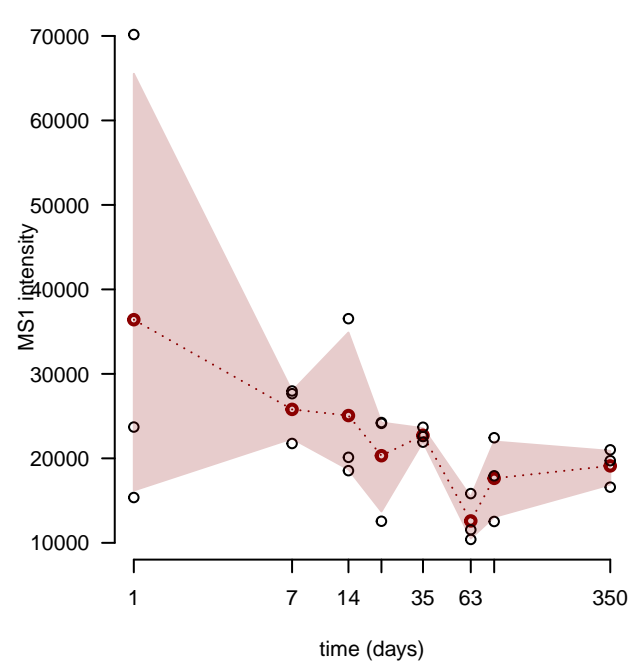

**P98156**  
**GN=Vldlr**  
very low density lipoprotein receptor

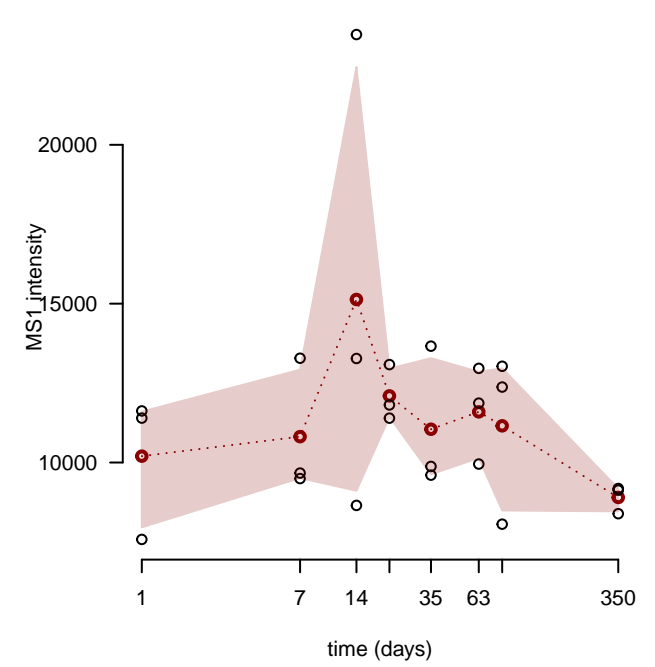

**P98191**  
**GN=Cds1**  
CDP-diacylglycerol synthase 1

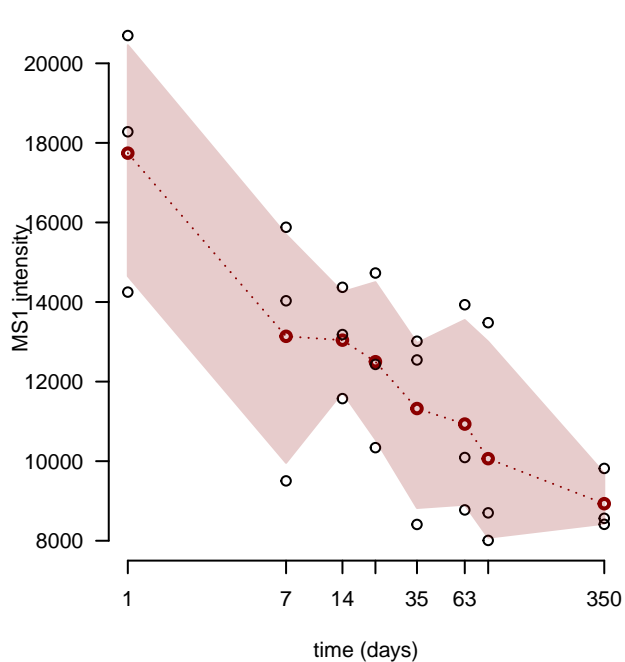

**P98192**  
**GN=Gnpat**  
glyceronephosphate O-acyltransferase

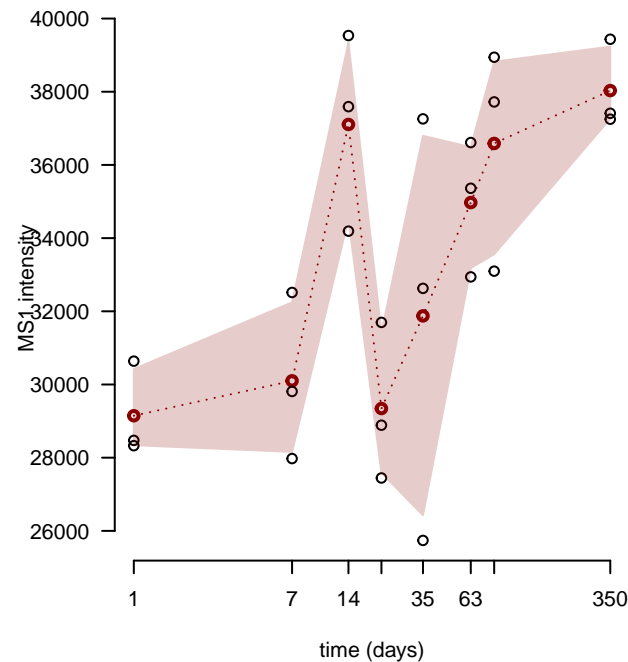

**P98195**  
**GN=Atp9b**  
ATPase, class II, type 9B

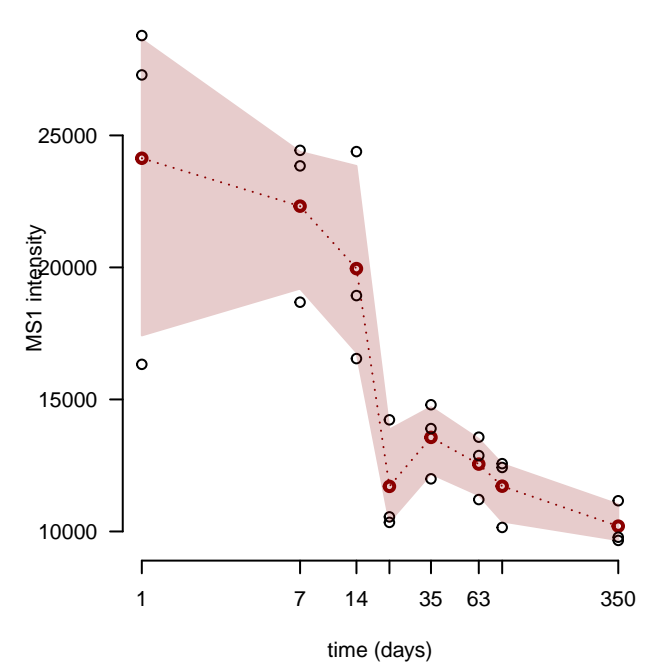

**P98197**  
**GN=Atp11a**  
ATPase, class VI, type 11A

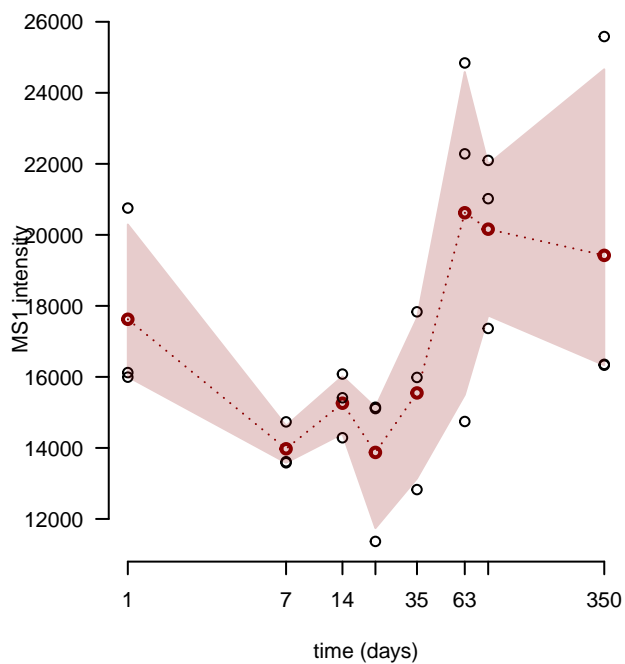

**P98203**  
**GN=Arvcf**  
armadillo repeat gene deleted in velocar ...

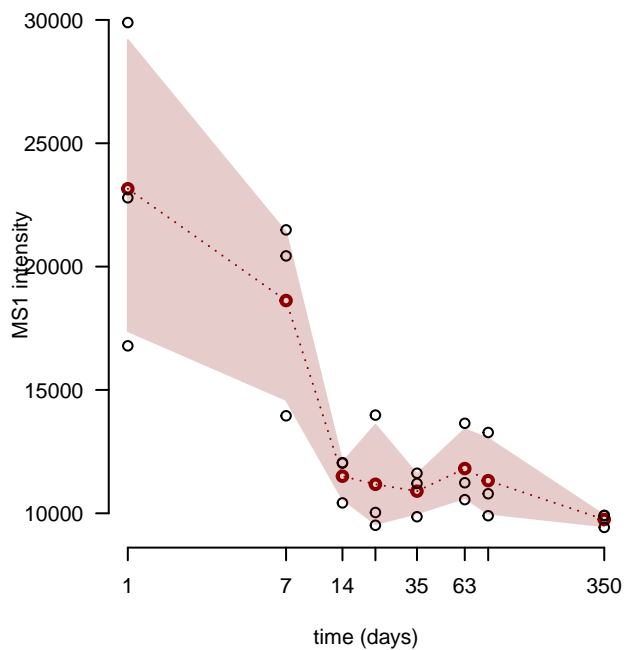

**P99024**  
**GN=Tubb5**  
tubulin, beta 5 class I

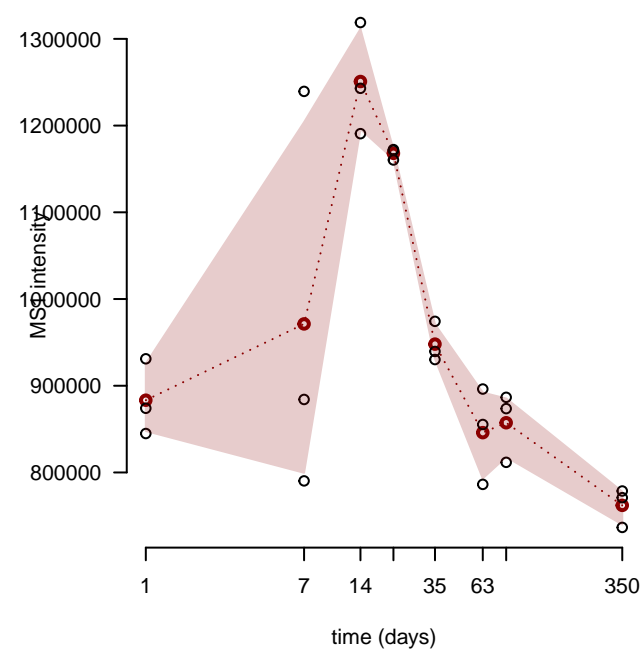

**P99026**  
**GN=Psmb4**  
proteasome (prosome, macropain) subunit, ...

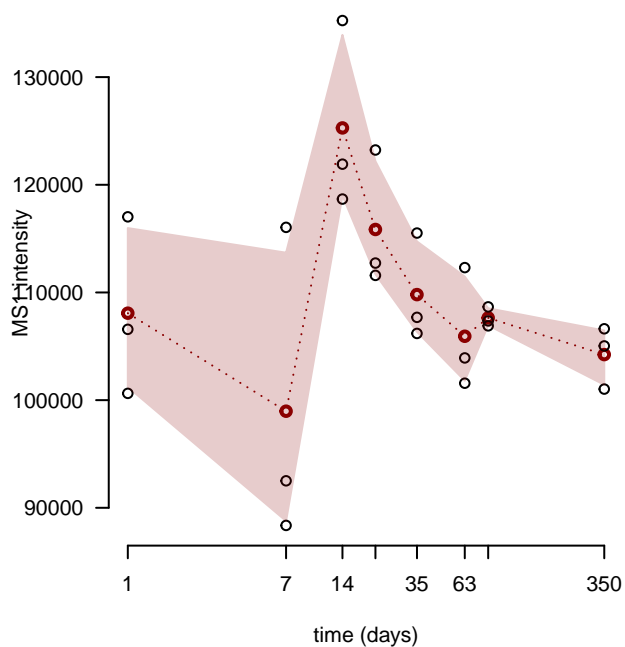

**P99027**  
**GN=Rplp2**  
ribosomal protein, large P2

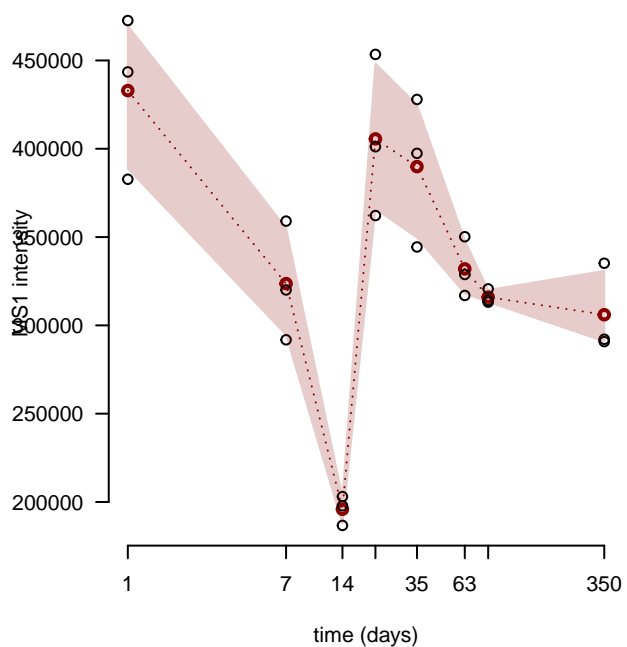

**P99028**  
**GN=Uqcrrh**  
ubiquinol-cytochrome c reductase hinge p ...

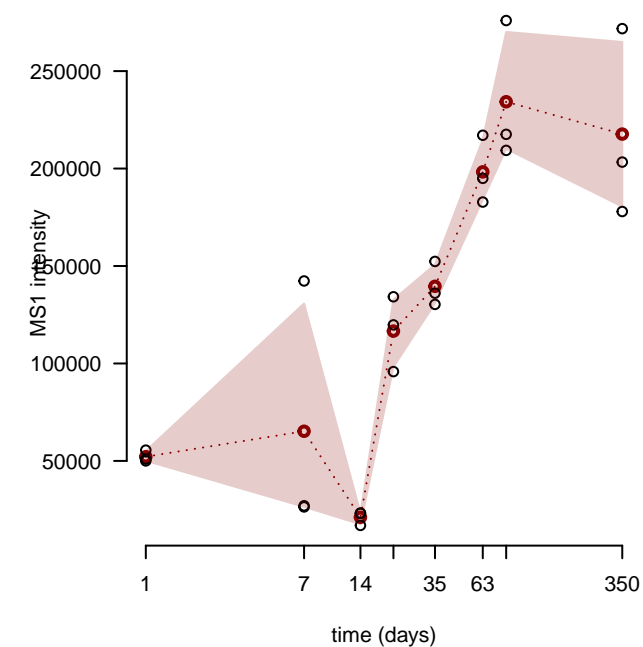

**P99029**  
**GN=Prdx5**  
peroxiredoxin 5

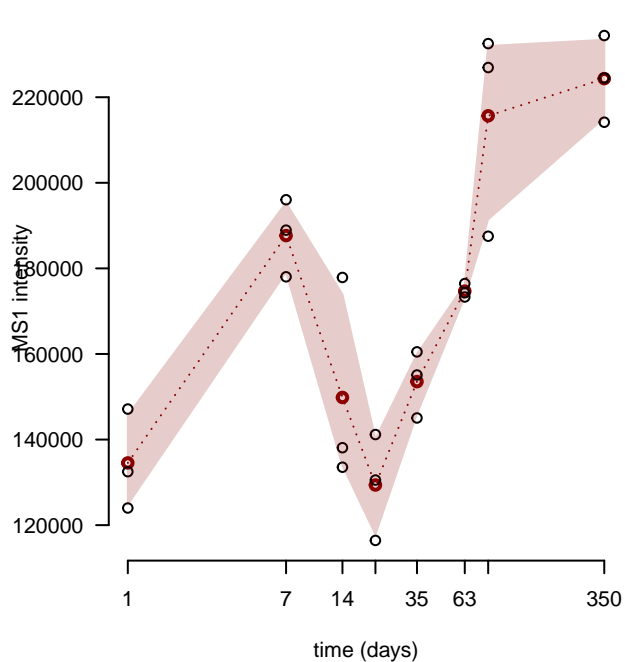

**Q00262**  
**GN=Stx2**  
syntaxin 2

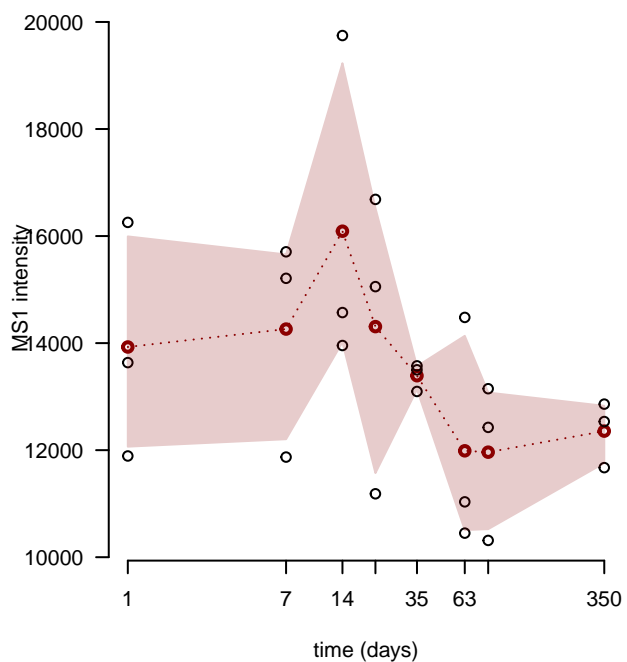

**Q00420**  
**GN=Gabpb1**  
GA repeat binding protein, beta 1

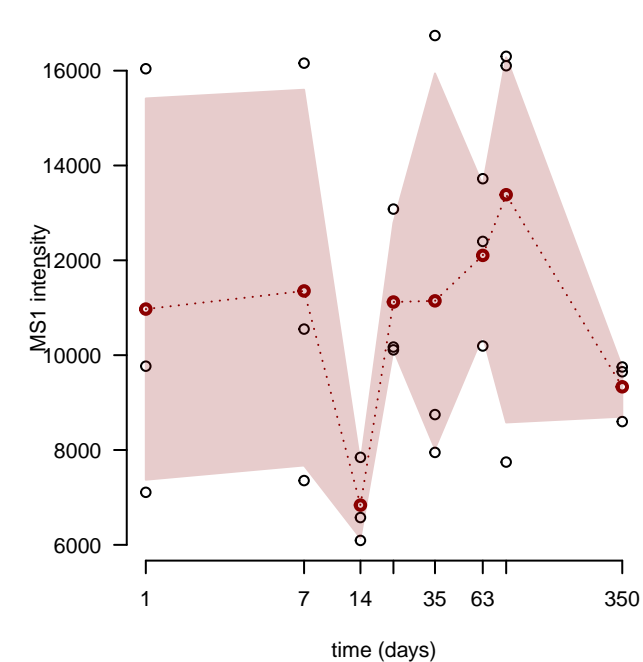

**Q00422**  
**GN=Gabpa**  
GA repeat binding protein, alpha

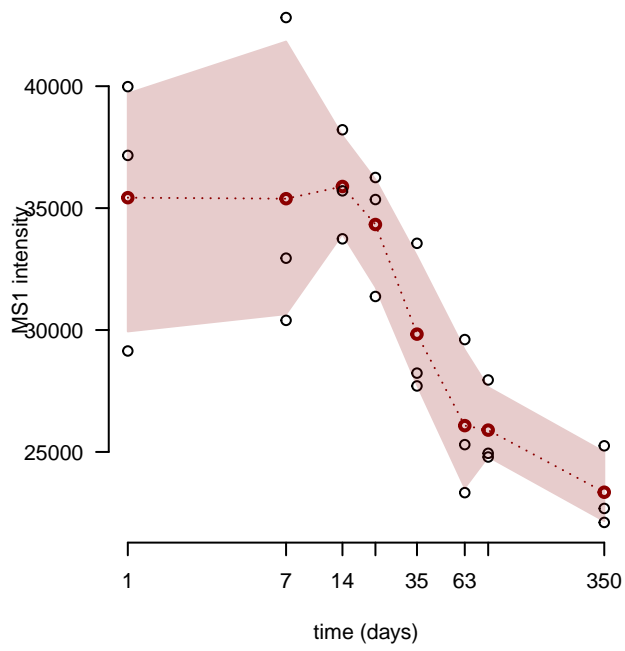

**Q00493**  
**GN=Cpe**  
carboxypeptidase E

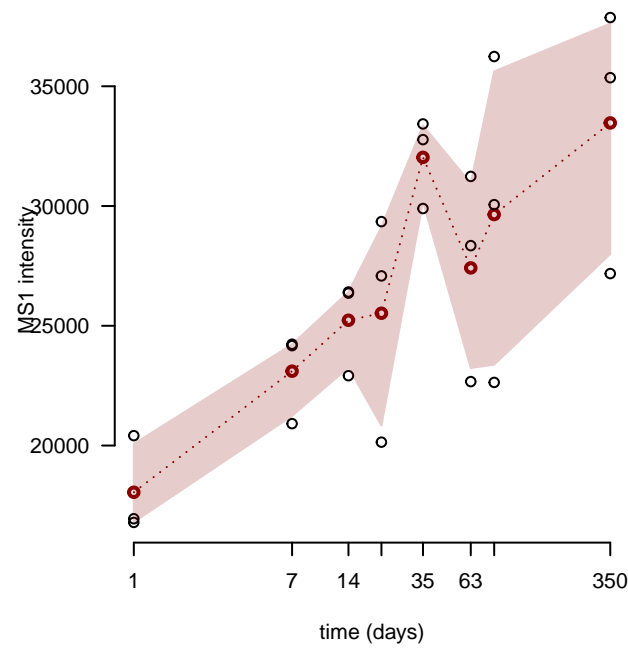

**Q00519**  
**GN=Xdh**  
xanthine dehydrogenase

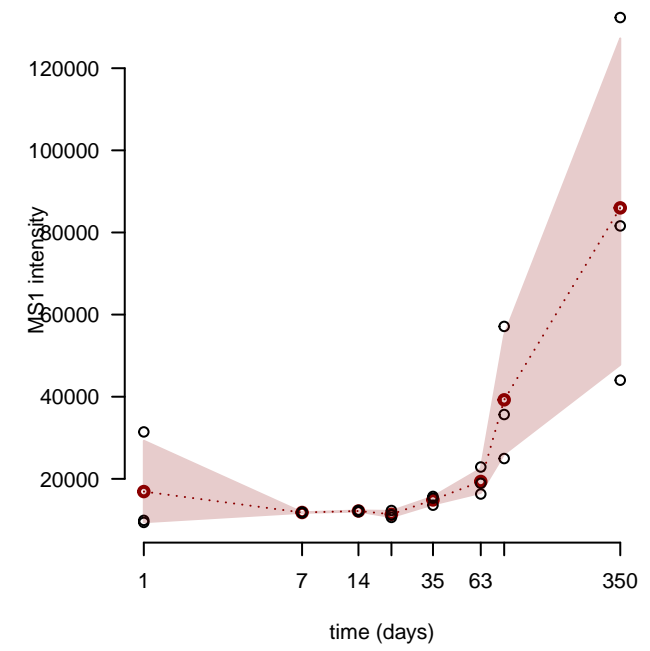

**Q00547**  
**GN=Hmnr**  
hyaluronan mediated motility receptor (R ...

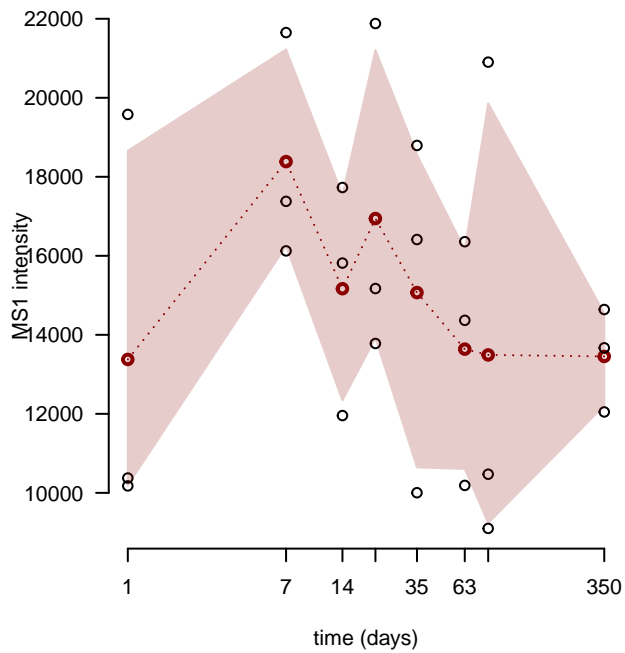

**Q00558**  
**GN=F8a1**

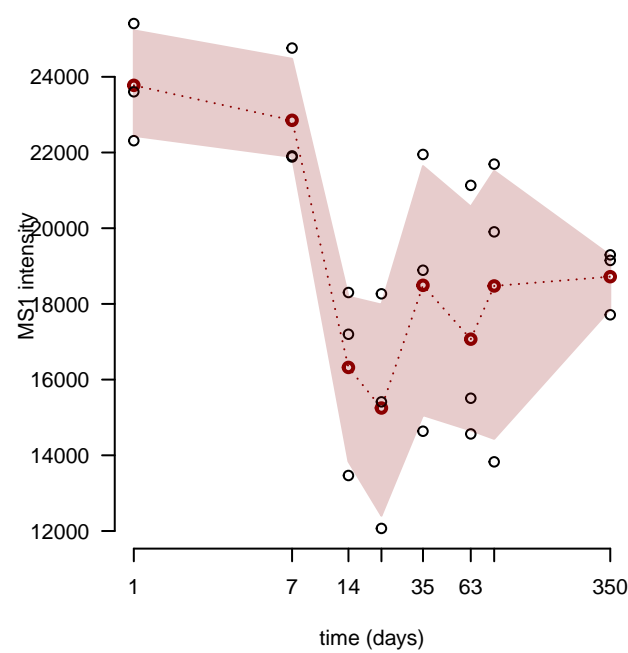

**Q00560**  
**GN=Il6st**  
interleukin 6 signal transducer

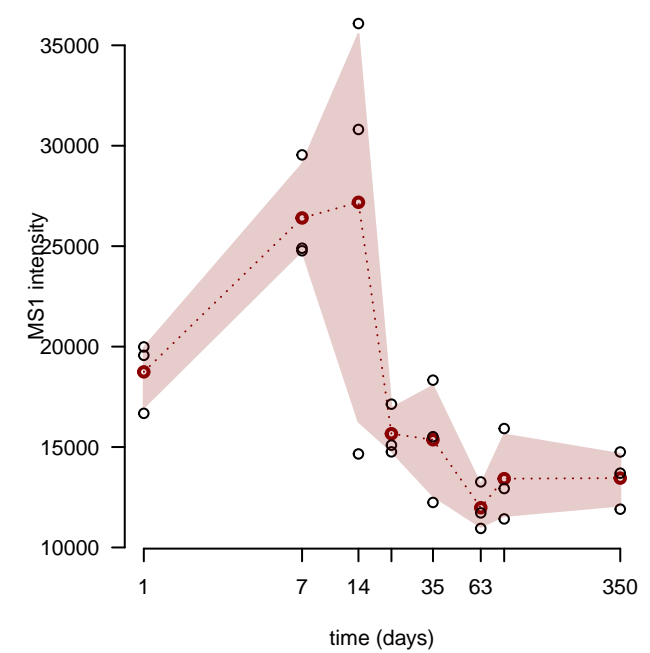

**Q00612**  
**GN=G6pdx**  
glucose-6-phosphate dehydrogenase X-link ...

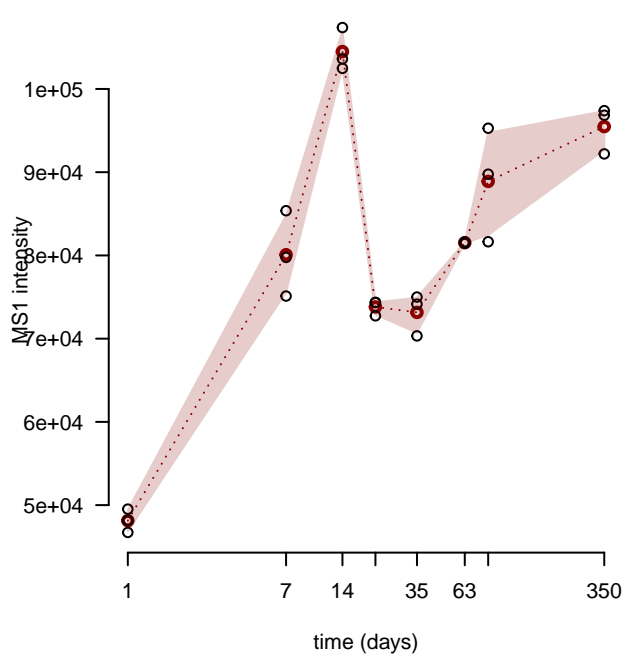

**Q00623**  
**GN=Apoa1**  
apolipoprotein A-I

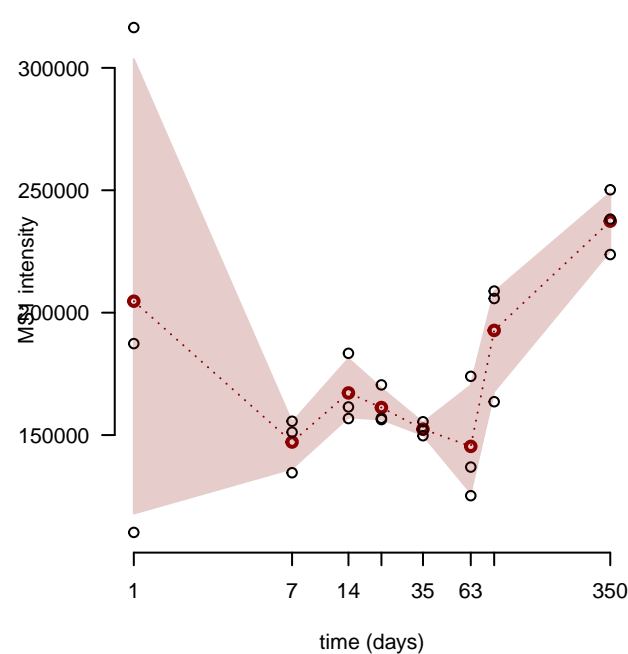

**Q00651**  
**GN=Itga4**  
integrin alpha 4

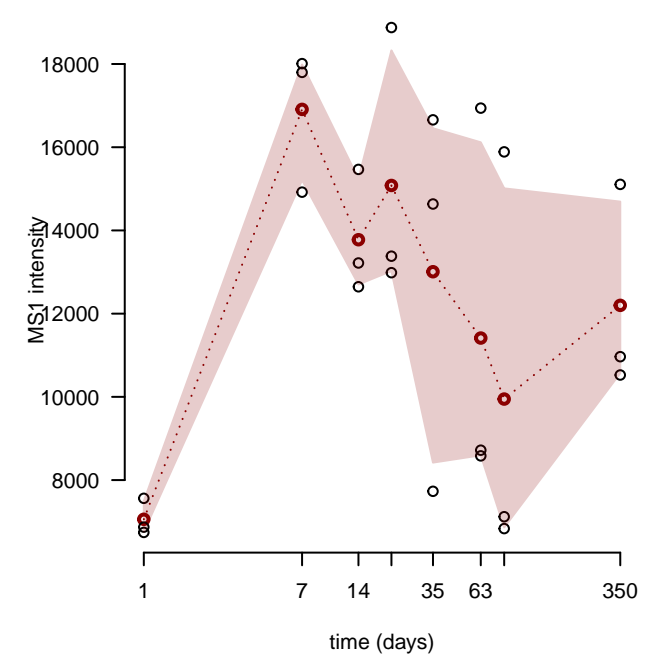



**Q00724**  
**GN=Rbp4**  
retinol binding protein 4, plasma

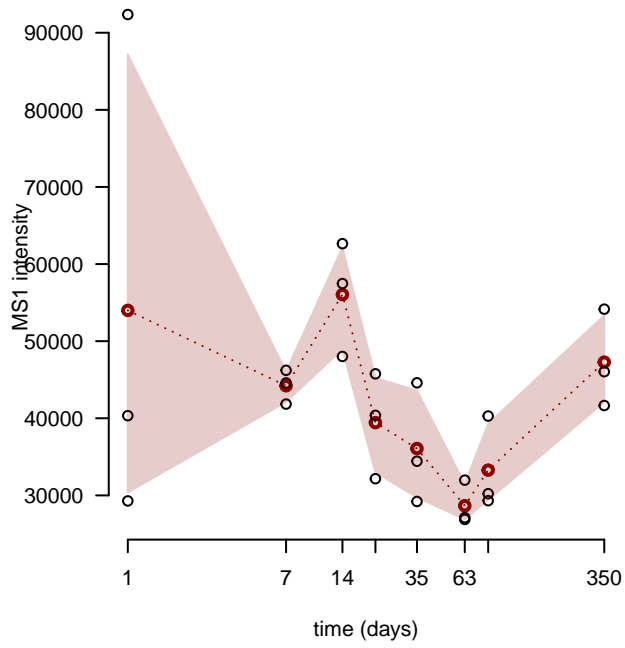

**Q00897**  
**GN=Serpina1d**  
serine (or cysteine) peptidase inhibitor ...

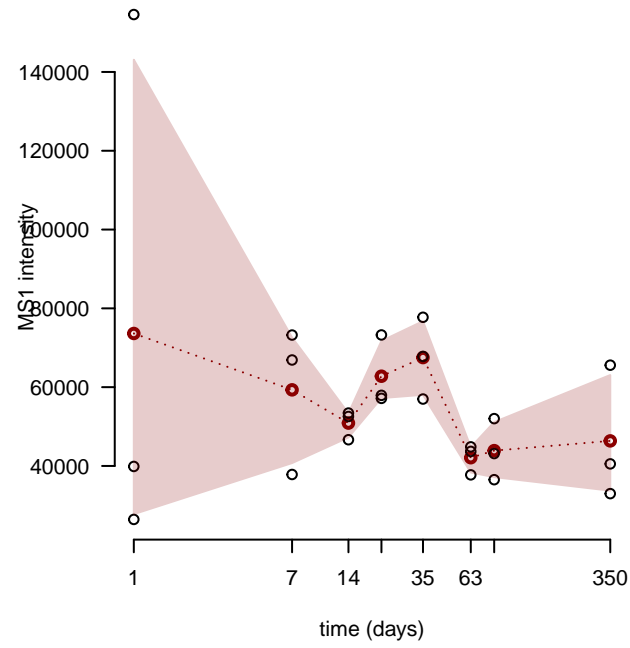

**Q00898**  
**GN=Serpina1e**  
serine (or cysteine) peptidase inhibitor ...

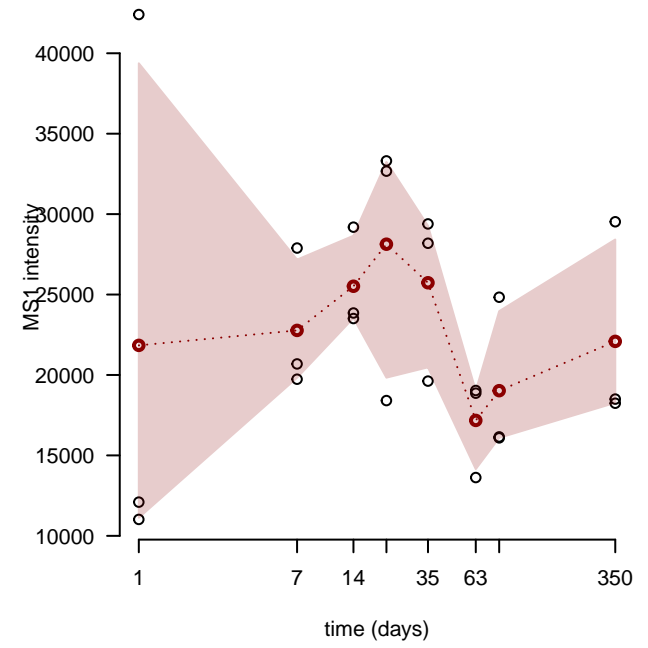

**Q00899**  
**GN=Yy1**  
YY1 transcription factor

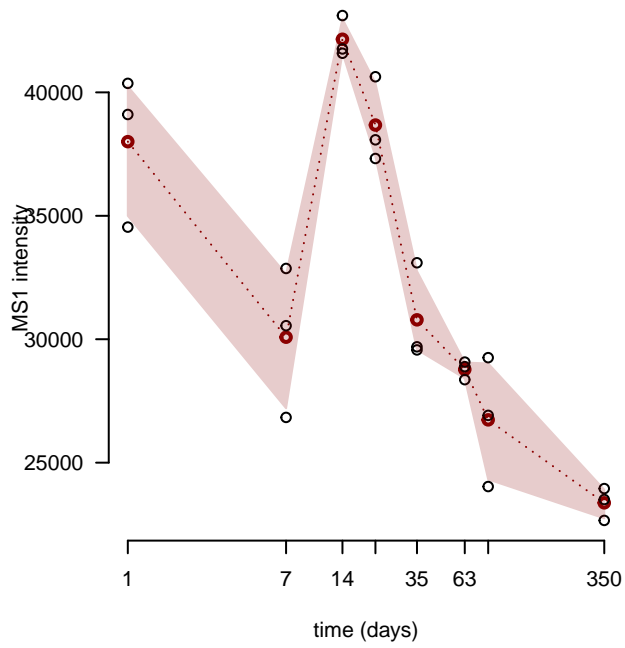

**Q00915**  
**GN=Rbp1**  
retinol binding protein 1, cellular

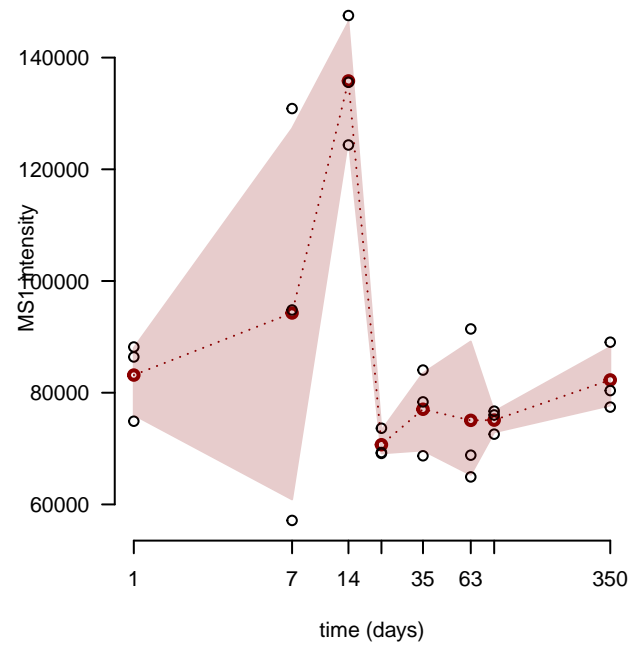

**Q00993**  
**GN=Axl**  
AXL receptor tyrosine kinase

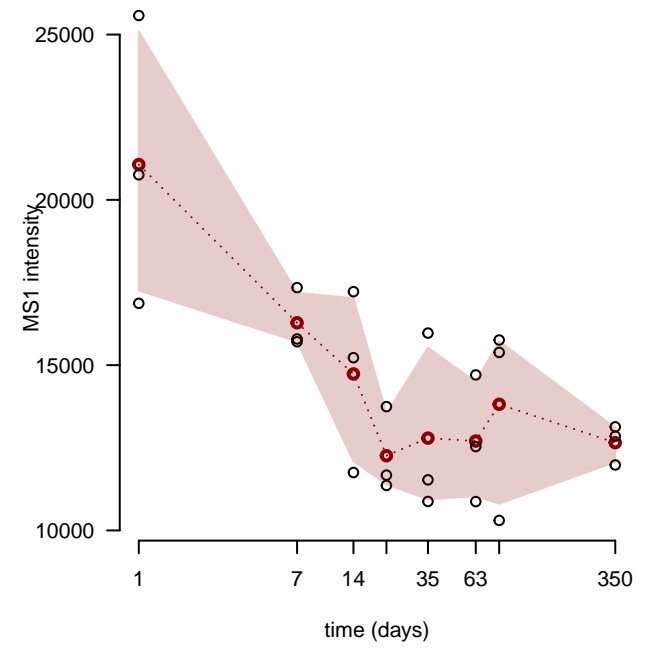

**Q00PI9**  
**GN=Hnrnpul2**  
heterogeneous nuclear ribonucleoprotein ...

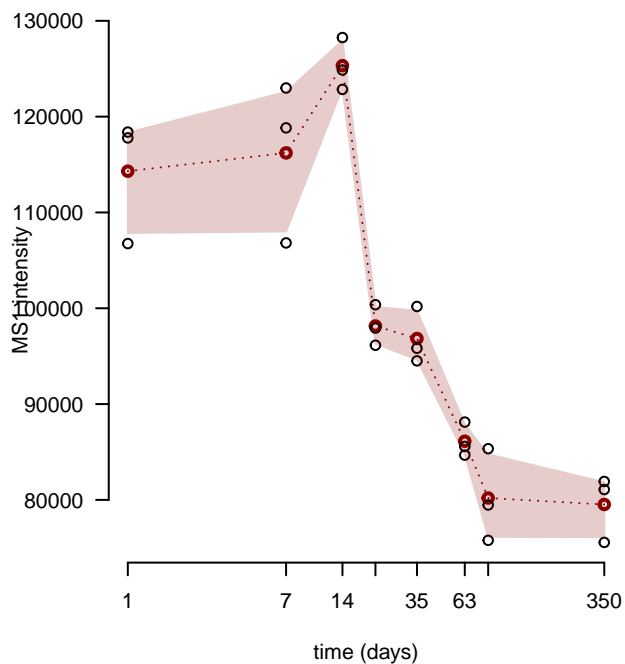

**Q01065**  
**GN=Pde1b**  
phosphodiesterase 1B, Ca2+-calmodulin de ...

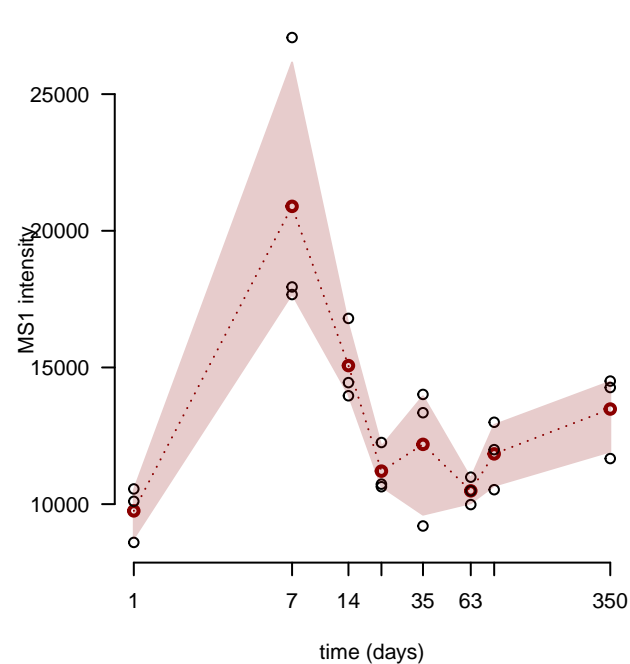

**Q01147**  
**GN=Creb1**  
cAMP responsive element binding protein ...

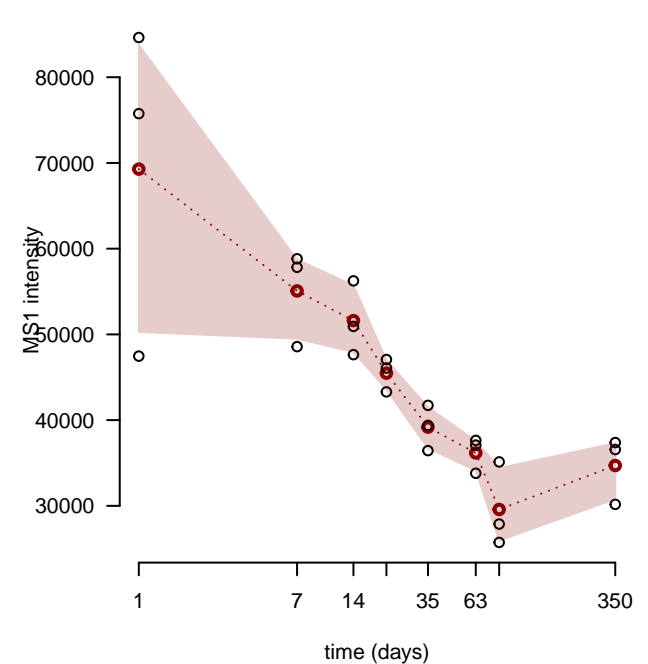

**Q01149**  
**GN=Col1a2**  
collagen, type I, alpha 2

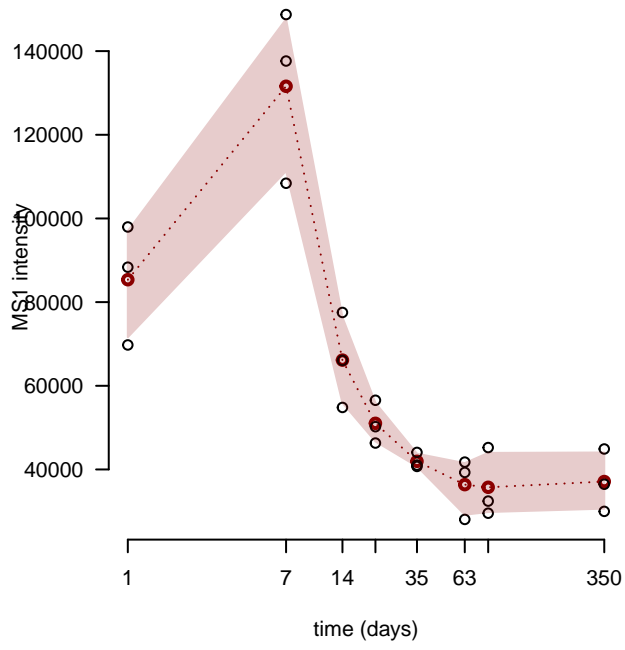

**Q01237**  
**GN=Hmgcr**  
3-hydroxy-3-methylglutaryl-Coenzyme A re ...

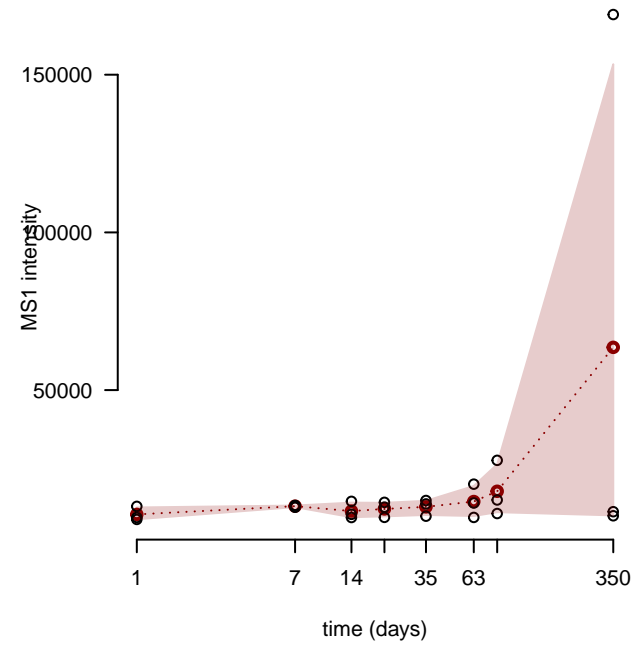

**Q01279**  
**GN=Egfr**  
epidermal growth factor receptor

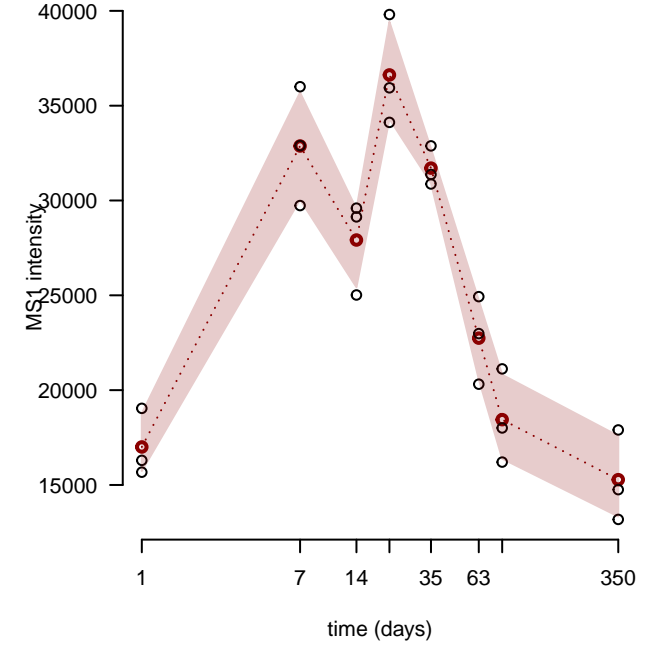

**Q01320**  
**GN=Top2a**  
topoisomerase (DNA) II alpha

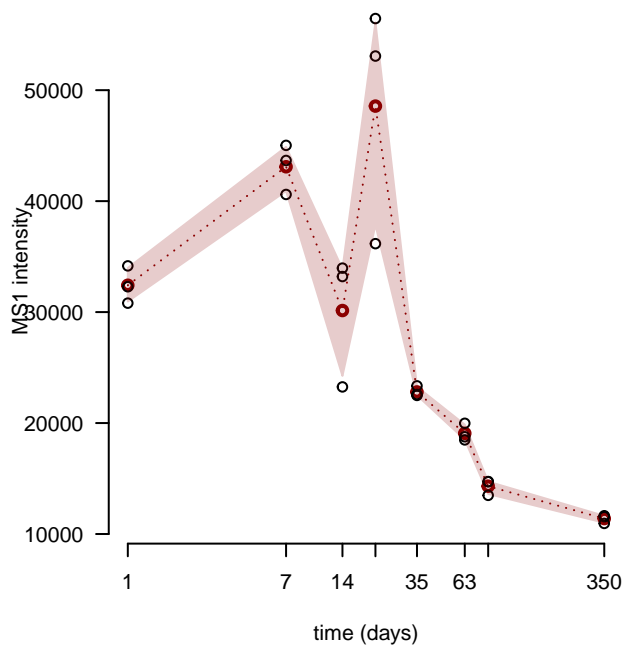

**Q01339**  
**GN=ApoH**  
apolipoprotein H

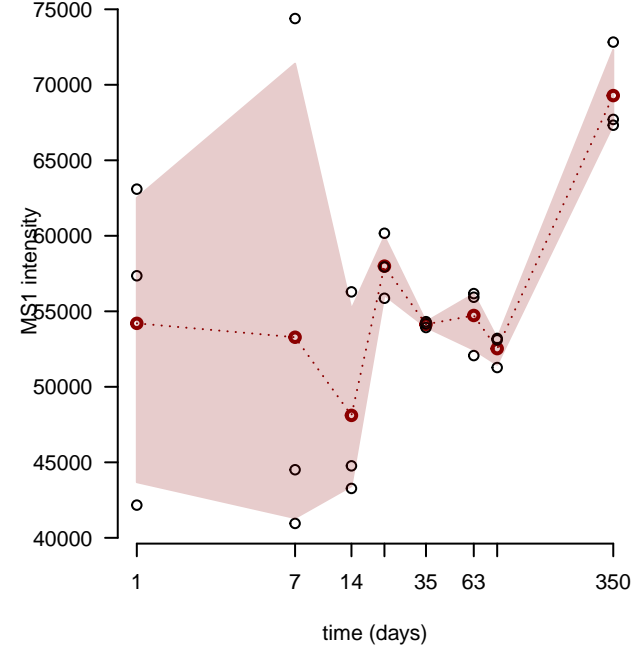

**Q01341**  
**GN=Adcy6**  
adenylate cyclase 6

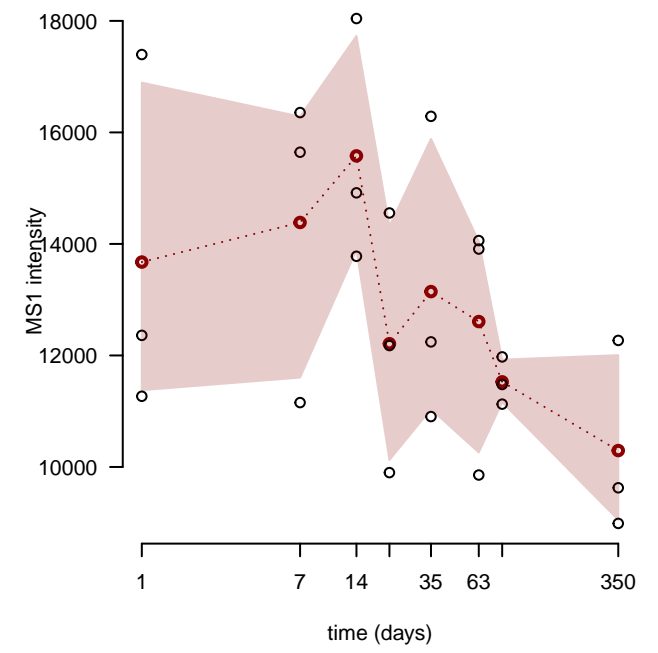

**Q01405**  
**GN=Sec23a**  
SEC23 homolog A, COPII coat complex comp ...

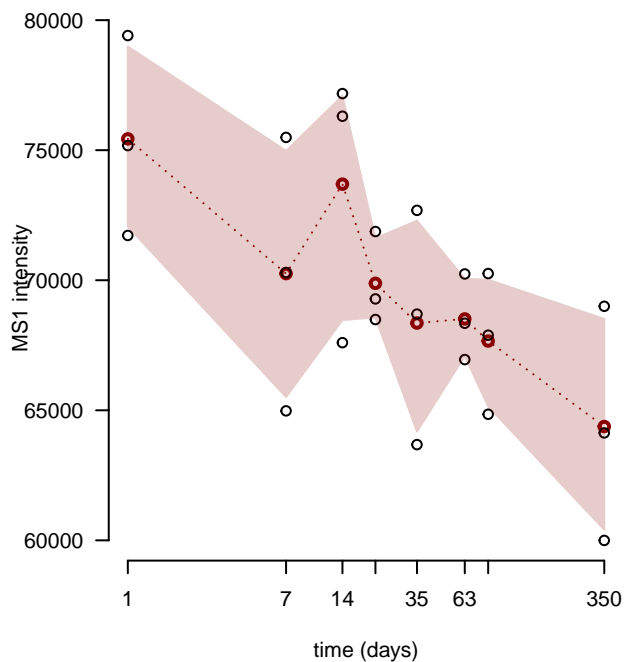

**Q01514**  
**GN=Gbp1**

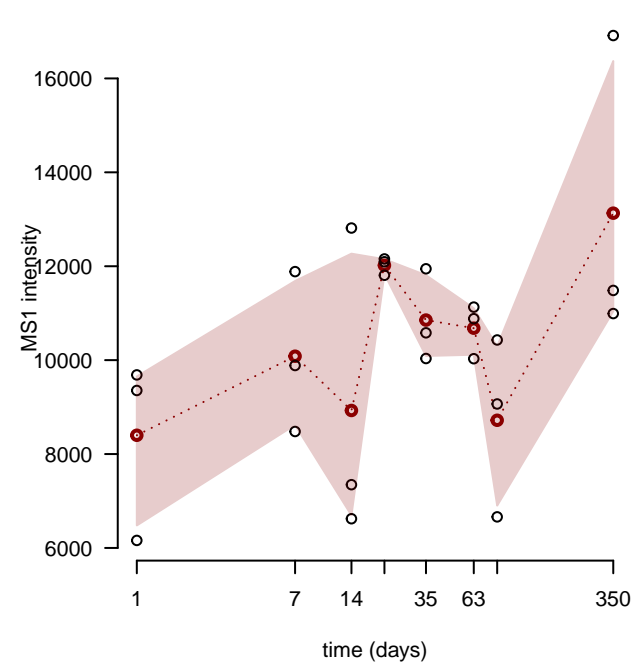

**Q01705**  
**GN=Notch1**  
notch 1

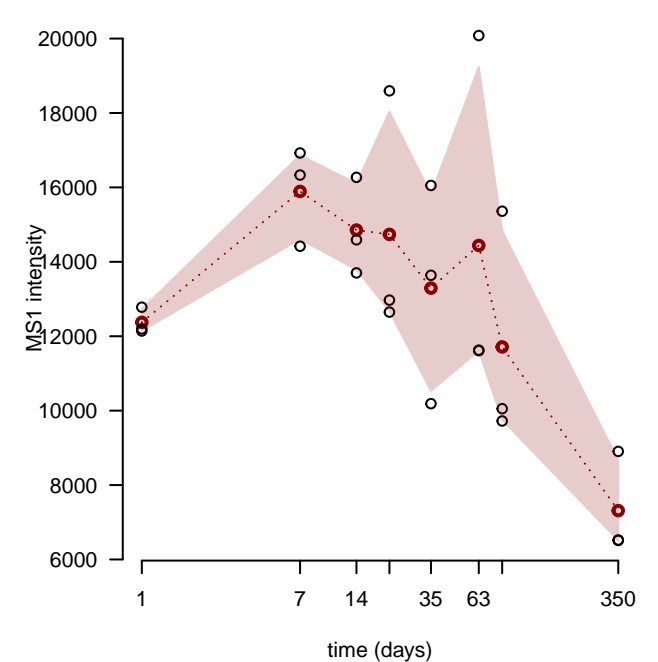

**Q01721**  
**GN=Gas1**  
growth arrest specific 1

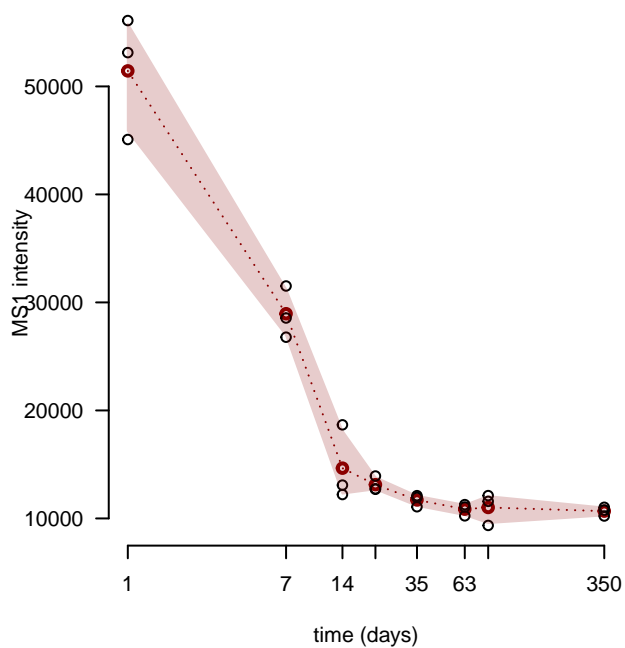

**Q01730**  
**GN=Rsu1**  
Ras suppressor protein 1

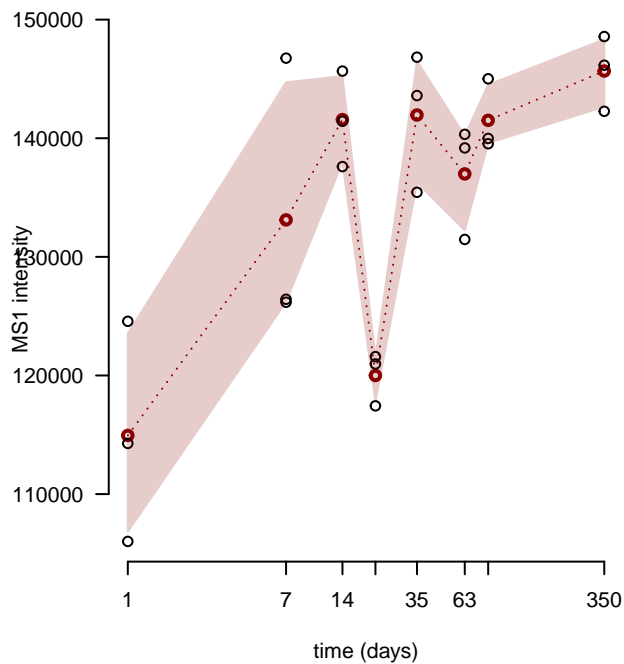

**Q01768**  
**GN=Nme2**  
NME/NM23 nucleoside diphosphate kinase 2

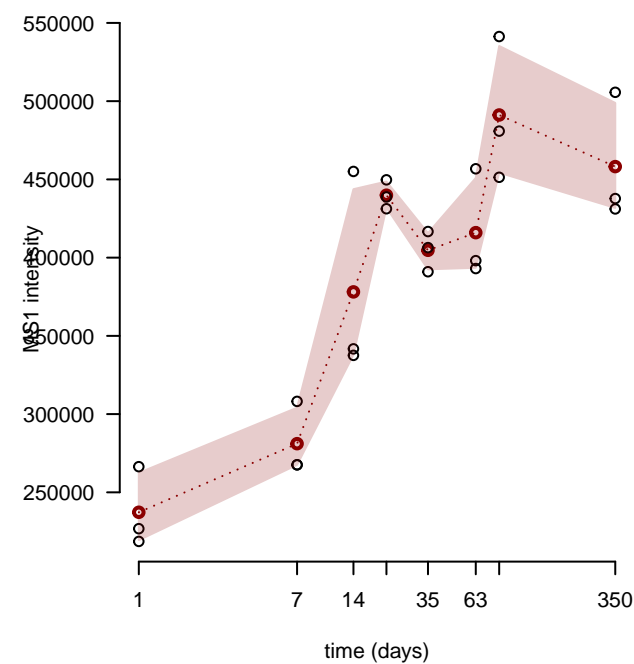

**Q01853**  
**GN=Vcp**  
valosin containing protein

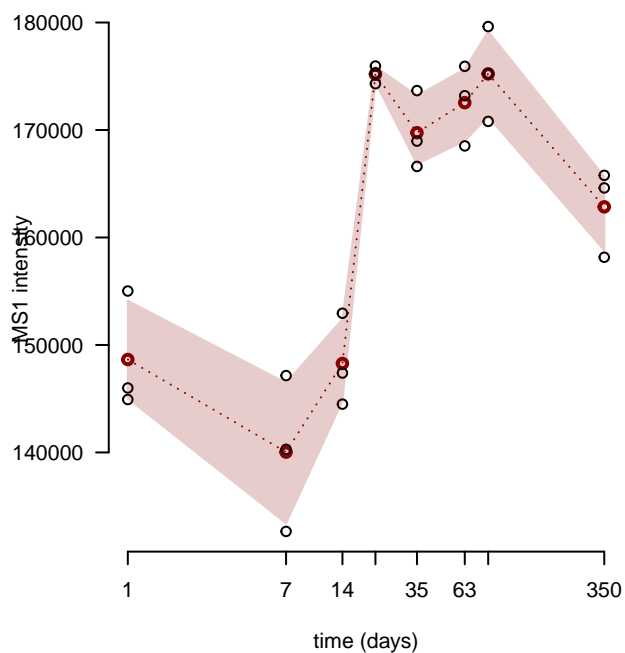

**Q02013**  
**GN=Aqp1**  
aquaporin 1

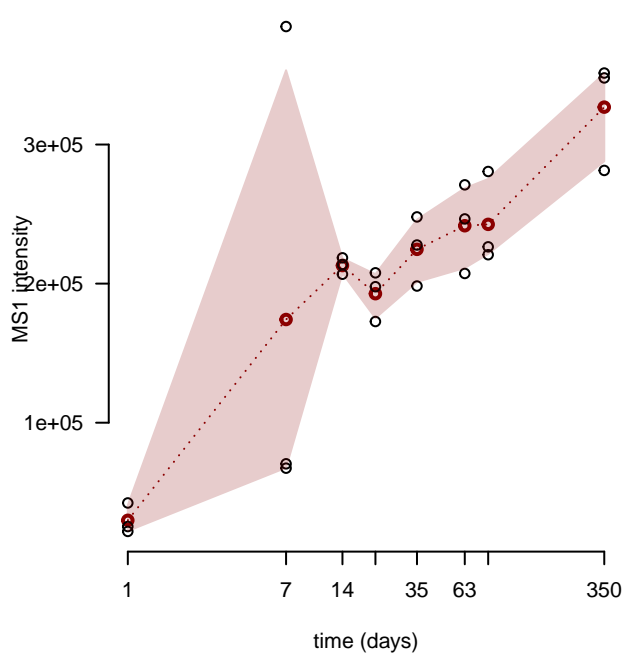

**Q02053**  
**GN=Uba1**  
ubiquitin-like modifier activating enzym ...

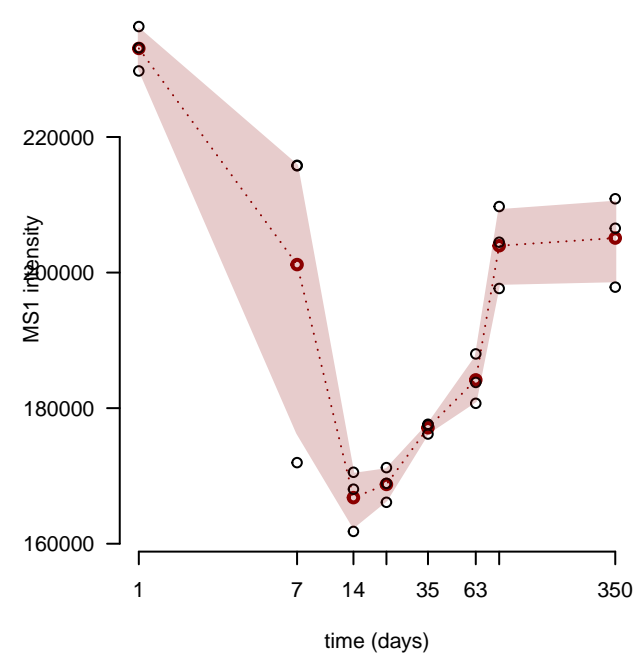

**Q02105**  
**GN=C1qc**  
complement component 1, q subcomponent, ...

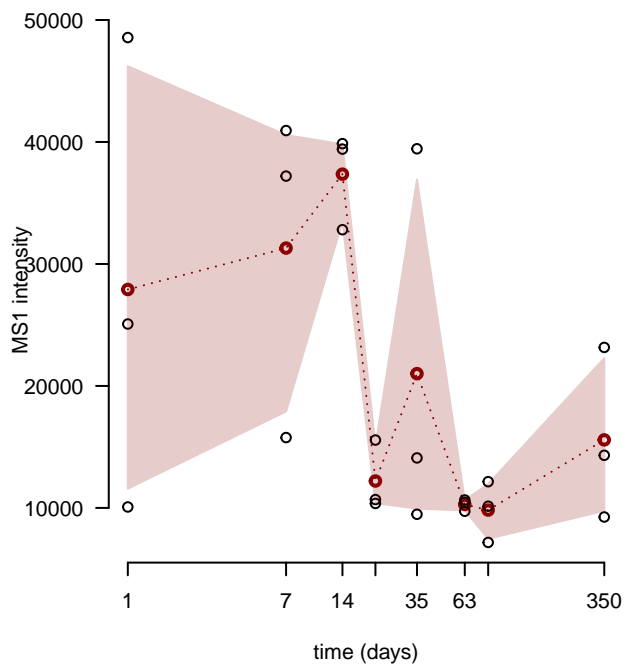

**Q02242**  
**GN=Pdcd1**  
programmed cell death 1

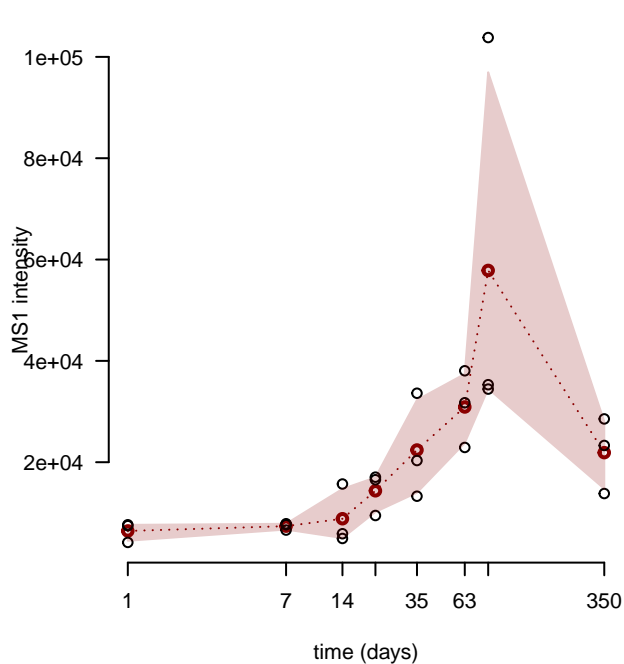

**Q02248**  
**GN=Ctnnb1**  
catenin (cadherin associated protein), b ...

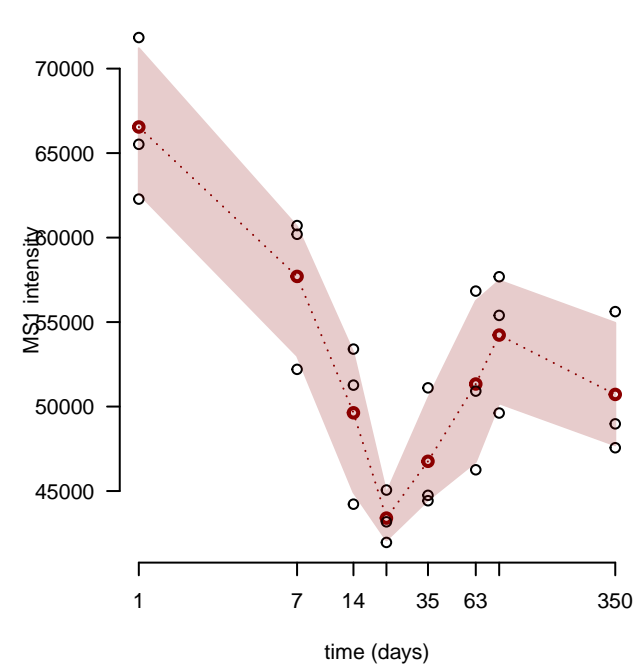

**Q02257**  
GN=Jup  
junction plakoglobin

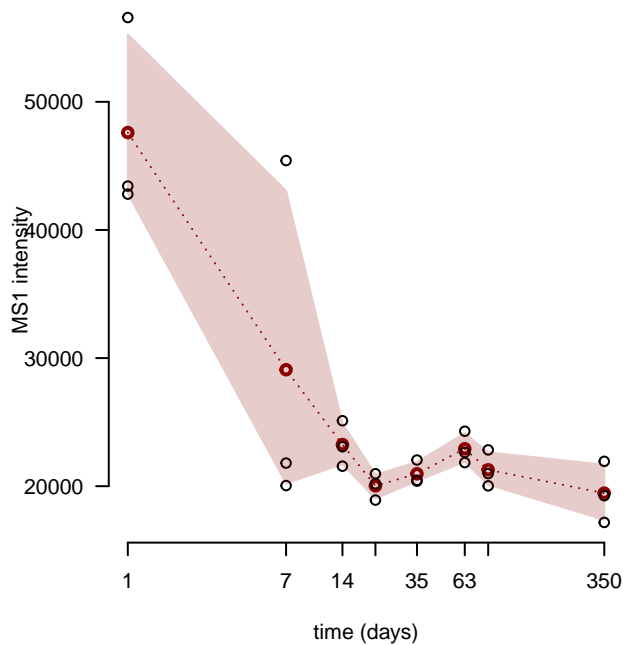

**Q02357**  
GN=Ank1  
ankyrin 1, erythroid

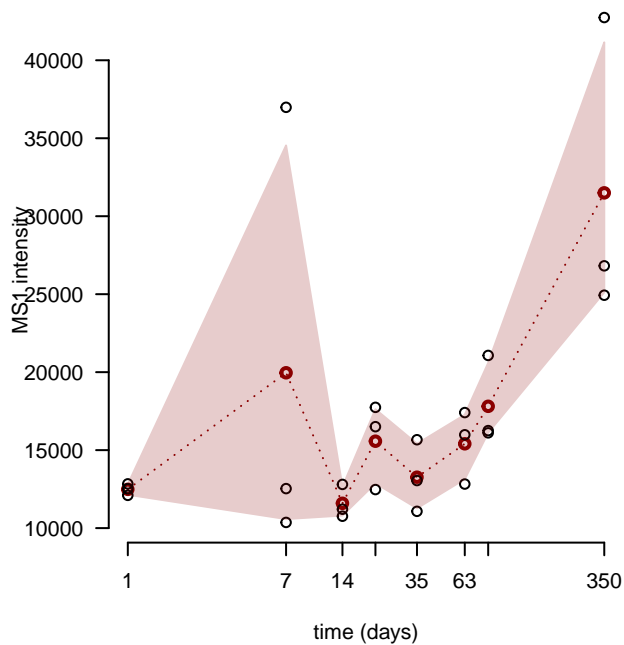

**Q02384**  
GN=Sos2  
SOS Ras/Rho guanine nucleotide exchange ...

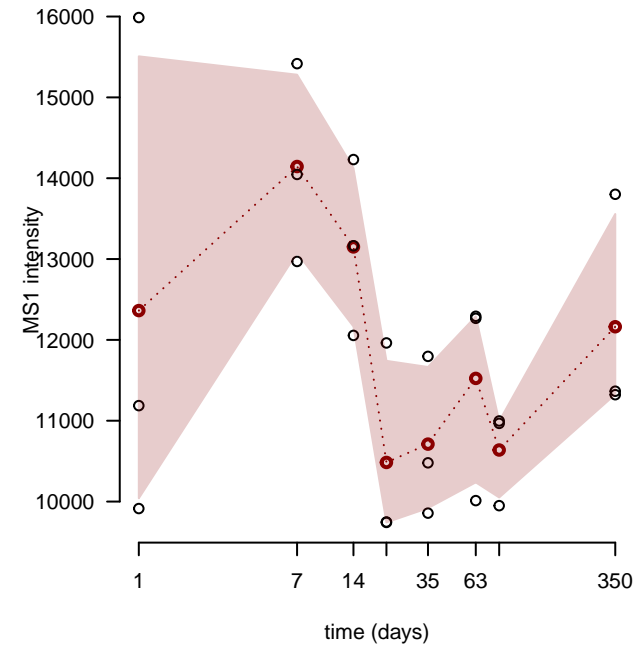

**Q02395**  
GN=Mtf2  
metal response element binding transcrip ...

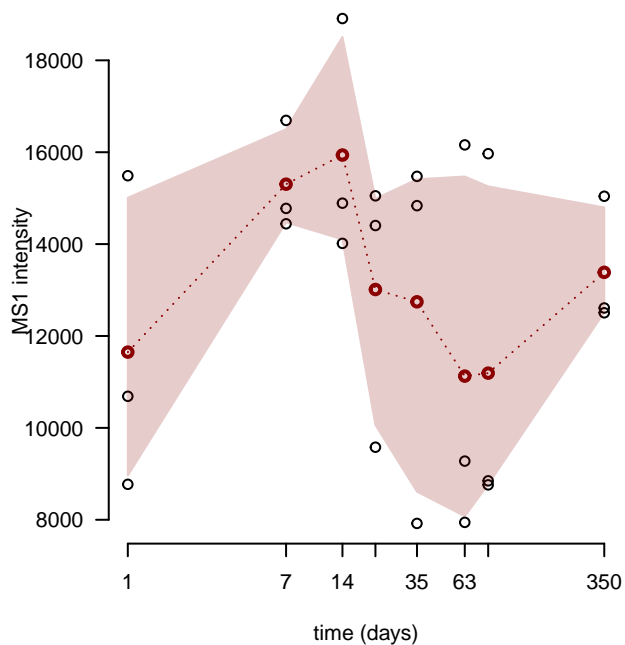

**Q02526**  
GN=Zfp41  
zinc finger protein 41

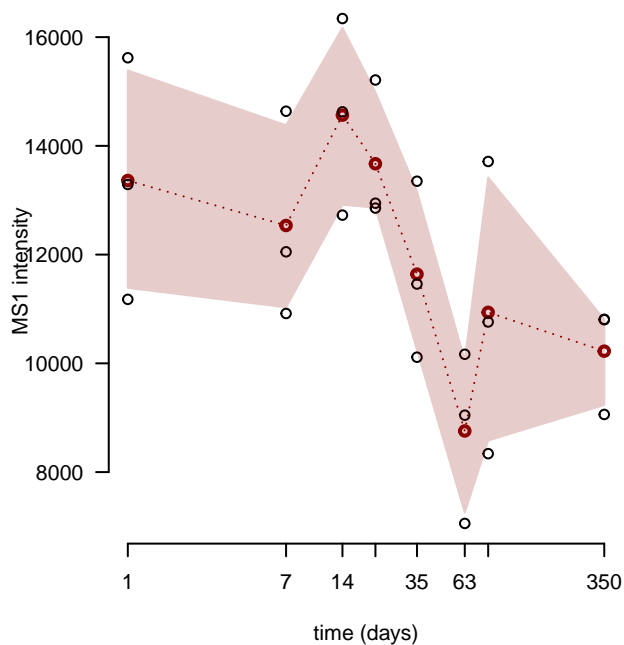

**Q02614**  
GN=Sap30bp  
SAP30 binding protein

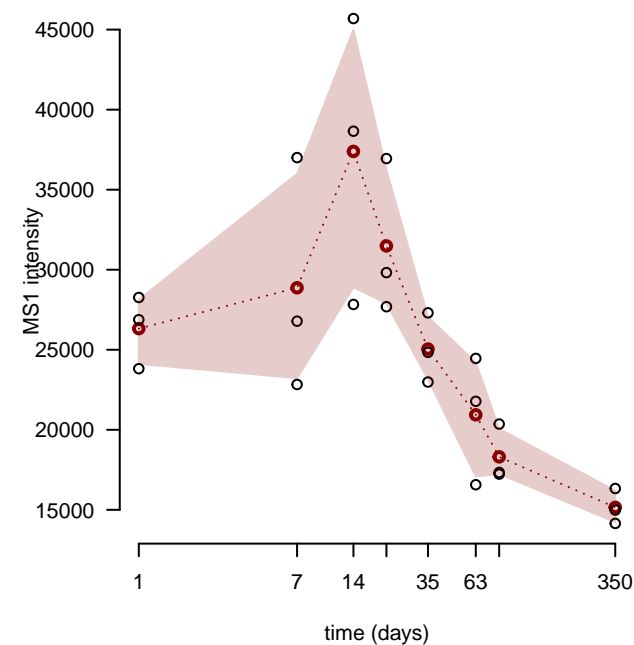

**Q02780**  
GN=Nfia  
nuclear factor I/A

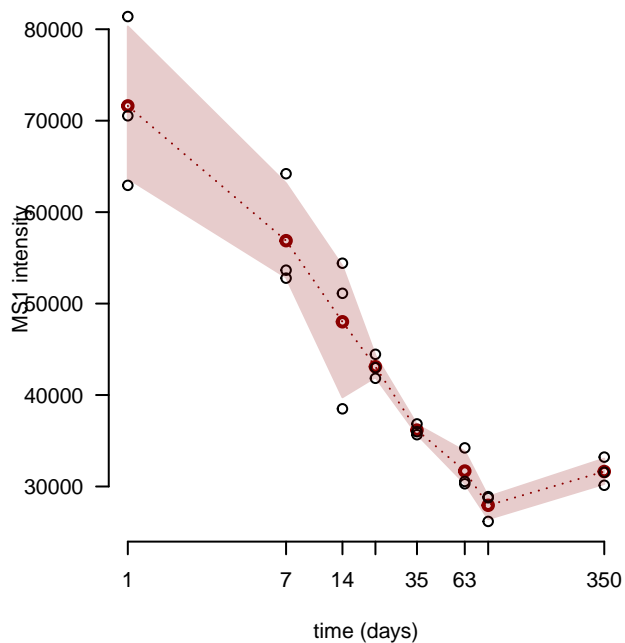

**Q02788**  
GN=Col6a2  
collagen, type VI, alpha 2

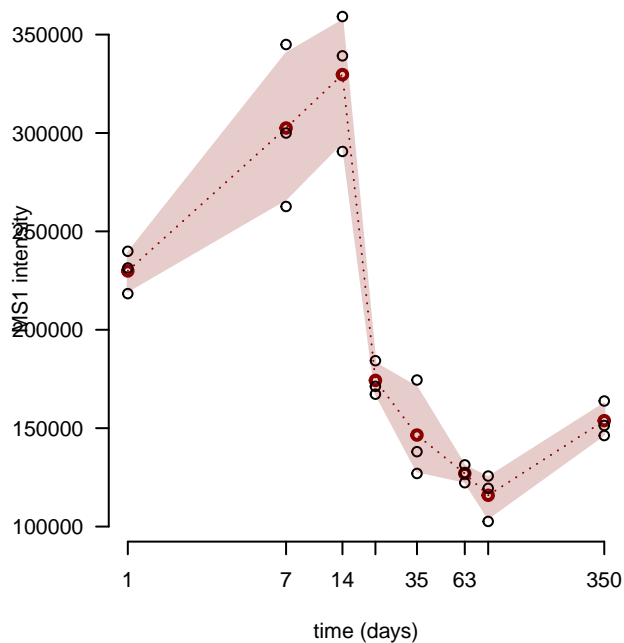

**Q02819**  
GN=Nucb1  
nucleobindin 1

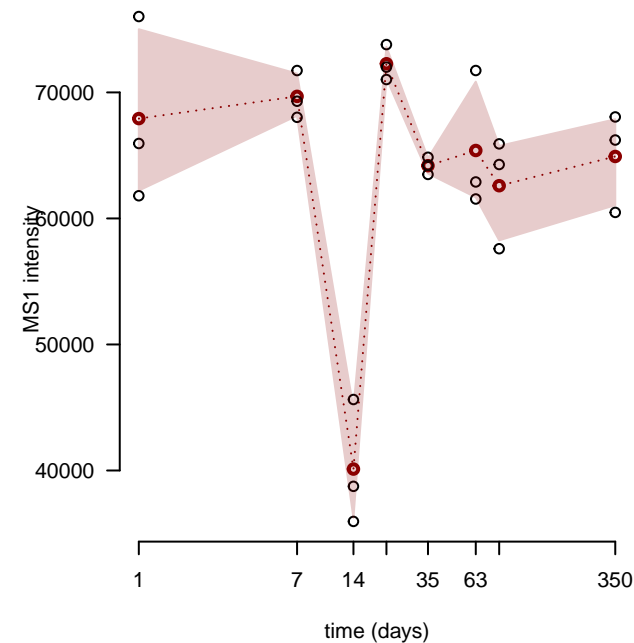

**Q02844**  
**GN=Tpsab1**  
tryptase alpha/beta 1

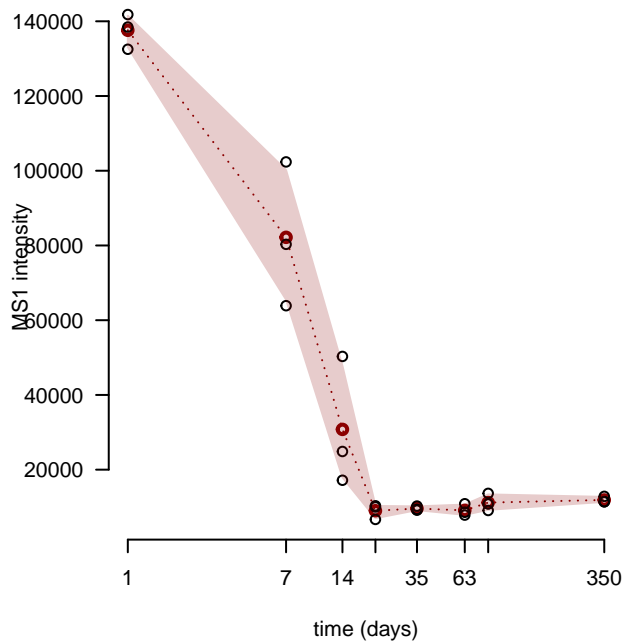

**Q02853**  
**GN=Mmp11**  
matrix metallopeptidase 11

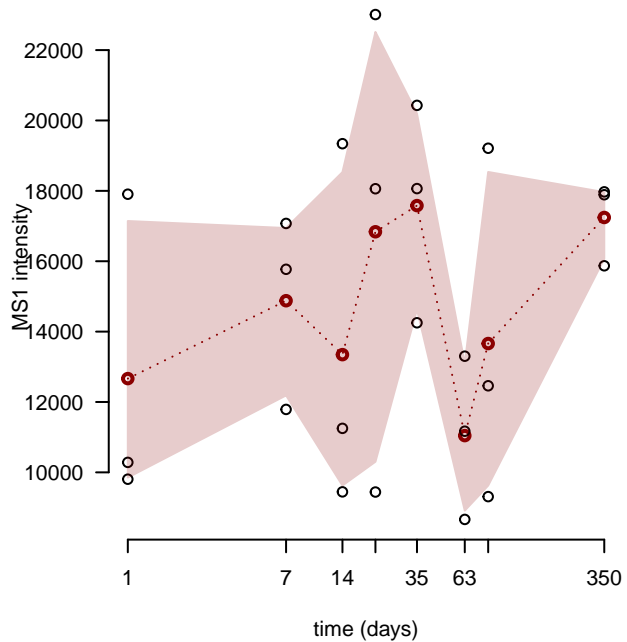

**Q03137**  
**GN=Epha4**  
Eph receptor A4

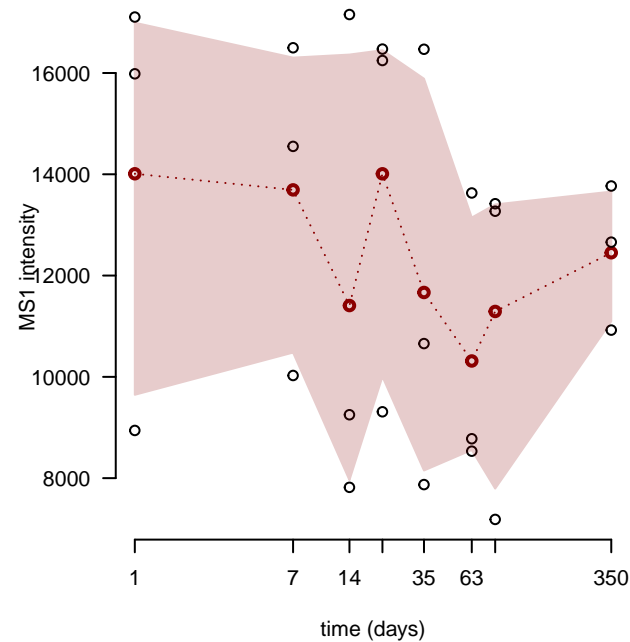

**Q03141**  
**GN=Mark3**  
MAP/microtubule affinity regulating kina ...

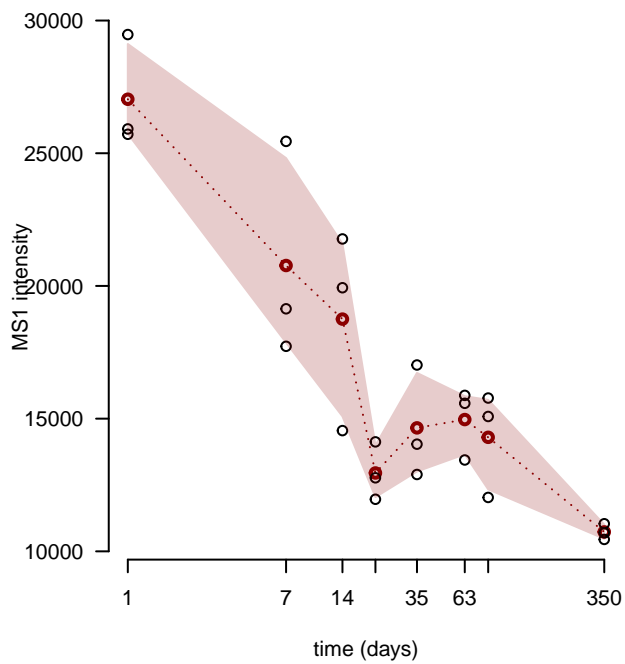

**Q03145**  
**GN=Epha2**  
Eph receptor A2

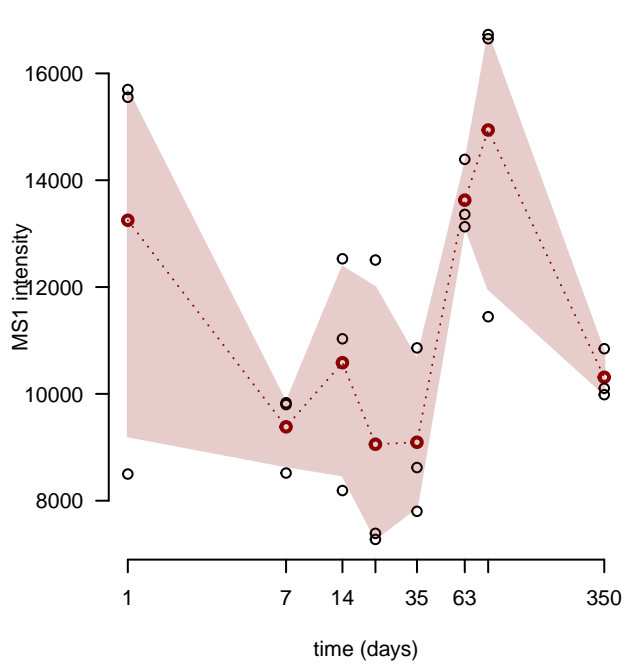

**Q03147**  
**GN=Cdk7**  
cyclin-dependent kinase 7

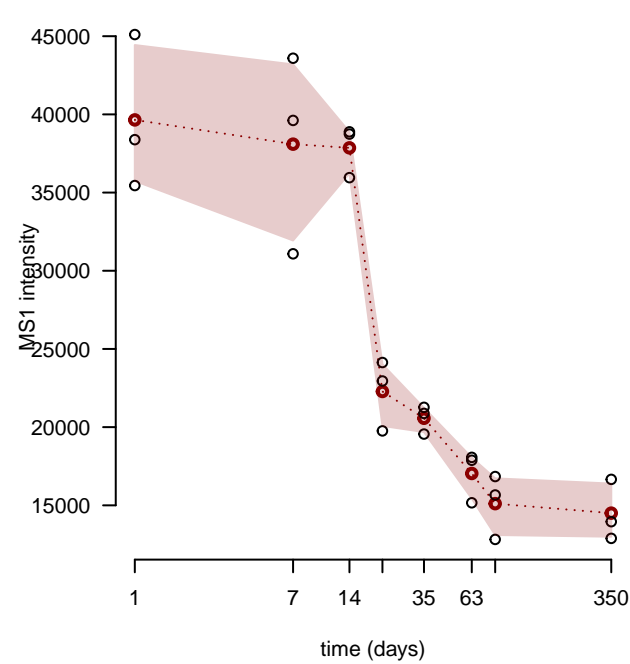

**Q03173**  
**GN=Enah**  
ENAH actin regulator

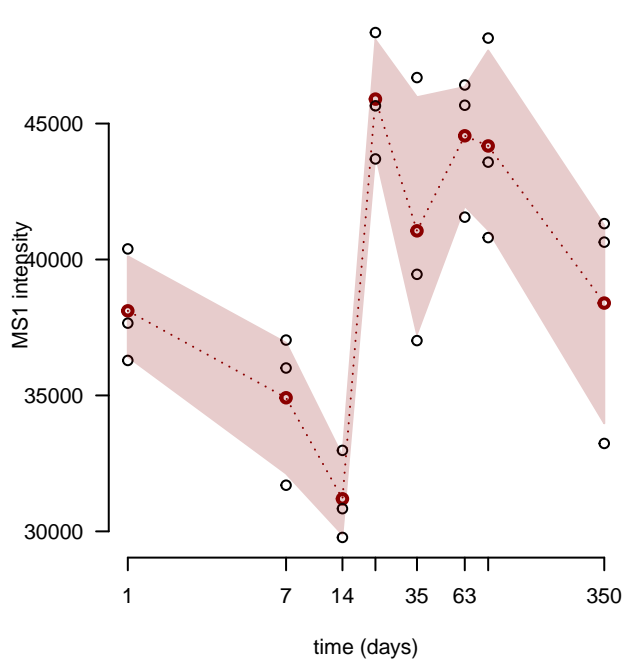

**Q03249**  
**GN=Galt**  
galactose-1-phosphate uridyl transferase

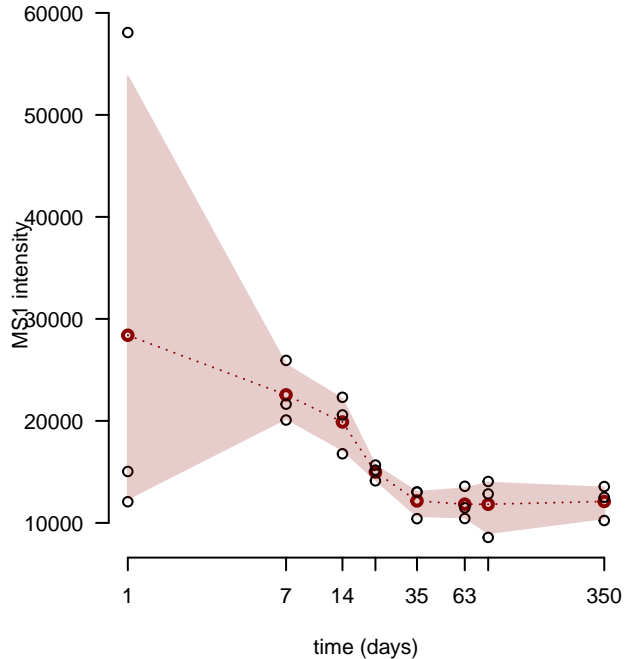

**Q03265**  
**GN=Atp5f1a**

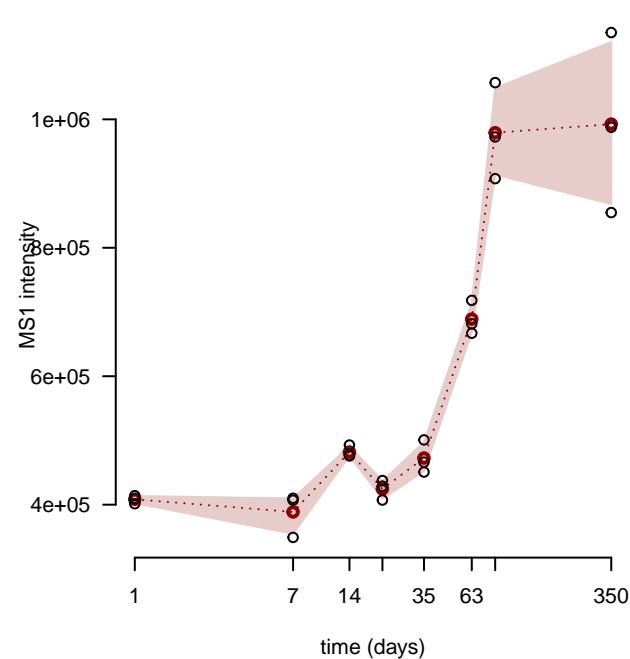

**Q03347**  
**GN=Runx1**  
runt related transcription factor 1

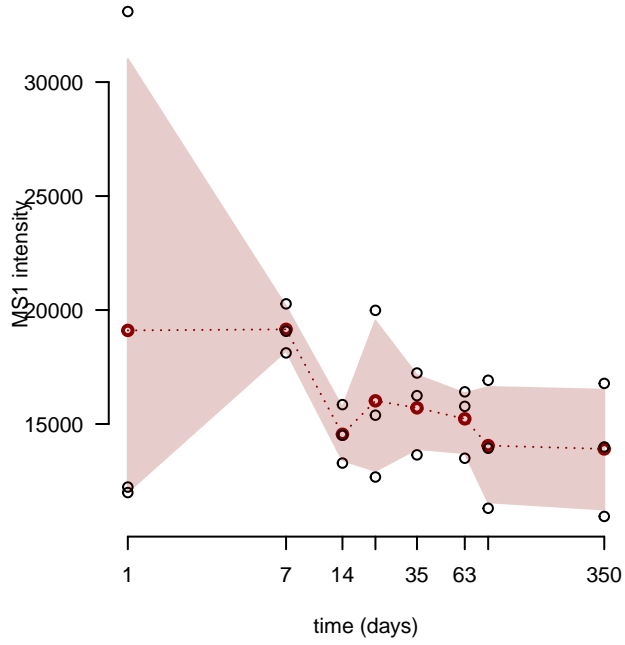

**Q03350**  
**GN=Thbs2**  
thrombospondin 2

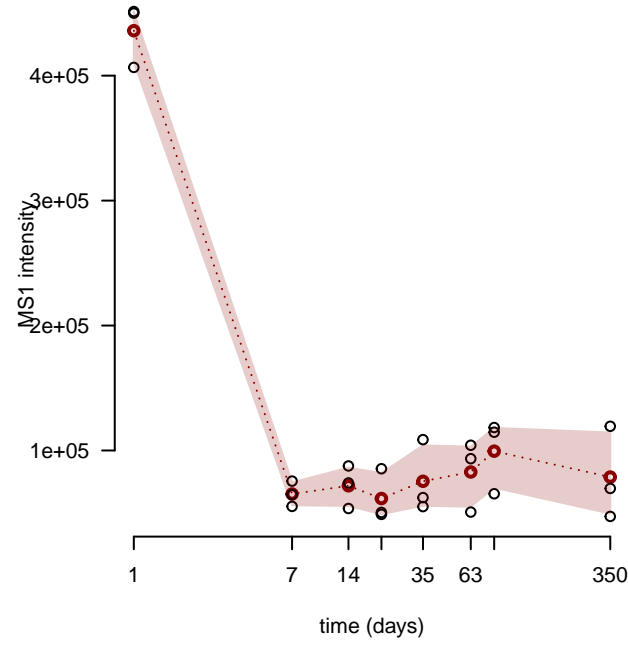

**Q03517**  
**GN=Scg2**  
secretogranin II

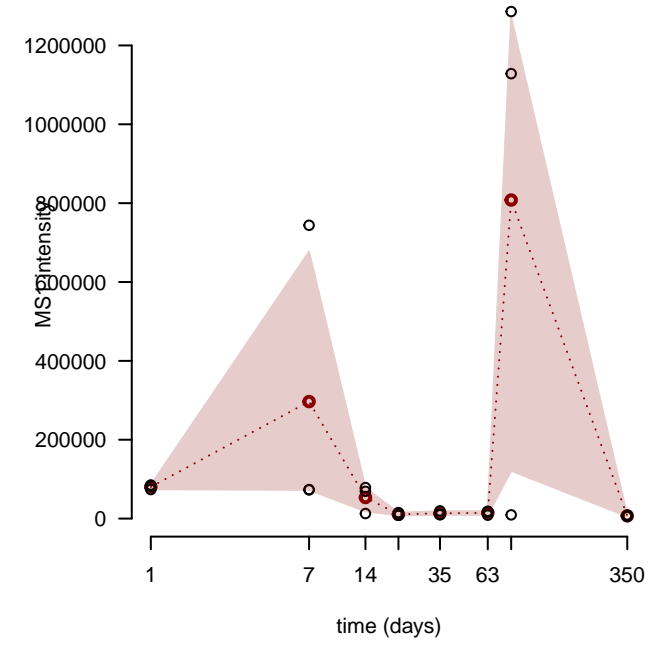

**Q03734**  
**GN=Serpina3m**  
serine (or cysteine) peptidase inhibitor ...

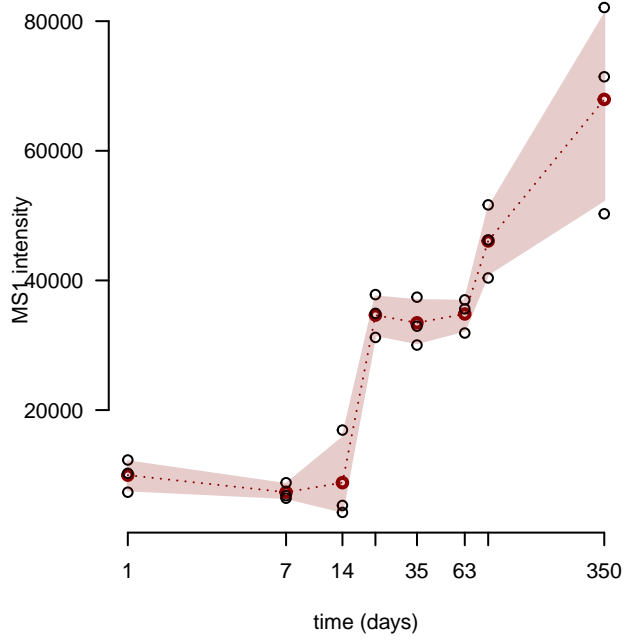

**Q03958**  
**GN=Pfdn6**  
prefoldin subunit 6

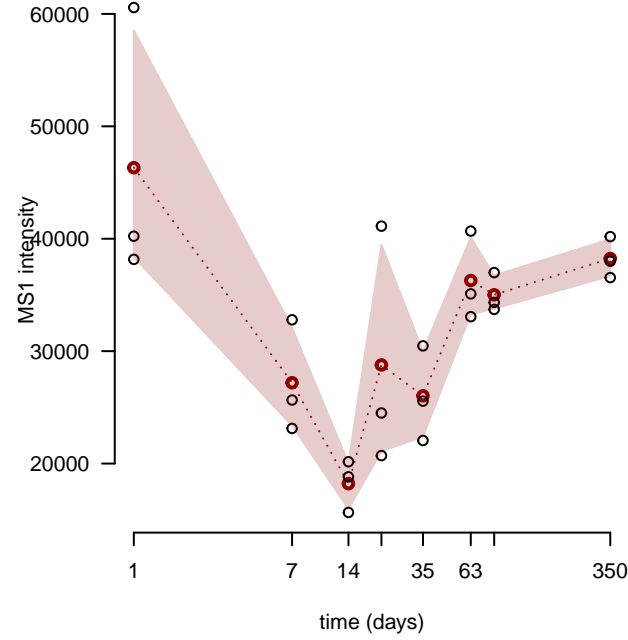

**Q03963**  
**GN=Eif2ak2**  
eukaryotic translation initiation factor ...

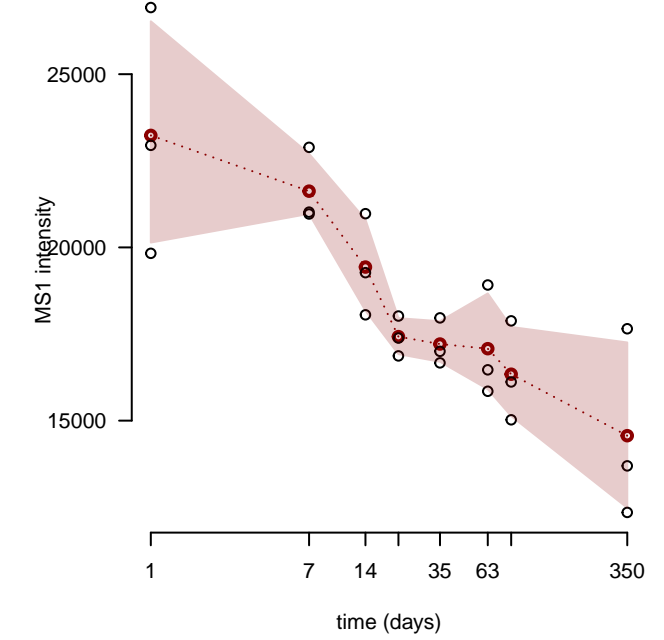

**Q04207**  
**GN=Rela**  
v-rel reticuloendotheliosis viral oncogene ...

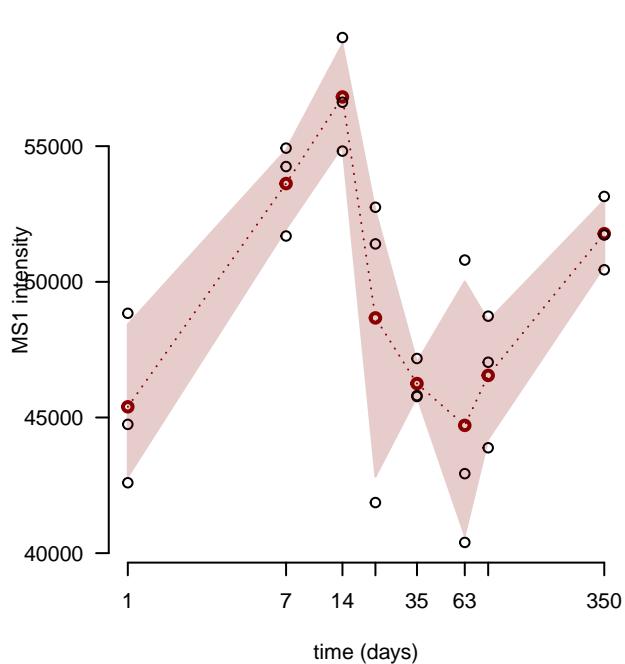

**Q04447**  
**GN=Ckb**  
creatine kinase, brain

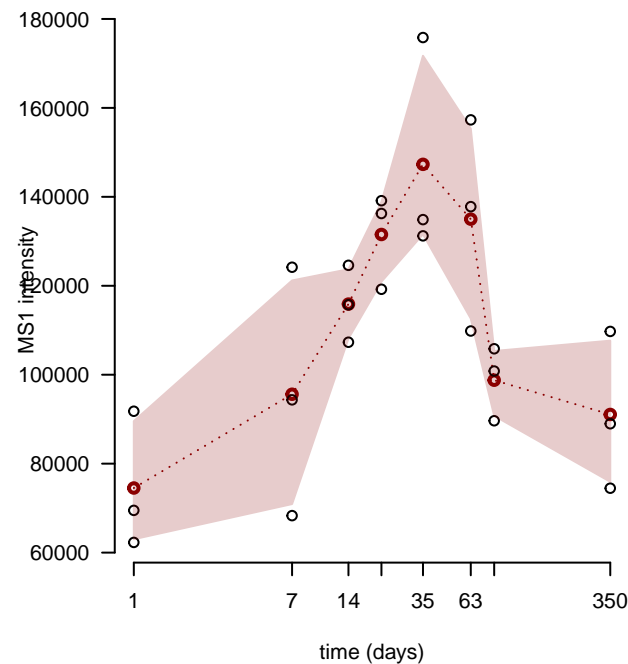

**Q04519**  
**GN=Smpd1**  
sphingomyelin phosphodiesterase 1, acid ...

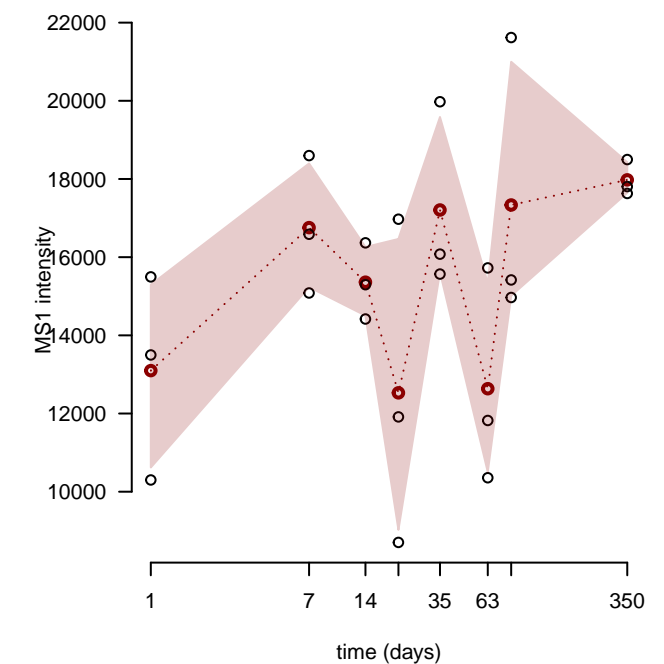

**Q04592**  
**GN=Pcsk5**  
proprotein convertase subtilisin/kexin t...

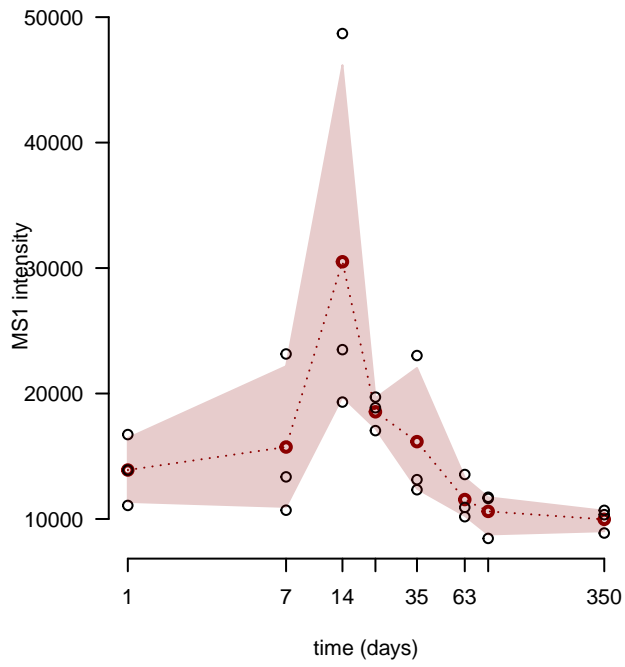

**Q04690**  
**GN=Nf1**  
neurofibromin 1

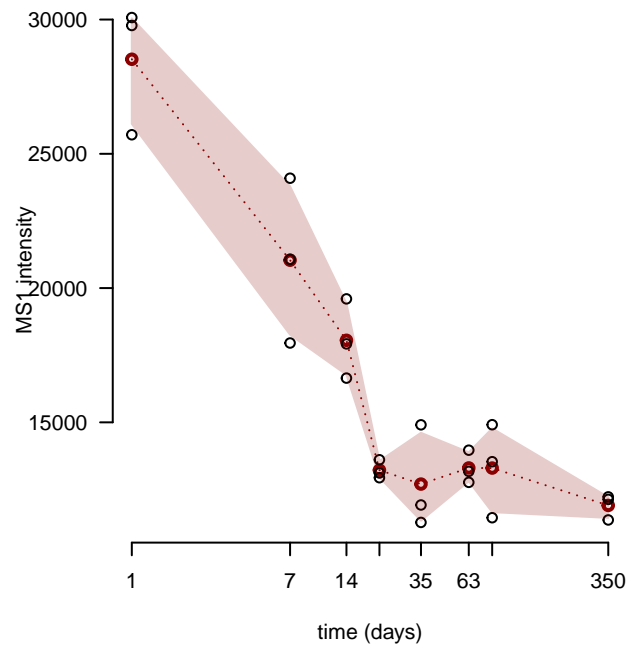

**Q04692**  
**GN=Smarcd1**  
SWI/SNF-related, matrix-associated actin ...

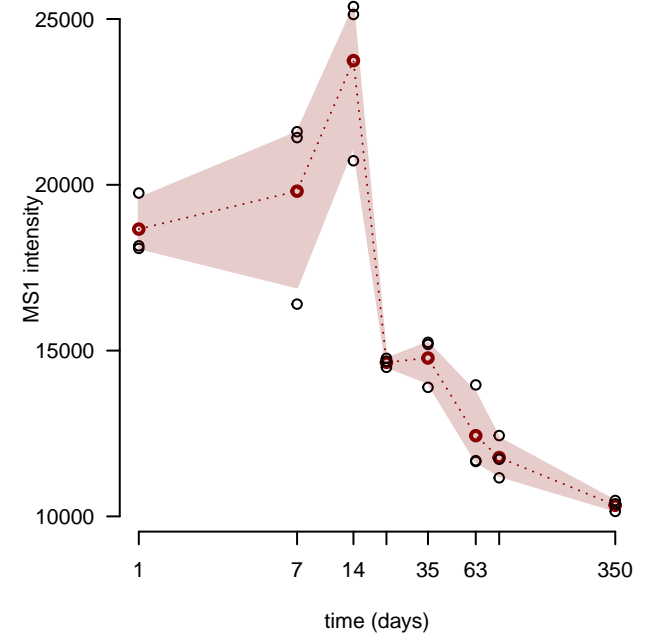

**Q04735**  
**GN=Cdk16**  
cyclin-dependent kinase 16

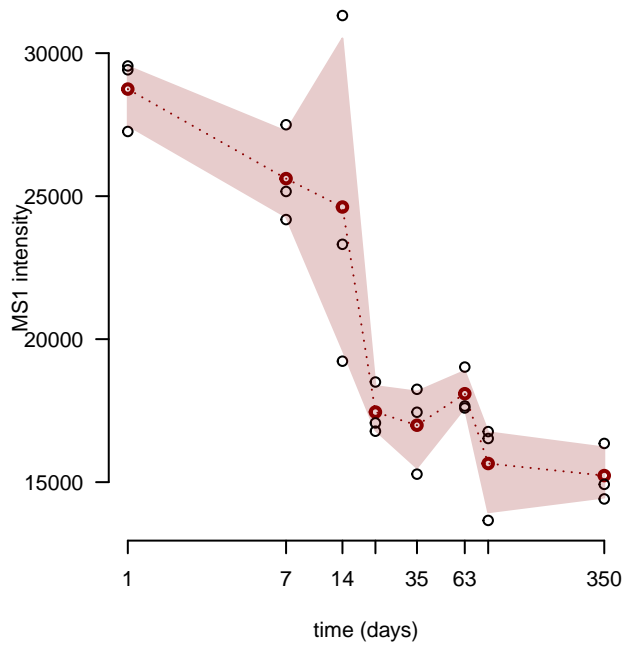

**Q04736**  
**GN=Yes1**  
YES proto-oncogene 1, Src family tyrosin ...

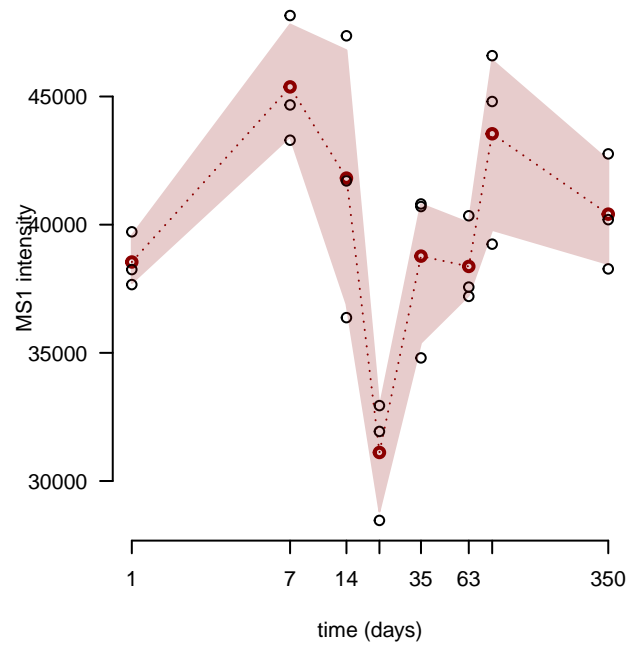

**Q04744**  
**GN=Emx2**  
empty spiracles homeobox 2

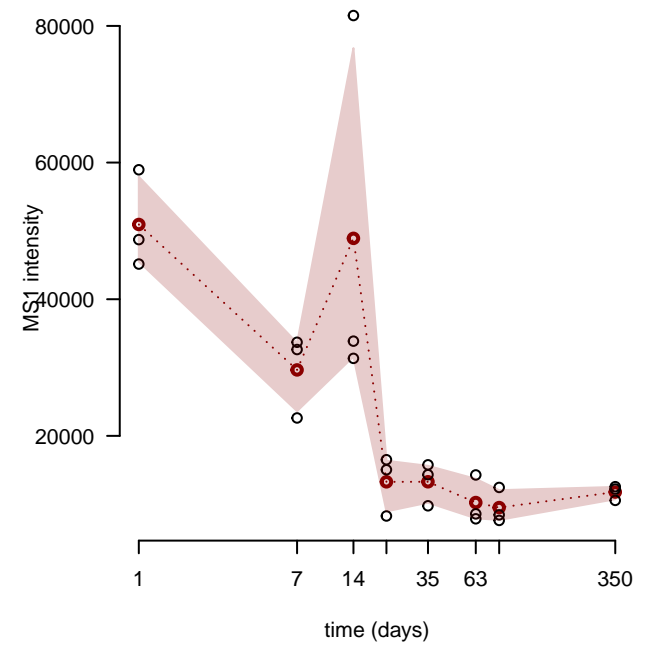

**Q04750**  
**GN=Top1**  
topoisomerase (DNA) I

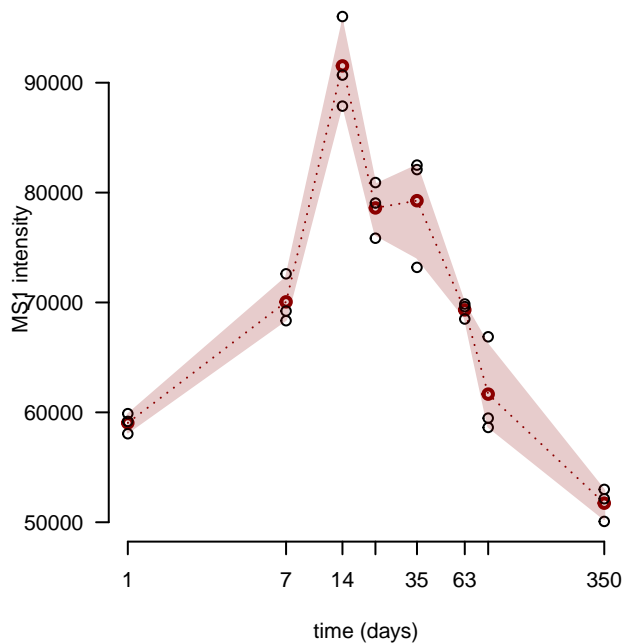

**Q04841**  
**GN=Mpg**  
N-methylpurine-DNA glycosylase

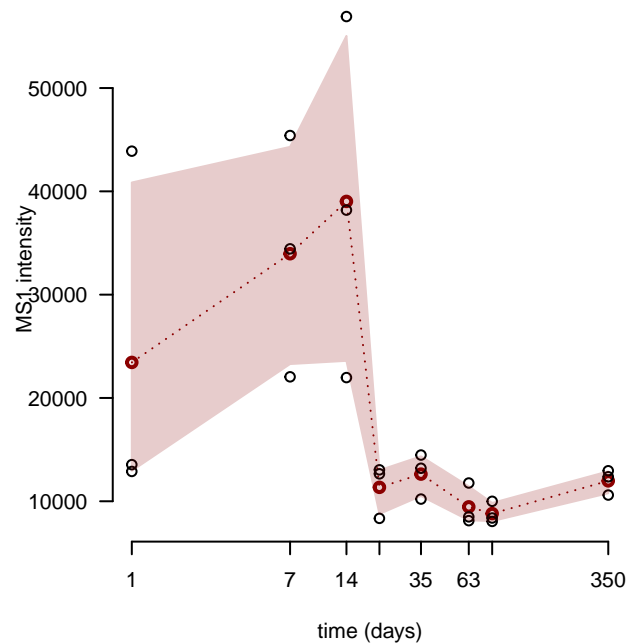

**Q04857**  
**GN=Col6a1**  
collagen, type VI, alpha 1

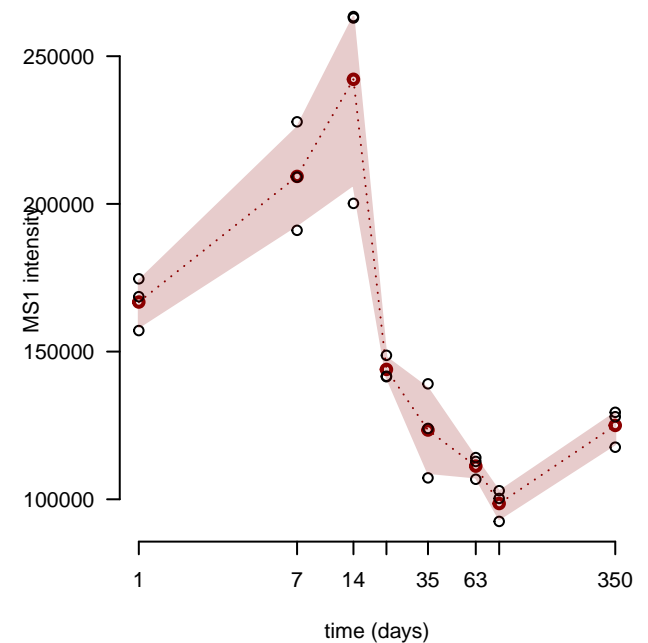

Q04997  
GN=Inha  
inhibin alpha

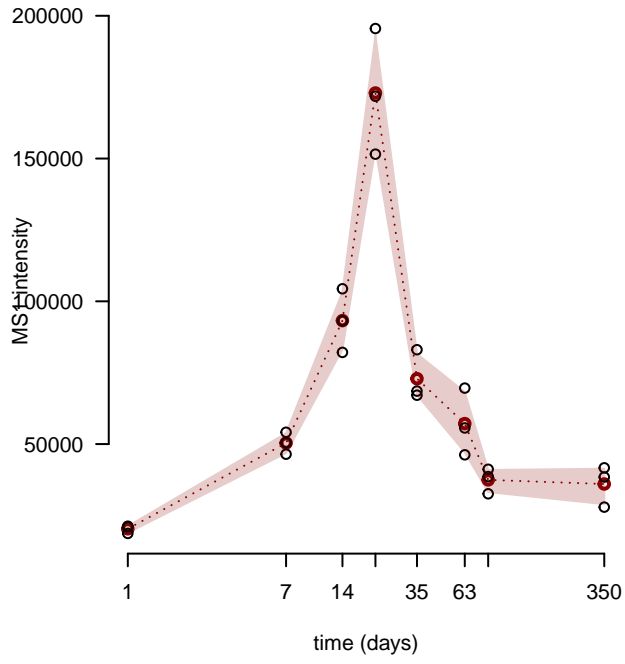

Q04998  
GN=Inhba  
inhibin beta-A

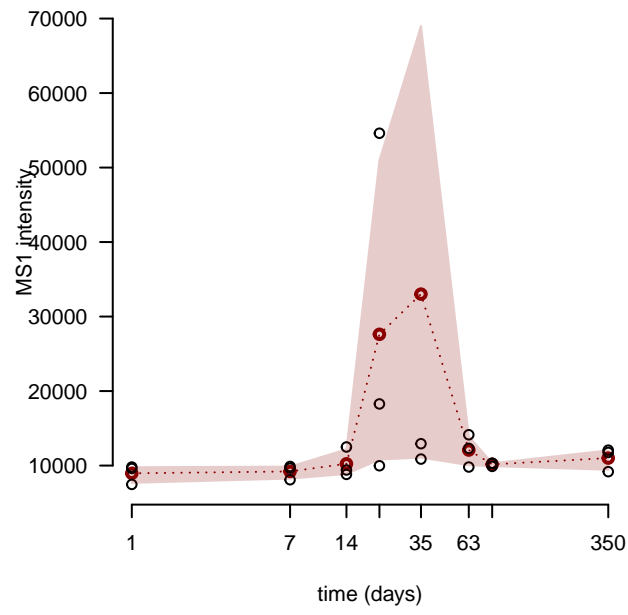

Q04999  
GN=Inhbb  
inhibin beta-B

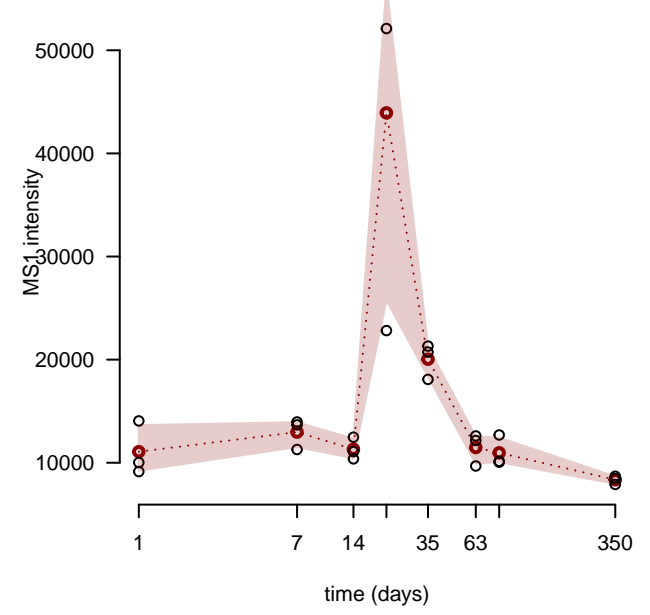

Q05117  
GN=Acp5  
acid phosphatase 5, tartrate resistant

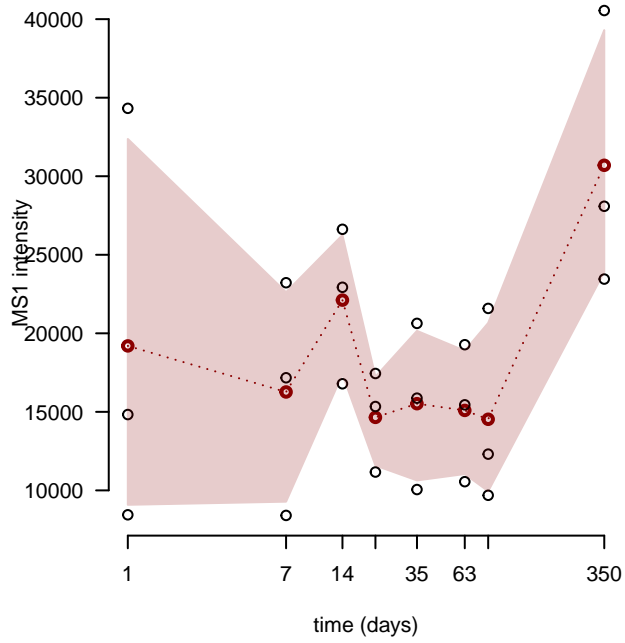

Q05144  
GN=Rac2  
Rac family small GTPase 2

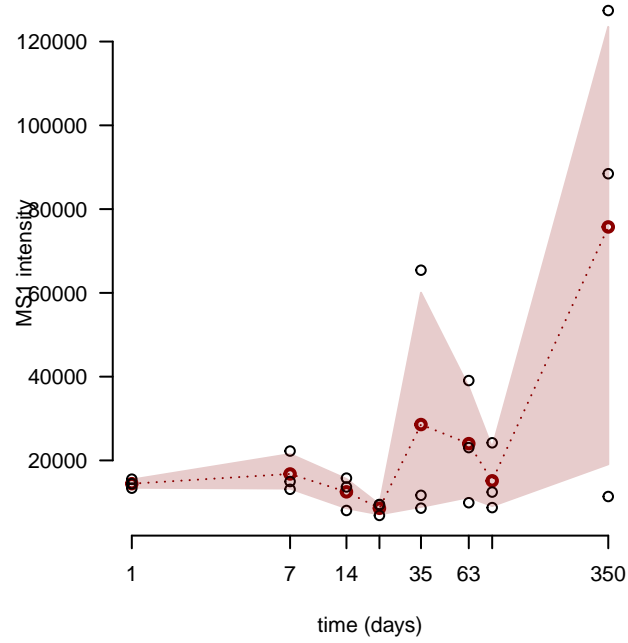

Q05186  
GN=Rcn1  
reticulocalbin 1

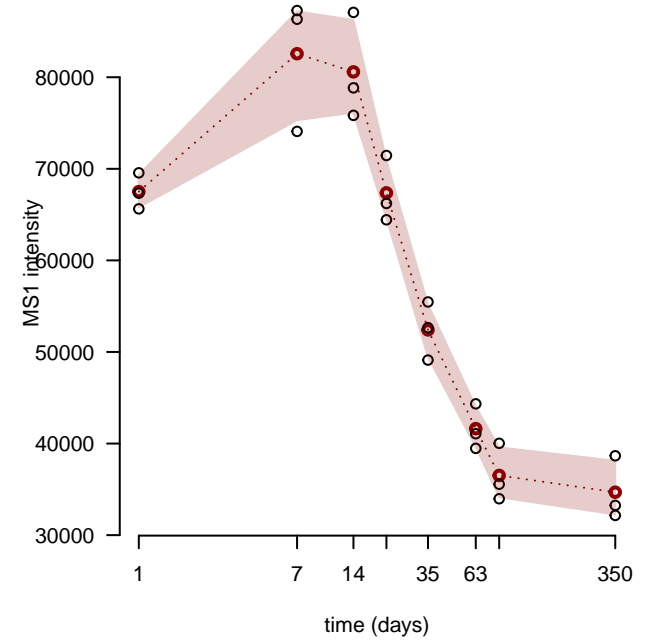

Q05421  
GN=Cyp2e1  
cytochrome P450, family 2, subfamily e, ...

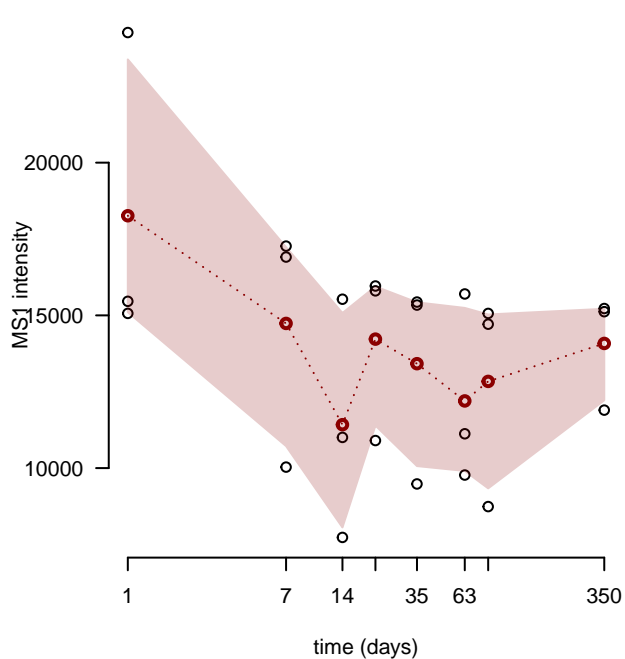

Q05512  
GN=Mark2  
MAP/microtubule affinity regulating kina ...

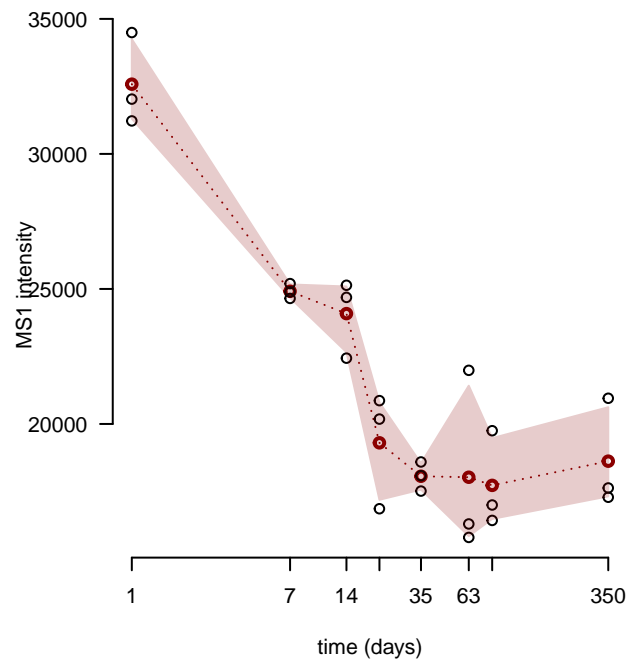

Q05793  
GN=Hspg2  
perlecan (heparan sulfate proteoglycan 2 ...

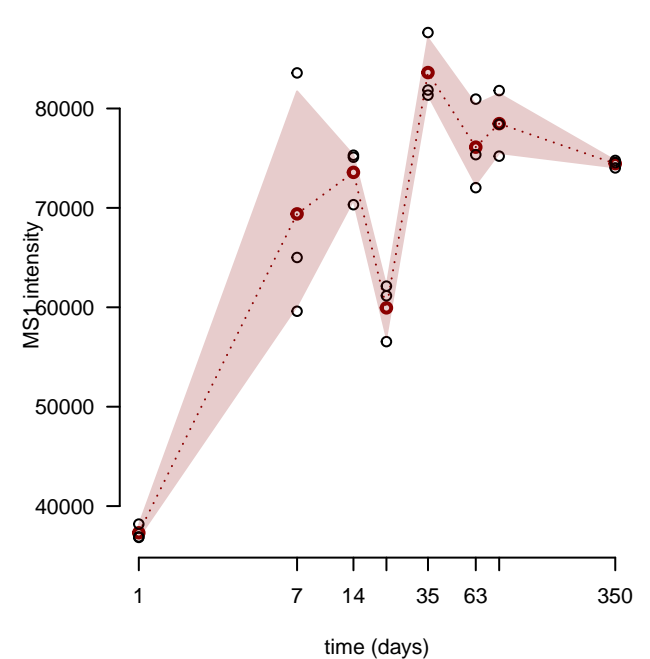



**Q05816**  
**GN=Fabp5**  
fatty acid binding protein 5, epidermal

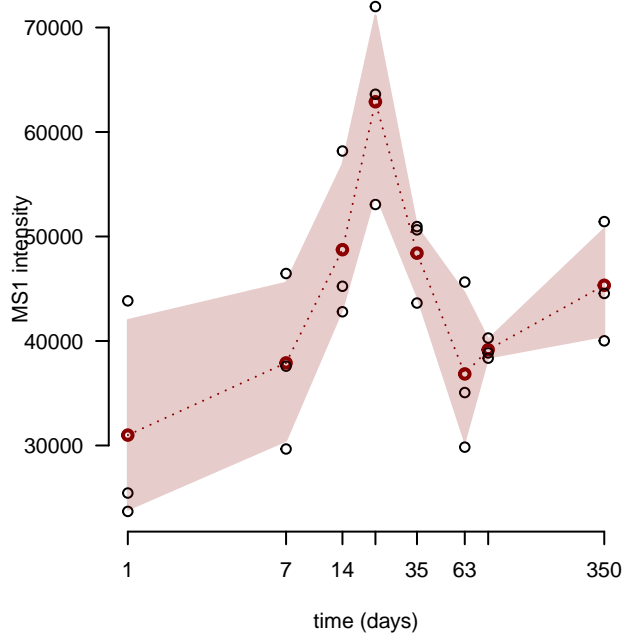

**Q05860**  
**GN=Fmn1**  
formin 1

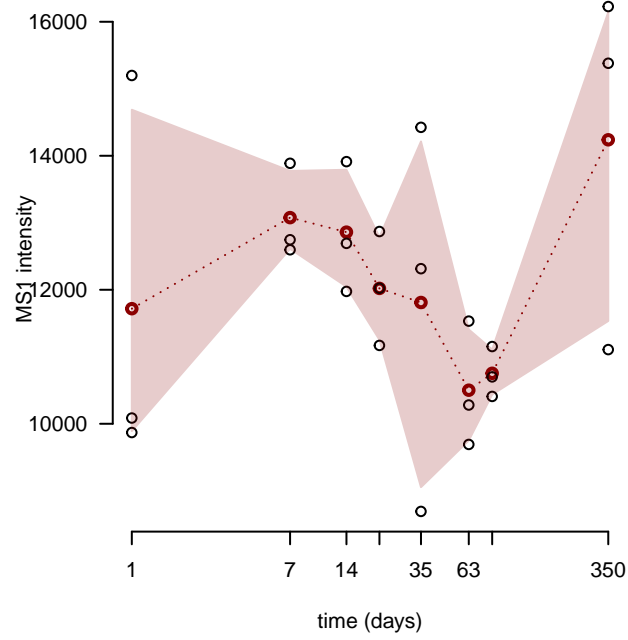

**Q05895**  
**GN=Thbs3**  
thrombospondin 3

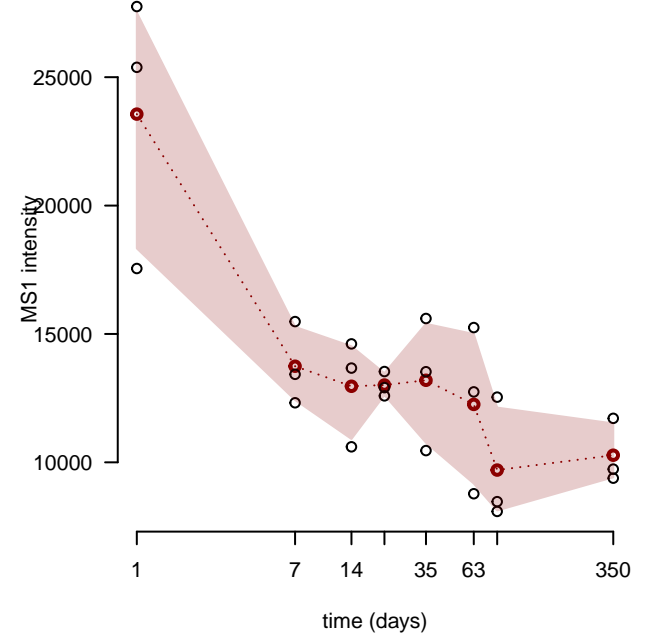

**Q05909**  
**GN=Ptpg**  
protein tyrosine phosphatase, receptor t...

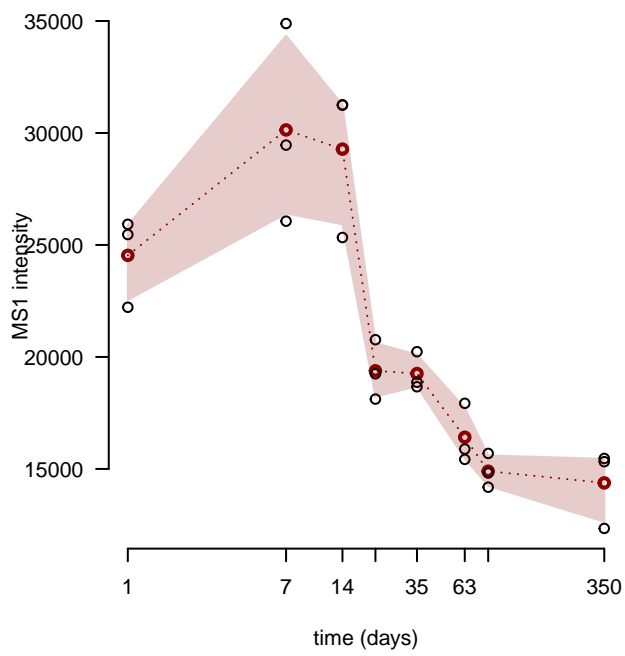

**Q05915**  
**GN=Gch1**  
GTP cyclohydrolase 1

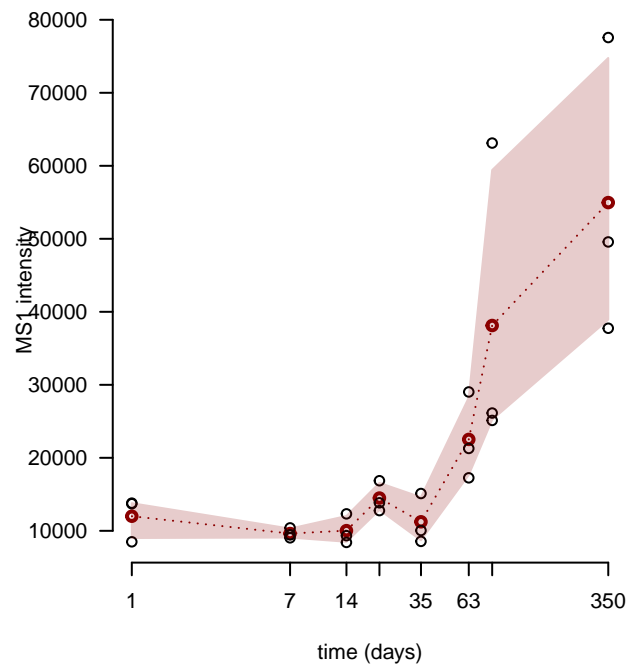

**Q05920**  
**GN=Pc**

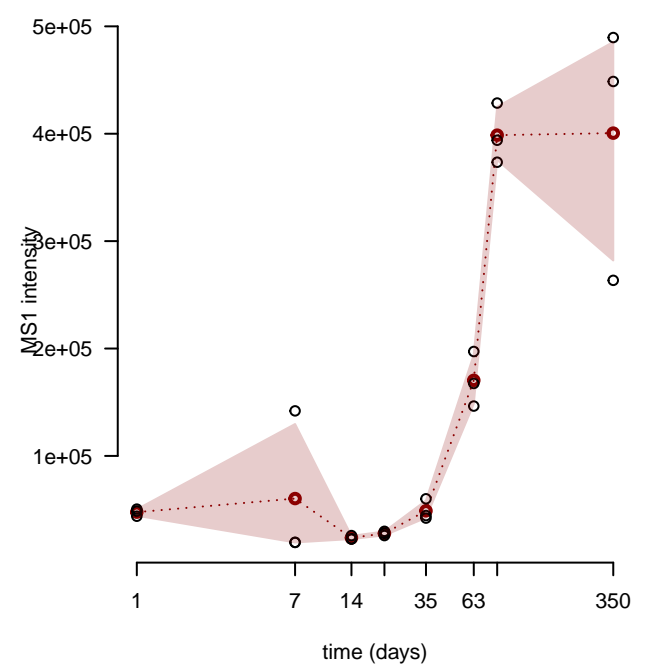

**Q05921**  
**GN=Rnasel**  
ribonuclease L (2', 5'-oligoadenylate ...

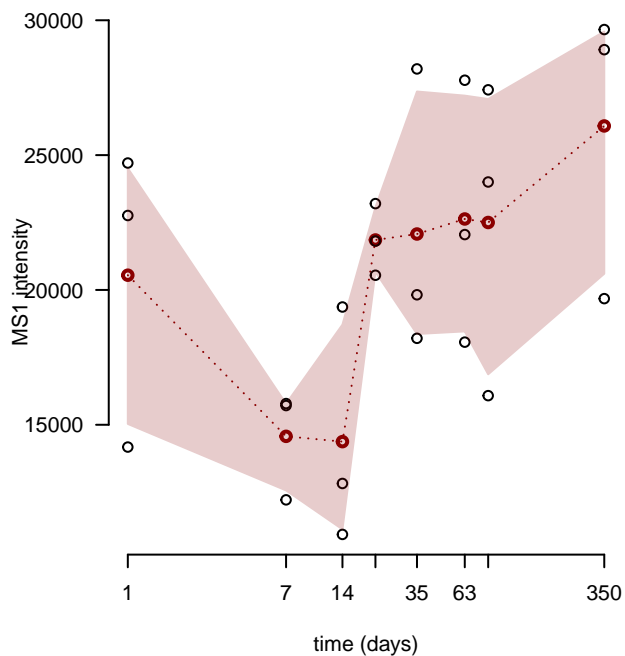

**Q05A36**  
**GN=Mex3c**  
mex3 RNA binding family member C

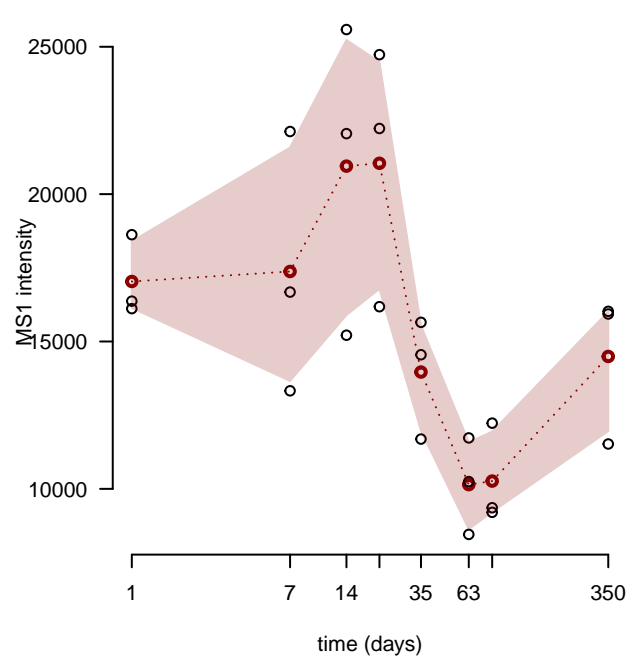

**Q05A80**  
**GN=Caprin2**  
caprin family member 2

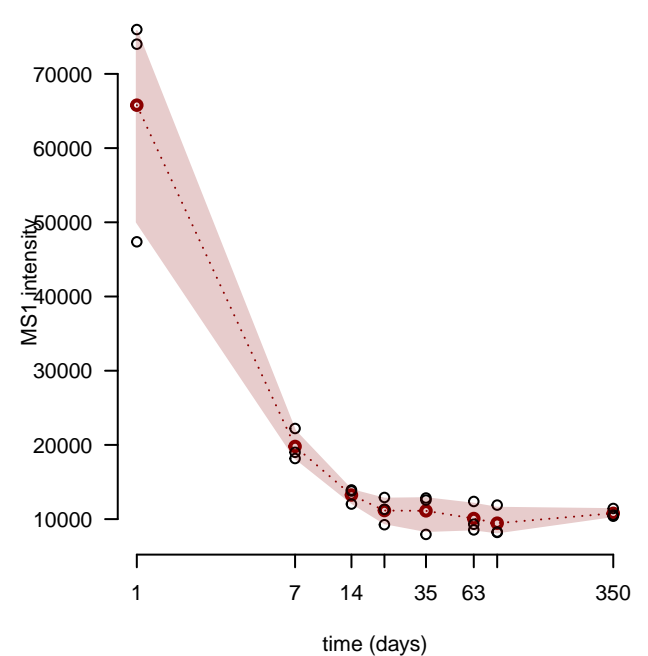

**Q05AH6**  
GN=Spindoc  
spindlin interactor and repressor of chr ...

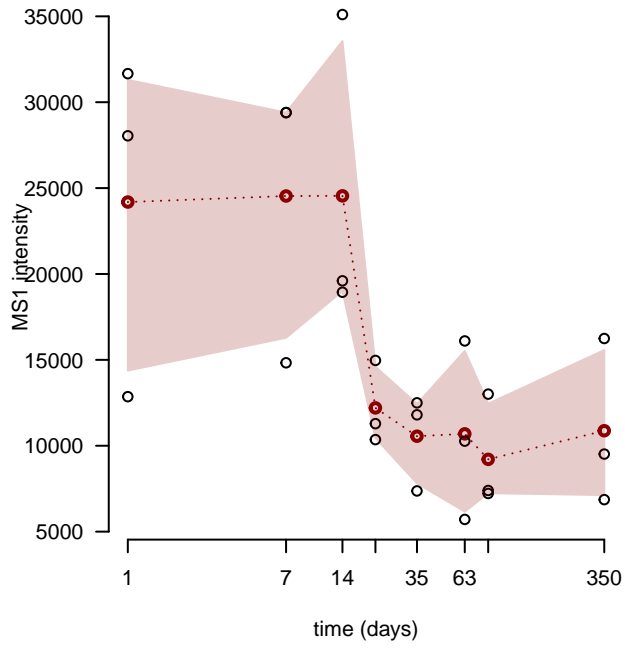

**Q05BC3**  
GN=Eml1  
echinoderm microtubule associated protei ...

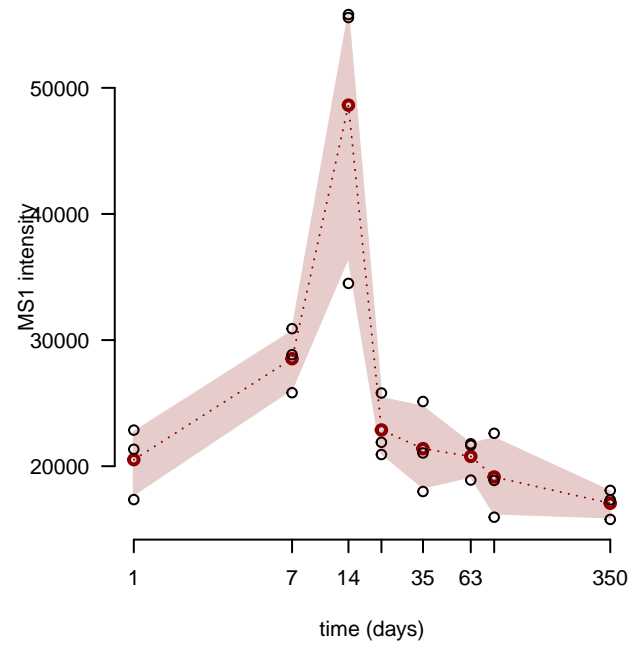

**Q05CL8**  
GN=Larp7  
La ribonucleoprotein 7, transcriptional ...

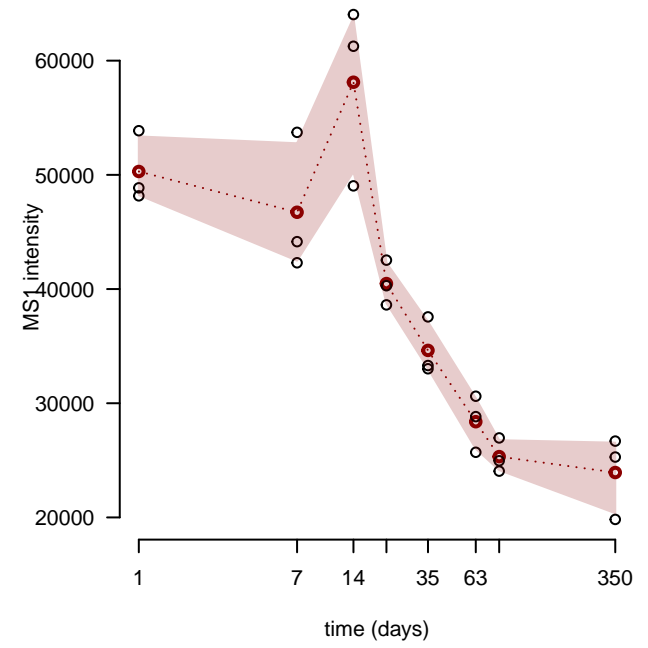

**Q05D44**  
GN=Eif5b  
eukaryotic translation initiation factor ...

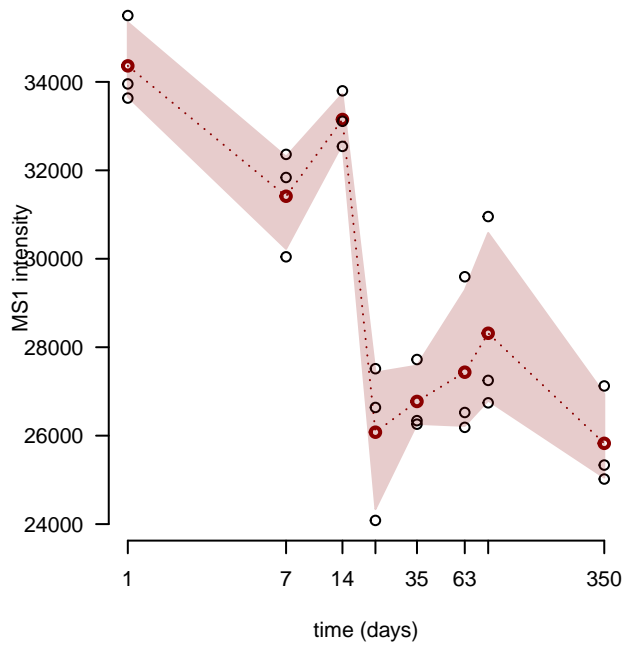

**Q06138**  
GN=Cab39  
calcium binding protein 39

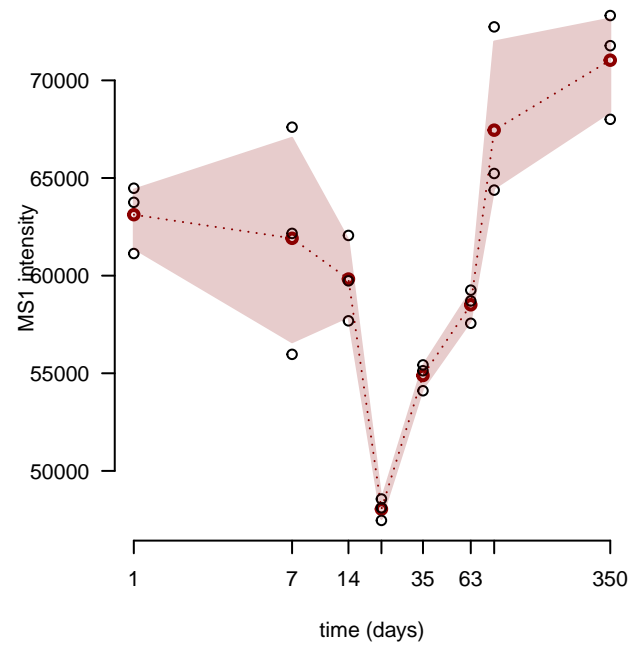

**Q06180**  
GN=Ptpn2  
protein tyrosine phosphatase, non-recept ...

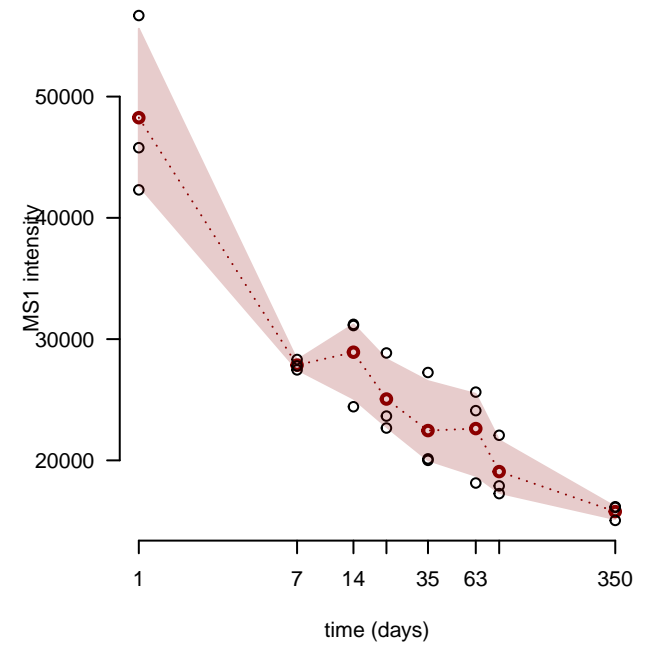

**Q06185**  
GN=Atp5me

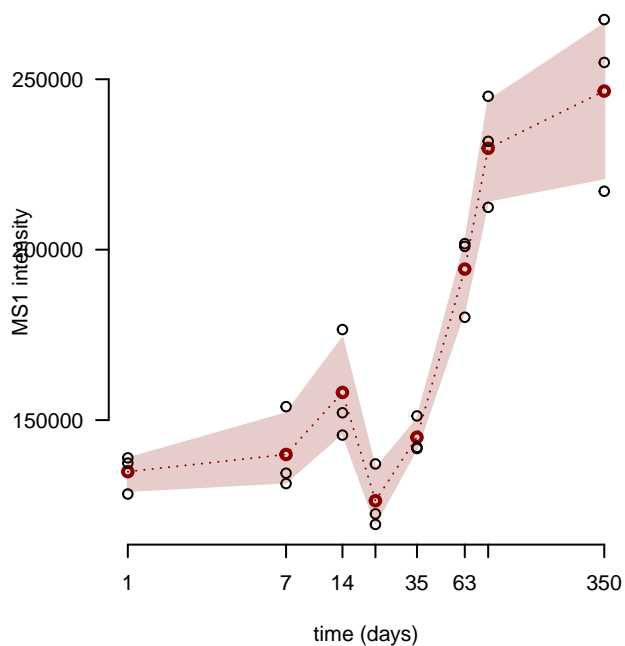

**Q06335**  
GN=Aplp2  
amyloid beta (A4) precursor-like protein ...

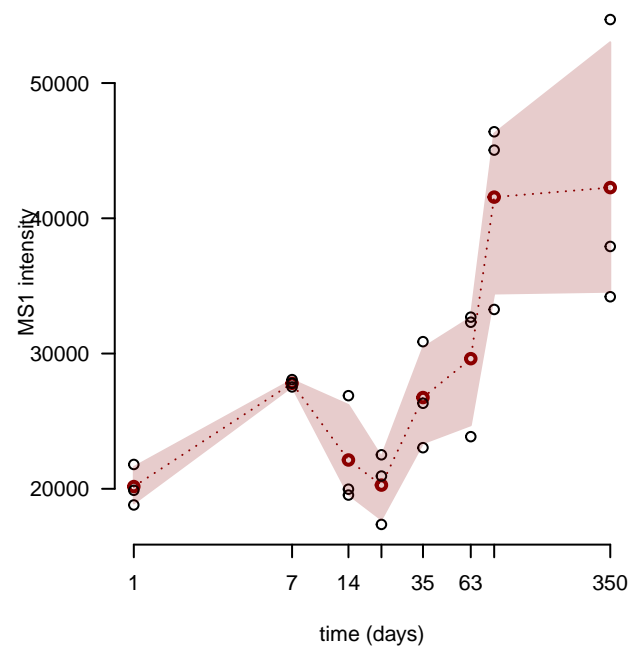

**Q06348**  
GN=Prrx2  
paired related homeobox 2

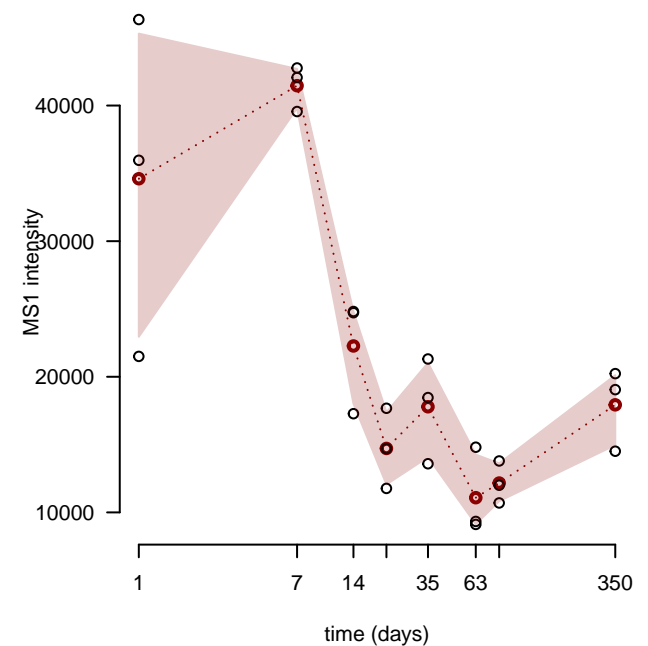

**Q06770**  
**GN=Serpina6**  
serine (or cysteine) peptidase inhibitor ...

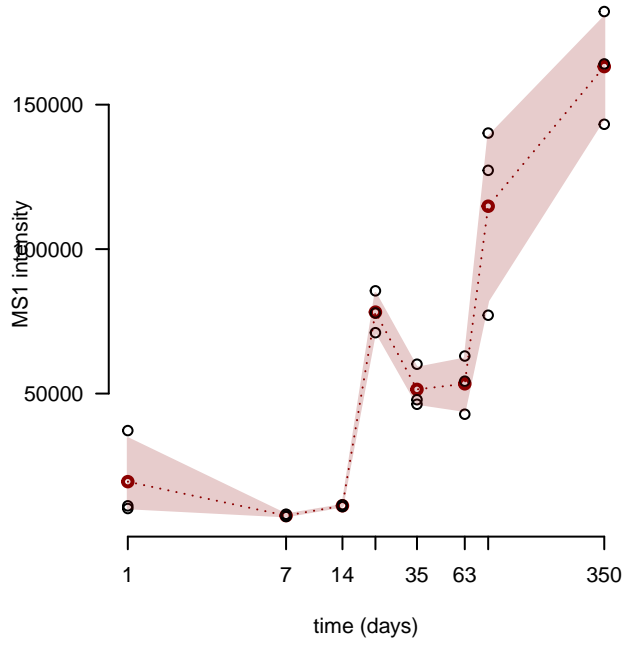

**Q06831**  
**GN=Sox4**  
SRY (sex determining region Y)-box 4

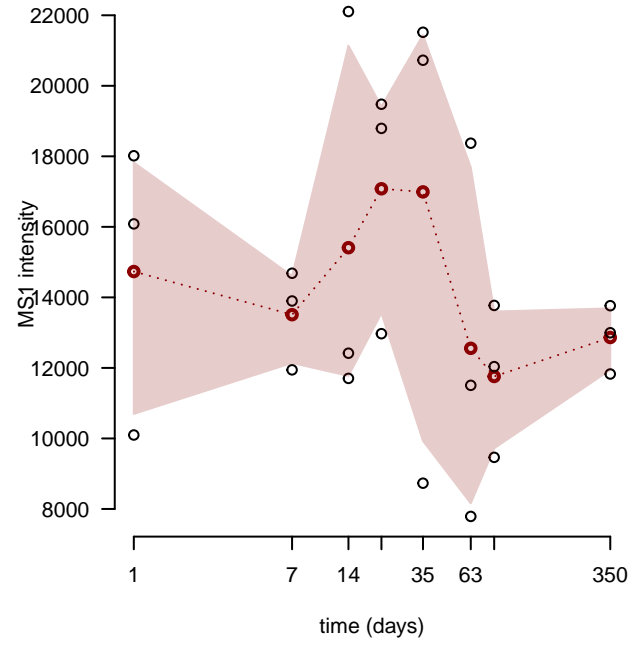

**Q06890**  
**GN=Clu**  
clusterin

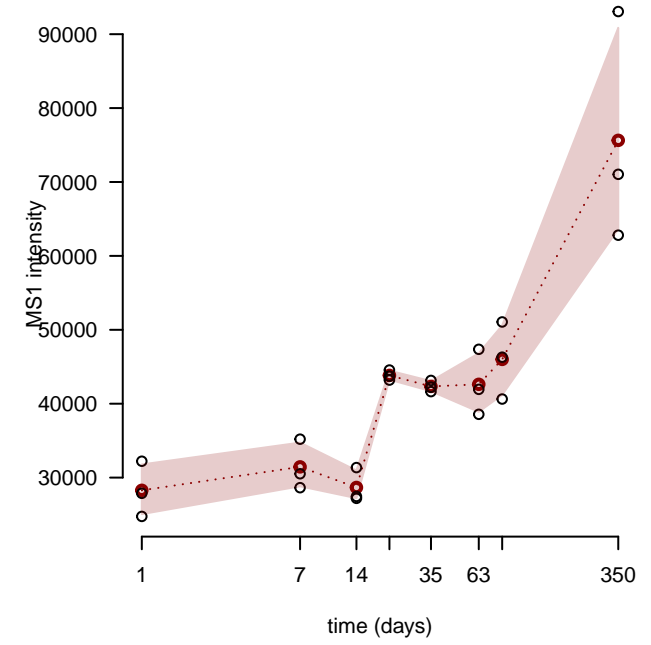

**Q07076**  
**GN=Anxa7**  
annexin A7

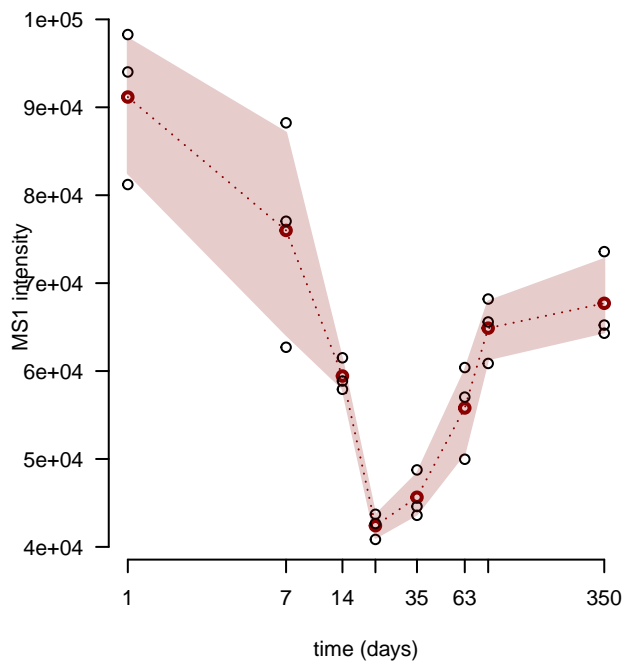

**Q07079**  
**GN=Igfbp5**  
insulin-like growth factor binding prote ...

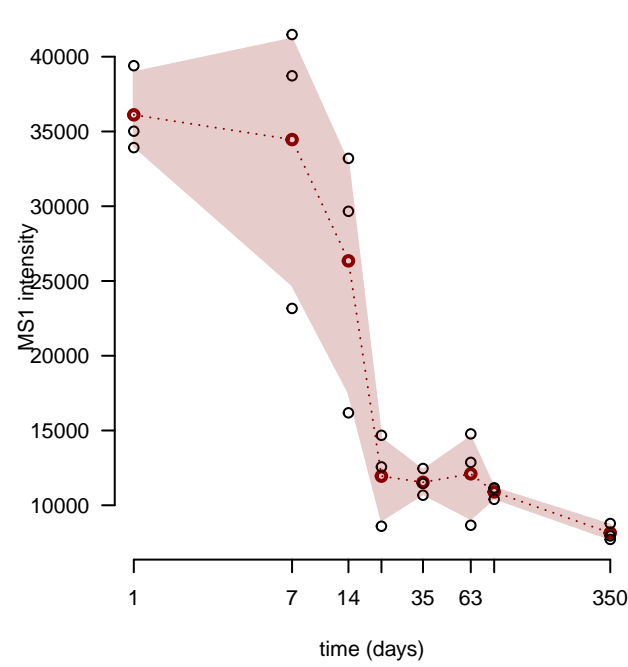

**Q07105**  
**GN=Gdf9**  
growth differentiation factor 9

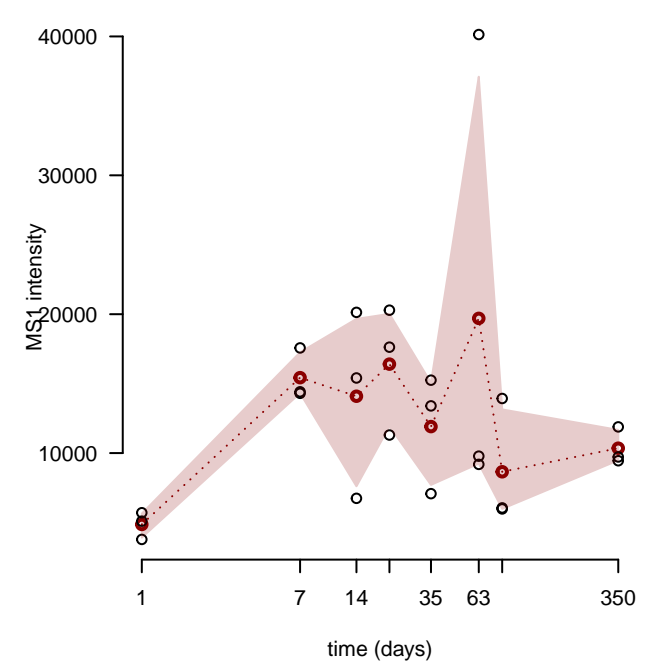

**Q07113**  
**GN=Igf2r**  
insulin-like growth factor 2 receptor

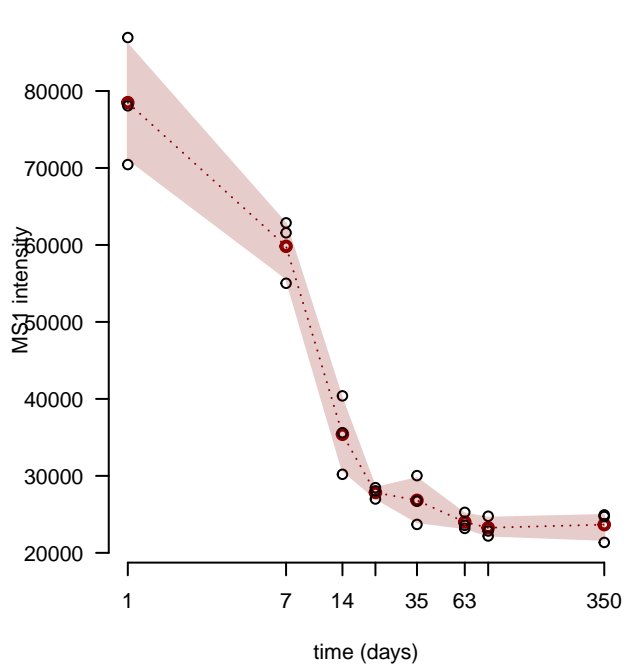

**Q07133**  
**GN=Hist1h1t**

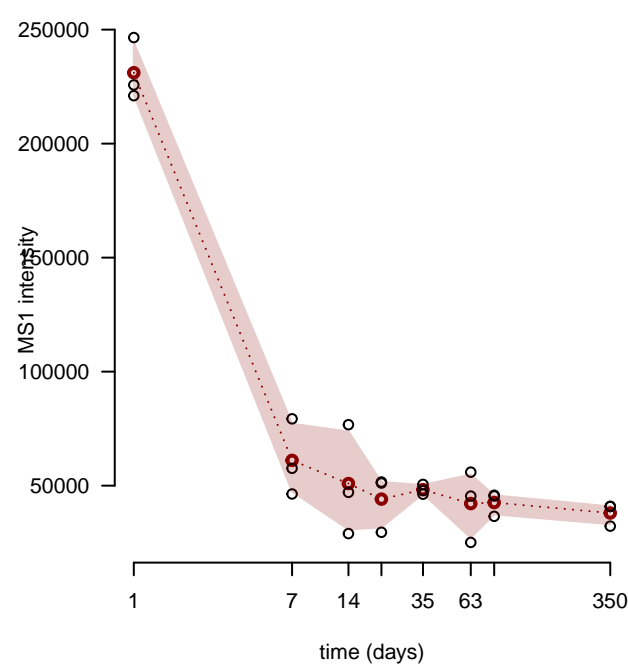

**Q07139**  
**GN=Ect2**  
ect2 oncogene

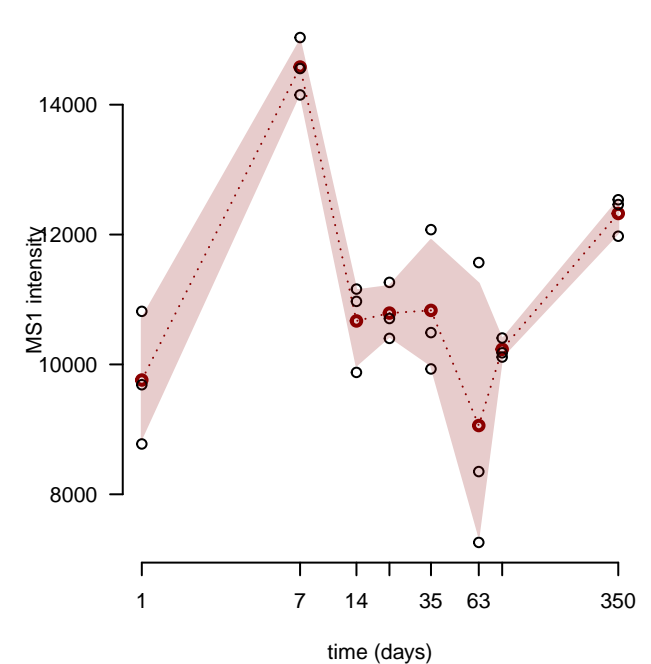

**Q07231**  
**GN=Zscan21**  
zinc finger and SCAN domain containing 2 ...

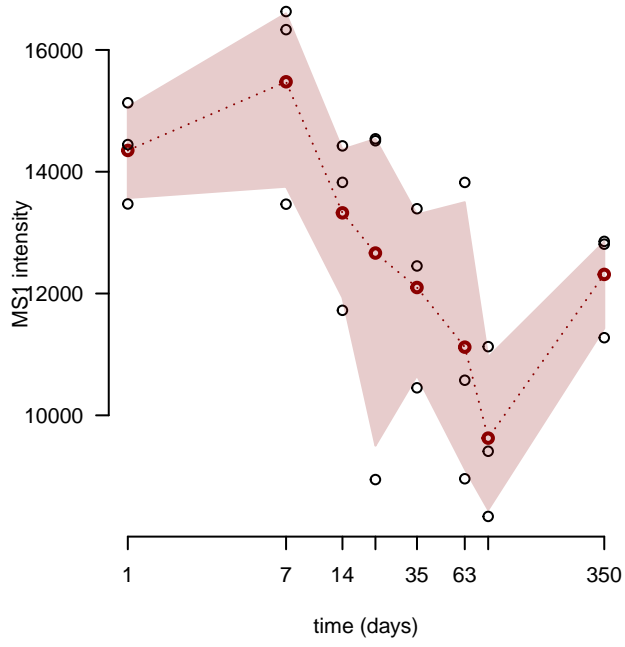

**Q07235**  
**GN=Serpine2**  
serine (or cysteine) peptidase inhibitor ...

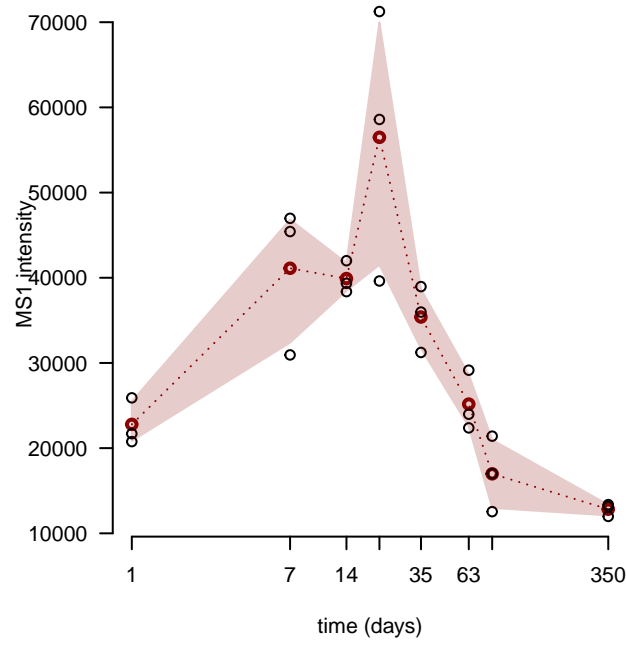

**Q07417**  
**GN=Acads**  
acyl-Coenzyme A dehydrogenase, short cha ...

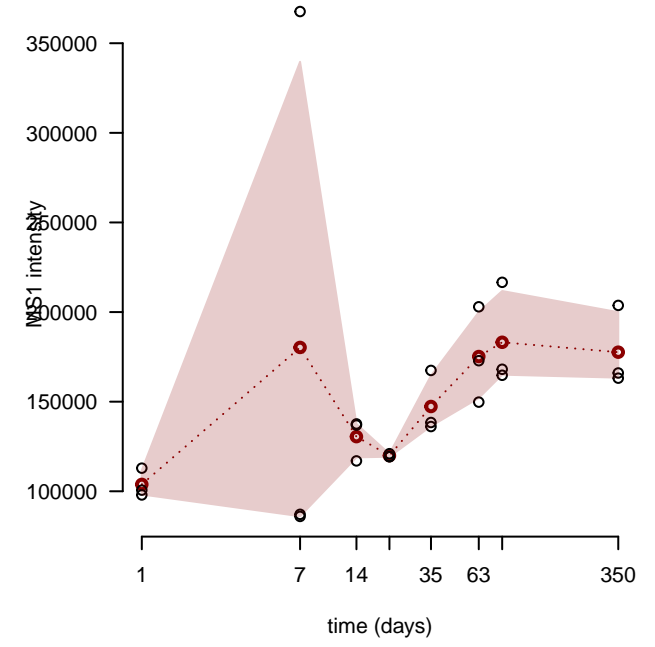

**Q07456**  
**GN=Ambp**  
alpha 1 microglobulin/bikunin precursor

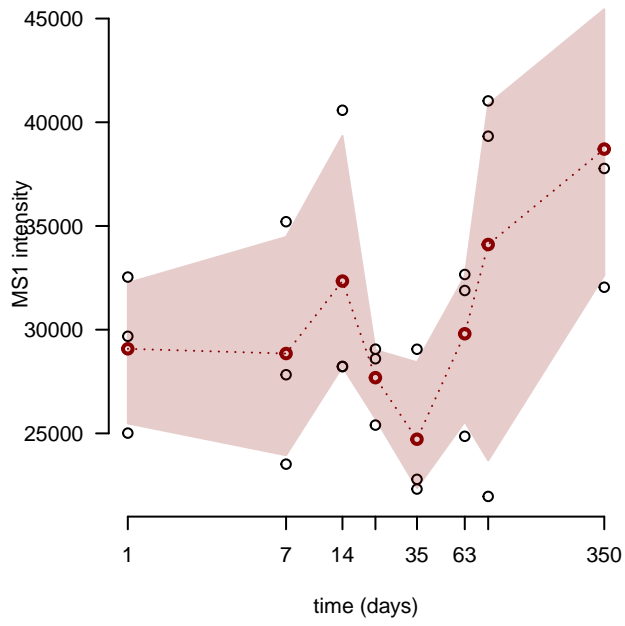

**Q07643**  
**GN=Col9a2**  
collagen, type IX, alpha 2

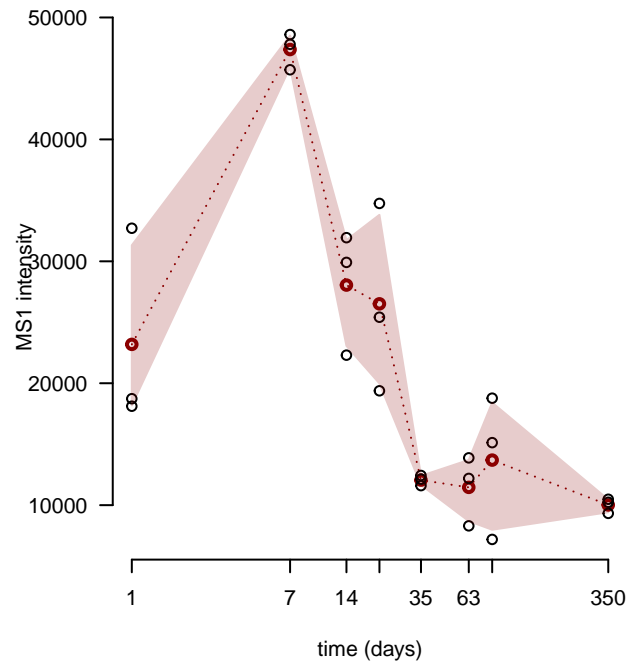

**Q07646**  
**GN=Mest**  
mesoderm specific transcript

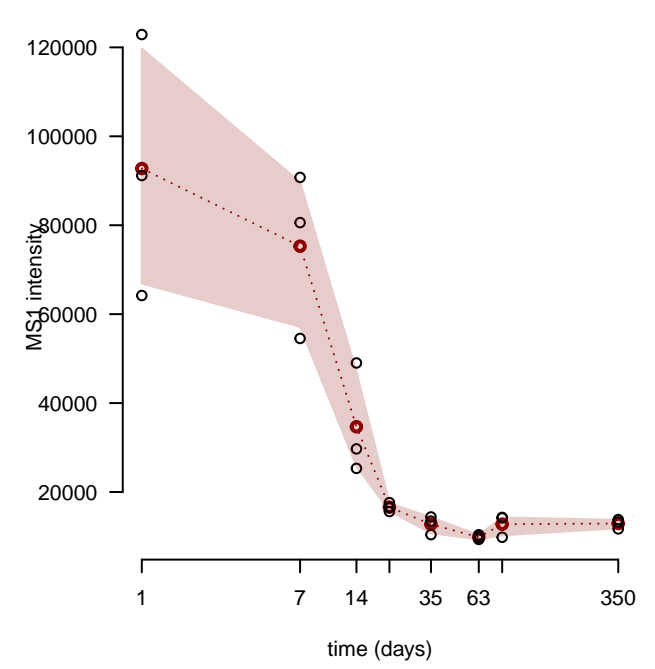

**Q07797**  
**GN=Lgals3bp**  
lectin, galactoside-binding, soluble, 3 ...

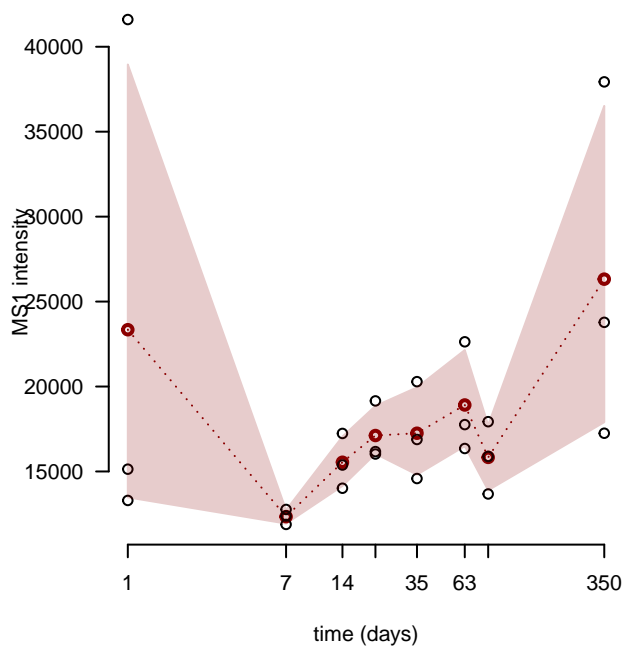

**Q07802**  
**GN=Ebf1**  
early B cell factor 1

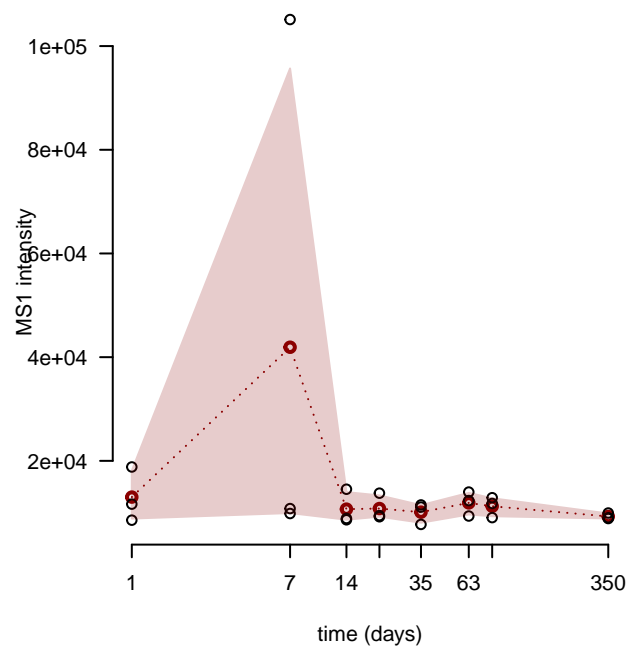

**Q07813**  
**GN=Bax**  
BCL2-associated X protein

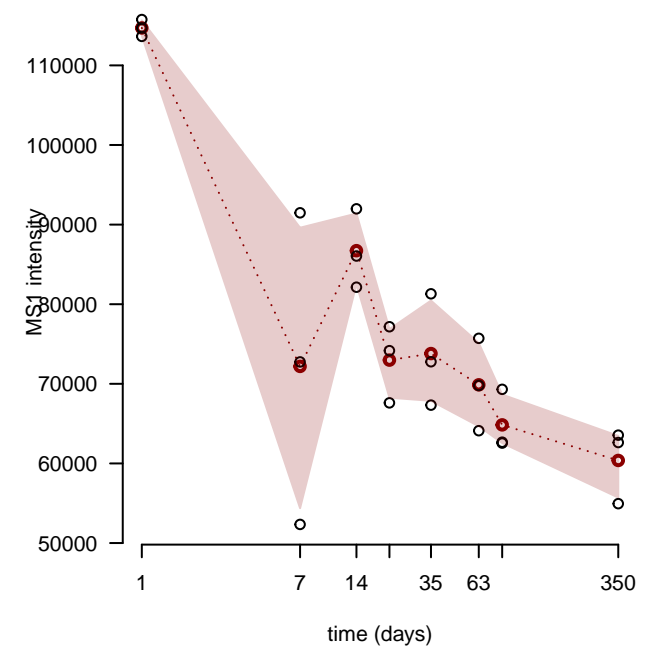

**Q07832**  
**GN=Plk1**  
polo like kinase 1

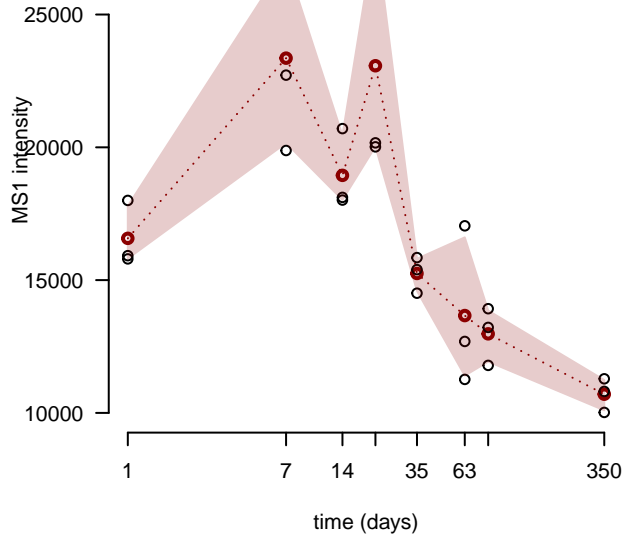

**Q07968**  
**GN=F13b**  
coagulation factor XIII, beta subunit

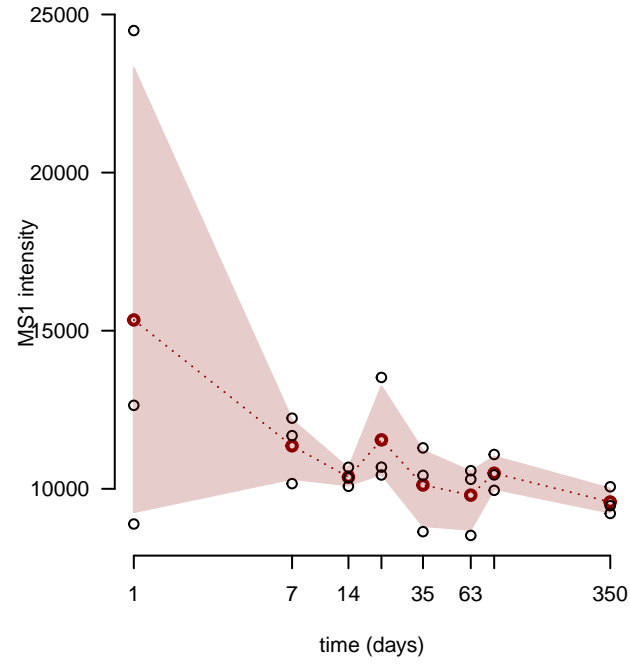

**Q08024**  
**GN=Cbfb**  
core binding factor beta

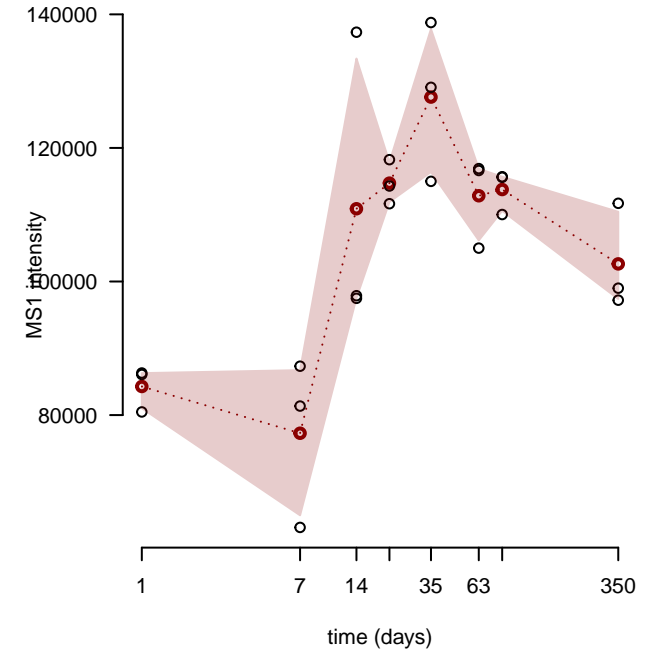

**Q08024**  
**GN=Cbfb**  
core binding factor beta

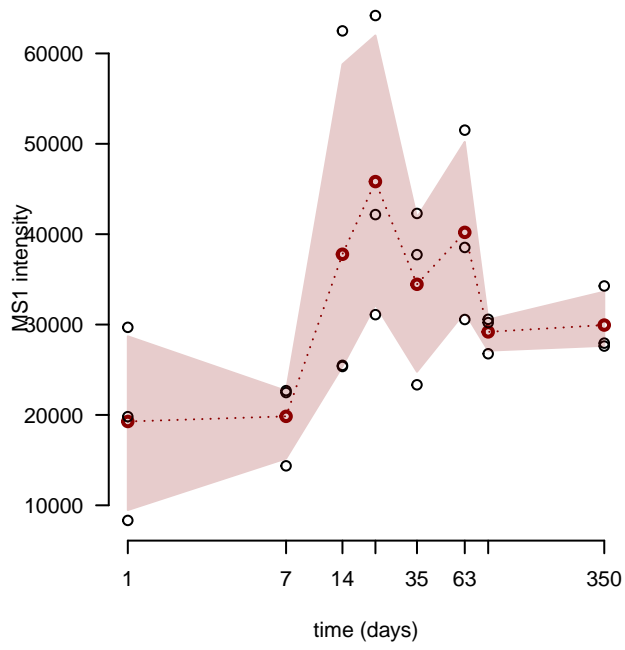

**Q08091**  
**GN=Cnn1**  
calponin 1

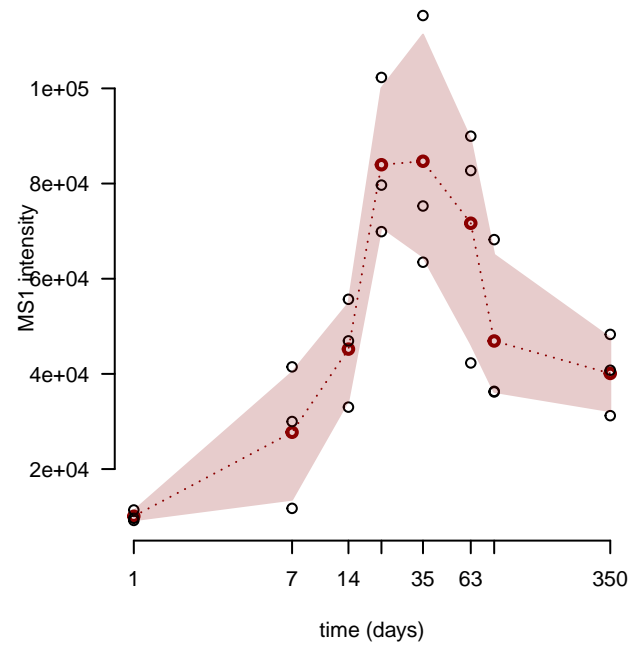

**Q08093**  
**GN=Cnn2**  
calponin 2

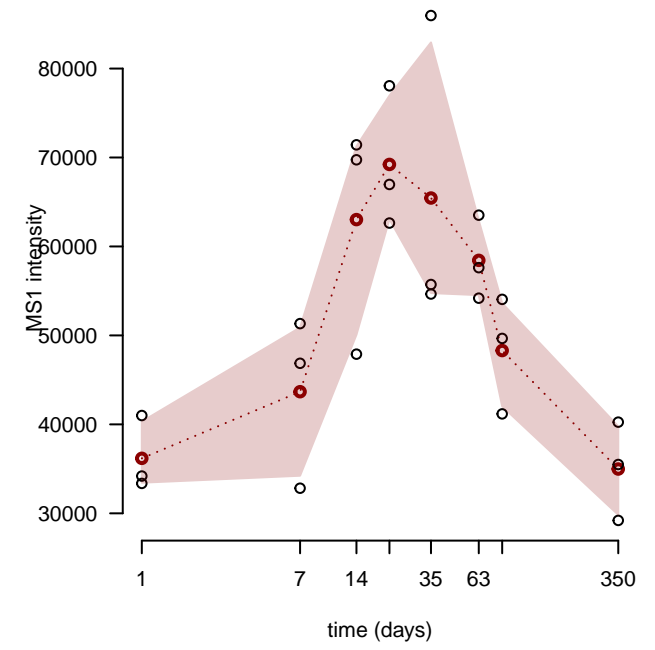

**Q08122**  
**GN=Tle3**  
transducin-like enhancer of split 3

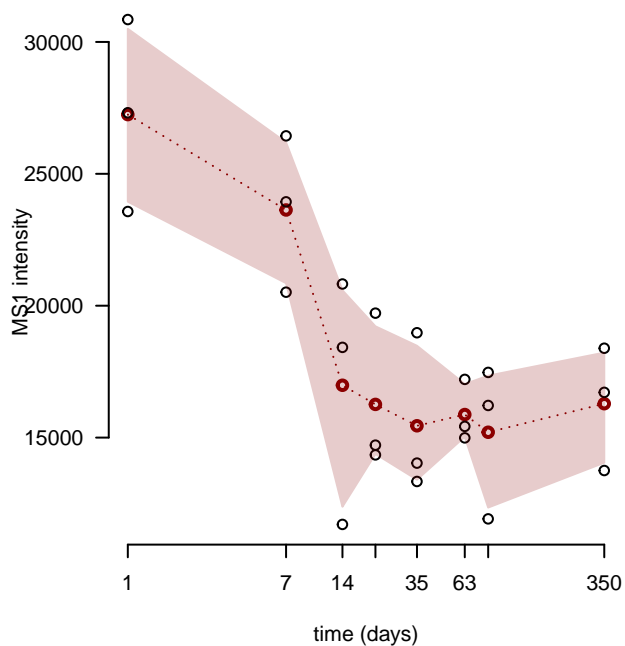

**Q08189**  
**GN=Tgm3**  
transglutaminase 3, E polypeptide

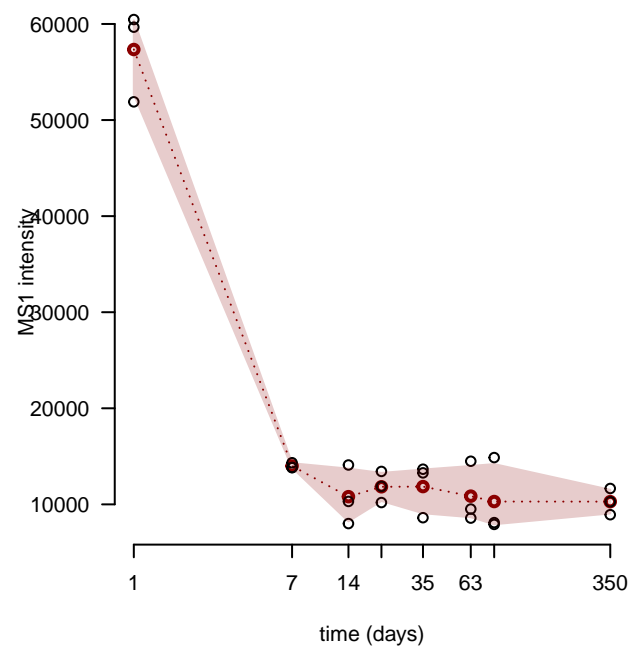

**Q08274**  
**GN=Dmwd**  
dystrophia myotonica-containing WD repea ...

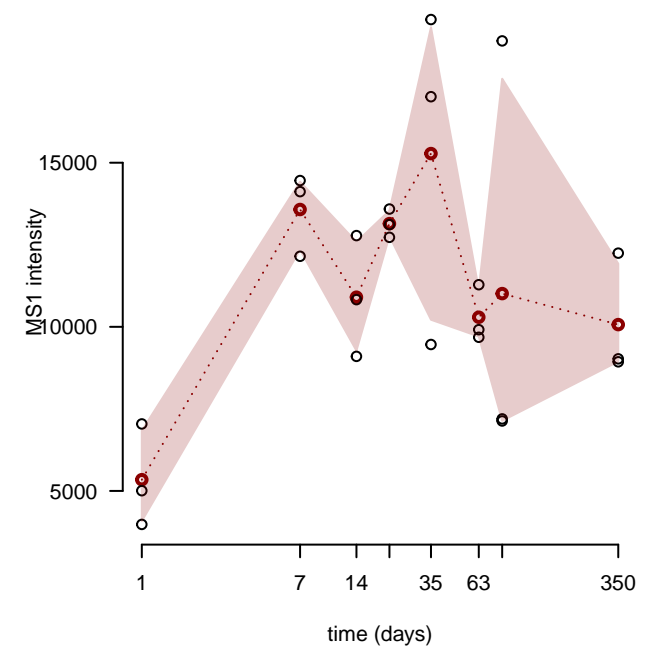

**Q08288**  
GN=Lyar  
Ly1 antibody reactive clone

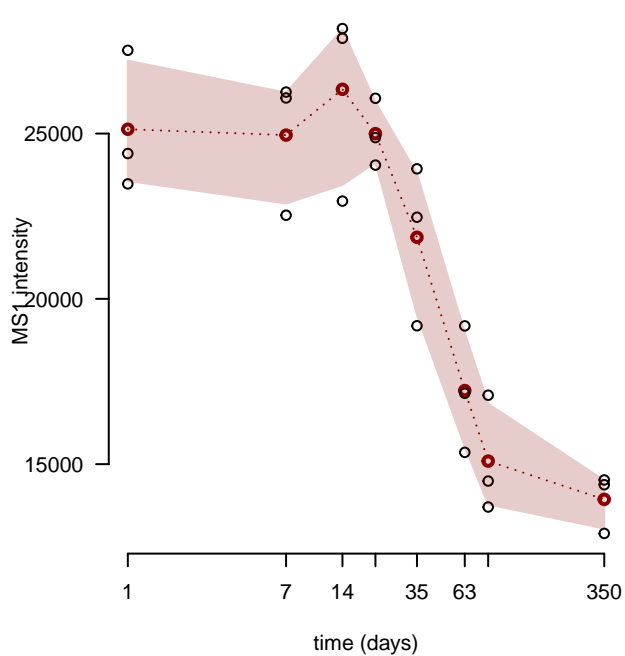

**Q08297**  
GN=Rad51  
RAD51 recombinase

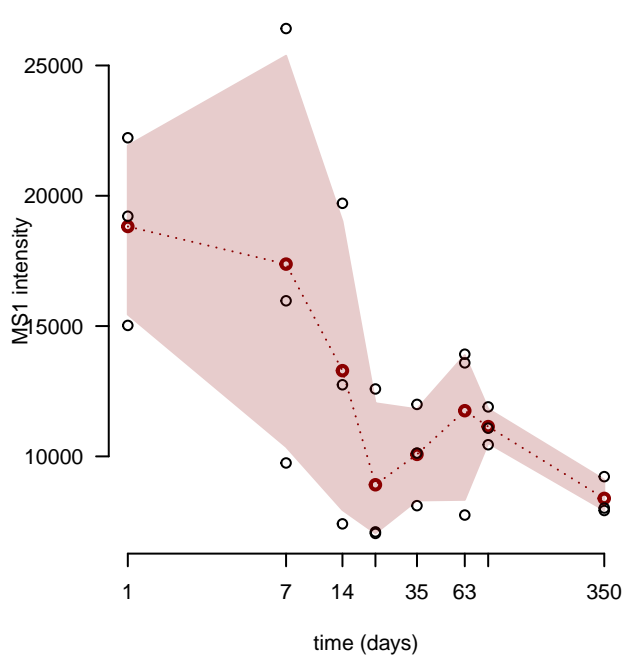

**Q08331**  
GN=Calb2  
calbindin 2

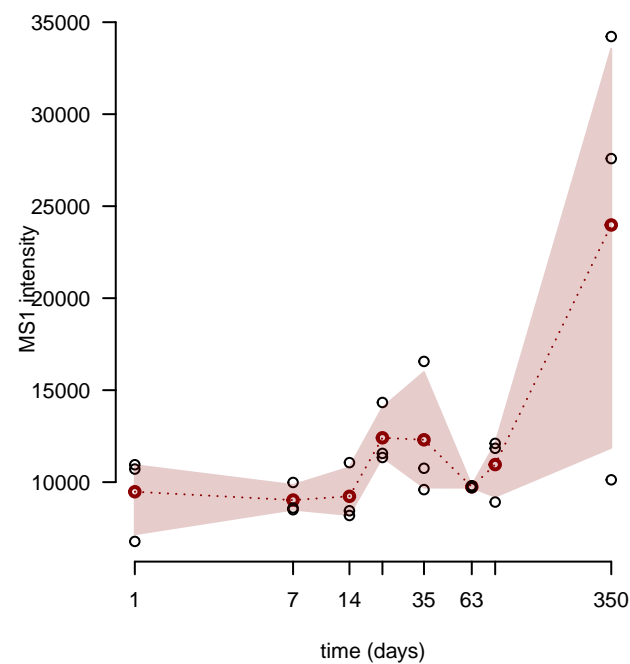

**Q08369**  
GN=Gata4  
GATA binding protein 4

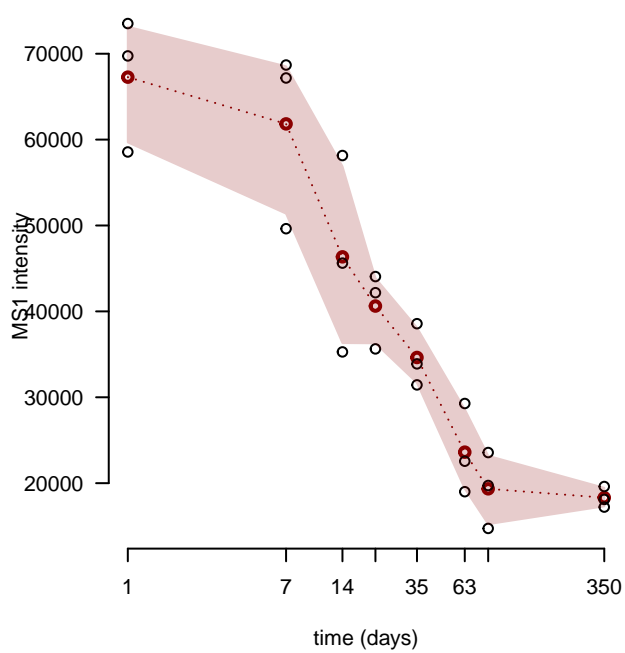

**Q08376**  
GN=Zbtb14  
zinc finger and BTB domain containing 14

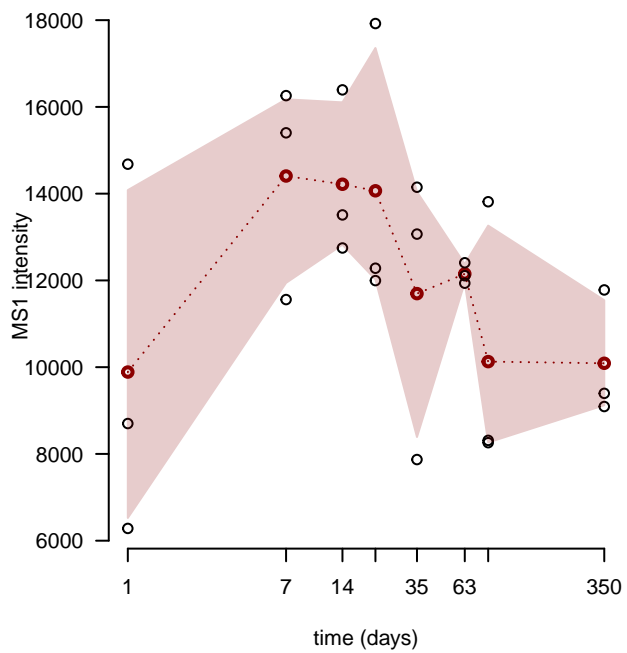

**Q08460**  
GN=Kcnma1  
potassium large conductance calcium-acti ...

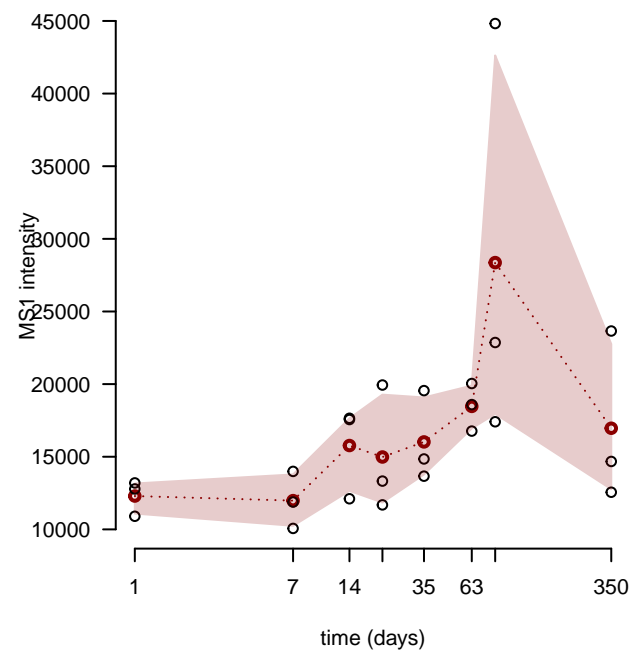

**Q08481**  
GN=Pecam1  
platelet/endothelial cell adhesion molec ...

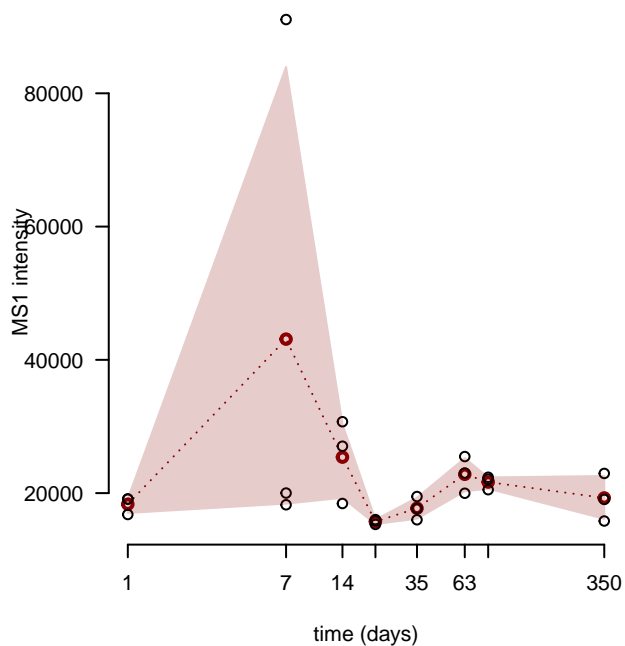

**Q08501**  
GN=Prlr  
prolactin receptor

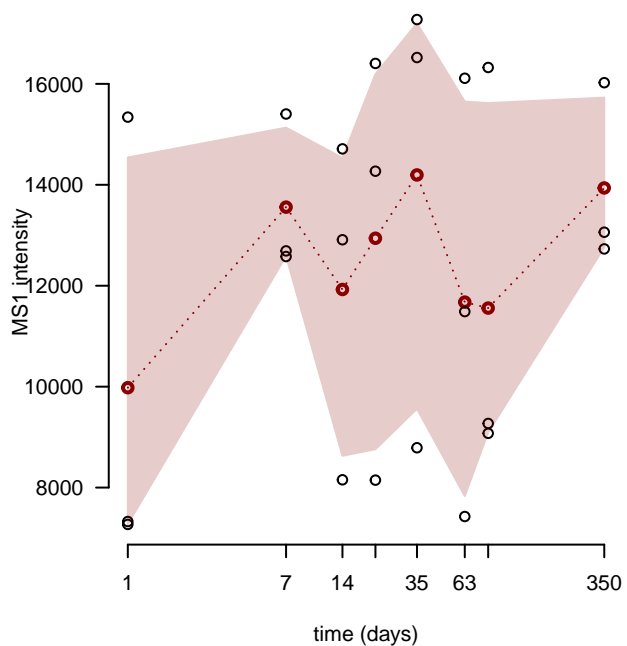

**Q08509**  
GN=Eps8  
epidermal growth factor receptor pathway ...

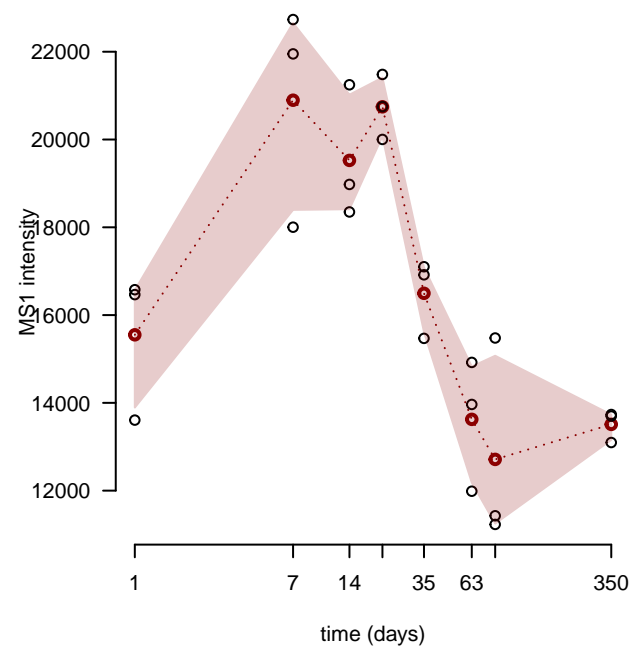

**Q08639**  
**GN=Tfdp1**  
transcription factor Dp 1

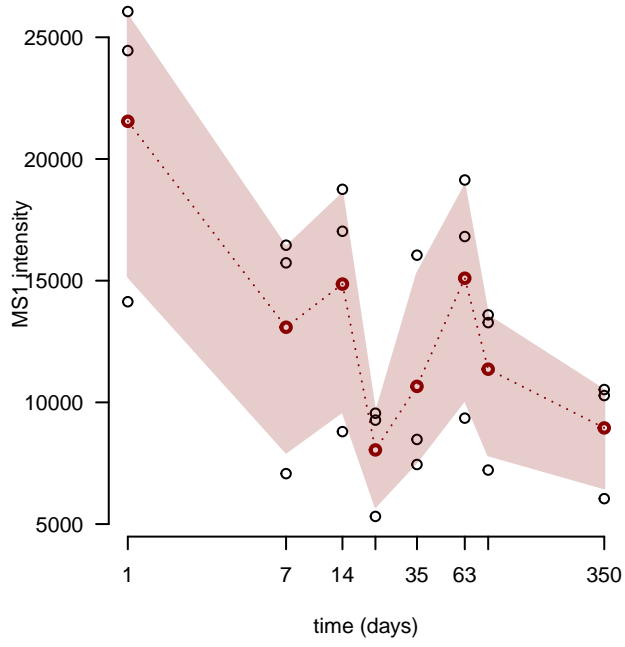

**Q08642**  
**GN=Padi2**  
peptidyl arginine deiminase, type II

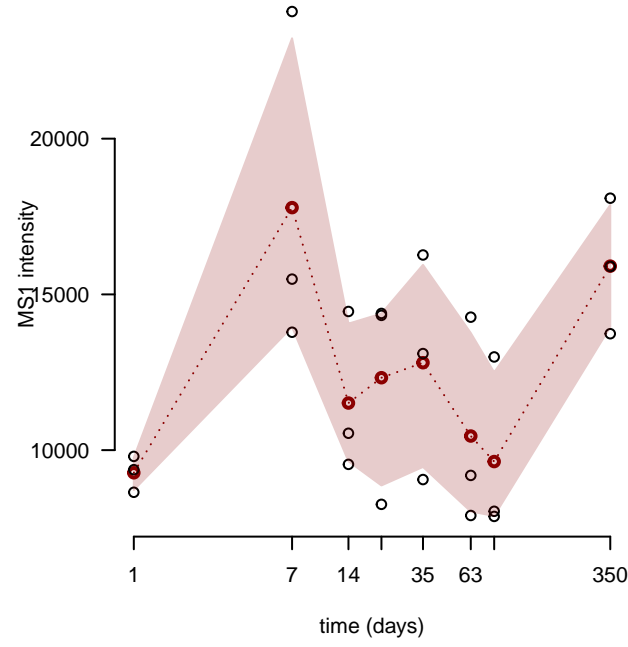

**Q08652**  
**GN=Rbp2**  
retinol binding protein 2, cellular

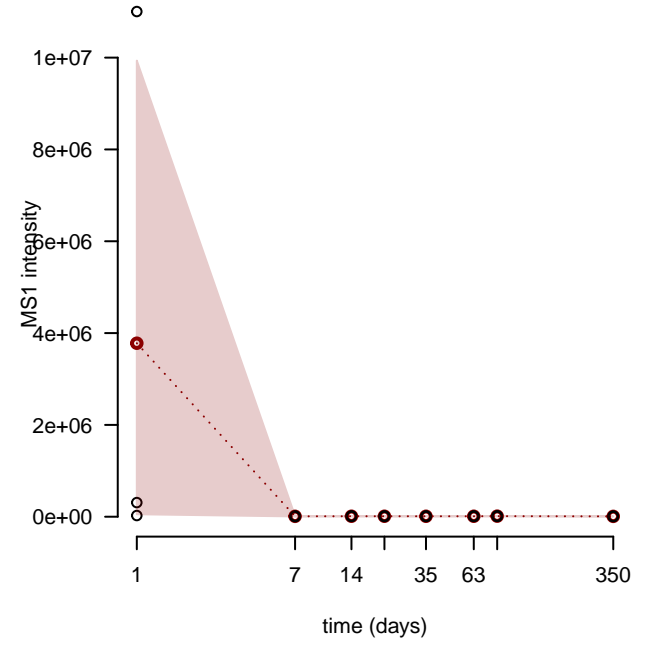

**Q08761**  
**GN=Pros1**  
protein S (alpha)

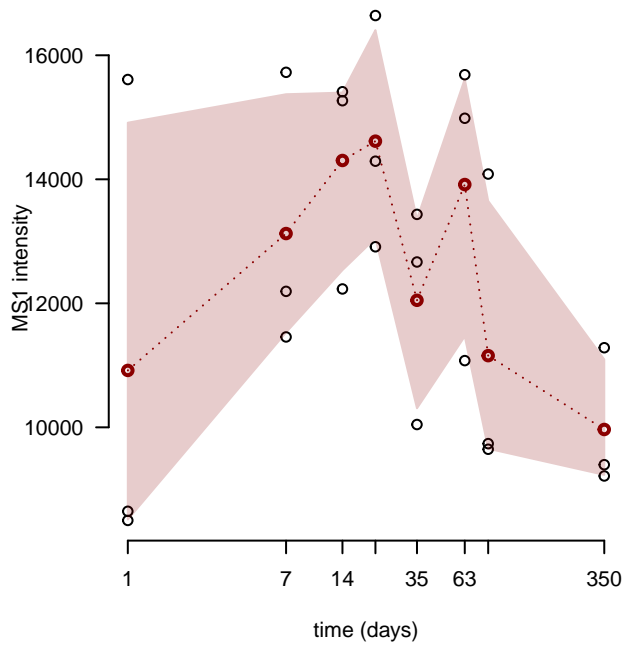

**Q08775**  
**GN=Runx2**  
runt related transcription factor 2

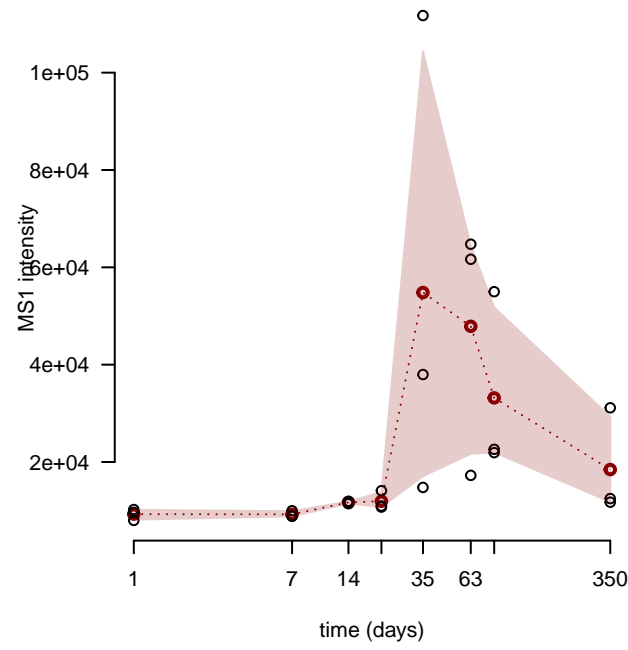

**Q08857**  
**GN=Cd36**  
CD36 molecule

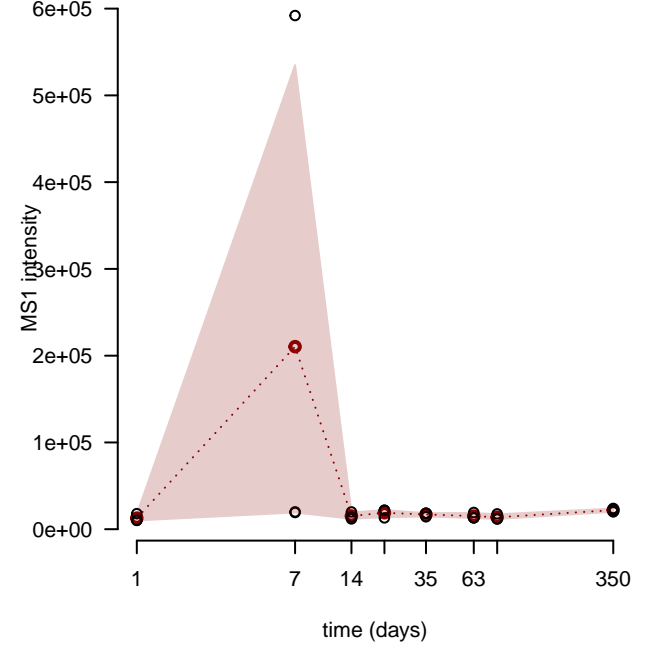

**Q08879**  
**GN=Fbln1**  
fibulin 1

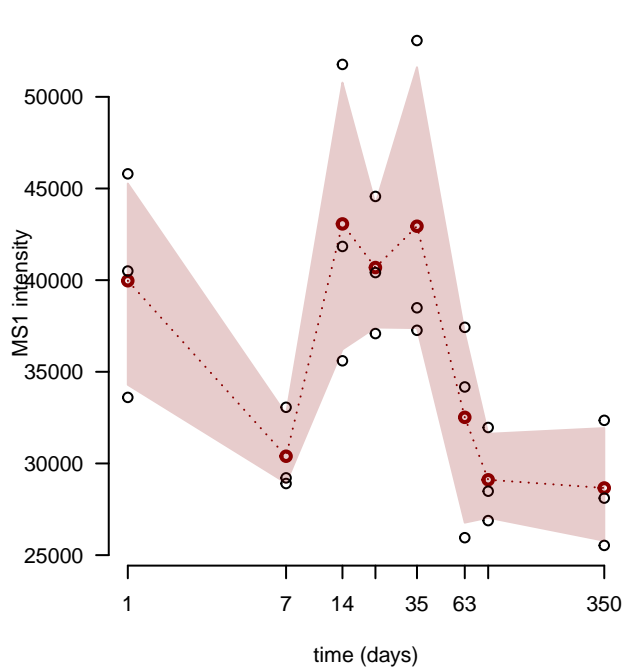

**Q08879**  
**GN=Fbln1**  
fibulin 1

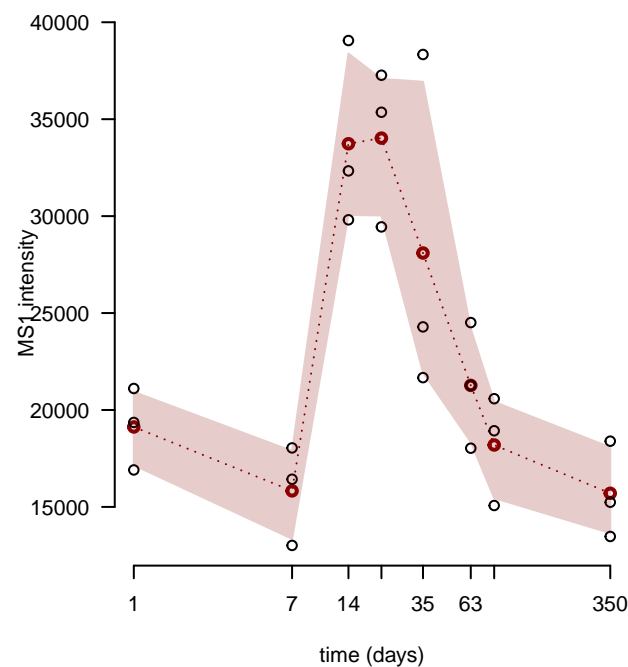

**Q08890**  
**GN=Ids**  
iduronate 2-sulfatase

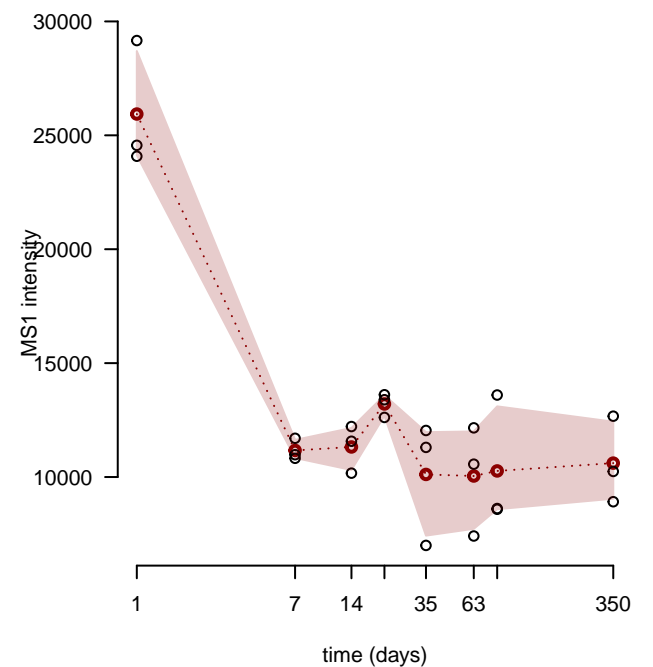

**Q08943**  
**GN=Ssrp1**  
structure specific recognition protein 1

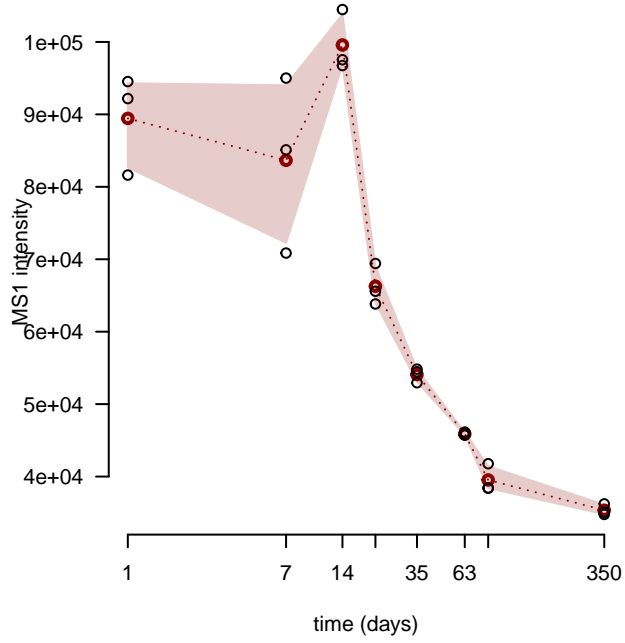

**Q09143**  
**GN=Slc7a1**  
solute carrier family 7 (cationic amino ...

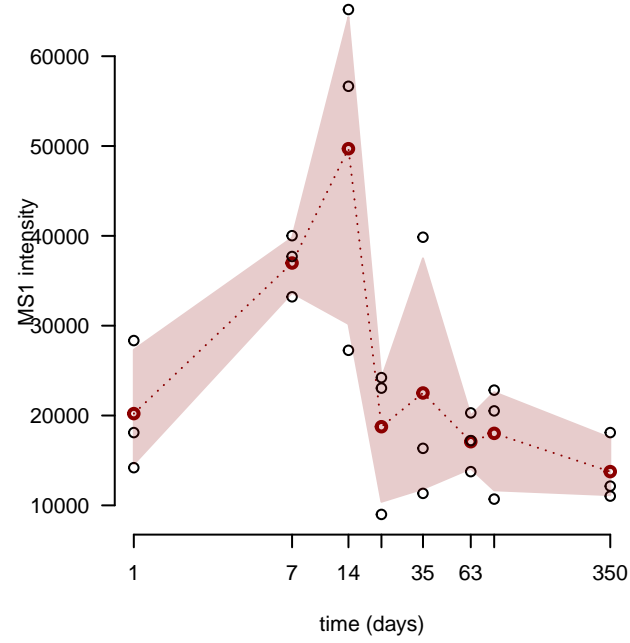

**Q09163**  
**GN=Dlk1**  
delta like non-canonical Notch ligand 1

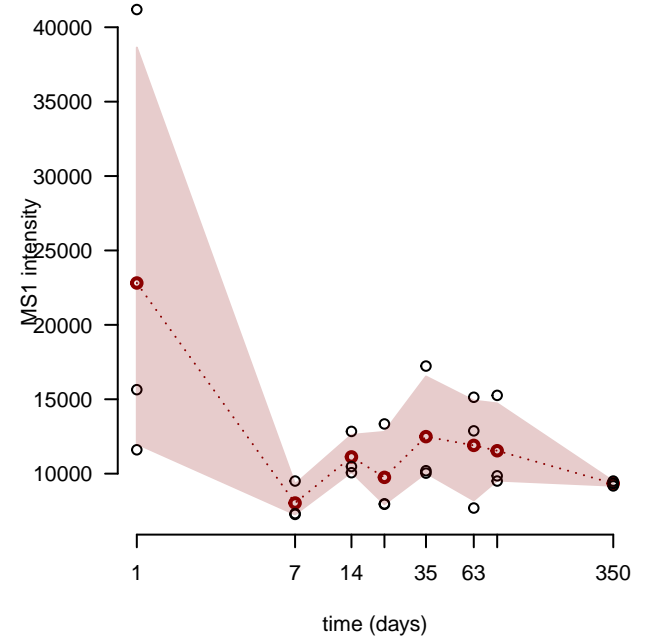

**Q09200**  
**GN=B4galnt1**  
beta-1,4-N-acetyl-galactosaminyl transfe ...

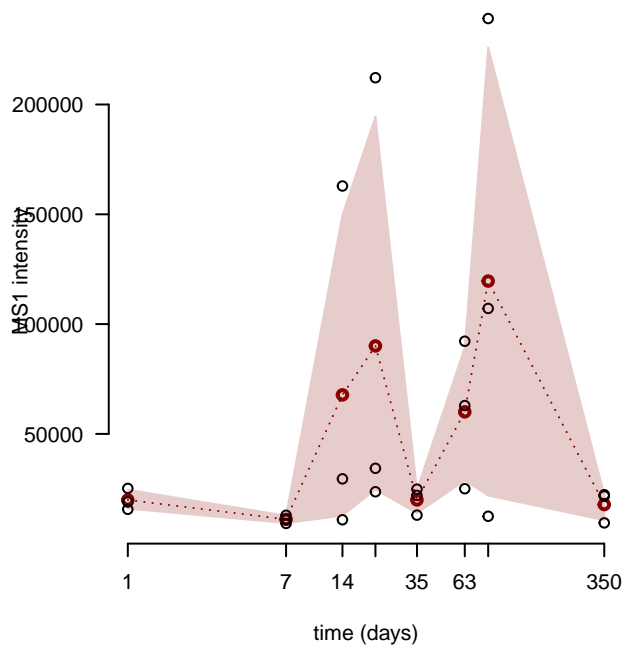

**Q09XV5**  
**GN=Chd8**  
chromodomain helicase DNA binding protei ...

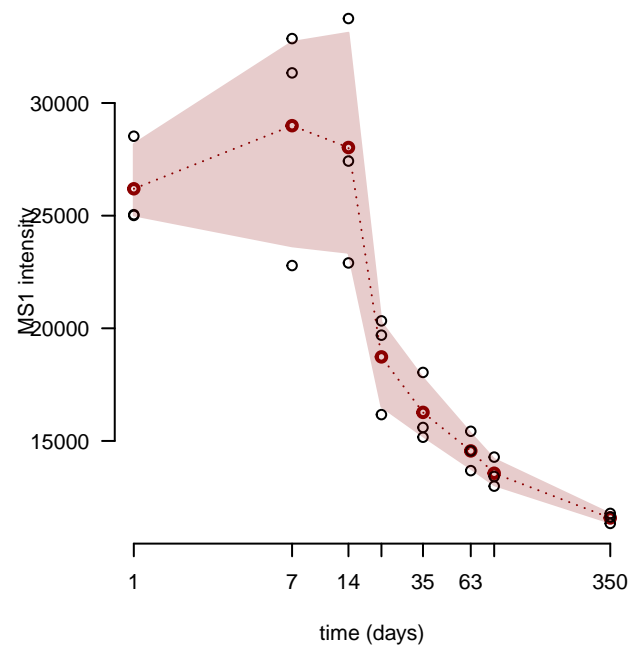

**Q0GNC1**  
**GN=Inf2**  
inverted formin, FH2 and WH2 domain cont ...

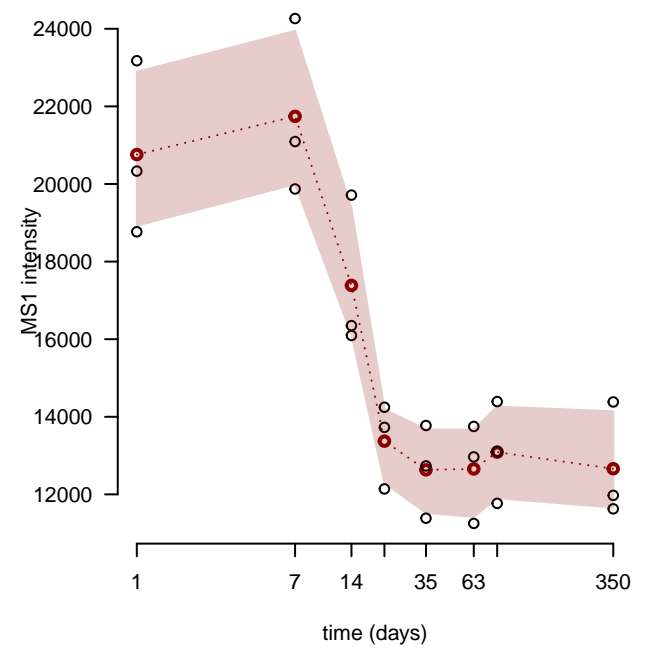

**Q0HA38**  
**GN=Ttc21b**  
tetratricopeptide repeat domain 21B

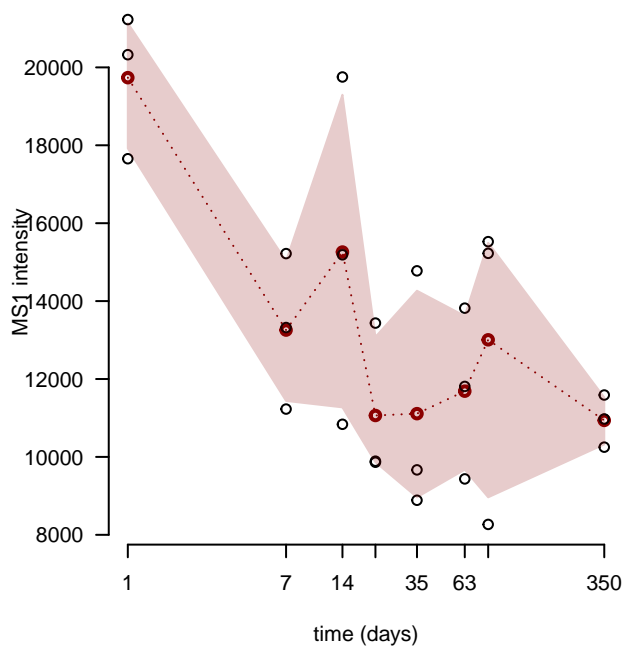

**Q0KL01**  
**GN=Ubxn2b**  
UBX domain protein 2B

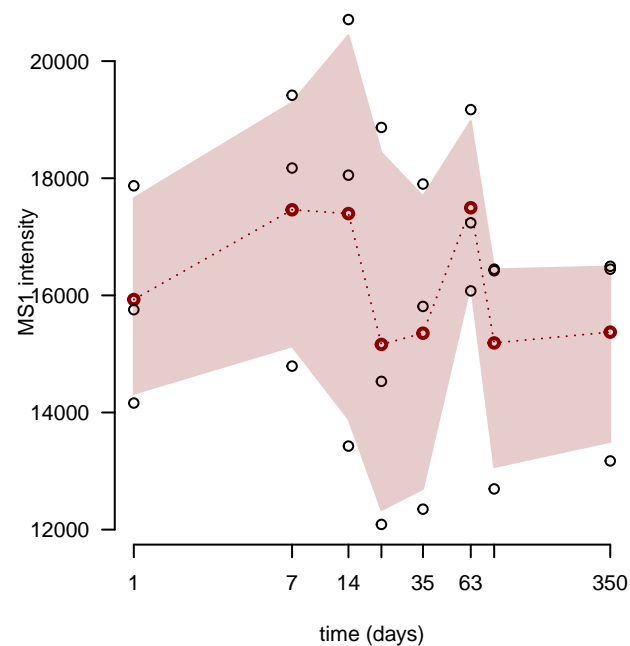

**Q0KL02**  
**GN=Trio**  
triple functional domain (PTPRF interact ...

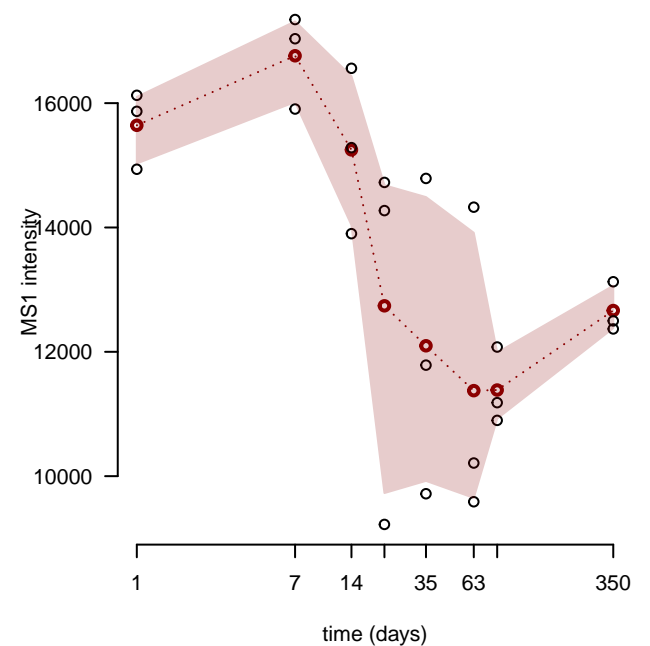



**Q0P5W1**  
**GN=Vps8**  
VPS8 CORVET complex subunit

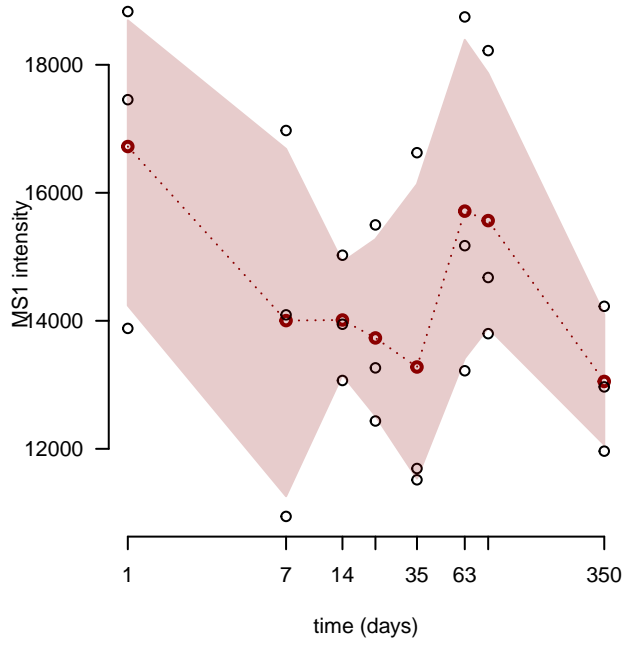

**Q0P678**  
**GN=Zc3h18**  
zinc finger CCCH-type containing 18

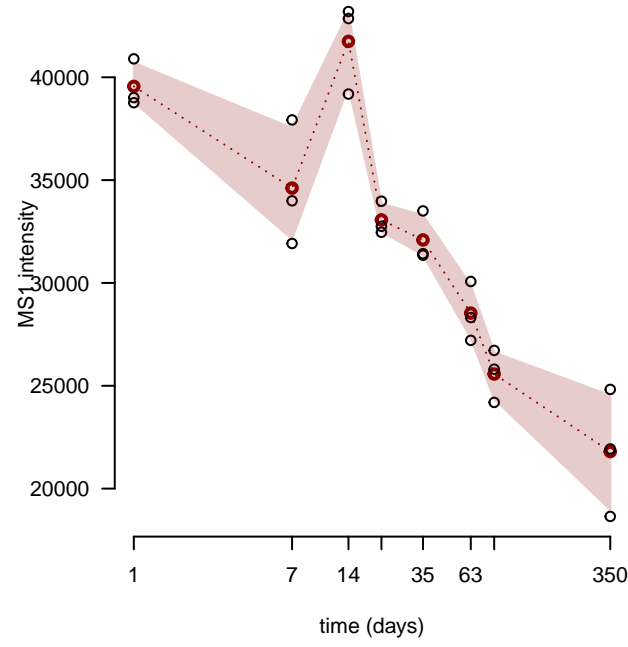

**Q0PHV7**  
**GN=Dact3**  
dishevelled-binding antagonist of beta-c ...

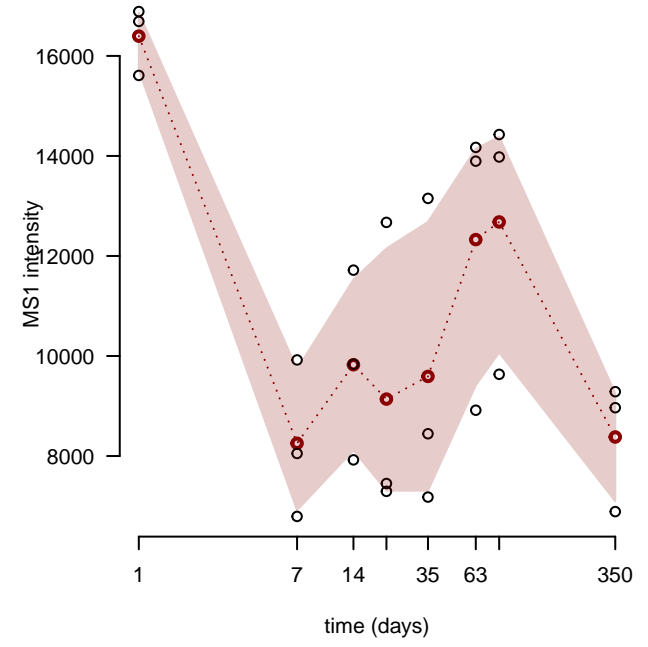

**Q0VBF8**  
**GN=Stum**  
mechanosensory transduction mediator

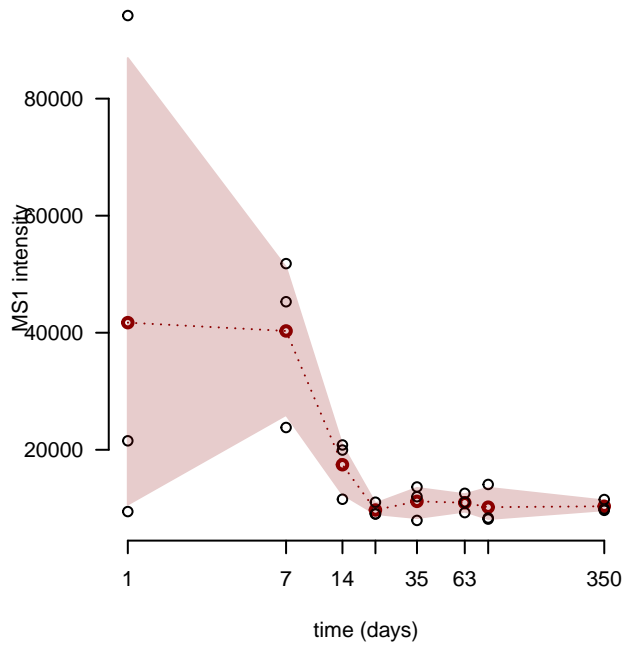

**Q0VBK2**  
**GN=Krt80**  
keratin 80

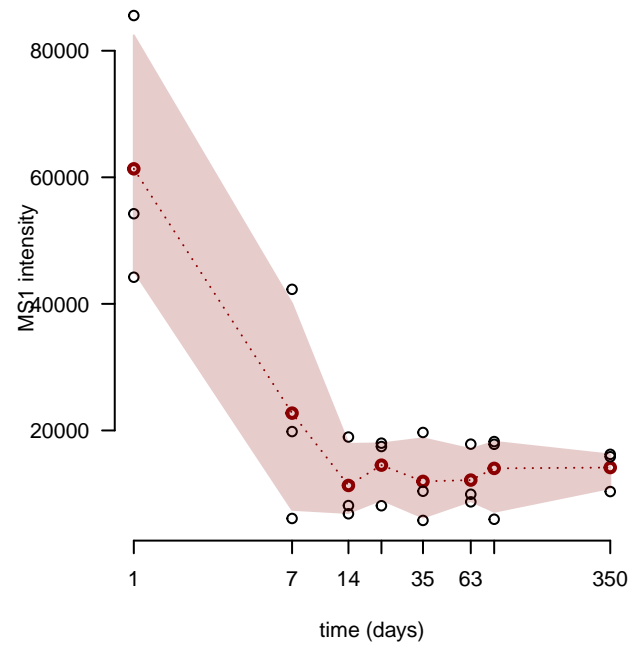

**Q0VBL3**  
**GN=Rbm15**  
RNA binding motif protein 15

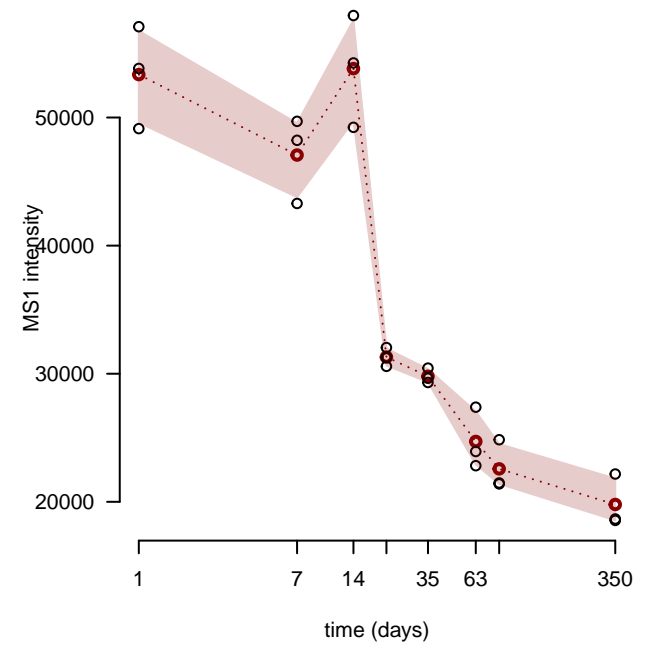

**Q0VEJ0**  
**GN=Cep76**  
centrosomal protein 76

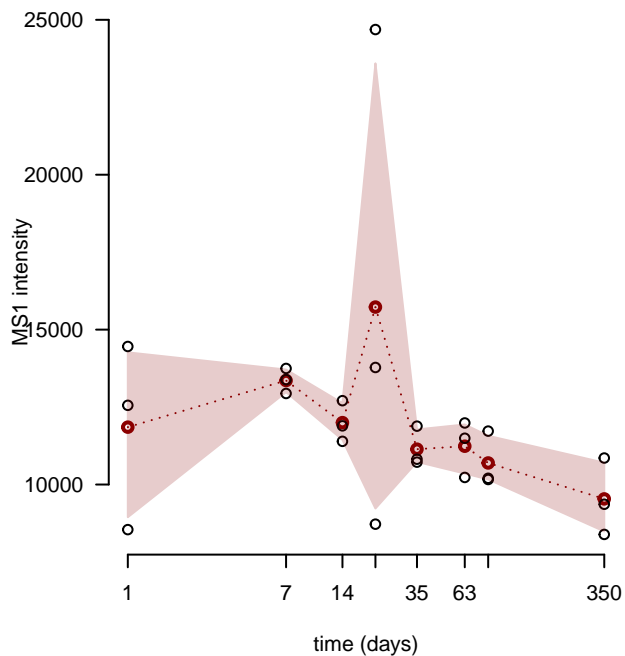

**Q0VG62**  
**GN=Rbis**  
ribosomal biogenesis factor

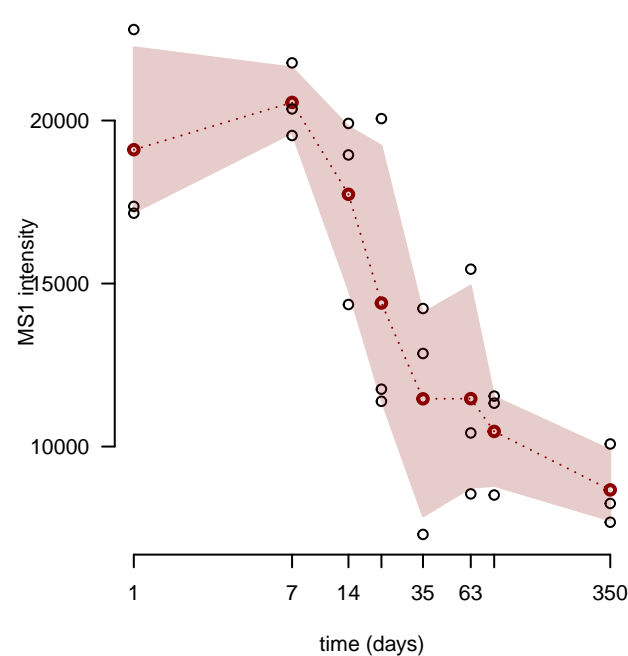

**Q0VGB7**  
**GN=Ppp4r2**  
protein phosphatase 4, regulatory subuni ...

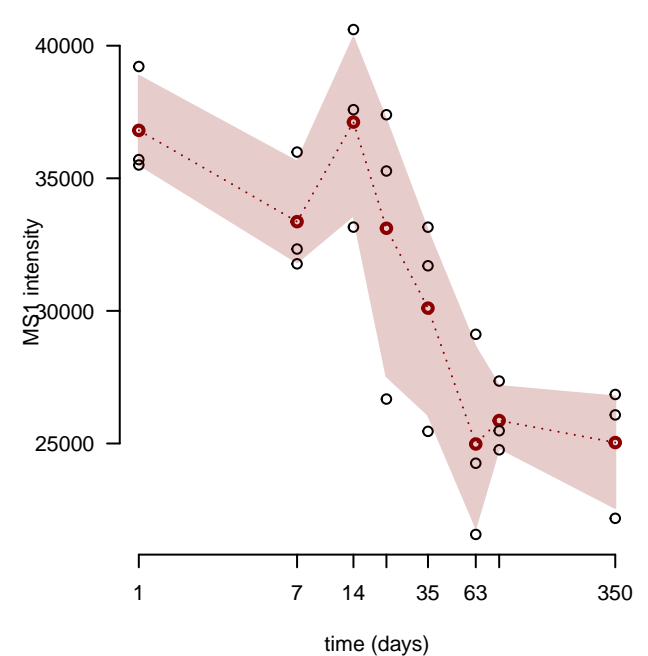

Q0VGY8

GN=Tanc1

tetratricopeptide repeat, ankyrin repeat ...

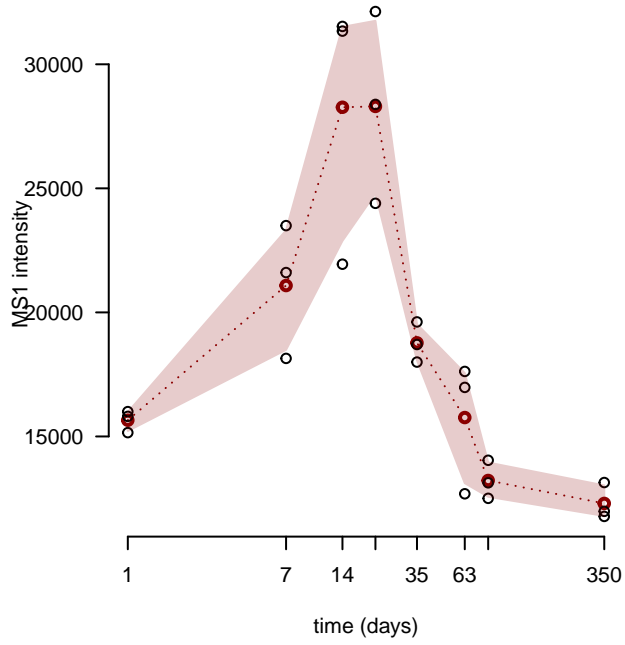

Q11011

GN=Npepps

aminopeptidase puromycin sensitive

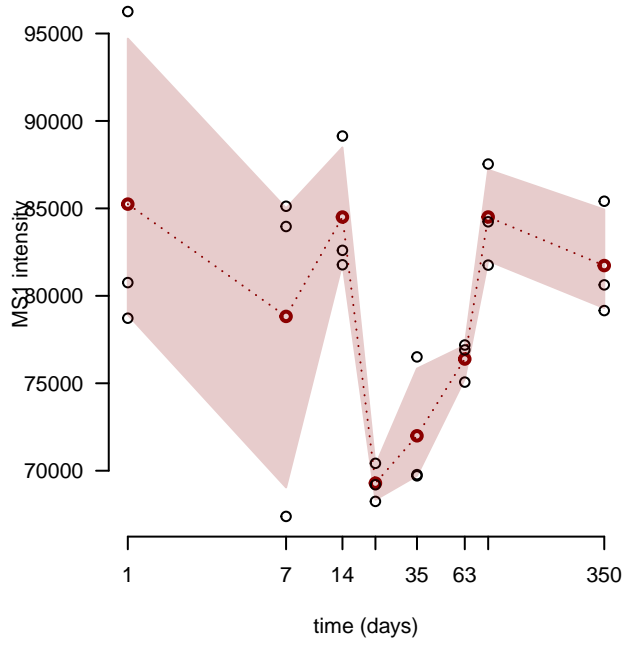

Q11136

GN=Pepd

peptidase D

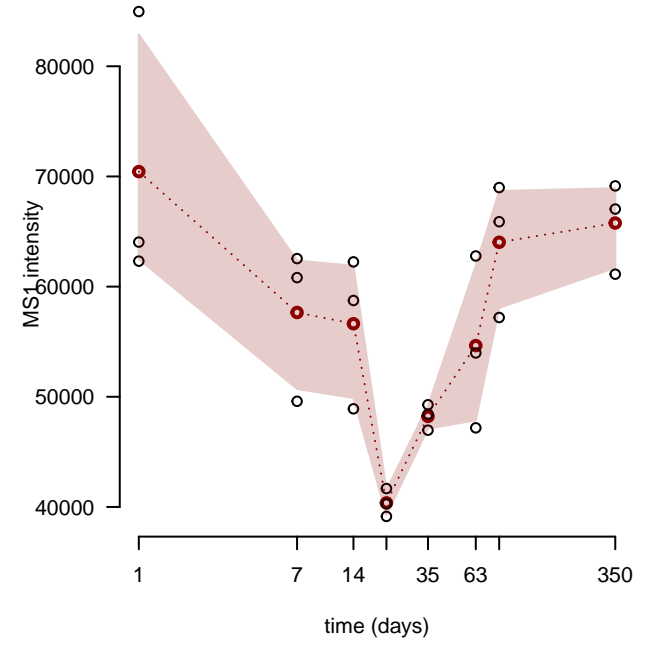

Q148V7

GN=Relch

RAB11 binding and LisH domain, coiled-co ...

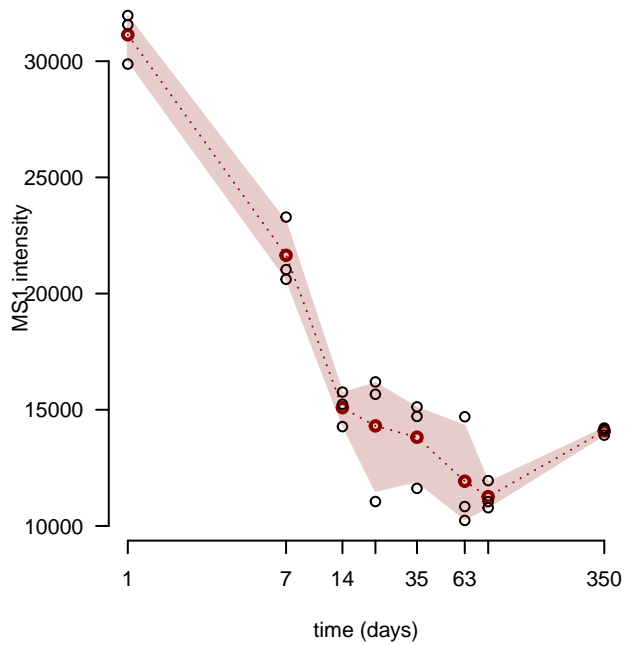

Q149C2

GN=Traf3ip1

TRAF3 interacting protein 1

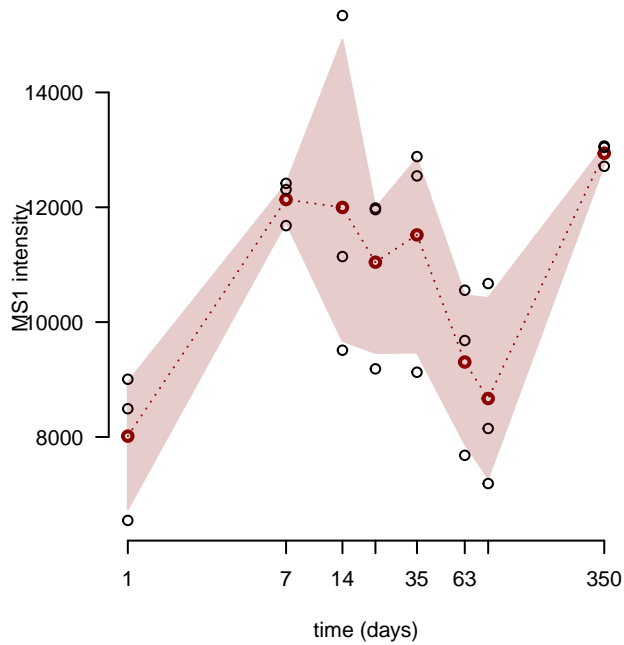

Q149F1

GN=Rpusd2

RNA pseudouridylate synthase domain cont ...

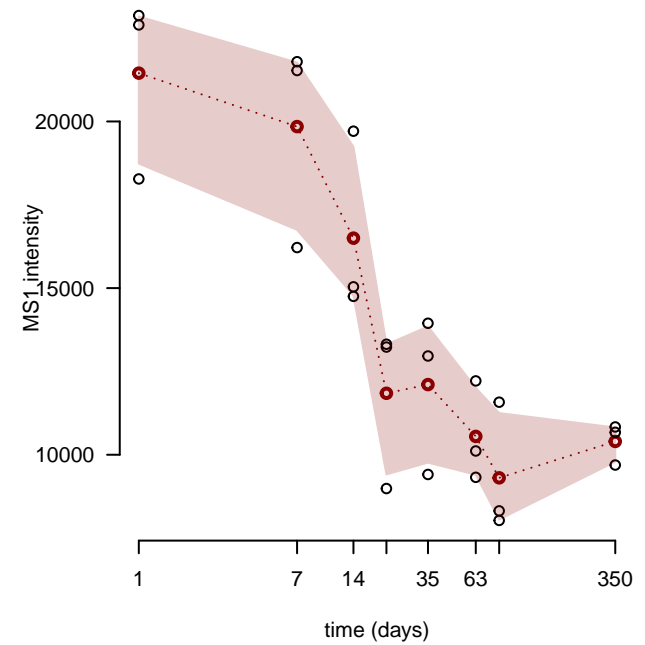

Q149F3

GN=Gsp2

G1 to S phase transition 2

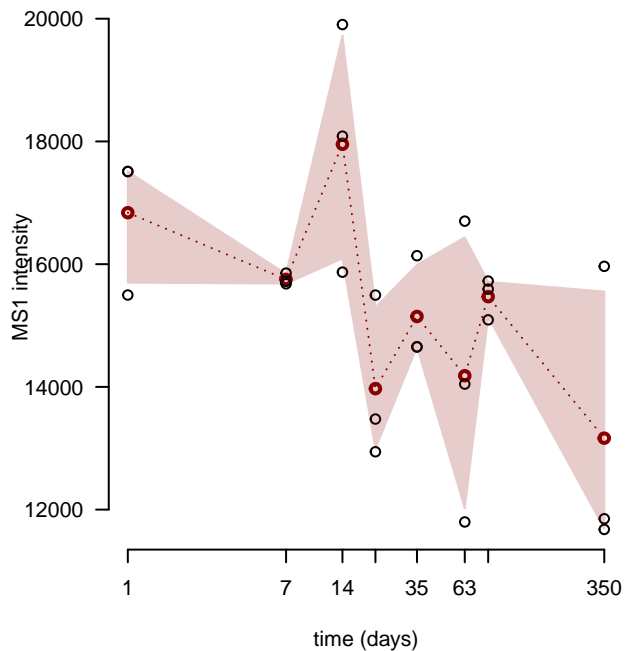

Q149L6

GN=Dnajb14

DnaJ heat shock protein family (Hsp40) m ...

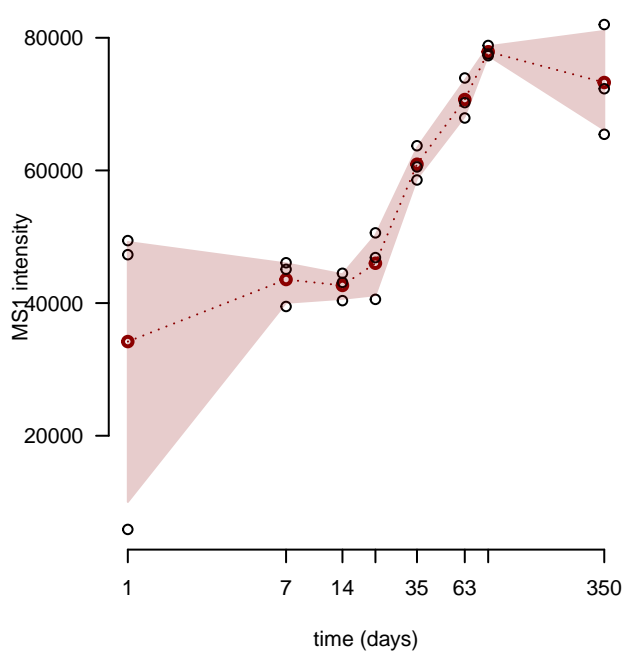

Q14AI0

GN=DSCC1

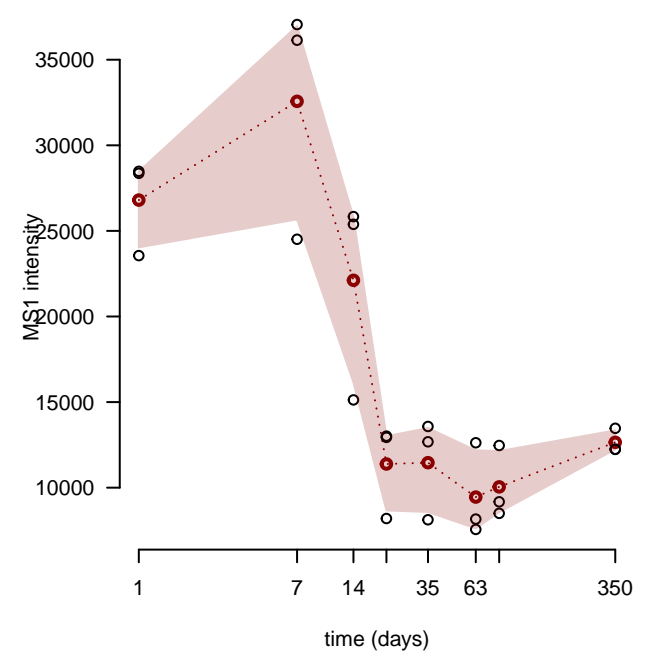

**Q14AI6**  
**GN=Rpusd3**

RNA pseudouridylate synthase domain cont ...

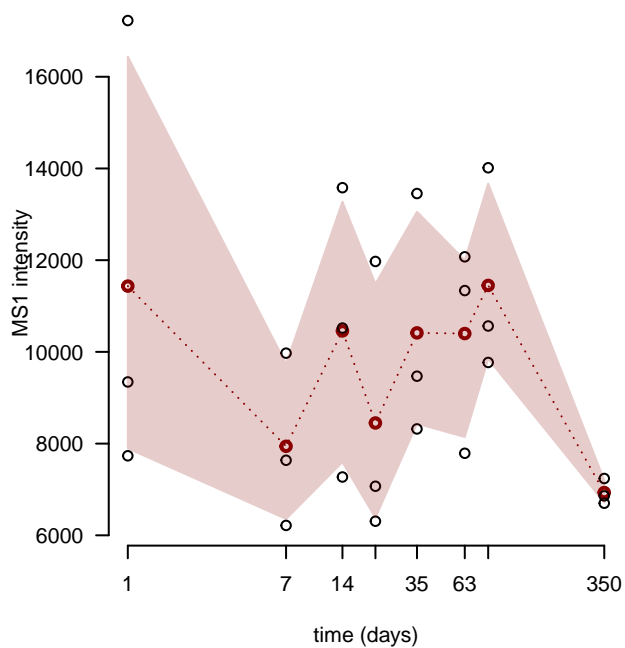

**Q14AW5**  
**GN=Nsun7**

NOL1/NOP2/Sun domain family, member 7

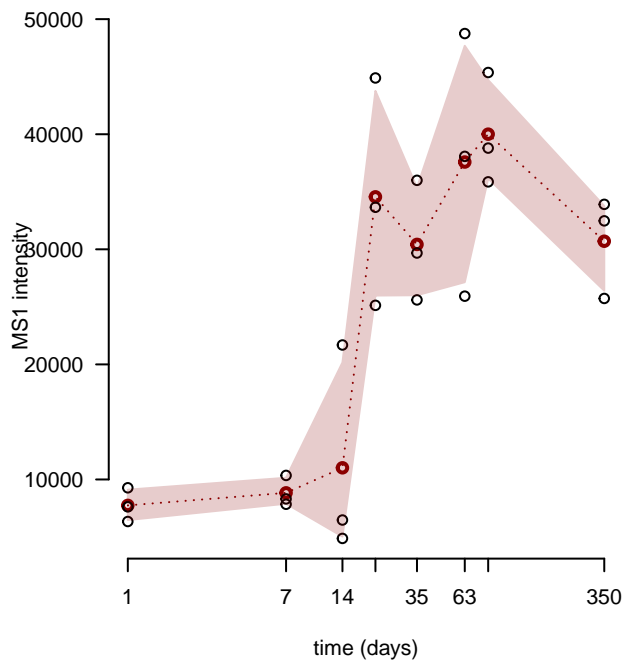

**Q14AX6**  
**GN=Cdk12**

cyclin-dependent kinase 12

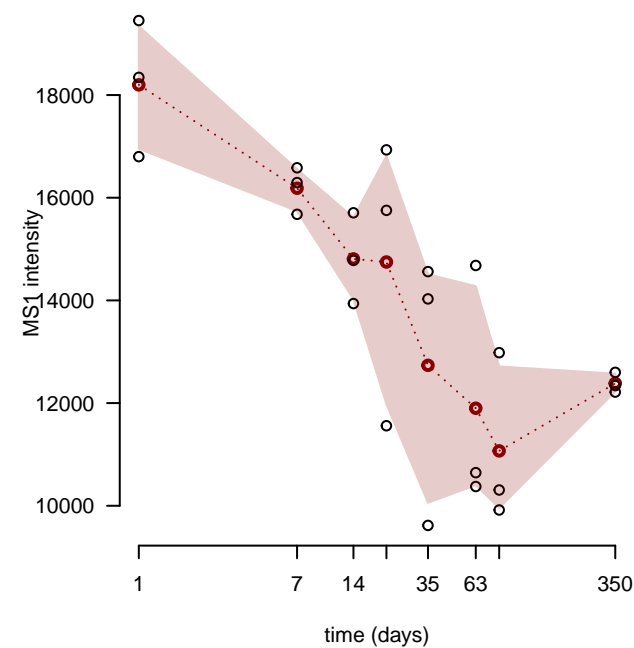

**Q14BI7**  
**GN=Tdrd9**

tudor domain containing 9

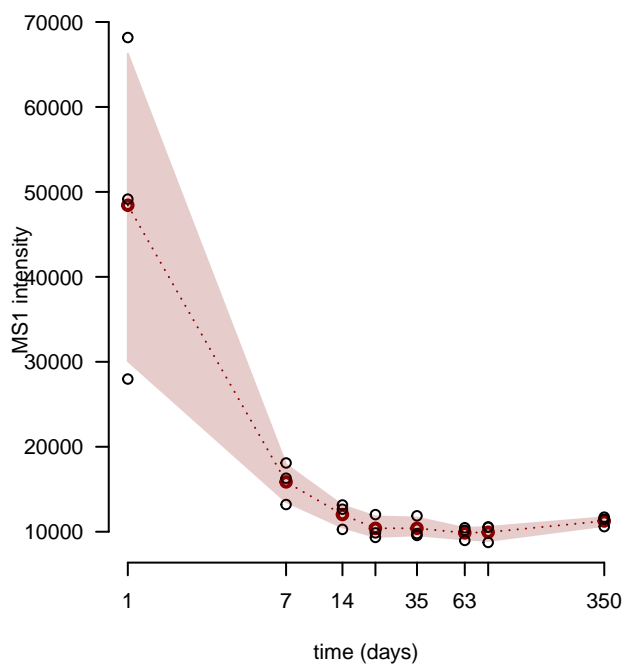

**Q14C51**  
**GN=Ptc3**

pentatricopeptide repeat domain 3

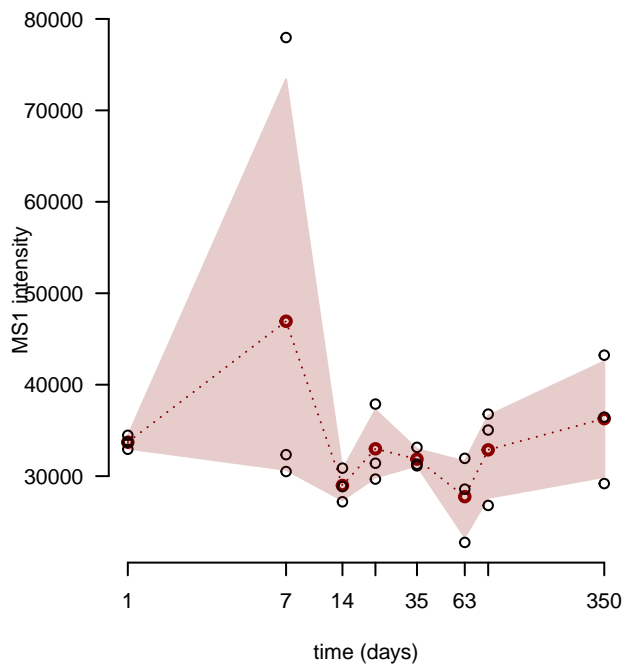

**Q14CH7**  
**GN=Aars2**

alanyl-tRNA synthetase 2, mitochondrial

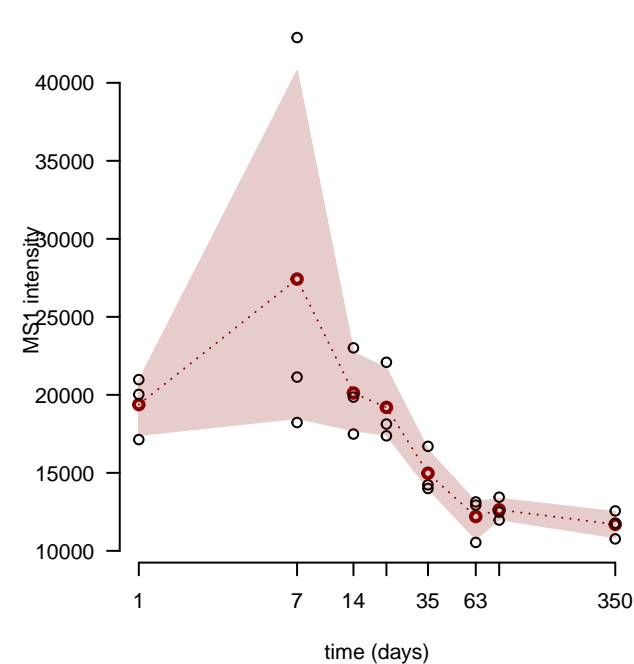

**Q14DH7**  
**GN=Acss3**

acyl-CoA synthetase short-chain family m ...

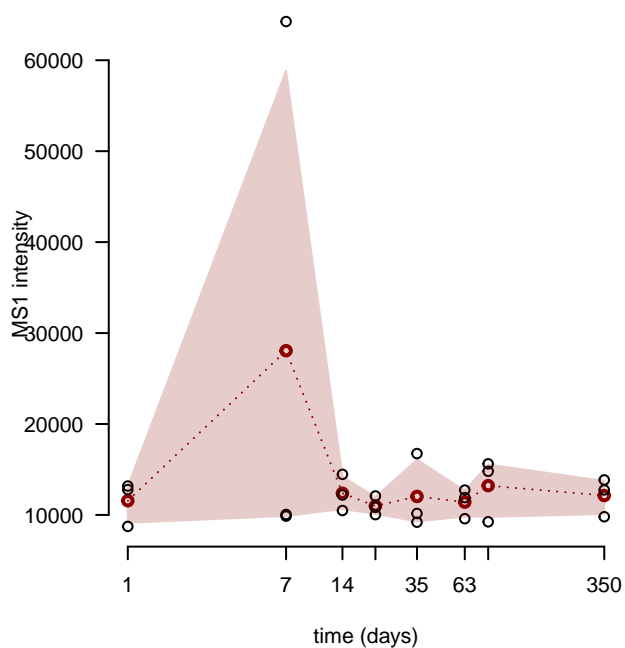

**Q14DK4**  
**GN=Gpat2**

glycerol-3-phosphate acyltransferase 2, ...

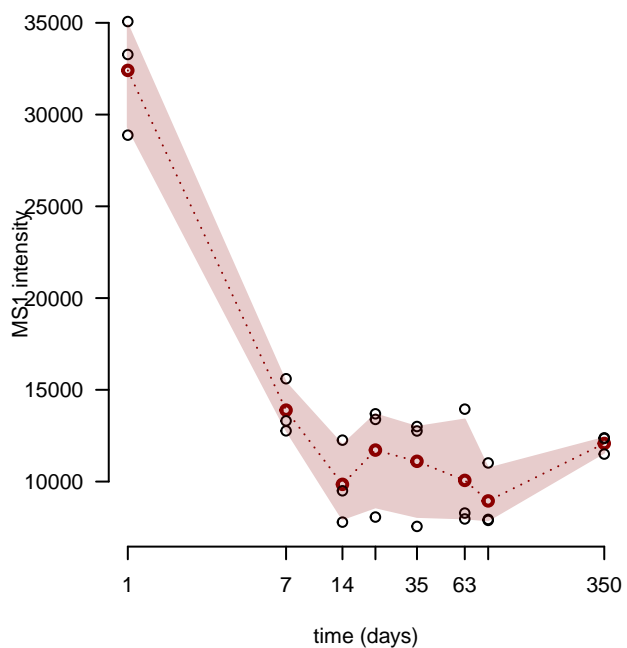

**Q14DQ1**  
**GN=Fam219b**

family with sequence similarity 219, mem ...

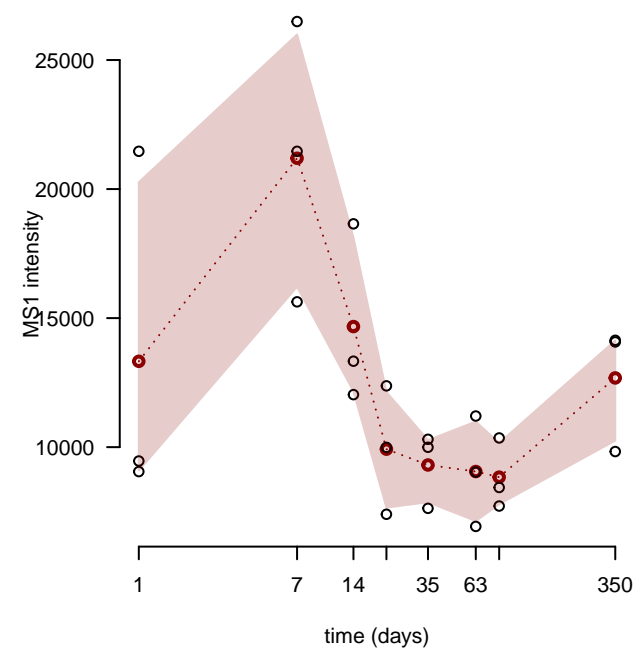

**Q18PI6**  
GN=Cd84  
CD84 antigen

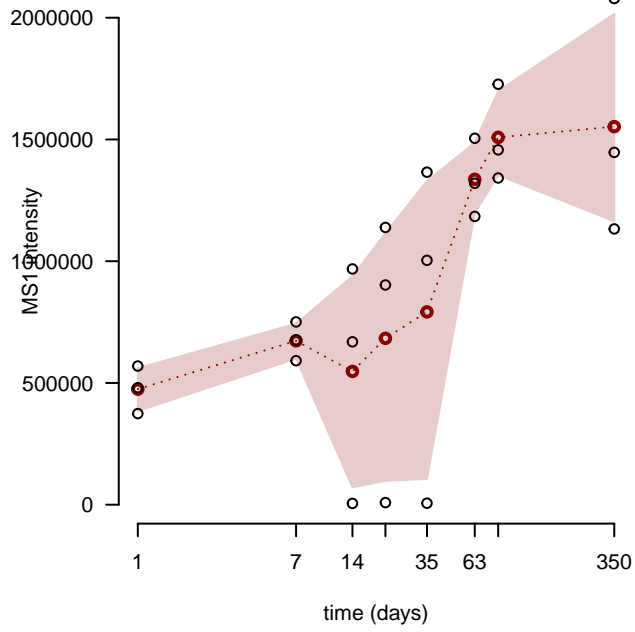

**Q19LI2**  
GN=A1bg  
alpha-1-B glycoprotein

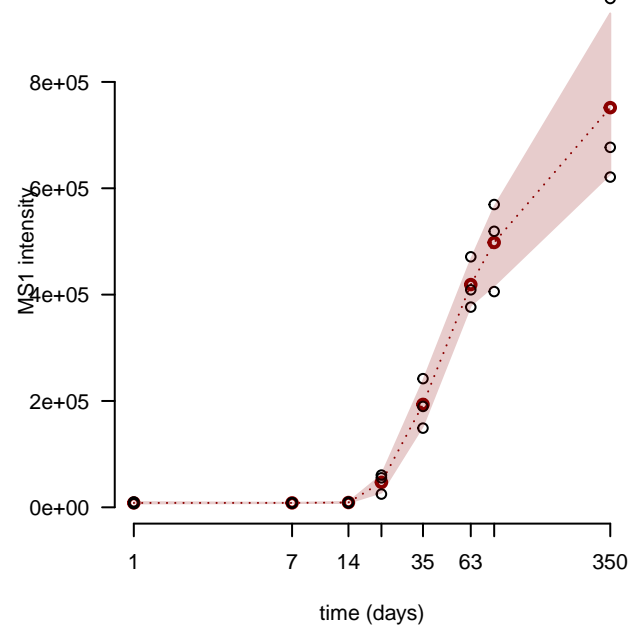

**Q1EHW4**  
GN=Sap25  
sin3 associated polypeptide

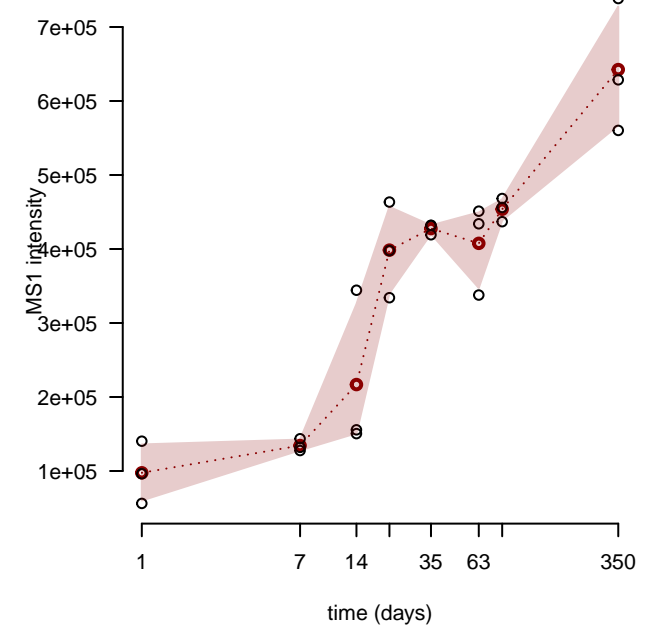

**Q1ERP8**  
GN=Cd300lg  
CD300 molecule like family member G

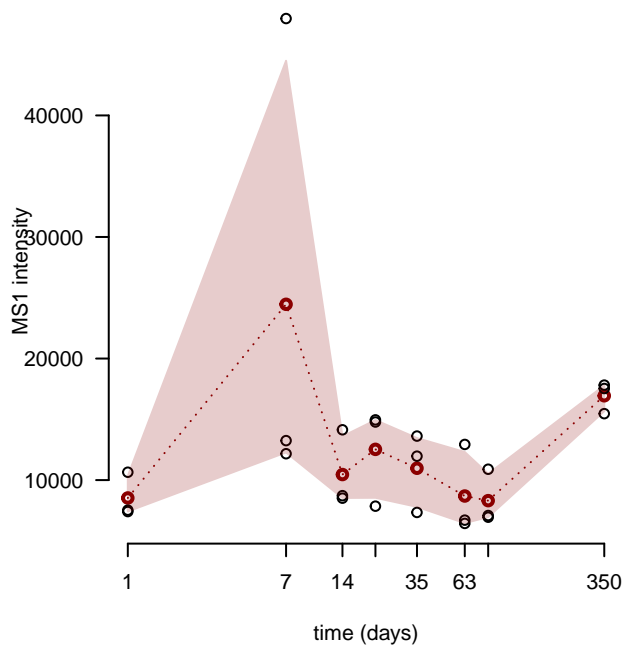

**Q1HFZ0**  
GN=Nsun2  
NOL1/NOP2/Sun domain family member 2

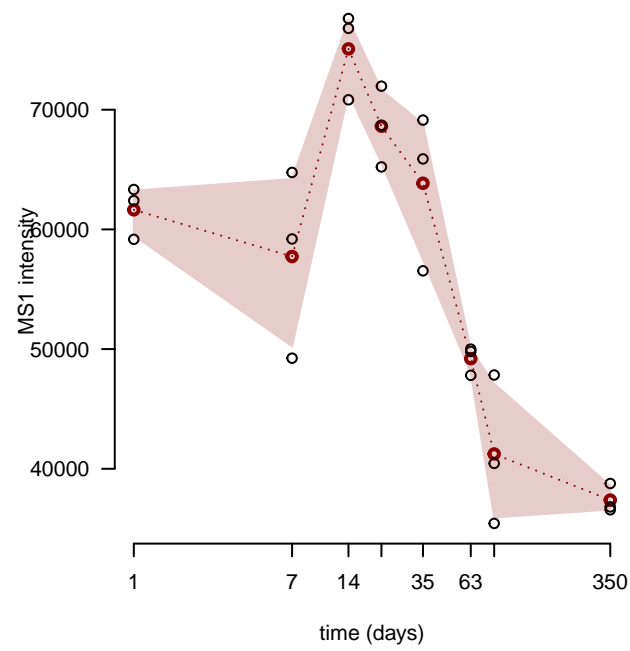

**Q1PSW8**  
GN=Trim71  
tripartite motif-containing 71

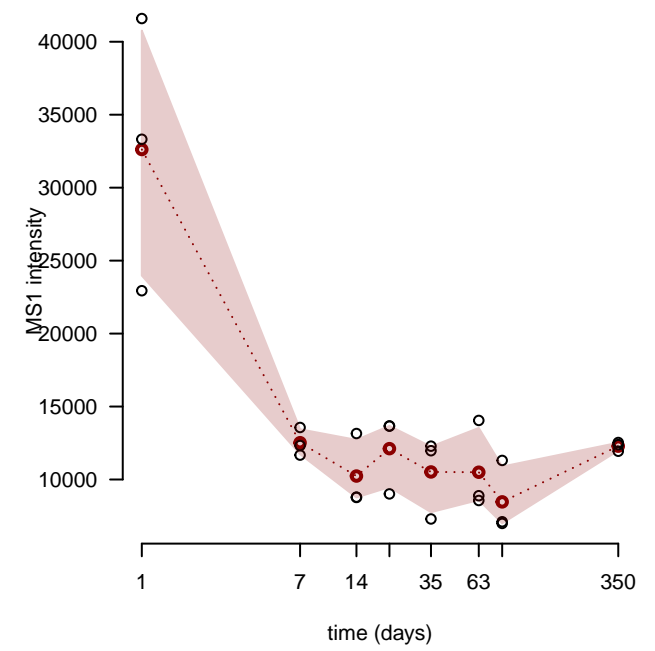

**Q1W617**  
GN=Shroom4  
shroom family member 4

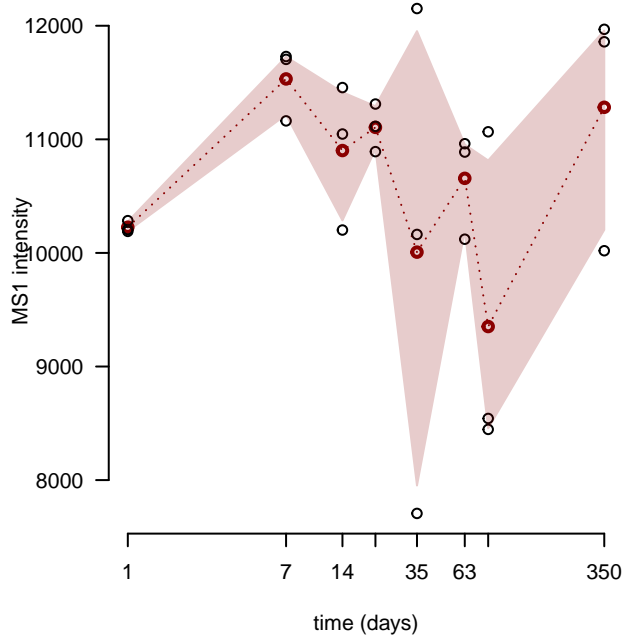

**Q1WG82**  
GN=Zglp1  
zinc finger, GATA-like protein 1

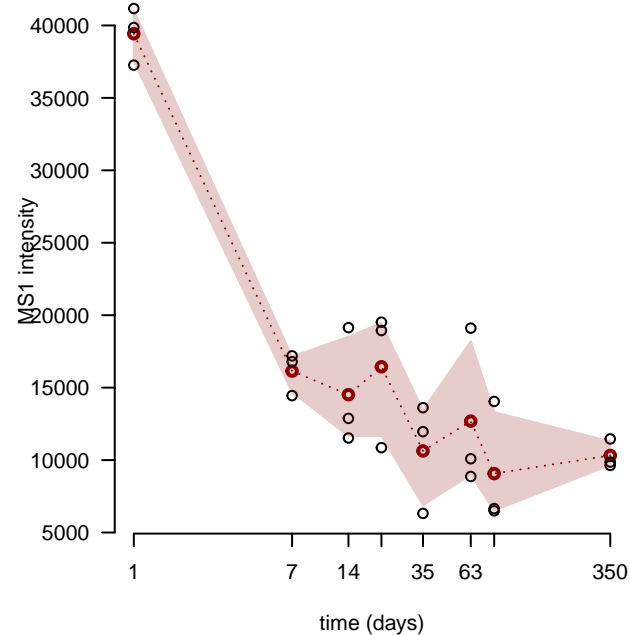

**Q2EMV9**  
GN=Parp14  
poly (ADP-ribose) polymerase family, mem ...

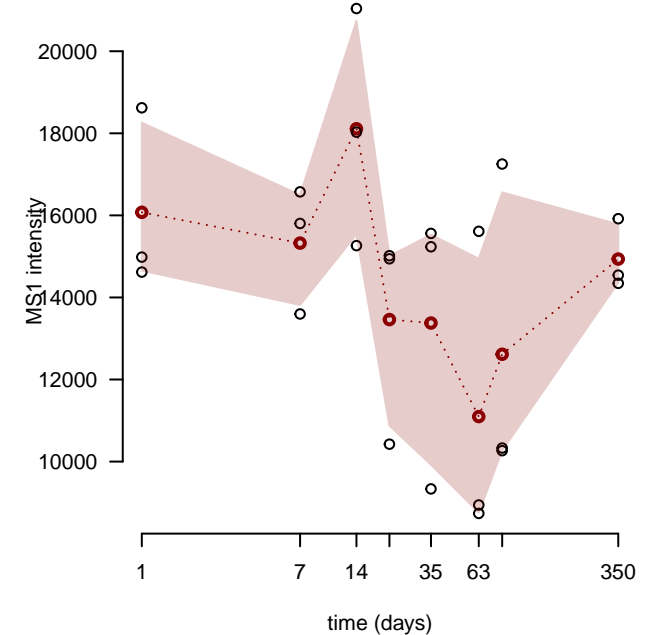

**Q2HXL6**  
**GN=Edem3**  
ER degradation enhancer, mannosidase alp ...

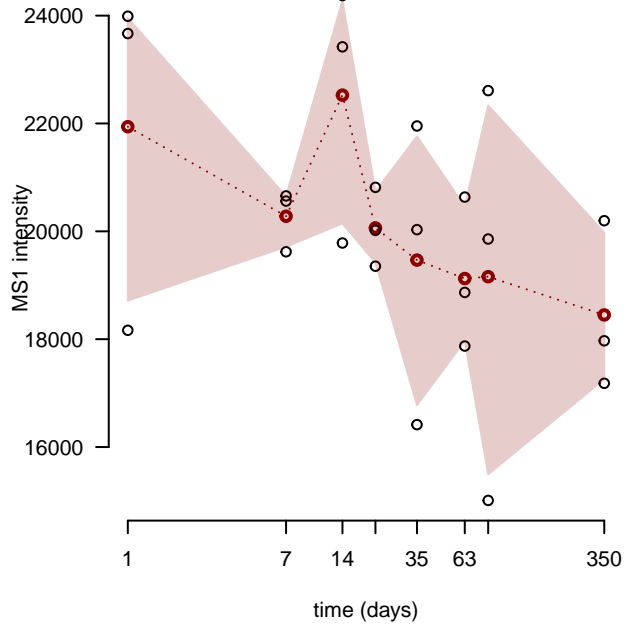

**Q2KHI9**  
**GN=Mcm9**  
minichromosome maintenance 9 homologous ...

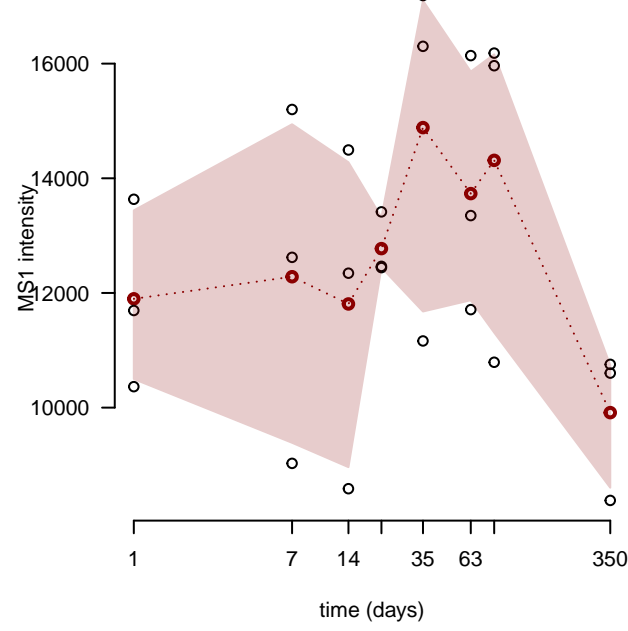

**Q2KN98**  
**GN=Specc1l**  
sperm antigen with calponin homology and ...

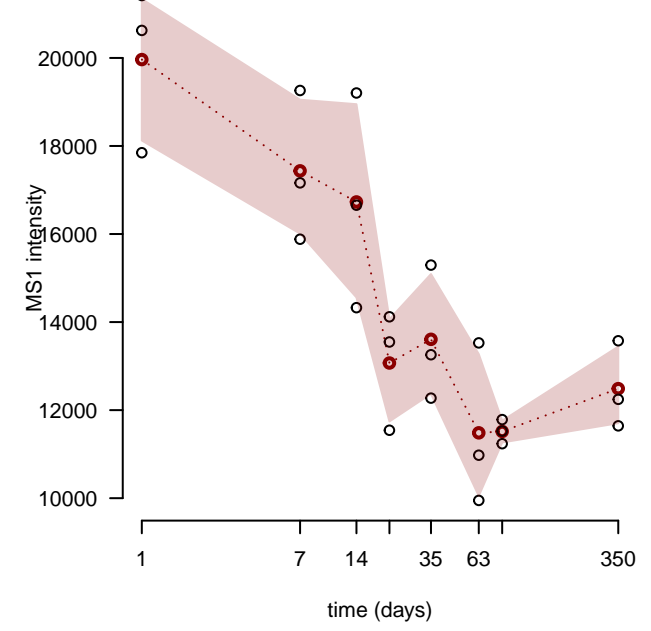

**Q2MV57**  
**GN=Tctn2**  
tectonic family member 2

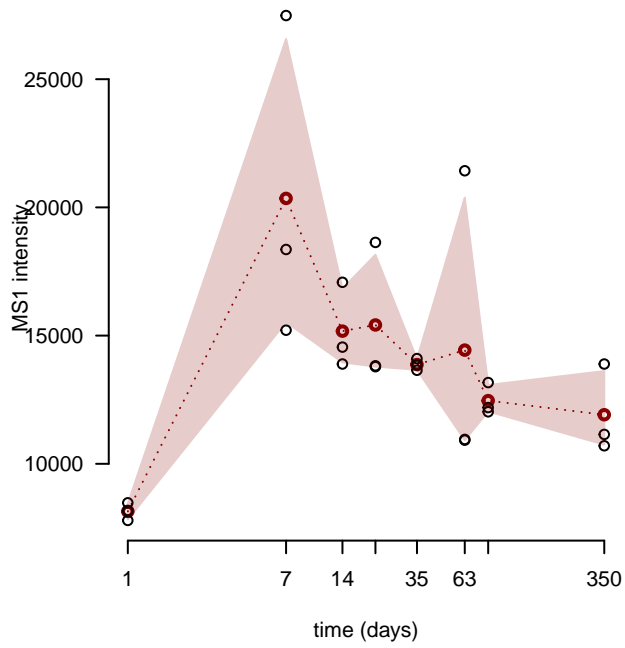

**Q2NL51**  
**GN=Gsk3a**  
glycogen synthase kinase 3 alpha

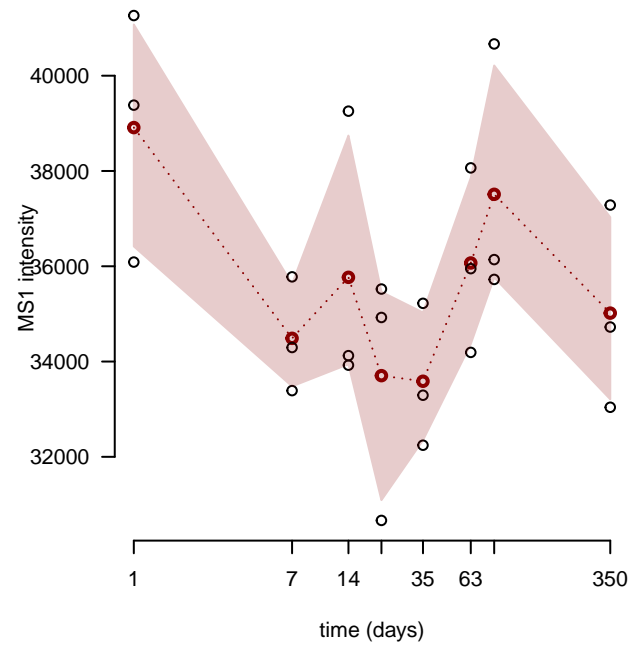

**Q2PFD7**  
**GN=Psd3**  
pleckstrin and Sec7 domain containing 3

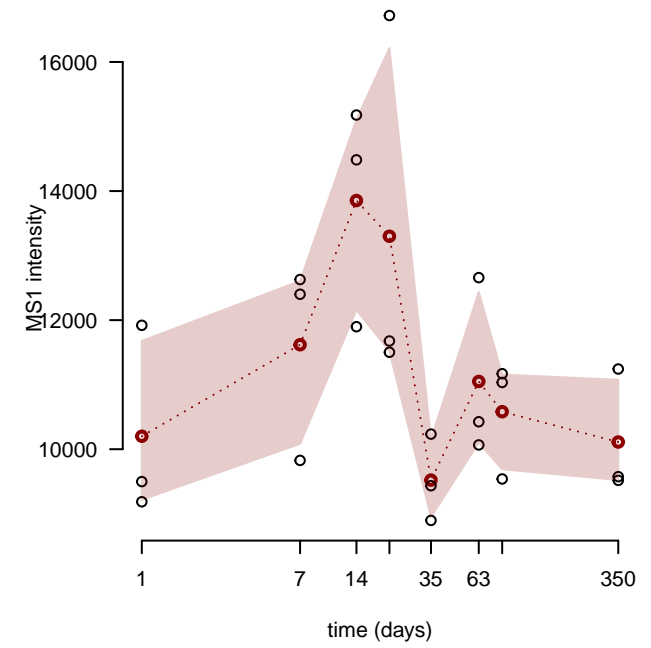

**Q2PZL6**  
**GN=Fat4**  
FAT atypical cadherin 4

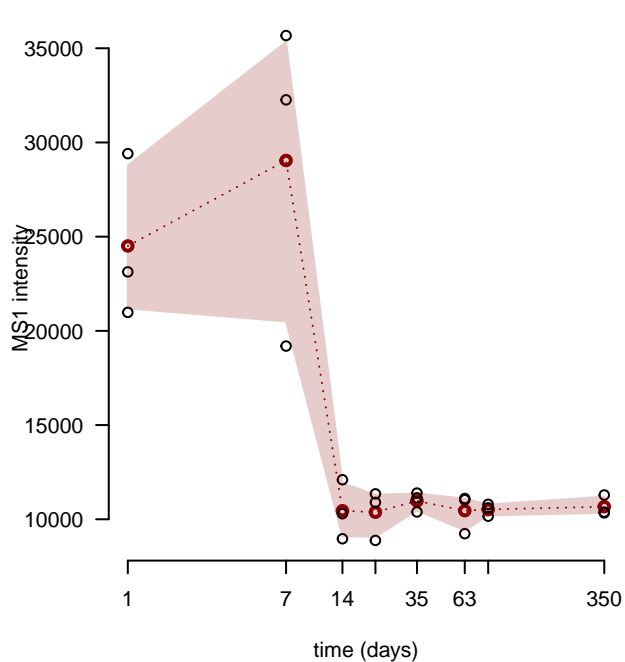

**Q2TBA3**  
**GN=Malt1**  
MALT1 paracaspase

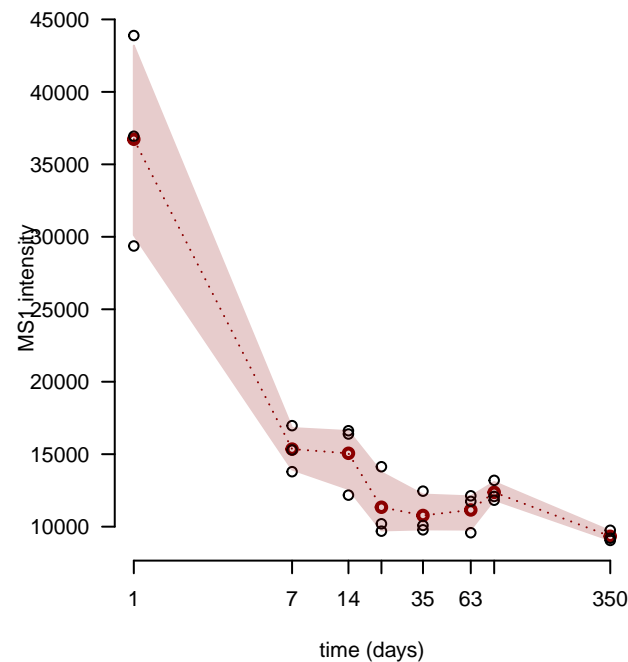

**Q2TBE6**  
**GN=Pi4k2a**  
phosphatidylinositol 4-kinase type 2 alp ...

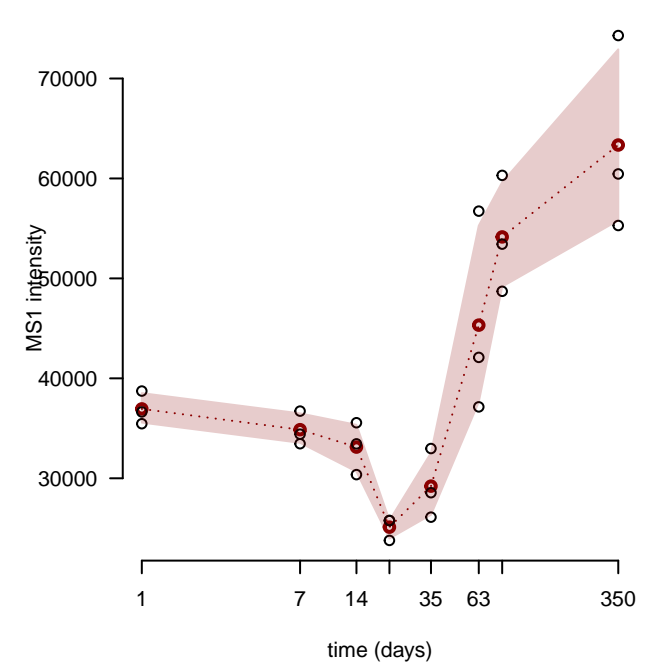

**Q2TL60**  
GN=Znf667

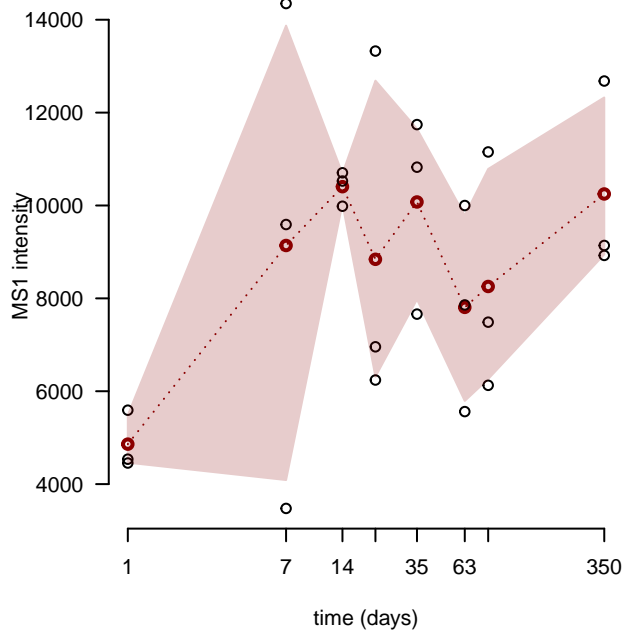

**Q2TPA8**  
GN=Hsd12  
hydroxysteroid dehydrogenase like 2

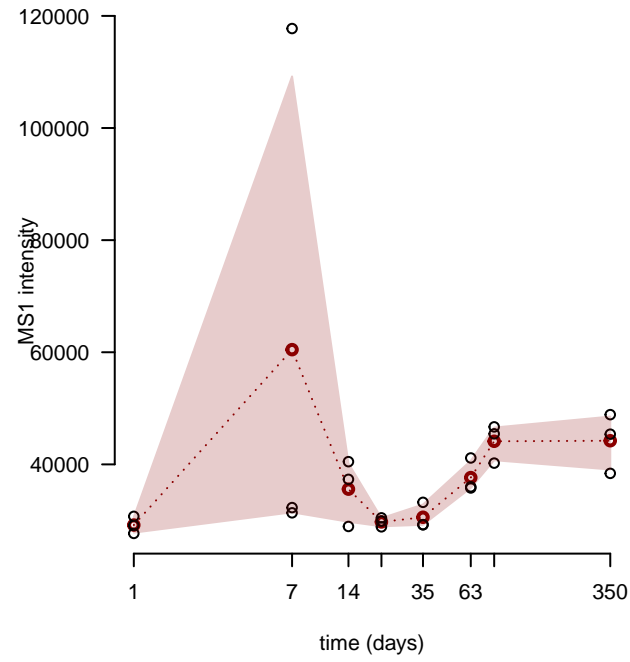

**Q2VIS4**  
GN=Flg2  
flaggrin family member 2

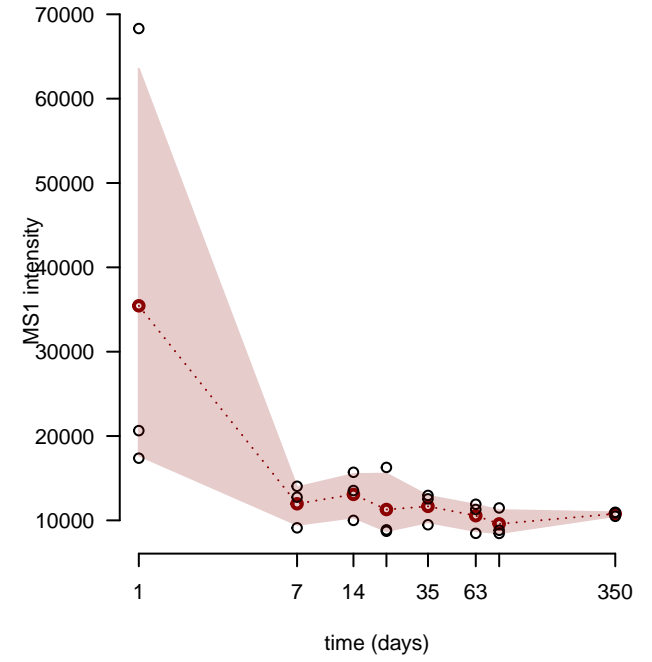

**Q2VPQ9**  
GN=Meaf6  
MYST/Esa1-associated factor 6

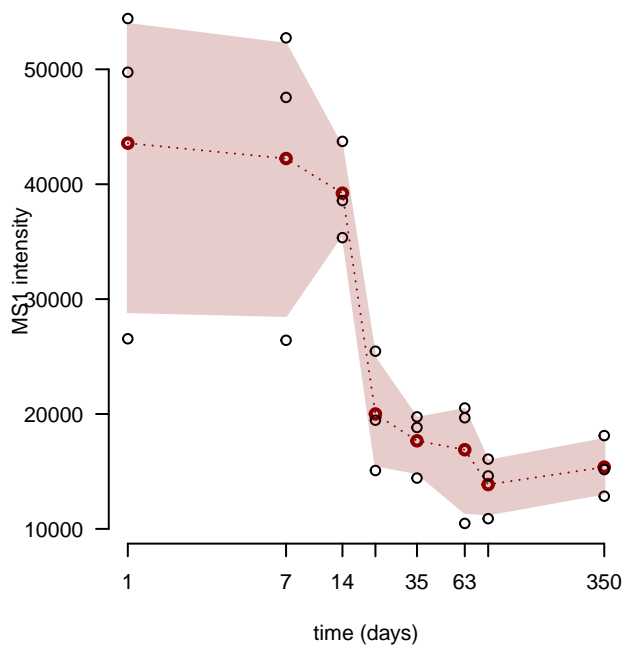

**Q2VPU4**  
GN=Mlxip  
MLX interacting protein

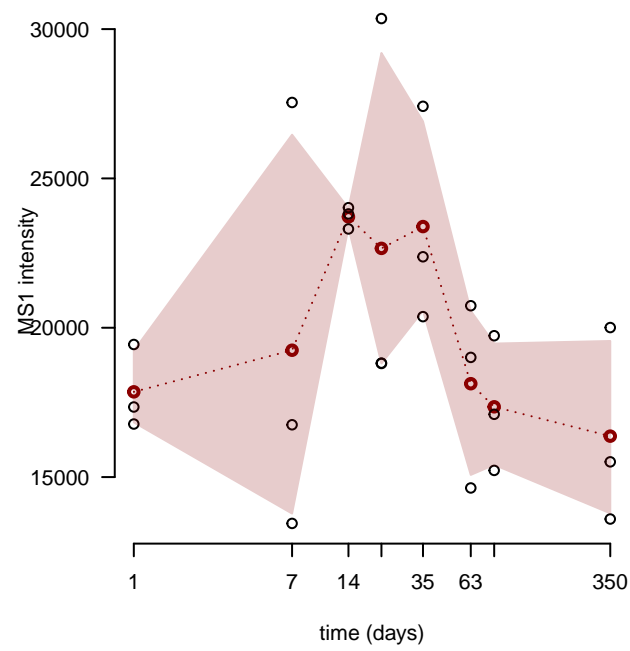

**Q2YDW2**  
GN=Msto1  
misato 1, mitochondrial distribution and ...

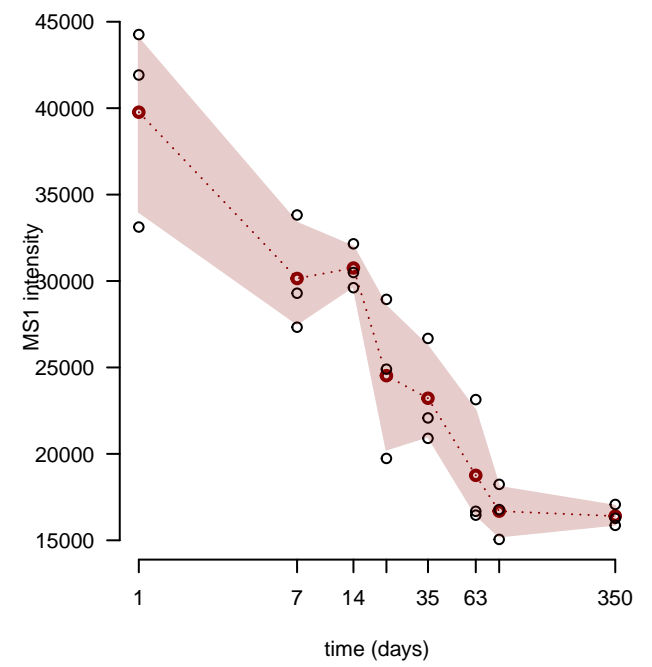

**Q31125**  
GN=Slc39a7  
solute carrier family 39 (zinc transport ...

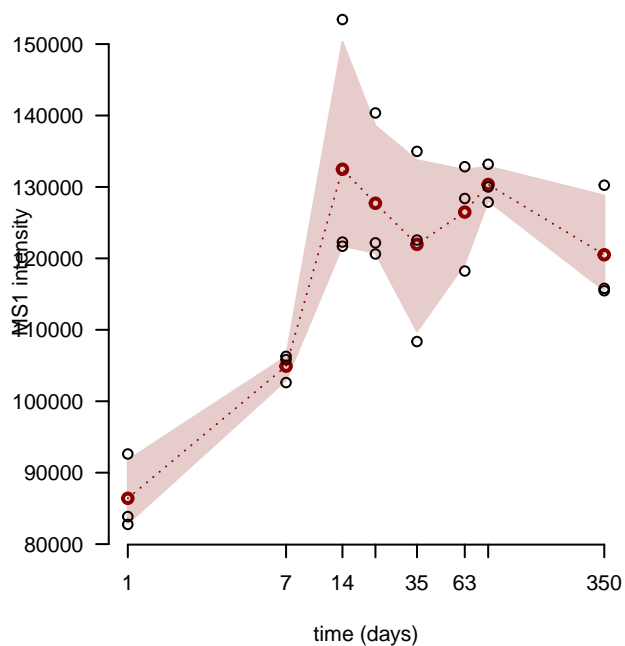

**Q32NY4**  
GN=Cnm3  
cyclin M3

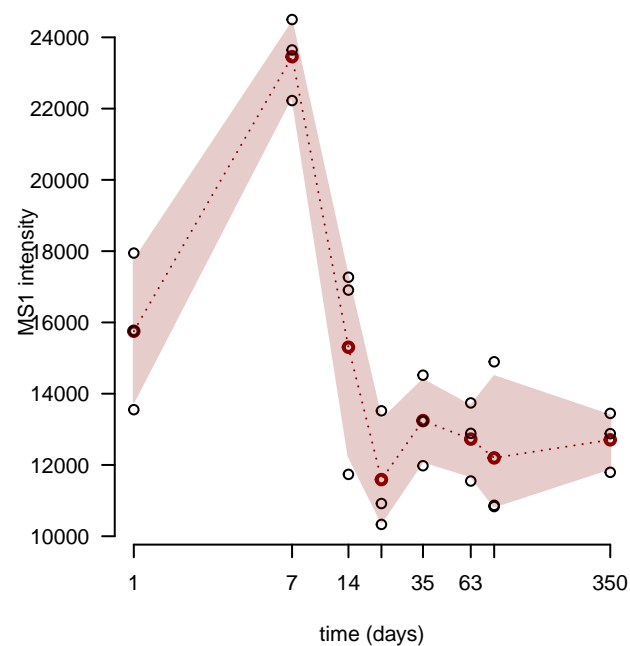

**Q32Q92**  
GN=Acot6  
acyl-CoA thioesterase 6

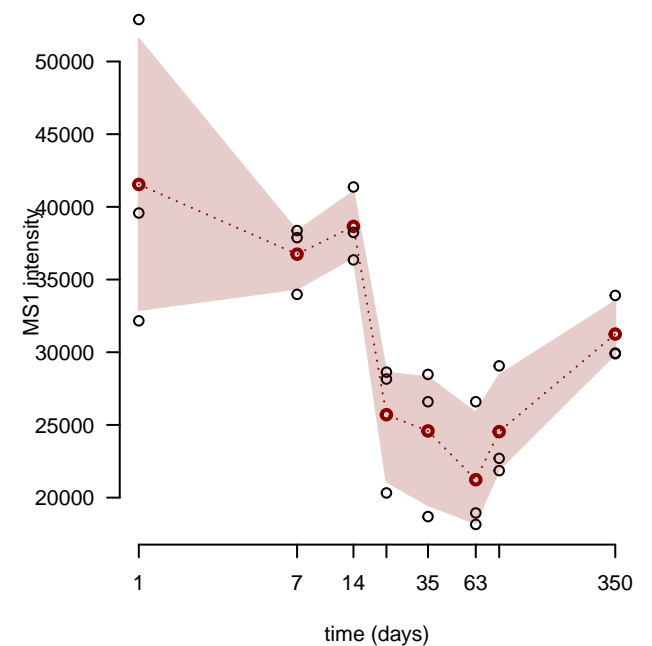

**Q3B7Z2**  
GN=Osbp  
oxysterol binding protein

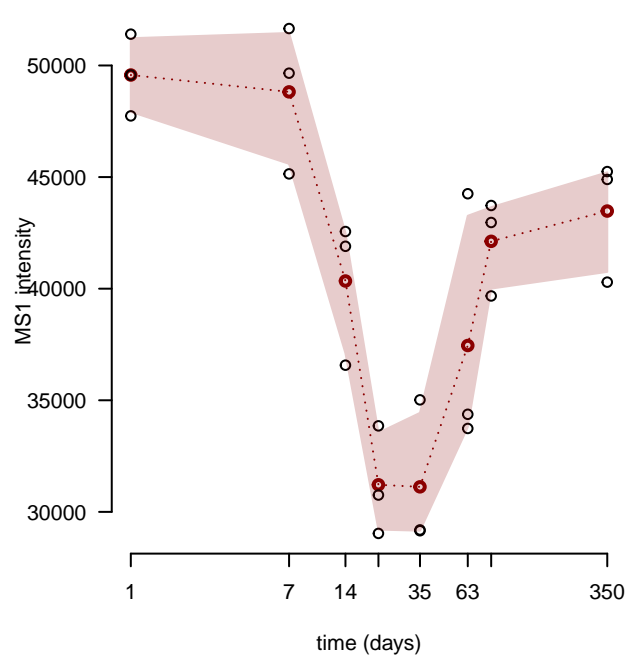

**Q3KNJ2**  
GN=Nhej1  
non-homologous end joining factor 1

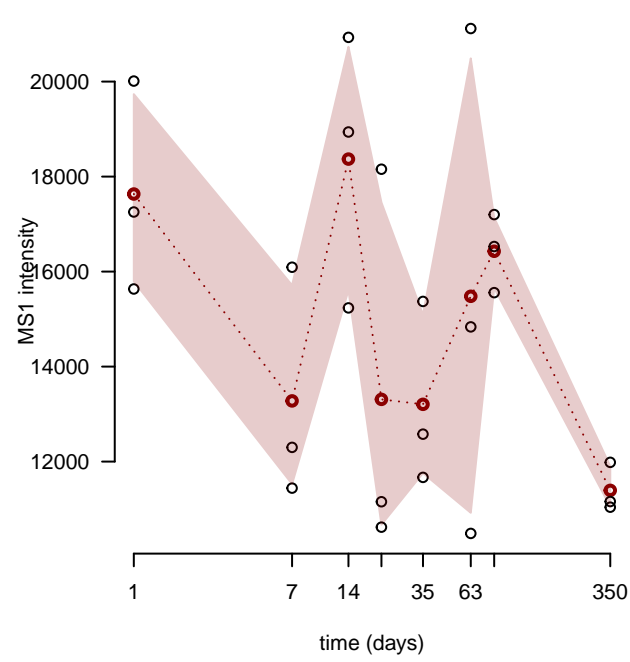

**Q3KNM2**  
GN=March5

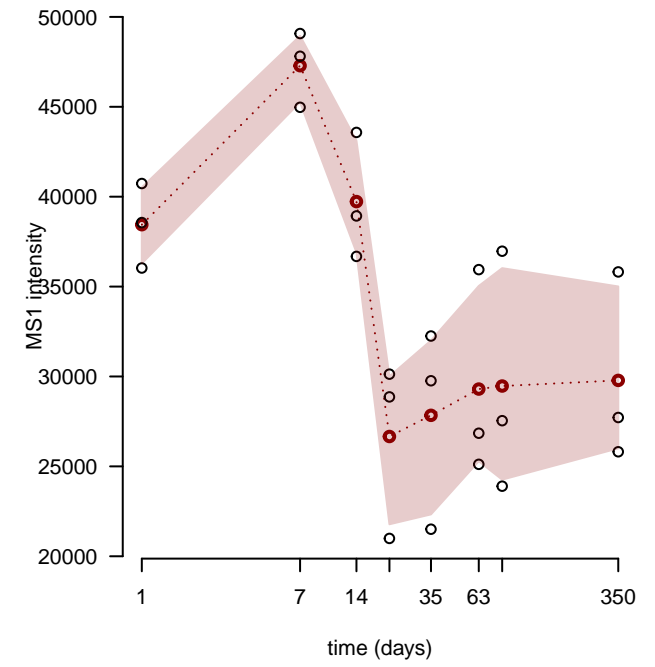

**Q3SXD3**  
GN=Hddc2  
HD domain containing 2

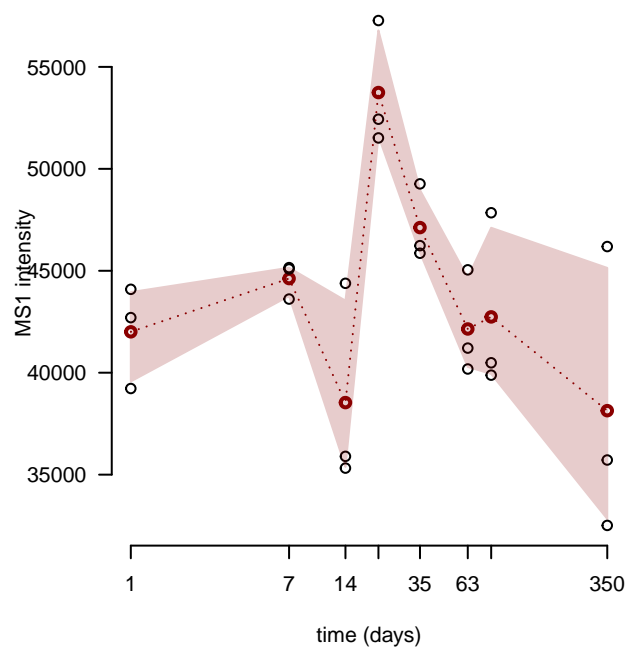

**Q3T9E4**  
GN=Tgtp2  
T cell specific GTPase 2

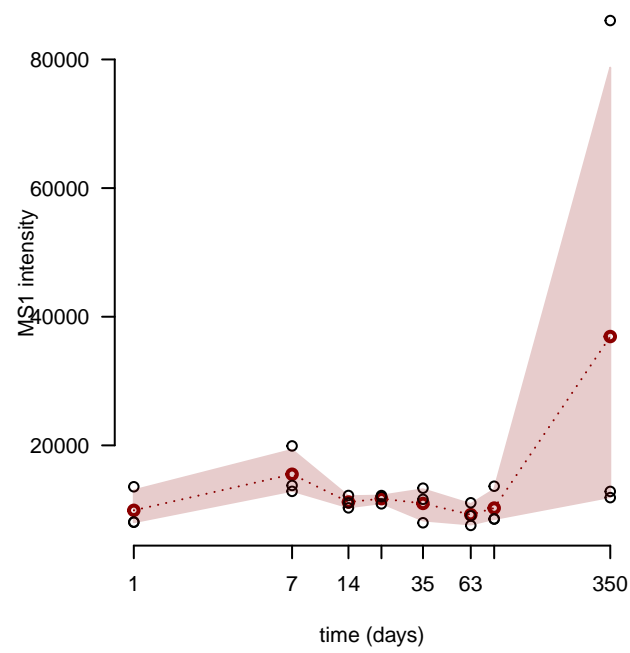

**Q3T9Z9**  
GN=Zup1  
zinc finger containing ubiquitin peptida ...

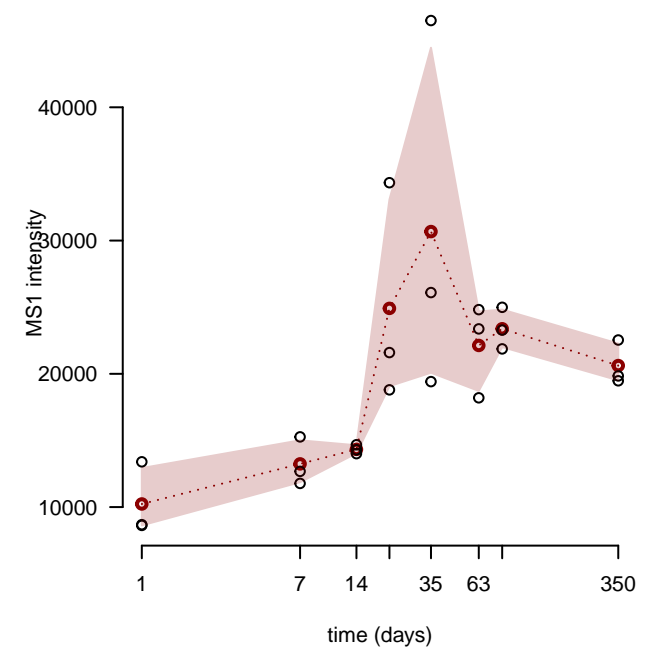

**Q3TA59**  
GN=Jmjd8  
jumonji domain containing 8

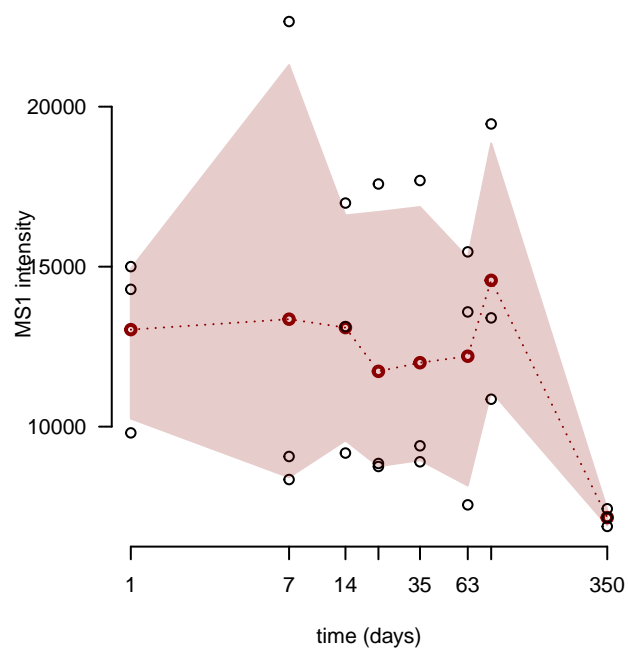

**Q3TAA7**  
GN=Stk11ip  
serine/threonine kinase 11 interacting p ...

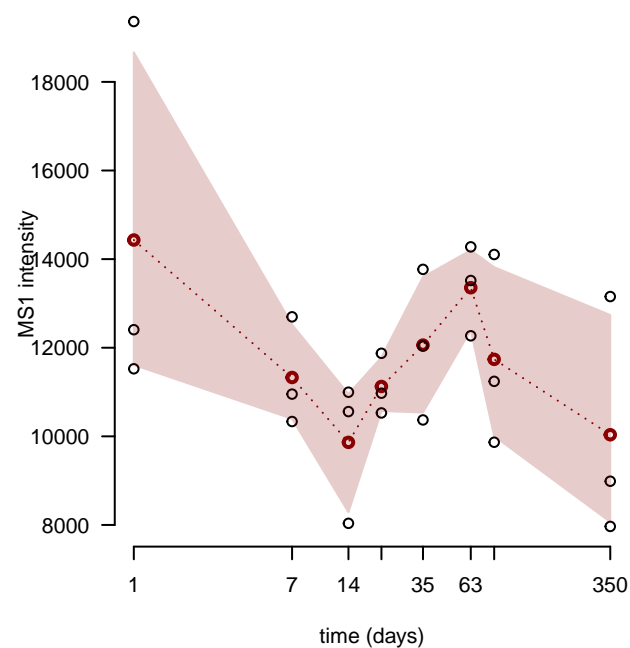

**Q3TAE8**  
GN=Alg6  
asparagine-linked glycosylation 6 (alpha ...

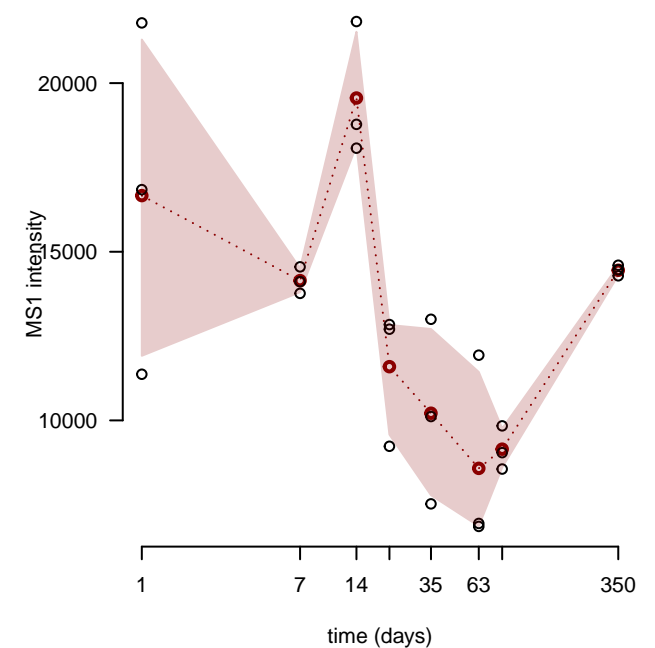

**Q3TAP4**  
GN=Ap5b1  
adaptor-related protein complex 5, beta ...

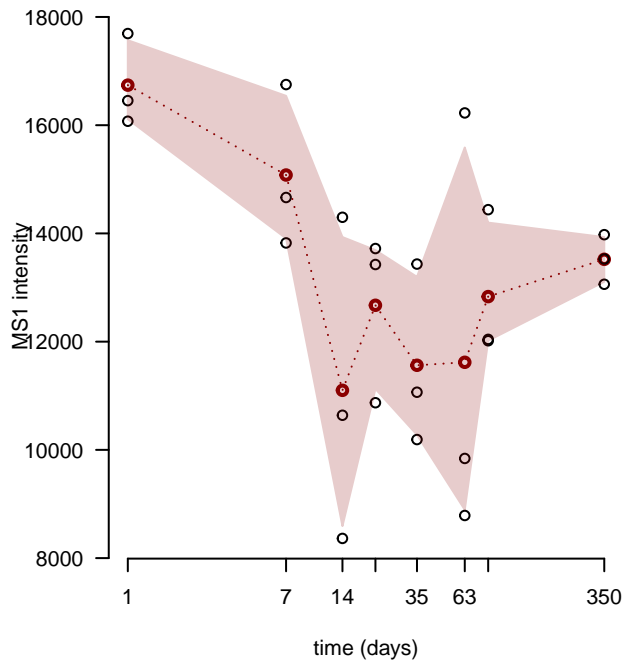

**Q3TAS6**  
GN=Emc10  
ER membrane protein complex subunit 10

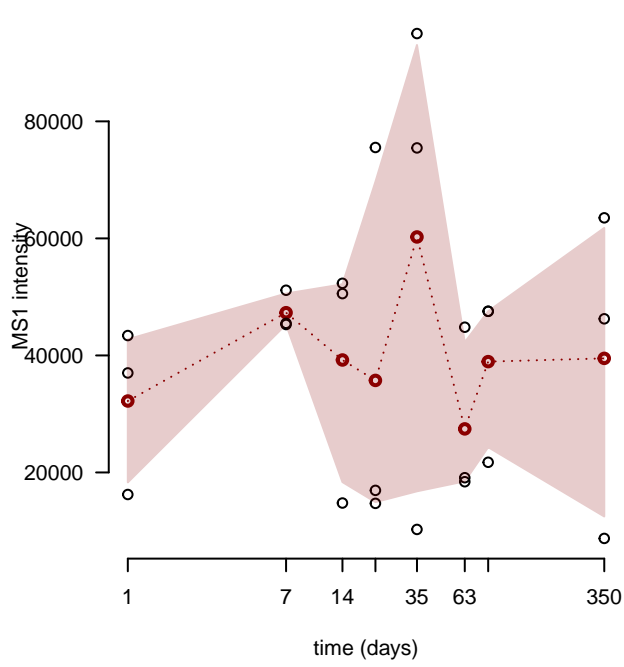

**Q3TB48**  
GN=Tmem104  
transmembrane protein 104

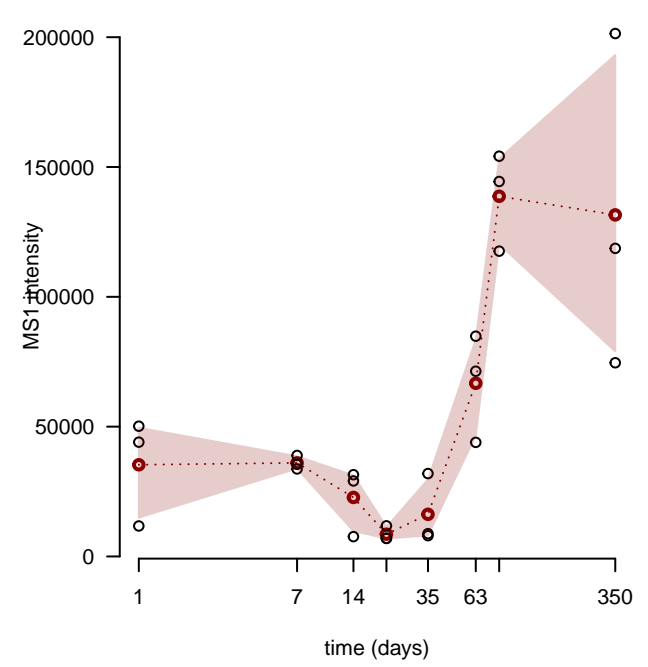

**Q3TB82**  
GN=Plekhf1  
pleckstrin homology domain containing, f ...

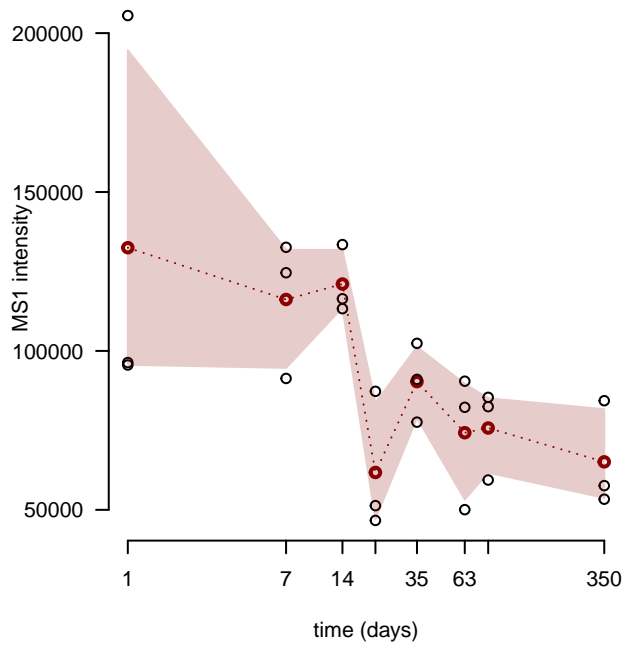

**Q3TBD2**  
GN=Arhgap45  
Rho GTPase activating protein 45

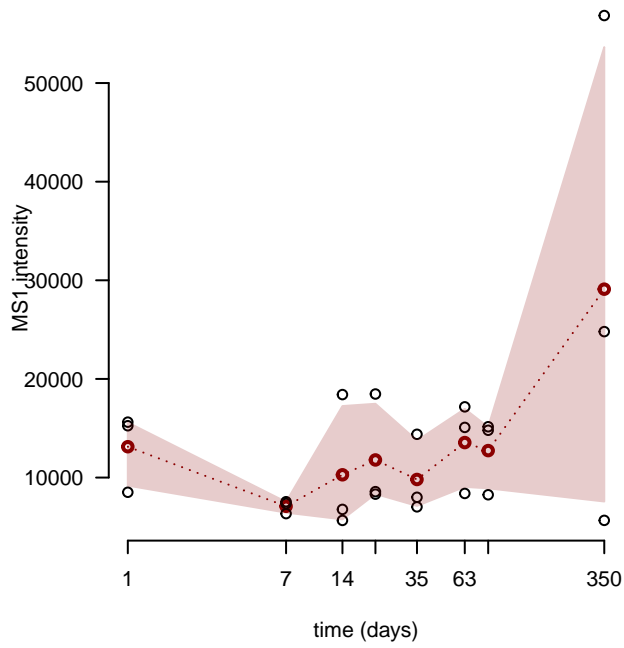

**Q3TBT3**  
GN=Tmem173

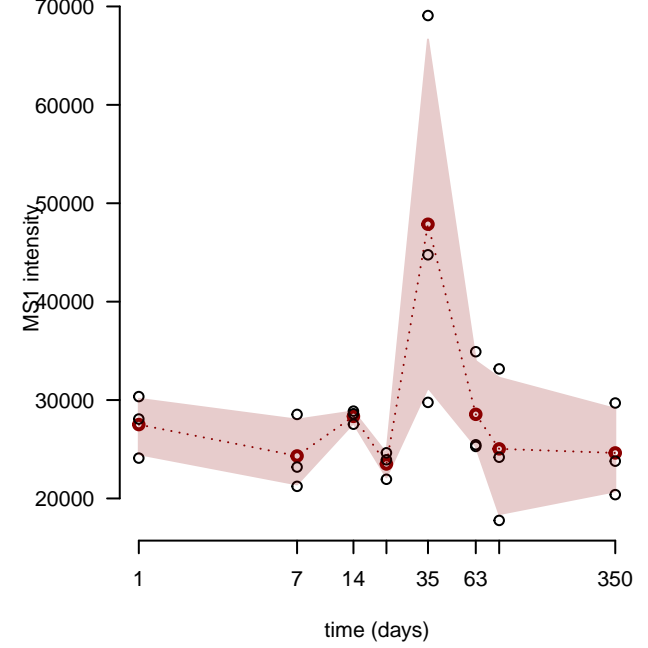

**Q3TBW2**  
GN=Mrpl10  
mitochondrial ribosomal protein L10

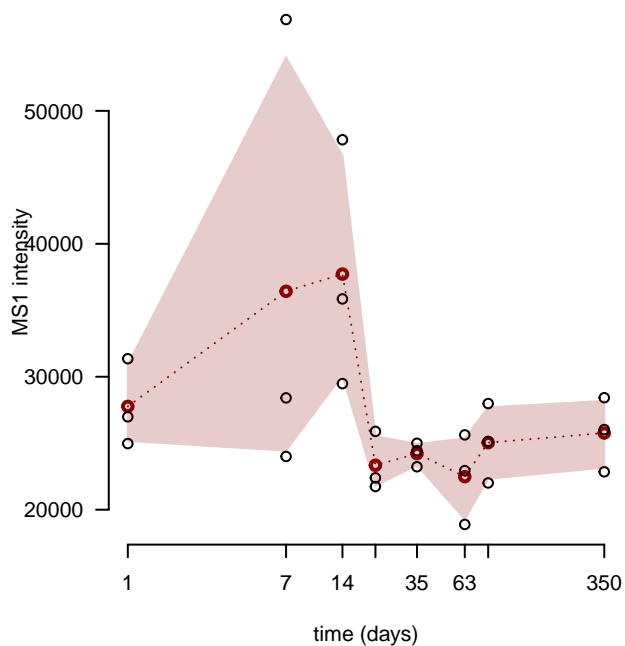

**Q3TC33**  
GN=Ccdc127  
coiled-coil domain containing 127

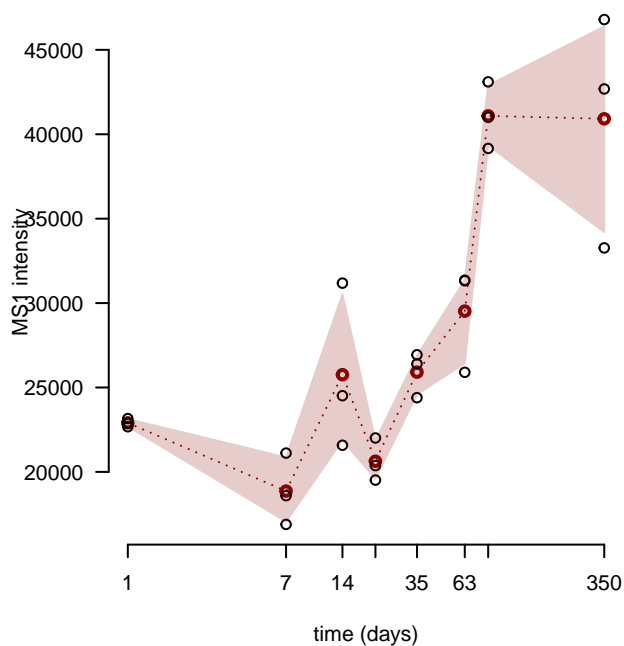

**Q3TC46**  
GN=Pat1  
protein associated with topoisomerase II ...

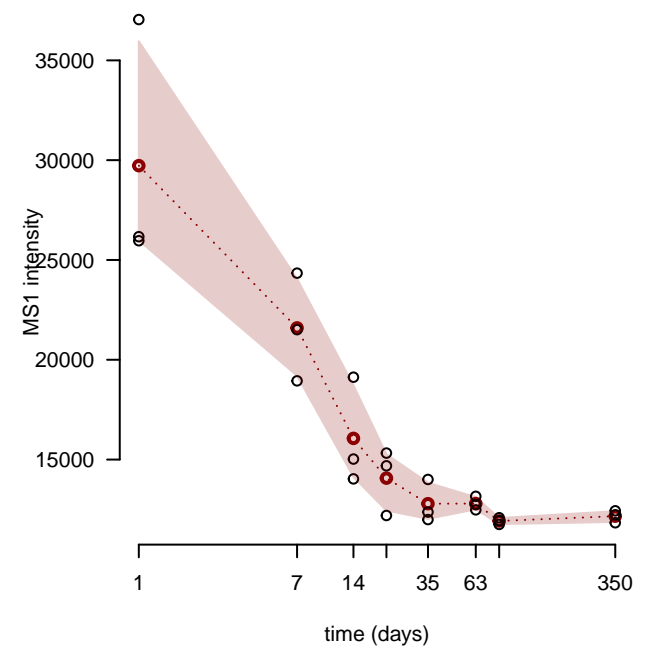



**Q3TC72**  
GN=Fahd2

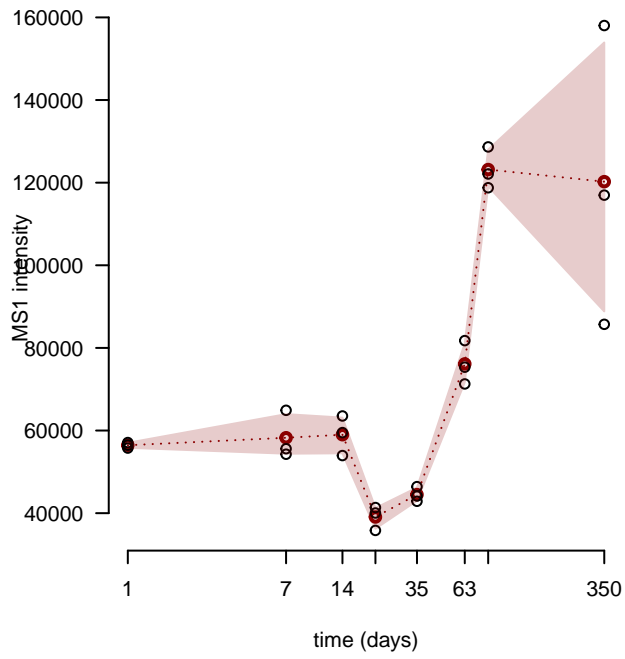

**Q3TC93**  
GN=Hs1bp3  
HCLS1 binding protein 3

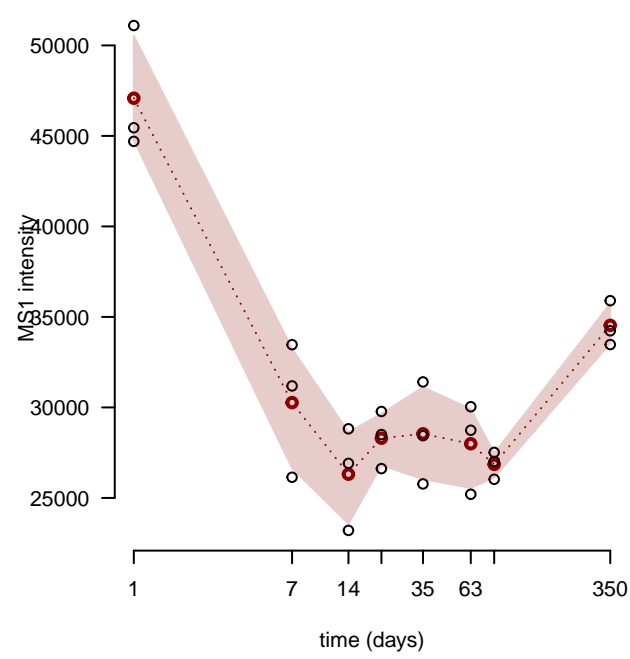

**Q3TCH7**  
GN=Cul4a  
cullin 4A

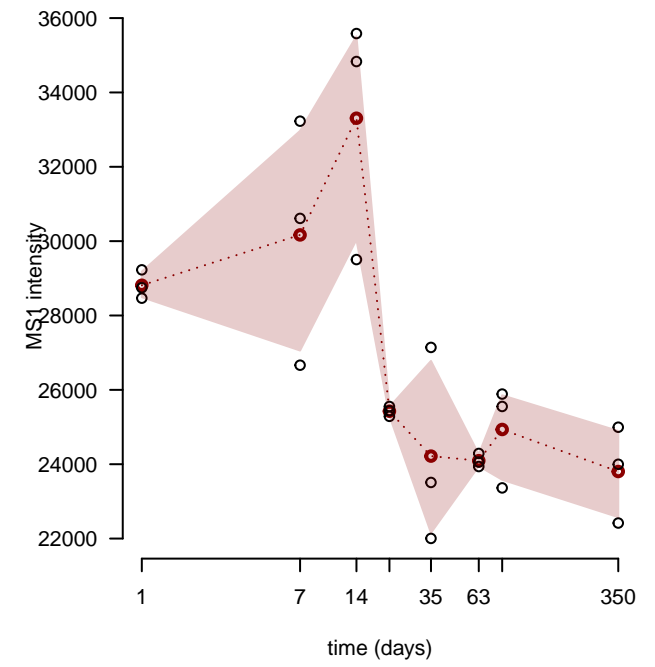

**Q3TCJ1**  
GN=Abraxas2  
BRISC complex subunit

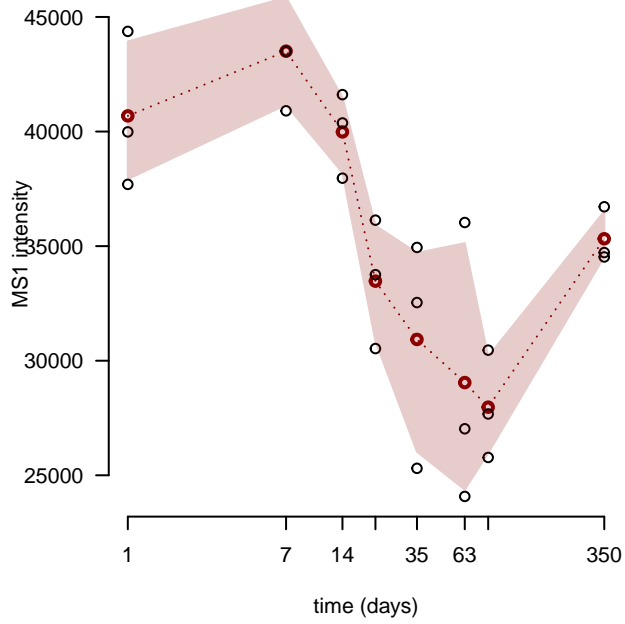

**Q3TCJ8**  
GN=Ccdc69  
coiled-coil domain containing 69

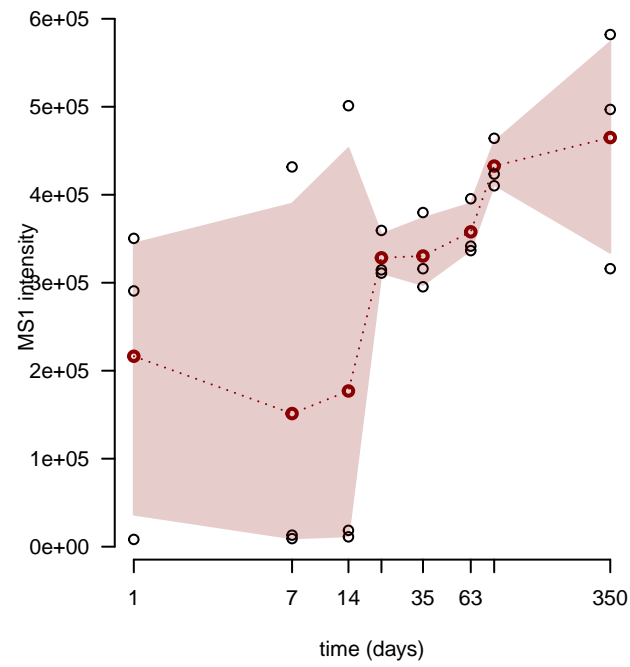

**Q3TCN2**  
GN=Plbd2  
phospholipase B domain containing 2

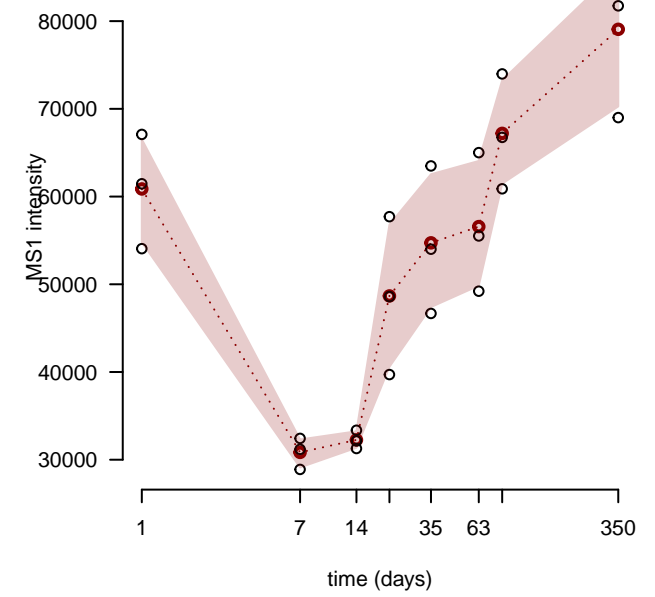

**Q3TCX3**  
GN=Khdc4  
KH domain containing 4, pre-mRNA splicin ...

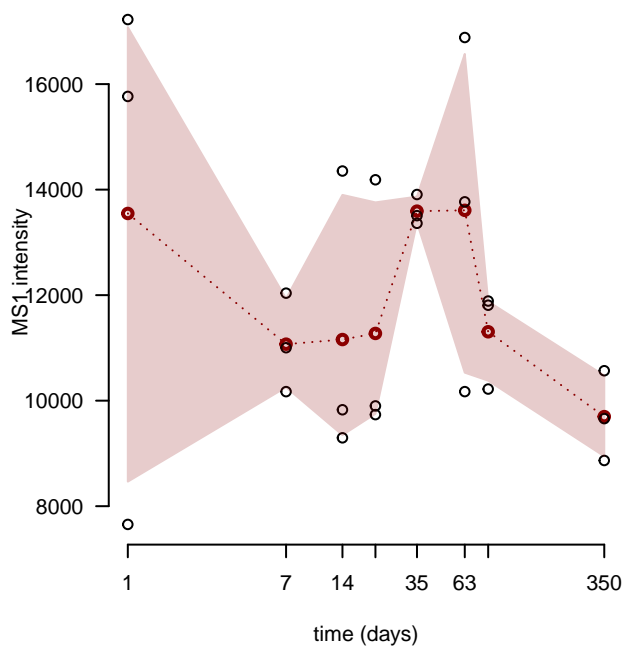

**Q3TD49**  
GN=Sppl2b  
signal peptide peptidase like 2B

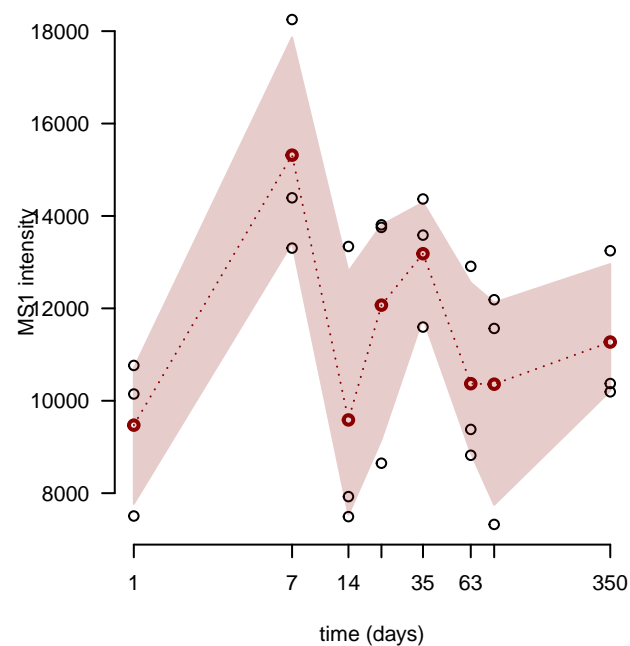

**Q3TDD9**  
GN=Ppp1r21  
protein phosphatase 1, regulatory subuni ...

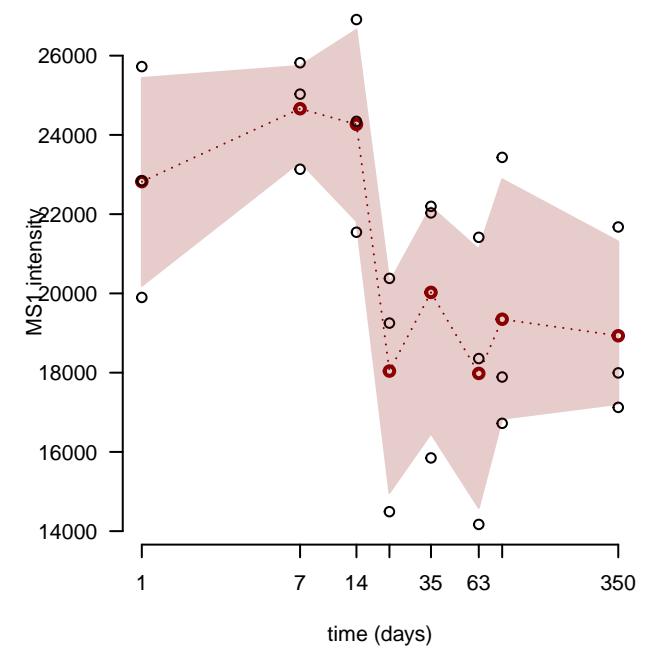

**Q3TDE8**  
GN=Znf691

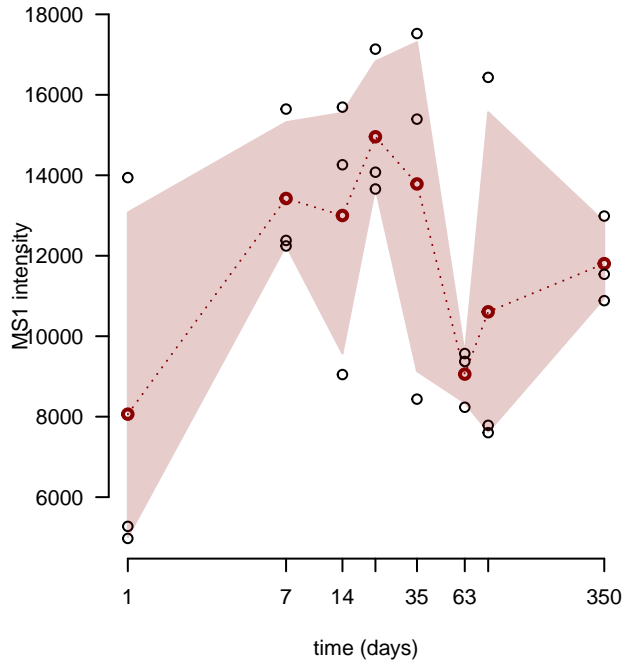

**Q3TDK6**  
GN=Rogdi  
rogdi homolog

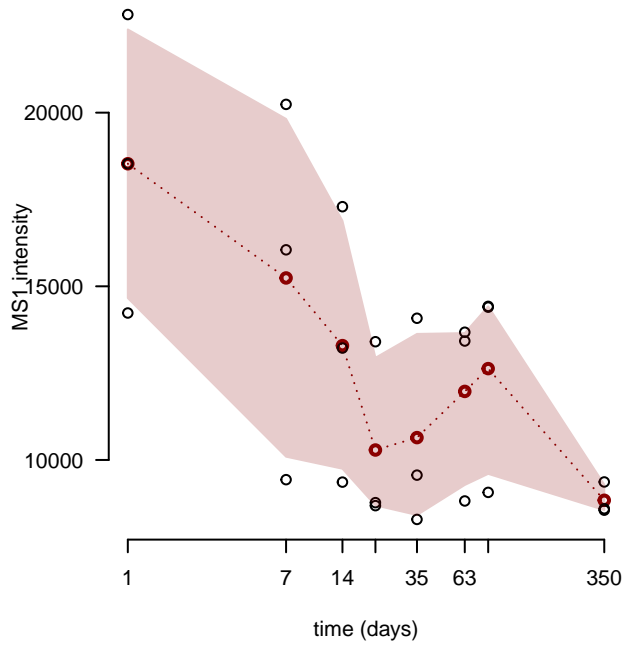

**Q3TDN2**  
GN=Faf2  
Fas associated factor family member 2

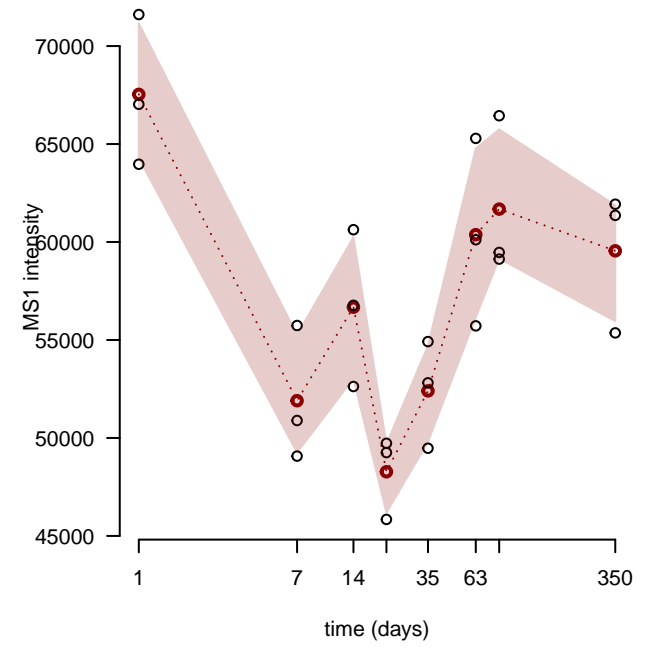

**Q3TDQ1**  
GN=Stt3b  
STT3, subunit of the oligosaccharyltrans ...

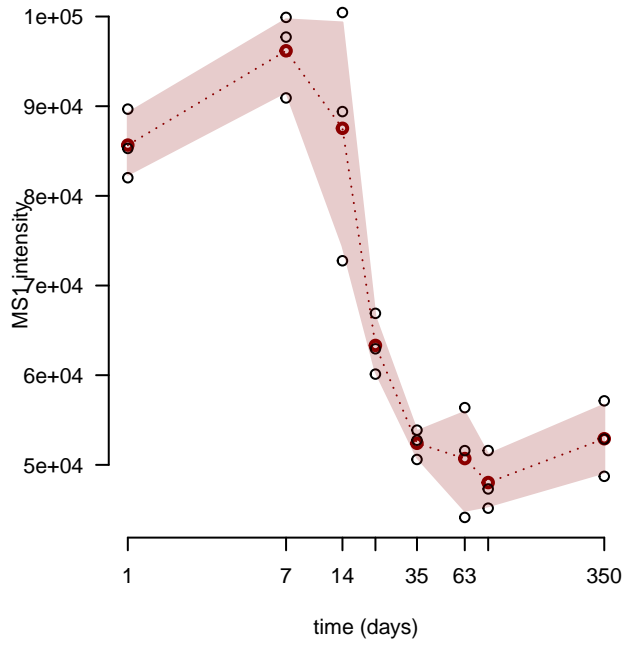

**Q3TDX8**  
GN=Cyb5r4  
cytochrome b5 reductase 4

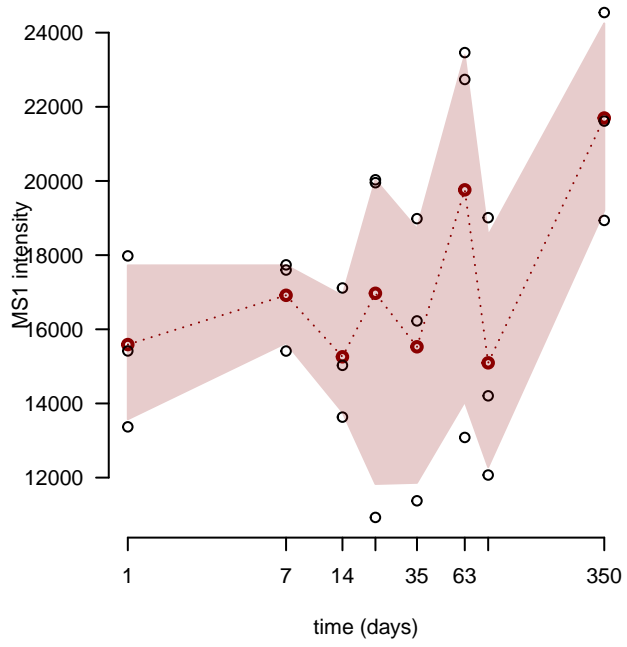

**Q3TEA8**  
GN=Hp1bp3  
heterochromatin protein 1, binding prote ...

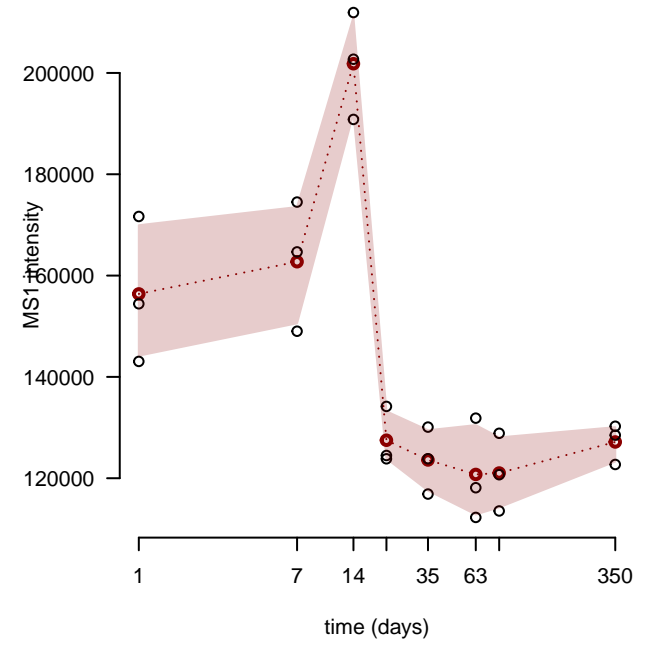

**Q3TEI4**  
GN=

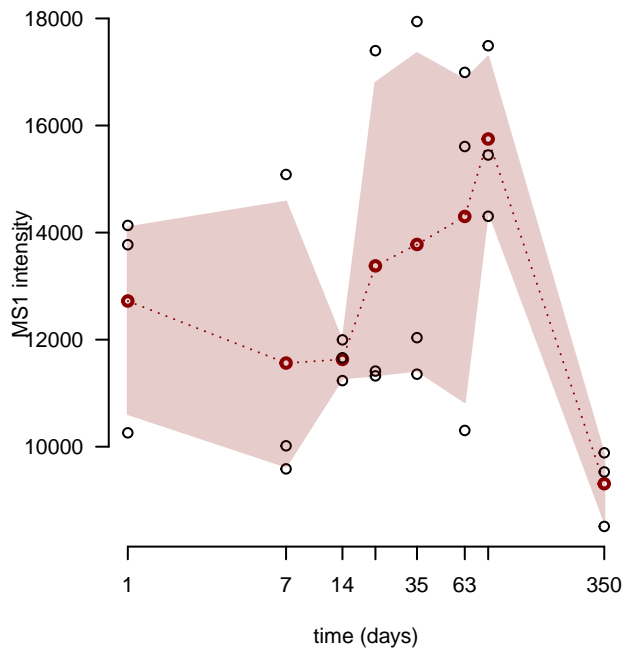

**Q3TEW6**  
GN=Mpzl1  
myelin protein zero-like 1

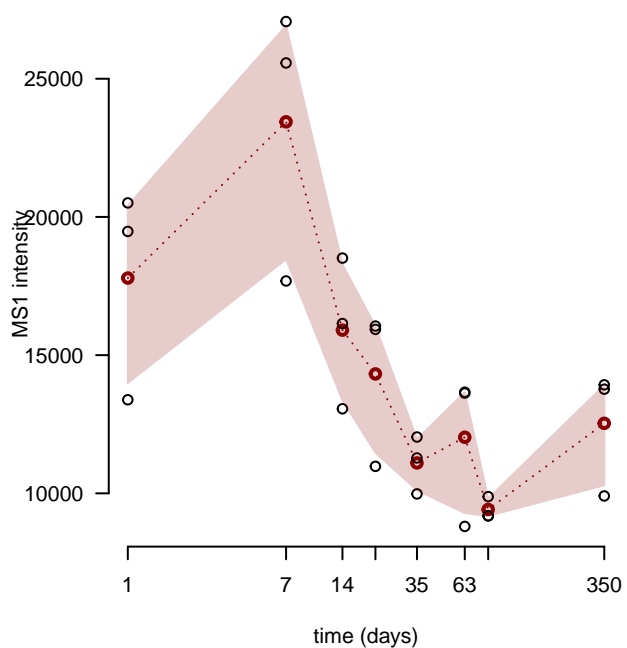

**Q3TFD2**  
GN=Lpcat1  
lysophosphatidylcholine acyltransferase ...

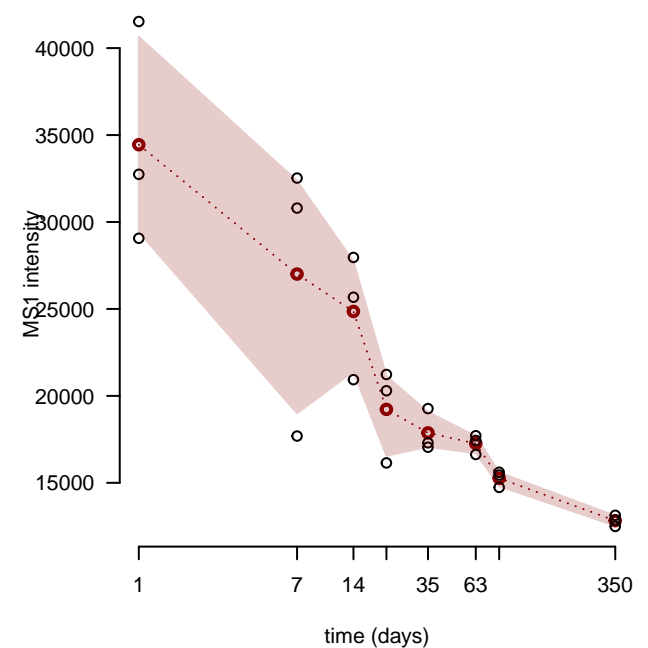

**Q3TFQ1**  
GN=Spryd7  
SPRY domain containing 7

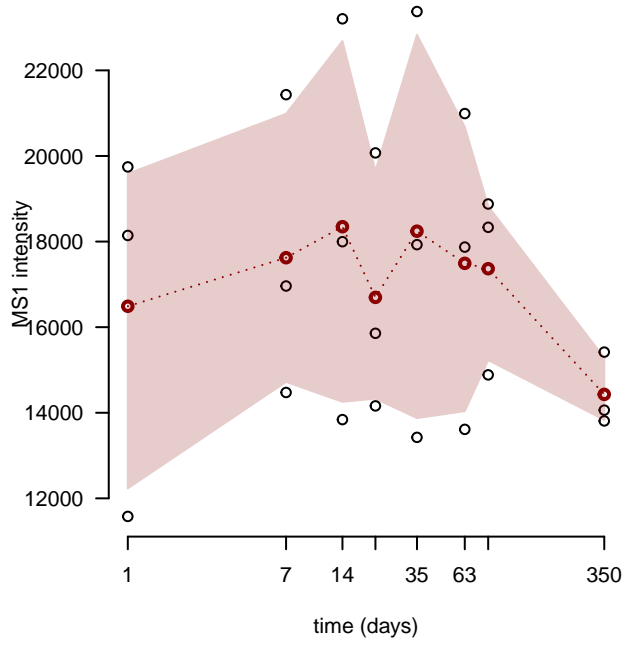

**Q3TGF2**  
GN=Fam107b  
family with sequence similarity 107, mem ...

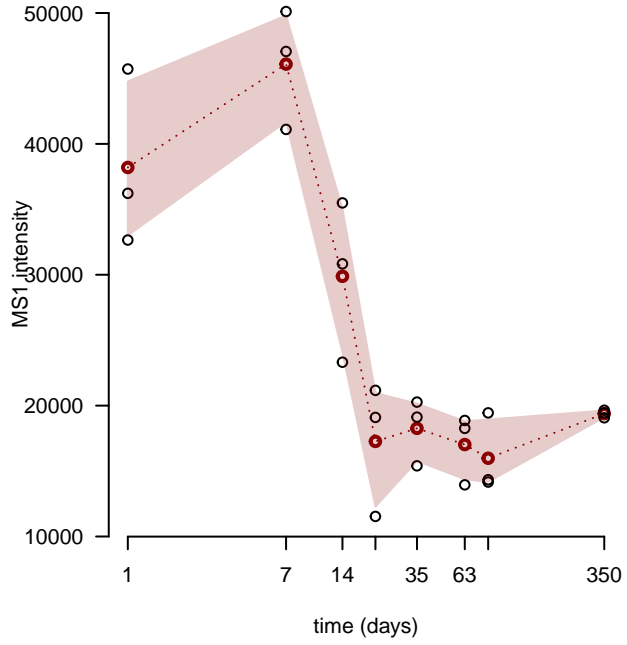

**Q3THE2**  
GN=Myl12b  
myosin, light chain 12B, regulatory

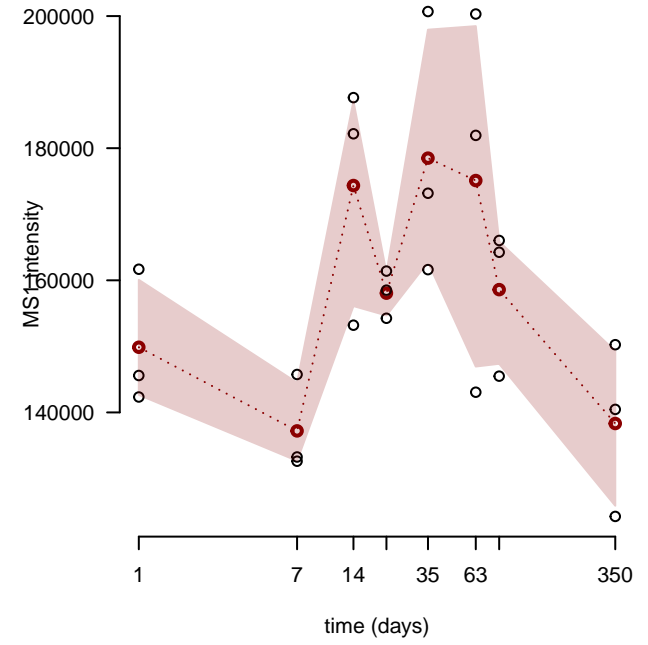

**Q3THF9**  
GN=Coq10b  
coenzyme Q10B

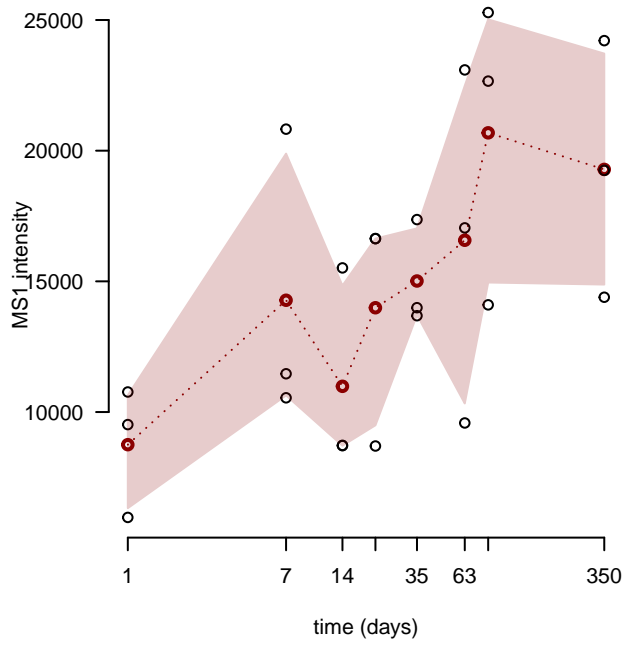

**Q3THG9**  
GN=Aarsd1  
alanyl-tRNA synthetase domain containing ...

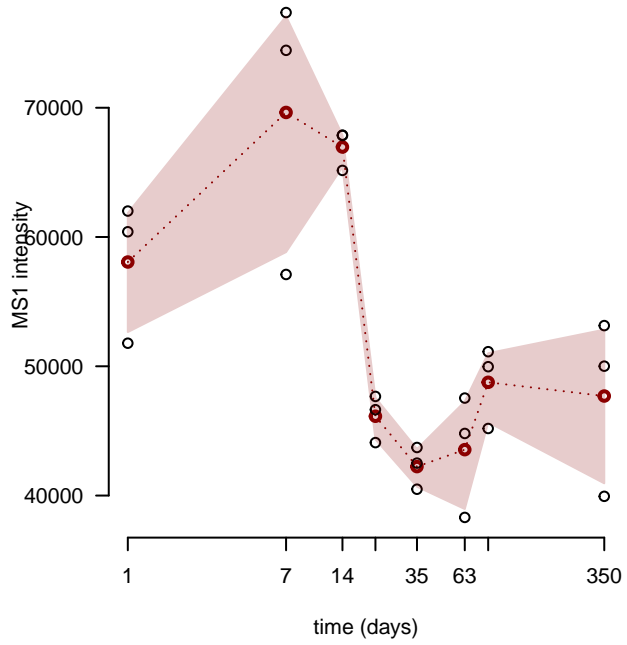

**Q3THJ3**  
GN=Eif1ad  
eukaryotic translation initiation factor ...

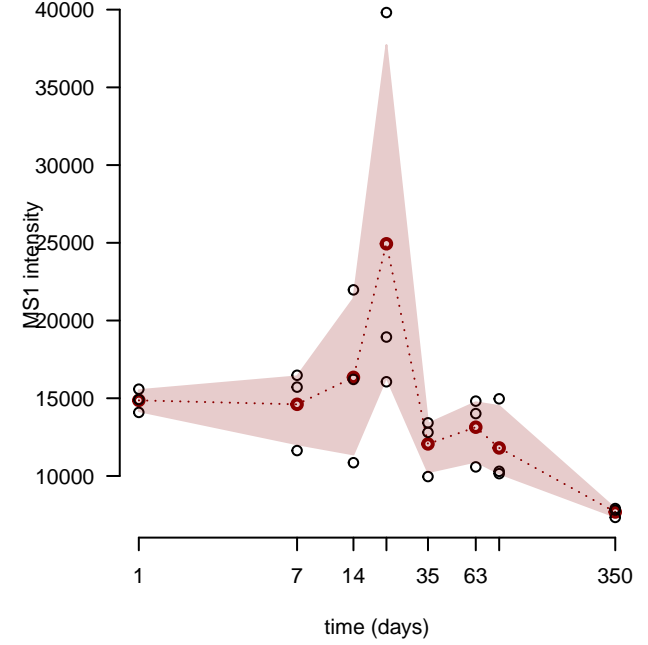

**Q3THK3**  
GN=Gtf2f1  
general transcription factor IIF, polype ...

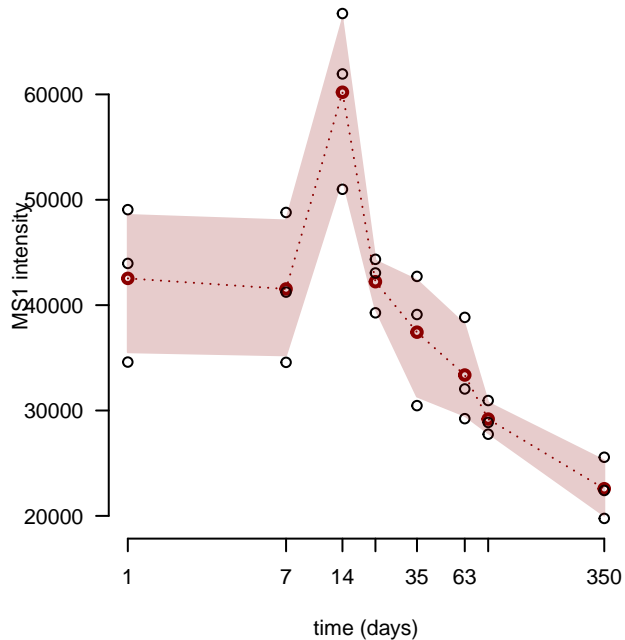

**Q3THK7**  
GN=Gmps  
guanine monophosphate synthetase

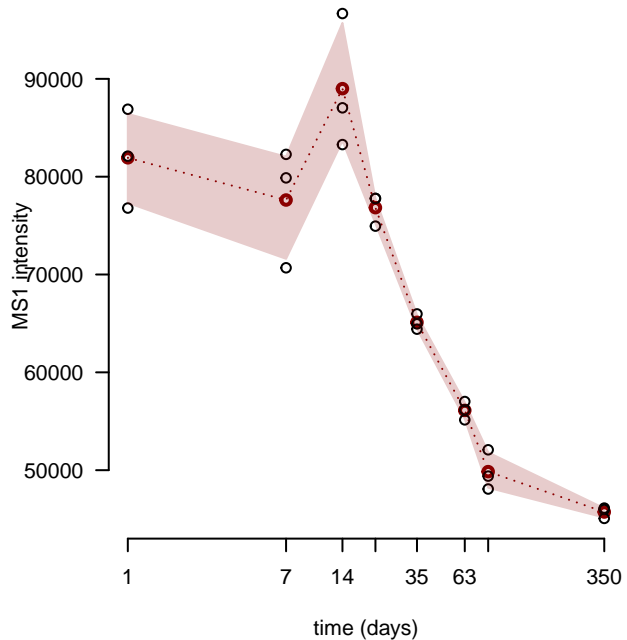

**Q3THS6**  
GN=Mat2a  
methionine adenosyltransferase II, alpha

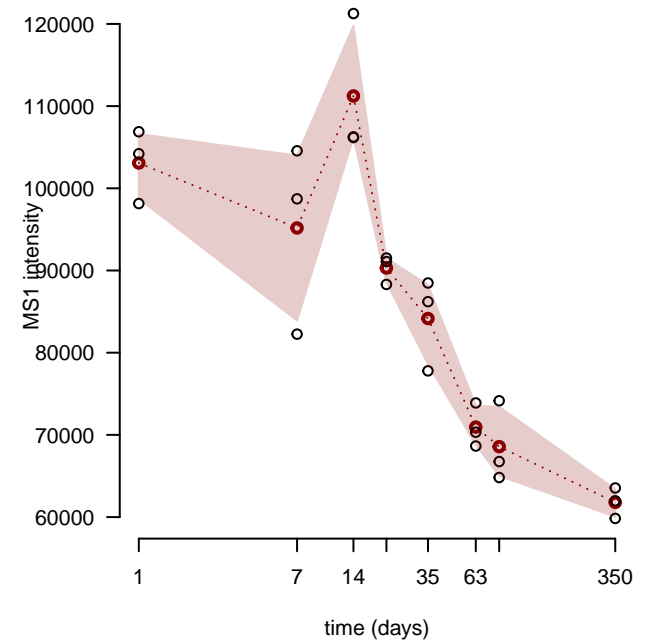

**Q3TIR1**  
**GN=Trappc13**  
trafficking protein particle complex 13

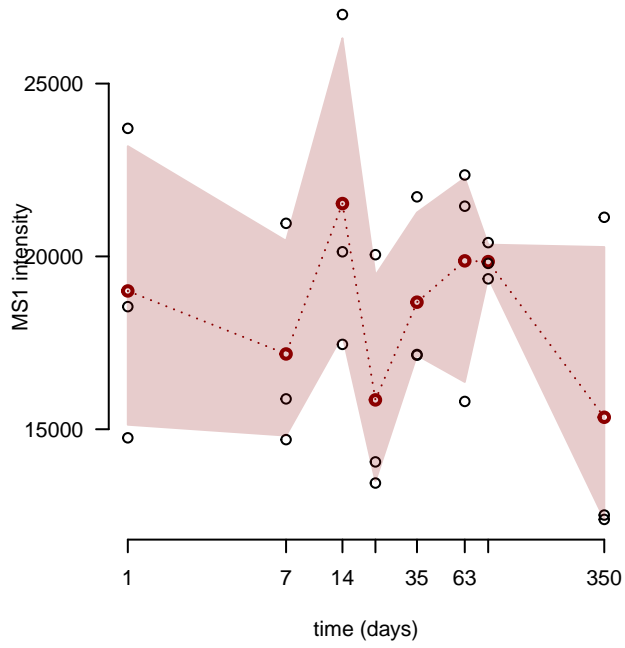

**Q3TIR3**  
**GN=Ric8a**  
RIC8 guanine nucleotide exchange factor ...

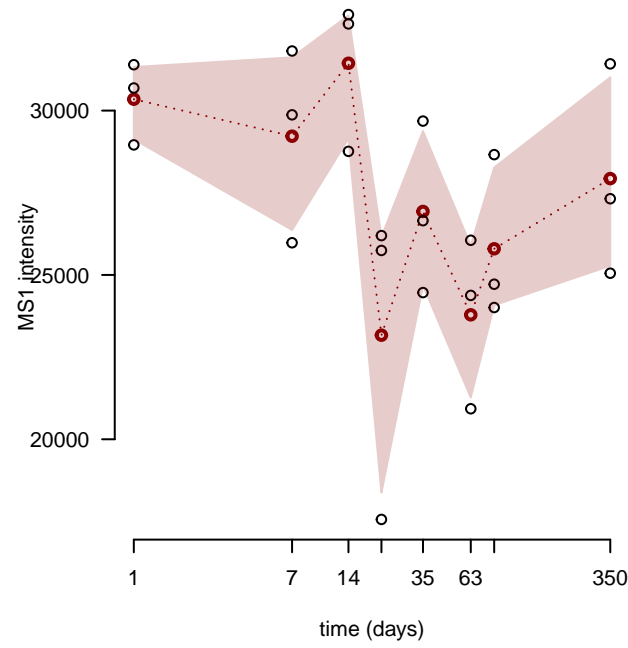

**Q3TIT8**  
**GN=Slc37a3**  
solute carrier family 37 (glycerol-3-pho ...

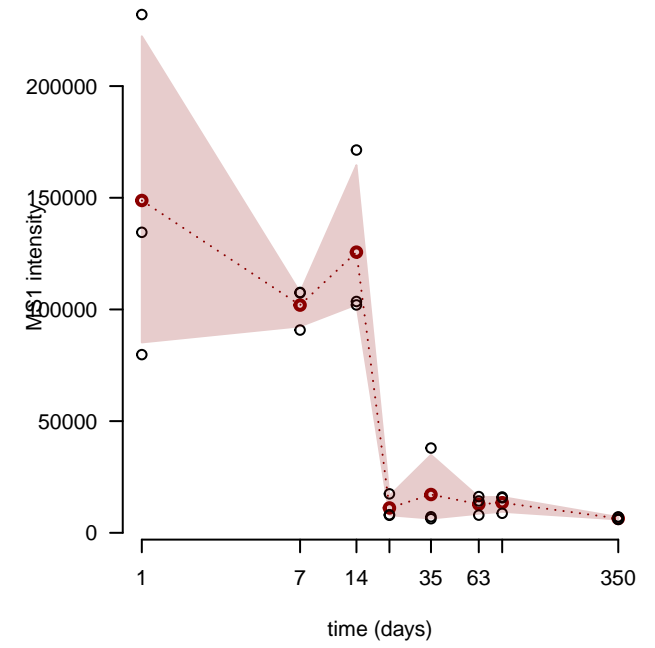

**Q3TIU4**  
**GN=Pde12**  
phosphodiesterase 12

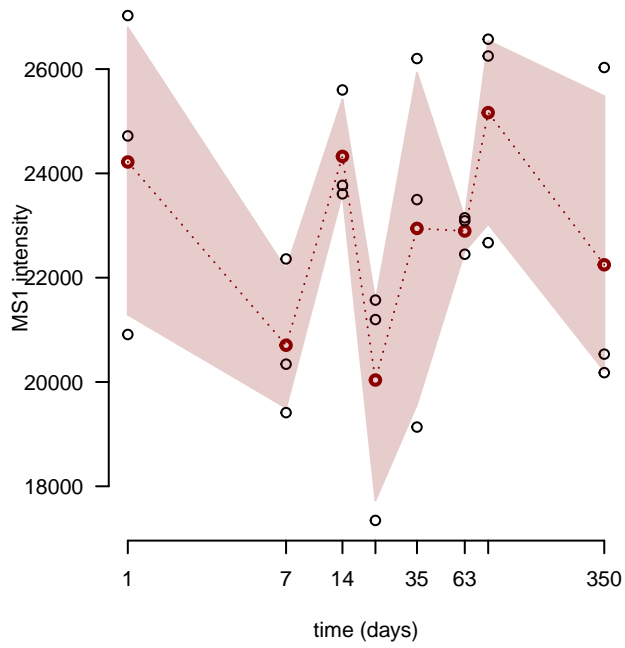

**Q3TIV5**  
**GN=Zc3h15**  
zinc finger CCCH-type containing 15

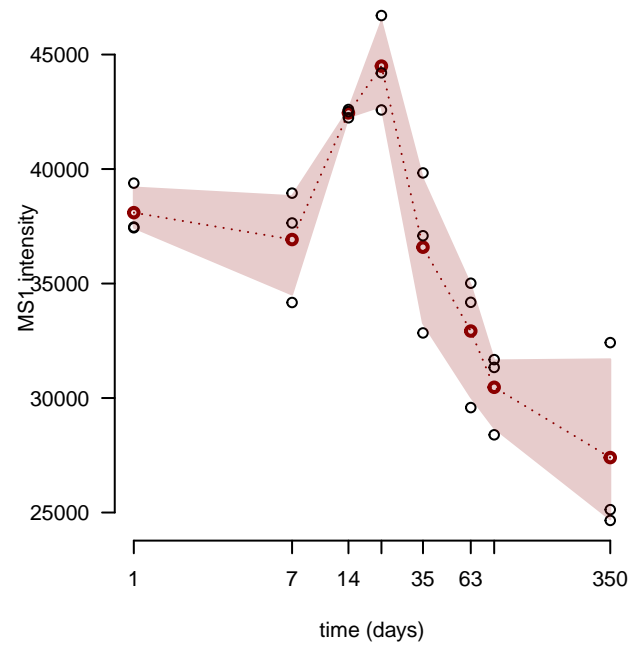

**Q3TIX9**  
**GN=Usp39**  
ubiquitin specific peptidase 39

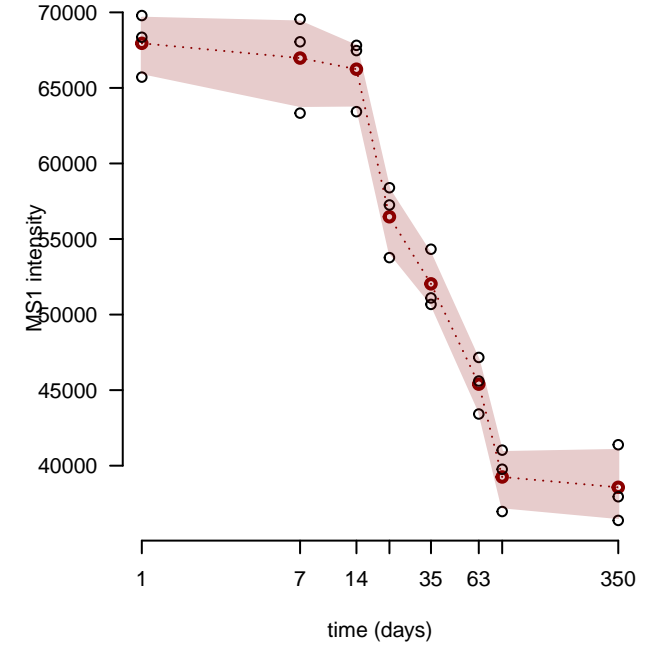

**Q3TJD7**  
**GN=Pdlim7**  
PDZ and LIM domain 7

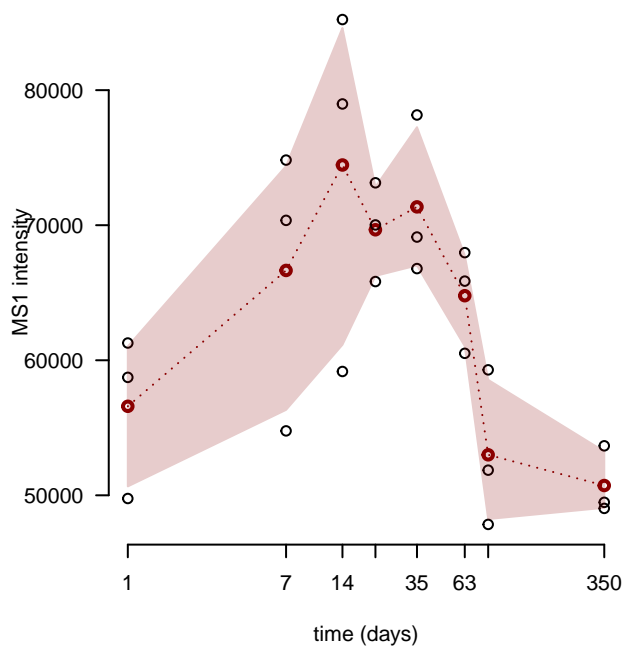

**Q3TJM4**  
**GN=Cenpt**  
centromere protein T

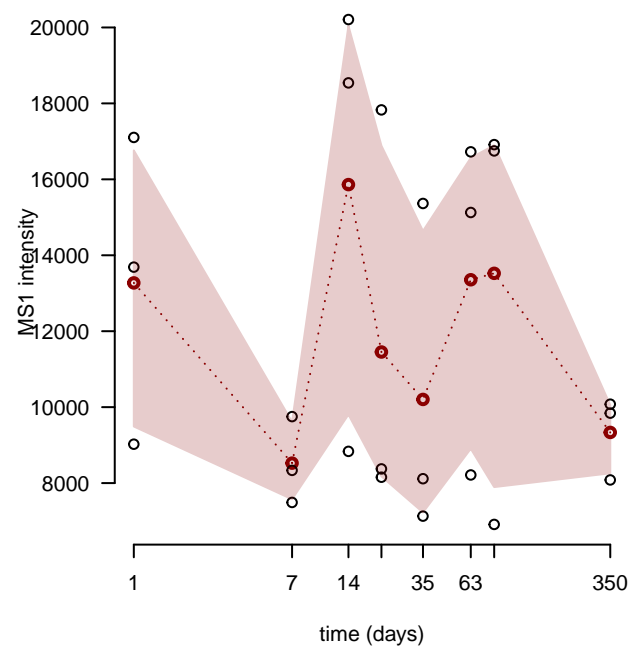

**Q3TJZ6**  
**GN=Fam98a**  
family with sequence similarity 98, memb ...

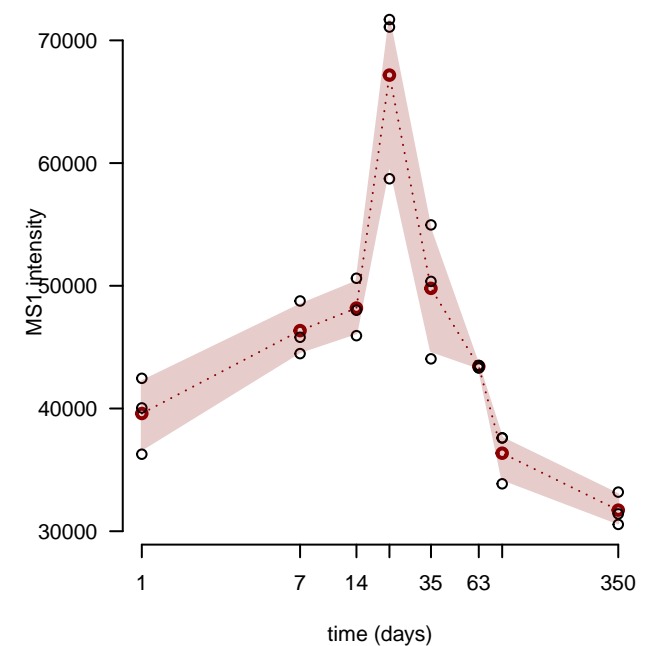

**Q3TKR3**  
GN=Nlrp4c  
NLR family, pyrin domain containing 4C

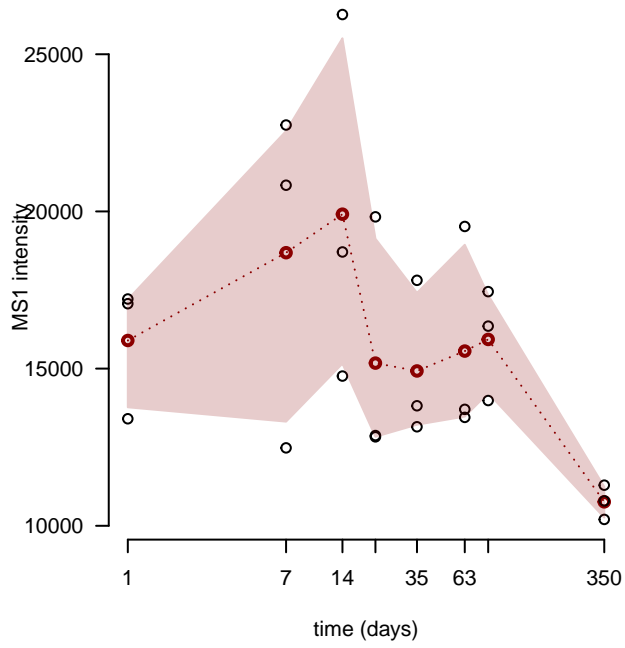

**Q3TKT4**  
GN=Smarca4  
SWI/SNF related, matrix associated, acti ...

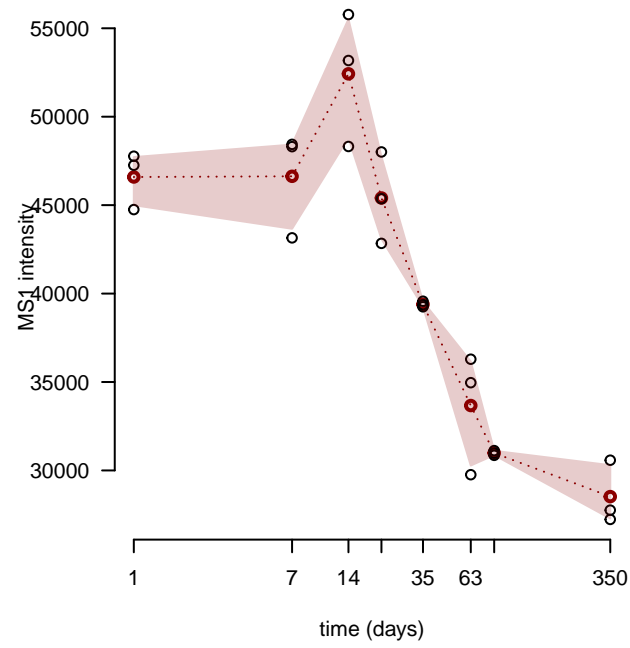

**Q3TKY6**  
GN=Cwc27  
CWC27 spliceosome-associated protein

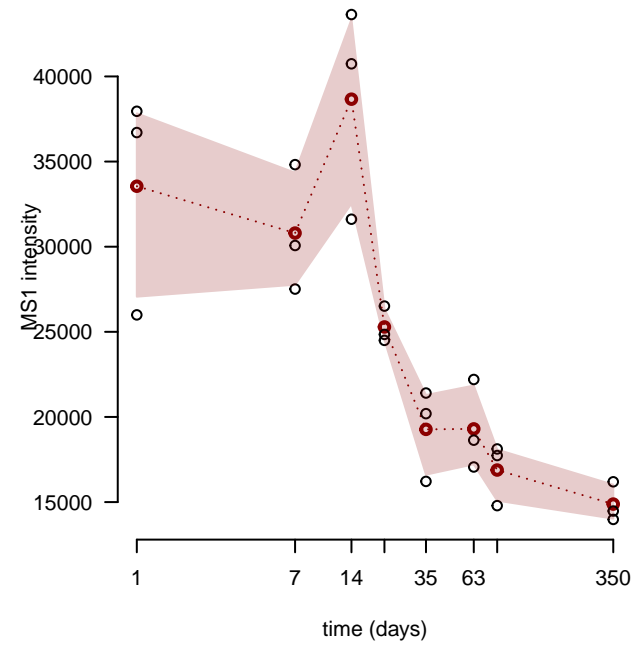

**Q3TL26**  
GN=Tfb2m  
transcription factor B2, mitochondrial

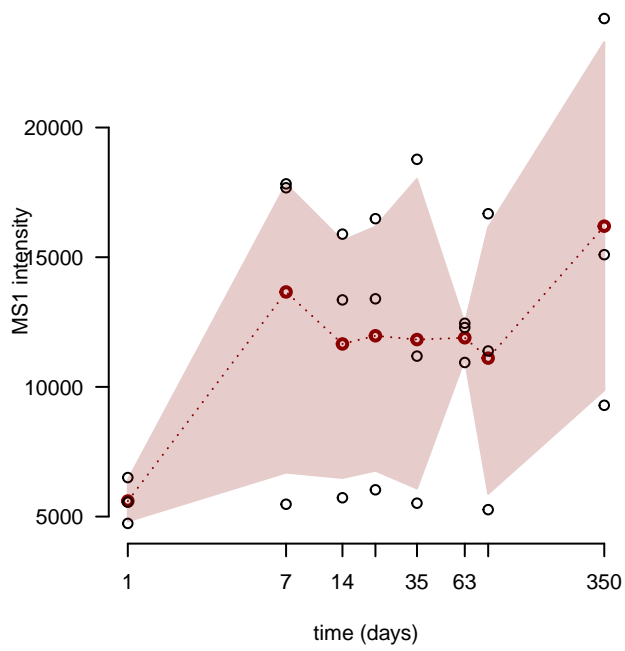

**Q3TL44**  
GN=NlrX1  
NLR family member X1

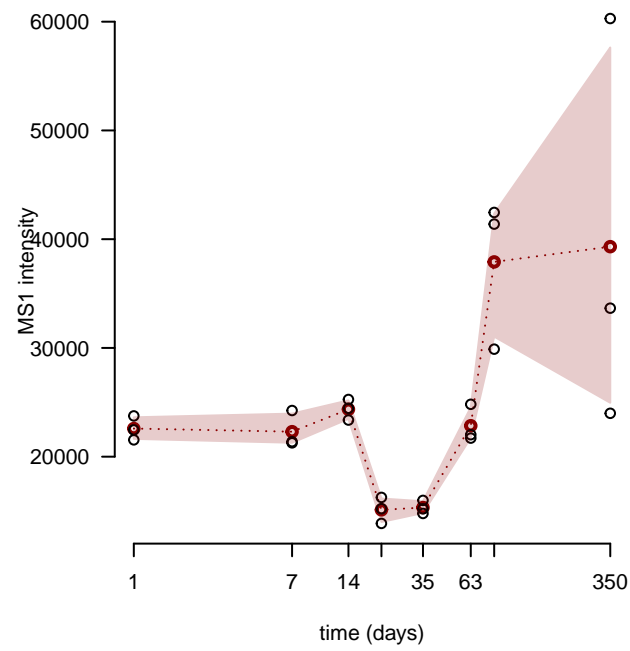

**Q3TLD5**  
GN=Uri1  
URI1, prefoldin-like chaperone

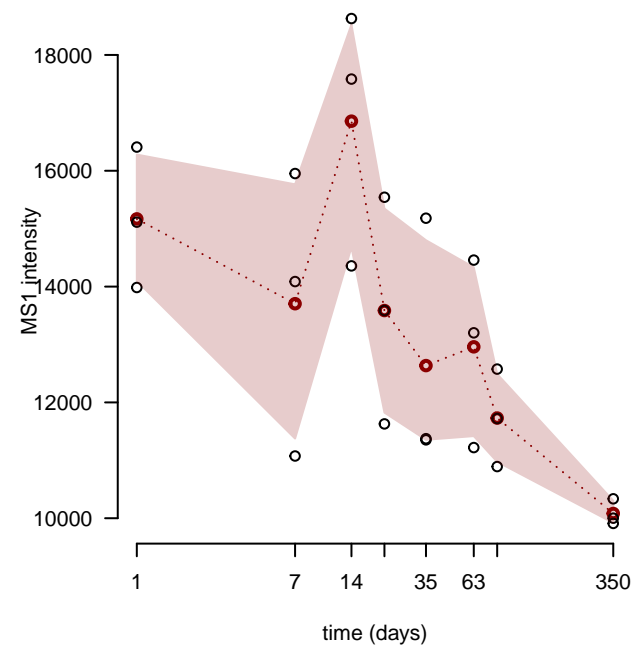

**Q3TLH4**  
GN=Prrc2c  
proline-rich coiled-coil 2C

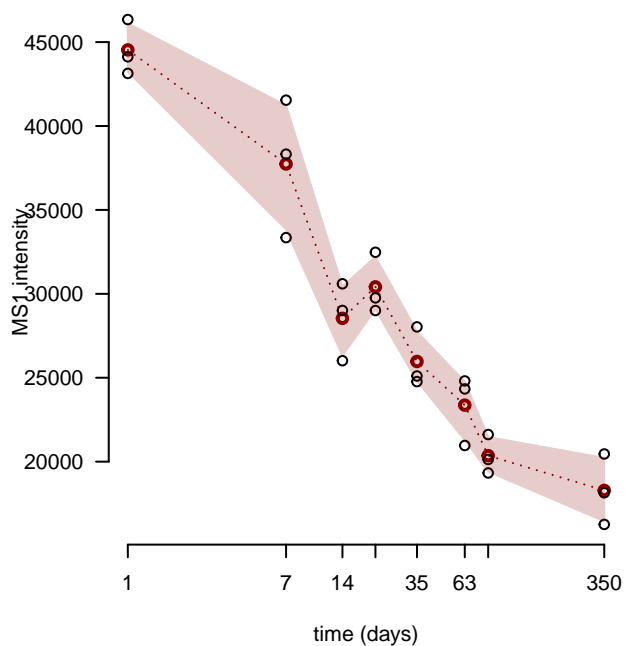

**Q3TLI0**  
GN=Trappc10  
trafficking protein particle complex 10

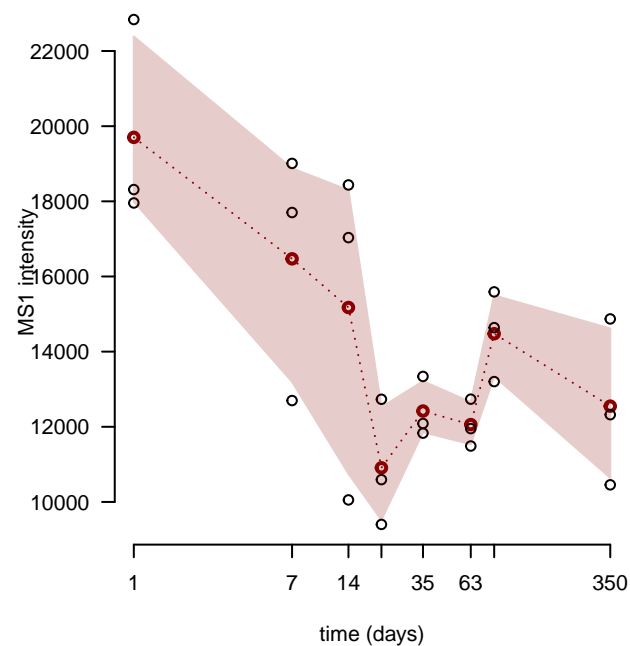

**Q3TLP5**  
GN=Echdc2  
enoyl Coenzyme A hydratase domain contai ...

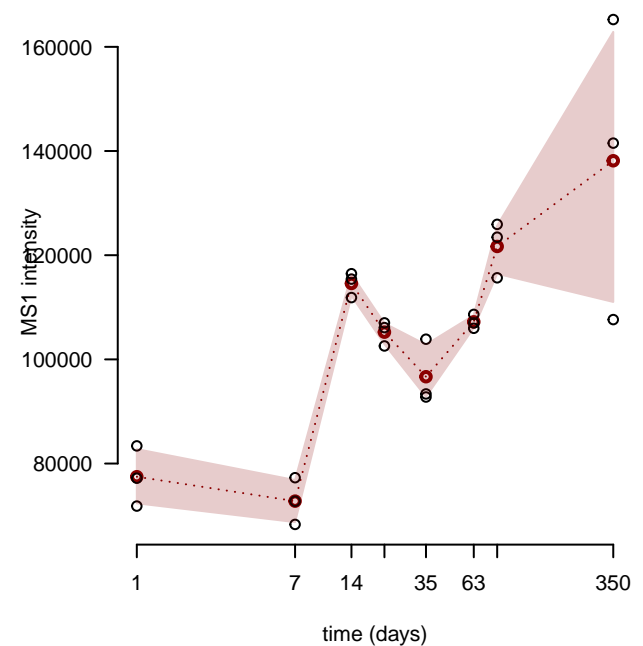

**Q3TLS3**  
GN=Gdpgp1  
GDP-D-glucose phosphorylase 1

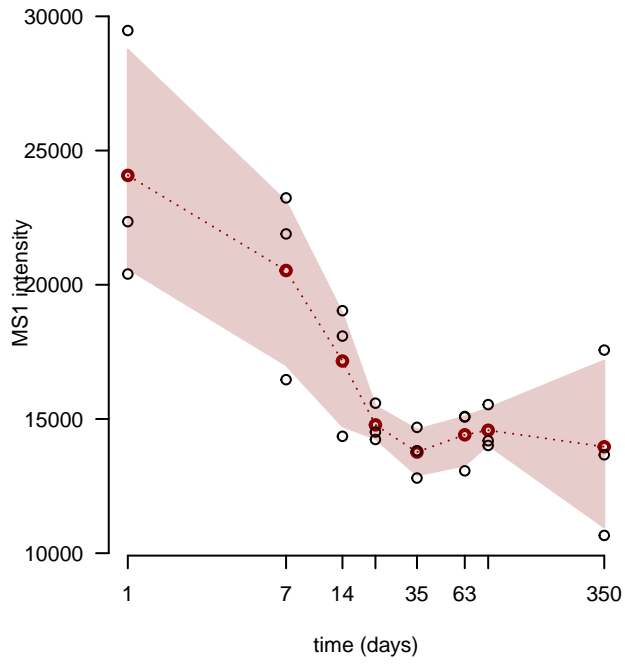

**Q3TMH2**  
GN=Scrn3  
secernin 3

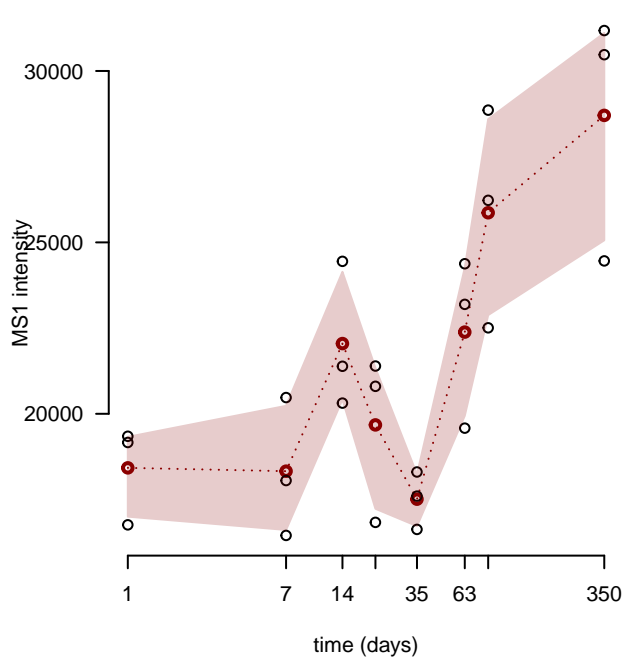

**Q3TMW1**  
GN=Ccdc102a  
coiled-coil domain containing 102A

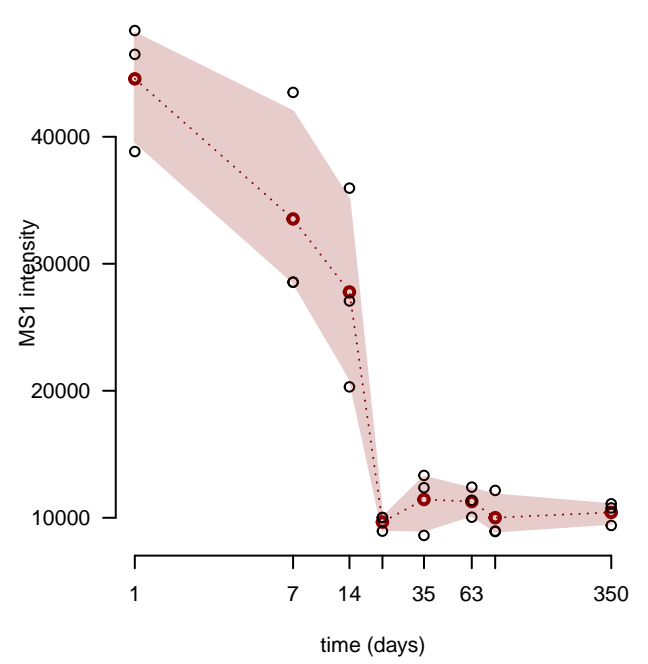

**Q3TMX7**  
GN=Qsox2  
quiescin Q6 sulfhydryl oxidase 2

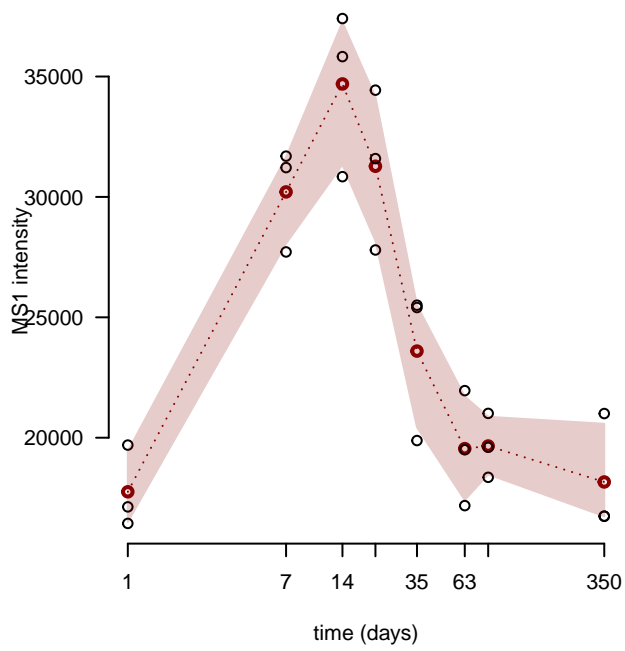

**Q3TNA1**  
GN=Xylb  
xylulokinase homolog (H. influenzae)

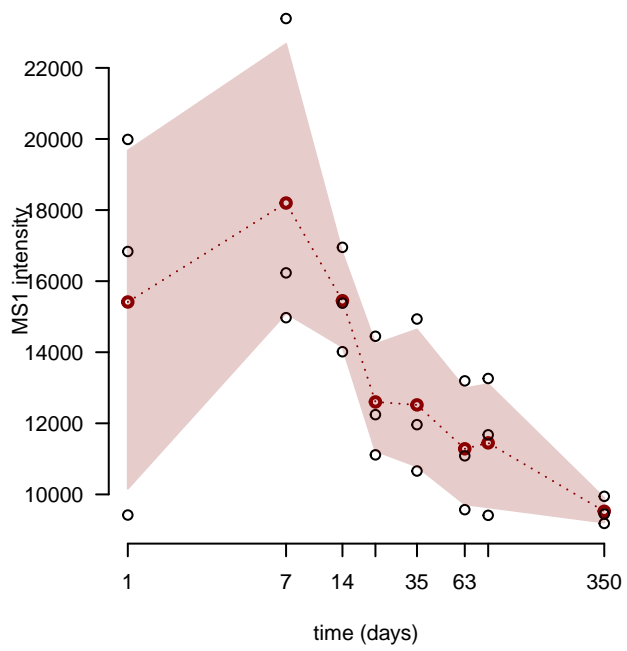

**Q3TNH5**  
GN=Fam172a  
family with sequence similarity 172, mem ...

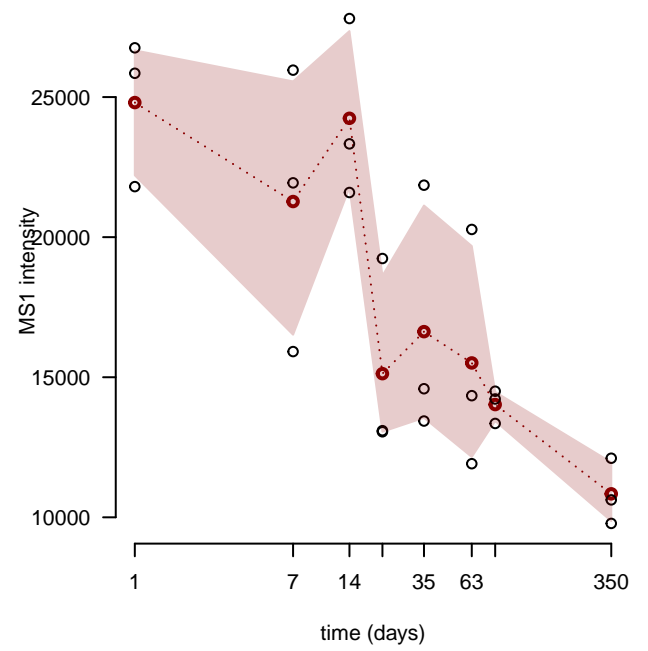

**Q3TNL8**  
GN=Itrip1  
inositol 1,4,5-triphosphate receptor int ...

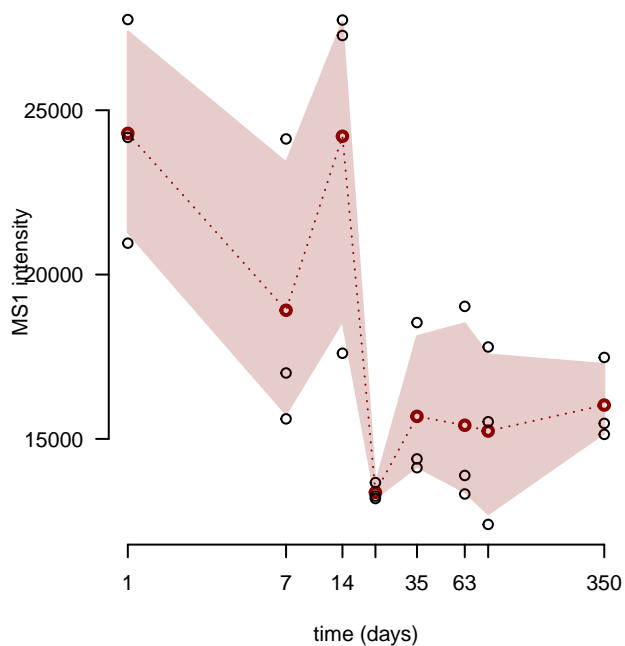

**Q3TP92**  
GN=Ctdnep1  
CTD nuclear envelope phosphatase 1

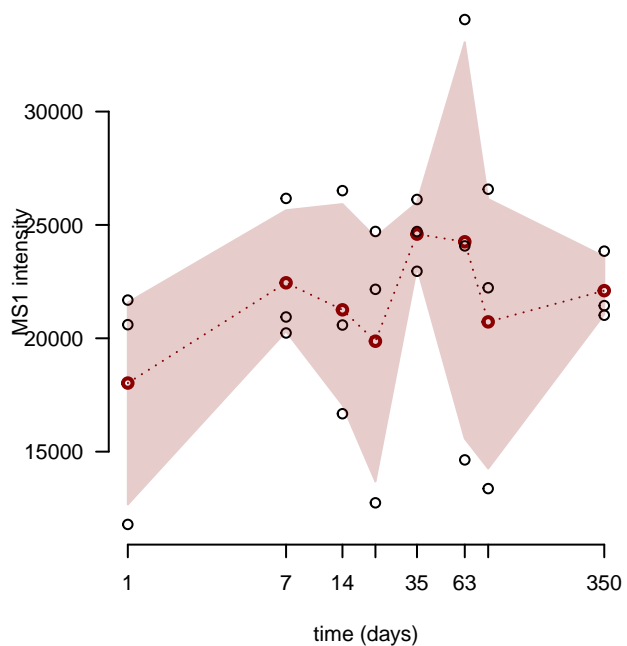

**Q3TPE9**  
GN=Ankmy2  
ankyrin repeat and MYND domain containin ...

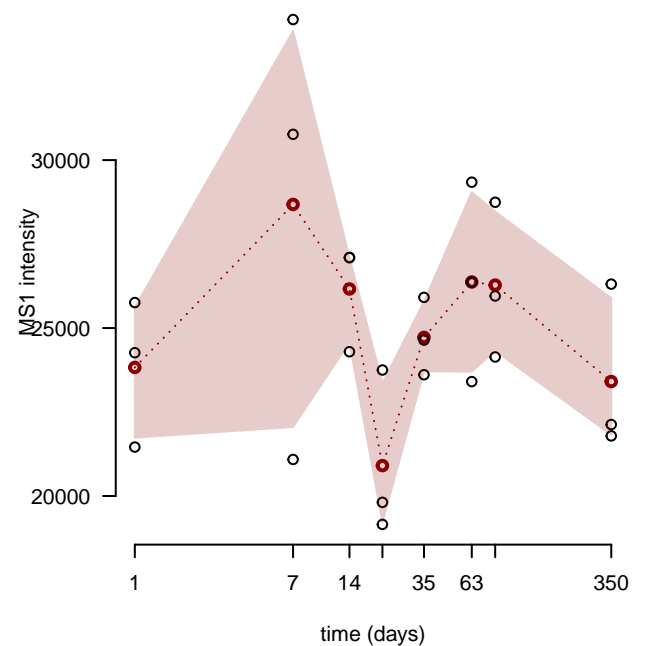

**Q3TPX4**  
GN=Exoc5  
exocyst complex component 5

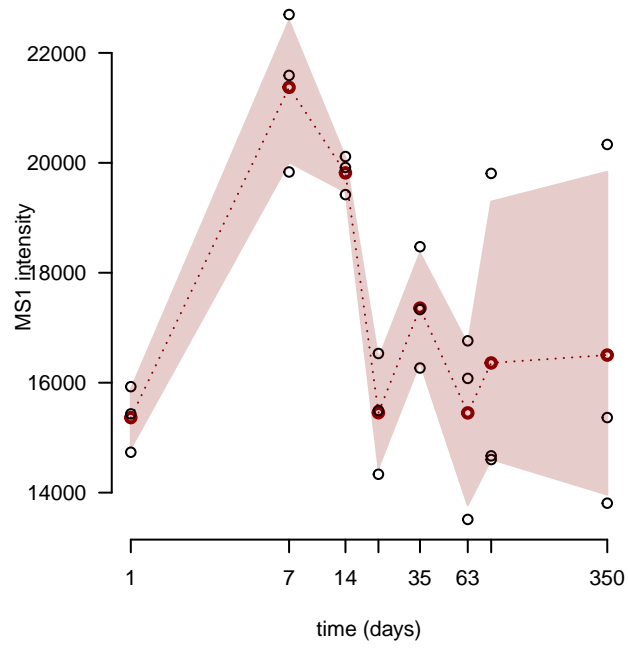

**Q3TQB2**  
GN=Foxred1  
FAD-dependent oxidoreductase domain cont ...

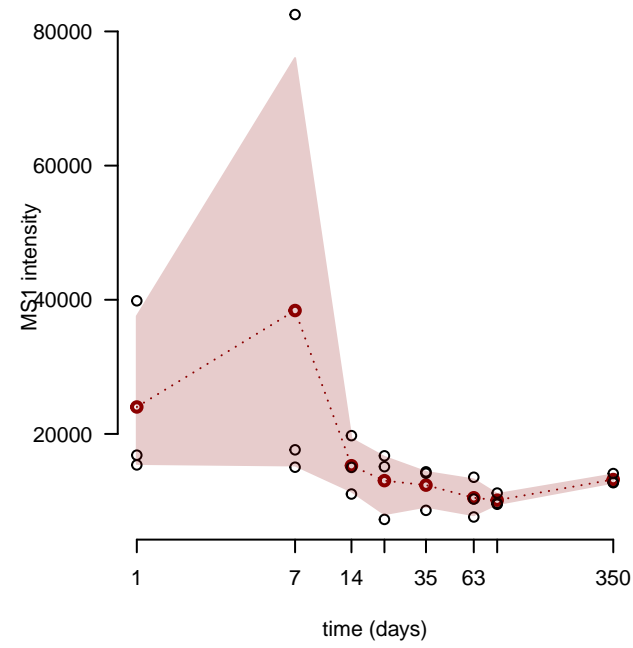

**Q3TQI7**  
GN=

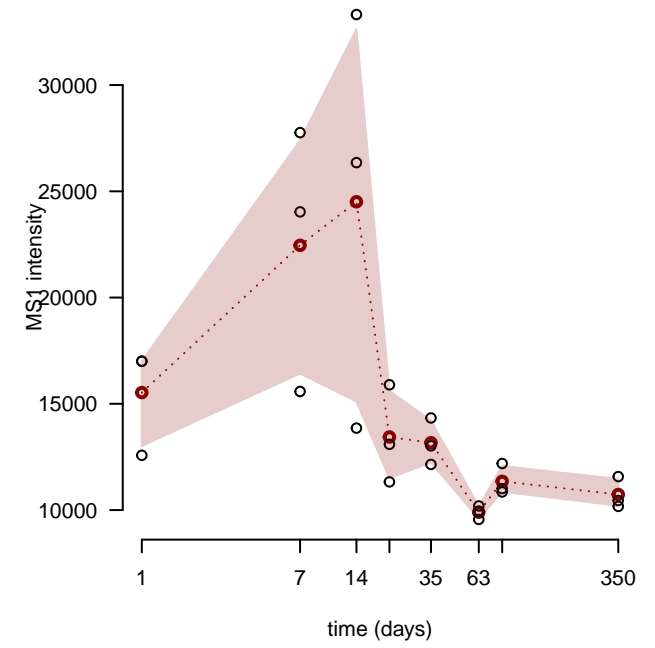

**Q3TRJ4**  
GN=Krt26  
keratin 26

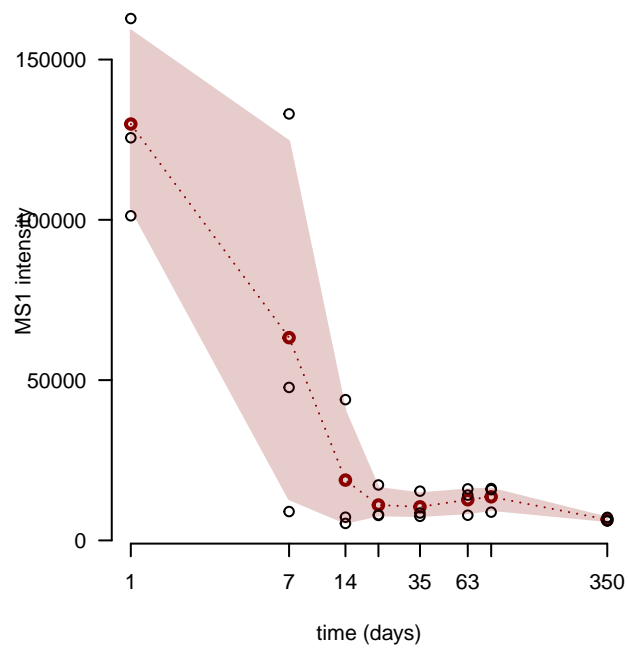

**Q3TRM4**  
GN=Pnpla6  
patatin-like phospholipase domain contai ...

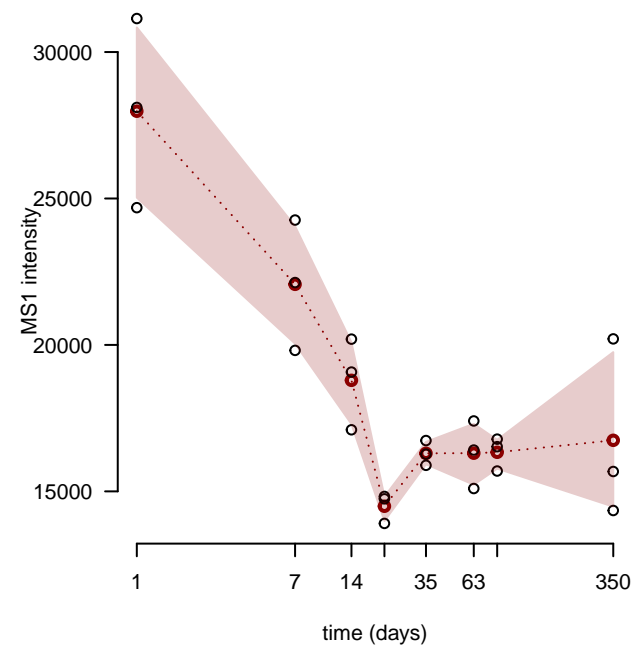

**Q3TRM8**  
GN=Hk3  
hexokinase 3

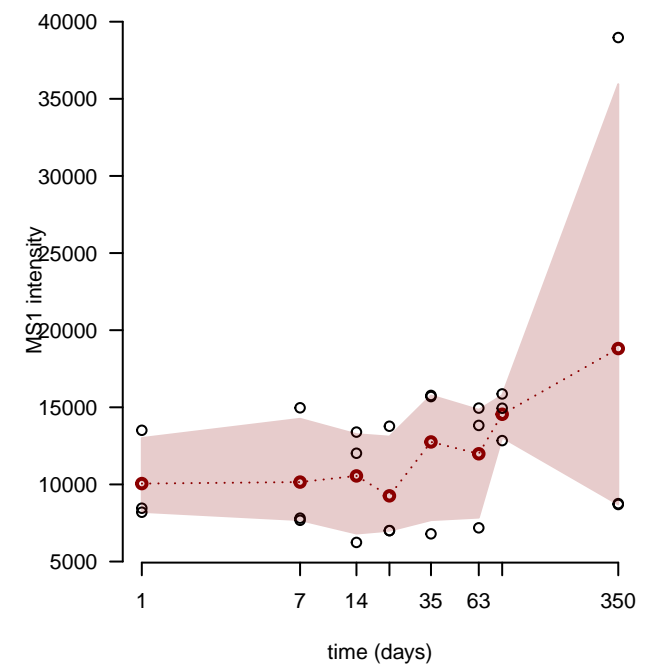

**Q3TSG4**  
GN=Alkbh5  
alkB homolog 5, RNA demethylase

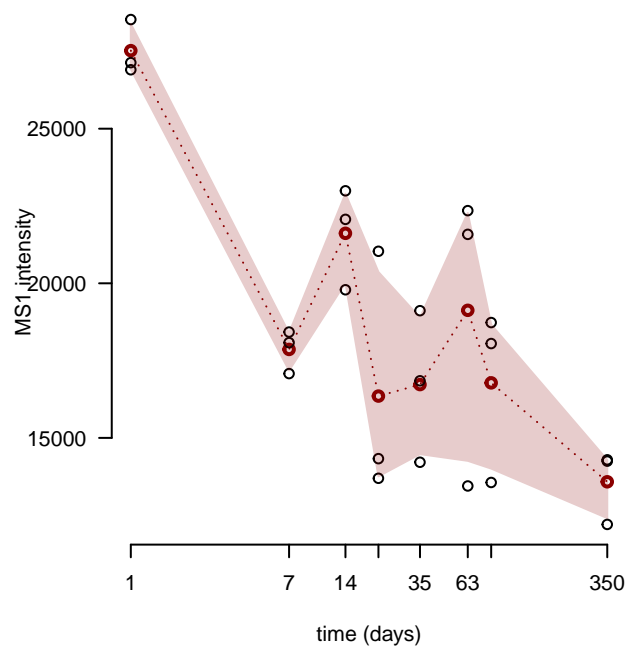

**Q3TT38**  
GN=Ilrun  
inflammation and lipid regulator with UB ...

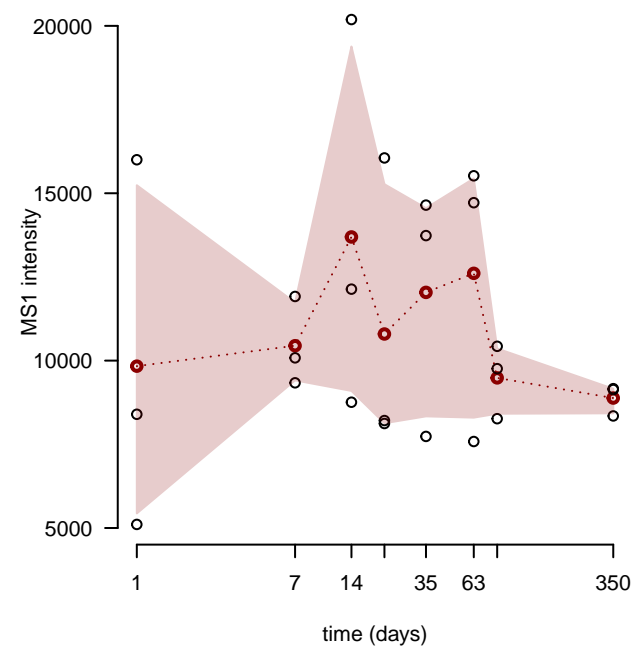

**Q3TTA7**  
GN=Cblb  
Casitas B-lineage lymphoma b

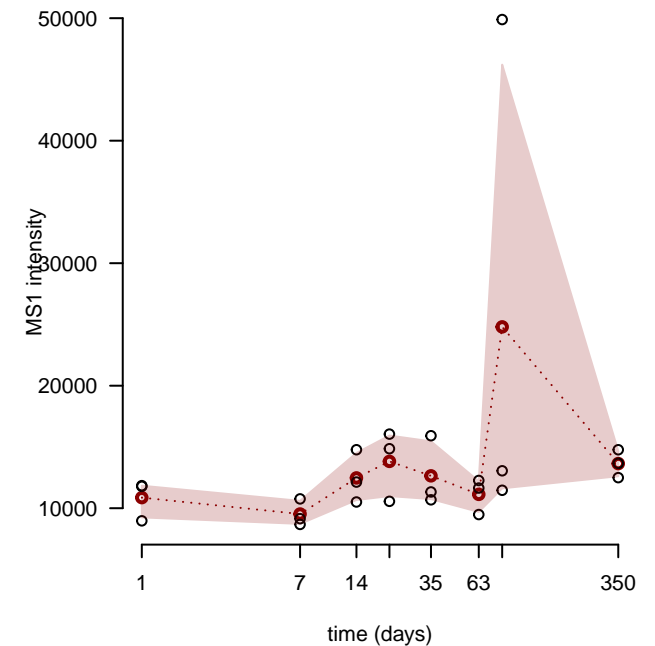

**Q3TTY5**  
GN=Krt2  
keratin 2

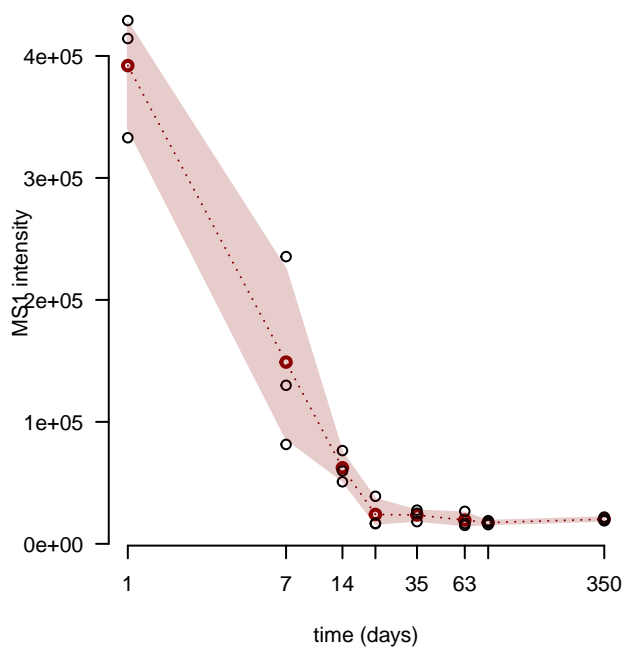

**Q3TUA9**  
GN=Pomk  
protein-O-mannose kinase

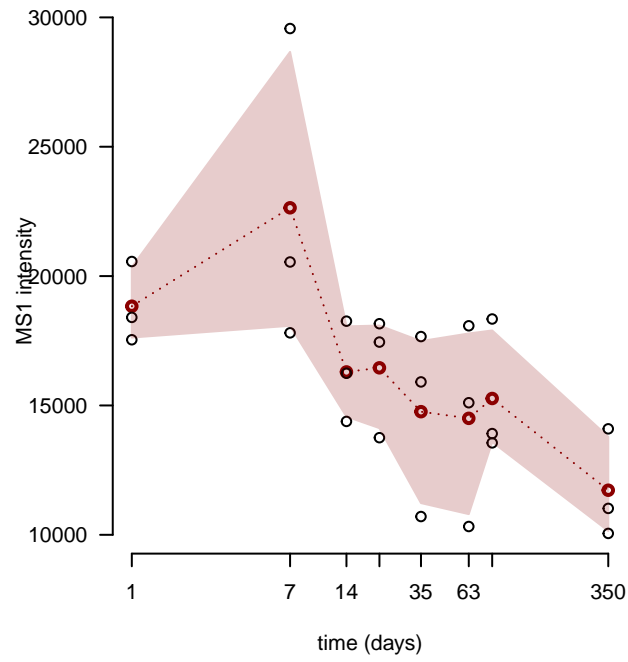

**Q3TUD9**  
GN=Tmem18  
transmembrane protein 18

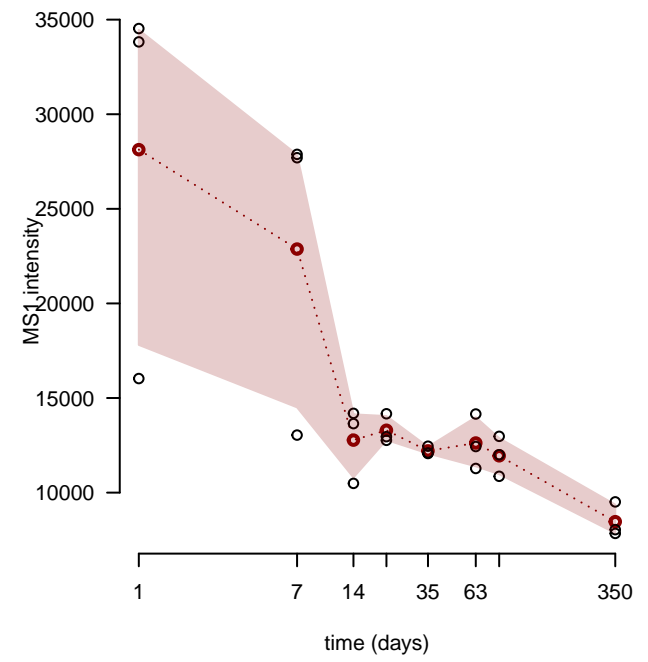

**Q3TUF7**  
GN=Yeats2  
YEATS domain containing 2

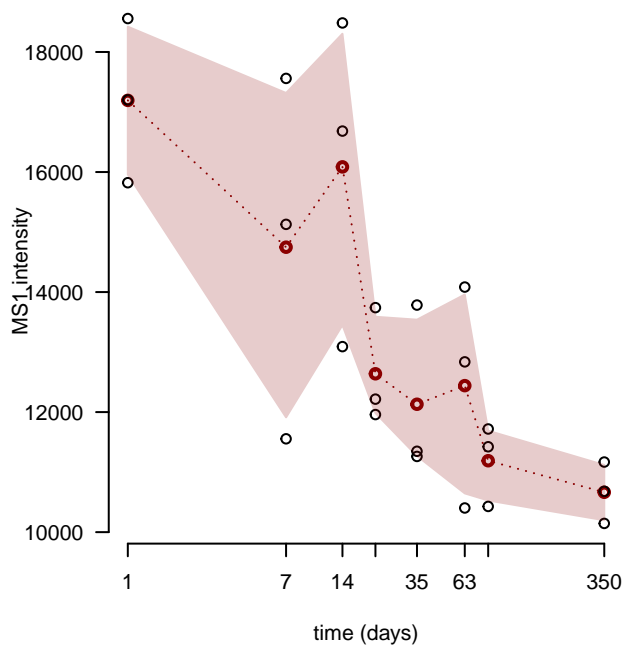

**Q3TUH1**  
GN=Tamm41  
TAM41 mitochondrial translocator assembl ...

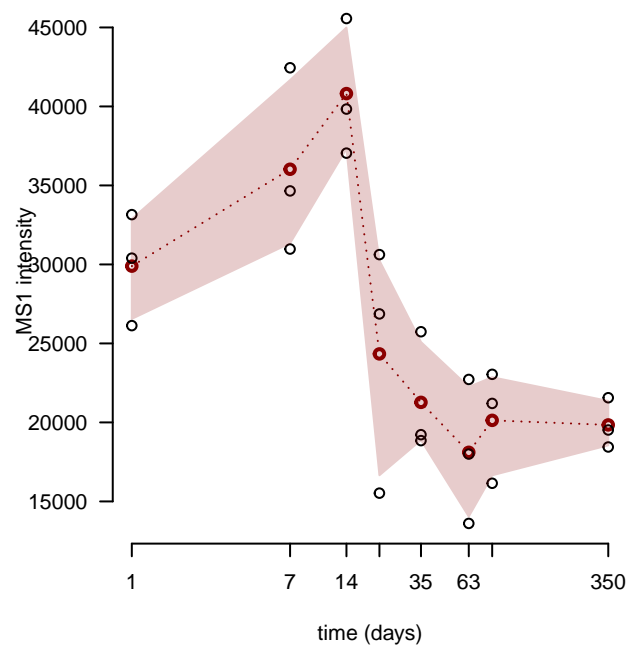

**Q3TUU5**  
GN=Tex30  
testis expressed 30

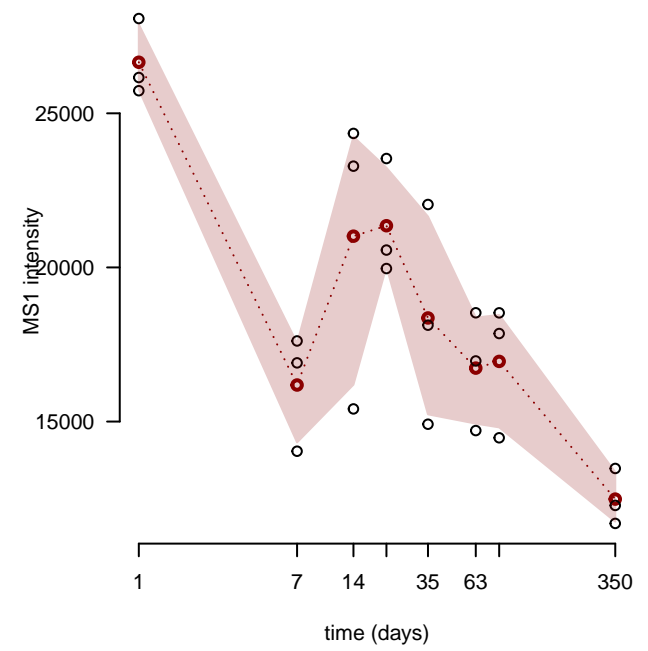

**Q3TV65**  
GN=Mpnd  
MPN domain containing

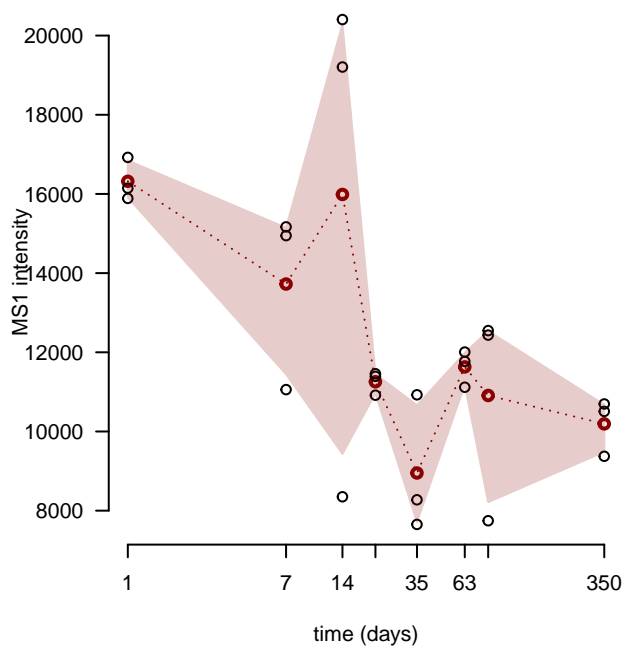

**Q3TVI4**  
GN=Hexim2  
hexamethylene bis-acetamide inducible 2

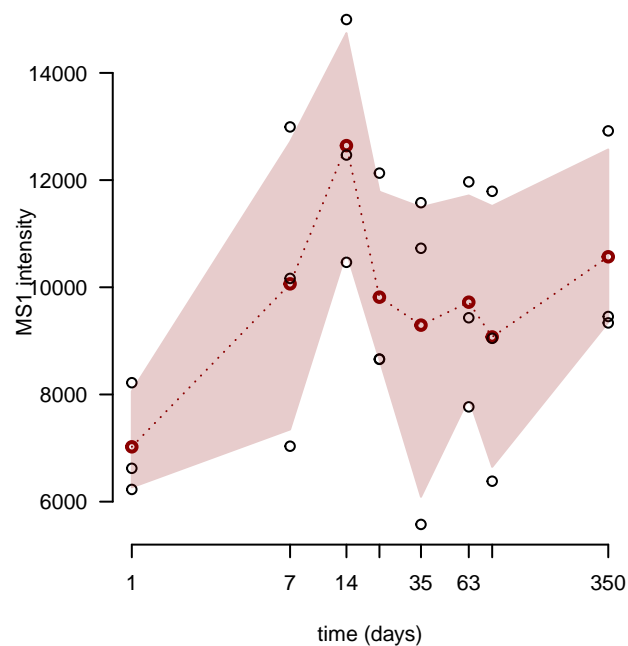

**Q3TVI8**  
GN=Pbxip1  
pre B cell leukemia transcription factor ...

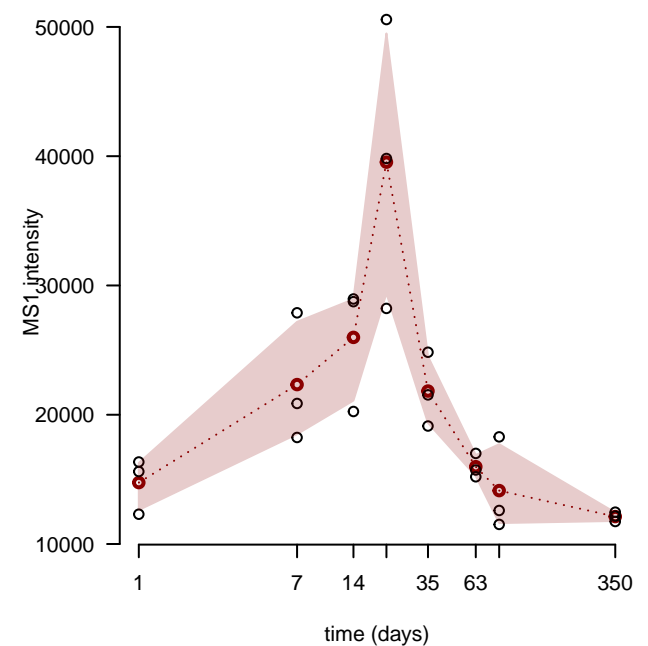



**Q3TW96**  
**GN=Uap111**

UDP-N-acetylglucosamine pyrophosphorylas ...

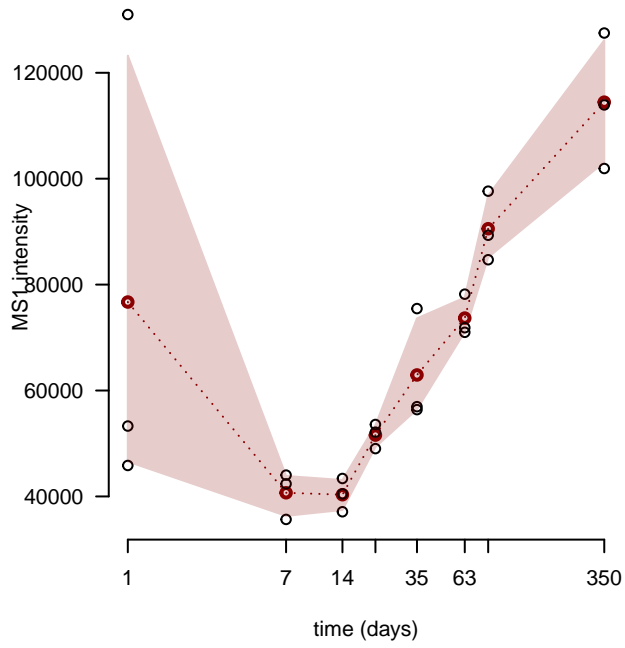

**Q3TWF6**  
**GN=Wdr70**

WD repeat domain 70

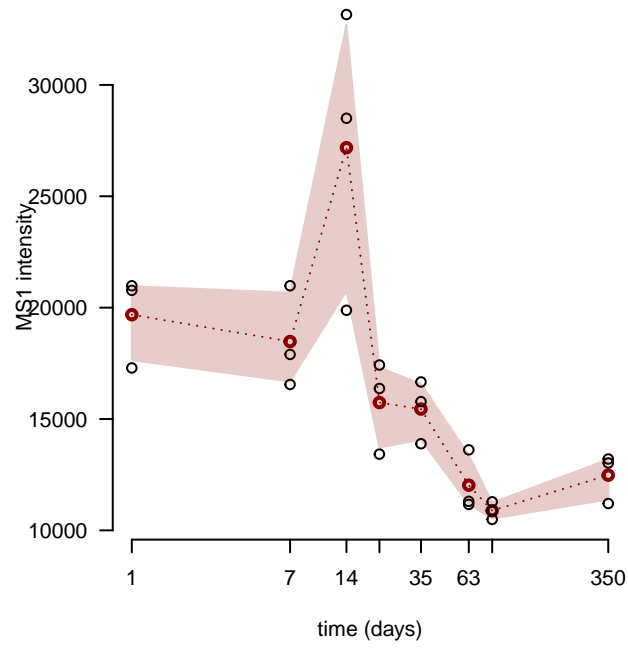

**Q3TWI9**  
**GN=Tmem63b**

transmembrane protein 63b

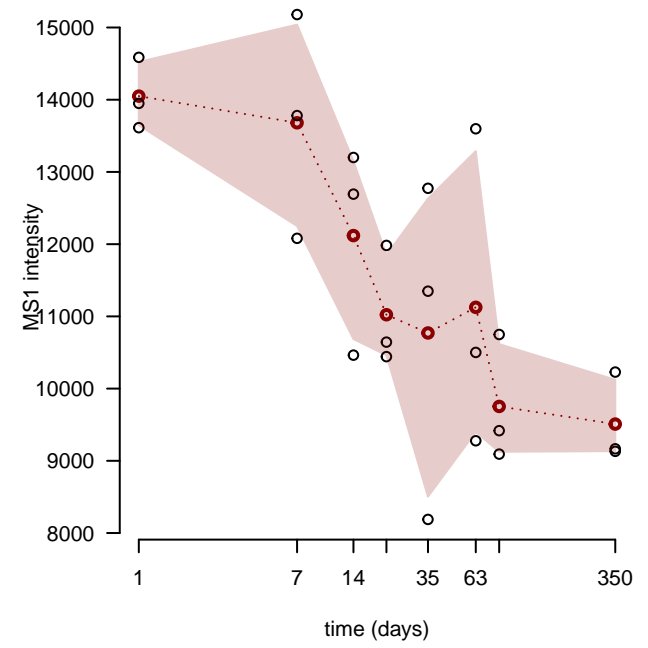

**Q3TWL2**  
**GN=Pip4p1**

phosphatidylinositol-4,5-bisphosphate 4- ...

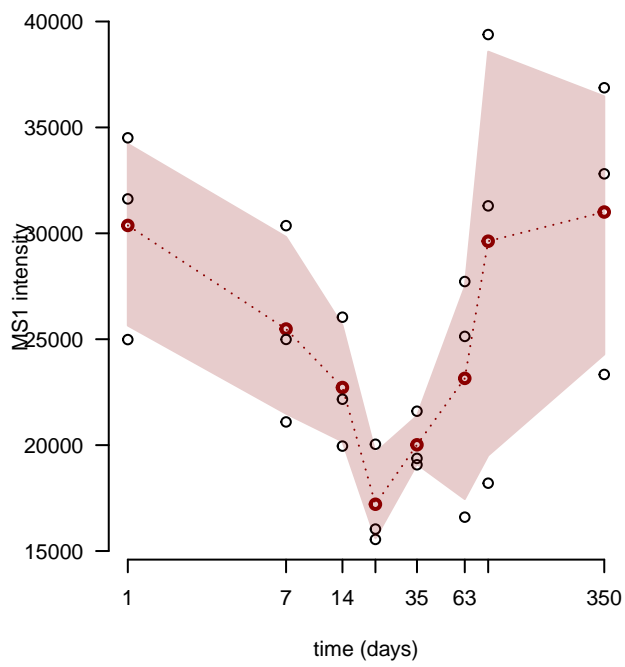

**Q3TWN3**  
**GN=Cnm2**

cyclin M2

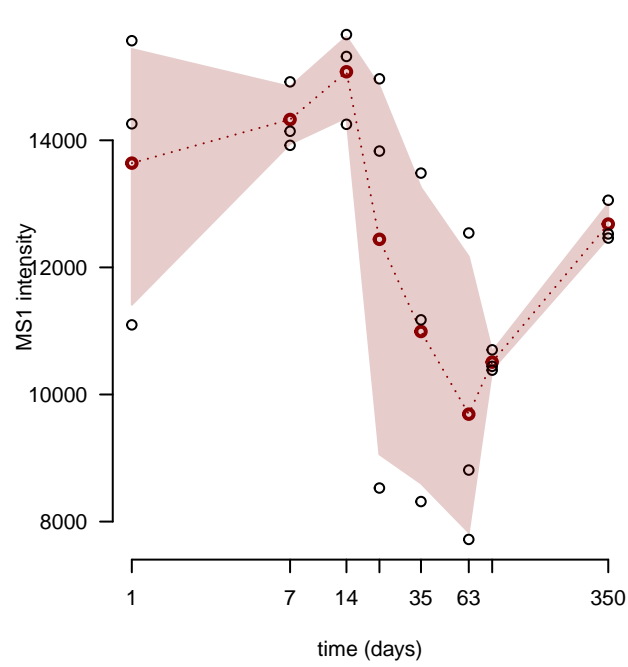

**Q3TWW8**  
**GN=Srsf6**

serine and arginine-rich splicing factor ...

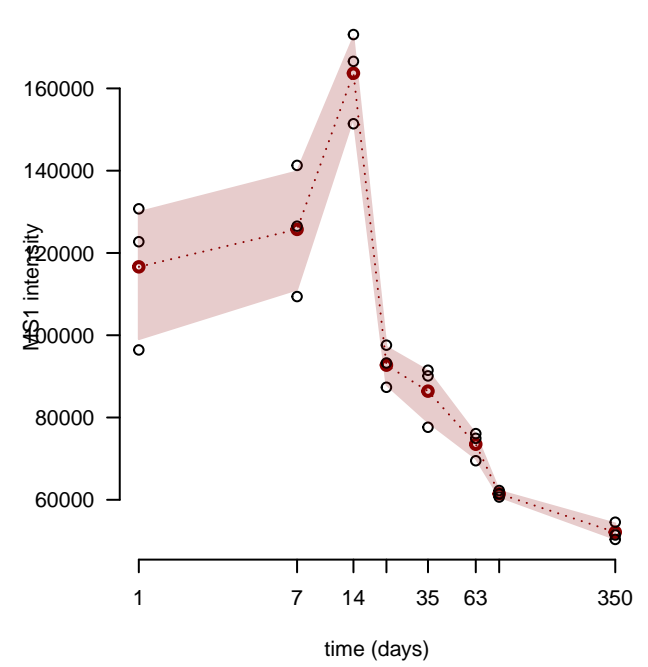

**Q3TX08**  
**GN=Trmt1**

tRNA methyltransferase 1

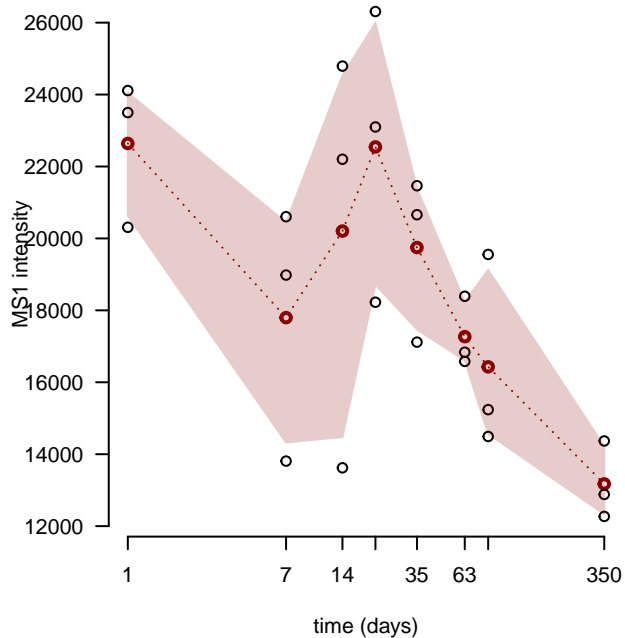

**Q3TXS7**  
**GN=Psm1**

proteasome (prosome, macropain) 26S subu ...

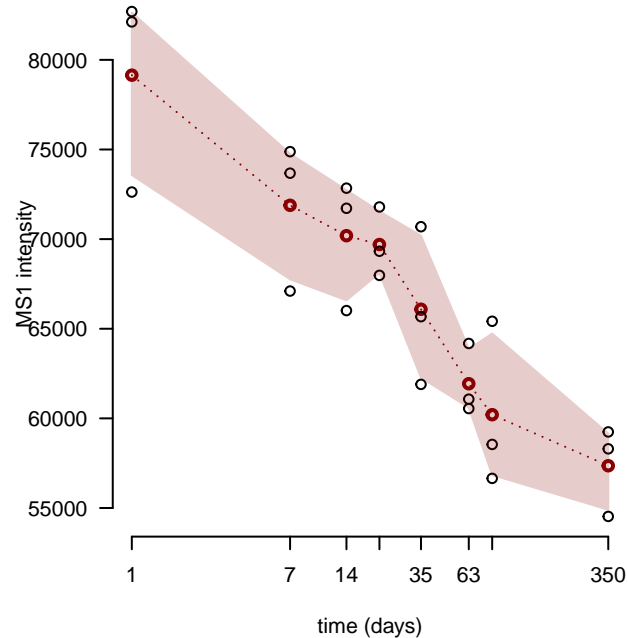

**Q3TXT3**  
**GN=Inip**

INTS3 and NABP interacting protein

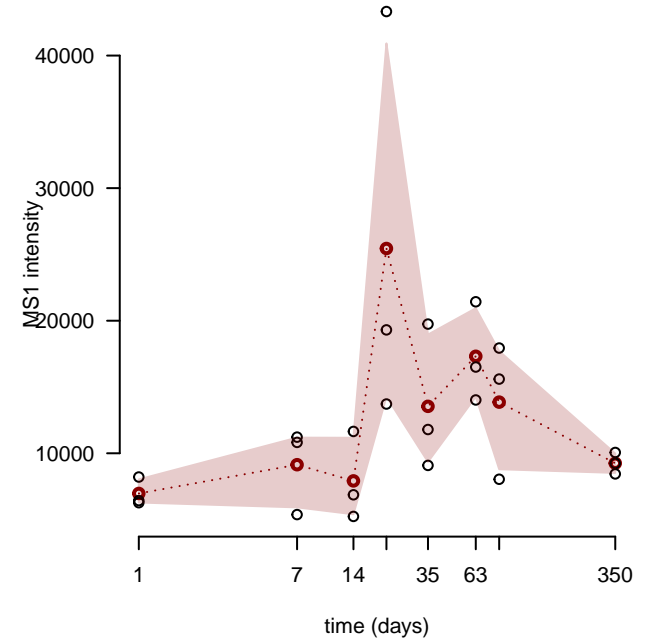

**Q3TXU5**  
**GN=Dhps**  
deoxyhypusine synthase

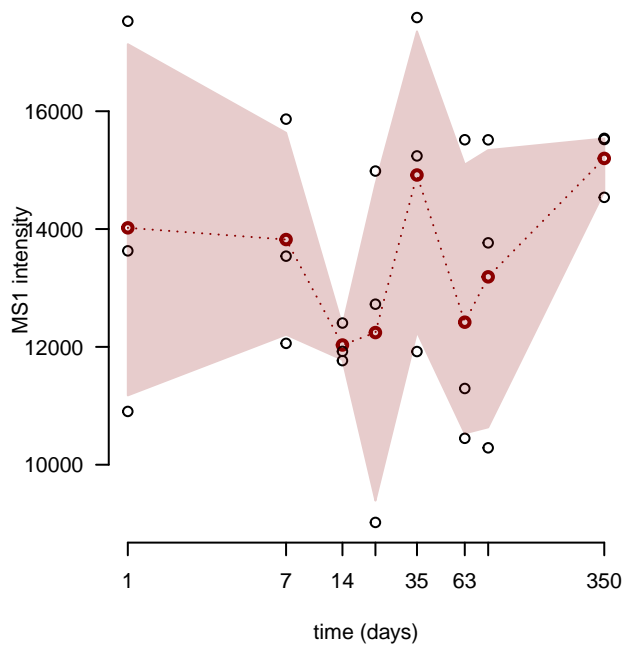

**Q3TXX3**  
**GN=Zfyve27**  
zinc finger, FYVE domain containing 27

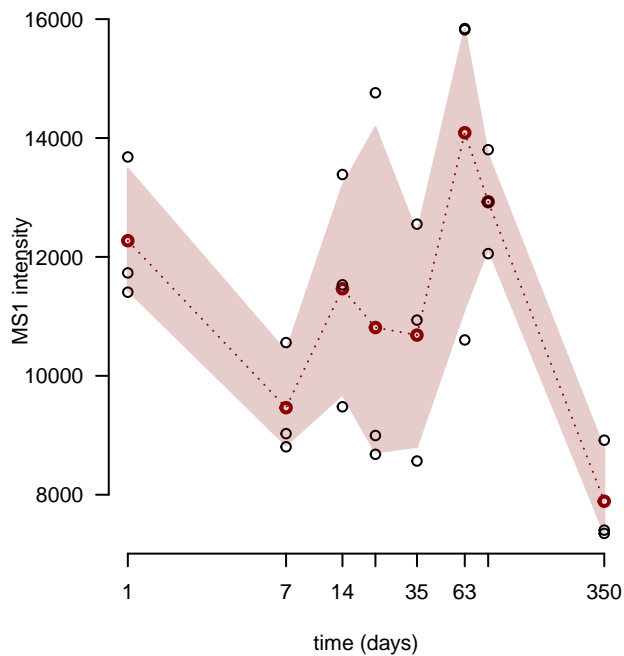

**Q3TYA6**  
**GN=Mphosph8**  
M-phase phosphoprotein 8

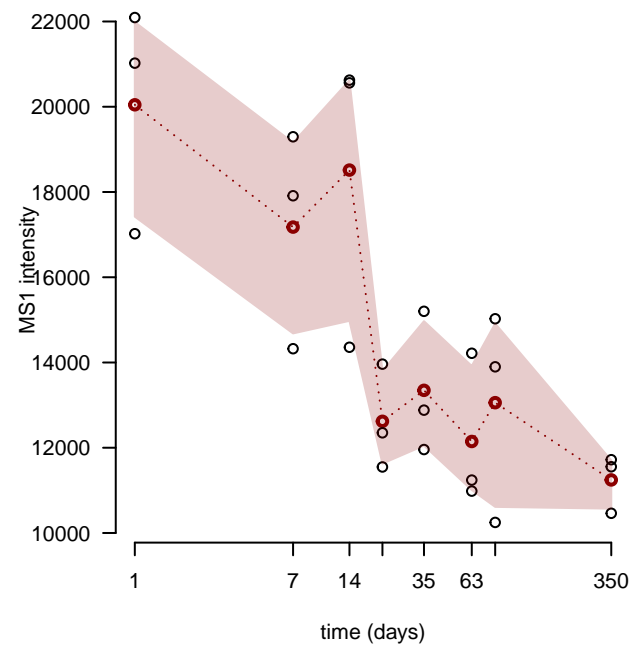

**Q3TYD4**  
**GN=Arsg**  
arylsulfatase G

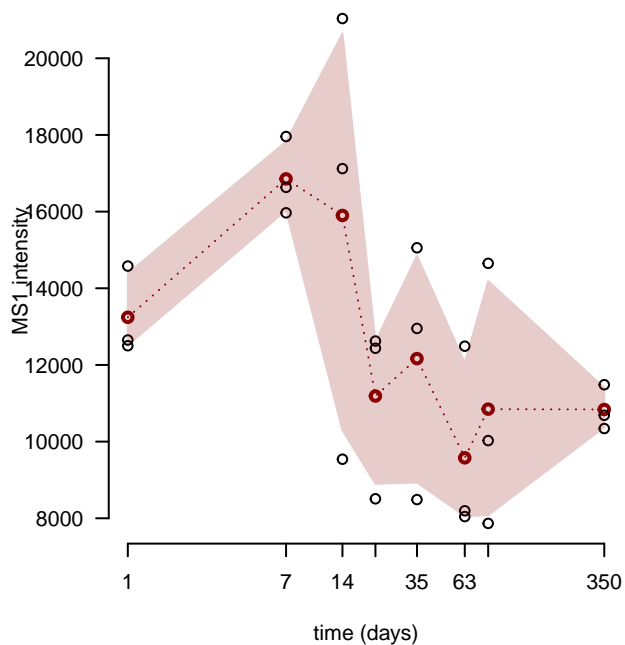

**Q3TYD6**  
**GN=Lmtk2**  
lemur tyrosine kinase 2

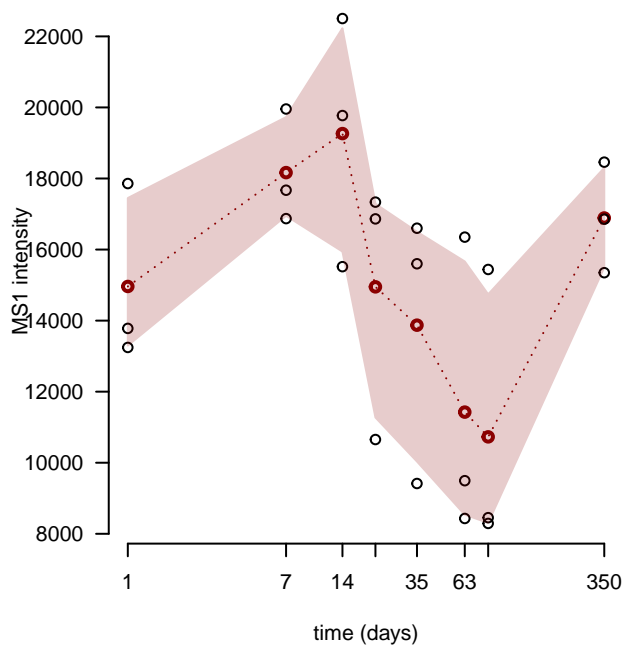

**Q3TYS2**  
**GN=Cybc1**  
cytochrome b 245 chaperone 1

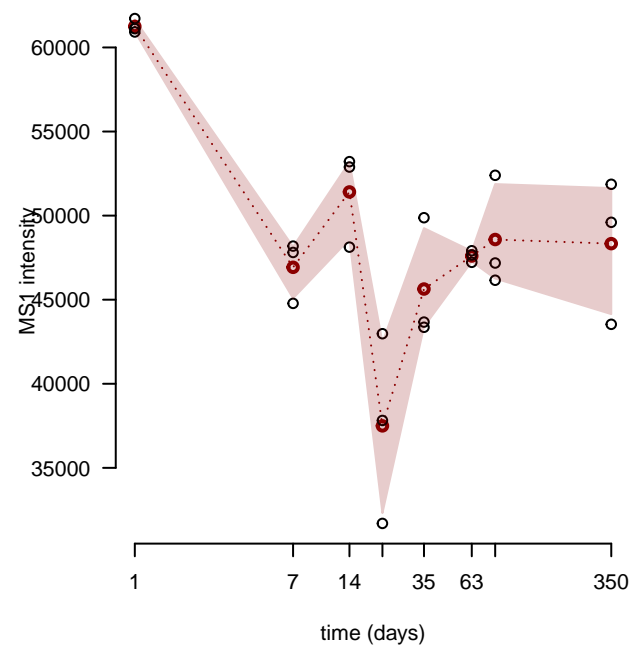

**Q3TYX3**  
**GN=Smyd5**  
SET and MYND domain containing 5

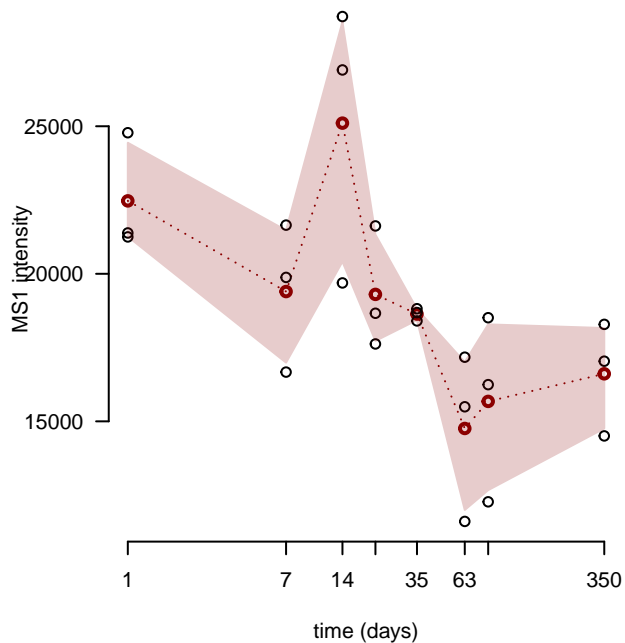

**Q3TZM9**  
**GN=Alg11**  
asparagine-linked glycosylation 11 (alpha ...

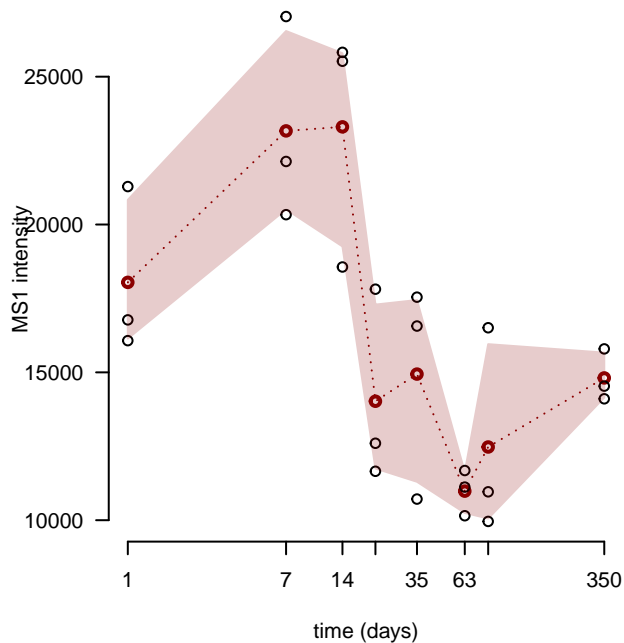

**Q3TZX3**  
**GN=Slc25a33**  
solute carrier family 25, member 33

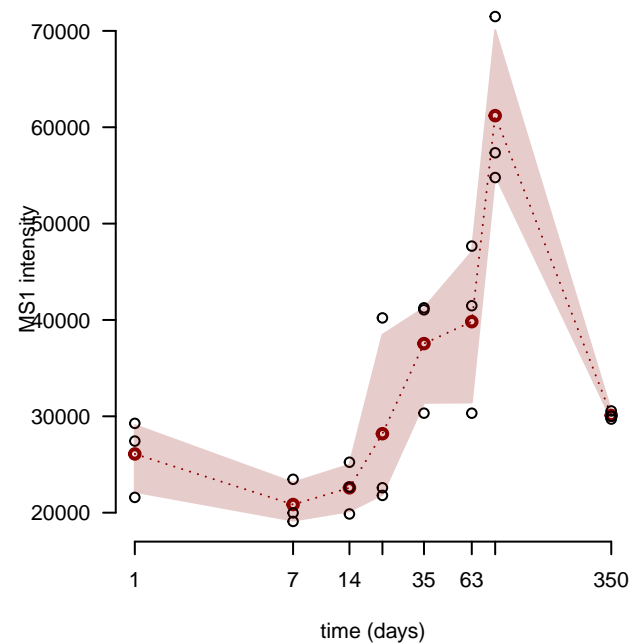

**Q3TZX8**  
**GN=NoI9**  
nucleolar protein 9

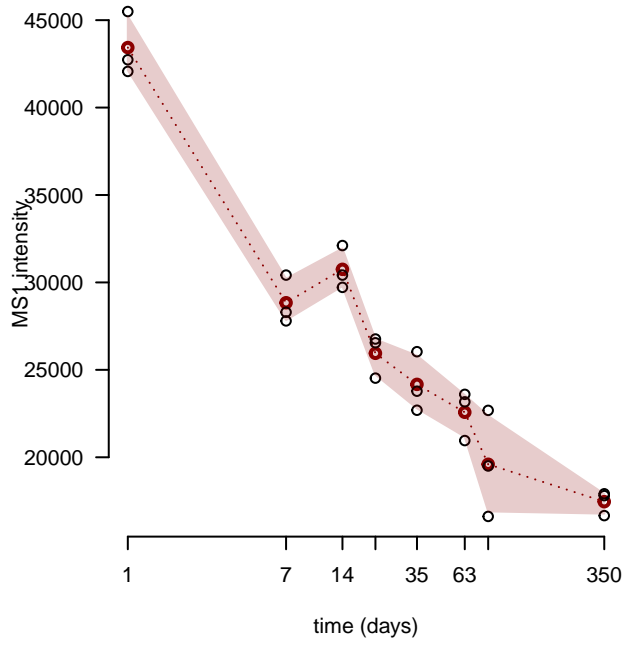

**Q3TZZ7**  
**GN=Esyt2**  
extended synaptotagmin-like protein 2

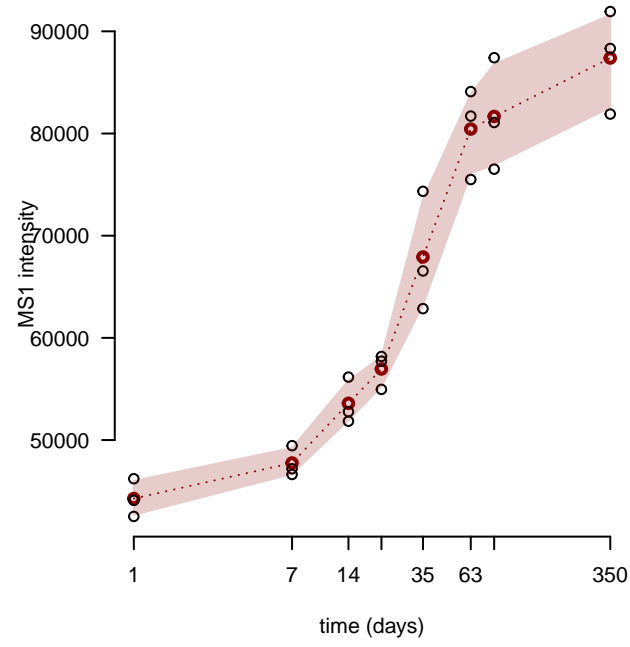

**Q3U0B3**  
**GN=Dhrs11**  
dehydrogenase/reductase (SDR family) mem ...

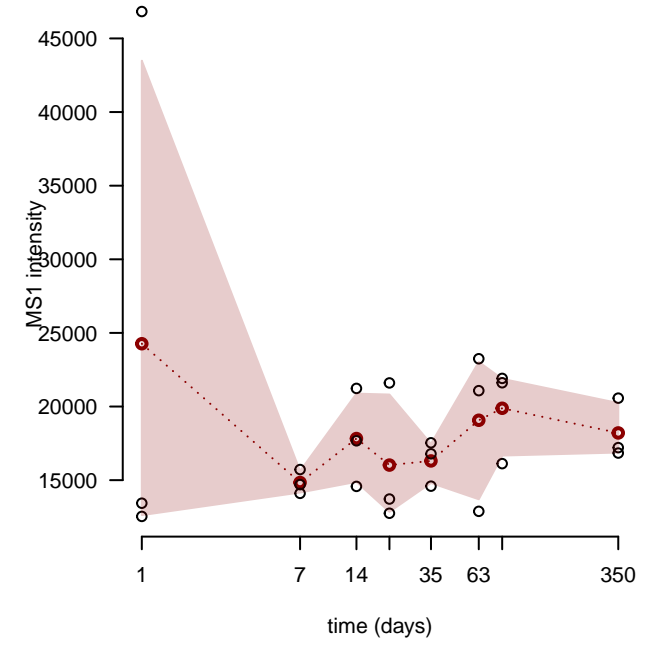

**Q3U0D9**  
**GN=Hace1**  
HECT domain and ankyrin repeat containin ...

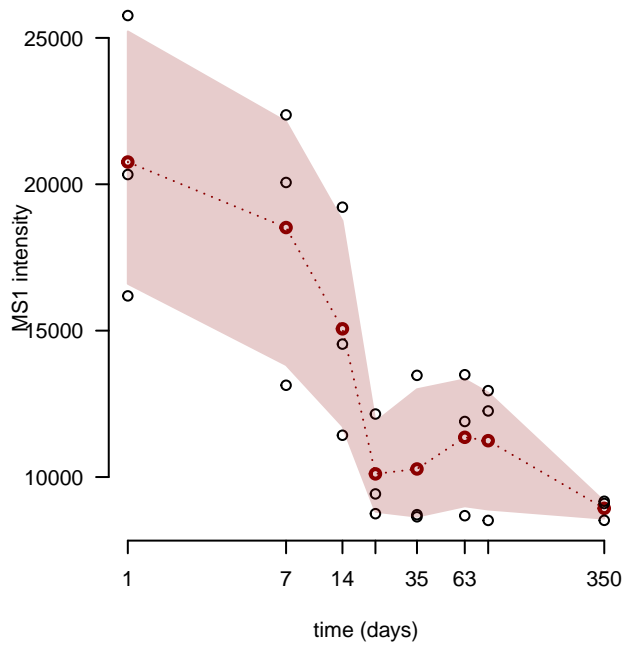

**Q3U0J8**  
**GN=Tbc1d2b**  
TBC1 domain family, member 2B

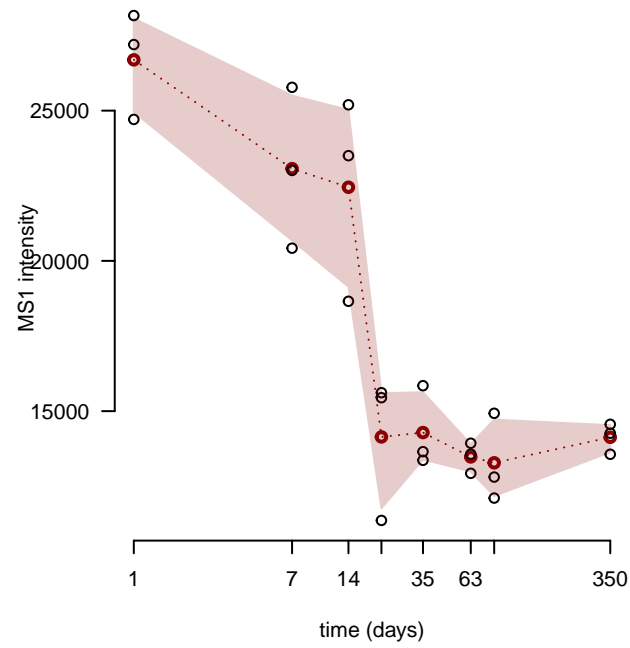

**Q3U0K8**  
**GN=Ogfod1**  
2-oxoglutarate and iron-dependent oxygen ...

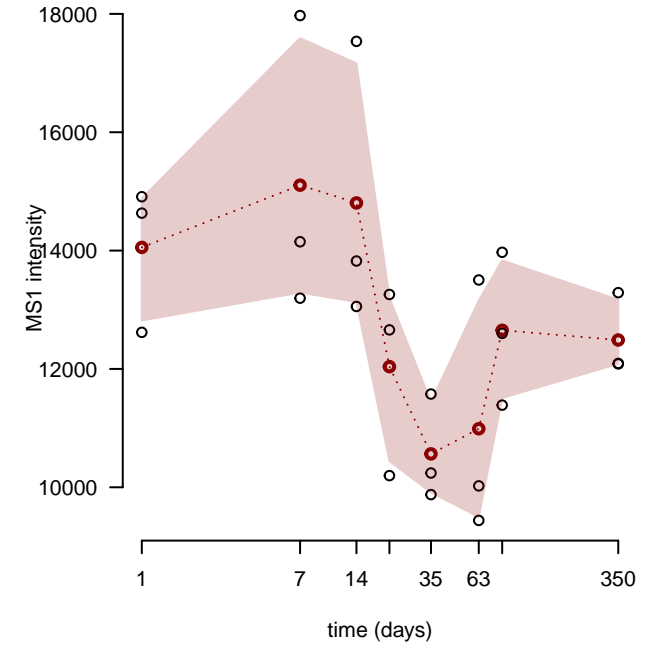

**Q3U0M1**  
**GN=Trappc9**  
trafficking protein particle complex 9

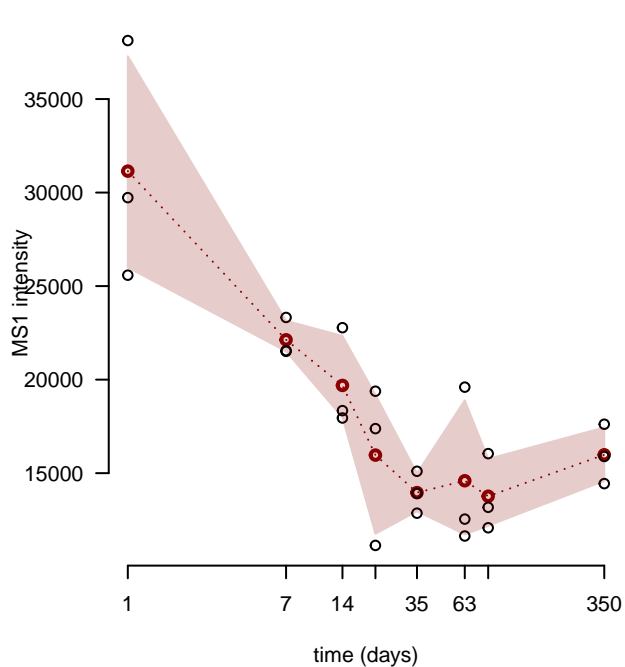

**Q3U0P5**  
**GN=**

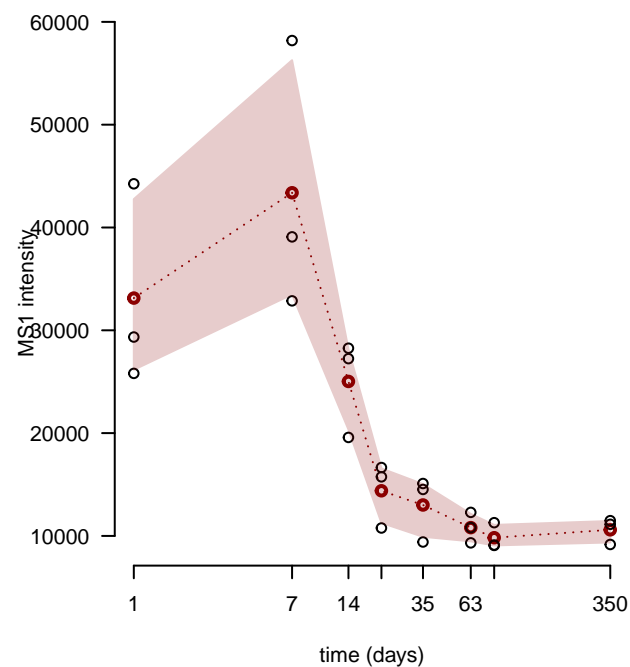

**Q3U0S6**  
**GN=Rasip1**  
Ras interacting protein 1

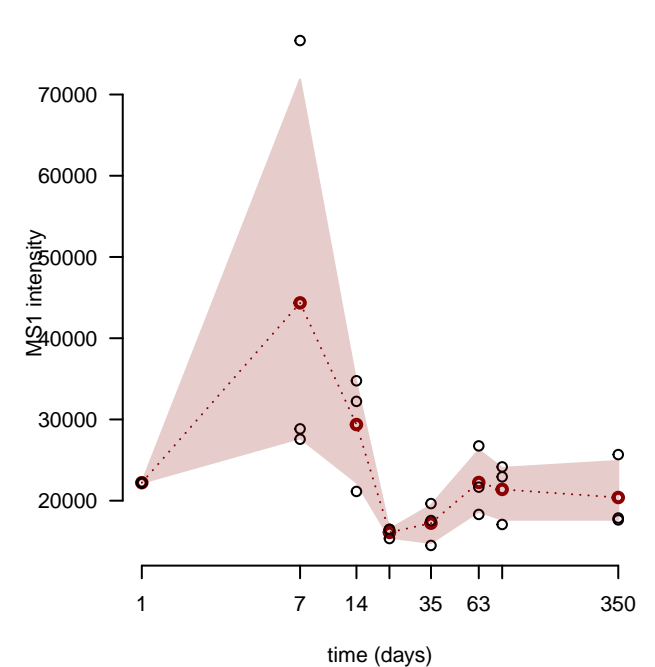

**Q3U0V1**  
GN=Khsrp  
KH-type splicing regulatory protein

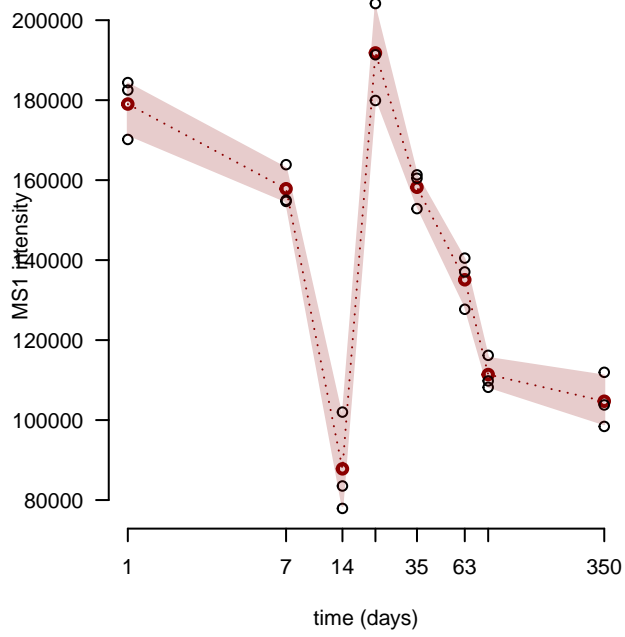

**Q3U0V2**  
GN=Tradd  
TNFRSF1A-associated via death domain

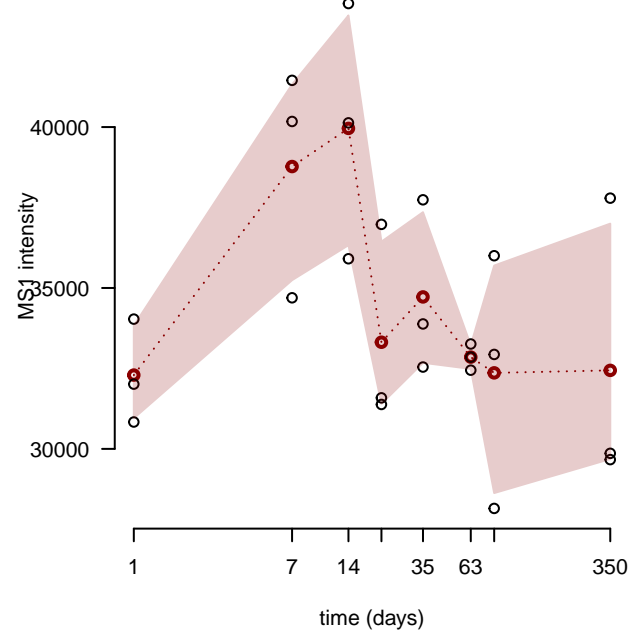

**Q3U0Y2**  
GN=Tmem35b  
transmembrane protein 35B

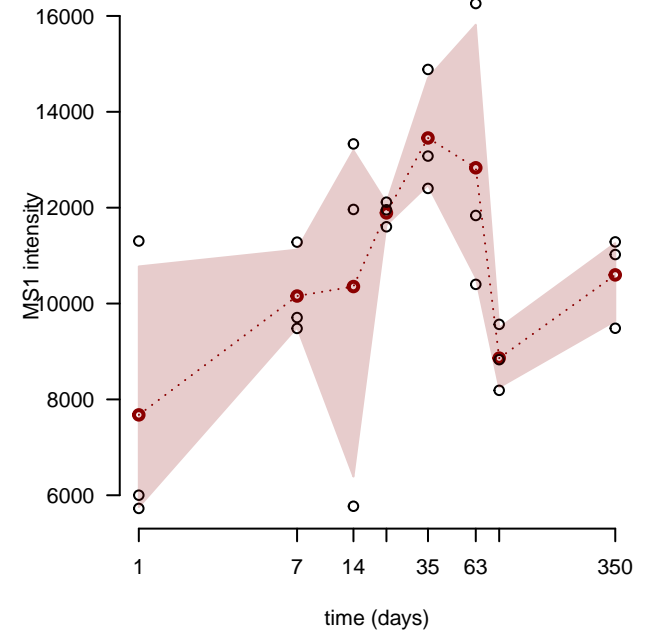

**Q3U133**  
GN=Znf746

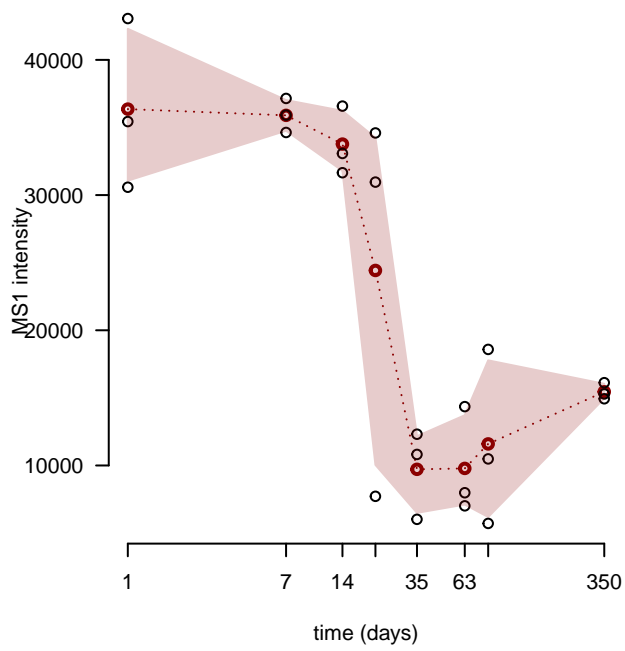

**Q3U182**  
GN=Crtc2  
CREB regulated transcription coactivator ...

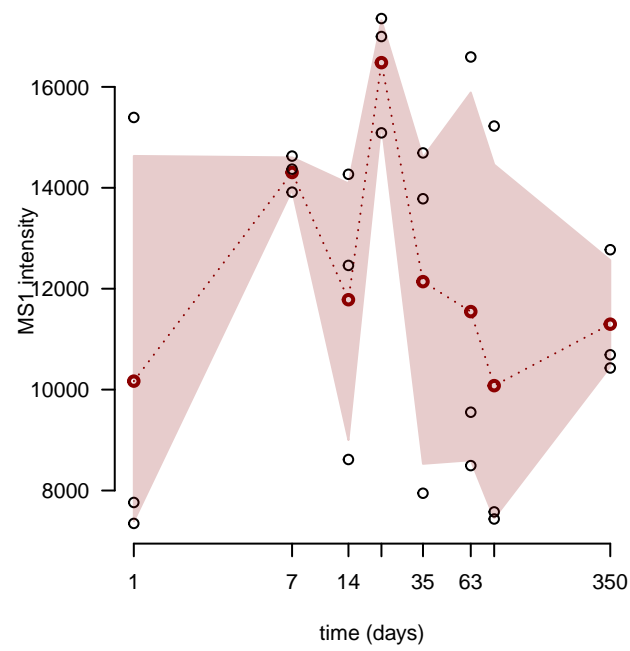

**Q3U186**  
GN=Rars2  
arginyl-tRNA synthetase 2, mitochondrial

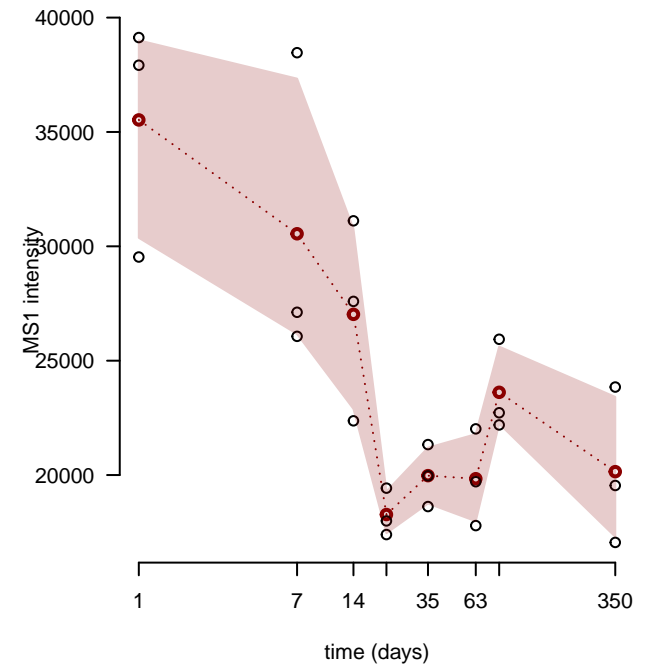

**Q3U1C6**  
GN=Tatdn3  
TatD DNase domain containing 3

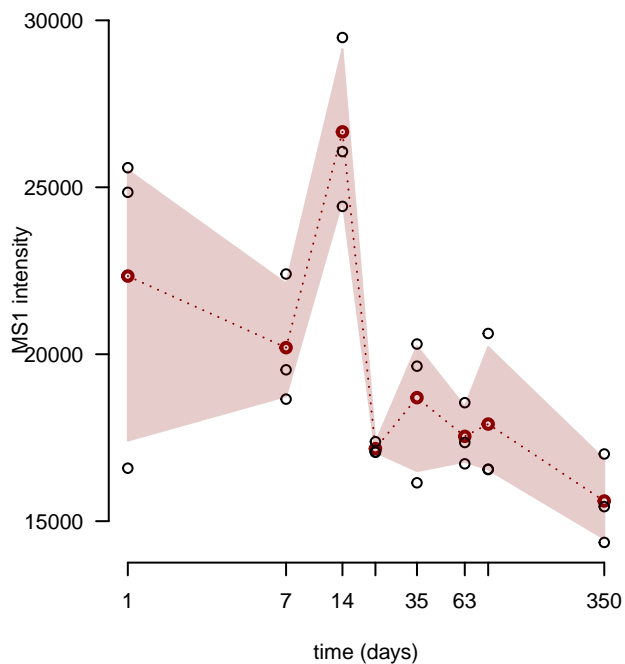

**Q3U1F9**  
GN=Pag1  
phosphoprotein associated with glycosphi ...

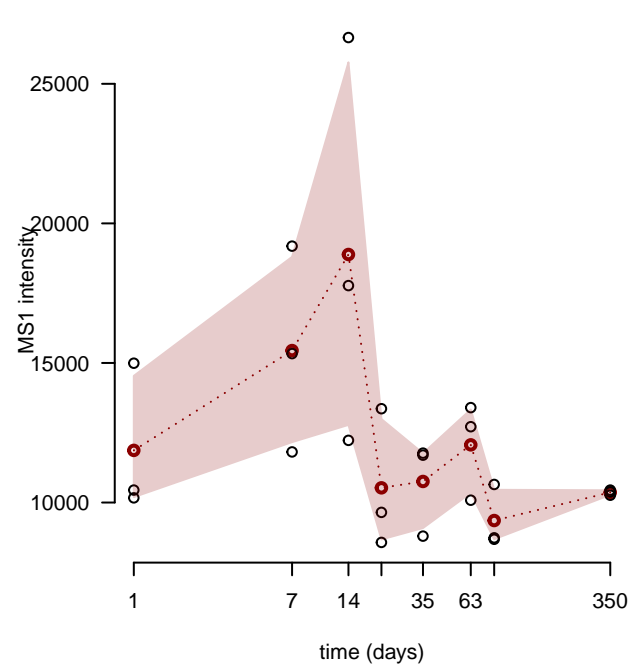

**Q3U1G5**  
GN=Isg2012  
interferon stimulated exonuclease gene 2 ...

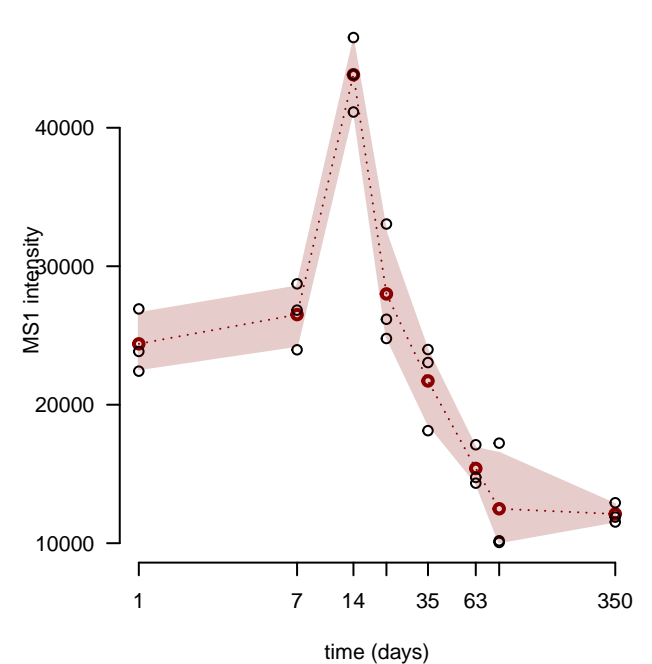

**Q3U1J0**  
**GN=Slc38a5**  
solute carrier family 38, member 5

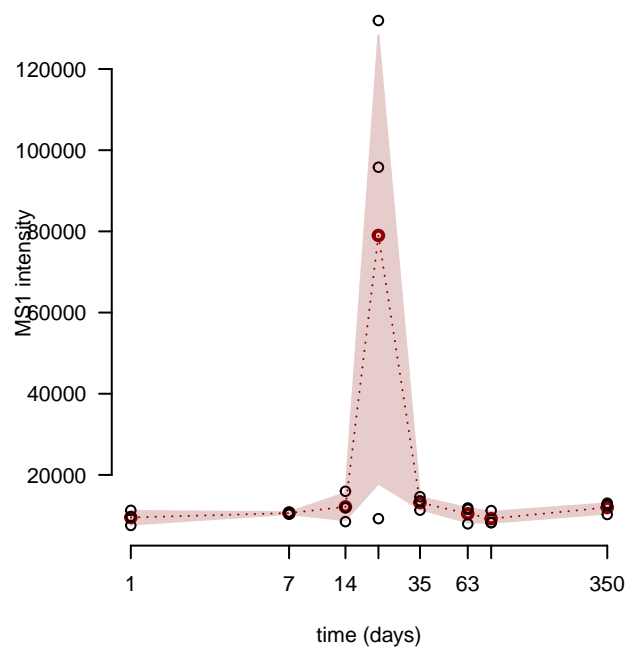

**Q3U1J4**  
**GN=Ddb1**  
damage specific DNA binding protein 1

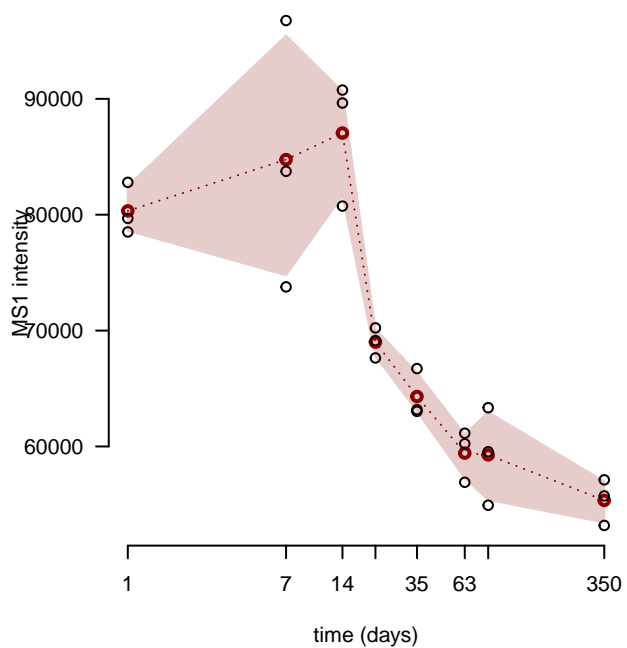

**Q3U1N2**  
**GN=Srebf2**  
sterol regulatory element binding factor ...

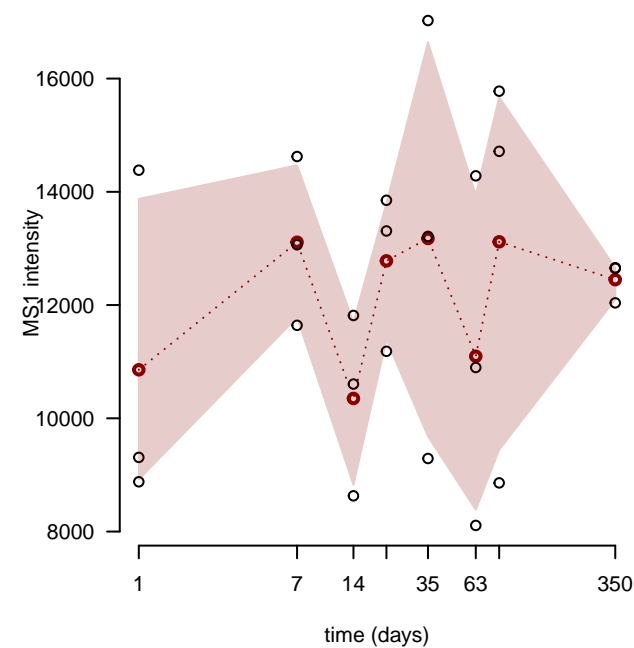

**Q3U1T3**  
**GN=Brms1l**  
breast cancer metastasis-suppressor 1-li ...

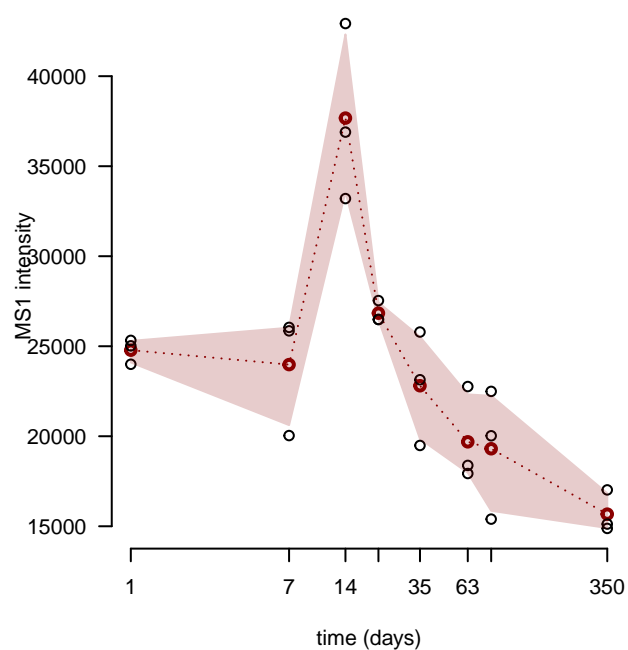

**Q3U1T9**  
**GN=Dennd1b**  
DENN/MADD domain containing 1B

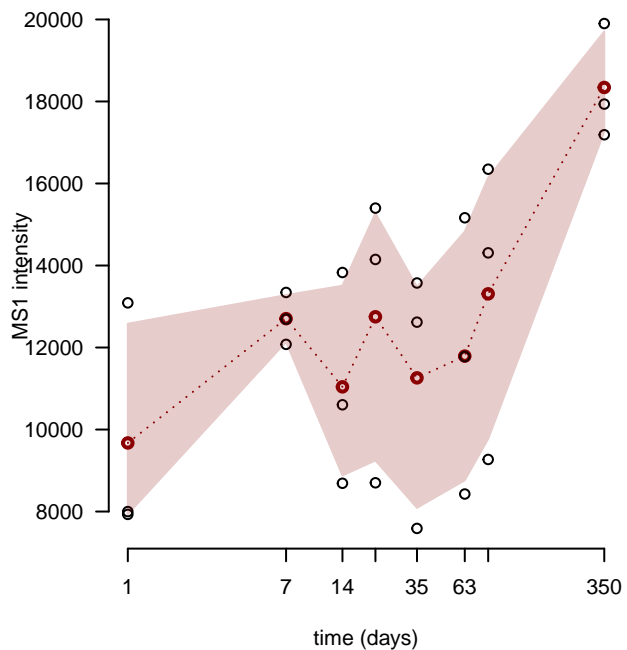

**Q3U1V6**  
**GN=Uevld**  
UEV and lactate/malate dehydrogenase doma ...

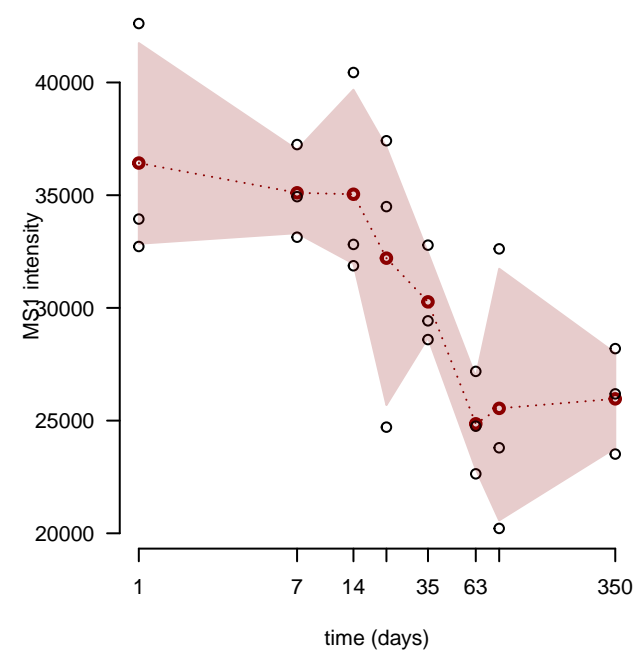

**Q3U213**  
**GN=Serac1**  
serine active site containing 1

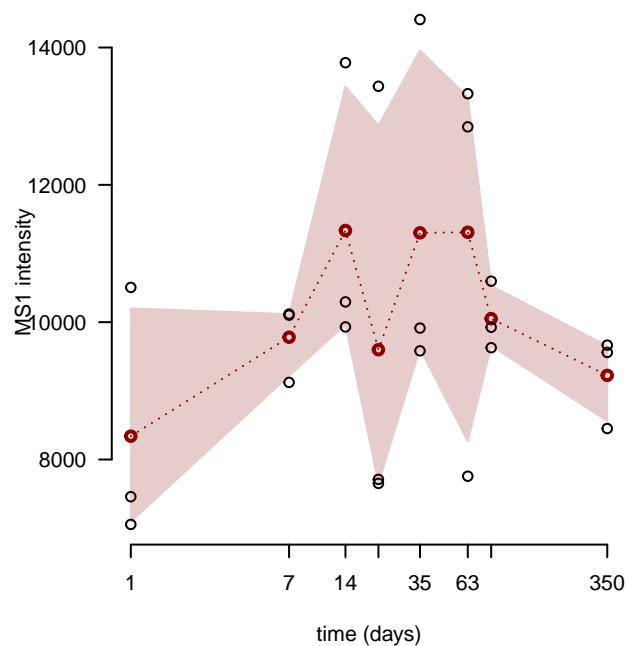

**Q3U276**  
**GN=Sdhaf1**  
succinate dehydrogenase complex assembly ...

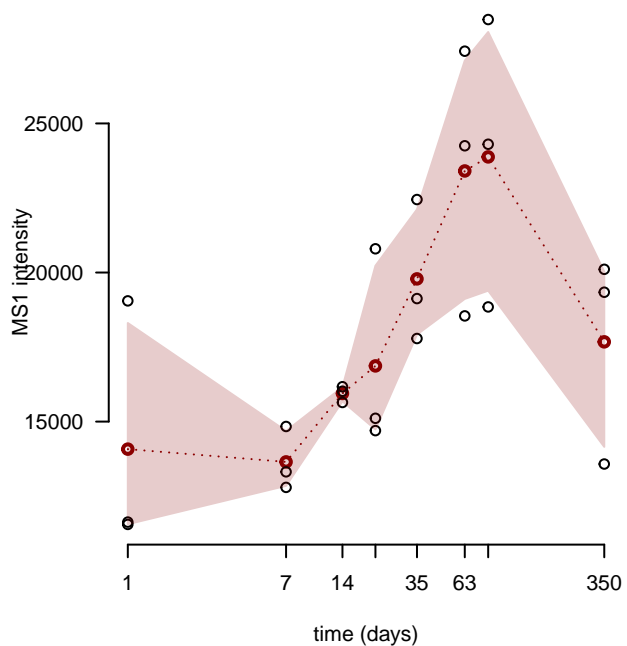

**Q3U284**  
**GN=Tmem231**  
transmembrane protein 231

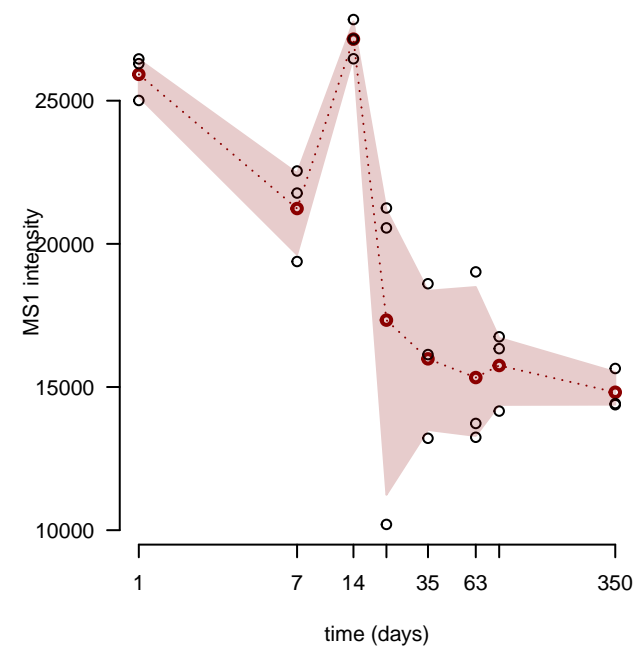

**Q3U2A8**  
**GN=Vars2**  
valyl-tRNA synthetase 2, mitochondrial

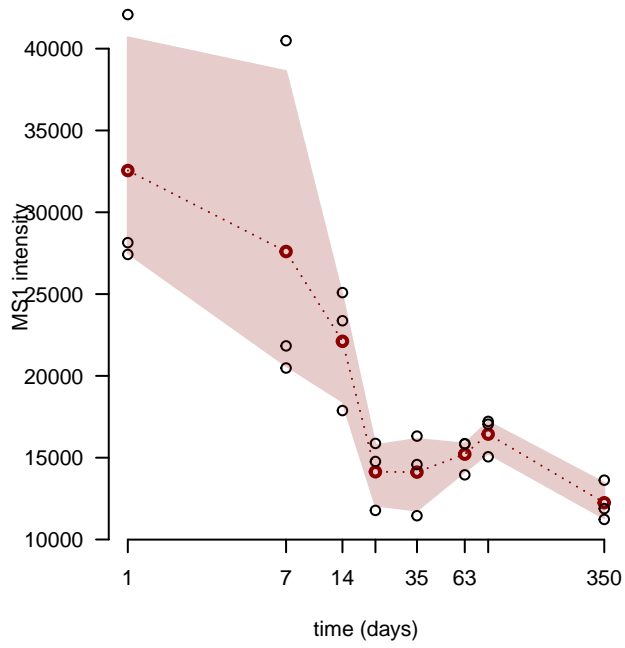

**Q3U2E2**  
**GN=Zmym5**  
zinc finger, MYM-type 5

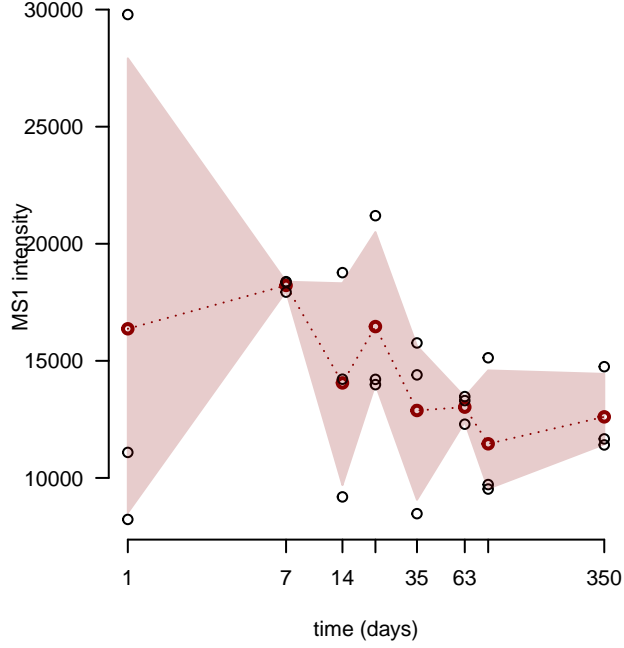

**Q3U2I3**  
**GN=Fam160a2**

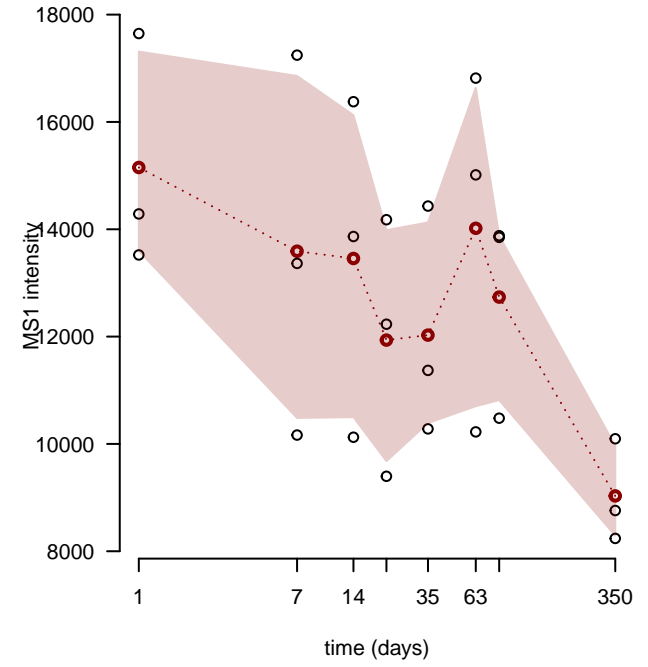

**Q3U2J5**  
**GN=Camkmt**  
calmodulin-llysine N-methyltransferase

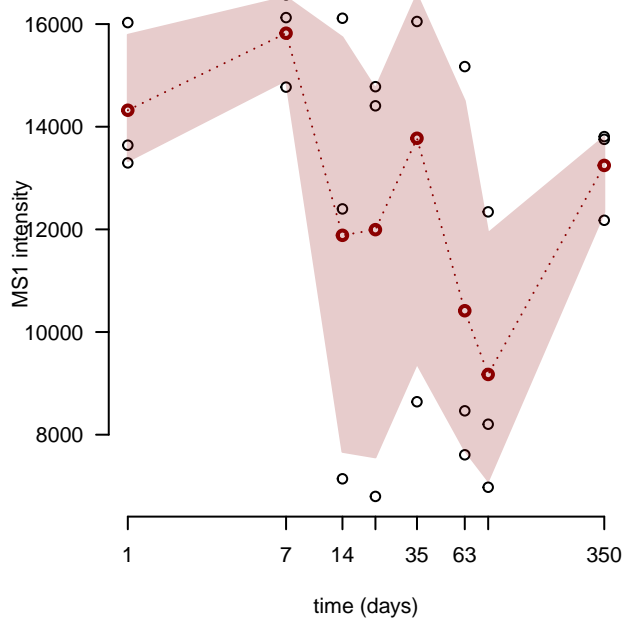

**Q3U2K0**  
**GN=Fam193b**  
family with sequence similarity 193, mem ...

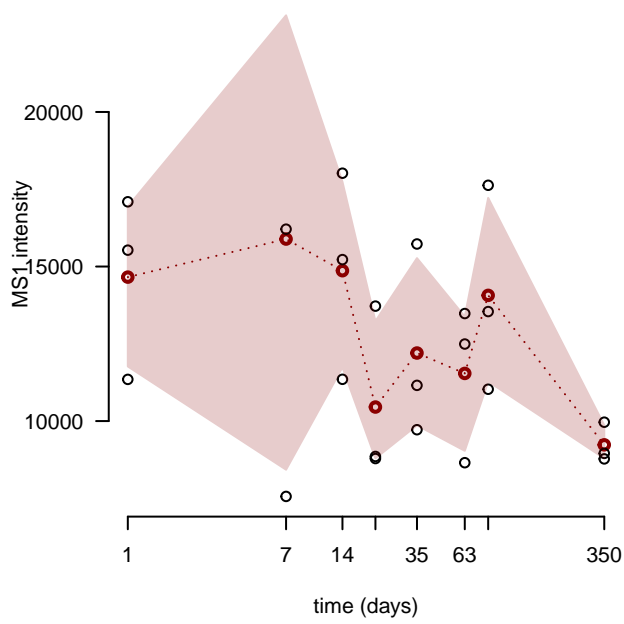

**Q3U2P1**  
**GN=Sec24a**  
Sec24 related gene family, member A (S. ...

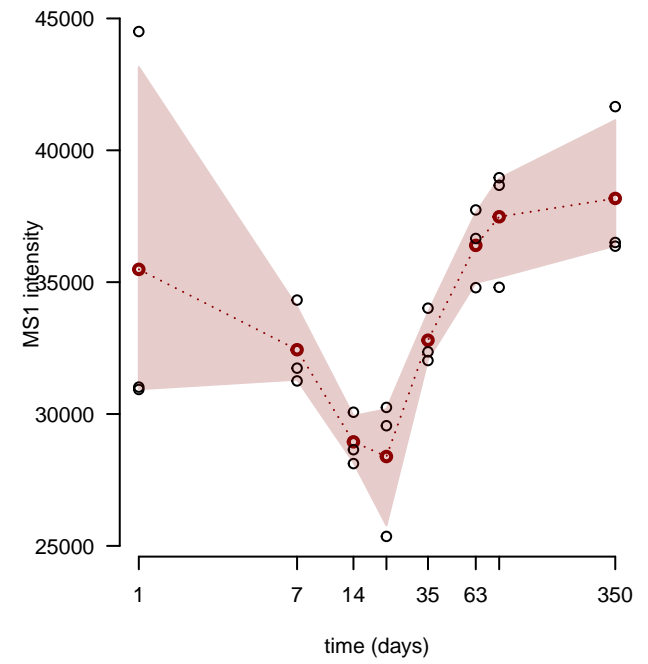

**Q3U2V3**  
**GN=Nudt18**  
nudix (nucleoside diphosphate linked moi ...

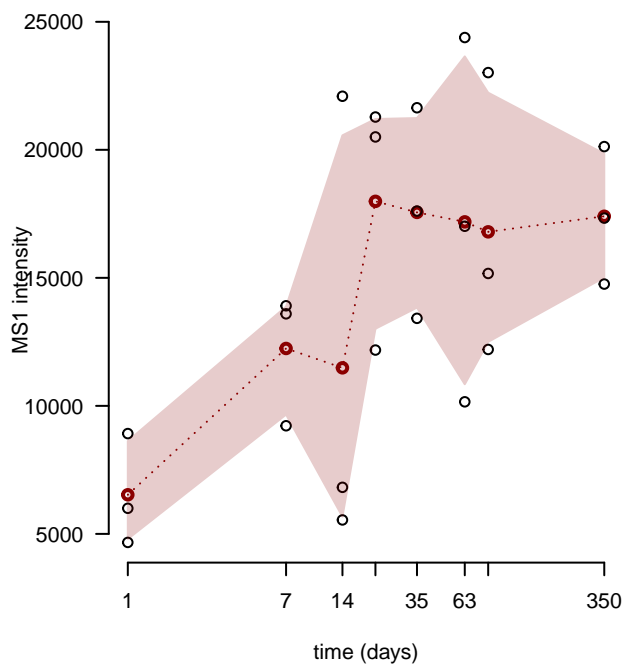

**Q3U308**  
**GN=Ctu2**  
cytosolic thiouridylase subunit 2

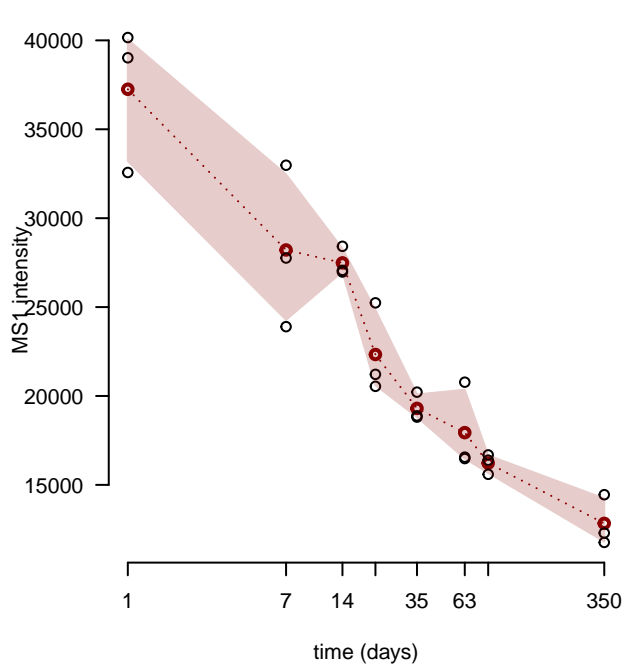

**Q3U319**  
**GN=Rnf40**  
ring finger protein 40

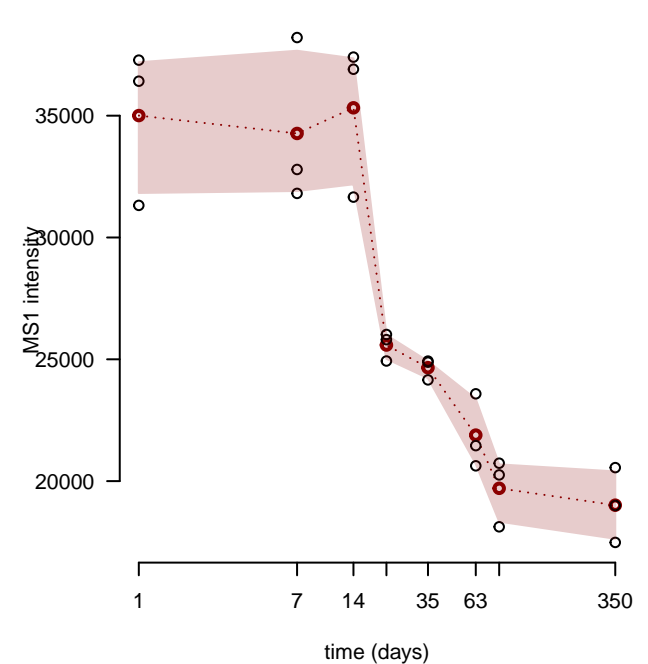

**Q3U3C9**  
**GN=Gse1**  
genetic suppressor element 1, coiled-coi ...

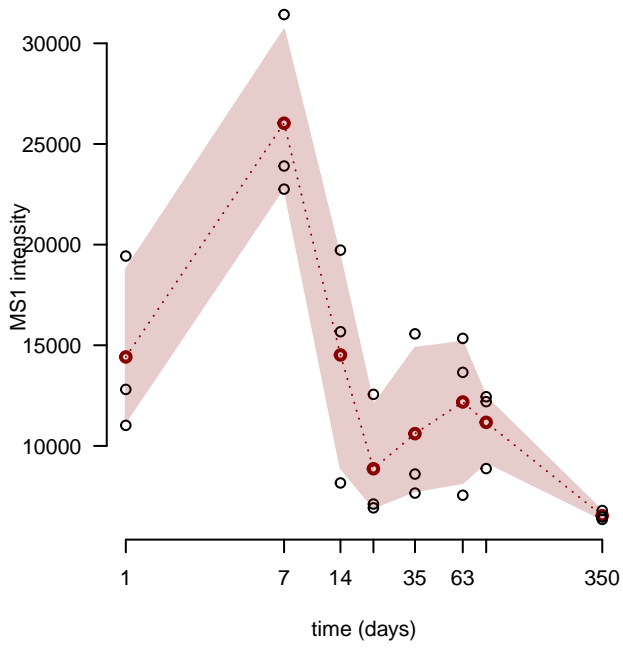

**Q3U3E2**  
**GN=Fam117b**  
family with sequence similarity 117, mem ...

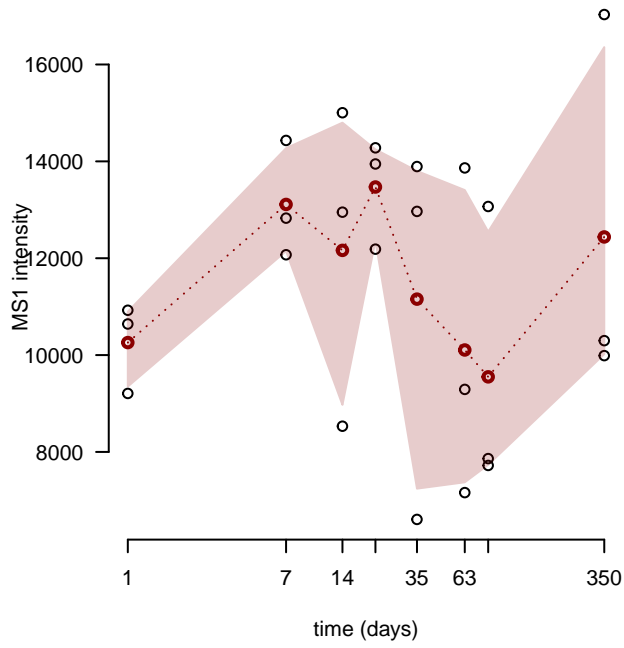

**Q3U3I9**  
**GN=Znf865**

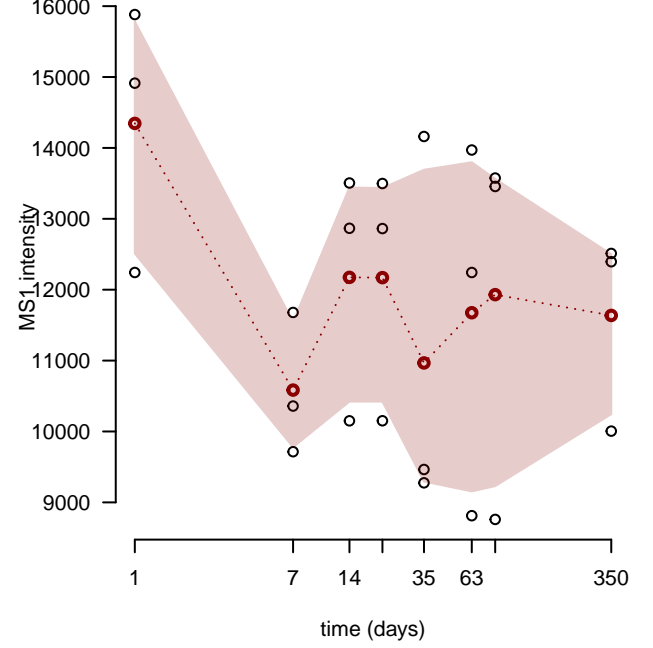

**Q3U3Q1**  
**GN=Ulk3**  
unc-51-like kinase 3

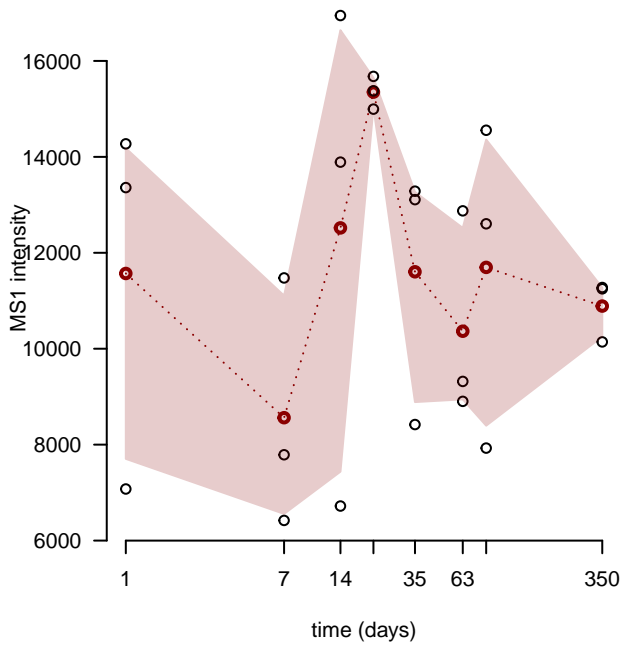

**Q3U3R4**  
**GN=Lmf1**  
lipase maturation factor 1

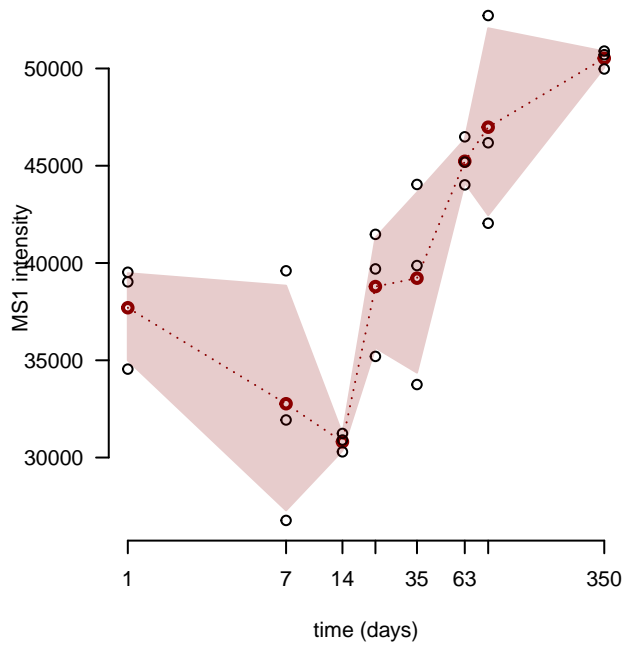

**Q3U3S3**  
**GN=Cenpl**  
centromere protein L

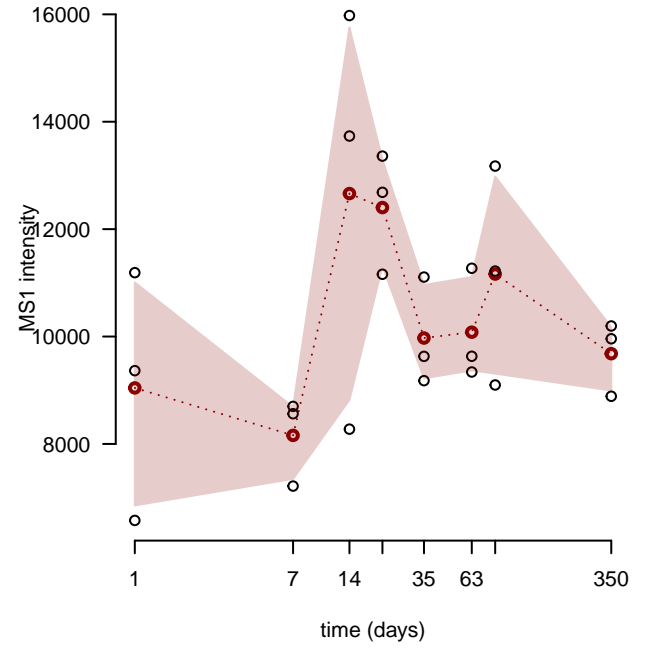

**Q3U3T8**  
**GN=Wdr62**  
WD repeat domain 62

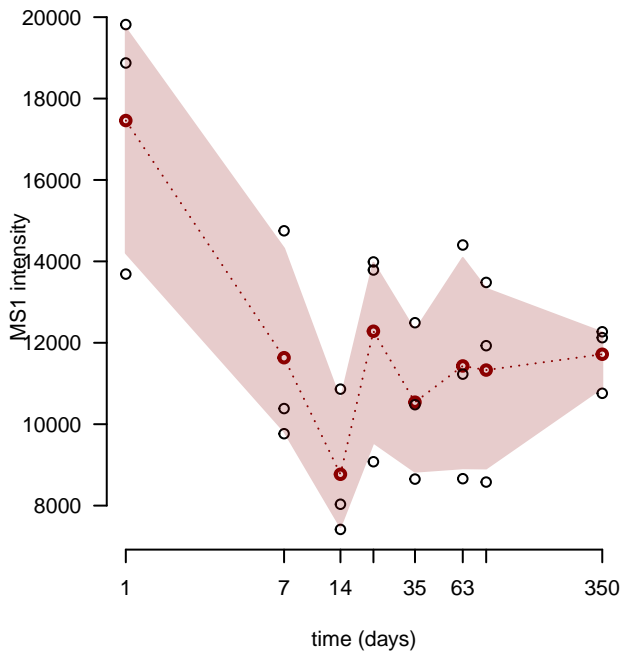

**Q3U3W5**  
**GN=Prmt9**  
protein arginine methyltransferase 9

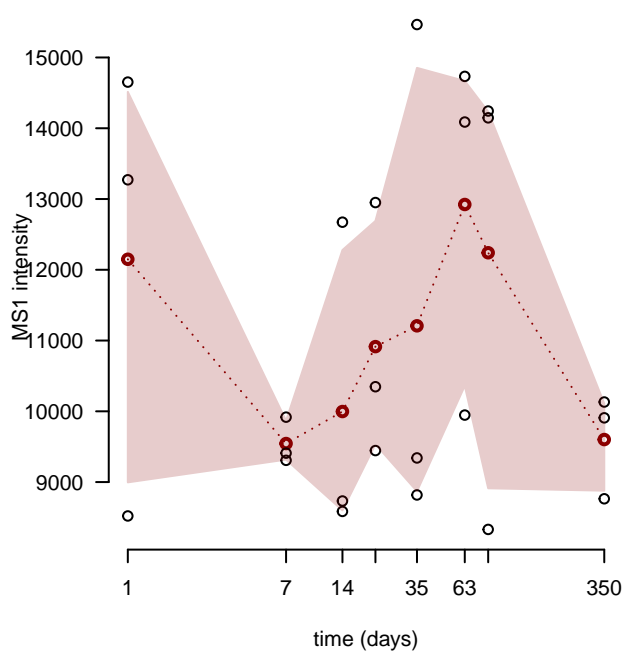

**Q3U487**  
**GN=Hectd3**  
HECT domain E3 ubiquitin protein ligase ...

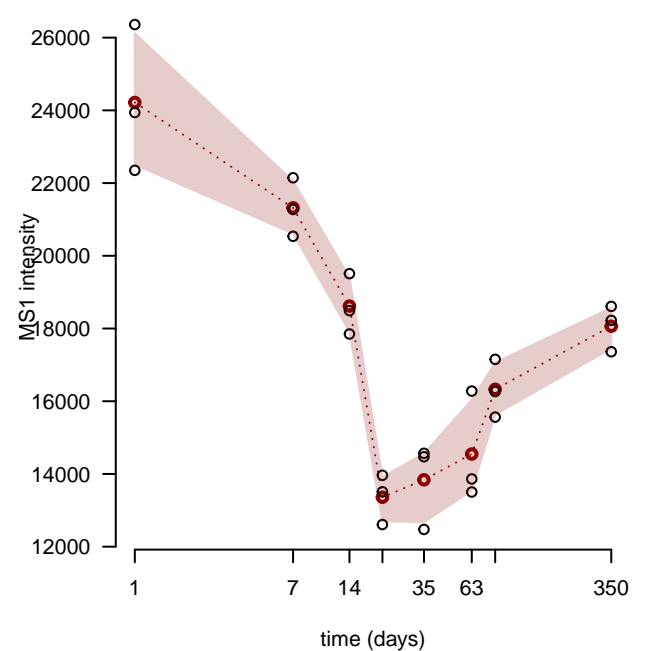

**Q3U492**  
GN=Kcp  
kielin/chordin-like protein

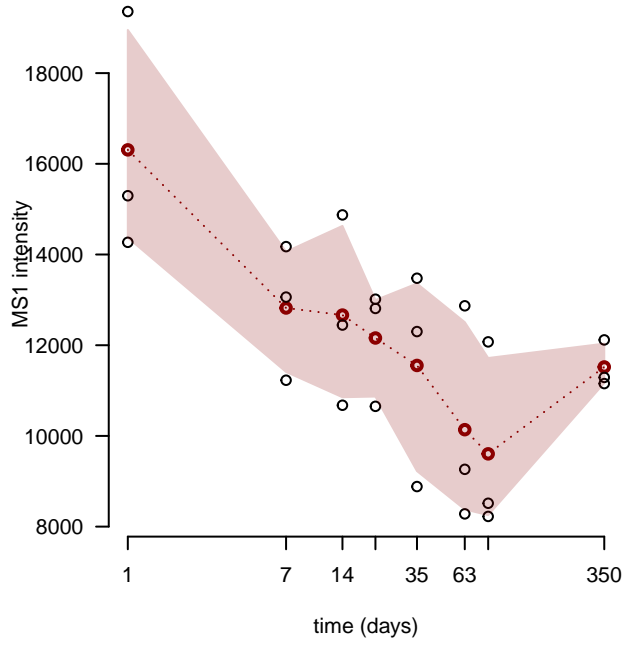

**Q3U4G3**  
GN=Xxylt1  
xyloside xylosyltransferase 1

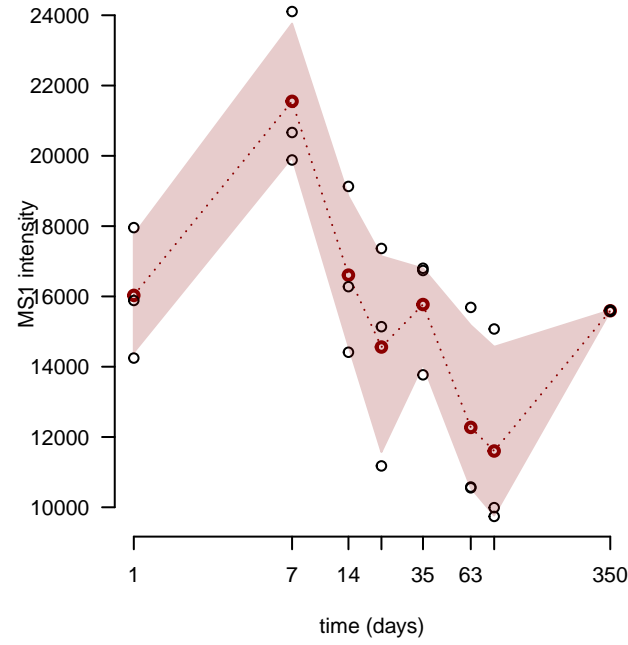

**Q3U4H6**  
GN=Hexd

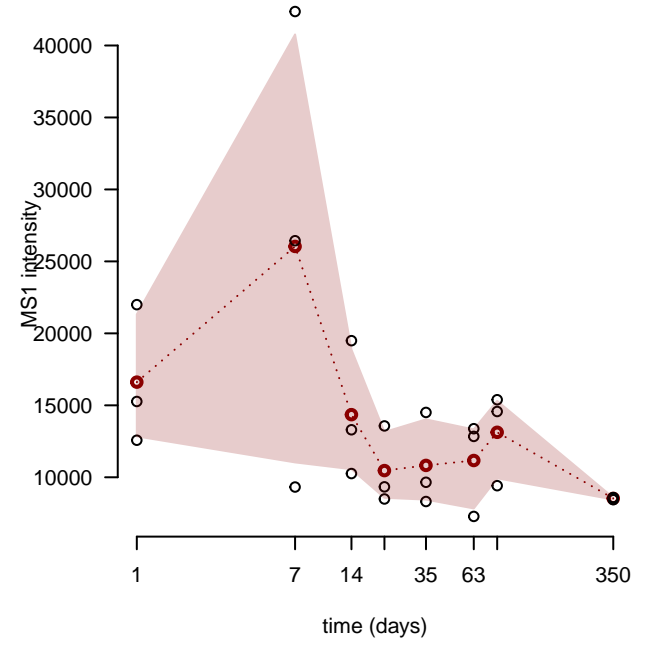

**Q3U4I7**  
GN=Pyroxd2  
pyridine nucleotide-disulphide oxidoredu ...

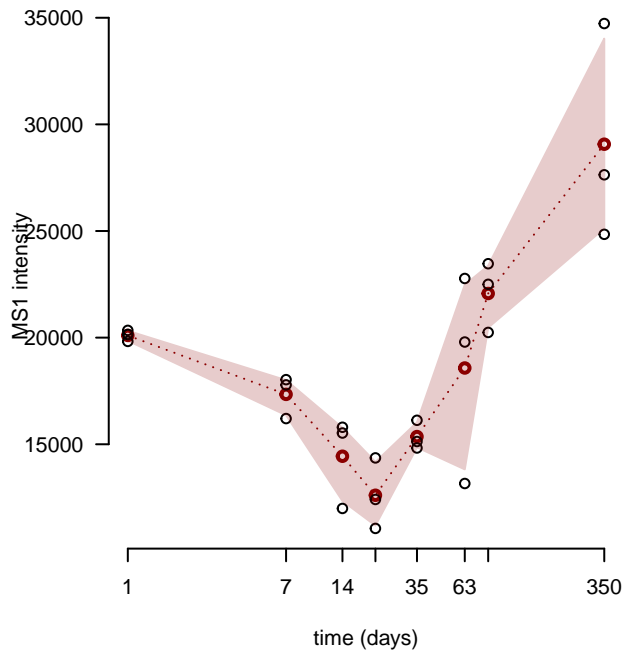

**Q3U564**  
GN=Dcp1b  
decapping mRNA 1B

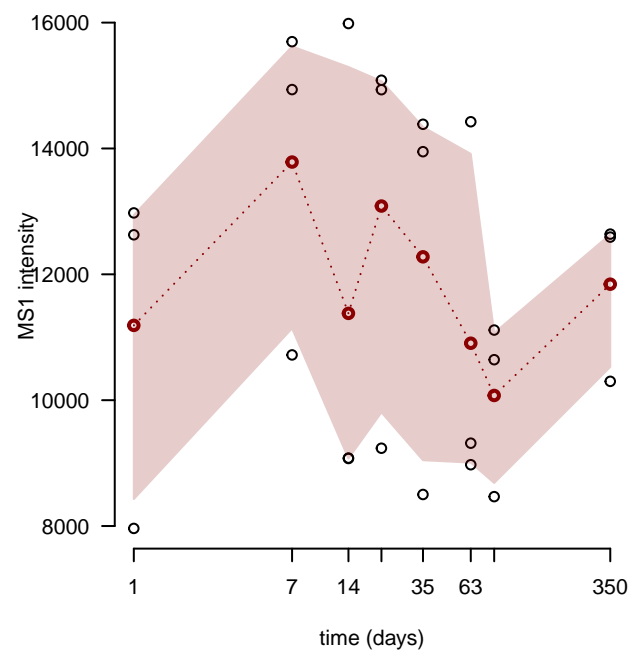

**Q3U5C7**  
GN=Prickle1  
prickle planar cell polarity protein 1

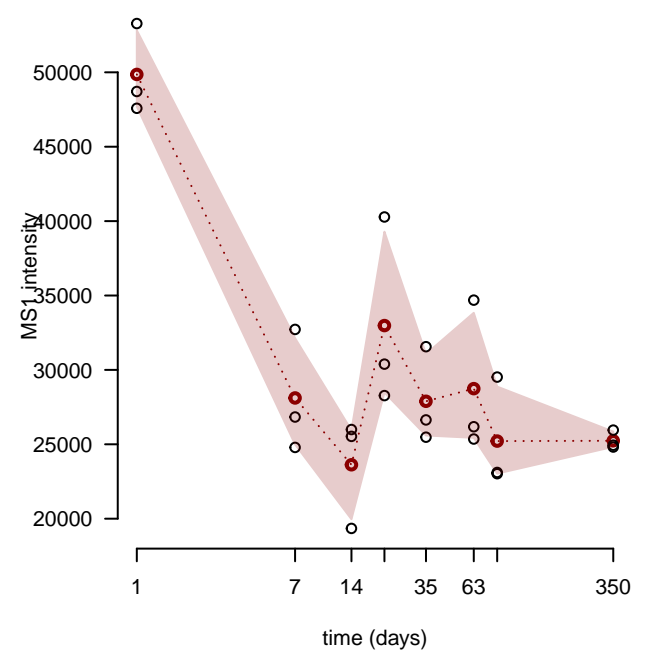

**Q3U5C8**  
GN=Arhgef16  
Rho guanine nucleotide exchange factor ( ...

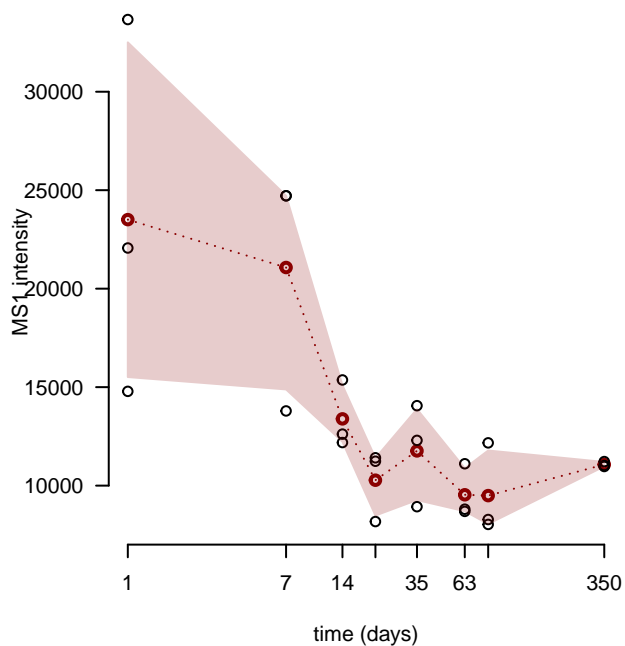

**Q3U5F4**  
GN=Yrdc  
yrdC domain containing (E.coli)

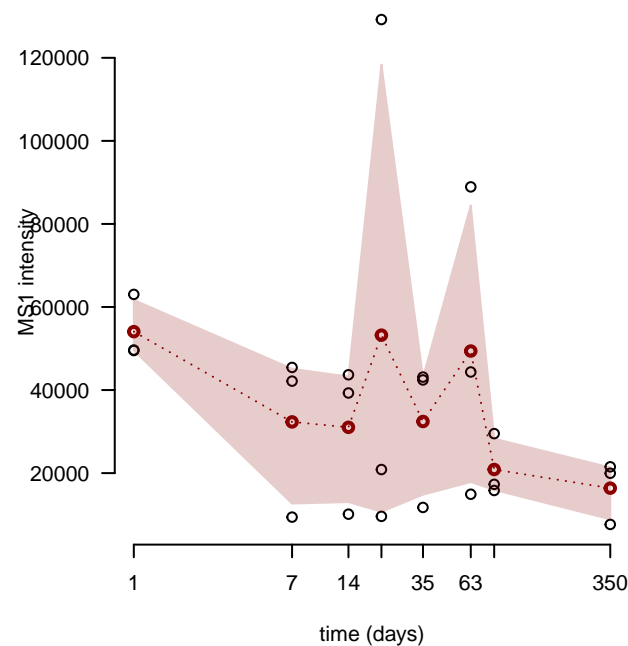

**Q3U5Q7**  
GN=Cmpk2  
cytidine monophosphate (UMP-CMP) kinase ...

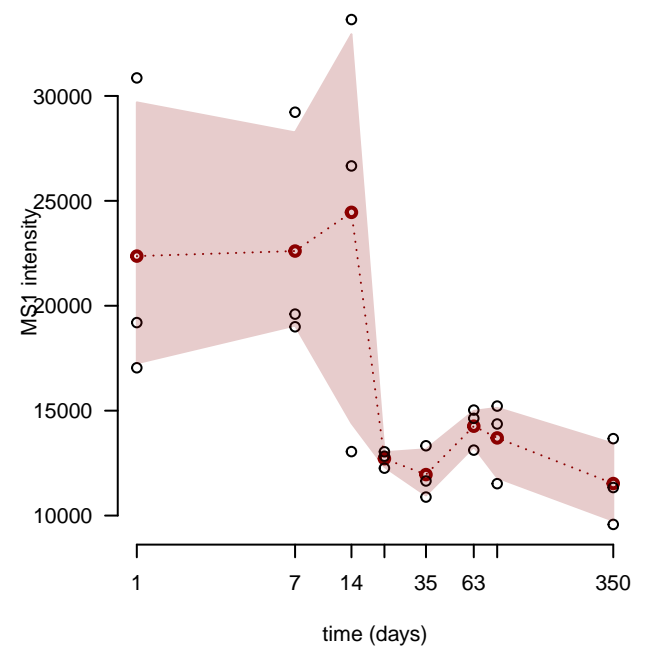



**Q3U6N9**  
GN=

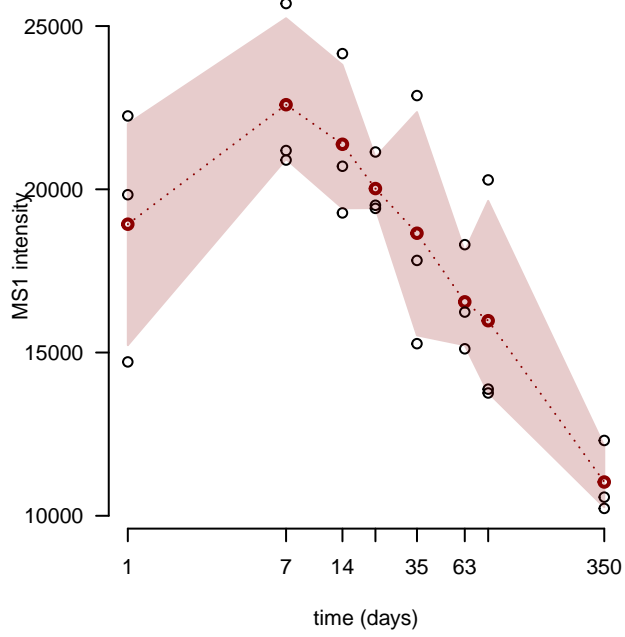

**Q3U6U5**  
GN=Gtpbp6  
GTP binding protein 6 (putative)

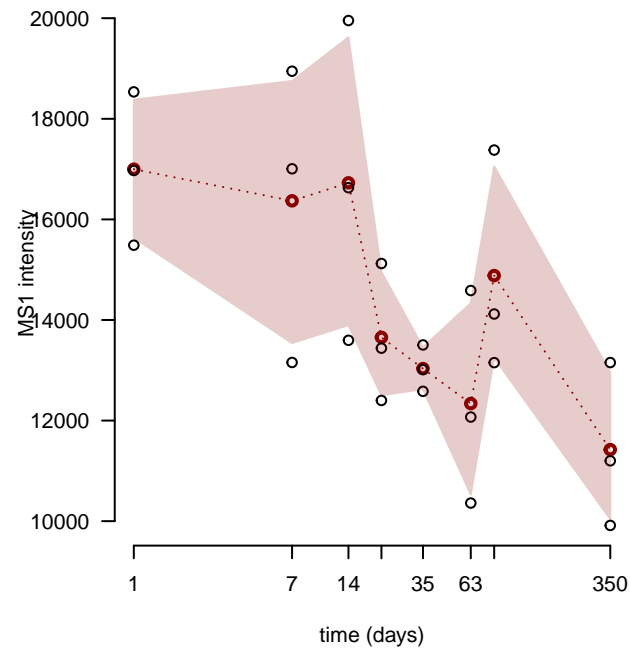

**Q3U7R1**  
GN=Esyt1  
extended synaptotagmin-like protein 1

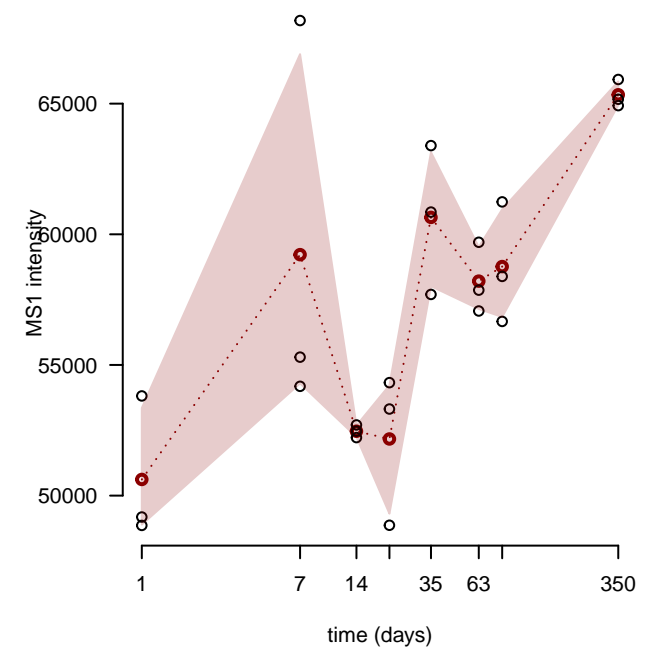

**Q3U7U3**  
GN=Fbxo7  
F-box protein 7

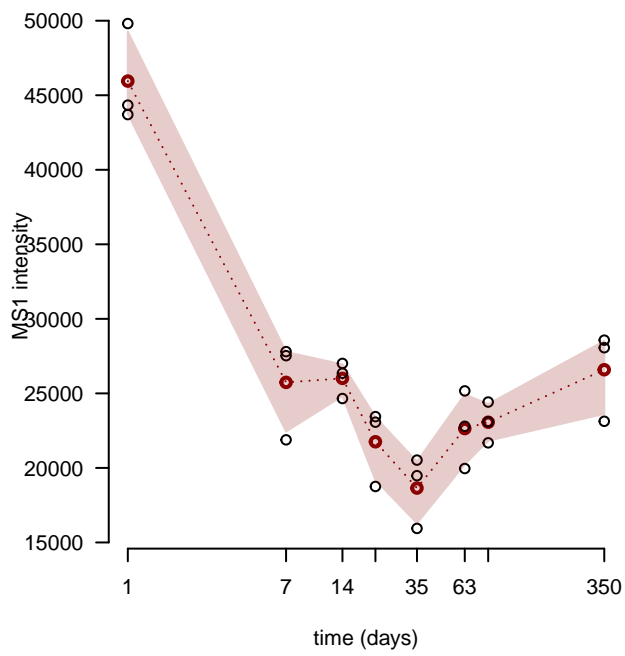

**Q3U821**  
GN=Wdr75  
WD repeat domain 75

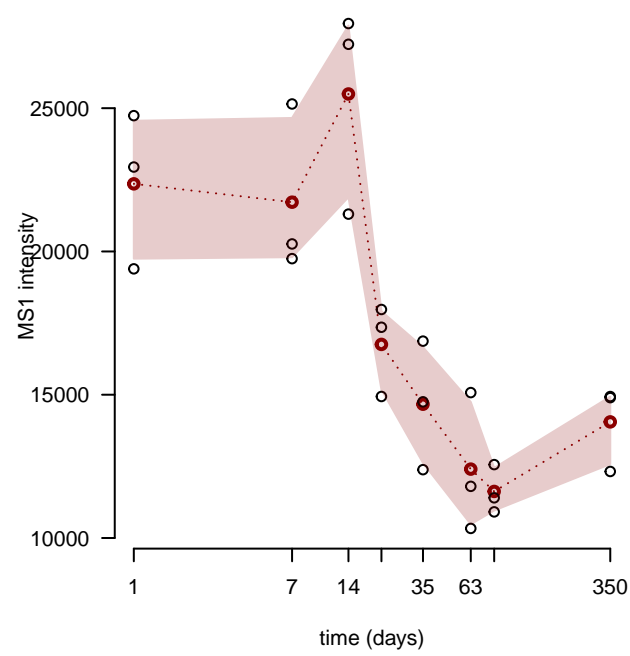

**Q3U827**  
GN=Rnf180  
ring finger protein 180

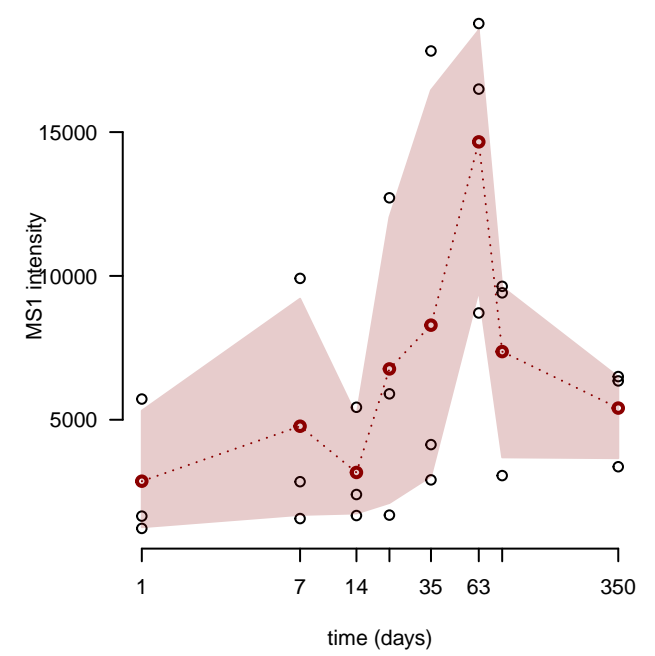

**Q3U829**  
GN=Ap5z1  
adaptor-related protein complex 5, zeta ...

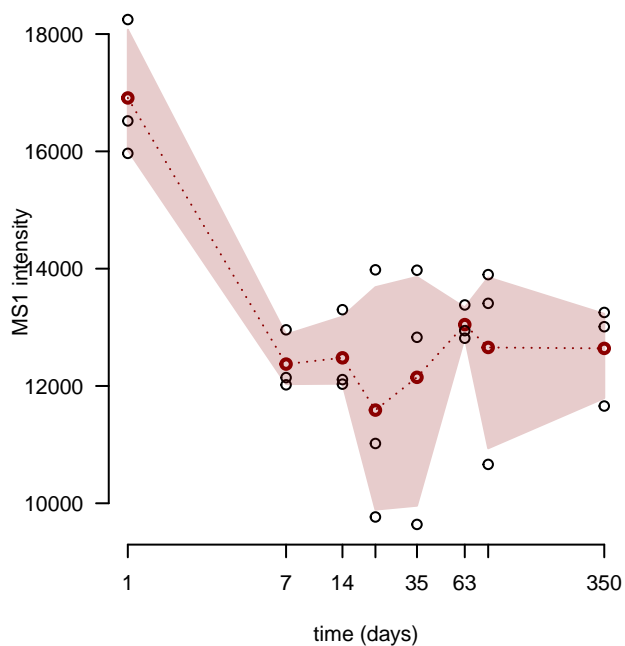

**Q3U898**  
GN=Cops9  
COP9 signalosome subunit 9

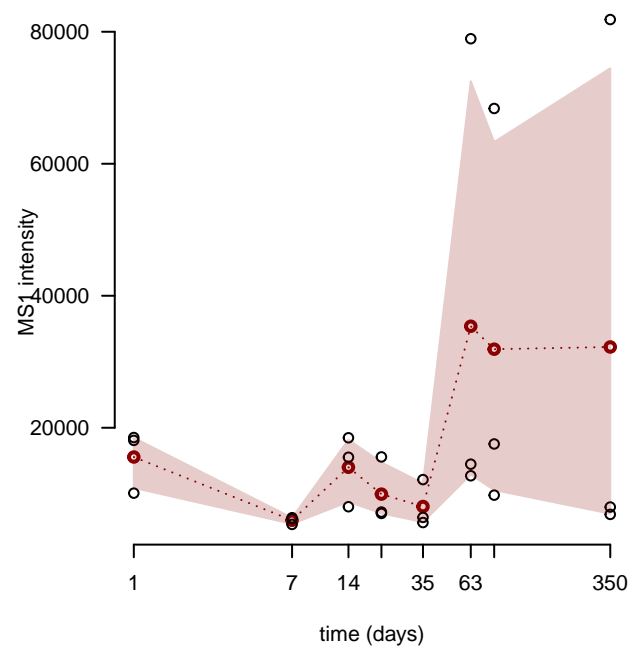

**Q3U962**  
GN=Col5a2  
collagen, type V, alpha 2

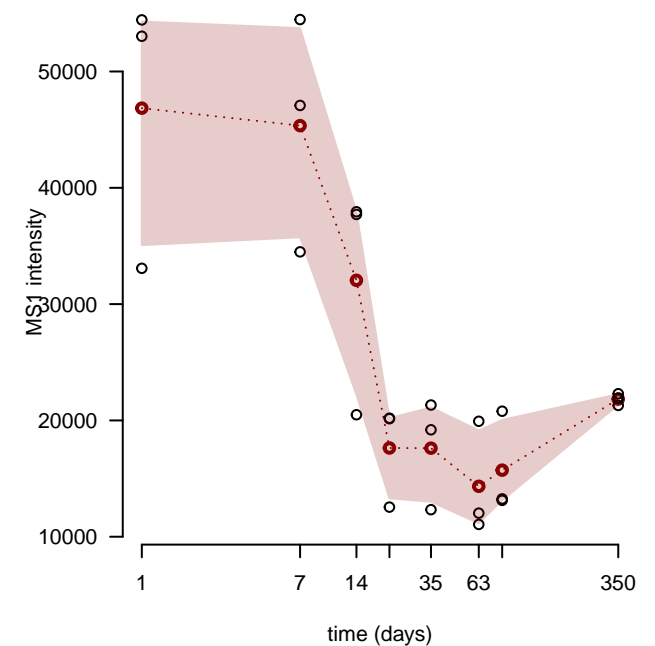

**Q3U9G9**  
GN=Lbr  
lamin B receptor

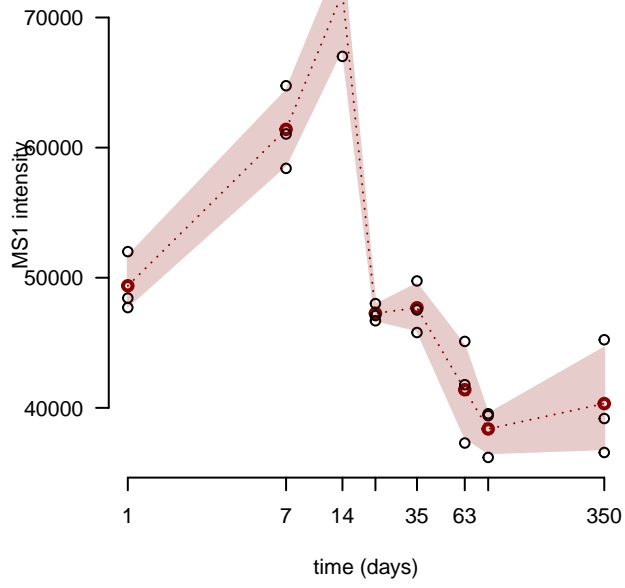

**Q3UA06**  
GN=Trip13  
thyroid hormone receptor interactor 13

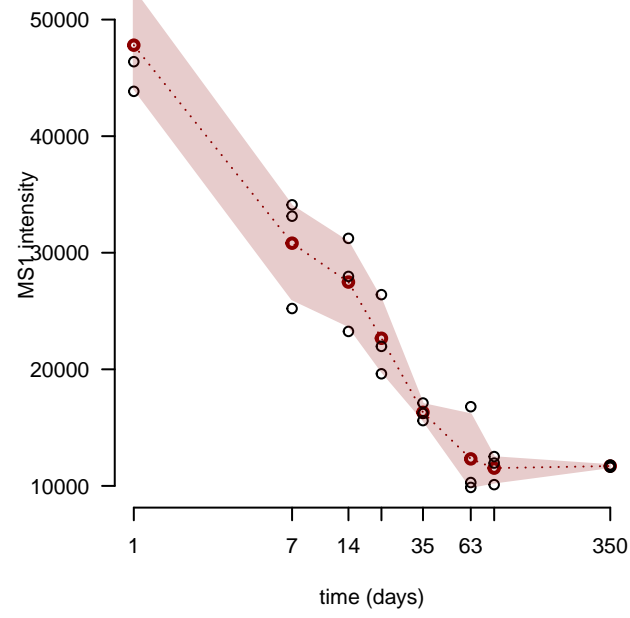

**Q3UA16**  
GN=Spc25  
SPC25, NDC80 kinetochore complex compone ...

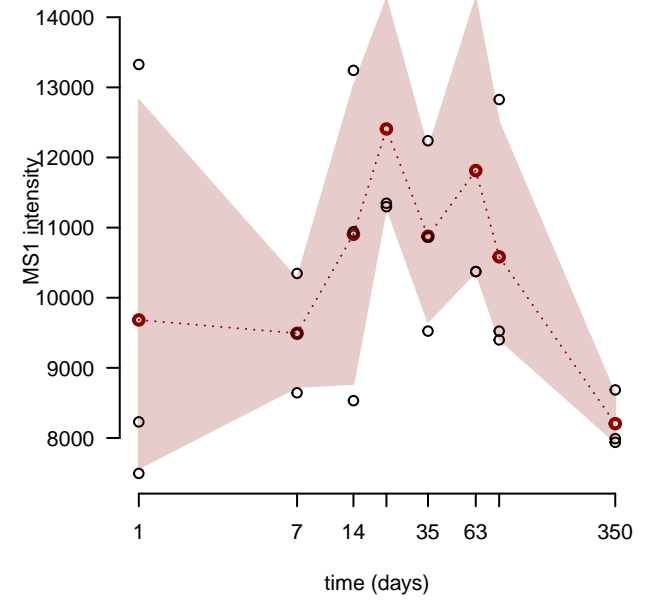

**Q3UA37**  
GN=Qrich1  
glutamine-rich 1

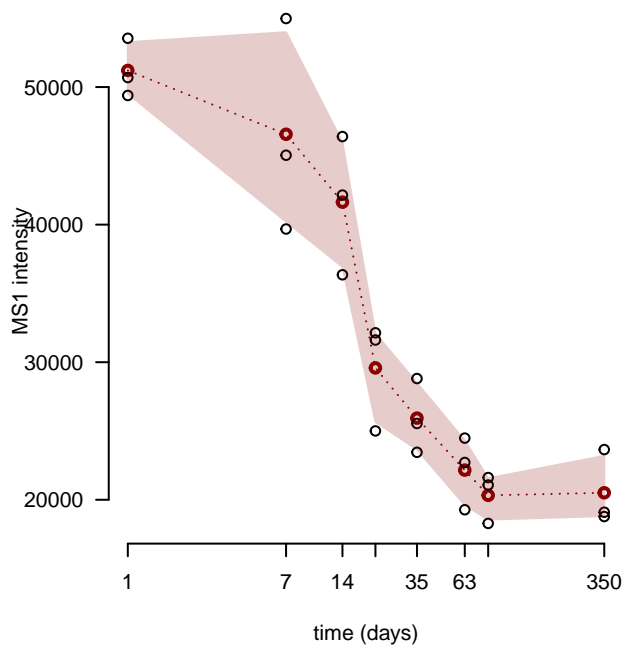

**Q3UBG2**  
GN=Pid1  
phosphotyrosine interaction domain conta ...

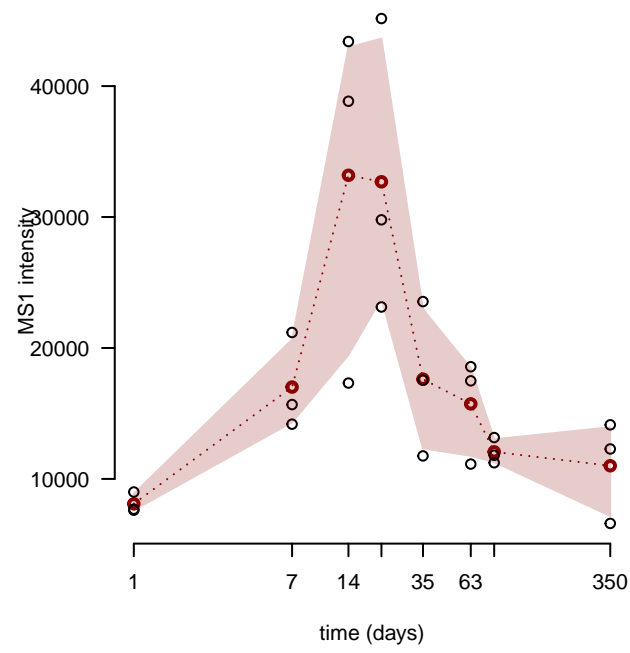

**Q3UBX0**  
GN=Tmem109  
transmembrane protein 109

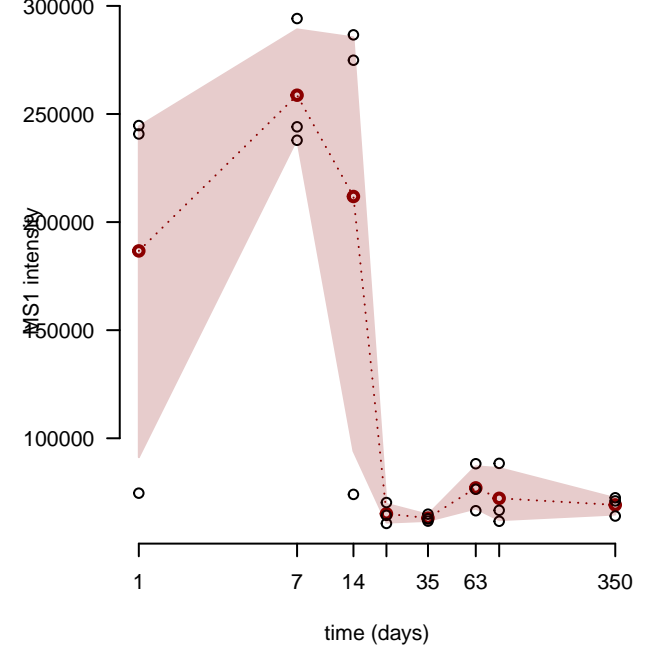

**Q3UBZ5**  
GN=Mif4gd  
MIF4G domain containing

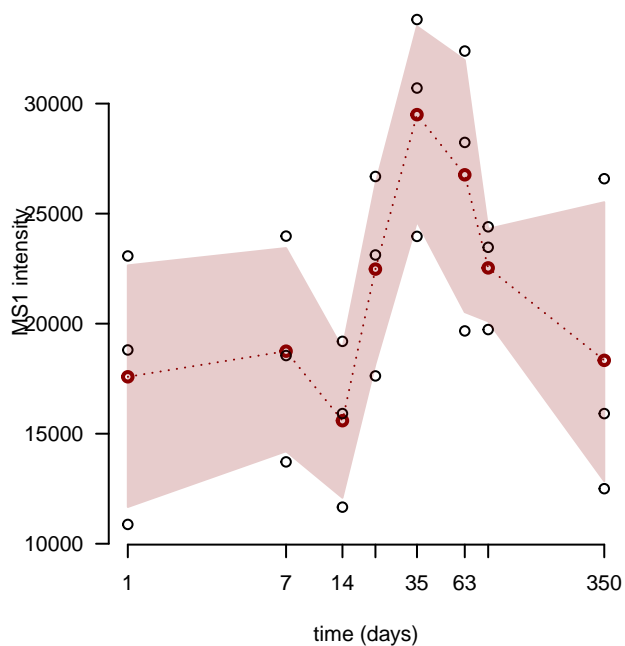

**Q3UC65**  
GN=Rsrp1  
arginine/serine rich protein 1

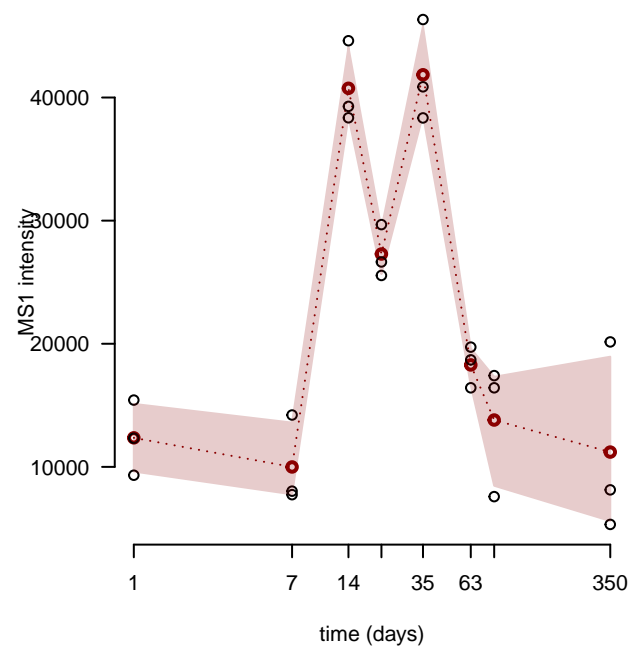

**Q3UCQ1**  
GN=Foxk2  
forkhead box K2

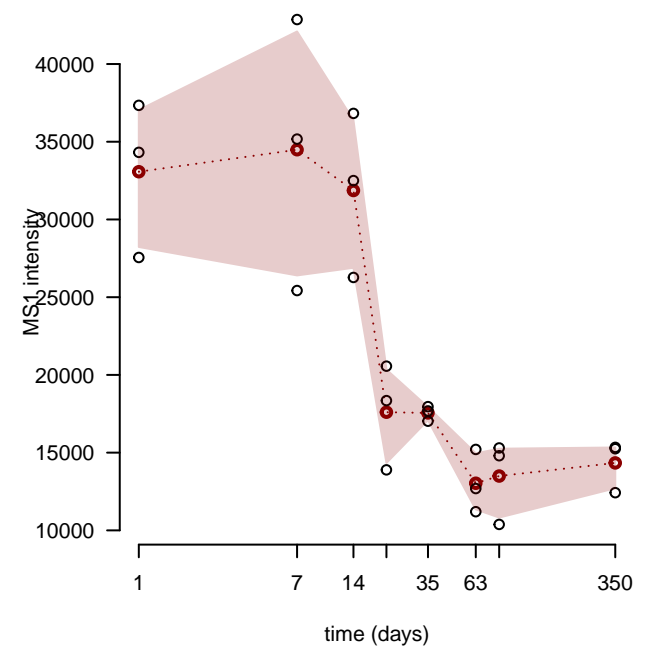

**Q3UCV8**  
**GN=Otuln**  
OTU deubiquitinase with linear linkage s ...

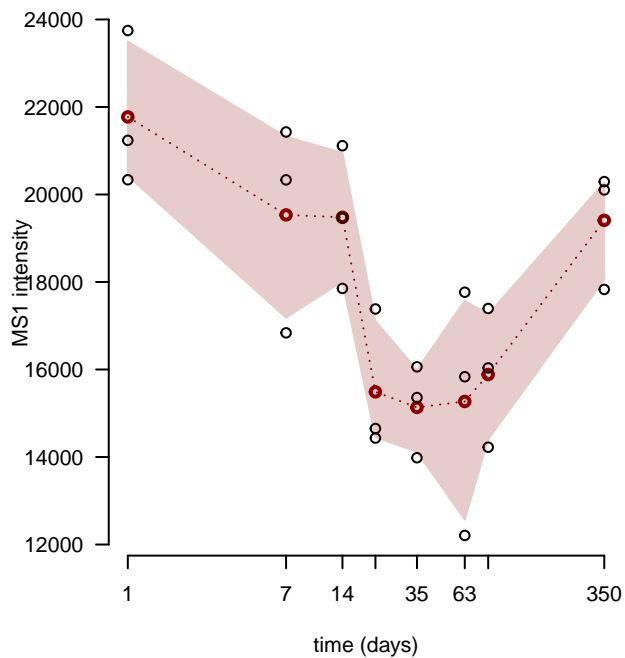

**Q3UD01**  
**GN=Atxn7I3b**  
ataxin 7-like 3B

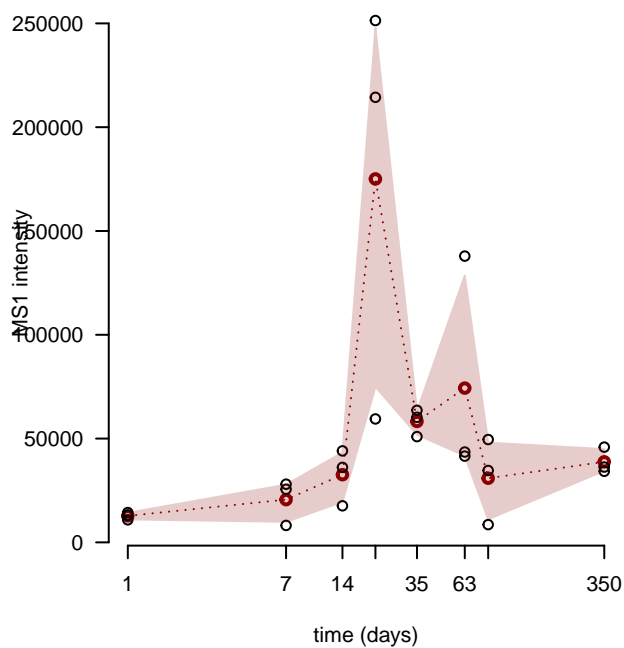

**Q3UDE2**  
**GN=Ttl12**  
tubulin tyrosine ligase-like family, mem ...

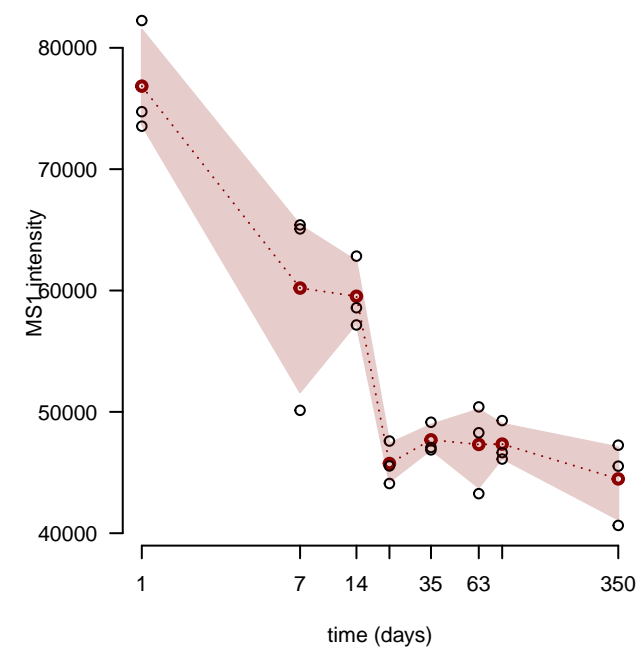

**Q3UDK1**  
**GN=Traf1**  
TRAF type zinc finger domain containing ...

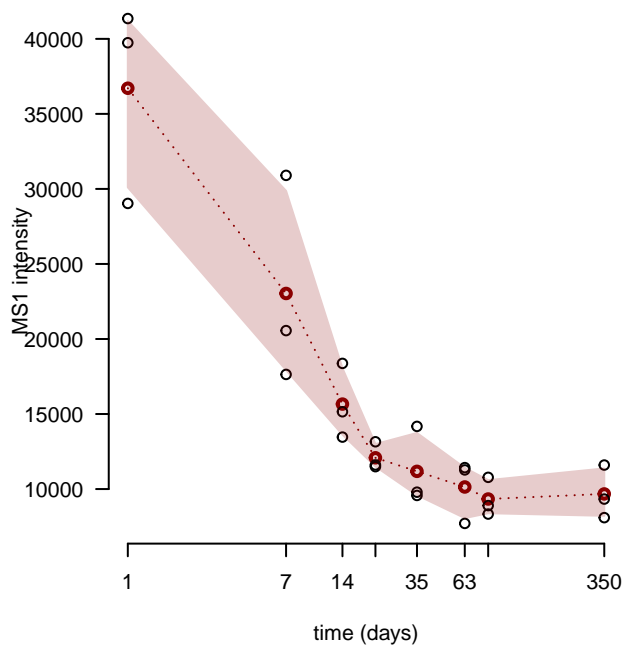

**Q3UDP0**  
**GN=Wdr41**  
WD repeat domain 41

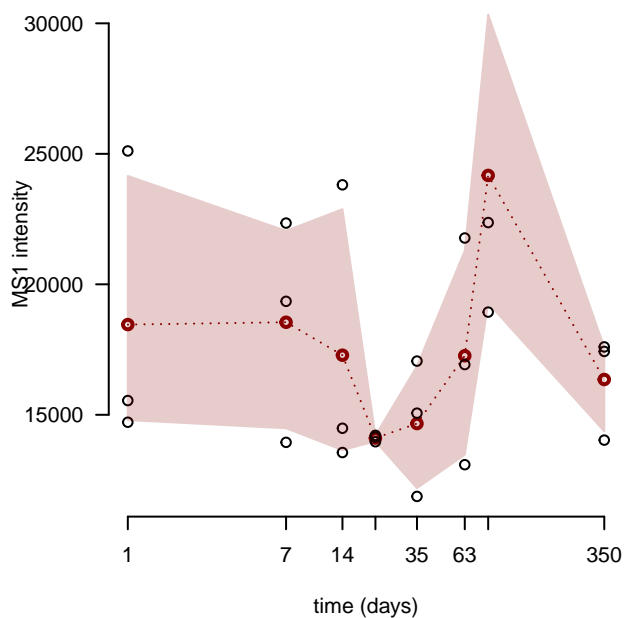

**Q3UDR8**  
**GN=Yip3**  
Yip1 domain family, member 3

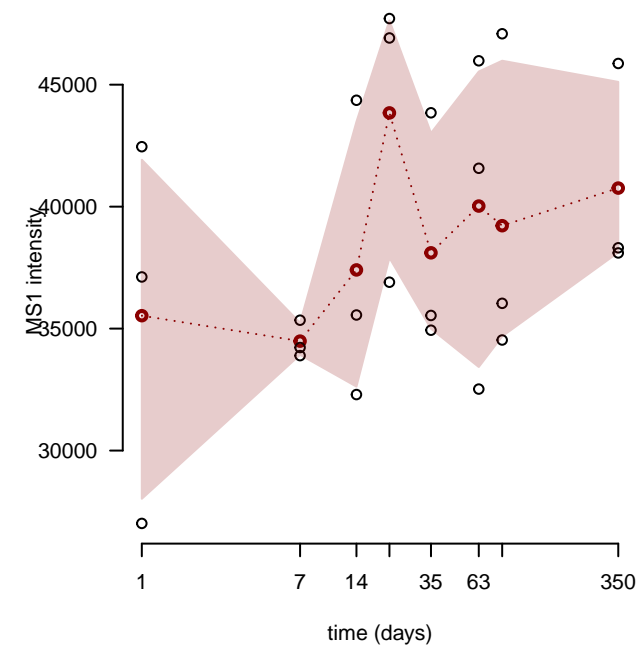

**Q3UDW8**  
**GN=Hgsnat**  
heparan-alpha-glucosaminide N-acetyltran ...

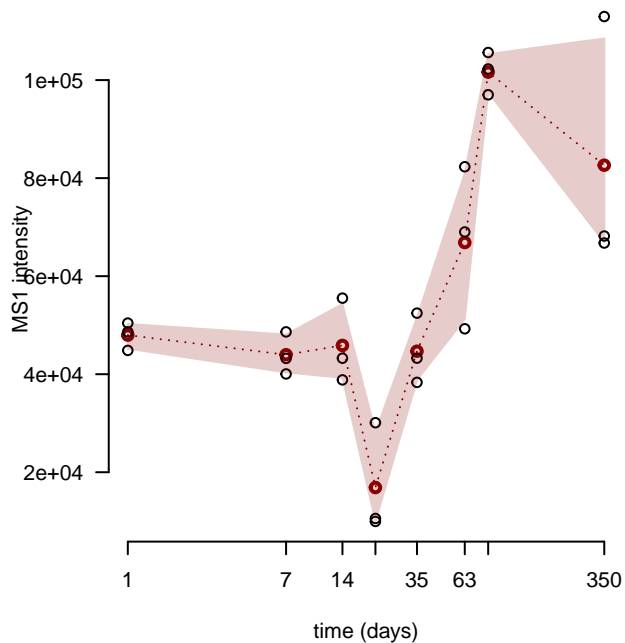

**Q3UE17**  
**GN=Mex3d**  
mex3 RNA binding family member D

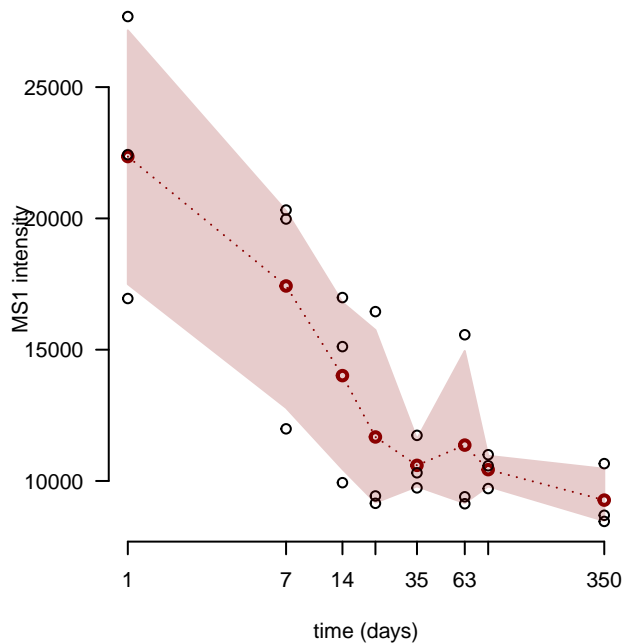

**Q3UE31**  
**GN=**

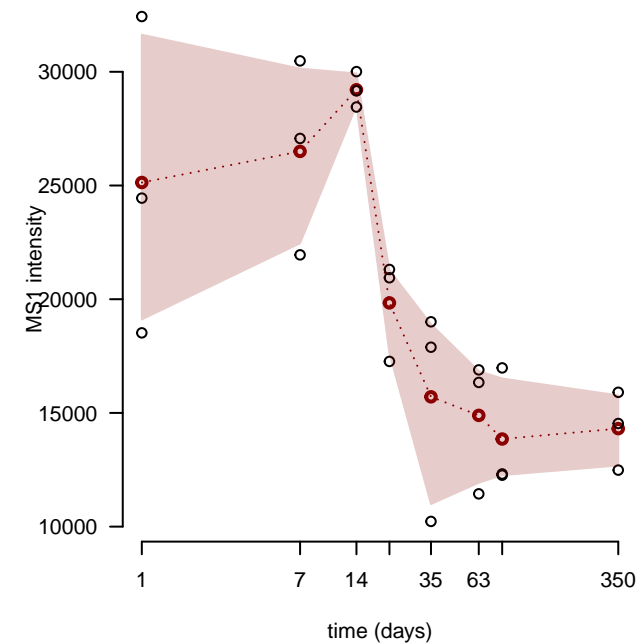

**Q3UE37**  
**GN=Ube2z**  
ubiquitin-conjugating enzyme E2Z

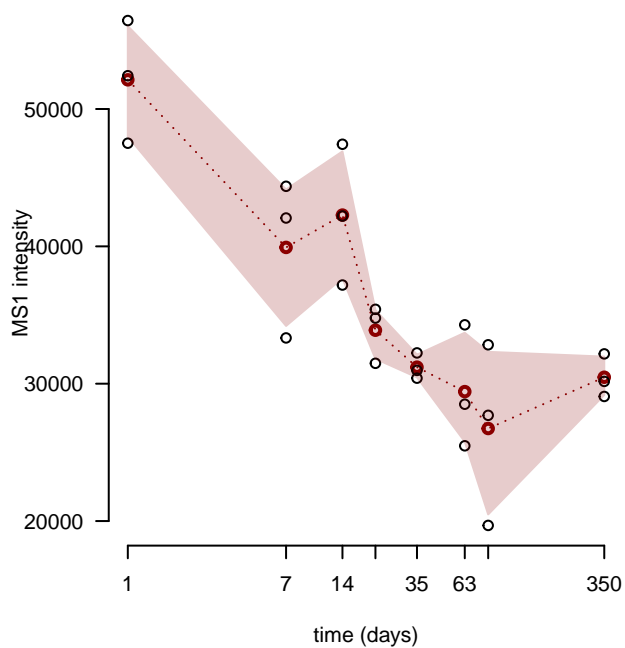

**Q3UEB3**  
**GN=Puf60**  
poly-U binding splicing factor 60

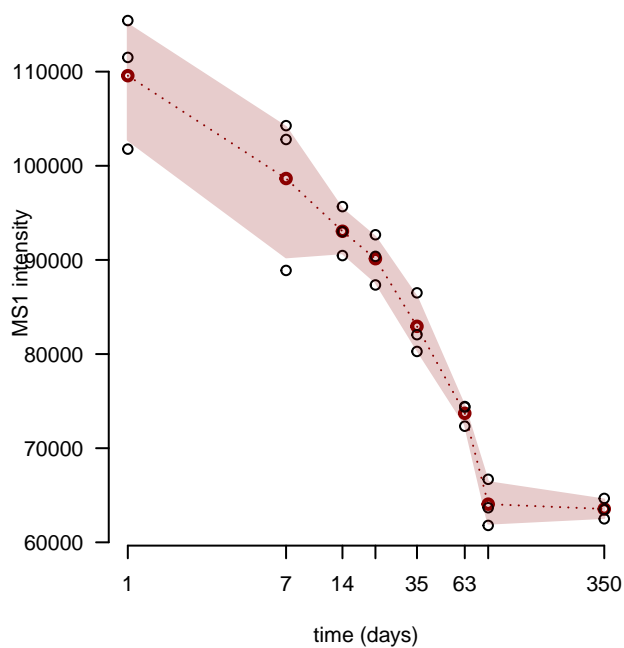

**Q3UFB2**  
**GN=Znhit6**  
zinc finger, HIT type 6

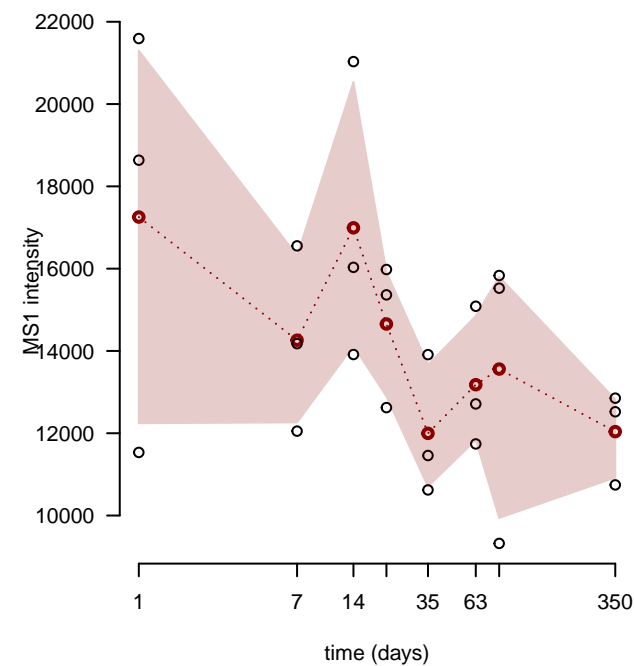

**Q3UFF7**  
**GN=Lyplal1**  
lysophospholipase-like 1

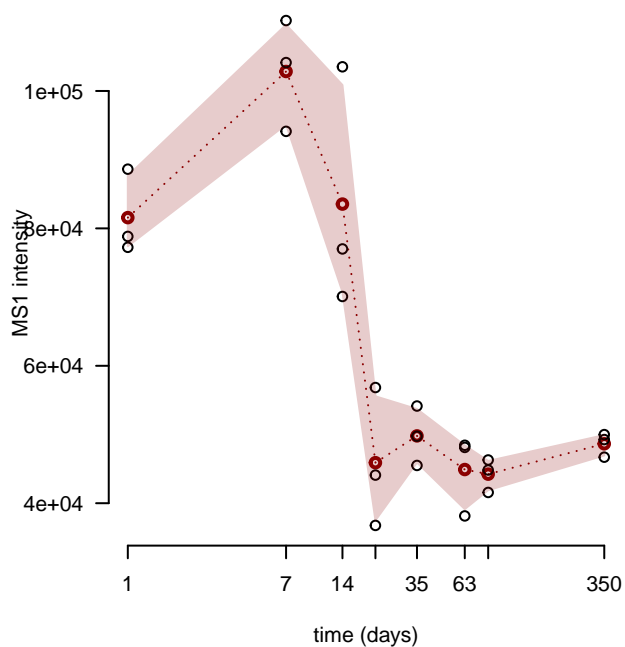

**Q3UFK8**  
**GN=Frmd8**  
FERM domain containing 8

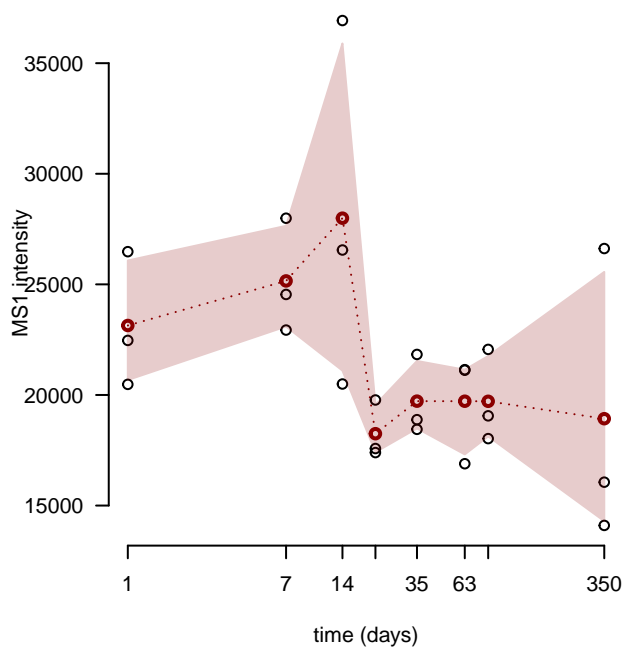

**Q3UFM5**  
**GN=Nom1**  
nucleolar protein with MIF4G domain 1

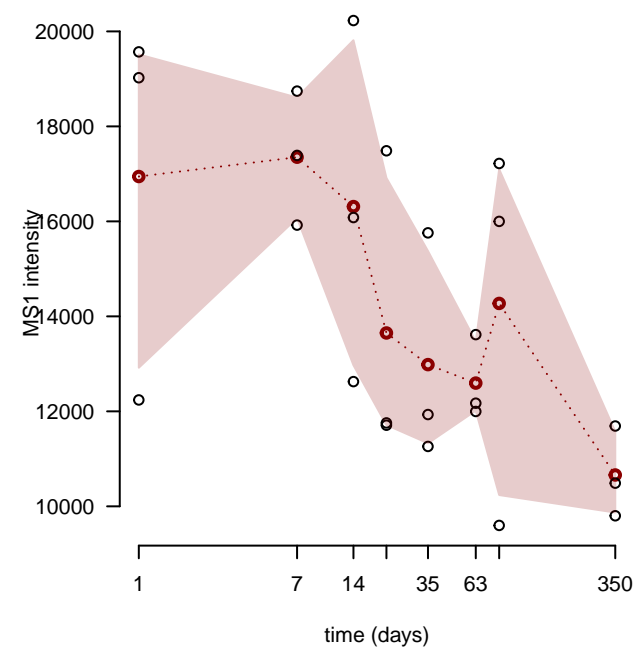

**Q3UFS0**  
**GN=Zyg11b**  
zyg-II family member B, cell cycle regul ...

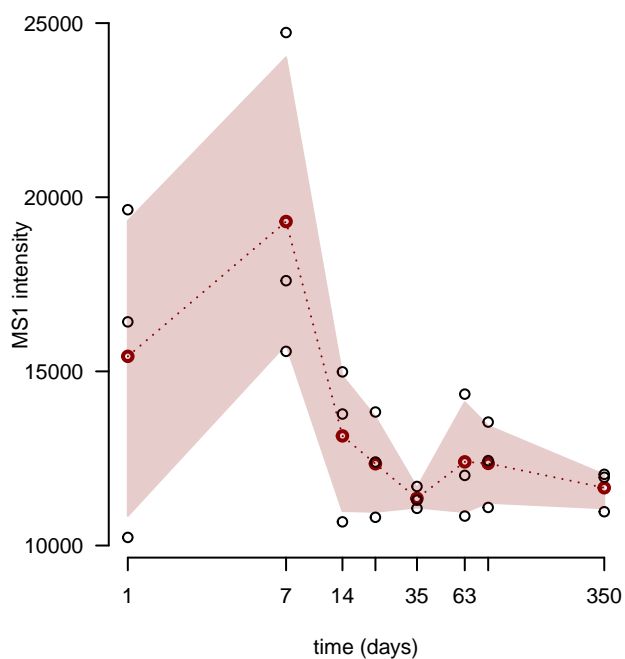

**Q3UFS4**  
**GN=Gpatch11**  
G patch domain containing 11

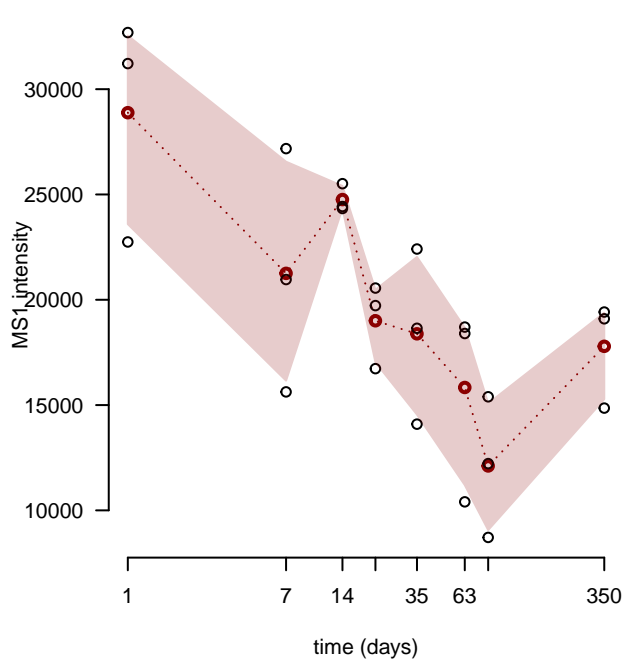

**Q3UFY0**  
**GN=Rrp36**  
ribosomal RNA processing 36

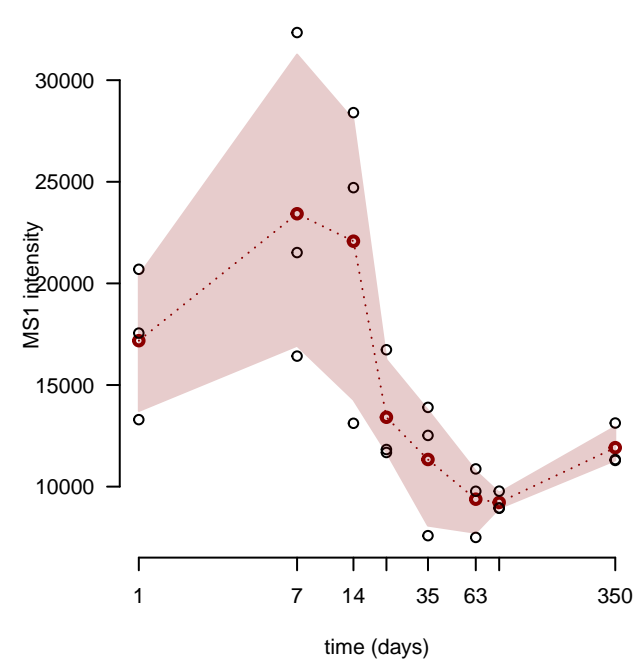

**Q3UFY7**  
GN=Nt5c3b  
5'-nucleotidase, cytosolic IIIB

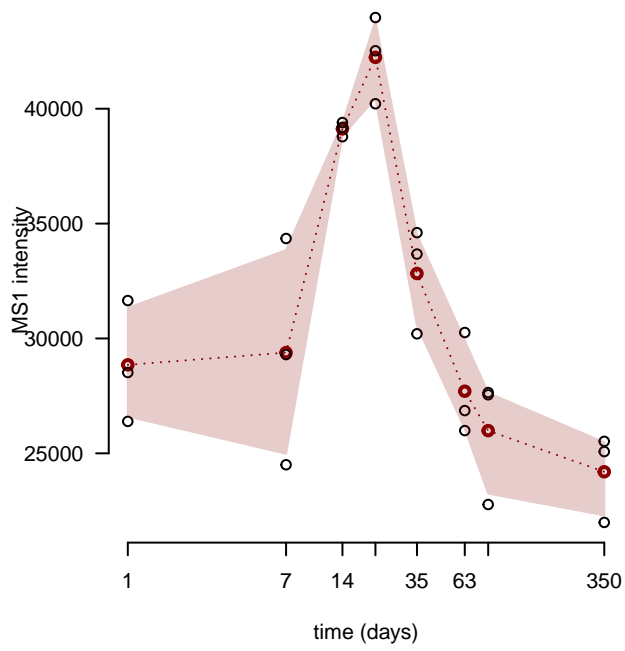

**Q3UFY8**  
GN=Trmt10c  
tRNA methyltransferase 10C, mitochondria ...

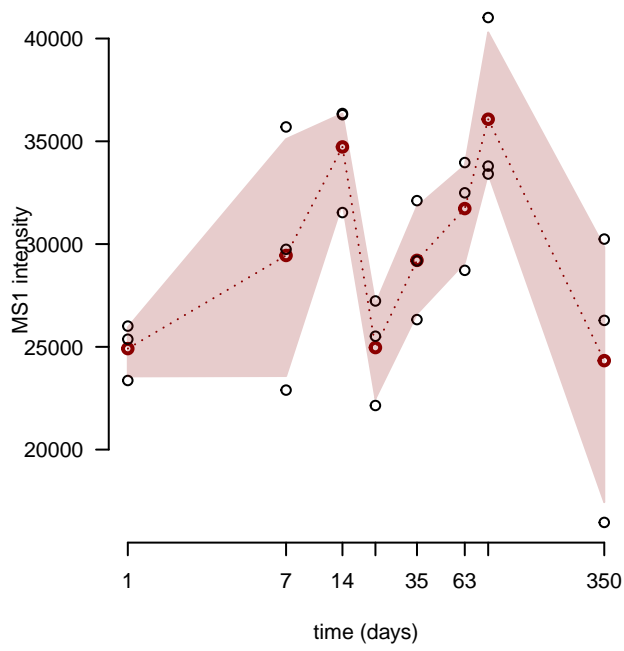

**Q3UG98**  
GN=Nat9  
N-acetyltransferase 9 (GCN5-related, put ...

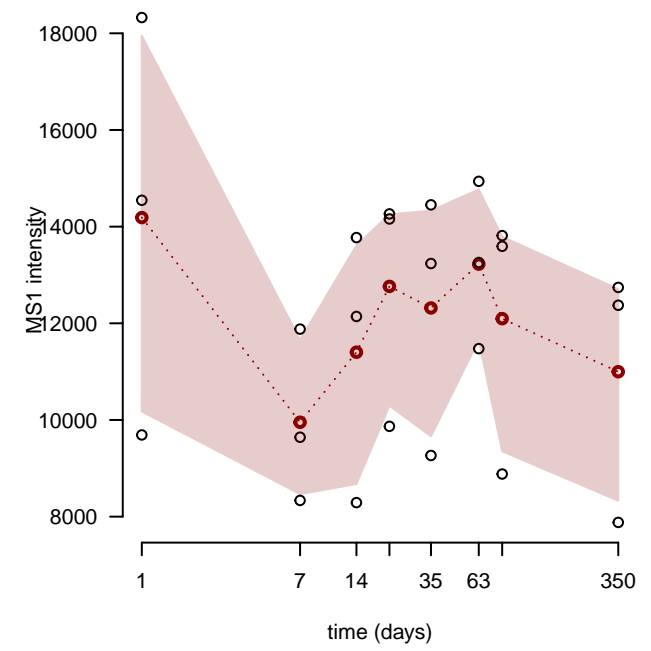

**Q3UGF1**  
GN=Wdr19  
WD repeat domain 19

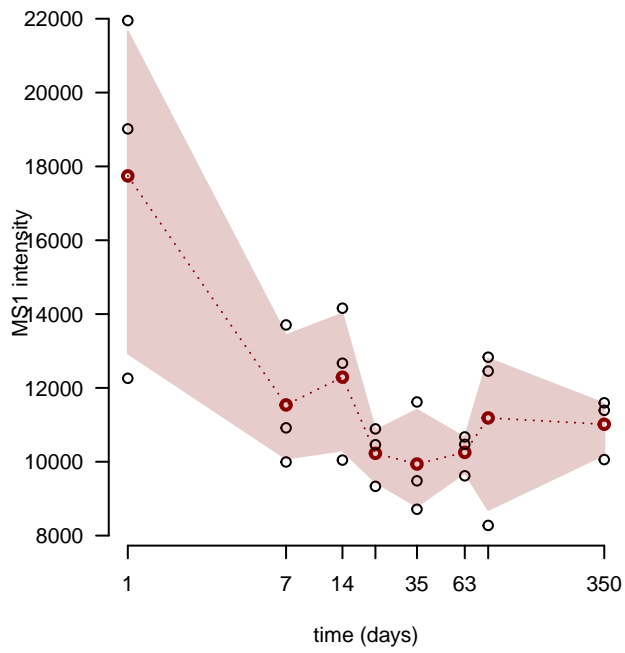

**Q3UGP8**  
GN=Alg10b  
asparagine-linked glycosylation 10B (alp ...

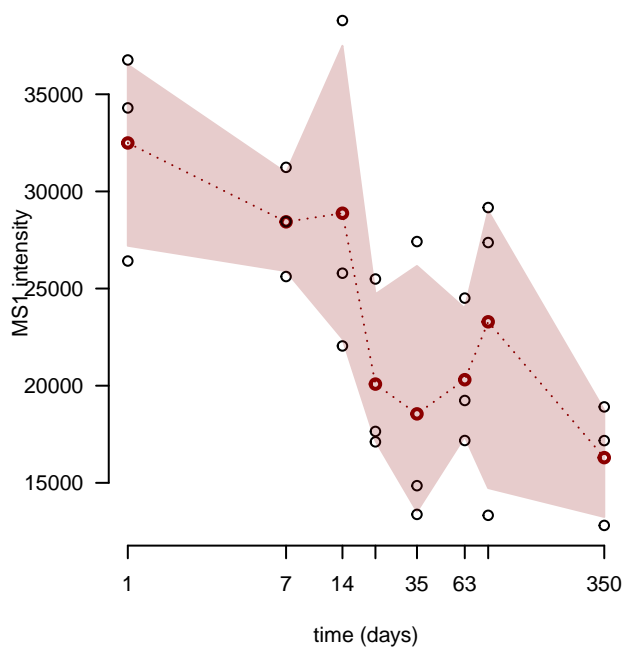

**Q3UGP9**  
GN=Lrrc58  
leucine rich repeat containing 58

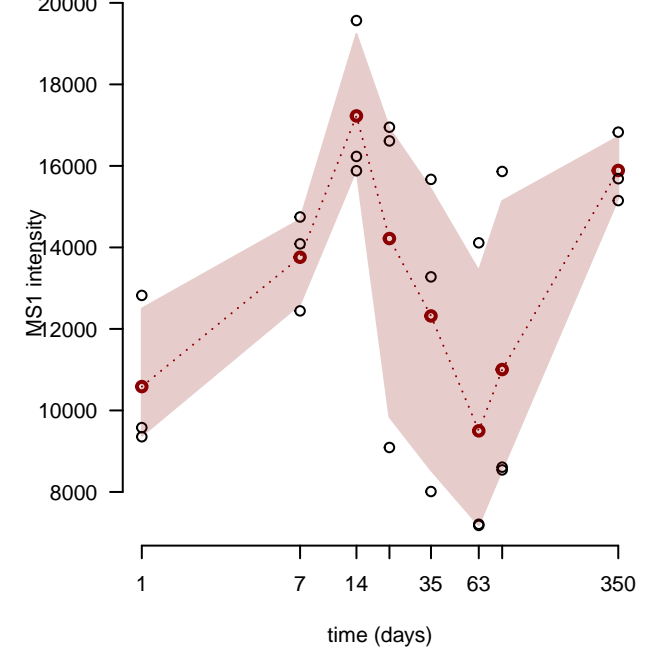

**Q3UGR5**  
GN=Hdhd2  
haloacid dehalogenase-like hydrolase dom ...

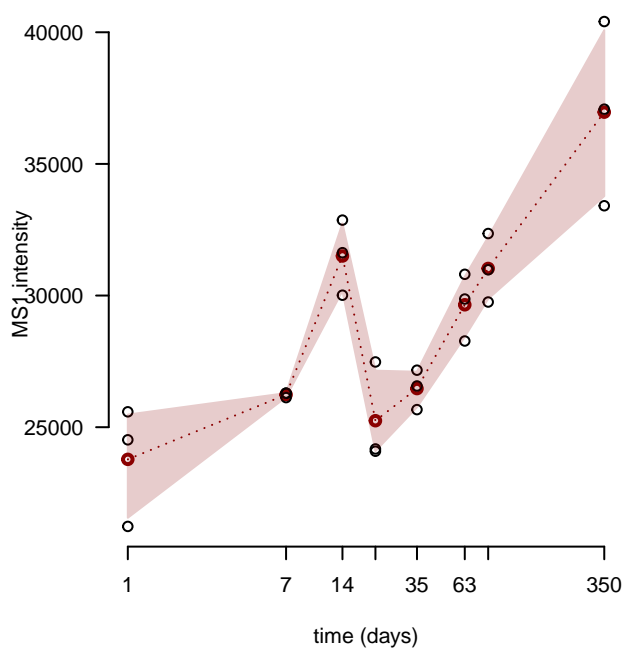

**Q3UGS4**  
GN=Mcrip1  
MAPK regulated corepressor interacting p ...

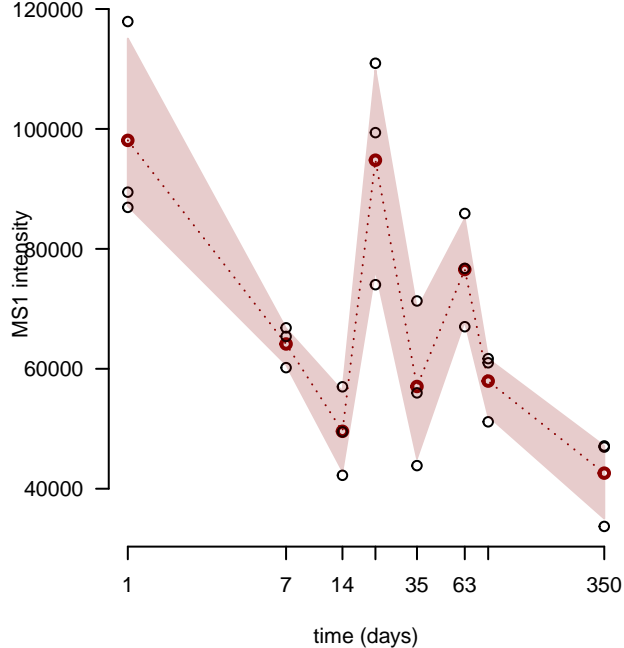

**Q3UGY8**  
GN=Arfgef3  
ARFGEF family member 3

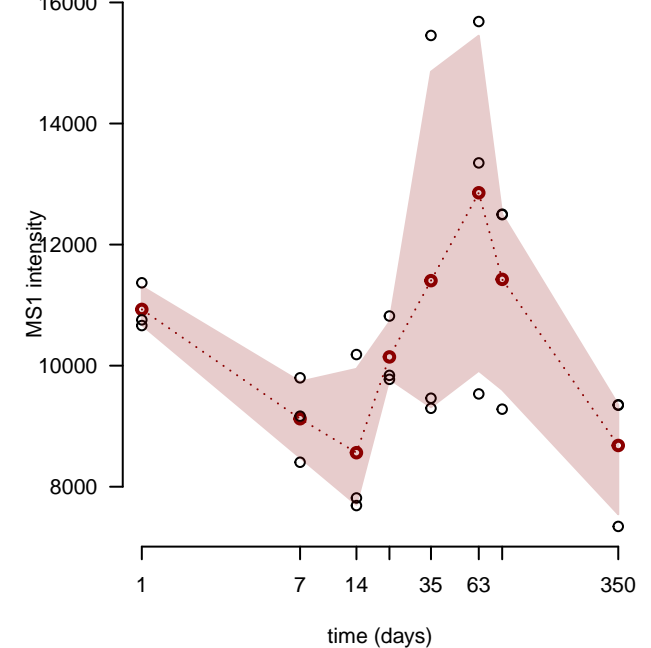

**Q3UH06**  
**GN=Rreb1**  
ras responsive element binding protein 1

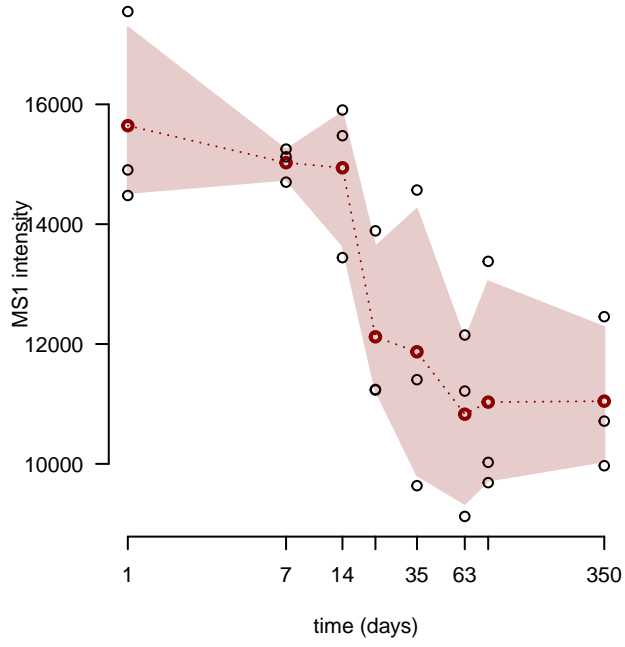

**Q3UH53**  
**GN=Sdk1**  
sidekick cell adhesion molecule 1

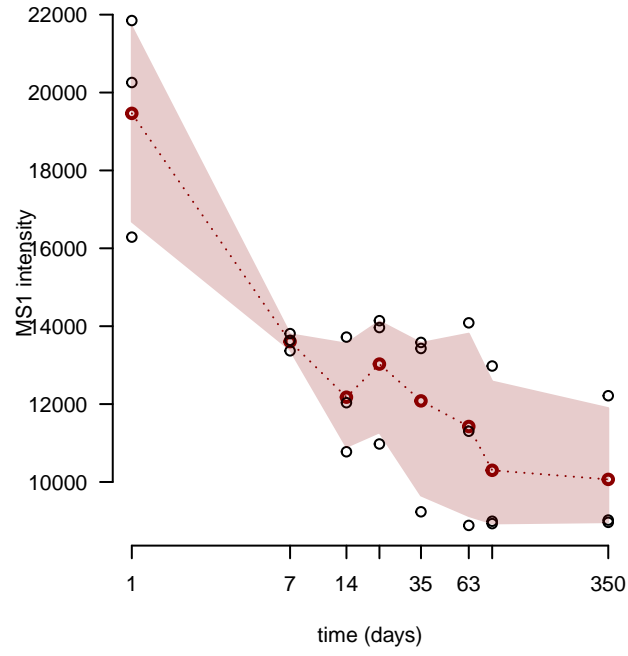

**Q3UH60**  
**GN=Dip2b**  
disco interacting protein 2 homolog B

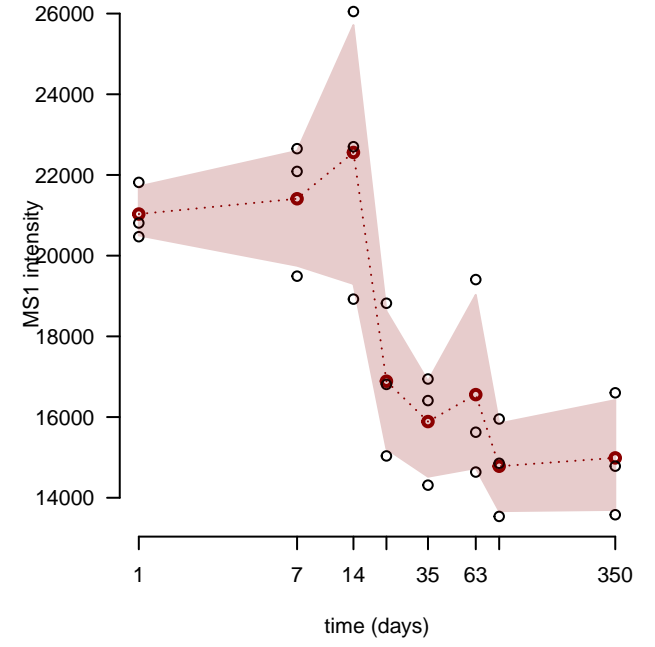

**Q3UH66**  
**GN=Wnk2**  
WNK lysine deficient protein kinase 2

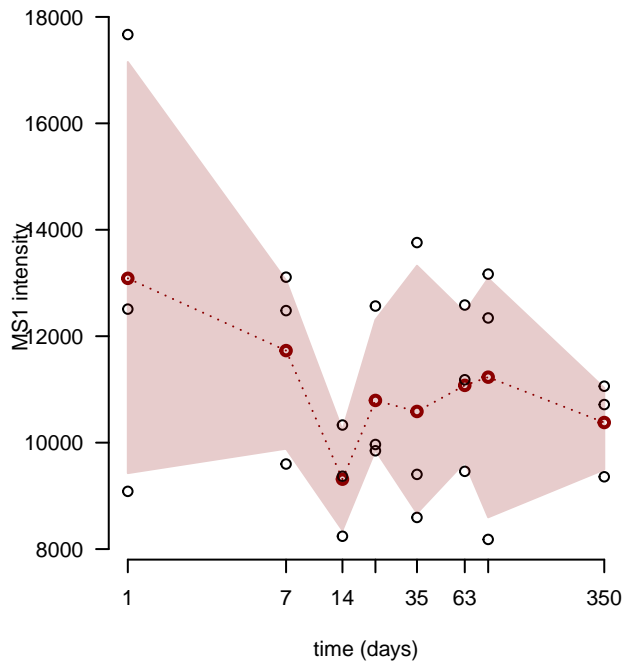

**Q3UH68**  
**GN=Limch1**  
LIM and calponin homology domains 1

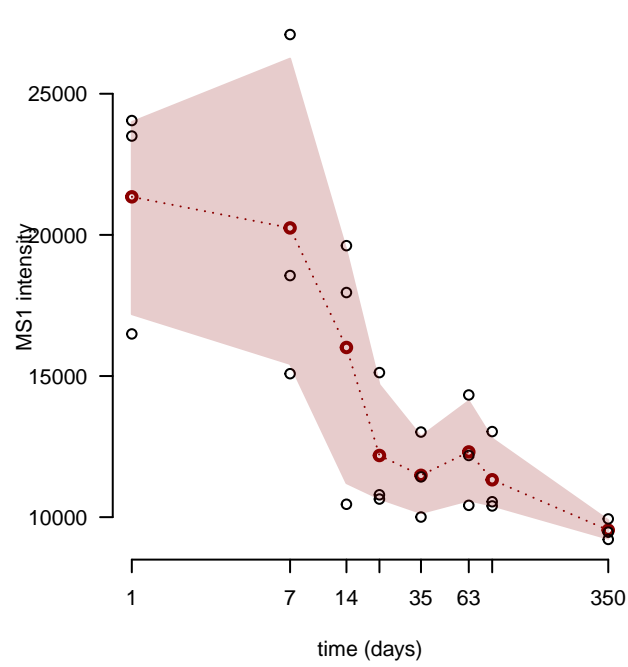

**Q3UH93**  
**GN=Plxnd1**  
plexin D1

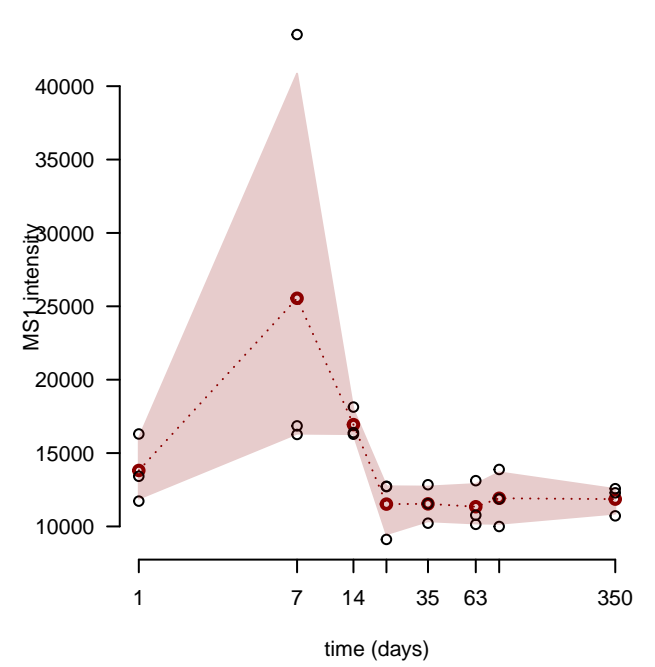

**Q3UHA3**  
**GN=Spg11**  
SPG11, spatacsin vesicle trafficking ass ...

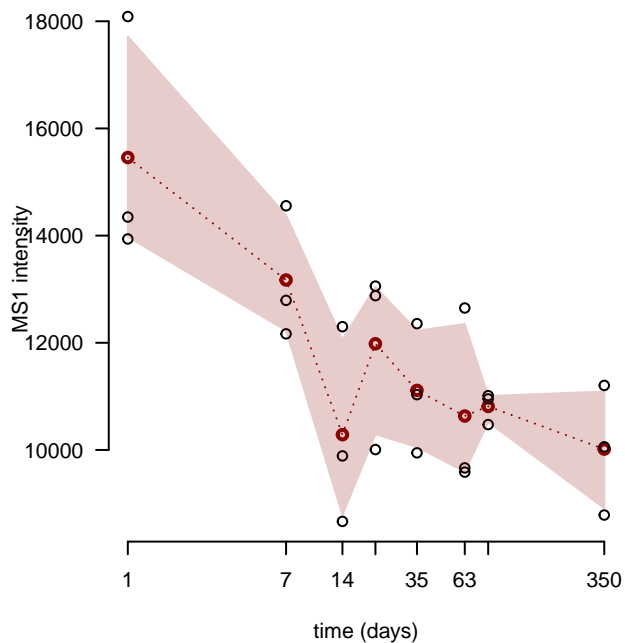

**Q3UHB1**  
**GN=Nt5dc3**  
5'-nucleotidase domain containing 3

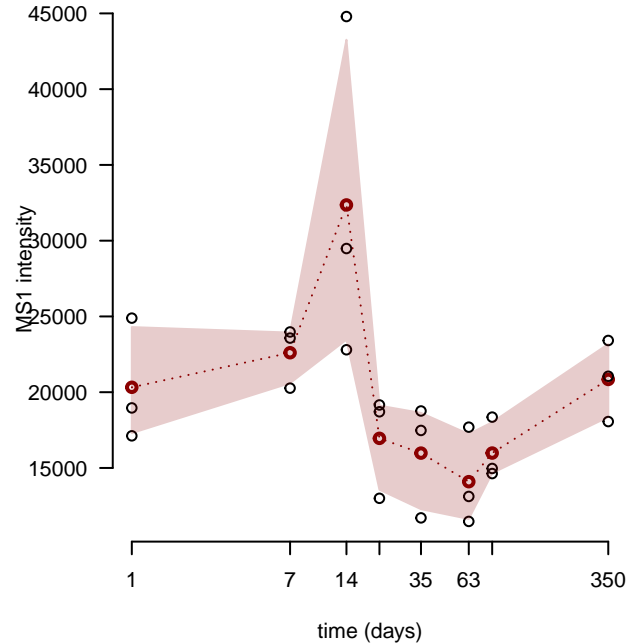

**Q3UHC0**  
**GN=Trnc6c**  
trinucleotide repeat containing 6C

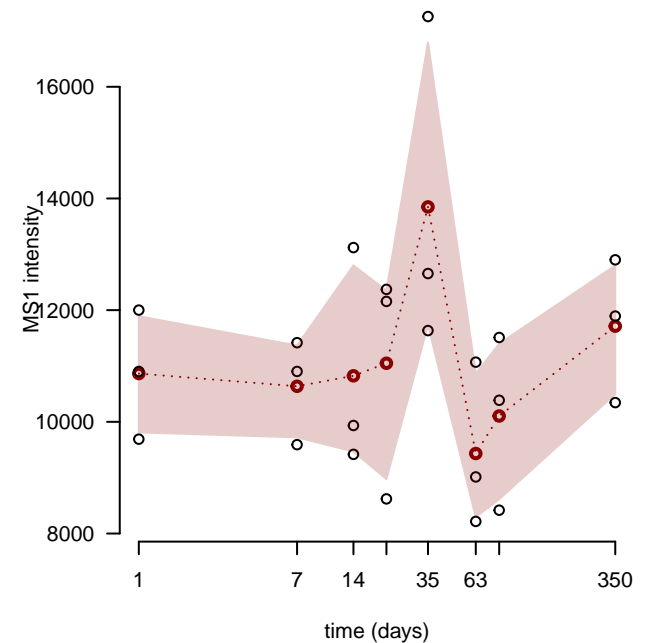

**Q3UHC2**  
GN=Lrrk1  
leucine-rich repeat kinase 1

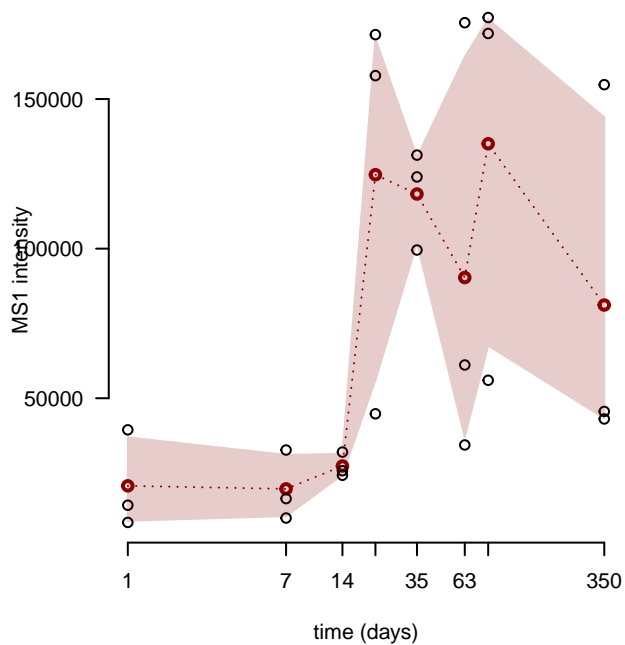

**Q3UHC7**  
GN=Dab2ip  
disabled 2 interacting protein

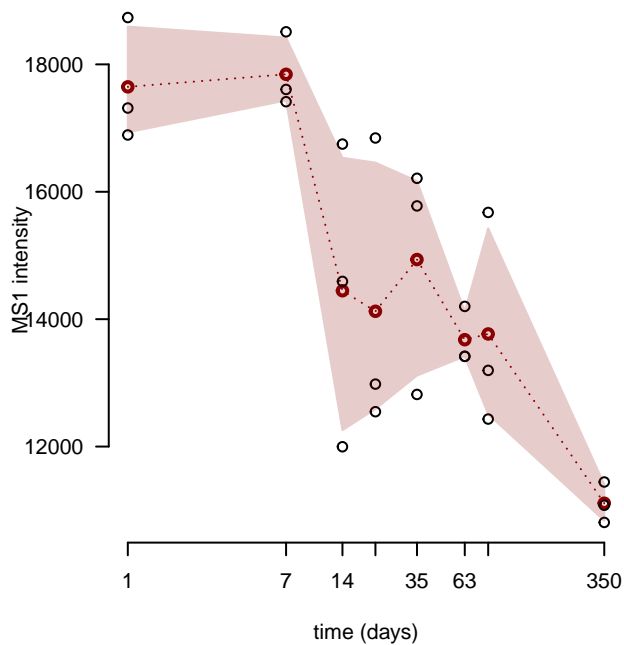

**Q3UHD2**  
GN=Gfod1  
glucose-fructose oxidoreductase domain c ...

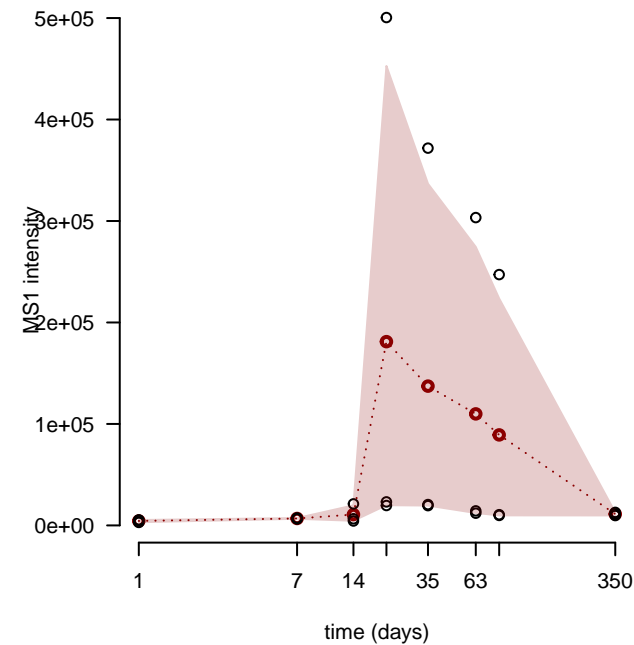

**Q3UHD6**  
GN=Snx27  
sorting nexin family member 27

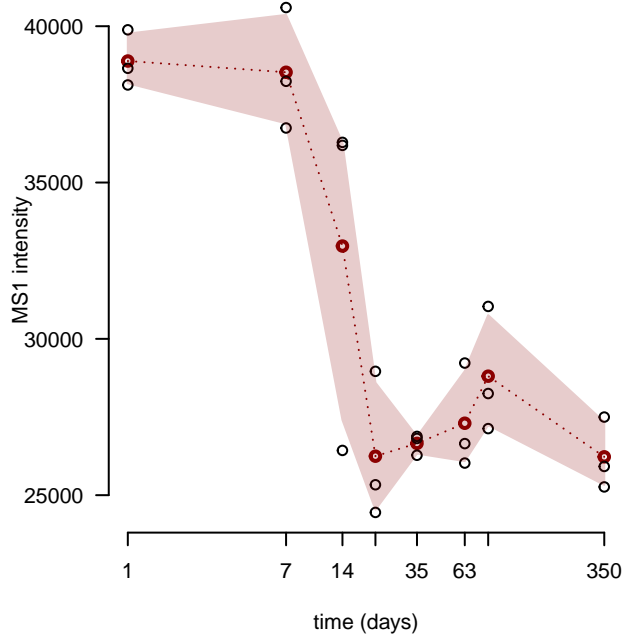

**Q3UHF3**  
GN=Mier3  
MIER family member 3

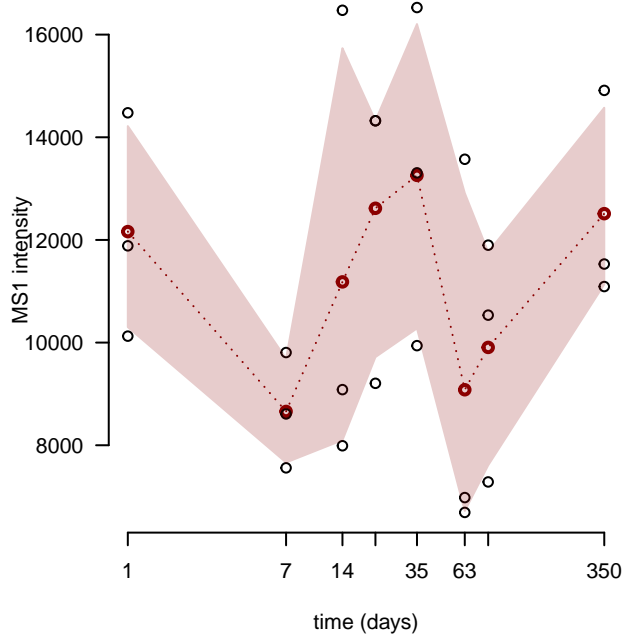

**Q3UHG7**  
GN=Lchn

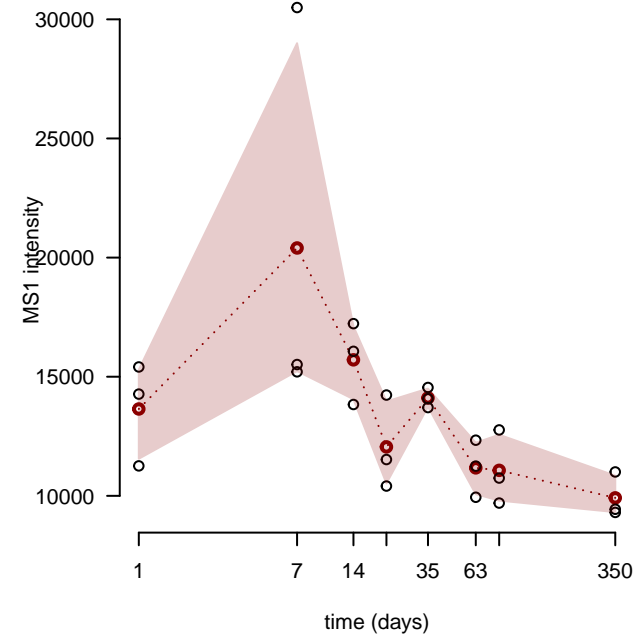

**Q3UHH1**  
GN=Zswim8  
zinc finger SWIM-type containing 8

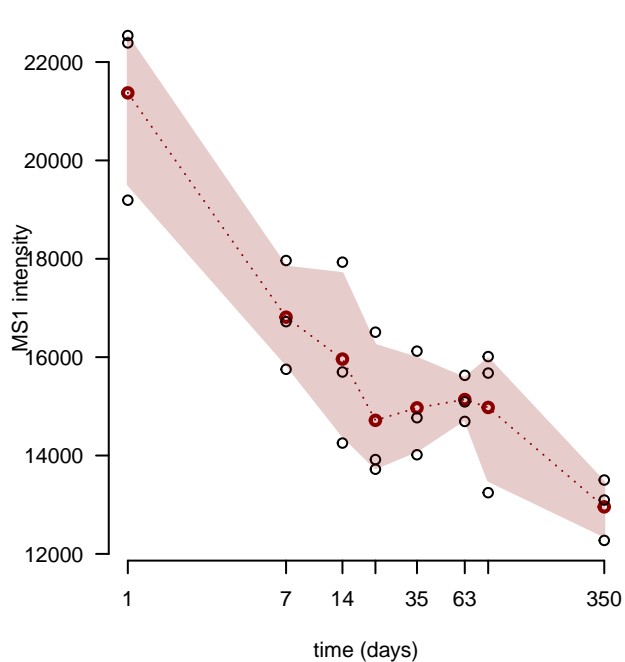

**Q3UHH2**  
GN=Slc22a23  
solute carrier family 22, member 23

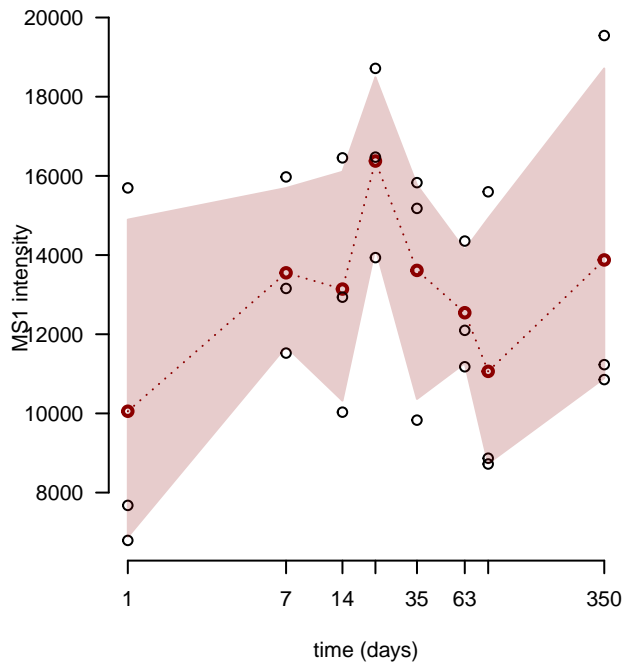

**Q3UHH2**  
GN=Slc22a23  
solute carrier family 22, member 23

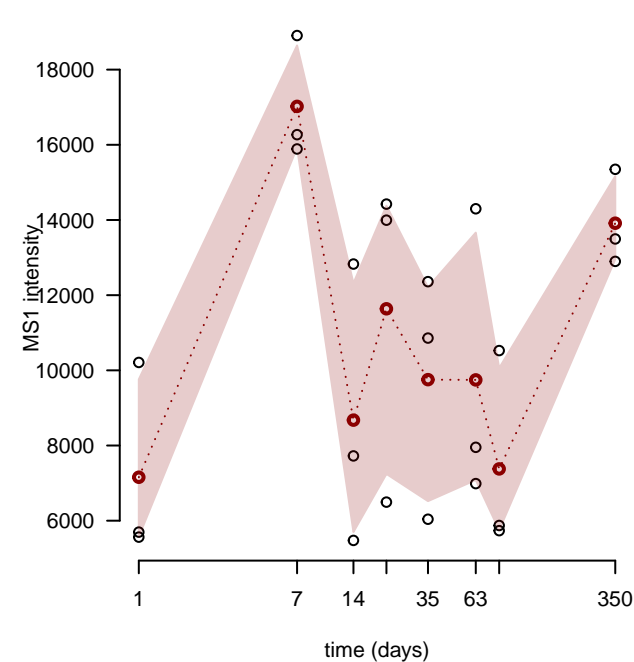

**Q3UHH8**  
**GN=Gxylt1**  
glucoside xylosyltransferase 1

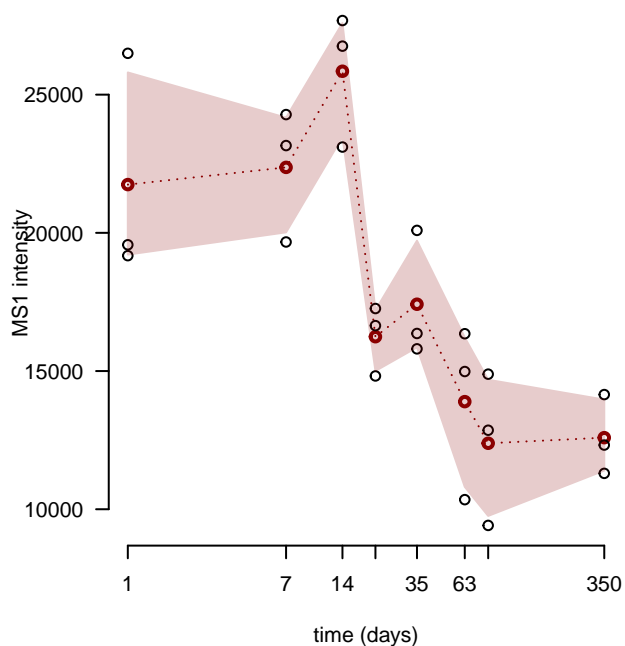

**Q3UHI4**  
**GN=Tmed8**  
transmembrane p24 trafficking protein 8

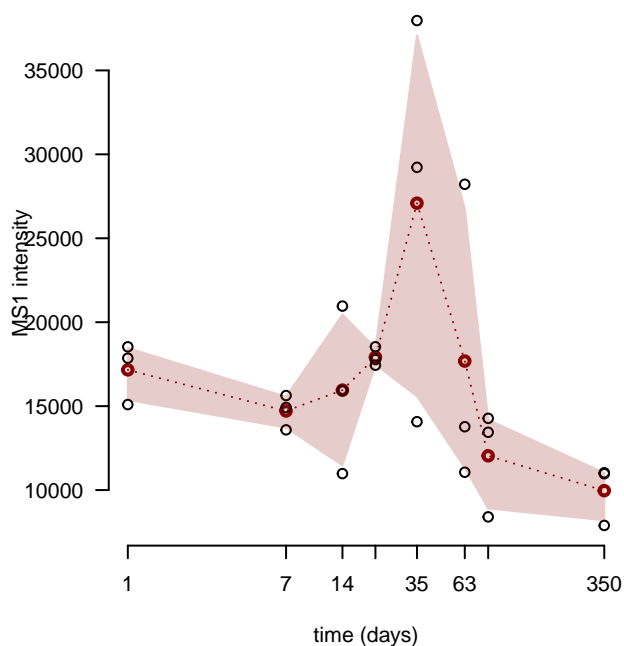

**Q3UHJ0**  
**GN=Aak1**  
AP2 associated kinase 1

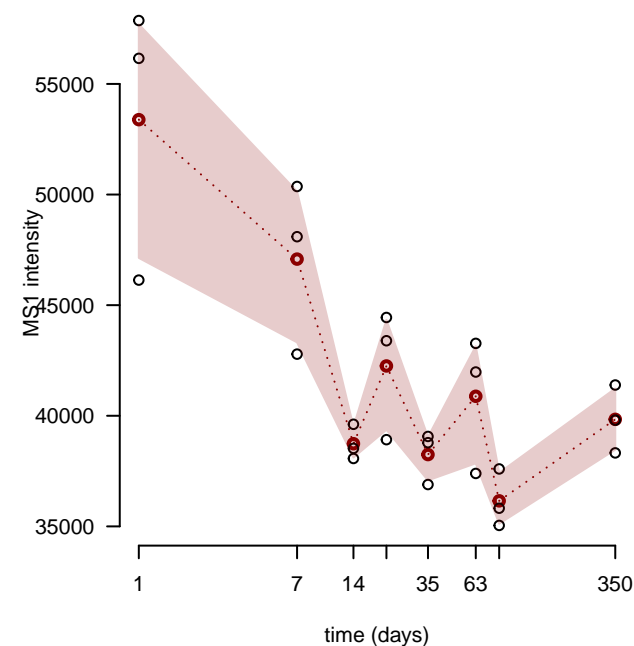

**Q3UHK1**  
**GN=Slc2a13**  
solute carrier family 2 (facilitated glu ...

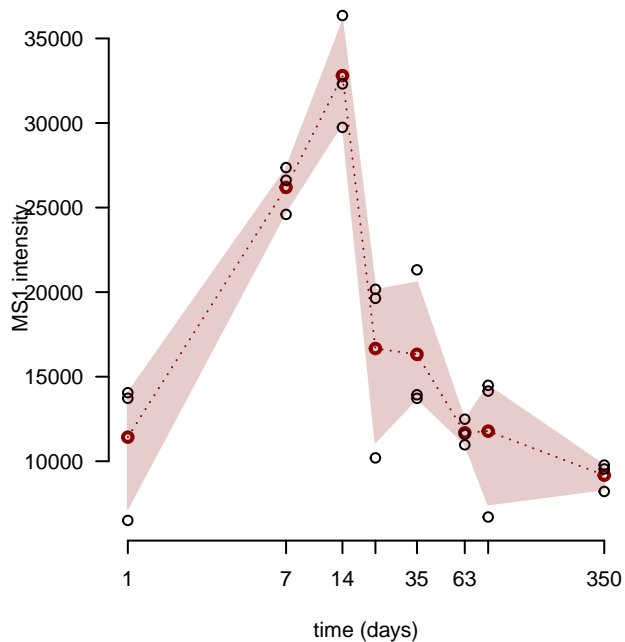

**Q3UHK3**  
**GN=Greb1**  
gene regulated by estrogen in breast can ...

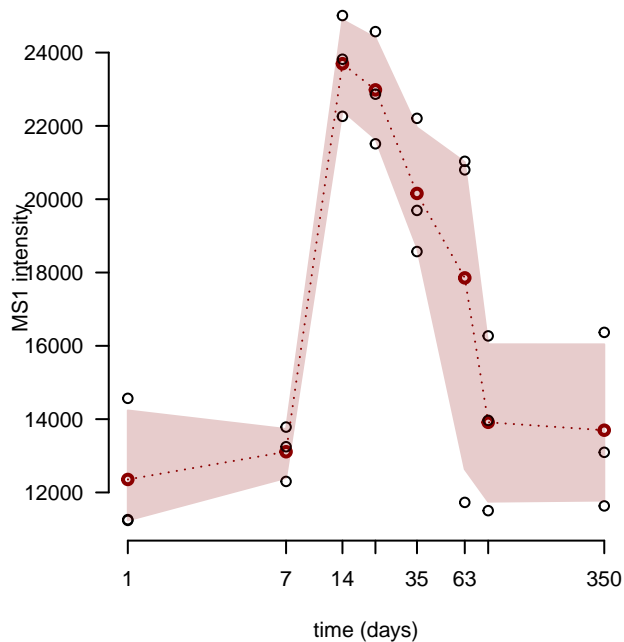

**Q3UHK6**  
**GN=Tenm4**  
teneurin transmembrane protein 4

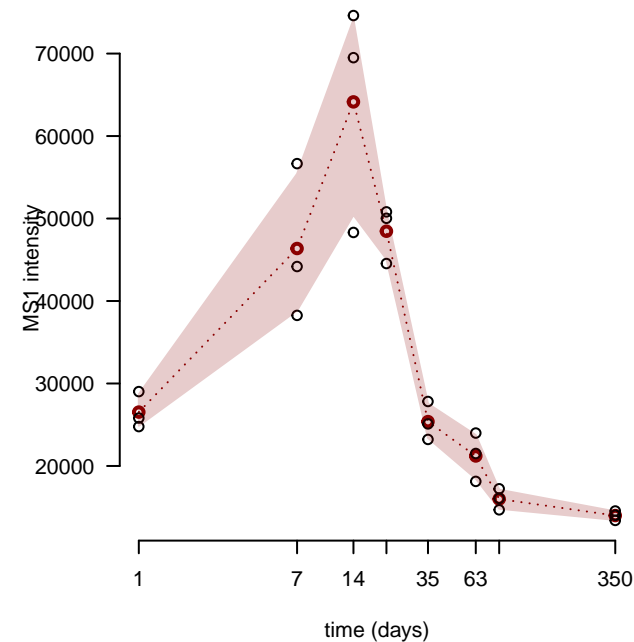

**Q3UHK8**  
**GN=Tnrc6a**  
trinucleotide repeat containing 6a

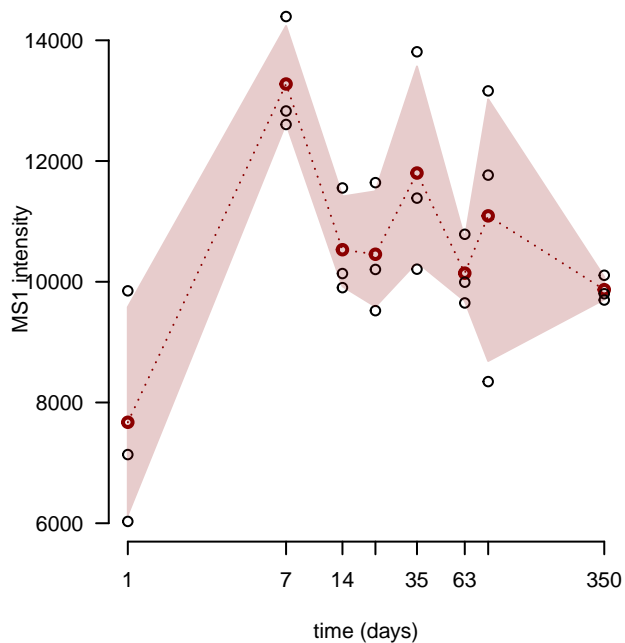

**Q3UHN9**  
**GN=Ndst1**  
N-deacetylase/N-sulfotransferase (hepara ...

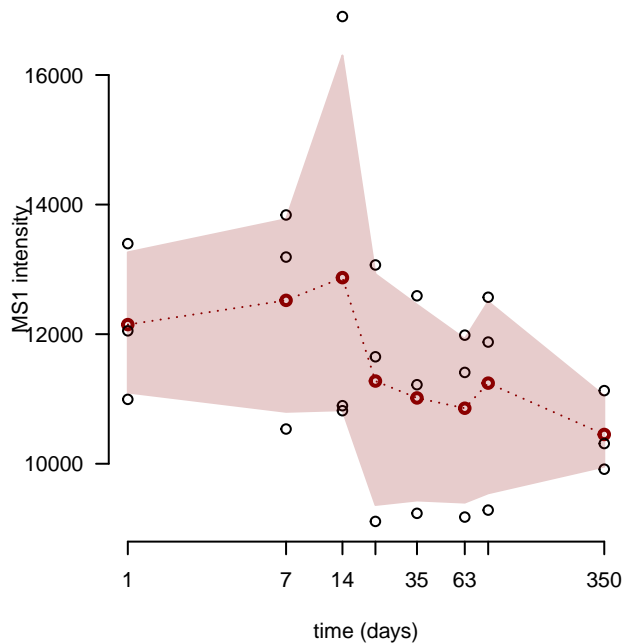

**Q3UHQ6**  
**GN=Dop1b**  
DOP1 leucine zipper like protein B

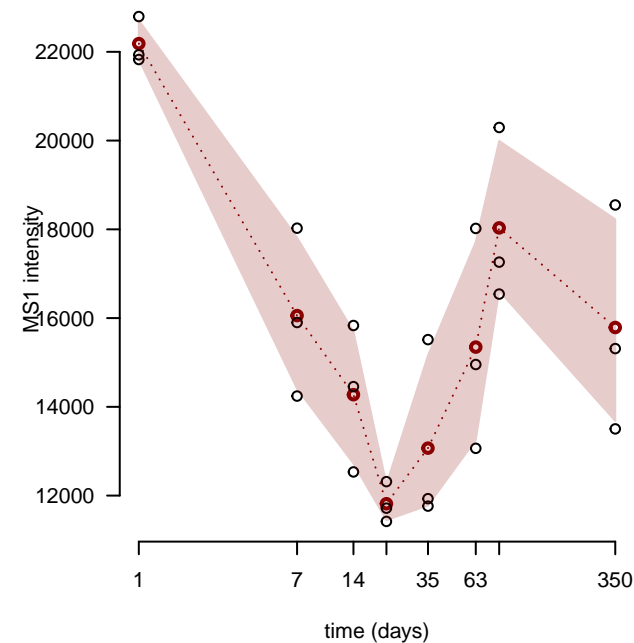



**Q3UHU5**  
**GN=Mtcl1**  
microtubule crosslinking factor 1

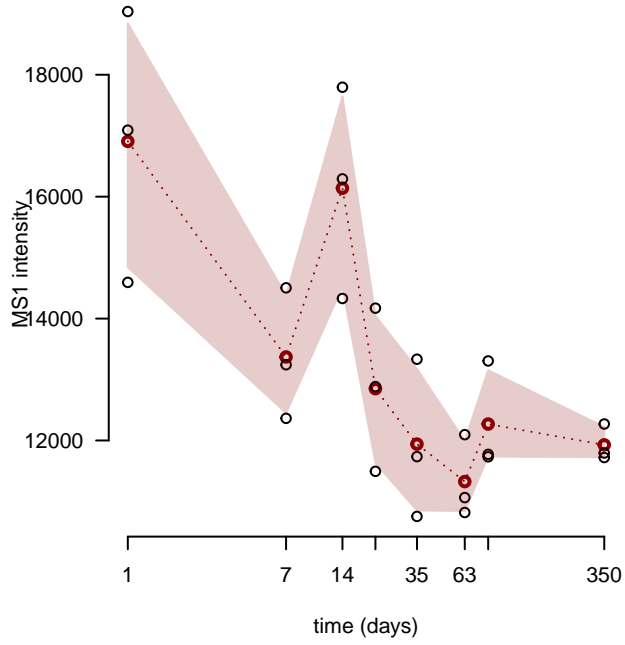

**Q3UHX0**  
**GN=Noi8**  
nucleolar protein 8

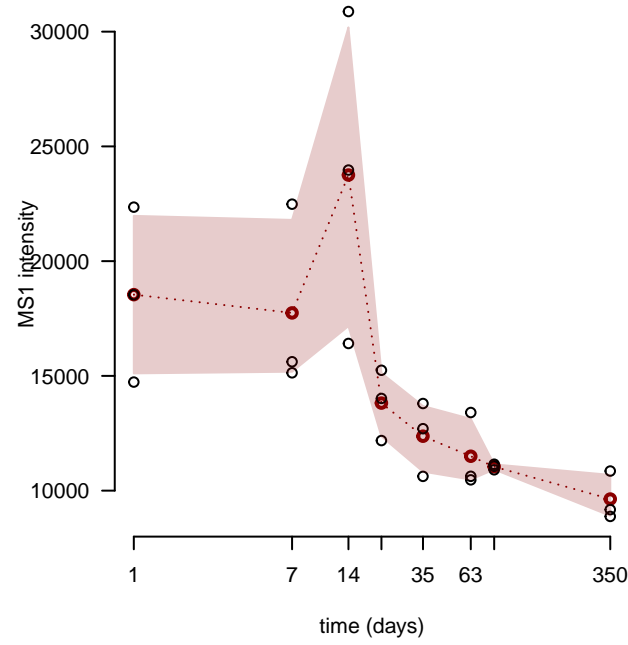

**Q3UHX2**  
**GN=Pdap1**  
PDGFA associated protein 1

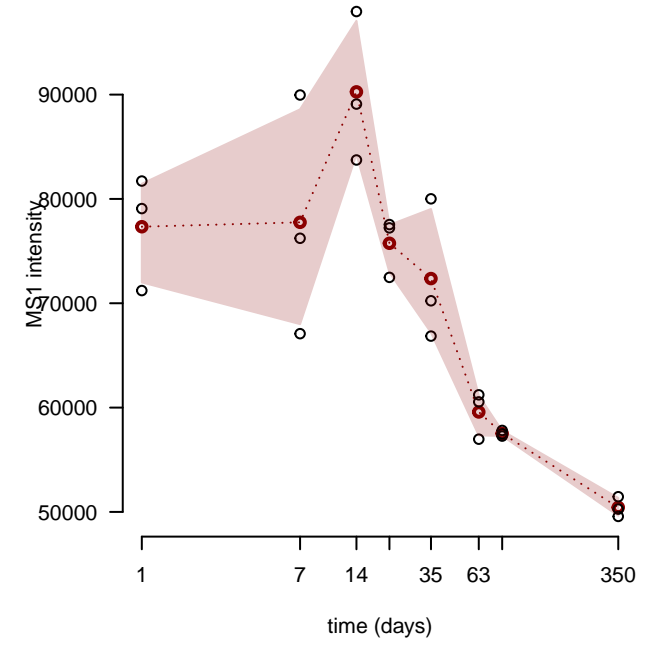

**Q3UHX9**  
**GN=Spout1**  
SPOUT domain containing methyltransferas ...

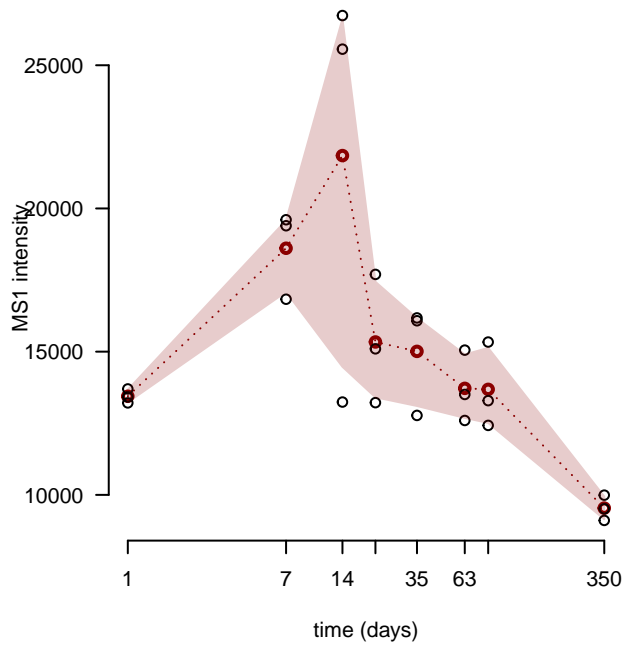

**Q3UI43**  
**GN=Babam1**  
BRISC and BRCA1 A complex member 1

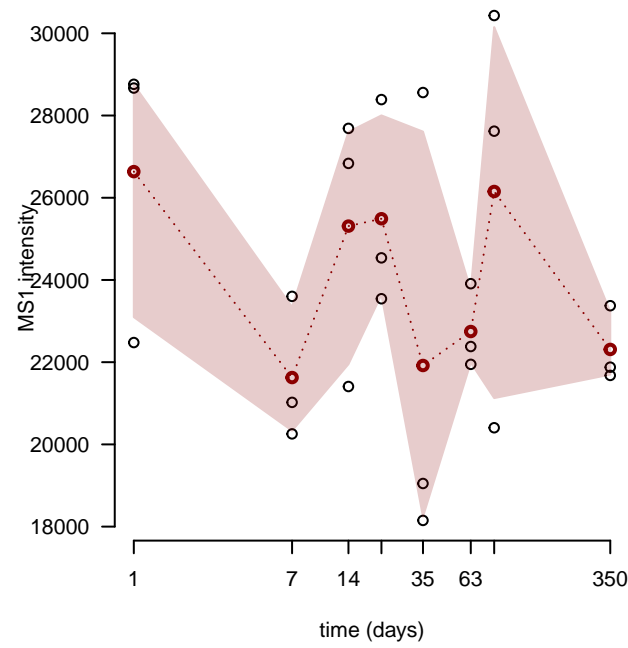

**Q3UIA2**  
**GN=Arhgap17**  
Rho GTPase activating protein 17

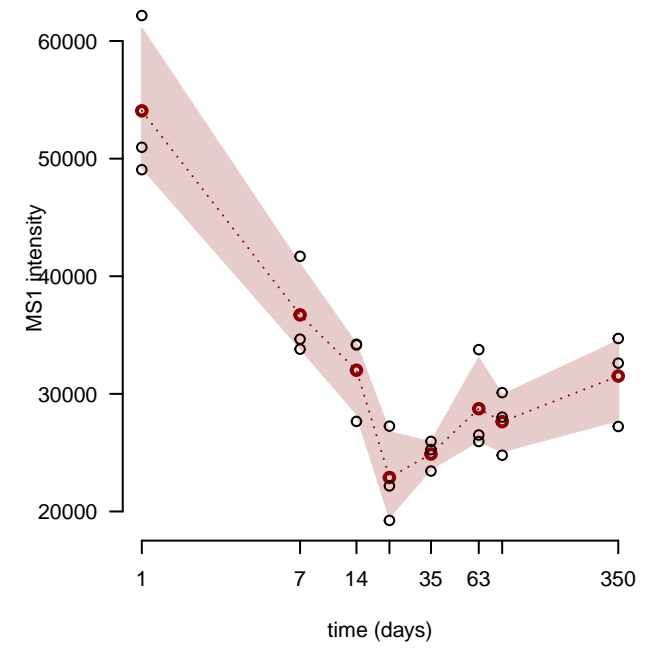

**Q3UIJ9**  
**GN=Myzap**  
myocardial zonula adherens protein

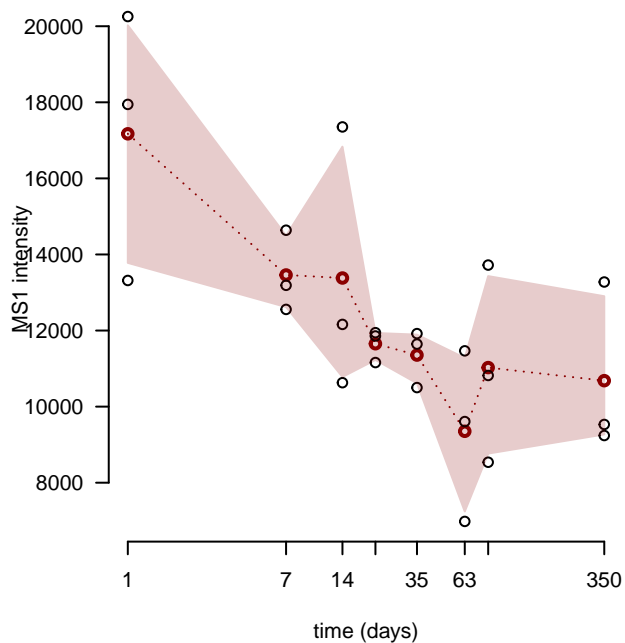

**Q3UIK4**  
**GN=Mettl14**  
methyltransferase like 14

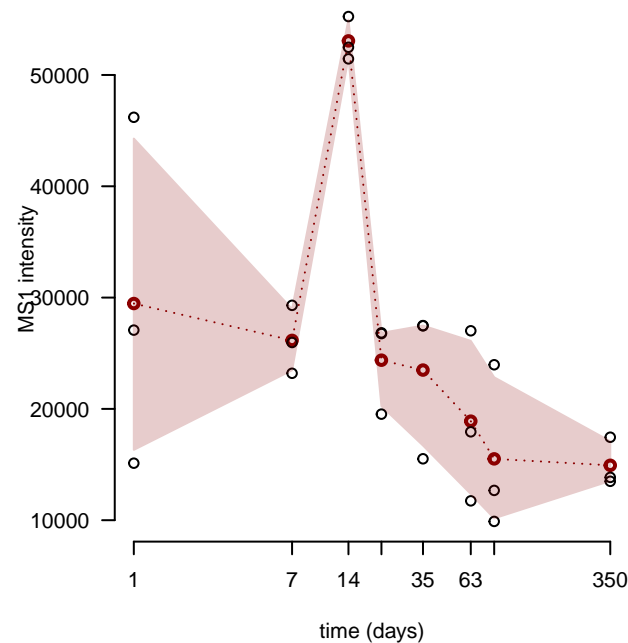

**Q3UIL6**  
**GN=Plekha7**  
pleckstrin homology domain containing, f ...

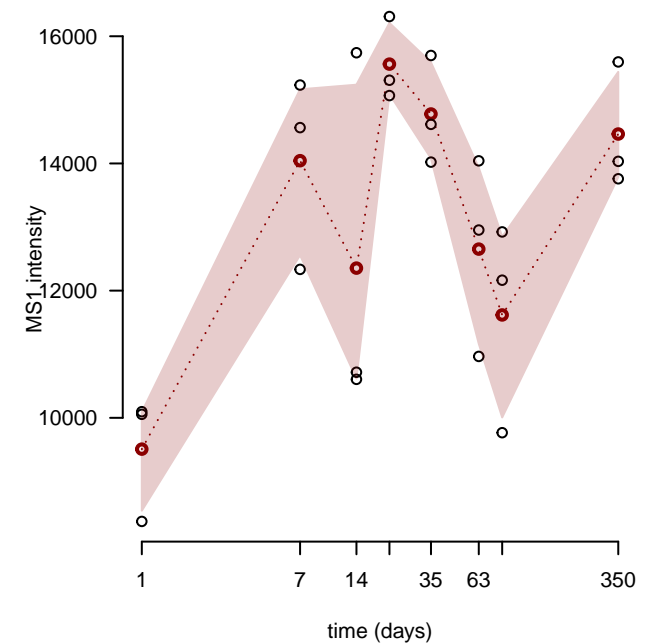

**Q3UIR3**  
**GN=Dtx3l**  
deltex 3-like, E3 ubiquitin ligase

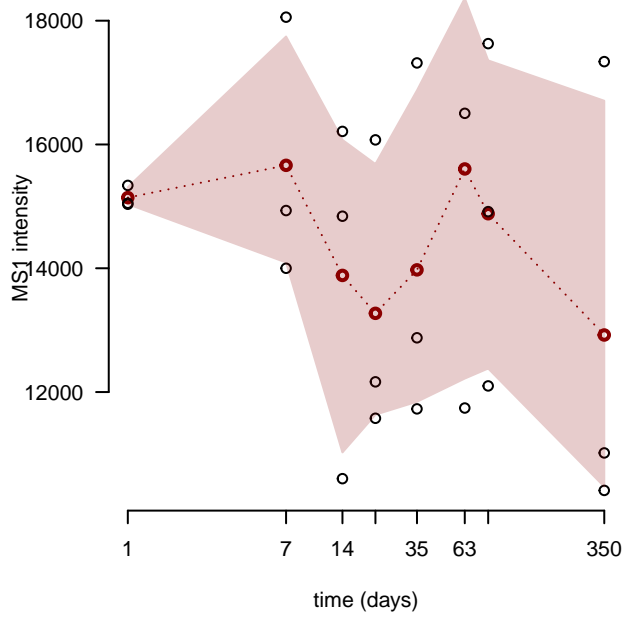

**Q3UIU2**  
**GN=Ndufb6**  
NADH:ubiquinone oxidoreductase subunit B ...

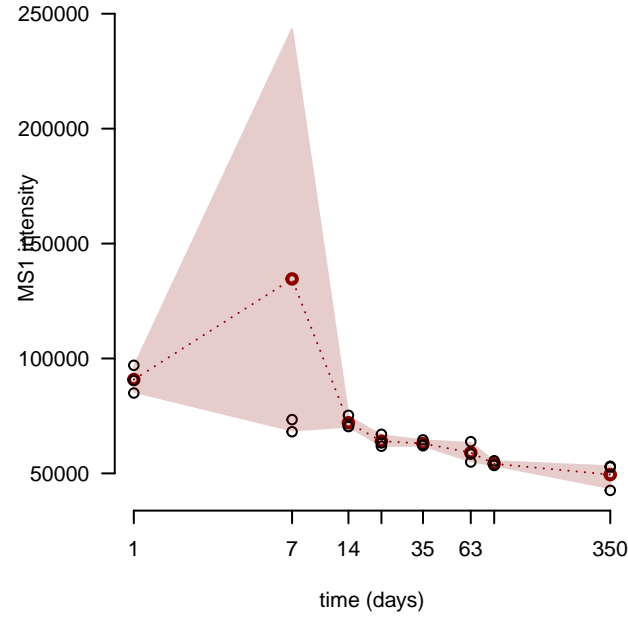

**Q3UIW5**  
**GN=Rnf10**  
ring finger protein 10

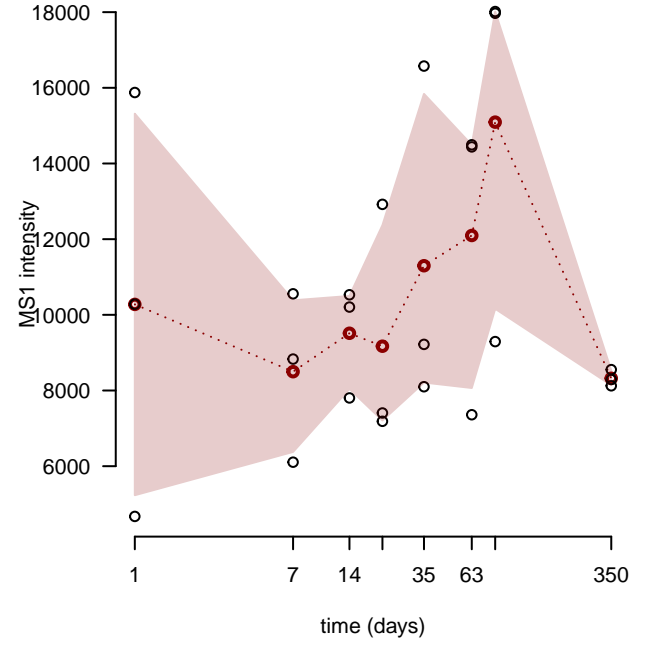

**Q3UJ81**  
**GN=Cnep1r1**  
CTD nuclear envelope phosphatase 1 regul ...

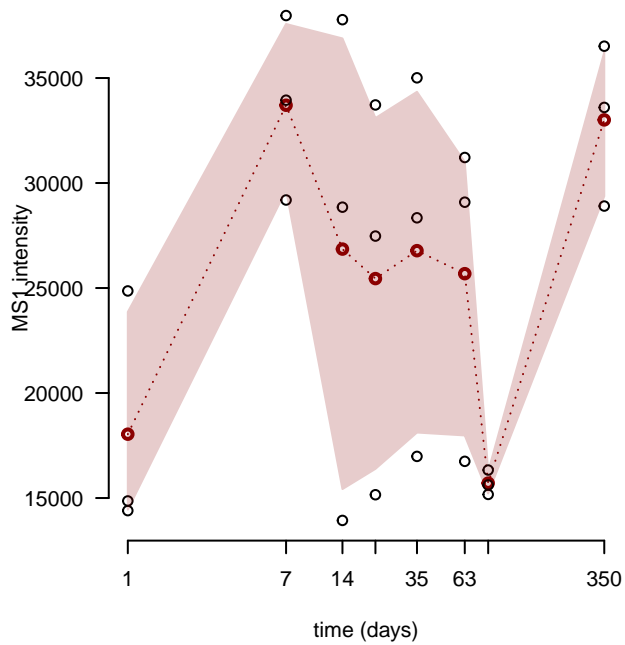

**Q3UJB9**  
**GN=Edc4**  
enhancer of mRNA decapping 4

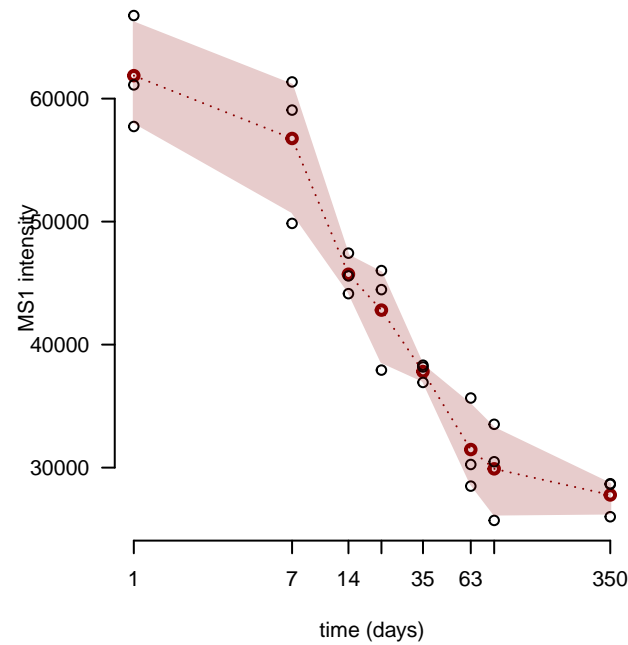

**Q3UJD6**  
**GN=Usp19**  
ubiquitin specific peptidase 19

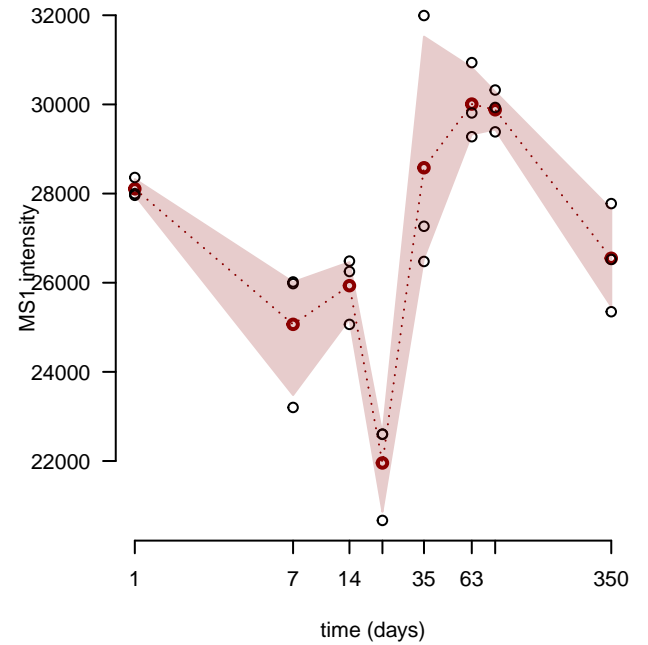

**Q3UJK4**  
**GN=Gtpbp2**  
GTP binding protein 2

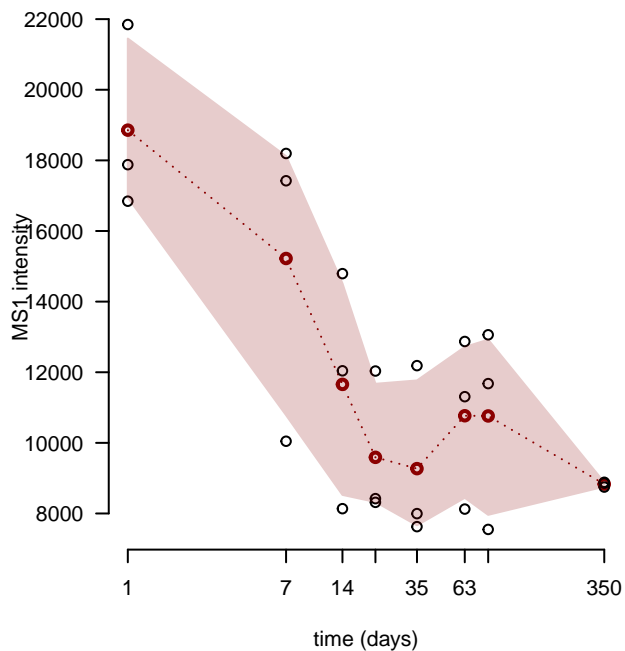

**Q3UJP5**  
**GN=**

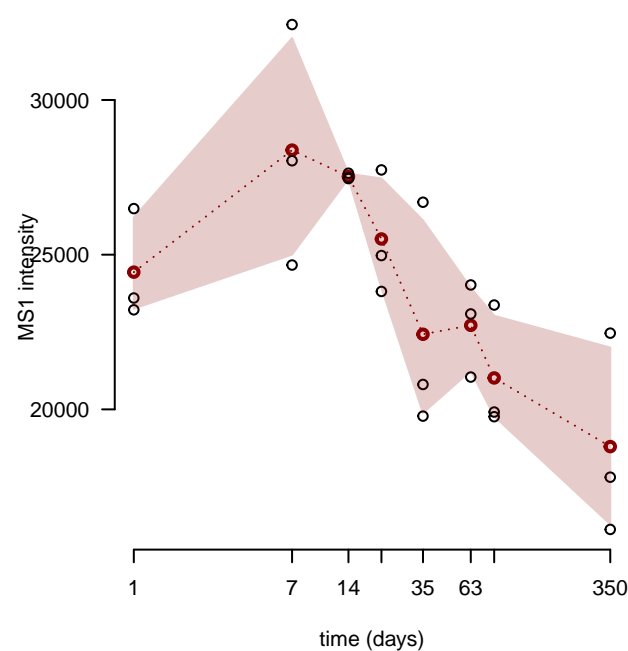

**Q3UJU9**  
**GN=Rmdn3**  
regulator of microtubule dynamics 3

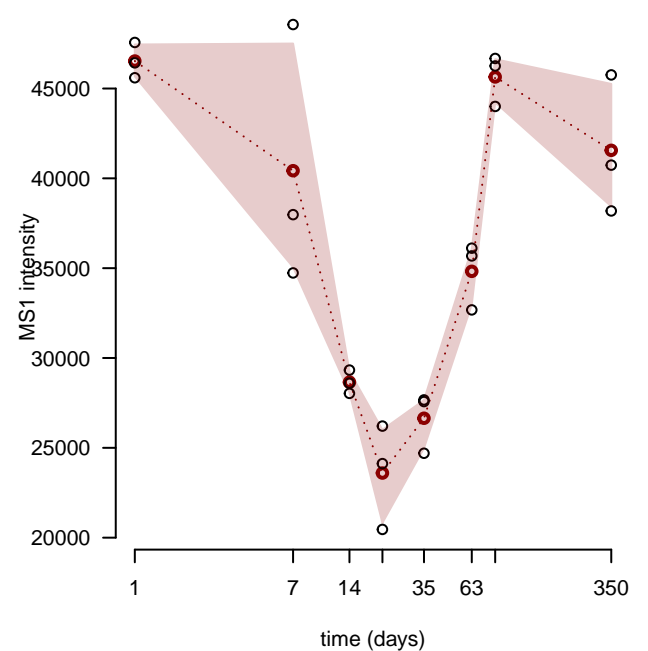

**Q3UJV1**  
**GN=Ccdc61**  
coiled-coil domain containing 61

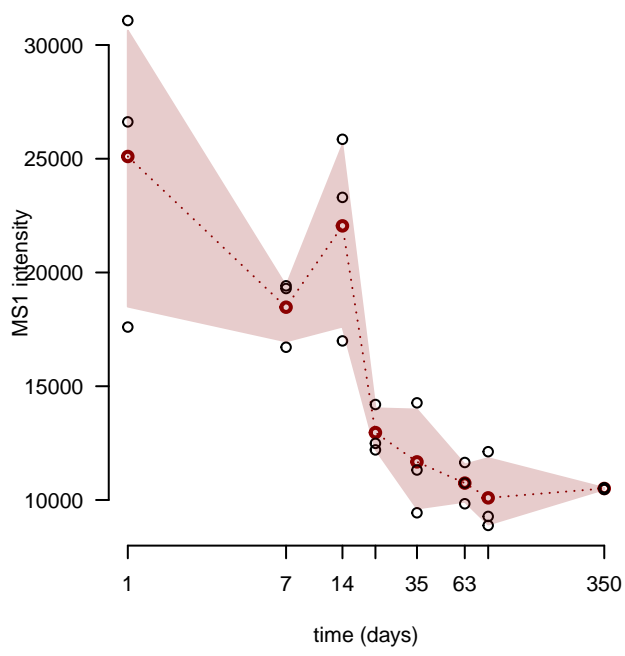

**Q3UK10**  
**GN=B9d2**  
B9 protein domain 2

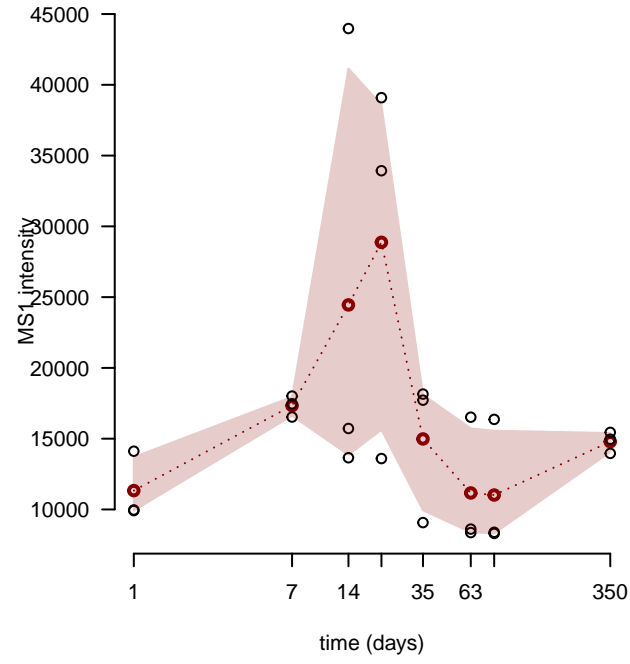

**Q3UKC1**  
**GN=Tax1bp1**  
Tax1 (human T cell leukemia virus type I ...

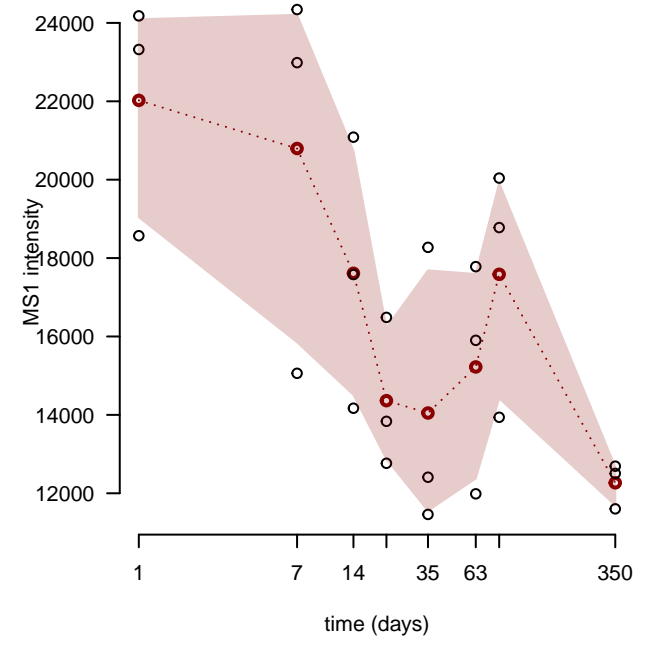

**Q3UKJ7**  
**GN=Smu1**  
smu-1 suppressor of mec-8 and unc-52 hom ...

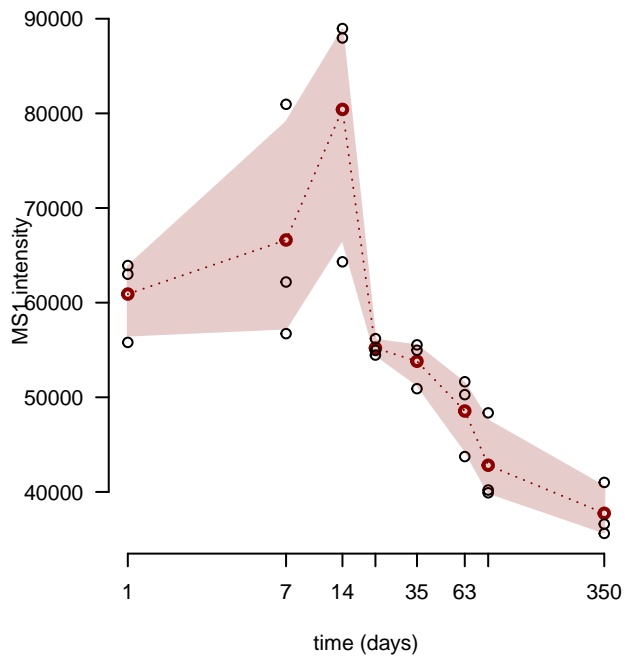

**Q3UL36**  
**GN=Arglu1**  
arginine and glutamate rich 1

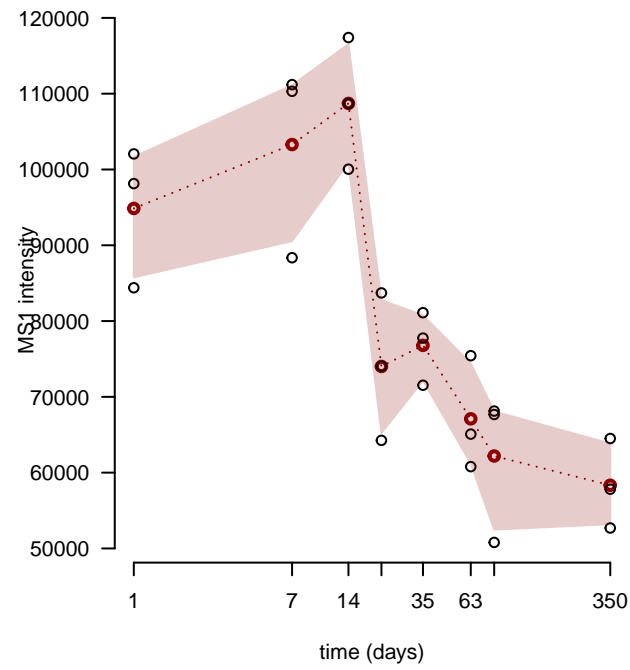

**Q3ULA2**  
**GN=Btrc**  
beta-transducin repeat containing protei ...

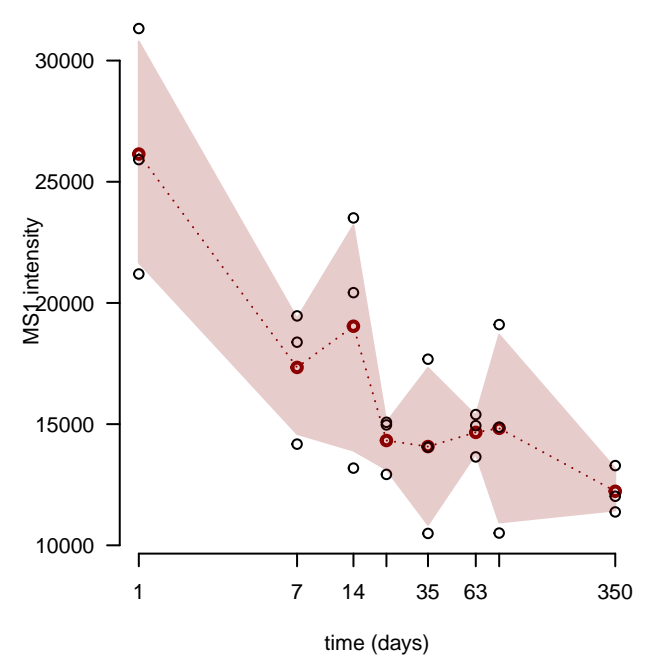

**Q3ULD5**  
**GN=Mccc2**  
methylcrotonoyl-Coenzyme A carboxylase 2 ...

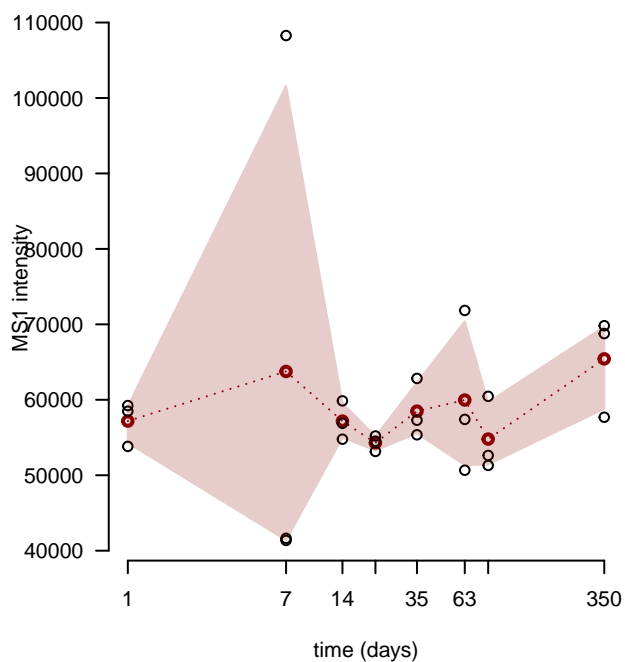

**Q3ULF4**  
**GN=Spg7**  
SPG7, paraplegin matrix AAA peptidase su ...

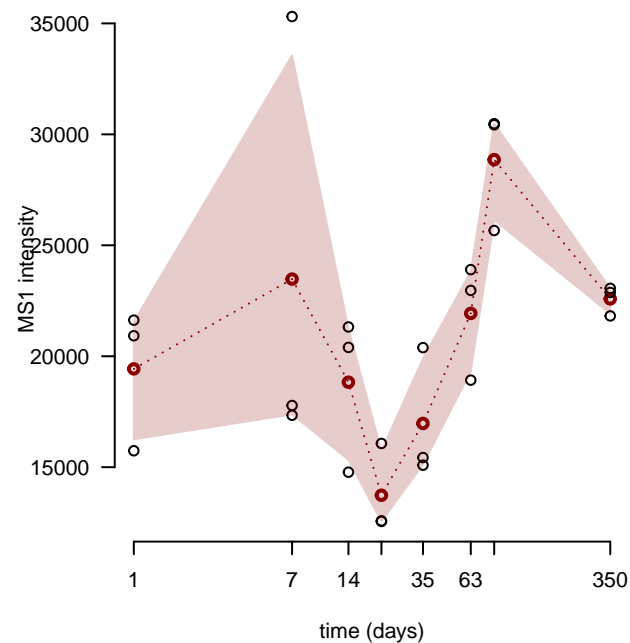

**Q3ULJ0**  
**GN=Gpd1l**  
glycerol-3-phosphate dehydrogenase 1-lik ...

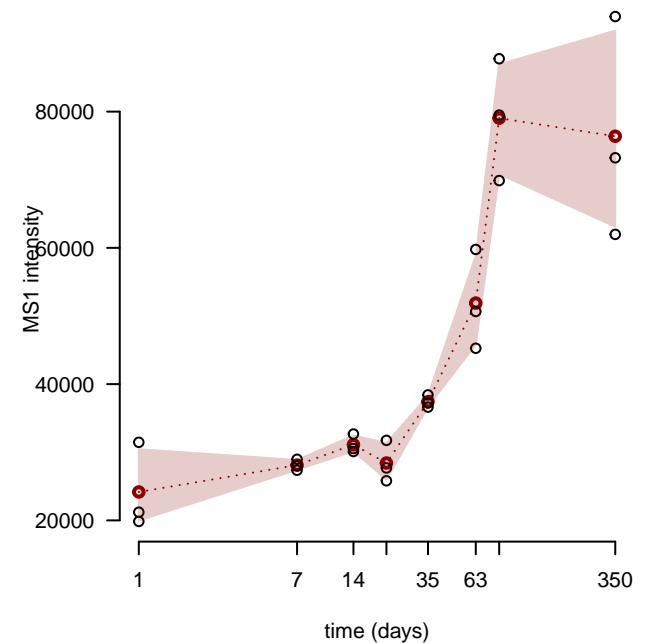

**Q3ULM0**  
**GN=Ccdc106**  
coiled-coil domain containing 106

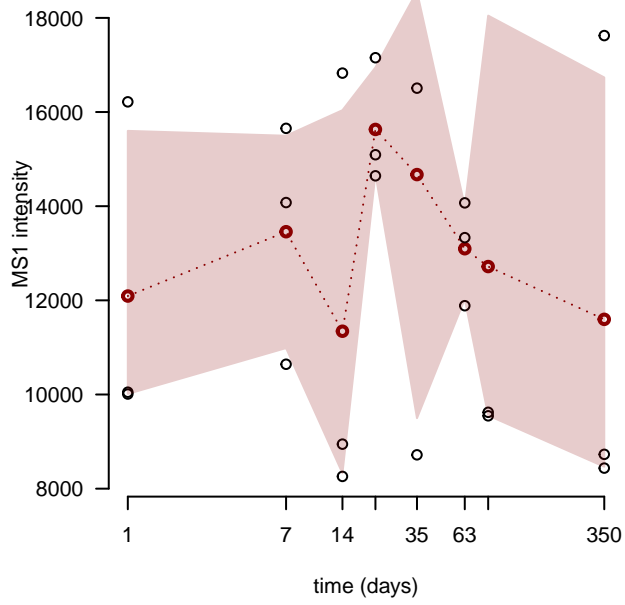

**Q3ULW8**  
**GN=Parp3**  
poly (ADP-ribose) polymerase family, mem ...

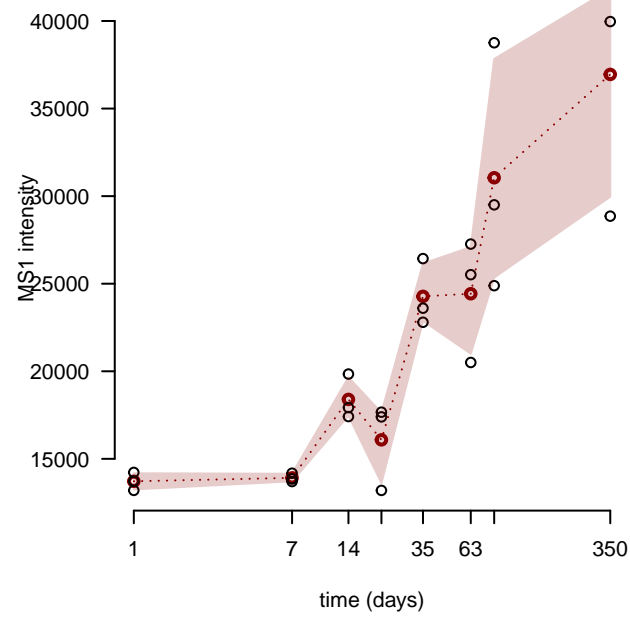

**Q3UM18**  
**GN=Lsg1**  
large 60S subunit nuclear export GTPase ...

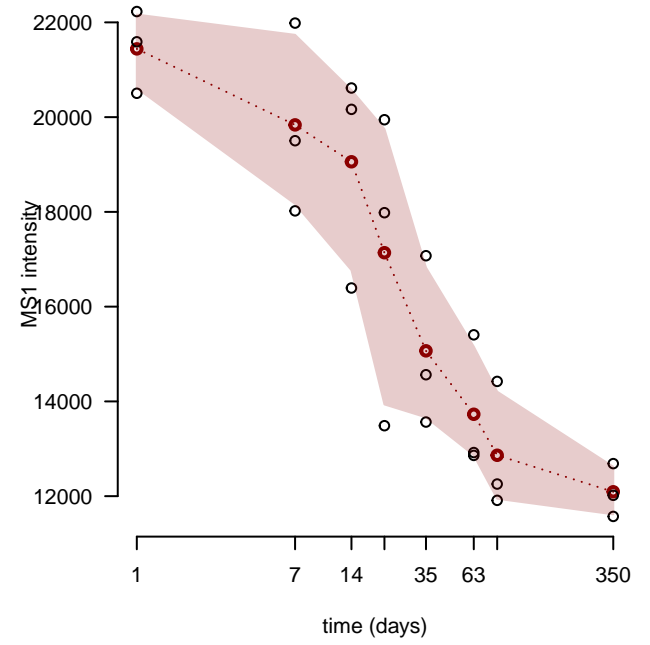

**Q3UM29**  
**GN=Cog7**  
component of oligomeric golgi complex 7

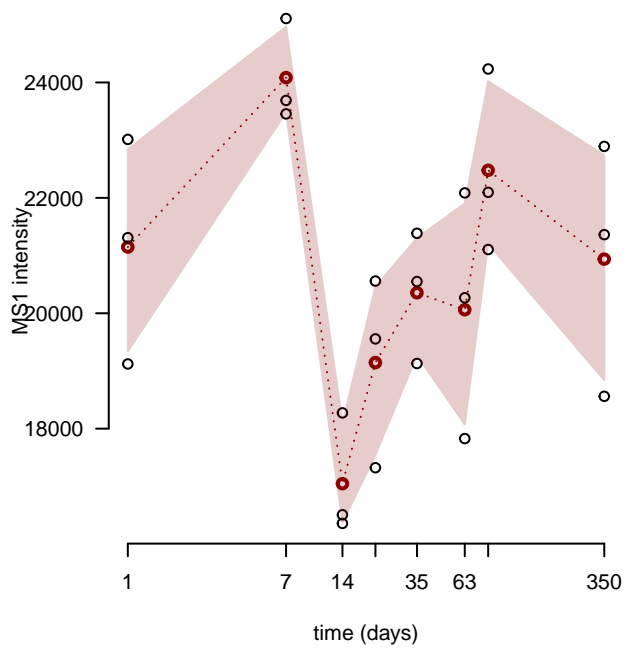

**Q3UM45**  
**GN=Ppp1r7**  
protein phosphatase 1, regulatory subuni ...

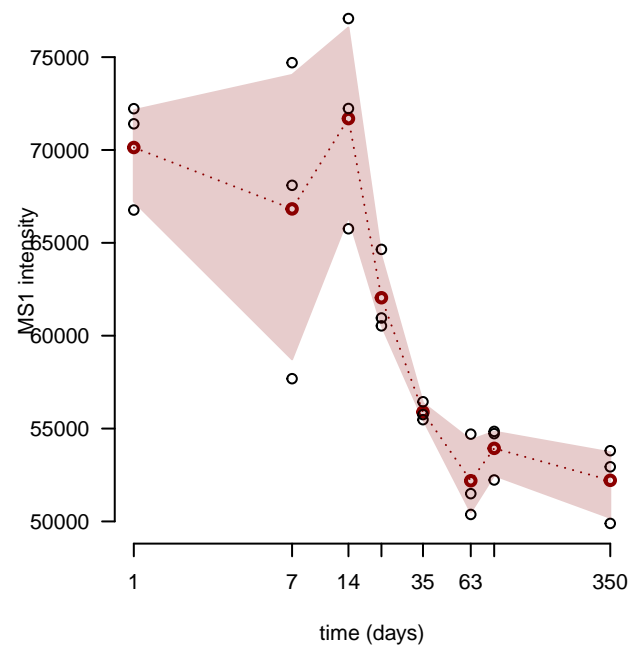

**Q3UMB5**  
**GN=Smcr8**  
Smith-Magenis syndrome chromosome region ...

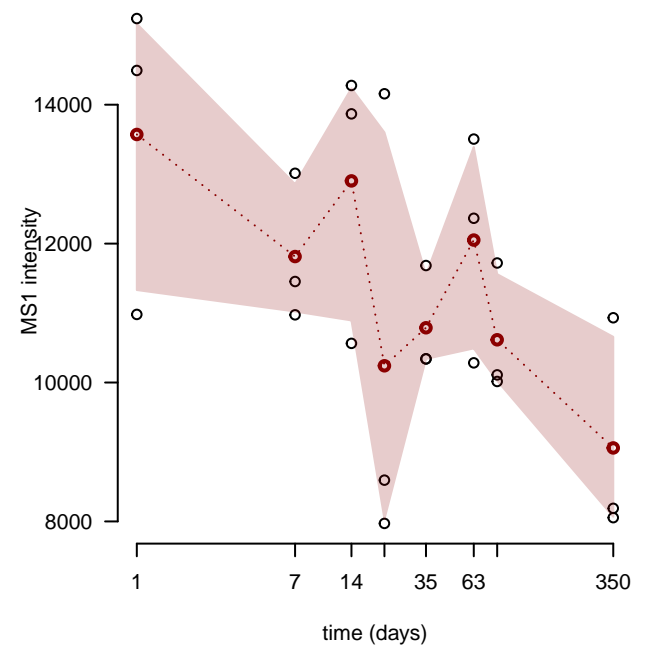

**Q3UMB9**  
**GN=Washc4**  
WASH complex subunit 4

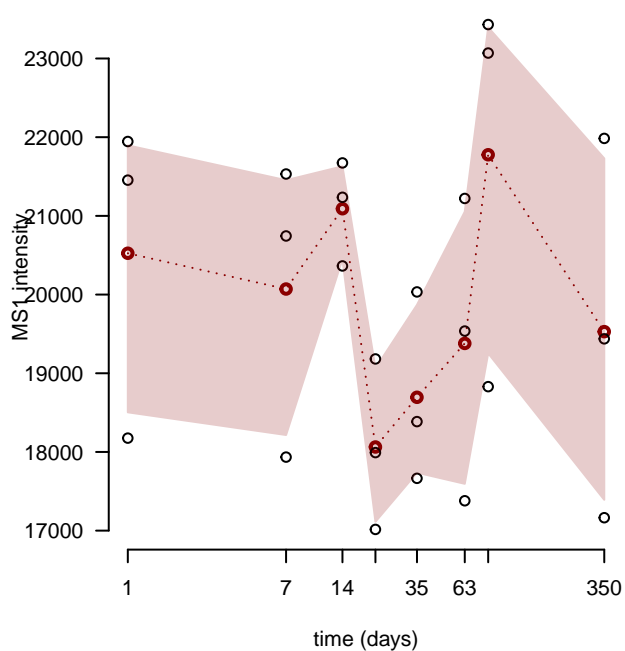

**Q3UMC0**  
**GN=Spata5**  
spermatogenesis associated 5

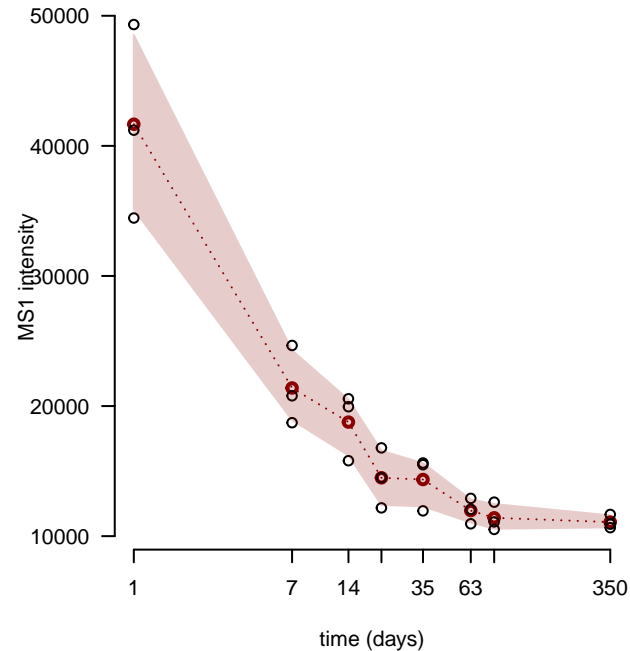

**Q3UMF0**  
**GN=Cobl1**  
Cobl-like 1

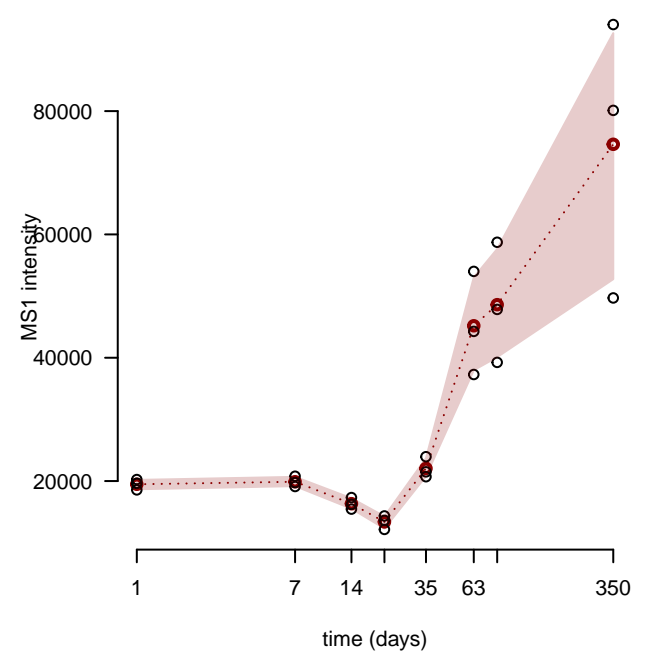

**Q3UMF0**  
GN=Cobl1  
Cobl-like 1

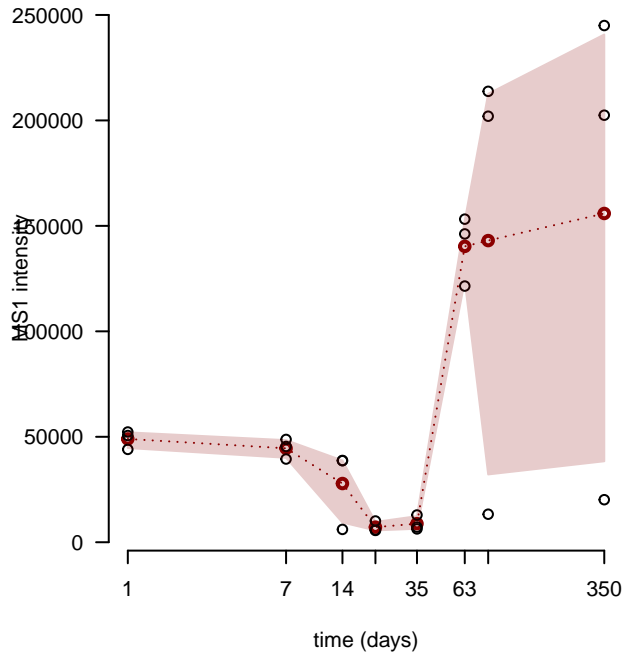

**Q3UMG5**  
GN=Lrch2  
leucine-rich repeats and calponin homolo ...

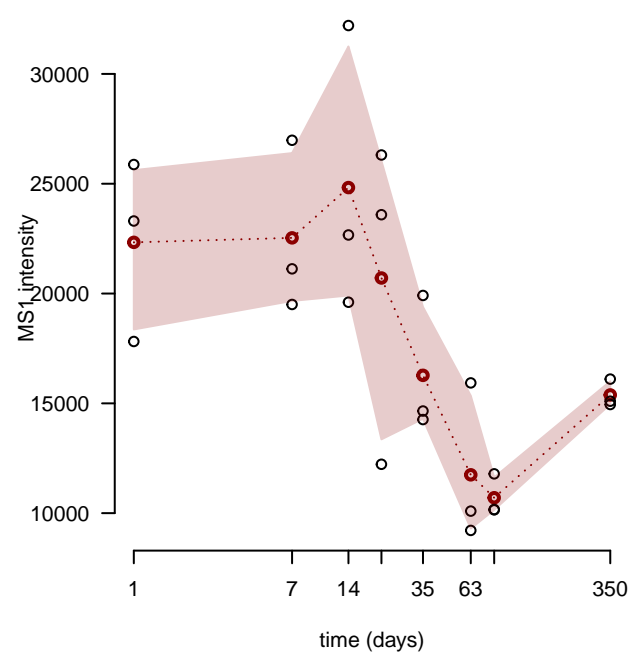

**Q3UMM4**  
GN=Cdk10  
cyclin-dependent kinase 10

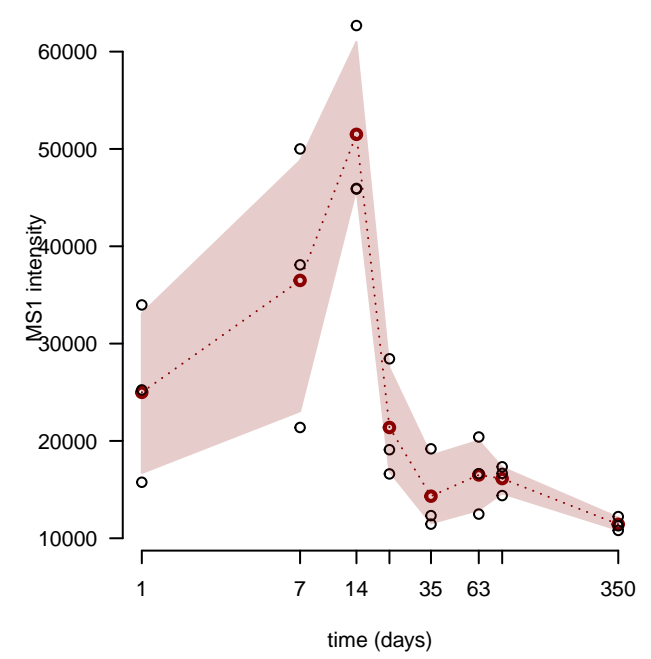

**Q3UMR0**  
GN=Ankrd27  
ankyrin repeat domain 27 (VPS9 domain)

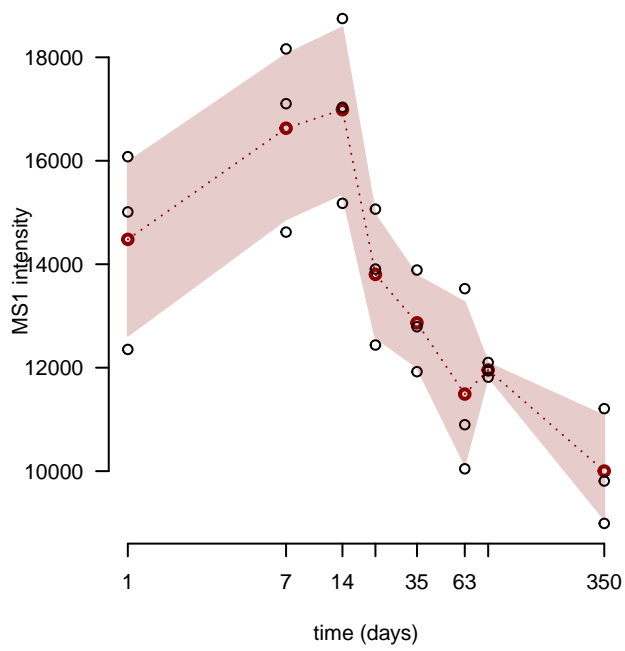

**Q3UMR5**  
GN=Mcu  
mitochondrial calcium uniporter

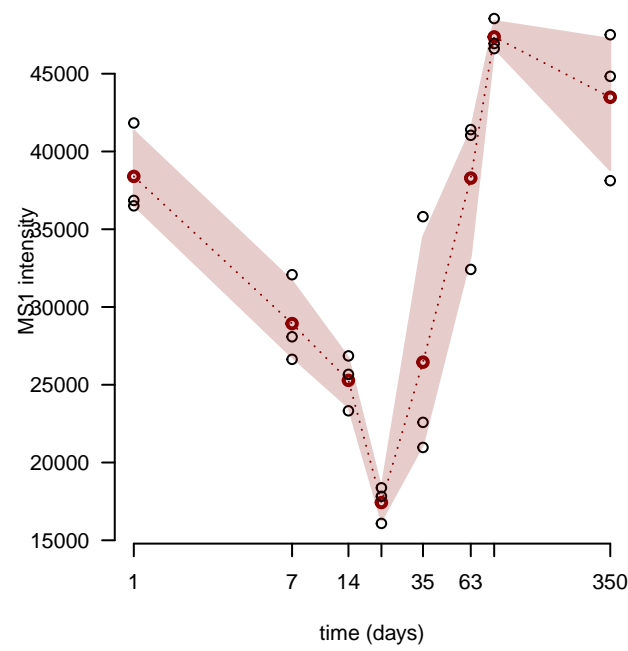

**Q3UMT1**  
GN=Ppp1r12c  
protein phosphatase 1, regulatory subuni ...

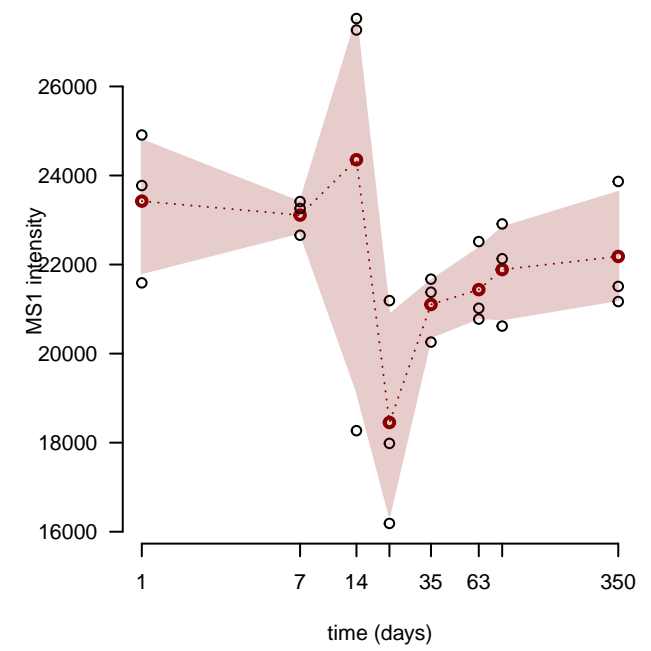

**Q3UMU9**  
GN=Hdgfl2  
HDGF like 2

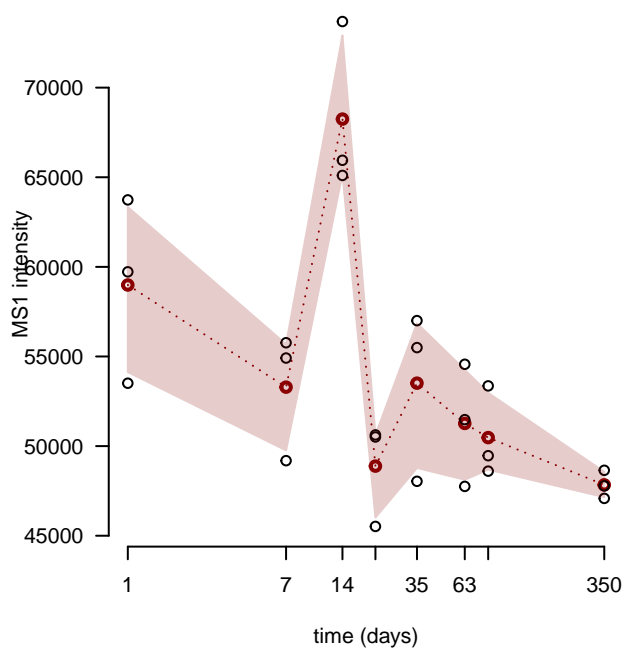

**Q3UMW7**  
GN=Mapkapk3  
mitogen-activated protein kinase-activat ...

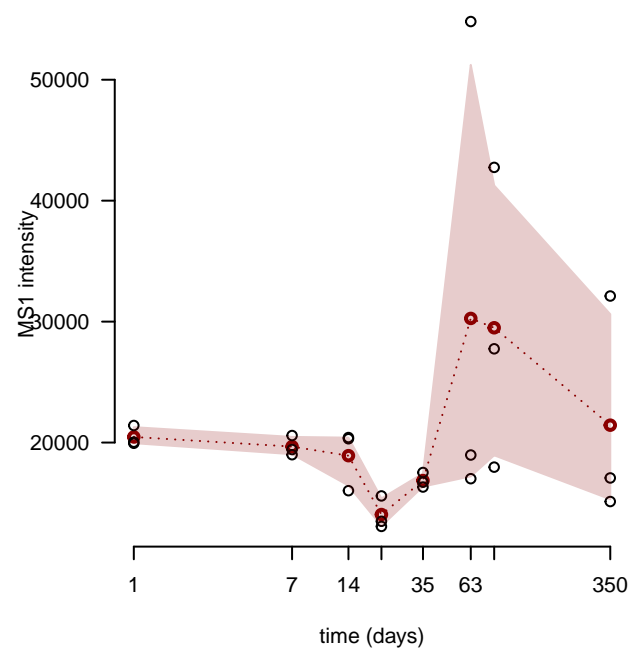

**Q3UMW8**  
GN=Cln5  
ceroid-lipofuscinosis, neuronal 5

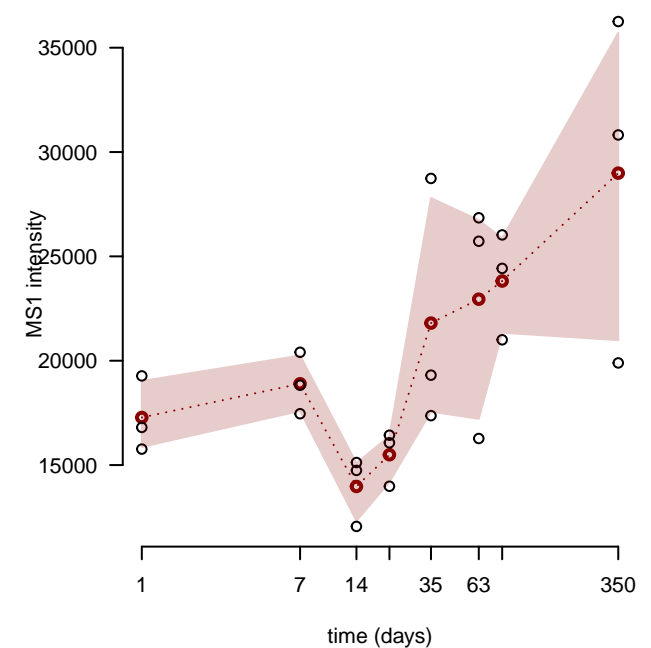

**Q3UMY5**  
**GN=Eml4**  
echinoderm microtubule associated protei ...

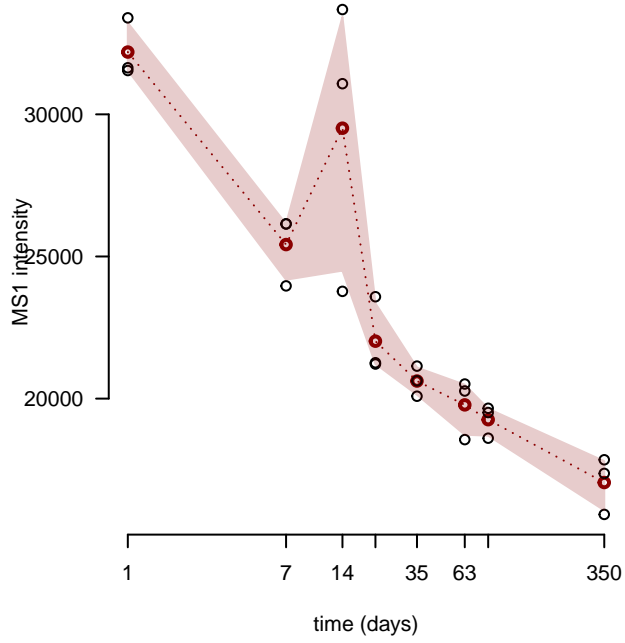

**Q3UN02**  
**GN=Lclat1**  
lysocardiolipin acyltransferase 1

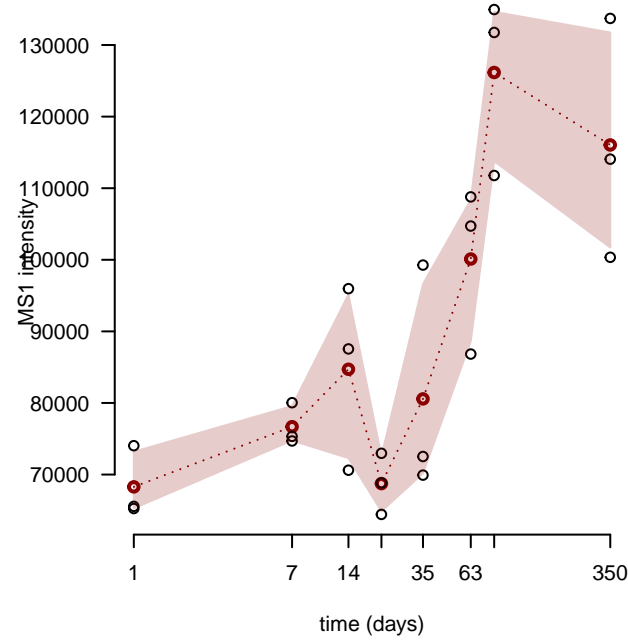

**Q3UN04**  
**GN=Usp30**  
ubiquitin specific peptidase 30

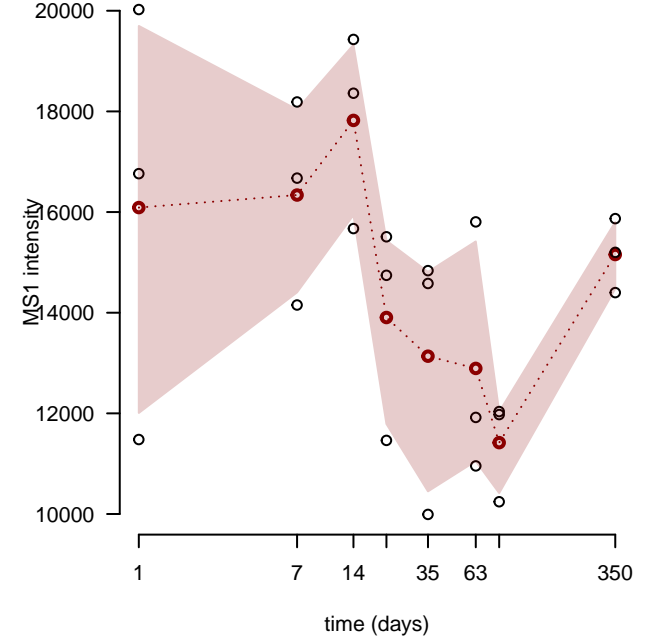

**Q3UN90**  
**GN=Lym9**  
LYR motif containing 9

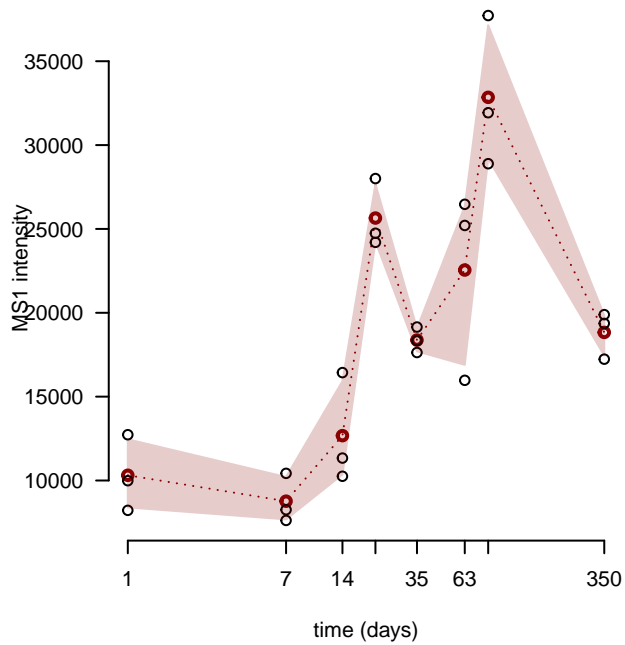

**Q3UNX5**  
**GN=Acsm3**  
acyl-CoA synthetase medium-chain family ...

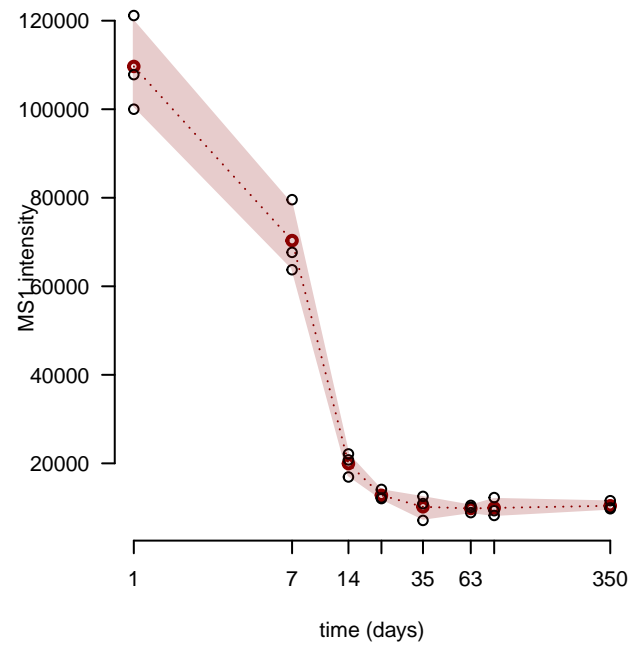

**Q3UNZ8**  
**GN=Cryz12**  
crystallin zeta like 2

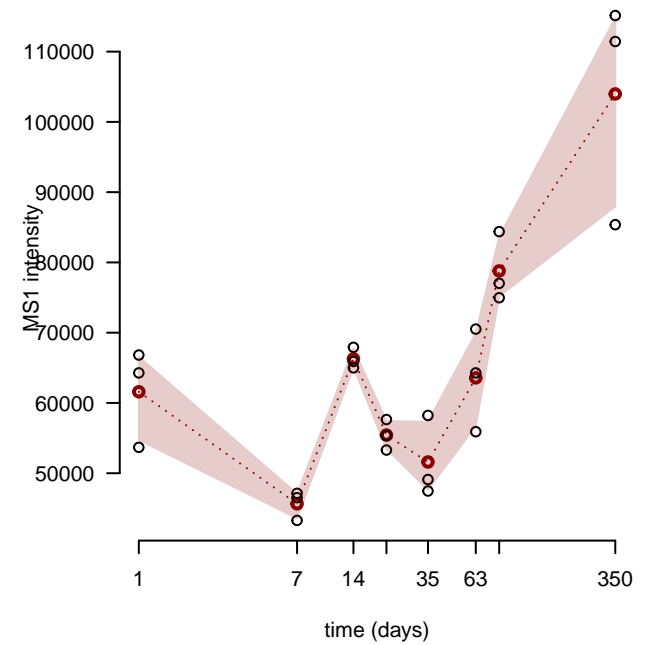

**Q3UP23**  
**GN=Tmem26**  
transmembrane protein 26

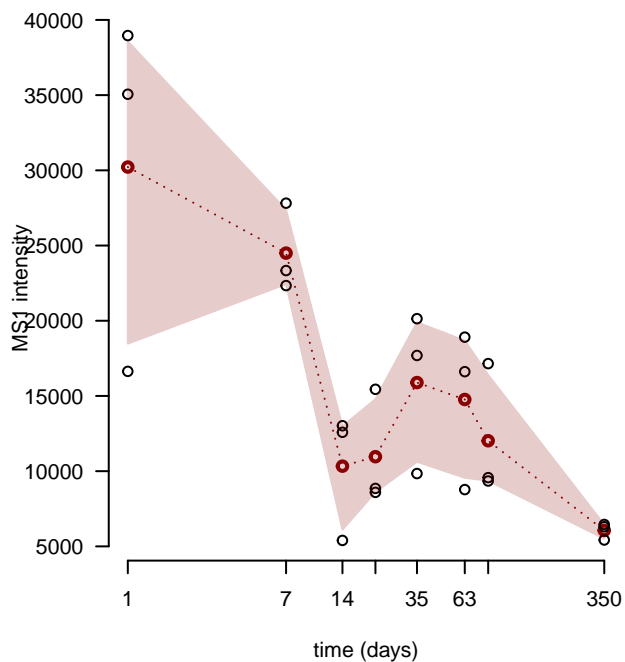

**Q3UPE3**  
**GN=Rmi2**  
RecQ mediated genome instability 2

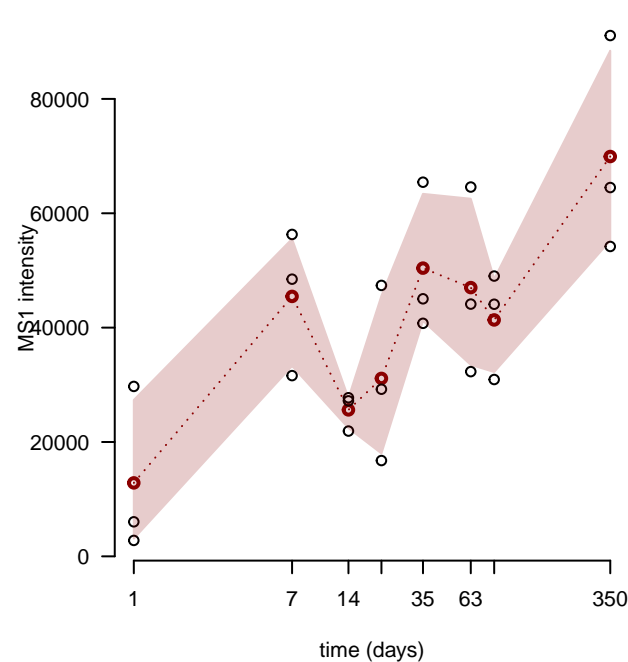

**Q3UPF5**  
**GN=Zc3hav1**  
zinc finger CCCH type, antiviral 1

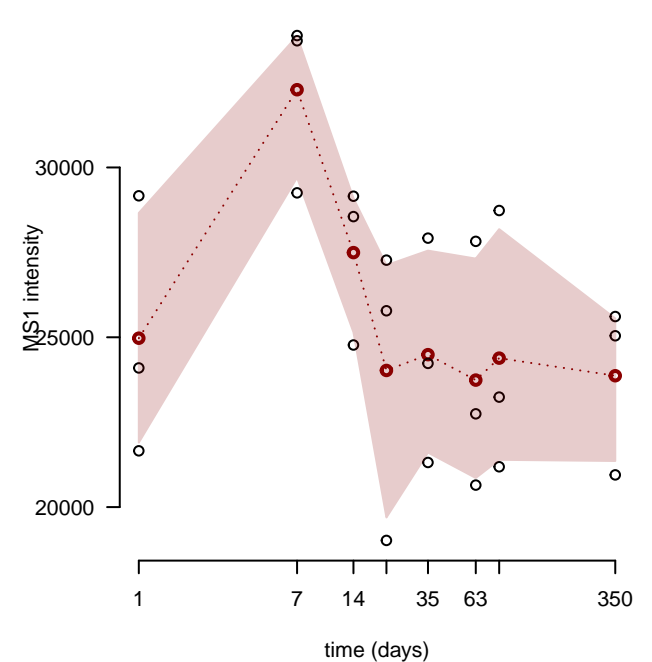

**Q3UPH1**  
**GN=Prrc1**  
proline-rich coiled-coil 1

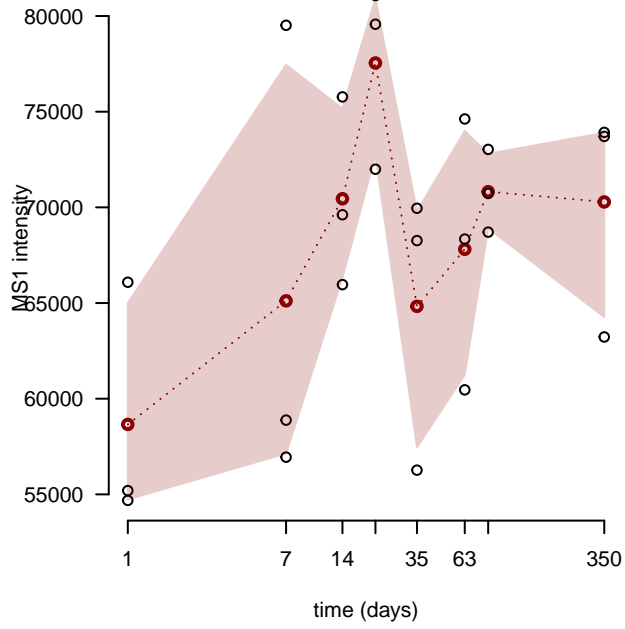

**Q3UPH7**  
**GN=Arhgef40**  
Rho guanine nucleotide exchange factor ( ...

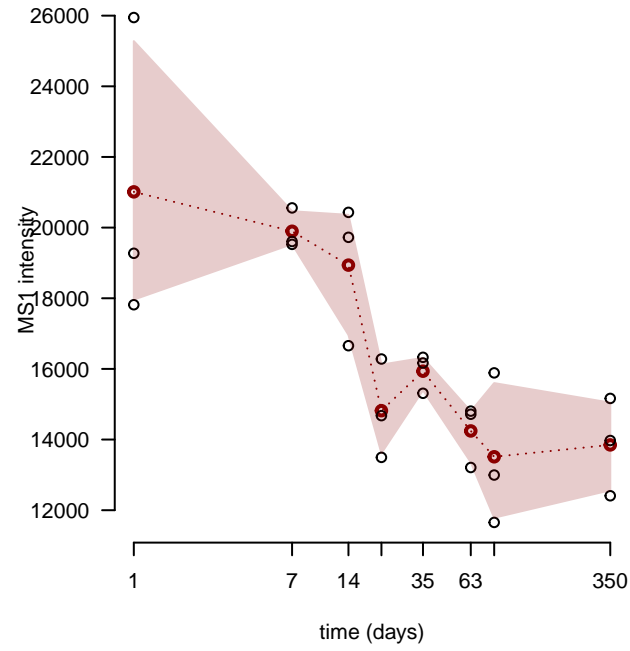

**Q3UPL0**  
**GN=Sec31a**  
Sec31 homolog A (*S. cerevisiae*)

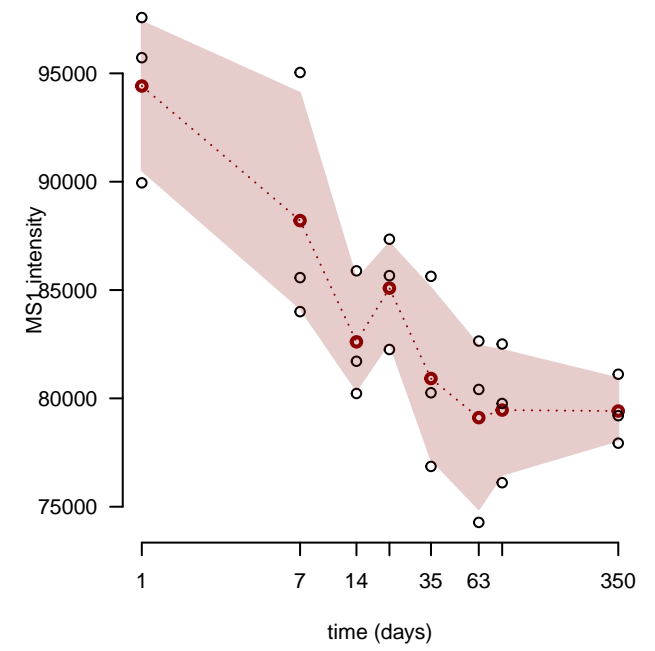

**Q3UPP8**  
**GN=Cep63**  
centrosomal protein 63

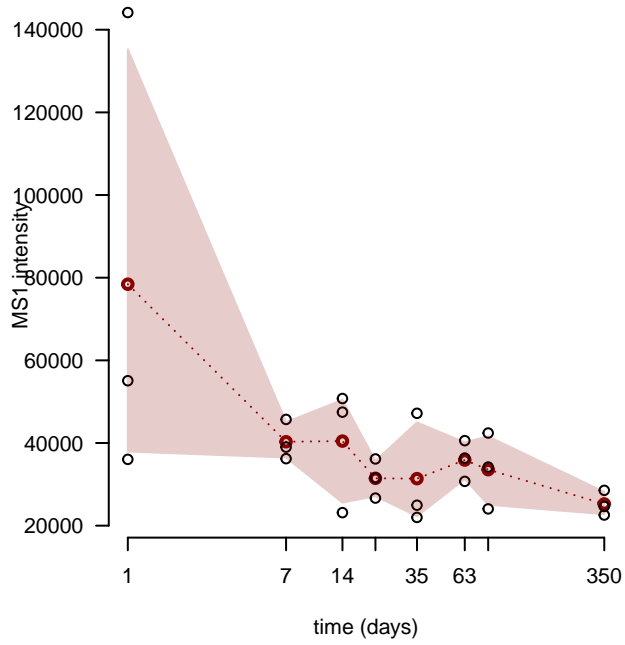

**Q3UPR9**  
**GN=Sbspon**  
somatomedin B and thrombospondin, type 1 ...

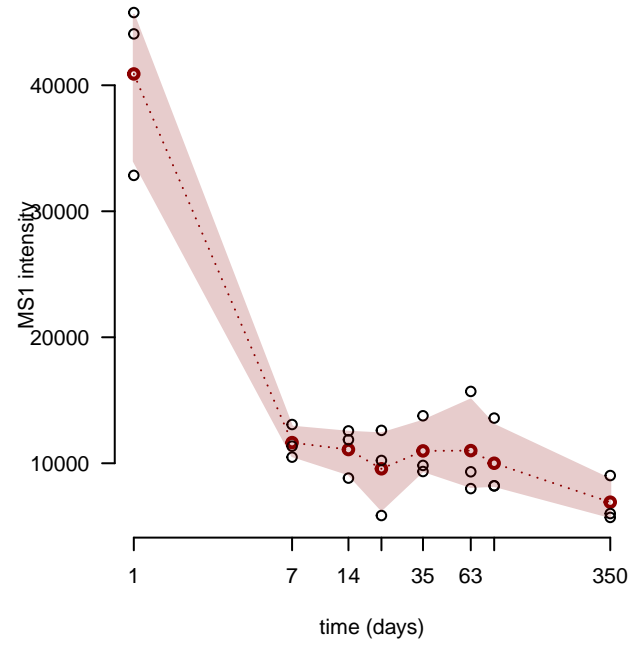

**Q3UPY5**  
**GN=Glb112**  
galactosidase, beta 1-like 2

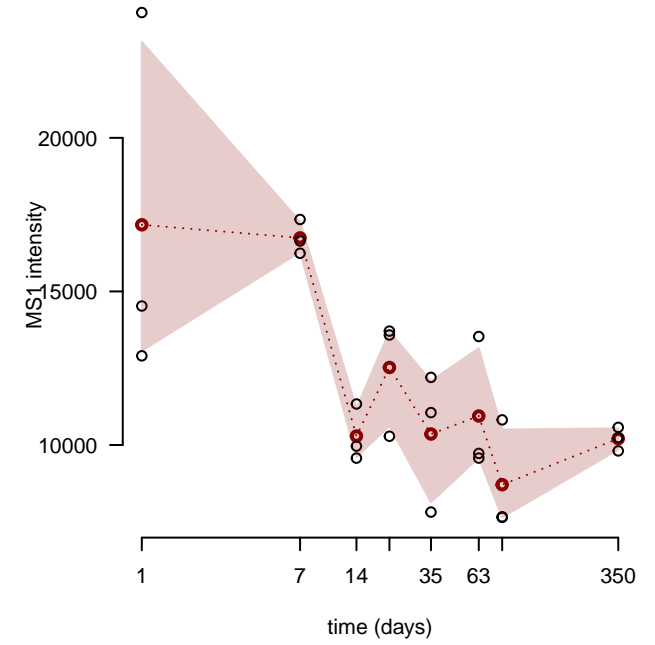

**Q3UQ28**  
**GN=Pxdn**  
peroxidasin

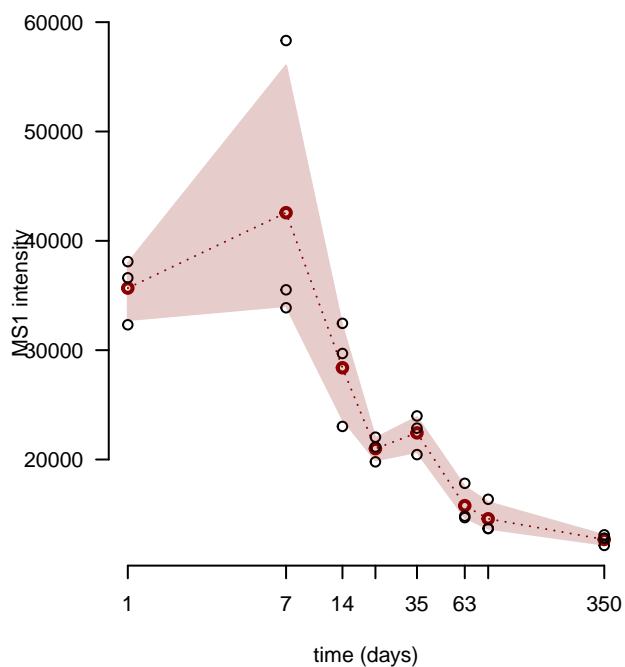

**Q3UQ44**  
**GN=Iqgap2**  
IQ motif containing GTPase activating pr ...

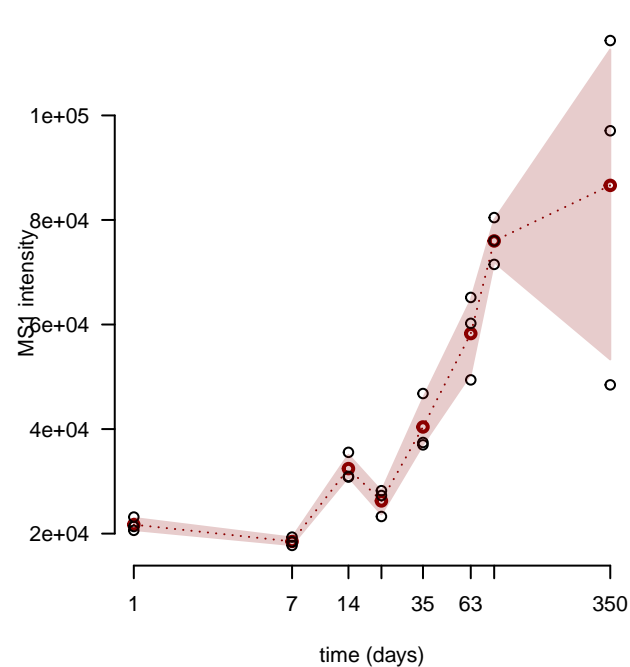

**Q3UQ84**  
**GN=Tars2**  
threonyl-tRNA synthetase 2, mitochondria ...

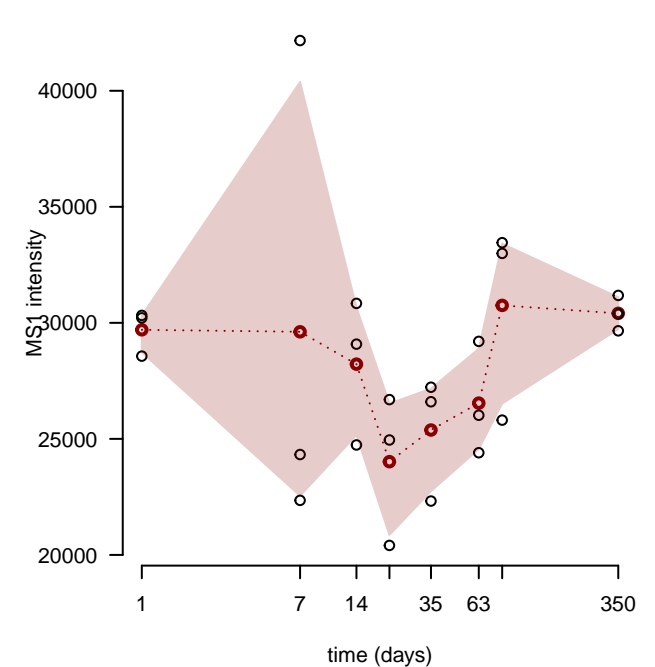

**Q3UQA7**  
GN=Selenoh  
selenoprotein H

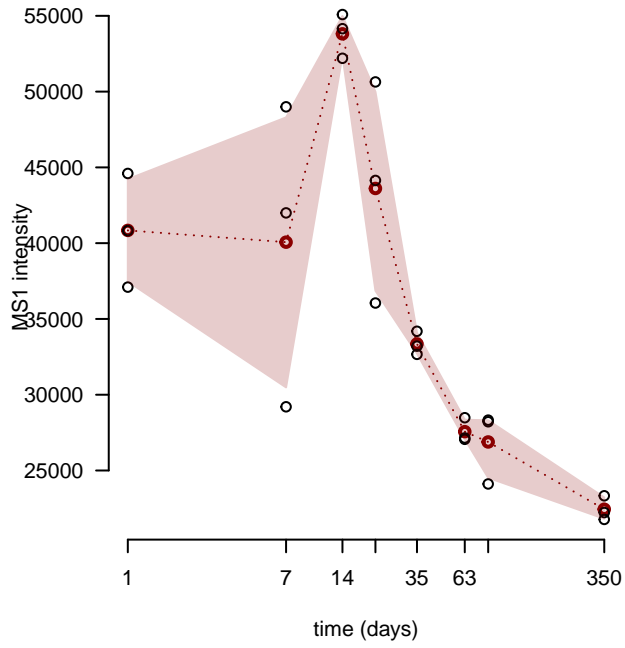

**Q3UQN2**  
GN=Fcho2  
FCH domain only 2

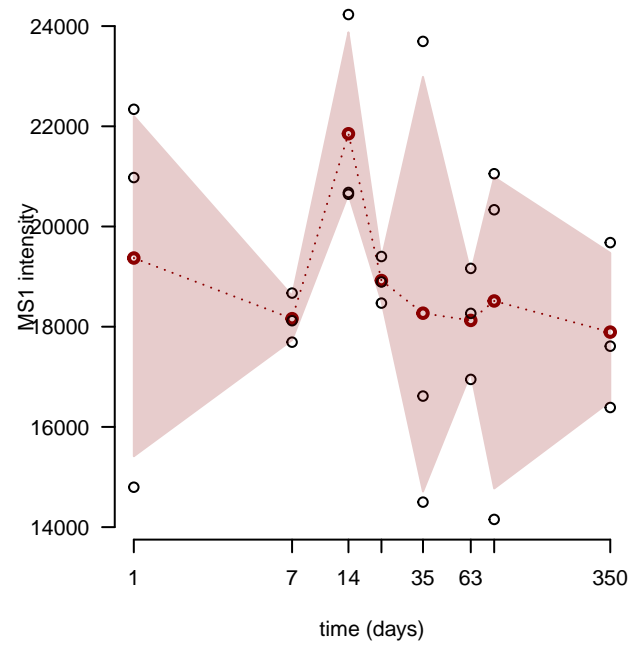

**Q3UQU0**  
GN=Brd9  
bromodomain containing 9

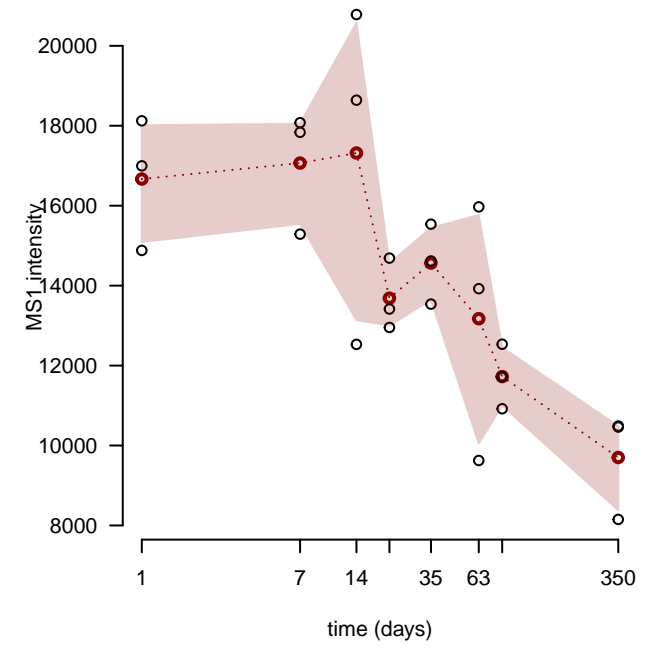

**Q3UQV5**  
GN=Kbtbd8  
kelch repeat and BTB (POZ) domain contai ...

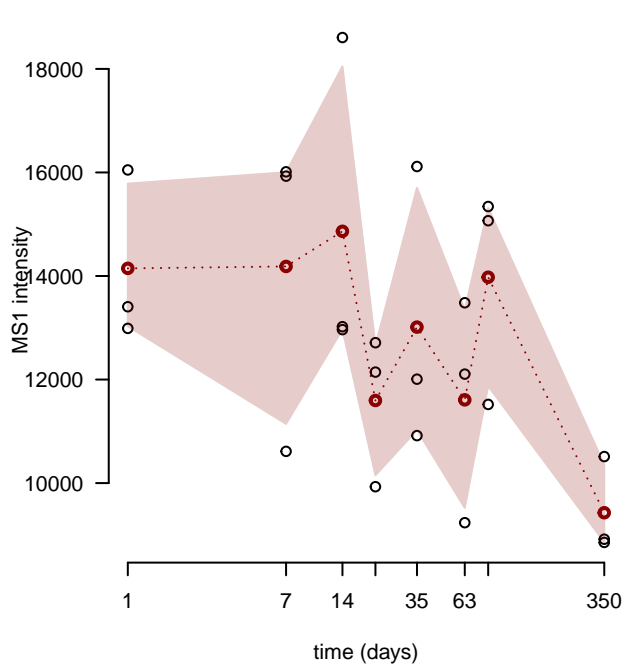

**Q3UR70**  
GN=Tgfbrap1  
transforming growth factor, beta recepto ...

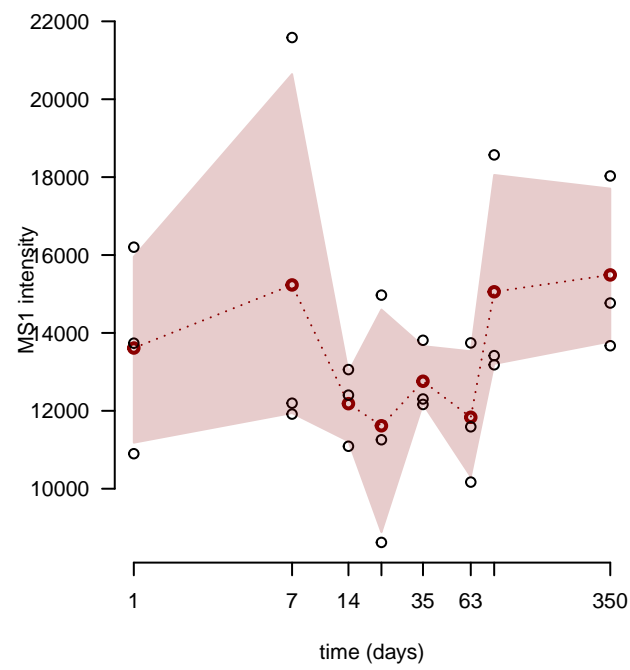

**Q3UR85**  
GN=Myrf  
myelin regulatory factor

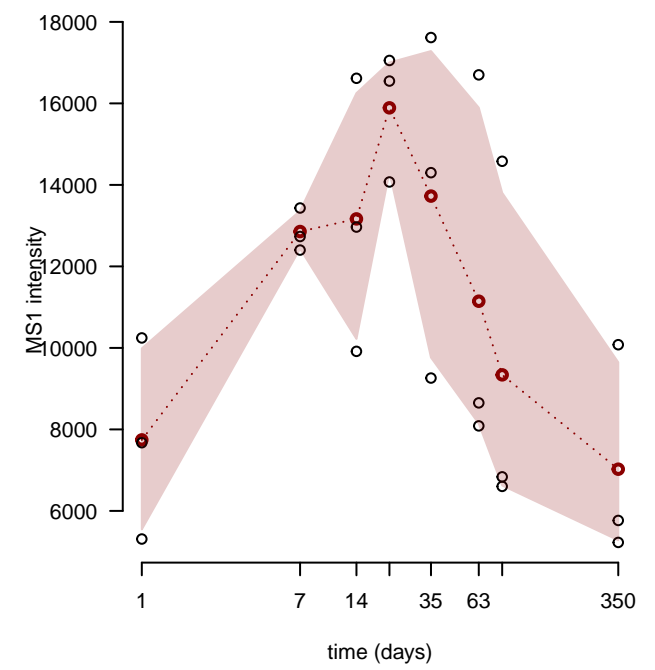

**Q3UR97**  
GN=Snx21  
sorting nexin family member 21

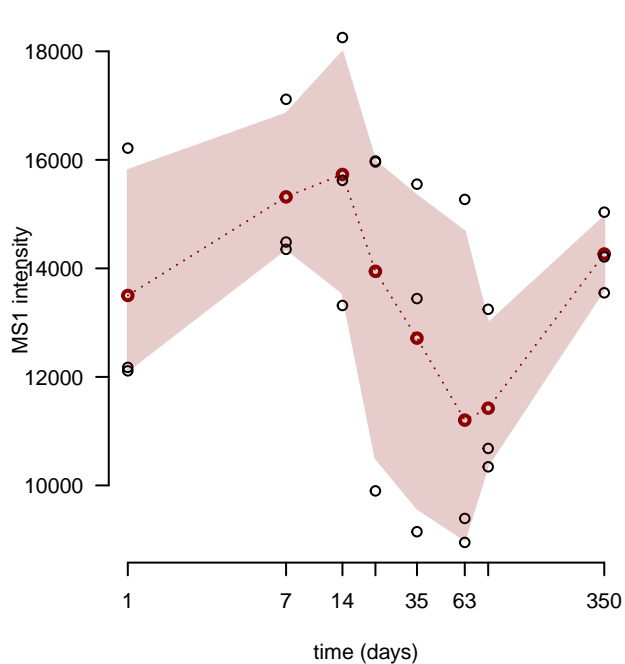

**Q3URD3**  
GN=Slmap  
sarcolemma associated protein

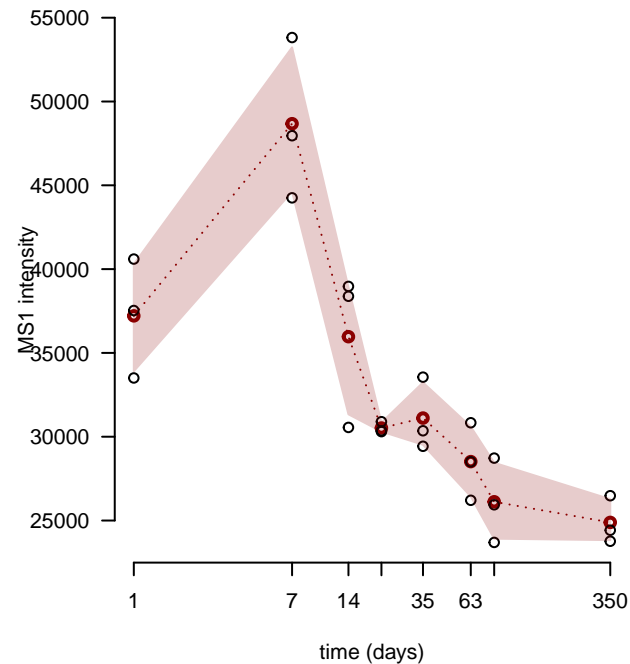

**Q3URD3**  
GN=Slmap  
sarcolemma associated protein

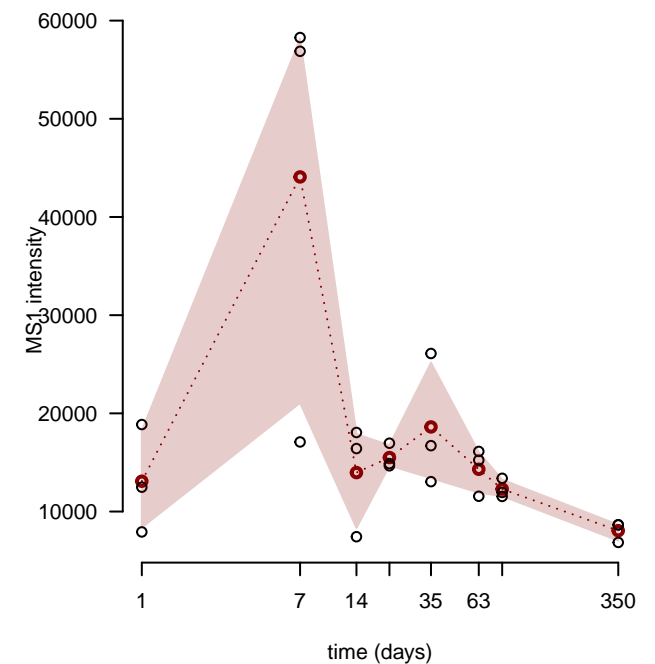



**Q3URE1**  
GN=Acsf3  
acyl-CoA synthetase family member 3

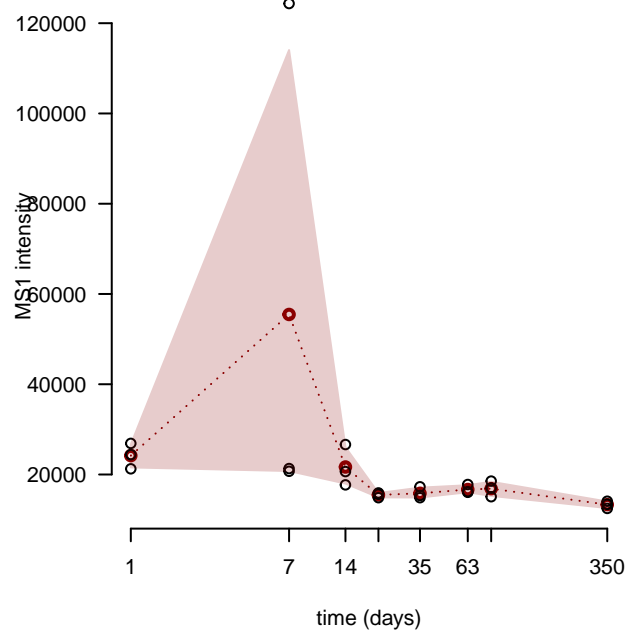

**Q3URQ0**  
GN=Tex10  
testis expressed gene 10

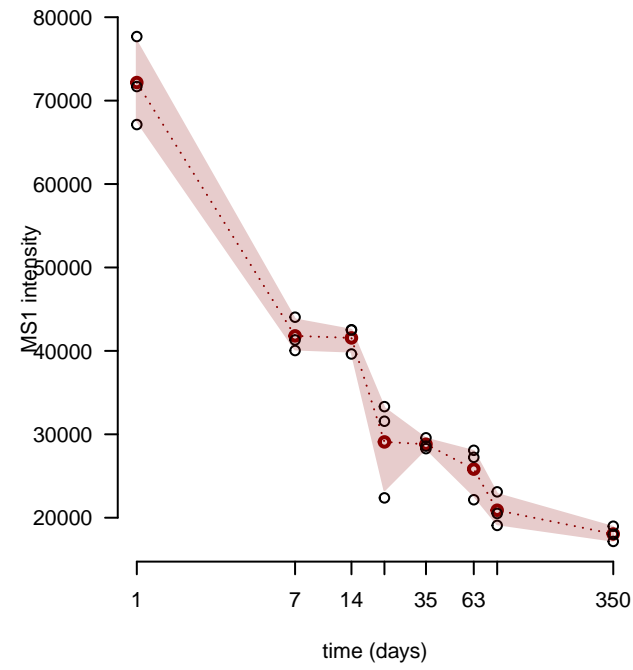

**Q3URQ7**  
GN=Mthfsd  
methenyltetrahydrofolate synthetase doma ...

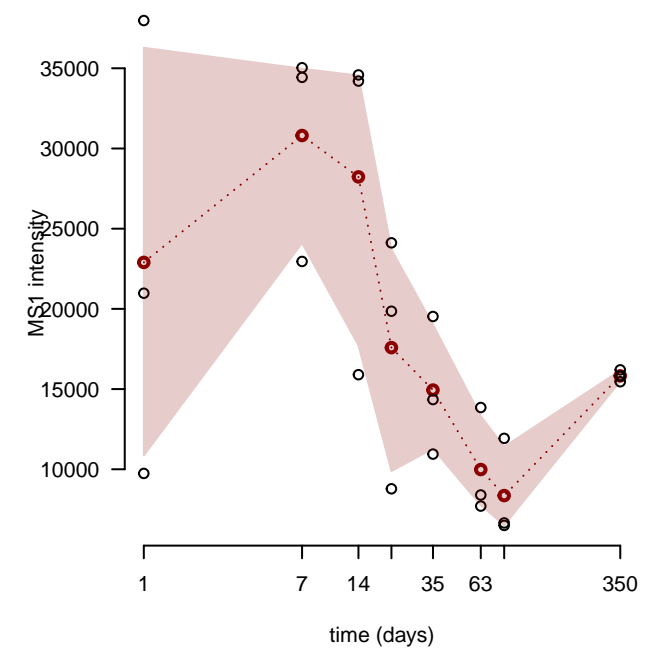

**Q3URS9**  
GN=Ccdc51  
coiled-coil domain containing 51

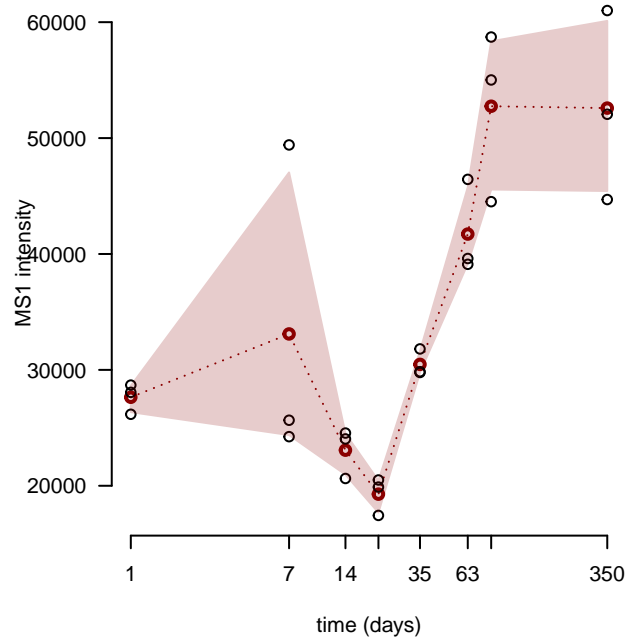

**Q3URU2**  
GN=Peg3  
paternally expressed 3

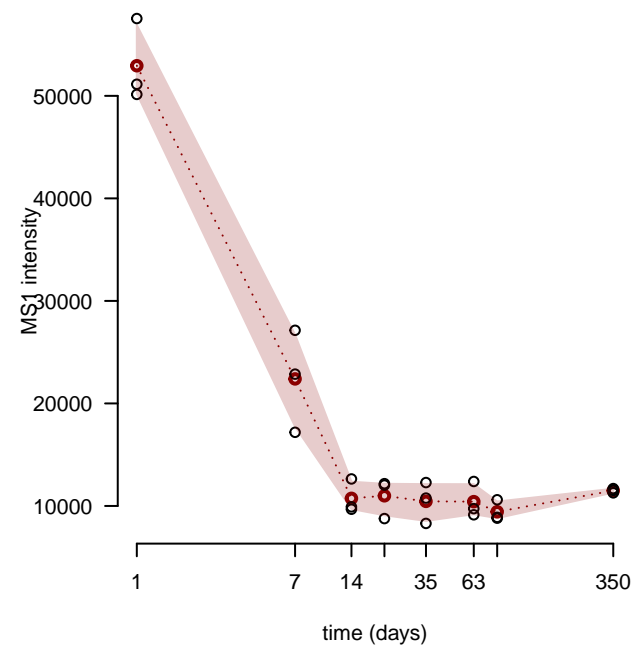

**Q3US17**  
GN=Znf48

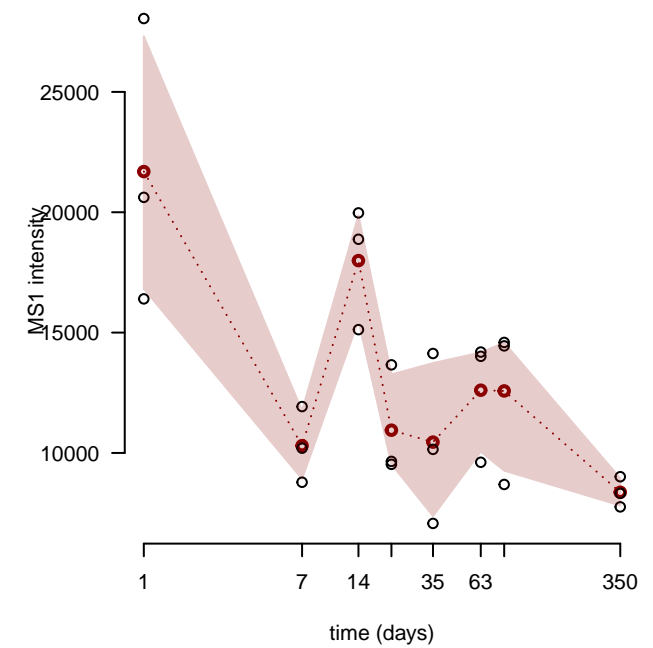

**Q3US41**  
GN=Esrp1  
epithelial splicing regulatory protein 1

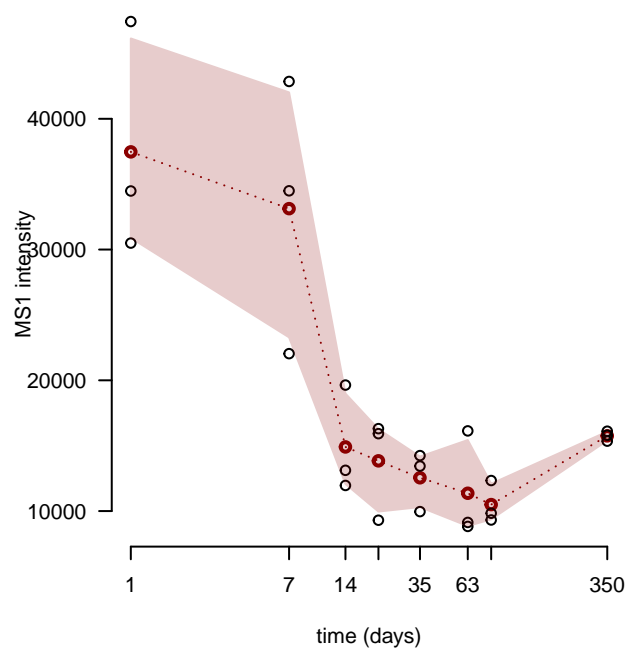

**Q3USB7**  
GN=Plc1  
phospholipase C-like 1

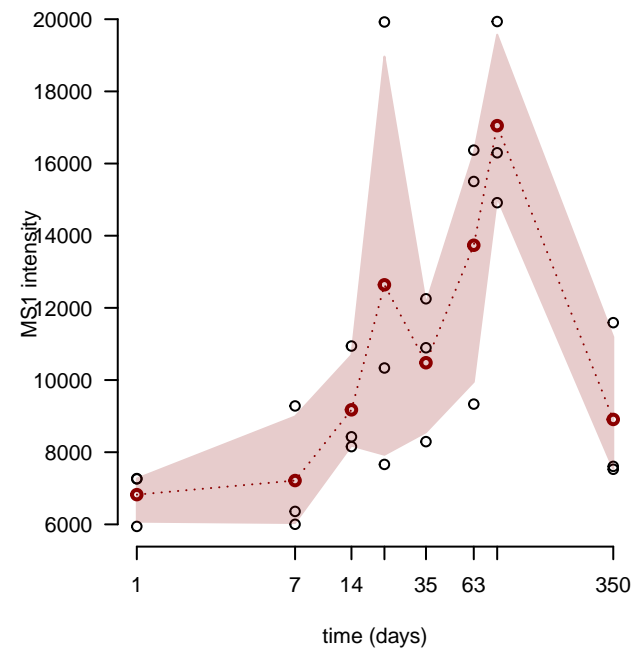

**Q3USH5**  
GN=Sfswap  
splicing factor SWAP

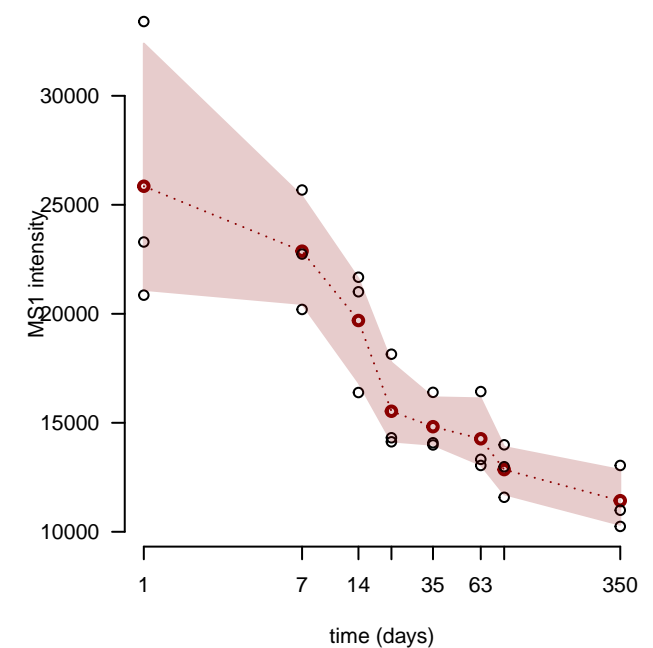

**Q3USJ8**  
**GN=Fchsd2**  
FCH and double SH3 domains 2

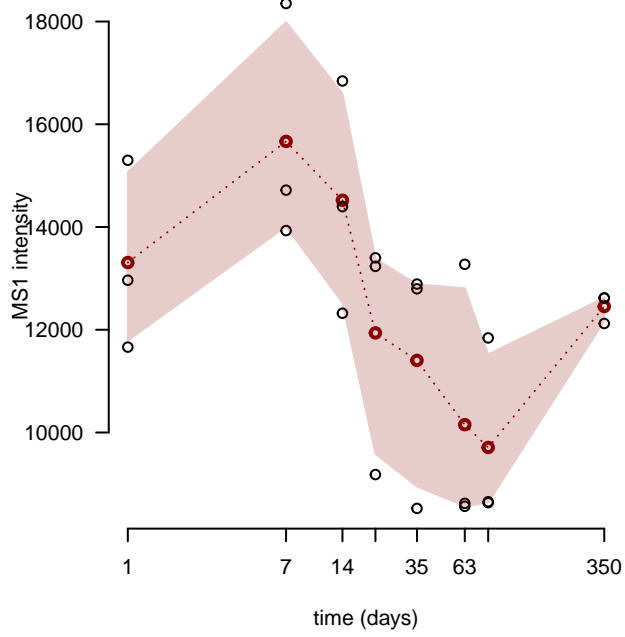

**Q3USZ8**  
**GN=Dipk2a**  
divergent protein kinase domain 2A

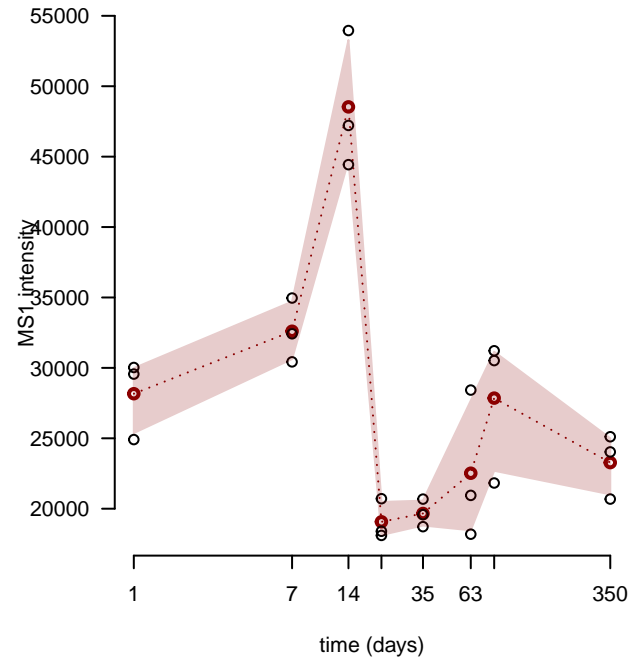

**Q3UTA9**  
**GN=Eif4e1b**  
eukaryotic translation initiation factor ...

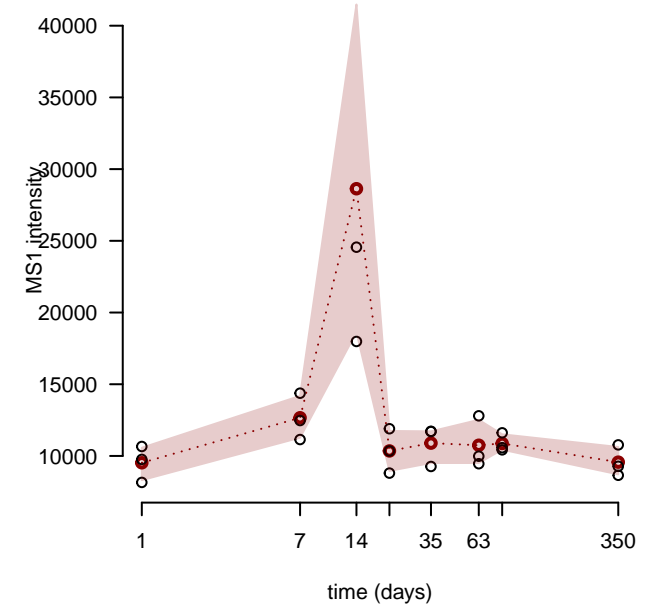

**Q3UTD9**  
**GN=Snim15**  
small integral membrane protein 15

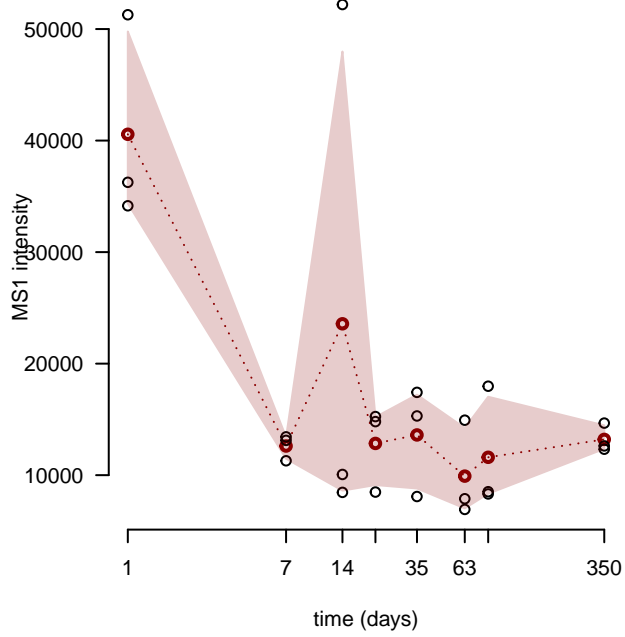

**Q3UTJ2**  
**GN=Sorbs2**  
sorbin and SH3 domain containing 2

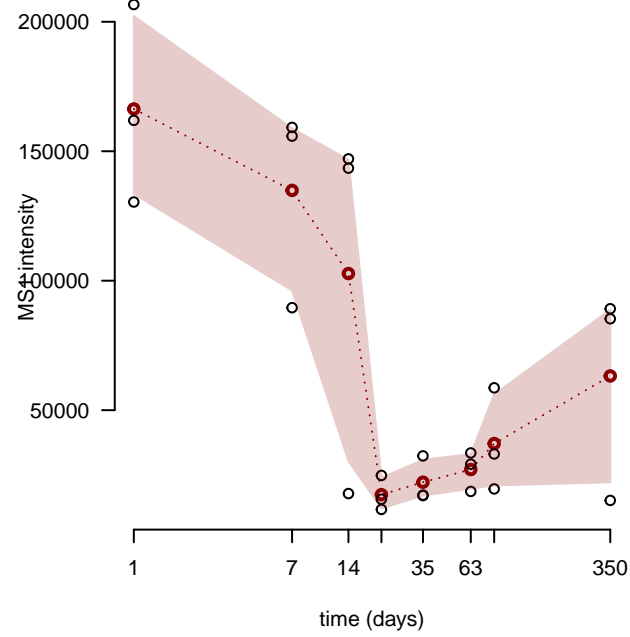

**Q3UTJ2**  
**GN=Sorbs2**  
sorbin and SH3 domain containing 2

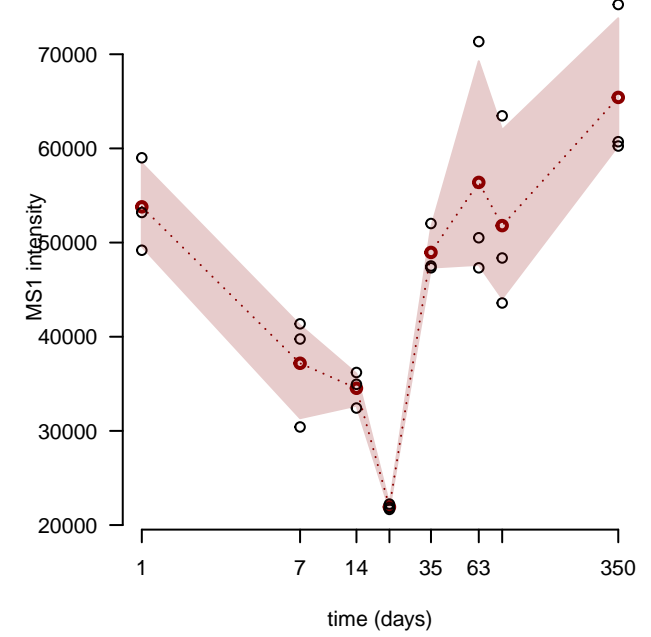

**Q3UTQ7**  
**GN=Prdm10**  
PR domain containing 10

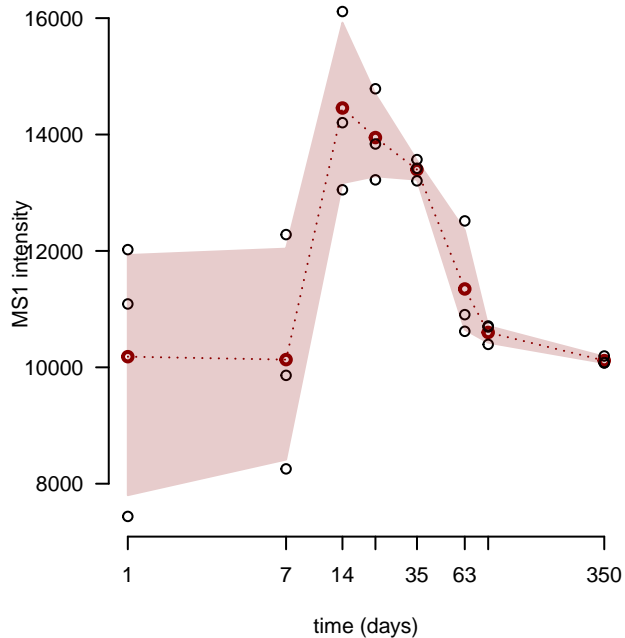

**Q3UTY6**  
**GN=Thsd4**  
thrombospondin, type I, domain containin ...

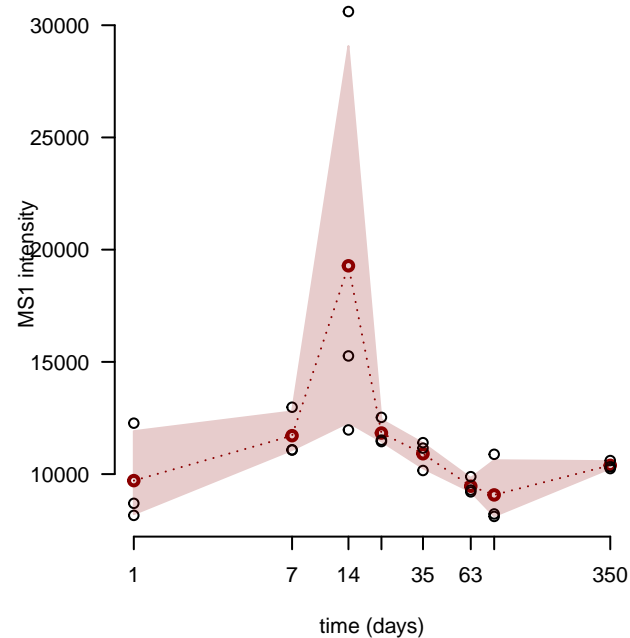

**Q3UTZ3**  
**GN=MAP11**

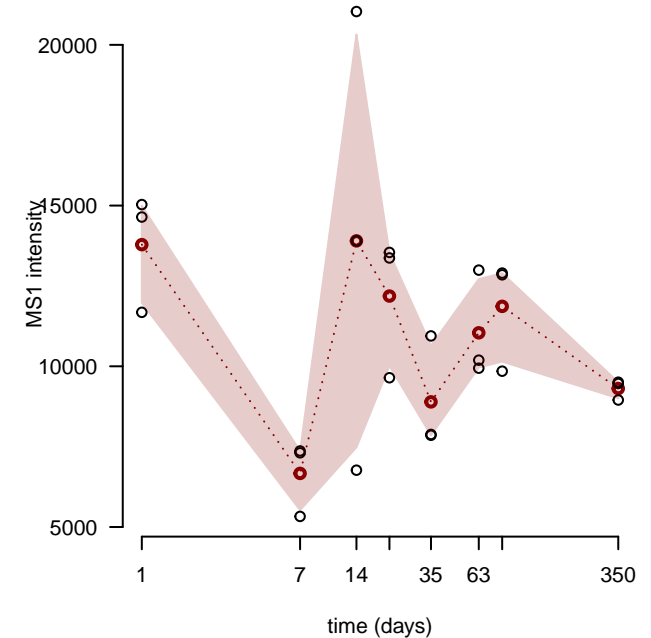

**Q3UU96**  
GN=Cdc42bpa  
CDC42 binding protein kinase alpha

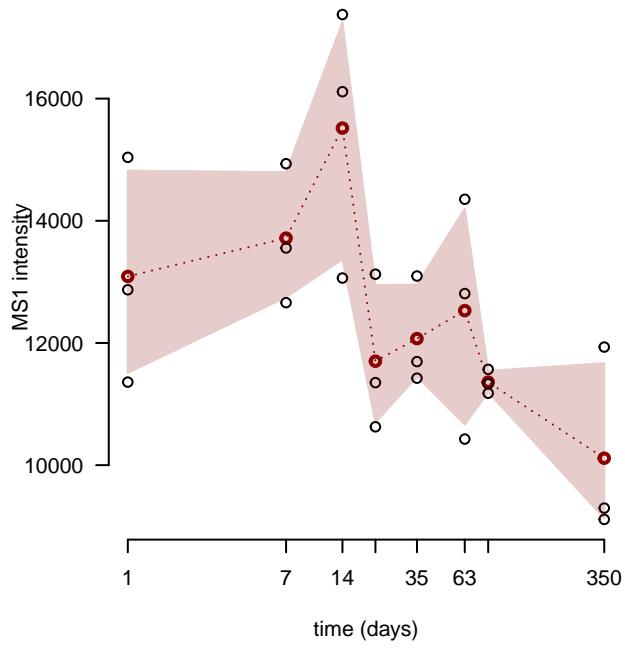

**Q3UUG6**  
GN=Tbc1d24  
TBC1 domain family, member 24

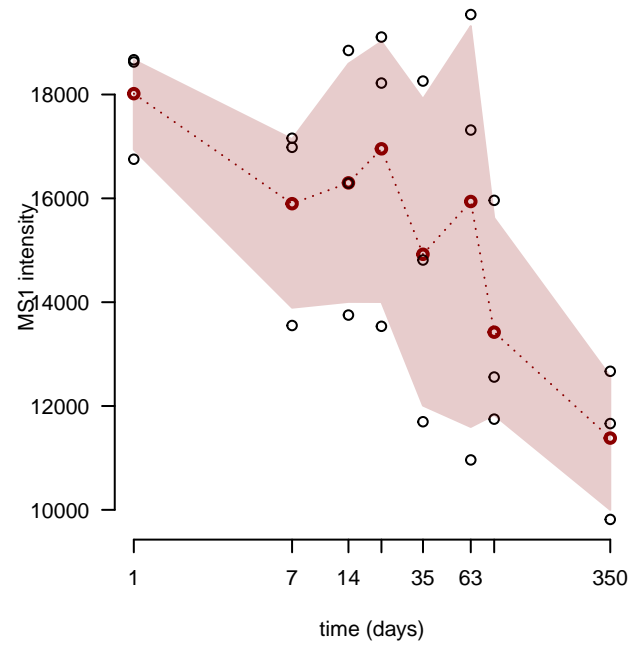

**Q3UUI3**  
GN=Them4  
thioesterase superfamily member 4

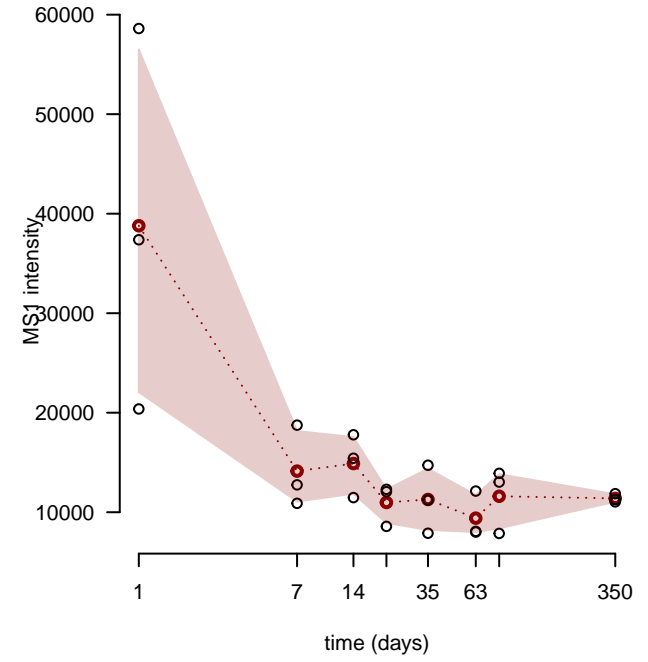

**Q3UUJ4**  
GN=Strada  
STE20-related kinase adaptor alpha

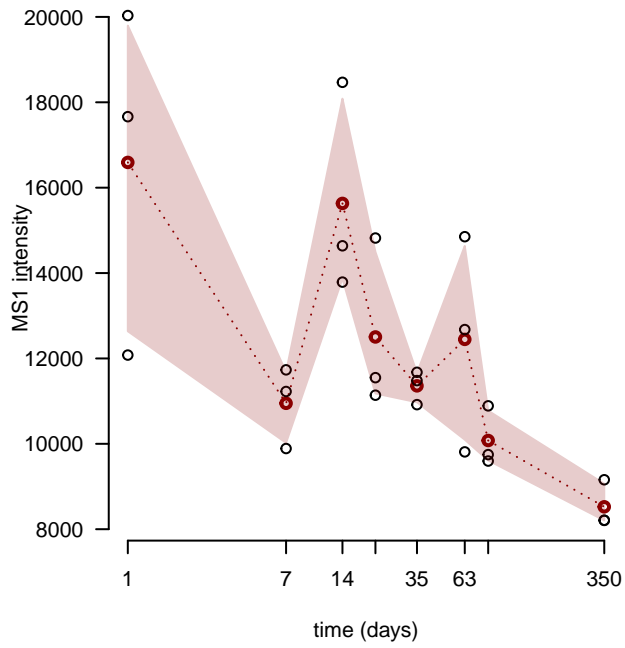

**Q3UUQ7**  
GN=Pgap1  
post-GPI attachment to proteins 1

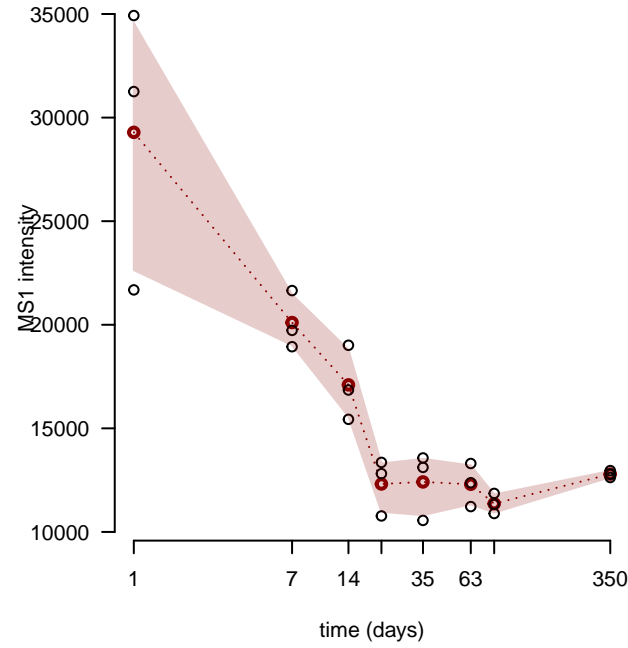

**Q3UV17**  
GN=Krt76  
keratin 76

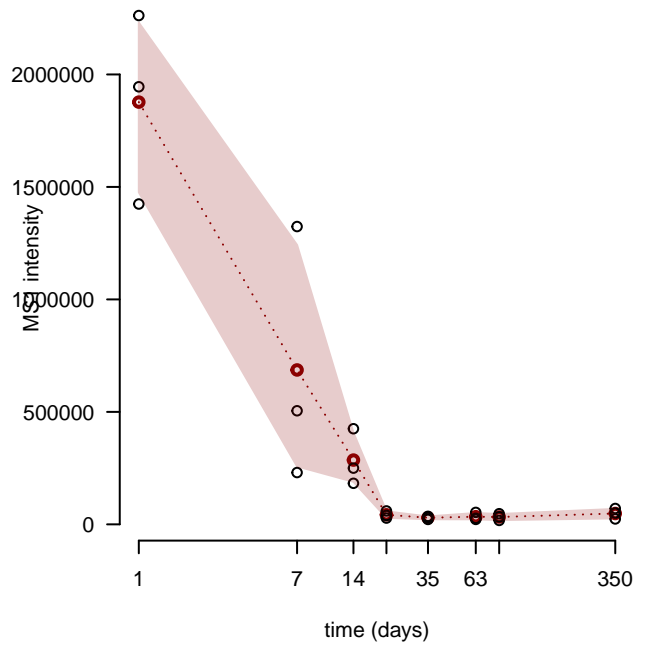

**Q3UV70**  
GN=Pdp1  
pyruvate dehydrogenase phosphatase catal ...

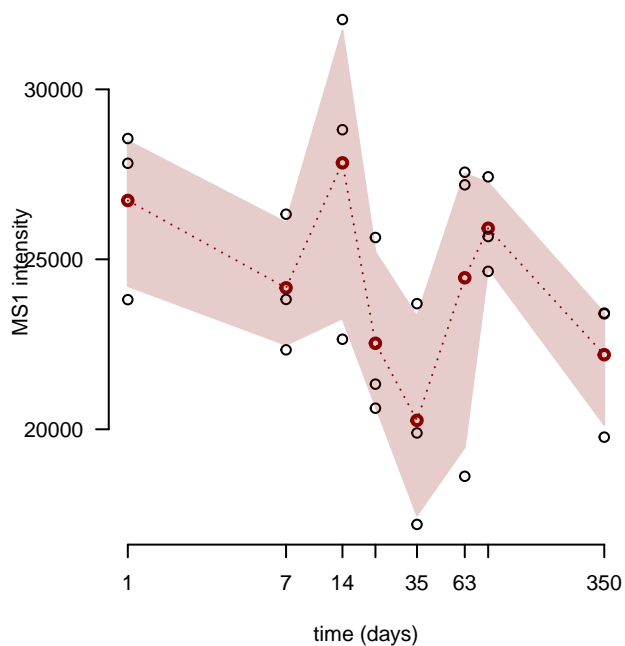

**Q3UVG3**  
GN=Fam91a1  
family with sequence similarity 91, memb ...

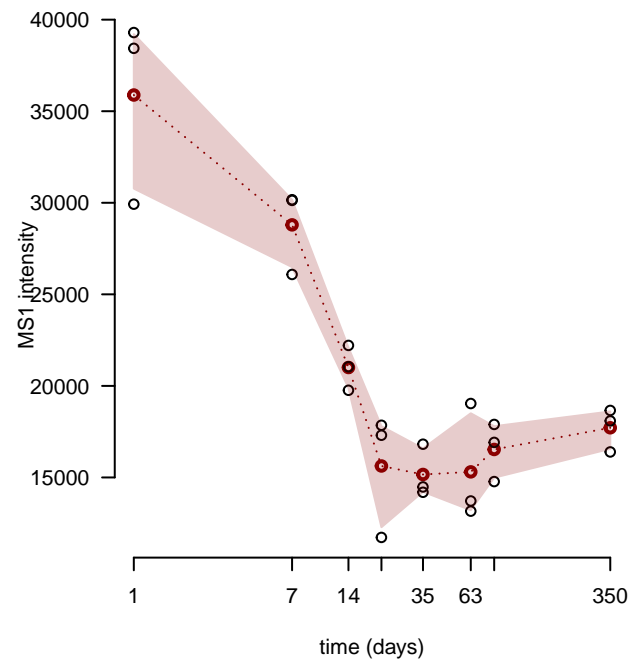

**Q3UVK0**  
GN=Ermp1  
endoplasmic reticulum metallopeptidase 1

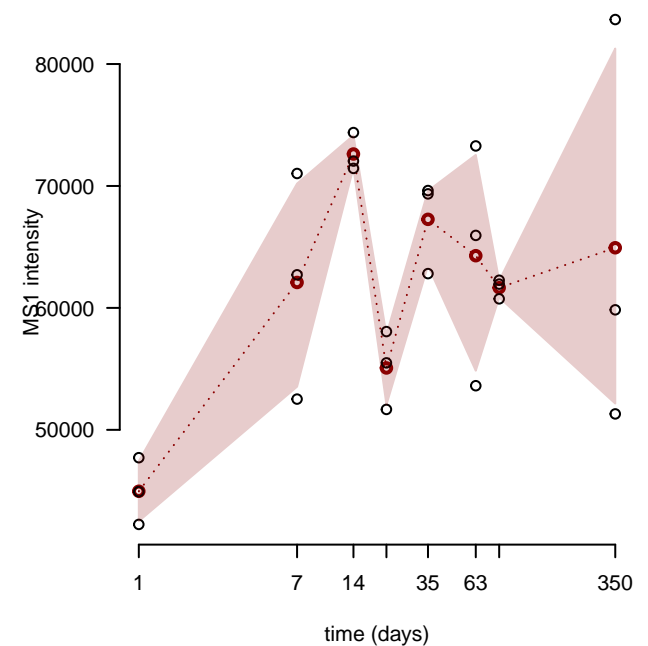

**Q3UVL4**  
**GN=Vps51**  
VPS51 GARP complex subunit

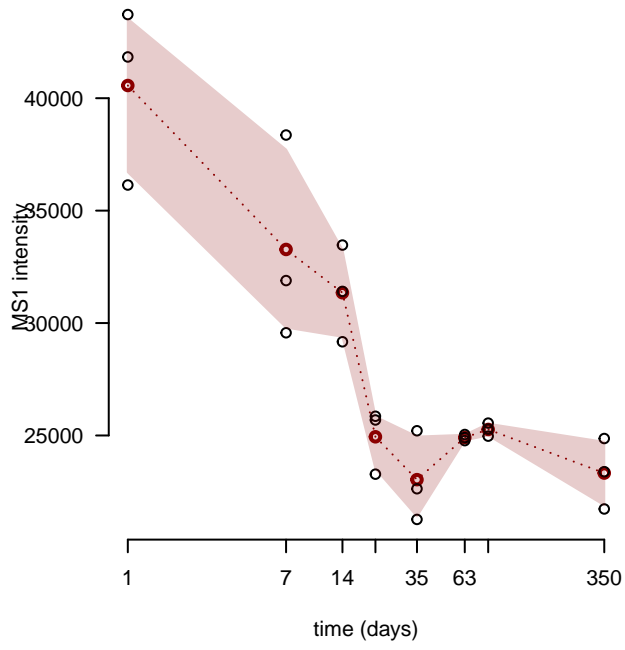

**Q3UW53**  
**GN=Fam129a**

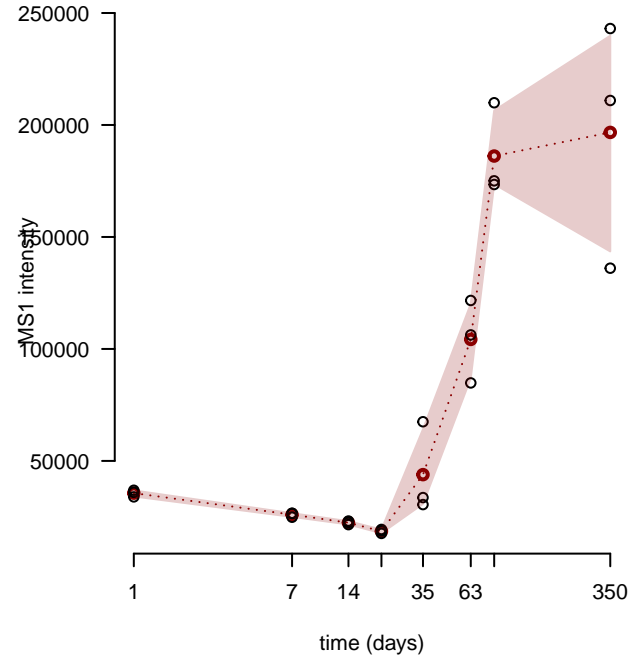

**Q3UWR2**  
**GN=Khdc1a**  
KH domain containing 1A

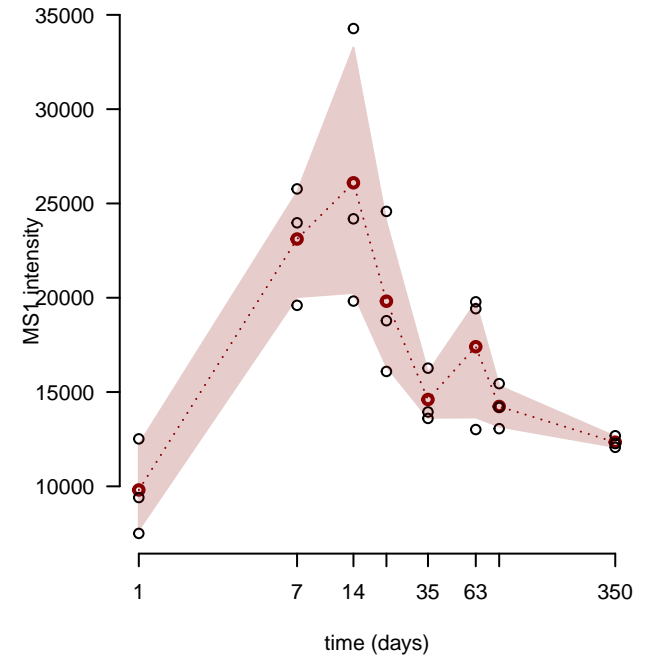

**Q3UX10**  
**GN=Tubal3**  
tubulin, alpha-like 3

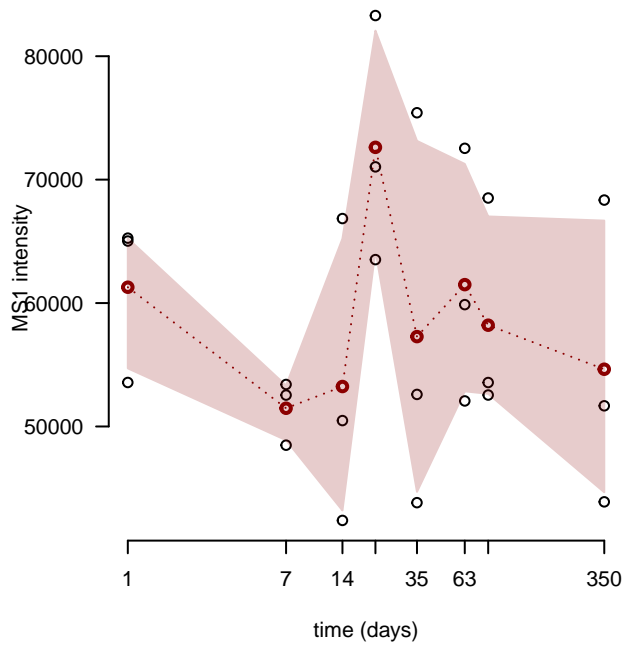

**Q3UXZ9**  
**GN=Kdm5a**  
lysine (K)-specific demethylase 5A

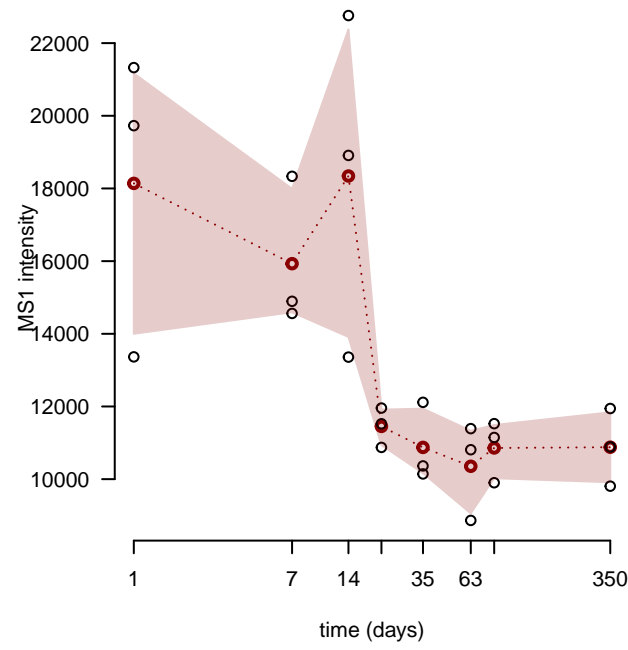

**Q3UY34**  
**GN=Custos**

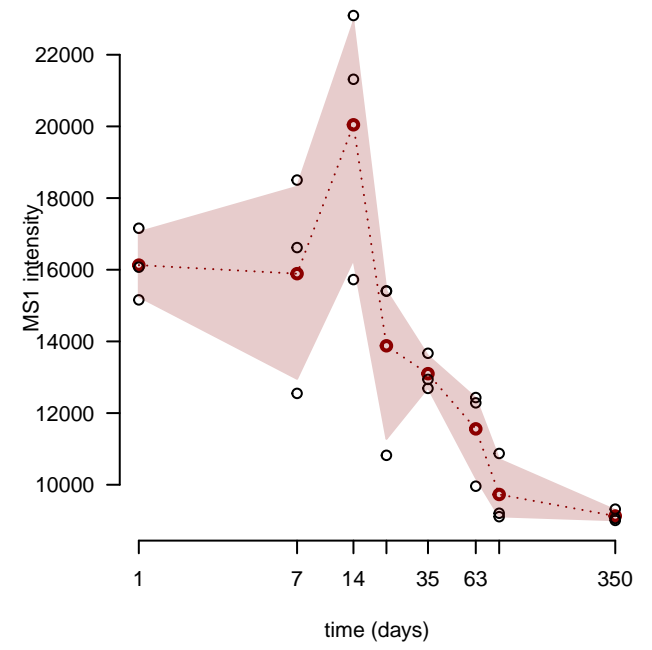

**Q3UYC0**  
**GN=Ppm1h**  
protein phosphatase 1H (PP2C domain cont ...

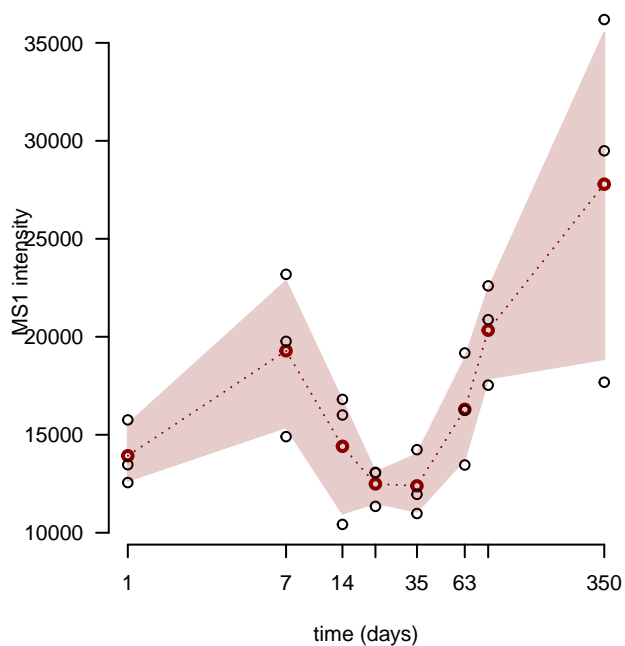

**Q3UYG1**  
**GN=Ccdc160**  
coiled-coil domain containing 160

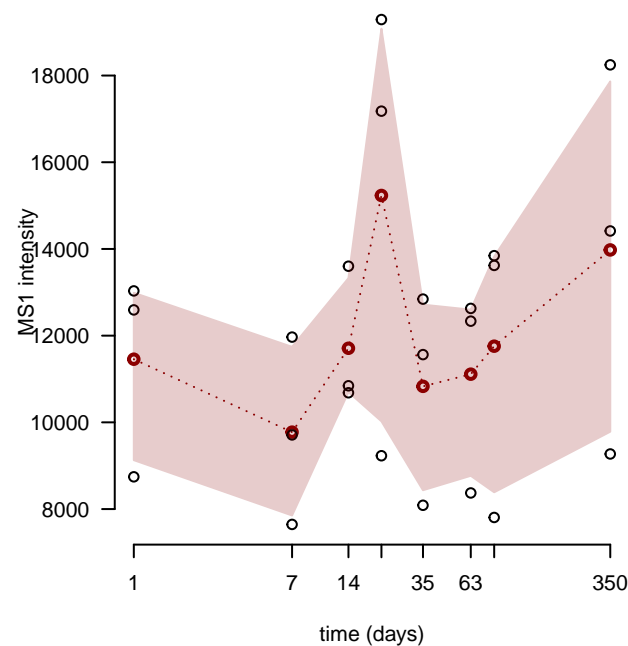

**Q3UYI5**  
**GN=Rgl3**  
ral guanine nucleotide dissociation stim ...

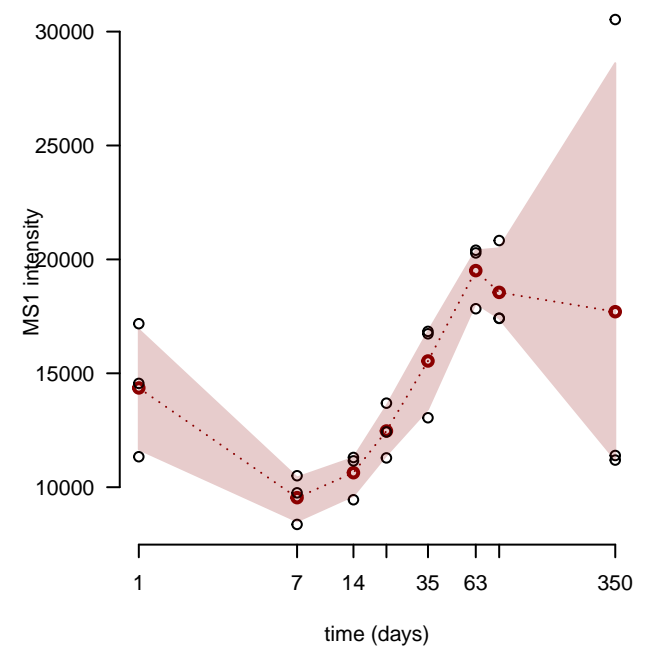

**Q3UYV9**  
**GN=Ncbp1**  
nuclear cap binding protein subunit 1

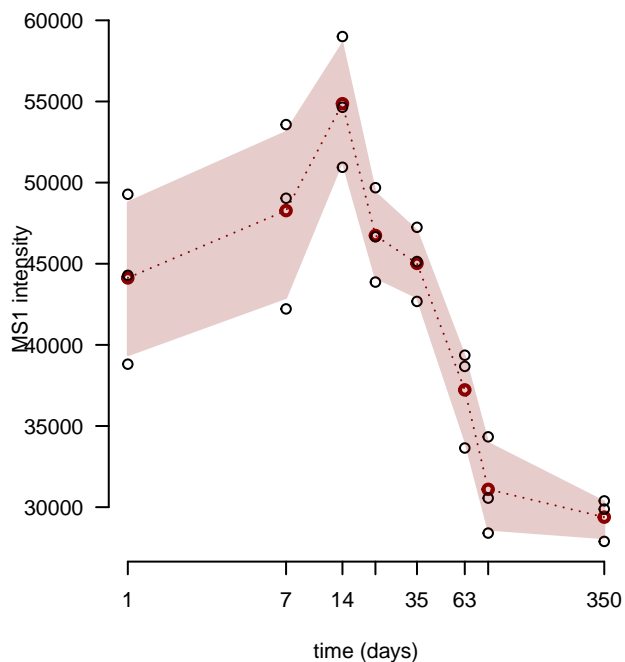

**Q3UZ01**  
**GN=Rnpc3**  
RNA-binding region (RNP1, RRM) containin ...

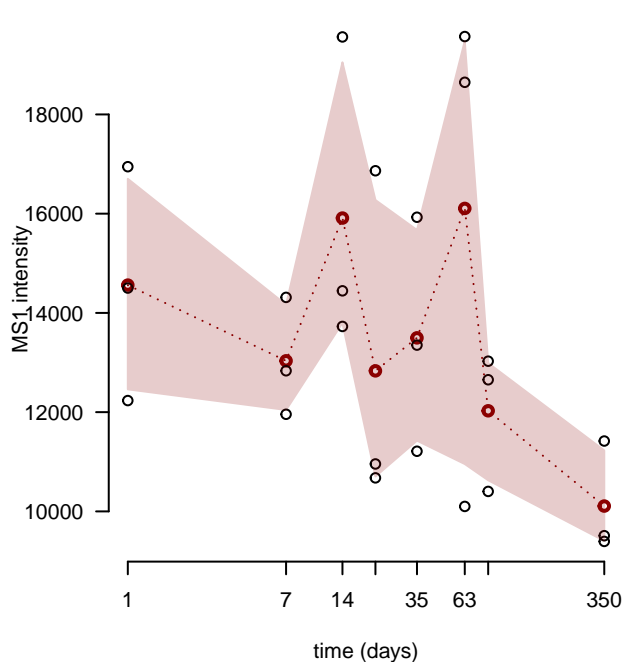

**Q3UZ09**  
**GN=C1rl**  
complement component 1, r subcomponent-I ...

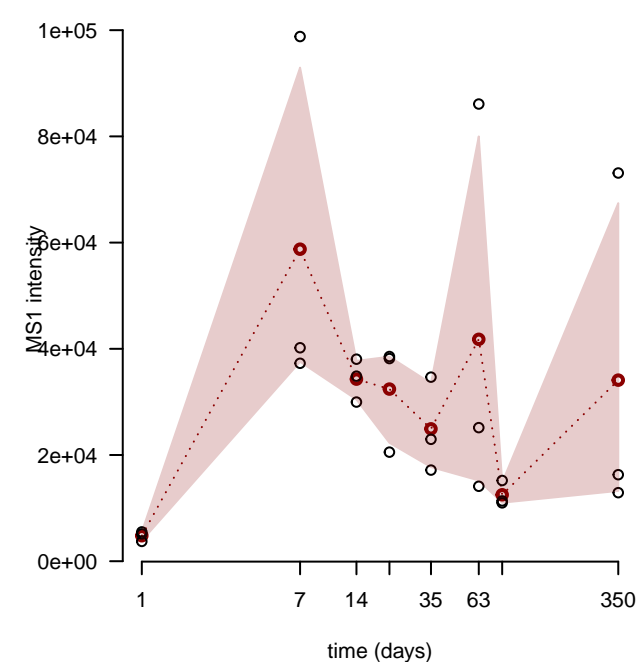

**Q3UZ18**  
**GN=Ice2**  
interactor of little elongation complex ...

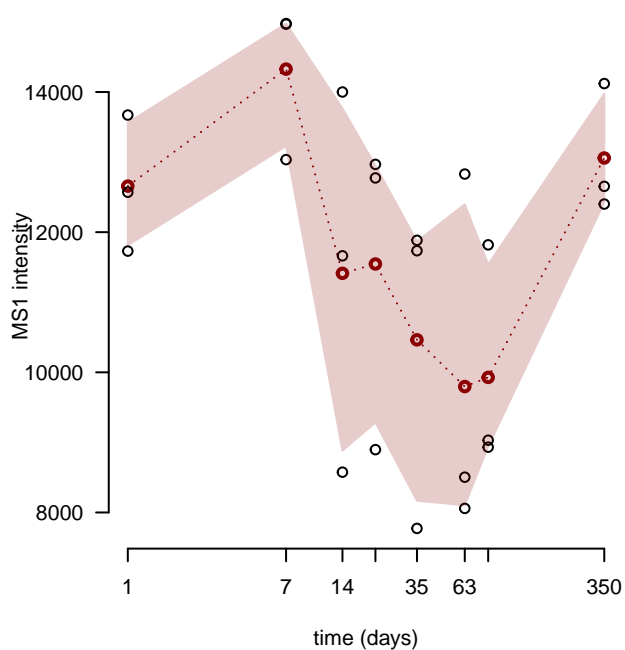

**Q3UZ39**  
**GN=Lrrfp1**  
leucine rich repeat (in FLII) interactin ...

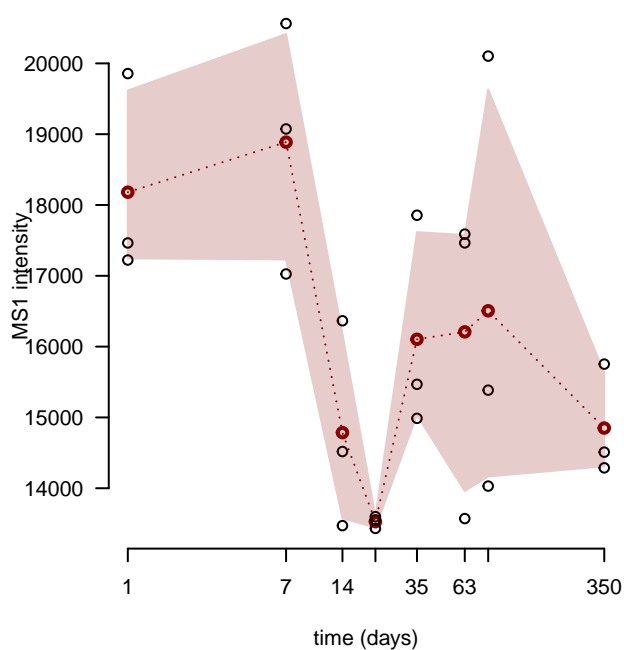

**Q3UZA1**  
**GN=Rcsd1**  
RCS domain containing 1

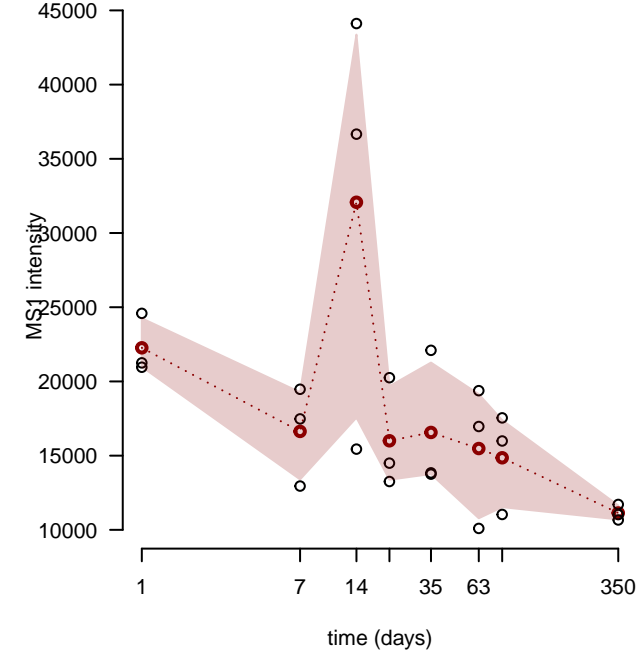

**Q3UZB0**  
**GN=Armcx5**  
armadillo repeat containing, X-linked 5

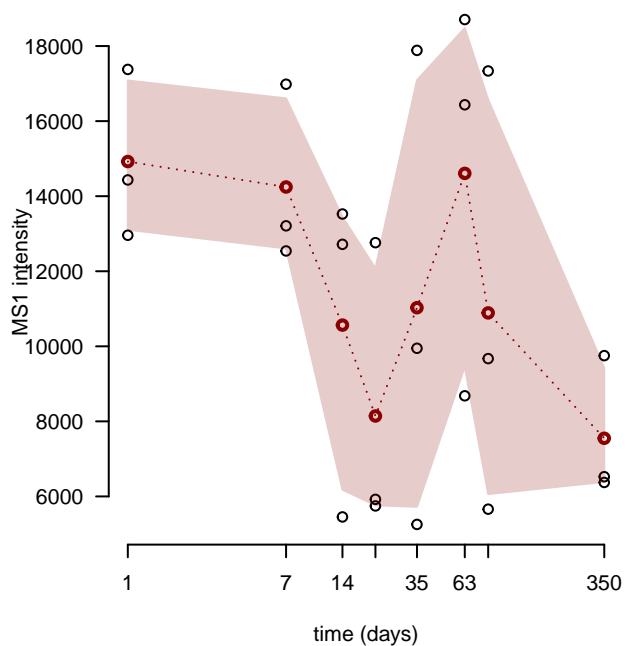

**Q3UZP0**  
**GN=Marvel2**  
MARVEL (membrane-associating) domain con ...

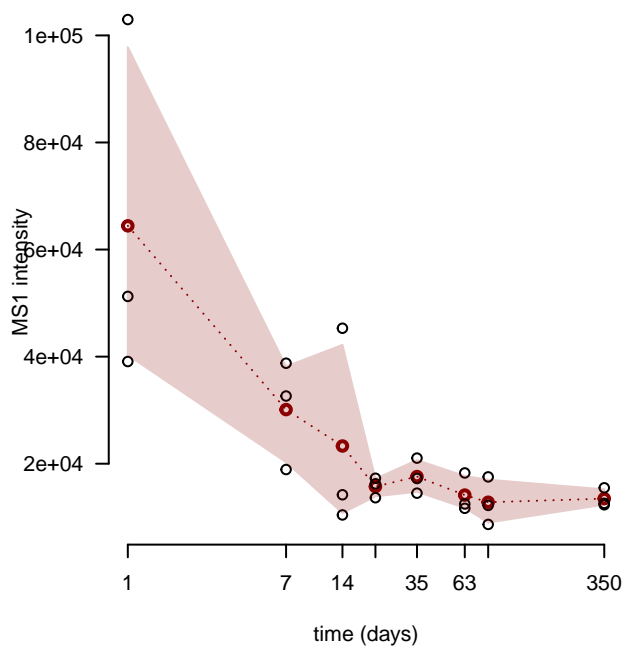

**Q3UZW7**  
**GN=Eef2kmt**  
eukaryotic elongation factor 2 lysine me ...

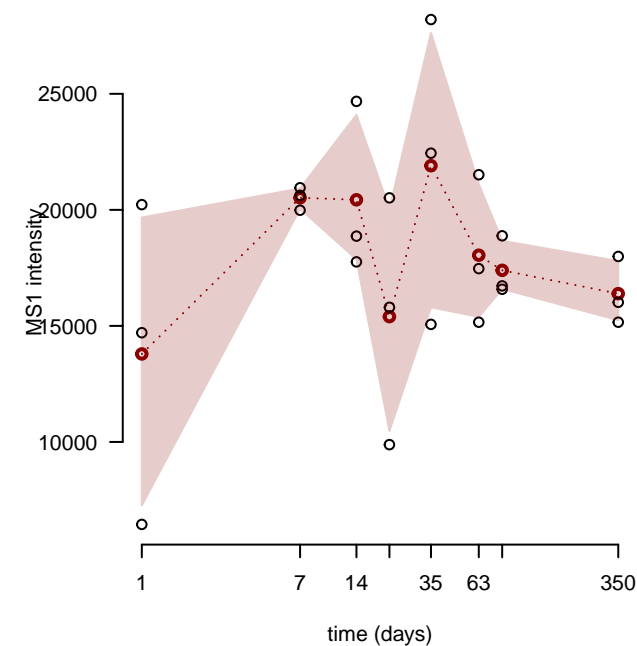

**Q3UZZ6**  
**GN=Sult1d1**  
sulfotransferase family 1D, member 1

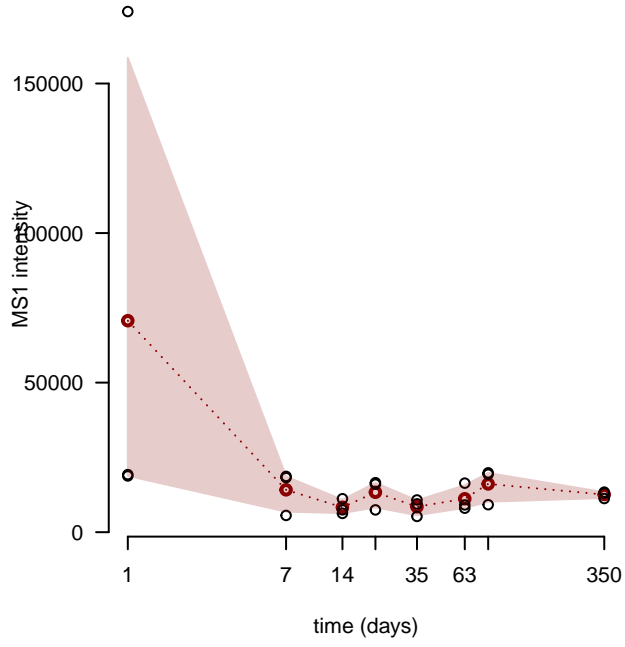

**Q3V009**  
**GN=Tmed1**  
transmembrane p24 trafficking protein 1

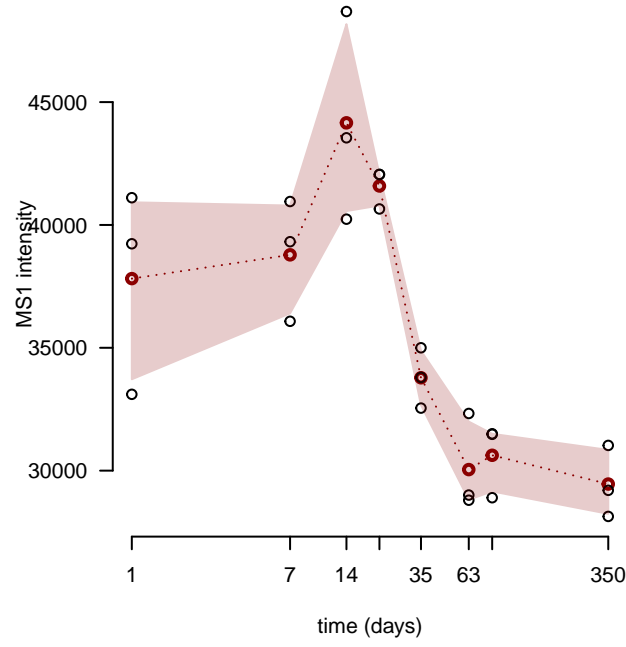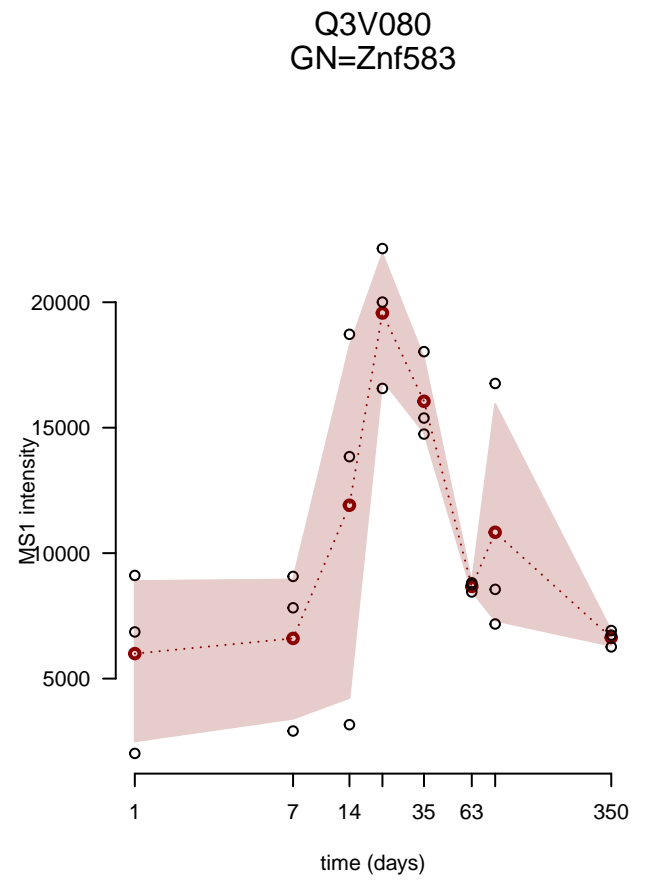

**Q3V0C1**  
**GN=Zmat1**  
zinc finger, matrin type 1

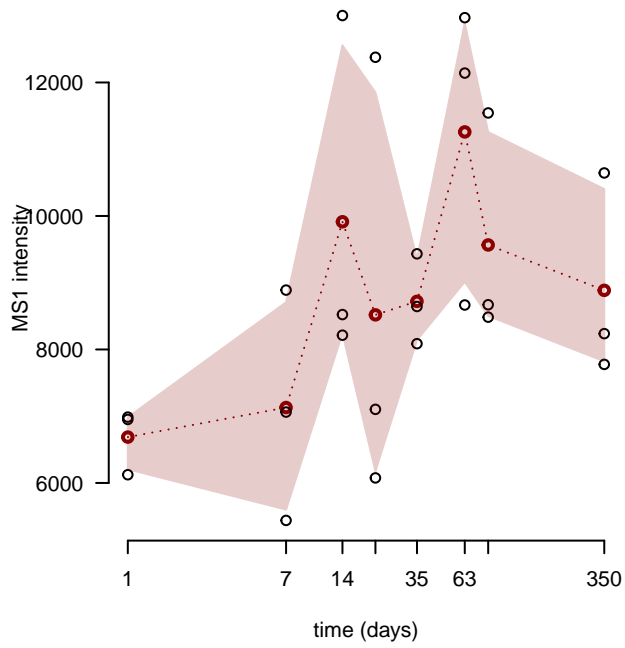

**Q3V0C5**  
**GN=Usp48**  
ubiquitin specific peptidase 48

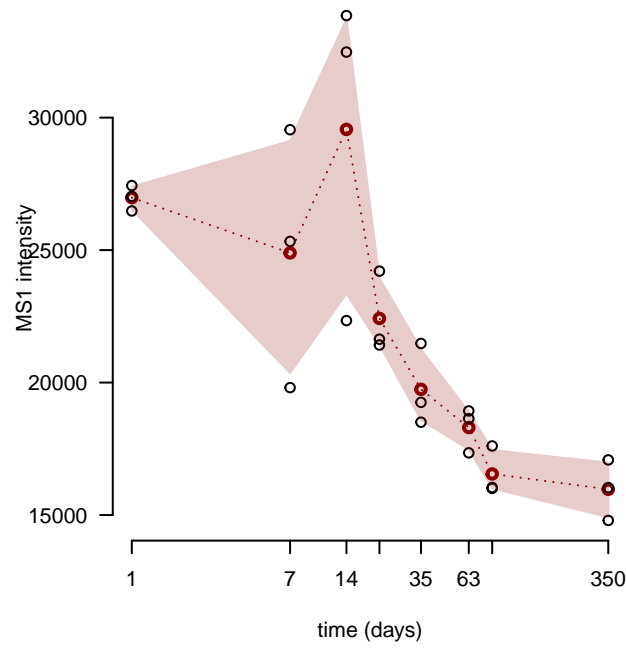

**Q3V0J1**  
**GN=Tmem237**  
transmembrane protein 237

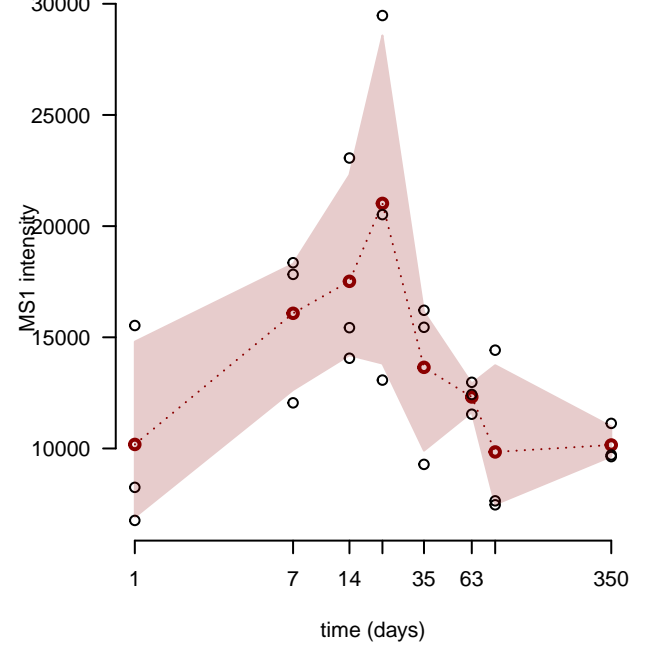

**Q3V0K9**  
**GN=Pls1**  
plastin 1 (l-isoform)

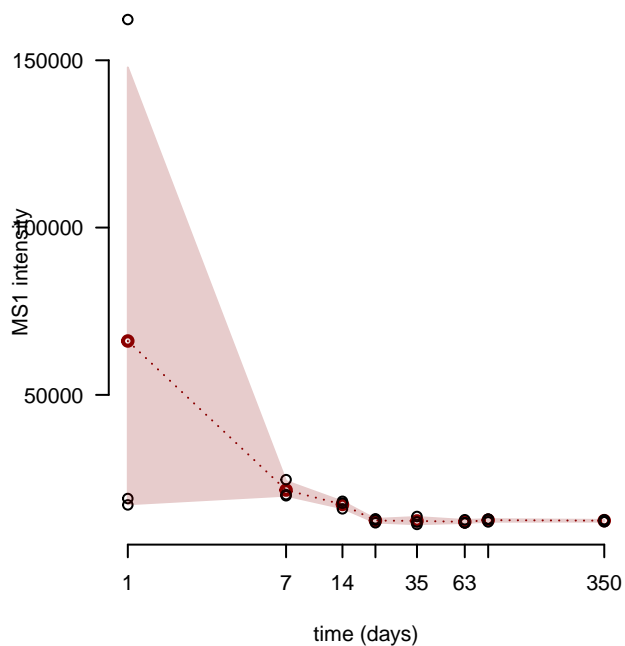

**Q3V132**  
**GN=Slc25a31**  
solute carrier family 25 (mitochondrial ...

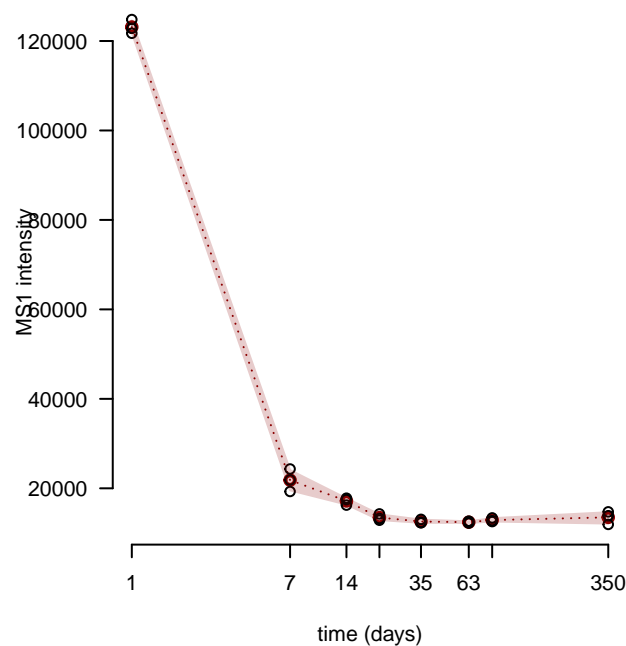

**Q3V1H1**  
**GN=Ckap2**  
cytoskeleton associated protein 2

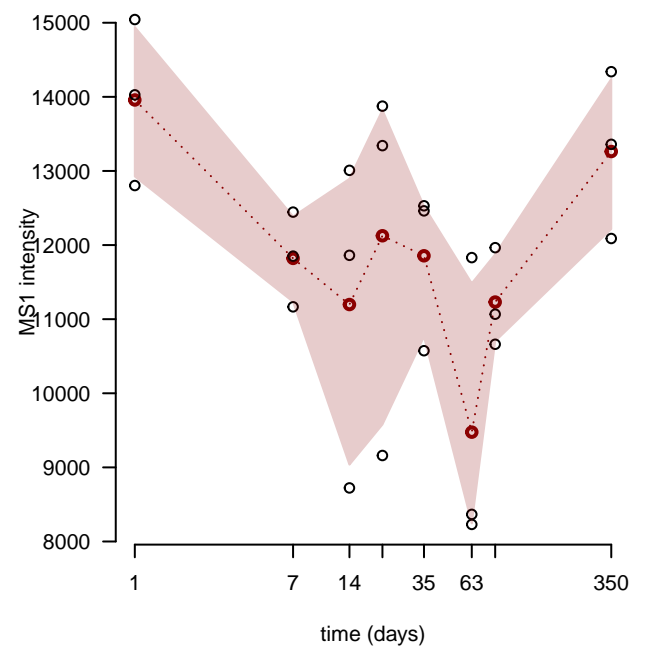

**Q3V1L4**  
**GN=Nt5c2**  
5'-nucleotidase, cytosolic II

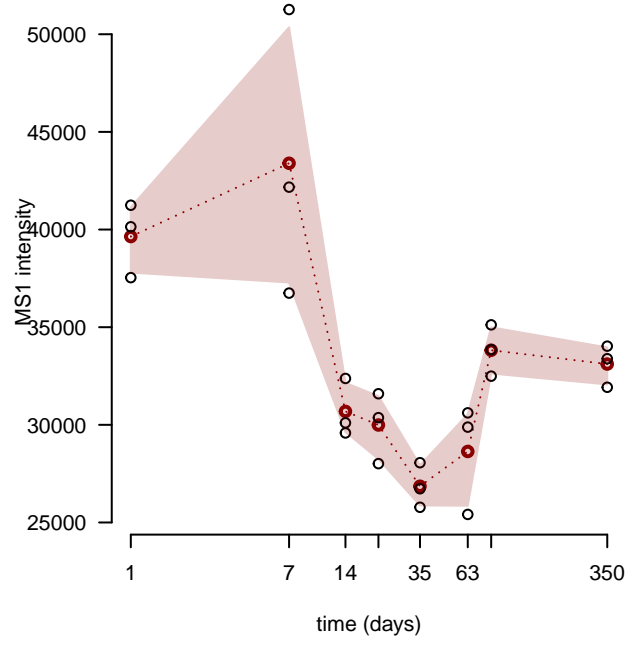

**Q3V1M1**  
**GN=Igsf10**  
immunoglobulin superfamily, member 10

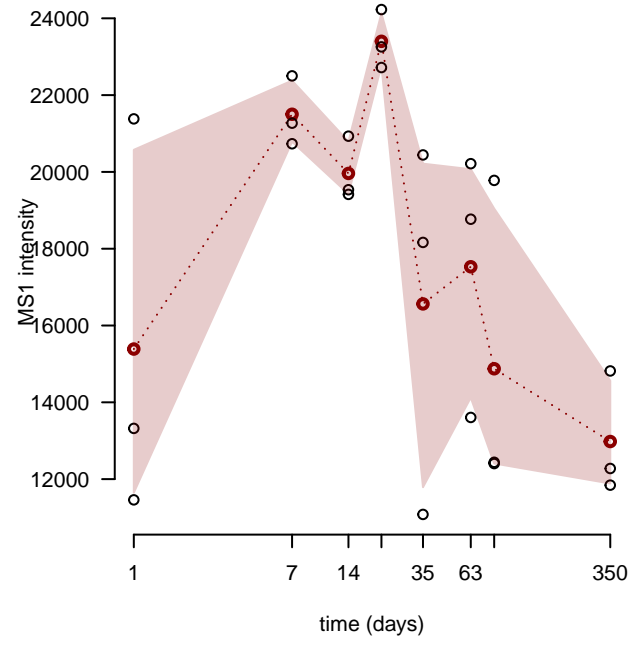

**Q3V1T4**  
**GN=P3h1**  
prolyl 3-hydroxylase 1

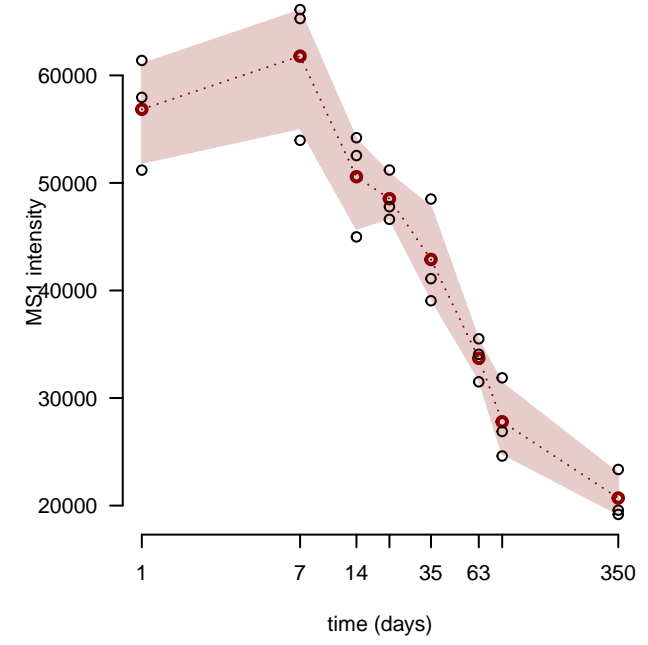

**Q3V1V3**  
**GN=Esf1**  
ESF1 nucleolar pre-rRNA processing prote ...

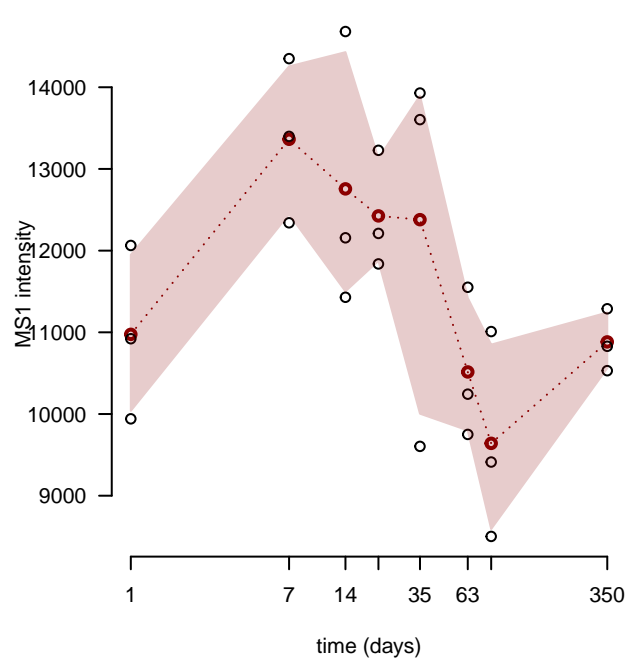

**Q3V2C1**  
**GN=Krtap9-3**  
keratin associated protein 9-3

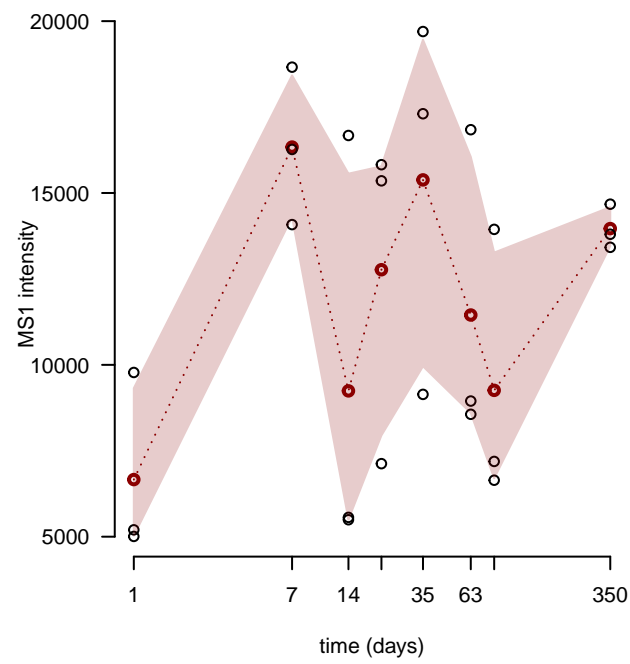

**Q3V300**  
**GN=Kif22**  
kinesin family member 22

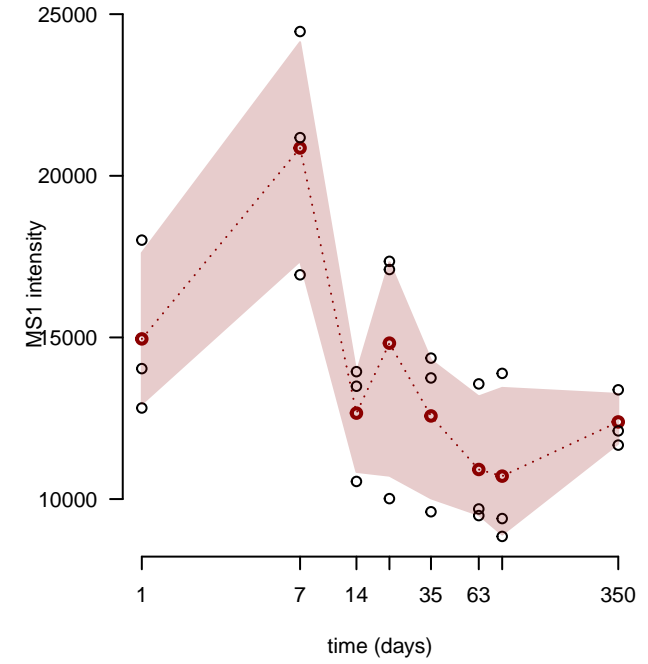

**Q3V384**  
**GN=Afg1l**  
AFG1 like ATPase

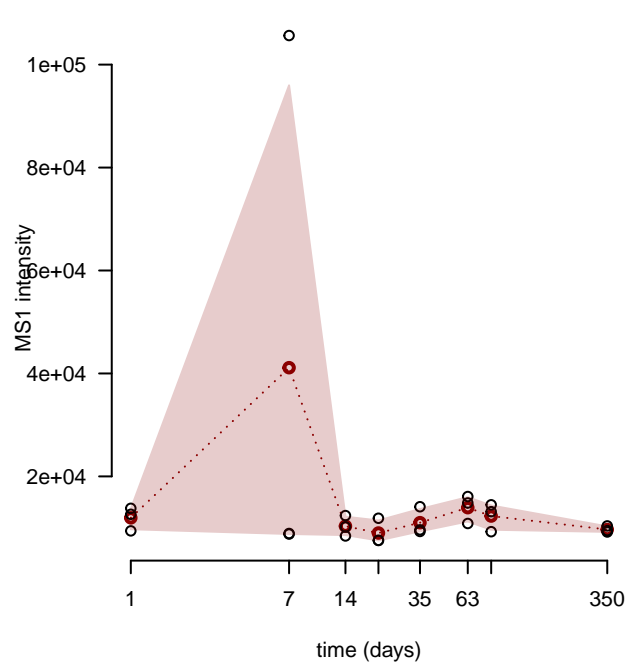

**Q3V3N7**  
**GN=Bbs1**  
Bardet-Biedl syndrome 1 (human)

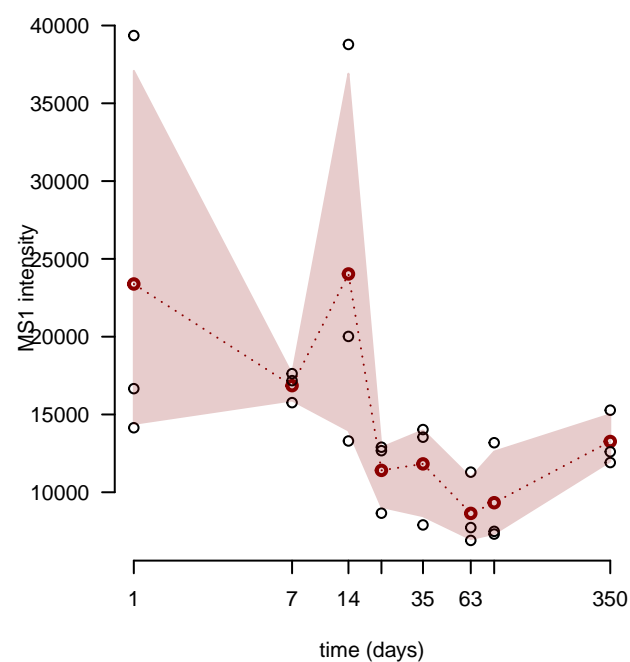

**Q3V3Q7**  
**GN=Pacs2**  
phosphofurin acidic cluster sorting prot ...

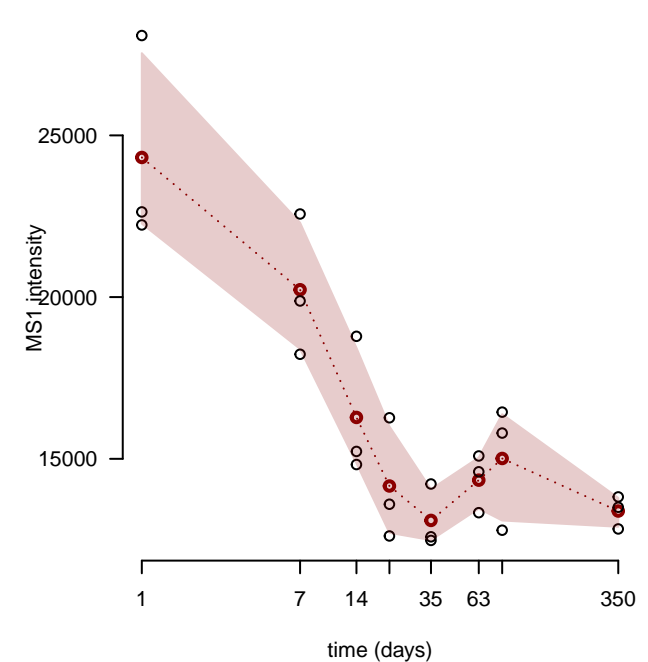

**Q3V3R1**  
**GN=Mthfd1l**  
methylenetetrahydrofolate dehydrogenase ...

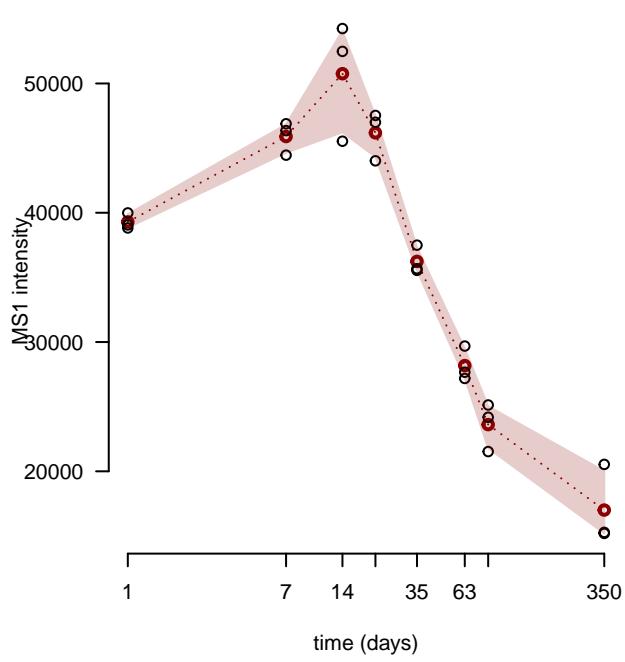

**Q3V3R4**  
**GN=Itga1**  
integrin alpha 1

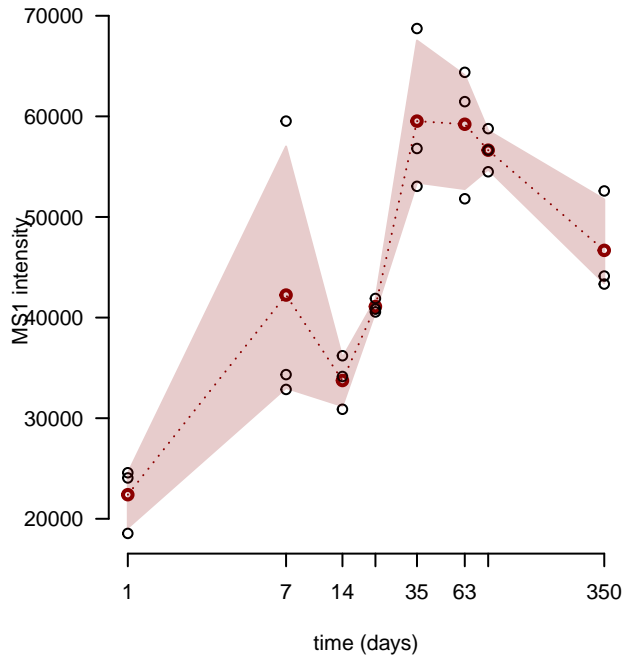

**Q3V4B5**  
**GN=Commd6**  
COMM domain containing 6

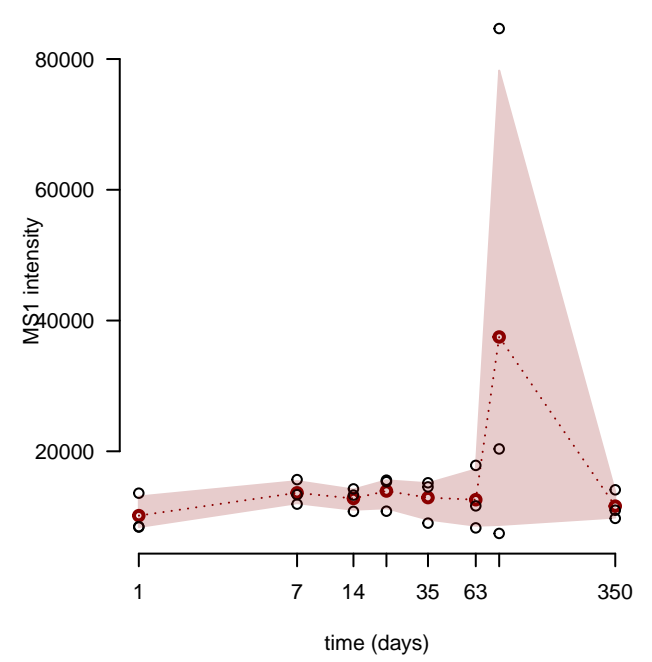

**Q3ZK22**  
**GN=Vezt**  
vezatin, adherens junctions transmembran ...

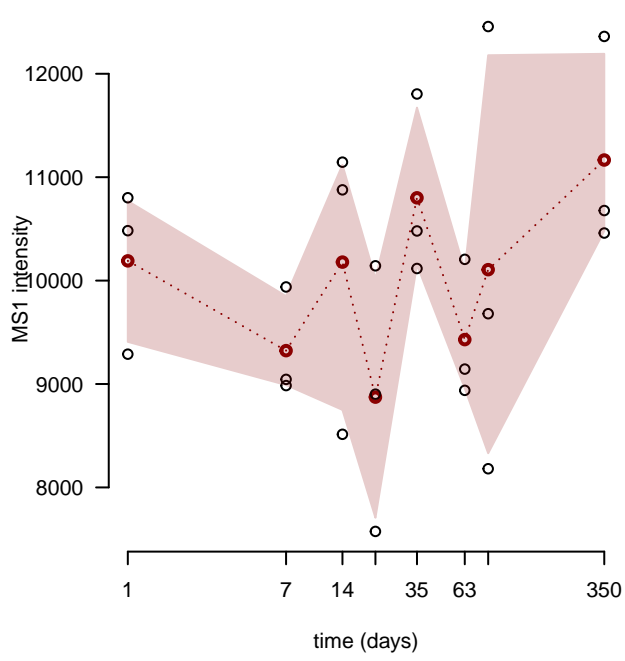

**Q45VK7**  
**GN=Dync2h1**  
dynein cytoplasmic 2 heavy chain 1

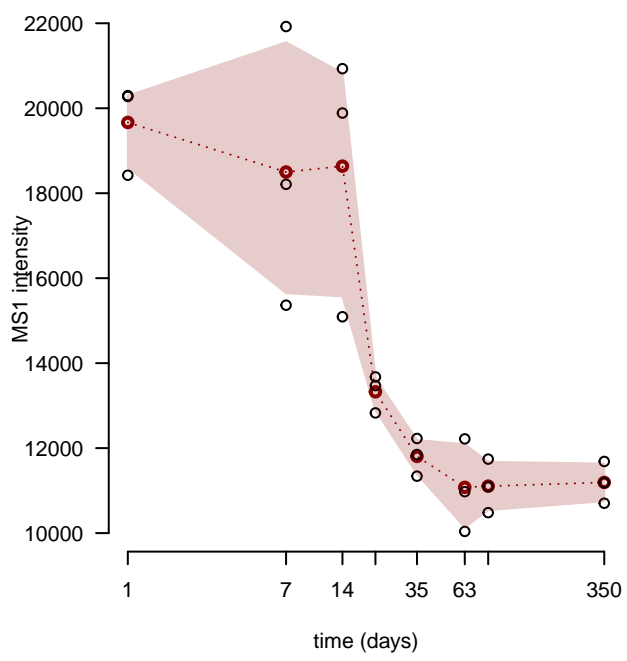

**Q497H0**  
**GN=Zfand3**  
zinc finger, AN1-type domain 3

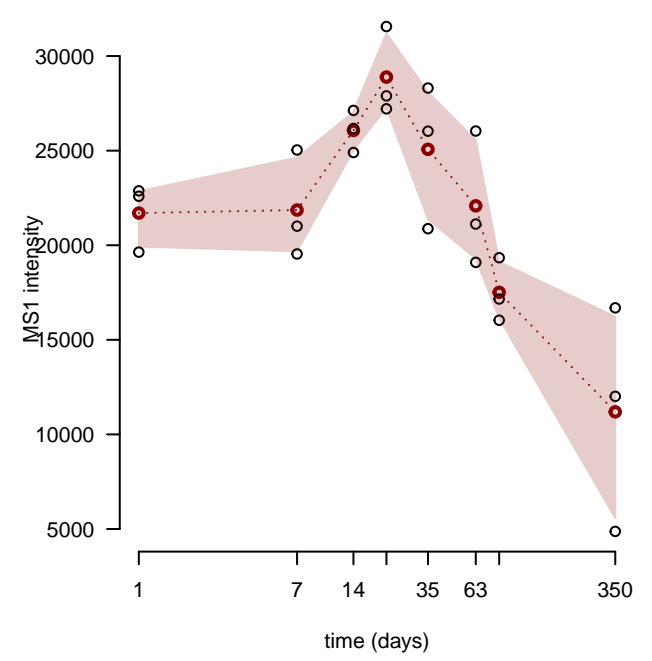

**Q497I4**  
**GN=Krt35**  
keratin 35

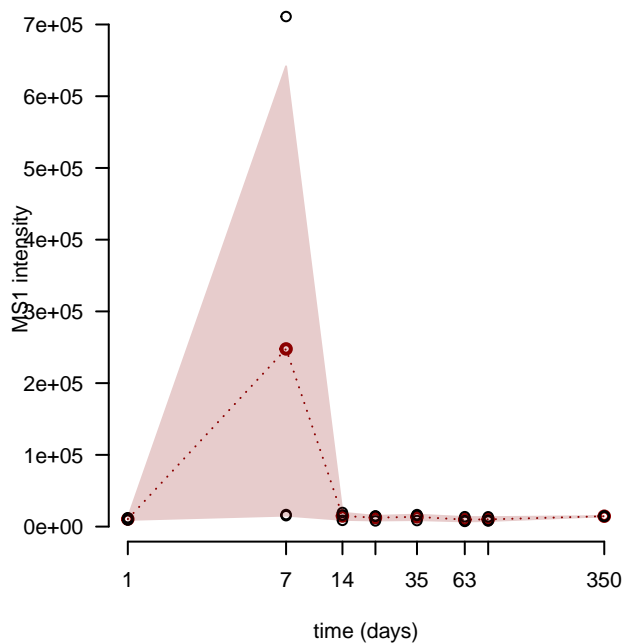

**Q497V5**  
**GN=Srbd1**  
S1 RNA binding domain 1

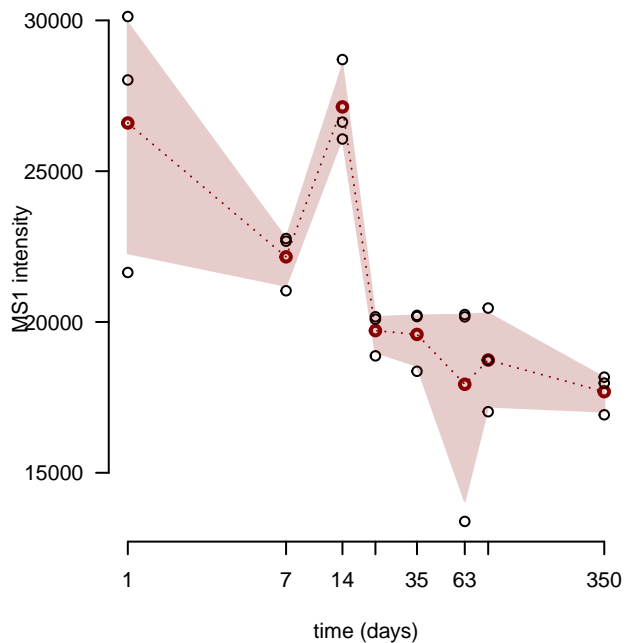

**Q499D0**  
**GN=Foxn3**  
forkhead box N3

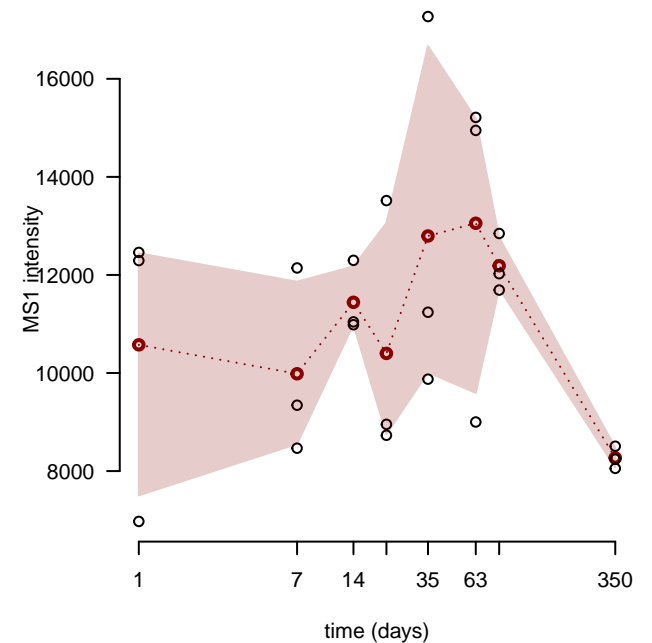



**Q499X9**  
**GN=Mars2**  
methionine-tRNA synthetase 2 (mitochondr ...

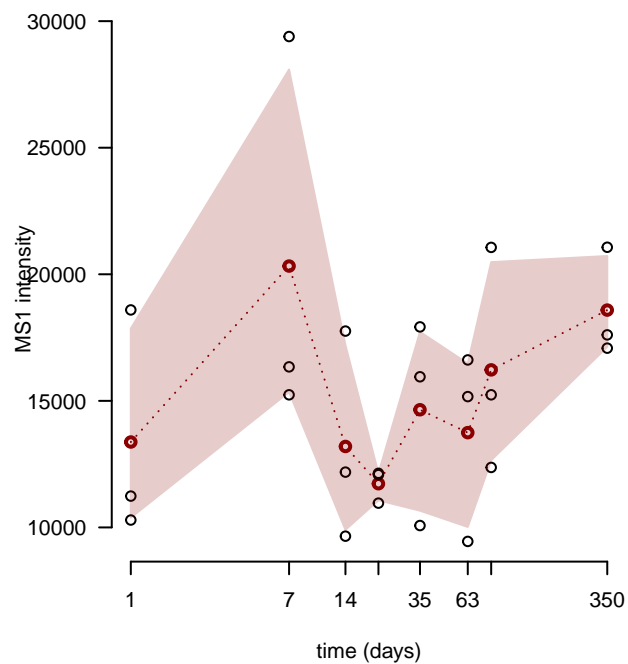

**Q4ACU6**  
**GN=Shank3**  
SH3 and multiple ankyrin repeat domains ...

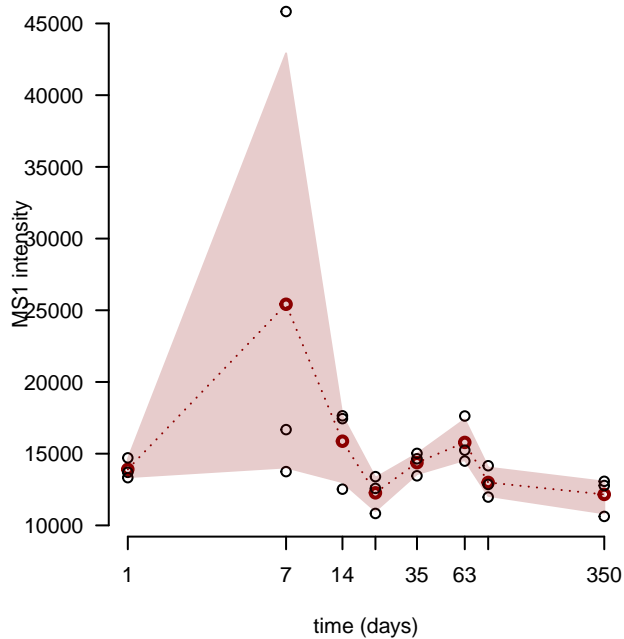

**Q4FK66**  
**GN=Prpf38a**  
PRP38 pre-mRNA processing factor 38 (yea ...

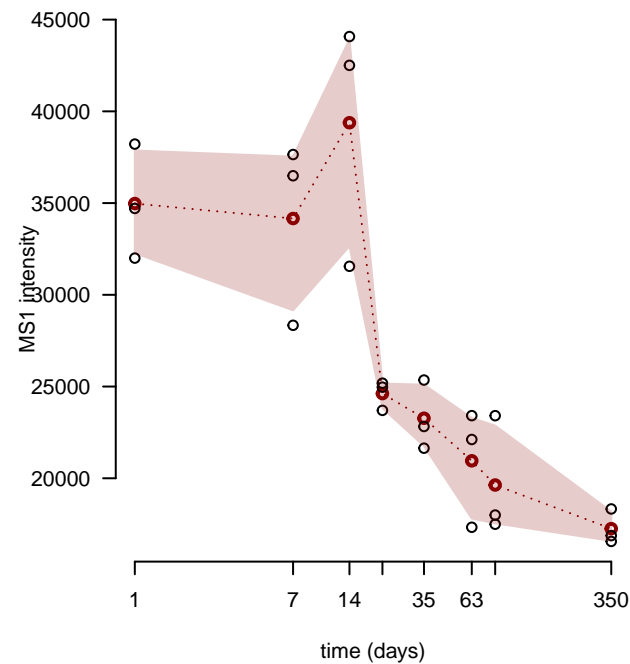

**Q4FZC9**  
**GN=Syne3**  
spectrin repeat containing, nuclear enve ...

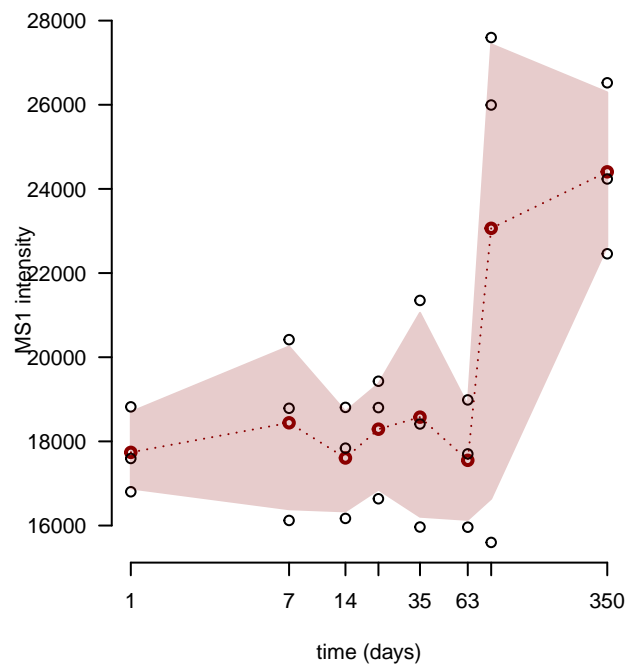

**Q4FZF3**  
**GN=Ddx49**  
DEAD box helicase 49

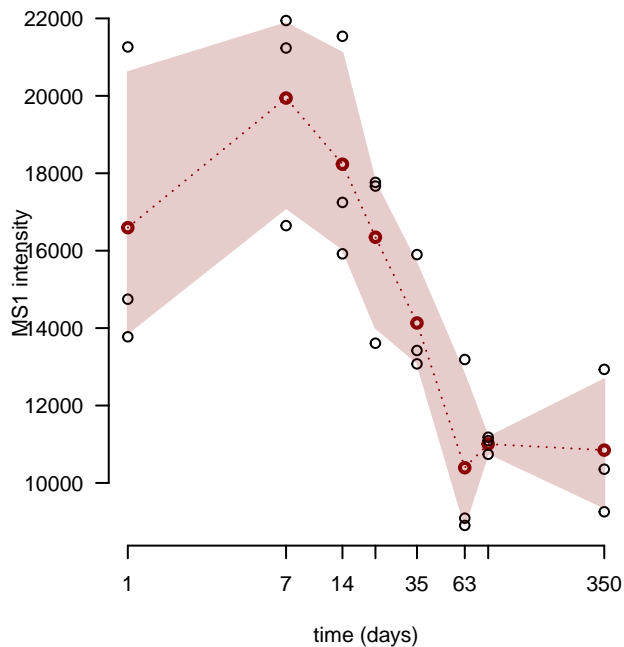

**Q4G5Y1**  
**GN=Klhdc2**  
kelch domain containing 2

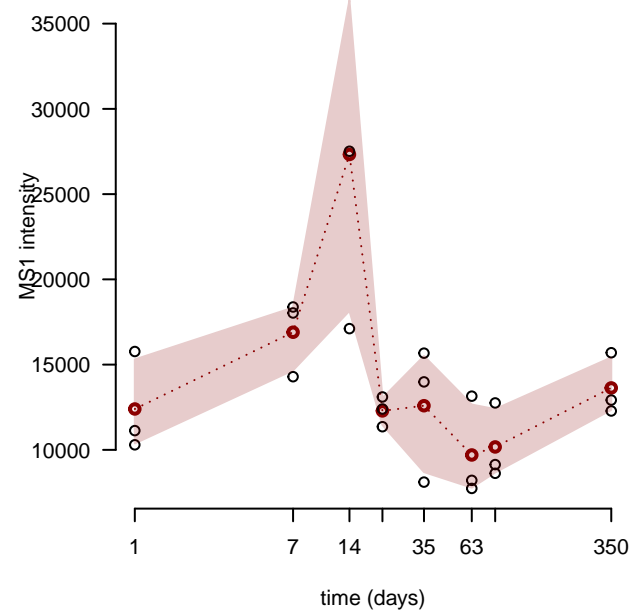

**Q4JIM5**  
**GN=Abl2**  
v-abl Abelson murine leukemia viral onco ...

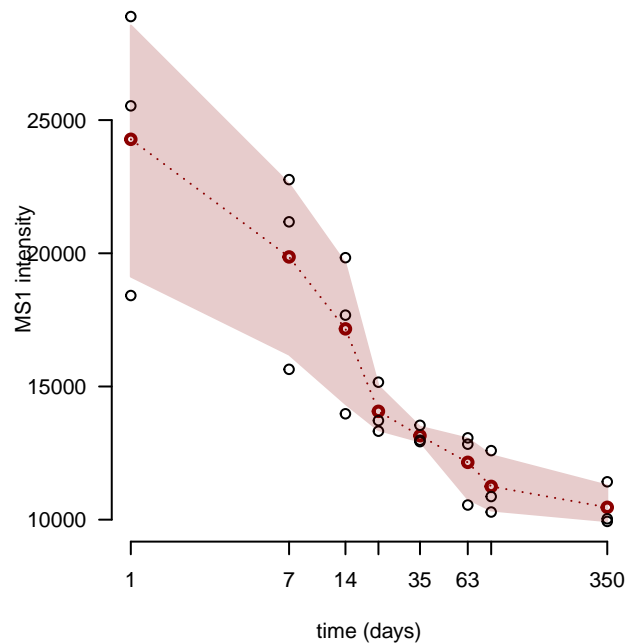

**Q4KML4**  
**GN=Abrac1**  
ABRA C-terminal like

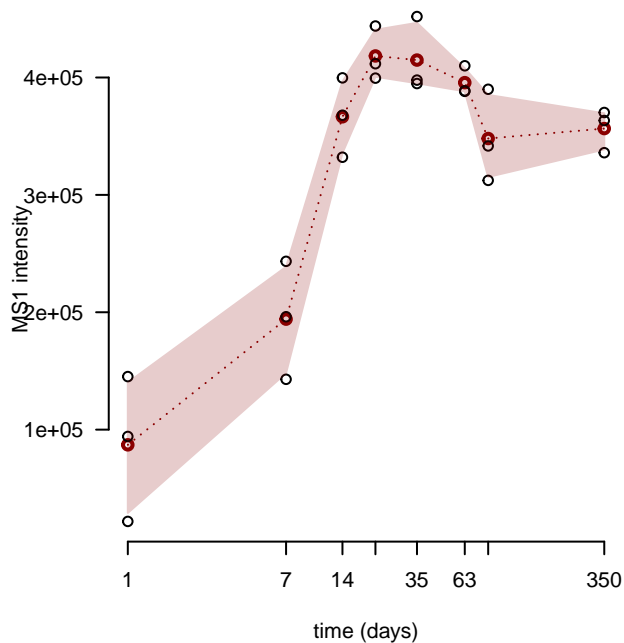

**Q4KMM3**  
**GN=Oxr1**  
oxidation resistance 1

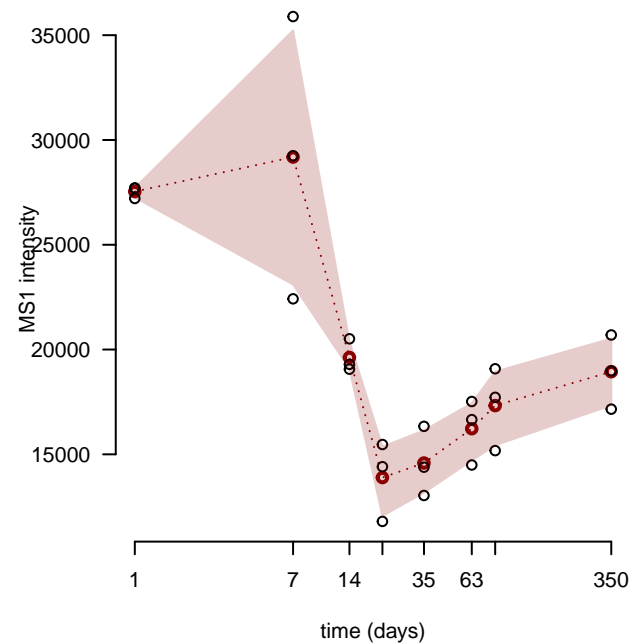

**Q4KWH5**  
**GN=P1ch1**  
phospholipase C, eta 1

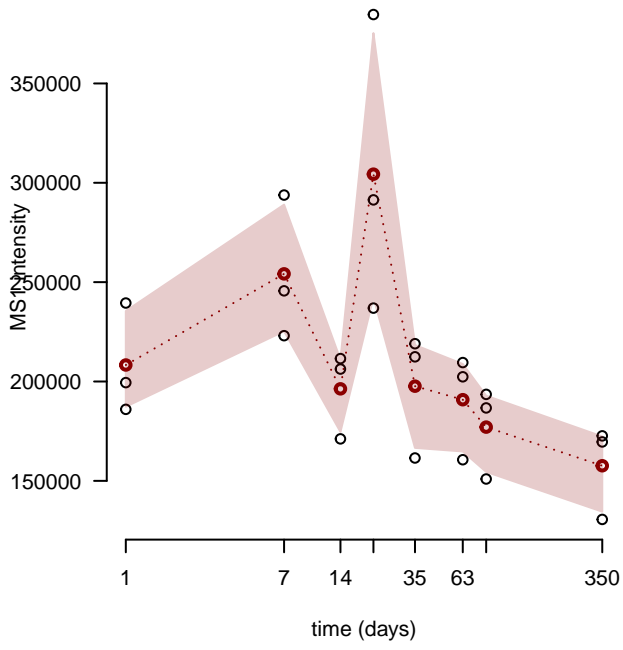

**Q4LDD4**  
**GN=Arap1**  
ArfGAP with RhoGAP domain, ankyrin repea ...

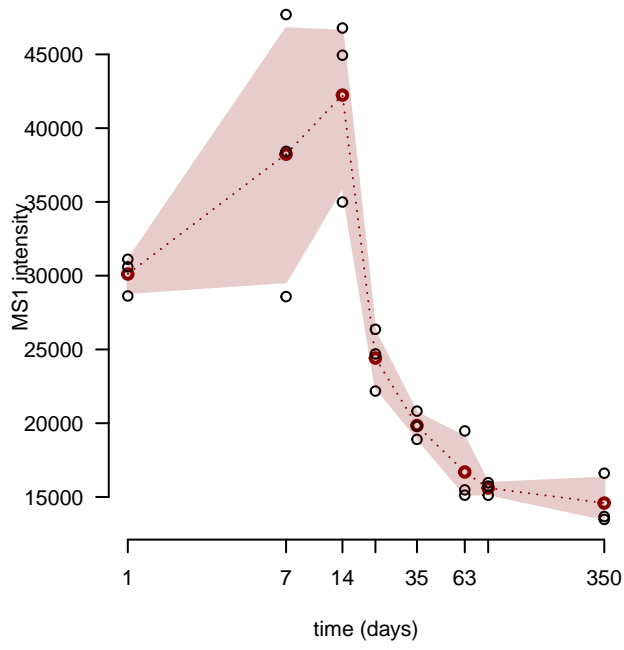

**Q4PJX1**  
**GN=Odr4**  
odr4 GPCR localization factor homolog

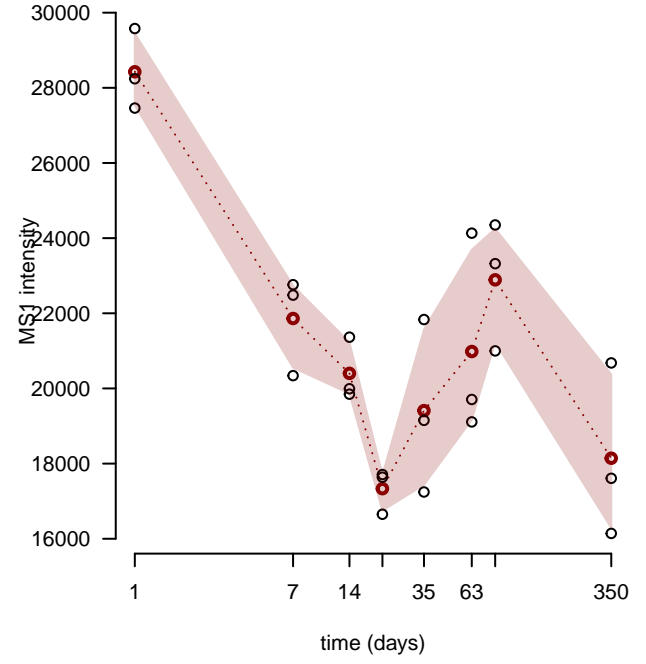

**Q4PZA2**  
**GN=Ece1**  
endothelin converting enzyme 1

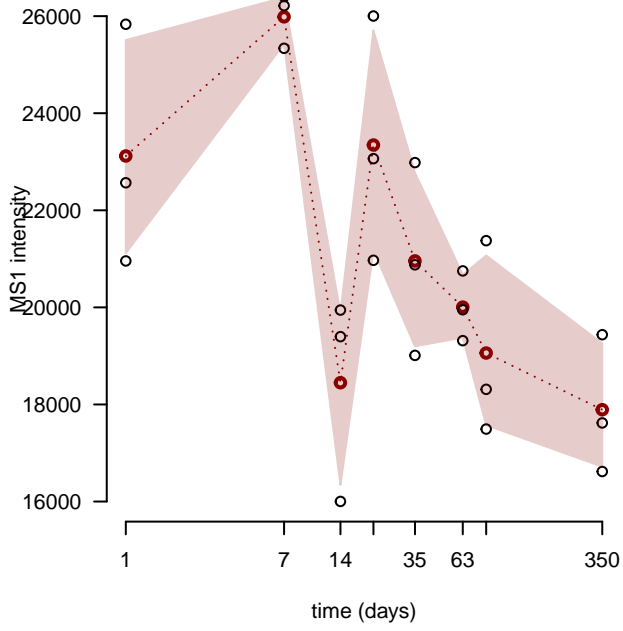

**Q4QQM4**  
**GN=Trp53i11**  
transformation related protein 53 induci ...

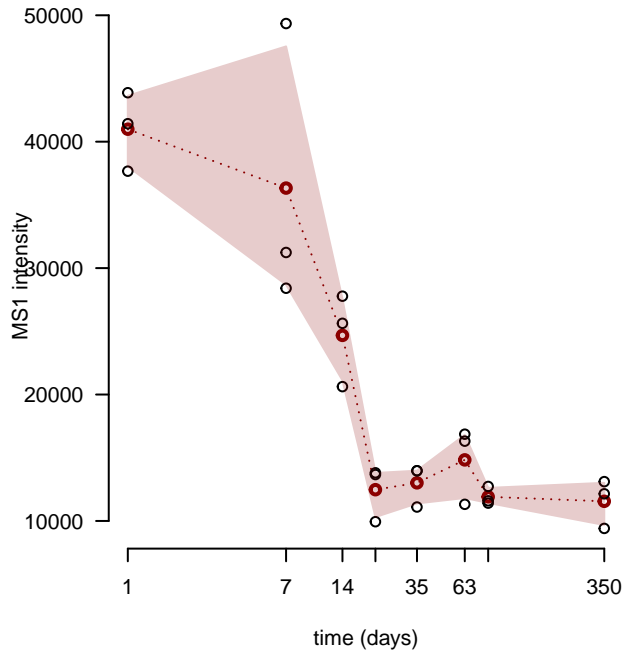

**Q4U2R1**  
**GN=Herc2**  
HECT and RLD domain containing E3 ubiqui ...

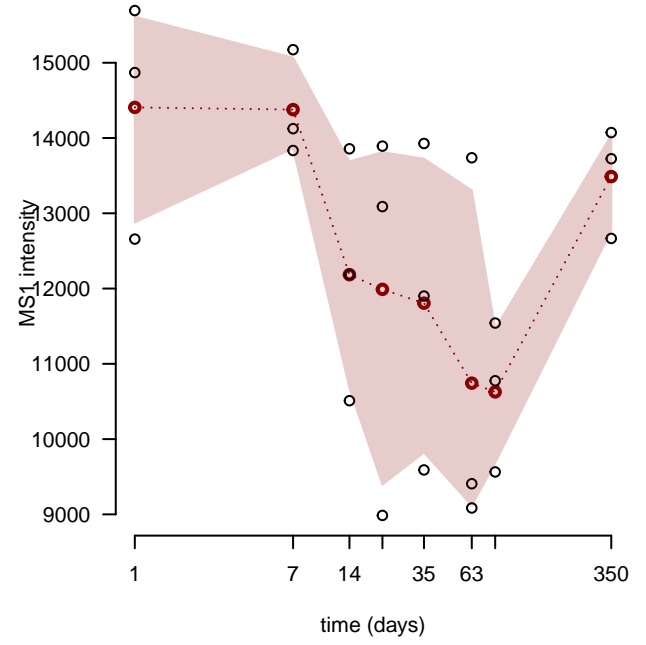

**Q4VA45**  
**GN=**

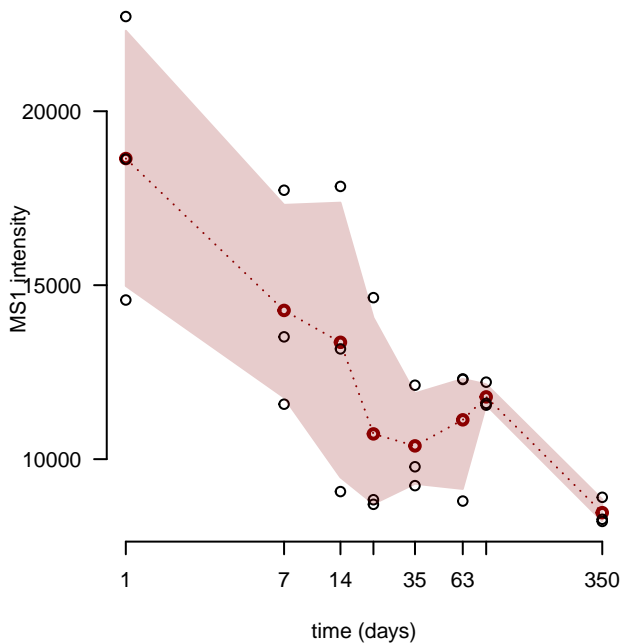

**Q4VA53**  
**GN=Pds5b**  
PDS5 cohesin associated factor B

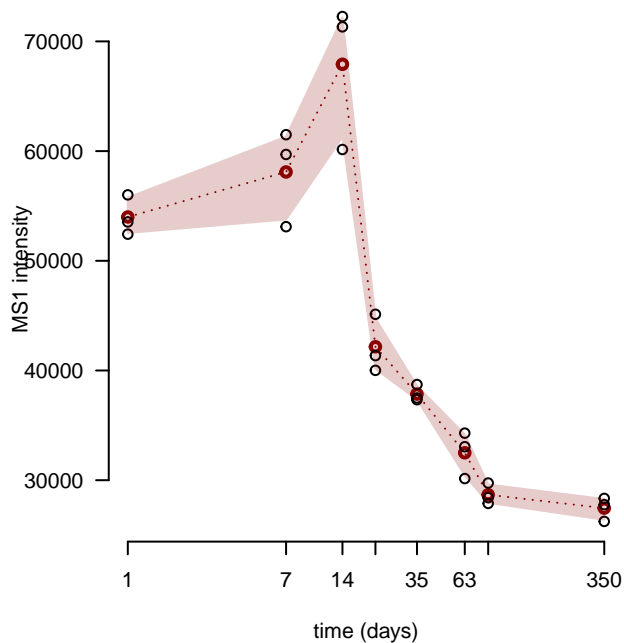

**Q4VA53**  
**GN=Pds5b**  
PDS5 cohesin associated factor B

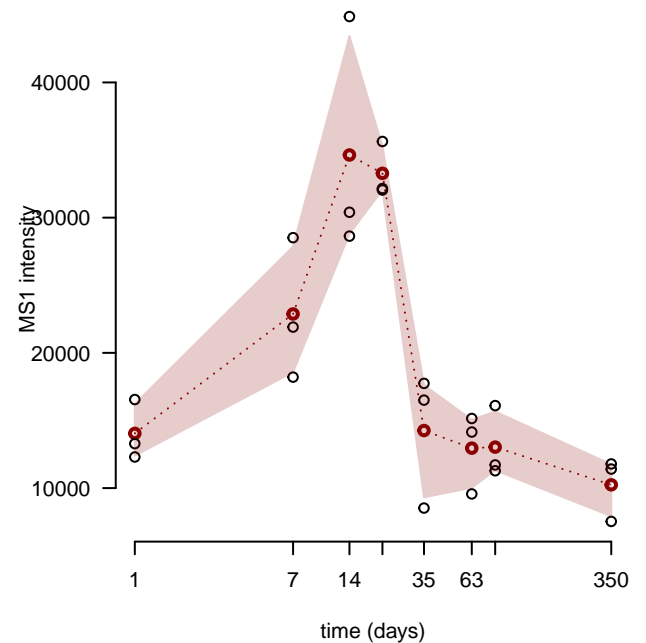

**Q4VAA2**  
**GN=Cdv3**  
carnitine deficiency–associated gene exp ...

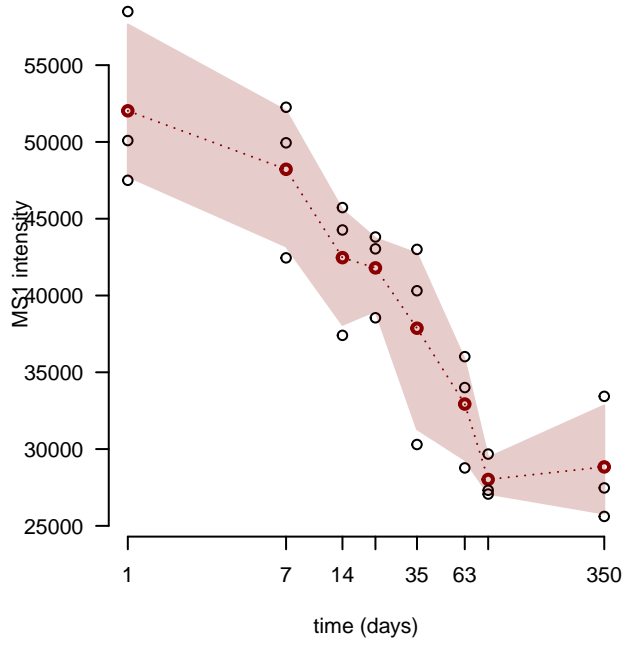

**Q4VAA7**  
**GN=Snx33**  
sorting nexin 33

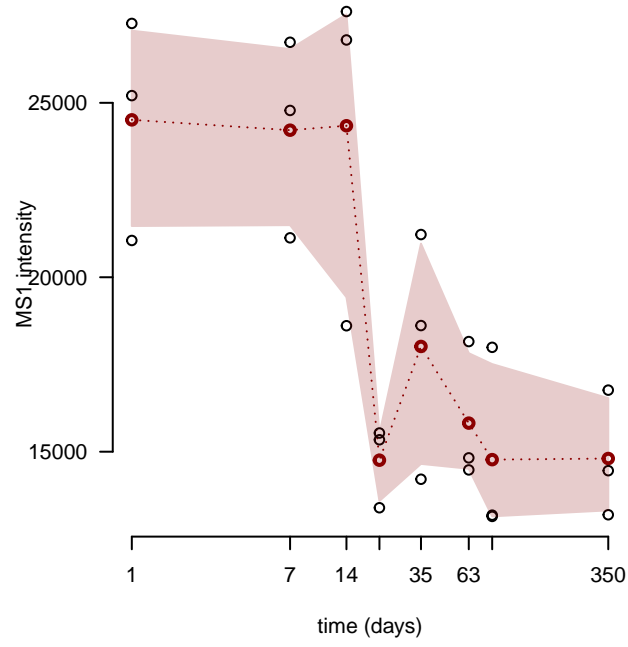

**Q4VAC9**  
**GN=Plekhg3**  
pleckstrin homology domain containing, f ...

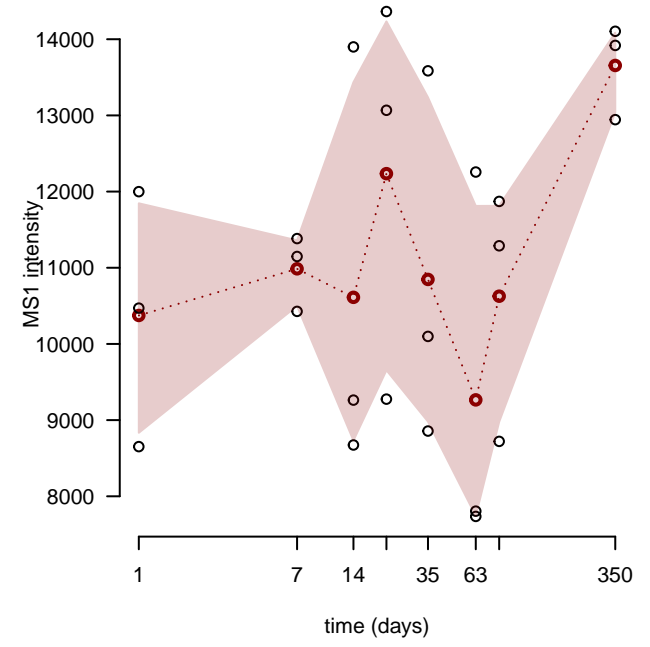

**Q4VAE3**  
**GN=Tmem65**  
transmembrane protein 65

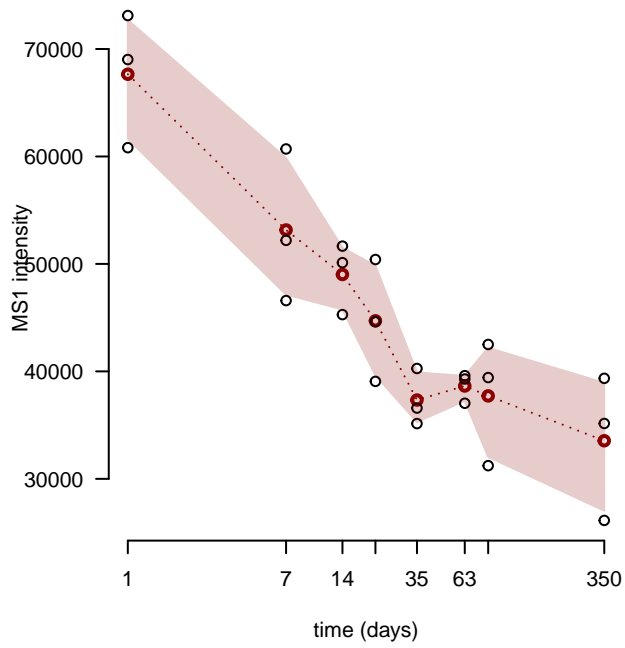

**Q4VBD2**  
**GN=Tapt1**  
transmembrane anterior posterior transfo ...

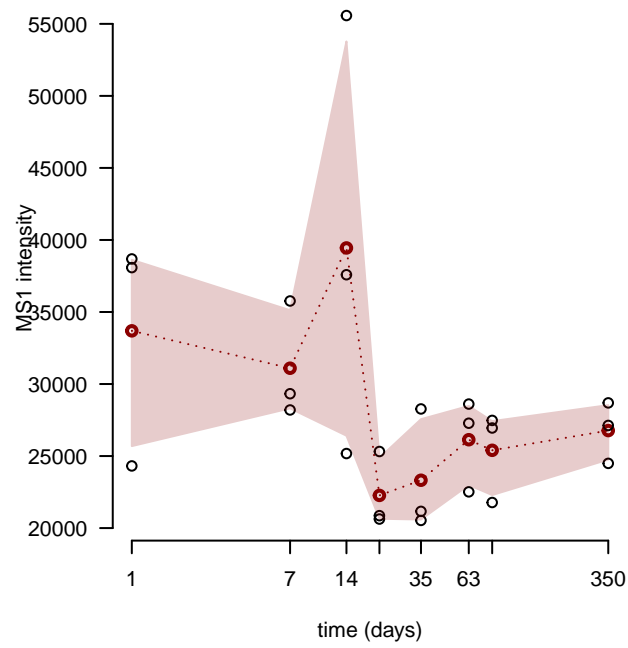

**Q4VBD9**  
**GN=Gzf1**  
GDNF–inducible zinc finger protein 1

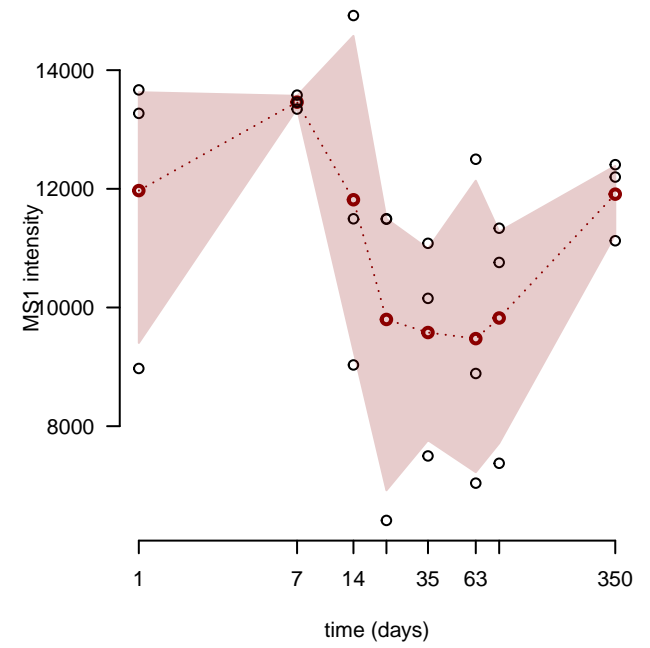

**Q4VBE4**  
**GN=Egflam**  
EGF–like, fibronectin type III and lamin ...

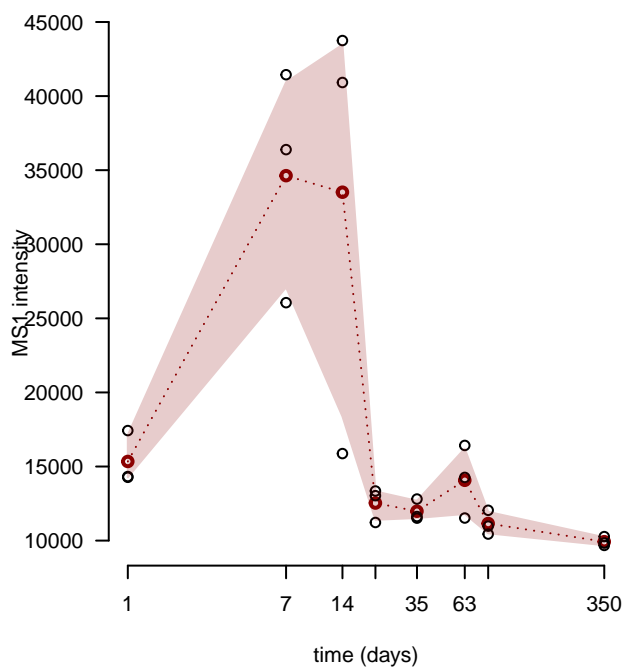

**Q4VBE8**  
**GN=Wdr18**  
WD repeat domain 18

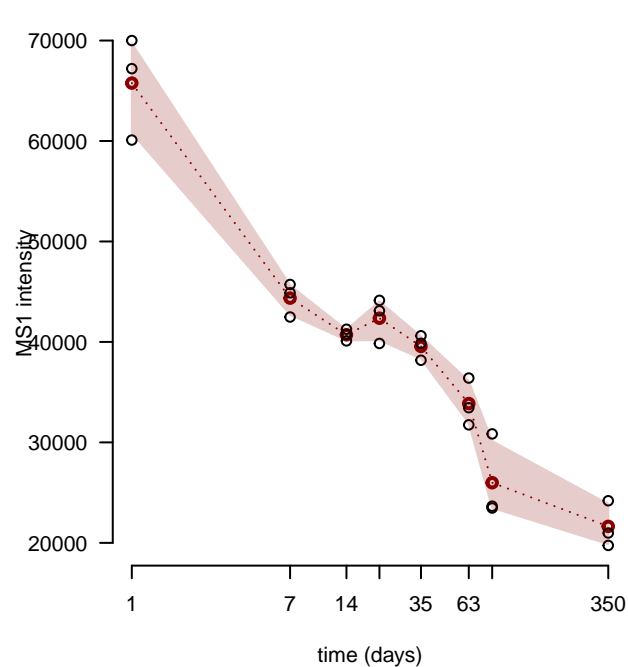

**Q4VBF2**  
**GN=R3hdm4**  
R3H domain containing 4

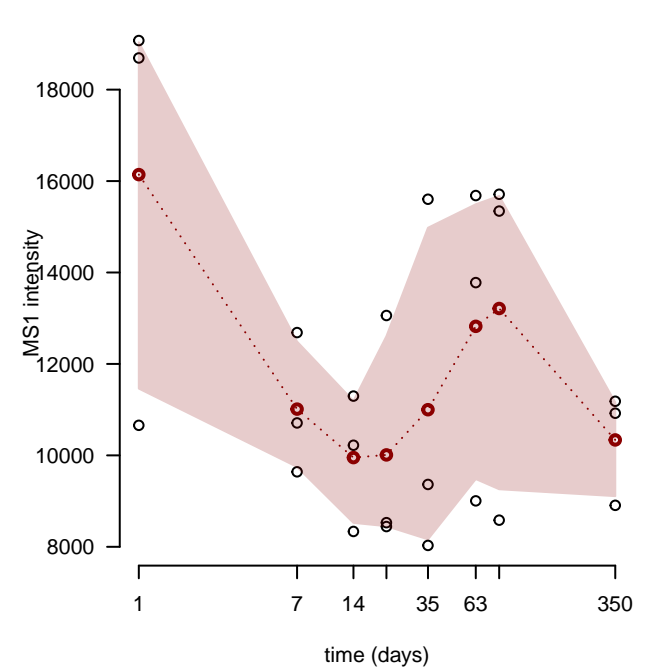

**Q4VC33**  
GN=Maea  
macrophage erythroblast attacher

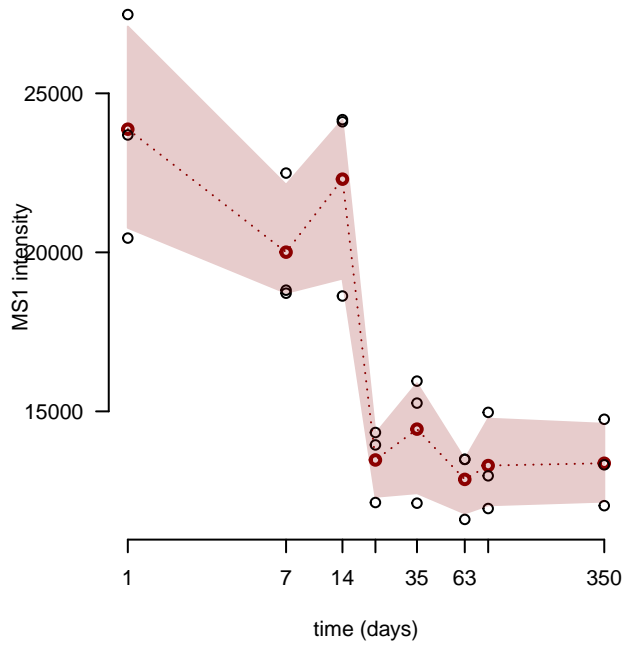

**Q4VGL6**  
GN=Rc3h1  
RING CCCH (C3H) domains 1

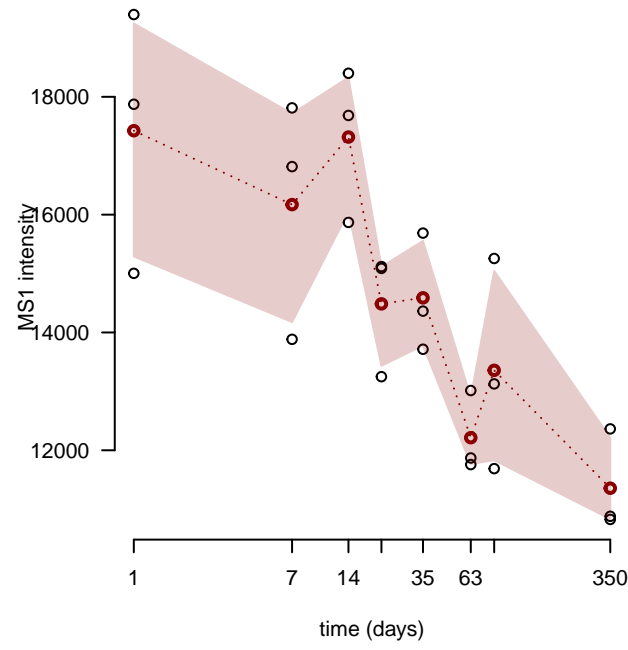

**Q501J2**  
GN=Fam173a

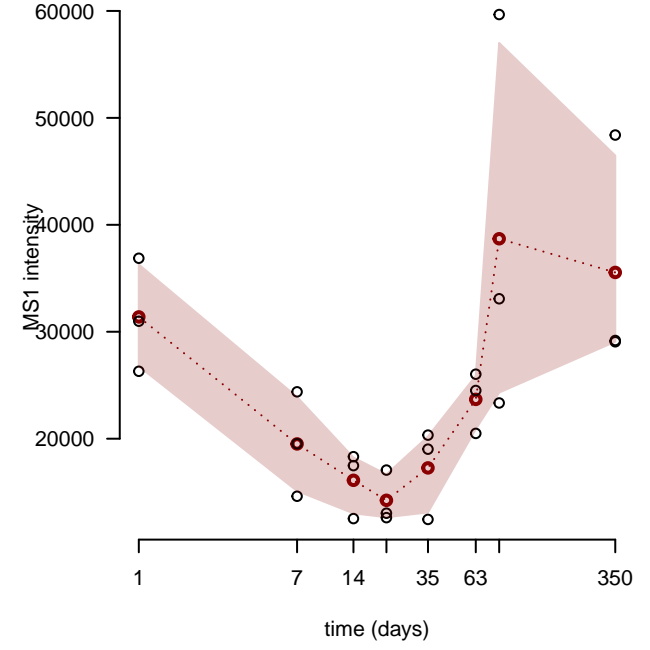

**Q501J6**  
GN=Ddx17  
DEAD box helicase 17

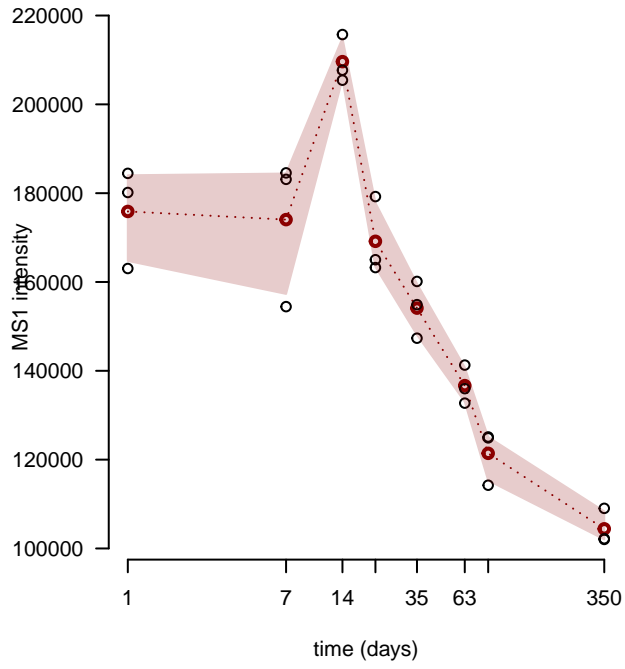

**Q501J7**  
GN=Phactr4  
phosphatase and actin regulator 4

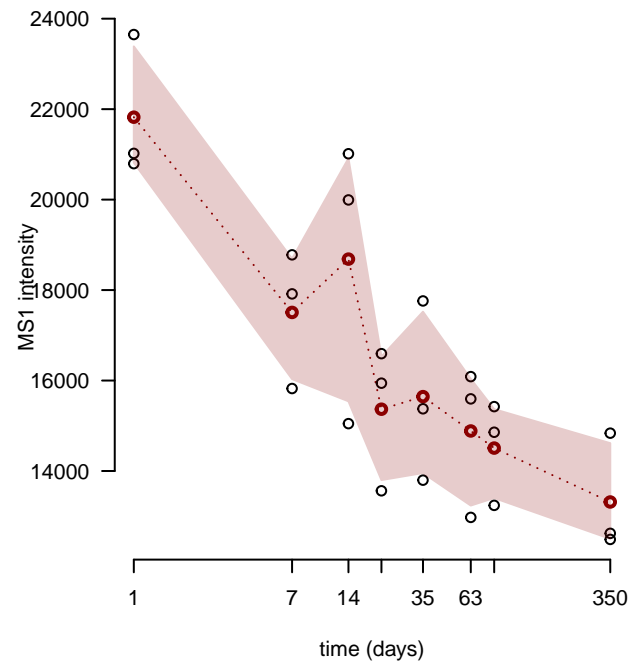

**Q504N0**  
GN=Cpa2  
carboxypeptidase A2, pancreatic

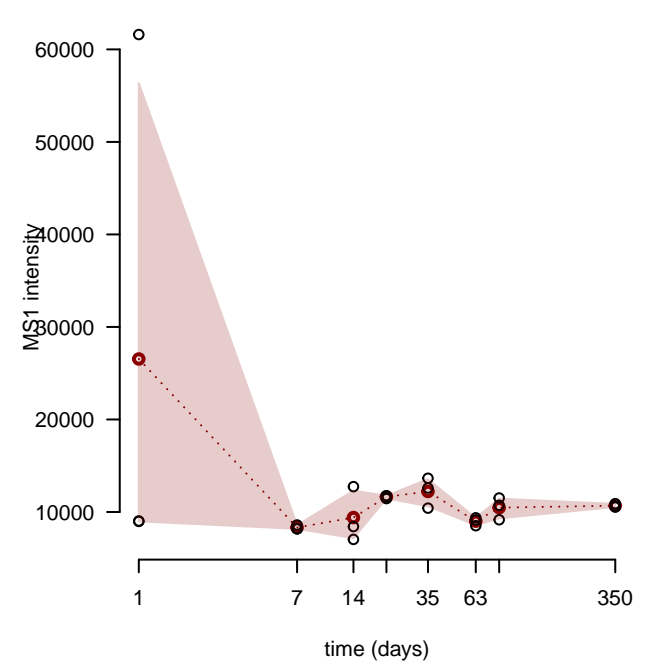

**Q504N7**  
GN=

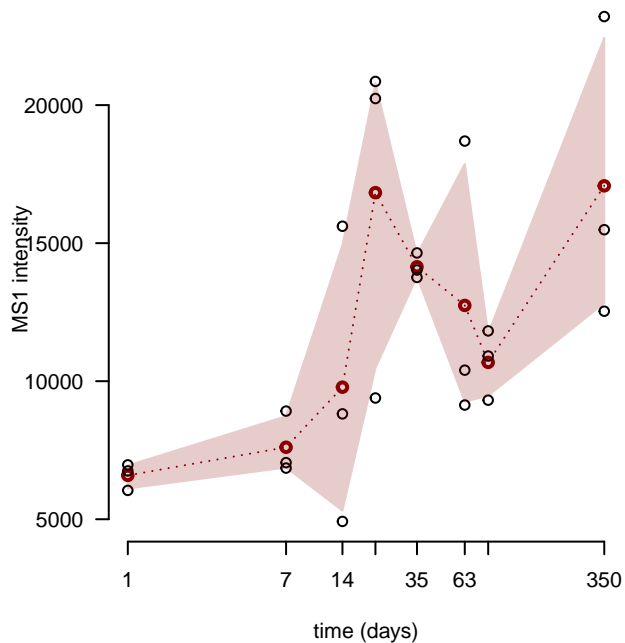

**Q505B7**  
GN=Zbtb80s  
zinc finger and BTB domain containing 8 ...

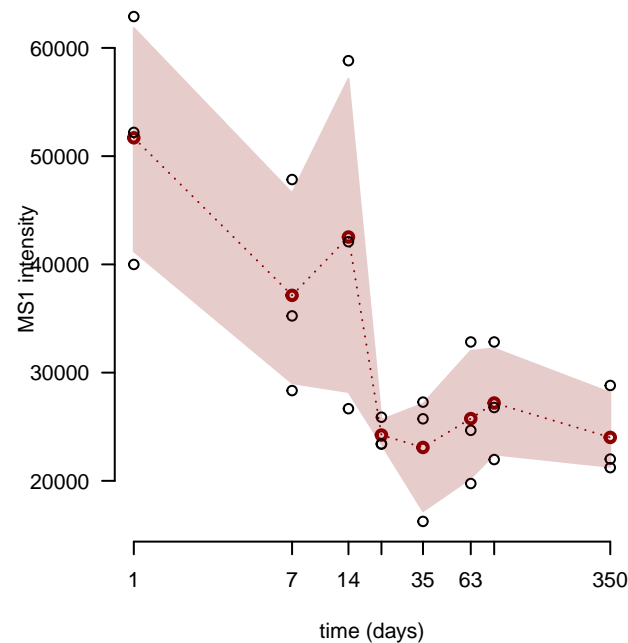

**Q505B8**  
GN=Syce2  
synaptonemal complex central element pro ...

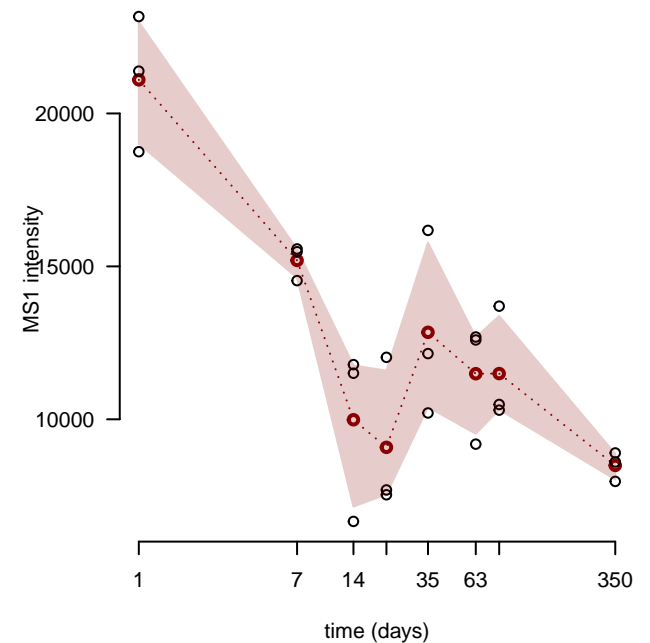

**Q505D1**  
GN=Ankrd28  
ankyrin repeat domain 28

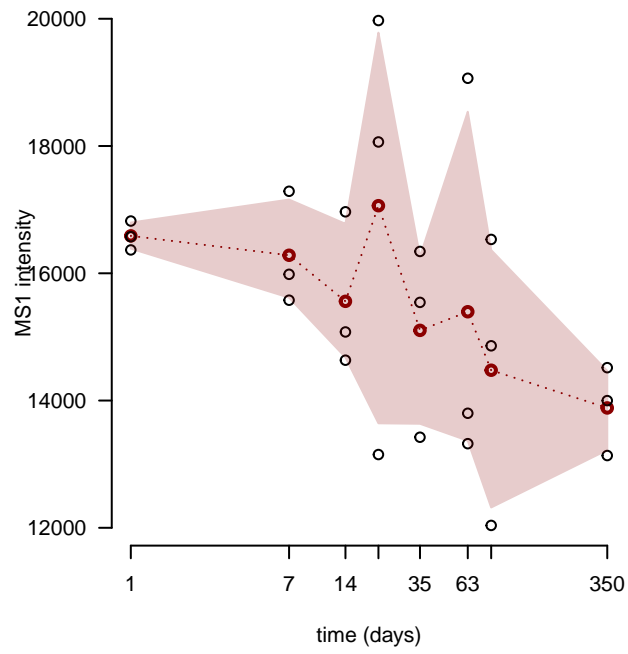

**Q505D7**  
GN=Opa3  
optic atrophy 3

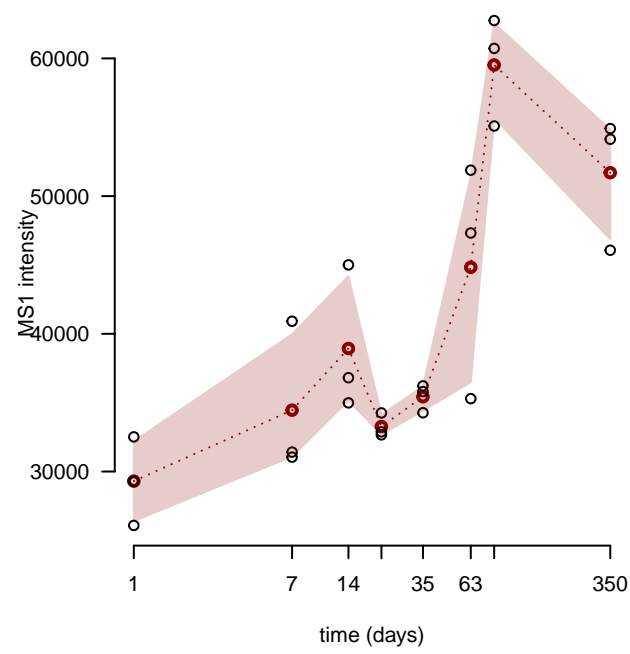

**Q505F1**  
GN=Nr2c1  
nuclear receptor subfamily 2, group C, m ...

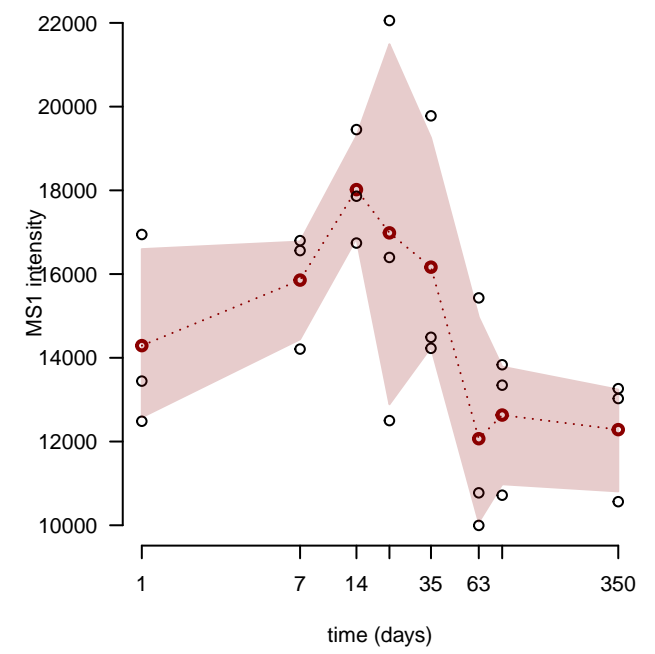

**Q505F5**  
GN=Lrrc47  
leucine rich repeat containing 47

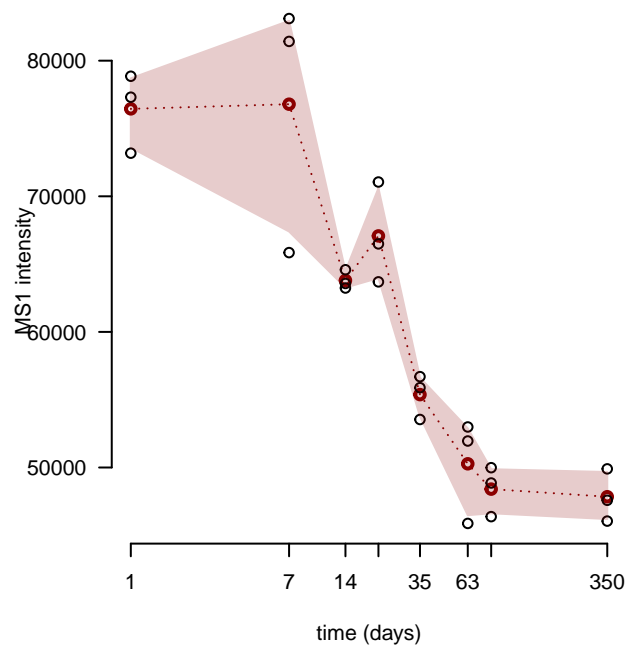

**Q505G8**  
GN=Znf827

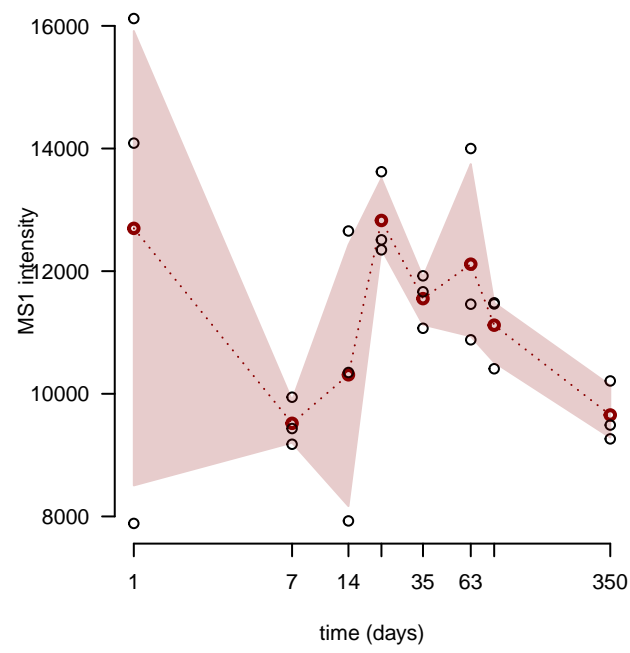

**Q505K2**  
GN=Fam160a1

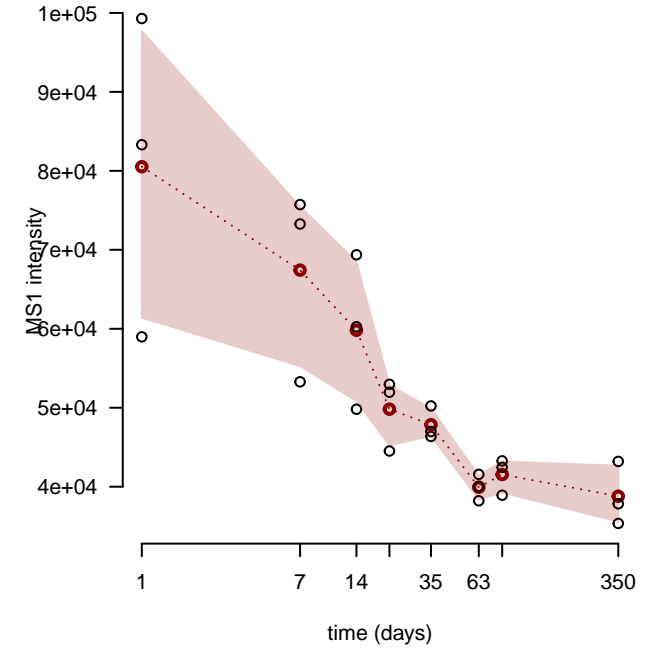

**Q52KB6**  
GN=C2cd3  
C2 calcium-dependent domain containing 3

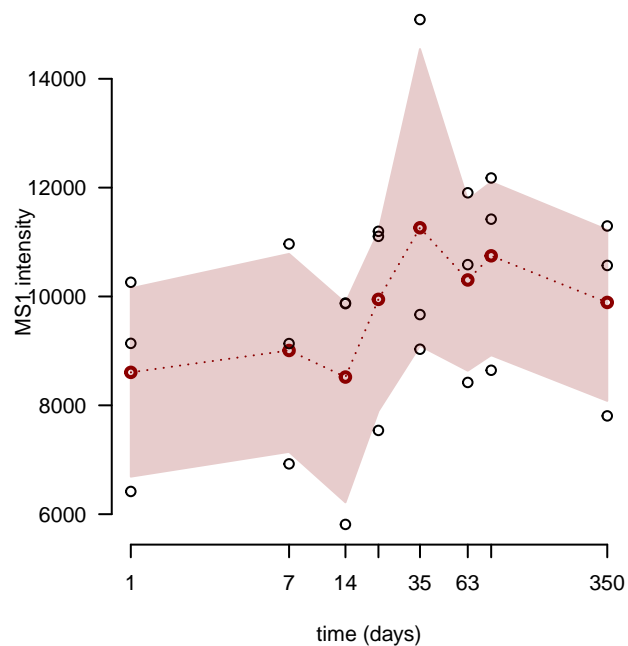

**Q52KE7**  
GN=Ccnl1  
cyclin L1

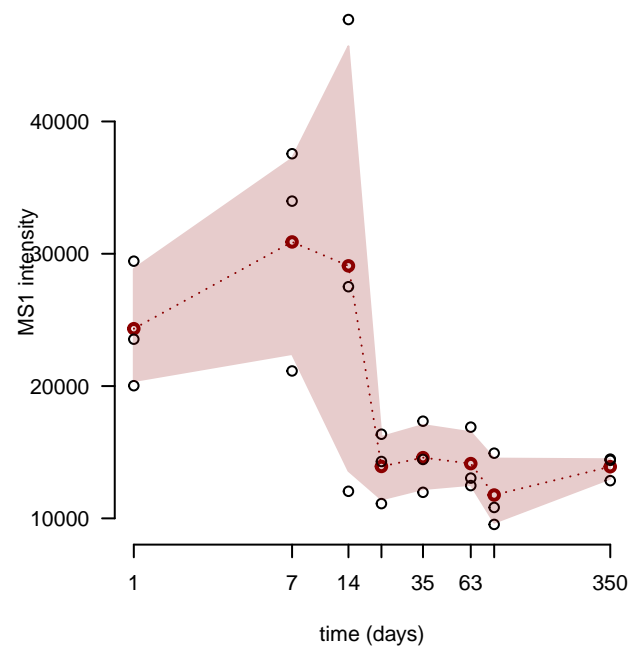

**Q52KG4**  
GN=Zbtb45  
zinc finger and BTB domain containing 45

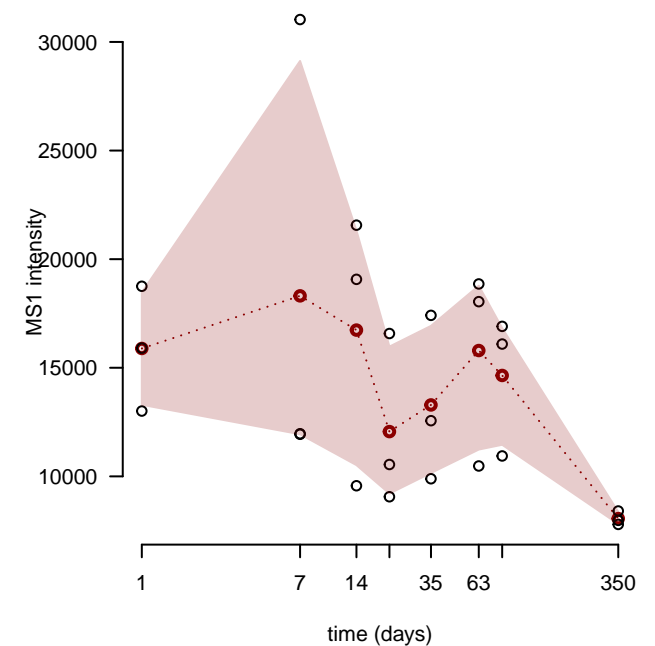

**Q52KI8**  
GN=Srrm1  
serine/arginine repetitive matrix 1

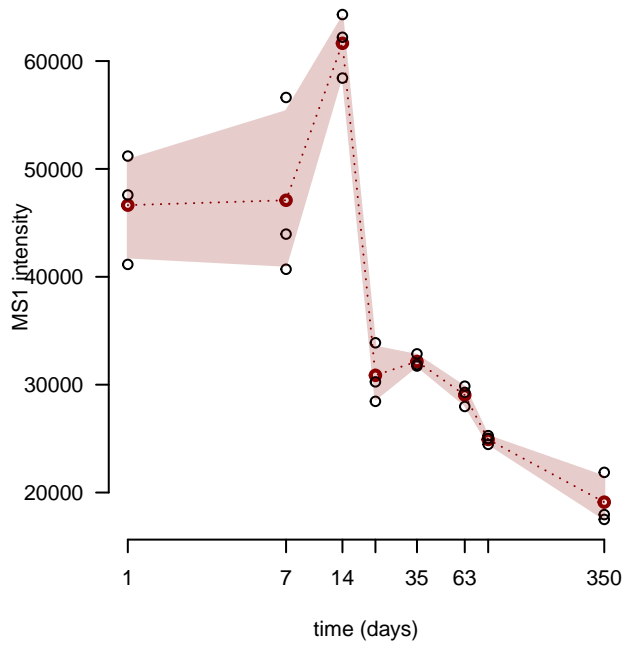

**Q52KR2**  
GN=Lrig2  
leucine-rich repeats and immunoglobulin- ...

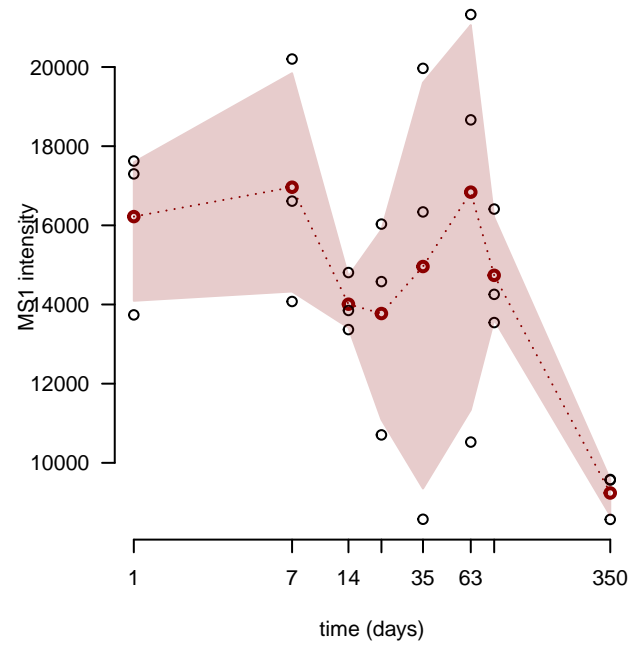

**Q52KR3**  
GN=Prune2  
prune homolog 2

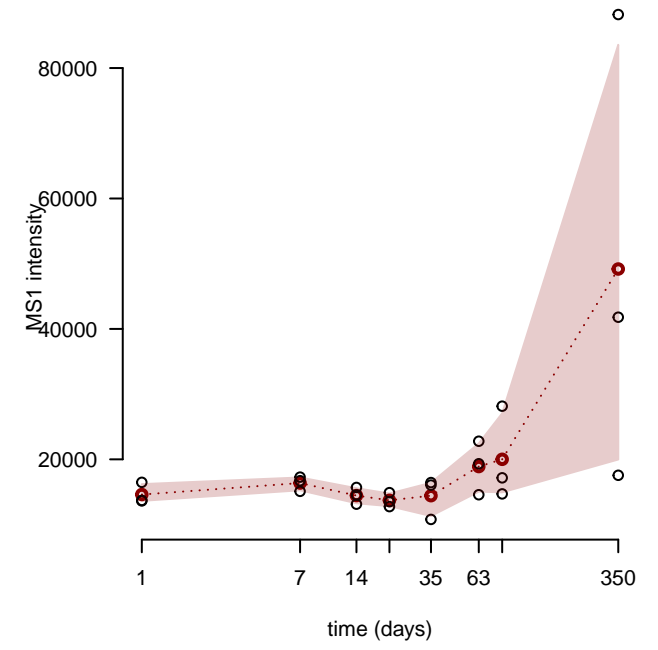

**Q566J8**  
GN=Coq8b  
coenzyme Q8B

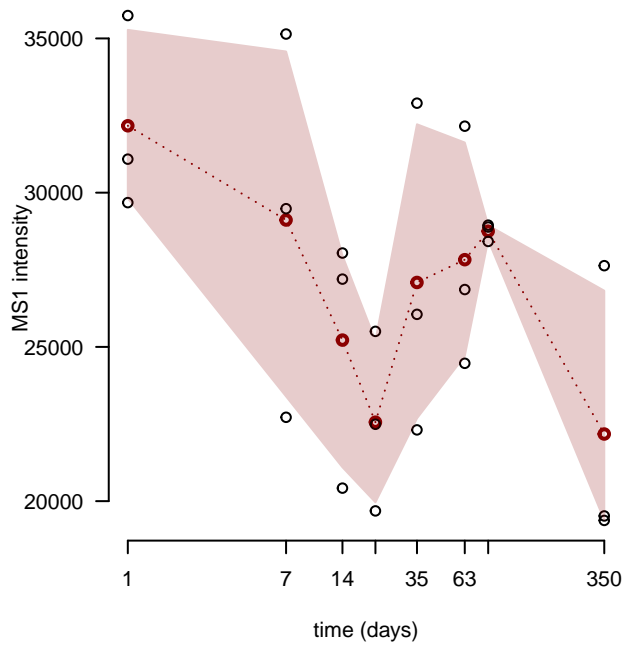

**Q569Z5**  
GN=Ddx46  
DEAD box helicase 46

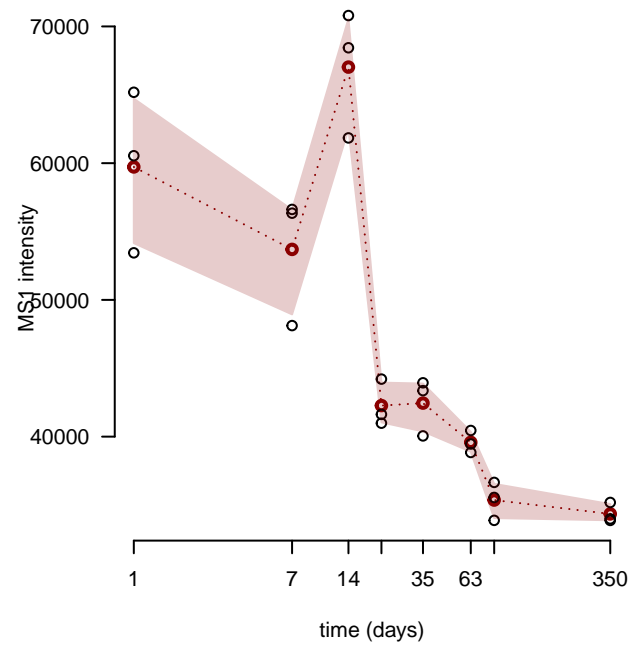

**Q569Z6**  
GN=Thrap3  
thyroid hormone receptor associated prot ...

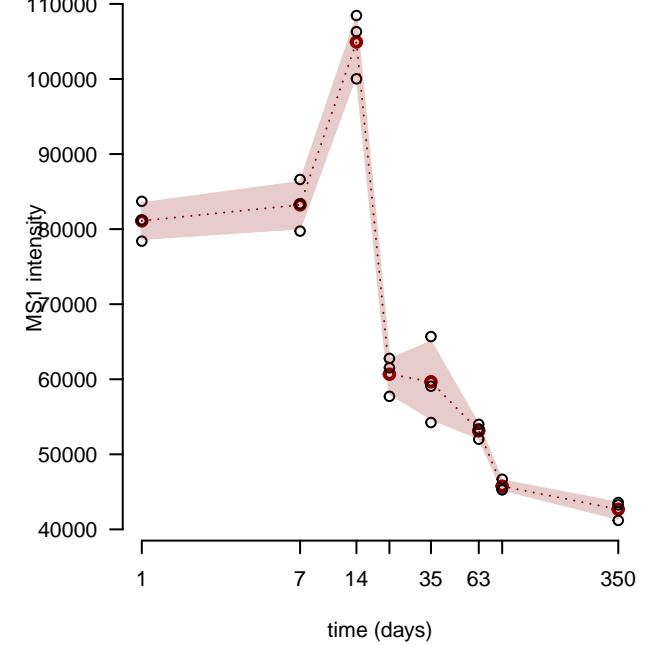

**Q56A06**  
GN=Tmtc2  
transmembrane and tetratricopeptide repe ...

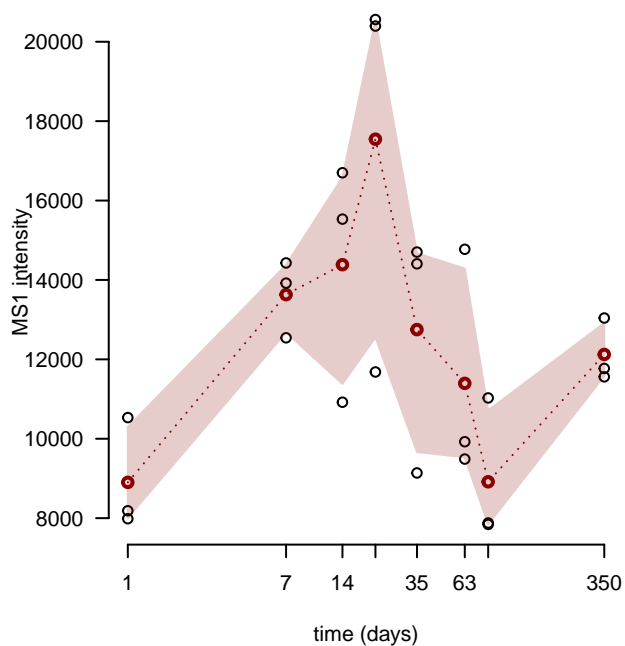

**Q56A08**  
GN=Gpkow  
G patch domain and KOW motifs

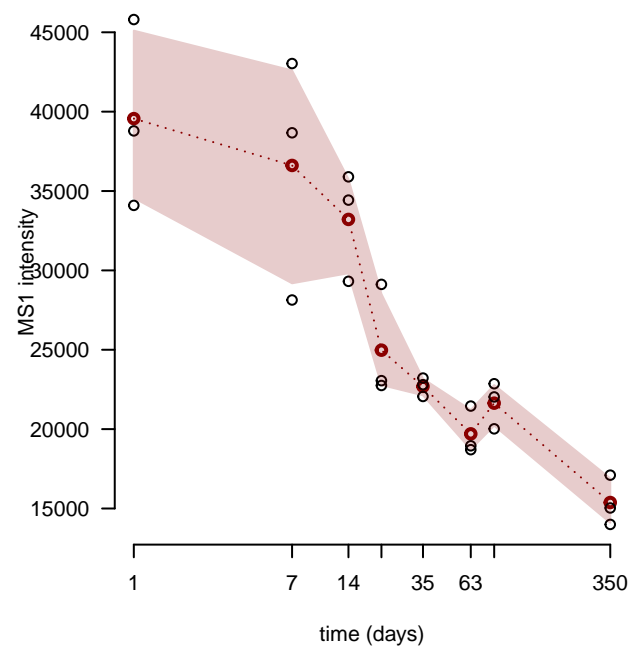

**Q570Y9**  
GN=Deptor  
DEP domain containing MTOR-interacting p ...

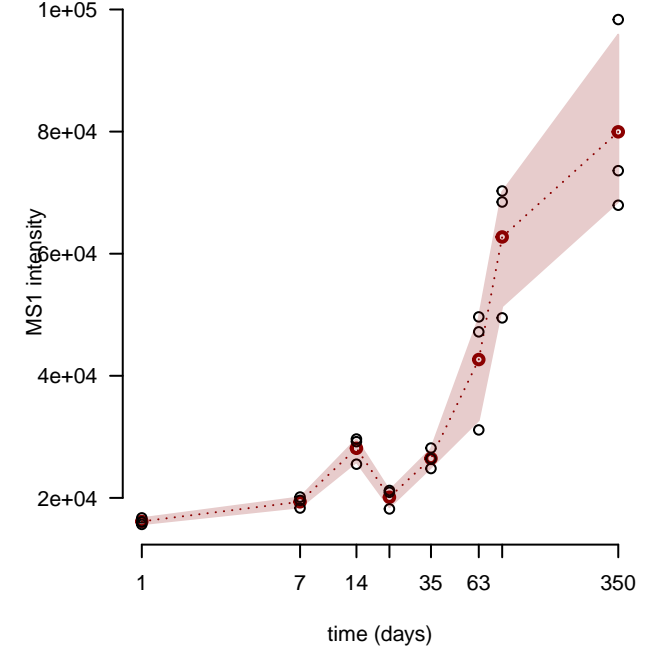

**Q571E4**  
GN=Gals  
galactosamine (N-acetyl)-6-sulfate sulfa ...

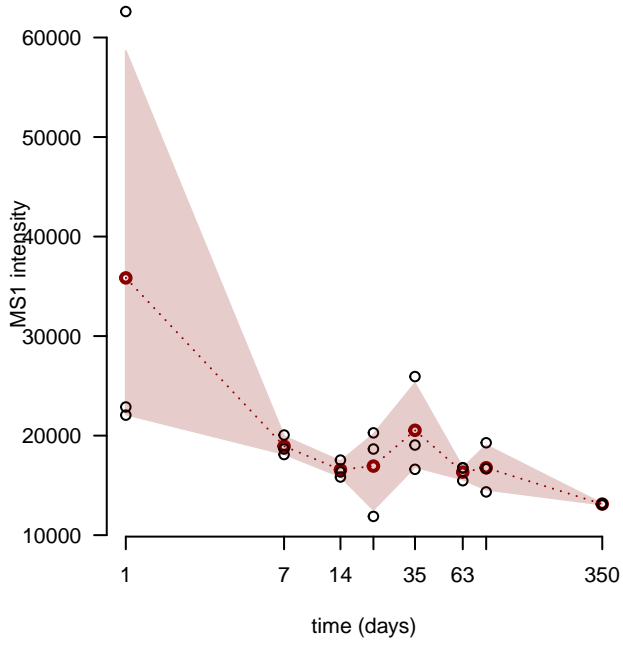

**Q571G4**  
GN=Lin54  
lin-54 DREAM MuvB core complex component

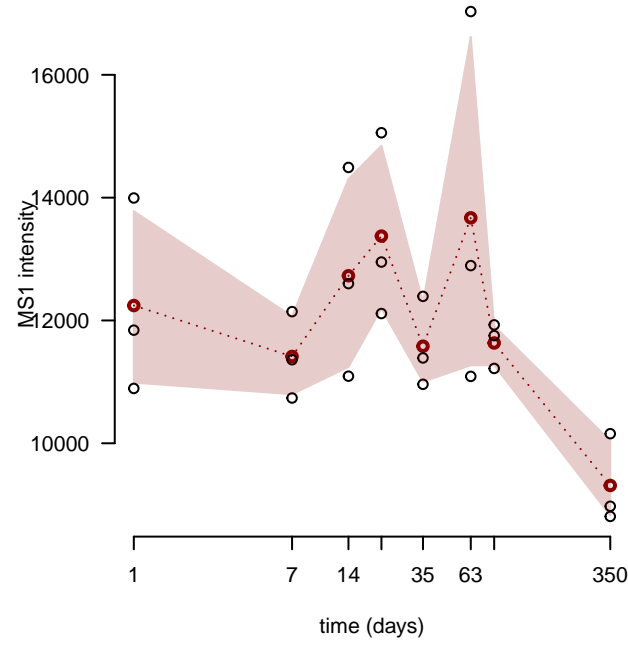

**Q571H0**  
GN=Urb1  
URB1 ribosome biogenesis 1 homolog (S. c ...

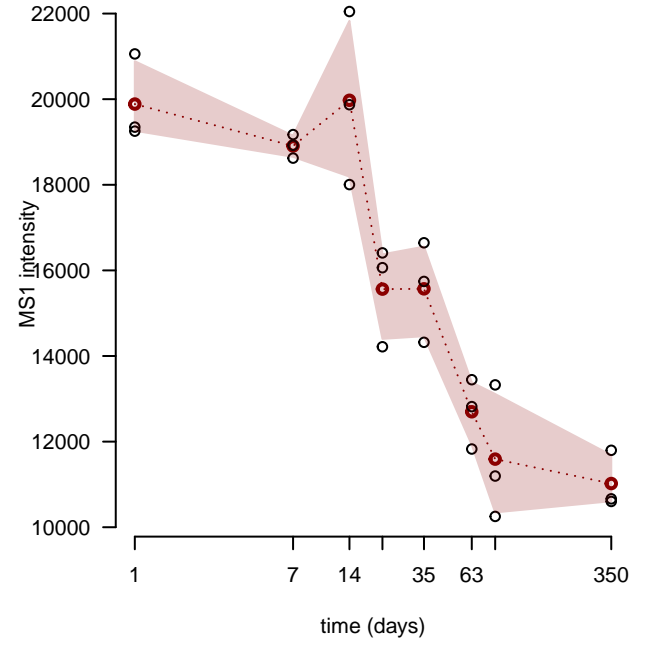

**Q571I9**  
GN=Aldh16a1  
aldehyde dehydrogenase 16 family, member ...

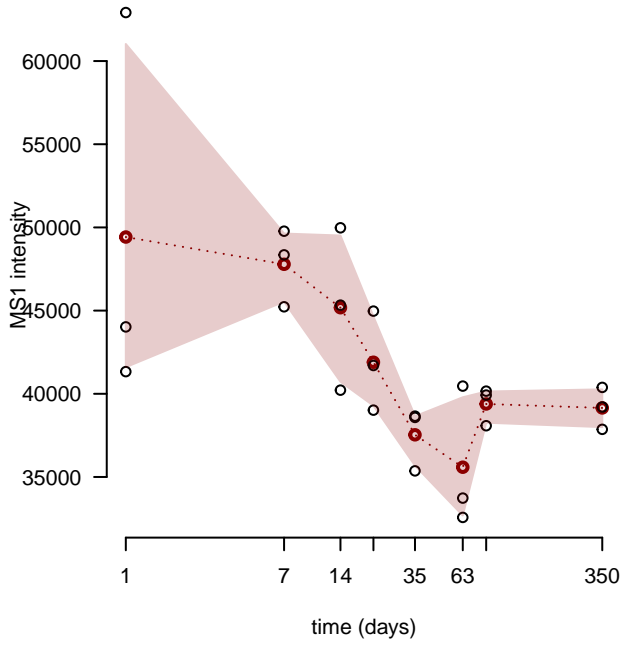

**Q571J5**  
GN=Znf354c

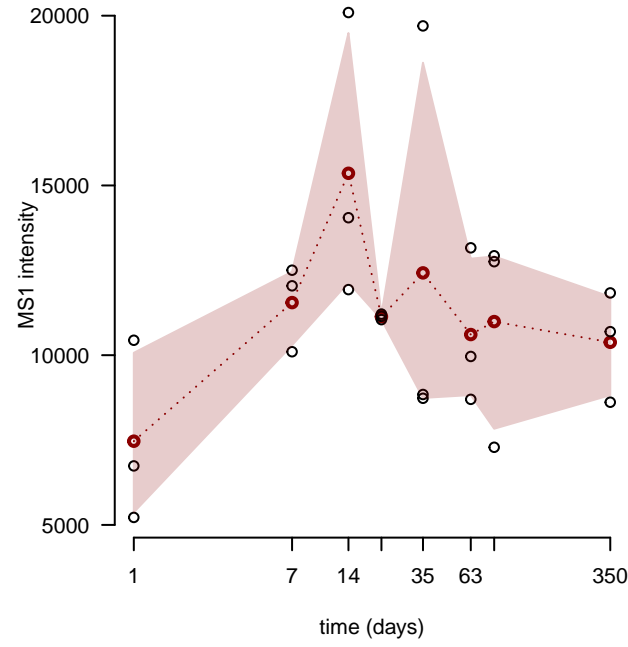

**Q571K4**  
GN=Tab3  
TGF-beta activated kinase 1/MAP3K7 bindi ...

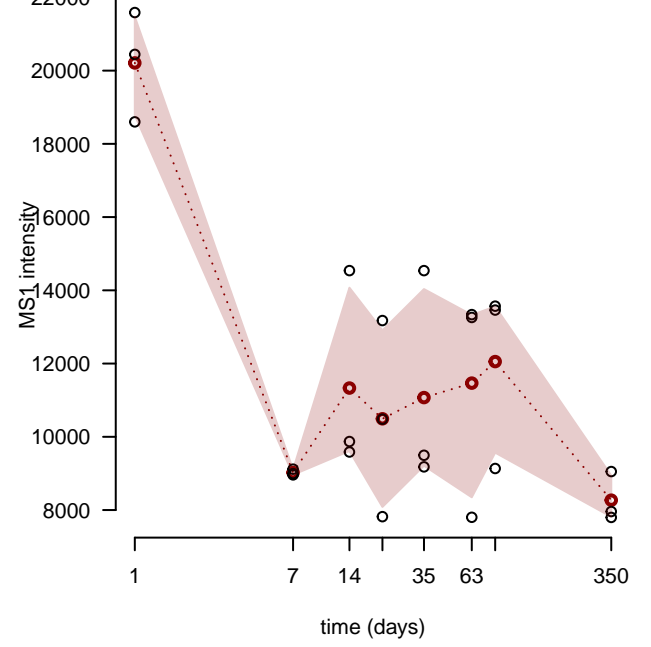

**Q58A65**  
GN=Spag9  
sperm associated antigen 9

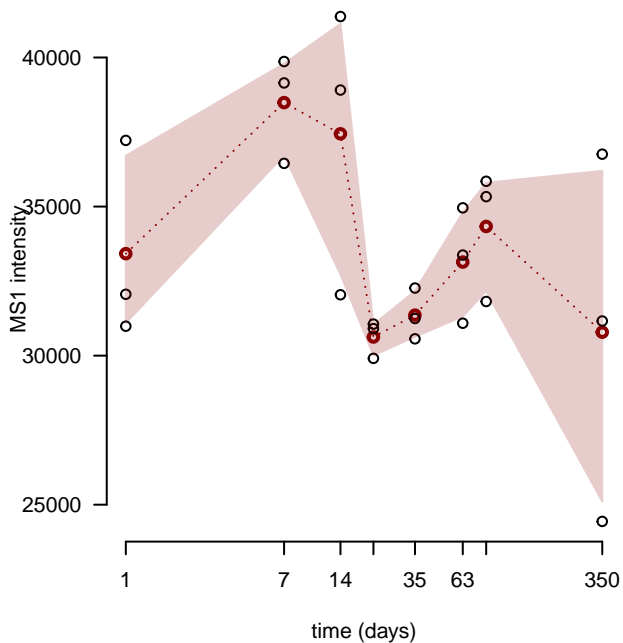

**Q59J78**  
GN=Ndufaf2  
NADH:ubiquinone oxidoreductase complex a ...

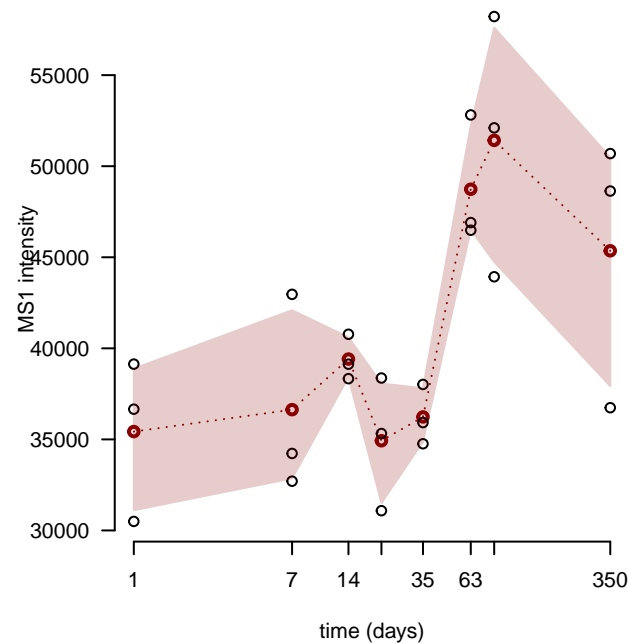

**Q5BKQ4**  
GN=Pnlipr1  
pancreatic lipase related protein 1

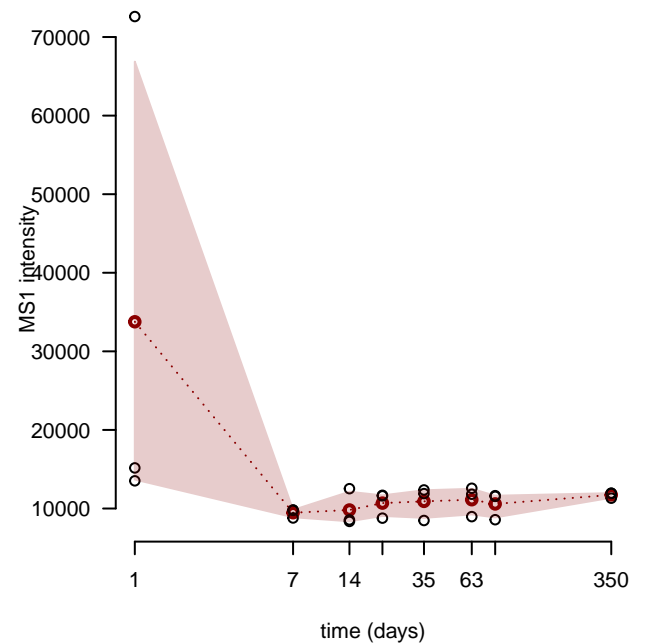

**Q5BL07**  
**GN=Pex1**  
peroxisomal biogenesis factor 1

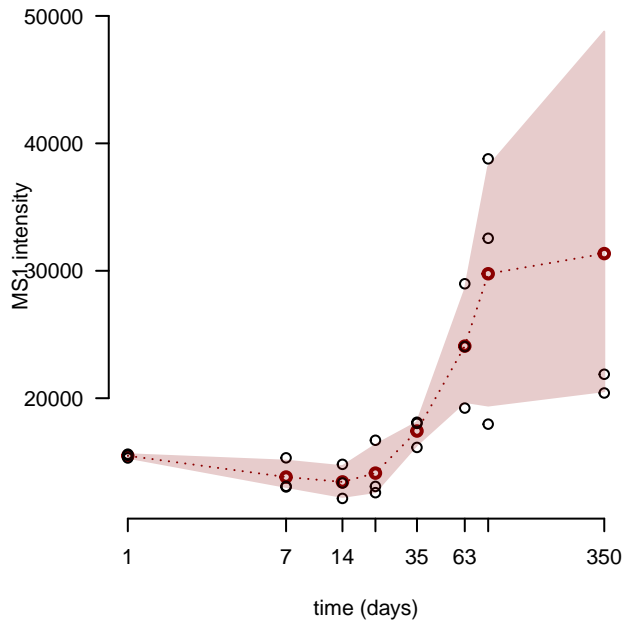

**Q5BLK4**  
**GN=Tut7**  
terminal uridylyl transferase 7

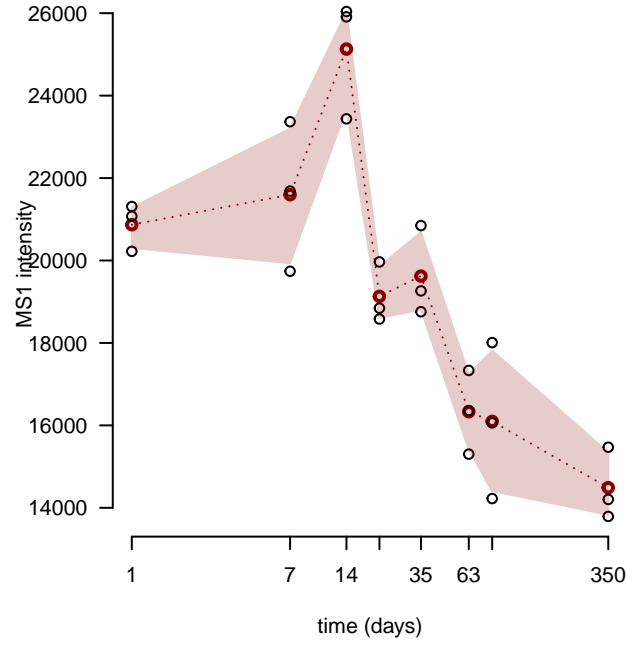

**Q5DQR4**  
**GN=Stxbp5l**  
syntaxin binding protein 5-like

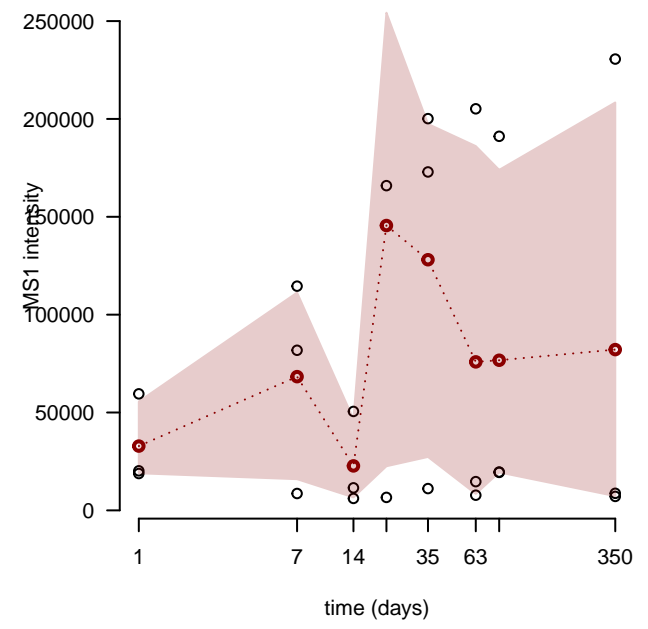

**Q5DTH5**  
**GN=Tshz1**  
teashirt zinc finger family member 1

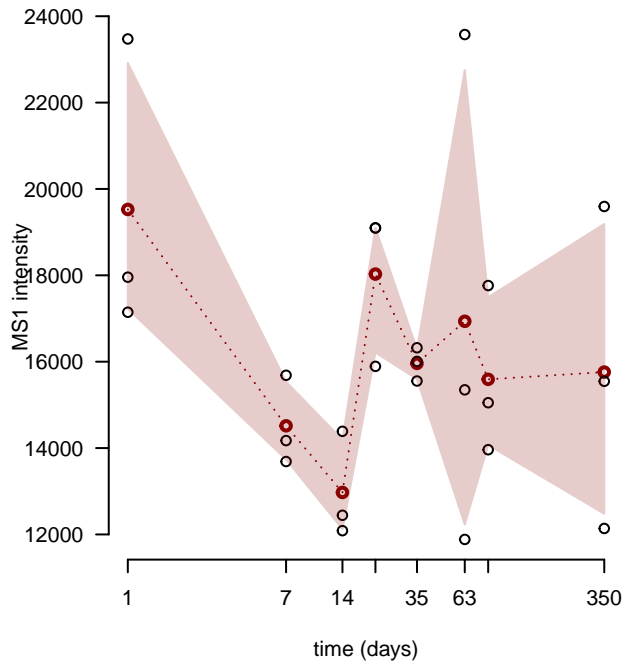

**Q5DTI8**  
**GN=Esyt3**  
extended synaptotagmin-like protein 3

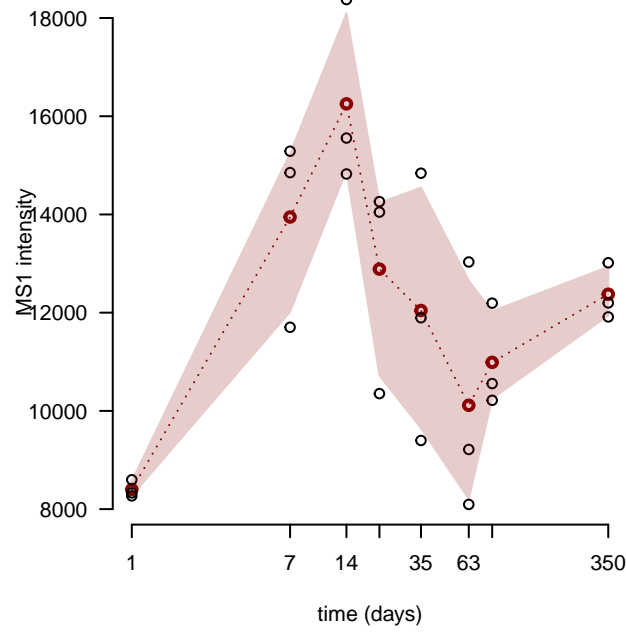

**Q5DTM8**  
**GN=Rnf20**  
ring finger protein 20

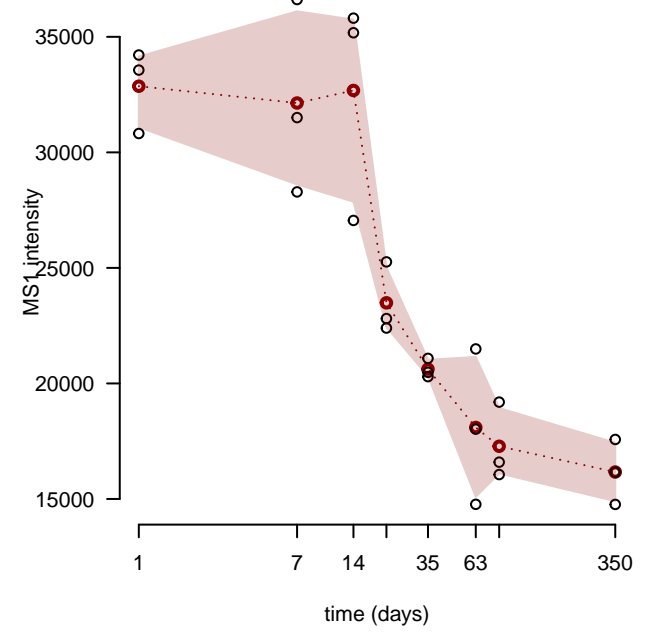

**Q5DTT3**  
**GN=Tasor2**  
transcription activation suppressor fami ...

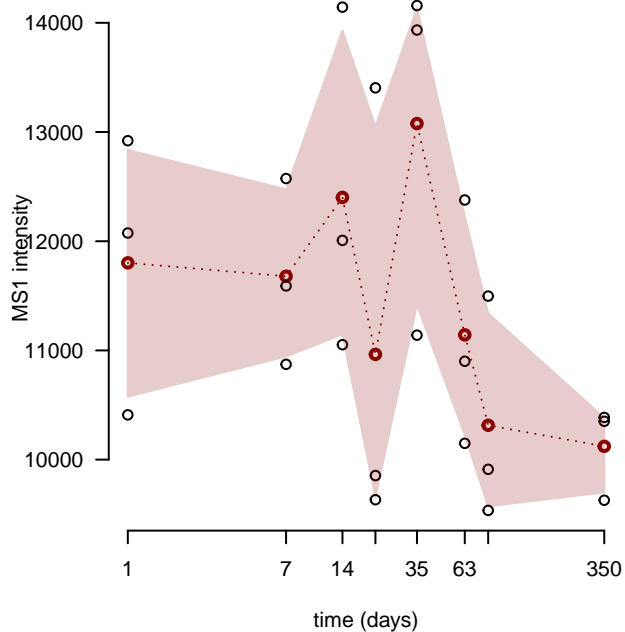

**Q5DTU0**  
**GN=Afap1l2**  
actin filament associated protein 1-like ...

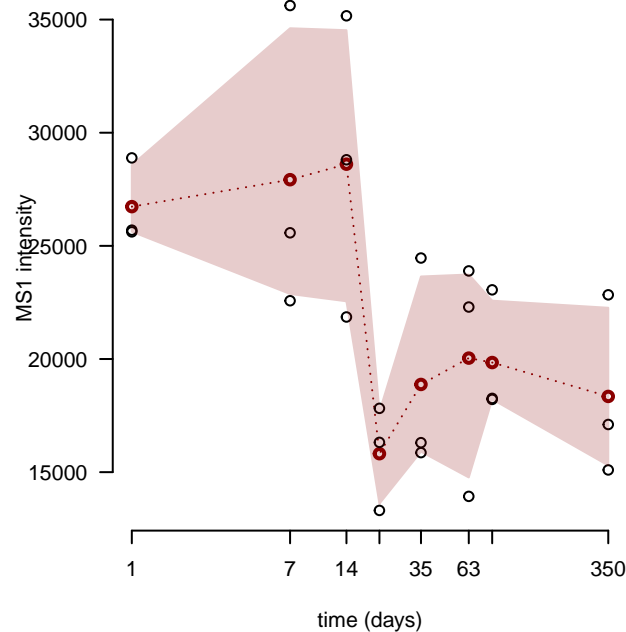

**Q5DTW7**  
**GN=Resf1**  
retroelement silencing factor 1

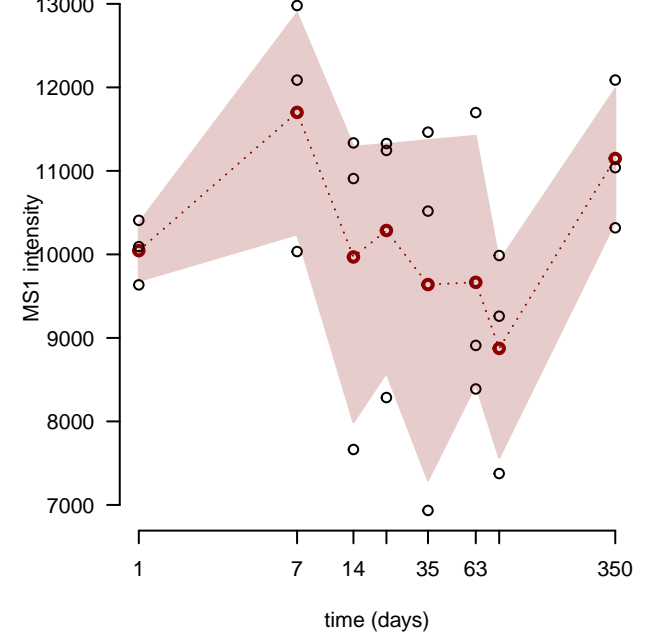



**Q5DTX6**  
**GN=Jcad**

junctional cadherin 5 associated

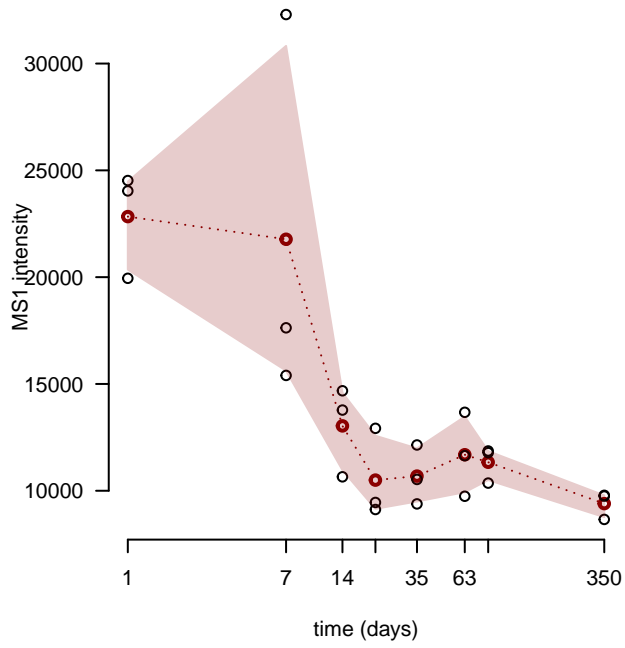

**Q5DTZ0**  
**GN=Nynrin**

NYN domain and retroviral integrase cont ...

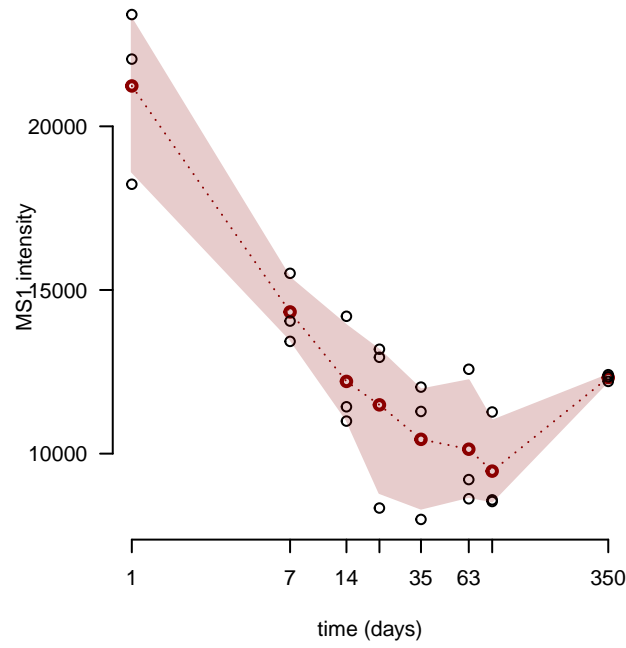

**Q5DU09**  
**GN=Znf652**

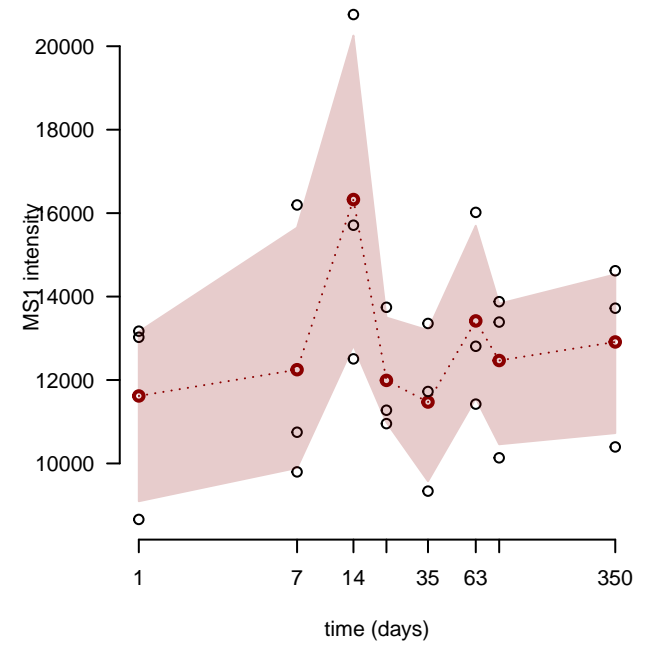

**Q5DU37**  
**GN=Zfyve26**

zinc finger, FYVE domain containing 26

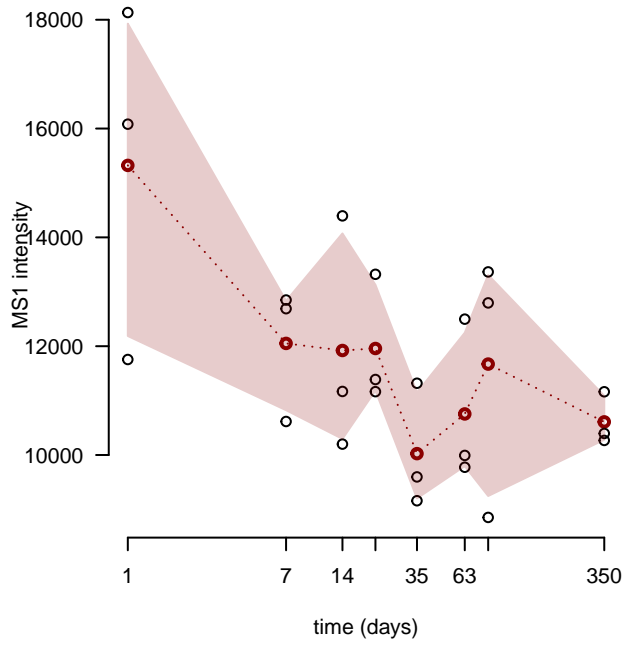

**Q5DW34**  
**GN=Ehmt1**

euchromatic histone methyltransferase 1

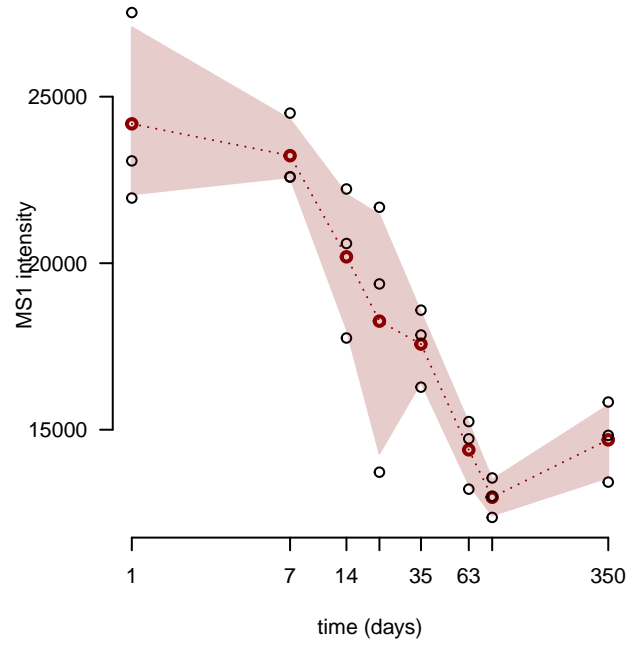

**Q5EBH1**  
**GN=Rassf5**

Ras association (RalGDS/AF-6) domain fam ...

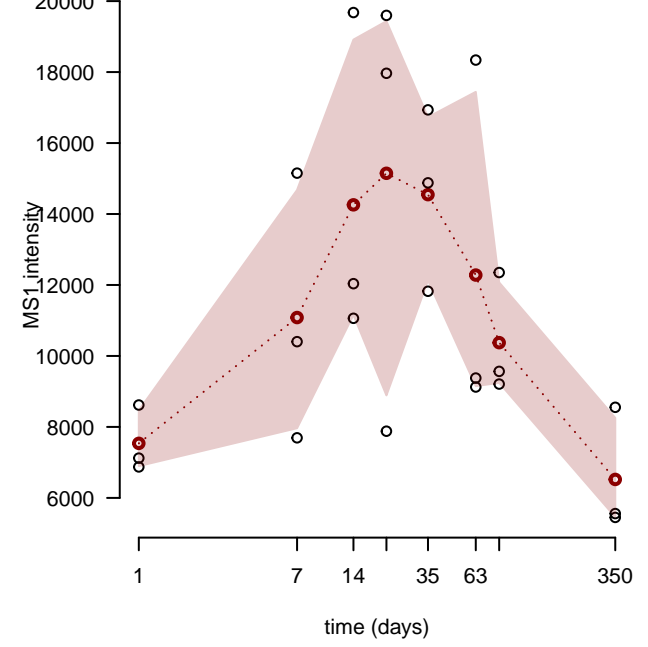

**Q5EBP3**  
**GN=Armc5**

armadillo repeat containing 5

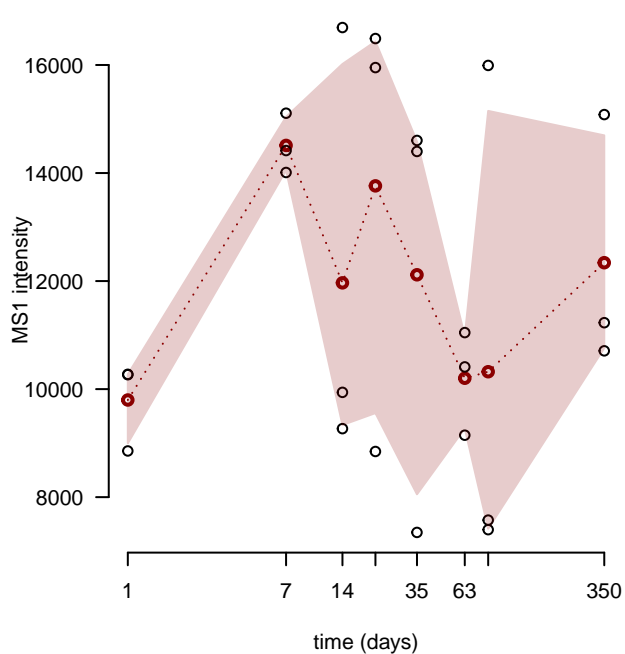

**Q5EE38**  
**GN=Acad**

adrenocortical dysplasia

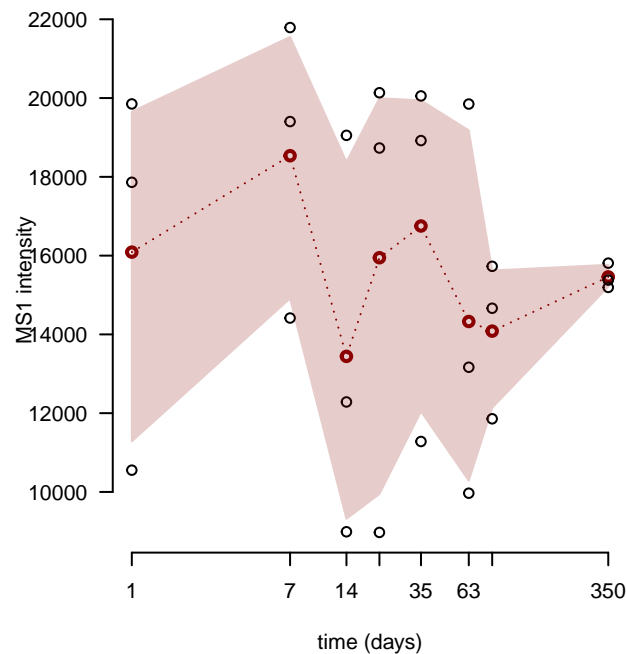

**Q5EG47**  
**GN=Prkaa1**

protein kinase, AMP-activated, alpha 1 c ...

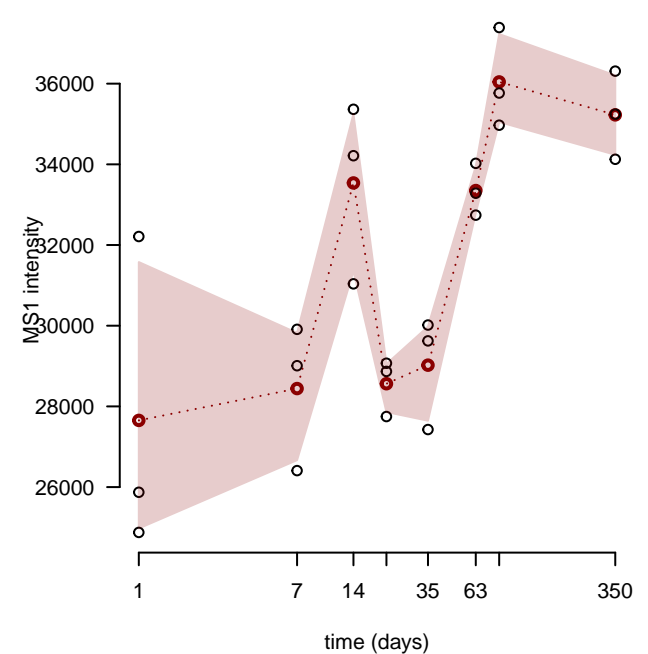

**Q5F285**  
**GN=Tmem256**  
transmembrane protein 256

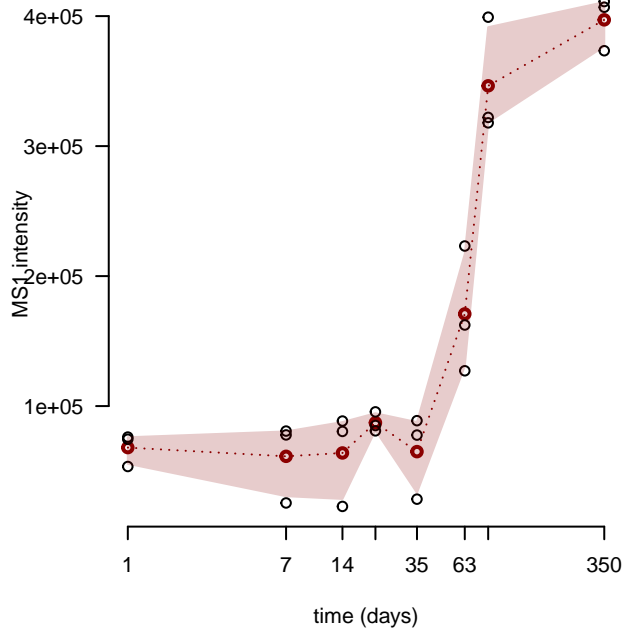

**Q5F2E7**  
**GN=Nufip2**  
nuclear FMR1 interacting protein 2

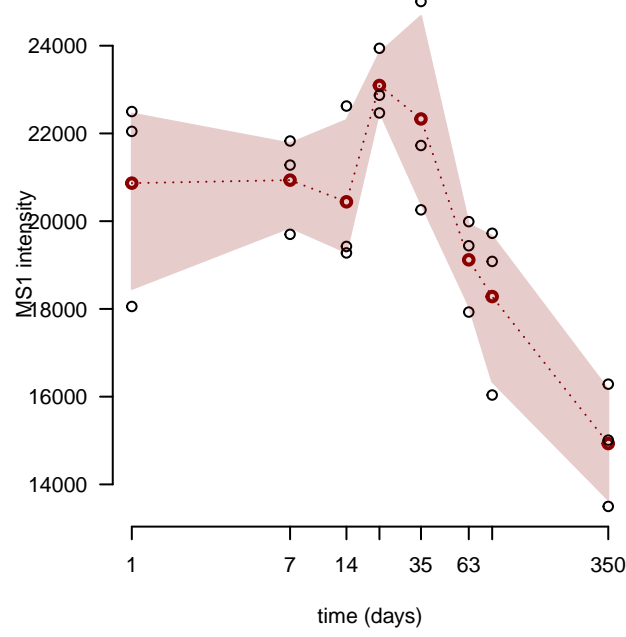

**Q5F2E8**  
**GN=Taok1**  
TAO kinase 1

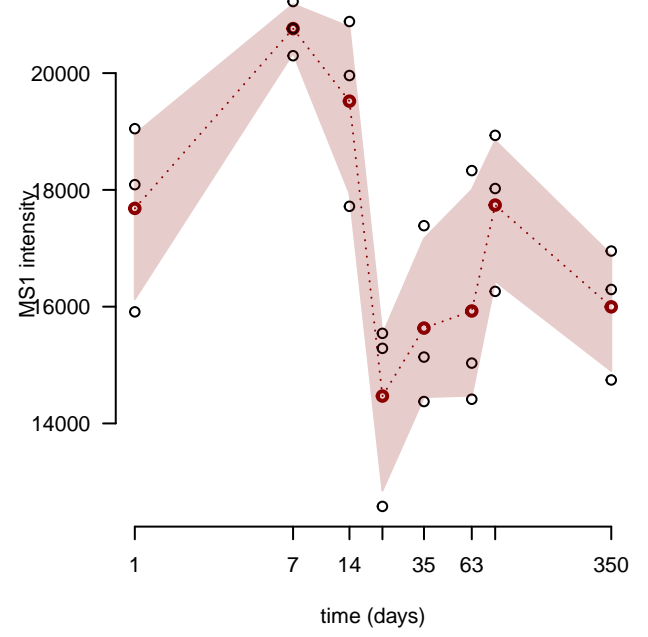

**Q5F2F2**  
**GN=Abhd15**  
abhydrolase domain containing 15

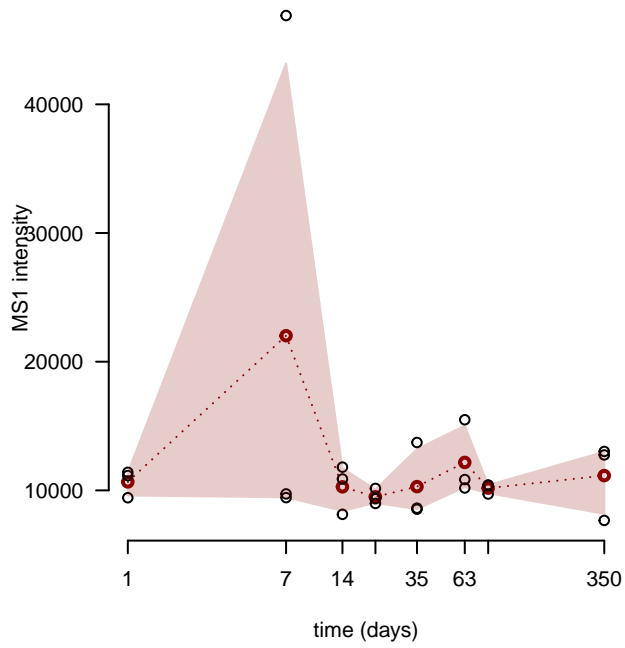

**Q5FWI3**  
**GN=Cemip2**  
cell migration inducing hyaluronidase 2

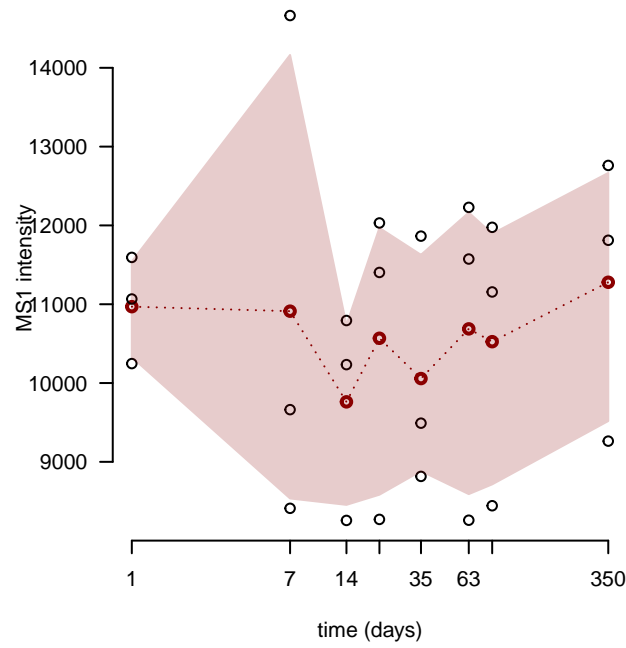

**Q5FWK3**  
**GN=Arhgap1**  
Rho GTPase activating protein 1

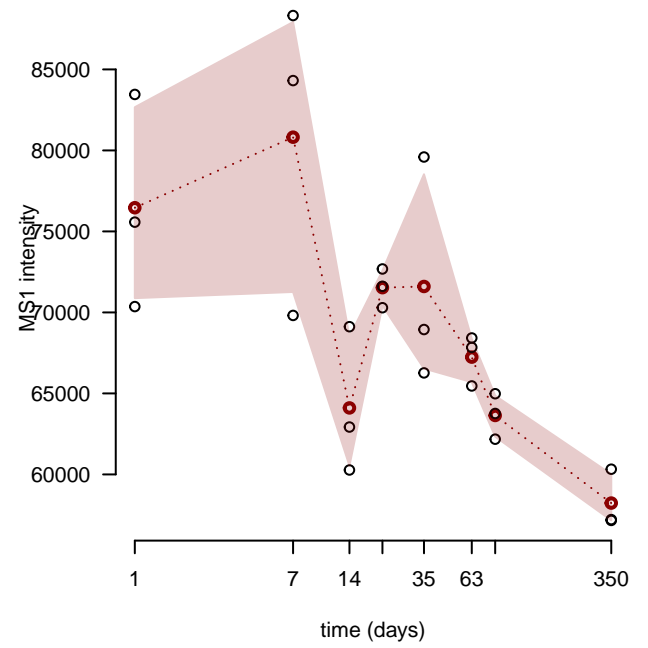

**Q5H8C4**  
**GN=Vps13a**  
vacuolar protein sorting 13A

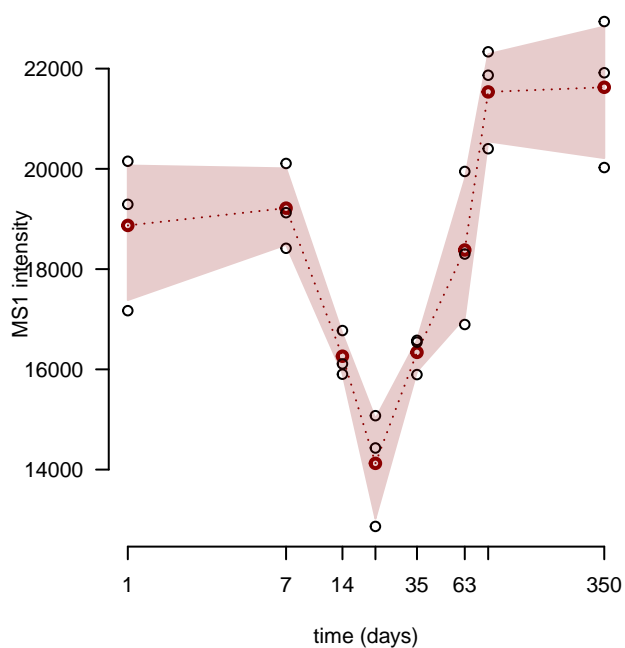

**Q5HZG4**  
**GN=Taf3**  
TATA-box binding protein associated fact ...

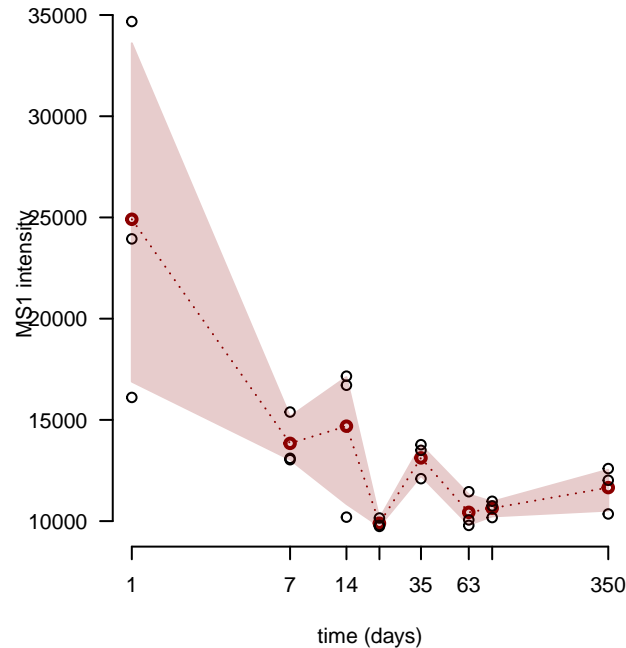

**Q5HZI1**  
**GN=Mtus1**  
mitochondrial tumor suppressor 1

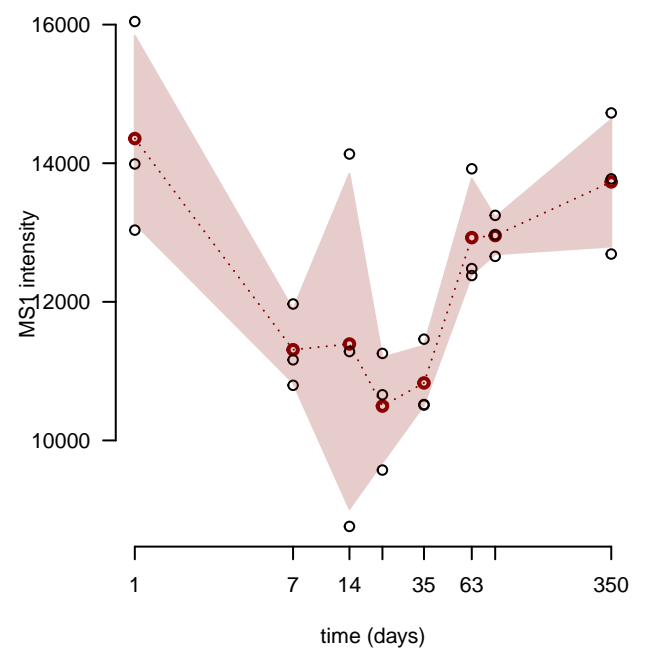

**Q5HZI9**  
GN=Slc25a51  
solute carrier family 25, member 51

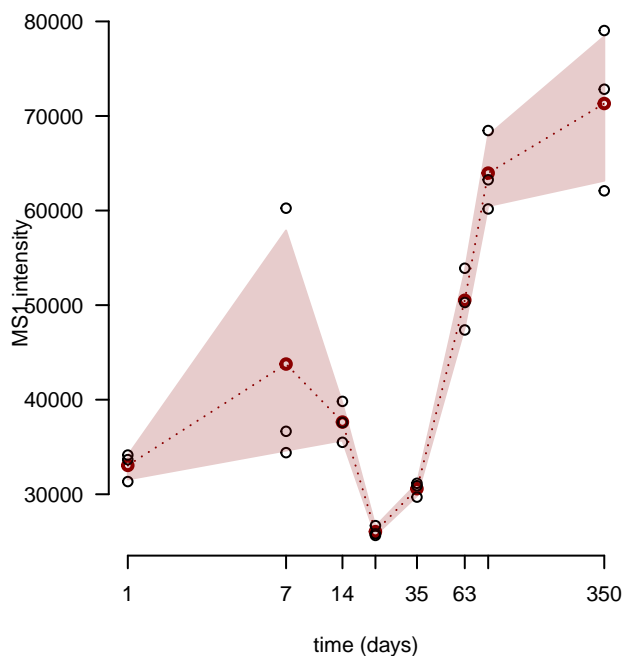

**Q5HZJ0**  
GN=Drosha  
drosha, ribonuclease type III

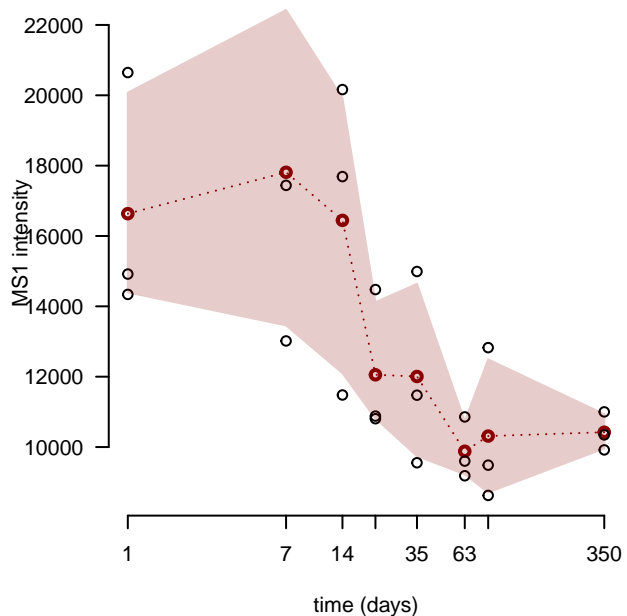

**Q5I012**  
GN=Slc38a10  
solute carrier family 38, member 10

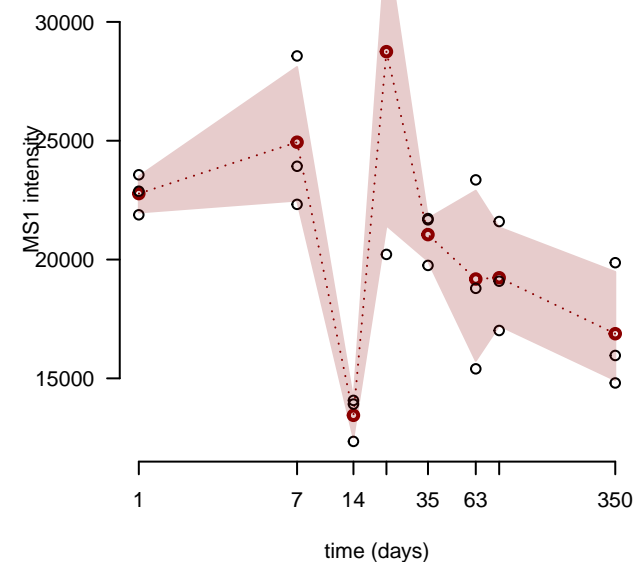

**Q5I043**  
GN=Usp28  
ubiquitin specific peptidase 28

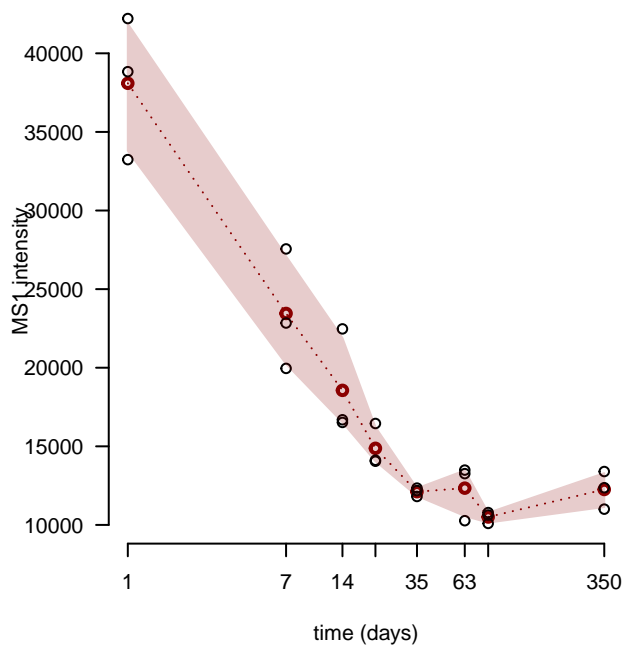

**Q5I2A0**  
GN=Serpina3g  
serine (or cysteine) peptidase inhibitor ...

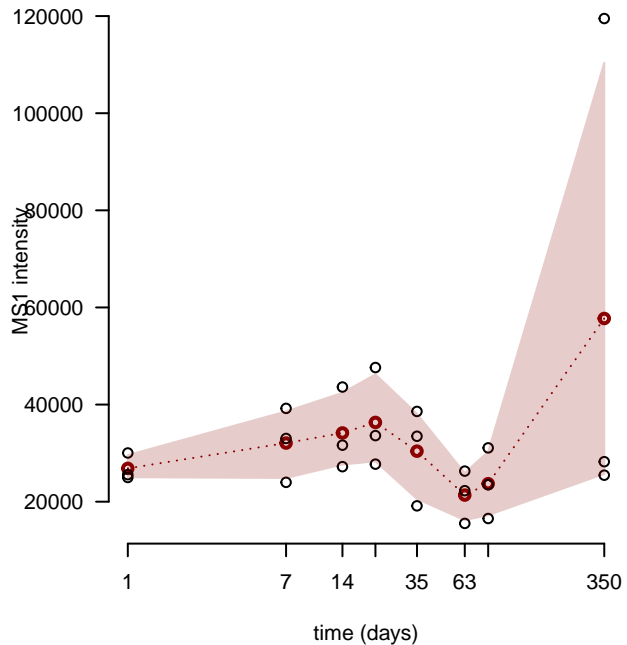

**Q5IRJ6**  
GN=Slc30a9  
solute carrier family 30 (zinc transport ...

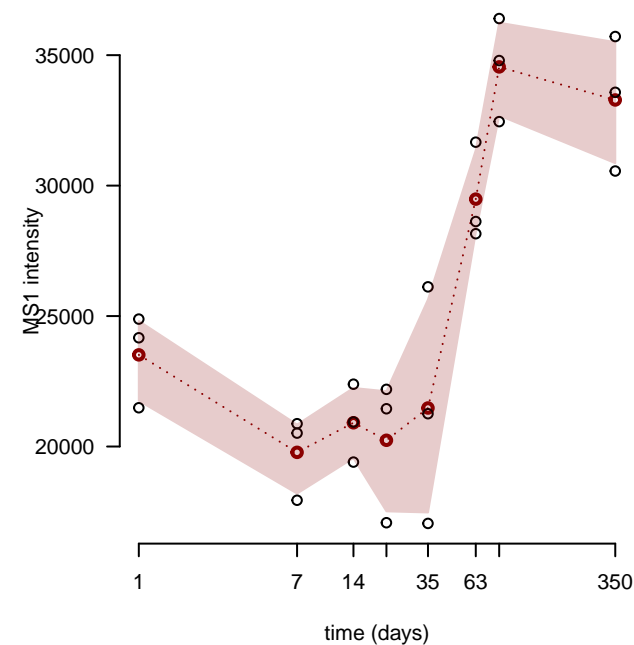

**Q5KU39**  
GN=Vps41  
VPS41 HOPS complex subunit

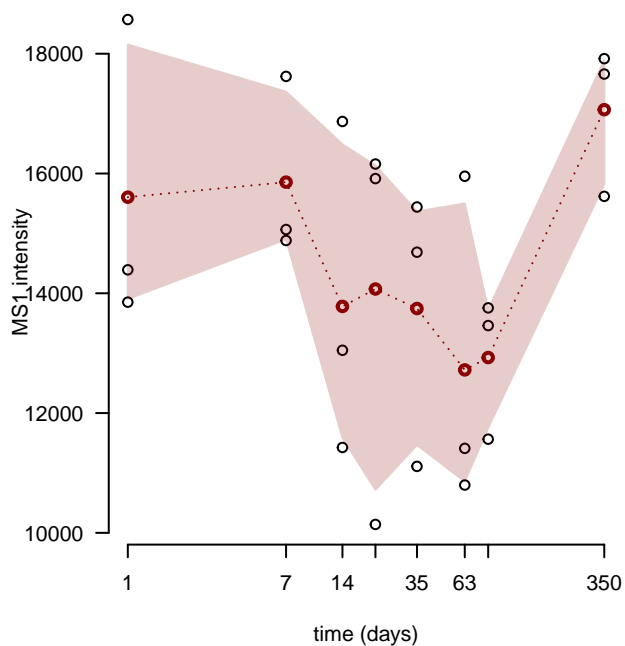

**Q5M8N0**  
GN=Cnrip1  
cannabinoid receptor interacting protein ...

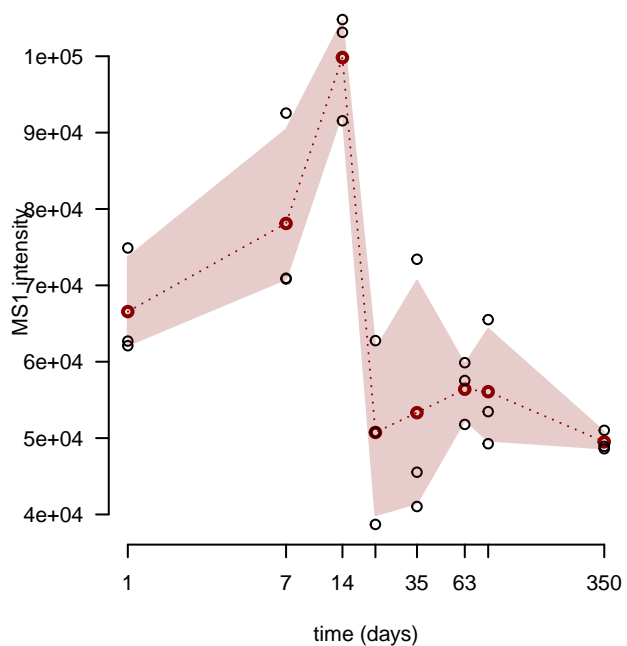

**Q5M8N4**  
GN=Sdr39u1  
short chain dehydrogenase/reductase fami ...

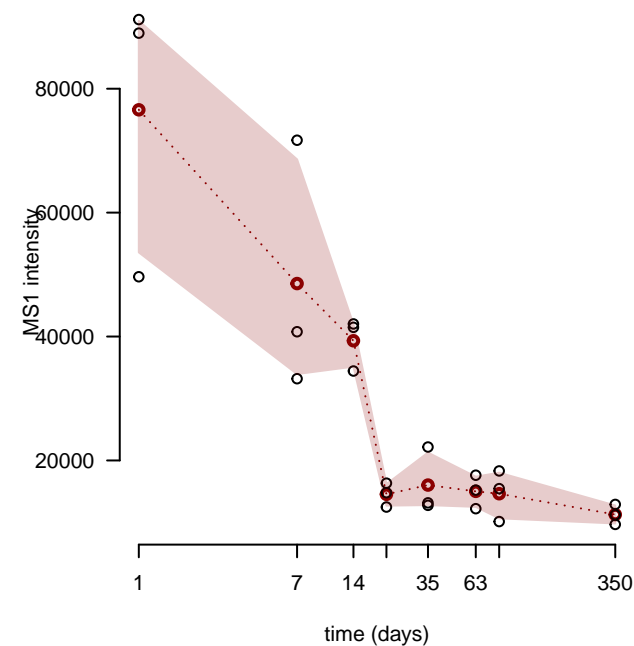

**Q5M956**  
**GN=Kctd1**  
potassium channel tetramerisation domain ...

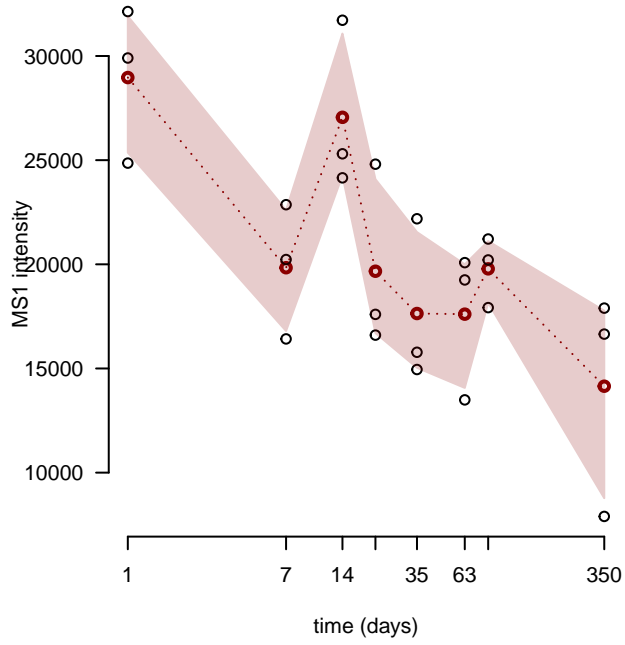

**Q5NBU8**  
**GN=Xaf1**  
XIAP associated factor 1

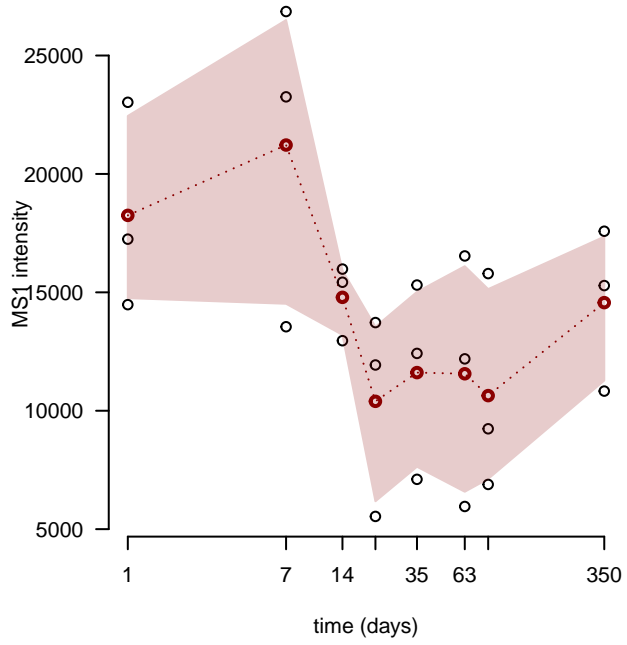

**Q5NC05**  
**GN=Ttf2**  
transcription termination factor, RNA po ...

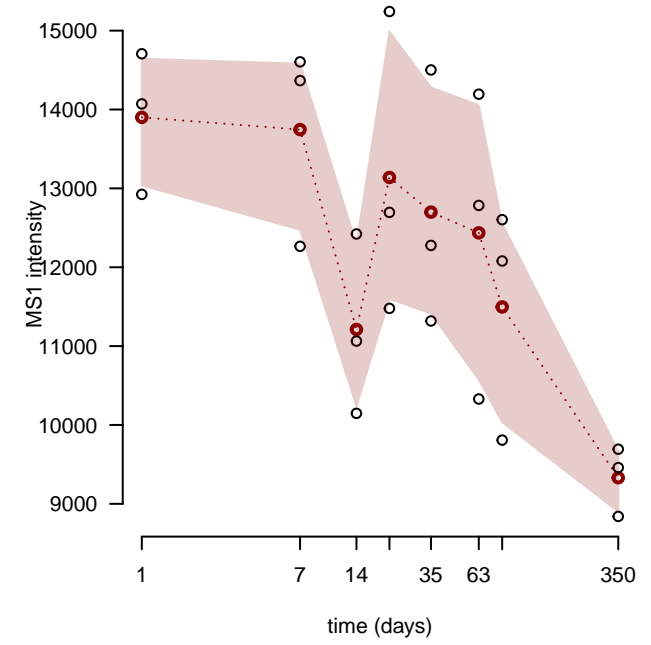

**Q5NCC3**  
**GN=Trim41**  
tripartite motif-containing 41

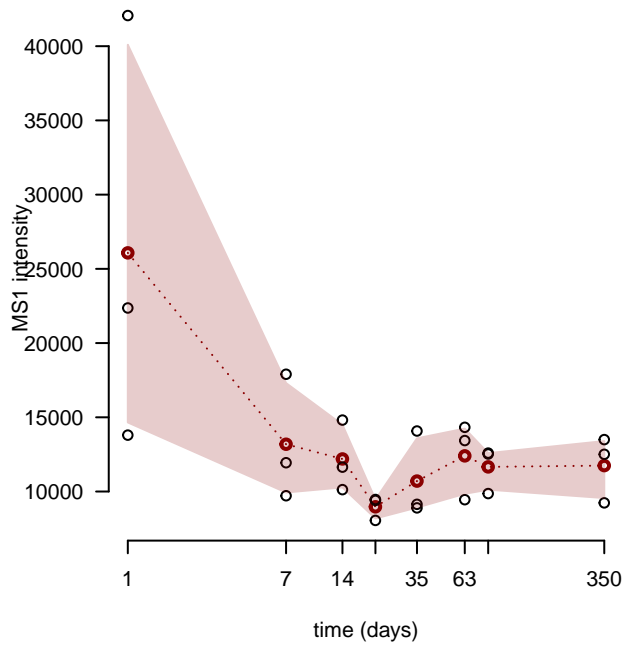

**Q5NCE8**  
**GN=Mrs2**  
MRS2 magnesium transporter

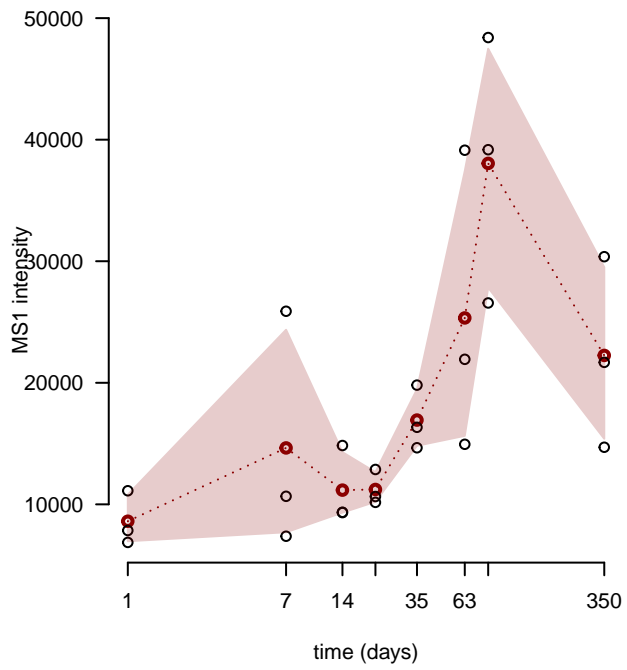

**Q5NCF2**  
**GN=Trappc1**  
trafficking protein particle complex 1

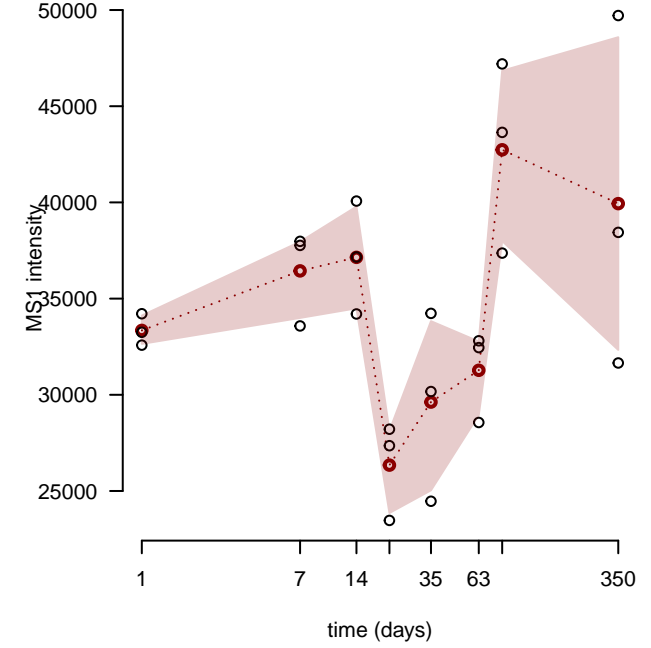

**Q5NC10**  
**GN=Urgcp**  
upregulator of cell proliferation

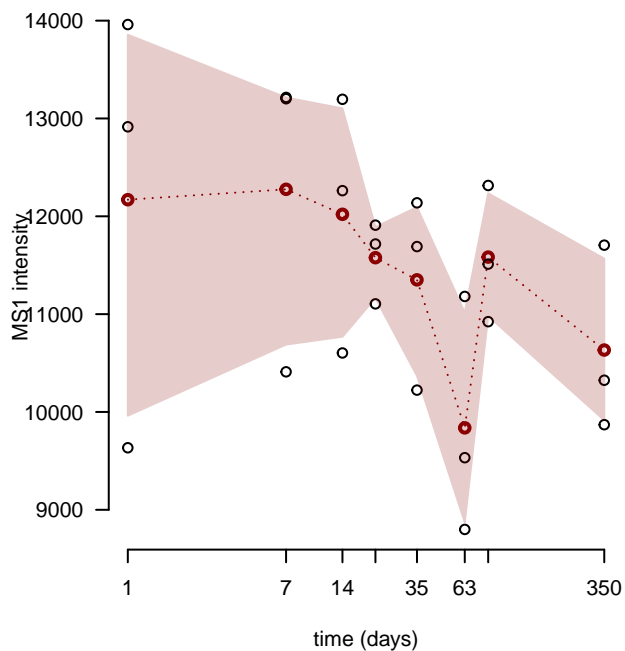

**Q5NCQ5**  
**GN=Dph1**  
diphthamide biosynthesis 1

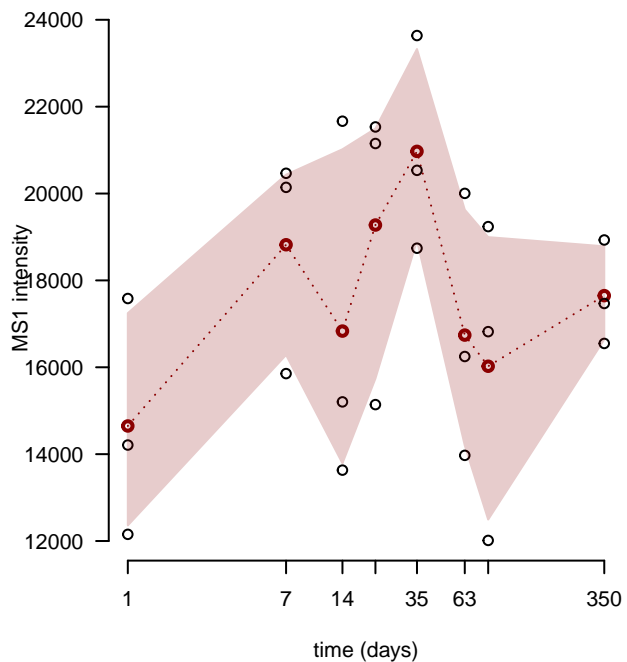

**Q5NCR9**  
**GN=Nsrp1**  
nuclear speckle regulatory protein 1

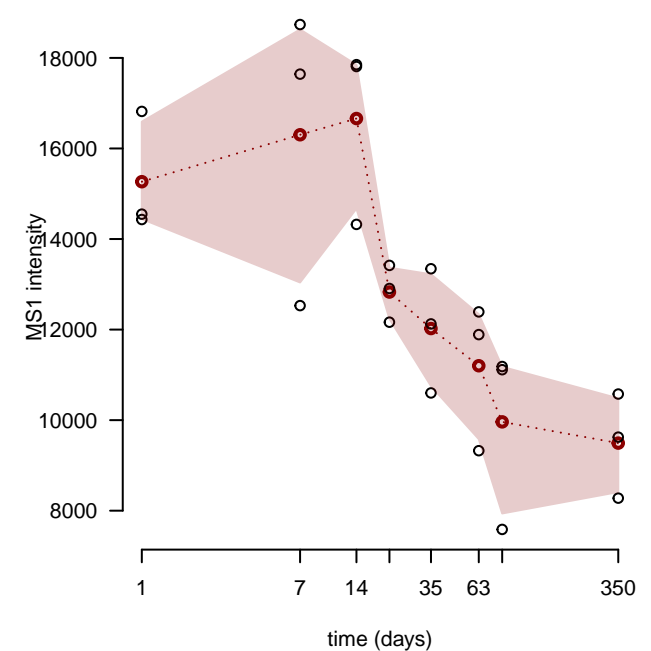

**Q5NCS9**  
GN=Mief2  
mitochondrial elongation factor 2

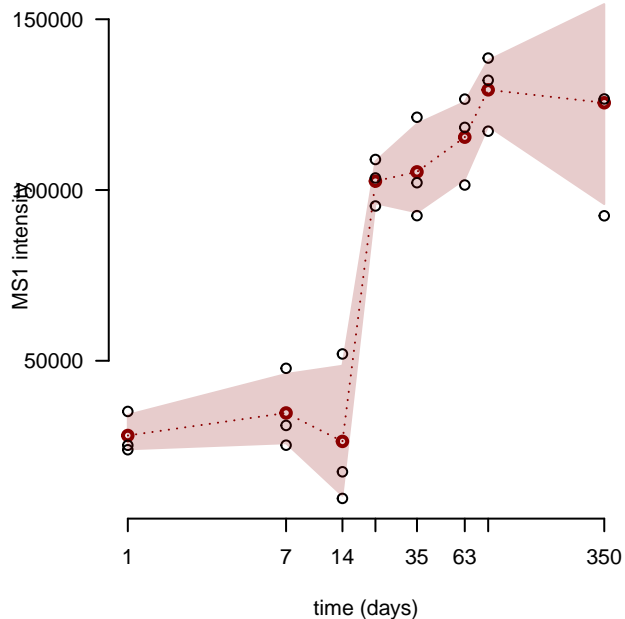

**Q5NCX5**  
GN=Neur14  
neuralized E3 ubiquitin protein ligase 4

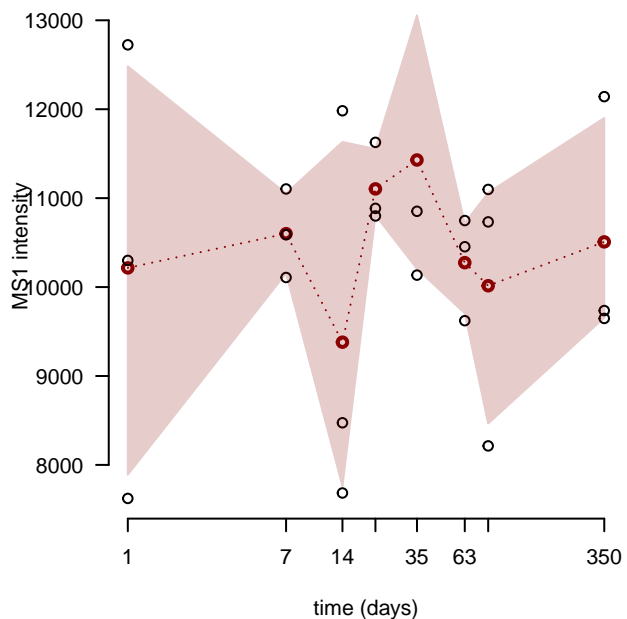

**Q5ND34**  
GN=Wdr81  
WD repeat domain 81

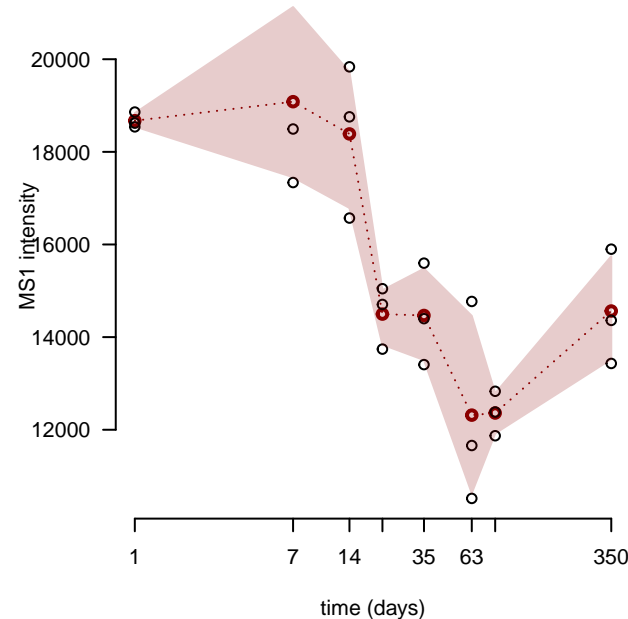

**Q5ND52**  
GN=Mrm3  
mitochondrial rRNA methyltransferase 3

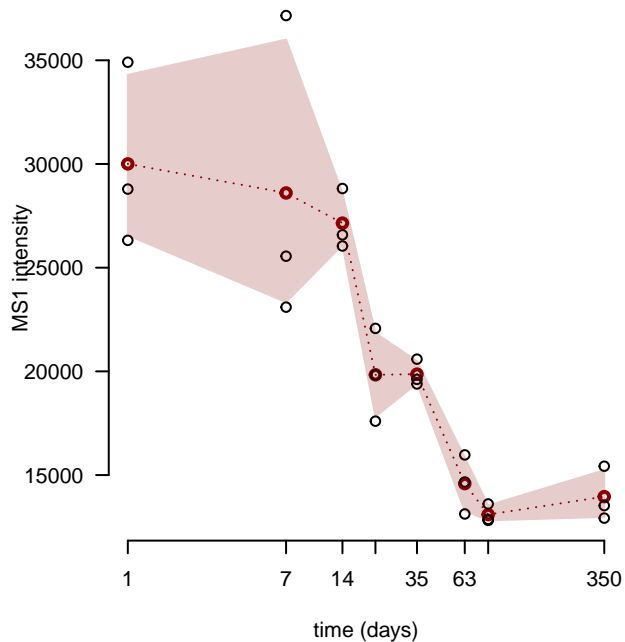

**Q5ND56**  
GN=Fam57a

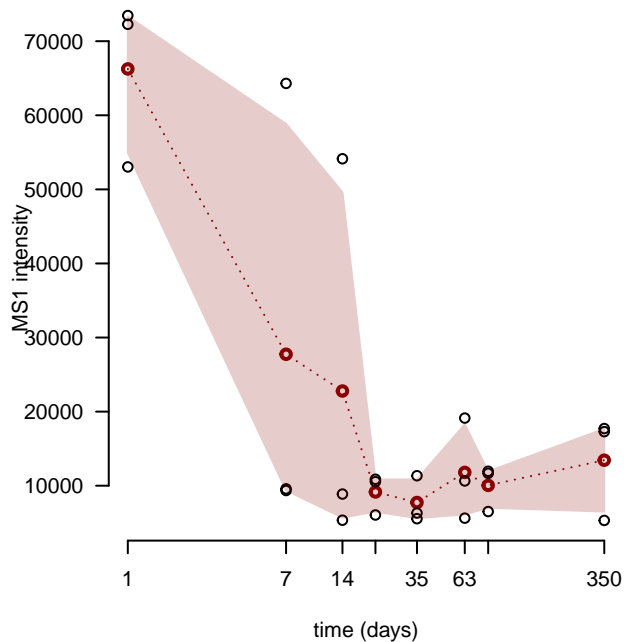

**Q5PR68**  
GN=Cep112  
centrosomal protein 112

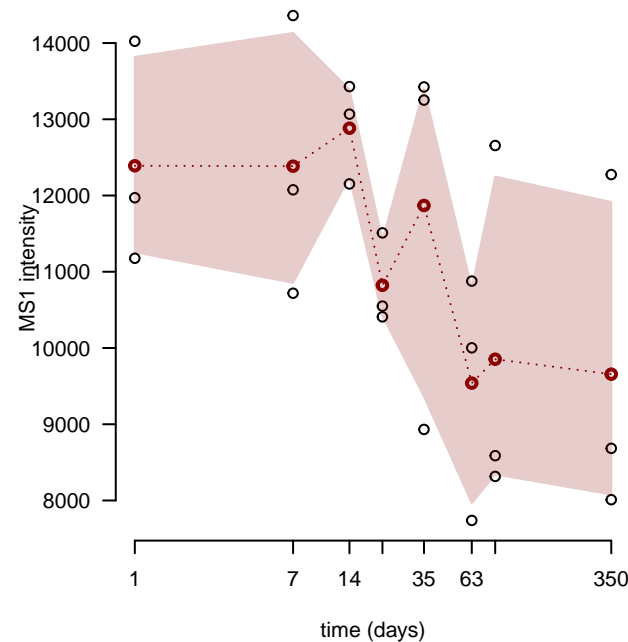

**Q5PRE5**  
GN=Proser1  
proline and serine rich 1

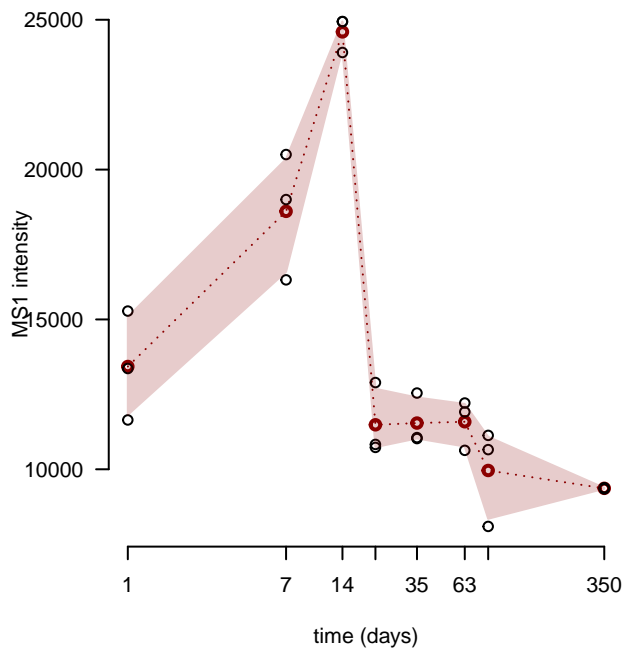

**Q5PRF0**  
GN=Heatr5a  
HEAT repeat containing 5A

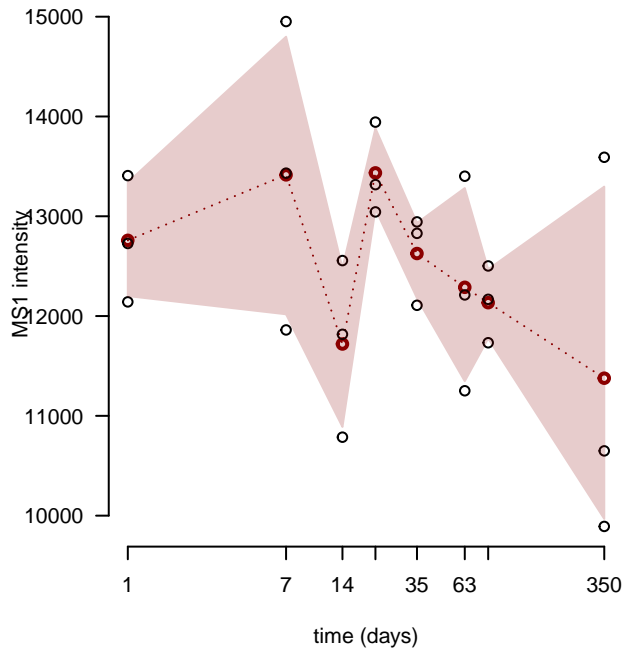

**Q5PSV9**  
GN=Mdc1  
mediator of DNA damage checkpoint 1

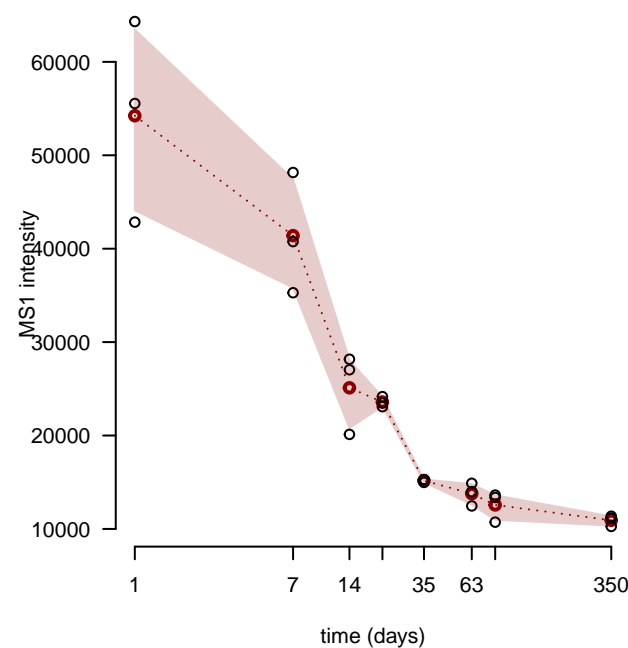

**Q5PT53**  
**GN=Slc10a7**  
solute carrier family 10 (sodium/bile ac ...

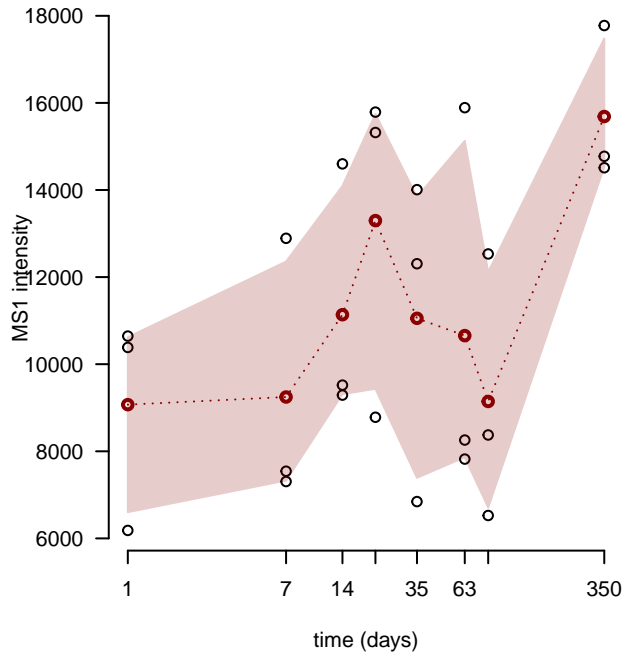

**Q5QNG6**  
**GN=Osbp2**  
oxysterol binding protein 2

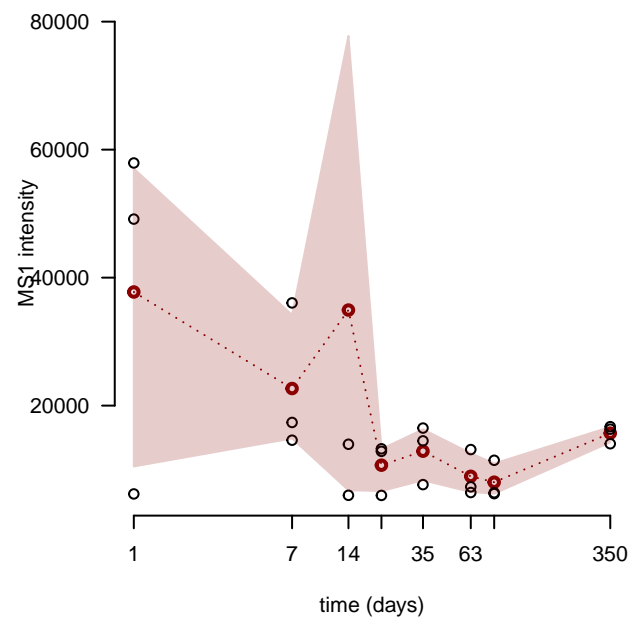

**Q5RJ54**  
**GN=Zscan26**  
zinc finger and SCAN domain containing 2 ...

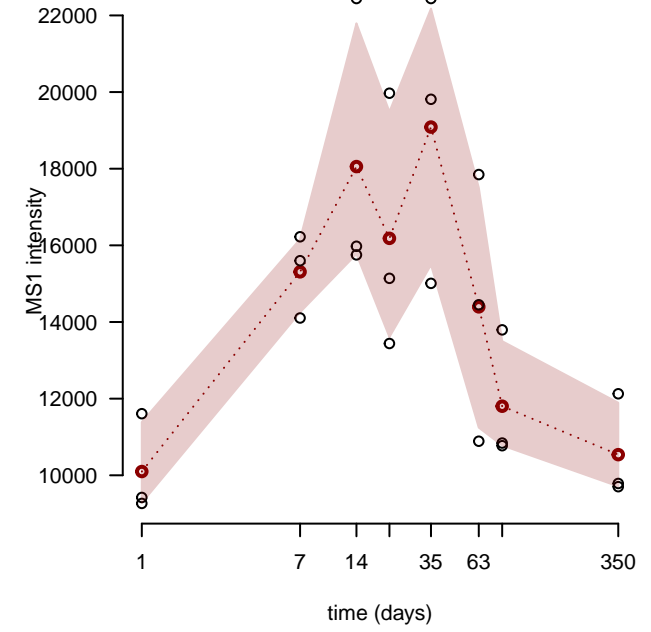

**Q5RJG1**  
**GN=Nol10**  
nucleolar protein 10

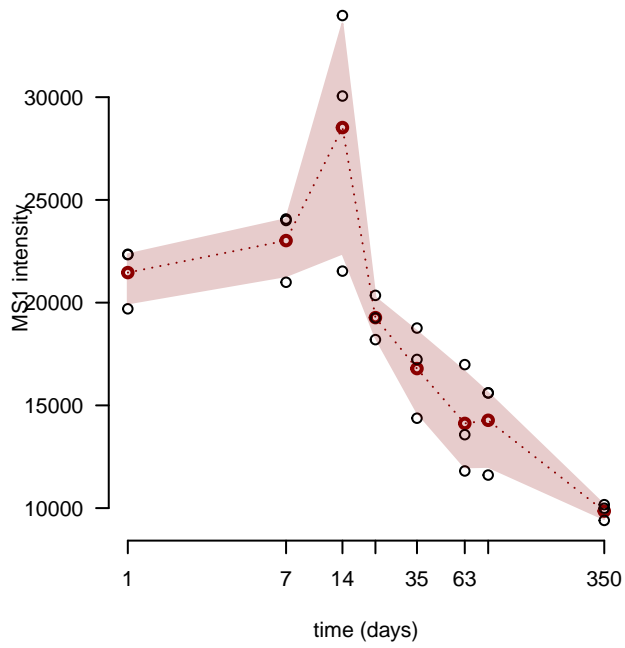

**Q5RJG7**  
**GN=Crppa**  
CDP-L-ribitol pyrophosphorylase A

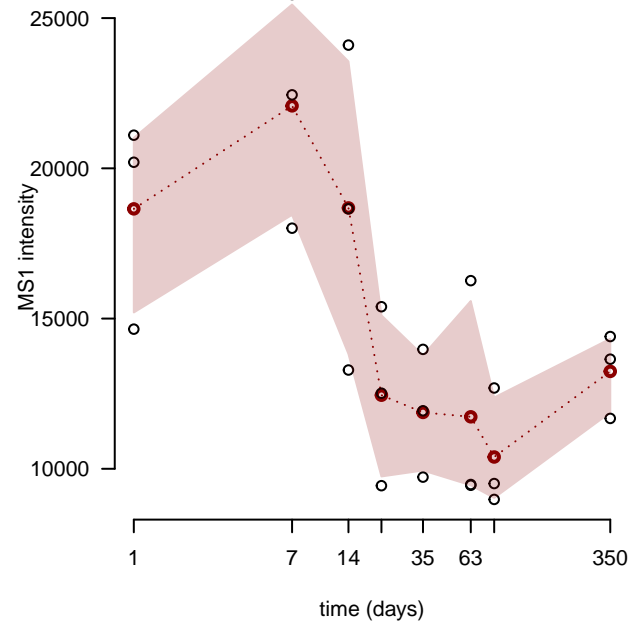

**Q5RJH2**  
**GN=Mctp2**  
multiple C2 domains, transmembrane 2 ...

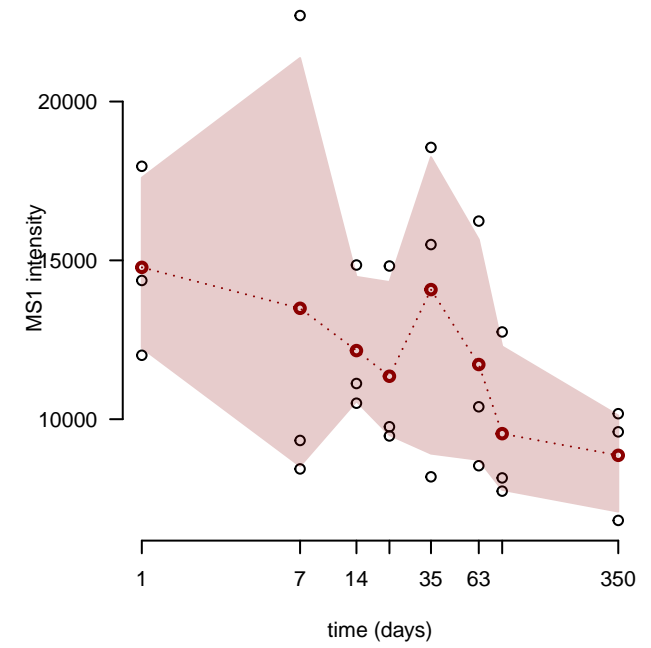

**Q5RJH6**  
**GN=Smg7**  
SMG7 nonsense mediated mRNA decay factor

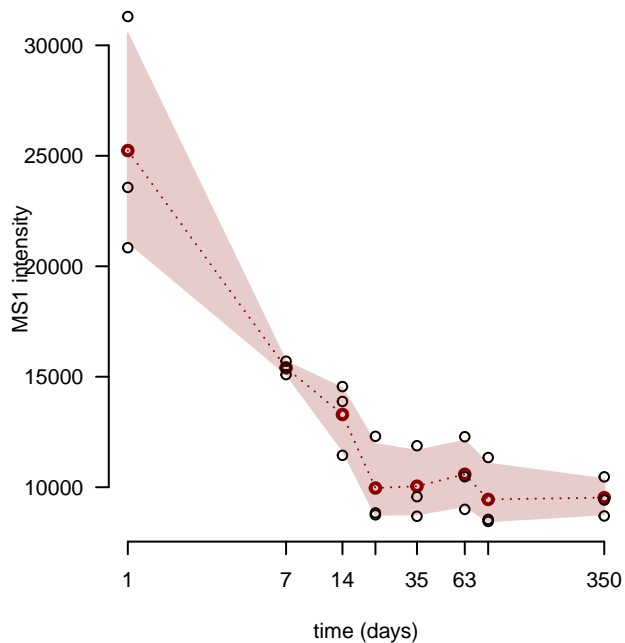

**Q5RKS2**  
**GN=Smim7**  
small integral membrane protein 7

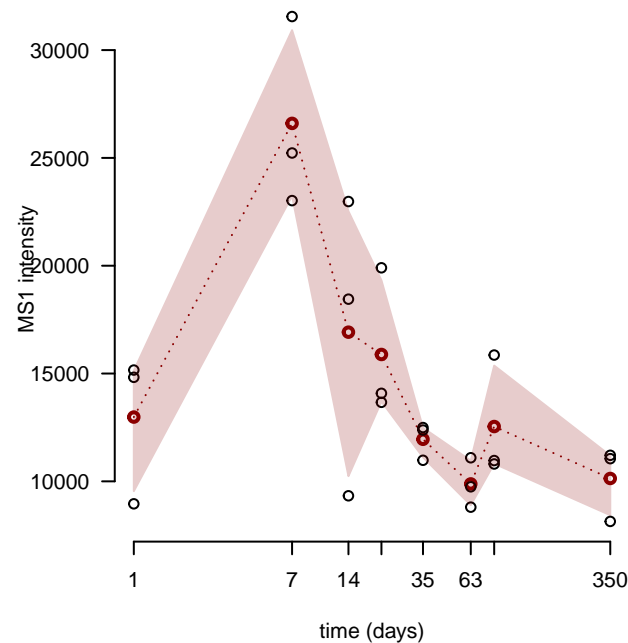

**Q5RKZ7**  
**GN=Mocs1**  
molybdenum cofactor synthesis 1

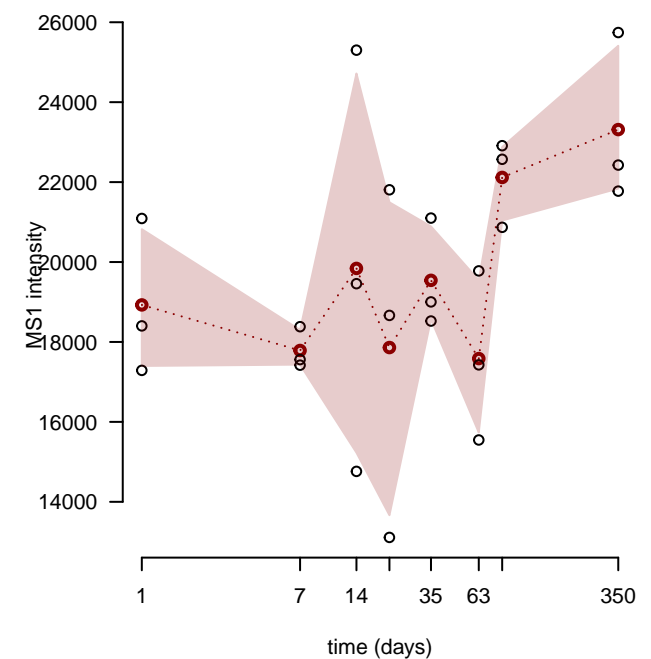

**Q5RL51**  
GN=Gstcd  
glutathione S-transferase, C-terminal do ...

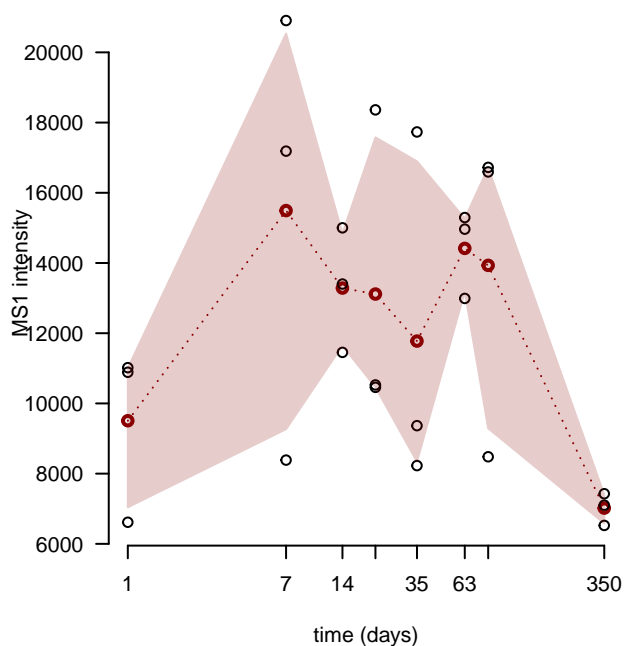

**Q5RL79**  
GN=Krtcap2  
keratinocyte associated protein 2

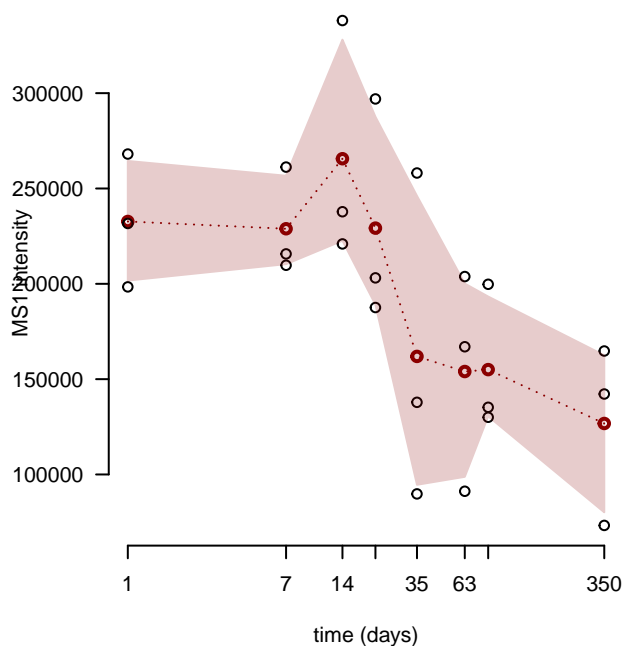

**Q5S006**  
GN=Lrrk2  
leucine-rich repeat kinase 2

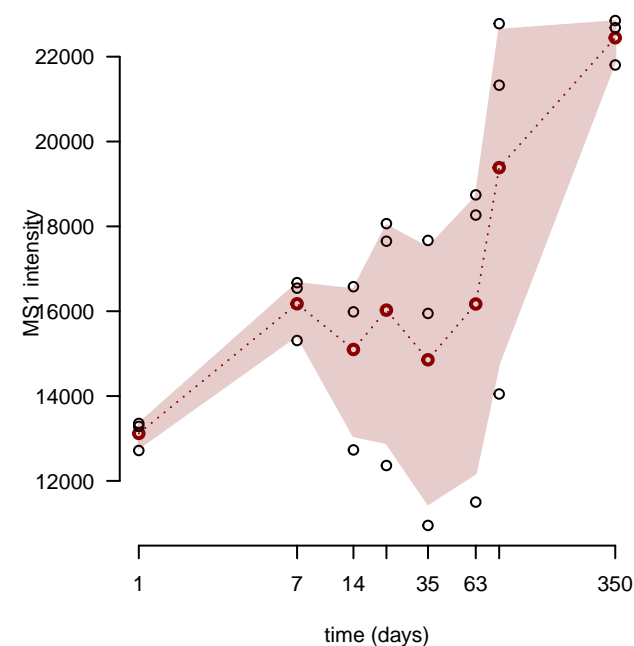

**Q5SF07**  
GN=Igf2bp2  
insulin-like growth factor 2 mRNA bindin ...

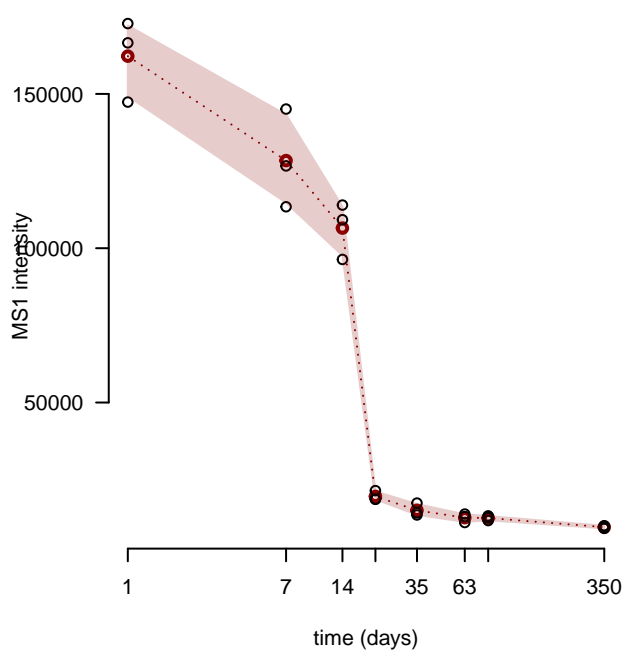

**Q5SFM8**  
GN=Rbm27  
RNA binding motif protein 27

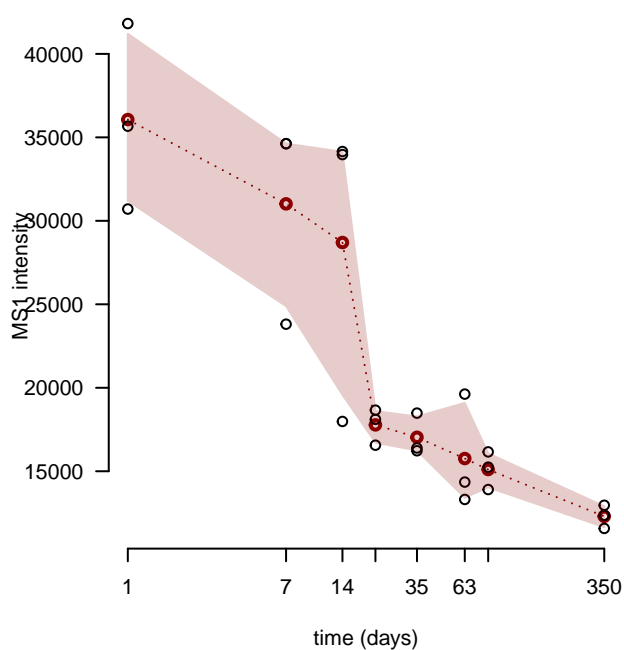

**Q5SNZ0**  
GN=Ccdc88a  
coiled coil domain containing 88A

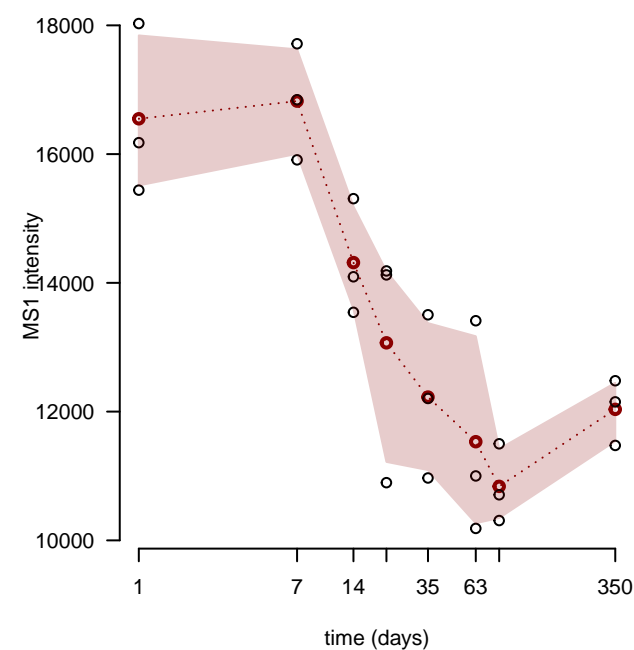

**Q5SPL2**  
GN=Phf12  
PHD finger protein 12

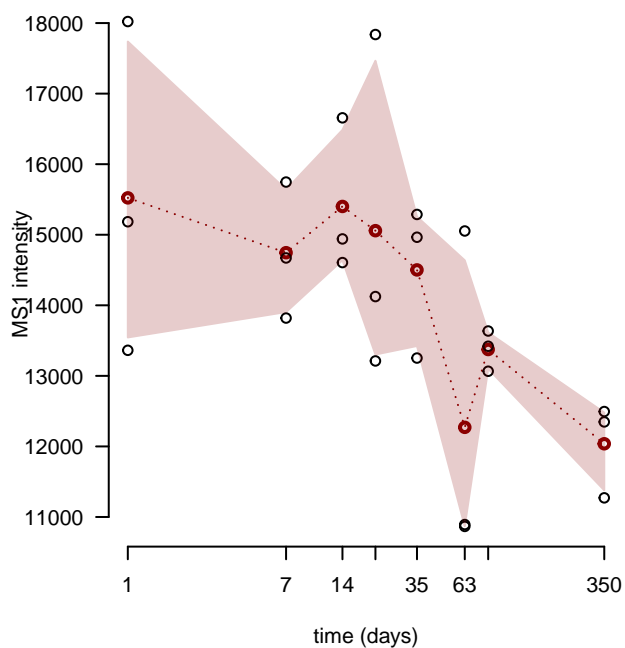

**Q5SQF8**  
GN=Sap30l  
SAP30-like

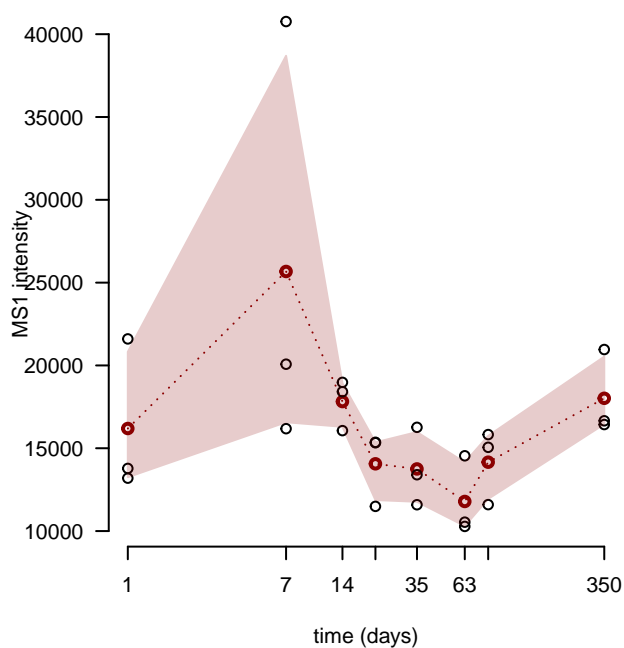

**Q5SQX6**  
GN=Cyfp2  
cytoplasmic FMR1 interacting protein 2

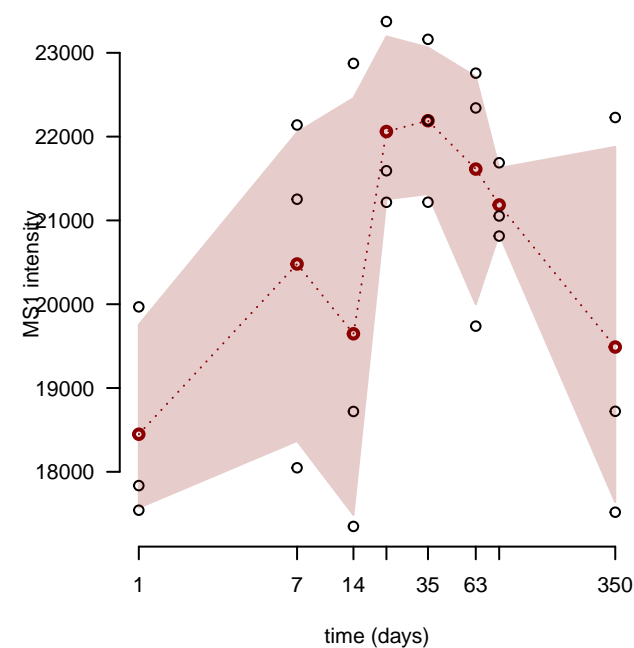

**Q5SRX1**  
GN=Tom112  
target of myb1-like 2 (chicken)

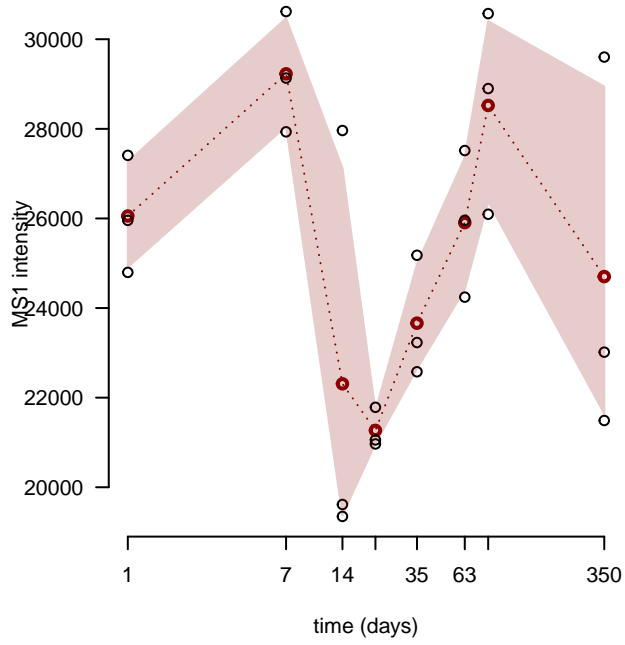

**Q5SRY7**  
GN=Fbxw11  
F-box and WD-40 domain protein 11

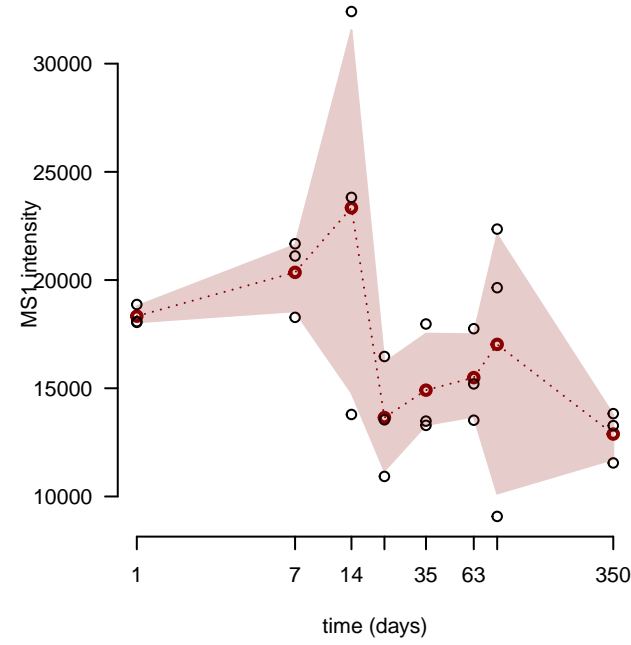

**Q5SS00**  
GN=Zdbf2  
zinc finger, DBF-type containing 2

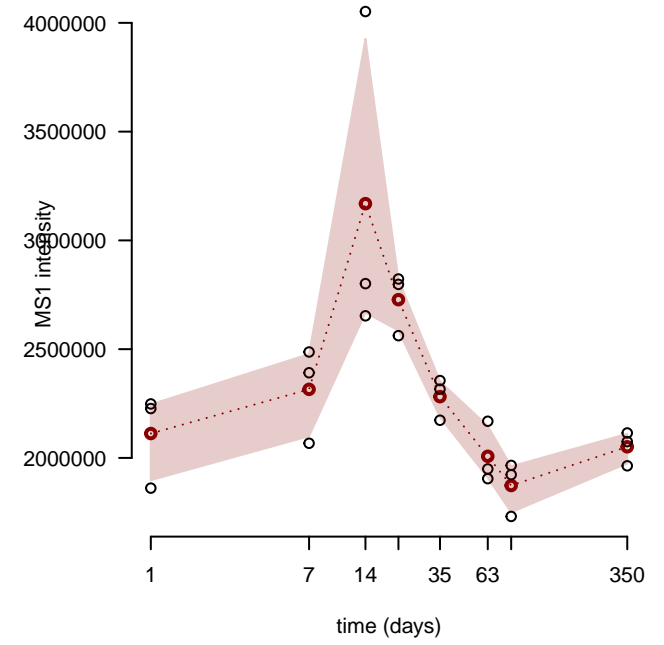

**Q5SS80**  
GN=Dhrs13  
dehydrogenase/reductase (SDR family) mem ...

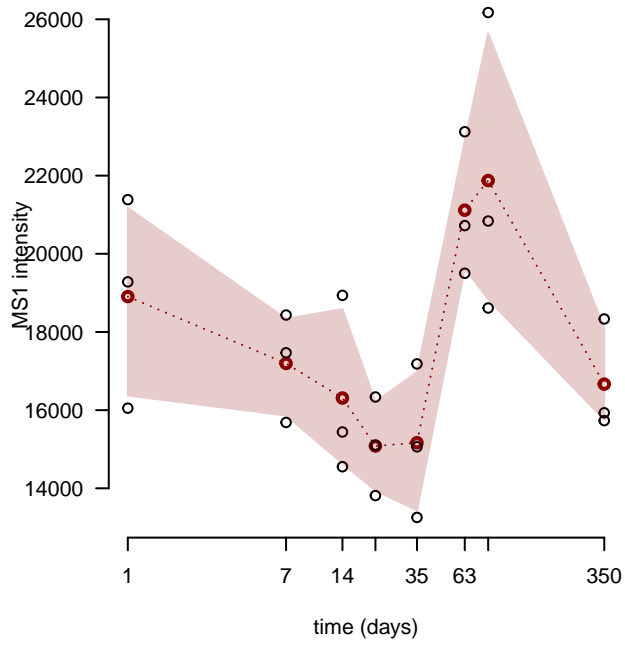

**Q5SSH7**  
GN=Zzef1  
zinc finger, ZZ-type with EF hand domain ...

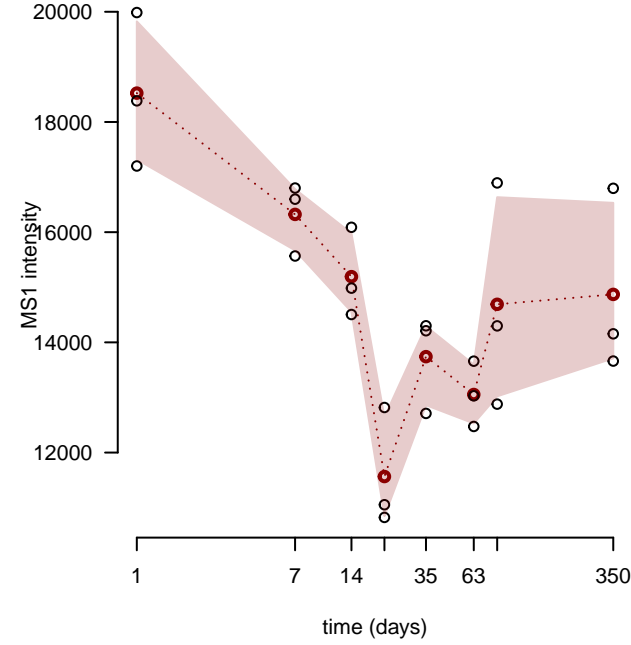

**Q5SSH8**  
GN=Cyb5d2  
cytochrome b5 domain containing 2

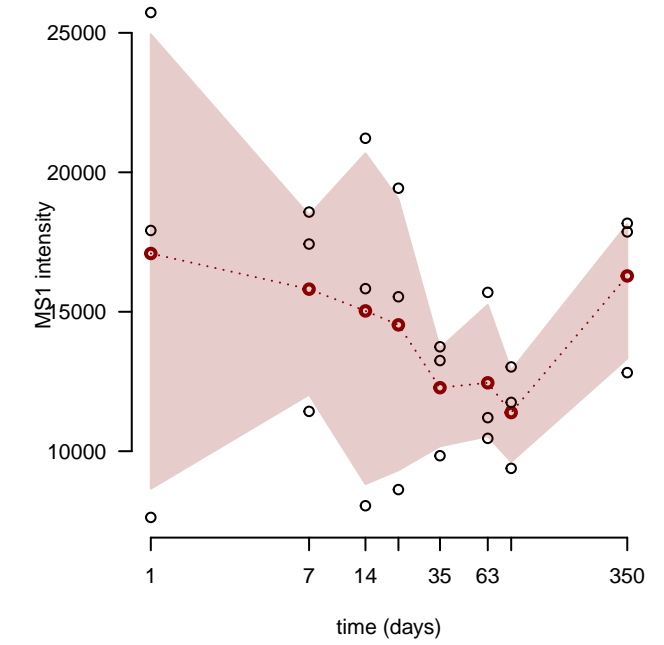

**Q5SSI6**  
GN=Utp18  
UTP18 small subunit processome component

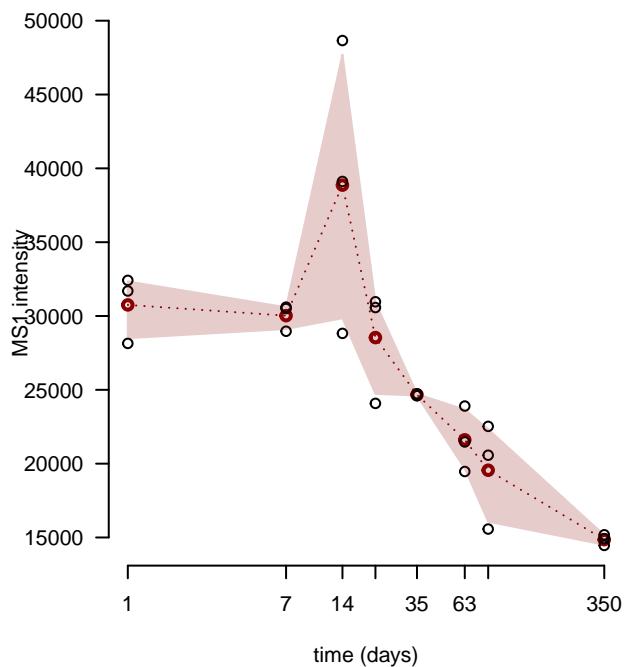

**Q5SSK3**  
GN=Tefm  
transcription elongation factor, mitocho ...

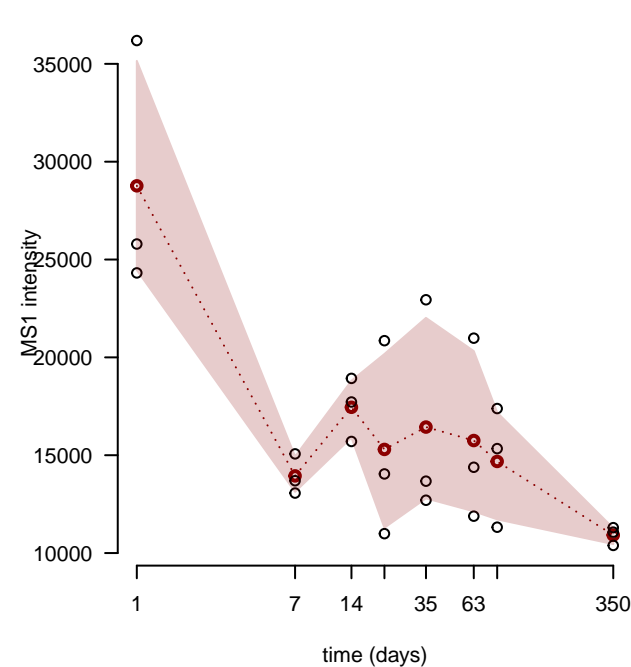

**Q5SSL4**  
GN=Abr  
active BCR-related gene

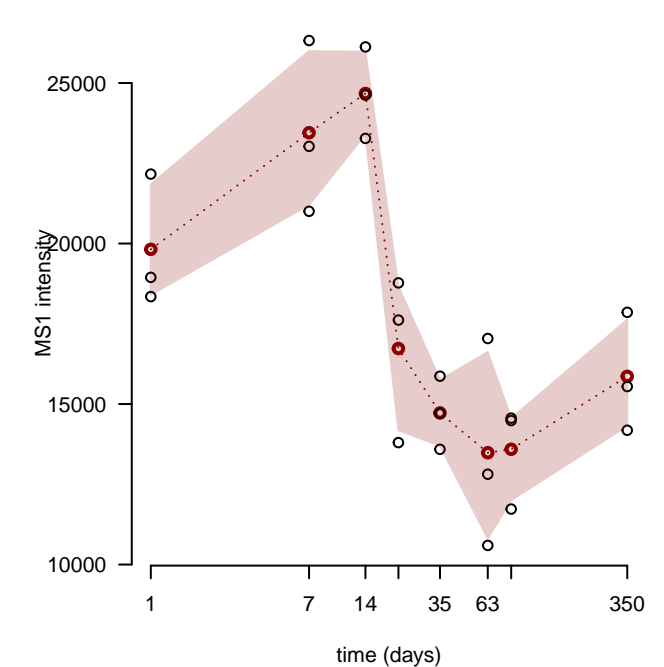



**Q5SSM3**  
**GN=Arhgap44**  
Rho GTPase activating protein 44

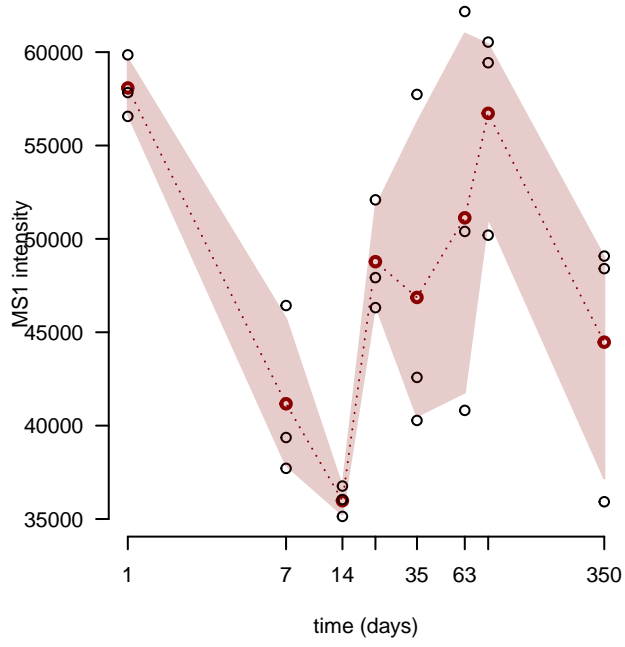

**Q5SSW2**  
**GN=Psme4**  
proteasome (prosome, macropain) activato ...

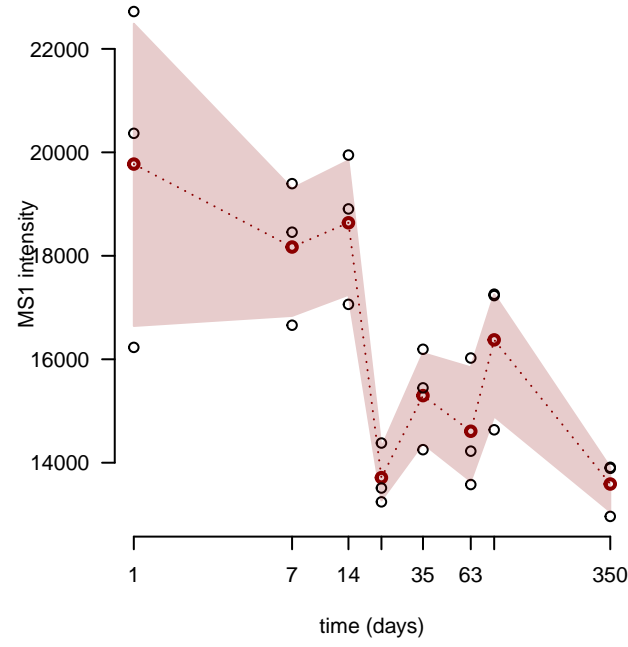

**Q5SSZ5**  
**GN=Tns3**  
tensin 3

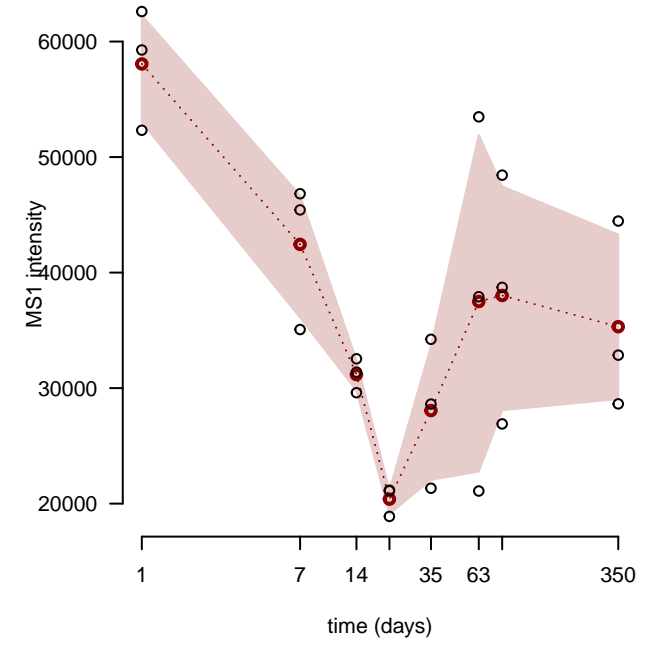

**Q5SU73**  
**GN=Coil**  
coilin

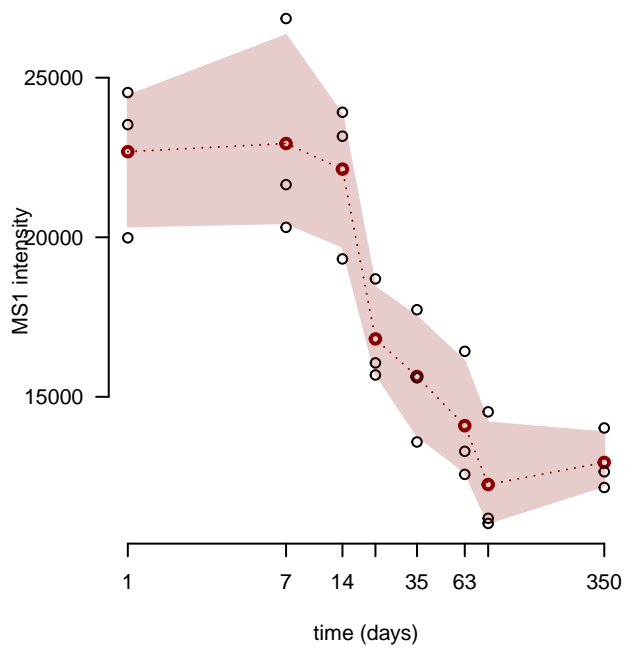

**Q5SUA5**  
**GN=Myo1g**  
myosin IG

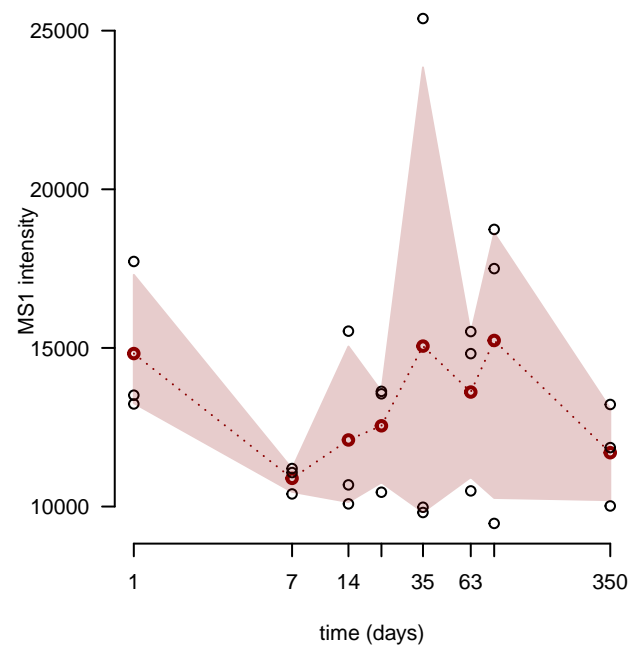

**Q5SUC9**  
**GN=SCO1**  
SCO1 cytochrome c oxidase assembly prote ...

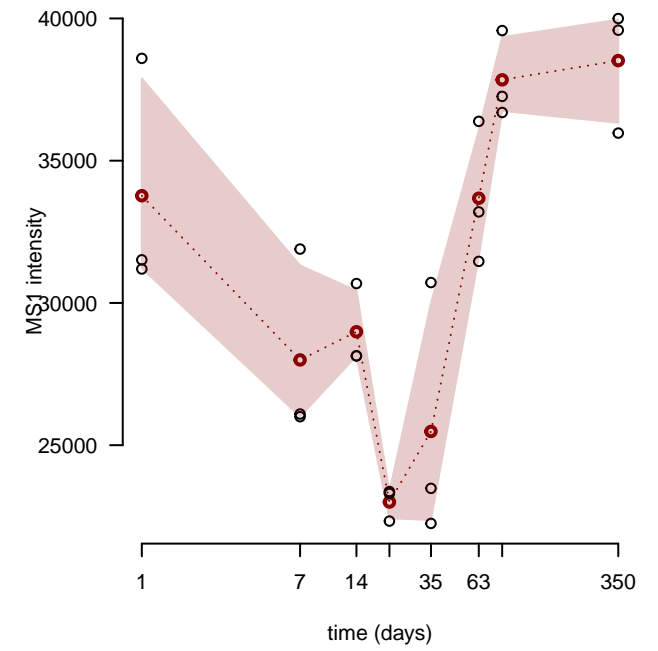

**Q5SUE8**  
**GN=Ankrd40**  
ankyrin repeat domain 40

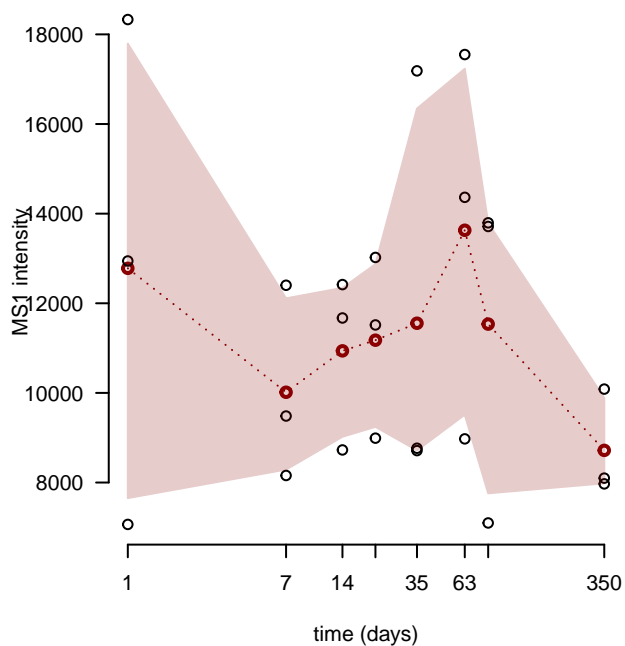

**Q5SUF2**  
**GN=Luc7I3**  
LUC7-like 3 (*S. cerevisiae*)

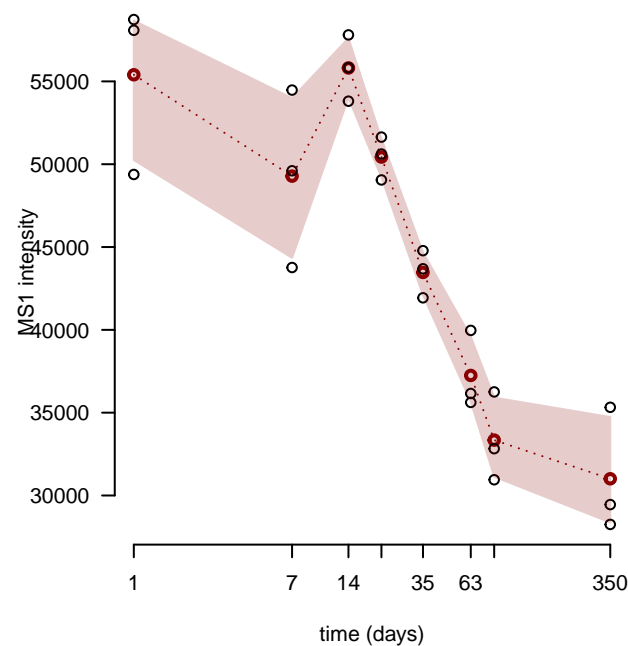

**Q5SUQ9**  
**GN=Ctc1**  
CTS telomere maintenance complex compone ...

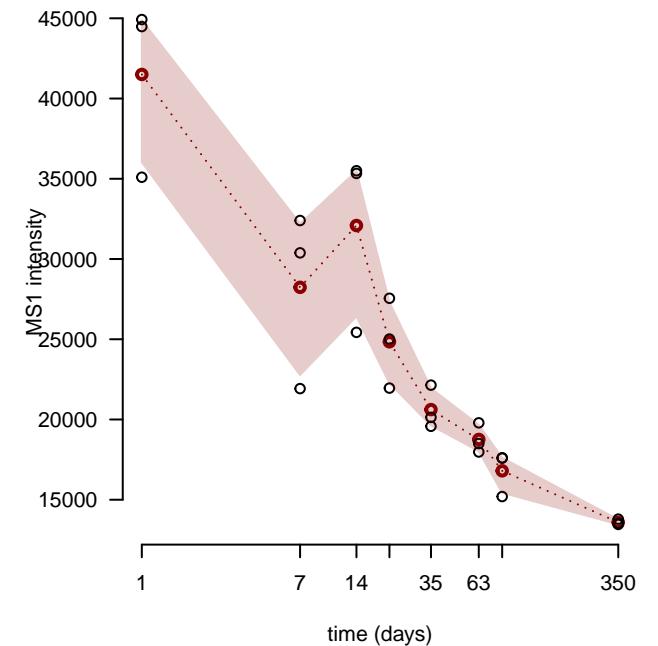

**Q5SUQ9**  
GN=Ctc1  
CTS telomere maintenance complex compone ...

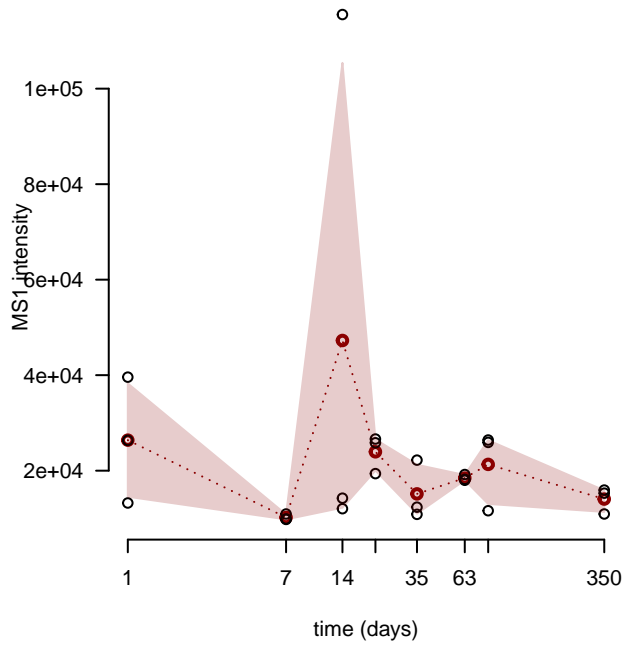

**Q5SUR0**  
GN=Pfas  
phosphoribosylformylglycinamide syntha ...

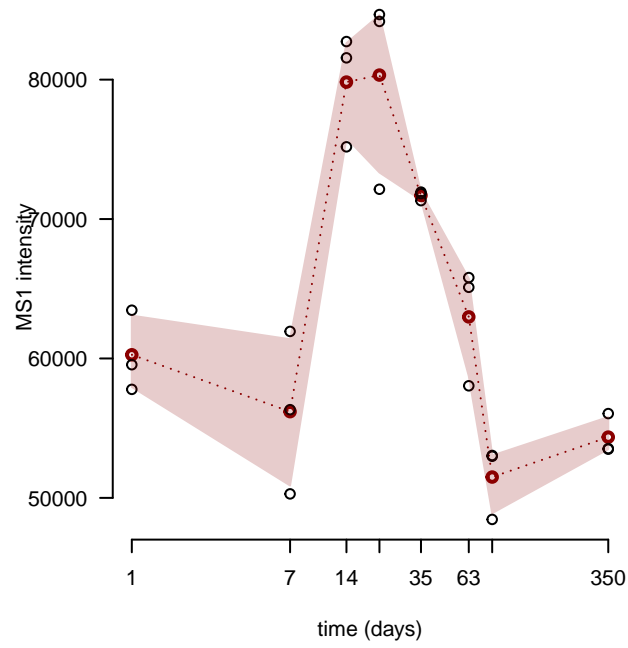

**Q5SV80**  
GN=Myo19  
myosin XIX

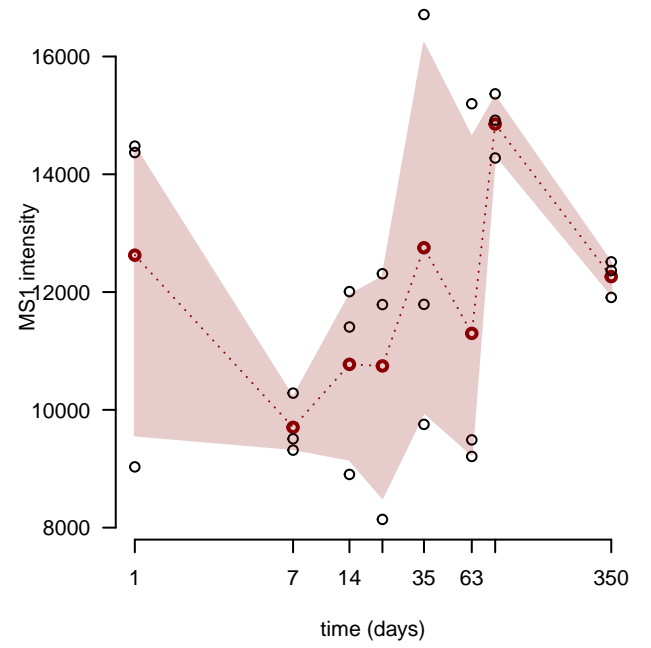

**Q5SV85**  
GN=Synrg  
synergin, gamma

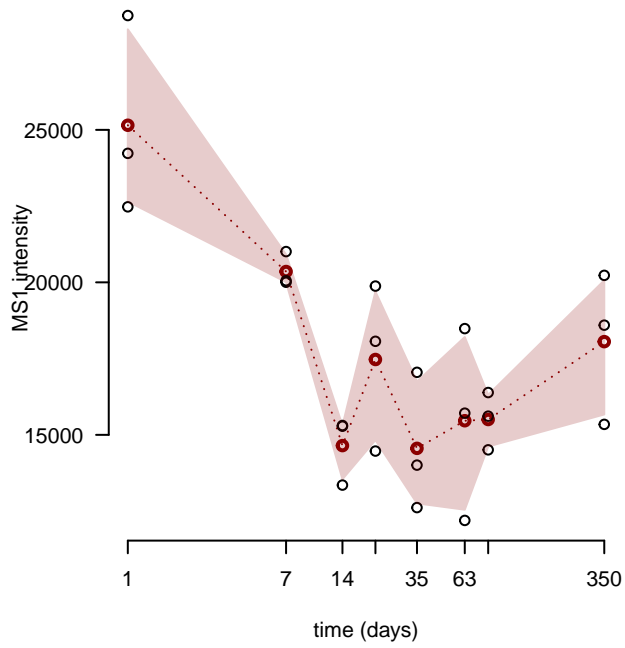

**Q5SVD0**  
GN=Rflnb  
refilin B

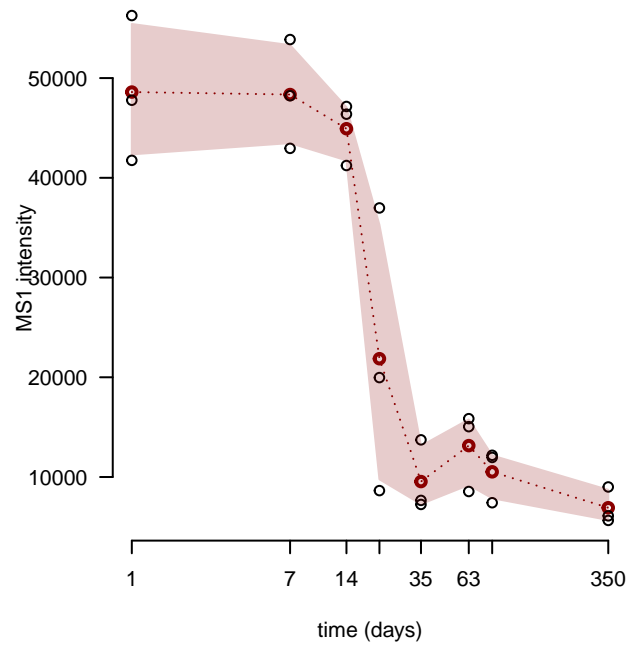

**Q5SVQ0**  
GN=Kat7  
K(lysine) acetyltransferase 7

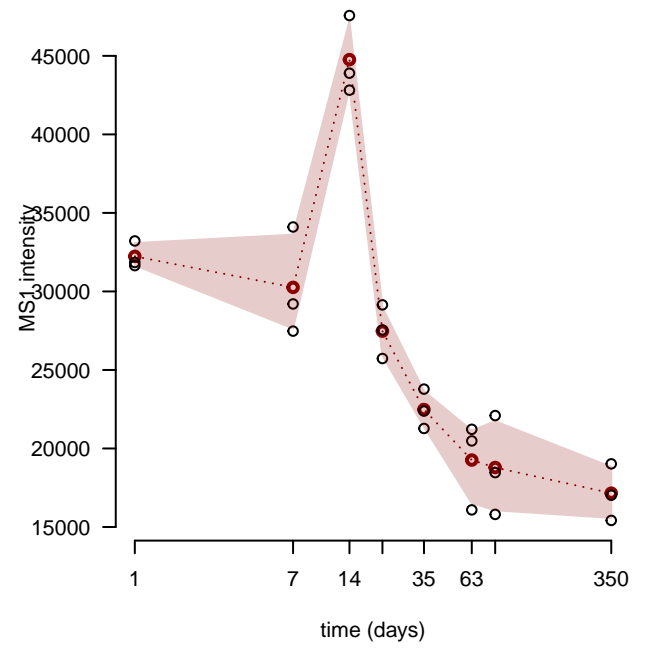

**Q5SVR0**  
GN=Tbc1d9b  
TBC1 domain family, member 9B

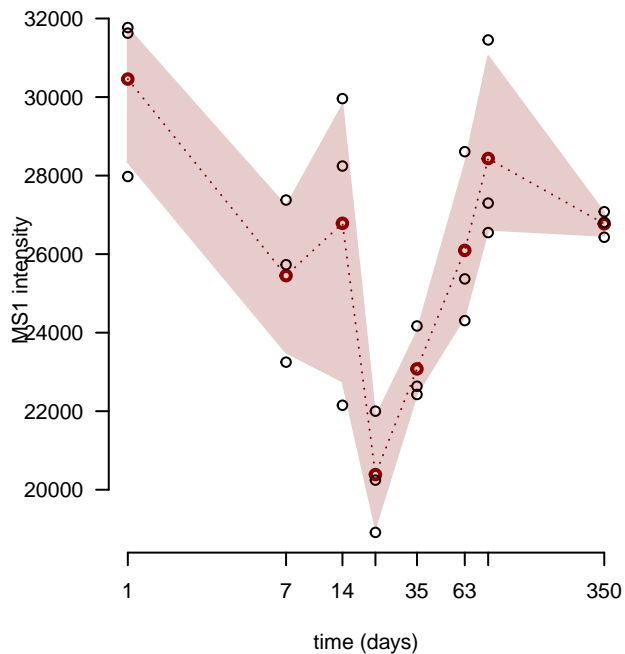

**Q5SW19**  
GN=Cluh  
clustered mitochondria (cluA/CLU1) homol ...

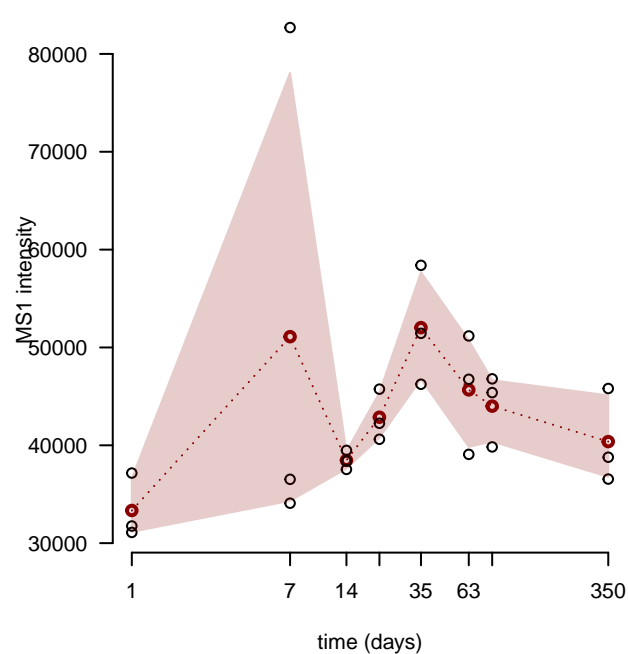

**Q5SWD9**  
GN=Tsr1  
TSR1 20S rRNA accumulation

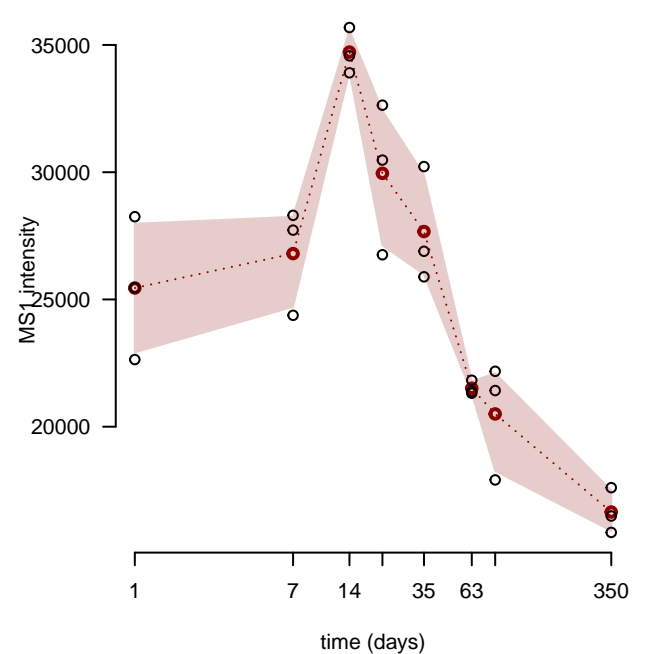

**Q5SWK7**  
**GN=Rnf145**  
ring finger protein 145

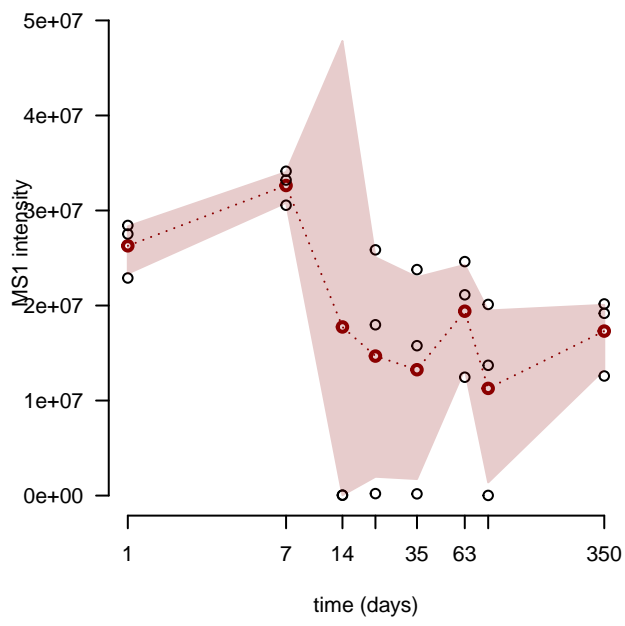

**Q5SWP3**  
**GN=Nacac**  
NAC alpha domain containing

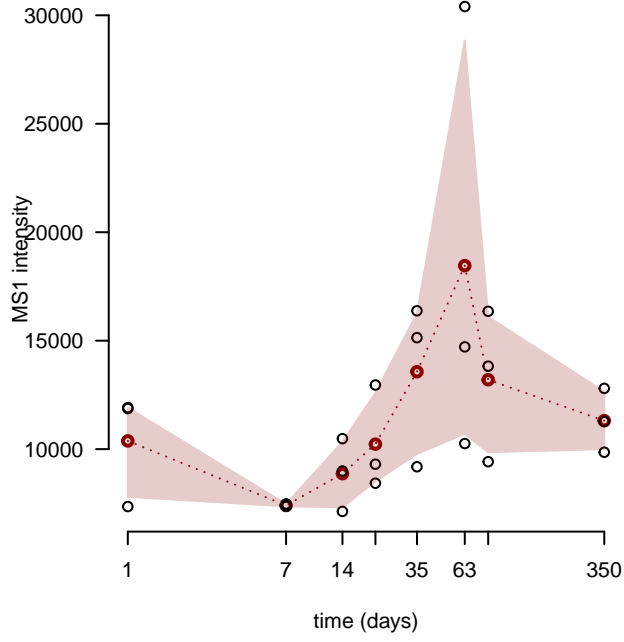

**Q5SWT3**  
**GN=Slc25a35**  
solute carrier family 25, member 35

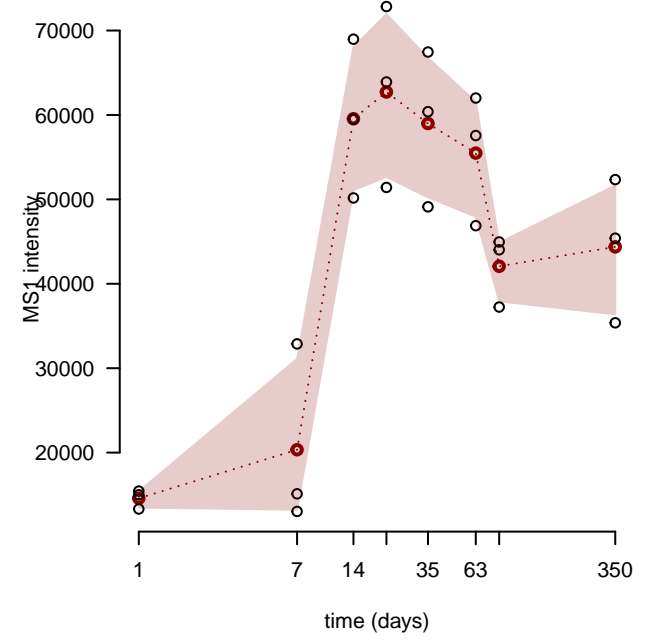

**Q5SWU9**  
**GN=Acaca**  
acetyl-Coenzyme A carboxylase alpha

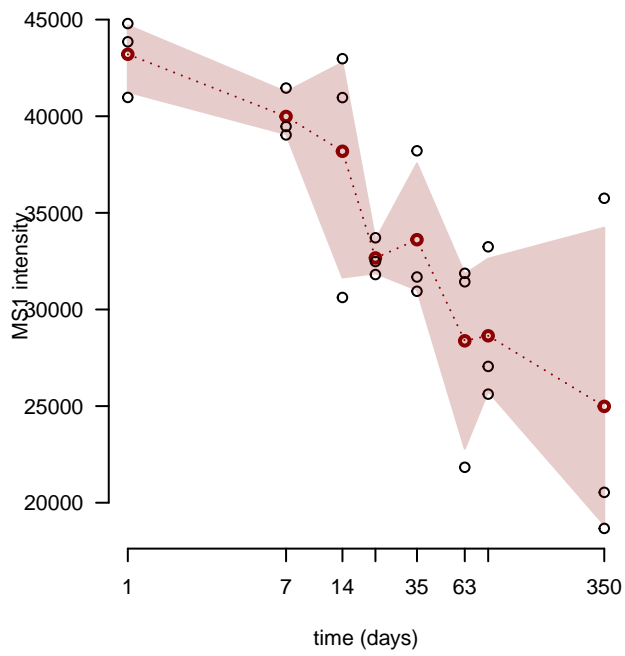

**Q5SWW4**  
**GN=Med13**  
mediator complex subunit 13

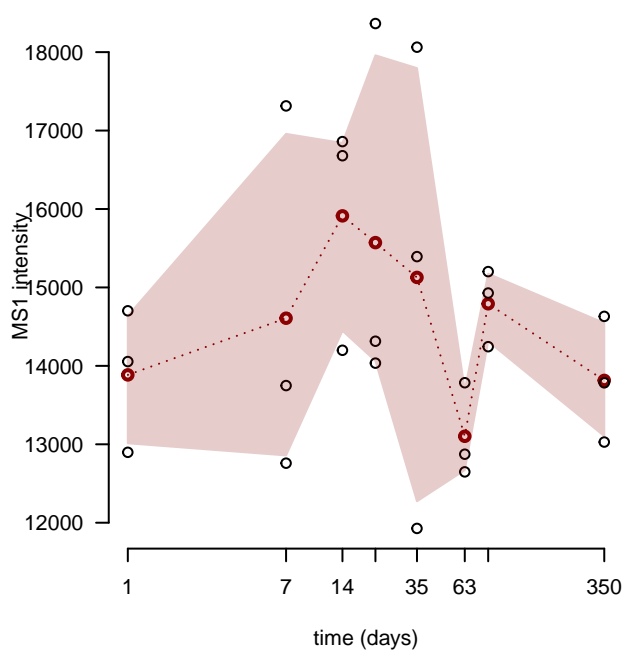

**Q5SWY7**  
**GN=Fam83g**  
family with sequence similarity 83, memb ...

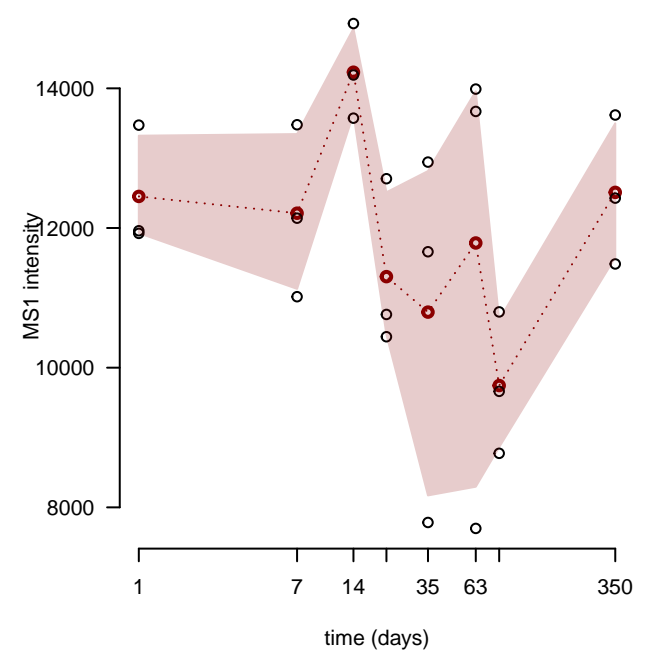

**Q5SX19**  
**GN=Pigl**  
phosphatidylinositol glycan anchor biosy ...

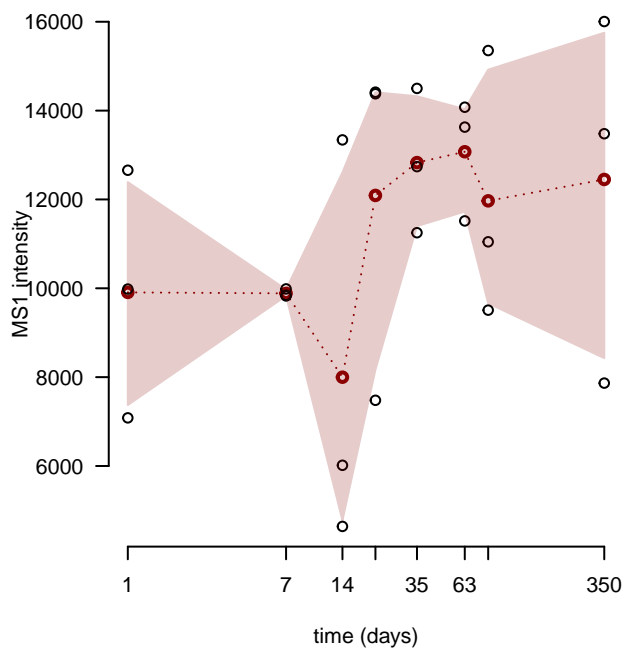

**Q5SX39**  
**GN=Myh4**  
myosin, heavy polypeptide 4, skeletal mu ...

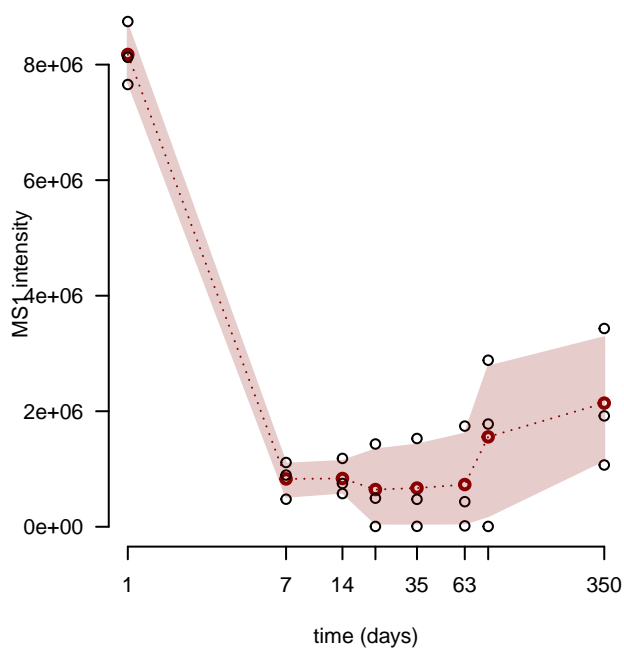

**Q5SX40**  
**GN=Myh1**  
myosin, heavy polypeptide 1, skeletal mu ...

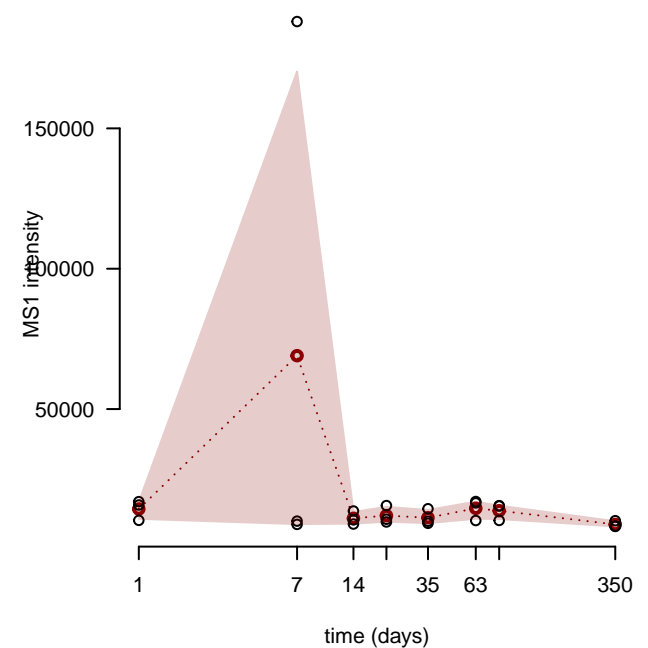

**Q5SXY1**  
GN=Specc1  
sperm antigen with calponin homology and ...

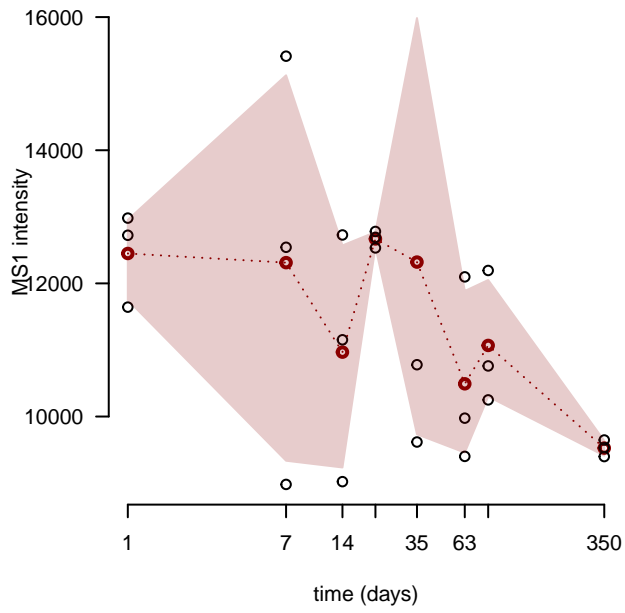

**Q5SYD0**  
GN=Myo1d  
myosin ID

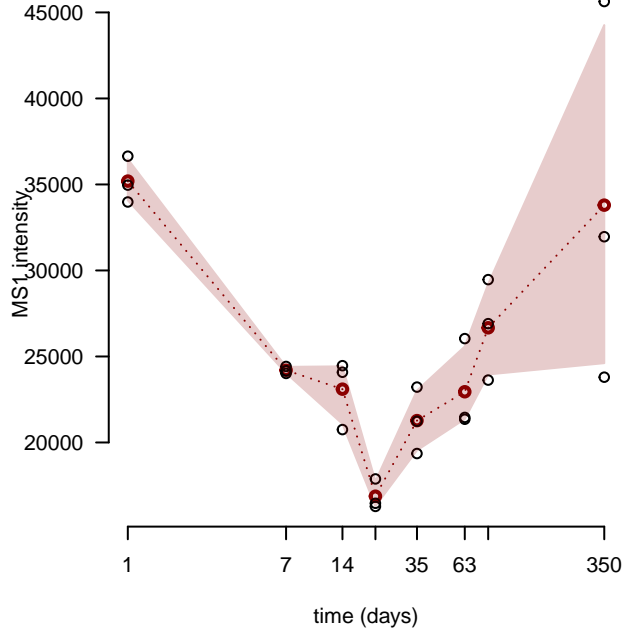

**Q5SYH2**  
GN=Tmem199  
transmembrane protein 199

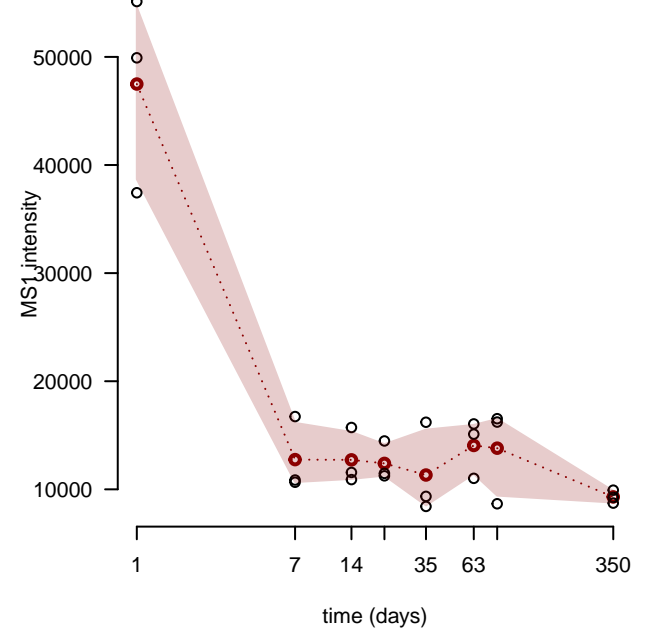

**Q5SYL3**  
GN=Kiaa0100

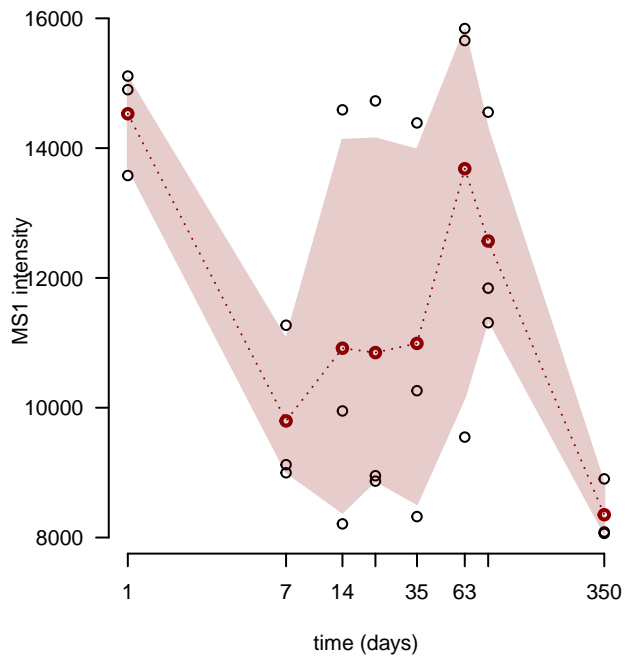

**Q5TIS6**  
GN=Noto  
notochord homeobox

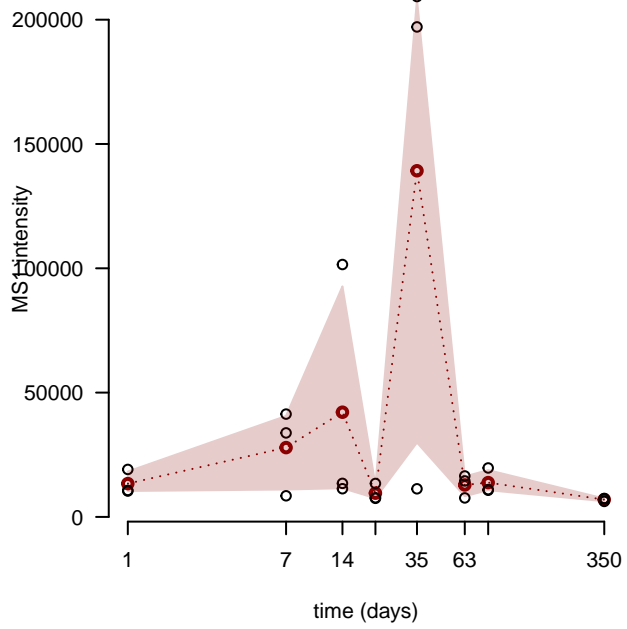

**Q5U3K5**  
GN=Rab16  
RAB, member RAS oncogene family-like 6

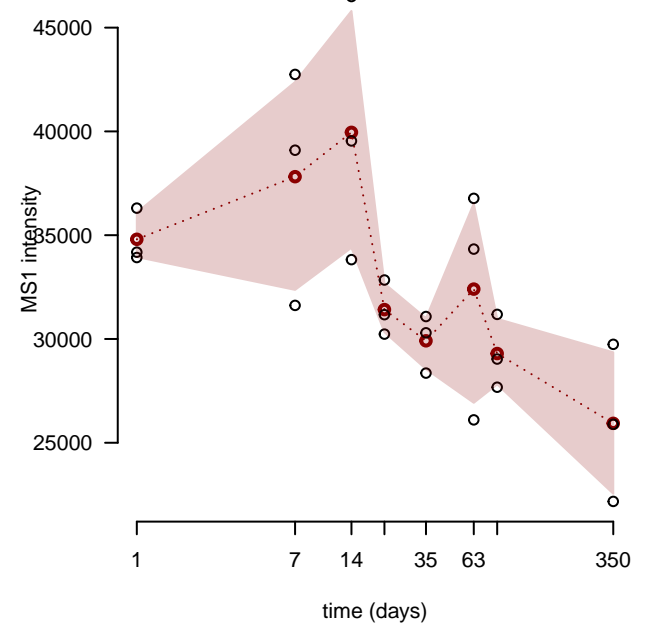

**Q5U419**  
GN=Mfsd3  
major facilitator superfamily domain con ...

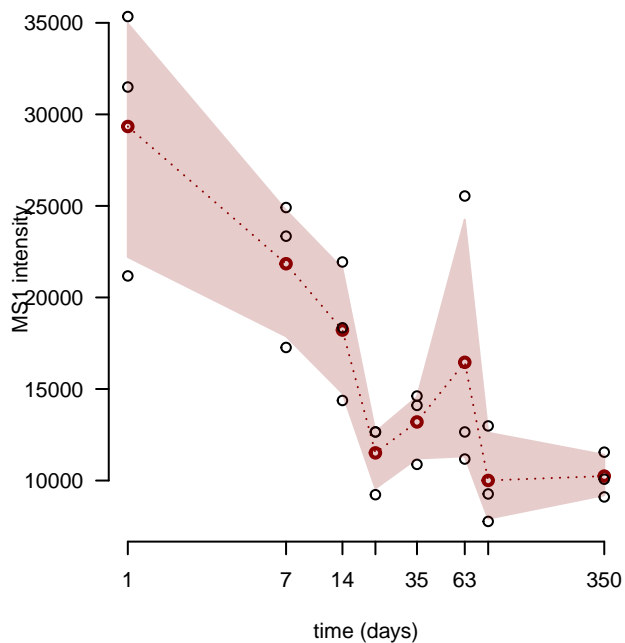

**Q5U430**  
GN=Ubr3  
ubiquitin protein ligase E3 component n- ...

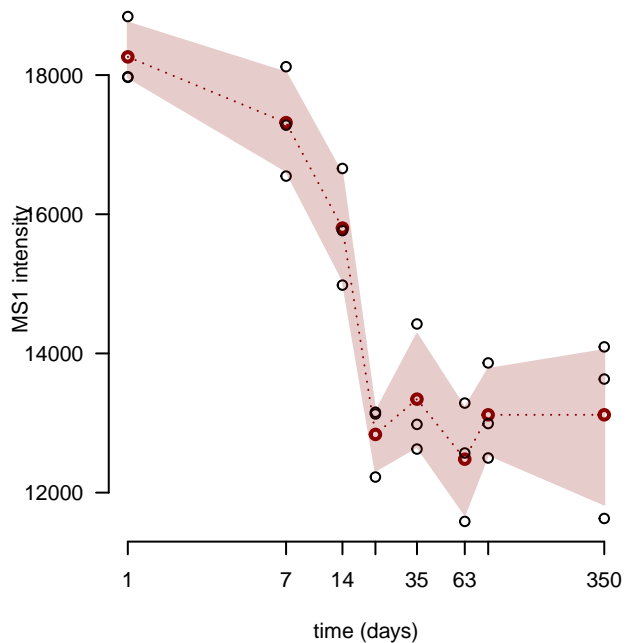

**Q5U458**  
GN=Dnajc11  
DnaJ heat shock protein family (Hsp40) m ...

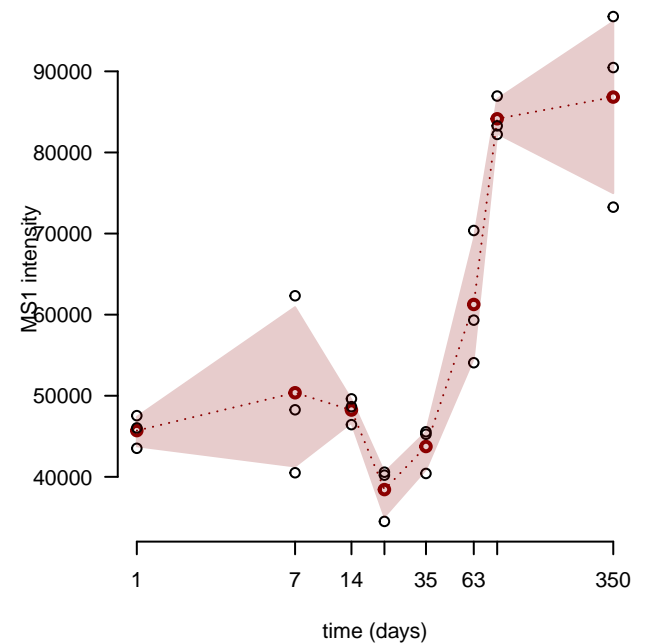

**Q5U4C1**  
**GN=Gprasp1**  
G protein-coupled receptor associated so ...

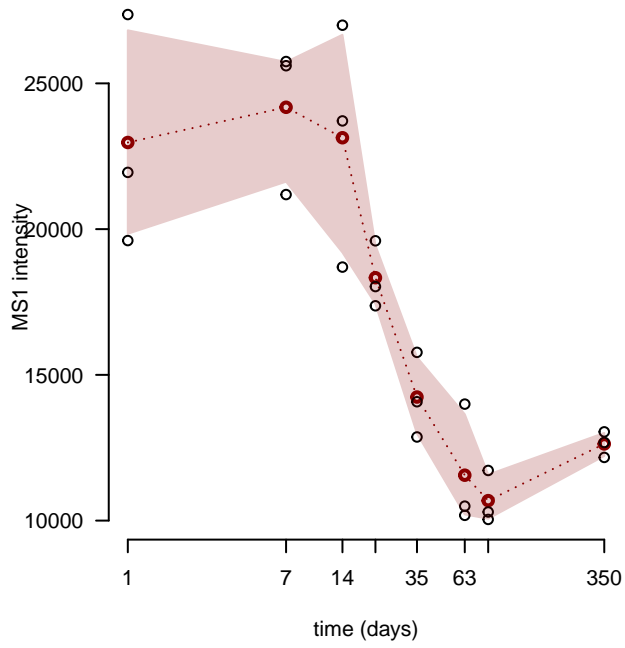

**Q5U4C3**  
**GN=Scaf1**  
SR-related CTD-associated factor 1

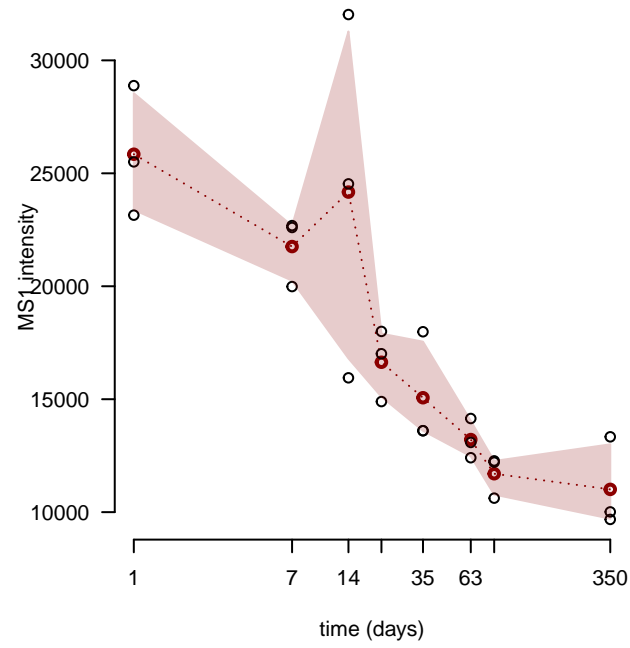

**Q5U4D9**  
**GN=Thoc6**  
THO complex 6

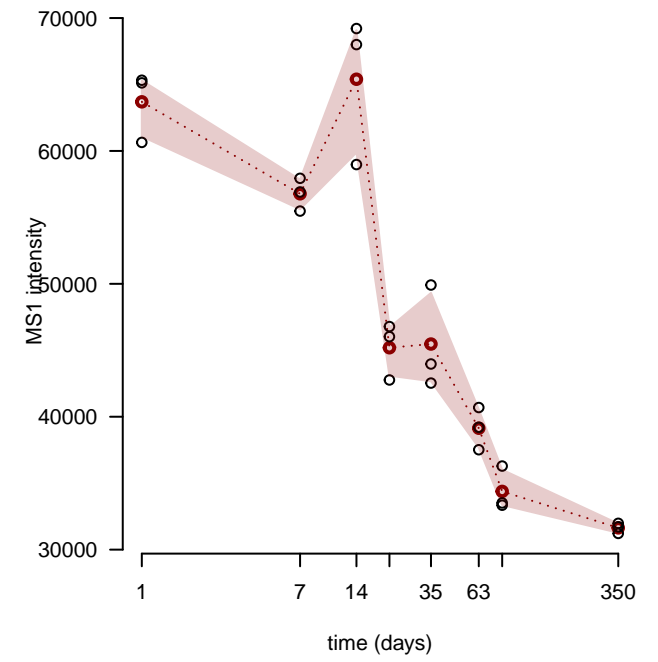

**Q5U4E2**  
**GN=Repin1**  
replication initiator 1

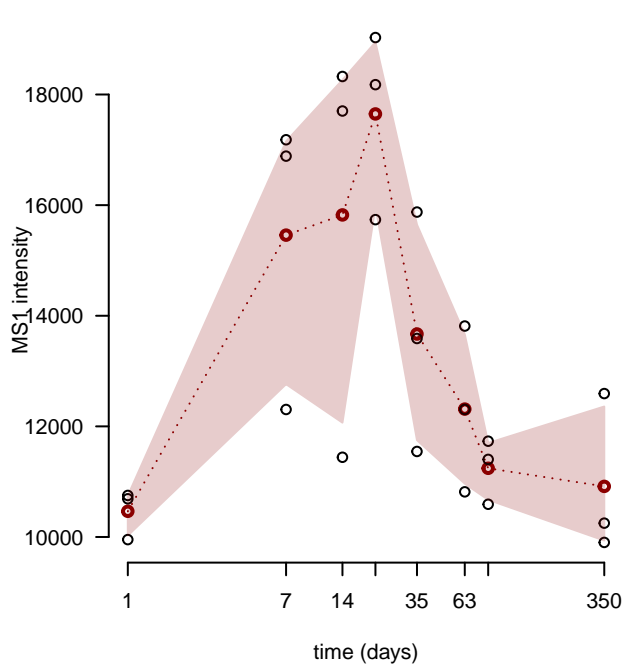

**Q5U4F6**  
**GN=Wdr34**

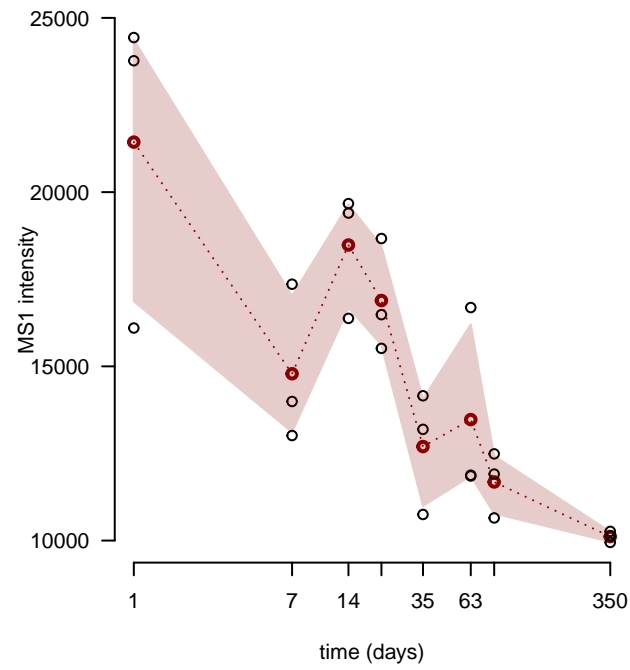

**Q5U5M8**  
**GN=Blc1s3**  
biogenesis of lysosomal organelles compl ...

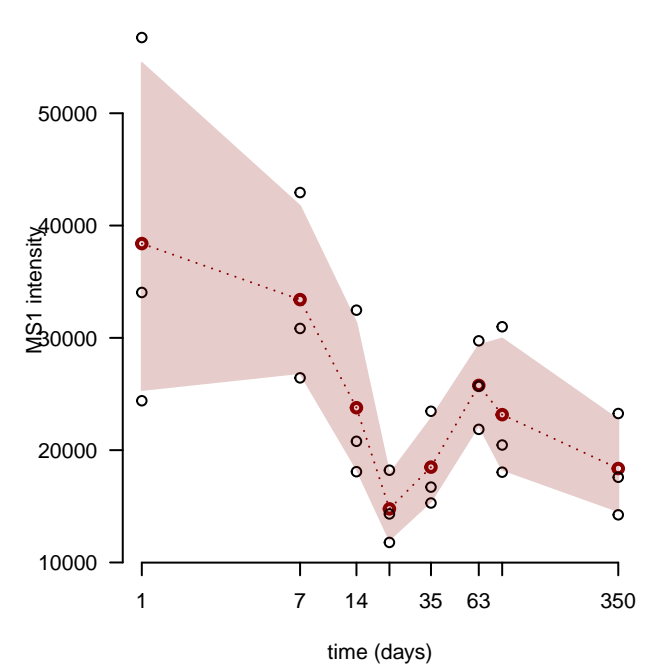

**Q5U5Q9**  
**GN=Uimc1**  
ubiquitin interaction motif containing 1

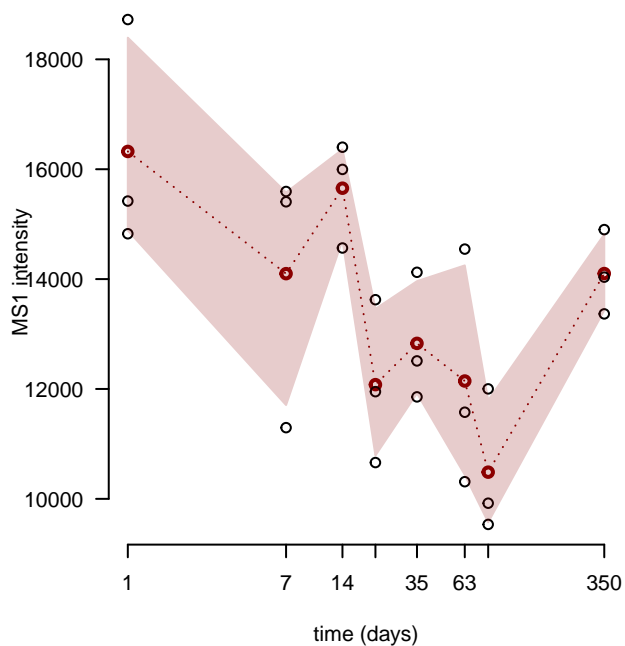

**Q5U5V2**  
**GN=Hykk**  
hydroxylysine kinase 1

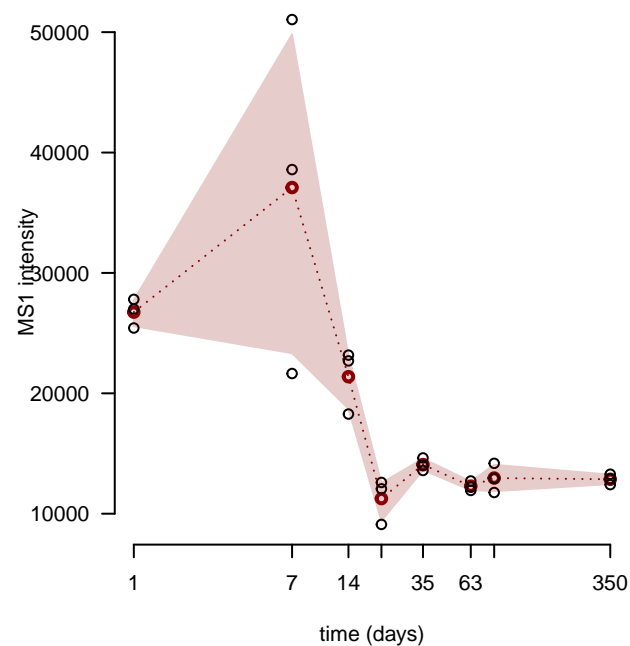

**Q5U680**  
**GN=Slc25a26**  
solute carrier family 25 (mitochondrial ...

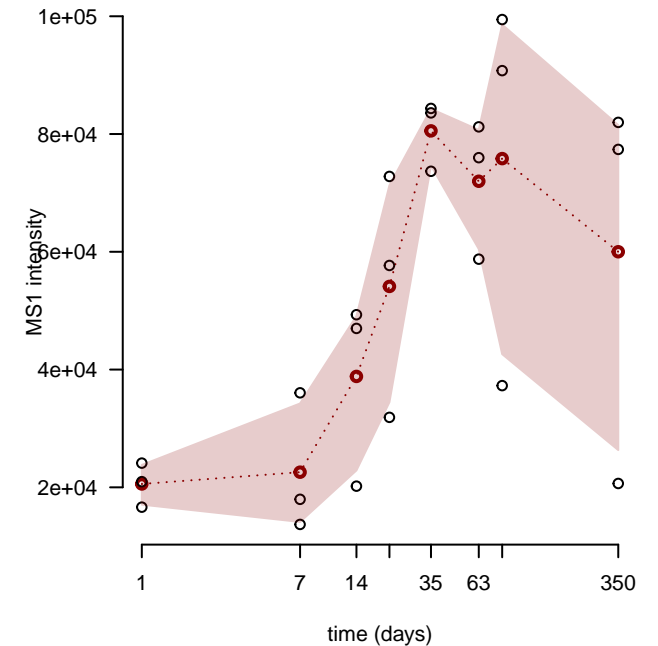

**Q5UAK0**  
GN=Mier1  
MEIR1 transcription regulator

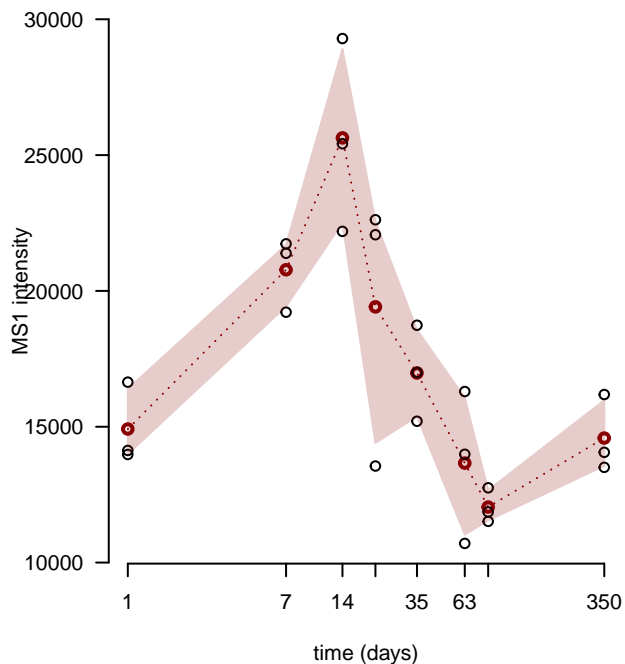

**Q5VCS6**  
GN=Tdrd5  
tudor domain containing 5

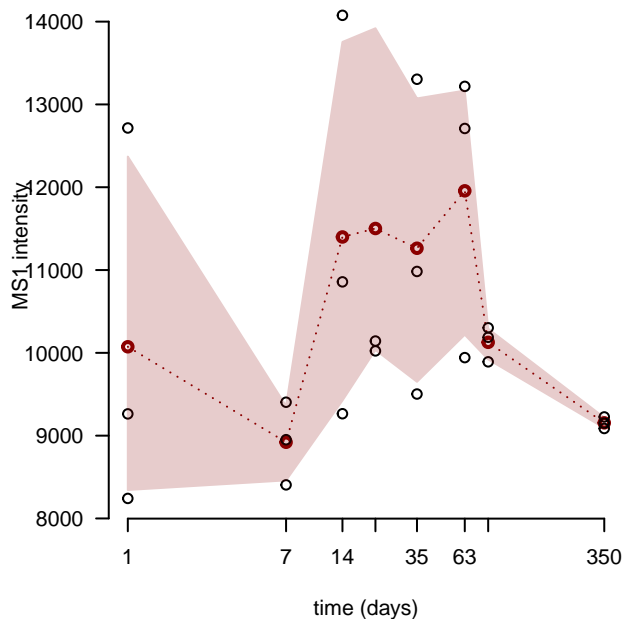

**Q5XF89**  
GN=Atp13a3  
ATPase type 13A3

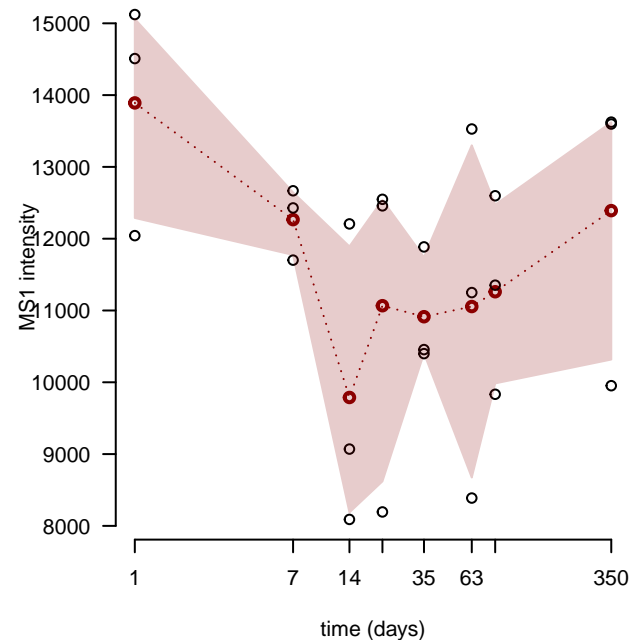

**Q5XFZ0**  
GN=

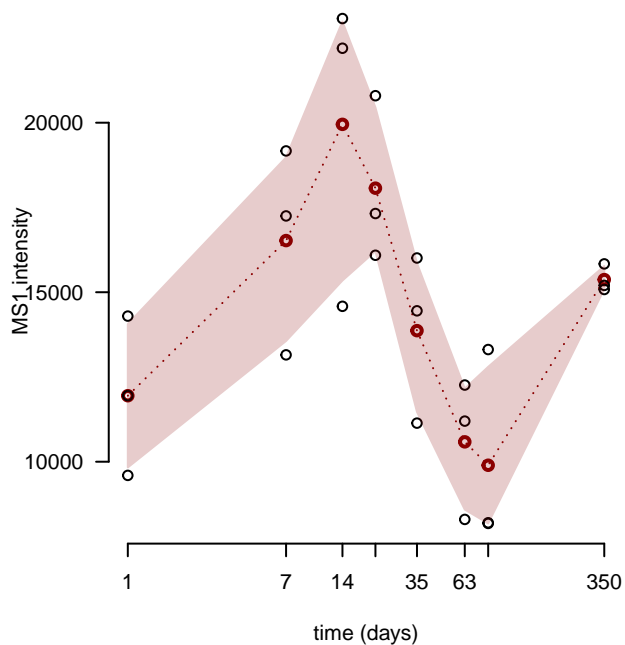

**Q5XG69**  
GN=Fam169a  
family with sequence similarity 169, mem ...

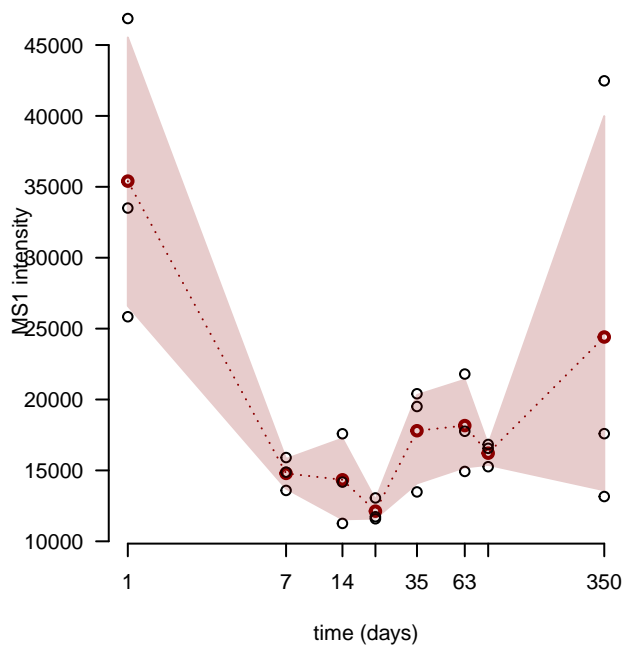

**Q5XG71**  
GN=Utp20  
UTP20 small subunit processome component

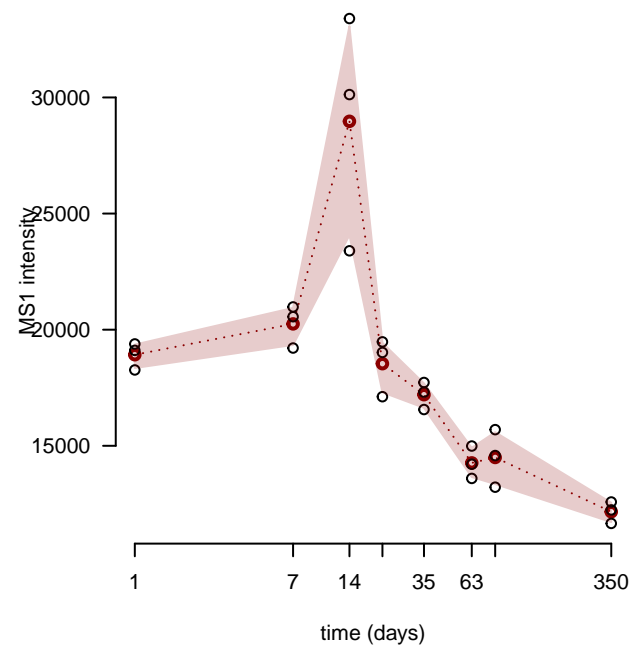

**Q5XG73**  
GN=Acbd5  
acyl-Coenzyme A binding domain containin ...

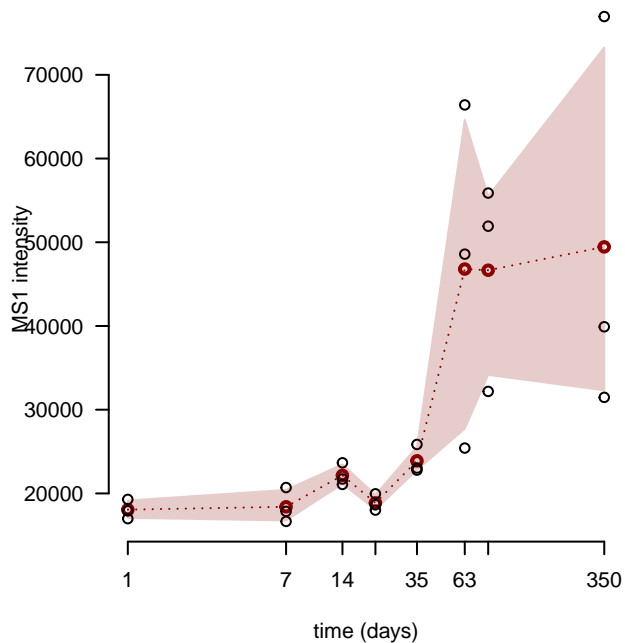

**Q5XJE5**  
GN=Leo1  
Leo1, Paf1/RNA polymerase II complex com ...

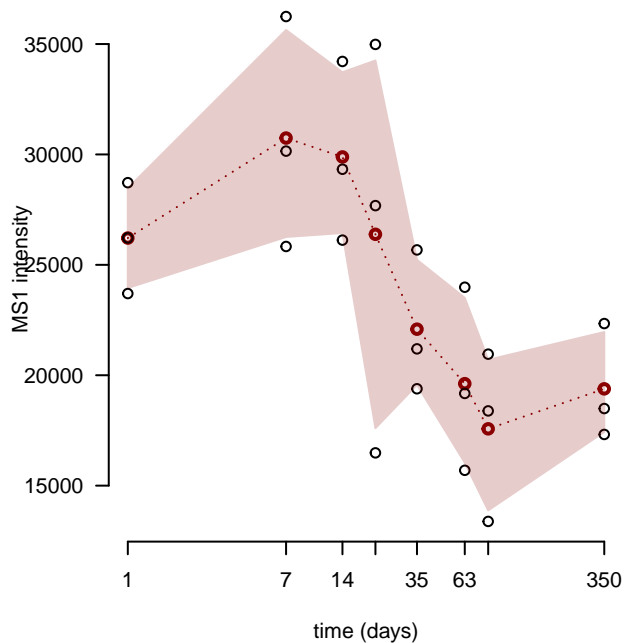

**Q5XJY4**  
GN=Parl  
presenilin associated, rhomboid-like

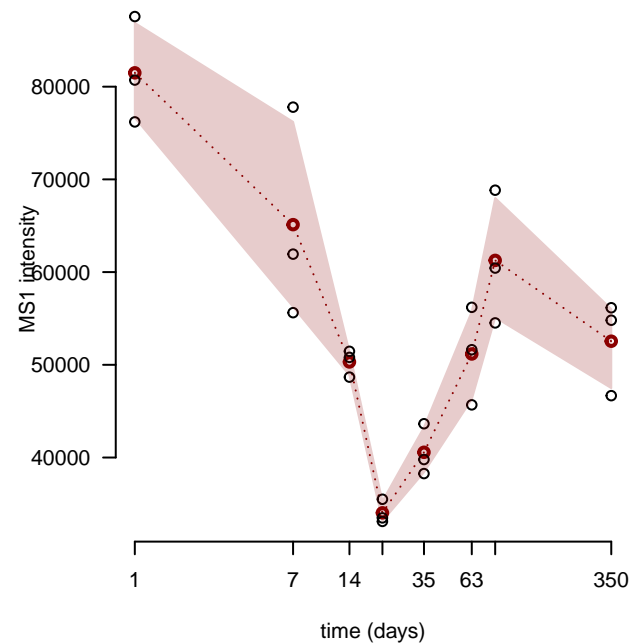

**Q5XJY5**  
GN=Arcn1  
archain 1

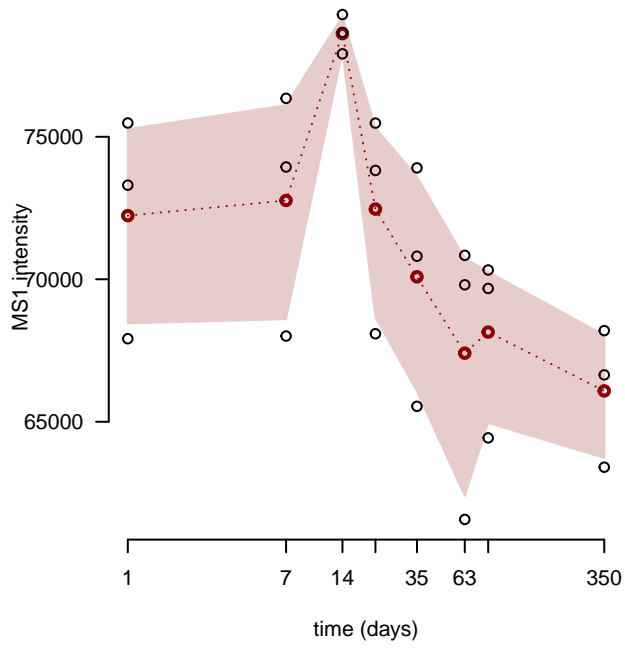

**Q5XKE0**  
GN=Mybpc2  
myosin binding protein C, fast-type

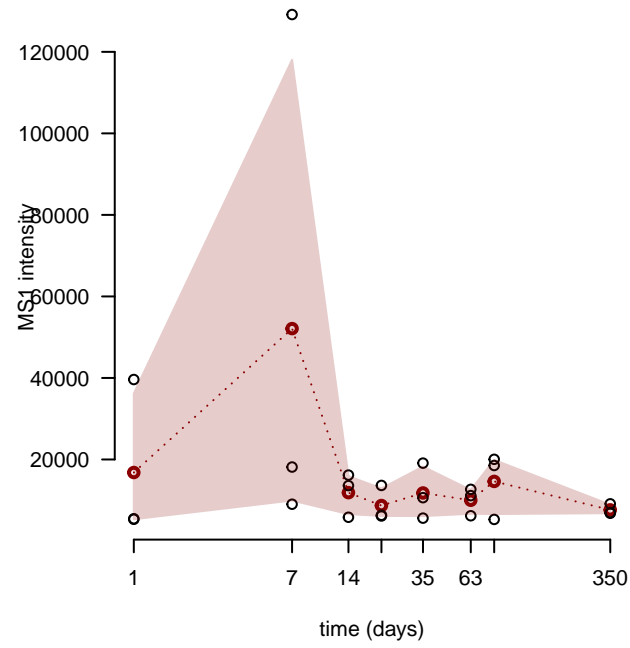

**Q5XKN4**  
GN=Jagn1  
jagunal homolog 1

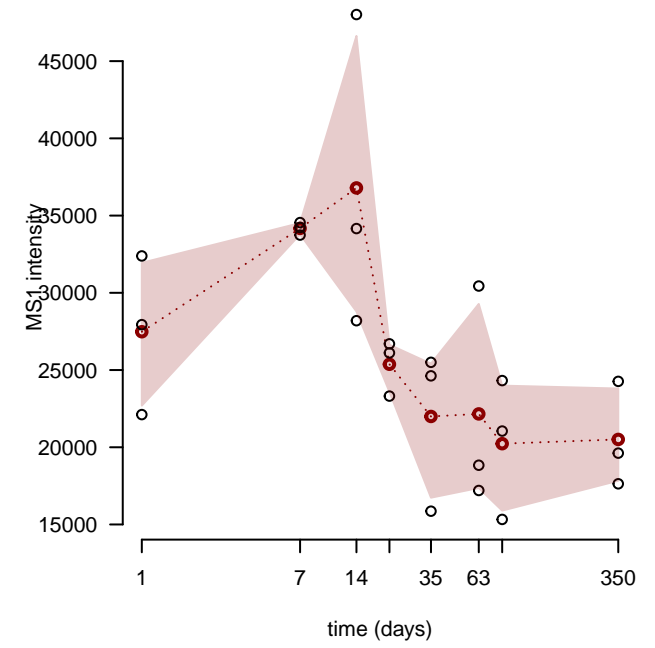

**Q5XPI3**  
GN=Rnf123  
ring finger protein 123

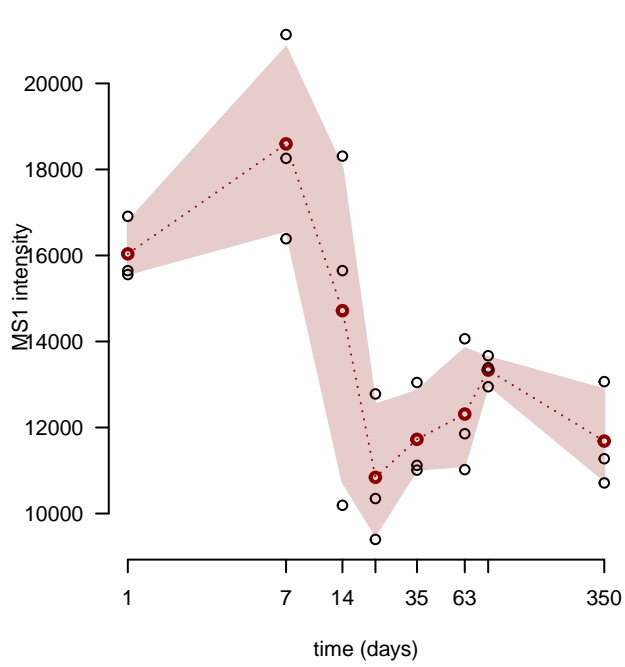

**Q5XPT3**  
GN=Large2  
LARGE xylosyl- and glucuronyltransferase ...

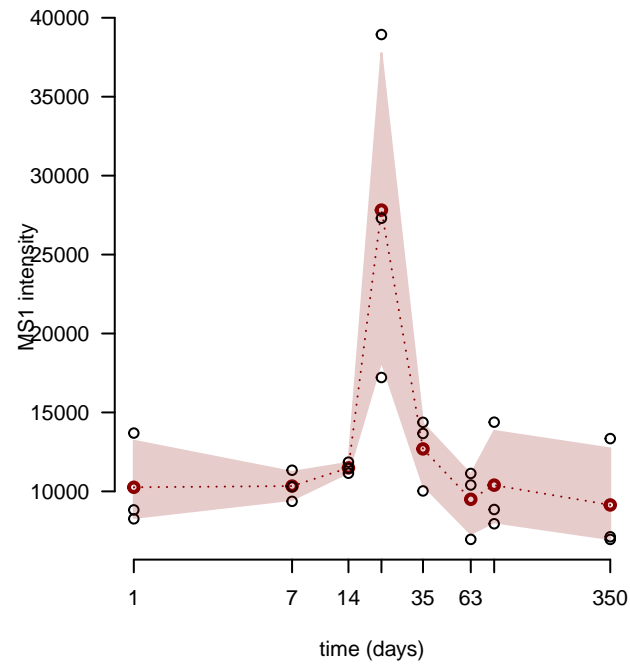

**Q5Y5T1**  
GN=Zdhhc20  
zinc finger, DHHC domain containing 20

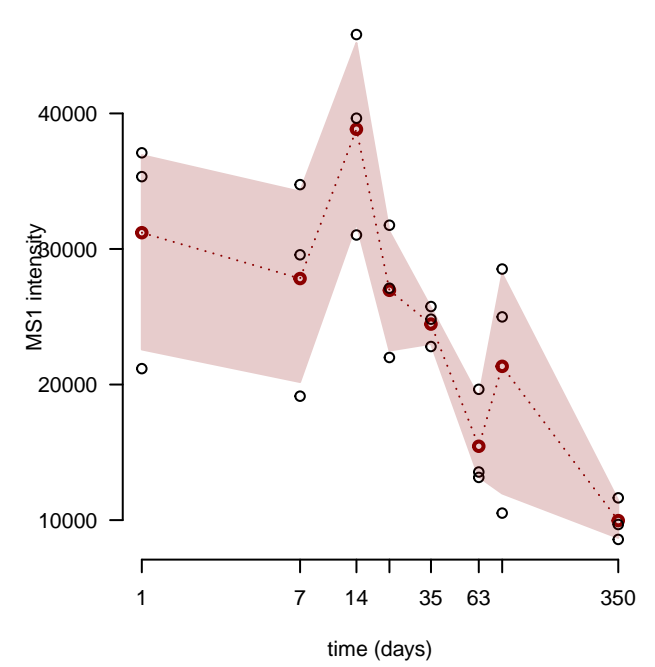

**Q60520**  
GN=Sin3a  
transcriptional regulator, SIN3A (yeast)

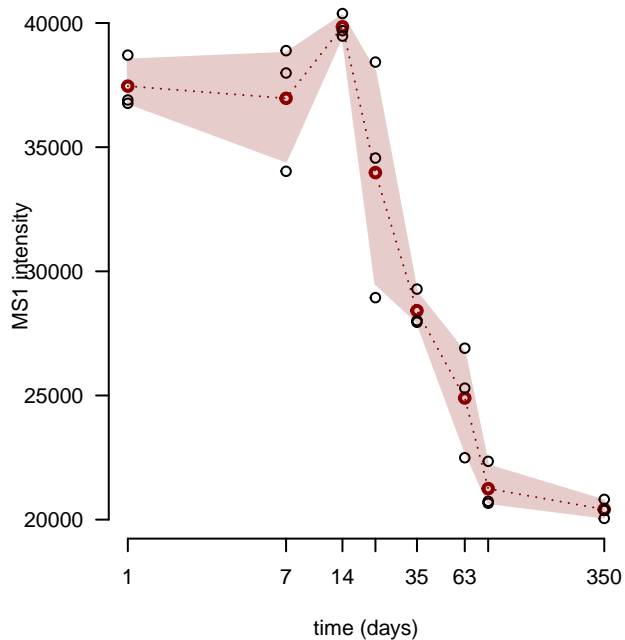

**Q60575**  
GN=Kif1b  
kinesin family member 1B

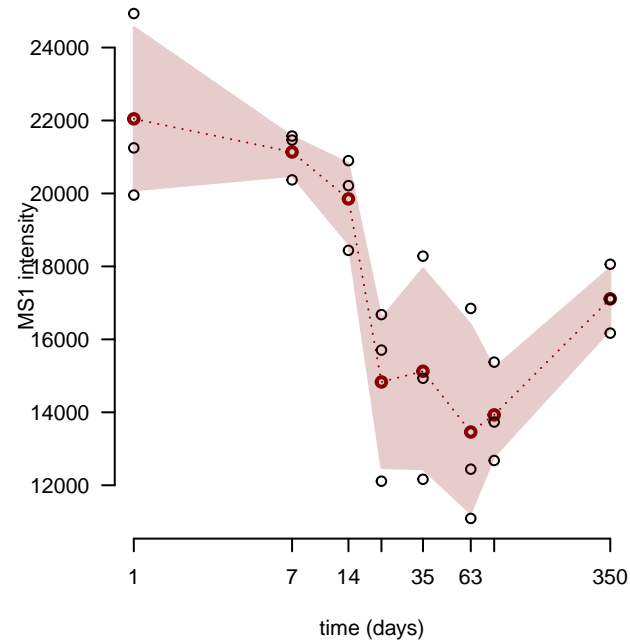

**Q60584**  
GN=Fbxw2  
F-box and WD-40 domain protein 2

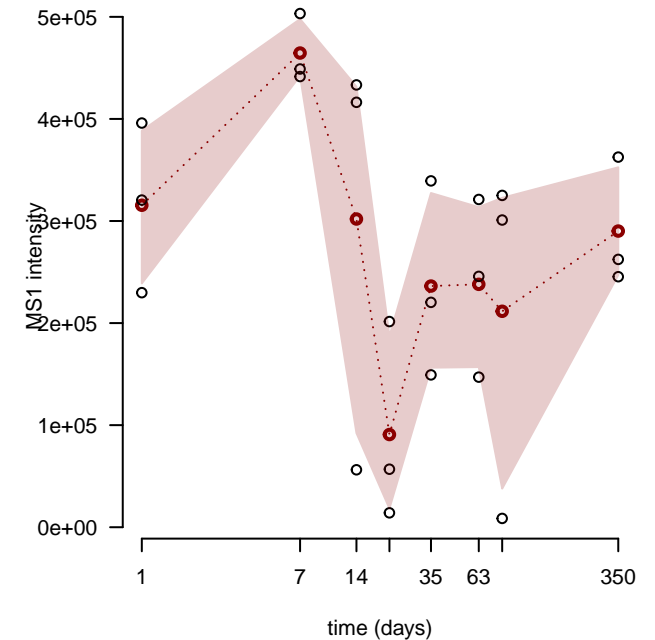

**Q60590**  
GN=Orm1  
orosomucoid 1

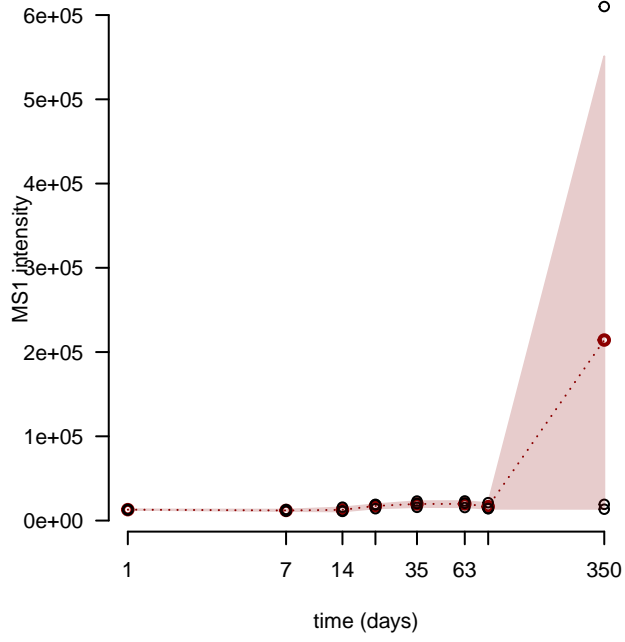

**Q60592**  
GN=Mast2  
microtubule associated serine/threonine ...

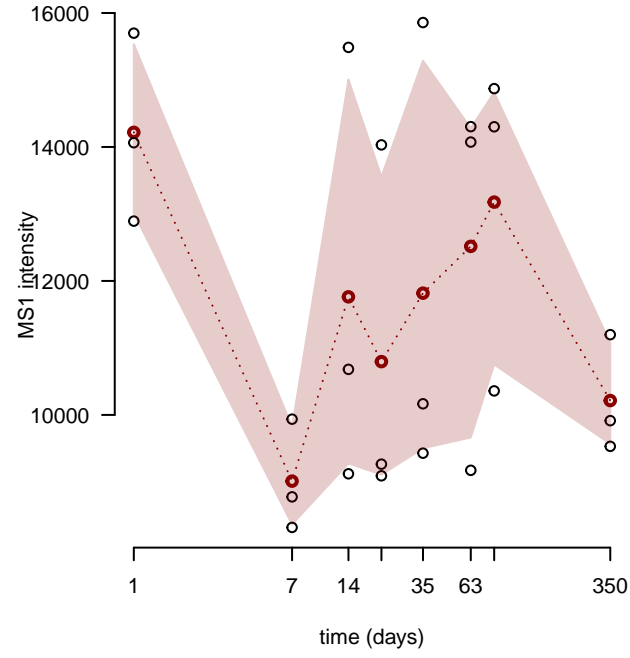

**Q60595**  
GN=Xlr3a  
X-linked lymphocyte-regulated 3A

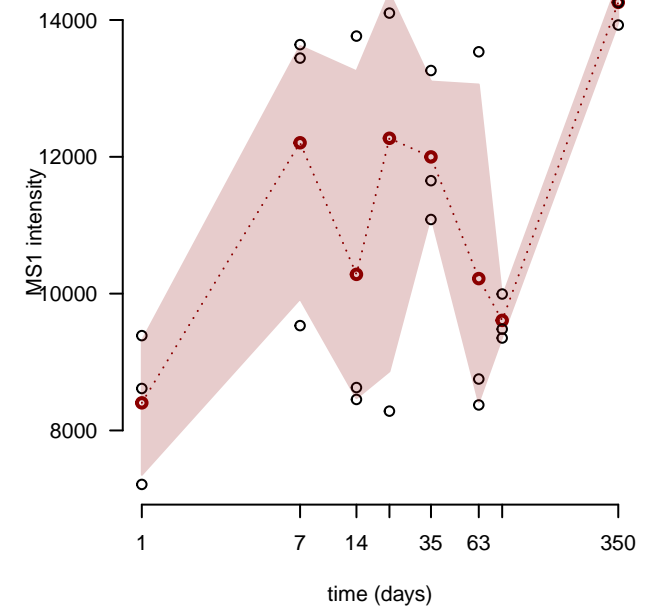

**Q60596**  
GN=Xrcc1  
X-ray repair complementing defective rep ...

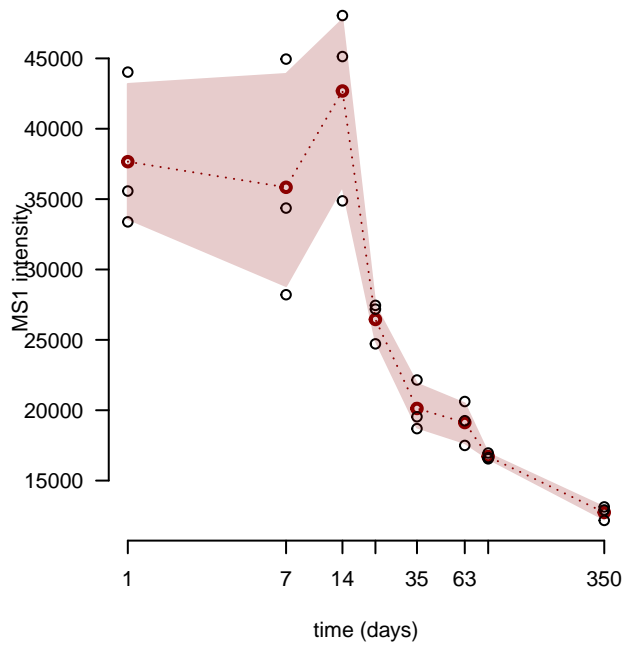

**Q60597**  
GN=Ogdh  
oxoglutarate (alpha-ketoglutarate) dehyd ...

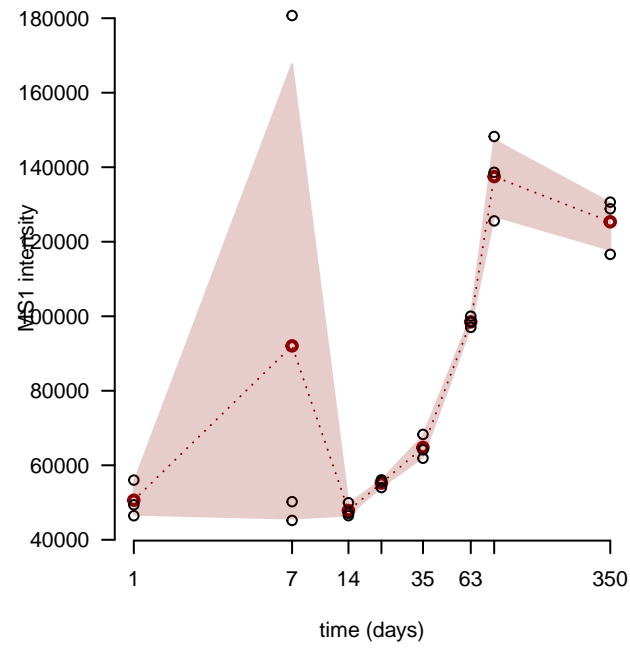

**Q60598**  
GN=Cctn  
cortactin

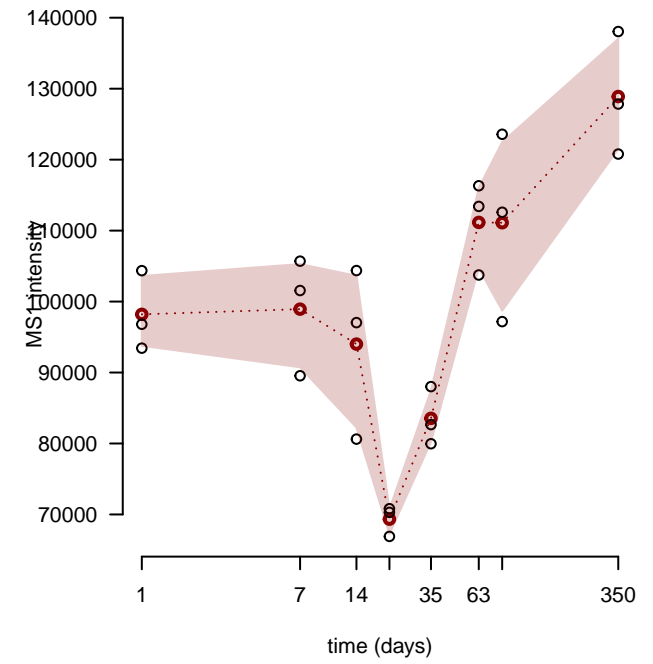

**Q60604**  
GN=Scin  
scinderin

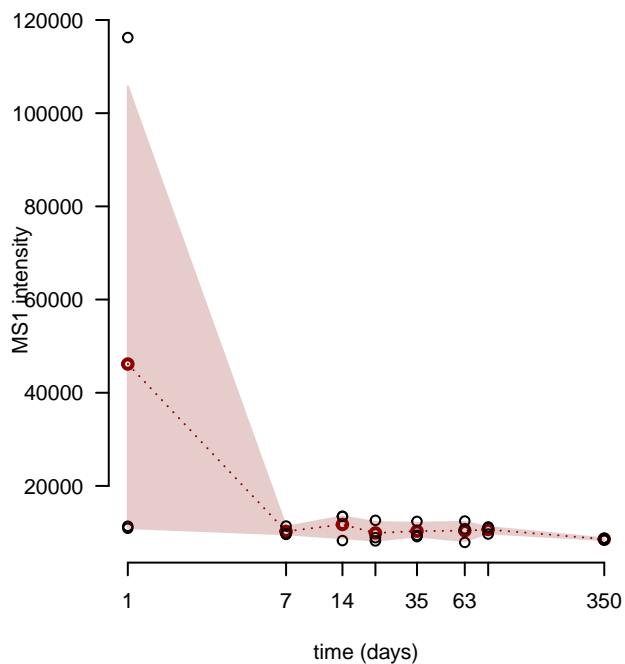

**Q60605**  
GN=Myl6  
myosin, light polypeptide 6, alkali, smo ...

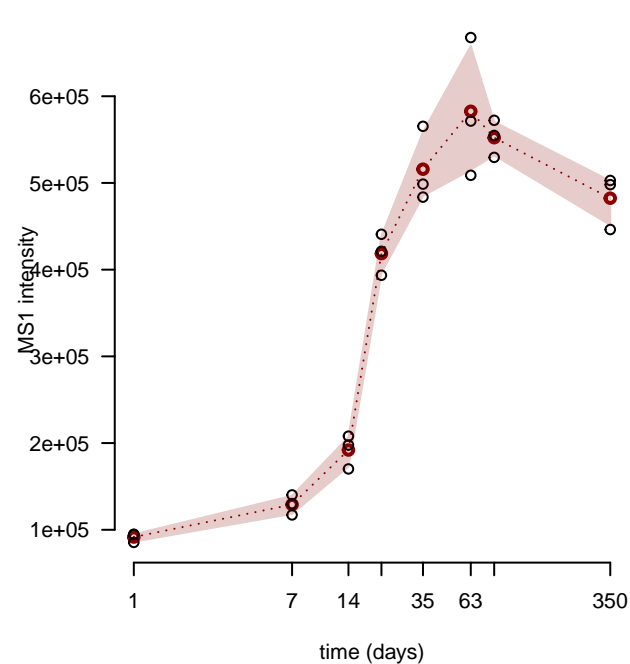

**Q60631**  
GN=Grb2  
growth factor receptor bound protein 2

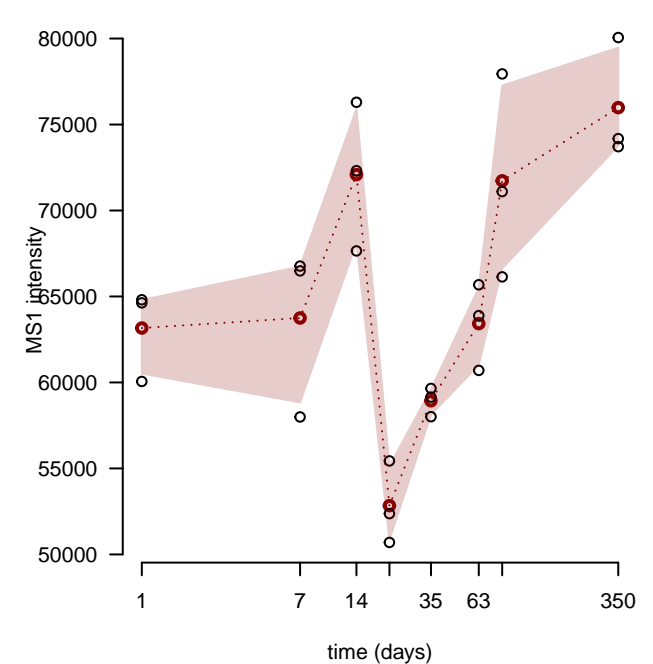



**Q60634**  
GN=Flot2  
flotillin 2

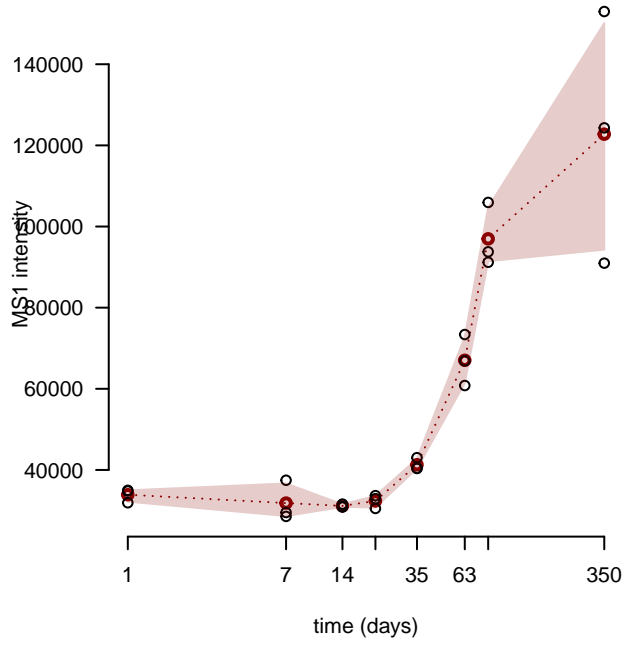

**Q60648**  
GN=Gm2a  
GM2 ganglioside activator protein

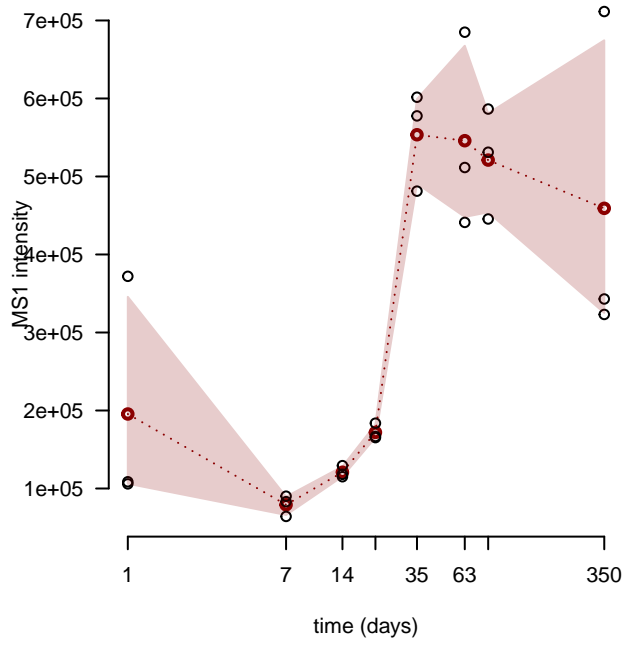

**Q60649**  
GN=Clpb  
ClpB caseinolytic peptidase B

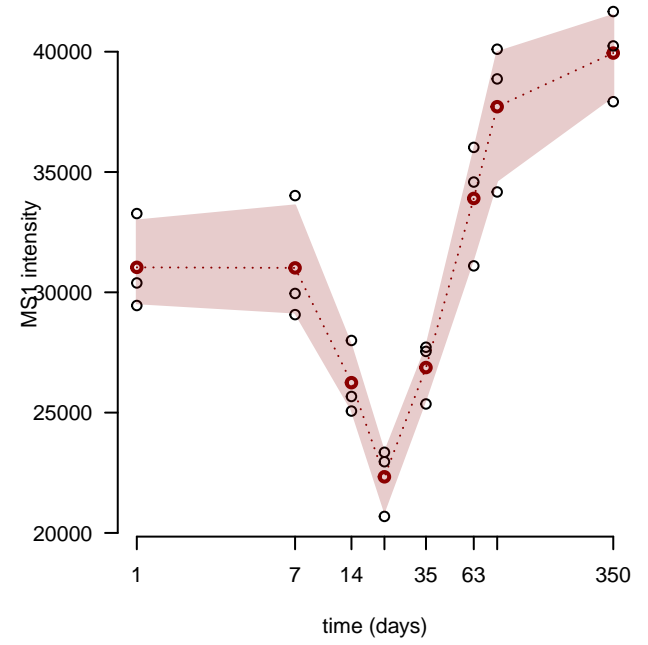

**Q60668**  
GN=Hnrnpd  
heterogeneous nuclear ribonucleoprotein ...

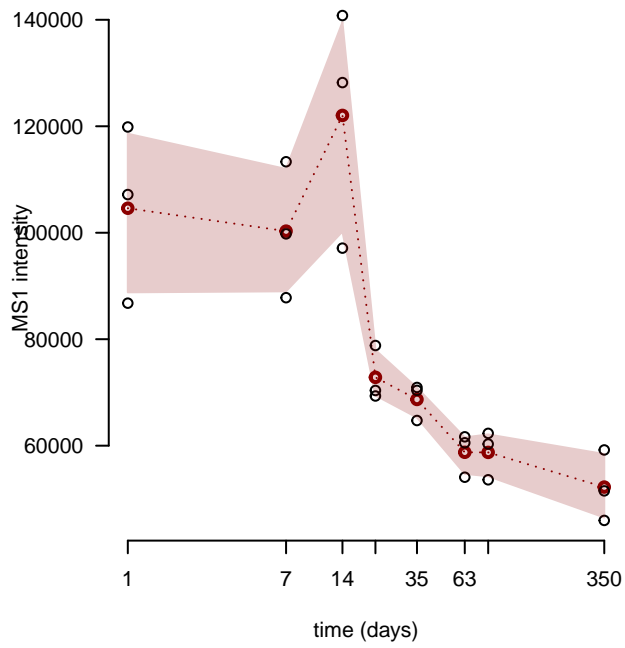

**Q60674**  
GN=Nr1d2  
nuclear receptor subfamily 1, group D, m ...

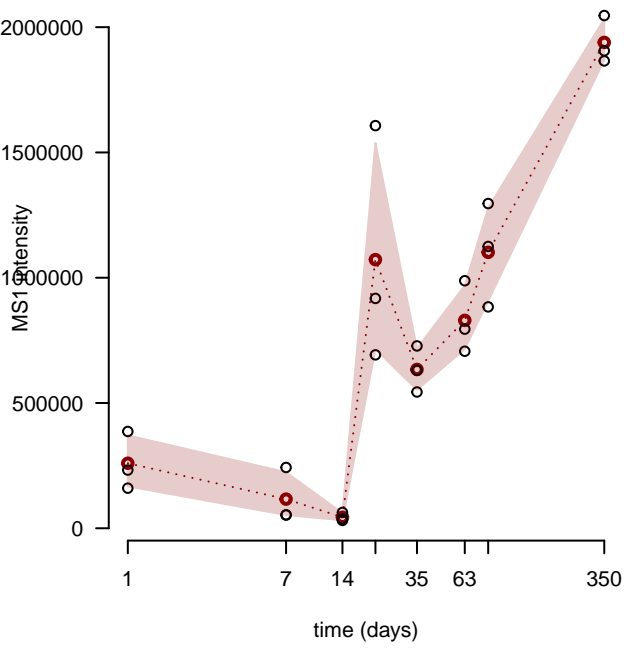

**Q60675**  
GN=Lama2  
laminin, alpha 2

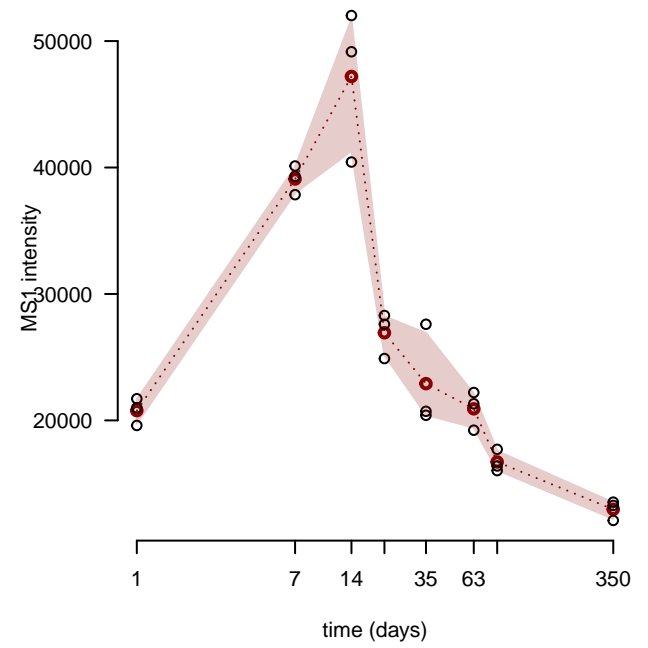

**Q60676**  
GN=Ppp5c  
protein phosphatase 5, catalytic subunit

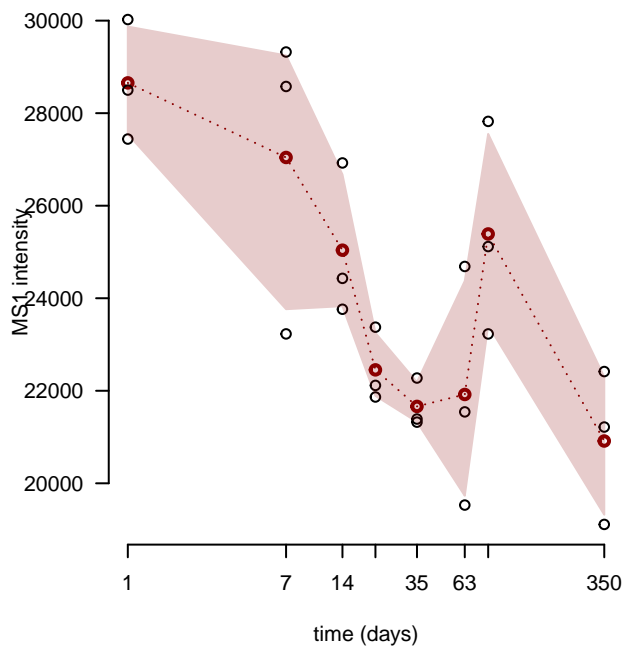

**Q60680**  
GN=Chuk  
conserved helix-loop-helix ubiquitous ki ...

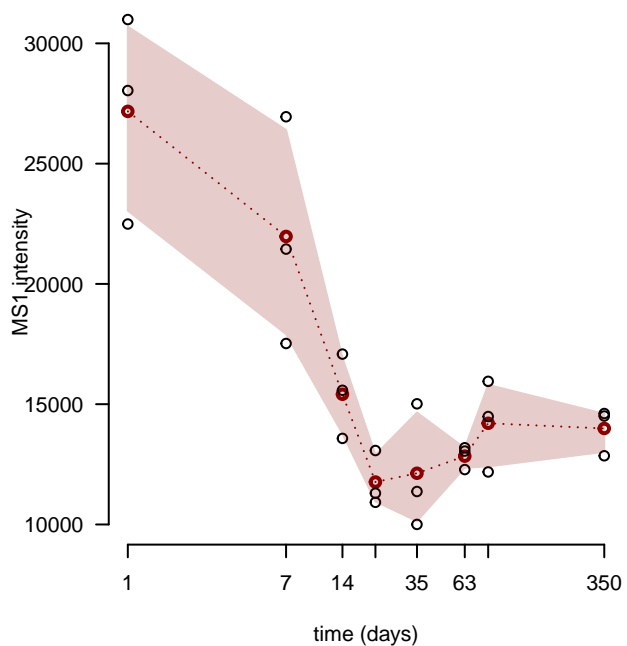

**Q60692**  
GN=Psm6  
proteasome (prosome, macropain) subunit, ...

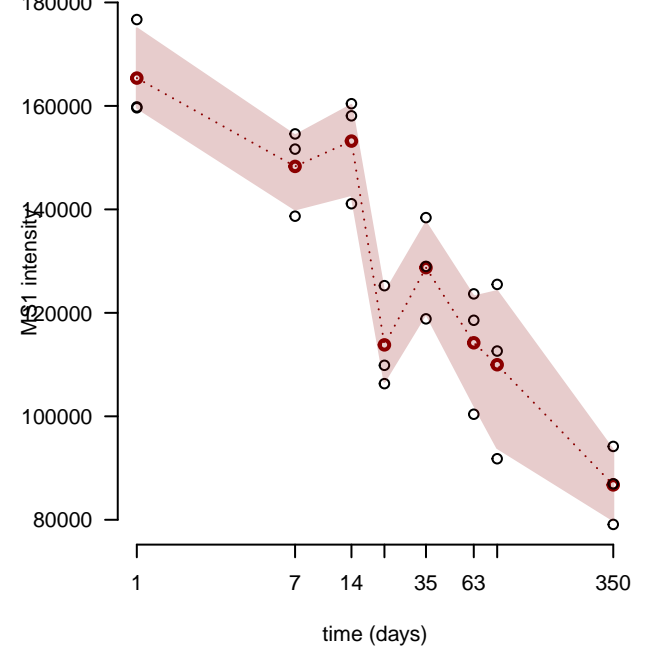

Q60695  
GN=Rgl1

ral guanine nucleotide dissociation stim ...

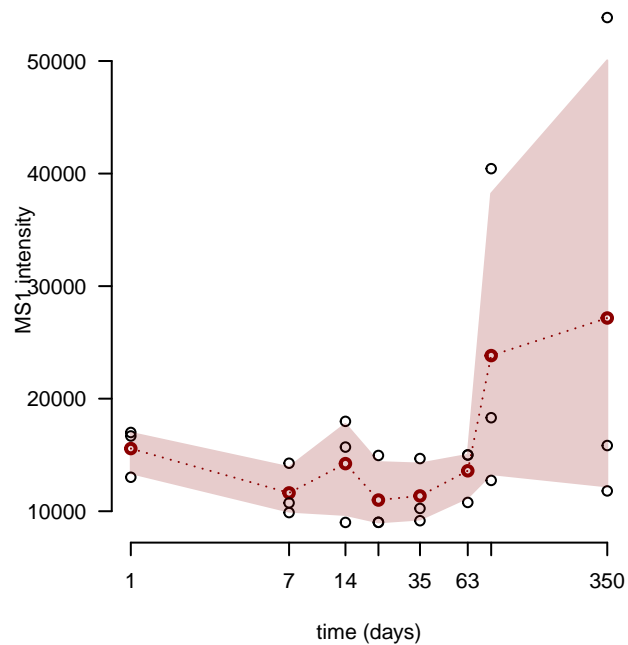

Q60698  
GN=Ski

ski sarcoma viral oncogene homolog (avia ...

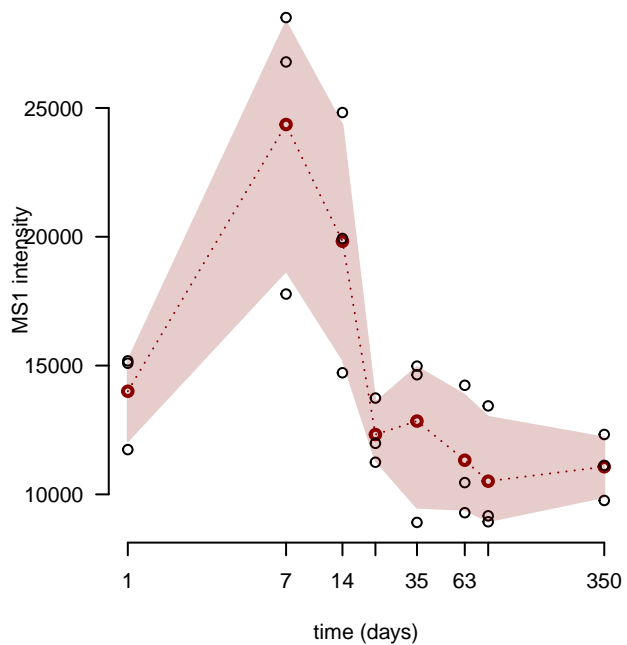

Q60707  
GN=Tbx2

T-box 2

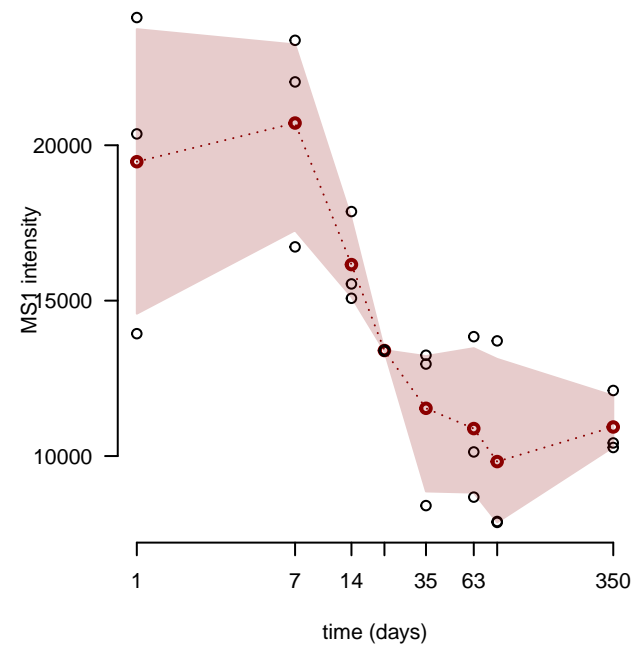

Q60710  
GN=Samhd1

SAM domain and HD domain, 1

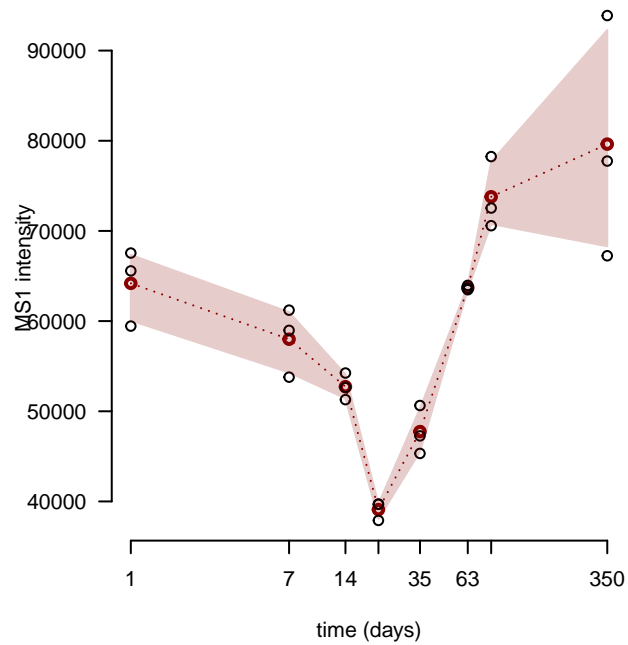

Q60714  
GN=Slc27a1

solute carrier family 27 (fatty acid tra ...

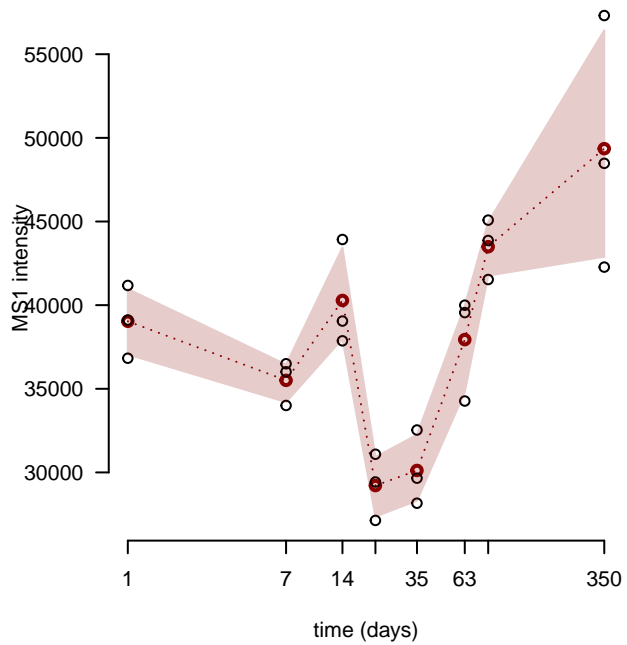

Q60715  
GN=P4ha1

procollagen-proline, 2-oxoglutarate 4-di ...

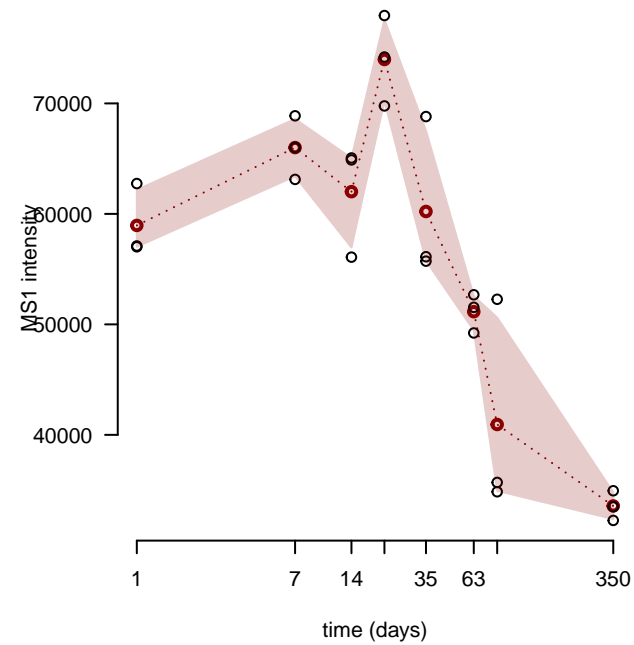

Q60715  
GN=P4ha1

procollagen-proline, 2-oxoglutarate 4-di ...

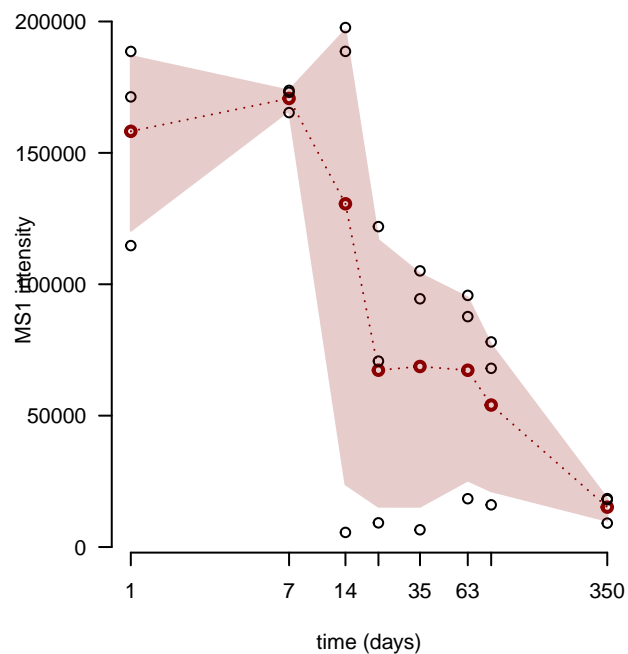

Q60716  
GN=P4ha2

procollagen-proline, 2-oxoglutarate 4-di ...

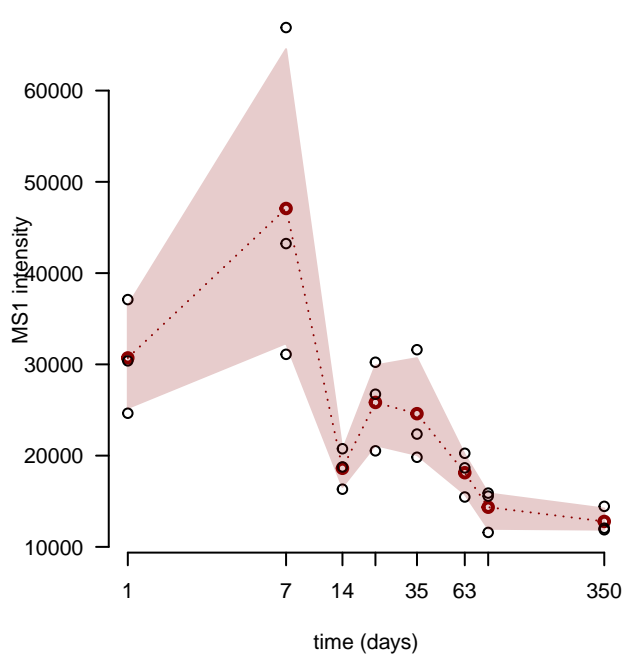

Q60722  
GN=Tcf4

transcription factor 4

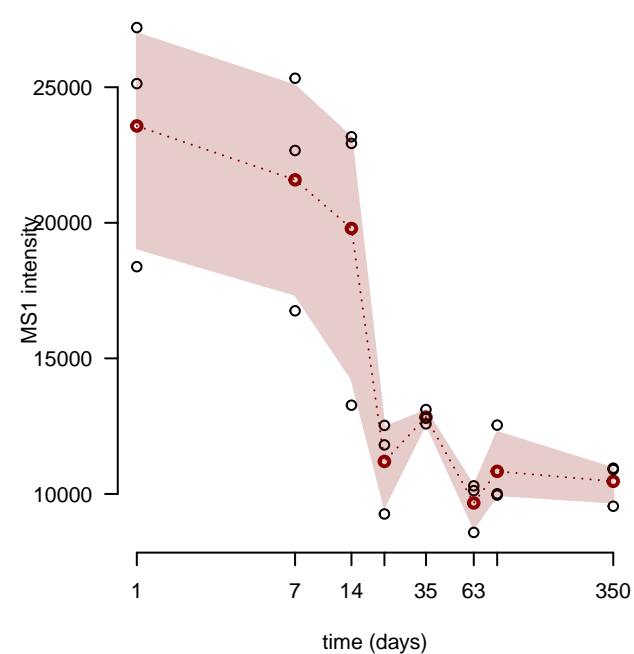

**Q60722**  
**GN=Tcf4**  
transcription factor 4

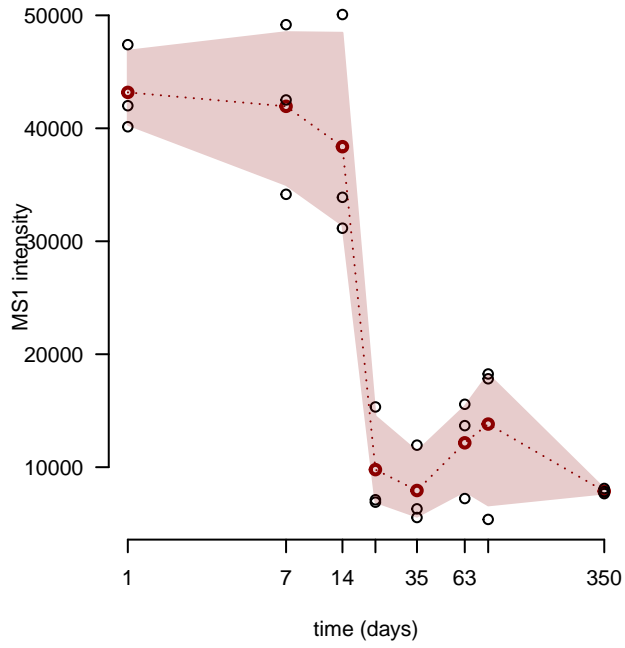

**Q60737**  
**GN=Csnk2a1**  
casein kinase 2, alpha 1 polypeptide

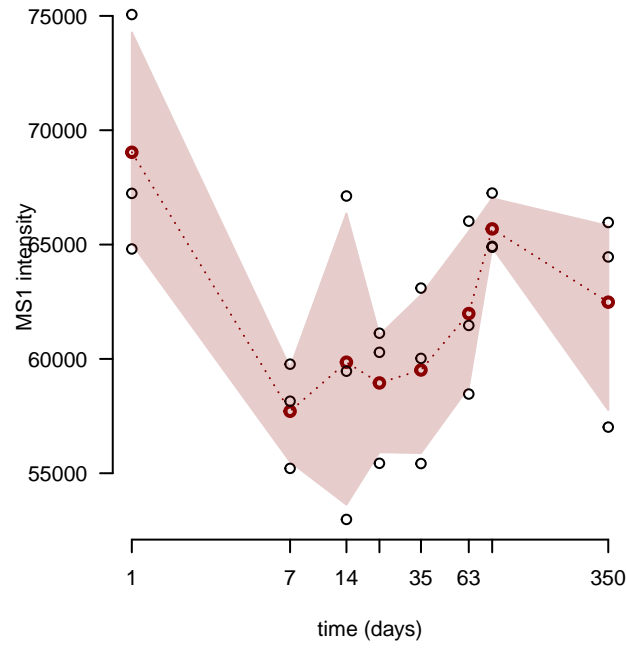

**Q60738**  
**GN=Slc30a1**  
solute carrier family 30 (zinc transport ...

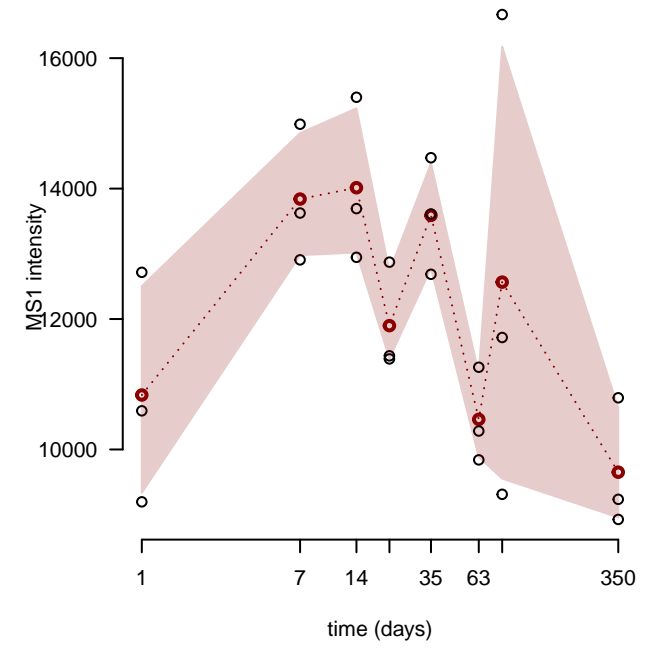

**Q60739**  
**GN=Bag1**  
BCL2-associated athanogene 1

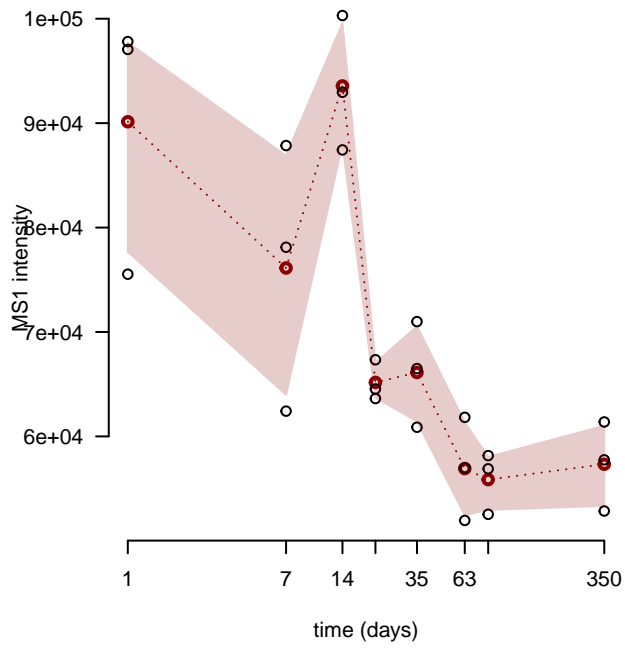

**Q60749**  
**GN=Khdrbs1**  
KH domain containing, RNA binding, signa ...

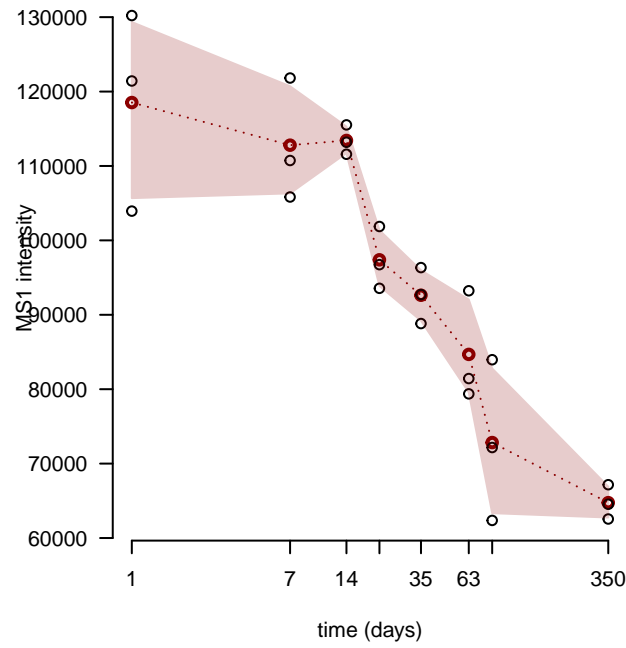

**Q60751**  
**GN=Igf1r**  
insulin-like growth factor I receptor

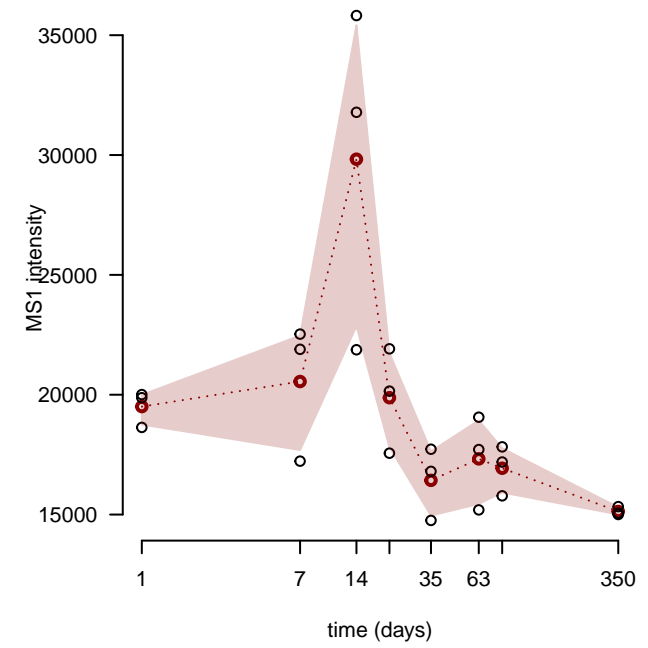

**Q60759**  
**GN=Gcdh**  
glutaryl-Coenzyme A dehydrogenase

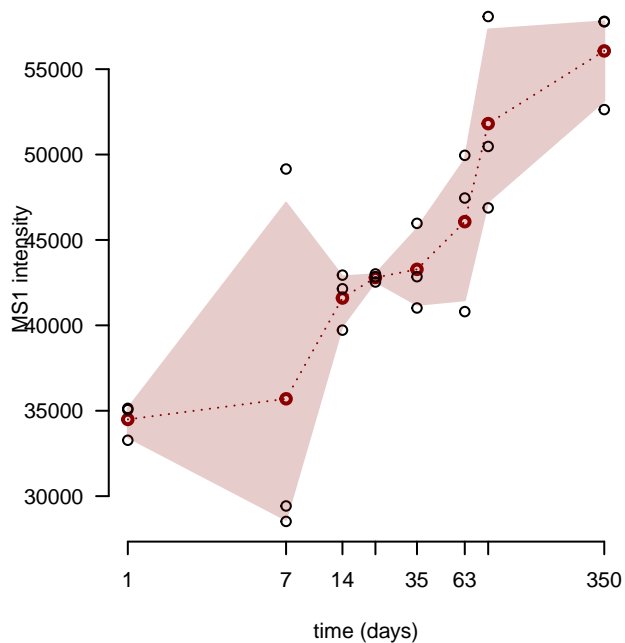

**Q60760**  
**GN=Grb10**  
growth factor receptor bound protein 10

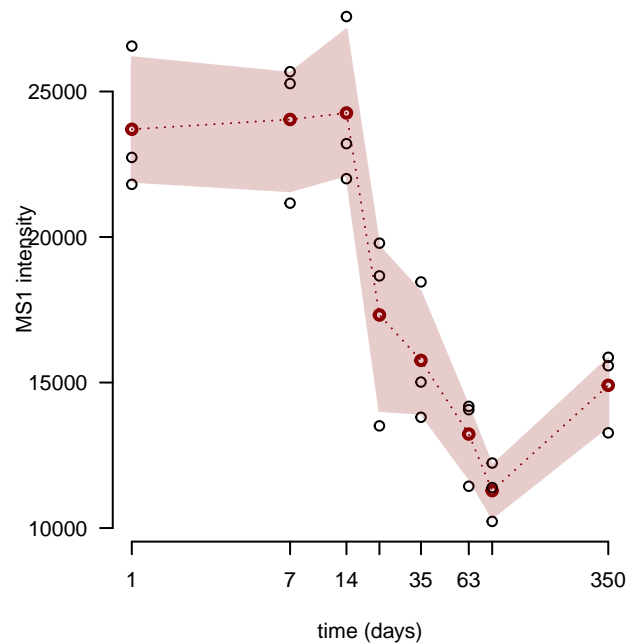

**Q60766**  
**GN=Irgm1**  
immunity-related GTPase family M member ...

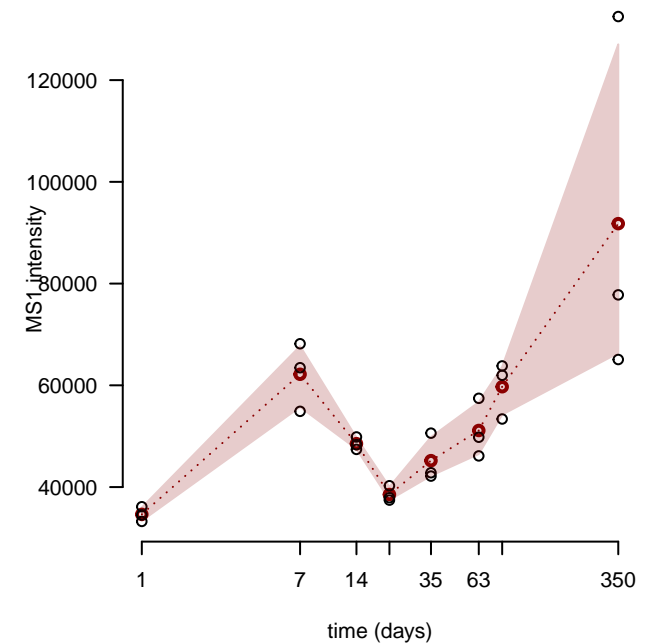

**Q60767**  
**GN=Ly75**  
lymphocyte antigen 75

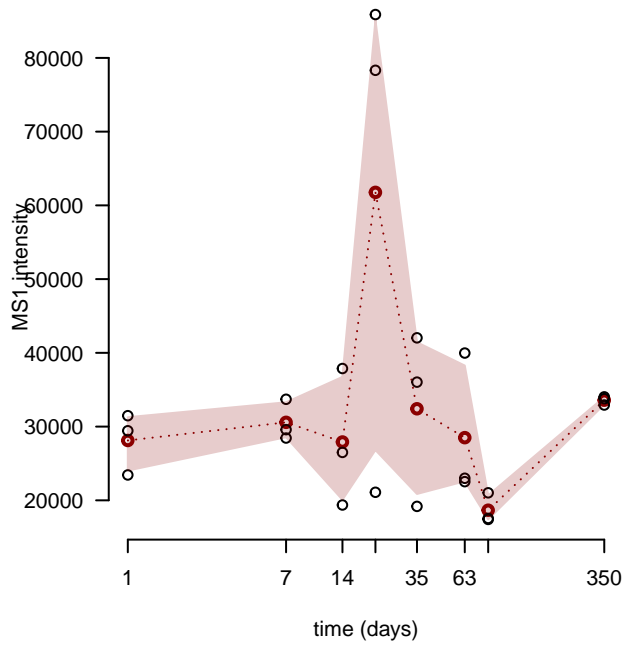

**Q60770**  
**GN=Stxbp3**  
syntaxin binding protein 3

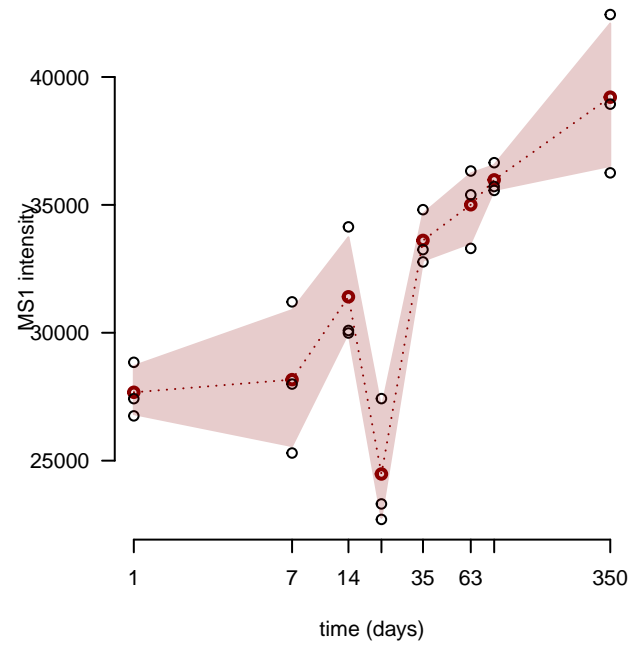

**Q60772**  
**GN=Cdkn2c**  
cyclin dependent kinase inhibitor 2C

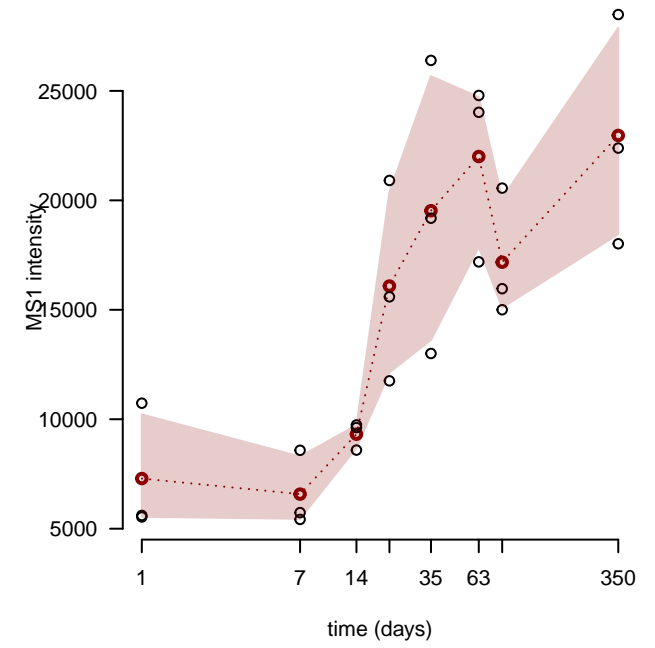

**Q60775**  
**GN=Elf1**  
E74 like ETS transcription factor 1

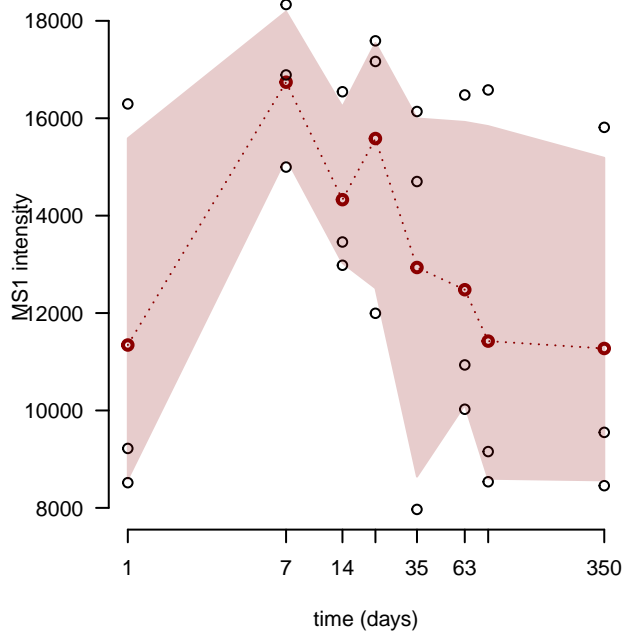

**Q60778**  
**GN=Nfkbib**  
nuclear factor of kappa light polypeptid ...

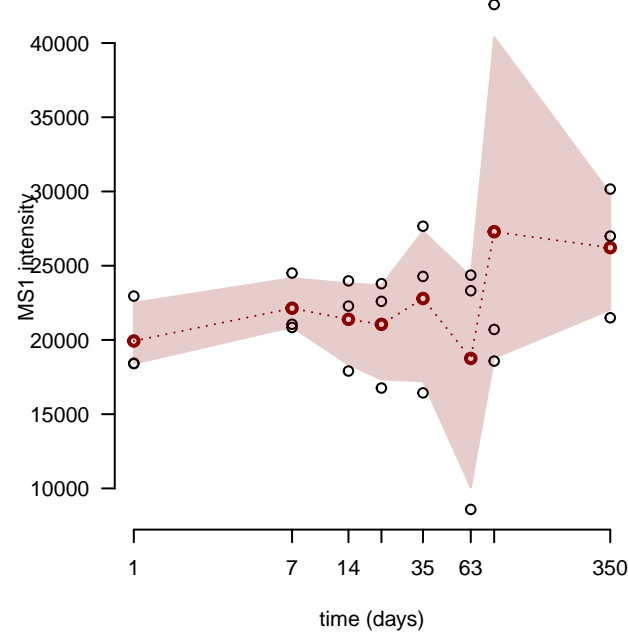

**Q60780**  
**GN=Gas7**  
growth arrest specific 7

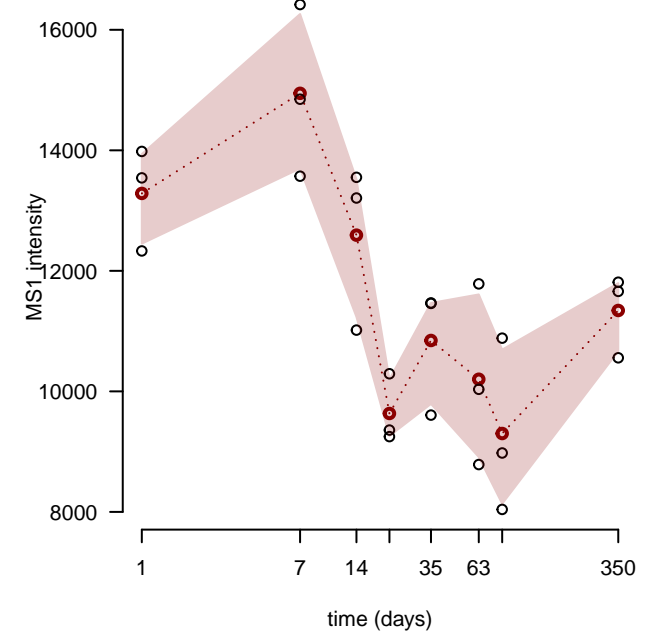

**Q60787**  
**GN=Lcp2**  
lymphocyte cytosolic protein 2

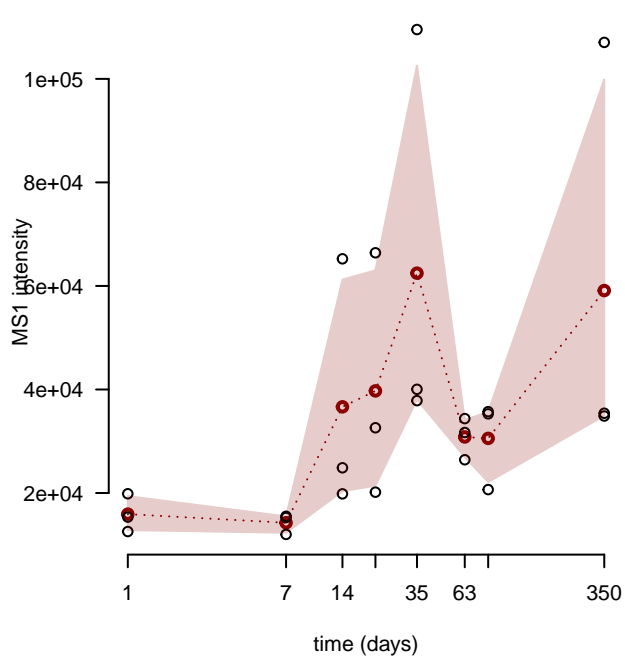

**Q60790**  
**GN=Rasa3**  
RAS p21 protein activator 3

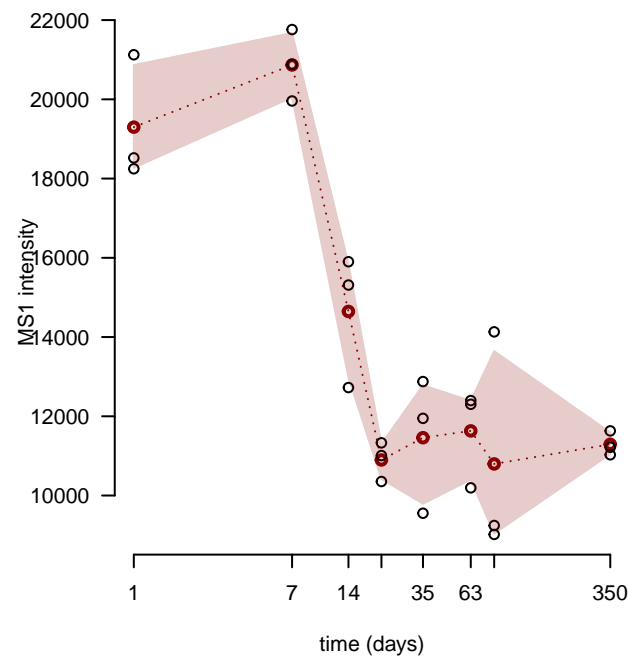

**Q60803**  
**GN=Traf3**  
TNF receptor-associated factor 3

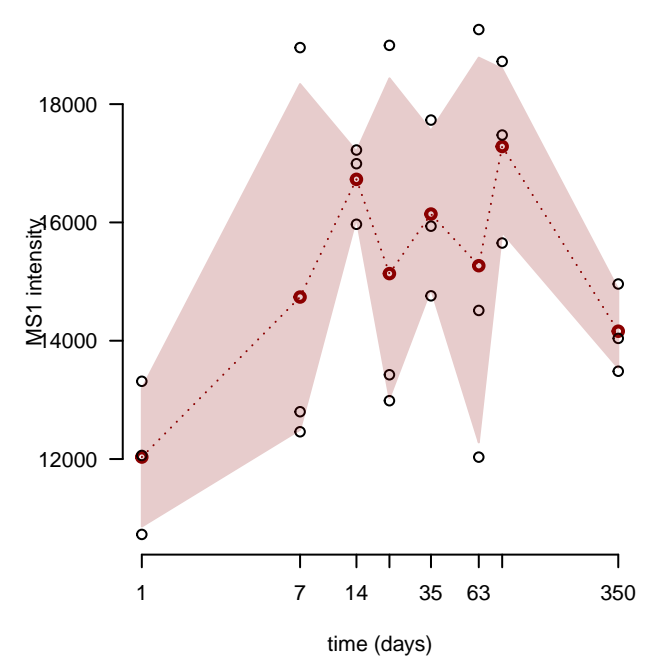

**Q60805**  
**GN=Mertk**  
MER proto-oncogene tyrosine kinase

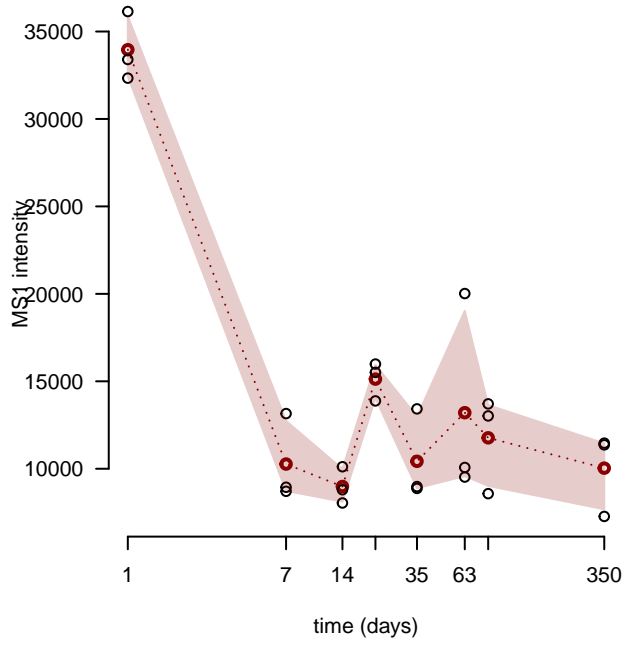

**Q60809**  
**GN=Cnot7**  
CCR4-NOT transcription complex, subunit ...

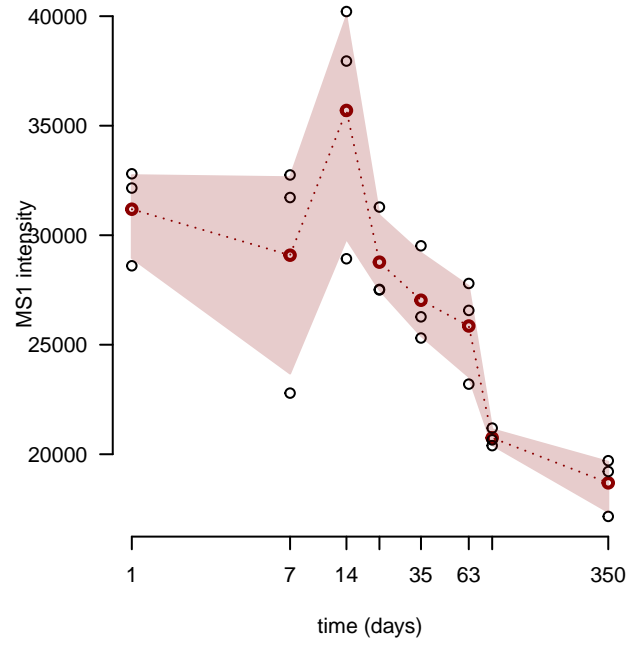

**Q60821**  
**GN=Zbtb17**  
zinc finger and BTB domain containing 17

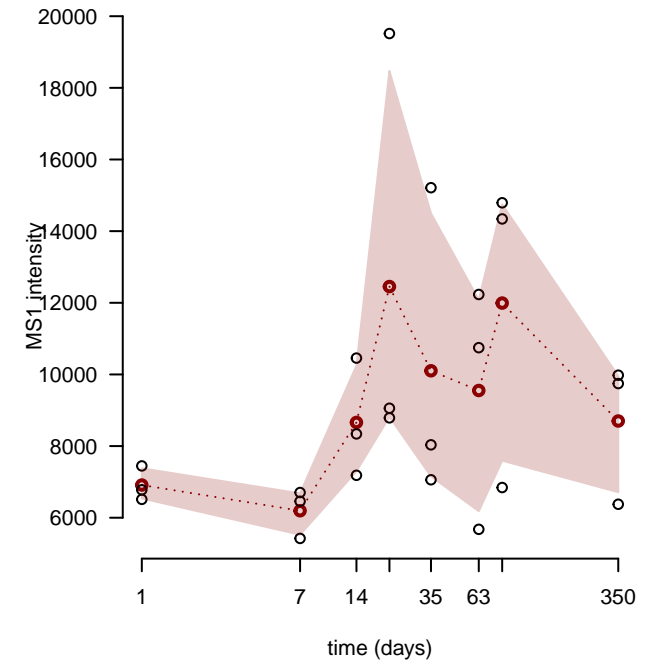

**Q60823**  
**GN=Akt2**  
thymoma viral proto-oncogene 2

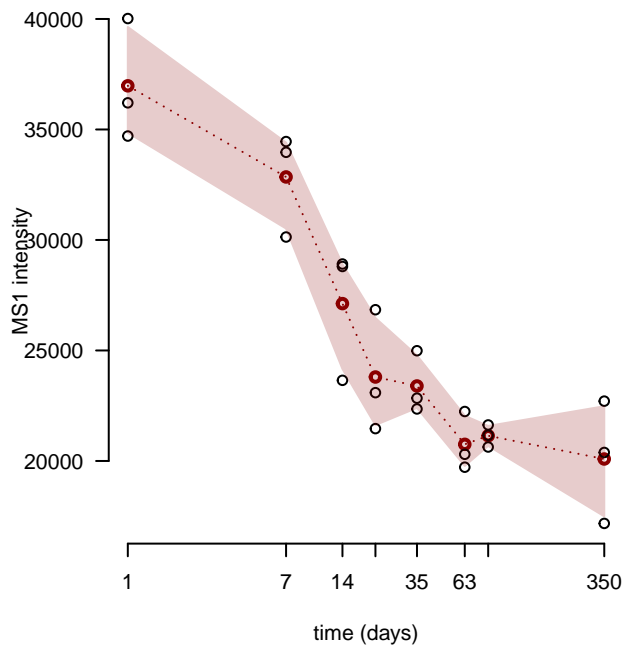

**Q60838**  
**GN=Dvl2**  
dishevelled segment polarity protein 2

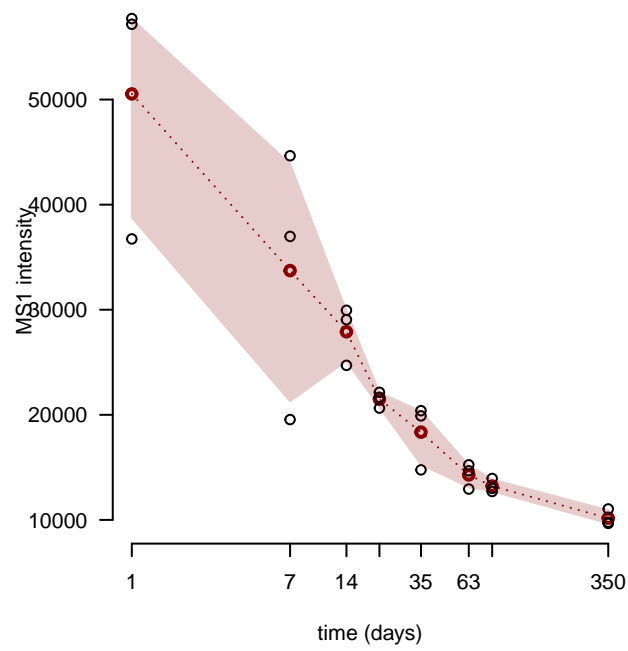

**Q60847**  
**GN=Col12a1**  
collagen, type XII, alpha 1

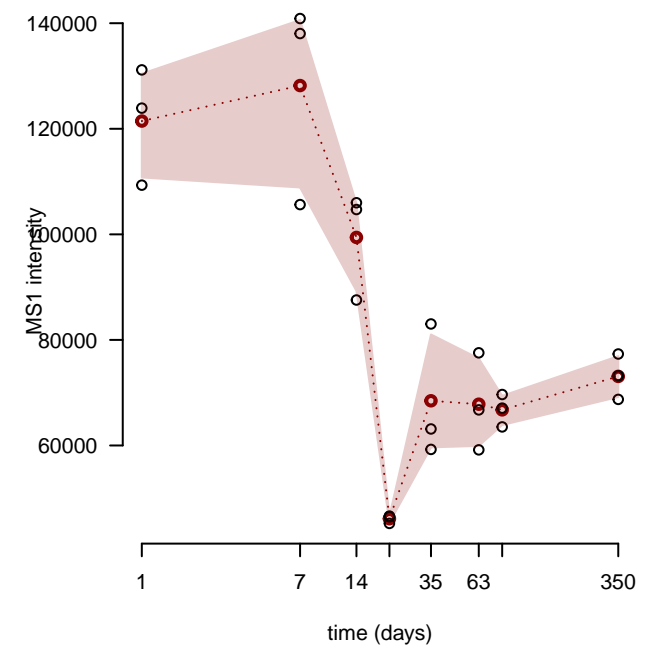

**Q60848**  
**GN=Hells**  
helicase, lymphoid specific

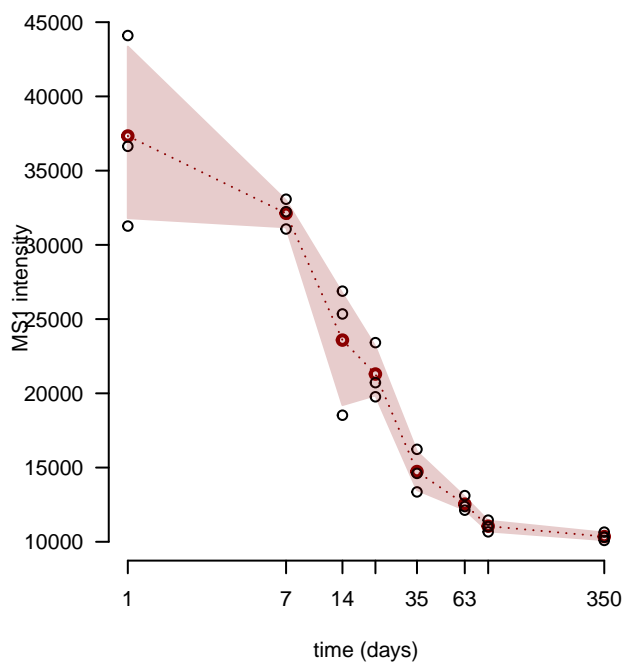

**Q60854**  
**GN=Serp1b6**

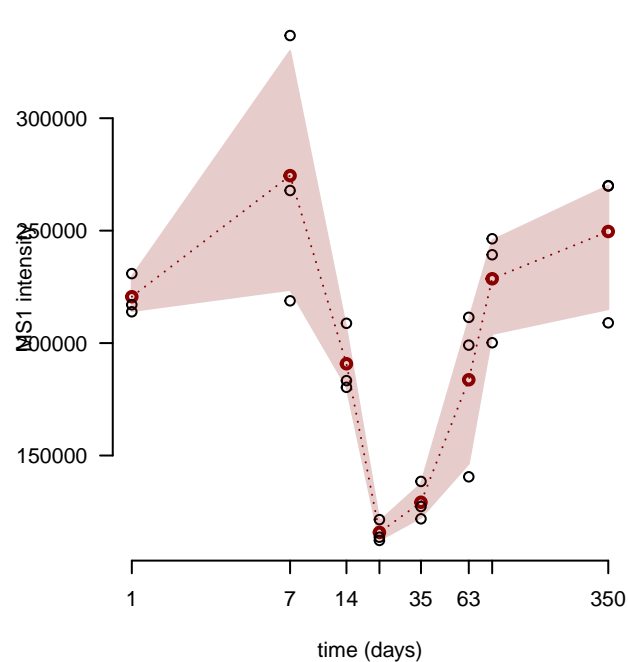

**Q60855**  
**GN=Ripk1**  
receptor (TNFRSF)-interacting serine-thr ...

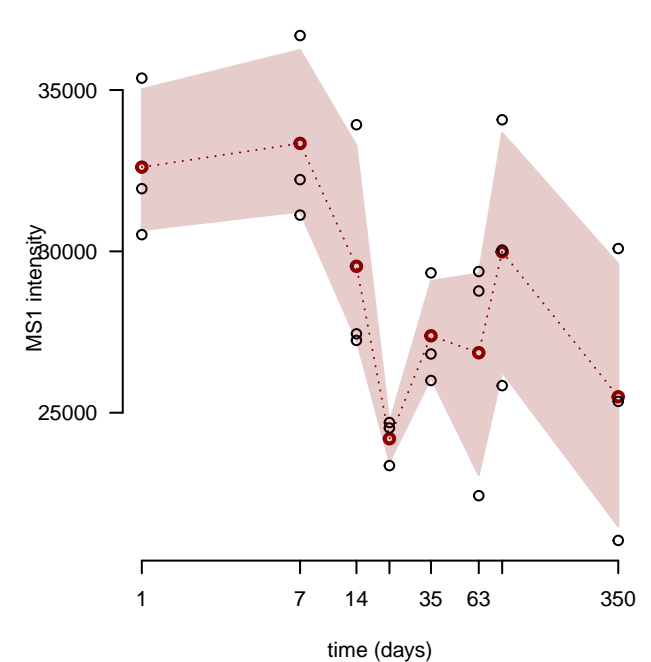

**Q60860**  
**GN=Ltc4s**  
leukotriene C4 synthase

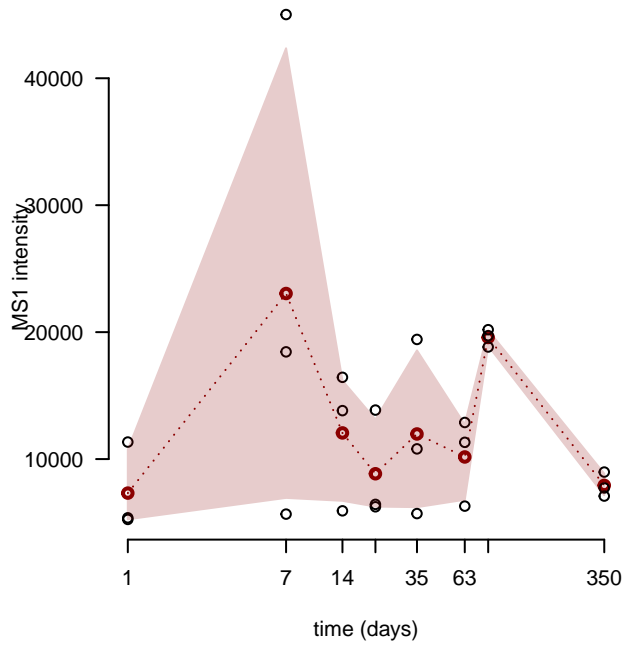

**Q60862**  
**GN=Orc2**  
origin recognition complex, subunit 2

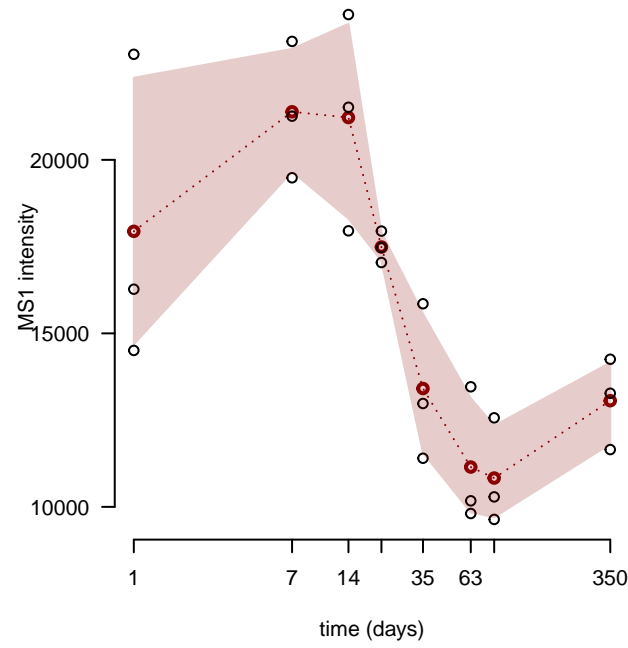

**Q60864**  
**GN=Stip1**  
stress-induced phosphoprotein 1

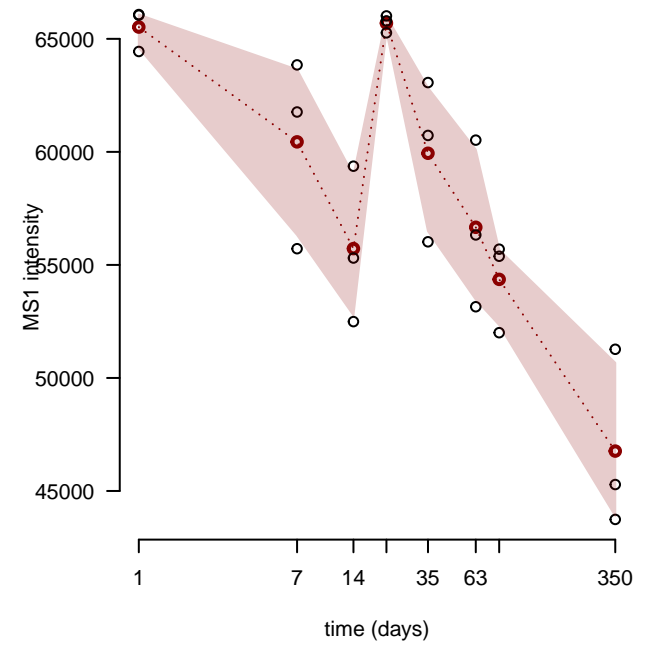

**Q60865**  
**GN=Caprin1**  
cell cycle associated protein 1

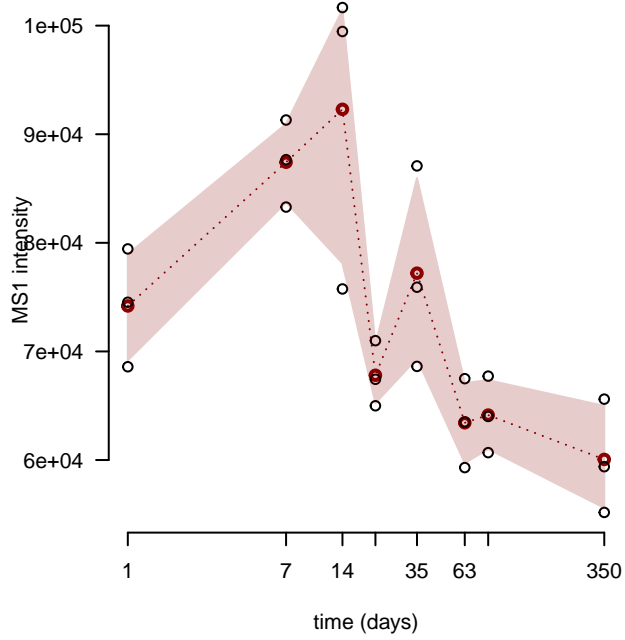

**Q60866**  
**GN=Pter**  
phosphotriesterase related

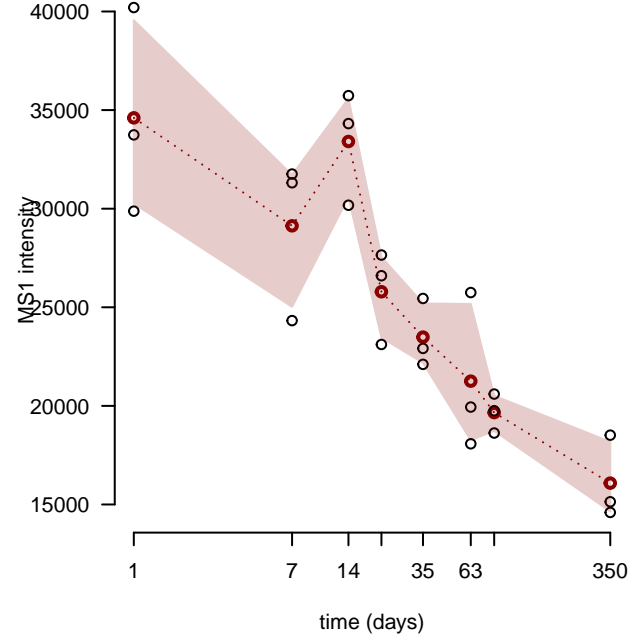

**Q60870**  
**GN=Reep5**  
receptor accessory protein 5

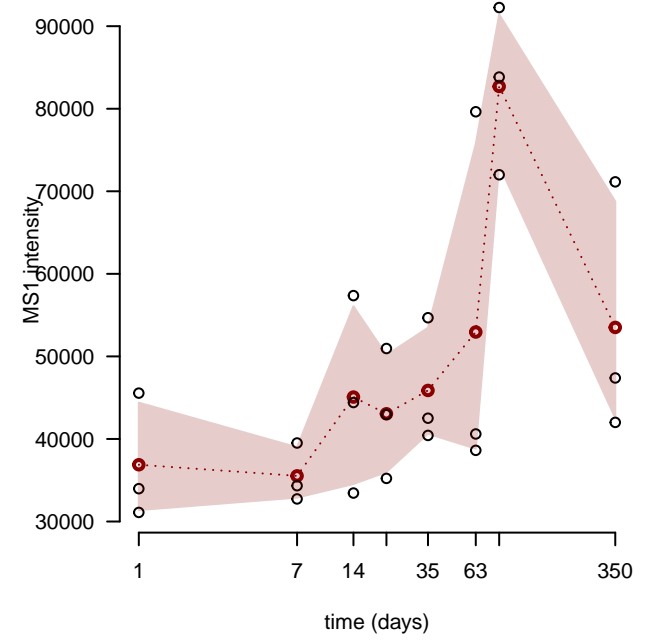

**Q60872**  
**GN=Eif1a**  
eukaryotic translation initiation factor ...

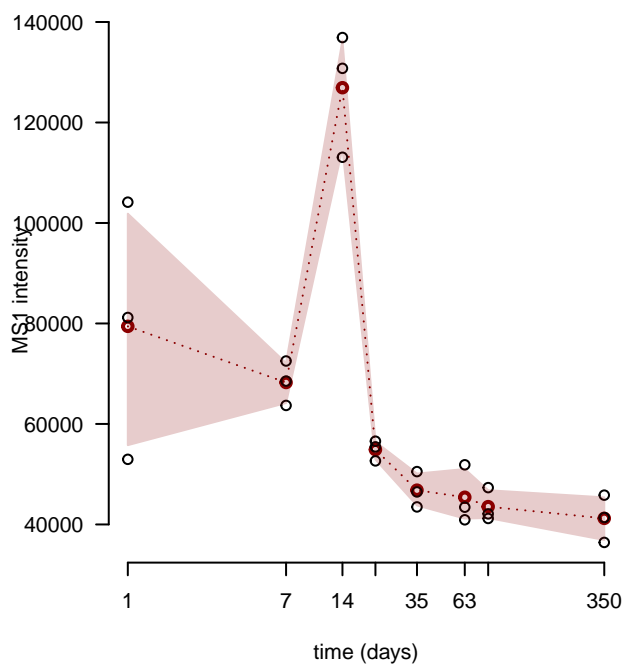

**Q60875**  
**GN=Arhgef2**  
rho/rac guanine nucleotide exchange fact ...

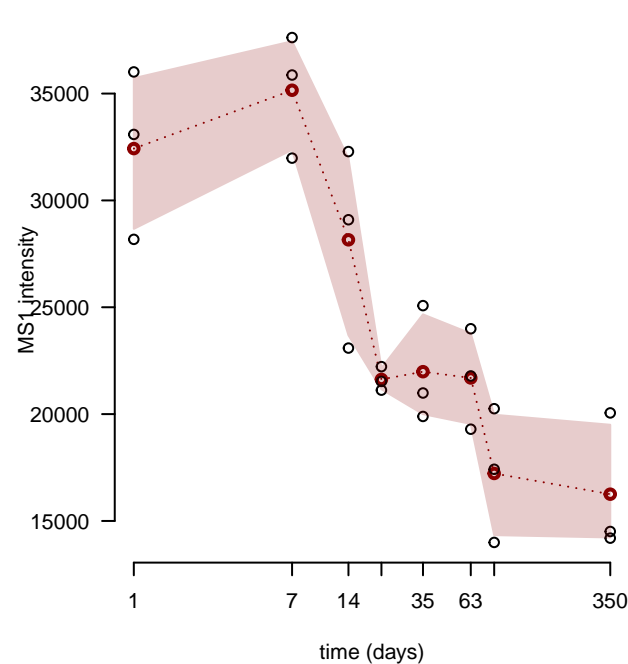

**Q60899**  
**GN=Elavl2**  
ELAV like RNA binding protein 1

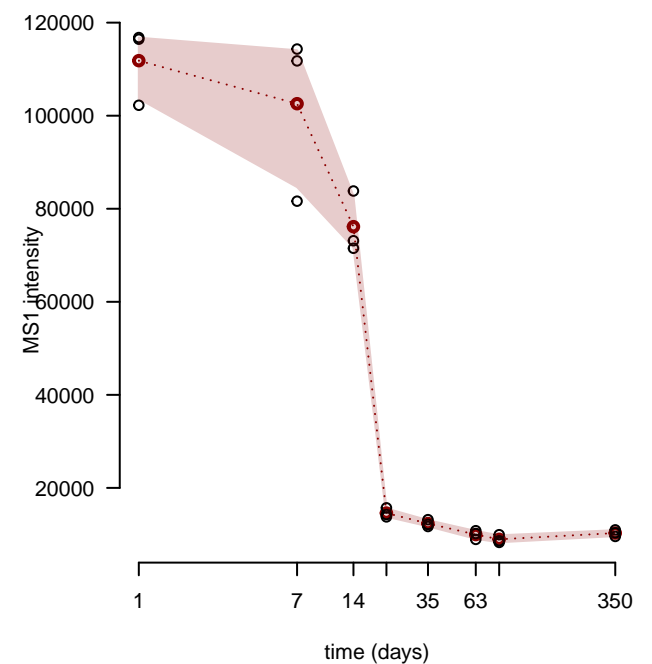

**Q60902**  
**GN=Eps151**  
epidermal growth factor receptor pathway ...

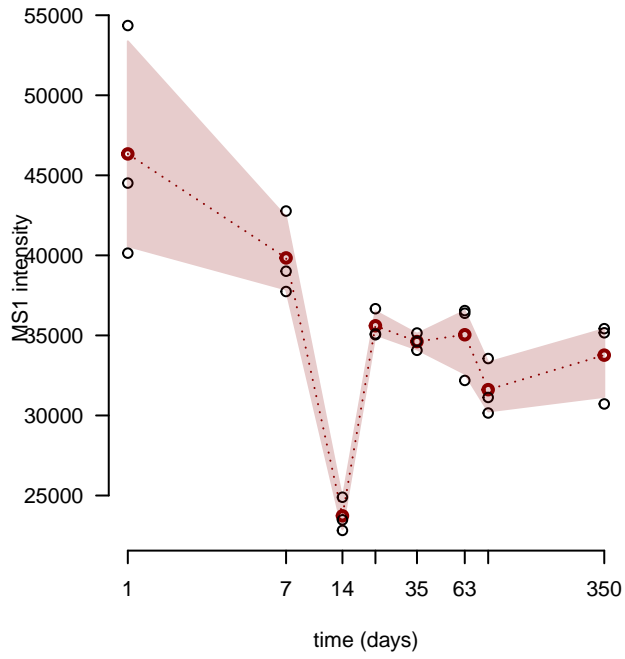

**Q60928**  
**GN=Ggt1**  
gamma-glutamyltransferase 1

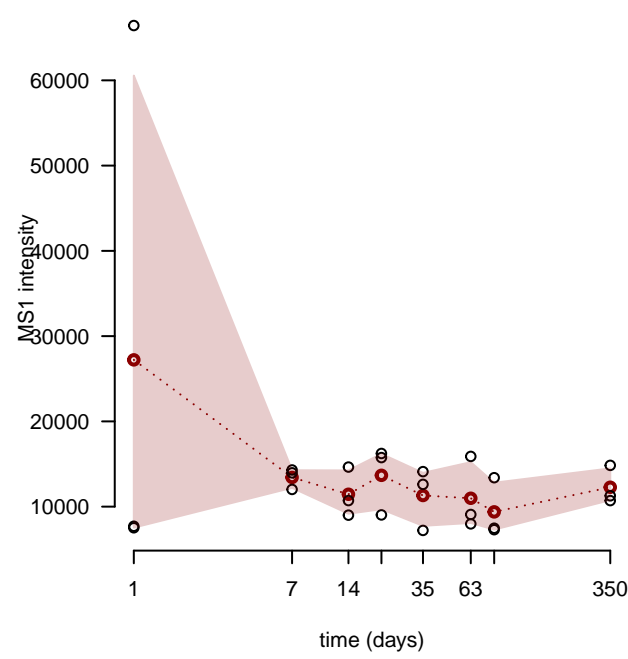

**Q60929**  
**GN=Mef2a**  
myocyte enhancer factor 2A

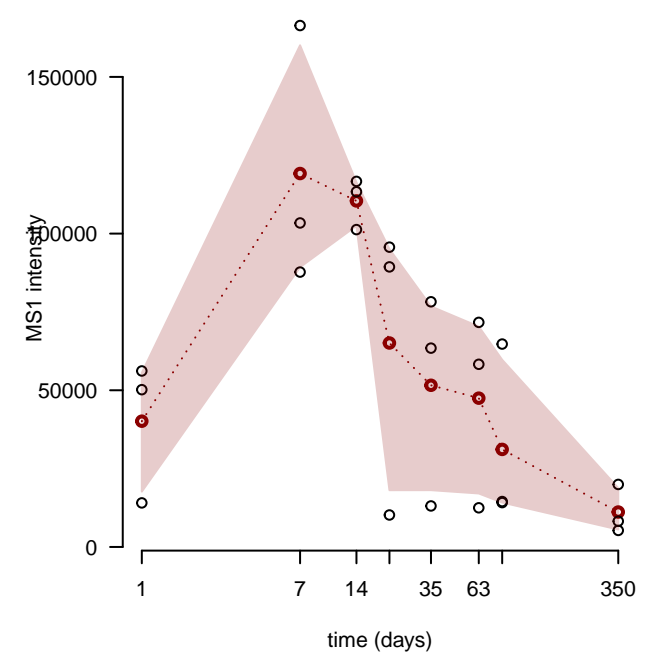

**Q60930**  
**GN=Vdac2**  
voltage-dependent anion channel 2

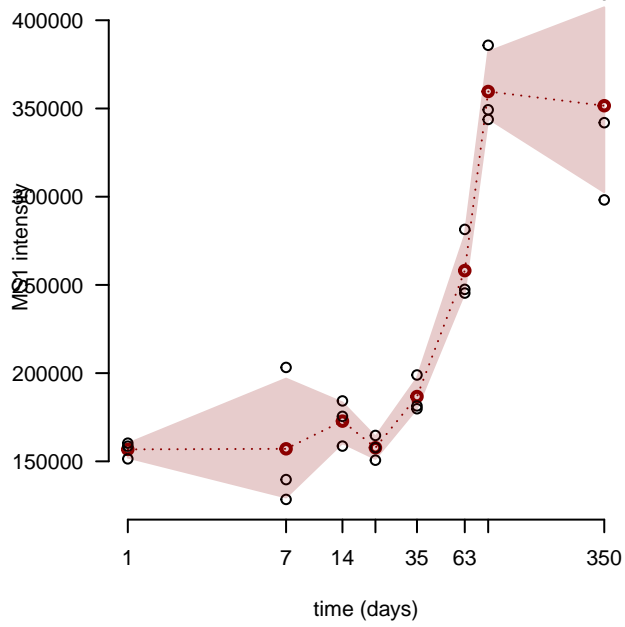

**Q60931**  
**GN=Vdac3**  
voltage-dependent anion channel 3

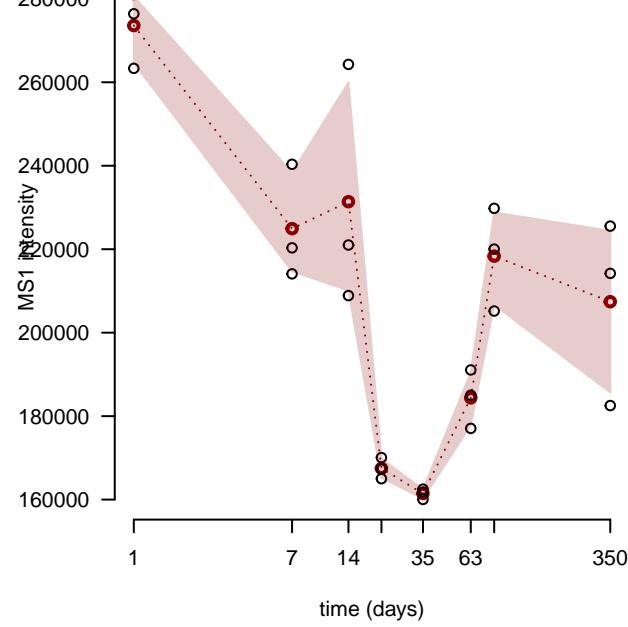

**Q60932**  
**GN=Vdac1**  
voltage-dependent anion channel 1

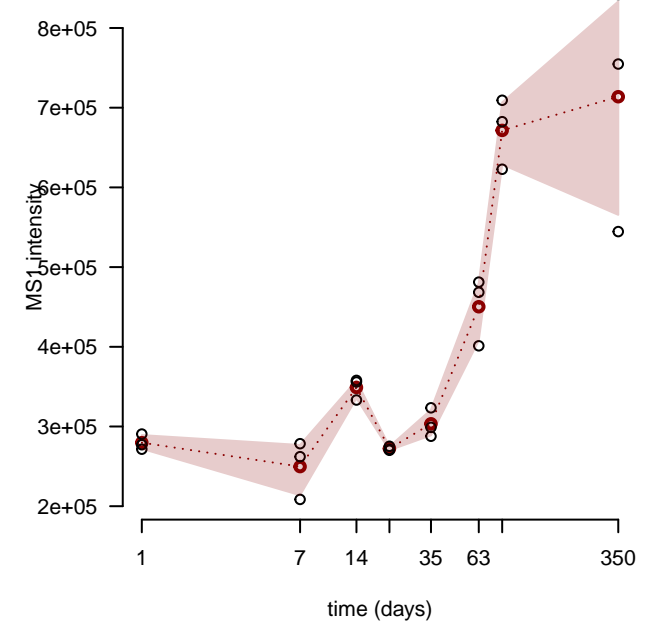

**Q60936**  
**GN=Coq8a**  
coenzyme Q8A

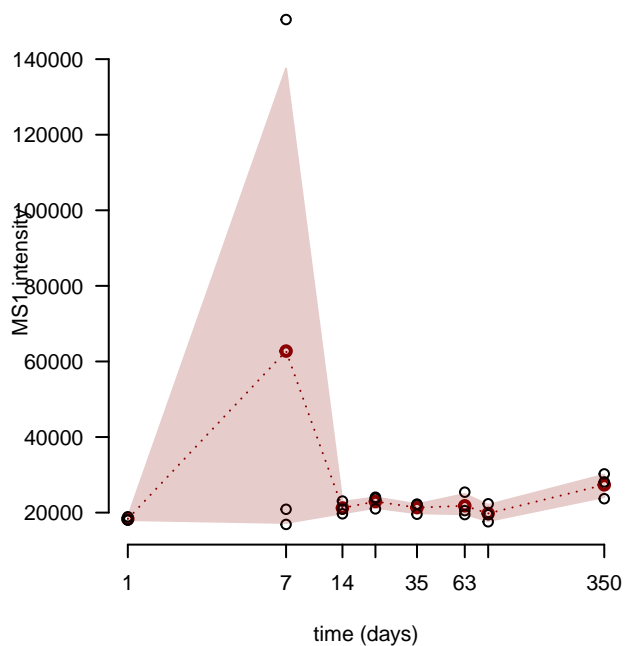

**Q60949**  
**GN=Tbc1d1**  
TBC1 domain family, member 1

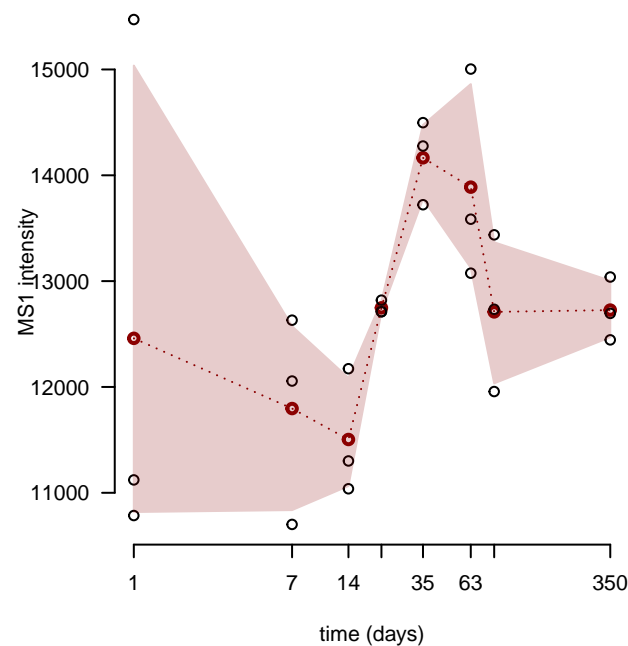

**Q60952**  
**GN=Cep250**  
centrosomal protein 250

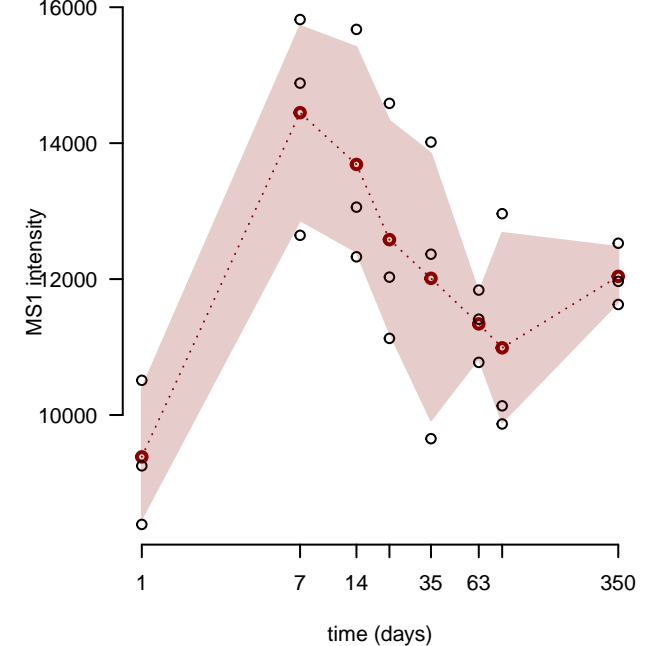

**Q60953**  
**GN=Pml**  
promyelocytic leukemia

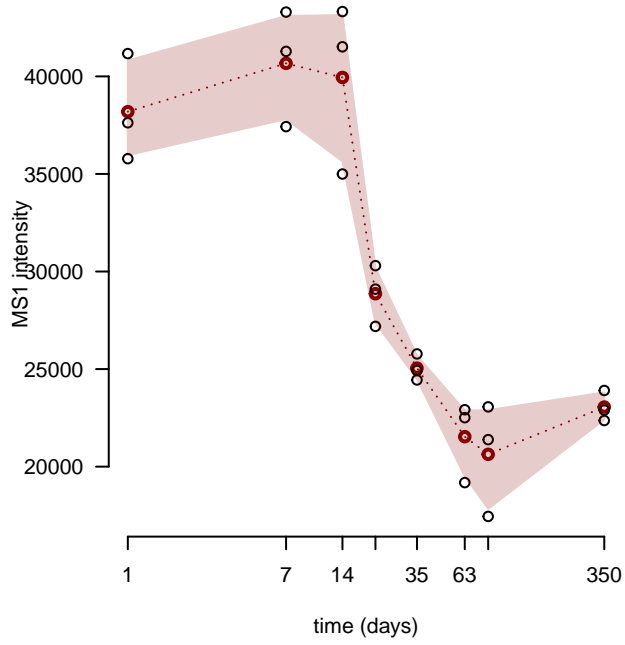

**Q60954**  
**GN=Meis1**  
Meis homeobox 1

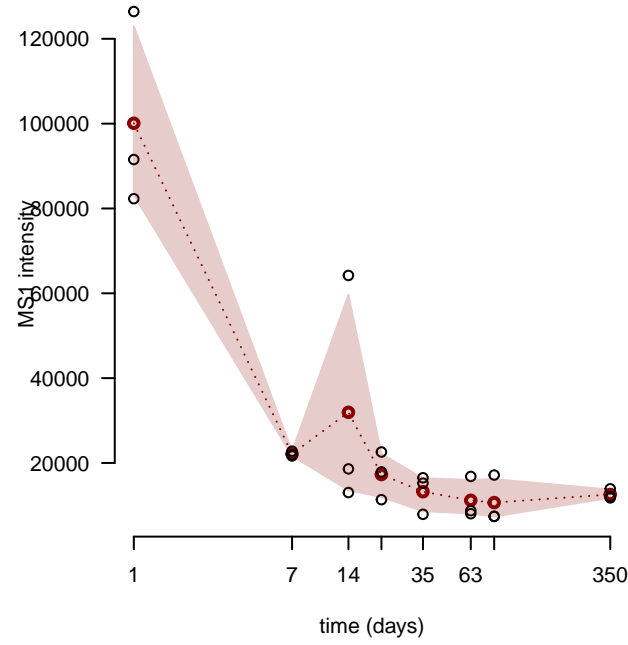

**Q60960**  
**GN=Kpna1**  
karyopherin (importin) alpha 1

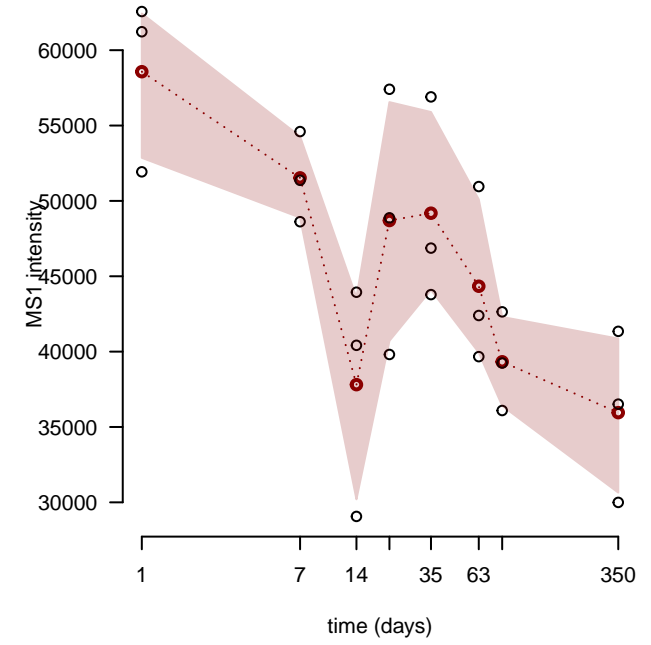

**Q60961**  
**GN=Laptm4a**  
lysosomal-associated protein transmembra ...

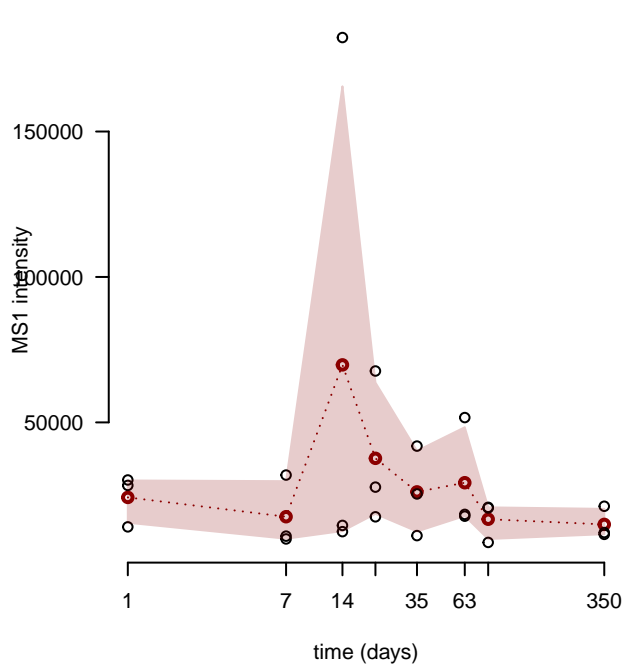

**Q60963**  
**GN=Pla2g7**  
phospholipase A2, group VII (platelet-ac ...

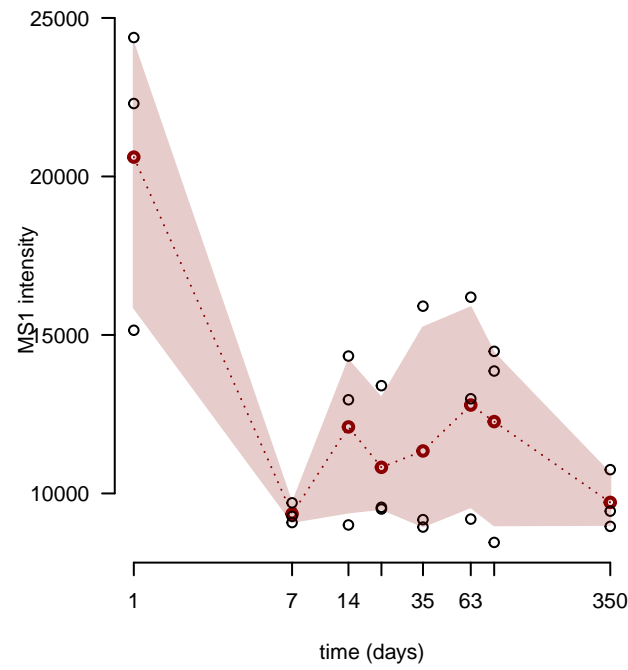

**Q60967**  
**GN=Papss1**  
3'-phosphoadenosine 5'-phosphosulfate sy ...

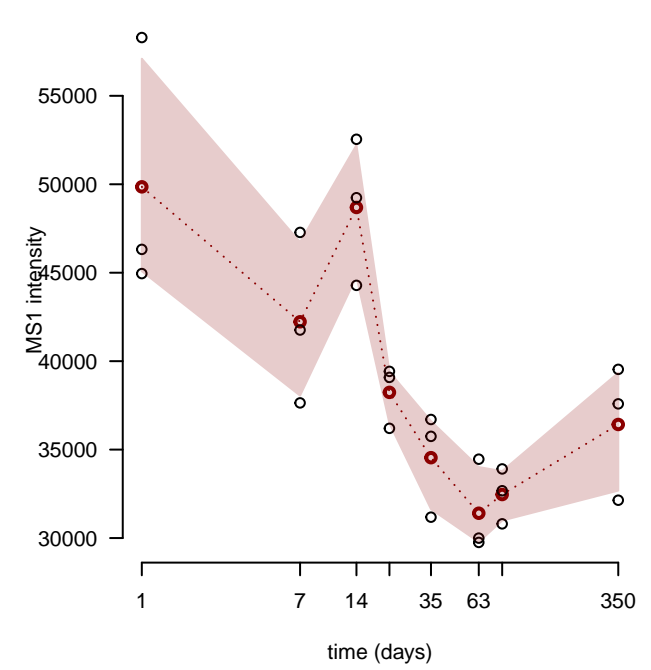

**Q60969**  
**GN=Styx**  
serine/threonine/tyrosine interaction pr ...

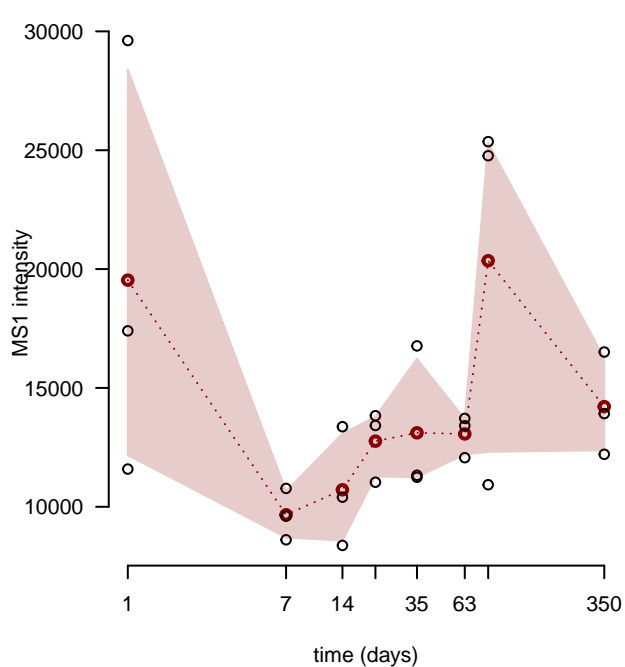

**Q60972**  
**GN=Rbbp4**  
retinoblastoma binding protein 4, chroma ...

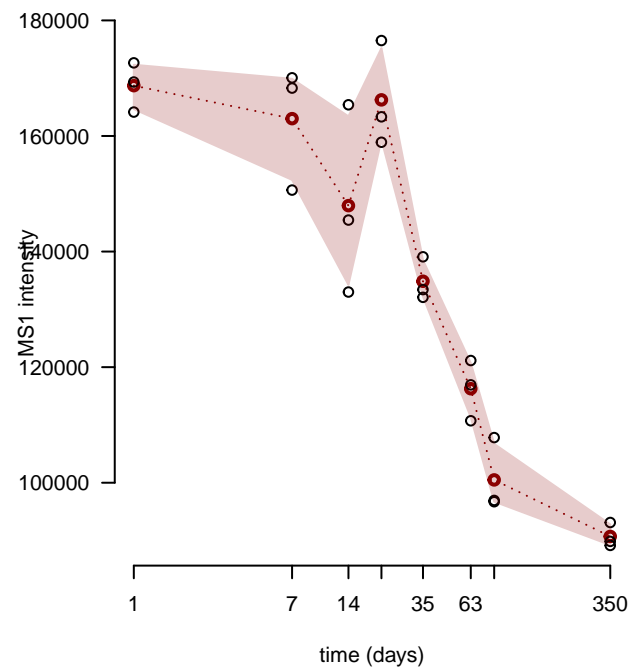

**Q60973**  
**GN=Rbbp7**  
retinoblastoma binding protein 7, chroma ...

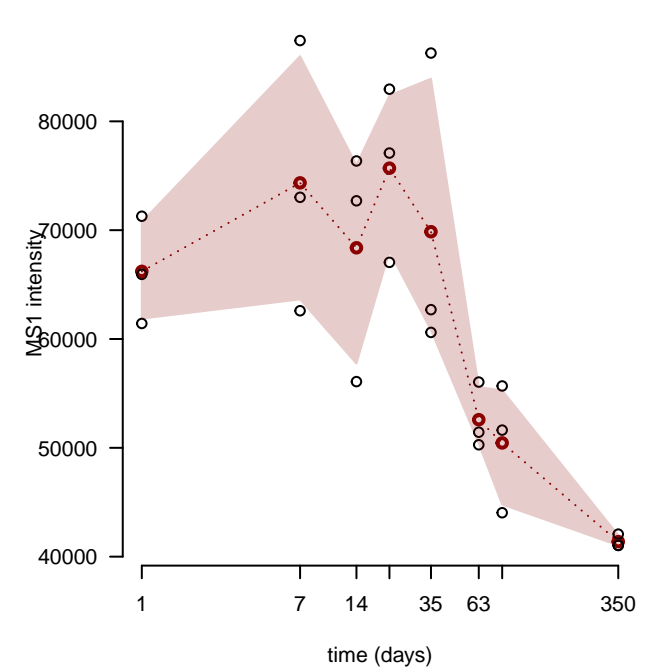



**Q60974**  
**GN=Ncor1**  
nuclear receptor co-repressor 1

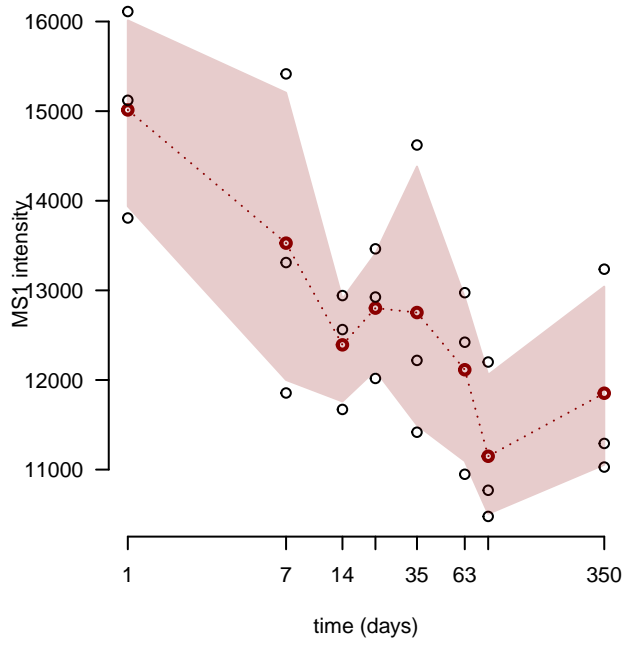

**Q60989**  
**GN=Xiap**  
X-linked inhibitor of apoptosis

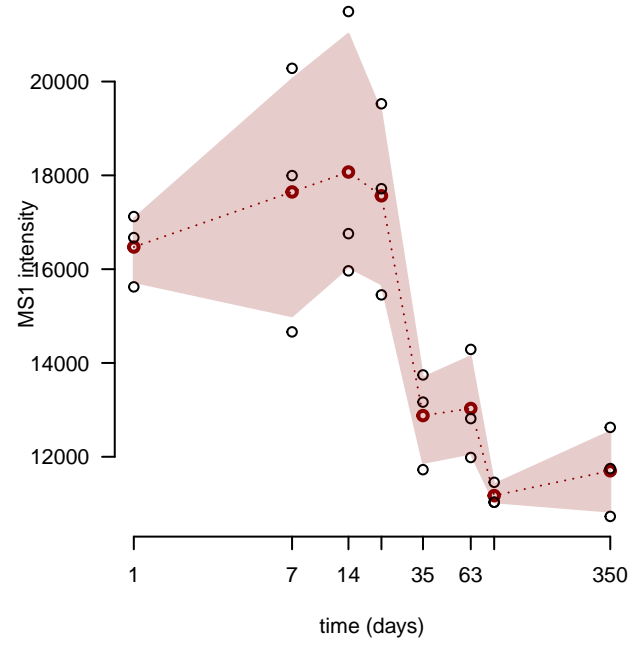

**Q60991**  
**GN=Cyp7b1**  
cytochrome P450, family 7, subfamily b, ...

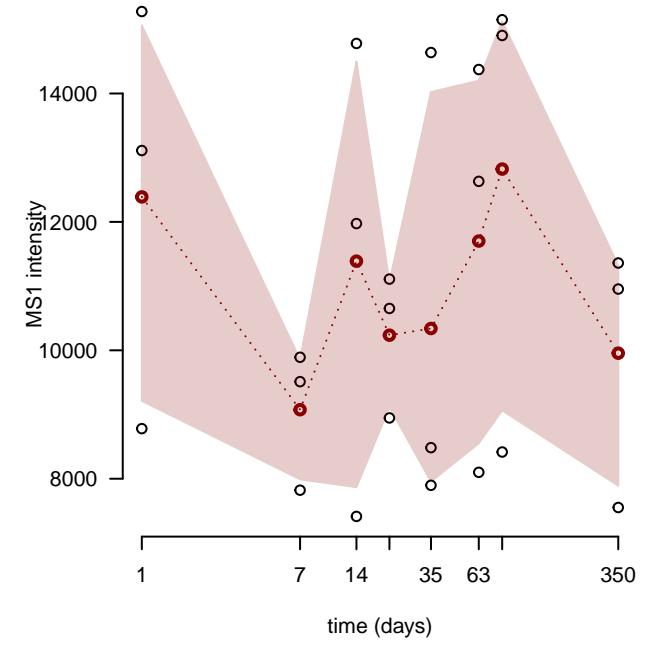

**Q60992**  
**GN=Vav2**  
vav 2 oncogene

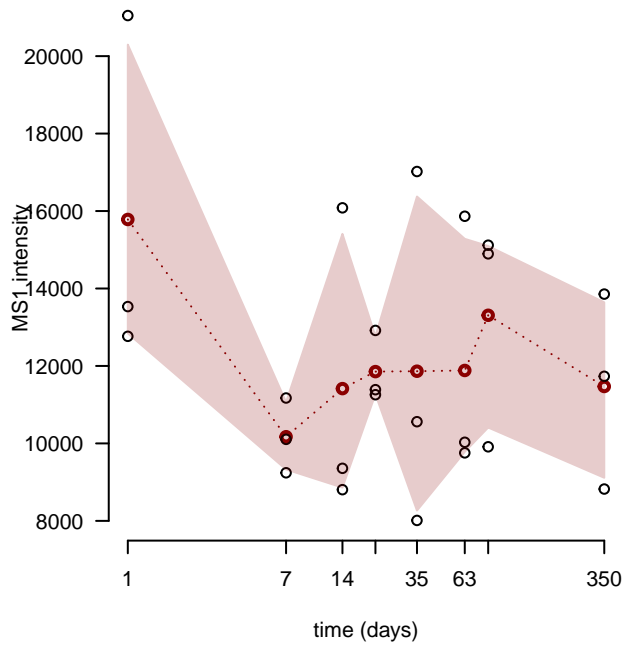

**Q60994**  
**GN=Adipoq**  
adiponectin, C1Q and collagen domain con ...

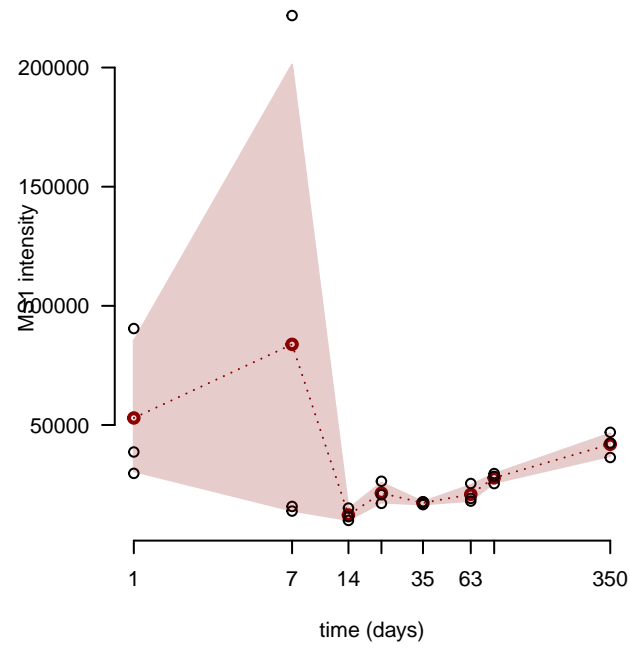

**Q60996**  
**GN=Ppp2r5c**  
protein phosphatase 2, regulatory subuni ...

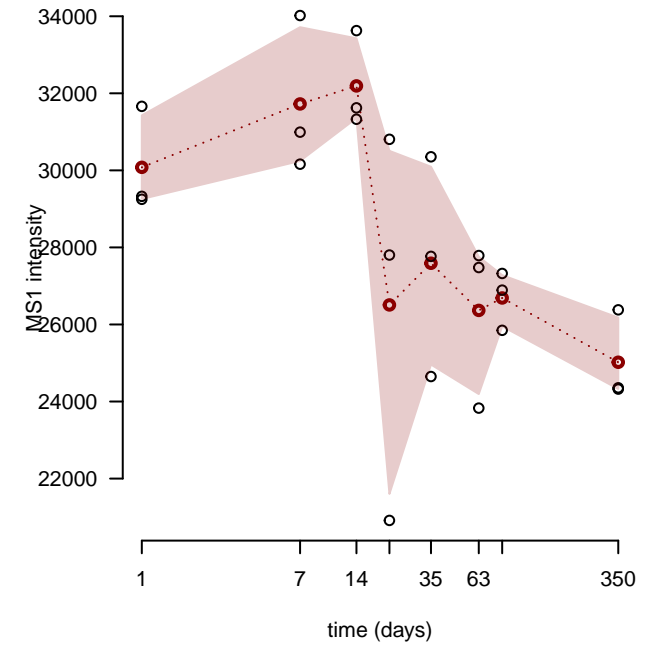

**Q61001**  
**GN=Lama5**  
laminin, alpha 5

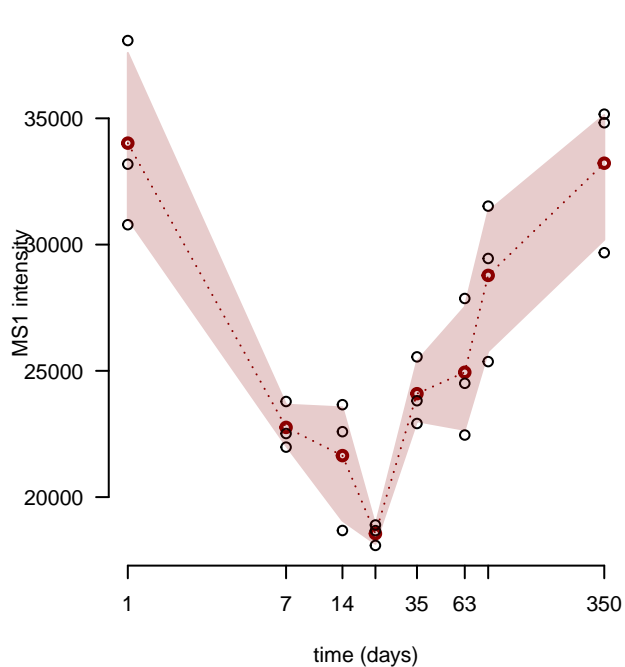

**Q61009**  
**GN=Scarb1**  
scavenger receptor class B, member 1

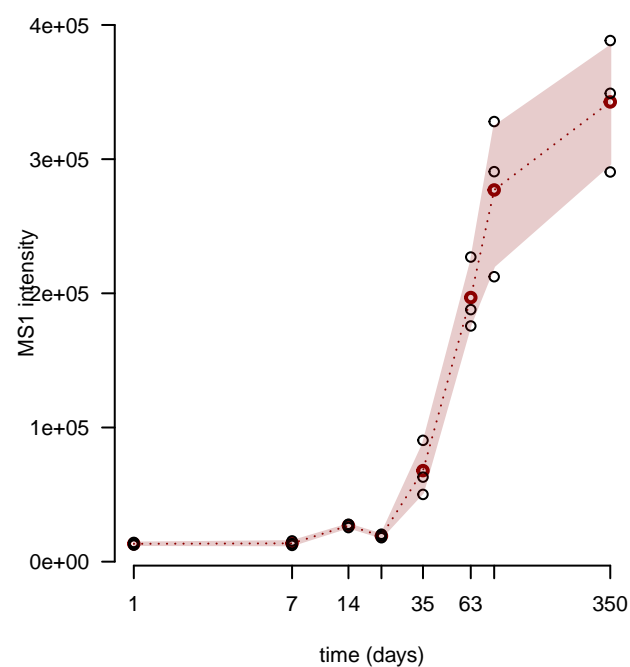

**Q61024**  
**GN=Asns**  
asparagine synthetase

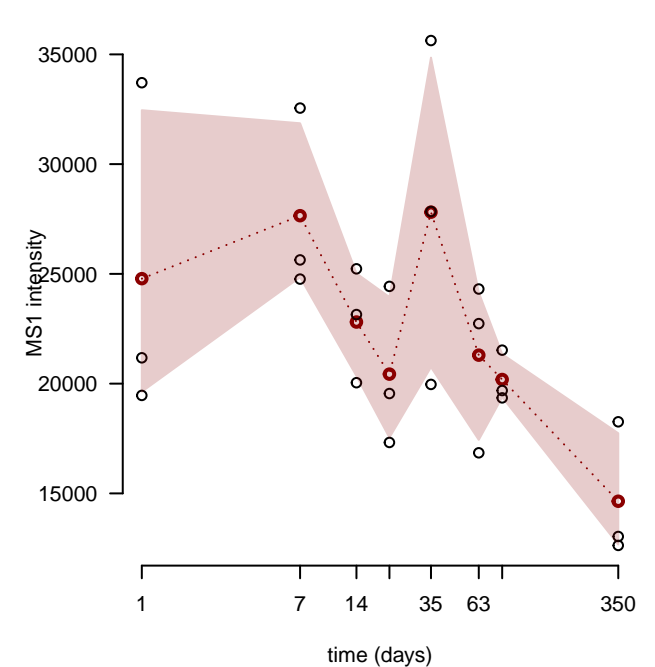

**Q61026**  
**GN=Ncoa2**  
nuclear receptor coactivator 2

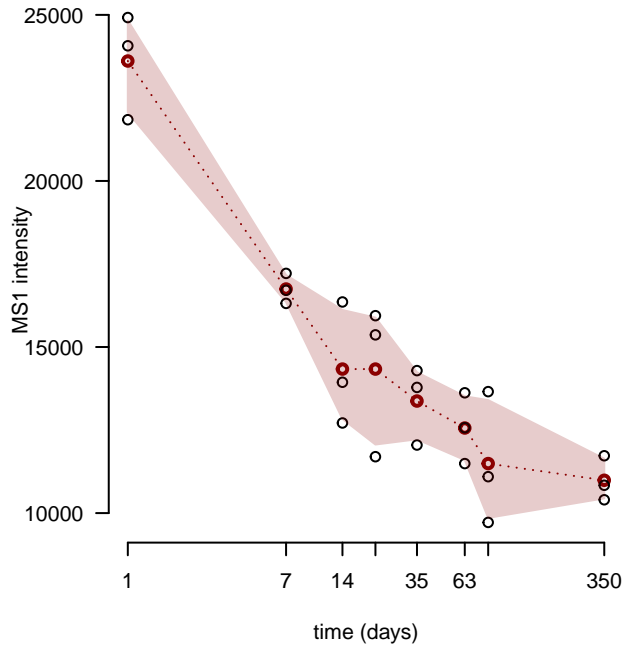

**Q61029**  
**GN=Tmpo**  
thymopoietin

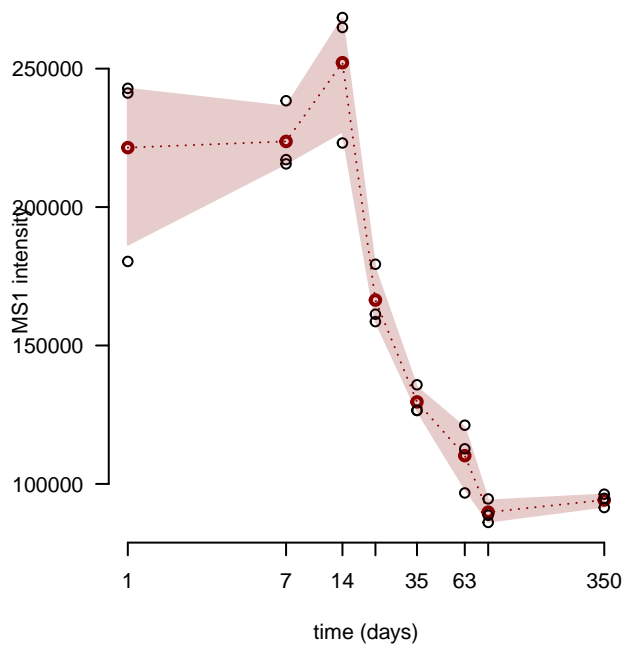

**Q61029**  
**GN=Tmpo**  
thymopoietin

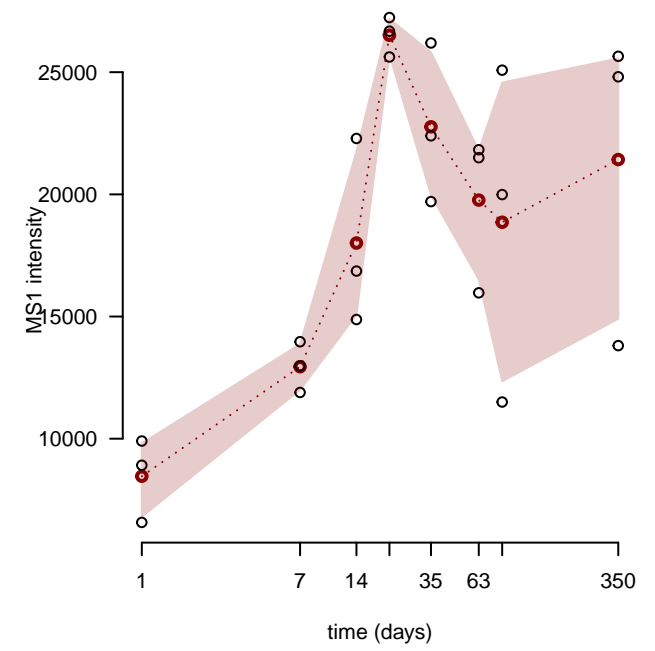

**Q61033**  
**GN=Tmpo**

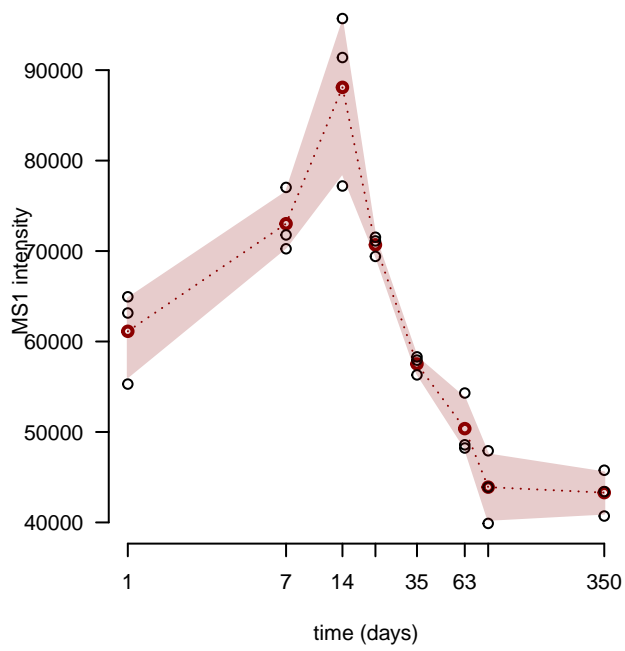

**Q61035**  
**GN=Hars**  
histidyl-tRNA synthetase

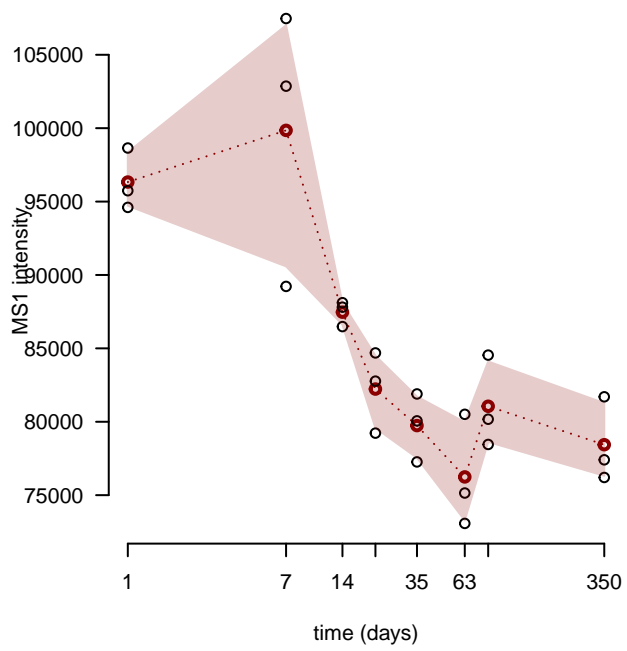

**Q61036**  
**GN=Pak3**  
p21 (RAC1) activated kinase 3

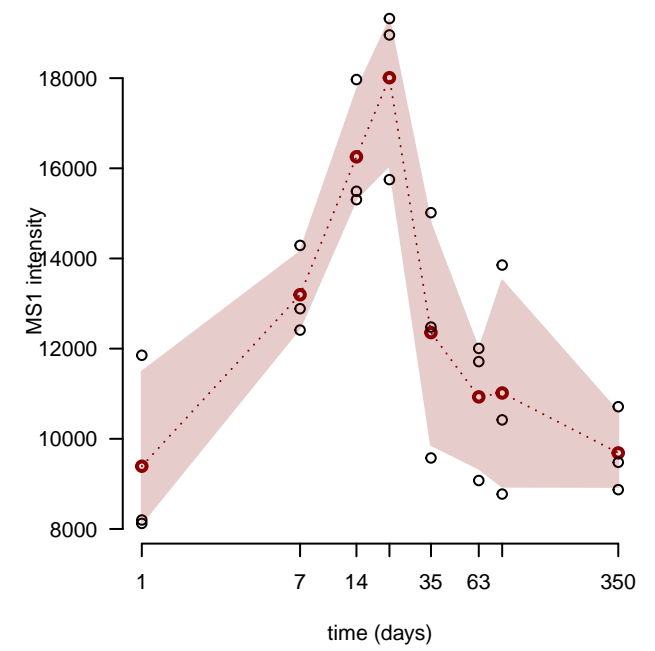

**Q61037**  
**GN=Tsc2**  
TSC complex subunit 2

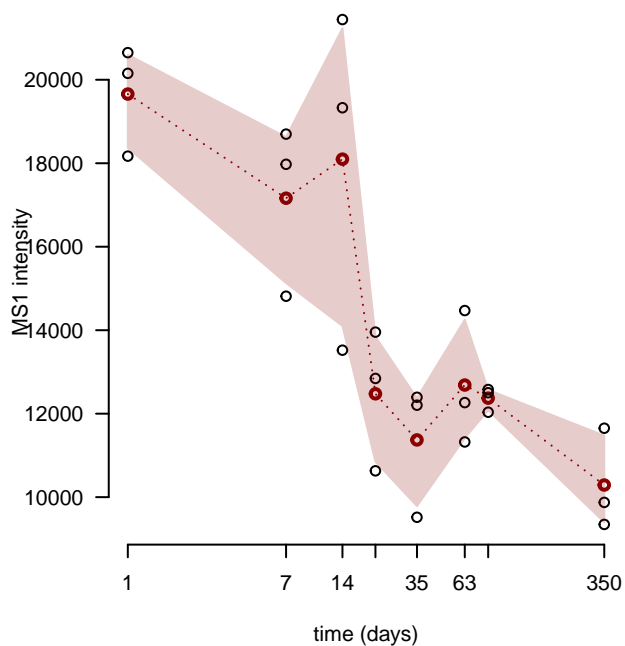

**Q61048**  
**GN=Wbp4**  
WW domain binding protein 4

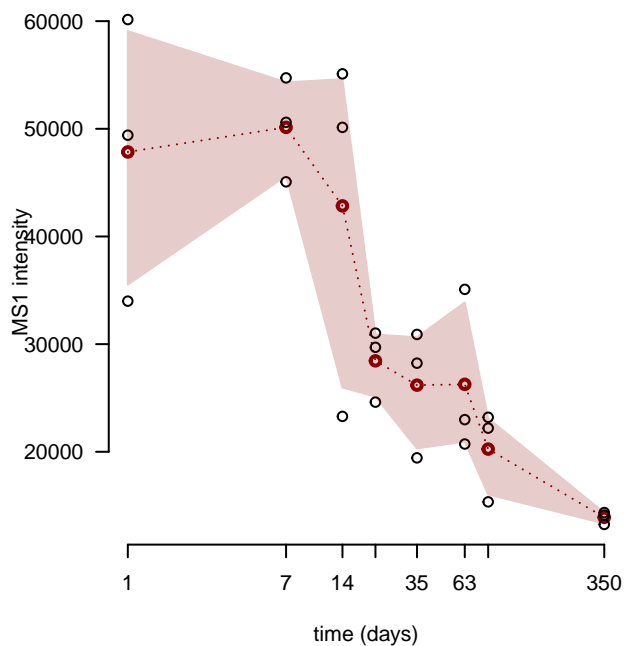

**Q61062**  
**GN=Dvl3**  
dishevelled segment polarity protein 3

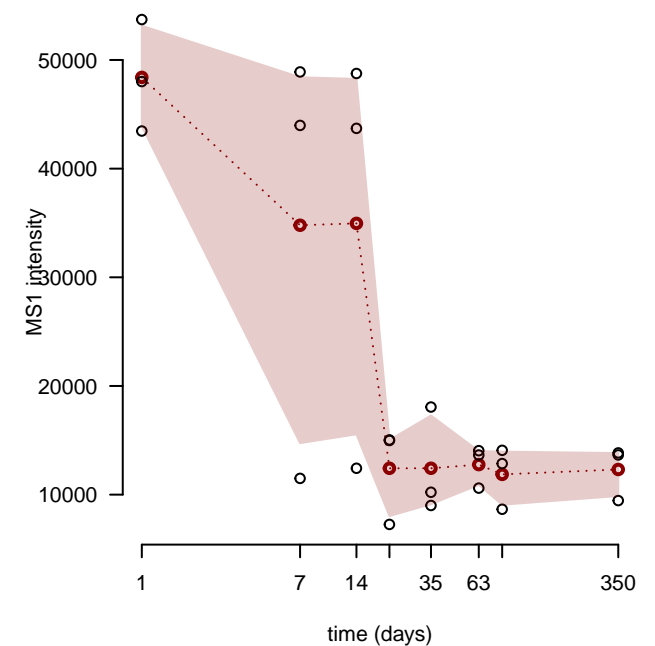

**Q61069**  
**GN=Usf1**  
upstream transcription factor 1

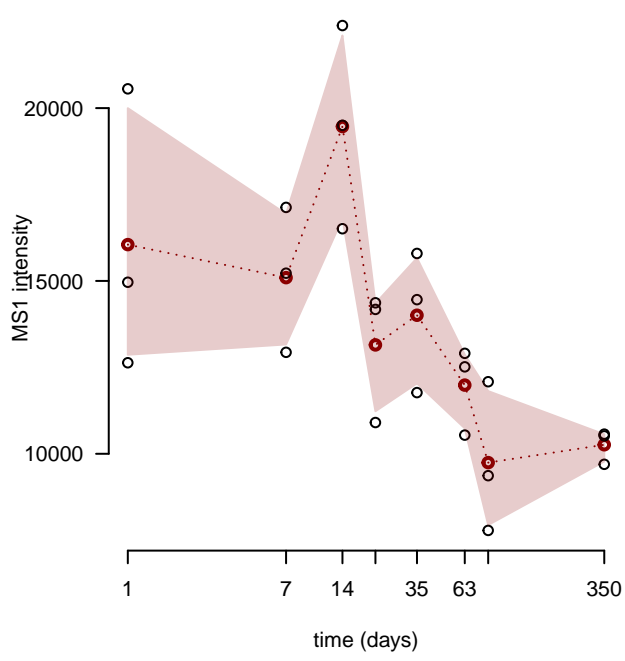

**Q61070**  
**GN=Et24**  
etoposide induced 2.4 mRNA

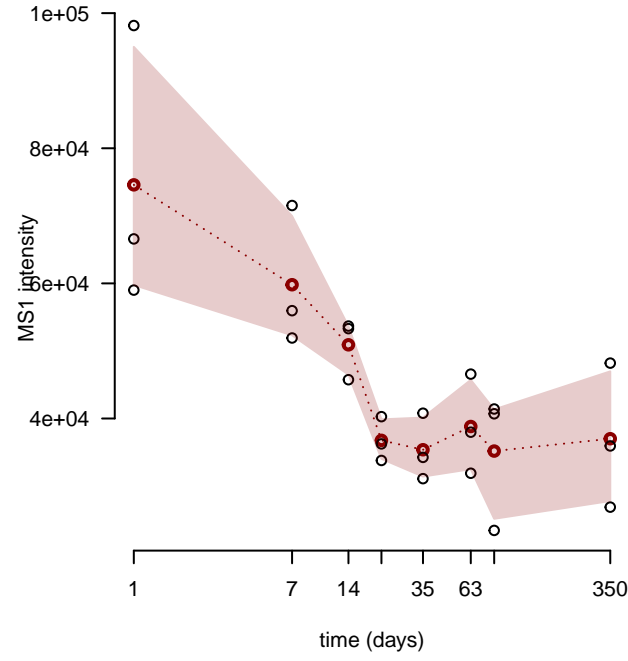

**Q61072**  
**GN=Adam9**  
a disintegrin and metallopeptidase domai ...

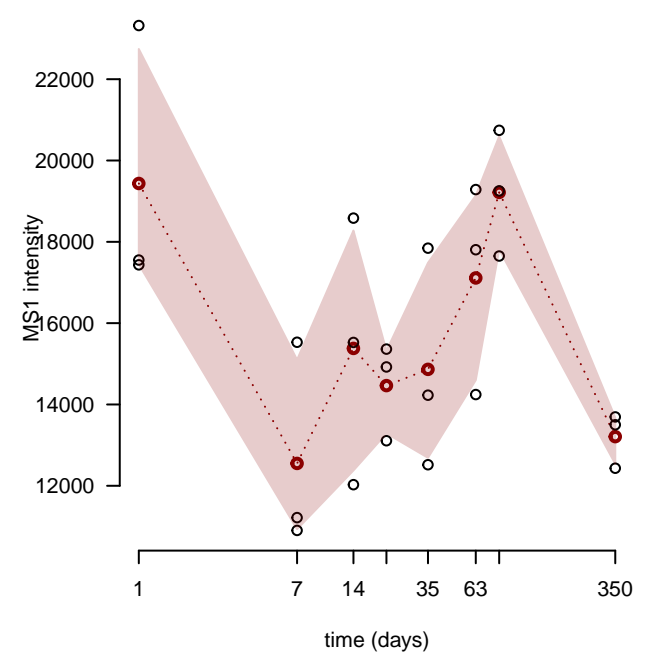

**Q61074**  
**GN=Ppm1g**  
protein phosphatase 1G (formerly 2C), ma ...

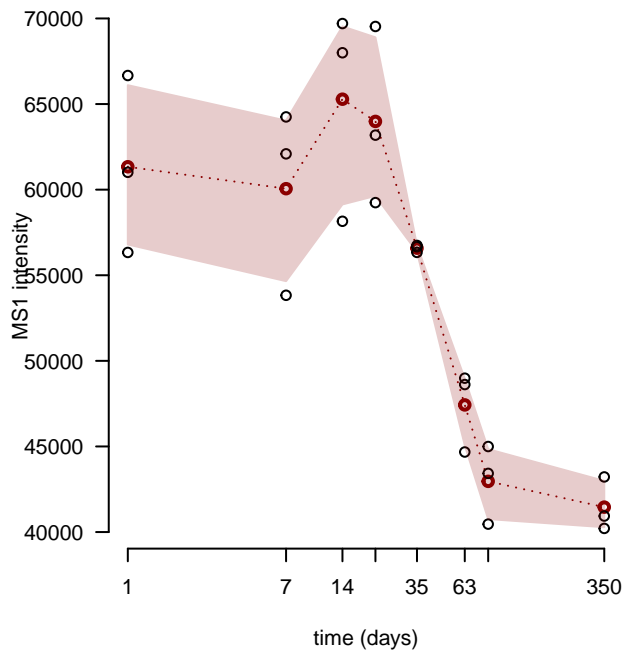

**Q61081**  
**GN=Cdc37**  
cell division cycle 37

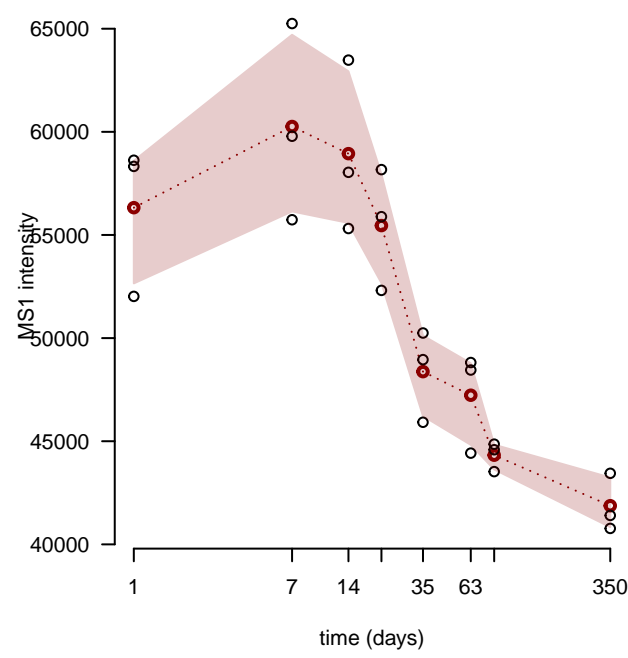

**Q61083**  
**GN=Map3k2**  
mitogen-activated protein kinase kinase ...

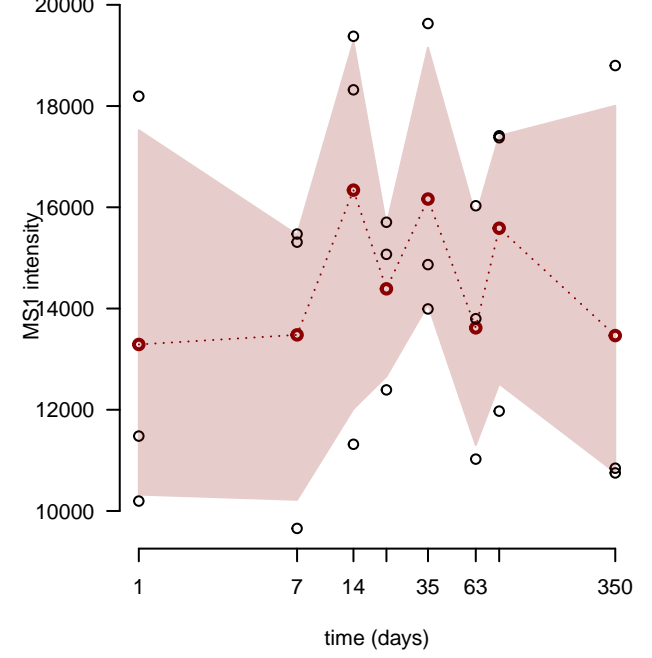

**Q61084**  
**GN=Map3k3**  
mitogen-activated protein kinase kinase ...

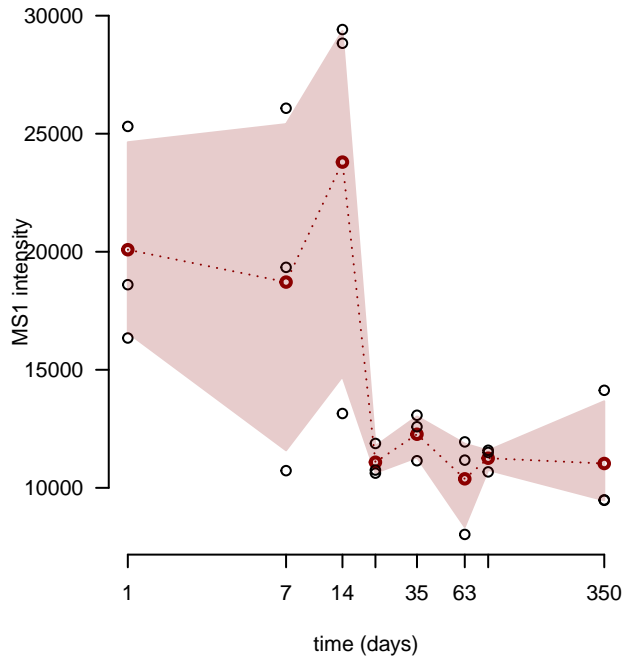

**Q61087**  
**GN=Lamb3**  
laminin, beta 3

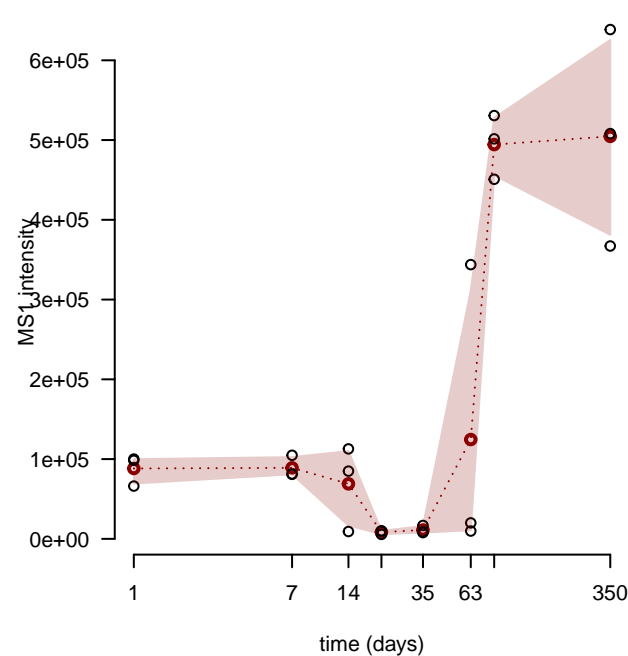

**Q61090**  
**GN=Fzd7**  
frizzled class receptor 7

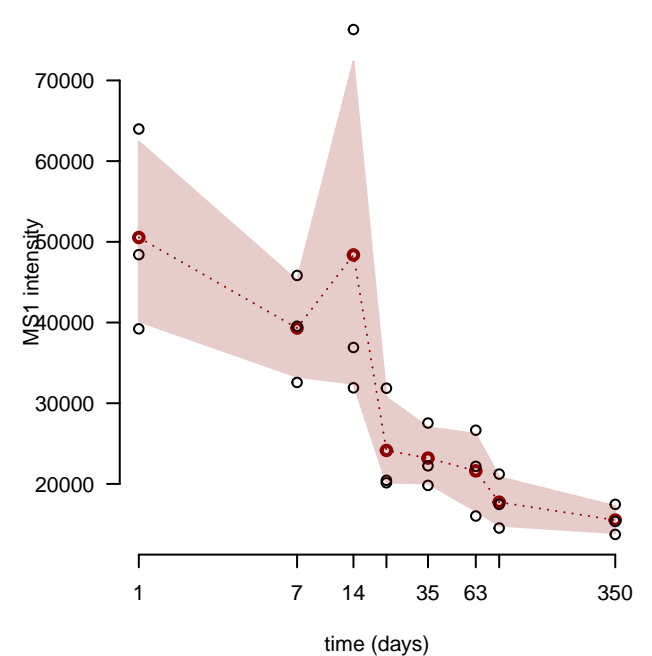

**Q61097**  
**GN=Ksr1**  
kinase suppressor of ras 1

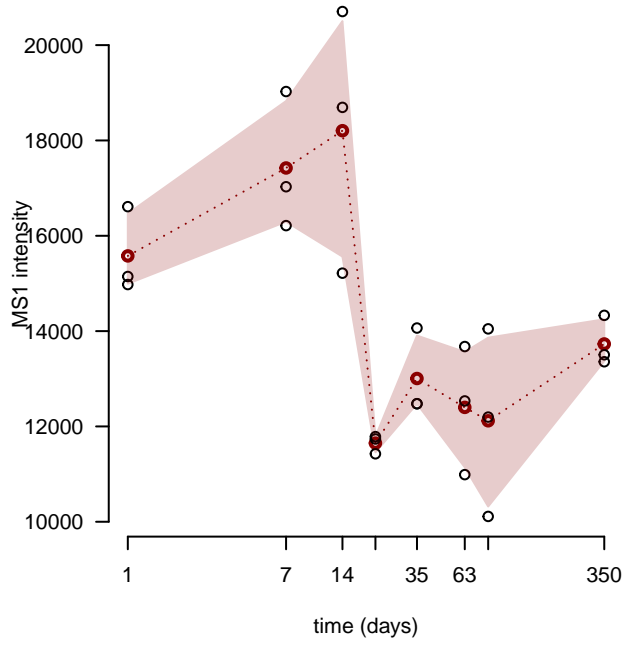

**Q61102**  
**GN=Abcb7**  
ATP-binding cassette, sub-family B (MDR/ ...

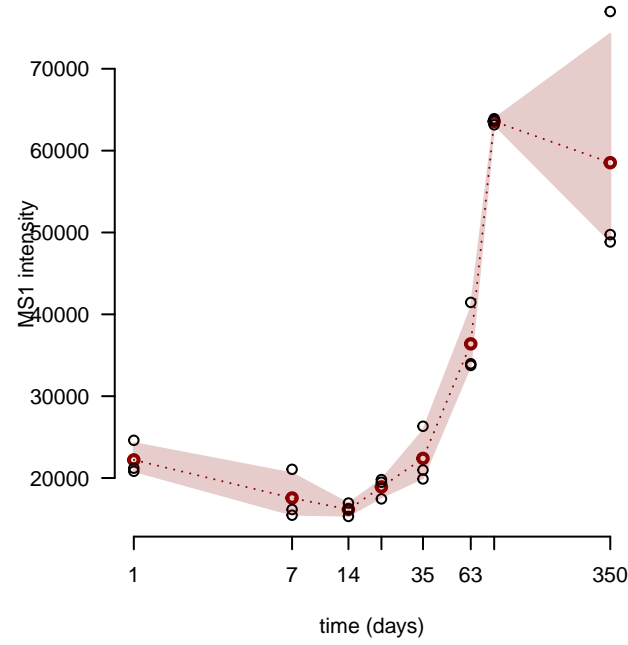

**Q61103**  
**GN=Dpf2**  
double PHD fingers 2

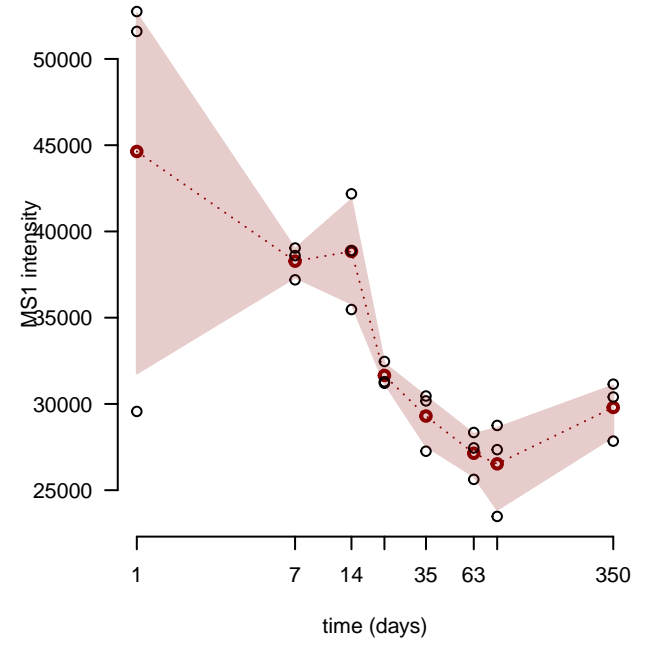

**Q61107**  
**GN=Gbp4**

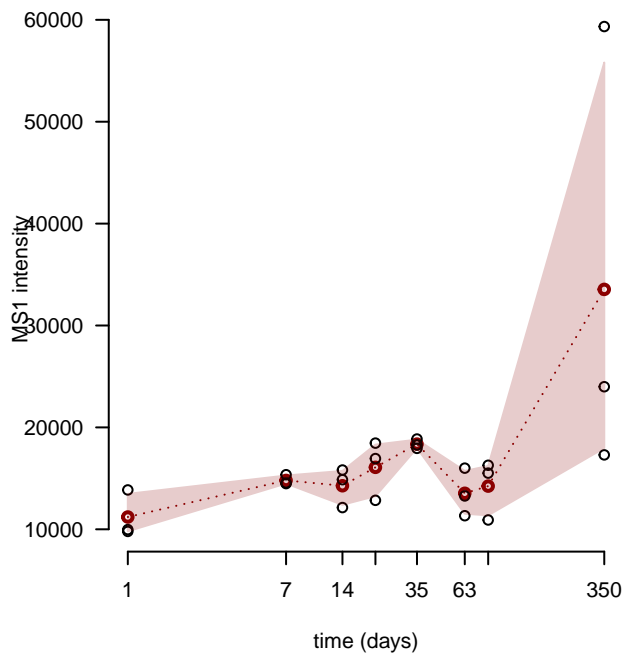

**Q61112**  
**GN=Sdf4**  
stromal cell derived factor 4

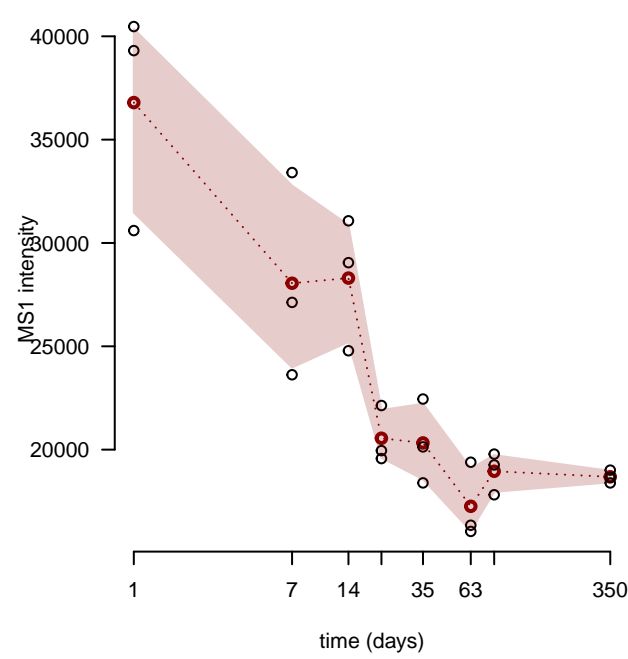

**Q61122**  
**GN=Nab1**  
Ngfi-A binding protein 1

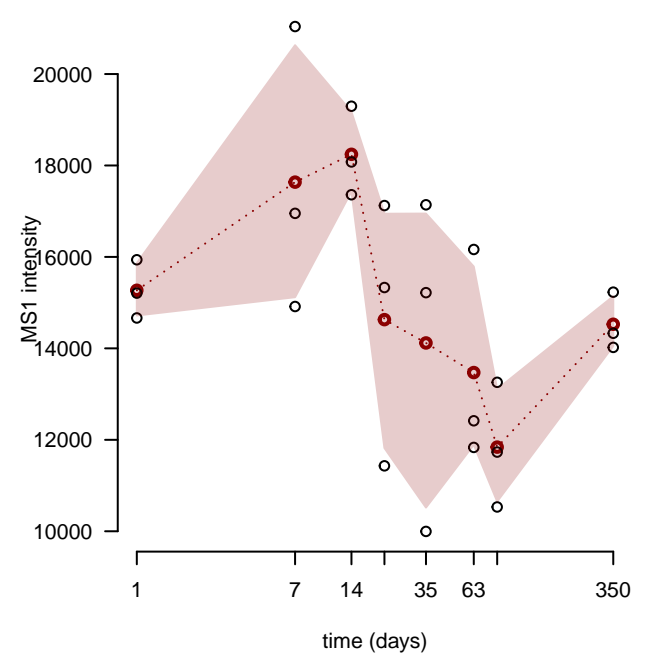

**Q61124**  
**GN=Cln3**  
ceroid lipofuscinosis, neuronal 3, juven ...

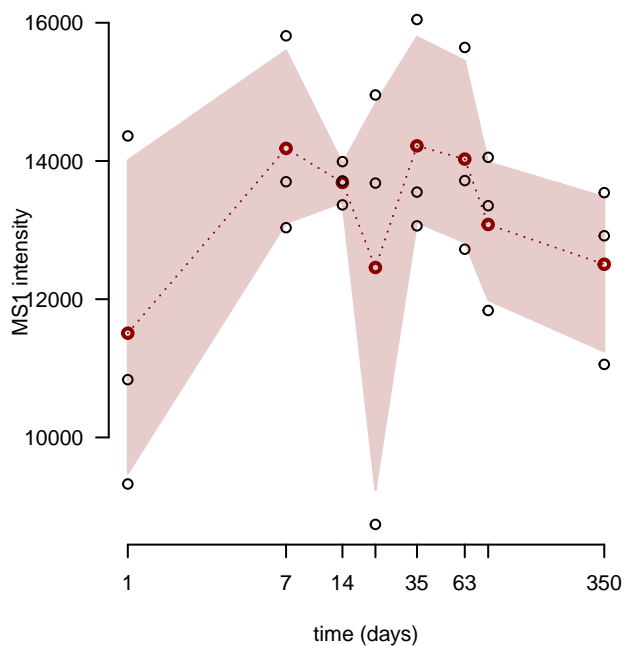

**Q61127**  
**GN=Nab2**  
Ngfi-A binding protein 2

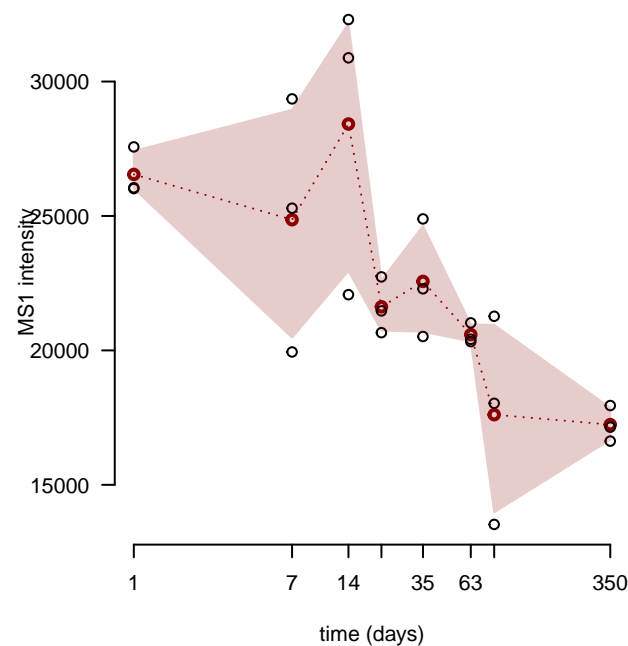

**Q61129**  
**GN=Cfi**  
complement component factor i

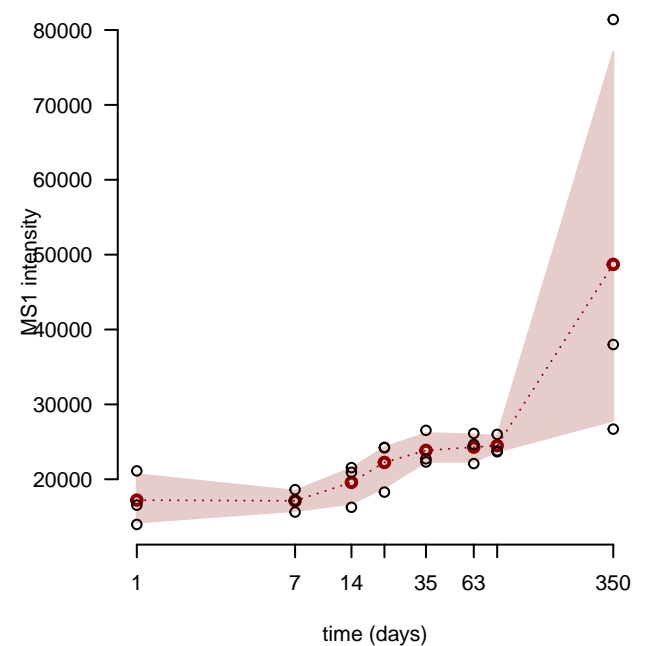

**Q61133**  
**GN=Gstt2**  
glutathione S-transferase, theta 2

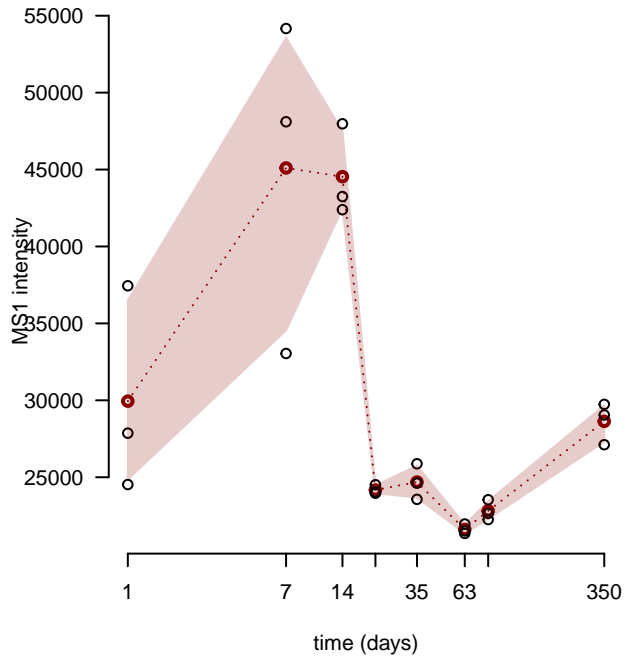

**Q61136**  
**GN=Prpf4b**  
pre-mRNA processing factor 4B

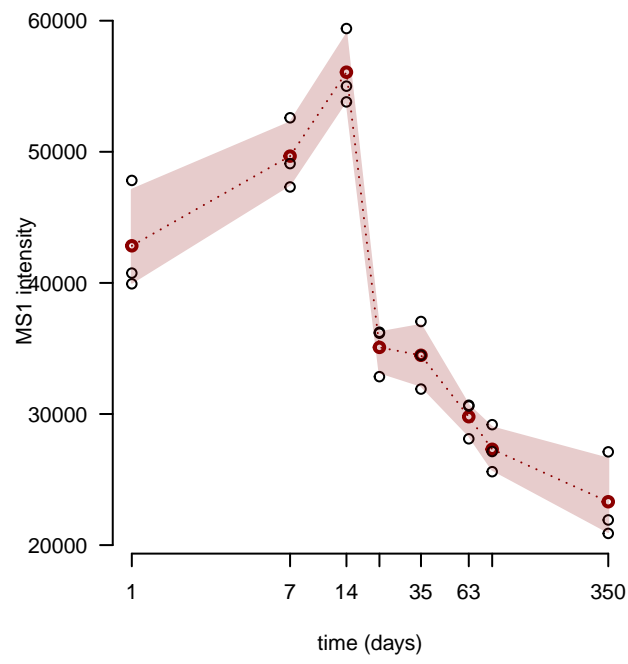

**Q61140**  
**GN=Bcar1**  
breast cancer anti-estrogen resistance 1

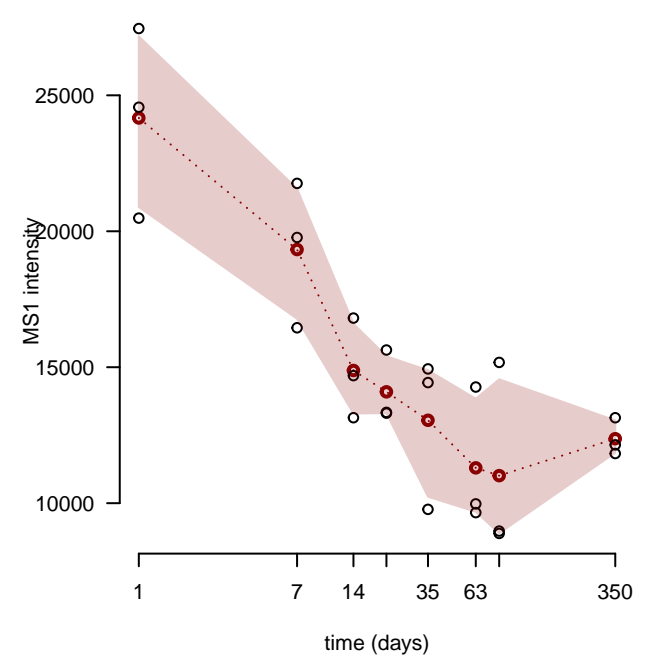

**Q61142**  
**GN=Spin1**  
spindlin 1

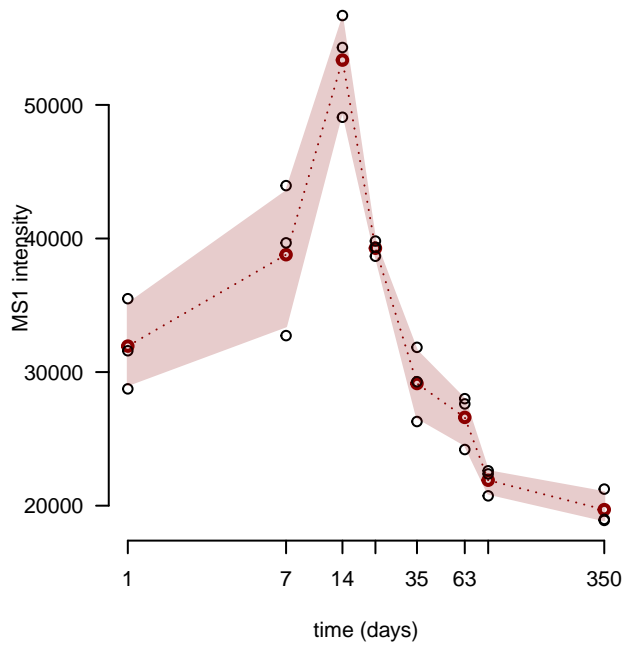

**Q61144**  
**GN=Psen2**  
presenilin 2

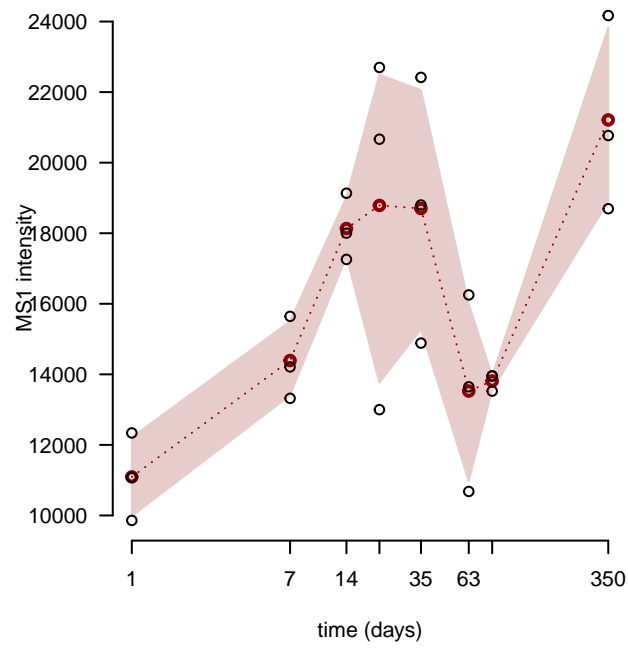

**Q61147**  
**GN=Cp**  
ceruloplasmin

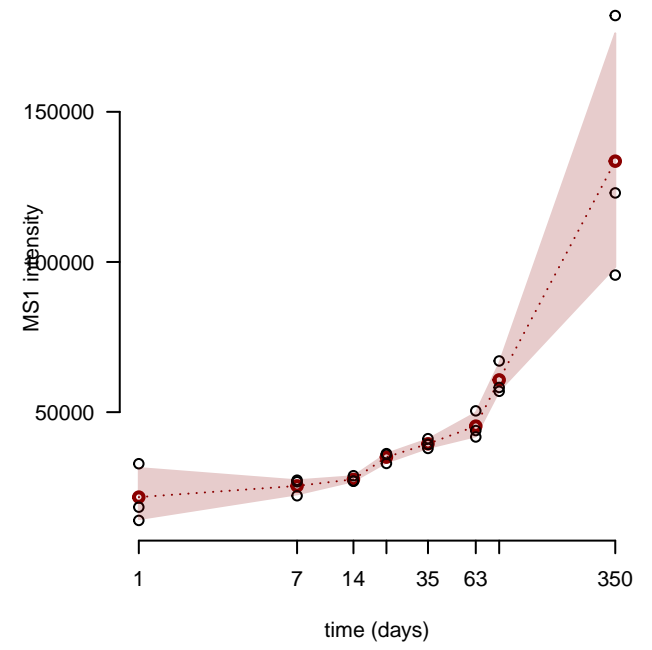

**Q61151**  
**GN=Ppp2r5e**  
protein phosphatase 2, regulatory subuni ...

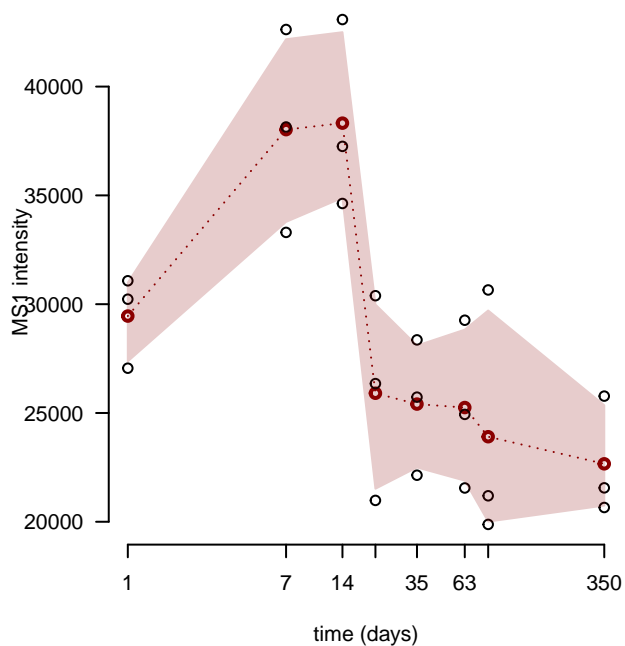

**Q61152**  
**GN=Ptpn18**  
protein tyrosine phosphatase, non-recept ...

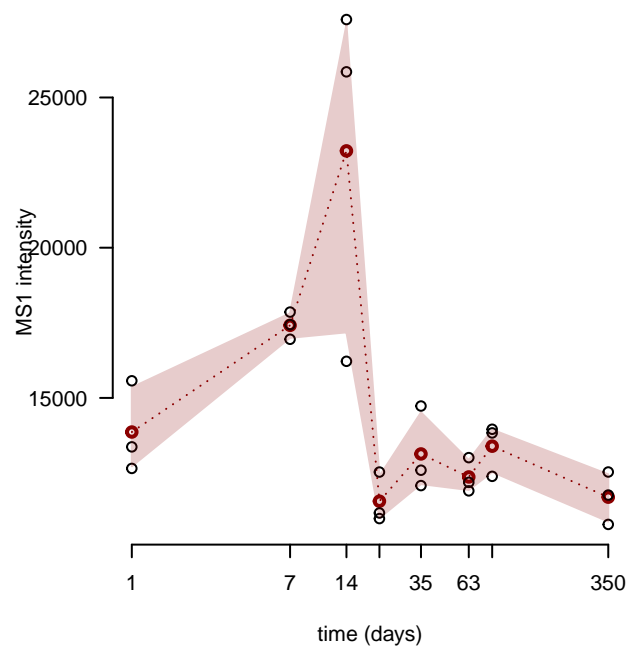

**Q61160**  
**GN=Fadd**  
Fas (TNFRSF6)-associated via death domai ...

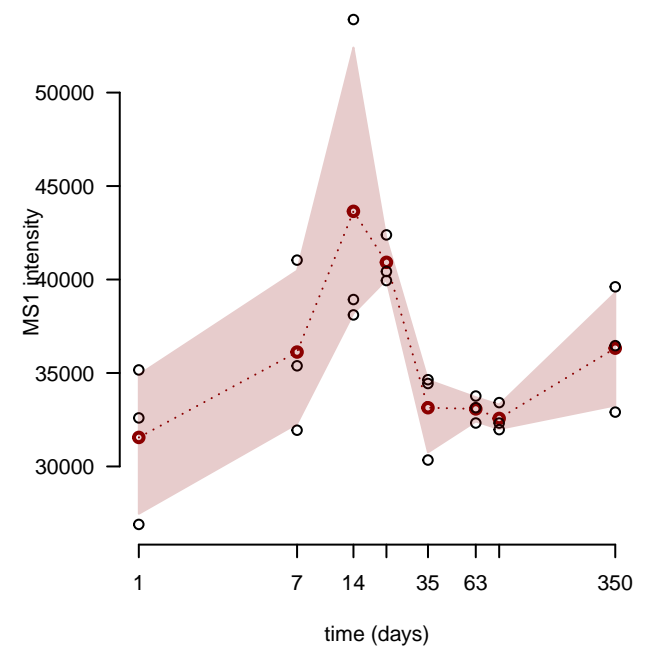

**Q61161**  
**GN=Map4k2**  
mitogen-activated protein kinase kinase ...

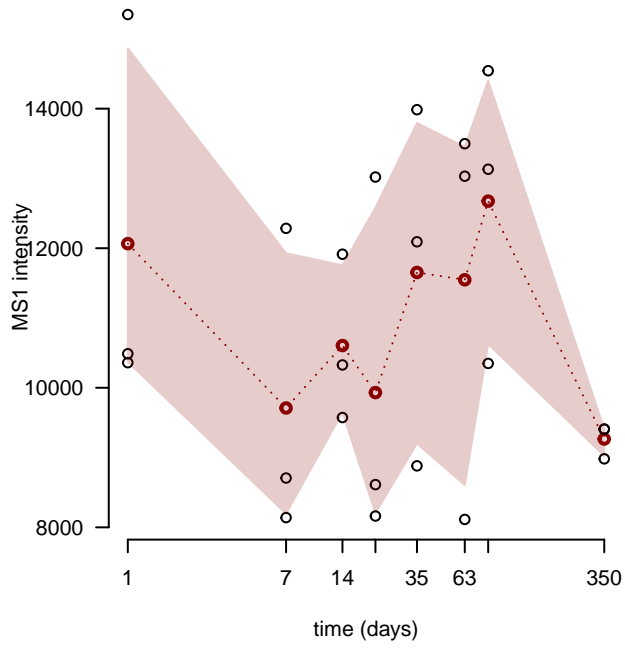

**Q61164**  
**GN=Ctcf**  
CCCTC-binding factor

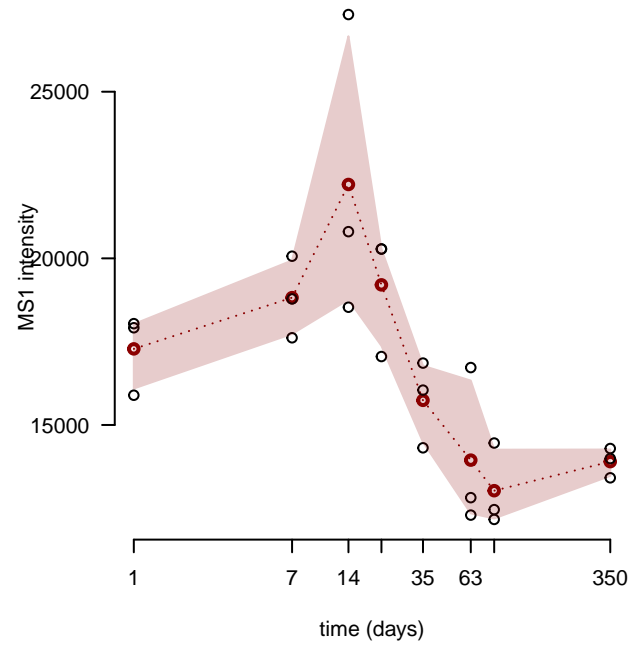

**Q61165**  
**GN=Slc9a1**  
solute carrier family 9 (sodium/hydrogen ...

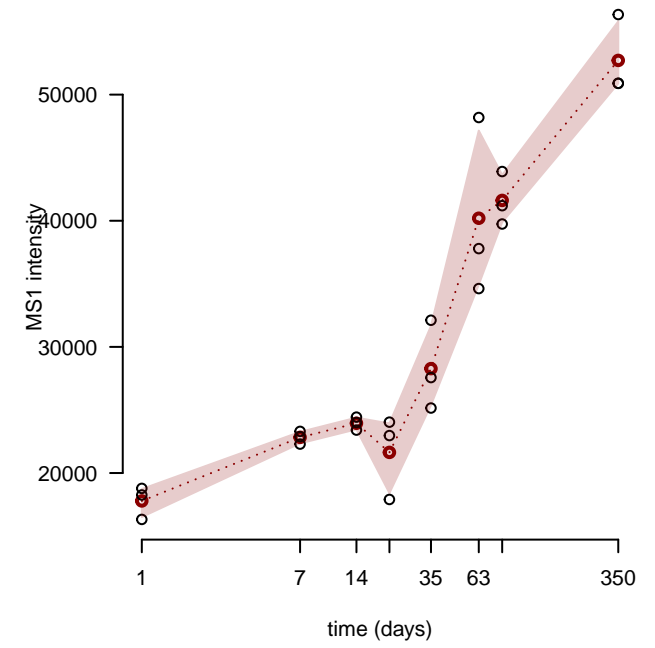

**Q61166**  
**GN=Mapre1**  
microtubule-associated protein, RP/EB fa ...

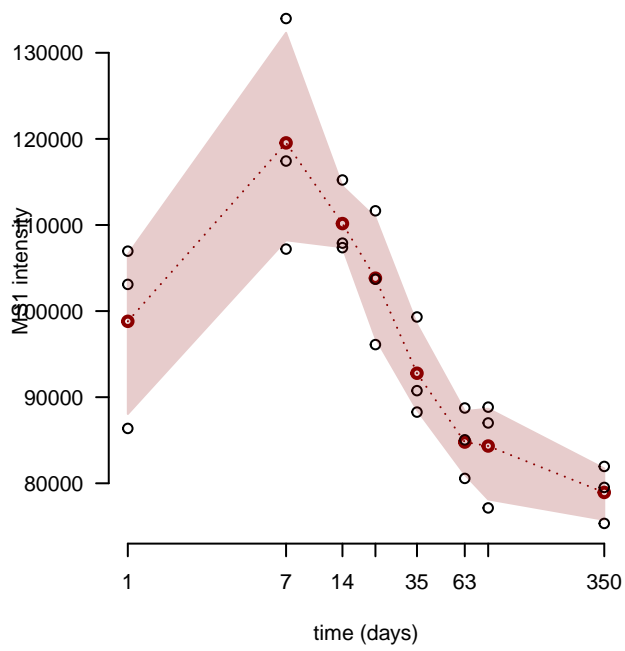

**Q61169**  
**GN=Gata6**  
GATA binding protein 6

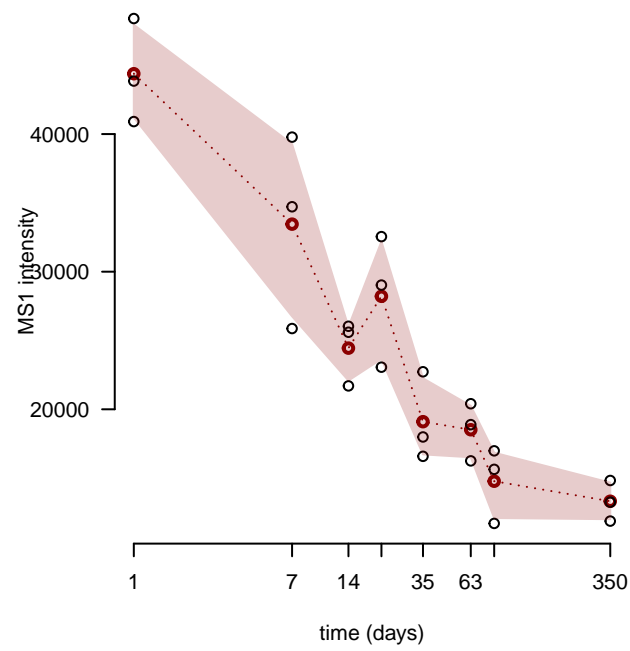

**Q61171**  
**GN=Prdx2**  
peroxiredoxin 2

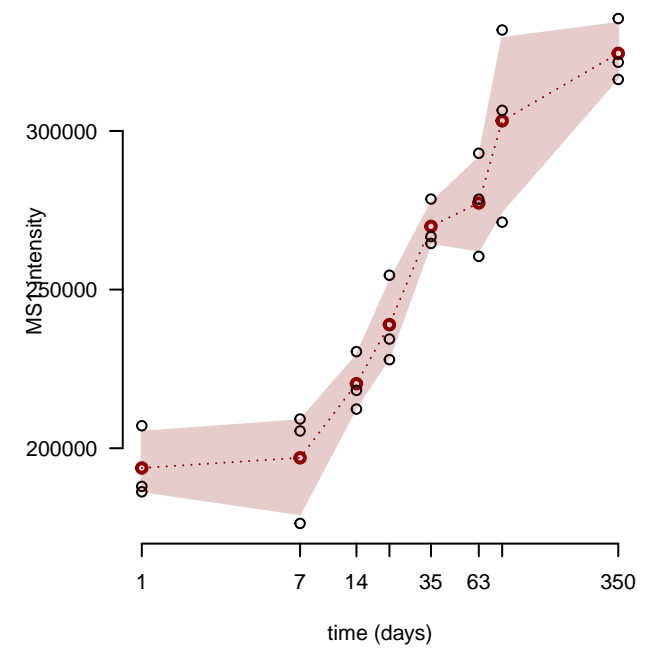

**Q61176**  
**GN=Arg1**  
arginase, liver

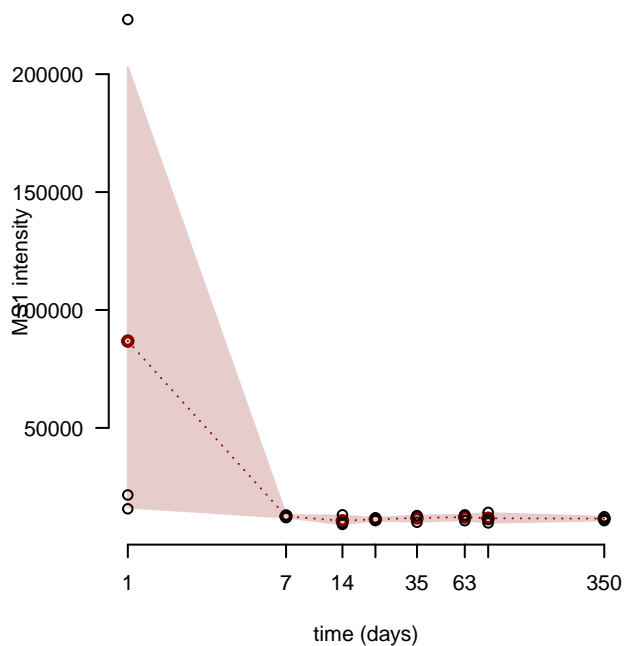

**Q61179**  
**GN=Irf9**  
interferon regulatory factor 9

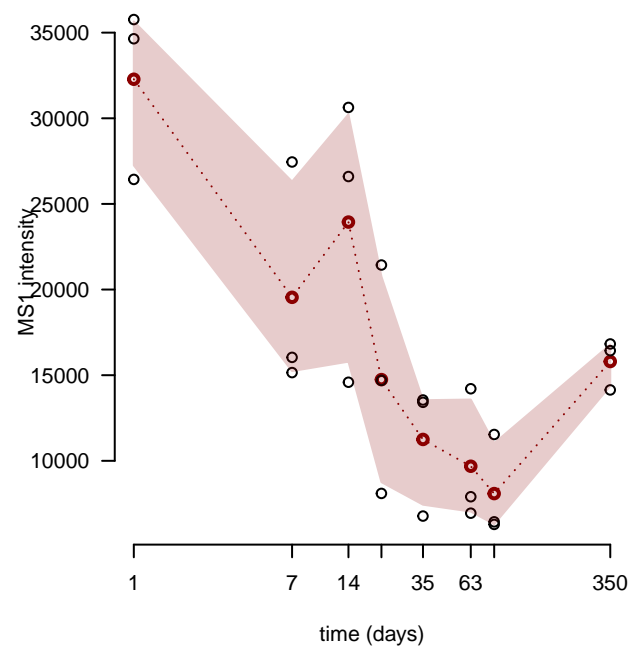

**Q61183**  
**GN=Papola**  
poly (A) polymerase alpha

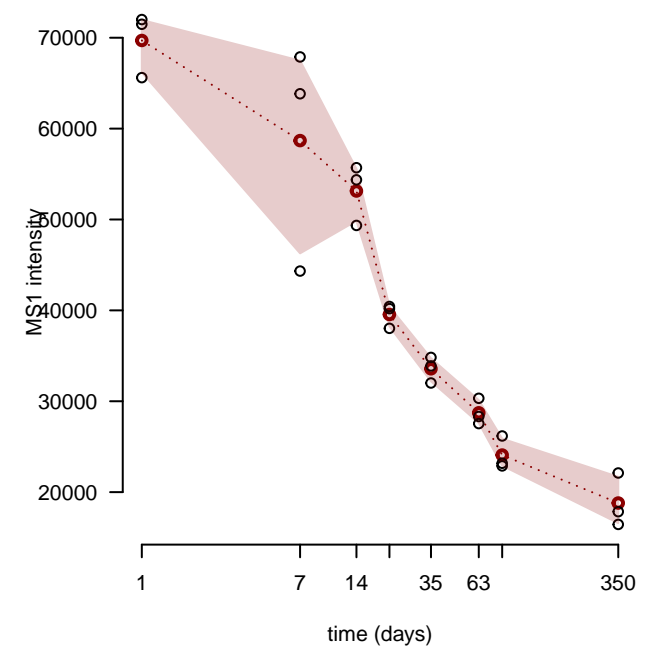

**Q61187**  
**GN=Tsg101**  
tumor susceptibility gene 101

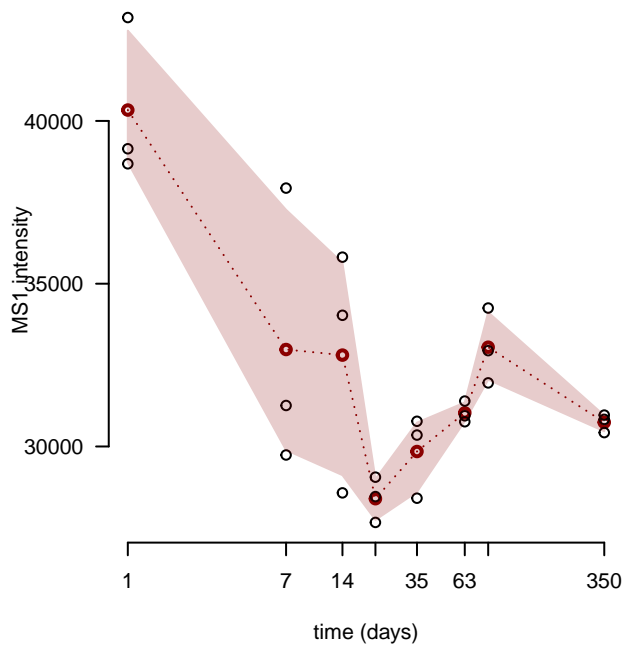

**Q61188**  
**GN=Ezh2**  
enhancer of zeste 2 polycomb repressive ...

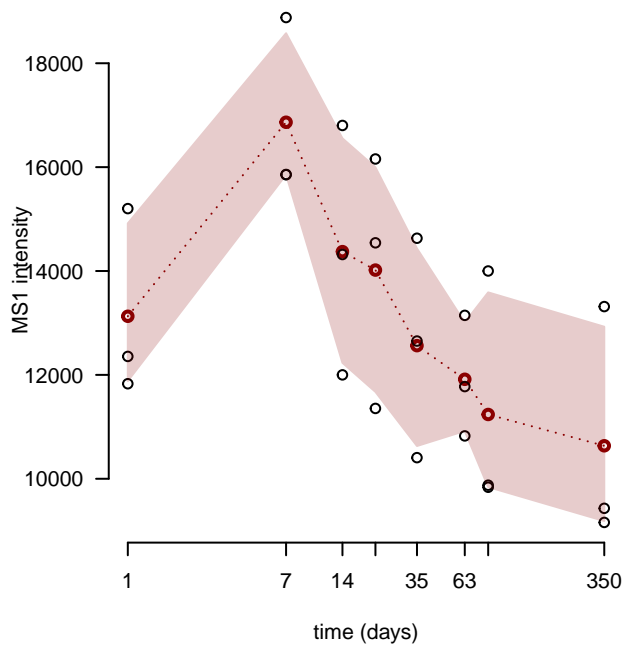

**Q61189**  
**GN=Clns1a**  
chloride channel, nucleotide-sensitive, ...

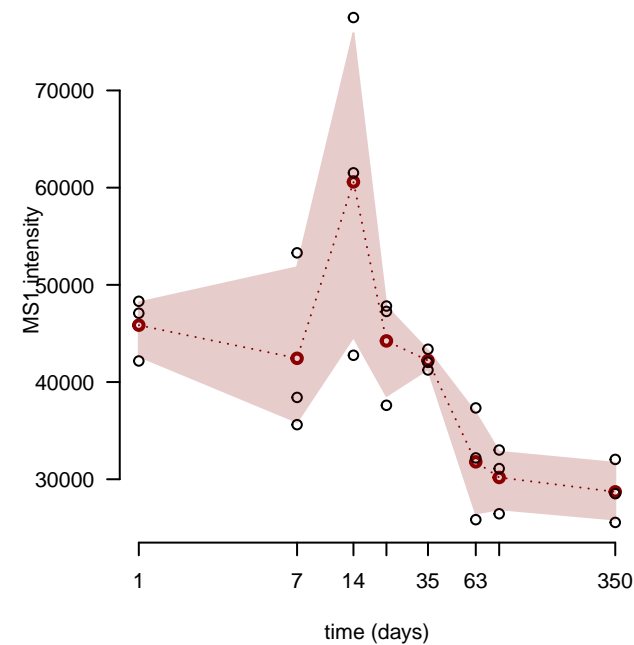

**Q61190**  
**GN=Il10rb**  
interleukin 10 receptor, beta

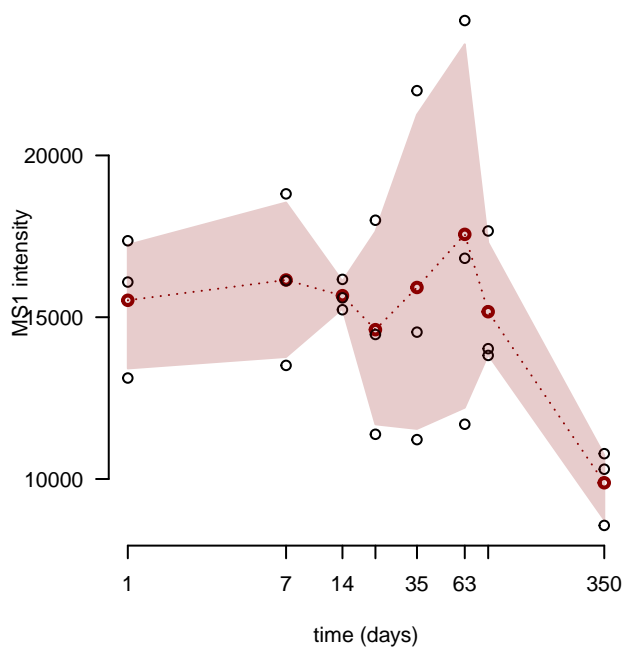

**Q61191**  
**GN=Hcfc1**  
host cell factor C1

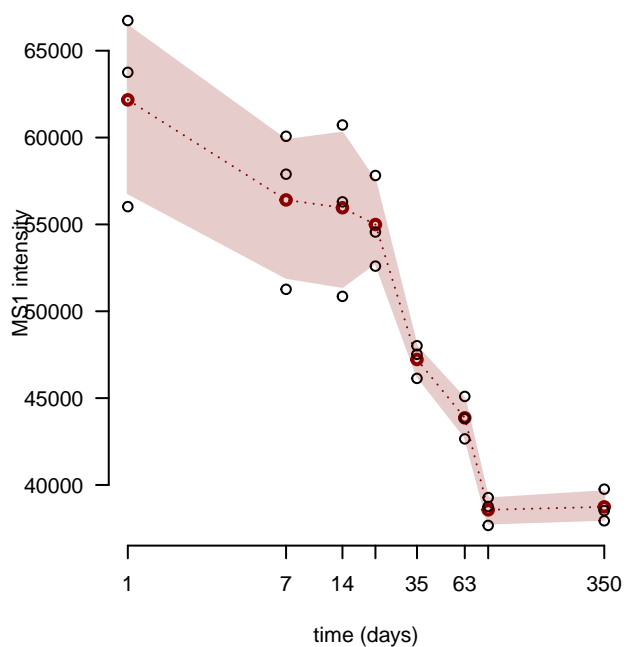

**Q61193**  
**GN=Rgl2**  
ral guanine nucleotide dissociation stim ...

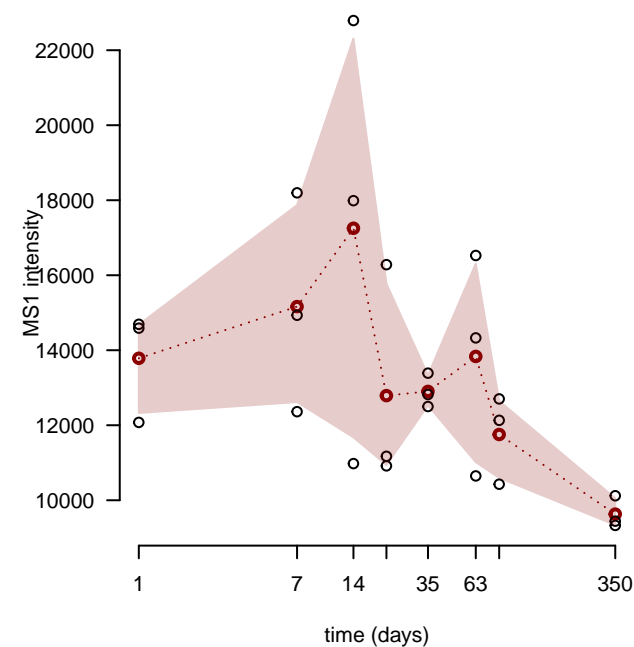

**Q61194**  
**GN=Pik3c2a**  
phosphatidylinositol-4-phosphate 3-kinas ...

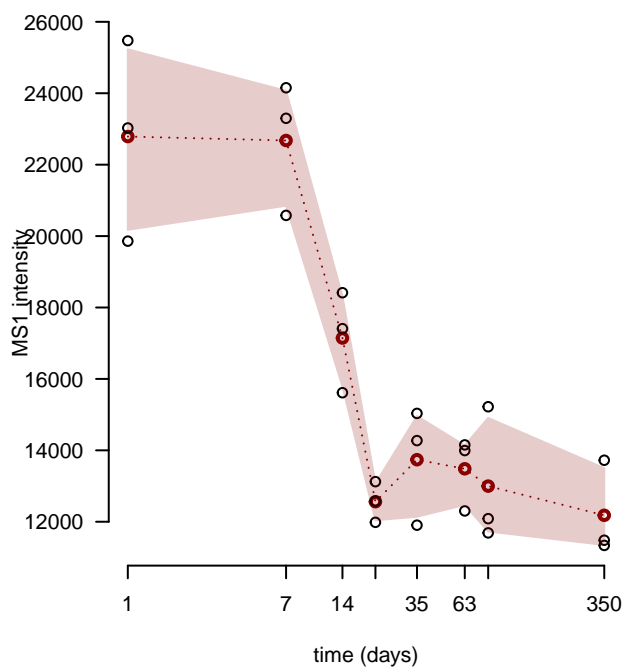

**Q61205**  
**GN=Pafah1b3**  
platelet-activating factor acetylhydrola ...

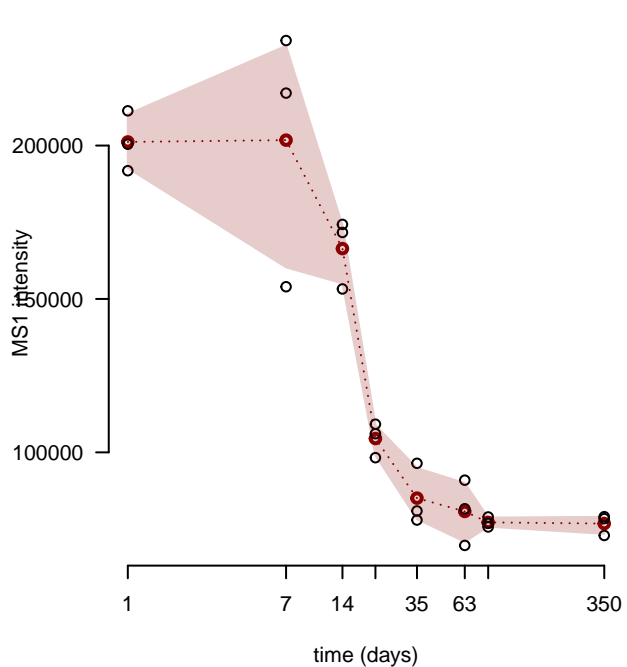

**Q61206**  
**GN=Pafah1b2**  
platelet-activating factor acetylhydrola ...

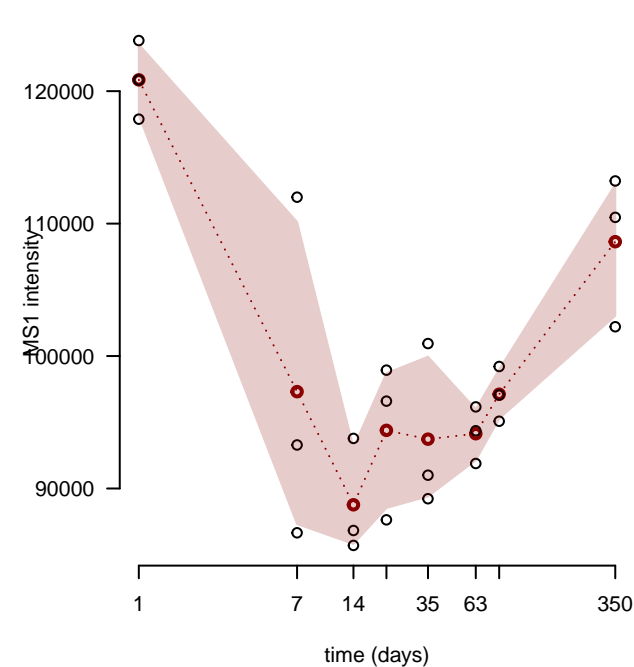

**Q61207**  
GN=Psap  
prosaposin

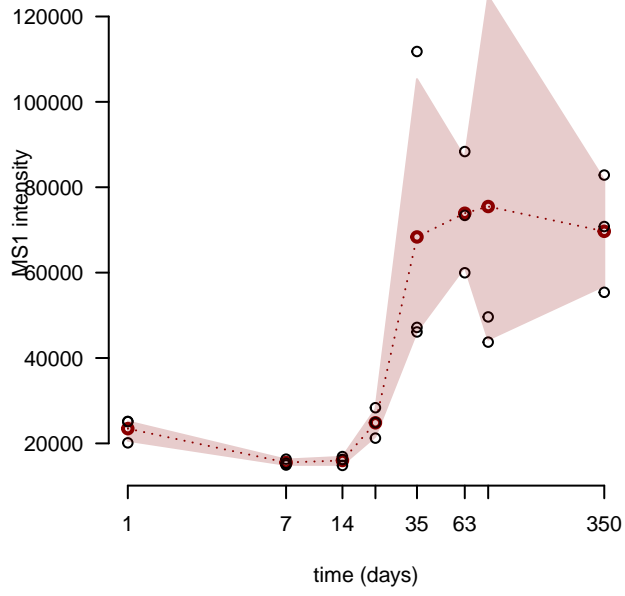

**Q61210**  
GN=Arhgef1  
Rho guanine nucleotide exchange factor ( ...

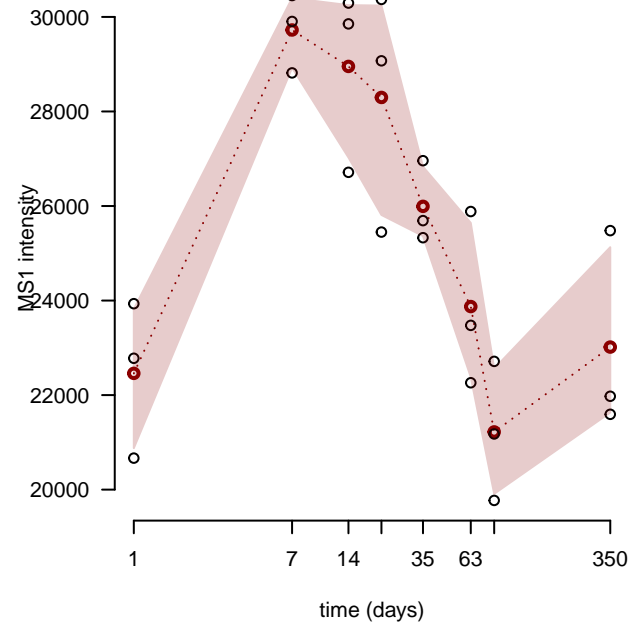

**Q61211**  
GN=Eif2d  
eukaryotic translation initiation factor ...

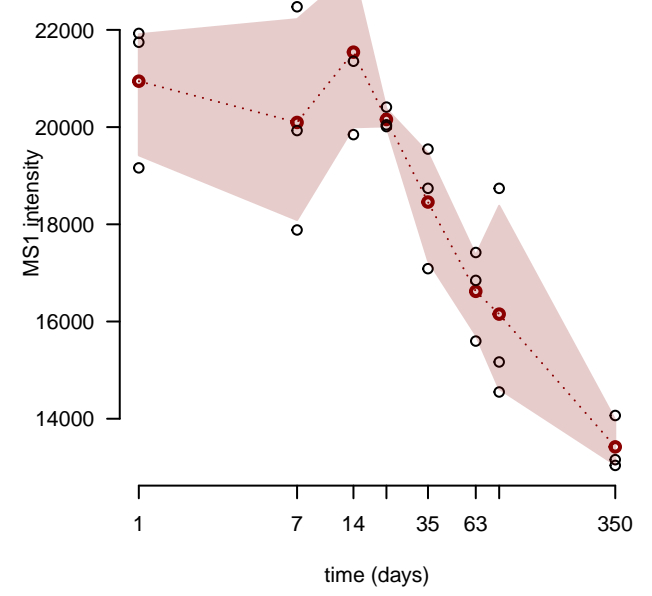

**Q61214**  
GN=Dyrk1a  
dual-specificity tyrosine-(Y)-phosphoryl ...

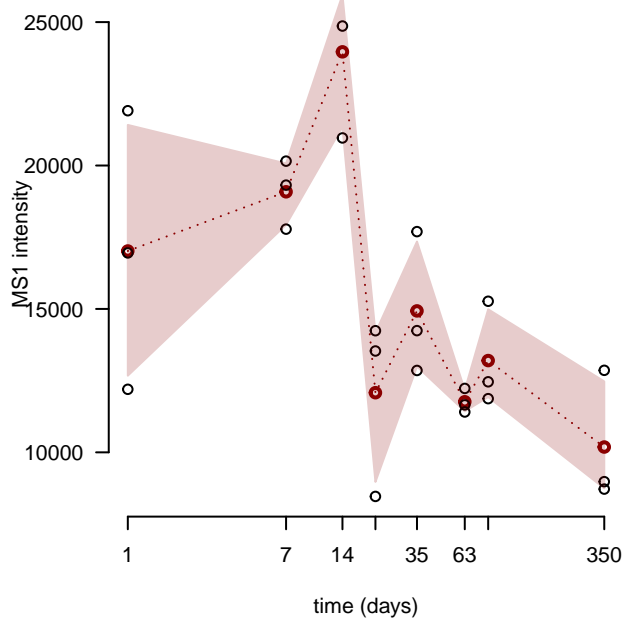

**Q61216**  
GN=Mre11

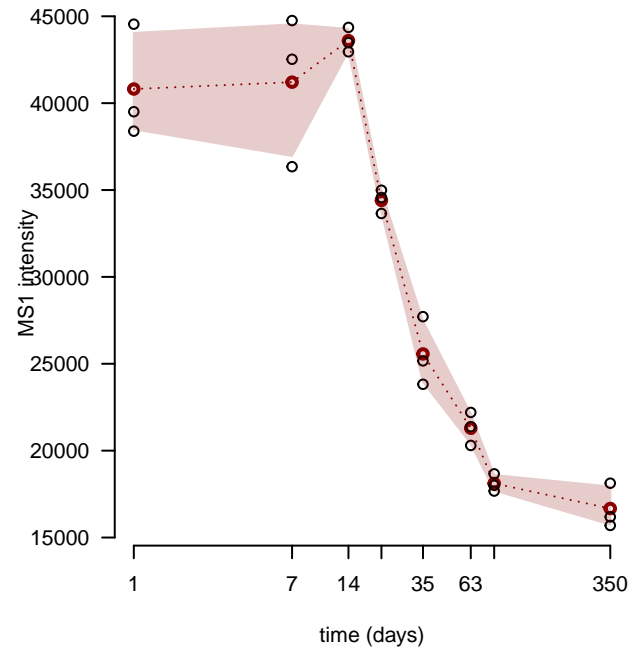

**Q61220**  
GN=Nell2  
NEL-like 2

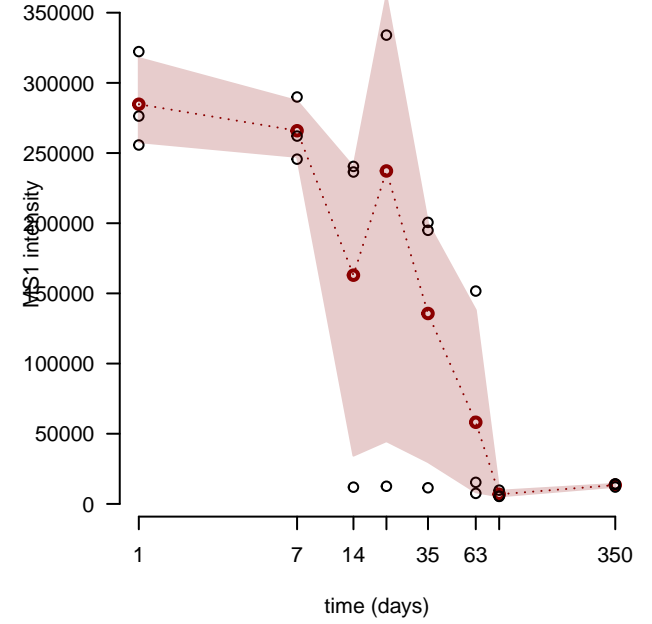

**Q61233**  
GN=Lcp1  
lymphocyte cytosolic protein 1

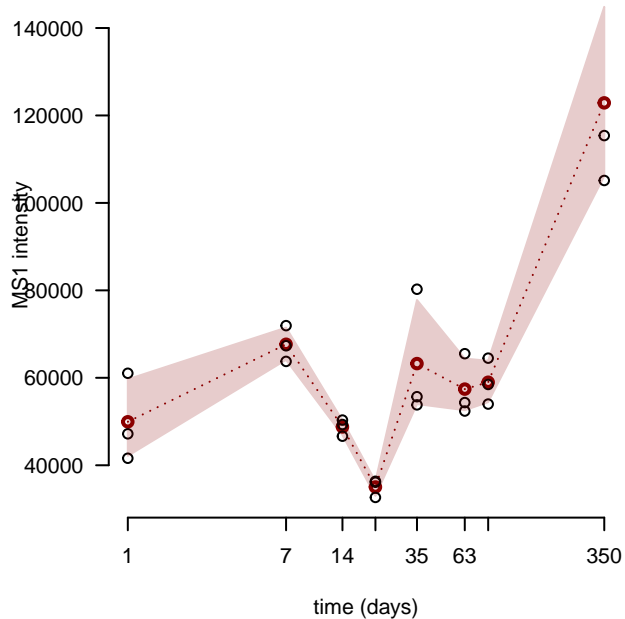

**Q61234**  
GN=Snta1  
syntrophin, acidic 1

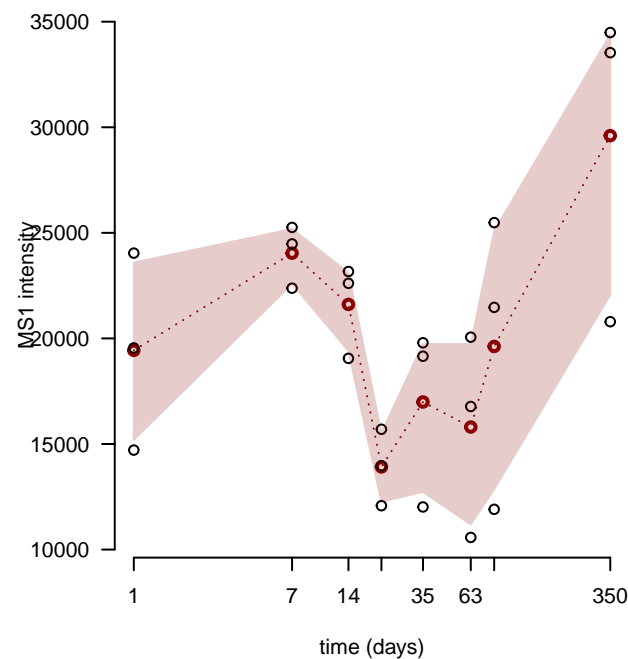

**Q61235**  
GN=Sntb2  
syntrophin, basic 2

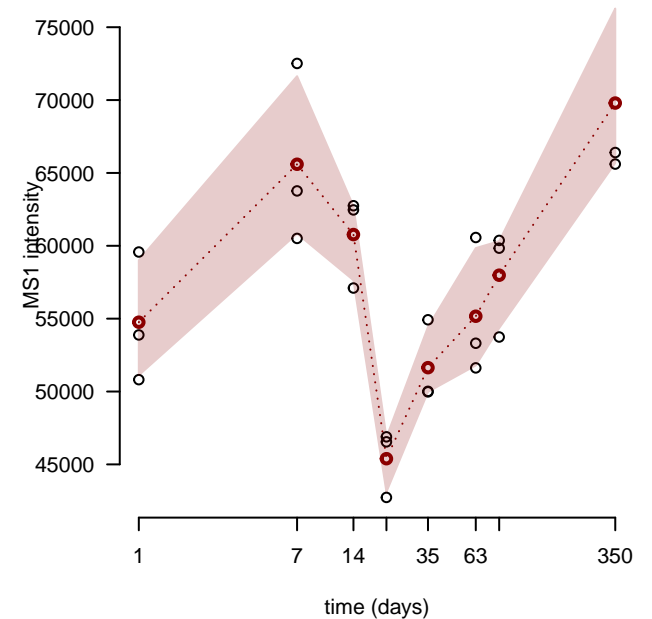



**Q61239**  
**GN=Fnta**  
farnesyltransferase, CAAX box, alpha

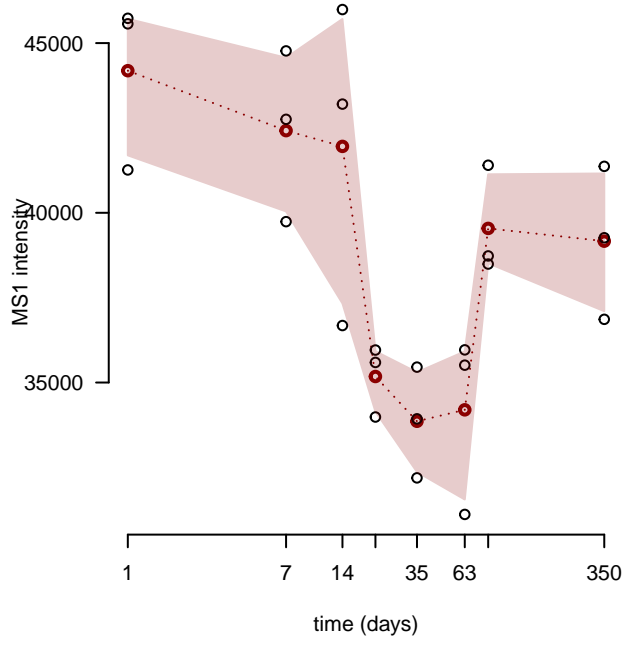

**Q61245**  
**GN=Col11a1**  
collagen, type XI, alpha 1

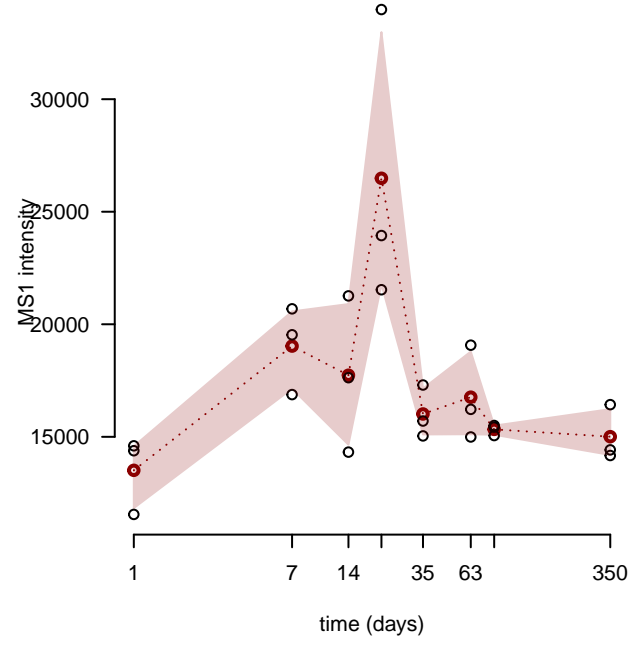

**Q61247**  
**GN=Serpinf2**  
serine (or cysteine) peptidase inhibitor ...

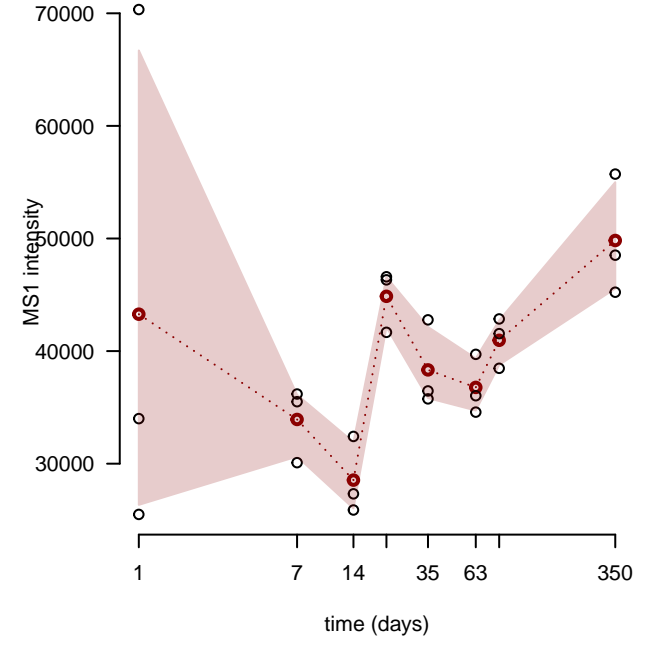

**Q61249**  
**GN=Igbp1**  
immunoglobulin (CD79A) binding protein 1

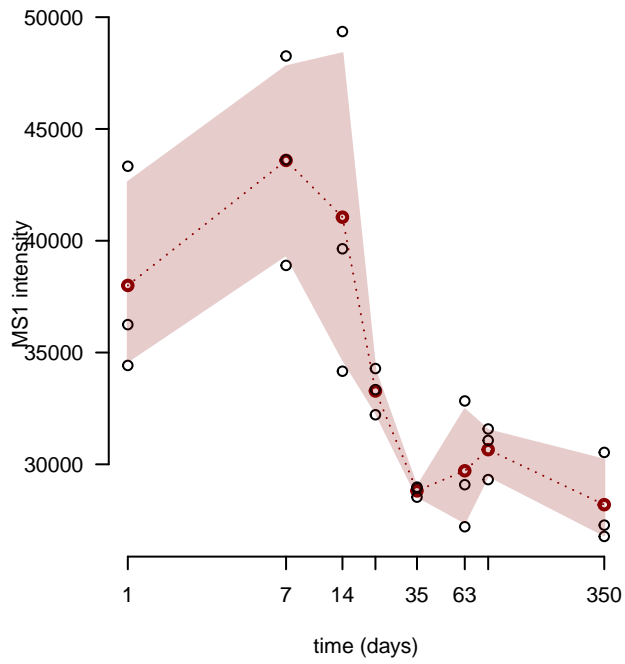

**Q61263**  
**GN=Soat1**  
sterol O-acyltransferase 1

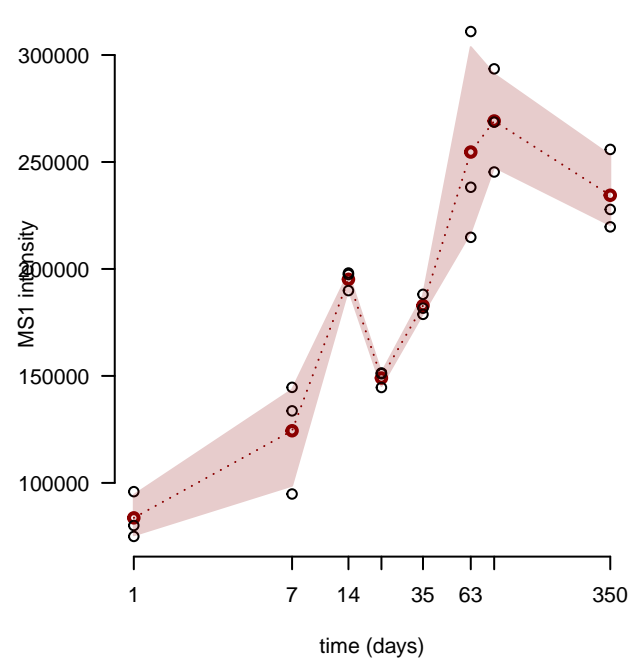

**Q61268**  
**GN=Apoc4**  
apolipoprotein C-IV

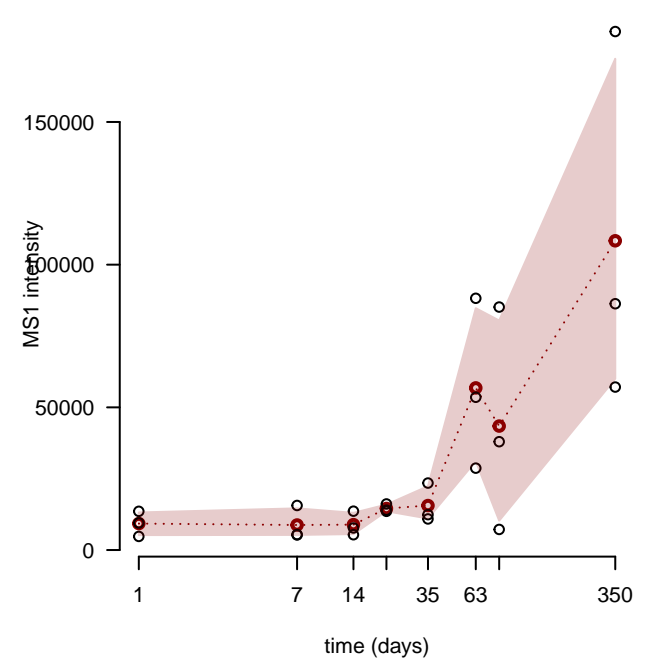

**Q61285**  
**GN=Abcd2**  
ATP-binding cassette, sub-family D (ALD) ...

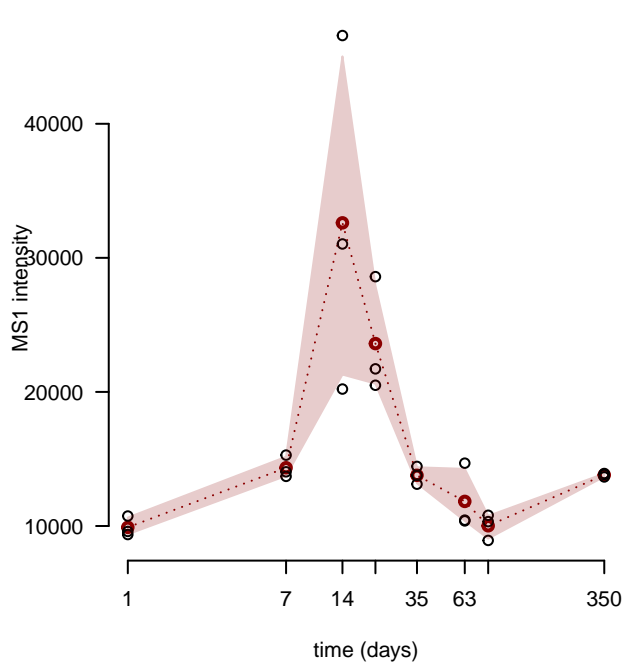

**Q61286**  
**GN=Tcf12**  
transcription factor 12

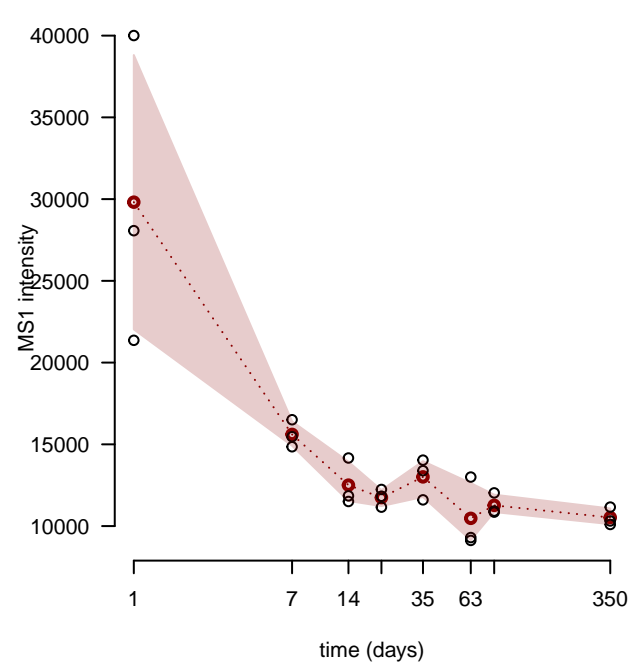

**Q61286**  
**GN=Tcf12**  
transcription factor 12

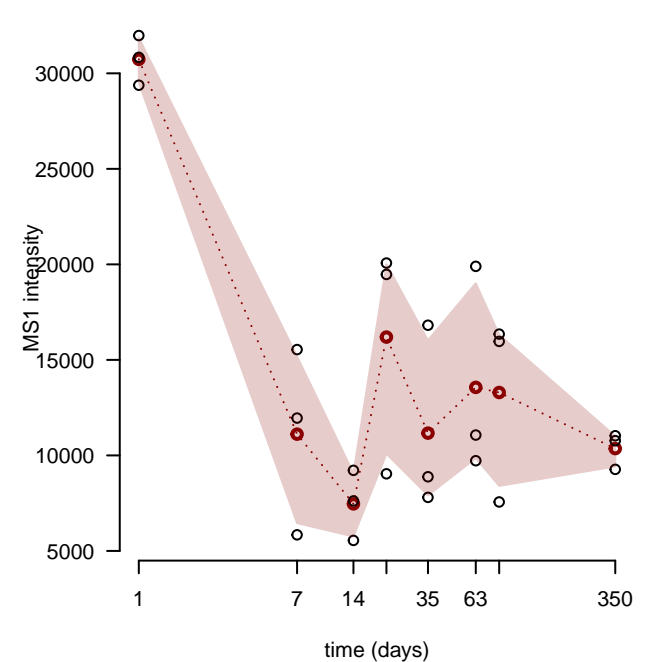

**Q61292**  
**GN=Lamb2**  
laminin, beta 2

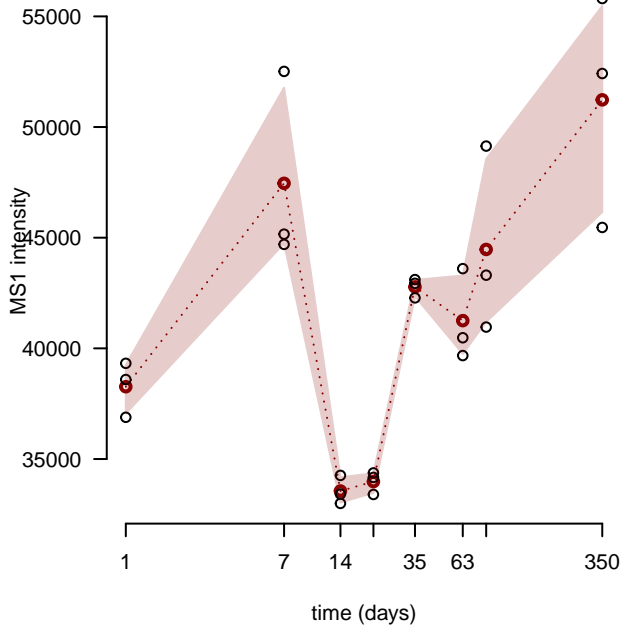

**Q61301**  
**GN=Ctnna2**  
catenin (cadherin associated protein), a ...

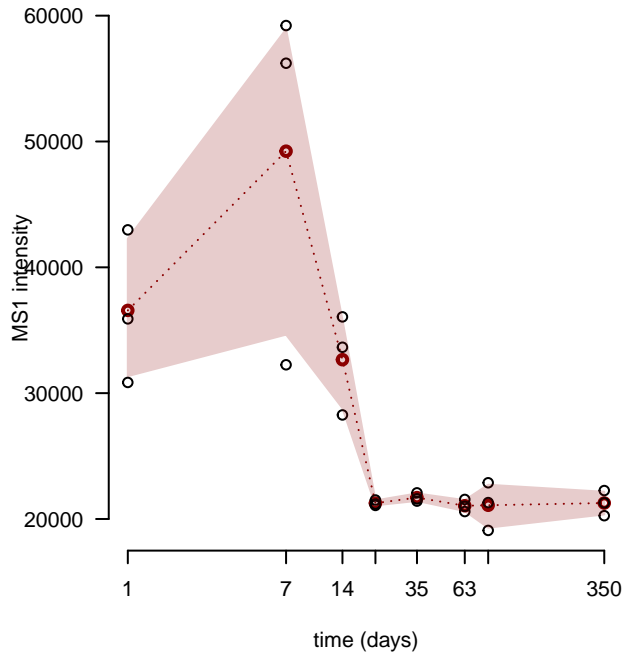

**Q61315**  
**GN=Apc**  
APC, WNT signaling pathway regulator

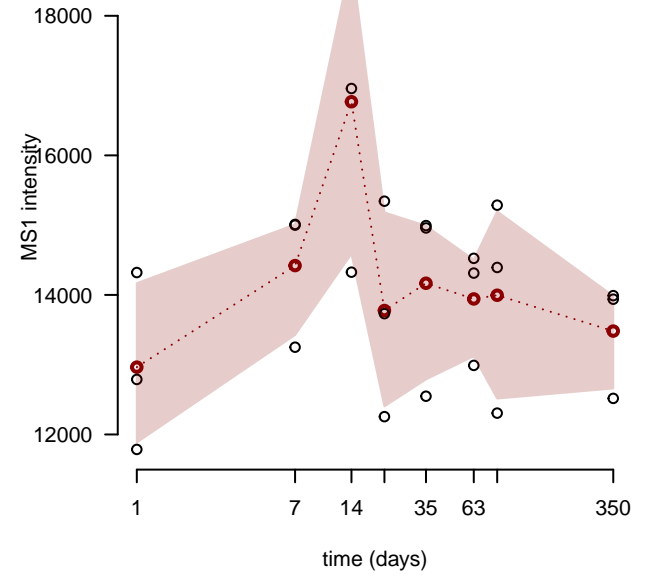

**Q61316**  
**GN=Hspa4**  
heat shock protein 4

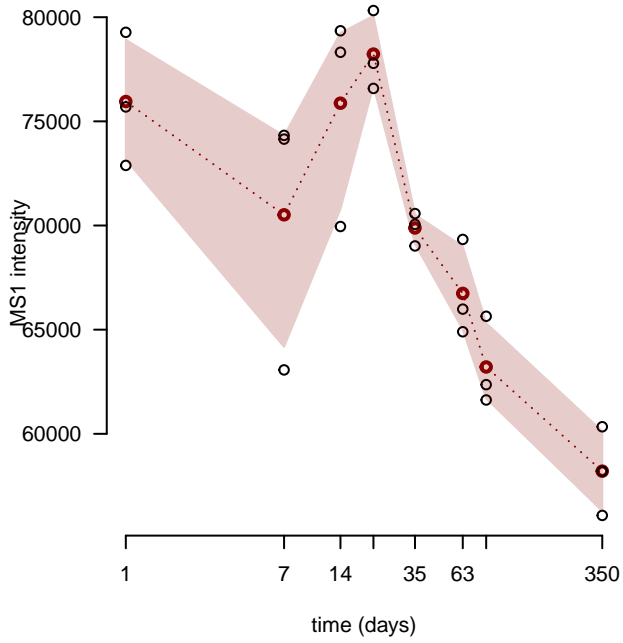

**Q61334**  
**GN=Bcap29**  
B cell receptor associated protein 29

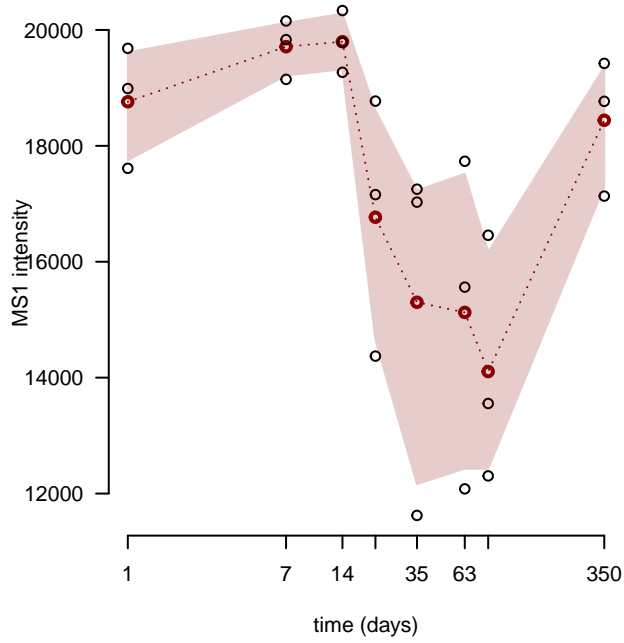

**Q61335**  
**GN=Bcap31**  
B cell receptor associated protein 31

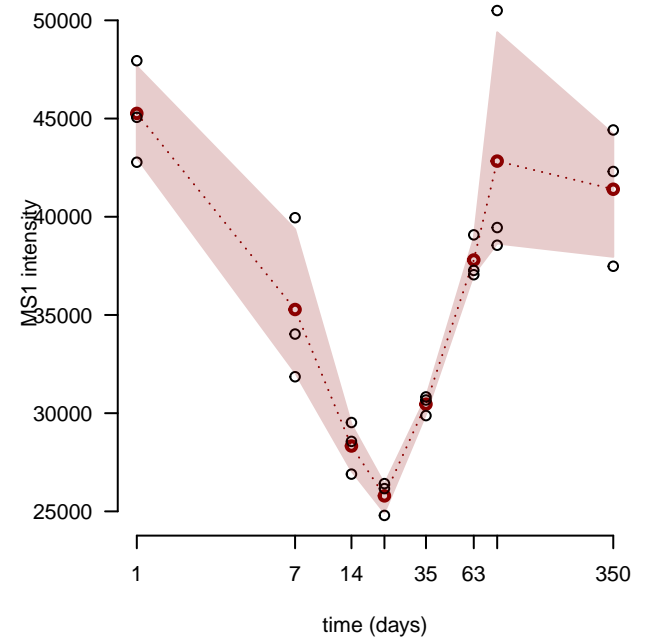

**Q61337**  
**GN=Bad**  
BCL2-associated agonist of cell death

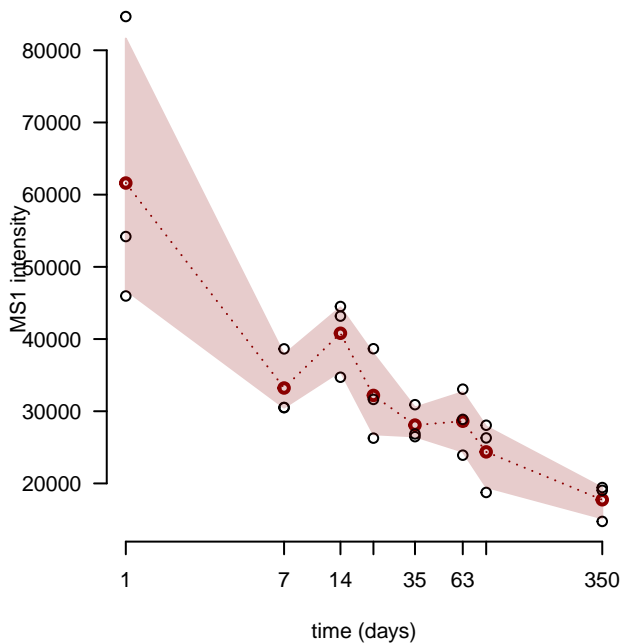

**Q61361**  
**GN=Bcan**  
brevican

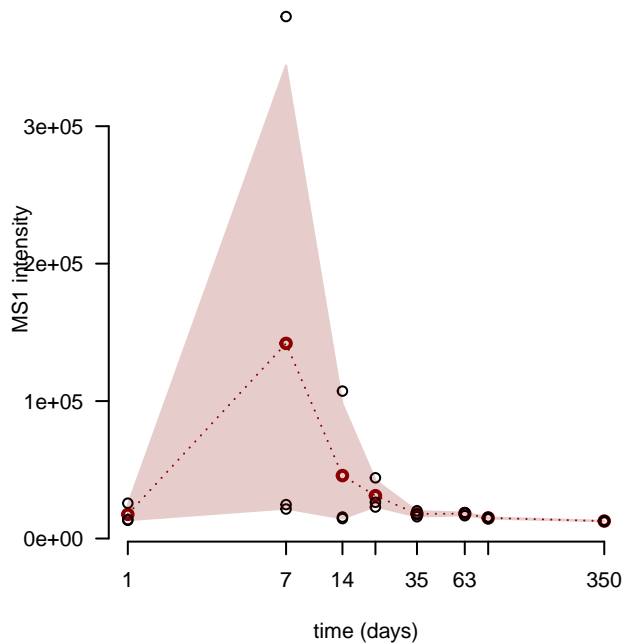

**Q61371**  
**GN=Ift88**  
intraflagellar transport 88

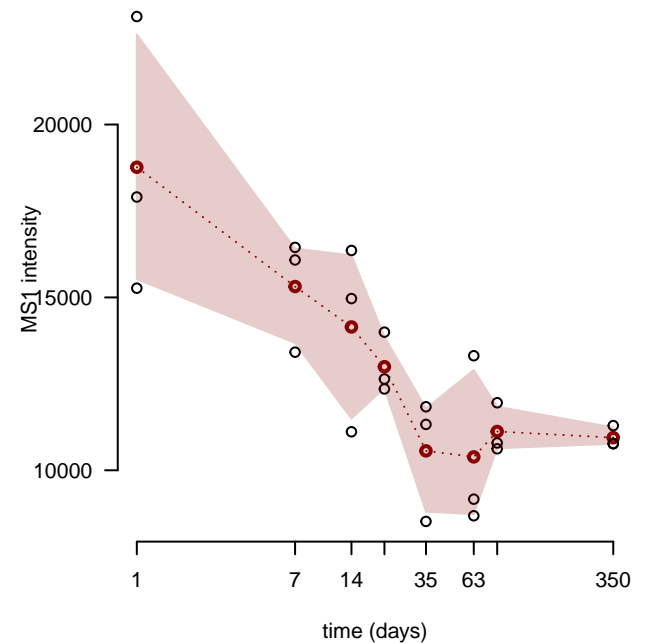

**Q61387**  
**GN=Cox7a2l**  
cytochrome c oxidase subunit 7A2 like

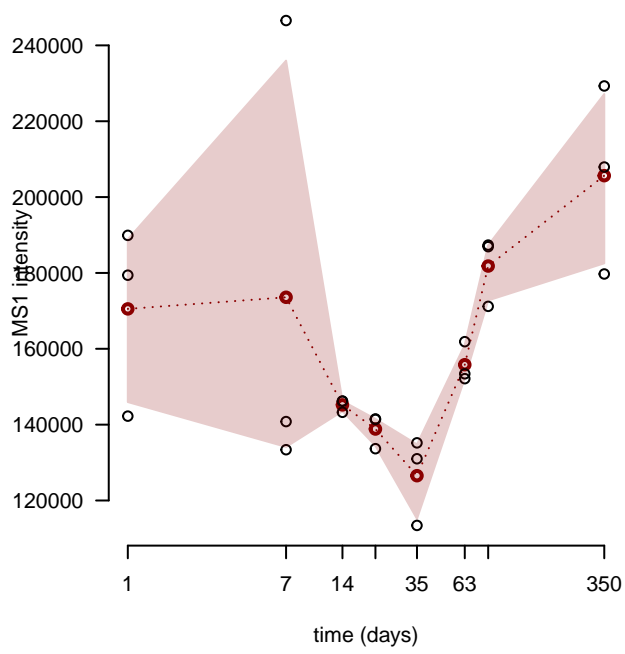

**Q61391**  
**GN=Mme**  
membrane metallo endopeptidase

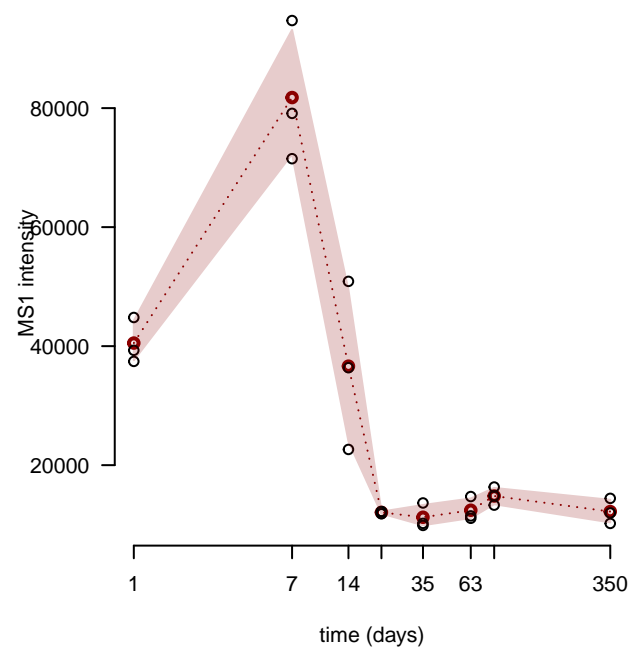

**Q61398**  
**GN=Pcolce**  
procollagen C-endopeptidase enhancer pro ...

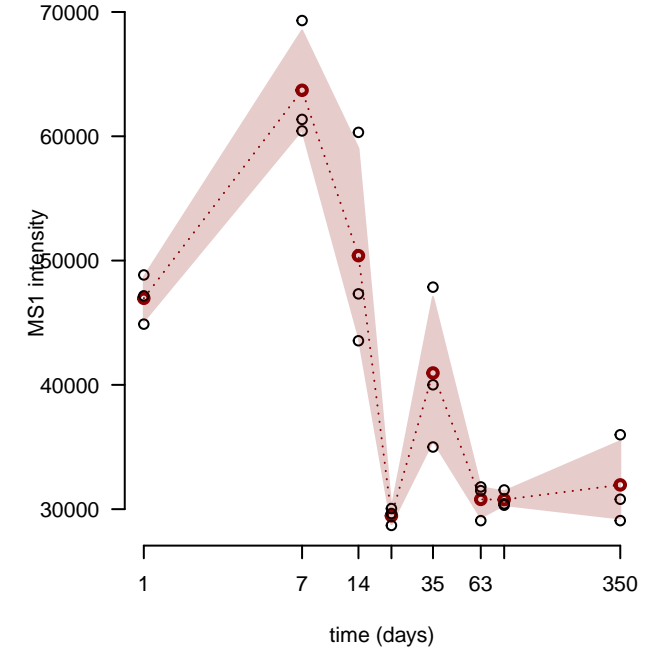

**Q61400**  
**GN=Ceacam10**  
CEA cell adhesion molecule 10

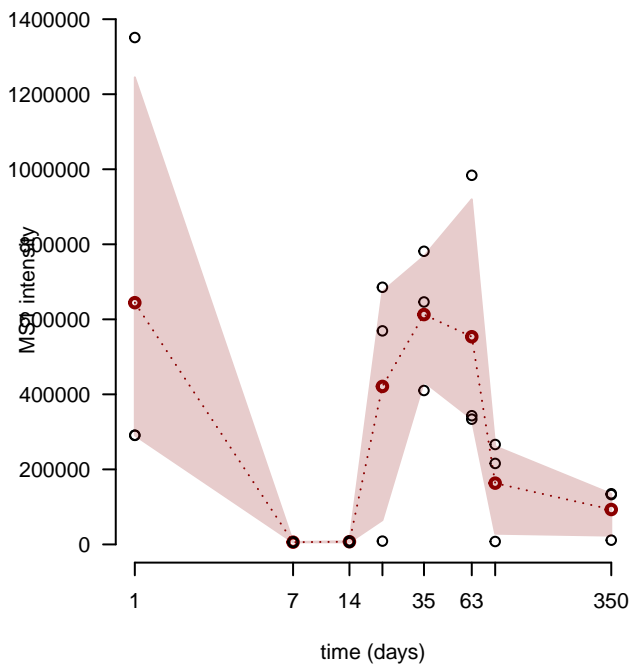

**Q61411**  
**GN=Hras**  
Harvey rat sarcoma virus oncogene

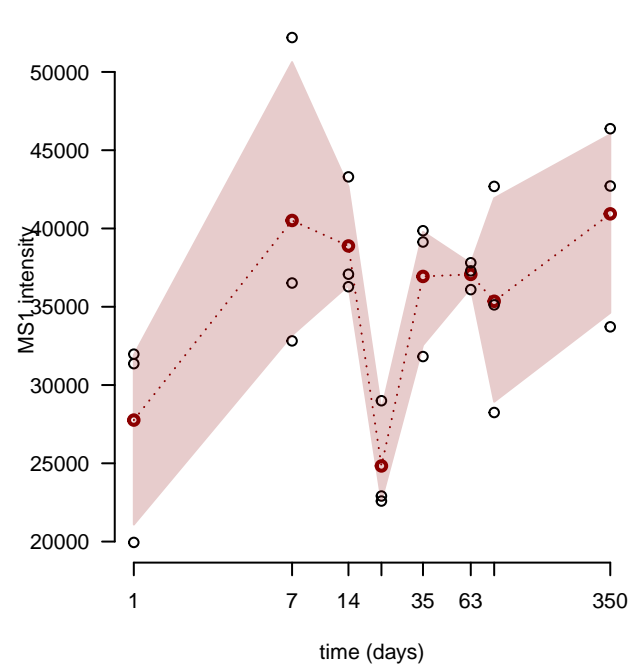

**Q61414**  
**GN=Krt15**  
keratin 15

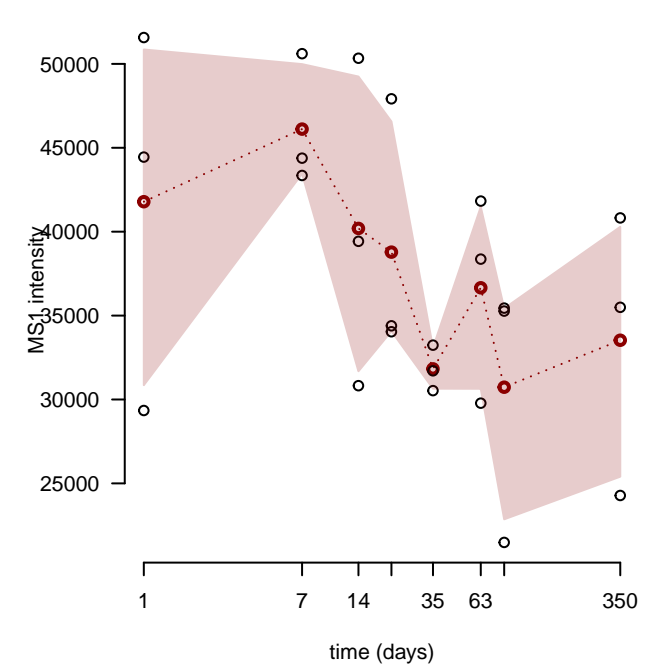

**Q61418**  
**GN=Clcn4**  
chloride channel, voltage-sensitive 4

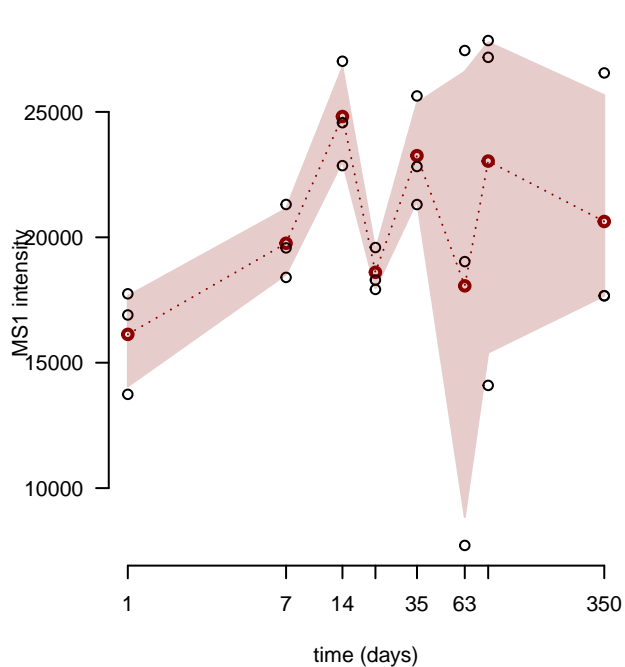

**Q61420**  
**GN=Slc35a1**  
solute carrier family 35 (CMP-sialic aci ...

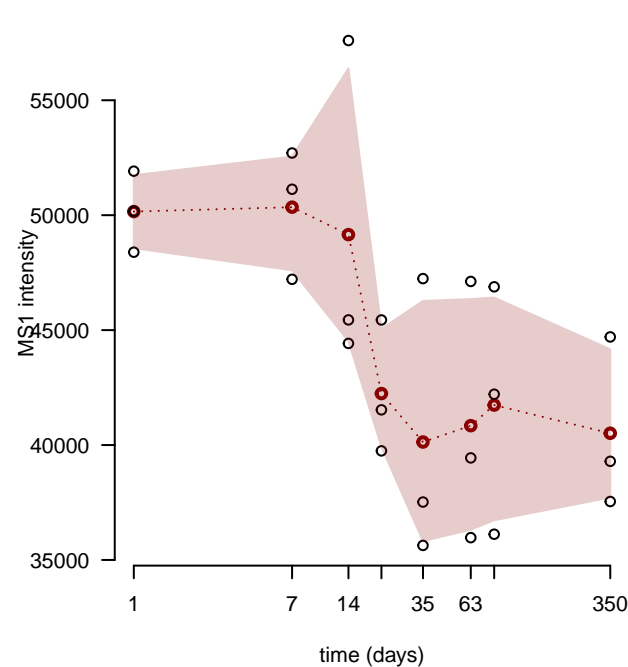

**Q61425**  
**GN=Hadh**  
hydroxyacyl-Coenzyme A dehydrogenase

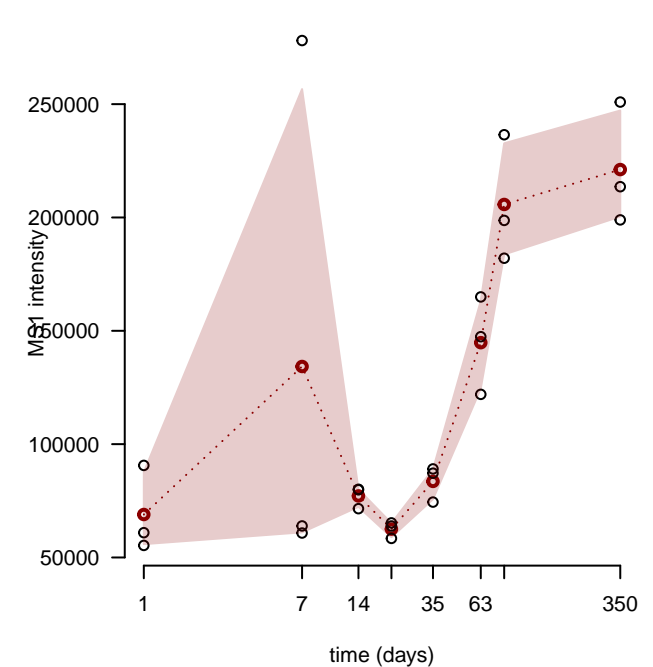

**Q61458**  
GN=Ccnh  
cyclin H

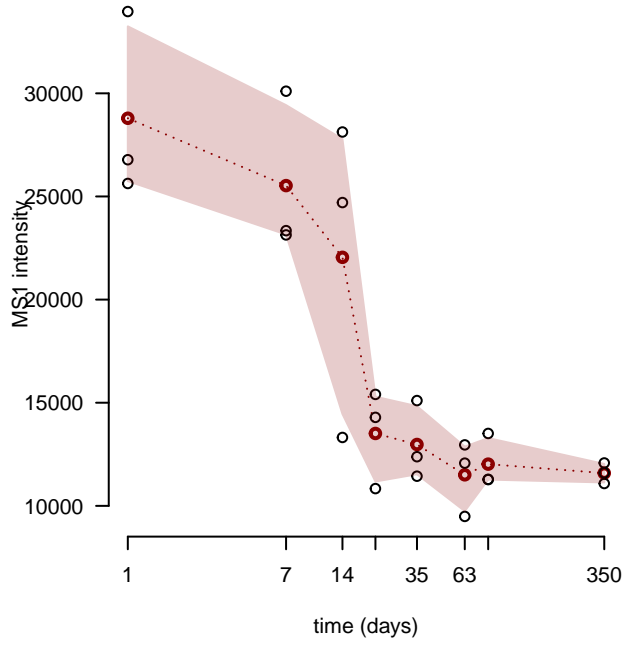

**Q61464**  
GN=Znf638

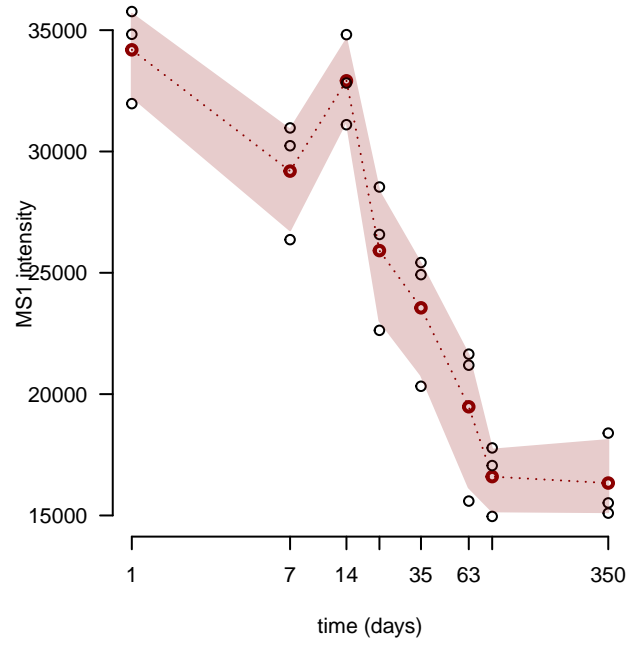

**Q61466**  
GN=Smarcd1  
SWI/SNF related, matrix associated, acti ...

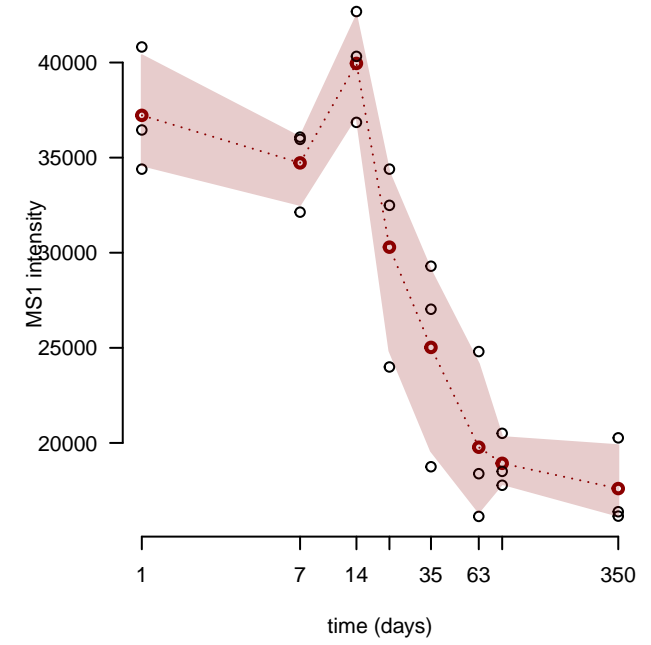

**Q61468**  
GN=Msln  
mesothelin

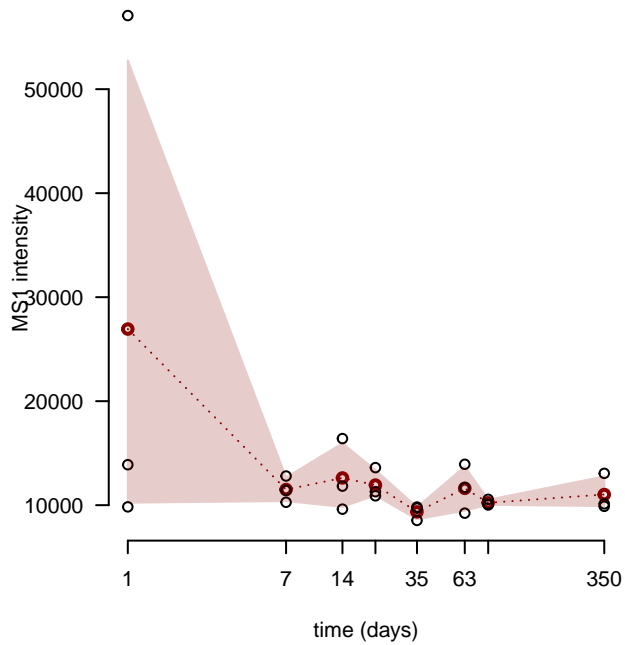

**Q61469**  
GN=Plpp1  
phospholipid phosphatase 1

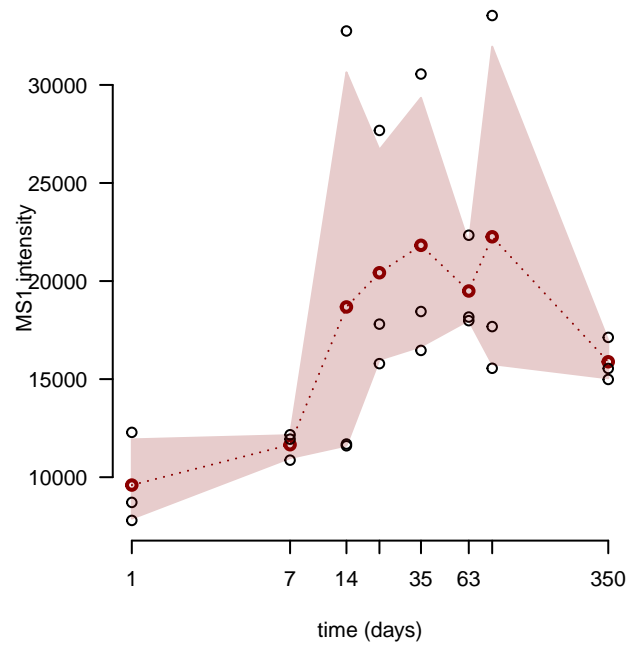

**Q61474**  
GN=Msi1  
musashi RNA-binding protein 1

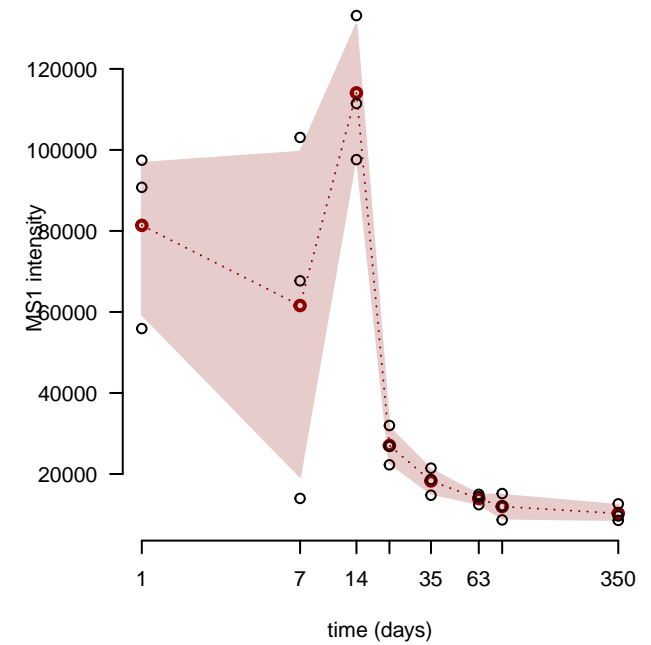

**Q61475**  
GN=Cd55  
CD55 molecule, decay accelerating factor ...

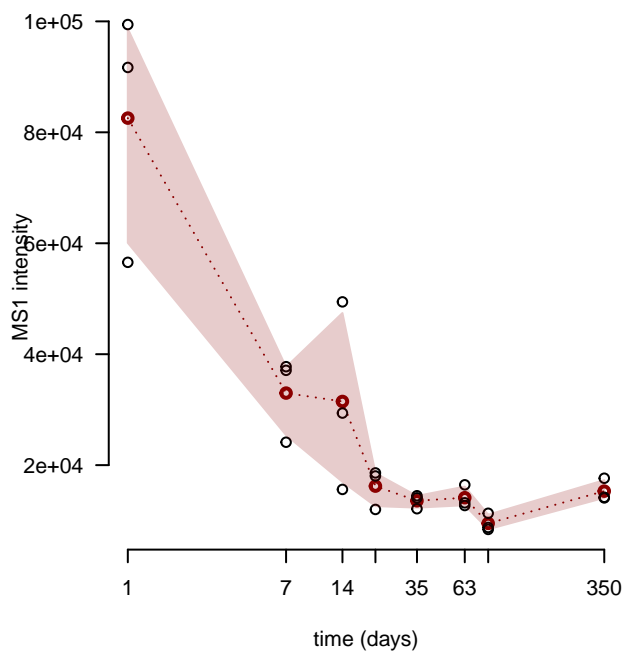

**Q61481**  
GN=Pde1a  
phosphodiesterase 1A, calmodulin-depende ...

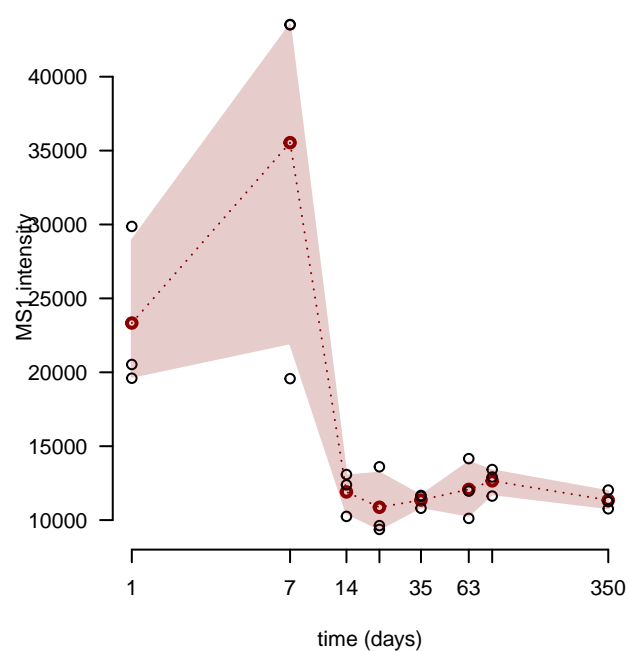

**Q61490**  
GN=Alcam  
activated leukocyte cell adhesion molecu ...

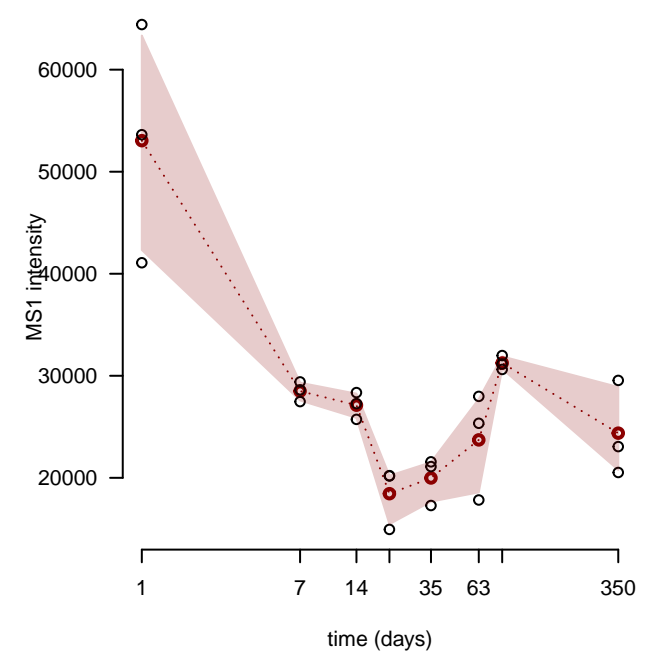

**Q61493**  
**GN=Rev3l**  
REV3 like, DNA directed polymerase zeta ...

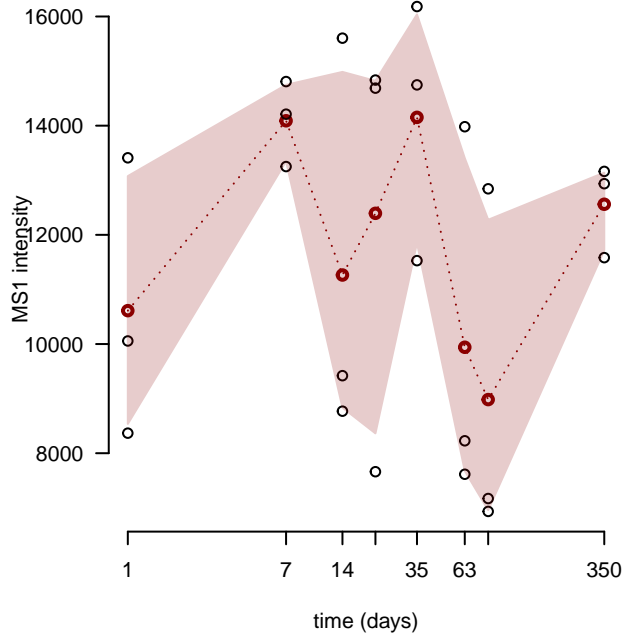

**Q61495**  
**GN=Dsg1a**  
desmoglein 1 alpha

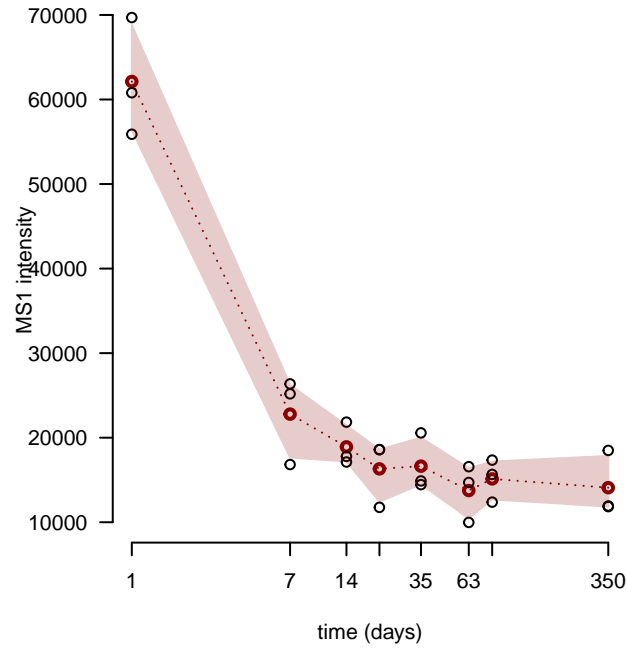

**Q61496**  
**GN=Ddx4**  
DEAD box helicase 4

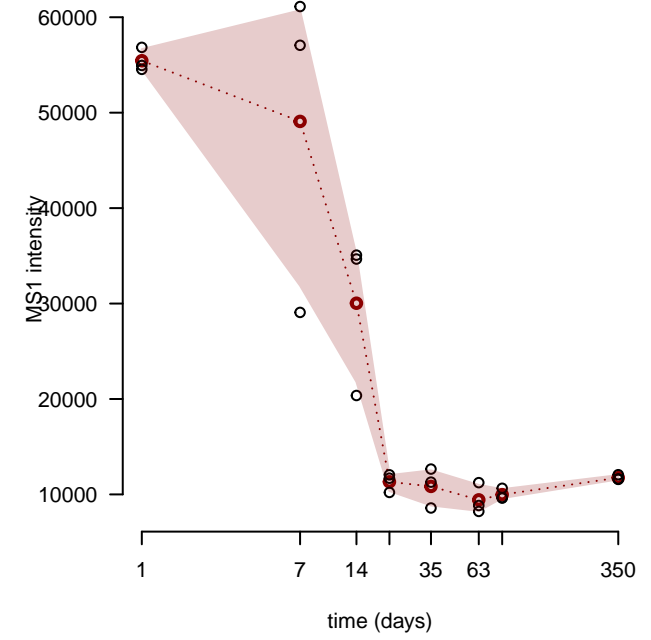

**Q61500**  
**GN=Itm2a**  
integral membrane protein 2A

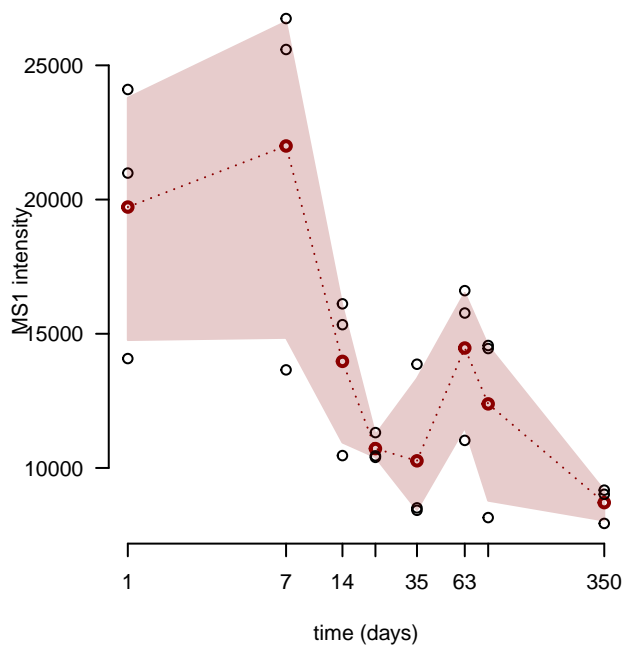

**Q61503**  
**GN=Nt5e**  
5' nucleotidase, ecto

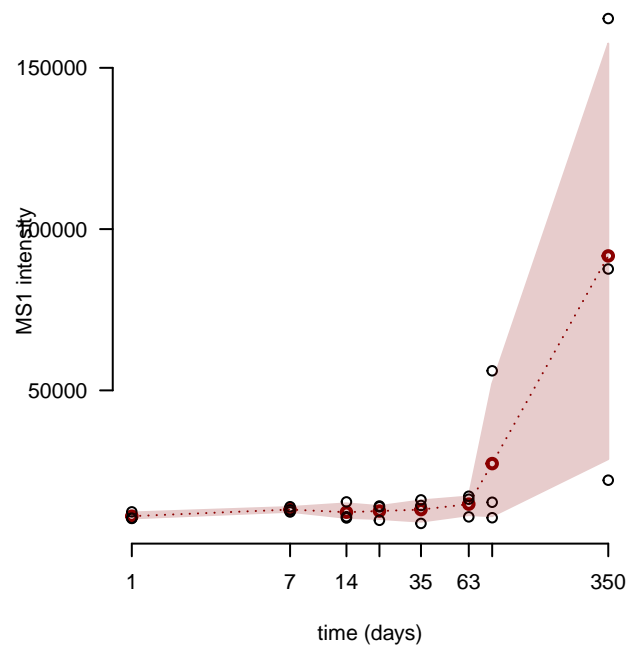

**Q61508**  
**GN=Ecm1**  
extracellular matrix protein 1

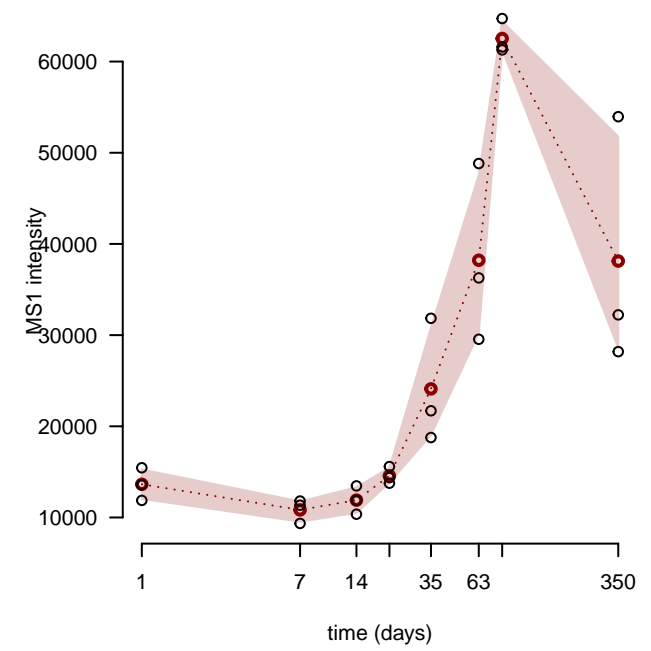

**Q61510**  
**GN=Trim25**  
tripartite motif-containing 25

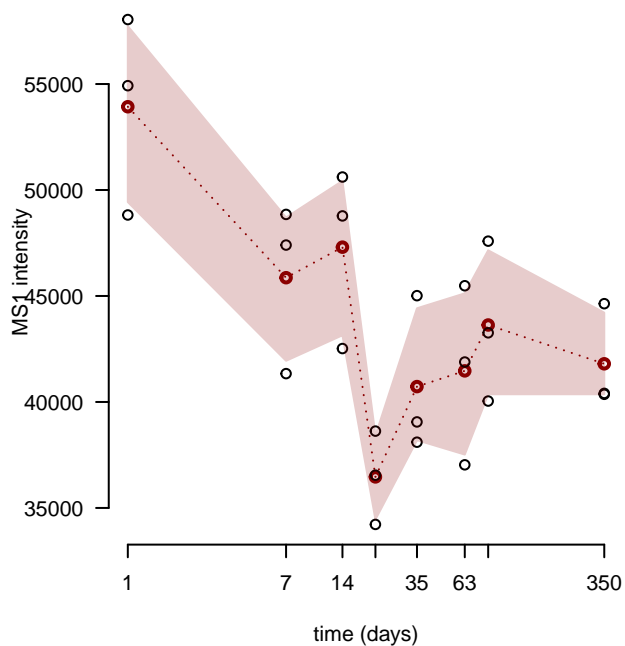

**Q61542**  
**GN=Stard3**  
START domain containing 3

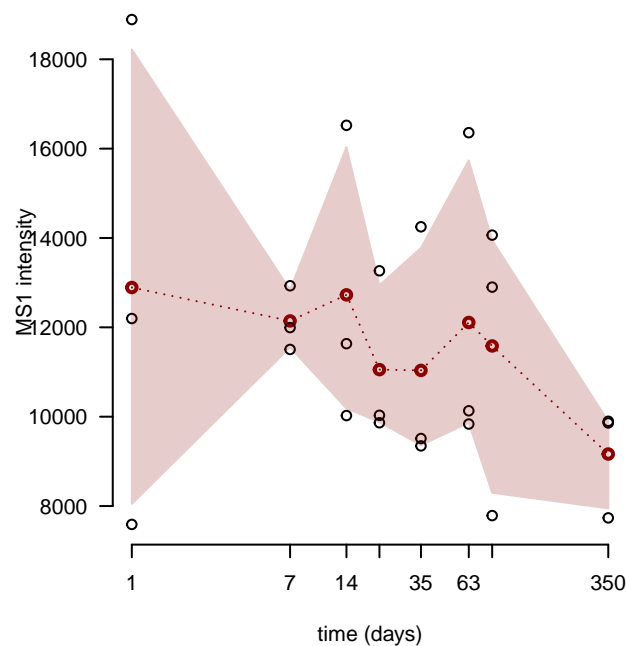

**Q61543**  
**GN=Glg1**  
golgi apparatus protein 1

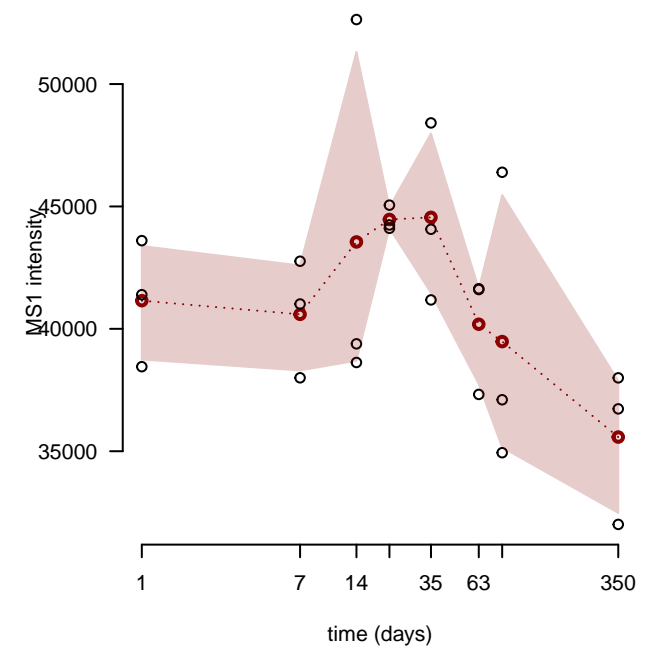

**Q61545**  
**GN=Ewsr1**  
Ewing sarcoma breakpoint region 1

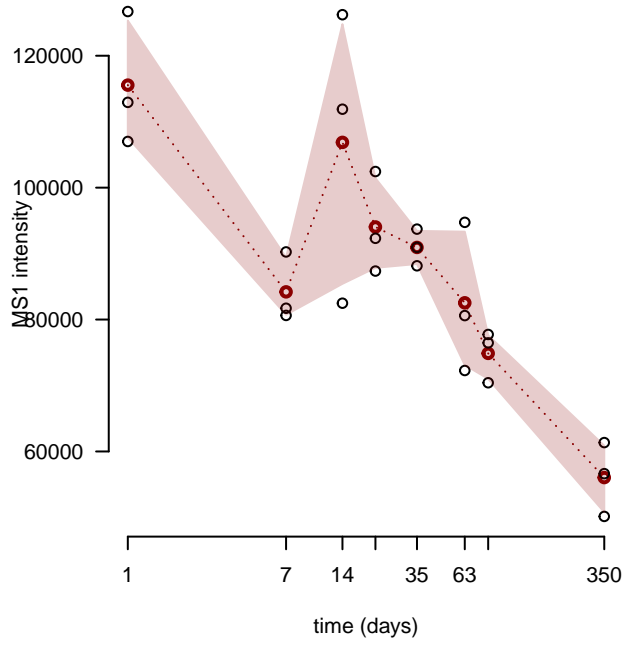

**Q61548**  
**GN=Snap91**  
synaptosomal-associated protein 91

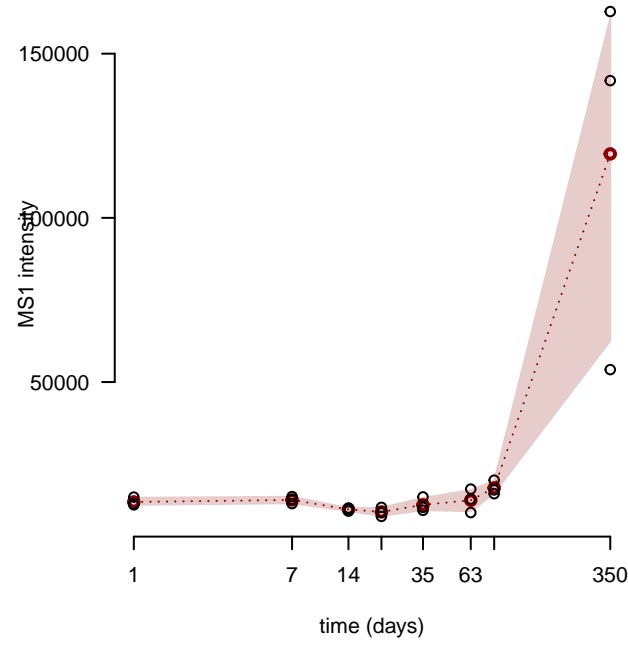

**Q61550**  
**GN=Rad21**  
RAD21 cohesin complex component

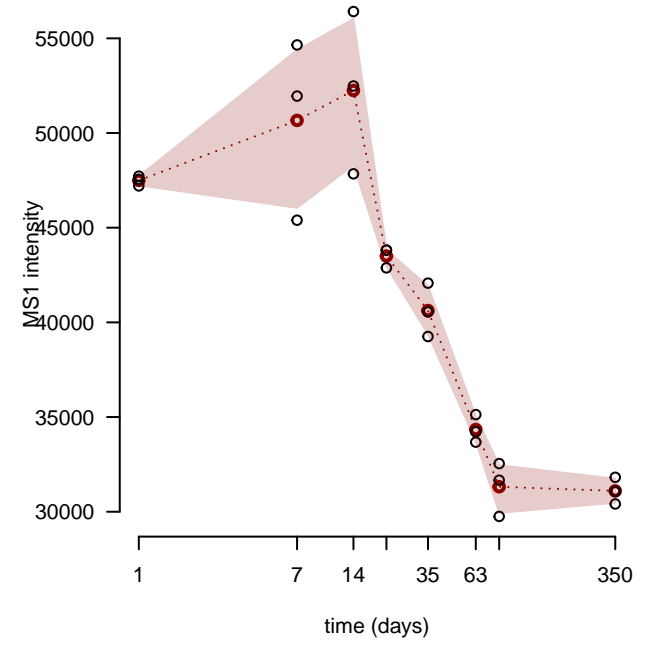

**Q61553**  
**GN=Fscn1**  
fascin actin-bundling protein 1

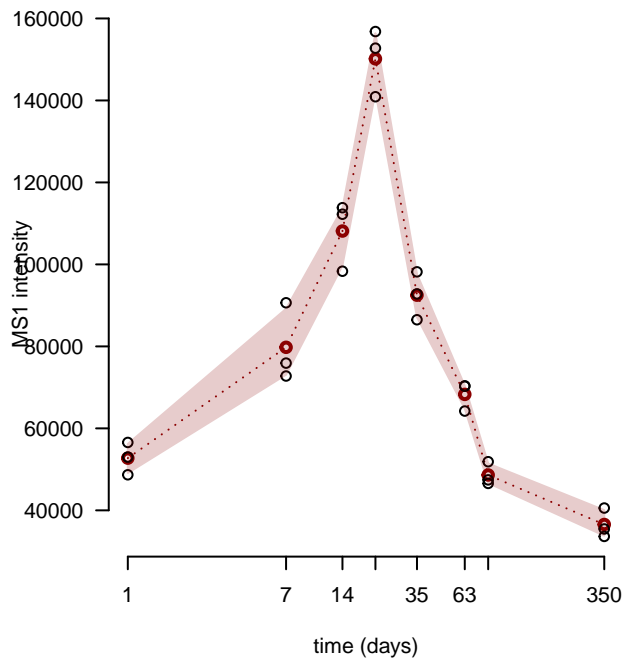

**Q61554**  
**GN=Fbn1**  
fibrillin 1

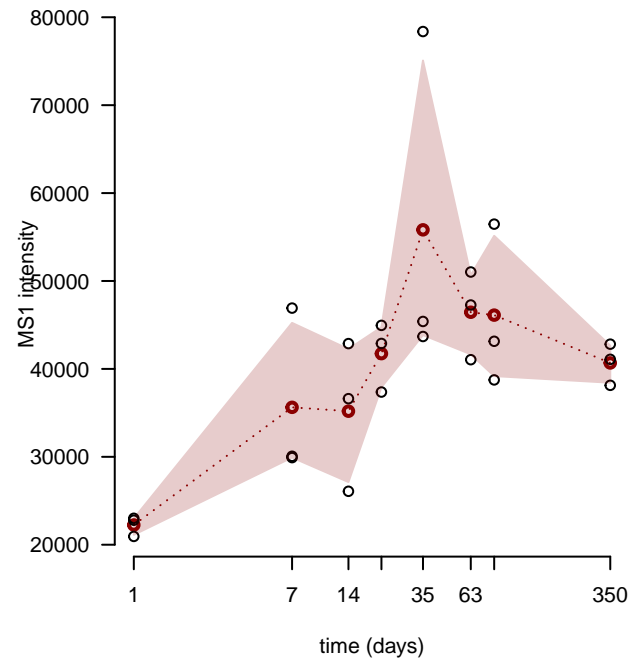

**Q61555**  
**GN=Fbn2**  
fibrillin 2

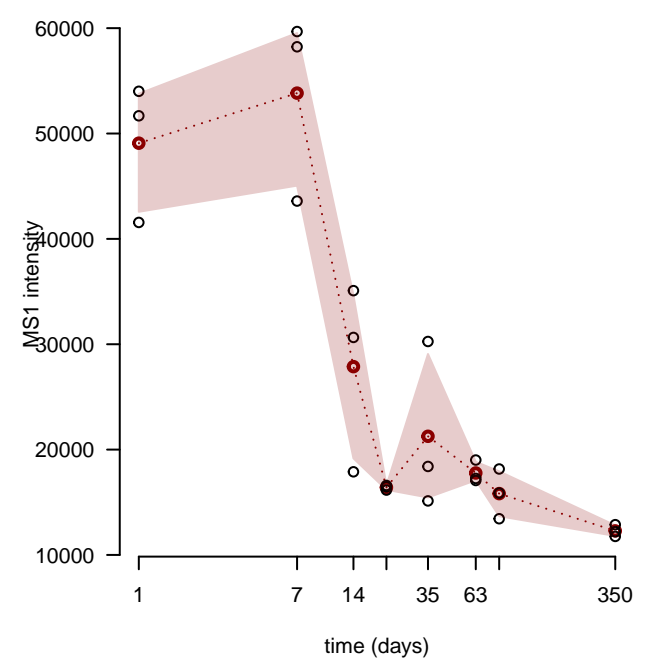

**Q61559**  
**GN=Fcgrt**  
Fc fragment of IgG receptor and transpor ...

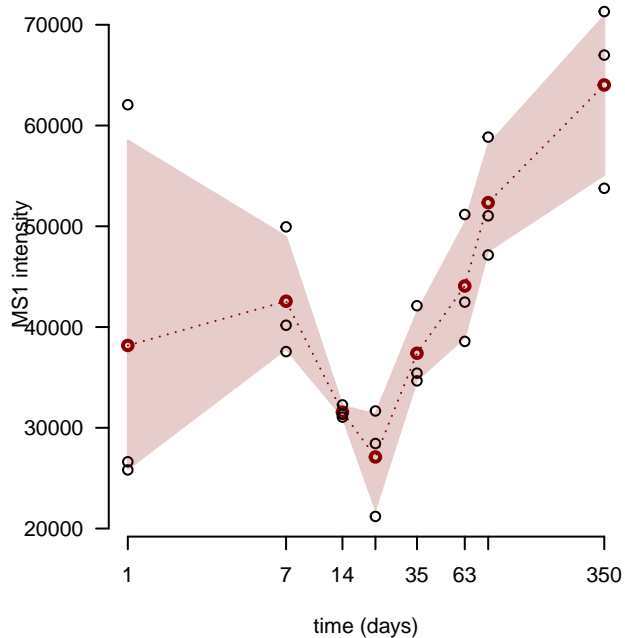

**Q61576**  
**GN=Fkbp10**  
FK506 binding protein 10

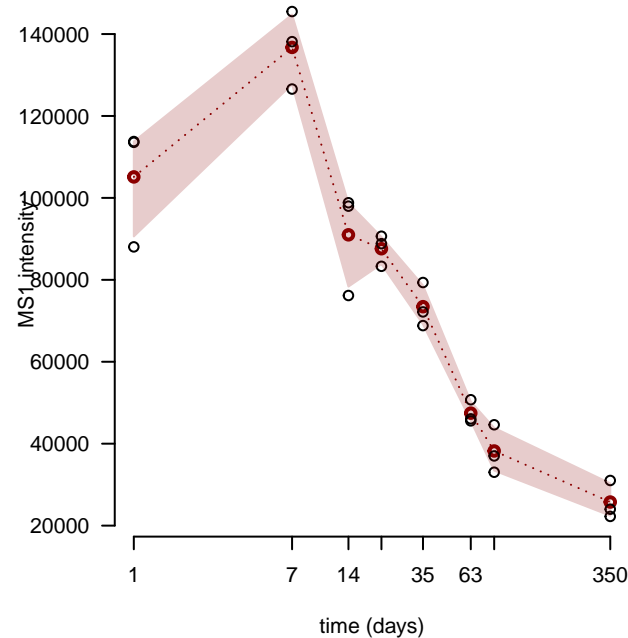

**Q61578**  
**GN=Fdxr**  
ferredoxin reductase

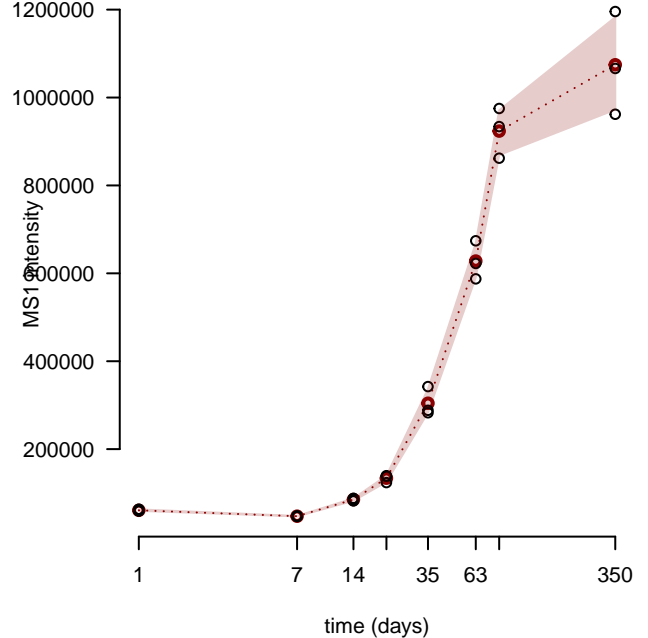

**Q61581**  
**GN=Igfbp7**  
insulin-like growth factor binding prote ...

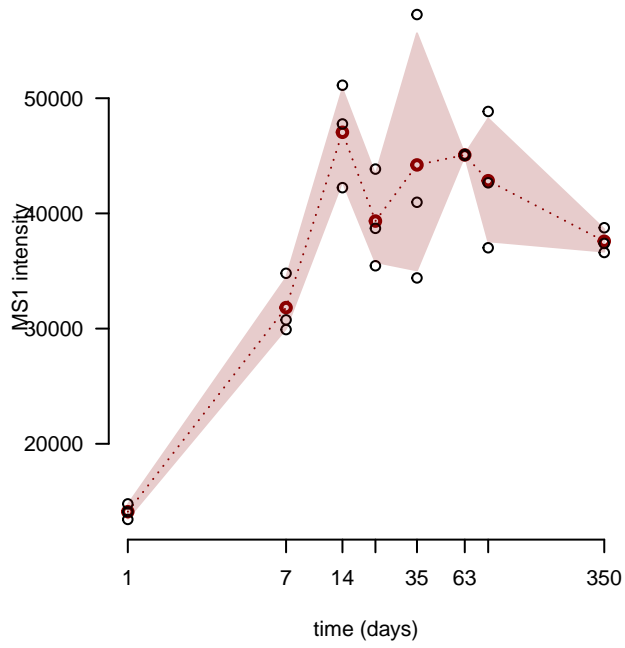

**Q61584**  
**GN=Fxr1**  
FMR1 autosomal homolog 1

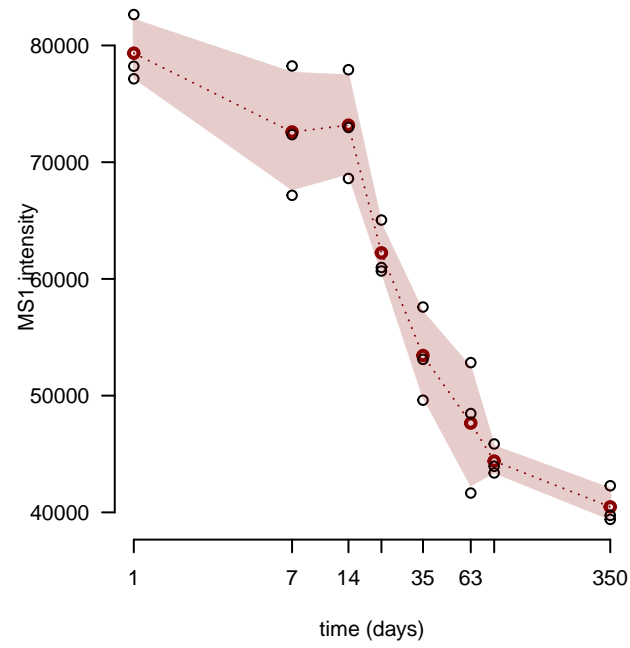

**Q61586**  
**GN=Gpam**  
glycerol-3-phosphate acyltransferase, mi ...

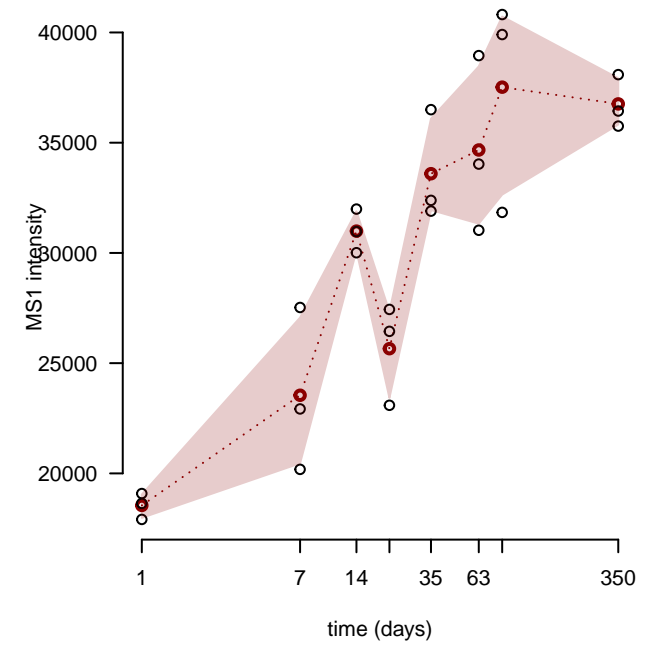

**Q61592**  
**GN=Gas6**  
growth arrest specific 6

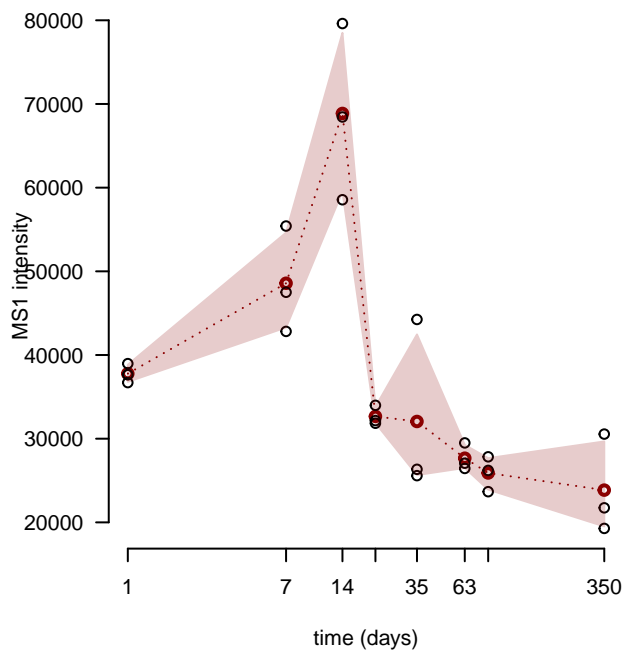

**Q61595**  
**GN=Ktn1**  
kinectin 1

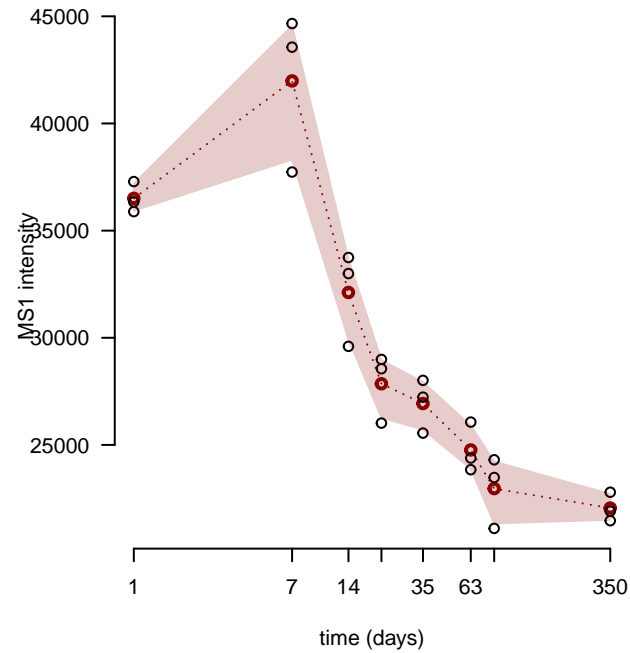

**Q61595**  
**GN=Ktn1**  
kinectin 1

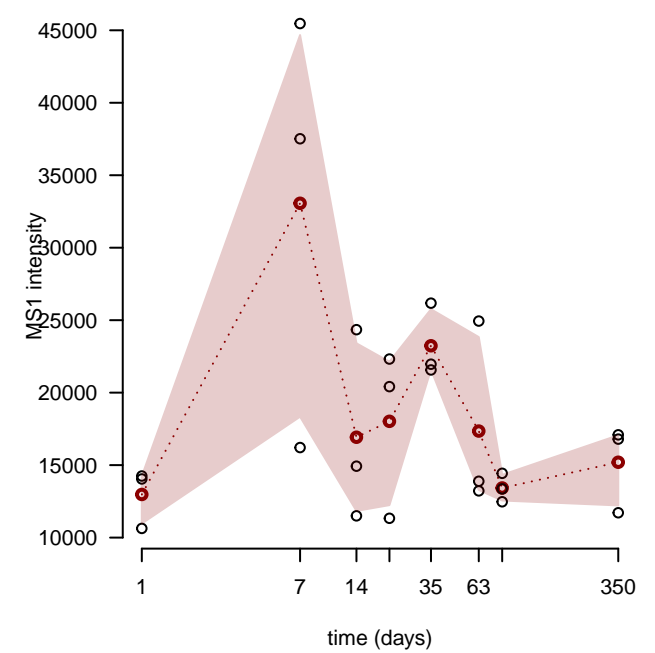

**Q61598**  
**GN=Gdi2**  
guanosine diphosphate (GDP) dissociation ...

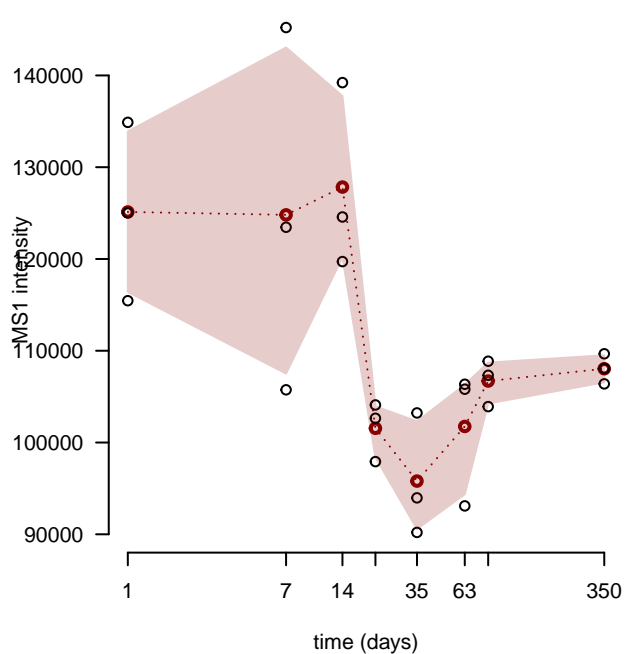

**Q61599**  
**GN=Arhgdib**  
Rho, GDP dissociation inhibitor (GDI) be ...

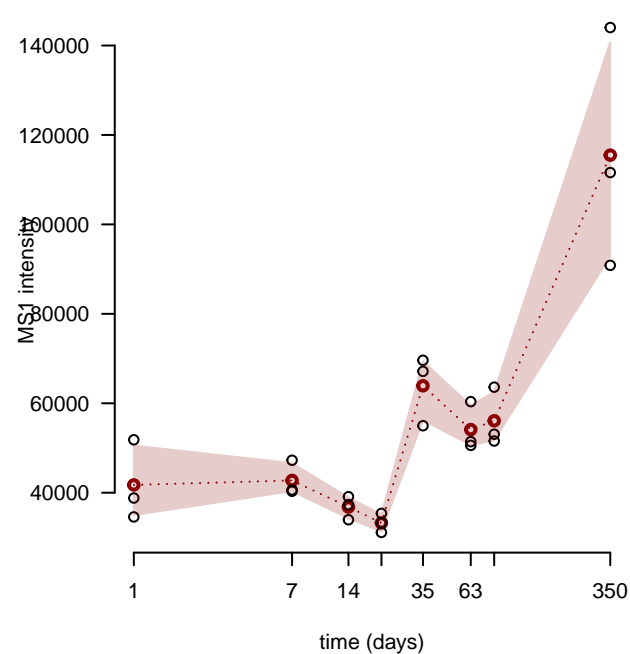

**Q61602**  
**GN=Gli3**  
GLI-Kruppel family member GLI3

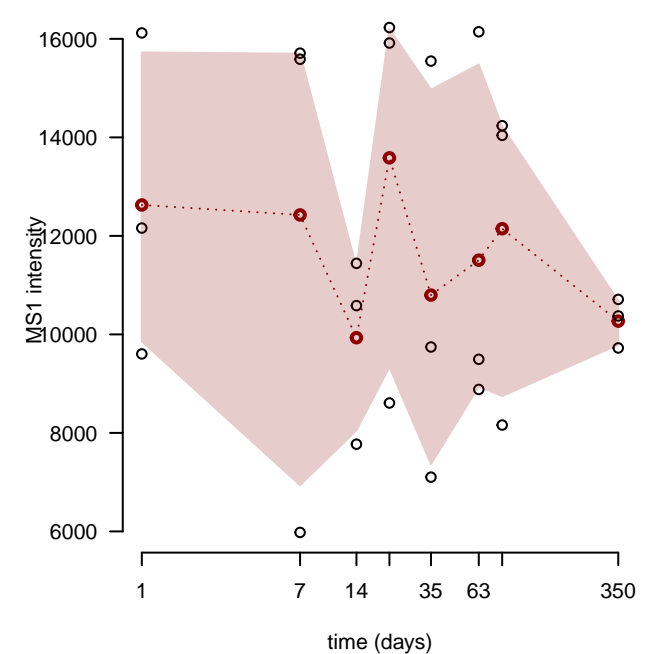

**Q61614**  
**GN=Ednra**  
endothelin receptor type A

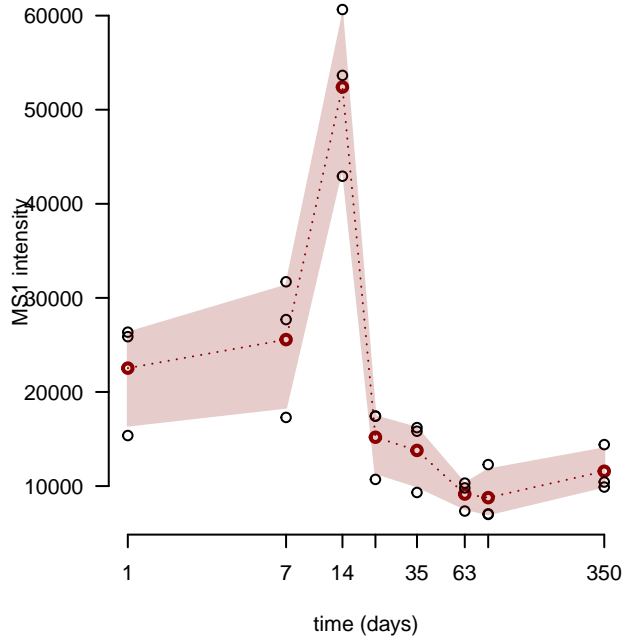

**Q61624**  
**GN=Znf148**

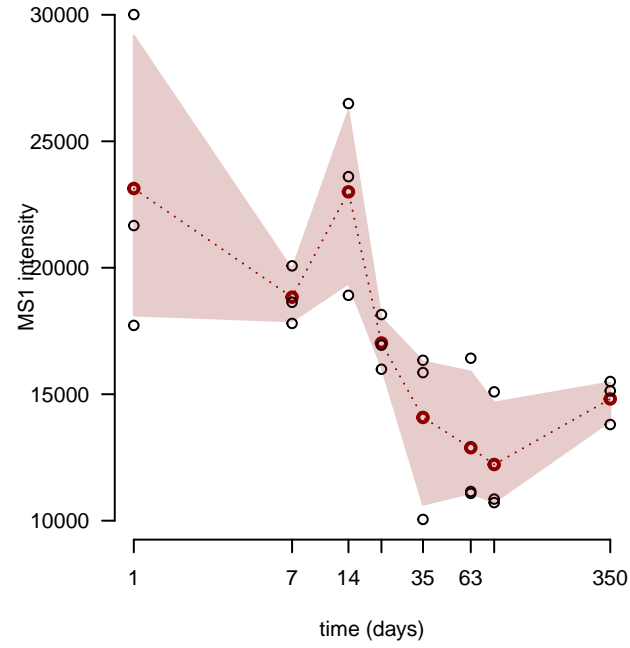

**Q61644**  
**GN=Pacsin1**  
protein kinase C and casein kinase subst ...

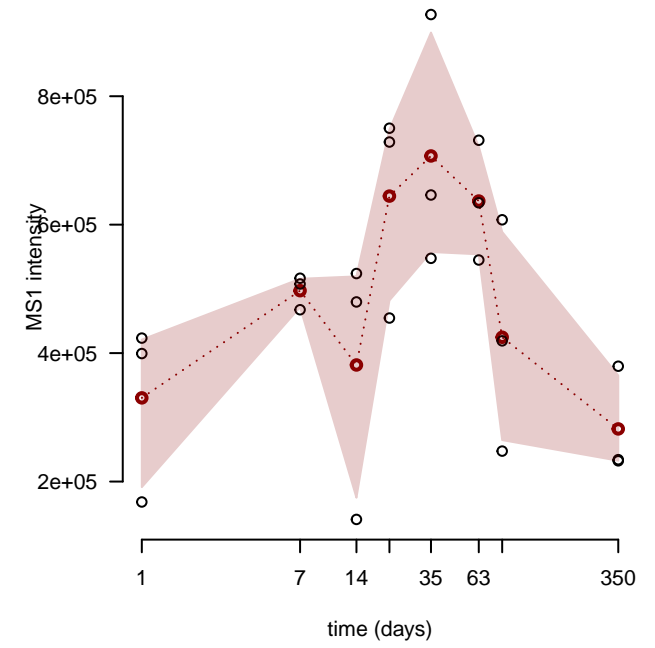

**Q61646**  
**GN=Hp**  
haptoglobin

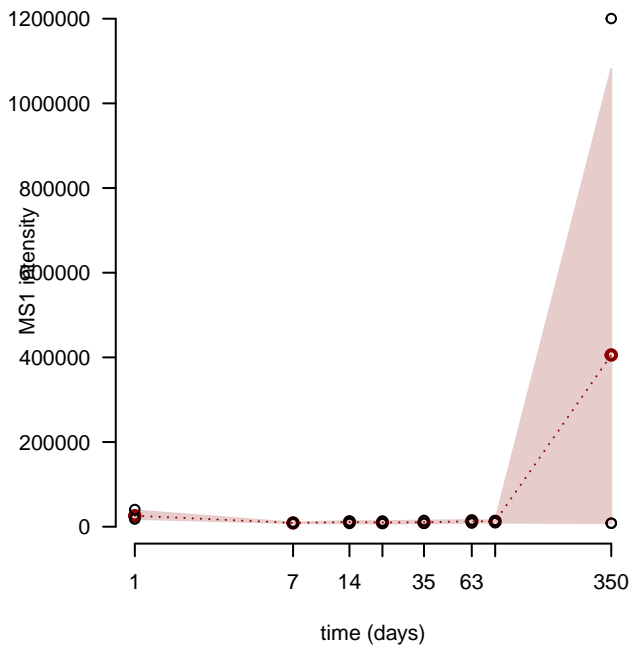

**Q61655**  
**GN=Ddx19a**  
DEAD box helicase 19a

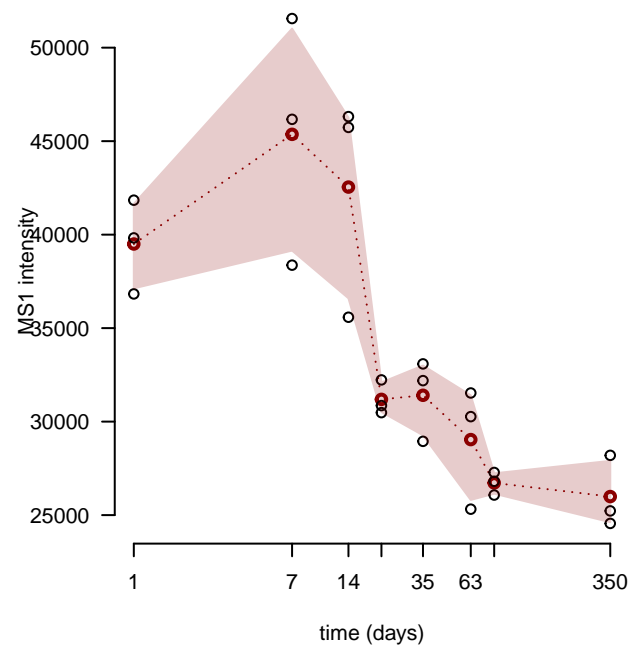

**Q61656**  
**GN=Ddx5**  
DEAD box helicase 5

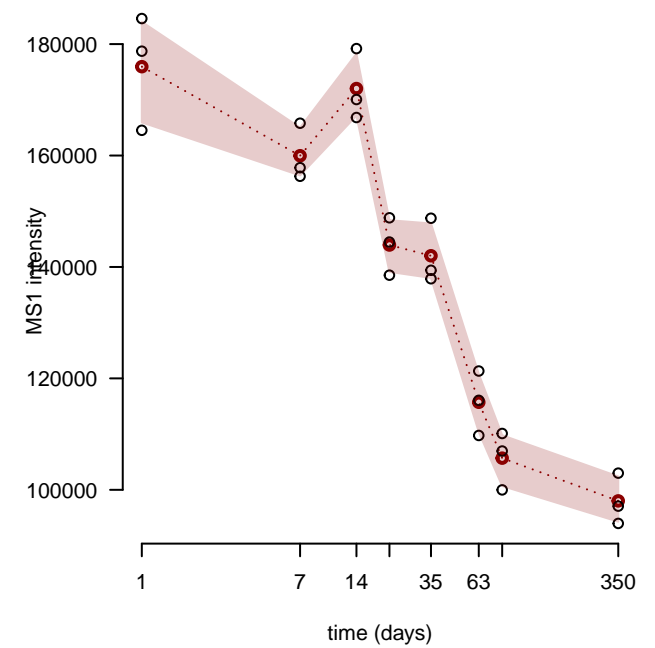

**Q61666**  
**GN=Hira**  
histone cell cycle regulator

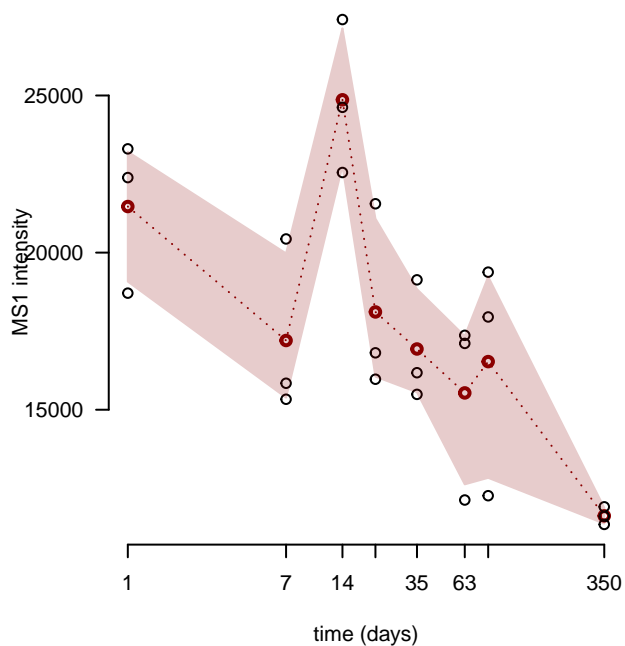

**Q61686**  
**GN=Cbx5**  
chromobox 5

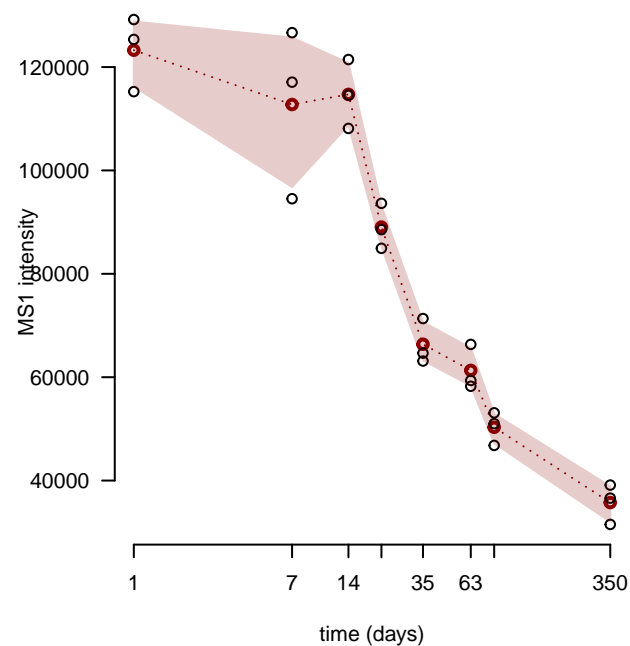

**Q61687**  
**GN=Atrx**  
ATRX, chromatin remodeler

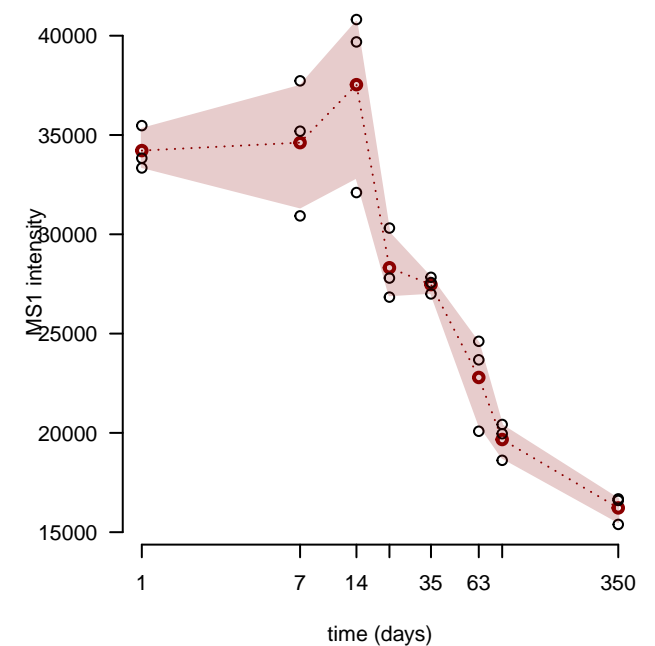



**Q61699**  
**GN=Hsph1**  
heat shock 105kDa/110kDa protein 1

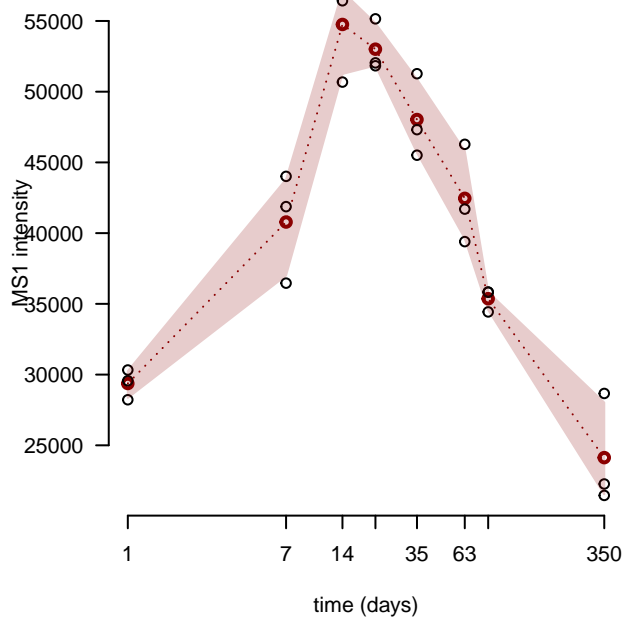

**Q61702**  
**GN=Itih1**  
inter-alpha trypsin inhibitor, heavy cha ...

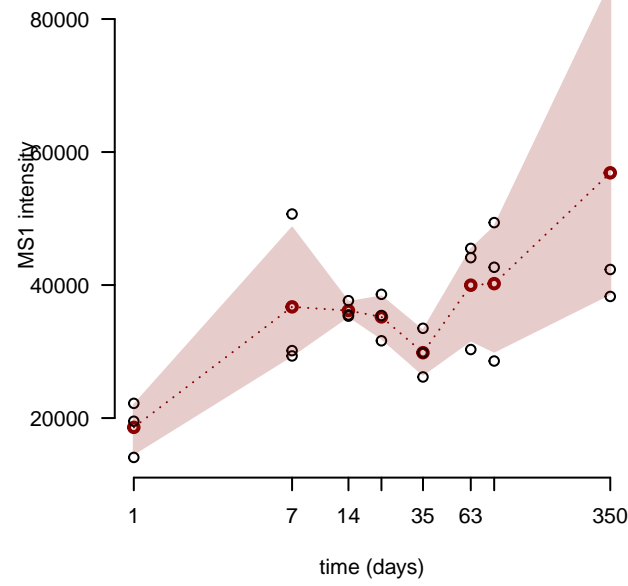

**Q61703**  
**GN=Itih2**  
inter-alpha trypsin inhibitor, heavy cha ...

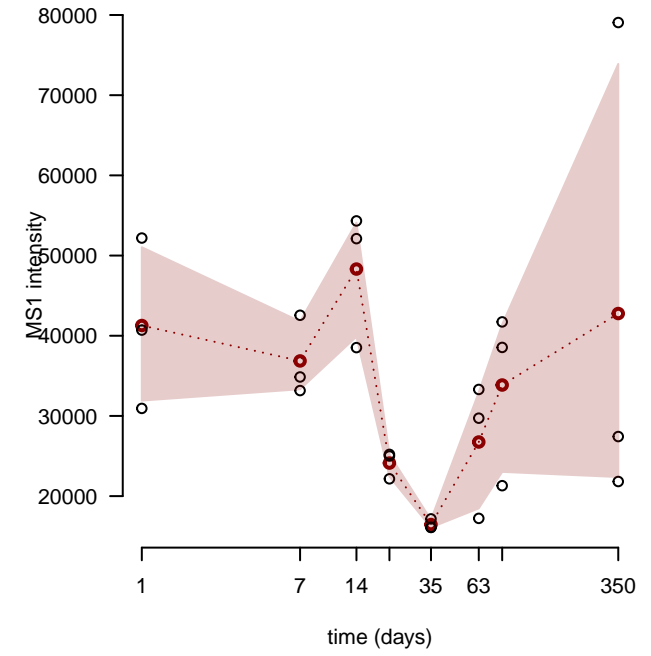

**Q61704**  
**GN=Itih3**  
inter-alpha trypsin inhibitor, heavy cha ...

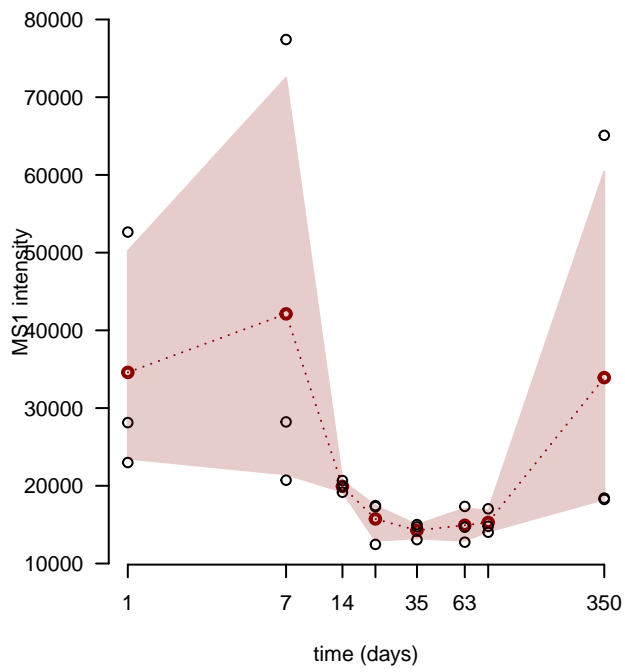

**Q61712**  
**GN=Dnajc1**  
DnaJ heat shock protein family (Hsp40) m ...

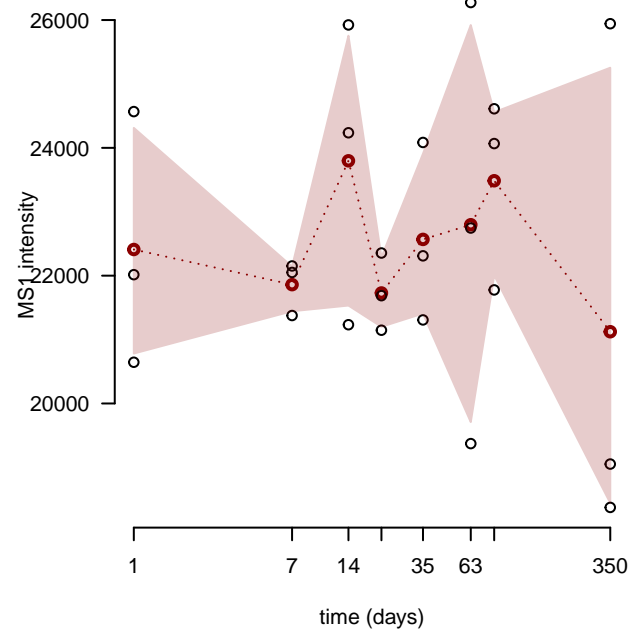

**Q61730**  
**GN=Il1rap**  
interleukin 1 receptor accessory protein

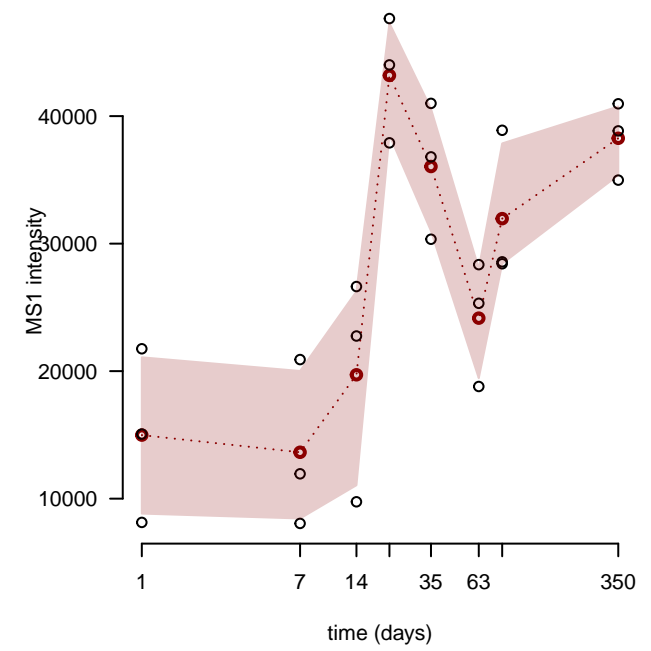

**Q61733**  
**GN=Mrps31**  
mitochondrial ribosomal protein S31

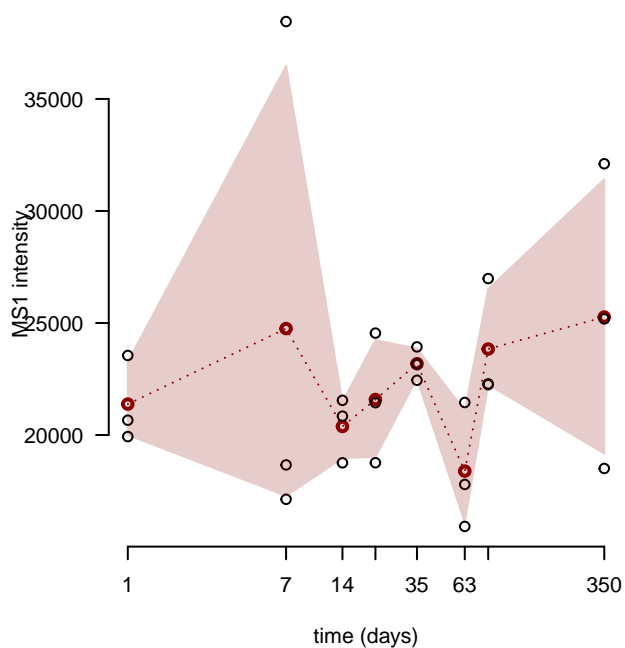

**Q61735**  
**GN=Cd47**  
CD47 antigen (Rh-related antigen, integr ...

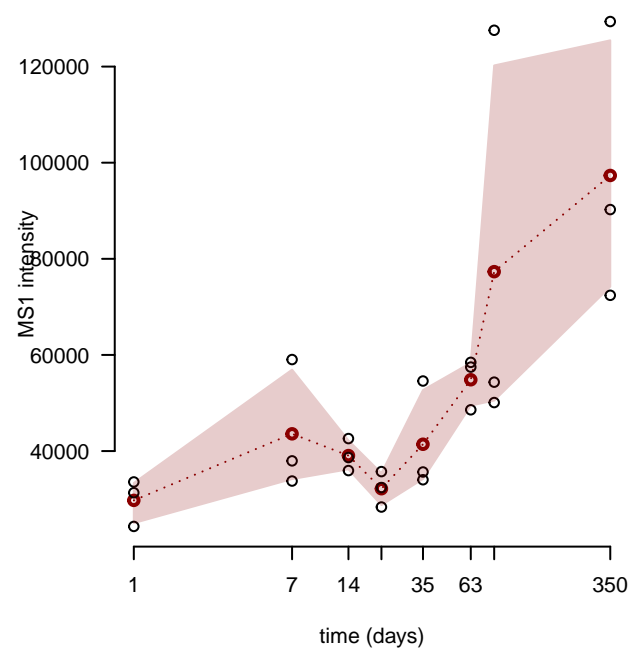

**Q61735**  
**GN=Cd47**  
CD47 antigen (Rh-related antigen, integr ...

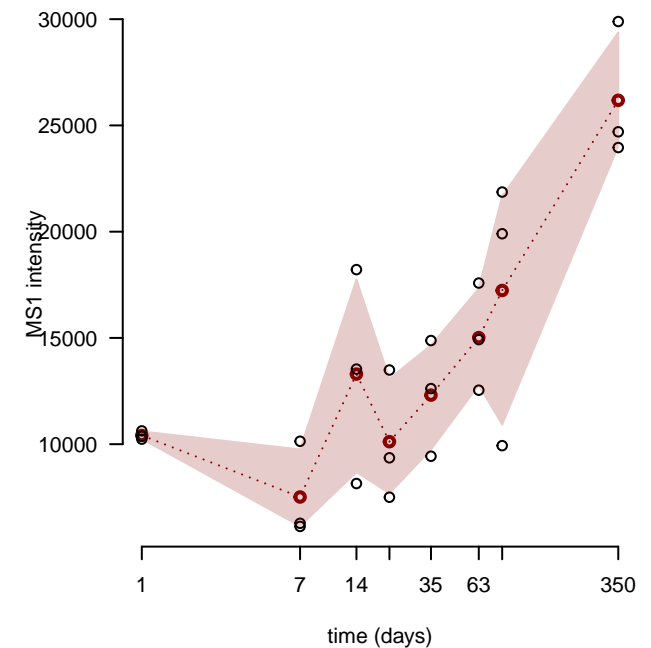

**Q61738**  
**GN=Itga7**  
integrin alpha 7

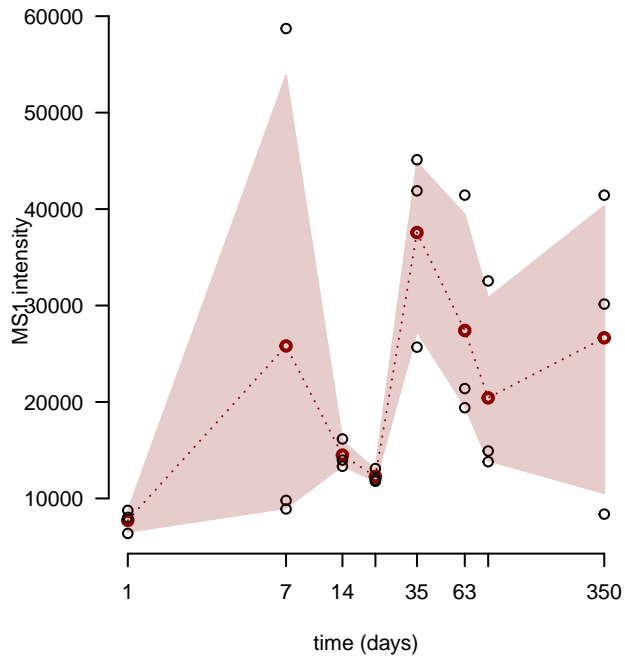

**Q61739**  
**GN=Itga6**  
integrin alpha 6

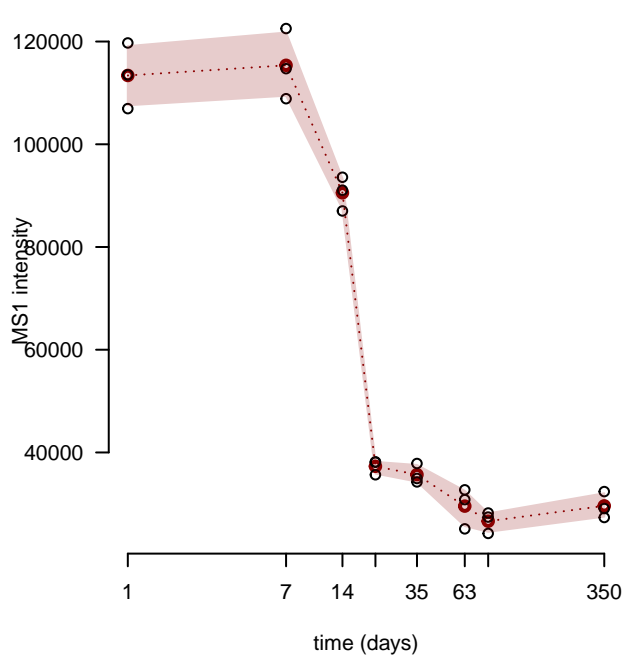

**Q61739**  
**GN=Itga6**  
integrin alpha 6

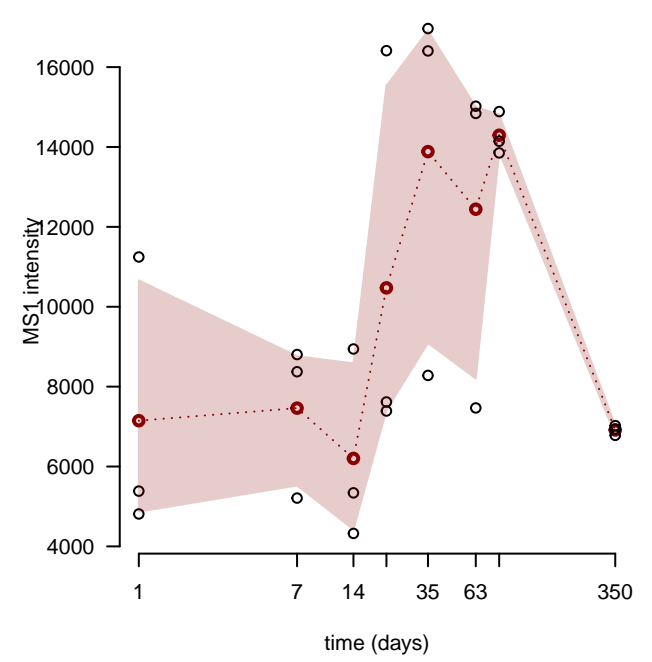

**Q61749**  
**GN=Eif2b4**  
eukaryotic translation initiation factor ...

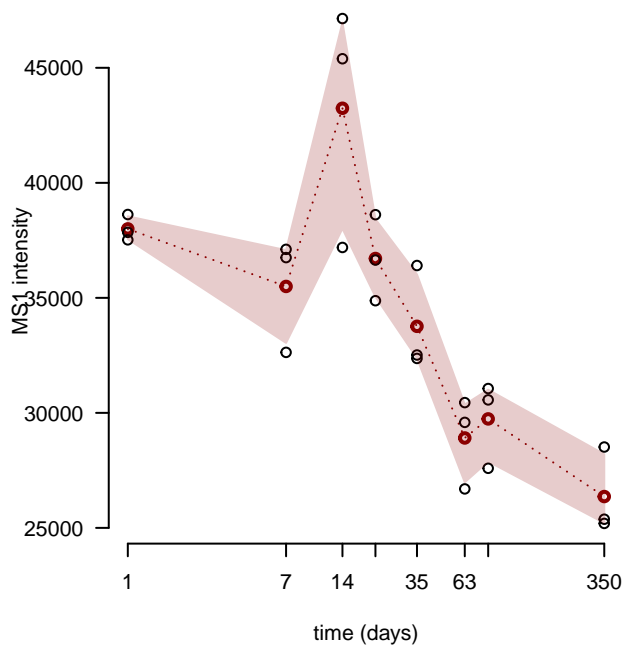

**Q61753**  
**GN=Phgdh**  
3-phosphoglycerate dehydrogenase

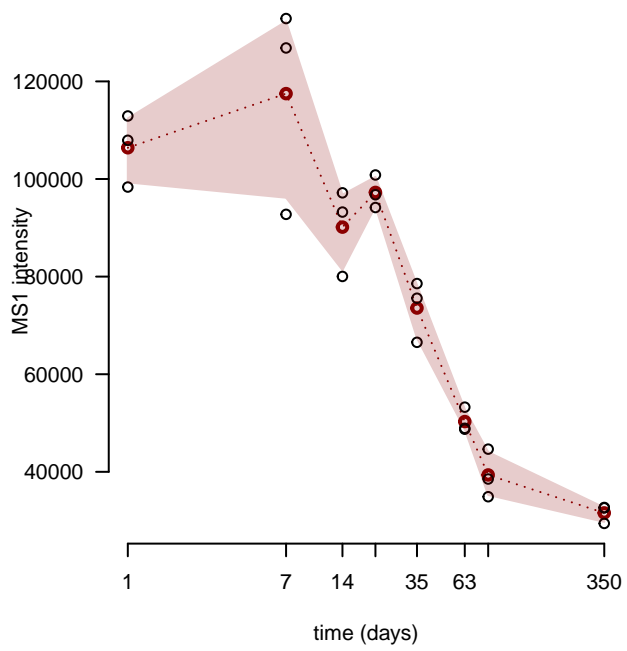

**Q61765**  
**GN=Krt31**  
keratin 31

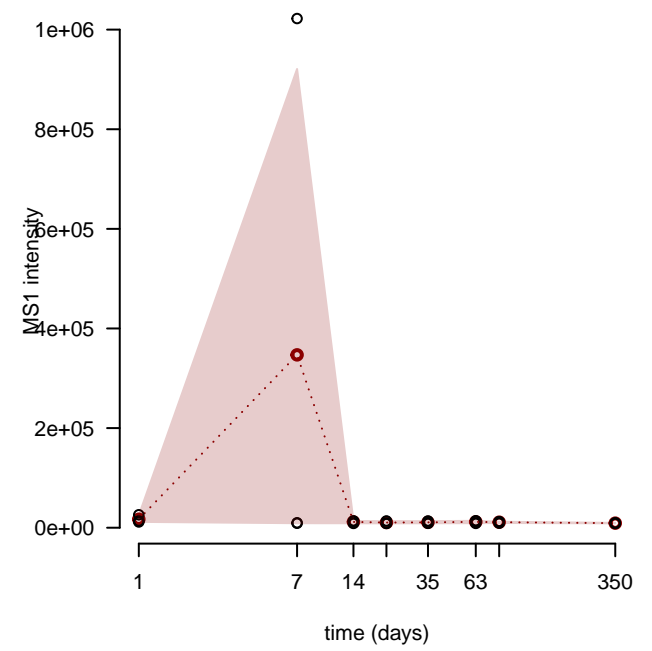

**Q61768**  
**GN=Kif5b**  
kinesin family member 5B

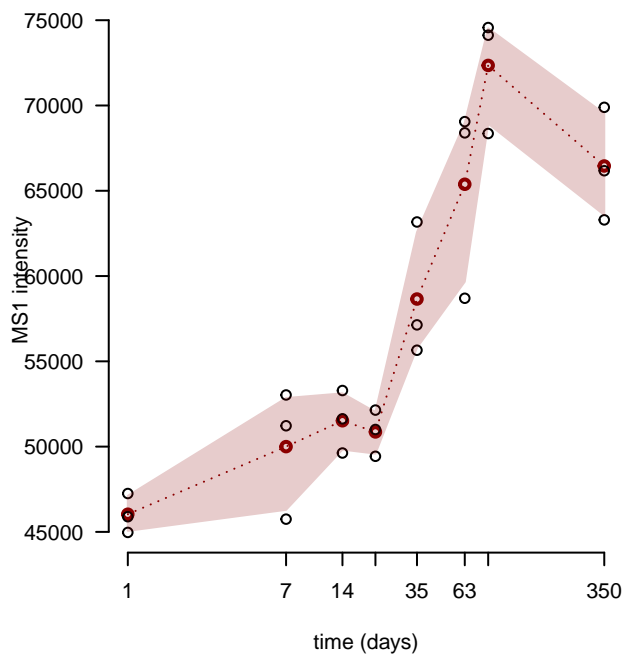

**Q61771**  
**GN=Kif3b**  
kinesin family member 3B

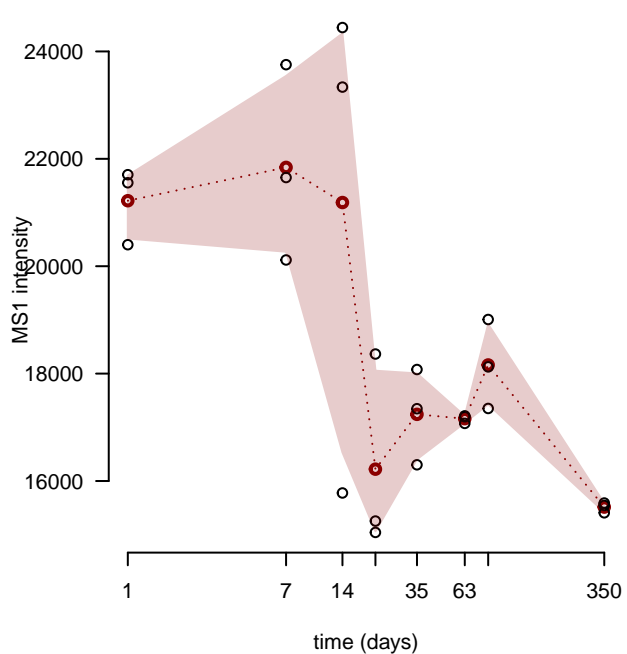

**Q61781**  
**GN=Krt14**  
keratin 14

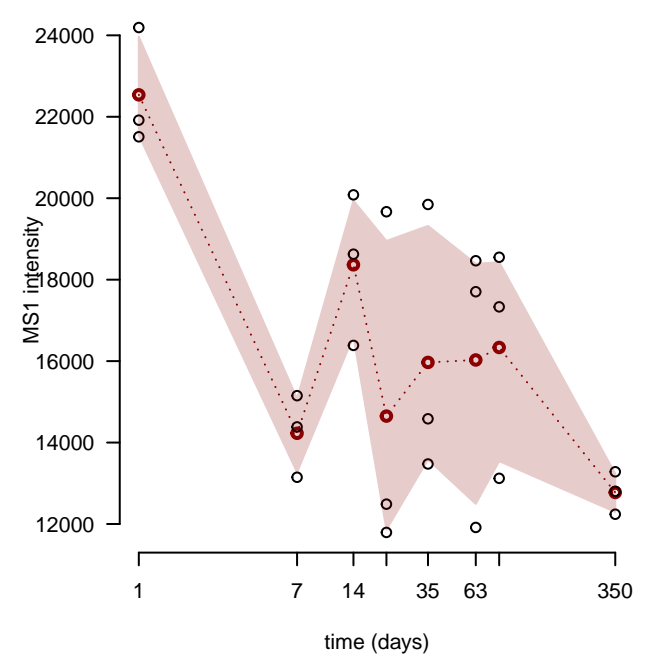

**Q61789**  
GN=Lama3  
laminin, alpha 3

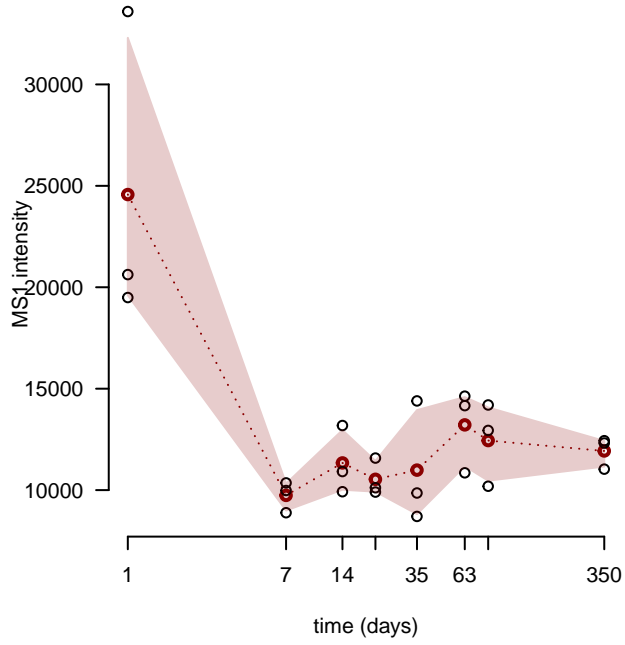

**Q61792**  
GN=Lasp1  
LIM and SH3 protein 1

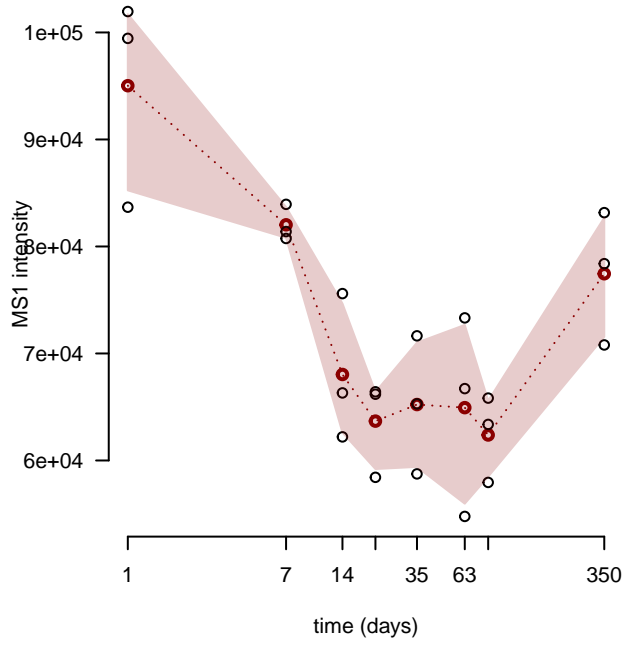

**Q61805**  
GN=Lbp  
lipopolysaccharide binding protein

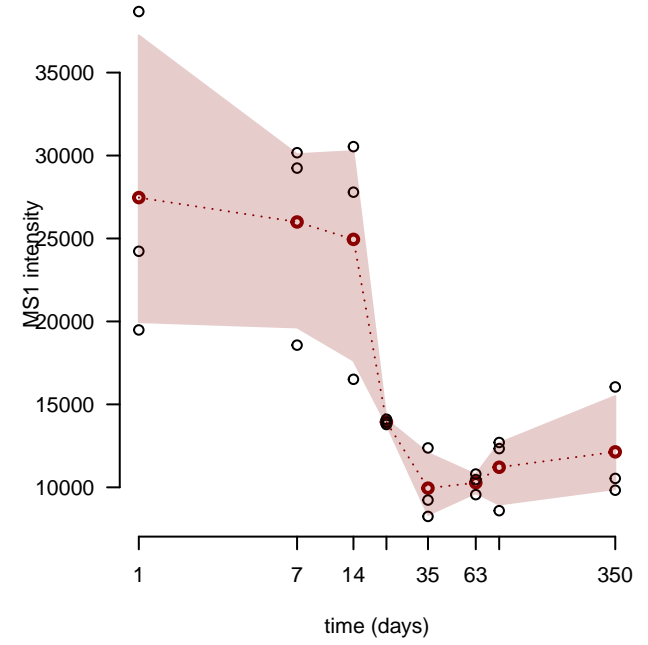

**Q61809**  
GN=Lrrn1  
leucine rich repeat protein 1, neuronal

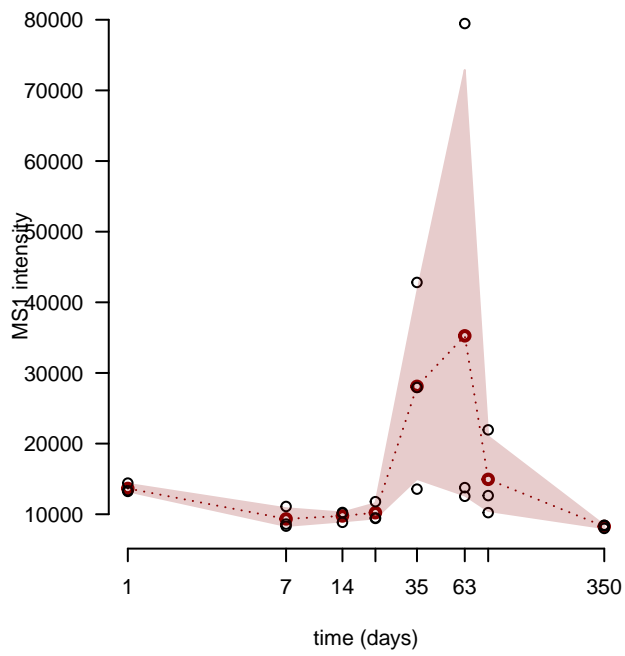

**Q61810**  
GN=Ltbp3  
latent transforming growth factor beta b ...

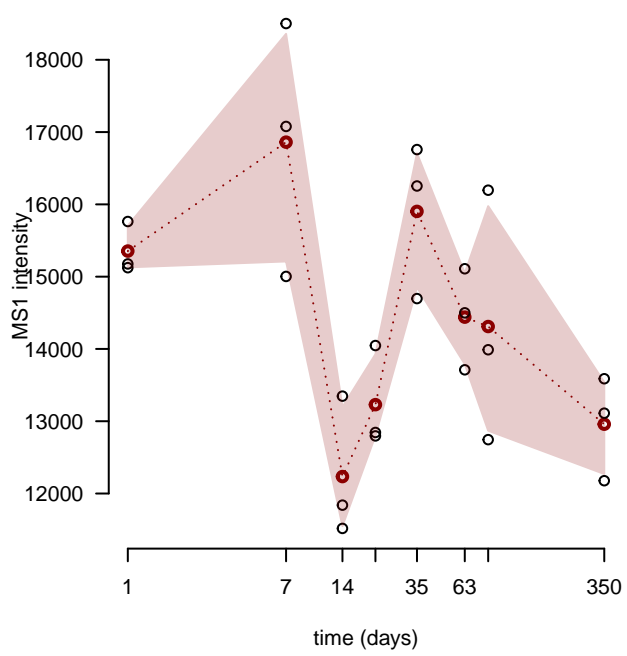

**Q61818**  
GN=Rai1  
retinoic acid induced 1

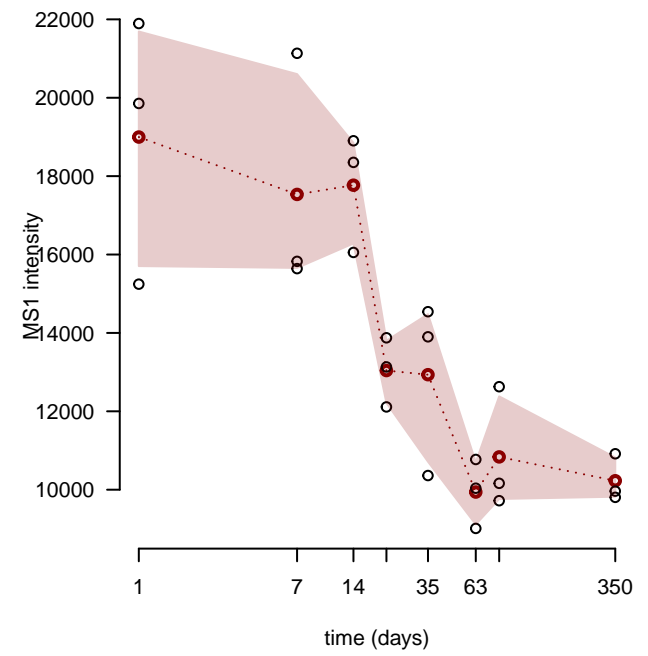

**Q61823**  
GN=Pdcd4  
programmed cell death 4

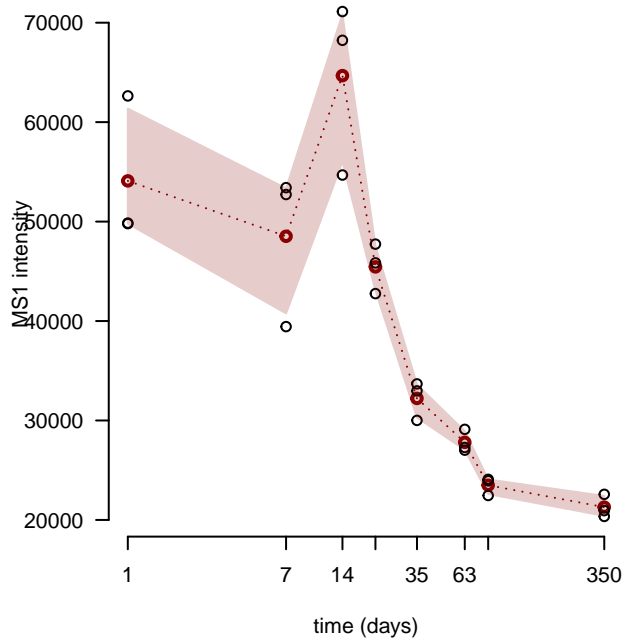

**Q61824**  
GN=Adam12  
a disintegrin and metallopeptidase domai ...

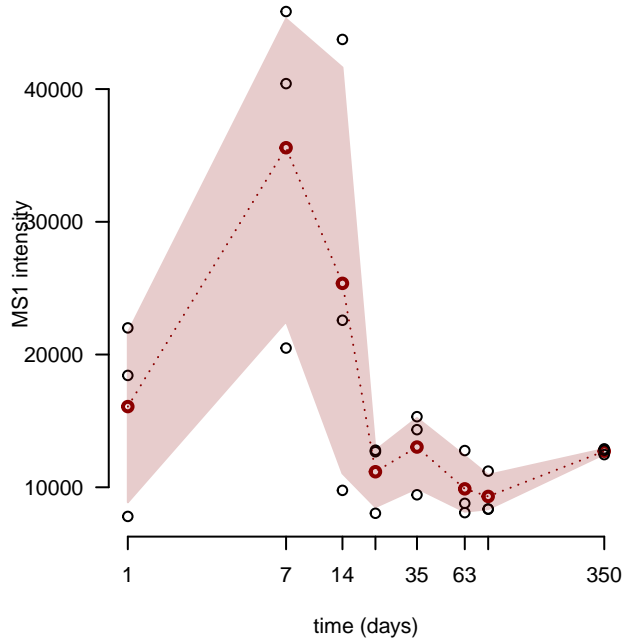

**Q61830**  
GN=Mrc1  
mannose receptor, C type 1

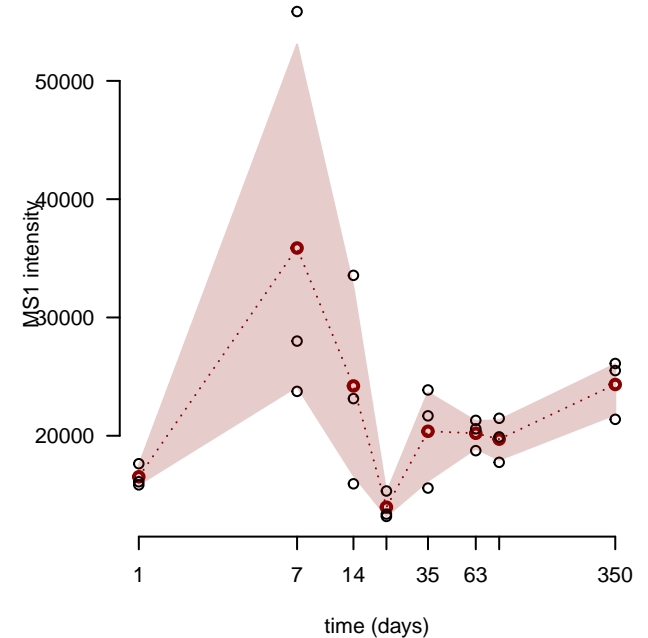

**Q61838**  
GN=Pzp  
PZP, alpha-2-macroglobulin like

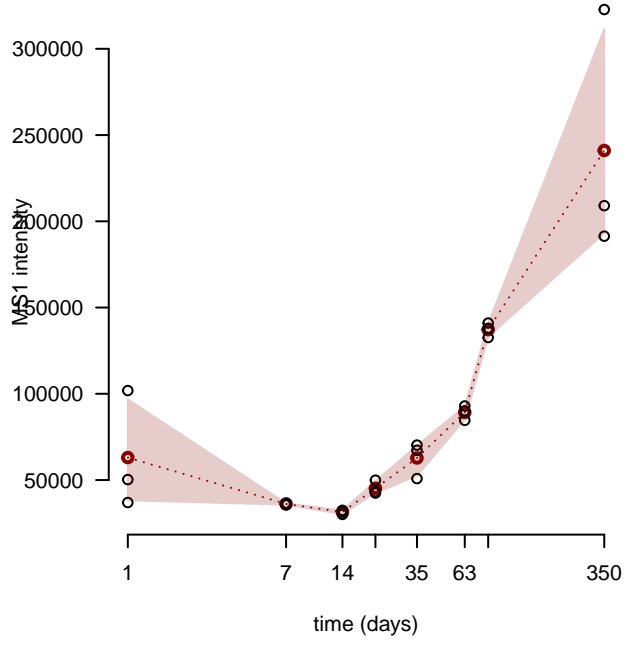

**Q61846**  
GN=Melk  
maternal embryonic leucine zipper kinase

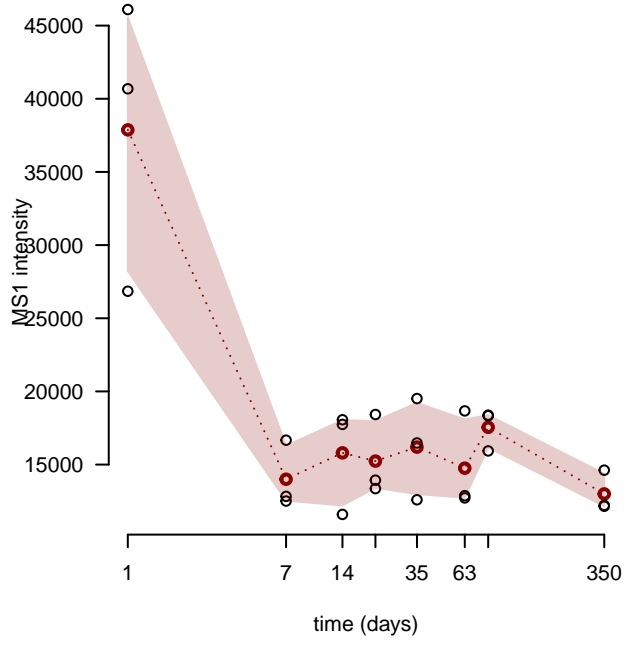

**Q61878**  
GN=Prg2  
proteoglycan 2, bone marrow

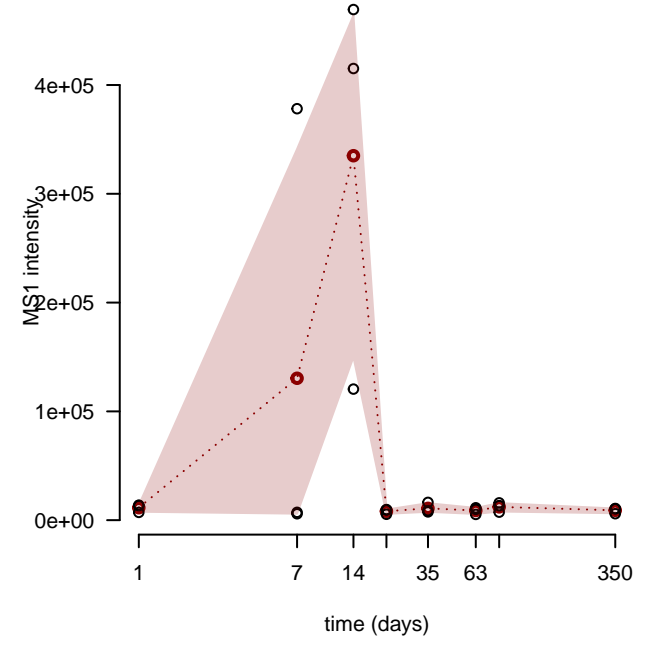

**Q61879**  
GN=Myh10  
myosin, heavy polypeptide 10, non-muscle

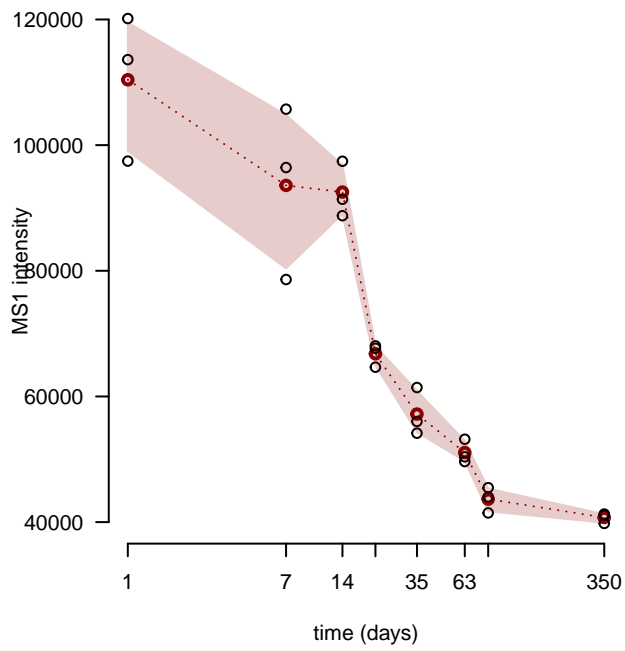

**Q61881**  
GN=Mcm7  
minichromosome maintenance complex compo ...

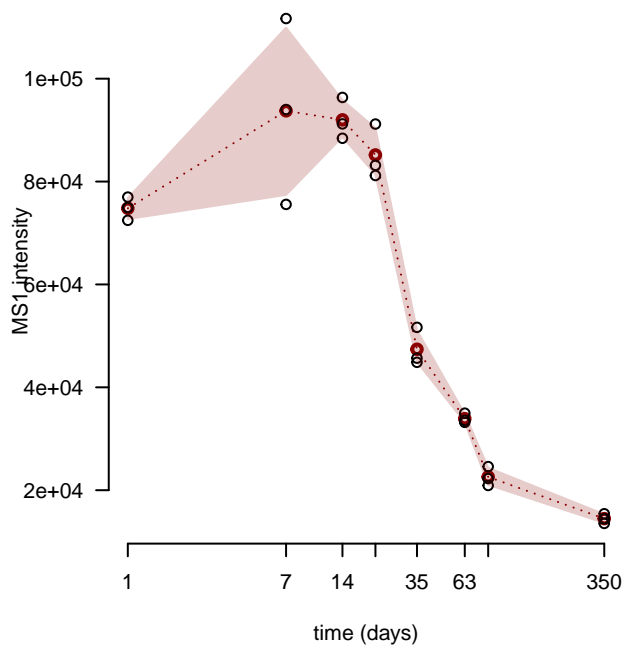

**Q61884**  
GN=Mns1  
meiosis-specific nuclear structural prot ...

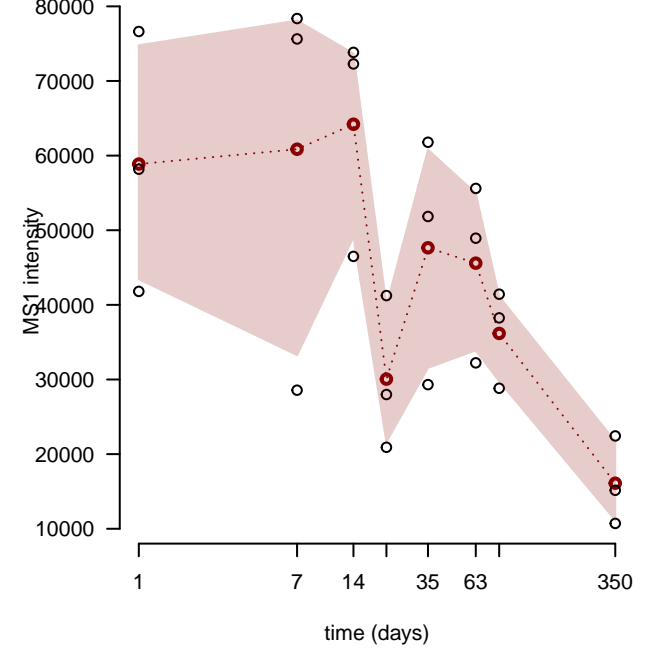

**Q61897**  
GN=Krt33b  
keratin 33B

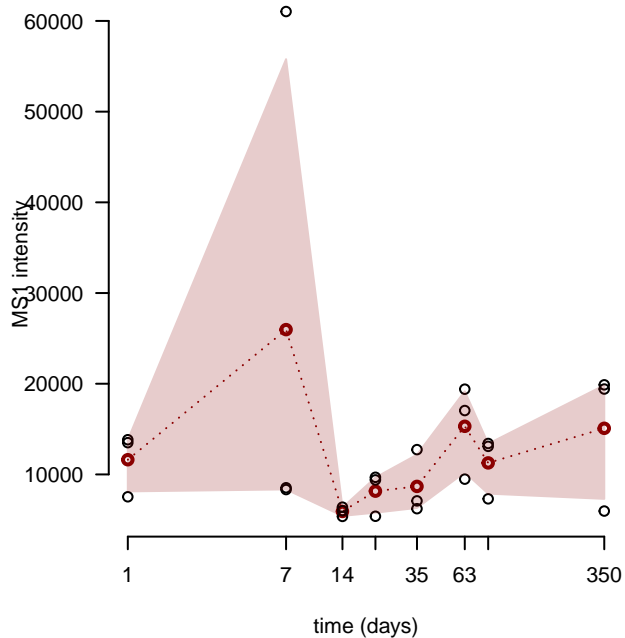

**Q61937**  
GN=Npm1  
nucleophosmin 1

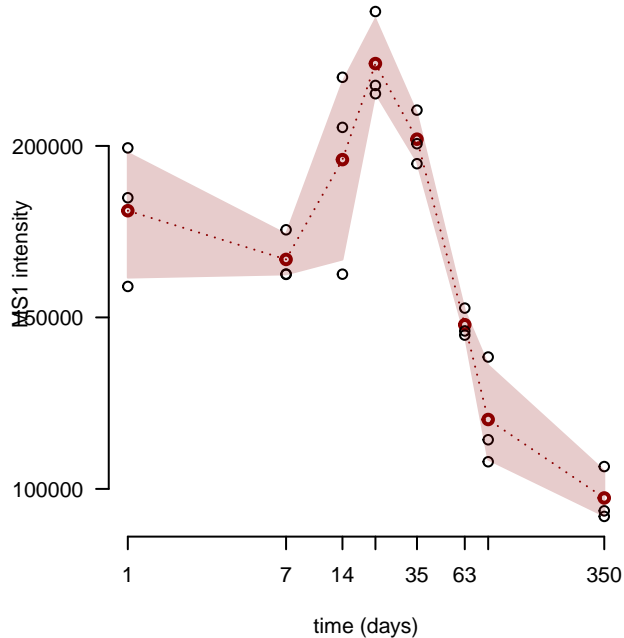

**Q61941**  
GN=Nnt  
nicotinamide nucleotide transhydrogenase

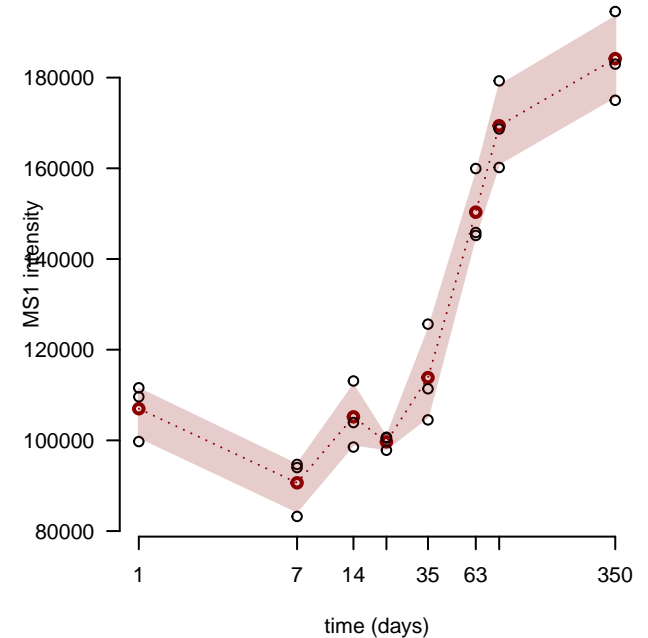

**Q61967**  
**GN=Zfp90**  
zinc finger protein 90

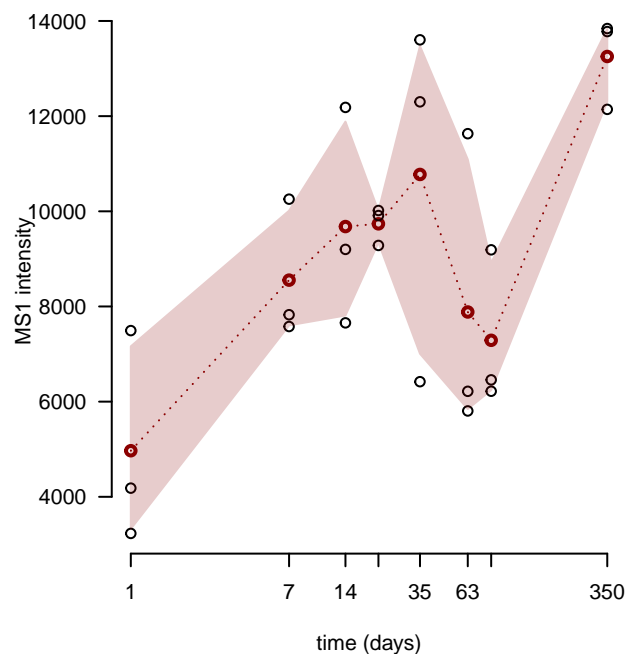

**Q61979**  
**GN=Nnat**  
neuronatin

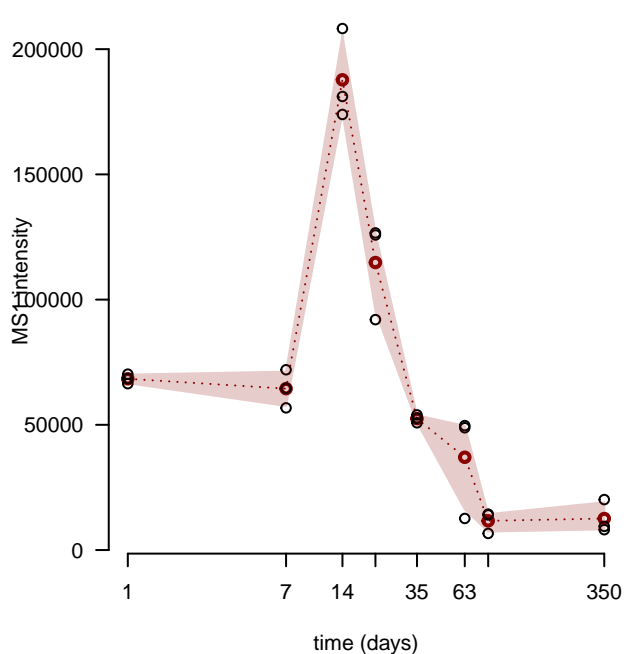

**Q61990**  
**GN=Pcbp2**  
poly(rC) binding protein 2

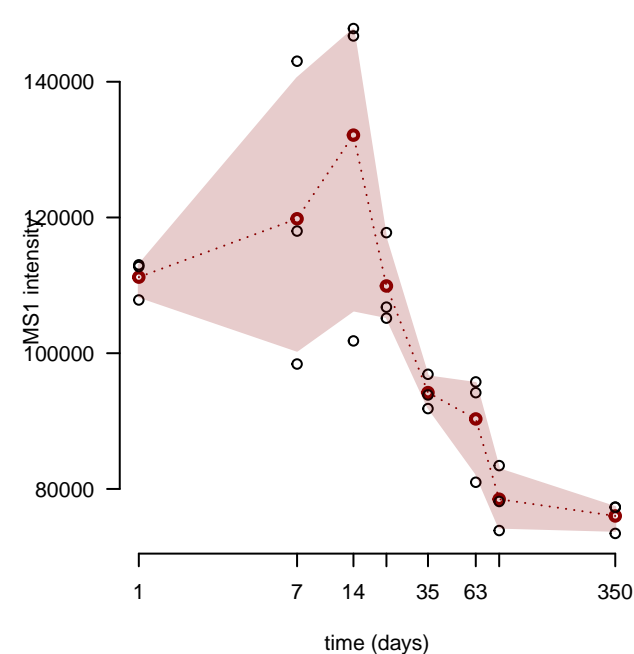

**Q61990**  
**GN=Pcbp2**  
poly(rC) binding protein 2

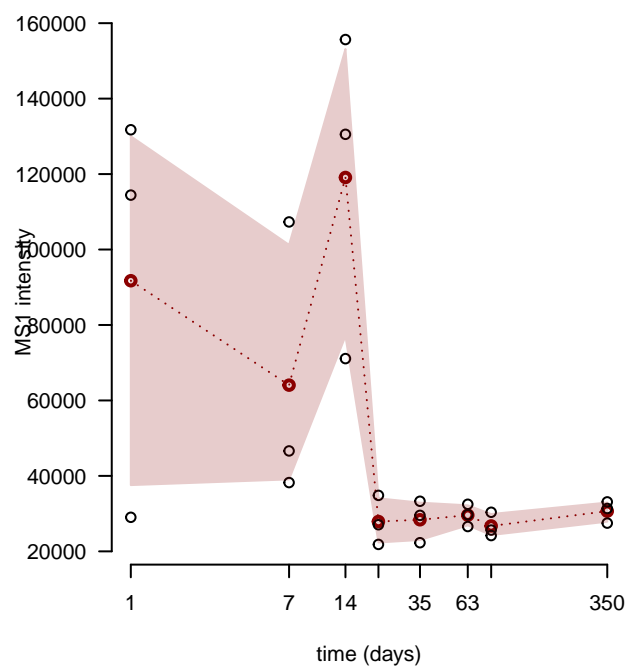

**Q62000**  
**GN=Ogn**  
osteoglycin

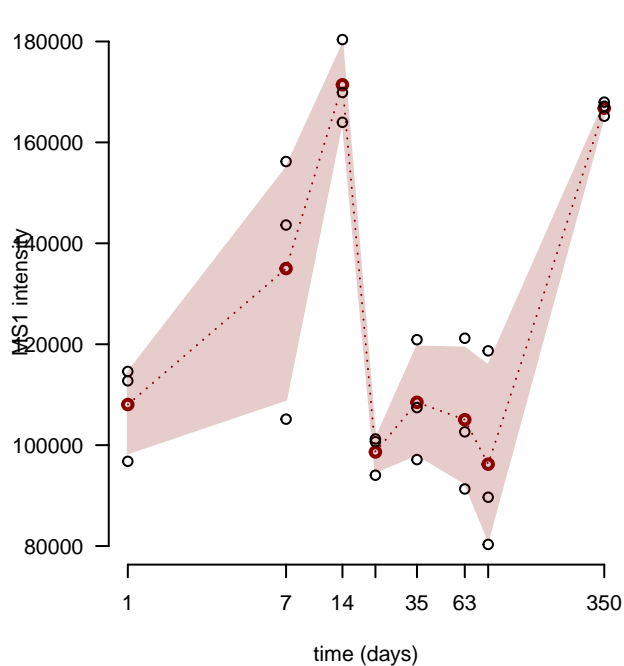

**Q62005**  
**GN=Zp1**  
zona pellucida glycoprotein 1

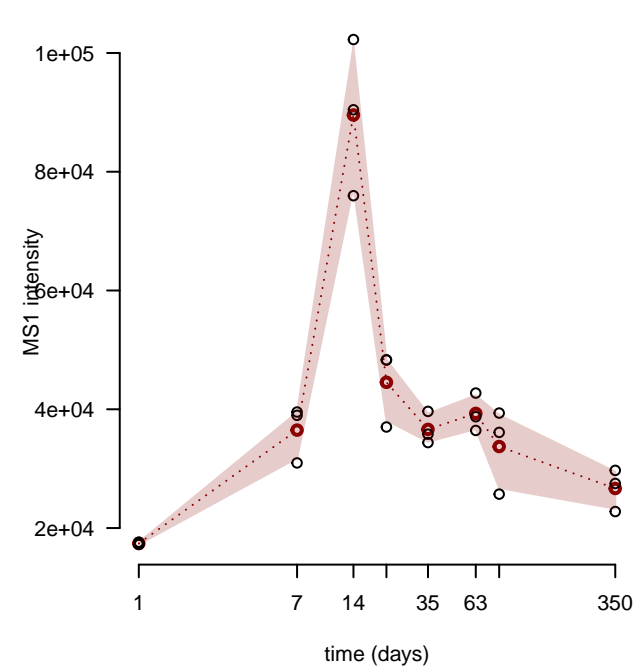

**Q62009**  
**GN=Postn**  
periostin, osteoblast specific factor

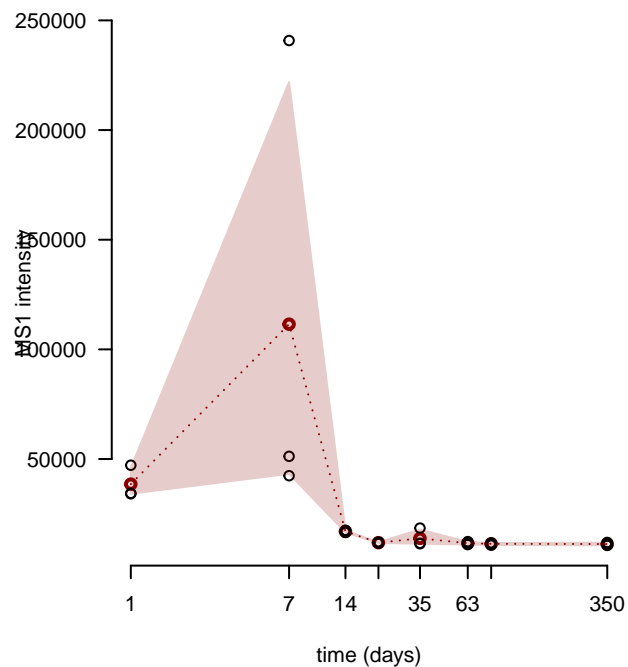

**Q62009**  
**GN=Postn**  
periostin, osteoblast specific factor

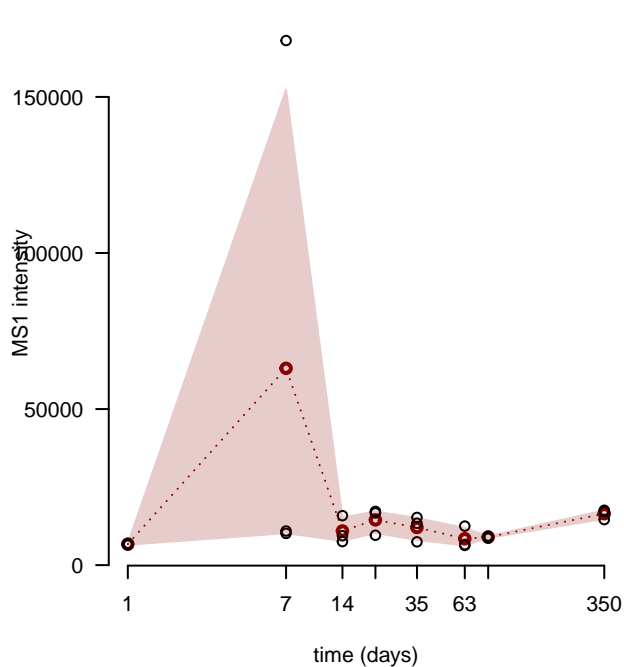

**Q62018**  
**GN=Ctr9**  
CTR9 homolog, Paf1/RNA polymerase II com ...

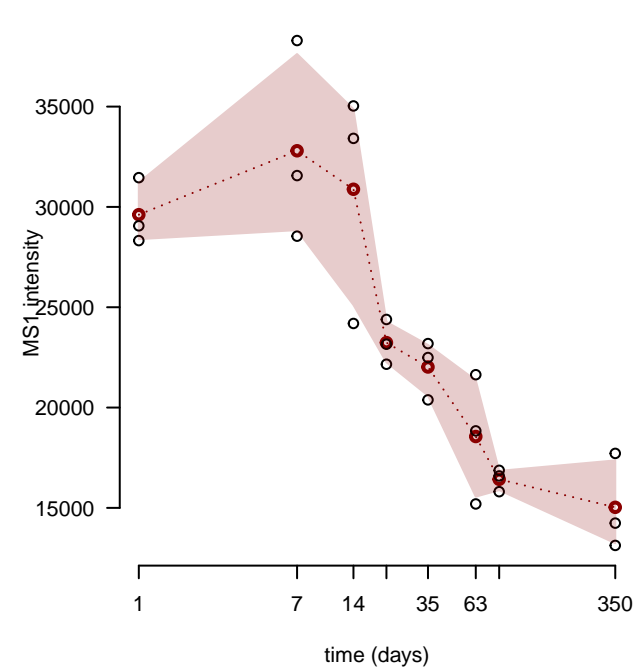

**Q62028**  
**GN=Pla2r1**  
phospholipase A2 receptor 1

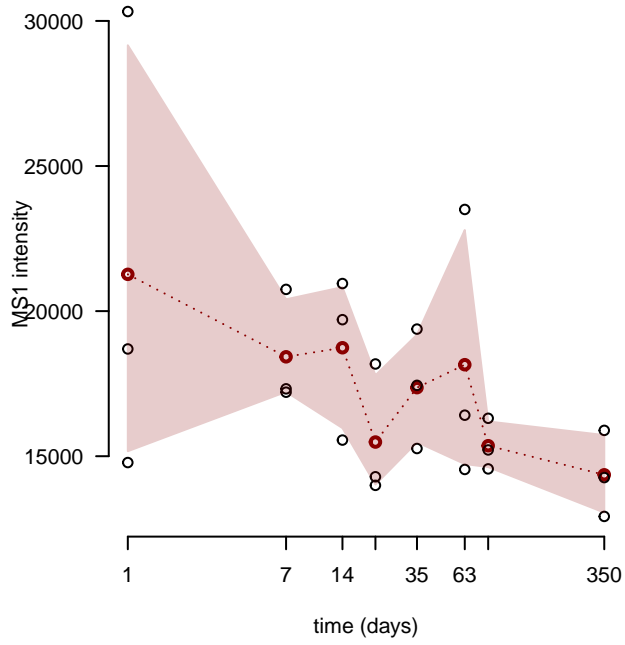

**Q62036**  
**GN=Cep131**  
centrosomal protein 131

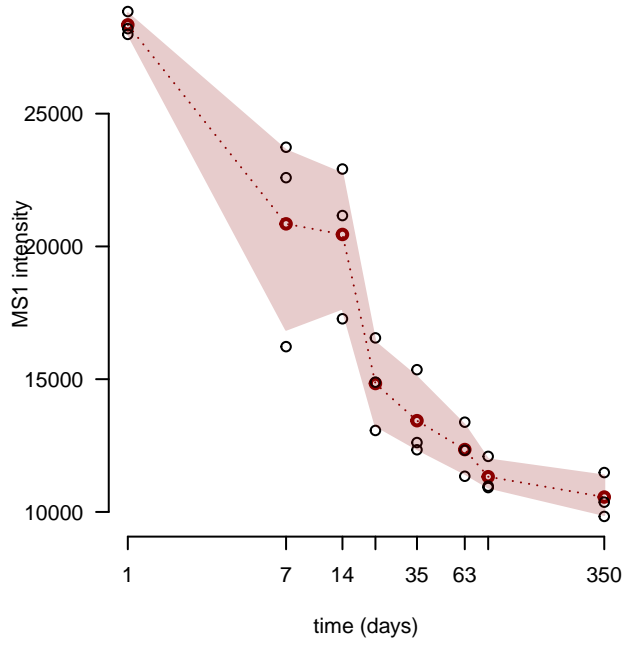

**Q62048**  
**GN=Pea15**

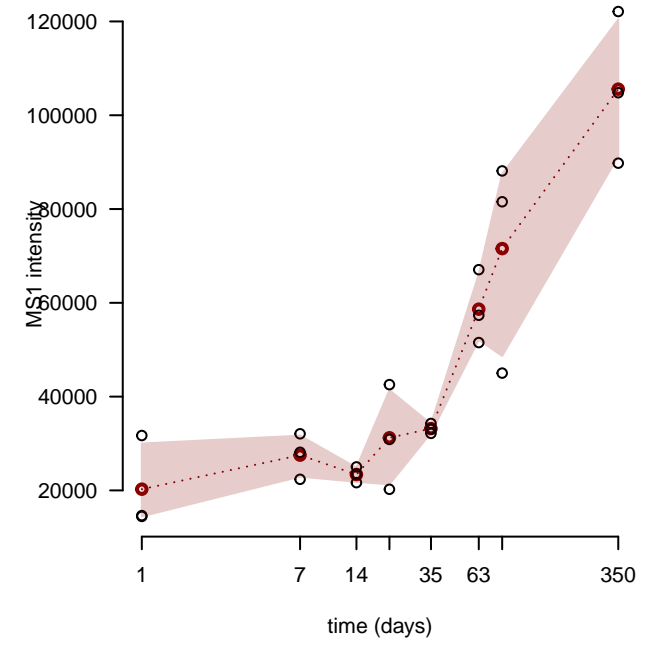

**Q62059**  
**GN=Vcan**  
versican

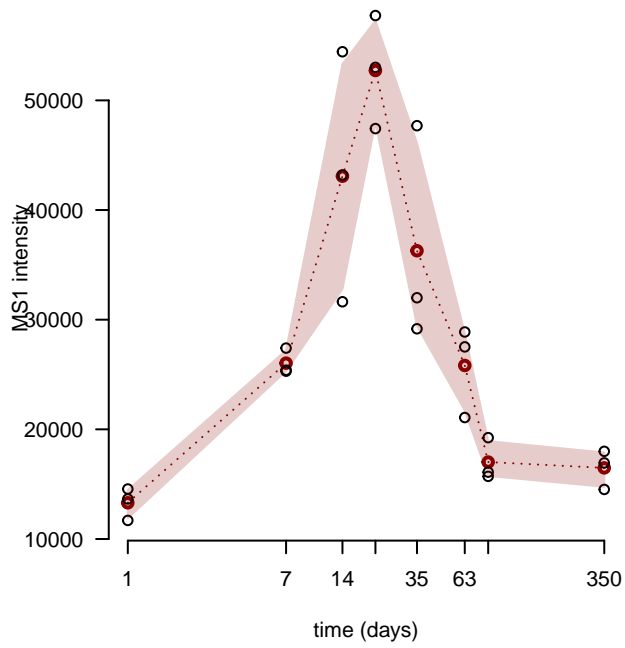

**Q62073**  
**GN=Map3k7**  
mitogen-activated protein kinase kinase ...

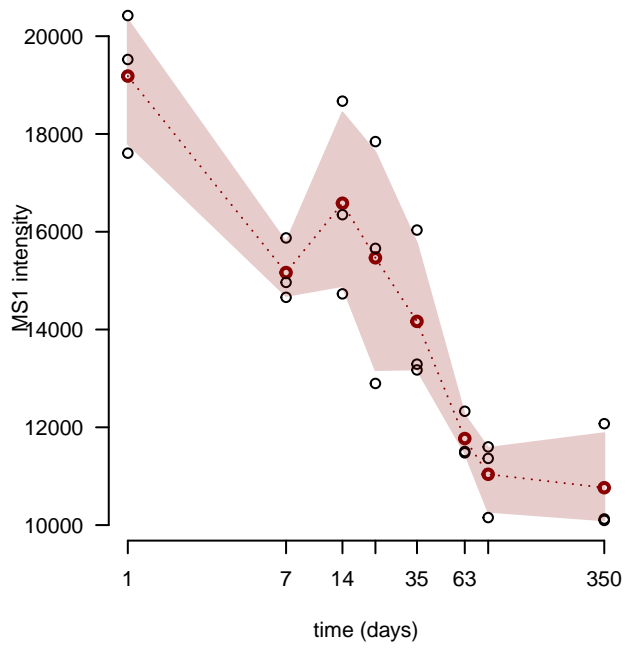

**Q62074**  
**GN=Prkci**  
protein kinase C, iota

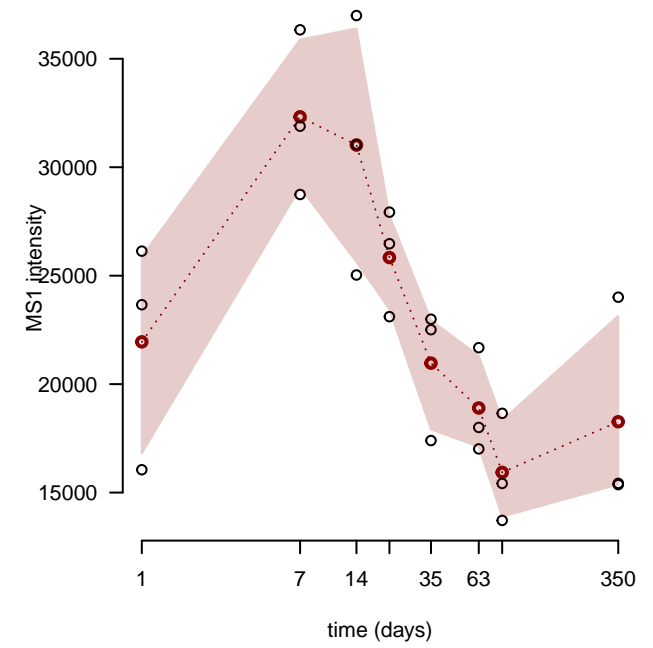

**Q62077**  
**GN=Plcg1**  
phospholipase C, gamma 1

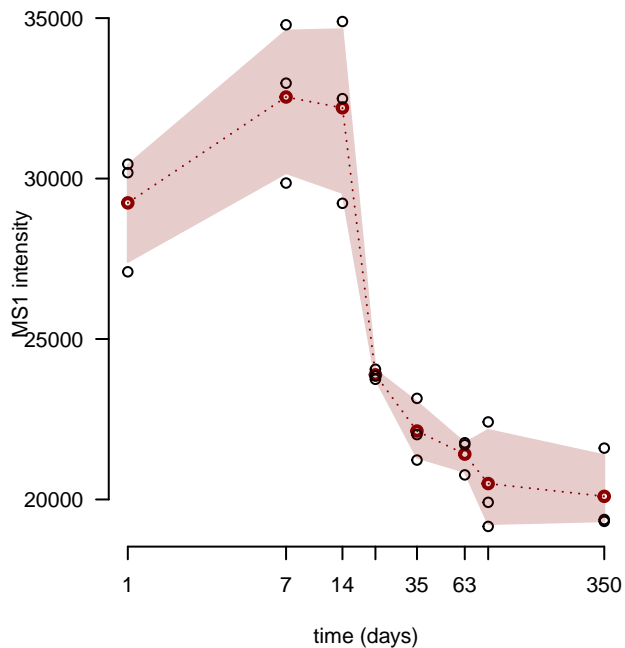

**Q62083**  
**GN=Pick1**  
protein interacting with C kinase 1

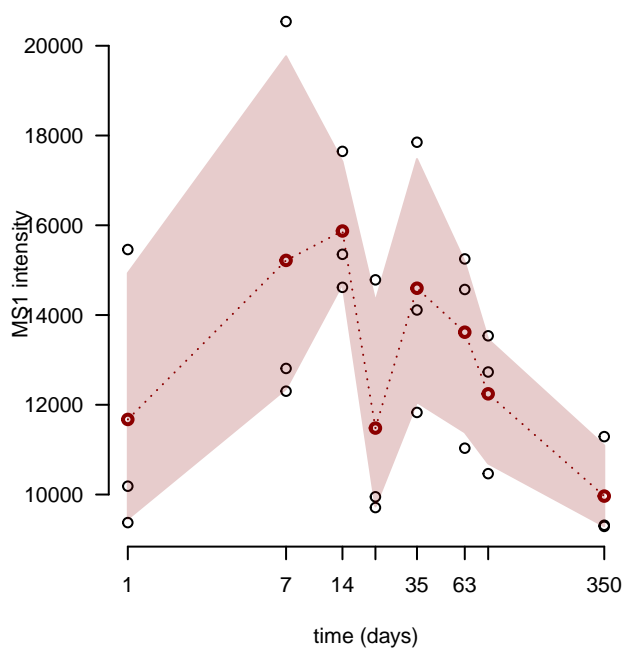

**Q62084**  
**GN=Ppp1r14b**  
protein phosphatase 1, regulatory inhibi ...

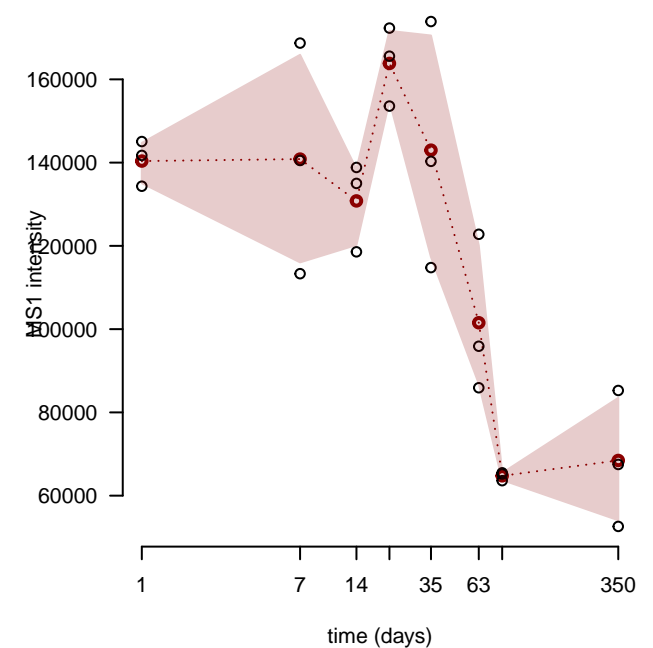

**Q62086**  
GN=Pon2  
paraoxonase 2

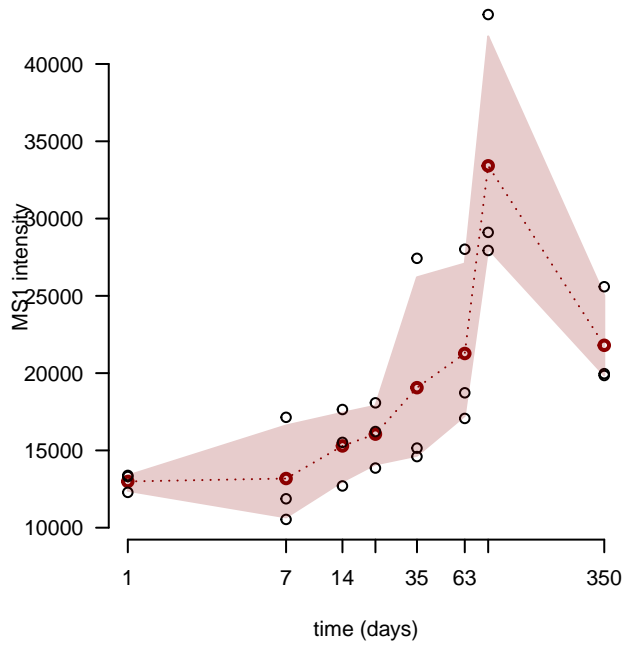

**Q62087**  
GN=Pon3  
paraoxonase 3

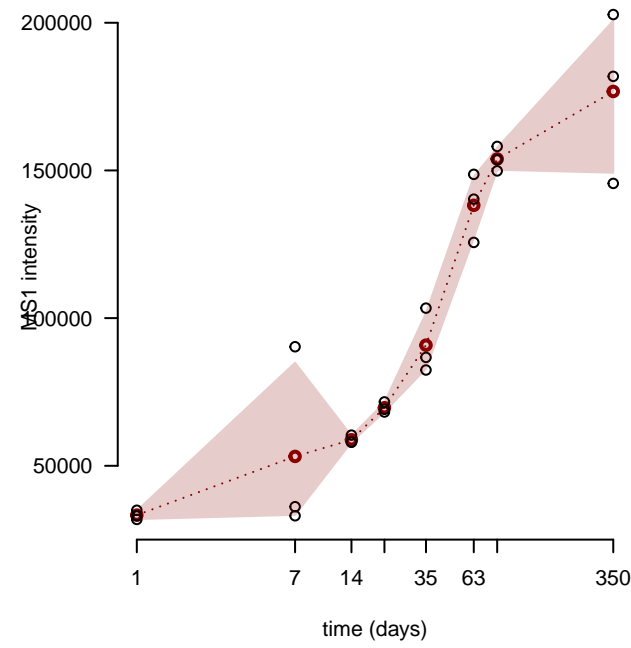

**Q62093**  
GN=Srsf2  
serine and arginine-rich splicing factor ...

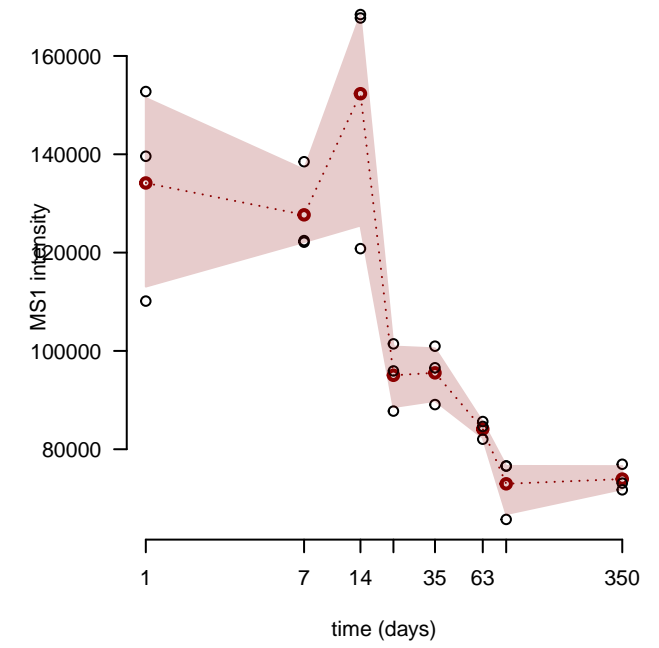

**Q62101**  
GN=Prkd1  
protein kinase D1

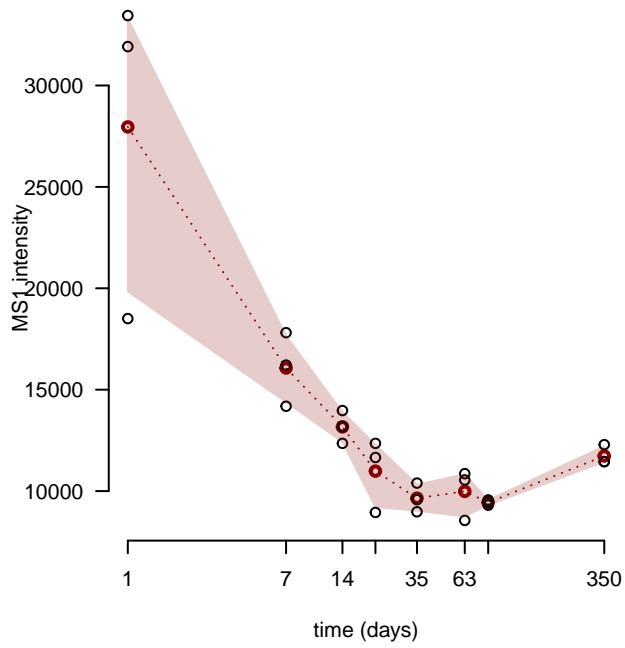

**Q62120**  
GN=Jak2  
Janus kinase 2

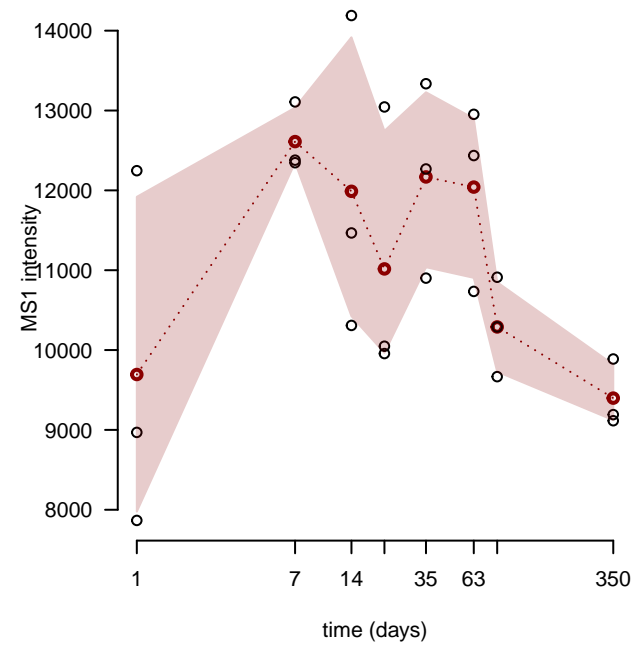

**Q62130**  
GN=Ptpn14  
protein tyrosine phosphatase, non-recept ...

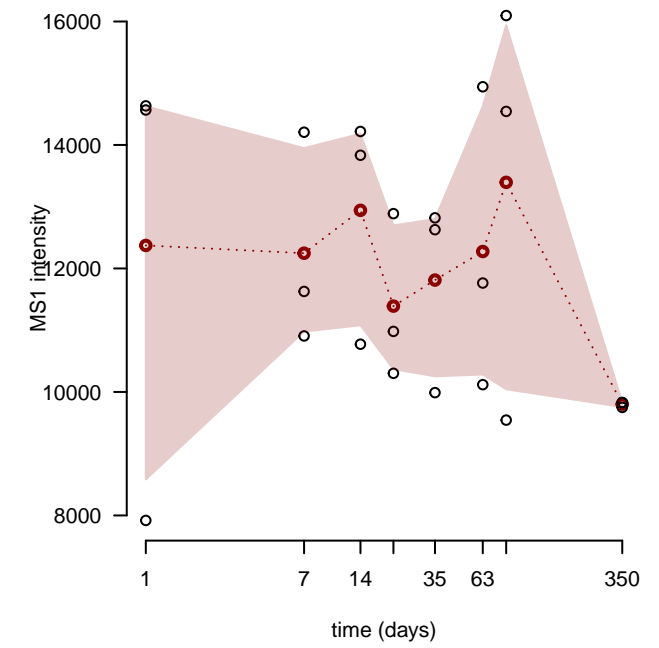

**Q62136**  
GN=Ptpn21  
protein tyrosine phosphatase, non-recept ...

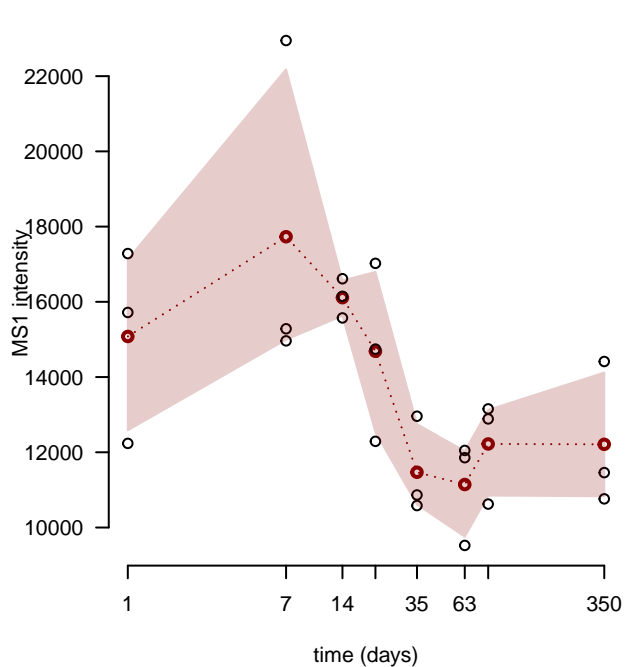

**Q62141**  
GN=Sin3b  
transcriptional regulator, SIN3B (yeast)

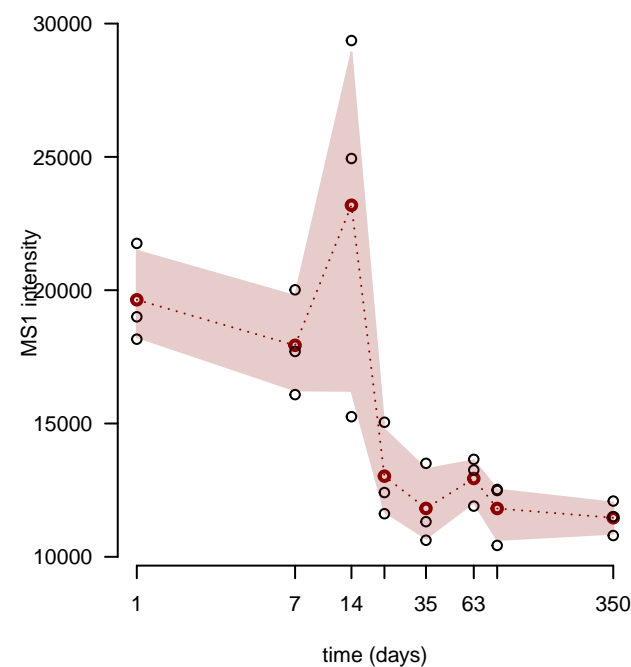

**Q62147**  
GN=Sspn  
sarcospan

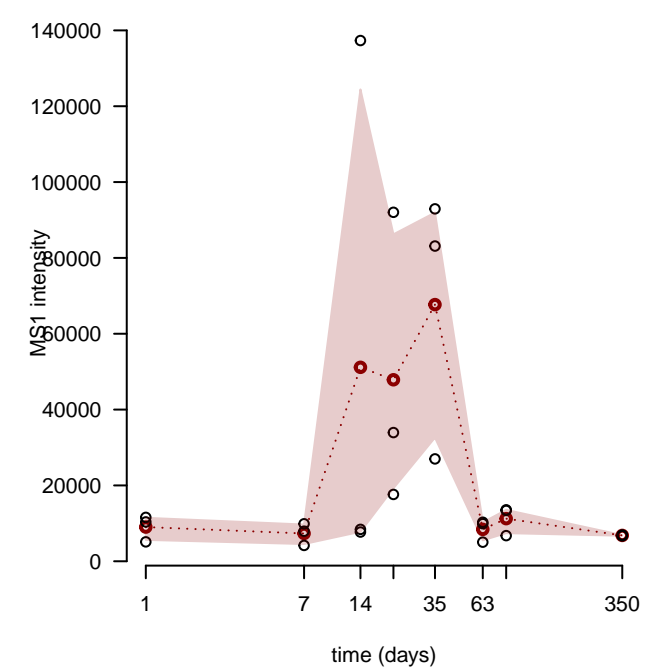

**Q62148**  
**GN=Aldh1a2**  
aldehyde dehydrogenase family 1, subfami ...

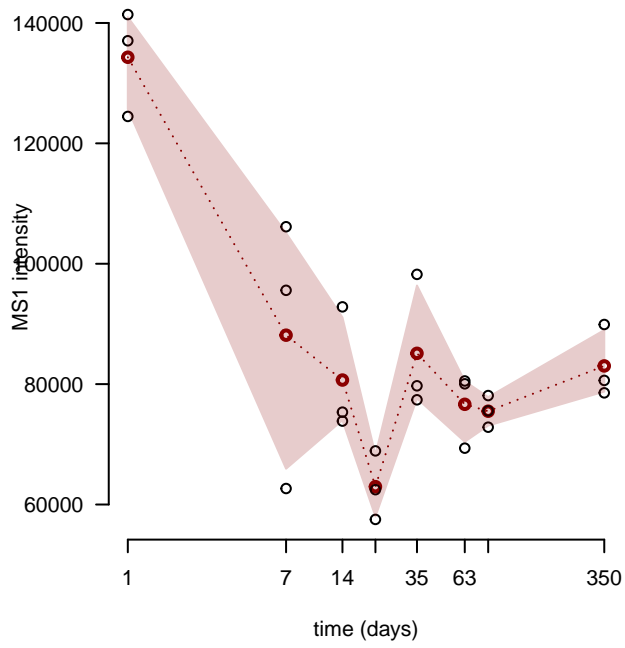

**Q62158**  
**GN=Trim27**  
tripartite motif-containing 27

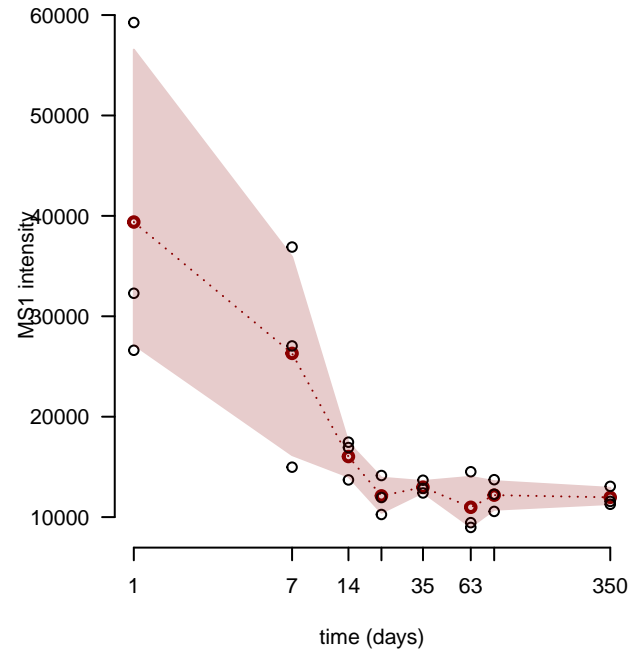

**Q62159**  
**GN=Rhoc**  
ras homolog family member C

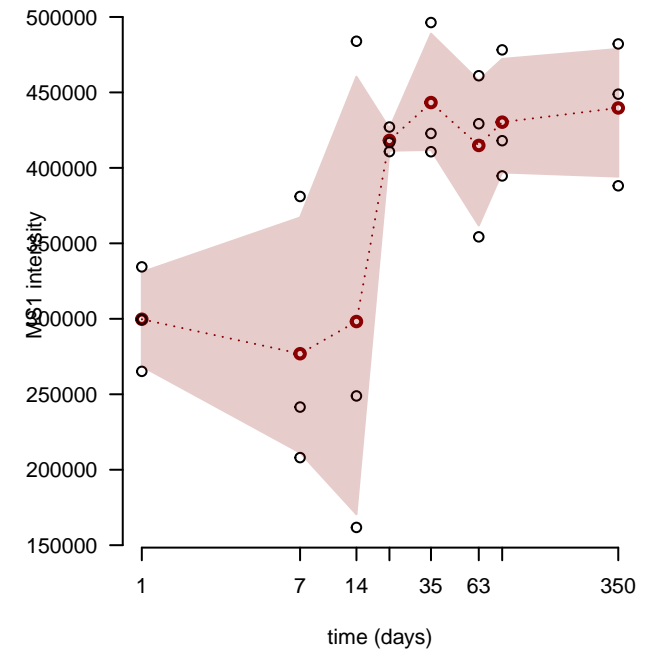

**Q62165**  
**GN=Dag1**  
dystroglycan 1

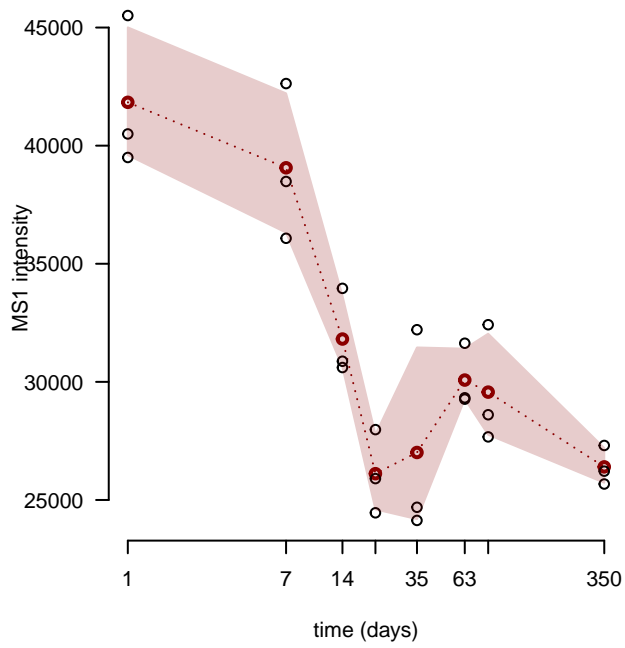

**Q62167**  
**GN=Ddx3x**  
DEAD box helicase 3, X-linked

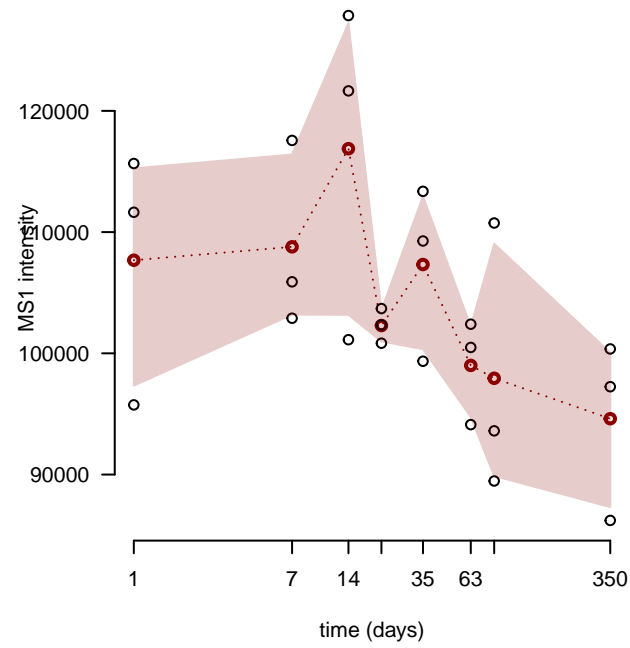

**Q62168**  
**GN=Krt32**  
keratin 32

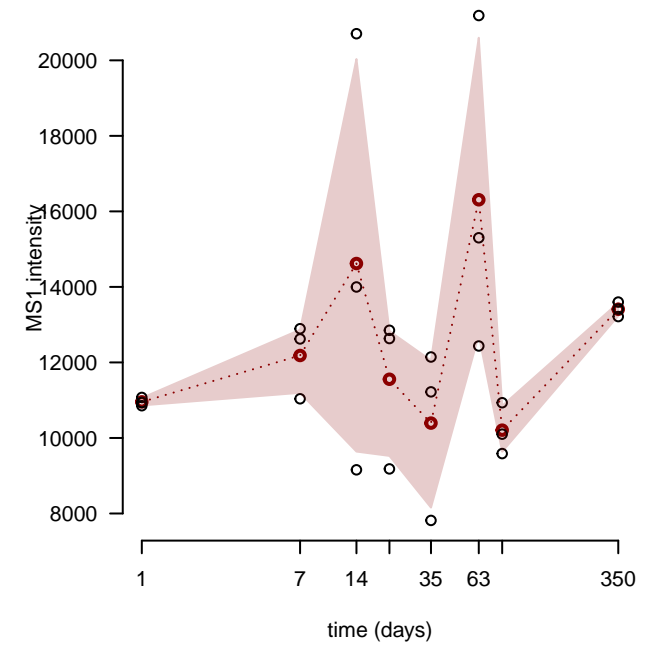

**Q62172**  
**GN=Ralbp1**  
ralA binding protein 1

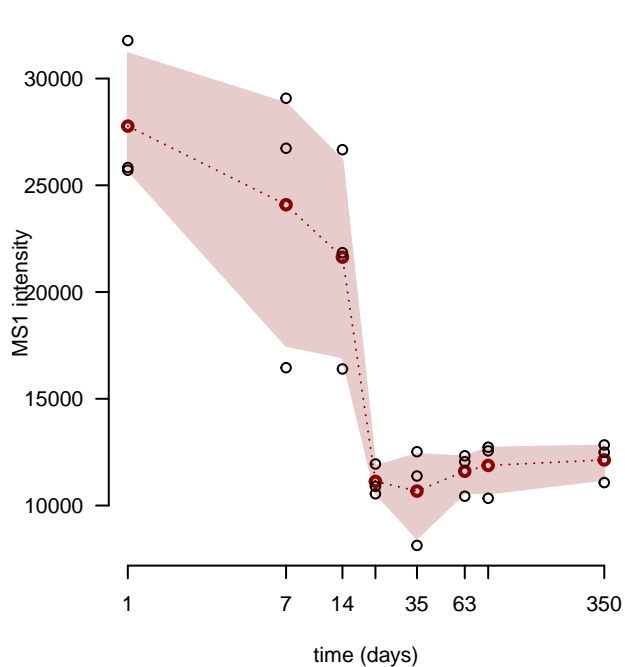

**Q62179**  
**GN=Sema4b**  
sema domain, immunoglobulin domain (Ig), ...

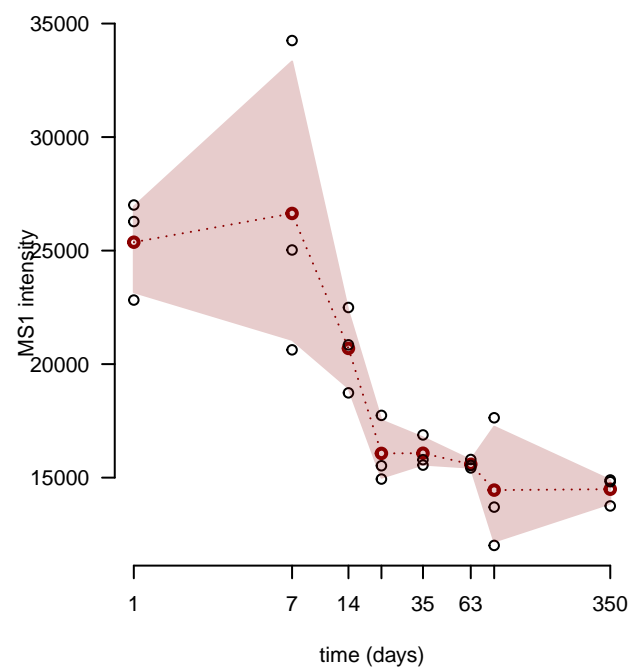

**Q62181**  
**GN=Sema3c**  
sema domain, immunoglobulin domain (Ig), ...

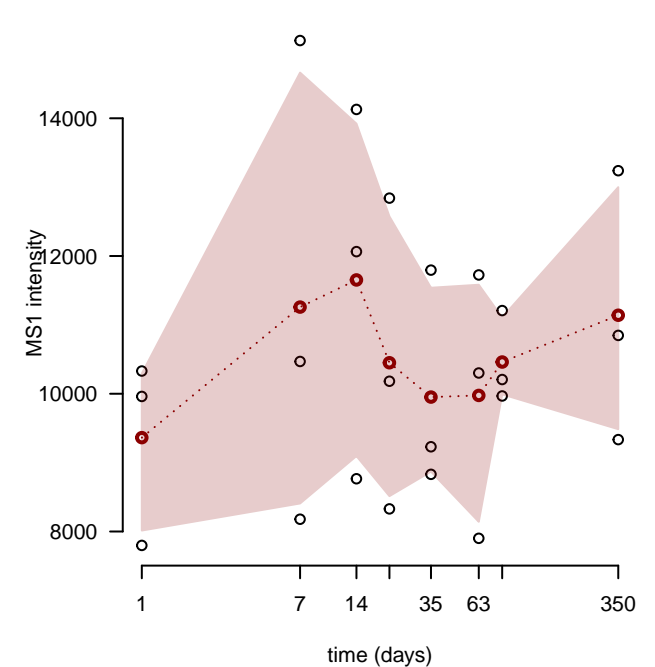



**Q62186**  
**GN=Ssr4**  
signal sequence receptor, delta

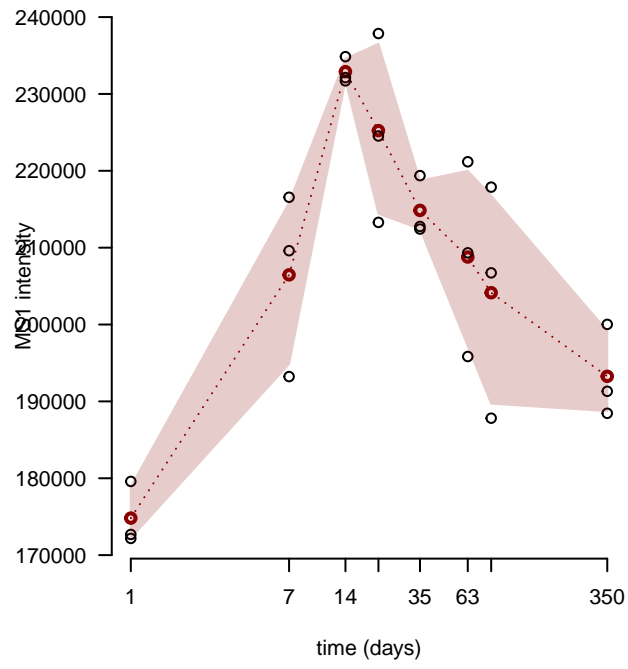

**Q62187**  
**GN=Ttf1**  
transcription termination factor, RNA po ...

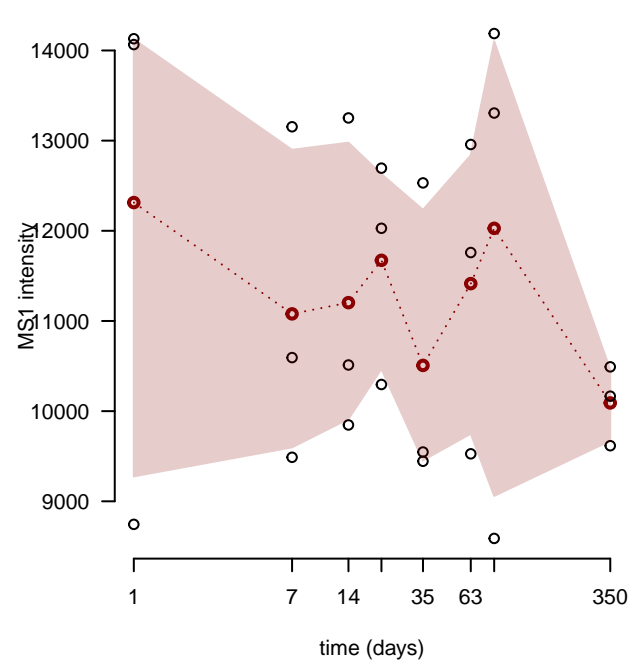

**Q62188**  
**GN=Dpys13**  
dihydropyrimidinase-like 3

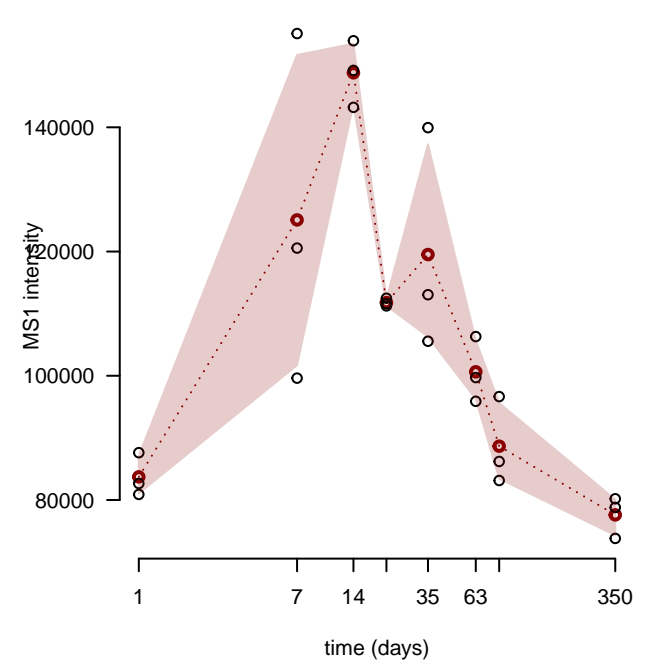

**Q62189**  
**GN=Snrpa**  
small nuclear ribonucleoprotein polypept ...

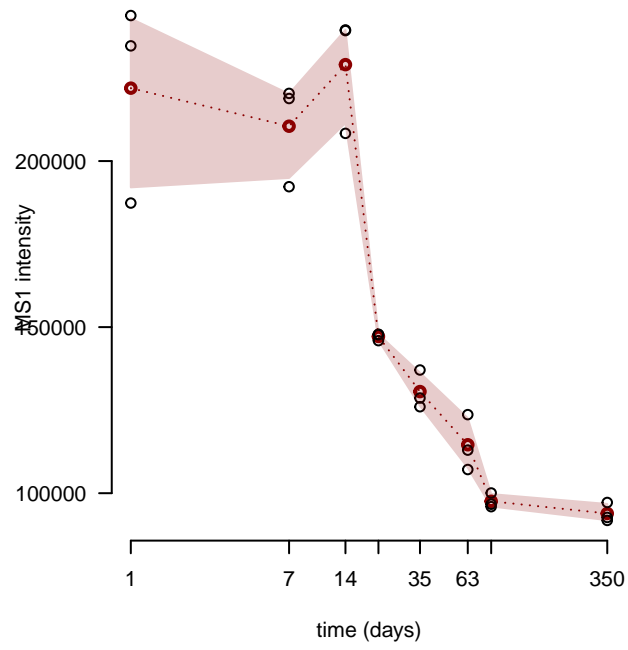

**Q62190**  
**GN=Mst1r**  
macrophage stimulating 1 receptor (c-met ...

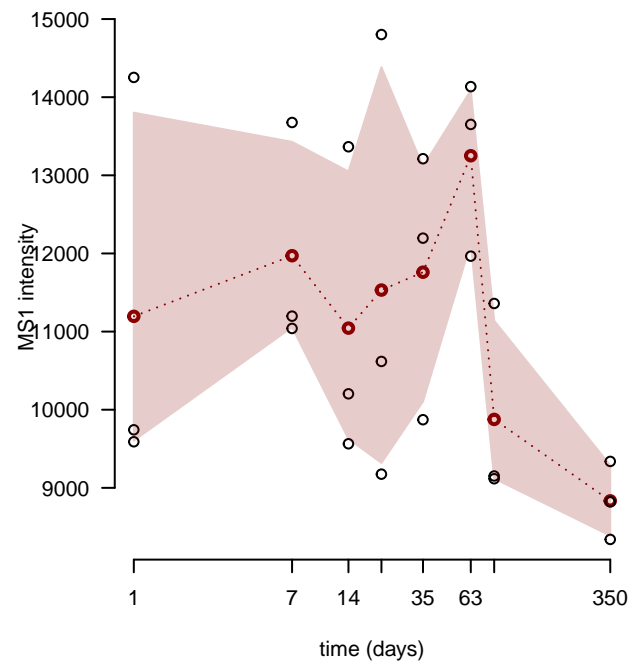

**Q62191**  
**GN=Trim21**  
tripartite motif-containing 21

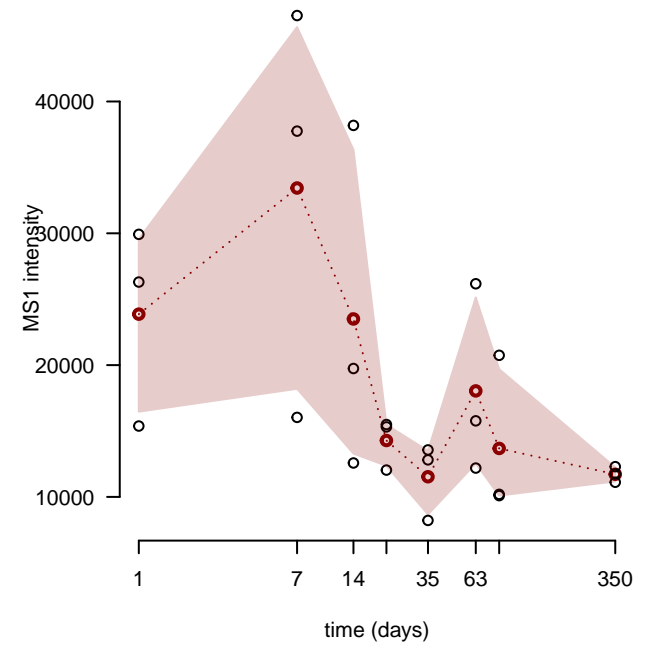

**Q62193**  
**GN=Rpa2**  
replication protein A2

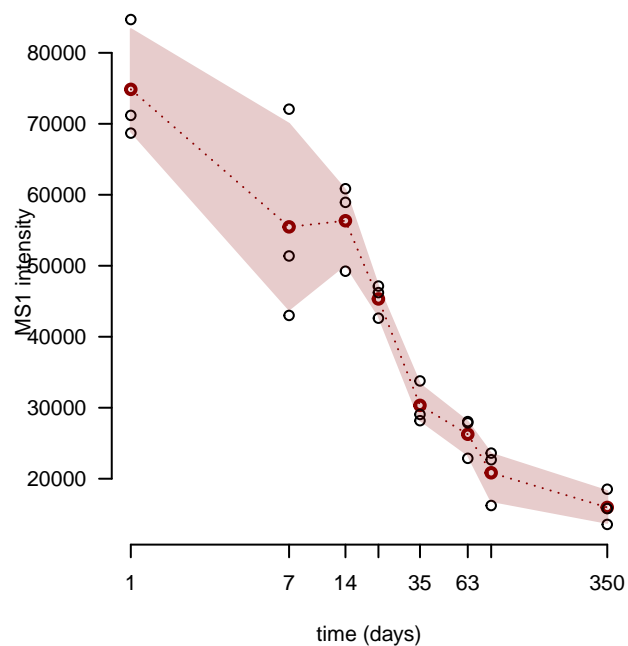

**Q62203**  
**GN=Sf3a2**  
splicing factor 3a, subunit 2

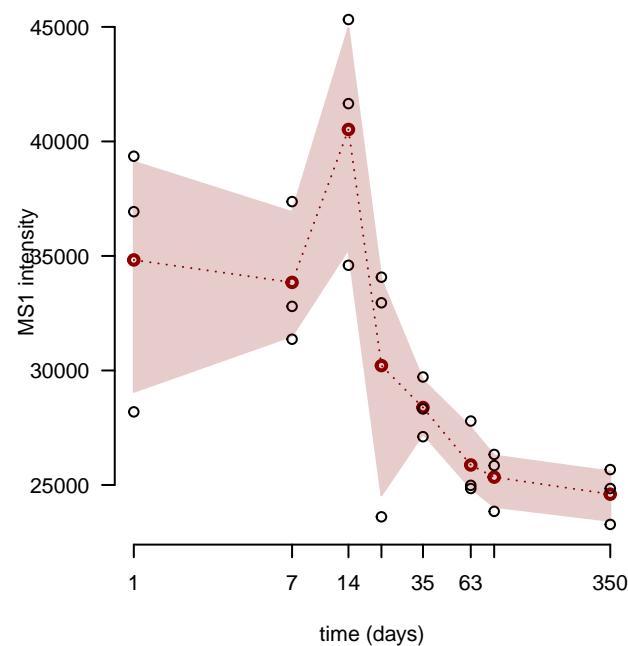

**Q62210**  
**GN=Birc2**  
baculoviral IAP repeat-containing 2

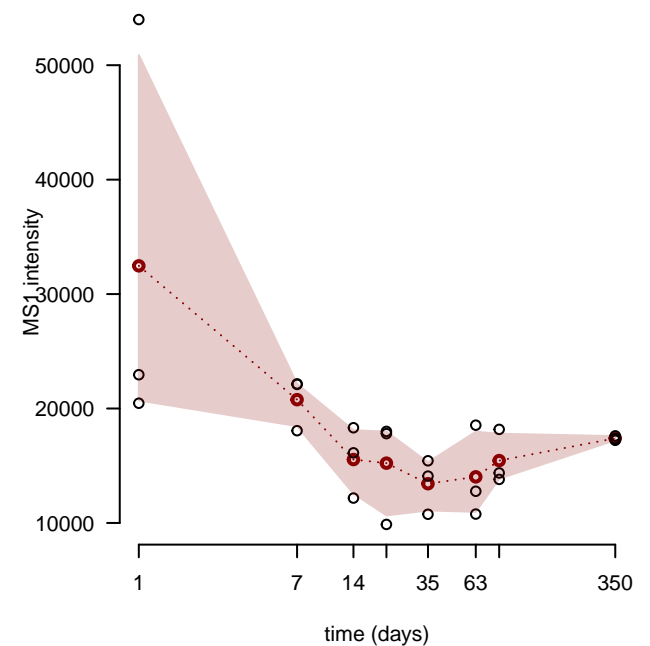

**Q62217**  
**GN=Sema5a**

sema domain, seven thrombospondin repeat ...

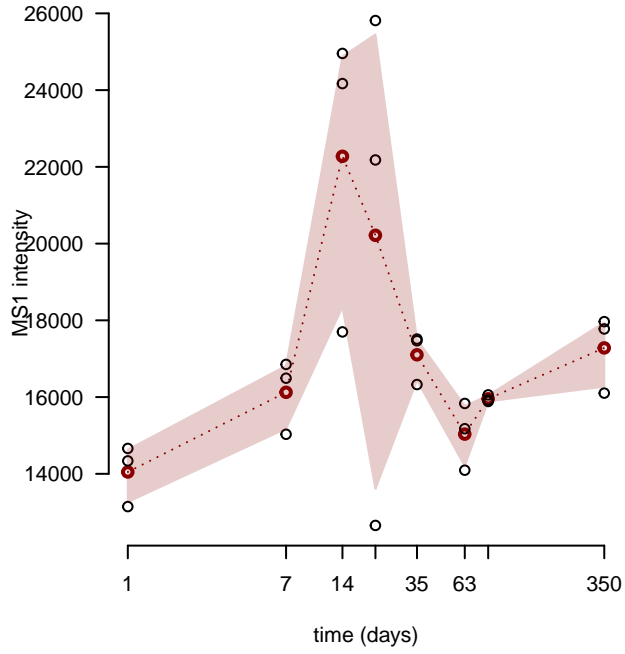

**Q62219**  
**GN=Tgfb1i1**

transforming growth factor beta 1 induce ...

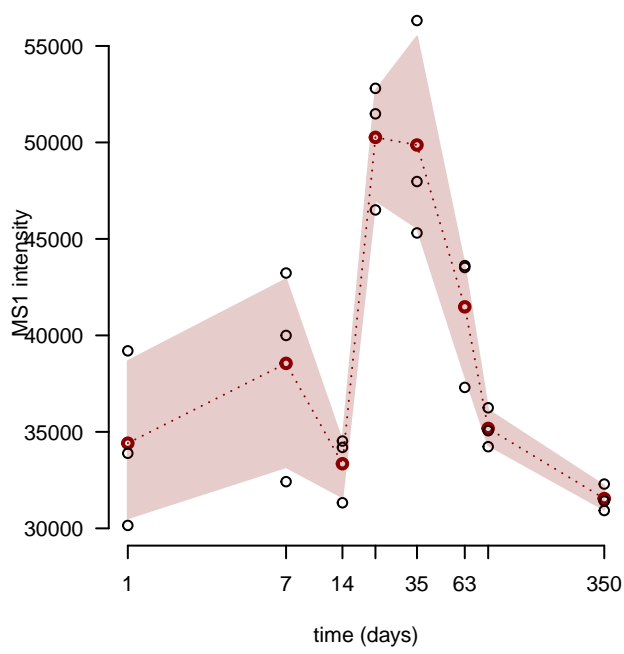

**Q62230**  
**GN=Siglec1**

sialic acid binding Ig-like lectin 1, si ...

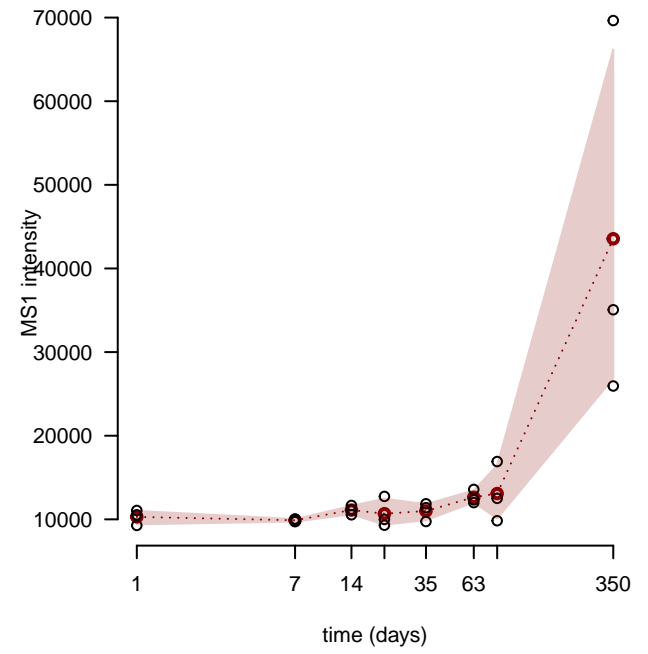

**Q62234**  
**GN=Myom1**

myomesin 1

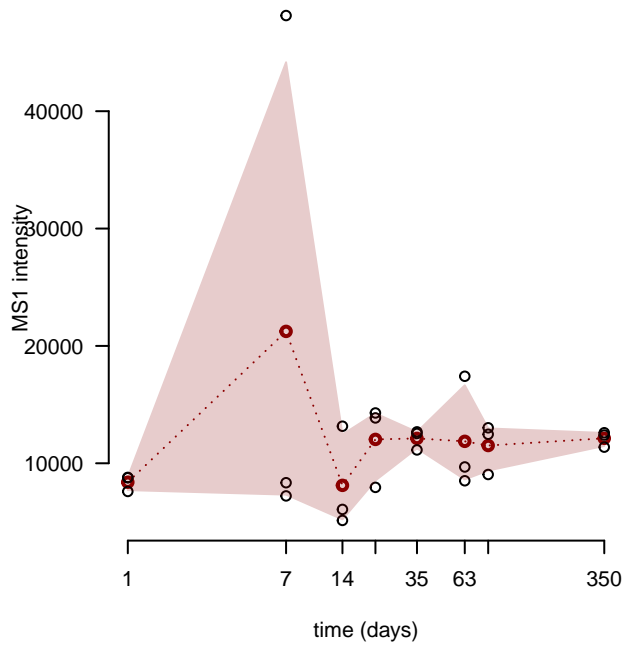

**Q62241**  
**GN=Snrpc**

U1 small nuclear ribonucleoprotein C

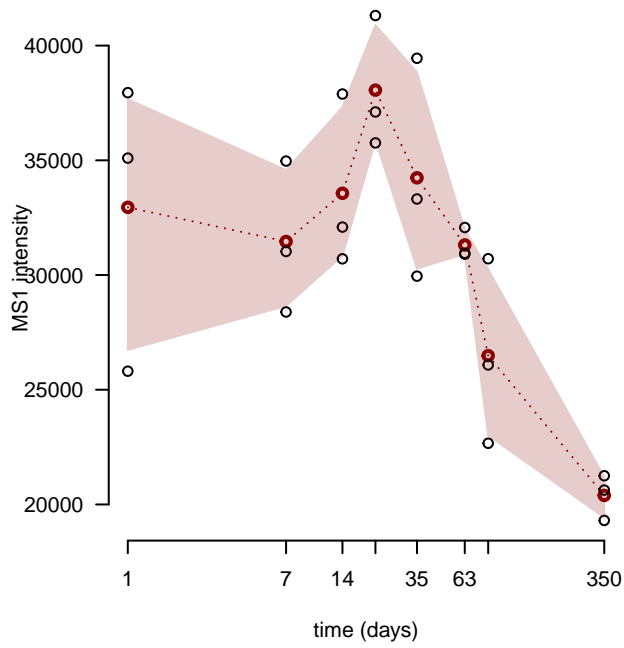

**Q62245**  
**GN=Sos1**

SOS Ras/Rac guanine nucleotide exchange ...

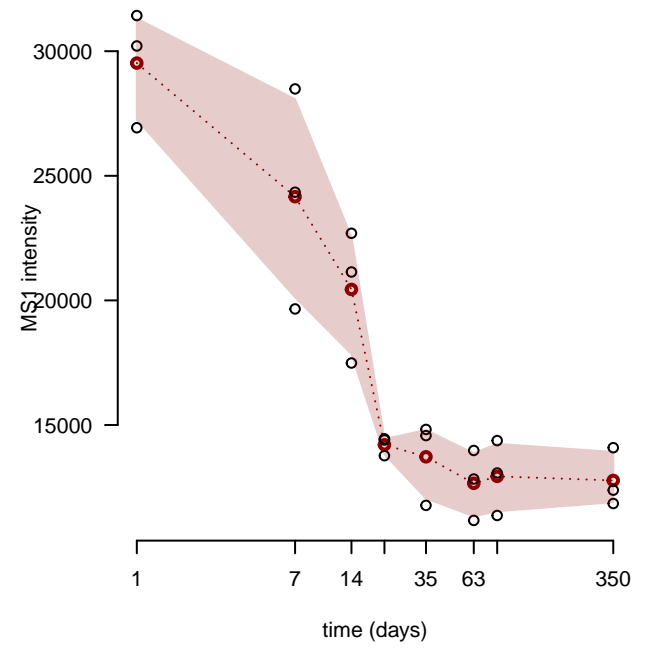

**Q62252**  
**GN=Spa17**

sperm autoantigenic protein 17

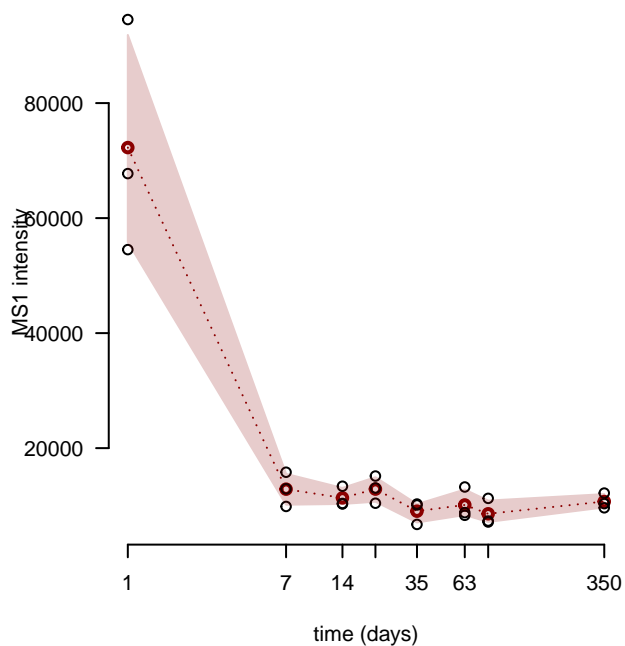

**Q62261**  
**GN=Sptbn1**

spectrin beta, non-erythrocytic 1

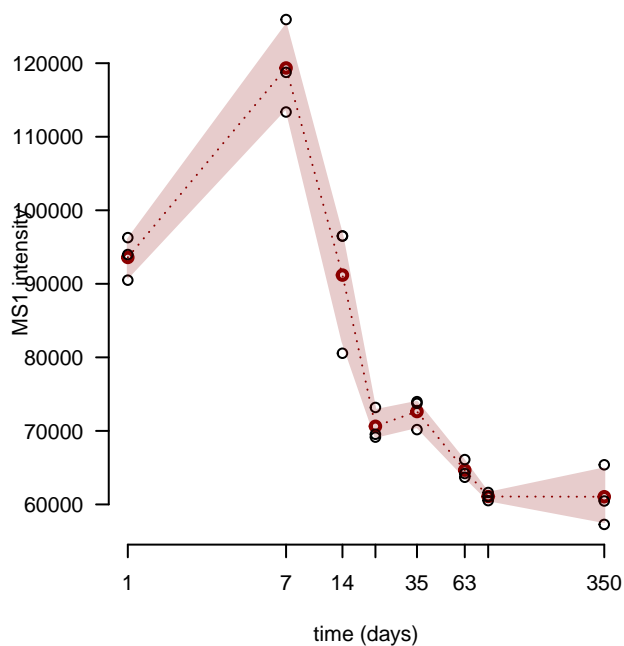

**Q62266**  
**GN=Sprr1a**

small proline-rich protein 1A

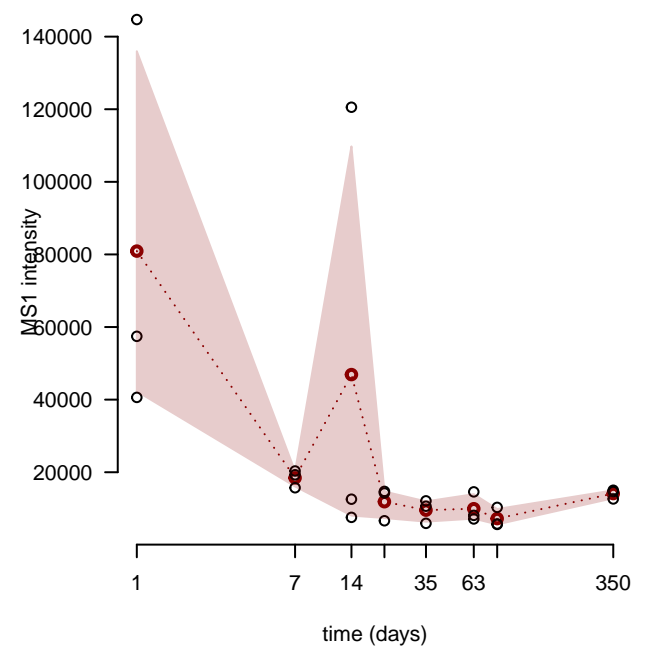

**Q62267**  
**GN=Sprr1b**  
small proline-rich protein 1B

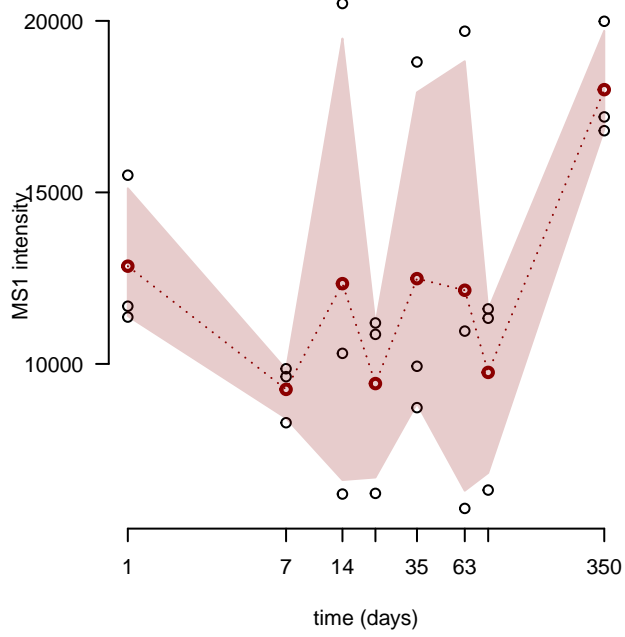

**Q62273**  
**GN=Slc26a2**  
solute carrier family 26 (sulfate transp ...

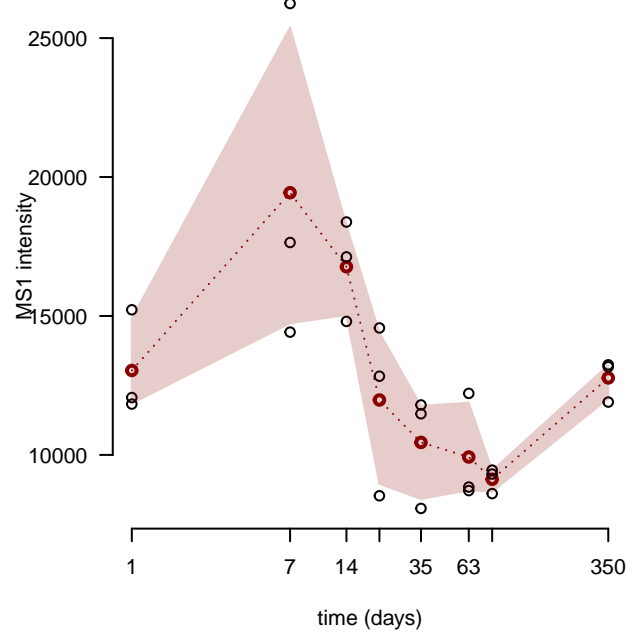

**Q62276**  
**GN=Med22**  
mediator complex subunit 22

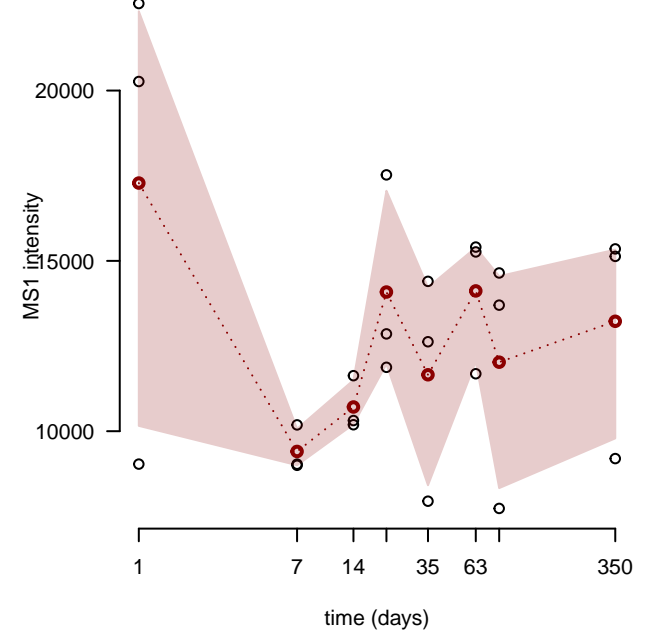

**Q62283**  
**GN=Tspan7**  
tetraspanin 7

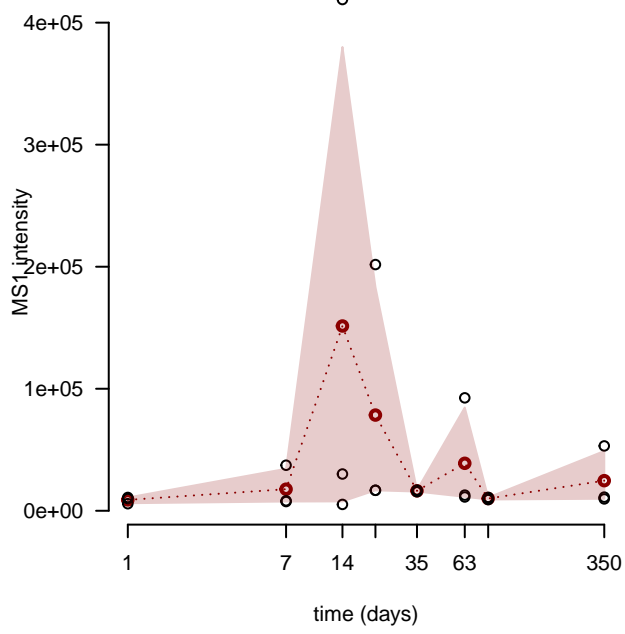

**Q62302**  
**GN=Tex261**  
testis expressed gene 261

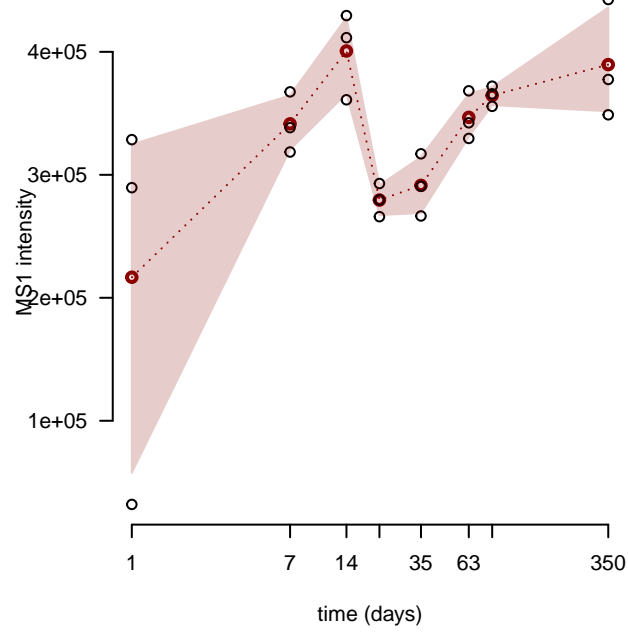

**Q62311**  
**GN=Taf6**  
TATA-box binding protein associated fact ...

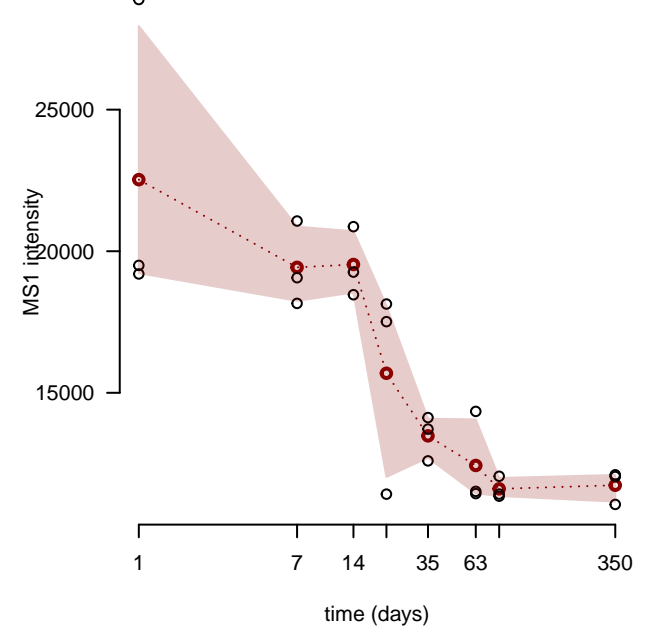

**Q62312**  
**GN=Tgfbr2**  
transforming growth factor, beta recepto ...

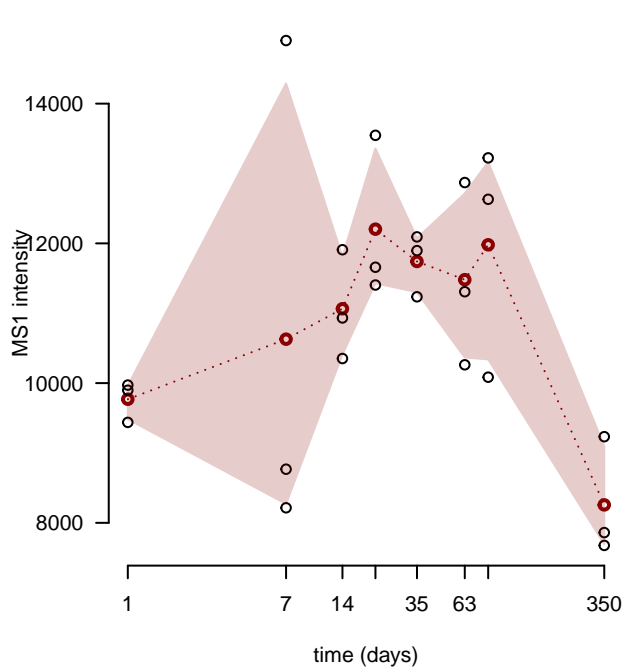

**Q62313**  
**GN=Tgoln1**  
trans-golgi network protein

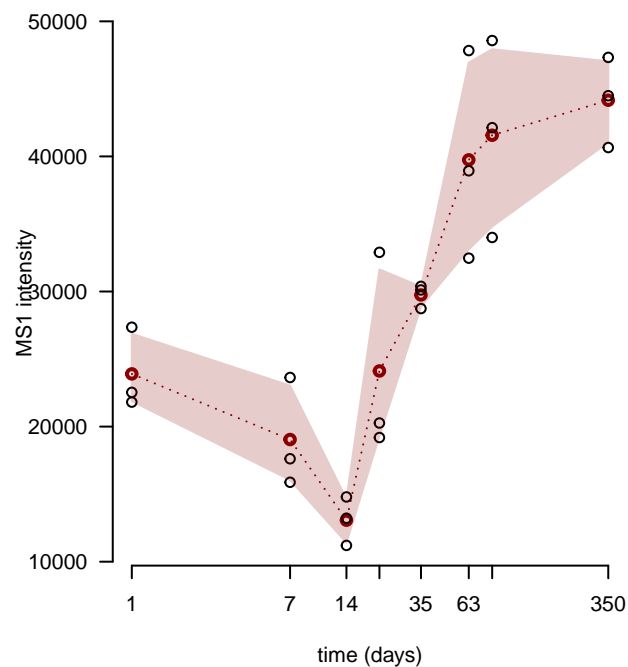

**Q62315**  
**GN=Jard2**  
jumonji, AT rich interactive domain 2

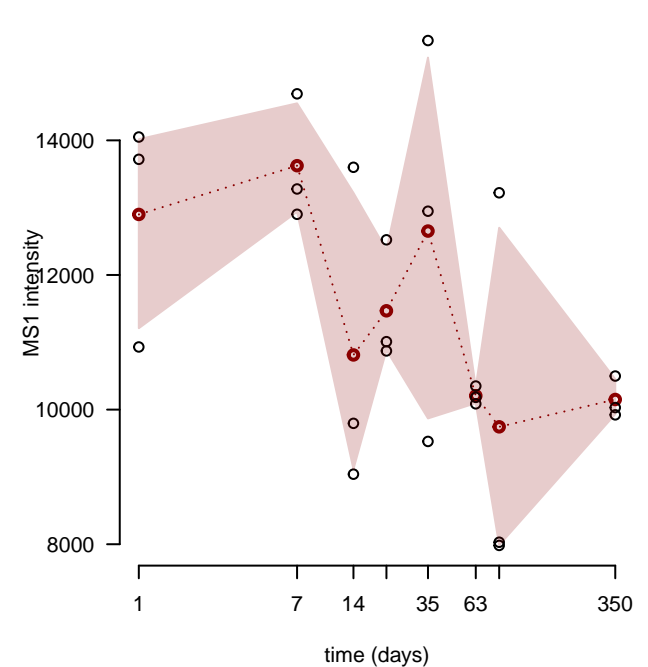

**Q62318**  
GN=Trim28  
tripartite motif-containing 28

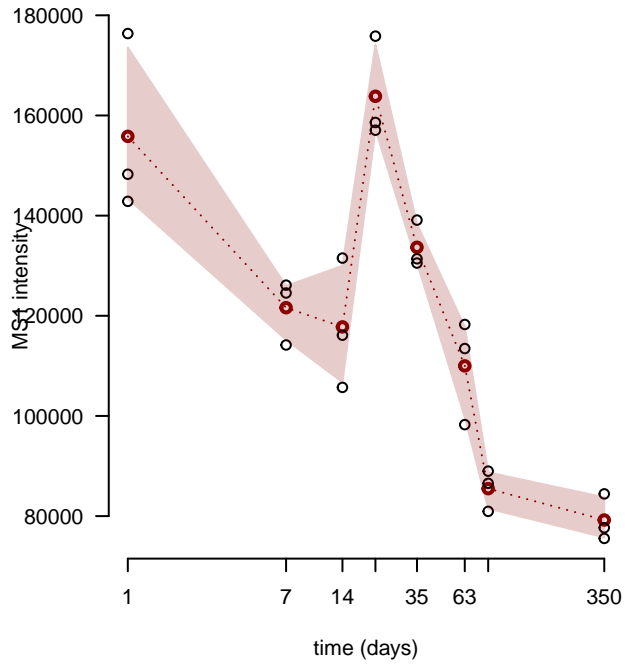

**Q62348**  
GN=Tsn  
translin

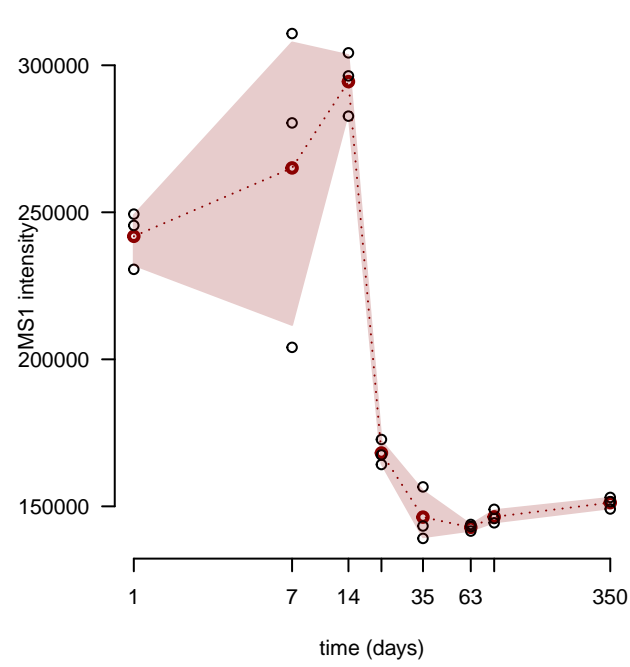

**Q62351**  
GN=Tfrc  
transferrin receptor

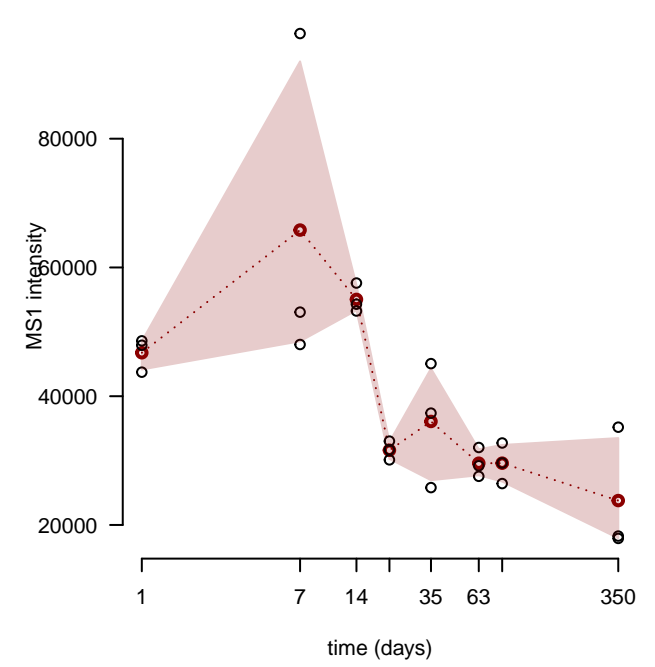

**Q62356**  
GN=Fstl1  
follistatin-like 1

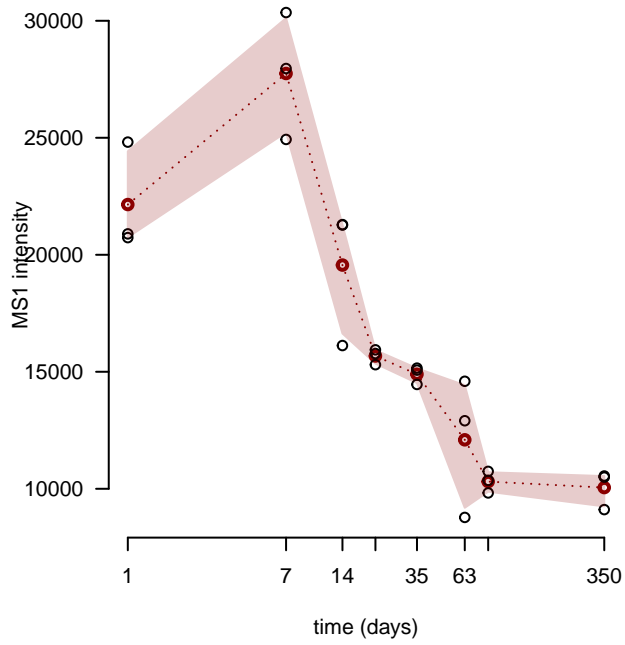

**Q62371**  
GN=Ddr2  
discoidin domain receptor family, member ...

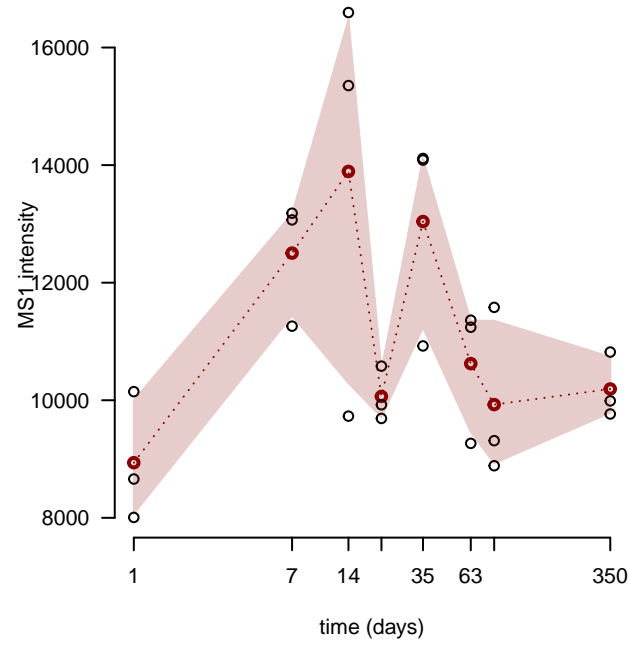

**Q62376**  
GN=Snrnp70  
small nuclear ribonucleoprotein 70 (U1)

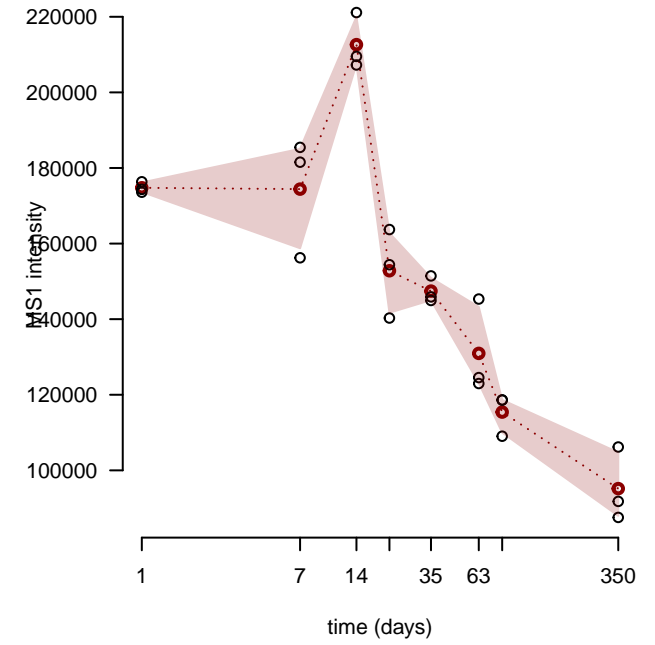

**Q62377**  
GN=Zrsr2  
zinc finger (CCCH type), RNA binding mot ...

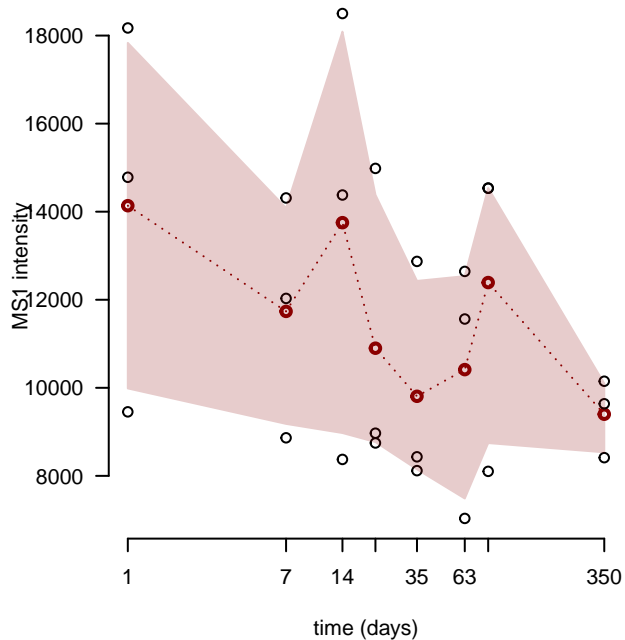

**Q62383**  
GN=Supt6h

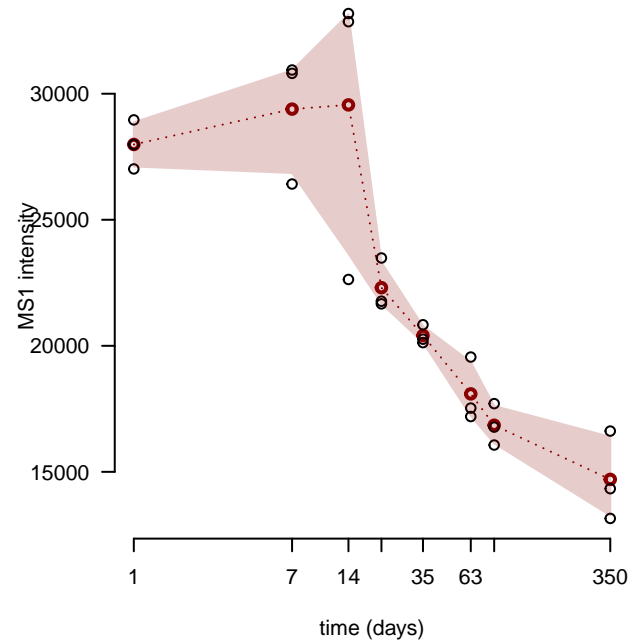

**Q62384**  
GN=Zpr1  
ZPR1 zinc finger

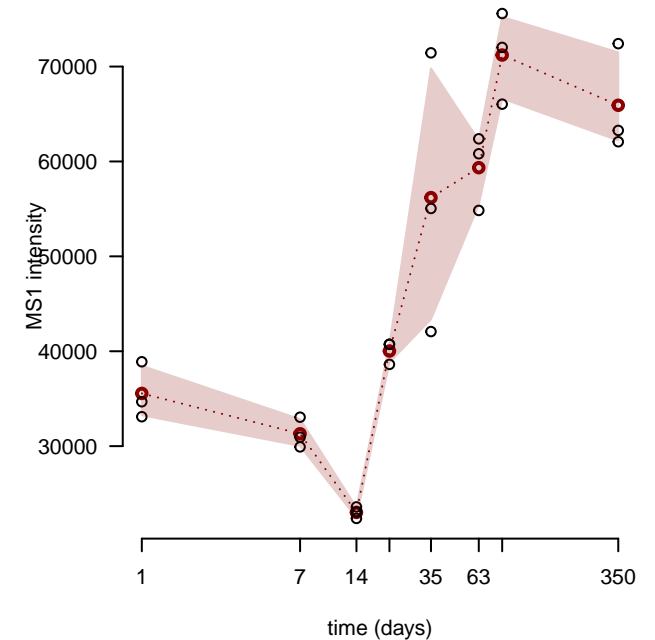

**Q62388**  
GN=Atm  
ataxia telangiectasia mutated

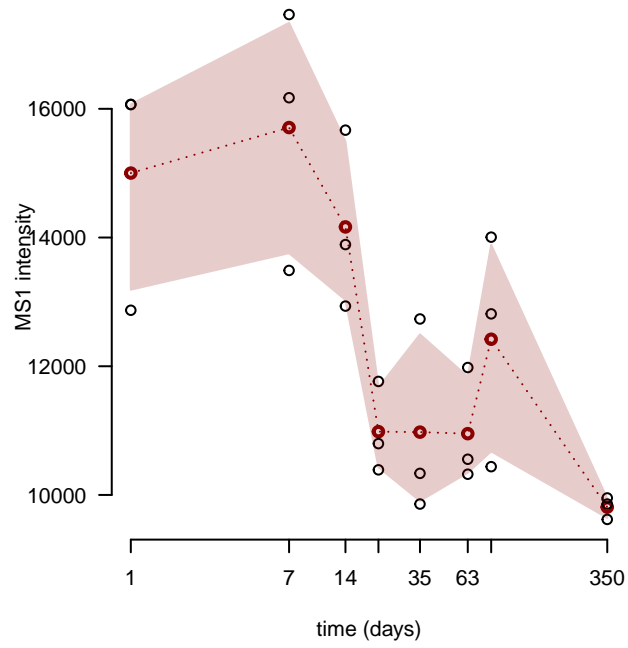

**Q62393**  
GN=Tpd52  
tumor protein D52

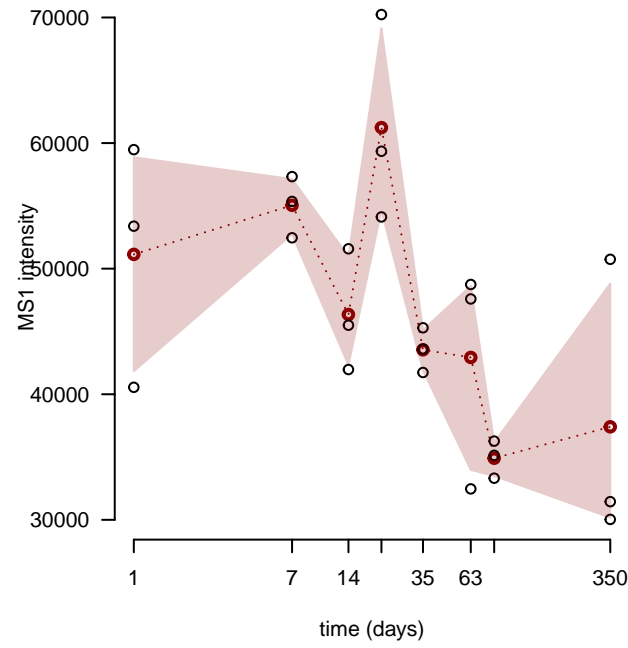

**Q62394**  
GN=Znf185

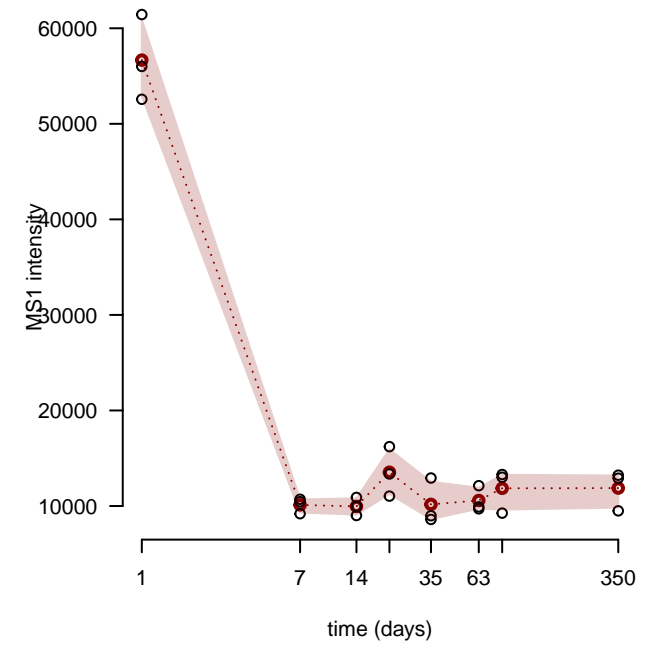

**Q62396**  
GN=Zfp92  
zinc finger protein 92

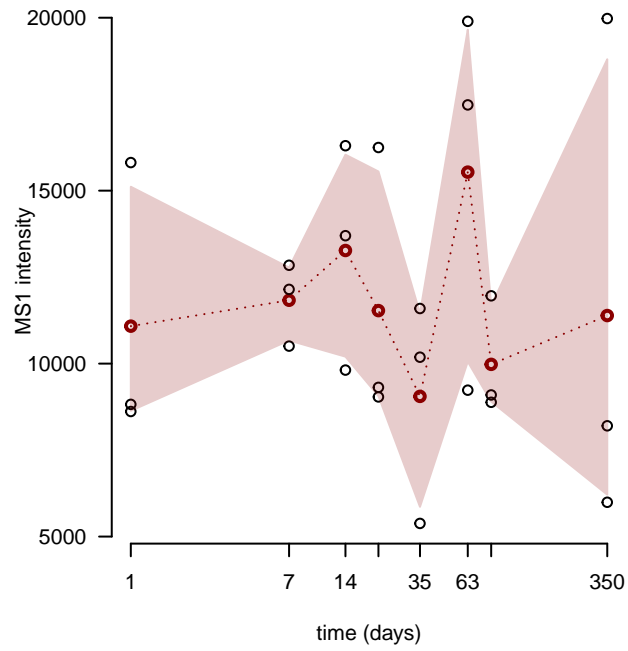

**Q62406**  
GN=Irak1  
interleukin-1 receptor-associated kinase ...

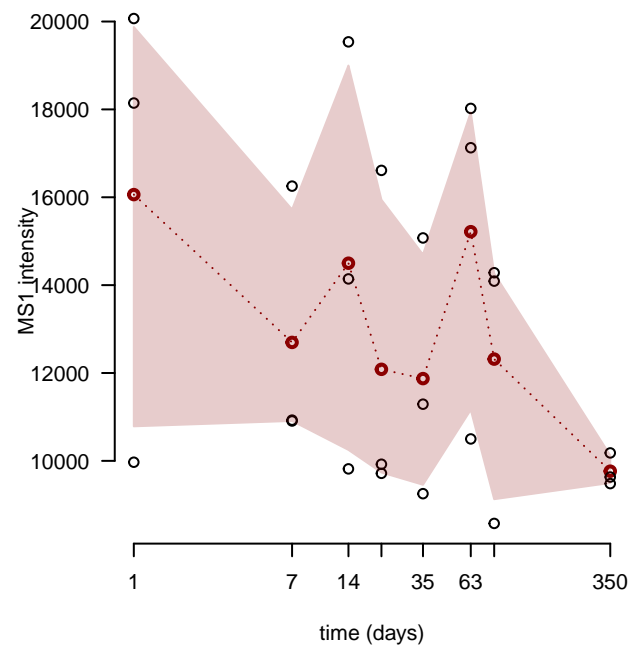

**Q62415**  
GN=Ppp1r13b  
protein phosphatase 1, regulatory subuni ...

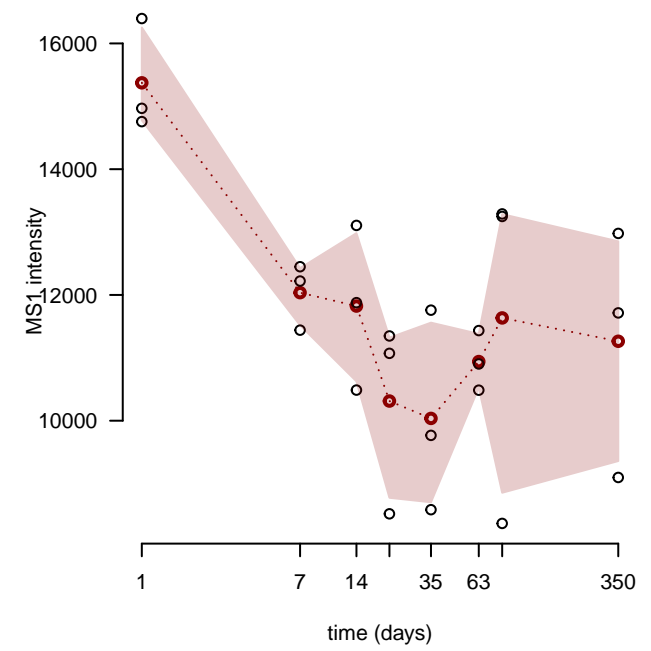

**Q62417**  
GN=Sorbs1  
sorbin and SH3 domain containing 1

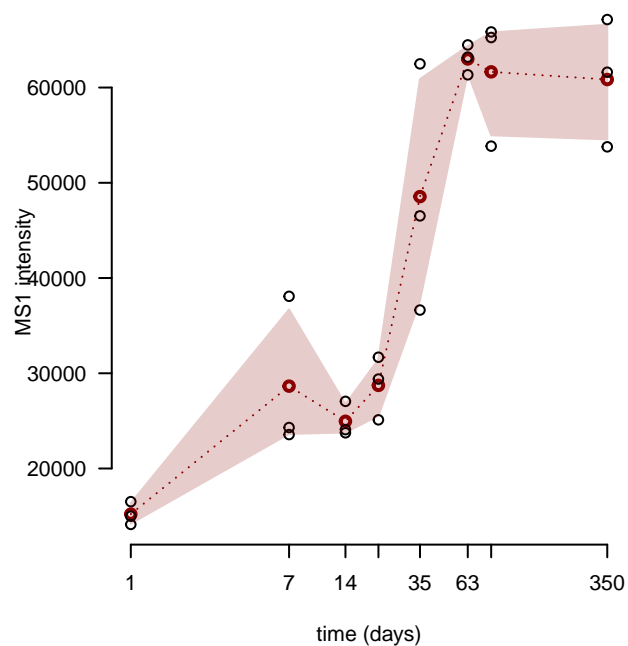

**Q62417**  
GN=Sorbs1  
sorbin and SH3 domain containing 1

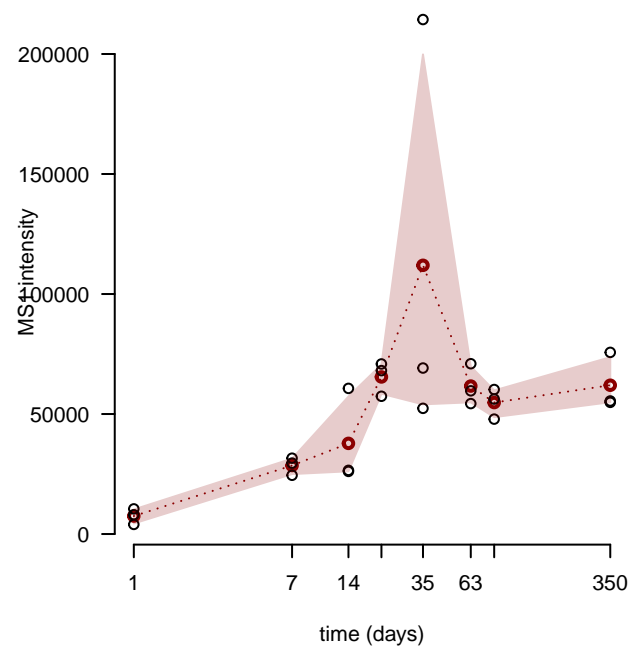

**Q62418**  
GN=Dbnl  
drebrin-like

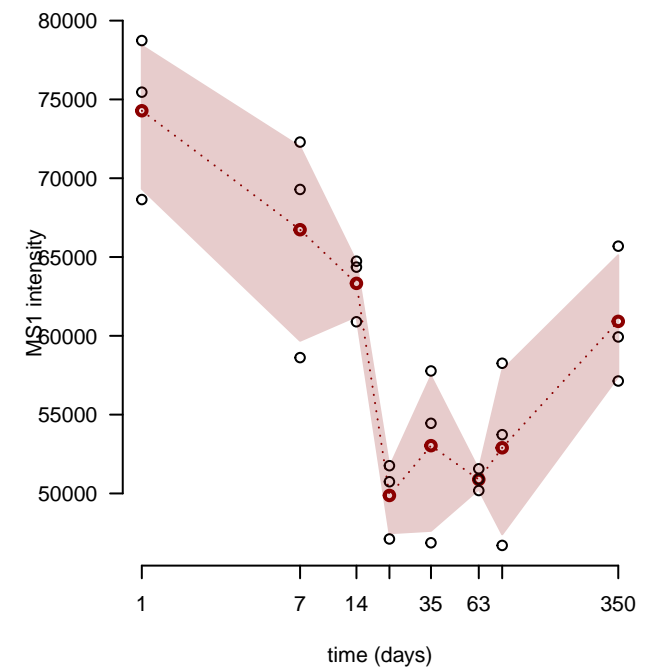

**Q62419**  
**GN=Sh3gl1**  
SH3-domain GRB2-like 1

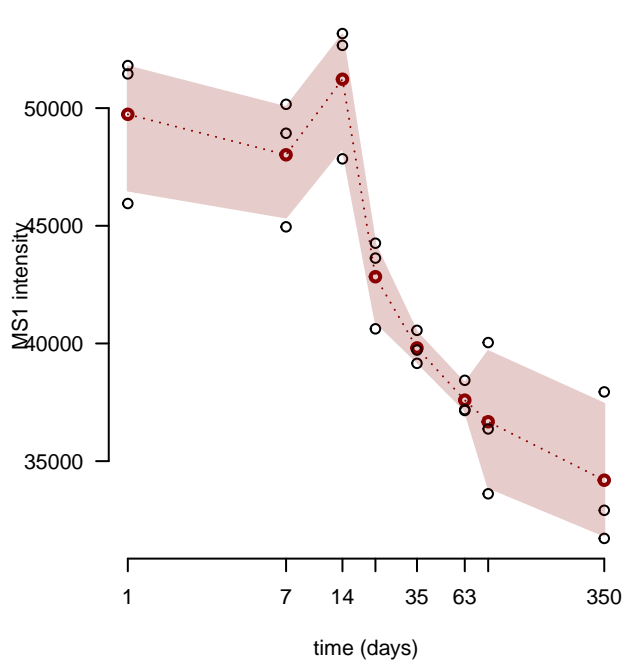

**Q62422**  
**GN=Ostf1**  
osteoclast stimulating factor 1

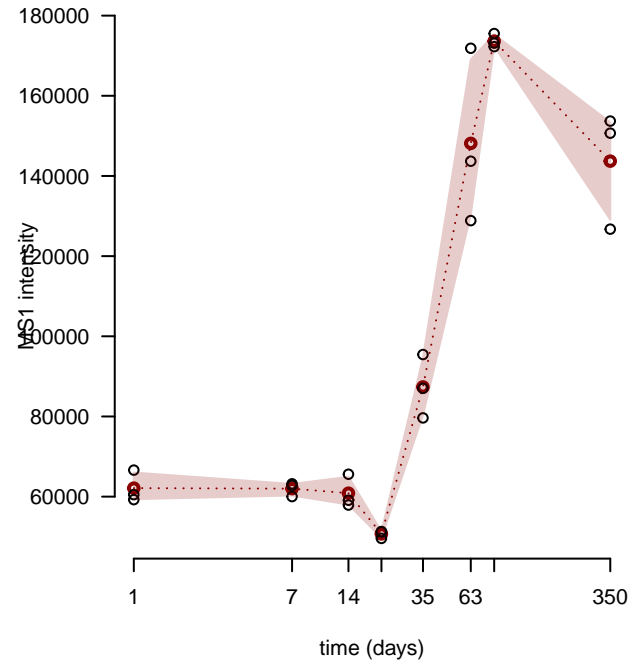

**Q62425**  
**GN=Ndufa4**  
Ndufa4, mitochondrial complex associated

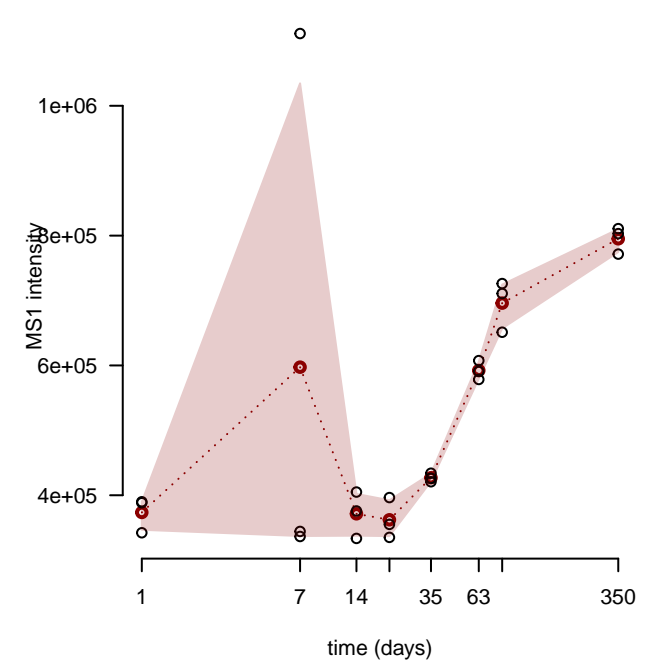

**Q62426**  
**GN=Cstb**  
cystatin B

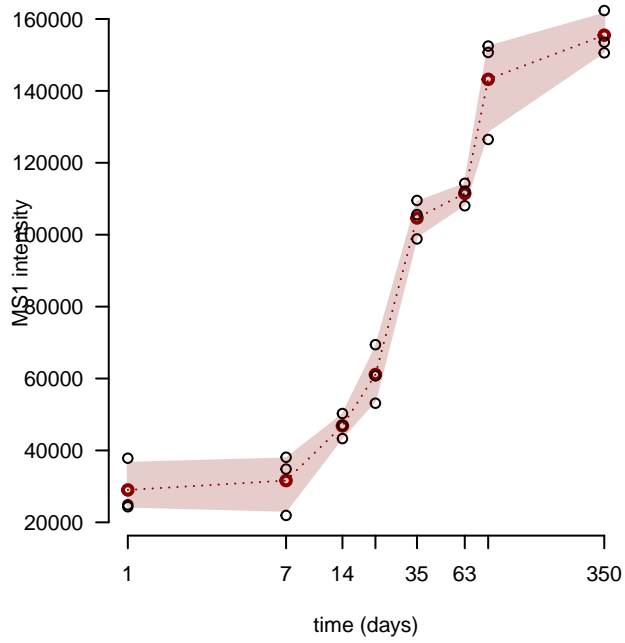

**Q62432**  
**GN=Smad2**  
SMAD family member 2

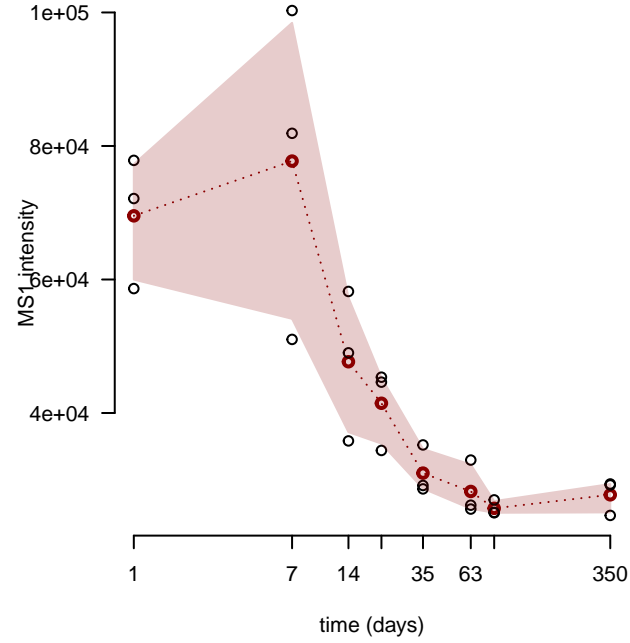

**Q62433**  
**GN=Ndrp1**  
N-myc downstream regulated gene 1

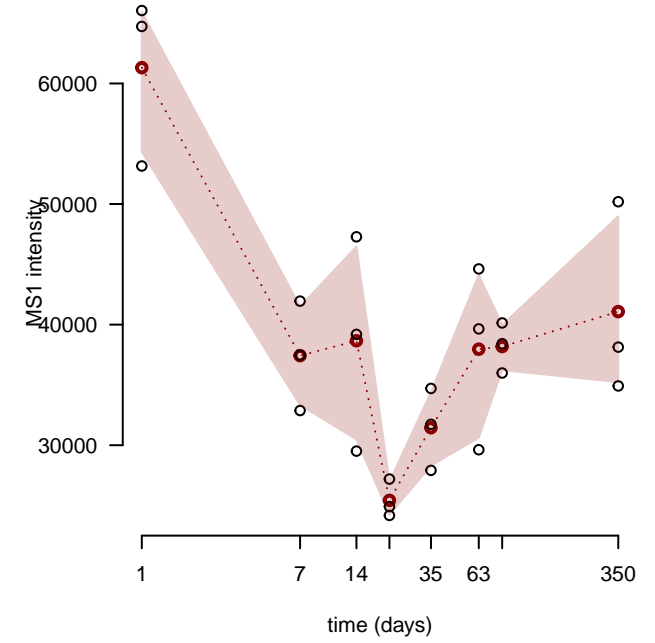

**Q62440**  
**GN=Tle1**  
transducin-like enhancer of split 1

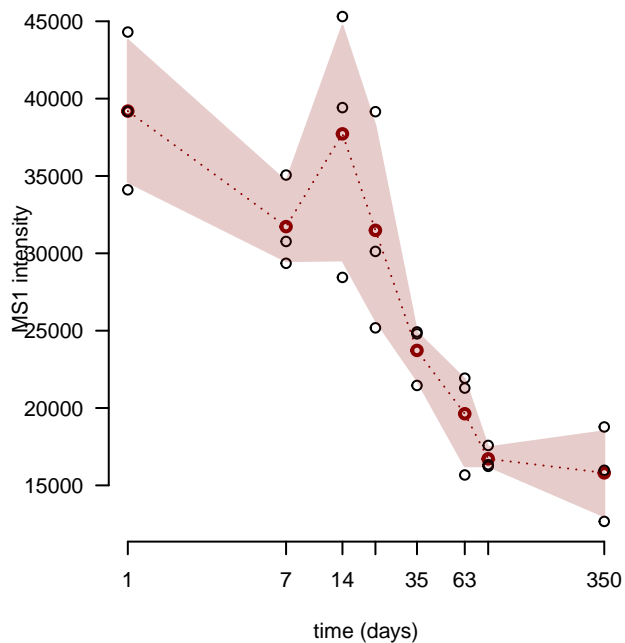

**Q62441**  
**GN=Tle4**  
transducin-like enhancer of split 4

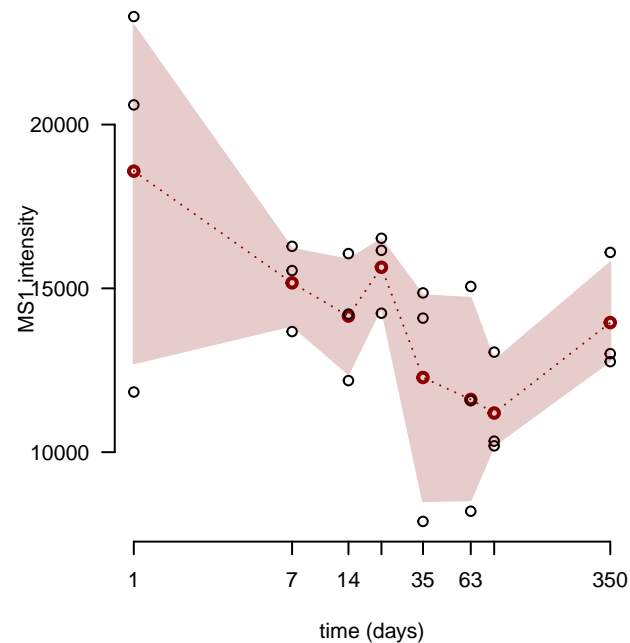

**Q62446**  
**GN=Fkbp3**  
FK506 binding protein 3

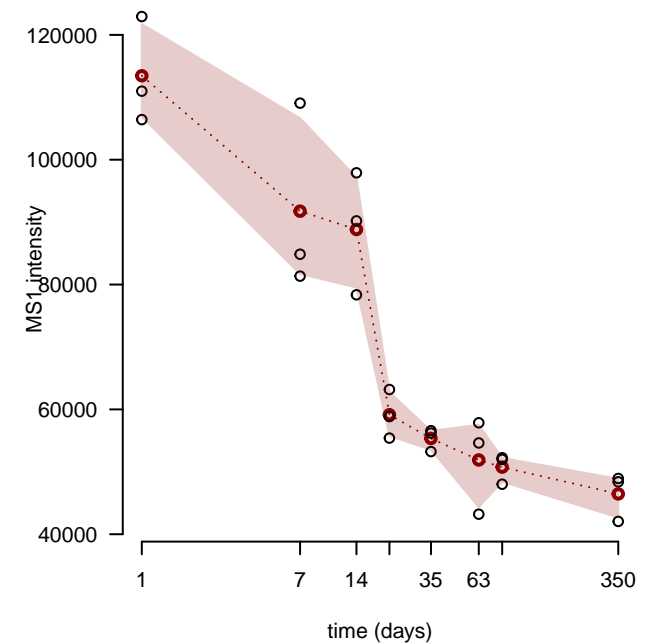

**Q62447**  
**GN=Ccnc**  
cyclin C

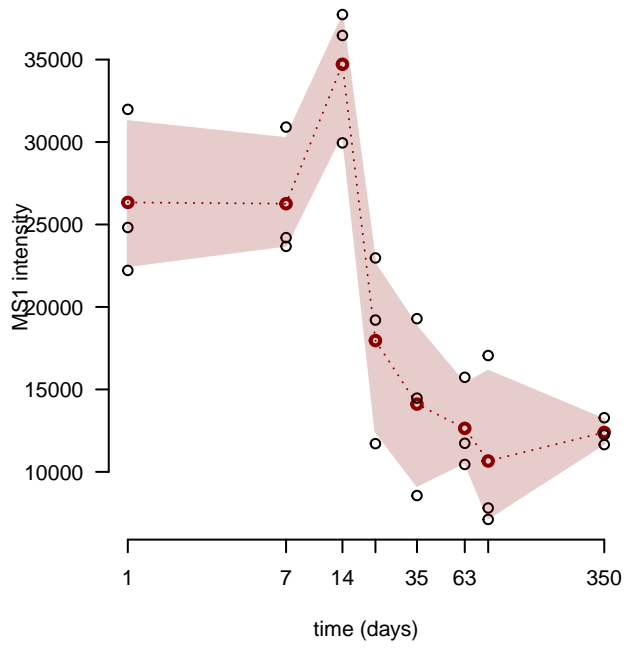

**Q62448**  
**GN=Eif4g2**  
eukaryotic translation initiation factor ...

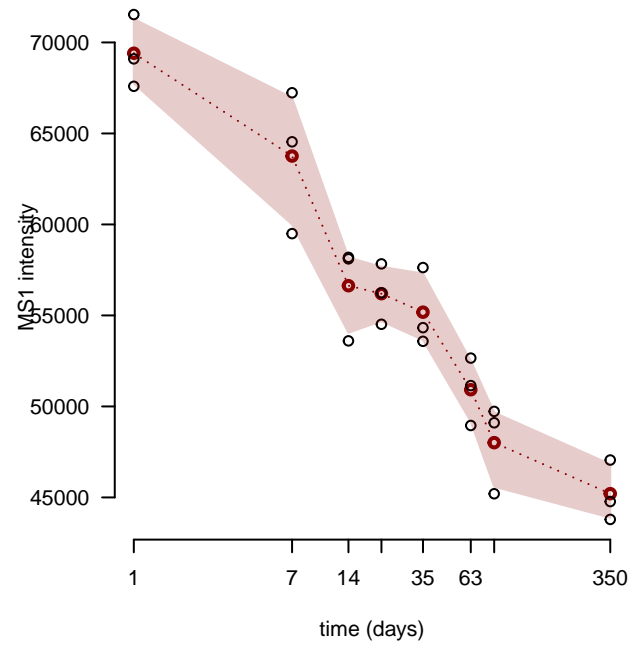

**Q62465**  
**GN=Val1**  
vesicle amine transport 1

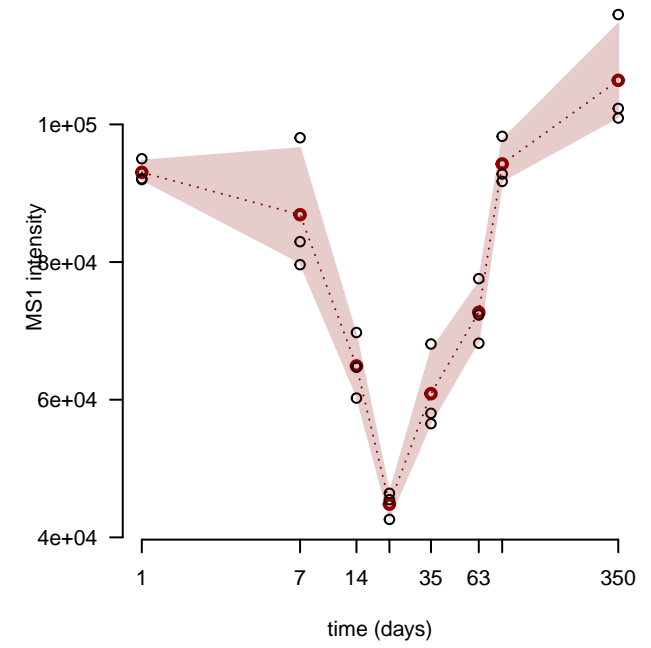

**Q62468**  
**GN=Viil1**  
villin 1

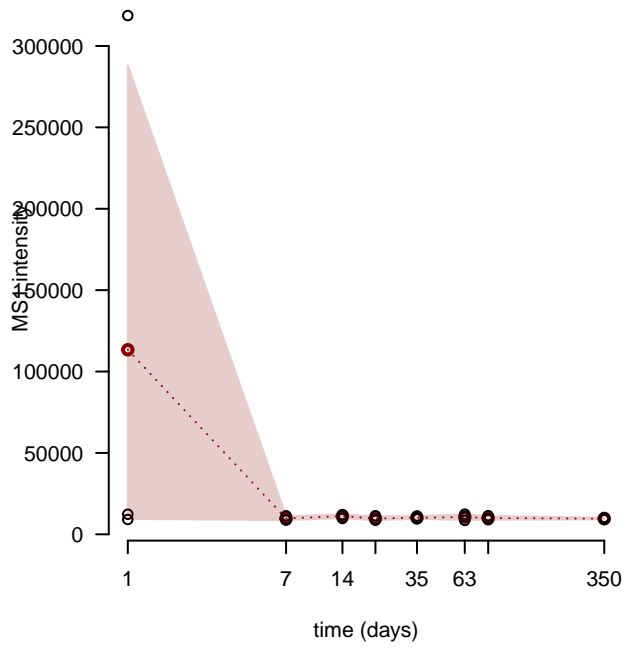

**Q62469**  
**GN=Itga2**  
integrin alpha 2

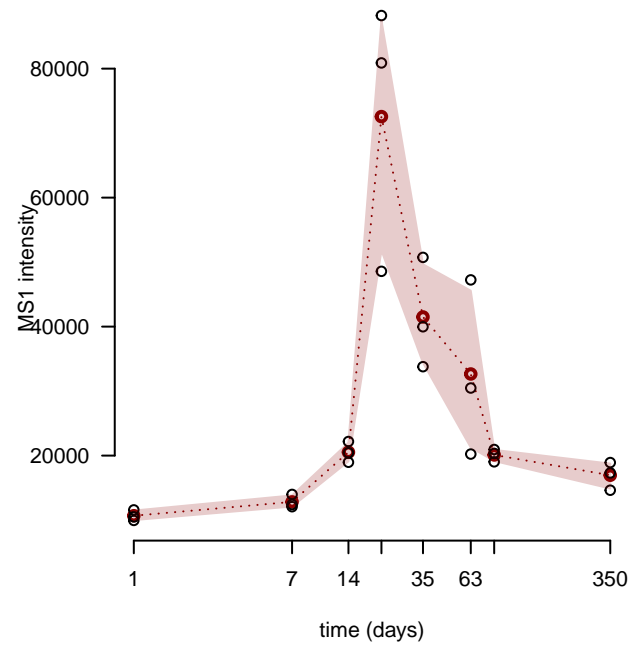

**Q62470**  
**GN=Itga3**  
integrin alpha 3

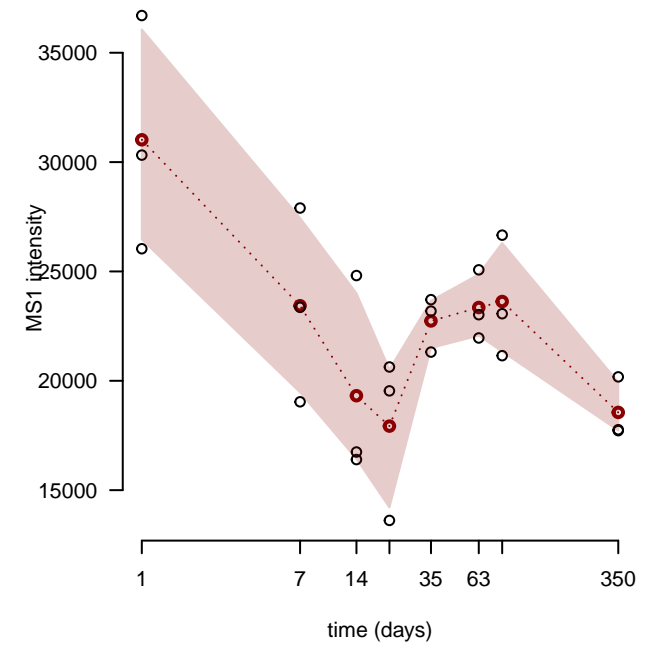

**Q62481**  
**GN=Vps72**  
vacuolar protein sorting 72

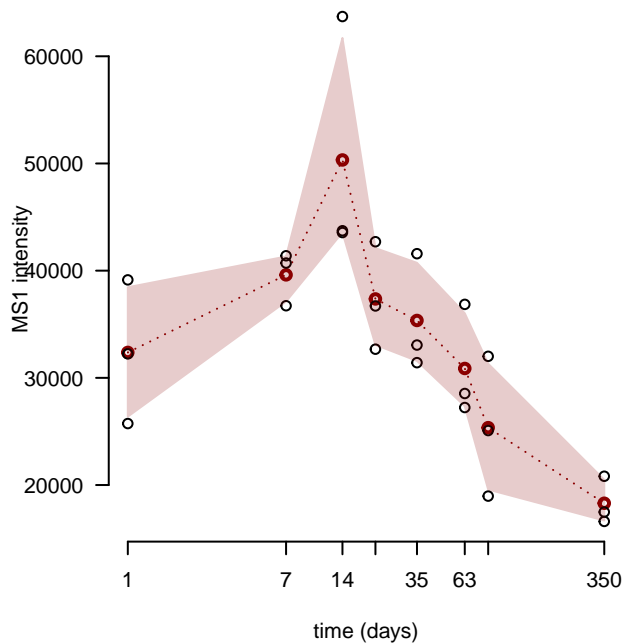

**Q62504**  
**GN=Spen**  
spen family transcription repressor

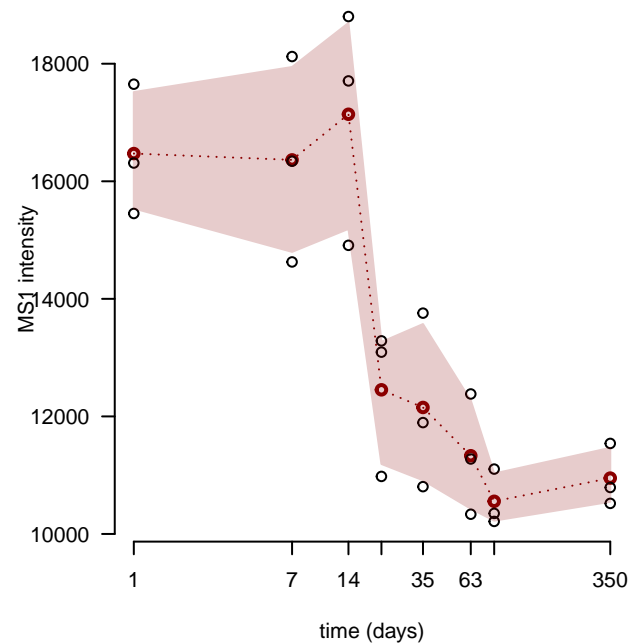

**Q62507**  
**GN=Coch**  
cochlin

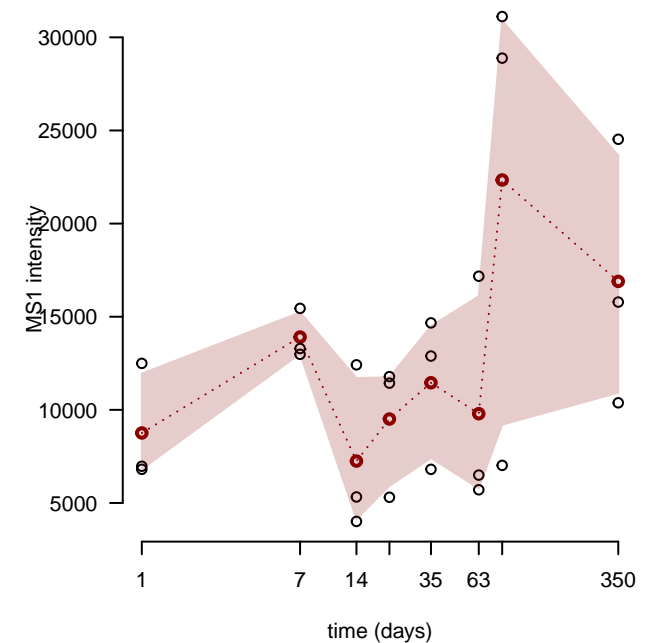

**Q62511**  
**GN=Zfp91**  
zinc finger protein 91

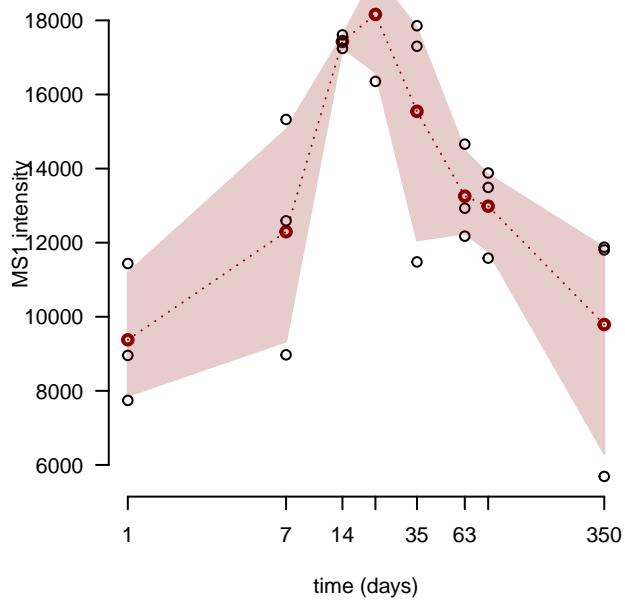

**Q62513**  
**GN=Znf260**

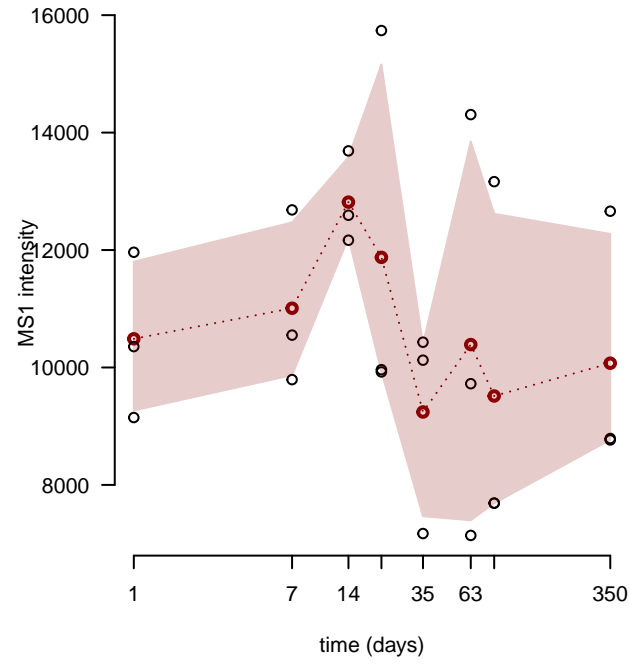

**Q62523**  
**GN=Zyx**  
zyxin

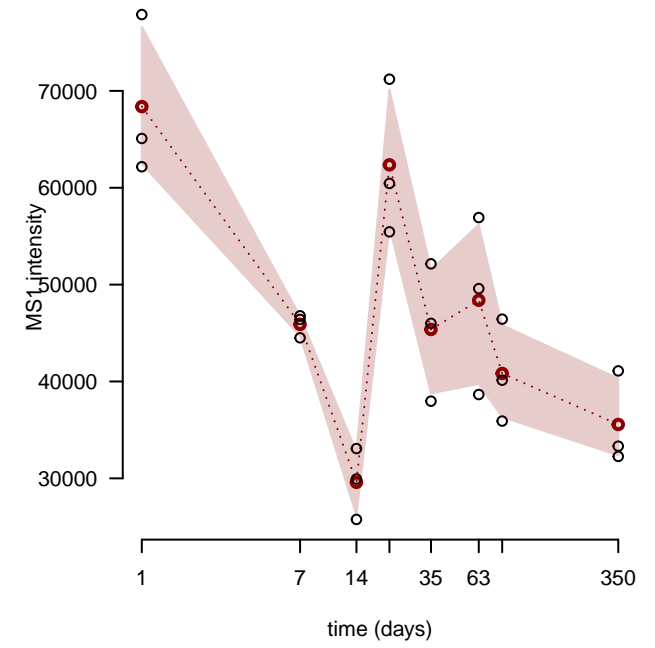

**Q62559**  
**GN=Ift52**  
intraflagellar transport 52

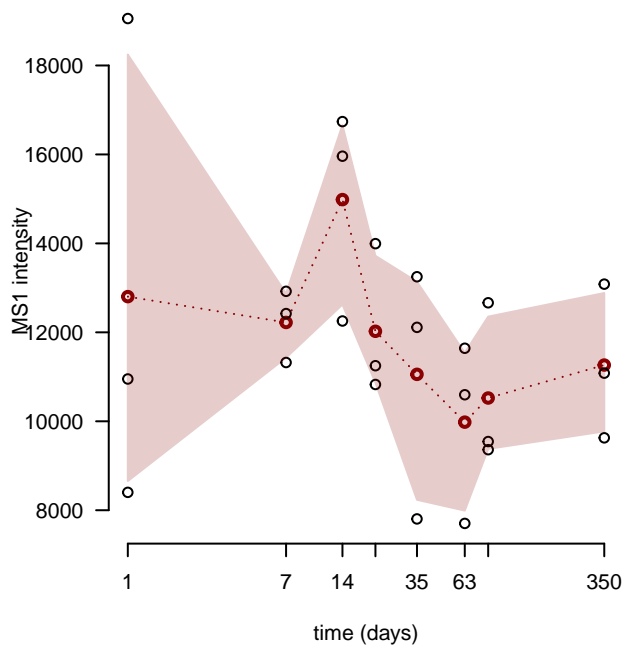

**Q63739**  
**GN=Ptp4a1**  
protein tyrosine phosphatase 4a1

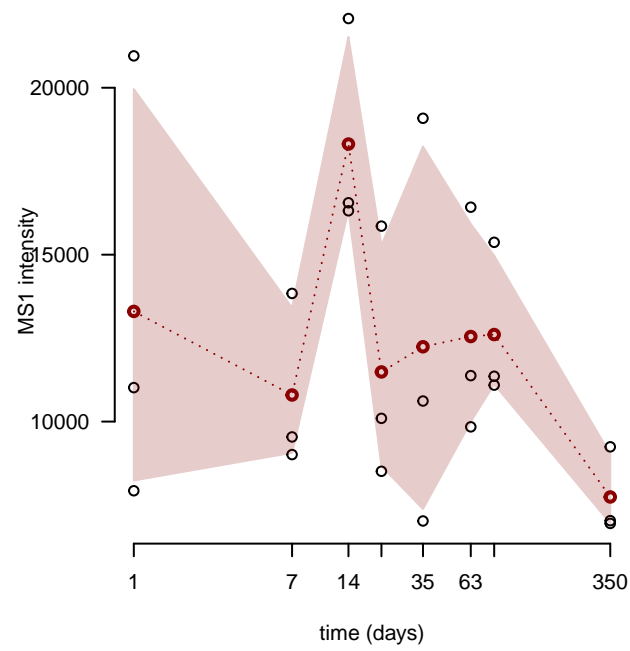

**Q63810**  
**GN=Ppp3r1**  
protein phosphatase 3, regulatory subuni ...

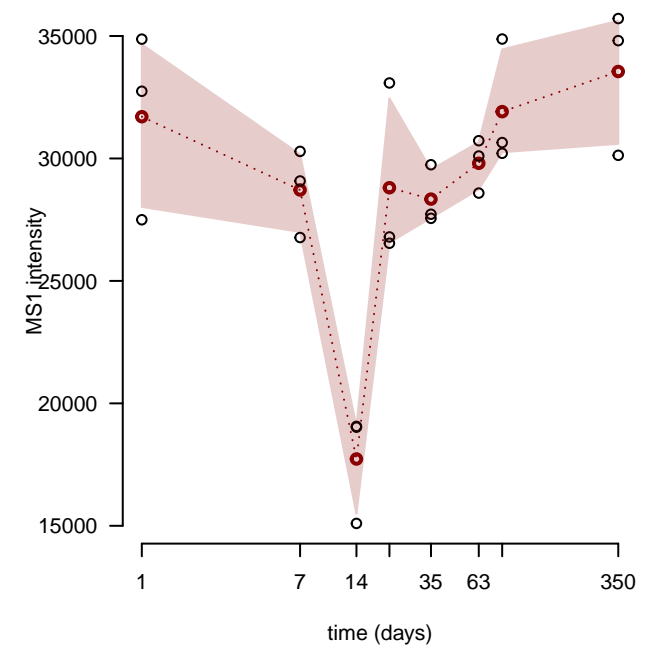

**Q63829**  
**GN=Commd3**  
COMM domain containing 3

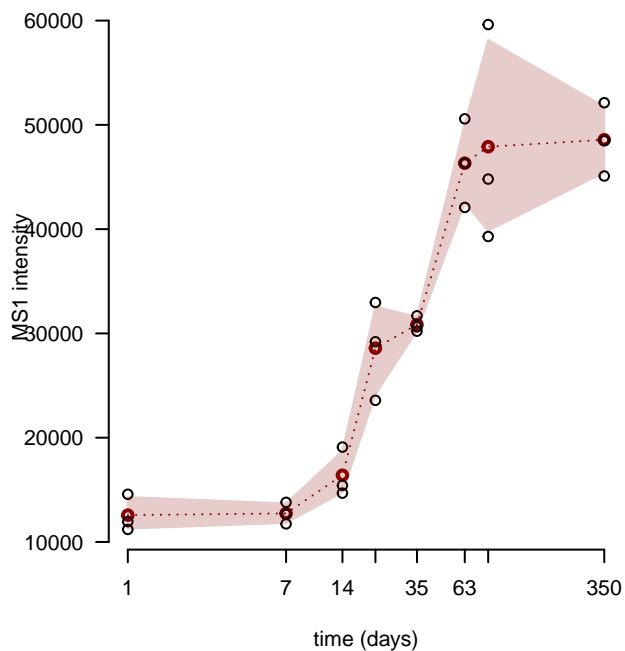

**Q63844**  
**GN=Mapk3**  
mitogen-activated protein kinase 3

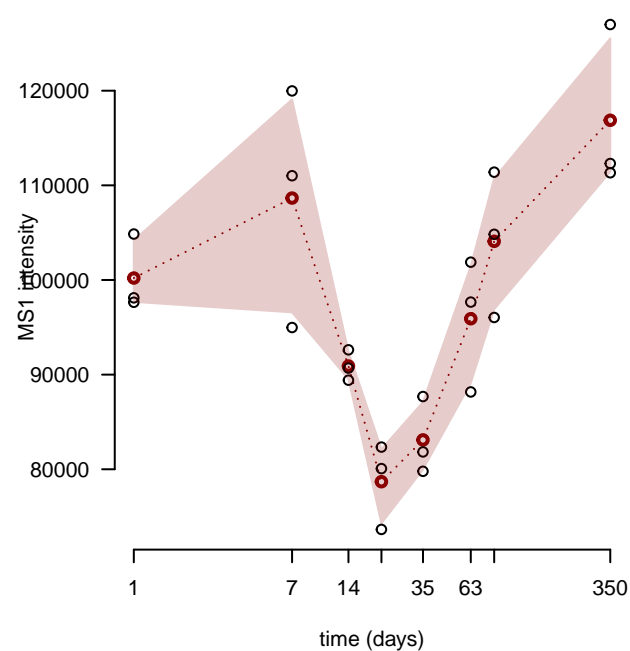

**Q63850**  
**GN=Nup62**  
nucleoporin 62

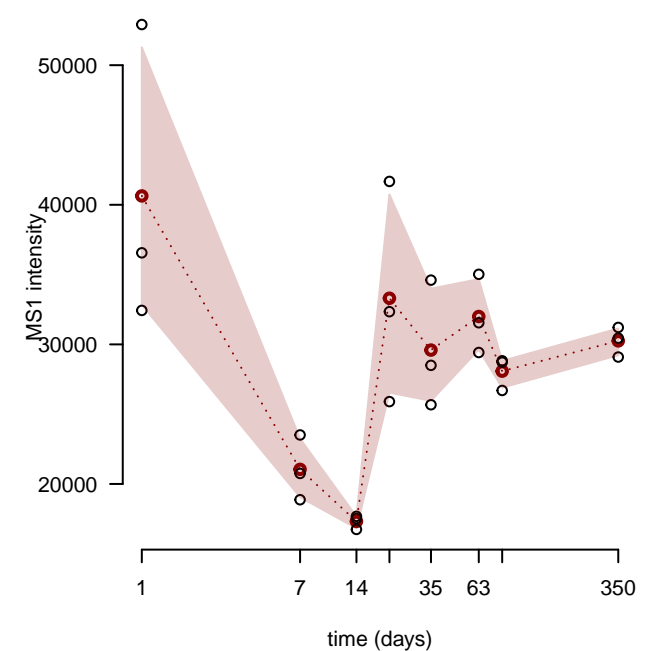



**Q63870**  
**GN=Col7a1**  
collagen, type VII, alpha 1

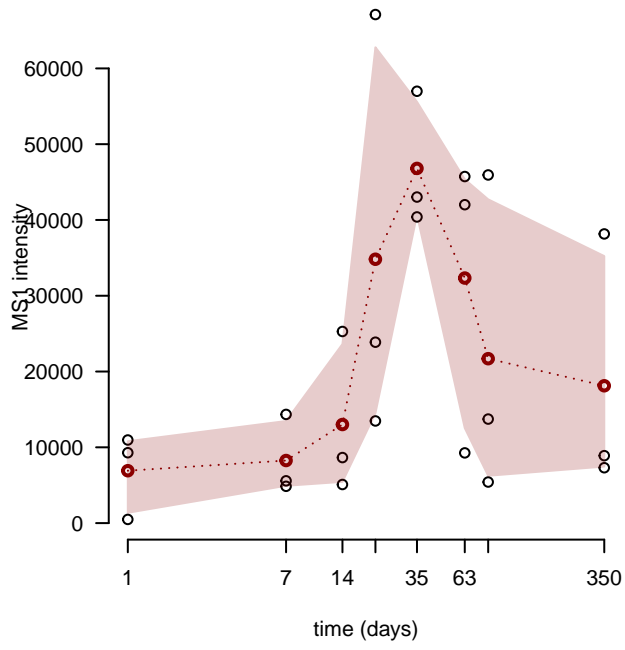

**Q63871**  
**GN=Polr2k**  
polymerase (RNA) II (DNA directed) polyp ...

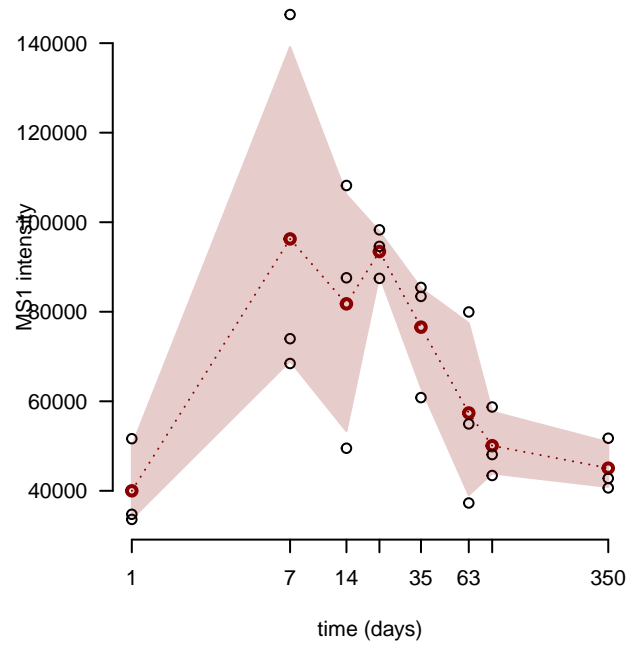

**Q63912**  
**GN=Omg**  
oligodendrocyte myelin glycoprotein

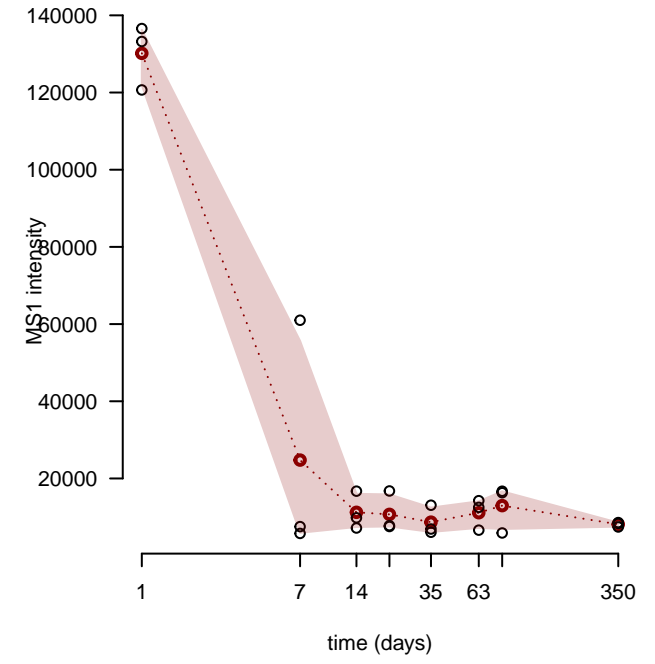

**Q63918**  
**GN=Cavin2**  
caveolae associated 2

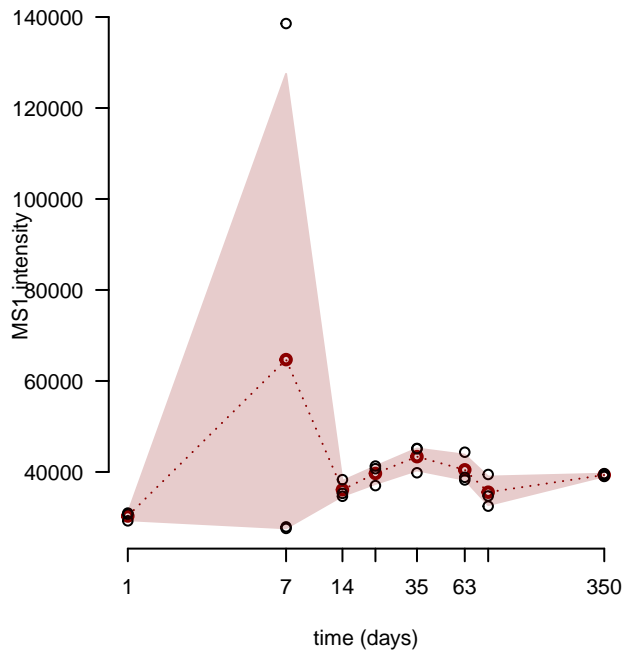

**Q63932**  
**GN=Map2k2**  
mitogen-activated protein kinase kinase ...

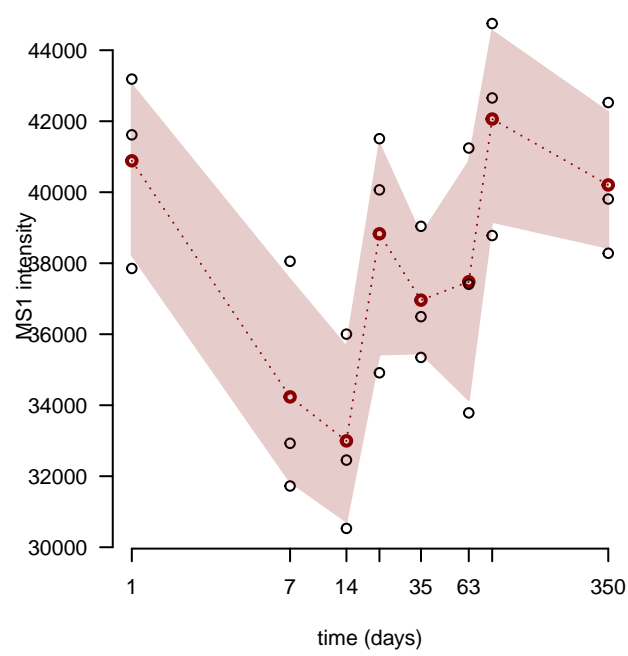

**Q63943**  
**GN=Mef2d**  
myocyte enhancer factor 2D

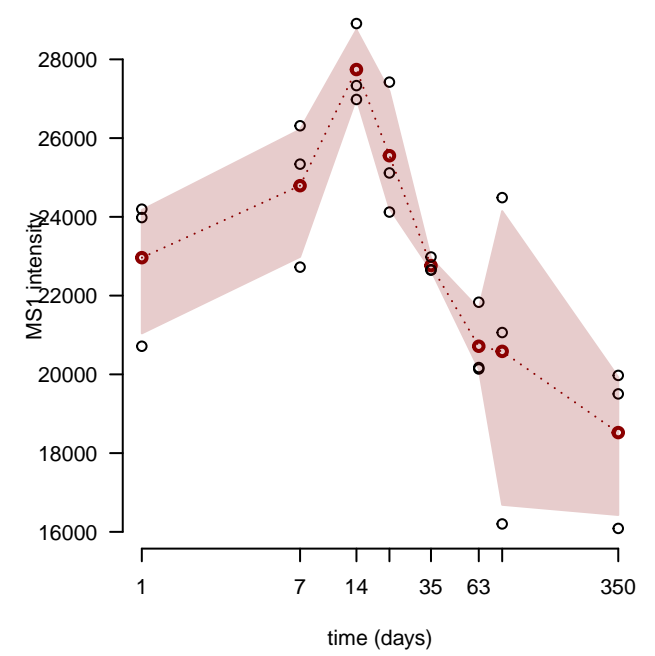

**Q63961**  
**GN=Eng**  
endoglin

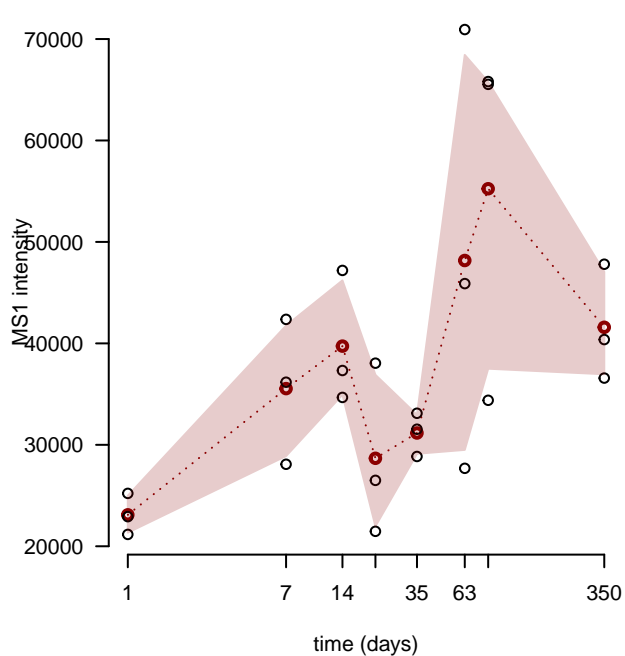

**Q63ZW7**  
**GN=Patj**  
PATJ, crumbs cell polarity complex compo ...

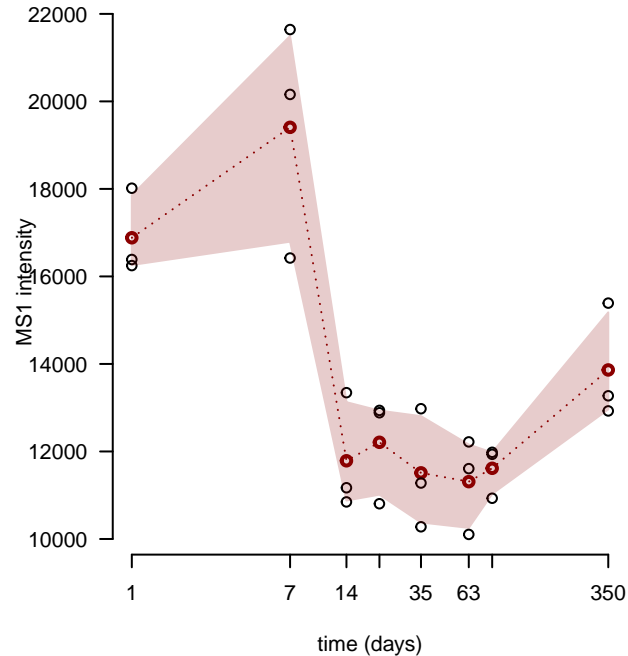

**Q64008**  
**GN=Rab34**  
RAB34, member RAS oncogene family

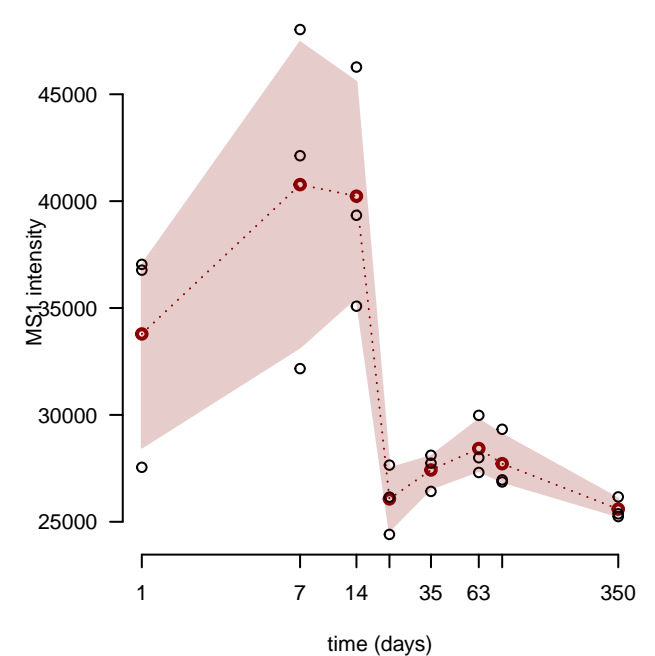

**Q64010**  
GN=Crk  
v-crkl avian sarcoma virus CT10 oncogene ...

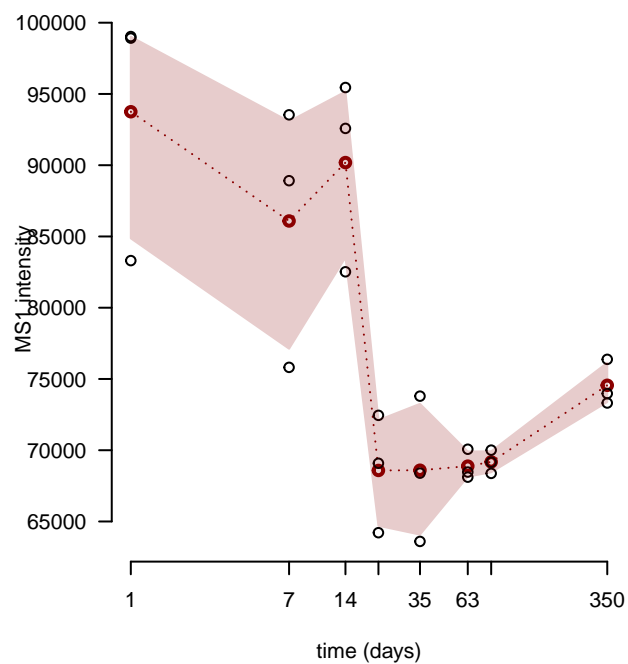

**Q64012**  
GN=Raly  
hnRNP-associated with lethal yellow

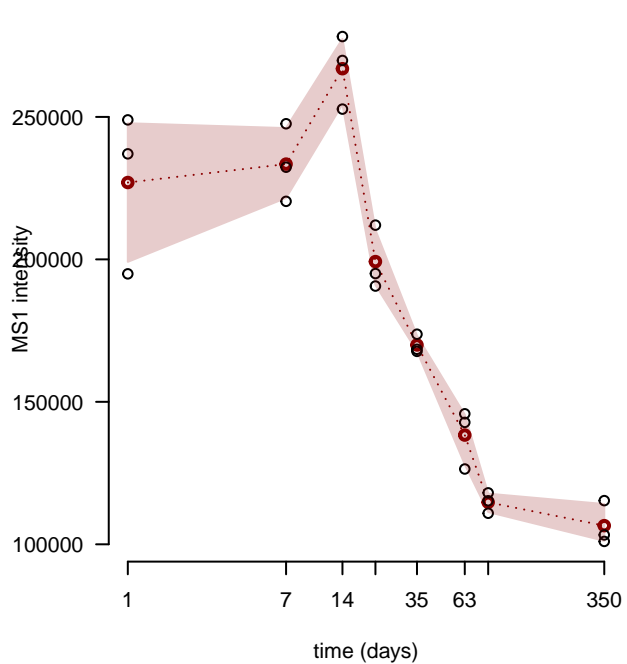

**Q64028**  
GN=Phc1  
polyhomeotic 1

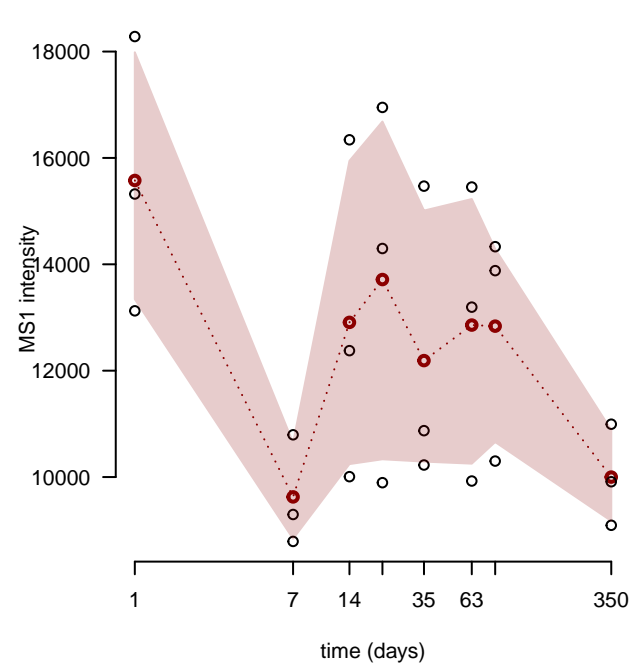

**Q64092**  
GN=Tfe3  
transcription factor E3

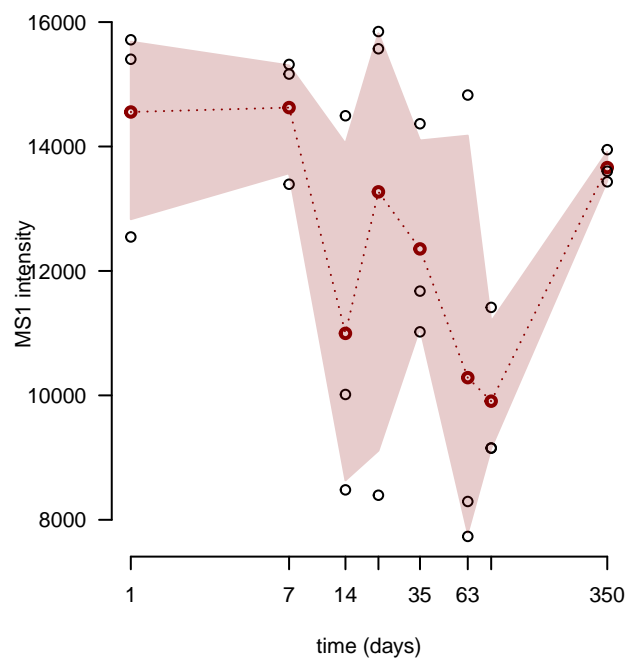

**Q64096**  
GN=Mcf2l  
mcf.2 transforming sequence-like

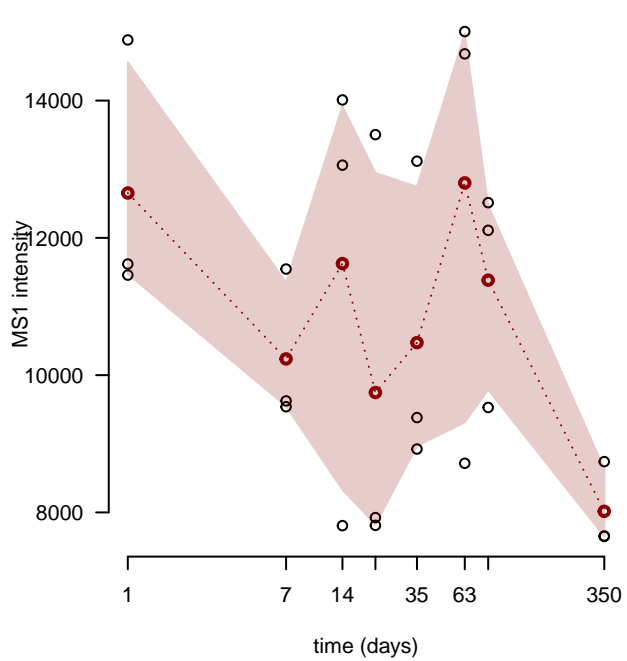

**Q640L3**  
GN=Ccpg1  
cell cycle progression 1

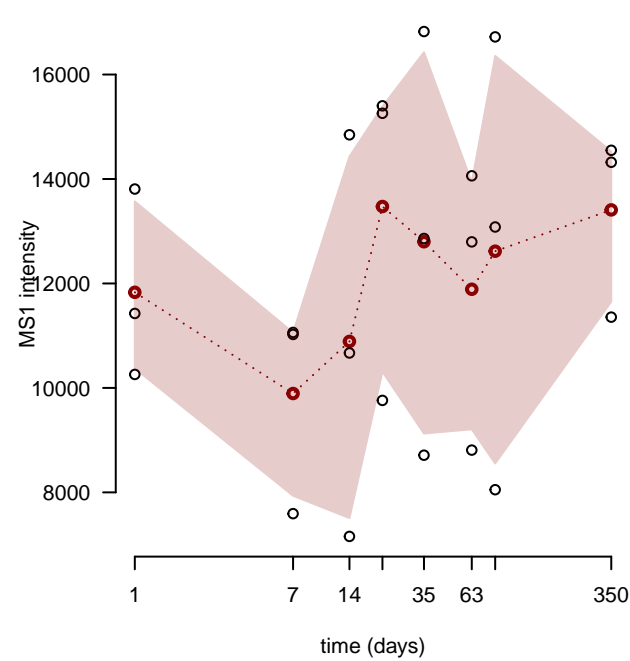

**Q640M1**  
GN=Utp14a  
UTP14A small subunit processome componen ...

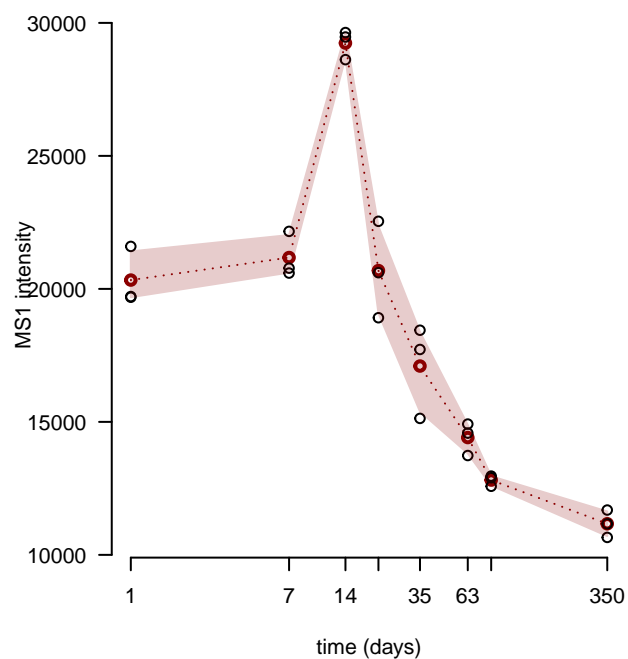

**Q640N1**  
GN=Aebp1  
AE binding protein 1

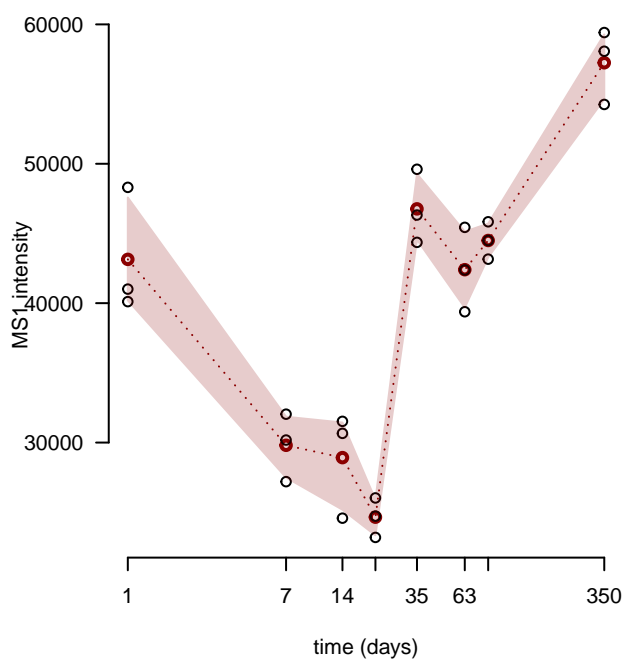

**Q640P2**  
GN=Angptl1  
angiopoietin-like 1

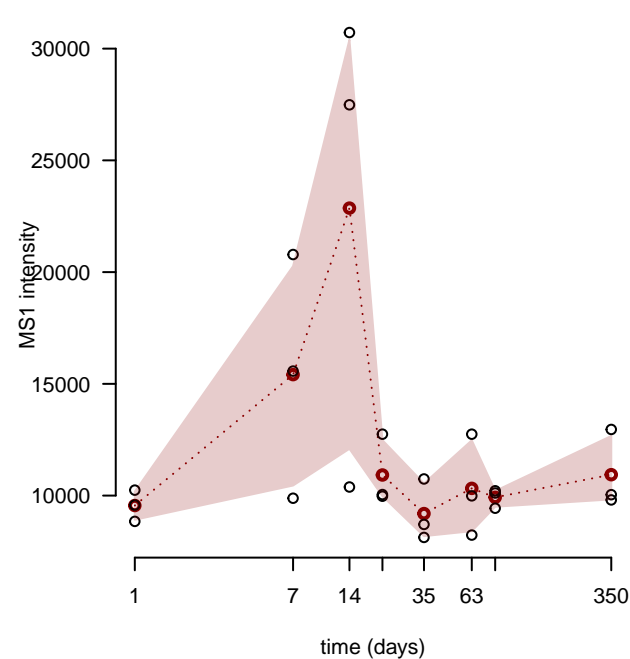

**Q640Q5**  
**GN=Pan3**  
PAN3 poly(A) specific ribonuclease subun ...

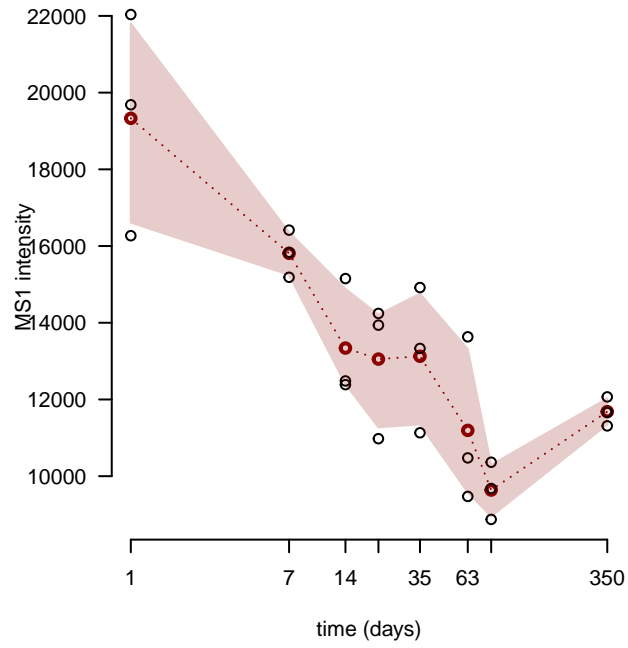

**Q64105**  
**GN=Spr**  
sepiapterin reductase

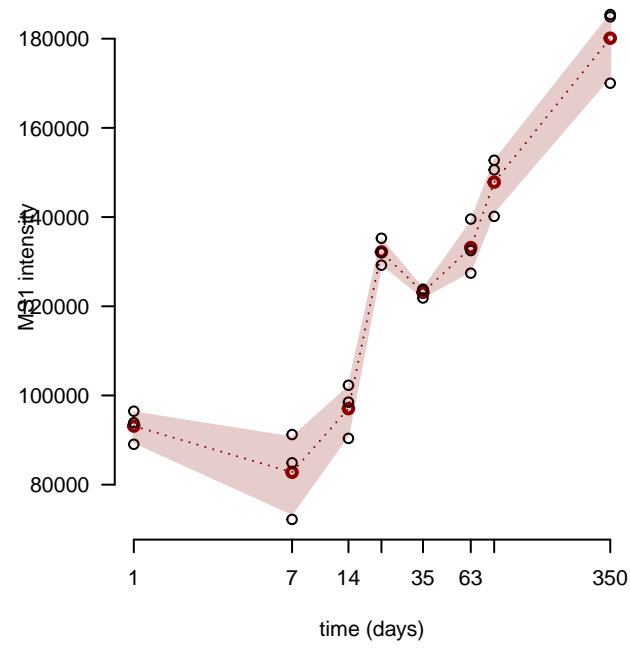

**Q64127**  
**GN=Trim24**  
tripartite motif-containing 24

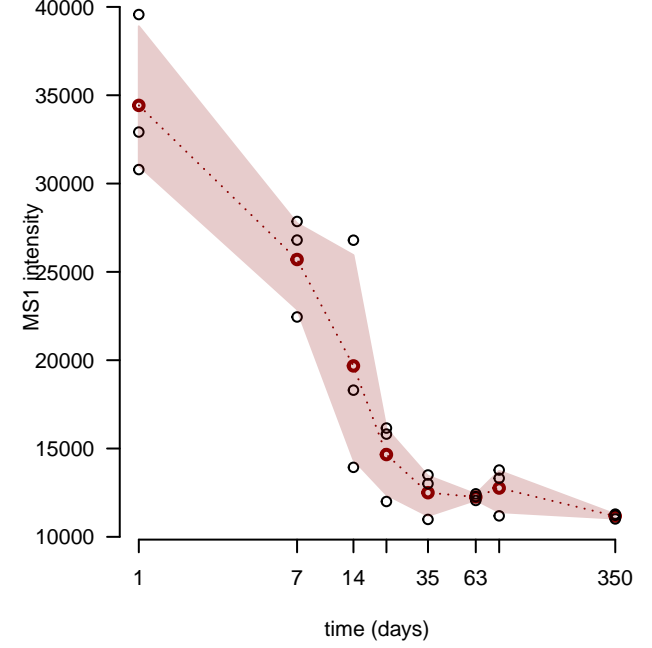

**Q64133**  
**GN=Maoa**  
monoamine oxidase A

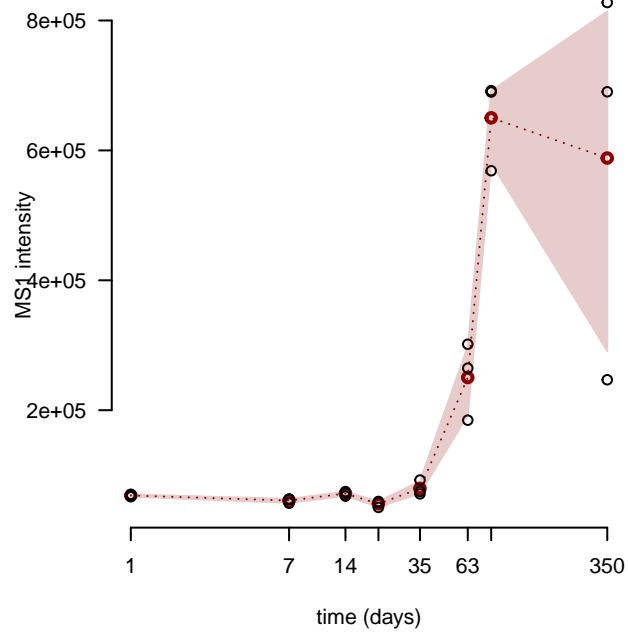

**Q64151**  
**GN=Sema4c**  
sema domain, immunoglobulin domain (Ig), ...

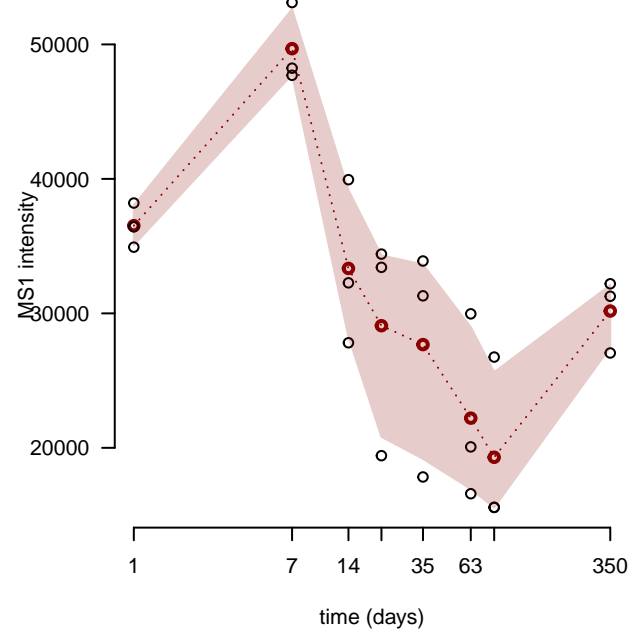

**Q64152**  
**GN=Btf3**  
basic transcription factor 3

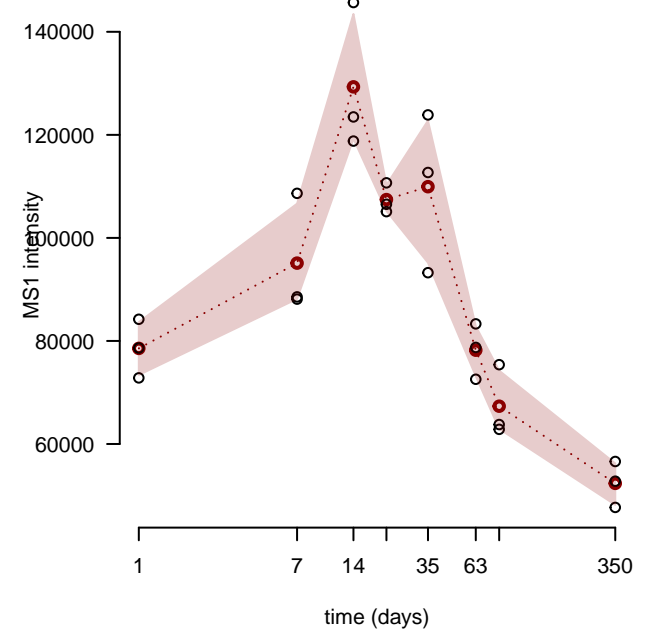

**Q64152**  
**GN=Btf3**  
basic transcription factor 3

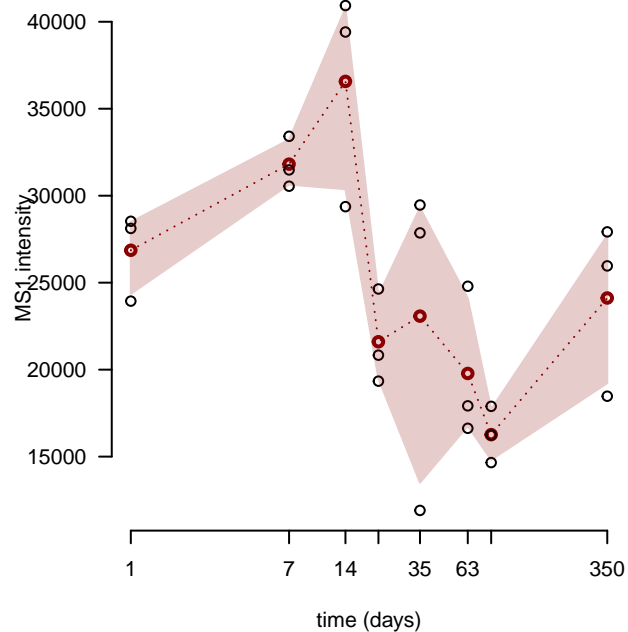

**Q64163**  
**GN=Tfdp2**  
transcription factor Dp 2

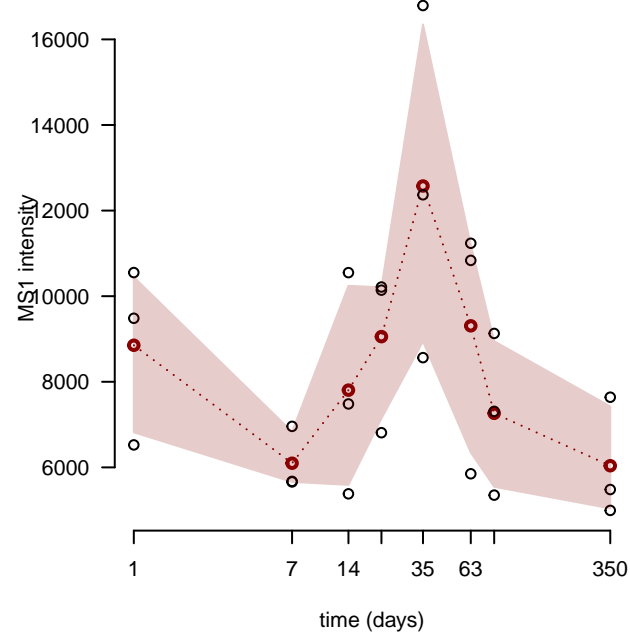

**Q64191**  
**GN=Aga**  
asparlyglucosaminidase

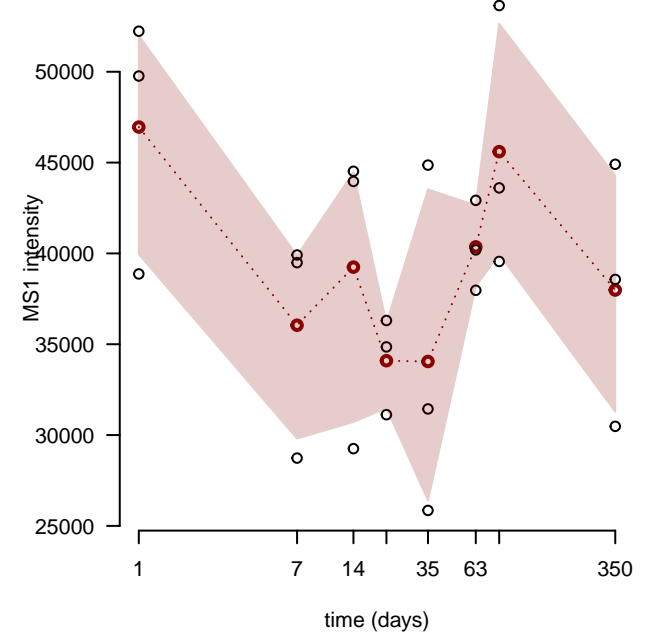

**Q641K1**  
**GN=Agtbbp1**  
ATP/GTP binding protein 1

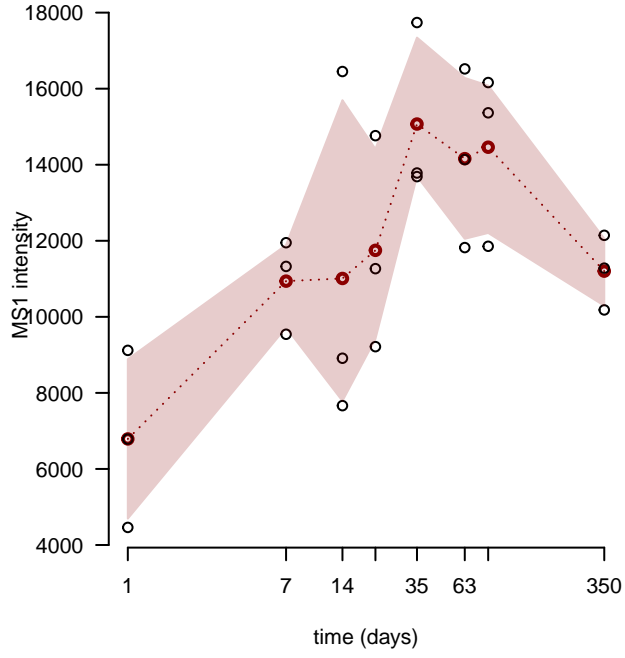

**Q64213**  
**GN=Sf1**  
splicing factor 1

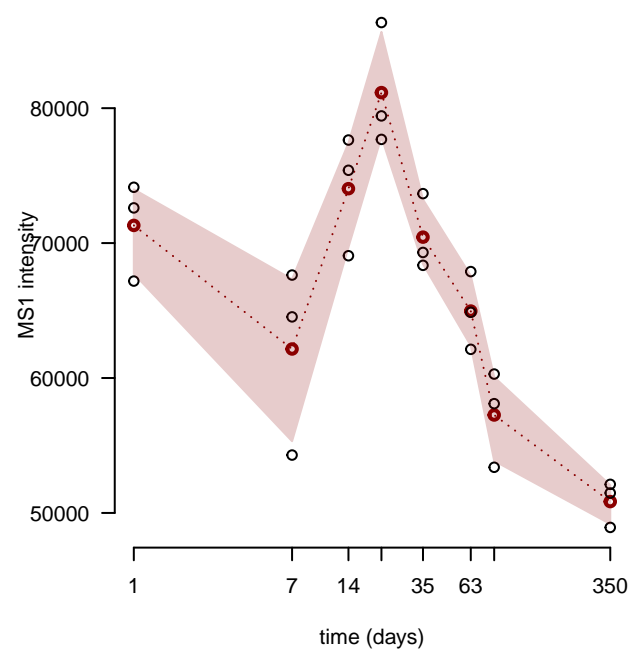

**Q64261**  
**GN=Cdk6**  
cyclin-dependent kinase 6

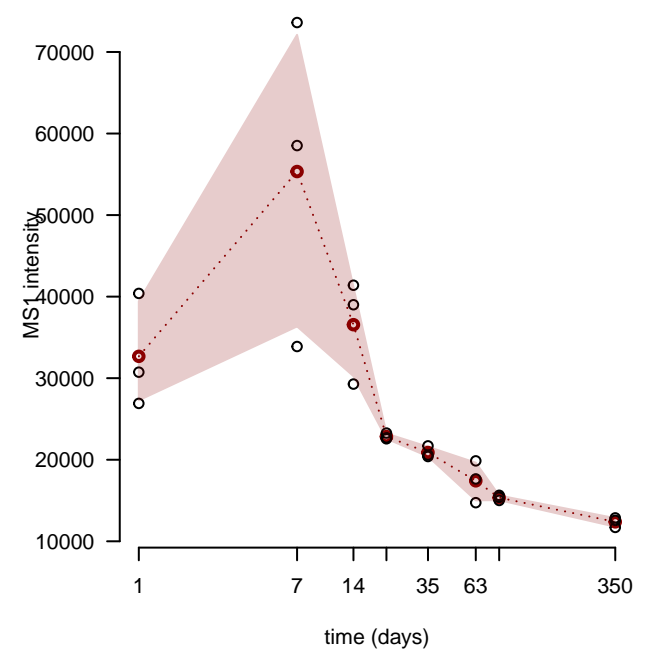

**Q64267**  
**GN=Xpa**  
xeroderma pigmentosum, complementation g ...

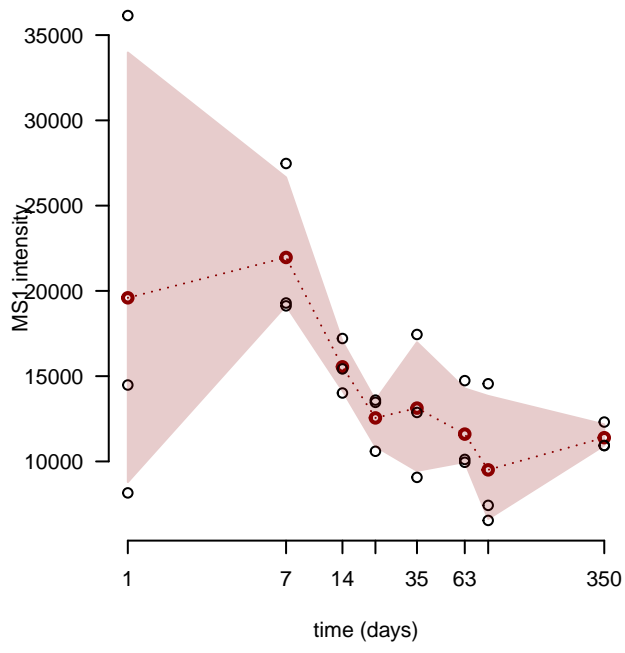

**Q64282**  
**GN=Ifit1**  
interferon-induced protein with tetratri ...

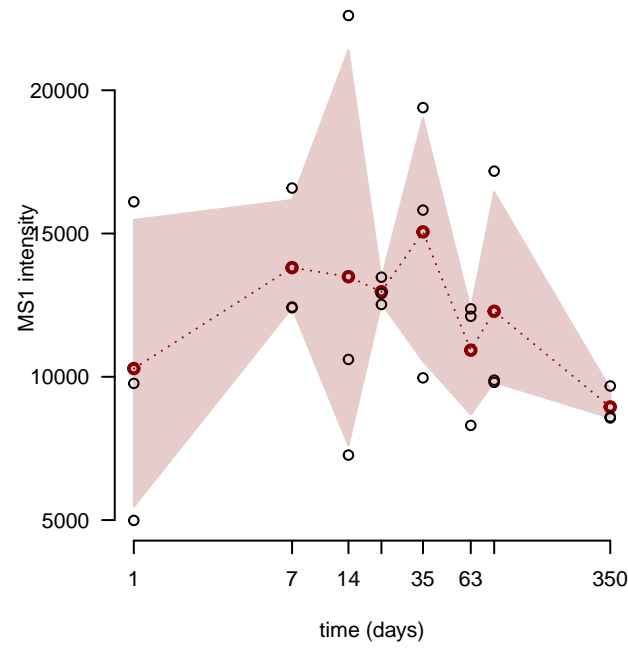

**Q64285**  
**GN=Cel**  
carboxyl ester lipase

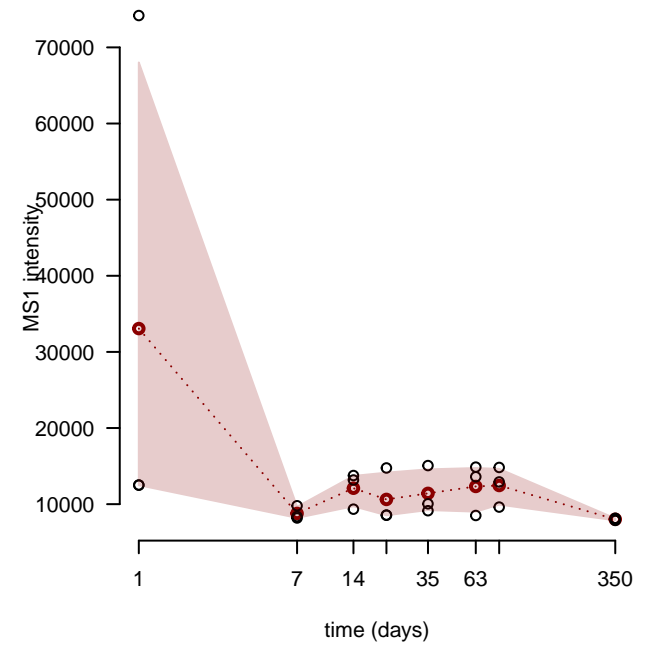

**Q64291**  
**GN=Krt12**  
keratin 12

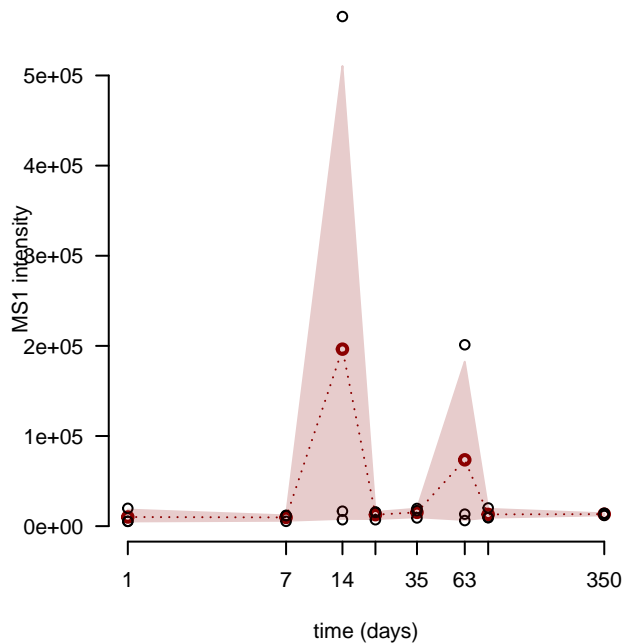

**Q64302**  
**GN=Tm4sf1**  
transmembrane 4 superfamily member 1

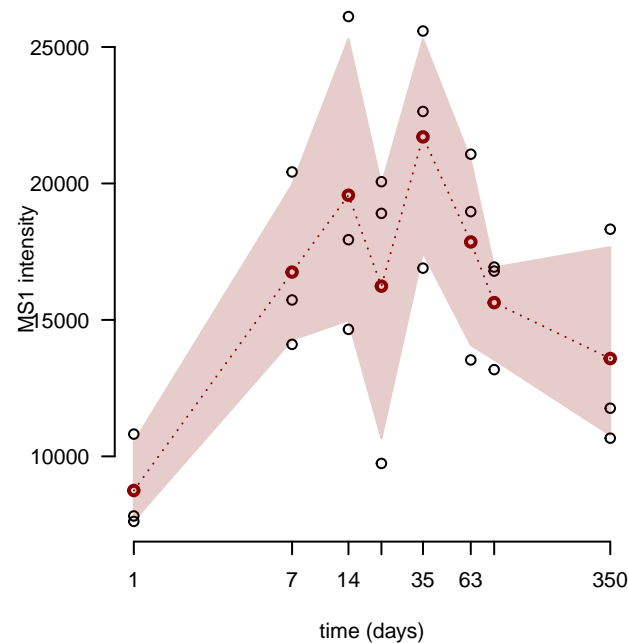

**Q64310**  
**GN=Surf4**  
surfeit gene 4

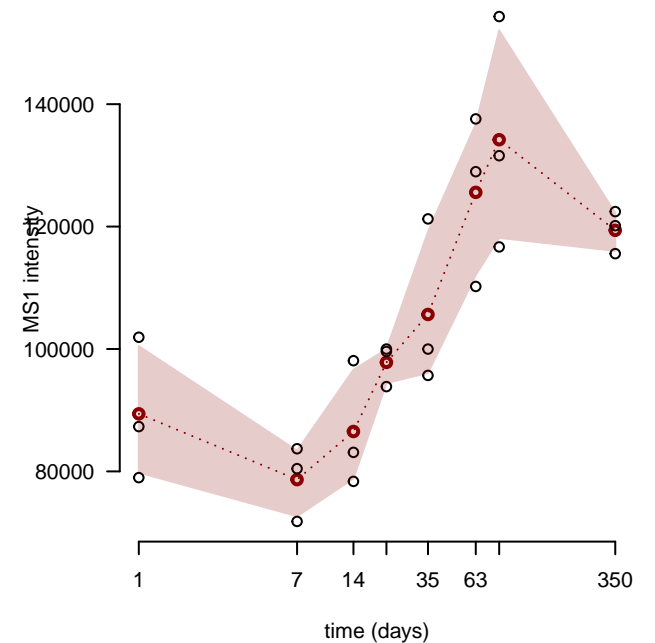

**Q64311**  
**GN=Ntan1**  
N-terminal Asn amidase

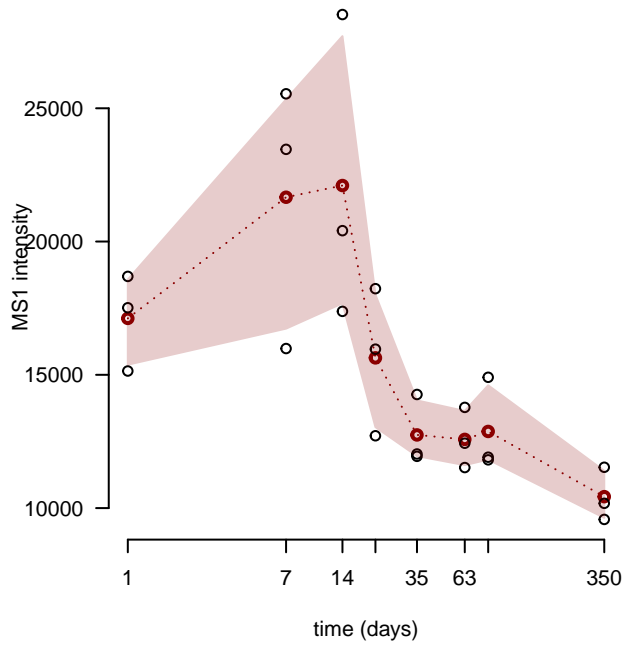

**Q64314**  
**GN=Cd34**  
CD34 antigen

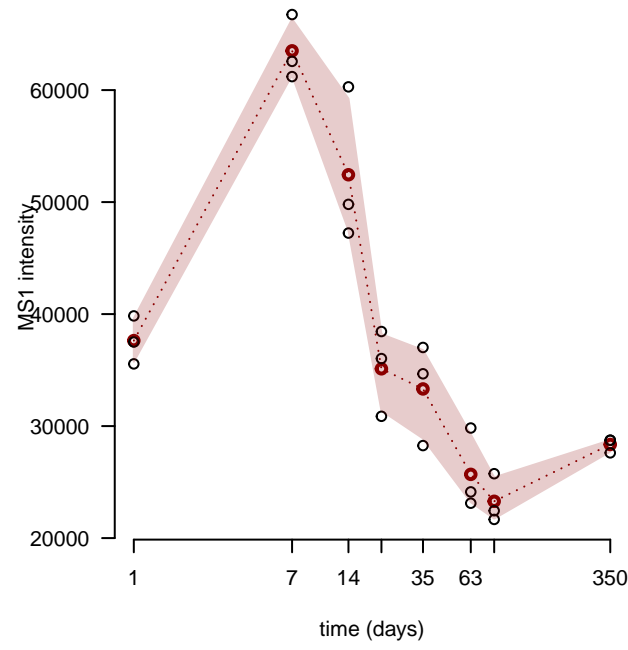

**Q64318**  
**GN=Zeb1**  
zinc finger E-box binding homeobox 1

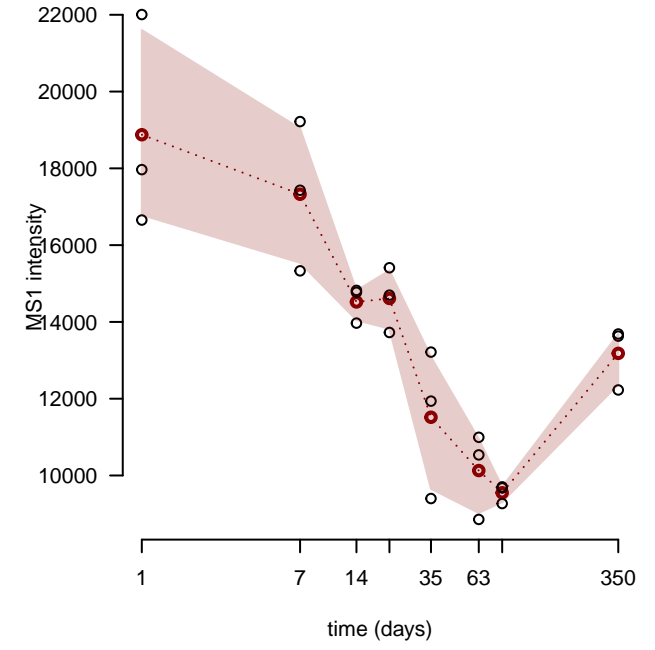

**Q64324**  
**GN=Stxbp2**  
syntaxin binding protein 2

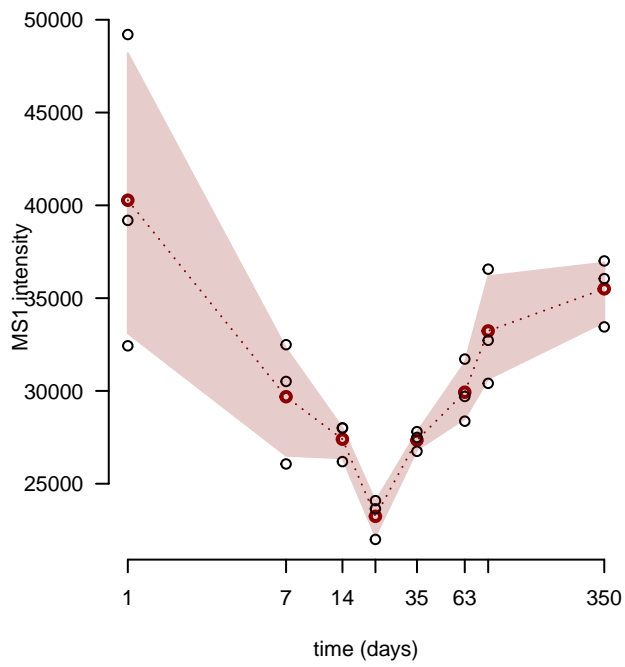

**Q64327**  
**GN=Mea1**  
male enhanced antigen 1

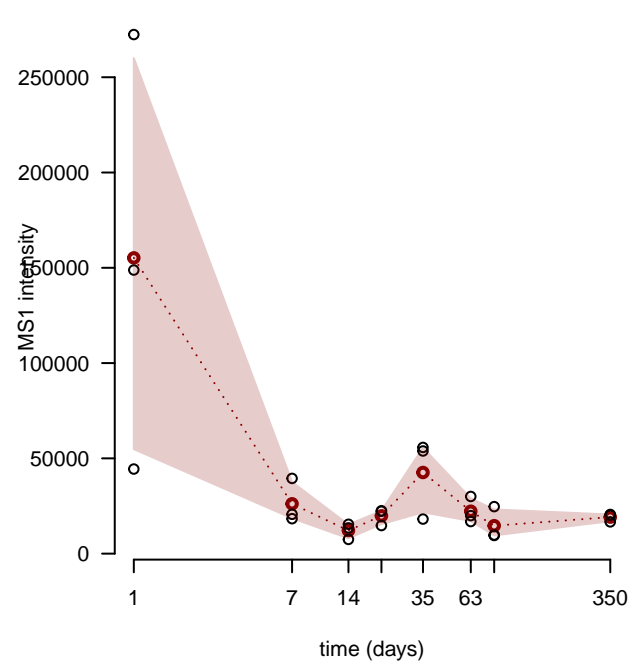

**Q64331**  
**GN=Myo6**  
myosin VI

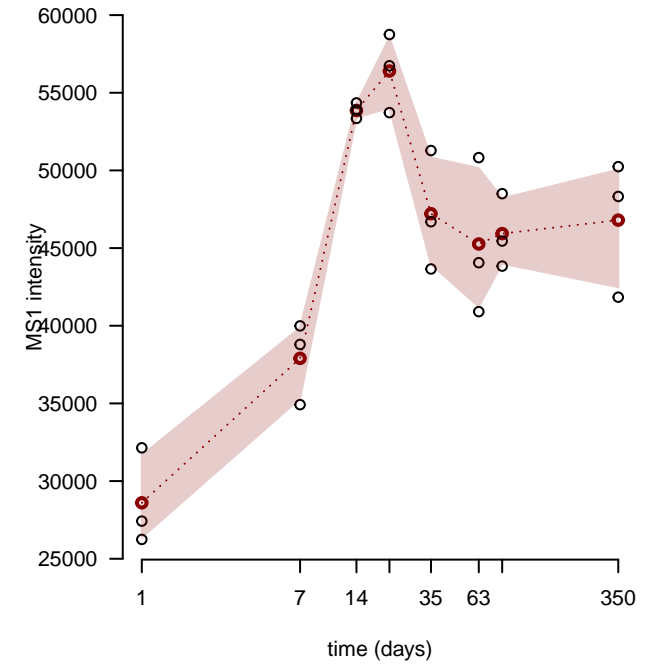

**Q64337**  
**GN=Sqstm1**  
sequestosome 1

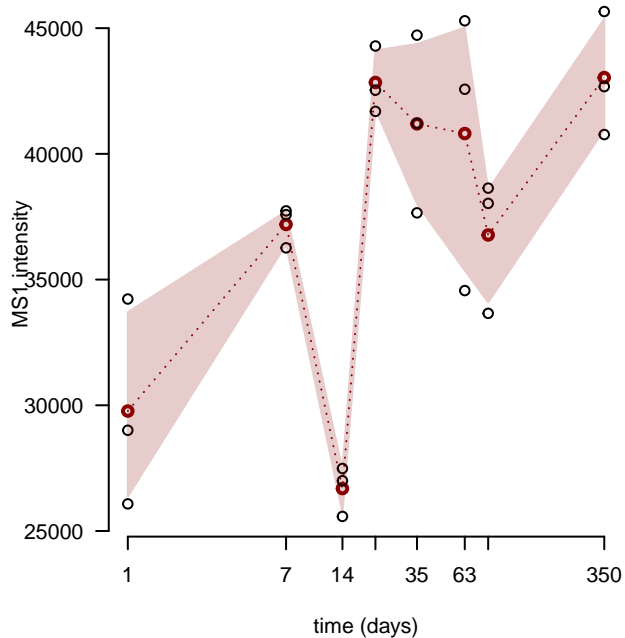

**Q64337**  
**GN=Sqstm1**  
sequestosome 1

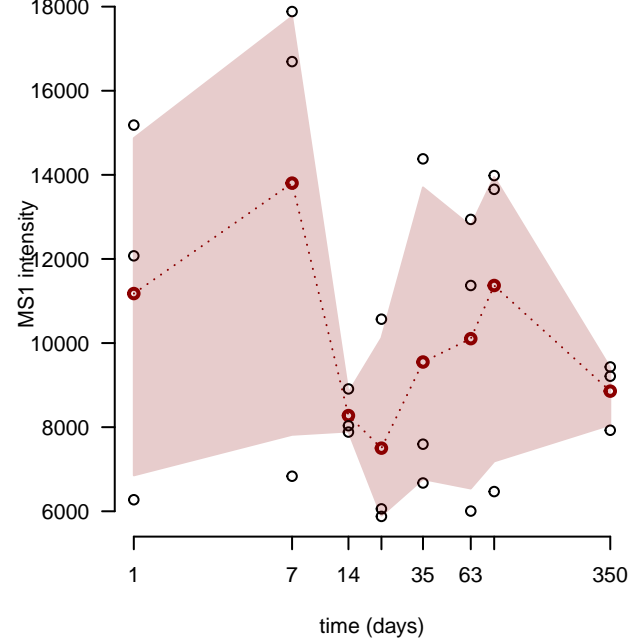

**Q64339**  
**GN=Isg15**  
ISG15 ubiquitin-like modifier

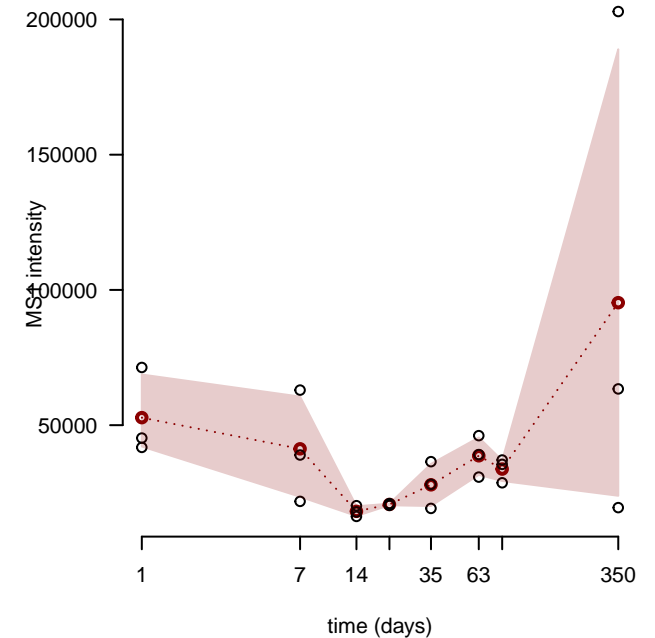

**Q64355**  
GN=Efs  
embryonal Fyn-associated substrate

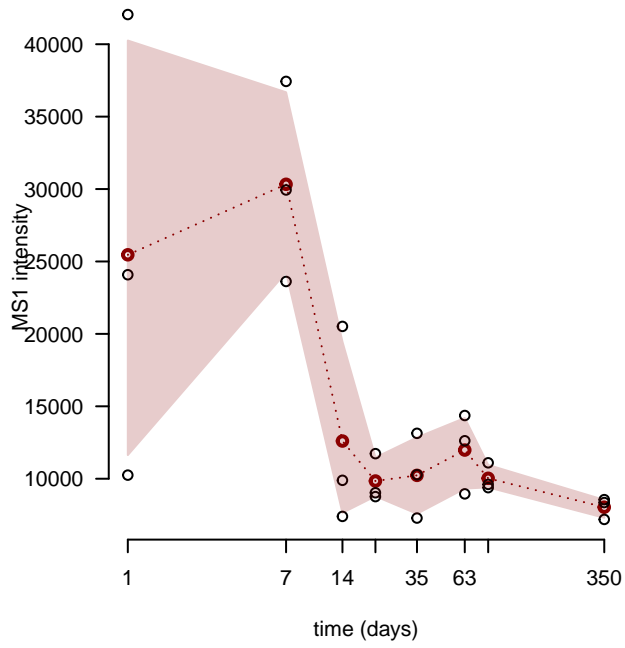

**Q64362**  
GN=Aktip  
AKT interacting protein

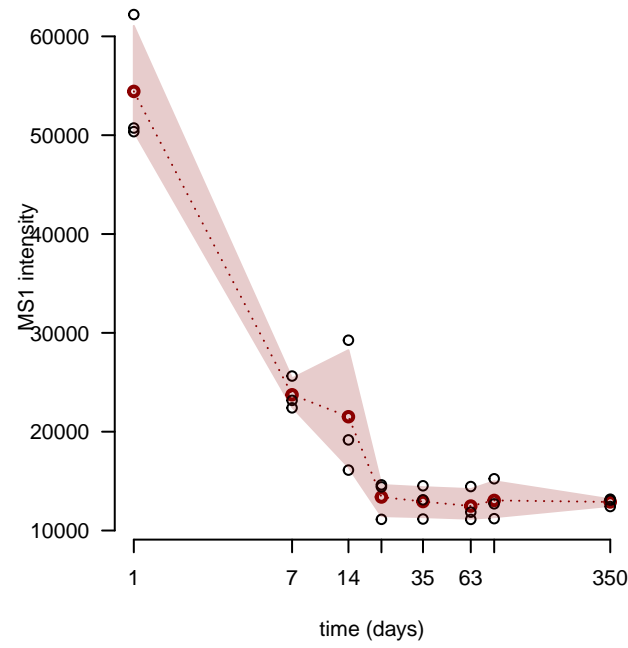

**Q64368**  
GN=Dazl  
deleted in azoospermia-like

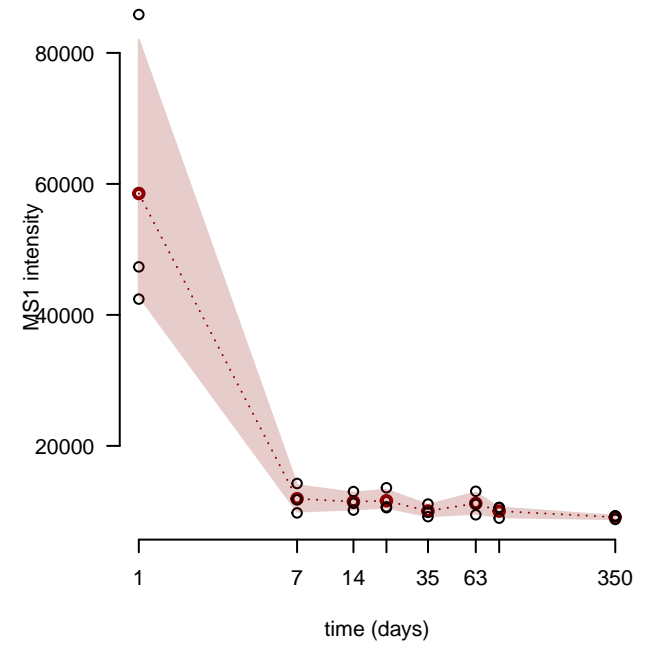

**Q64373**  
GN=Bcl2l1  
BCL2-like 1

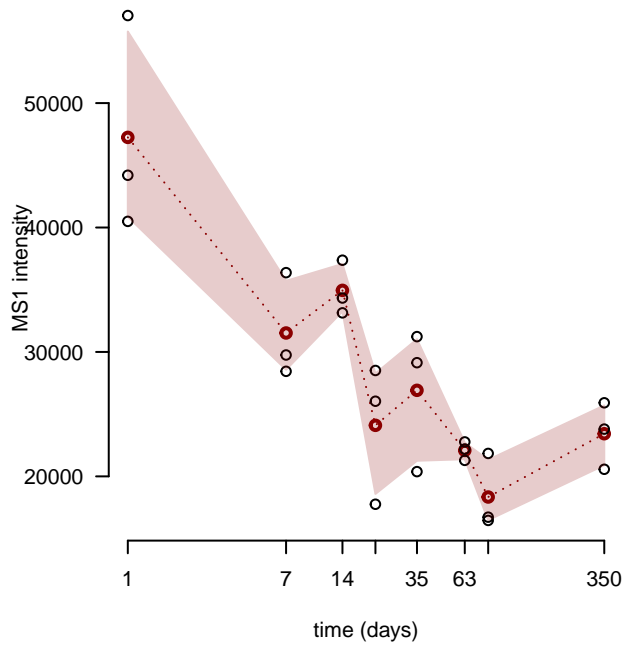

**Q64374**  
GN=Rgn  
regucalcin

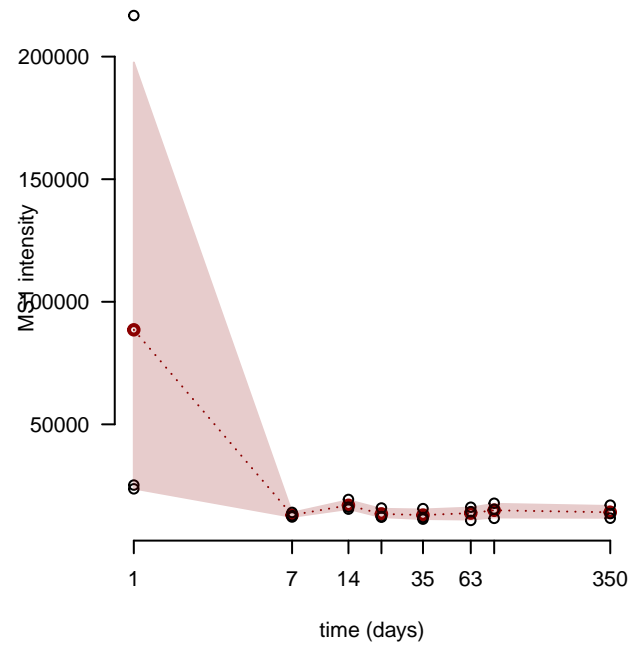

**Q64378**  
GN=Fkbp5  
FK506 binding protein 5

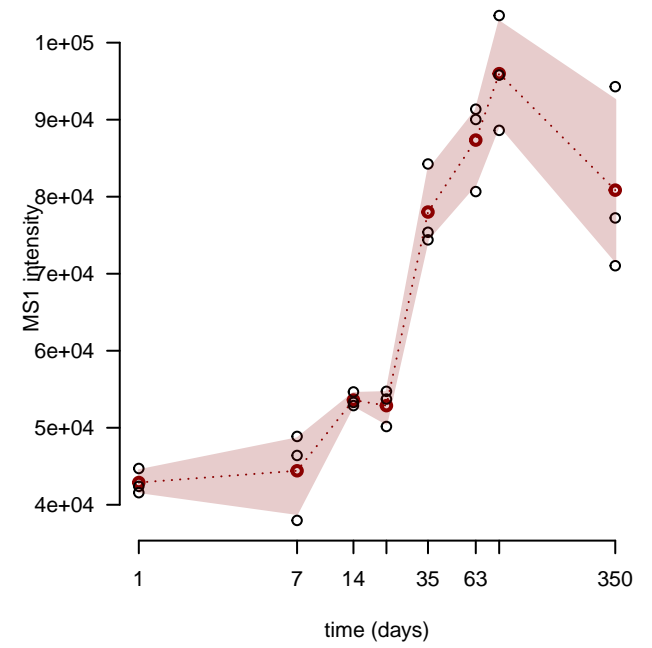

**Q64385**  
GN=Il11ra1  
interleukin 11 receptor, alpha chain 1

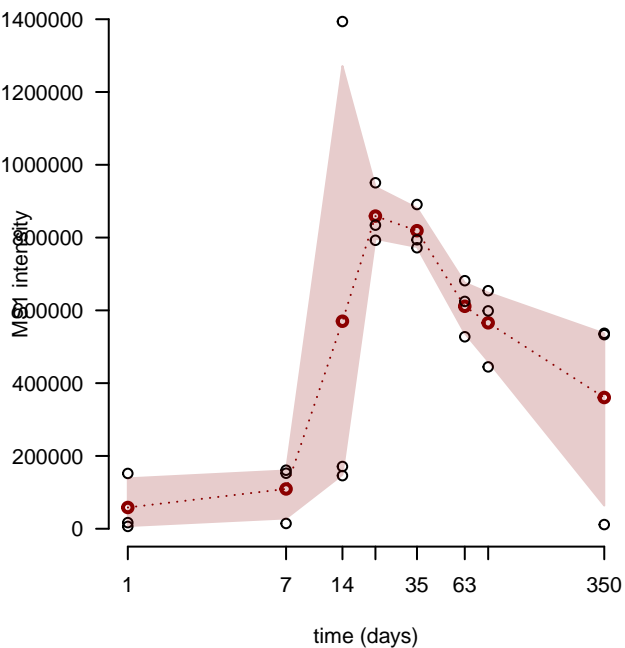

**Q64429**  
GN=Cyp1b1  
cytochrome P450, family 1, subfamily b, ...

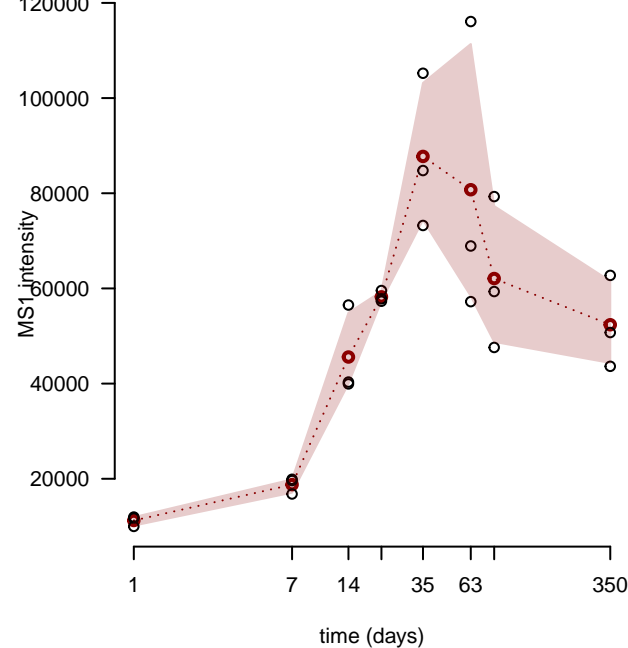

**Q64430**  
GN=Atp7a  
ATPase, Cu++ transporting, alpha polypep ...

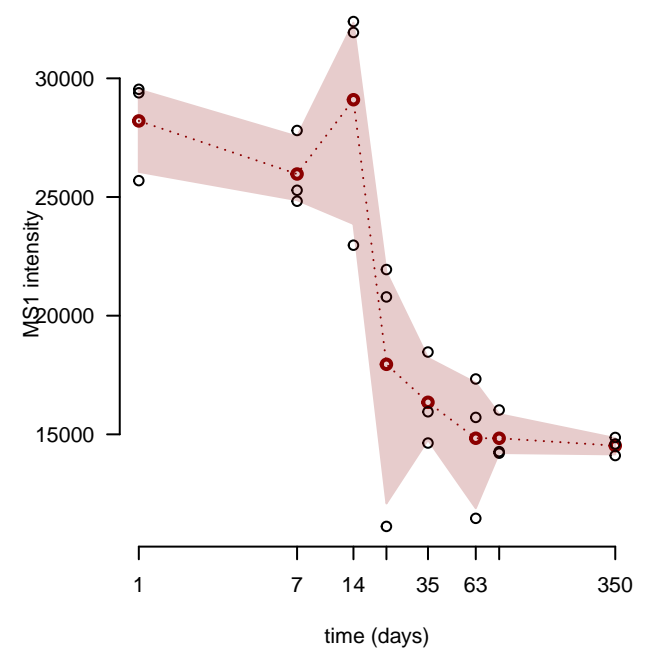

**Q64433**  
**GN=Hspe1**  
heat shock protein 1 (chaperonin 10)

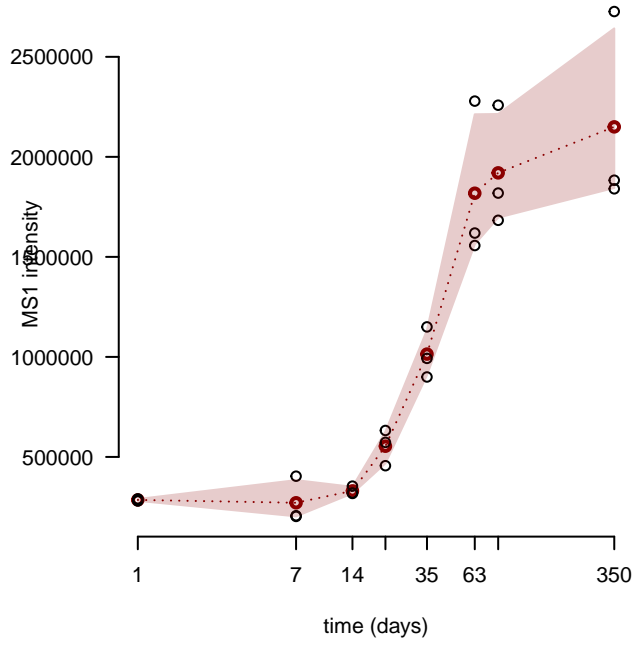

**Q64435**  
**GN=Ugt1a6**

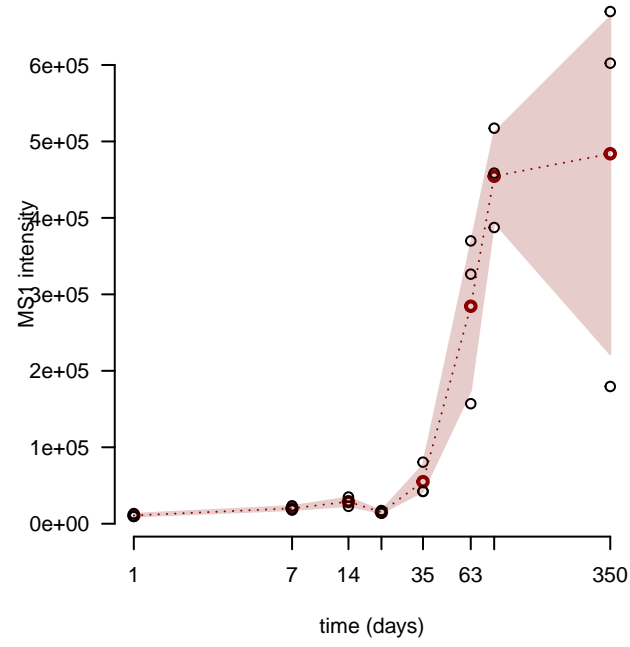

**Q64437**  
**GN=Adh7**  
alcohol dehydrogenase 7 (class IV), mu o ...

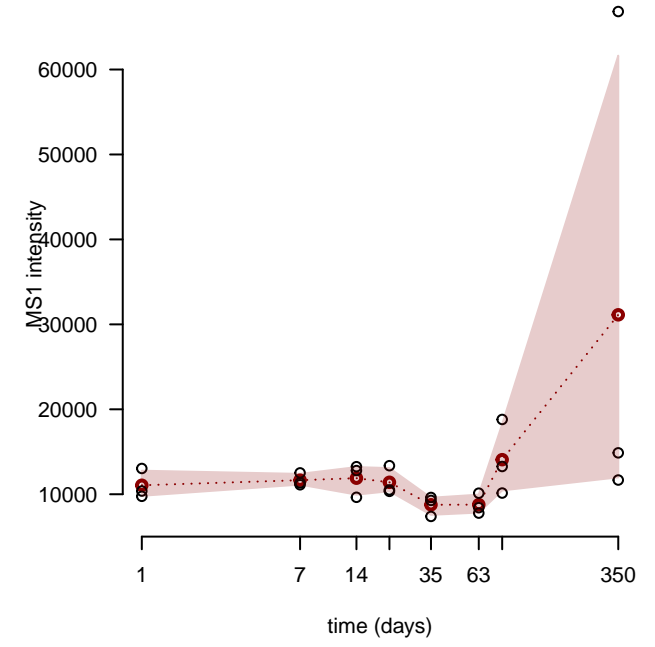

**Q64442**  
**GN=Sord**  
sorbitol dehydrogenase

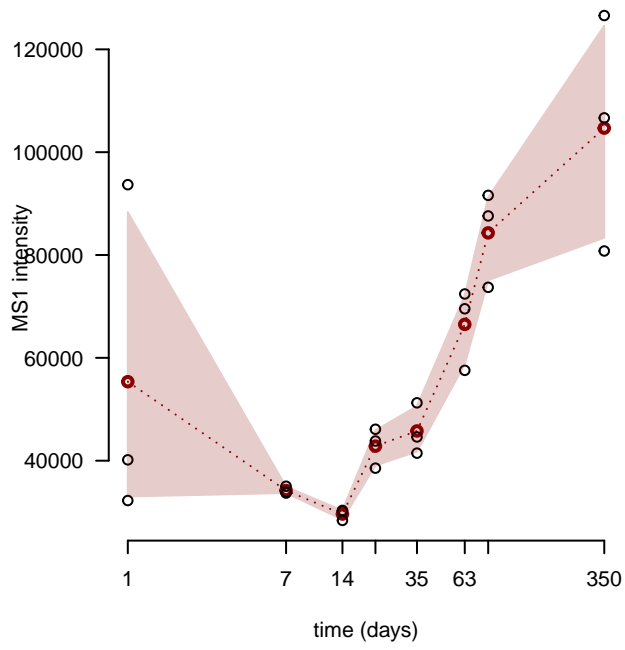

**Q64444**  
**GN=Ca4**

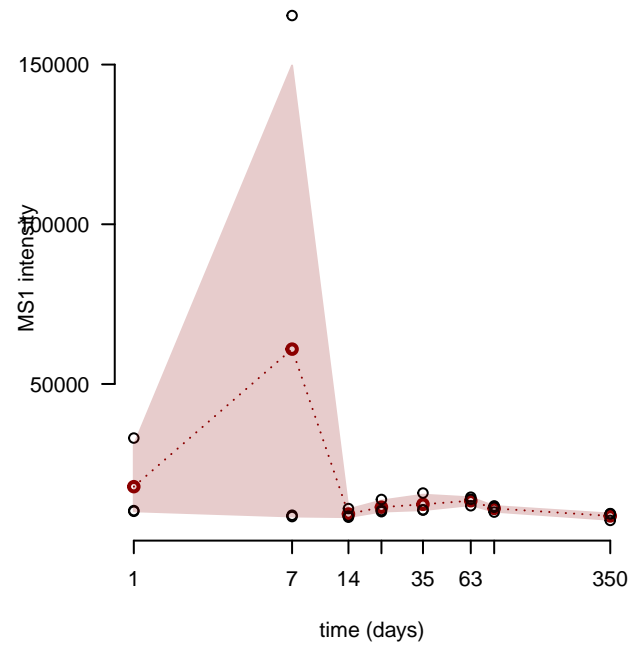

**Q64449**  
**GN=Mrc2**  
mannose receptor, C type 2

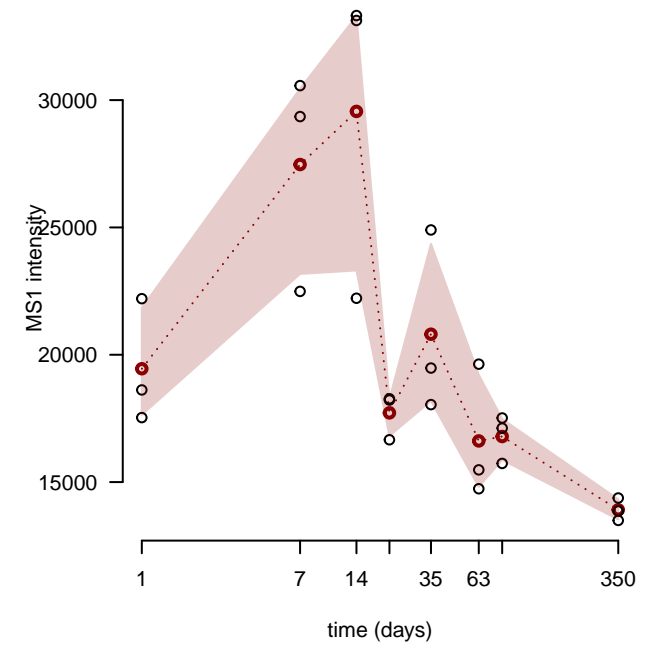

**Q64455**  
**GN=Ptprij**  
protein tyrosine phosphatase, receptor t ...

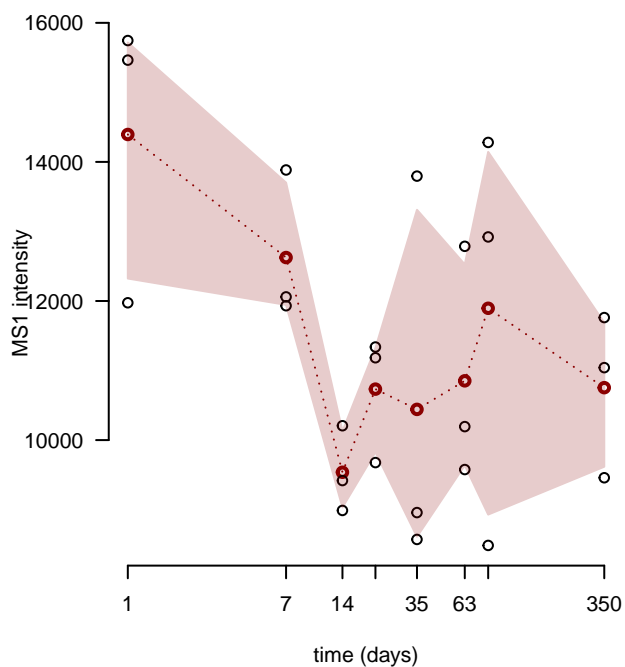

**Q64462**  
**GN=Cyp4b1**  
cytochrome P450, family 4, subfamily b, ...

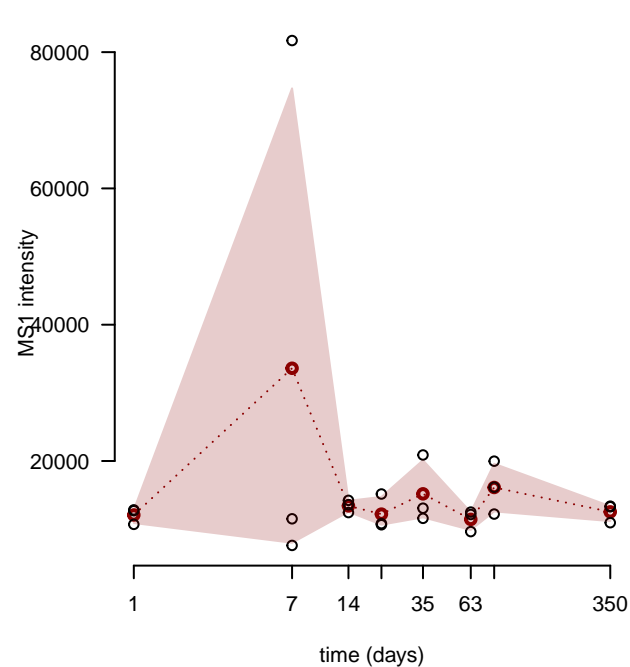

**Q64471**  
**GN=Gstt1**  
glutathione S-transferase, theta 1

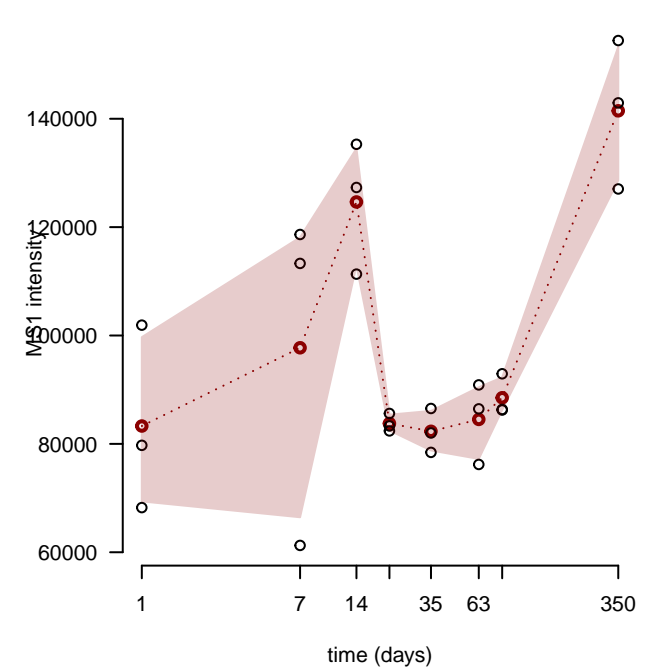

**Q64478**  
GN=Hist1h2bh

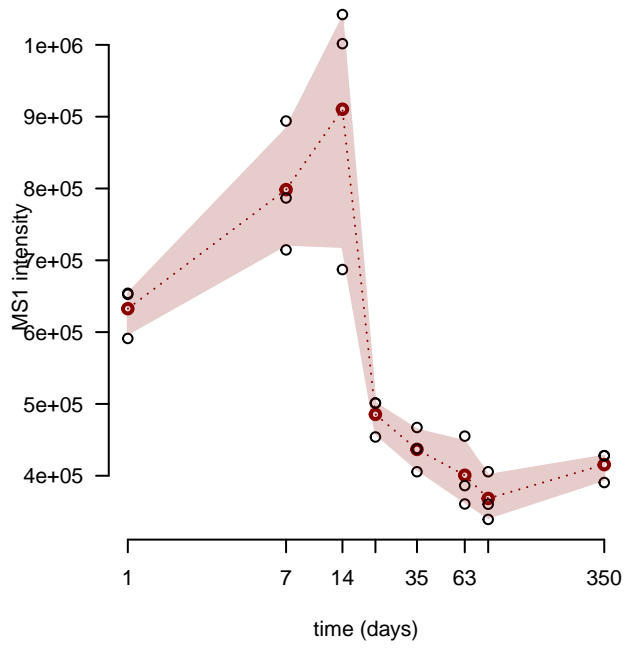

**Q64487**  
GN=Ptpd  
protein tyrosine phosphatase, receptor t...

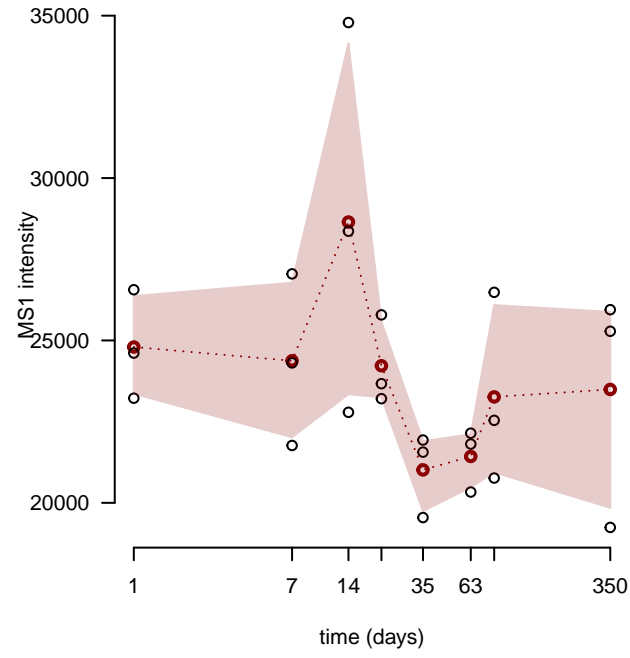

**Q64511**  
GN=Top2b  
topoisomerase (DNA) II beta

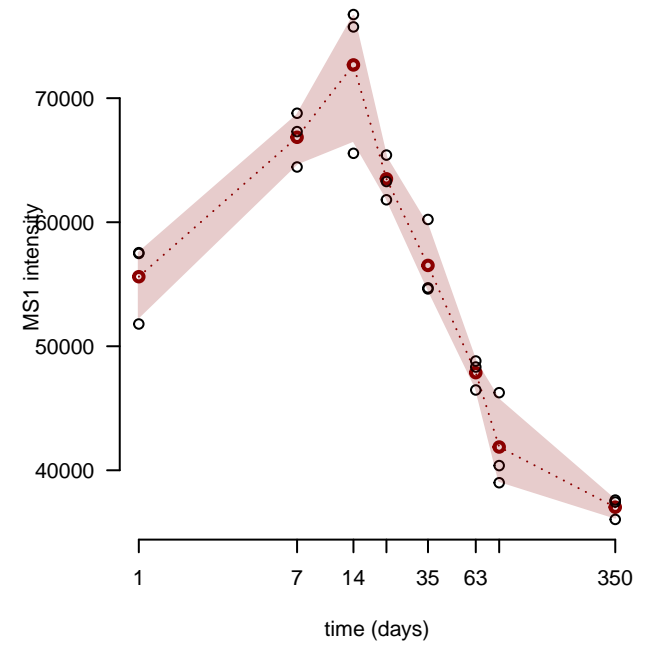

**Q64512**  
GN=Ptpn13  
protein tyrosine phosphatase, non-recept ...

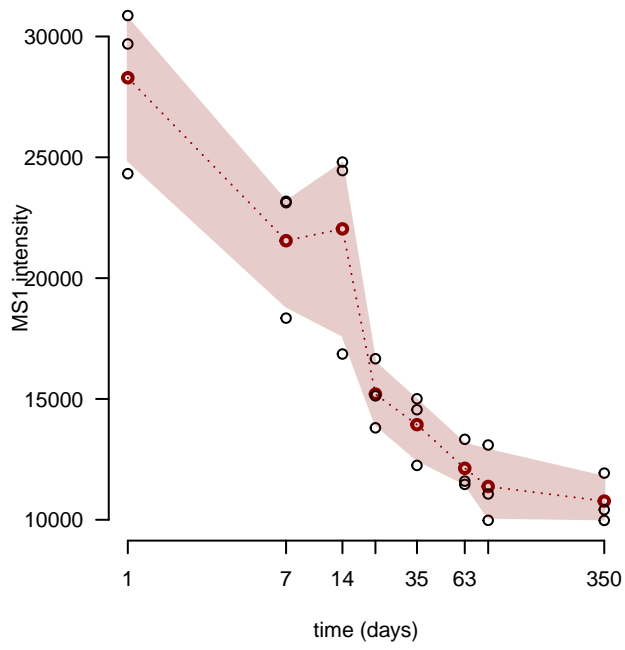

**Q64514**  
GN=Tpp2  
tripeptidyl peptidase II

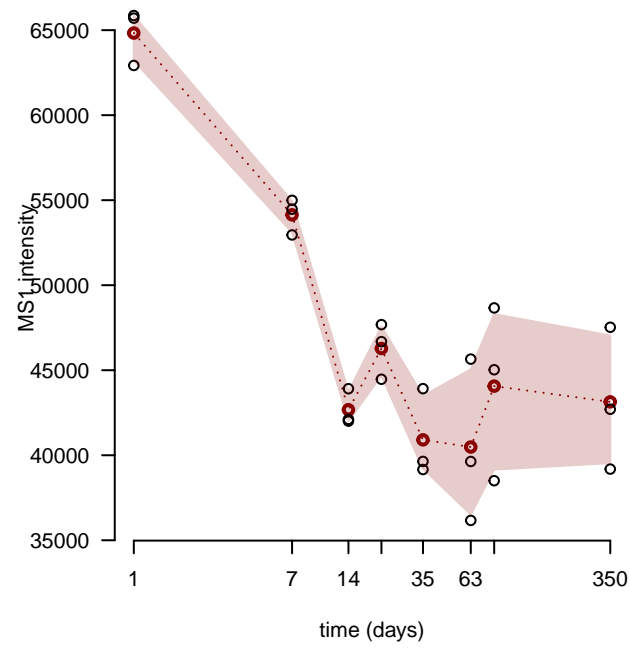

**Q64514**  
GN=Tpp2  
tripeptidyl peptidase II

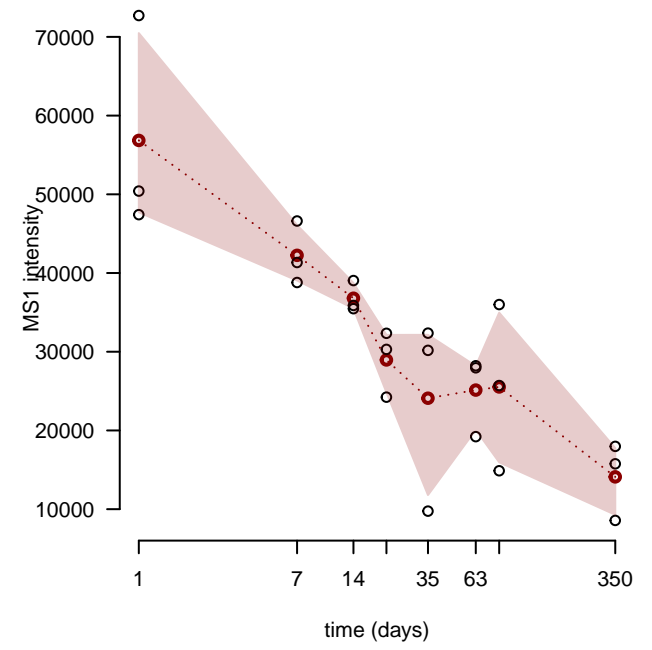

**Q64516**  
GN=Gk  
glycerol kinase

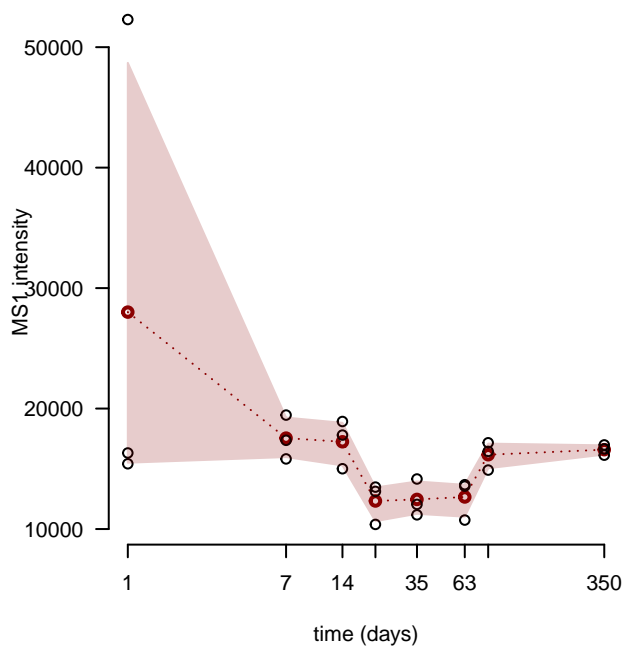

**Q64518**  
GN=Atp2a3  
ATPase, Ca++ transporting, ubiquitous

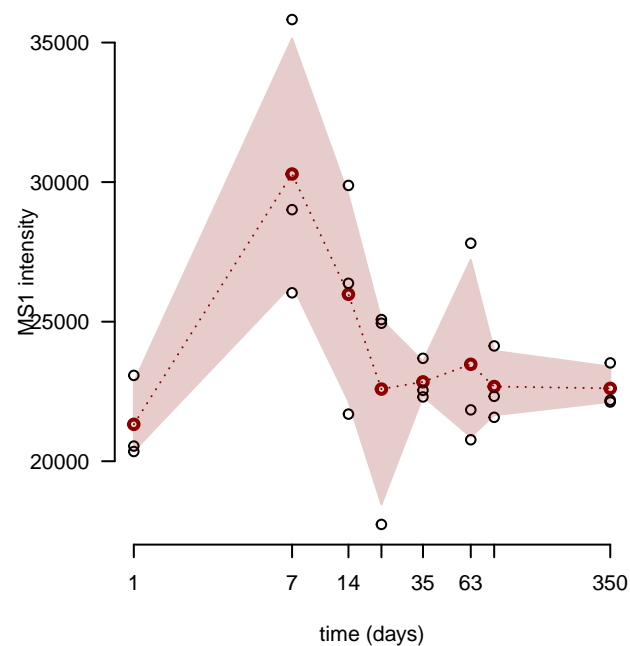

**Q64519**  
GN=Sdc3  
syndecan 3

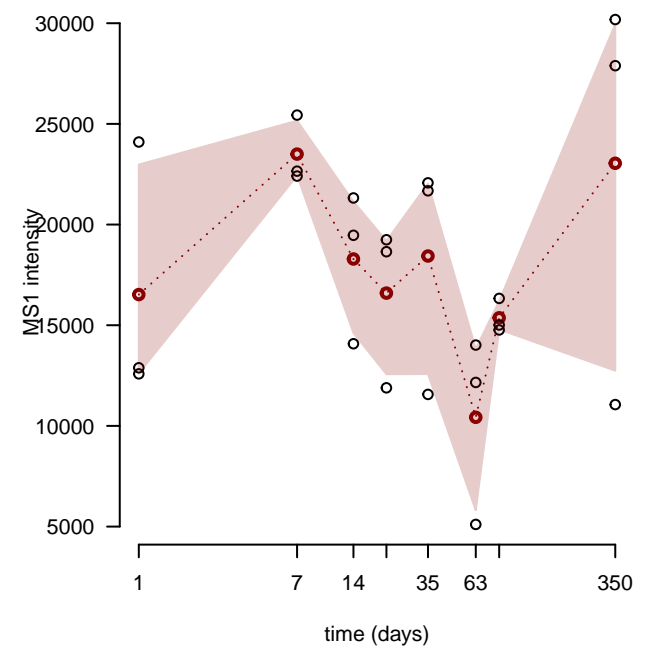



**Q64520**  
**GN=Guk1**  
guanylate kinase 1

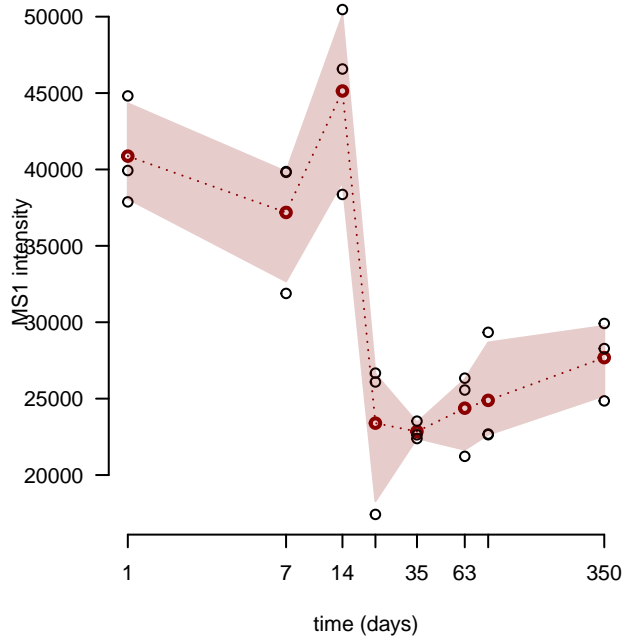

**Q64521**  
**GN=Gpd2**  
glycerol phosphate dehydrogenase 2, mito ...

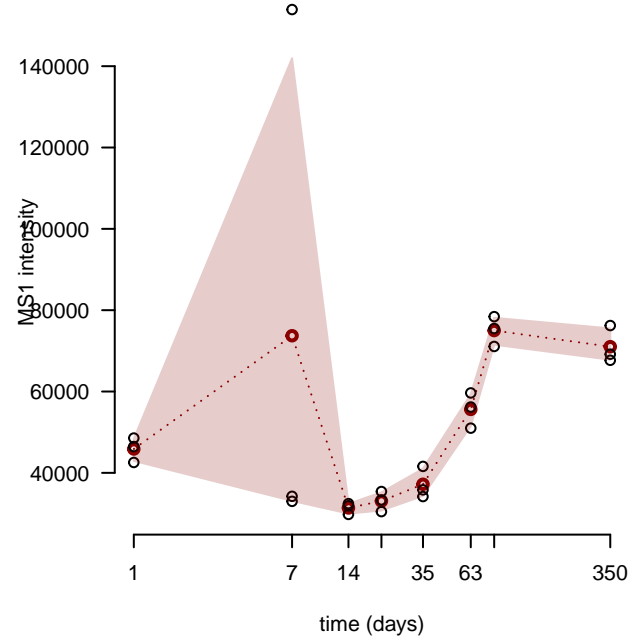

**Q64522**  
**GN=Hist2h2ab**

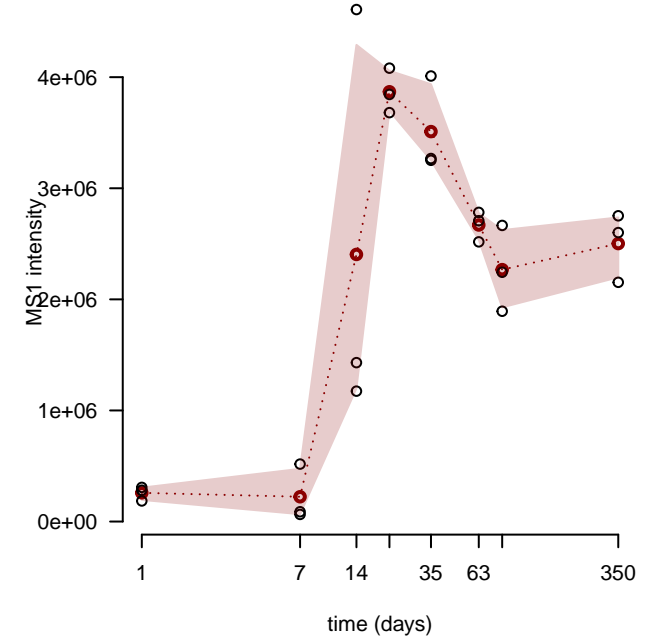

**Q64523**  
**GN=Hist2h2ac**

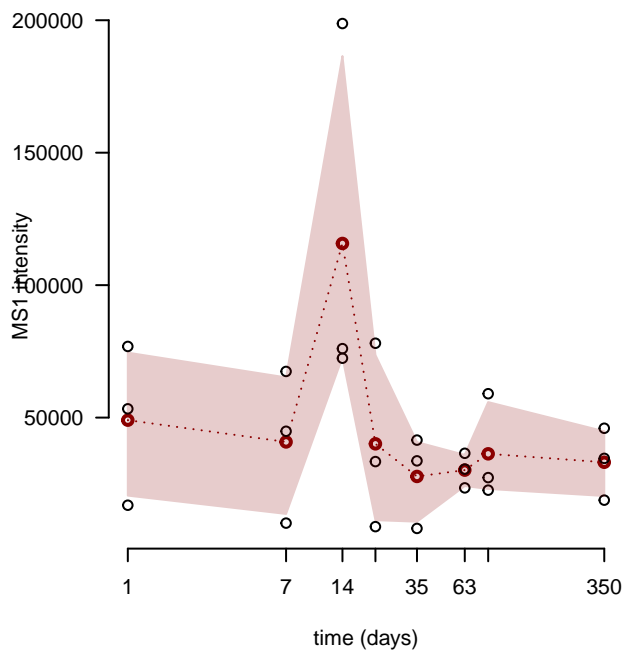

**Q64524**  
**GN=Hist2h2be**

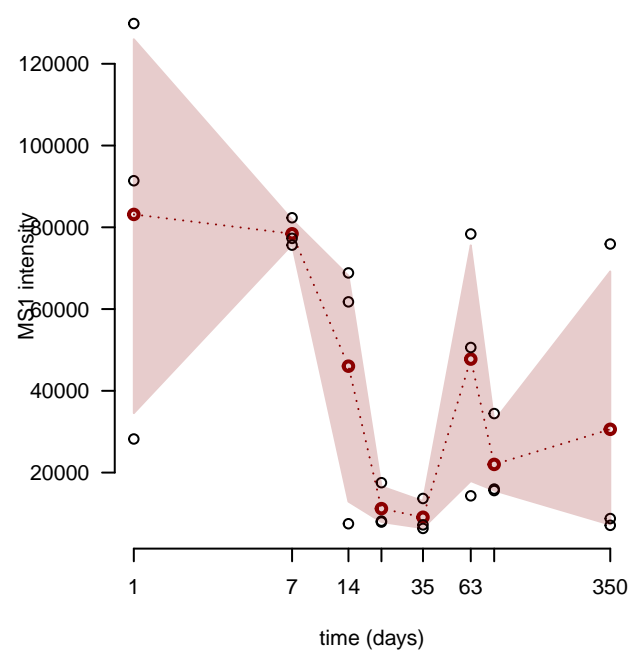

**Q64525**  
**GN=Hist2h2bb**

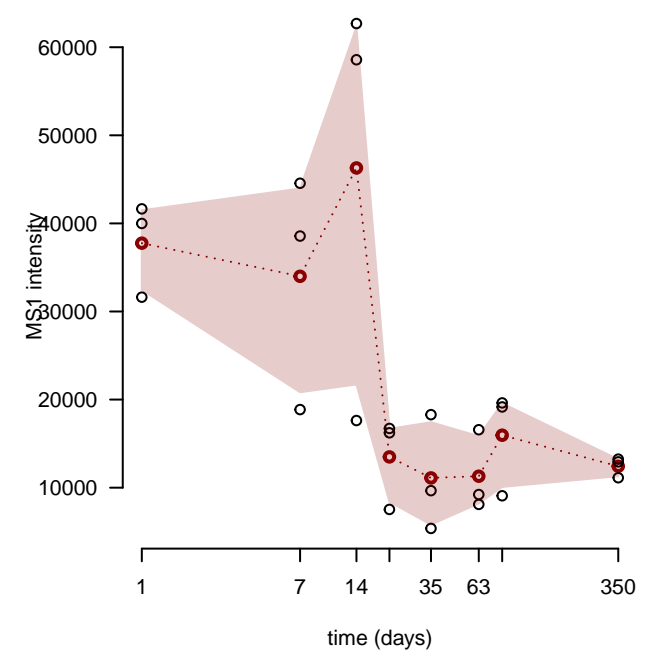

**Q64669**  
**GN=Nqo1**  
NAD(P)H dehydrogenase, quinone 1

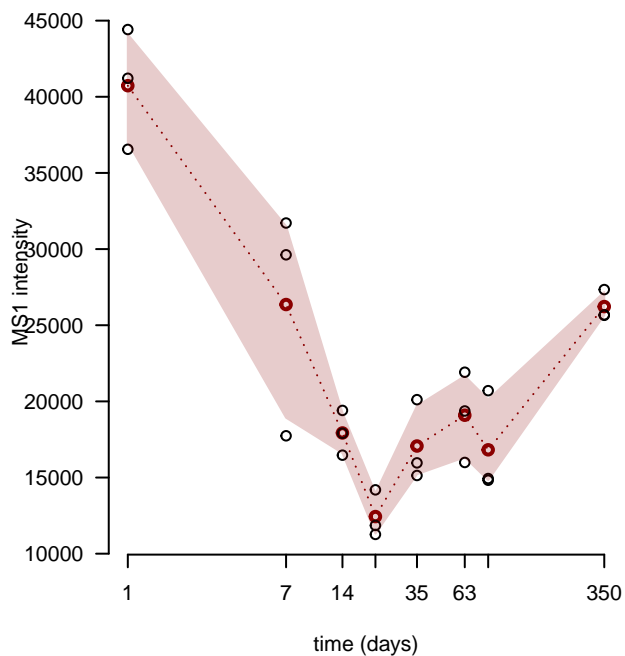

**Q64674**  
**GN=Srm**  
spermidine synthase

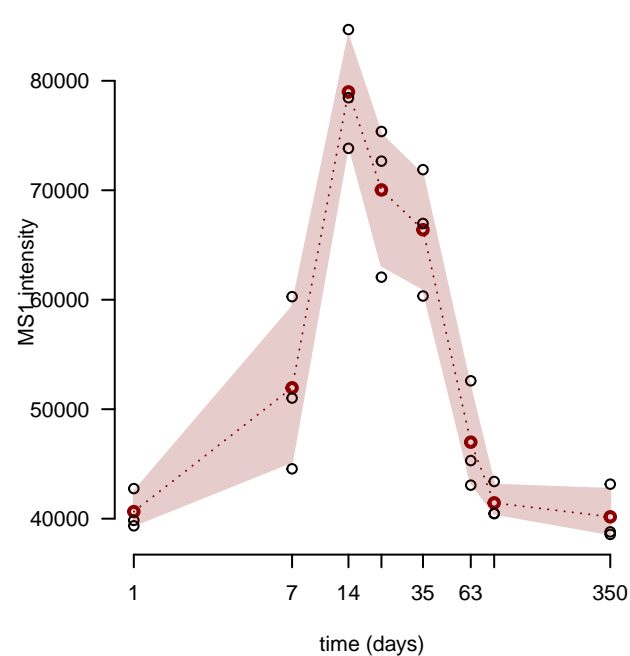

**Q64685**  
**GN=St6gal1**  
beta galactoside alpha 2,6 sialyltransfe ...

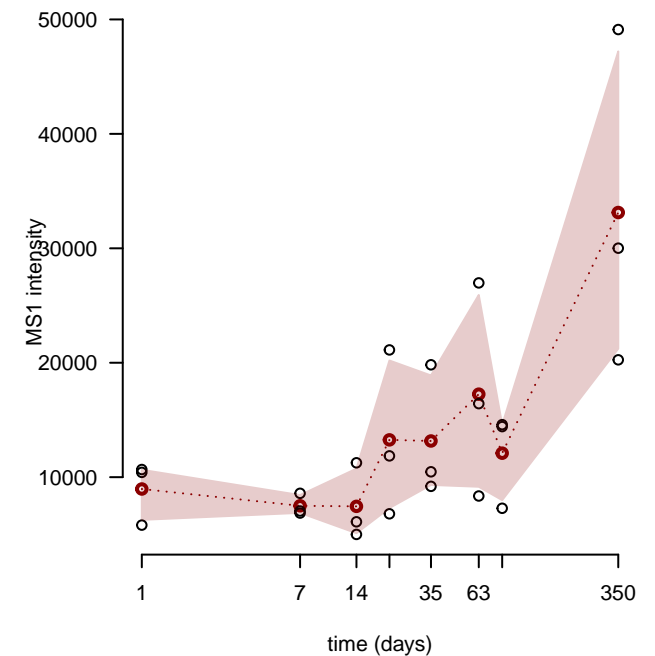

**Q64687**  
**GN=St8sia1**  
ST8 alpha-N-acetyl-neuraminide alpha-2,8 ...

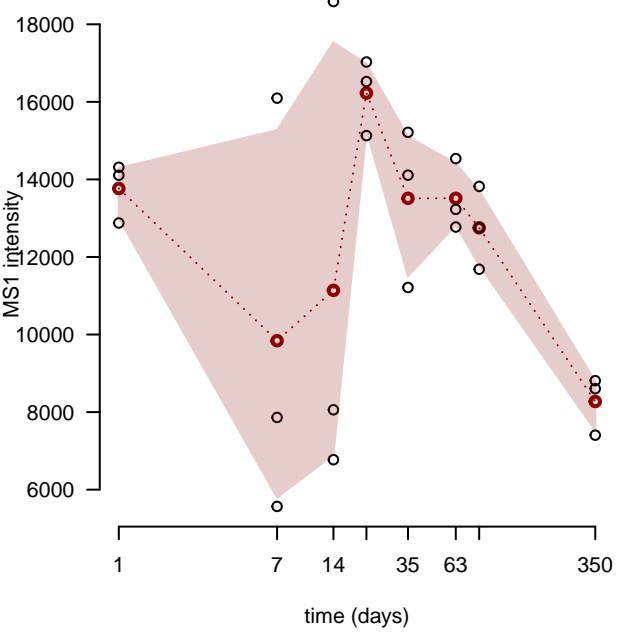

**Q64695**  
**GN=Procr**  
protein C receptor, endothelial

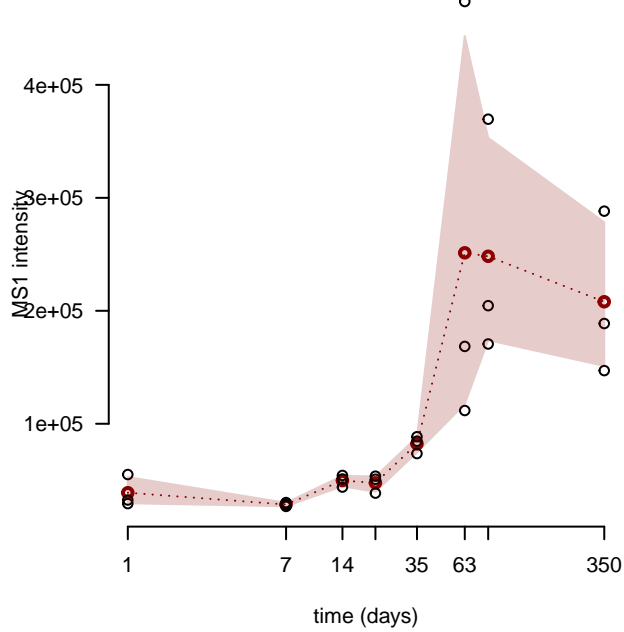

**Q64700**  
**GN=Rbl2**  
RB transcriptional corepressor like 2

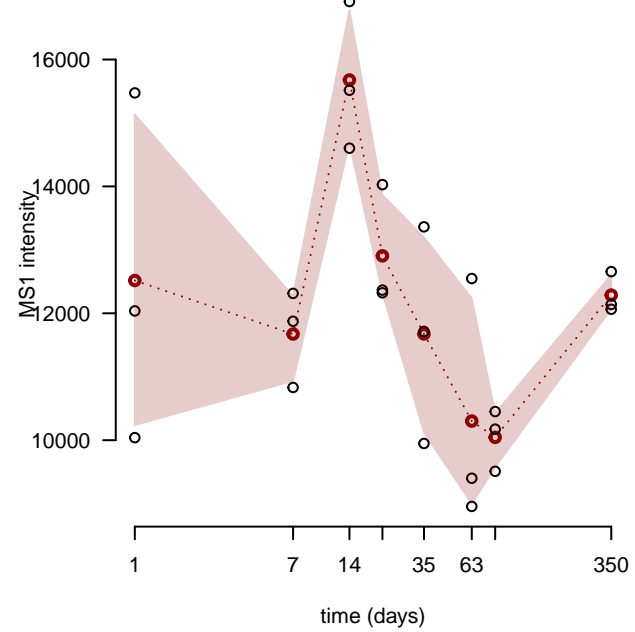

**Q64704**  
**GN=Stx3**  
syntaxin 3

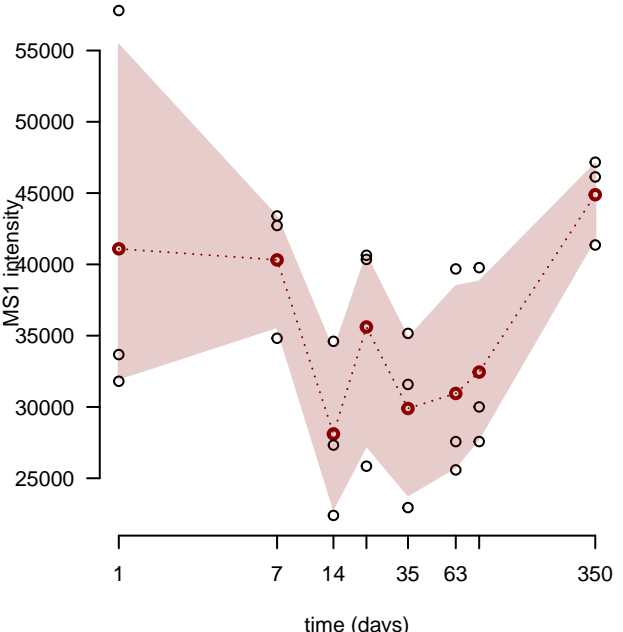

**Q64705**  
**GN=Usf2**  
upstream transcription factor 2

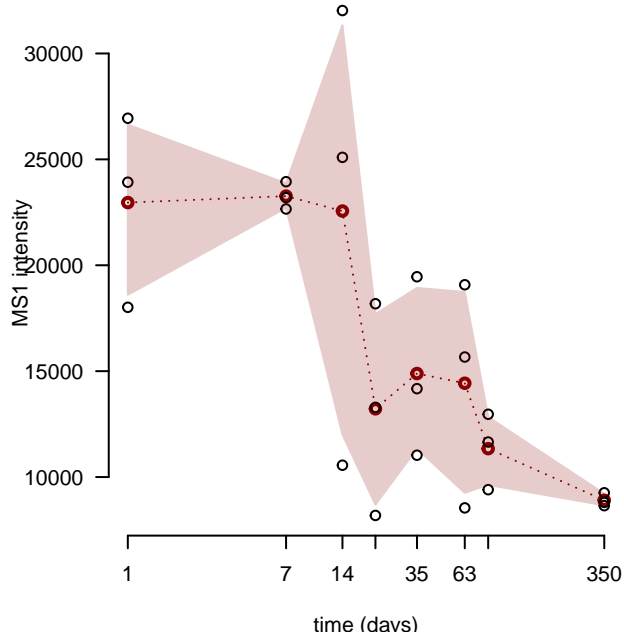

**Q64707**  
**GN=Zrsr1**  
zinc finger (CCCH type), RNA binding mot ...

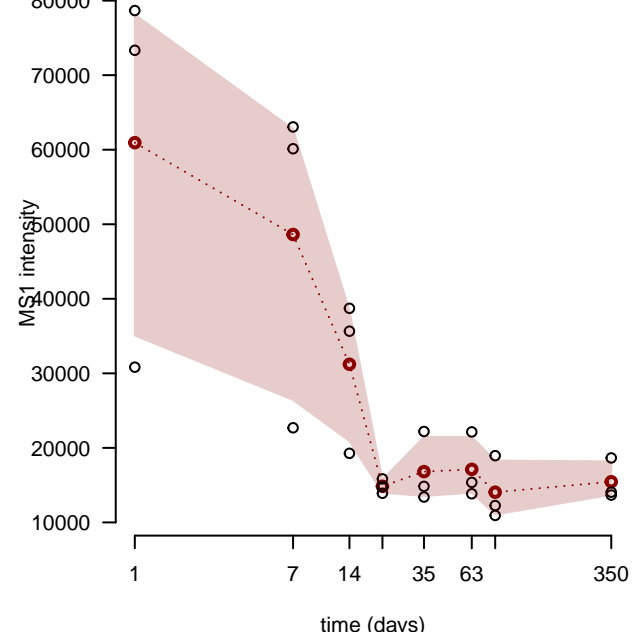

**Q64726**  
**GN=Azgp1**  
alpha-2-glycoprotein 1, zinc

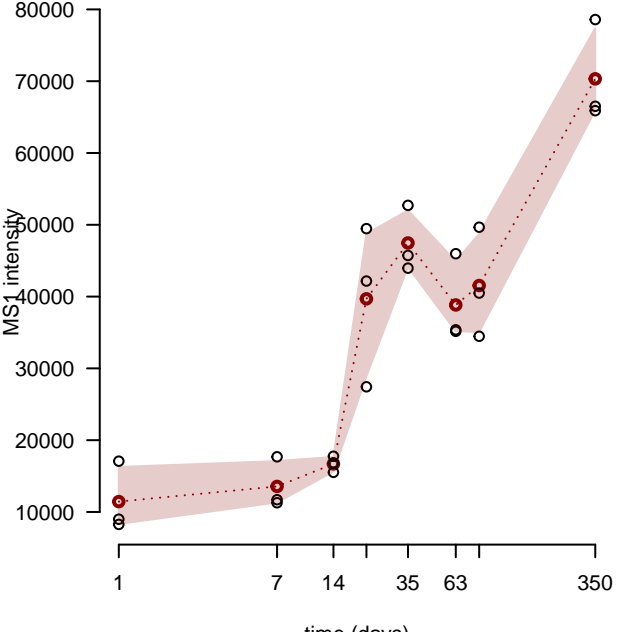

**Q64727**  
**GN=Vcl**  
vinculin

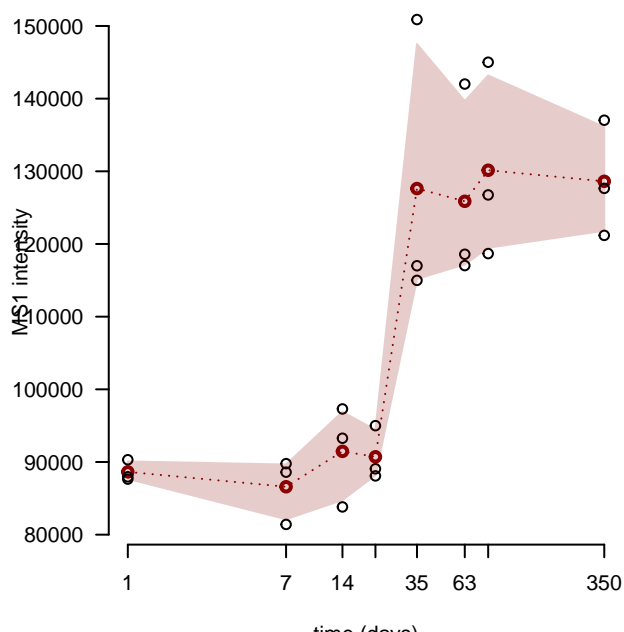

**Q64729**  
**GN=Tgfbr1**  
transforming growth factor, beta recepto ...

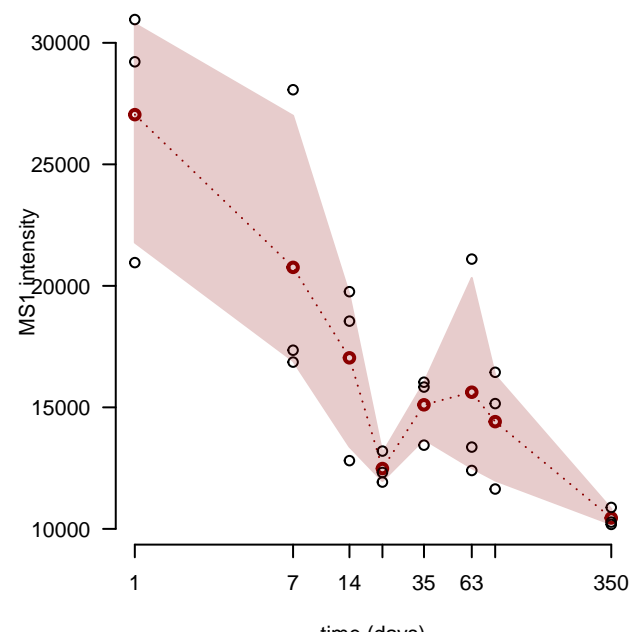

**Q64735**  
**GN=Cr11**  
complement component (3b/4b) receptor 1- ...

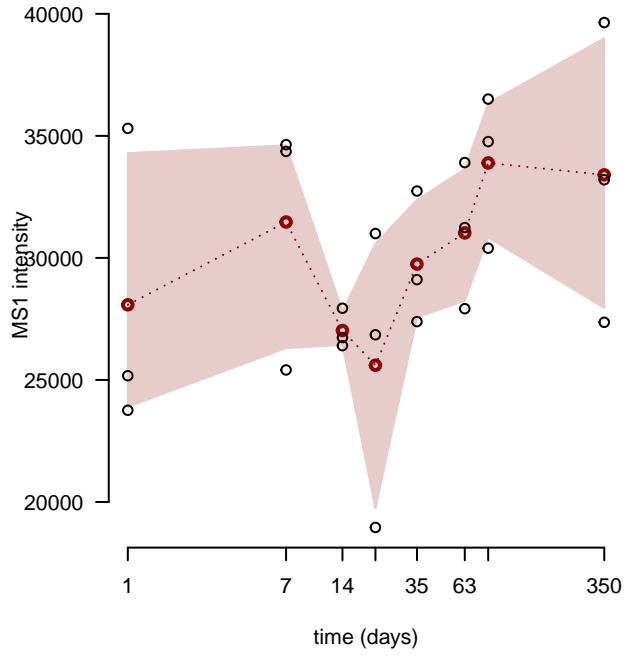

**Q64737**  
**GN=Gart**  
phosphoribosylglycinamide formyltransfer ...

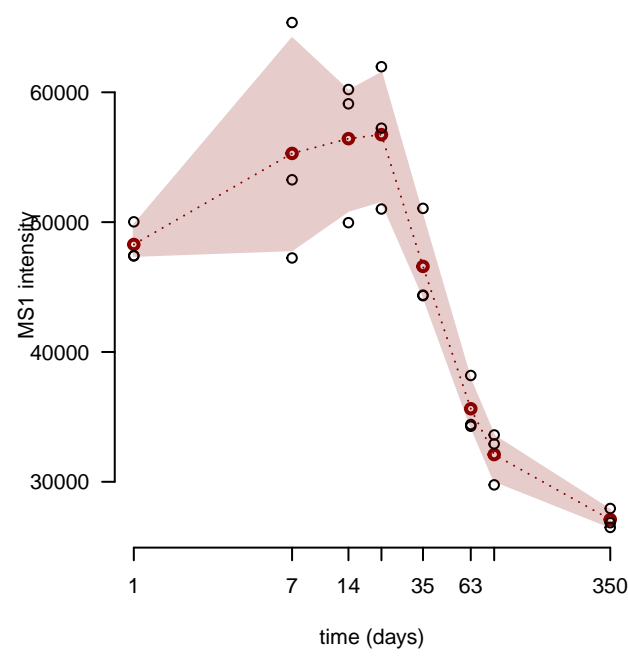

**Q64FW2**  
**GN=Retsat**  
retinol saturase (all trans retinol 13,1 ...

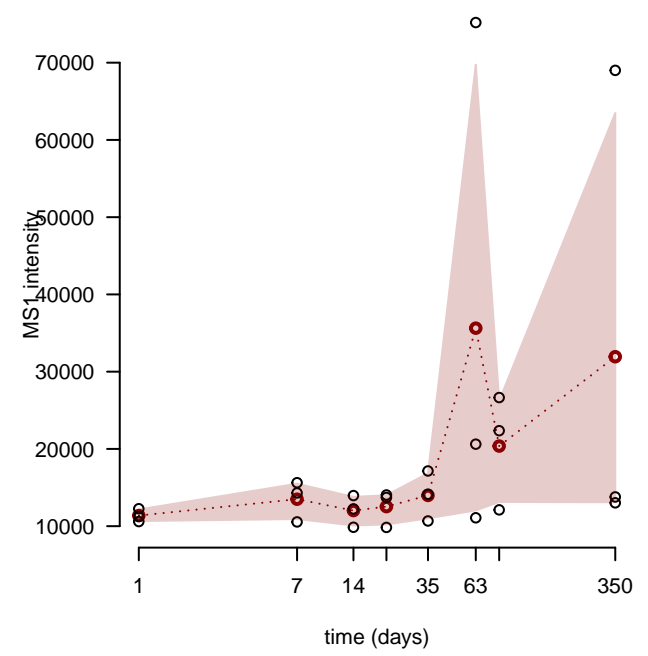

**Q64GA5**  
**GN=Pla2g4c**  
phospholipase A2, group IVC (cytosolic, ...

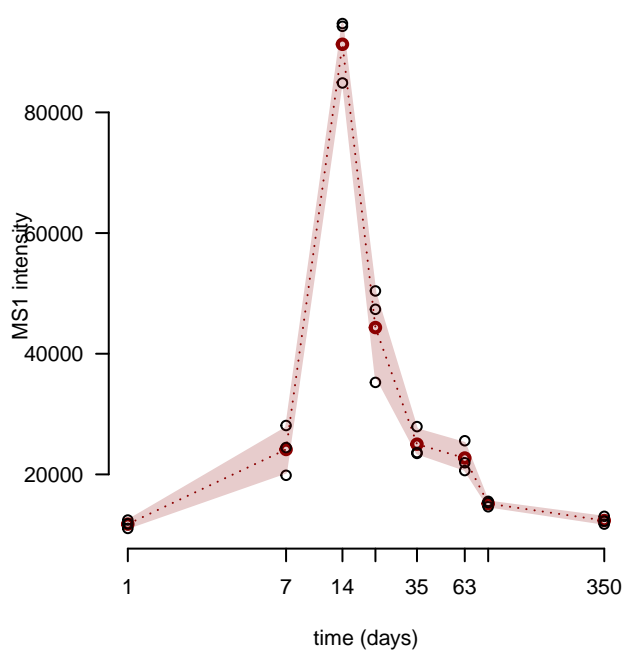

**Q65Z40**  
**GN=Wapl**  
WAPL cohesin release factor

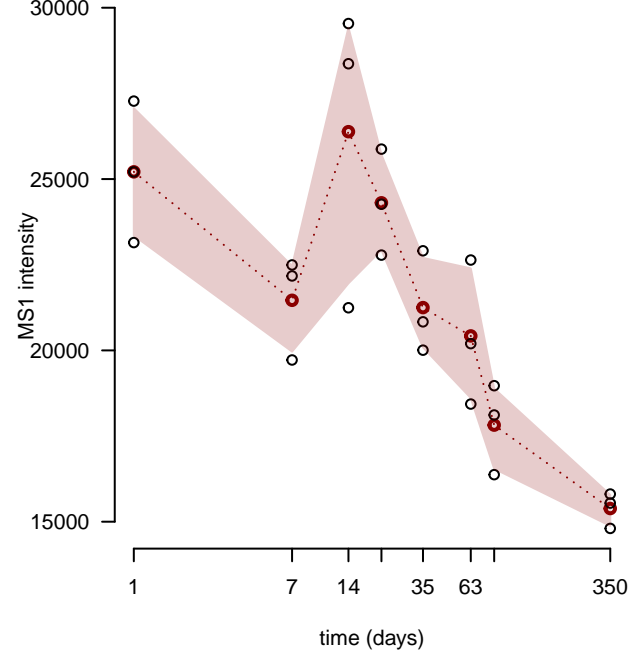

**Q66GT5**  
**GN=Ptpmt1**  
protein tyrosine phosphatase, mitochondr ...

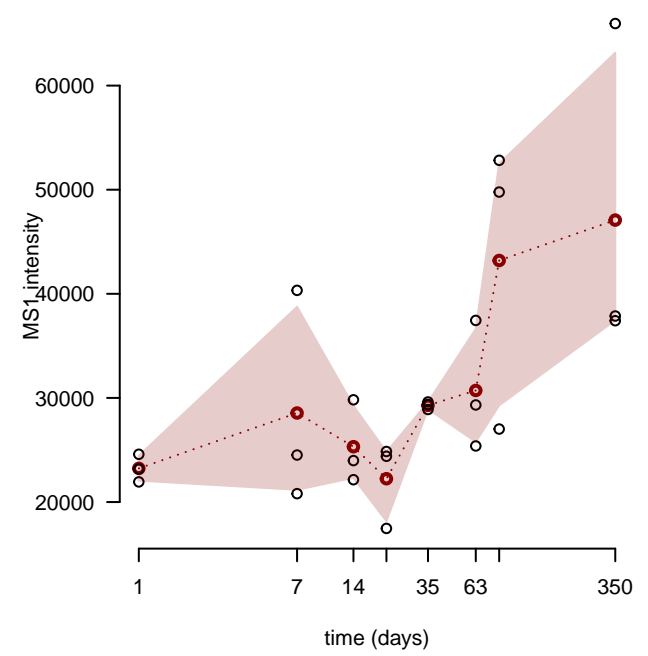

**Q66JQ7**  
**GN=Knl1**  
kinetochore scaffold 1

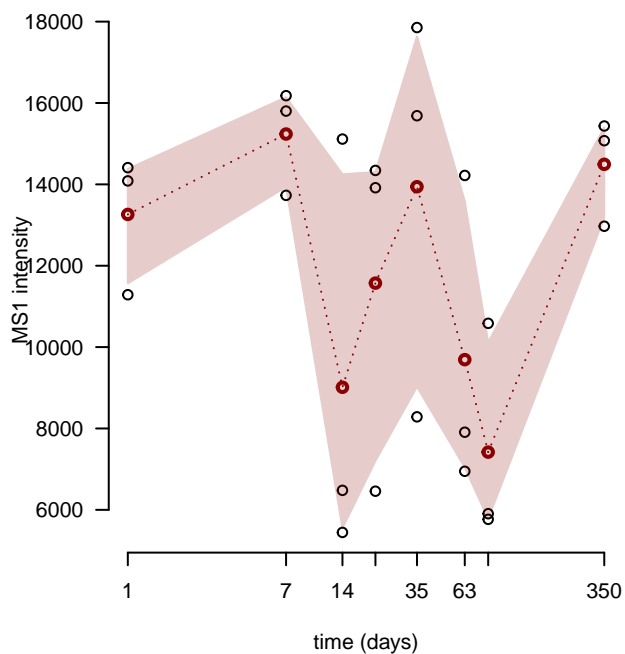

**Q66JS6**  
**GN=Eif3j2**  
eukaryotic translation initiation factor ...

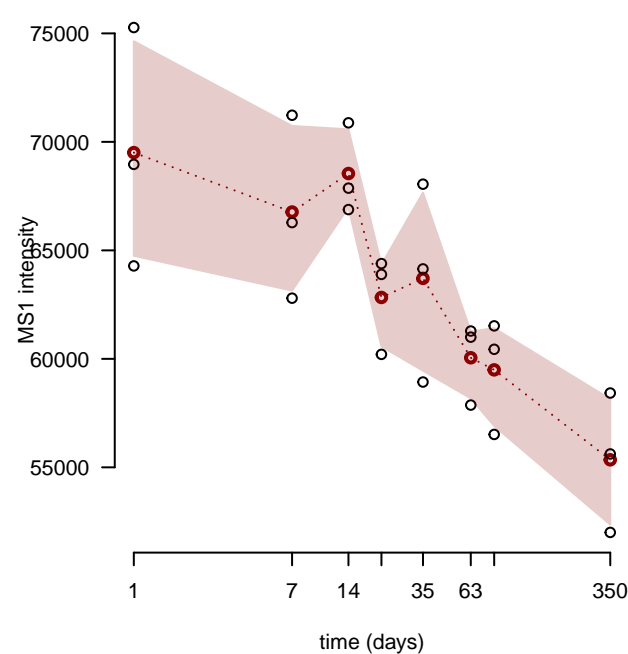

**Q66JV4**  
**GN=Rbm12b2**  
RNA binding motif protein 12 B2

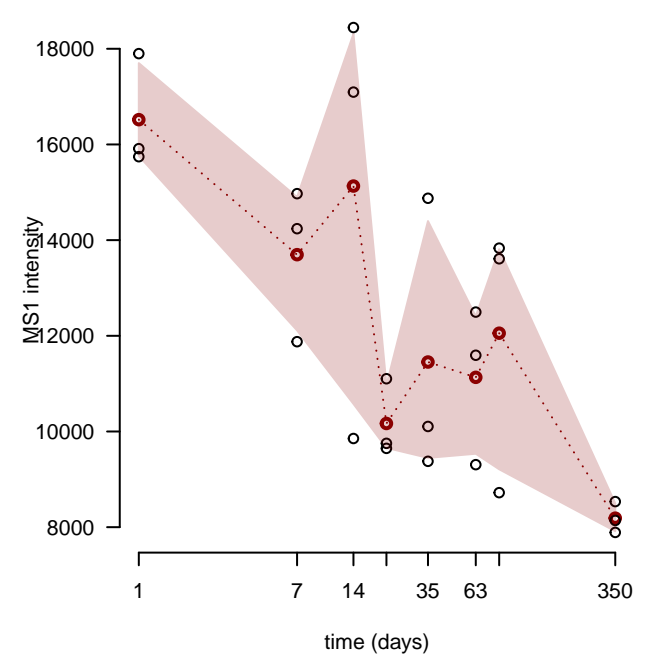

**Q66JX5**  
GN=Fgfr1op

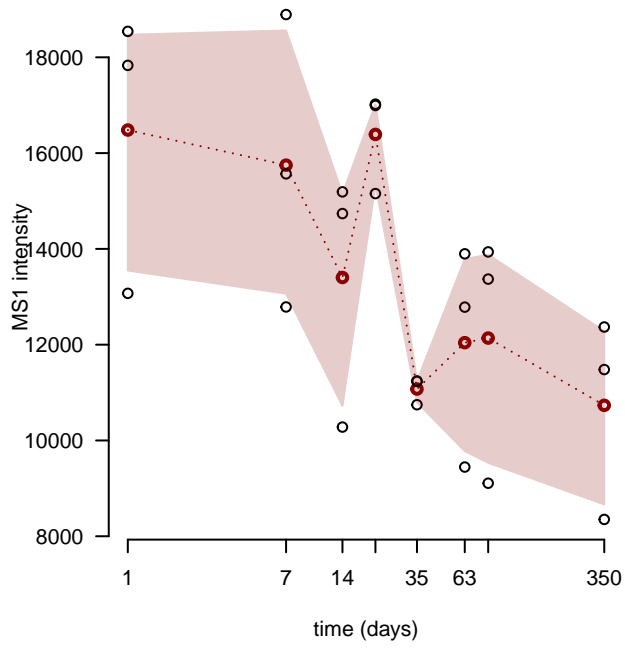

**Q66T02**  
GN=Pleckhg5  
pleckstrin homology domain containing, f...

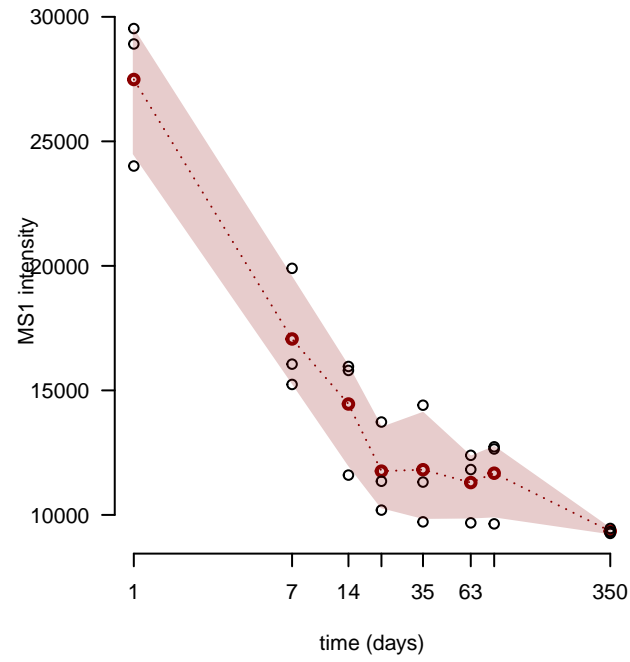

**Q66X03**  
GN=Nlrp9a  
NLR family, pyrin domain containing 9A

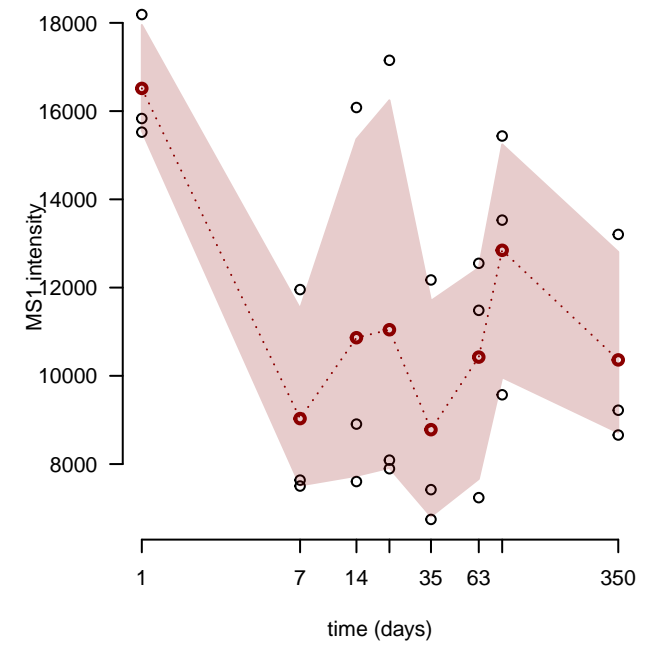

**Q66X05**  
GN=Nlrp4f  
NLR family, pyrin domain containing 4F

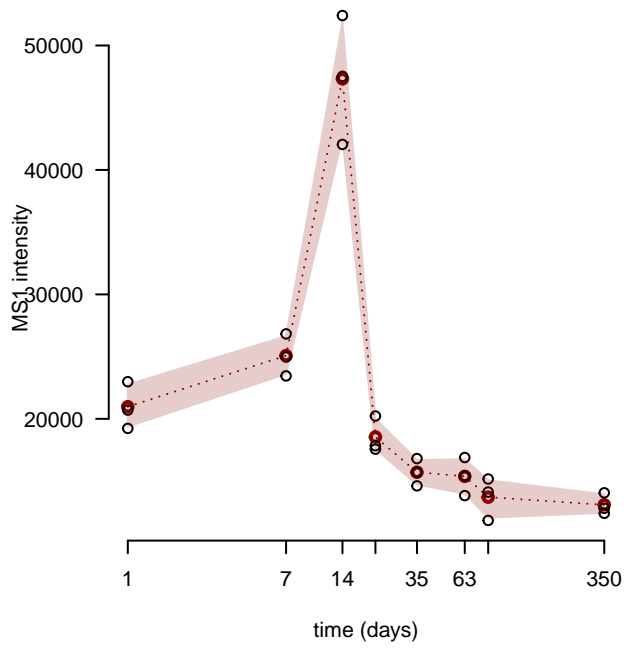

**Q66X19**  
GN=Nlrp4e  
NLR family, pyrin domain containing 4E

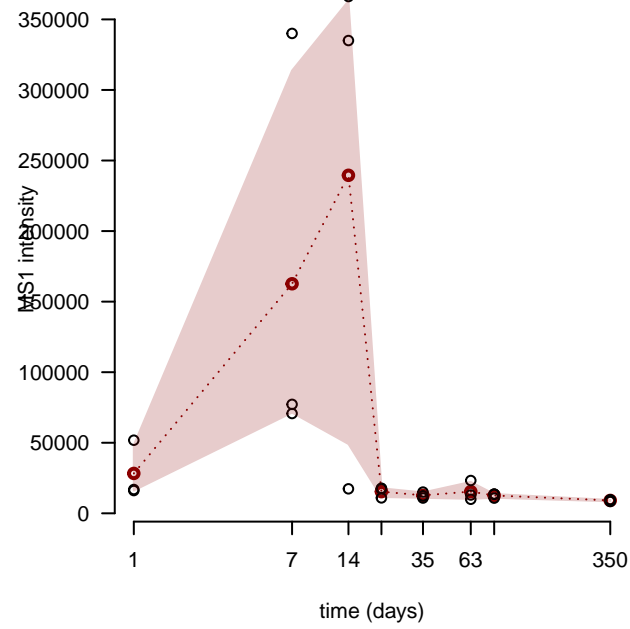

**Q66X22**  
GN=Nlrp9b  
NLR family, pyrin domain containing 9B

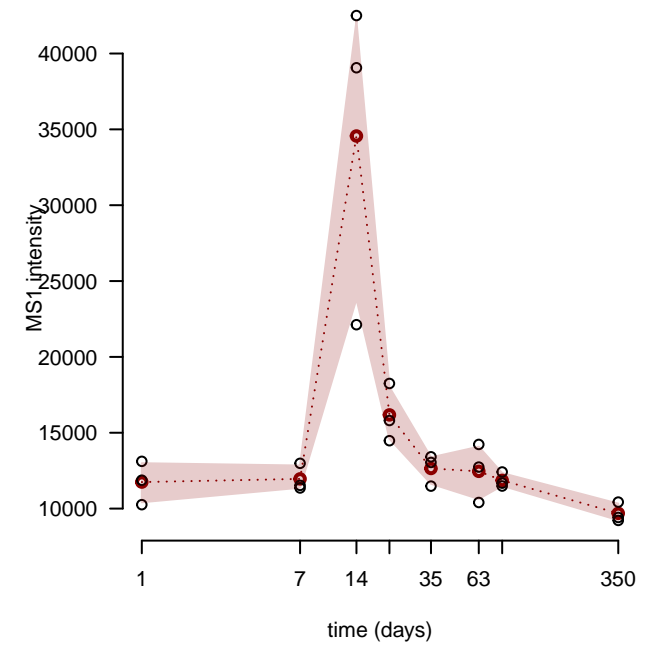

**Q673H1**  
GN=Tusc1  
tumor suppressor candidate 1

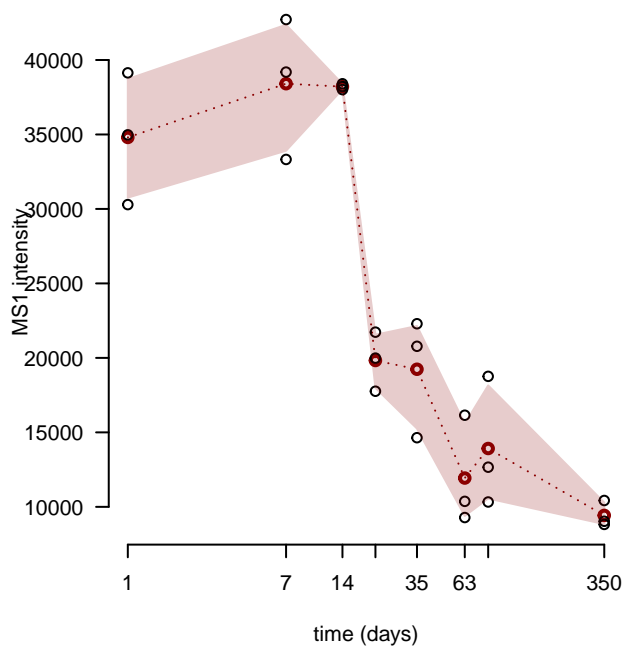

**Q67FY2**  
GN=Bcl9l  
B cell CLL/lymphoma 9-like

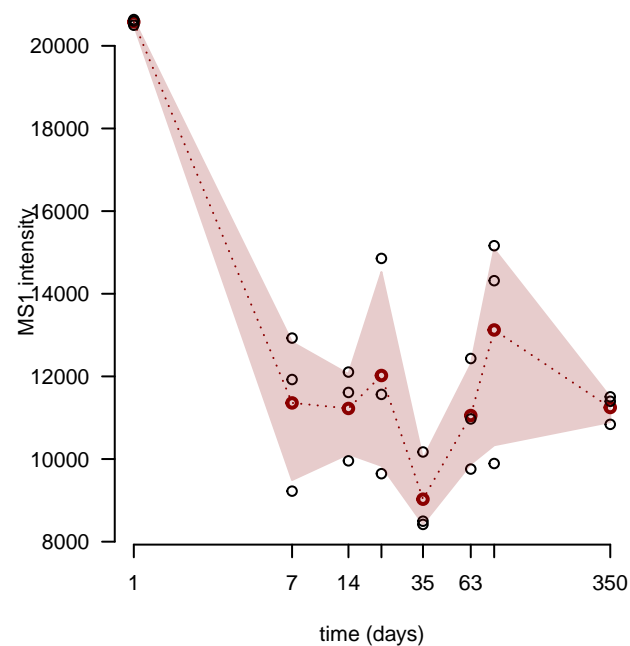

**Q684R7**  
GN=Frem1  
Fras1 related extracellular matrix prote ...

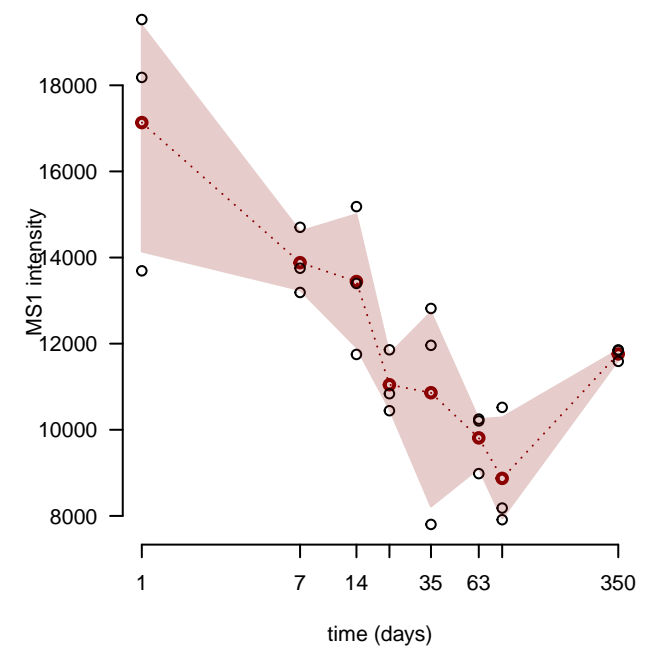

**Q689Z5**  
**GN=Sbno1**  
strawberry notch 1

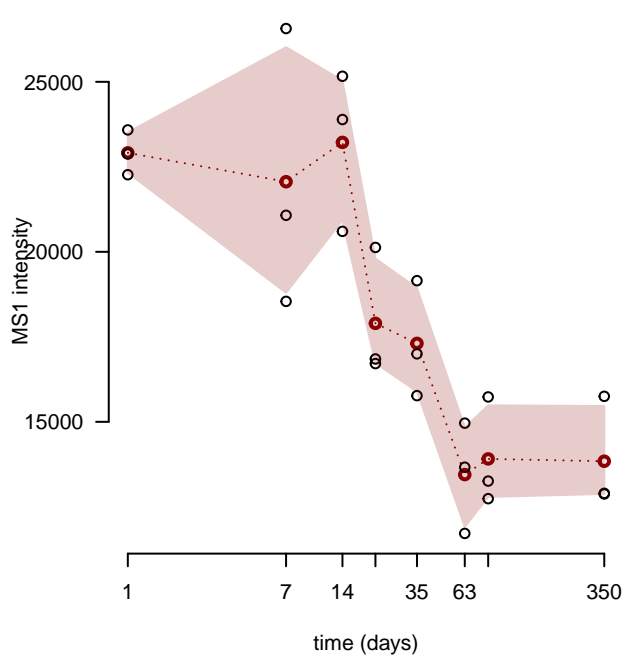

**Q68ED3**  
**GN=Tent4b**  
terminal nucleotidyltransferase 4B

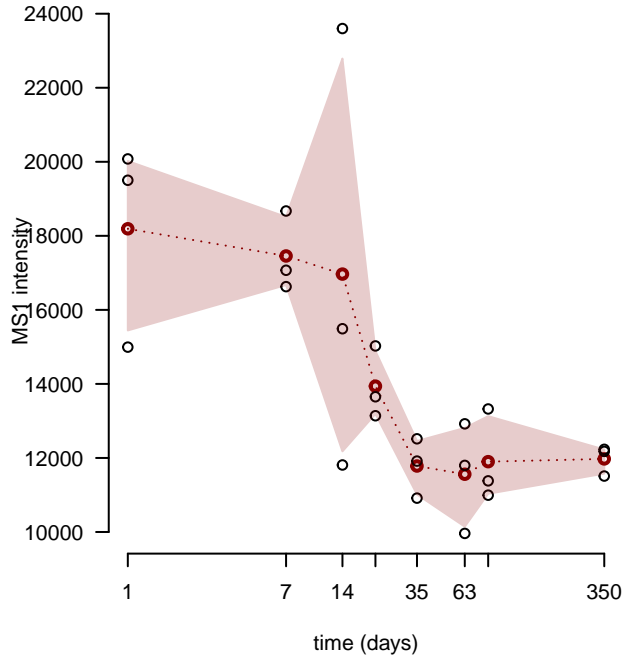

**Q68ED7**  
**GN=Crtc1**  
CREB regulated transcription coactivator ...

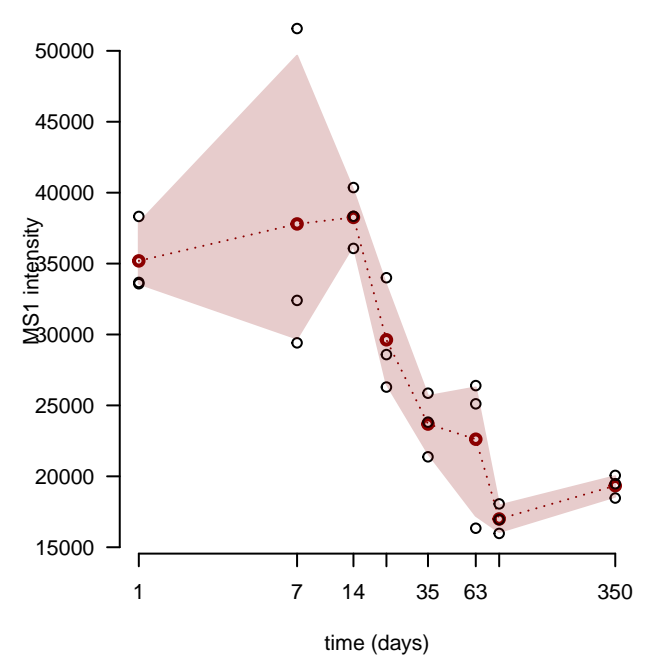

**Q68EF0**  
**GN=Rab3ip**  
RAB3A interacting protein

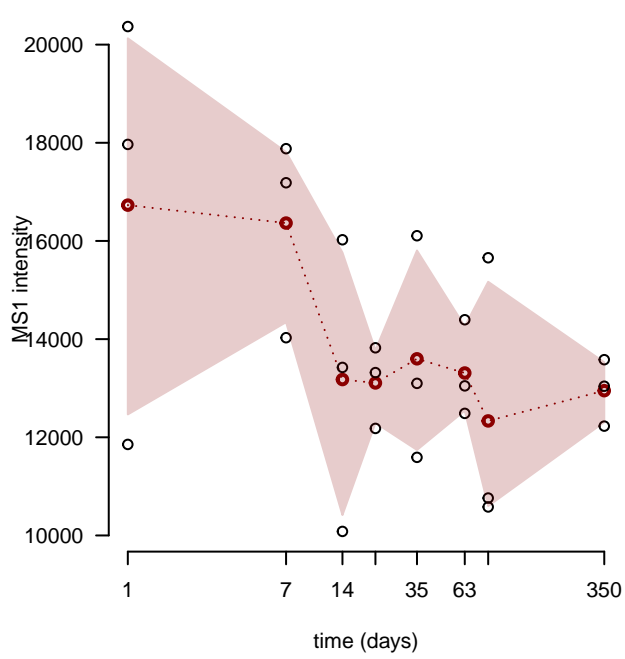

**Q68FD5**  
**GN=Cltc**  
clathrin, heavy polypeptide (Hc)

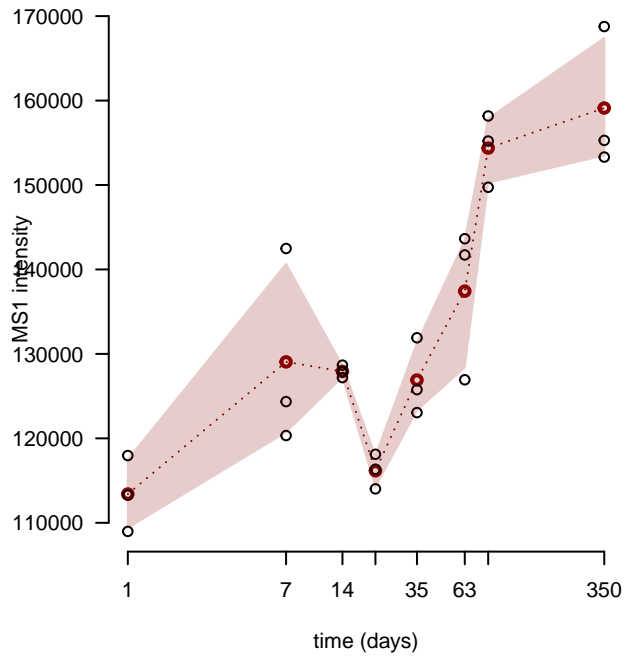

**Q68FD7**  
**GN=Fnip1**  
folliculin interacting protein 1

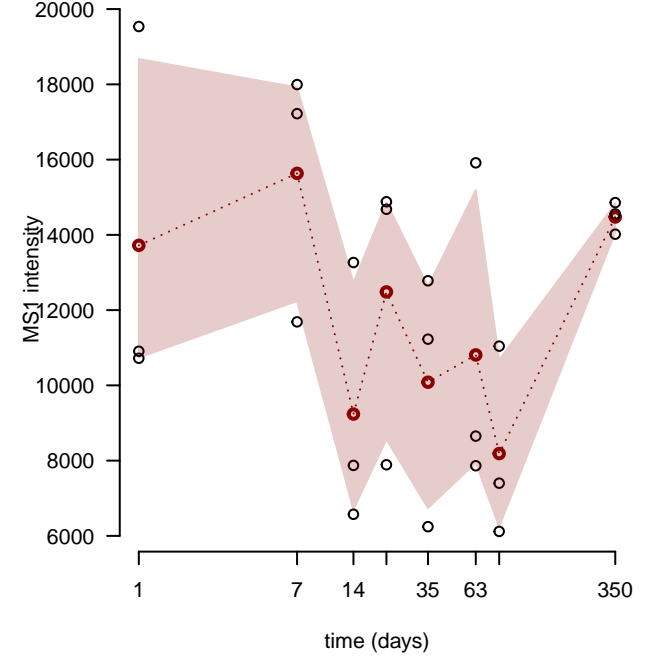

**Q68FE2**  
**GN=Atg9a**  
autophagy related 9A

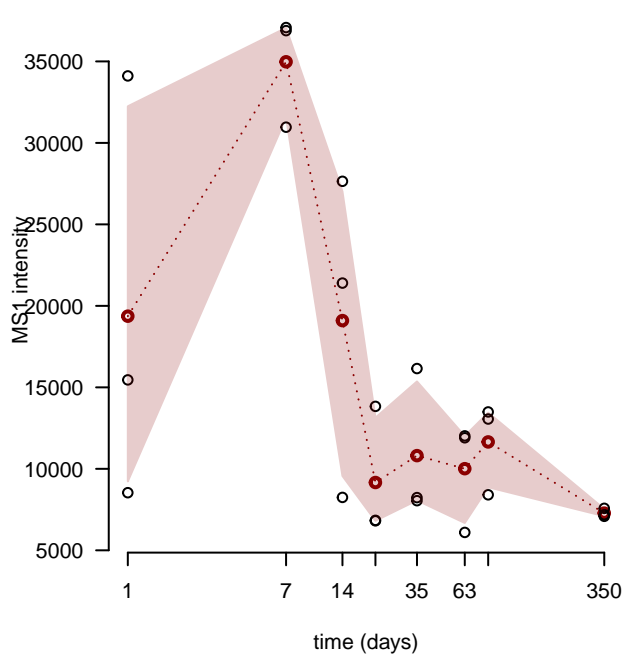

**Q68FE6**  
**GN=Ripor1**  
RHO family interacting cell polarization ...

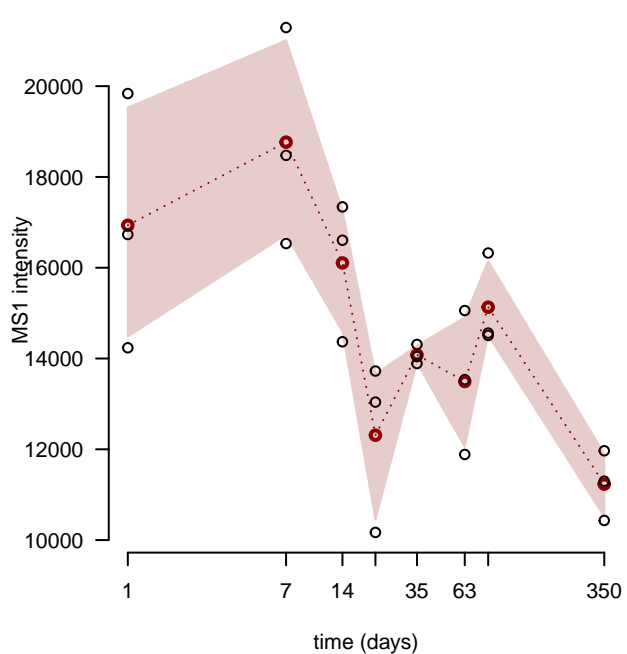

**Q68FE8**  
**GN=Znf280d**

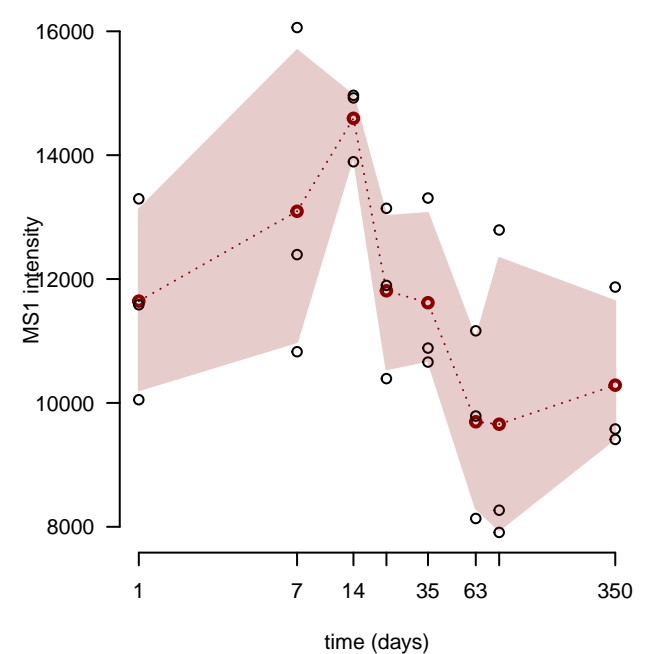

**Q68FE9**  
**GN=Tshz2**  
teashirt zinc finger family member 2

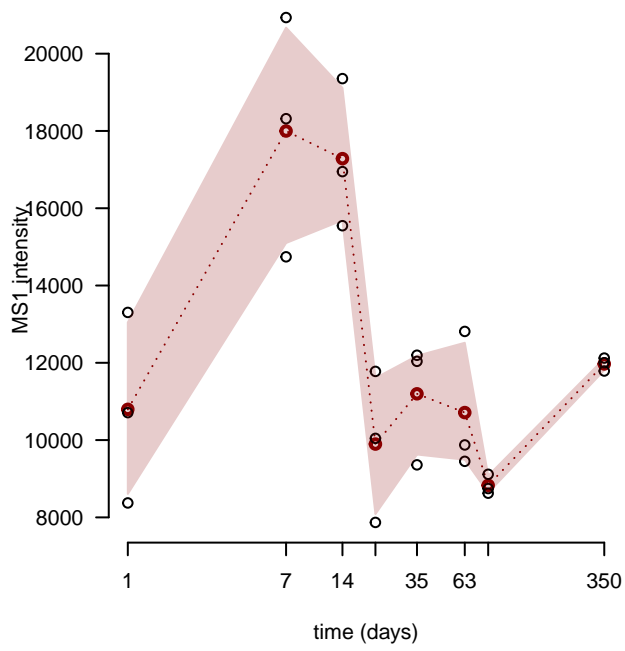

**Q68FF6**  
**GN=Git1**  
GIT ArfGAP 1

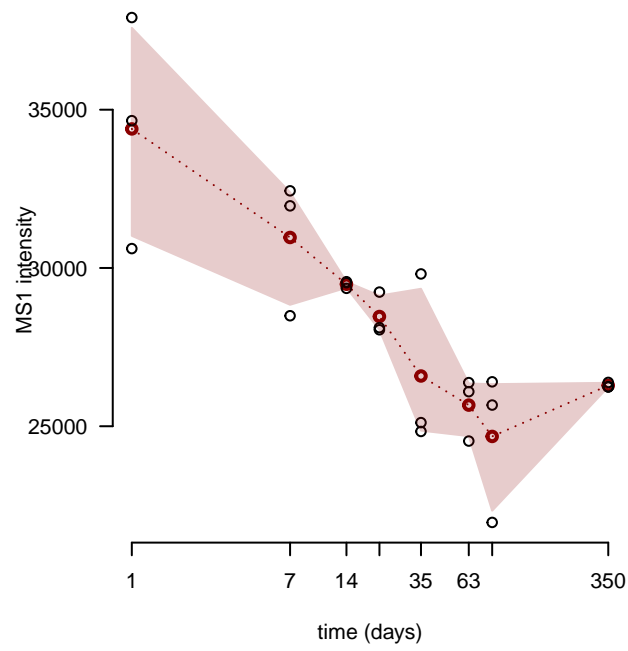

**Q68FF9**  
**GN=Srd5a1**  
steroid 5 alpha-reductase 1

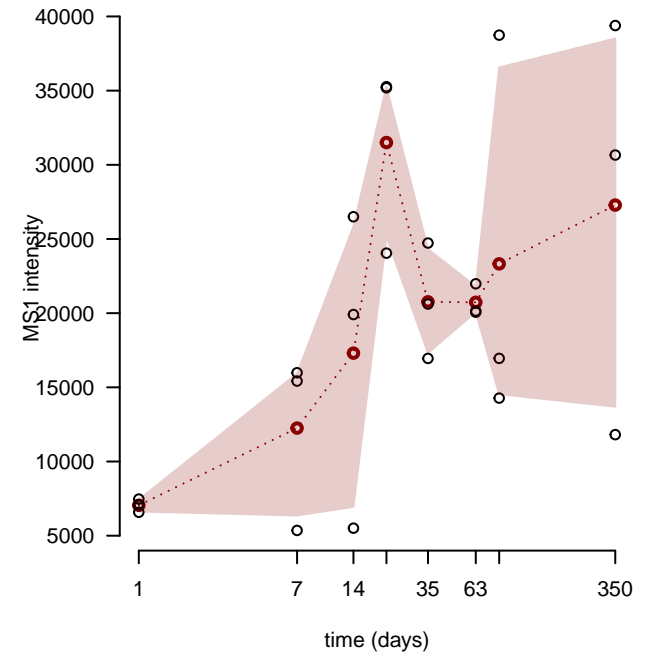

**Q68FG3**  
**GN=Spty2d1**  
SPT2 chromatin protein domain containing ...

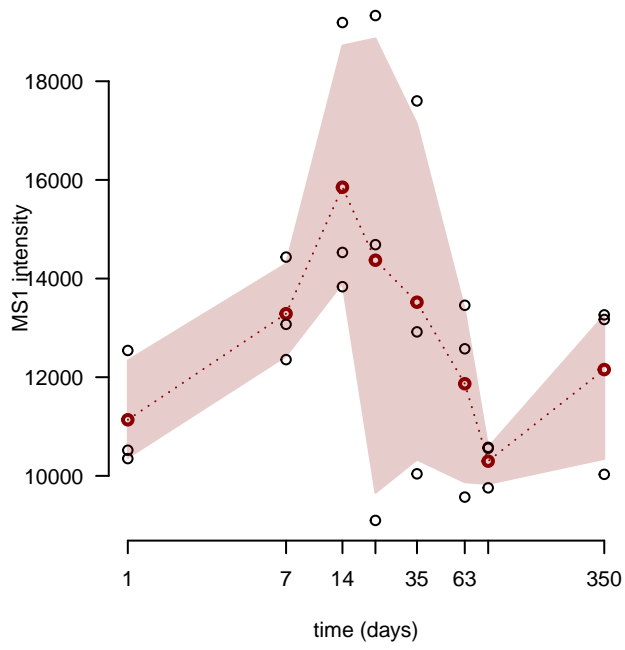

**Q68FH0**  
**GN=Pkp4**  
plakophilin 4

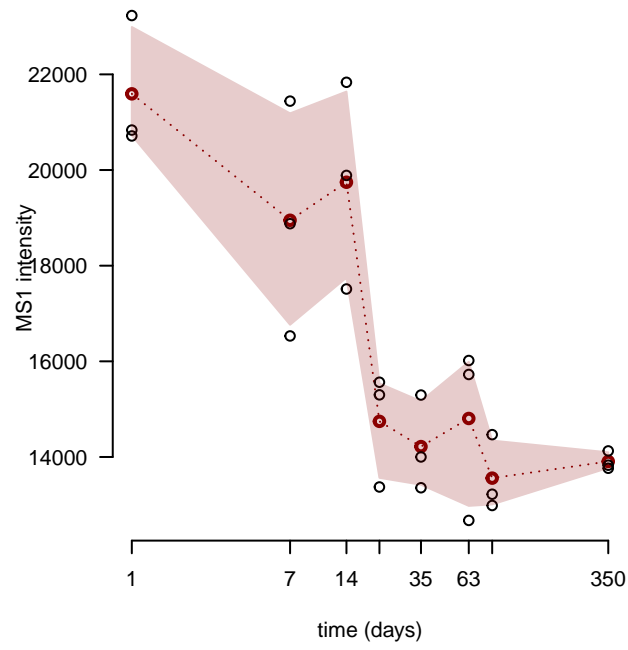

**Q68FH4**  
**GN=Galk2**  
galactokinase 2

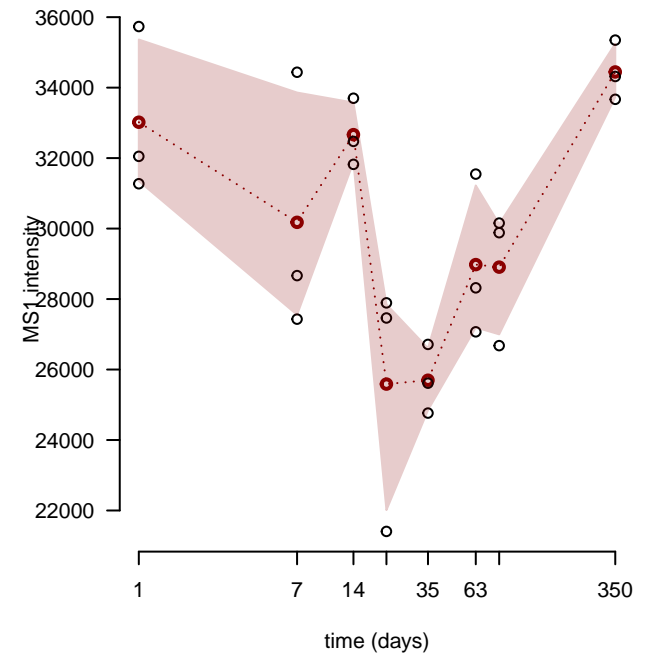

**Q68FL4**  
**GN=Ahcyl2**  
S-adenosylhomocysteine hydrolase-like 2

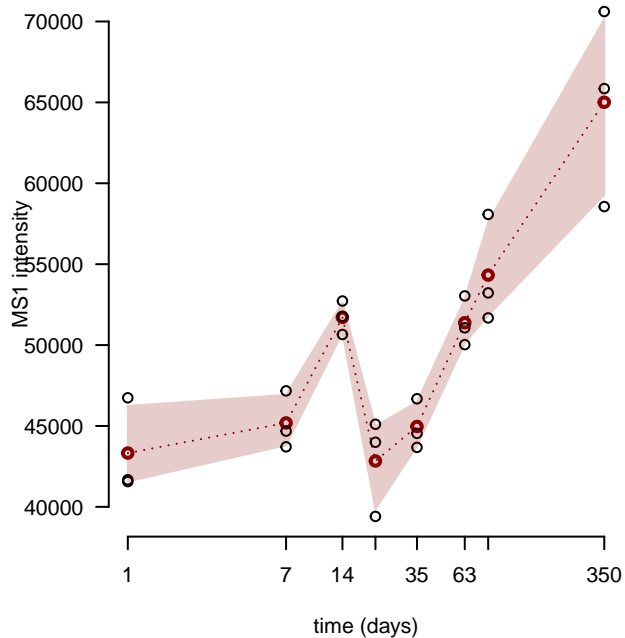

**Q68FL6**  
**GN=Mars**

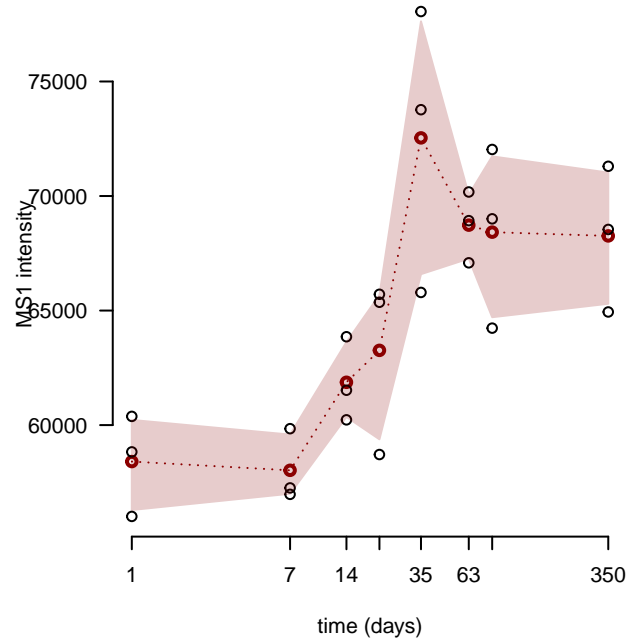

**Q69Z26**  
**GN=Cntn4**  
contactin 4

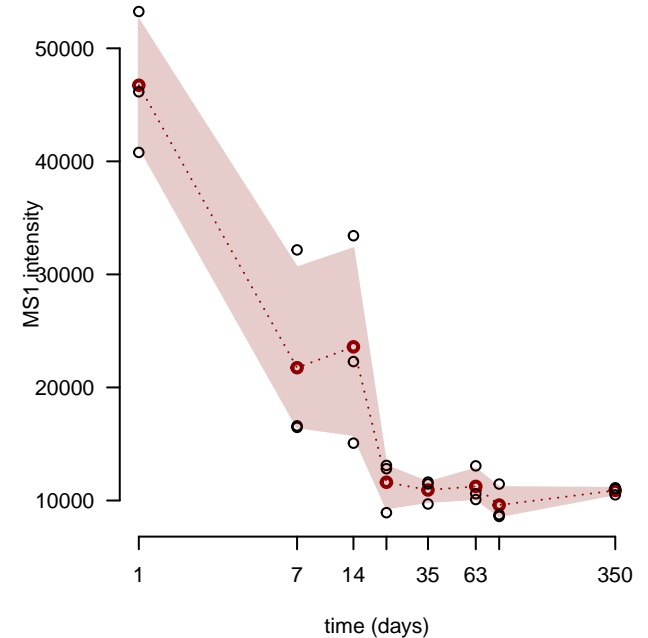

**Q69Z36**  
**GN=Mex3b**  
mex3 RNA binding family member B

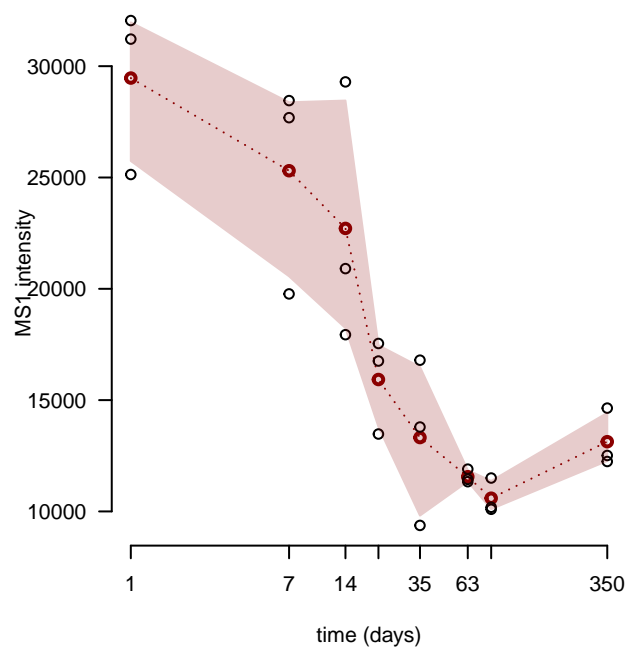

**Q69Z37**  
**GN=Samd9l**  
sterile alpha motif domain containing 9- ...

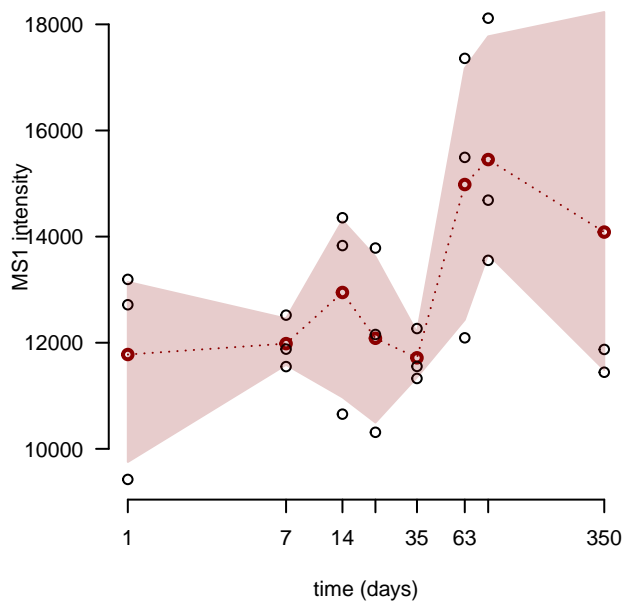

**Q69Z38**  
**GN=Peak1**  
pseudopodium-enriched atypical kinase 1

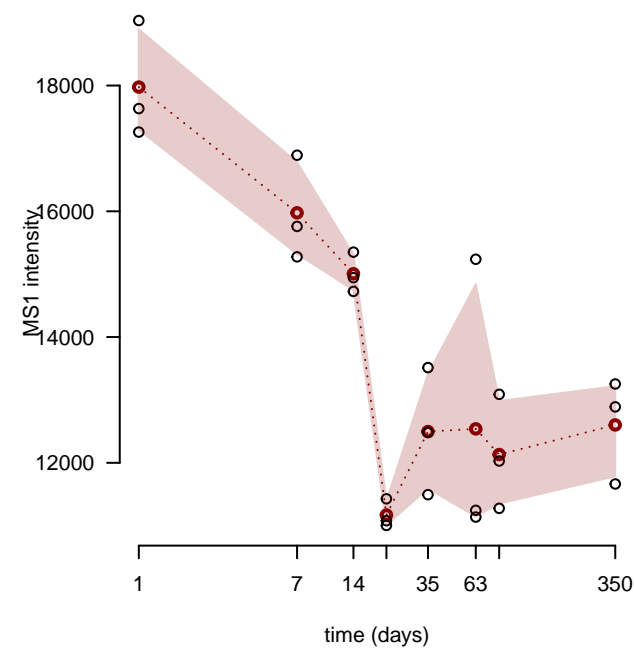

**Q69Z61**  
**GN=Pwwp2a**  
PWWP domain containing 2A

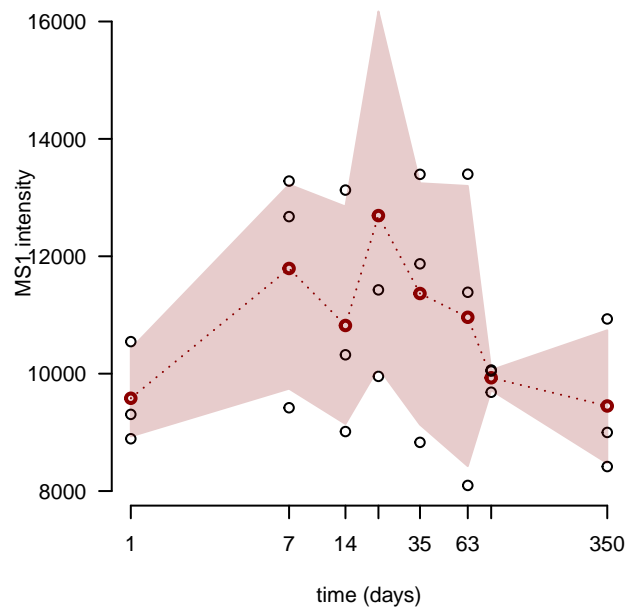

**Q69Z99**  
**GN=Znf512**

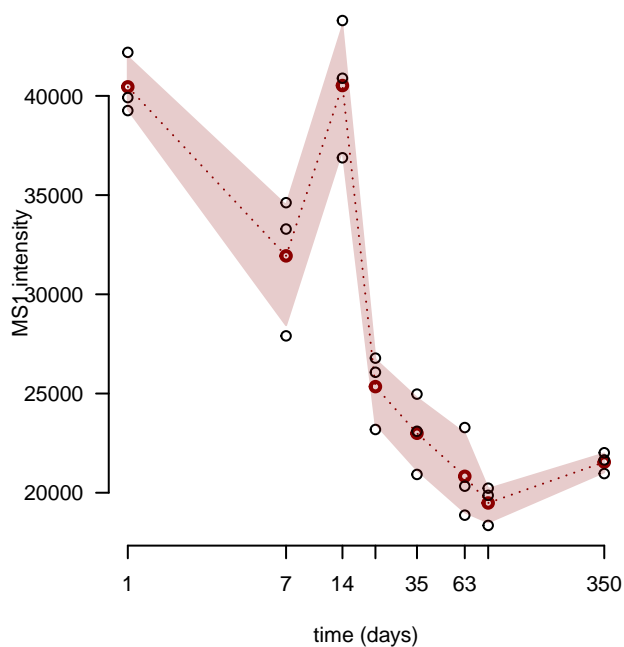

**Q69ZA1**  
**GN=Cdk13**  
cyclin-dependent kinase 13

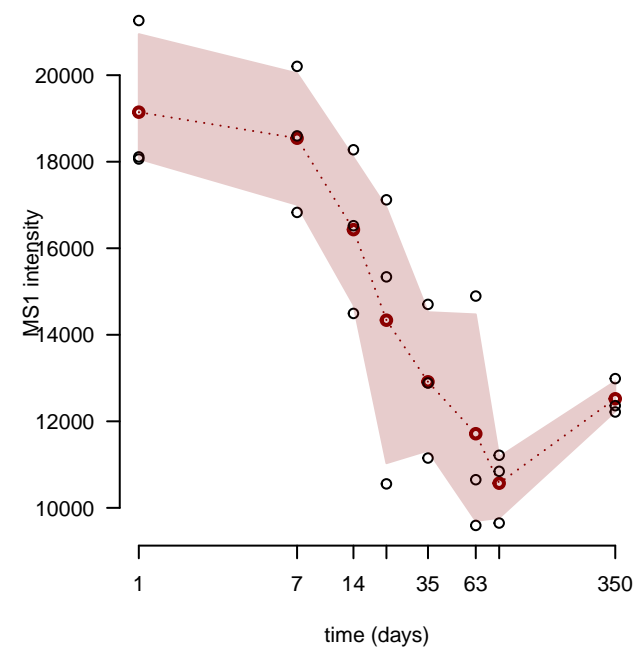

**Q69ZB0**  
**GN=Lrrcc1**  
leucine rich repeat and coiled-coil doma ...

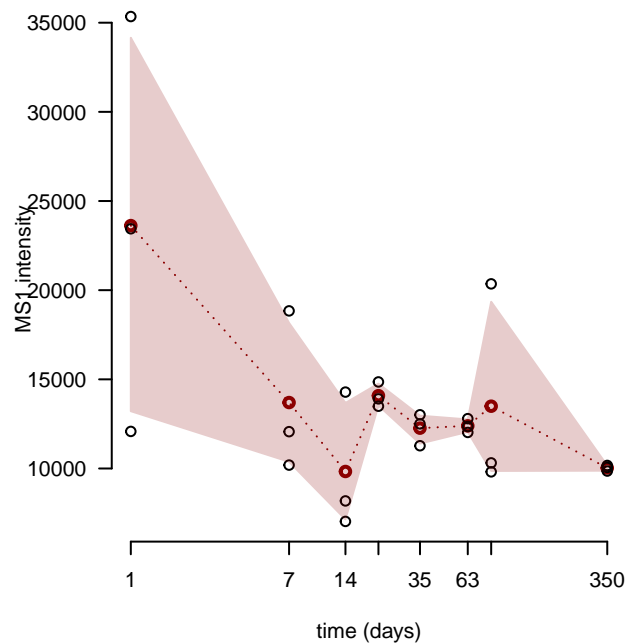

**Q69ZB3**  
**GN=Tspyl5**  
testis-specific protein, Y-encoded-like ...

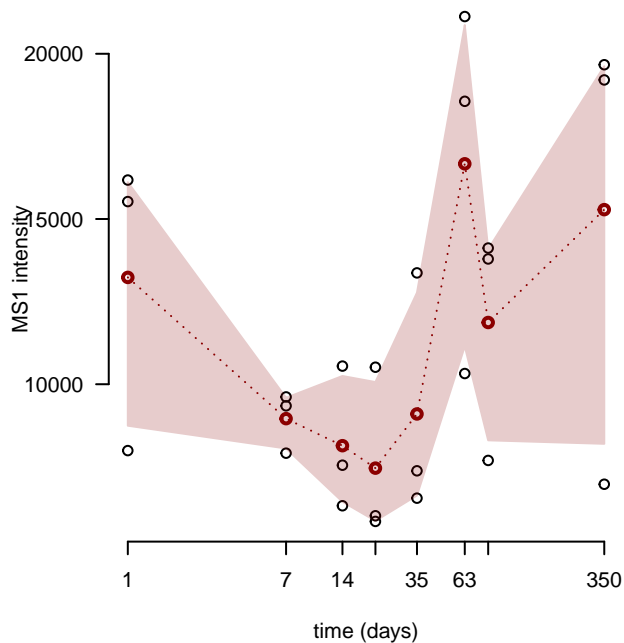

**Q69ZC8**  
**GN=Gpalpp1**  
GPALPP motifs containing 1

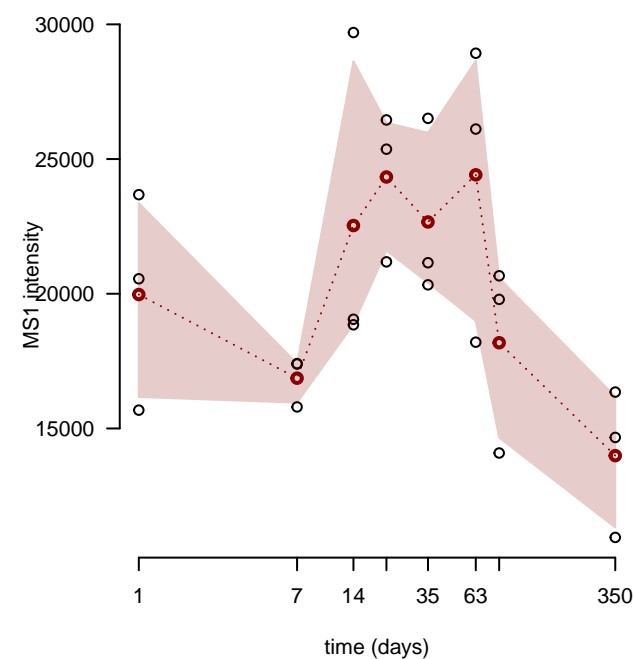

**Q69ZF3**  
**GN=Gba2**  
glucosidase beta 2

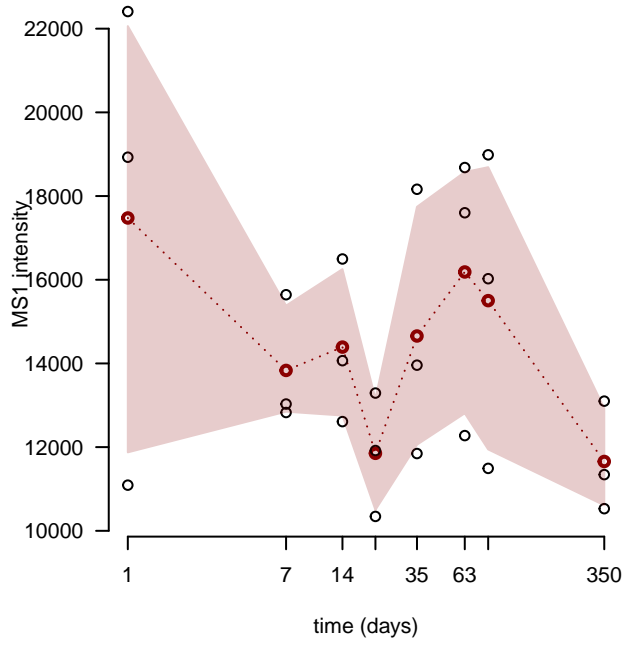

**Q69ZF7**  
**GN=Cnm4**  
cyclin M4

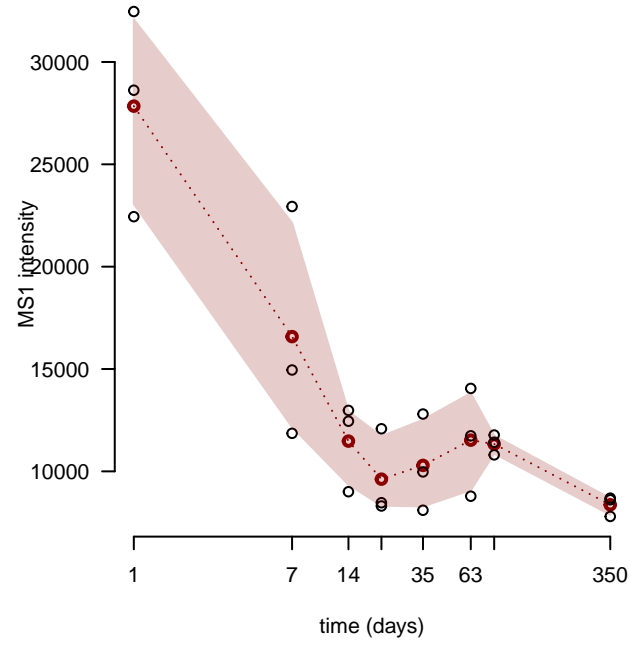

**Q69ZF8**  
**GN=Ms12**  
MSL complex subunit 2

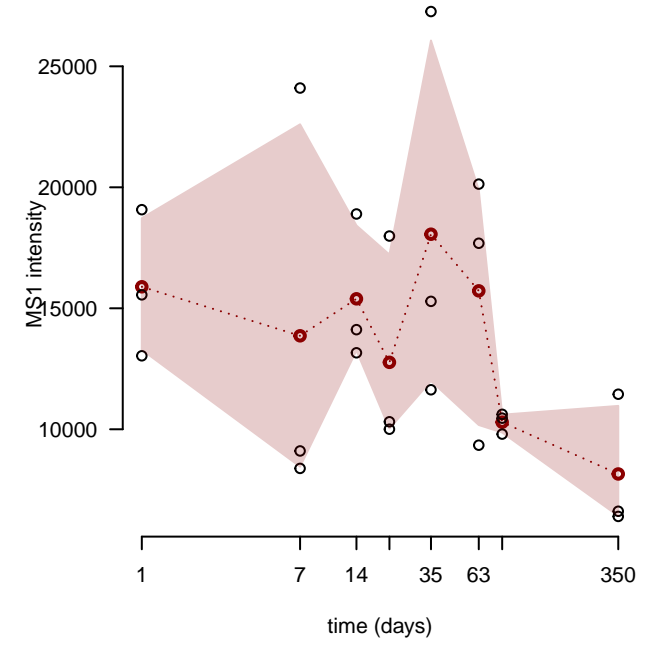

**Q69ZH9**  
**GN=Arhgap23**  
Rho GTPase activating protein 23

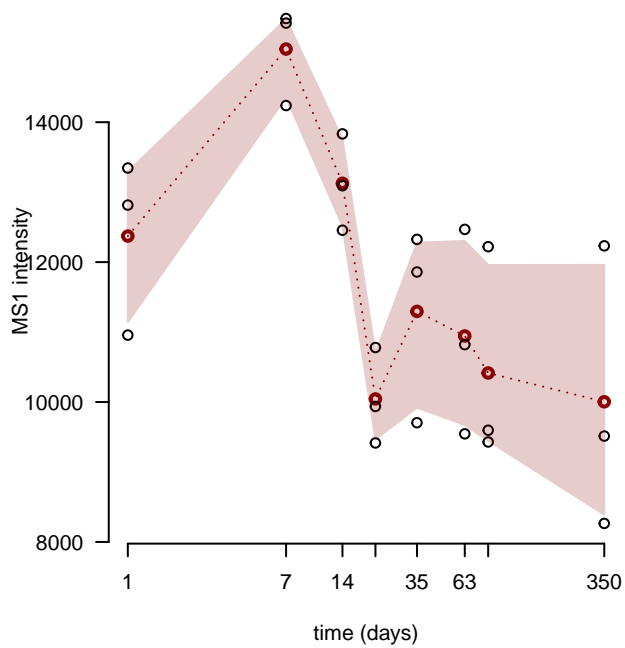

**Q69ZI1**  
**GN=Sh3rf1**  
SH3 domain containing ring finger 1

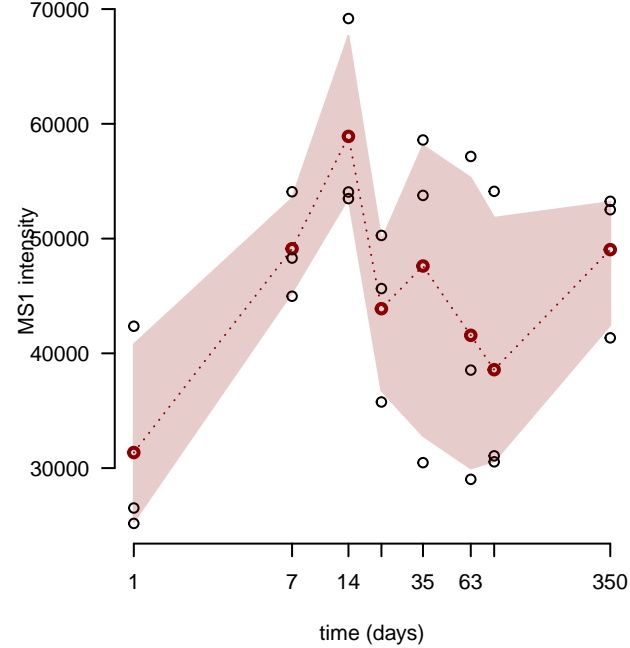

**Q69ZJ7**  
**GN=Ric1**  
RAB6A GEF complex partner 1

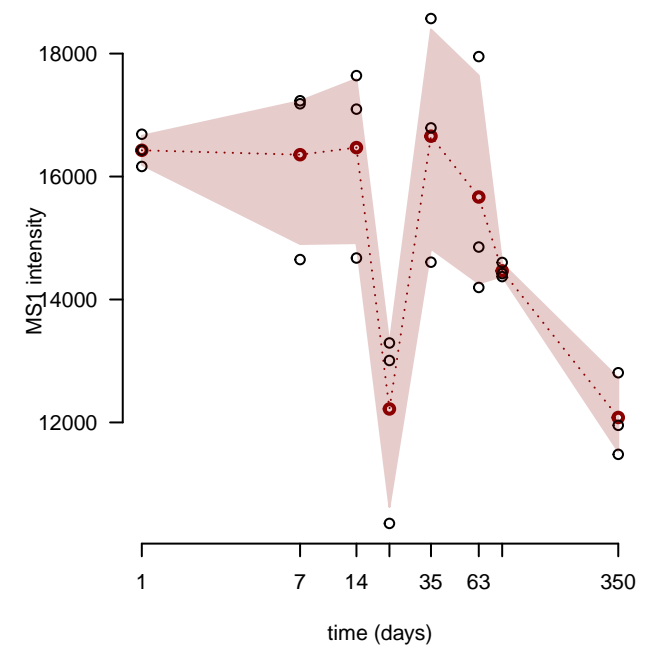

**Q69ZK0**  
**GN=Prex1**  
phosphatidylinositol-3,4,5-trisphosphate ...

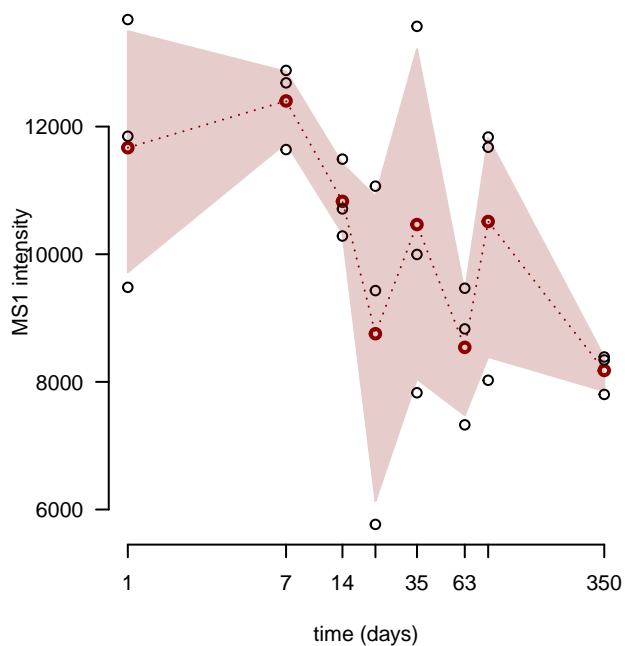

**Q69ZK6**  
**GN=Jmjd1c**  
jumonji domain containing 1C

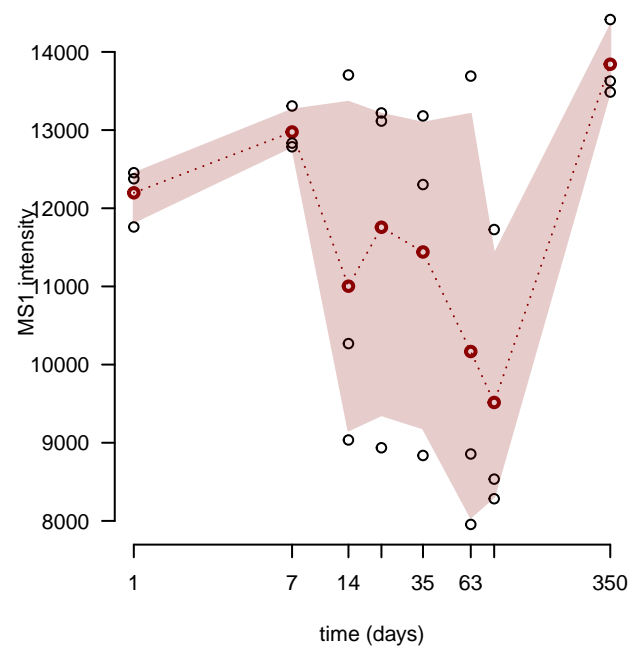

**Q69ZK9**  
**GN=Nlgn2**  
neuroligin 2

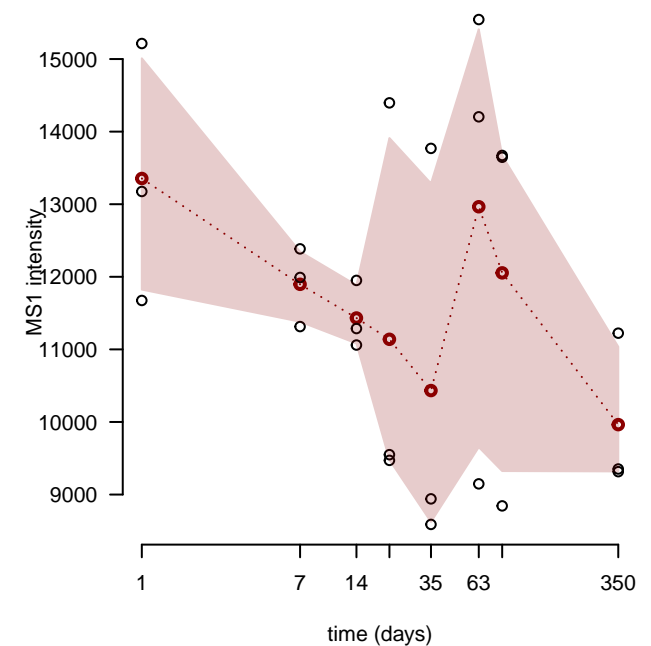



**Q69ZL1**  
GN=Fgd6  
FYVE, RhoGEF and PH domain containing 6

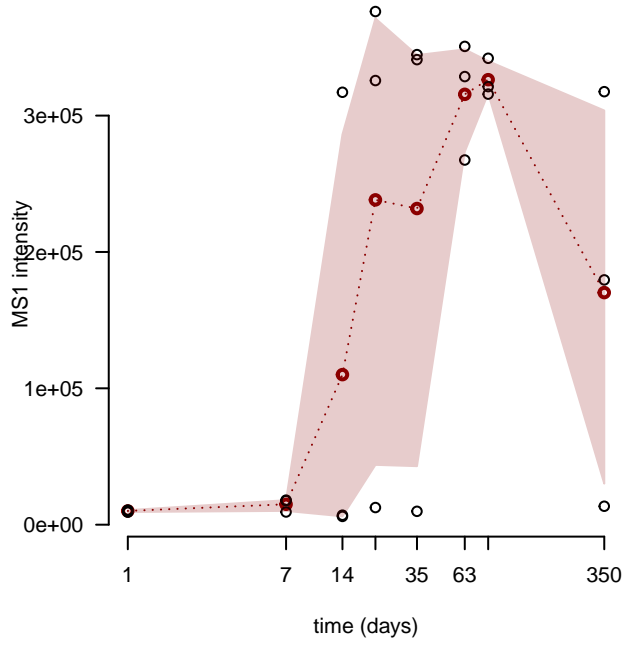

**Q69ZM6**  
GN=Stk36  
serine/threonine kinase 36

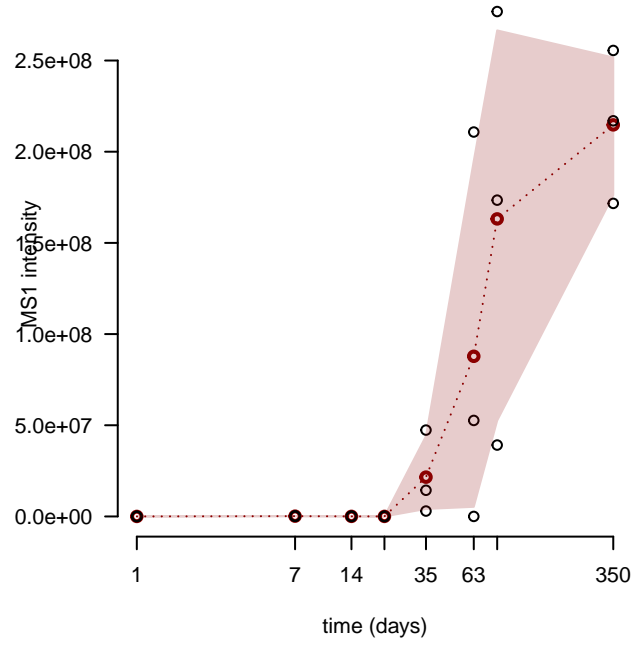

**Q69ZN7**  
GN=Myof  
myoferlin

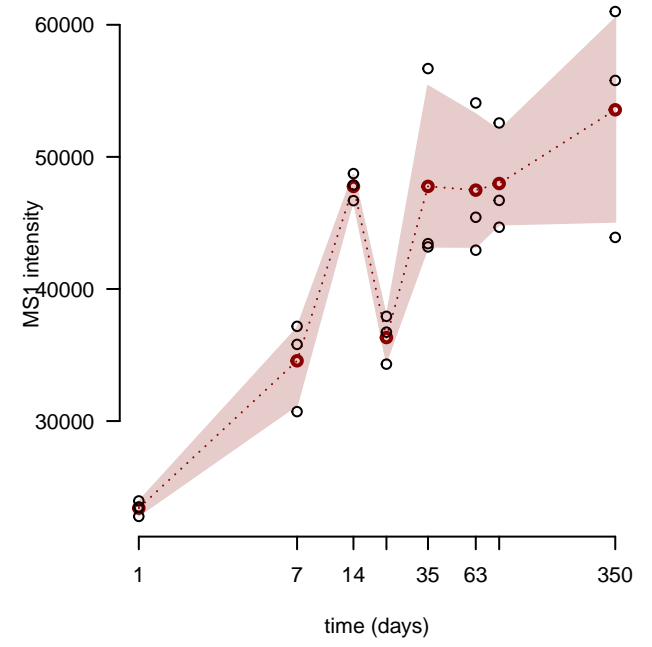

**Q69ZP3**  
GN=Pnkd  
paroxysmal nonkinesigenic dyskinesia

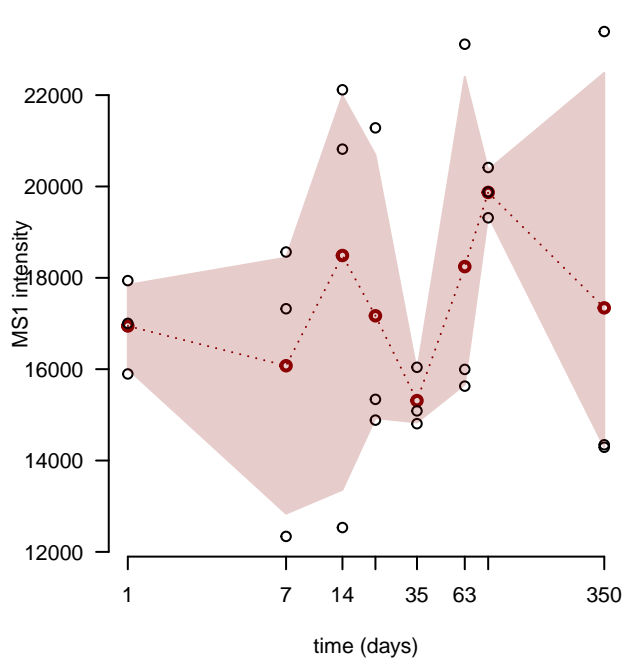

**Q69ZP3**  
GN=Pnkd  
paroxysmal nonkinesigenic dyskinesia

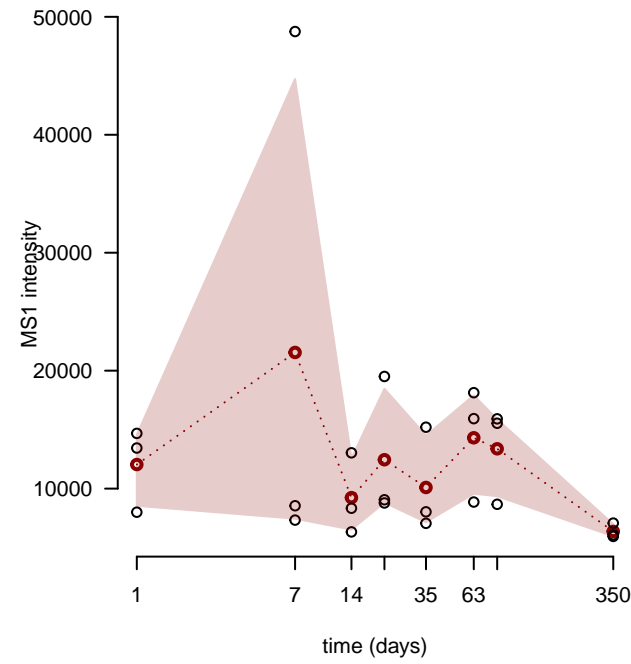

**Q69ZQ1**  
GN=Myorg  
myogenesis regulating glycosidase (putat ...

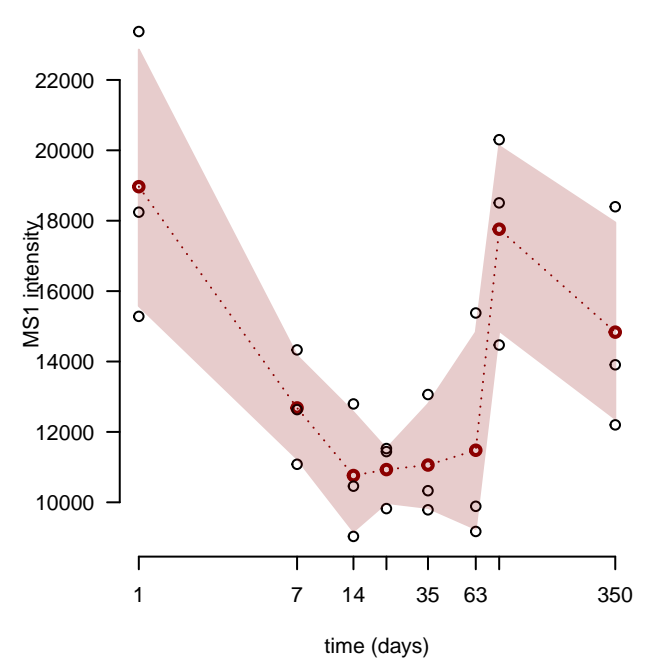

**Q69ZQ2**  
GN=Isy1  
ISY1 splicing factor homolog

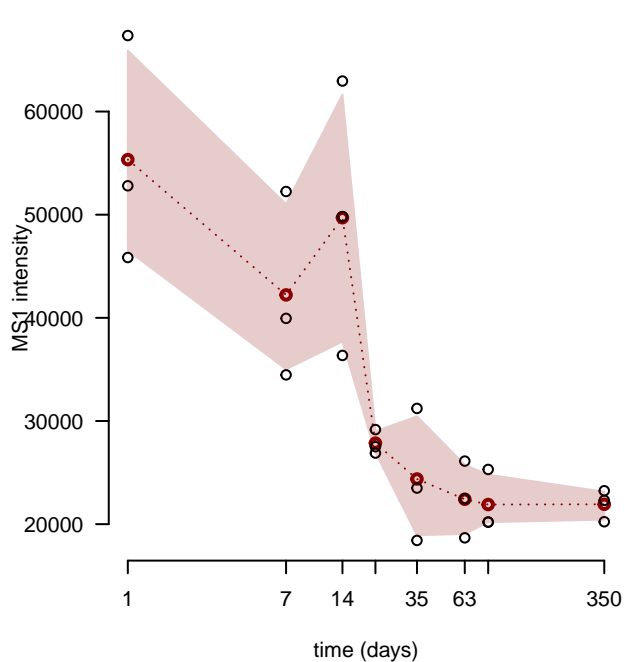

**Q69ZR2**  
GN=Hectd1  
HECT domain E3 ubiquitin protein ligase ...

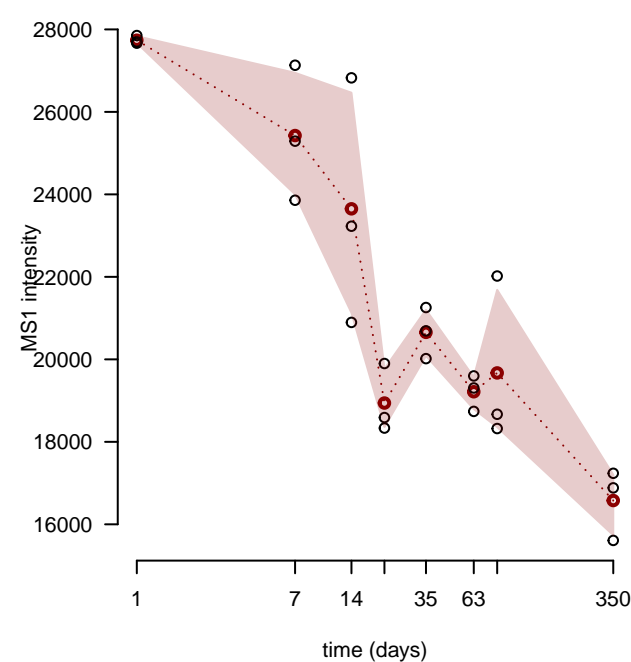

**Q69ZR9**  
GN=Tasor  
transcription activation suppressor

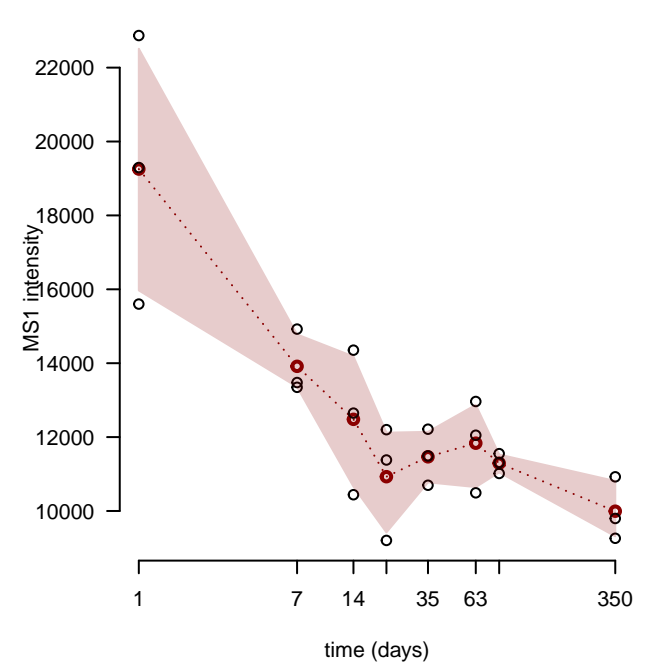

**Q69ZS0**  
**GN=Pdzrn3**  
PDZ domain containing RING finger 3

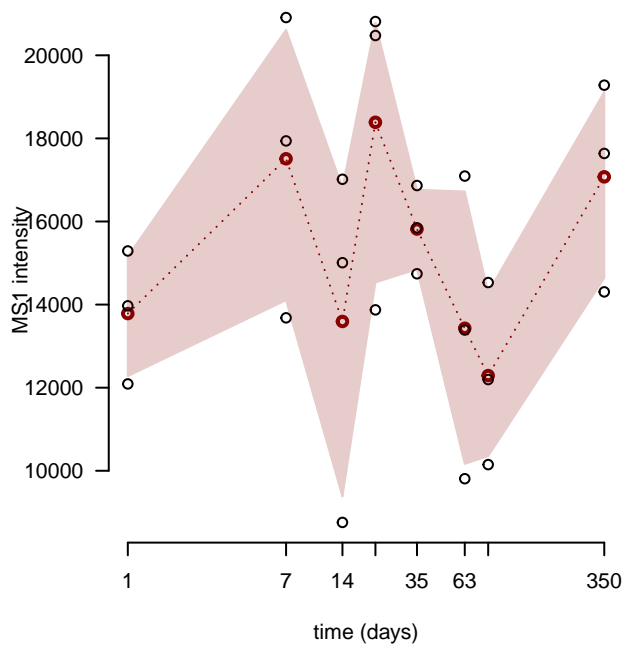

**Q69ZS7**  
**GN=Hbs1I**  
Hbs1-like (S. cerevisiae)

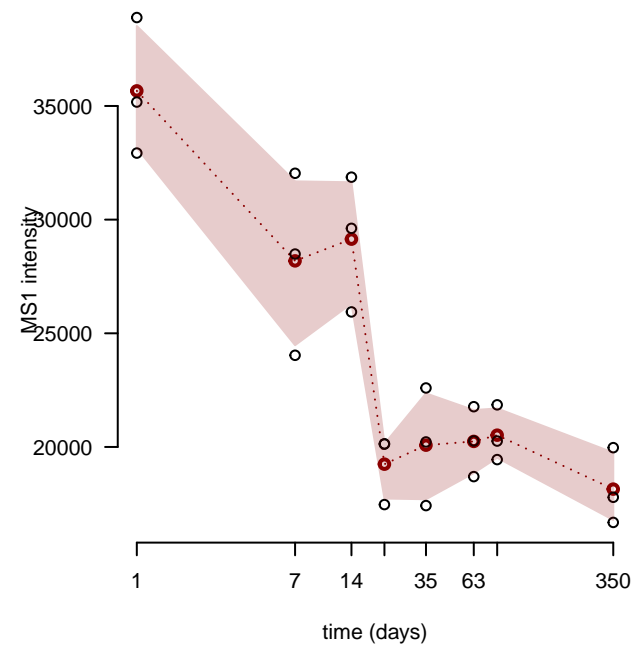

**Q69ZS8**  
**GN=Kazn**  
kazrin, perioplakin interacting protein

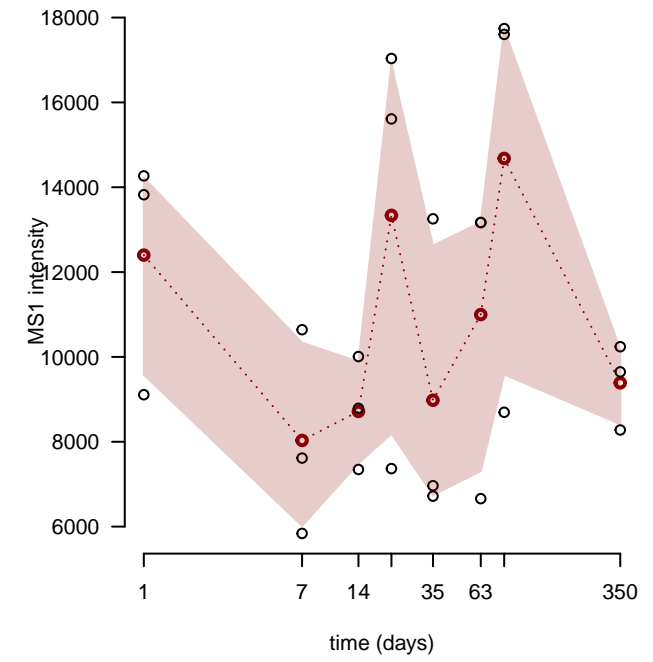

**Q69ZW3**  
**GN=Ehbp1**  
EH domain binding protein 1

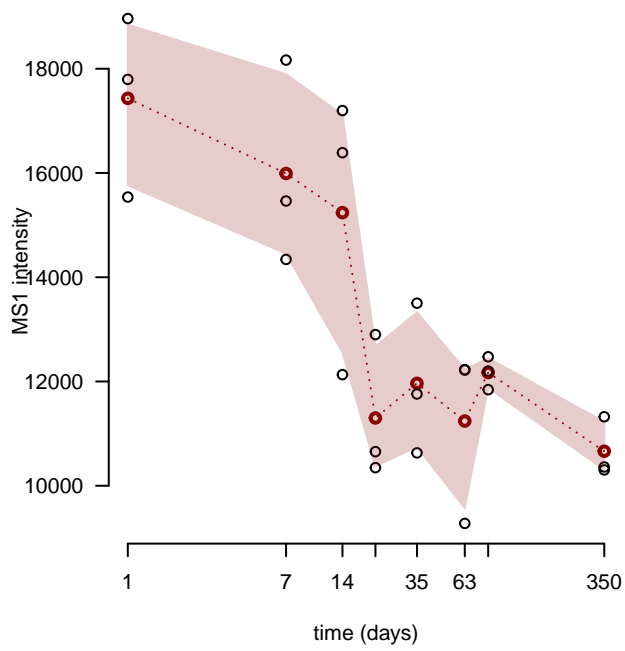

**Q69ZX6**  
**GN=Morc2a**  
microorchidia 2A

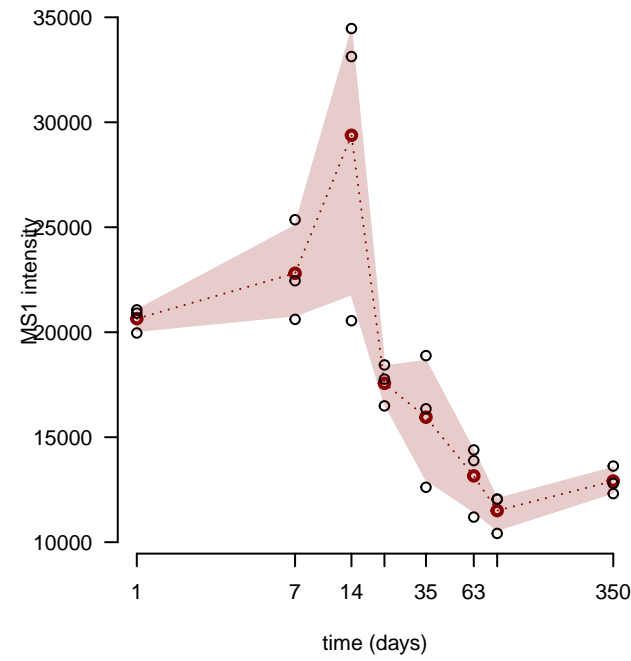

**Q69ZX8**  
**GN=Ablim3**  
actin binding LIM protein family, member ...

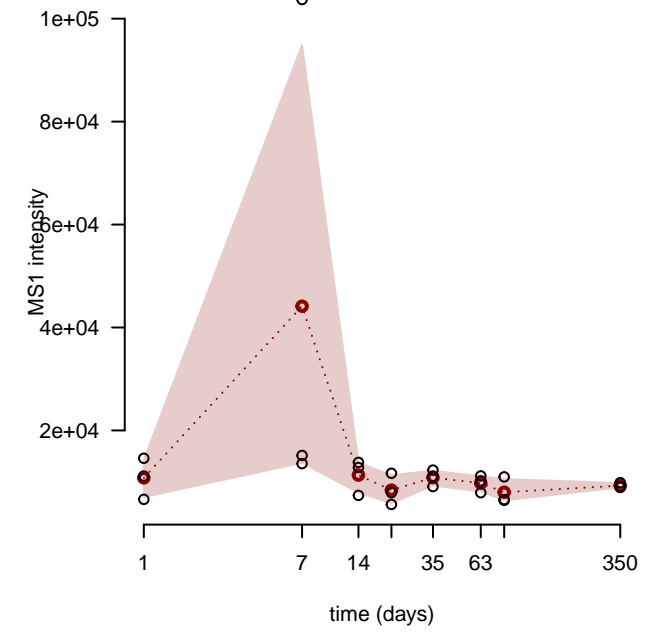

**Q69ZZ6**  
**GN=Tmcc1**  
transmembrane and coiled coil domains 1

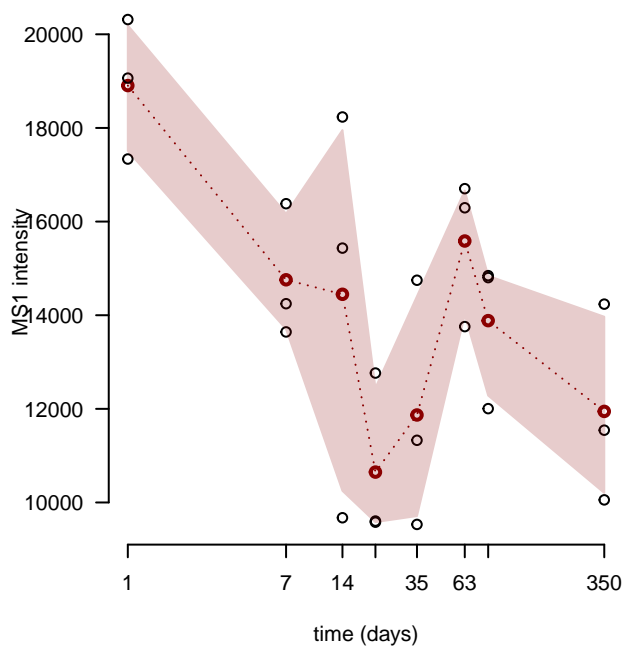

**Q6A009**  
**GN=Ltn1**  
listerin E3 ubiquitin protein ligase 1

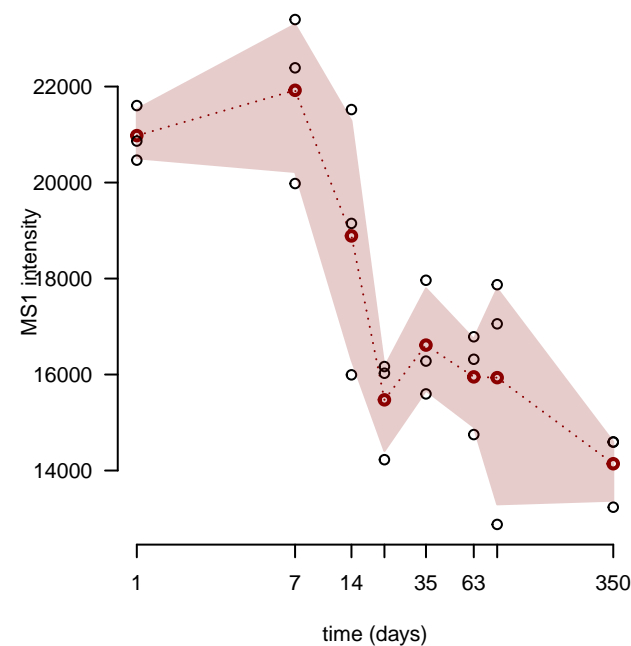

**Q6A026**  
**GN=Pds5a**  
PDS5 cohesin associated factor A

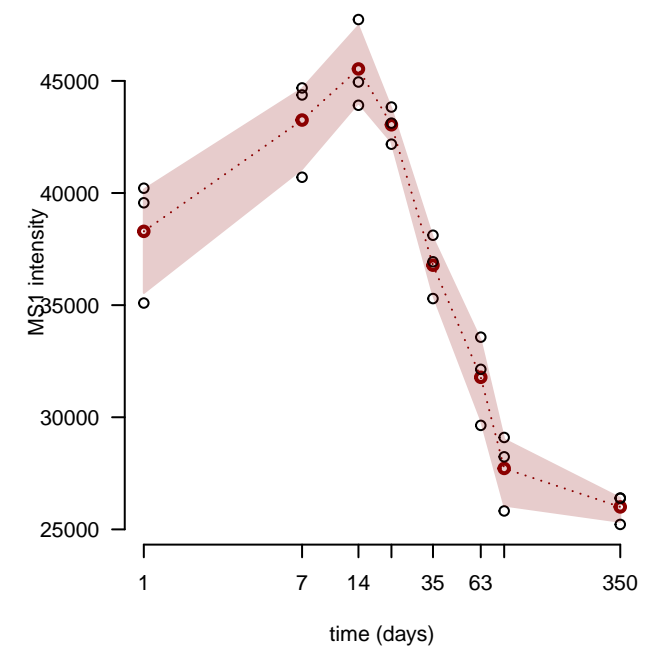

**Q6A028**  
GN=Swap70  
SWA-70 protein

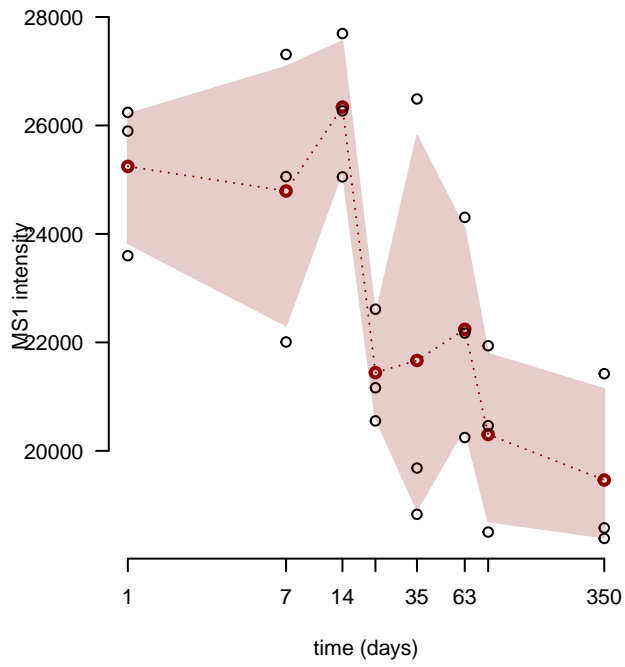

**Q6A037**  
GN=N4bp1  
NEDD4 binding protein 1

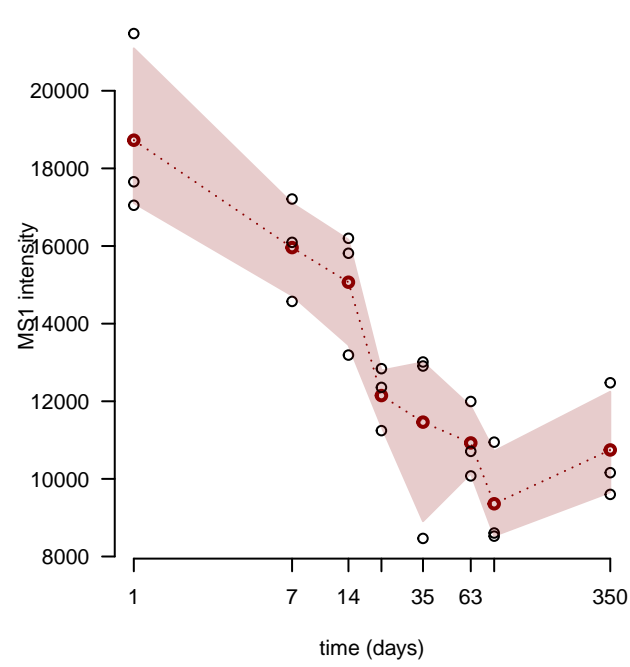

**Q6A039**  
GN=Tbc1d12  
TBC1D12: TBC1 domain family, member 12

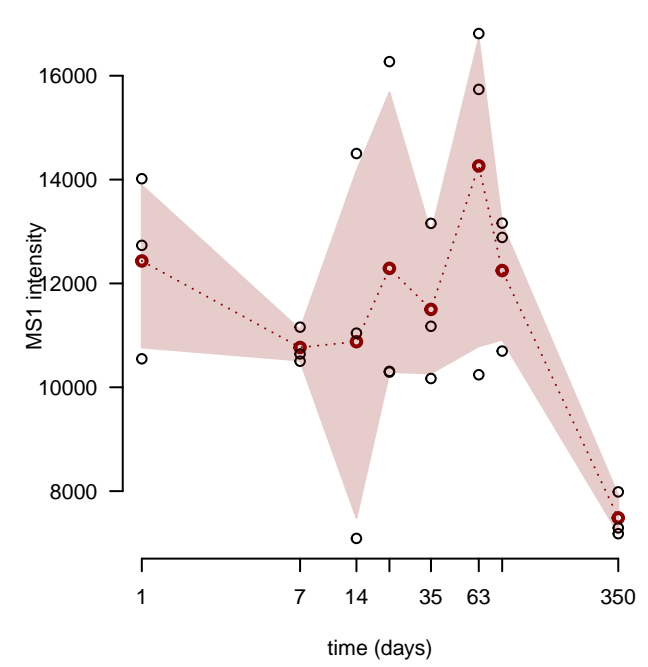

**Q6A058**  
GN=Armcx2  
armadillo repeat containing, X-linked 2

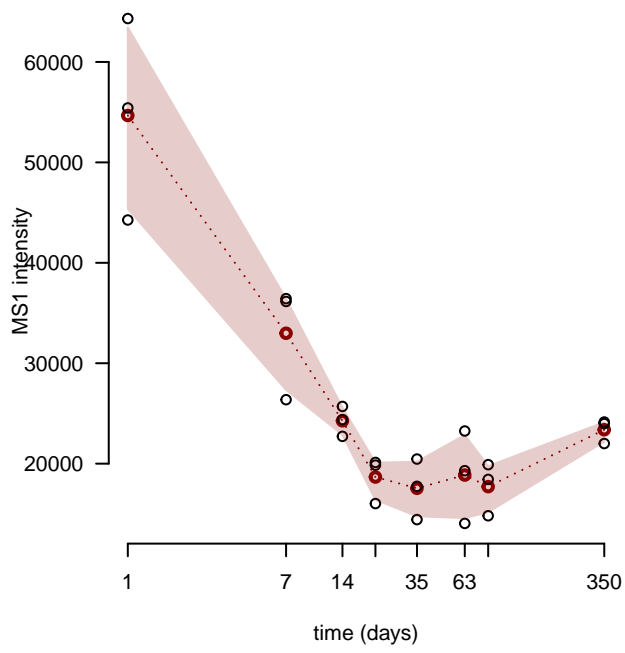

**Q6A065**  
GN=Cep170  
centrosomal protein 170

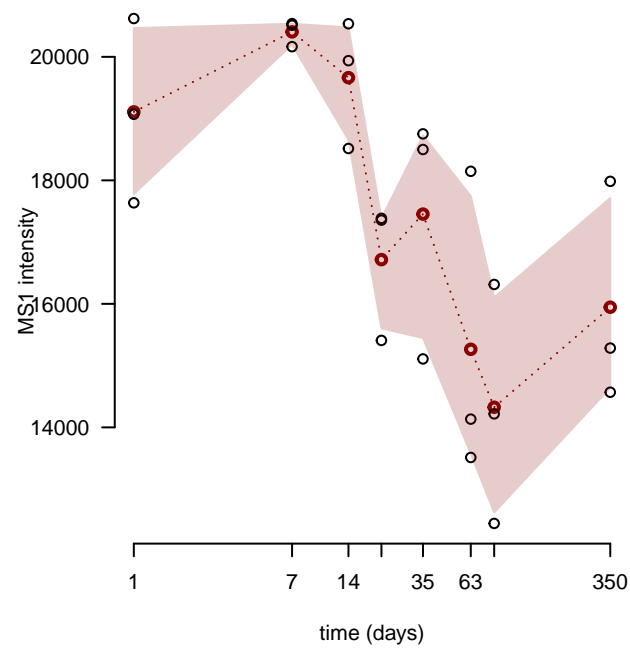

**Q6A068**  
GN=Cdc5I  
cell division cycle 5-like (S. pombe)

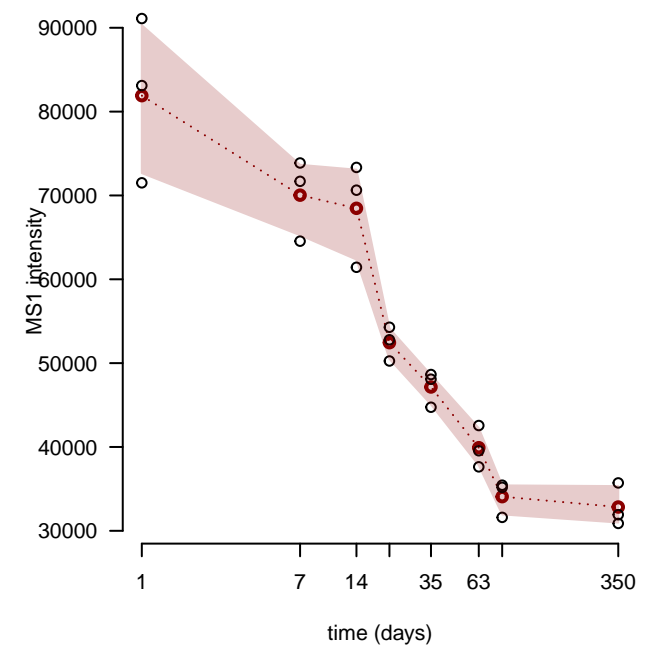

**Q6A078**  
GN=Cep290  
centrosomal protein 290

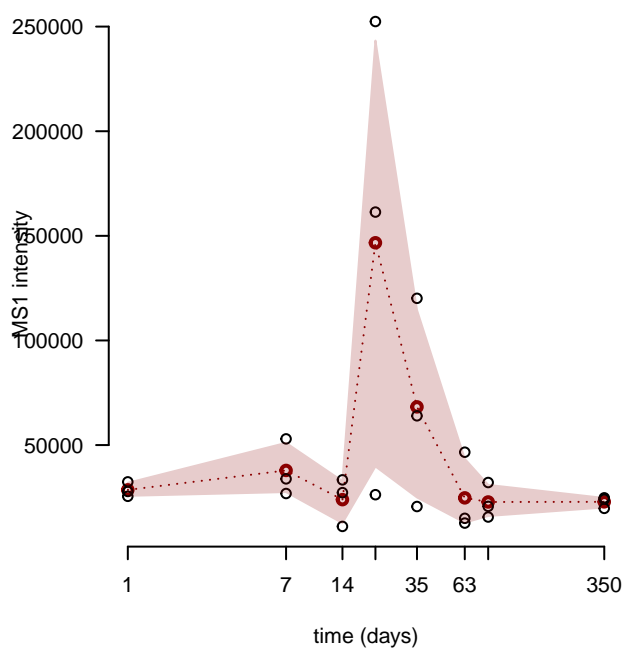

**Q6A085**  
GN=Znf629

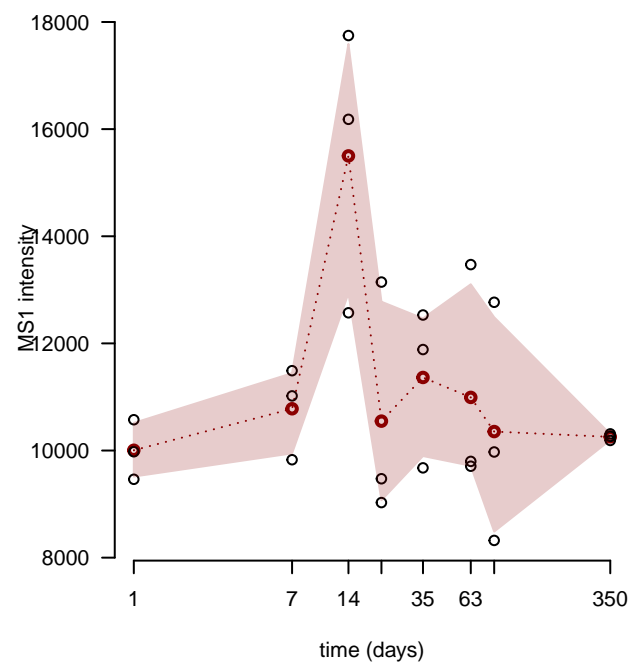

**Q6A098**  
GN=Secisbp2I  
SECIS binding protein 2-like

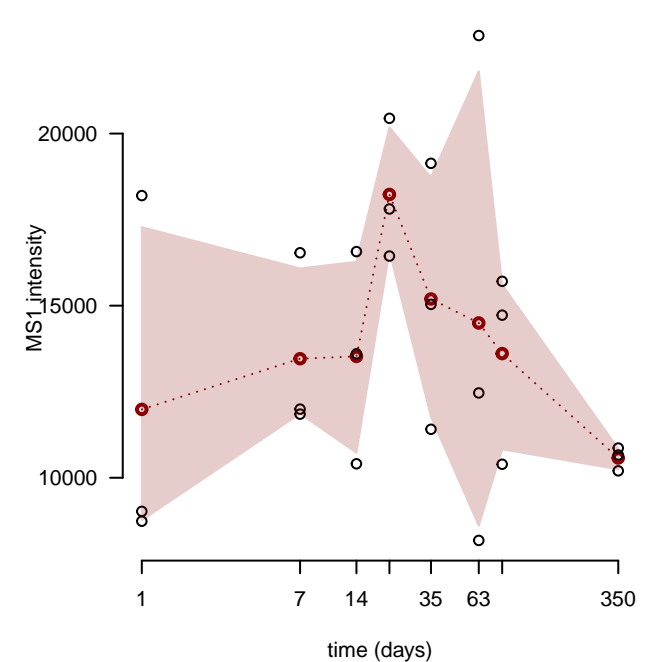

**Q6A0A2**  
**GN=Larp4b**  
La ribonucleoprotein 4B

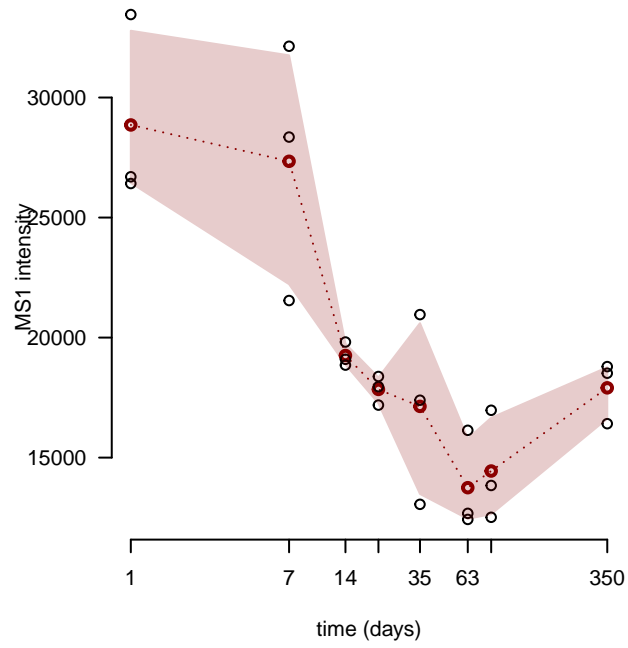

**Q6A0A9**  
**GN=FAM120A**

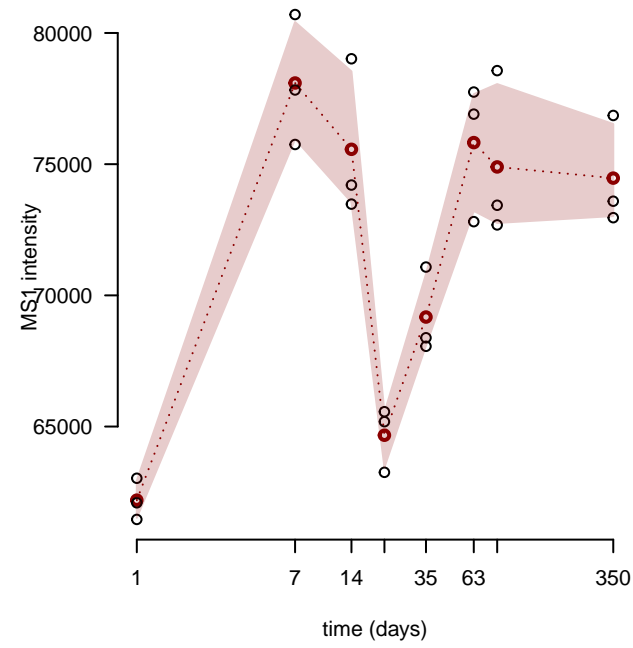

**Q6A0D4**  
**GN=Rftn1**  
raftlin lipid raft linker 1

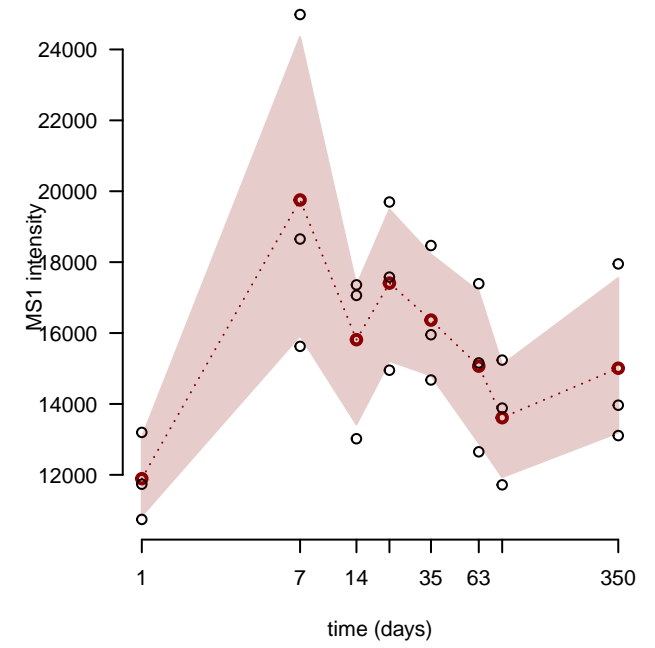

**Q6A4J8**  
**GN=Usp7**  
ubiquitin specific peptidase 7

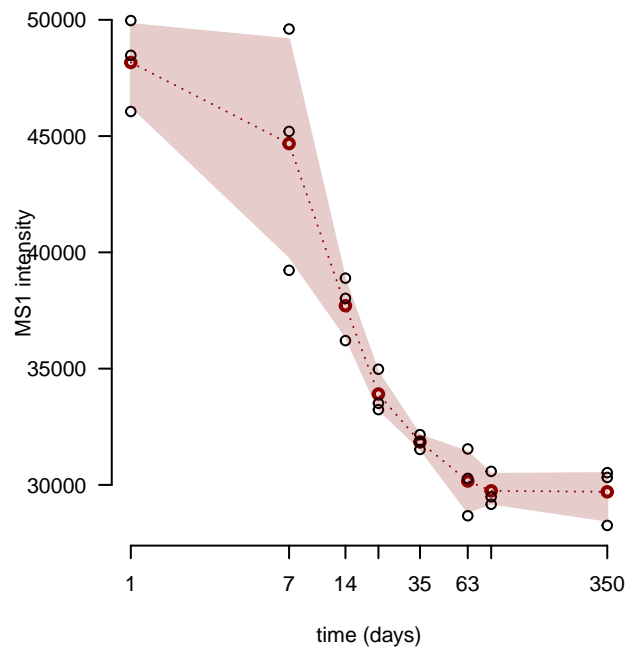

**Q6A4J8**  
**GN=Usp7**  
ubiquitin specific peptidase 7

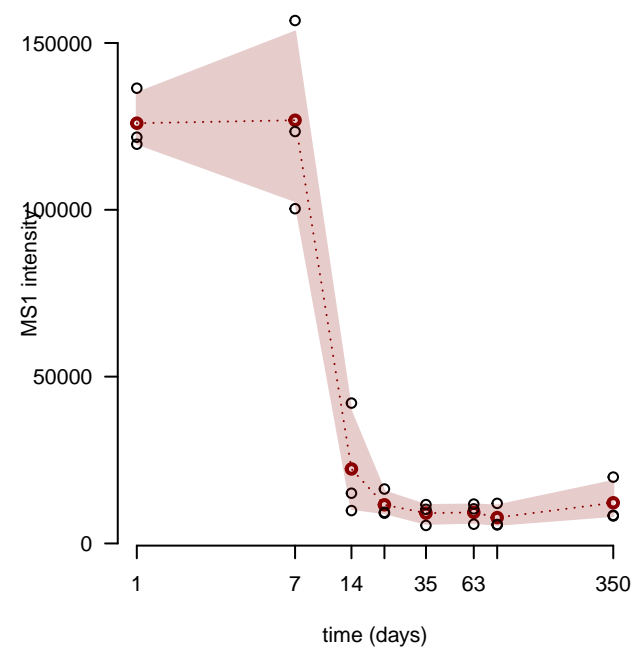

**Q6AW69**  
**GN=Cgn1**  
cingulin-like 1

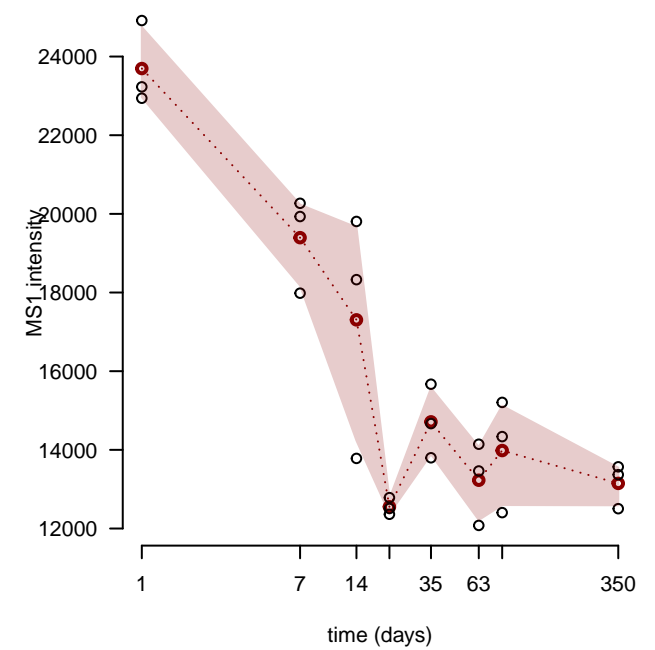

**Q6AXC6**  
**GN=Ddx11**  
DEAD/H box helicase 11

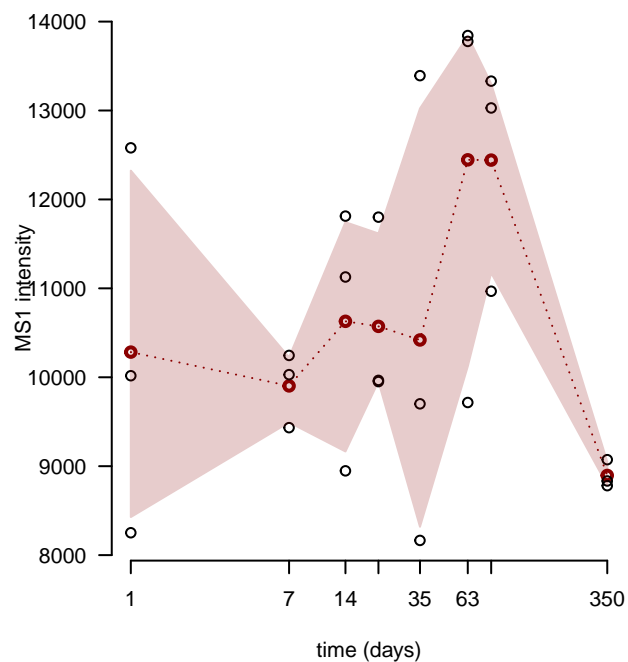

**Q6B966**  
**GN=Nlrp14**  
NLR family, pyrin domain containing 14

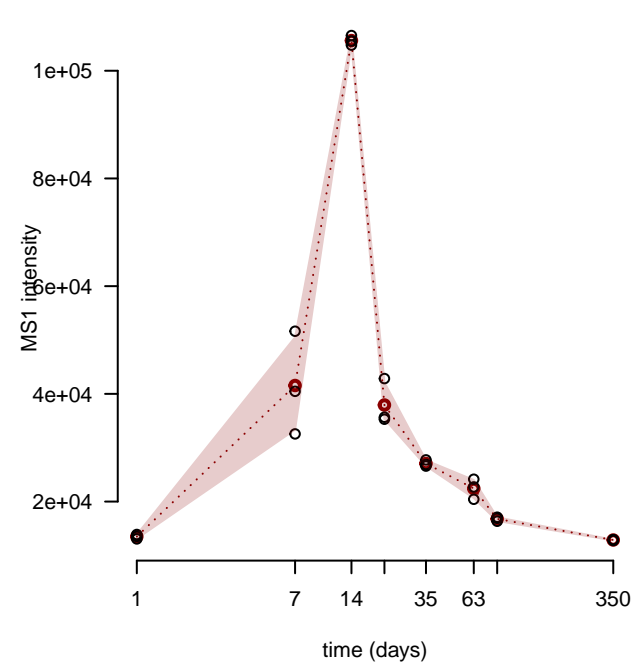

**Q6DFV1**  
**GN=Ncapg2**  
non-SMC condensin II complex, subunit G2

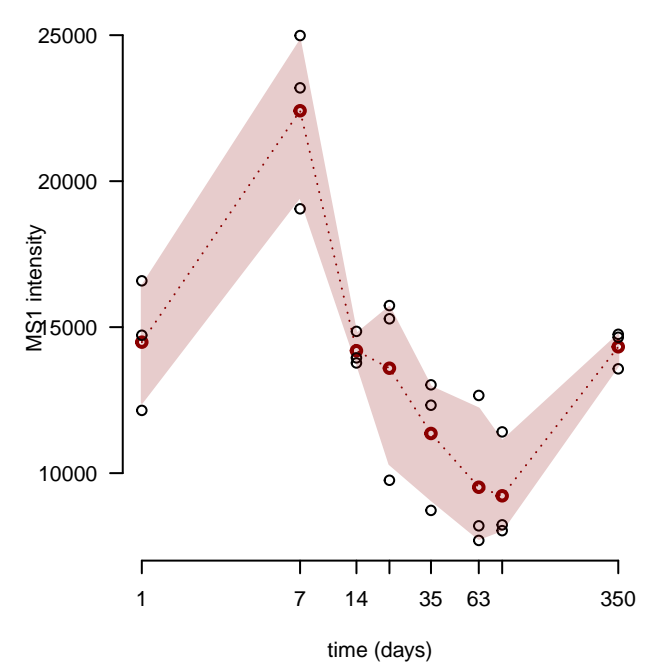

**Q6DFV3**  
**GN=Arhgap21**  
Rho GTPase activating protein 21

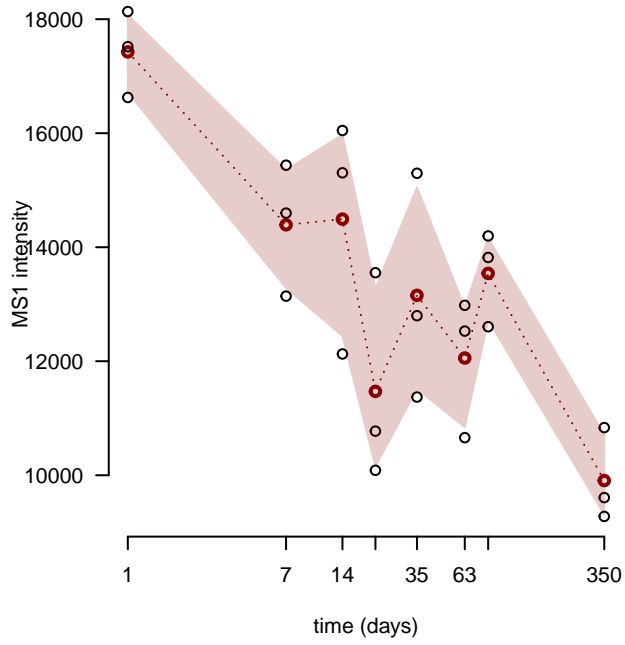

**Q6DFV5**  
**GN=Helz**  
helicase with zinc finger domain

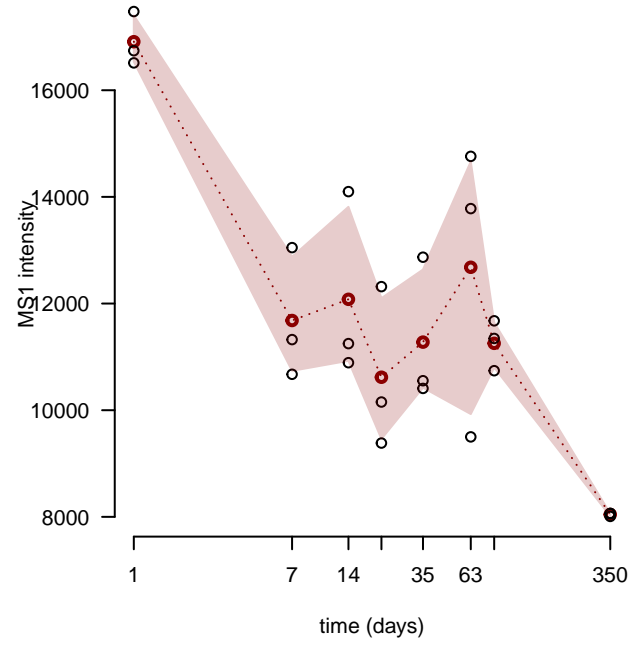

**Q6DFV7**  
**GN=Ncoa7**  
nuclear receptor coactivator 7

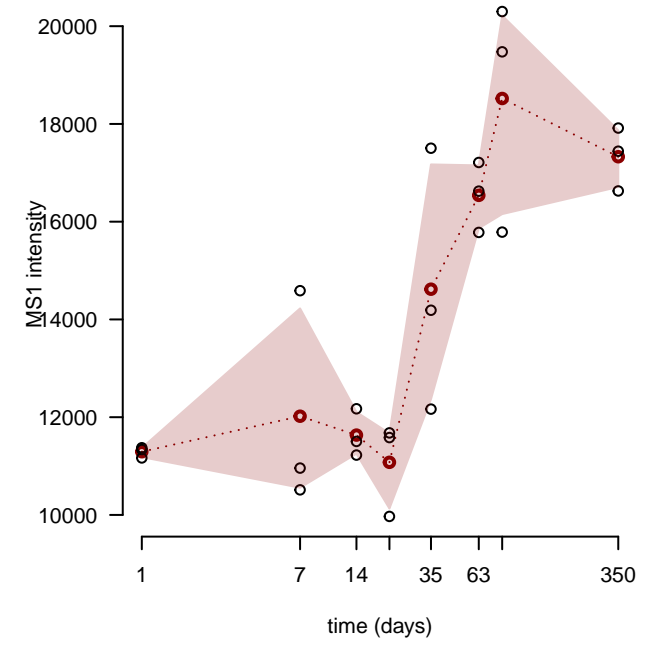

**Q6DFW4**  
**GN=Nop58**  
NOP58 ribonucleoprotein

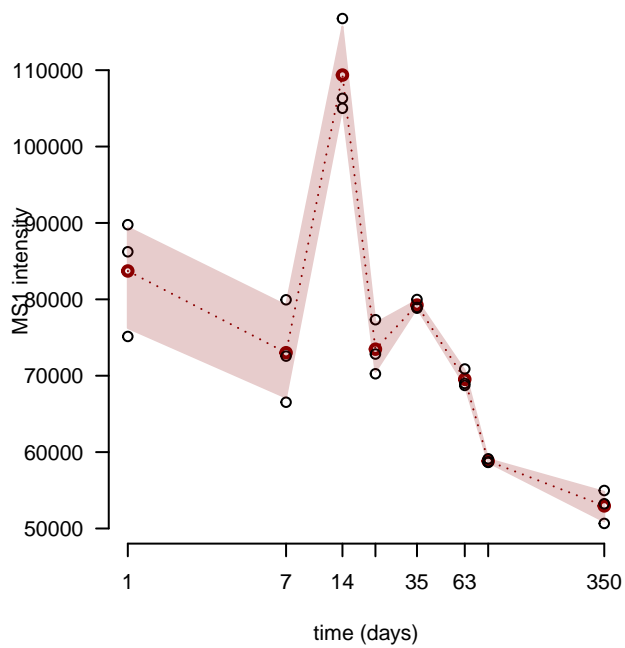

**Q6DFW5**  
**GN=**

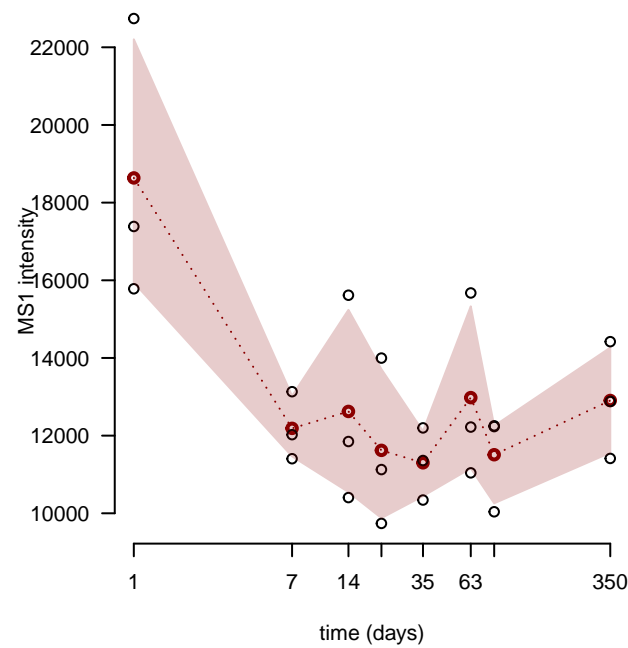

**Q6DFX2**  
**GN=Antxr2**  
anthrax toxin receptor 2

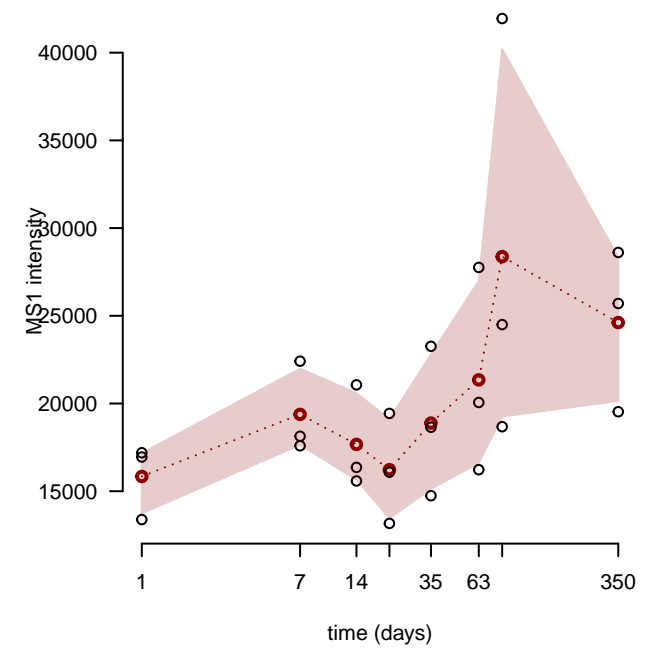

**Q6DI86**  
**GN=Fastkd1**  
FAST kinase domains 1

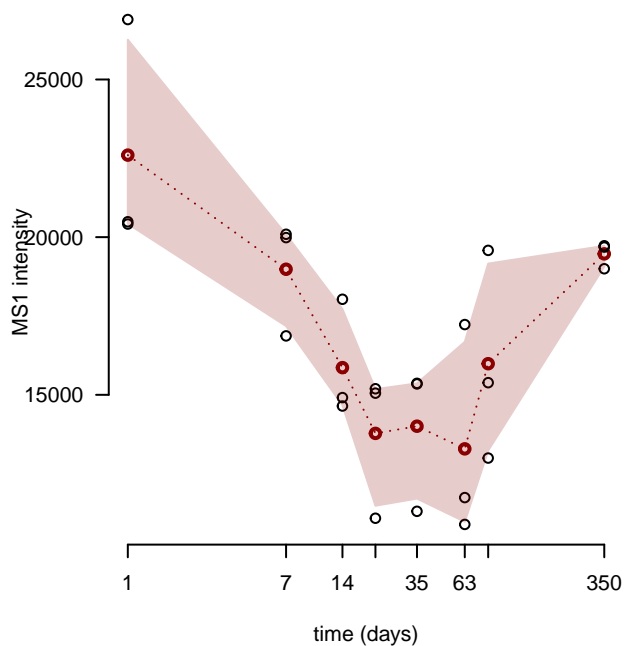

**Q6DI92**  
**GN=Zswim9**  
zinc finger SWIM-type containing 9

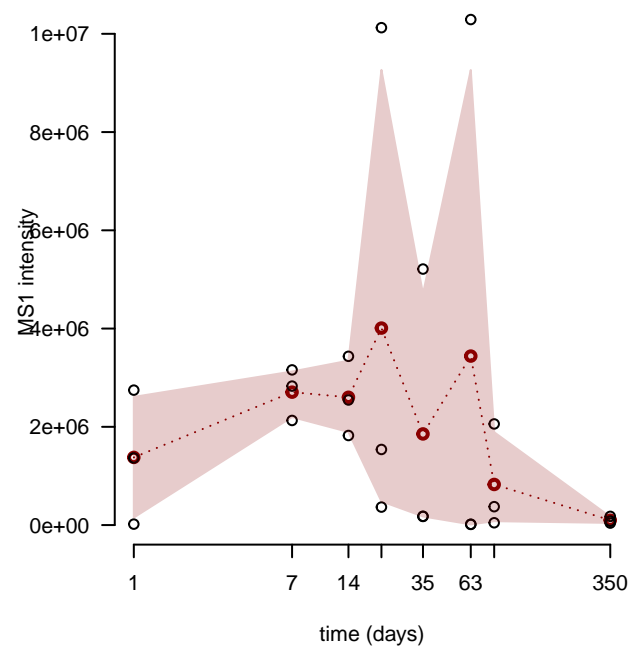

**Q6DIA2**  
**GN=Exoc3l4**  
exocyst complex component 3-like 4

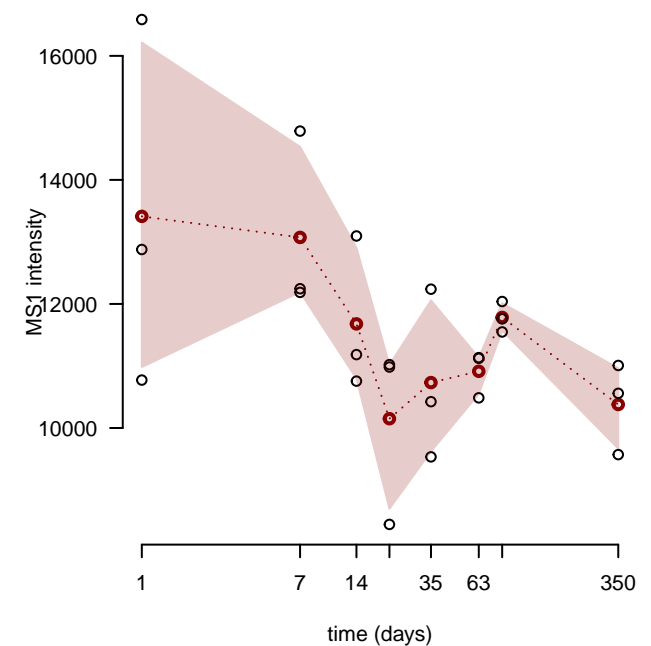

**Q6DIB4**  
**GN=Noi4l**  
nucleolar protein 4-like

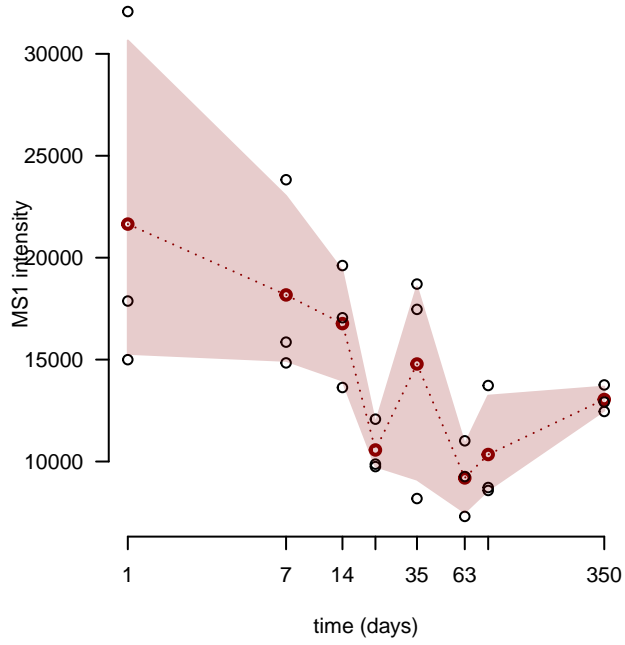

**Q6DIC0**  
**GN=Smarca2**  
SWI/SNF related, matrix associated, acti ...

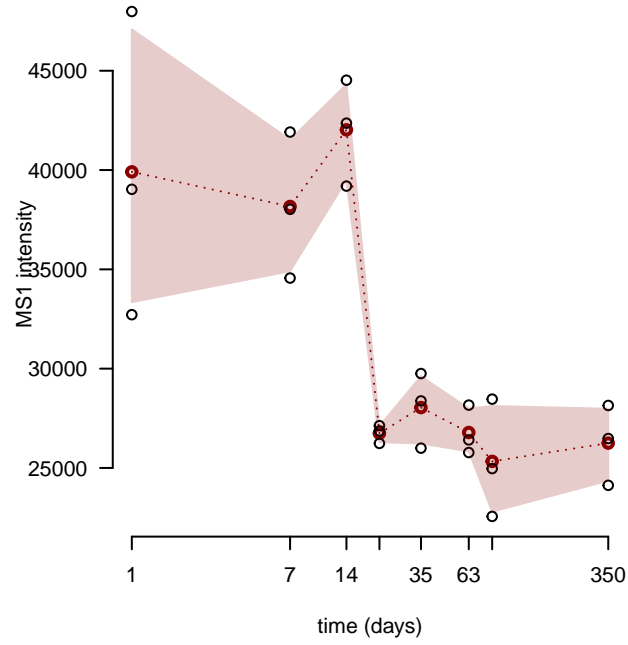

**Q6DID3**  
**GN=Scaf8**  
SR-related CTD-associated factor 8

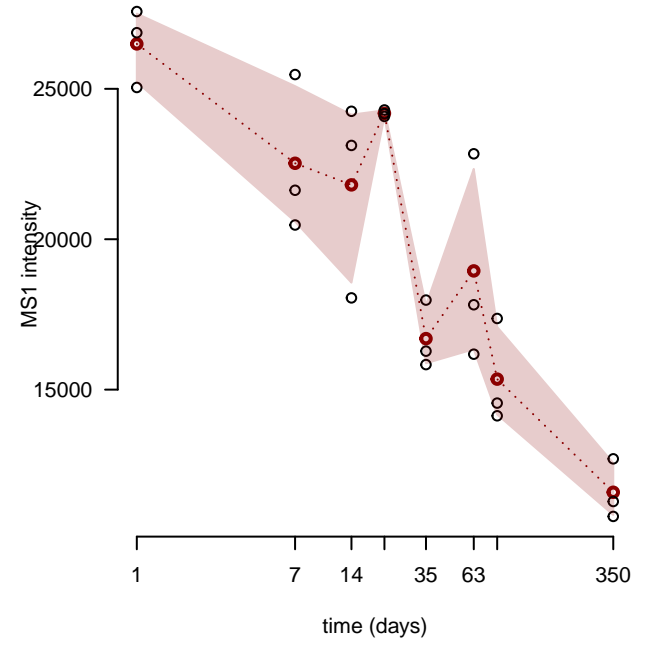

**Q6DID5**  
**GN=Pwwp3a**  
PWWP domain containing 3A, DNA repair fa ...

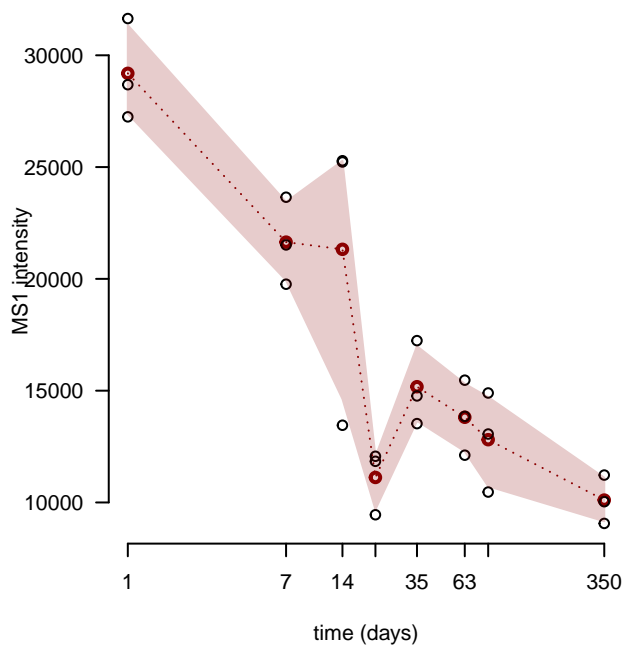

**Q6DID7**  
**GN=Wls**  
wntless WNT ligand secretion mediator

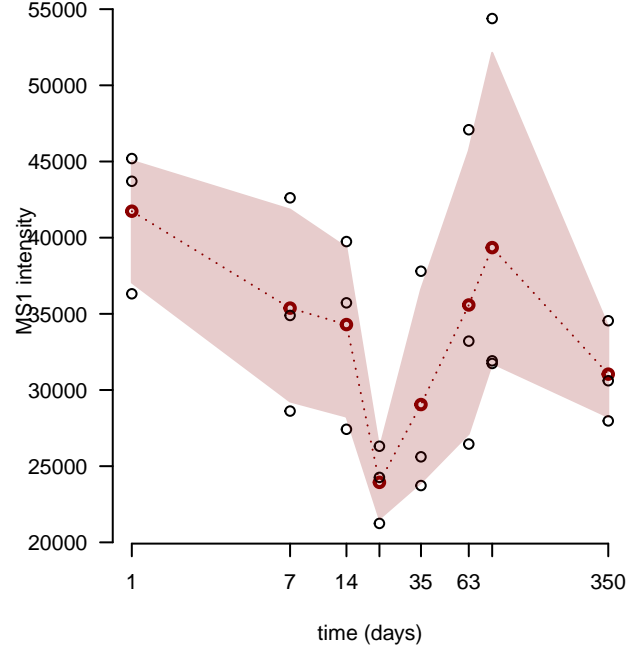

**Q6DTY7**  
**GN=Pfkfb4**  
6-phosphofructo-2-kinase/fructose-2,6-bi ...

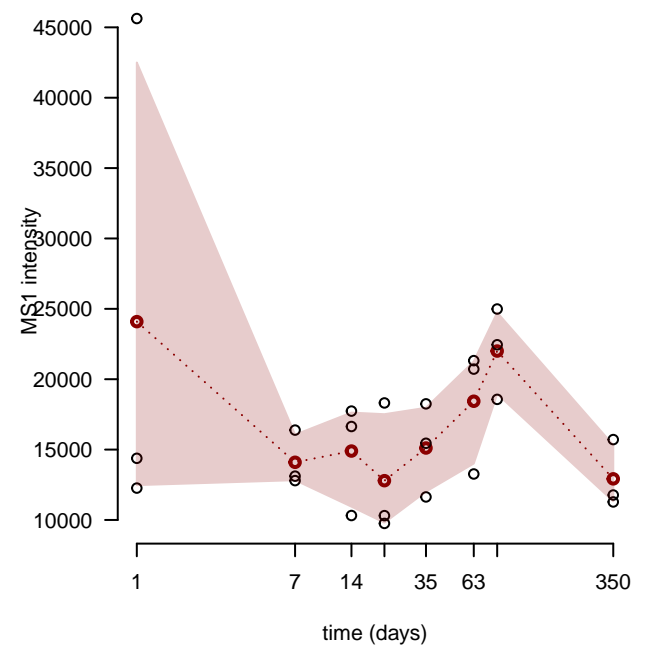

**Q6DVA0**  
**GN=Lemd2**  
LEM domain containing 2

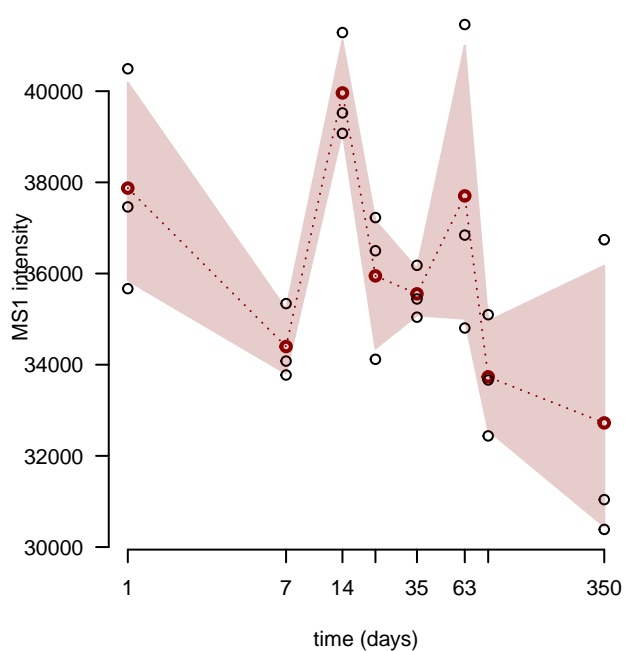

**Q6DYE8**  
**GN=Enpp3**  
ectonucleotide pyrophosphatase/phosphodi ...

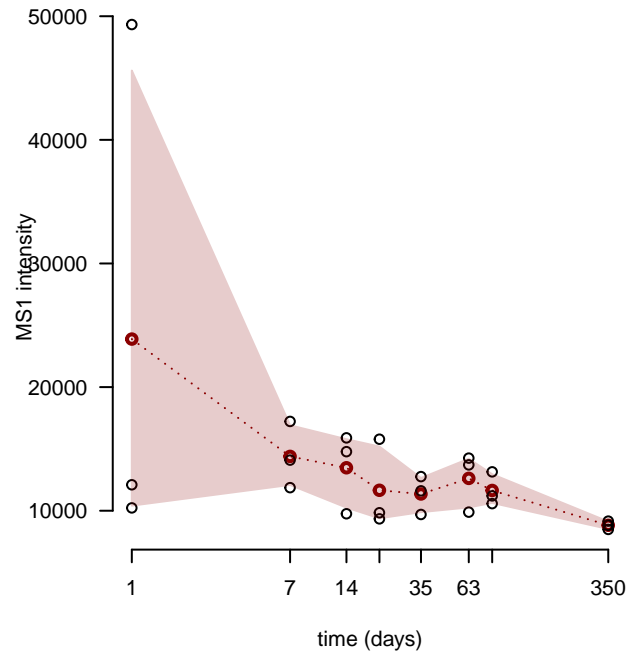

**Q6EDY6**  
**GN=Carmil1**  
capping protein regulator and myosin 1 l ...

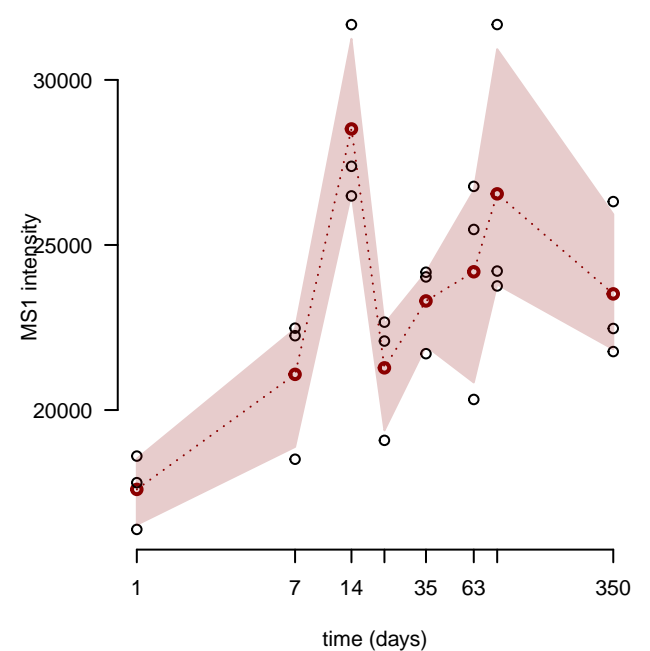

**Q6GQS1**  
**GN=Slc25a23**  
solute carrier family 25 (mitochondrial ...

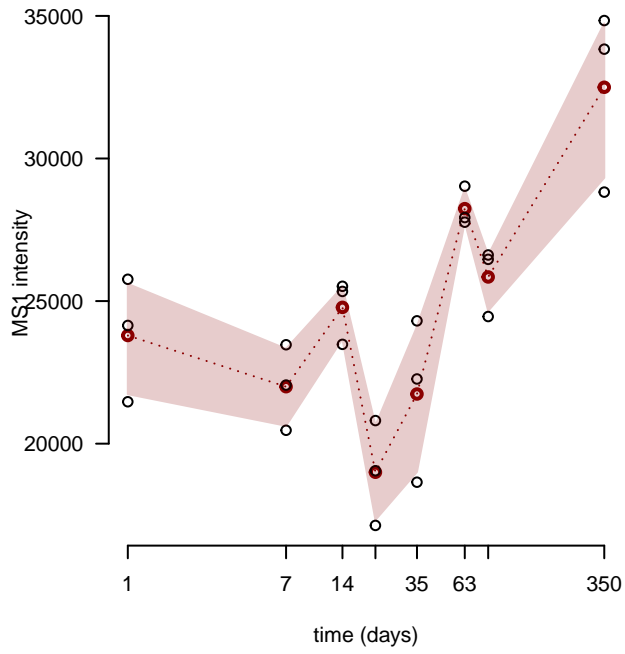

**Q6GQT0**  
**GN=Cdc14a**  
CDC14 cell division cycle 14A

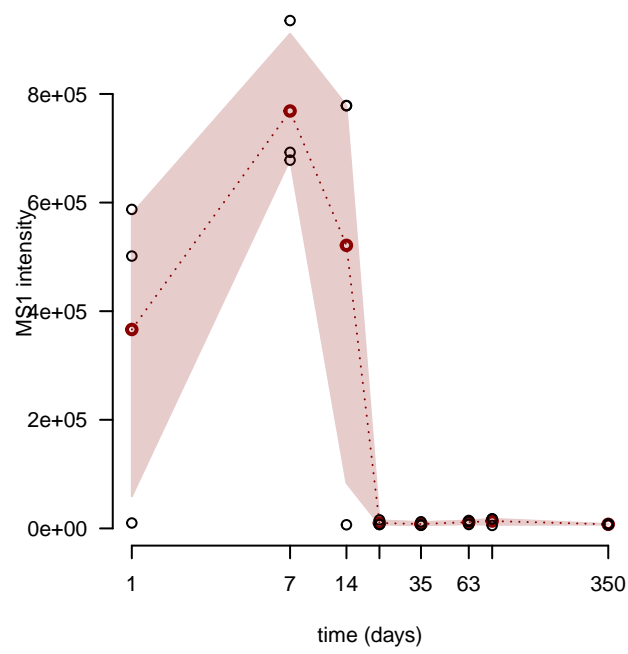

**Q6GQT1**  
**GN=A2m**  
alpha-2-macroglobulin

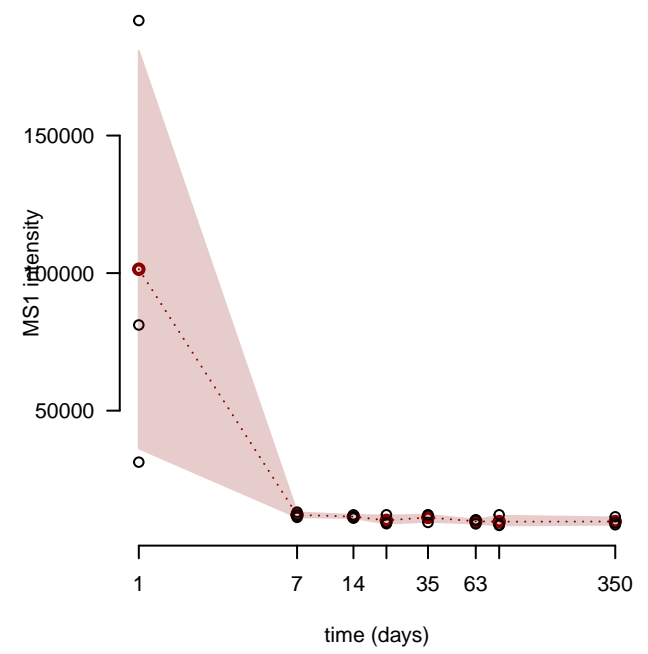

**Q6GQT6**  
**GN=Scap**  
SREBF chaperone

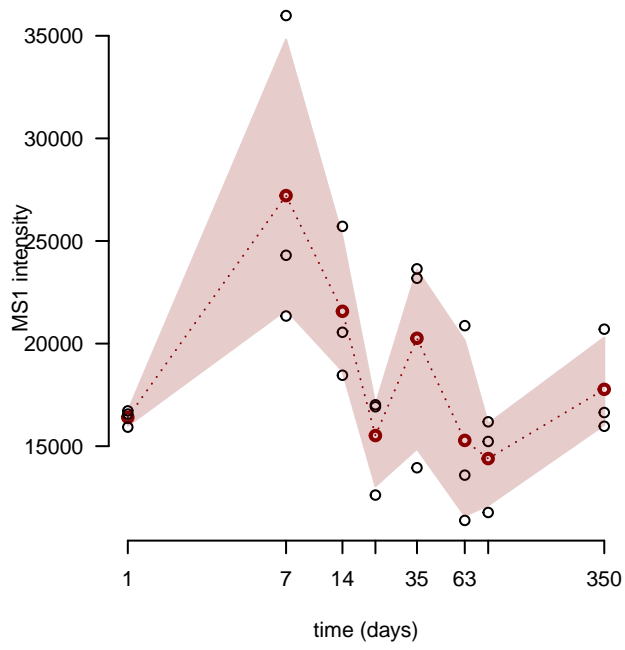

**Q6GQT9**  
**GN=Nomo1**  
nodal modulator 1

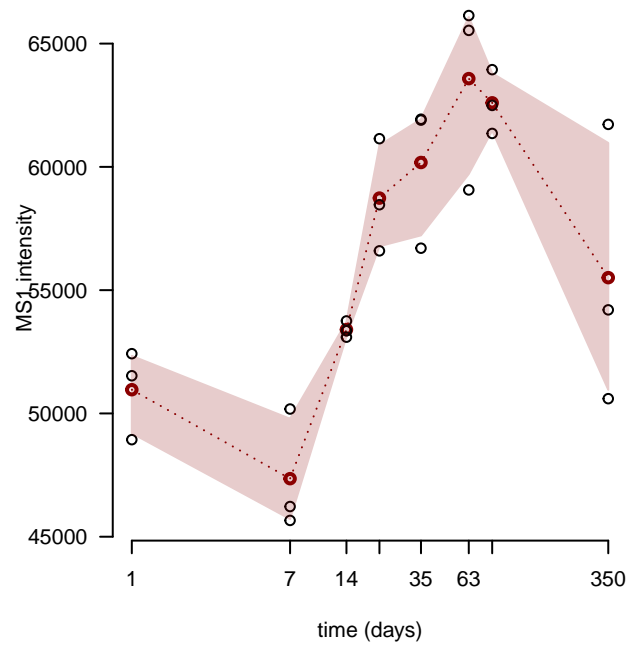

**Q6GQU2**  
**GN=Klh23**  
kelch-like 23

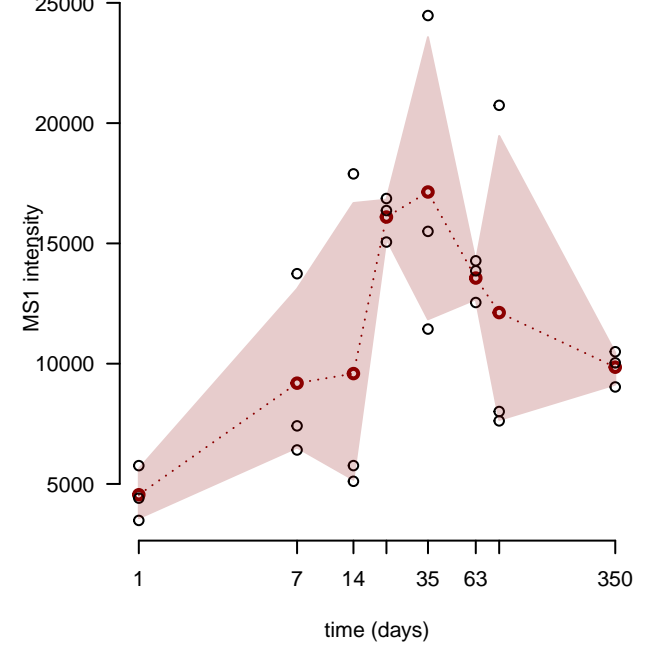

**Q6GQV7**  
**GN=Edrf1**  
erythroid differentiation regulatory fac ...

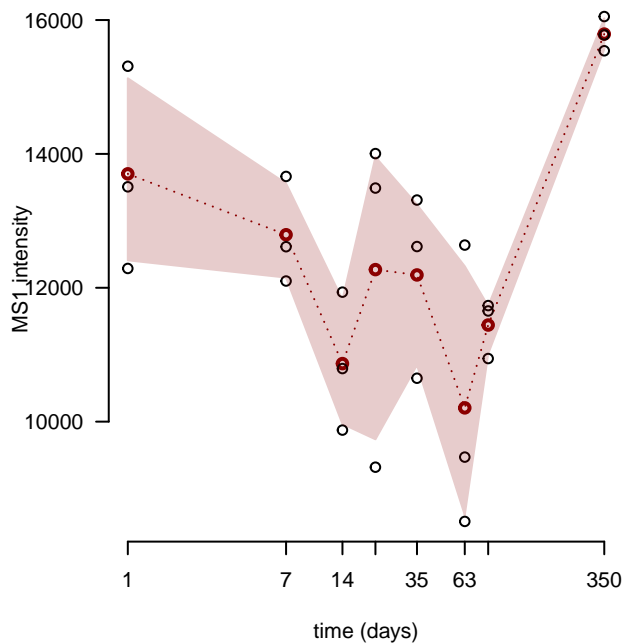

**Q6GU68**  
**GN=Islr**  
immunoglobulin superfamily containing le ...

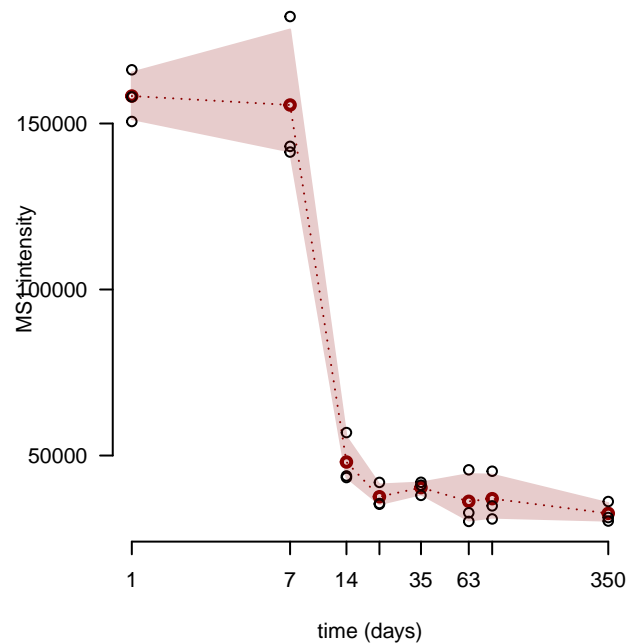

**Q6GV12**  
**GN=Kdsr**  
3-ketodihydroshingosine reductase

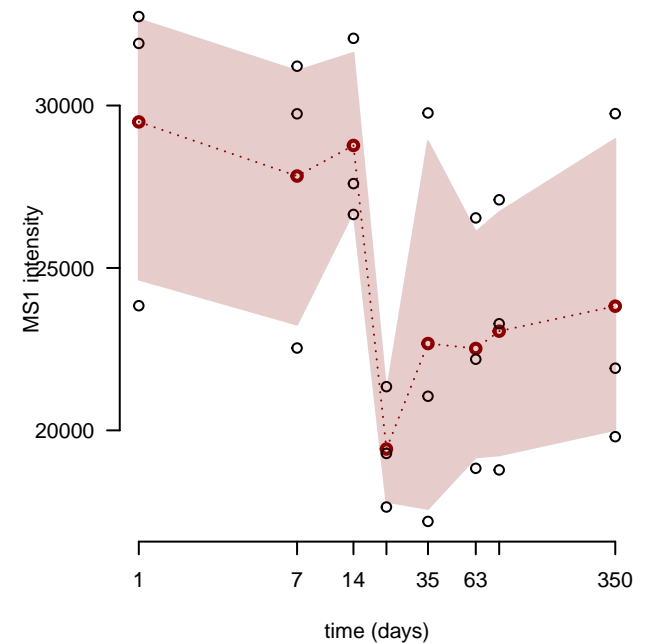

**Q6GYP7**  
**GN=Ralgap1**  
Ral GTPase activating protein, alpha sub ...

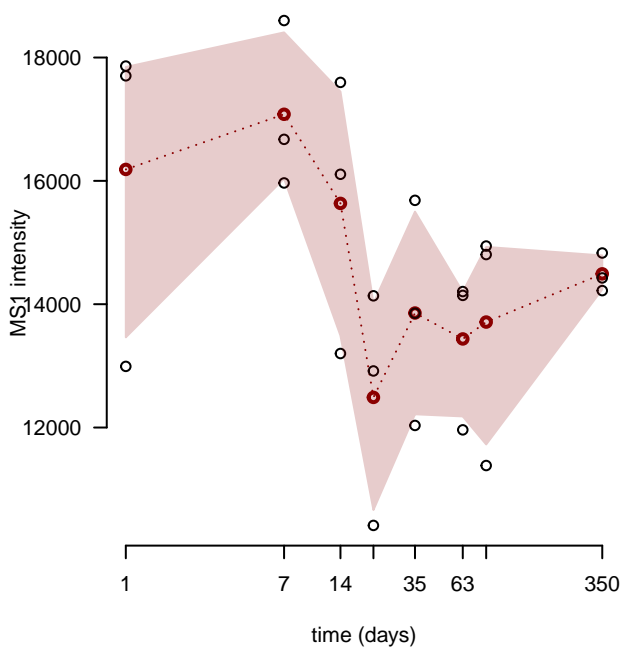

**Q6HA09**  
**GN=AstI**  
astacin-like metalloendopeptidase (M12 f ...

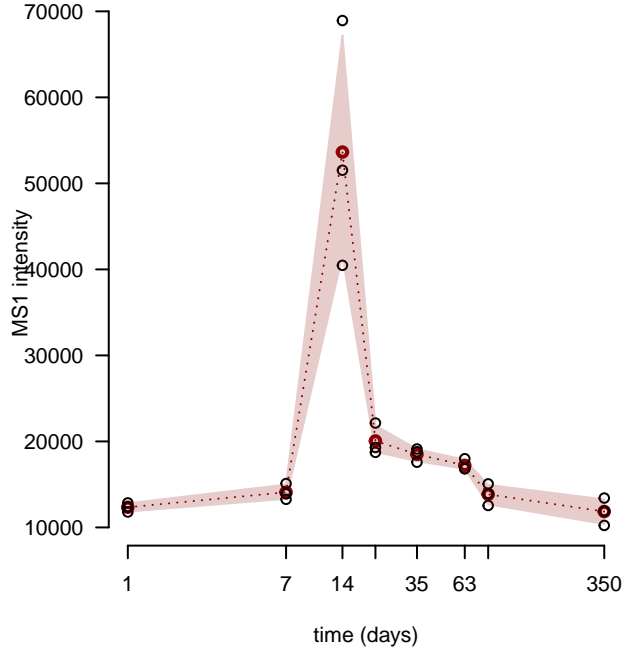

**Q6I6G8**  
**GN=Hecw2**  
HECT, C2 and WW domain containing E3 ubi ...

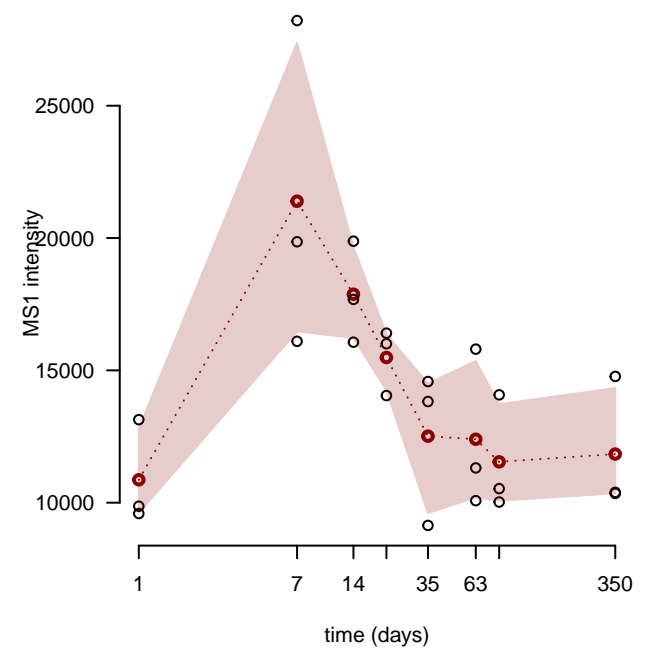

**Q6IE82**  
**GN=Jade3**  
jade family PHD finger 3

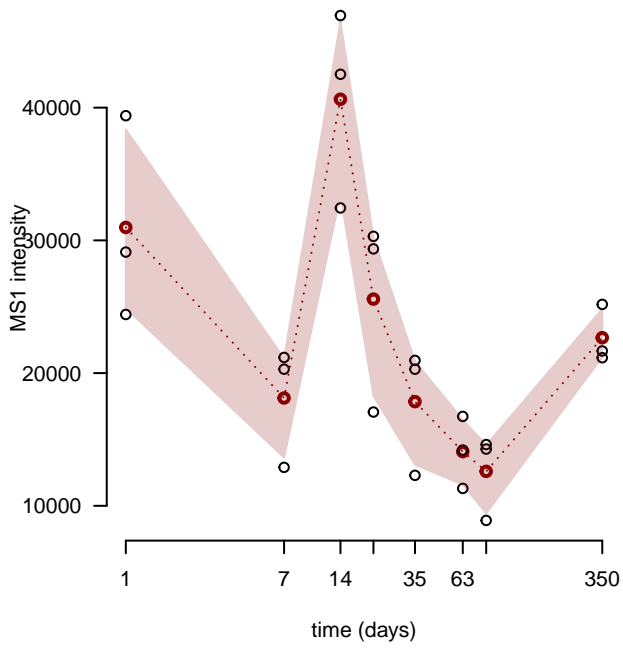

**Q6IFX2**  
**GN=Krt42**  
keratin 42

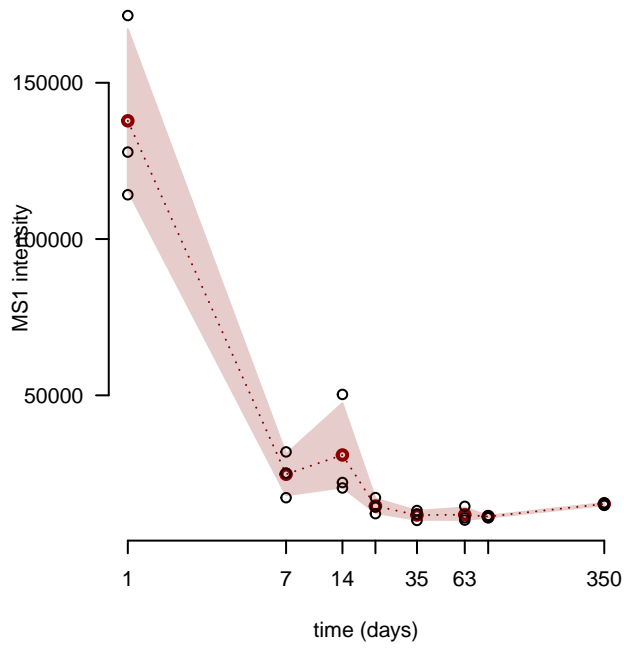

**Q6IFX4**  
**GN=Krt39**  
keratin 39

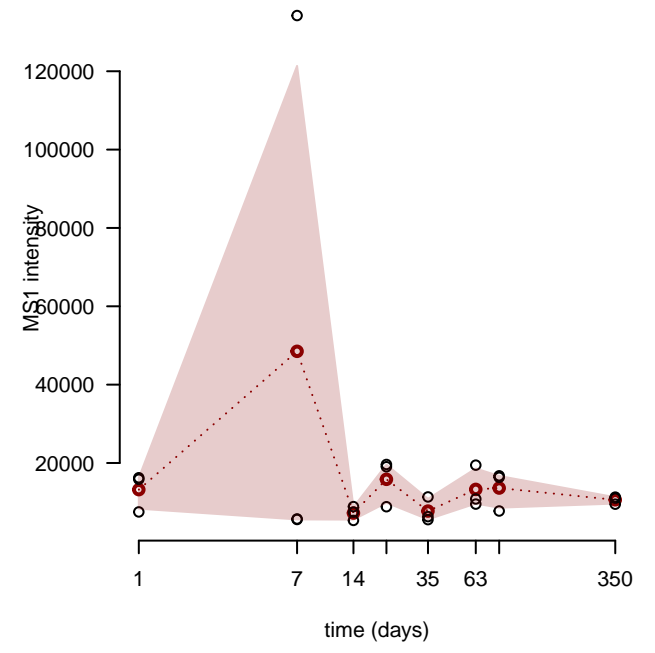

**Q6IFZ6**  
**GN=Krt77**  
keratin 77

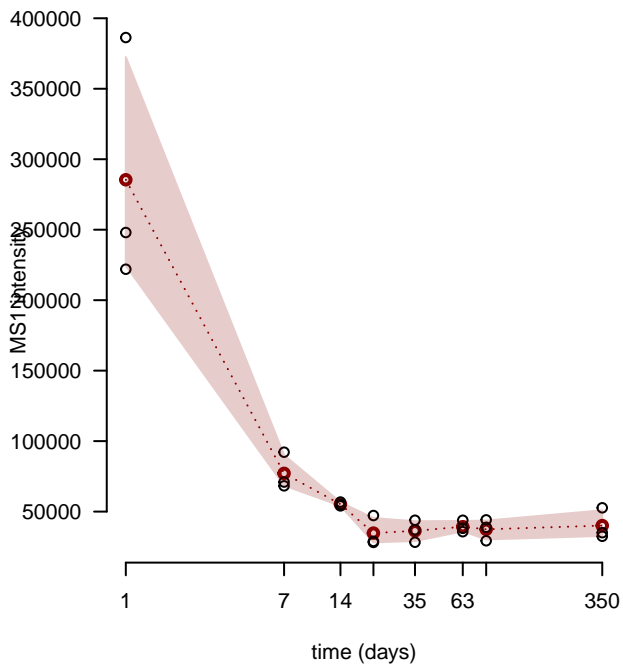

**Q6IMB1**  
**GN=Ras111a**  
RAS-like, family 11, member A

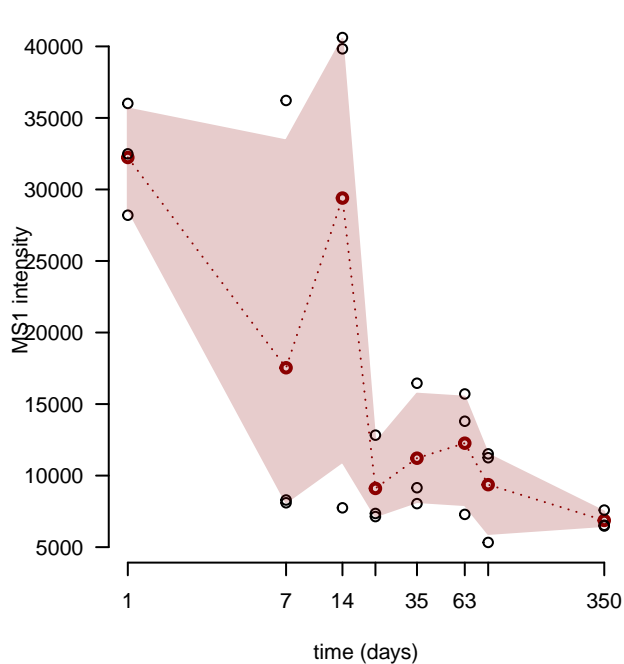

**Q6IME9**  
**GN=Krt72**  
keratin 72

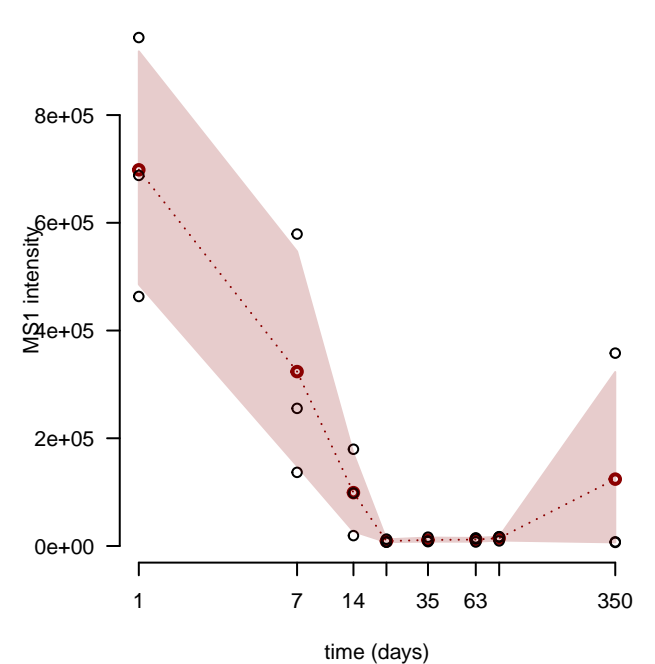



**Q6IMF0**  
GN=Krt87  
keratin 87

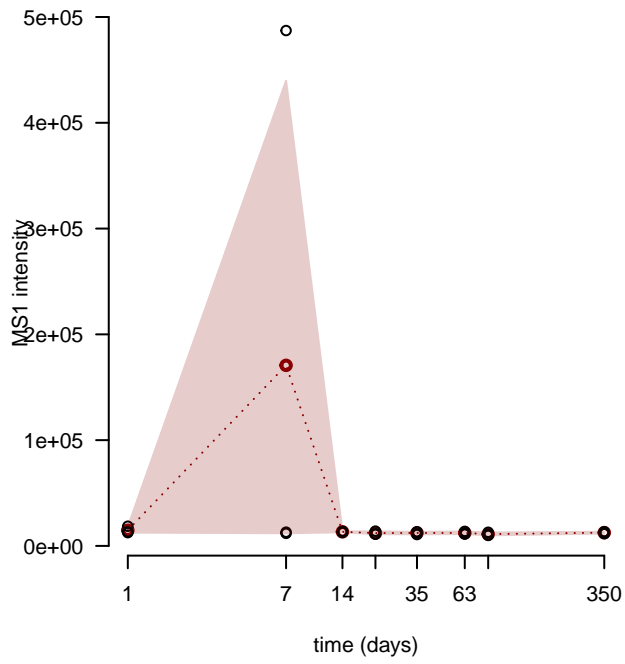

**Q6IQX7**  
GN=Chpf  
chondroitin polymerizing factor

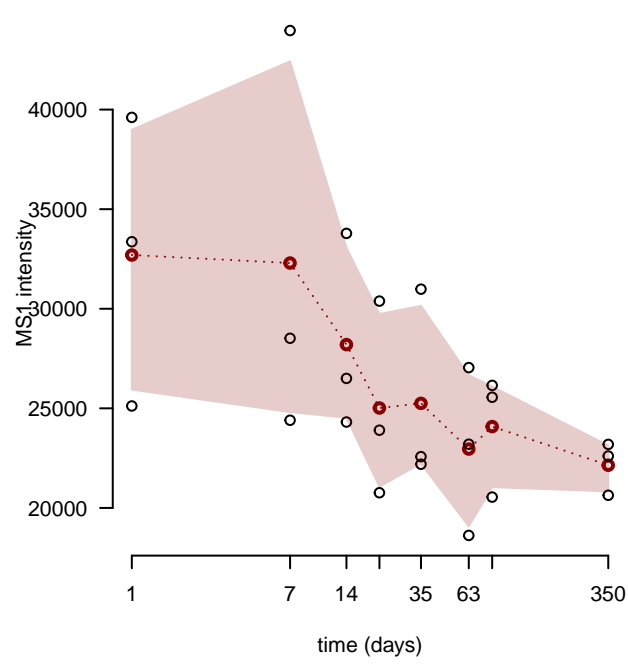

**Q6IQX8**  
GN=Znf219

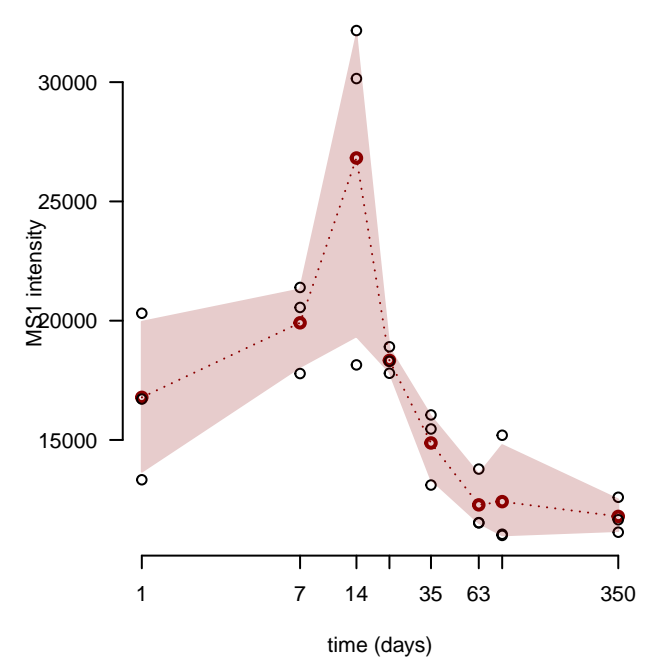

**Q6IQY5**  
GN=Cep70  
centrosomal protein 70

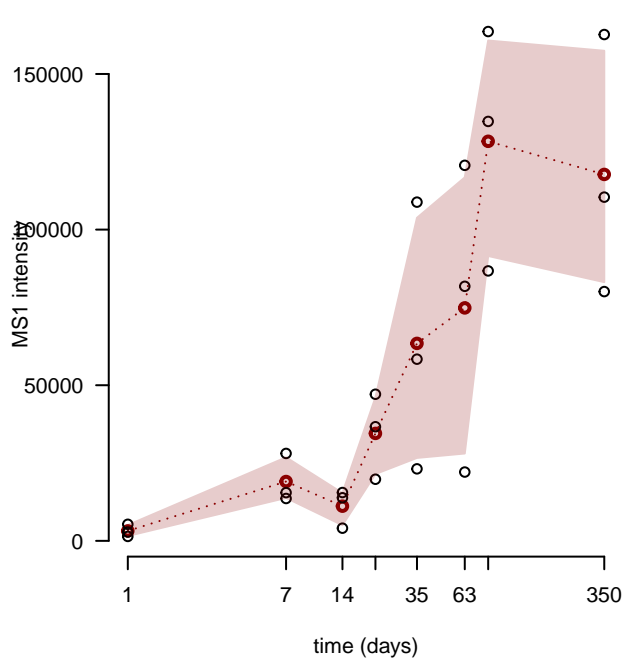

**Q6IR34**  
GN=Gpsm1  
G-protein signalling modulator 1 (AGS3-I ...

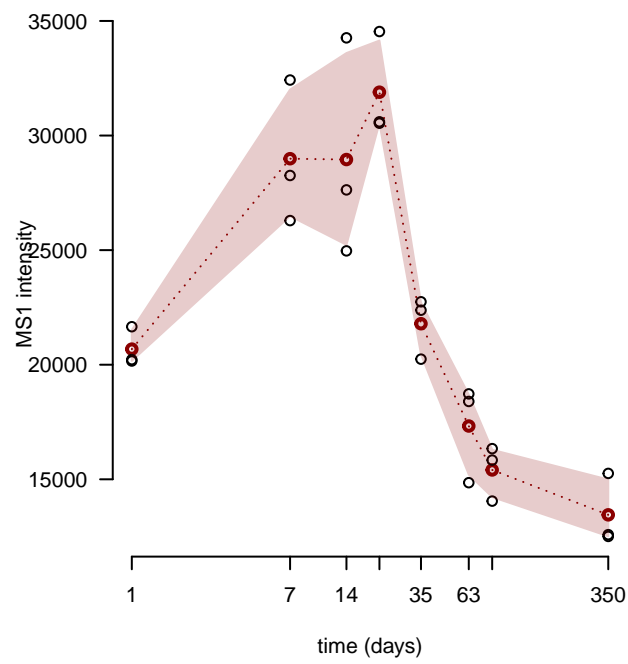

**Q6IR41**  
GN=C1qtnf6  
C1q and tumor necrosis factor related pr ...

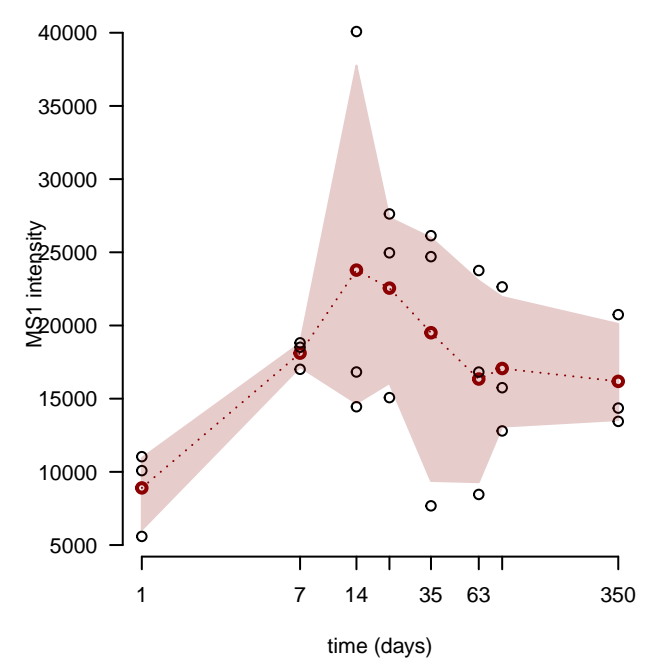

**Q6IRT3**  
GN=Parpbp  
PARP1 binding protein

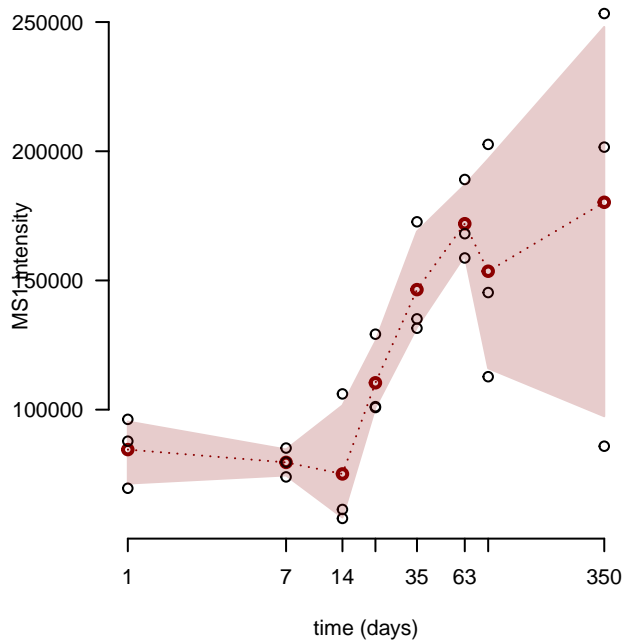

**Q6IRU2**  
GN=Tpm4  
tropomyosin 4

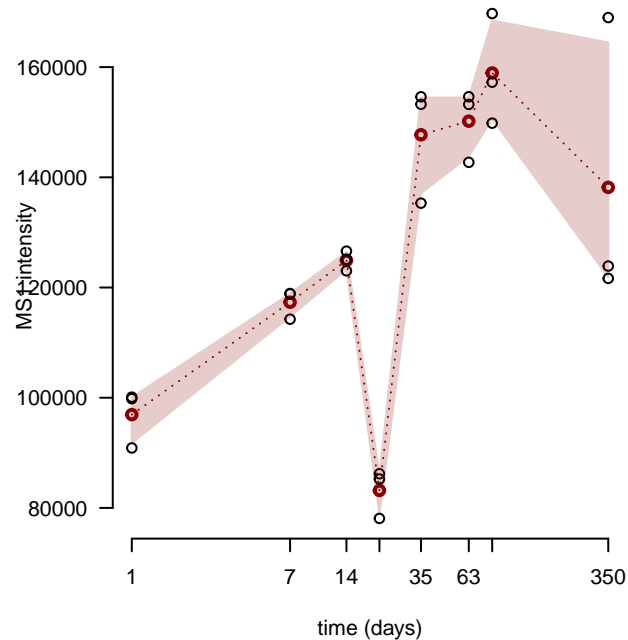

**Q6IRU5**  
GN=Cltb  
clathrin, light polypeptide (Lcb)

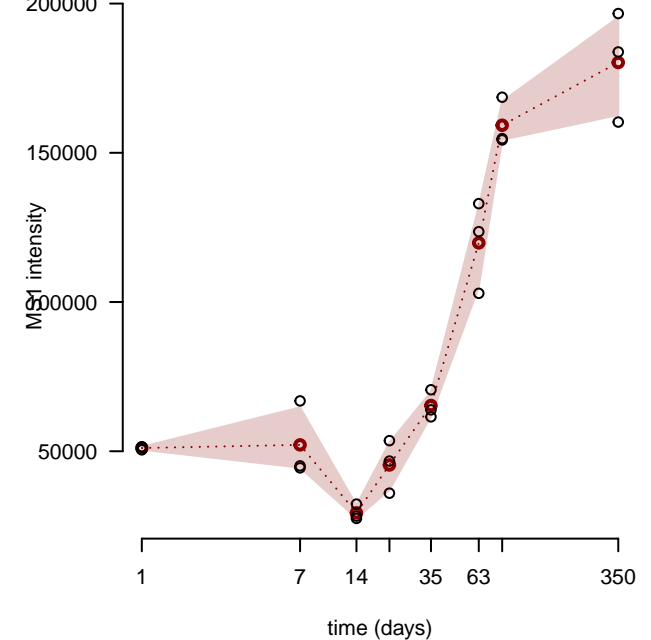

**Q6JPI3**  
**GN=Med13l**  
mediator complex subunit 13-like

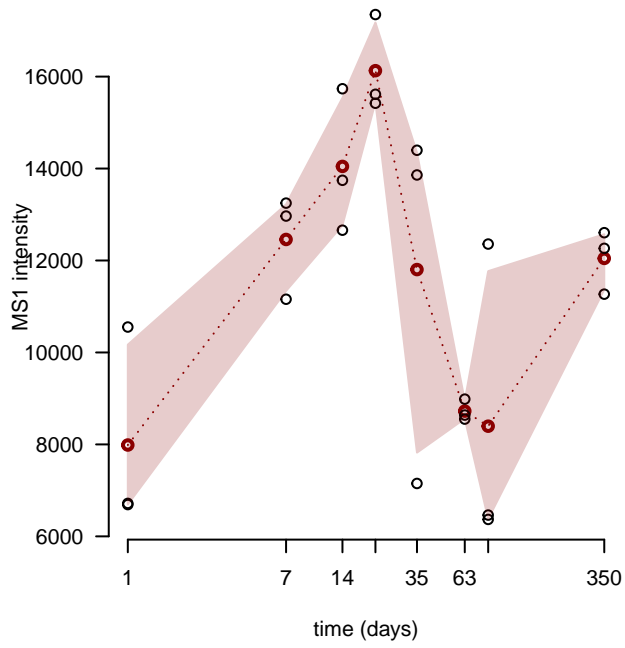

**Q6KAQ7**  
**GN=Zzz3**  
zinc finger, ZZ domain containing 3

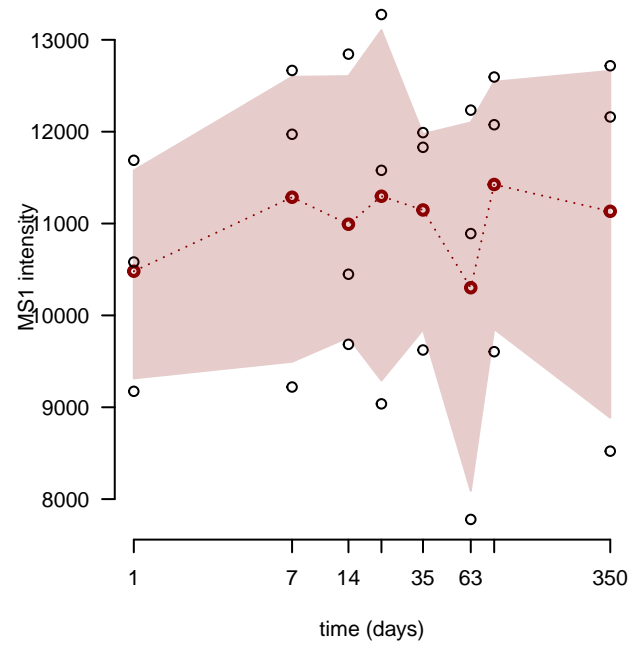

**Q6KAR6**  
**GN=Exoc3**  
exocyst complex component 3

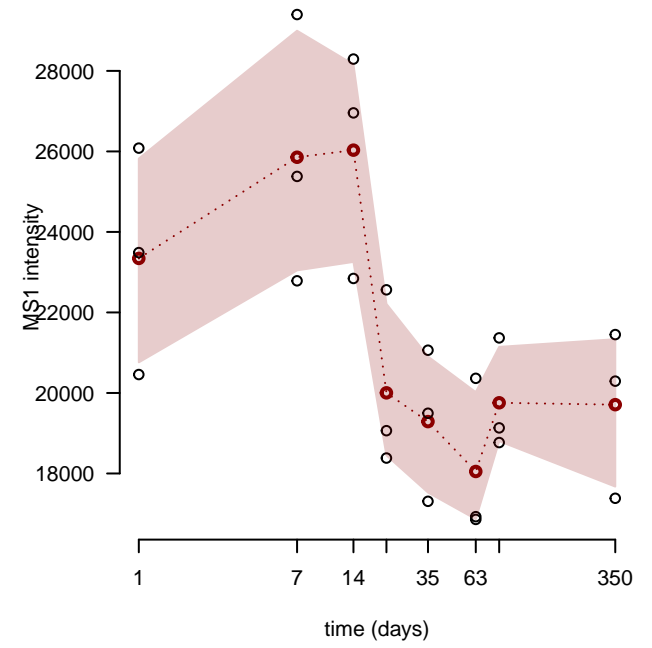

**Q6KAU4**  
**GN=Mvb12b**  
multivesicular body subunit 12B

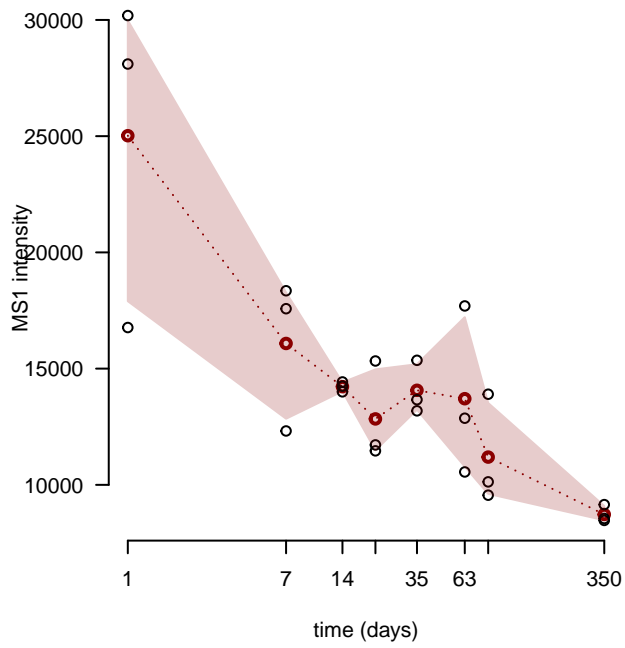

**Q6KAU7**  
**GN=Plekhhg2**  
pleckstrin homology domain containing, f...

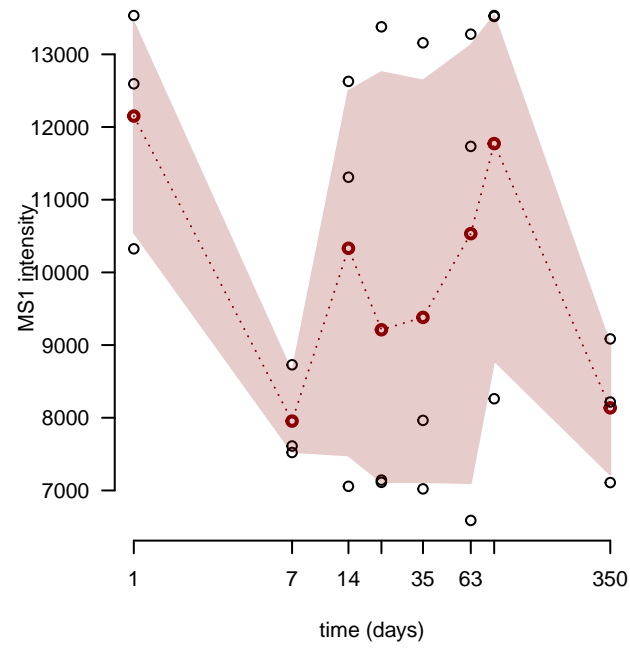

**Q6KCD5**  
**GN=Nipbl**  
NIPBL cohesin loading factor

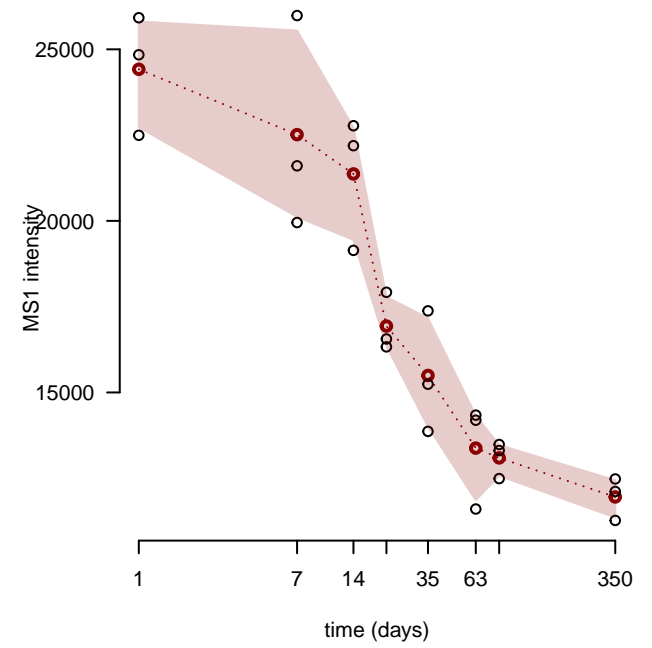

**Q6NS45**  
**GN=Ccdc66**  
coiled-coil domain containing 66

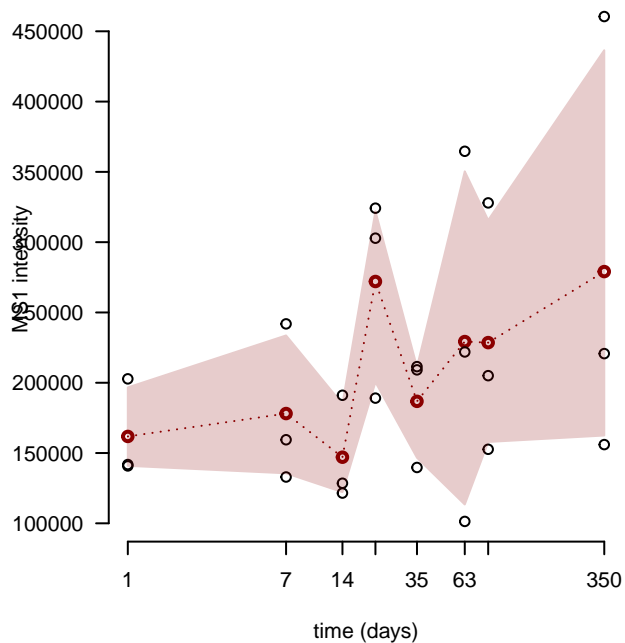

**Q6NS46**  
**GN=Pdcd11**  
programmed cell death 11

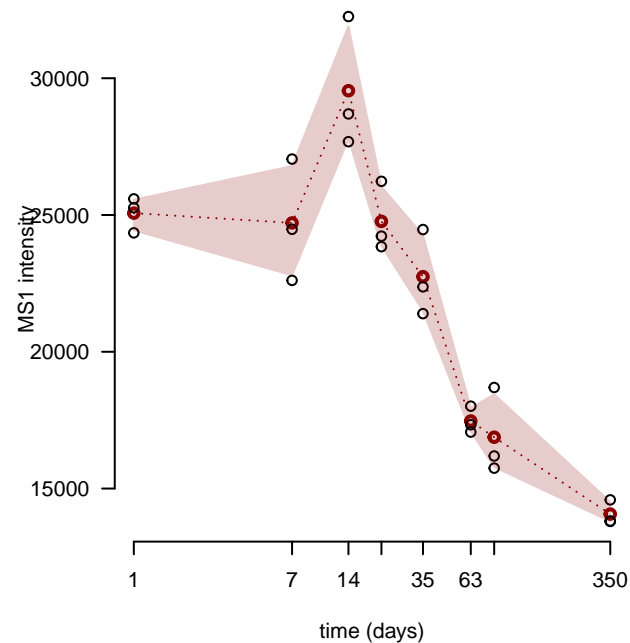

**Q6NS57**  
**GN=Mapkbp1**  
mitogen-activated protein kinase binding ...

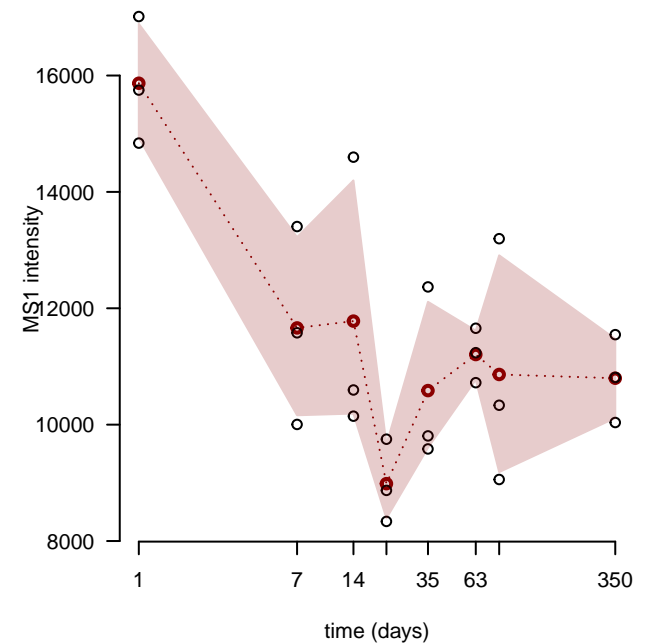

**Q6NS59**  
**GN=Fam135a**  
family with sequence similarity 135, mem ...

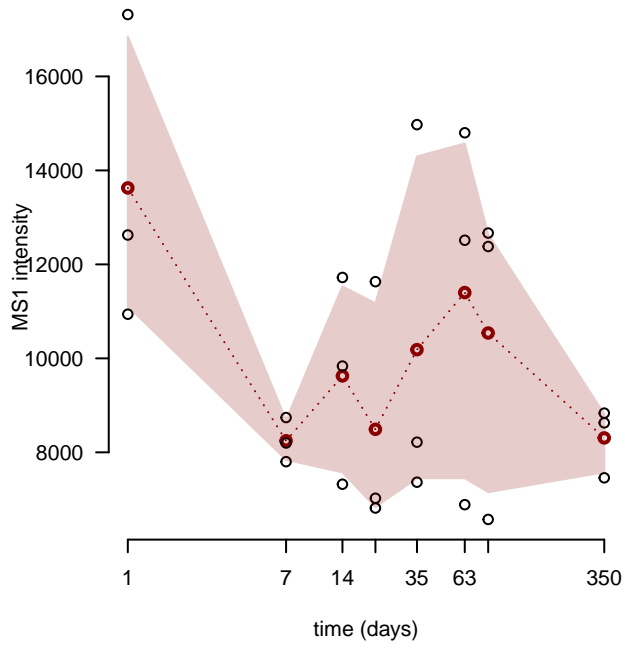

**Q6NS82**  
**GN=Retreg2**  
reticulophagy regulator family member 2

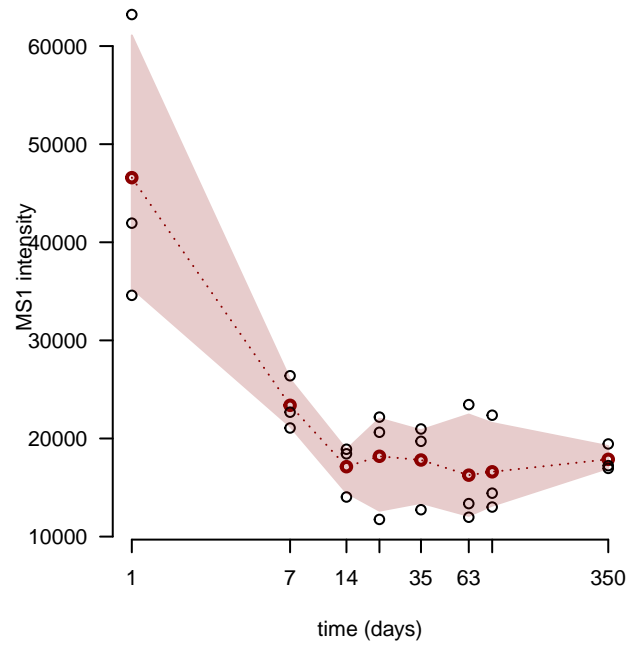

**Q6NSQ7**  
**GN=Ltv1**  
LTV1 ribosome biogenesis factor

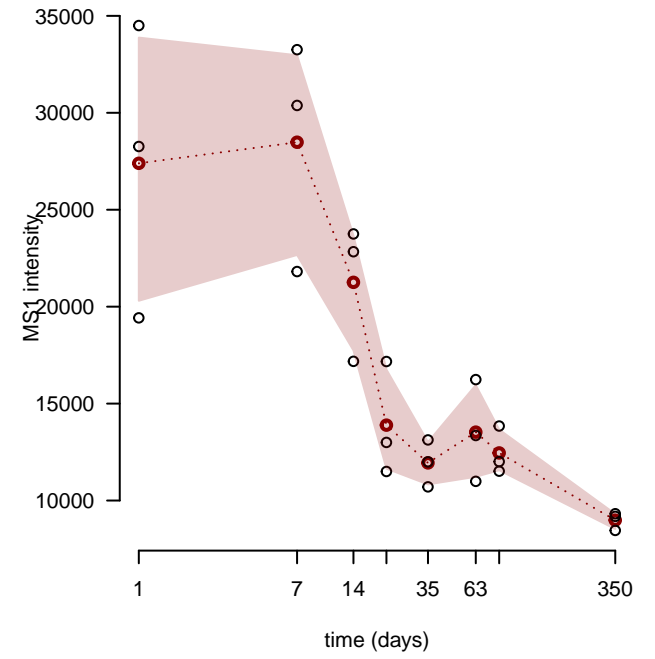

**Q6NSQ9**  
**GN=G6pc3**  
glucose 6 phosphatase, catalytic, 3

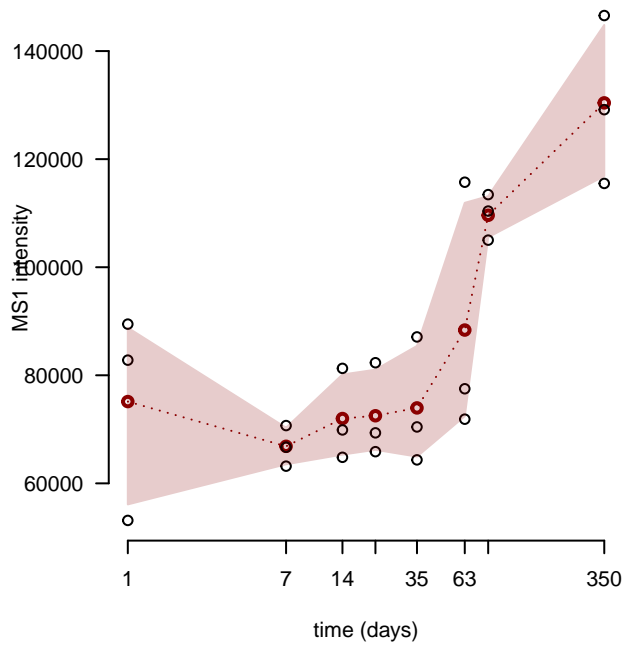

**Q6NSR8**  
**GN=Npep1**  
aminopeptidase-like 1

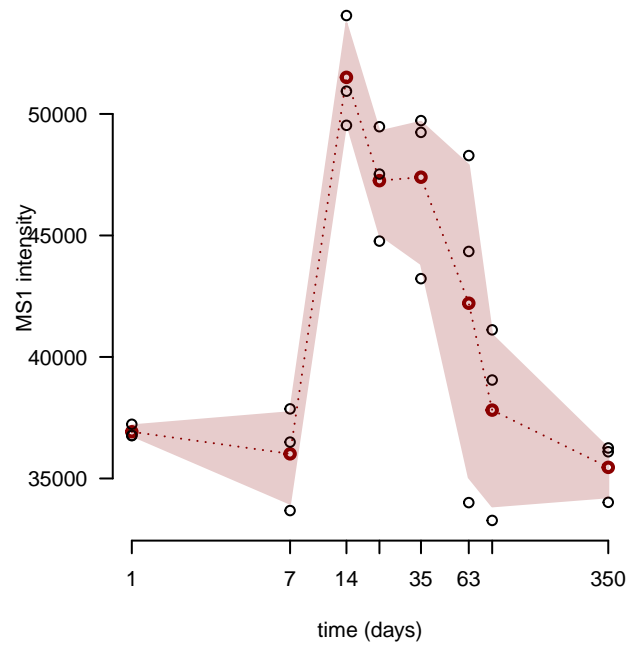

**Q6NSU3**  
**GN=Git8d1**  
glycosyltransferase 8 domain containing ...

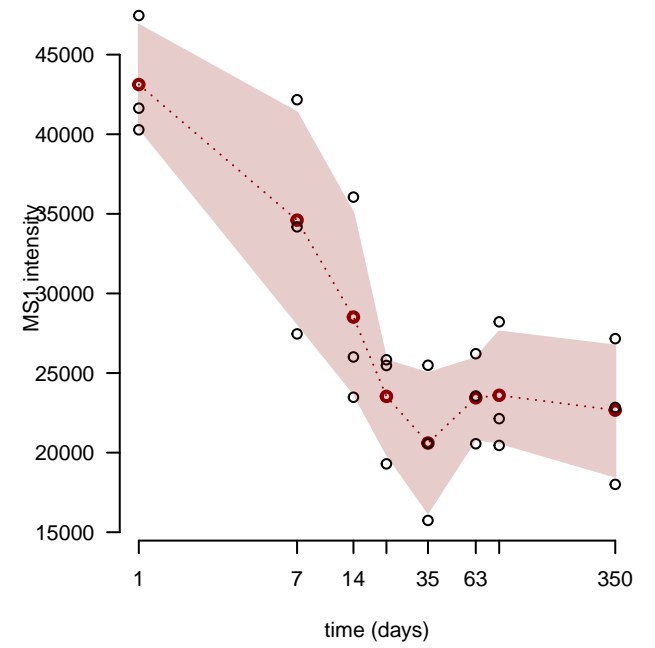

**Q6NT99**  
**GN=Dusp23**  
dual specificity phosphatase 23

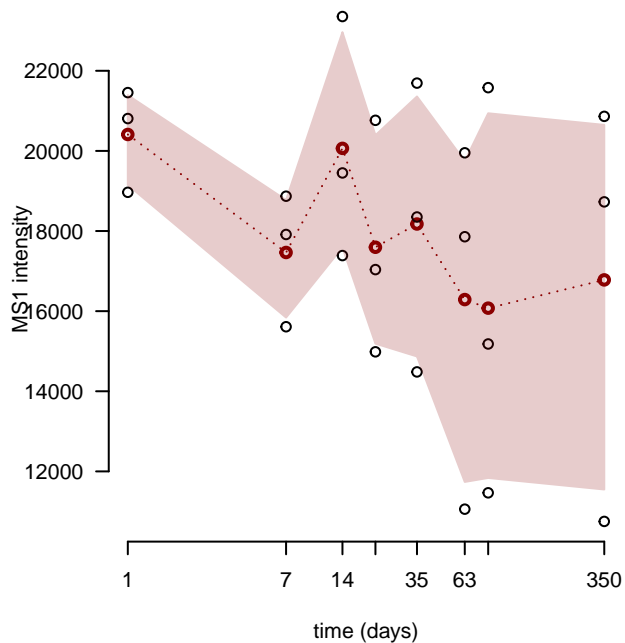

**Q6NV66**  
**GN=Zfp646**  
zinc finger protein 646

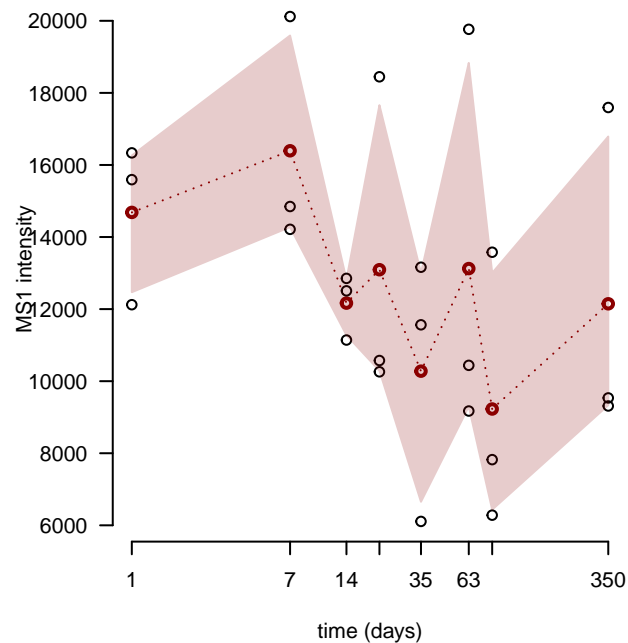

**Q6NV83**  
**GN=U2surp**  
U2 snRNP-associated SURP domain containi ...

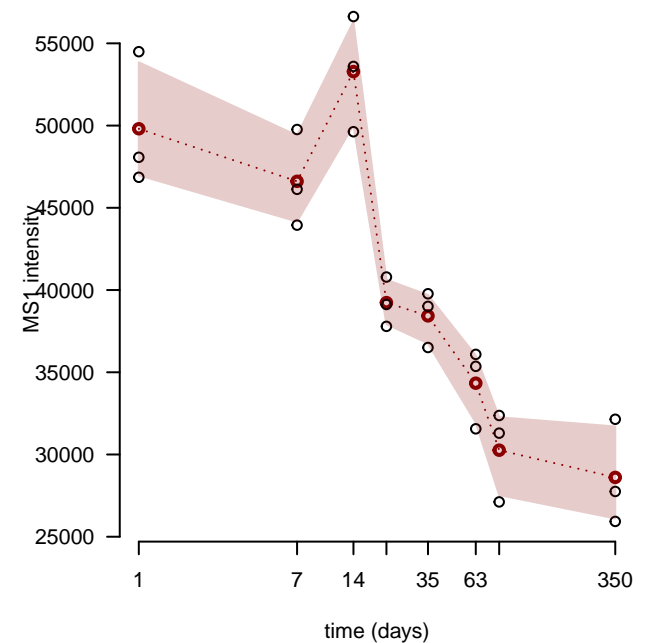

**Q6NVD0**  
**GN=Frem2**

Fras1 related extracellular matrix prote ...

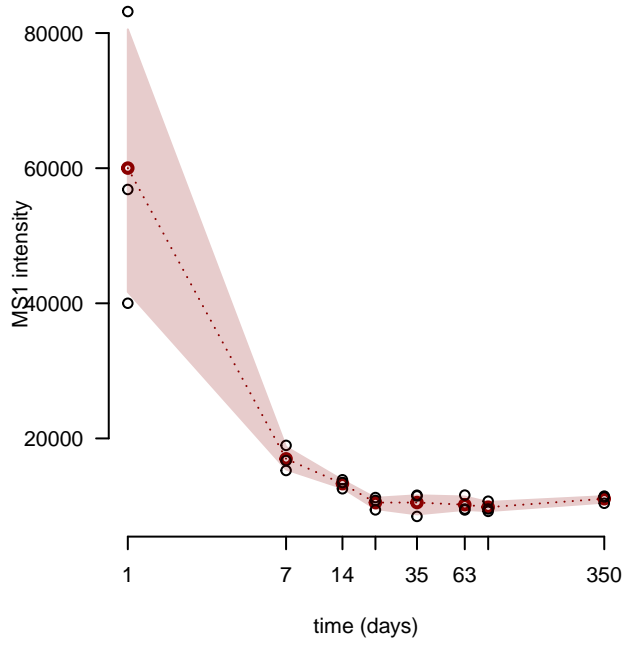

**Q6NVE3**  
**GN=Spin2c**

spindlin family, member 2C

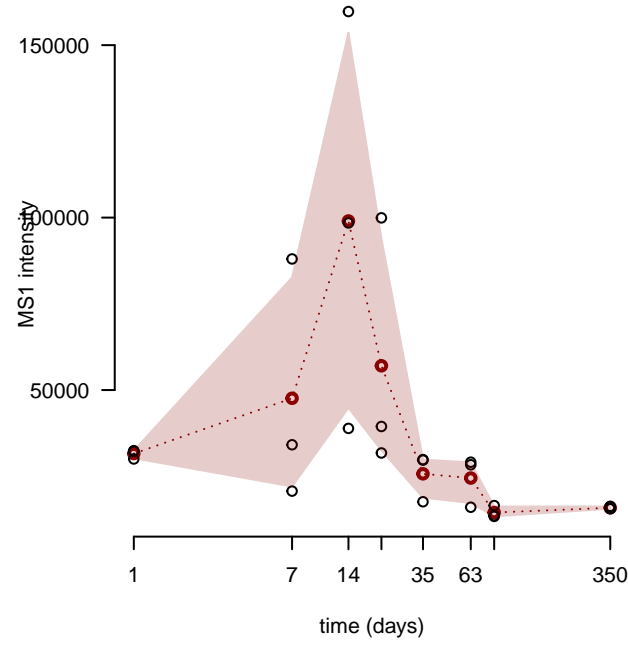

**Q6NVE8**  
**GN=Wdr44**

WD repeat domain 44

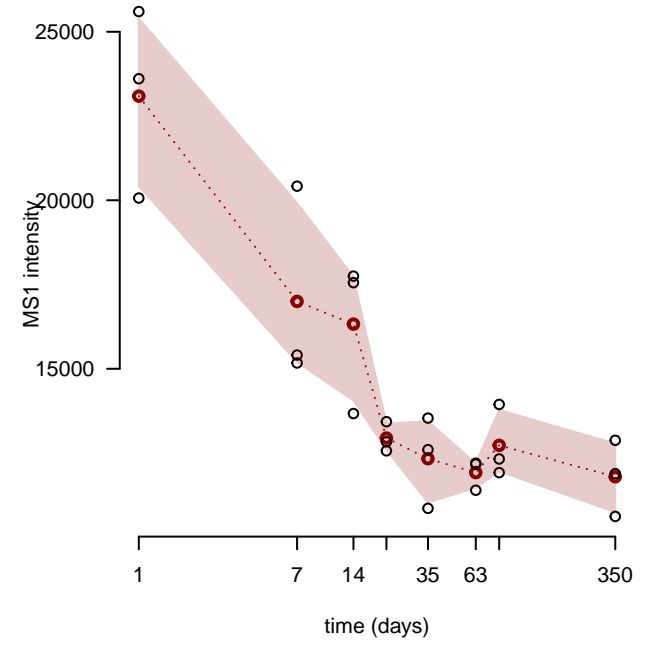

**Q6NVE9**  
**GN=Pptc7**

PTC7 protein phosphatase homolog

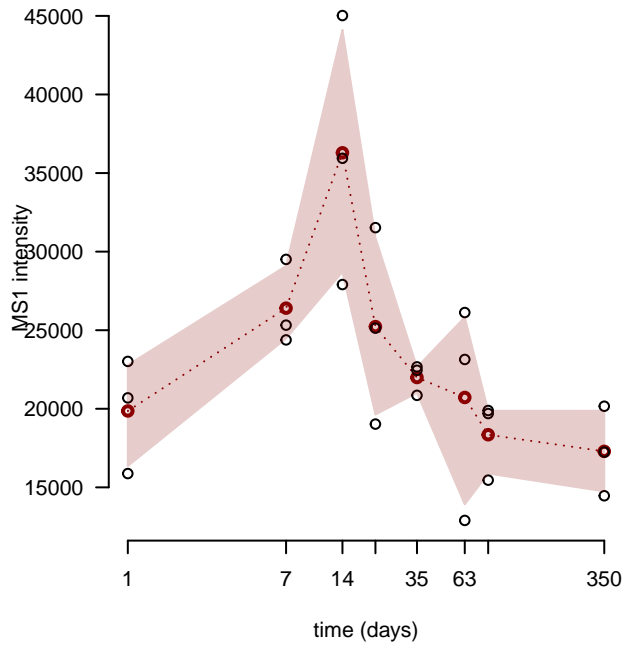

**Q6NVF0**  
**GN=Ocr1**

OCRL, inositol polyphosphate-5-phosphata ...

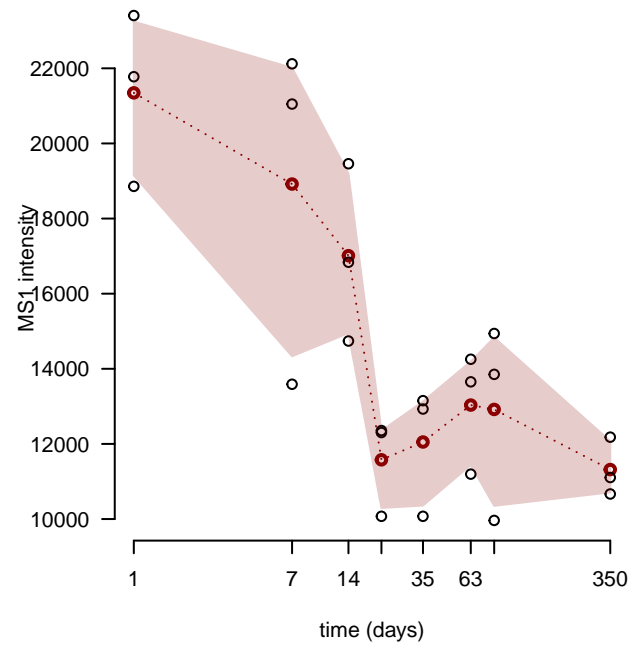

**Q6NVF4**  
**GN=Helb**

helicase (DNA) B

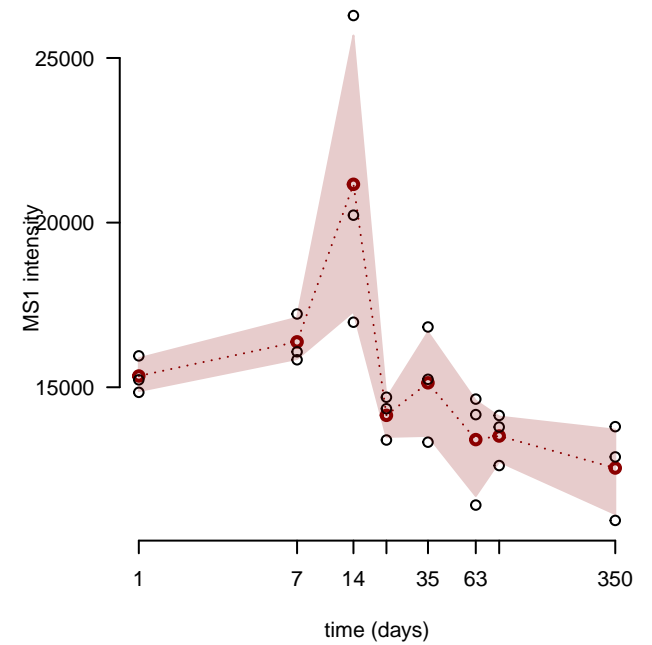

**Q6NVF9**  
**GN=Cpsf6**

cleavage and polyadenylation specific fa ...

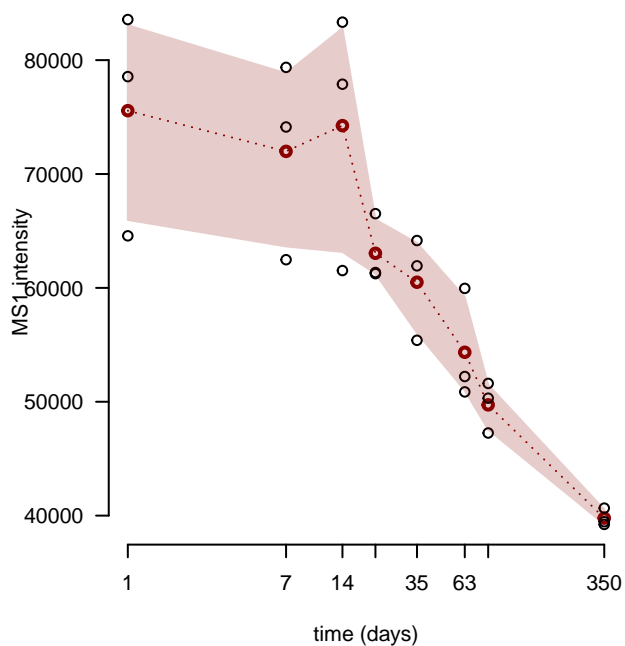

**Q6NVG1**  
**GN=Lpcat4**

lysophosphatidylcholine acyltransferase ...

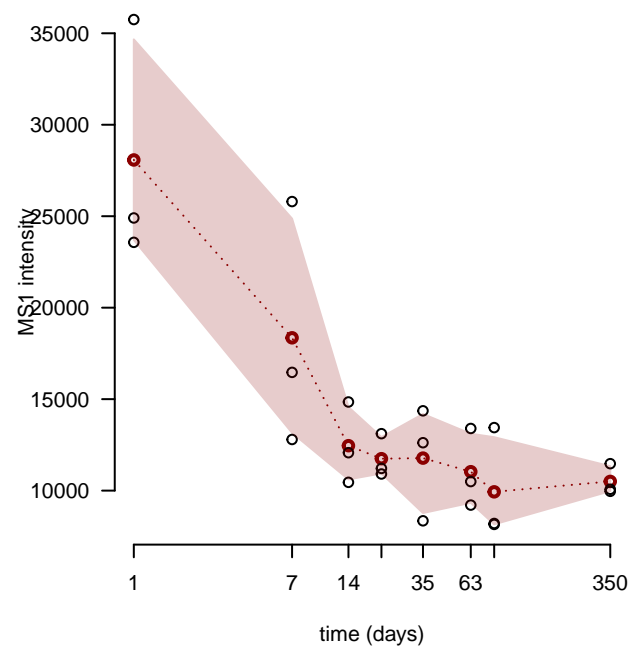

**Q6NVG7**  
**GN=Colgalt2**

collagen beta(1-O)galactosyltransferase ...

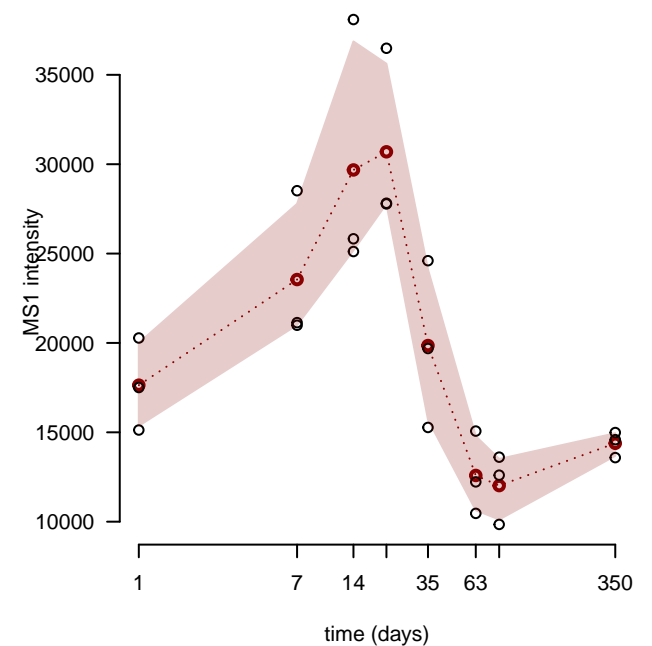

**Q6NWX3**  
**GN=Ift122**  
intraflagellar transport 122

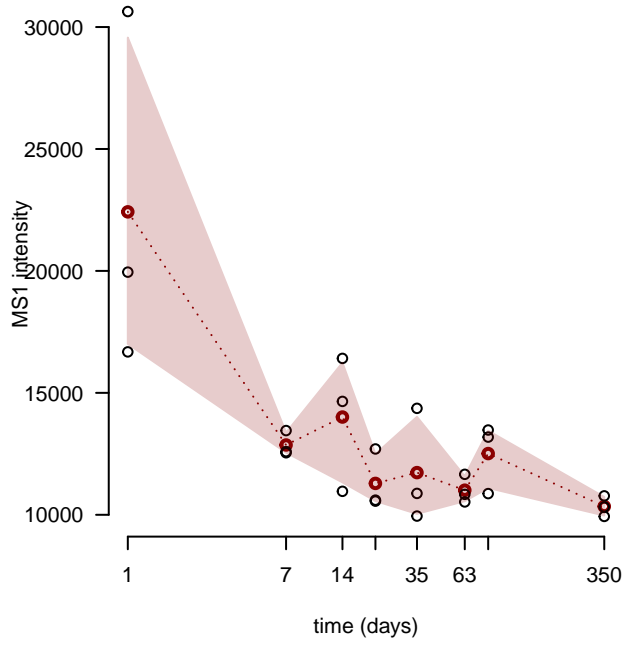

**Q6NWX9**  
**GN=Fndc3b**  
fibronectin type III domain containing 3 ...

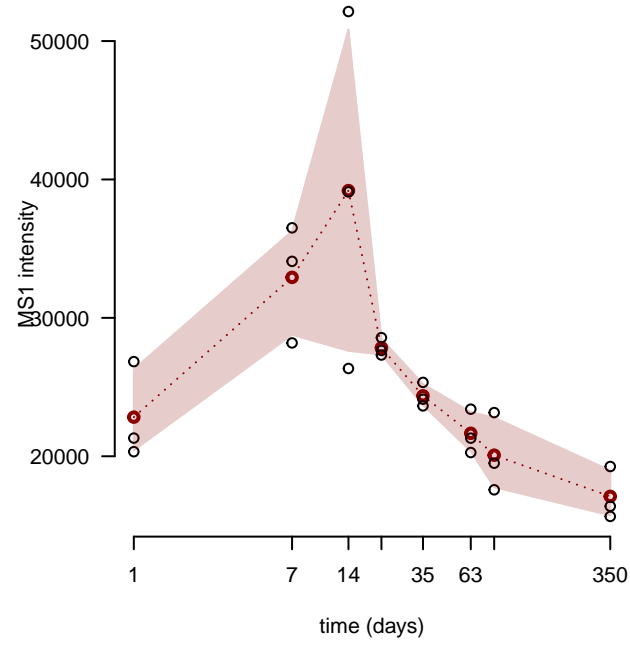

**Q6NXH2**  
**GN=Manea**  
mannosidase, endo-alpha

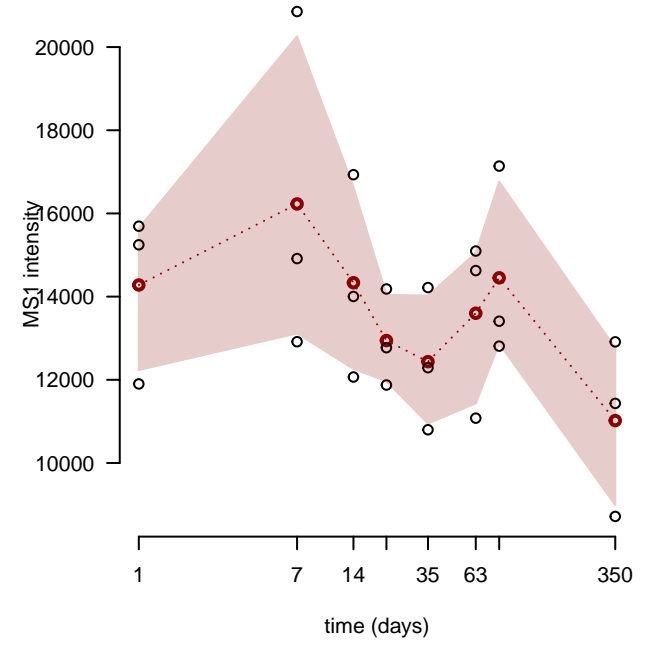

**Q6NXH3**  
**GN=Gppb1**  
GC-rich promoter binding protein 1

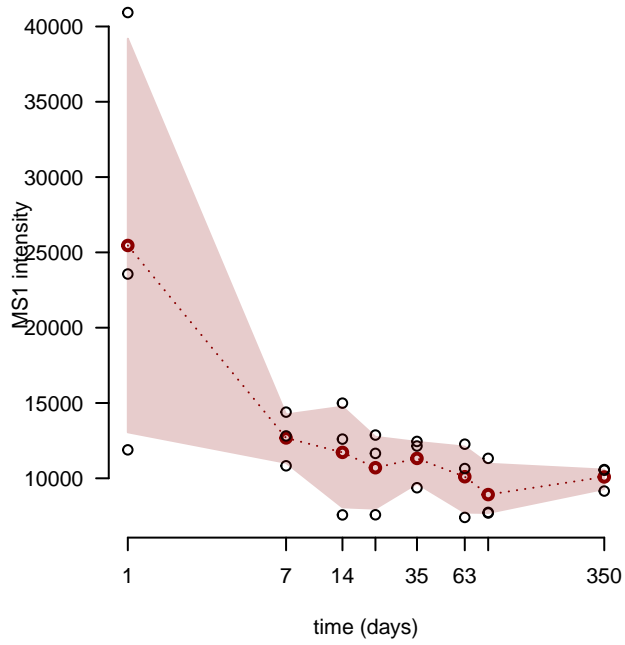

**Q6NXH9**  
**GN=Krt73**  
keratin 73

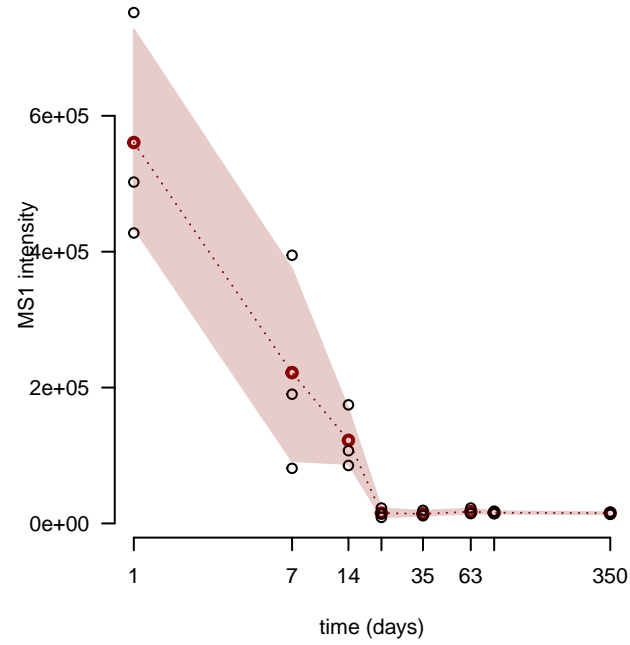

**Q6NXI6**  
**GN=Rprd2**  
regulation of nuclear pre-mRNA domain co ...

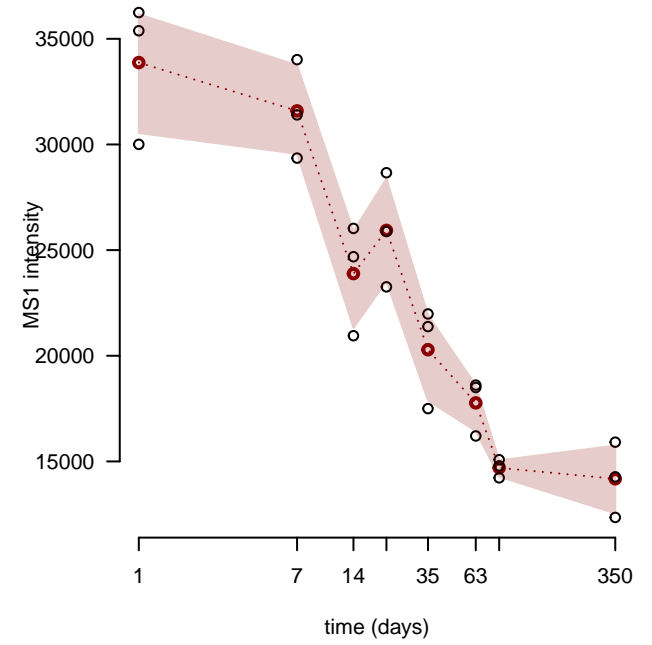

**Q6NXJ0**  
**GN=Wwc2**  
WW, C2 and coiled-coil domain containing ...

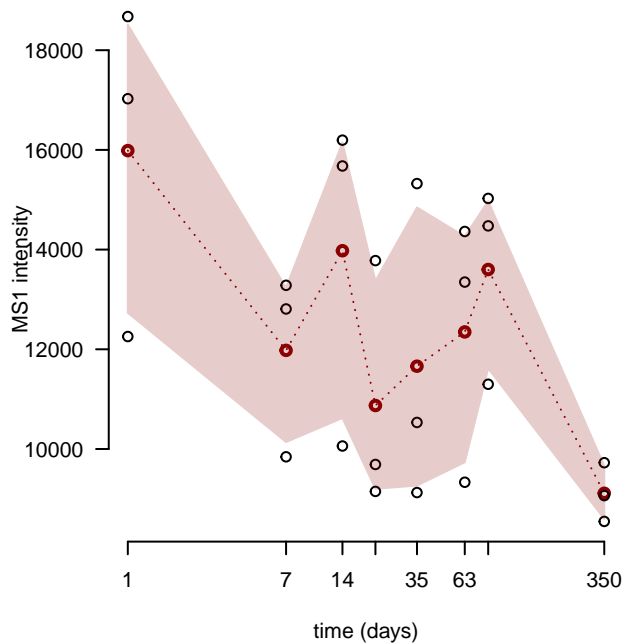

**Q6NXK2**  
**GN=Znf532**

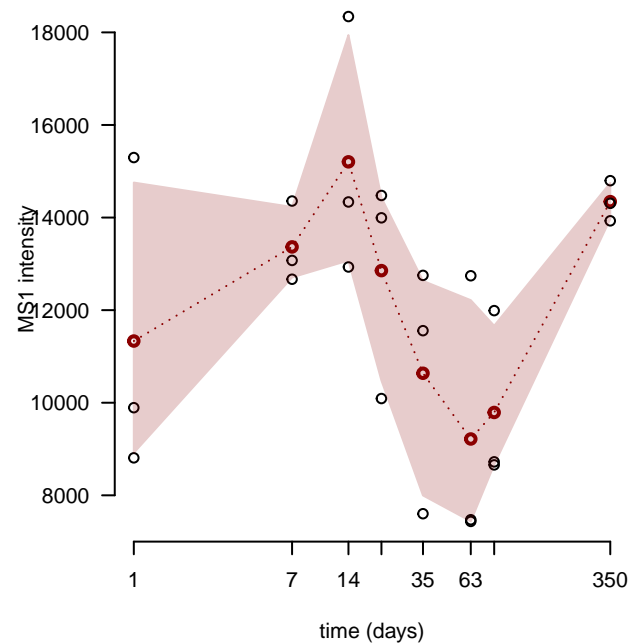

**Q6NXL6**  
**GN=Senp5**  
SUMO/sentrin specific peptidase 5

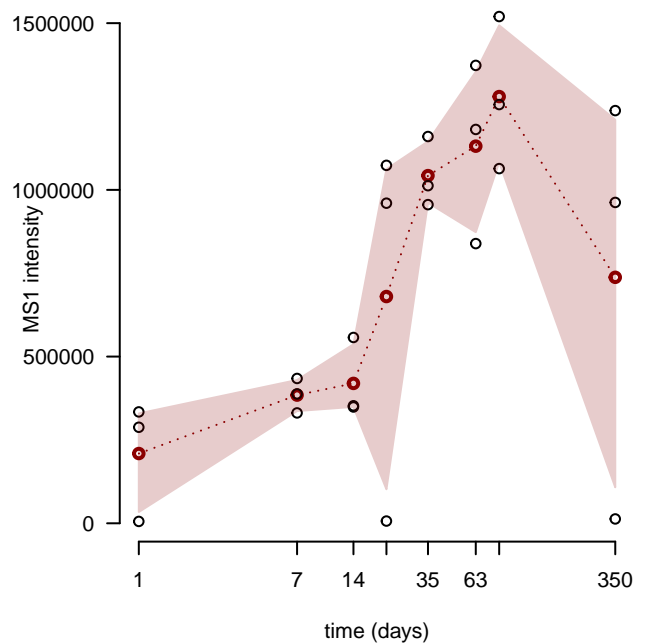

**Q6NXM2**  
**GN=Rcbtb1**  
regulator of chromosome condensation (RC ...

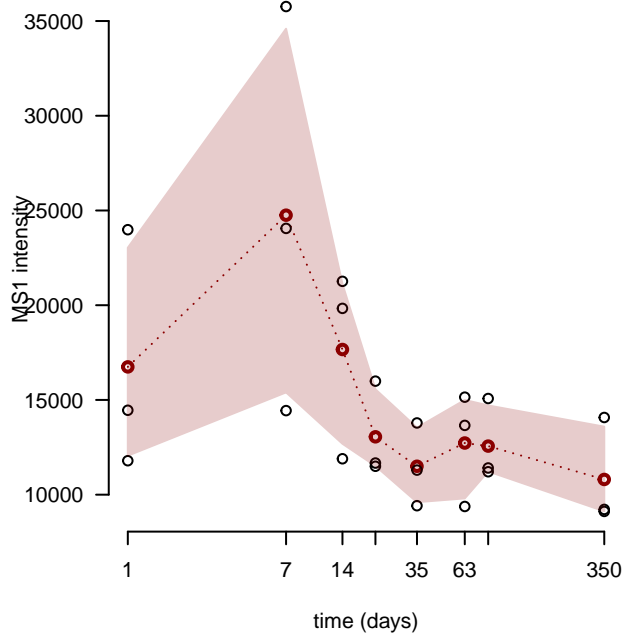

**Q6NXN1**  
**GN=Szrd1**  
SUZ RNA binding domain containing 1

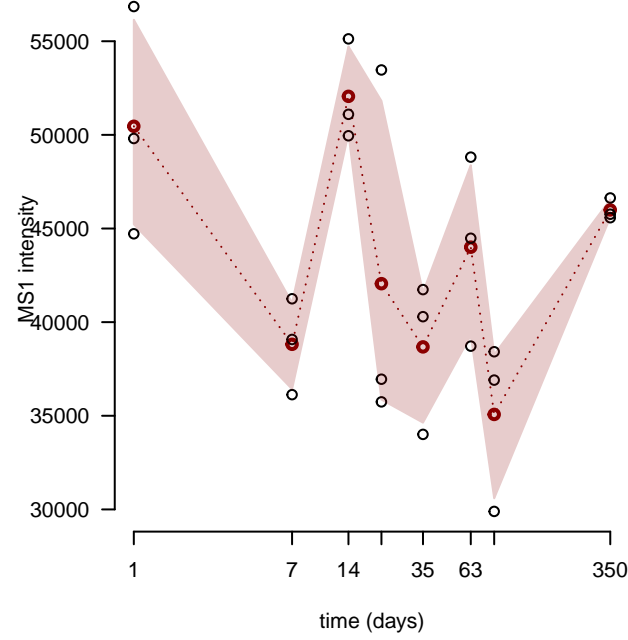

**Q6NXW6**  
**GN=Rad17**  
RAD17 checkpoint clamp loader component

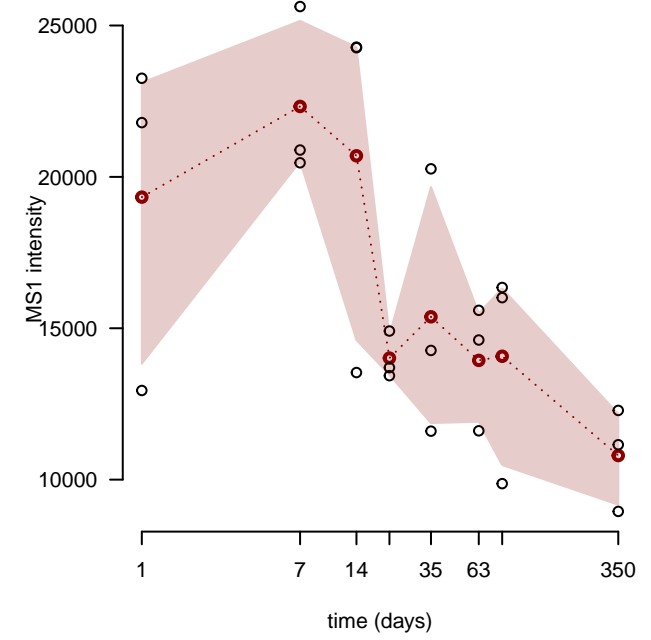

**Q6NZA9**  
**GN=Taf9b**  
TATA-box binding protein associated fact ...

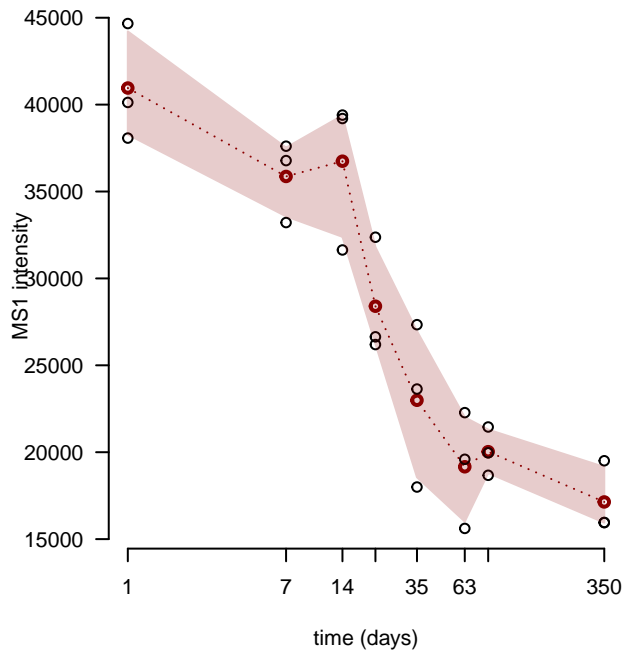

**Q6NZB0**  
**GN=Dnajc8**  
DnaJ heat shock protein family (Hsp40) m ...

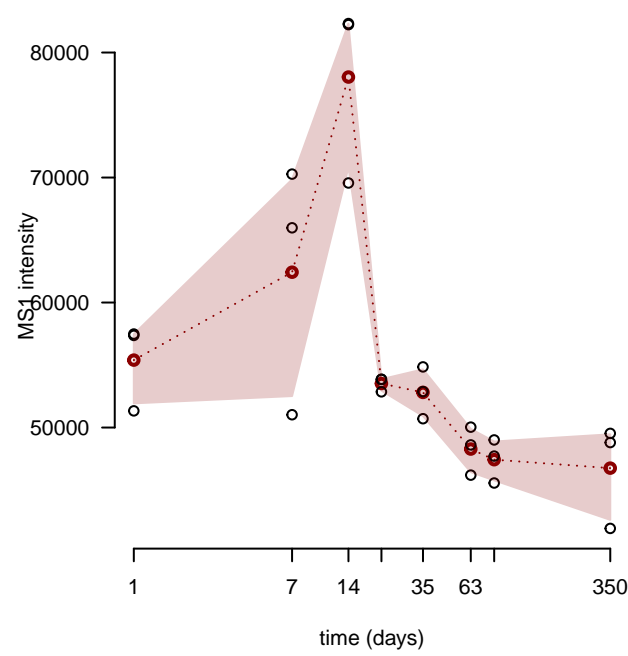

**Q6NZB1**  
**GN=Prmt6**  
protein arginine N-methyltransferase 6

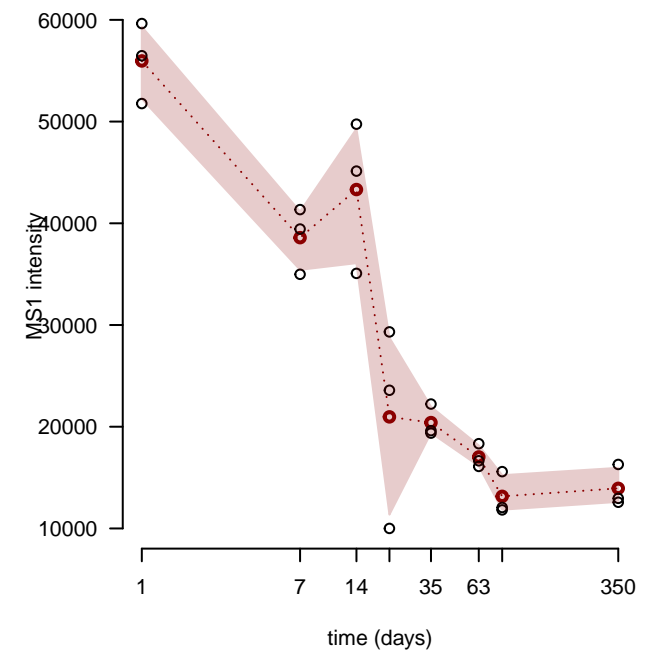

**Q6NZC7**  
**GN=Sec23ip**  
Sec23 interacting protein

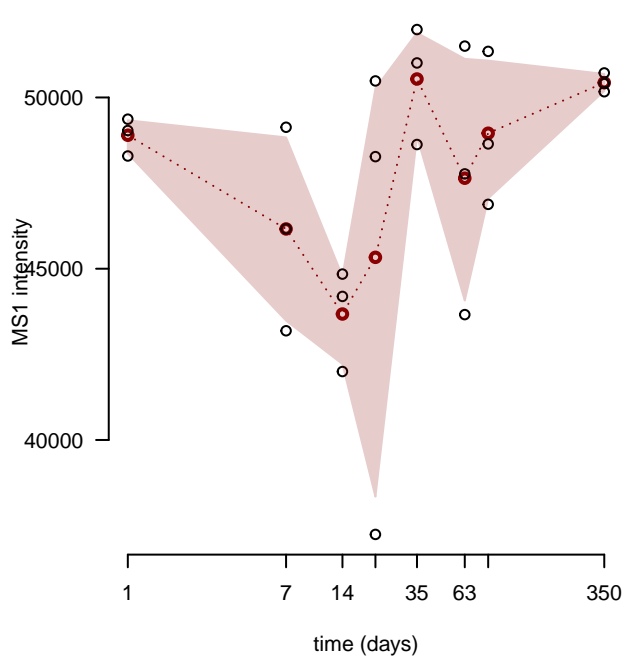

**Q6NZF1**  
**GN=Zc3h11a**  
zinc finger CCCH type containing 11A

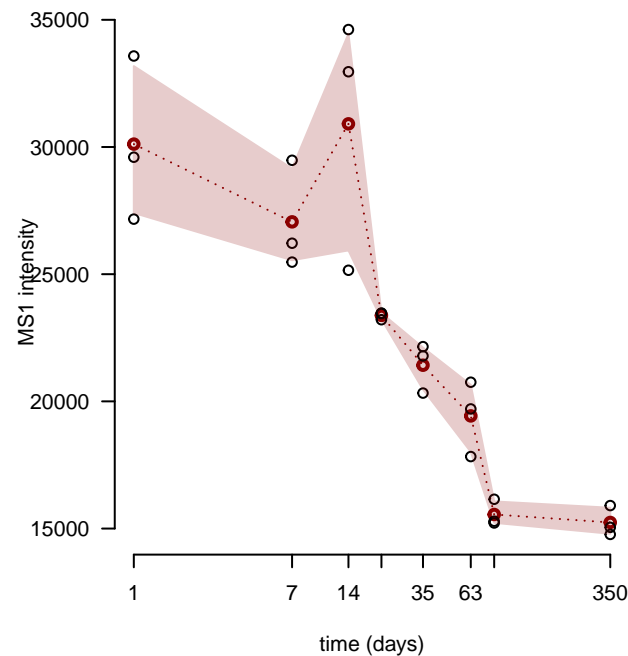

**Q6NZJ6**  
**GN=Eif4g1**  
eukaryotic translation initiation factor ...

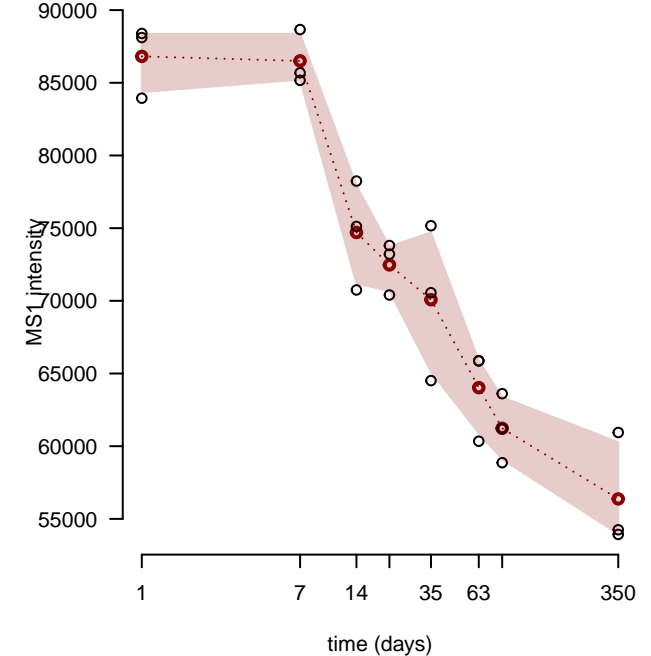

**Q6NZK8**  
**GN=Ptpdc1**  
protein tyrosine phosphatase domain cont ...

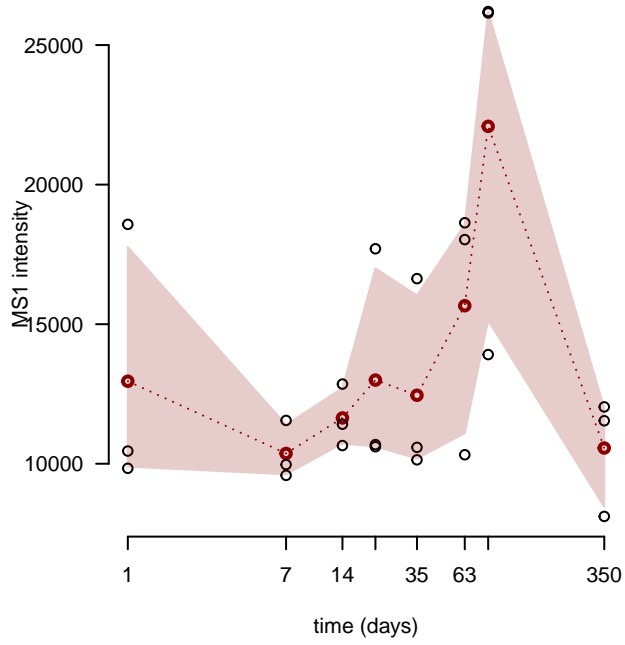

**Q6NZL6**  
**GN=Tonsl**  
tonsoku-like, DNA repair protein

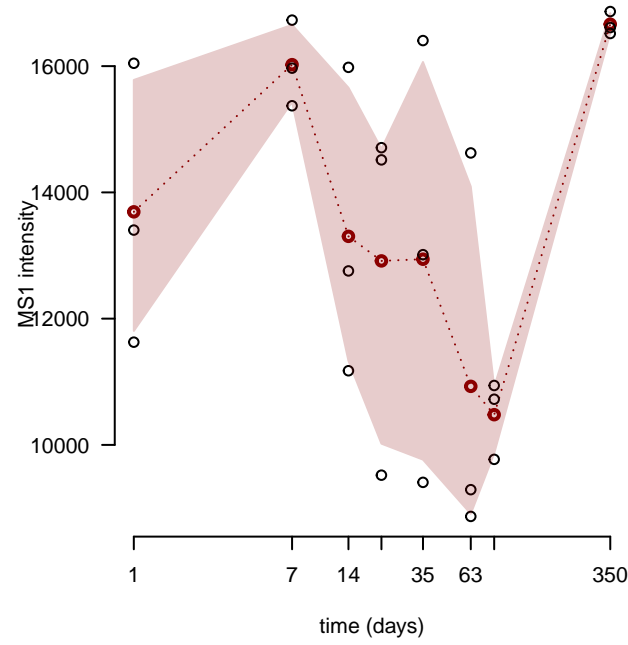

**Q6NZL8**  
**GN=Scube1**  
signal peptide, CUB domain, EGF-like 1

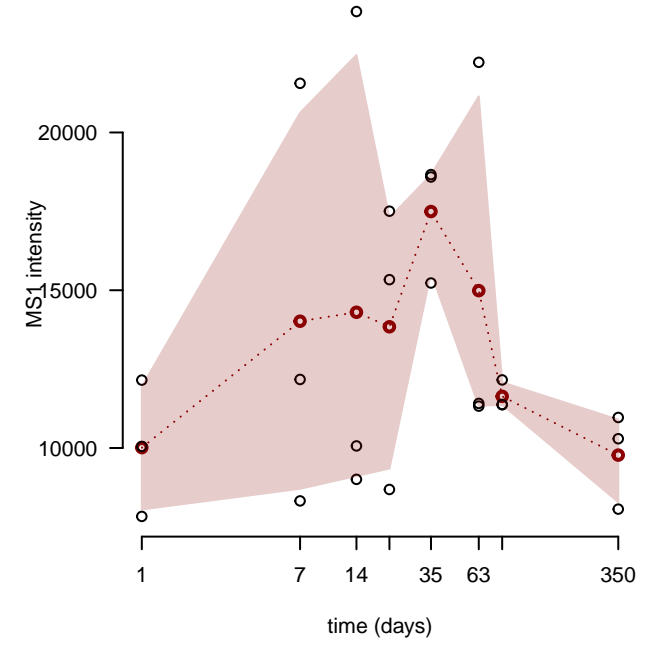

**Q6NZM9**  
**GN=Hdac4**  
histone deacetylase 4

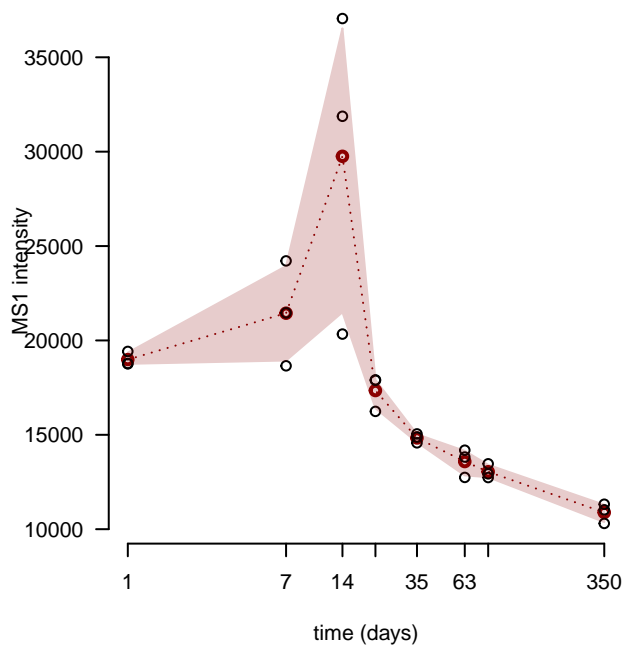

**Q6NZM9**  
**GN=Hdac4**  
histone deacetylase 4

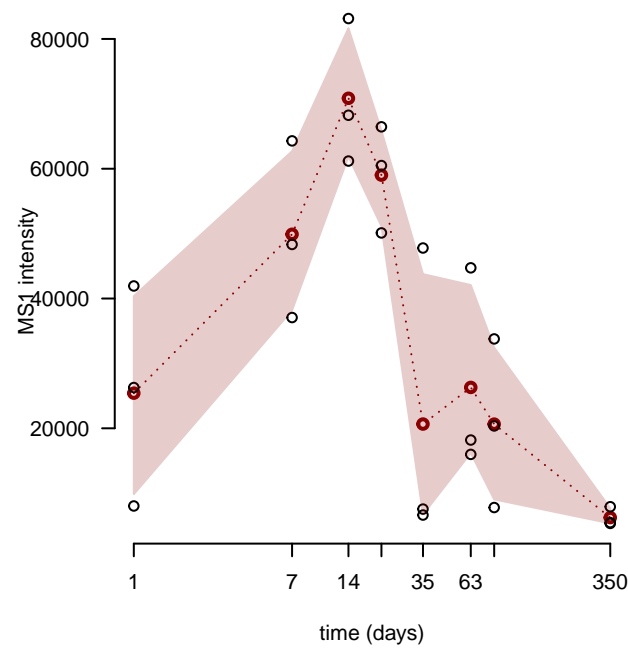

**Q6NZN0**  
**GN=Rbm26**  
RNA binding motif protein 26

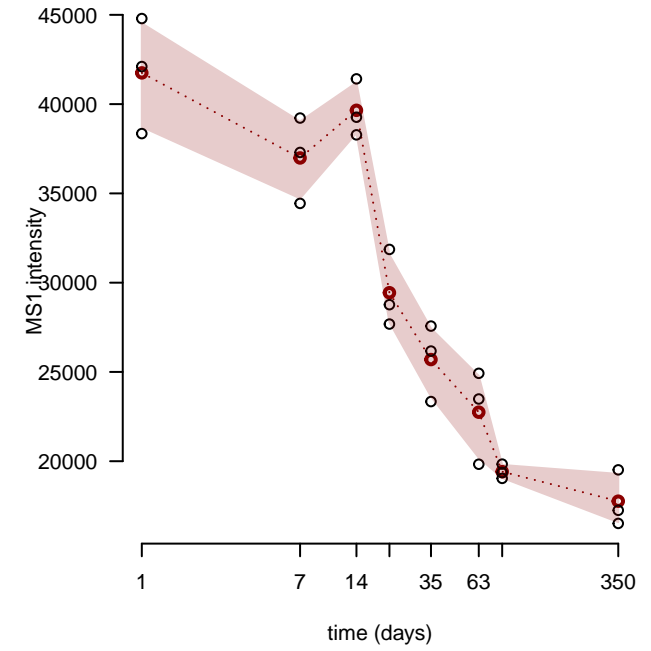

**Q6NZP1**  
**GN=Zranb3**  
zinc finger, RAN-binding domain containi ...

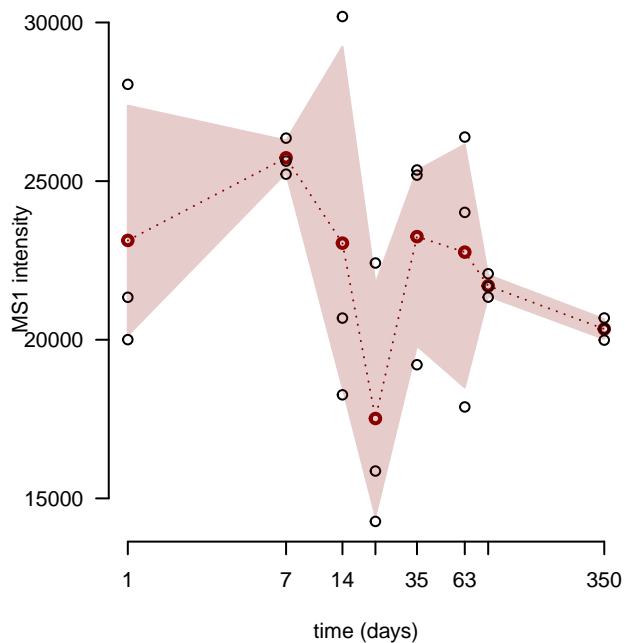

**Q6NZQ2**  
**GN=Ddx31**  
DEAD/H box helicase 31

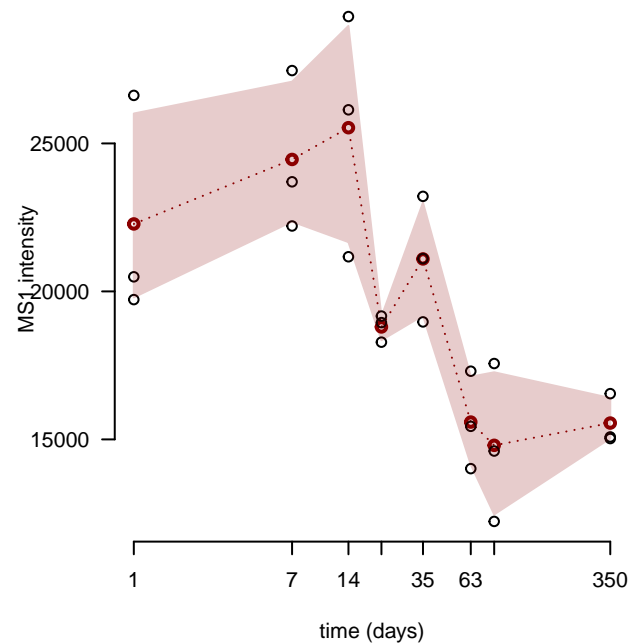

**Q6NZQ4**  
**GN=Paxip1**  
PAX interacting (with transcription-acti ...

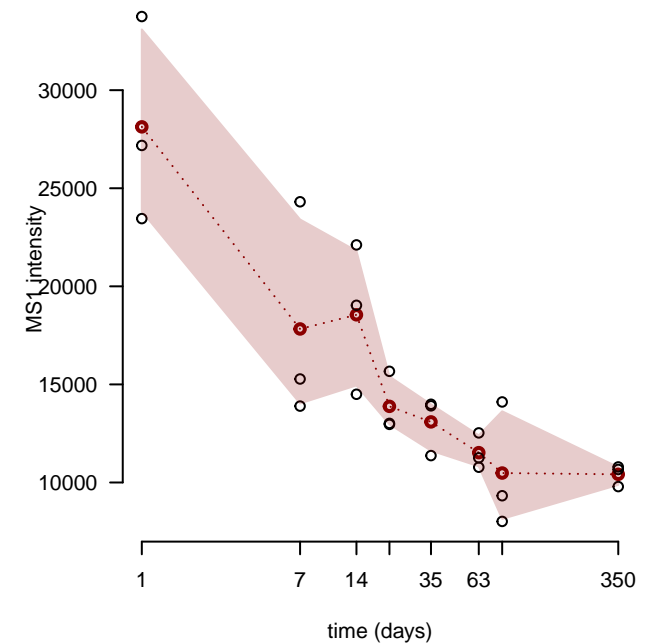

**Q6NZQ6**  
GN=Znf740

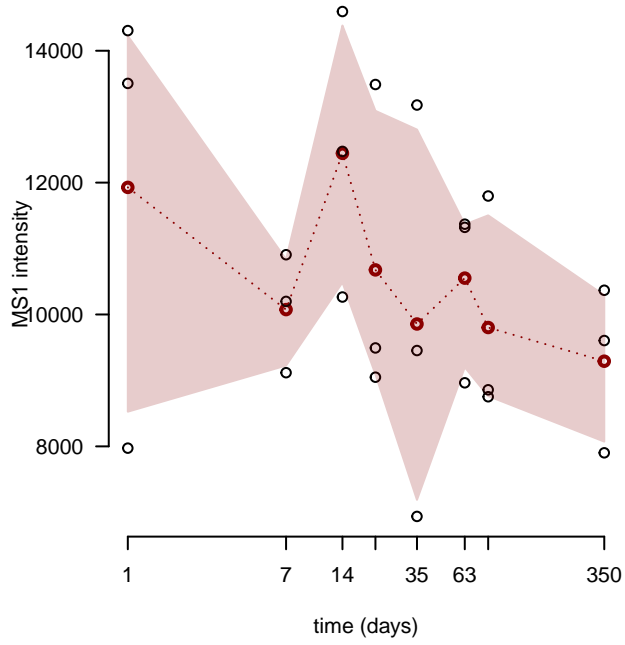

**Q6NZR2**  
GN=Msantd2  
Myb/SANT-like DNA-binding domain contain ...

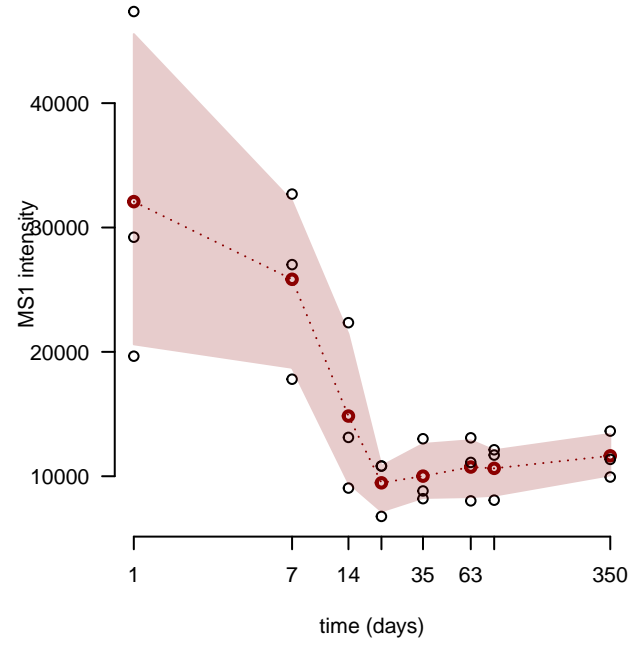

**Q6P069**  
GN=Sri  
sorcini

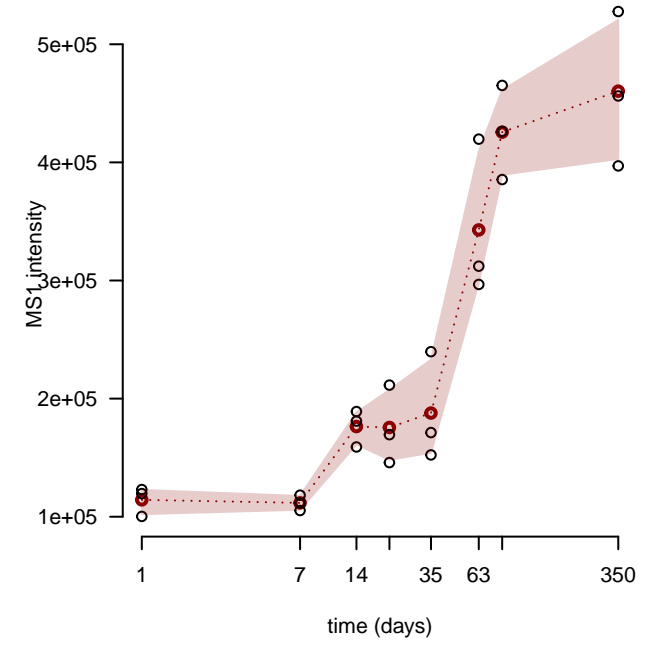

**Q6P073**  
GN=Ube2j2  
ubiquitin-conjugating enzyme E2J 2

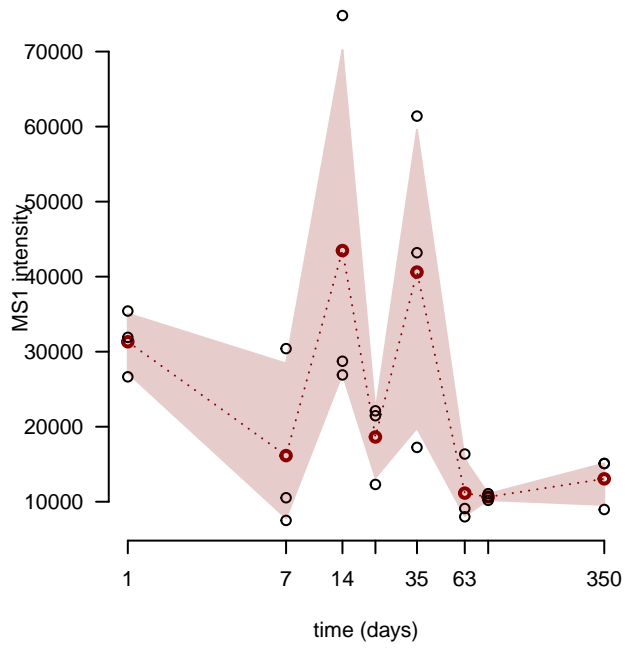

**Q6P0X2**  
GN=Znf511

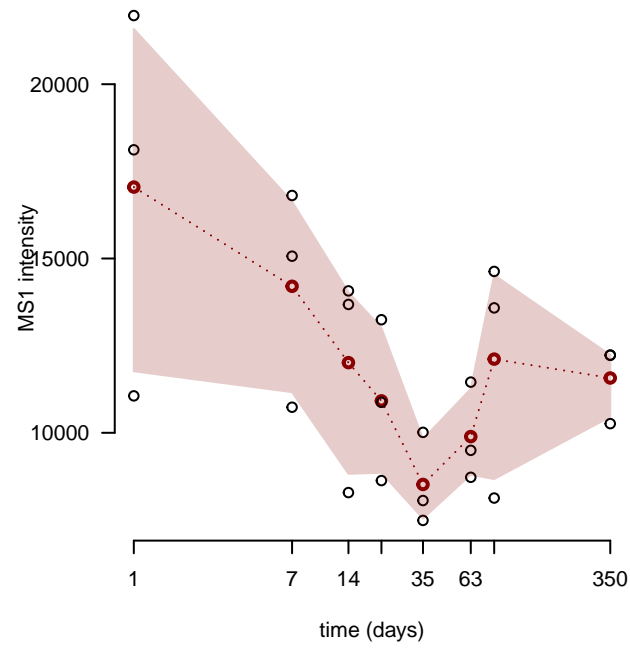

**Q6P1B1**  
GN=Xpnpep1  
X-prolyl aminopeptidase (aminopeptidase ...

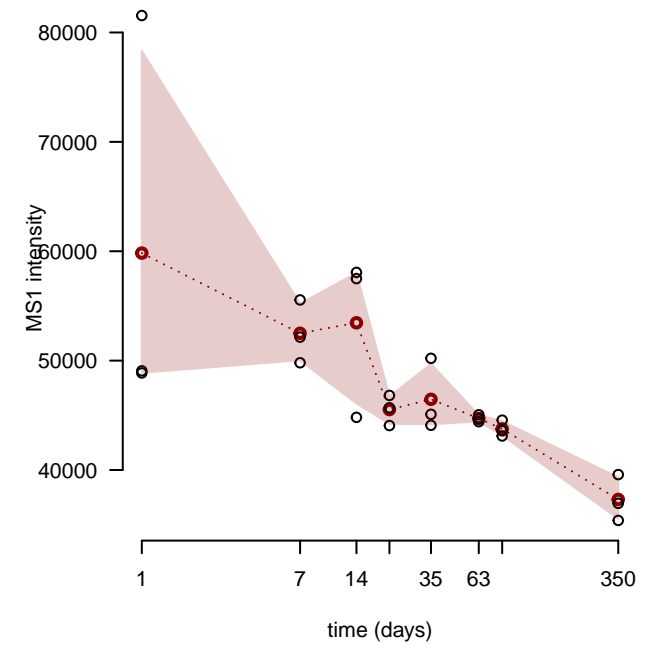

**Q6P1D7**  
GN=Slx4  
SLX4 structure-specific endonuclease sub ...

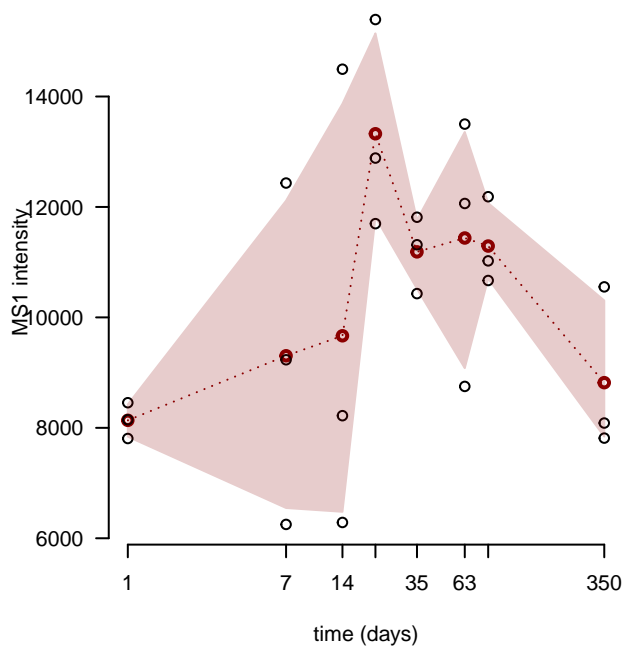

**Q6P1E1**  
GN=Zmiz1  
zinc finger, MIZ-type containing 1

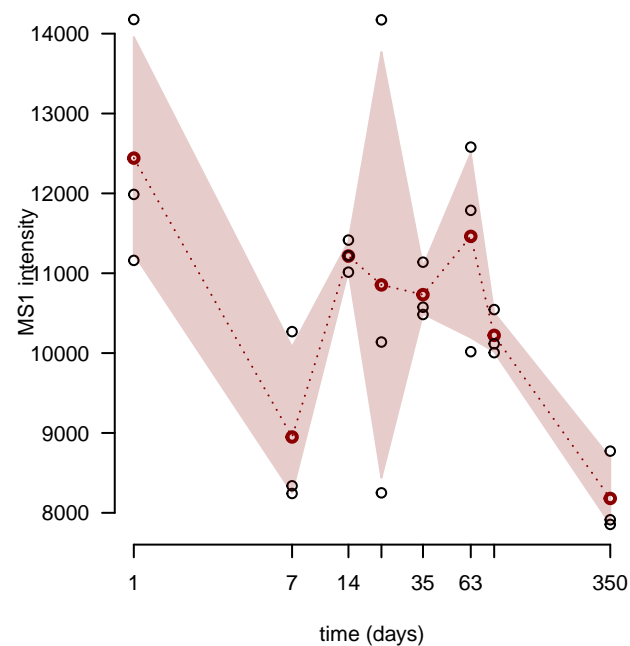

**Q6P1F6**  
GN=Ppp2r2a  
protein phosphatase 2, regulatory subuni ...

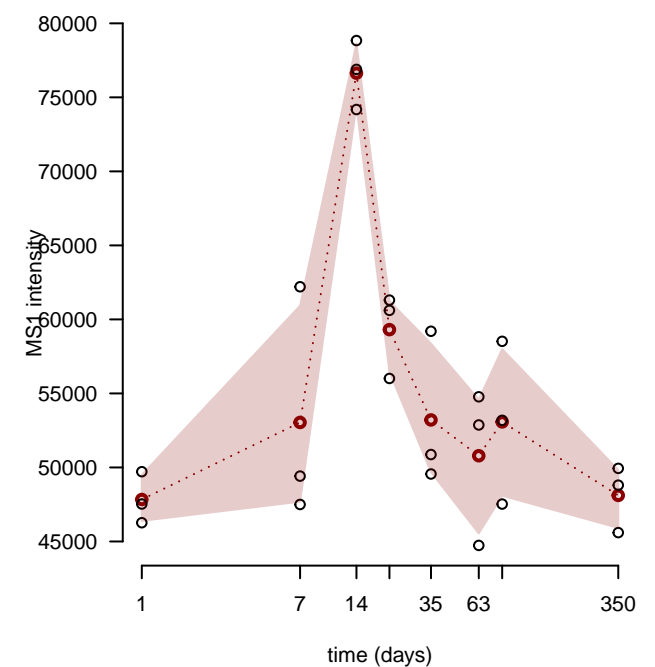



**Q6P1G0**  
**GN=Heatr6**  
HEAT repeat containing 6

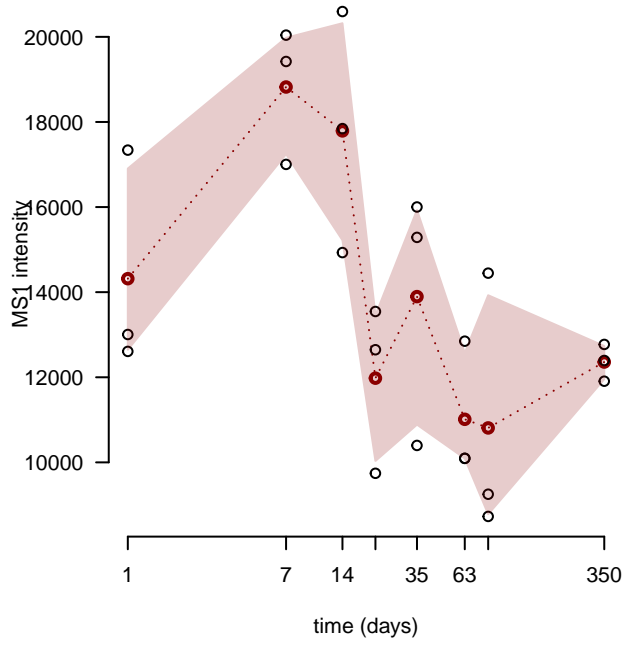

**Q6P1G2**  
**GN=Kdm2b**  
lysine (K)-specific demethylase 2B

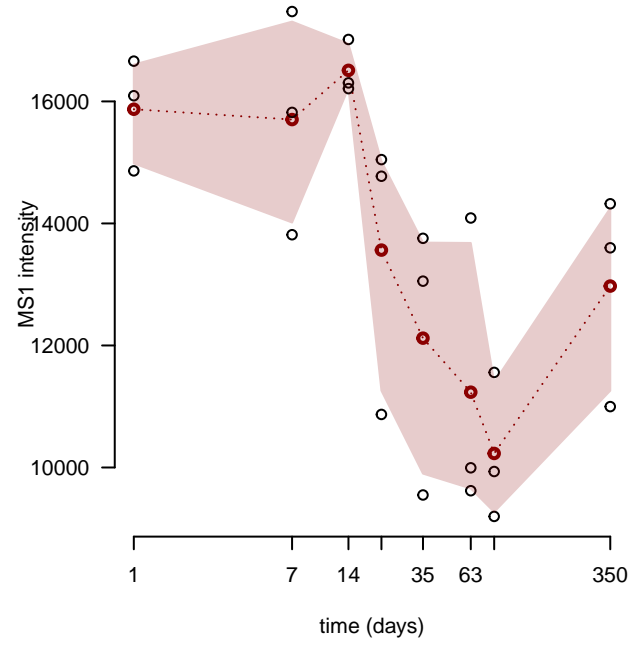

**Q6P1H1**  
**GN=Cyb561a3**  
cytochrome b561 family, member A3

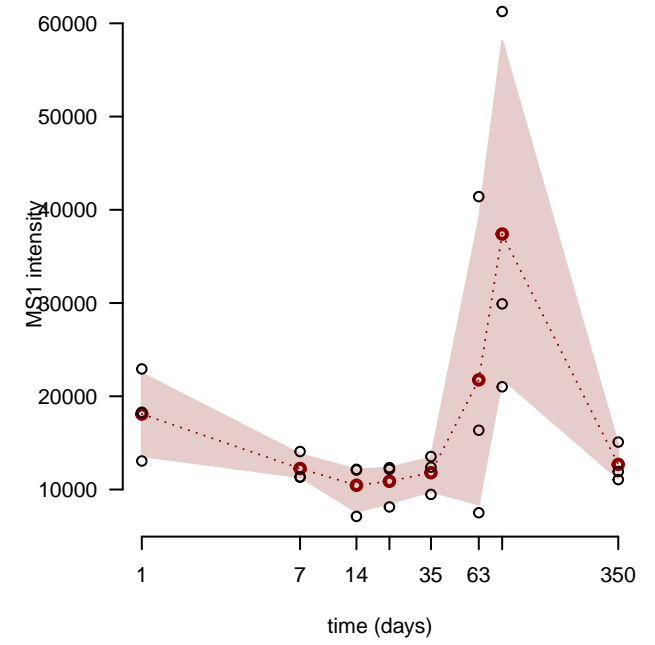

**Q6P1H6**  
**GN=Ankle2**  
ankyrin repeat and LEM domain containing ...

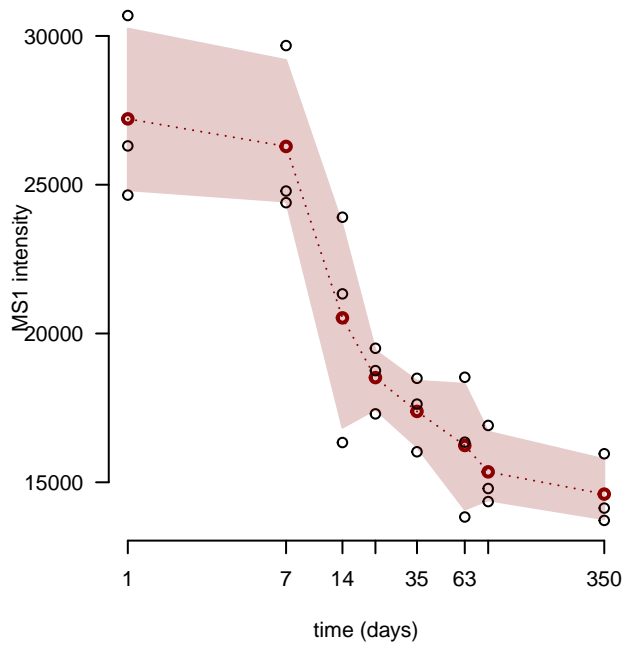

**Q6P1I3**  
**GN=**

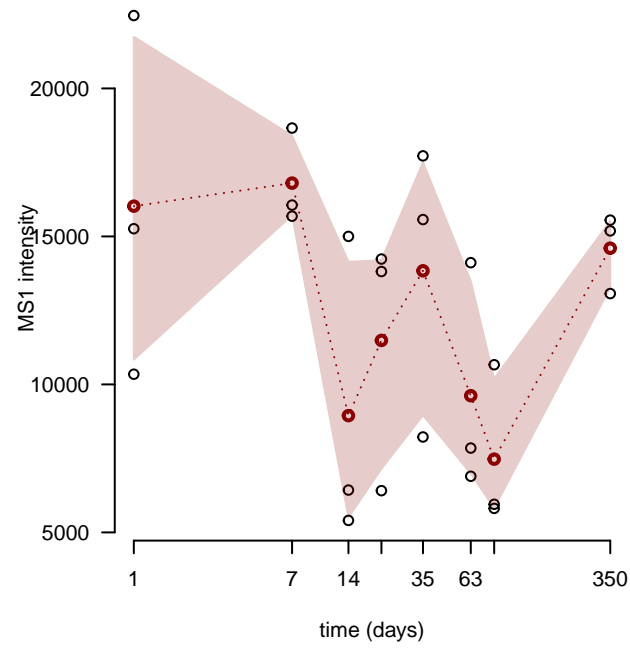

**Q6P1Y1**  
**GN=Rtl3**  
retrotransposon Gag like 3

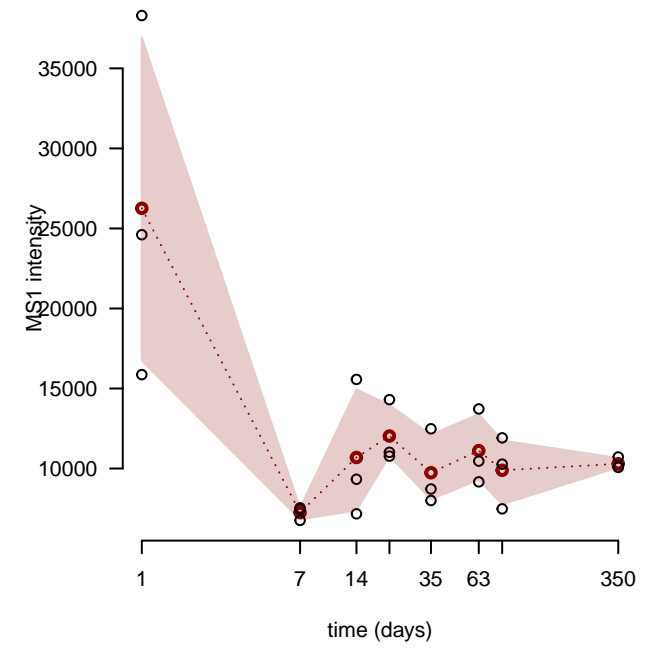

**Q6P2B1**  
**GN=Tnpo3**  
transportin 3

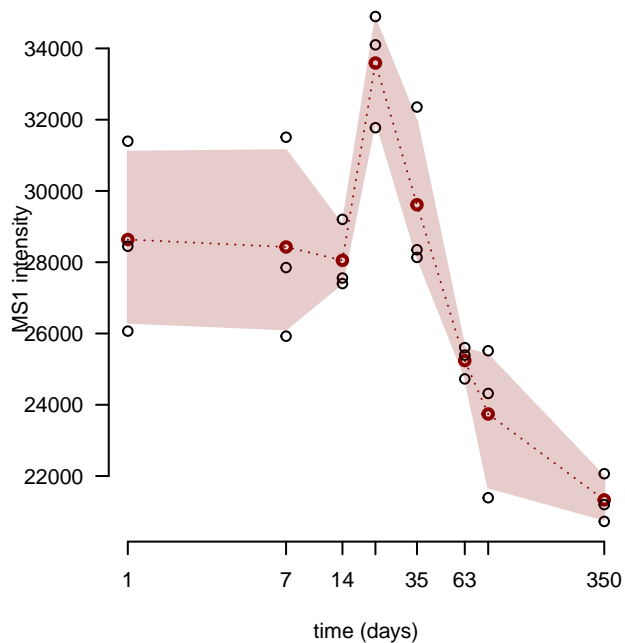

**Q6P2K6**  
**GN=Ppp4r3a**  
protein phosphatase 4 regulatory subunit ...

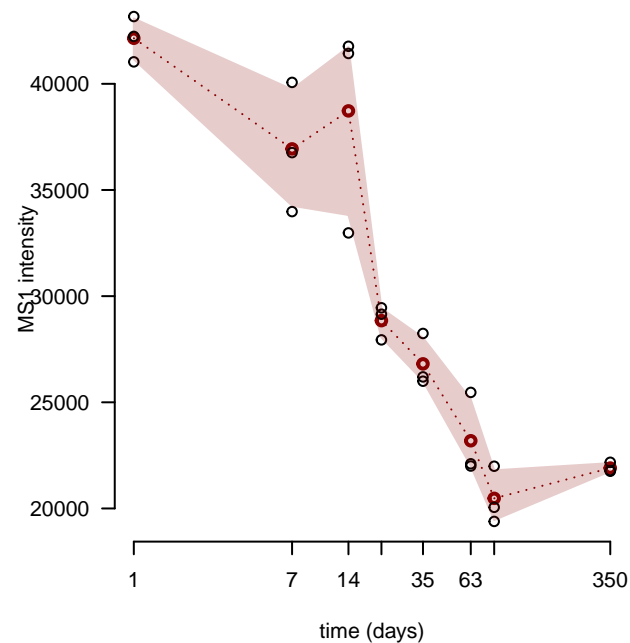

**Q6P2L6**  
**GN=Nsd3**  
nuclear receptor binding SET domain prot ...

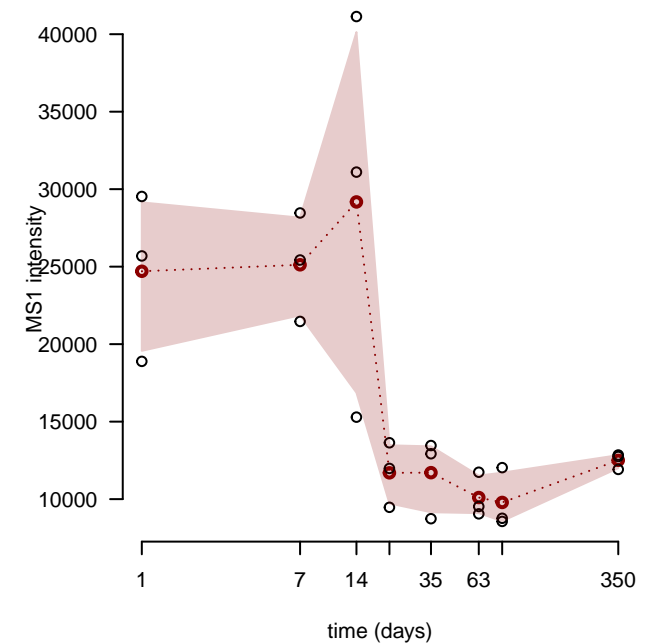

**Q6P2L7**  
GN=Casc4

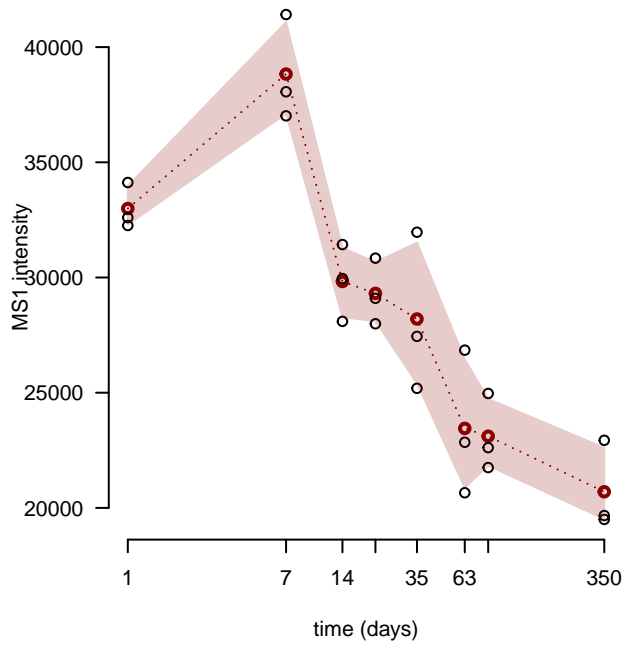

**Q6P3A8**  
GN=Bckdhb  
branched chain ketoacid dehydrogenase E1 ...

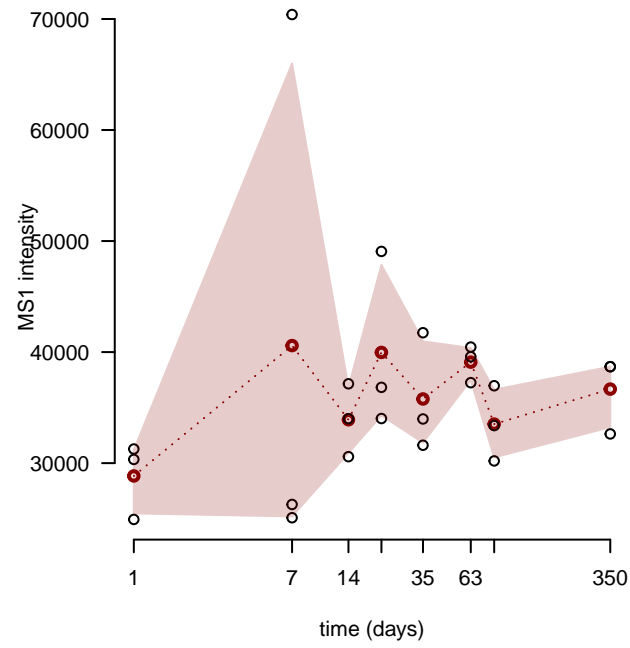

**Q6P3B9**  
GN=Rbfa  
ribosome binding factor A

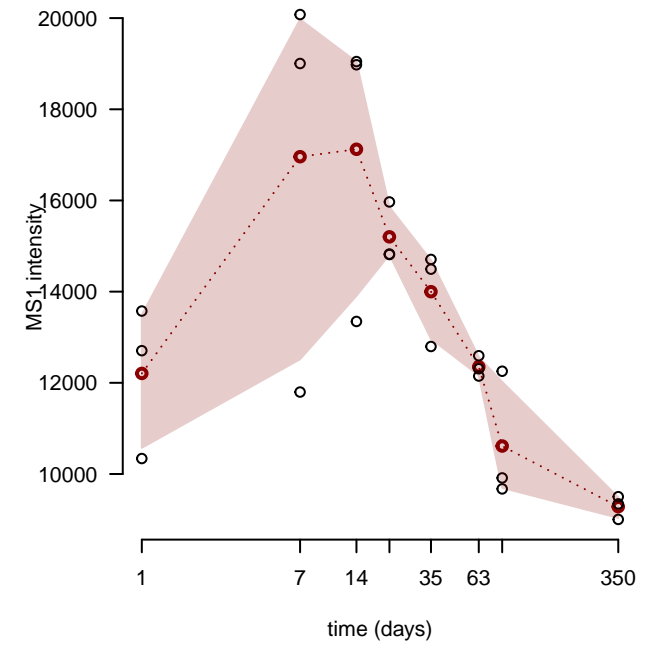

**Q6P3D0**  
GN=Nudt16  
nudix (nucleoside diphosphate linked moi ...

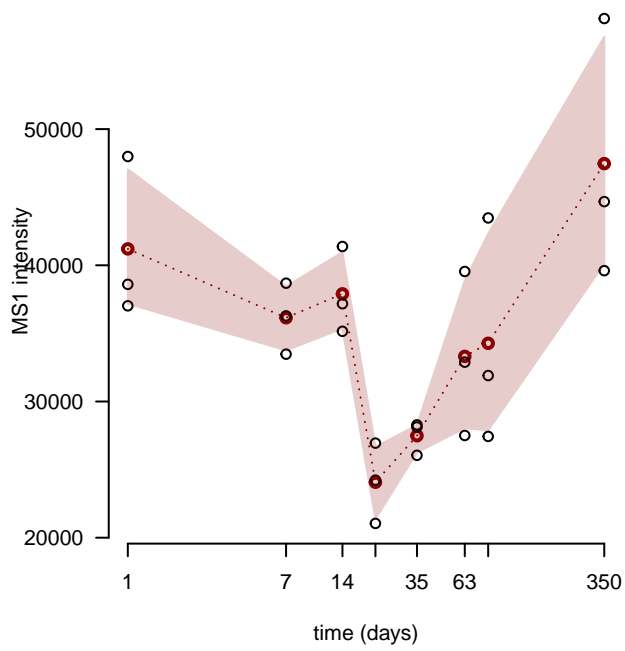

**Q6P3E7**  
GN=Hdac10  
histone deacetylase 10

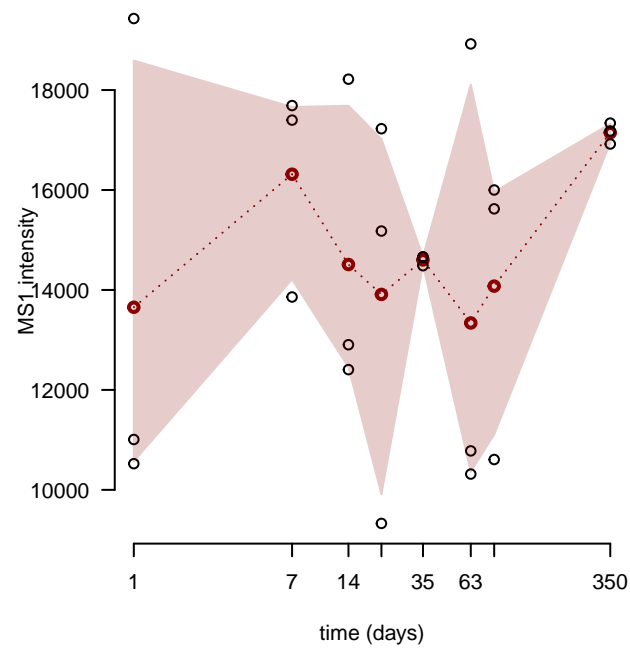

**Q6P3Y5**  
GN=Znf280c

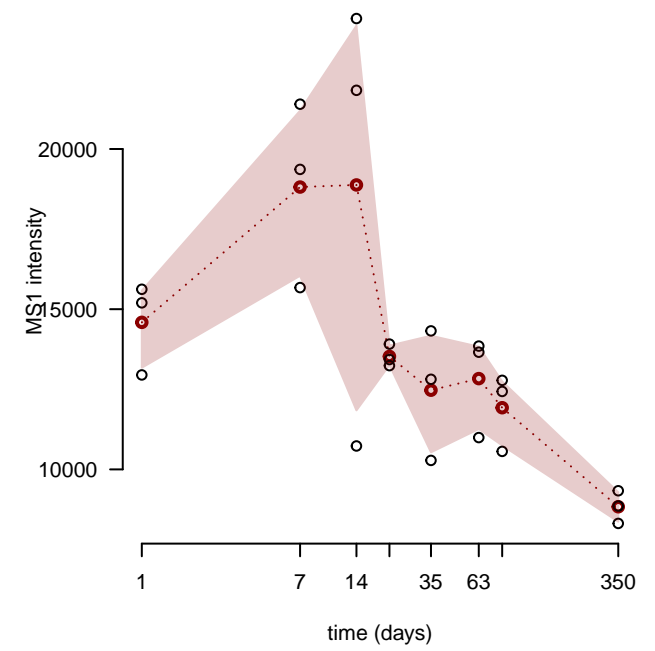

**Q6P3Z3**  
GN=Thap4  
THAP domain containing 4

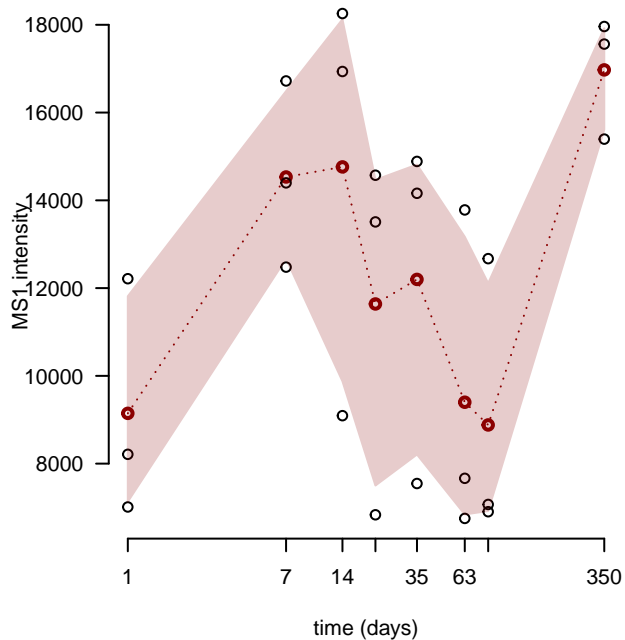

**Q6P4S6**  
GN=Sik3  
SIK family kinase 3

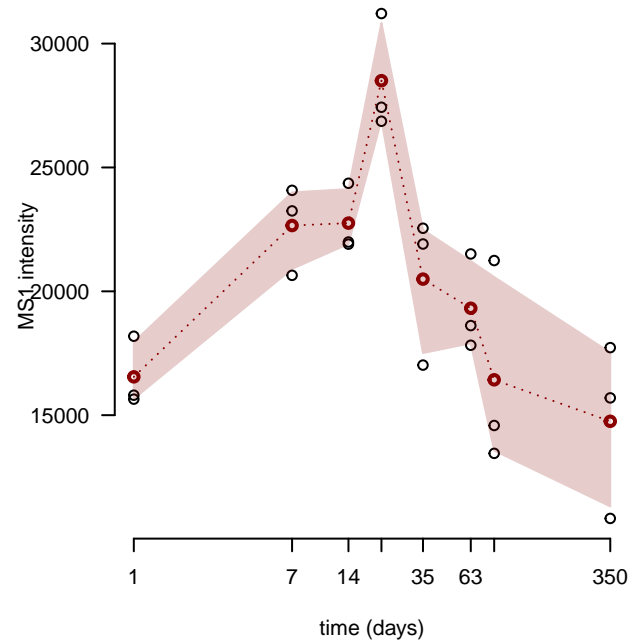

**Q6P4S8**  
GN=Ints1  
integrator complex subunit 1

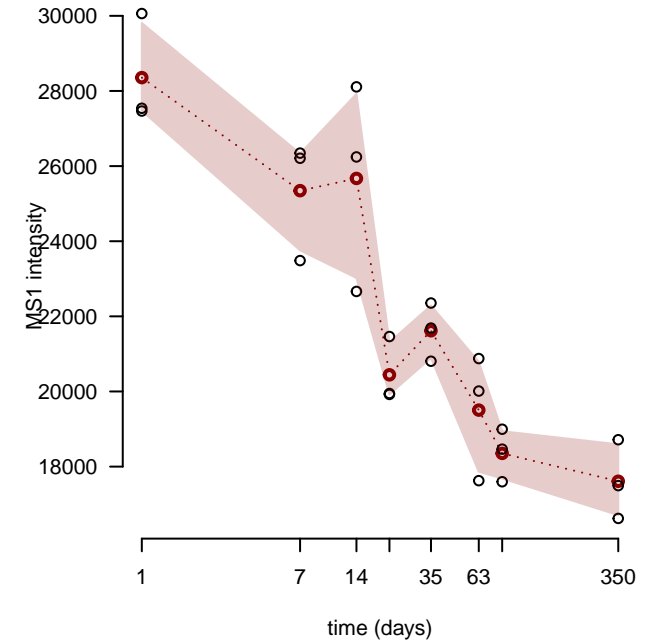

**Q6P4T0**  
**GN=Atg2a**  
autophagy related 2A

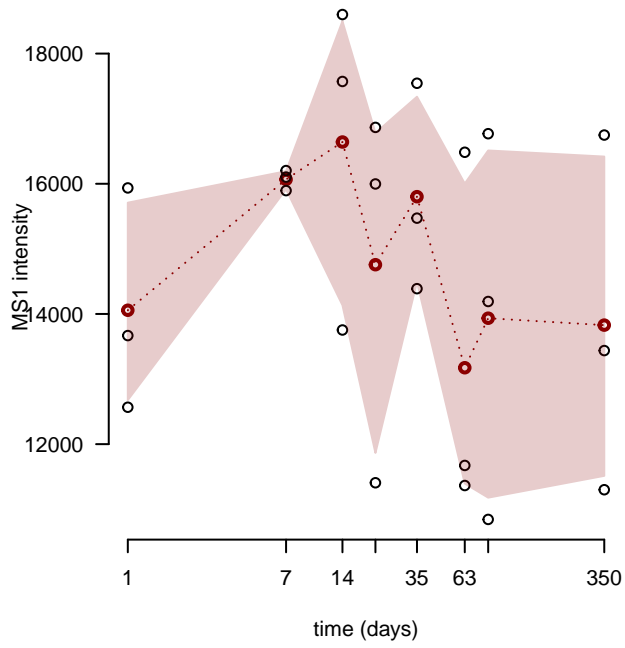

**Q6P4T2**  
**GN=Snrnp200**  
small nuclear ribonucleoprotein 200 (U5)

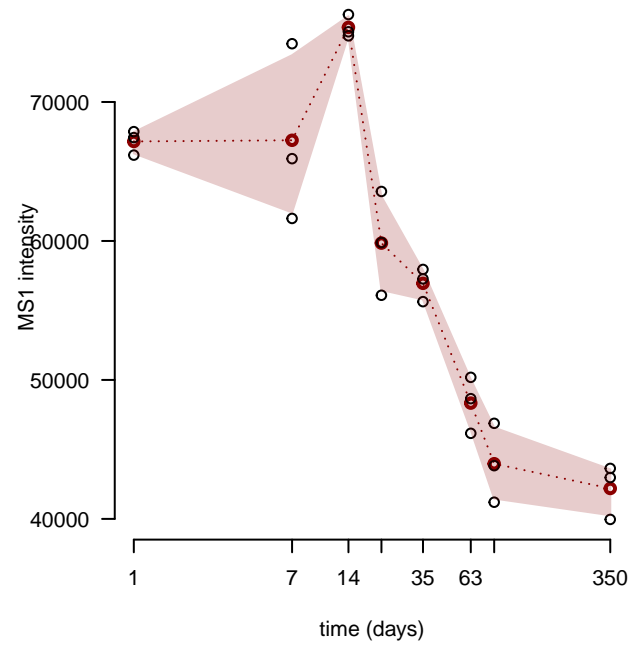

**Q6P542**  
**GN=Abcf1**  
ATP-binding cassette, sub-family F (GCN2 ...)

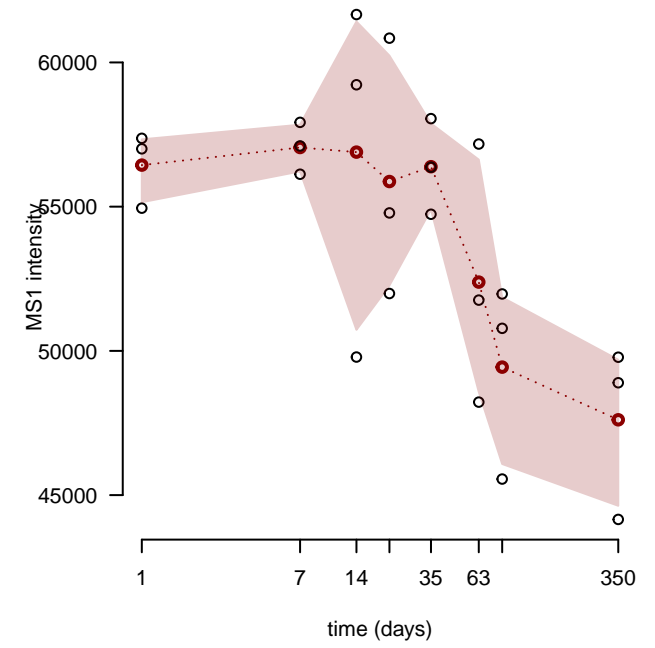

**Q6P549**  
**GN=Inpp1**  
inositol polyphosphate phosphatase-like ...

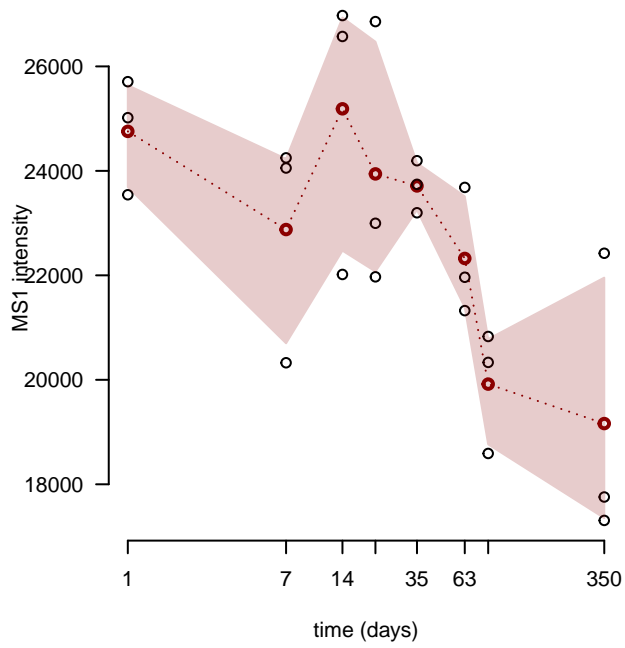

**Q6P5B0**  
**GN=Rrp12**  
ribosomal RNA processing 12 homolog

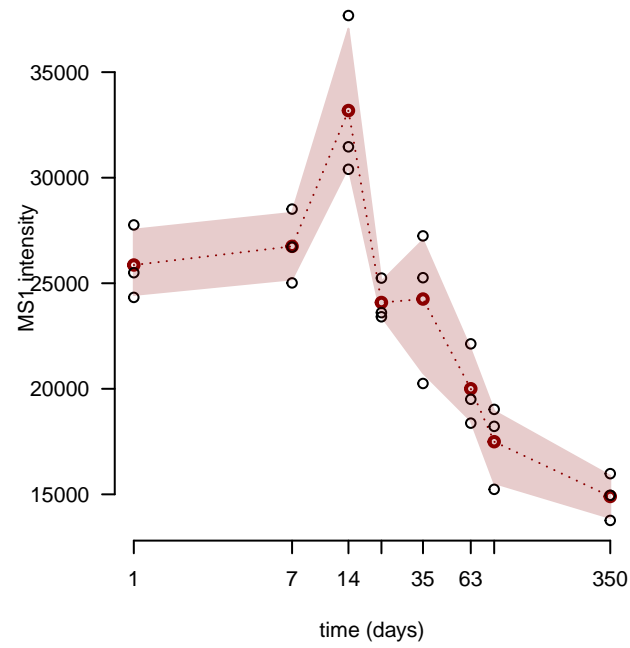

**Q6P5C5**  
**GN=Smug1**  
single-strand selective monofunctional u ...

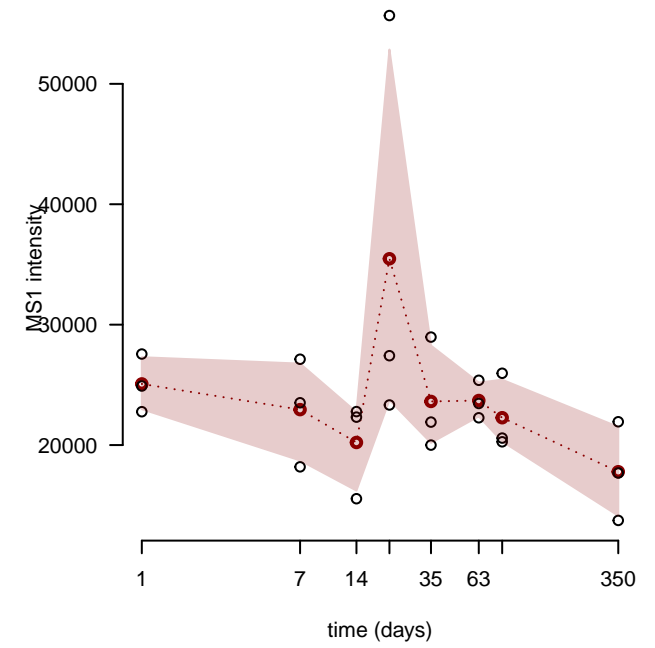

**Q6P5C7**  
**GN=Znf728**

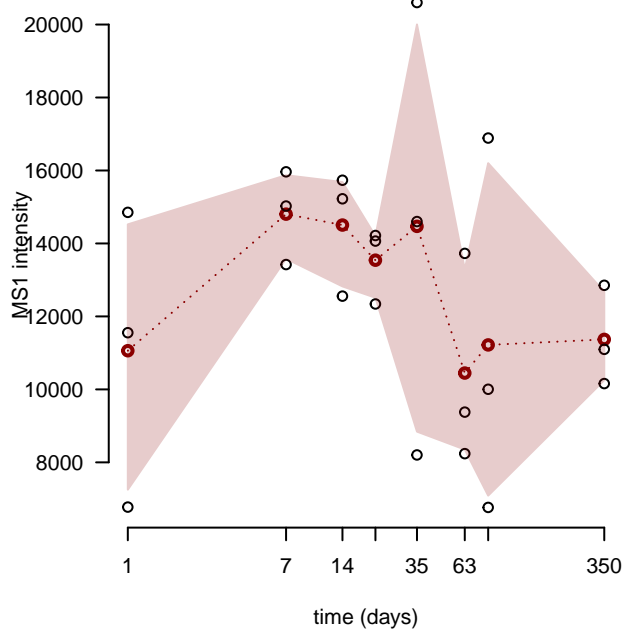

**Q6P5D3**  
**GN=Dhx57**  
DEAH (Asp-Glu-Ala-Asp/His) box polypepti ...

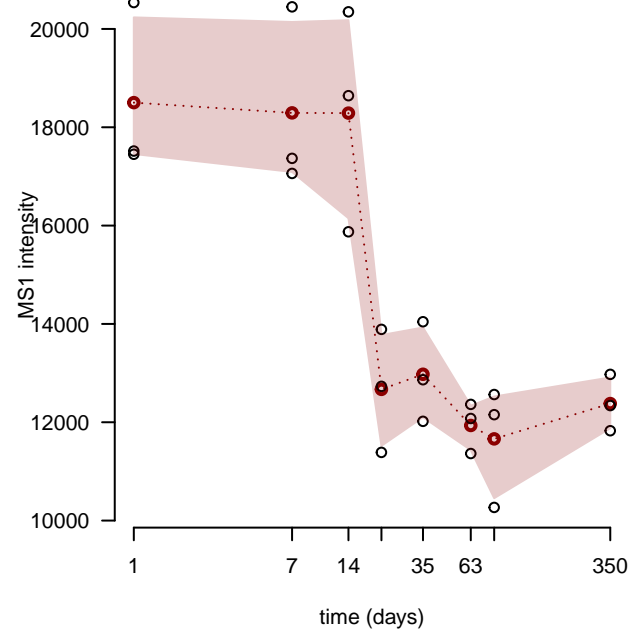

**Q6P5D4**  
**GN=Cep135**  
centrosomal protein 135

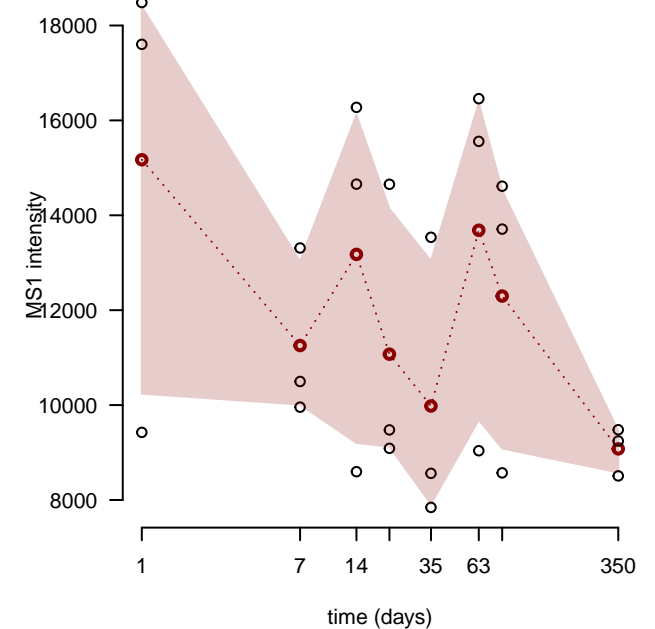

**Q6P5D8**  
**GN=Smchd1**  
SMC hinge domain containing 1

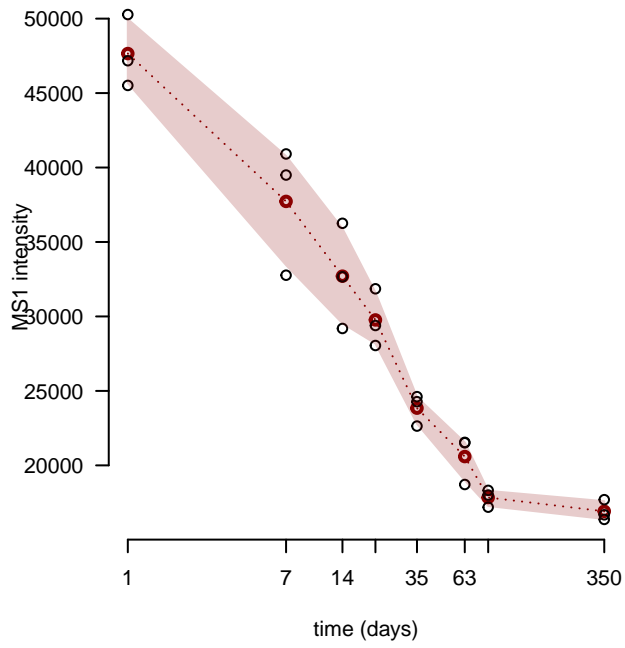

**Q6P5E4**  
**GN=Uggt1**  
UDP-glucose glycoprotein glucosyltransfe ...

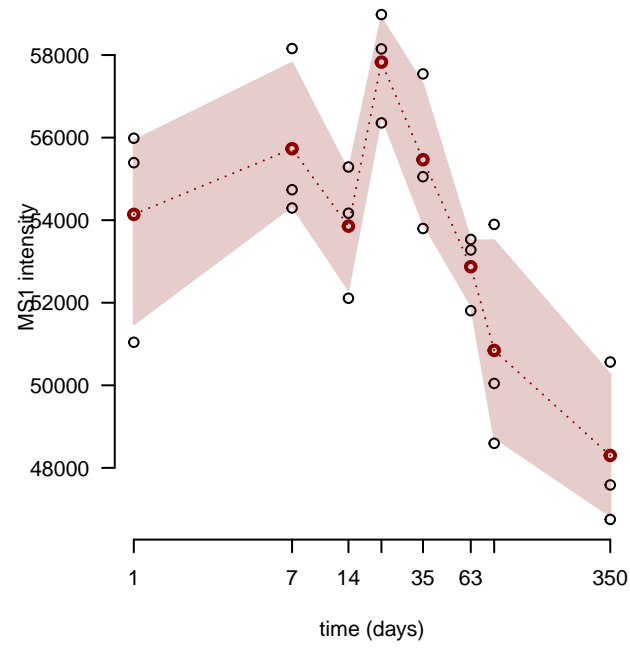

**Q6P5E6**  
**GN=Gga2**  
golgi associated, gamma adaptin ear cont ...

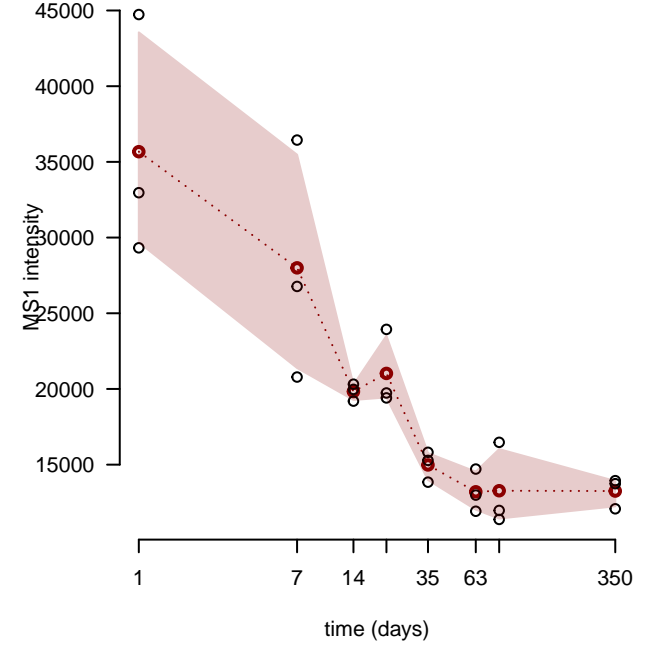

**Q6P5E8**  
**GN=Dgkq**  
diacylglycerol kinase, theta

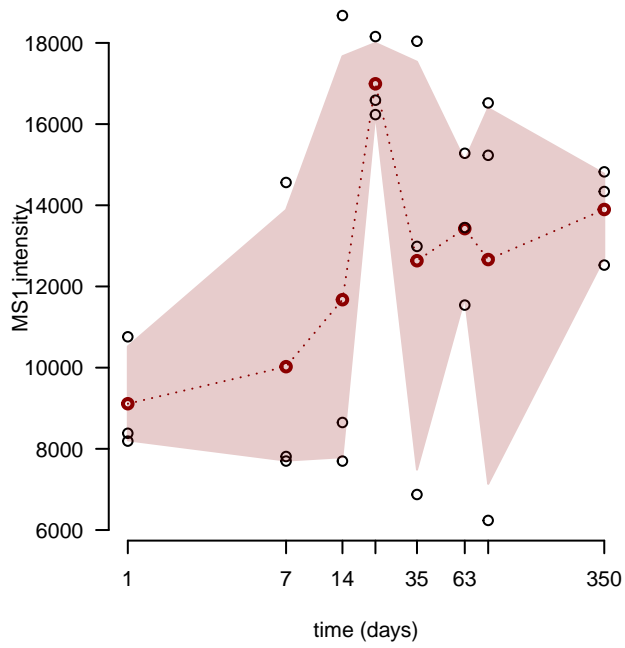

**Q6P5F6**  
**GN=Slc39a10**  
solute carrier family 39 (zinc transport ...

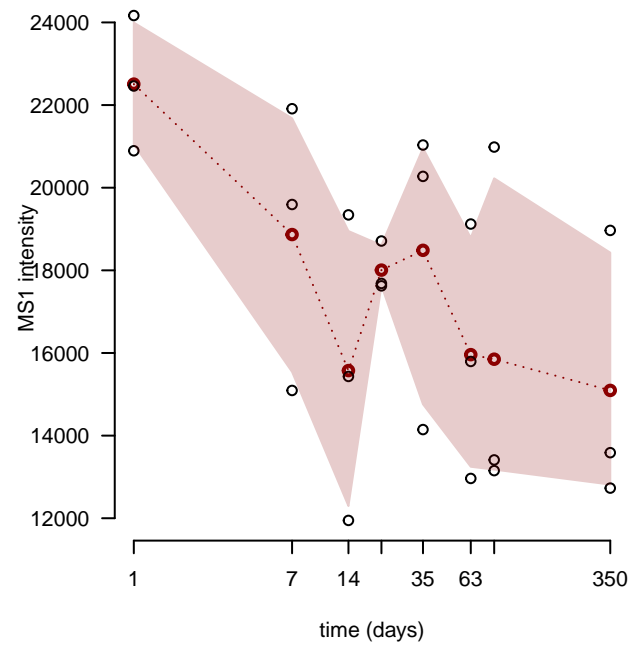

**Q6P5F7**  
**GN=Ttyh3**  
tweety family member 3

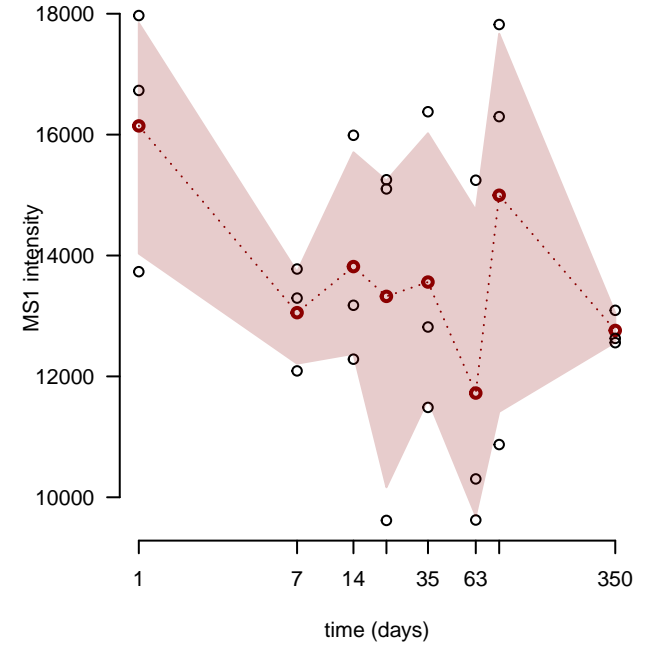

**Q6P5F9**  
**GN=Xpo1**  
exportin 1

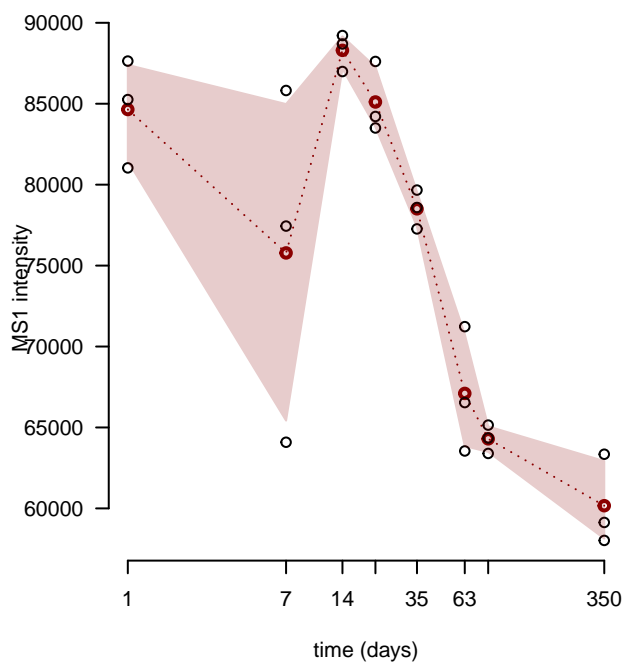

**Q6P5G3**  
**GN=Mbtd1**  
mbt domain containing 1

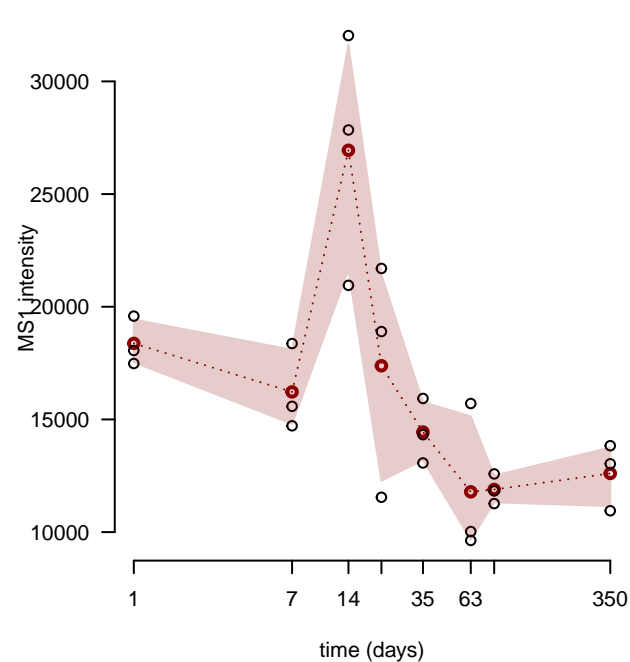

**Q6P5G6**  
**GN=Ubxn7**  
UBX domain protein 7

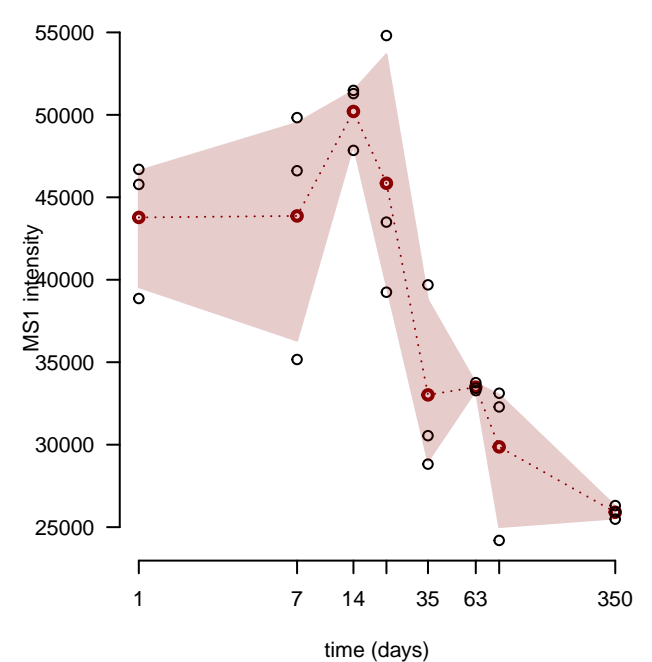

**Q6P5H2**  
GN=Nes  
nestin

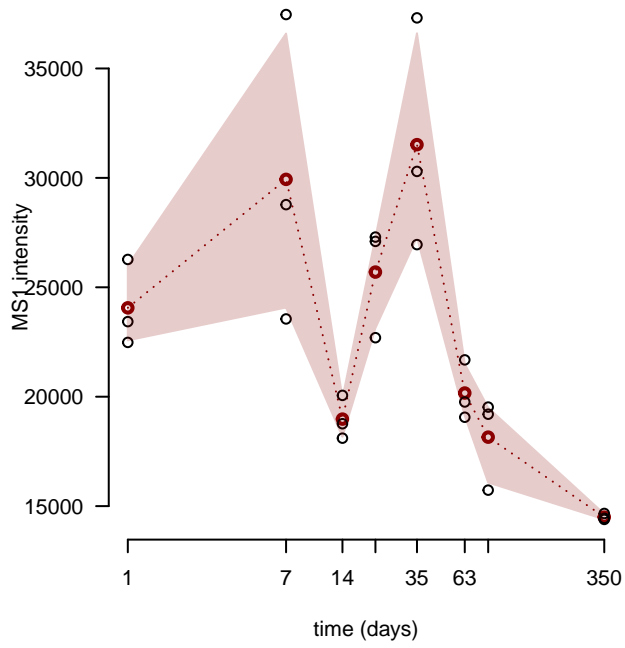

**Q6P5H6**  
GN=Frmd5  
FERM domain containing 5

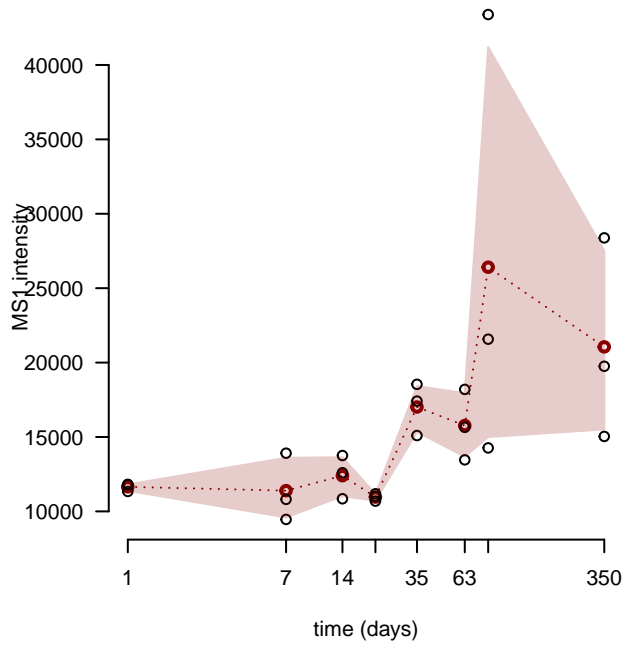

**Q6P5H6**  
GN=Frmd5  
FERM domain containing 5

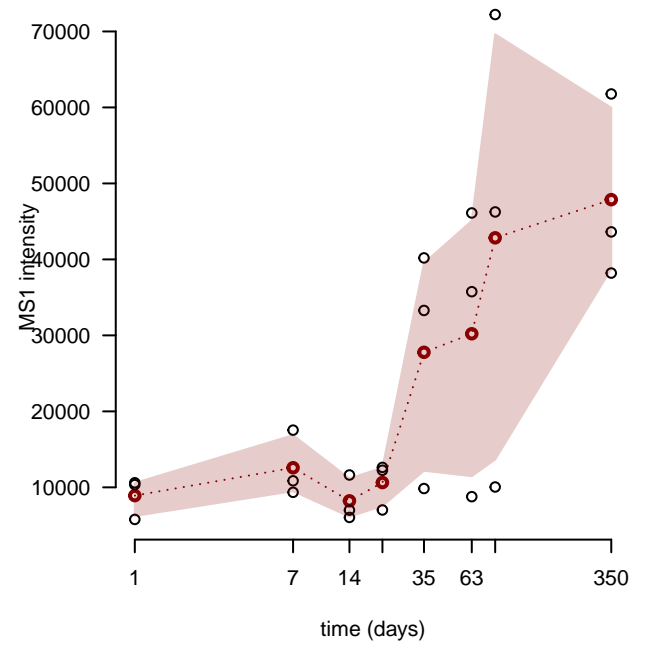

**Q6P6I6**  
GN=Polr2m  
polymerase (RNA) II (DNA directed) polyp ...

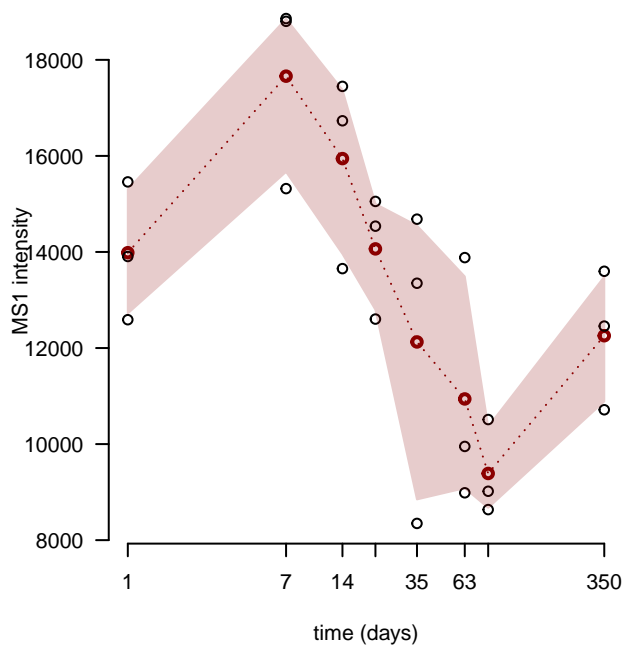

**Q6P6J9**  
GN=Txndc15  
thioredoxin domain containing 15

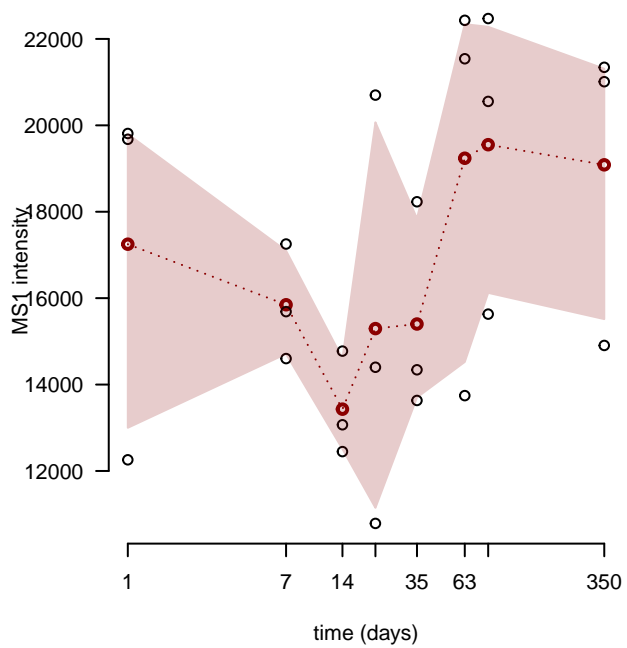

**Q6P6L0**  
GN=Filip1l  
filamin A interacting protein 1-like

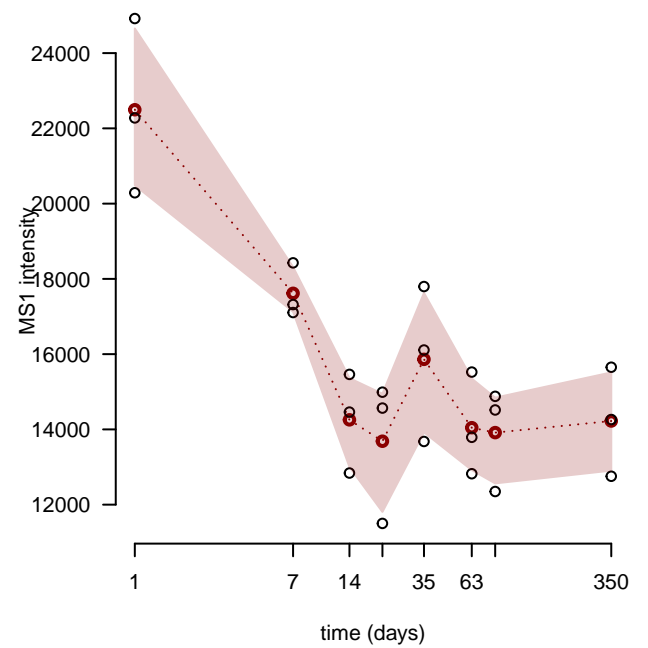

**Q6P6M7**  
GN=Sepsecs  
Sep (O-phosphoserine) tRNA:Sec (selenocys ...

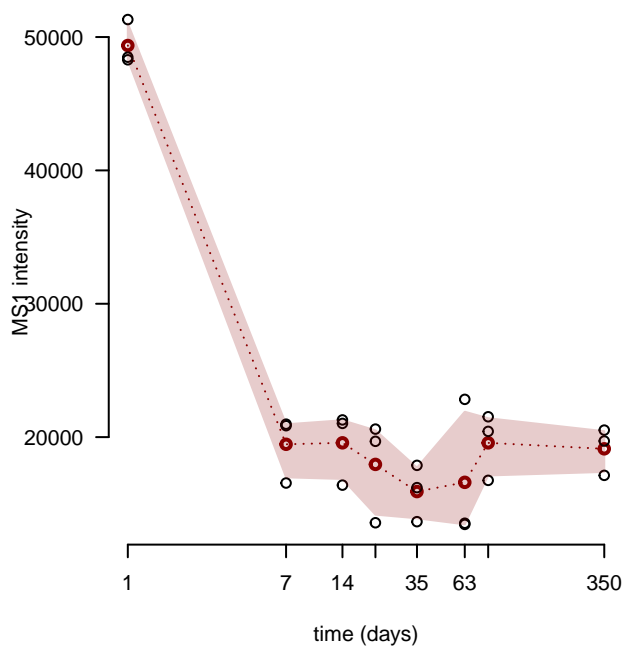

**Q6P7W0**  
GN=Senp6  
SUMO/sentrin specific peptidase 6

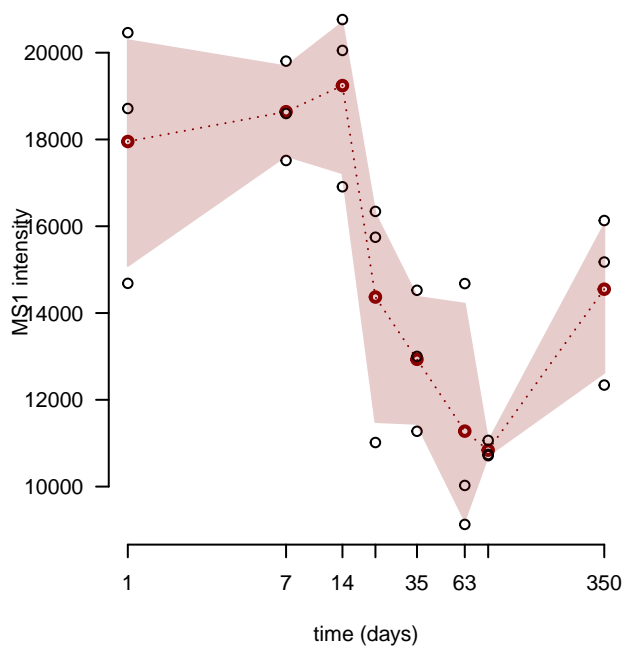

**Q6P7W5**  
GN=Tsen2  
tRNA splicing endonuclease subunit 2

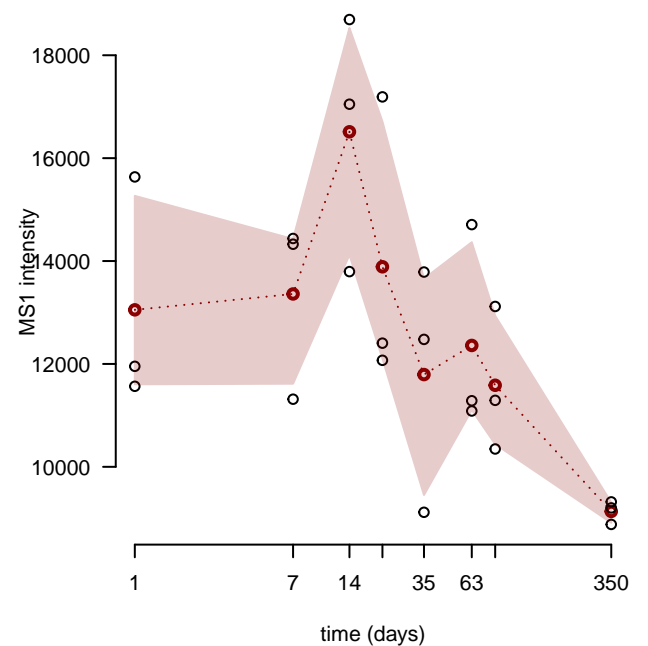

**Q6P8H8**  
**GN=Alg8**

asparagine-linked glycosylation 8 (alpha ...

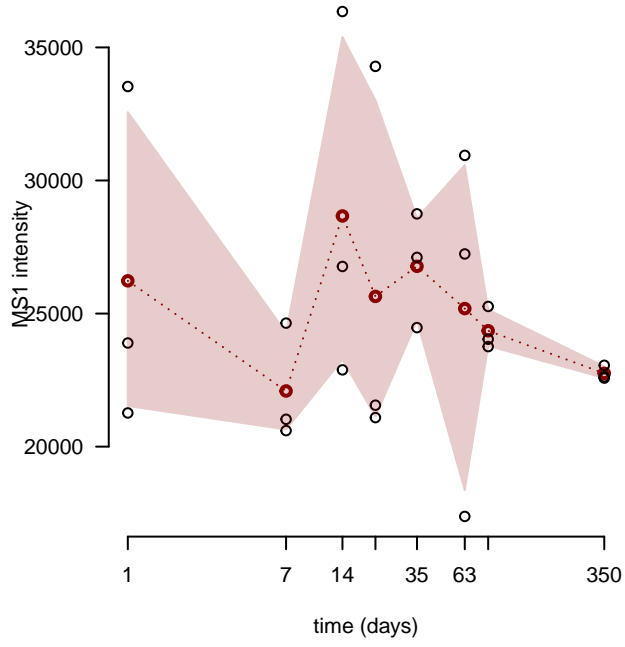

**Q6P8I4**  
**GN=Pcnp**

PEST proteolytic signal containing nucle ...

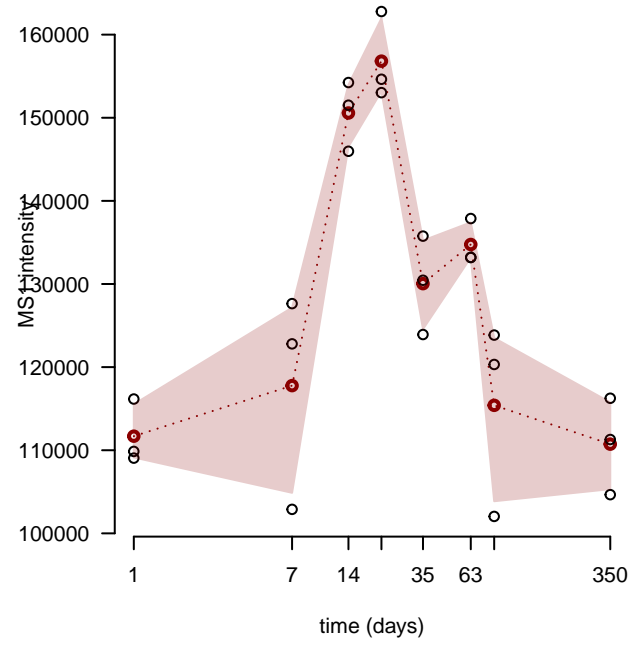

**Q6P8I6**  
**GN=Cox11**

cytochrome c oxidase assembly protein 11 ...

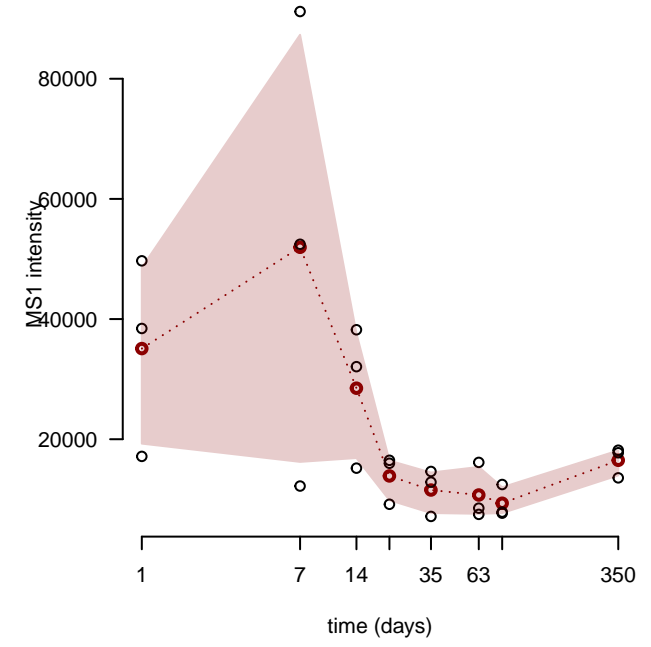

**Q6P8J2**  
**GN=Sat2**

spermidine/spermine N1-acetyl transferas ...

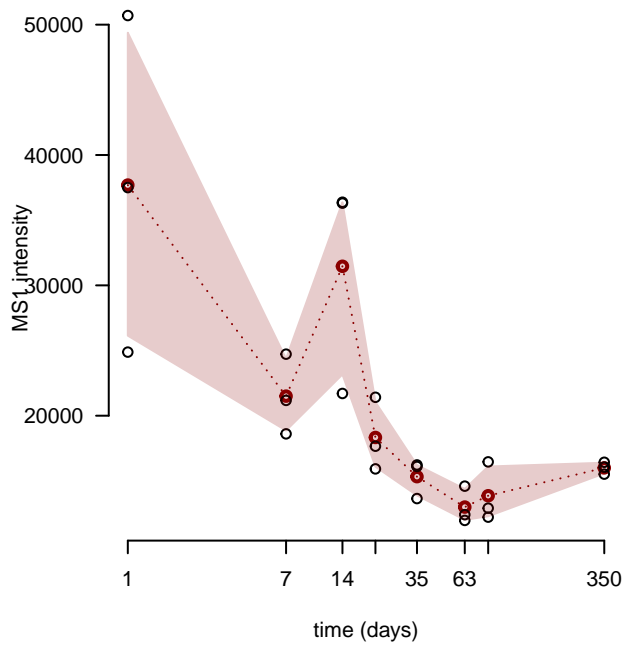

**Q6P8M1**  
**GN=Tatdn1**

TatD DNase domain containing 1

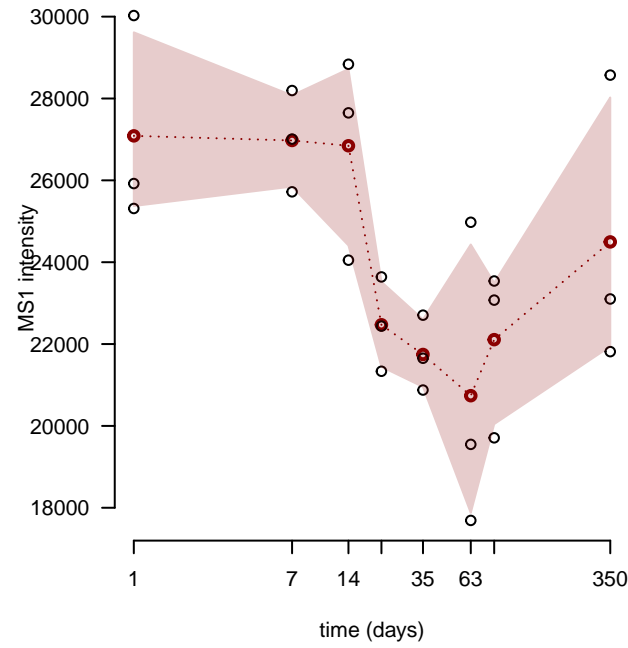

**Q6P8X1**  
**GN=Snx6**

sorting nexin 6

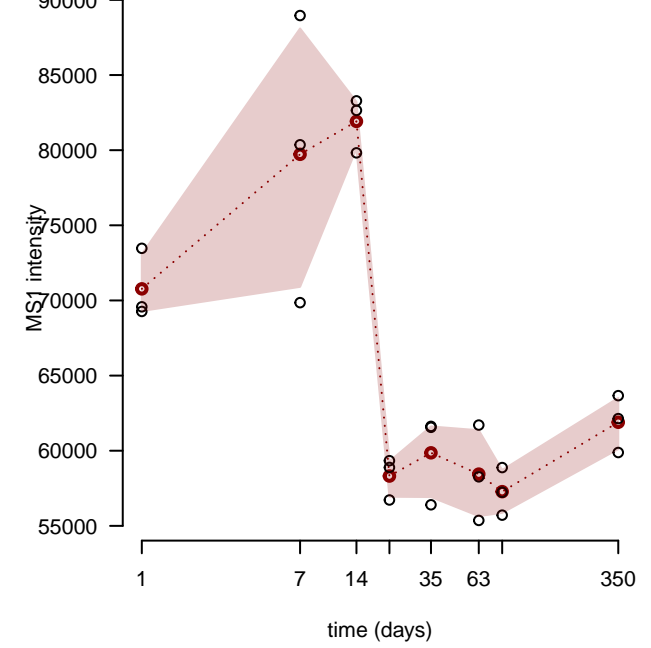

**Q6P9J5**  
**GN=Kank4**

KN motif and ankyrin repeat domains 4

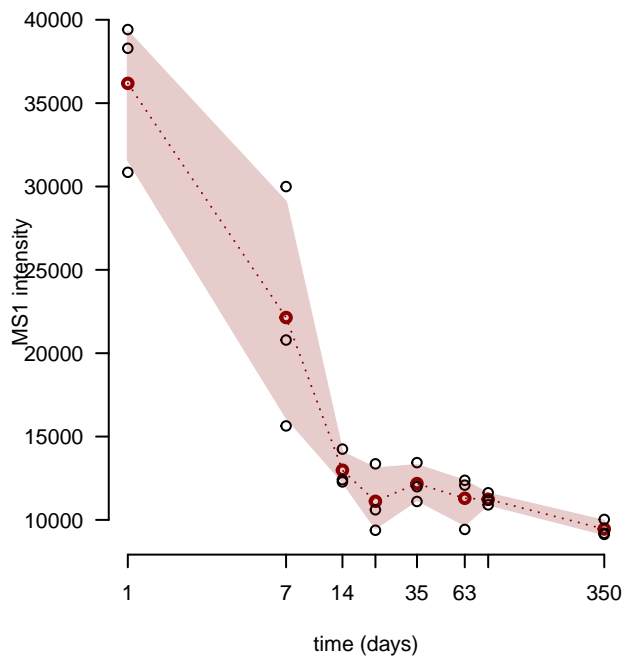

**Q6P9J9**  
**GN=Ano6**

anoctamin 6

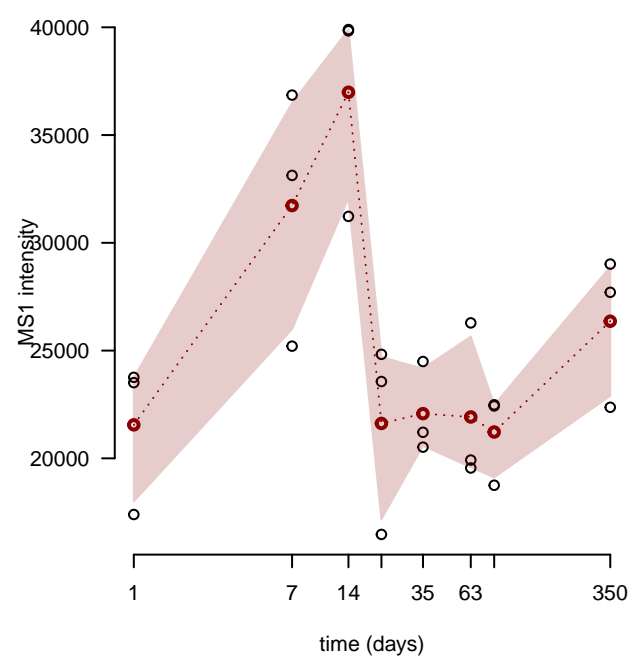

**Q6P9K8**  
**GN=Caskin1**

CASK interacting protein 1

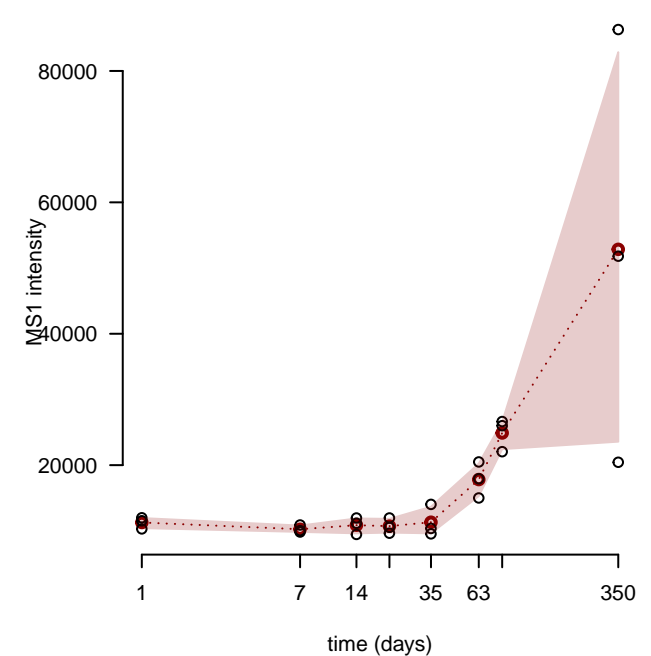

**Q6P9L6**  
**GN=Kif15**  
kinesin family member 15

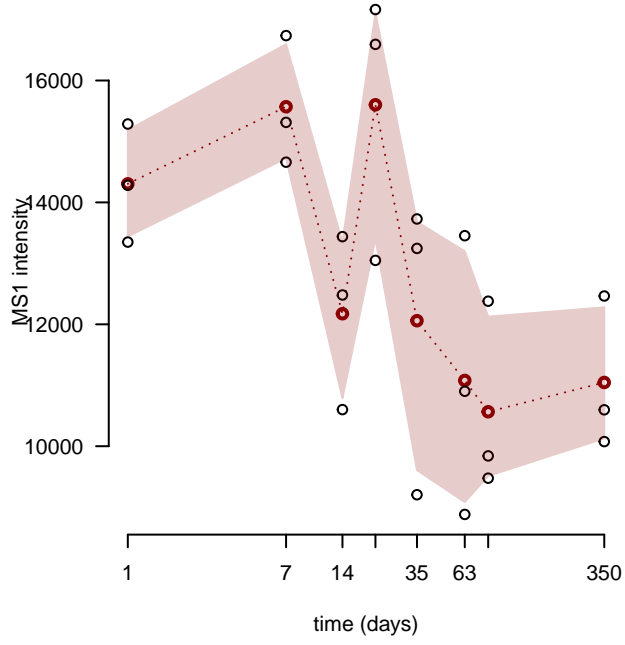

**Q6P9N1**  
**GN=Fam126a**  
family with sequence similarity 126, mem ...

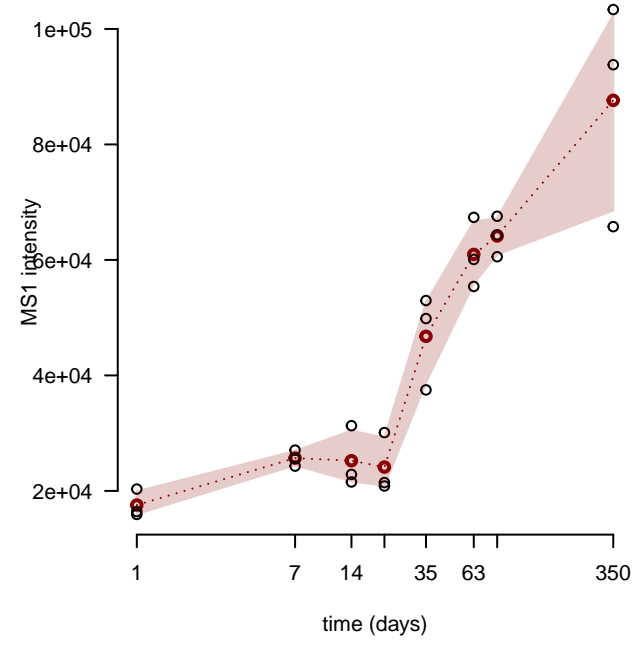

**Q6P9P6**  
**GN=Kif11**  
kinesin family member 11

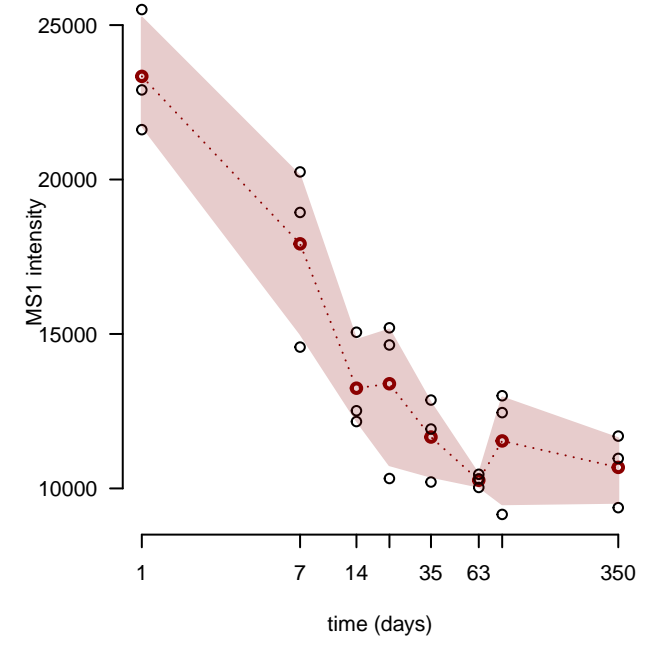

**Q6P9Q4**  
**GN=Fhod1**  
formin homology 2 domain containing 1

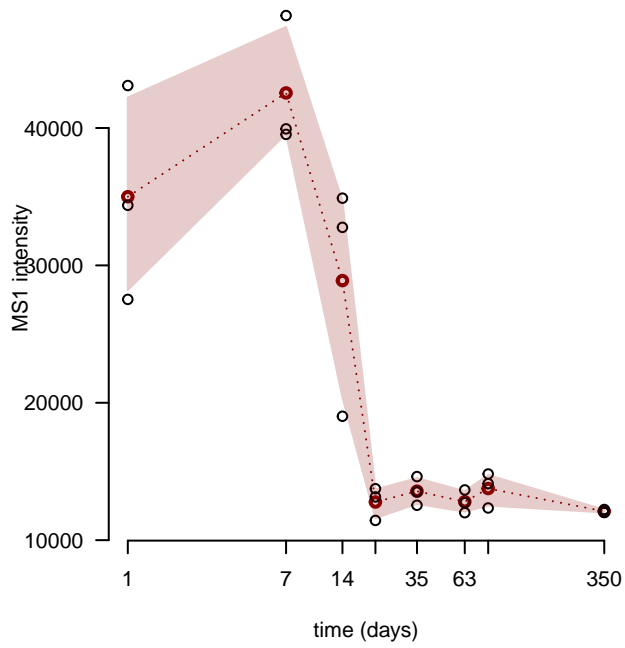

**Q6P9Q6**  
**GN=Fkbp15**  
FK506 binding protein 15

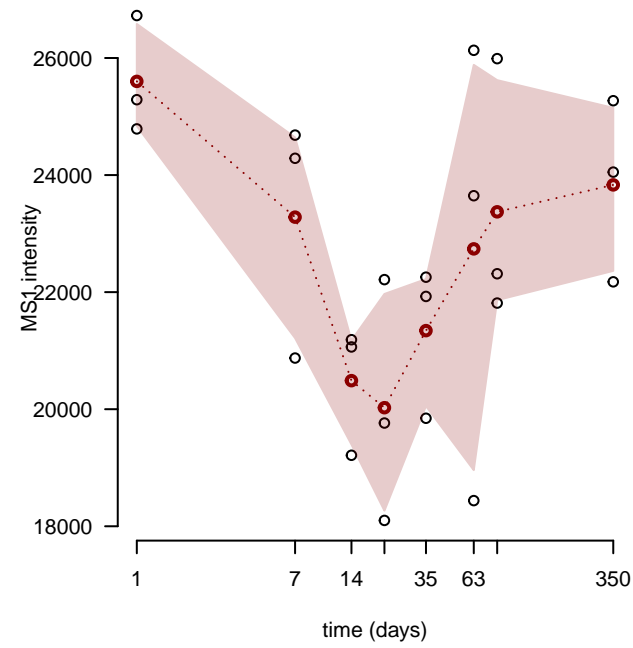

**Q6P9R1**  
**GN=Ddx51**  
DEAD box helicase 51

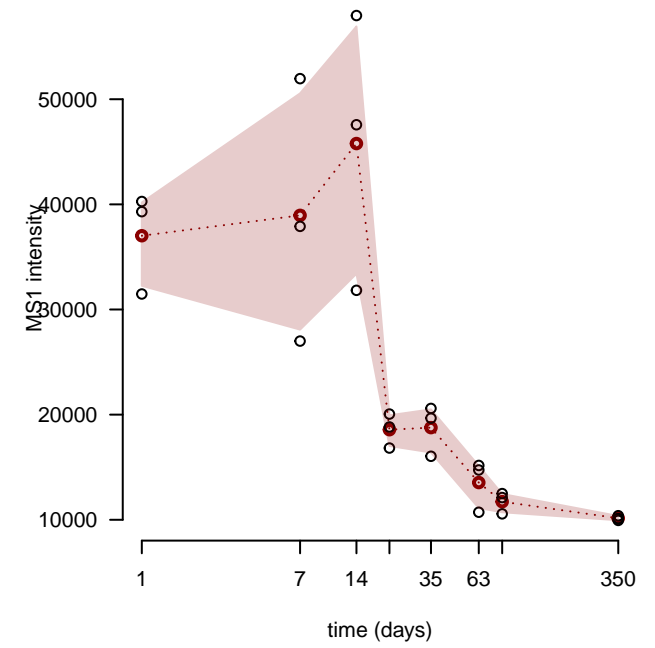

**Q6P9R2**  
**GN=Oxsr1**  
oxidative-stress responsive 1

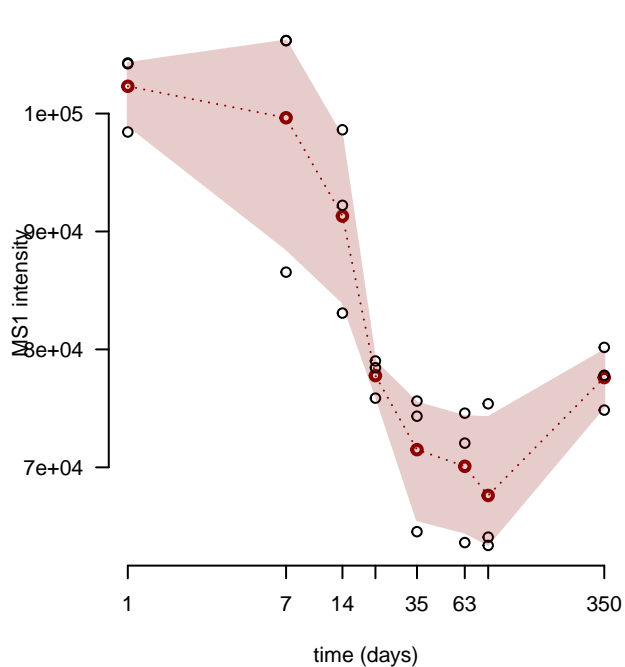

**Q6P9R4**  
**GN=Arhgef18**  
rho/rac guanine nucleotide exchange fact ...

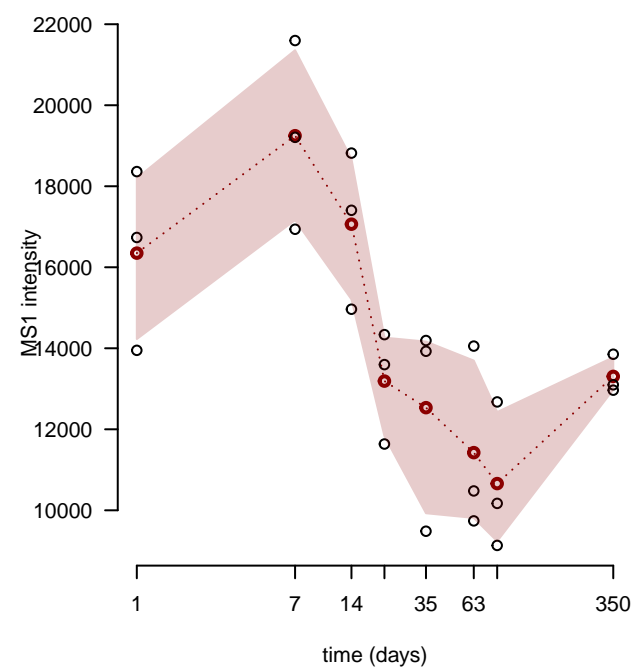

**Q6P9S0**  
**GN=Mtss2**  
MTSS I-BAR domain containing 2

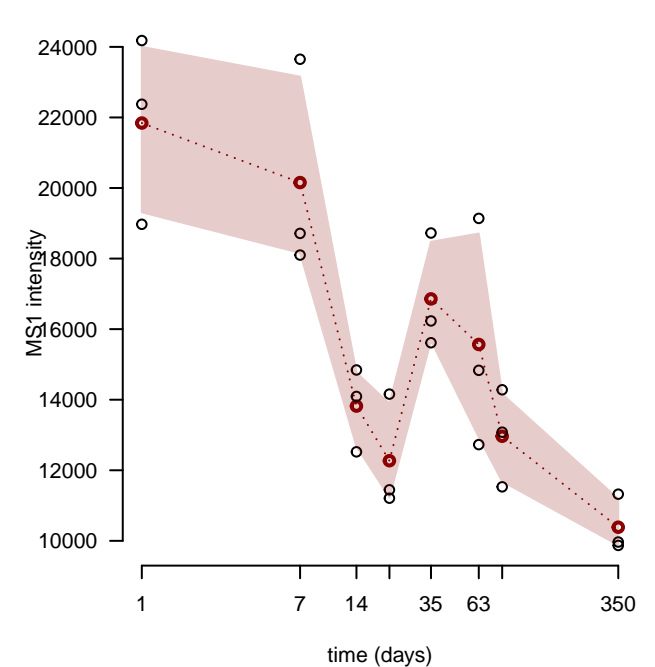

**Q6P9Z1**  
**GN=Smarcd3**  
SWI/SNF related, matrix associated, acti ...

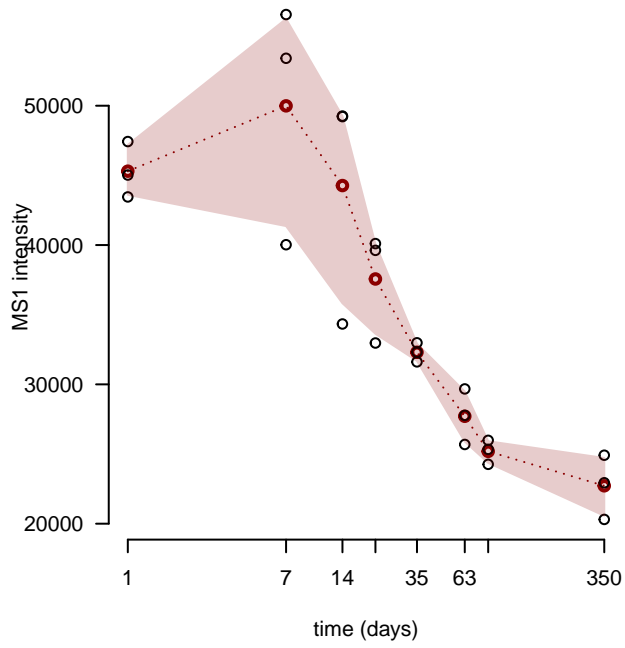

**Q6PA06**  
**GN=Atl2**  
atlastin GTPase 2

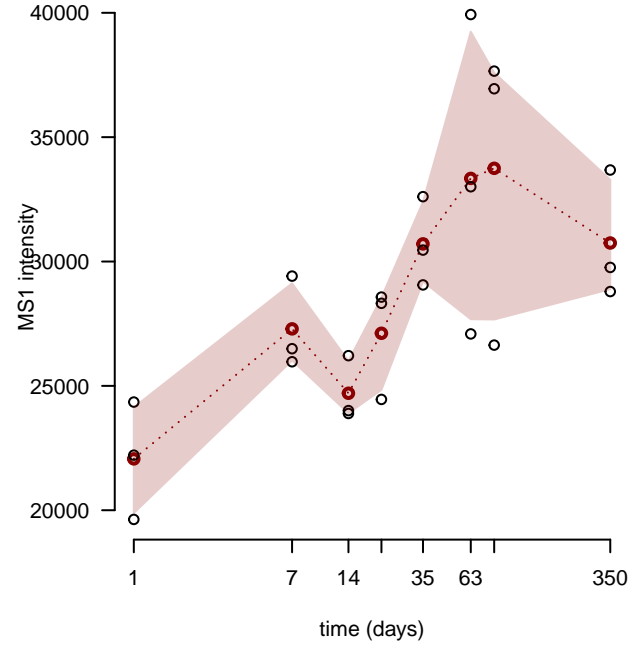

**Q6PAC3**  
**GN=Dcaf13**  
DDB1 and CUL4 associated factor 13

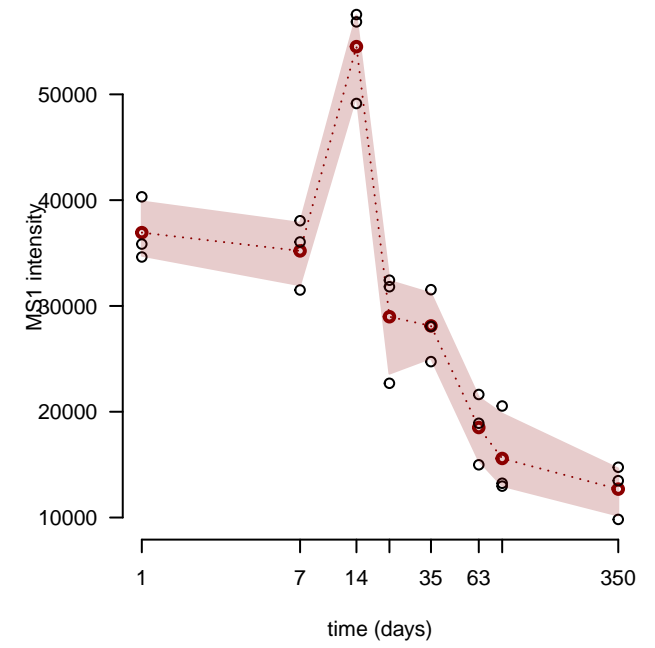

**Q6PAJ1**  
**GN=Bcr**  
BCR activator of RhoGEF and GTPase

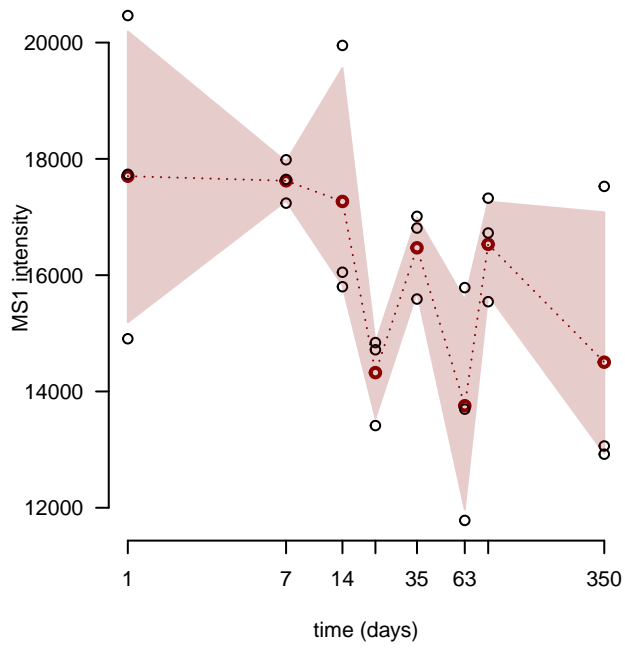

**Q6PAL0**  
**GN=Bend3**  
BEN domain containing 3

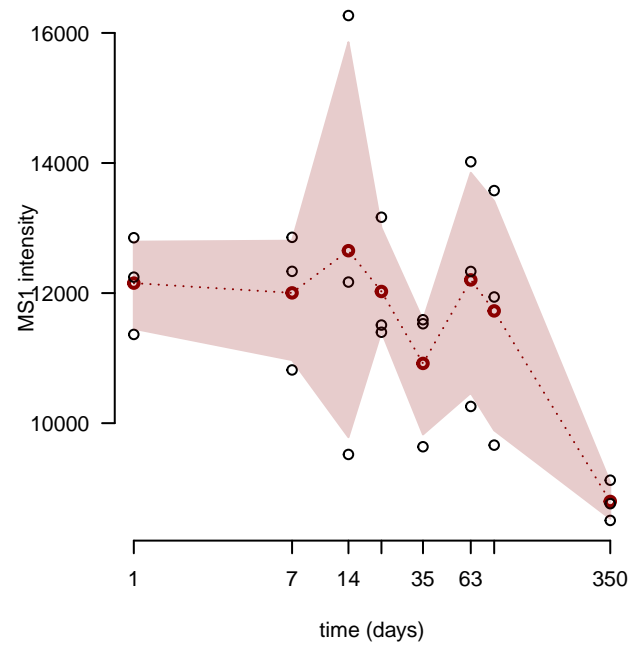

**Q6PAL7**  
**GN=Ahdc1**  
AT hook, DNA binding motif, containing 1

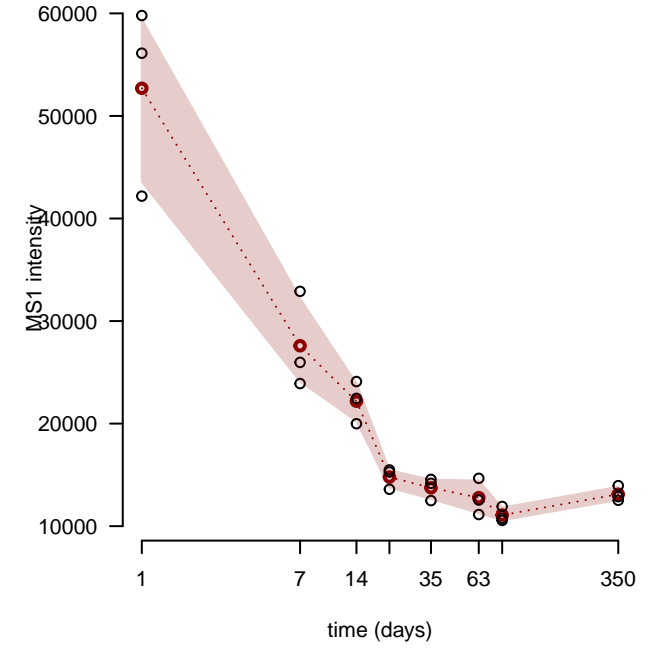

**Q6PAL8**  
**GN=Dennd5a**  
DENN/MADD domain containing 5A

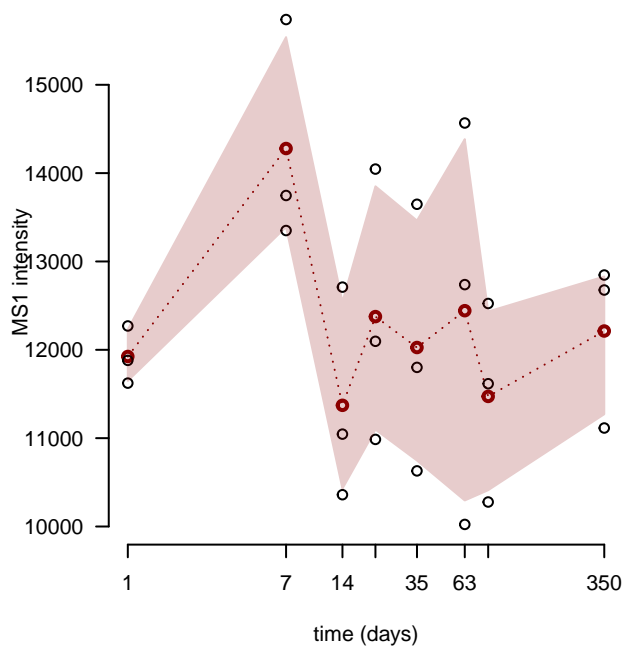

**Q6PAM0**  
**GN=Prkab2**  
protein kinase, AMP-activated, beta 2 no ...

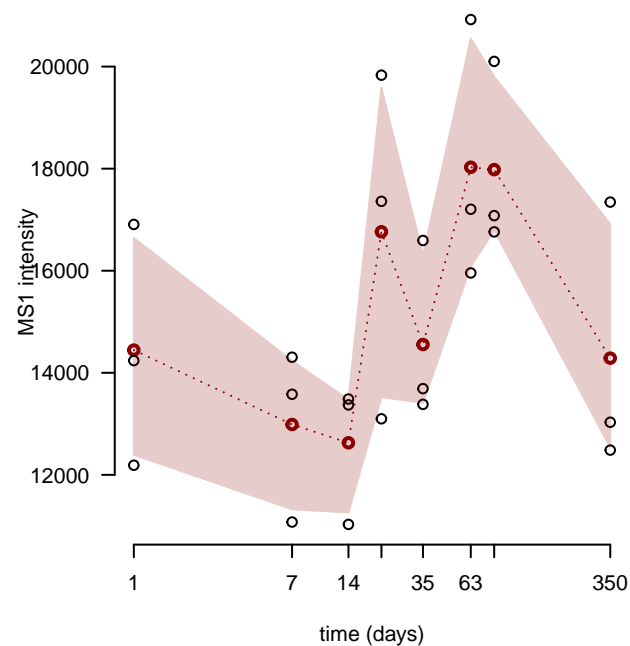

**Q6PAM1**  
**GN=Txlna**  
taxilin alpha

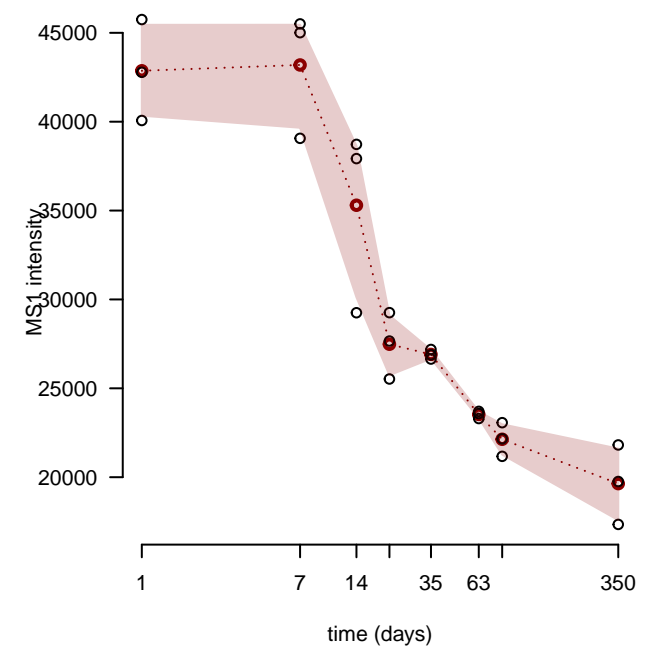



**Q6PAQ4**  
**GN=Rexo4**  
REX4, 3'-5' exonuclease

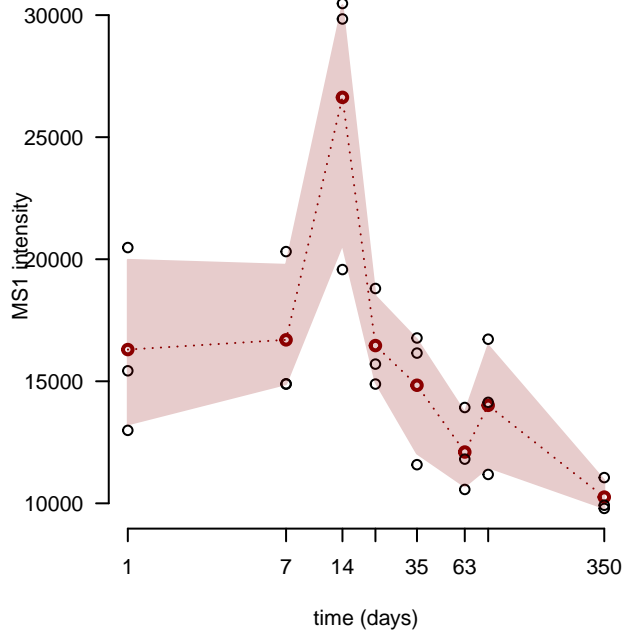

**Q6PAR0**  
**GN=Klhdc10**  
kelch domain containing 10

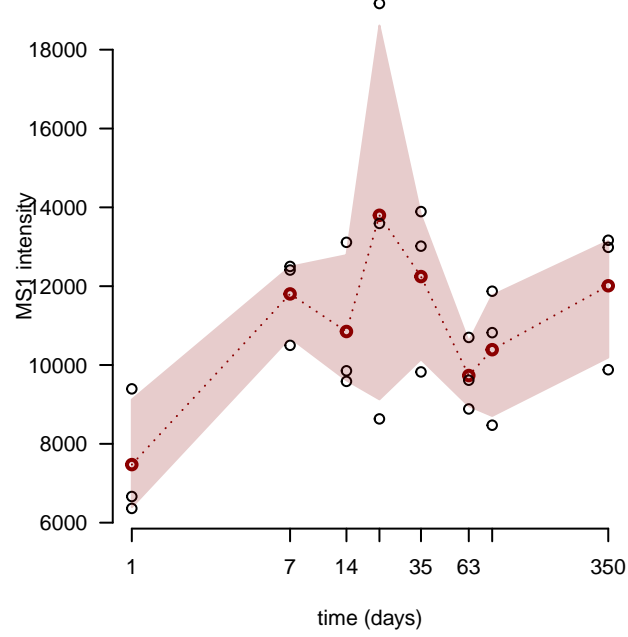

**Q6PAR5**  
**GN=Gapvd1**  
GTPase activating protein and VPS9 domain containing

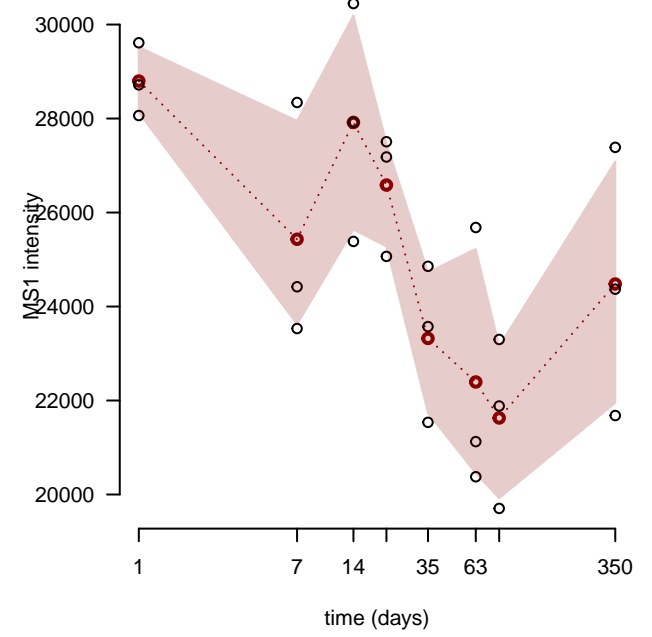

**Q6PAT0**  
**GN=Adat3**  
adenosine deaminase, tRNA-specific 3

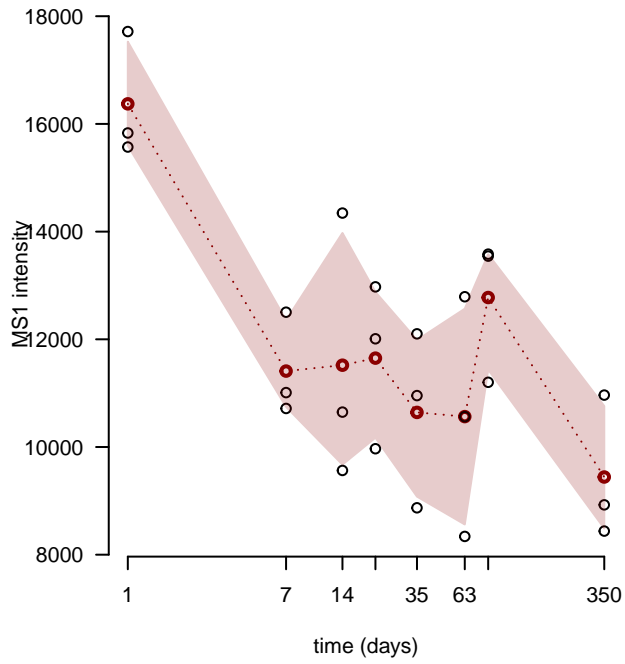

**Q6PAV2**  
**GN=Herc4**  
hect domain and RLD 4

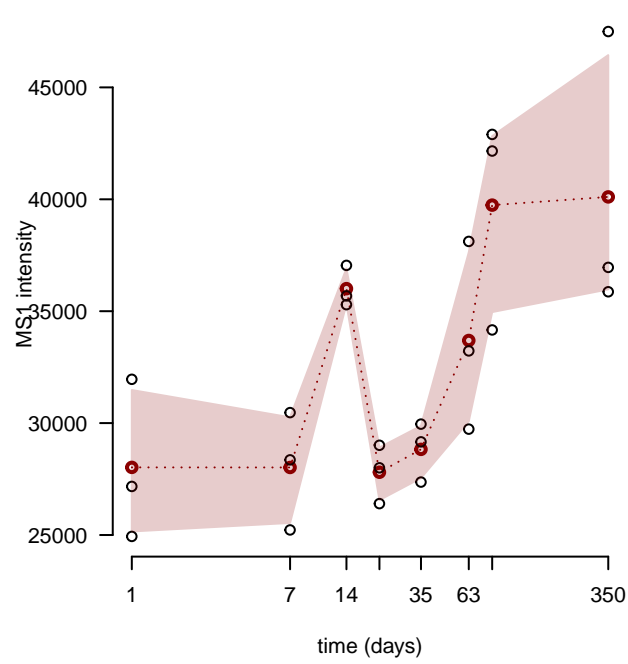

**Q6PB44**  
**GN=Ptpn23**  
protein tyrosine phosphatase, non-receptor type 23

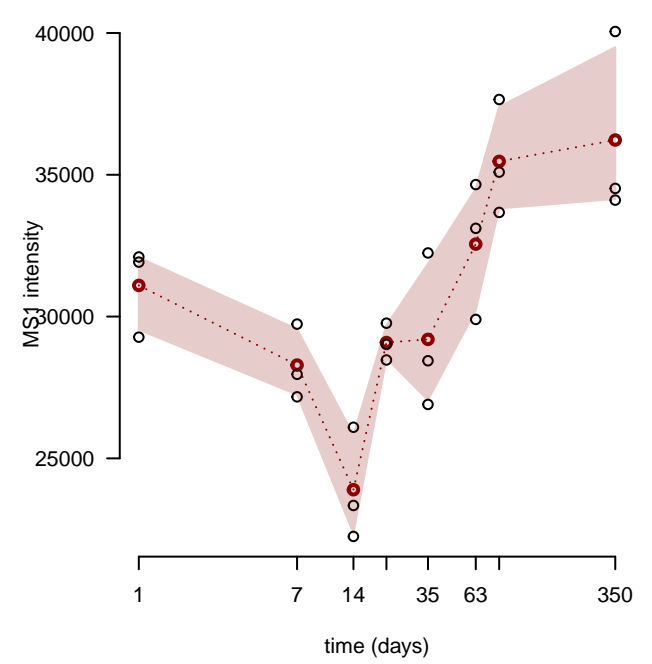

**Q6PB66**  
**GN=Lrpprc**  
leucine-rich PPR-motif containing

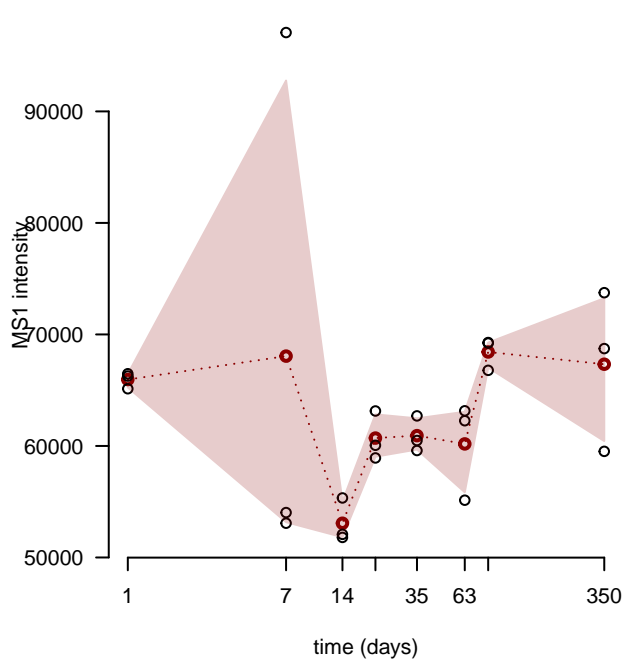

**Q6PB70**  
**GN=Ano8**  
anoctamin 8

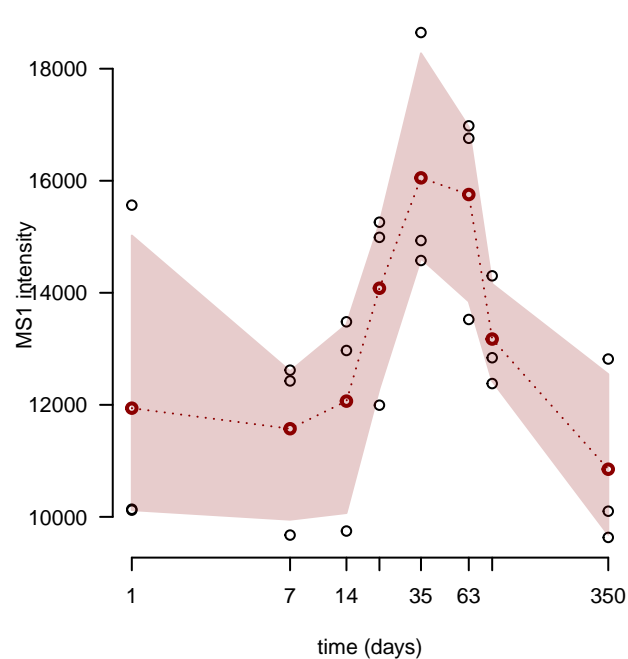

**Q6PB93**  
**GN=Galnt2**  
polypeptide N-acetylgalactosaminyltransferase 2

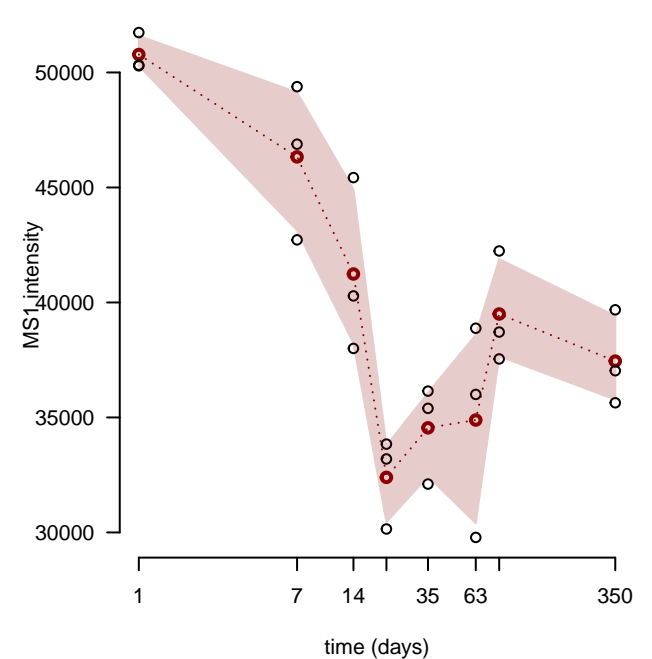

**Q6PB97**  
**GN=Fbxl19**  
F-box and leucine-rich repeat protein 19

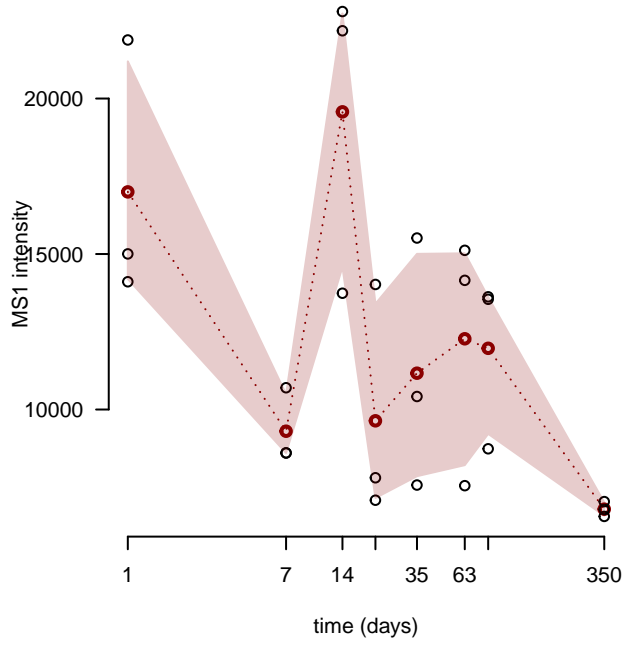

**Q6PCL9**  
**GN=Papolg**  
poly(A) polymerase gamma

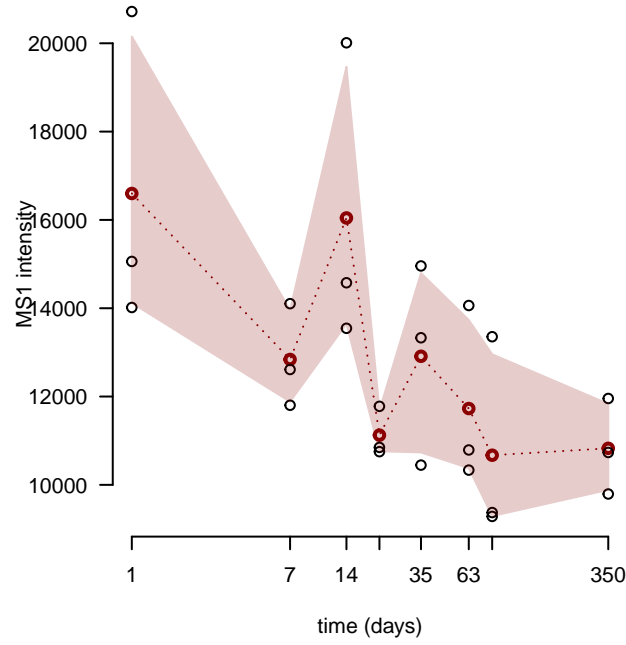

**Q6PCM1**  
**GN=Kdm3a**  
lysine (K)-specific demethylase 3A

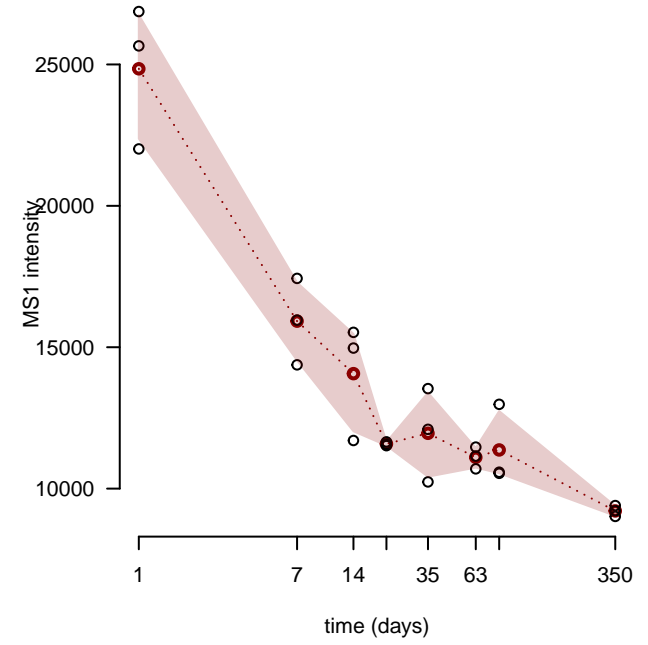

**Q6PCM2**  
**GN=Ints6**  
integrator complex subunit 6

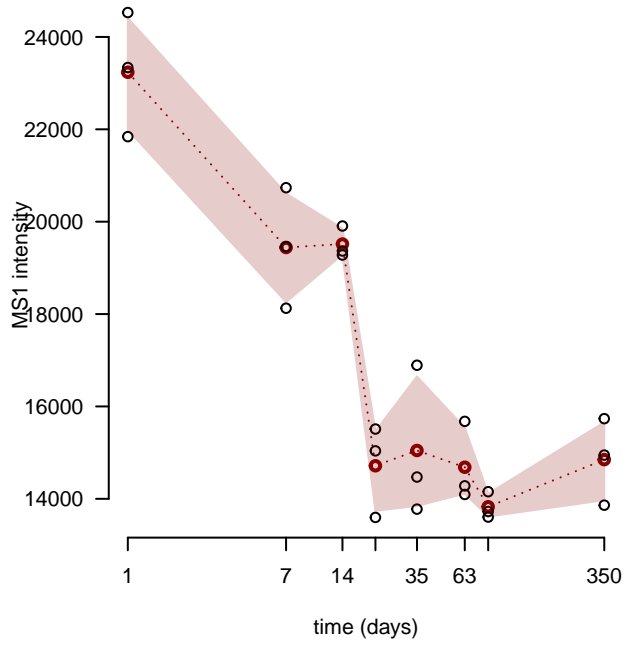

**Q6PCN7**  
**GN=Hltf**  
helicase-like transcription factor

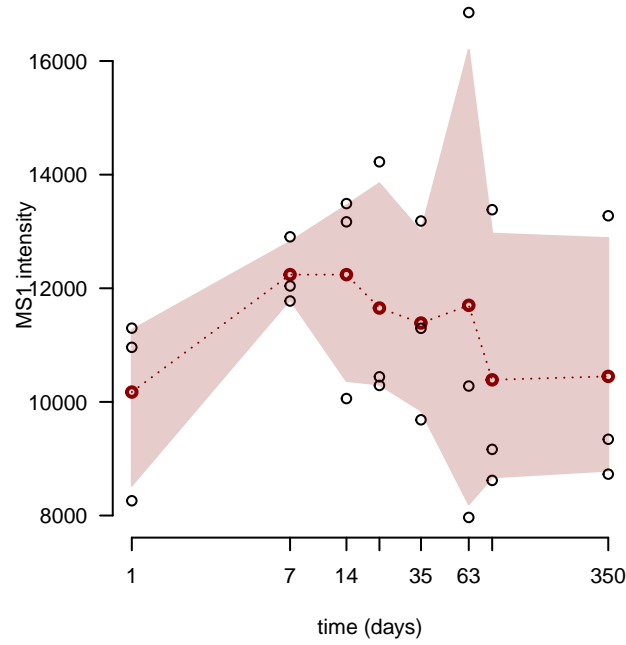

**Q6PCP5**  
**GN=Mff**  
mitochondrial fission factor

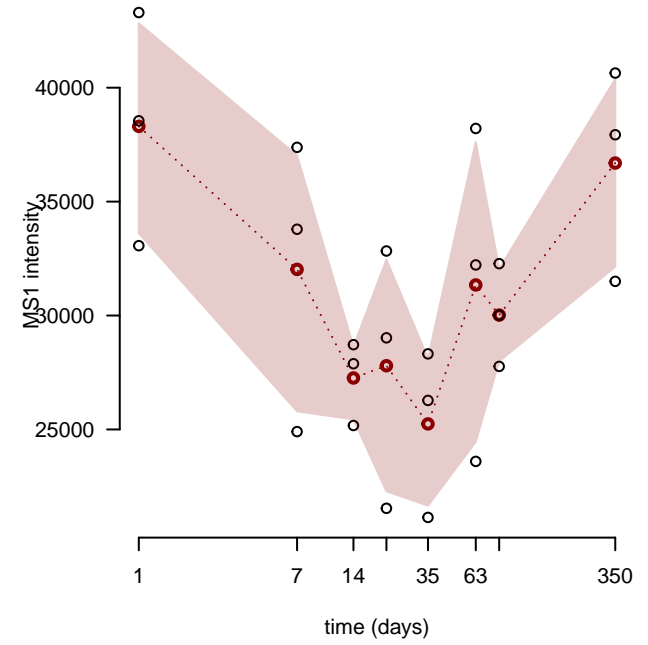

**Q6PCP5**  
**GN=Mff**  
mitochondrial fission factor

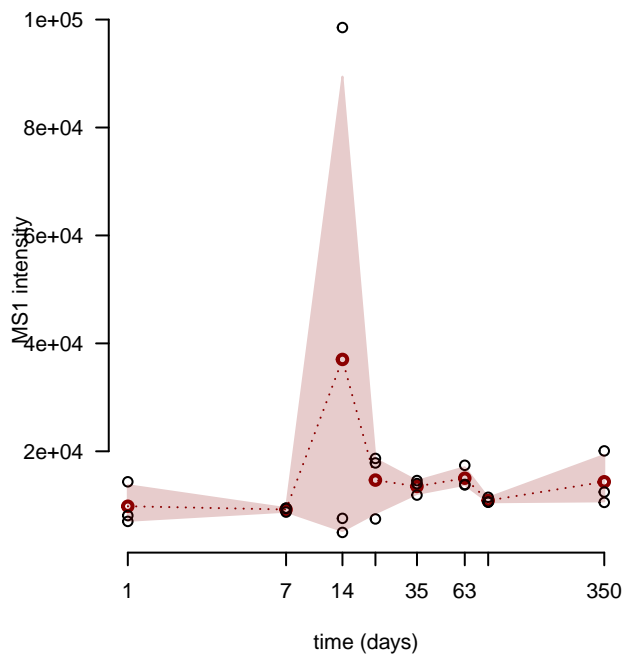

**Q6PCQ0**  
**GN=lqce**  
IQ motif containing E

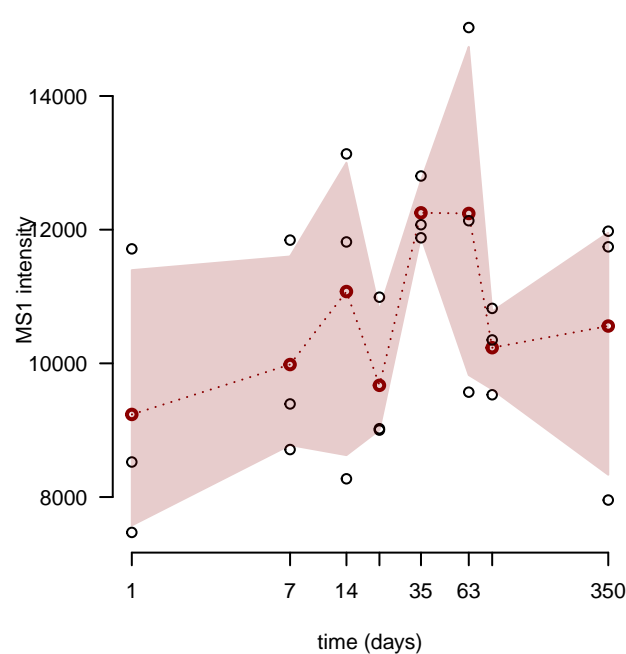

**Q6PCX9**  
**GN=Trim37**  
tripartite motif-containing 37

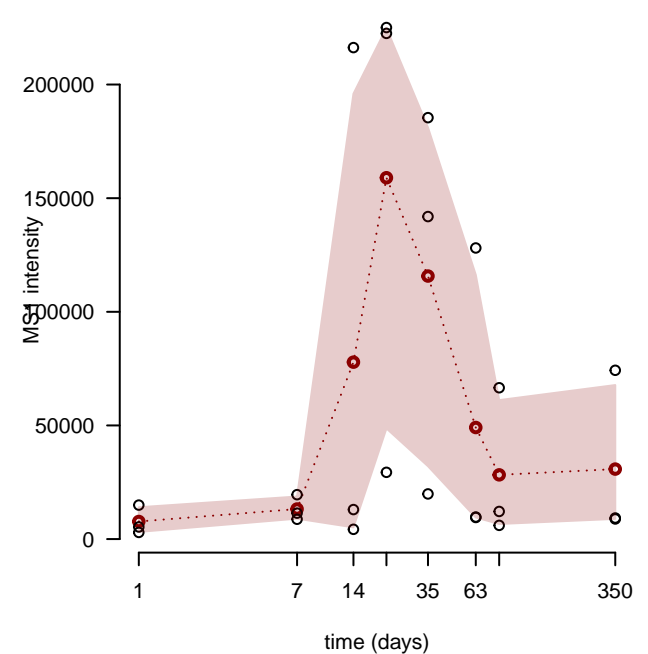

**Q6PCZ4**  
**GN=Magee1**  
MAGE family member E1

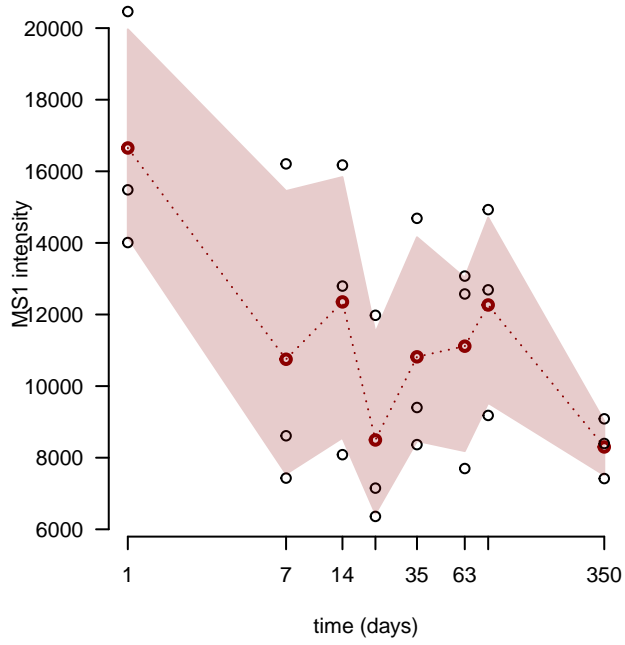

**Q6PD03**  
**GN=Ppp2r5a**  
protein phosphatase 2, regulatory subuni ...

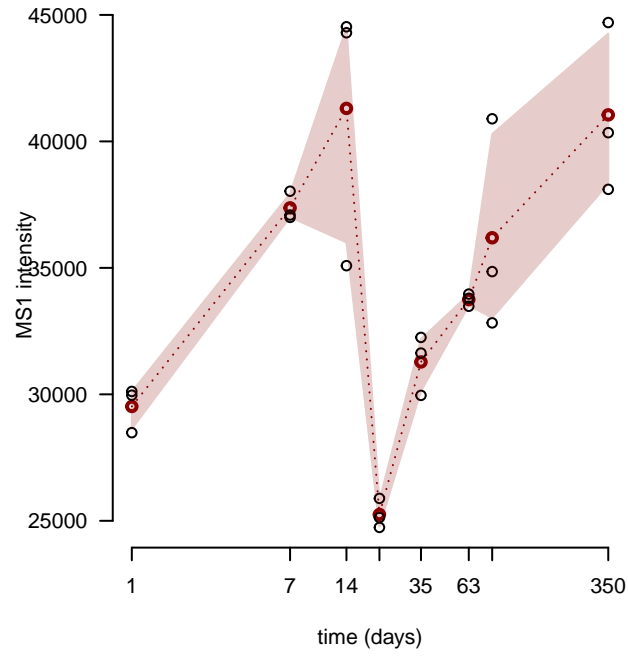

**Q6PD10**  
**GN=Ip6k1**  
inositol hexaphosphate kinase 1

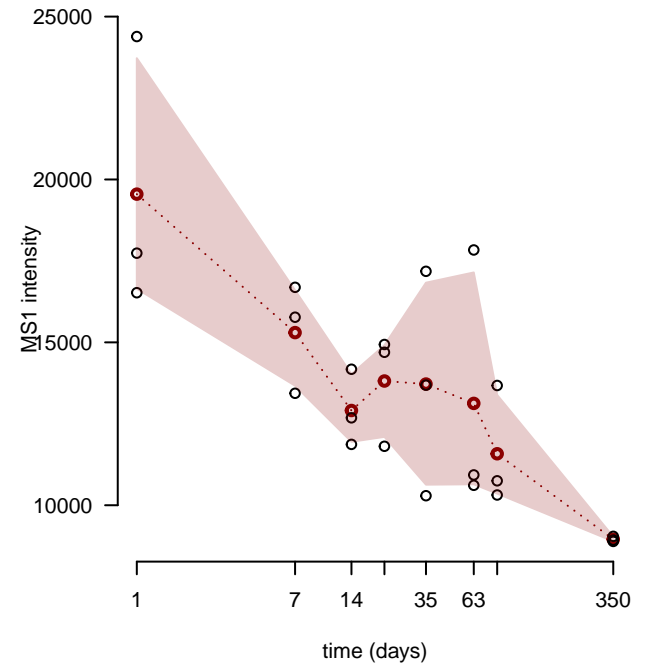

**Q6PD19**  
**GN=Armh3**  
armadillo-like helical domain containing ...

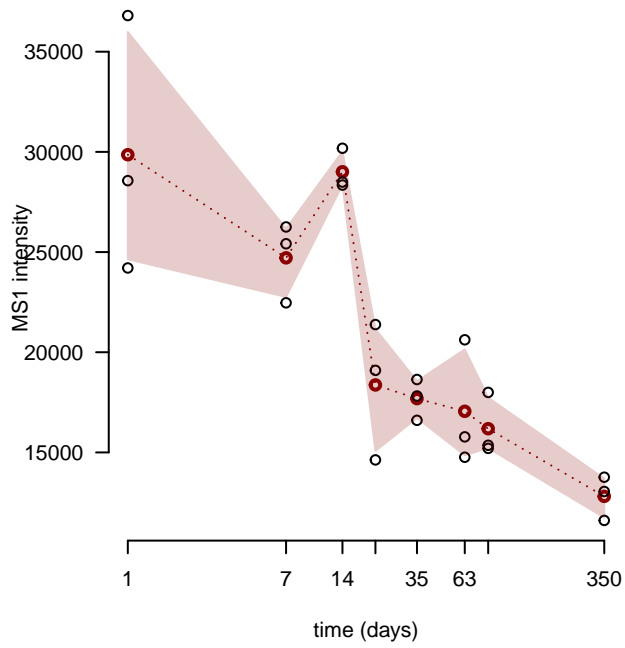

**Q6PD26**  
**GN=Pigs**  
phosphatidylinositol glycan anchor biosy ...

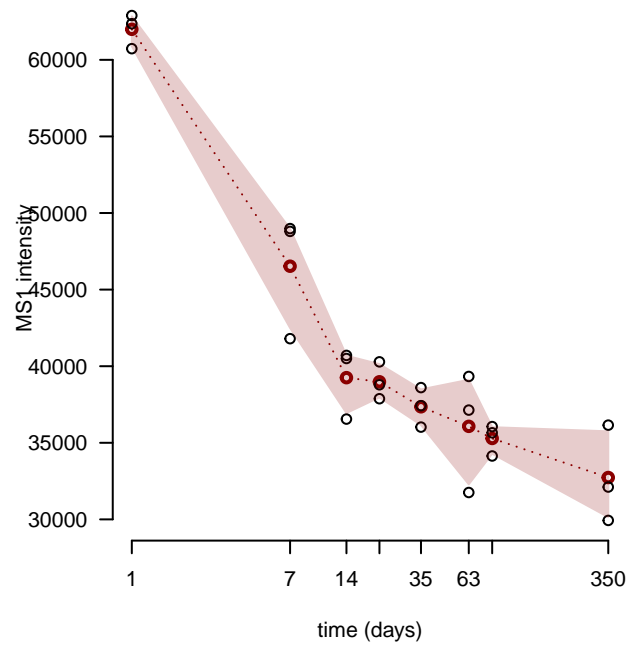

**Q6PD28**  
**GN=Ppp2r5b**  
protein phosphatase 2, regulatory subuni ...

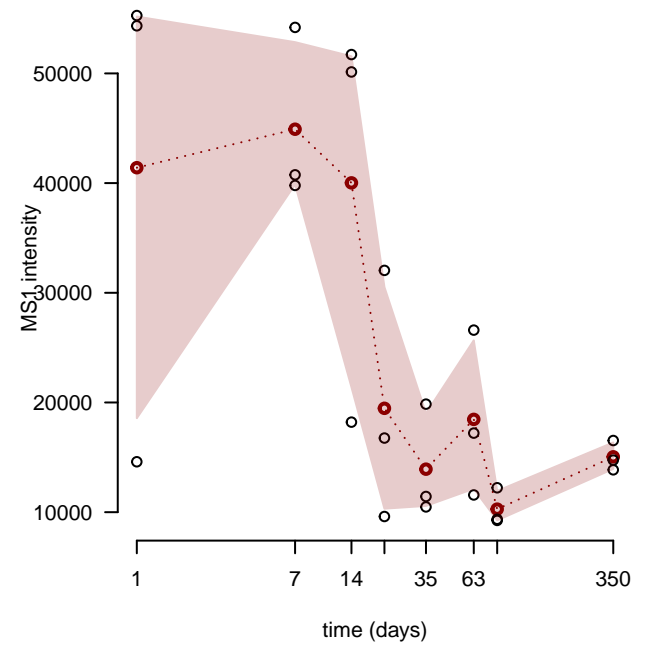

**Q6PDG5**  
**GN=Smarcc2**  
SWI/SNF related, matrix associated, acti ...

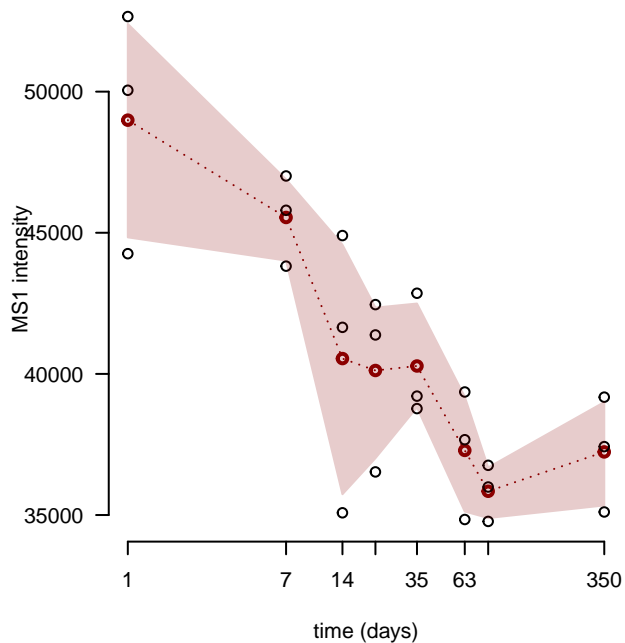

**Q6PDG8**  
**GN=Mon1a**  
MON1 homolog A, secretory trafficking as ...

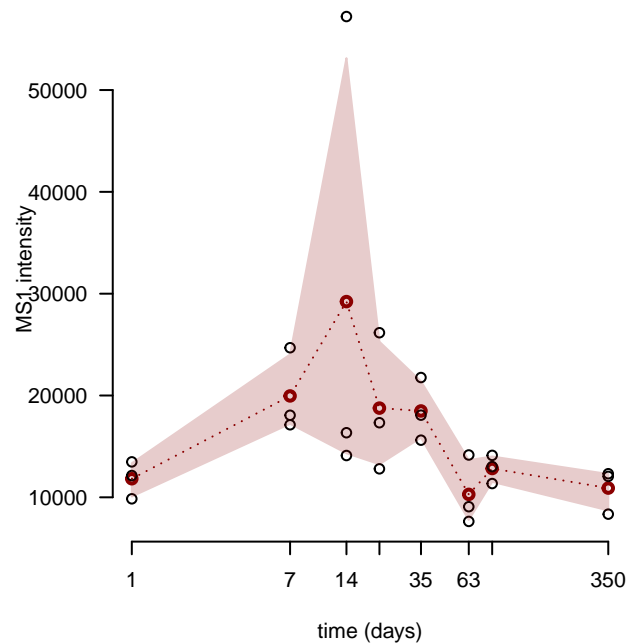

**Q6PDH0**  
**GN=Phldb1**  
pleckstrin homology like domain, family ...

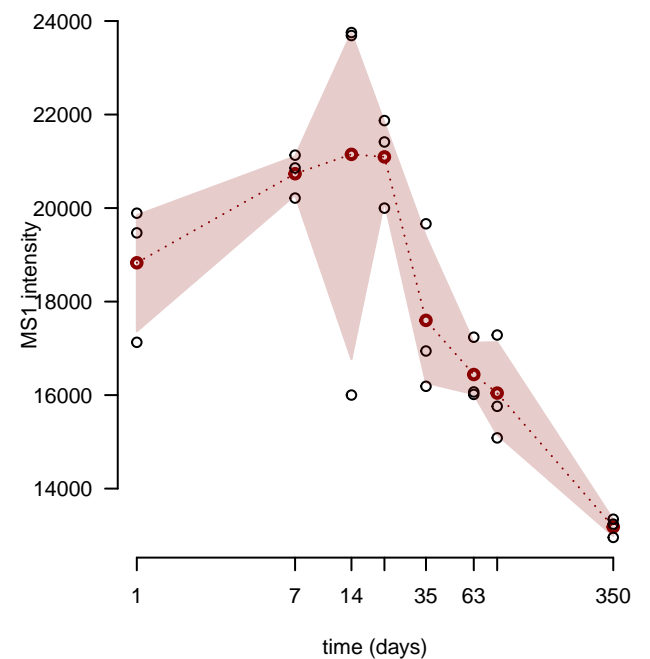

**Q6PDI5**  
GN=Ecpas  
Ecm29 proteasome adaptor and scaffold

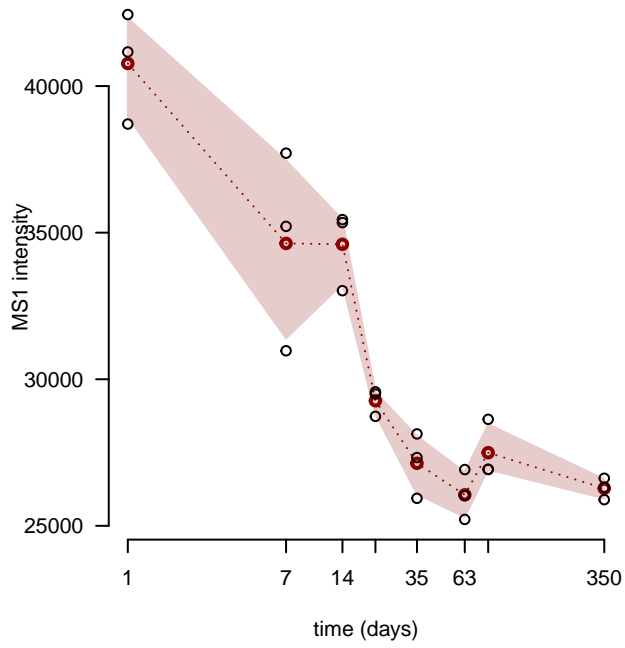

**Q6PDI6**  
GN=Mindy2  
MINDY lysine 48 deubiquitinase 2

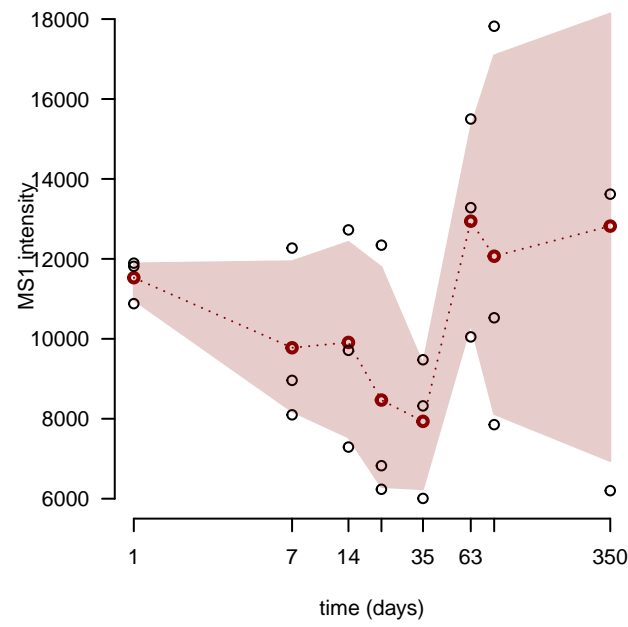

**Q6PDJ1**  
GN=Cachd1  
cache domain containing 1

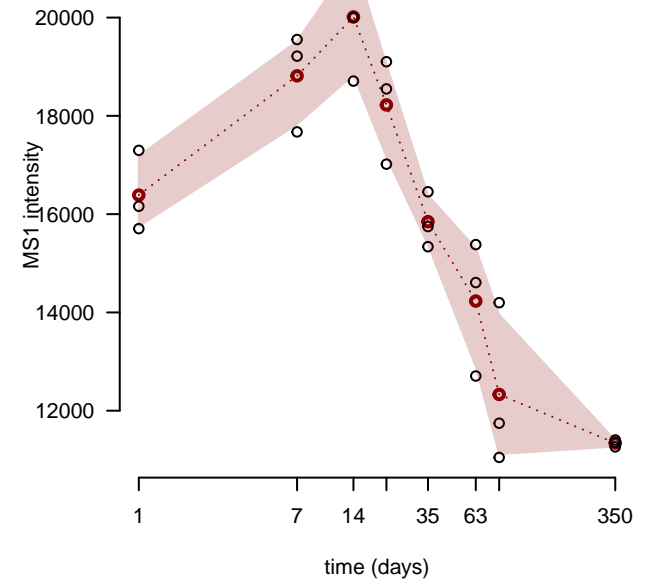

**Q6PDJ6**  
GN=Fbxo42  
F-box protein 42

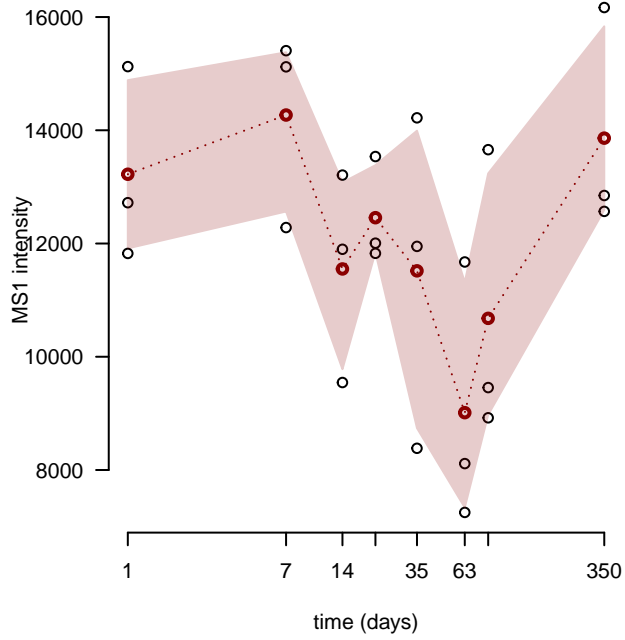

**Q6PDK2**  
GN=Kmt2d  
lysine (K)-specific methyltransferase 2D

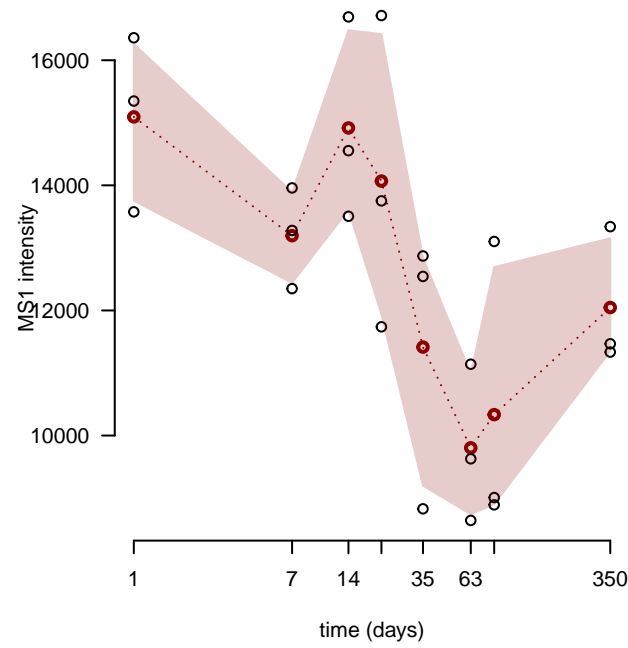

**Q6PDL0**  
GN=Dync1li2  
dynein, cytoplasmic 1 light intermediate ...

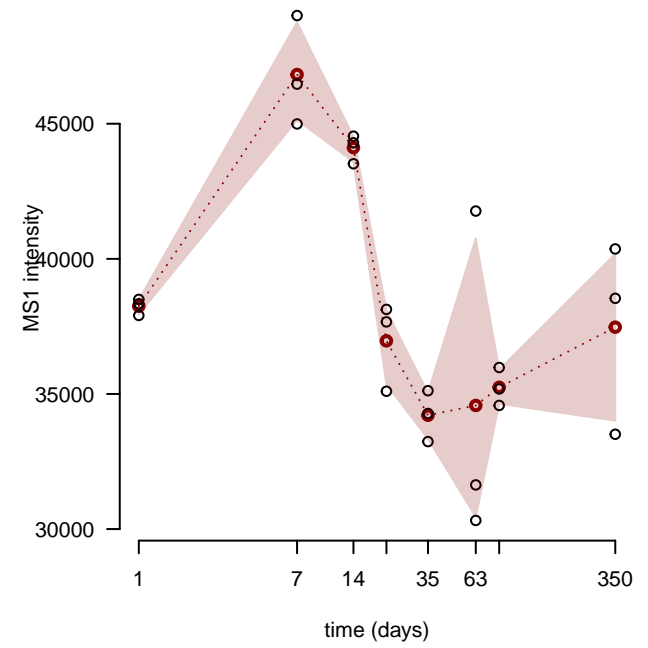

**Q6PDM1**  
GN=Msl1  
male specific lethal 1

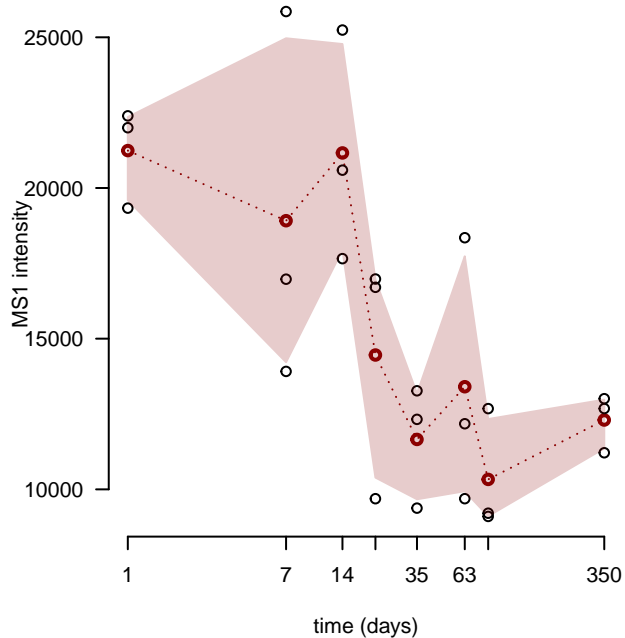

**Q6PDM2**  
GN=Srsf1  
serine and arginine-rich splicing factor ...

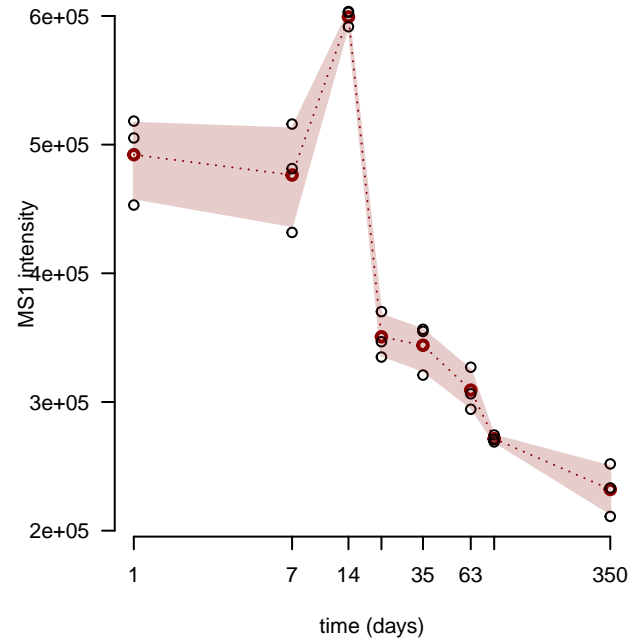

**Q6PDN3**  
GN=Mylk  
myosin, light polypeptide kinase

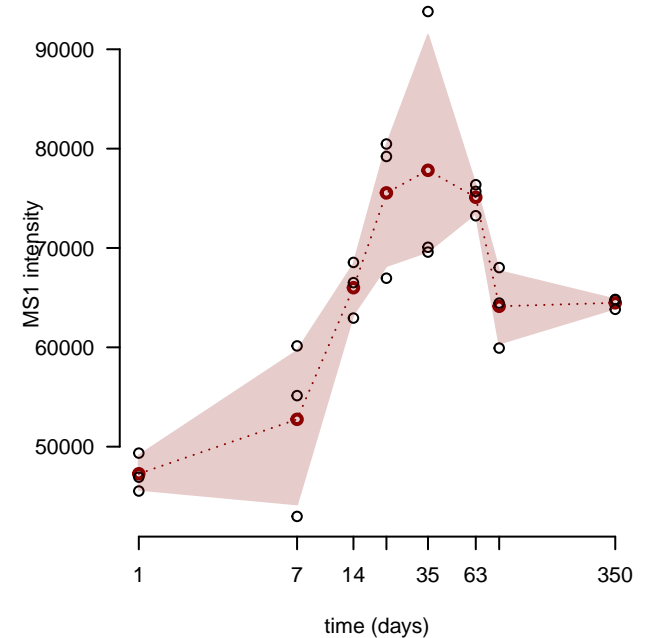

**Q6PDN3**  
**GN=Mylk**

myosin, light polypeptide kinase

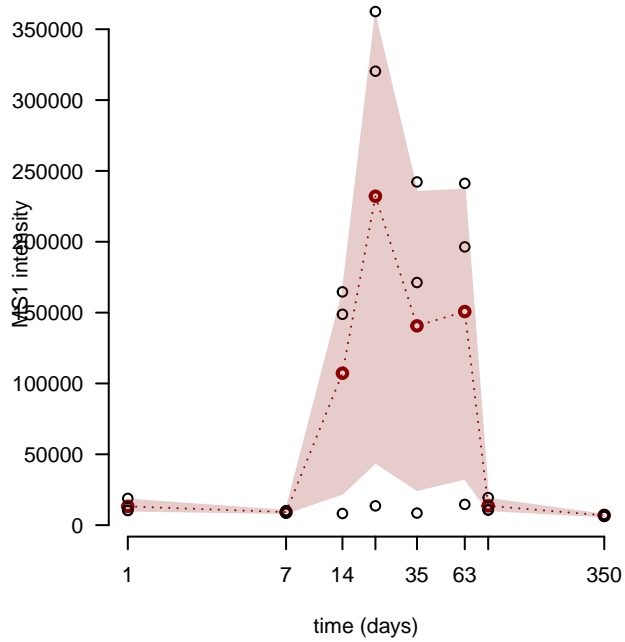

**Q6PDQ2**  
**GN=Chd4**

chromodomain helicase DNA binding protei ...

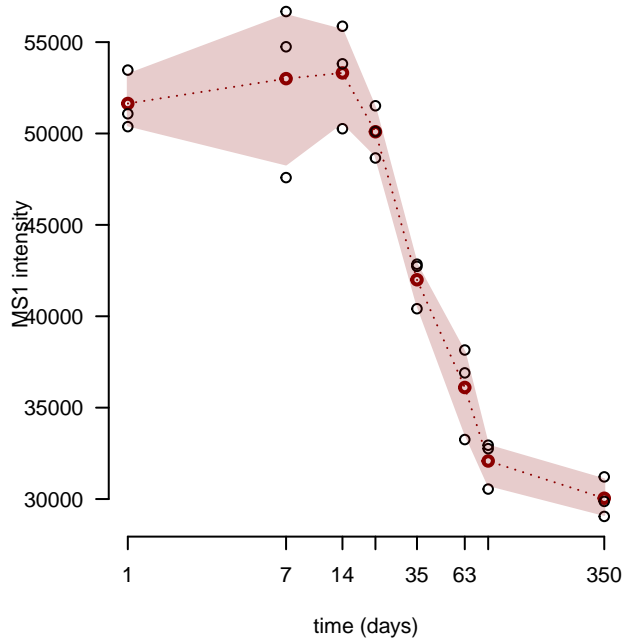

**Q6PDX6**  
**GN=Rnf220**

ring finger protein 220

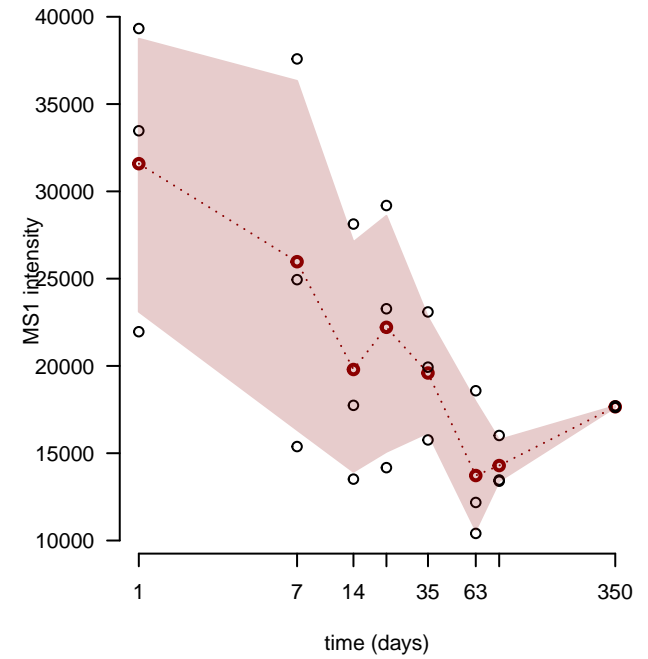

**Q6PDY0**  
**GN=Ccdc85b**

coiled-coil domain containing 85B

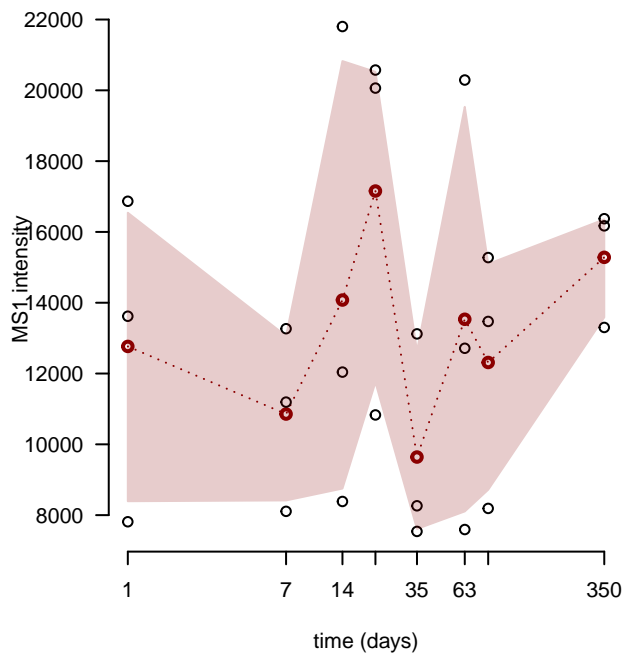

**Q6PDY2**  
**GN=Ado**

2-aminoethanethiol (cysteamine) dioxygen ...

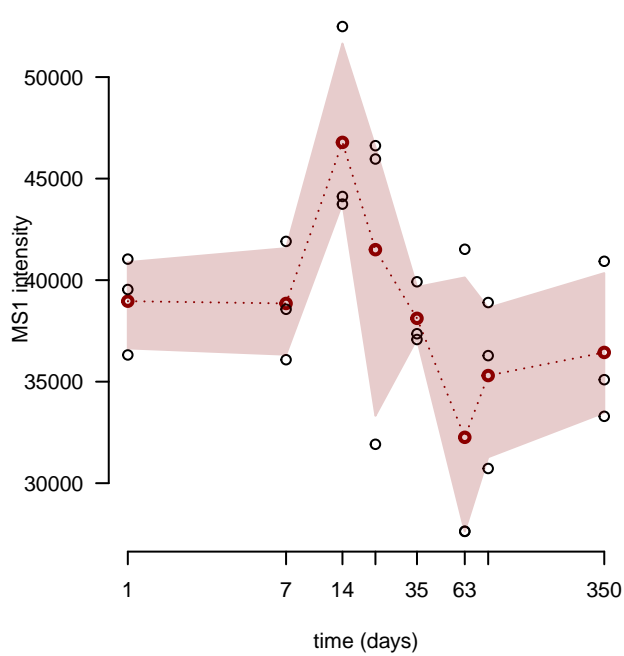

**Q6PE01**  
**GN=Snrnp40**

small nuclear ribonucleoprotein 40 (U5)

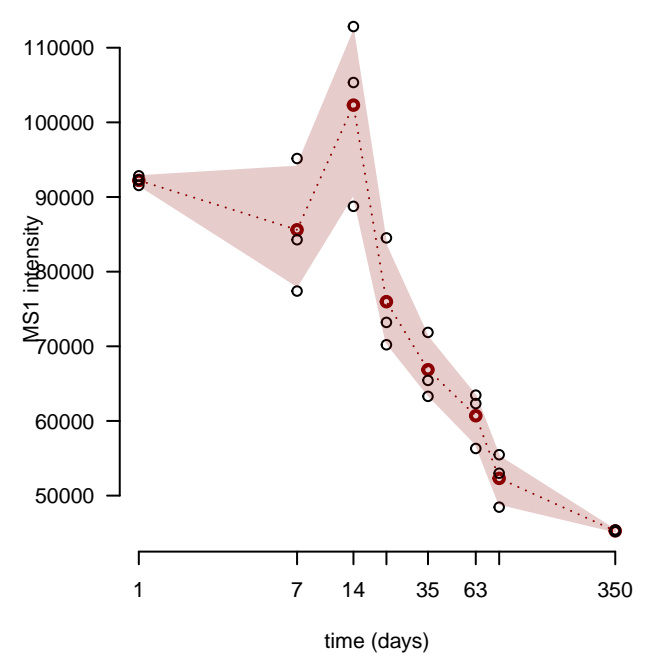

**Q6PE15**  
**GN=Abhd10**

abhydrolase domain containing 10

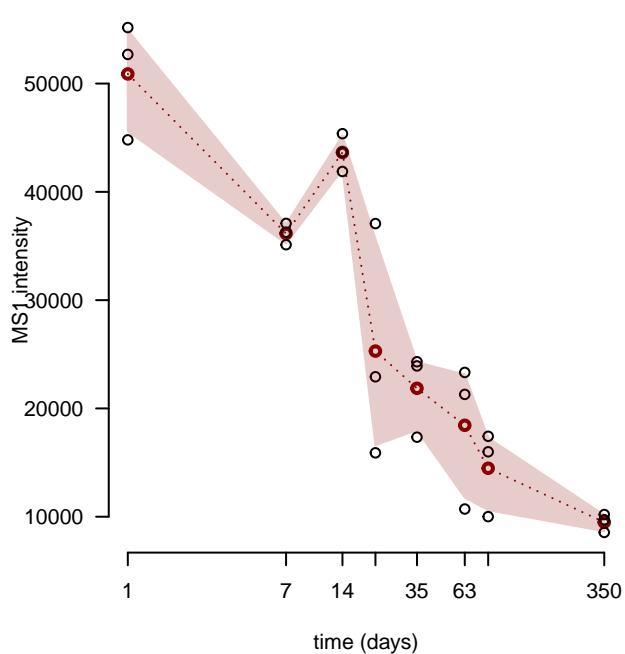

**Q6PE54**  
**GN=Dhx40**

DEAH (Asp-Glu-Ala-His) box polypeptide 4 ...

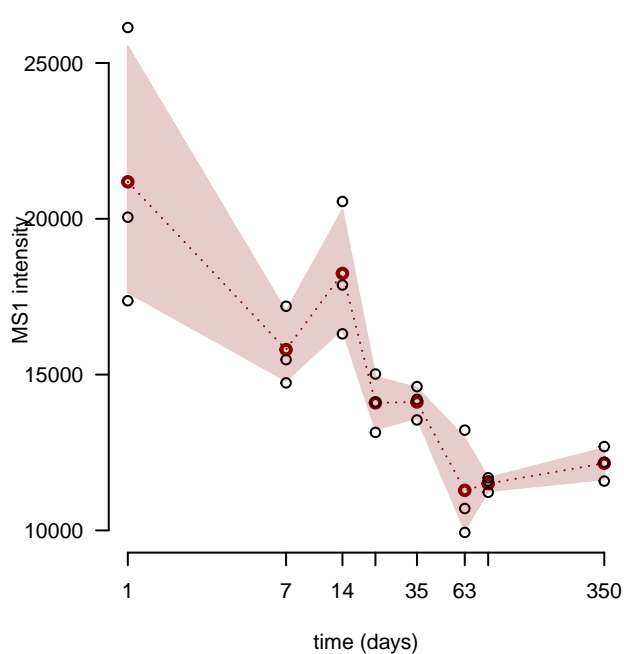

**Q6PEB6**  
**GN=Mob4**

MOB family member 4, phocin

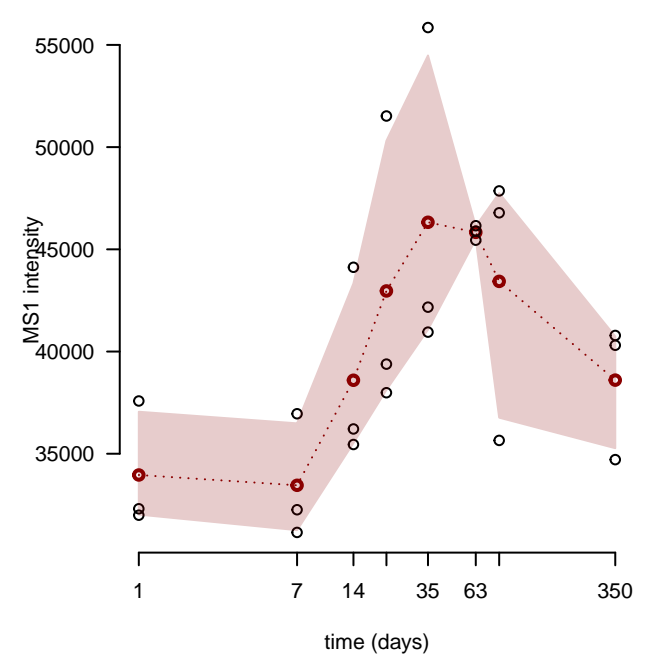

**Q6PEE2**  
GN=Ctif  
CBP80/20-dependent translation initiatio ...

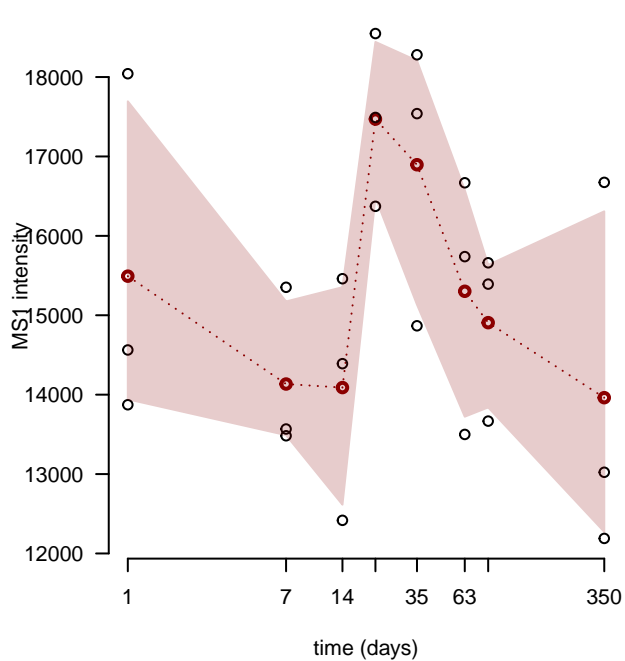

**Q6PEE3**  
GN=Rrm2b  
ribonucleotide reductase M2 B (TP53 indu ...

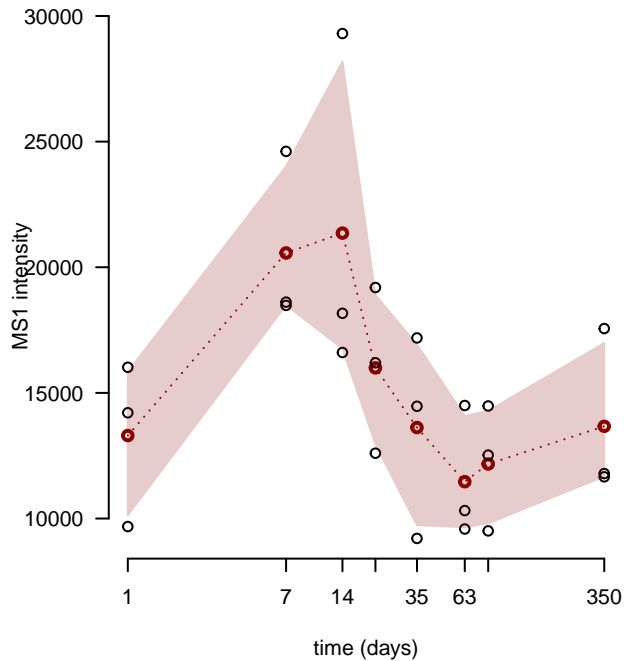

**Q6PEM6**  
GN=Grand2b

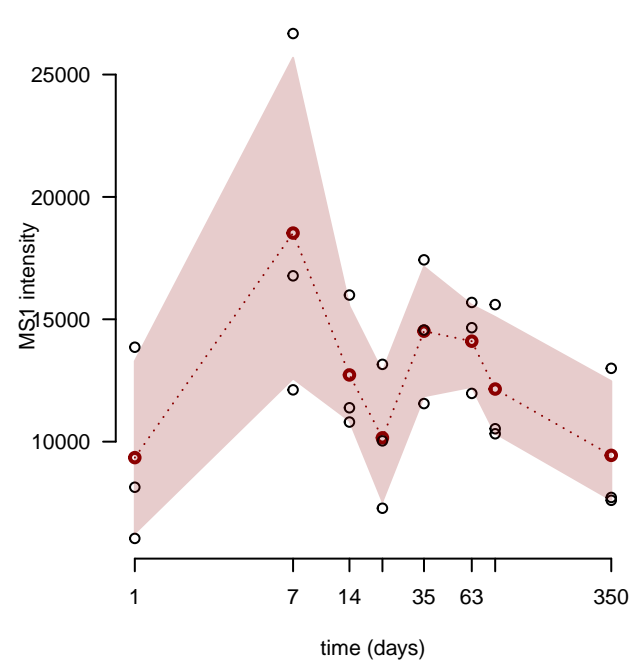

**Q6PER3**  
GN=Mapre3  
microtubule-associated protein, RP/EB fa ...

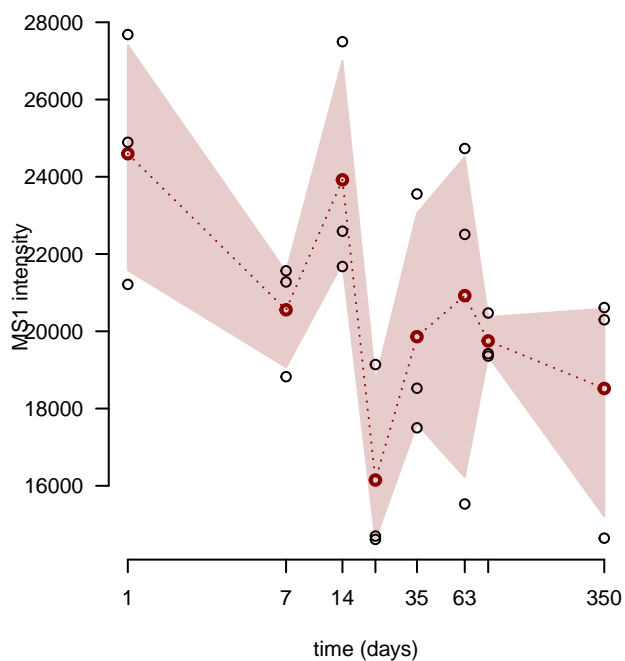

**Q6PEV3**  
GN=Wipf2  
WAS/WASL interacting protein family, mem ...

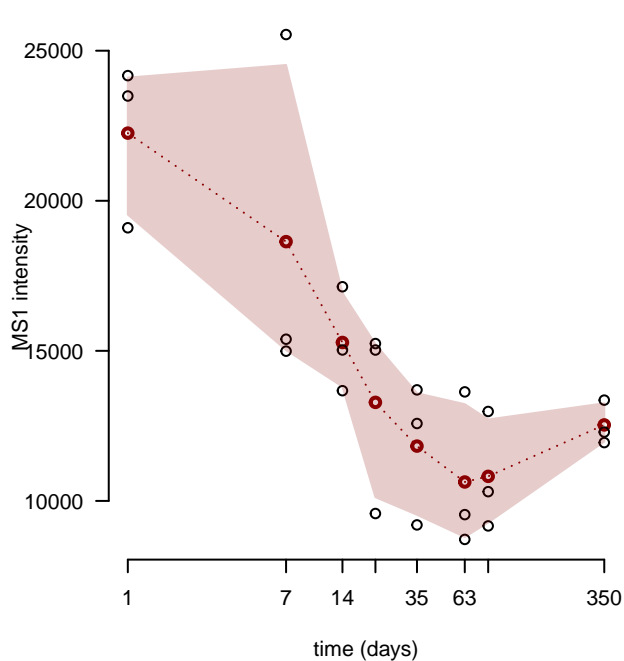

**Q6PF93**  
GN=Pik3c3  
phosphatidylinositol 3-kinase catalytic ...

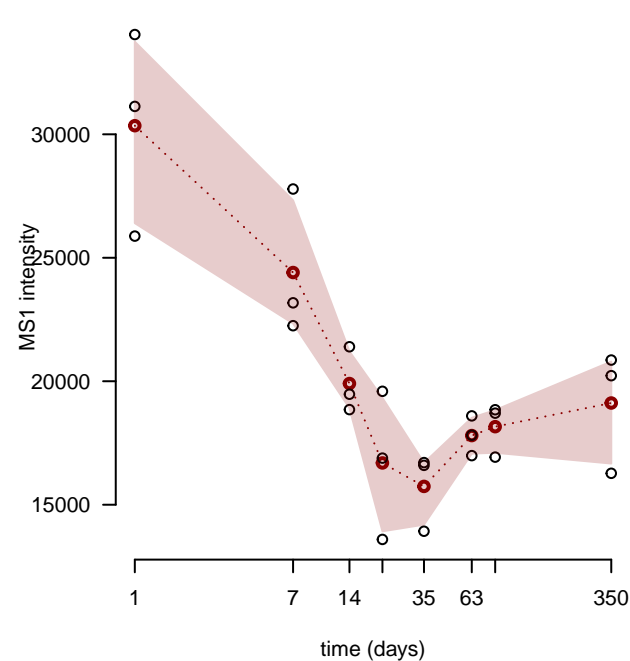

**Q6PFD6**  
GN=Kif18b  
kinesin family member 18B

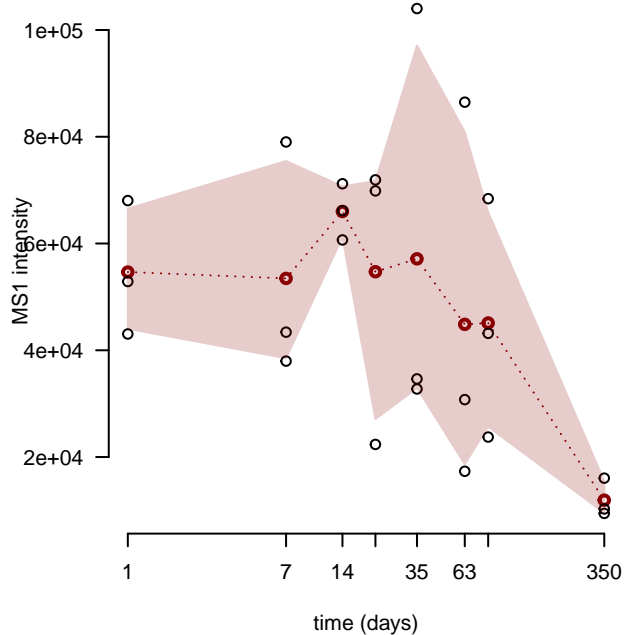

**Q6PFD9**  
GN=Nup98  
nucleoporin 98

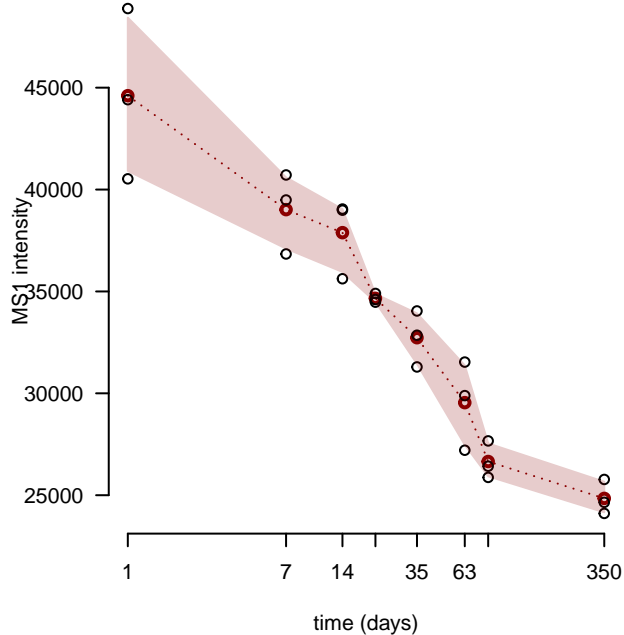

**Q6PFE7**  
GN=Tmeff1  
transmembrane protein with EGF-like and ...

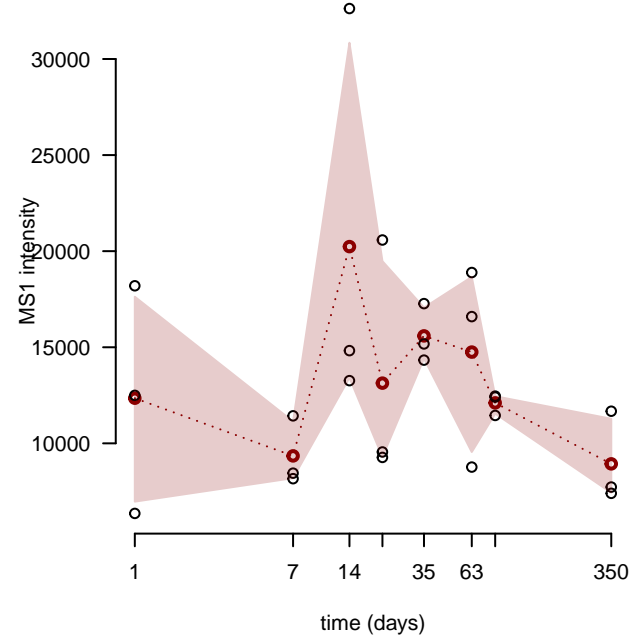

**Q6PFQ7**  
**GN=Rasa4**  
RAS p21 protein activator 4

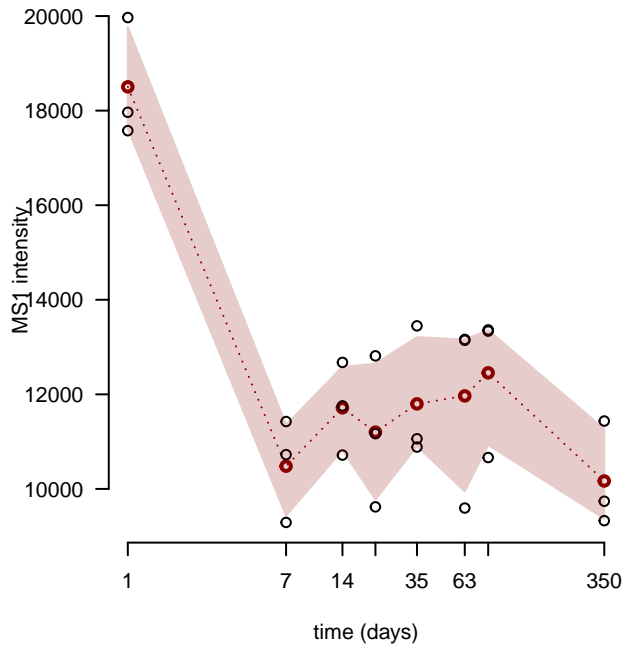

**Q6PFR5**  
**GN=Tra2a**  
transformer 2 alpha

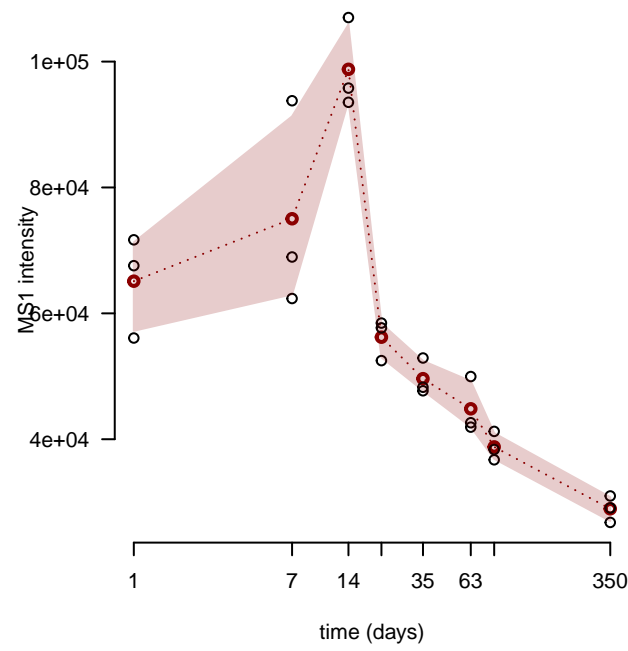

**Q6PFX6**  
**GN=Cdh24**  
cadherin-like 24

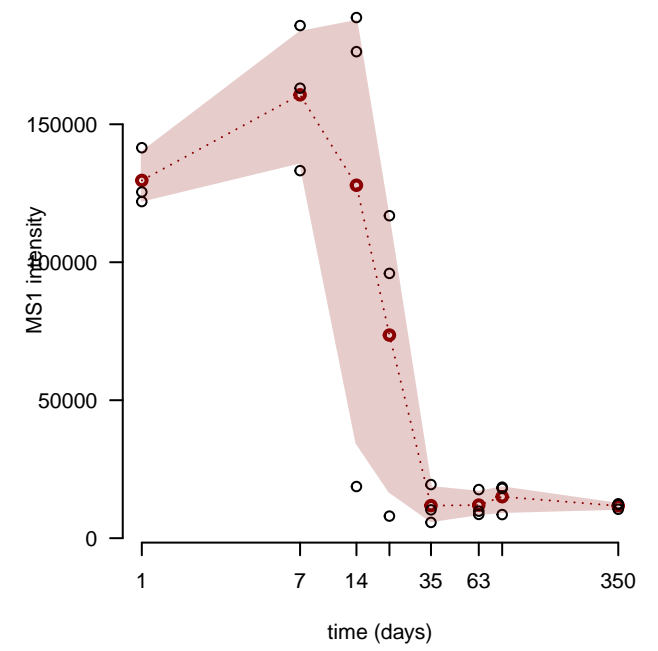

**Q6PFY1**  
**GN=Fchsd1**  
FCH and double SH3 domains 1

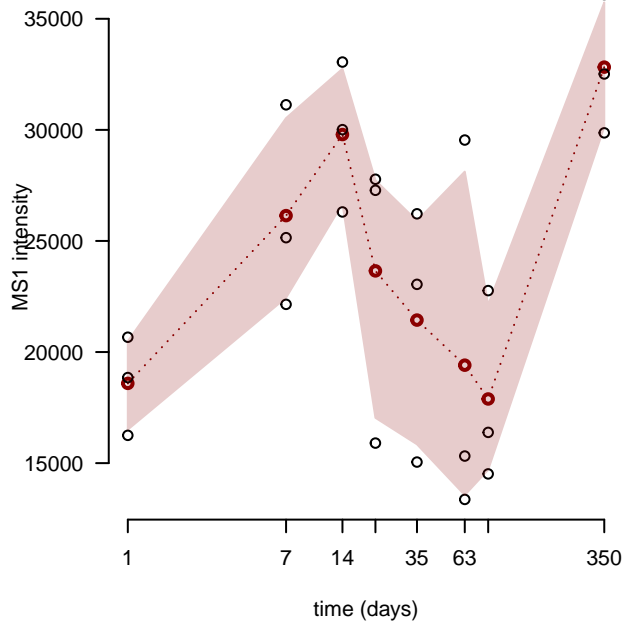

**Q6PG95**  
**GN=Cramp1**  
cramped chromatin regulator 1

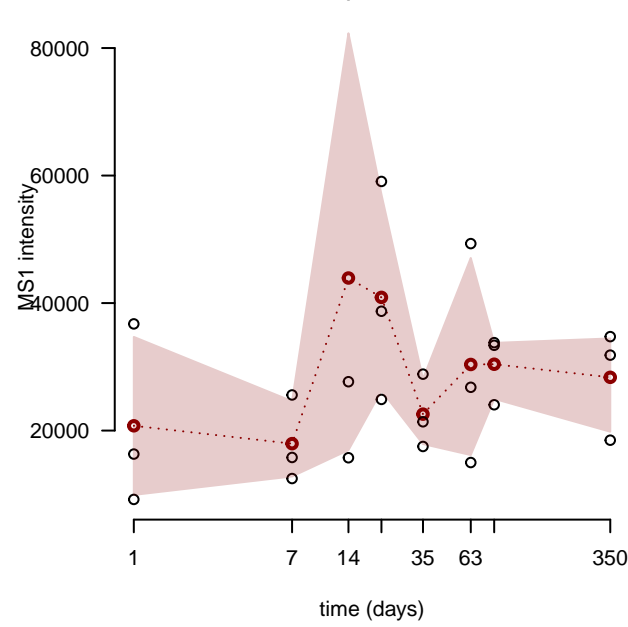

**Q6PGA0**  
**GN=Rcor3**  
REST corepressor 3

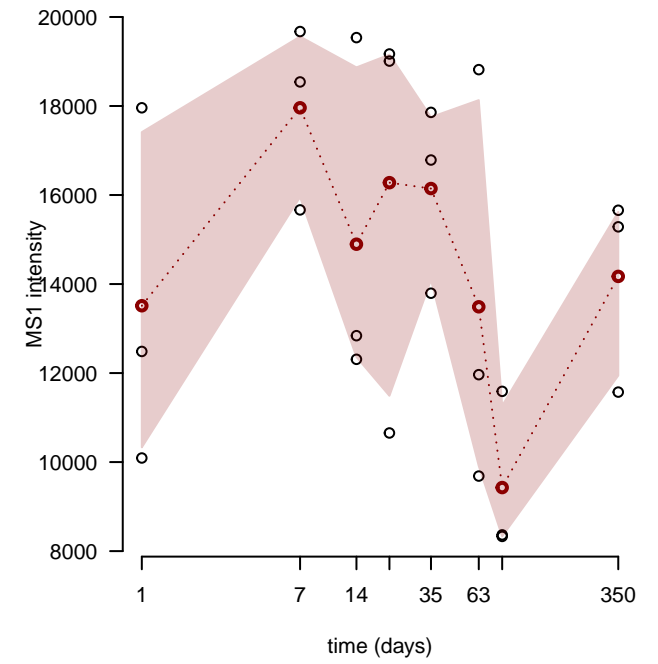

**Q6PGB6**  
**GN=Naa50**  
N(alpha)-acetyltransferase 50, NatE cata ...

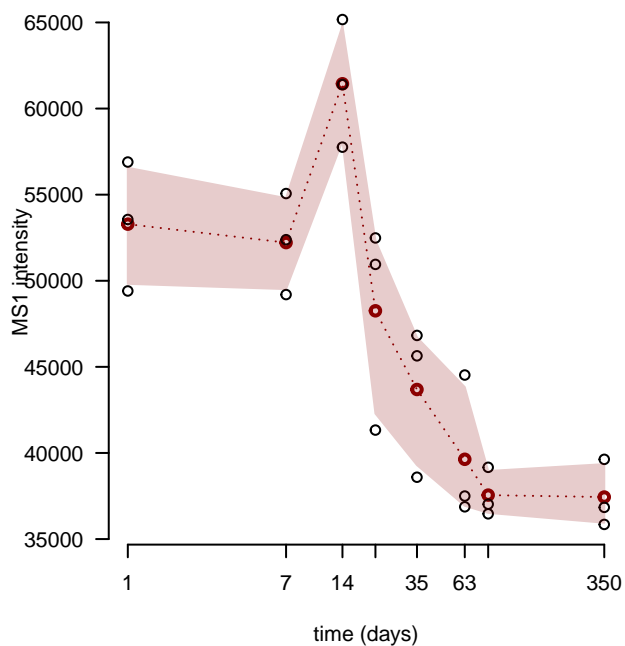

**Q6PGB8**  
**GN=Smarca1**  
SWI/SNF related, matrix associated, acti ...

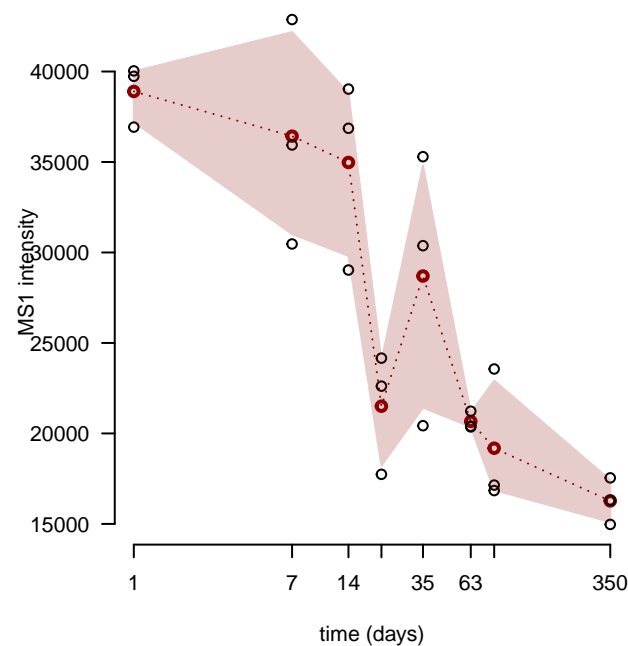

**Q6PGC1**  
**GN=Dhx29**  
DEAH (Asp-Glu-Ala-His) box polypeptide 2 ...

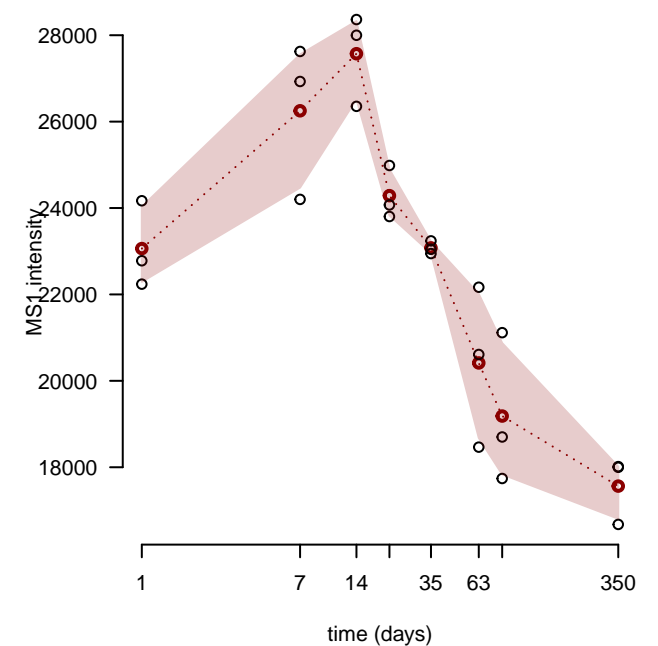

**Q6PGF3**  
**GN=Med16**  
mediator complex subunit 16

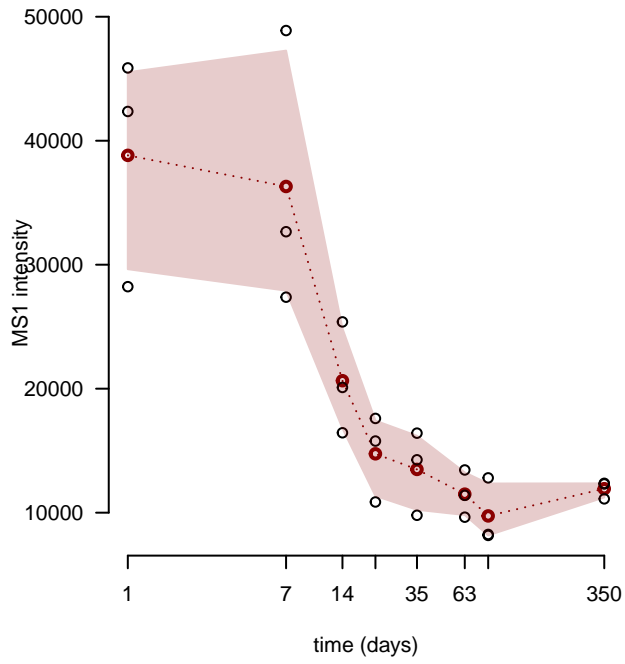

**Q6PGF7**  
**GN=Exoc8**  
exocyst complex component 8

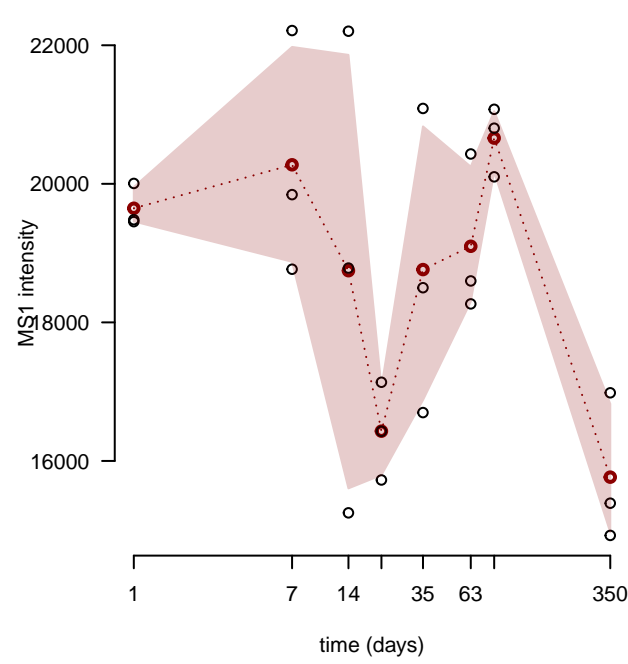

**Q6PGG2**  
**GN=Gmp**  
Gem-interacting protein

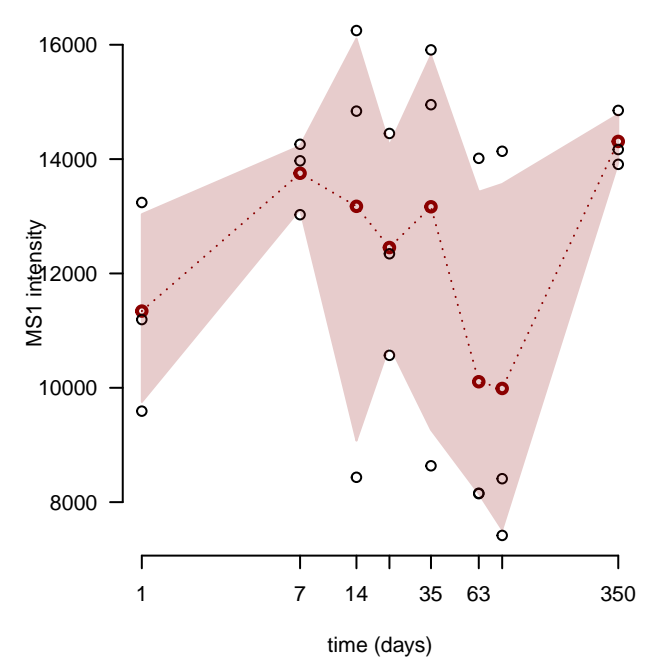

**Q6PGG6**  
**GN=Gnl3l**  
guanine nucleotide binding protein-like ...

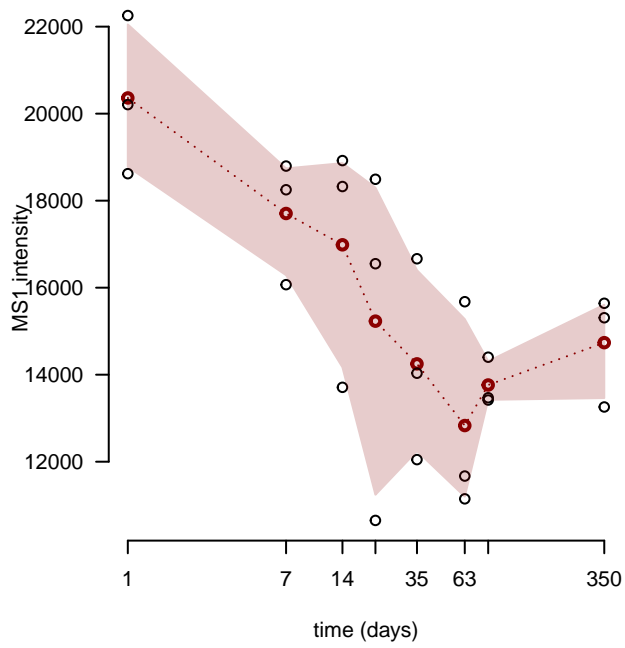

**Q6PGH0**  
**GN=Ubt2**  
ubiquitin domain containing 2

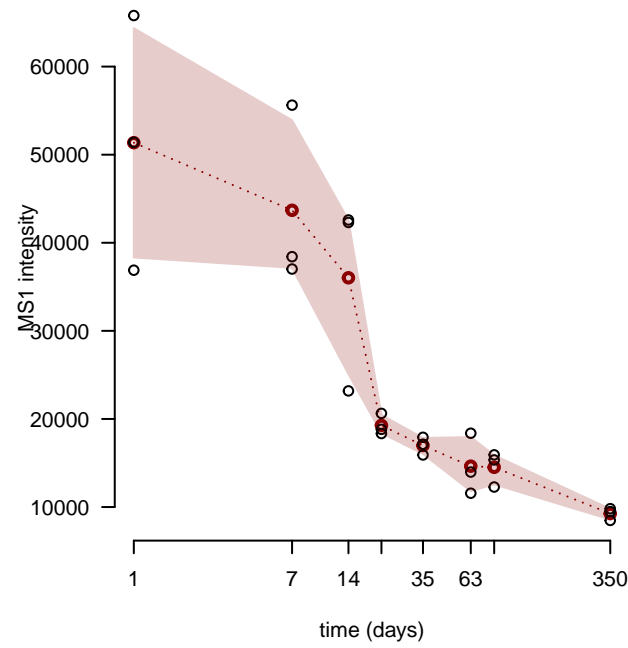

**Q6PGH1**  
**GN=Bud31**  
BUD31 homolog

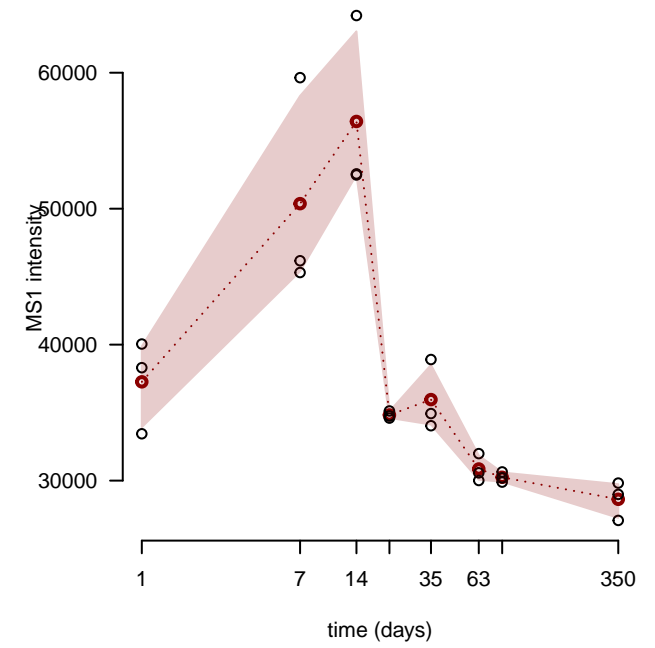

**Q6PGH2**  
**GN=Jpt2**  
Jupiter microtubule associated homolog 2

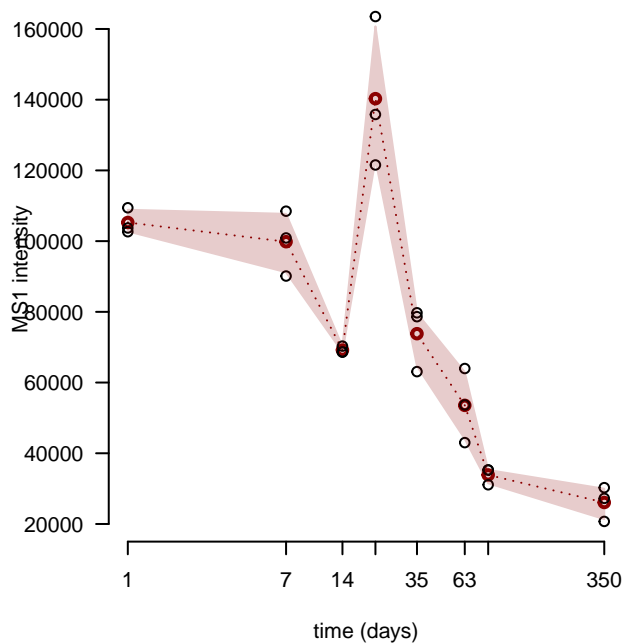

**Q6PGL7**  
**GN=Washc2**  
WASH complex subunit 2

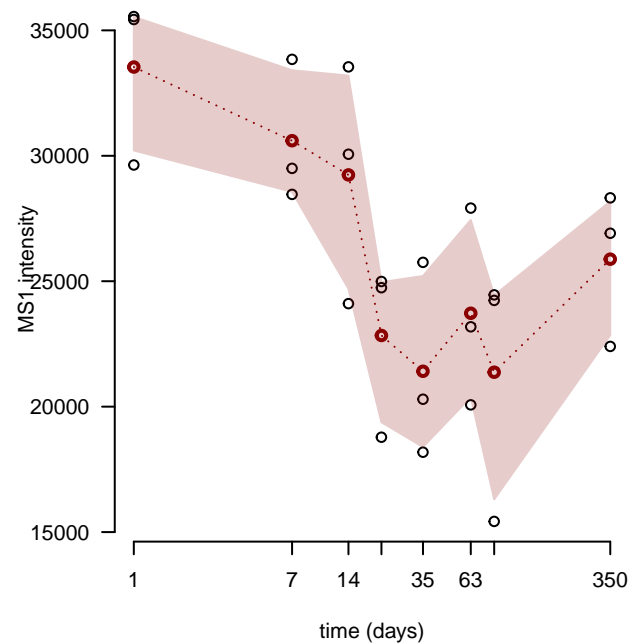

**Q6PGN3**  
**GN=Dck2**  
doublecortin-like kinase 2

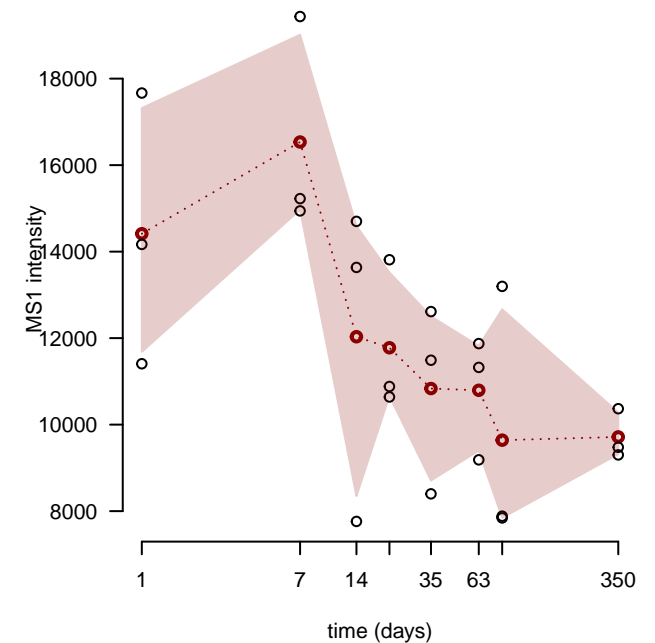



**Q6PHN7**  
**GN=Tmem164**  
transmembrane protein 164

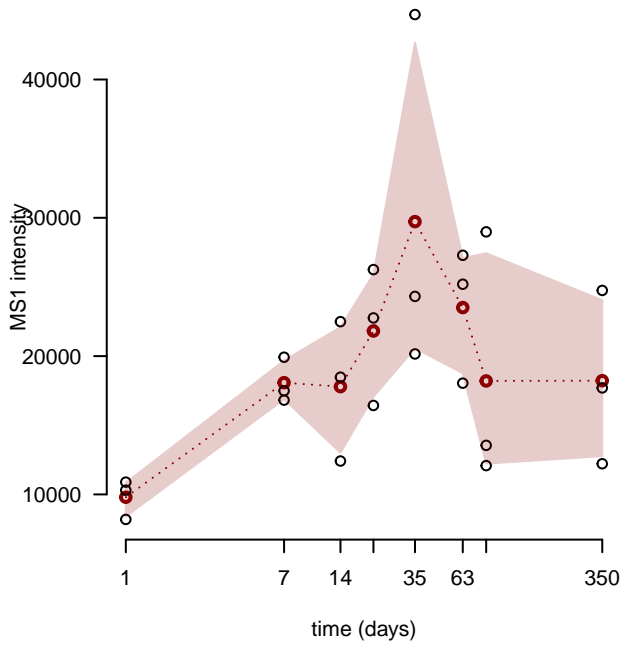

**Q6PHN9**  
**GN=Rab35**  
RAB35, member RAS oncogene family

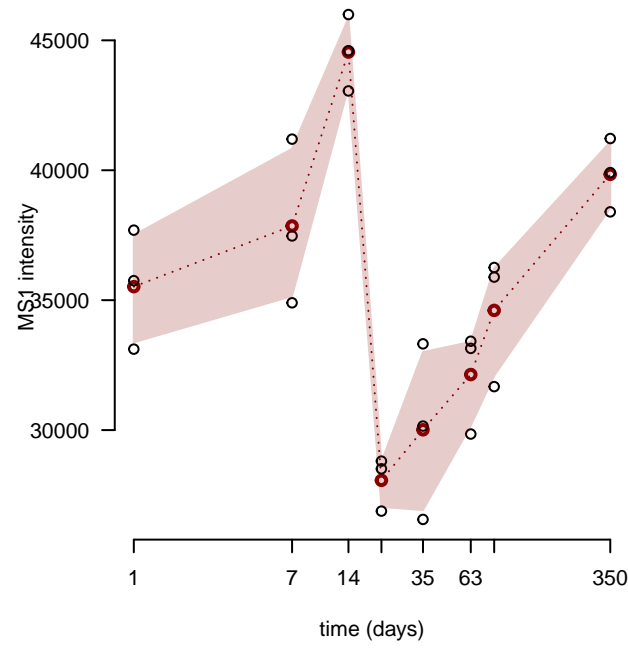

**Q6PHQ8**  
**GN=Naa35**  
N(alpha)-acetyltransferase 35, NatC auxi ...

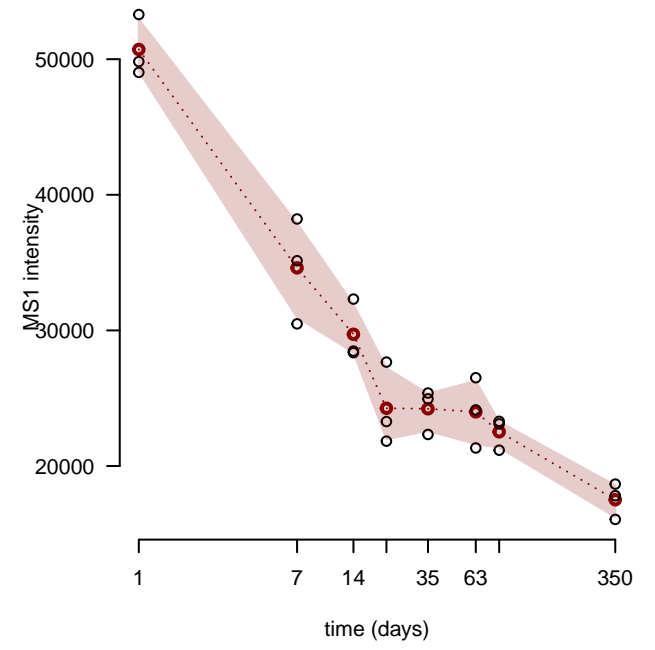

**Q6PHS6**  
**GN=Snx13**  
sorting nexin 13

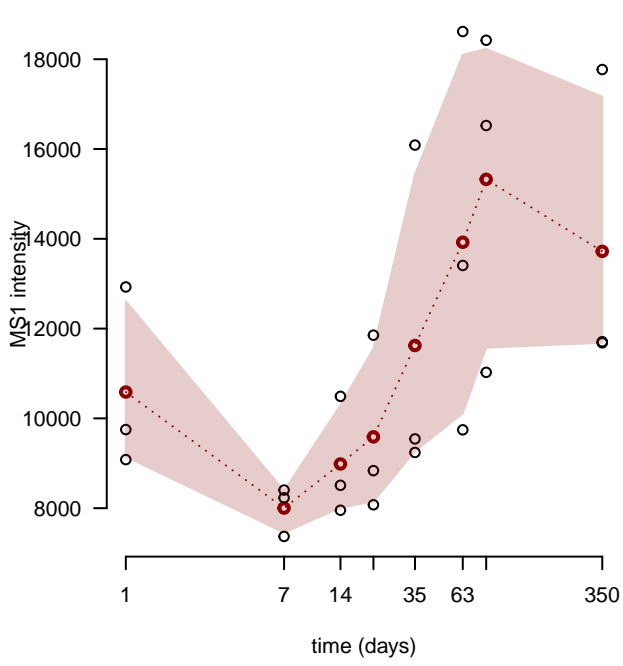

**Q6PHS9**  
**GN=Cacna2d2**  
calcium channel, voltage-dependent, alpha ...

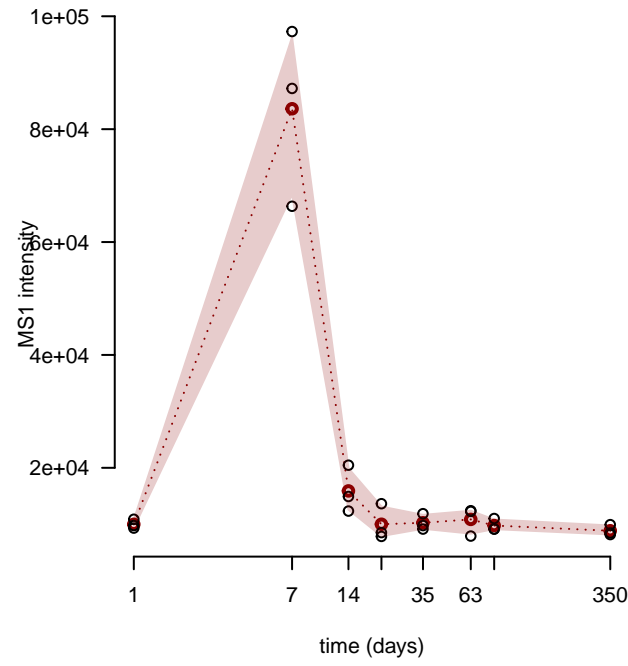

**Q6PHU5**  
**GN=Sort1**  
sortilin 1

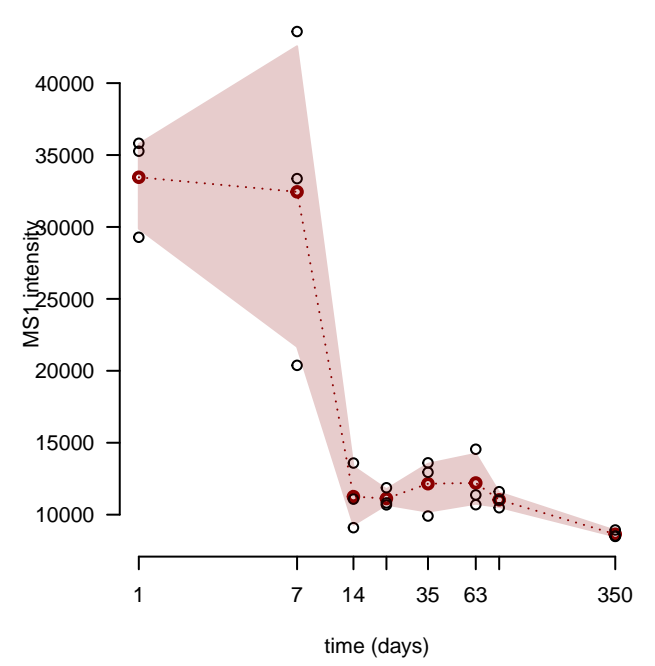

**Q6PHZ2**  
**GN=Camk2d**  
calcium/calmodulin-dependent protein kin ...

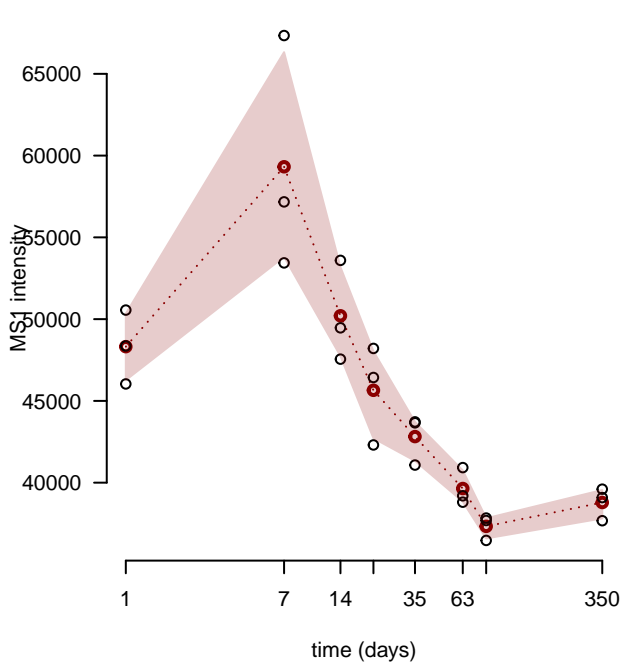

**Q6PHZ5**  
**GN=Rbm15b**  
RNA binding motif protein 15B

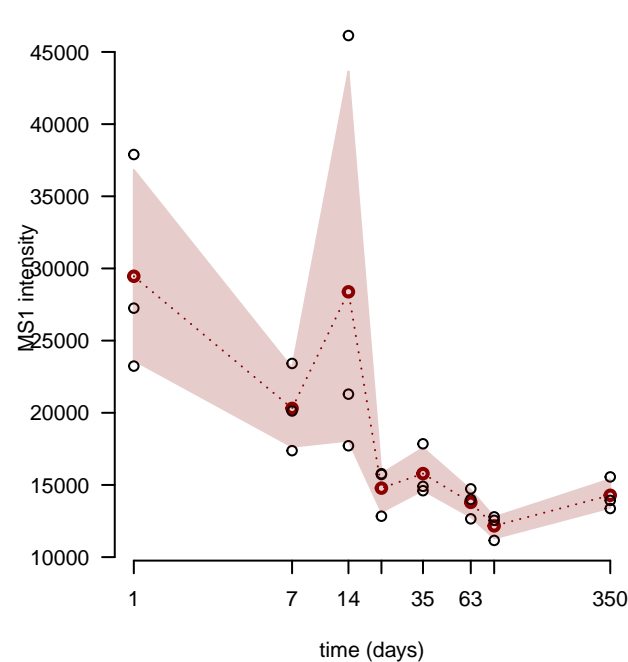

**Q6PIC6**  
**GN=Atp1a3**  
ATPase, Na+/K+ transporting, alpha 3 pol ...

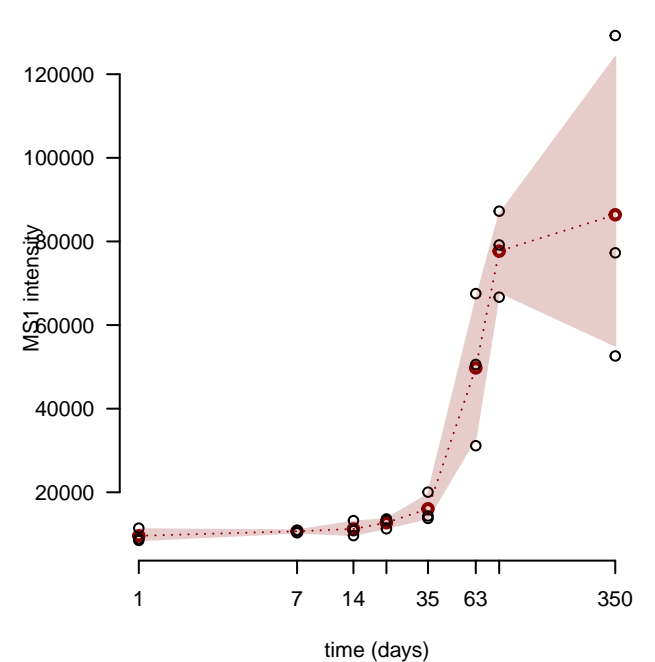

**Q6PIE5**  
GN=Atp1a2  
ATPase, Na+/K+ transporting, alpha 2 pol ...

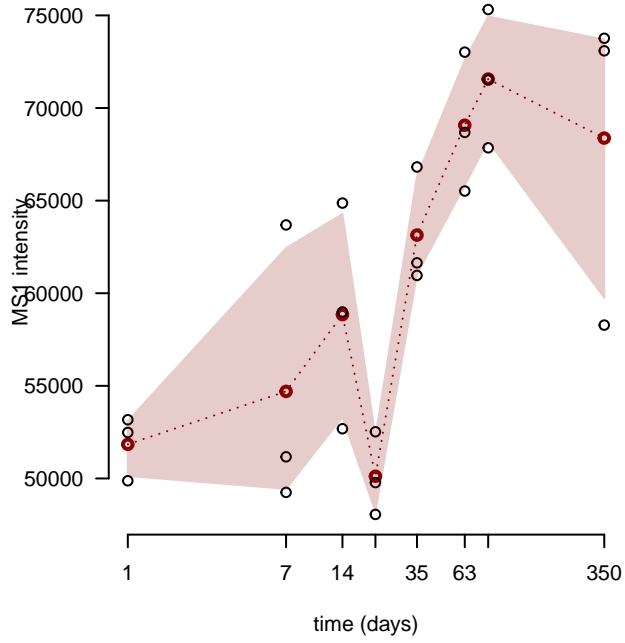

**Q6PIJ4**  
GN=Nfrkb  
nuclear factor related to kappa B bindin ...

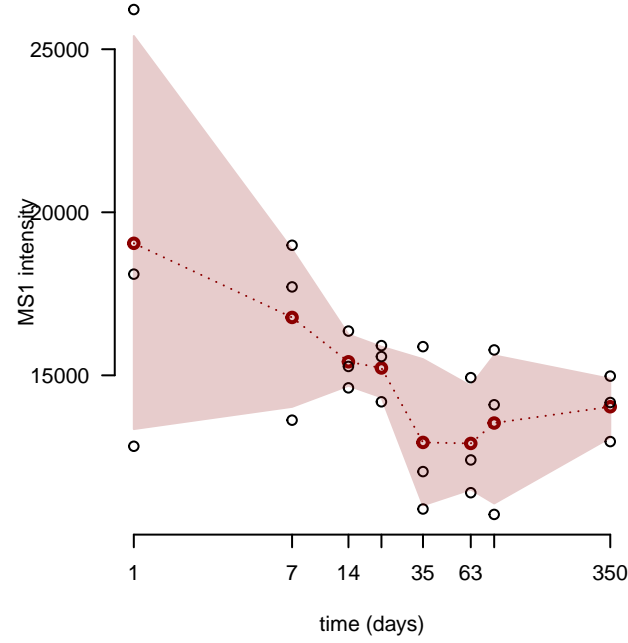

**Q6PIP5**  
GN=Nudcd1  
NudC domain containing 1

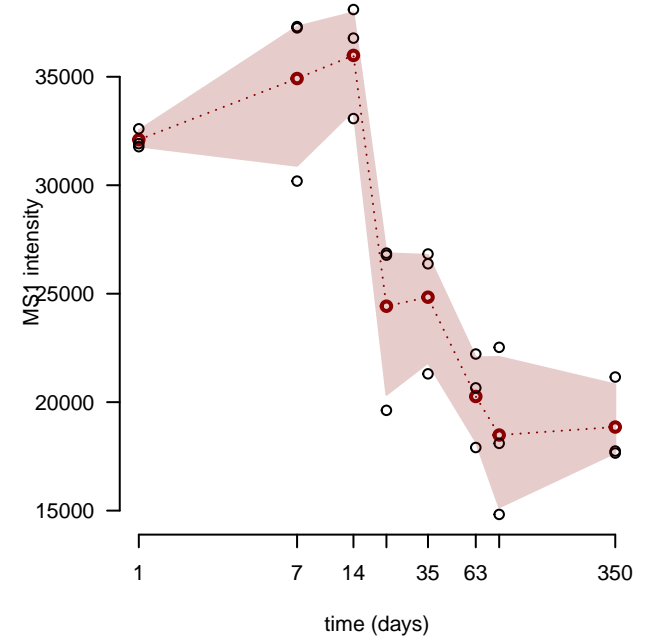

**Q6PIU9**  
GN=

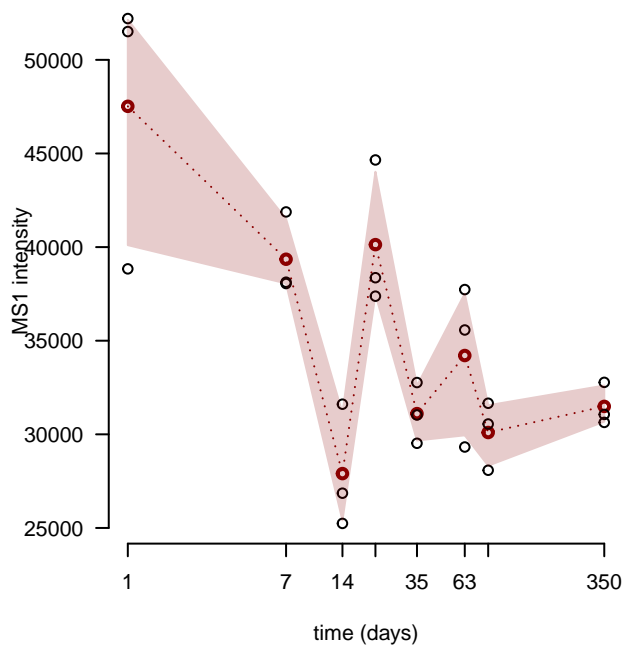

**Q6PIX5**  
GN=Rhbdf1  
rhomboid 5 homolog 1

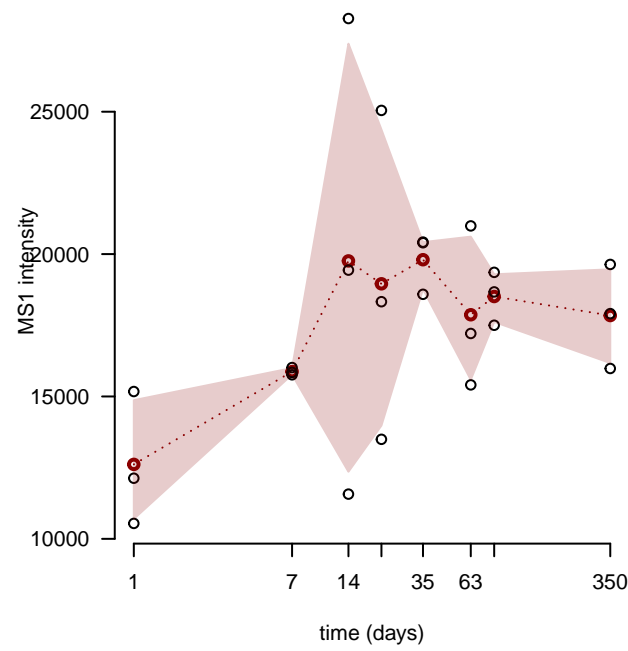

**Q6PIX9**  
GN=D11Wsu47e  
DNA segment, Chr 11, Wayne State Univers ...

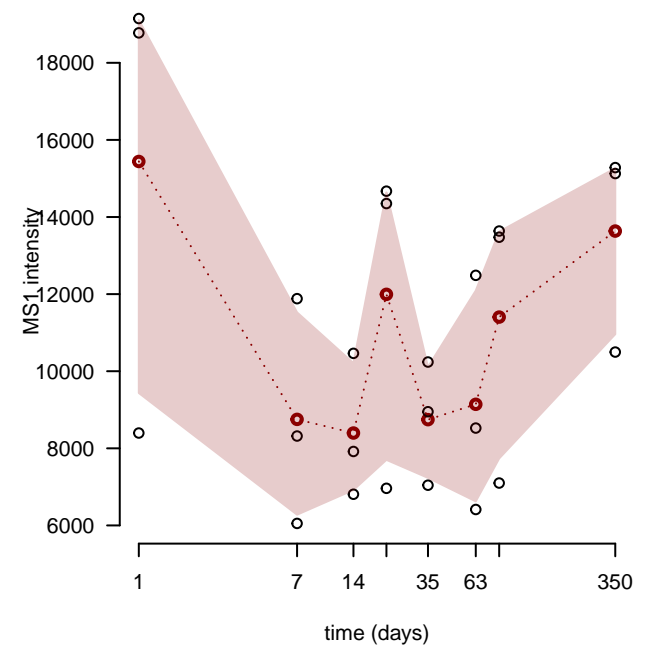

**Q6PJN8**  
GN=DaIrd3  
DALR anticodon binding domain containi ...

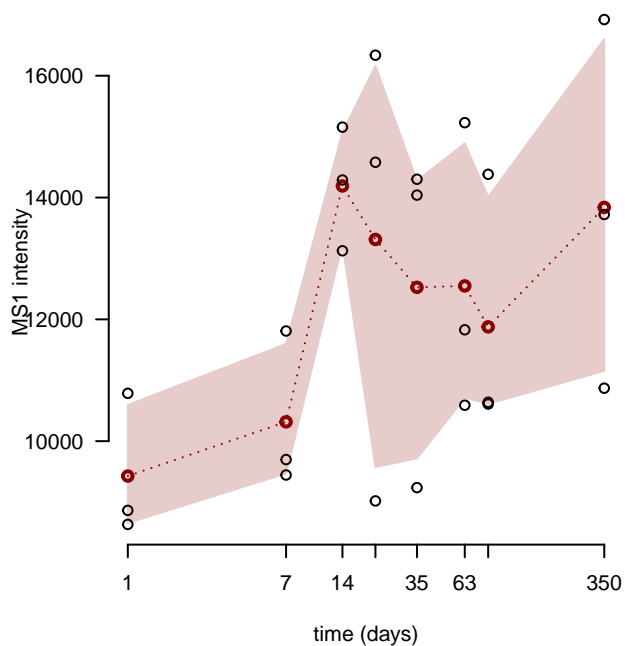

**Q6PNC0**  
GN=Dmxl1  
Dmx-like 1

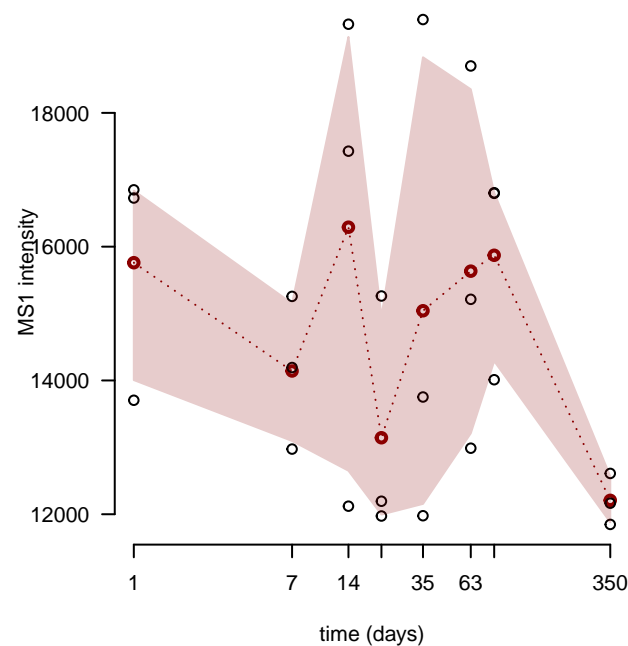

**Q6PR54**  
GN=Rif1  
replication timing regulatory factor 1

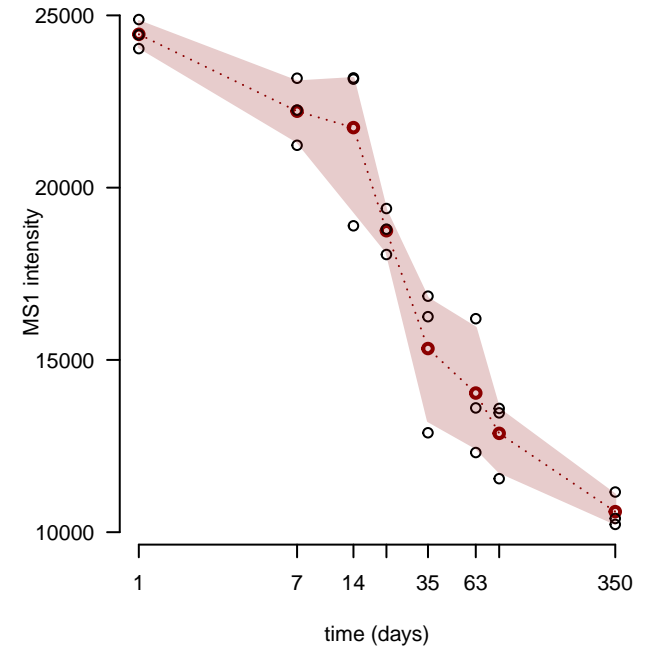

**Q6Q477**  
GN=Atp2b4

ATPase, Ca++ transporting, plasma membra ...

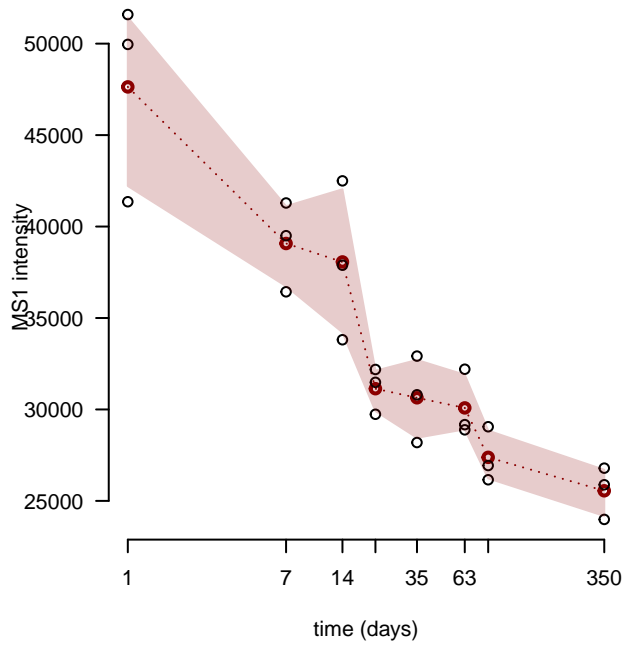

**Q6Q783**  
GN=Kmt5c

lysine methyltransferase 5C

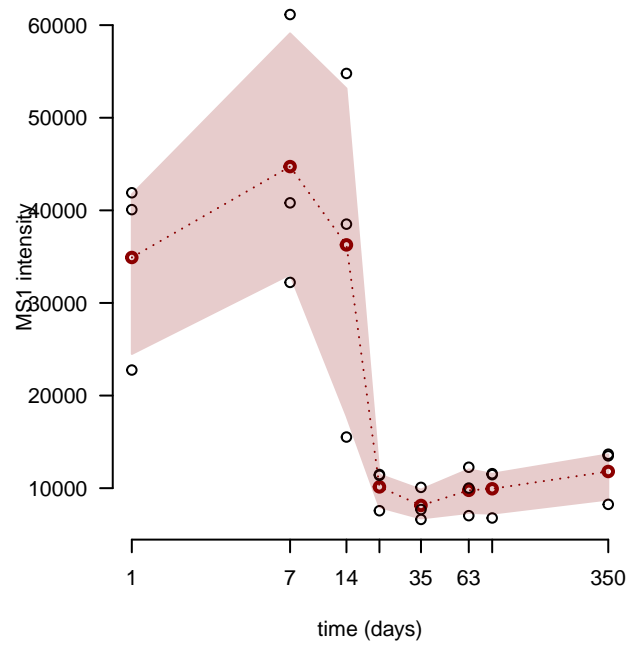

**Q6Q899**  
GN=Ddx58

DEAD/H box helicase 58

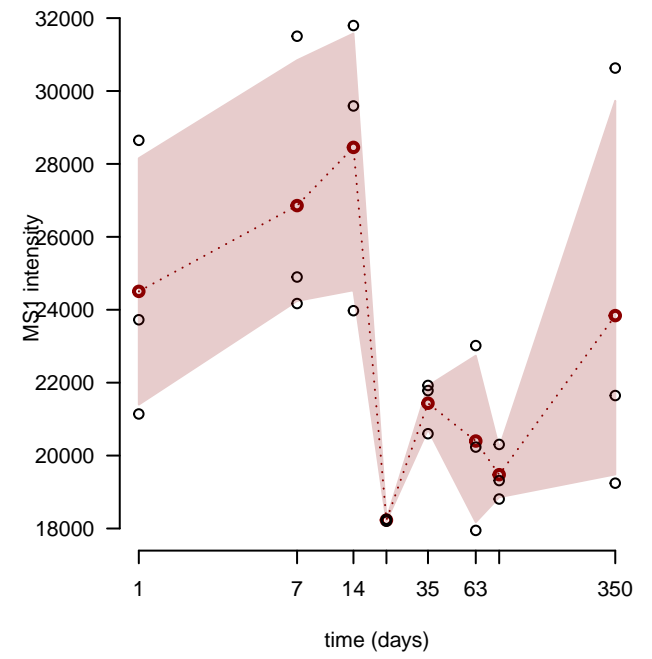

**Q6QD59**  
GN=Bnip1

BCL2/adenovirus E1B interacting protein ...

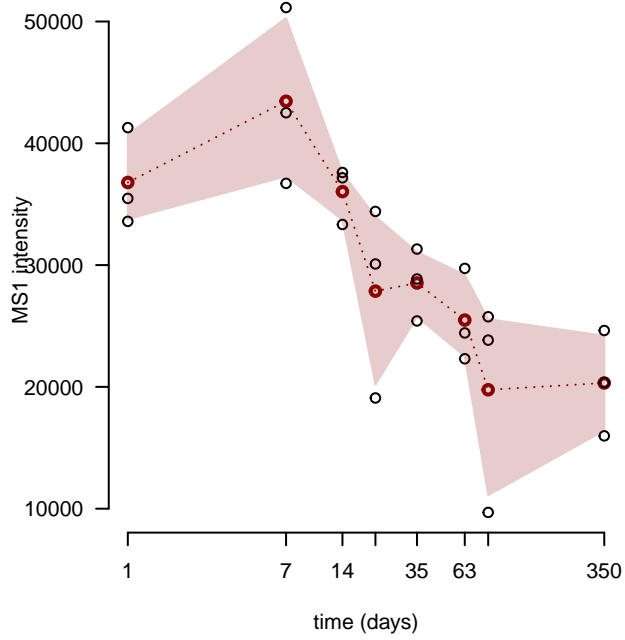

**Q6QI06**  
GN=Rictor

RPTOR independent companion of MTOR, com ...

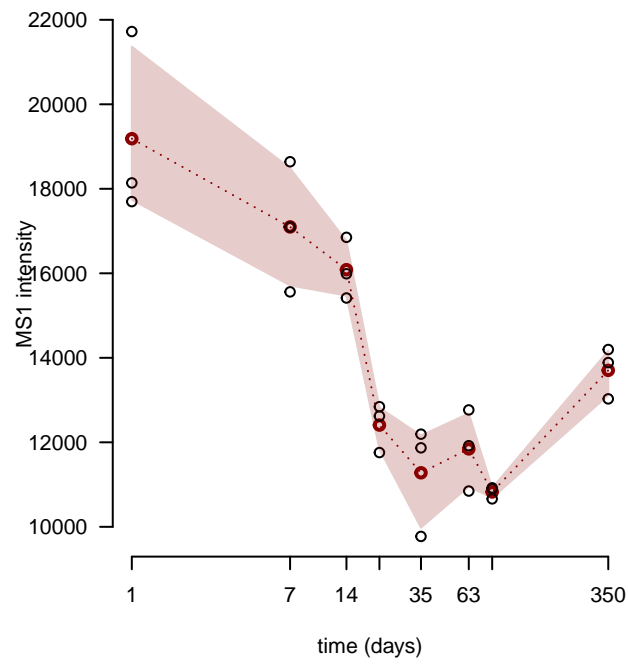

**Q6R2P8**  
GN=Neil2

nei like 2 (E. coli)

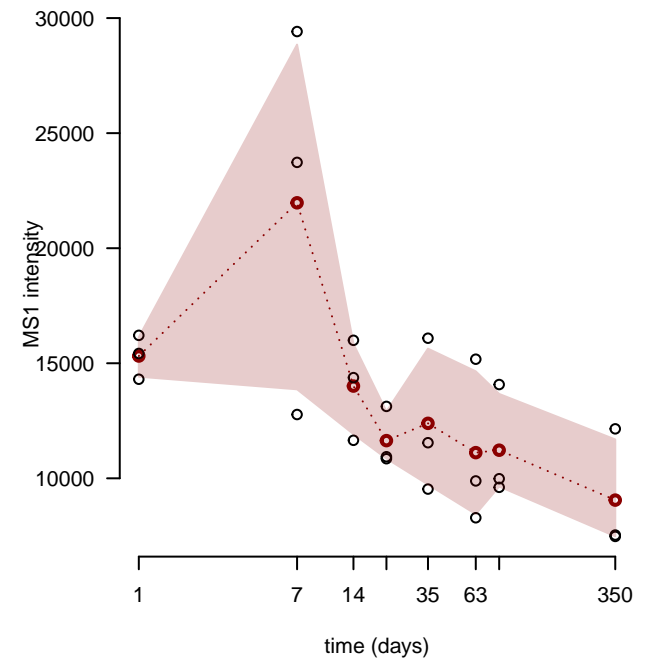

**Q6R891**  
GN=Ppp1r9b

protein phosphatase 1, regulatory subuni ...

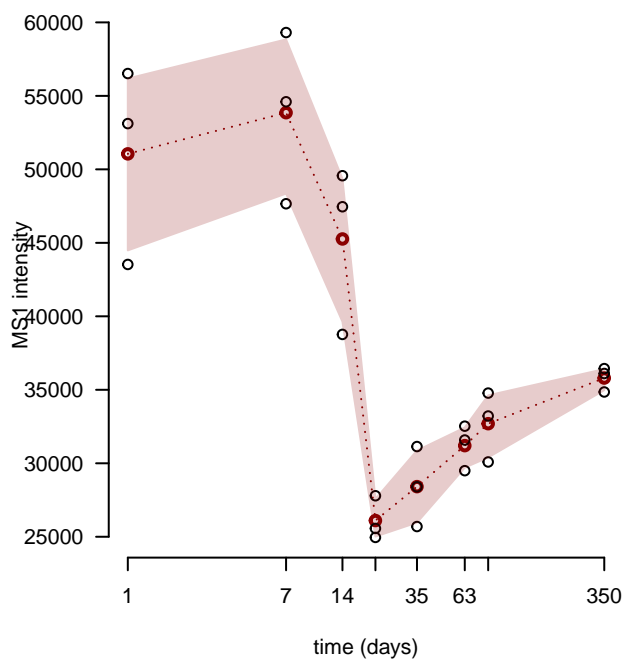

**Q6RHR9**  
GN=Magi1

membrane associated guanylate kinase, WW ...

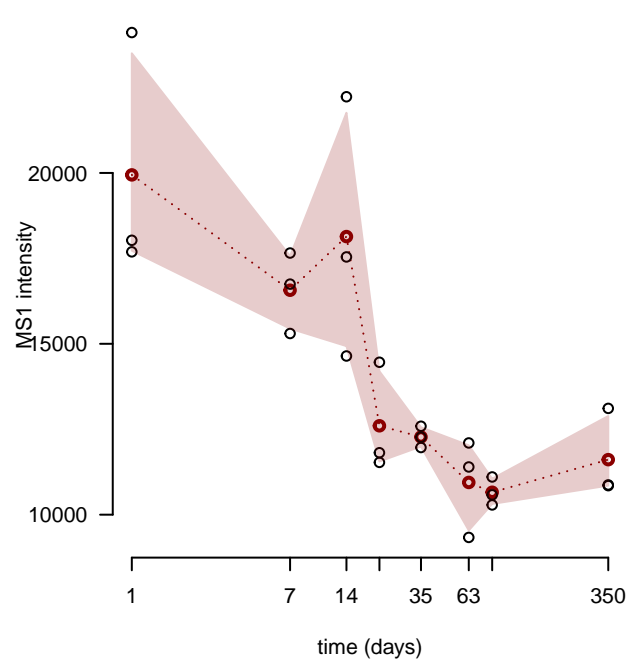

**Q6RI63**  
GN=Fam120b

family with sequence similarity 120, mem ...

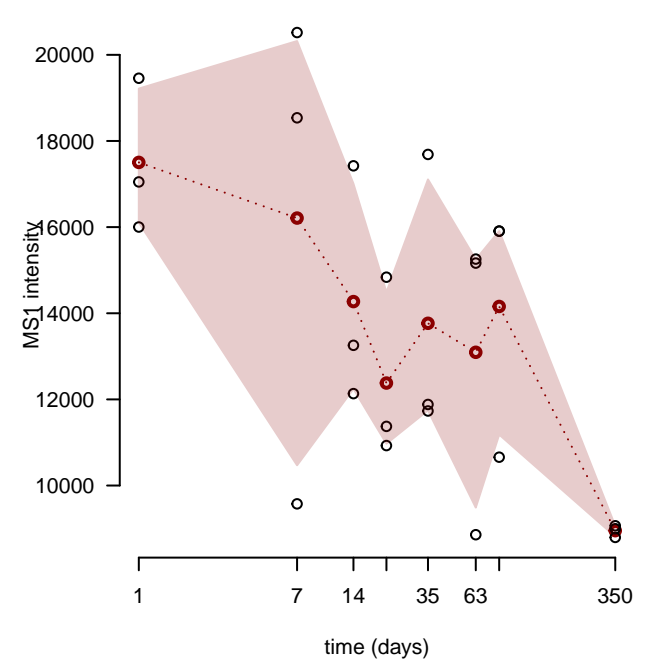

**Q6RT24**  
GN=Cenpe  
centromere protein E

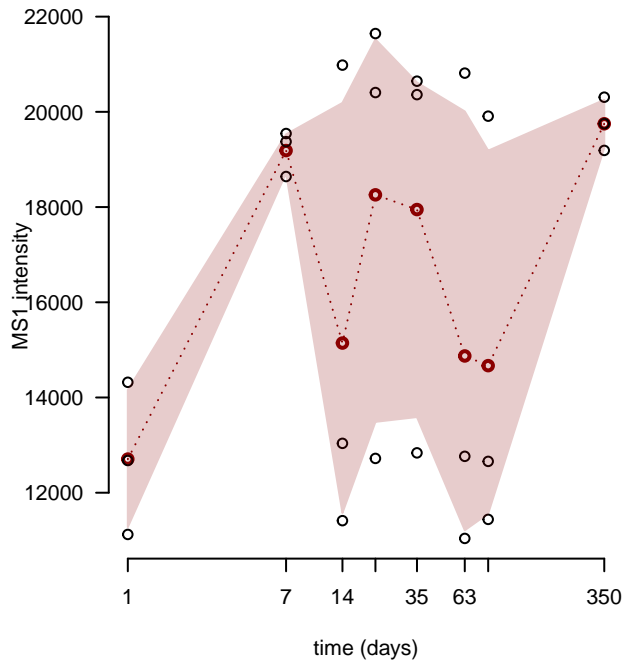

**Q6RUT7**  
GN=Ccsmst1

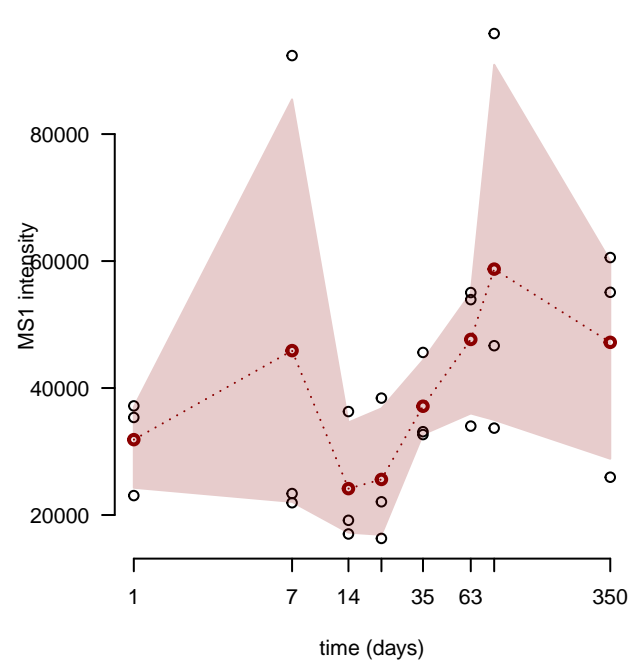

**Q6S5J6**  
GN=Krit1  
KRIT1, ankyrin repeat containing

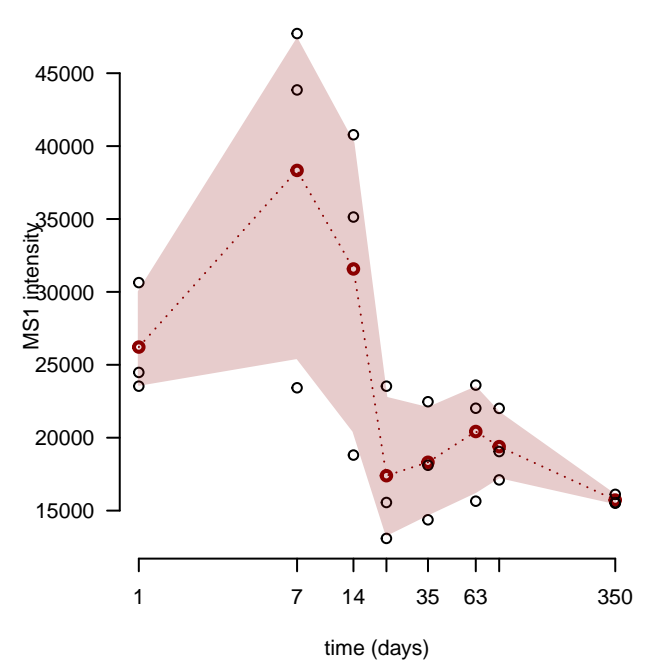

**Q6SKR2**  
GN=N6amt1  
N-6 adenine-specific DNA methyltransfera ...

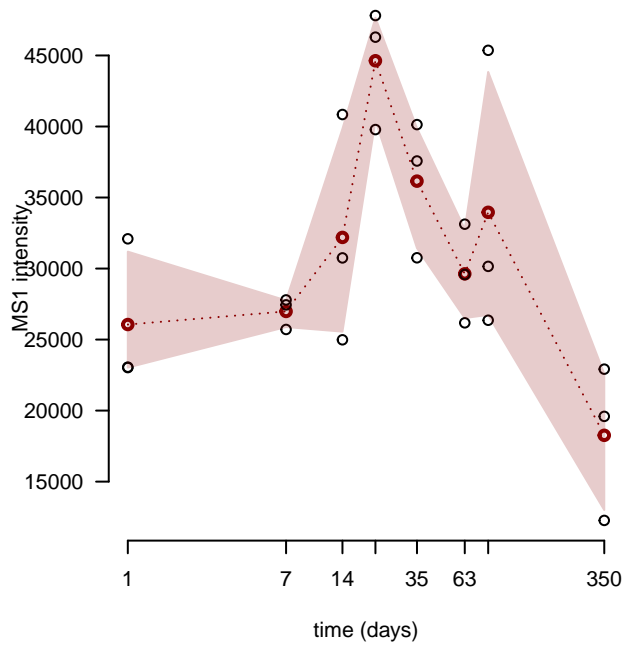

**Q6TCG8**  
GN=Paqr3  
progesterin and adipoQ receptor family mem ...

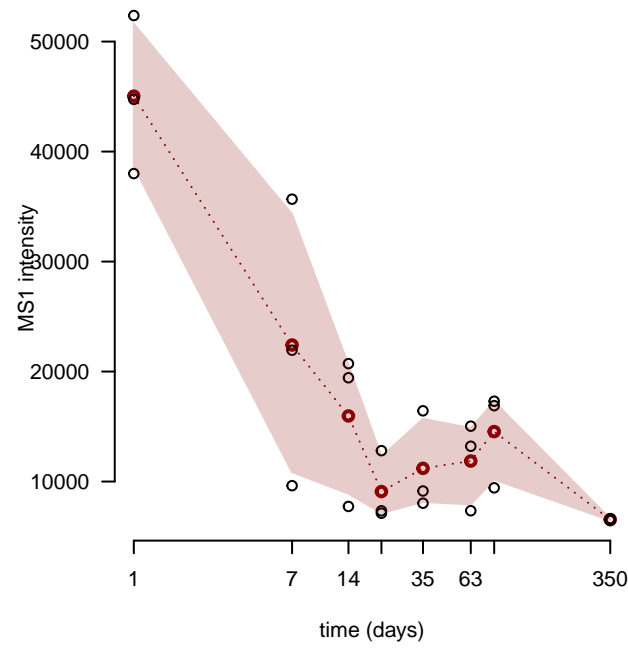

**Q6TEK5**  
GN=Vkorc11  
vitamin K epoxide reductase complex, sub ...

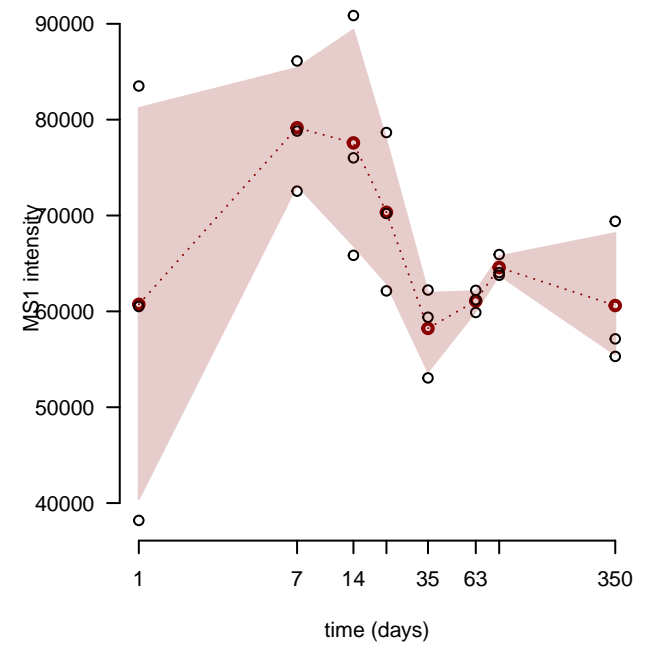

**Q6TXD4**  
GN=Dnmbp  
dynamin binding protein

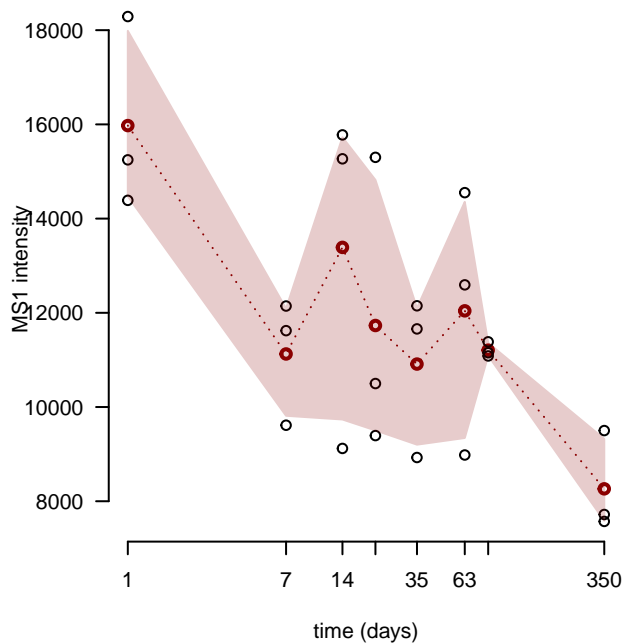

**Q6TYB5**  
GN=Fez2  
fasciculation and elongation protein zet ...

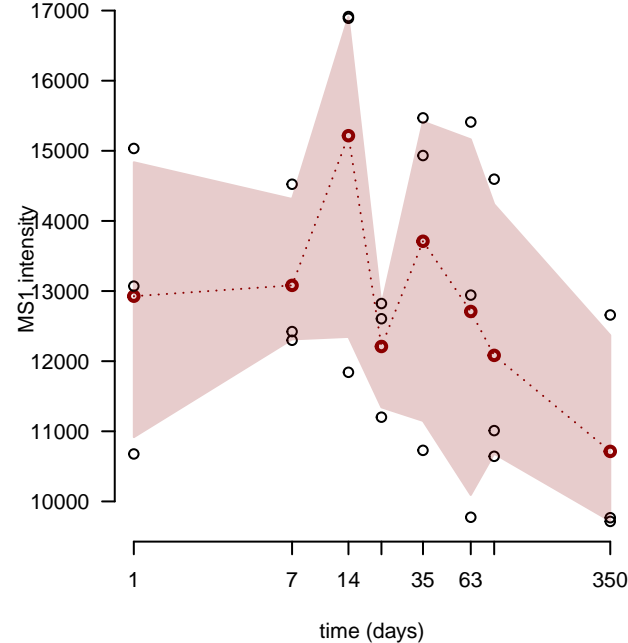

**Q6URW6**  
GN=Myh14  
myosin, heavy polypeptide 14

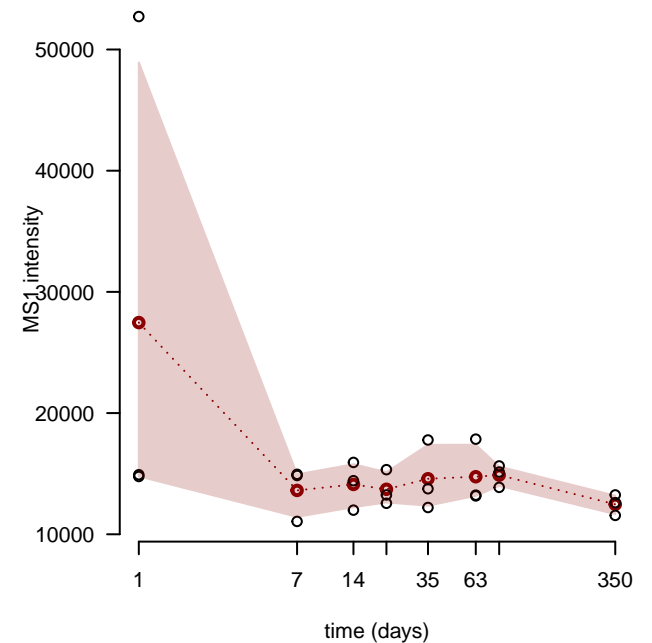

**Q6V4S5**  
**GN=Sdk2**  
sidekick cell adhesion molecule 2

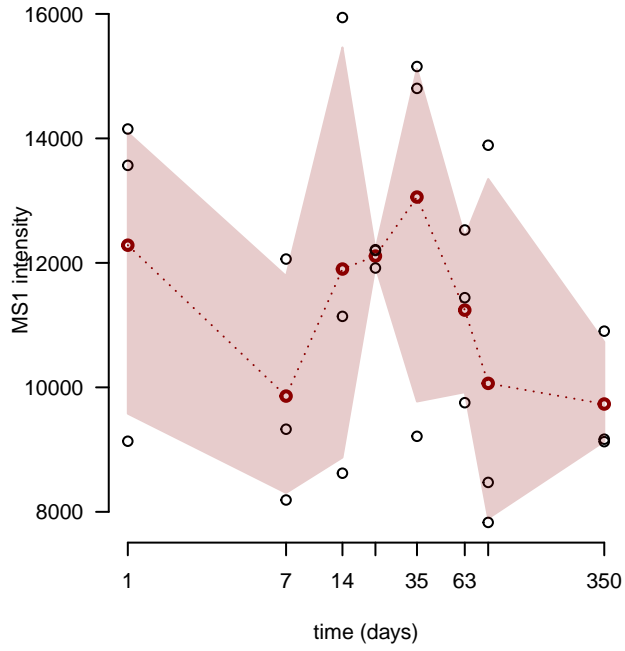

**Q6VGS5**  
**GN=Ccdc88c**  
coiled-coil domain containing 88C

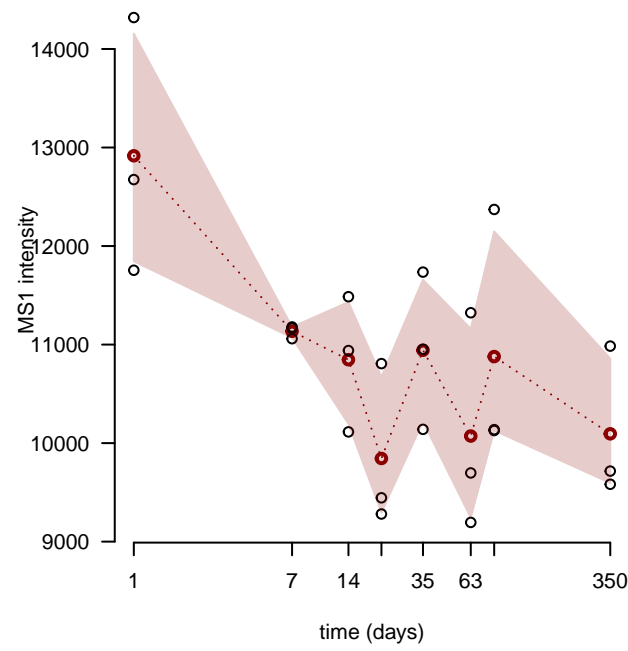

**Q6VH22**  
**GN=Ift172**  
intraflagellar transport 172

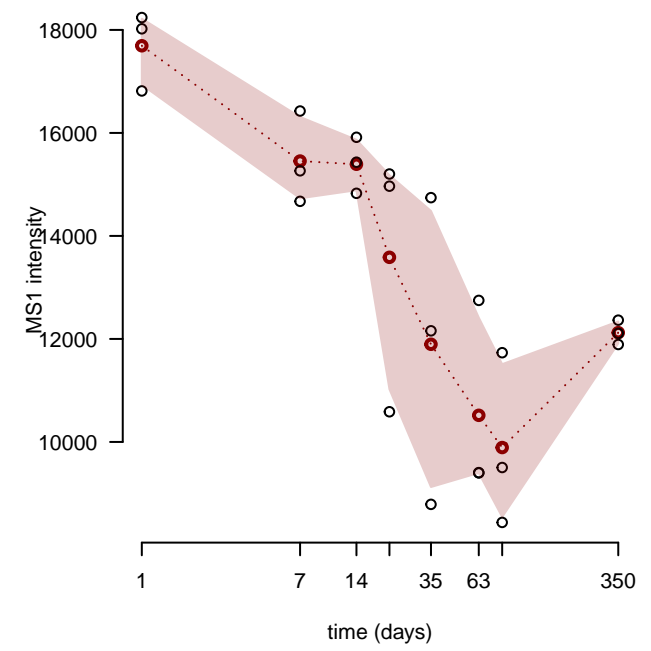

**Q6VN19**  
**GN=Ranbp10**  
RAN binding protein 10

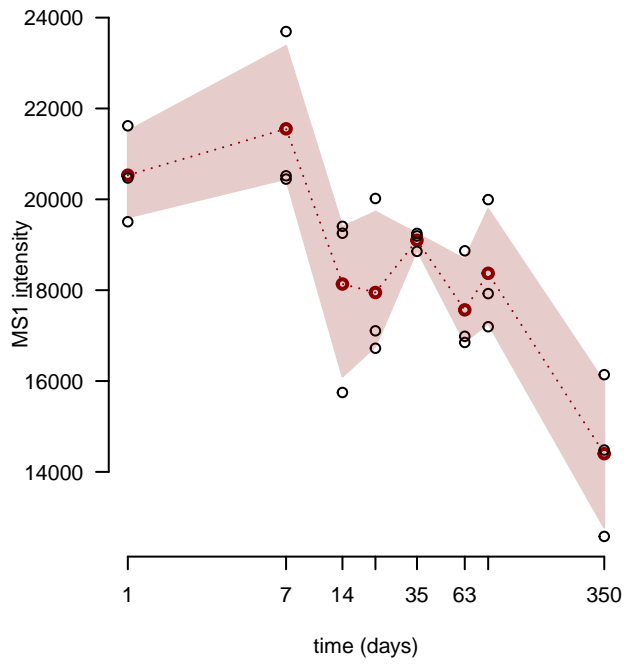

**Q6VNB8**  
**GN=Wdfy3**  
WD repeat and FYVE domain containing 3

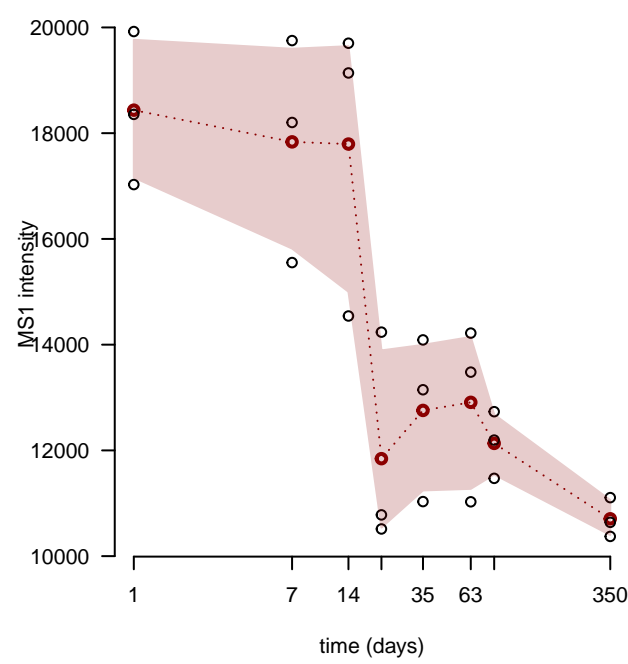

**Q6VNS1**  
**GN=Ntrk3**  
neurotrophic tyrosine kinase, receptor, ...

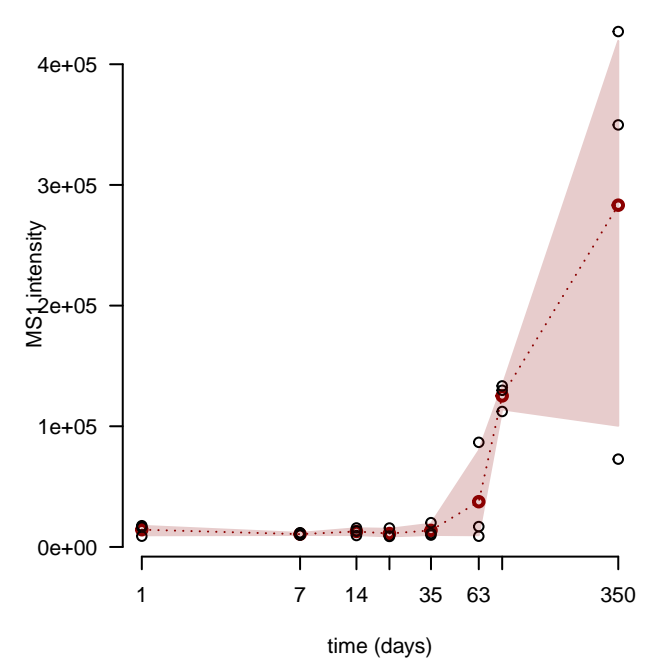

**Q6V VW5**  
**GN=Npr2**  
natriuretic peptide receptor 2

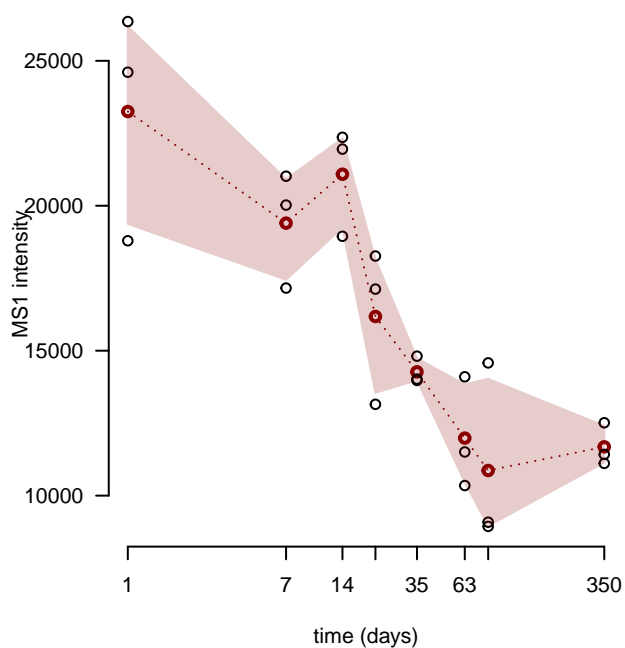

**Q6W8Q3**  
**GN=Pcp4l1**  
Purkinje cell protein 4-like 1

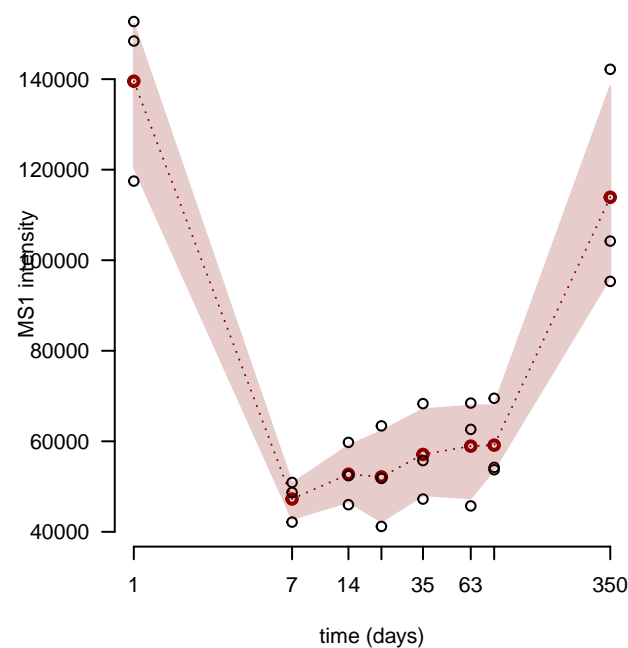

**Q6WKZ8**  
**GN=Ubr2**  
ubiquitin protein ligase E3 component n- ...

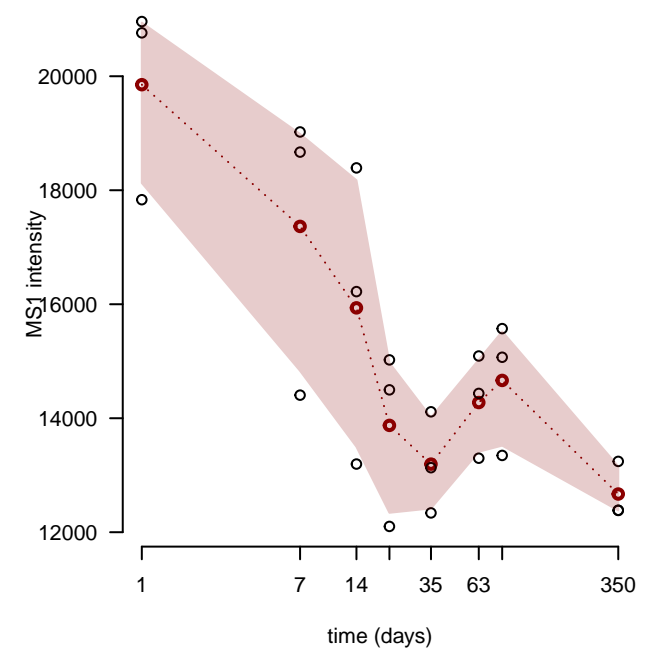

**Q6WQJ1**  
**GN=Dagla**  
diacylglycerol lipase, alpha

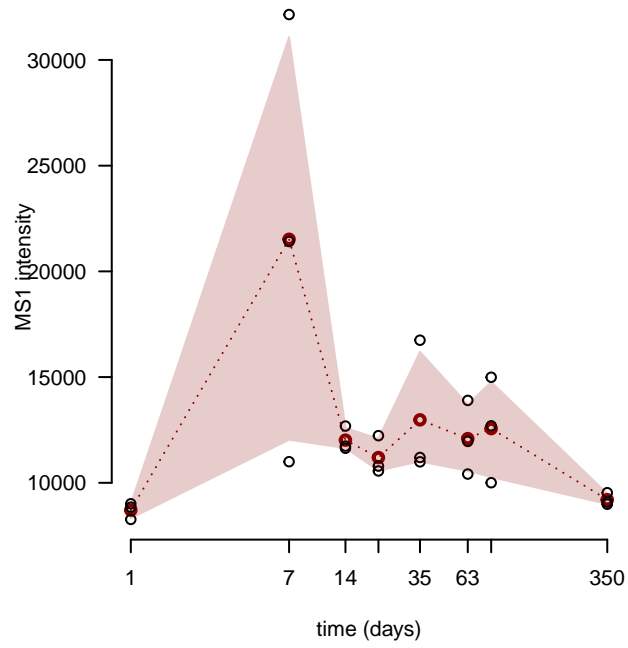

**Q6WVG3**  
**GN=Kctd12**  
potassium channel tetramerisation domain ...

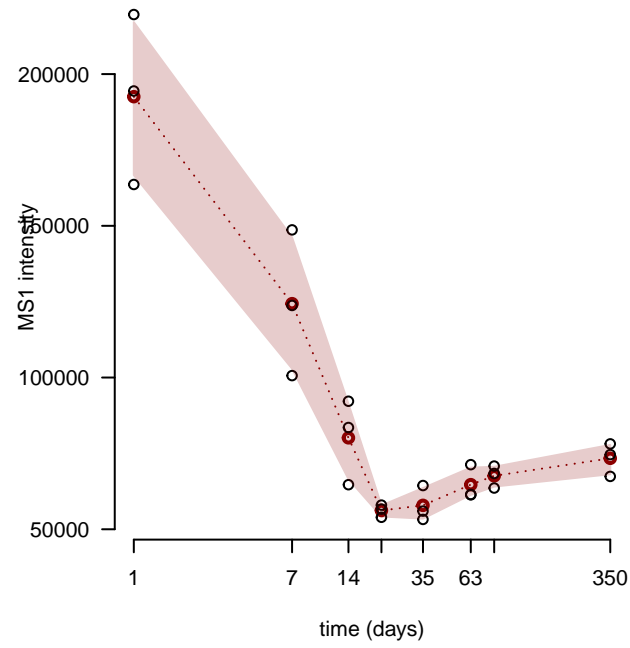

**Q6X893**  
**GN=Slc44a1**  
solute carrier family 44, member 1

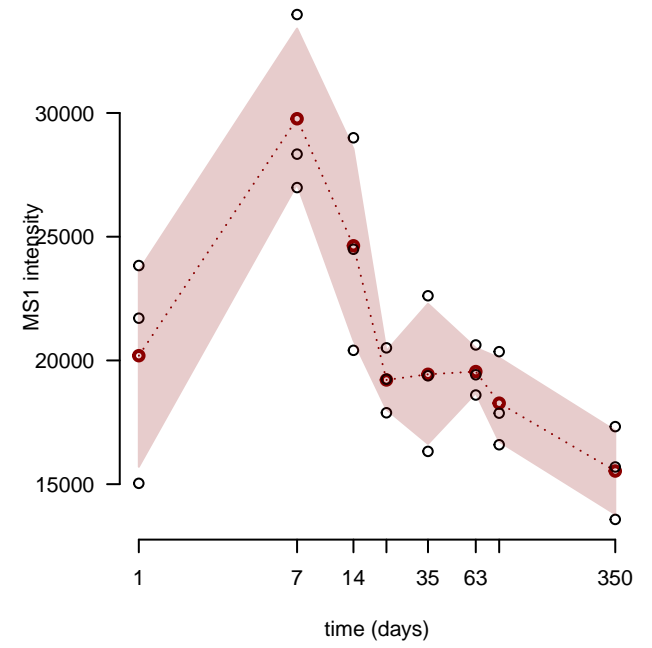

**Q6XBJ3**  
**GN=Onecut2**  
one cut domain, family member 2

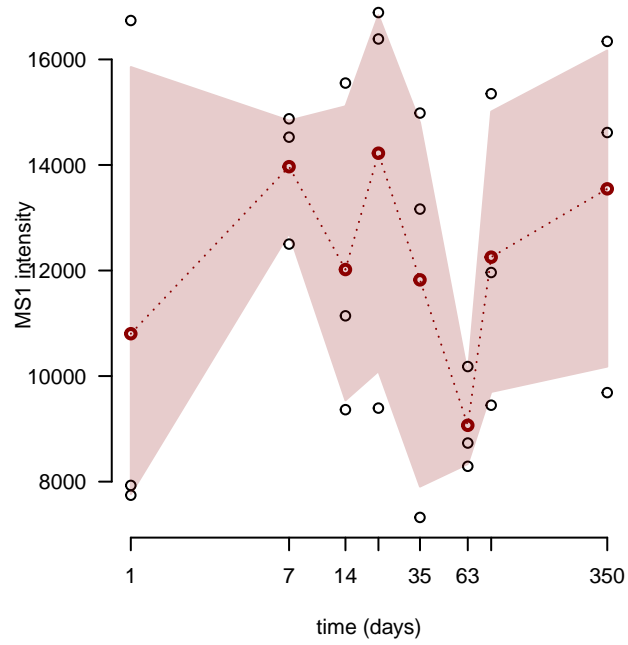

**Q6XP49**  
**GN=Glis3**  
GLIS family zinc finger 3

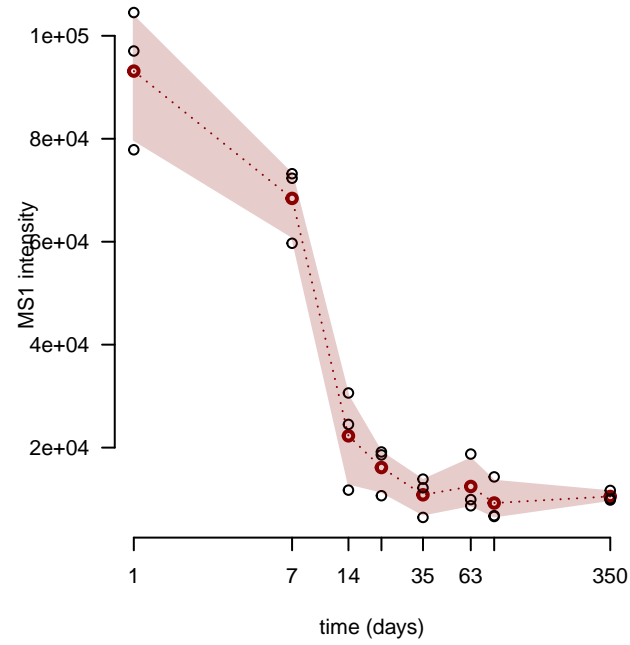

**Q6XUX1**  
**GN=Dstyk**  
dual serine/threonine and tyrosine prote ...

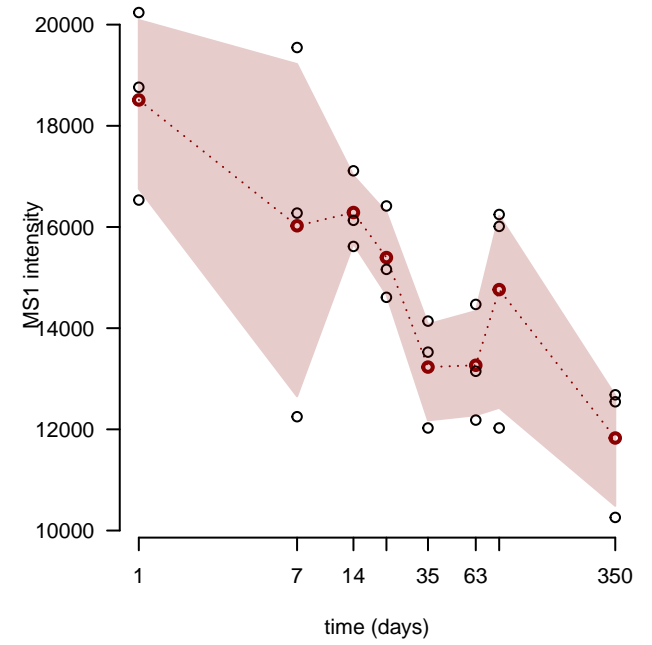

**Q6Y5D8**  
**GN=Arhgap10**  
Rho GTPase activating protein 10

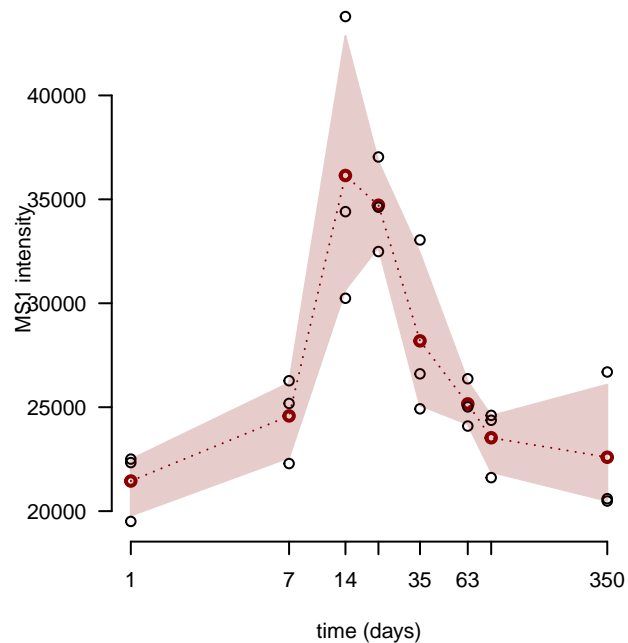

**Q6Y685**  
**GN=Tacc1**  
transforming, acidic coiled-coil contain ...

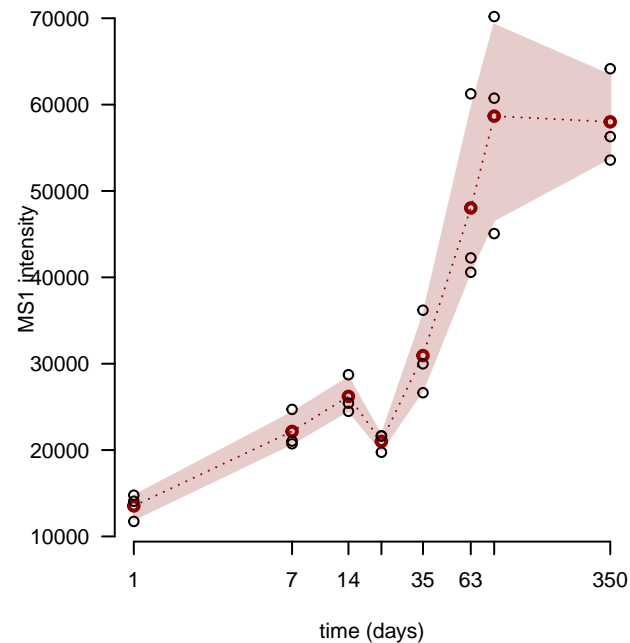

**Q6Y7W8**  
**GN=Gigyf2**  
GRB10 interacting GYF protein 2

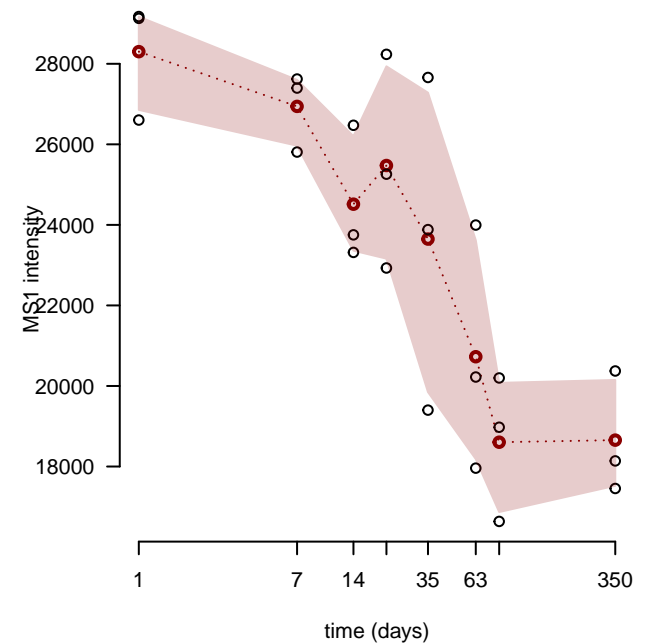

**Q6ZPE2**  
GN=Sbf1  
SET binding factor 1

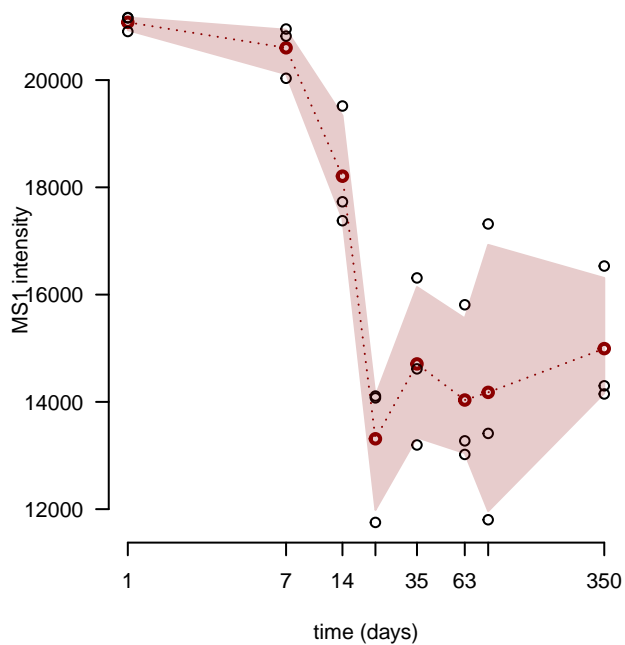

**Q6ZPF4**  
GN=Fmnl3  
formin-like 3

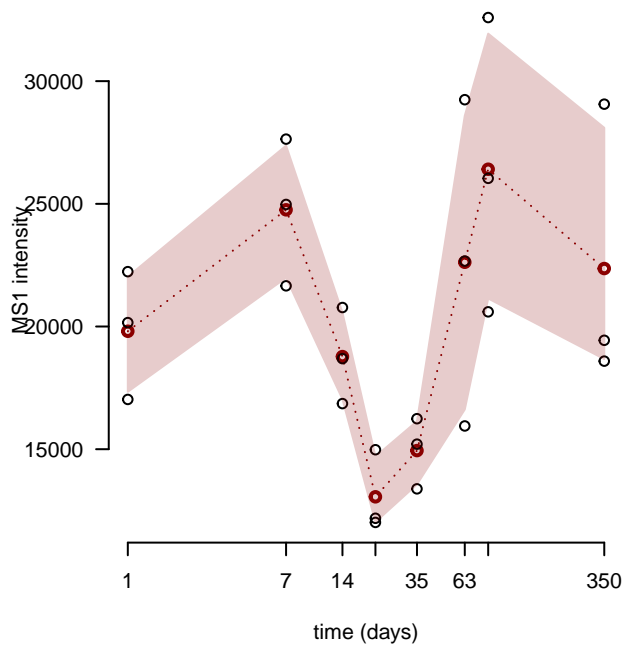

**Q6ZPG2**  
GN=Wdr90  
WD repeat domain 90

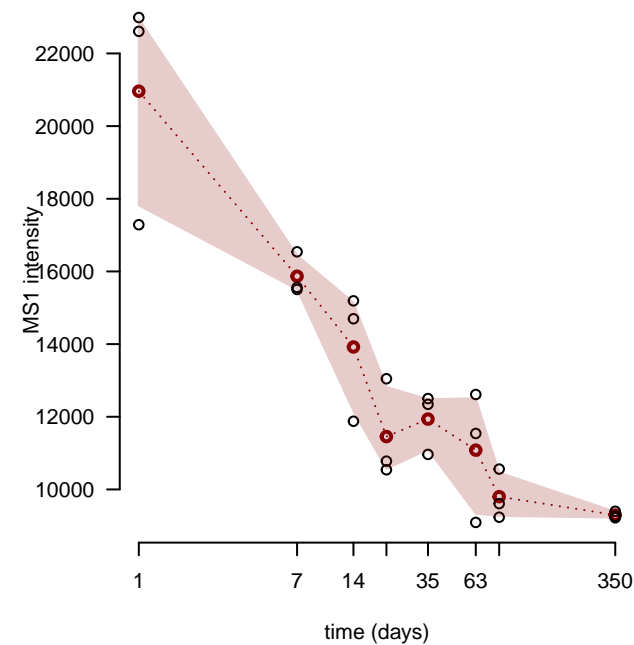

**Q6ZPJ0**  
GN=Tex2  
testis expressed gene 2

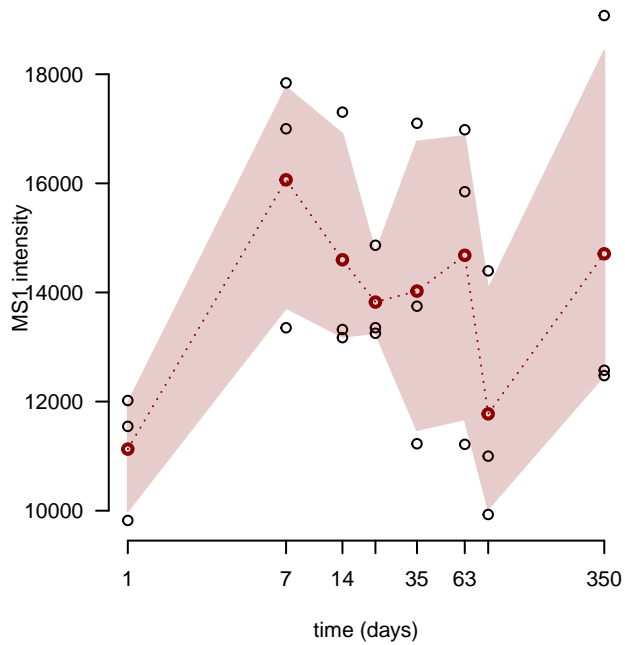

**Q6ZPJ3**  
GN=Ube2o  
ubiquitin-conjugating enzyme E2O

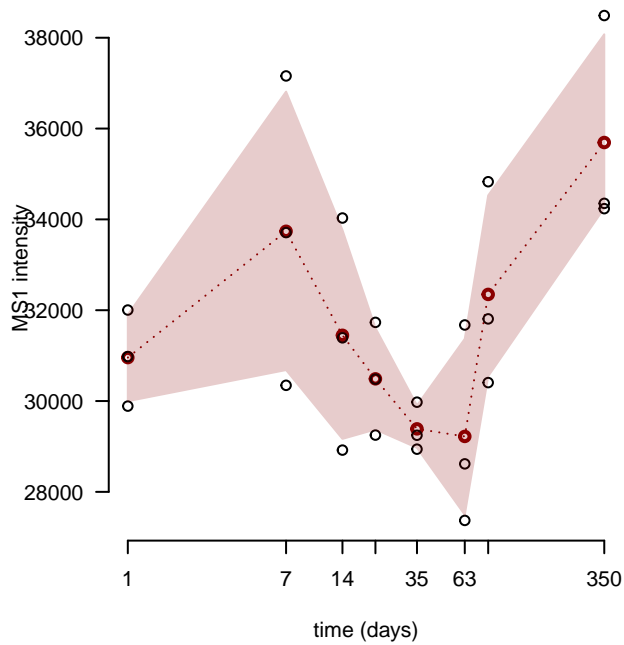

**Q6ZPK0**  
GN=Phf21a  
PHD finger protein 21A

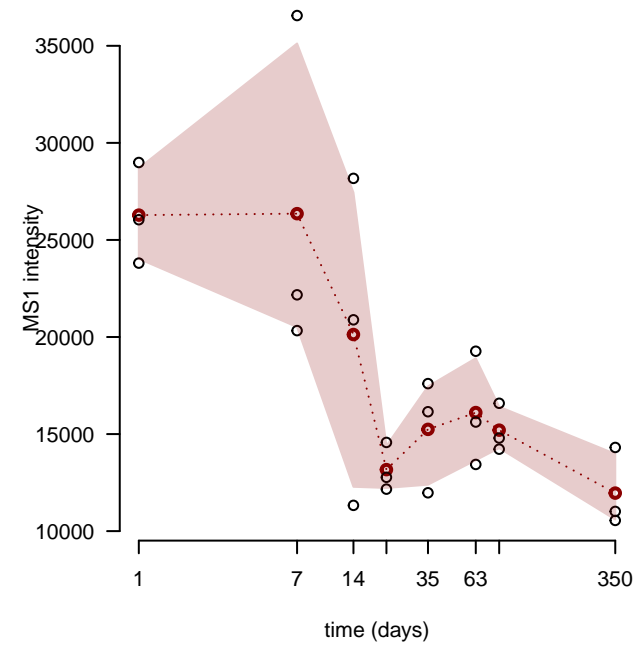

**Q6ZPL9**  
GN=Ddx55  
DEAD box helicase 55

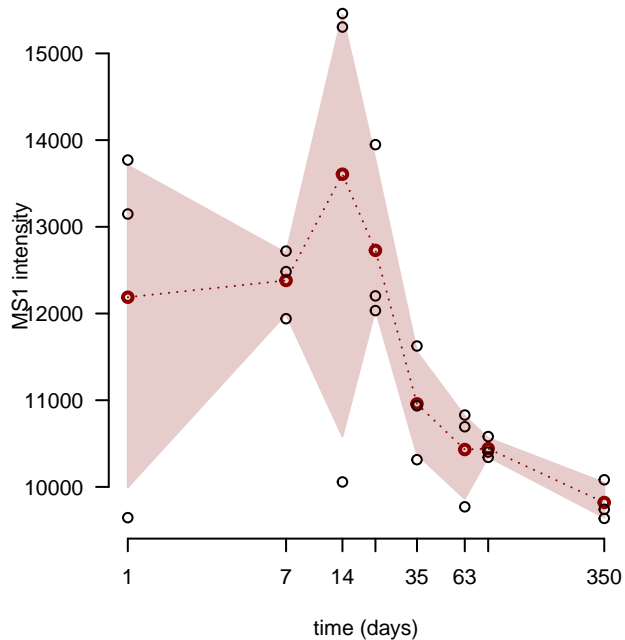

**Q6ZPQ6**  
GN=Pitpnm2  
phosphatidylinositol transfer protein, m ...

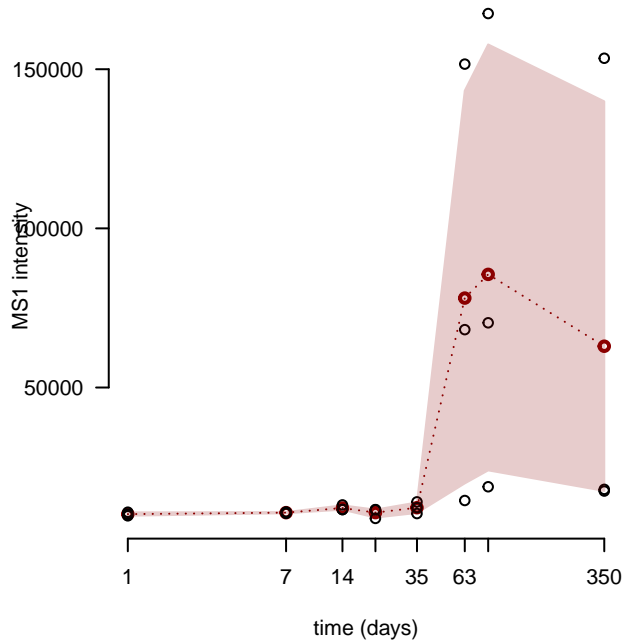

**Q6ZPR5**  
GN=Smpd4  
sphingomyelin phosphodiesterase 4

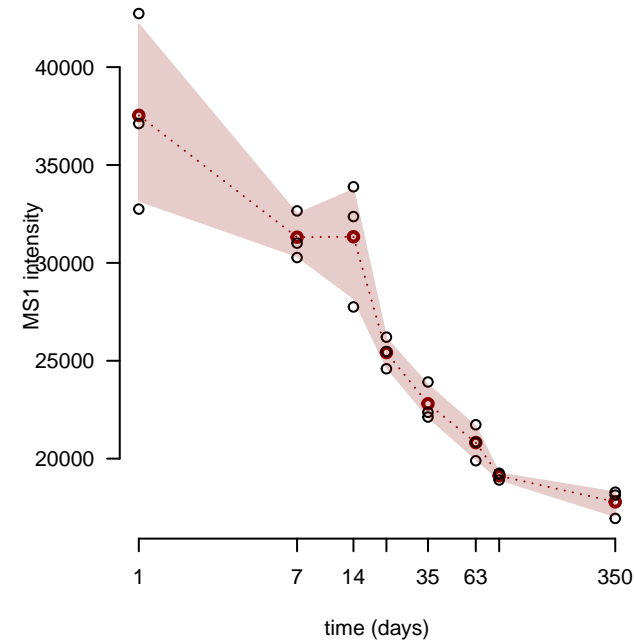

**Q6ZPR6**  
GN=Ibtk  
inhibitor of Bruton agammaglobulinemia t ...

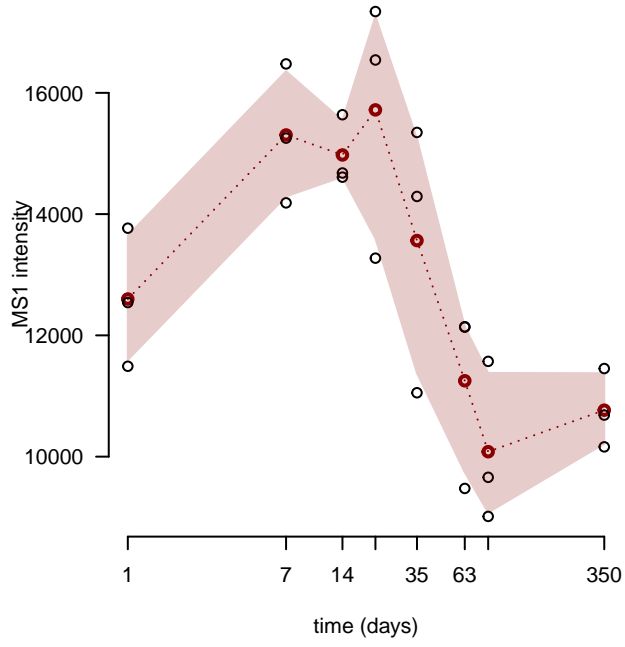

**Q6ZPS6**  
GN=Ankib1  
ankyrin repeat and IBR domain containing ...

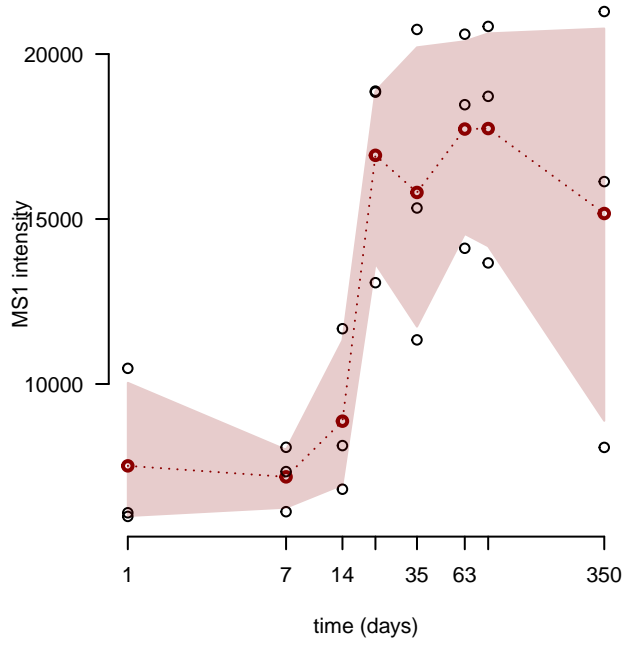

**Q6ZPT1**  
GN=Kih19  
kelch-like 9

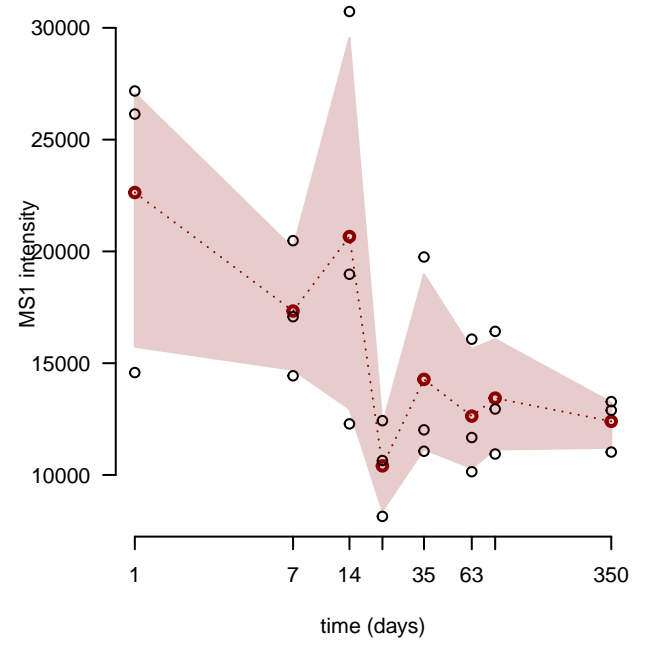

**Q6ZPU9**  
GN=Kif1bp

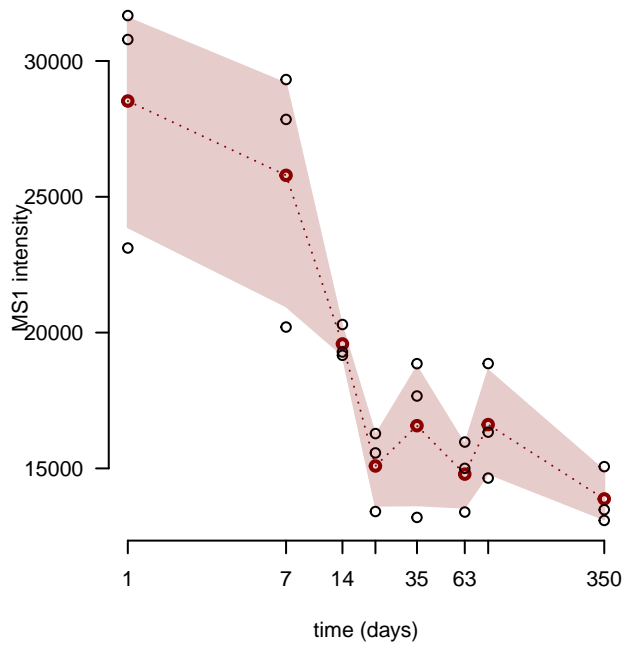

**Q6ZPV2**  
GN=Ino80  
INO80 complex subunit

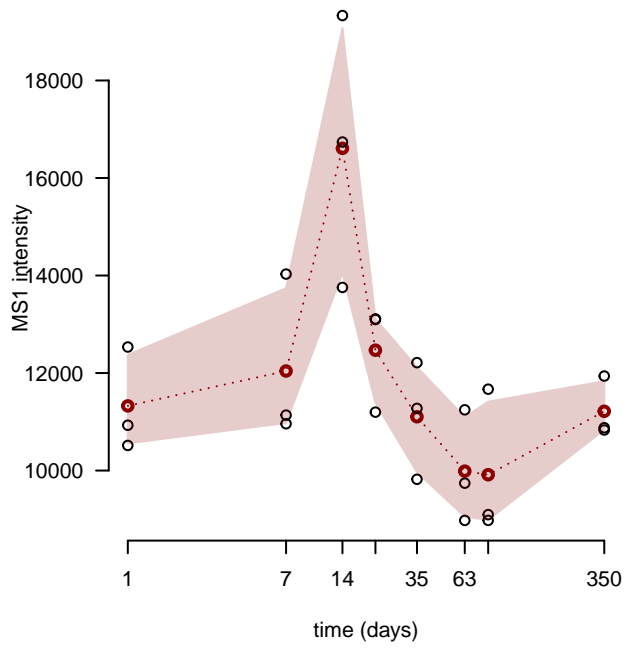

**Q6ZPY2**  
GN=Smg5  
SMG5 nonsense mediated mRNA decay factor

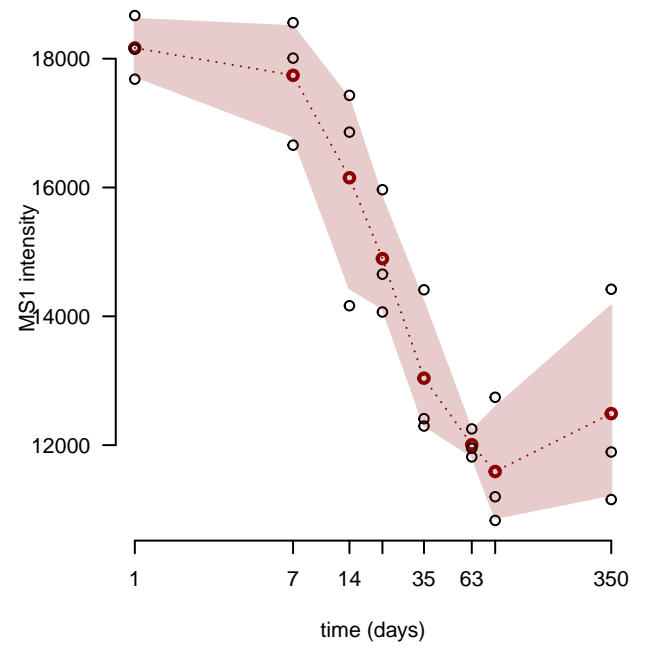

**Q6ZPY7**  
GN=Kdm3b  
KDM3B lysine (K)-specific demethylase 3B

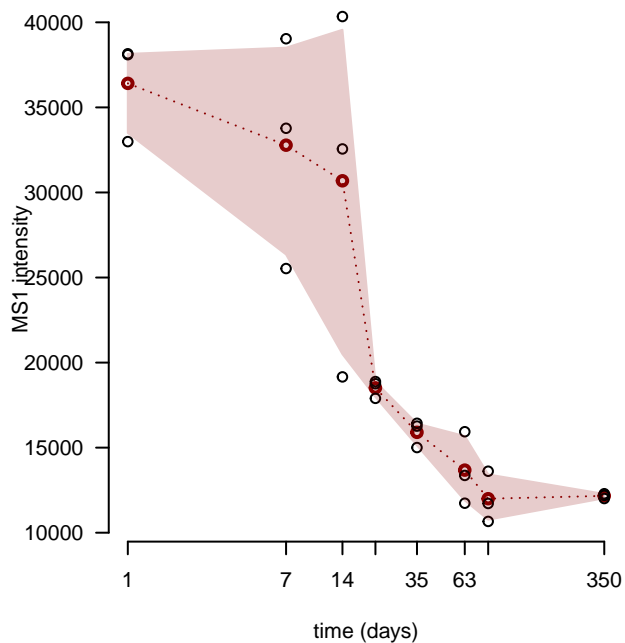

**Q6ZPZ3**  
GN=Zc3h4  
zinc finger CCCH-type containing 4

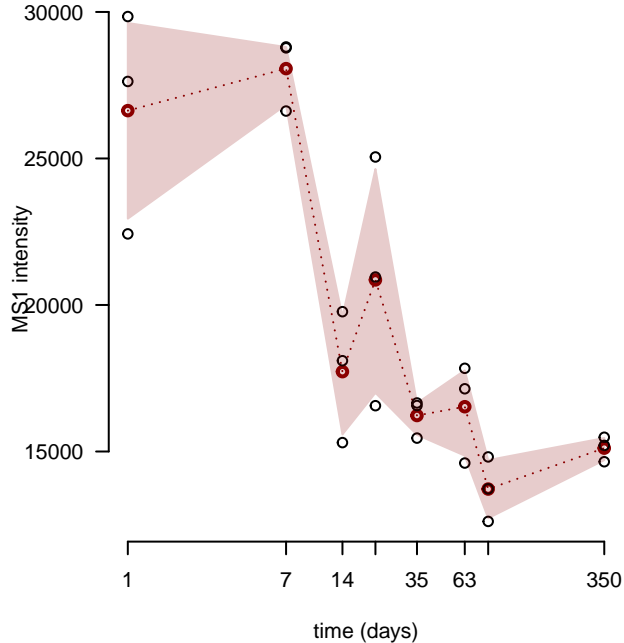

**Q6ZQ03**  
GN=Fbnp4  
formin binding protein 4

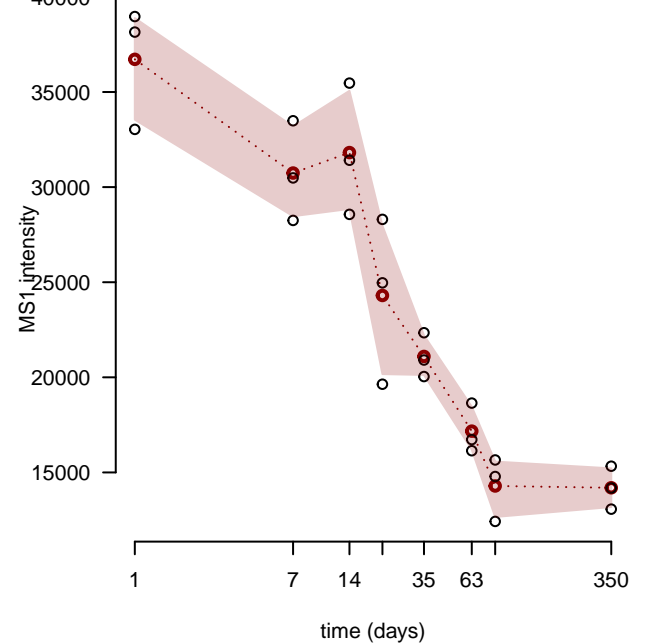



**Q6ZQ08**  
**GN=Cnot1**  
CCR4–NOT transcription complex, subunit ...

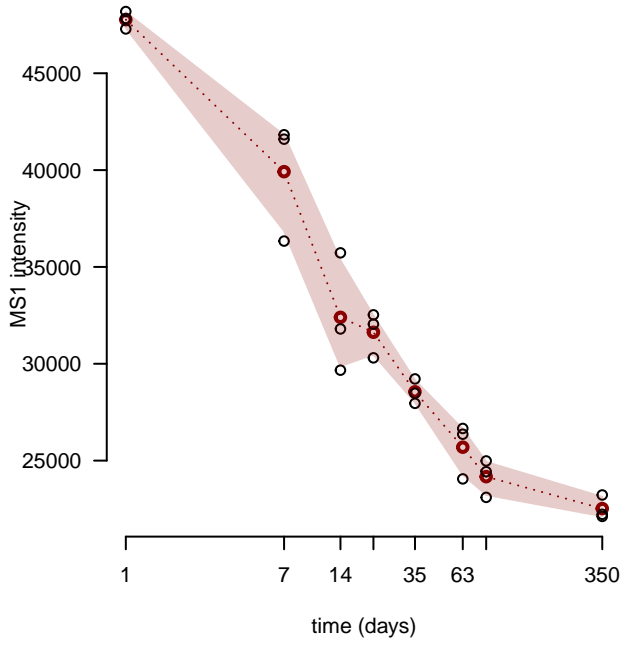

**Q6ZQ11**  
**GN=Chsy1**  
chondroitin sulfate synthase 1

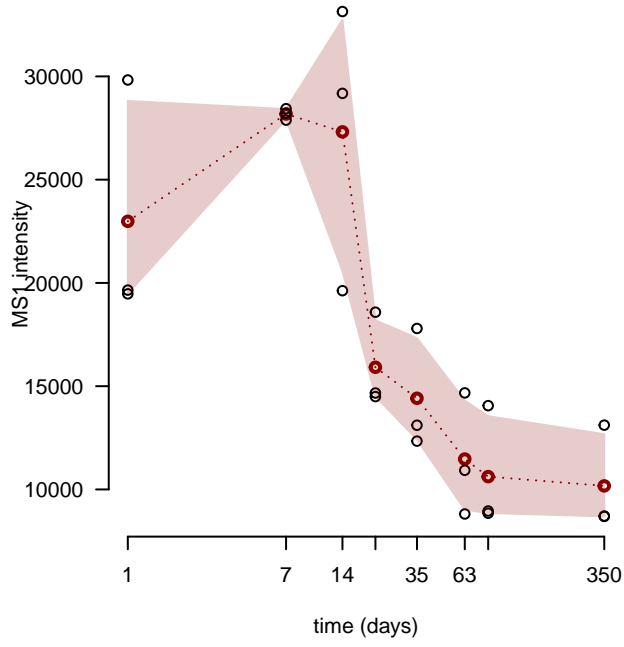

**Q6ZQ29**  
**GN=Taok2**  
TAO kinase 2

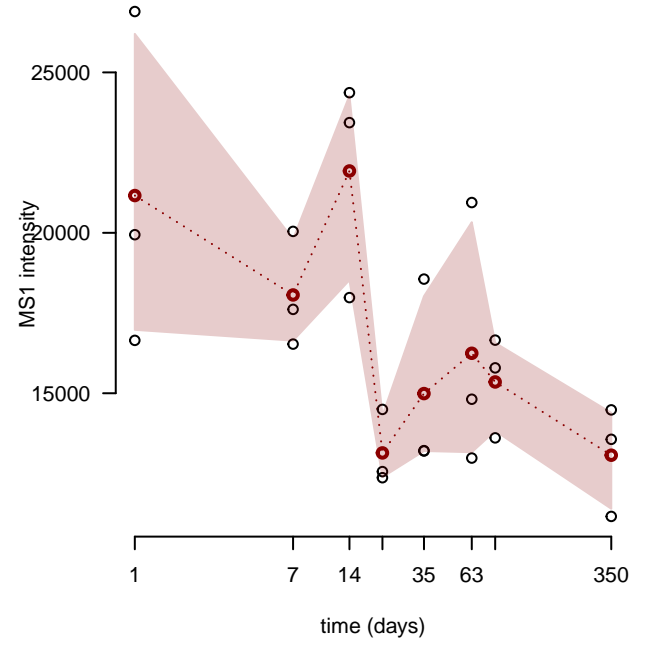

**Q6ZQ29**  
**GN=Taok2**  
TAO kinase 2

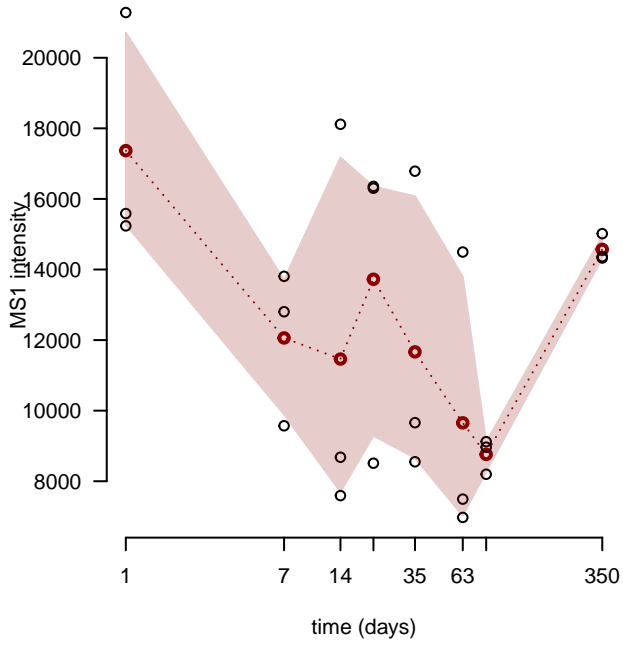

**Q6ZQ38**  
**GN=Cand1**  
cullin associated and neddylation disass ...

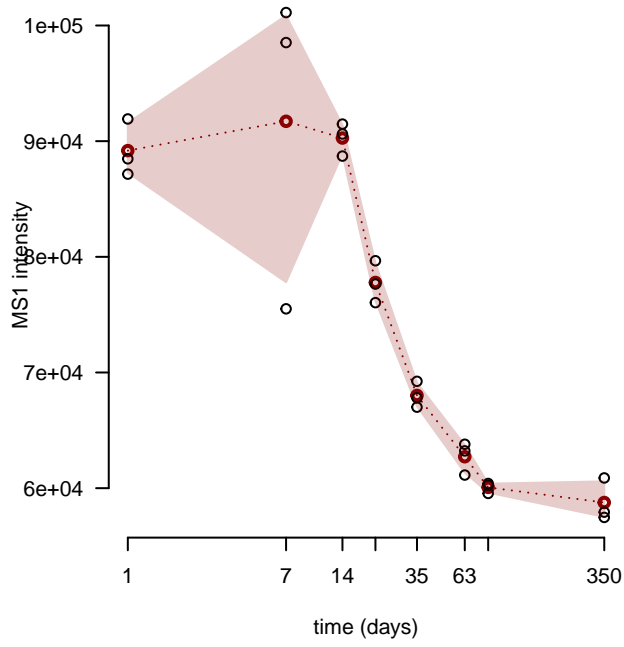

**Q6ZQ58**  
**GN=Larp1**  
La ribonucleoprotein 1, translational re ...

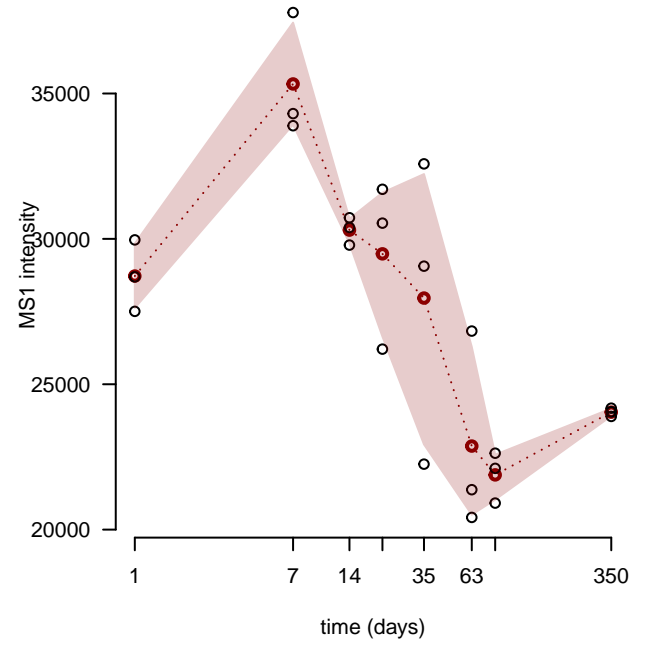

**Q6ZQ73**  
**GN=Cand2**  
cullin–associated and neddylation–dissoc ...

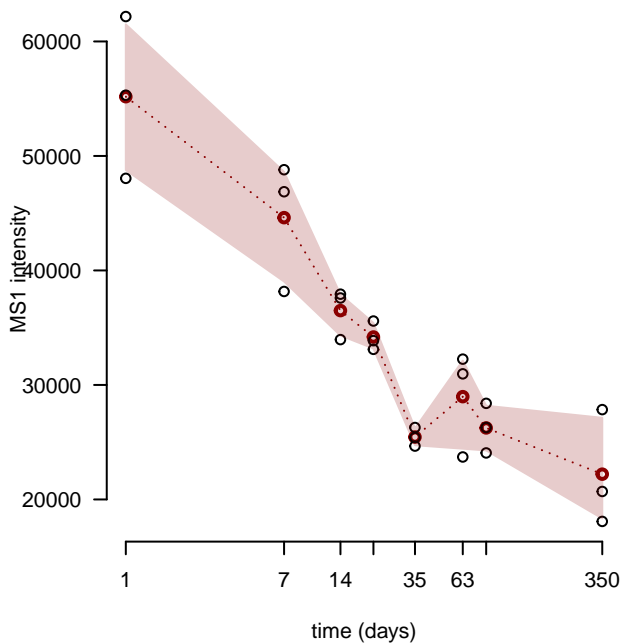

**Q6ZQ82**  
**GN=Arhgap26**  
Rho GTPase activating protein 26

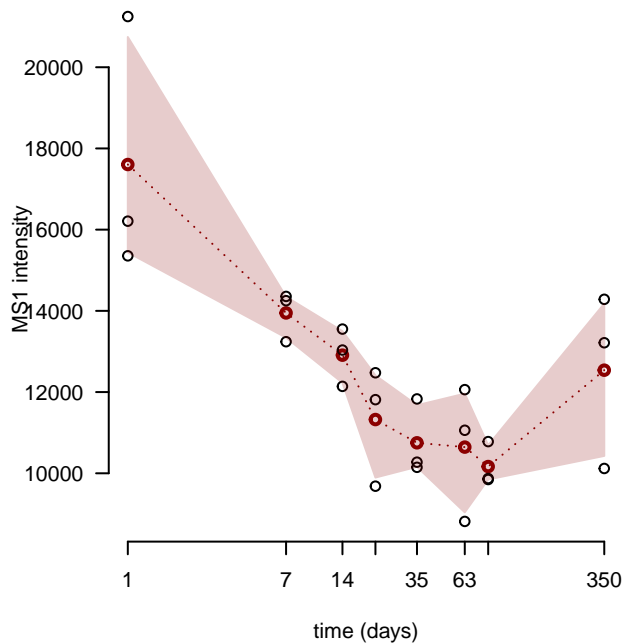

**Q6ZQ88**  
**GN=Kdm1a**  
lysine (K)–specific demethylase 1A

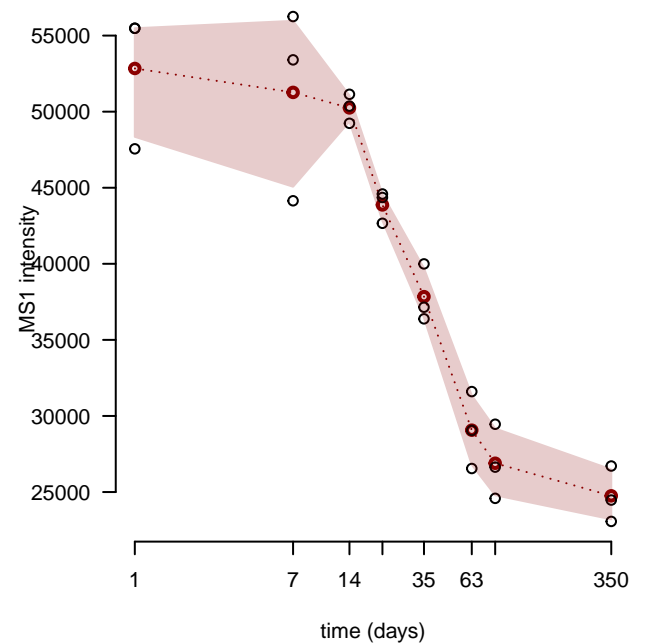

**Q6ZQ89**  
GN=March6

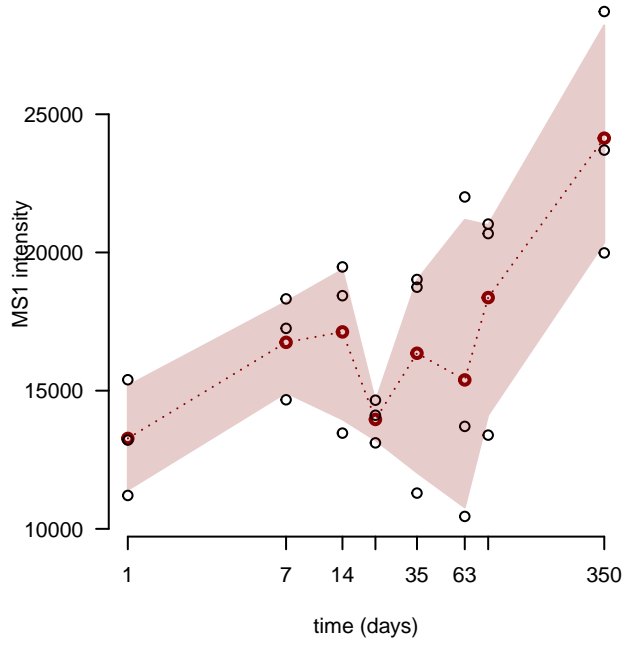

**Q6ZQ93**  
GN=Usp34  
ubiquitin specific peptidase 34

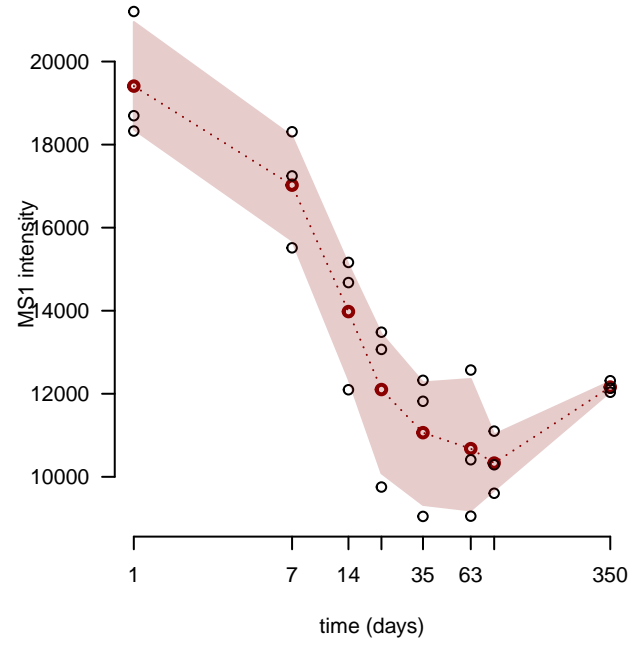

**Q6ZQA6**  
GN=Igsf3  
immunoglobulin superfamily, member 3

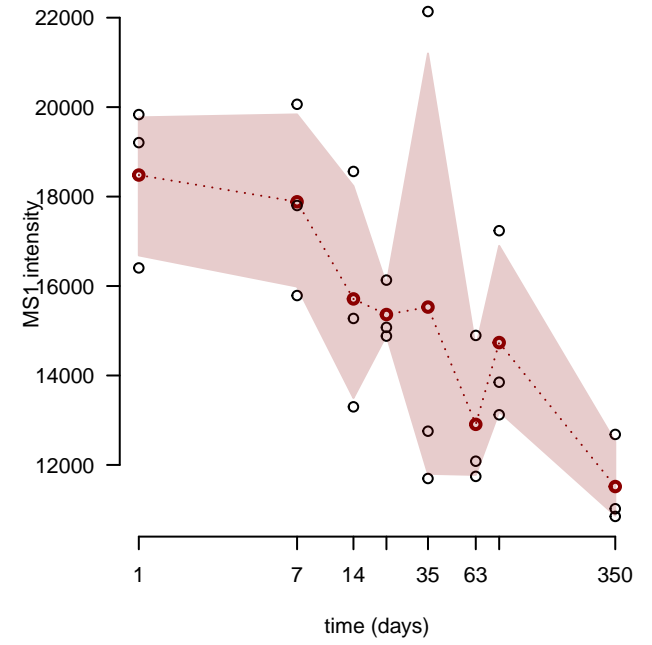

**Q6ZQB6**  
GN=Ppip5k2  
diphosphoinositol pentakisphosphate kina ...

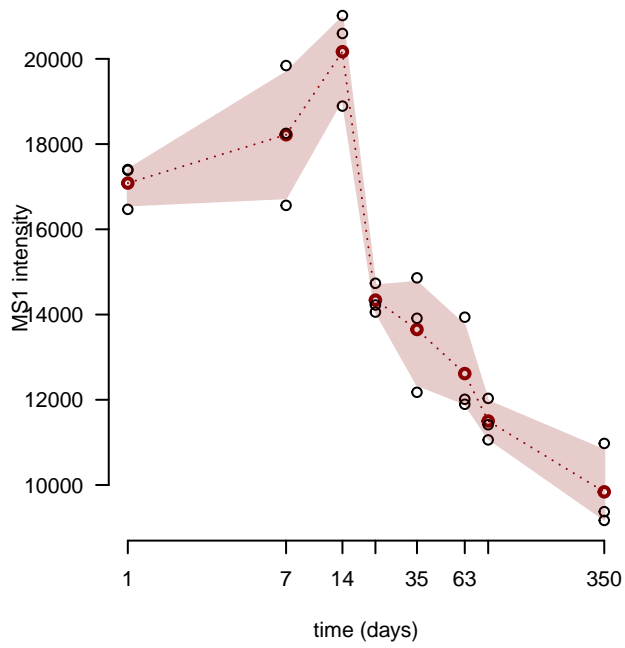

**Q6ZQE4**  
GN=Nemp1  
nuclear envelope integral membrane prote ...

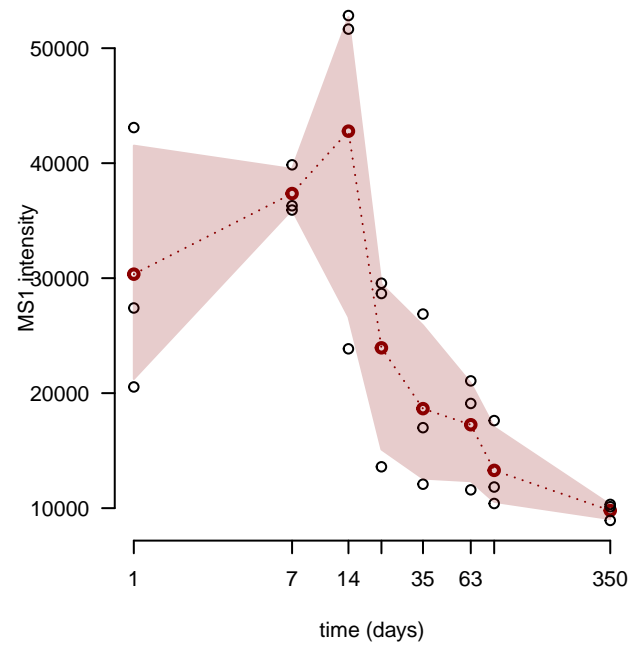

**Q6ZQF0**  
GN=Topbp1  
topoisomerase (DNA) II binding protein 1

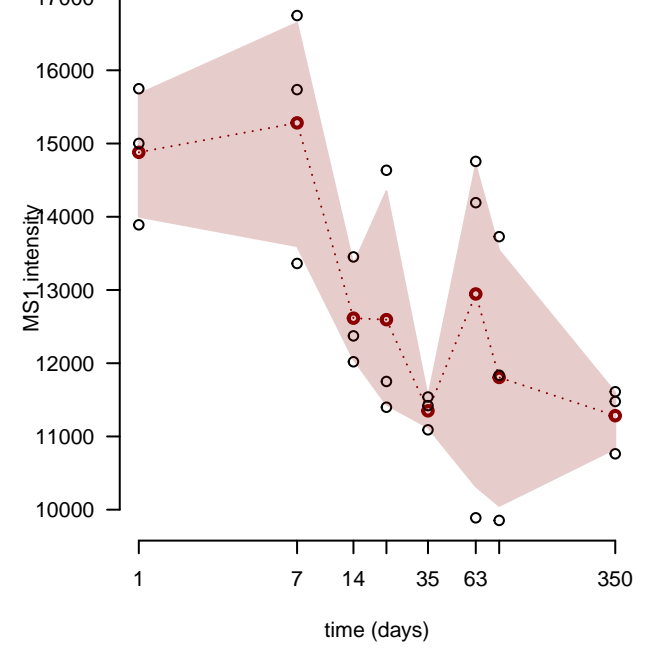

**Q6ZQH8**  
GN=Nup188  
nucleoporin 188

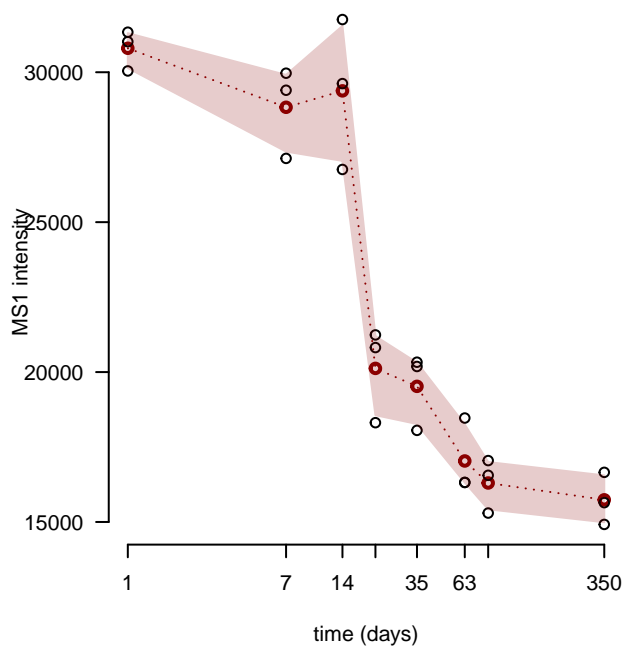

**Q6ZQI3**  
GN=Mlec  
malectin

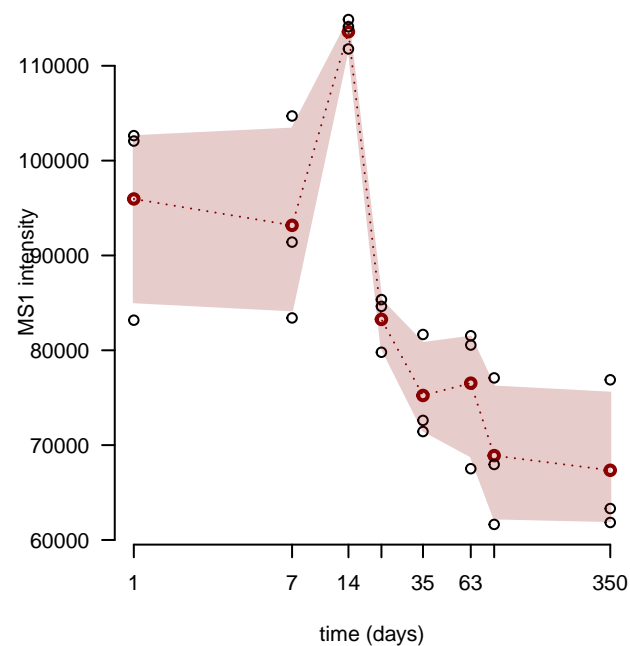

**Q6ZQK0**  
GN=Ncapd3  
non-SMC condensin II complex, subunit D3

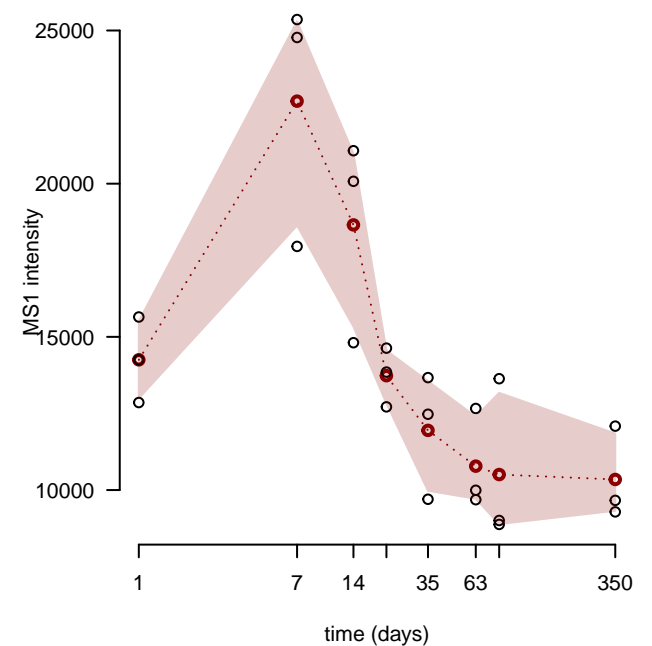

**Q6ZQK5**  
**GN=Acap2**  
ArfGAP with coiled-coil, ankyrin repeat ...

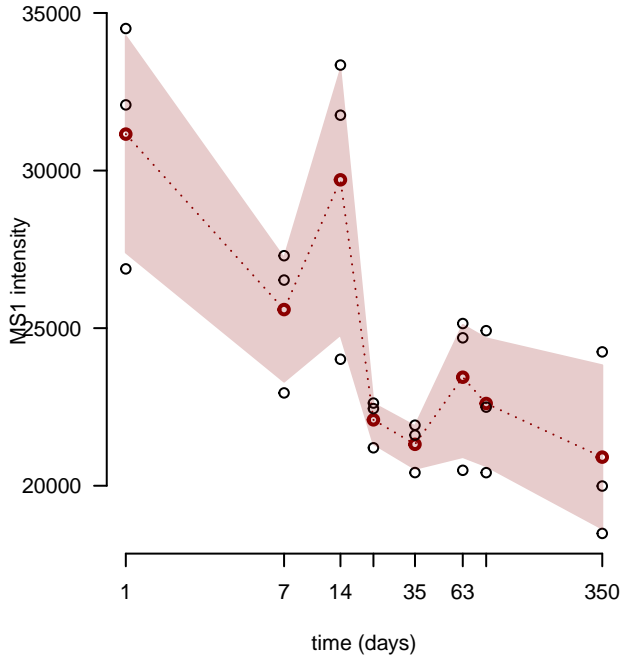

**Q6ZQL4**  
**GN=Wdr43**  
WD repeat domain 43

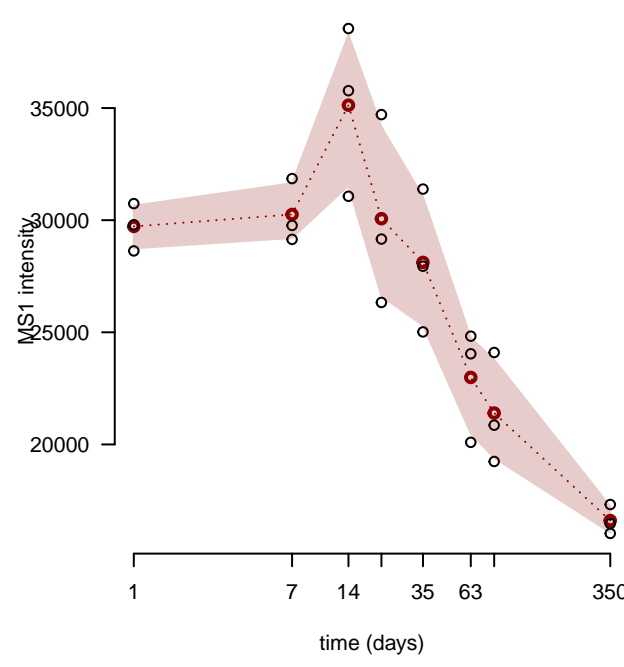

**Q6ZQM8**  
**GN=Ugt1a7c**  
UDP glucuronosyltransferase 1 family, po ...

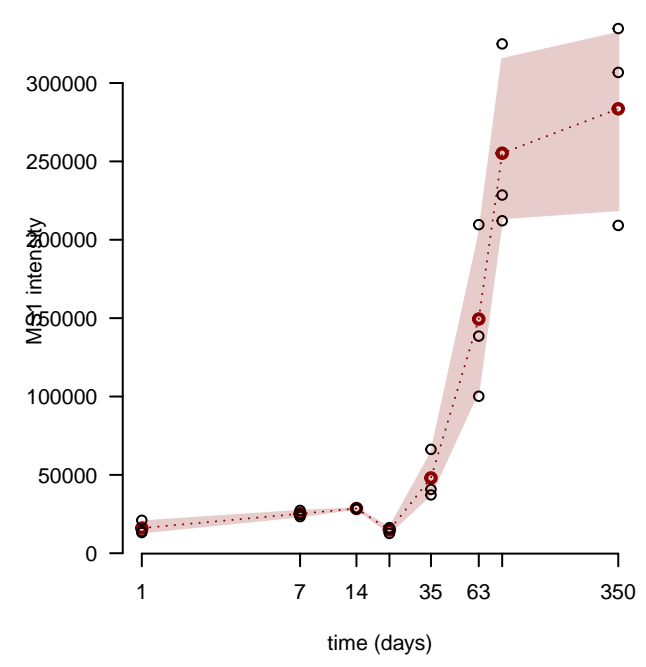

**Q6ZWM4**  
**GN=Lsm8**  
LSM8 homolog, U6 small nuclear RNA assoc ...

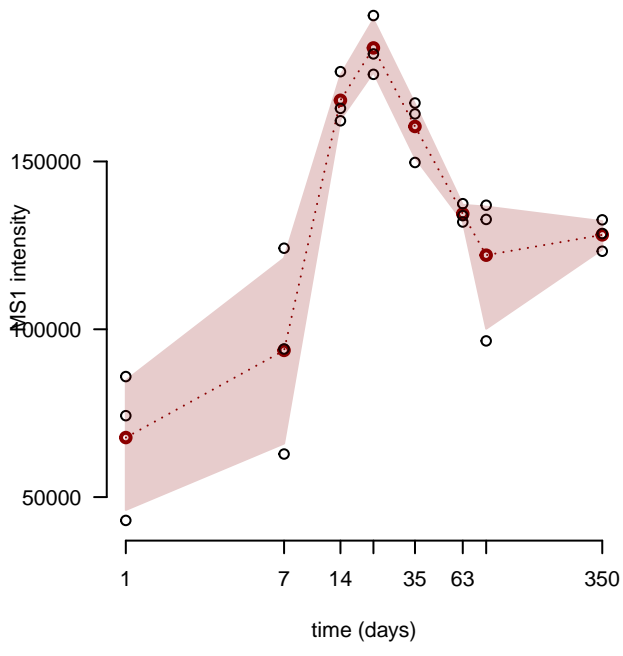

**Q6ZWN5**  
**GN=Rps9**  
ribosomal protein S9

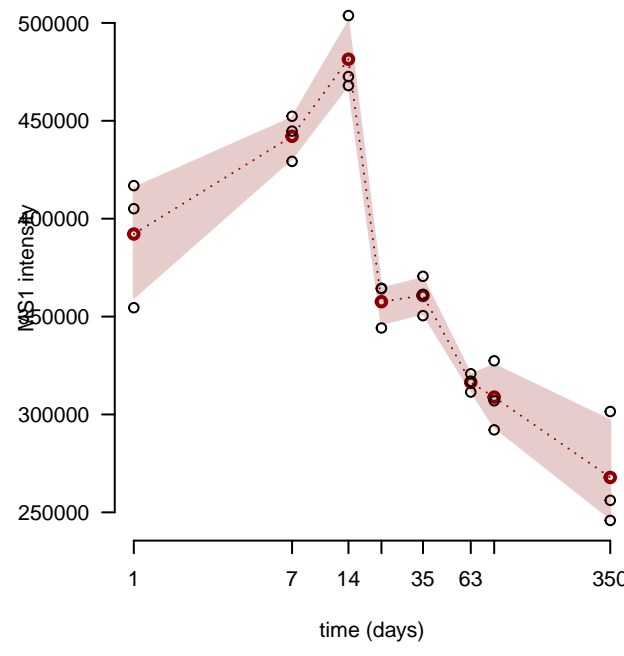

**Q6ZWQ0**  
**GN=Syne2**  
spectrin repeat containing, nuclear enve ...

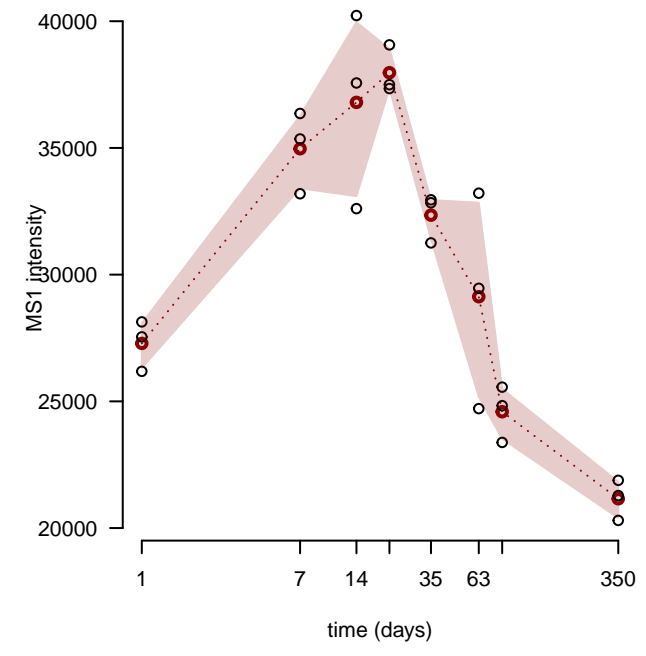

**Q6ZWQ0**  
**GN=Syne2**  
spectrin repeat containing, nuclear enve ...

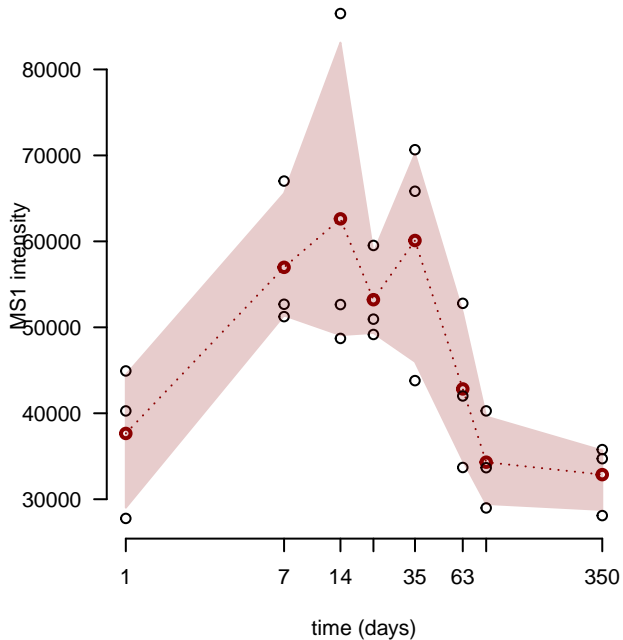

**Q6ZWQ7**  
**GN=Spcs3**  
signal peptidase complex subunit 3 homol ...

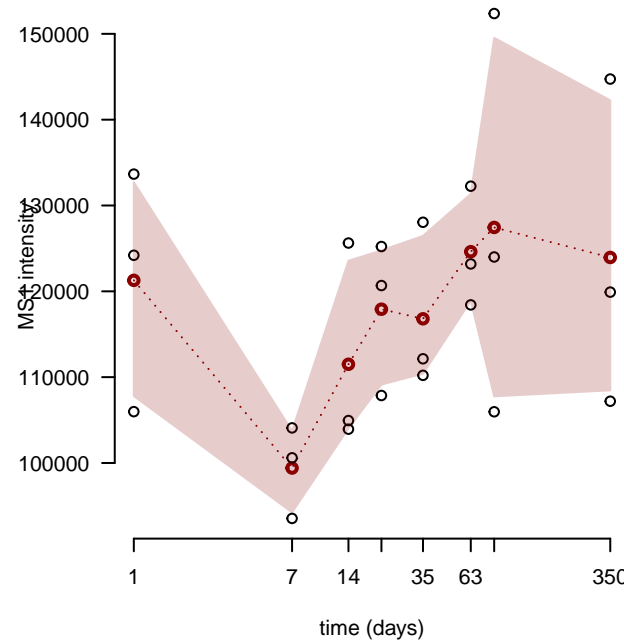

**Q6ZWR6**  
**GN=Syne1**  
spectrin repeat containing, nuclear enve ...

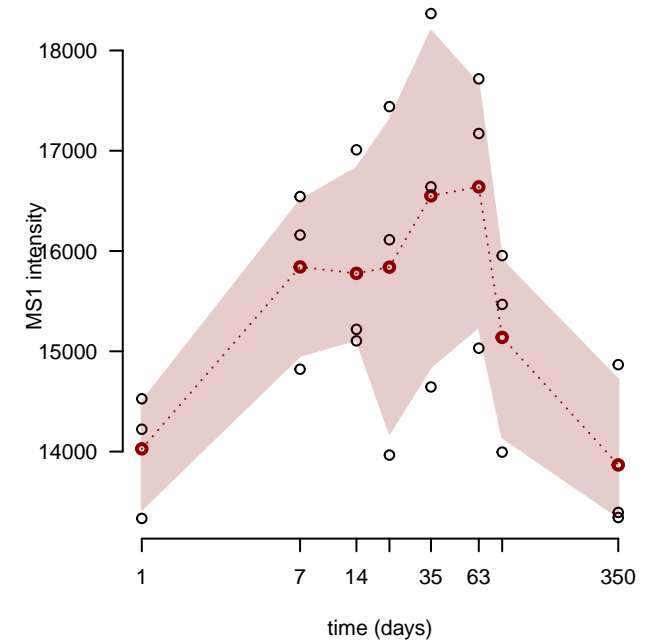

**Q6ZWU9**  
**GN=Rps27**  
ribosomal protein S27

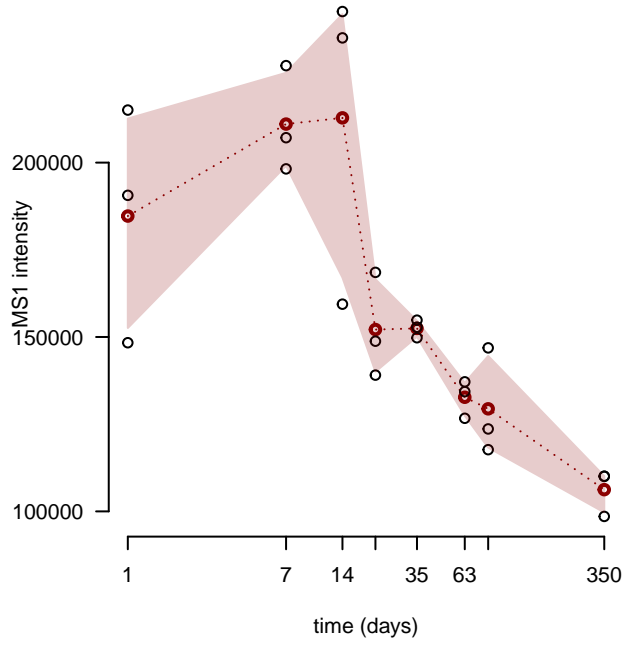

**Q6ZWV3**  
**GN=Rpl10**  
ribosomal protein L10

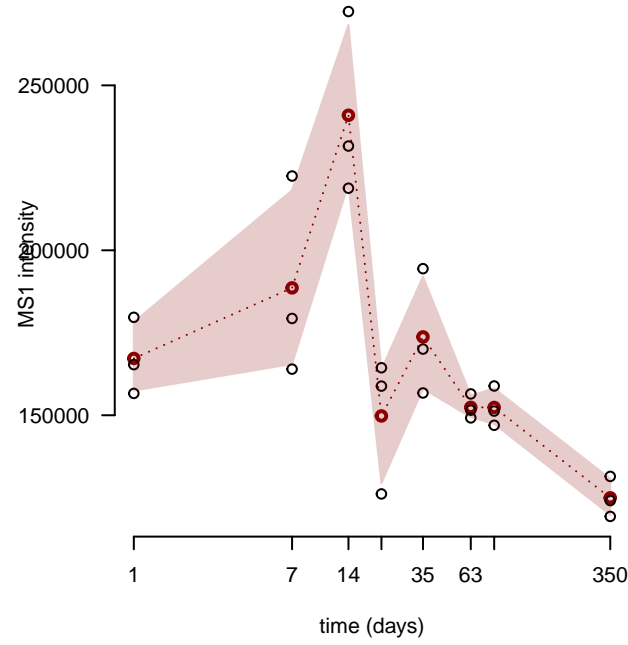

**Q6ZWV7**  
**GN=Rpl35**  
ribosomal protein L35

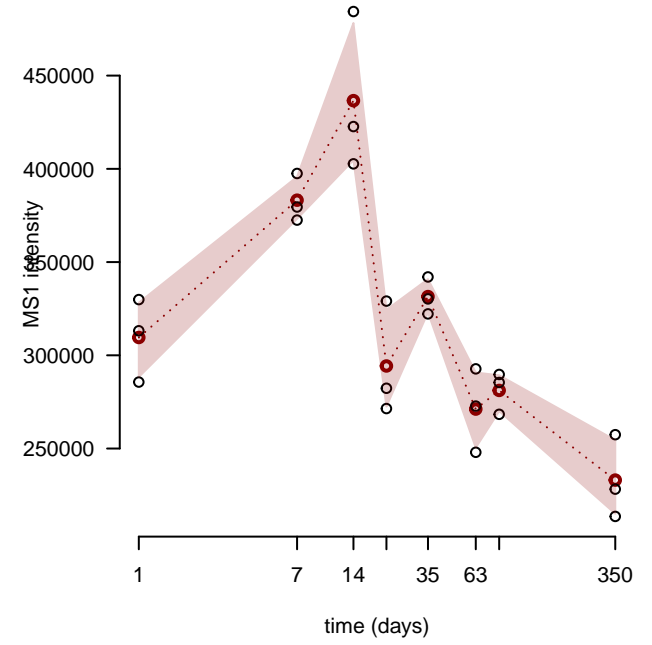

**Q6ZWX6**  
**GN=Eif2s1**  
eukaryotic translation initiation factor ...

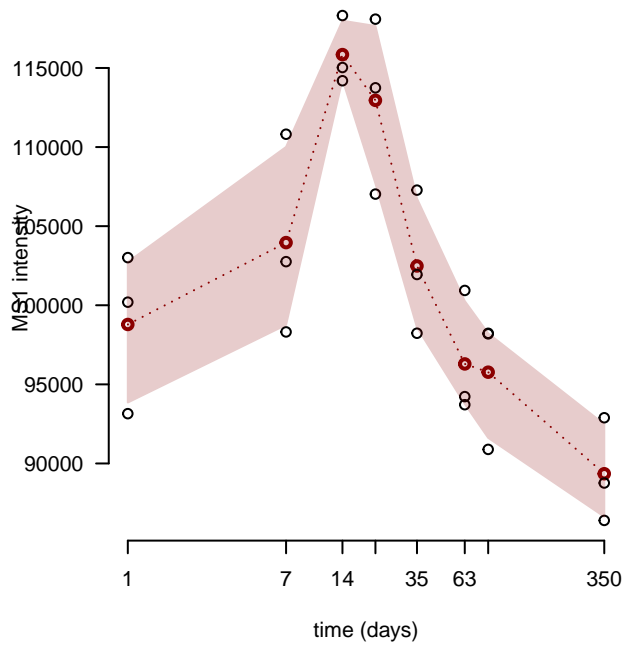

**Q6ZWY3**  
**GN=Rps271**  
ribosomal protein S27-like

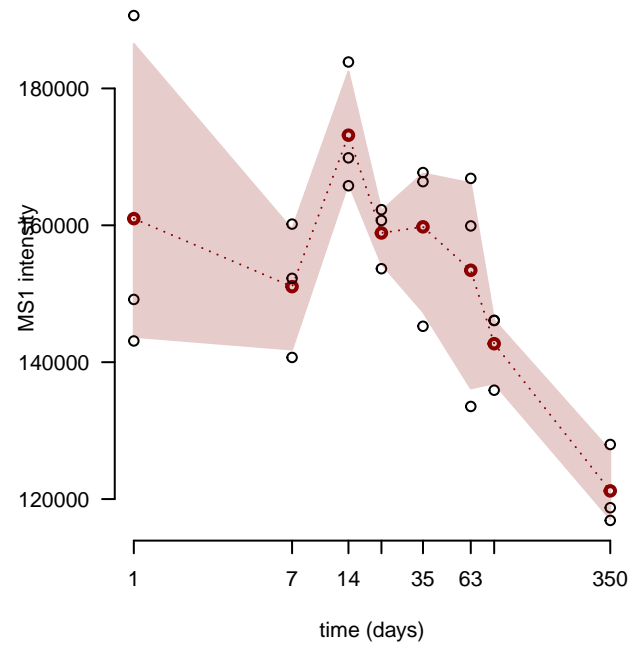

**Q6ZWY8**  
**GN=Tmsb10**  
thymosin, beta 10

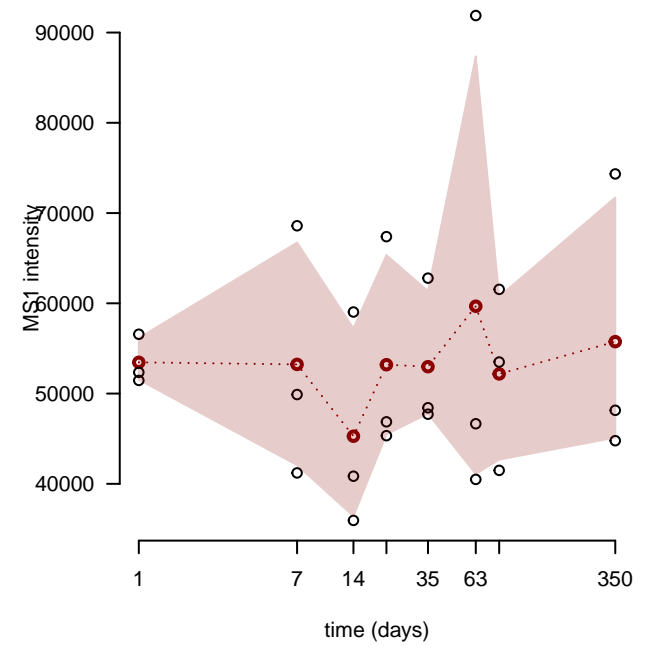

**Q6ZWZ2**  
**GN=Ube2r2**  
ubiquitin-conjugating enzyme E2R 2

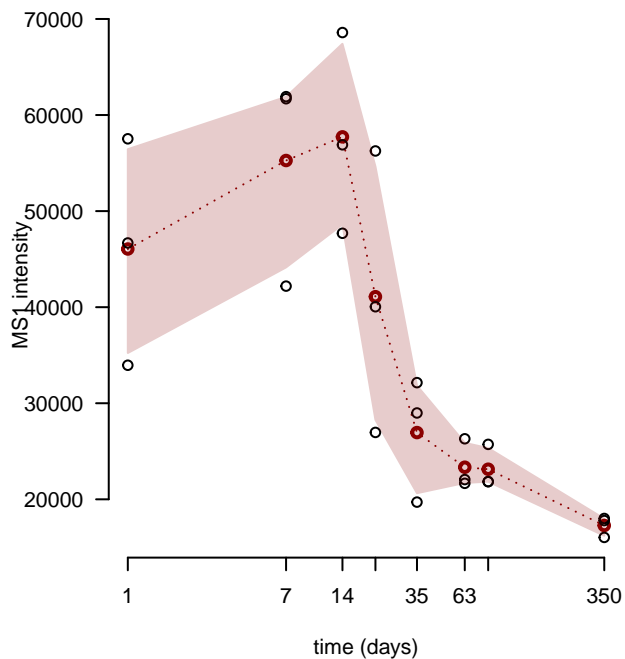

**Q70E20**  
**GN=Sned1**  
sushi, nidogen and EGF-like domains 1

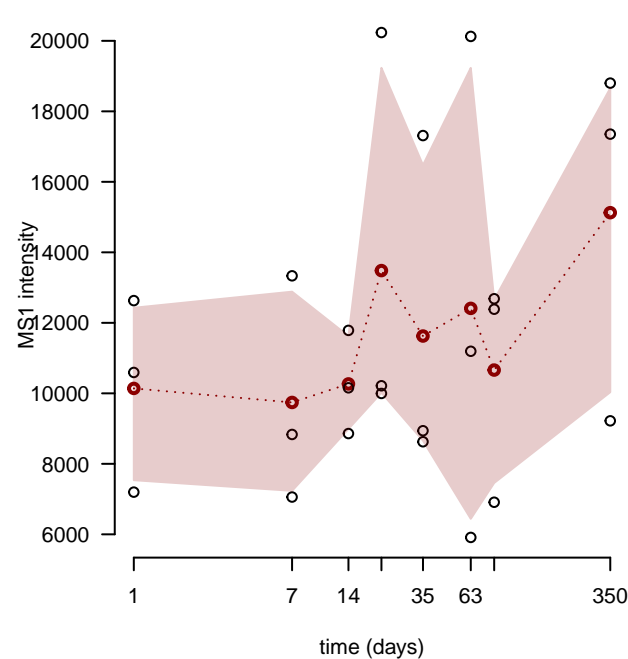

**Q70FJ1**  
**GN=Akap9**  
A kinase (PRKA) anchor protein (yotiao) ...

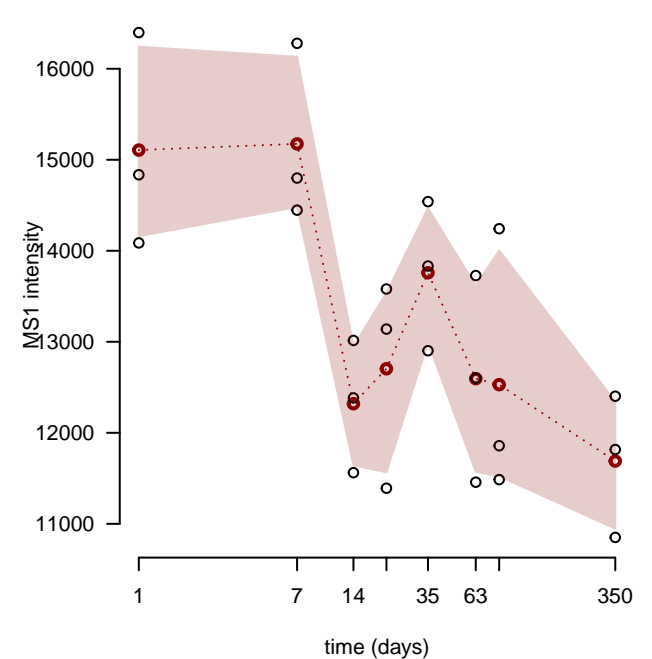

**Q70IV5**  
GN=Synm  
synemin, intermediate filament protein

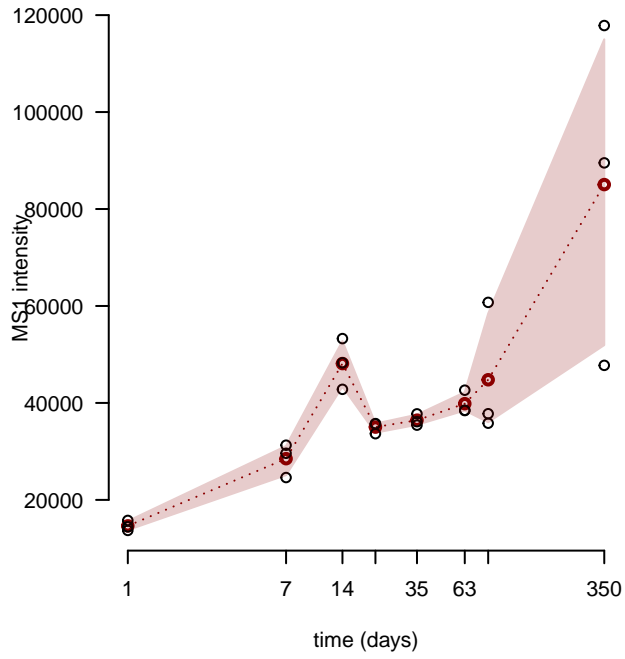

**Q70IV5**  
GN=Synm  
synemin, intermediate filament protein

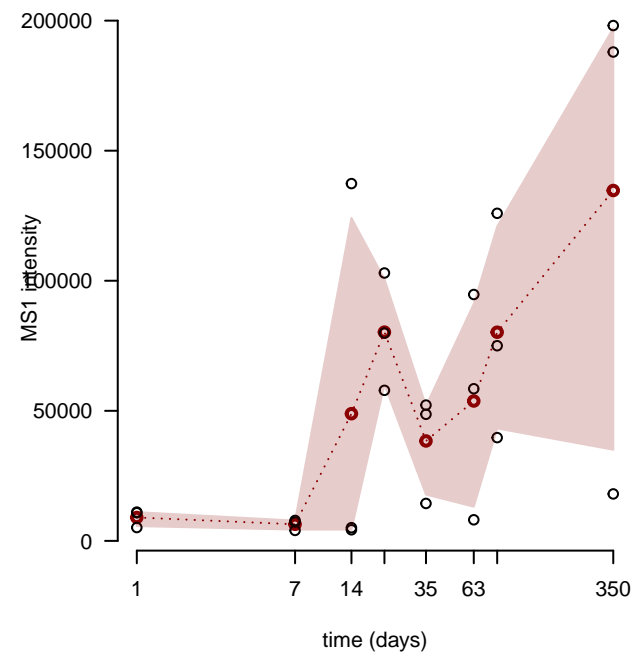

**Q711T7**  
GN=Nadsyn1  
NAD synthetase 1

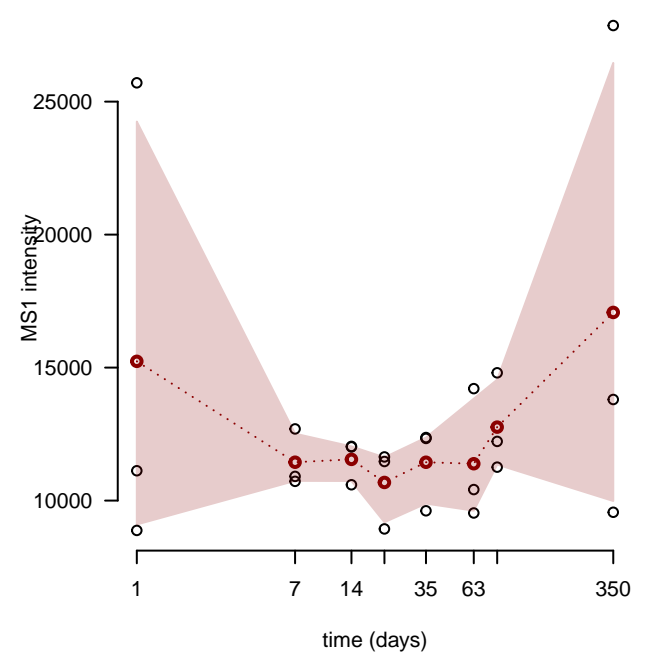

**Q71B07**  
GN=Dpy19I3  
dpy-19-like 3 (C. elegans)

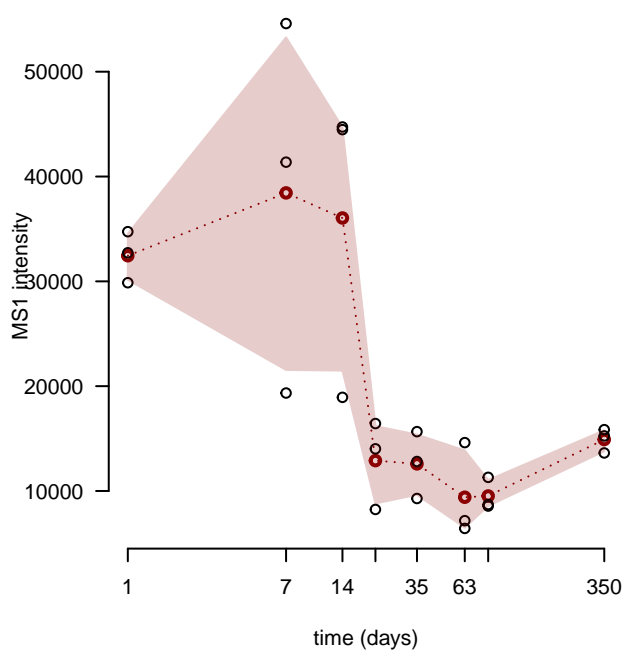

**Q71FD5**  
GN=Znrf2  
zinc and ring finger 2

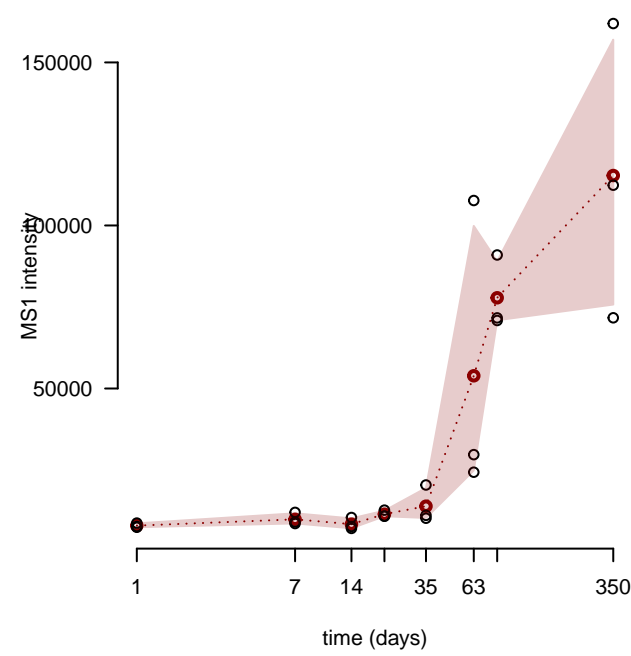

**Q71FD7**  
GN=Fblim1  
filamin binding LIM protein 1

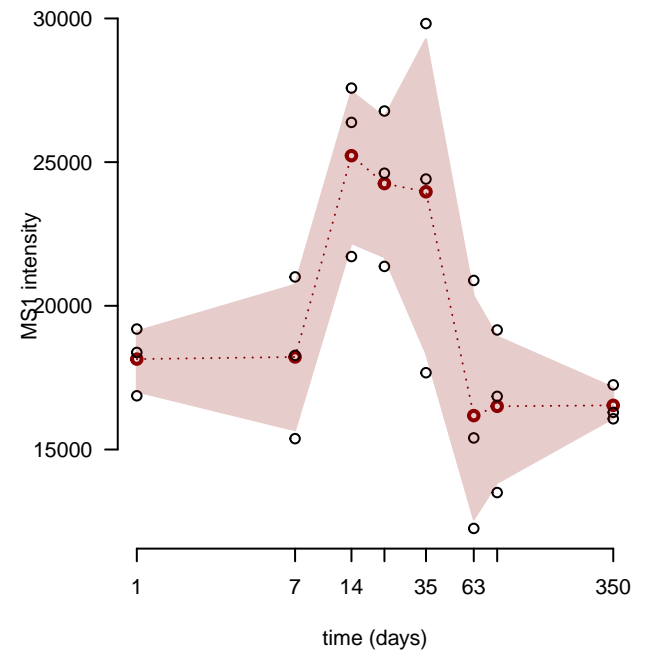

**Q71KT5**  
GN=Tm7sf2  
transmembrane 7 superfamily member 2

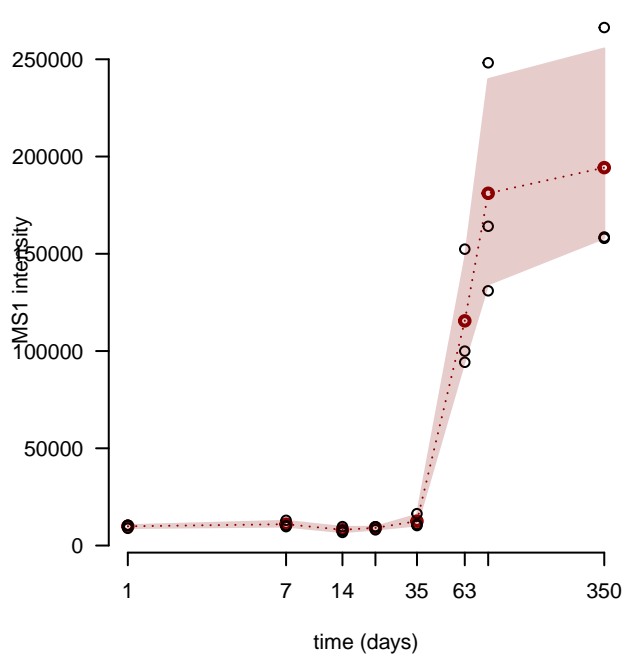

**Q71LX4**  
GN=Tln2  
talin 2

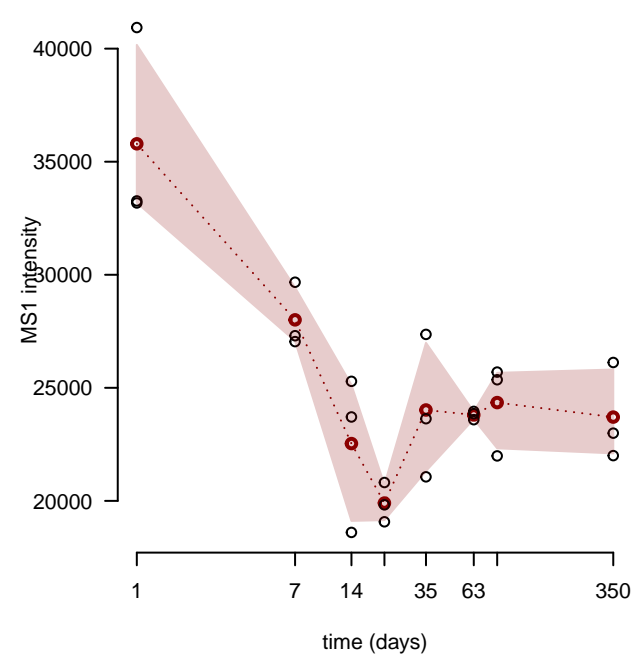

**Q71RI9**  
GN=Kyat3  
kynurenine aminotransferase 3

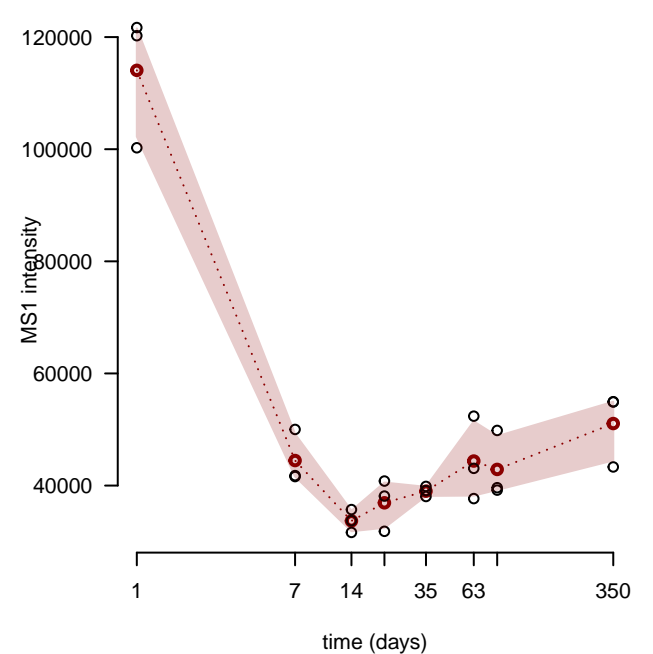

**Q75N62**  
**GN=Gimap8**  
GTPase, IMAP family member 8

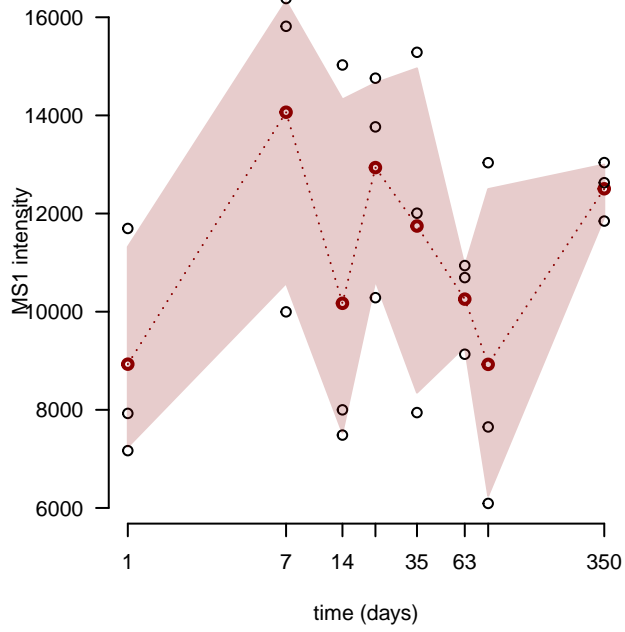

**Q76I79**  
**GN=Ssh1**  
slingshot protein phosphatase 1

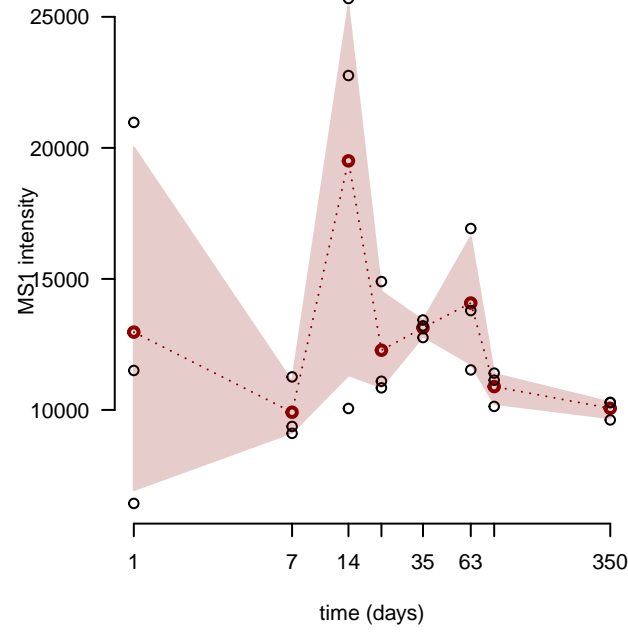

**Q76KF0**  
**GN=Sema6d**  
sema domain, transmembrane domain (TM), ...

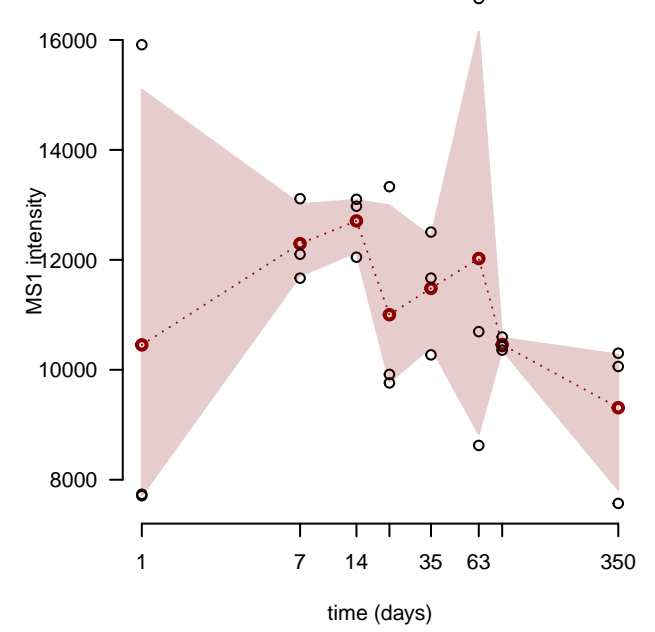

**Q76KJ5**  
**GN=Cd3eap**  
CD3E antigen, epsilon polypeptide associ ...

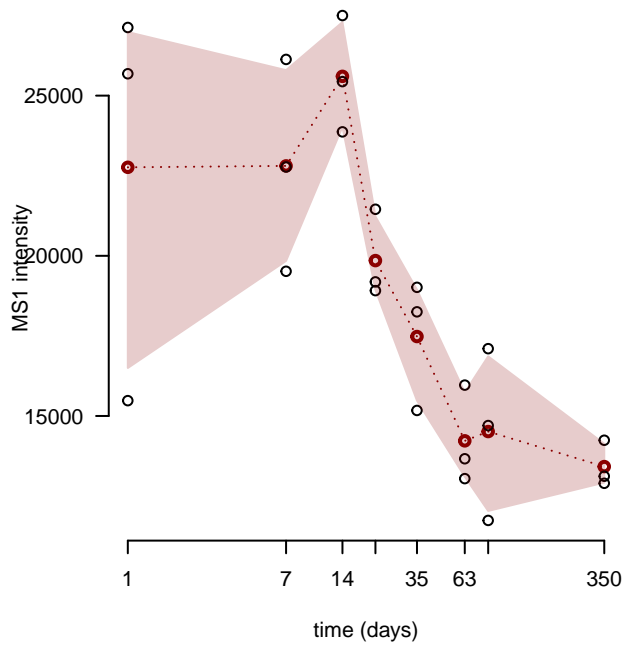

**Q76LS9**  
**GN=Mindy1**  
MINDY lysine 48 deubiquitinase 1

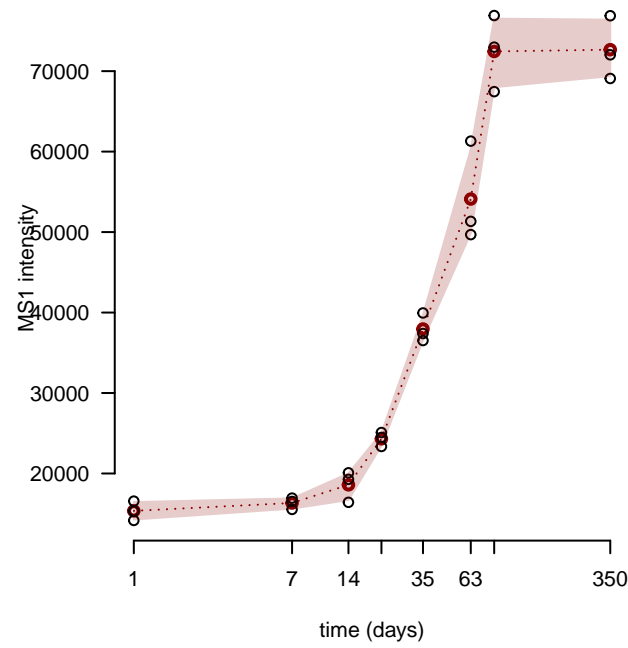

**Q76MZ3**  
**GN=Ppp2r1a**  
protein phosphatase 2, regulatory subuni ...

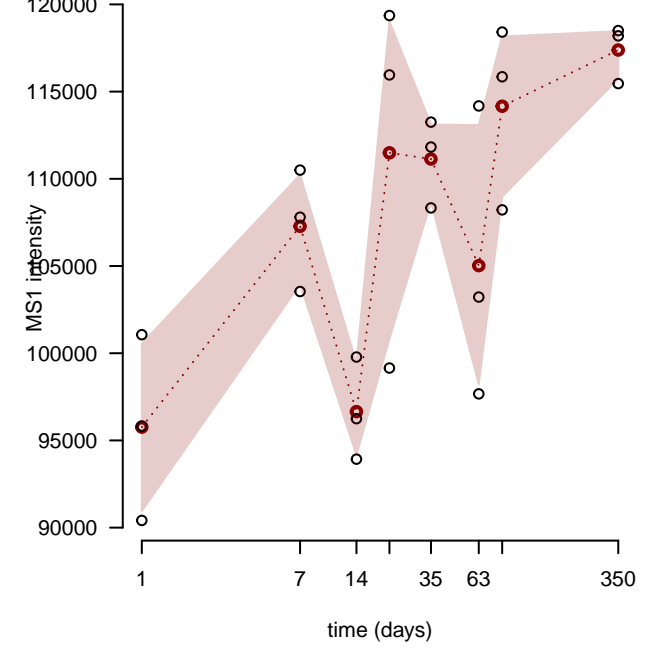

**Q76N33**  
**GN=Stambp1**  
STAM binding protein like 1

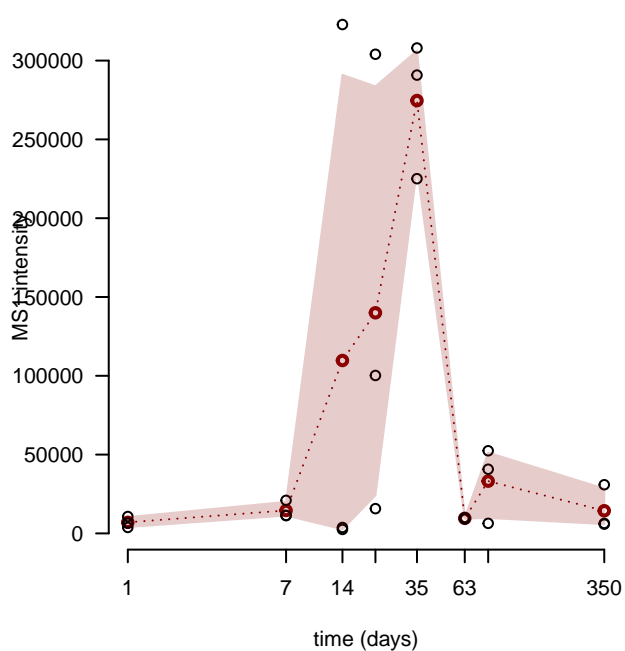

**Q78HU3**  
**GN=Mvb12a**  
multivesicular body subunit 12A

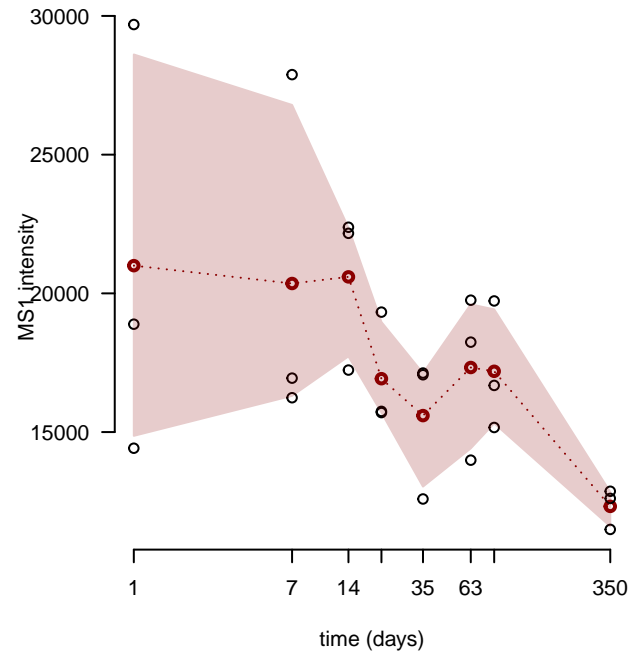

**Q78HU7**  
**GN=Gypc**  
glycophorin C

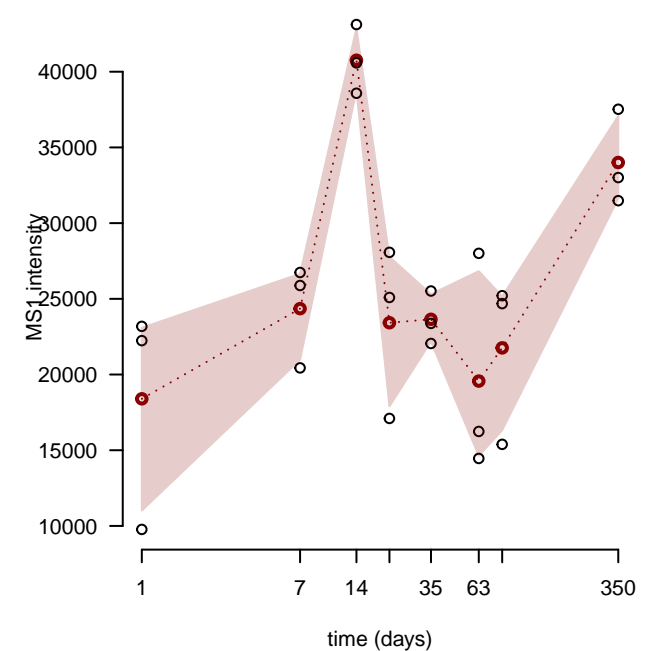

**Q78IK2**  
GN=Atp5md  
ATP synthase membrane subunit DAPIT

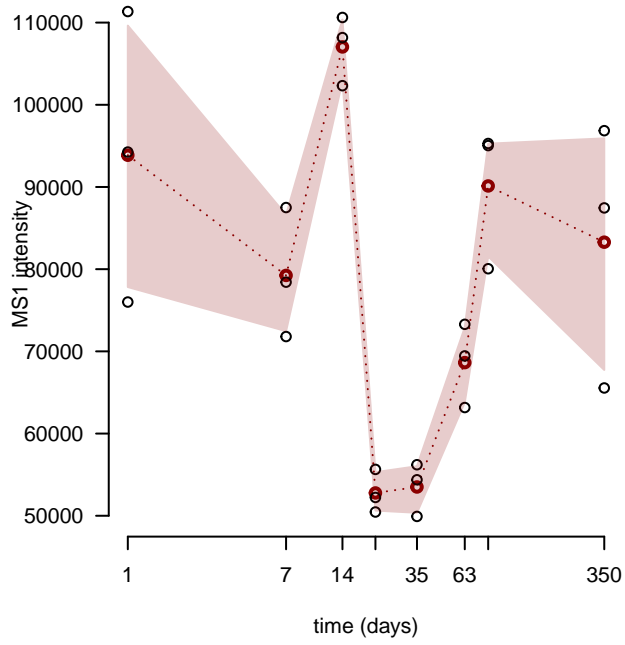

**Q78IK4**  
GN=Apool  
apolipoprotein O-like

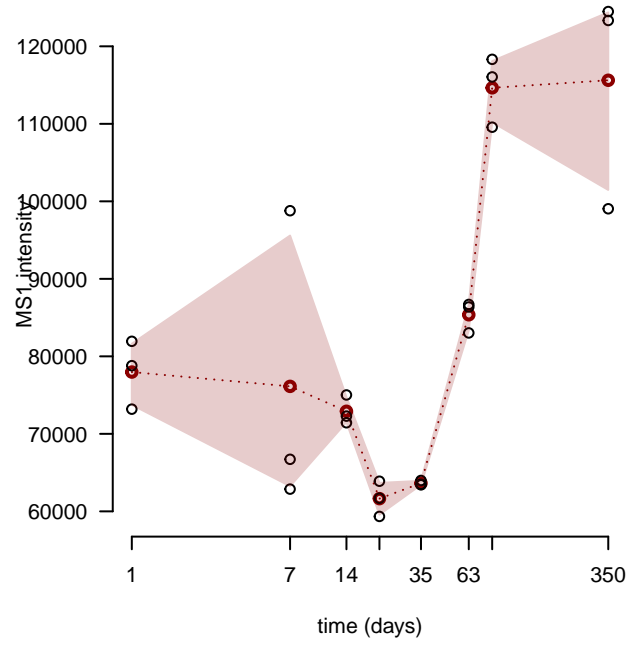

**Q78IS1**  
GN=Tmed3  
transmembrane p24 trafficking protein 3

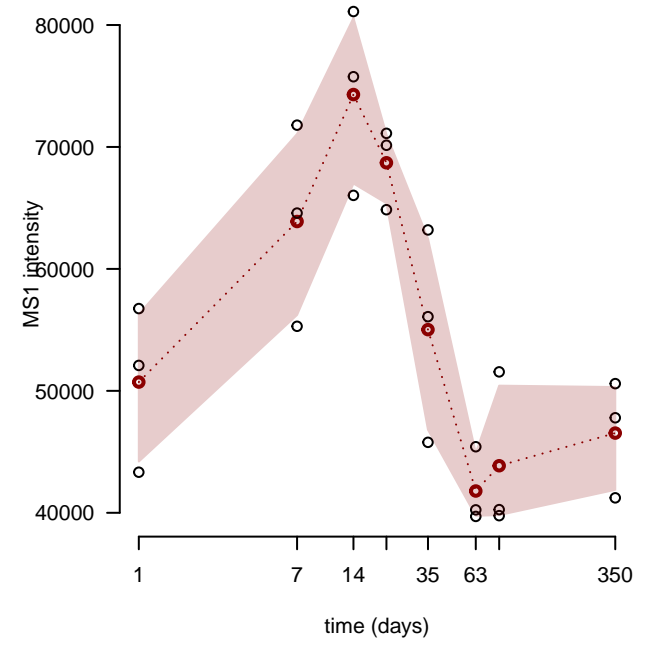

**Q78J03**  
GN=Msrb2  
methionine sulfoxide reductase B2

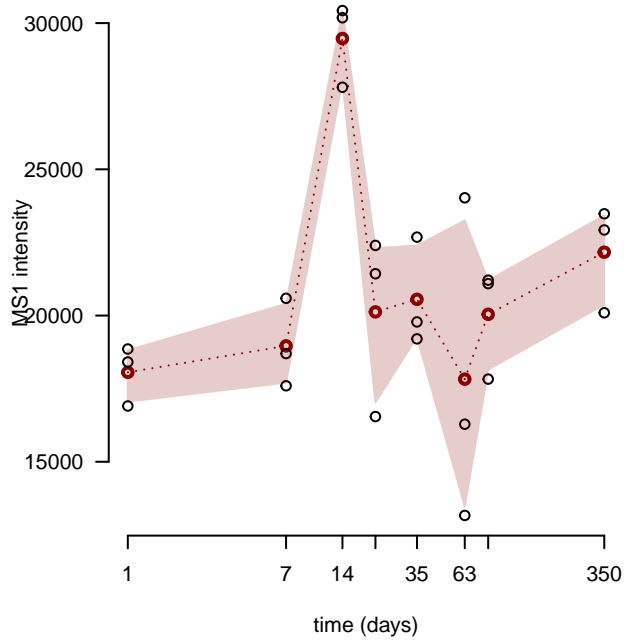

**Q78JE5**  
GN=Fbxo22  
F-box protein 22

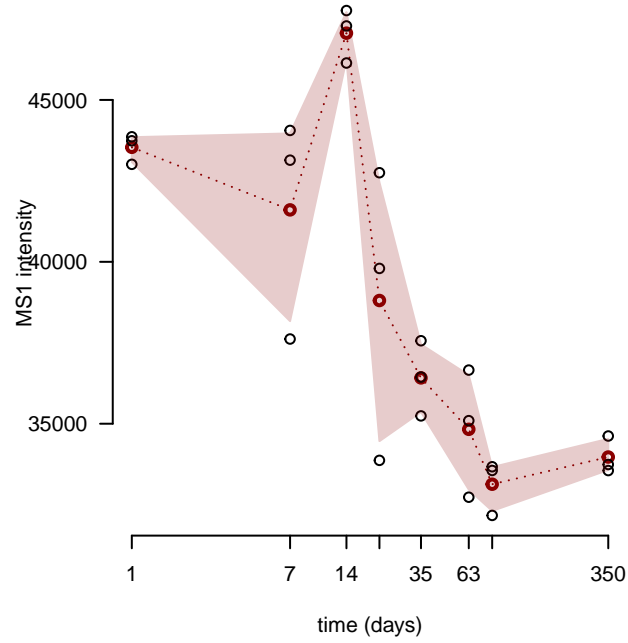

**Q78JT3**  
GN=Hao  
3-hydroxyanthranilate 3,4-dioxygenase

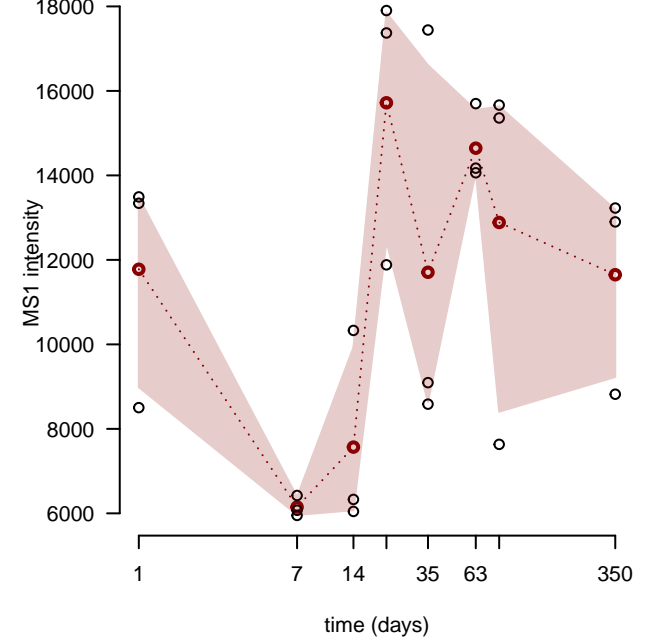

**Q78JW9**  
GN=Ubf1  
ubiquitin family domain containing 1

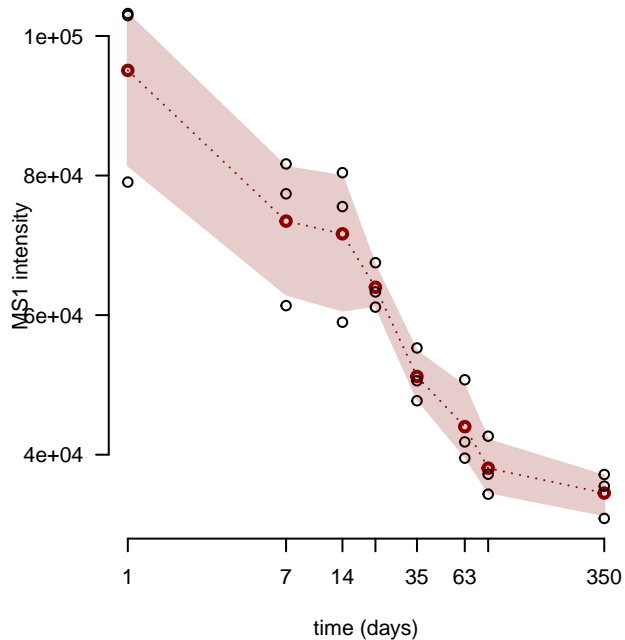

**Q78PG9**  
GN=Ccdc25  
coiled-coil domain containing 25

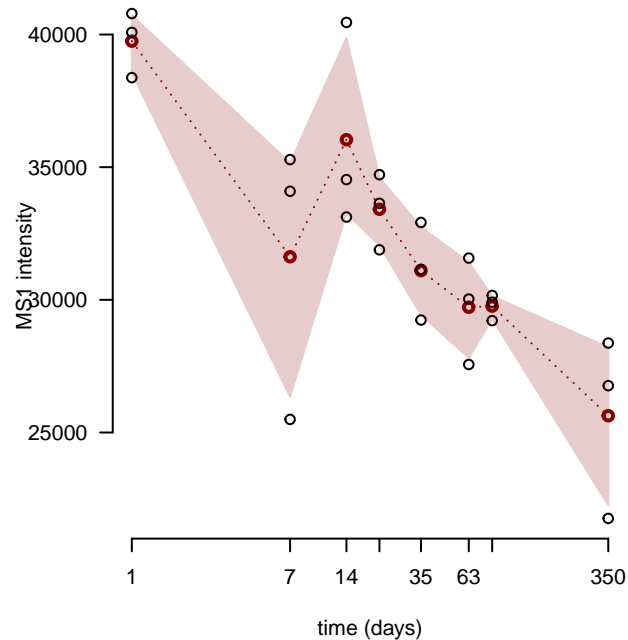

**Q78PY7**  
GN=Snd1  
staphylococcal nuclease and tudor domain ...

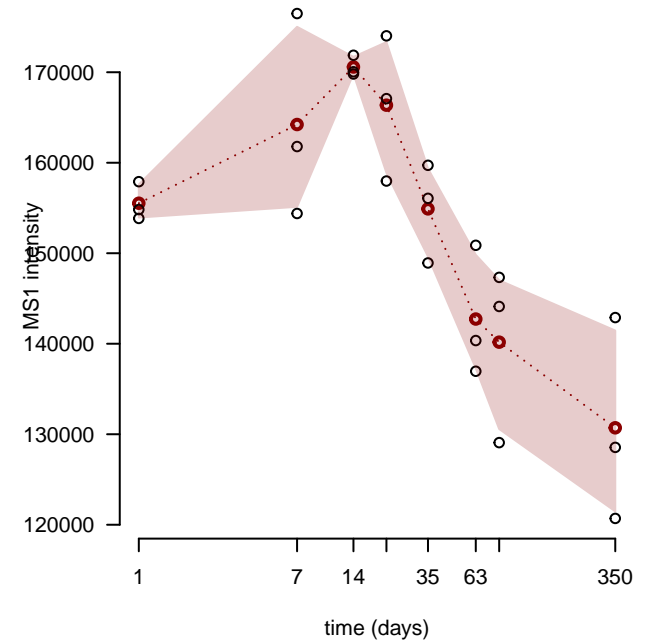

**Q78RX3**  
**GN=Smim12**  
small integral membrane protein 12

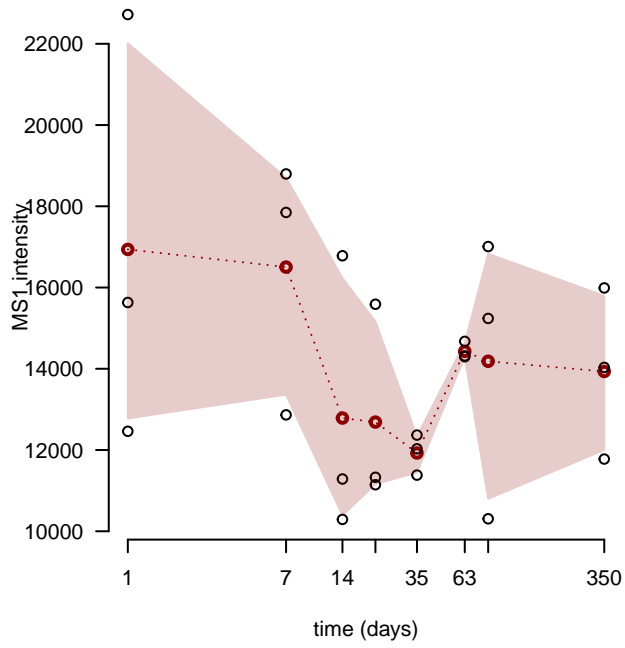

**Q78T54**  
**GN=Vma21**  
VMA21 vacuolar H<sup>+</sup>-ATPase homolog (S. cer ...

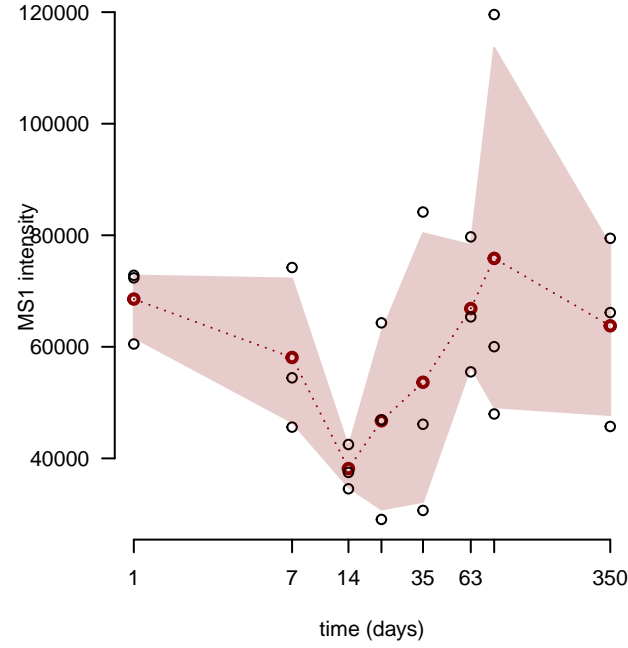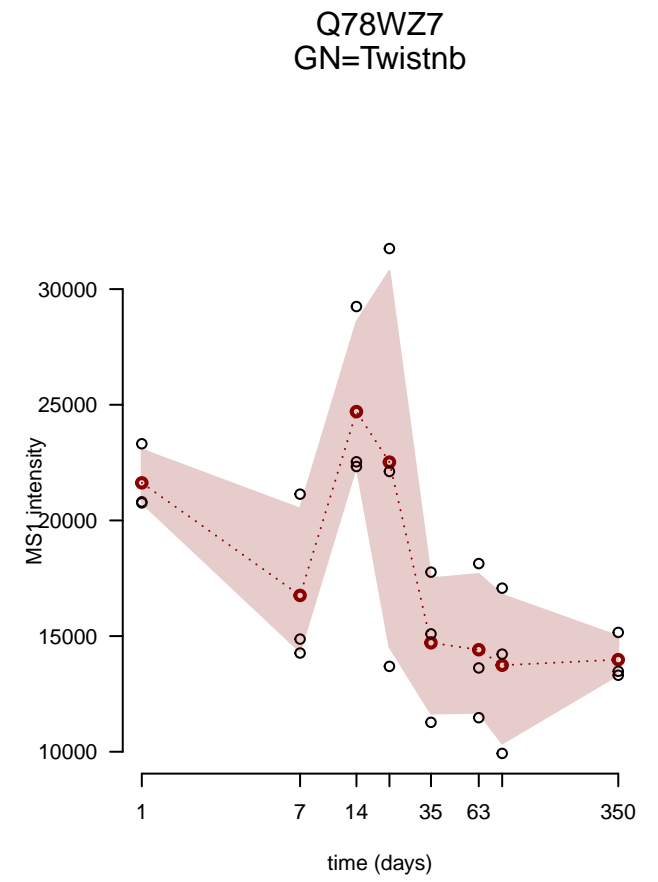

**Q78XF5**  
**GN=Ostc**  
oligosaccharyltransferase complex subuni ...

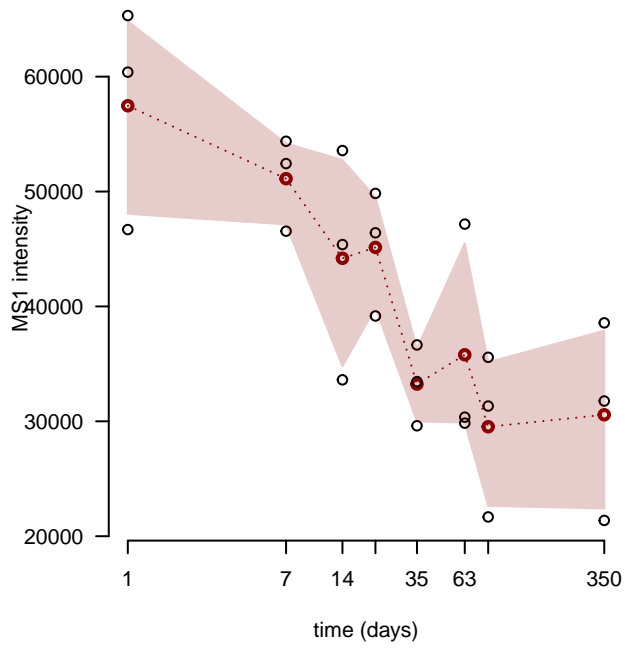

**Q78YY6**  
**GN=Dnajc15**  
DnaJ heat shock protein family (Hsp40) m ...

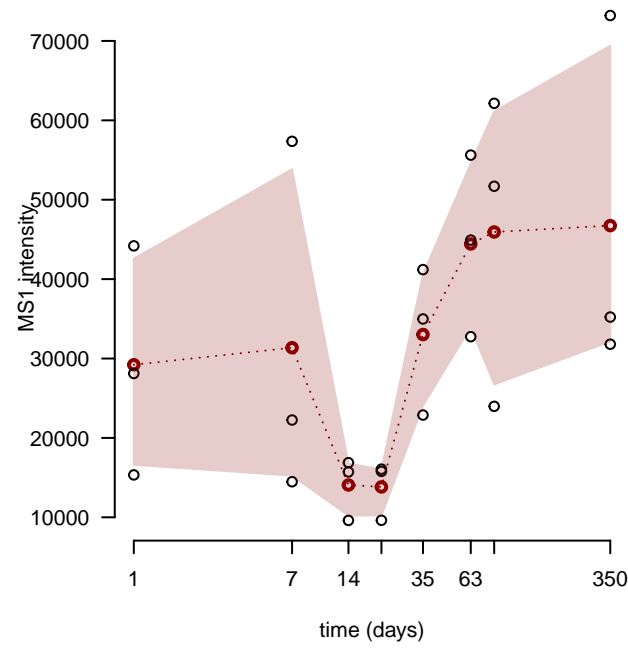

**Q78YZ6**  
**GN=Scoc**  
short coiled-coil protein

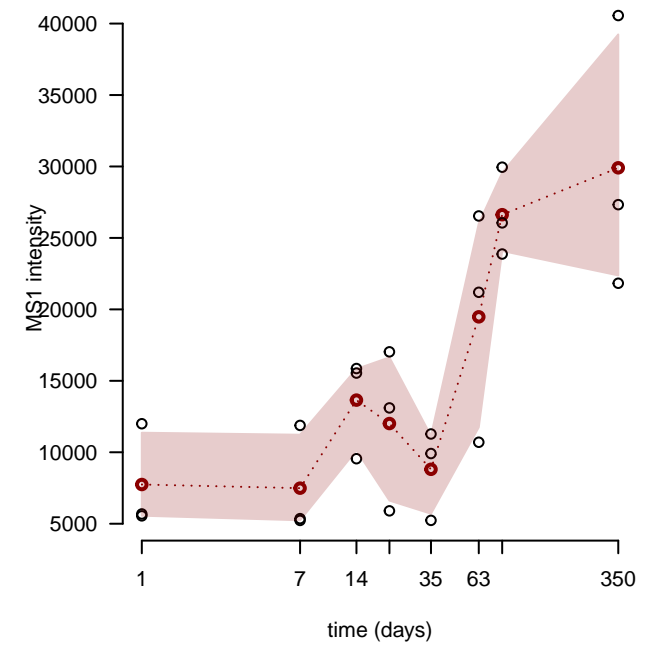

**Q78ZA7**  
**GN=Nap114**  
nucleosome assembly protein 1-like 4

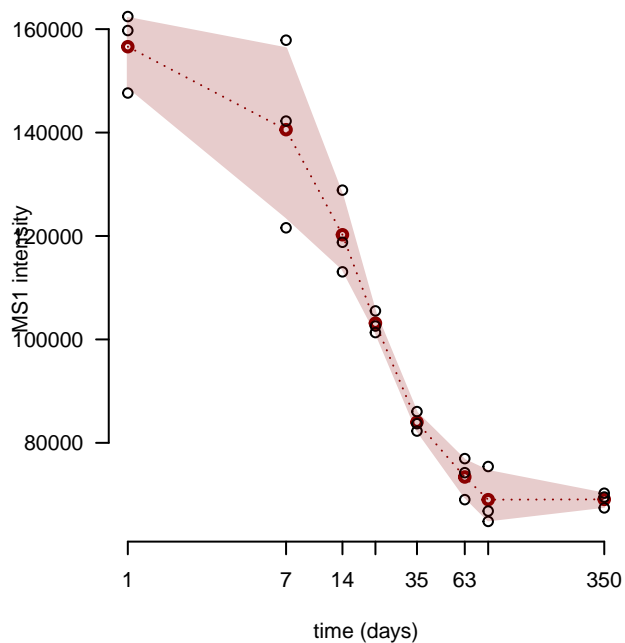

**Q791T5**  
**GN=Mtch1**  
mitochondrial carrier 1

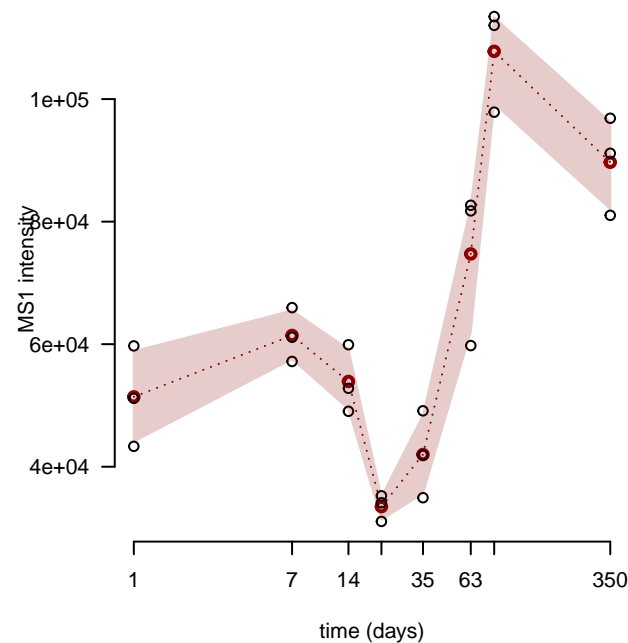

**Q791V5**  
**GN=Mtch2**  
mitochondrial carrier 2

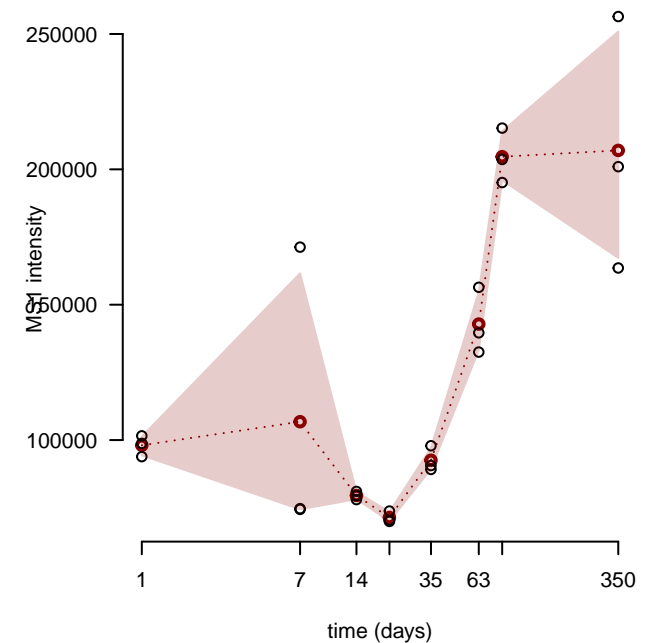



**Q793I8**  
GN=Tifa  
TRAF-interacting protein with forkhead-a ...

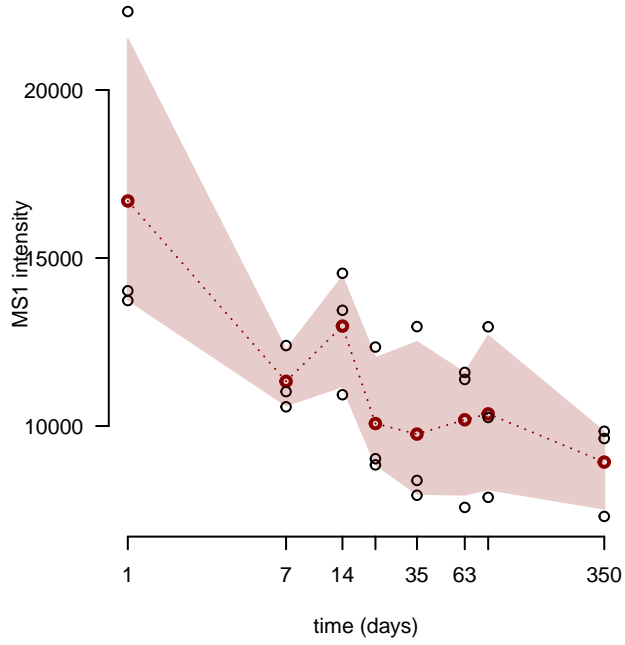

**Q7JJ13**  
GN=Brd2  
bromodomain containing 2

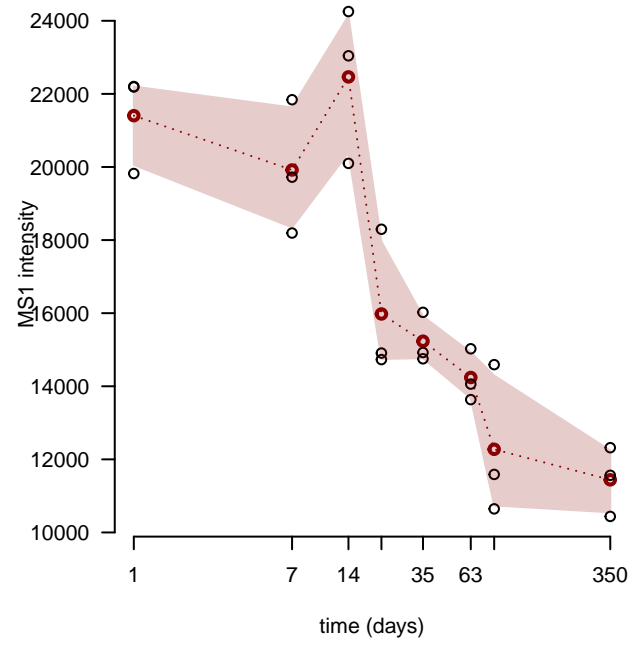

**Q7M6U3**  
GN=Tex14  
testis expressed gene 14

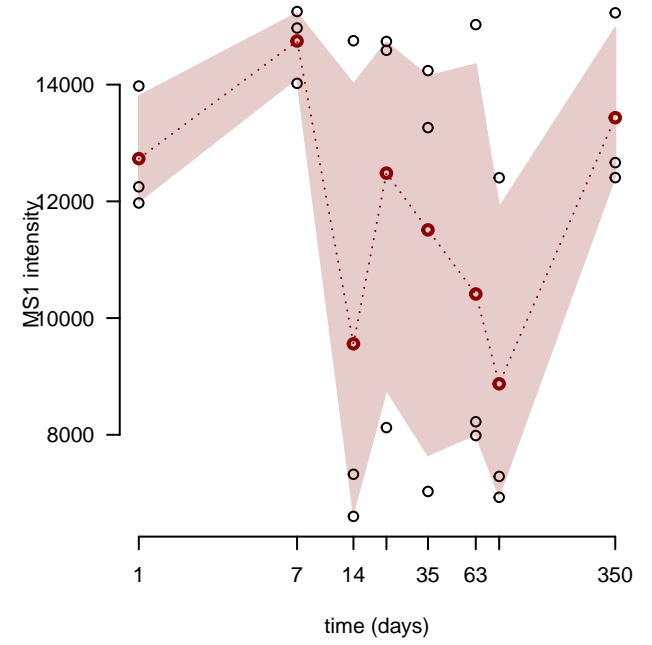

**Q7M6Y3**  
GN=Picalm  
phosphatidylinositol binding clathrin as ...

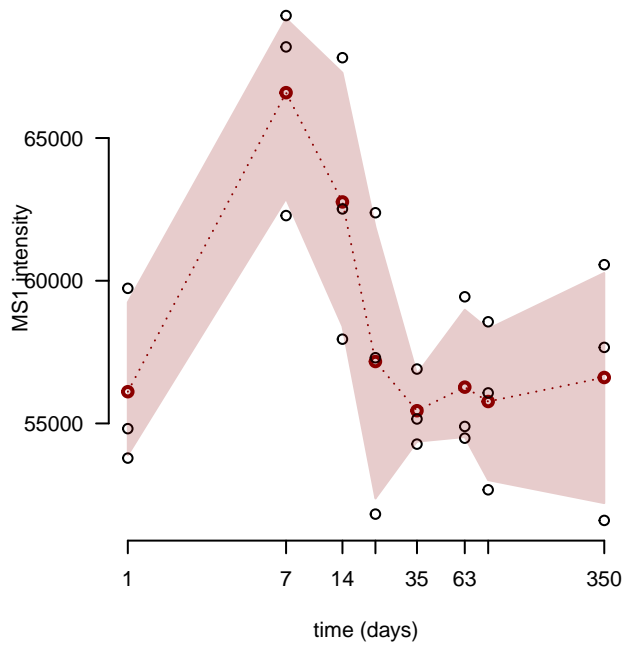

**Q7M753**  
GN=

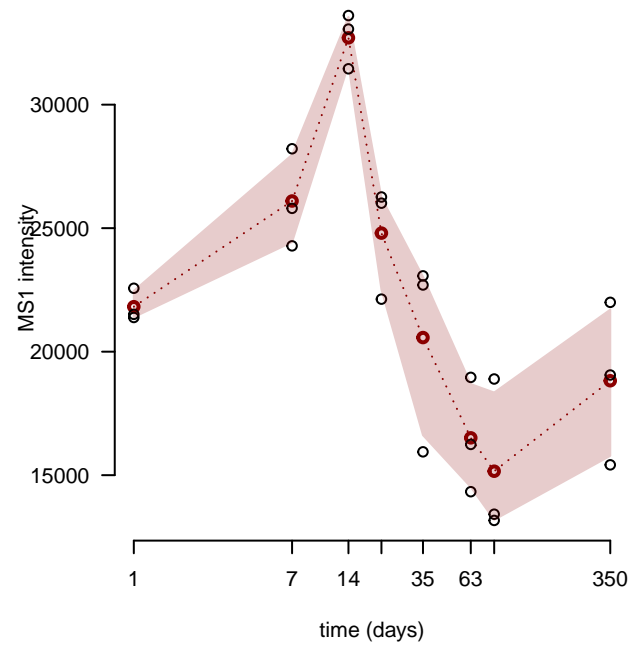

**Q7SIG6**  
GN=Asap2  
ArfGAP with SH3 domain, ankyrin repeat a ...

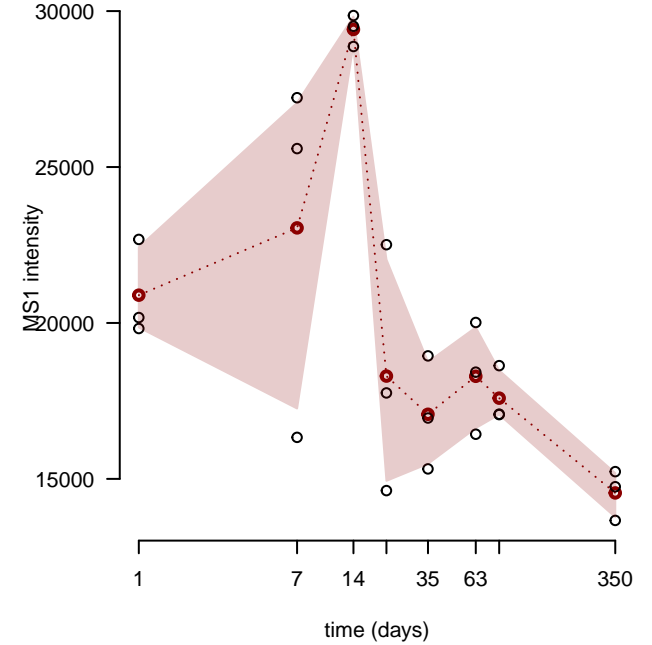

**Q7TMA2**  
GN=Znf503

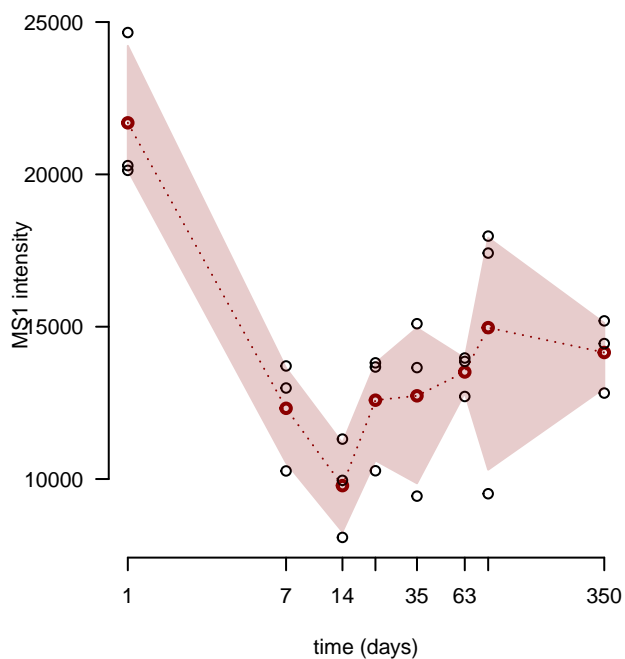

**Q7TMB8**  
GN=Cyfp1  
cytoplasmic FMR1 interacting protein 1

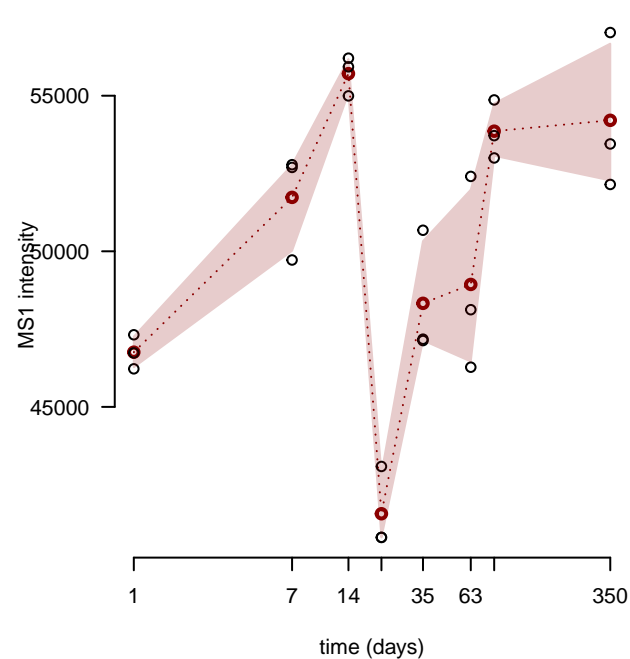

**Q7TMC8**  
GN=Fcsk  
fucose kinase

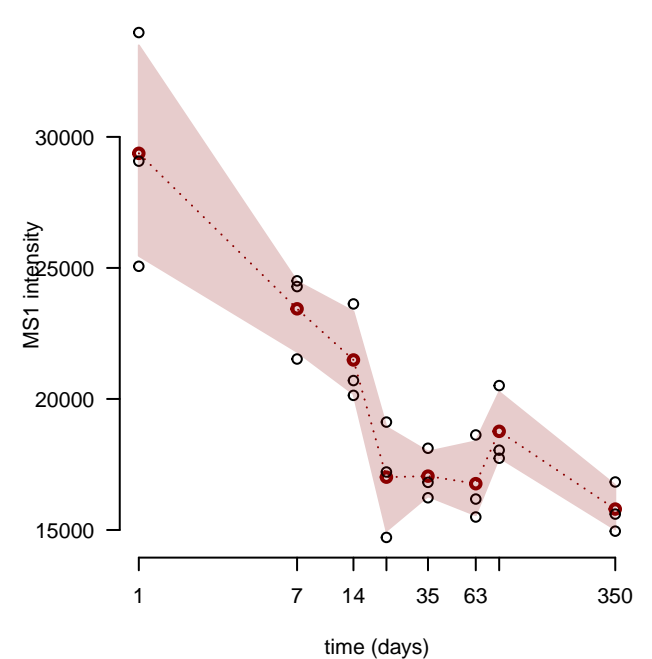

**Q7TMD7**  
GN=Dsg4  
desmoglein 4

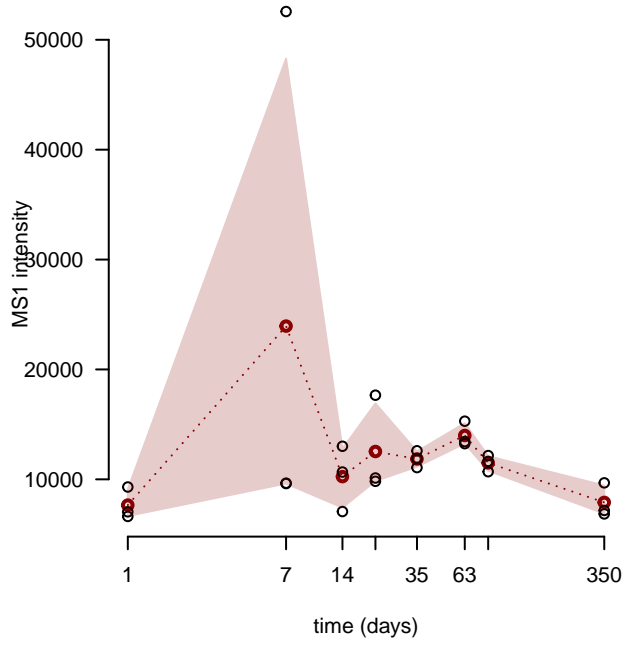

**Q7TME2**  
GN=Spag5  
sperm associated antigen 5

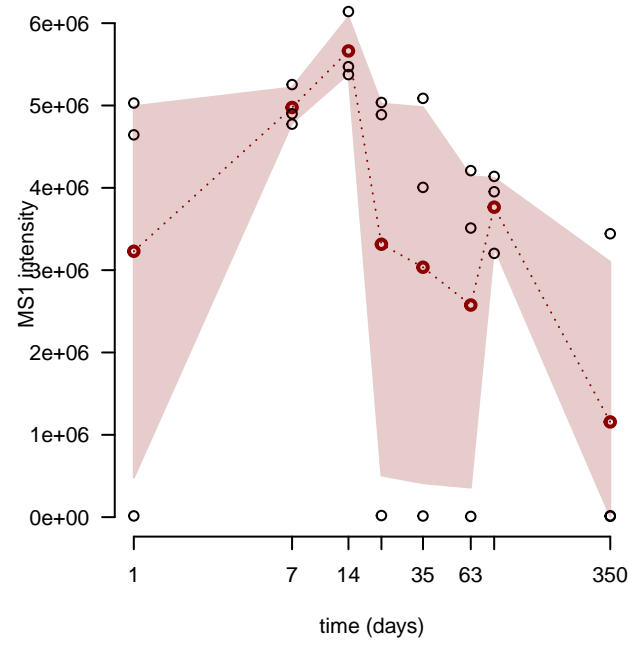

**Q7TMF2**  
GN=Eri1  
exoribonuclease 1

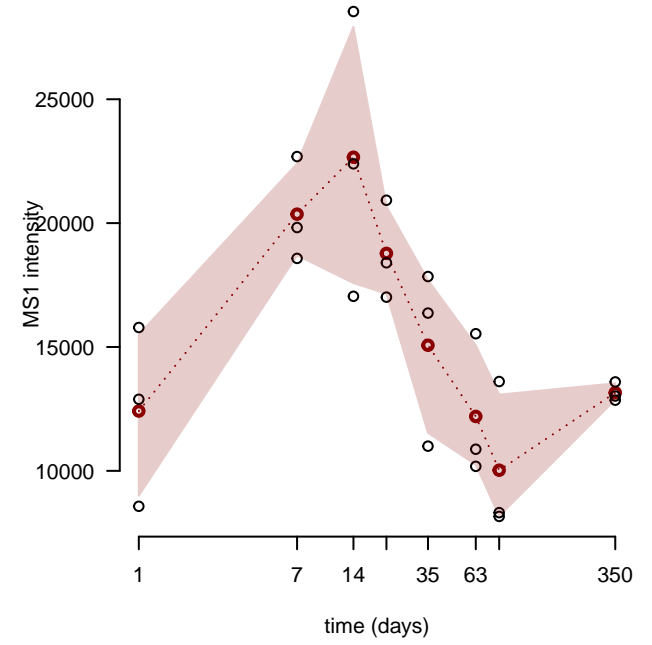

**Q7TMF3**  
GN=Ndufa12  
NADH:ubiquinone oxidoreductase subunit A ...

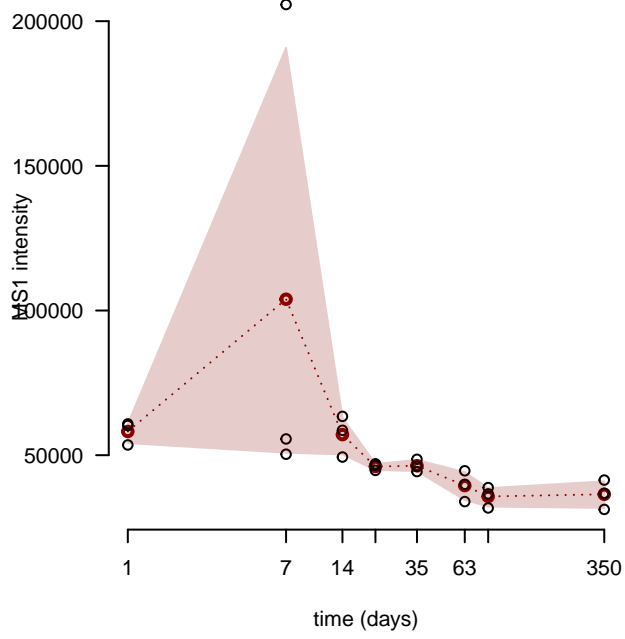

**Q7TMI3**  
GN=Uhrf2  
ubiquitin-like, containing PHD and RING ...

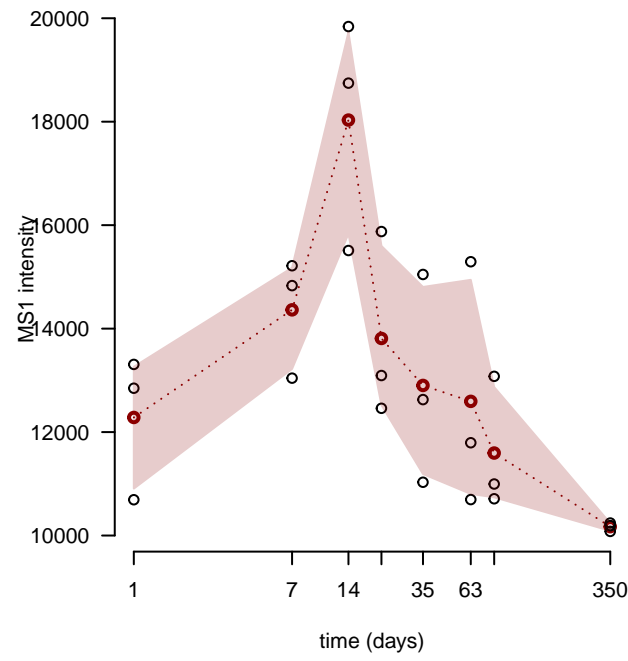

**Q7TMK6**  
GN=Hook2  
hook microtubule tethering protein 2

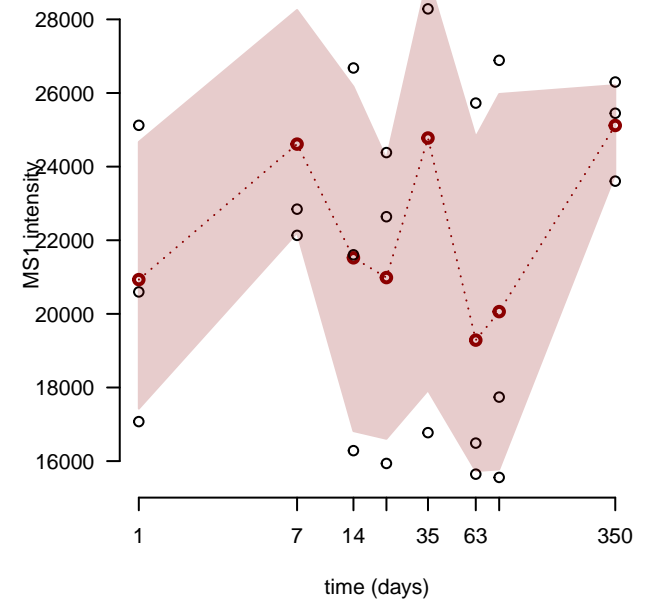

**Q7TMK9**  
GN=Syncrip  
synaptotagmin binding, cytoplasmic RNA i ...

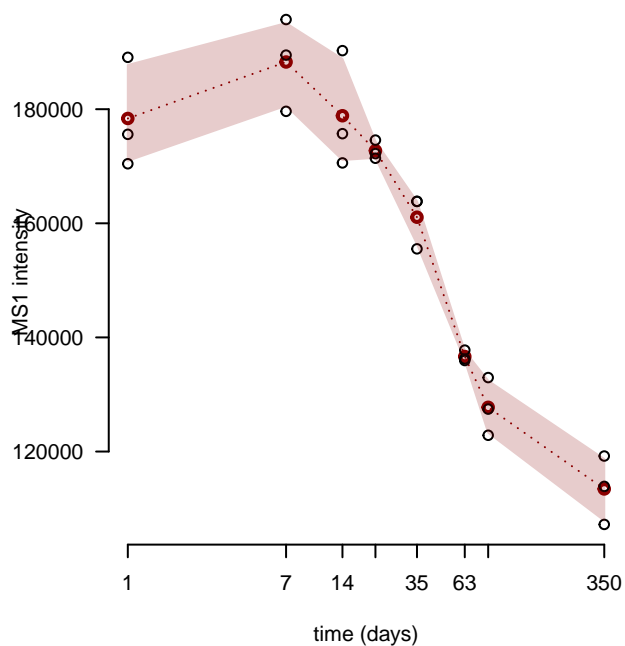

**Q7TMK9**  
GN=Syncrip  
synaptotagmin binding, cytoplasmic RNA i ...

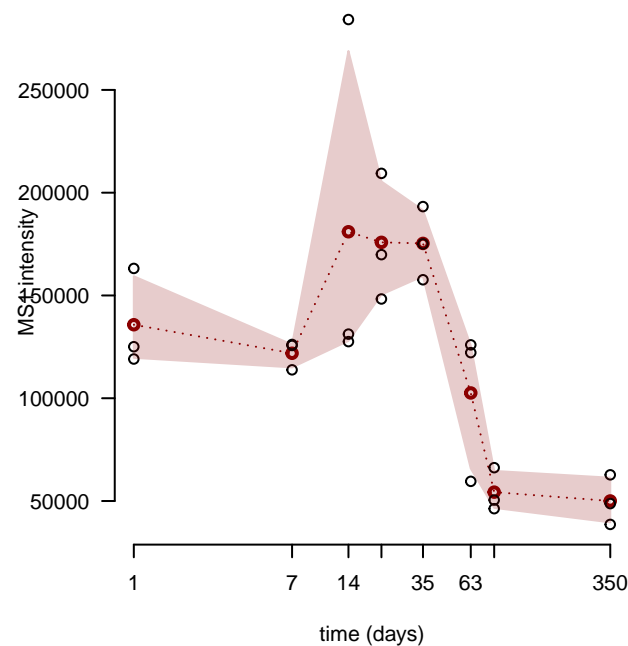

**Q7TMM8**  
GN=Parp16  
poly (ADP-ribose) polymerase family, mem ...

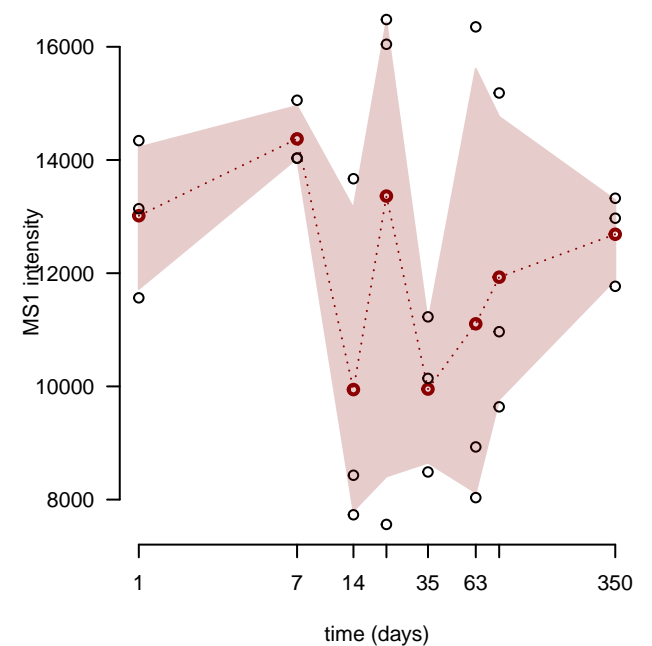

**Q7TMM9**  
GN=Tubb2a  
tubulin, beta 2A class IIA

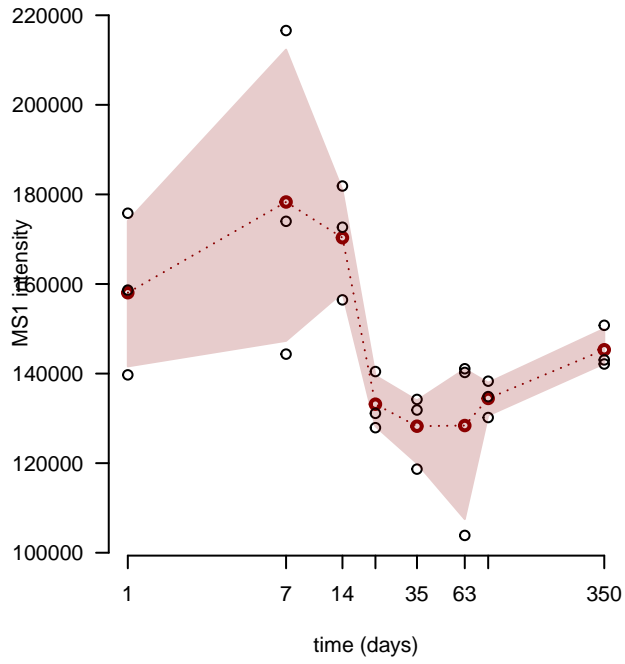

**Q7TMQ7**  
GN=Wdr91  
WD repeat domain 91

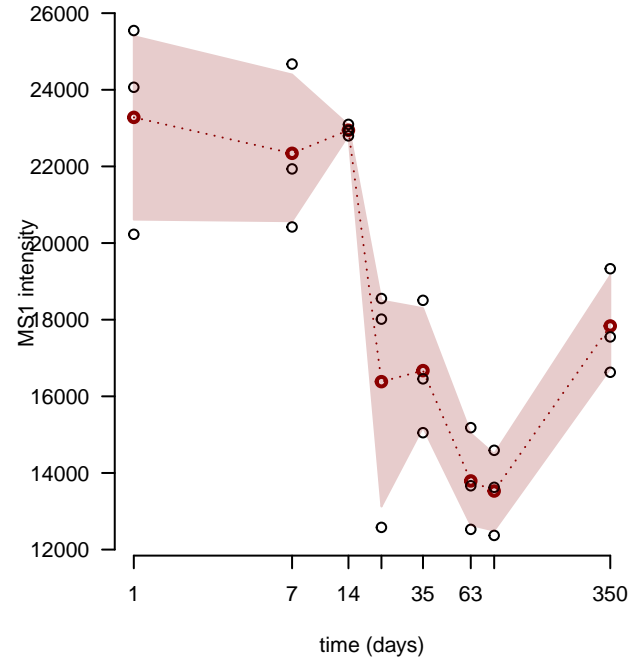

**Q7TMR0**  
GN=Prpc  
prolylcarboxypeptidase (angiotensinase C ...

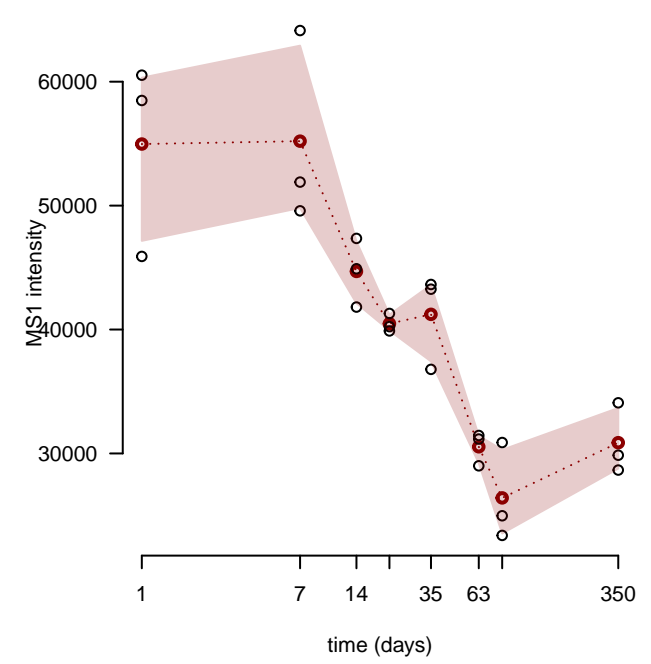

**Q7TMS5**  
GN=Abcg2  
ATP binding cassette subfamily G member ...

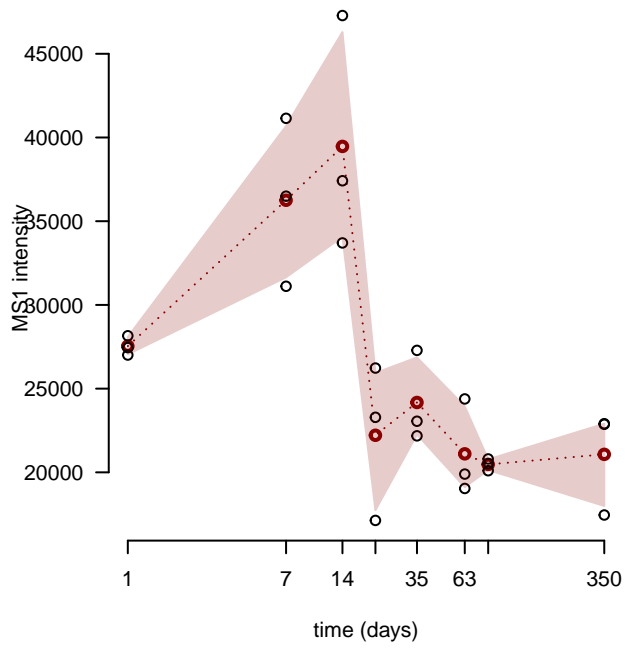

**Q7TMV1**  
GN=Rnf139  
ring finger protein 139

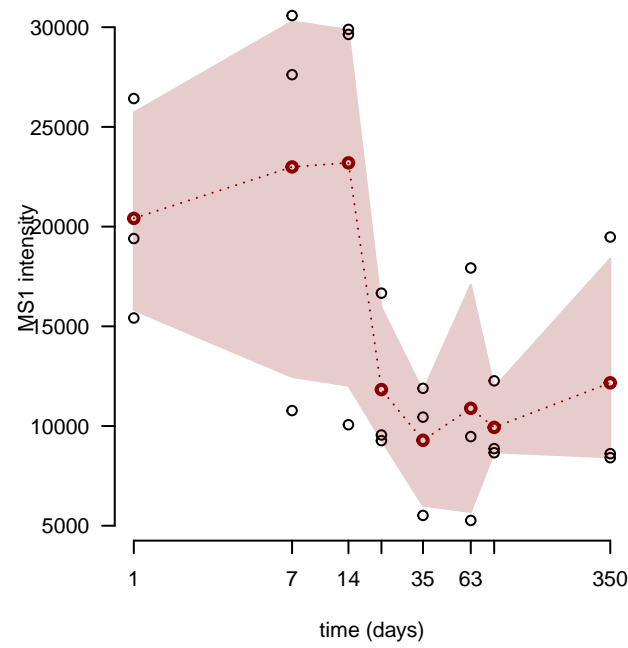

**Q7TMV3**  
GN=Fastkd5  
FAST kinase domains 5

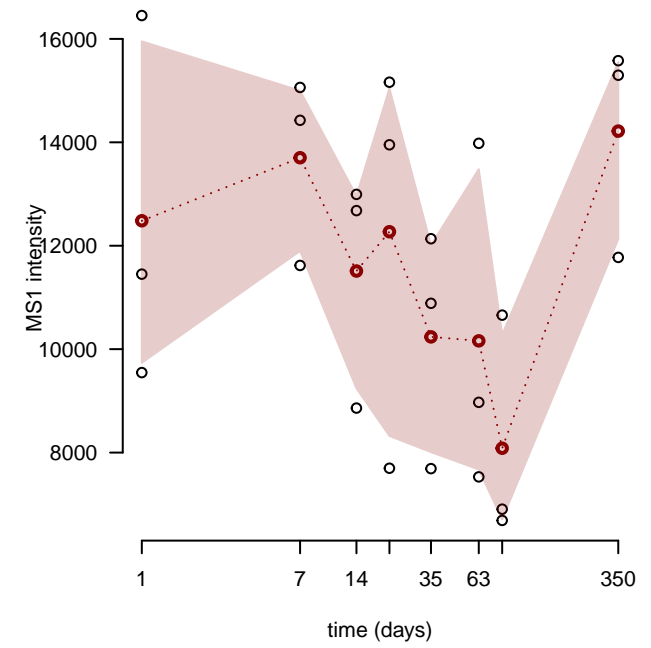

**Q7TMW6**  
GN=Ciao3  
cytosolic iron-sulfur assembly component ...

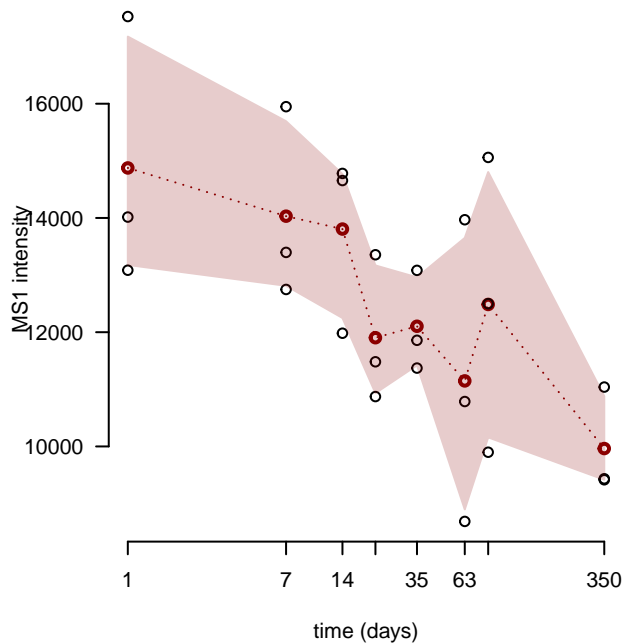

**Q7TMX5**  
GN=Shq1  
SHQ1 homolog (*S. cerevisiae*)

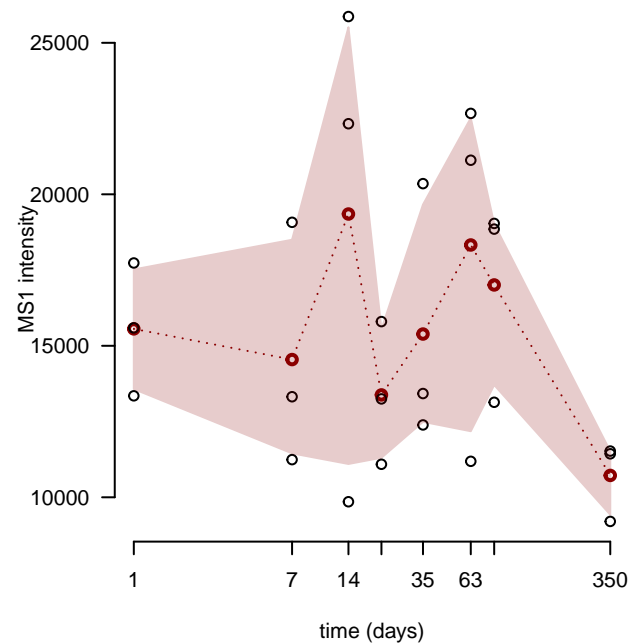

**Q7TMY4**  
GN=Thoc7  
THO complex 7

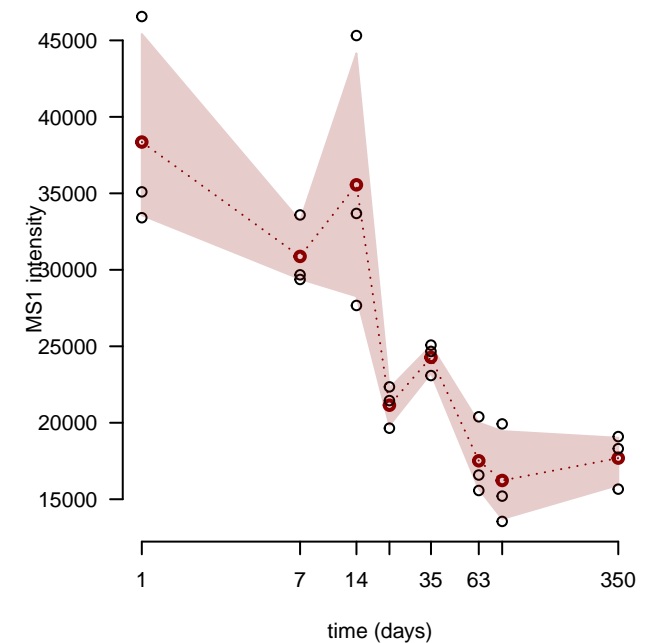

**Q7TMY7**  
GN=lpo8  
importin 8

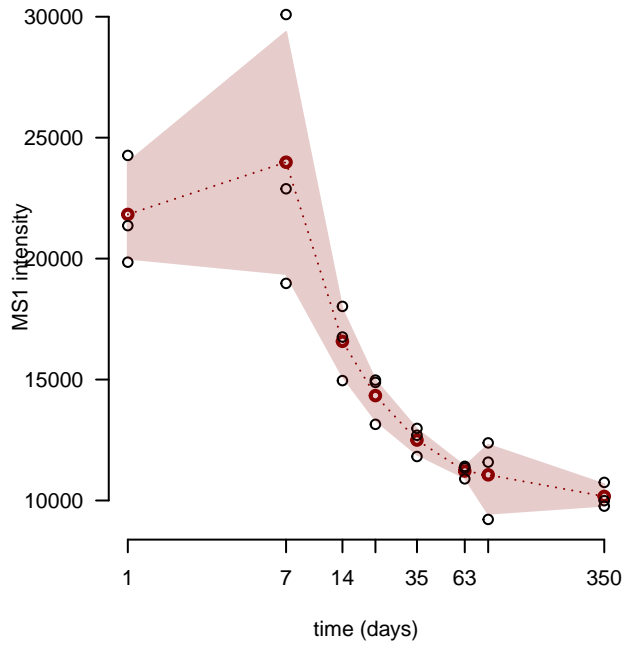

**Q7TMY8**  
GN=Huwe1  
HECT, UBA and WWE domain containing 1

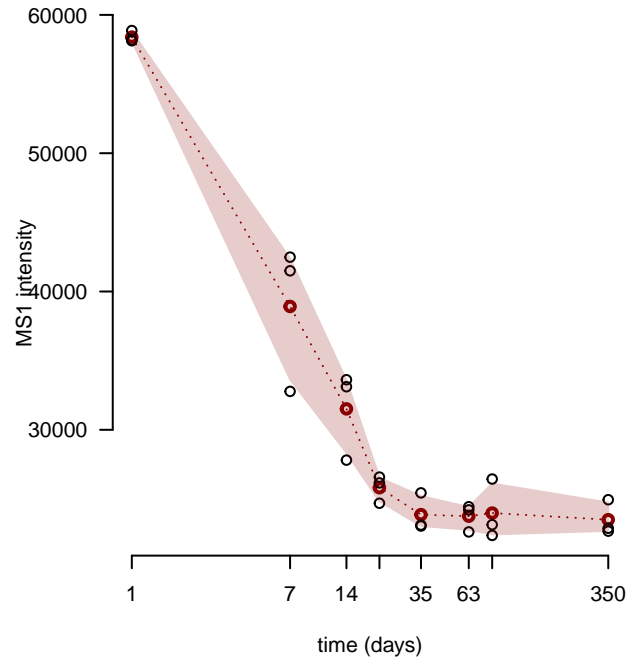

**Q7TN02**  
GN=Med26  
mediator complex subunit 26

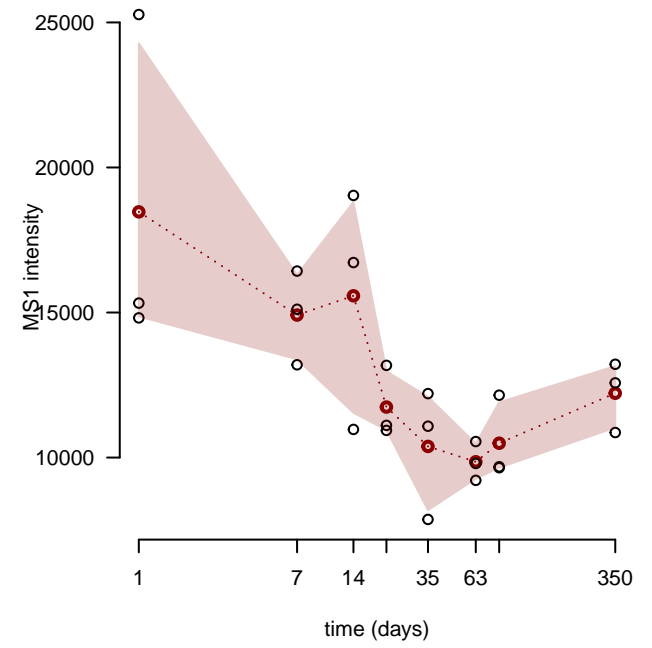

**Q7TN22**  
GN=Txndc16  
thioredoxin domain containing 16

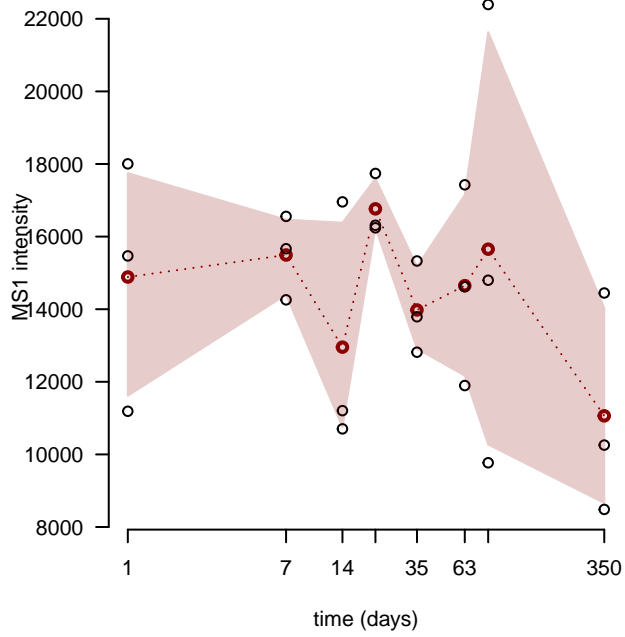

**Q7TN29**  
GN=Smap2  
small ArfGAP 2

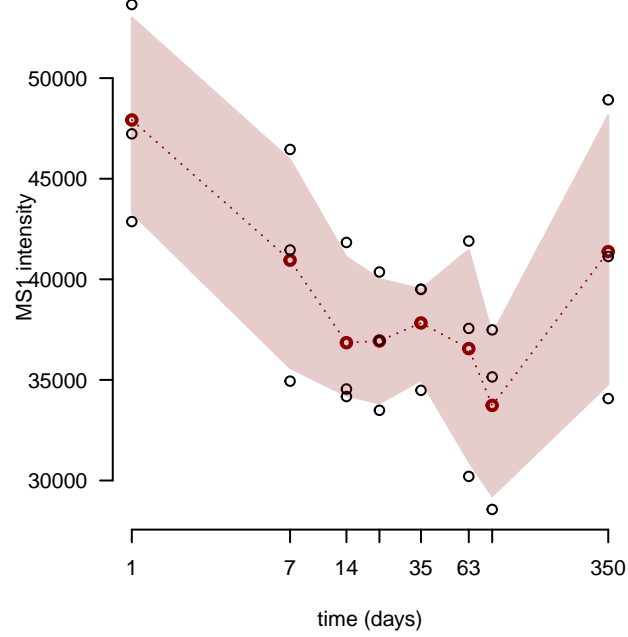

**Q7TN31**  
GN=Aggf1  
angiogenic factor with G patch and FHA d...

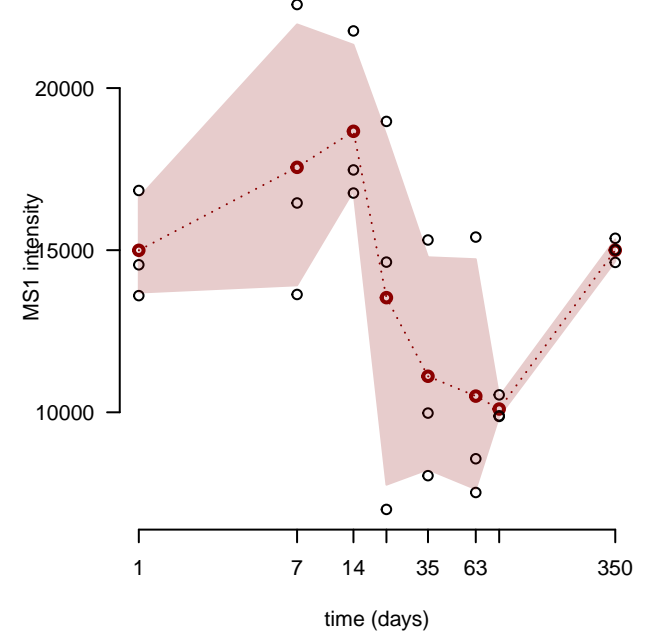

**Q7TN37**  
GN=Trpm4  
transient receptor potential cation chan ...

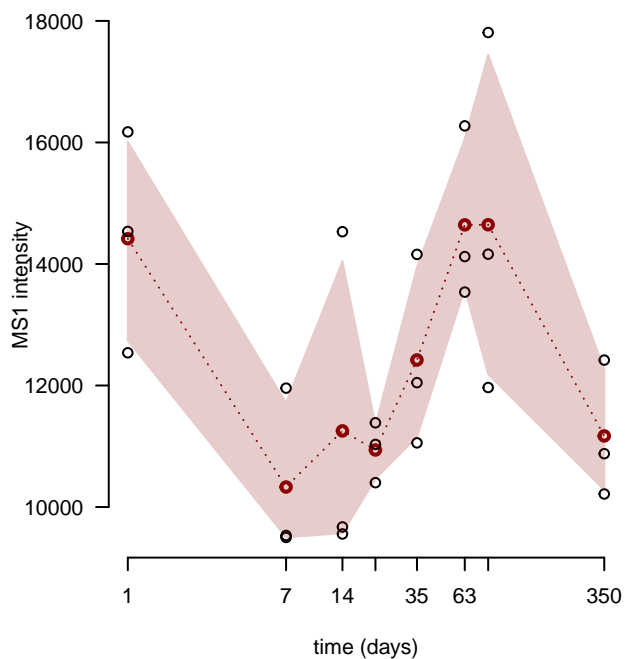

**Q7TN73**  
GN=Casd1  
CAS1 domain containing 1

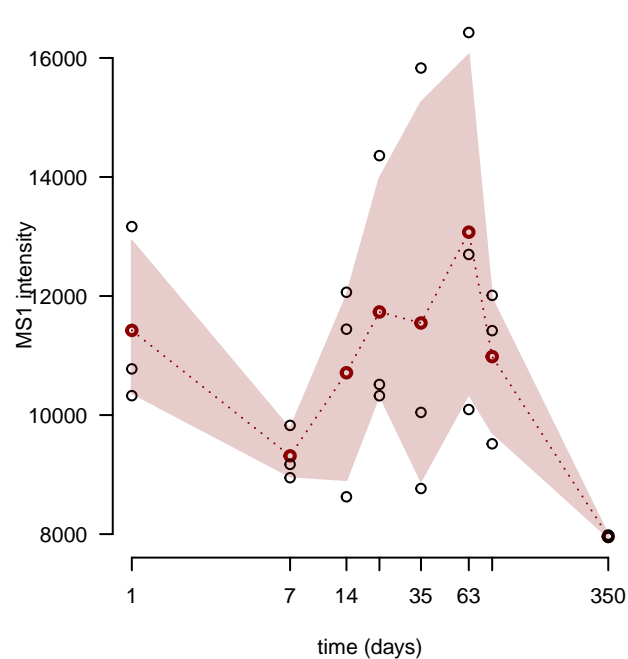

**Q7TN75**  
GN=Peg10  
paternally expressed 10

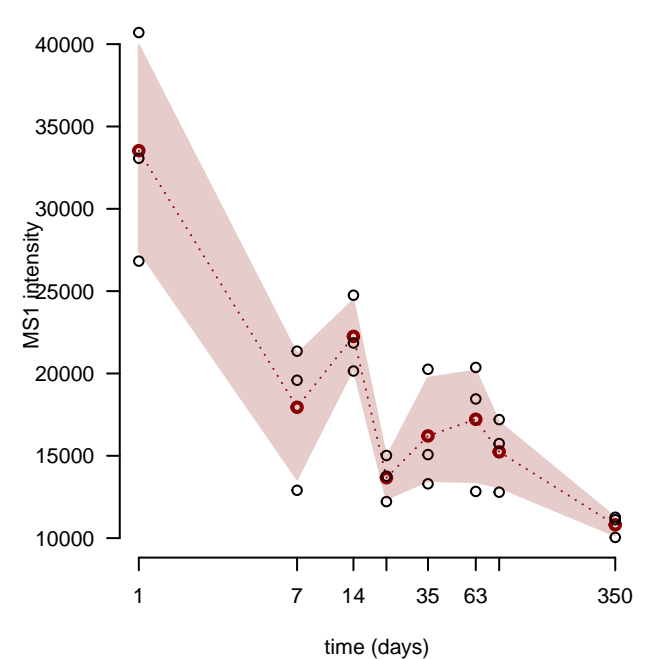

**Q7TN79**  
GN=Akap7

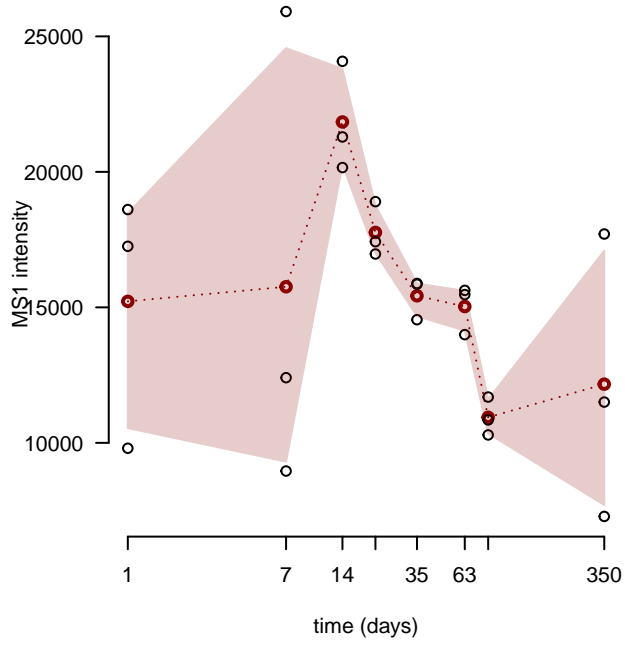

**Q7TN98**  
GN=Cpeb4  
cytoplasmic polyadenylation element bind ...

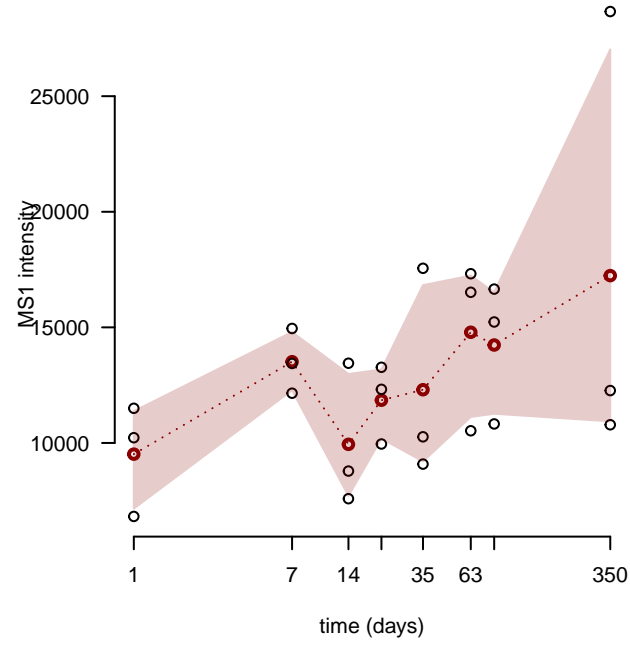

**Q7TN99**  
GN=Cpeb3  
cytoplasmic polyadenylation element bind ...

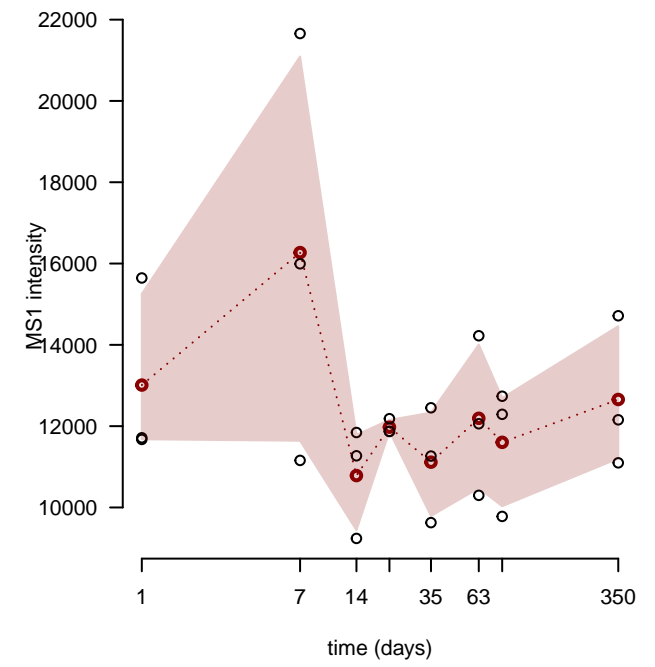

**Q7TNC4**  
GN=Luc712  
LUC7-like 2 (*S. cerevisiae*)

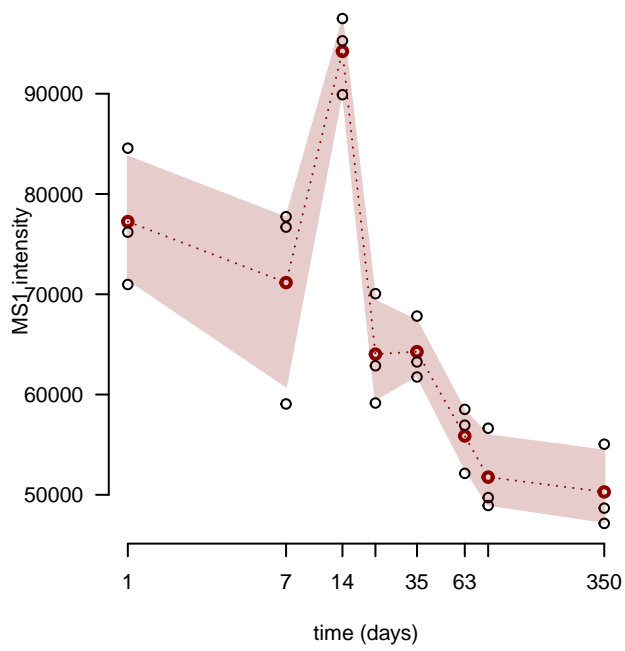

**Q7TNC9**  
GN=

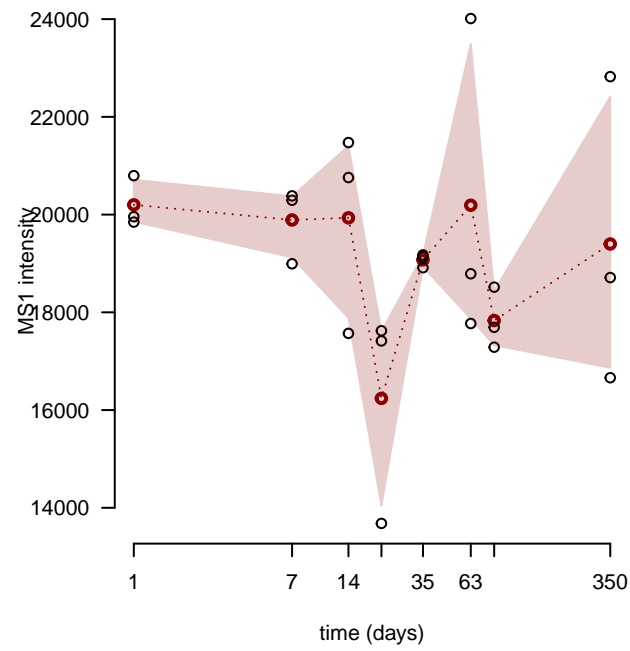

**Q7TND5**  
GN=Rpf1  
ribosome production factor 1 homolog

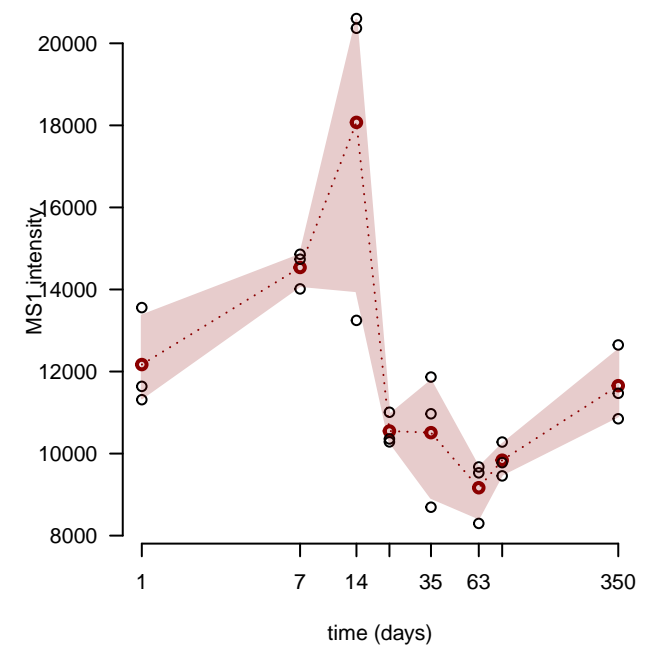

**Q7TNE1**  
GN=Sugct  
succinyl-CoA glutarate-CoA transferase

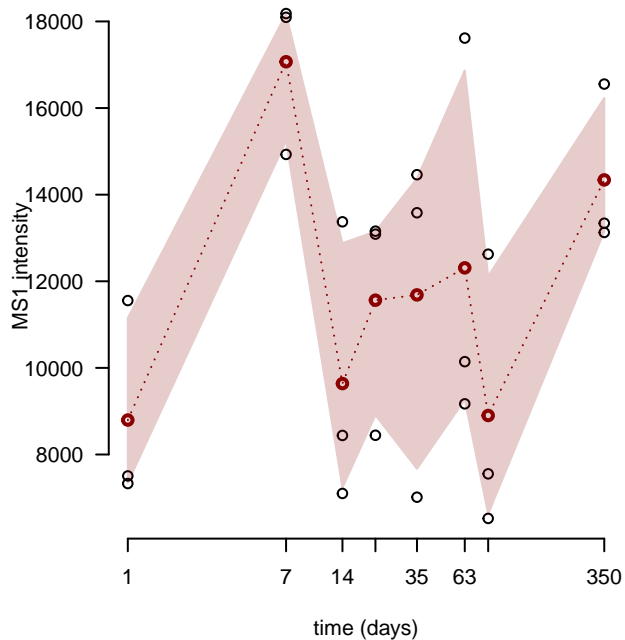

**Q7TNE3**  
GN=Spag7  
sperm associated antigen 7

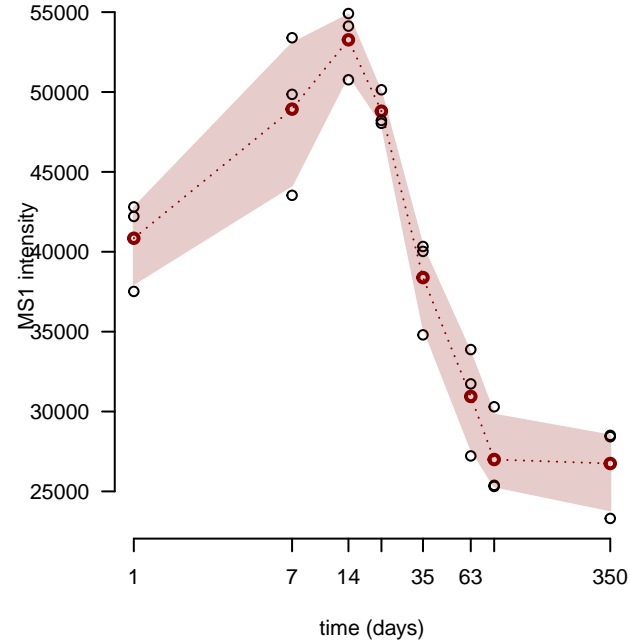

**Q7TNF9**  
GN=Fam117a  
family with sequence similarity 117, mem ...

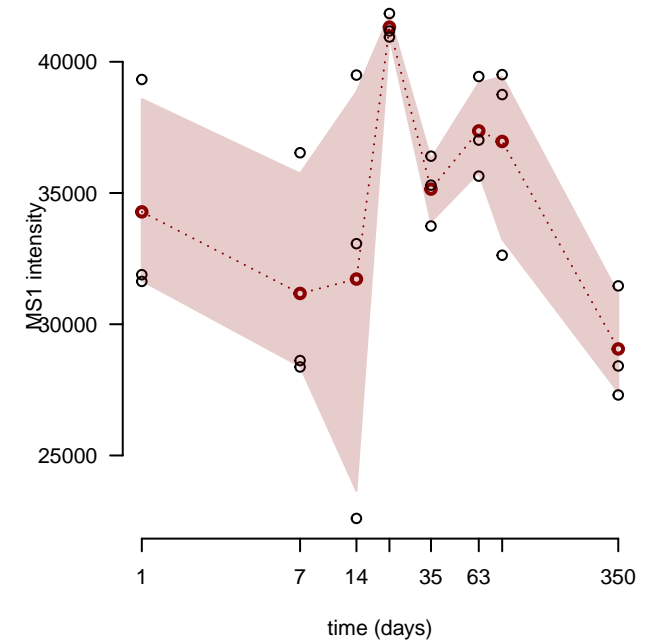

**Q7TNG5**  
**GN=Eml2**

echinoderm microtubule associated protei ...

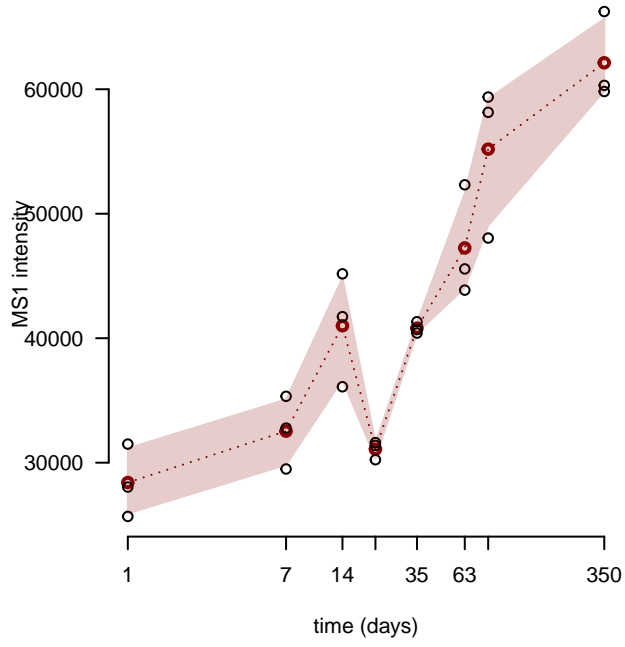

**Q7TNG8**  
**GN=Ldhd**

lactate dehydrogenase D

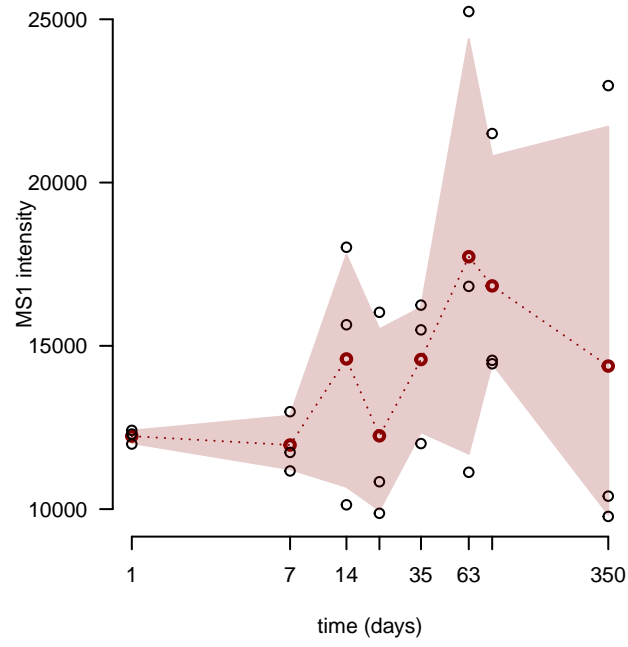

**Q7TNH6**  
**GN=Nphp3**

nephronophthisis 3 (adolescent)

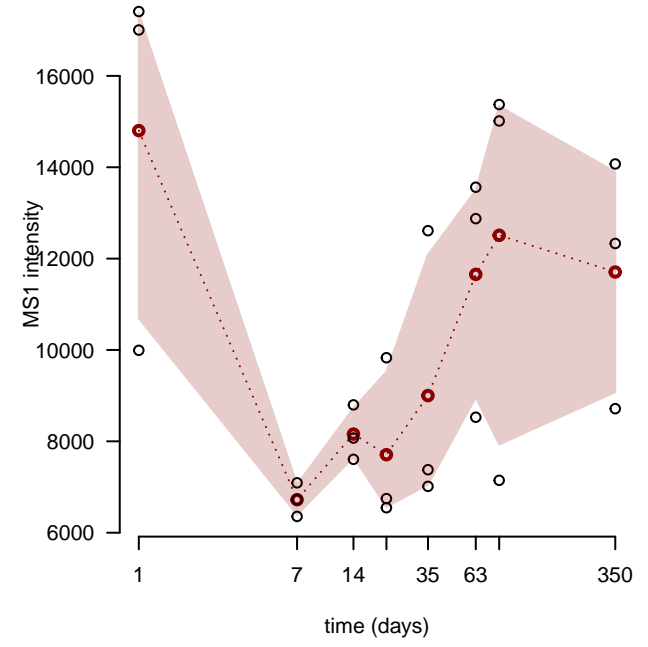

**Q7TNP2**  
**GN=Ppp2r1b**

protein phosphatase 2, regulatory subuni ...

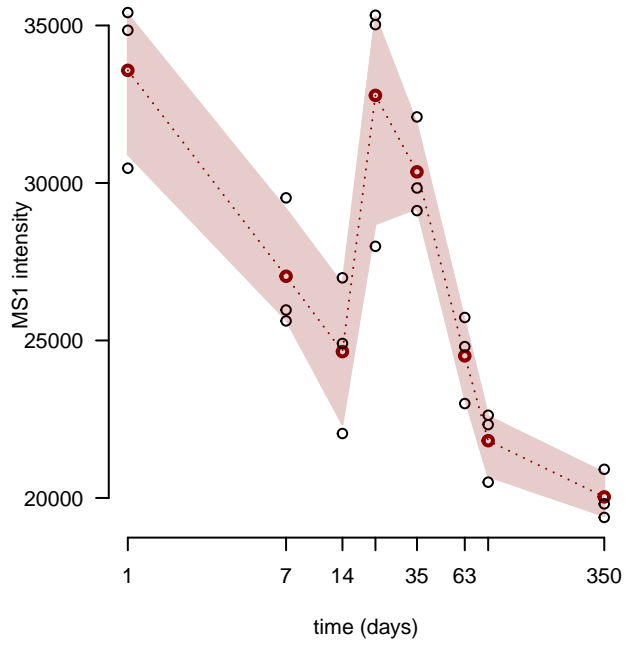

**Q7TNS2**  
**GN=Micos10**

mitochondrial contact site and cristae o ...

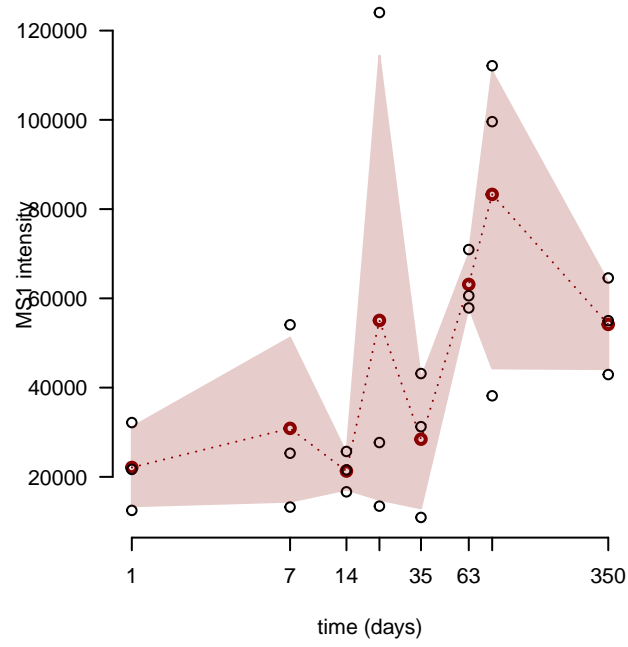

**Q7TNU6**  
**GN=Znf250**

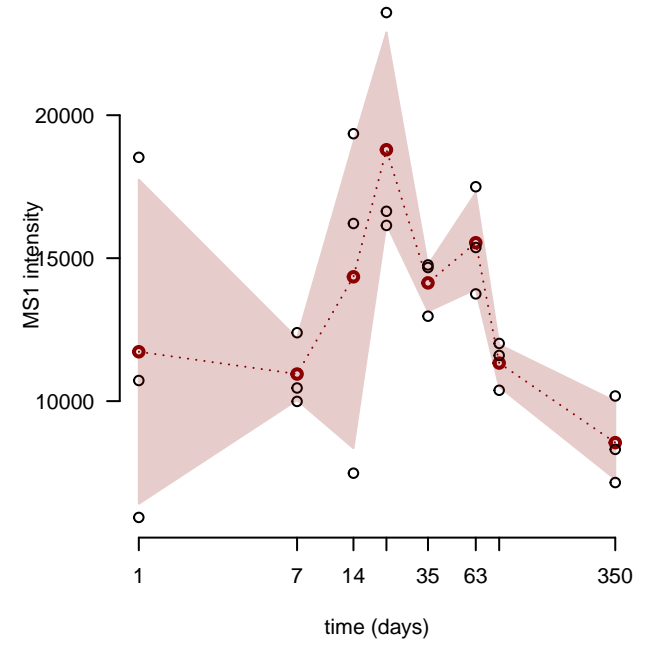

**Q7TNV0**  
**GN=Dek**

DEK proto-oncogene (DNA binding)

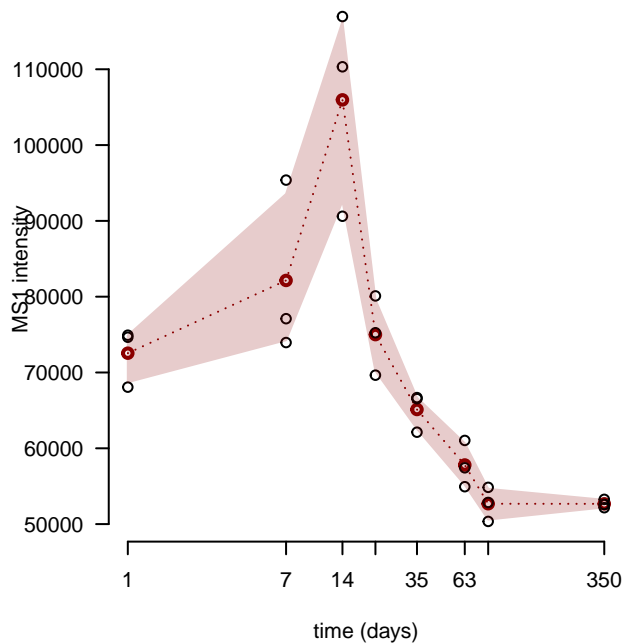

**Q7TPC1**  
**GN=Cdsn**

corneodesmosin

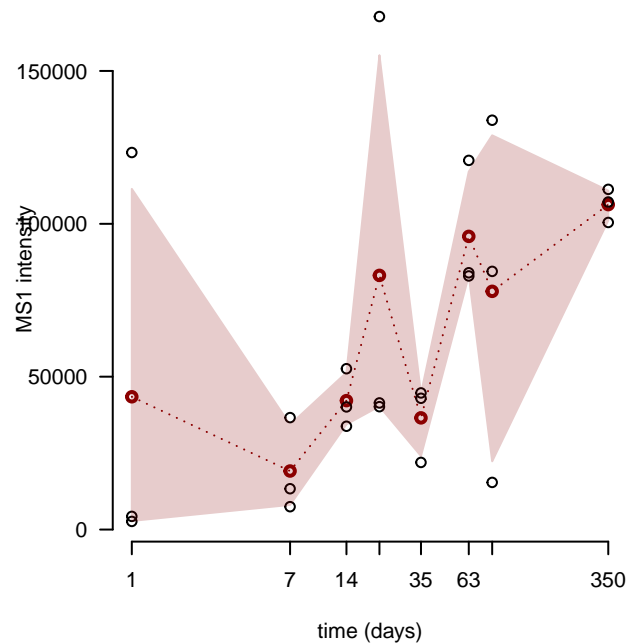

**Q7TPD0**  
**GN=Ints3**

integrator complex subunit 3

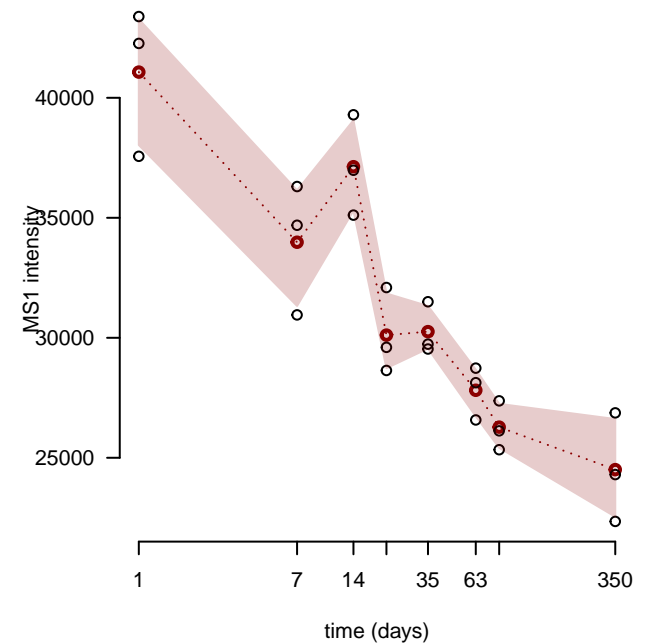

**Q7TPD2**  
GN=Fam185a  
family with sequence similarity 185, mem ...

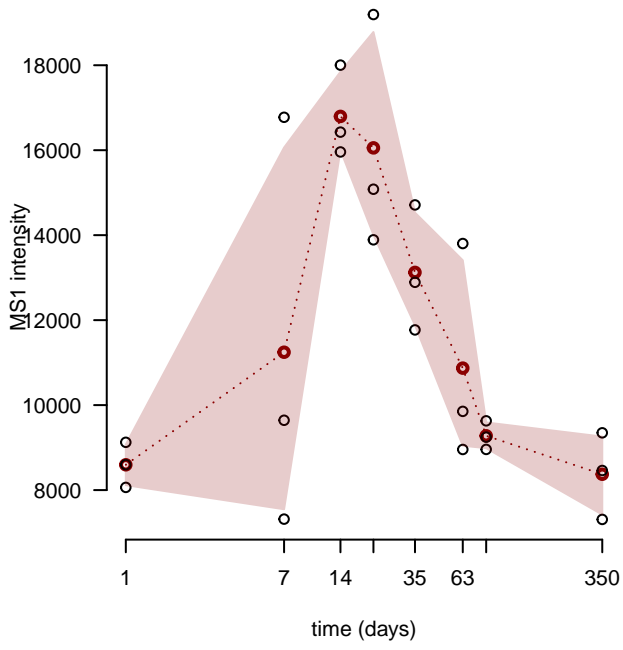

**Q7TPD3**  
GN=Robo2  
roundabout guidance receptor 2

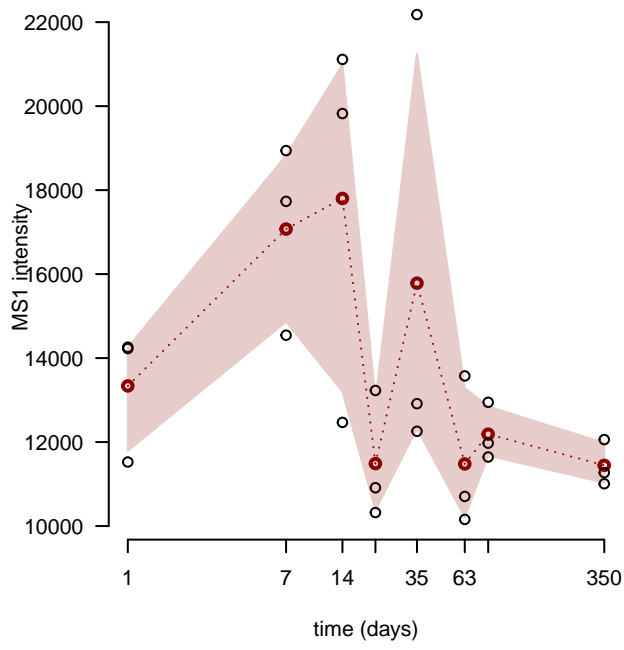

**Q7TPD6**  
GN=Raver2  
ribonucleoprotein, PTB-binding 2

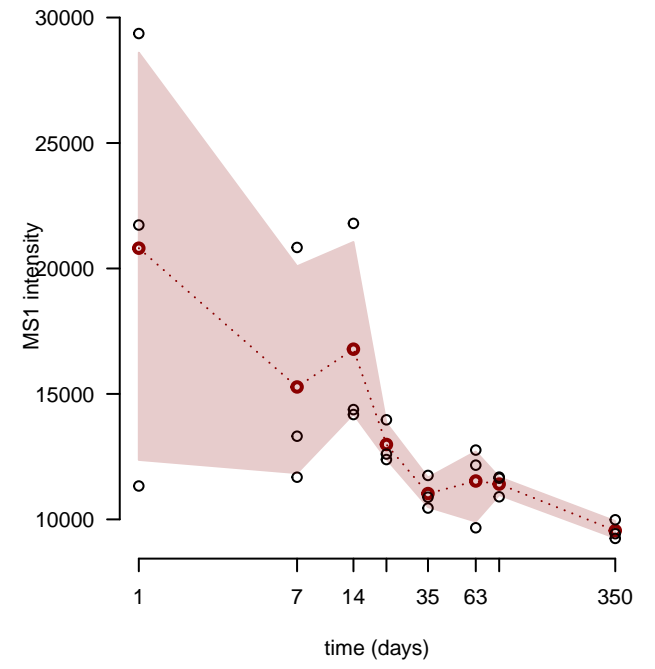

**Q7TPE5**  
GN=Slc7a6os  
solute carrier family 7, member 6 opposi ...

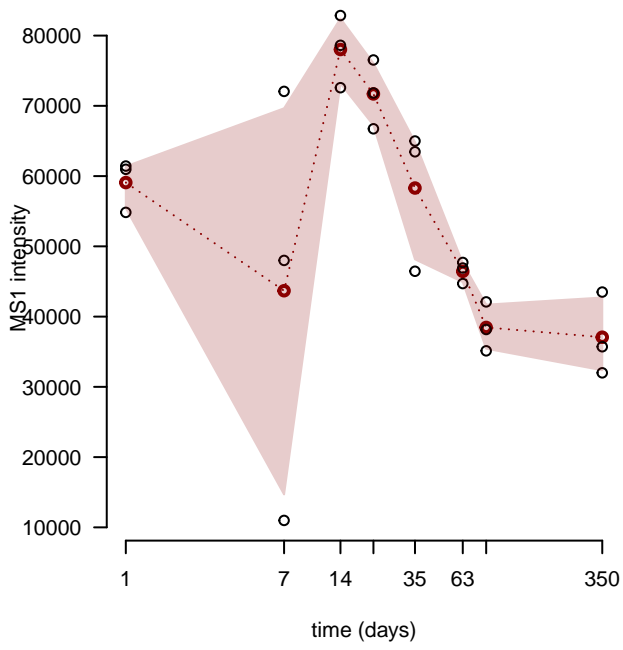

**Q7TPH6**  
GN=Mycbp2  
MYC binding protein 2, E3 ubiquitin prot ...

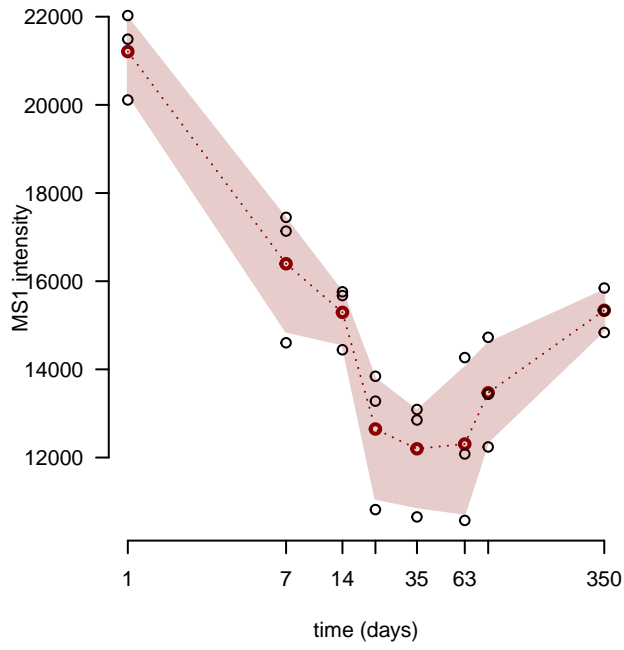

**Q7TPM1**  
GN=Prrc2b  
proline-rich coiled-coil 2B

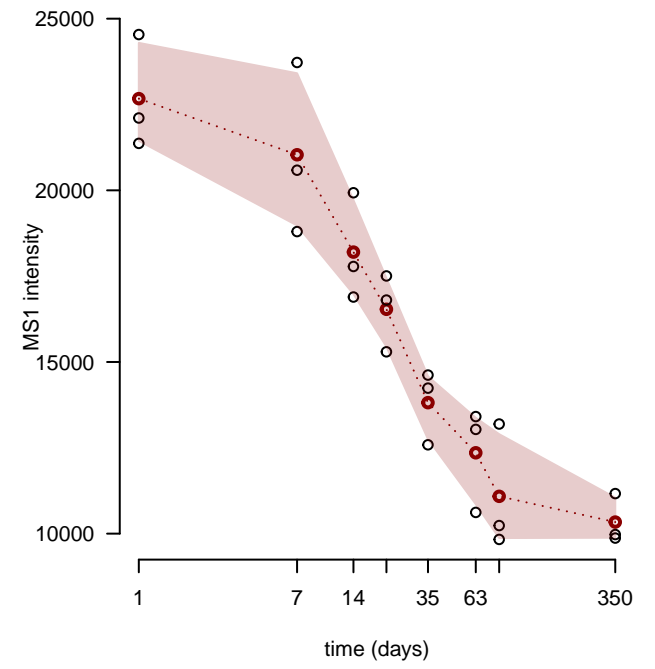

**Q7TPM1**  
GN=Prrc2b  
proline-rich coiled-coil 2B

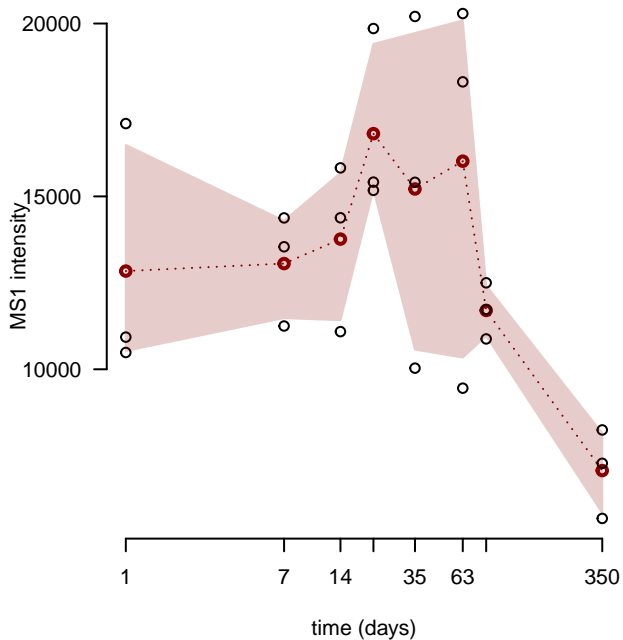

**Q7TPM6**  
GN=Fsd1  
fibronectin type 3 and SPRY domain-conta ...

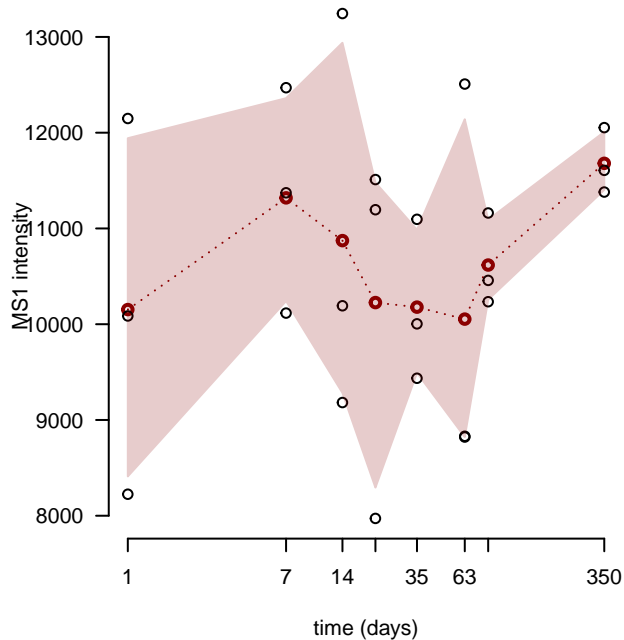

**Q7TPM9**  
GN=Mttr10  
myotubularin related protein 10

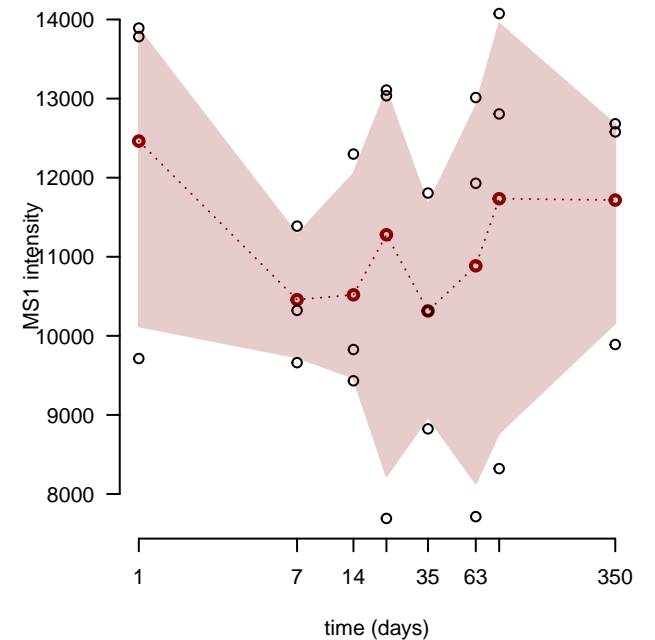

**Q7TPN9**  
GN=Prr14  
proline rich 14

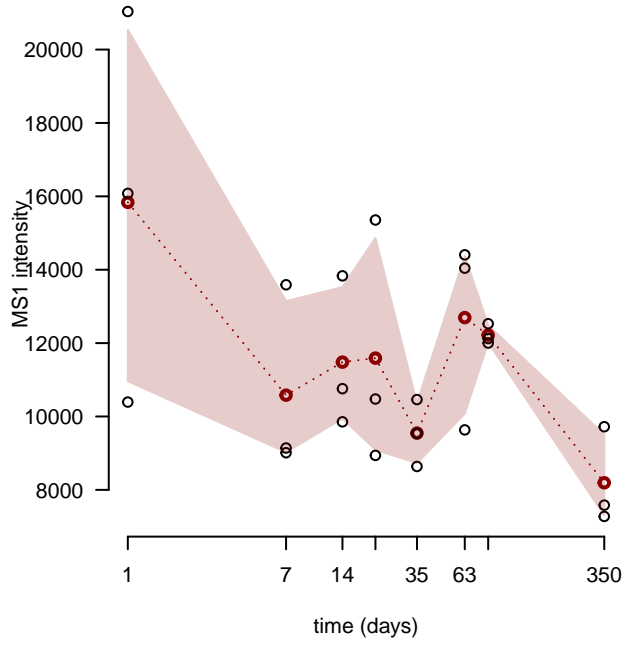

**Q7TPQ3**  
GN=Shprh  
SNF2 histone linker PHD RING helicase

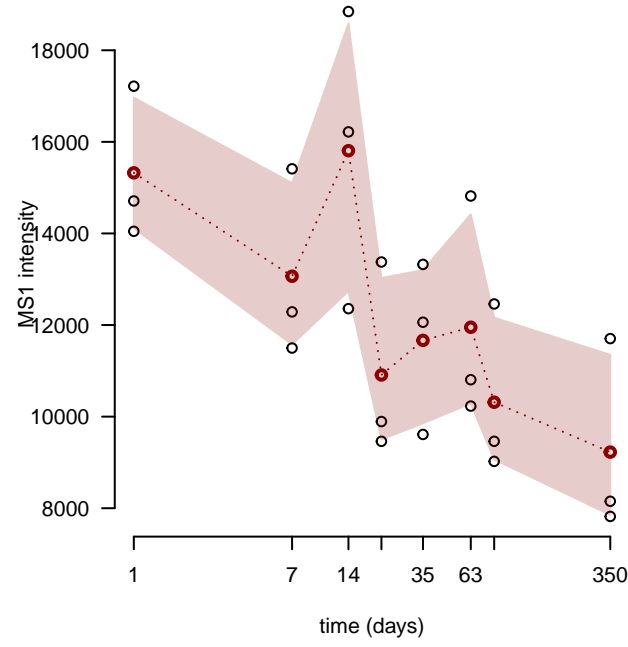

**Q7TPR4**  
GN=Actn1  
actinin, alpha 1

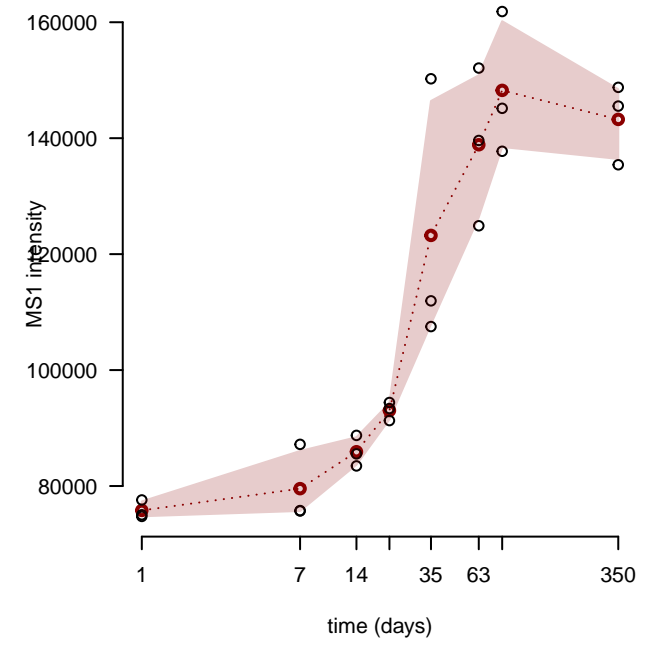

**Q7TPS5**  
GN=C2cd5  
C2 calcium-dependent domain containing 5

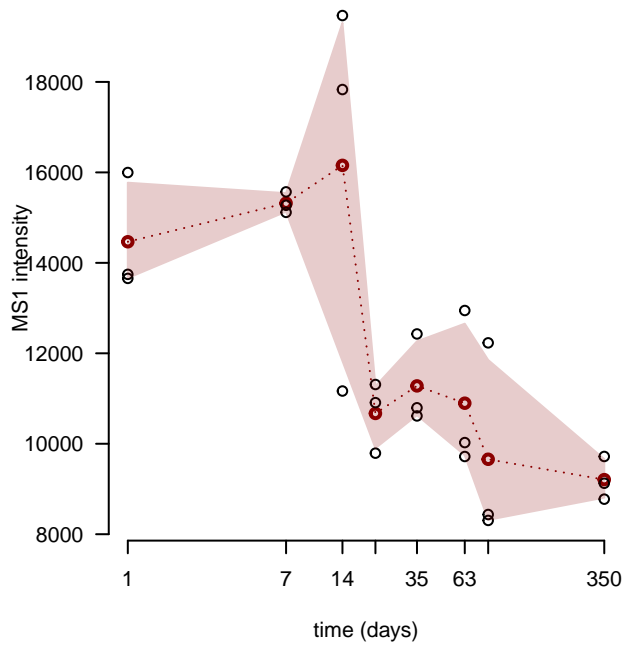

**Q7TPV2**  
GN=Dzip3  
DAZ interacting protein 3, zinc finger

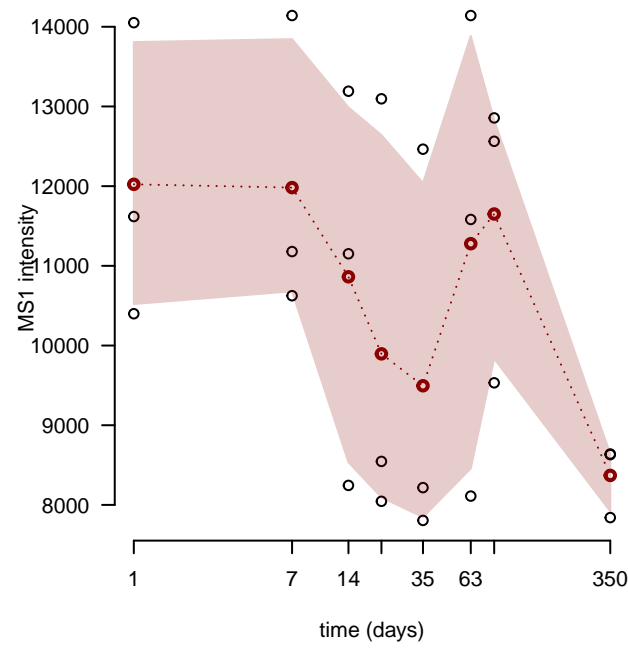

**Q7TPV4**  
GN=Mybbp1a  
MYB binding protein (P160) 1a

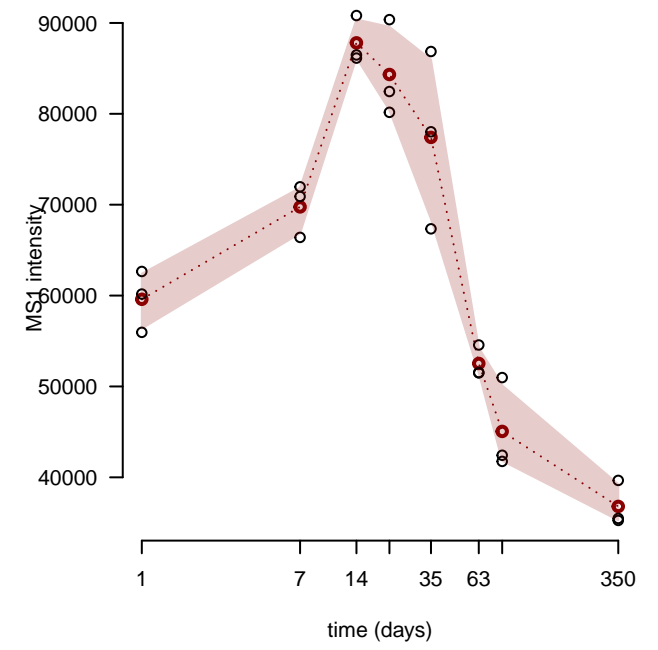

**Q7TPW1**  
GN=Nexn  
nexilin

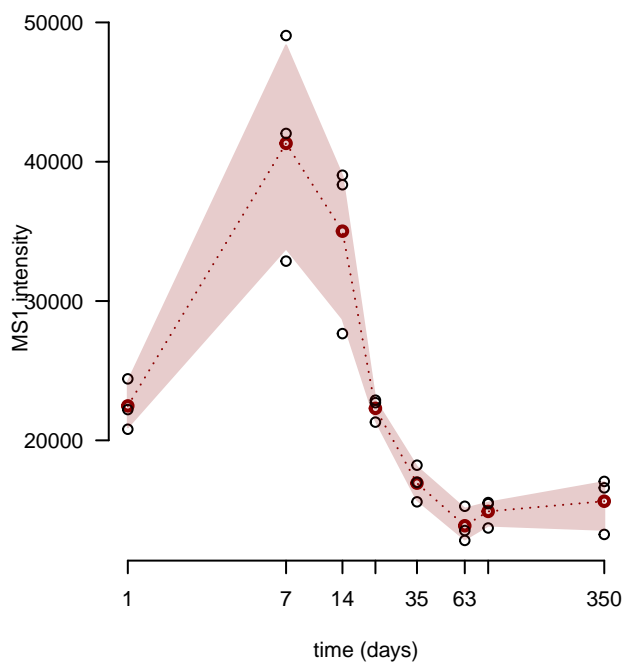

**Q7TPZ8**  
GN=Cpa1  
carboxypeptidase A1, pancreatic

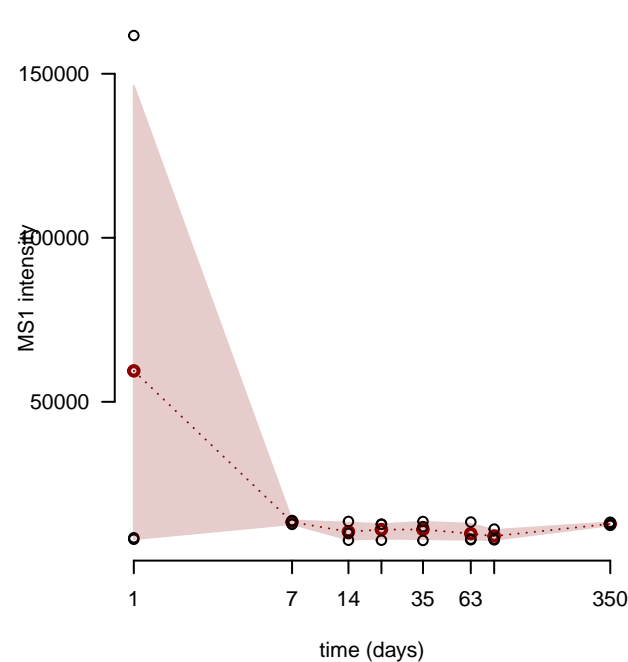

**Q7TQ95**  
GN=Lnpk  
lunapark, ER junction formation factor

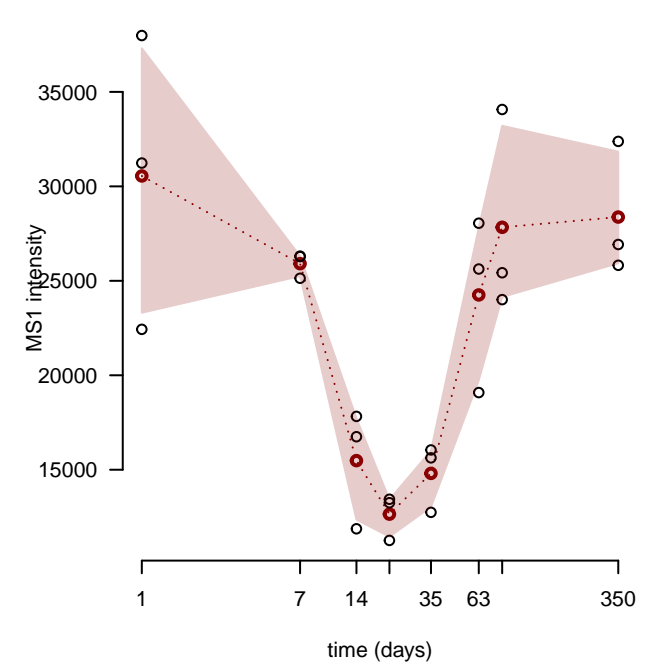



**Q7TQC5**  
GN=Aptx  
aprataxin

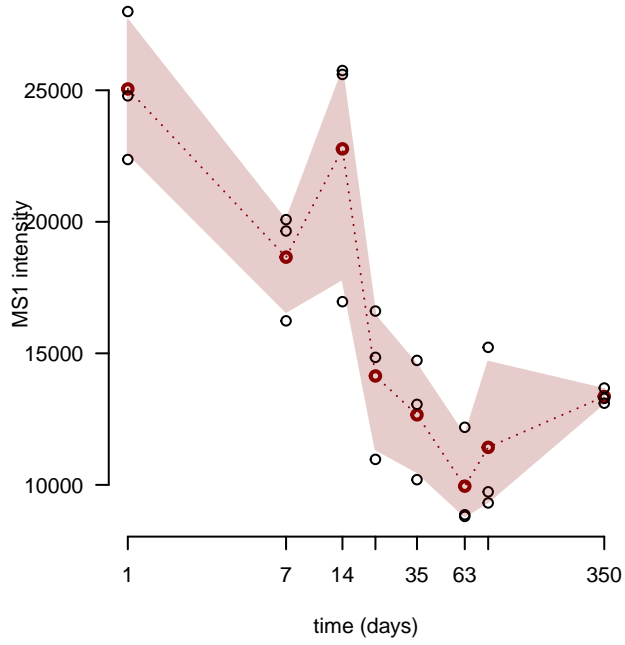

**Q7TQE6**  
GN=Maco1  
macoilin 1

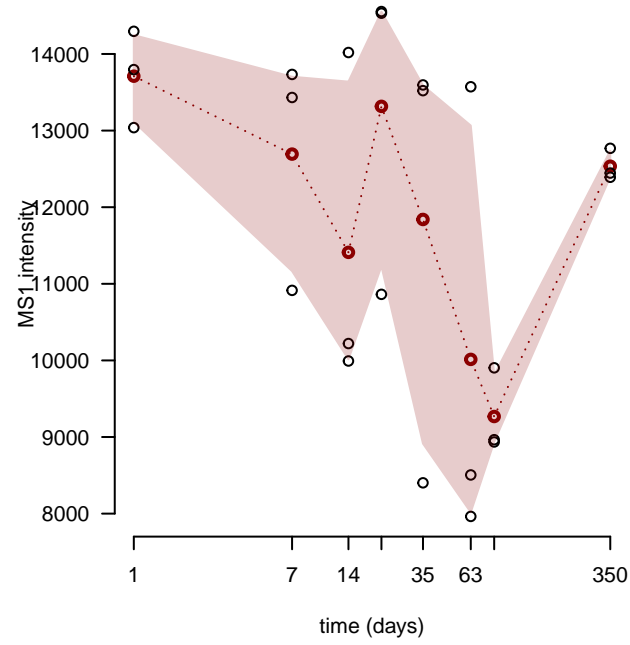

**Q7TQF2**  
GN=Fbxo10  
F-box protein 10

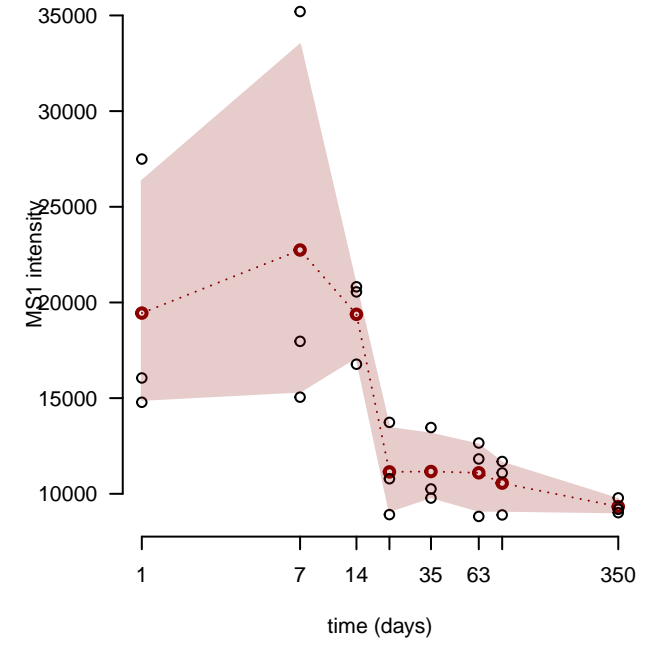

**Q7TQG1**  
GN=Plekha6  
pleckstrin homology domain containing, f ...

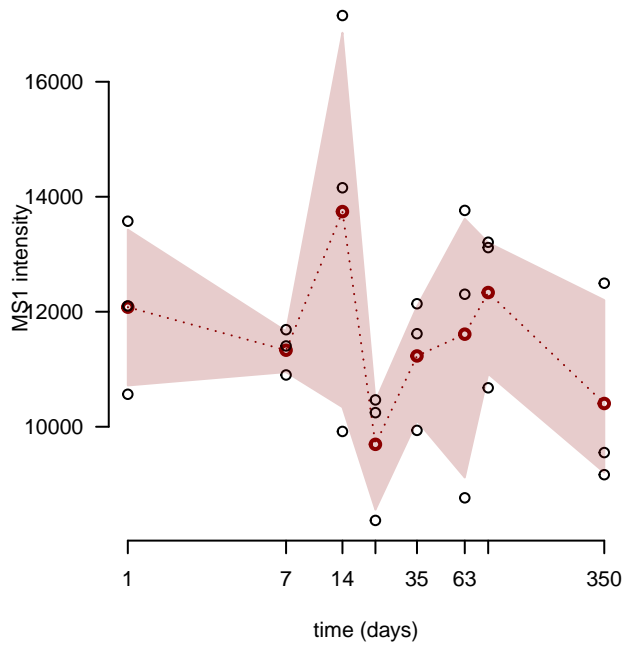

**Q7TQH0**  
GN=Atxn2l  
ataxin 2-like

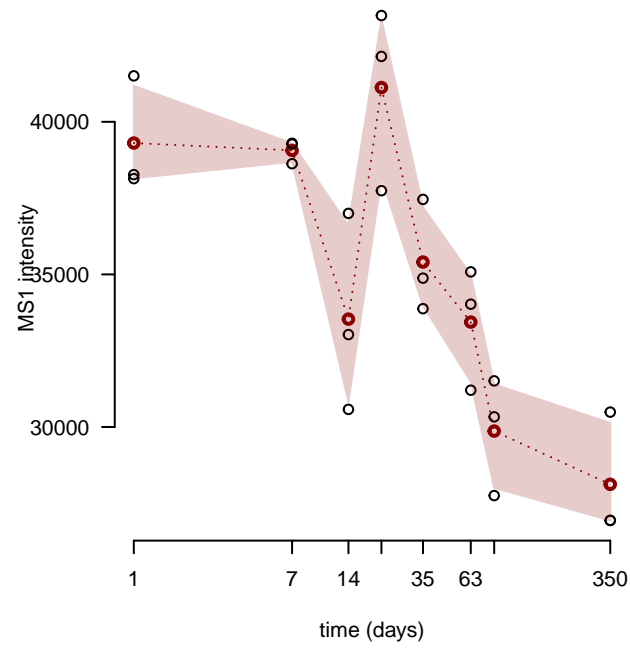

**Q7TQI3**  
GN=Otub1  
OTU domain, ubiquitin aldehyde binding 1

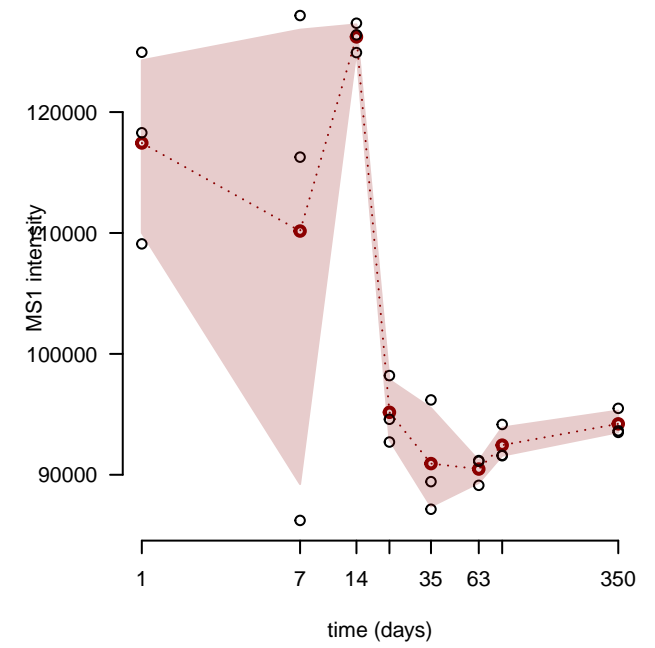

**Q7TQJ1**  
GN=Marveld1  
MARVEL (membrane-associated) domain con ...

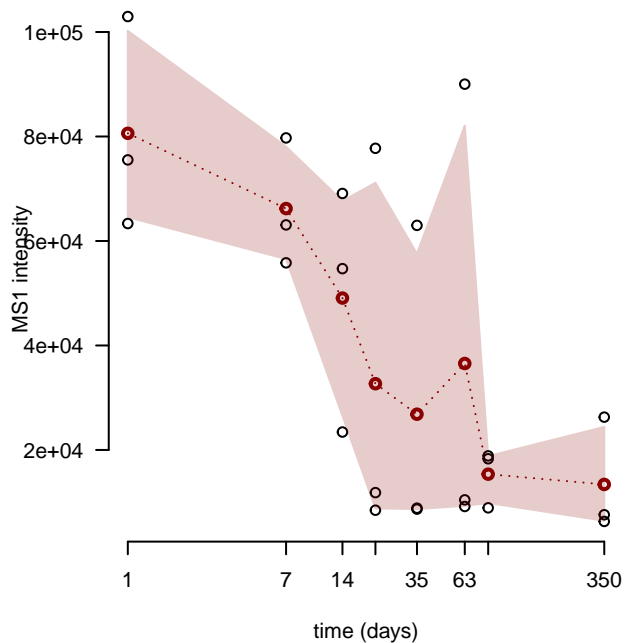

**Q7TQJ8**  
GN=Wtip  
WT1 interacting protein

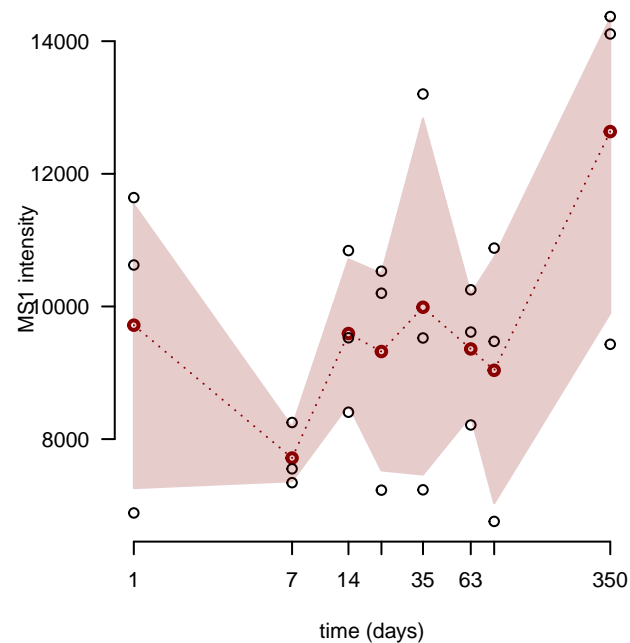

**Q7TQK0**  
GN=Ccnt2  
cyclin T2

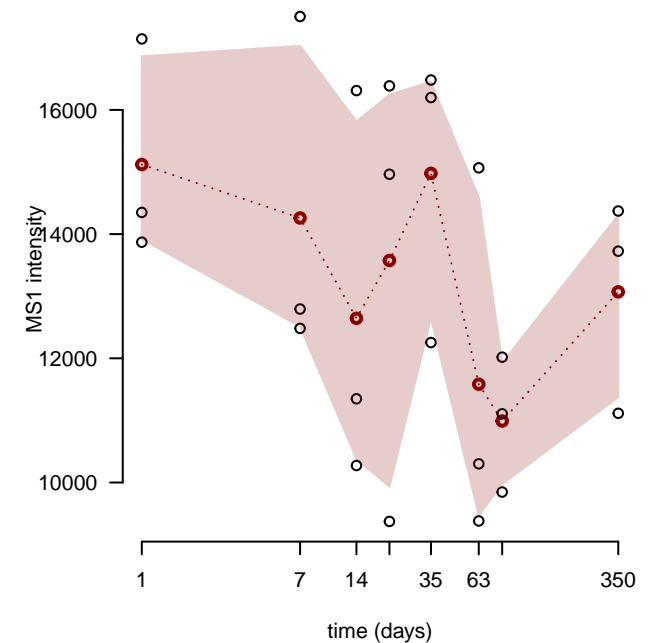

**Q7TQK1**  
**GN=Ints7**  
integrator complex subunit 7

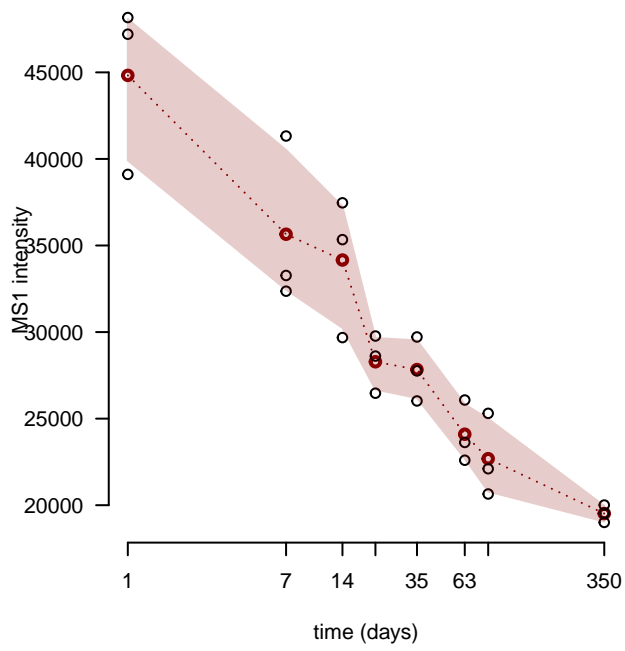

**Q7TQK4**  
**GN=Exosc3**  
exosome component 3

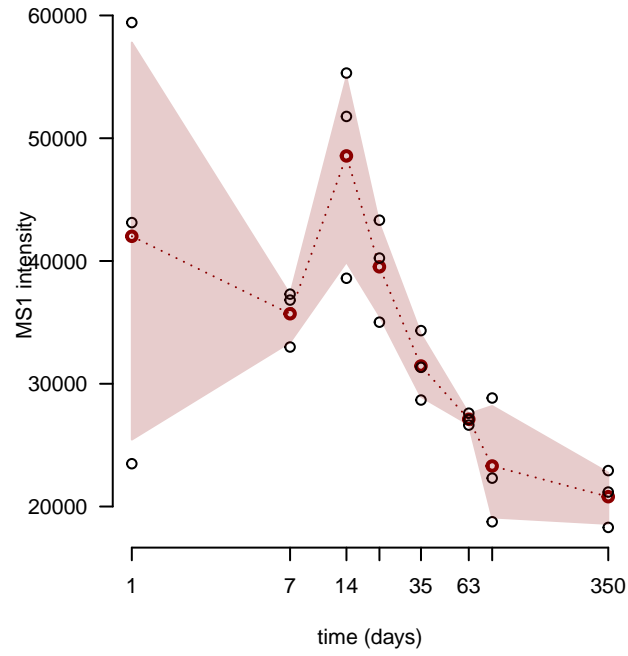

**Q7TQK5**  
**GN=Ccdc93**  
coiled-coil domain containing 93

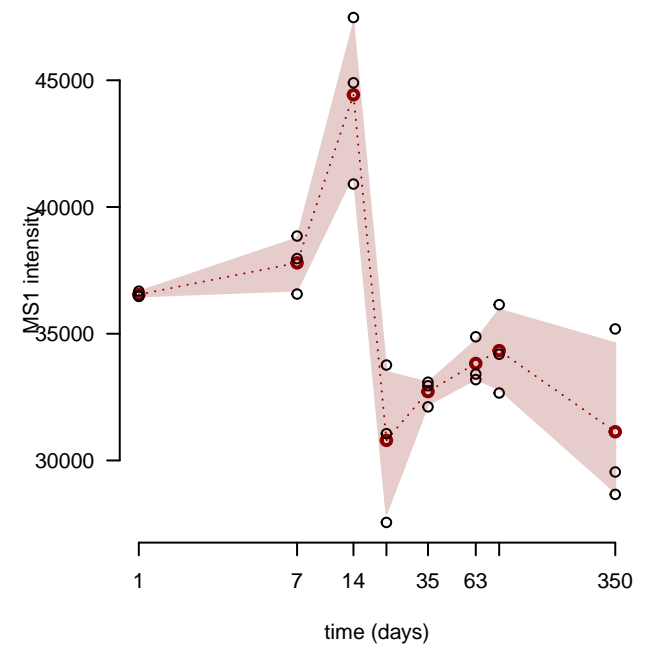

**Q7TQN3**  
**GN=Wfikkn2**  
WAP, follistatin/kazal, immunoglobulin, ...

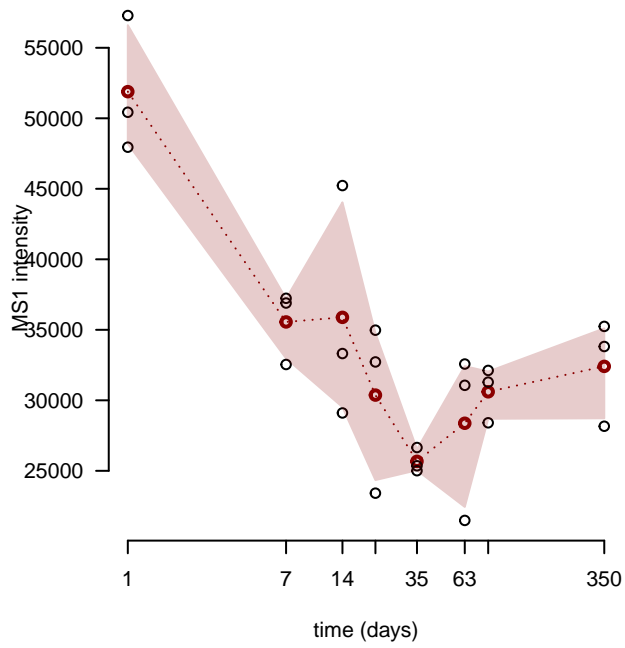

**Q7TS68**  
**GN=Nsun6**  
NOL1/NOP2/Sun domain family member 6

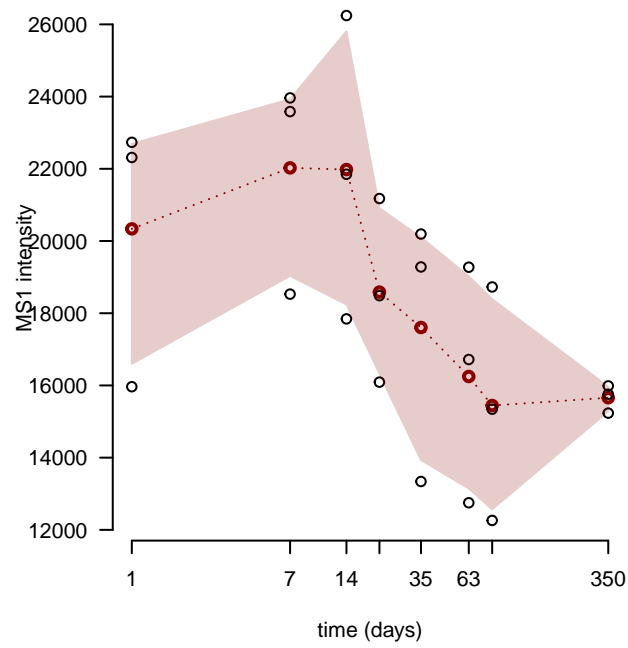

**Q7TS72**  
**GN=Itpkc**  
inositol 1,4,5-trisphosphate 3-kinase C

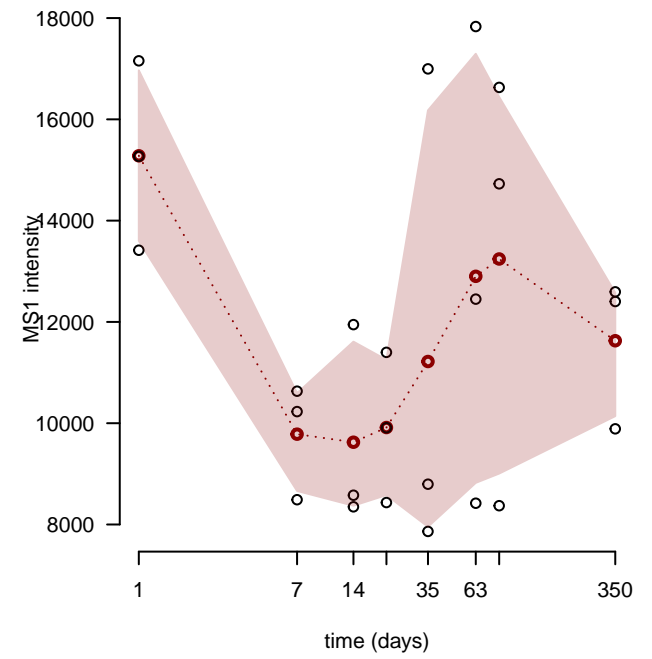

**Q7TS74**  
**GN=Ckap2l**  
cytoskeleton associated protein 2-like

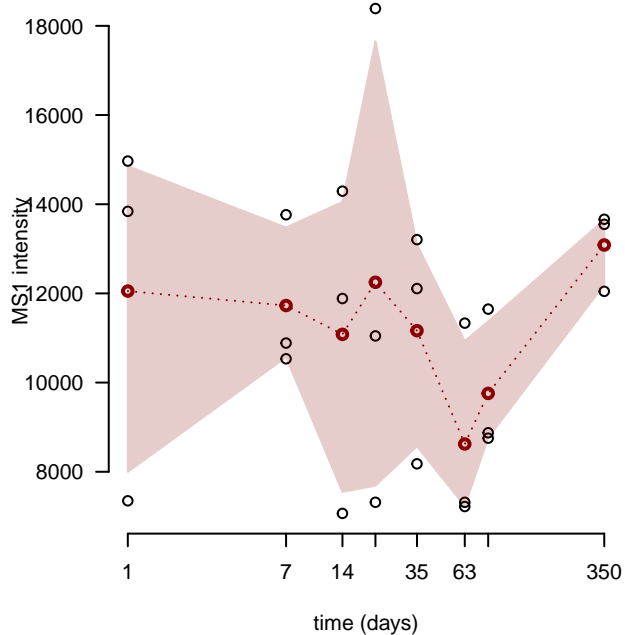

**Q7TSC1**  
**GN=Prrc2a**  
proline-rich coiled-coil 2A

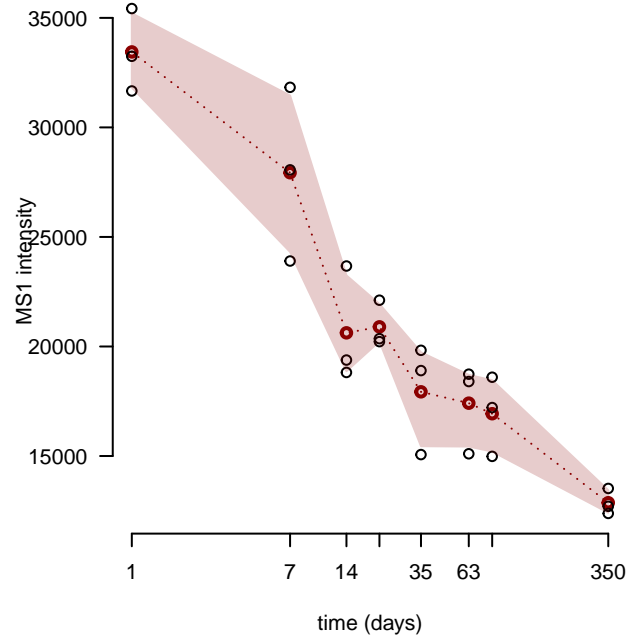

**Q7TSE6**  
**GN=Stk38l**  
serine/threonine kinase 38 like

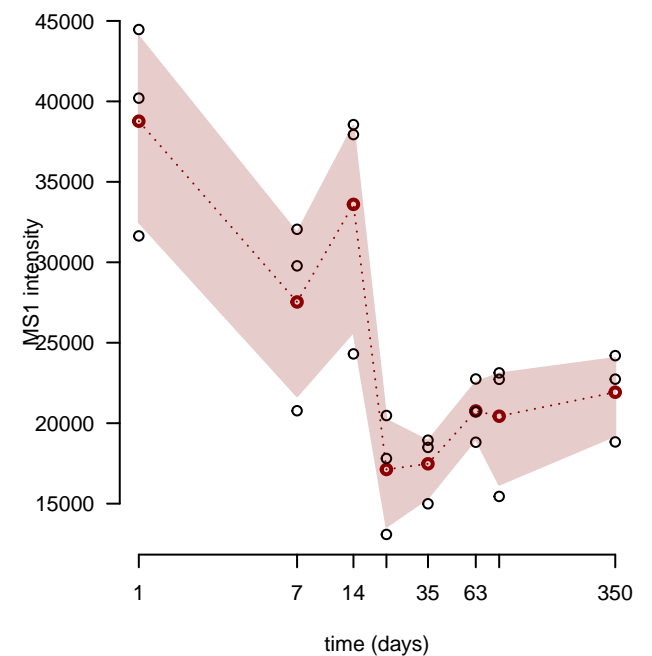

**Q7TSF4**  
GN=Lrrc75a  
leucine rich repeat containing 75A

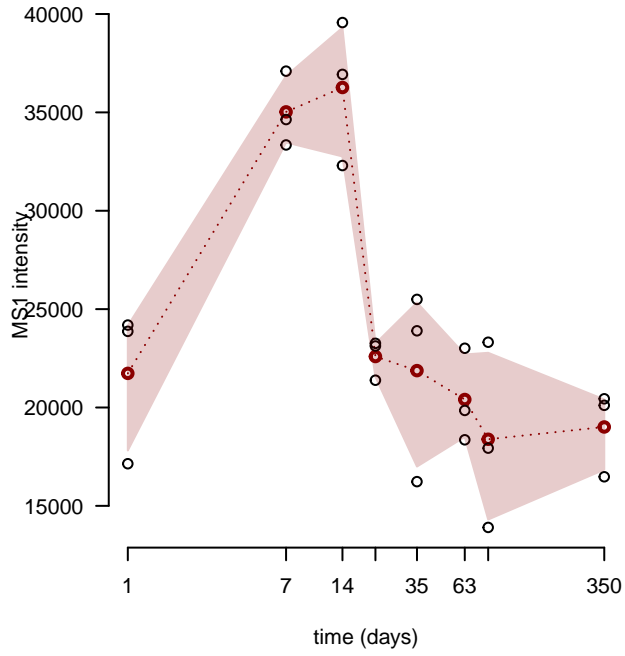

**Q7TSG1**  
GN=Cep120  
centrosomal protein 120

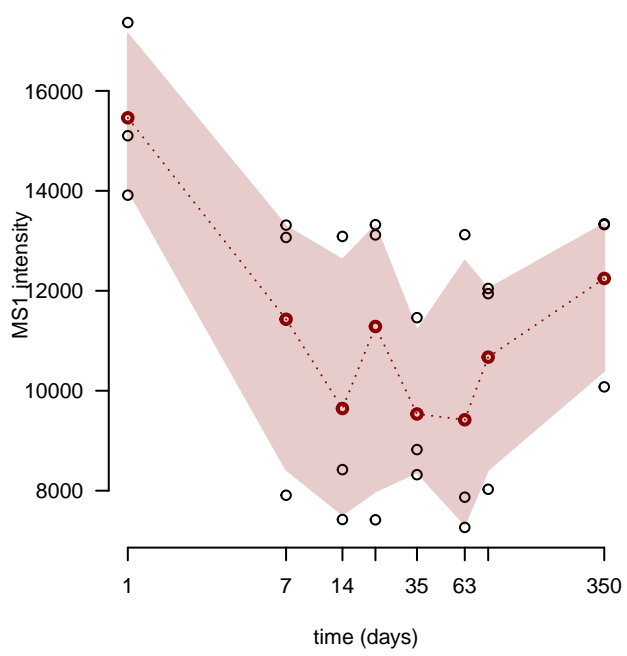

**Q7TSG2**  
GN=Ctdp1  
CTD (carboxy-terminal domain, RNA polyme ...

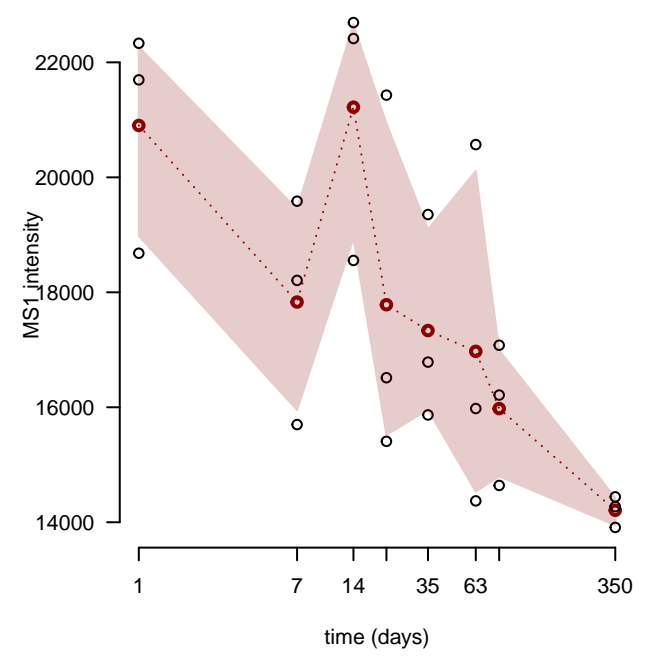

**Q7TSG3**  
GN=Fbxo5  
F-box protein 5

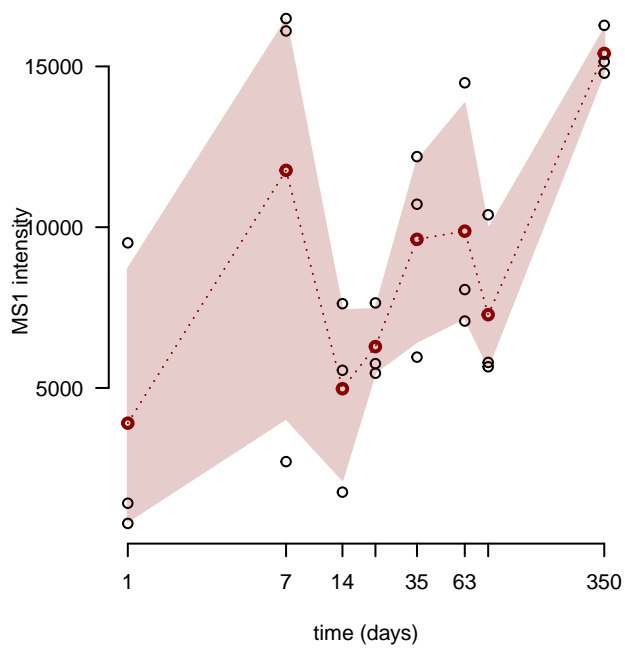

**Q7TSH2**  
GN=Phkb  
phosphorylase kinase beta

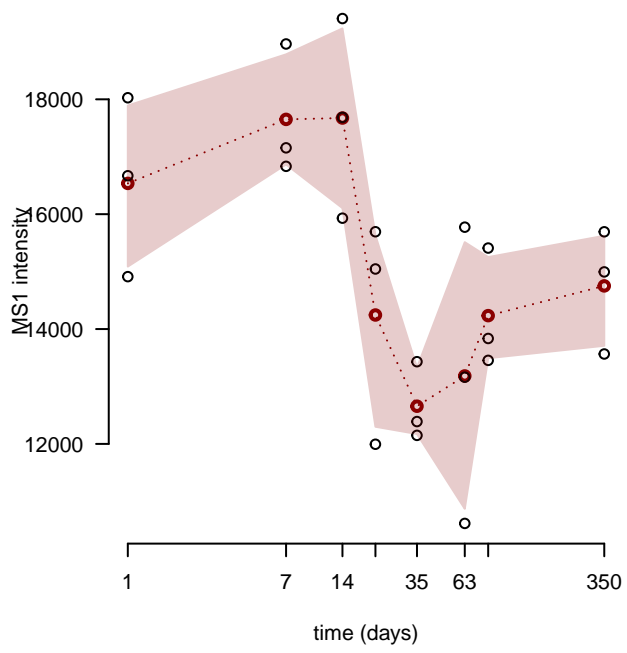

**Q7TSH3**  
GN=Znf516

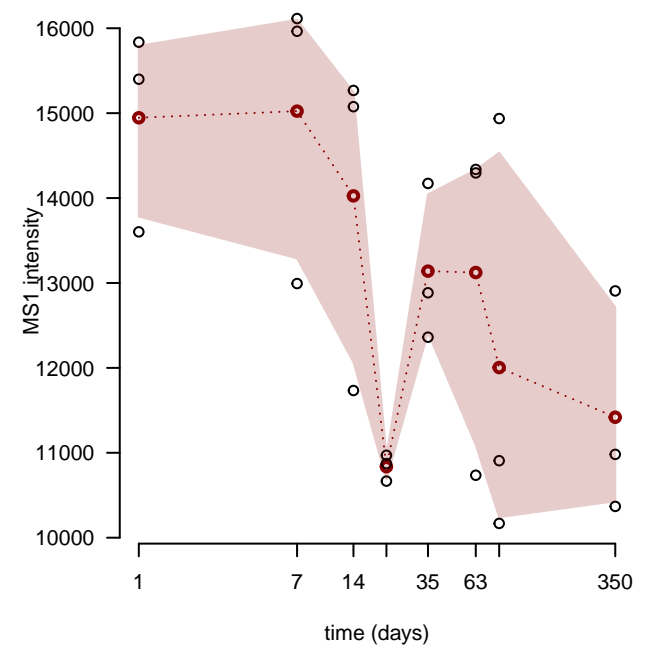

**Q7TSH6**  
GN=

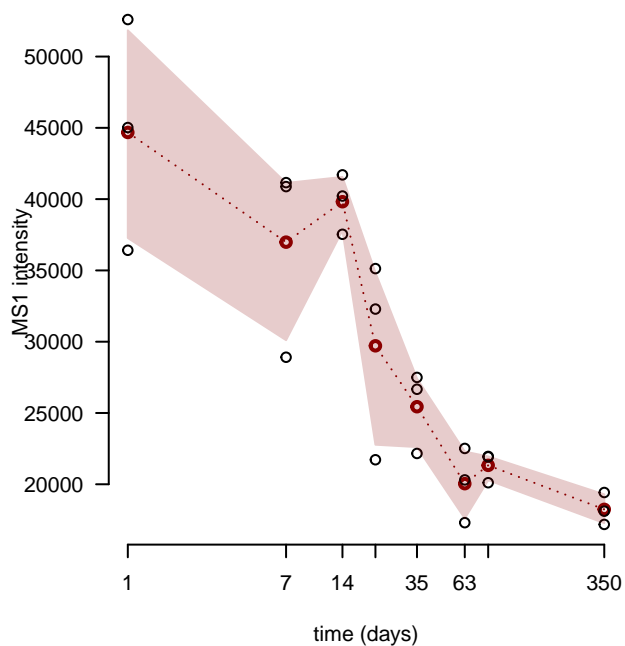

**Q7TSI0**  
GN=Znf12

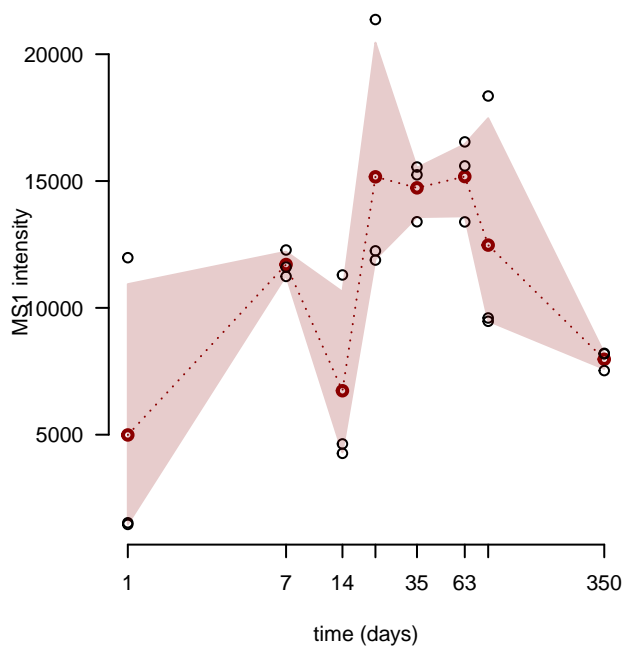

**Q7TSI3**  
GN=Ppp6r1  
protein phosphatase 6, regulatory subuni ...

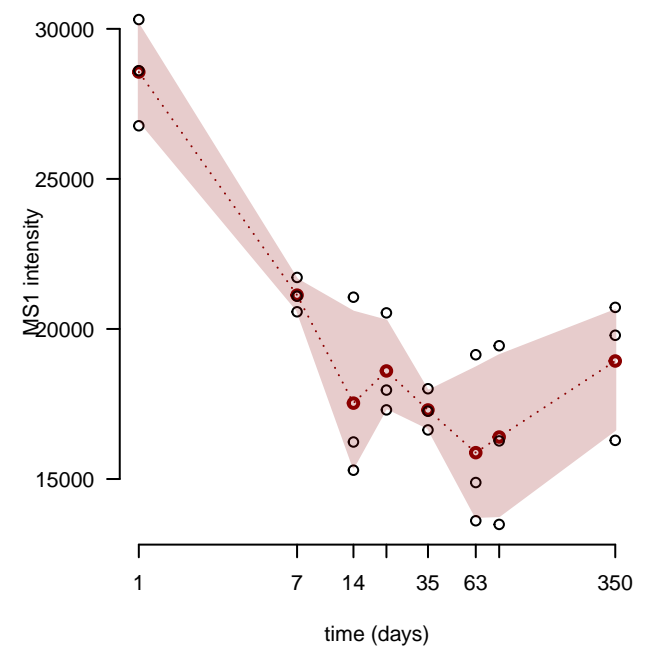

**Q7TSJ2**  
GN=Map6  
microtubule-associated protein 6

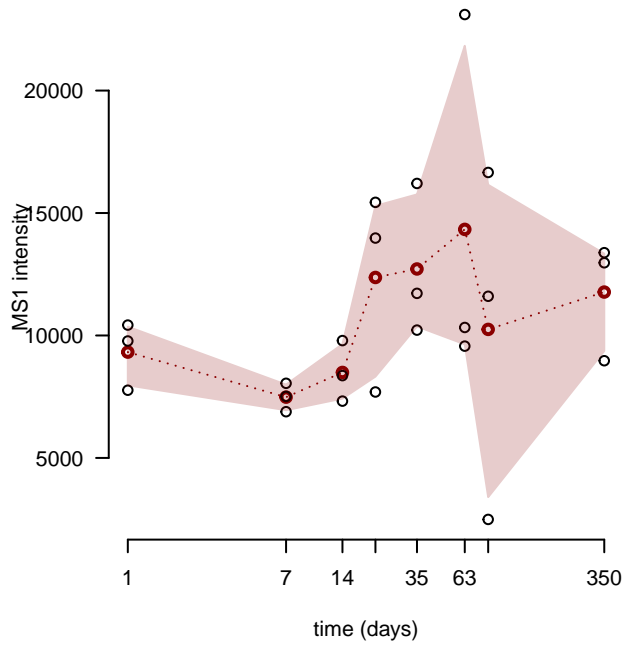

**Q7TSQ8**  
GN=Pdpr  
pyruvate dehydrogenase phosphatase regul ...

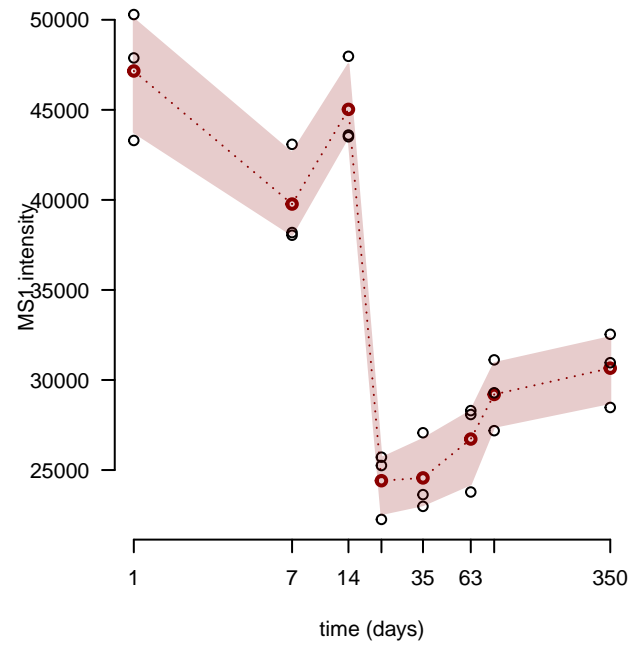

**Q7TSS2**  
GN=Ube2q1  
ubiquitin-conjugating enzyme E2Q family ...

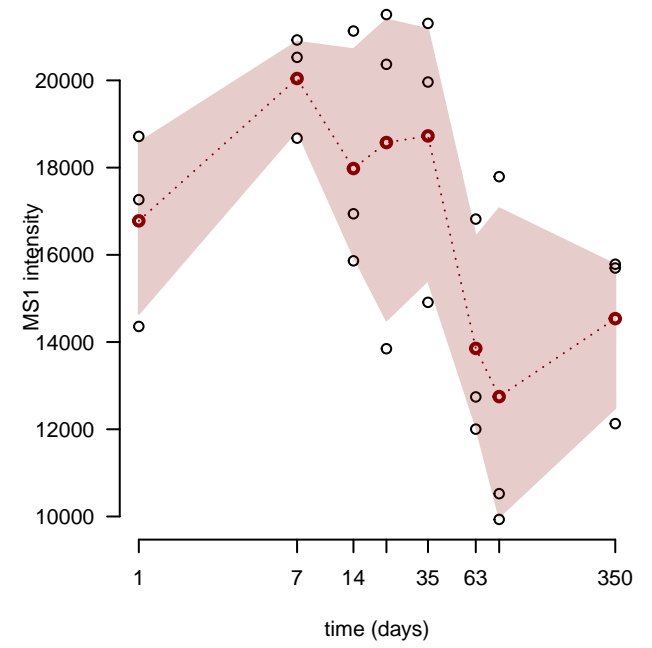

**Q7TSV4**  
GN=Pgm2  
phosphoglucomutase 2

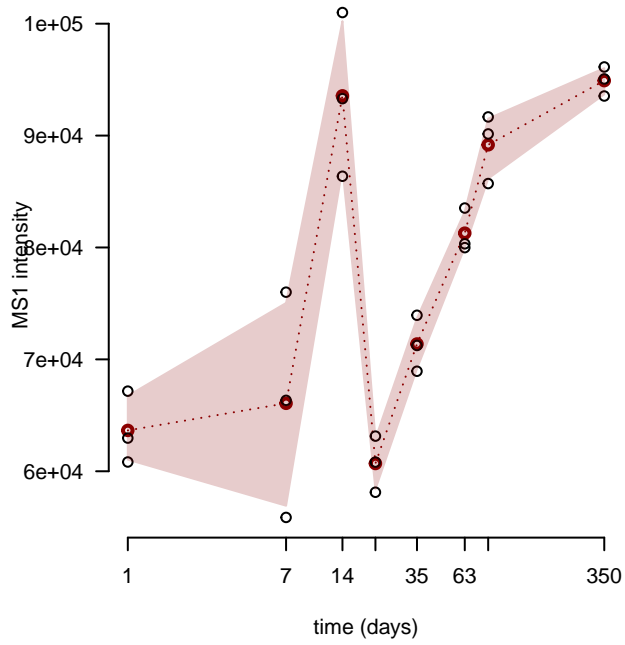

**Q7TSY8**  
GN=Sgo2

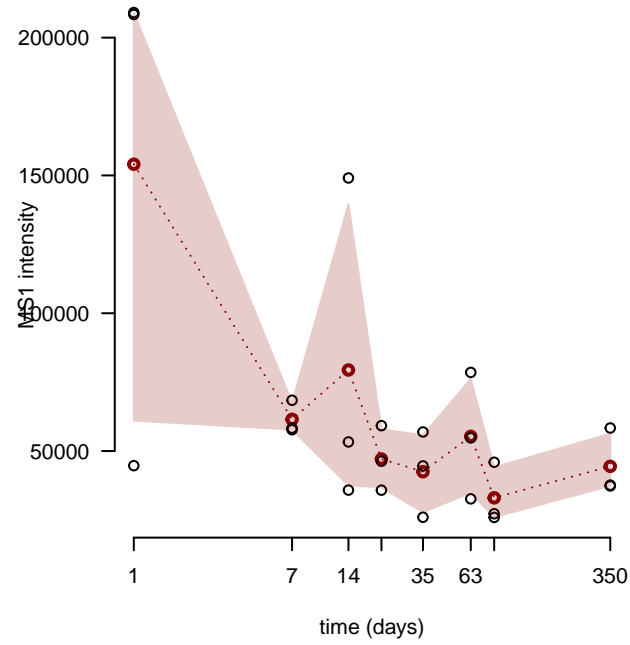

**Q7TSZ8**  
GN=Nacc1  
nucleus accumbens associated 1, BEN and ...

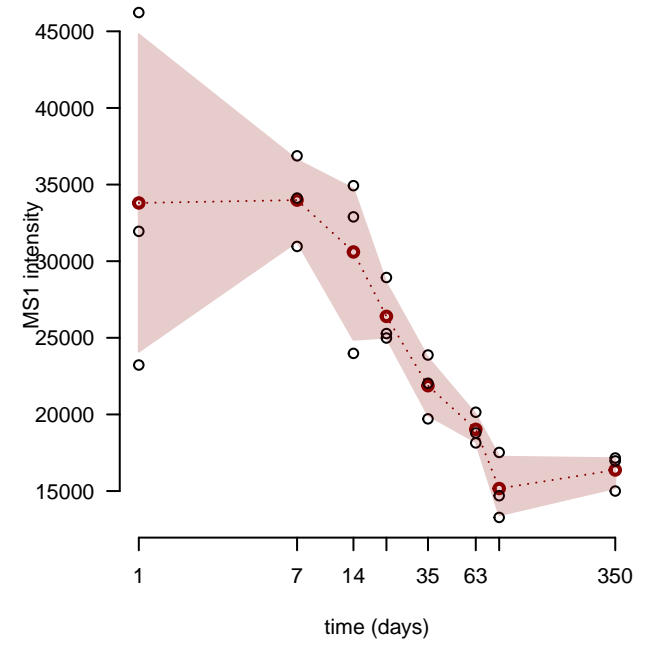

**Q7TT00**  
GN=Supt20h

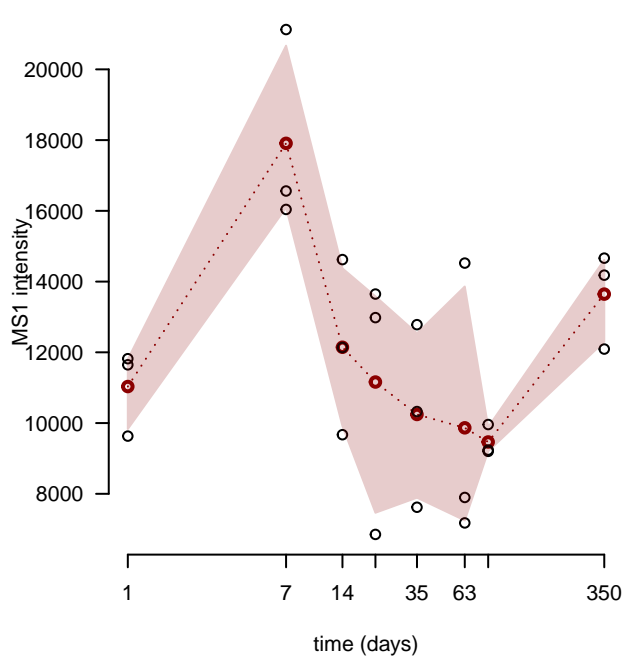

**Q7TT15**  
GN=Galnt17  
polypeptide N-acetylgalactosaminyltransf ...

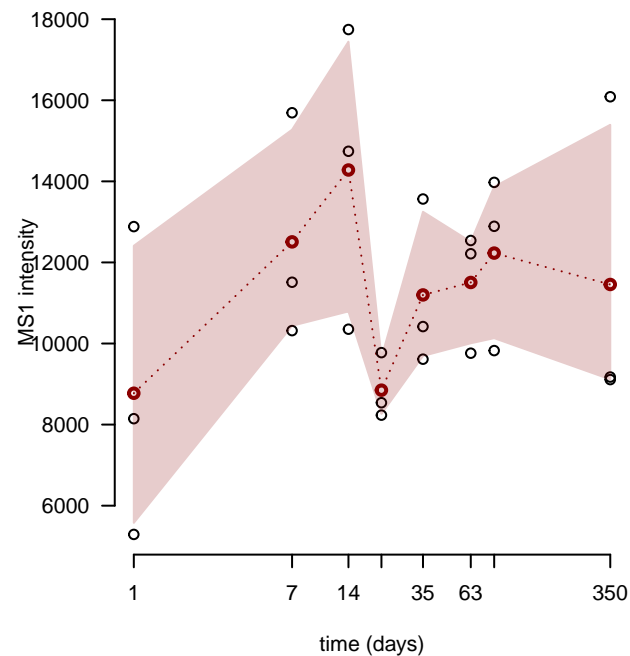

**Q7TT18**  
GN=Atf7ip  
activating transcription factor 7 intera ...

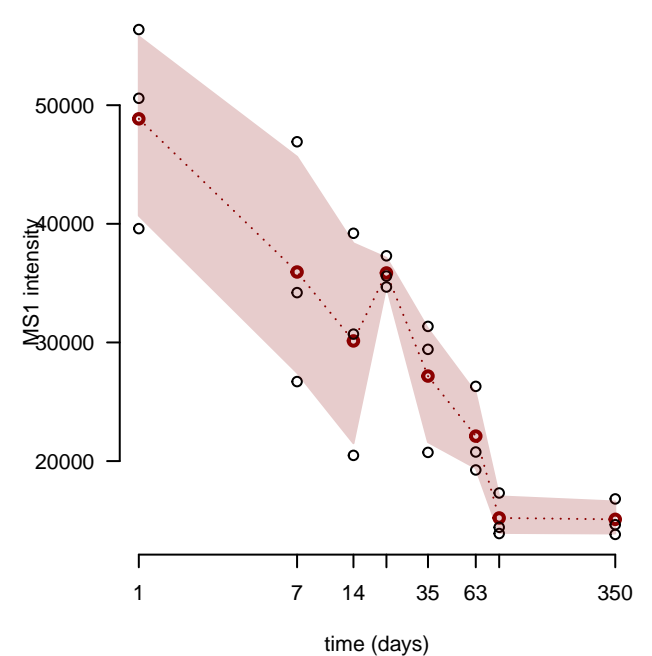

**Q7TT28**  
**GN=Rexo1**  
REX1, RNA exonuclease 1

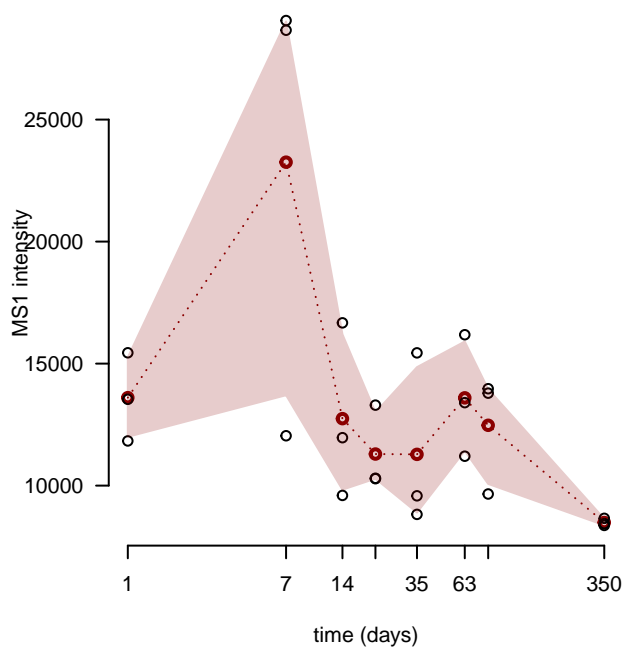

**Q7TT36**  
**GN=Adgra3**  
adhesion G protein-coupled receptor A3

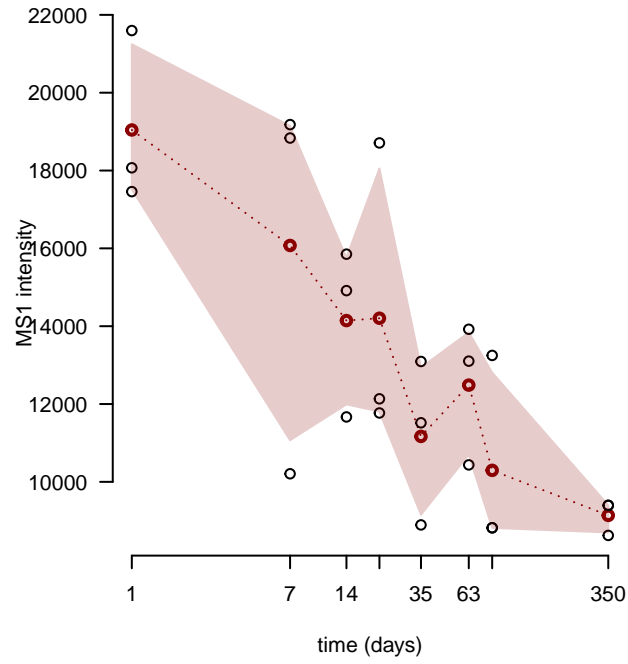

**Q7TT37**  
**GN=Elp1**  
elongator complex protein 1

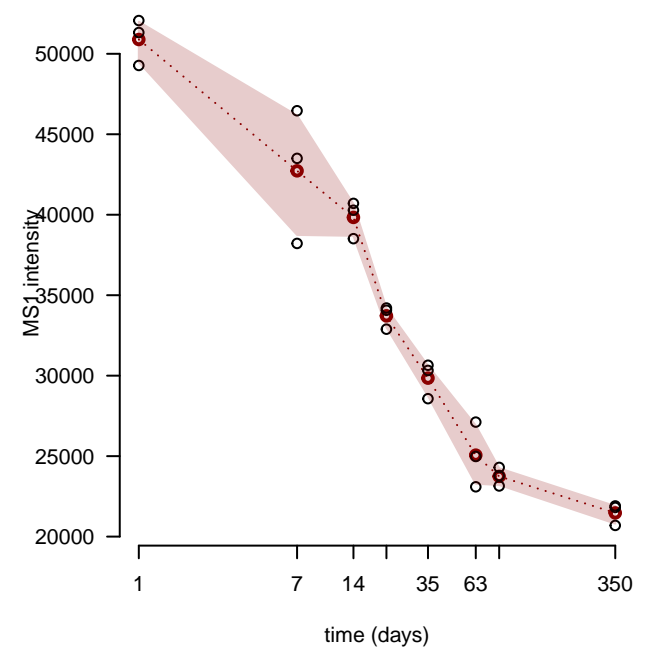

**Q7TT45**  
**GN=Rragd**  
Ras-related GTP binding D

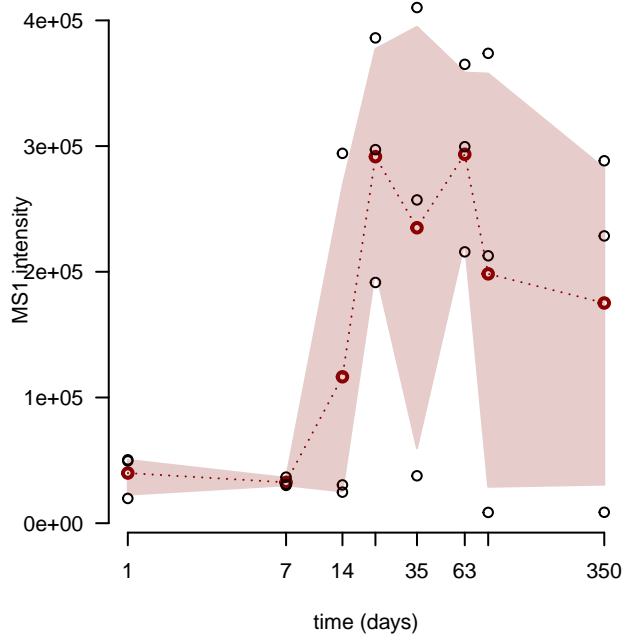

**Q7TT50**  
**GN=Cdc42bpb**  
CDC42 binding protein kinase beta

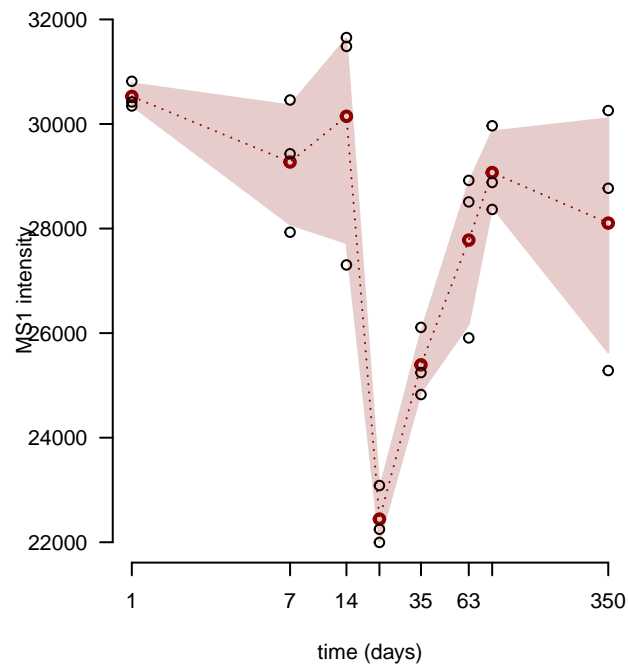

**Q80ST9**  
**GN=Lca5**  
Leber congenital amaurosis 5 (human)

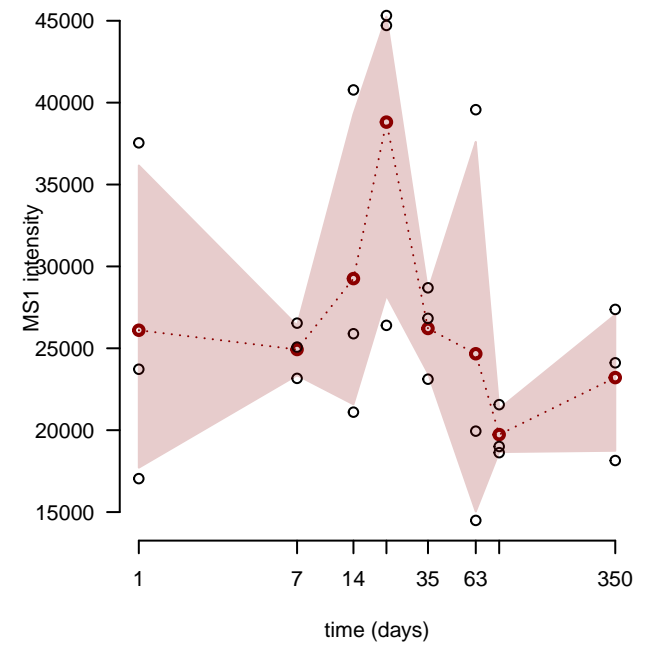

**Q80SU3**  
**GN=Zar1**  
zygote arrest 1

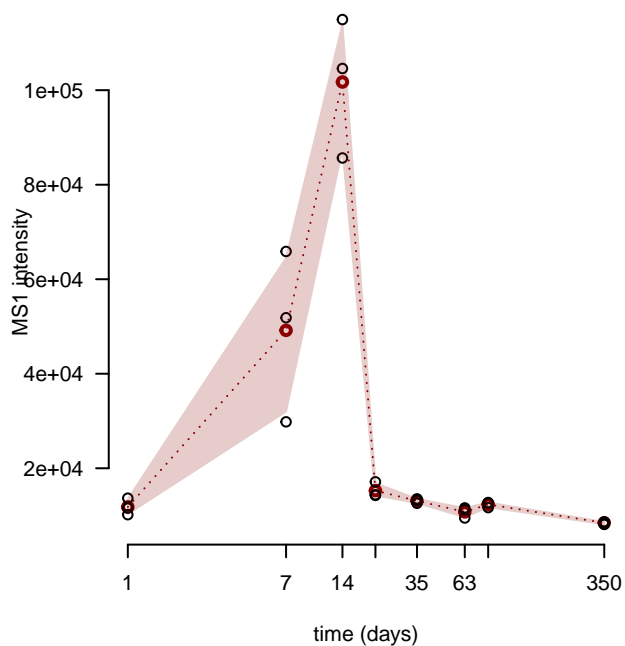

**Q80SU7**  
**GN=Gvin1**  
GTPase, very large interferon inducible ...

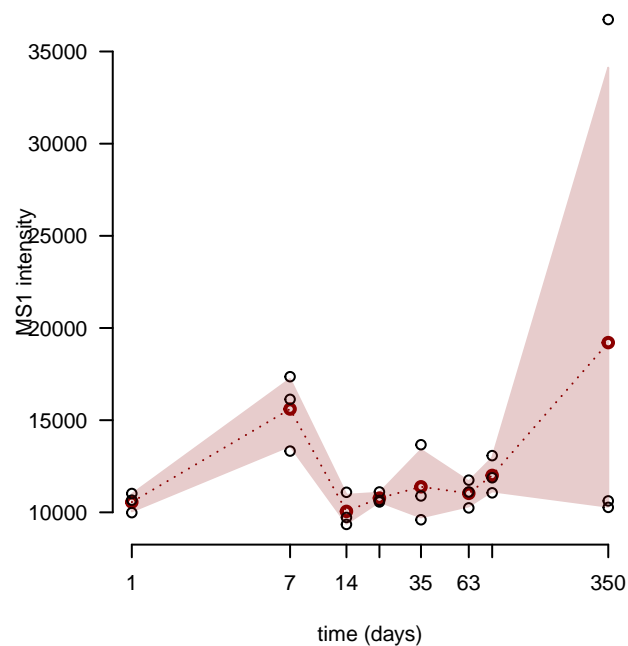

**Q80SW1**  
**GN=Ahcy11**  
S-adenosylhomocysteine hydrolase-like 1

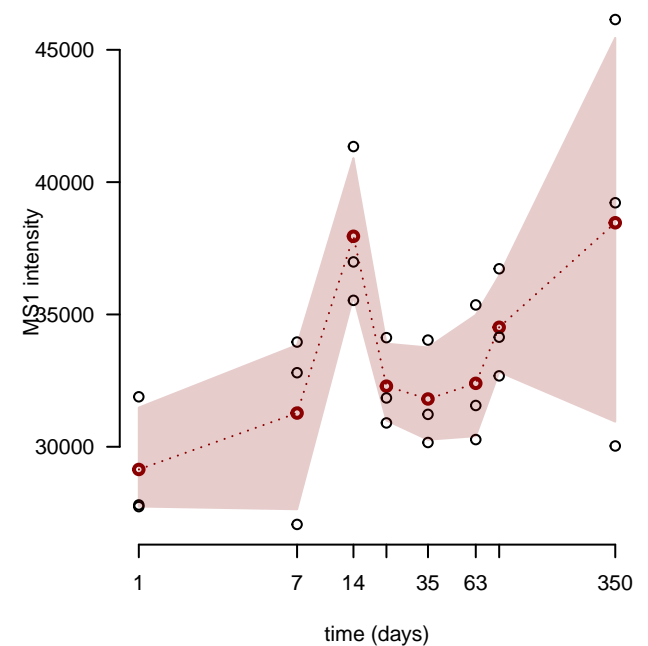

**Q80SY4**  
**GN=Mib1**  
MIB E3 ubiquitin protein ligase 1

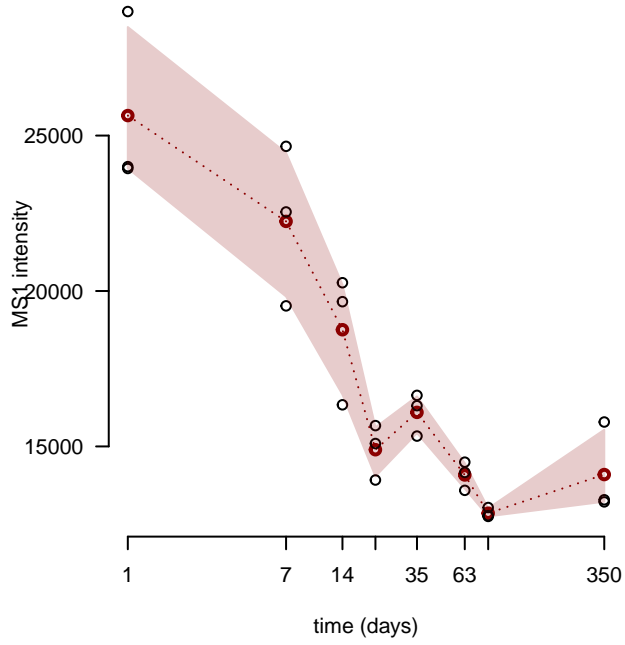

**Q80SY5**  
**GN=Prpf38b**  
PRP38 pre-mRNA processing factor 38 (yea ...

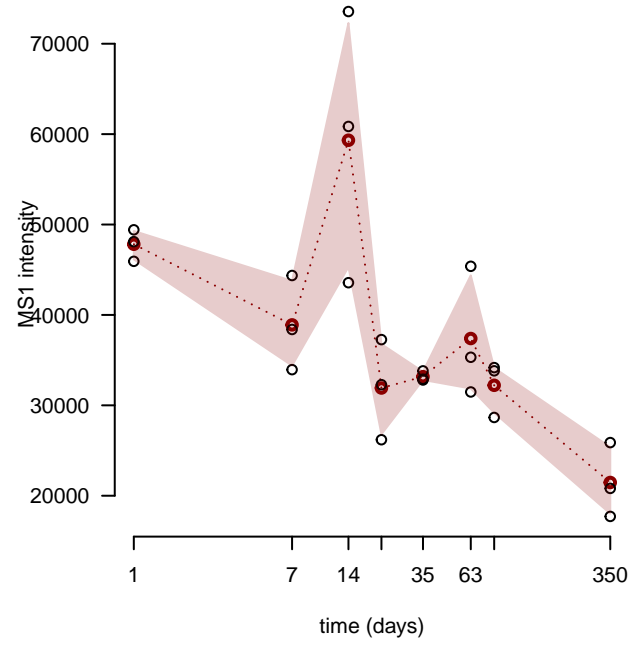

**Q80SY6**  
**GN=Adal**  
adenosine deaminase-like

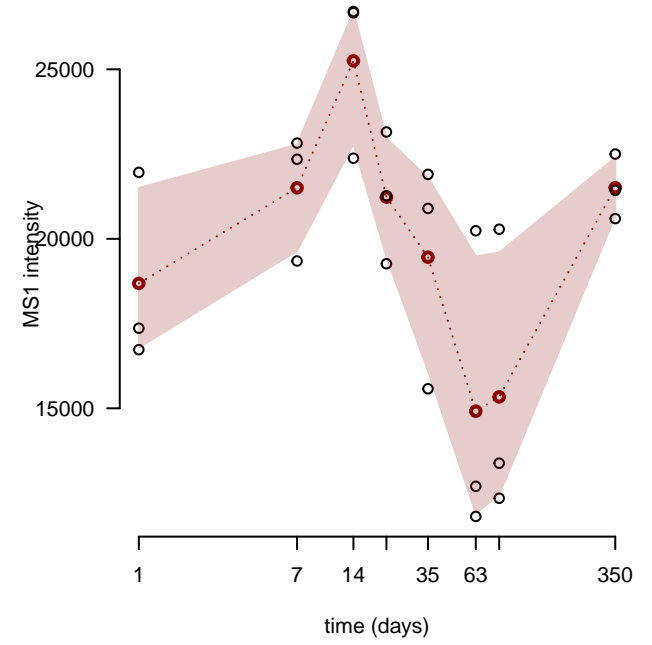

**Q80SZ7**  
**GN=Gng5**  
guanine nucleotide binding protein (G pr ...

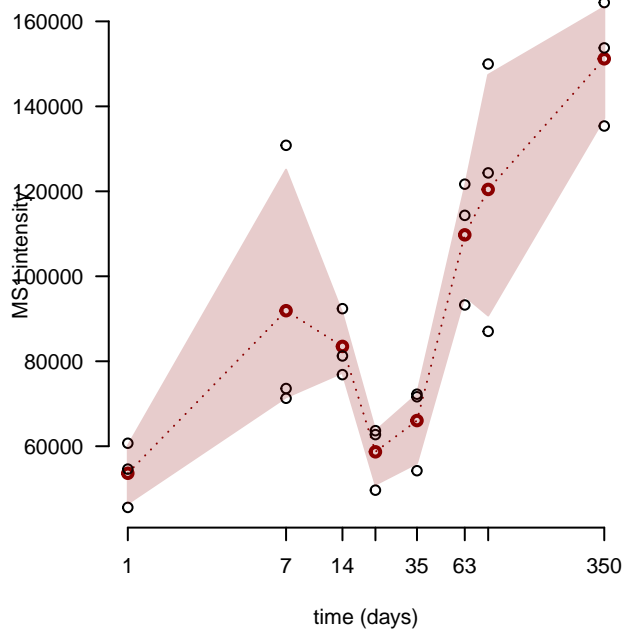

**Q80T14**  
**GN=Fras1**  
Fraser extracellular matrix complex subu ...

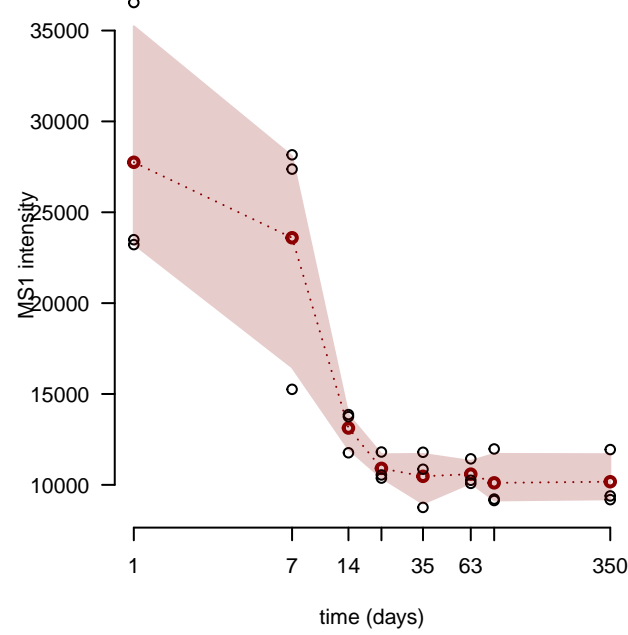

**Q80T69**  
**GN=Rsbn1**  
rosbin, round spermatid basic protein 1

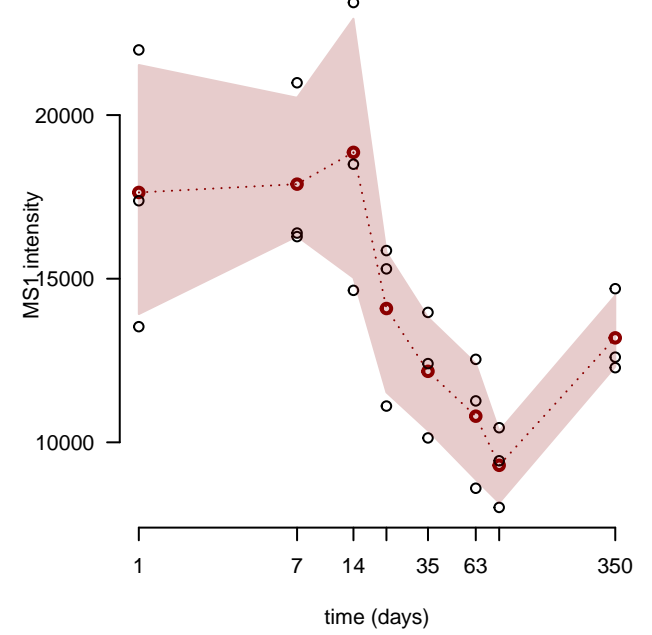

**Q80T85**  
**GN=Dcaf5**  
DDB1 and CUL4 associated factor 5

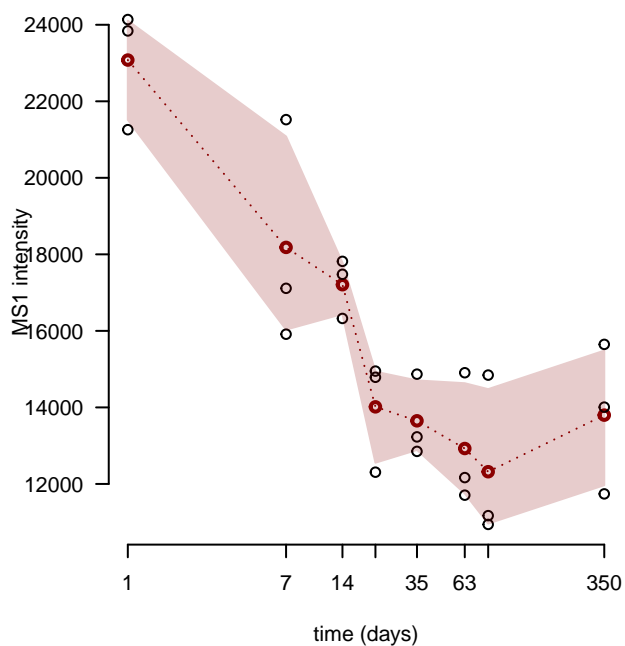

**Q80TA1**  
**GN=Selenoi**  
selenoprotein I

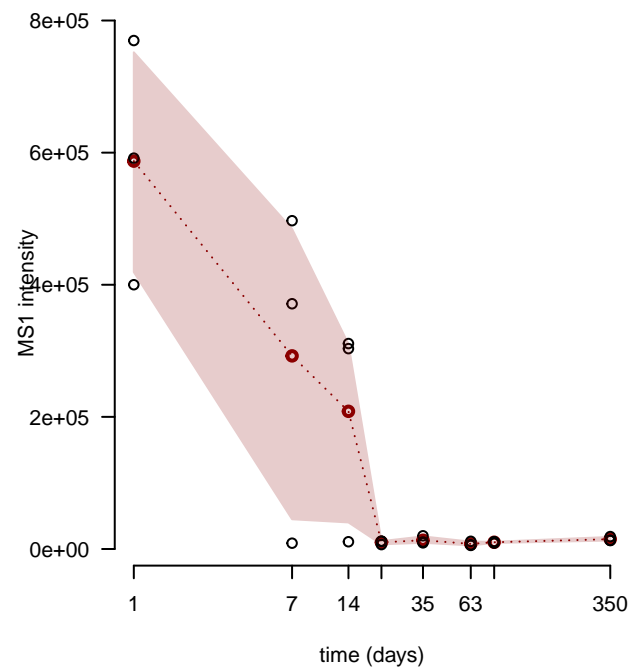

**Q80TA6**  
**GN=Mtnr12**  
myotubularin related protein 12

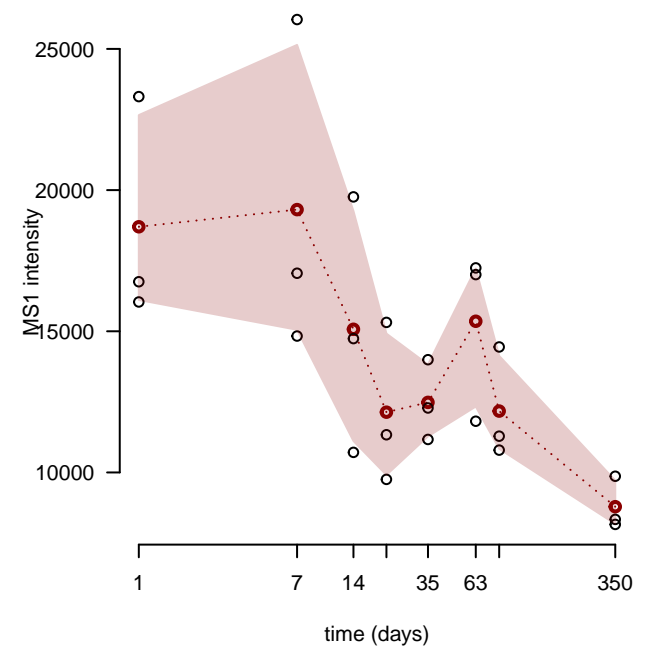

**Q80TA9**  
**GN=Epg5**

ectopic P-granules autophagy protein 5 h ...

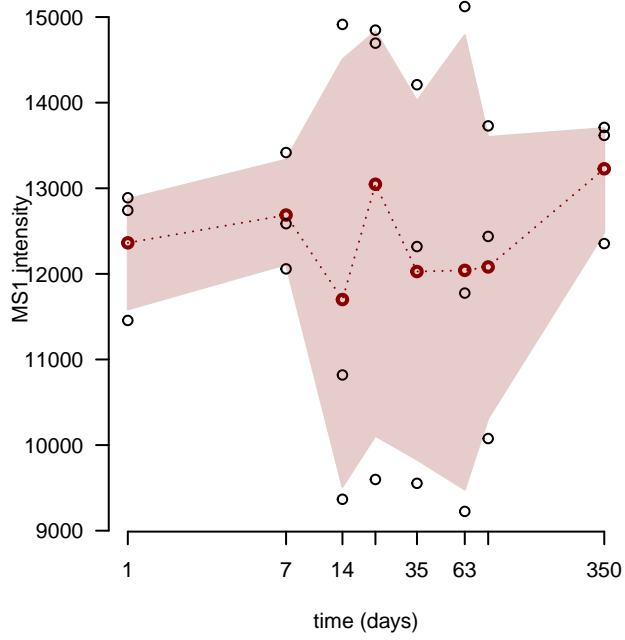

**Q80TB8**  
**GN=Val11**

vesicle amine transport protein 1 like

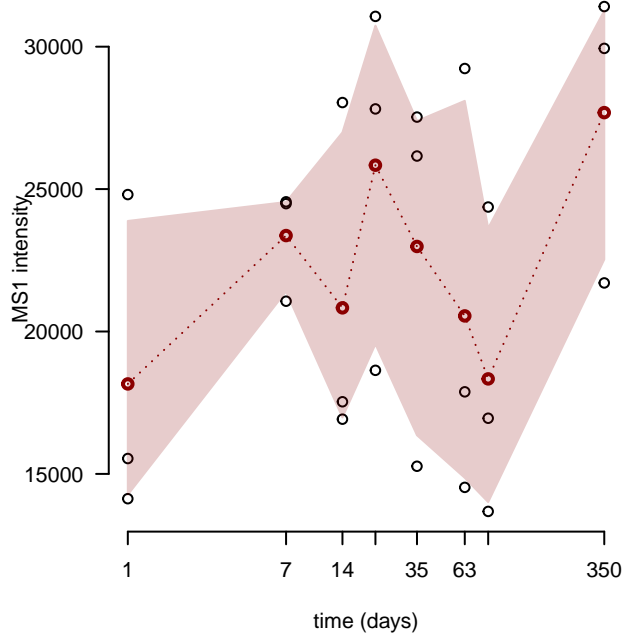

**Q80TC5**  
**GN=Pogk**

pogo transposable element with KRAB doma ...

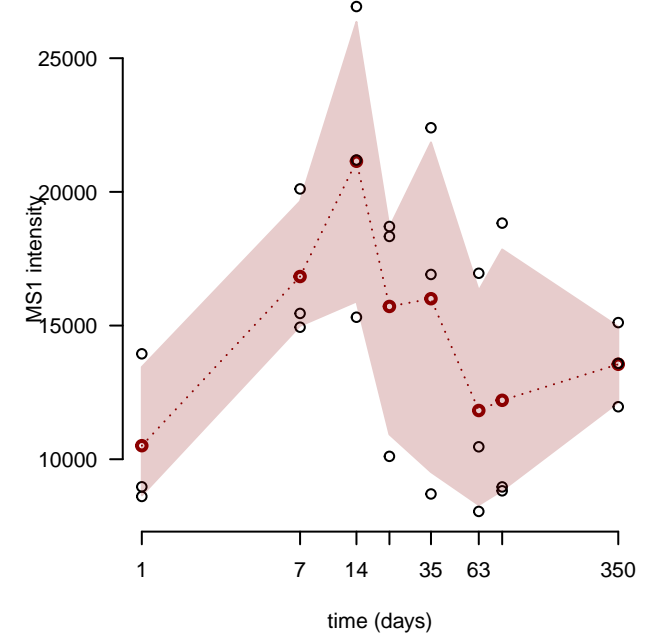

**Q80TE0**  
**GN=Rpap1**

RNA polymerase II associated protein 1

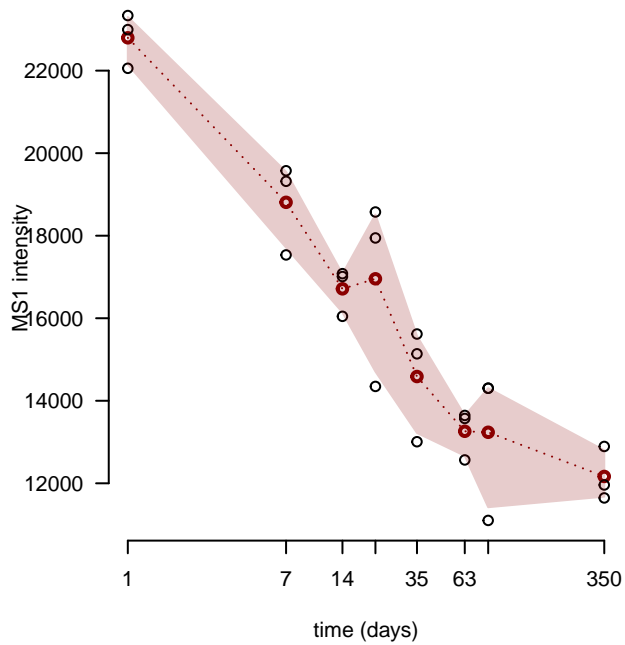

**Q80TE4**  
**GN=Sipa112**

signal-induced proliferation-associated ...

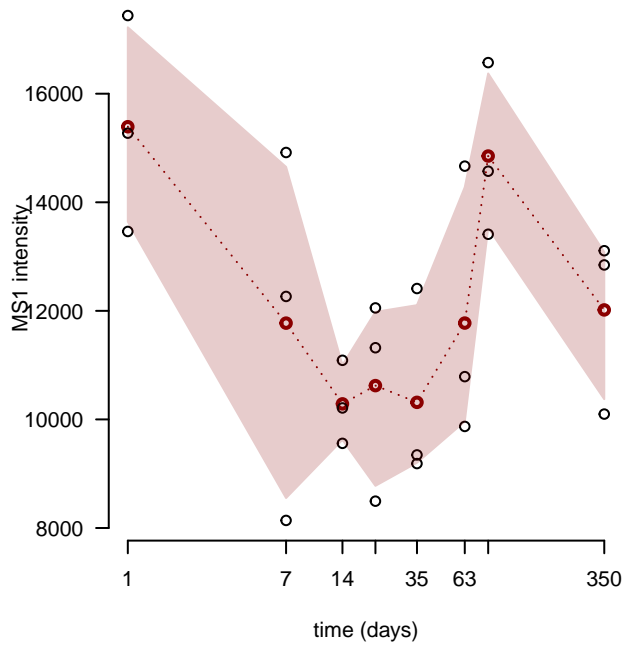

**Q80TF4**  
**GN=Klh113**

kelch-like 13

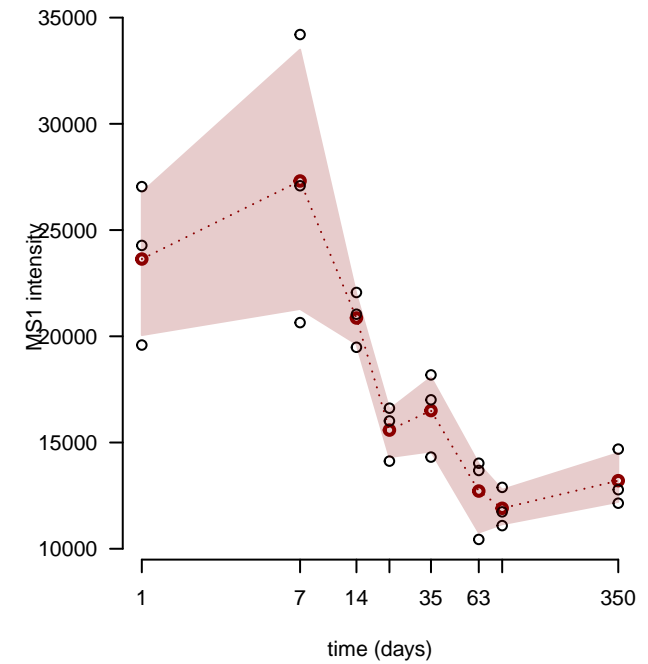

**Q80TG1**  
**GN=Kans11**

KAT8 regulatory NSL complex subunit 1

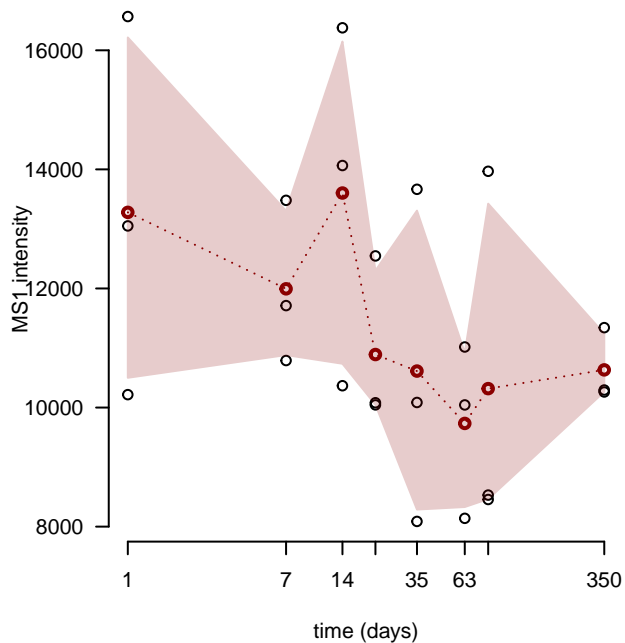

**Q80TH2**  
**GN=Erbin**

ErbB2 interacting protein

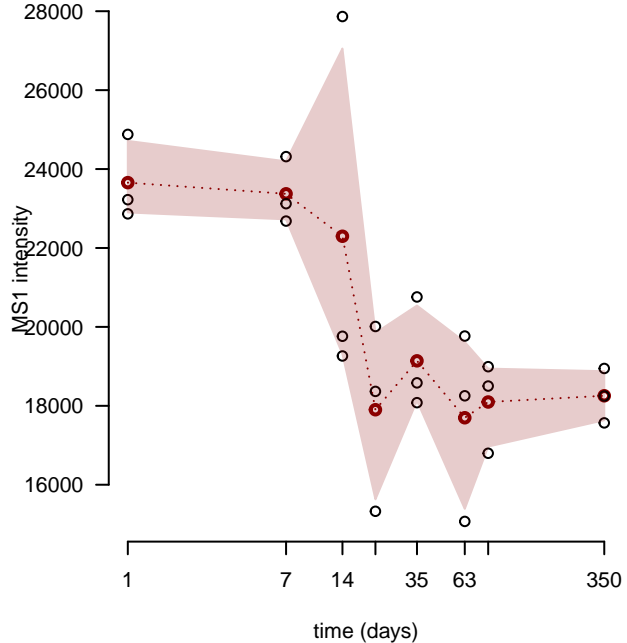

**Q80TI0**  
**GN=Gramd1b**

GRAM domain containing 1B

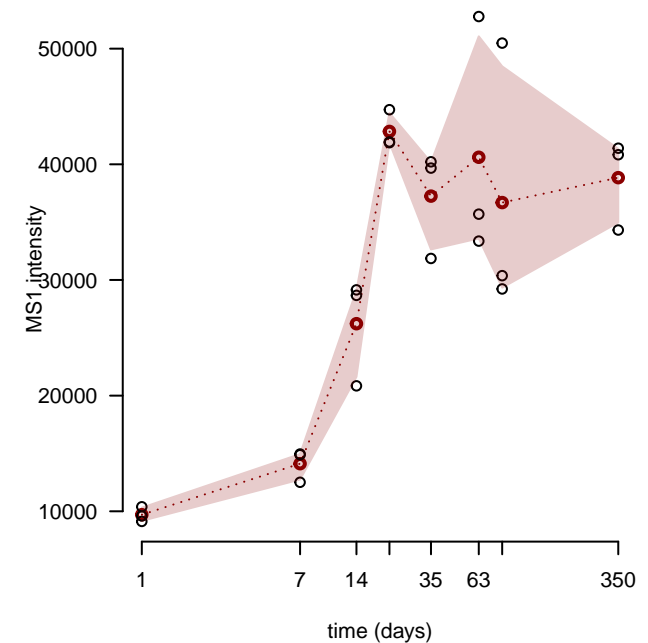

**Q80TJ7**  
GN=Phf8  
PHD finger protein 8

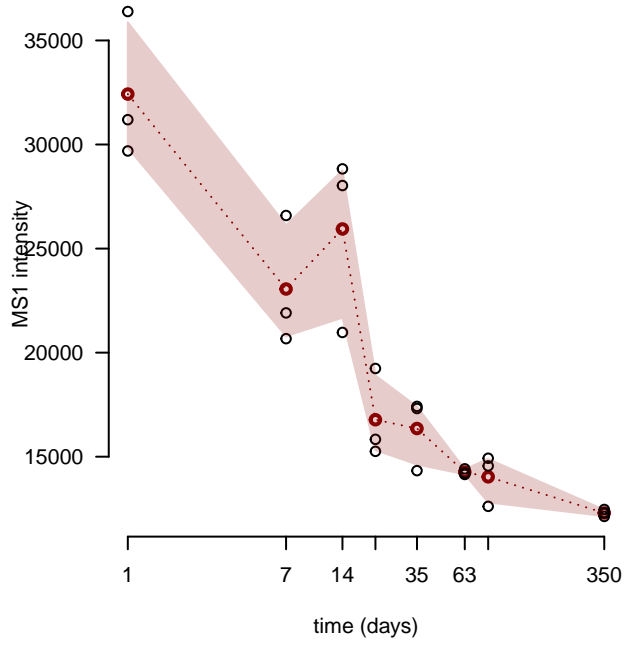

**Q80TL0**  
GN=Ppm1e  
protein phosphatase 1E (PP2C domain cont ...

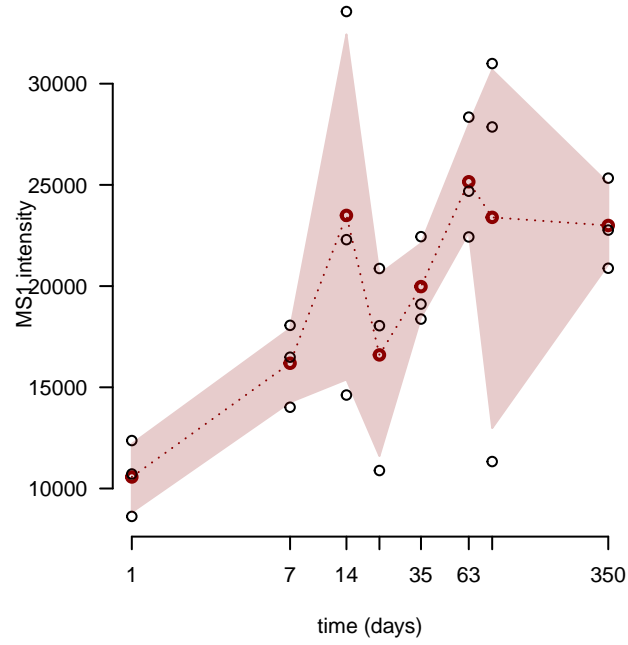

**Q80TL7**  
GN=Mon2  
MON2 homolog, regulator of endosome to G ...

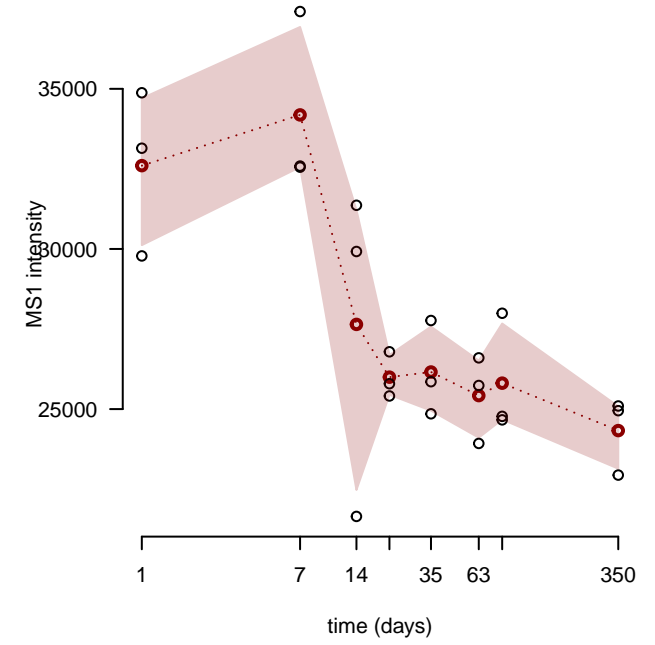

**Q80TM6**  
GN=R3hdm2  
R3H domain containing 2

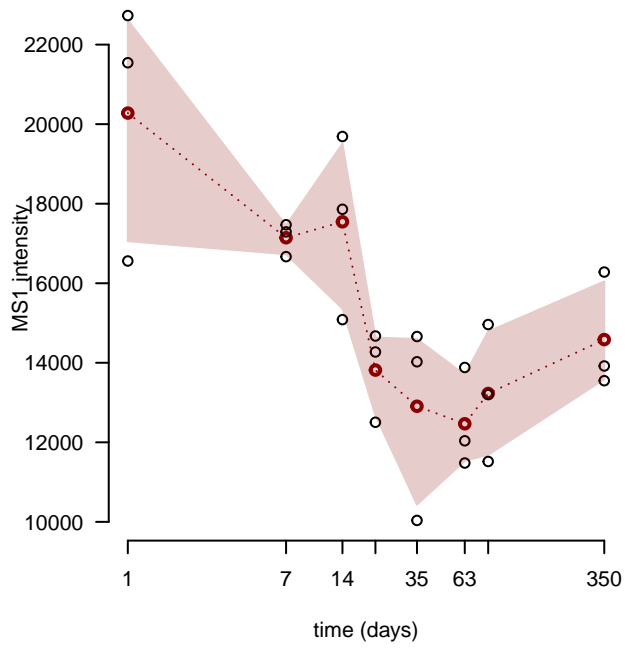

**Q80TM9**  
GN=Nisch  
nischarin

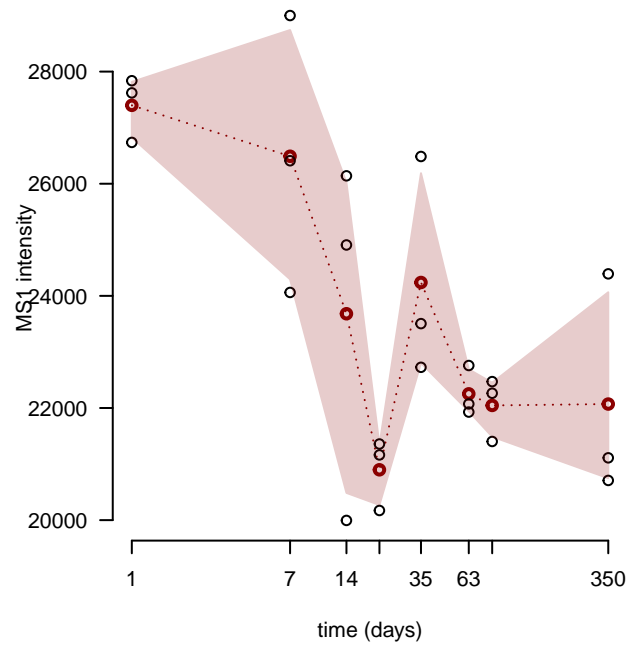

**Q80TN4**  
GN=Dnajc16  
DnaJ heat shock protein family (Hsp40) m ...

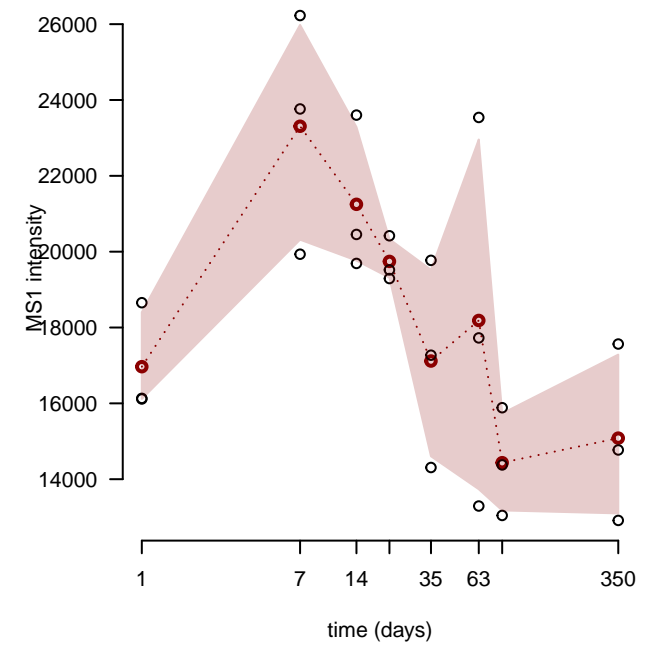

**Q80TN5**  
GN=Zdhhc17  
zinc finger, DHHC domain containing 17

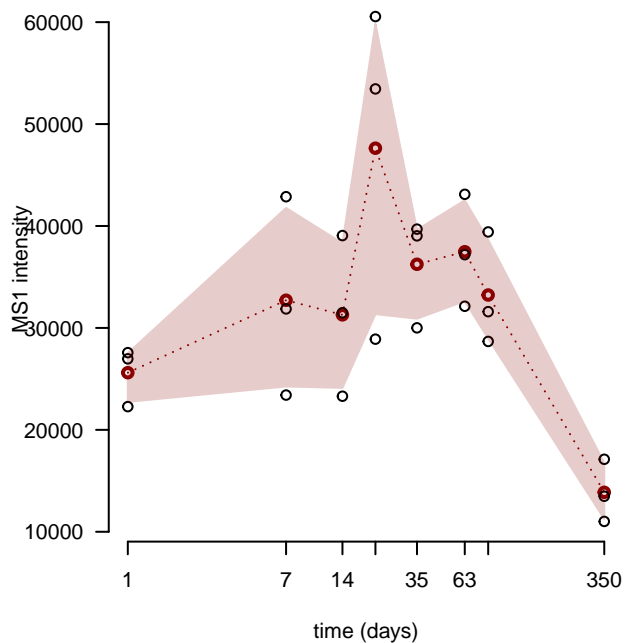

**Q80TP3**  
GN=Ubr5  
ubiquitin protein ligase E3 component n- ...

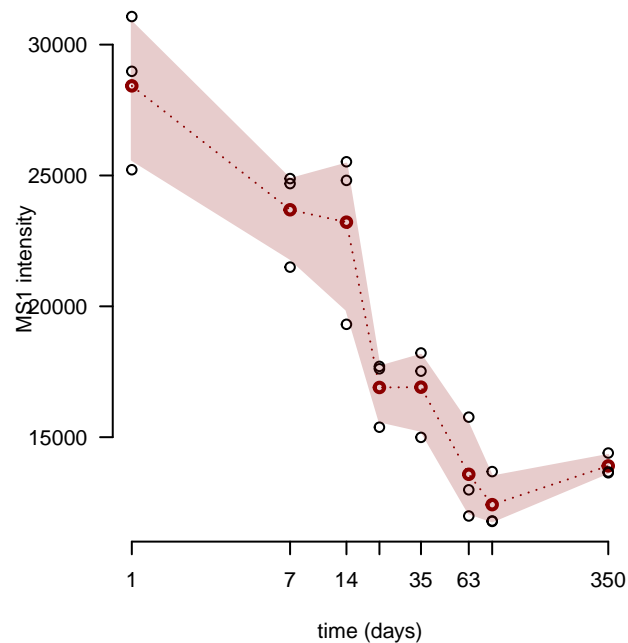

**Q80TQ2**  
GN=Cyld  
CYLD lysine 63 deubiquitinase

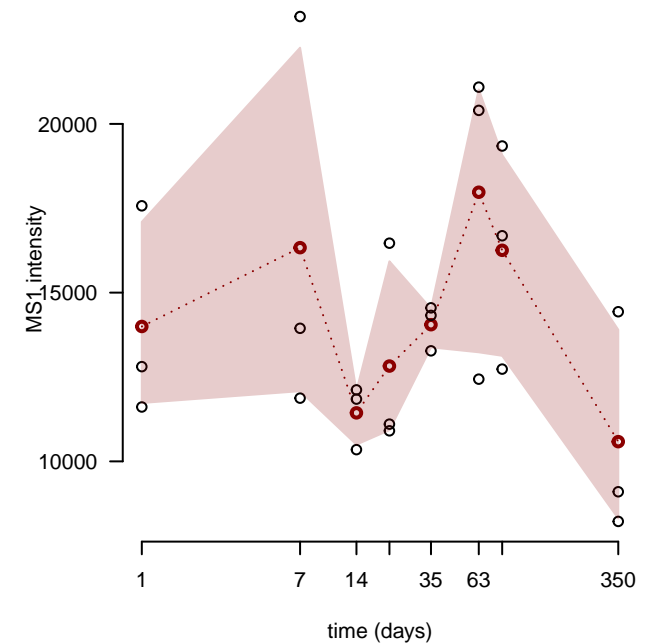



**Q80TQ5**  
**GN=Plekhm2**  
pleckstrin homology domain containing, f...

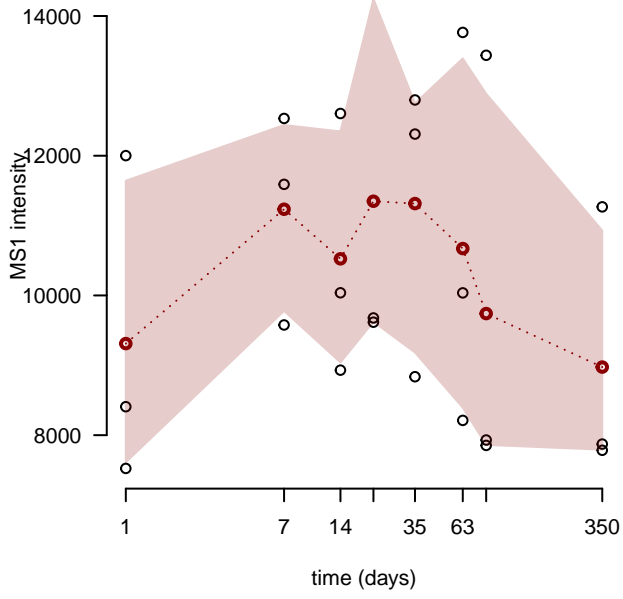

**Q80TR1**  
**GN=Adgr1**  
adhesion G protein-coupled receptor L1

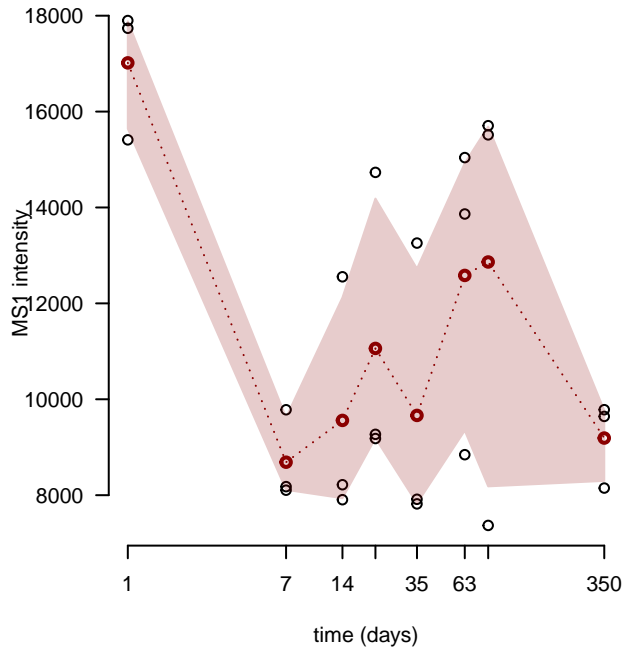

**Q80TR8**  
**GN=Dcaf1**  
DDB1 and CUL4 associated factor 1

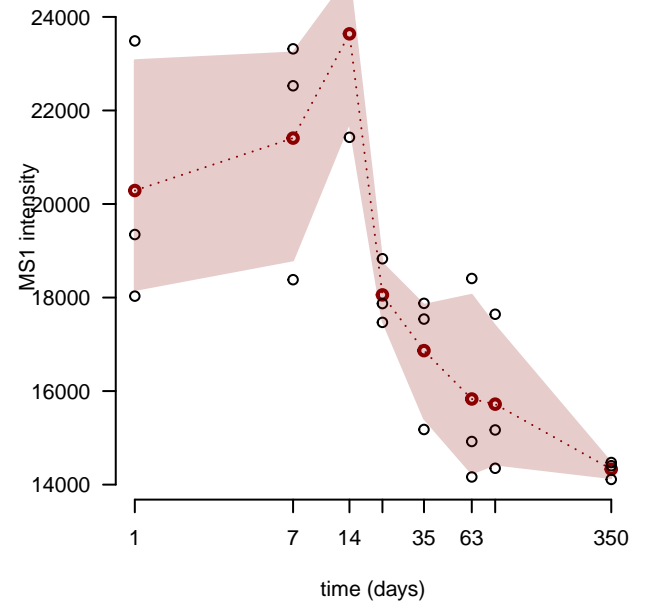

**Q80TS3**  
**GN=Adgrl3**  
adhesion G protein-coupled receptor L3

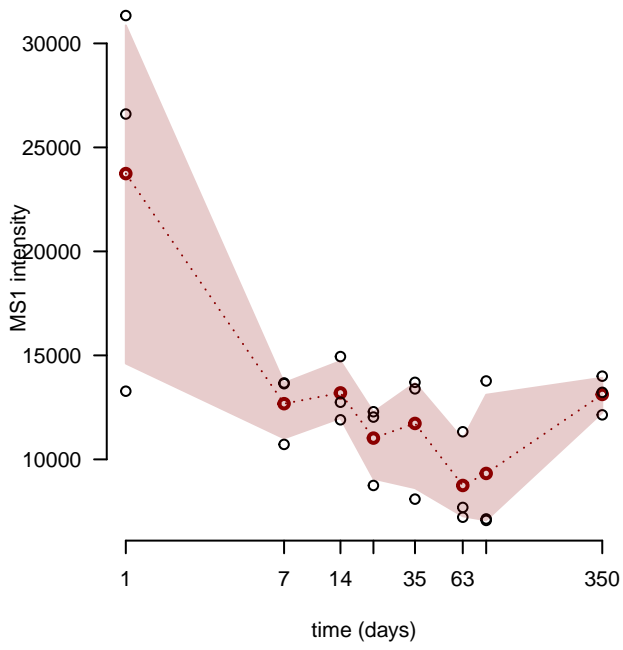

**Q80TS5**  
**GN=Znf423**

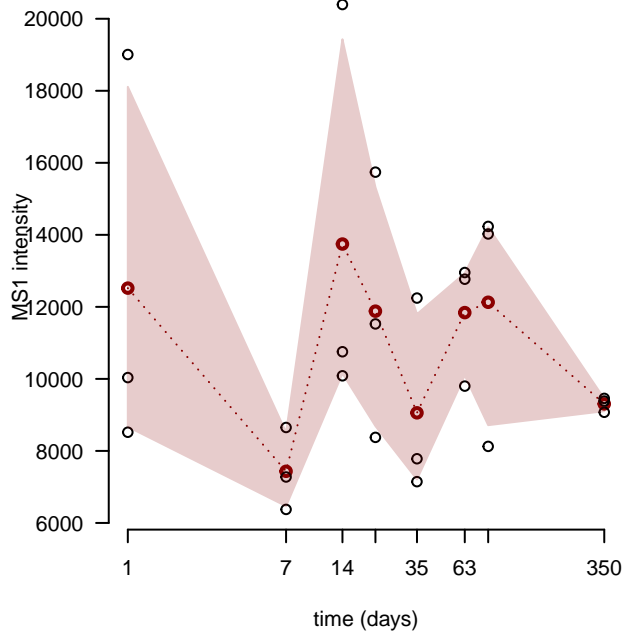

**Q80TS8**  
**GN=Sel1l3**  
sel-1 suppressor of lin-12-like 3 (C. el ...

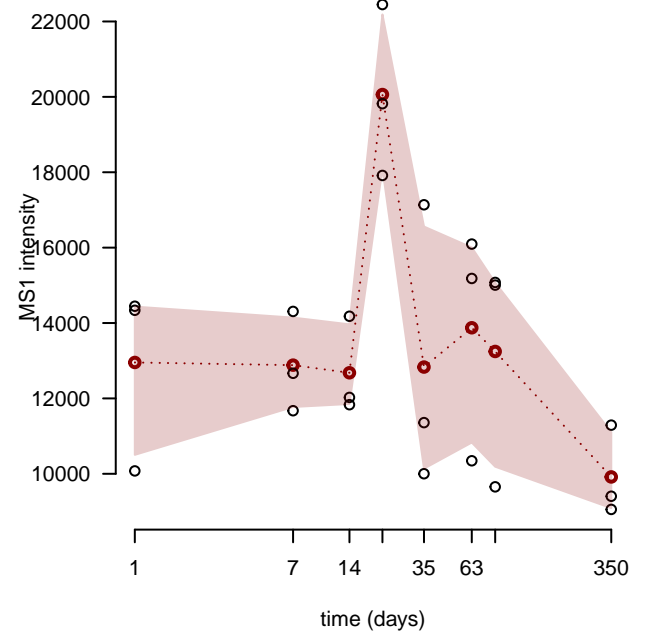

**Q80TT8**  
**GN=Cul9**  
cullin 9

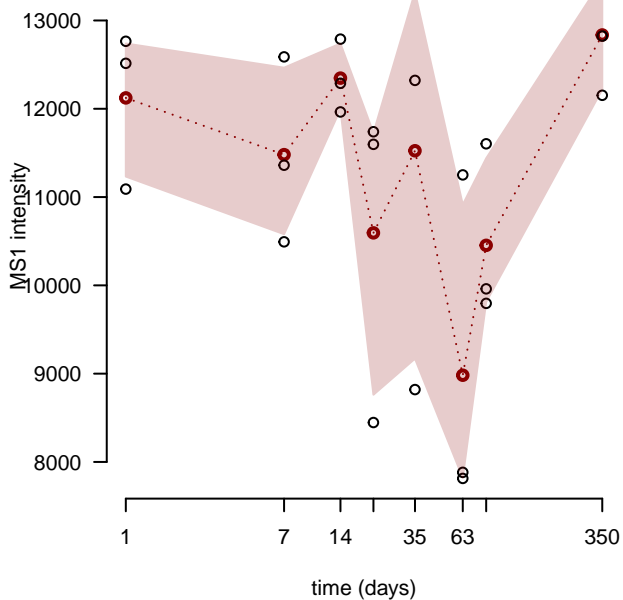

**Q80TV8**  
**GN=Clasp1**  
CLIP associating protein 1

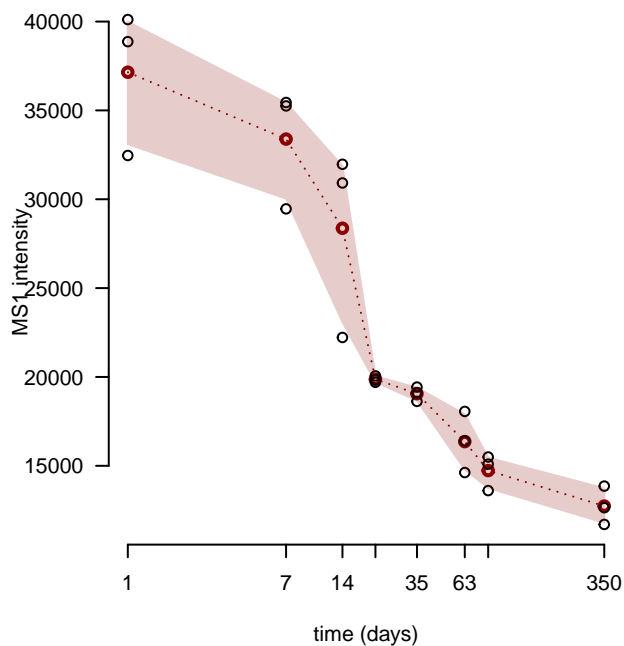

**Q80TY0**  
**GN=Fnbp1**  
formin binding protein 1

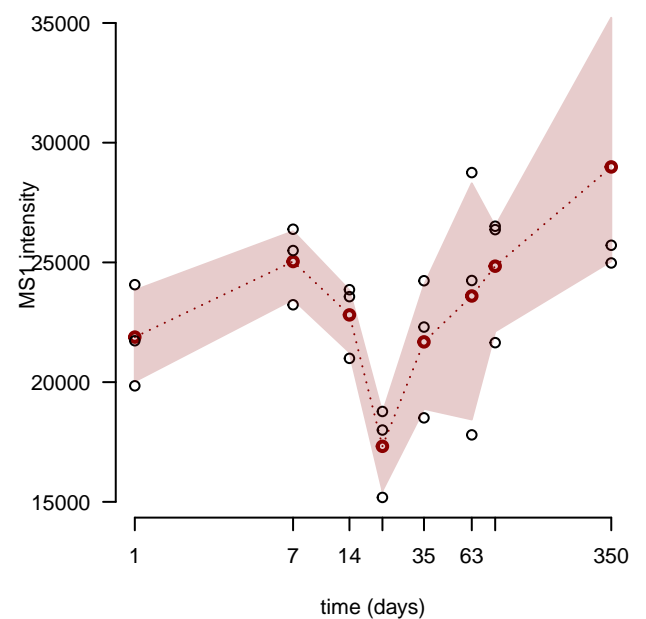

**Q80TY5**  
GN=Vps13b  
vacuolar protein sorting 13B

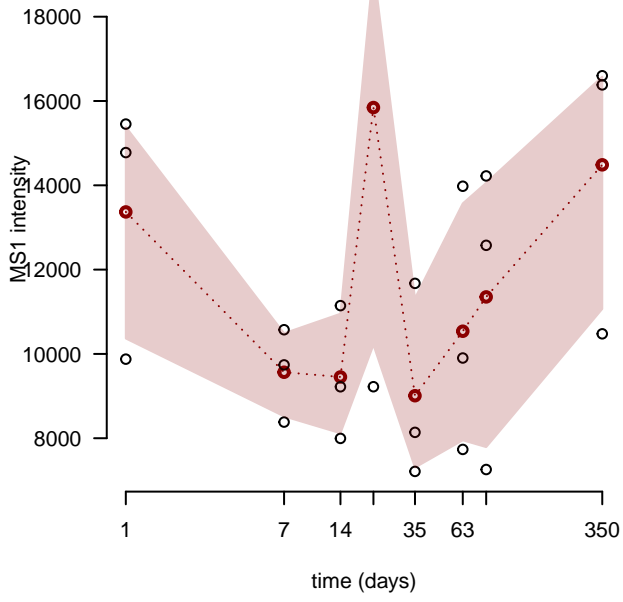

**Q80TZ9**  
GN=Rere  
arginine glutamic acid dipeptide (RE) re ...

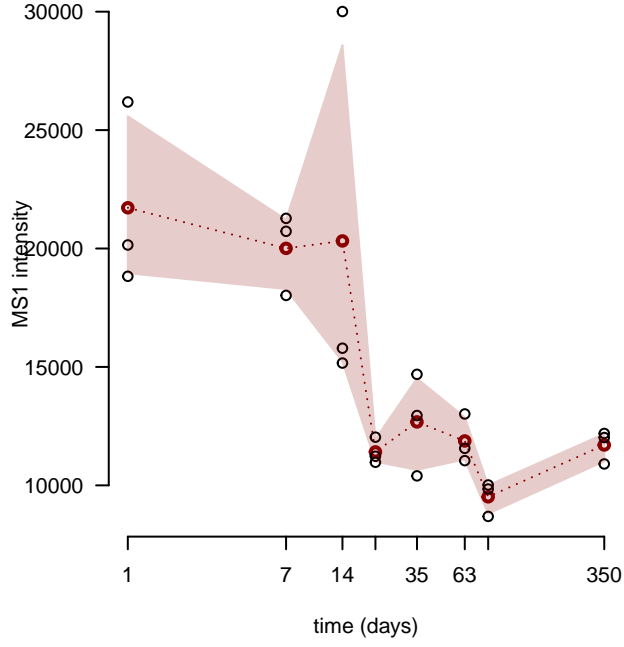

**Q80U04**  
GN=Pja2  
praja ring finger ubiquitin ligase 2

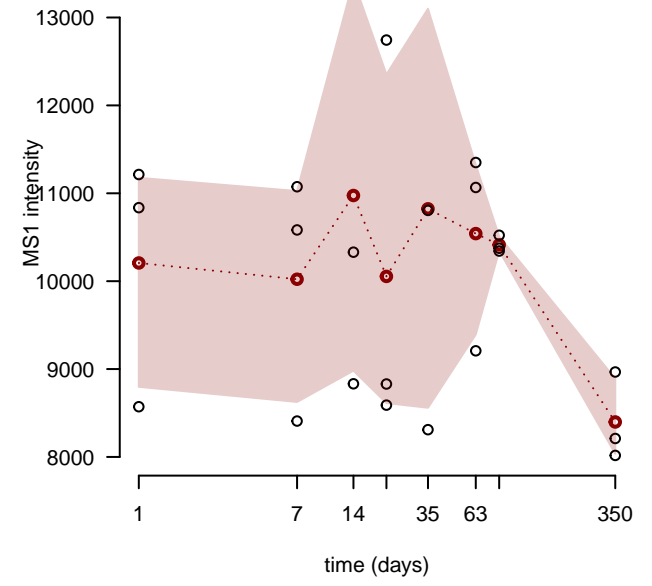

**Q80U16**  
GN=Ripor2  
RHO family interacting cell polarization ...

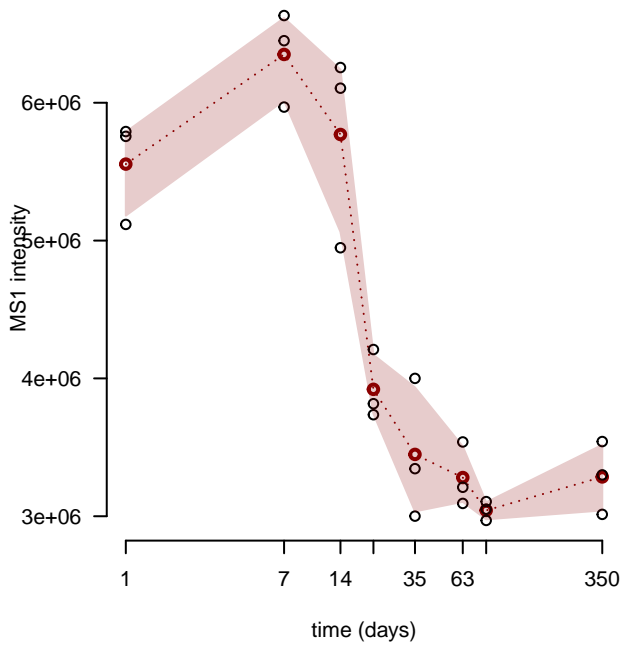

**Q80U28**  
GN=Madd  
MAP-kinase activating death domain

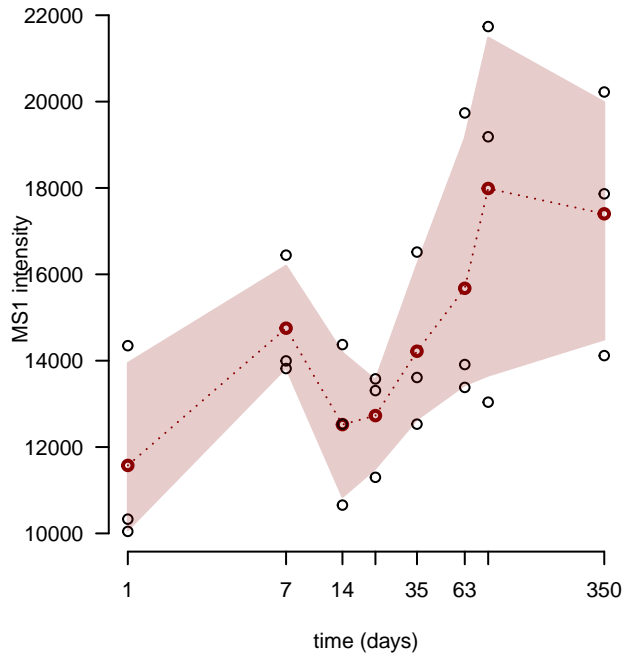

**Q80U30**  
GN=Clec16a  
C-type lectin domain family 16, member A

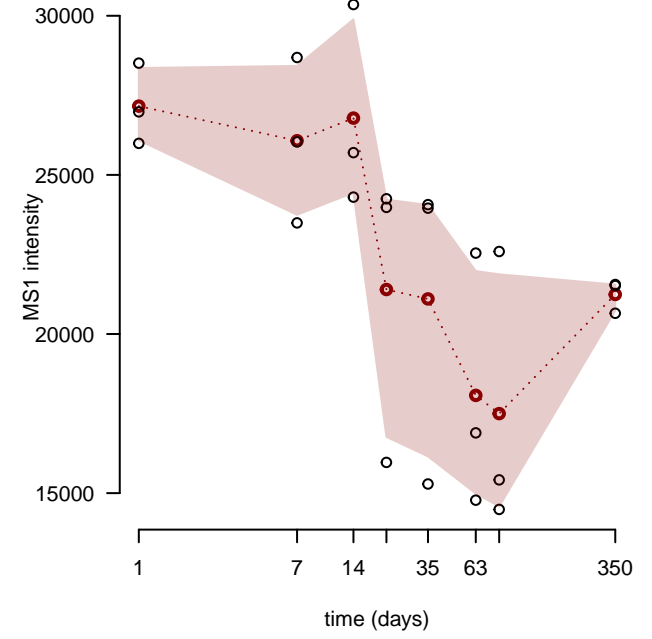

**Q80U35**  
GN=Arhgef17  
Rho guanine nucleotide exchange factor (...)

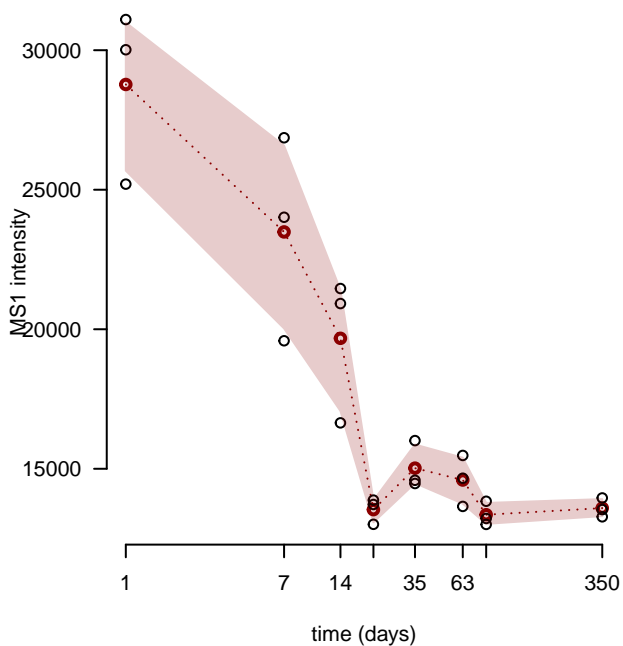

**Q80U38**  
GN=Khyn  
KH and NYN domain containing

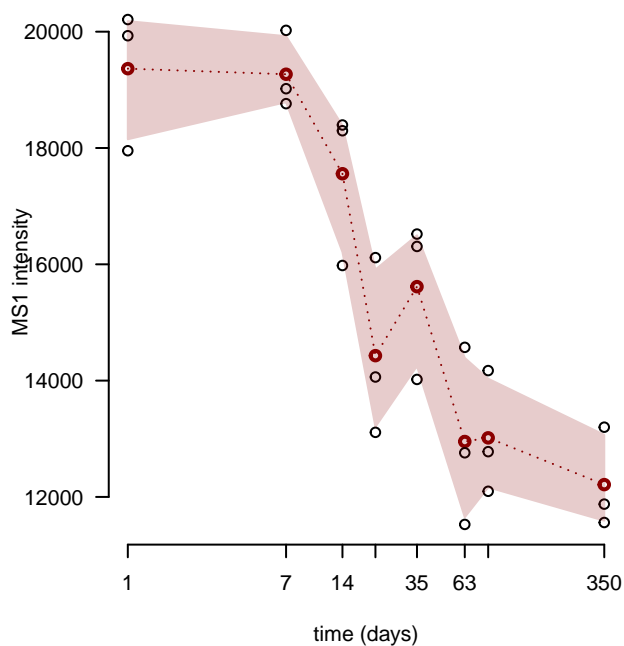

**Q80U44**  
GN=Zfyve16  
zinc finger, FYVE domain containing 16

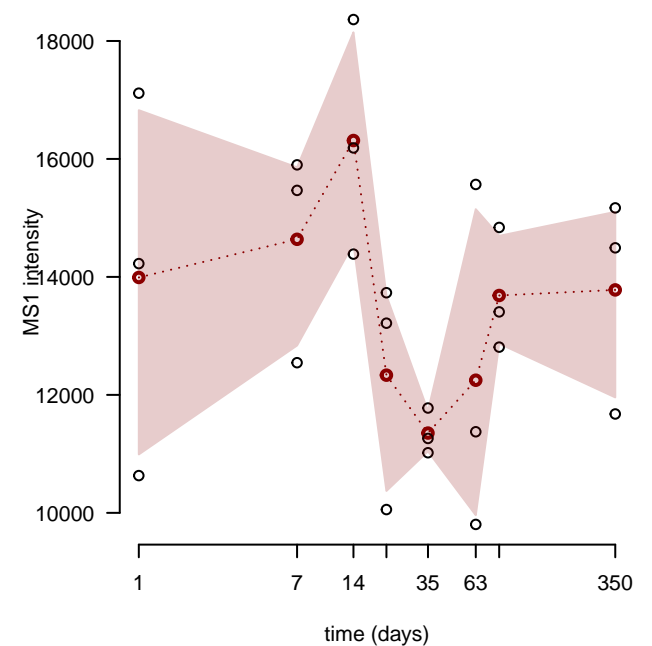

**Q80U49**  
**GN=Cep170b**  
centrosomal protein 170B

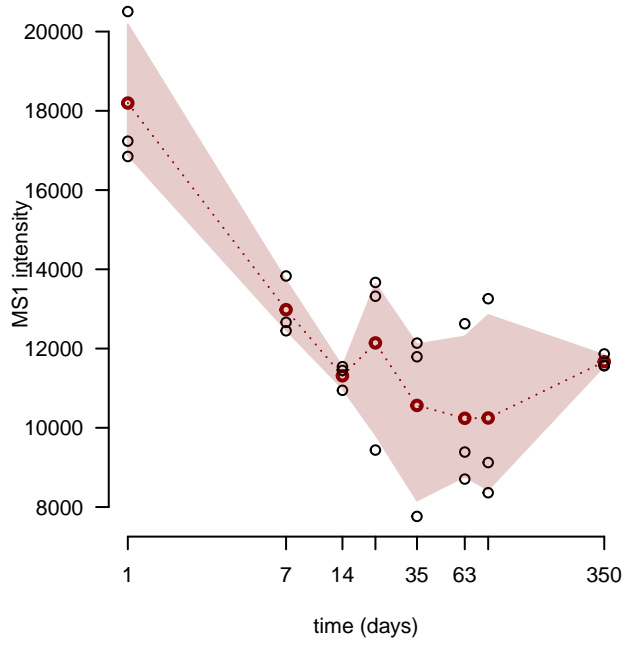

**Q80U56**  
**GN=Avl9**  
AVL9 cell migration associated

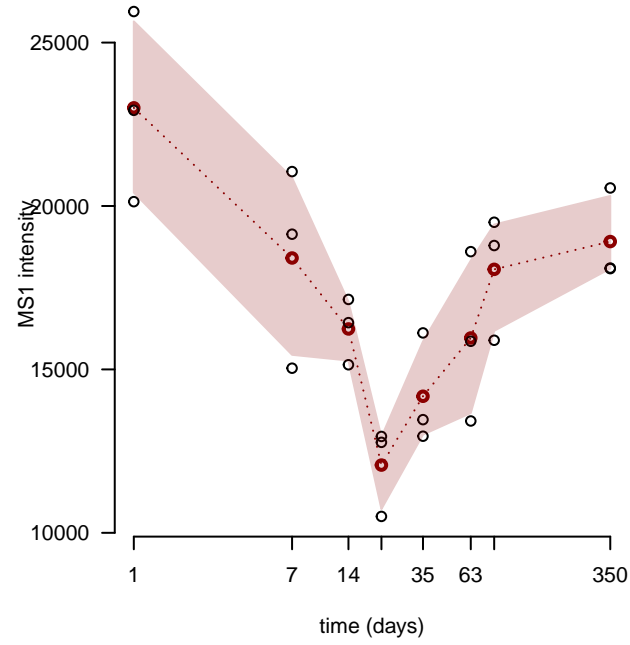

**Q80U58**  
**GN=Pum2**  
pumilio RNA-binding family member 2

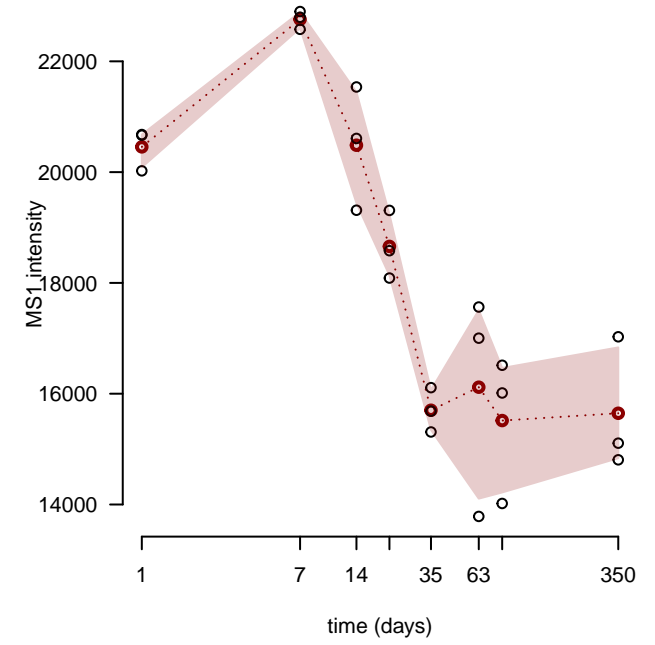

**Q80U63**  
**GN=Mfn2**  
mitofusin 2

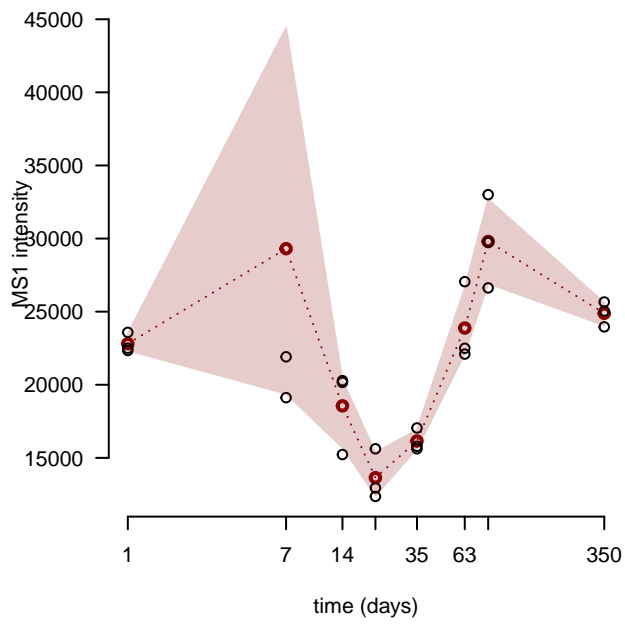

**Q80U70**  
**GN=Suz12**  
SUZ12 polycomb repressive complex 2 subu ...

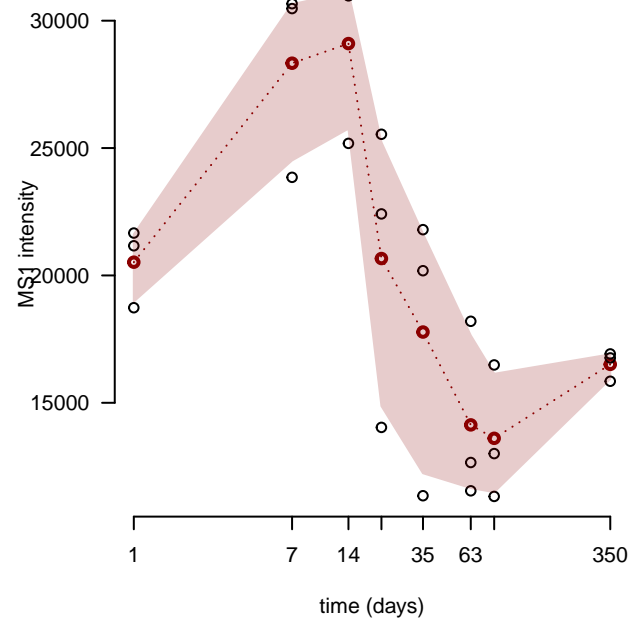

**Q80U72**  
**GN=Scrib**  
scribbled planar cell polarity

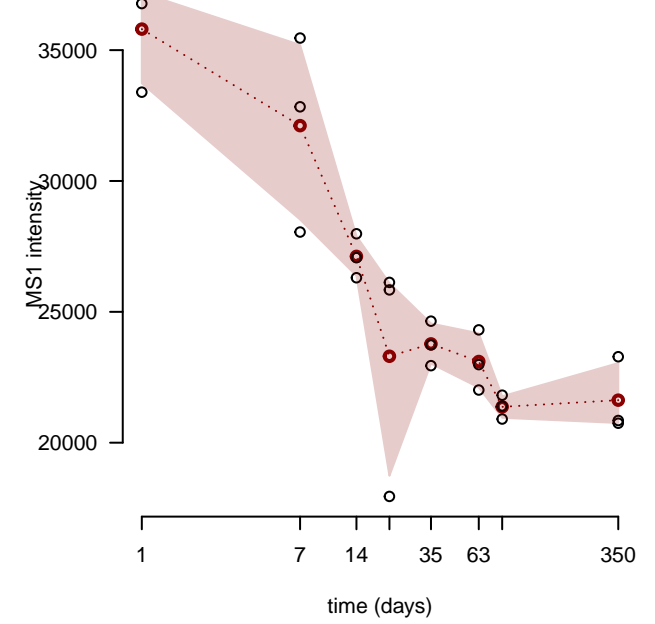

**Q80U78**  
**GN=Pum1**  
pumilio RNA-binding family member 1

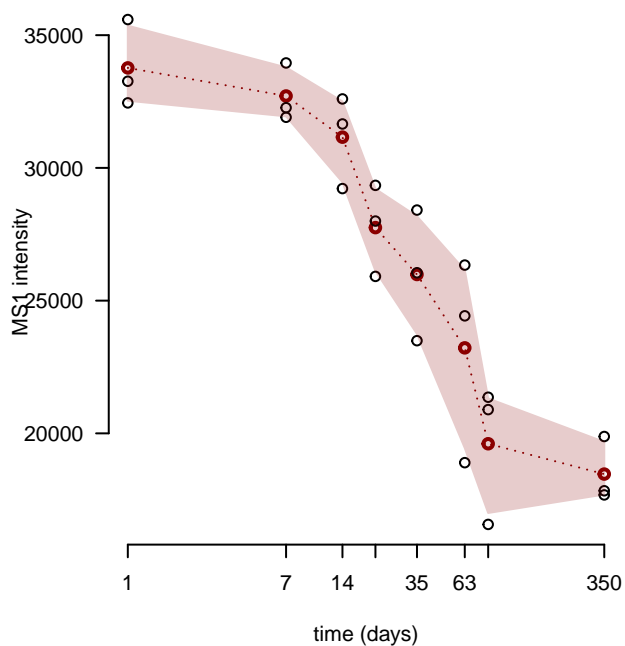

**Q80U87**  
**GN=Usp8**  
ubiquitin specific peptidase 8

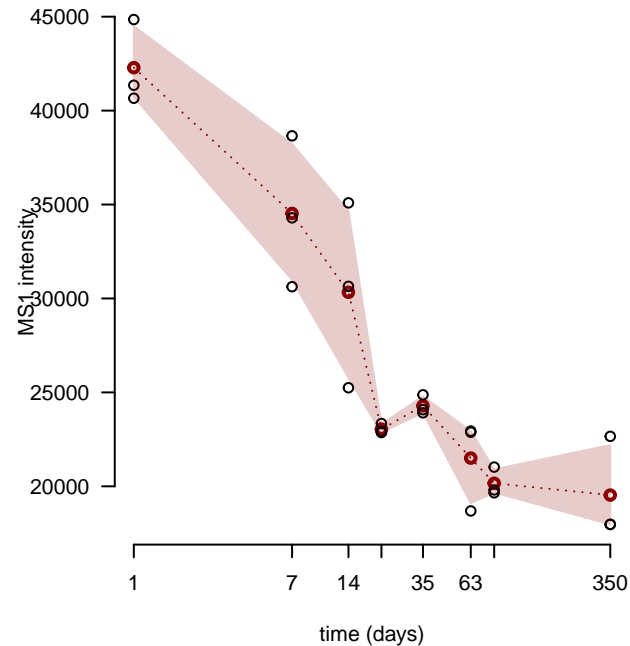

**Q80U93**  
**GN=Nup214**  
nucleoporin 214

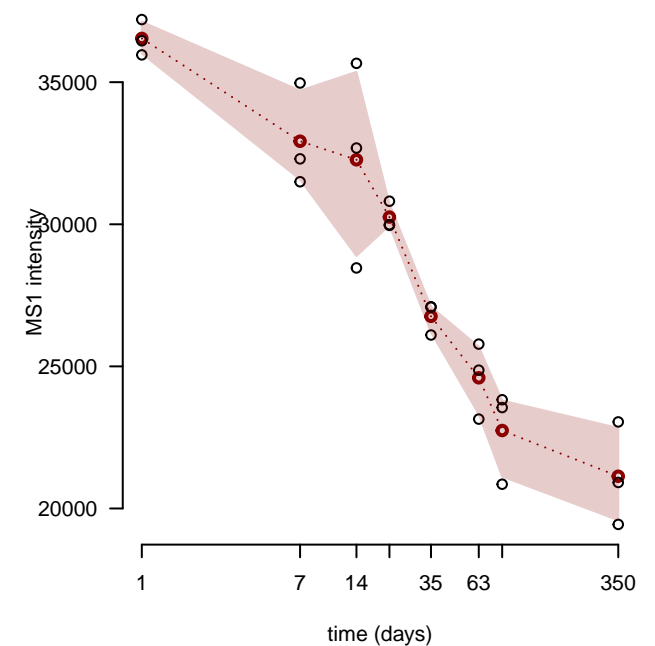

**Q80U95**  
GN=Ube3c  
ubiquitin protein ligase E3C

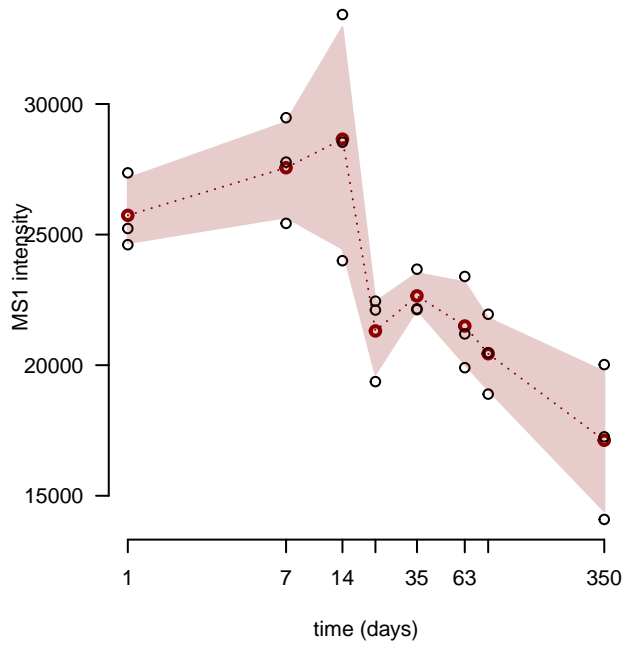

**Q80UG1**  
GN=Fads6  
fatty acid desaturase domain family, mem ...

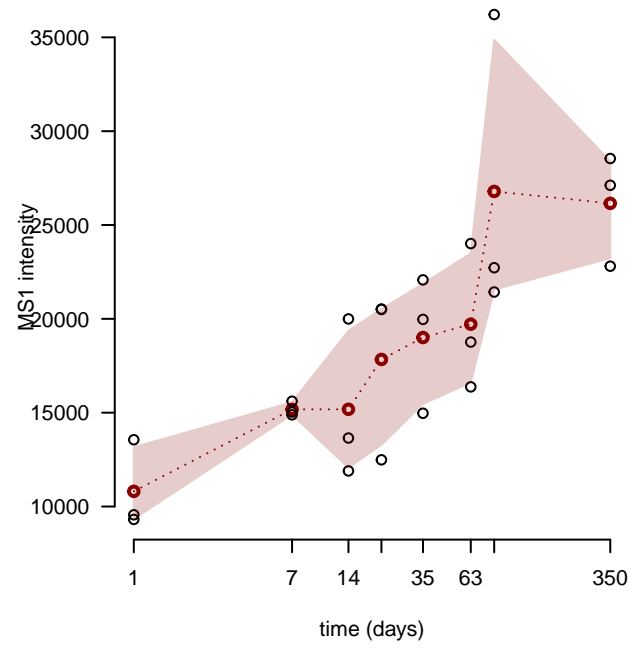

**Q80UG2**  
GN=Plxna4  
plexin A4

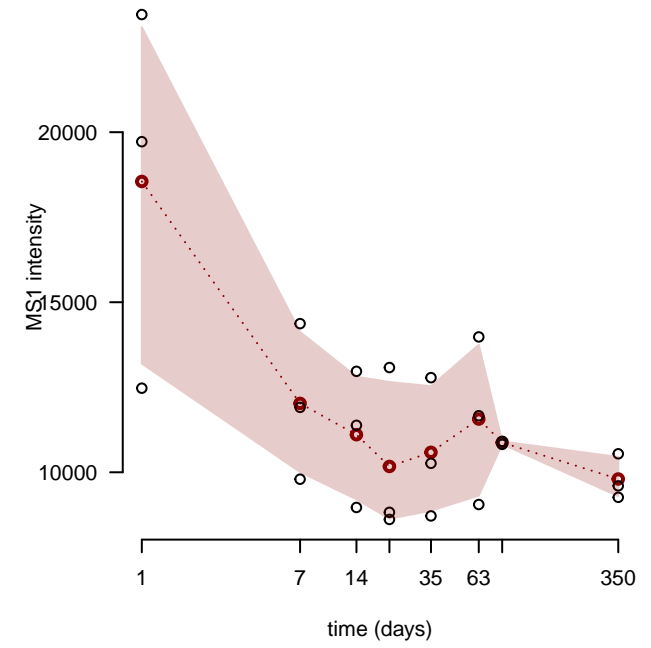

**Q80UG5**  
GN=Sept9

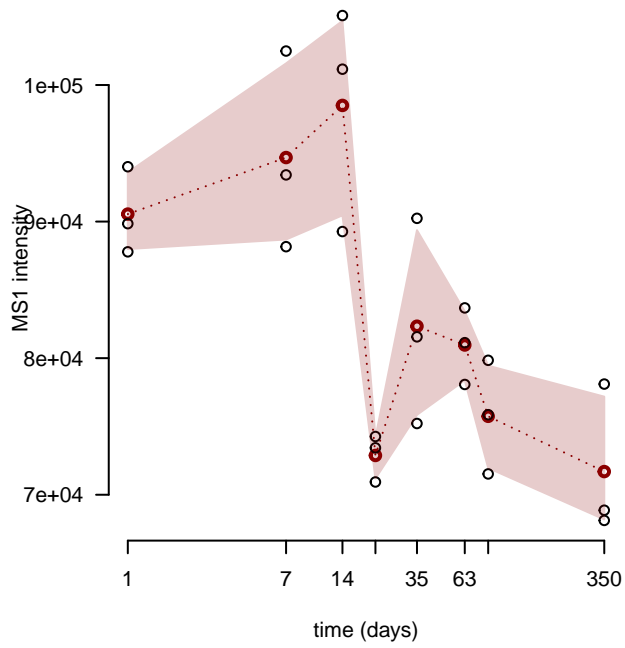

**Q80UJ7**  
GN=Rab3gap1  
RAB3 GTPase activating protein subunit 1

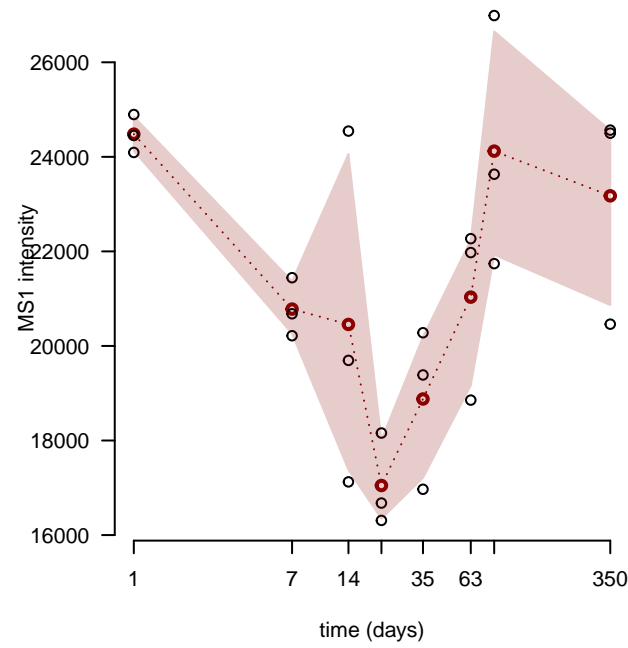

**Q80UK0**  
GN=Sestd1  
SEC14 and spectrin domains 1

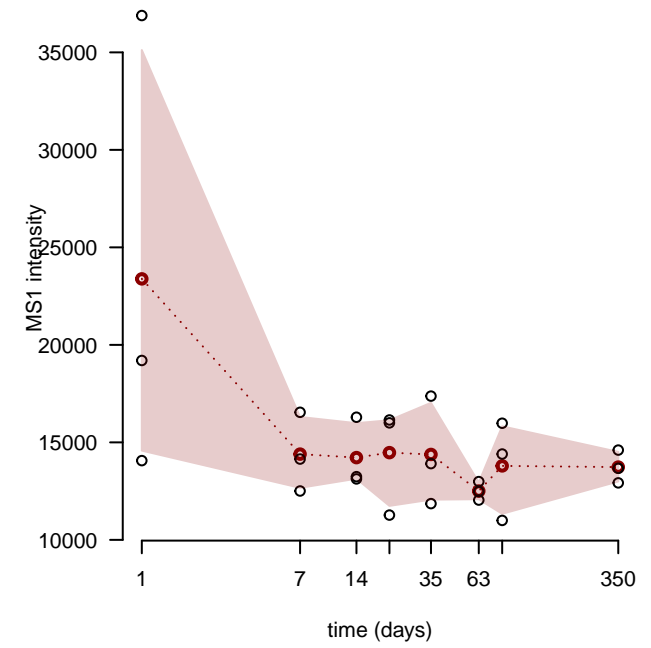

**Q80UK8**  
GN=Ints2  
integrator complex subunit 2

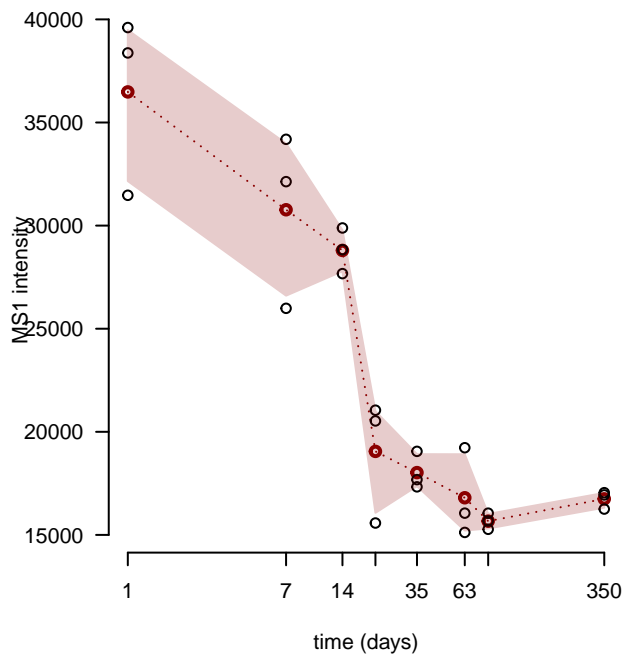

**Q80UM3**  
GN=Naa15  
N(alpha)-acetyltransferase 15, NatA auxi ...

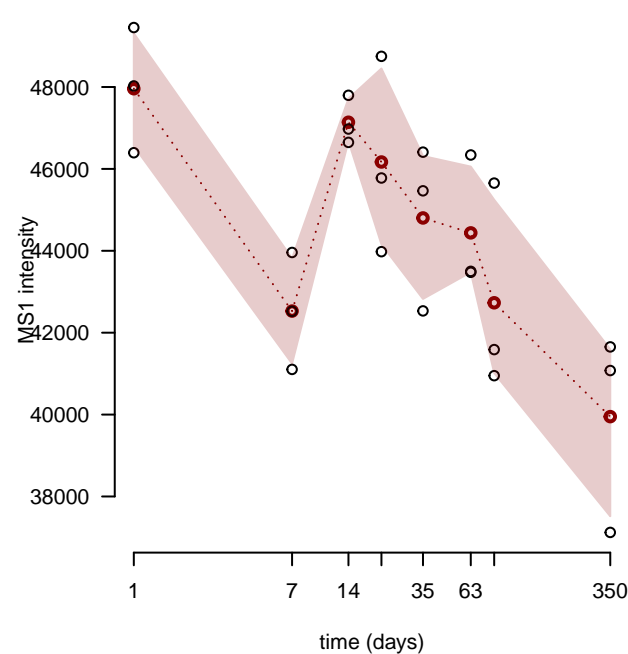

**Q80UM7**  
GN=Mogs  
mannosyl-oligosaccharide glucosidase

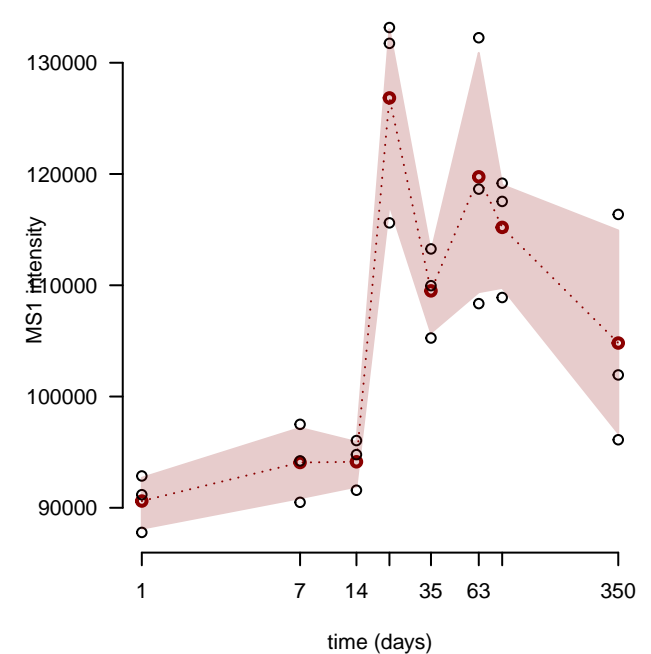

**Q80UN9**  
**GN=Trit1**  
tRNA isopentenyltransferase 1

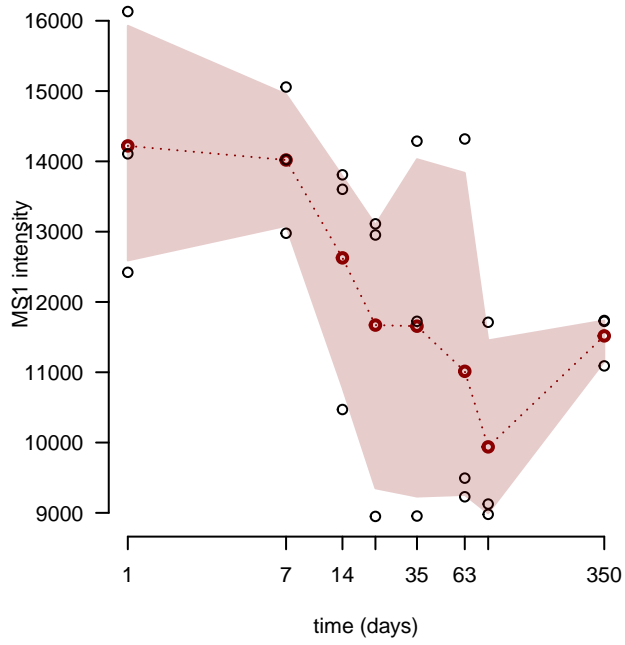

**Q80UP3**  
**GN=Dgkz**  
diacylglycerol kinase zeta

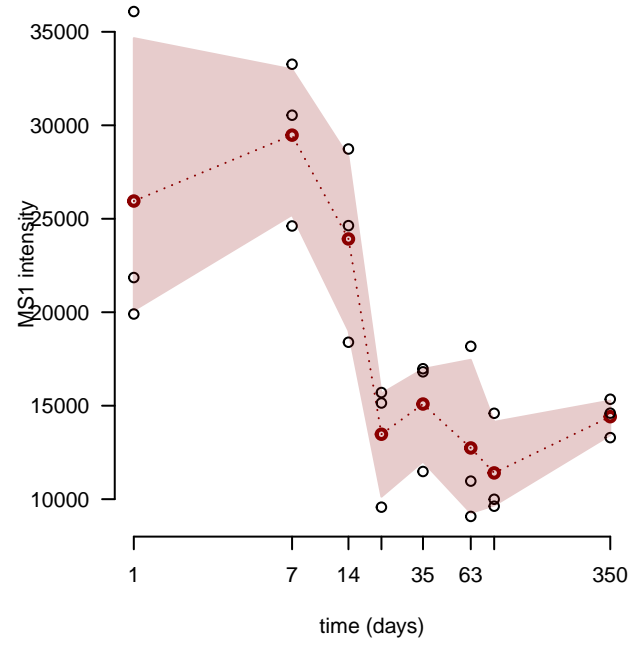

**Q80UP5**  
**GN=Ankrd13a**  
ankyrin repeat domain 13a

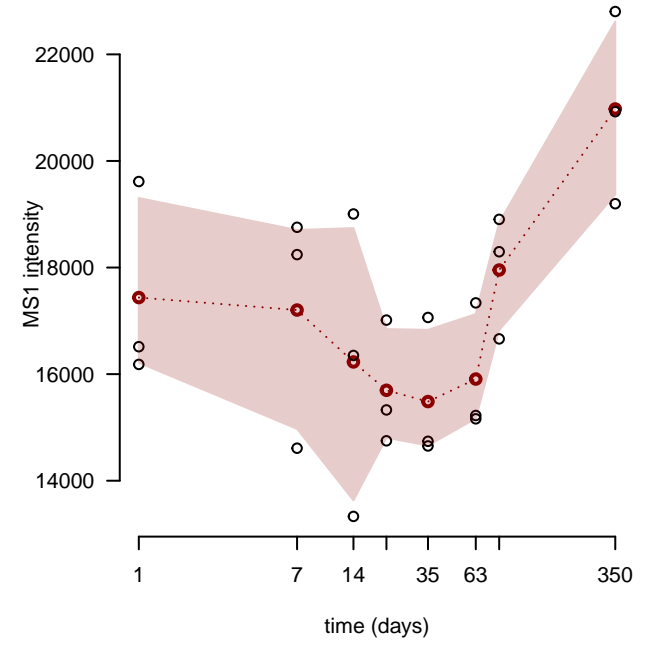

**Q80UP8**  
**GN=Slc20a2**  
solute carrier family 20, member 2

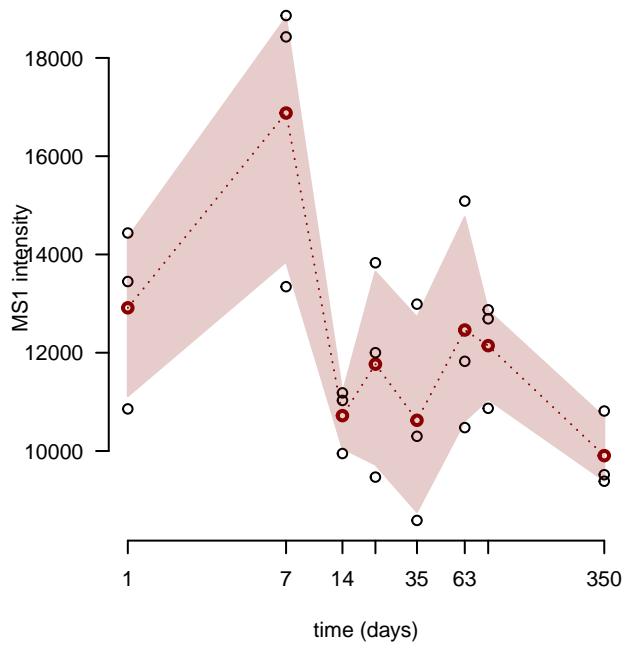

**Q80US4**  
**GN=Actr5**  
ARP5 actin-related protein 5

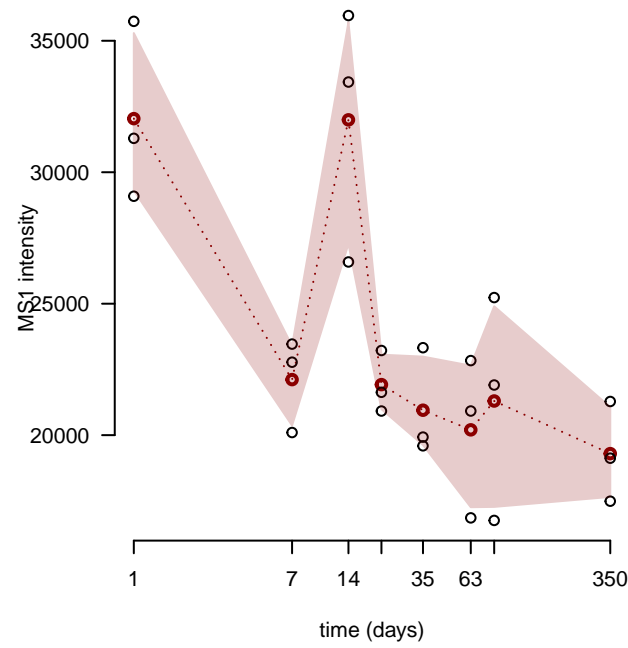

**Q80UU1**  
**GN=Ankzf1**  
ankyrin repeat and zinc finger domain co ...

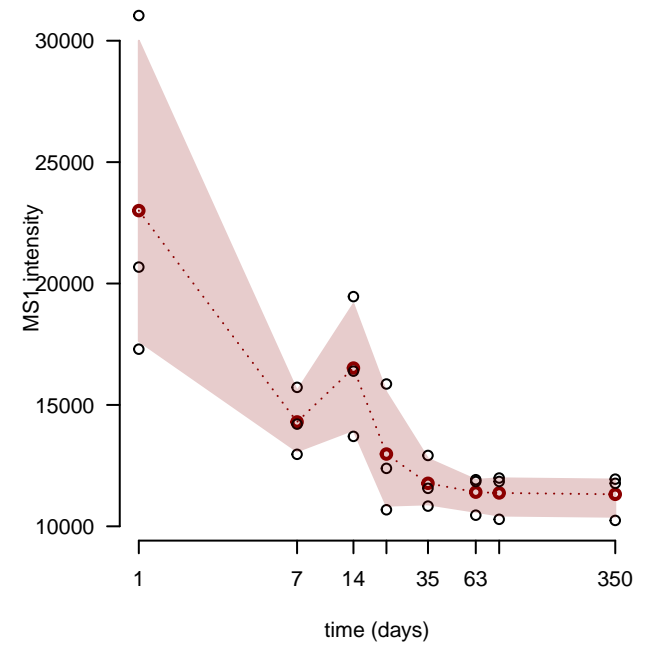

**Q80UU2**  
**GN=Rpp38**  
ribonuclease P/MRP 38 subunit

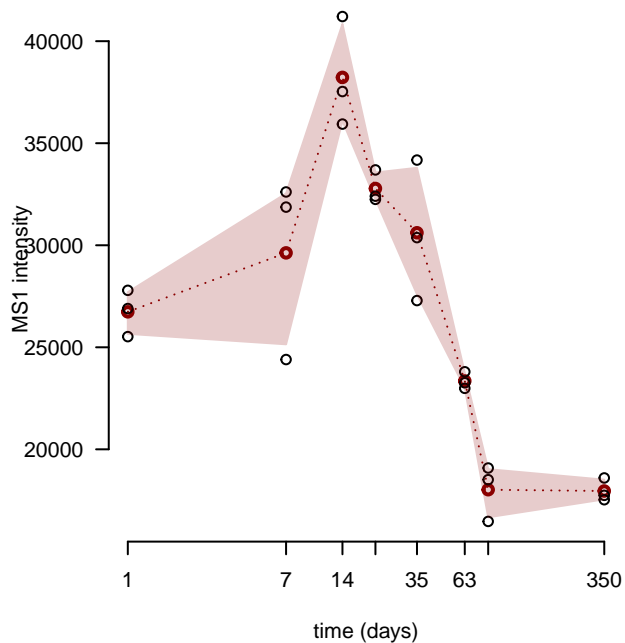

**Q80UU9**  
**GN=Pgrmc2**  
progesterone receptor membrane component ...

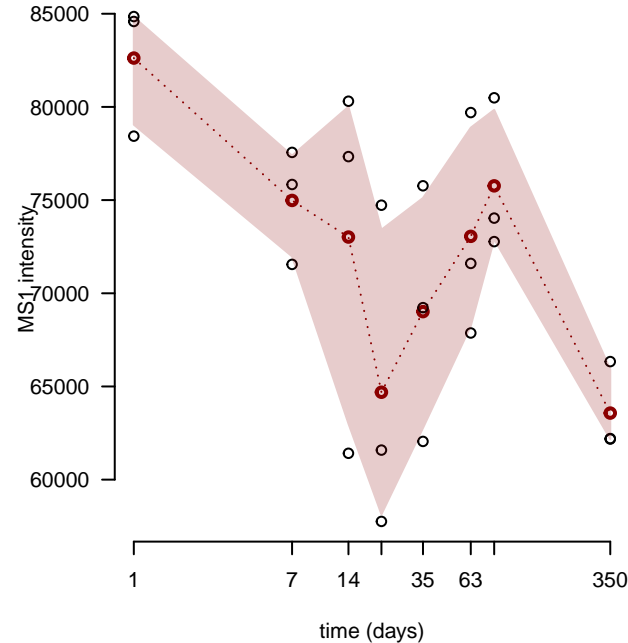

**Q80UV9**  
**GN=Taf1**  
TATA-box binding protein associated fact ...

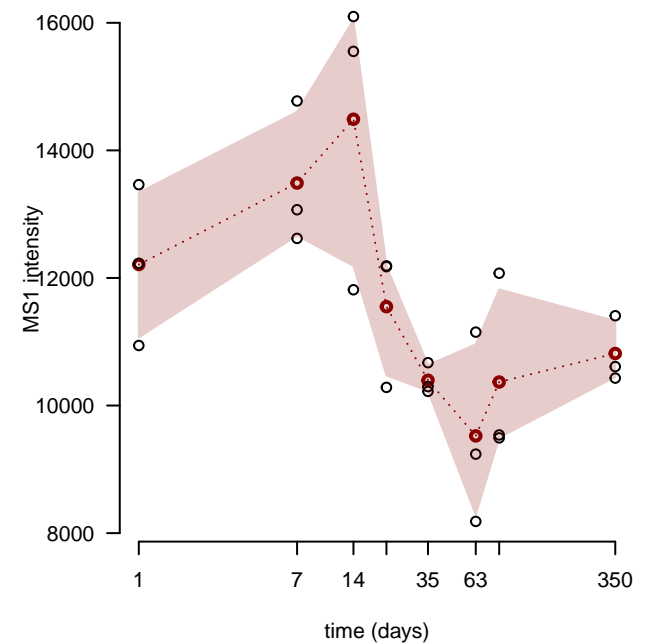

**Q80UW0**  
**GN=Hs6st2**  
heparan sulfate 6-O-sulfotransferase 2

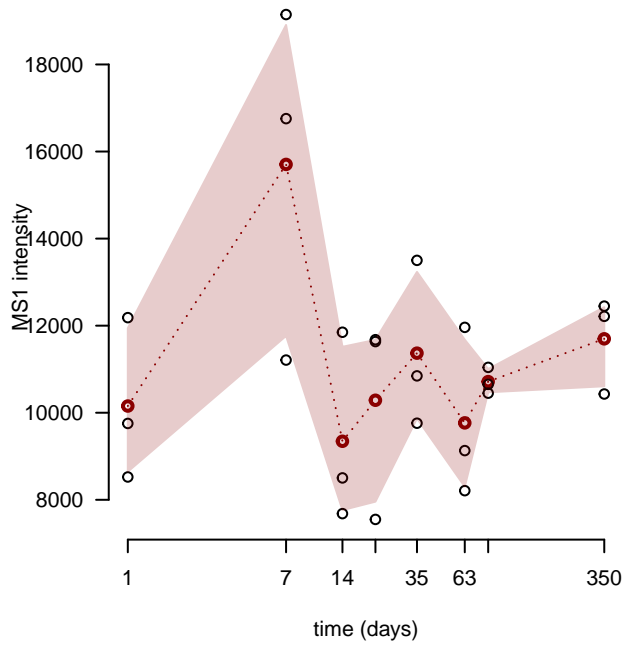

**Q80UW5**  
**GN=Cdc42bpg**  
CDC42 binding protein kinase gamma (DMPK ...

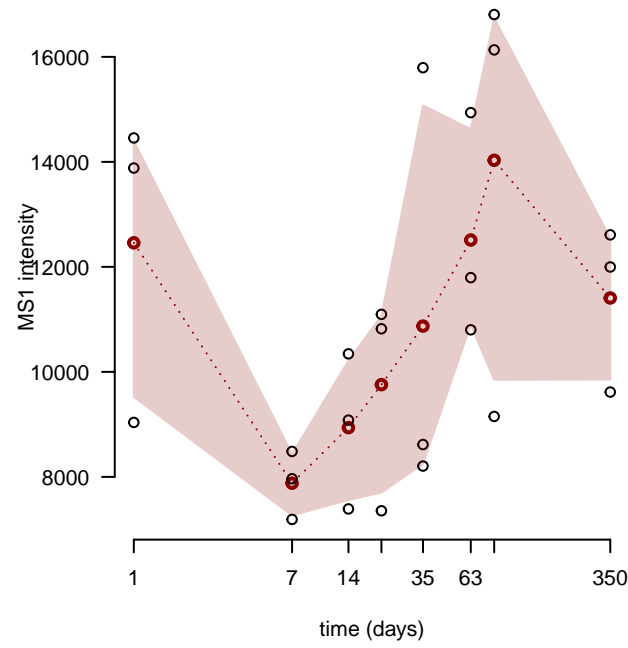

**Q80UW8**  
**GN=Polr2e**  
polymerase (RNA) II (DNA directed) polyp ...

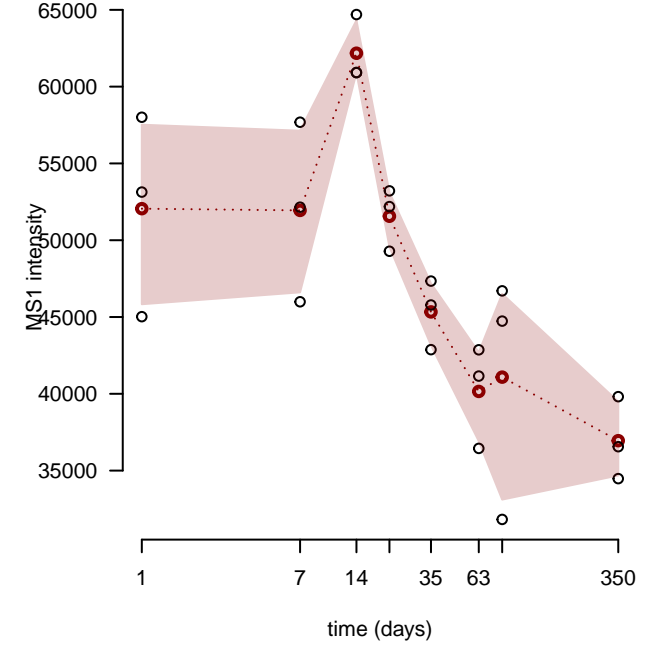

**Q80UX8**  
**GN=Abhd13**  
abhydrolase domain containing 13

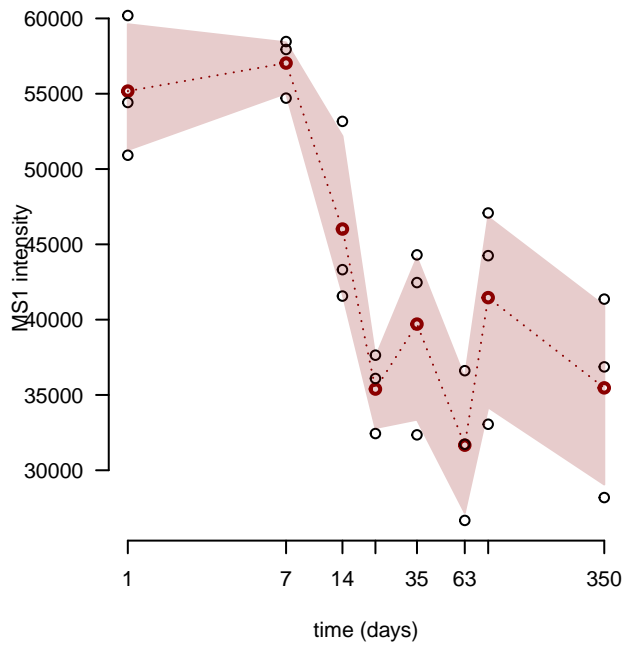

**Q80UY1**  
**GN=Carnmt1**  
carnosine N-methyltransferase 1

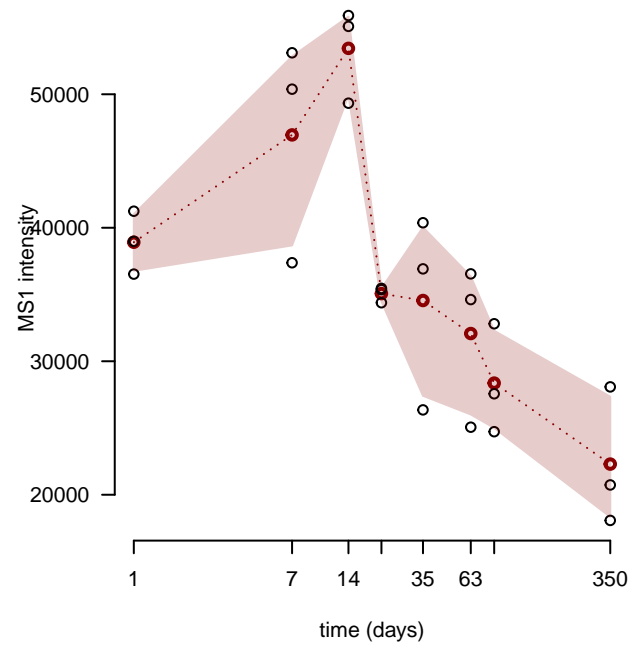

**Q80UY2**  
**GN=Kcmf1**  
potassium channel modulatory factor 1

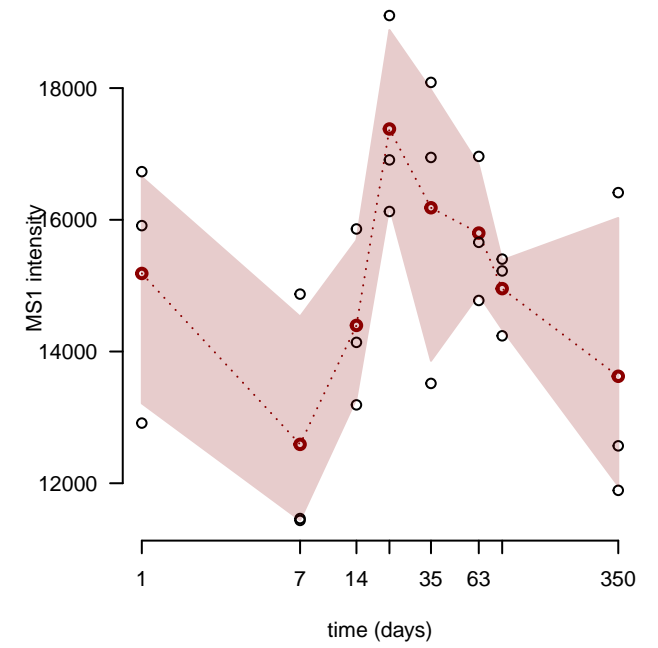

**Q80UZ0**  
**GN=Fgd5**  
FYVE, RhoGEF and PH domain containing 5

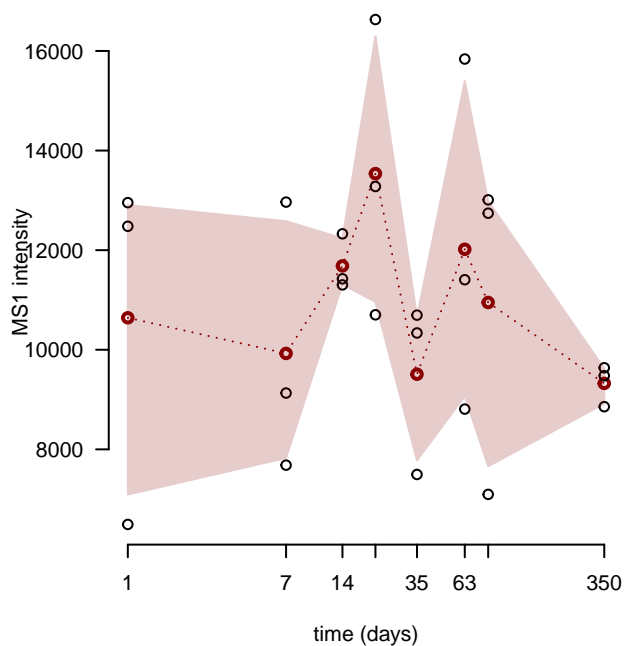

**Q80UZ2**  
**GN=Sdad1**  
SDA1 domain containing 1

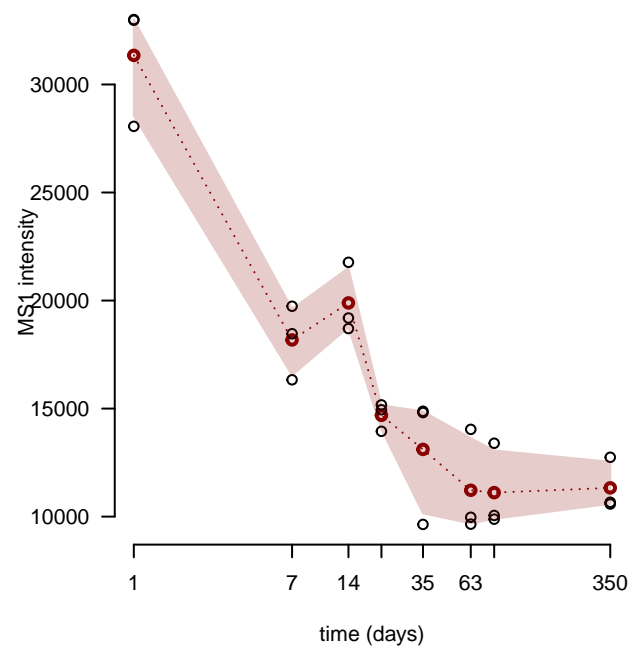

**Q80V03**  
**GN=Adck5**  
aarF domain containing kinase 5

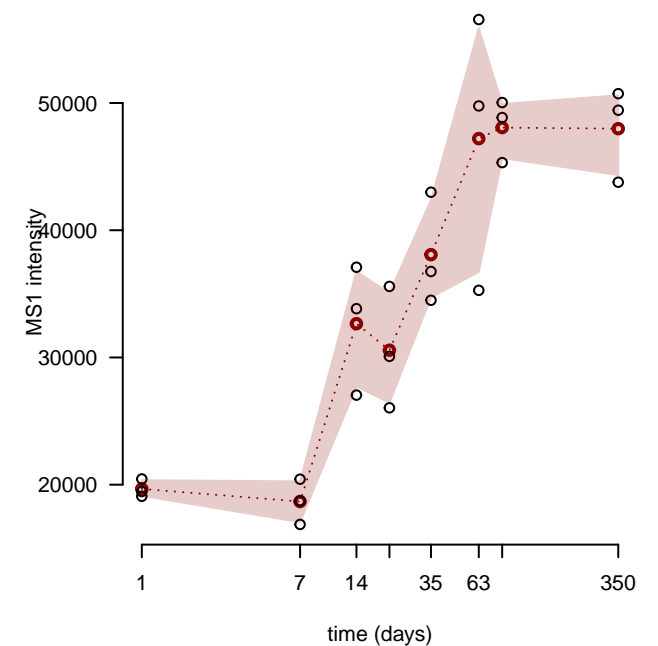

Q80V23  
GN=Znf32

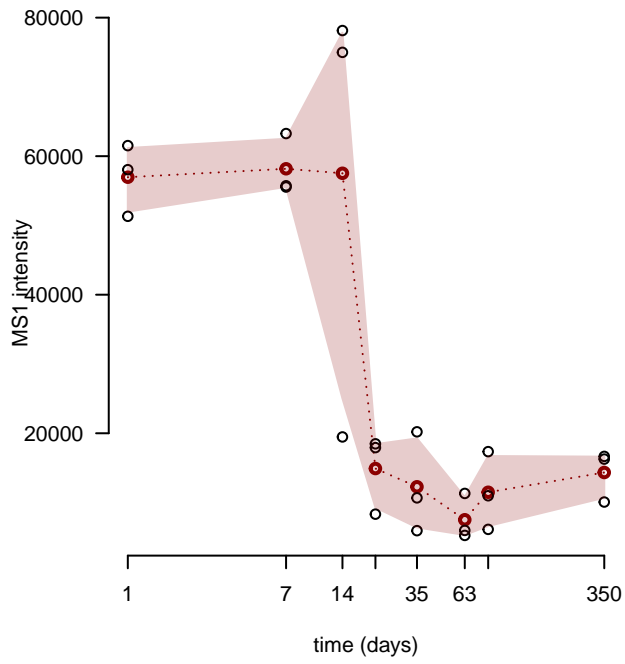

Q80V26  
GN=Impad1

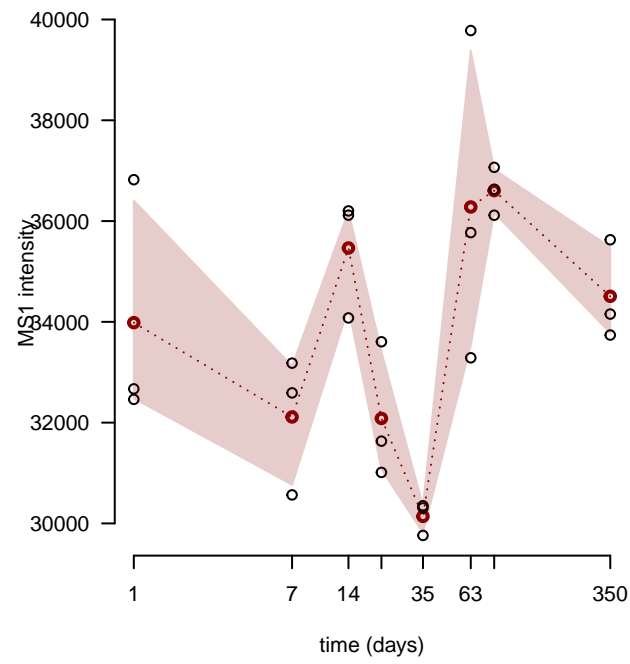

Q80V31  
GN=Cep104  
centrosomal protein 104

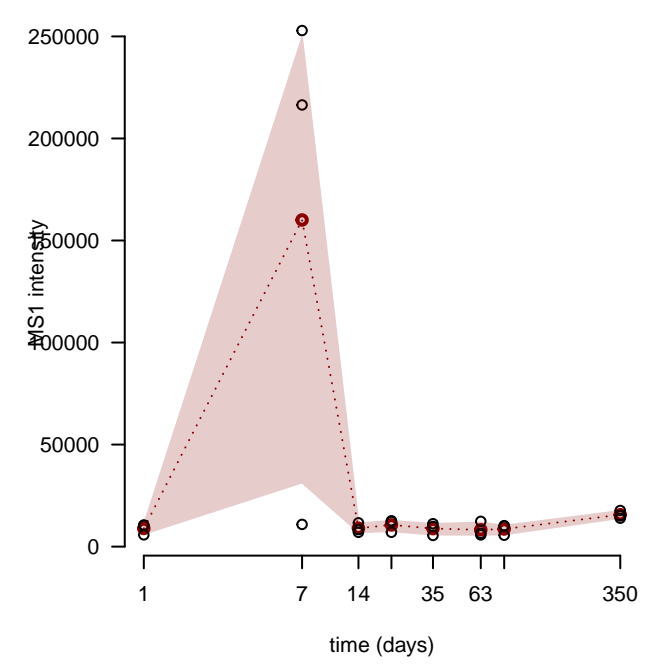

Q80V42  
GN=Cpm  
carboxypeptidase M

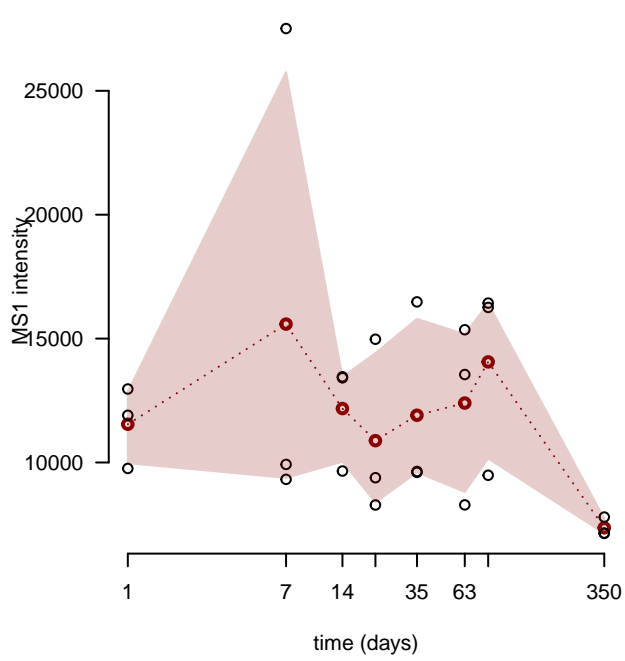

Q80V53  
GN=Chst14  
carbohydrate sulfotransferase 14

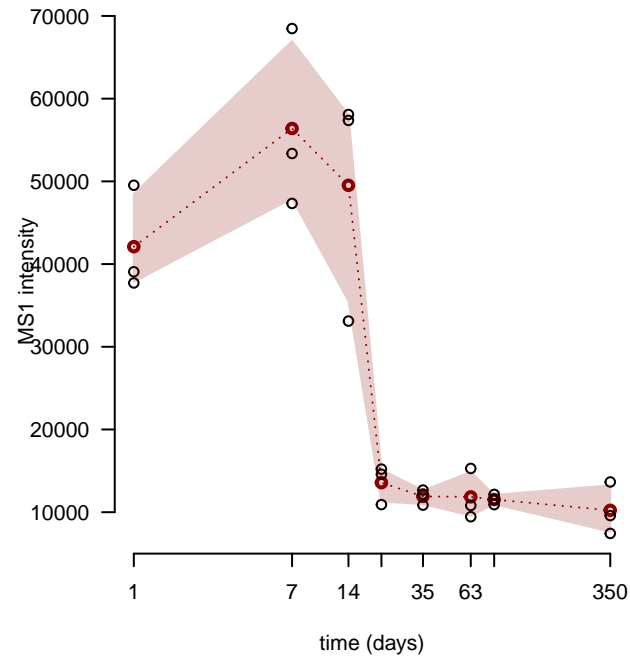

Q80V62  
GN=Fancd2  
Fanconi anemia, complementation group D2

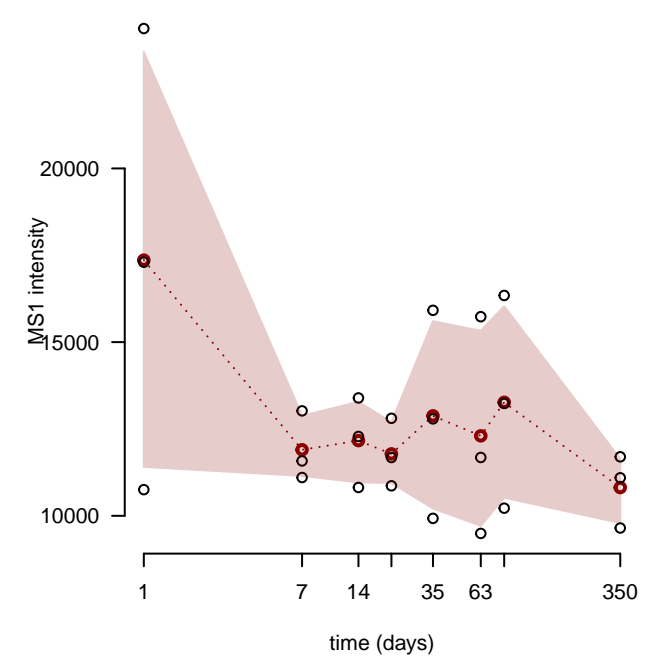

Q80V70  
GN=Megf6  
multiple EGF-like-domains 6

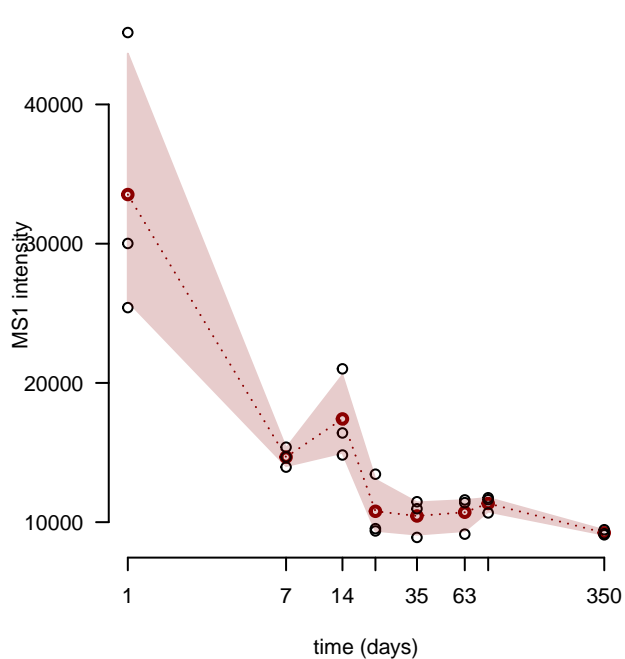

Q80V85  
GN=Trim62  
tripartite motif-containing 62

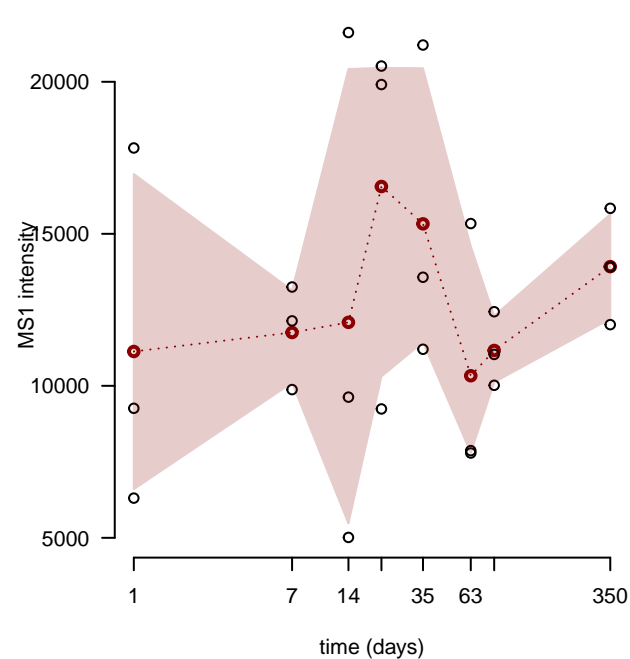

Q80V86  
GN=Ints8  
integrator complex subunit 8

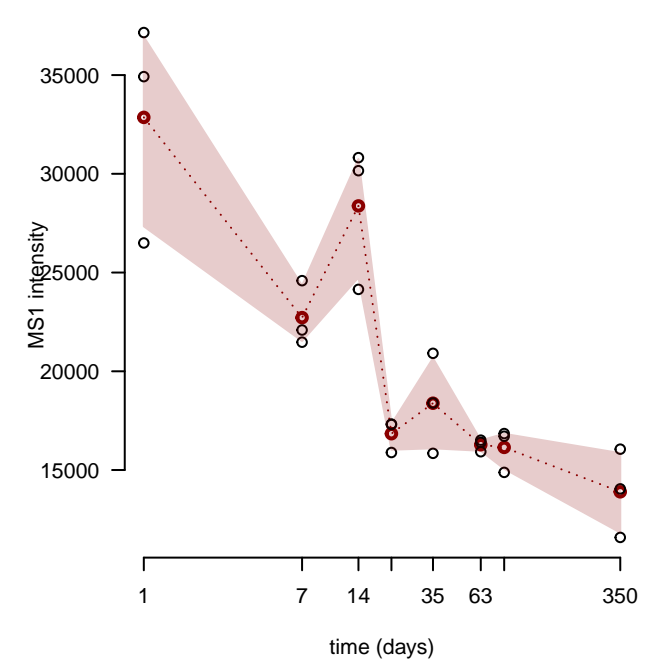

**Q80V91**  
**GN=Dtx3**  
deltex 3, E3 ubiquitin ligase

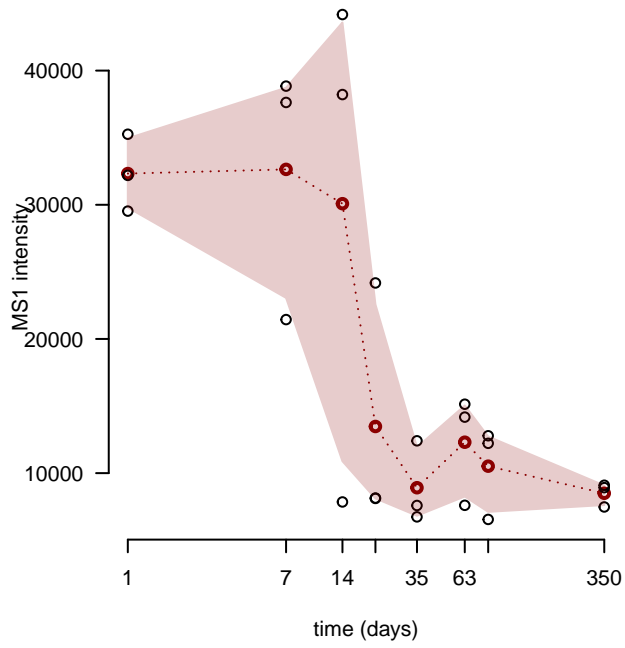

**Q80V94**  
**GN=Ap4e1**  
adaptor-related protein complex AP-4, ep ...

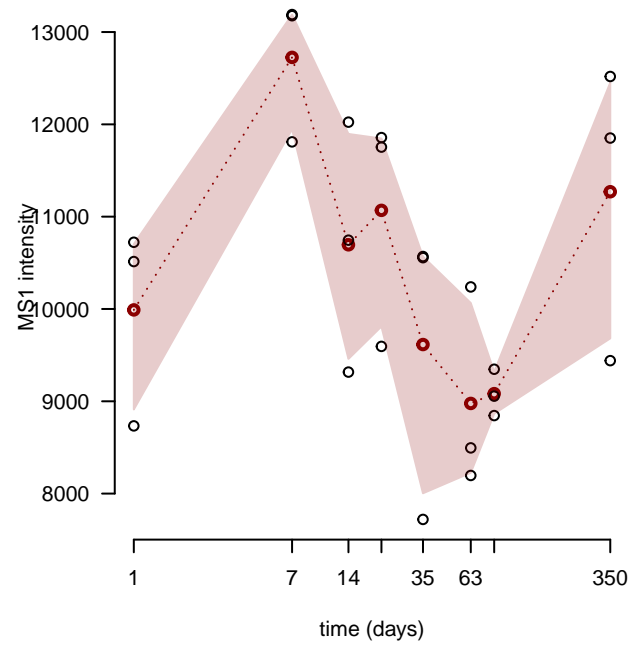

**Q80VA0**  
**GN=Galnt7**  
polypeptide N-acetylgalactosaminyltransf ...

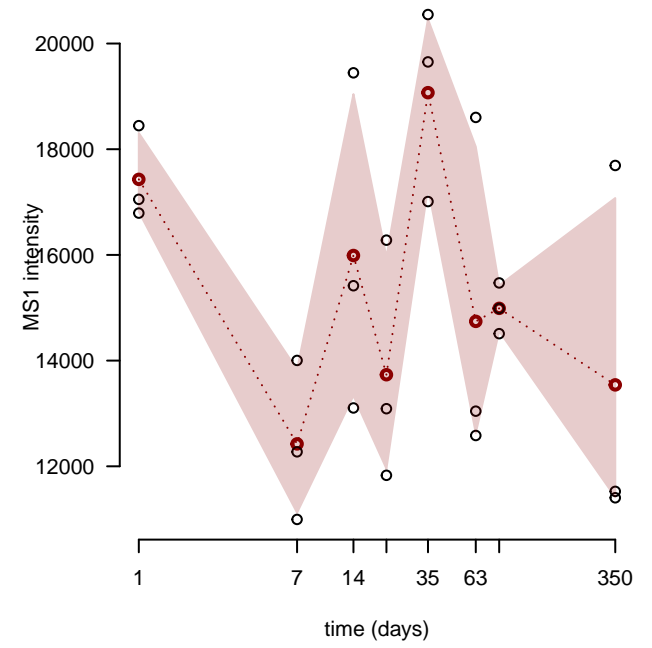

**Q80VC9**  
**GN=Camsap3**  
calmodulin regulated spectrin-associated ...

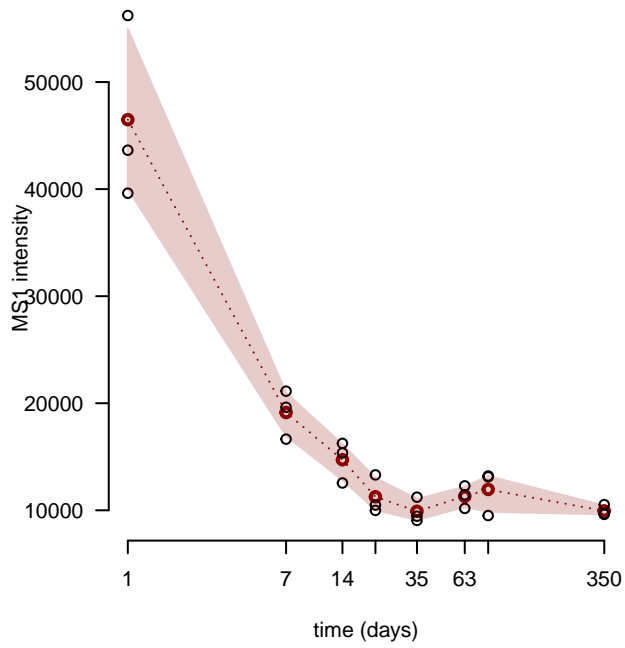

**Q80VD1**  
**GN=Fam98b**  
family with sequence similarity 98, memb ...

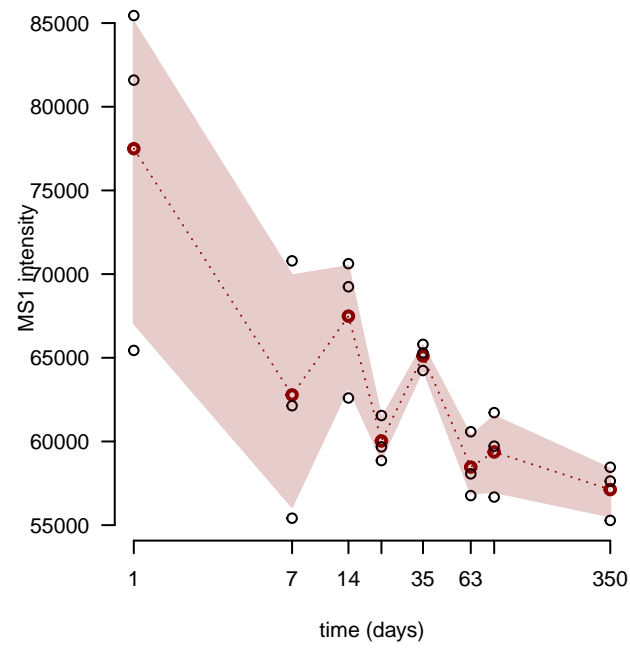

**Q80VI1**  
**GN=Trim56**  
tripartite motif-containing 56

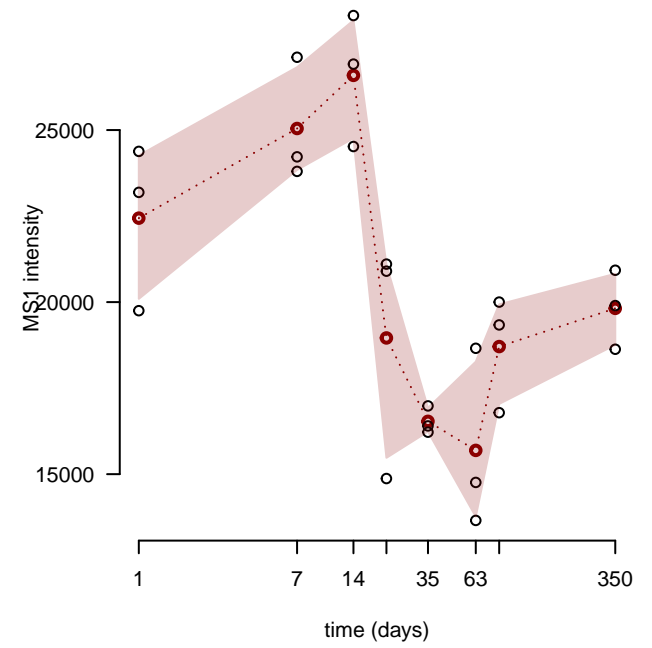

**Q80VJ2**  
**GN=Sra1**  
steroid receptor RNA activator 1

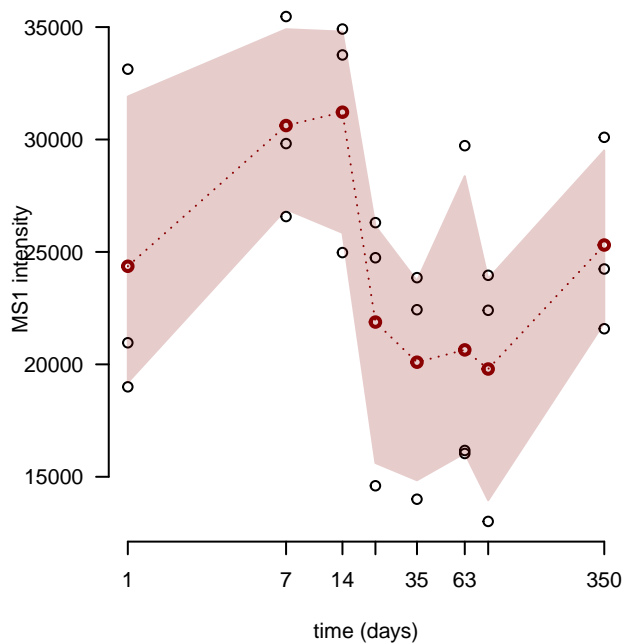

**Q80VJ3**  
**GN=Dnph1**  
2'-deoxynucleoside 5'-phosphate N-hydrol ...

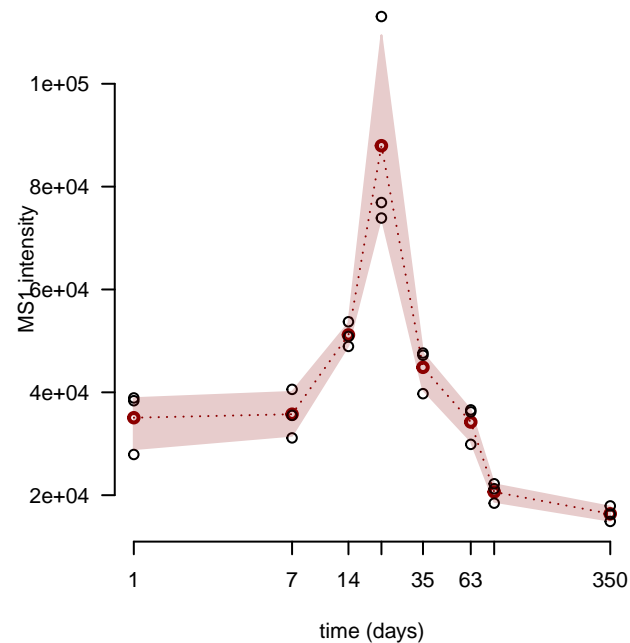

**Q80VL1**  
**GN=Tdrkh**  
tudor and KH domain containing protein

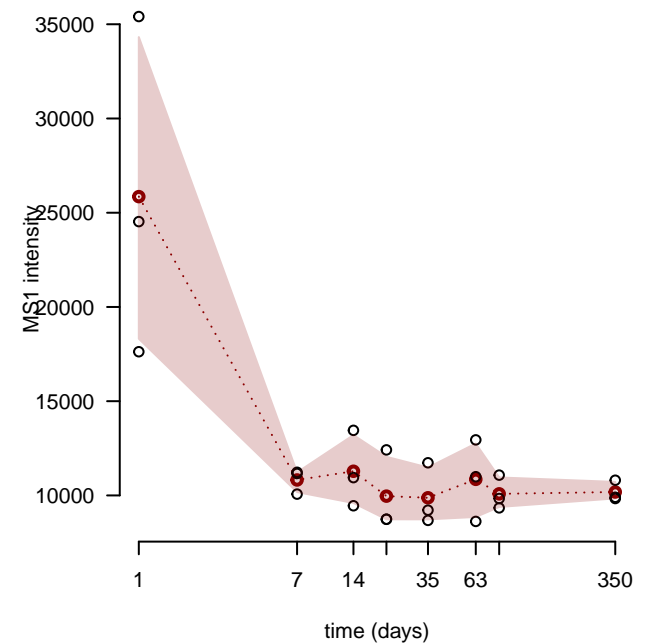



**Q80VL3**  
**GN=Prickle3**  
prickle planar cell polarity protein 3

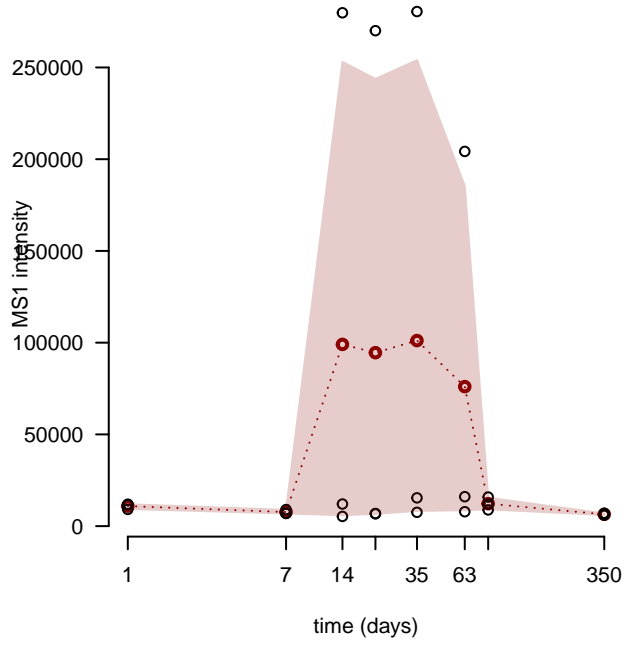

**Q80VM4**  
**GN=Znf579**

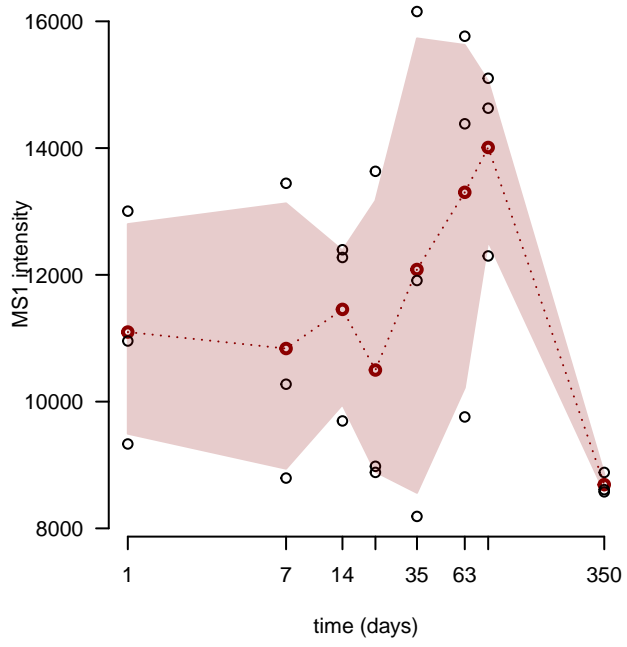

**Q80VP0**  
**GN=Tecpr1**  
tectonin beta-propeller repeat containin ...

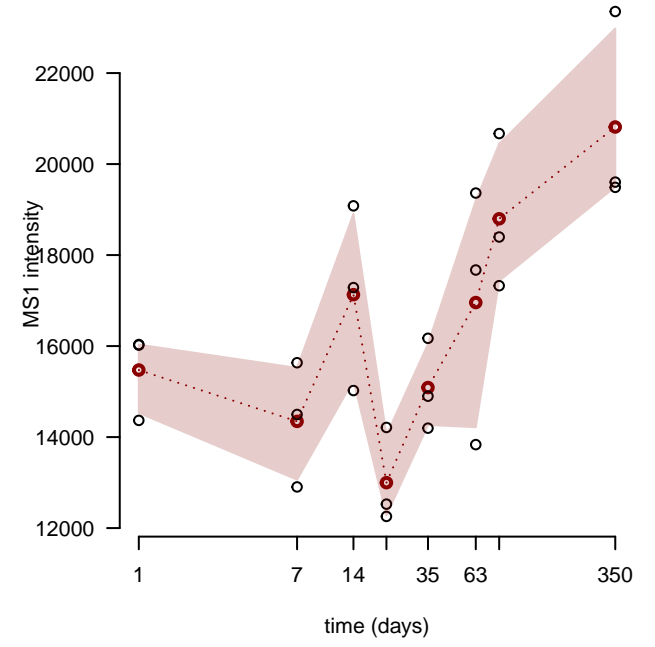

**Q80VP1**  
**GN=Epn1**  
epsin 1

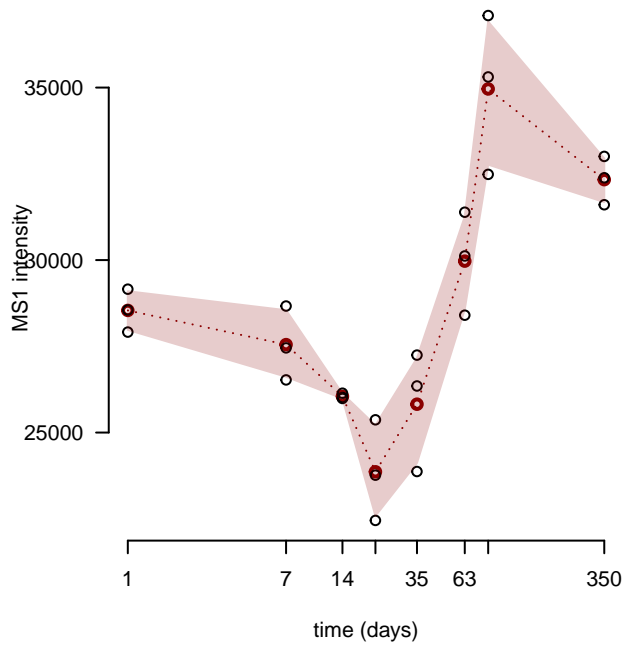

**Q80VP2**  
**GN=Spata7**  
spermatogenesis associated 7

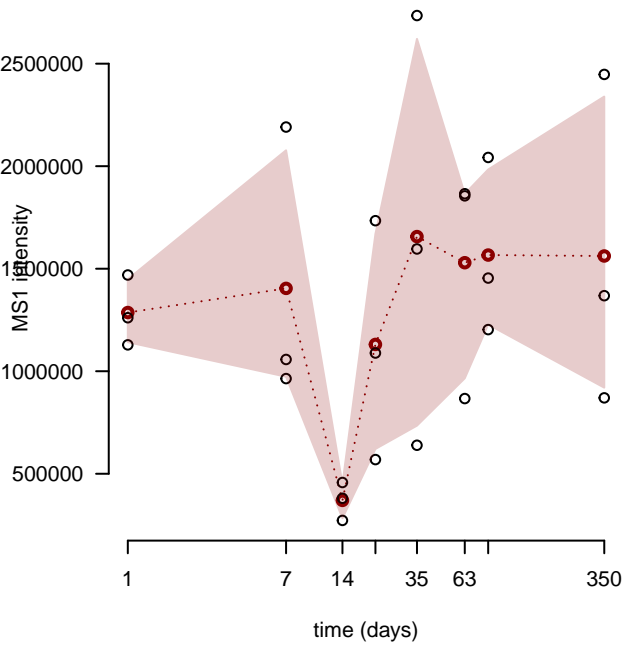

**Q80VP5**  
**GN=**

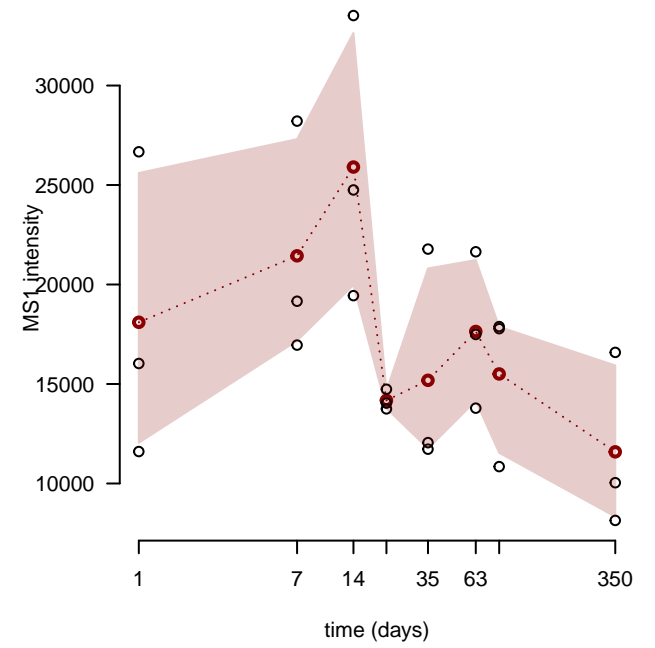

**Q80VQ0**  
**GN=Aldh3b1**  
aldehyde dehydrogenase 3 family, member ...

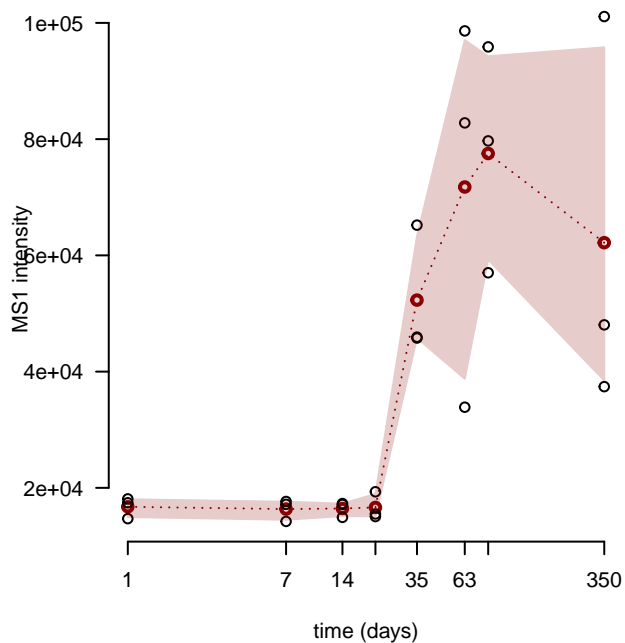

**Q80VQ1**  
**GN=Lrrc1**  
leucine rich repeat containing 1

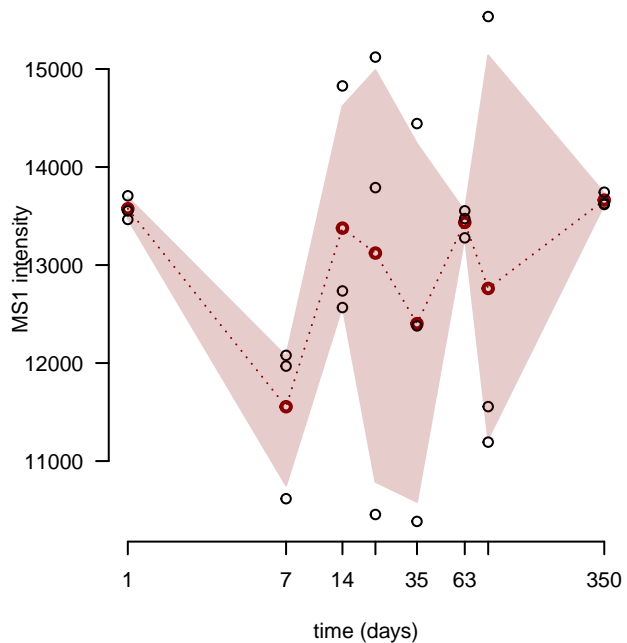

**Q80VY9**  
**GN=Dhx33**  
DEAH (Asp-Glu-Ala-His) box polypeptide 3 ...

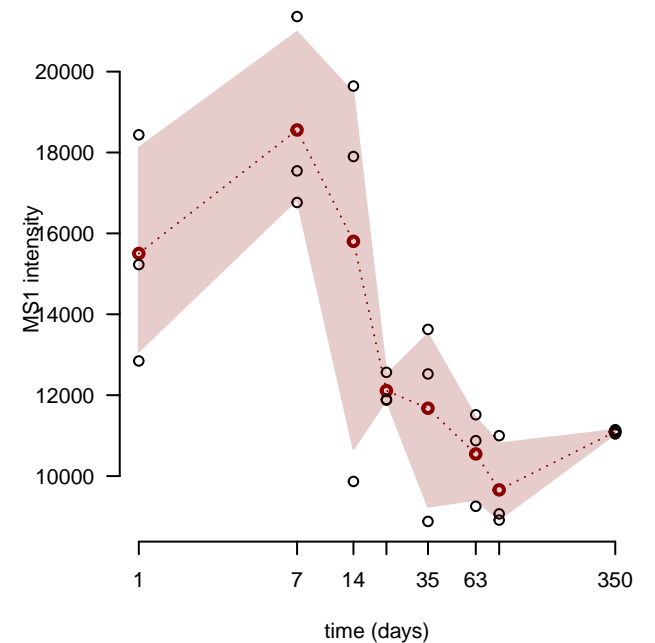

**Q80W00**  
**GN=Ppp1r10**  
protein phosphatase 1, regulatory subuni ...

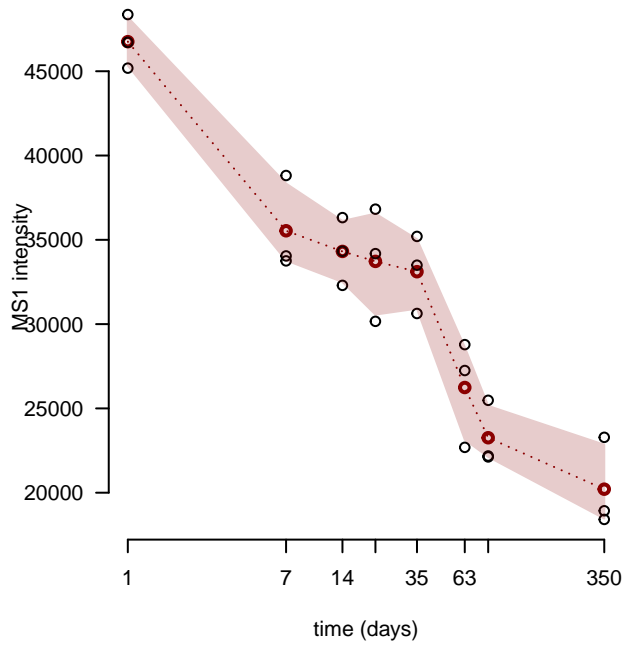

**Q80W14**  
**GN=Prpf40b**  
pre-mRNA processing factor 40B

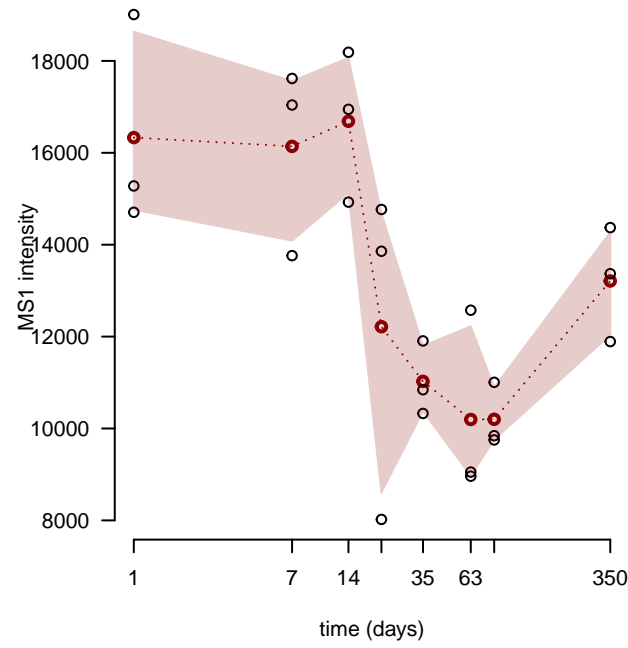

**Q80W21**  
**GN=Gstm7**  
glutathione S-transferase, mu 7

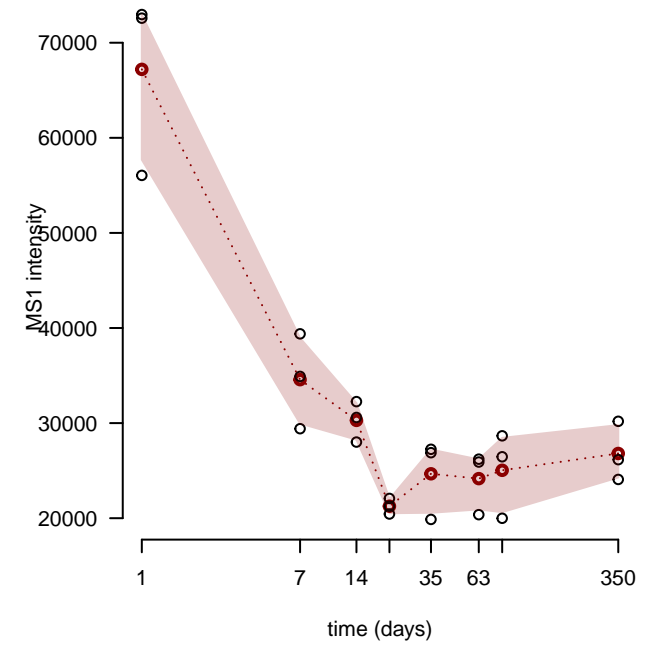

**Q80W22**  
**GN=Thns12**  
threonine synthase-like 2 (bacterial)

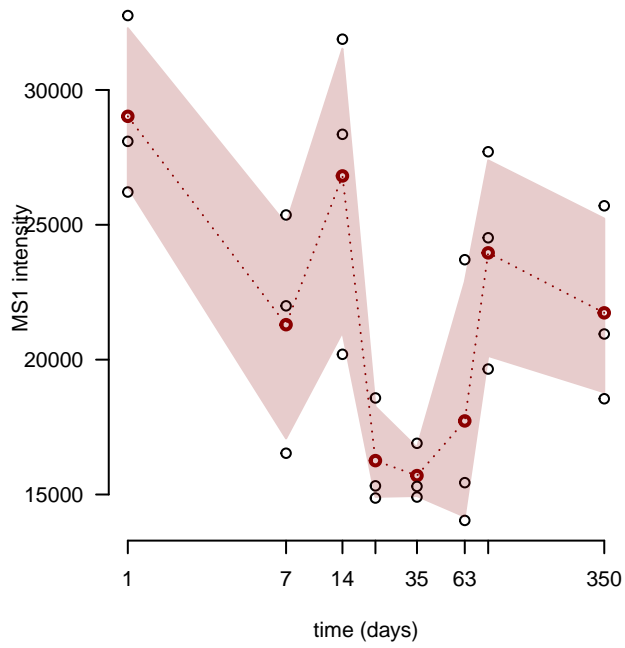

**Q80W37**  
**GN=Snupn**  
snurportin 1

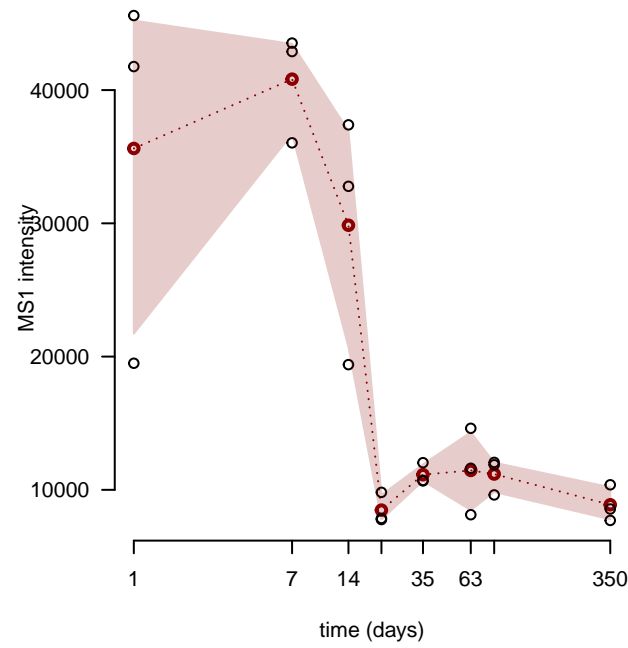

**Q80W47**  
**GN=Wipi2**  
WD repeat domain, phosphoinositide inter ...

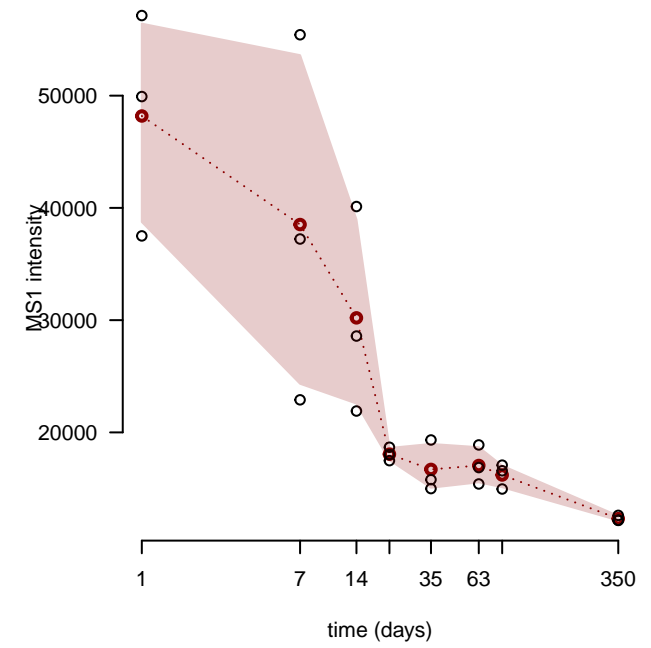

**Q80W49**  
**GN=Crybg3**  
beta-gamma crystallin domain containing ...

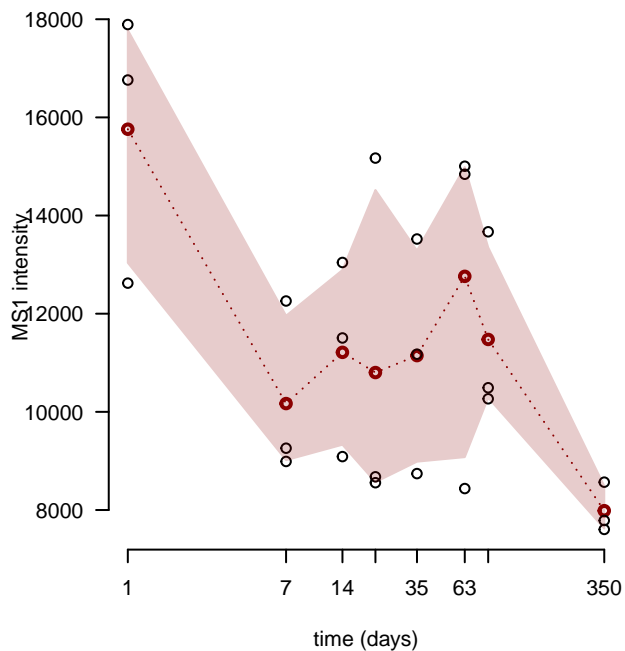

**Q80W54**  
**GN=Zmpste24**  
zinc metalloproteinase, STE24

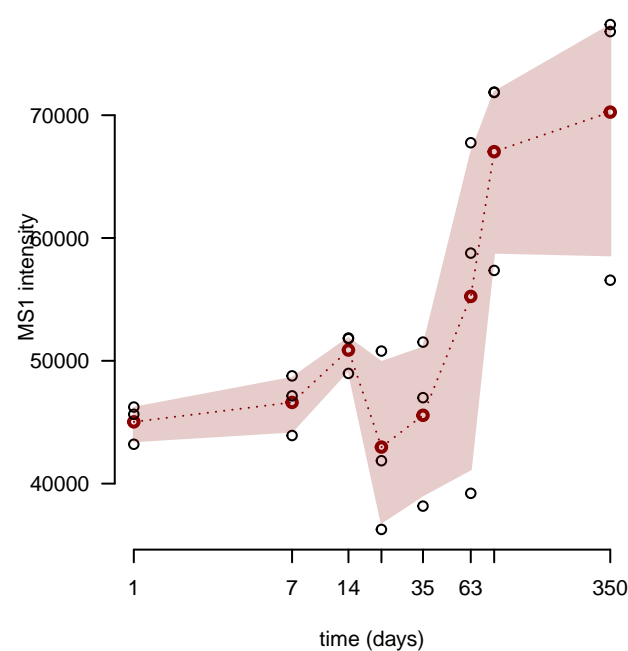

**Q80W68**  
**GN=Kirrel1**

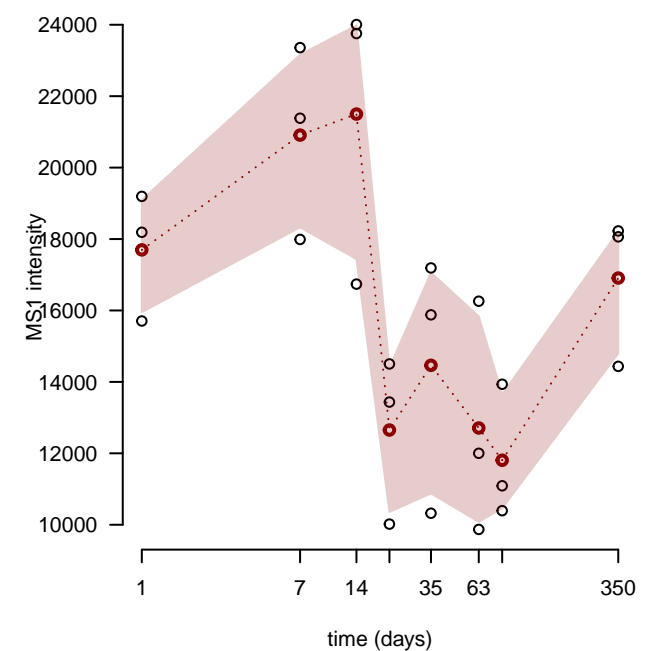

**Q80W71**  
**GN=Plekha8**  
pleckstrin homology domain containing, f...

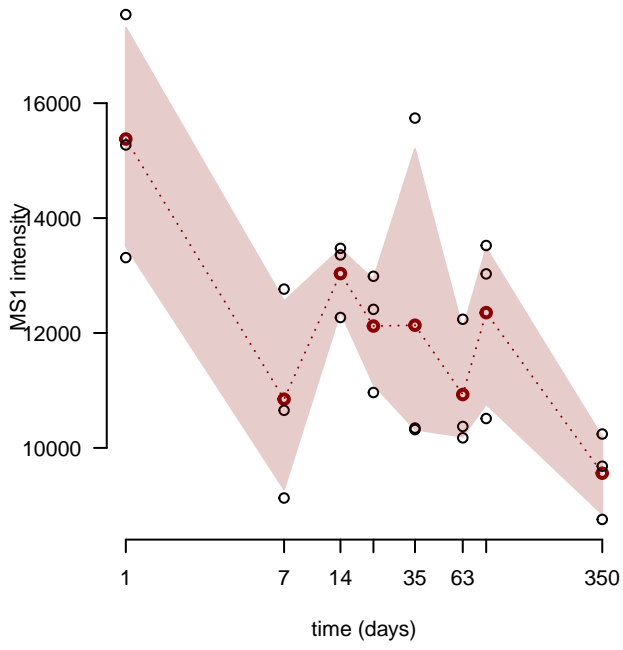

**Q80W85**  
**GN=Npm2**  
nucleophosmin/nucleoplasmin 2

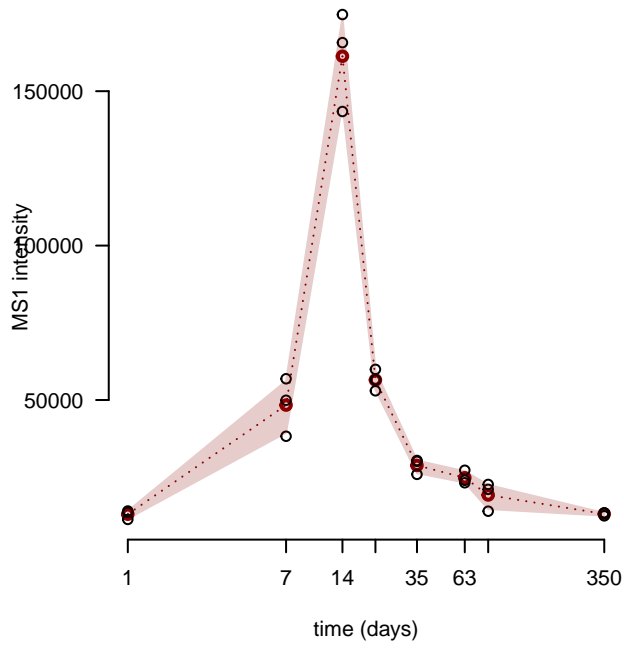

**Q80W88**  
**GN=Homez**  
homeodomain leucine zipper-encoding gene

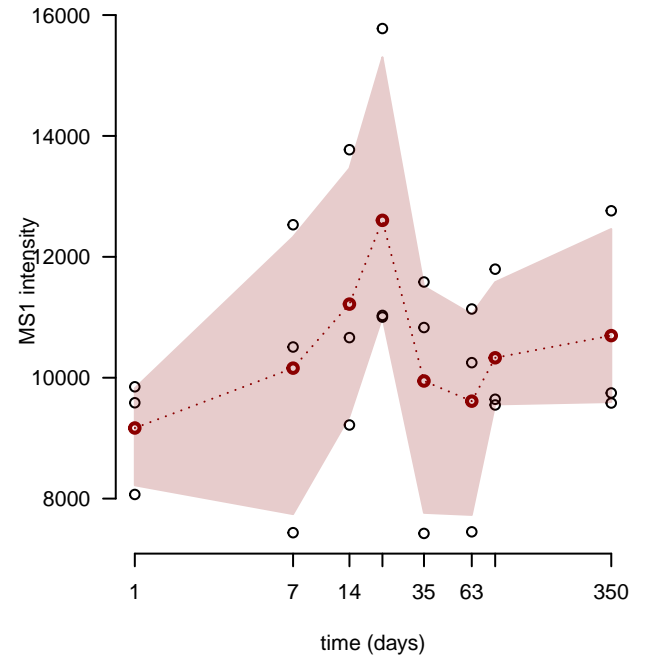

**Q80W93**  
**GN=Hydin**  
HYDIN, axonemal central pair apparatus p...

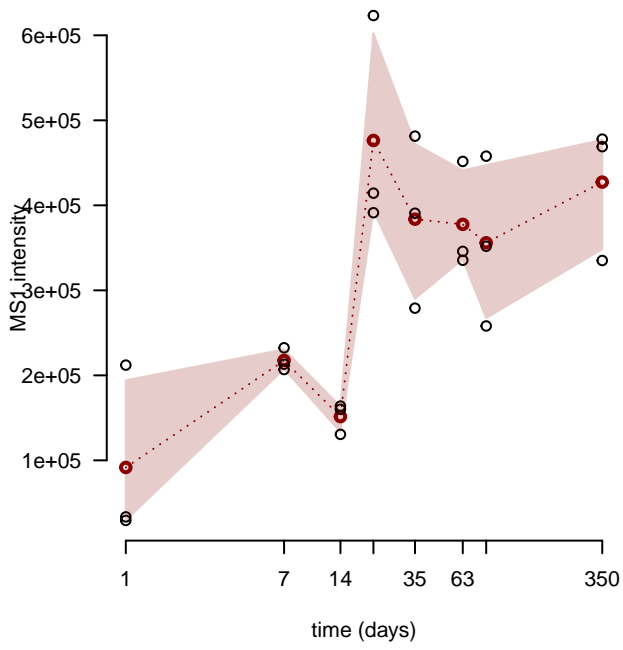

**Q80W94**  
**GN=Mogat2**  
monoacylglycerol O-acyltransferase 2

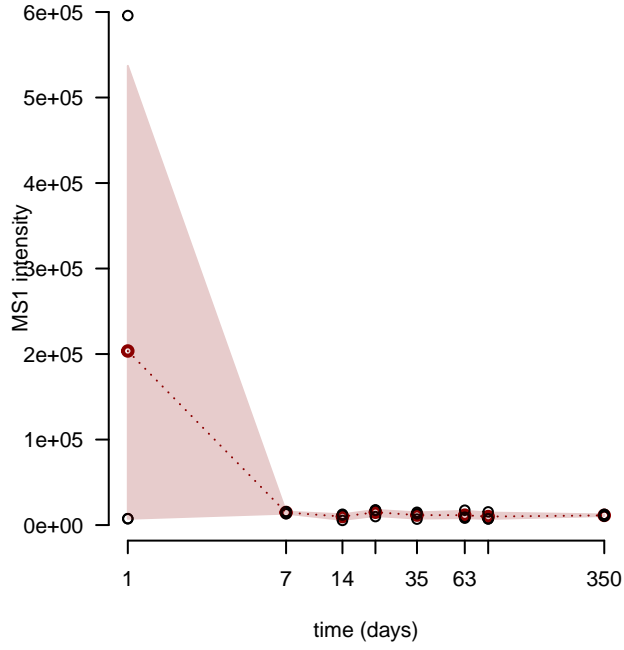

**Q80WB5**  
**GN=Wdyhv1**  
WDYHV motif containing 1

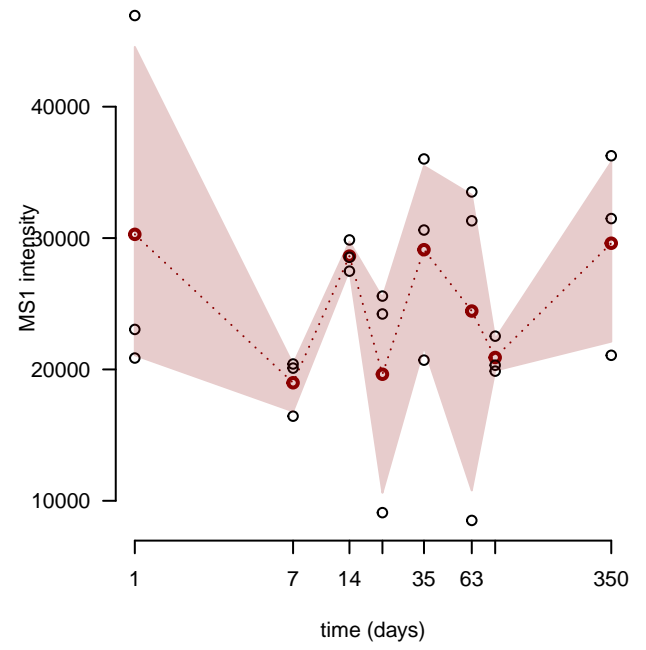

**Q80WC1**  
**GN=Ubn2**  
ubiquitin 2

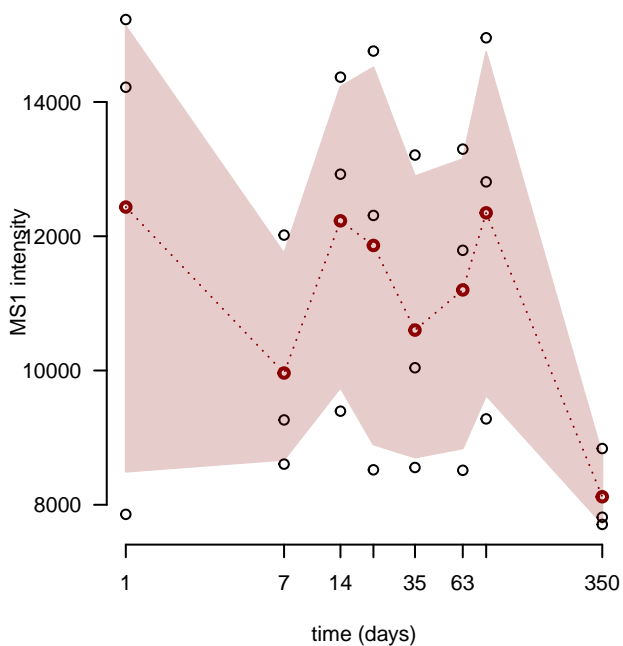

**Q80WC3**  
**GN=Tnrc18**  
trinucleotide repeat containing 18

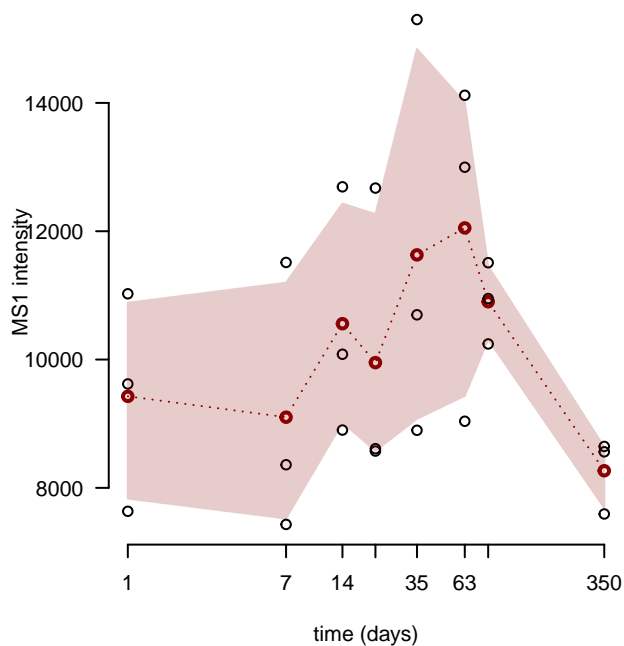

**Q80WC7**  
**GN=Agfg2**  
ArfGAP with FG repeats 2

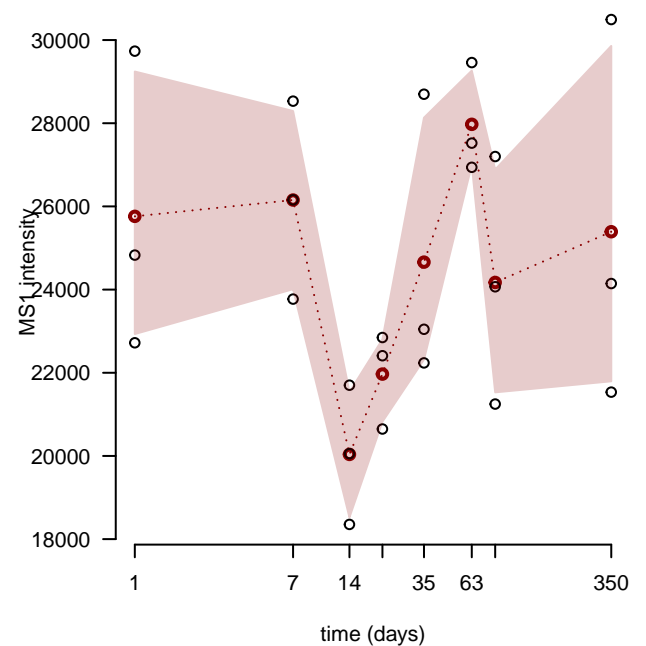

**Q80WG5**  
GN=Lrrc8a  
leucine rich repeat containing 8A VRAC s ...

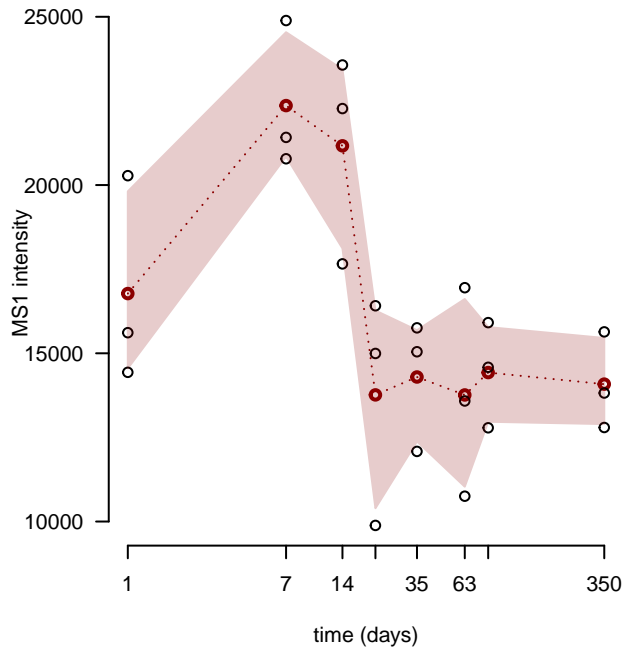

**Q80WJ7**  
GN=Mtdh  
metadherin

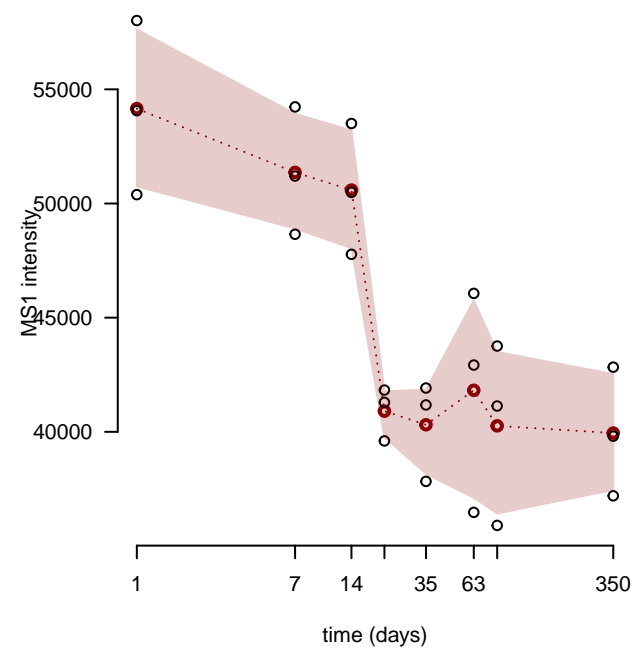

**Q80WQ2**  
GN=Vac14  
Vac14 homolog (*S. cerevisiae*)

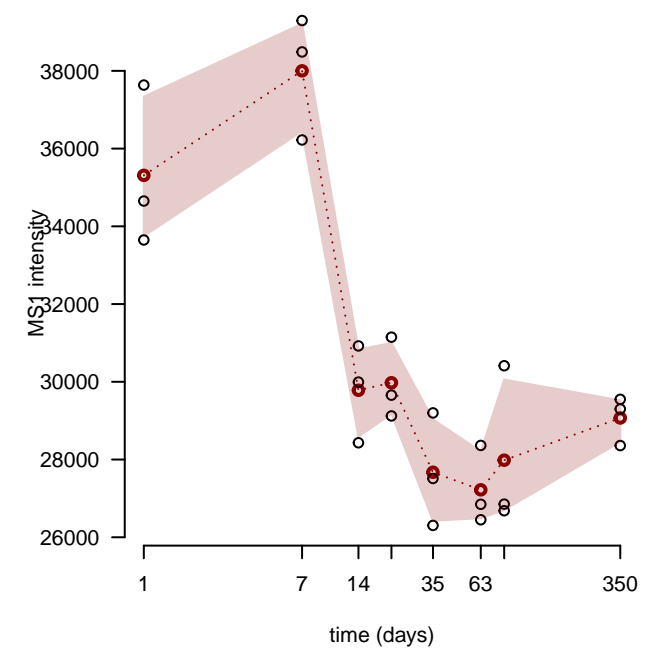

**Q80WR1**  
GN=Tspan18  
tetraspanin 18

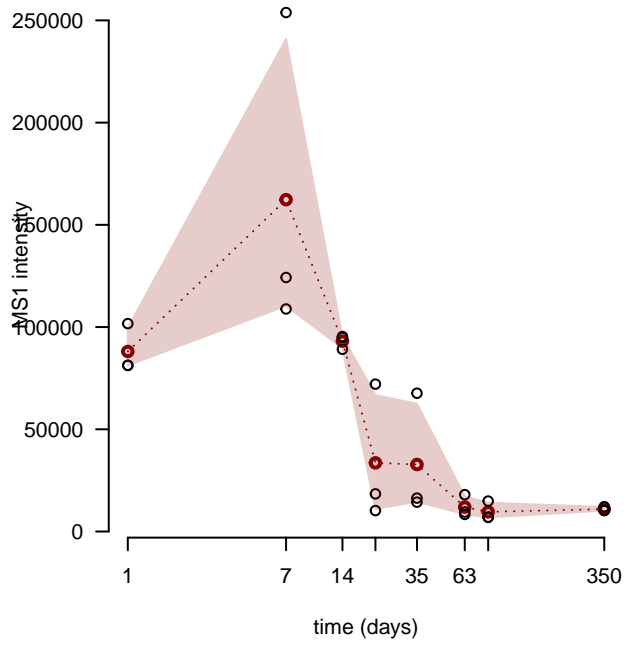

**Q80WR5**  
GN=

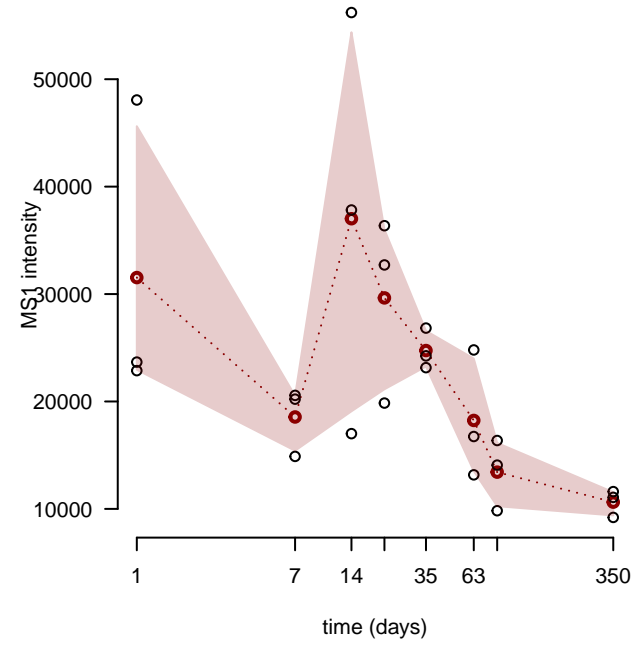

**Q80WS1**  
GN=Rimklb  
ribosomal modification protein rimK-like ...

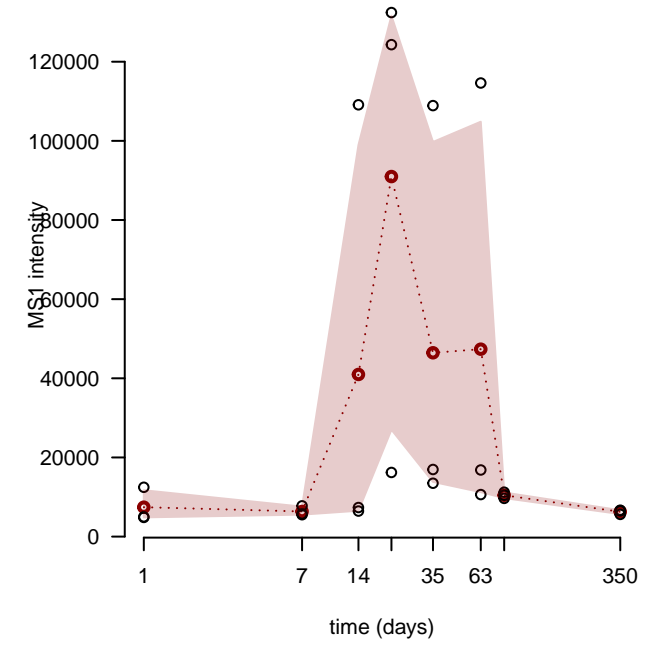

**Q80WT5**  
GN=Aftph  
aftiphilin

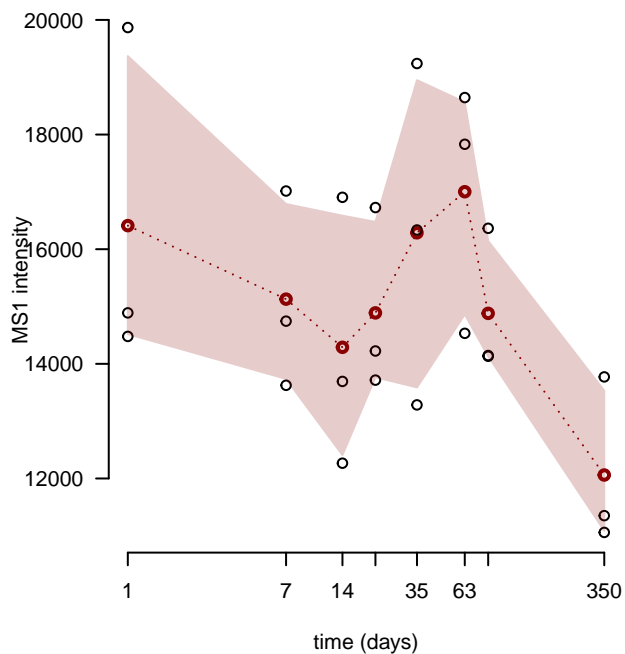

**Q80WV3**  
GN=Chst2  
carbohydrate sulfotransferase 2

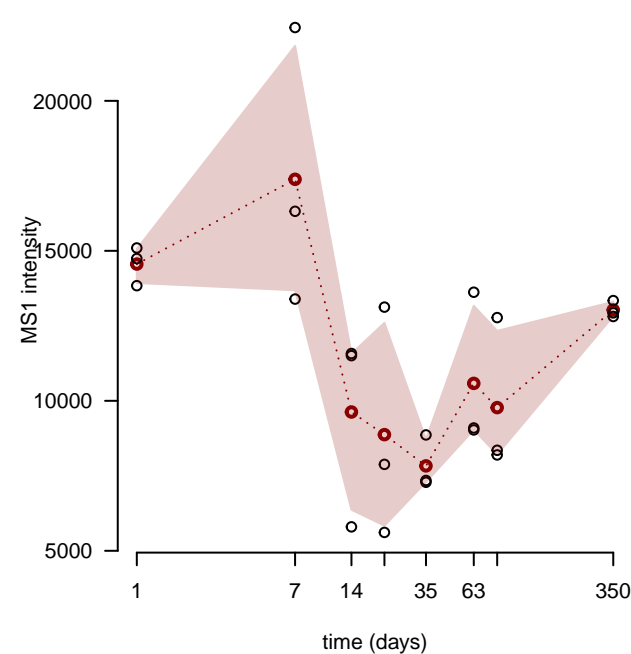

**Q80WW9**  
GN=Ddrgk1  
DDRK domain containing 1

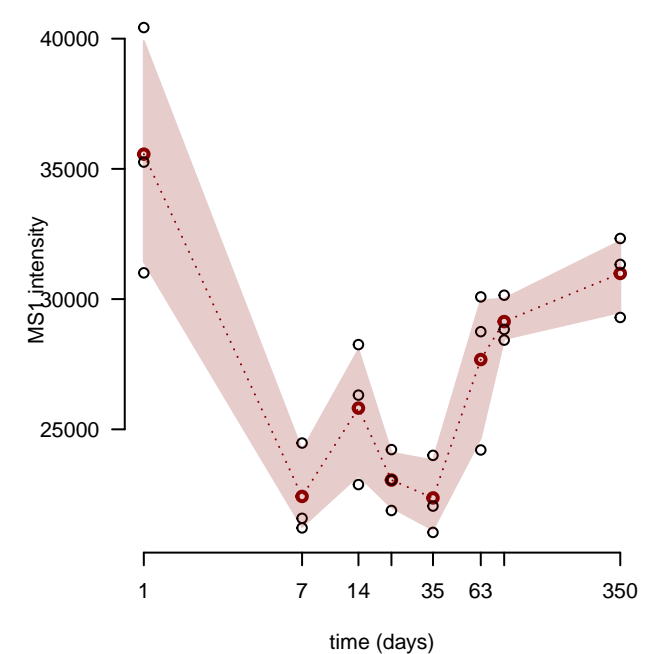

**Q80X19**  
**GN=Col14a1**  
collagen, type XIV, alpha 1

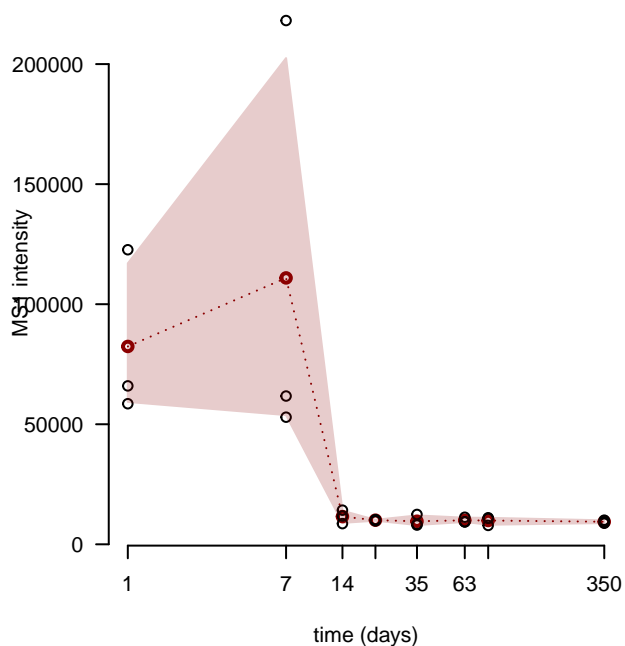

**Q80X32**  
**GN=**

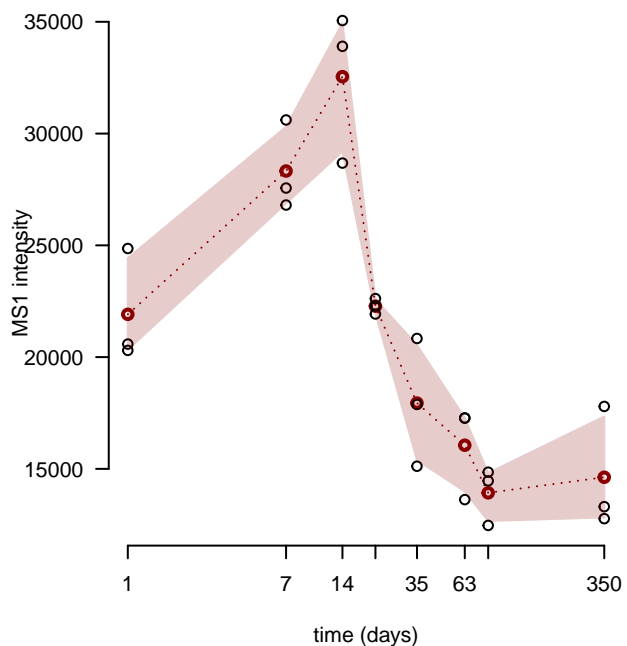

**Q80X41**  
**GN=Vrk1**  
vaccinia related kinase 1

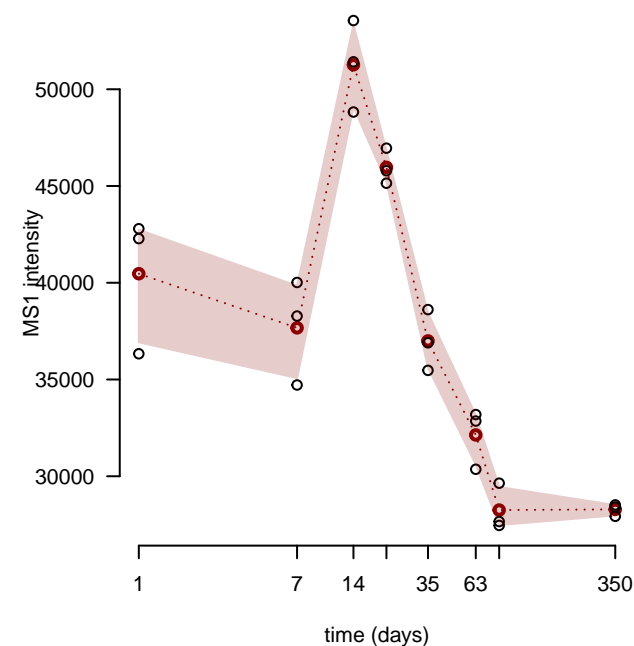

**Q80X45**  
**GN=Tmem167b**  
transmembrane protein 167B

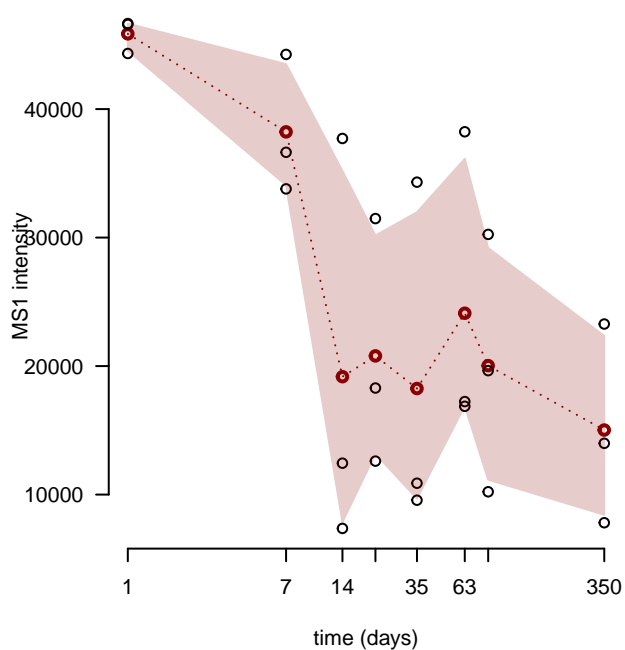

**Q80X50**  
**GN=Ubp2l**  
ubiquitin-associated protein 2-like

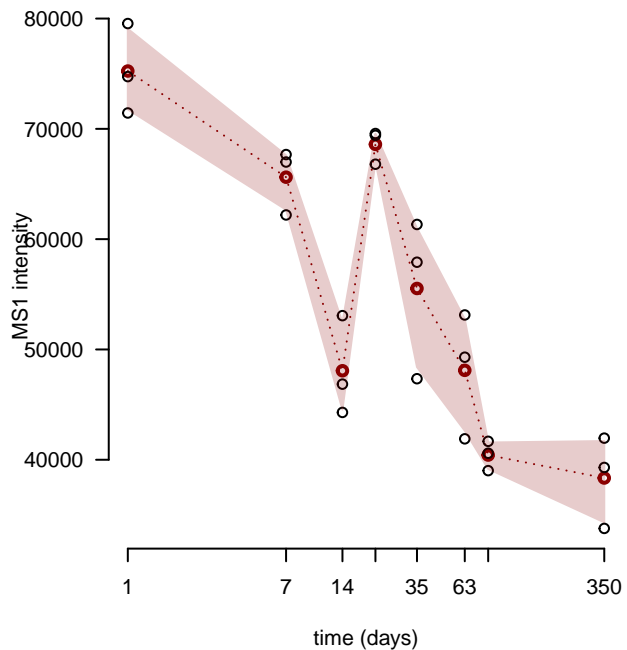

**Q80X71**  
**GN=Tmem106b**  
transmembrane protein 106B

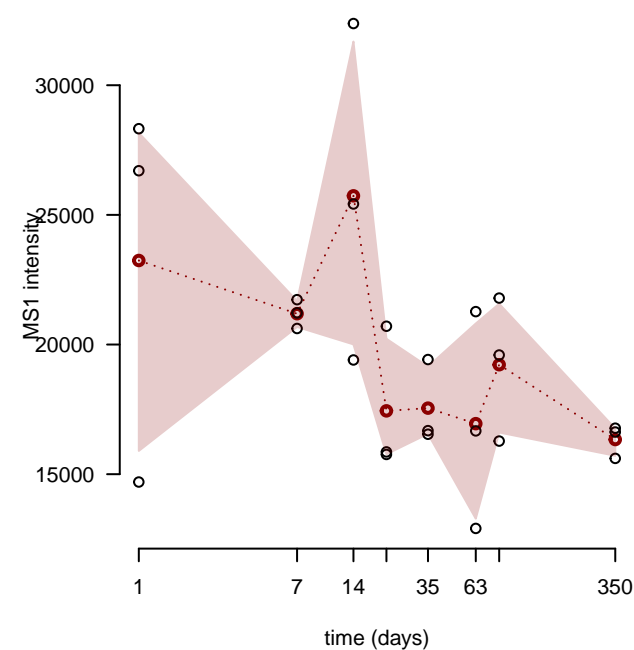

**Q80X73**  
**GN=Pelo**  
pelota mRNA surveillance and ribosome re ...

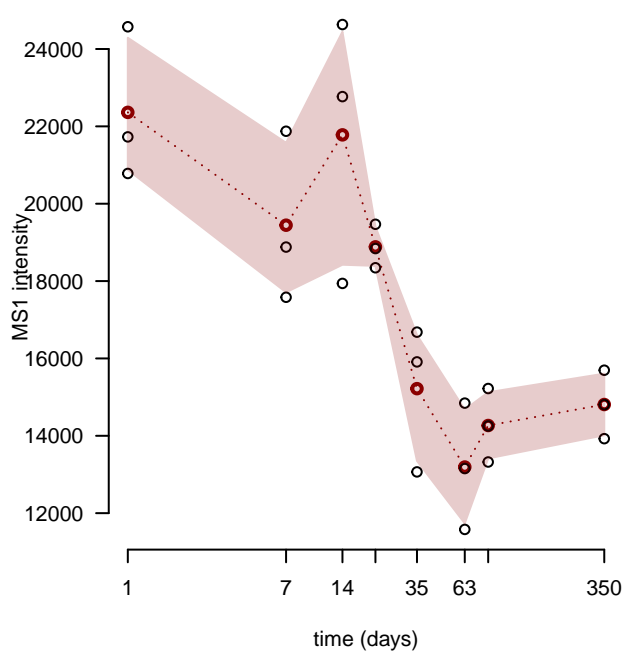

**Q80X76**  
**GN=Serpina3f**  
serine (or cysteine) peptidase inhibitor ...

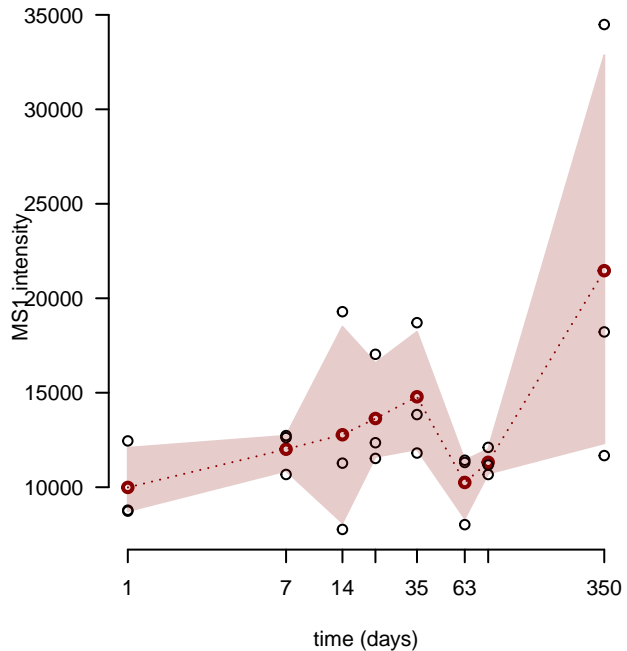

**Q80X80**  
**GN=C2cd2l**  
C2 calcium-dependent domain containing 2 ...

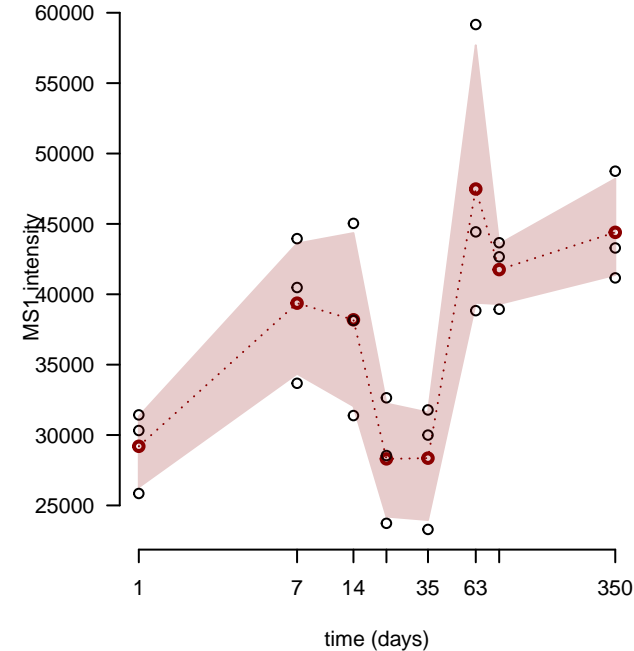

**Q80X82**  
GN=Sympk  
sympleskin

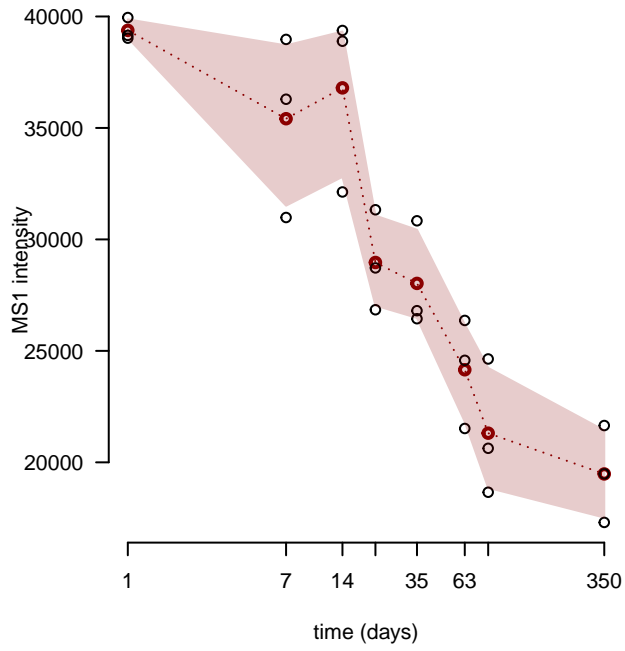

**Q80X85**  
GN=Mrps7  
mitochondrial ribosomal protein S7

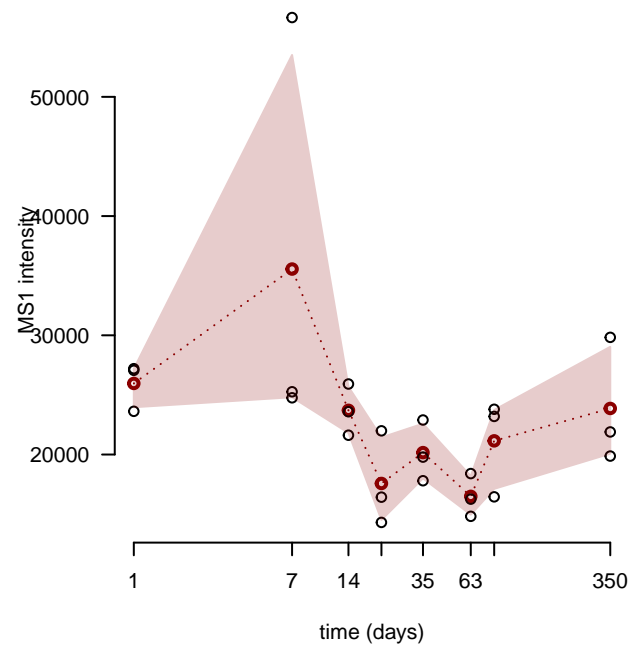

**Q80X90**  
GN=Flnb  
filamin, beta

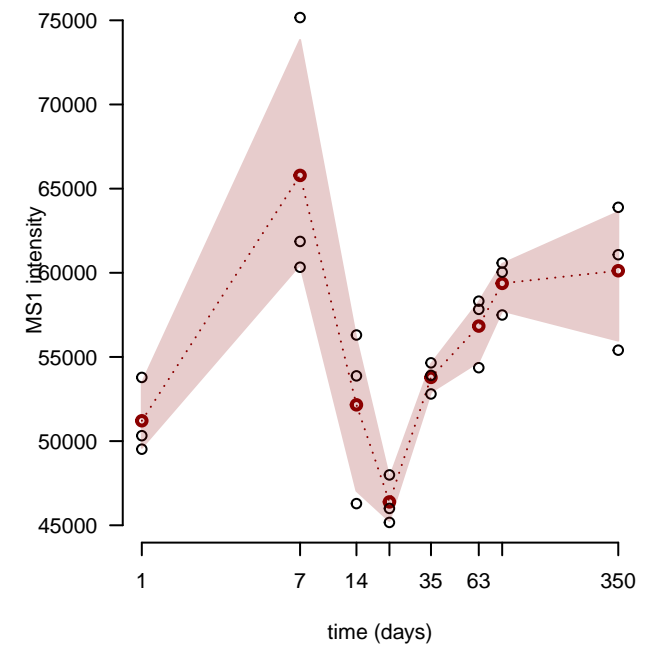

**Q80X95**  
GN=Rraga  
Ras-related GTP binding A

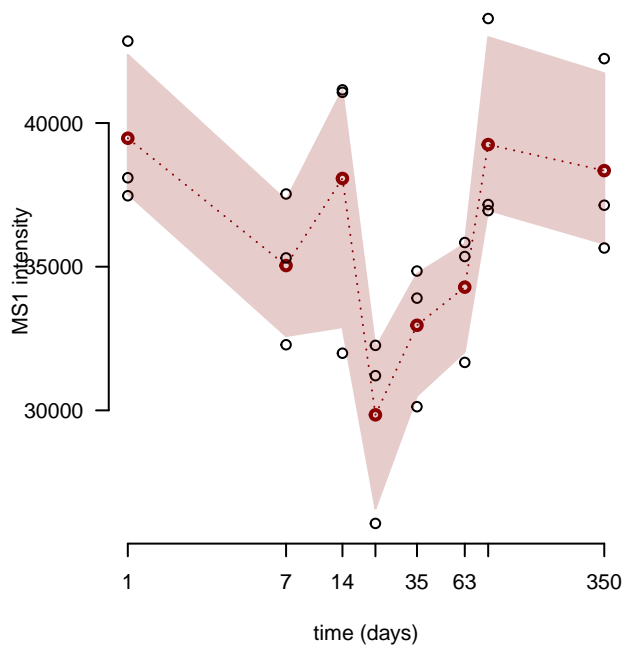

**Q80XA6**  
GN=Reps2  
RALBP1 associated Eps domain containing ...

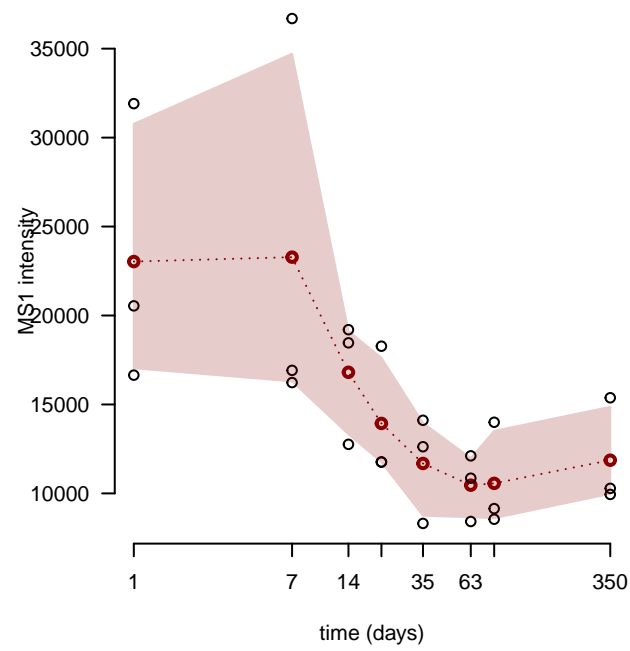

**Q80XC2**  
GN=Trmt61a  
tRNA methyltransferase 61A

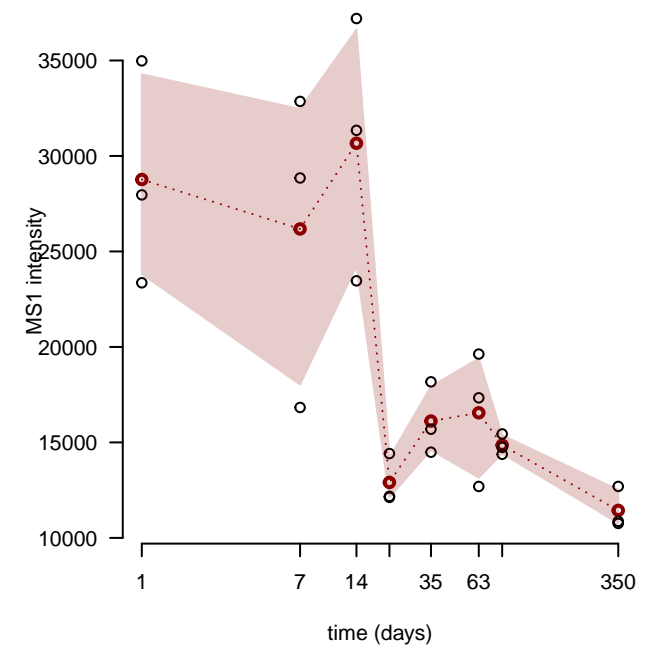

**Q80XC6**  
GN=Nrde2  
nrde-2 necessary for RNA interference, d ...

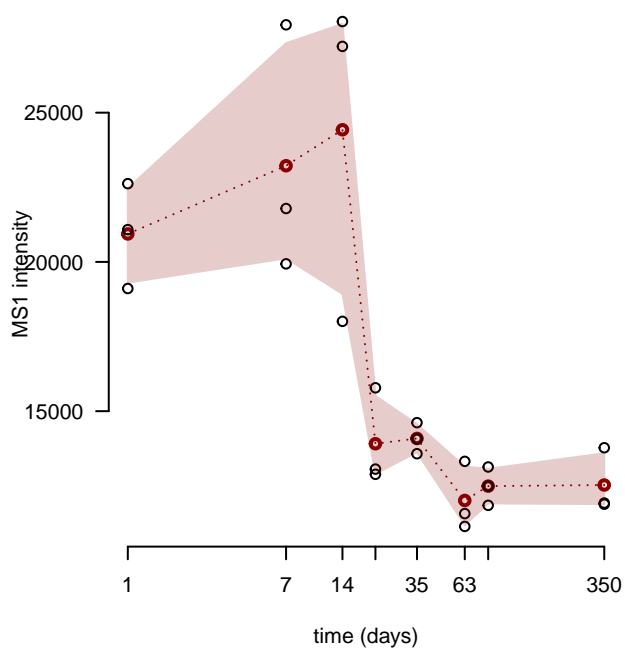

**Q80XD1**  
GN=Chn2  
chimerin 2

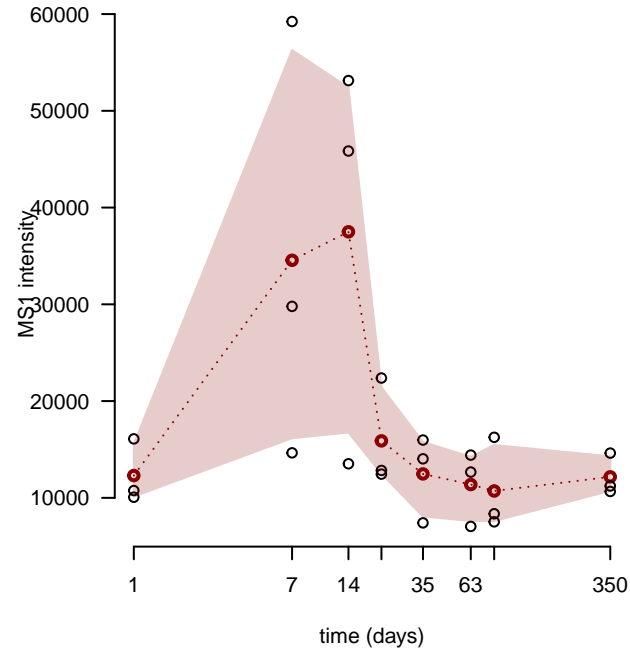

**Q80XE1**  
GN=Ric8b  
RIC8 guanine nucleotide exchange factor ...

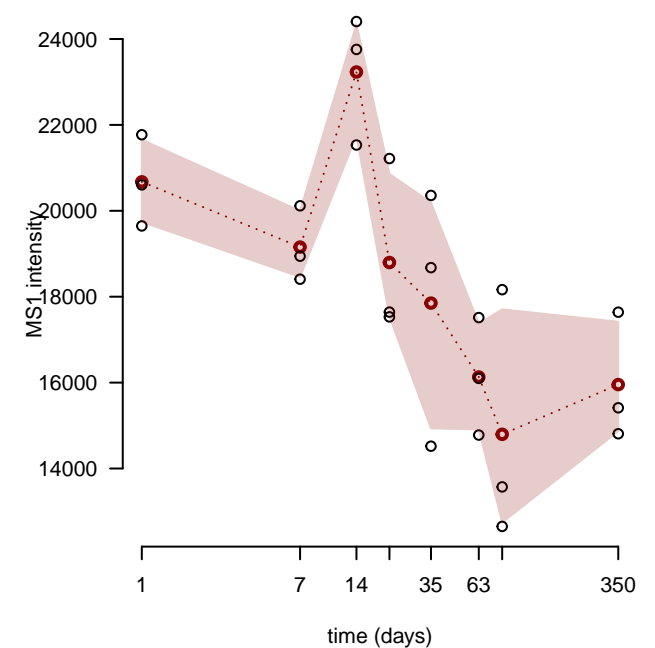

**Q80XH1**  
GN=Kxd1  
KxDL motif containing 1

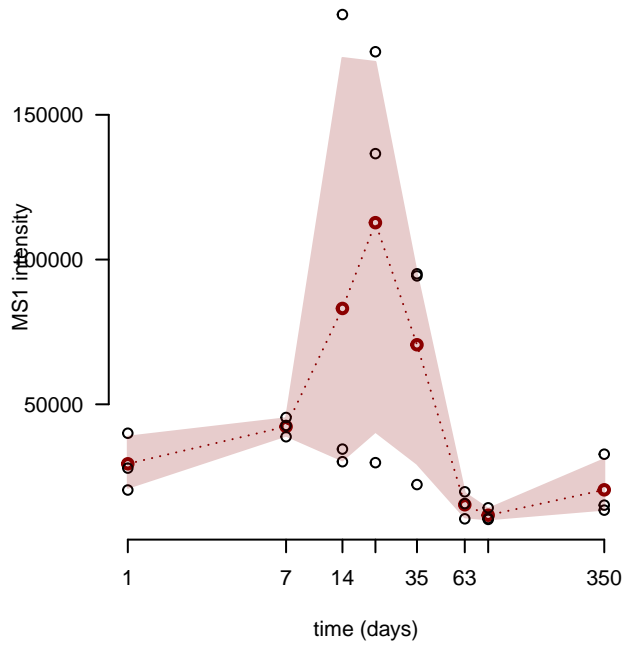

**Q80X13**  
GN=Eif4g3  
eukaryotic translation initiation factor ...

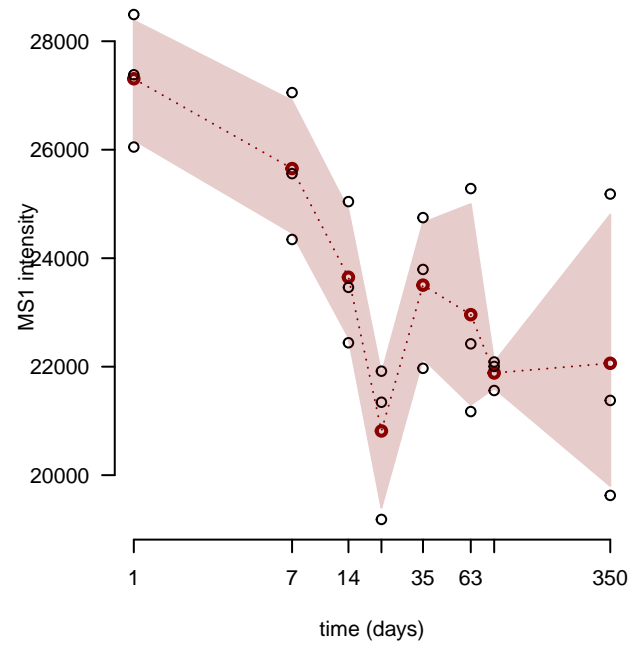

**Q80X13**  
GN=Eif4g3  
eukaryotic translation initiation factor ...

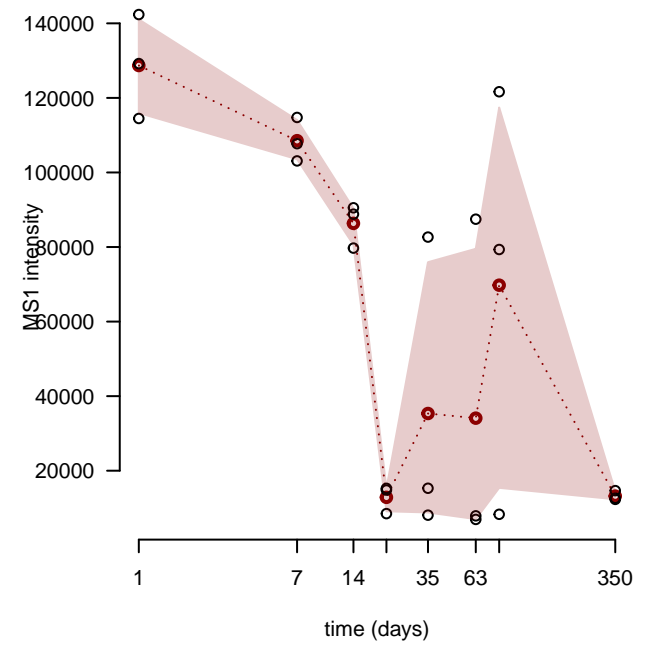

**Q80X14**  
GN=Pip4k2b  
phosphatidylinositol-5-phosphate 4-kinas ...

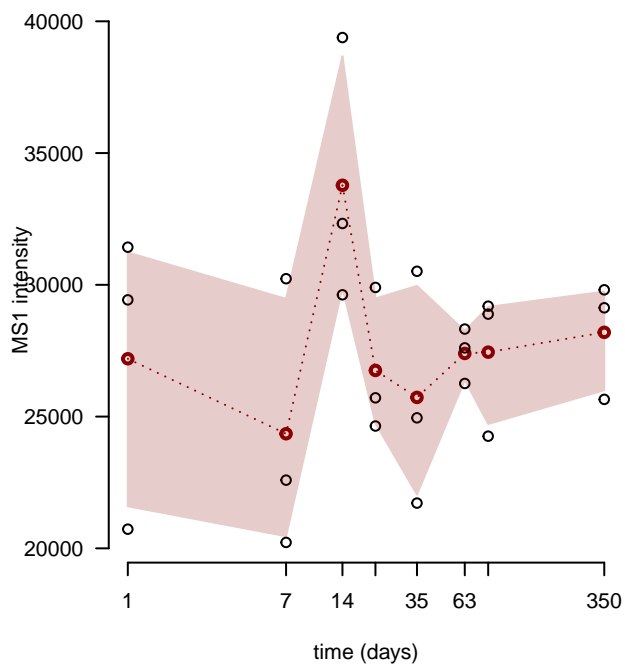

**Q80XJ2**  
GN=Rnf168  
ring finger protein 168

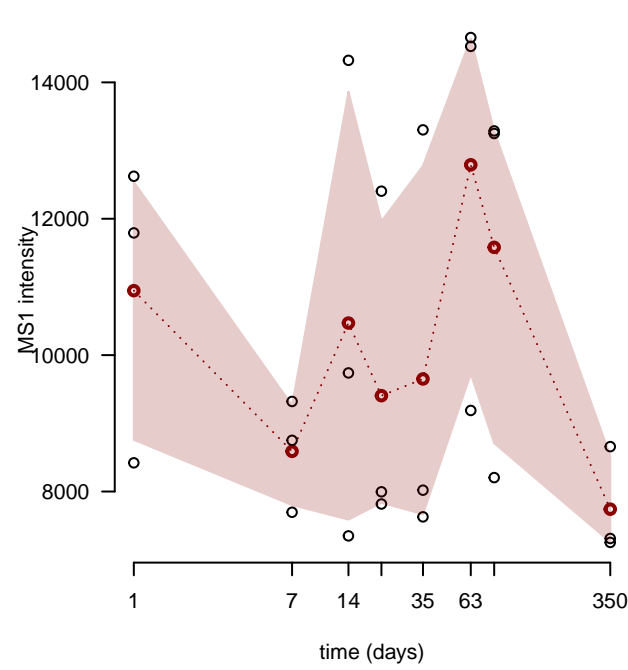

**Q80XJ3**  
GN=Ttc28  
tetratricopeptide repeat domain 28

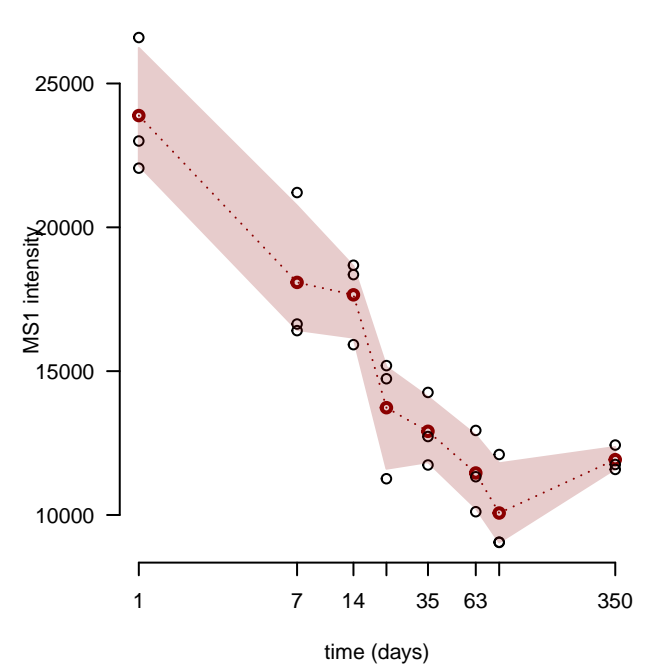

**Q80XK6**  
GN=Atg2b  
autophagy related 2B

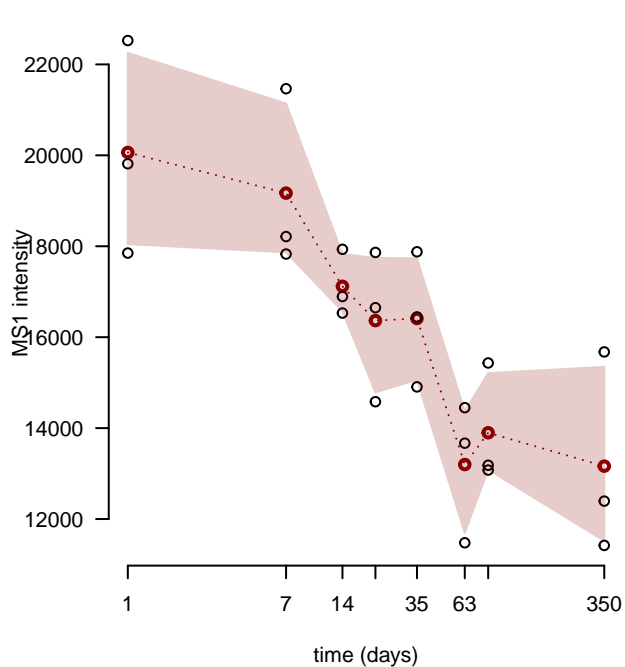

**Q80XL6**  
GN=Acad11  
acyl-Coenzyme A dehydrogenase family, me ...

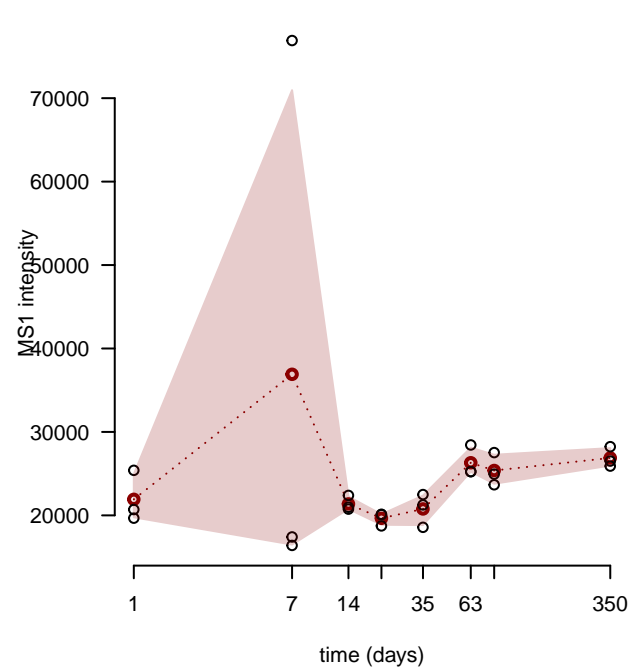

**Q80XL7**  
GN=Mppe1  
metallophosphoesterase 1

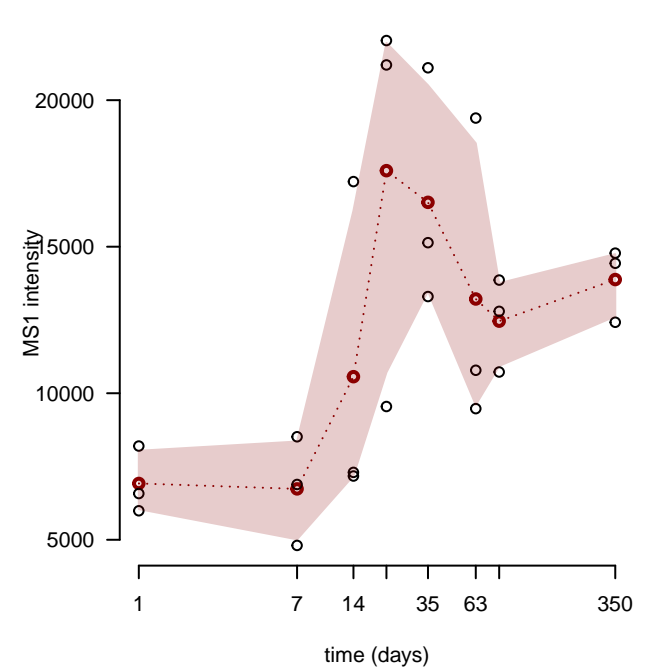

**Q80XN0**  
**GN=Bdh1**  
3-hydroxybutyrate dehydrogenase, type 1

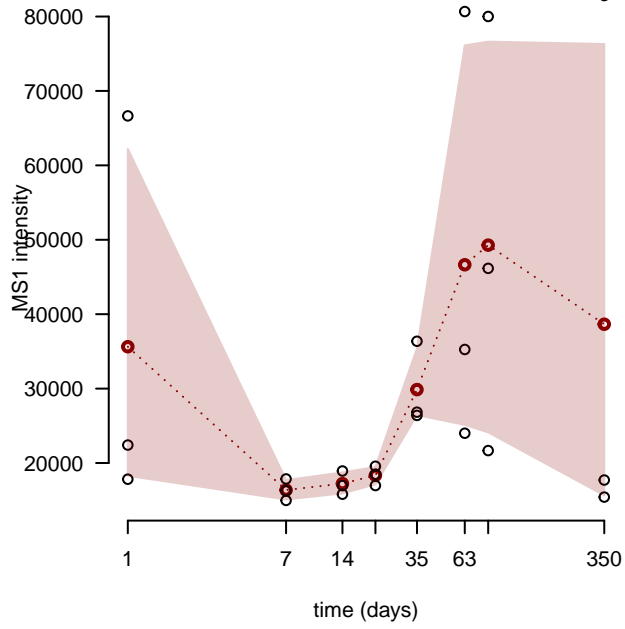

**Q80XP8**  
**GN=Fam76b**  
family with sequence similarity 76, memb ...

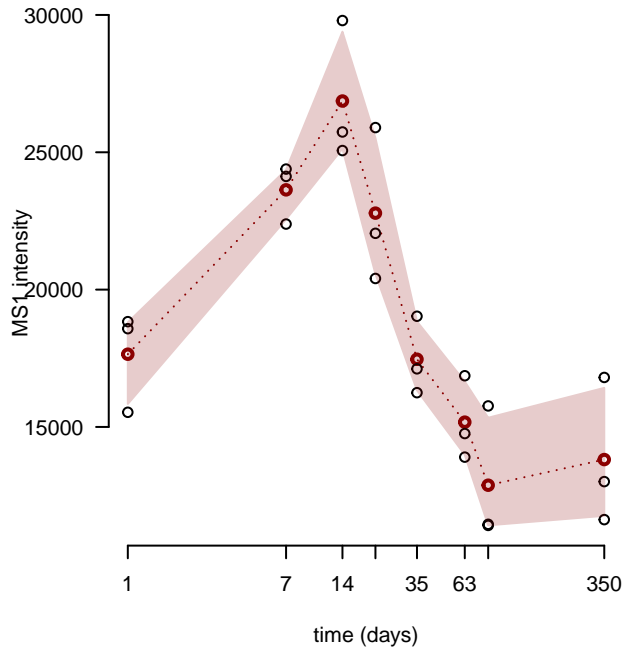

**Q80XP9**  
**GN=Wnk3**  
WNK lysine deficient protein kinase 3

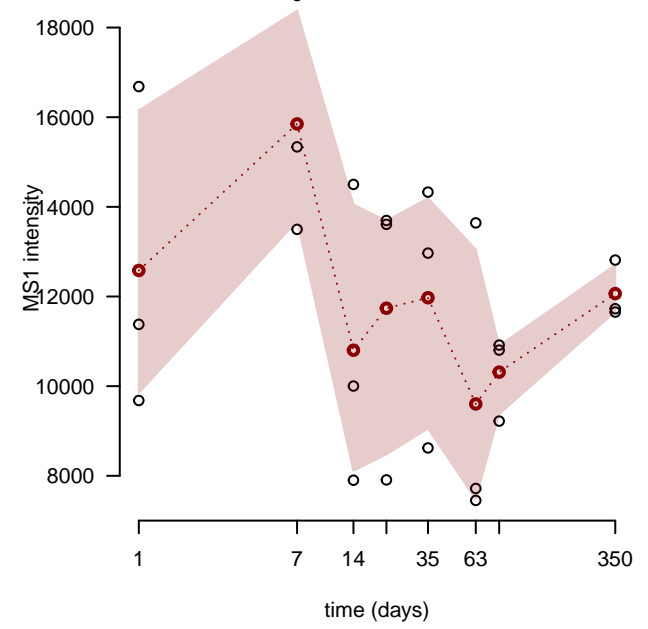

**Q80XQ2**  
**GN=Tbc1d5**  
TBC1 domain family, member 5

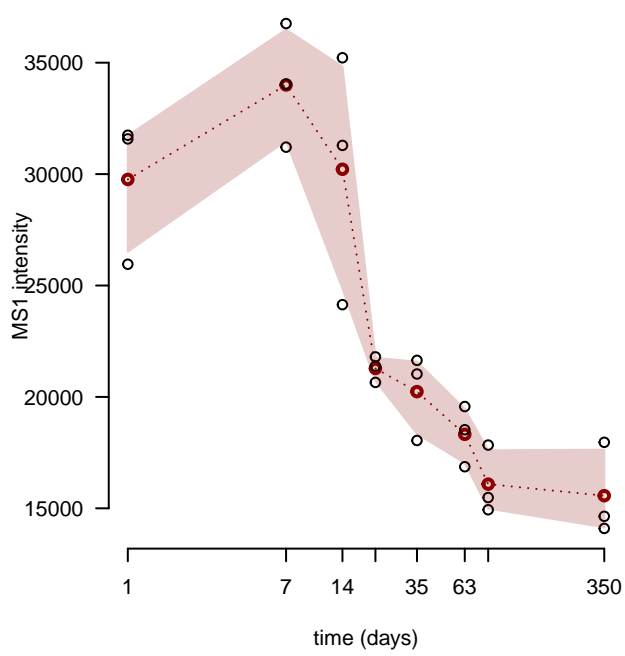

**Q80XR2**  
**GN=Atp2c1**  
ATPase, Ca++-sequestering

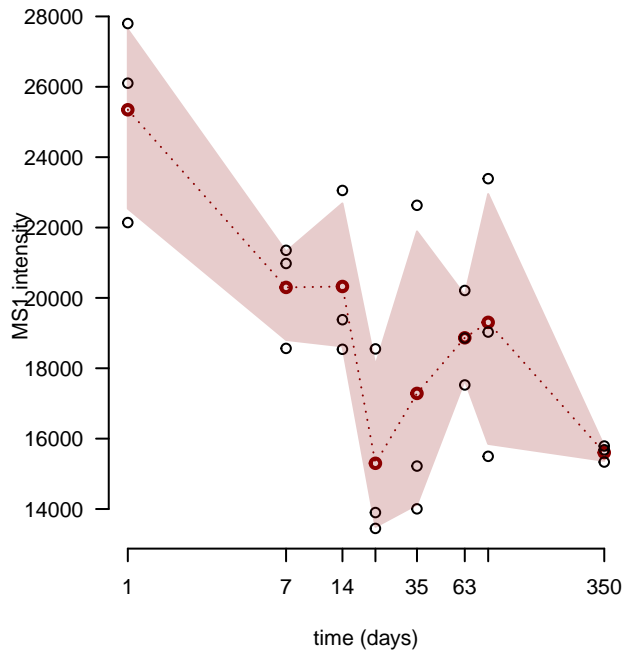

**Q80XS6**  
**GN=Samd4b**  
sterile alpha motif domain containing 4B

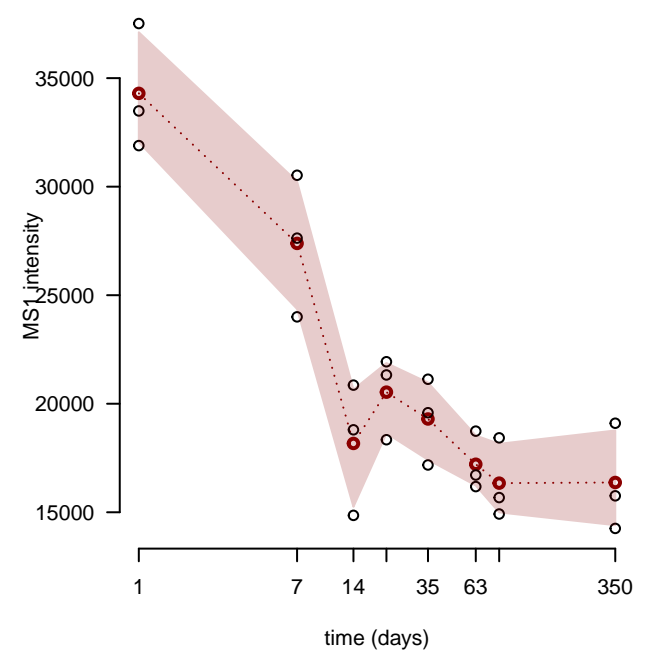

**Q80XU3**  
**GN=Nucks1**  
nuclear casein kinase and cyclin-depende ...

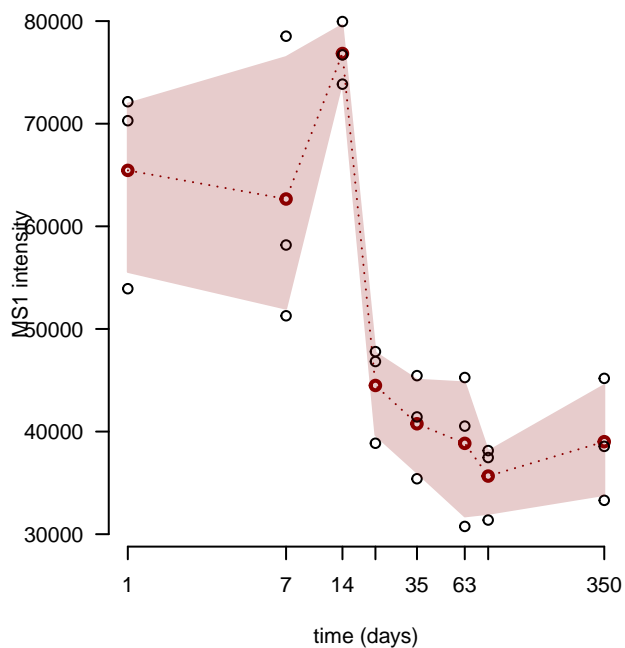

**Q80Y14**  
**GN=Glrx5**  
glutaredoxin 5

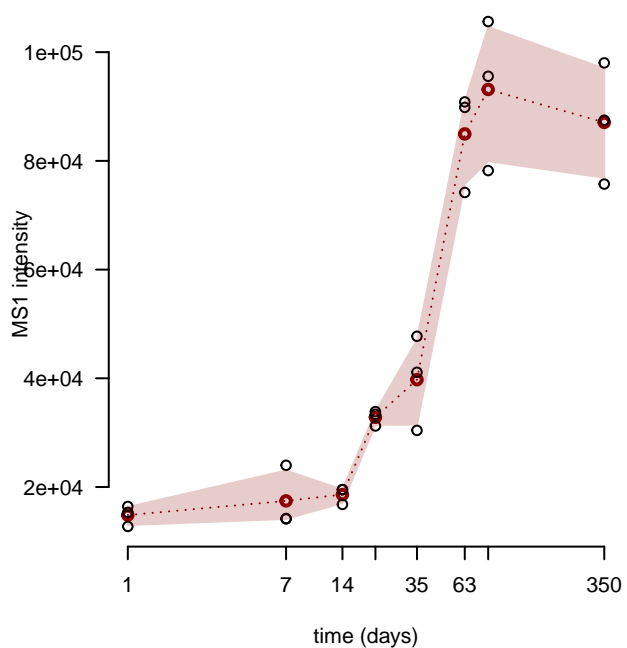

**Q80Y17**  
**GN=Llg1**  
LLGL1 scribble cell polarity complex com ...

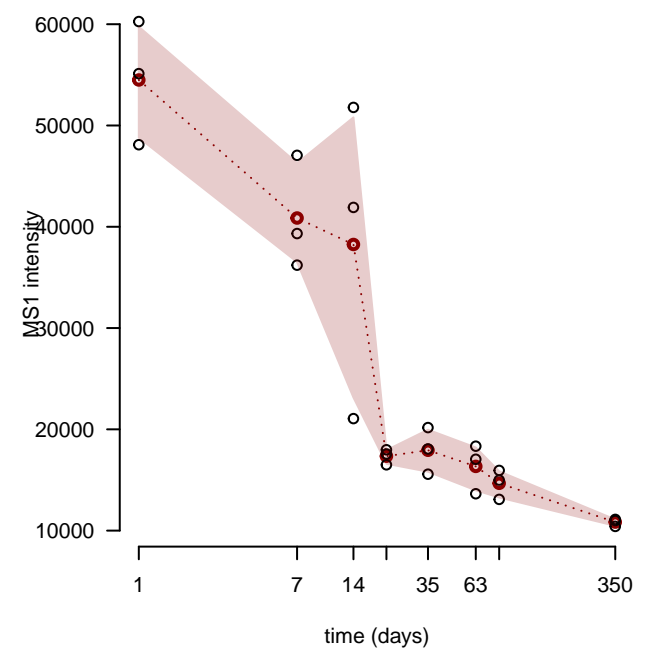



**Q80Y20**  
**GN=Alkbh8**  
alkB homolog 8, tRNA methyltransferase

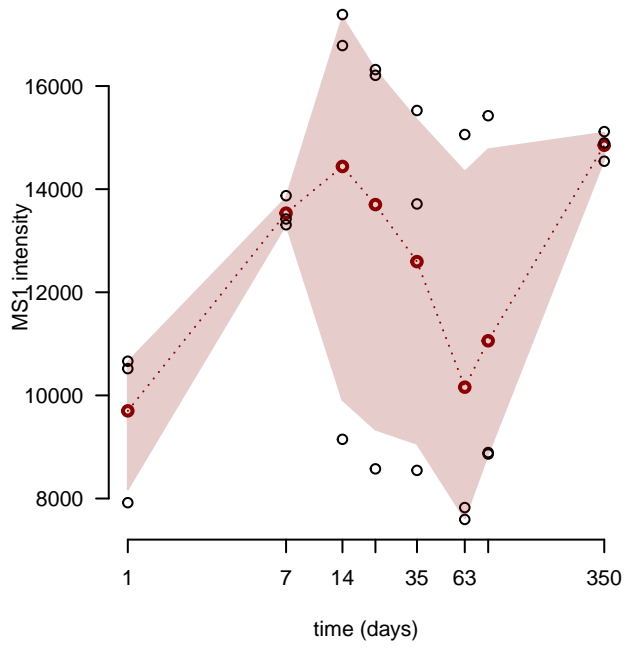

**Q80Y24**  
**GN=Prickle2**  
prickle planar cell polarity protein 2

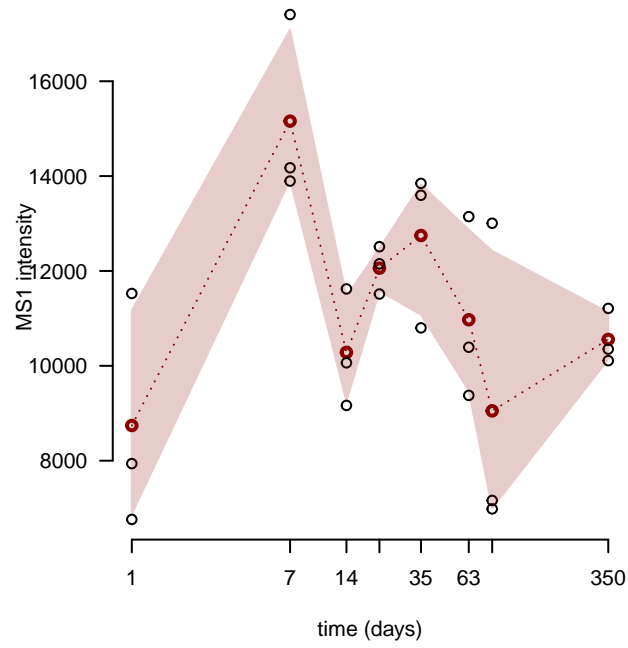

**Q80Y44**  
**GN=Ddx10**  
DEAD box helicase 10

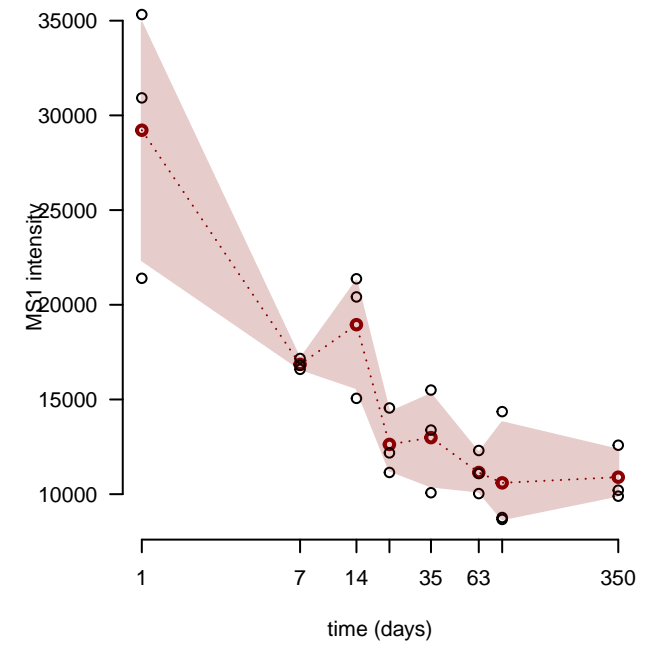

**Q80Y55**  
**GN=Bsdc1**  
BSD domain containing 1

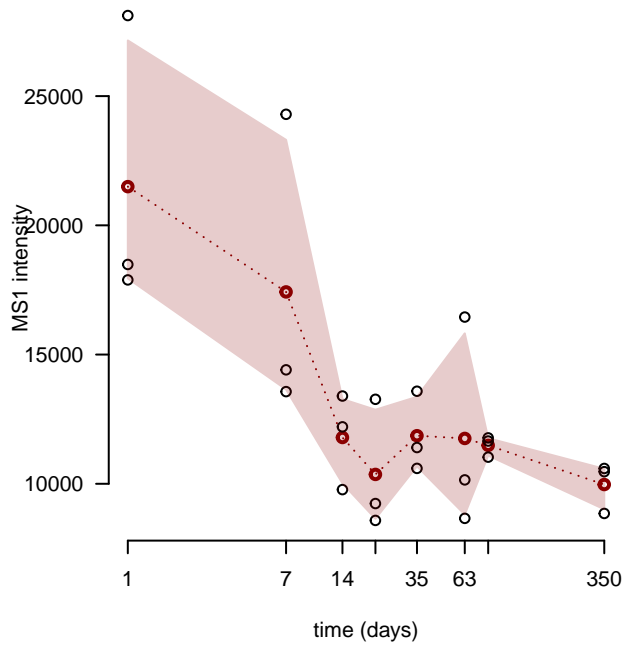

**Q80Y56**  
**GN=Rbsn**  
rabenosyn, RAB effector

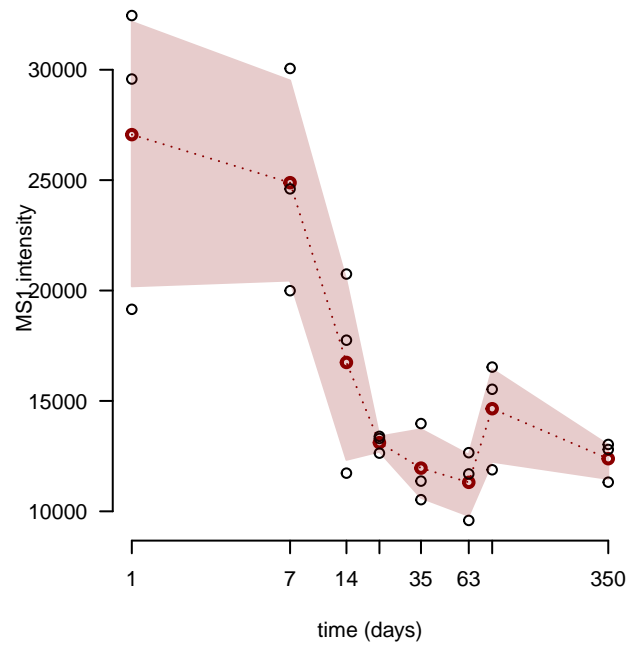

**Q80Y81**  
**GN=Elac2**  
elaC ribonuclease Z 2

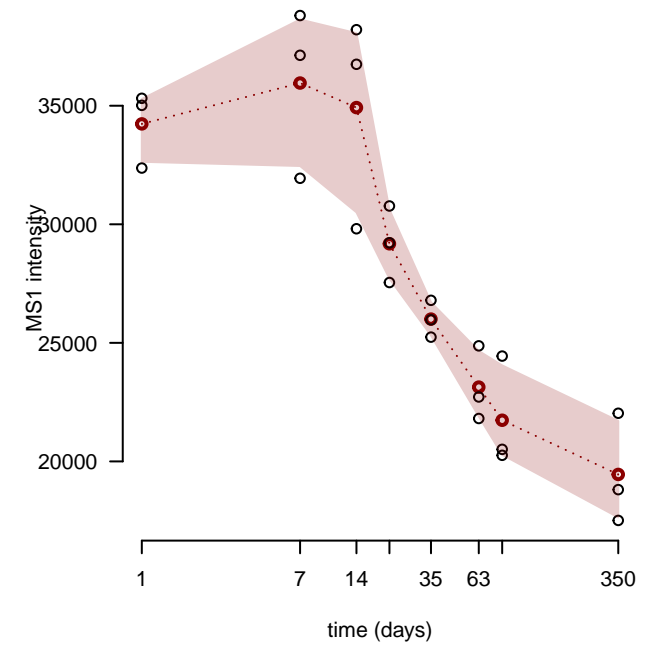

**Q80Y83**  
**GN=Dixdc1**  
DIX domain containing 1

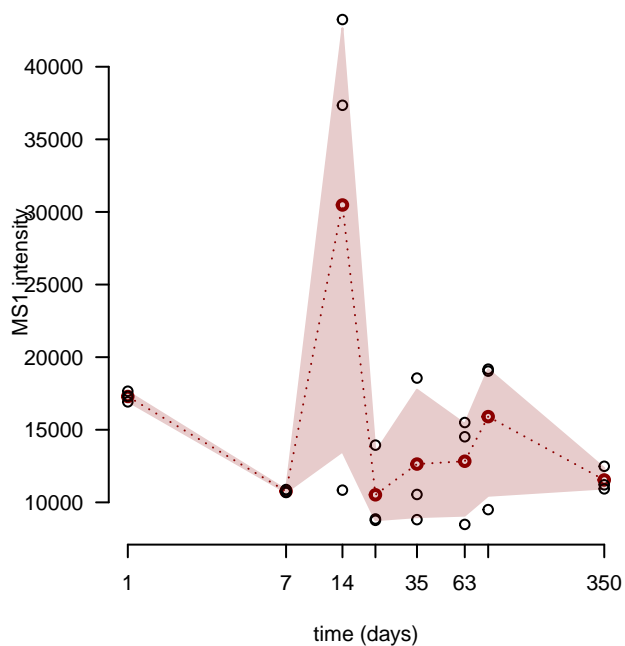

**Q80Y84**  
**GN=Kdm5b**  
lysine (K)-specific demethylase 5B

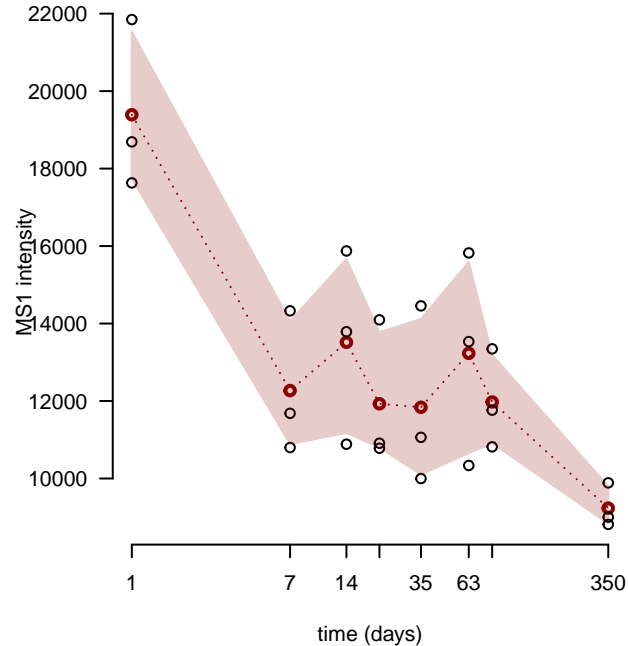

**Q80Y98**  
**GN=Ddhd2**  
DDHD domain containing 2

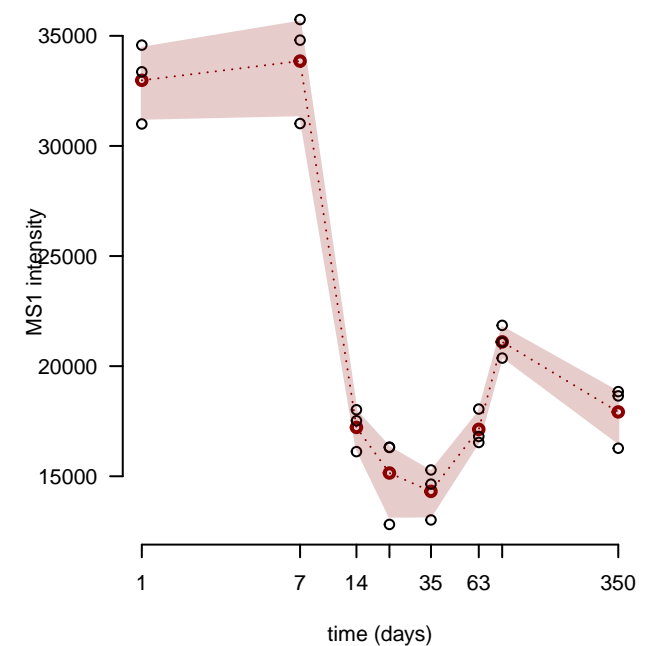

**Q80YA3**  
**GN=Ddhd1**  
DDHD domain containing 1

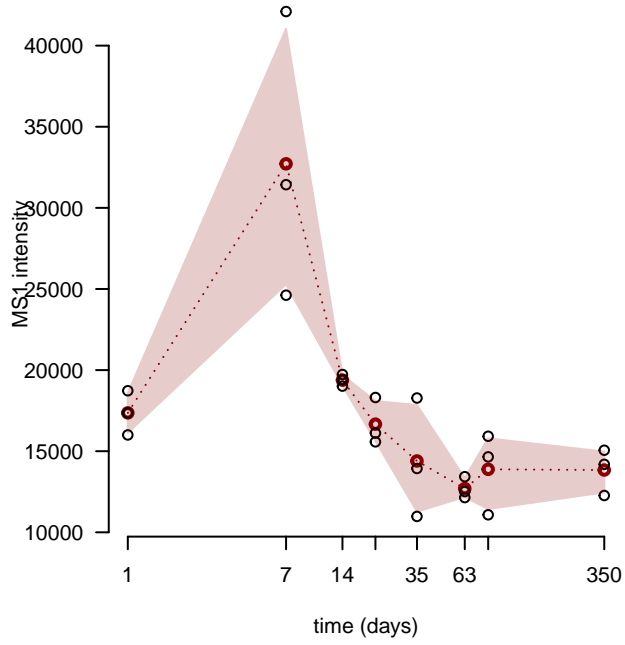

**Q80YA7**  
**GN=Dpp8**  
dipeptidylpeptidase 8

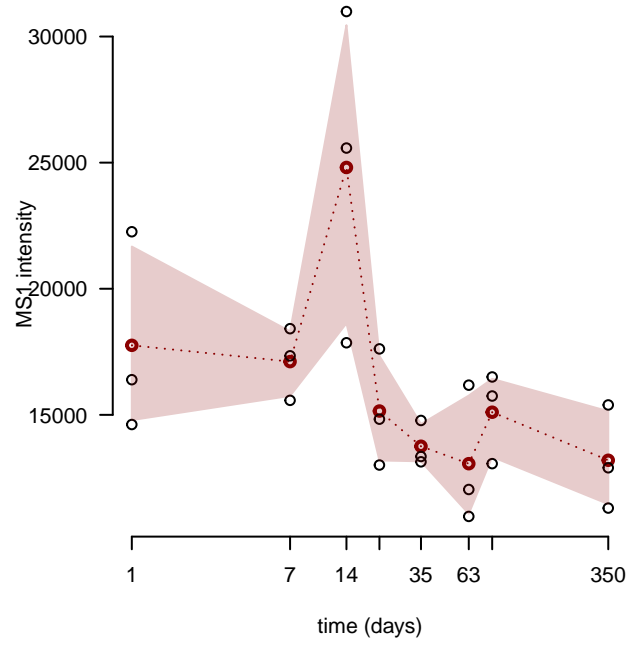

**Q80YA8**  
**GN=Crb2**  
crumbs family member 2

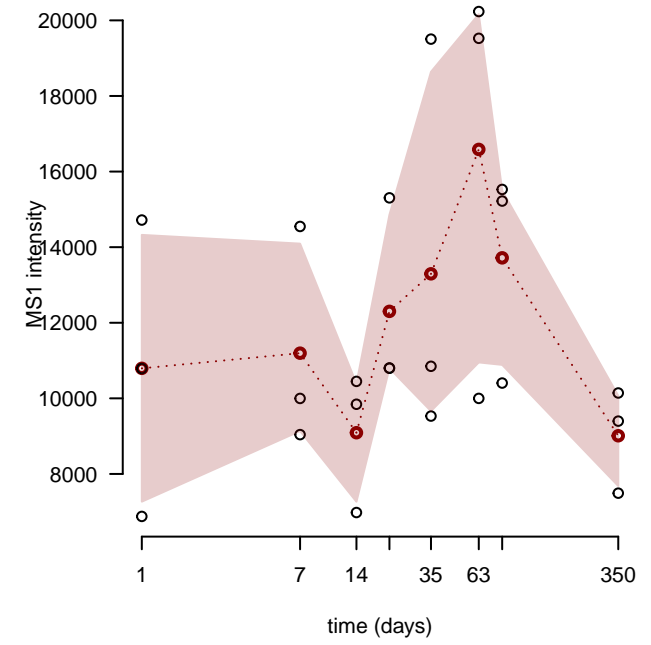

**Q80YC5**  
**GN=F12**  
coagulation factor XII (Hageman factor)

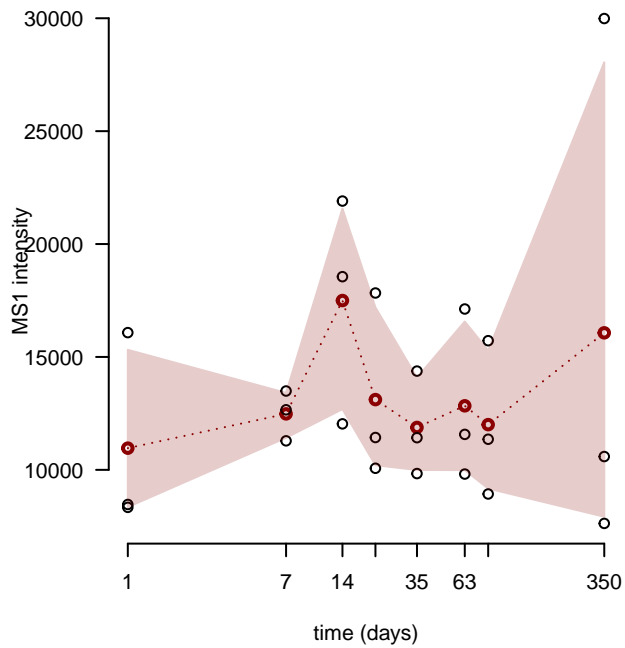

**Q80YD1**  
**GN=Supv311**  
suppressor of var1, 3-like 1 (S. cerevis ...

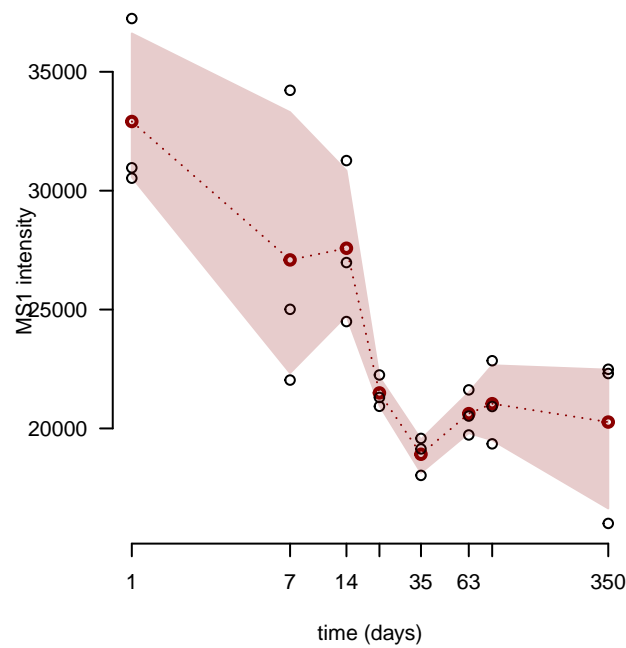

**Q80YD6**  
**GN=Sergef**  
secretion regulating guanine nucleotide ...

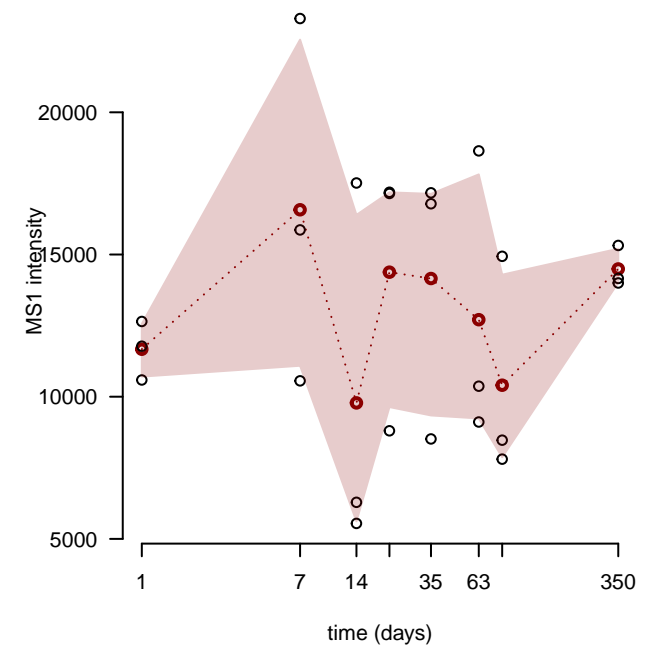

**Q80YE7**  
**GN=Dapk1**  
death associated protein kinase 1

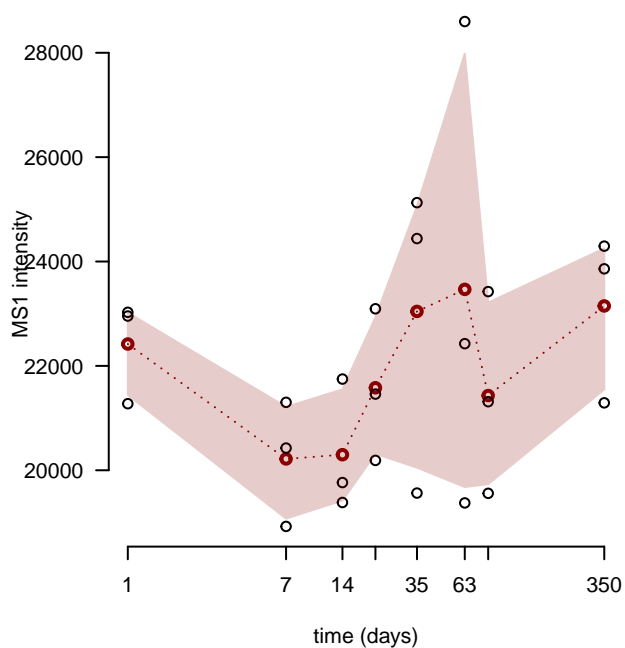

**Q80YF6**  
**GN=Upk3b**  
uroplakin 3B

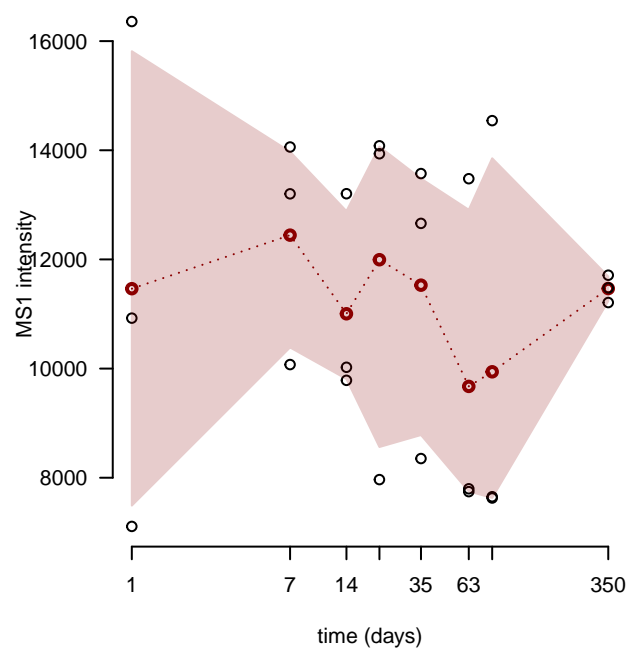

**Q80YQ2**  
**GN=Med23**  
mediator complex subunit 23

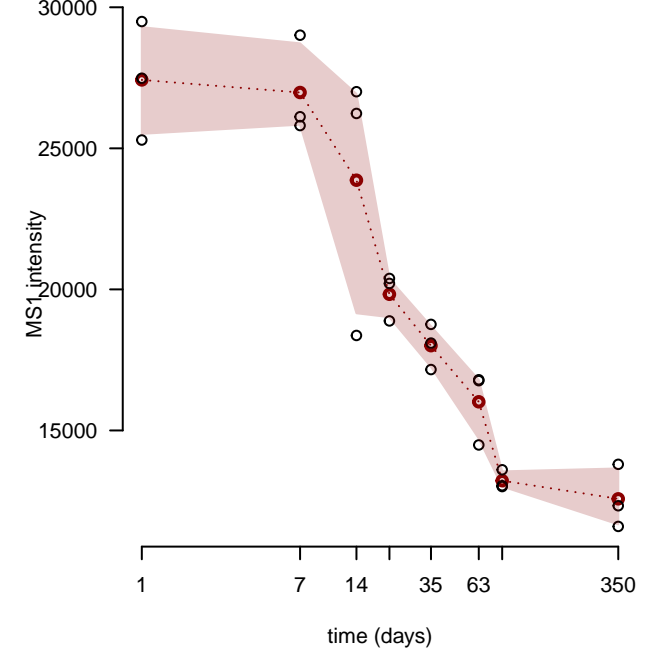

**Q80YQ8**  
**GN=Rmnd5a**  
required for meiotic nuclear division 5 ...

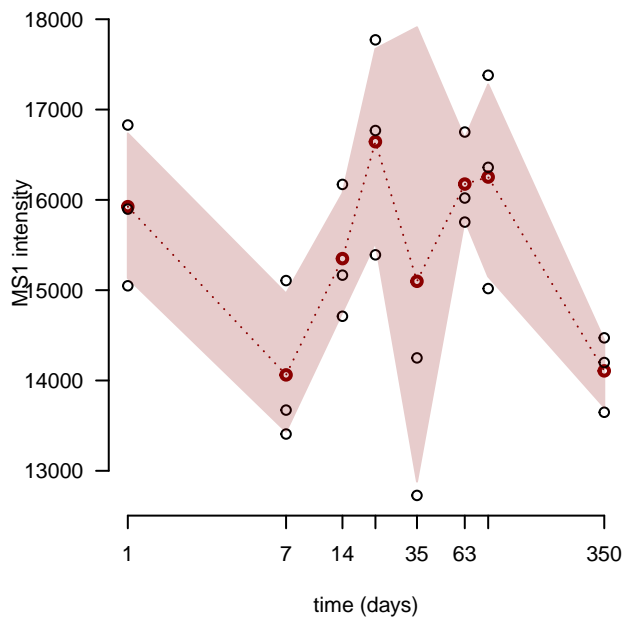

**Q80YR4**  
**GN=Znf598**

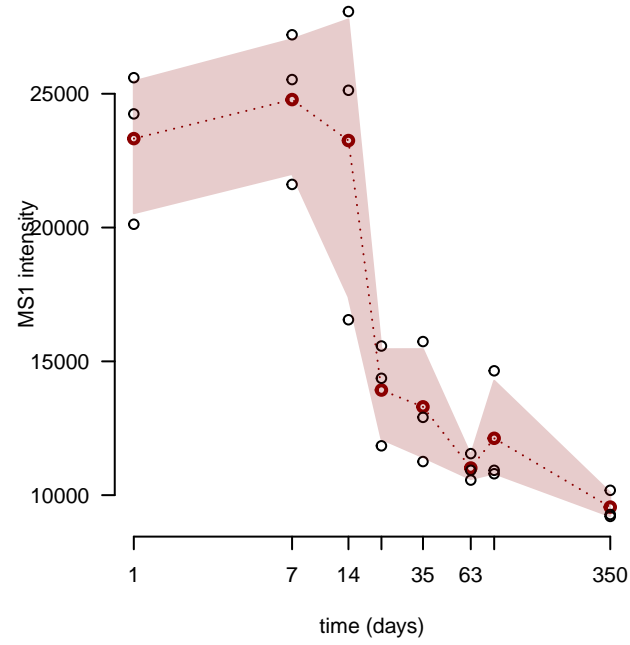

**Q80YR5**  
**GN=Safb2**  
scaffold attachment factor B2

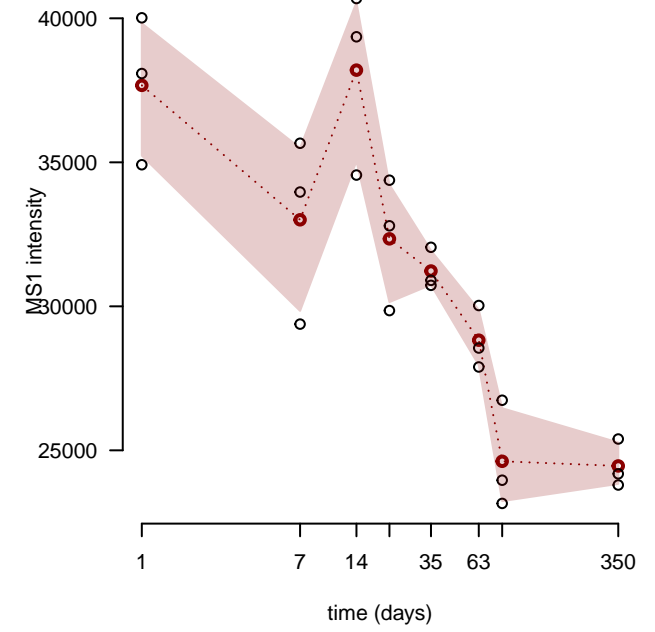

**Q80YR9**  
**GN=Rbm12b1**  
RNA binding motif protein 12 B1

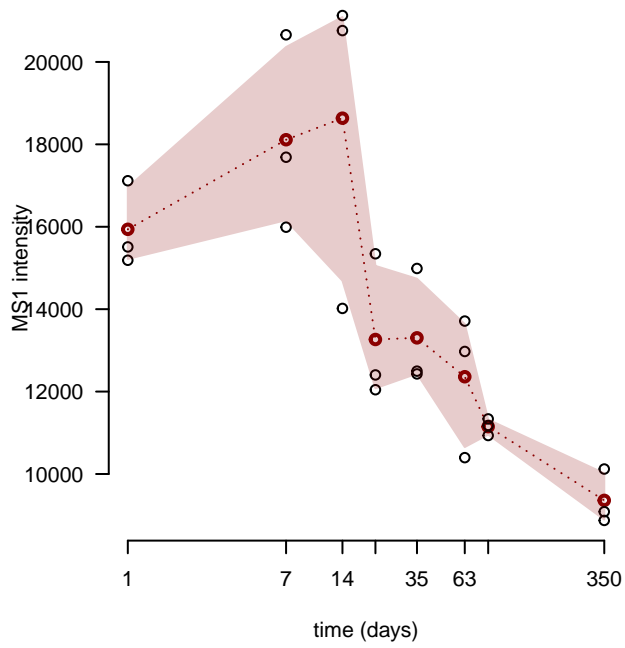

**Q80YS6**  
**GN=Afap1**  
actin filament associated protein 1

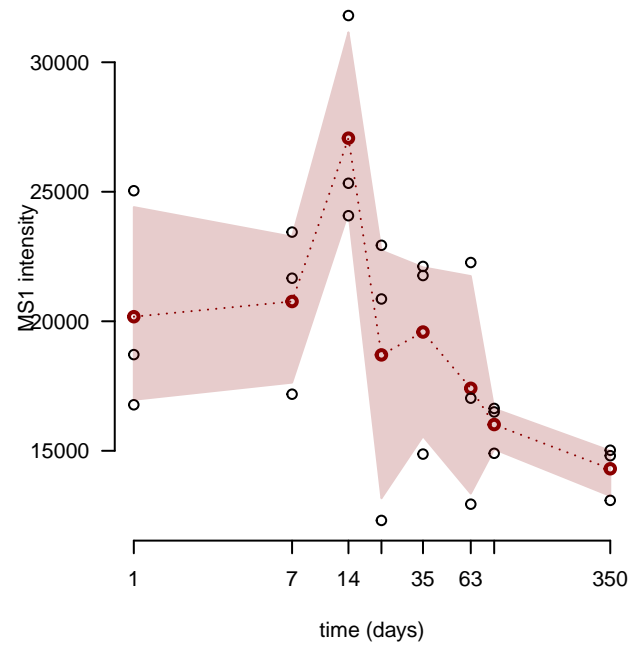

**Q80YT7**  
**GN=Pde4dip**  
phosphodiesterase 4D interacting protein ...

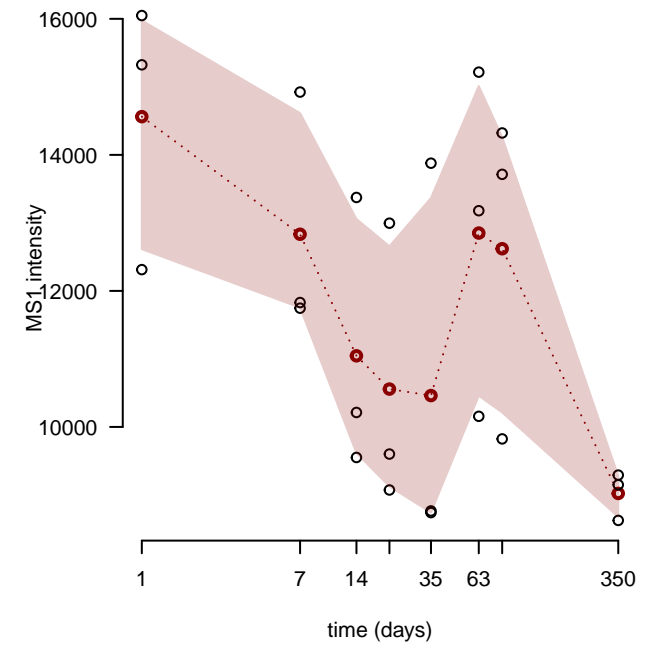

**Q80YV2**  
**GN=Zc3hc1**  
zinc finger, C3HC type 1

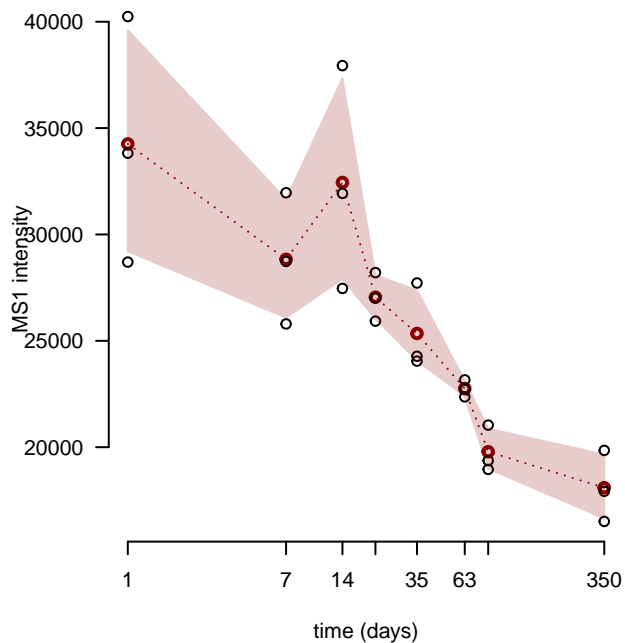

**Q80YV3**  
**GN=Trrap**  
transformation/transcription domain-asso ...

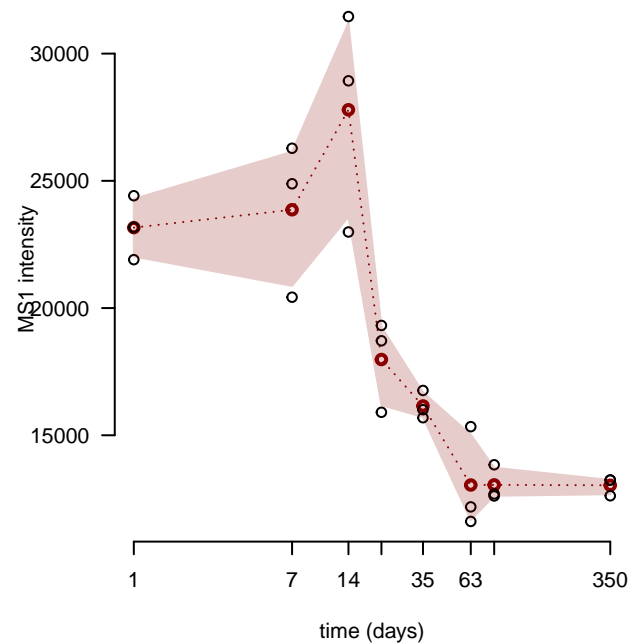

**Q80YV4**  
**GN=Pank4**  
pantothenate kinase 4

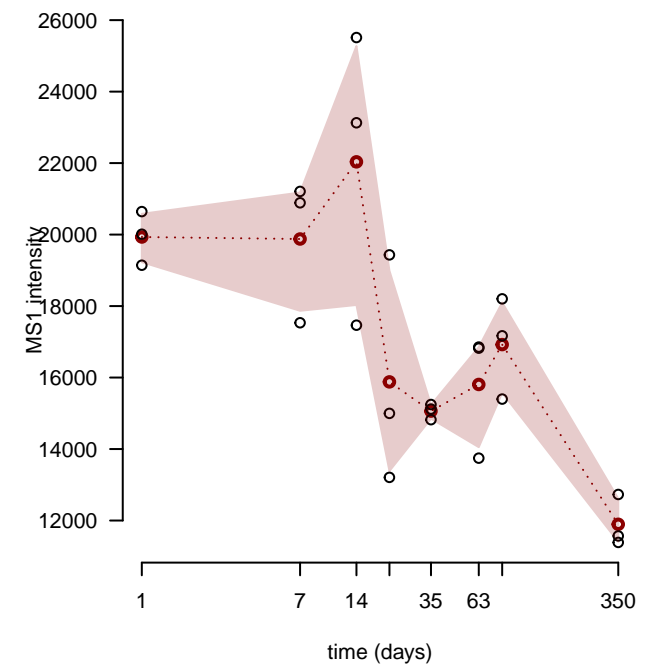

**Q80YW0**  
GN=Cyth4  
cytohesin 4

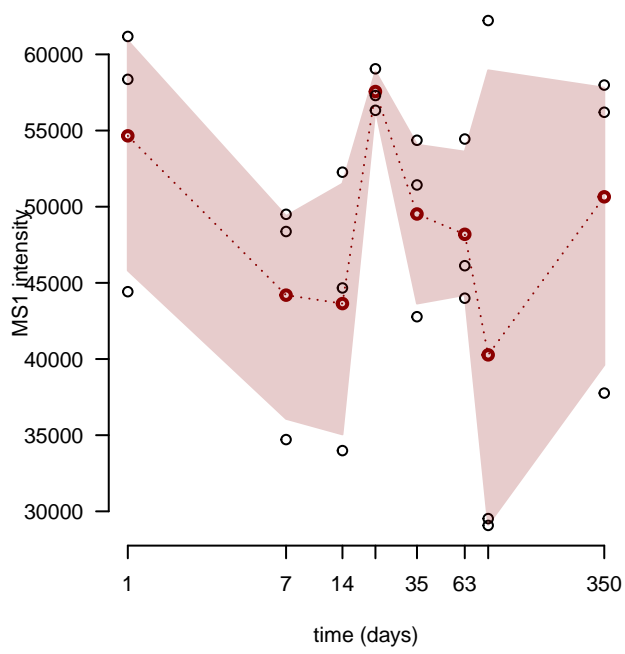

**Q80YX1**  
GN=Tnc  
tenascin C

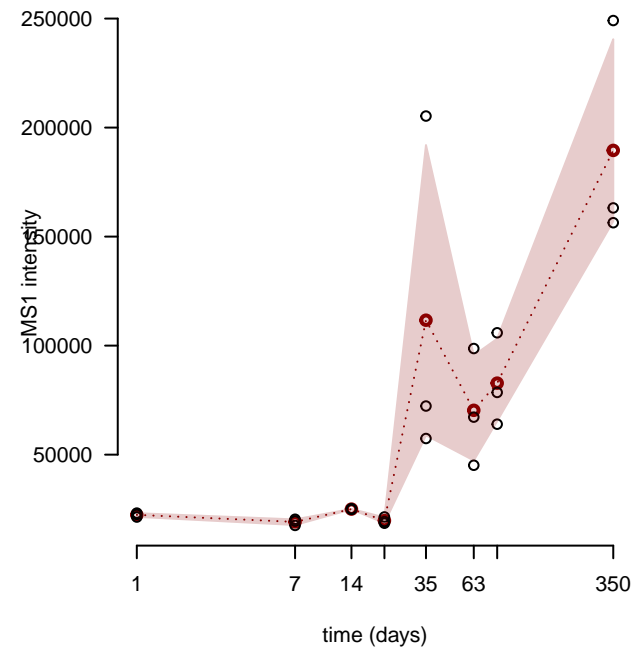

**Q80YX1**  
GN=Tnc  
tenascin C

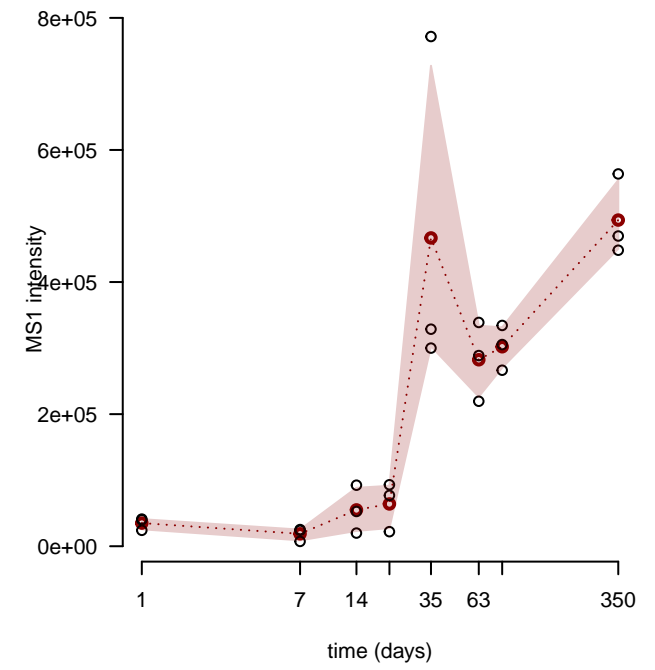

**Q80YY7**  
GN=Znf618

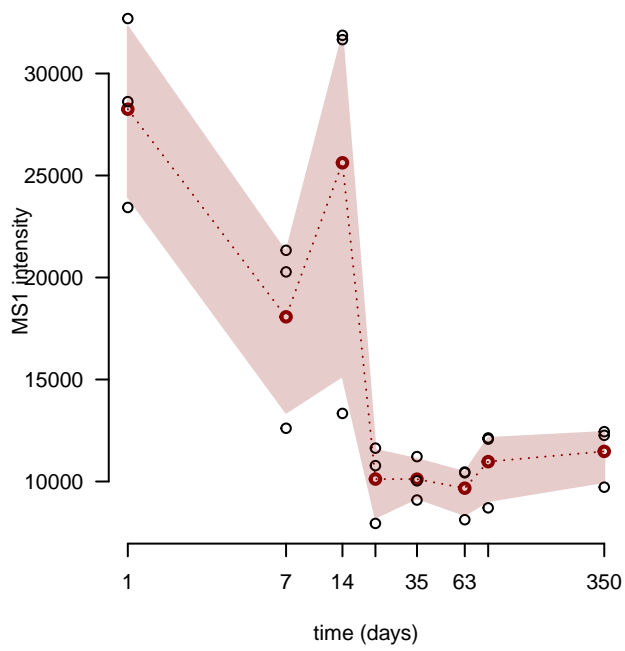

**Q80Z25**  
GN=Ofd1  
OFD1, centriole and centriolar satellite ...

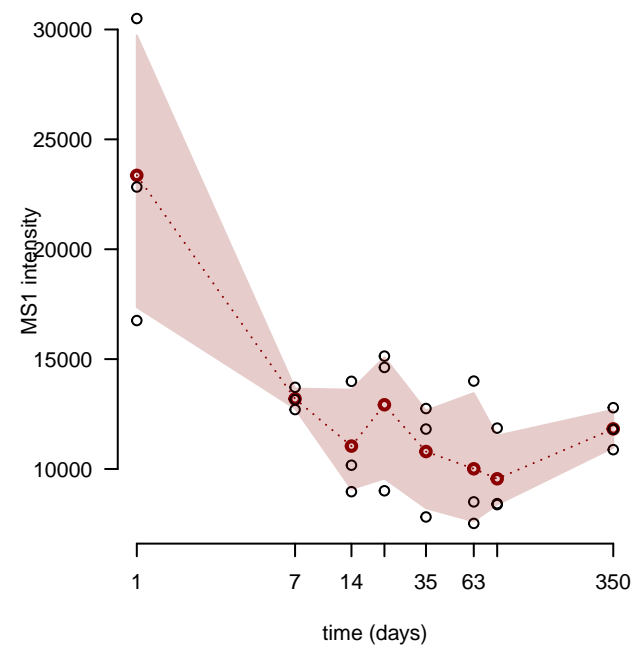

**Q80Z96**  
GN=Vangl1  
VANGL planar cell polarity 1

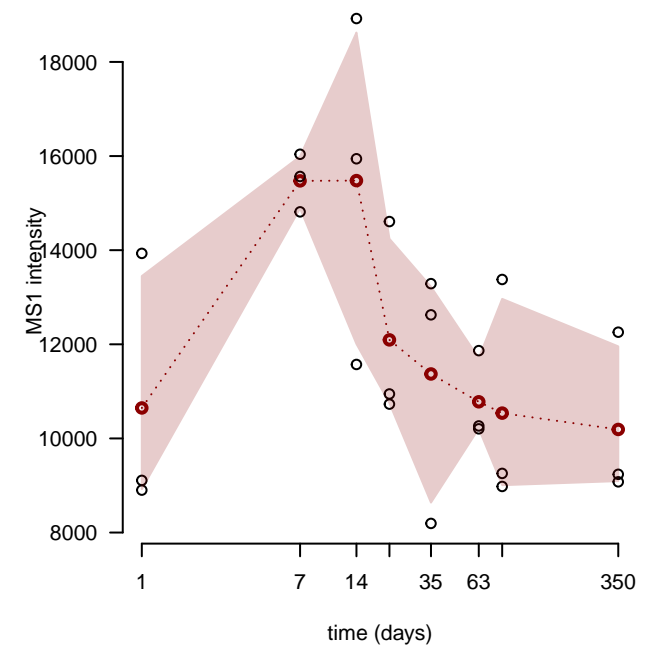

**Q80ZA4**  
GN=Pkhd11  
polycystic kidney and hepatic disease 1- ...

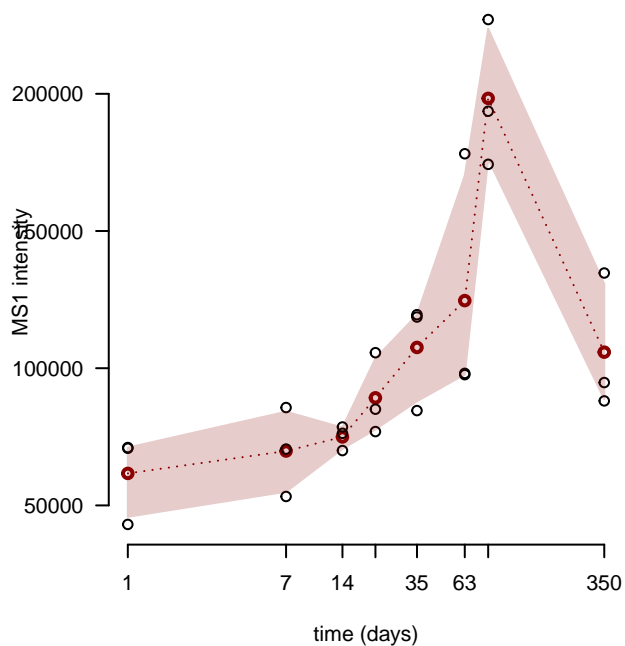

**Q80ZA7**  
GN=Fmr1nb  
Fmr1 neighbor

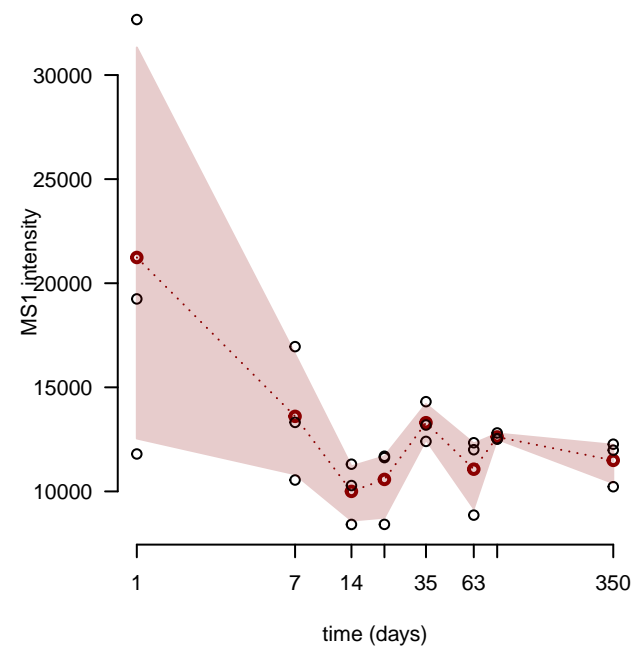

**Q80ZI6**  
GN=Lrsam1  
leucine rich repeat and sterile alpha mo ...

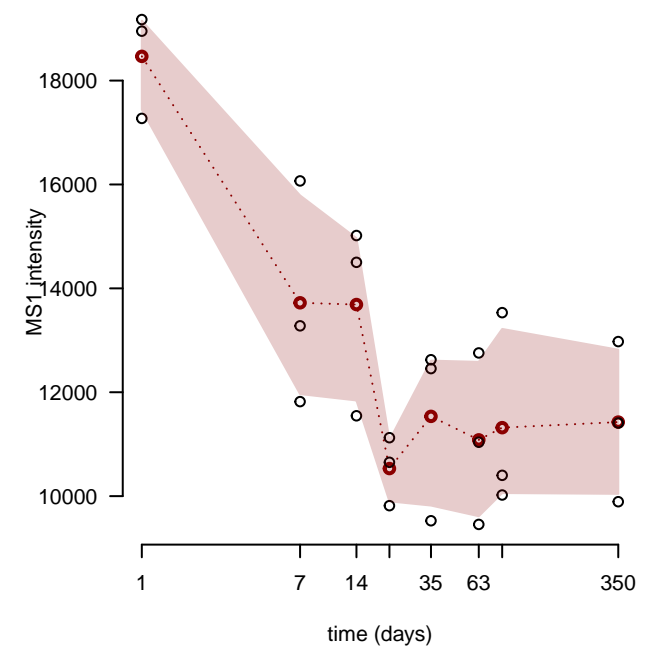

**Q80ZJ1**  
**GN=Rap2a**  
RAS related protein 2a

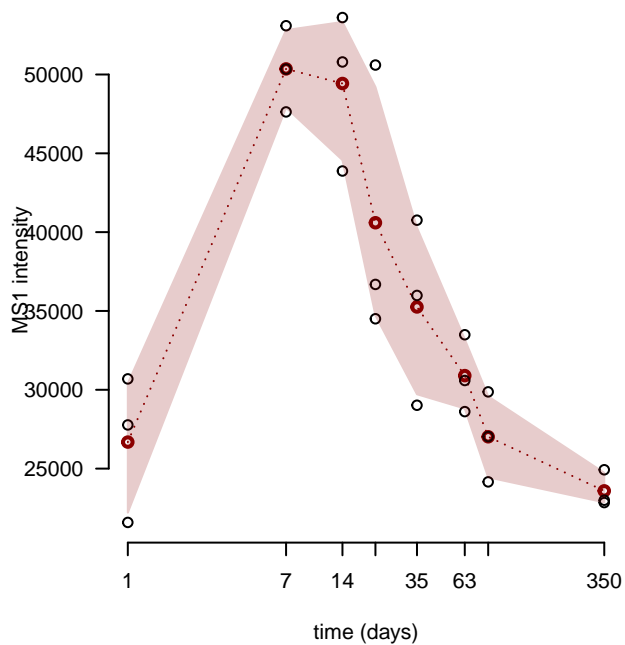

**Q80ZJ6**  
**GN=Zer1**  
zyg-11 related, cell cycle regulator

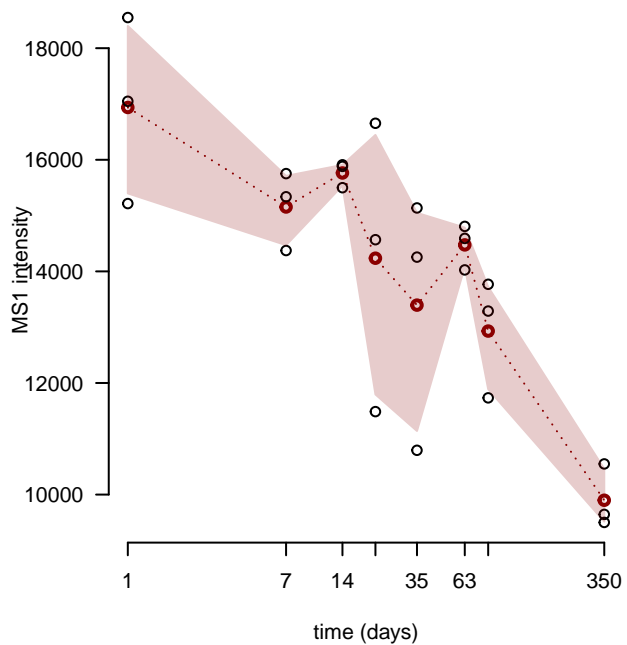

**Q80ZK0**  
**GN=Mrps10**  
mitochondrial ribosomal protein S10

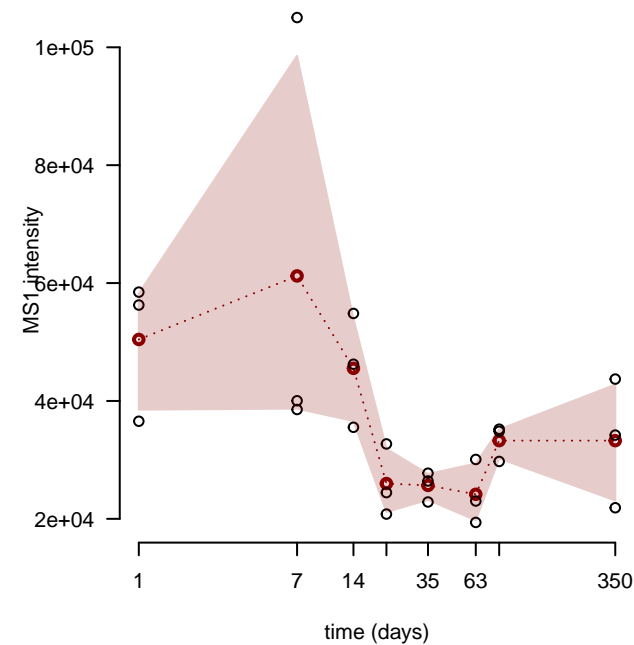

**Q80ZK9**  
**GN=Wdtdc1**  
WD and tetratricopeptide repeats 1

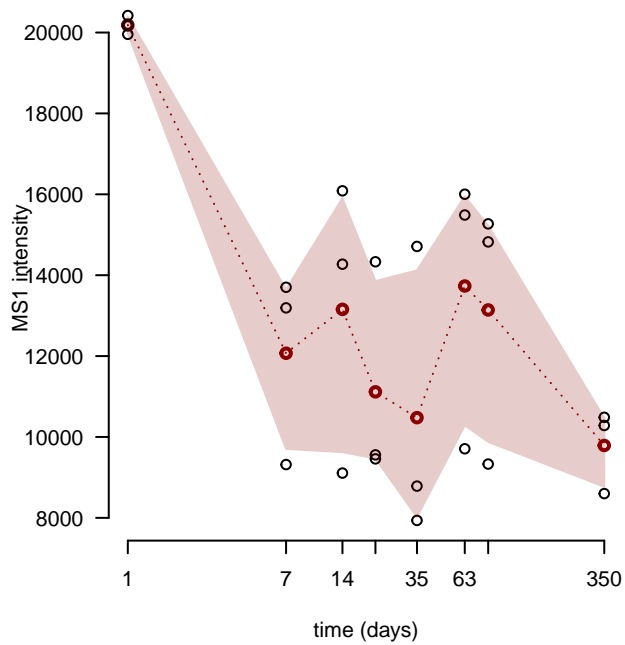

**Q80ZM7**  
**GN=Gtf2a2**  
general transcription factor II A, 2

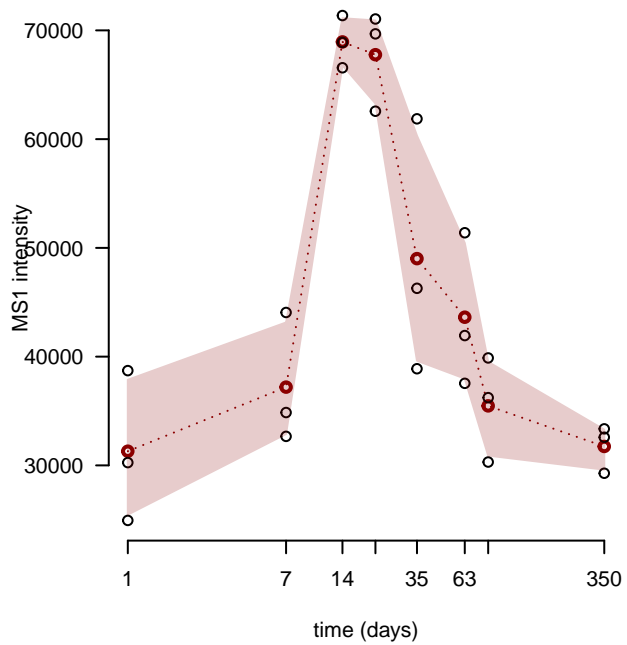

**Q80ZM8**  
**GN=Crls1**  
cardiolipin synthase 1

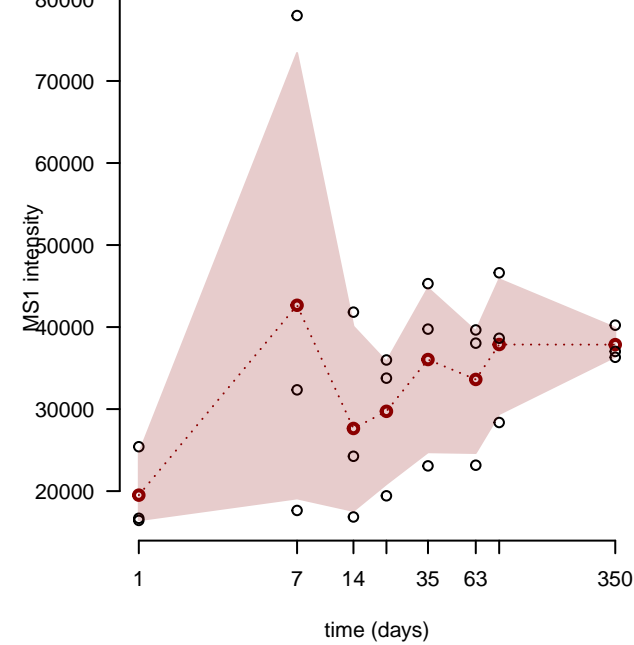

**Q80ZN9**  
**GN=Cox6b2**  
cytochrome c oxidase subunit 6B2

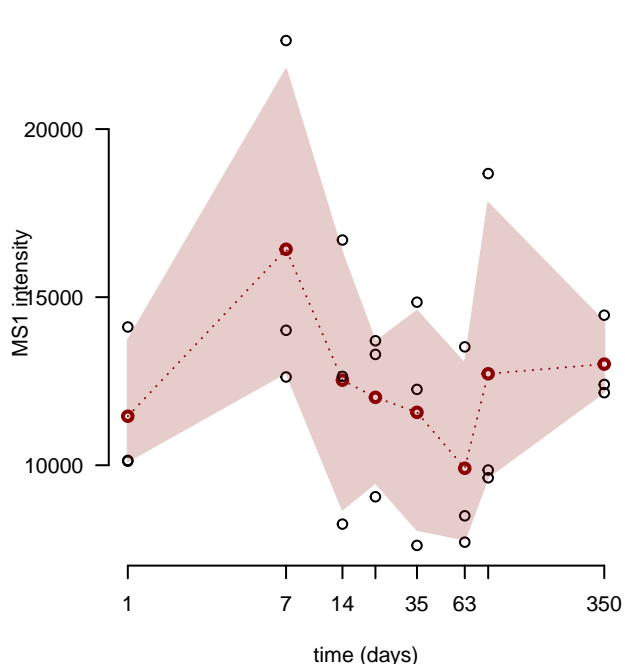

**Q80ZQ9**  
**GN=Abitram**  
actin binding transcription modulator

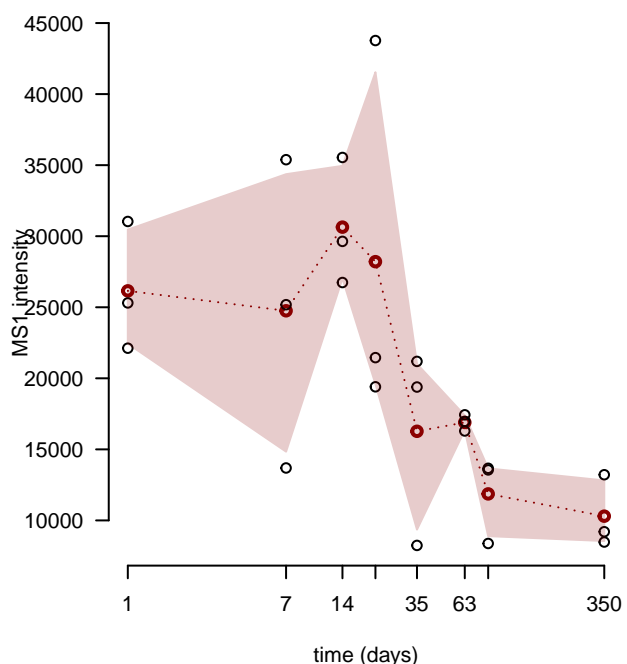

**Q80ZS3**  
**GN=Mrps26**  
mitochondrial ribosomal protein S26

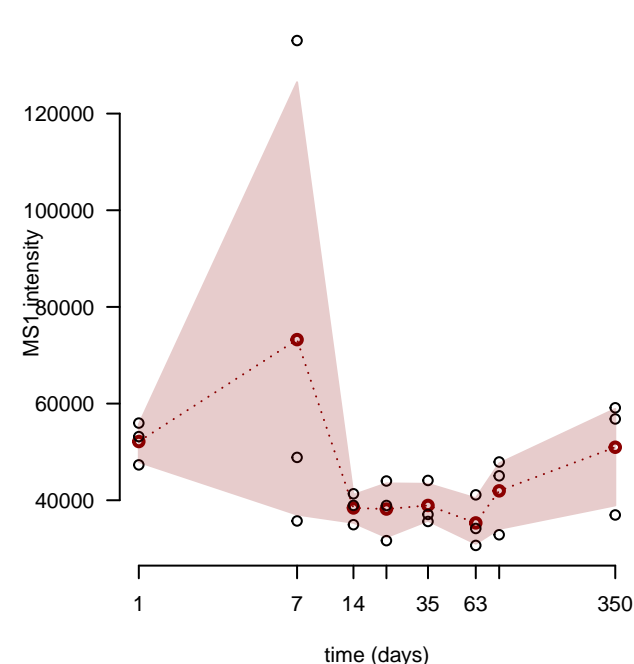

**Q80ZU0**  
**GN=Arl5a**  
ADP-ribosylation factor-like 5A

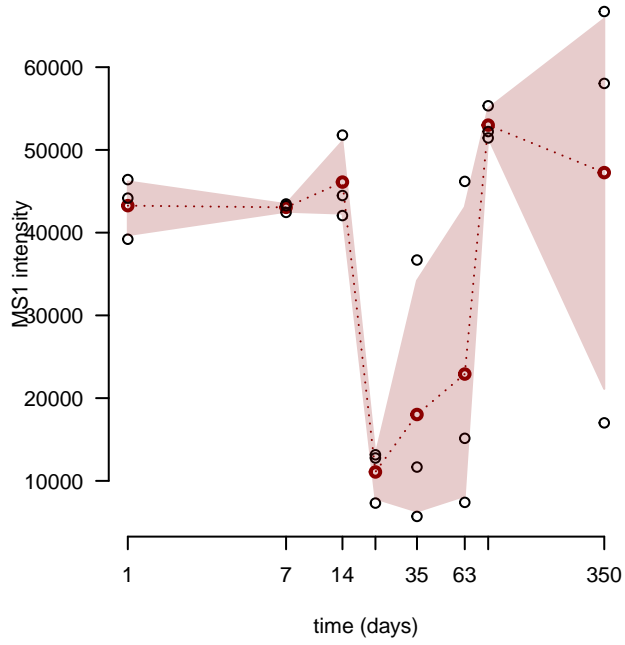

**Q80ZV0**  
**GN=Rnaseh2b**  
ribonuclease H2, subunit B

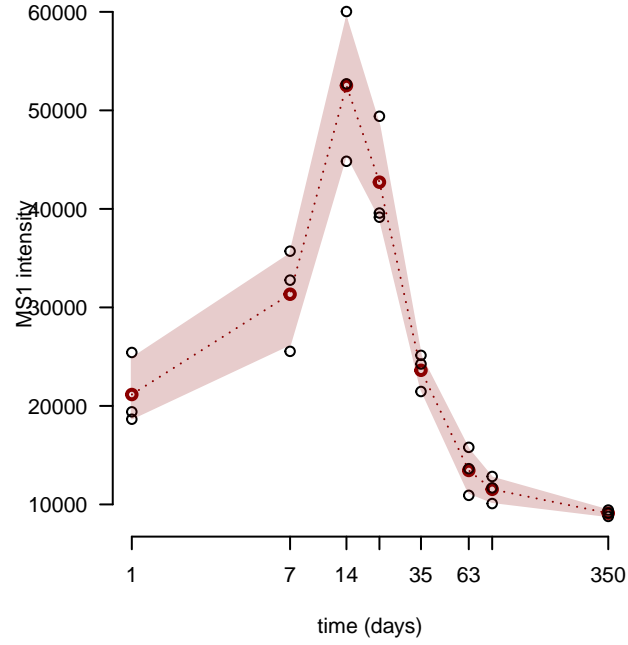

**Q80ZW2**  
**GN=Them6**  
thioesterase superfamily member 6

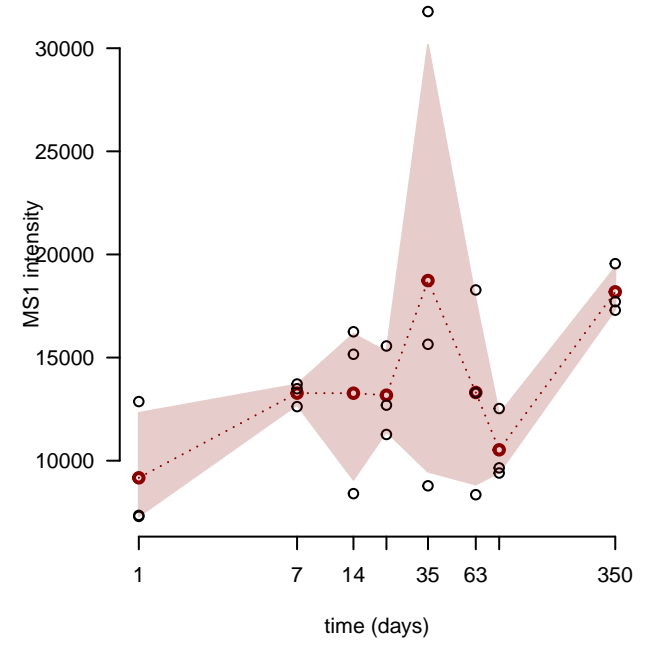

**Q80ZX8**  
**GN=Spag1**  
sperm associated antigen 1

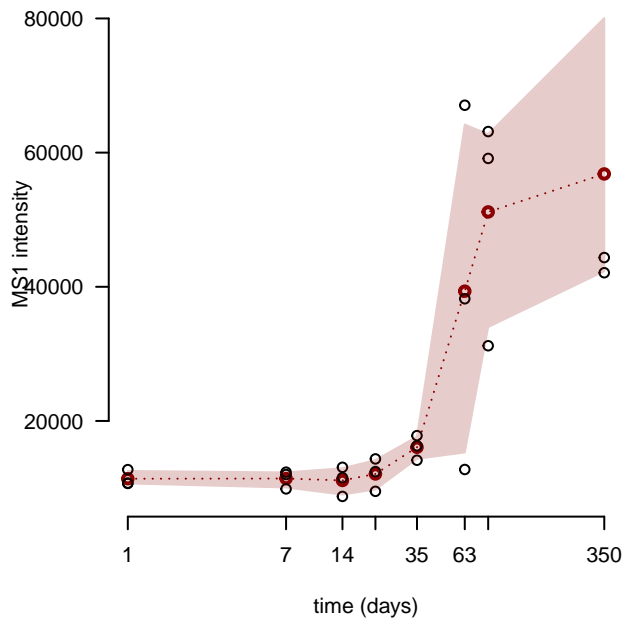

**Q810A3**  
**GN=Ttc9c**  
tetratricopeptide repeat domain 9C

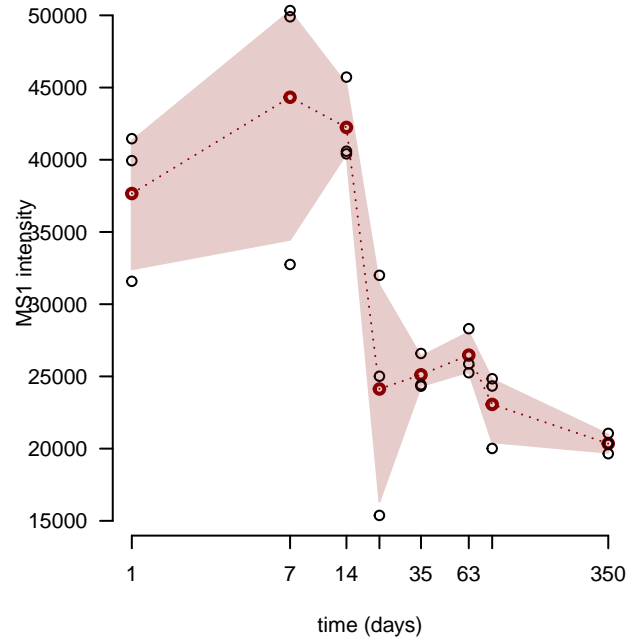

**Q810A7**  
**GN=Ddx42**  
DEAD box helicase 42

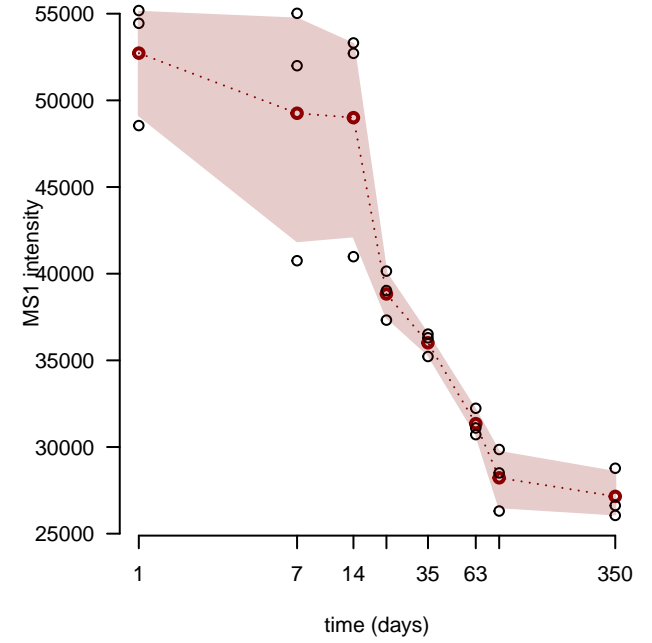

**Q810B6**  
**GN=Ankfy1**  
ankyrin repeat and FYVE domain containin ...

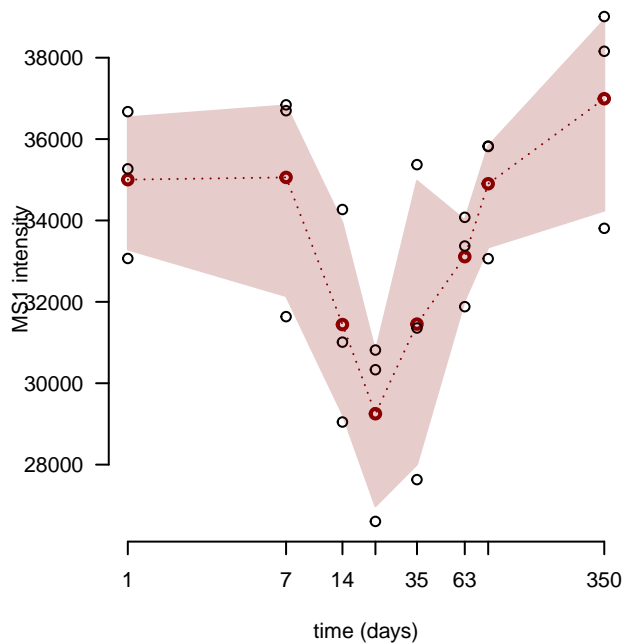

**Q810D6**  
**GN=Grwd1**  
glutamate-rich WD repeat containing 1

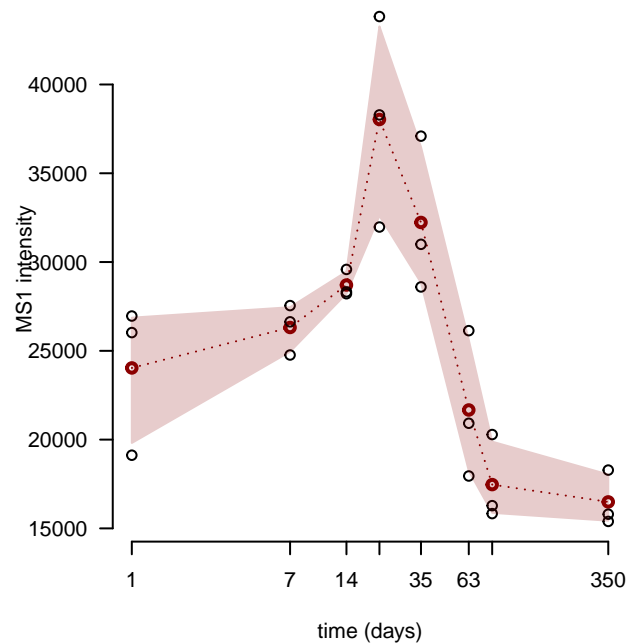

**Q810J8**  
**GN=Zfyv1**  
zinc finger, FYVE domain containing 1

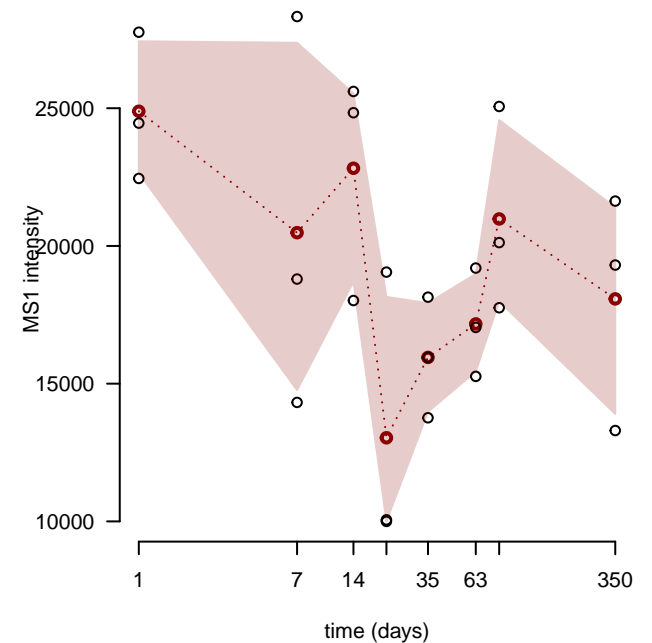

**Q810K9**  
**GN=Gxylt2**  
glucoside xylosyltransferase 2

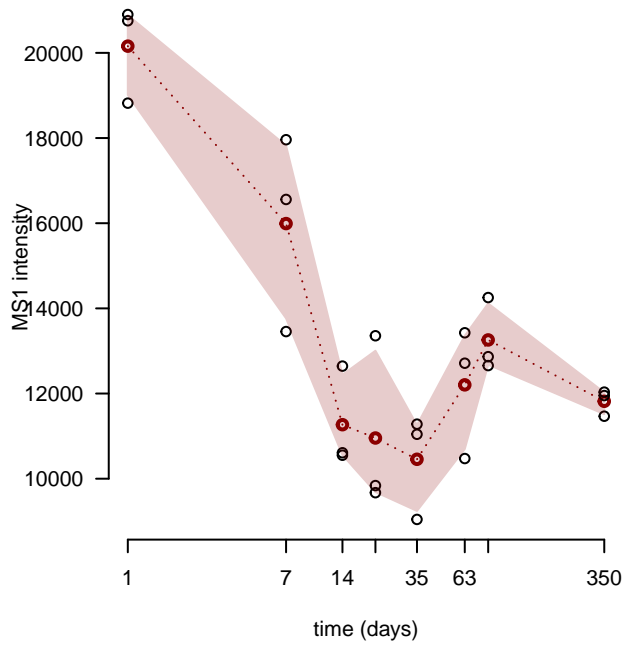

**Q810L3**  
**GN=Chfr**  
checkpoint with forkhead and ring finger ...

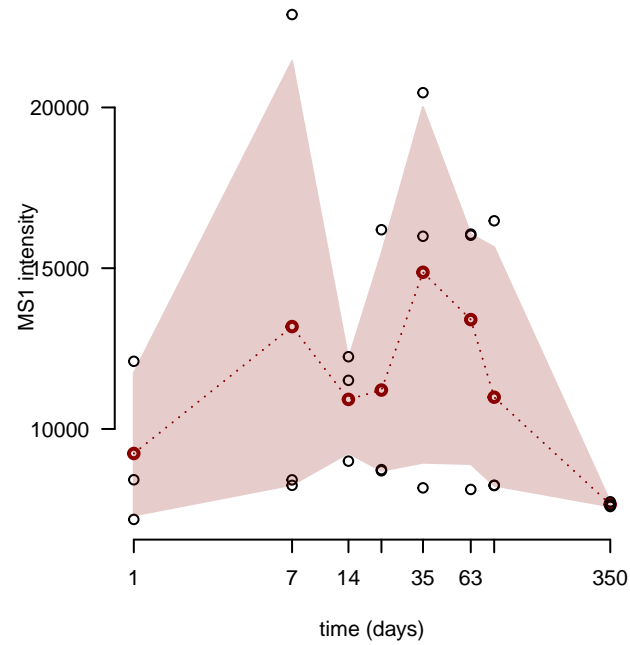

**Q810L4**  
**GN=Tmem39b**  
transmembrane protein 39b

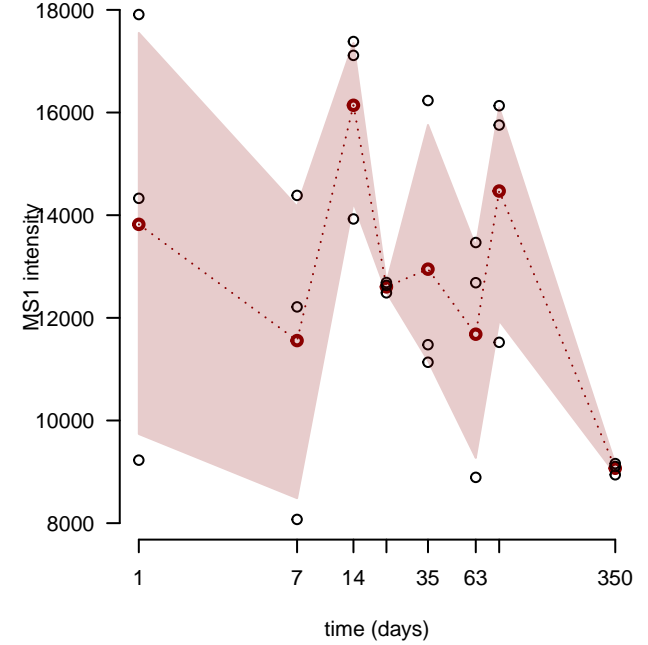

**Q810U4**  
**GN=Nrcam**  
neuronal cell adhesion molecule

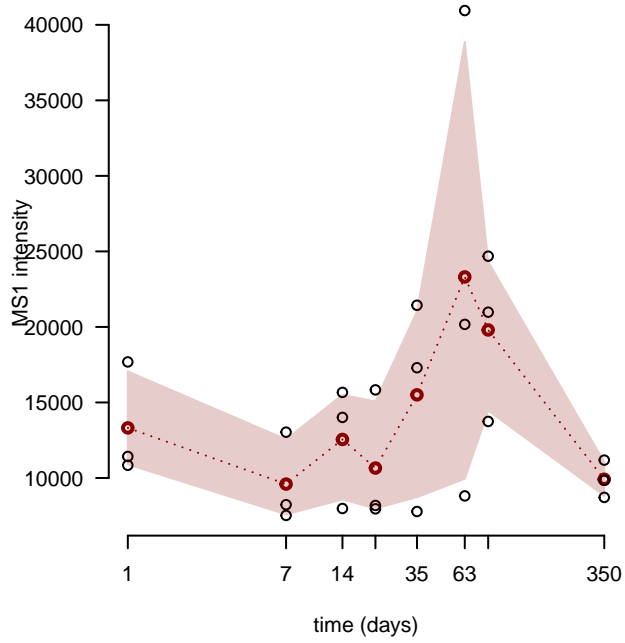

**Q810U5**  
**GN=Ccdc50**  
coiled-coil domain containing 50

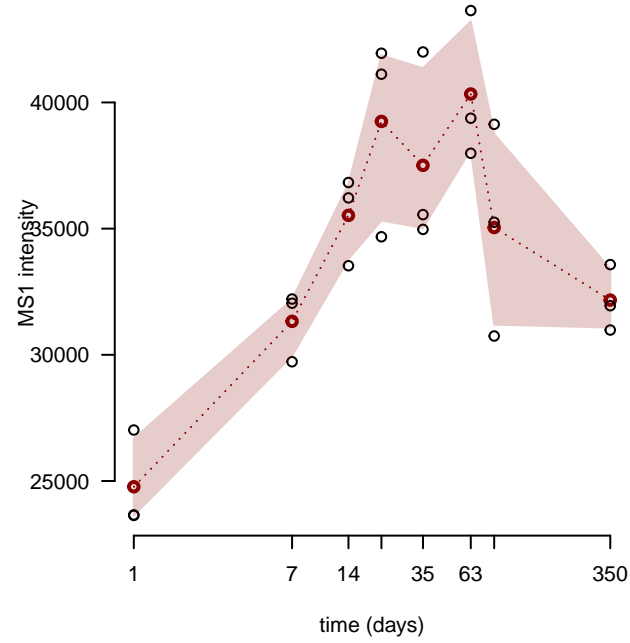

**Q810V0**  
**GN=Mphosph10**  
M-phase phosphoprotein 10 (U3 small nucl ...

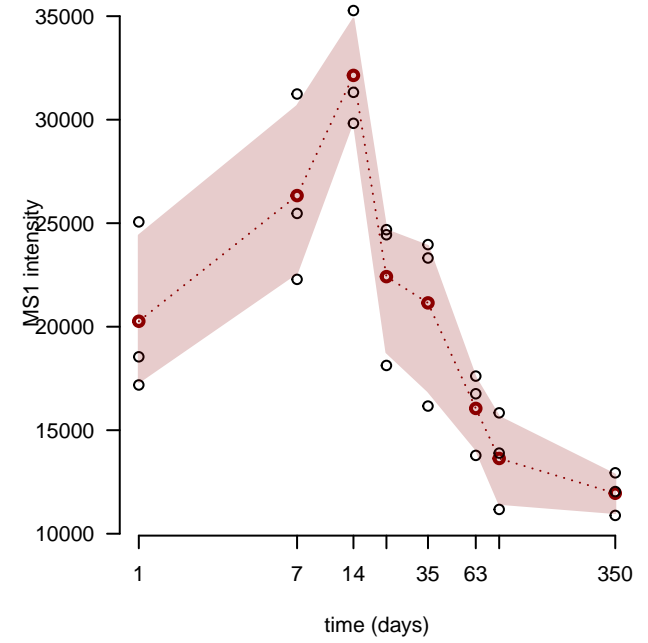

**Q811B1**  
**GN=Xylt1**  
xylosyltransferase 1

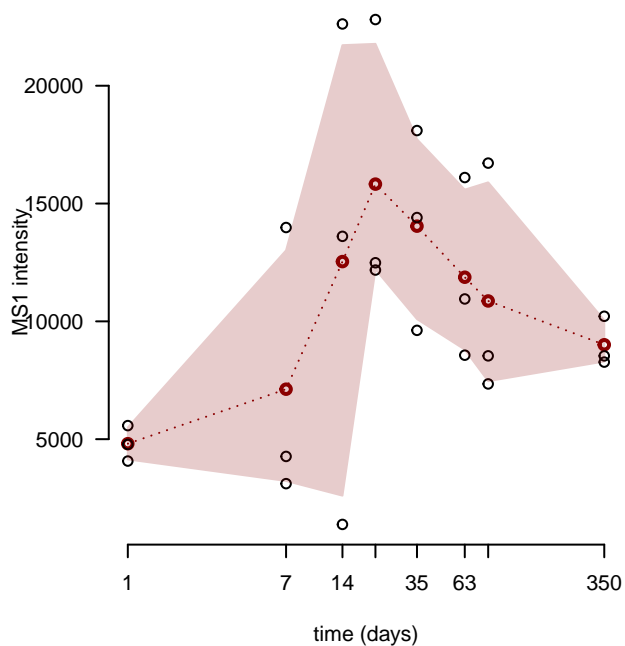

**Q811B5**  
**GN=Prr3**  
proline-rich polypeptide 3

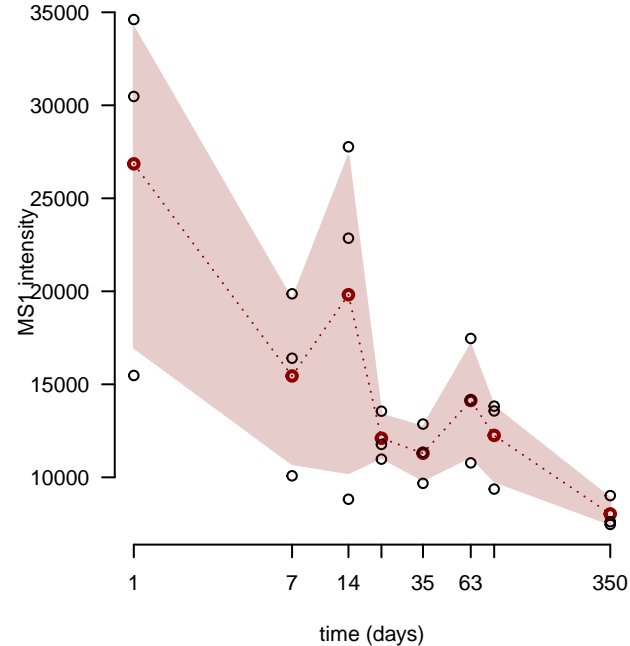

**Q811C2**  
**GN=Atg4c**  
autophagy related 4C, cysteine peptidase

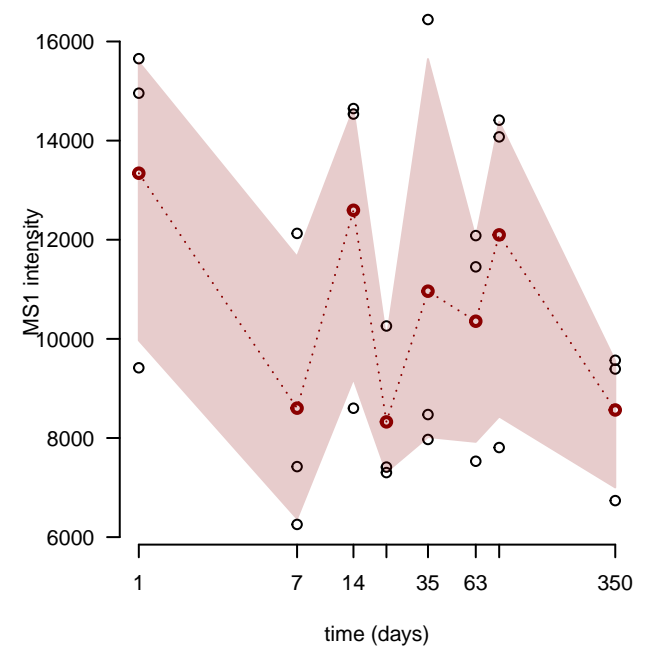

**Q811D0**  
**GN=Dlg1**  
discs large MAGUK scaffold protein 1

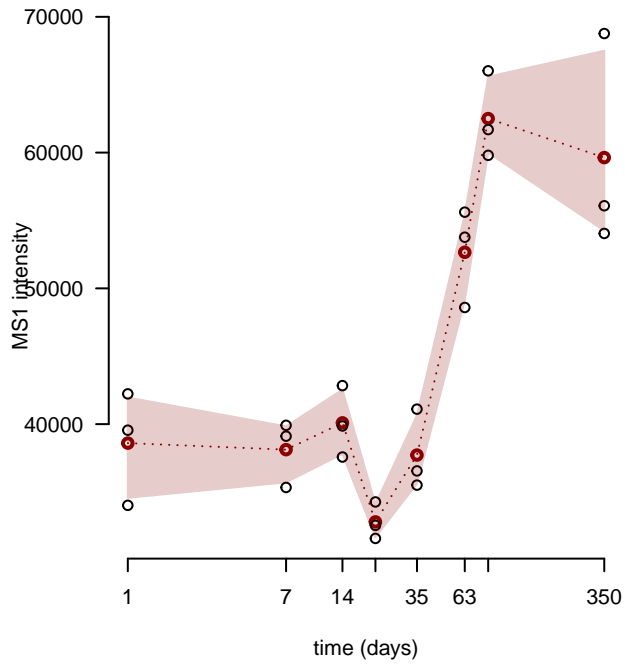

**Q811D0**  
**GN=Dlg1**  
discs large MAGUK scaffold protein 1

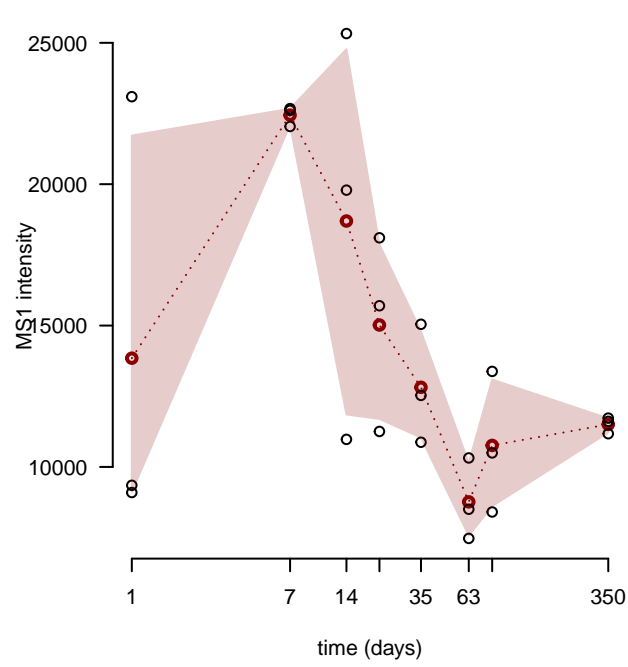

**Q811G0**  
**GN=Bbs9**  
Bardet-Biedl syndrome 9 (human)

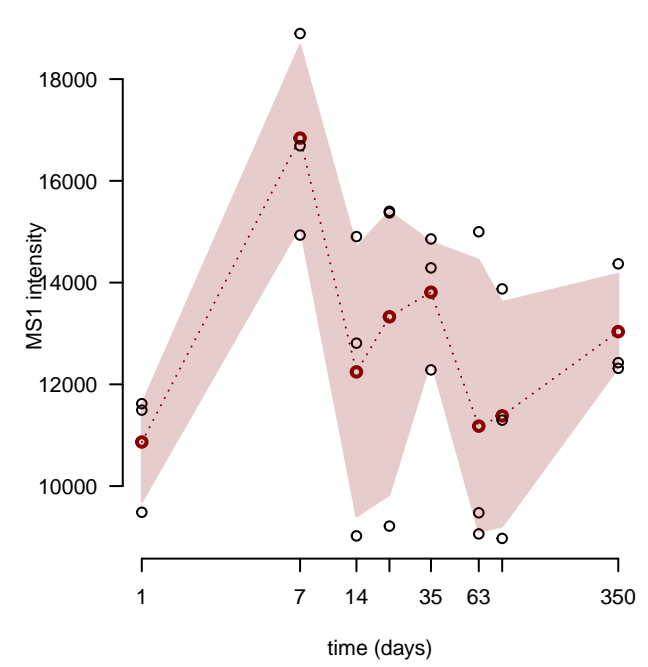

**Q811I0**  
**GN=Atpaf1**  
ATP synthase mitochondrial F1 complex as ...

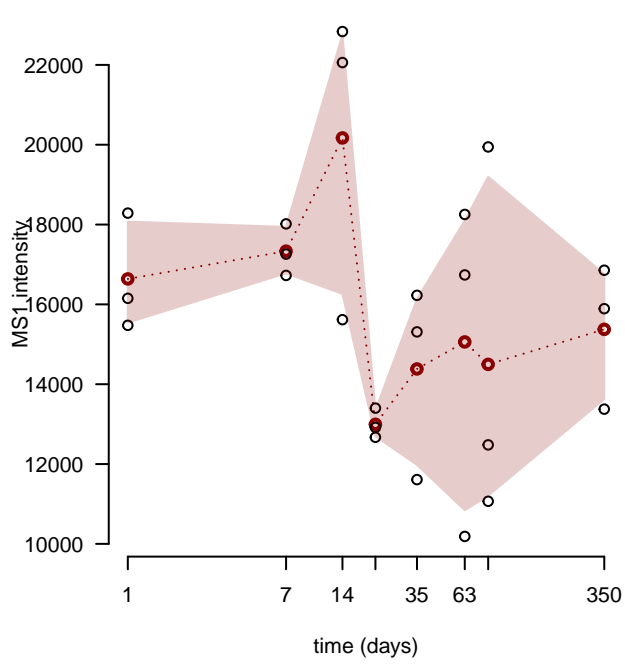

**Q811J3**  
**GN=lreb2**  
iron responsive element binding protein ...

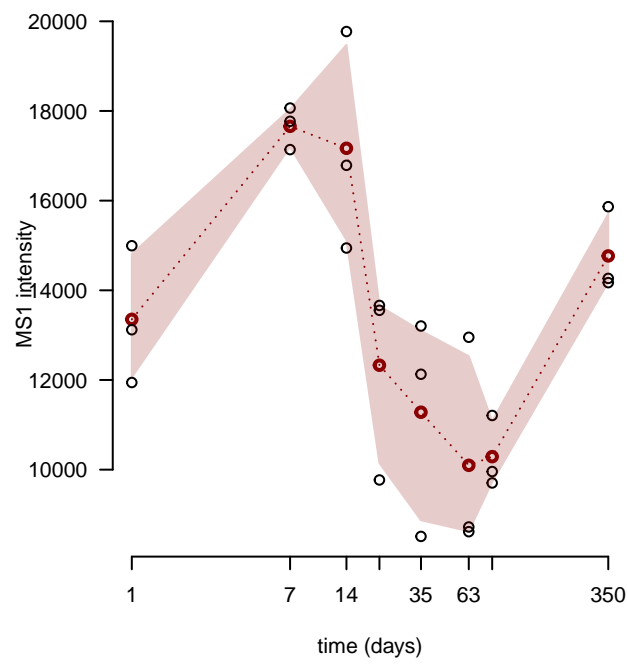

**Q811L6**  
**GN=Mast4**  
microtubule associated serine/threonine ...

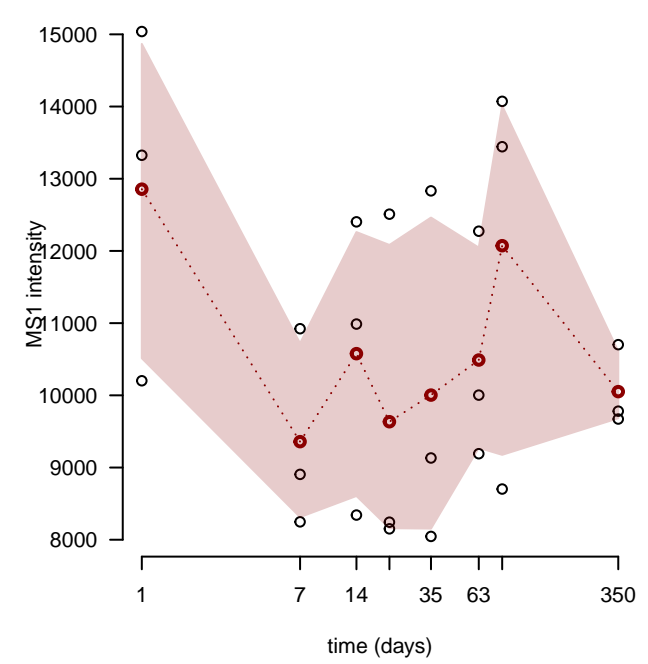

**Q811P8**  
**GN=Arhgap32**  
Rho GTPase activating protein 32

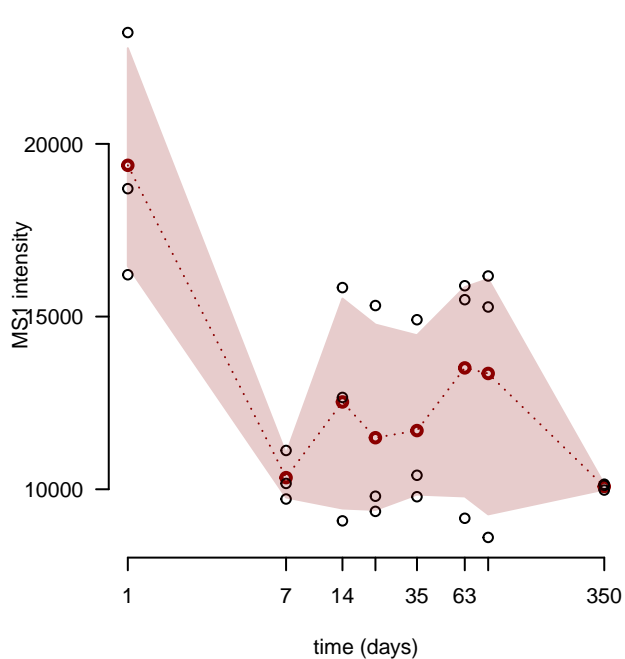

**Q811S7**  
**GN=Ubp1**  
upstream binding protein 1

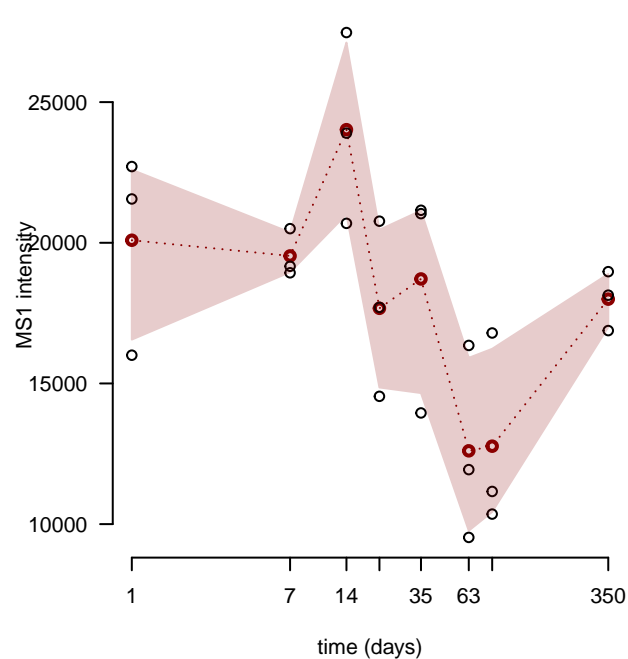

**Q811U4**  
**GN=Mfn1**  
mitofusin 1

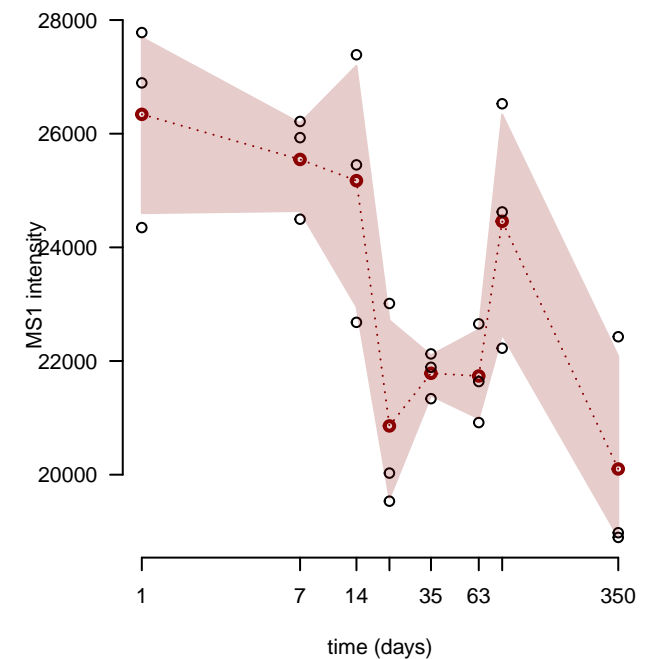



**Q812A2**  
**GN=Srgap3**

SLIT-ROBO Rho GTPase activating protein ...

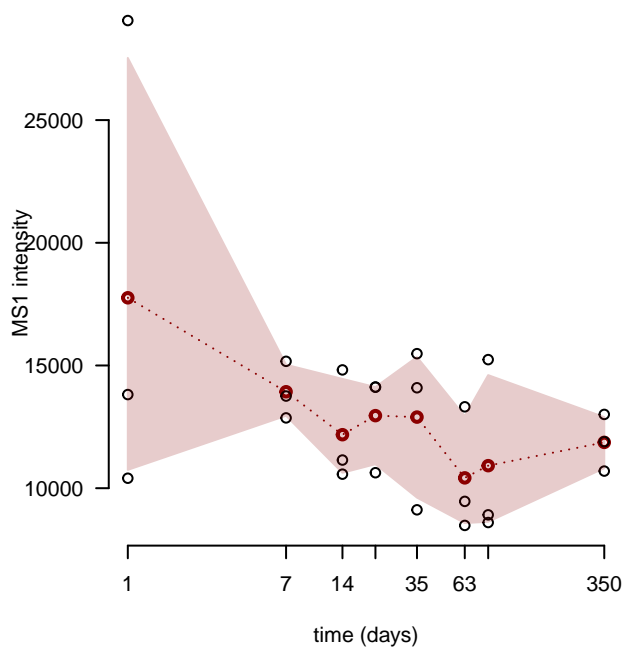

**Q812G0**  
**GN=Mgat4a**

mannoside acetylglucosaminyltransferase ...

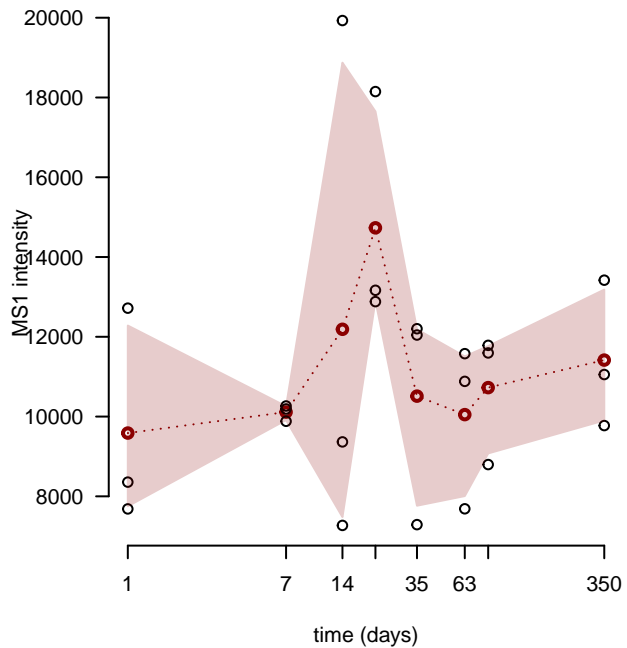

**Q8BFP9**  
**GN=Pdk1**

pyruvate dehydrogenase kinase, isoenzyme ...

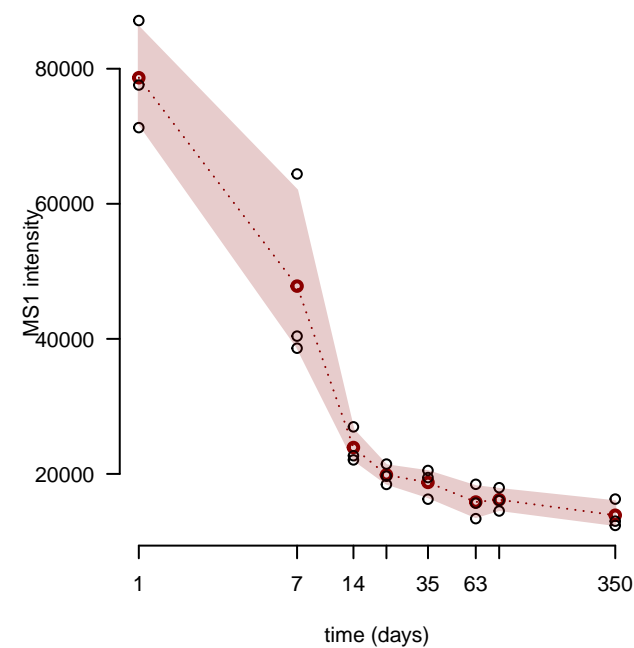

**Q8BFQ4**  
**GN=Wdr82**

WD repeat domain containing 82

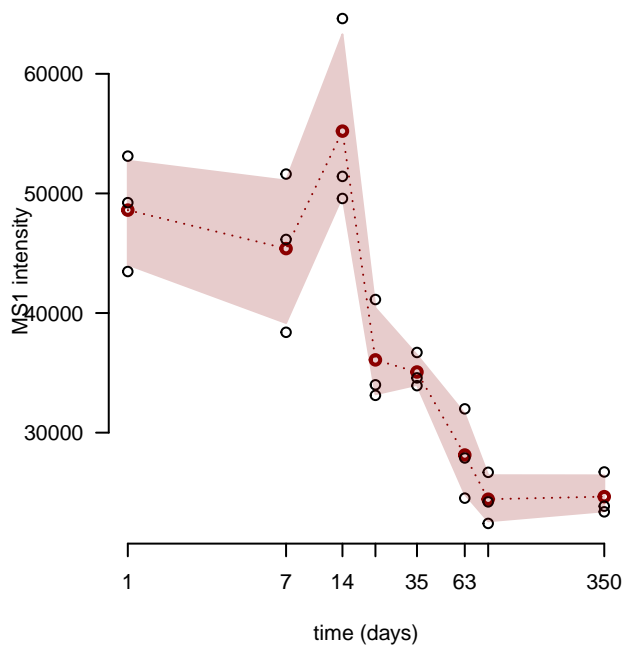

**Q8BFQ6**  
**GN=Slc49a4**

solute carrier family 49 member 4

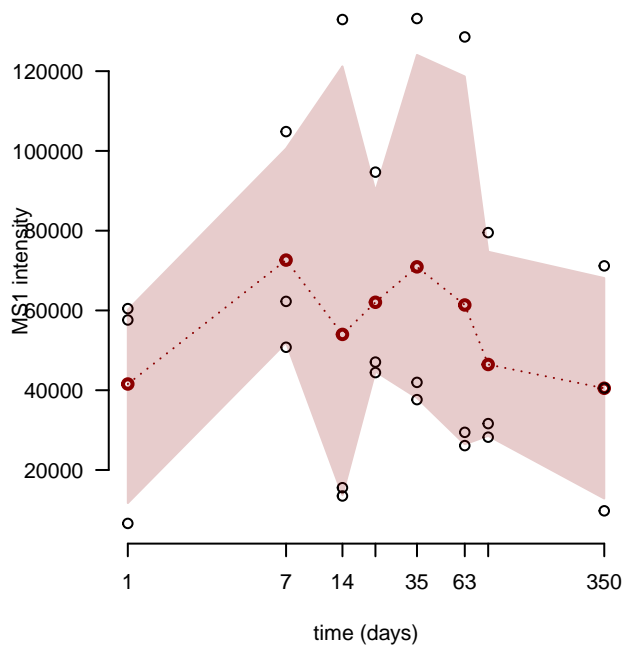

**Q8BFQ8**  
**GN=Gatd1**

glutamine amidotransferase like class 1 ...

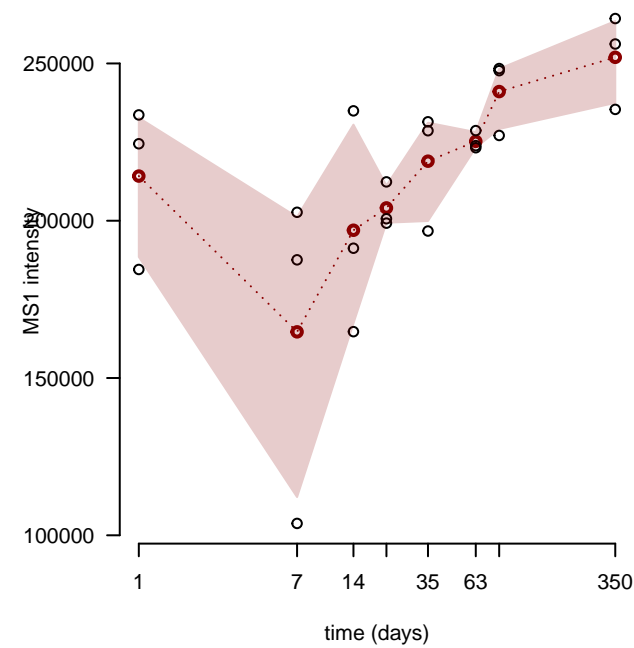

**Q8BFQ9**  
**GN=Klh42**

kelch-like 42

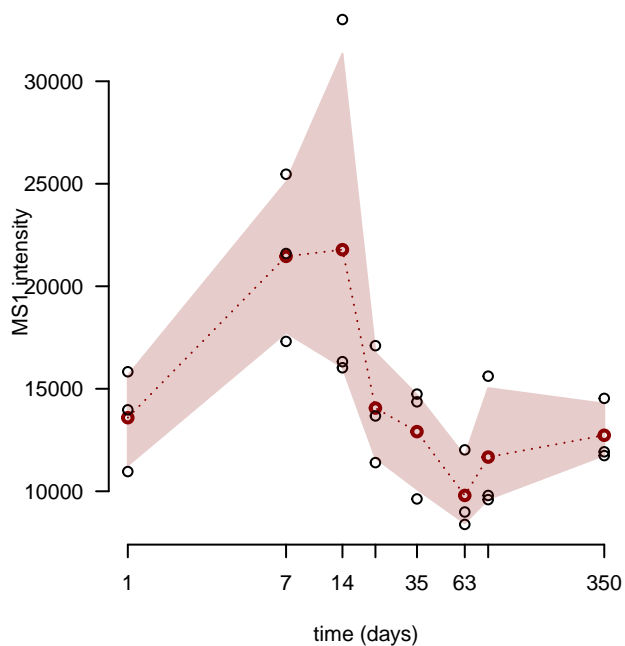

**Q8BFR1**  
**GN=Zc3hav1l**

zinc finger CCCH-type, antiviral 1-like

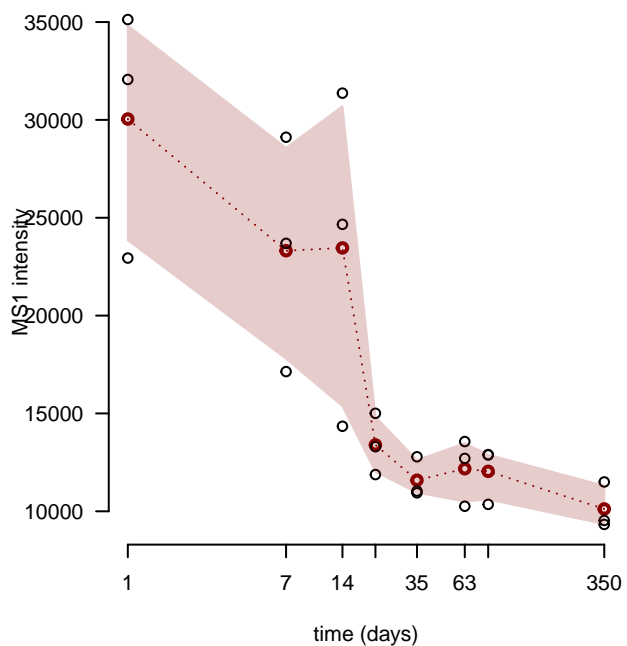

**Q8BFR2**  
**GN=Fstl5**

folliculin-like 5

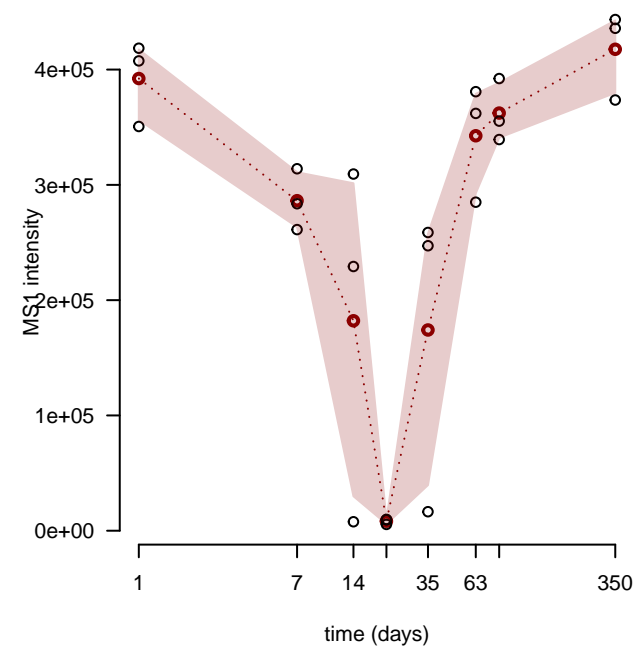

**Q8BFR4**  
GN=Gns  
glucosamine (N-acetyl)-6-sulfatase

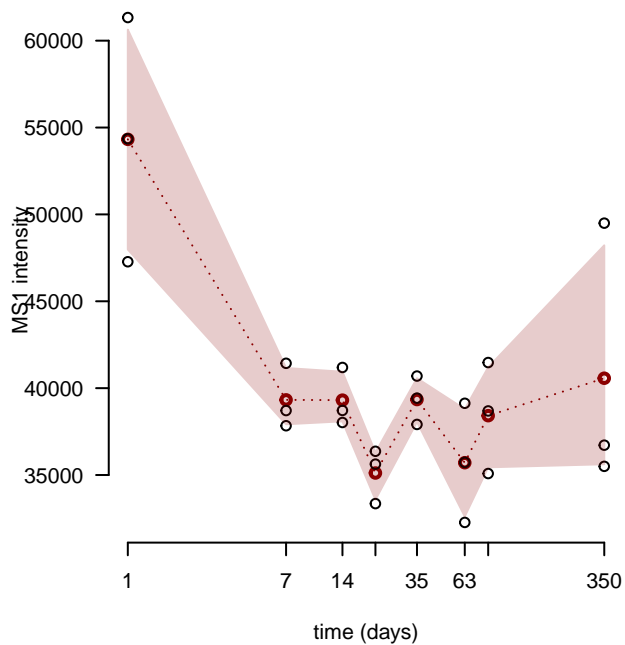

**Q8BFR5**  
GN=Tufm  
Tu translation elongation factor, mitoch ...

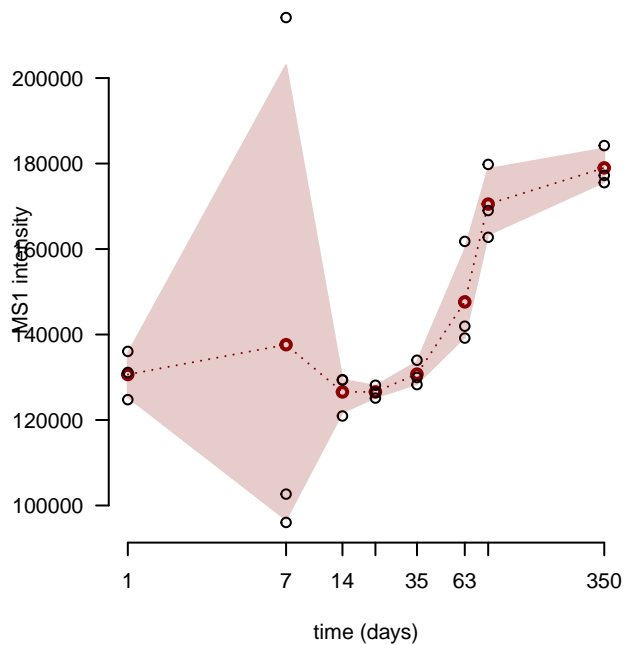

**Q8BFR6**  
GN=Zfand1  
zinc finger, AN1-type domain 1

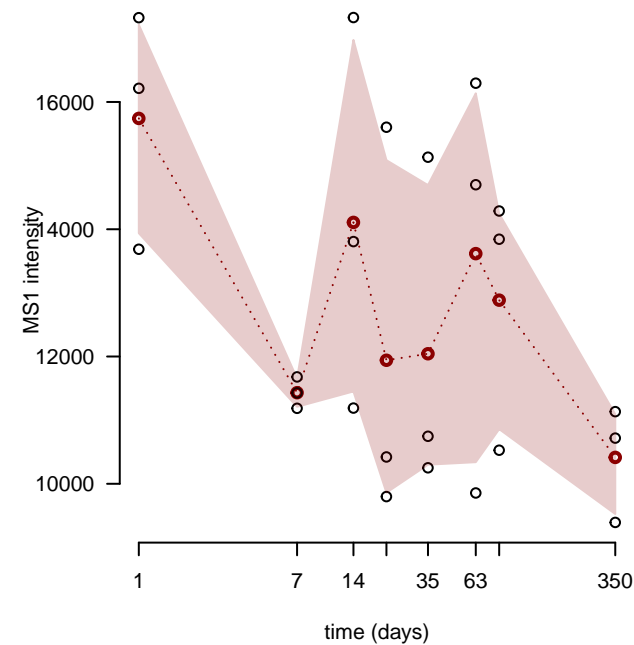

**Q8BFS6**  
GN=Cpped1  
calcineurin-like phosphoesterase domain ...

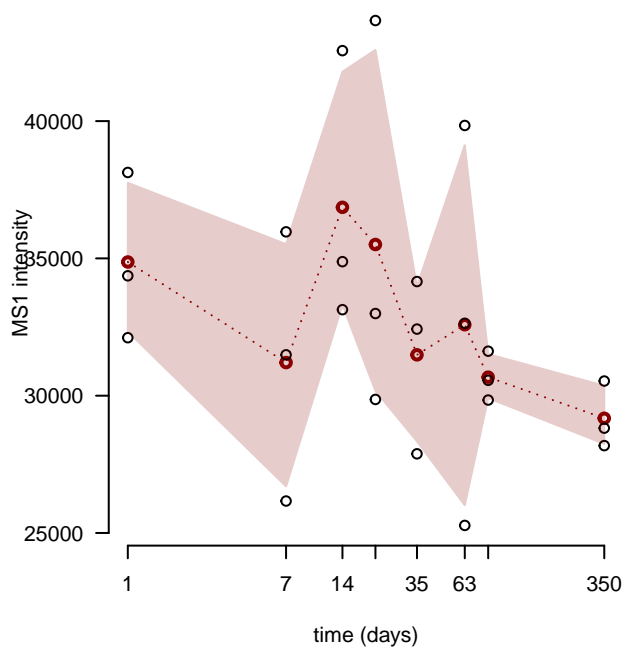

**Q8BFS9**  
GN=Asnsd1  
asparagine synthetase domain containing ...

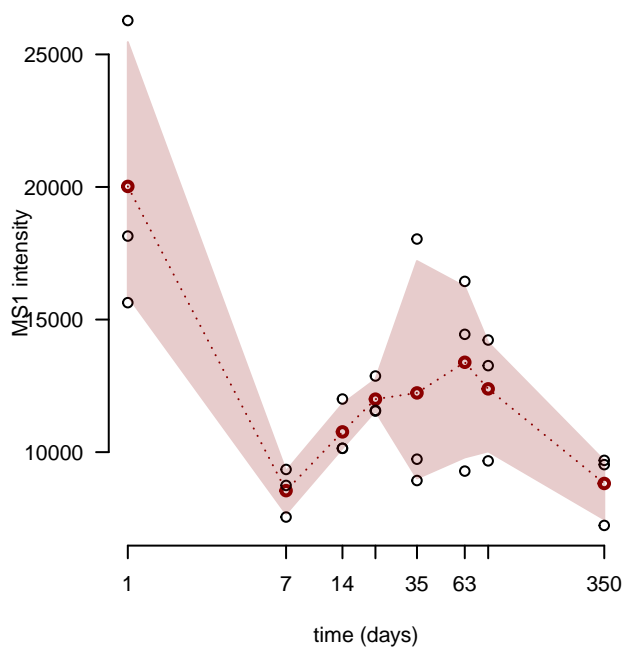

**Q8BFT2**  
GN=Haus4  
HAUS augmin-like complex, subunit 4

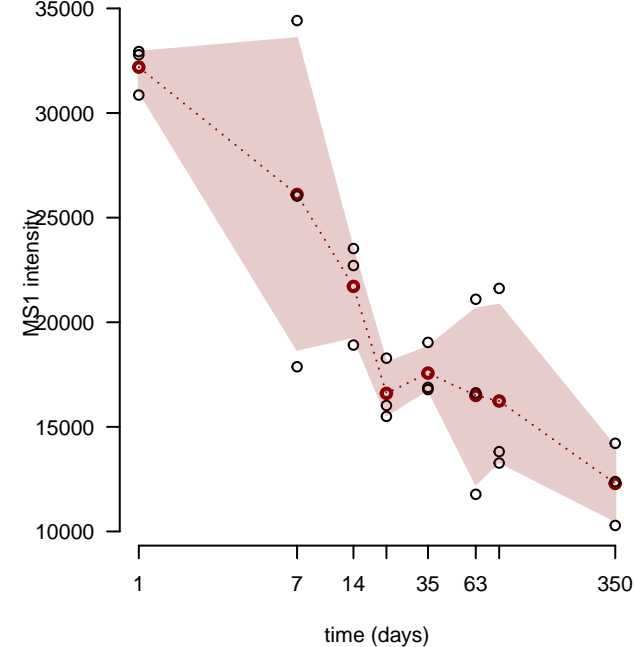

**Q8BFU3**  
GN=Rnf214  
ring finger protein 214

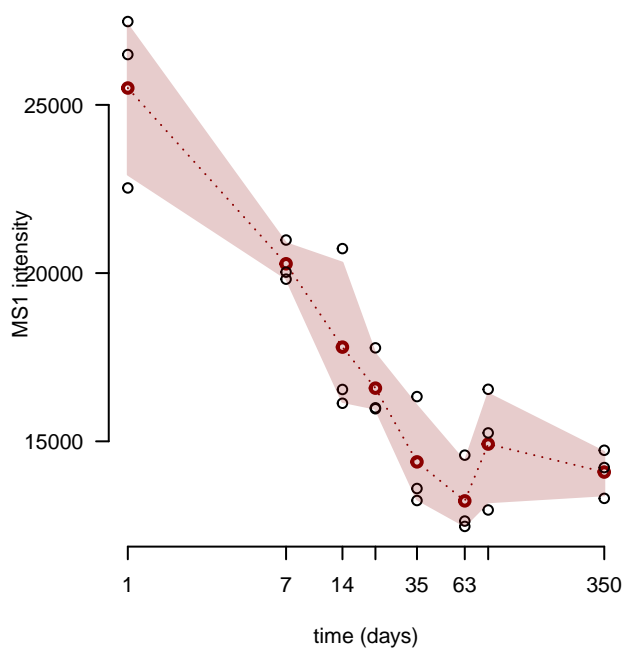

**Q8BFU3**  
GN=Rnf214  
ring finger protein 214

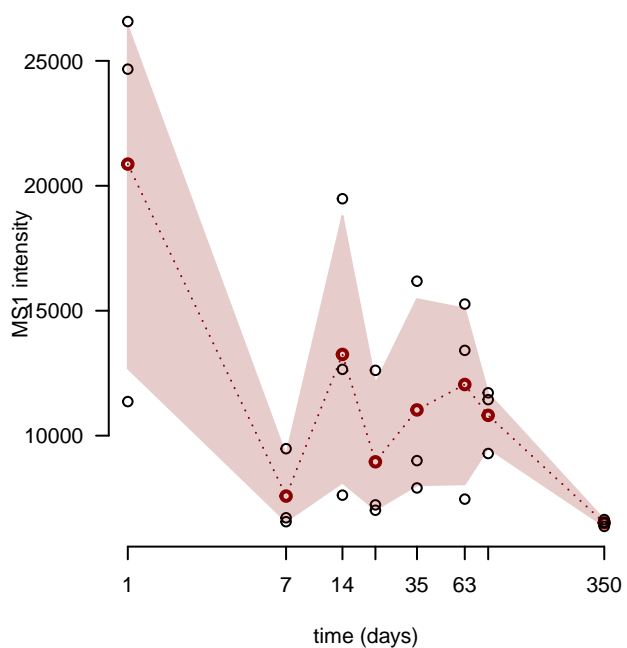

**Q8BFV2**  
GN=Pcid2  
PCI domain containing 2

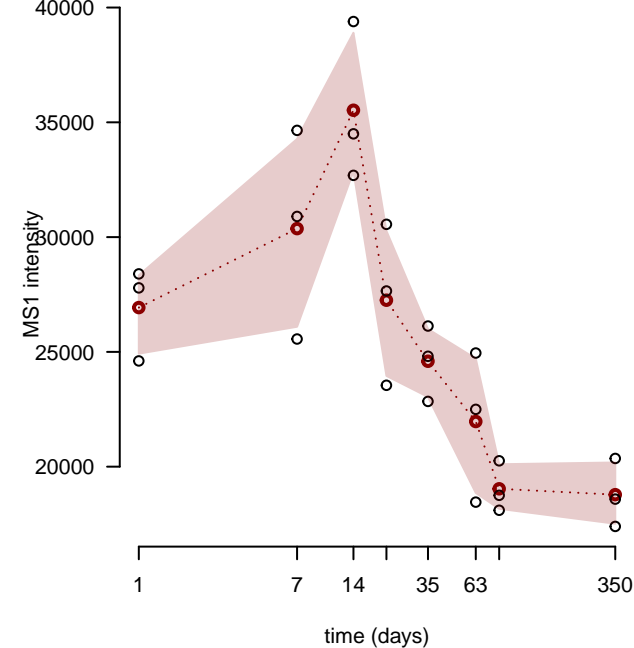

**Q8BFW4**  
**GN=Trim65**  
tripartite motif-containing 65

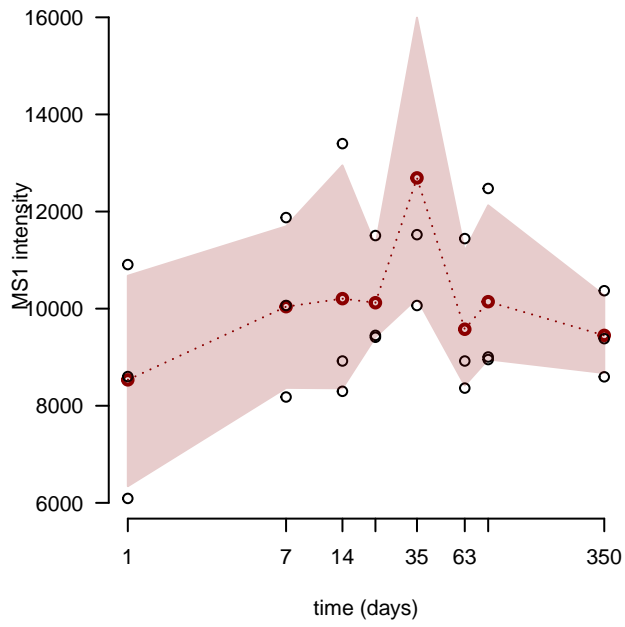

**Q8BFW7**  
**GN=Lpp**  
LIM domain containing preferred transloc ...

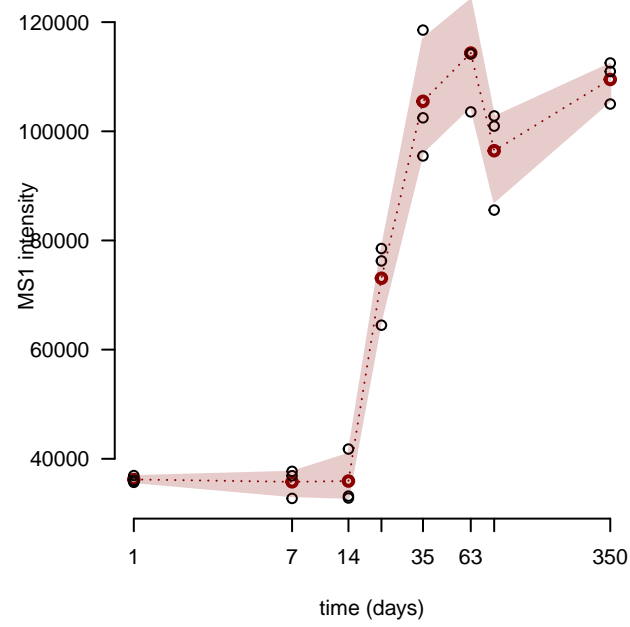

**Q8BFX3**  
**GN=Kctd3**  
potassium channel tetramerisation domain ...

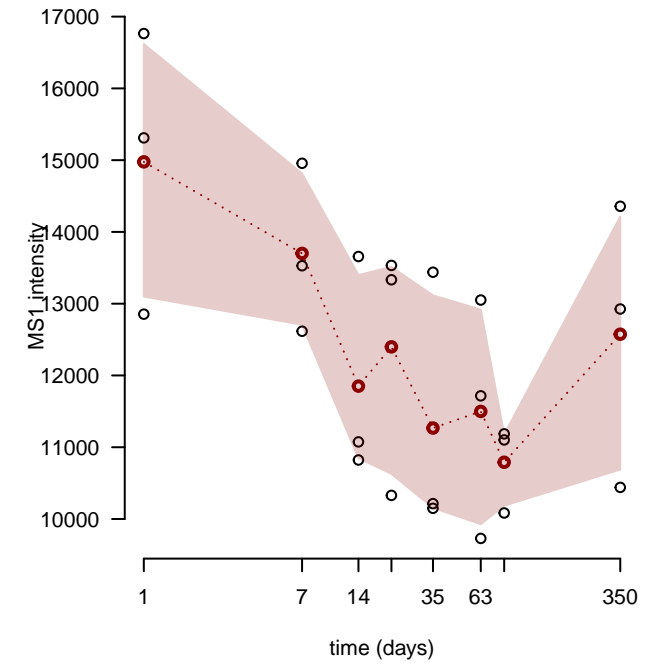

**Q8BFY6**  
**GN=Pef1**  
penta-EF hand domain containing 1

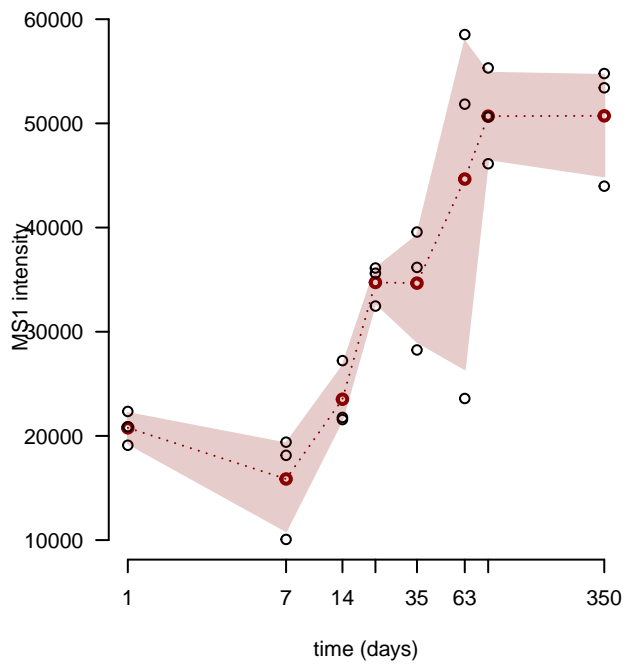

**Q8BFY7**  
**GN=Pimreg**  
PICALM interacting mitotic regulator

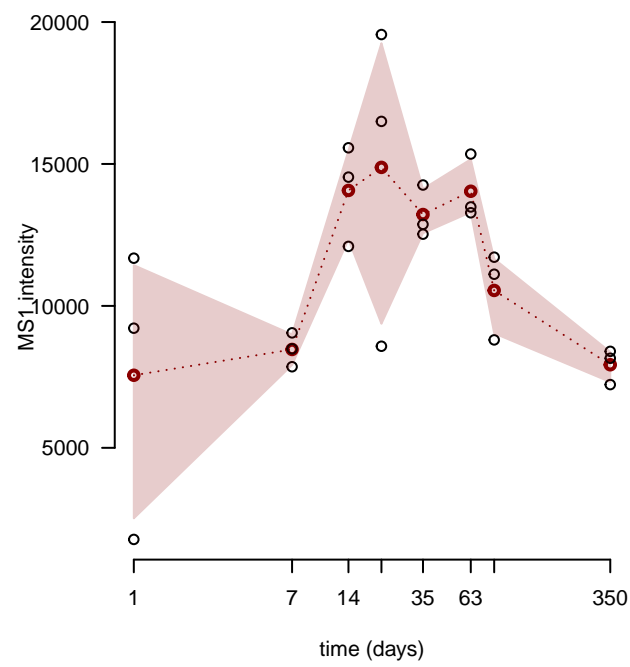

**Q8BFY9**  
**GN=Tnpo1**  
transportin 1

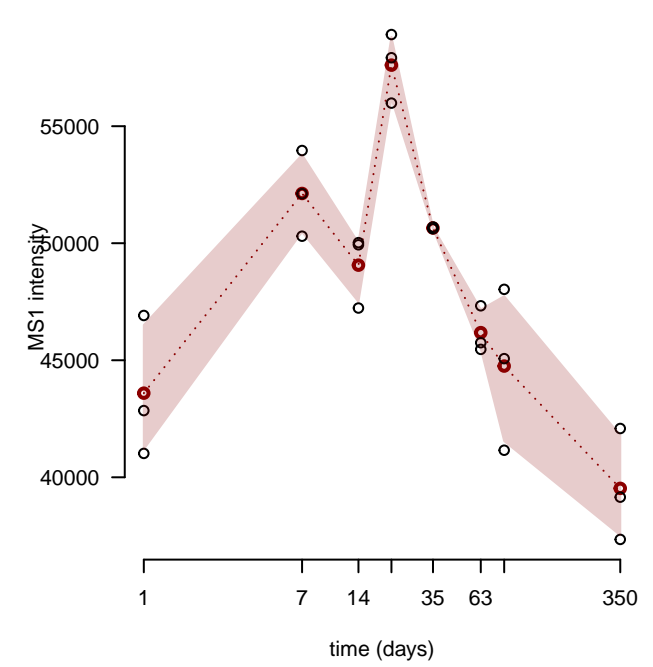

**Q8BFZ3**  
**GN=Actb12**  
actin, beta-like 2

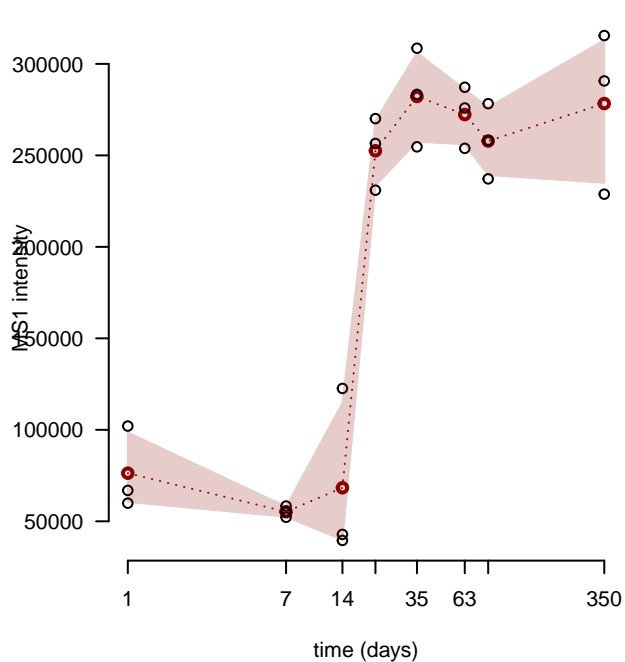

**Q8BFZ9**  
**GN=Erlin2**  
ER lipid raft associated 2

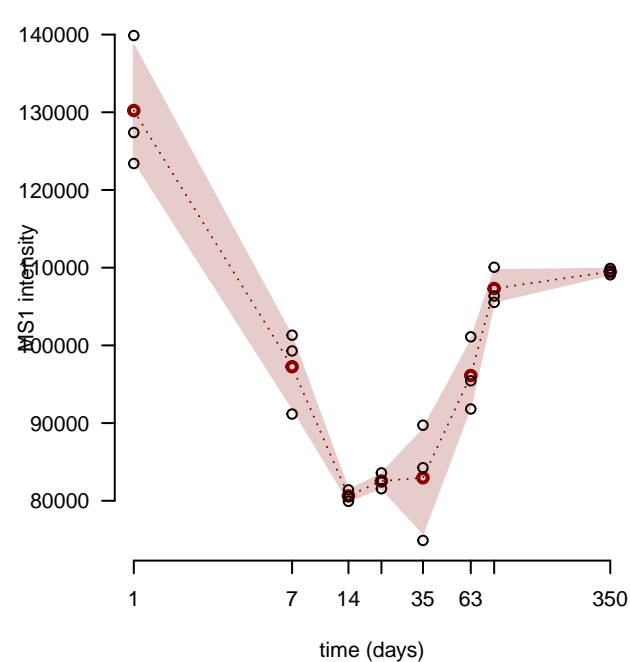

**Q8BG05**  
**GN=Hnrnpa3**  
heterogeneous nuclear ribonucleoprotein ...

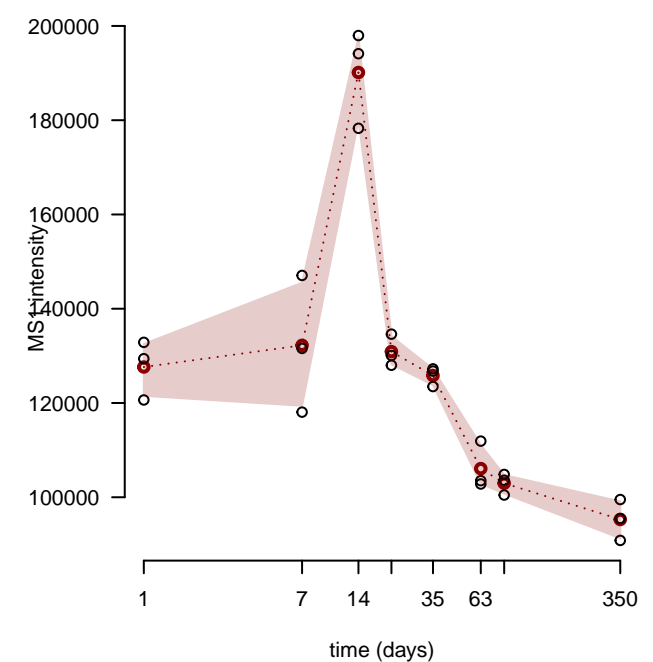

**Q8BG05**  
**GN=Hnrnpa3**

heterogeneous nuclear ribonucleoprotein ...

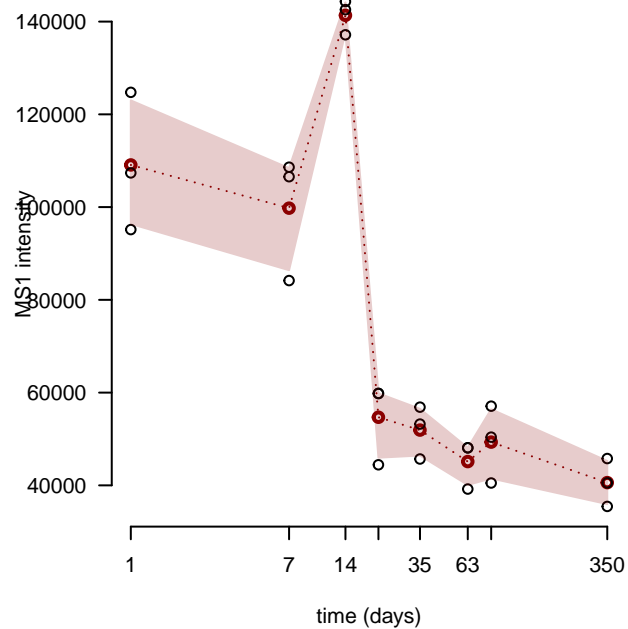

**Q8BG07**  
**GN=Plid4**

phospholipase D family, member 4

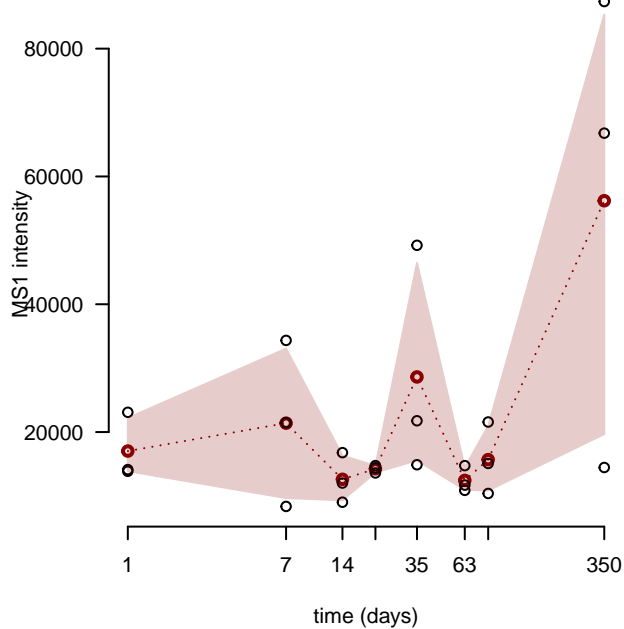

**Q8BG15**  
**GN=Ctdspl2**

CTD (carboxy-terminal domain, RNA polyme ...

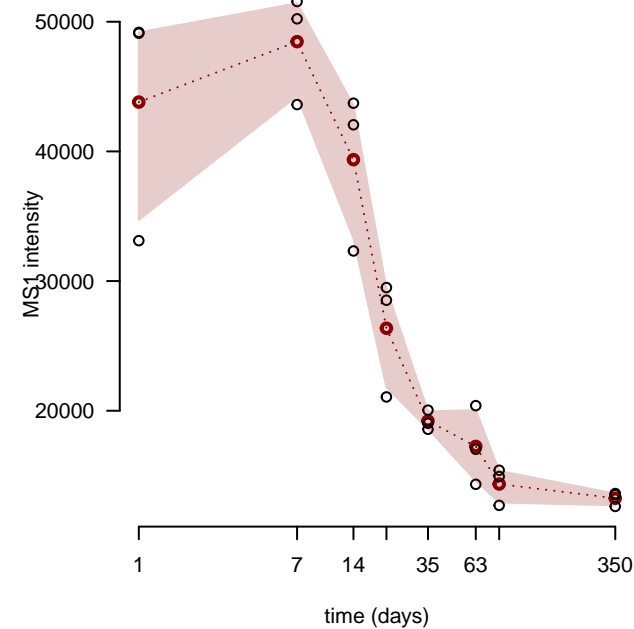

**Q8BG17**  
**GN=Nol12**

nucleolar protein 12

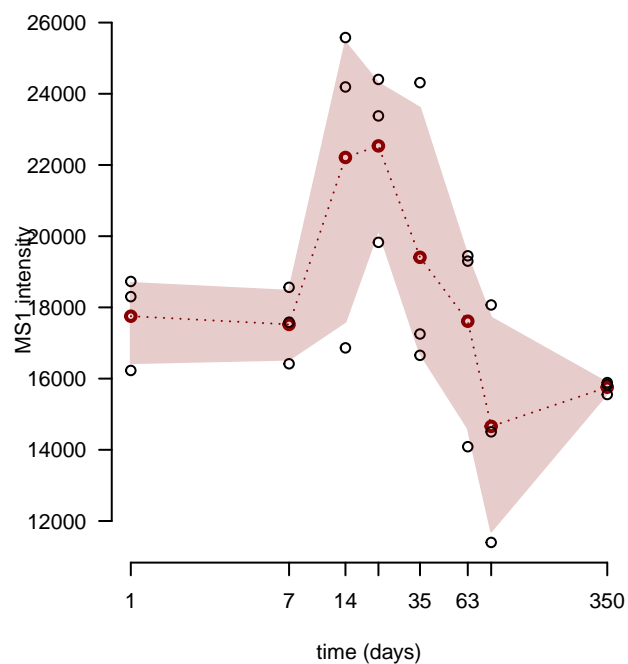

**Q8BG19**  
**GN=Tmtc4**

transmembrane and tetratricopeptide repe ...

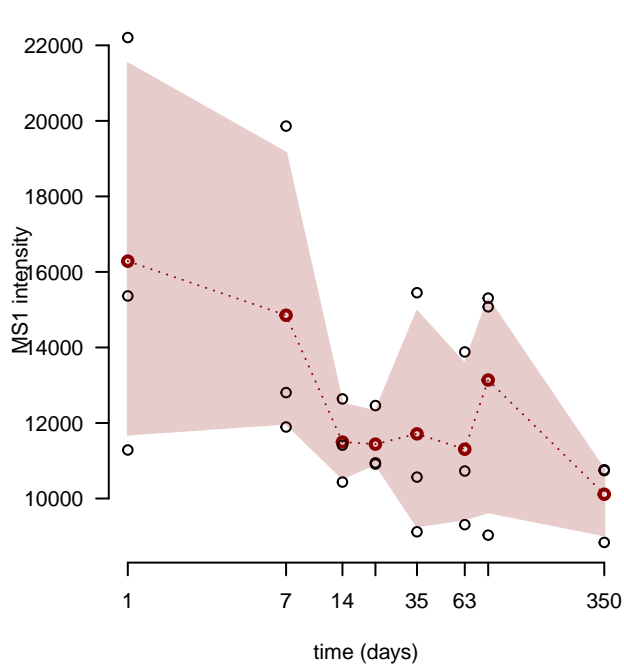

**Q8BG21**  
**GN=Cacfd1**

calcium channel flower domain containing ...

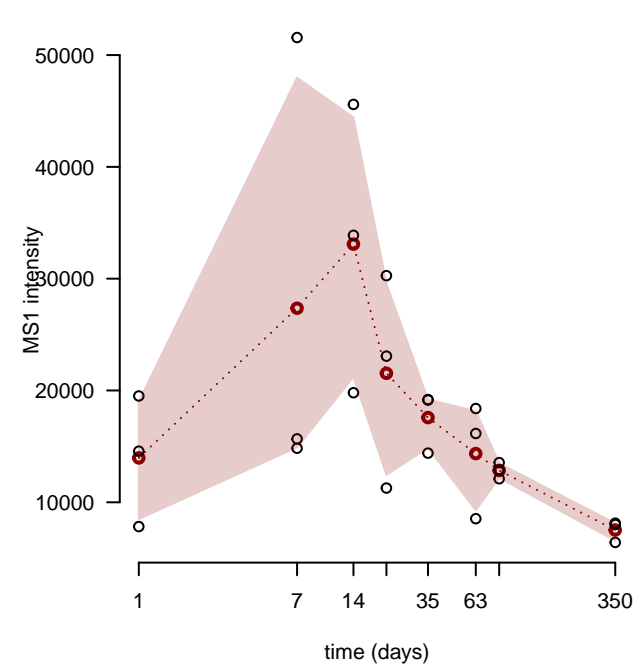

**Q8BG30**  
**GN=Nelfa**

negative elongation factor complex membe ...

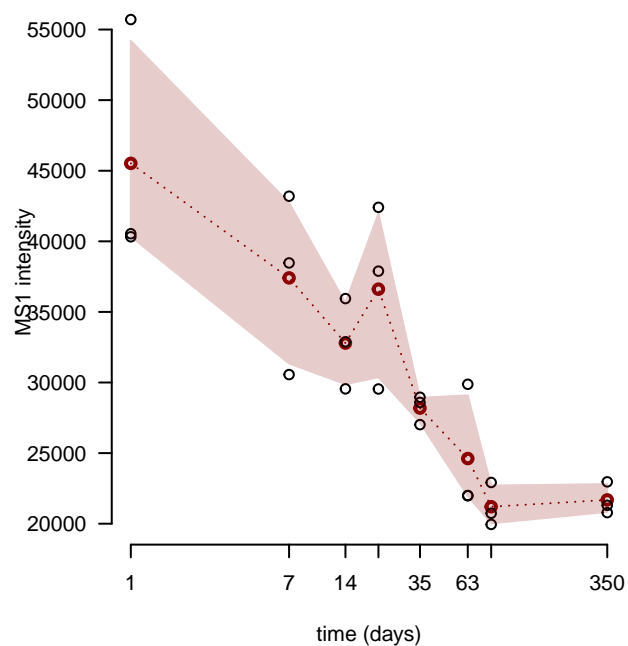

**Q8BG32**  
**GN=Psm11**

proteasome (prosome, macropain) 26S subu ...

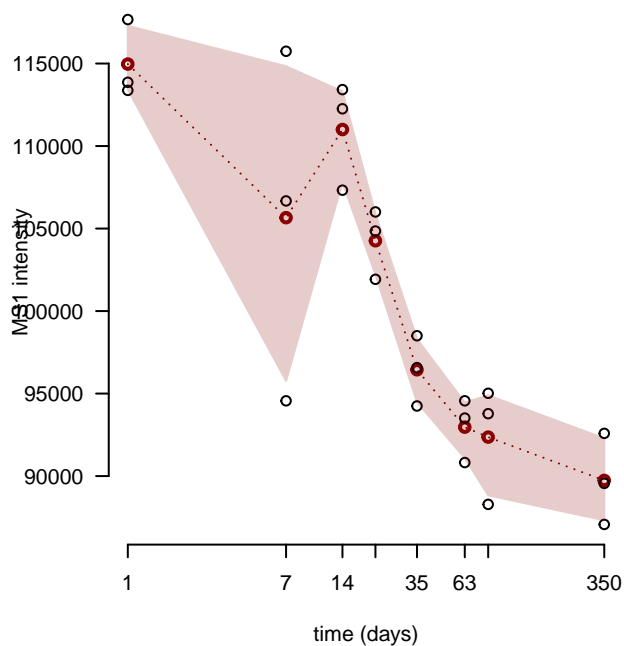

**Q8BG40**  
**GN=Katnb1**

katanin p80 (WD40-containing) subunit B ...

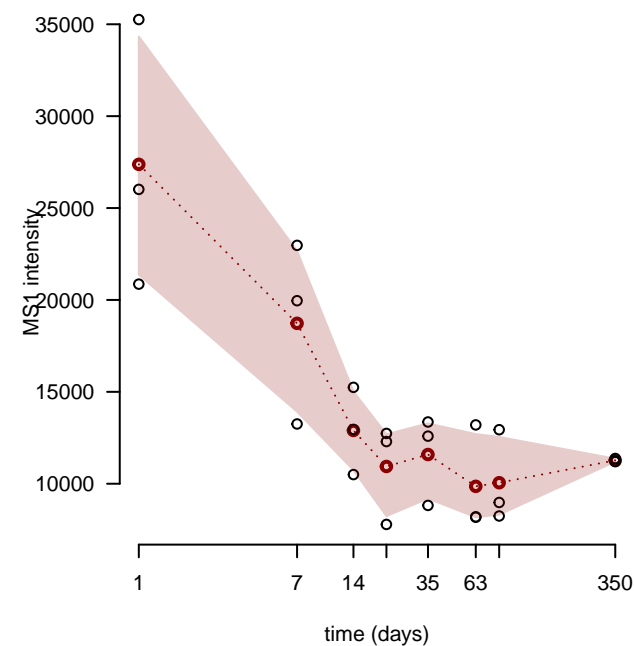

**Q8BG48**  
**GN=Stk17b**  
serine/threonine kinase 17b (apoptosis-i ...

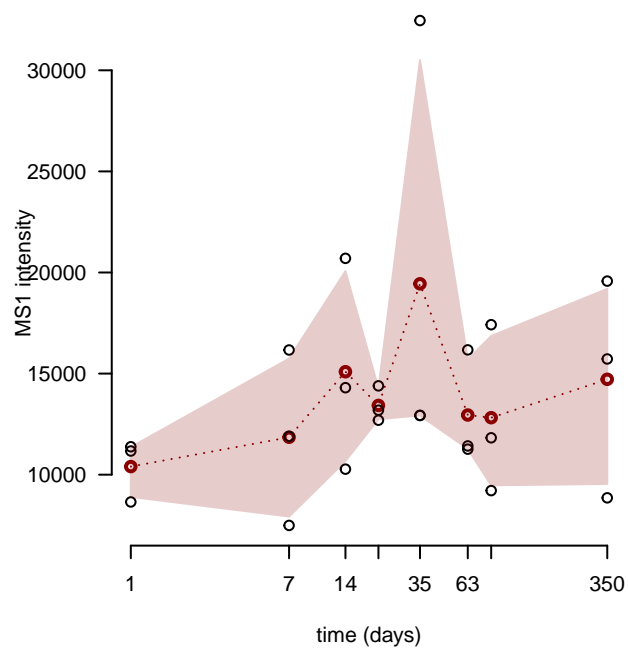

**Q8BG51**  
**GN=Rhot1**  
ras homolog family member T1

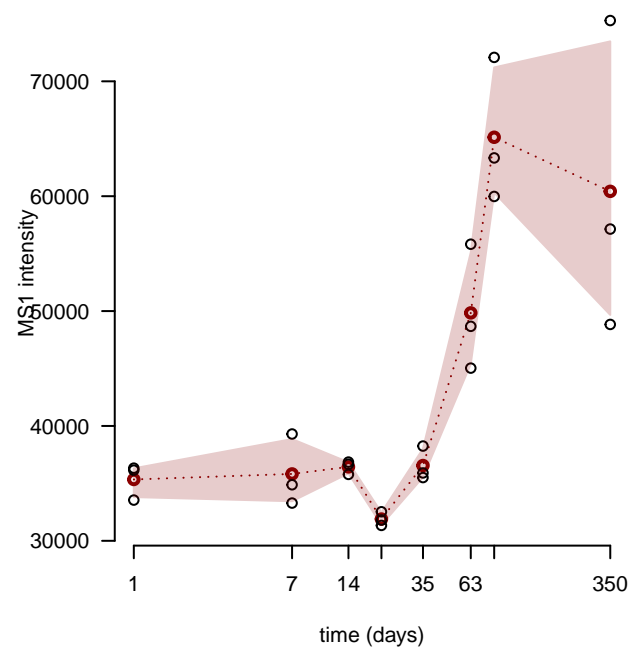

**Q8BG60**  
**GN=Txnip**  
thioredoxin interacting protein

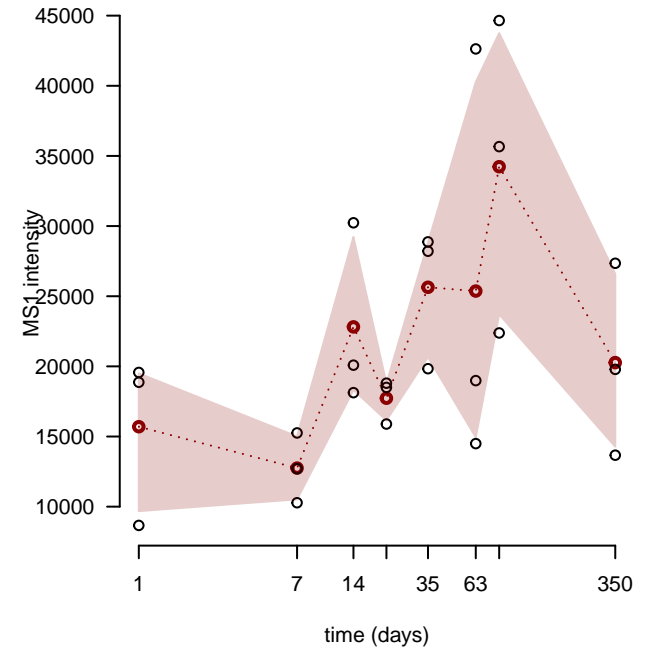

**Q8BG67**  
**GN=Efr3a**  
EFR3 homolog A

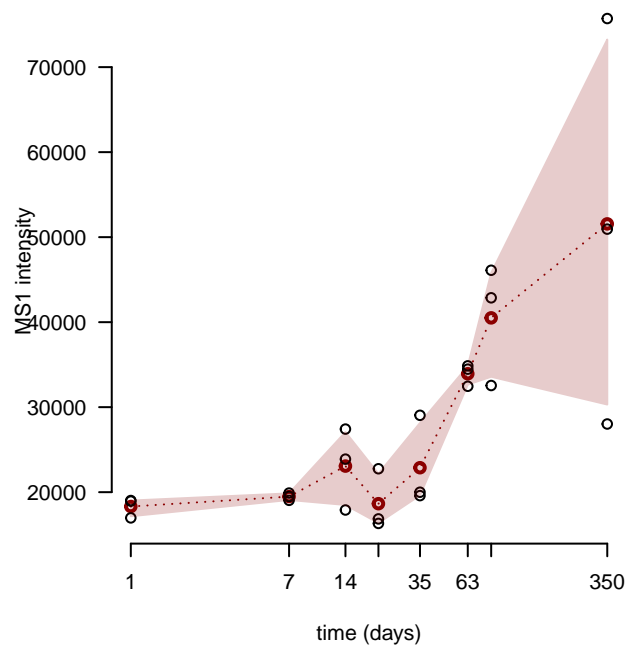

**Q8BG73**  
**GN=Sh3bgrl2**  
SH3 domain binding glutamic acid-rich pr ...

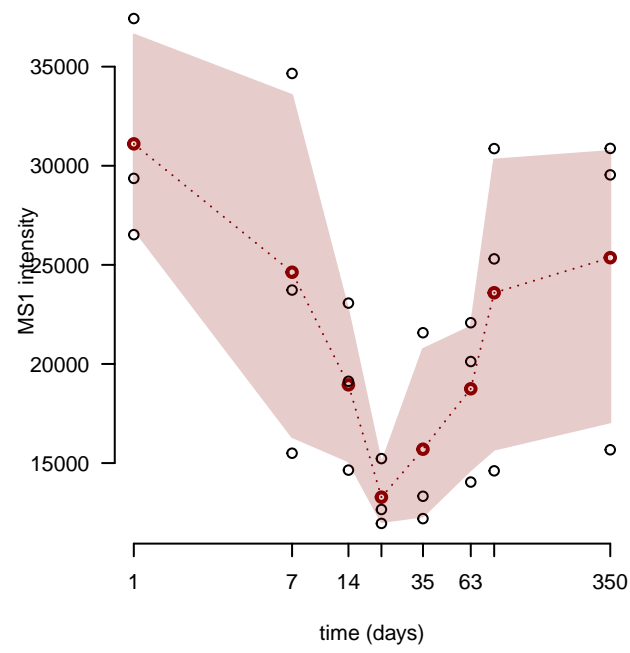

**Q8BG79**  
**GN=Cwf19l2**  
CWF19-like 2, cell cycle control (S. pom ...

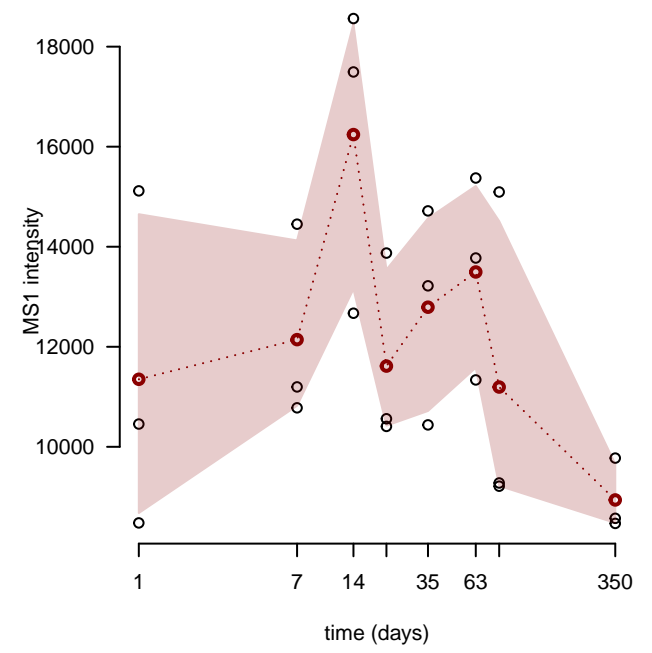

**Q8BG81**  
**GN=Poldip3**  
polymerase (DNA-directed), delta interac ...

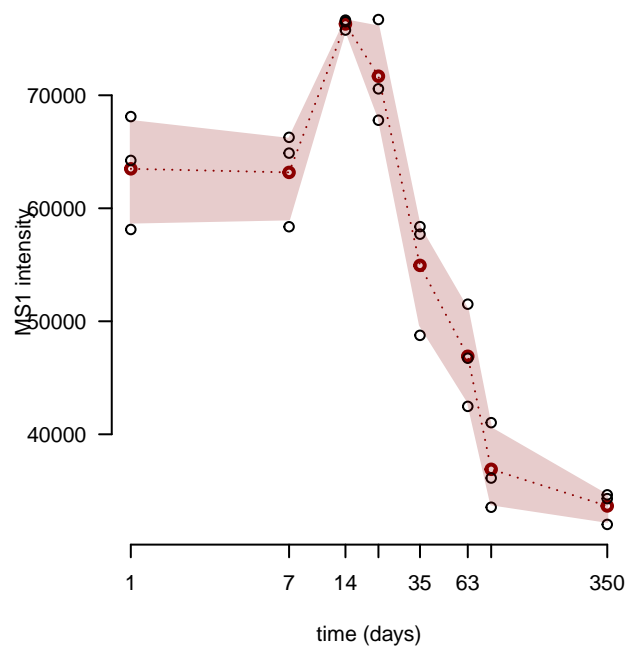

**Q8BG87**  
**GN=Tet3**  
tet methylcytosine dioxygenase 3

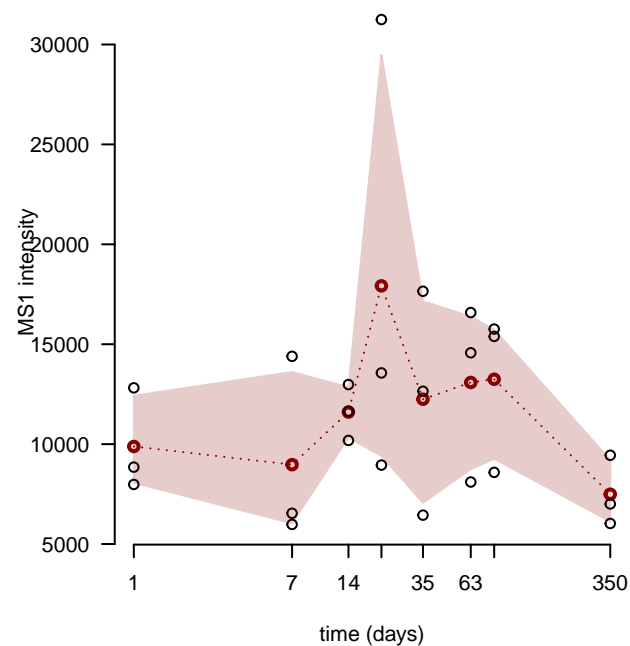

**Q8BG94**  
**GN=Commd7**  
COMM domain containing 7

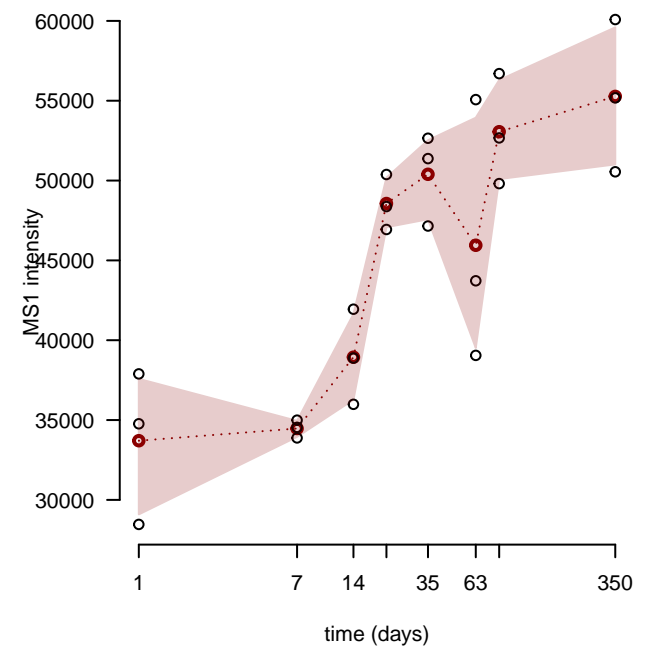

**Q8BG95**  
**GN=Ppp1r12b**  
protein phosphatase 1, regulatory subuni ...

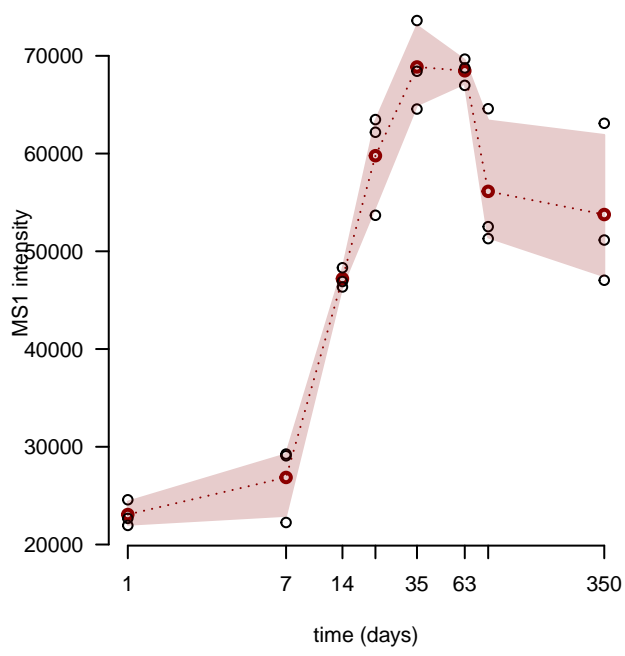

**Q8BG99**  
**GN=Pknos2**  
Pbx/knotted 1 homeobox 2

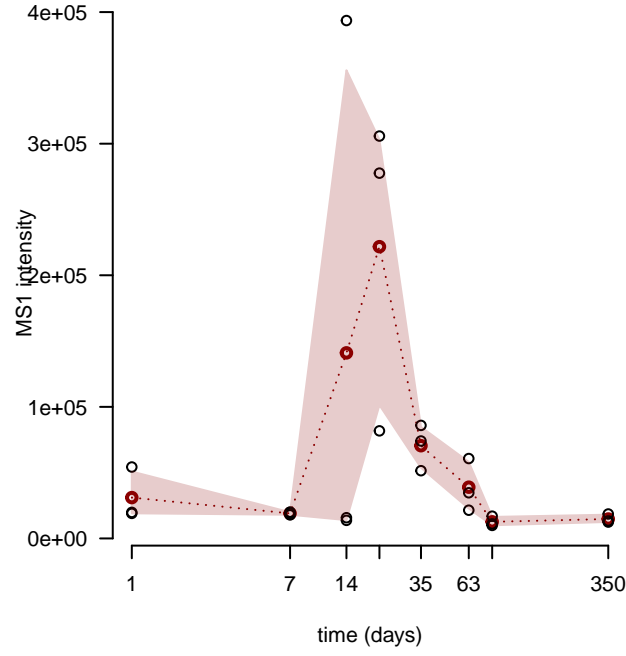

**Q8BGA2**  
**GN=Lhfp12**  
lipoma HMGIC fusion partner-like 2

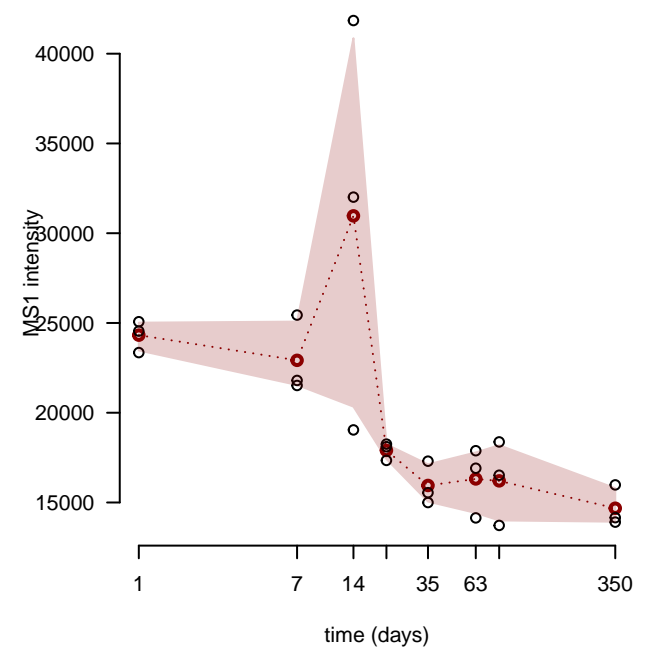

**Q8BGA5**  
**GN=Krr1**  
KRR1, small subunit (SSU) processome com ...

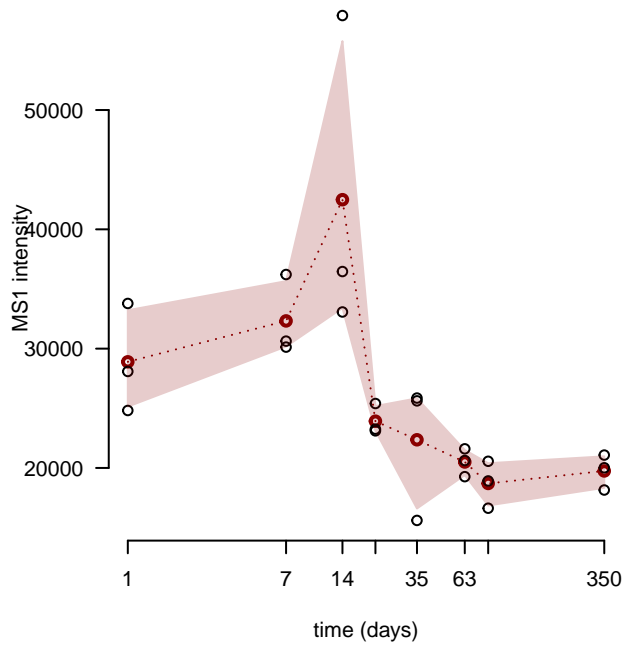

**Q8BGA7**  
**GN=**

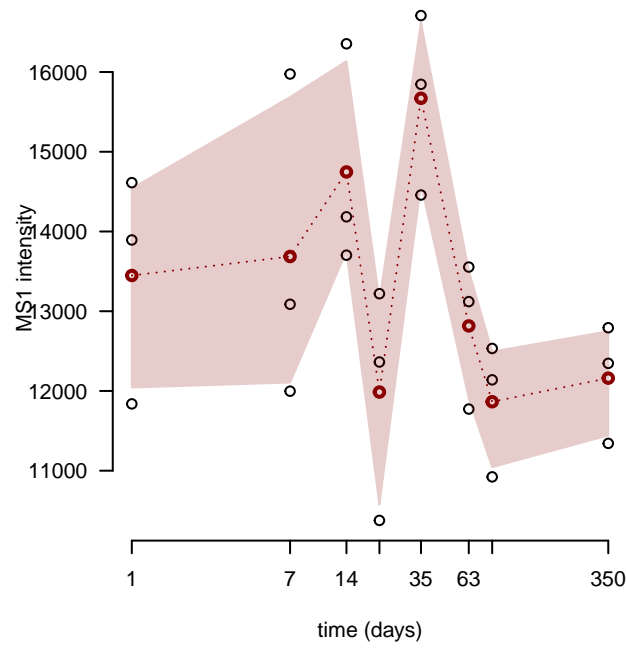

**Q8BGA9**  
**GN=Oxa1l**  
oxidase assembly 1-like

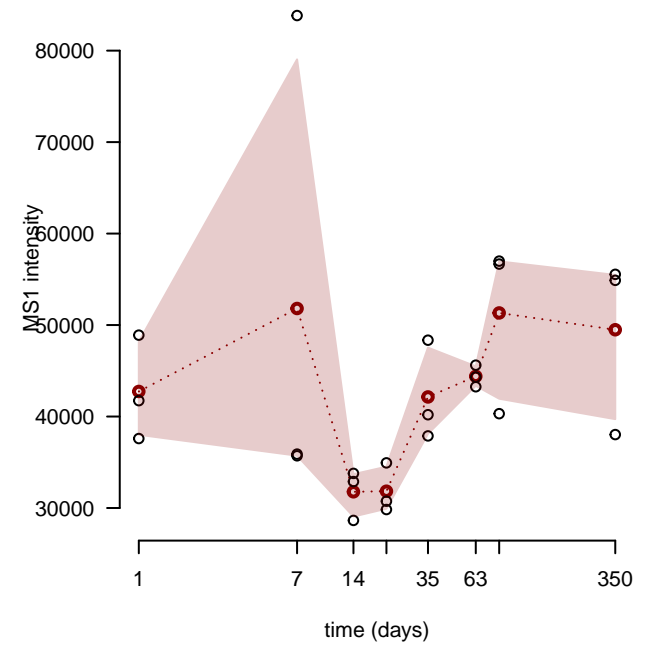

**Q8BGB5**  
**GN=Limd2**  
LIM domain containing 2

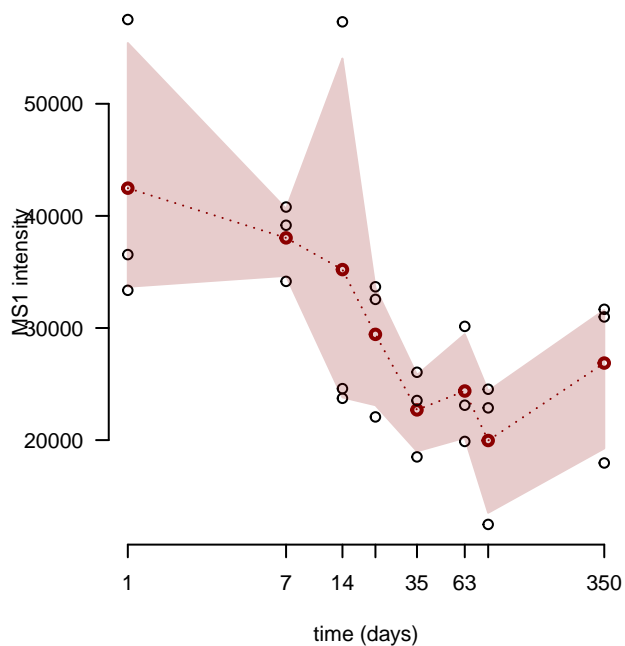

**Q8BGB7**  
**GN=Enoph1**  
enolase-phosphatase 1

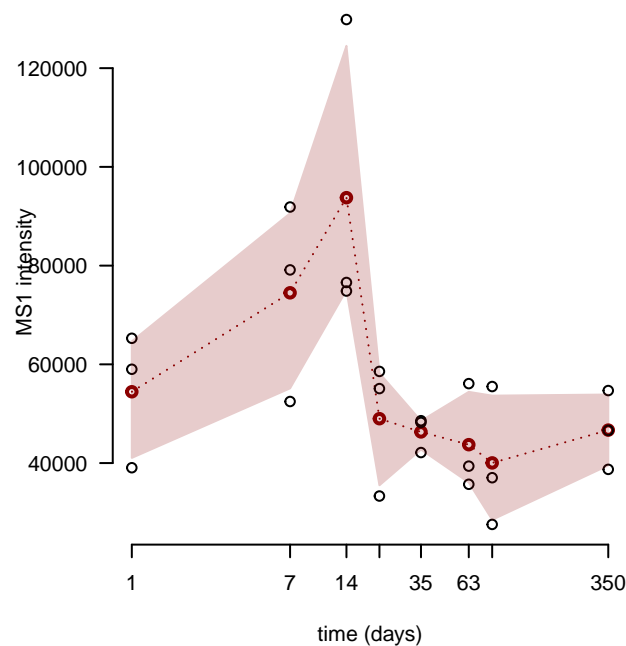

**Q8BGB8**  
**GN=Coq4**  
coenzyme Q4

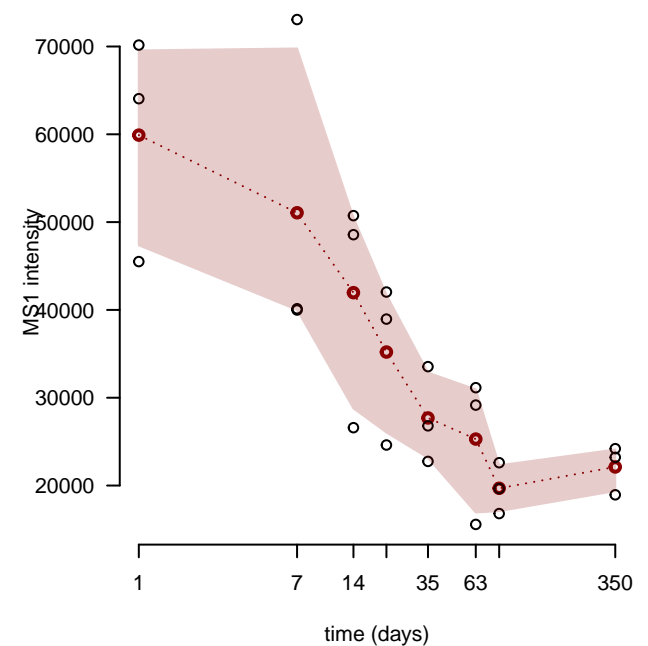

**Q8BGC0**  
**GN=Htatsf1**  
HIV TAT specific factor 1

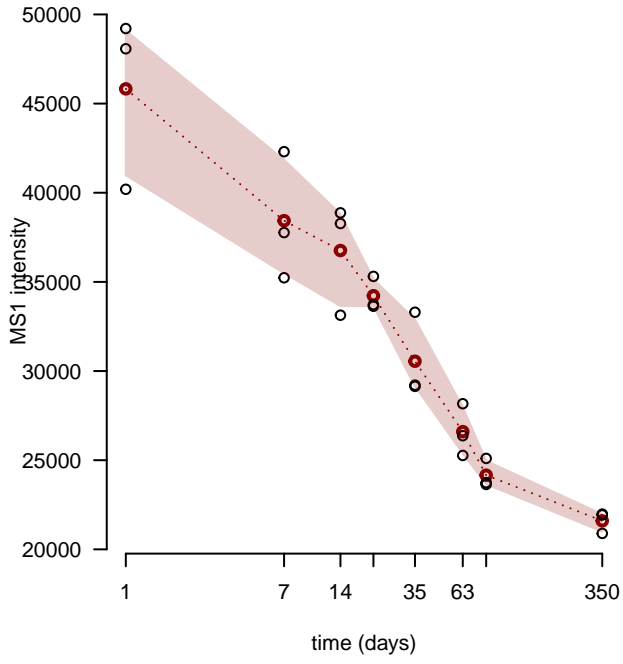

**Q8BGC1**  
**GN=**

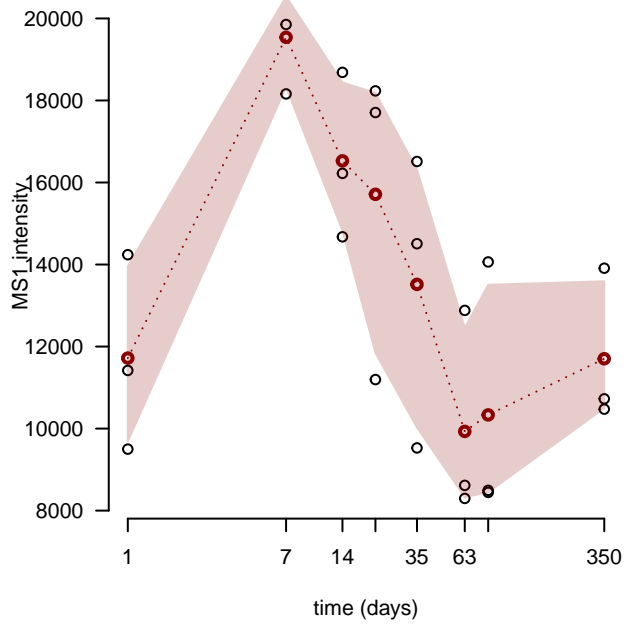

**Q8BGC4**  
**GN=Zadh2**  
zinc binding alcohol dehydrogenase, doma ...

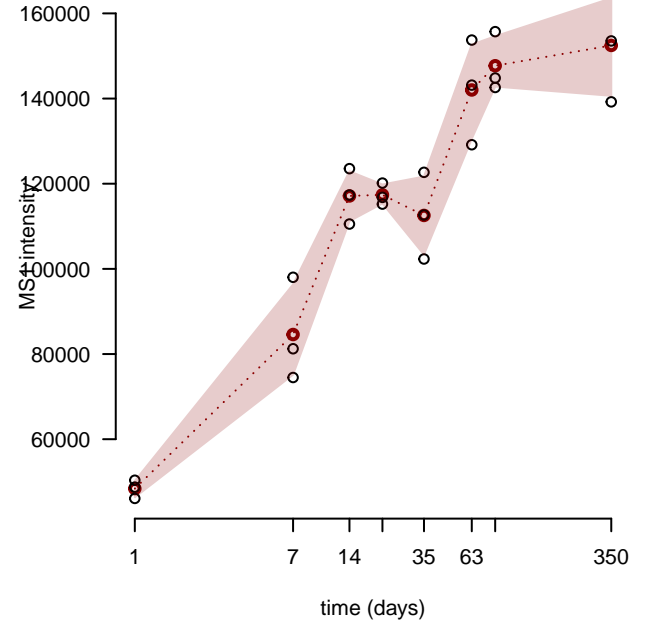

**Q8BGD5**  
**GN=Cpt1c**  
carnitine palmitoyltransferase 1c

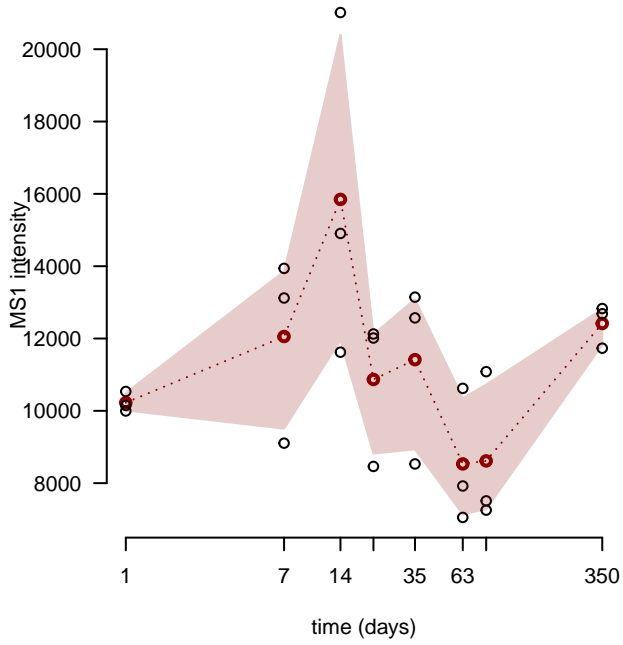

**Q8BGD8**  
**GN=Coa6**  
cytochrome c oxidase assembly factor 6

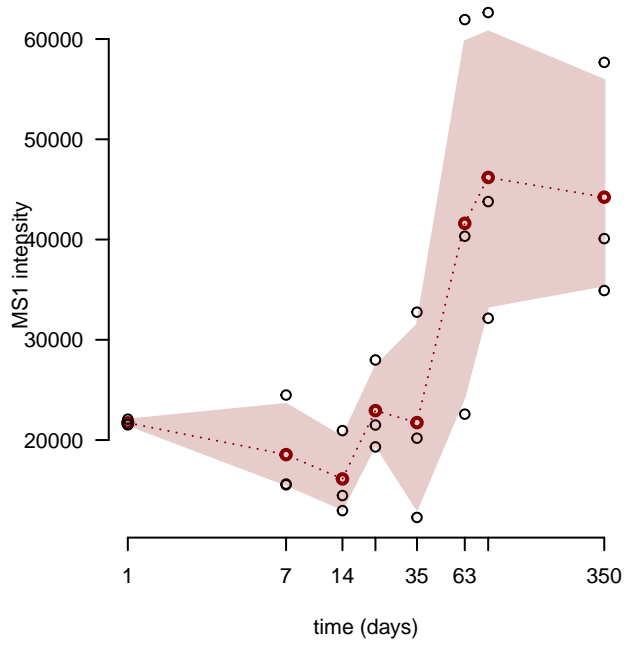

**Q8BGD9**  
**GN=Eif4b**  
eukaryotic translation initiation factor ...

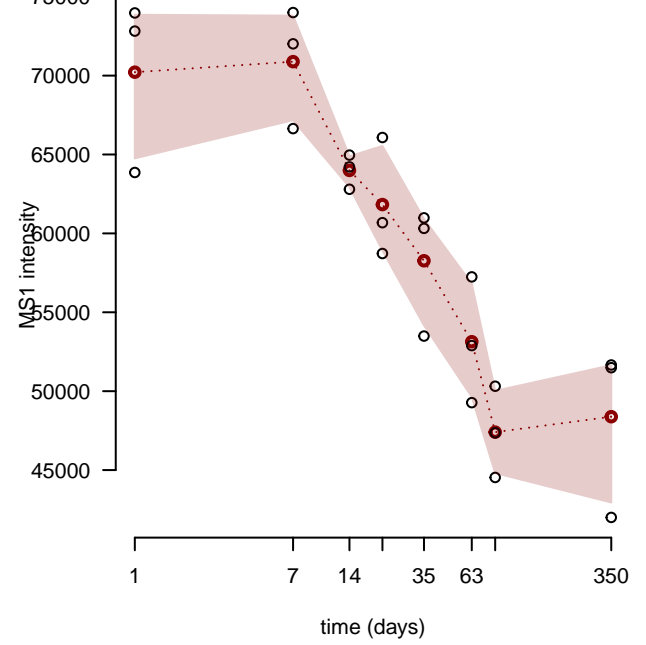

**Q8BGE6**  
**GN=Atg4b**  
autophagy related 4B, cysteine peptidase

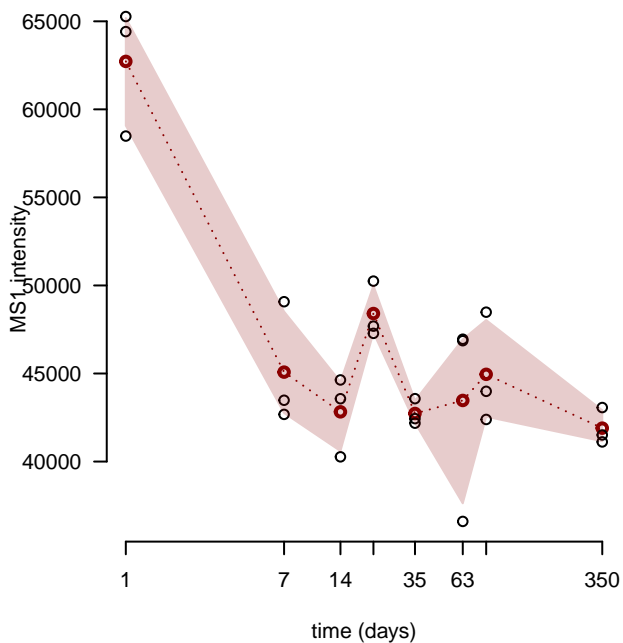

**Q8BGE7**  
**GN=Trim6**  
tripartite motif-containing 6

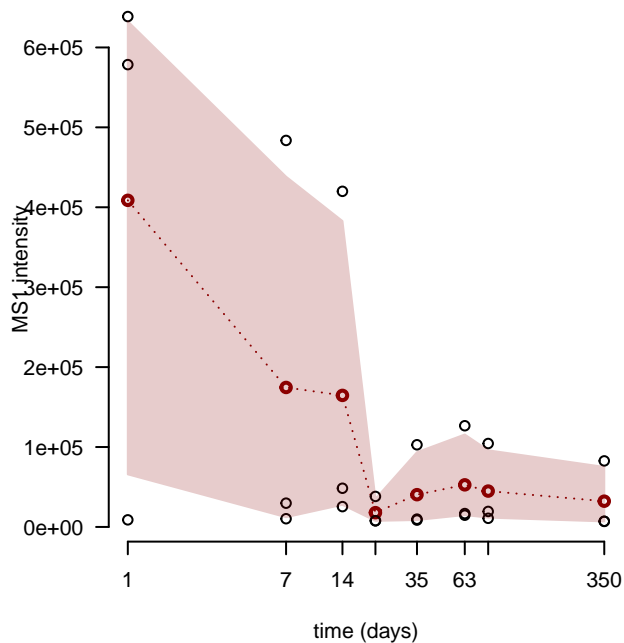

**Q8BGF3**  
**GN=Wdr92**

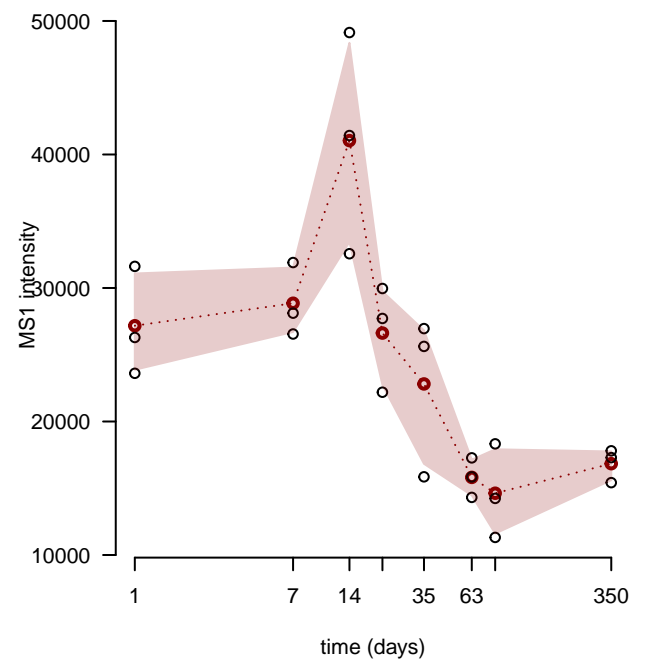

**Q8BGF6**  
**GN=Elmod2**  
ELMO/CED-12 domain containing 2

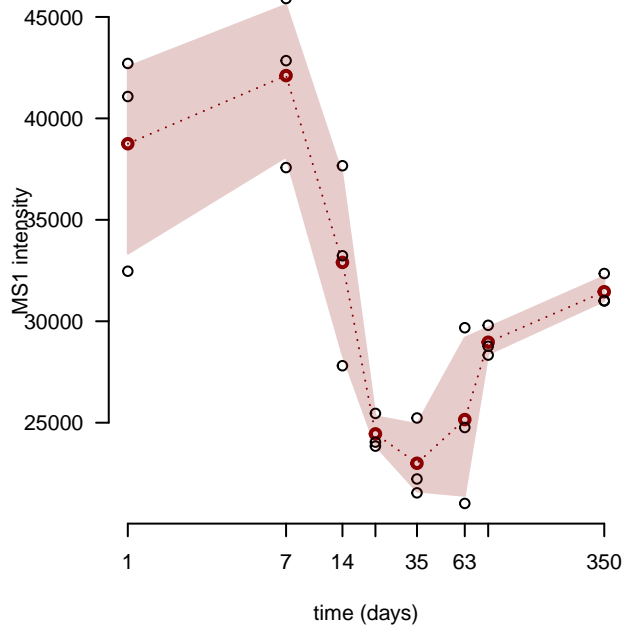

**Q8BGF7**  
**GN=Pan2**  
PAN2 poly(A) specific ribonuclease subun ...

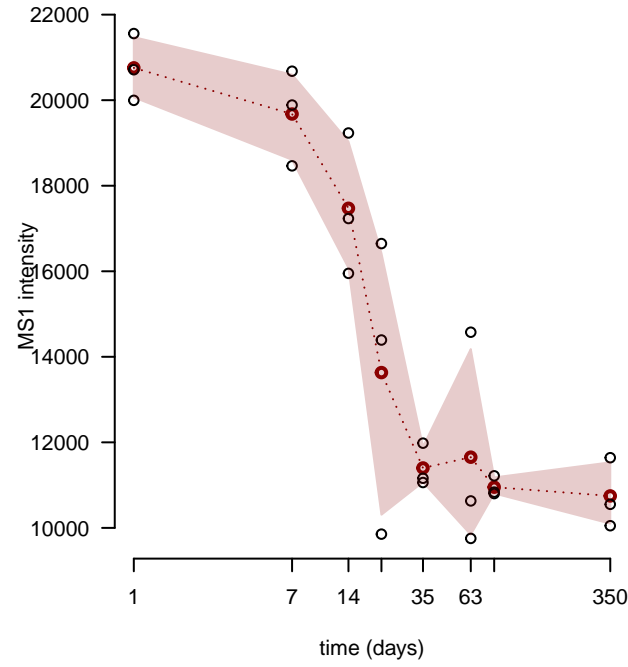

**Q8BGF9**  
**GN=Slc25a44**  
solute carrier family 25, member 44

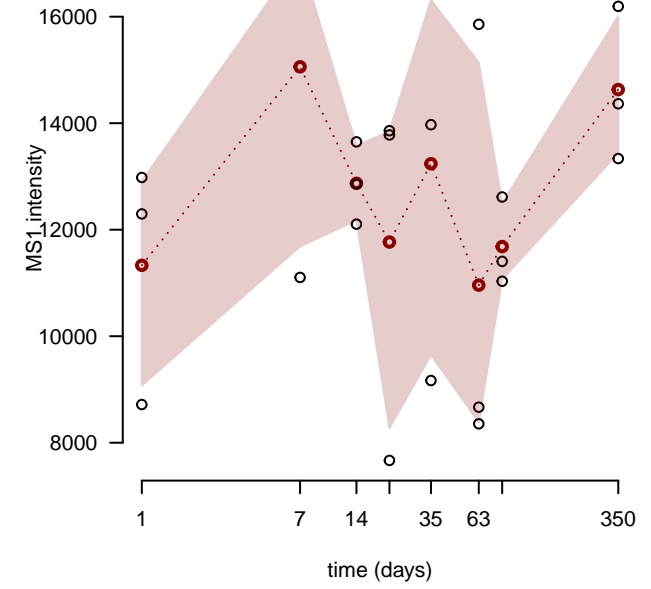

**Q8BGG7**  
**GN=Ubash3b**  
ubiquitin associated and SH3 domain cont ...

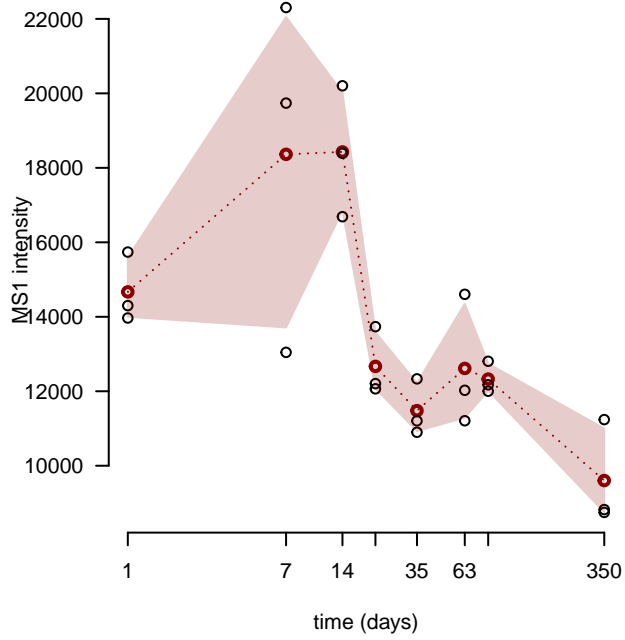

**Q8BGH2**  
**GN=Samm50**  
SAMM50 sorting and assembly machinery co ...

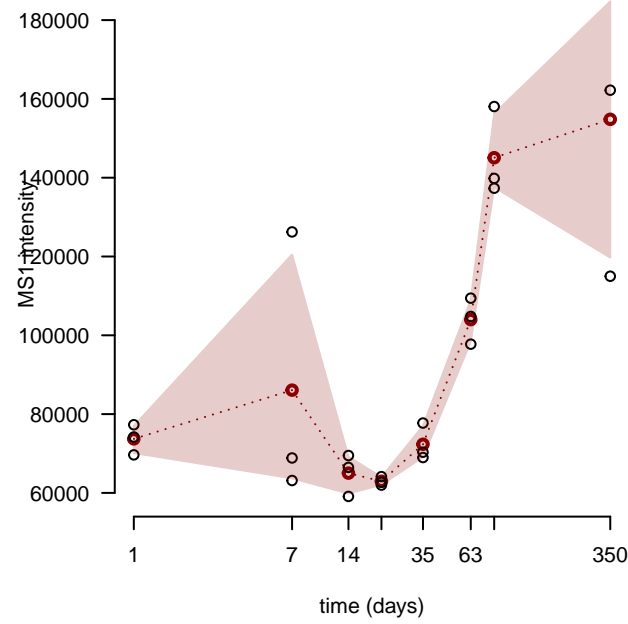

**Q8BGH4**  
**GN=Reep1**  
receptor accessory protein 1

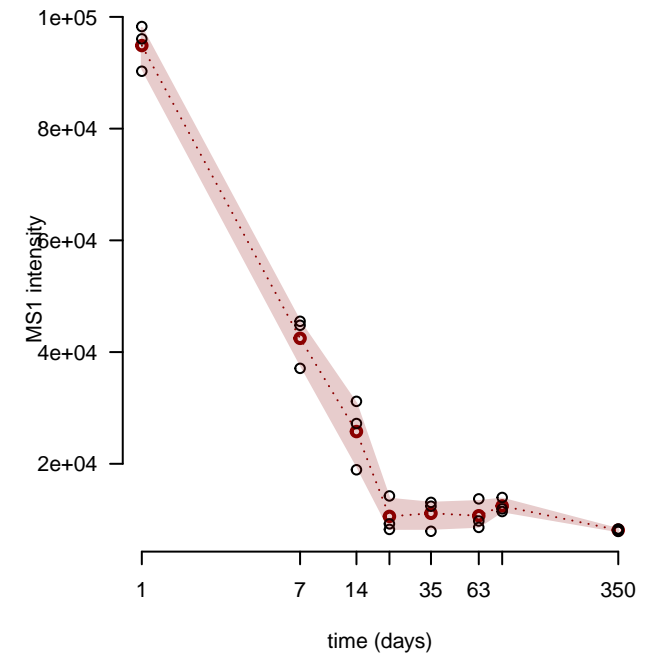

**Q8BGI4**  
**GN=Fam13a**  
family with sequence similarity 13, memb ...

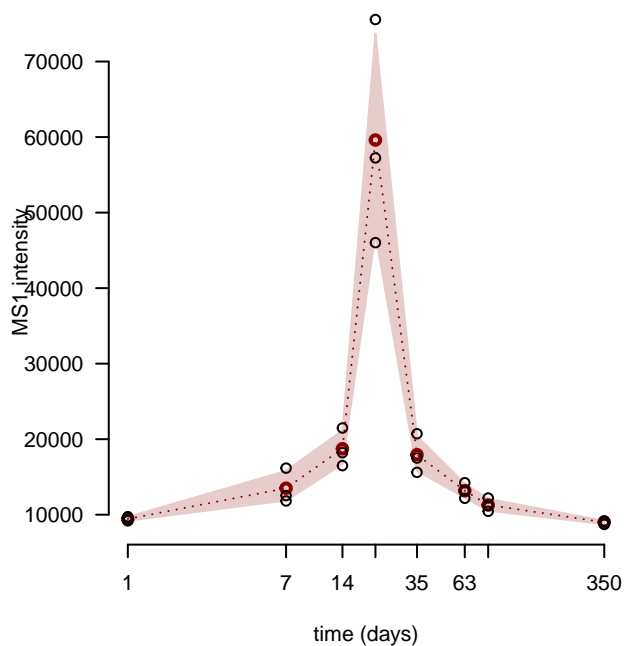

**Q8BGI5**  
**GN=Pex26**  
peroxisomal biogenesis factor 26

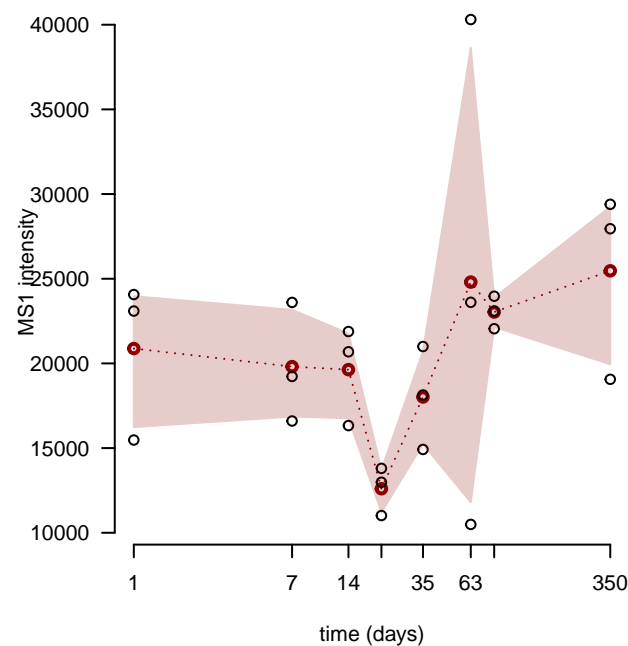

**Q8BGJ9**  
**GN=U2af114**  
U2 small nuclear RNA auxiliary factor 1- ...

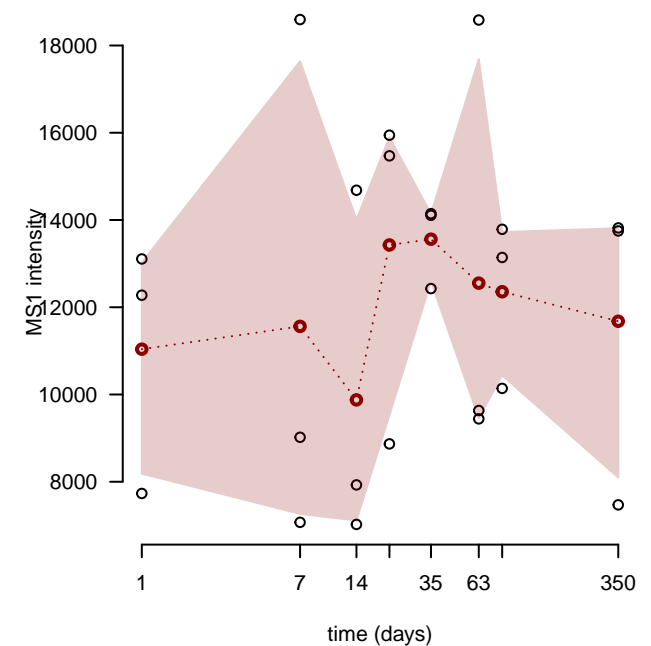



**Q8BGK6**  
**GN=Slc7a6**  
solute carrier family 7 (cationic amino ...

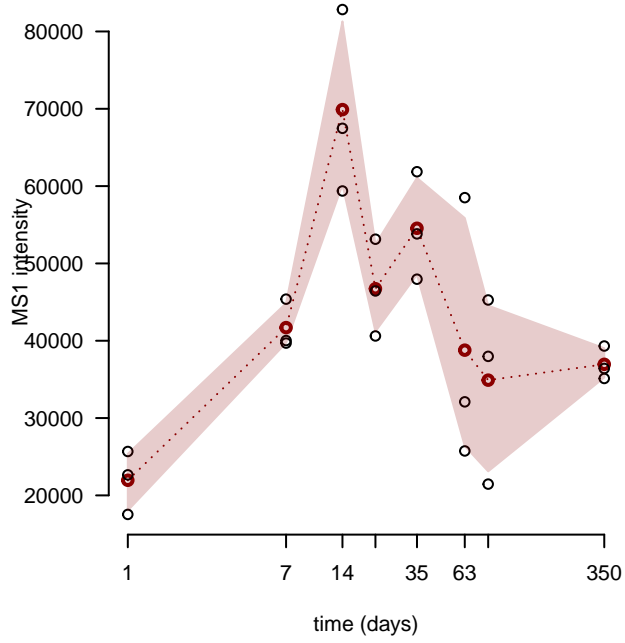

**Q8BGN2**  
**GN=D3Erd751e**  
DNA segment, Chr 3, ERATO Doi 751, expe ...

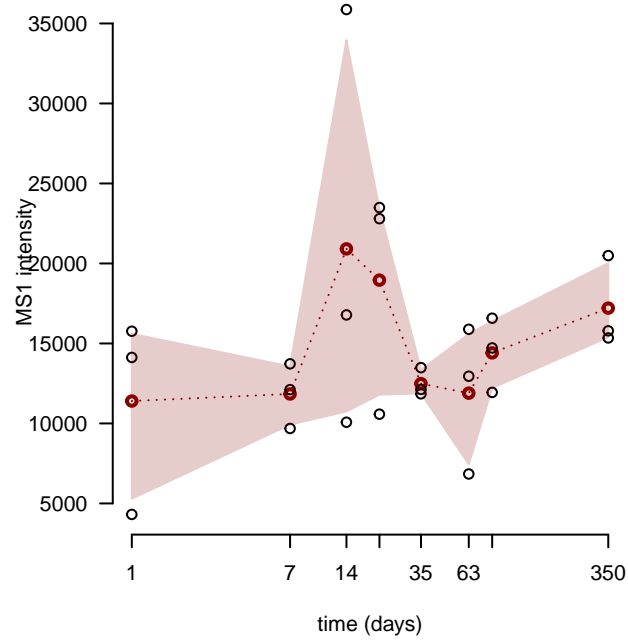

**Q8BGN3**  
**GN=Enpp6**  
ectonucleotide pyrophosphatase/phosphodi ...

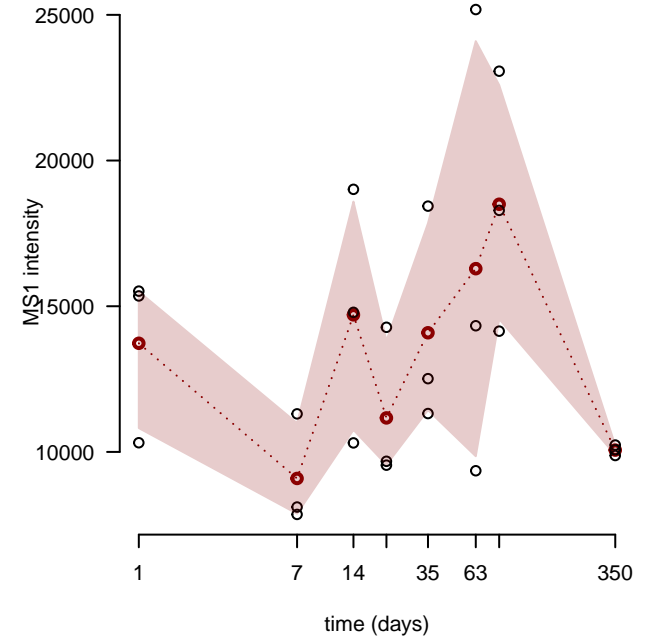

**Q8BGP6**  
**GN=Slc25a40**  
solute carrier family 25, member 40

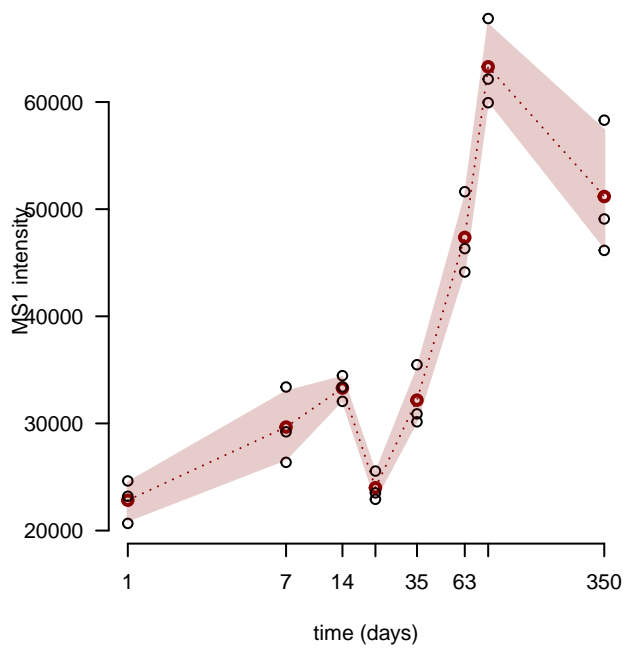

**Q8BGQ1**  
**GN=Vipas39**  
VPS33B interacting protein, apical-basol ...

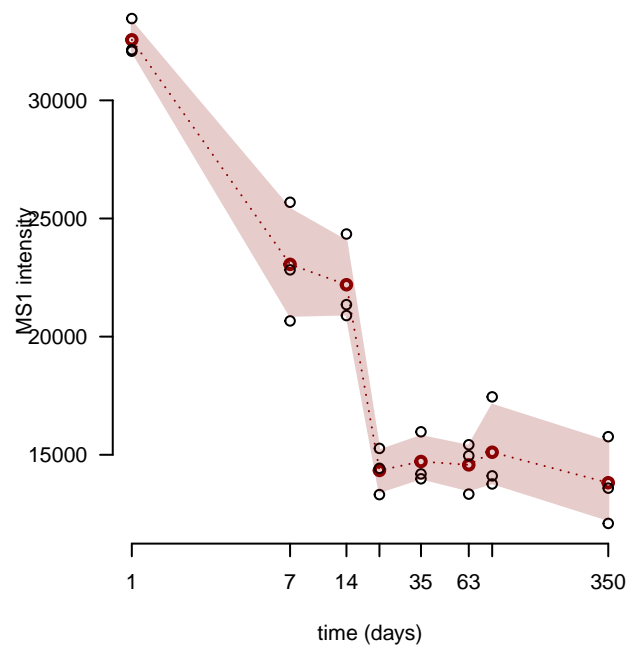

**Q8BGQ4**  
**GN=Pomt2**  
protein-O-mannosyltransferase 2

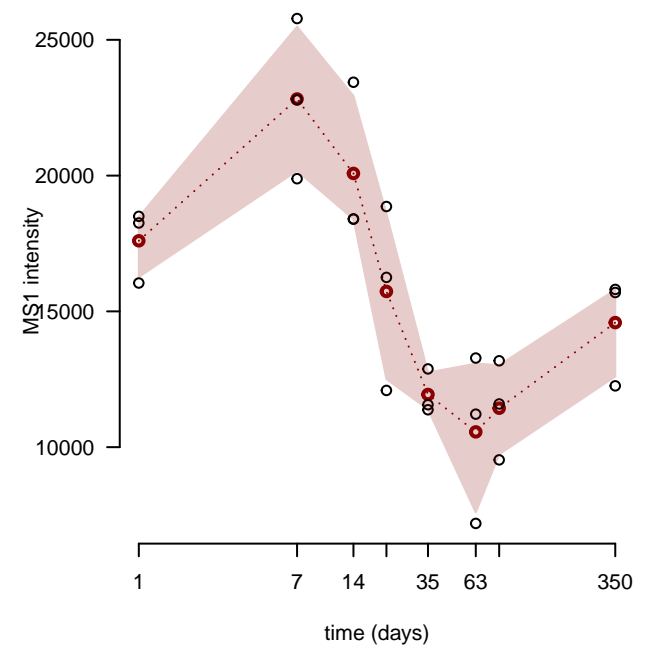

**Q8BGQ6**  
**GN=Efcab14**  
EF-hand calcium binding domain 14

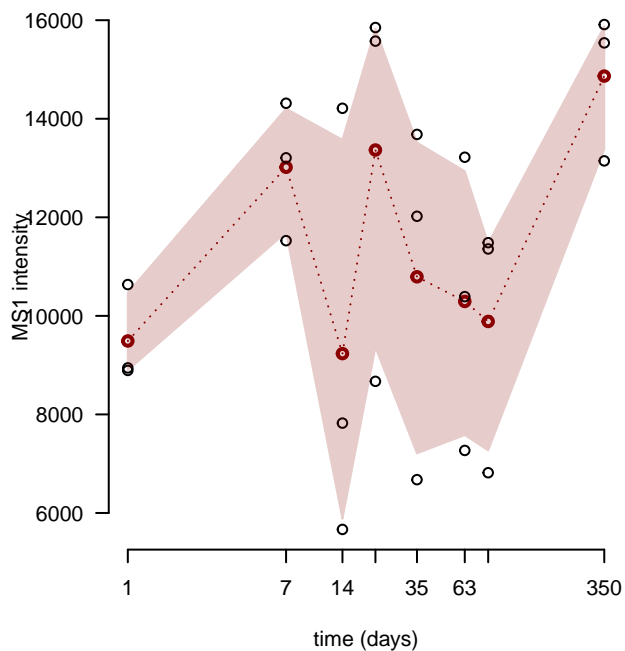

**Q8BGQ7**  
**GN=Aars**  
alanyl-tRNA synthetase

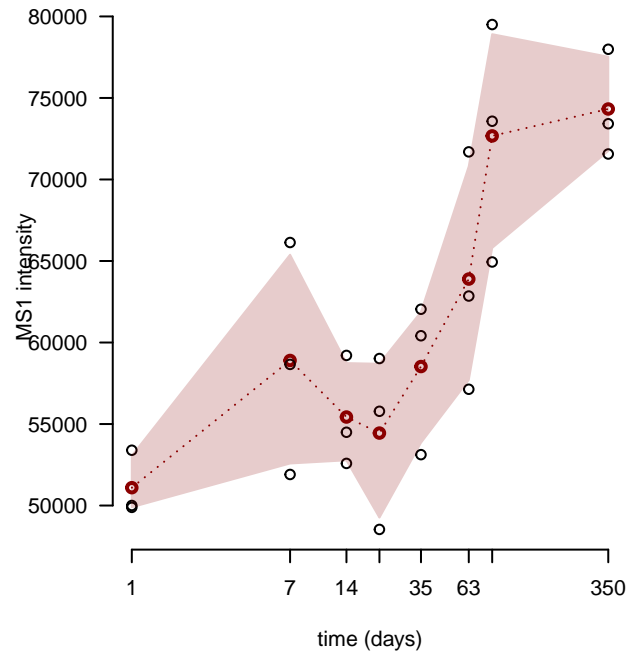

**Q8BGR2**  
**GN=Lrrc8d**  
leucine rich repeat containing 8D

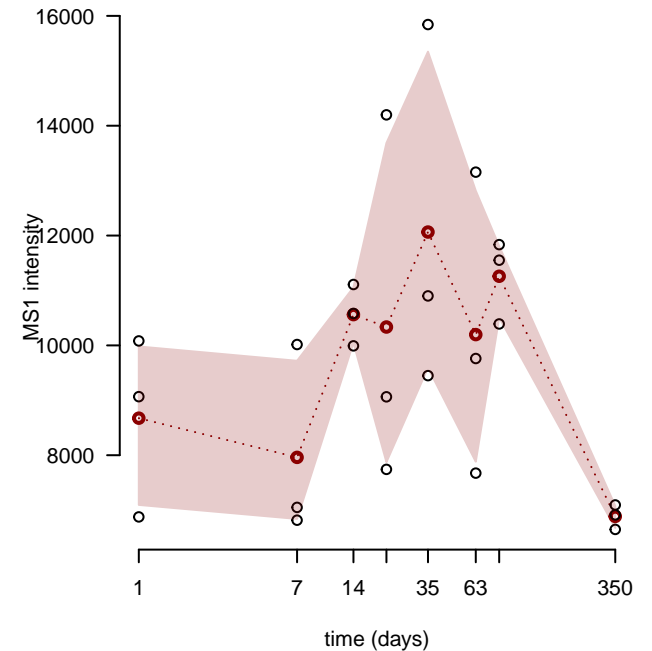

**Q8BGR6**  
**GN=Arl15**  
ADP-ribosylation factor-like 15

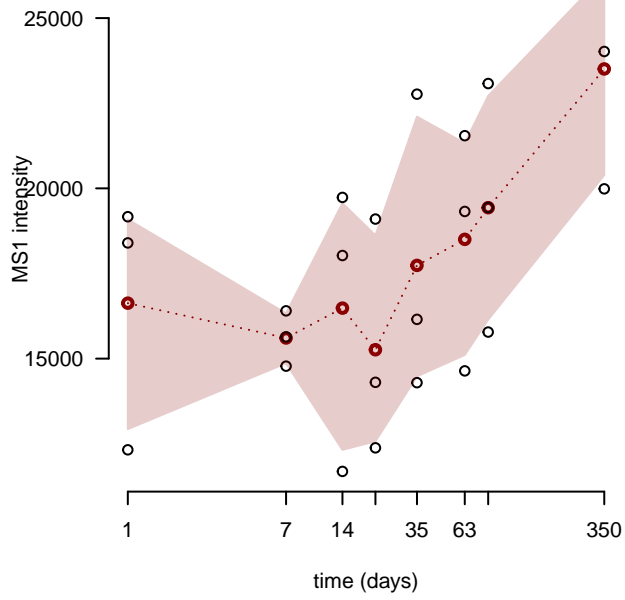

**Q8BGR9**  
**GN=Ublcp1**  
ubiquitin-like domain containing CTD pho ...

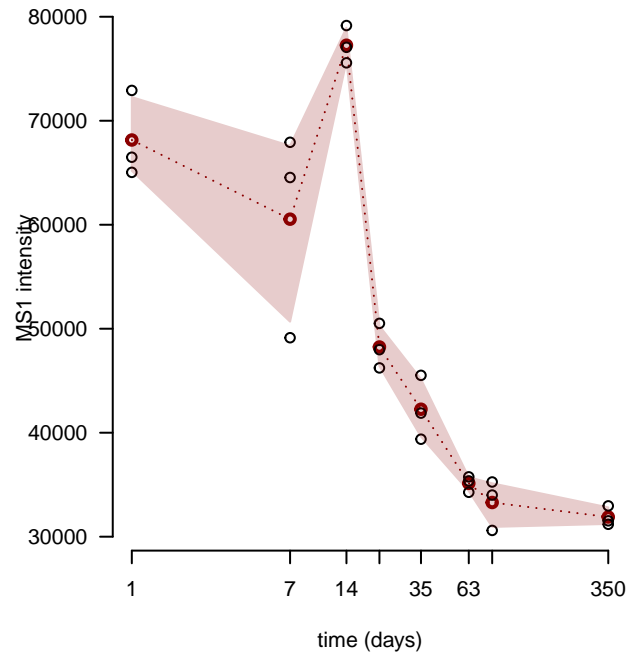

**Q8BGS0**  
**GN=Mak16**  
MAK16 homolog

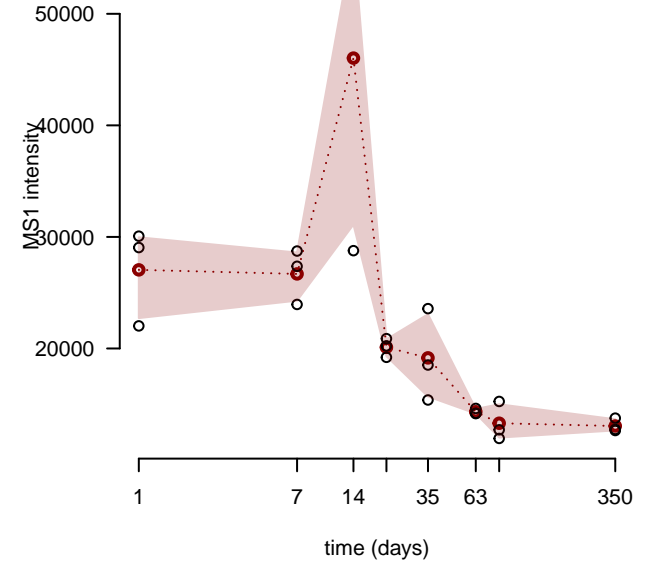

**Q8BGS1**  
**GN=Epb4115**  
erythrocyte membrane protein band 4.1 li ...

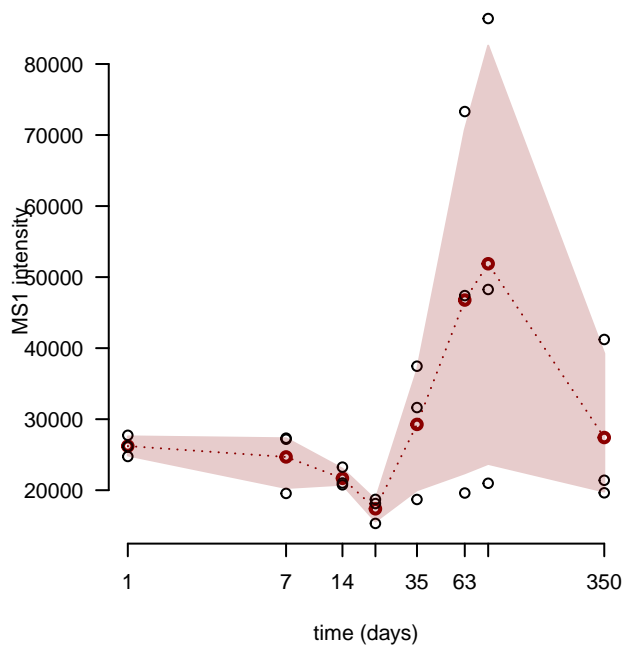

**Q8BGS2**  
**GN=Bola2**  
bola-like 2 (E. coli)

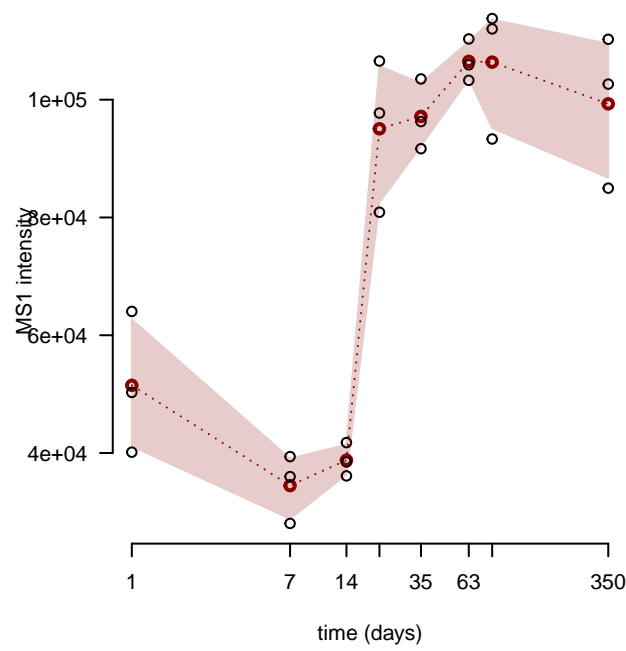

**Q8BGS3**  
**GN=Zkscan1**  
zinc finger with KRAB and SCAN domains 1

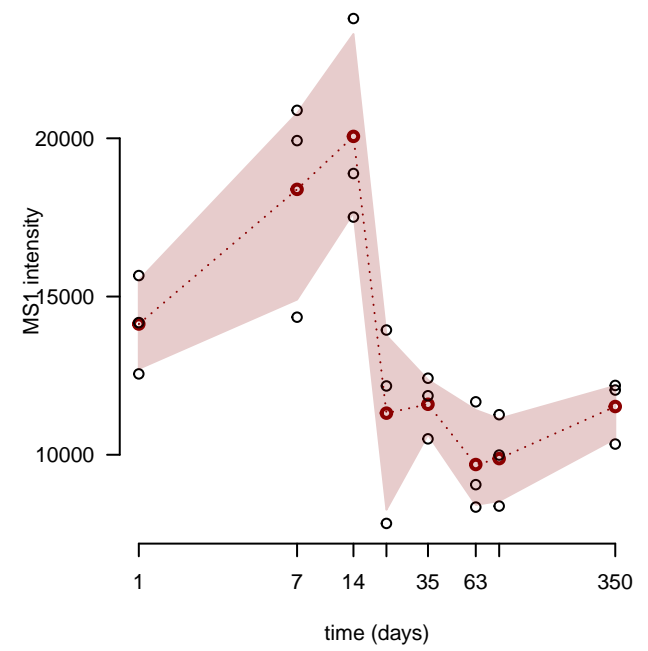

**Q8BGS7**  
**GN=Cept1**  
choline/ethanolaminephosphotransferase 1

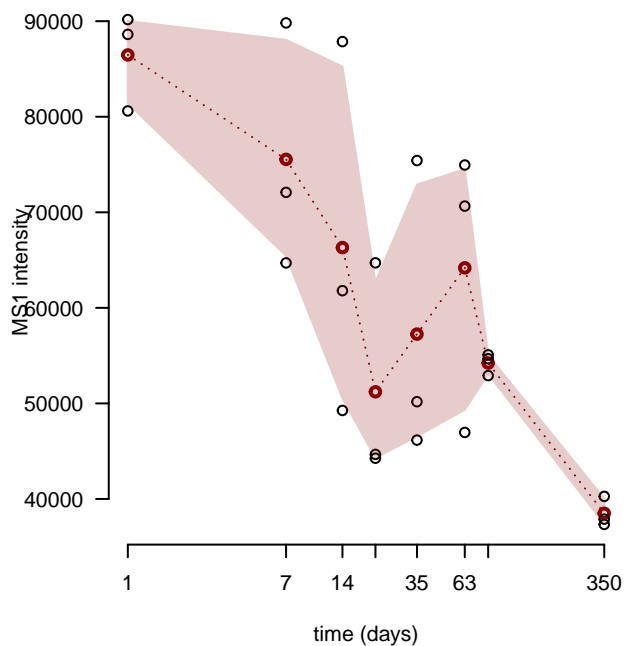

**Q8BGT5**  
**GN=Gpt2**  
glutamic pyruvate transaminase (alanine ...

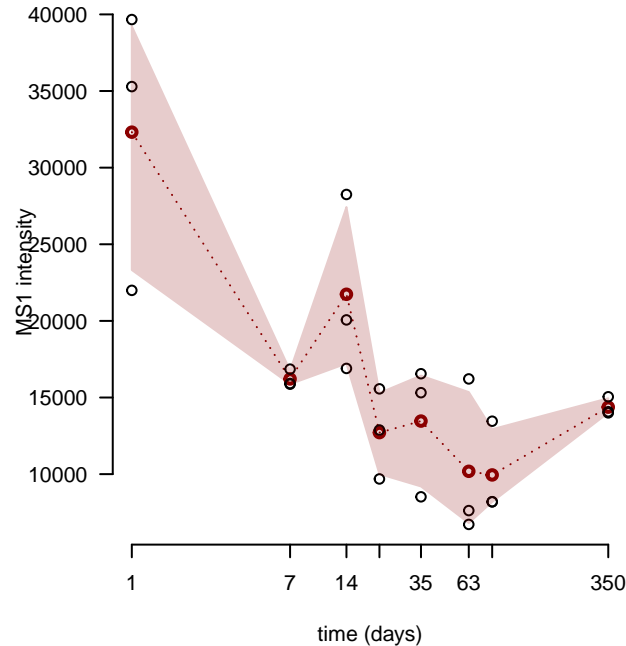

**Q8BGT7**  
**GN=Smndc1**  
survival motor neuron domain containing ...

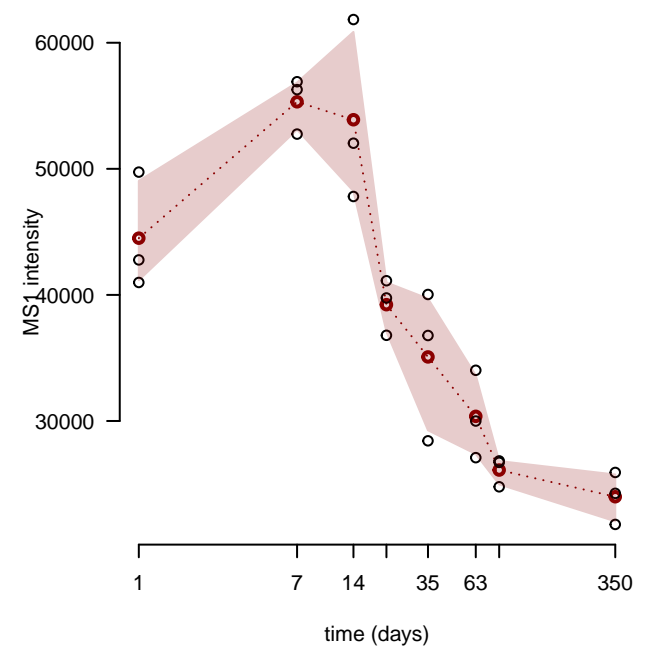

**Q8BGT9**  
**GN=Galnt12**  
polypeptide N-acetylgalactosaminyltransf ...

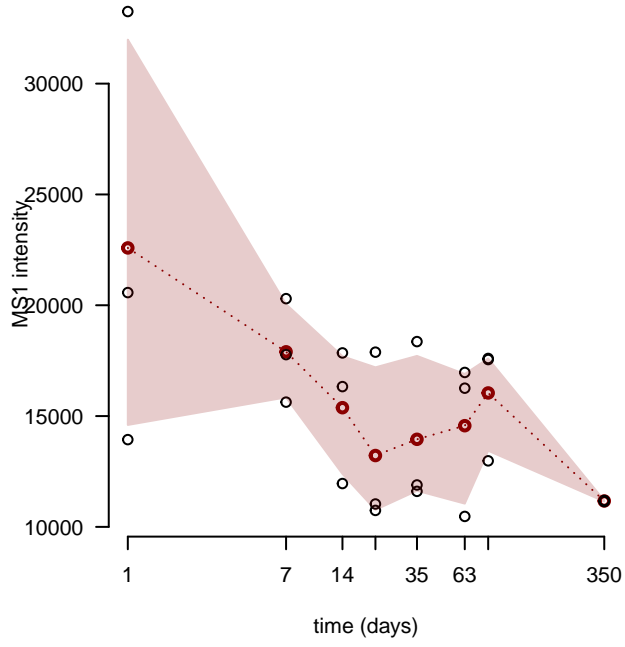

**Q8BGU5**  
**GN=Ccny**  
cyclin Y

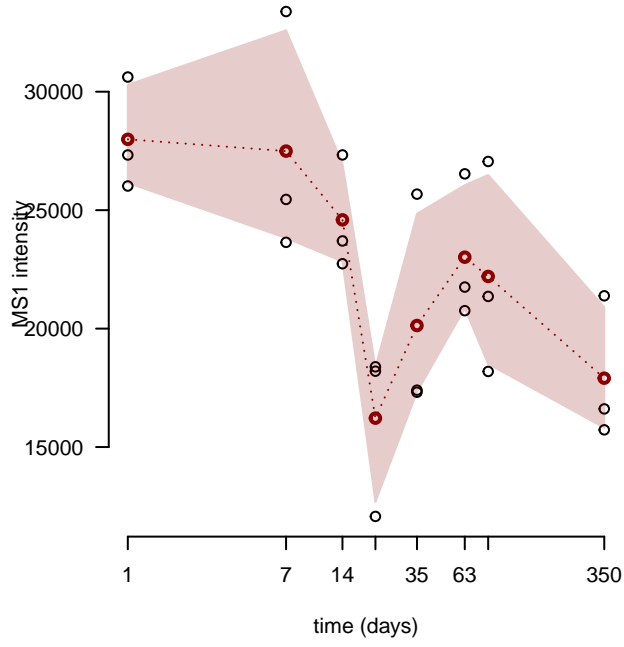

**Q8BGV0**  
**GN=Nars2**  
asparaginyl-tRNA synthetase 2 (mitochondr ...

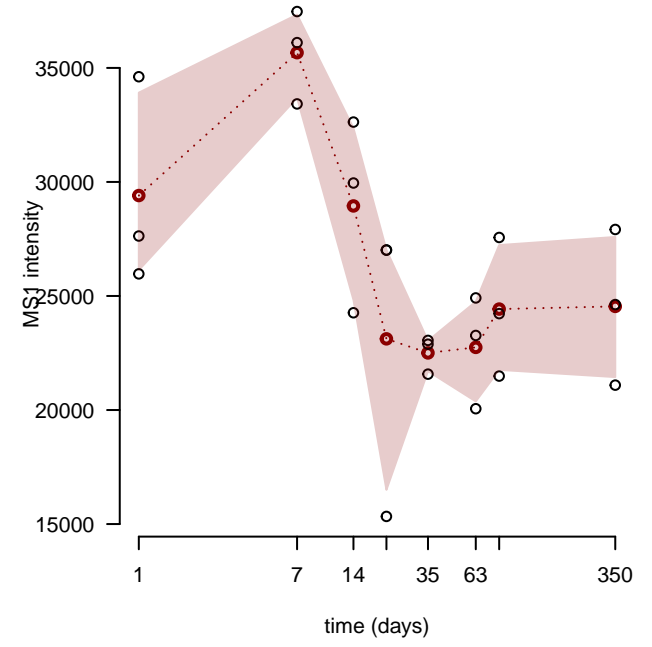

**Q8BGV4**  
**GN=Tti2**  
TELO2 interacting protein 2

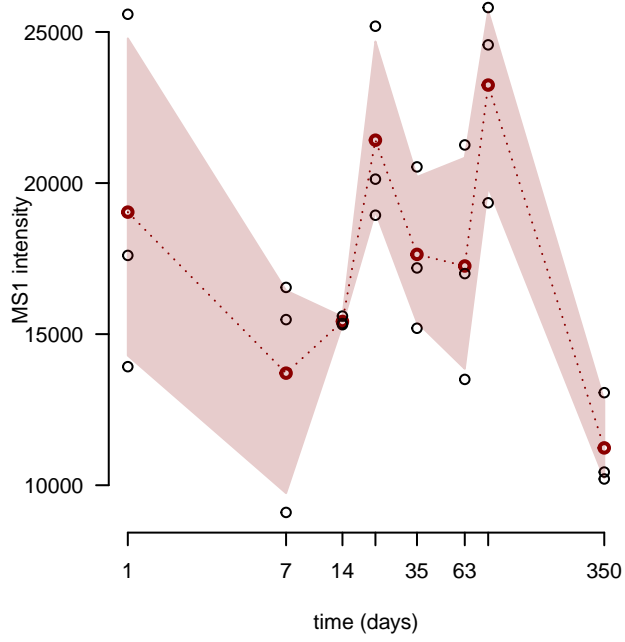

**Q8BGV8**  
**GN=Mief1**  
mitochondrial elongation factor 1

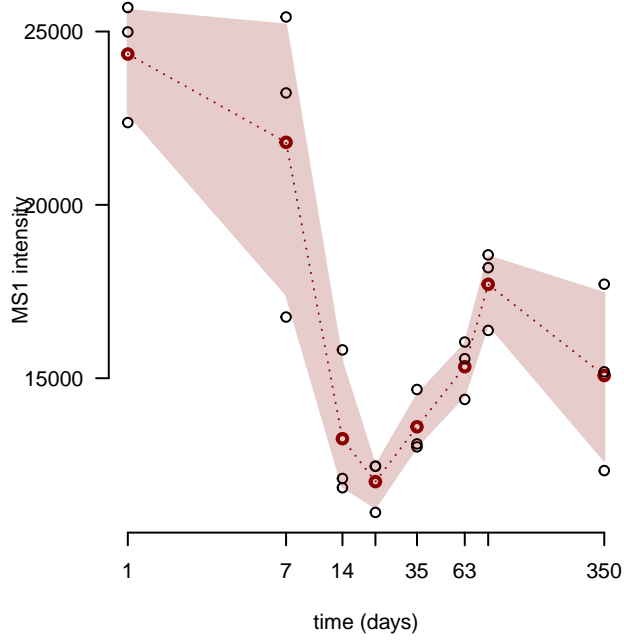

**Q8BGW1**  
**GN=Fto**  
fat mass and obesity associated

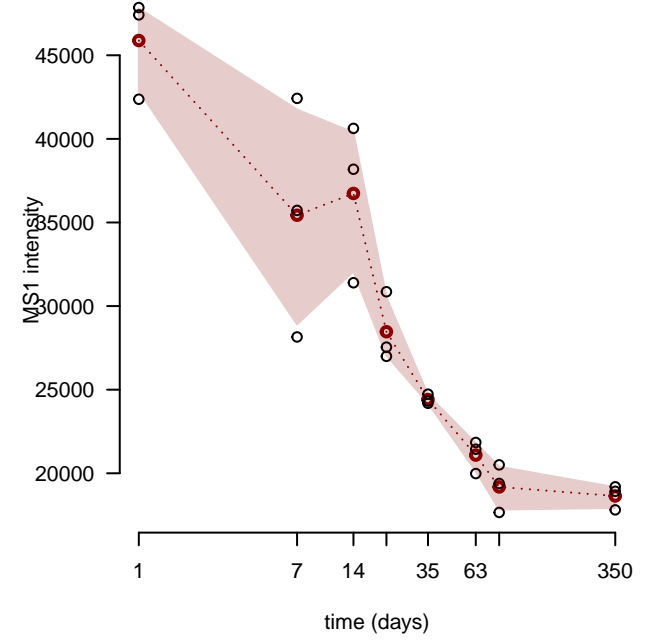

**Q8BGX1**  
**GN=Pced1b**  
PC-esterase domain containing 1B

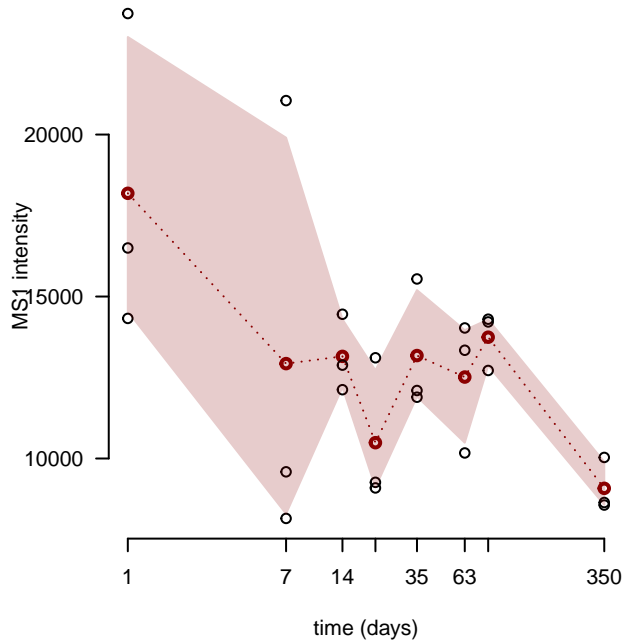

**Q8BGX2**  
**GN=Timm29**  
translocase of inner mitochondrial membr ...

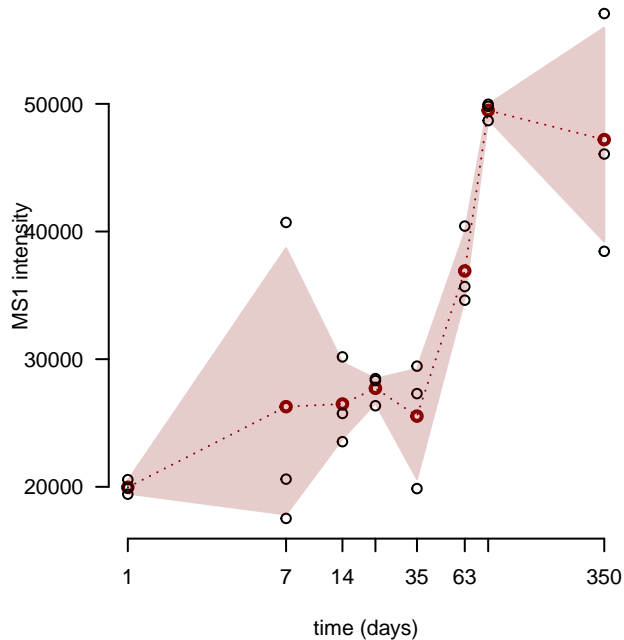

**Q8BGX7**  
**GN=Spidr**  
scaffolding protein involved in DNA repa ...

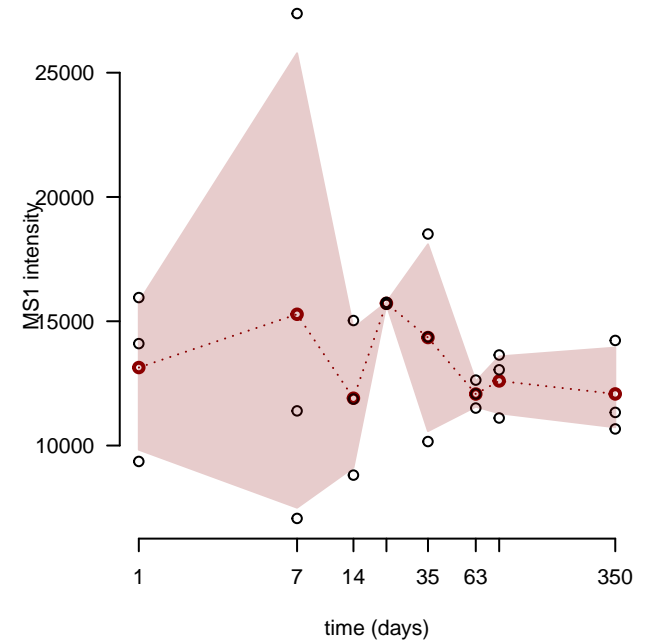

**Q8BGY2**  
**GN=Eif5a2**  
eukaryotic translation initiation factor ...

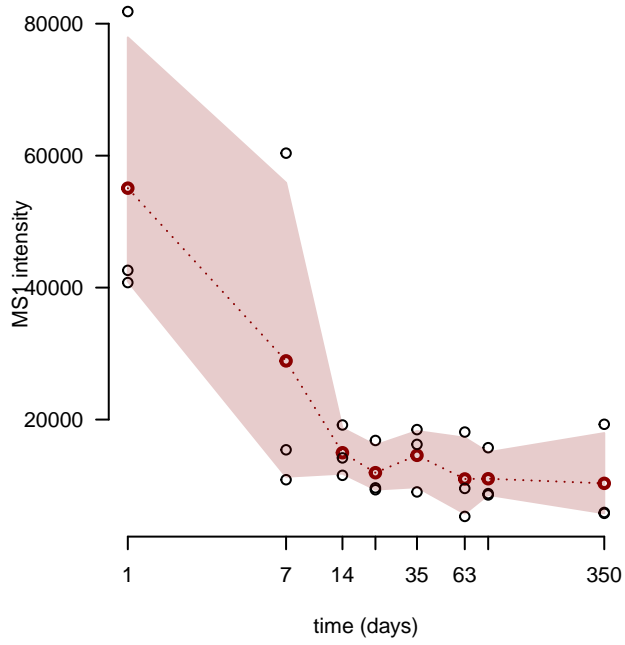

**Q8BGY4**  
**GN=Klh26**  
kelch-like 26

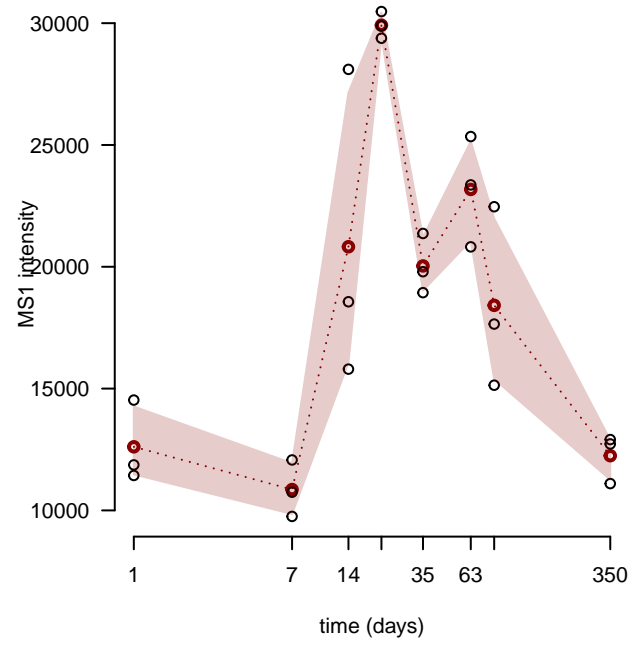

**Q8BGY7**  
**GN=Fam210a**  
family with sequence similarity 210, mem ...

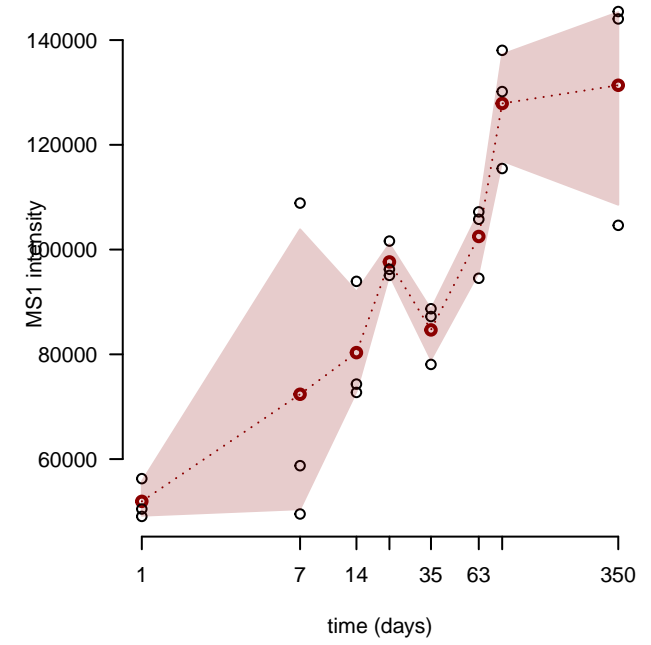

**Q8BGZ4**  
**GN=Cdc23**  
CDC23 cell division cycle 23

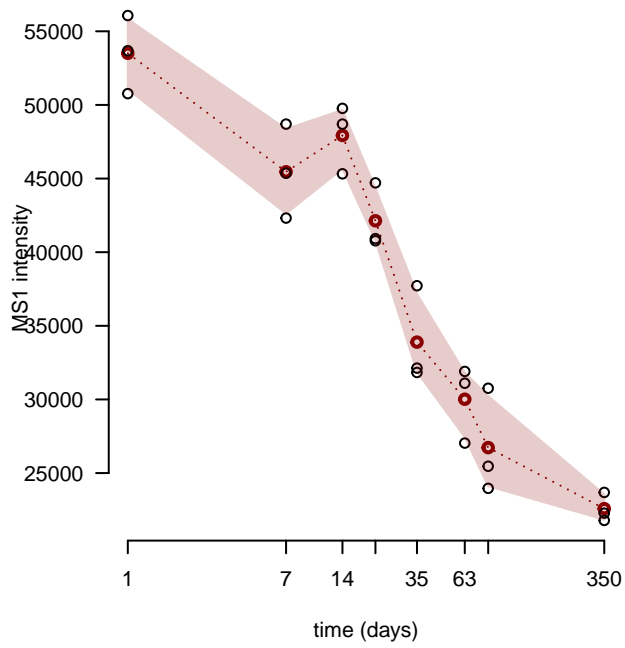

**Q8BGZ7**  
**GN=Krt75**  
keratin 75

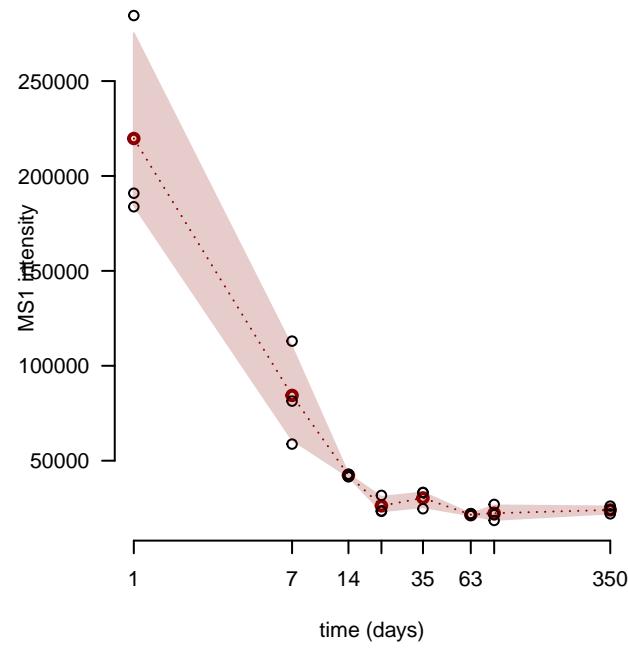

**Q8BGZ8**  
**GN=Zpld1**  
zona pellucida like domain containing 1

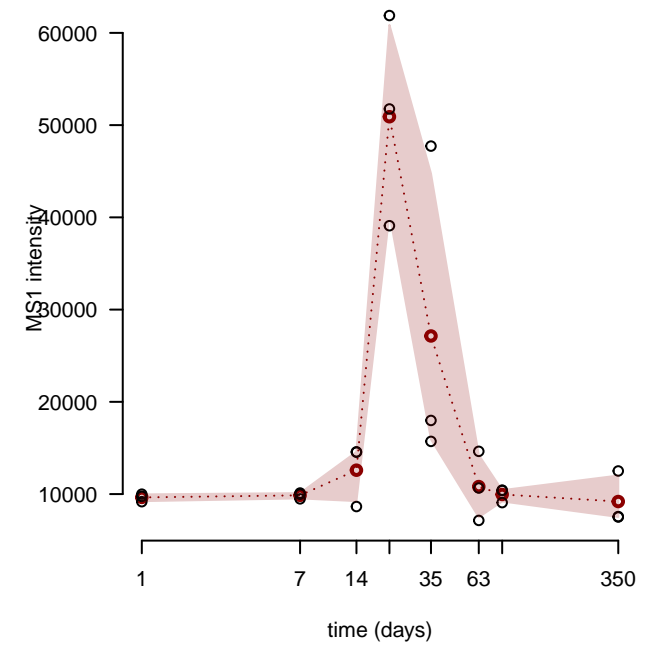

**Q8BH00**  
**GN=Aldh8a1**  
aldehyde dehydrogenase 8 family, member ...

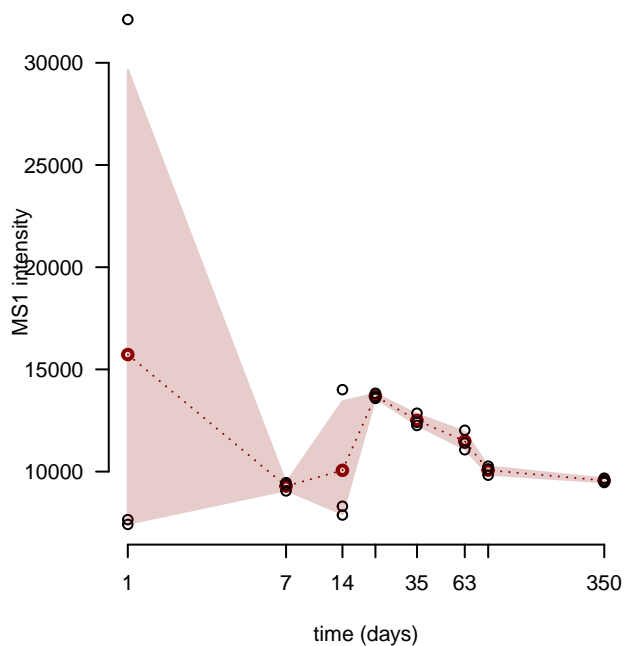

**Q8BH02**  
**GN=Tor4a**  
torsin family 4, member A

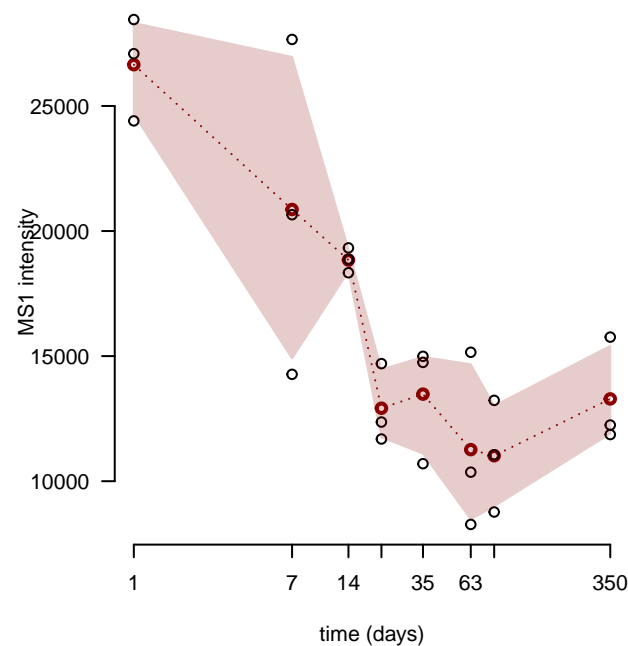

**Q8BH04**  
**GN=Pck2**  
phosphoenolpyruvate carboxykinase 2 (mit ...

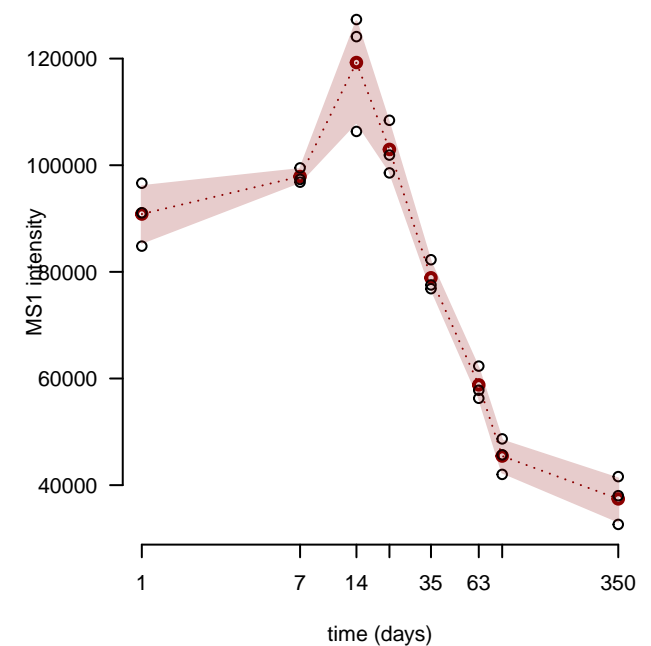

**Q8BH07**  
**GN=Arl6ip6**  
ADP-ribosylation factor-like 6 interacti ...

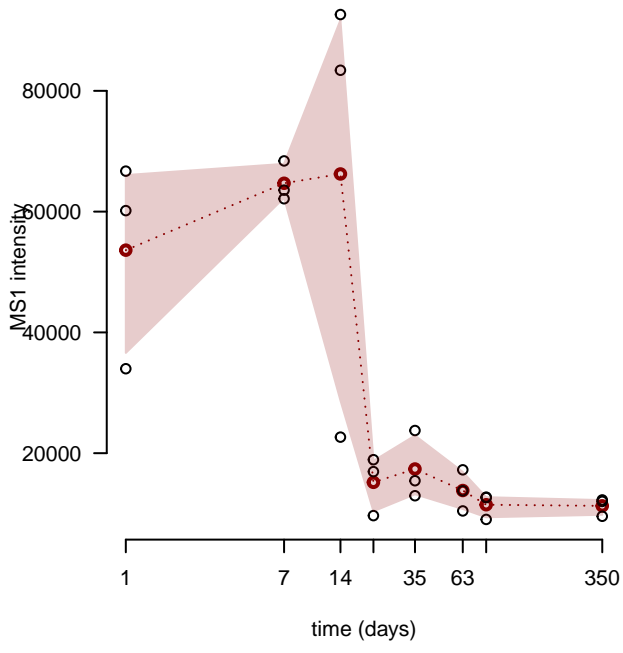

**Q8BH15**  
**GN=Cnot10**  
CCR4-NOT transcription complex, subunit ...

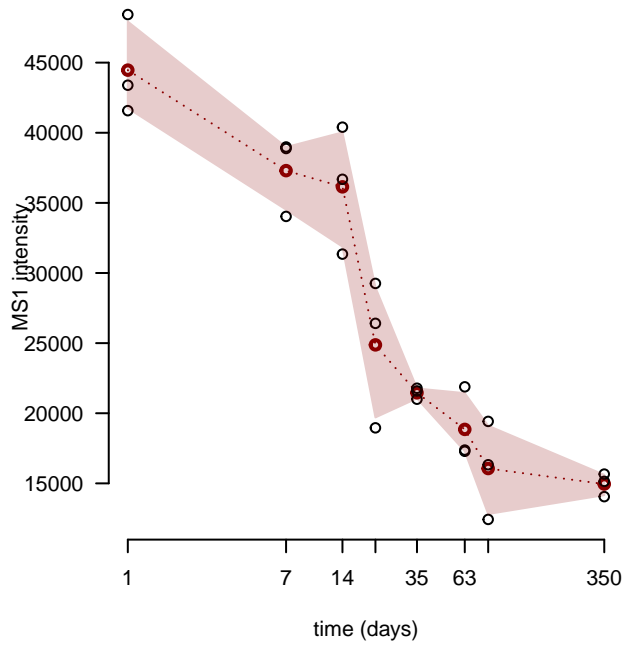

**Q8BH15**  
**GN=Cnot10**  
CCR4-NOT transcription complex, subunit ...

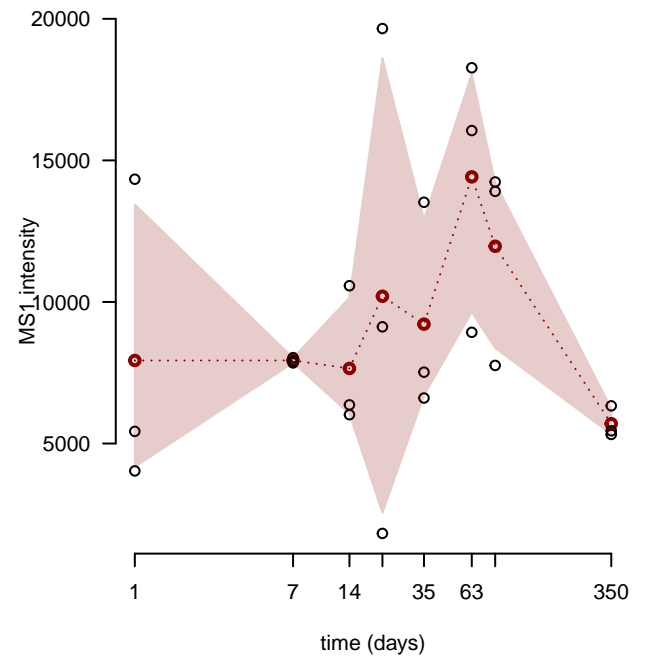

**Q8BH18**  
**GN=Tmem117**  
transmembrane protein 117

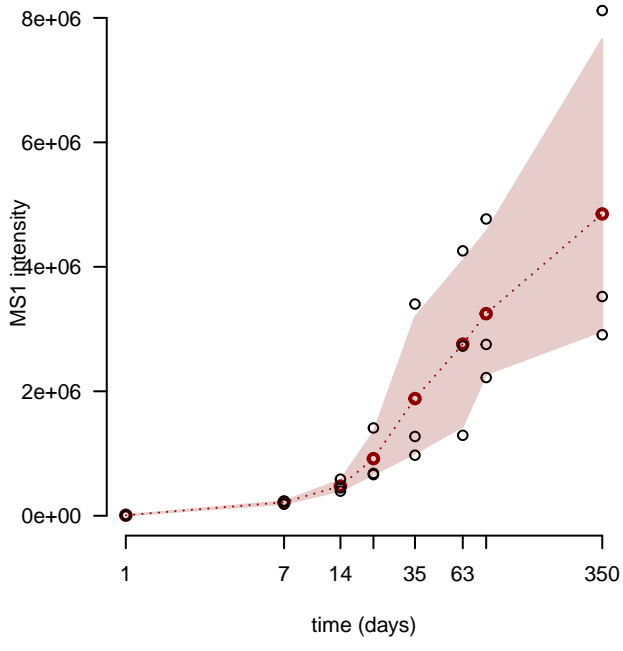

**Q8BH24**  
**GN=Tm9sf4**  
transmembrane 9 superfamily member 4

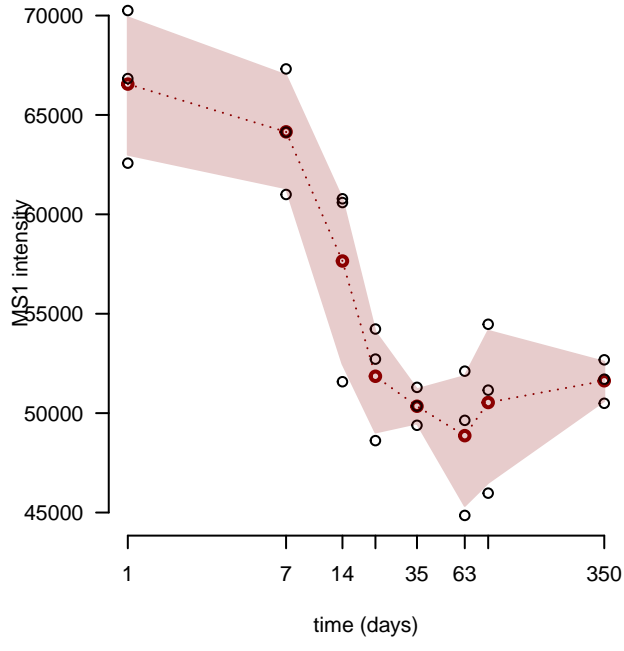

**Q8BH34**  
**GN=Sema3d**  
sema domain, immunoglobulin domain (Ig), ...

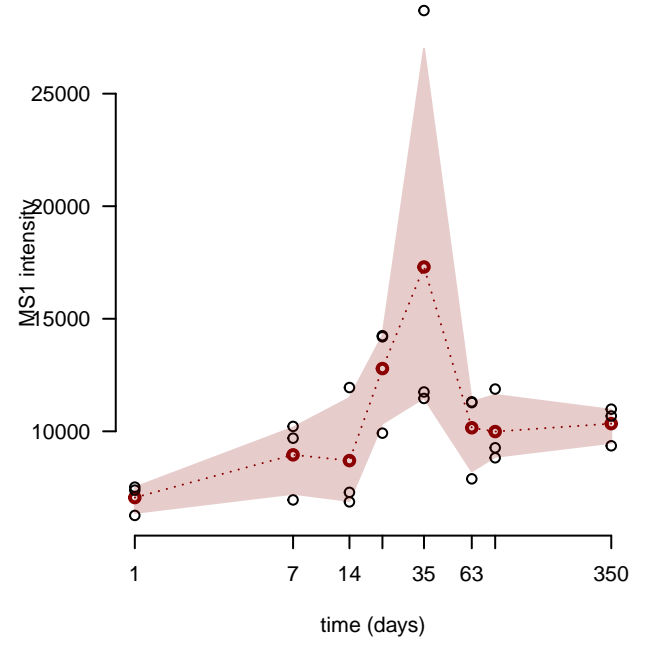

**Q8BH35**  
**GN=C8b**  
complement component 8, beta polypeptide

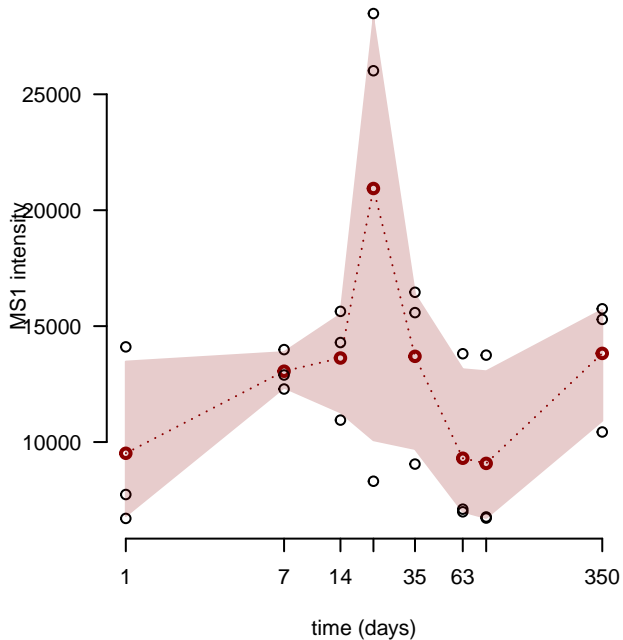

**Q8BH43**  
**GN=Wasf2**  
WASP family, member 2

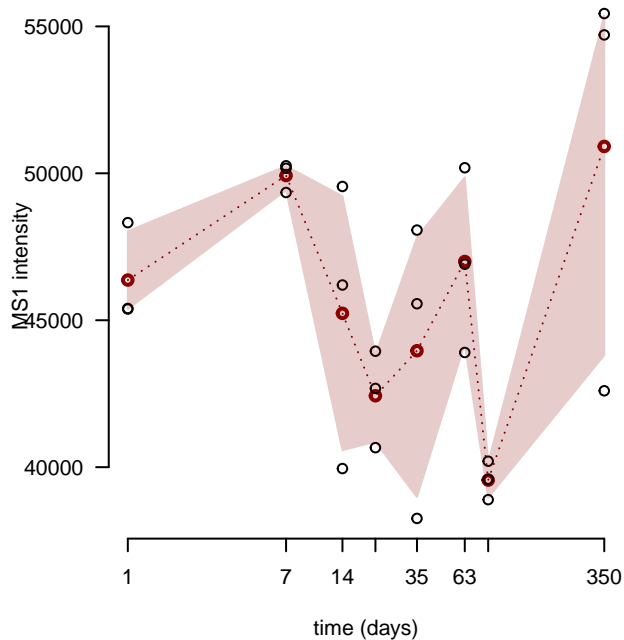

**Q8BH44**  
**GN=Coro2b**  
coronin, actin binding protein, 2B

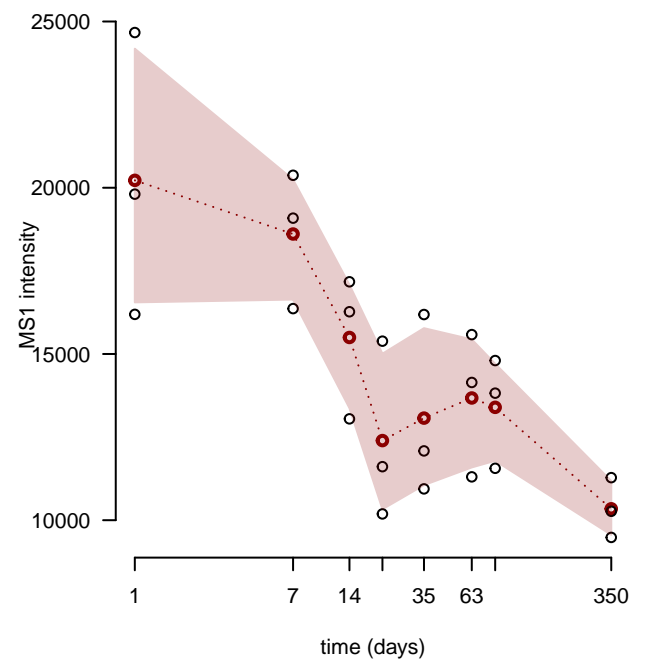

**Q8BH47**  
**GN=Sec22a**  
SEC22 homolog A, vesicle trafficking pro ...

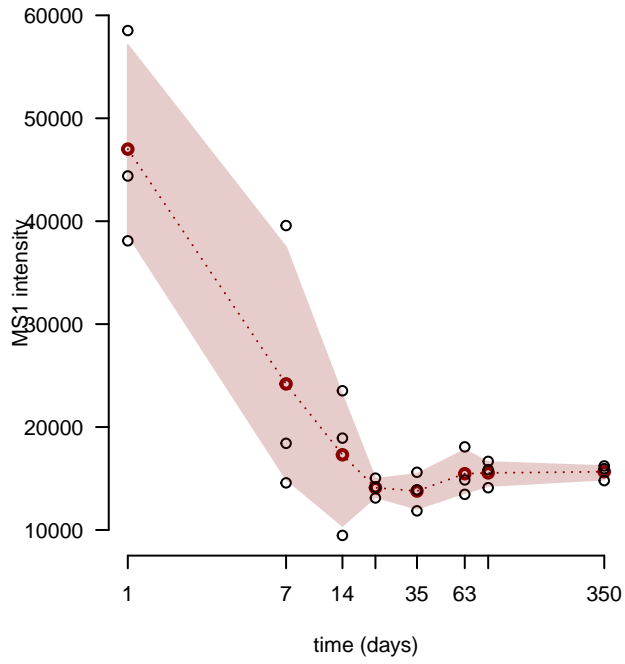

**Q8BH48**  
**GN=Ubp1**  
ubiquitin-associated protein 1

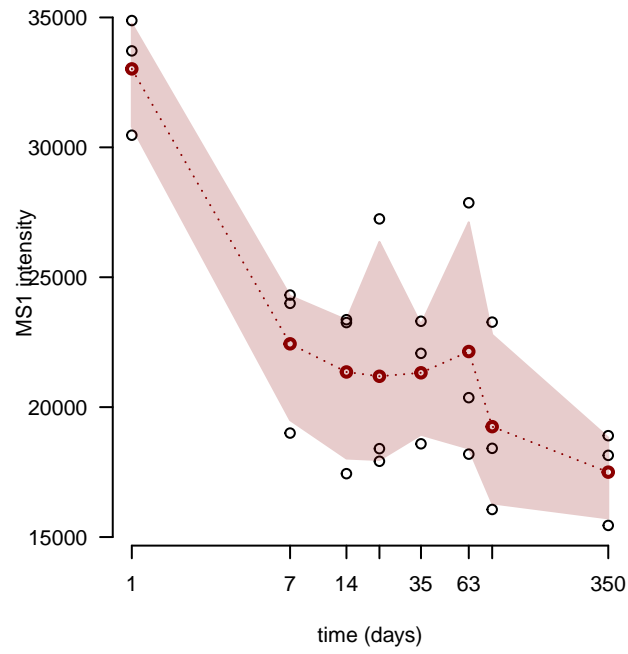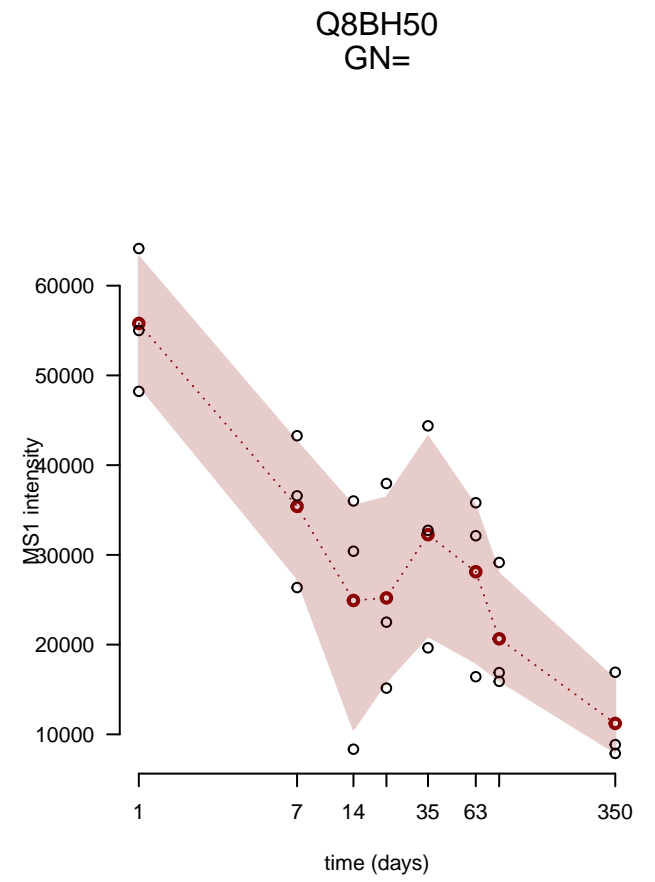

**Q8BH51**  
**GN=Cox14**  
cytochrome c oxidase assembly protein 14

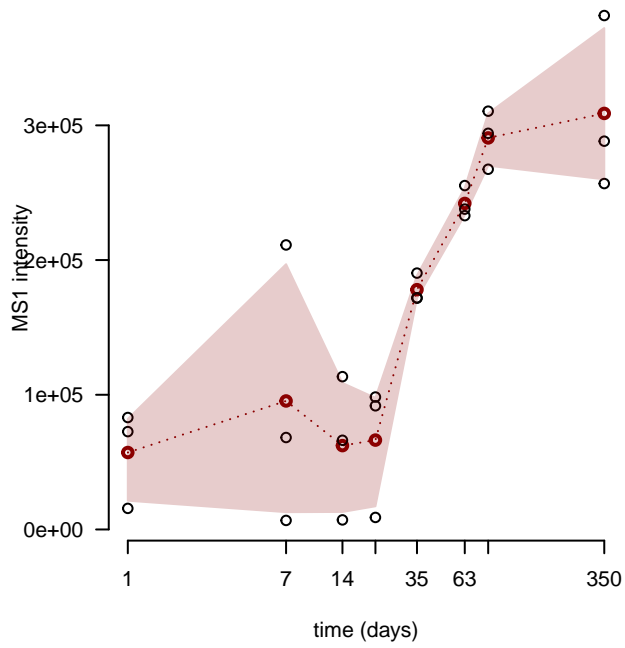

**Q8BH55**  
**GN=Thns1**  
threonine synthase-like 1 (bacterial)

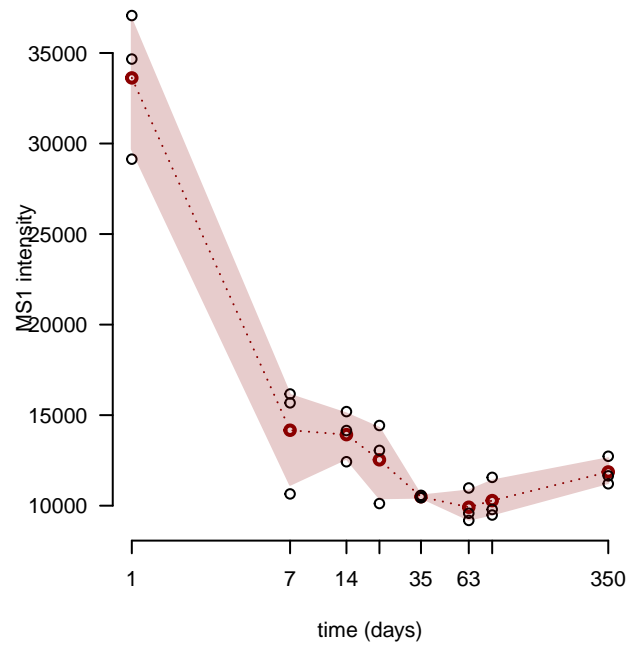

**Q8BH57**  
**GN=Wdr48**  
WD repeat domain 48

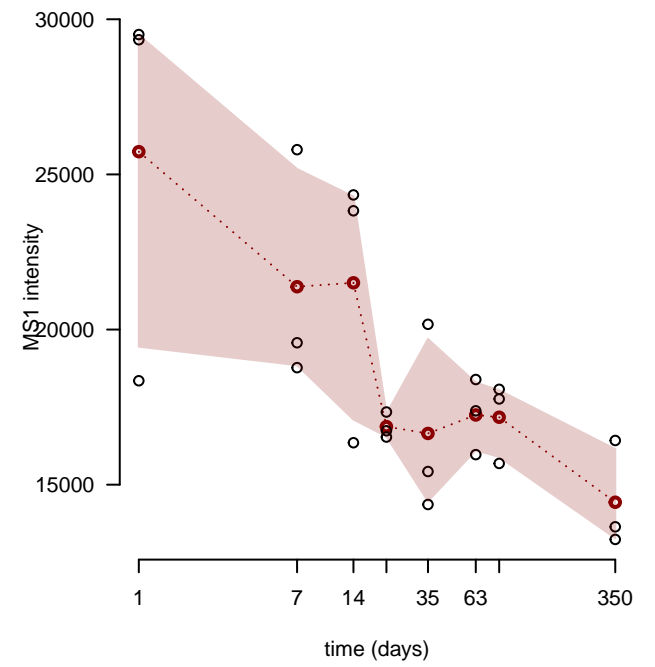

**Q8BH58**  
**GN=Tip1**  
TIP41, TOR signalling pathway regulator- ...

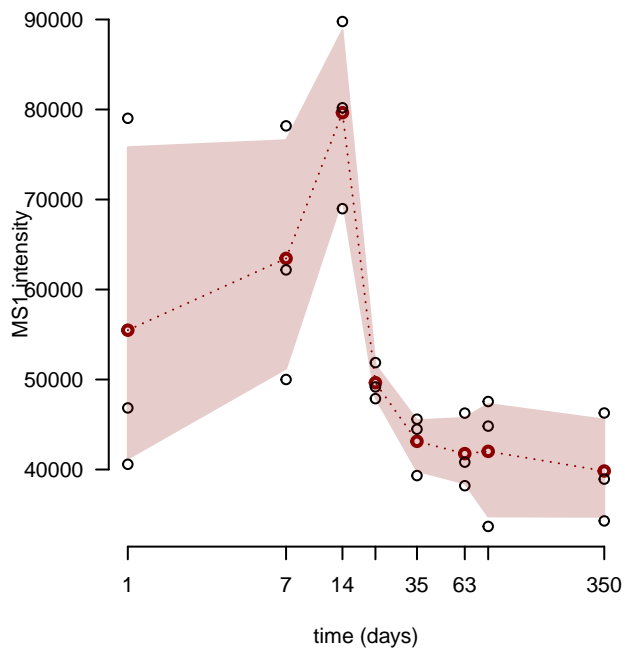

**Q8BH59**  
**GN=Slc25a12**  
solute carrier family 25 (mitochondrial ...

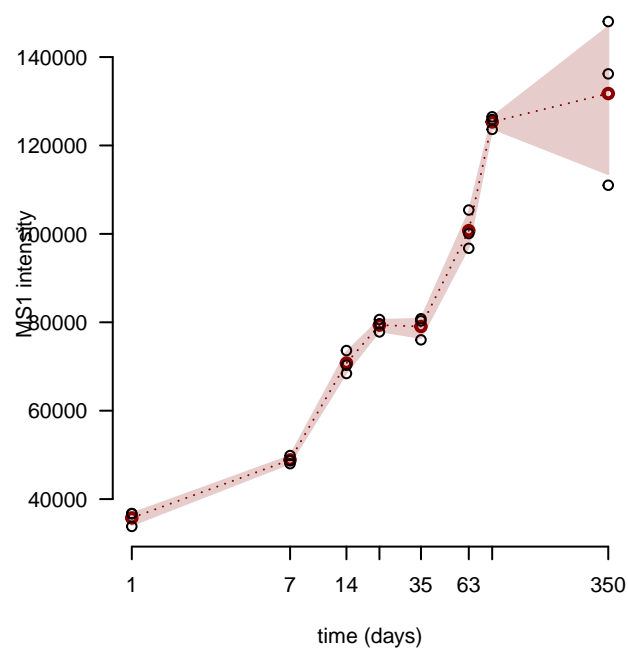

**Q8BH60**  
**GN=Gopc**  
golgi associated PDZ and coiled-coil mot ...

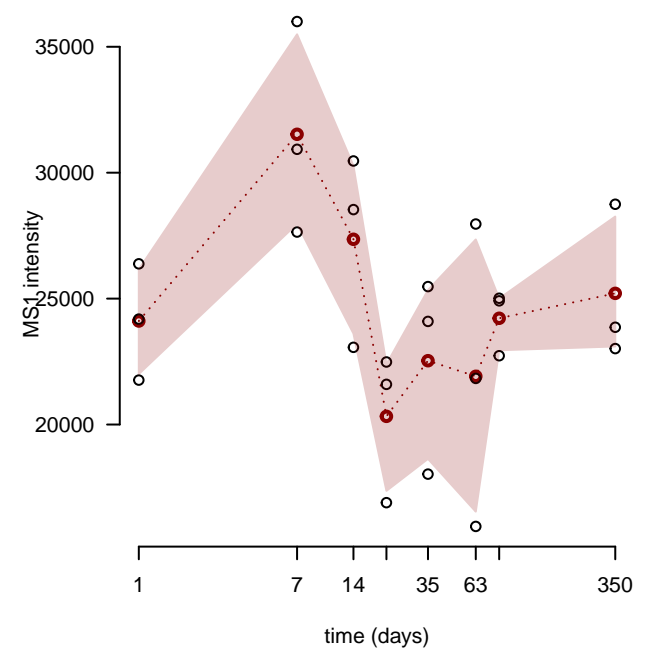

**Q8BH61**  
**GN=F13a1**  
coagulation factor XIII, A1 subunit

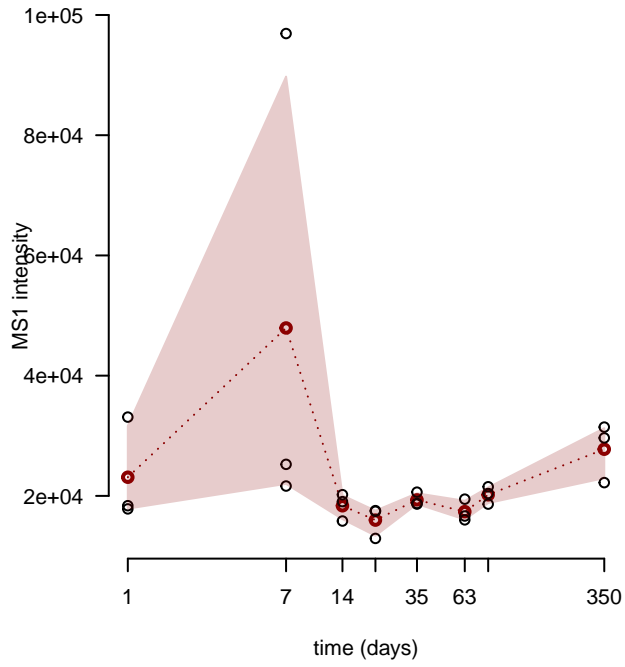

**Q8BH64**  
**GN=Ehd2**  
EH-domain containing 2

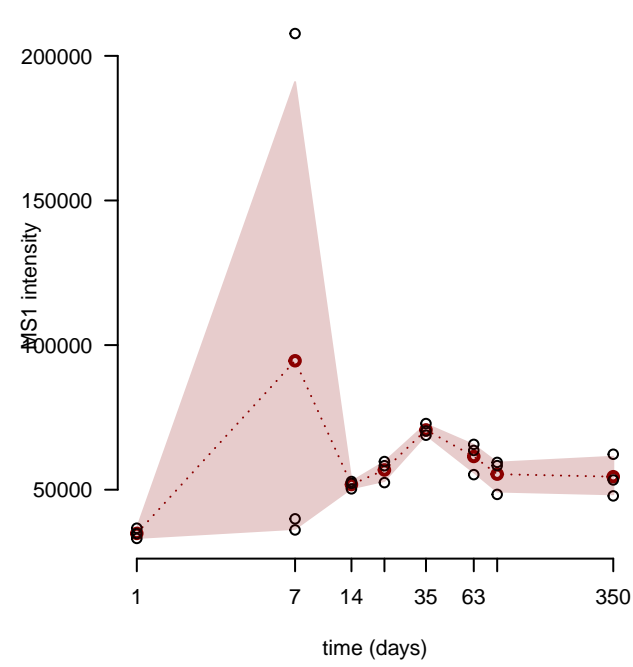

**Q8BH65**  
**GN=Dennd6a**  
DENN/MADD domain containing 6A

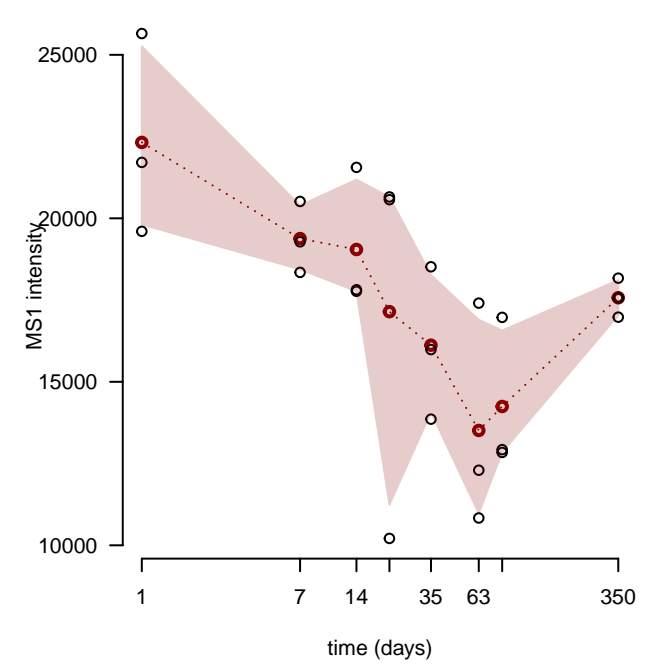

**Q8BH66**  
**GN=At11**  
atlastin GTPase 1

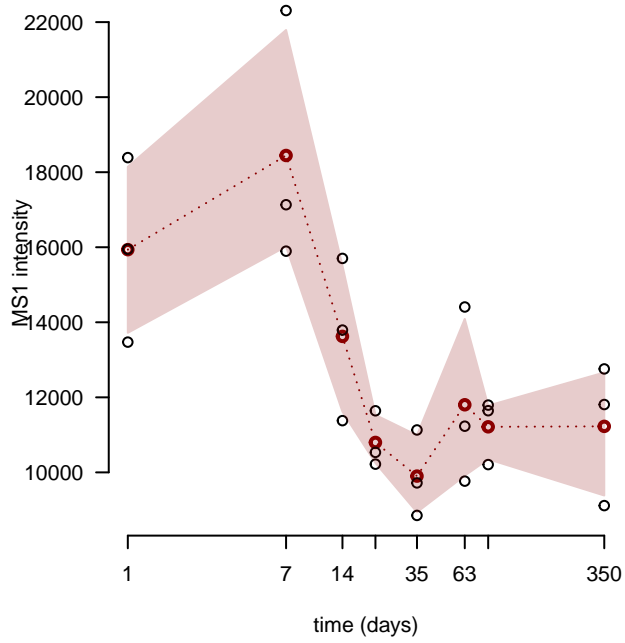

**Q8BH69**  
**GN=Seps1**  
selenophosphate synthetase 1

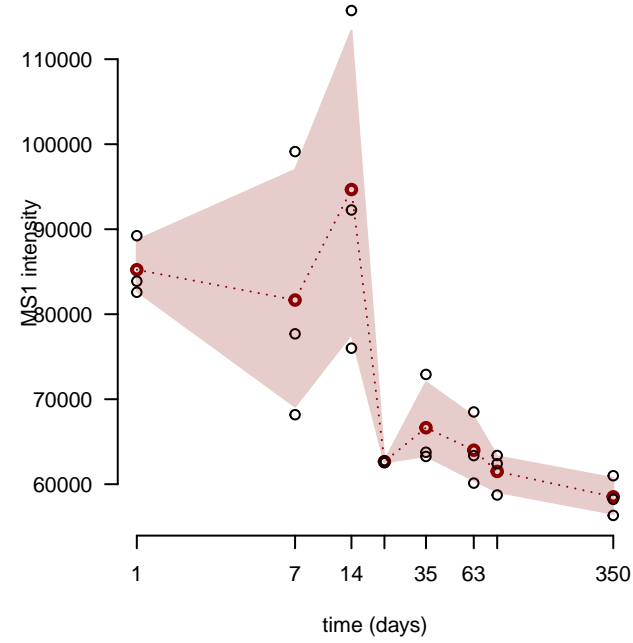

**Q8BH70**  
**GN=Fbx14**  
F-box and leucine-rich repeat protein 4

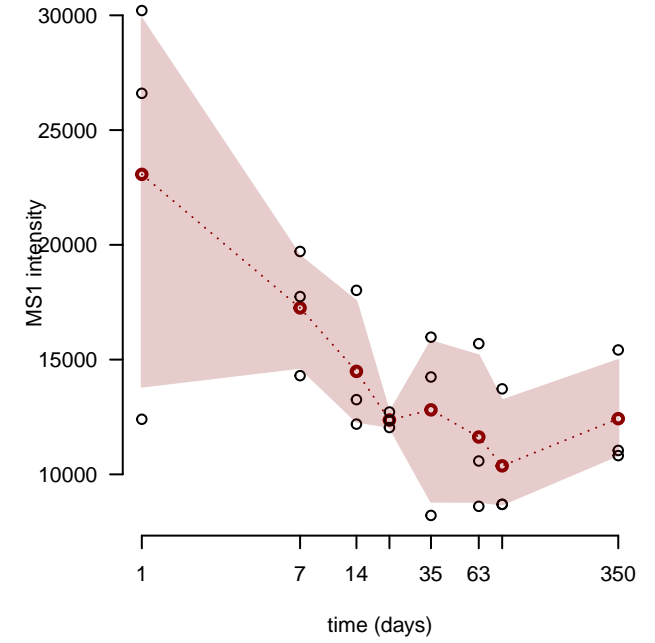

**Q8BH73**  
**GN=Qpctl**  
glutaminyl-peptide cyclotransferase-like

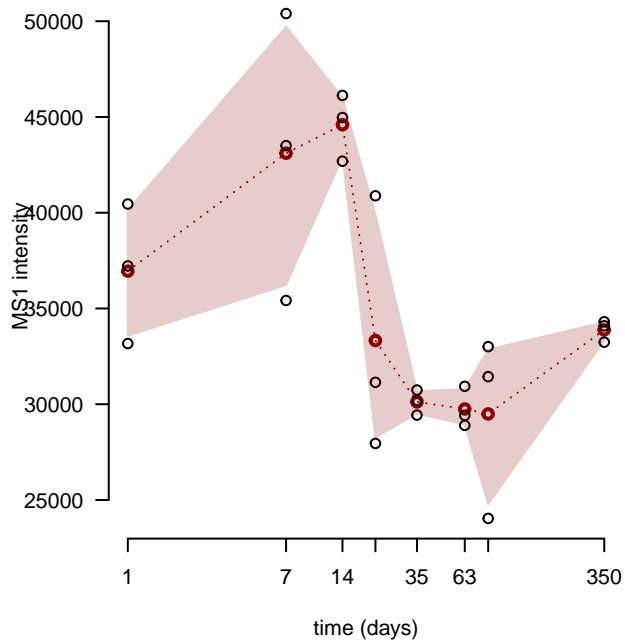

**Q8BH74**  
**GN=Nup107**  
nucleoporin 107

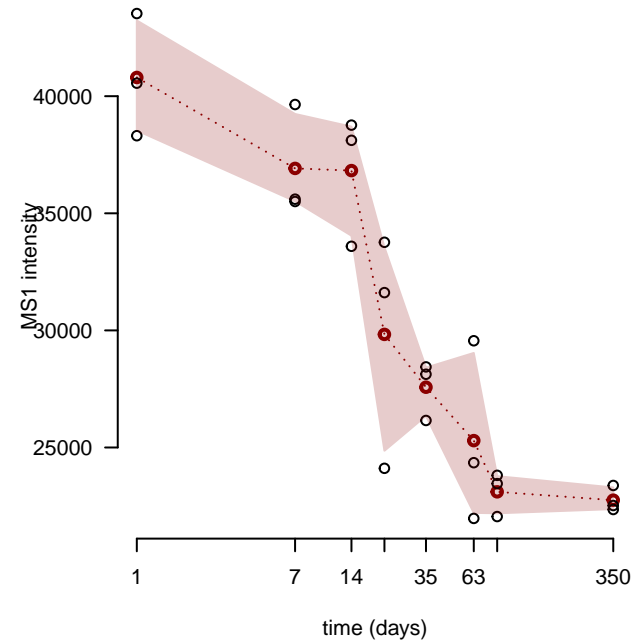

**Q8BH79**  
**GN=Ano10**  
anoctamin 10

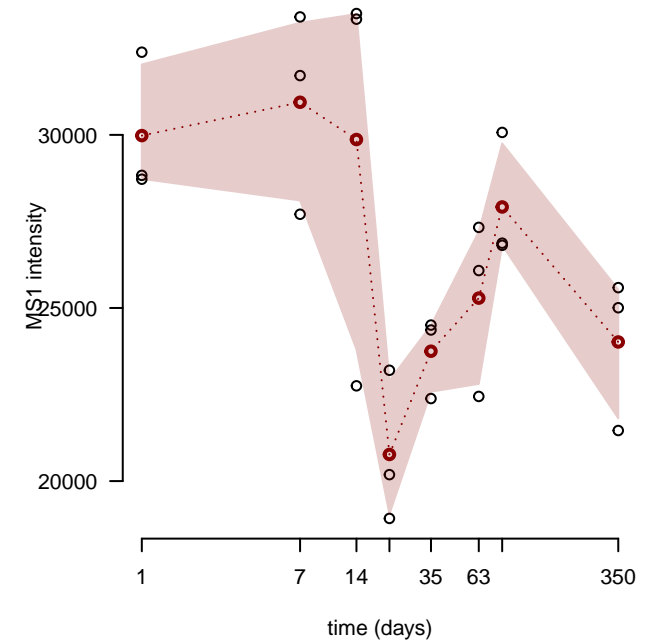

**Q8BH82**  
**GN=Napepld**  
N-acyl phosphatidylethanolamine phosphol ...

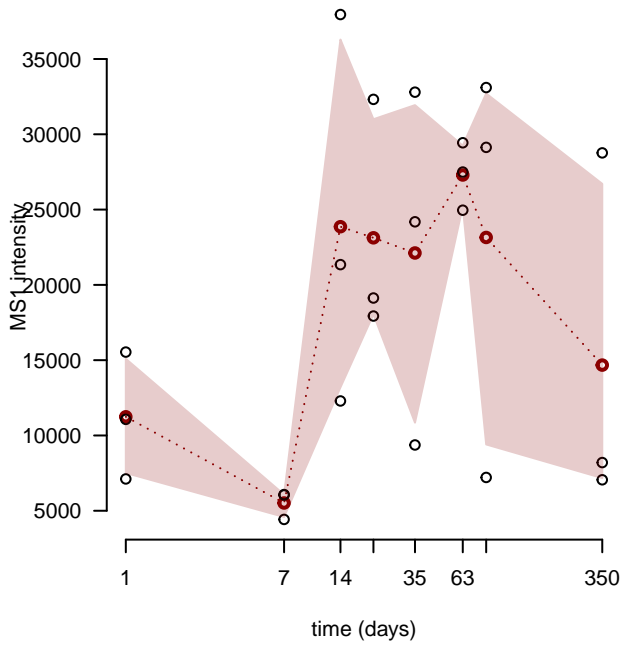

**Q8BH86**  
**GN=Dglucy**  
D-glutamate cyclase

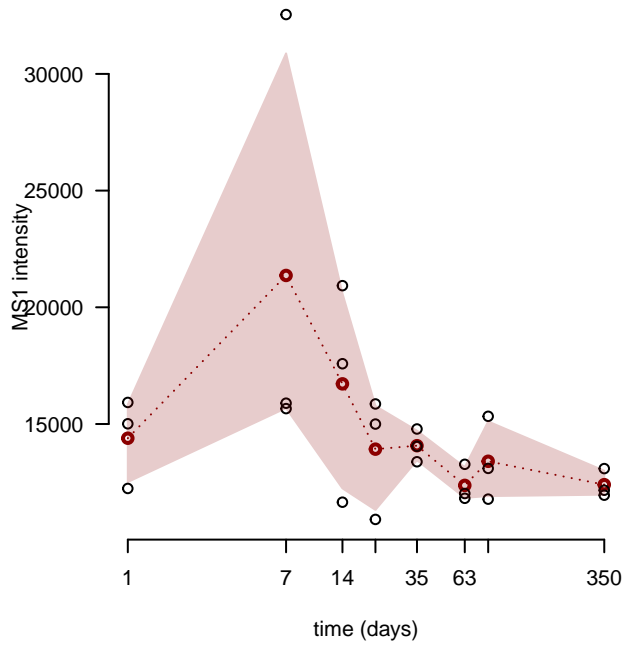

**Q8BH95**  
**GN=Echs1**  
enoyl Coenzyme A hydratase, short chain, ...

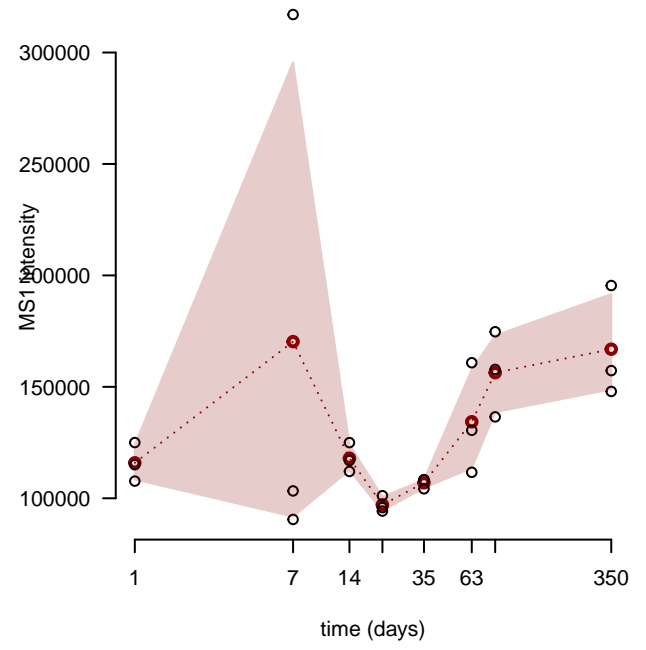

**Q8BH97**  
**GN=Rcn3**  
reticulocalbin 3, EF-hand calcium bindin ...

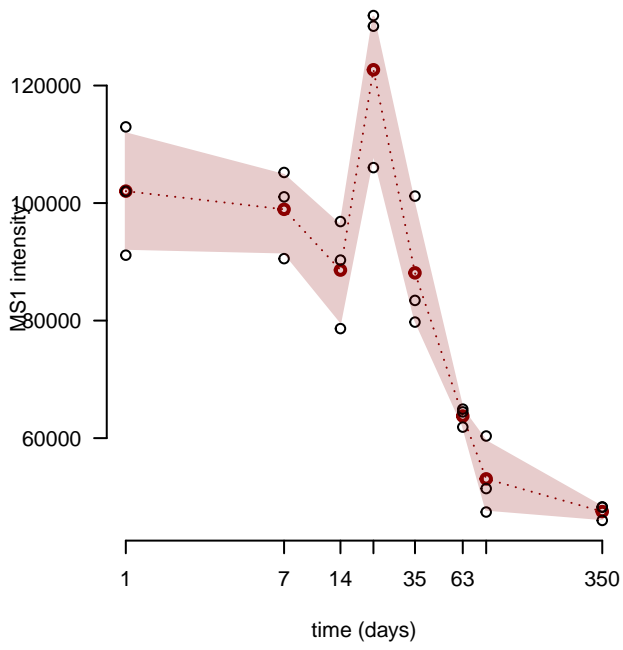

**Q8BHA0**  
**GN=Ino80c**  
INO80 complex subunit C

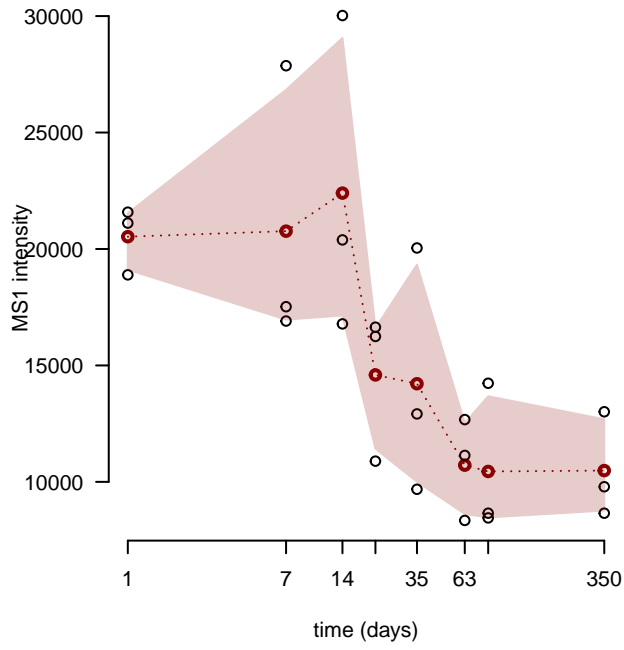

**Q8BHA3**  
**GN=Dtd2**  
D-tyrosyl-tRNA deacylase 2

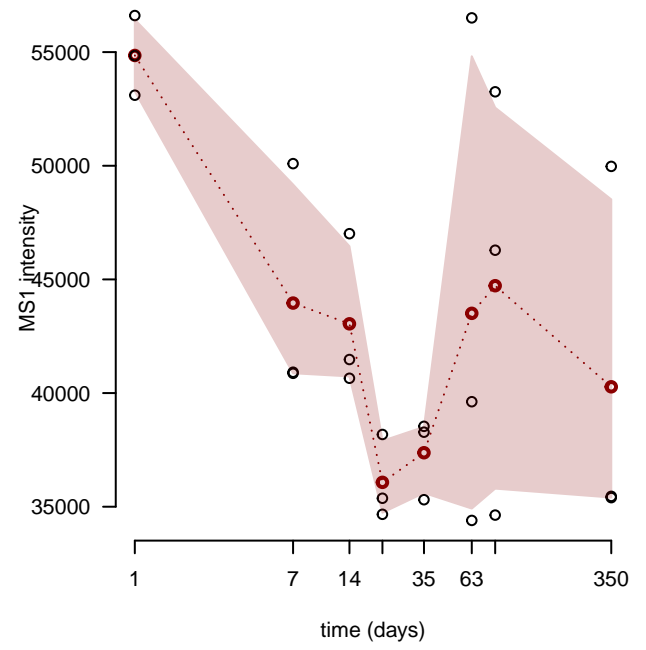

**Q8BHB4**  
**GN=Wdr3**  
WD repeat domain 3

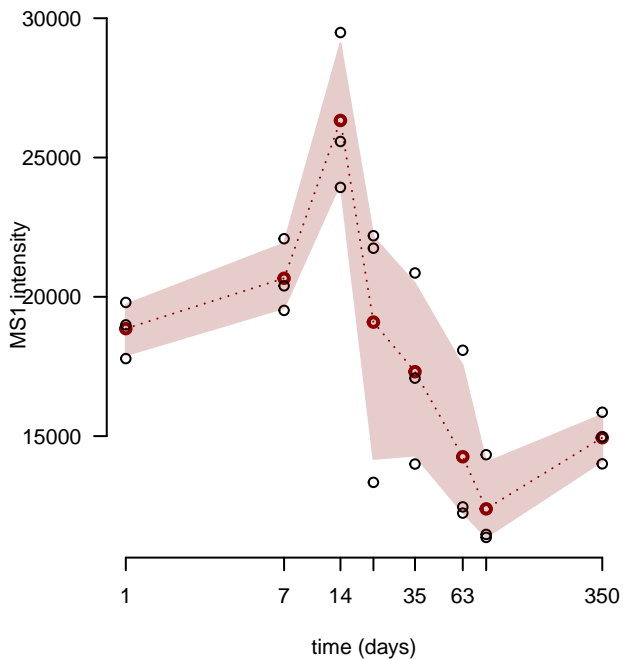

**Q8BHB9**  
**GN=Clic6**  
chloride intracellular channel 6

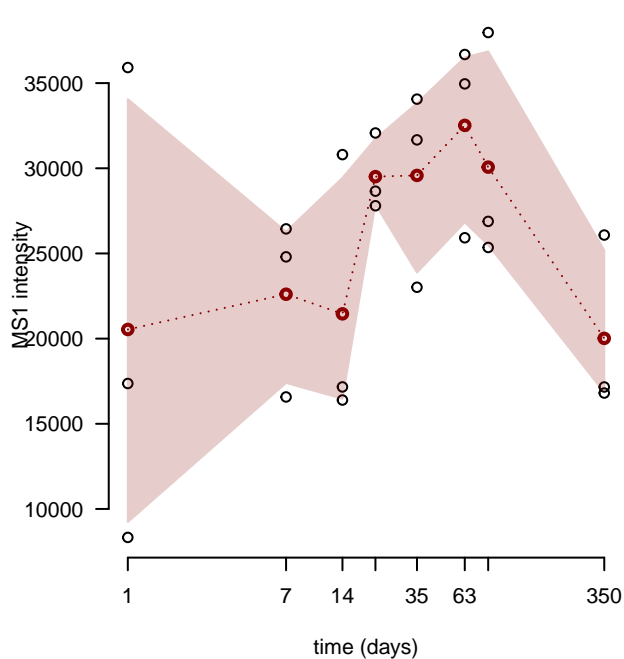

**Q8BHC0**  
**GN=Lyve1**  
lymphatic vessel endothelial hyaluronan ...

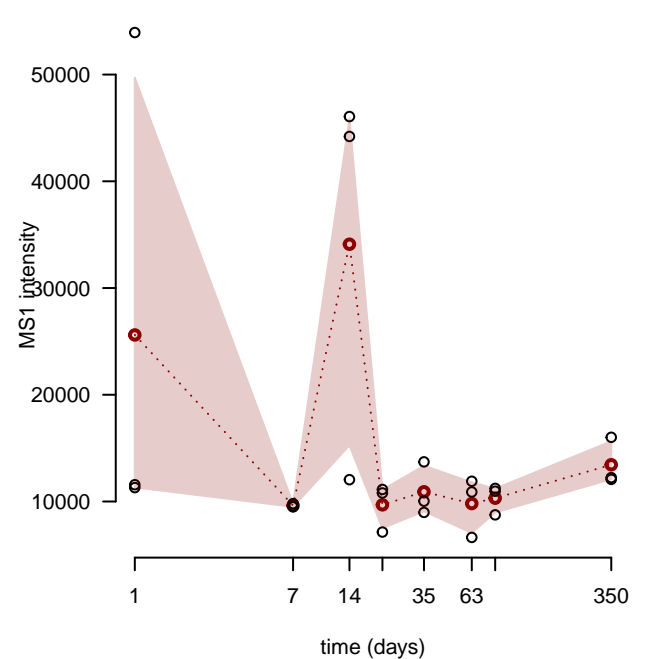



**Q8BHC4**  
GN=Dcakd  
dephospho-CoA kinase domain containing

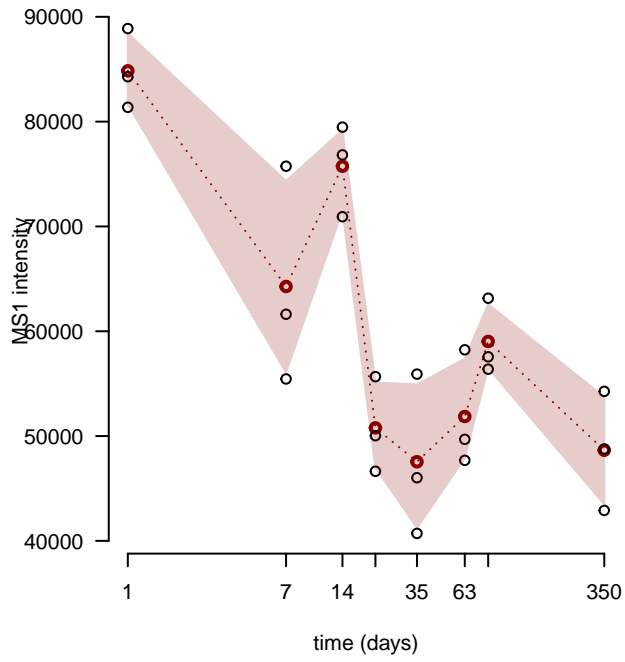

**Q8BHC7**  
GN=Rhbdd1  
rhomboid domain containing 1

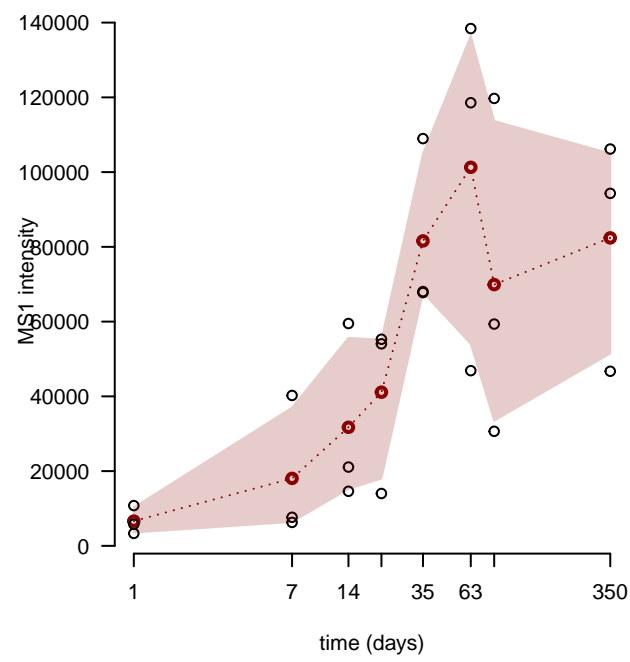

**Q8BHC9**  
GN=Fut11  
fucosyltransferase 11

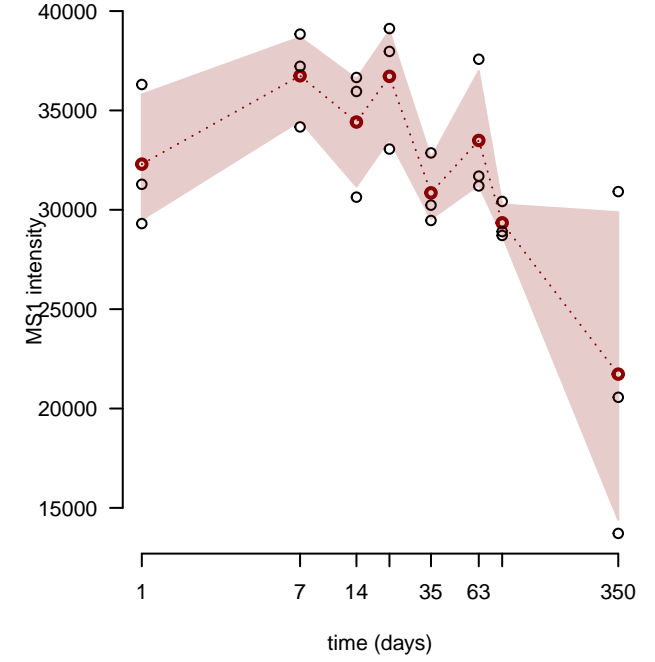

**Q8BHD7**  
GN=Ptp3  
polypyrimidine tract binding protein 3

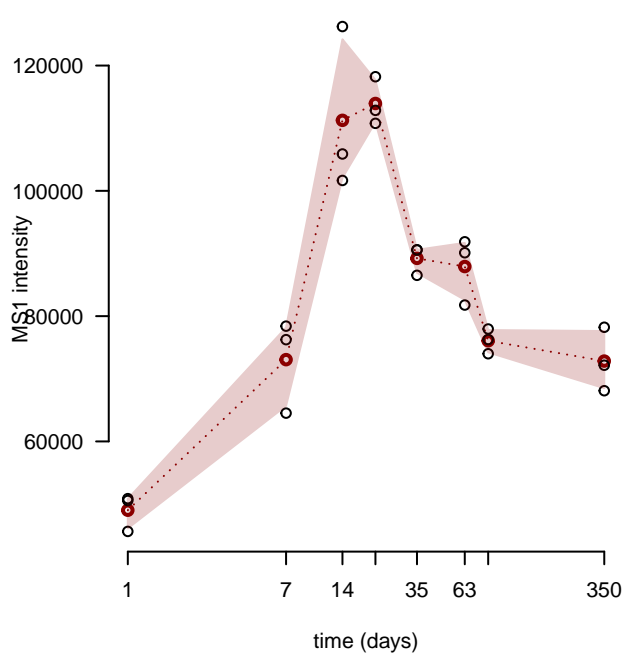

**Q8BHD8**  
GN=Pcmd2  
protein-L-isoaspartate (D-aspartate) O-m ...

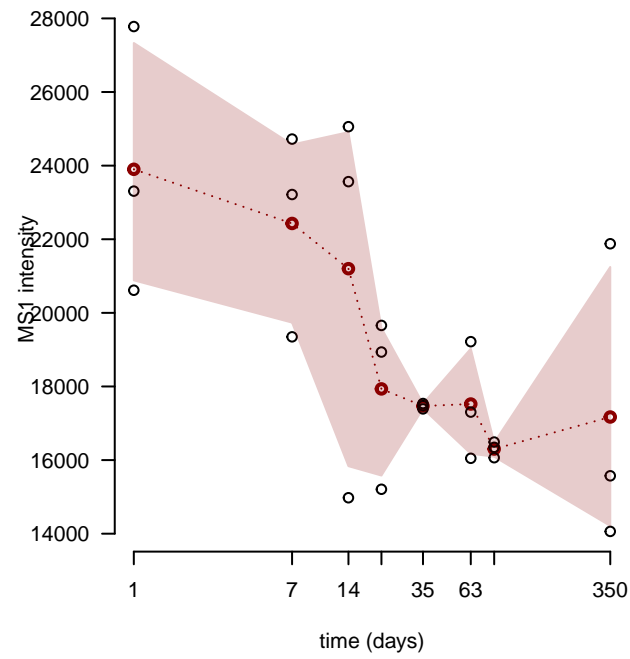

**Q8BHE1**  
GN=Gemin8  
gem nuclear organelle associated protein ...

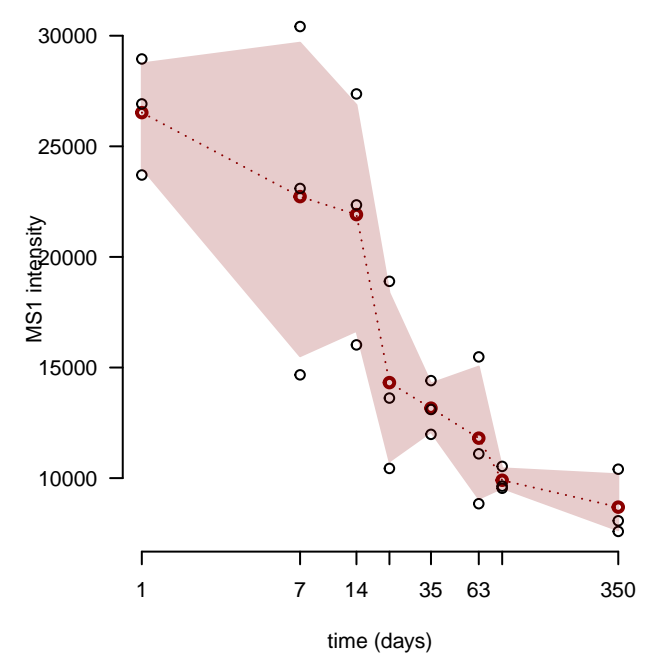

**Q8BHE8**  
GN=Maip1  
matrix AAA peptidase interacting protein ...

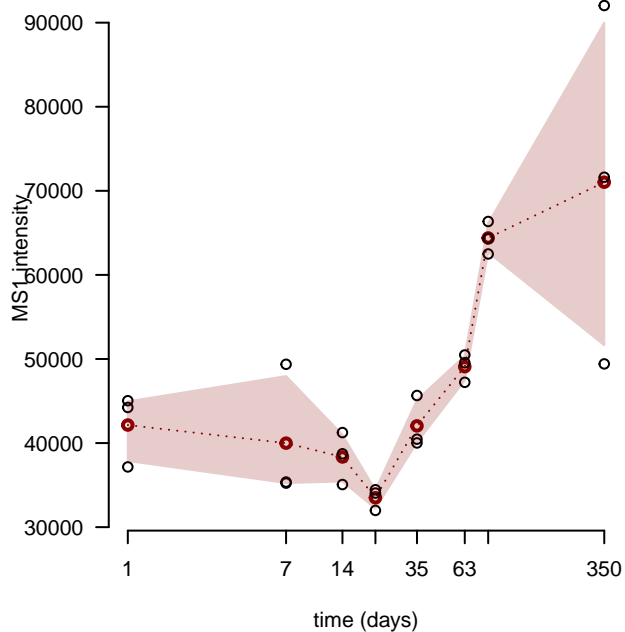

**Q8BHF7**  
GN=Pgs1  
phosphatidylglycerophosphate synthase 1

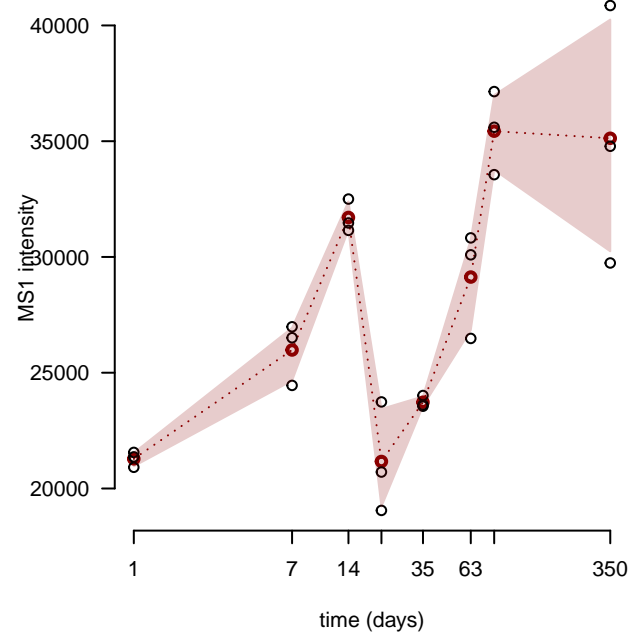

**Q8BHG1**  
GN=Nrdc

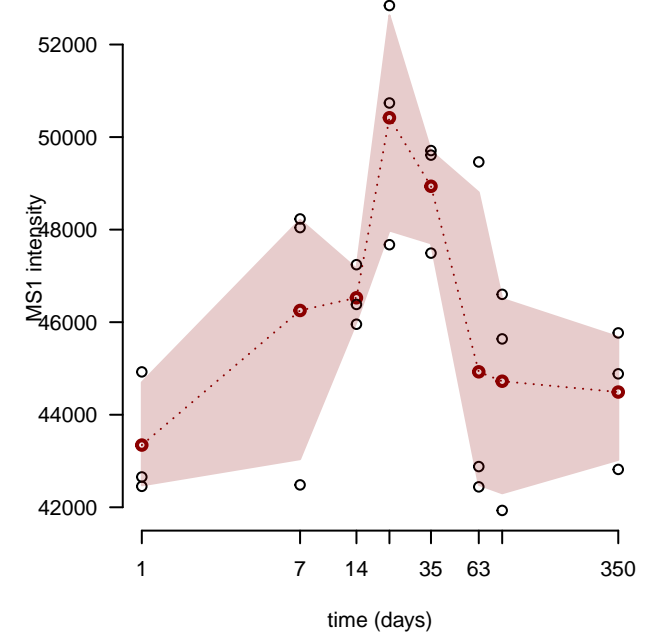

**Q8BHG2**  
GN=Czib  
CXXC motif containing zinc binding prote ...

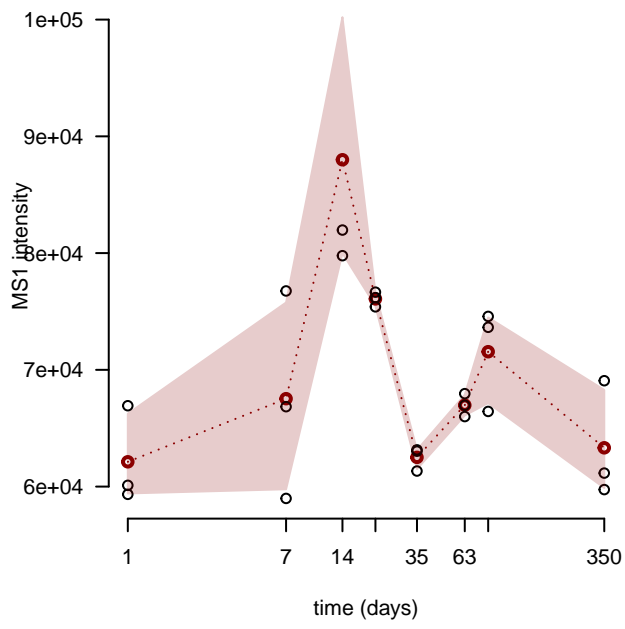

**Q8BHG9**  
GN=Cggbp1  
CGG triplet repeat binding protein 1

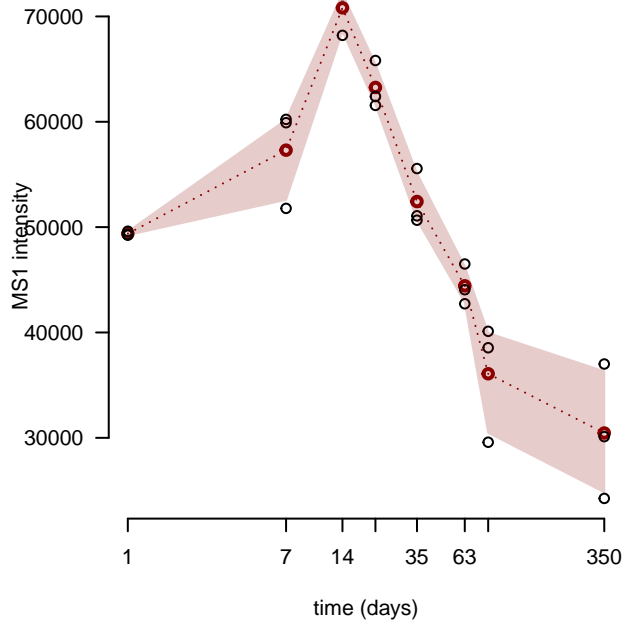

**Q8BHI7**  
GN=Elolv5  
ELOVL family member 5, elongation of lon ...

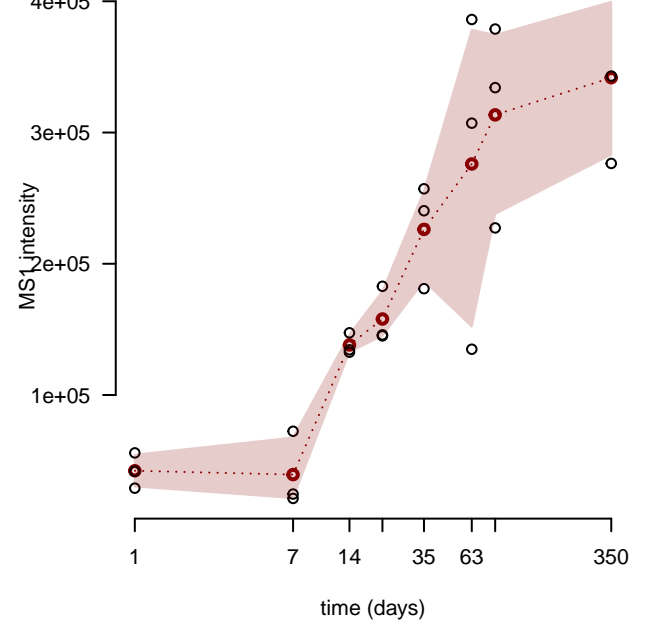

**Q8BHJ5**  
GN=Tbl1xr1  
transducin (beta)-like 1X-linked recepto ...

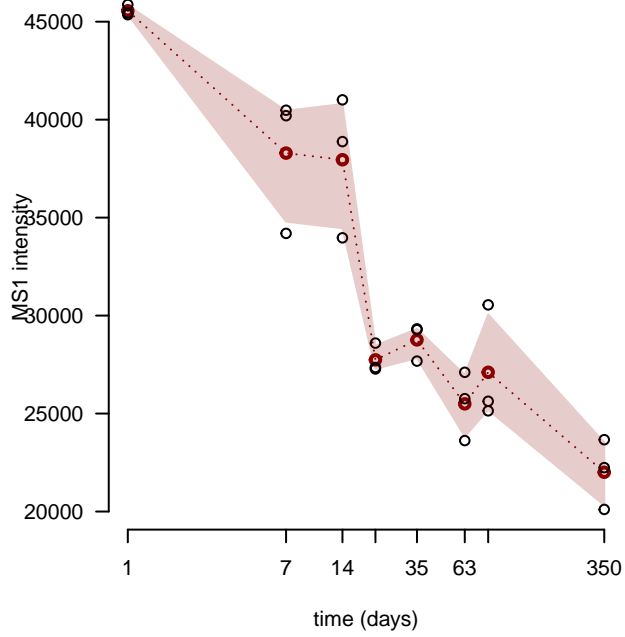

**Q8BHJ6**  
GN=Serinc5  
serine incorporator 5

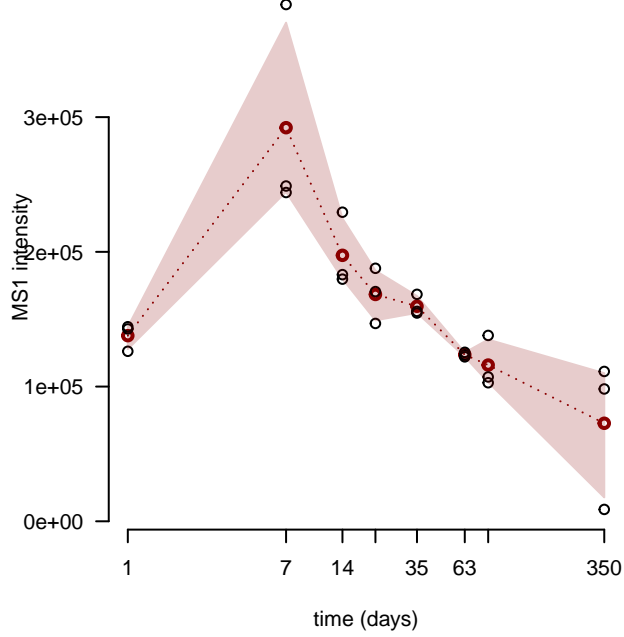

**Q8BHJ9**  
GN=Slu7  
SLU7 splicing factor homolog (S. cerevis ...

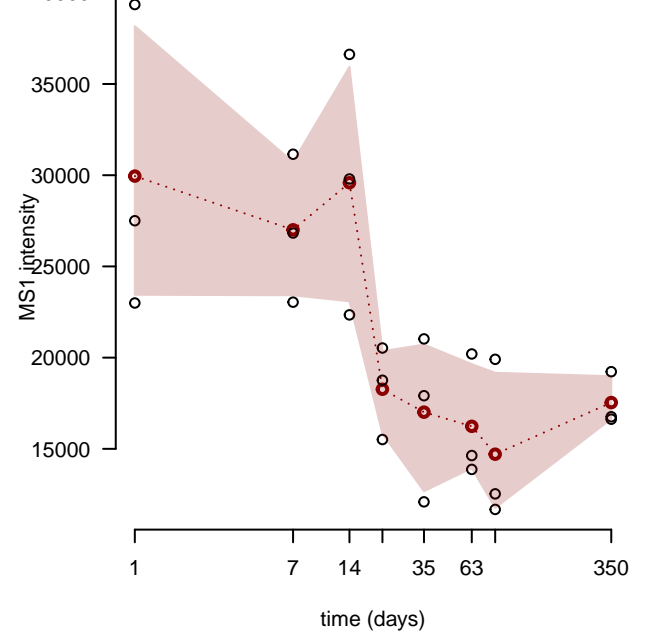

**Q8BHK1**  
GN=Nipa1  
non imprinted in Prader-Willi/Angelman s ...

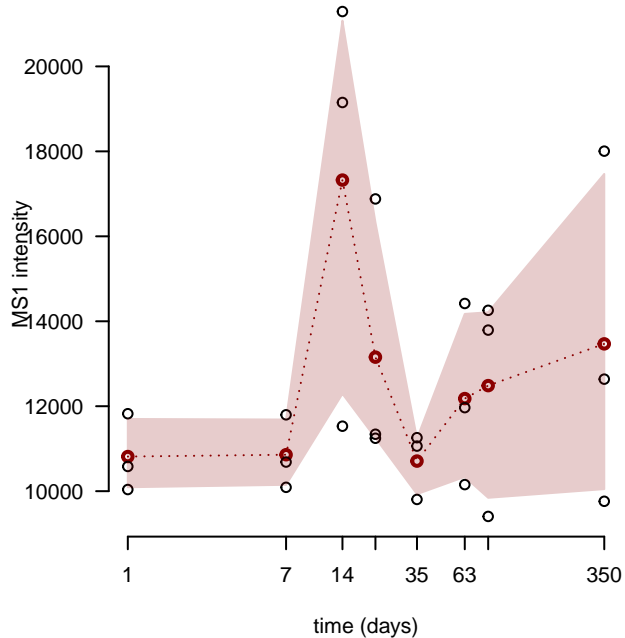

**Q8BHK9**  
GN=Ercc6l  
excision repair cross-complementing rode ...

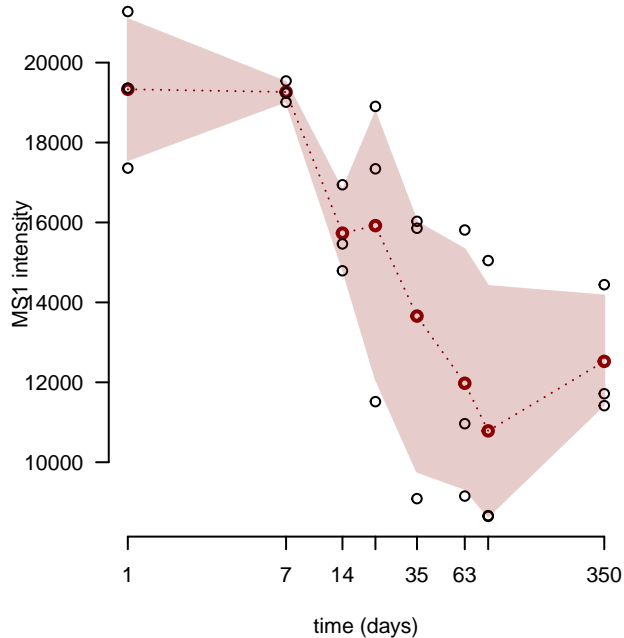

**Q8BHL3**  
GN=Tbc1d10b  
TBC1 domain family, member 10b

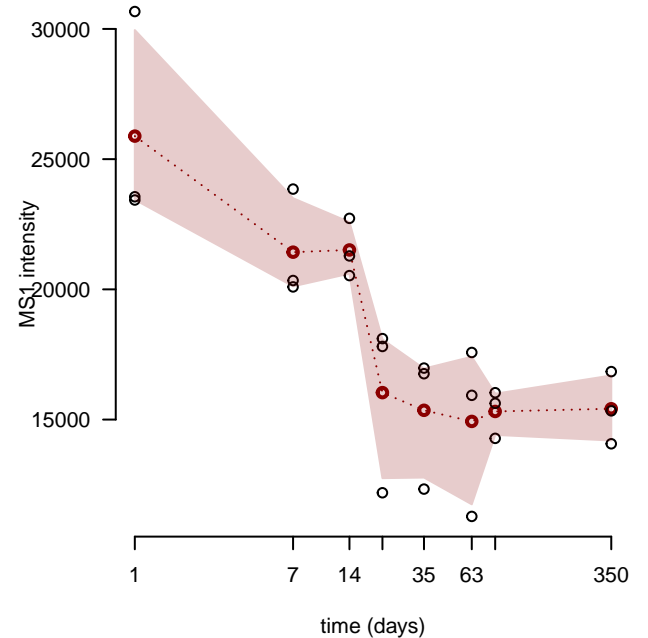

**Q8BHL5**  
**GN=Elmo2**  
engulfment and cell motility 2

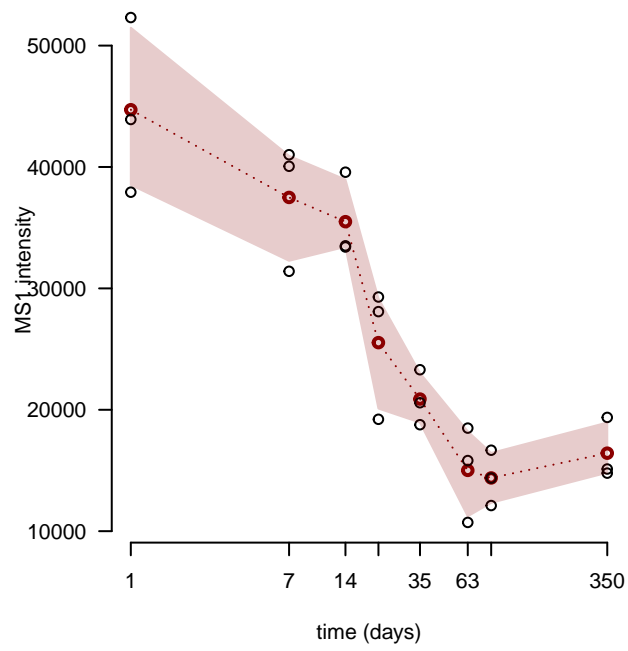

**Q8BHL8**  
**GN=Psmf1**  
proteasome (prosome, macropain) inhibito ...

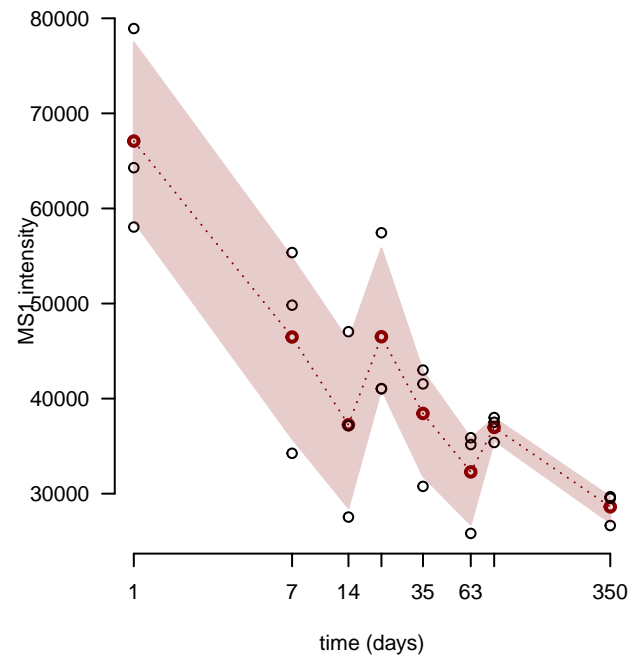

**Q8BHN0**  
**GN=Ppm1l**  
protein phosphatase 1 (formerly 2C)-like

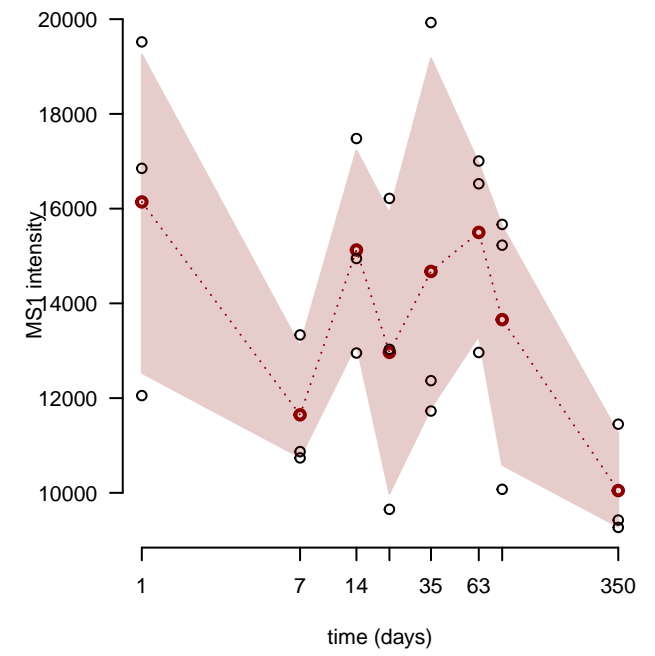

**Q8BHN1**  
**GN=Txlng**  
taxilin gamma

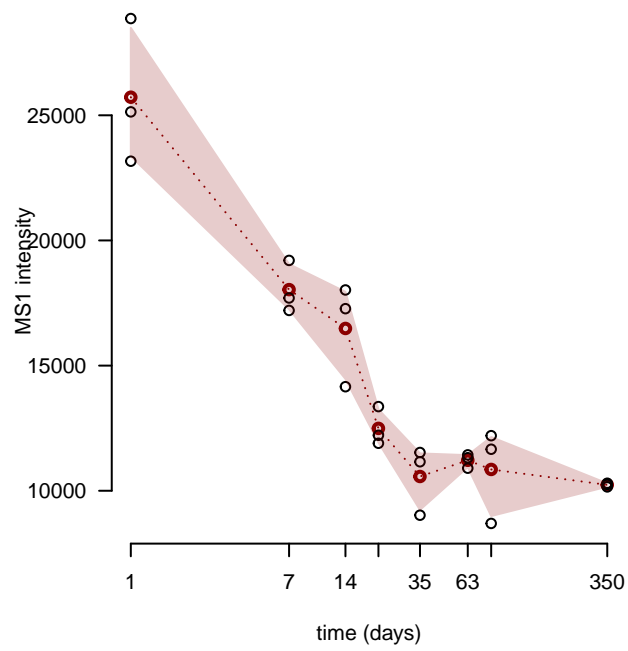

**Q8BHN3**  
**GN=Ganab**  
alpha glucosidase 2 alpha neutral subuni ...

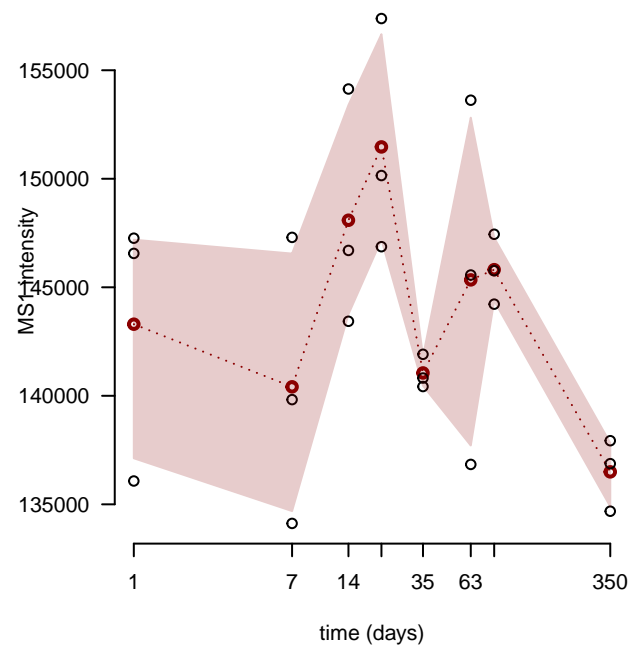

**Q8BHN3**  
**GN=Ganab**  
alpha glucosidase 2 alpha neutral subuni ...

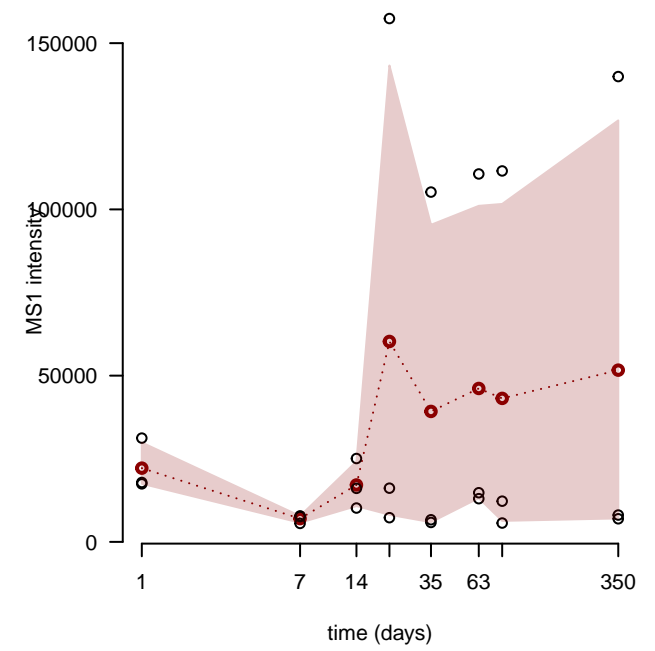

**Q8BHN5**  
**GN=Rbm45**  
RNA binding motif protein 45

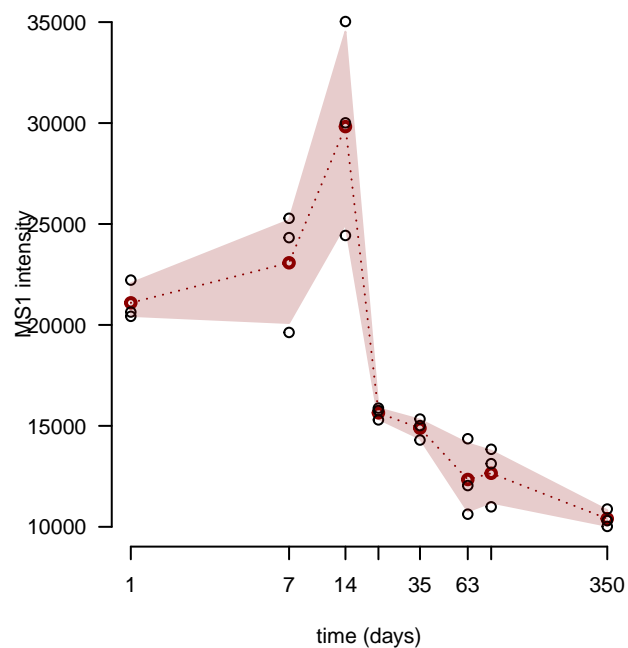

**Q8BHN7**  
**GN=**

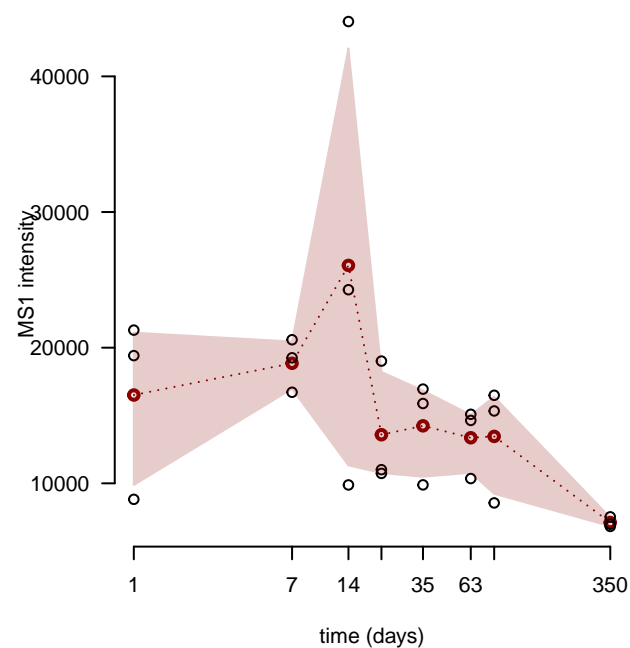

**Q8BHS3**  
**GN=Rbm22**  
RNA binding motif protein 22

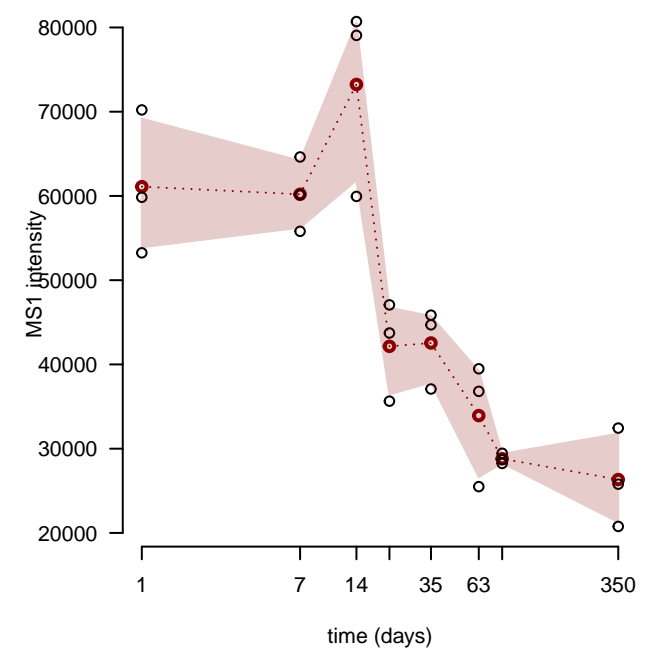

**Q8BHS6**  
**GN=Armcx3**  
armadillo repeat containing, X-linked 3

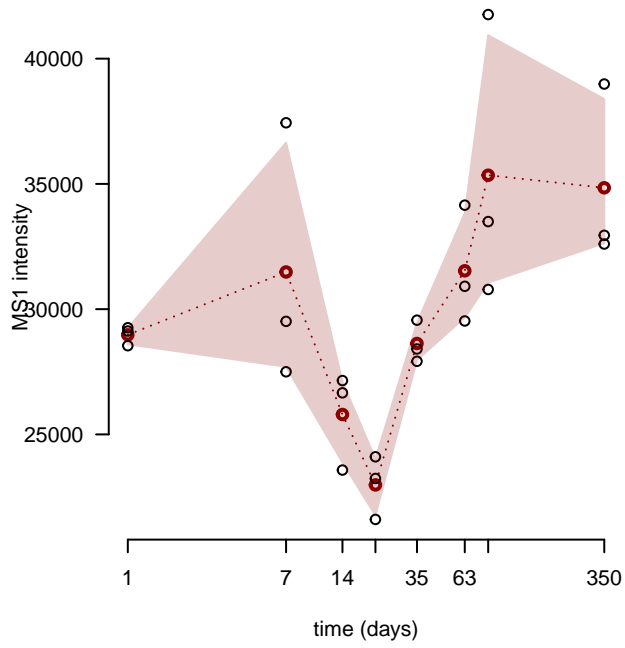

**Q8BHS8**  
**GN=Sybu**  
syntabulin (syntaxin-interacting)

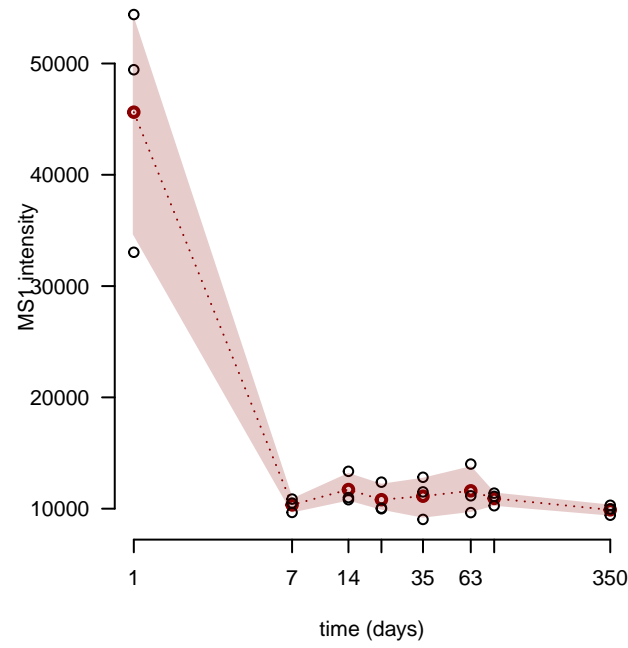

**Q8BHT6**  
**GN=B3glt**  
beta-3-glucosyltransferase

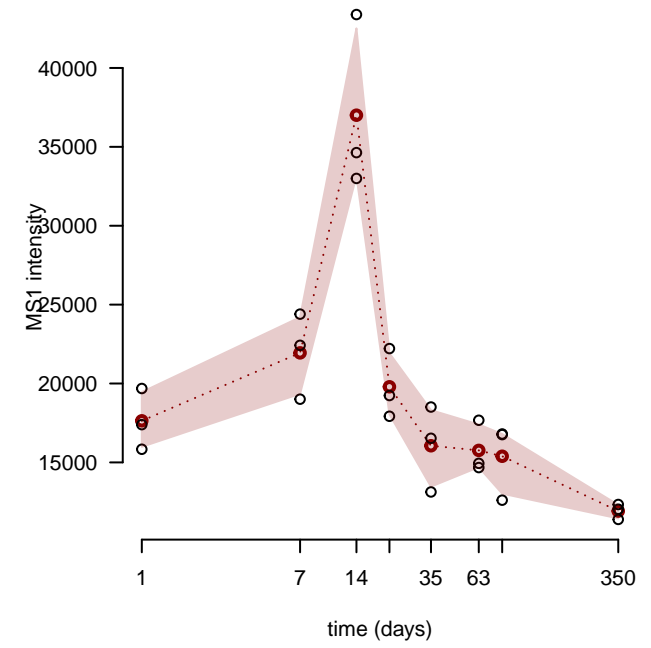

**Q8BHT7**  
**GN=Rgp1**  
RAB6A GEF complex partner 1

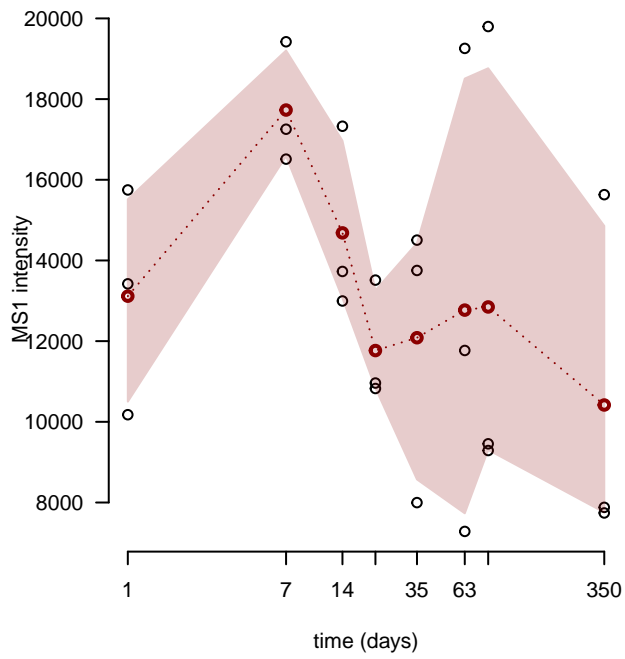

**Q8BHW2**  
**GN=Oscp1**  
organic solute carrier partner 1

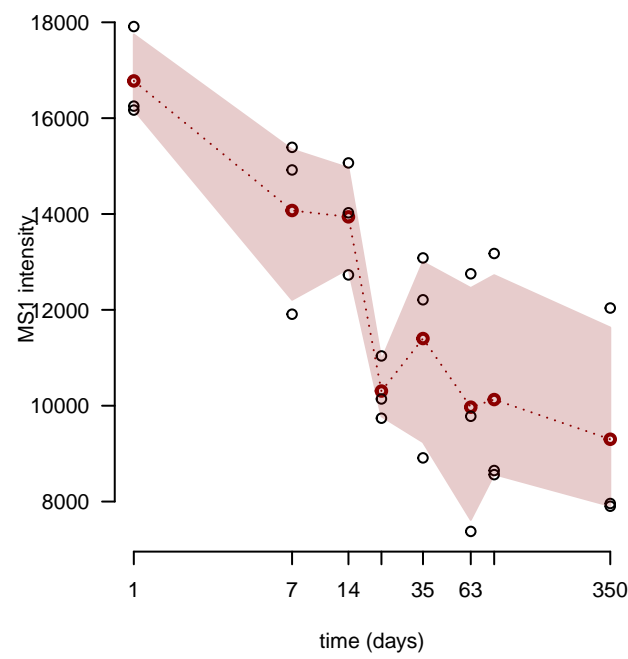

**Q8BHX1**  
**GN=Haus1**  
HAUS augmin-like complex, subunit 1

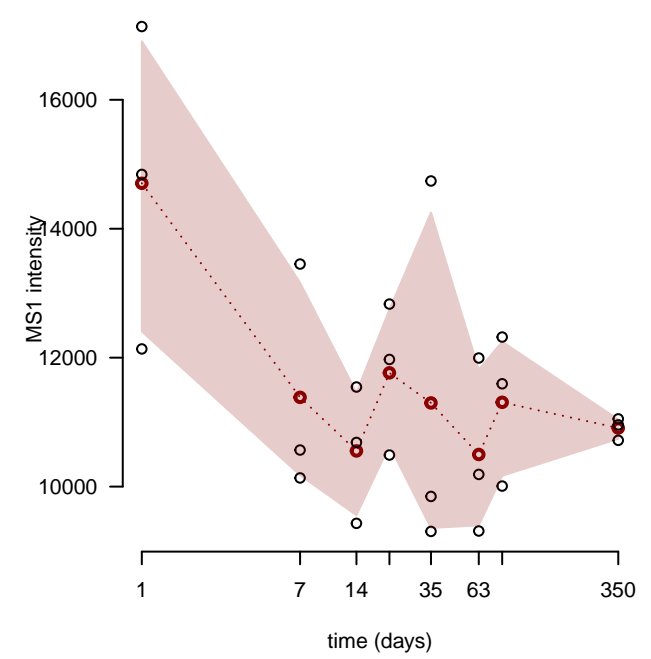

**Q8BHX3**  
**GN=Cdca8**  
cell division cycle associated 8

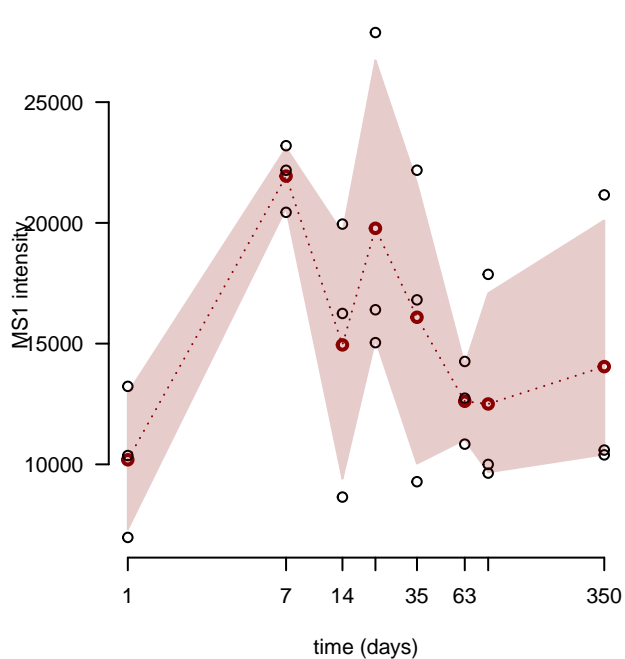

**Q8BHY2**  
**GN=Noc4l**  
NOC4 like

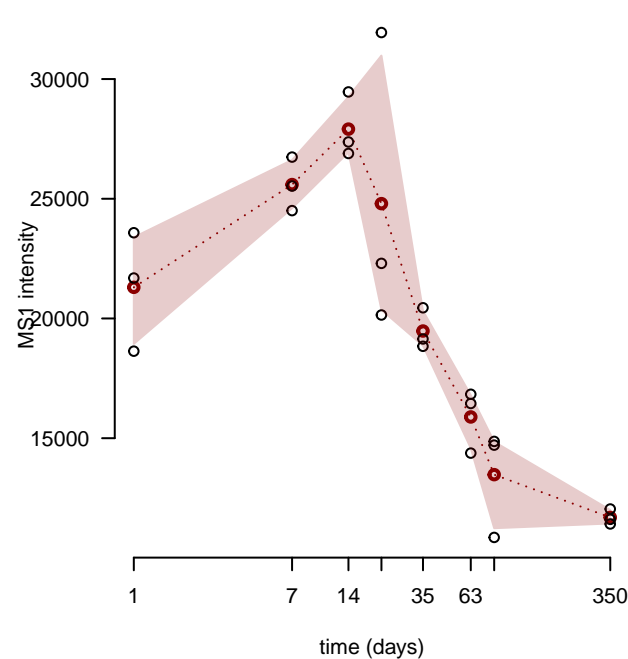

**Q8BHY3**  
**GN=Ano1**  
anoctamin 1, calcium activated chloride ...

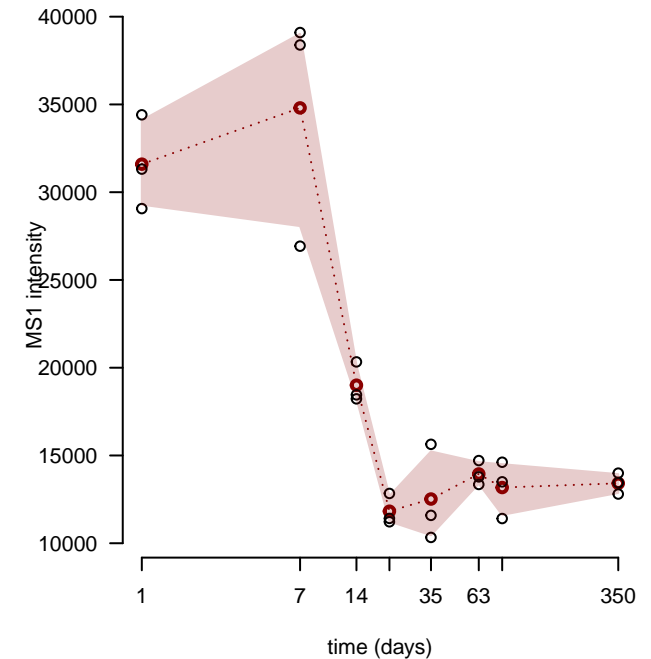

**Q8BHY8**  
GN=Snx14  
sorting nexin 14

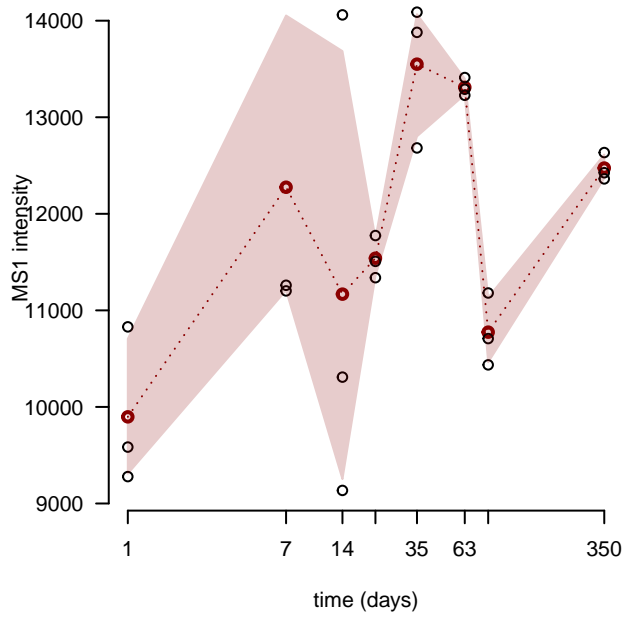

**Q8BHZ0**  
GN=Fam49a

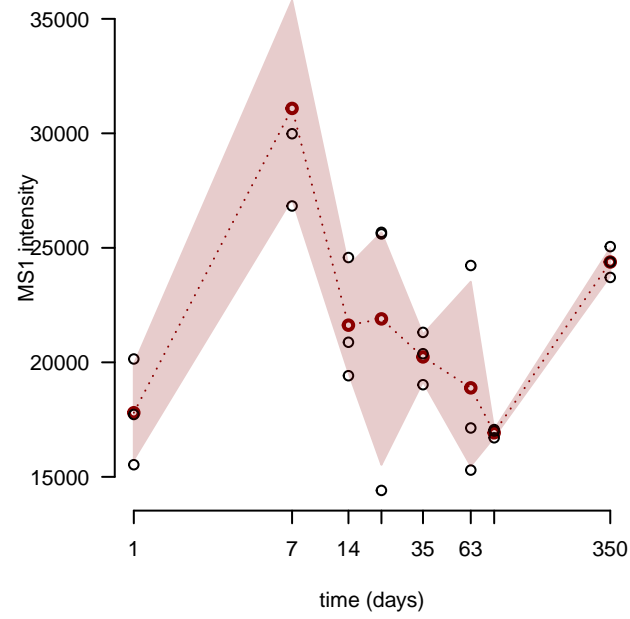

**Q8BHZ4**  
GN=Znf592

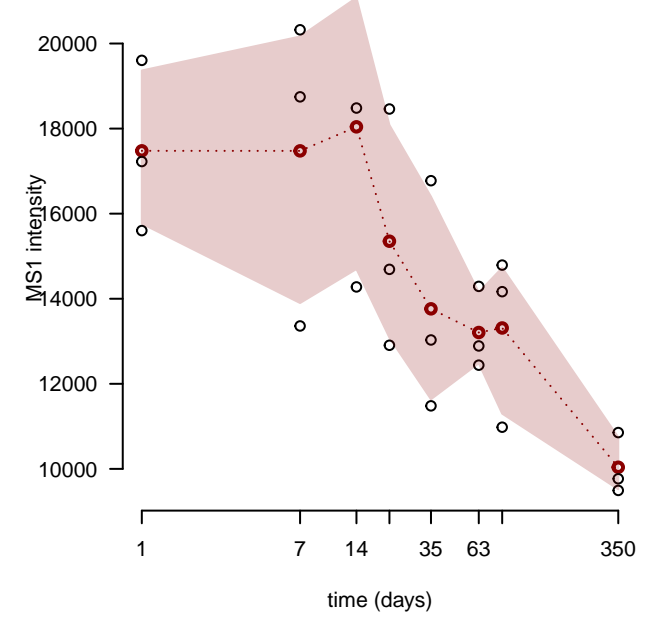

**Q8BI06**  
GN=Cemip  
cell migration inducing protein, hyaluro ...

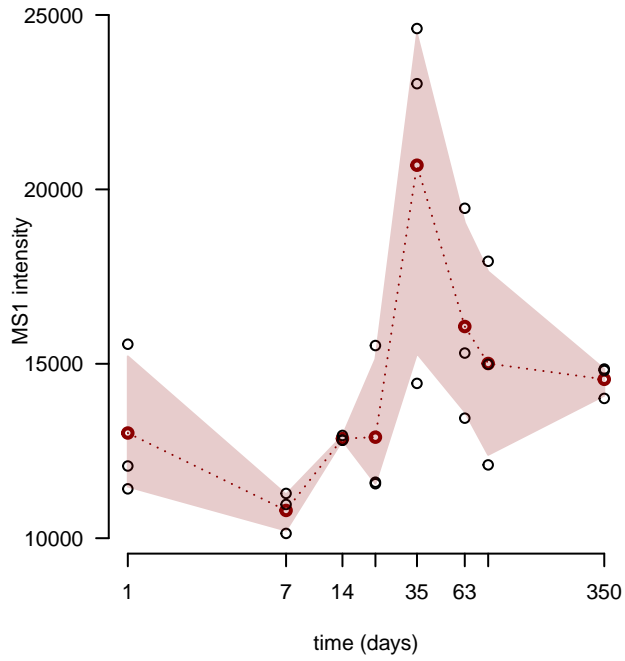

**Q8BI08**  
GN=Mal2  
mal, T cell differentiation protein 2

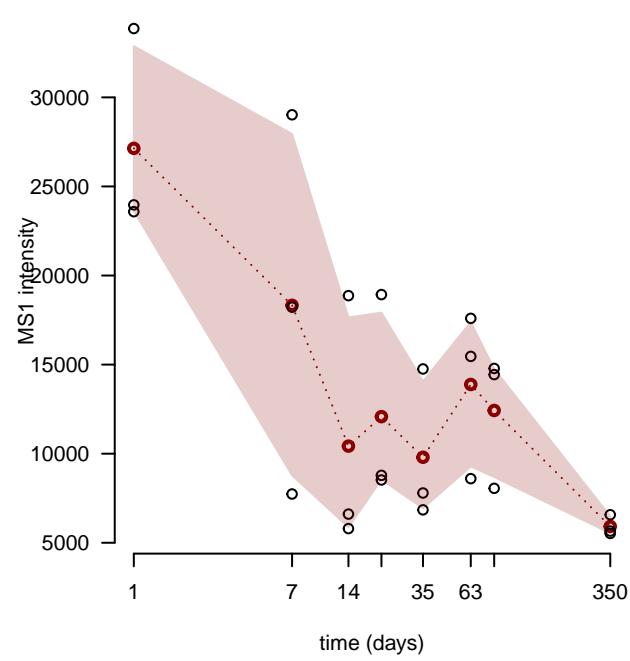

**Q8BI72**  
GN=Cdkn2aip  
CDKN2A interacting protein

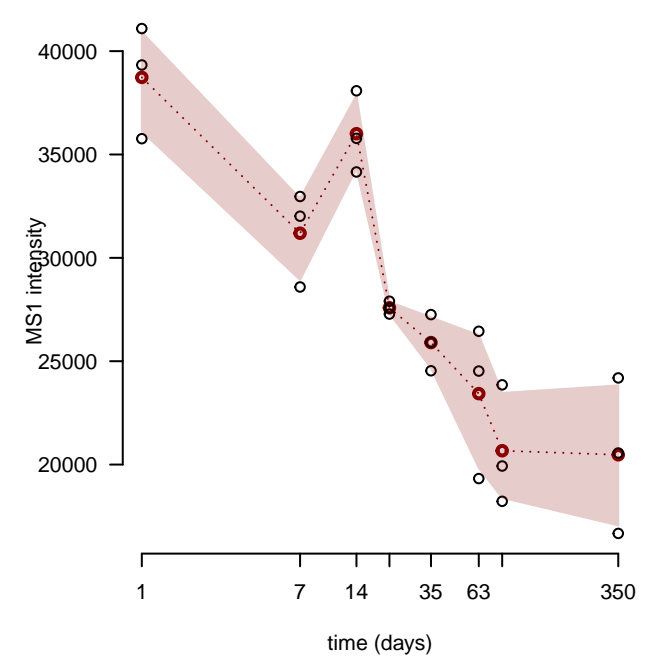

**Q8BI84**  
GN=Mia3  
MIA SH3 domain ER export factor 3

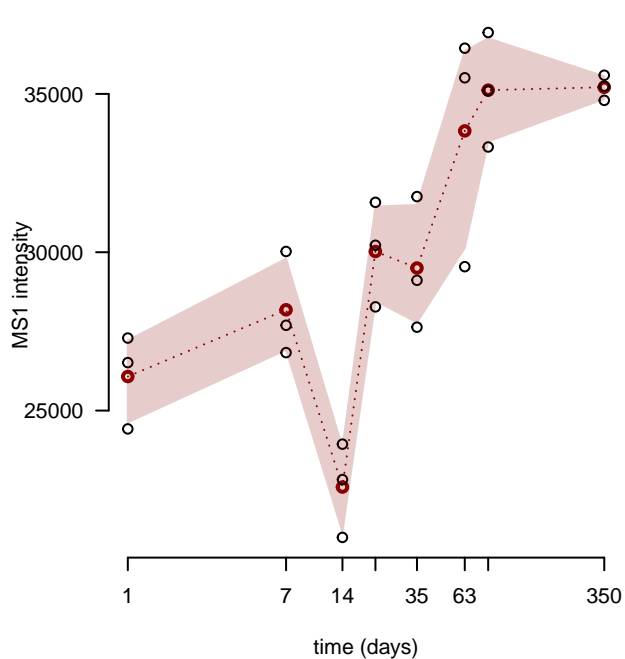

**Q8BIA4**  
GN=Fbxw8  
F-box and WD-40 domain protein 8

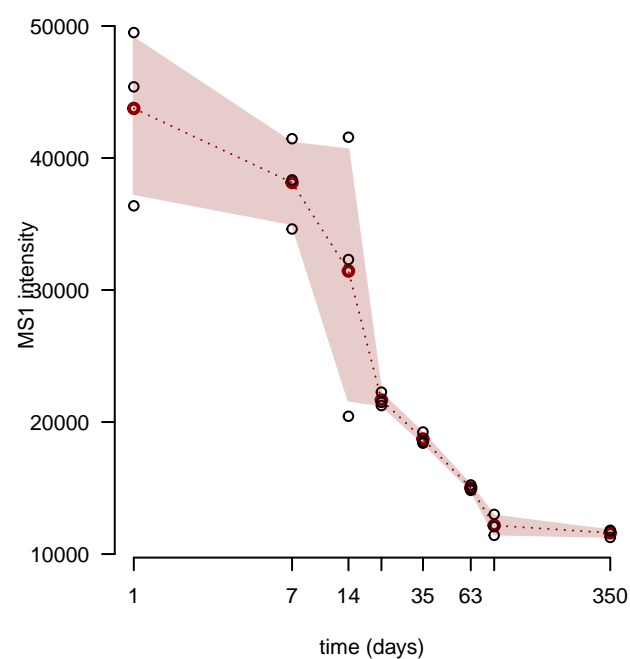

**Q8BIE6**  
GN=Frmd4a  
FERM domain containing 4A

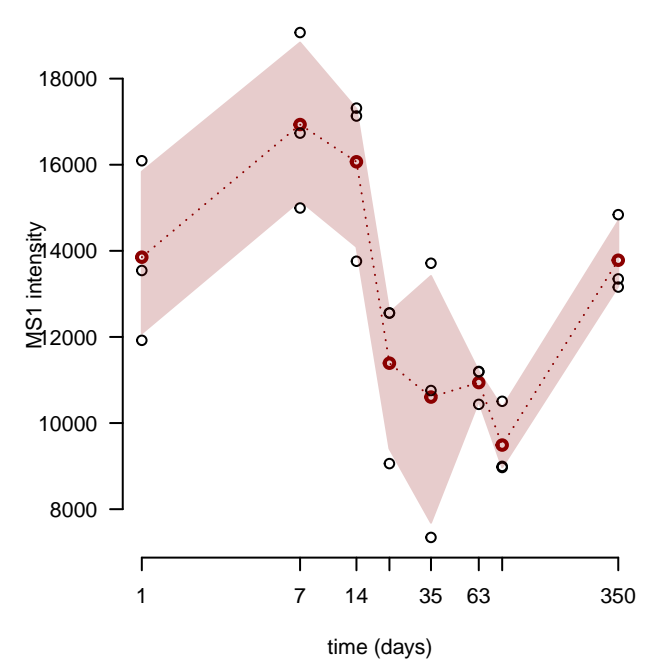

**Q8BIF0**  
GN=Cd9912  
CD99 antigen-like 2

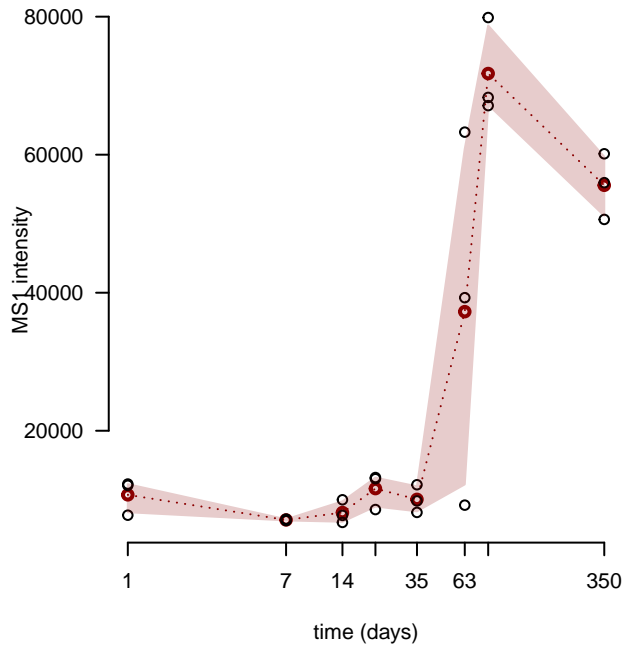

**Q8BIF9**  
GN=Znf787

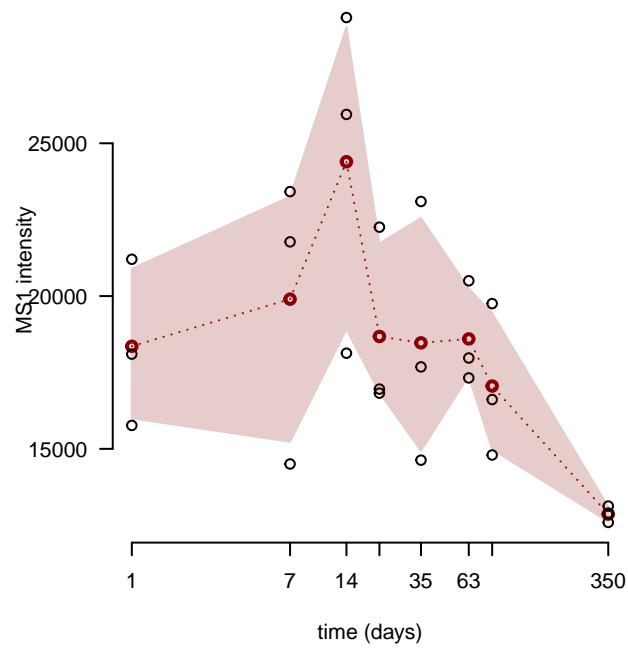

**Q8BIG4**  
GN=Fbxo28  
F-box protein 28

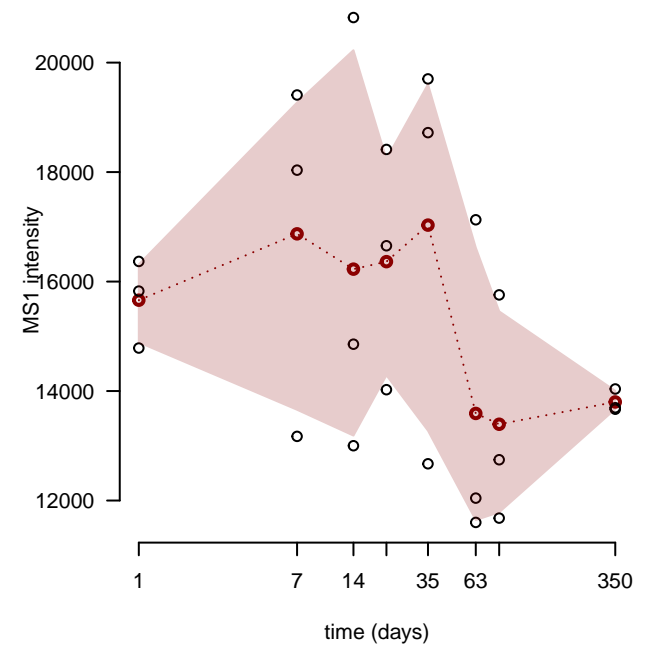

**Q8BIG7**  
GN=Comtd1  
catechol-O-methyltransferase domain cont ...

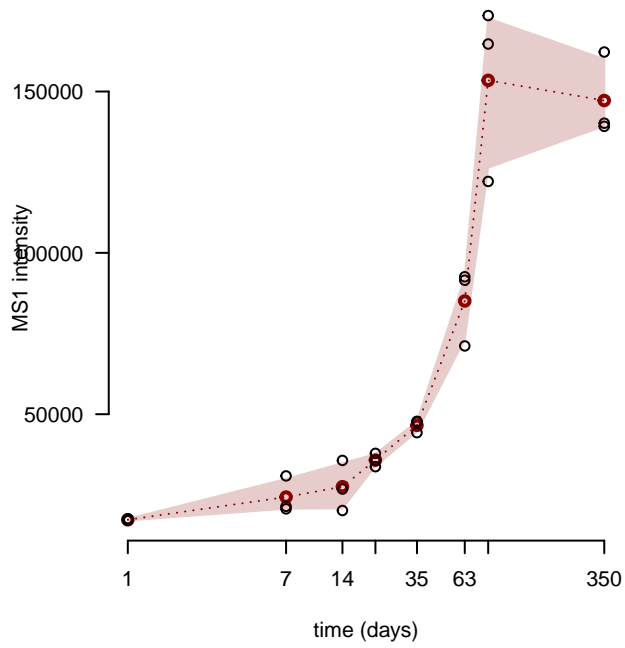

**Q8BIH0**  
GN=Sap130  
Sin3A associated protein

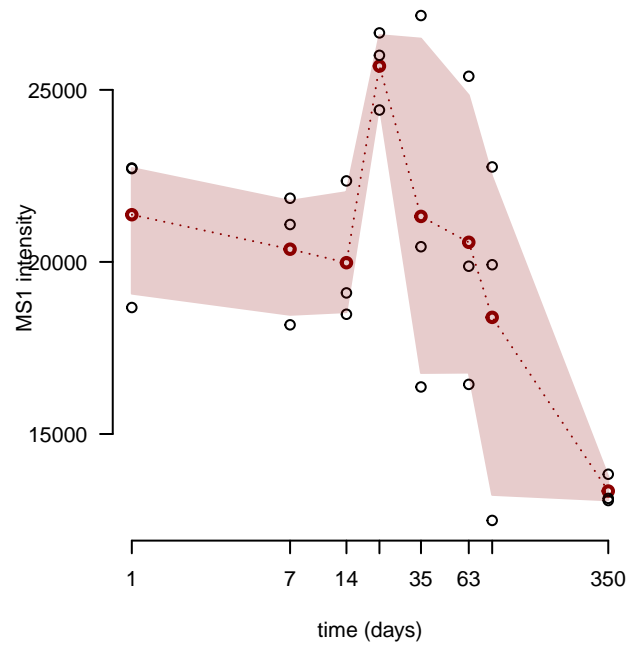

**Q8BIJ6**  
GN=lars2  
isoleucine-tRNA synthetase 2, mitochondr ...

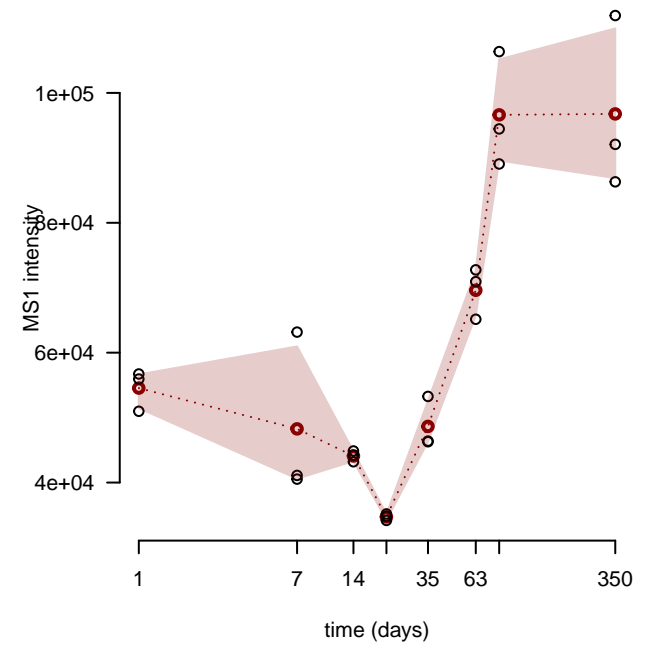

**Q8BIJ7**  
GN=Rufy1  
RUN and FYVE domain containing 1

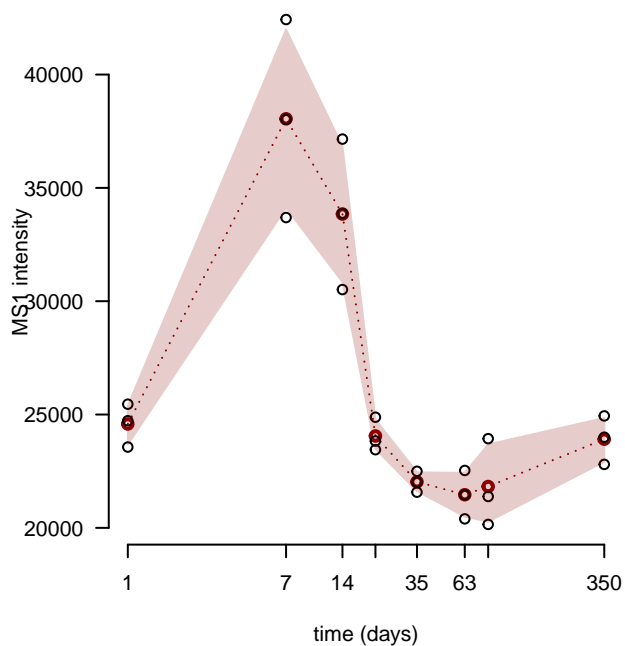

**Q8BIK4**  
GN=Dock9  
dedicator of cytokinesis 9

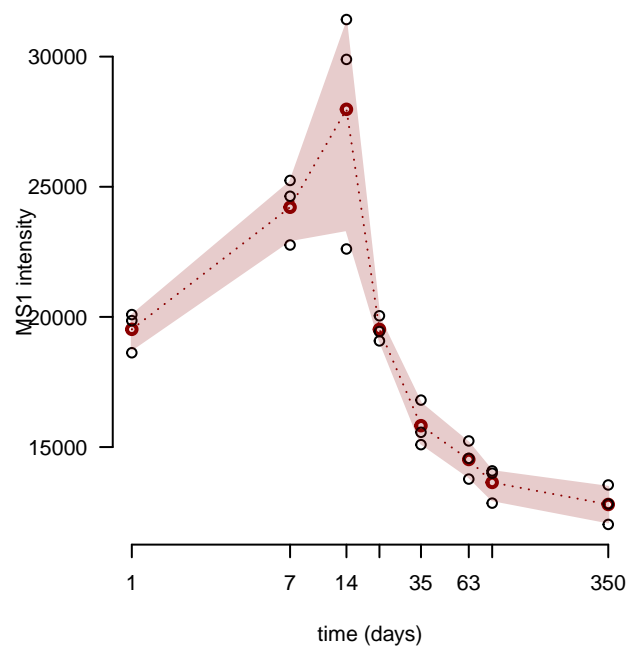

**Q8BIL5**  
GN=Hook1  
hook microtubule tethering protein 1

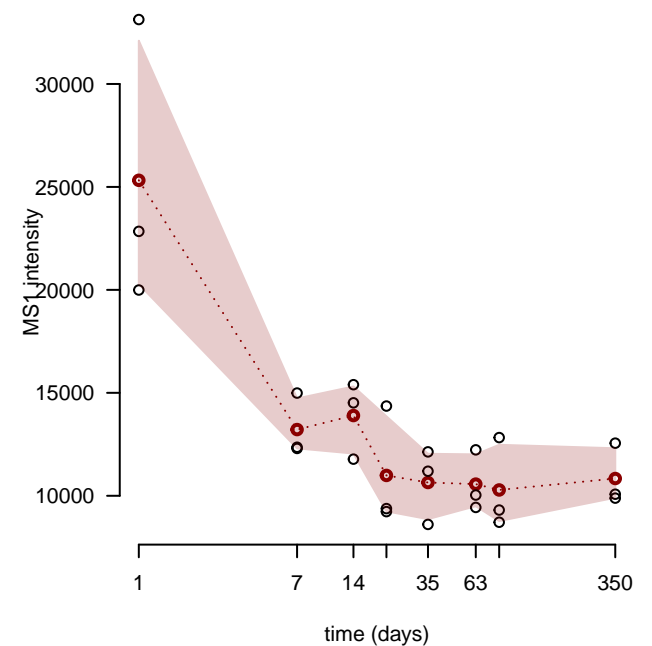

**Q8BIP0**  
GN=Dars2  
aspartyl-tRNA synthetase 2 (mitochondria ...

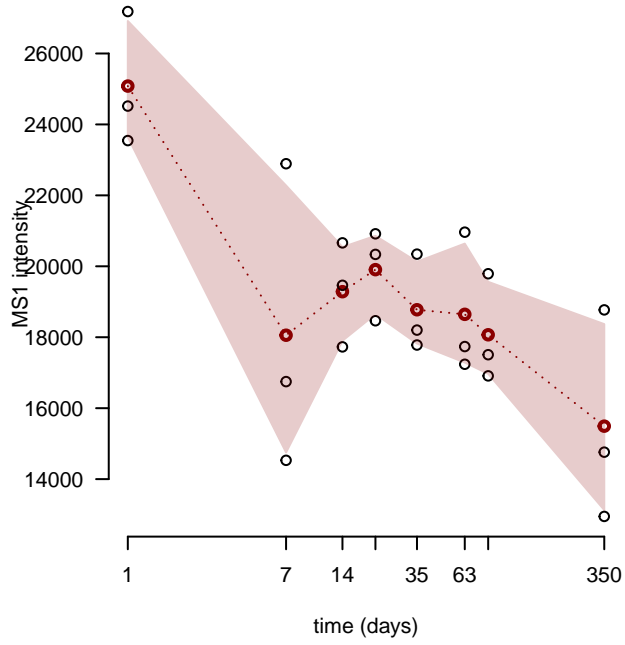

**Q8BIQ5**  
GN=Cstf2  
cleavage stimulation factor, 3' pre-RNA ...

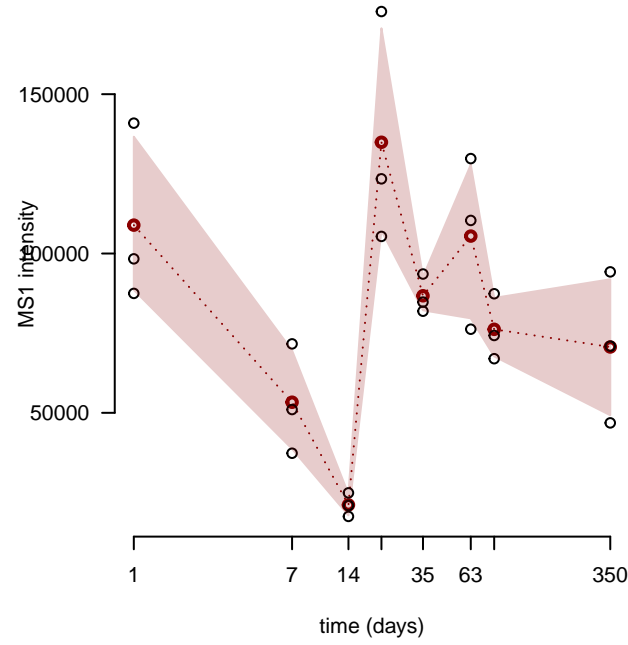

**Q8BIS8**  
GN=Ccdc126  
coiled-coil domain containing 126

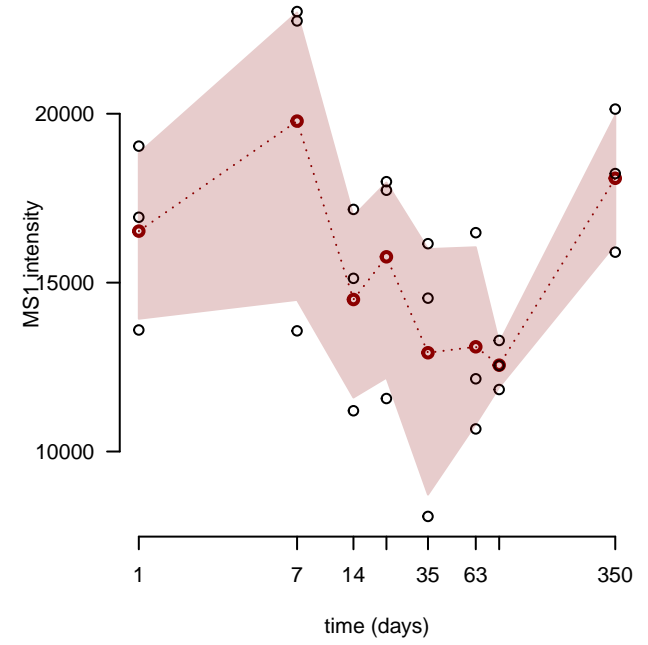

**Q8BIV3**  
GN=Ranbp6  
RAN binding protein 6

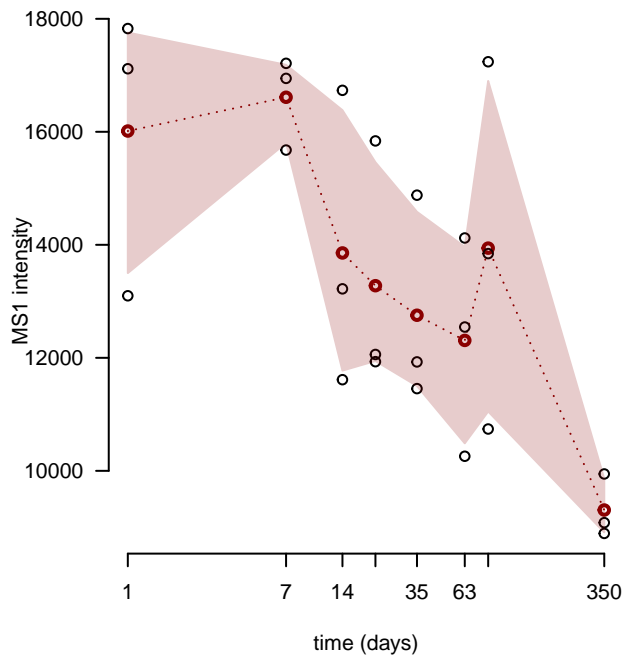

**Q8BIW1**  
GN=Prune1  
prune exopolyphosphatase

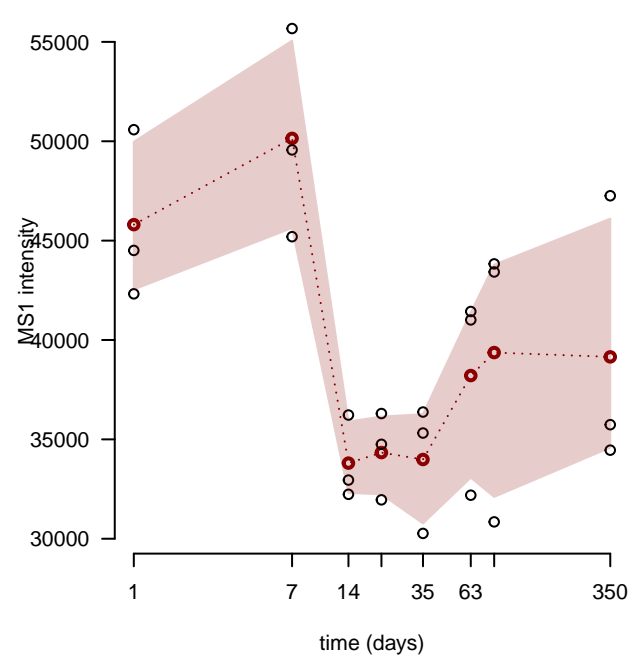

**Q8BIW9**  
GN=Chtf18  
CTF18, chromosome transmission fidelity ...

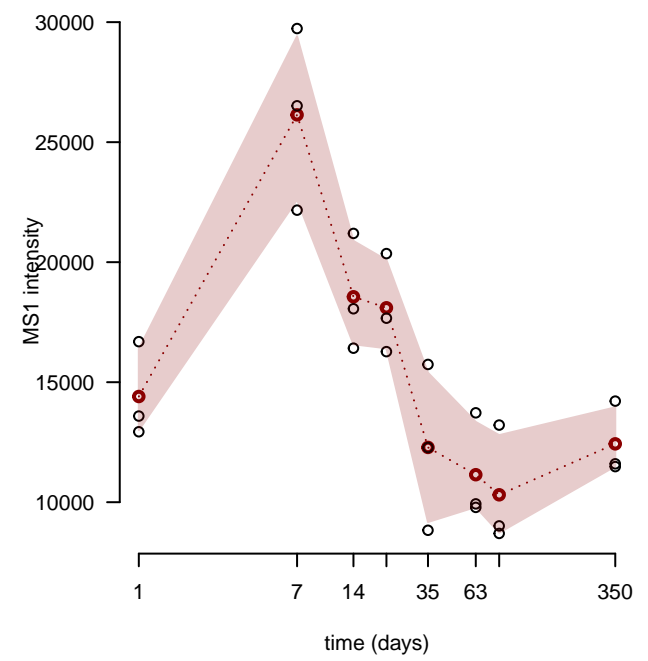

**Q8BIX3**  
GN=Arl14ep  
ADP-ribosylation factor-like 14 effector ...

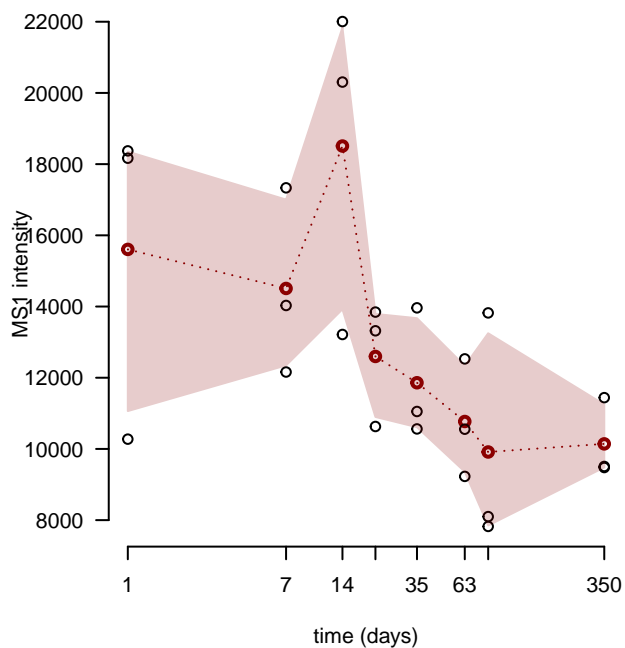

**Q8BIZ6**  
GN=Snip1  
Smad nuclear interacting protein 1

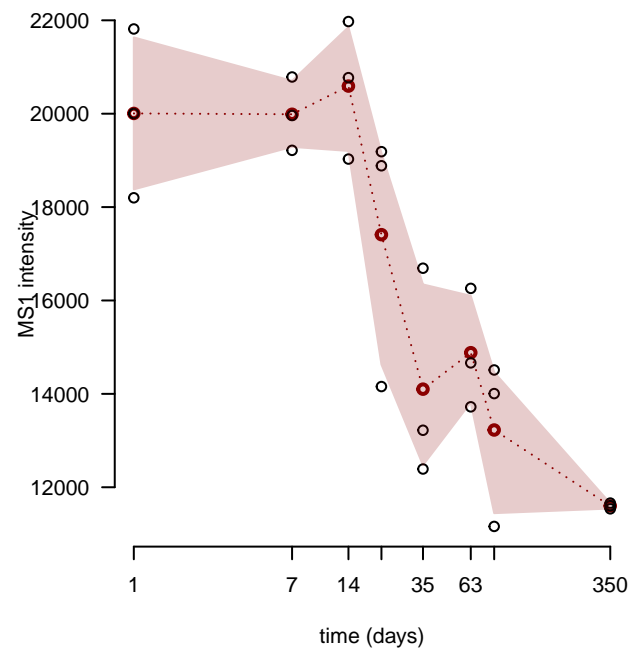

**Q8BJ03**  
GN=Cox15  
cytochrome c oxidase assembly protein 15

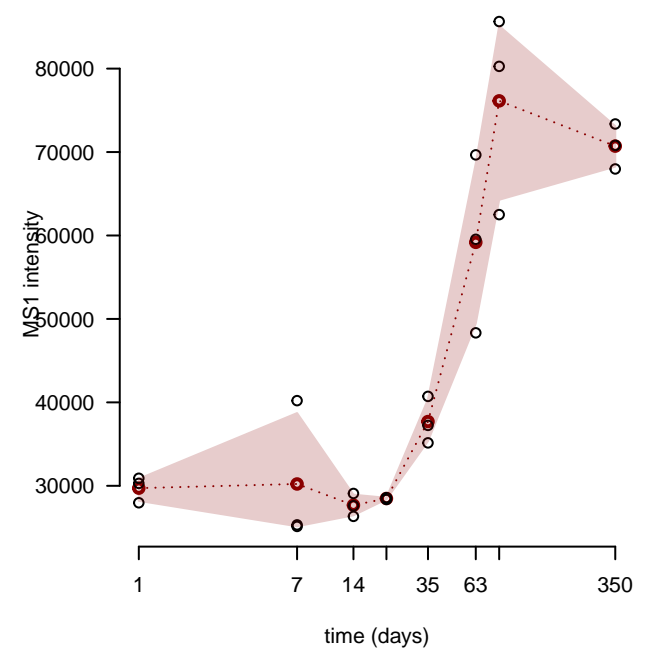

**Q8BJ05**  
**GN=Zc3h14**  
zinc finger CCCH type containing 14

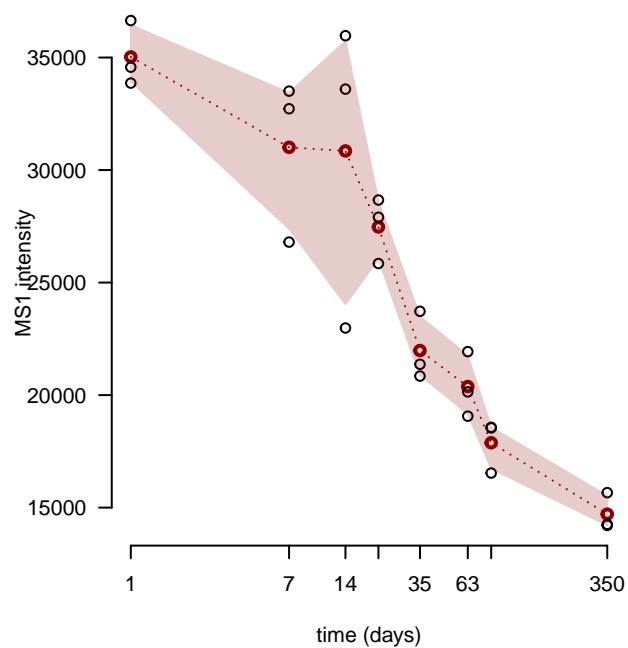

**Q8BJ34**  
**GN=Marf1**  
meiosis regulator and mRNA stability 1

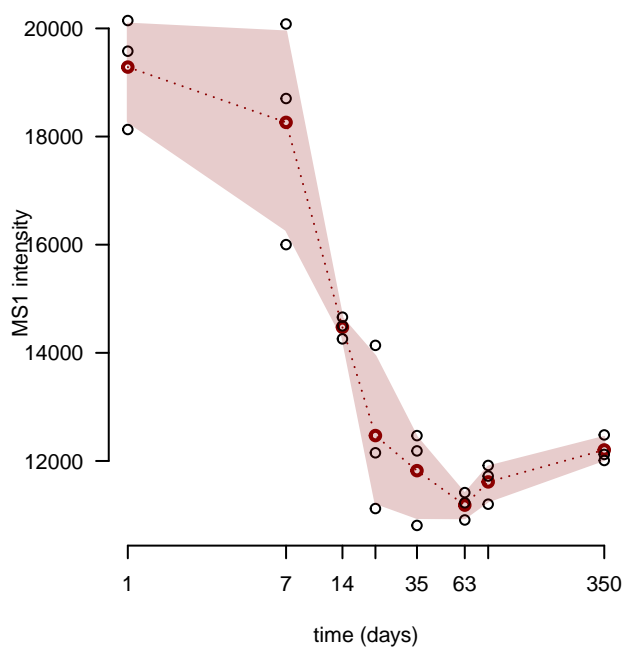

**Q8BJ37**  
**GN=Tdp1**  
tyrosyl-DNA phosphodiesterase 1

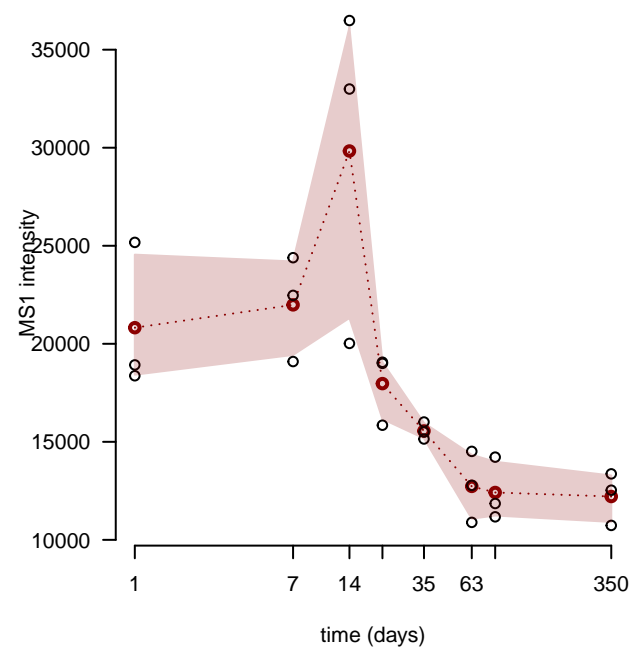

**Q8BJ48**  
**GN=Nagpa**  
N-acetylglucosamine-1-phosphodiester alphasidase 1

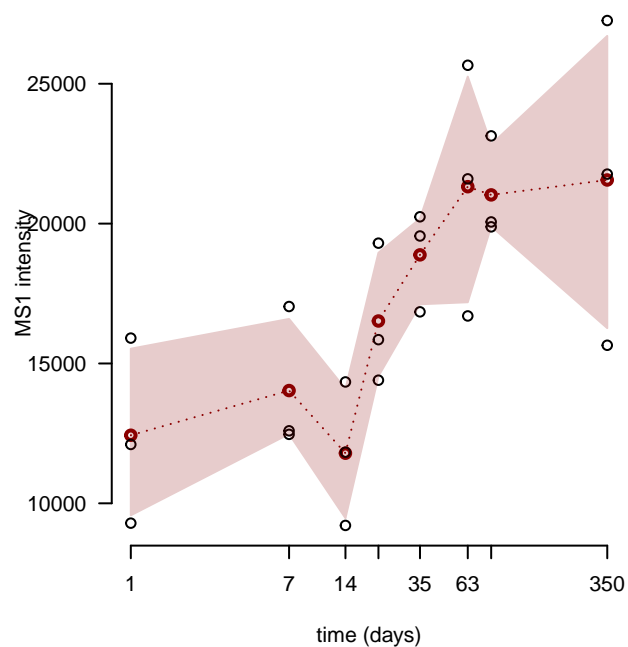

**Q8BJ56**  
**GN=Pnpla2**  
patatin-like phospholipase domain containing 2

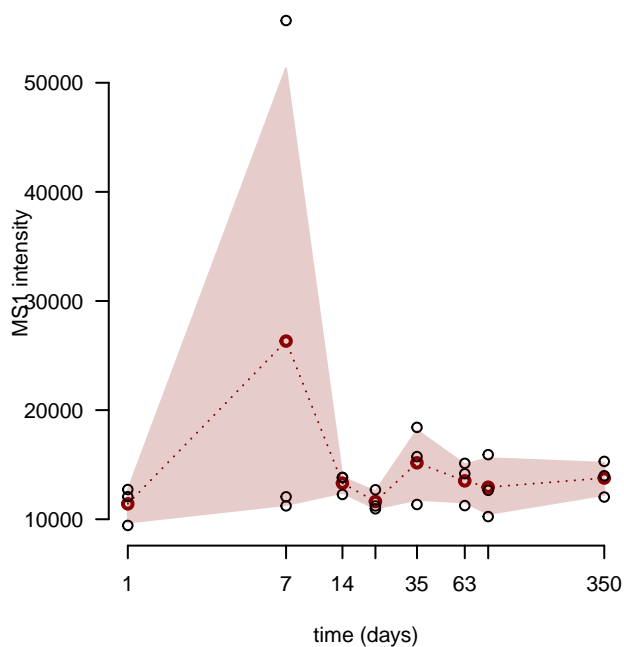

**Q8BJ63**  
**GN=Ap5m1**  
adaptor-related protein complex 5, mu 1 subunit

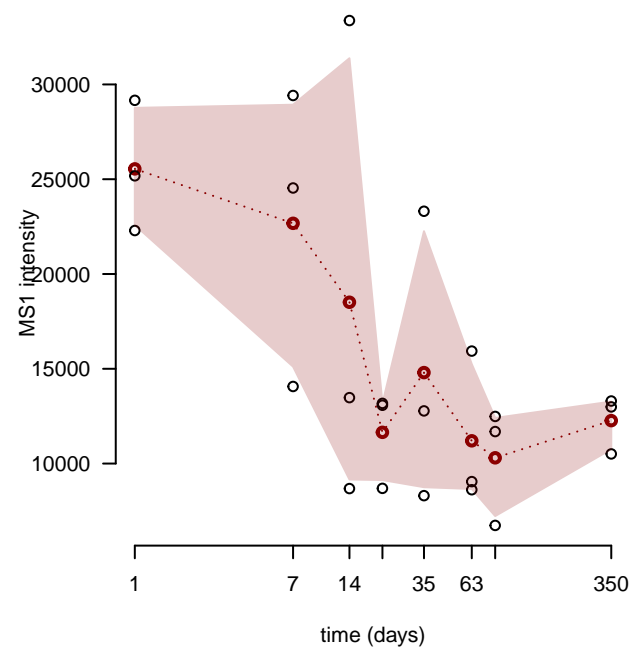

**Q8BJ64**  
**GN=Chdh**  
choline dehydrogenase

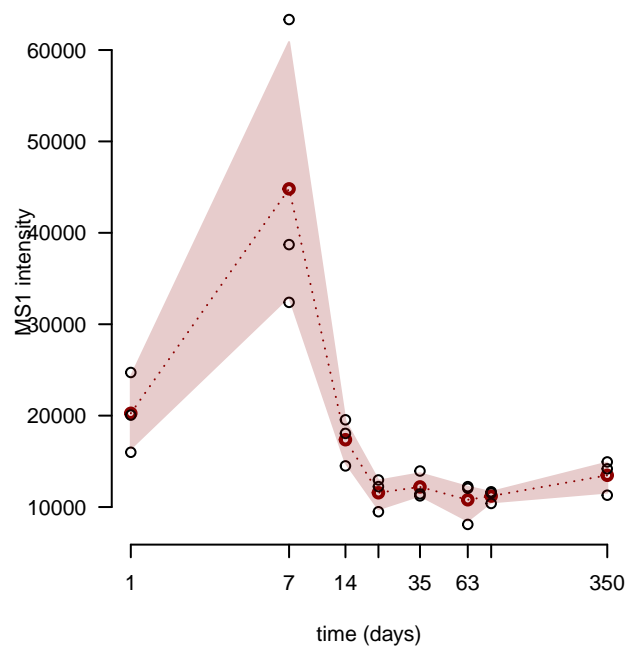

**Q8BJ71**  
**GN=Nup93**  
nucleoporin 93

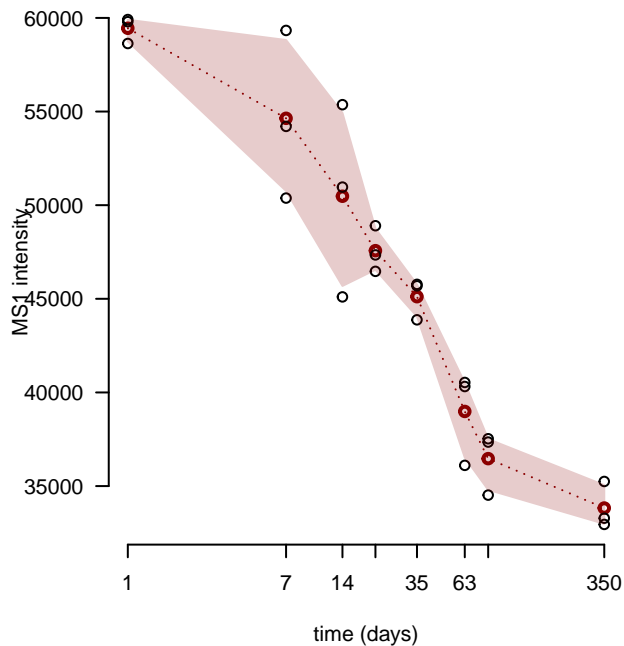

**Q8BJ83**  
**GN=Tm2d3**  
TM2 domain containing 3

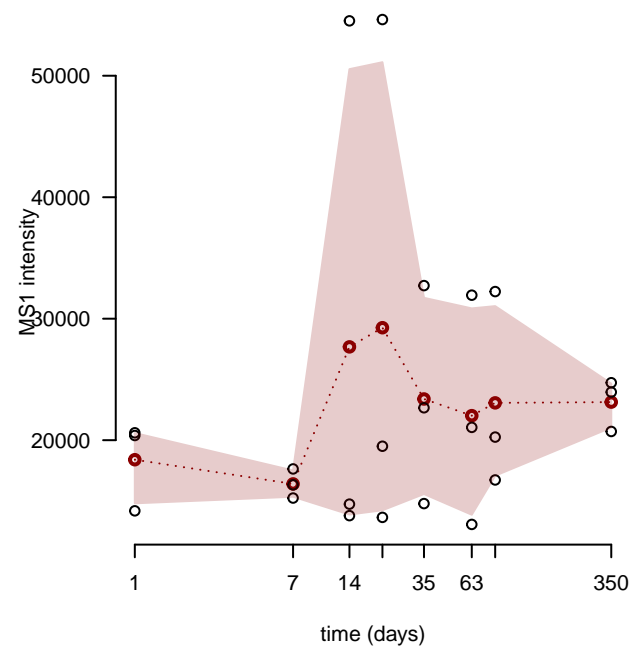



**Q8BJ90**  
GN=Znf771

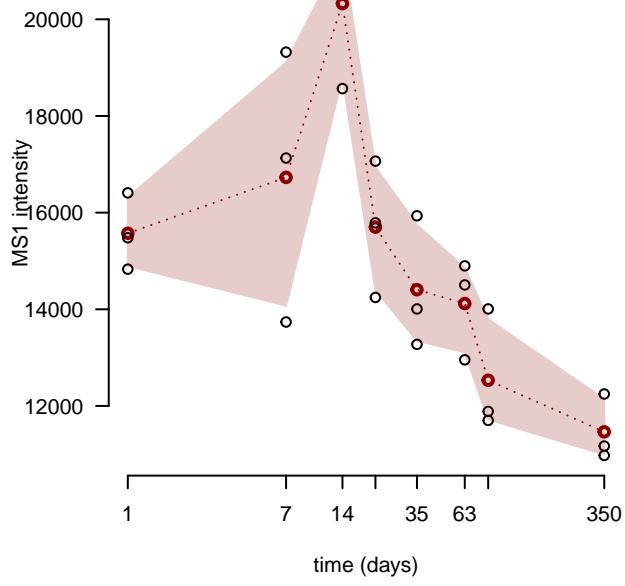

**Q8BJA3**  
GN=Hmbox1  
homeobox containing 1

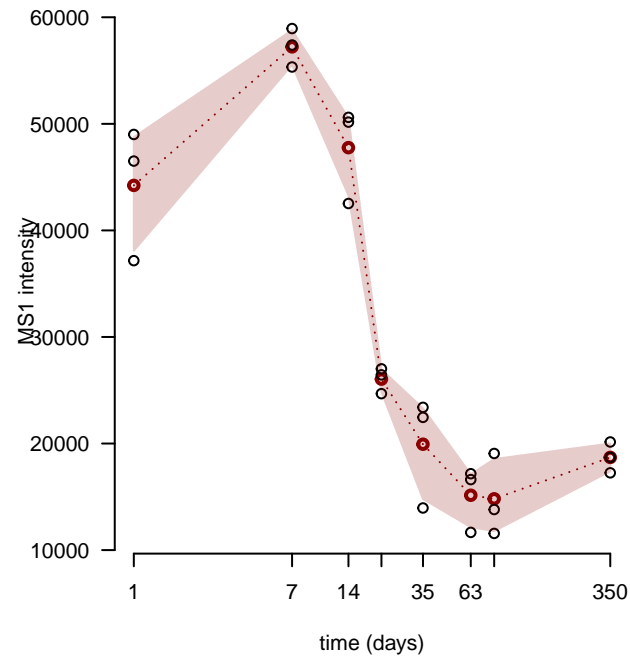

**Q8BJD1**  
GN=Itih5  
inter-alpha-trypsin inhibitor, heavy cha ...

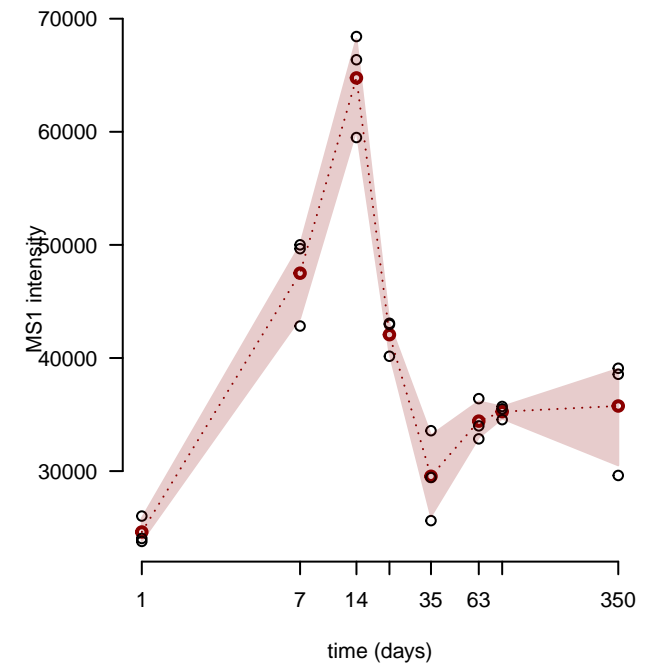

**Q8BJE2**  
GN=Btnl9  
butyrophilin-like 9

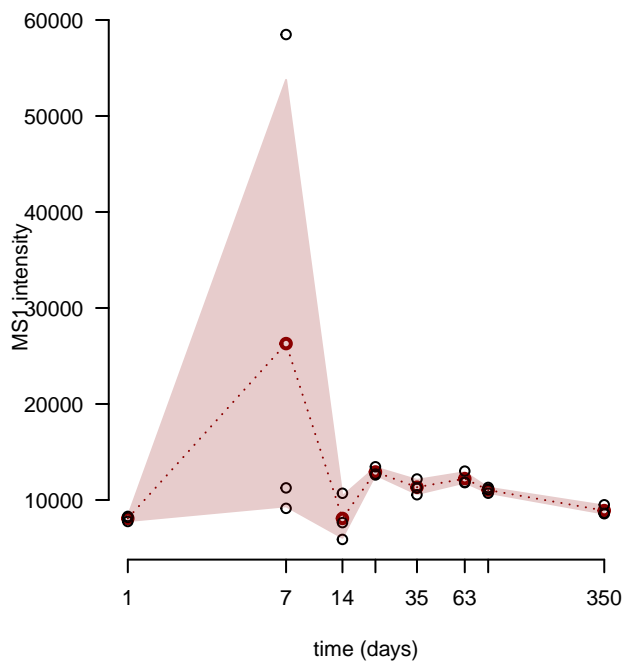

**Q8BJF9**  
GN=Chmp2b  
charged multivesicular body protein 2B

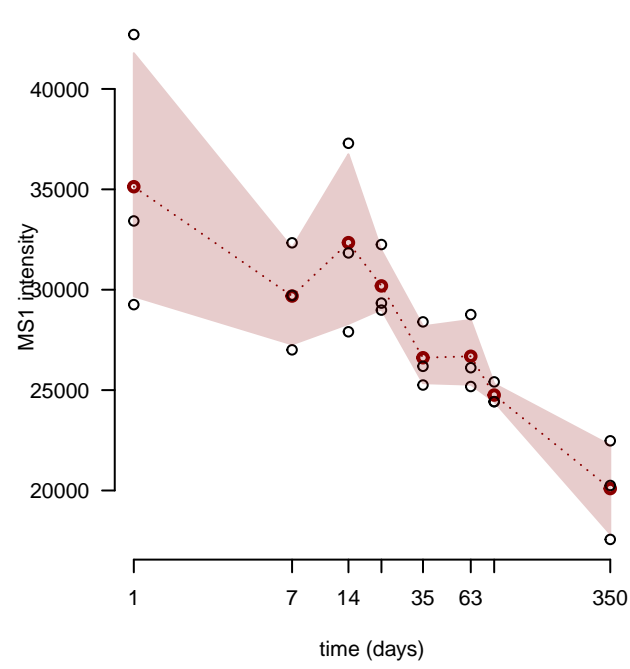

**Q8BJG4**  
GN=Mob3c  
MOB kinase activator 3C

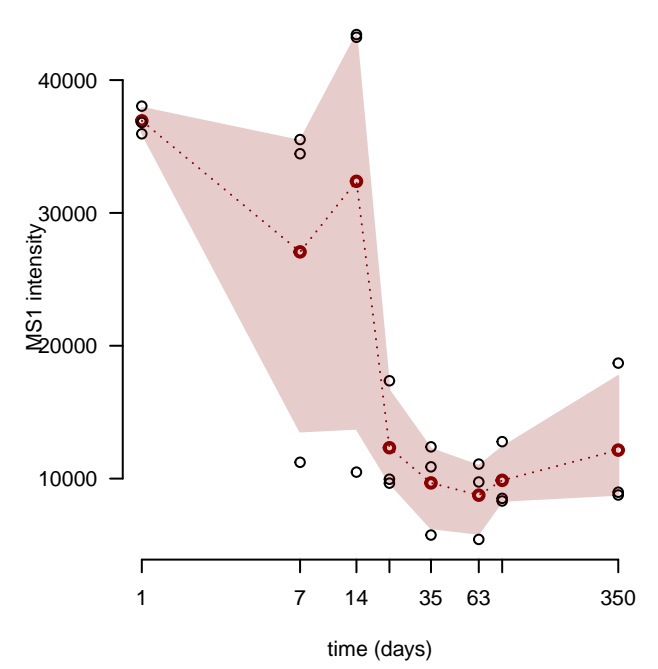

**Q8BJH1**  
GN=Zc2hc1a  
zinc finger, C2HC-type containing 1A

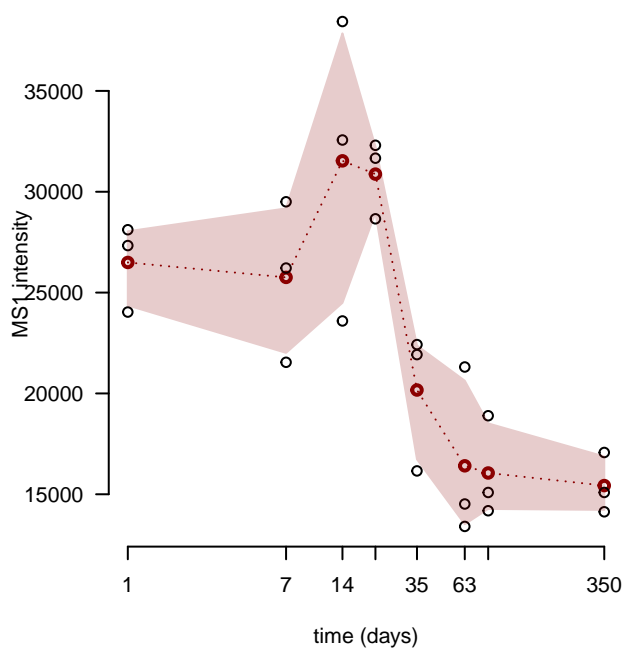

**Q8BJK1**  
GN=Kctd7  
potassium channel tetramerisation domain ...

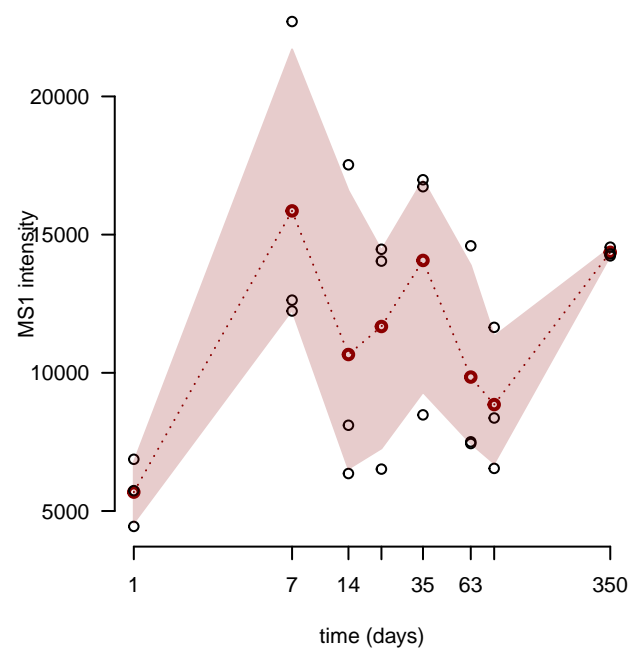

**Q8BJL0**  
GN=Smarca1  
SWI/SNF related matrix associated, actin ...

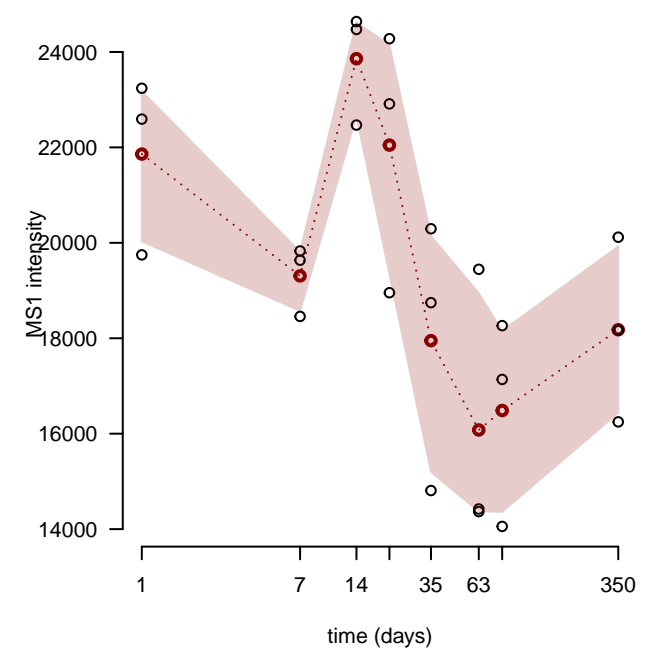

**Q8BJL1**  
GN=Fbxo30  
F-box protein 30

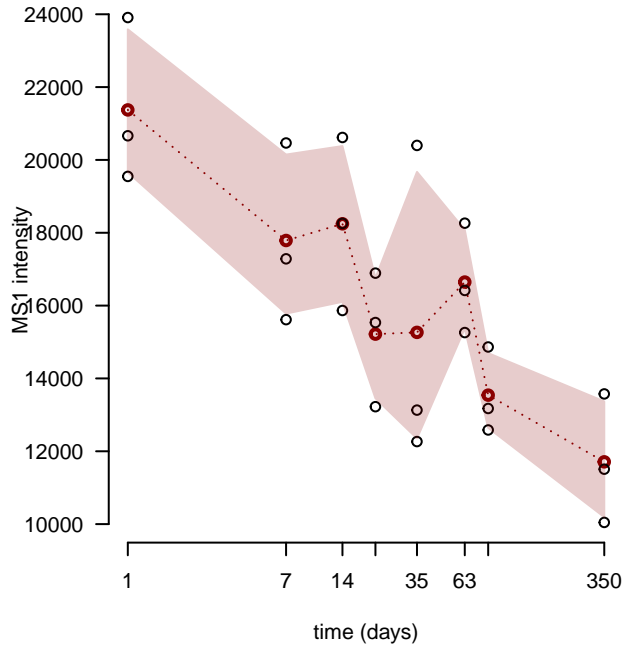

**Q8BJM3**  
GN=R3hcc1l  
R3H domain and coiled-coil containing 1 ...

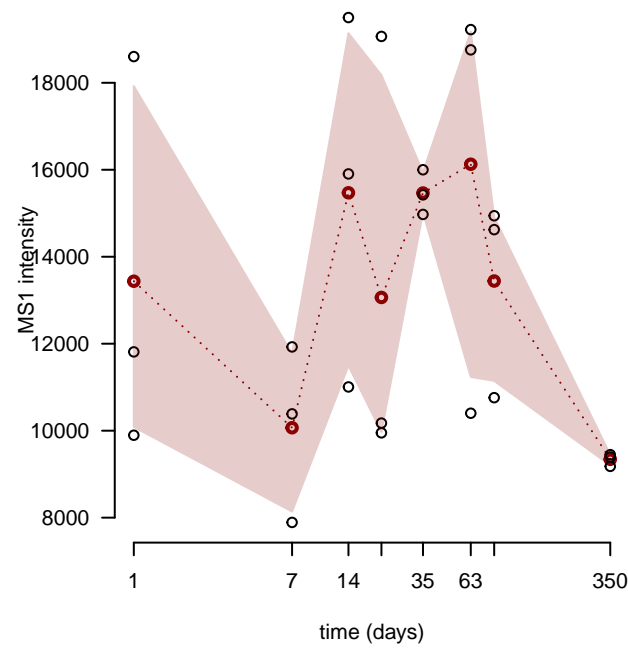

**Q8BJM5**  
GN=Slc30a6  
solute carrier family 30 (zinc transport ...

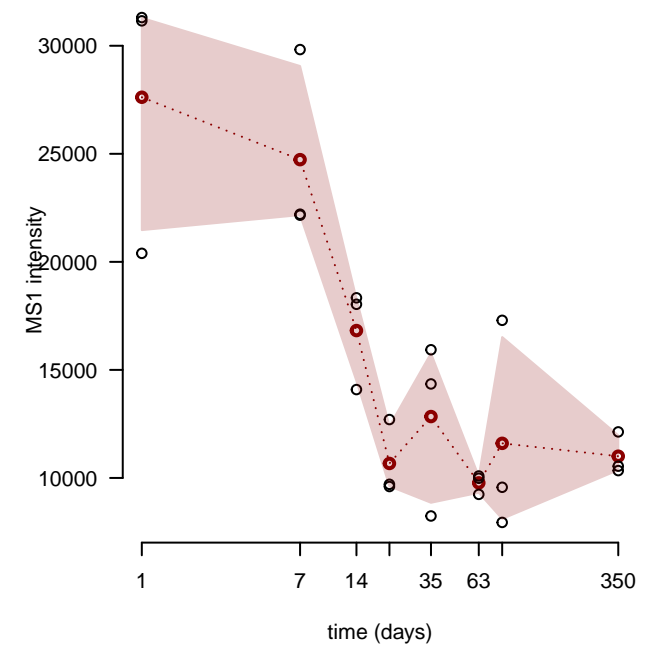

**Q8BJM7**  
GN=Tyw1  
tRNA-yW synthesizing protein 1 homolog ( ...

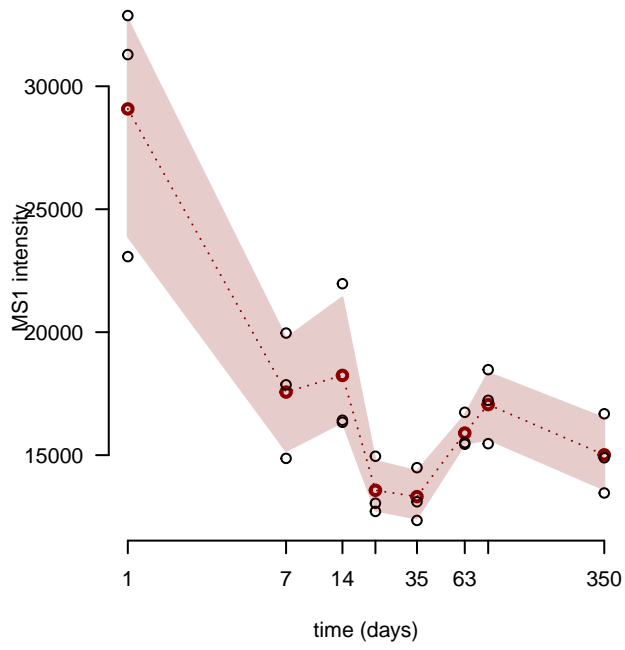

**Q8BJQ2**  
GN=Usp1  
ubiquitin specific peptidase 1

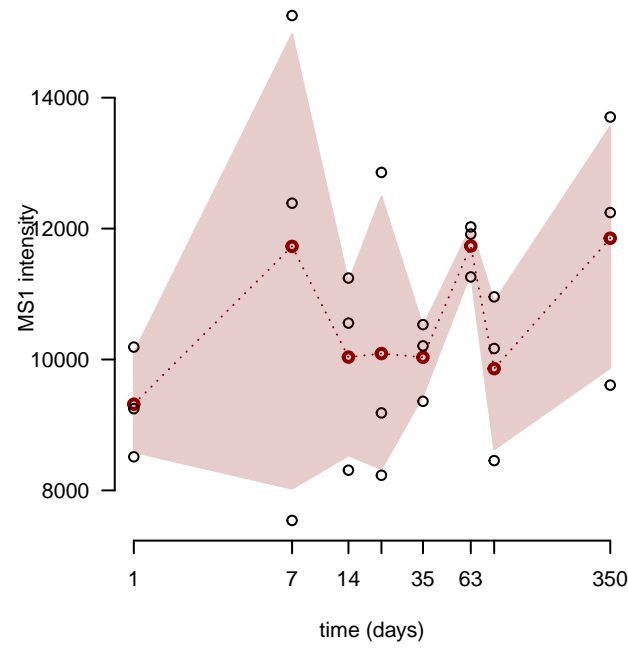

**Q8BJQ9**  
GN=Csgalact1  
chondroitin sulfate N-acetylgalactosamin ...

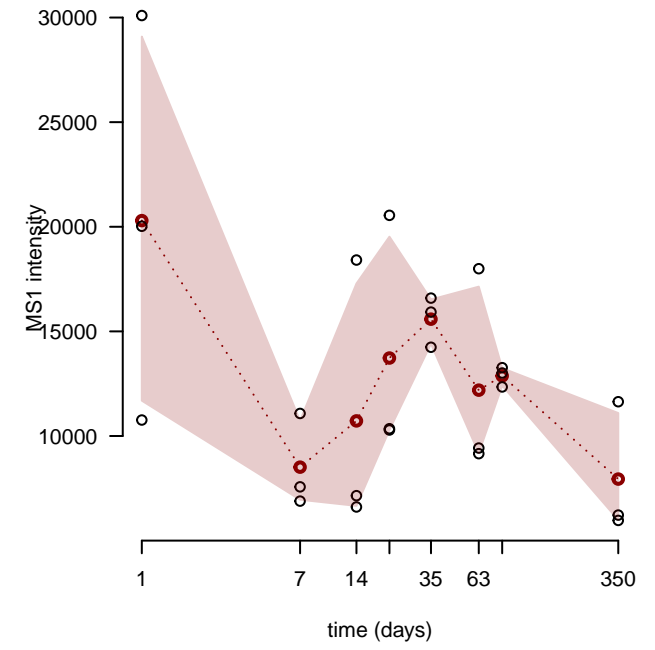

**Q8BJS4**  
GN=Sun2  
Sad1 and UNC84 domain containing 2

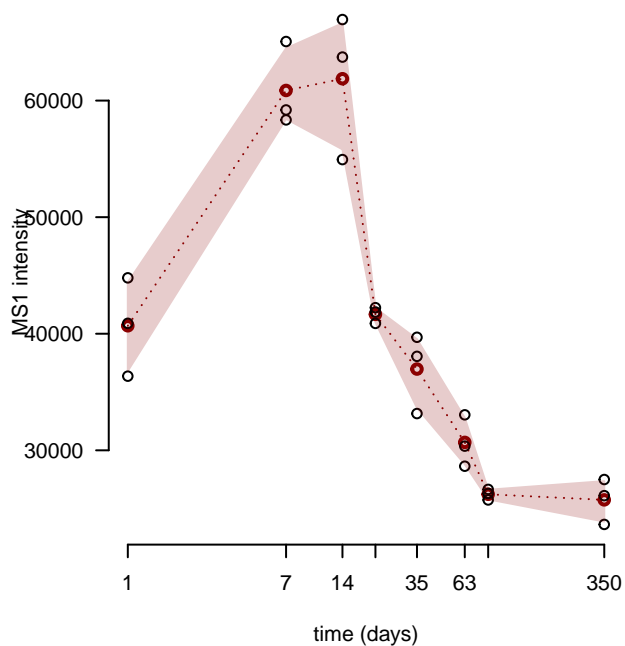

**Q8BJT9**  
GN=Edem2  
ER degradation enhancer, mannosidase alp ...

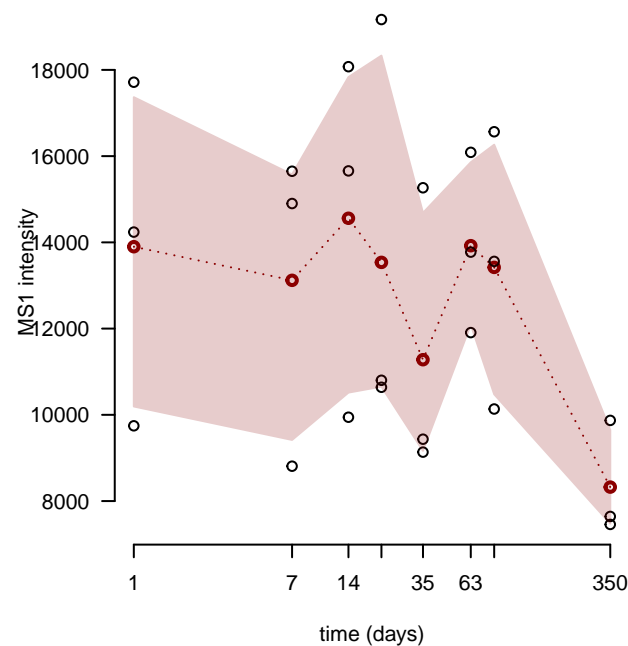

**Q8BJU0**  
GN=Sgta  
small glutamine-rich tetratricopeptide r ...

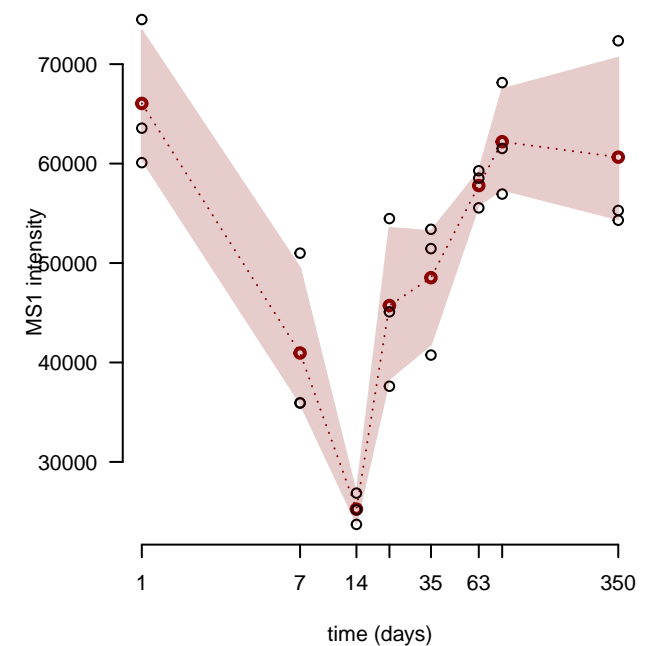

**Q8BJU2**  
GN=Tspan9  
tetraspanin 9

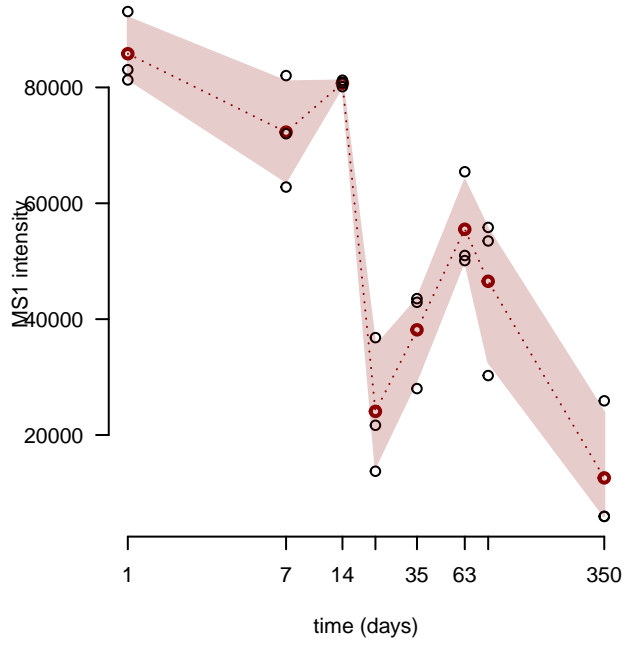

**Q8BJU9**  
GN=Mtrf1l  
mitochondrial translational release fact ...

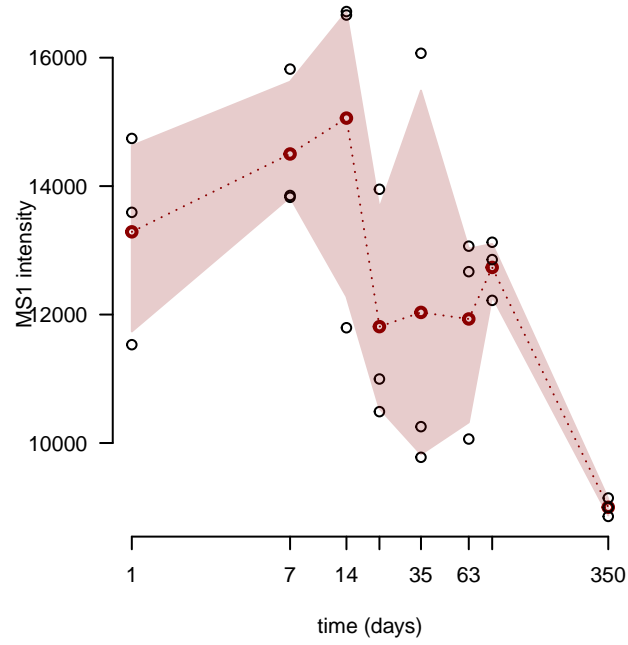

**Q8BJW5**  
GN=Nol11  
nucleolar protein 11

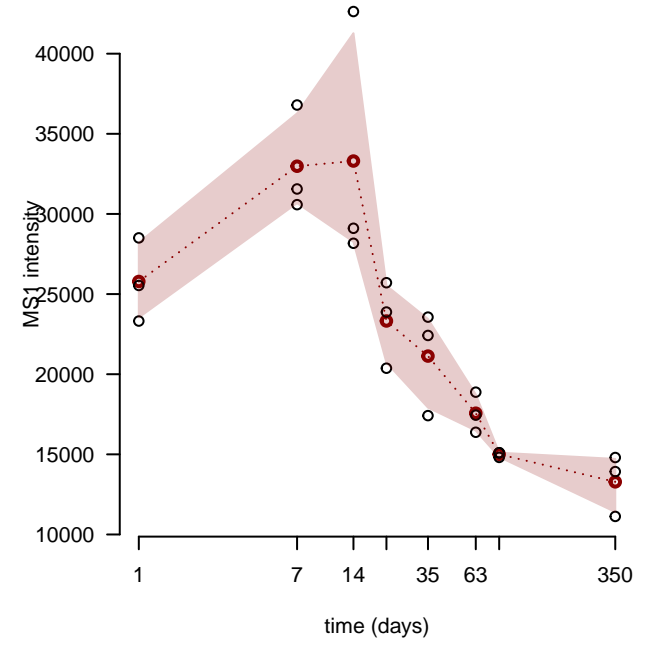

**Q8BJW6**  
GN=Eif2a  
eukaryotic translation initiation factor ...

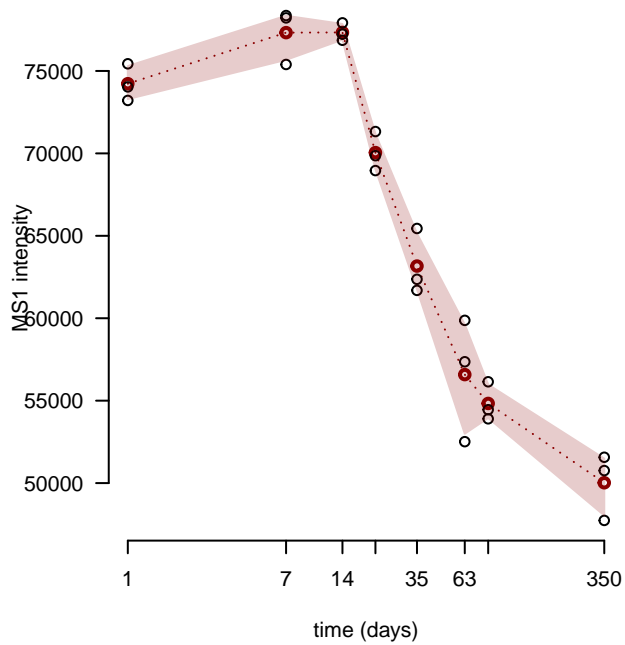

**Q8BJY1**  
GN=Psmc5  
proteasome (prosome, macropain) 26S subu ...

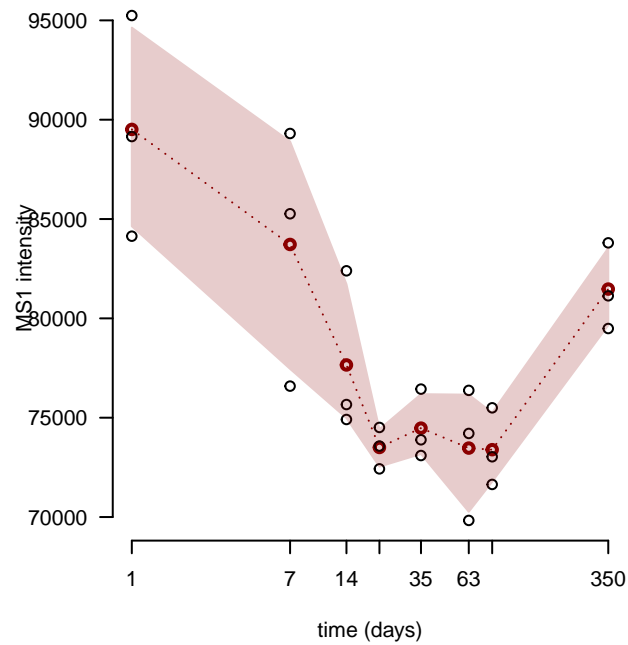

**Q8BJZ3**  
GN=Tmbim1  
transmembrane BAX inhibitor motif contai ...

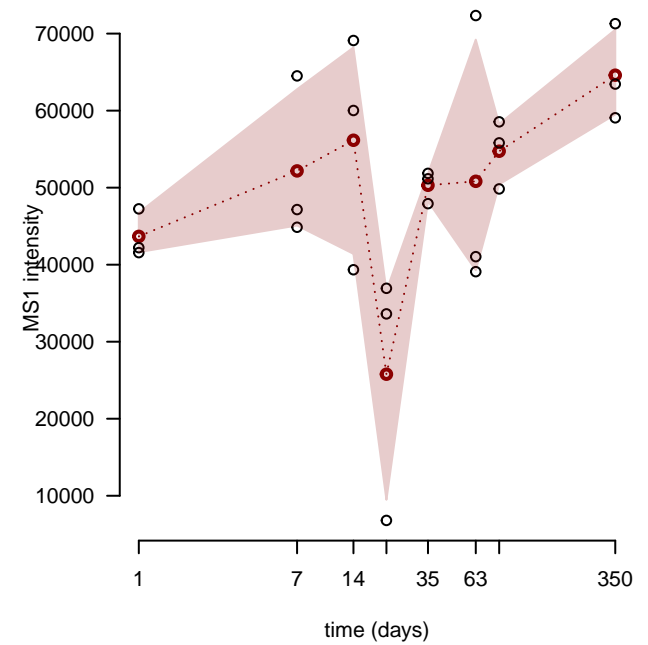

**Q8BJZ4**  
GN=Mrps35  
mitochondrial ribosomal protein S35

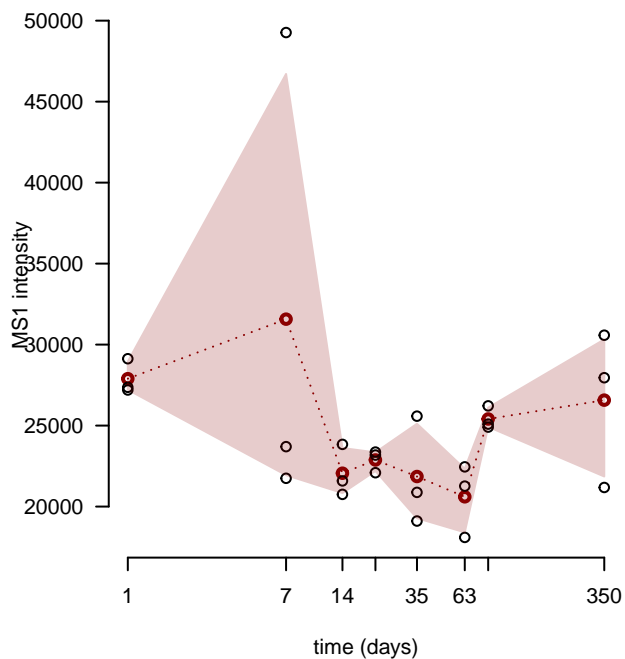

**Q8BK03**  
GN=Miga2  
mitoguardin 2

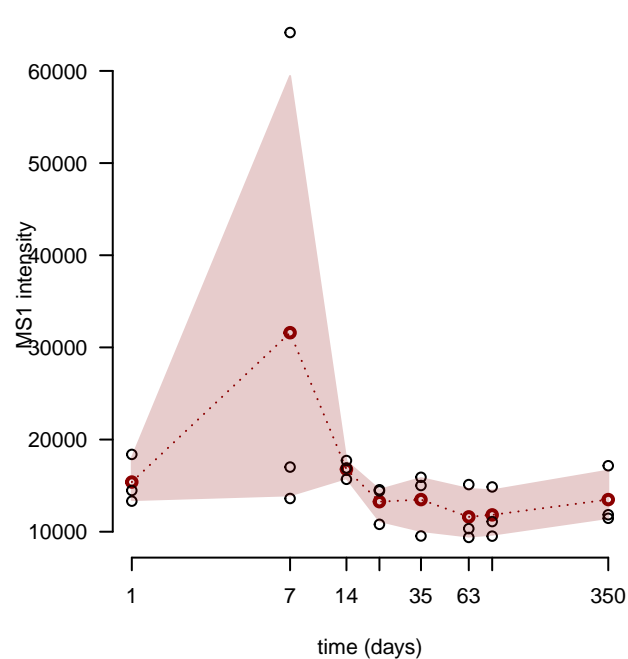

**Q8BK08**  
GN=Tmem11  
transmembrane protein 11

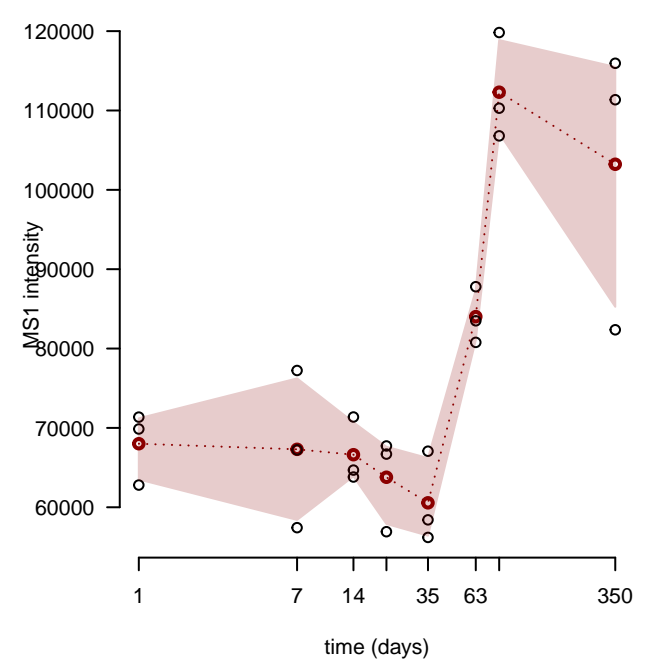

**Q8BK30**  
**GN=Ndufv3**  
NADH:ubiquinone oxidoreductase core subu ...

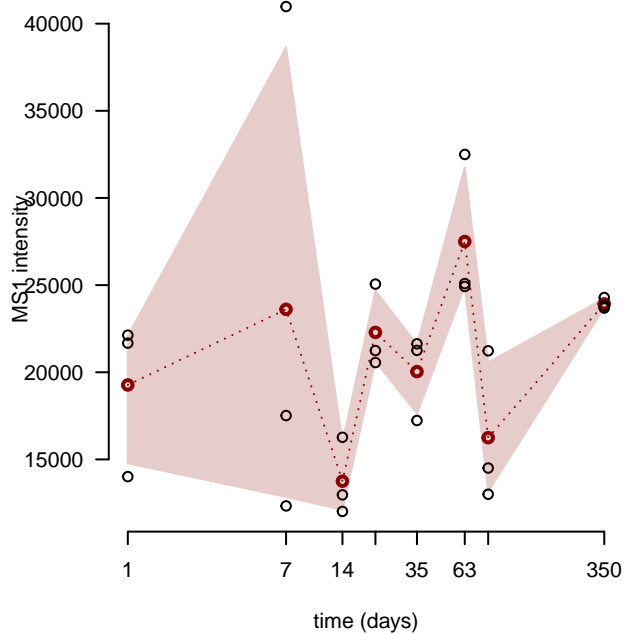

**Q8BK35**  
**GN=Nop53**  
NOP53 ribosome biogenesis factor

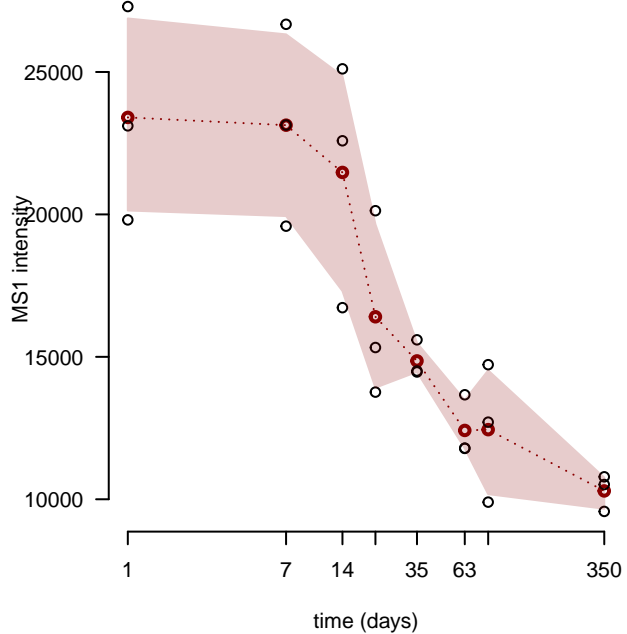

**Q8BK48**  
**GN=Ces2e**  
carboxylesterase 2E

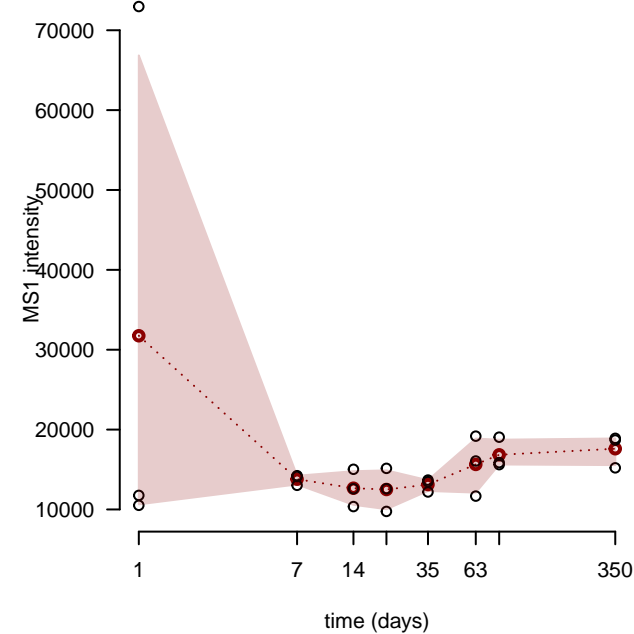

**Q8BK62**  
**GN=Olflm3**  
olfactomedin-like 3

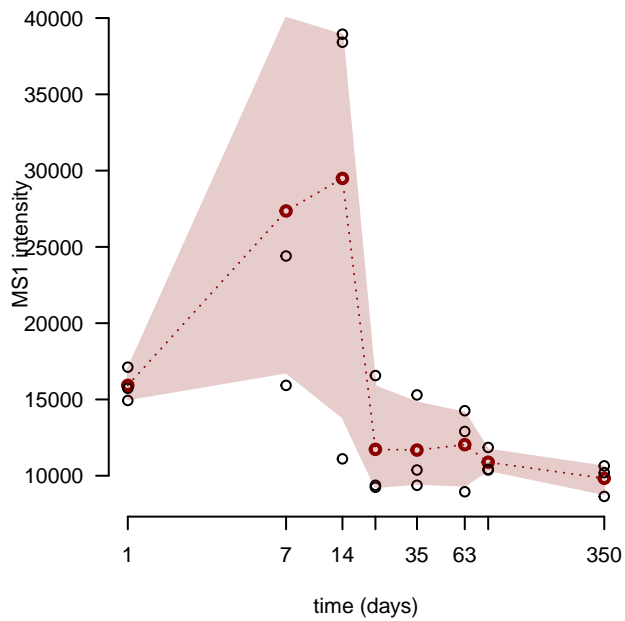

**Q8BK63**  
**GN=Csnk1a1**  
casein kinase 1, alpha 1

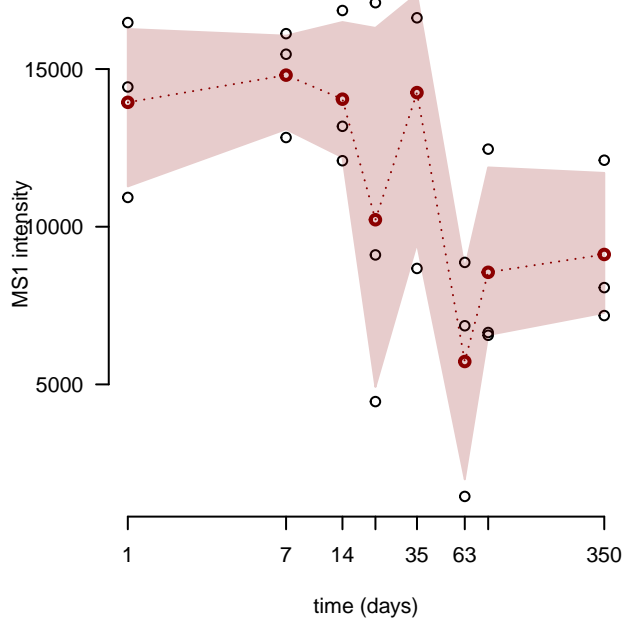

**Q8BK63**  
**GN=Csnk1a1**  
casein kinase 1, alpha 1

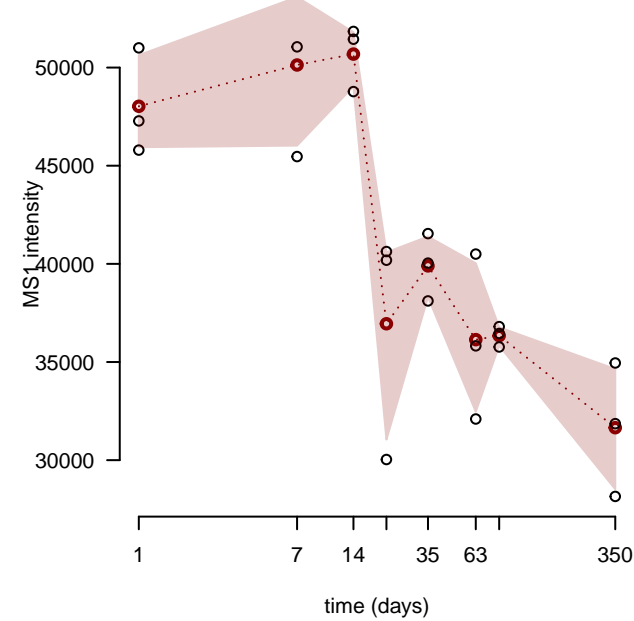

**Q8BK64**  
**GN=Ahsa1**  
AHA1, activator of heat shock protein AT ...

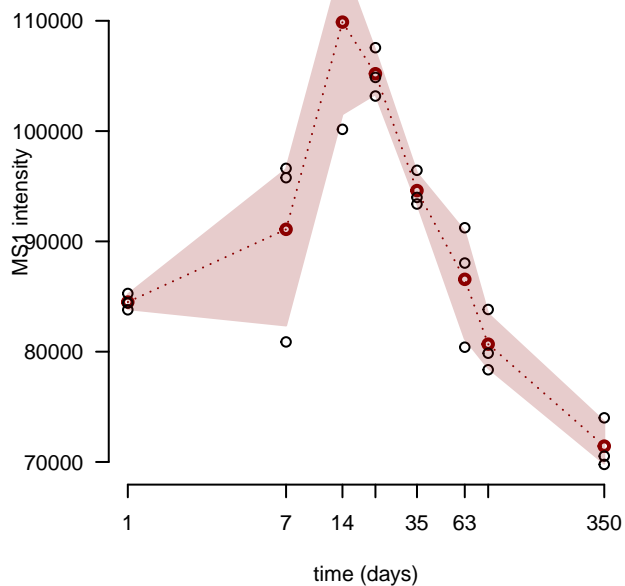

**Q8BK67**  
**GN=Rcc2**  
regulator of chromosome condensation 2

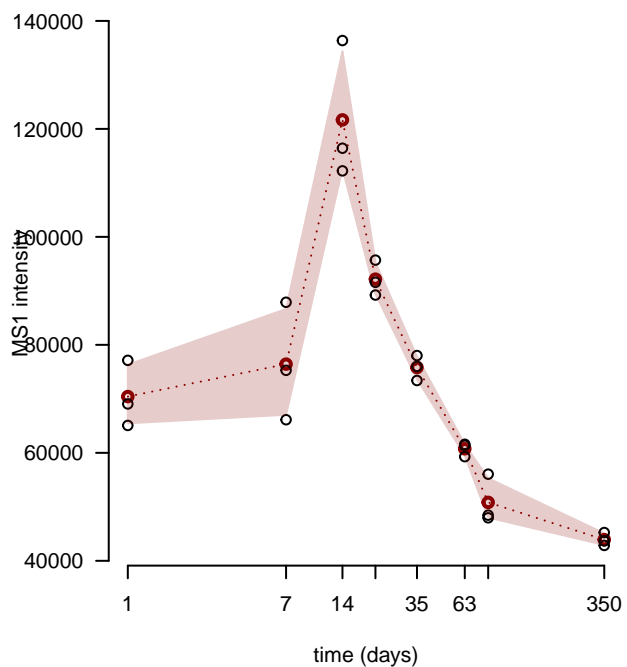

**Q8BK72**  
**GN=Mrps27**  
mitochondrial ribosomal protein S27

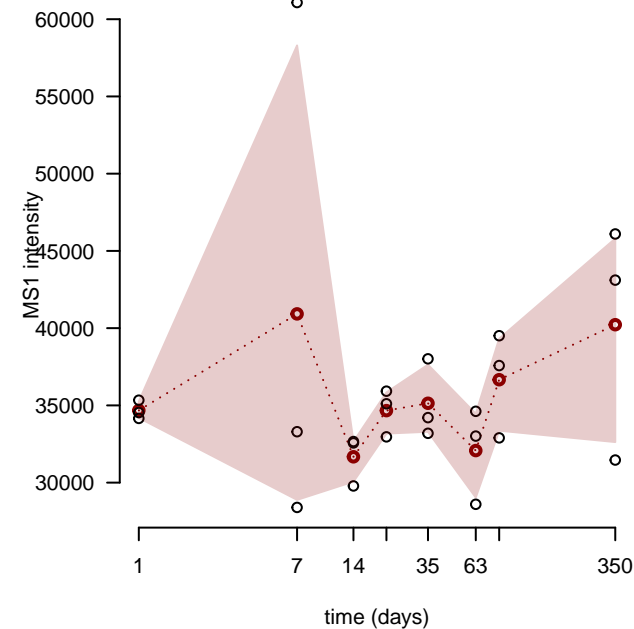

**Q8BK75**  
GN=Elp6  
elongator acetyltransferase complex subu ...

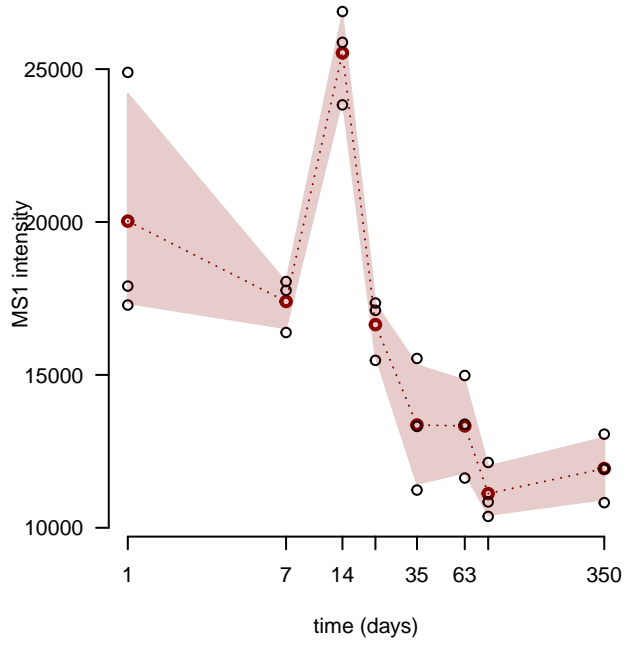

**Q8BKC5**  
GN=Ipo5  
importin 5

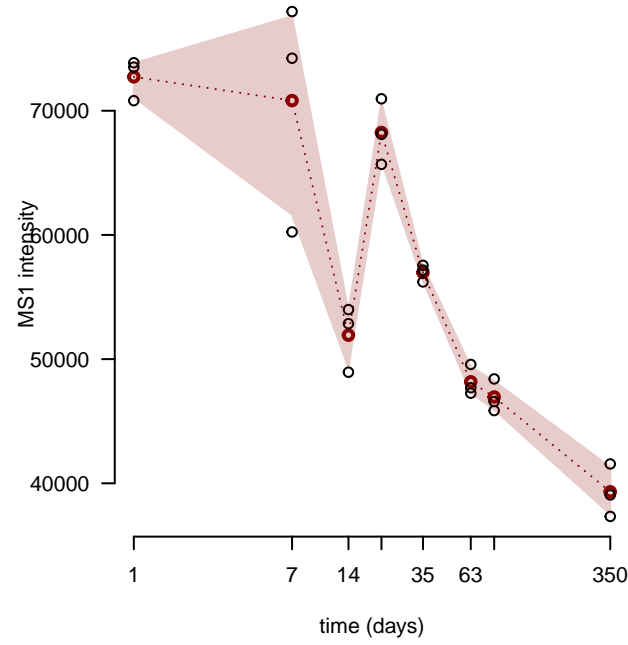

**Q8BKC8**  
GN=Pi4kb  
phosphatidylinositol 4-kinase beta

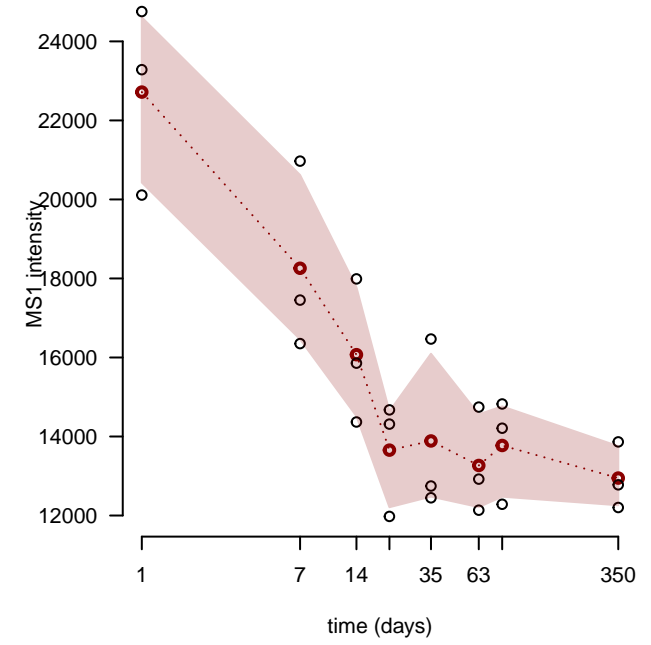

**Q8BKE6**  
GN=Cyp20a1  
cytochrome P450, family 20, subfamily a, ...

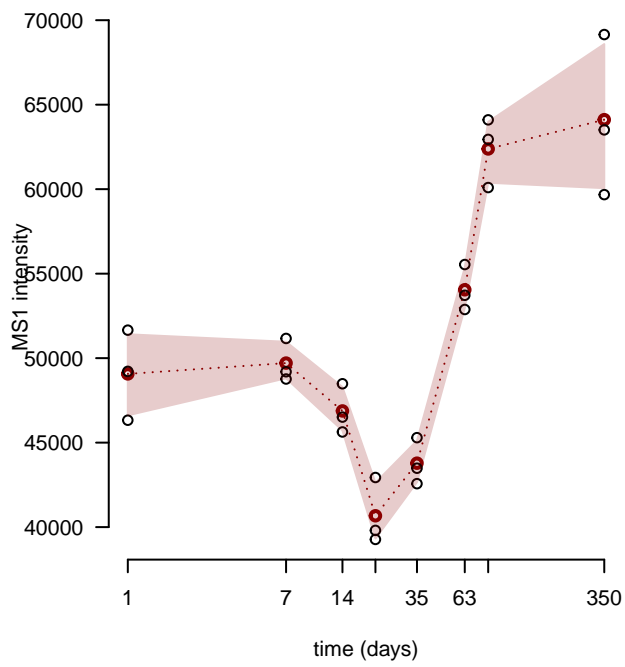

**Q8BKE9**  
GN=Ift74  
intraflagellar transport 74

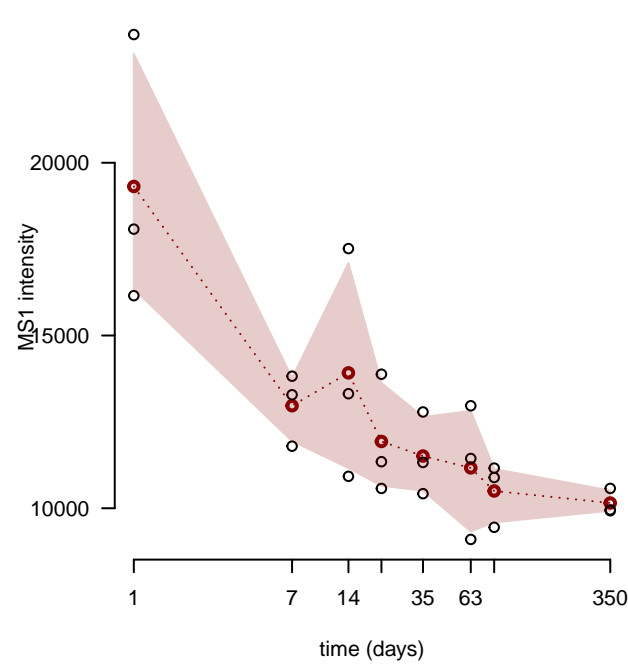

**Q8BKF1**  
GN=Polrmt  
polymerase (RNA) mitochondrial (DNA dire ...

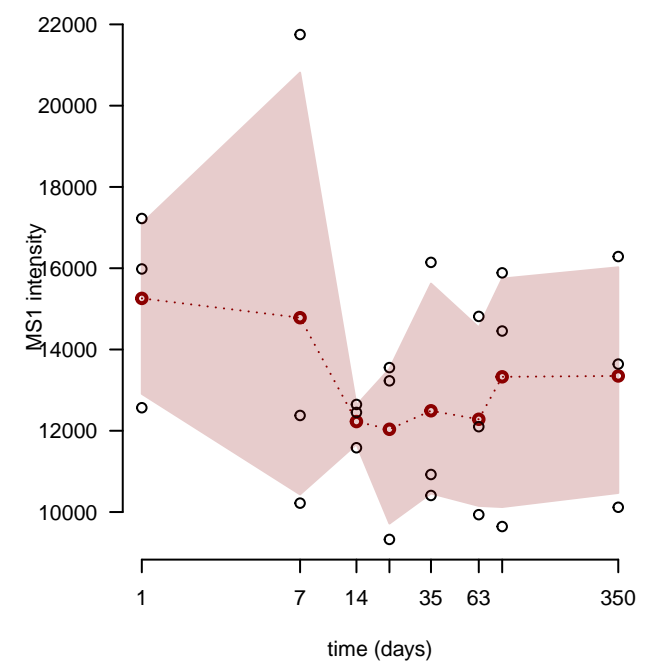

**Q8BKG3**  
GN=Ptk7  
PTK7 protein tyrosine kinase 7

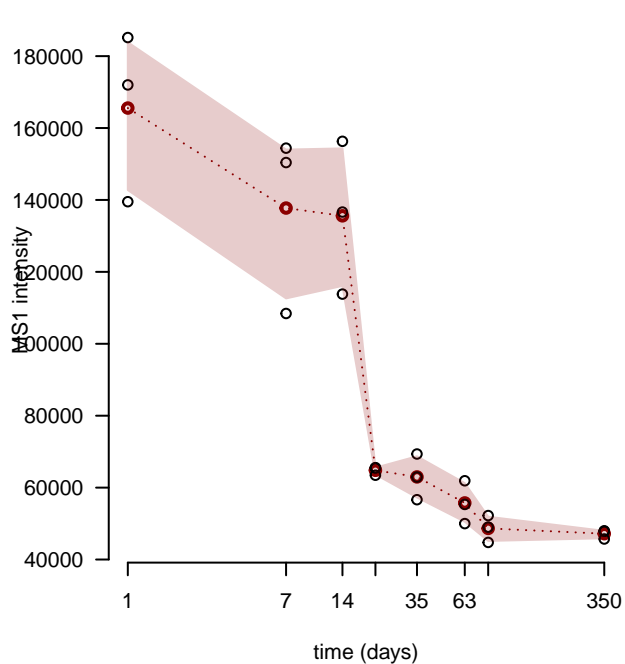

**Q8BKH7**  
GN=Mapkap1  
mitogen-activated protein kinase associa ...

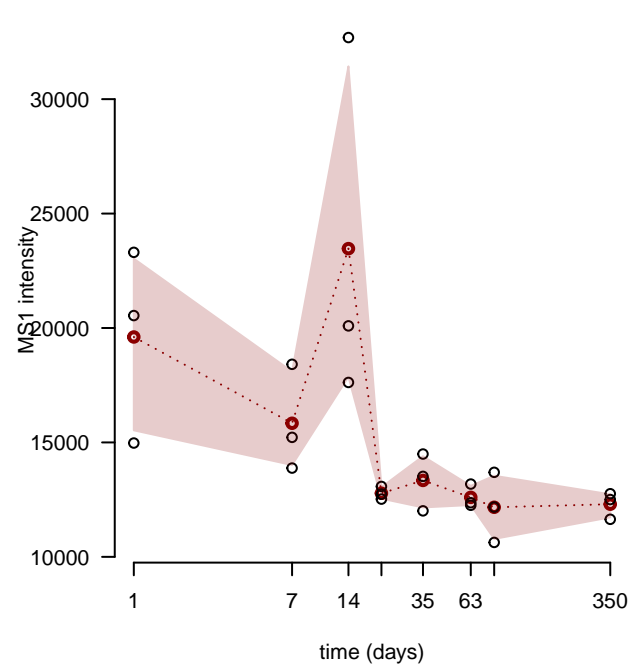

**Q8BK12**  
GN=Tnrc6b  
trinucleotide repeat containing 6b

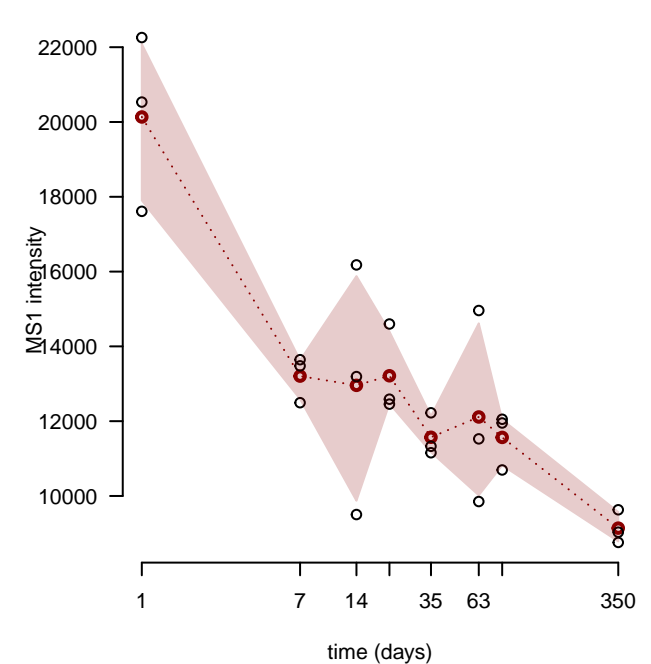

**Q8BKJ9**  
GN=Sirt7  
sirtuin 7

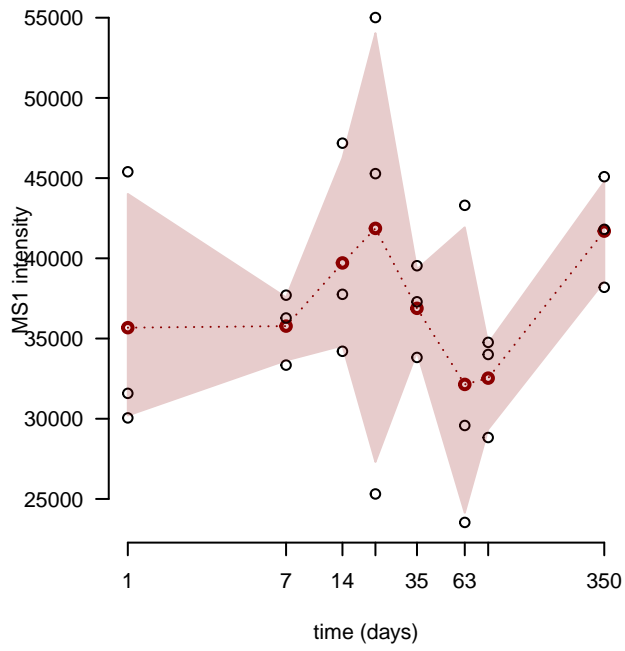

**Q8BKN5**  
GN=Tubgcp5  
tubulin, gamma complex associated protei ...

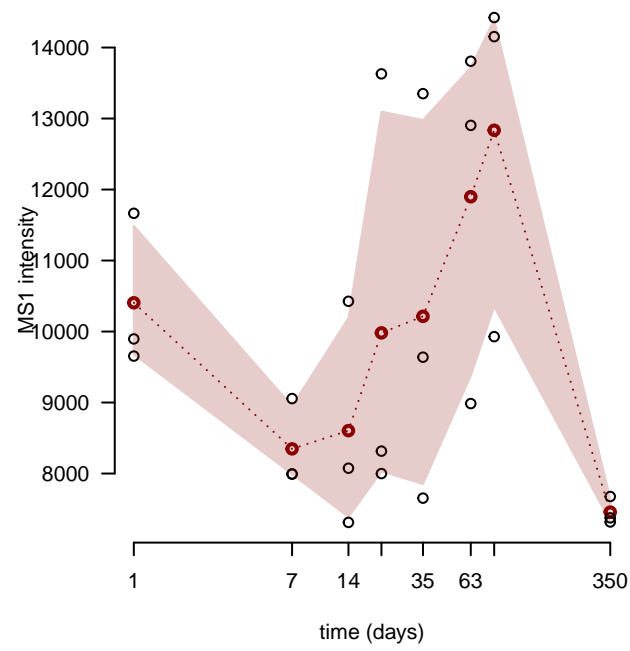

**Q8BKR5**  
GN=Ppp1r37  
protein phosphatase 1, regulatory subuni ...

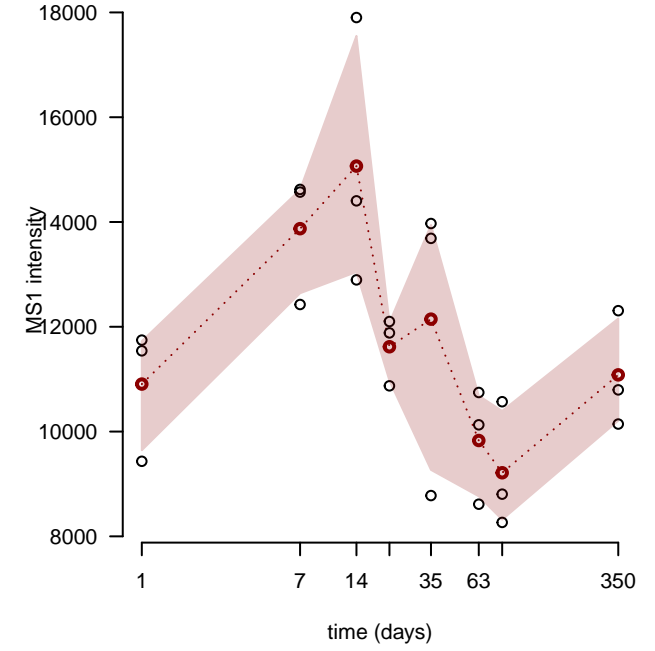

**Q8BKS9**  
GN=Pum3  
pumilio RNA-binding family member 3

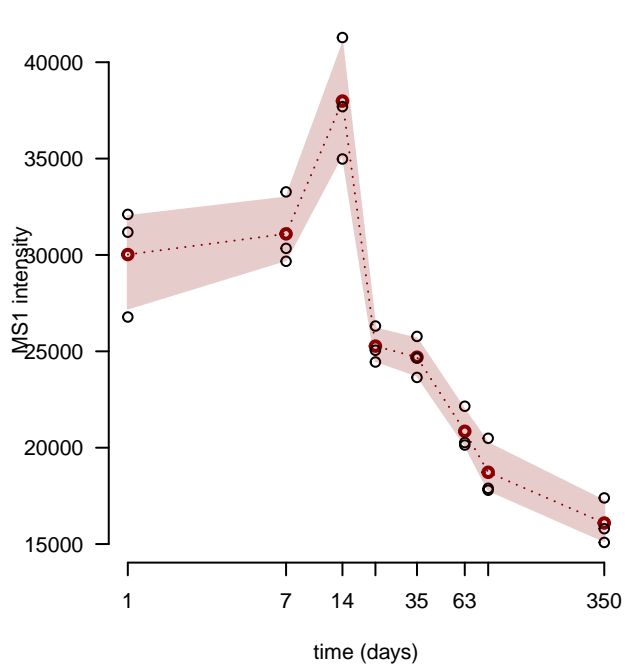

**Q8BKT3**  
GN=Gcfc2  
GC-rich sequence DNA binding factor 2

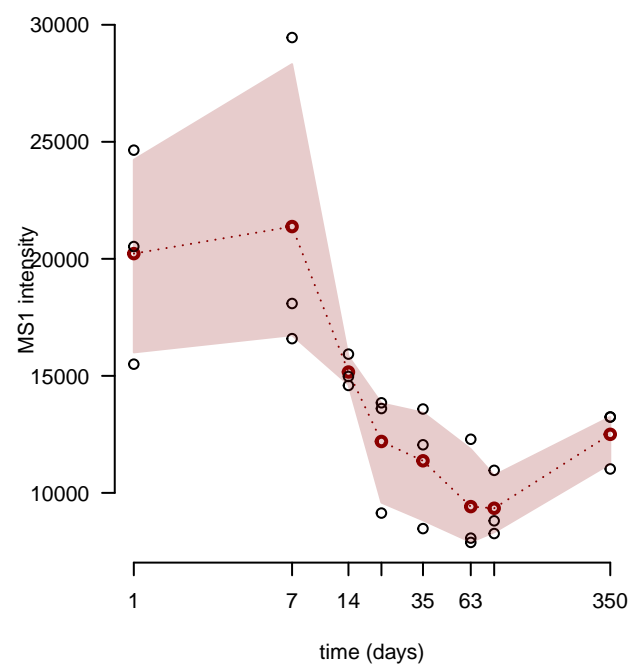

**Q8BKT7**  
GN=Thoc5  
THO complex 5

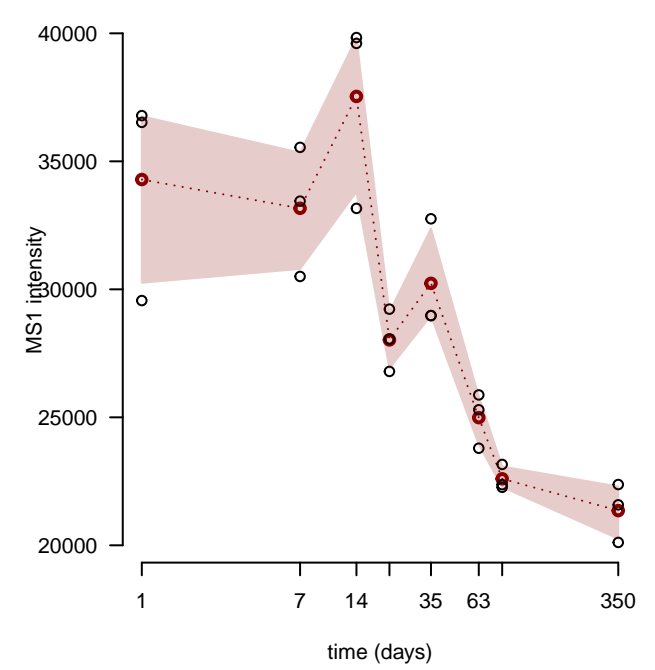

**Q8BKT8**  
GN=Haus7  
HAUS augmin-like complex, subunit 7

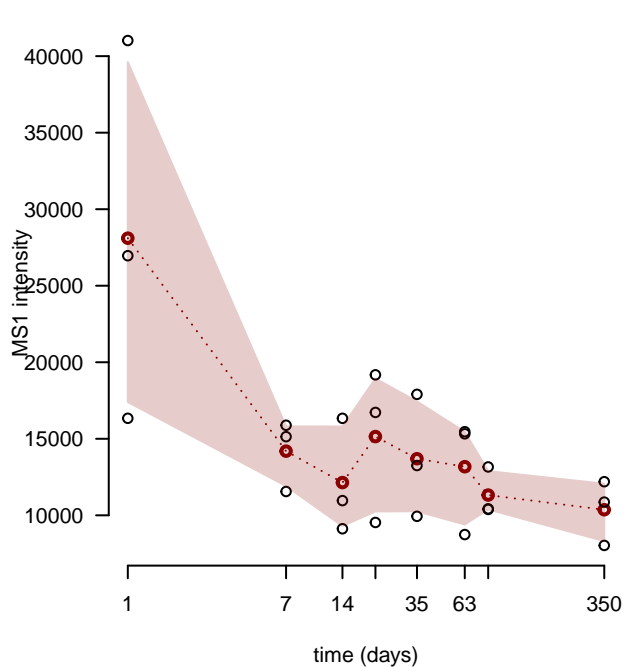

**Q8BKU8**  
GN=Tmem87b  
transmembrane protein 87B

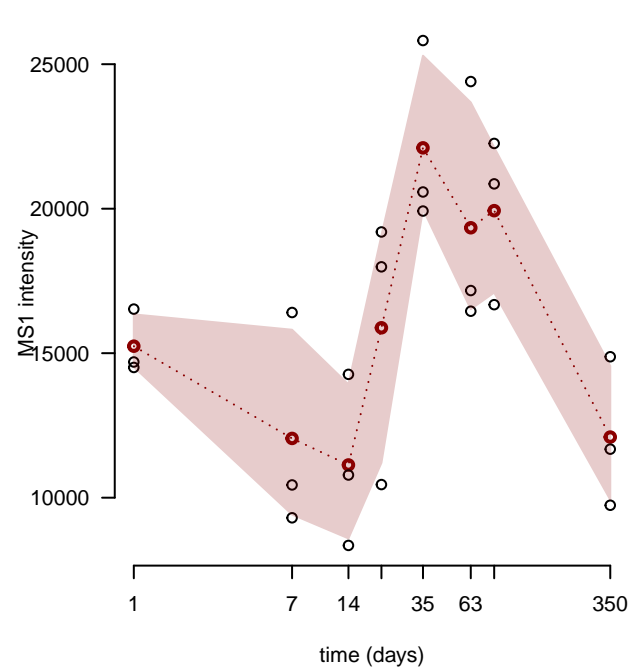

**Q8BKX1**  
GN=Baiap2  
brain-specific angiogenesis inhibitor 1- ...

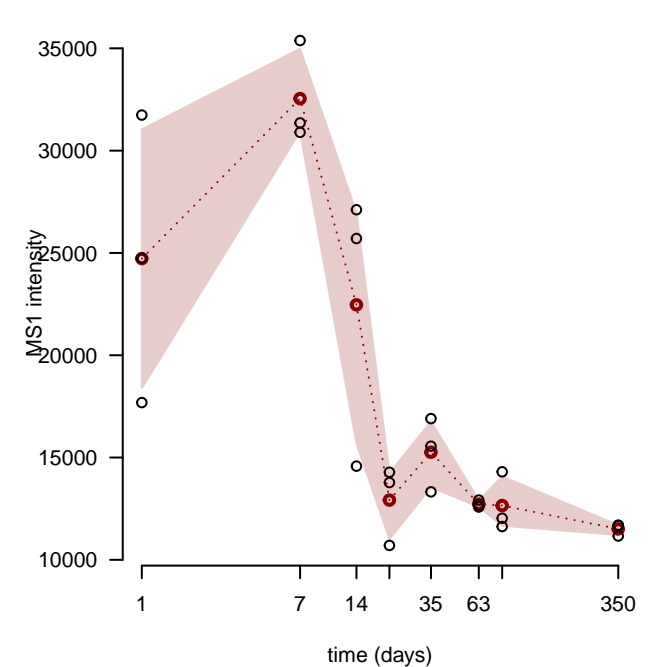

**Q8BKX6**  
**GN=Smg1**

SMG1 nonsense mediated mRNA decay associ ...

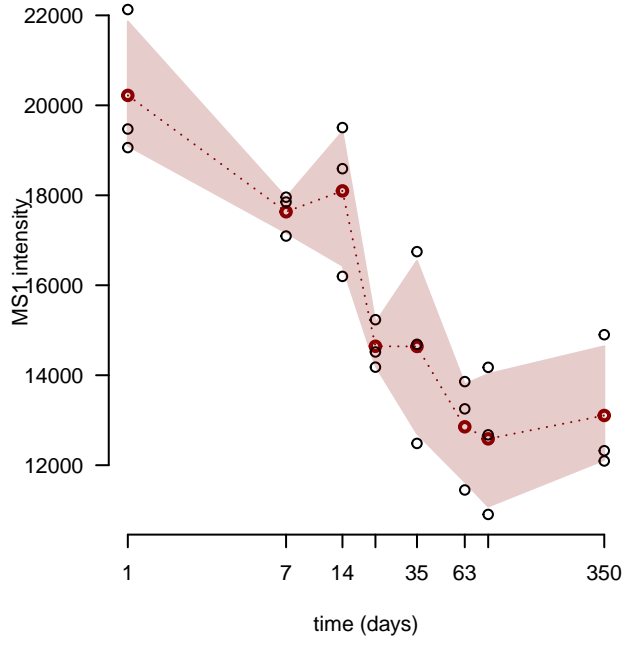

**Q8BKY8**  
**GN=Mterf2**

mitochondrial transcription termination ...

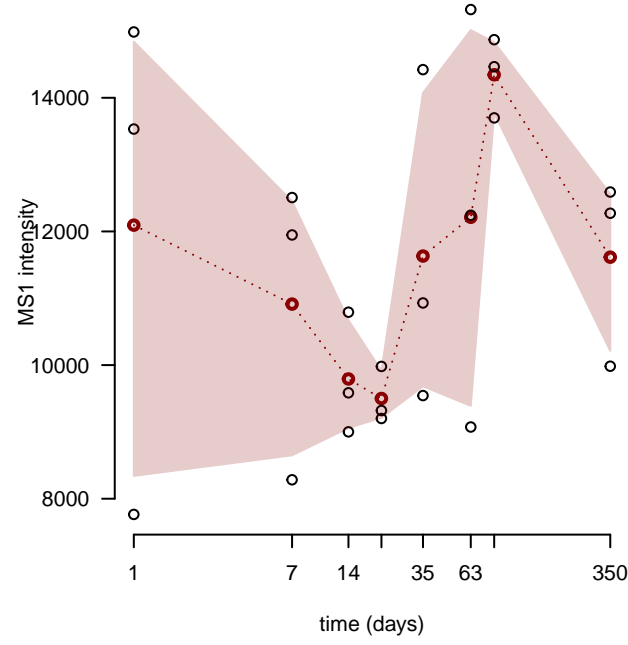

**Q8BKZ9**  
**GN=Pdhx**

pyruvate dehydrogenase complex, componen ...

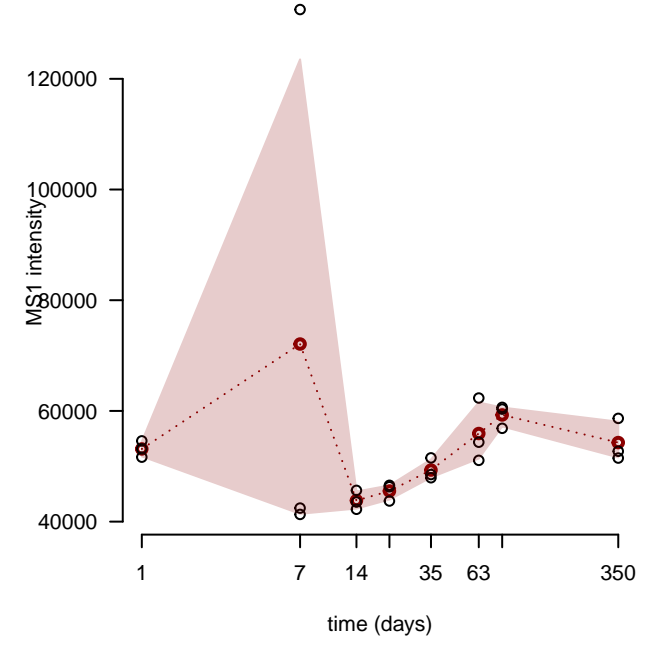

**Q8BL06**  
**GN=Usp54**

ubiquitin specific peptidase 54

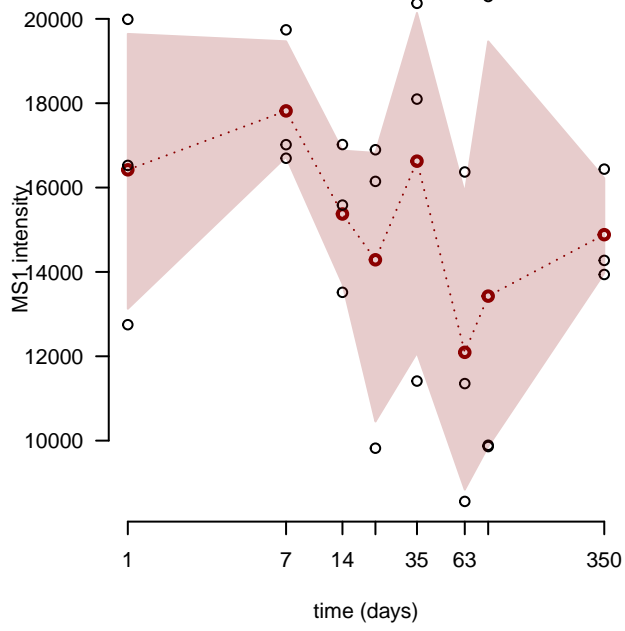

**Q8BL48**  
**GN=Unk**

unkempt family zinc finger

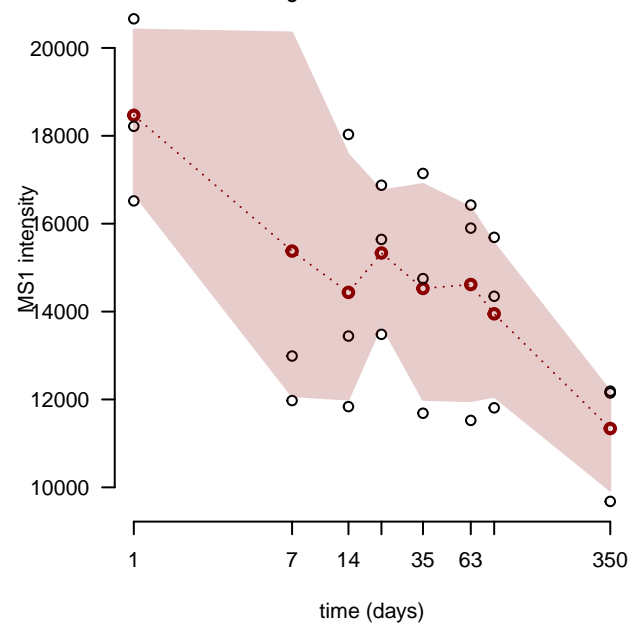

**Q8BL66**  
**GN=Eea1**

early endosome antigen 1

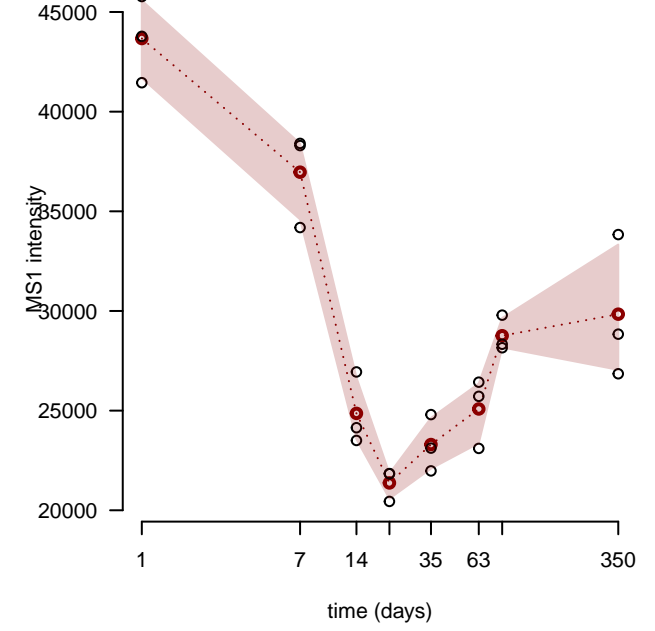

**Q8BL74**  
**GN=Gtf3c2**

general transcription factor IIIc, polyp ...

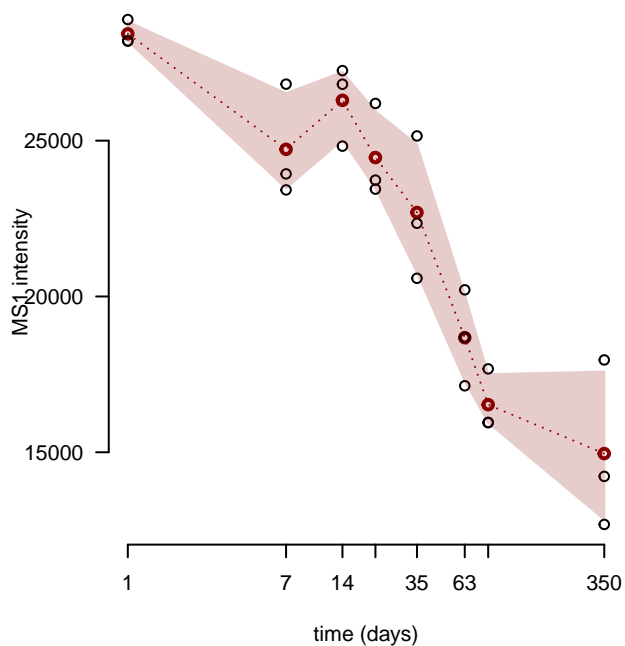

**Q8BL86**  
**GN=Mblac2**

metallo-beta-lactamase domain containing ...

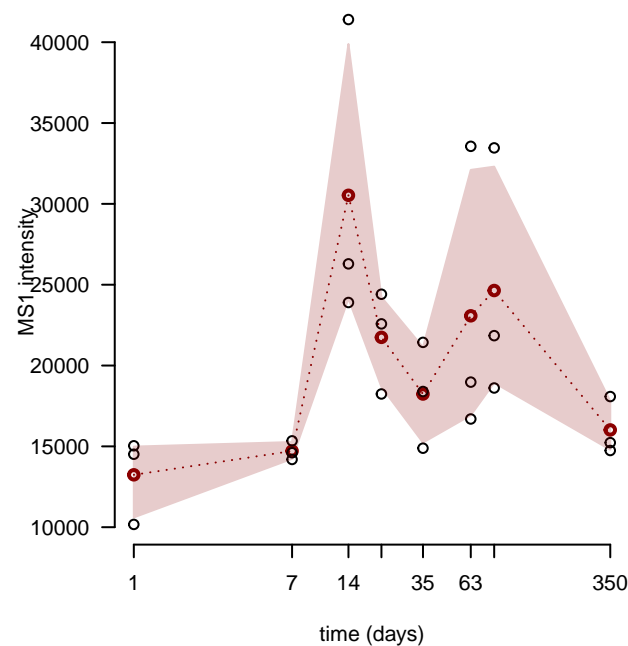

**Q8BL95**  
**GN=Cfap298**

cilia and flagella associate protien 298

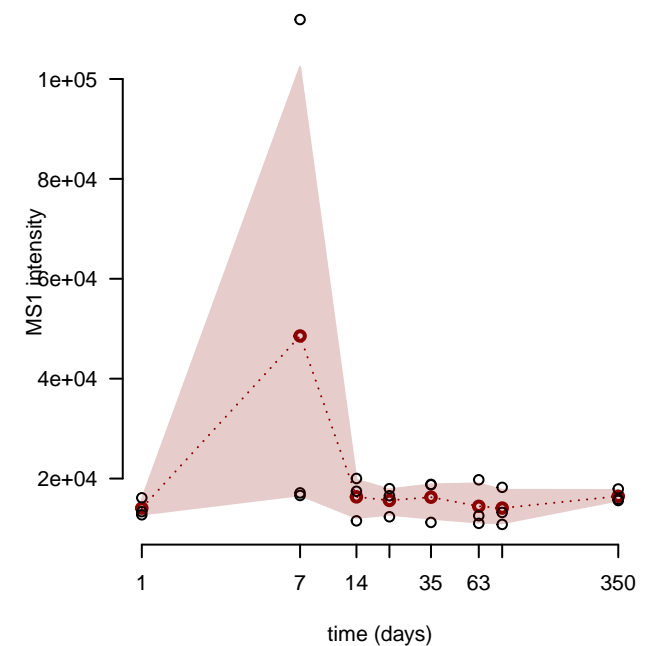

**Q8BL97**  
**GN=Srsf7**  
serine and arginine-rich splicing factor ...

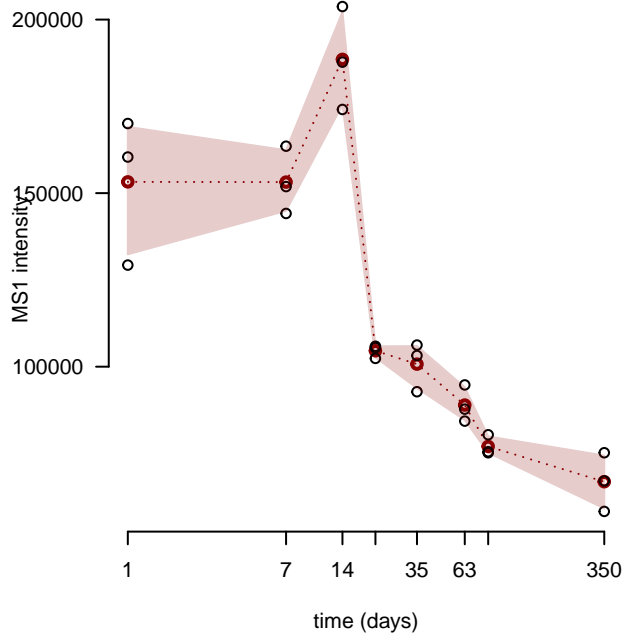

**Q8BL99**  
**GN=Dop1a**  
DOP1 leucine zipper like protein A

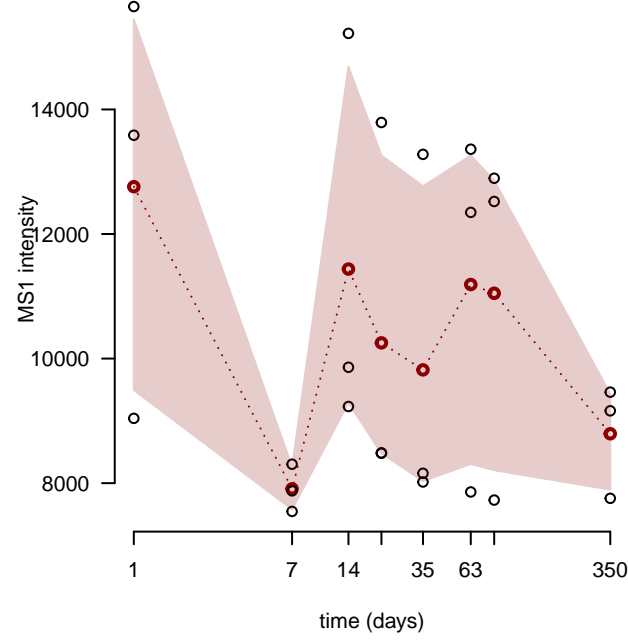

**Q8BLB0**  
**GN=Zfp3**  
zinc finger protein 3

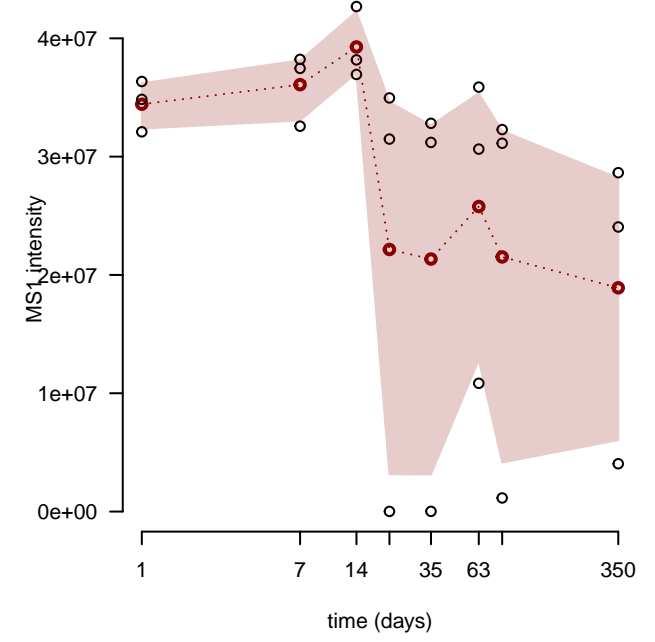

**Q8BLB7**  
**GN=L3mbtl3**  
L3MBTL3 histone methyl-lysine binding pr ...

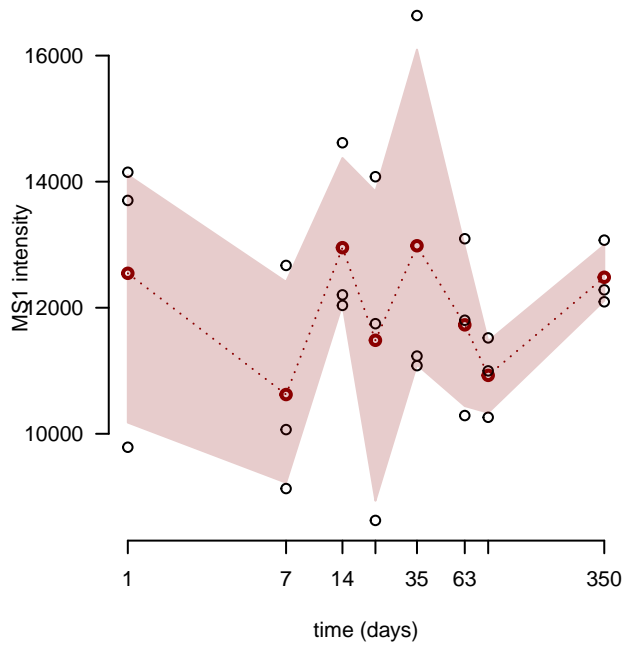

**Q8BLF1**  
**GN=Nceh1**  
neutral cholesterol ester hydrolase 1

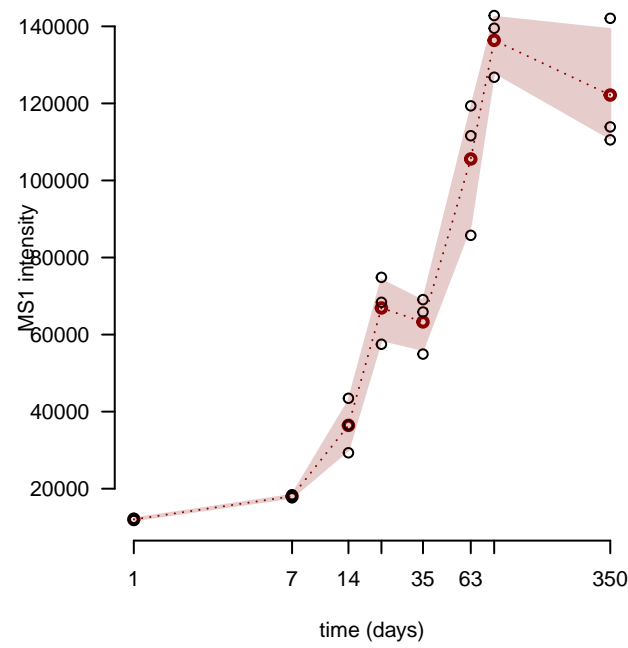

**Q8BLG2**  
**GN=Lpar4**  
lysophosphatidic acid receptor 4

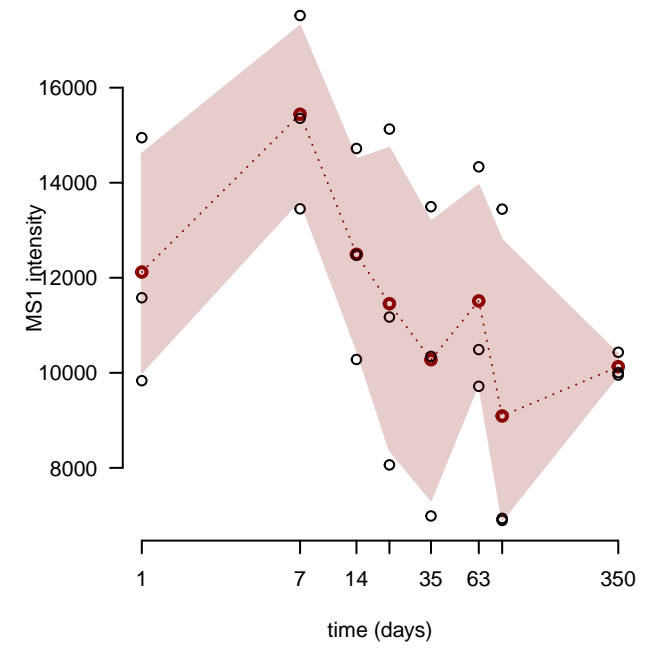

**Q8BLH7**  
**GN=Hirip3**  
HIRA interacting protein 3

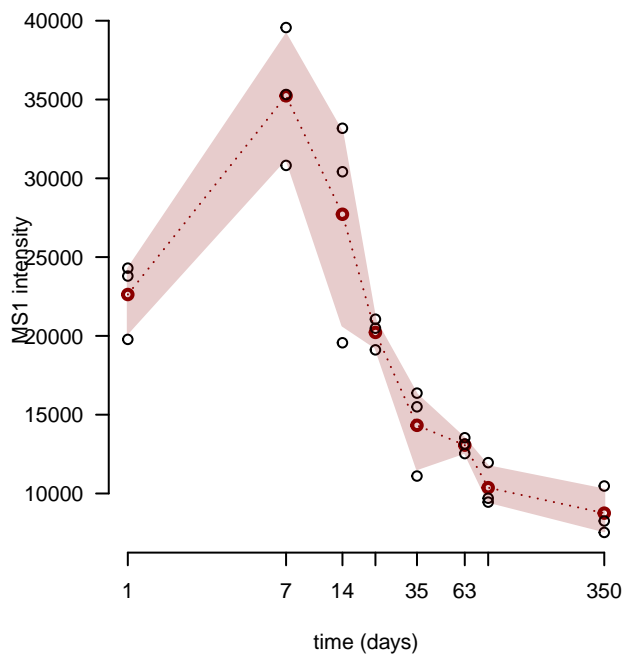

**Q8BLK3**  
**GN=Lsamp**  
limbic system-associated membrane protei ...

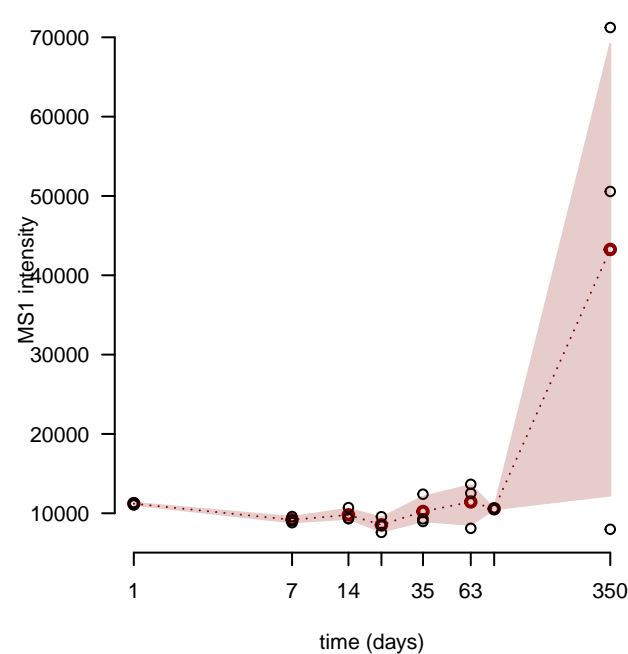

**Q8BLN5**  
**GN=Lss**  
lanosterol synthase

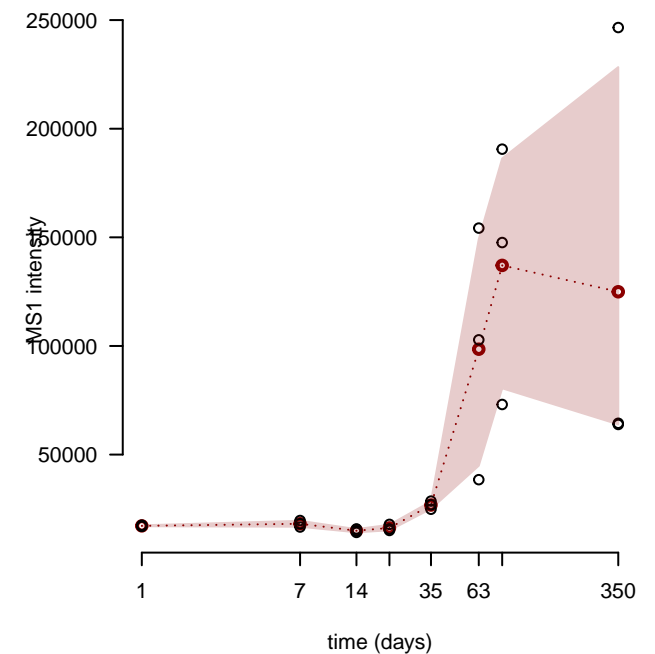



**Q8BLR9**  
GN=Hif1an  
hypoxia-inducible factor 1, alpha subuni ...

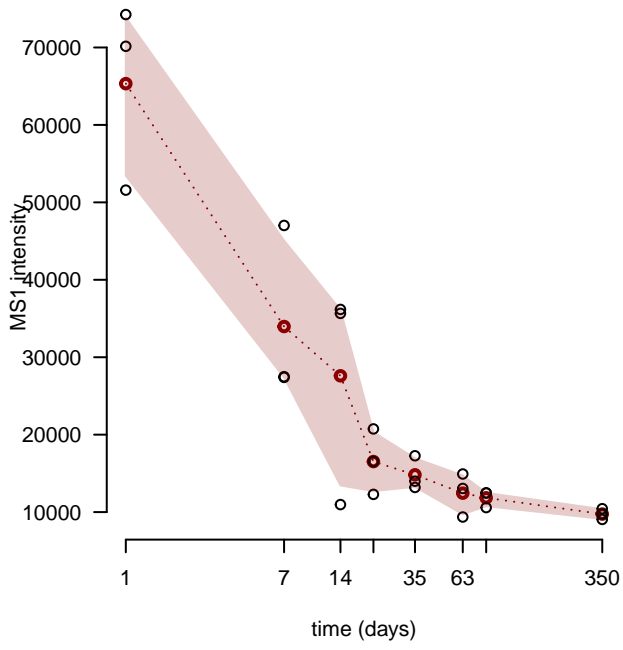

**Q8BLU0**  
GN=Flrt2  
fibronectin leucine rich transmembrane p ...

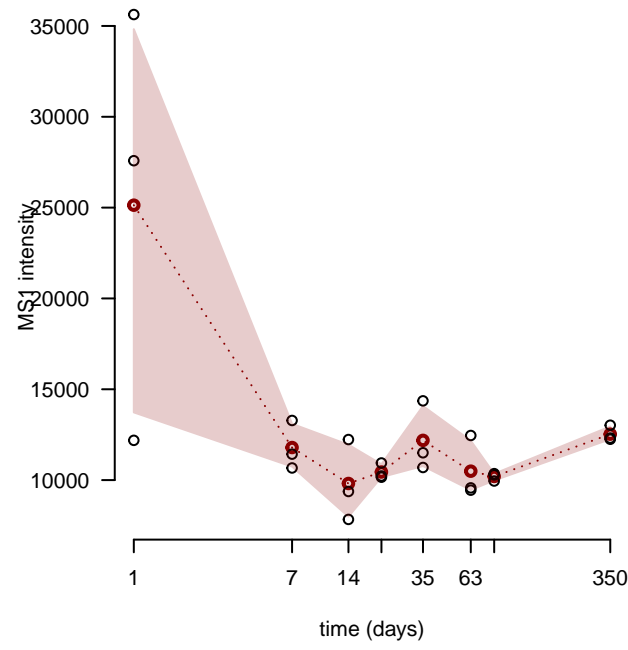

**Q8BLV3**  
GN=Slc9a7  
solute carrier family 9 (sodium/hydrogen ...

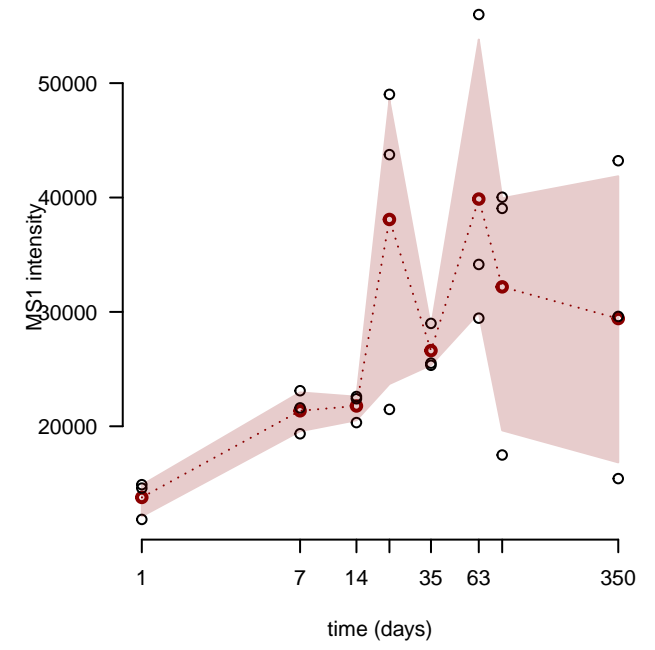

**Q8BLX4**  
GN=Slc35c1  
solute carrier family 35, member C1

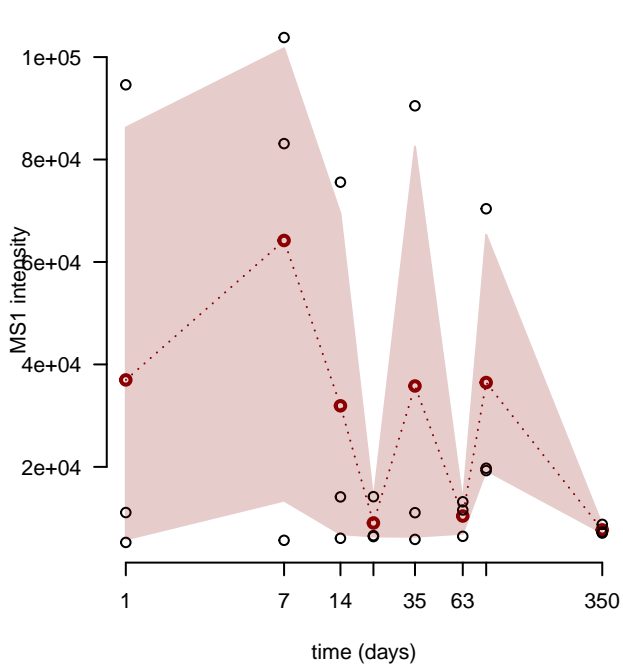

**Q8BLX7**  
GN=Col16a1  
collagen, type XVI, alpha 1

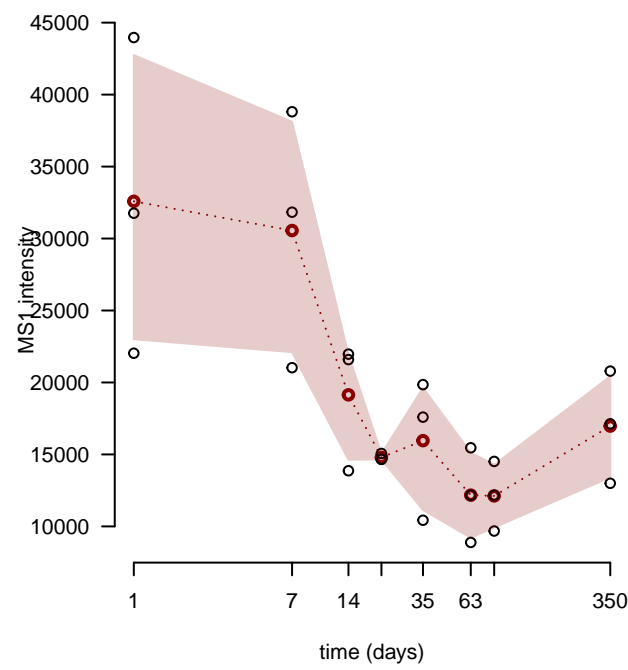

**Q8BLY1**  
GN=Smoc1  
SPARC related modular calcium binding 1

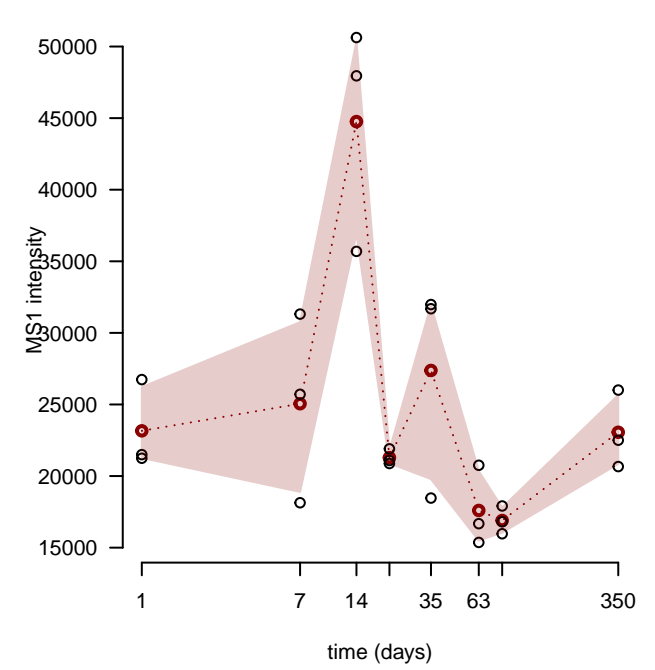

**Q8BLY2**  
GN=Tarsl2  
threonyl-tRNA synthetase-like 2

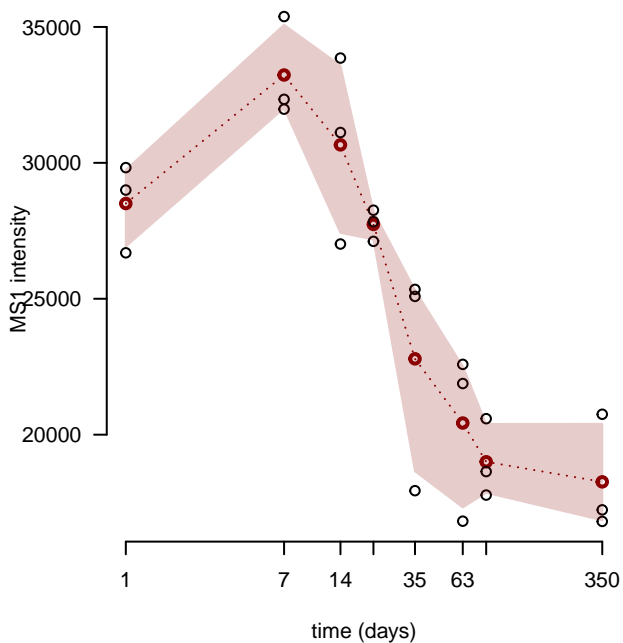

**Q8BLY7**  
GN=Hps6  
HPS6, biogenesis of lysosomal organelles ...

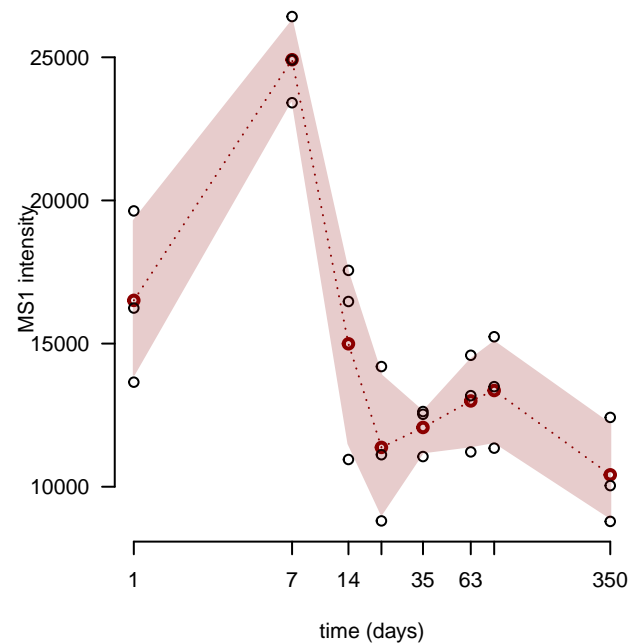

**Q8BM39**  
GN=Prpf18  
pre-mRNA processing factor 18

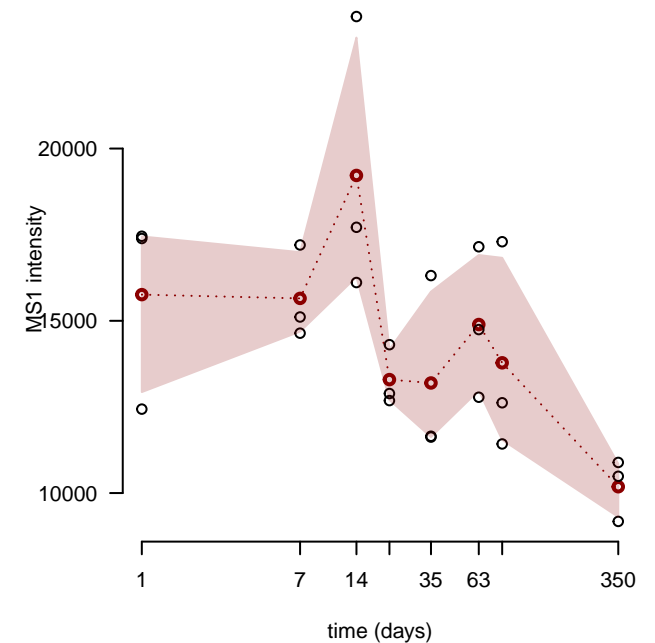

**Q8BM55**  
**GN=Tmem214**  
transmembrane protein 214

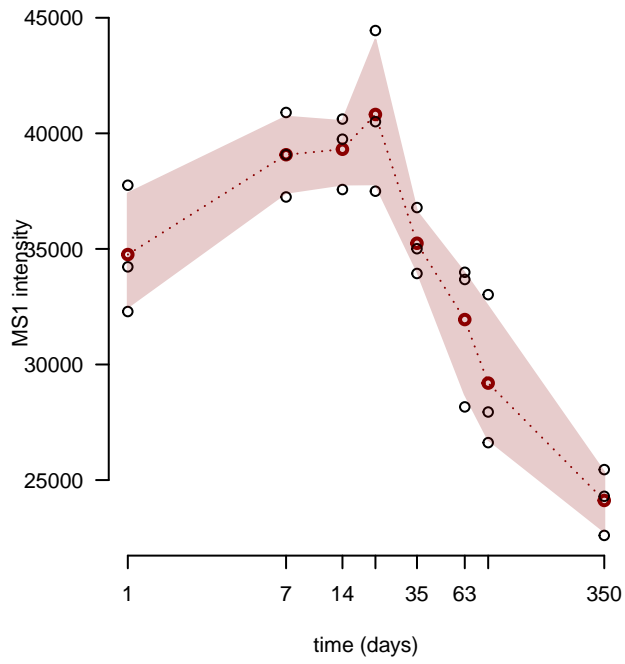

**Q8BM72**  
**GN=Hspa13**  
heat shock protein 70 family, member 13

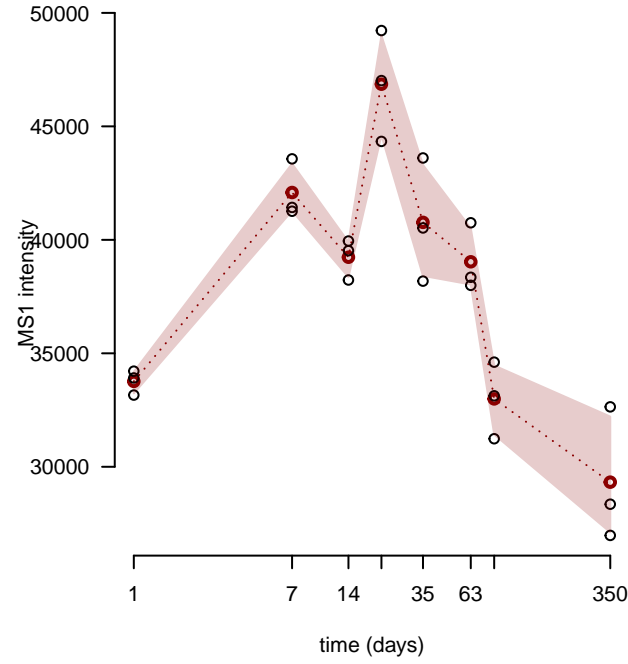

**Q8BM75**  
**GN=Arid5b**  
AT rich interactive domain 5B (MRF1-like ...

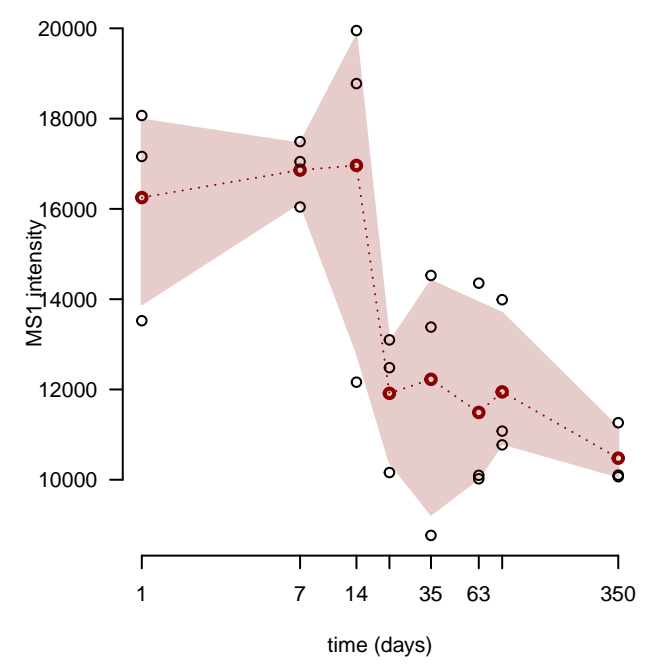

**Q8BM85**  
**GN=Tbck**  
TBC1 domain containing kinase

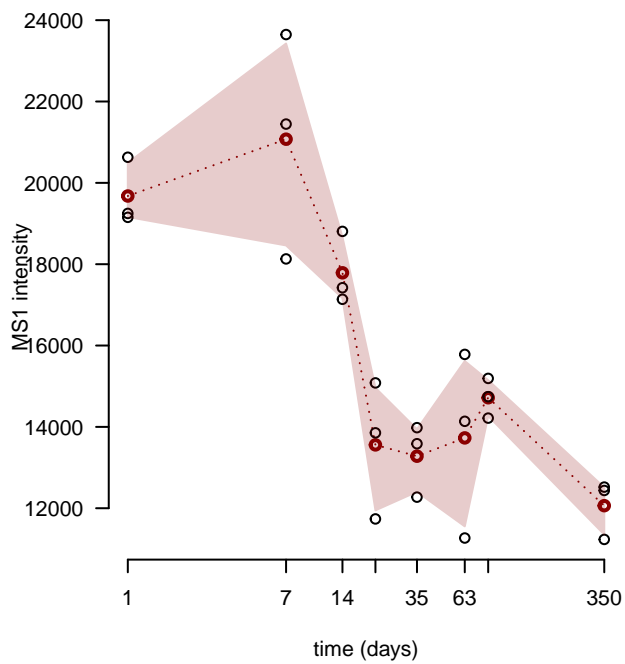

**Q8BM88**  
**GN=Ctso**  
cathepsin O

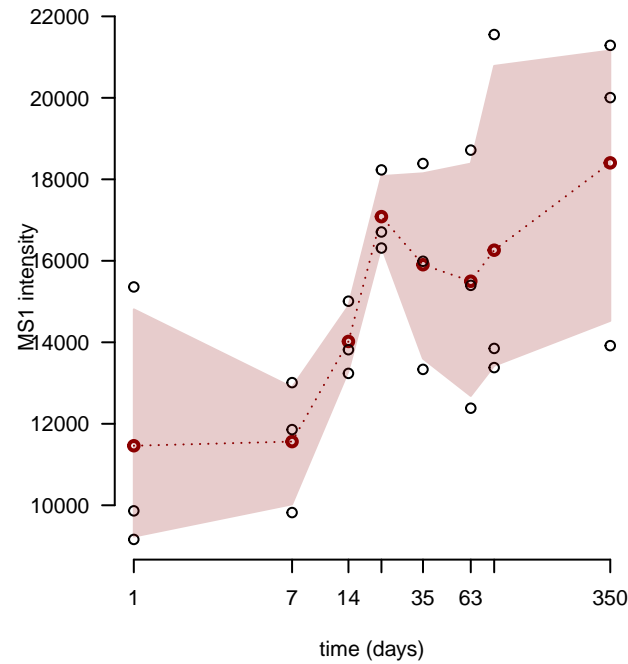

**Q8BMA6**  
**GN=Srp68**  
signal recognition particle 68

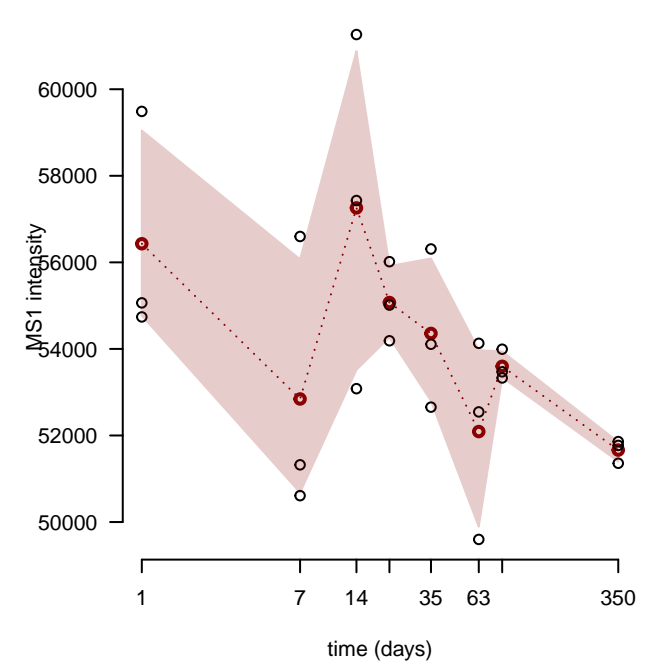

**Q8BMB0**  
**GN=Emsy**  
EMSY, BRCA2-interacting transcriptional ...

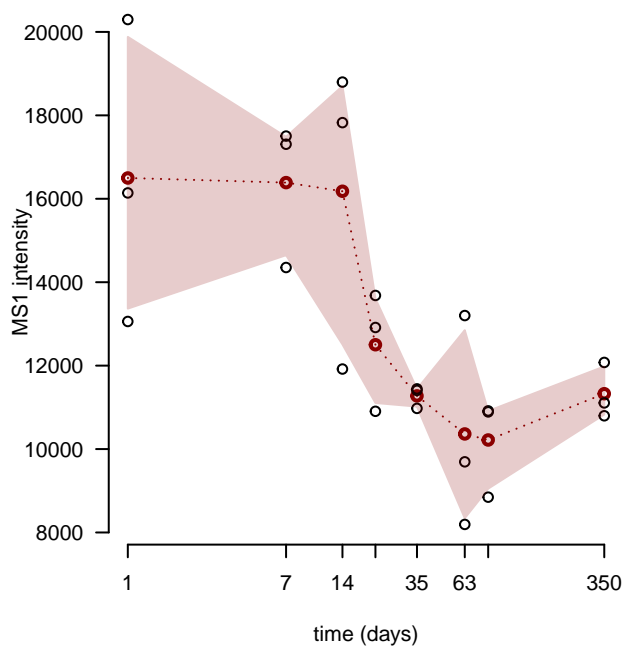

**Q8BMB3**  
**GN=Eif4e2**  
eukaryotic translation initiation factor ...

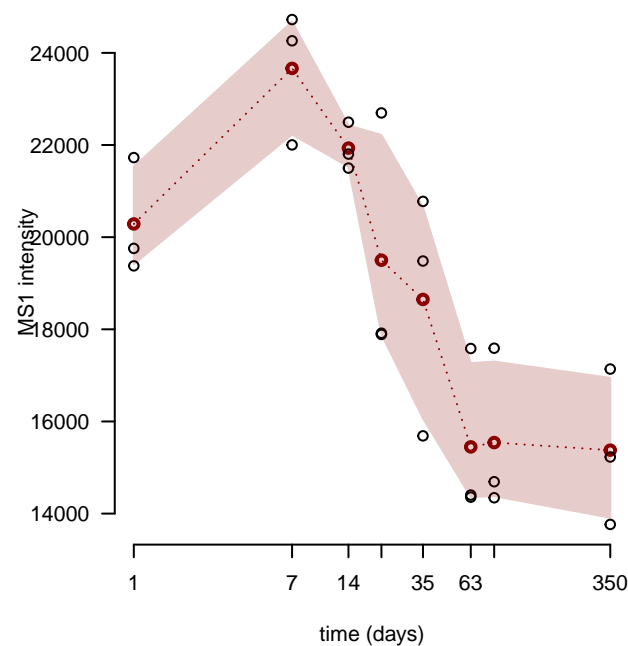

**Q8BMC4**  
**GN=Nop9**  
NOP9 nucleolar protein

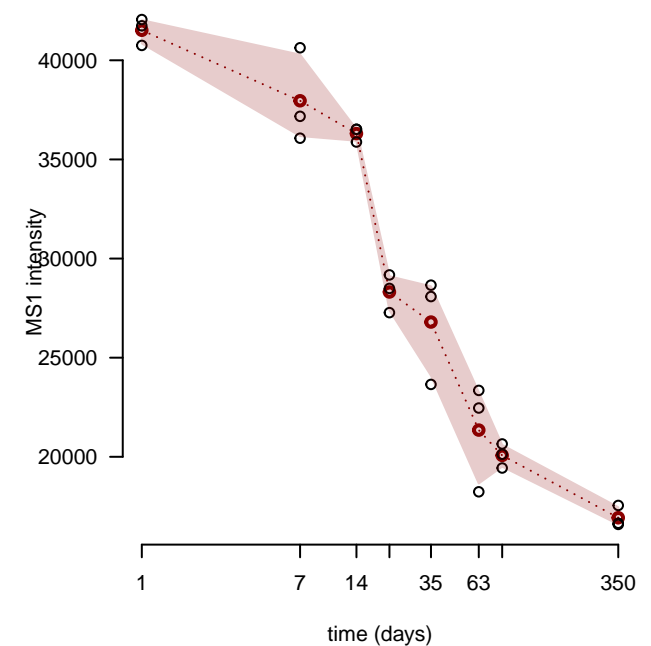

**Q8BMD6**  
**GN=Tmem260**  
transmembrane protein 260

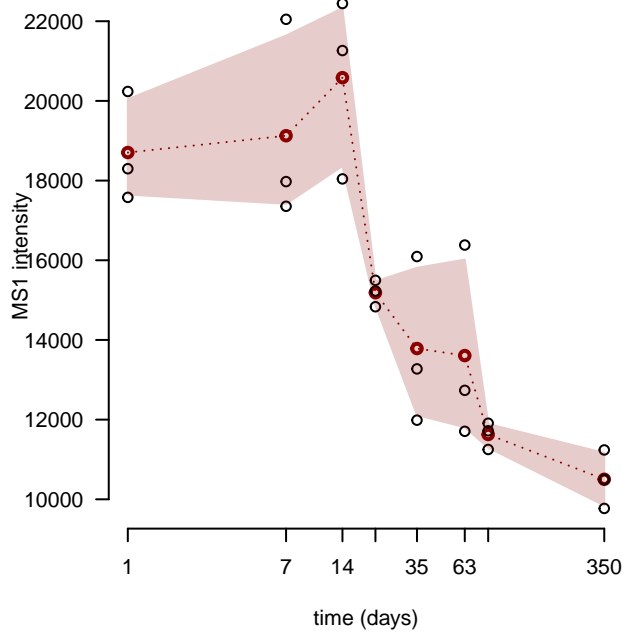

**Q8BMD8**  
**GN=Slc25a24**  
solute carrier family 25 (mitochondrial ...

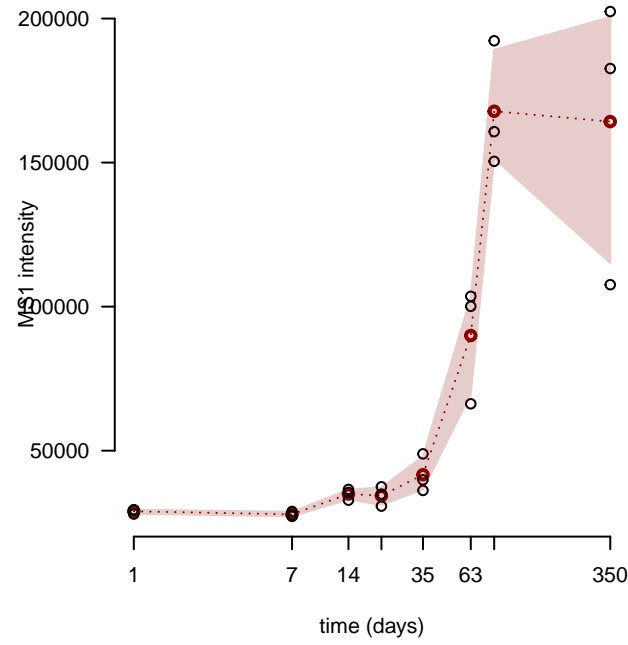

**Q8BME9**  
**GN=Cbln4**  
cerebellin 4 precursor protein

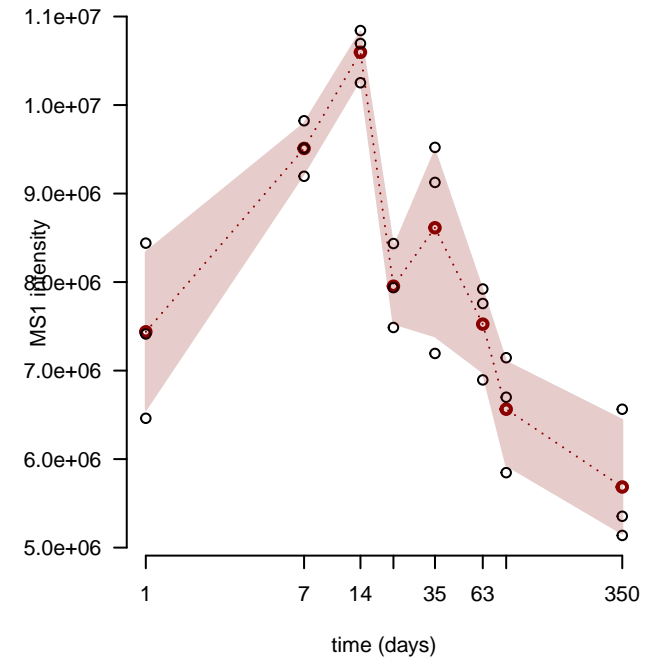

**Q8BMF3**  
**GN=Me3**  
malic enzyme 3, NADP(+)-dependent, mitoc ...

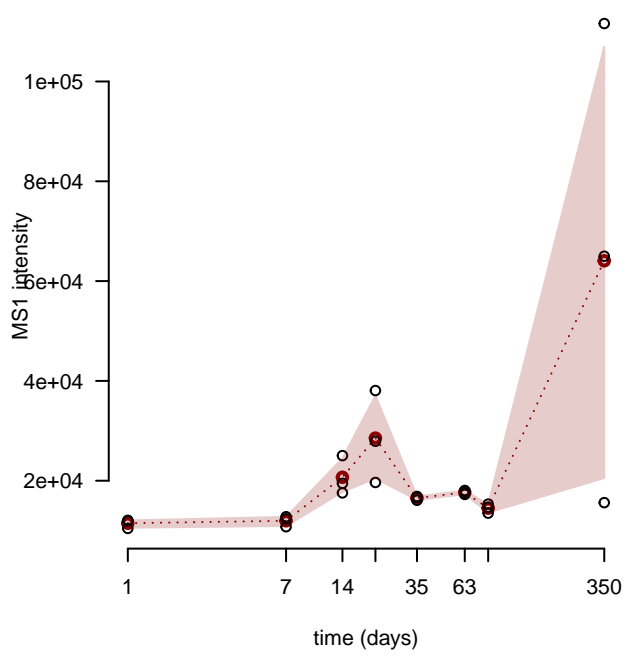

**Q8BMF4**  
**GN=Dlat**  
dihydrolipoamide S-acetyltransferase (E2 ...

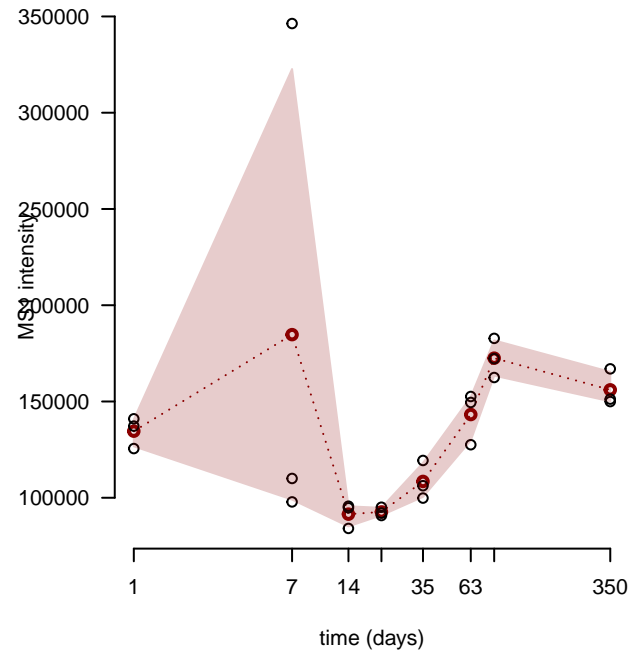

**Q8BMG1**  
**GN=Atrip**  
ATR interacting protein

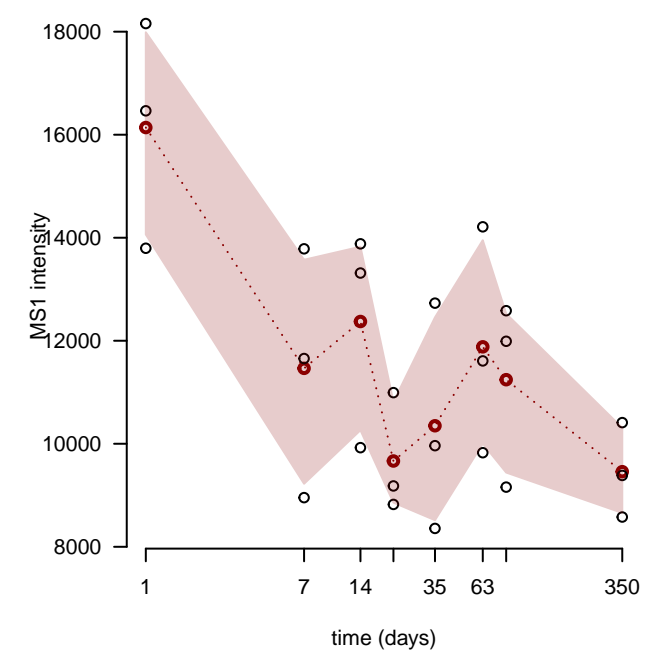

**Q8BMG7**  
**GN=Rab3gap2**  
RAB3 GTPase activating protein subunit 2

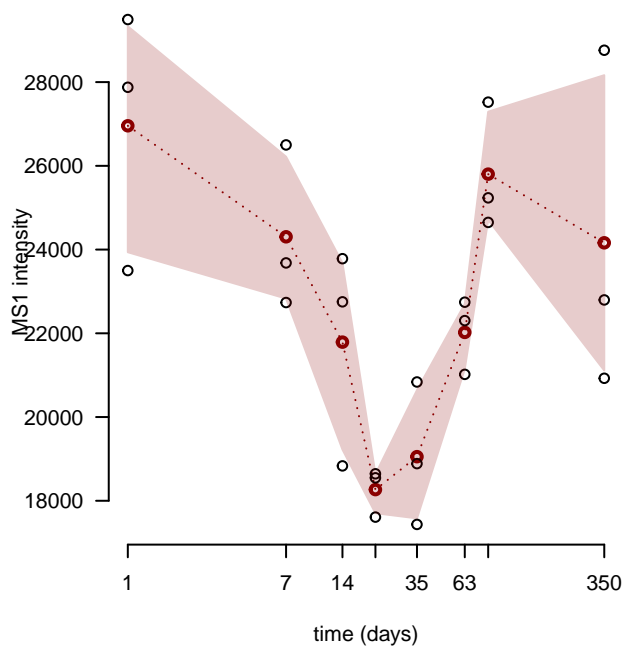

**Q8BMG8**  
**GN=Slc25a32**  
solute carrier family 25, member 32

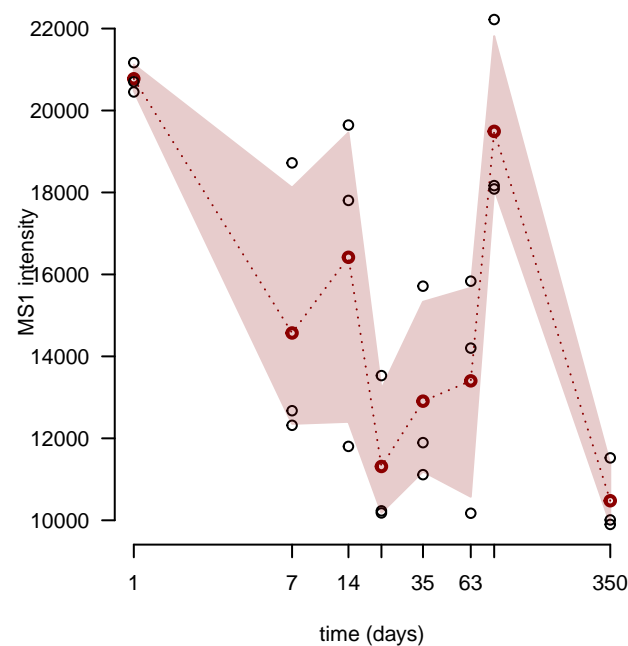

**Q8BMI0**  
**GN=Fbxo38**  
F-box protein 38

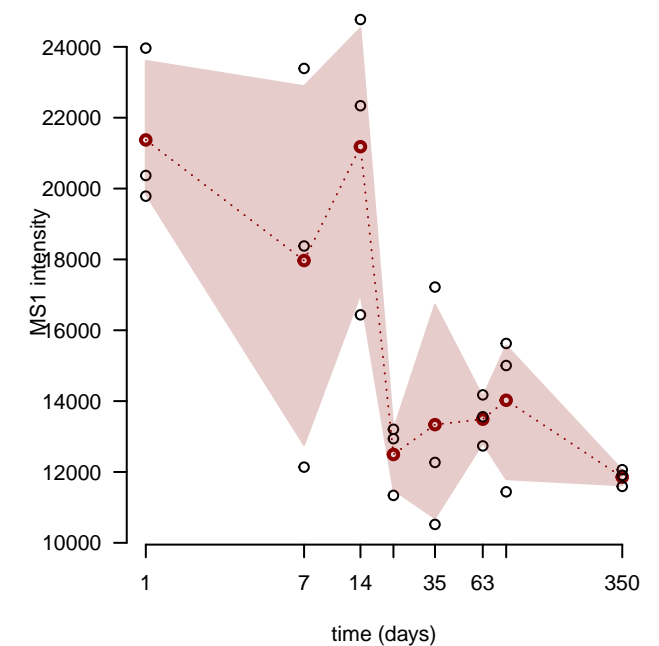

**Q8BMI3**  
**GN=Gga3**

golgi associated, gamma adaptin ear cont ...

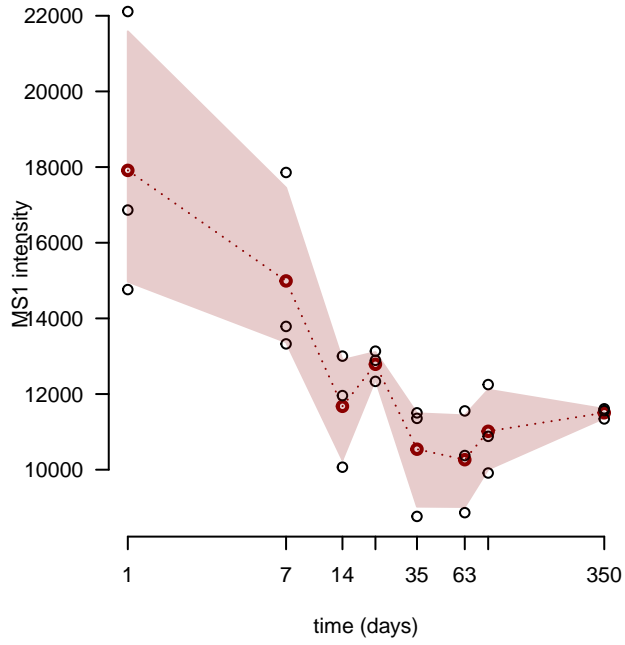

**Q8BMJ2**  
**GN=Lars**

leucyl-tRNA synthetase

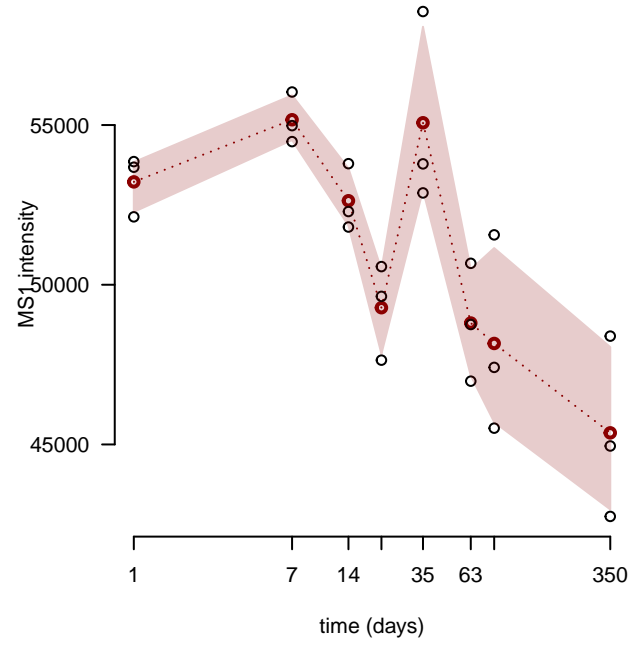

**Q8BMJ3**  
**GN=Eif1ax**

eukaryotic translation initiation factor ...

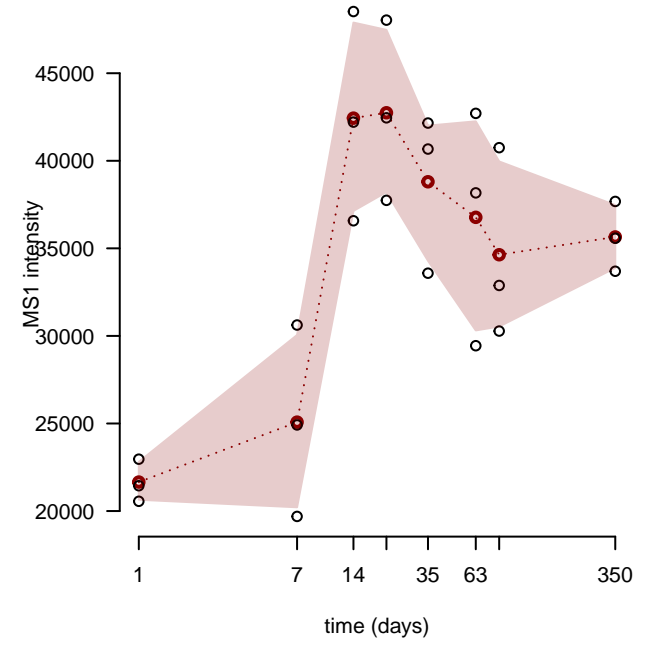

**Q8BMK0**  
**GN=Cep85**

centrosomal protein 85

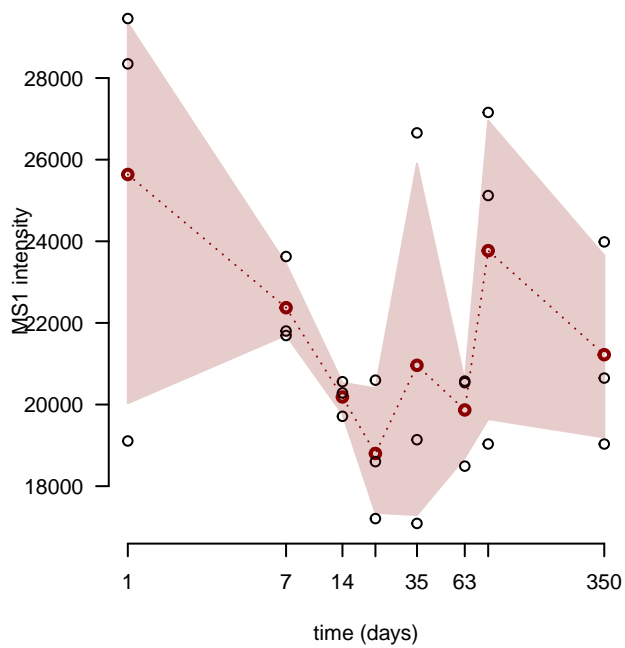

**Q8BMK1**  
**GN=Mettl2**

methyltransferase like 2

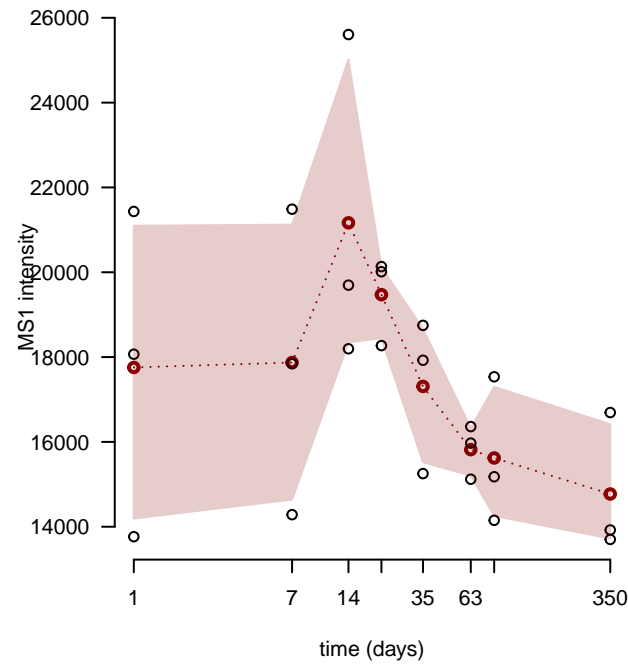

**Q8BMK4**  
**GN=Ckap4**

cytoskeleton-associated protein 4

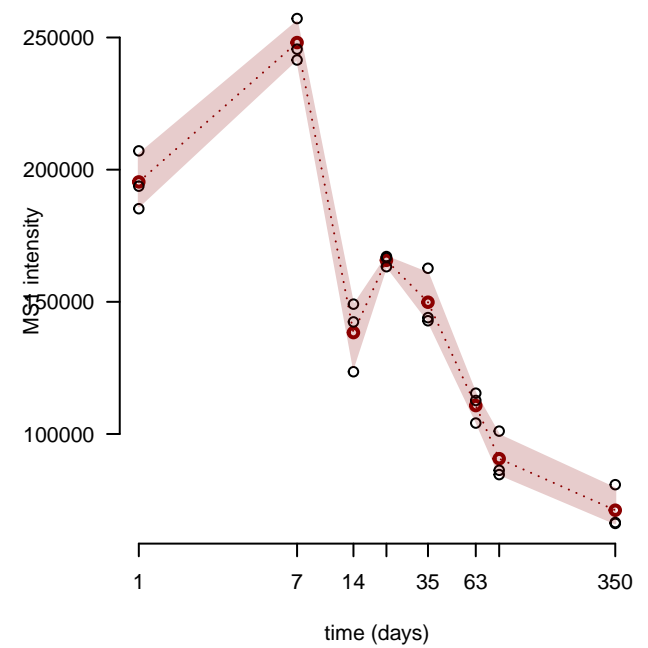

**Q8BML1**  
**GN=Mical2**

microtubule associated monooxygenase, ca ...

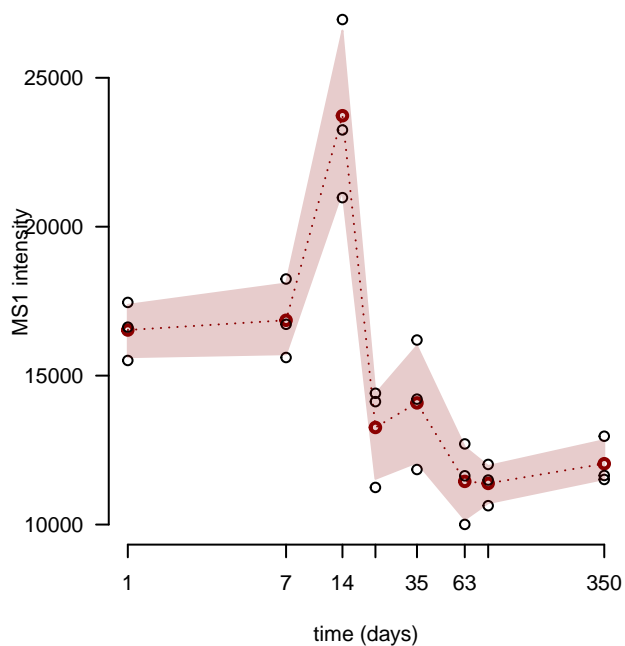

**Q8BML9**  
**GN=Qars**

glutamyl-tRNA synthetase

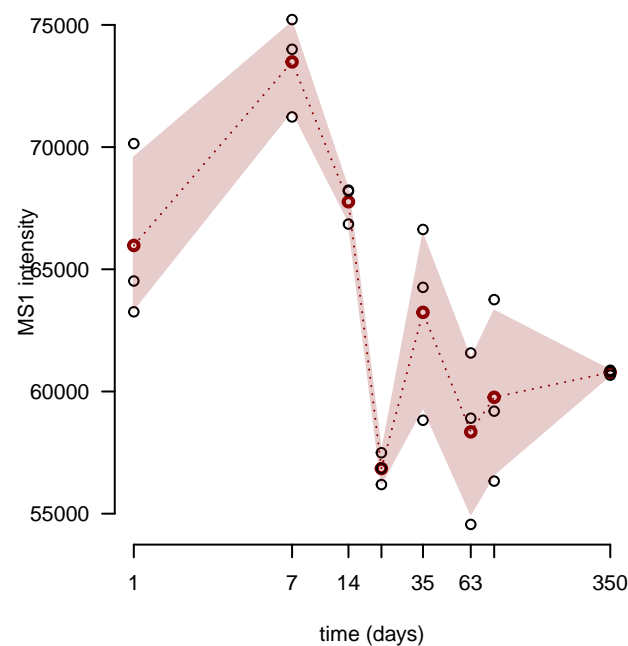

**Q8BMP6**  
**GN=Acbd3**

acyl-Coenzyme A binding domain containin ...

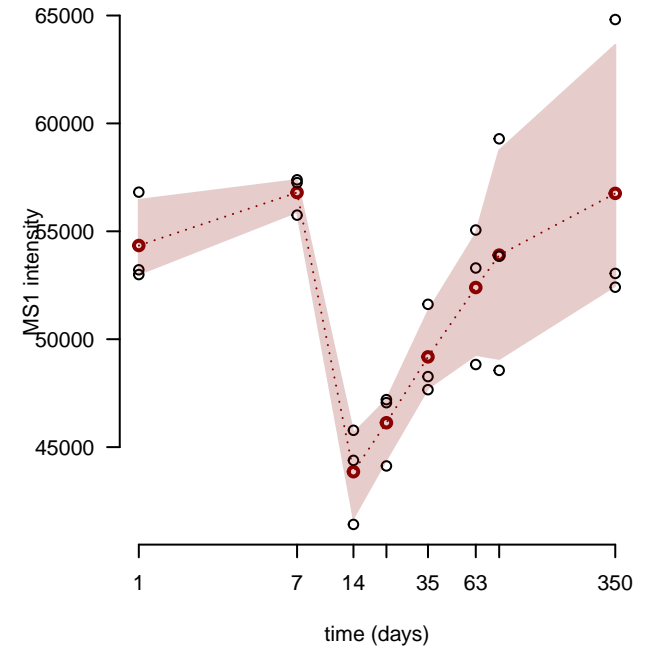

**Q8BMQ2**  
**GN=Gtf3c4**  
general transcription factor IIIc, polyp ...

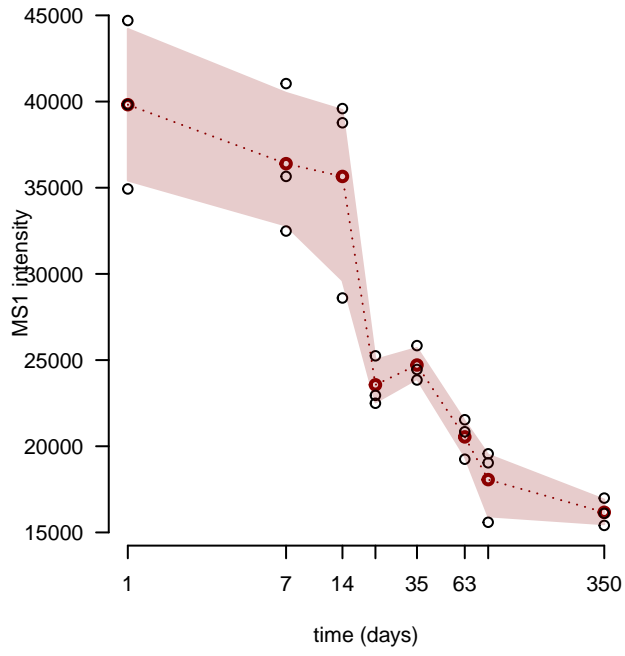

**Q8BMQ3**  
**GN=Bnc2**  
basenuclin 2

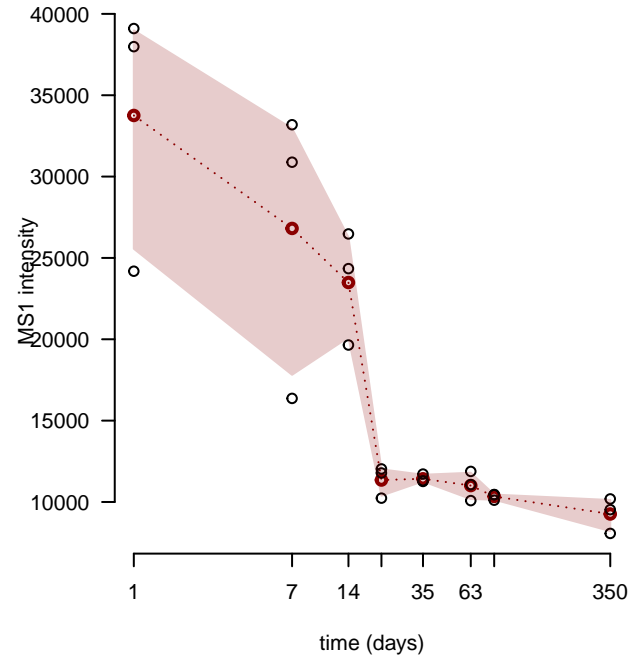

**Q8BMQ8**  
**GN=Mon1b**  
MON1 homolog B, secretory trafficking as ...

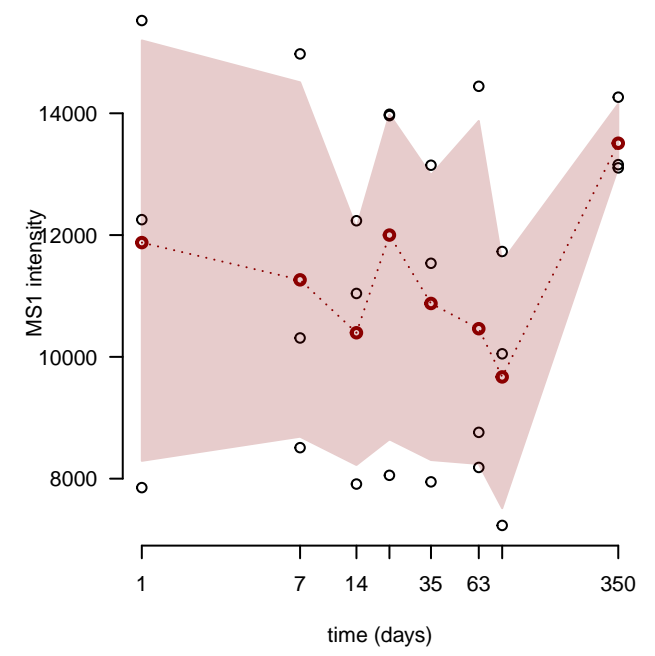

**Q8BMS1**  
**GN=Hadha**  
hydroxyacyl-CoA dehydrogenase trifunctio ...

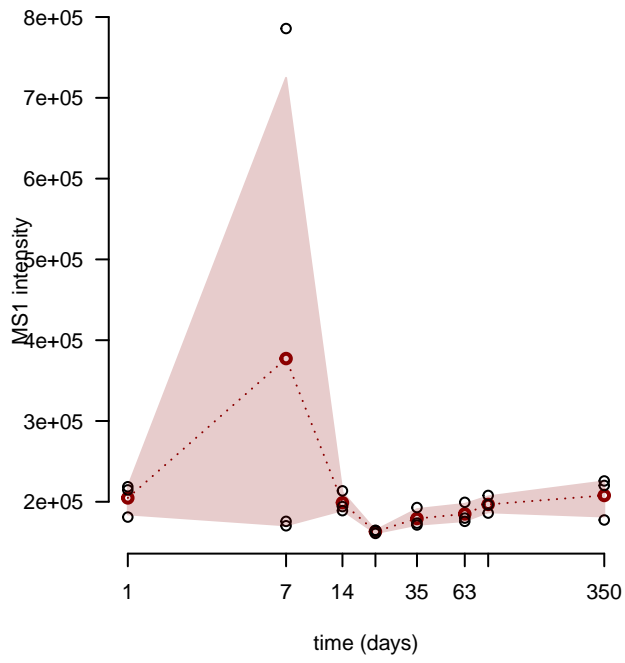

**Q8BMS4**  
**GN=Coq3**  
coenzyme Q3 methyltransferase

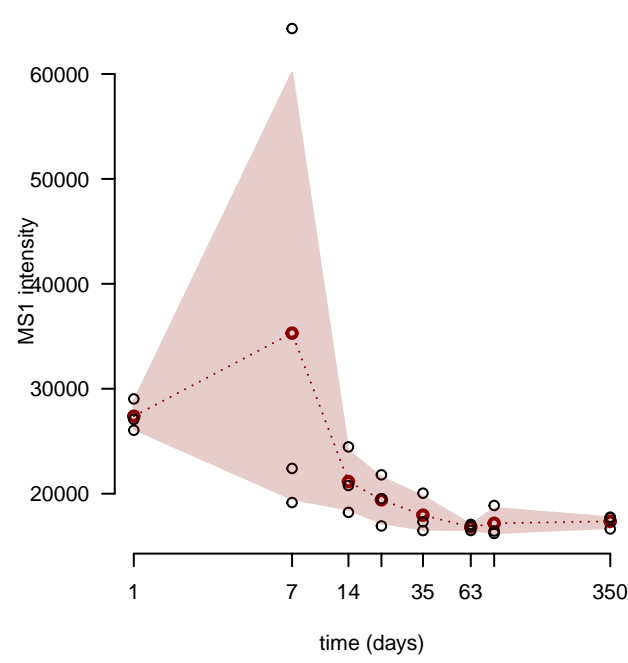

**Q8BMS9**  
**GN=Rassf2**  
Ras association (RalGDS/AF-6) domain fam ...

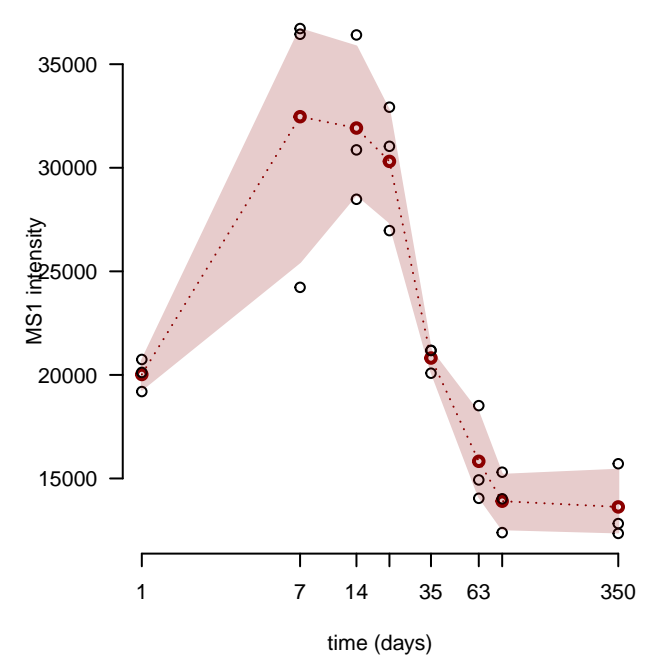

**Q8BMT9**  
**GN=Hhat**  
hedgehog acyltransferase

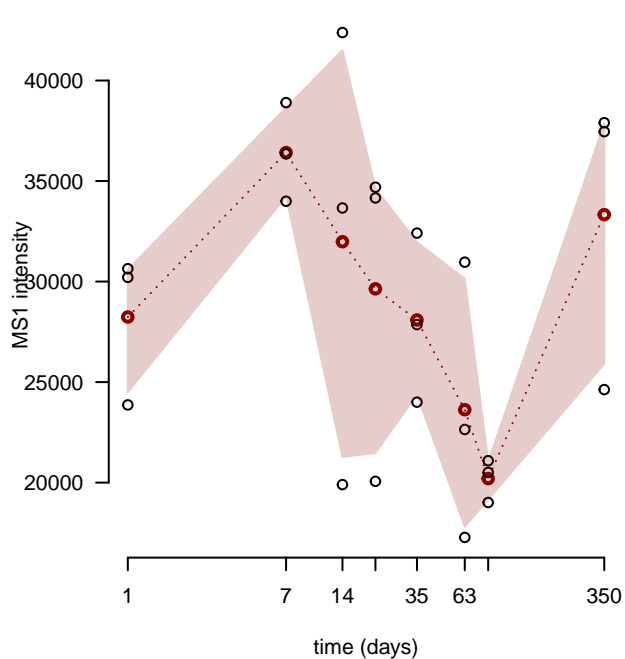

**Q8BMZ5**  
**GN=Tsen34**  
tRNA splicing endonuclease subunit 34

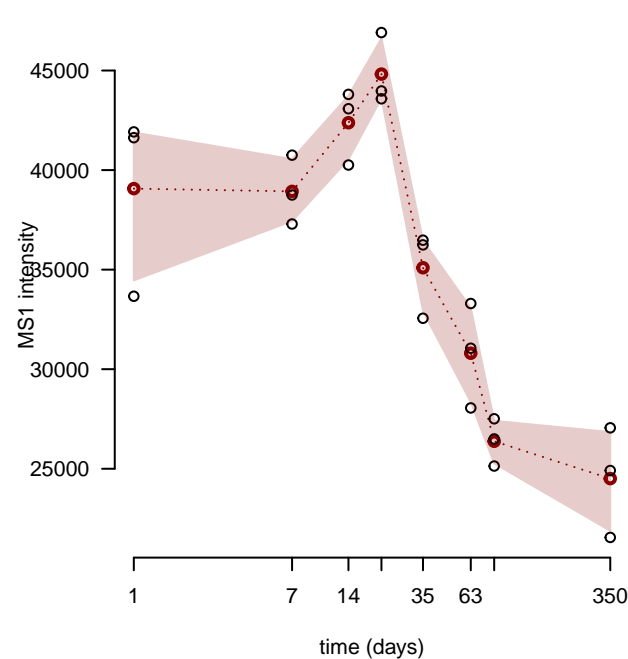

**Q8BN21**  
**GN=Vrk2**  
vaccinia related kinase 2

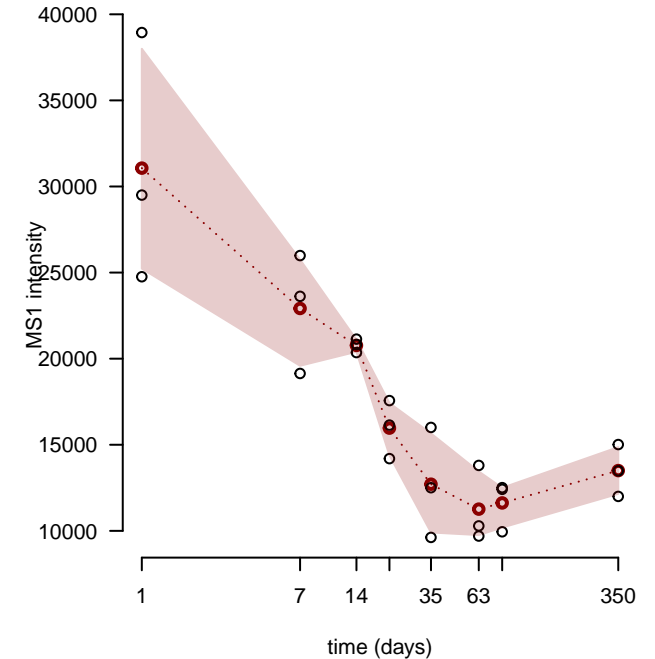

**Q8BN57**  
GN=

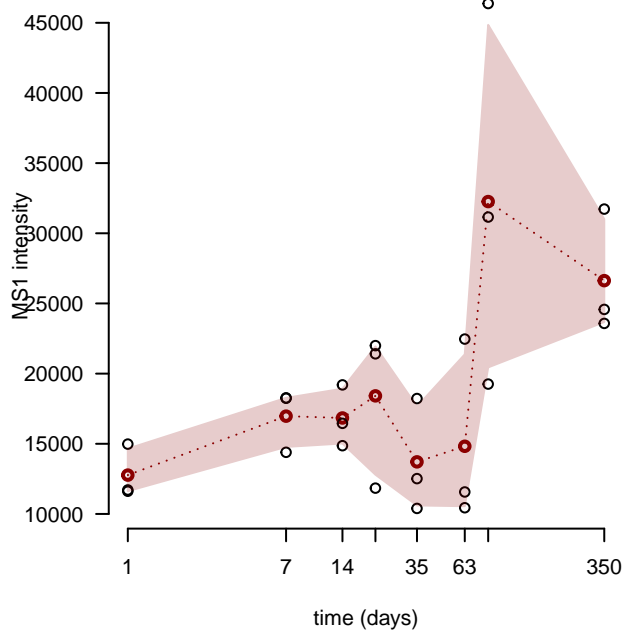

**Q8BN58**  
GN=Arhgap28  
Rho GTPase activating protein 28

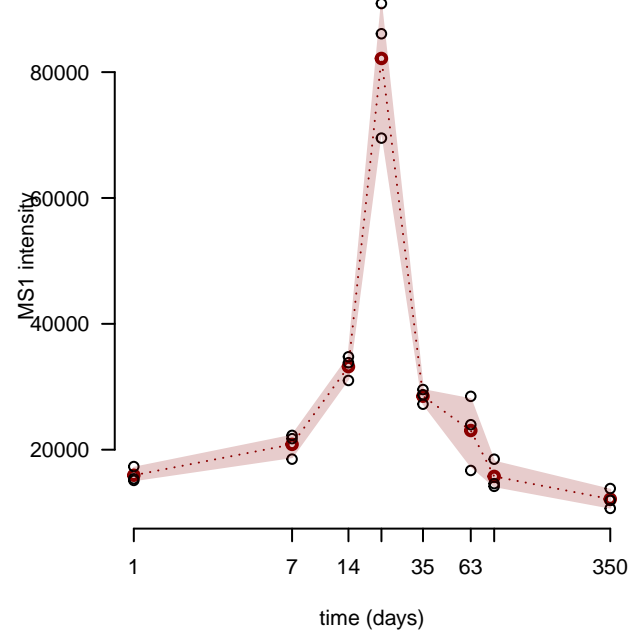

**Q8BN78**  
GN=Zbtb33  
zinc finger and BTB domain containing 33

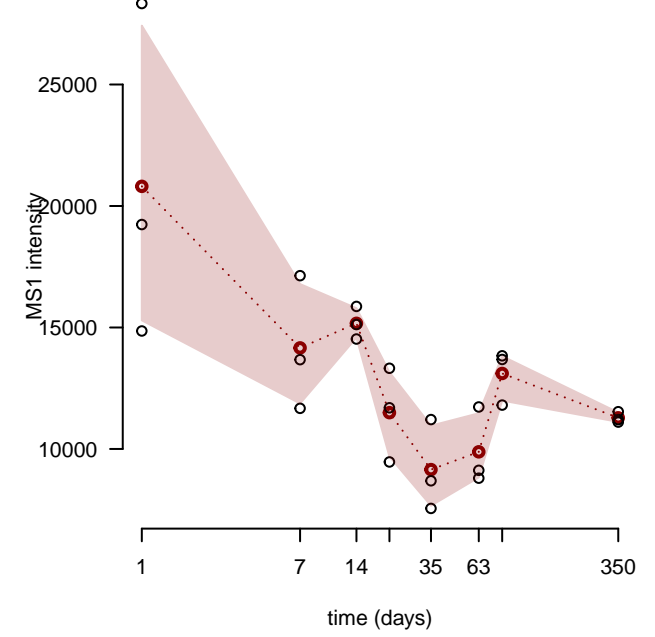

**Q8BN82**  
GN=Slc17a5  
solute carrier family 17 (anion/sugar tr ...

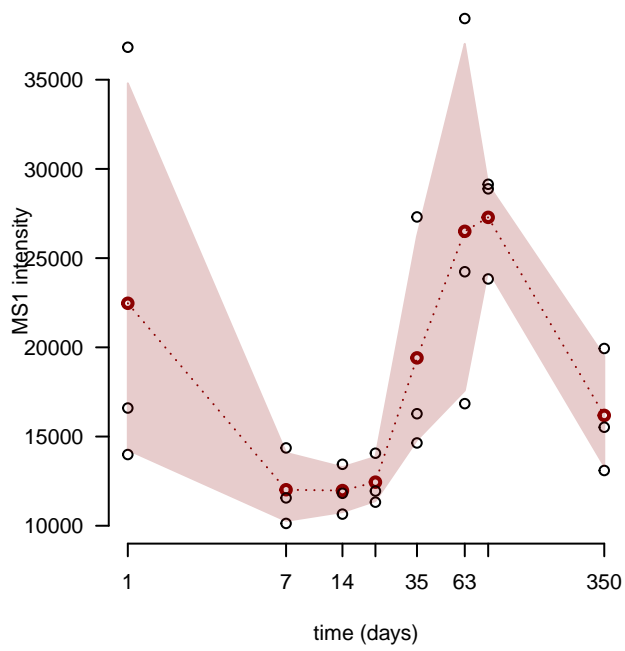

**Q8BND3**  
GN=Wdr35  
WD repeat domain 35

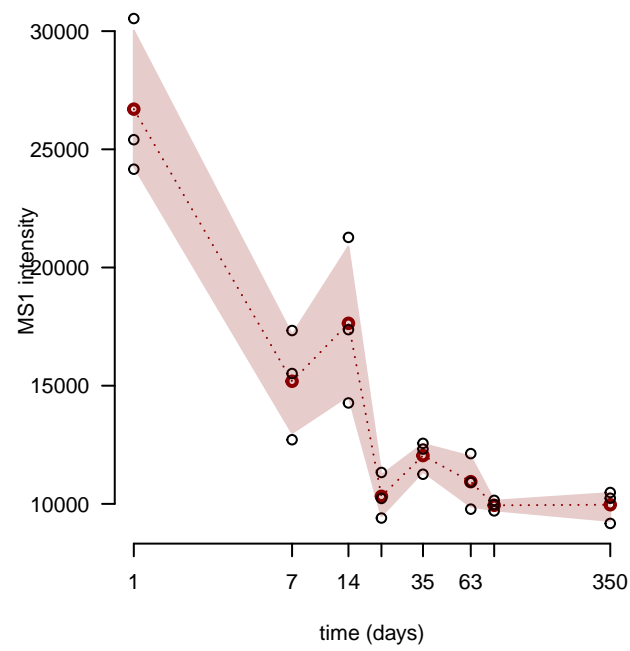

**Q8BND4**  
GN=Ints6l  
integrator complex subunit 6 like

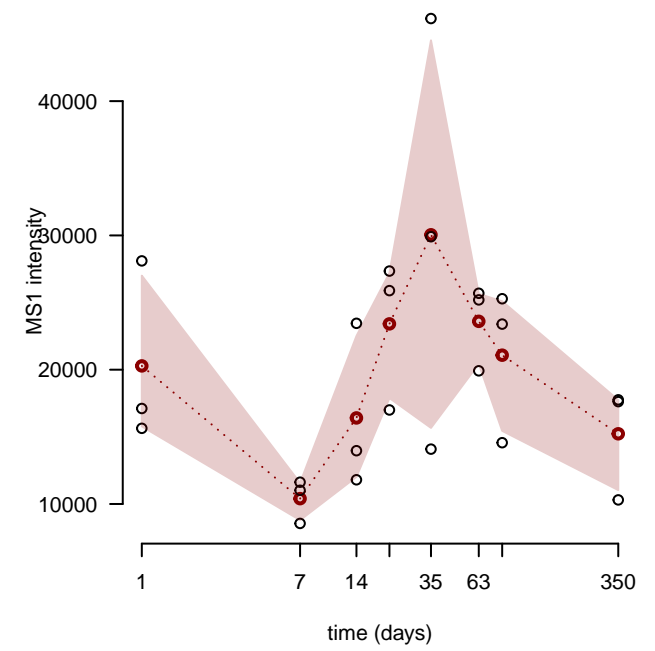

**Q8BND5**  
GN=Qsox1  
quiescin Q6 sulfhydryl oxidase 1

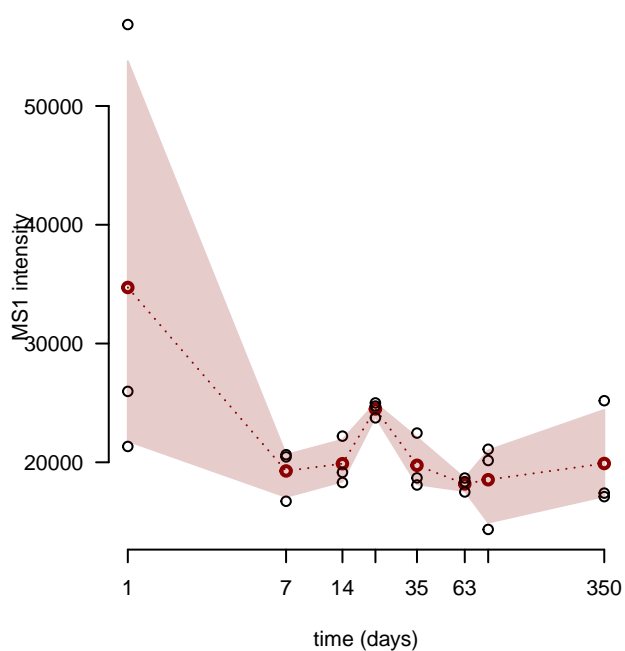

**Q8BNE1**  
GN=Tcaf1  
TRPM8 channel-associated factor 1

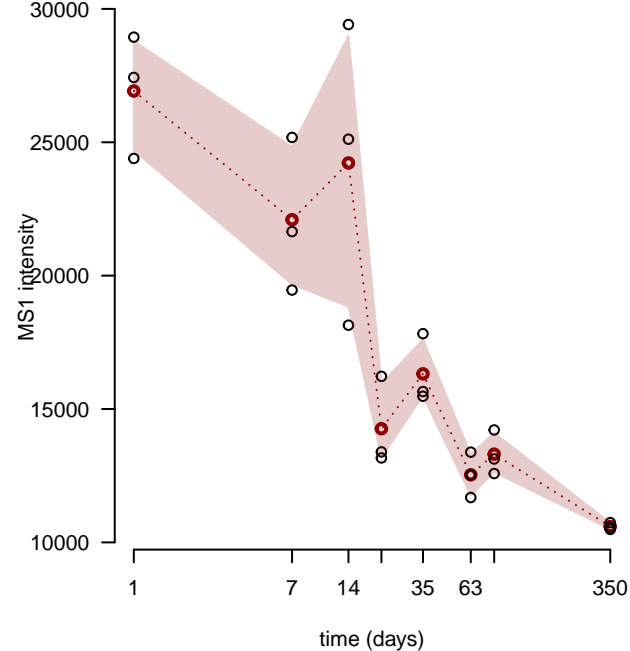

**Q8BNI4**  
GN=Der12  
Der1-like domain family, member 2

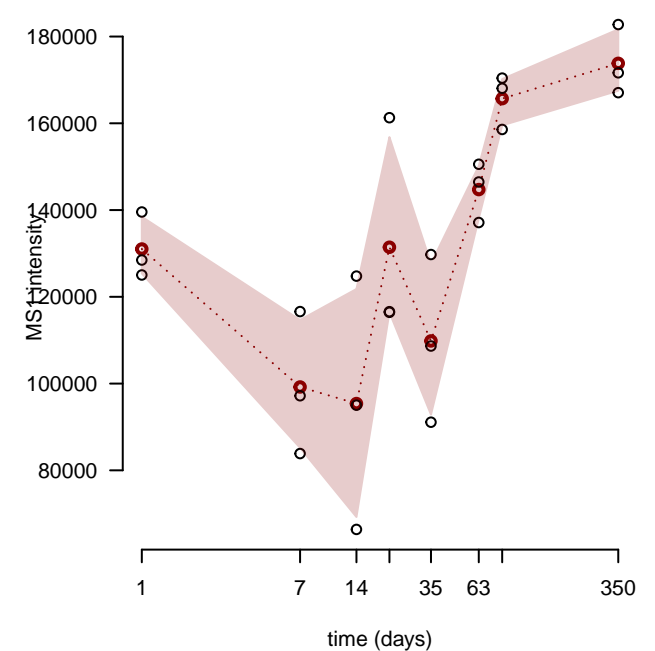

**Q8BNL5**  
**GN=Kctd6**  
potassium channel tetramerisation domain ...

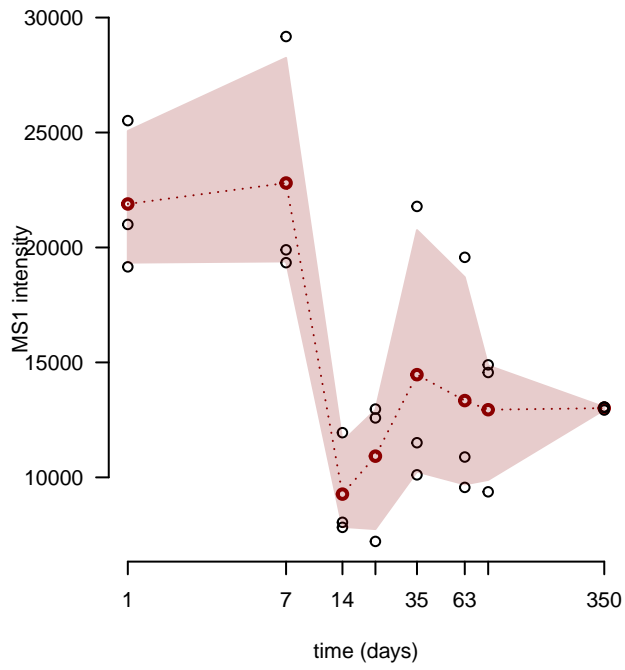

**Q8BNU0**  
**GN=Armc6**  
armadillo repeat containing 6

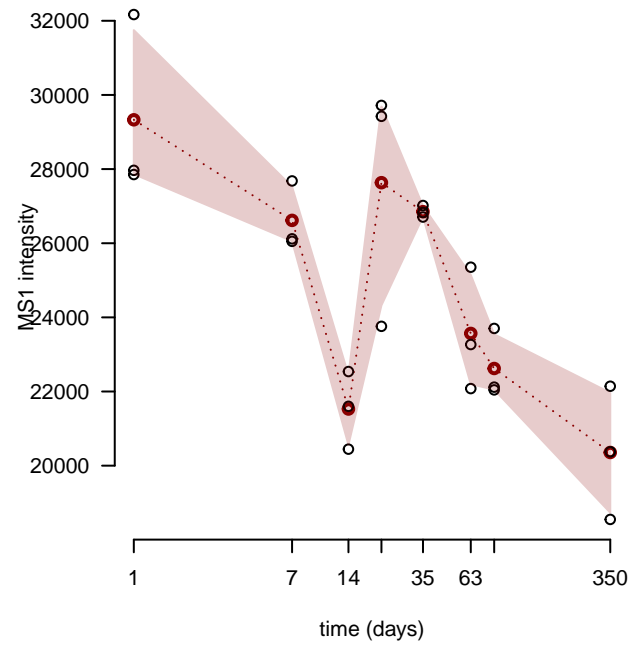

**Q8BNV1**  
**GN=Trmt2a**  
TRM2 tRNA methyltransferase 2A

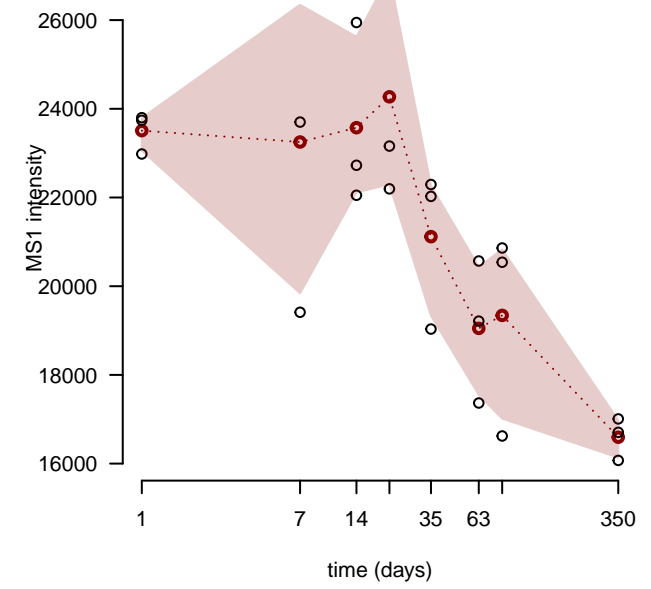

**Q8BNW9**  
**GN=Kbtbd11**  
kelch repeat and BTB (POZ) domain containi ...

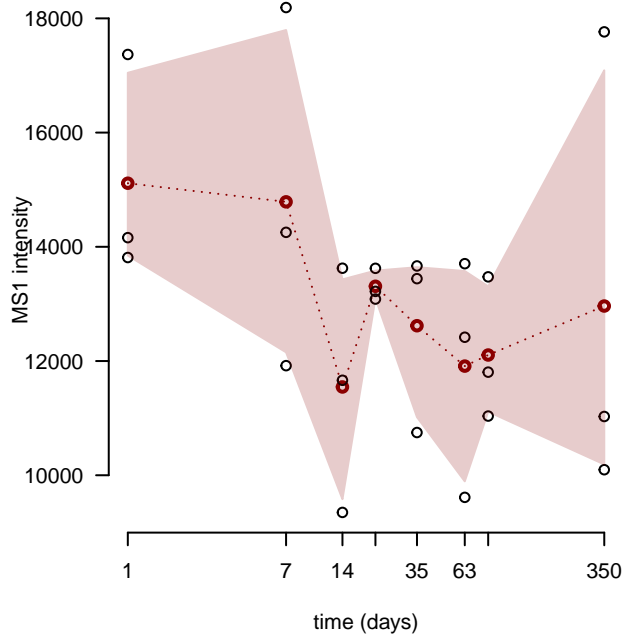

**Q8BP00**  
**GN=Iqcb1**  
IQ calmodulin-binding motif containing 1

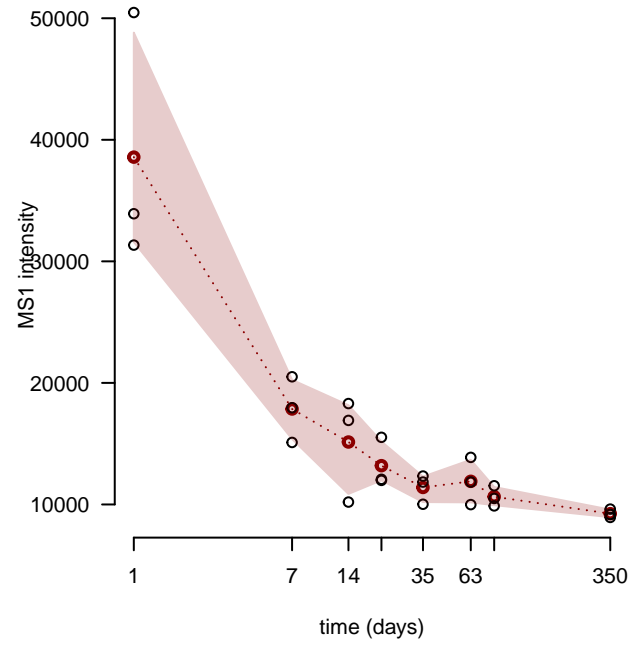

**Q8BP01**  
**GN=Vmac**  
vimentin-type intermediate filament asso ...

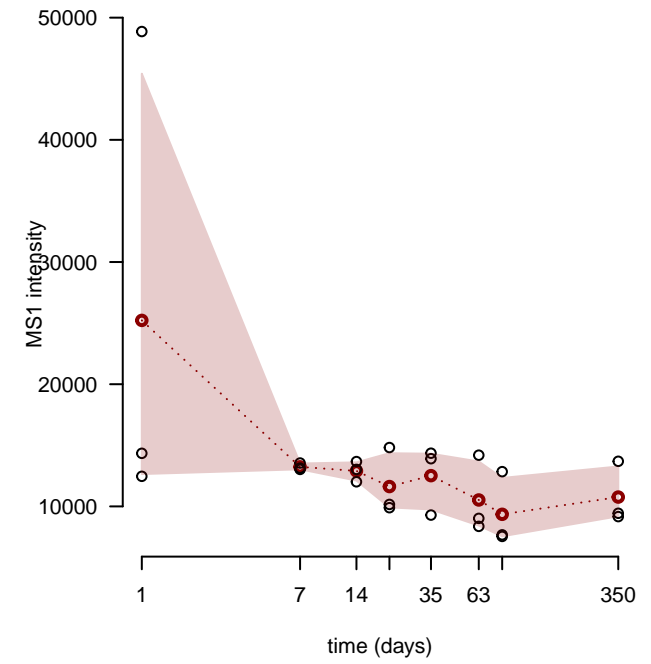

**Q8BP22**  
**GN=Fam92a**

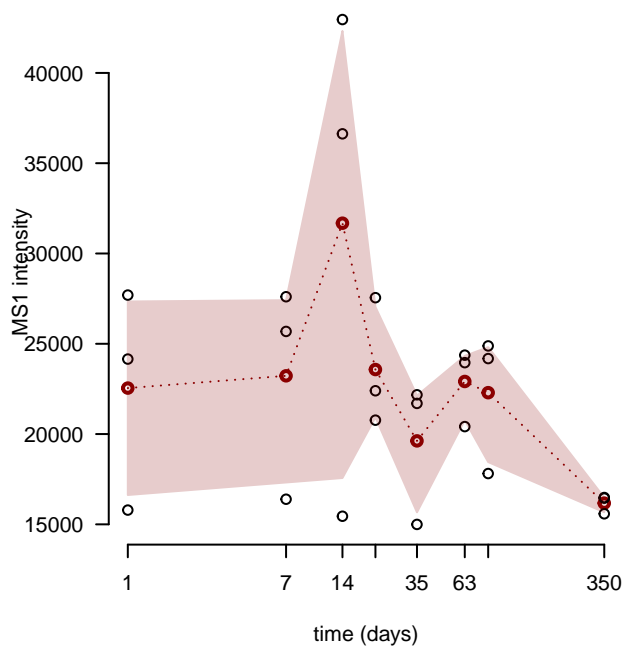

**Q8BP27**  
**GN=Sfr1**  
SWI5 dependent recombination repair 1

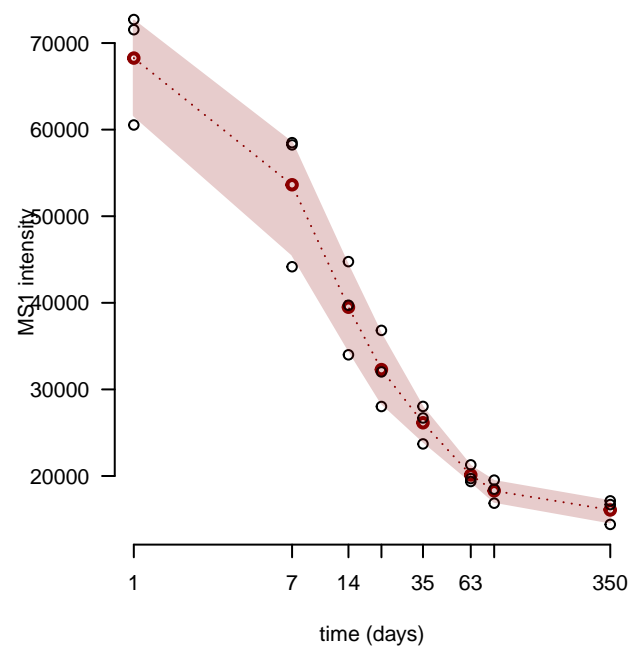

**Q8BP40**  
**GN=Acp6**  
acid phosphatase 6, lysophosphatidic

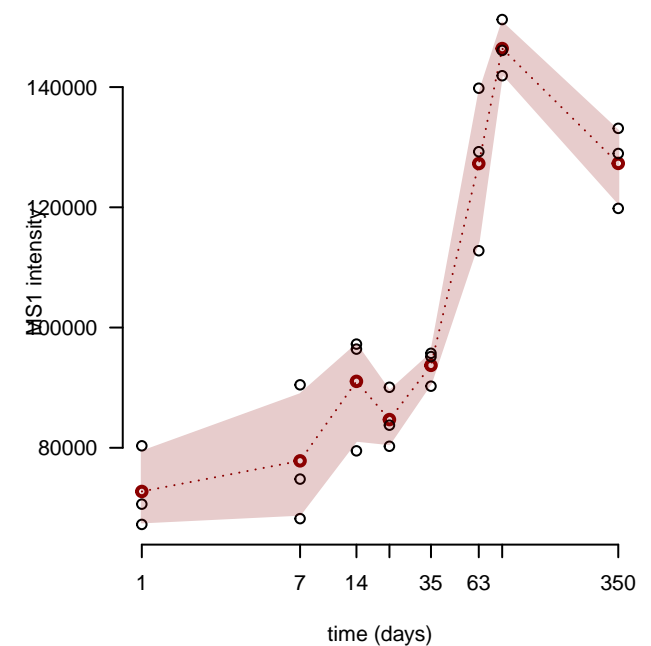

**Q8BP47**  
**GN=Nars**  
asparaginyl-tRNA synthetase

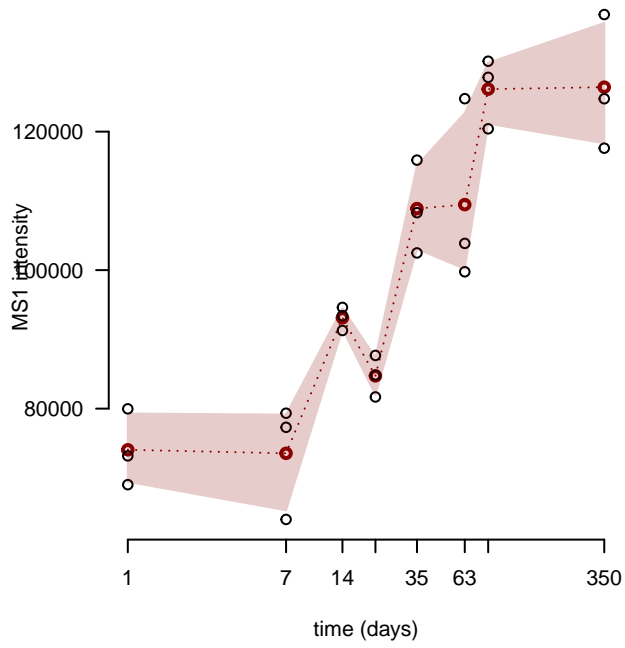

**Q8BP48**  
**GN=Metap1**  
methionyl aminopeptidase 1

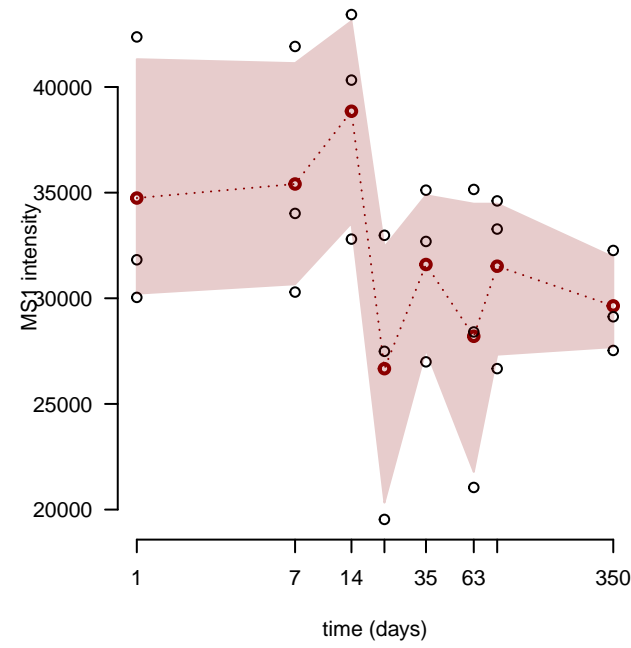

**Q8BP56**  
**GN=Pgghg**  
protein glucosylgalactosylhydroxylysine ...

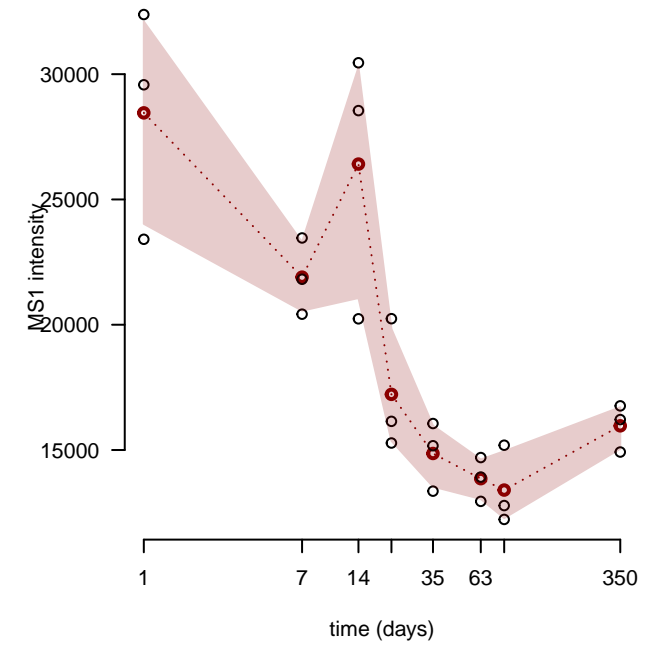

**Q8BP67**  
**GN=Rpl24**  
ribosomal protein L24

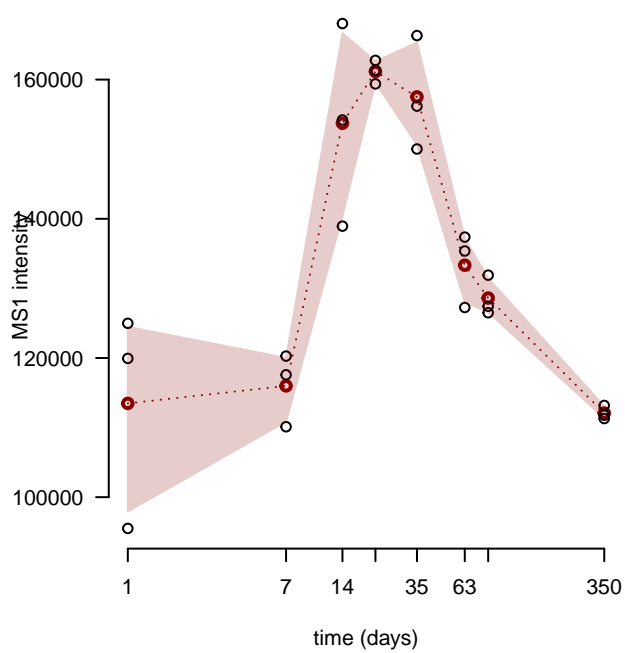

**Q8BP71**  
**GN=Rbfox2**  
RNA binding protein, fox-1 homolog (C. e ...

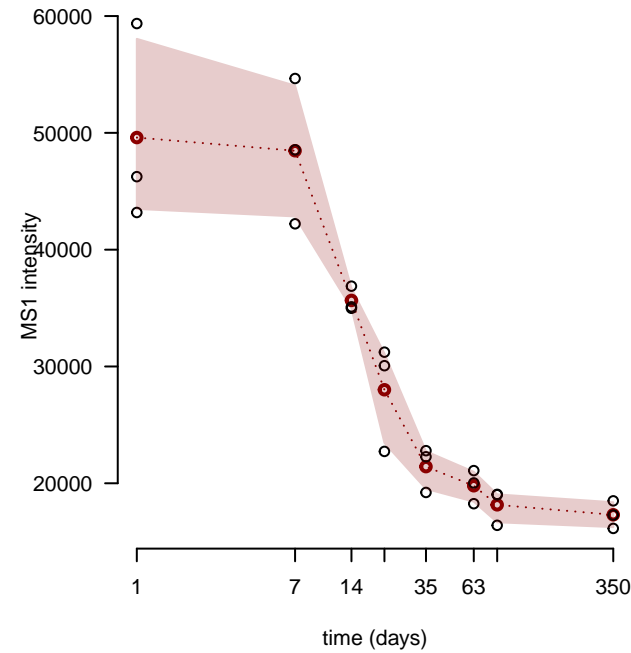

**Q8BP78**  
**GN=Fra10ac1**  
FRA10AC1 homolog (human)

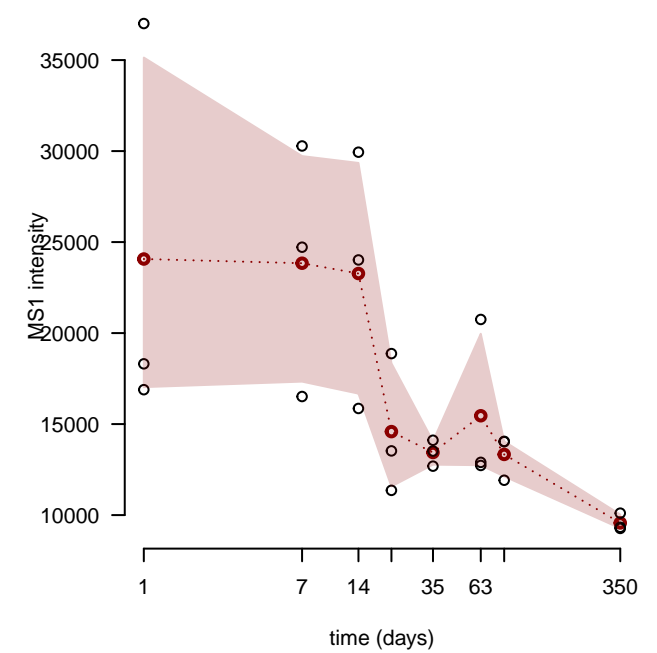

**Q8BP92**  
**GN=Rcn2**  
reticulocalbin 2

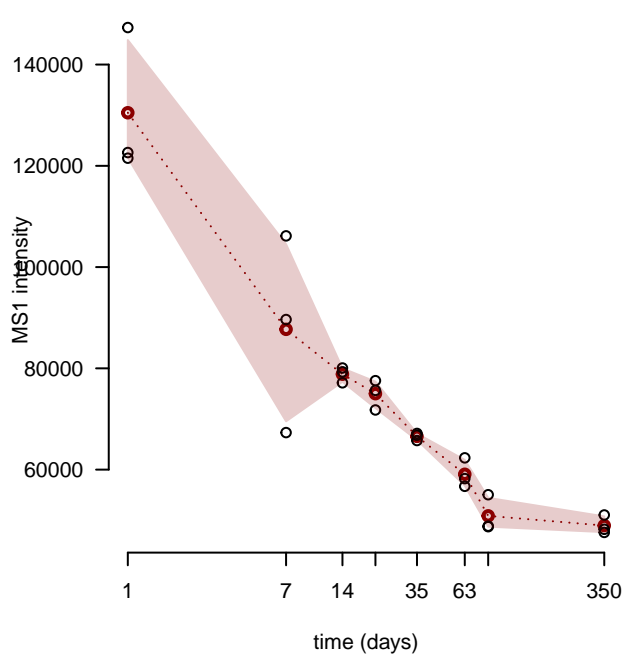

**Q8BPA8**  
**GN=Dpcd**  
deleted in primary ciliary dyskinesia

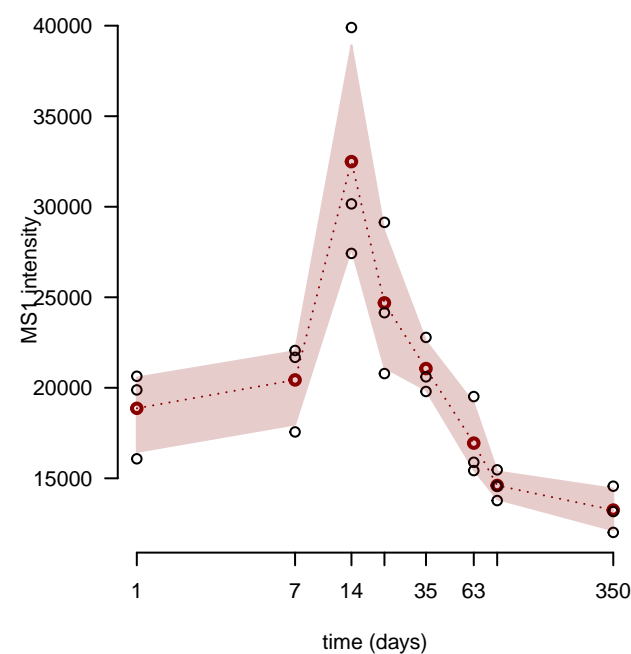

**Q8BPB0**  
**GN=Mob1b**  
MOB kinase activator 1B

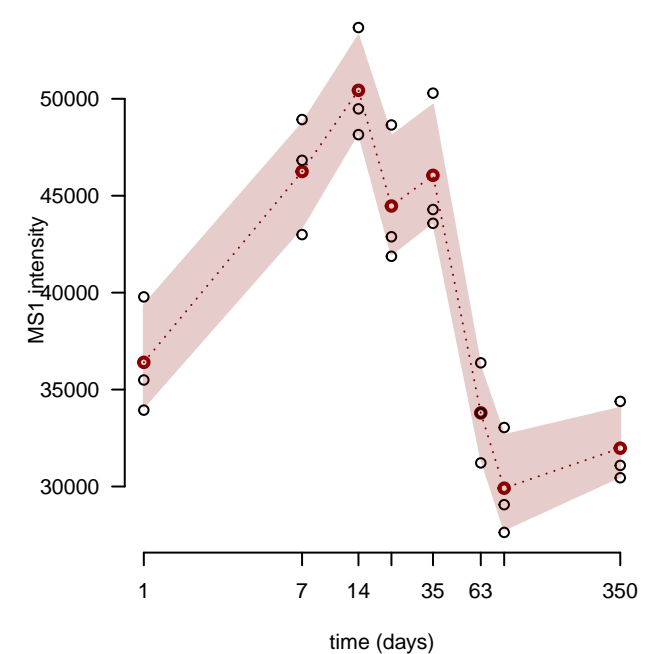



**Q8BPB5**  
**GN=Efemp1**  
epidermal growth factor-containing fibul ...

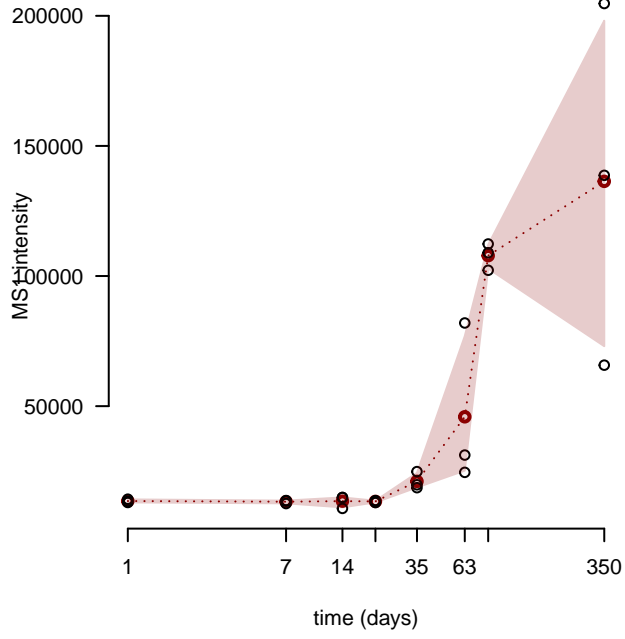

**Q8BPE4**  
**GN=Tmem177**  
transmembrane protein 177

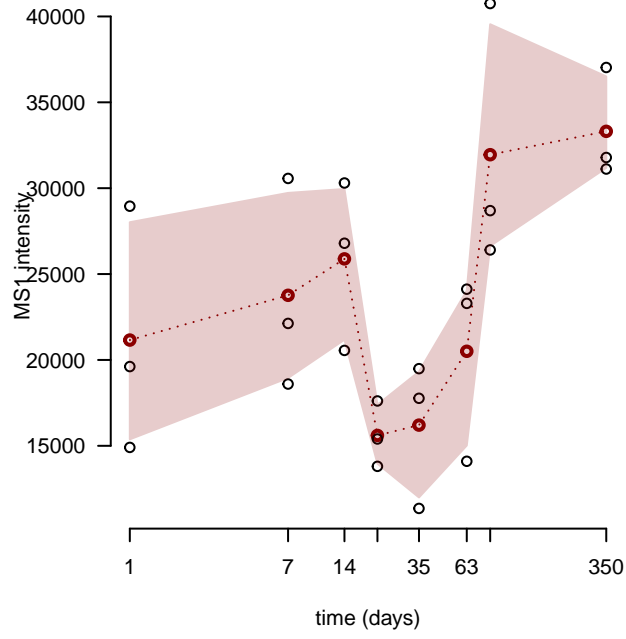

**Q8BPG6**  
**GN=Sumf2**  
sulfatase modifying factor 2

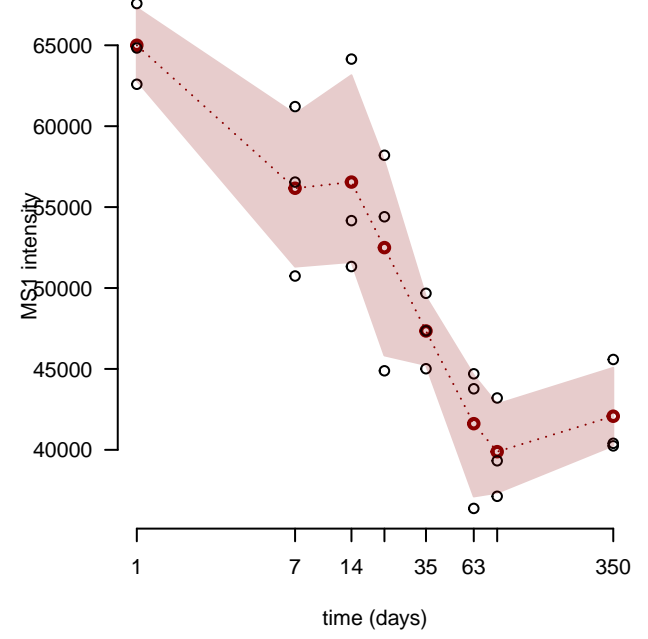

**Q8BPK2**  
**GN=Zcchc3**  
zinc finger, CCHC domain containing 3

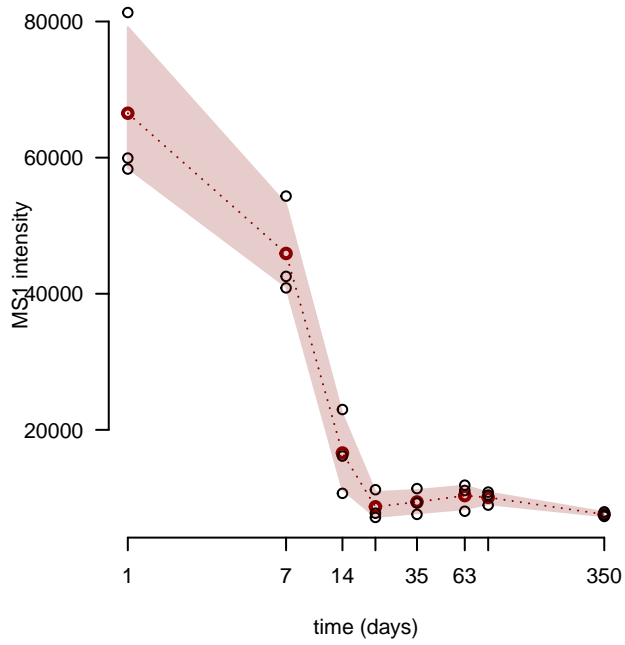

**Q8BPM0**  
**GN=Daam1**  
dishevelled associated activator of morp ...

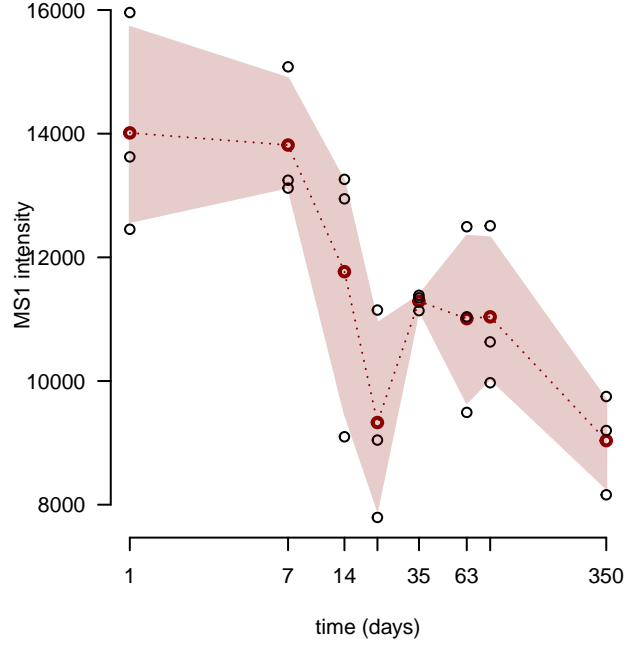

**Q8BPM2**  
**GN=Map4k5**  
mitogen-activated protein kinase kinase ...

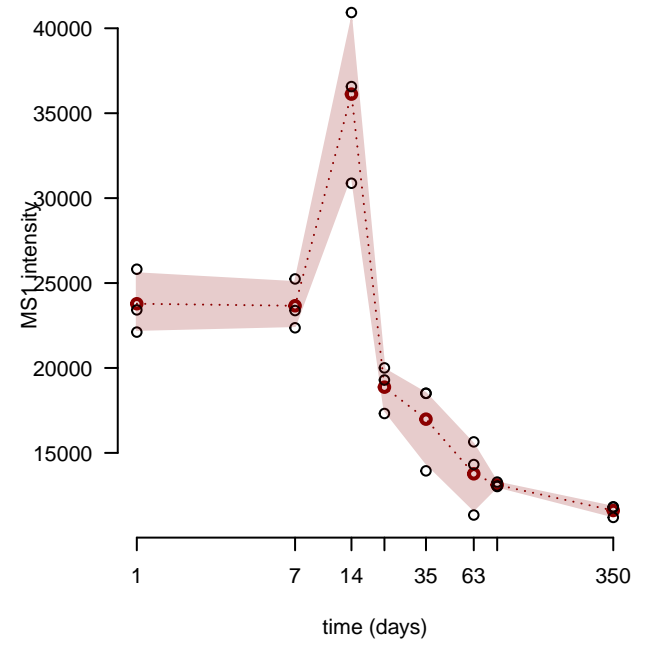

**Q8BPN8**  
**GN=Dmxl2**  
Dmx-like 2

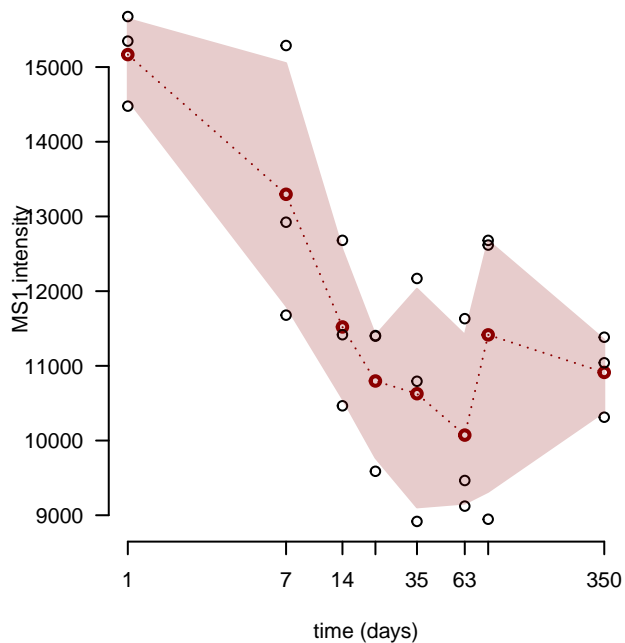

**Q8BPP0**  
**GN=Znf436**

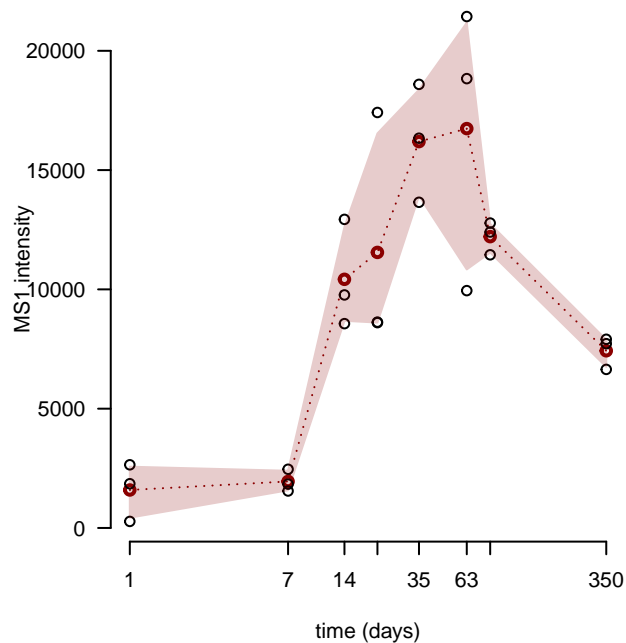

**Q8BPS4**  
**GN=Gpr180**  
G protein-coupled receptor 180

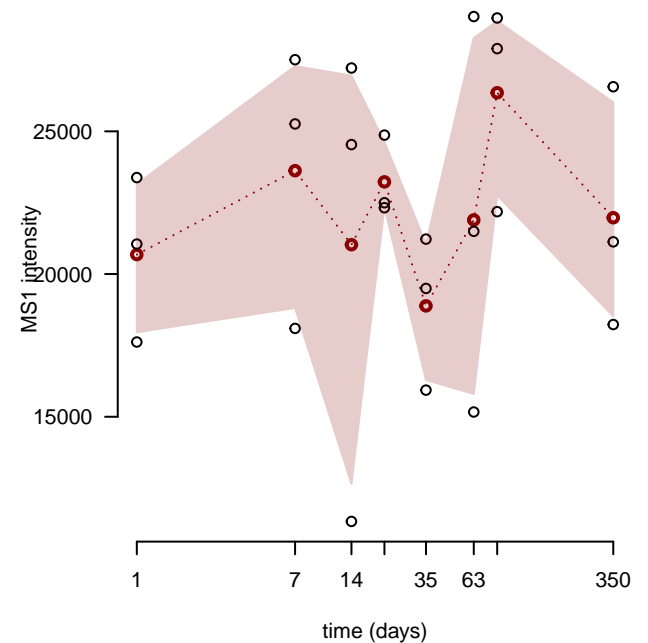

**Q8BPU7**  
**GN=Elmo1**  
engulfment and cell motility 1

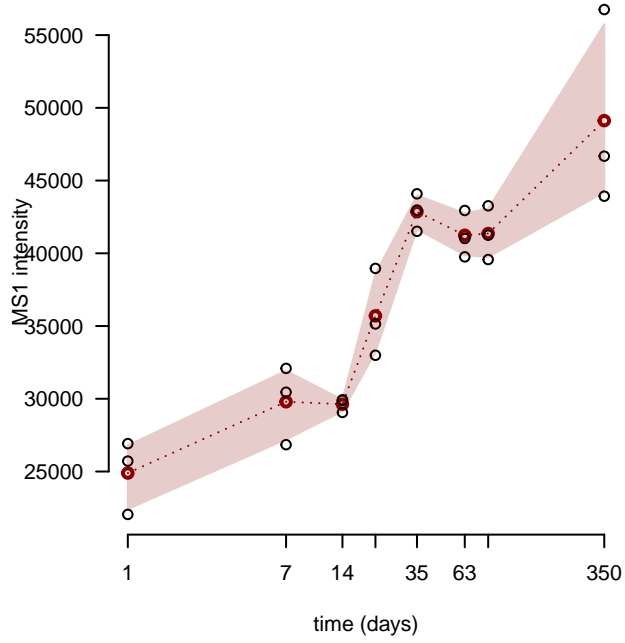

**Q8BPY9**  
**GN=Figl1**  
fidgetin-like 1

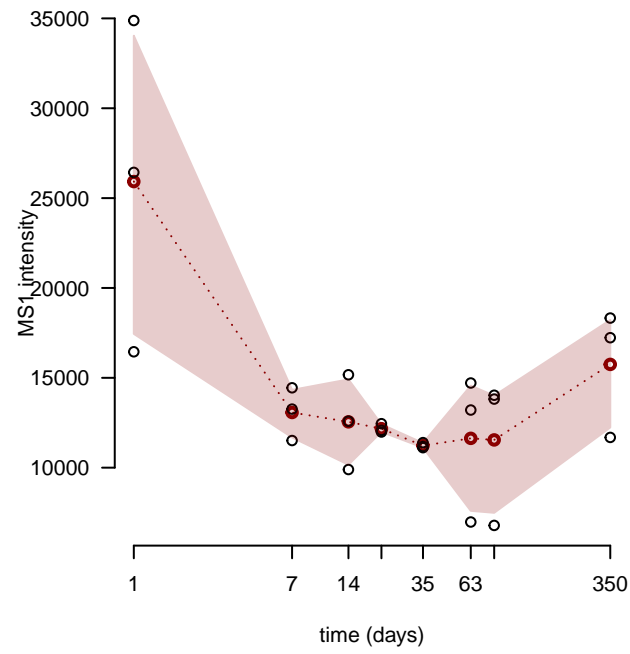

**Q8BPZ8**  
**GN=Abraxas1**  
BRCA1 A complex subunit

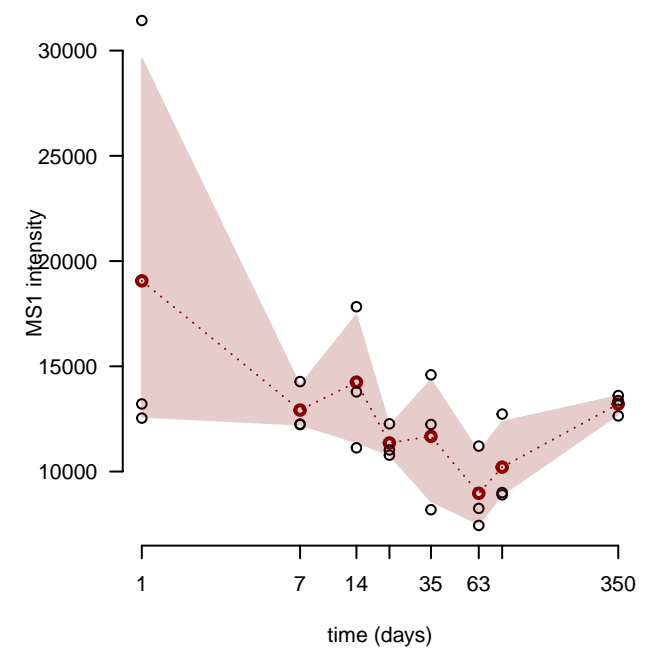

**Q8BQ30**  
**GN=Ppp1r18**  
protein phosphatase 1, regulatory subuni ...

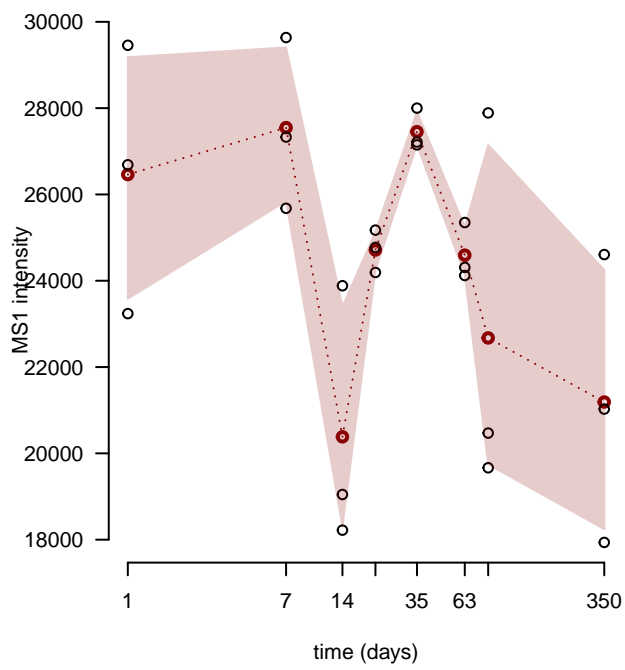

**Q8BQ47**  
**GN=Cnpy4**  
canopy FGF signaling regulator 4

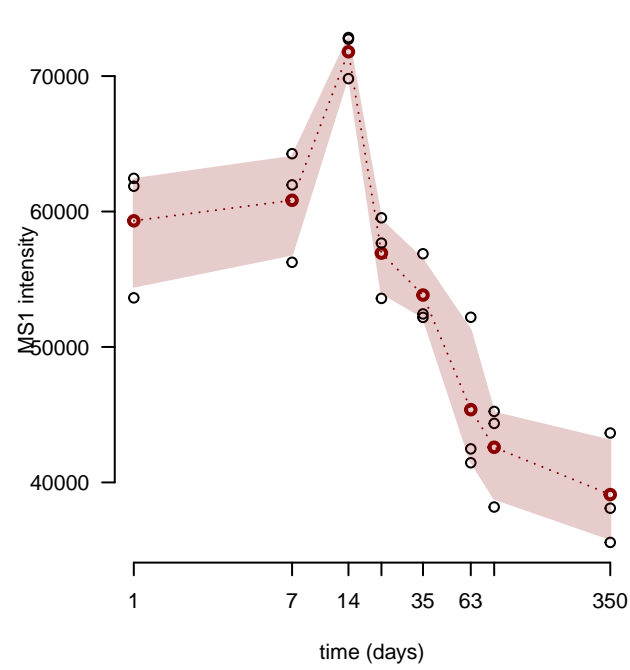

**Q8BQ48**  
**GN=Cep295**  
centrosomal protein 295

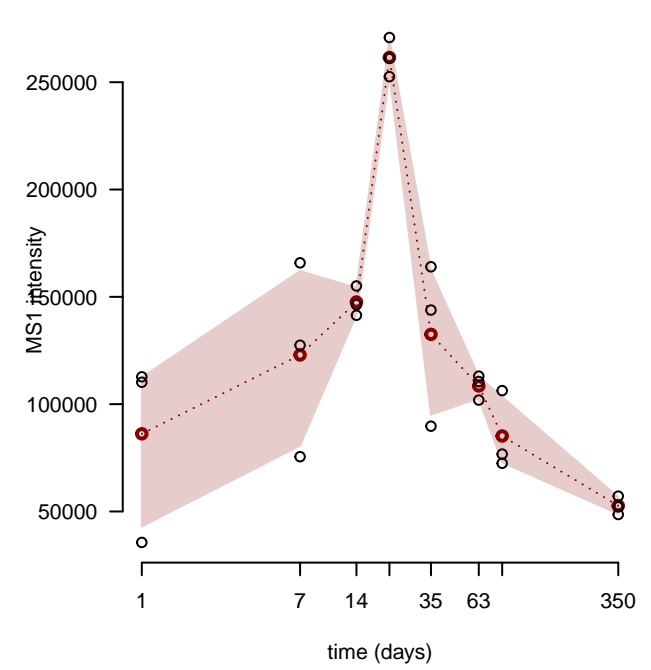

**Q8BQ89**  
**GN=Lix1l**  
Lix1-like

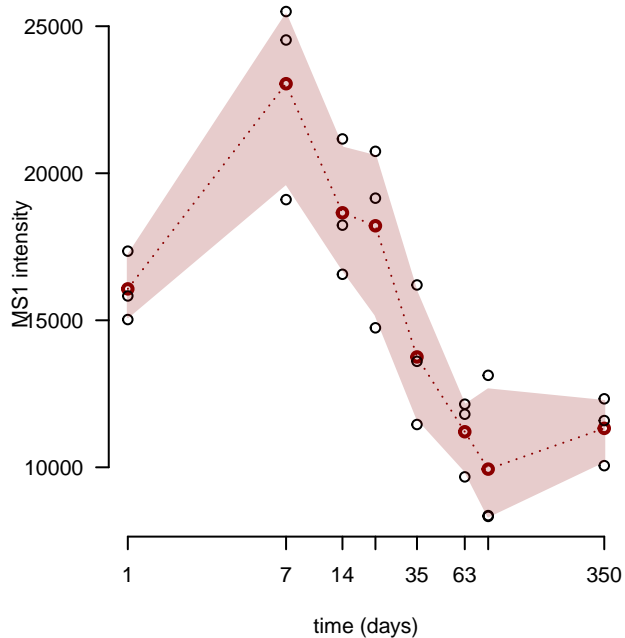

**Q8BQM4**  
**GN=Heatr3**  
HEAT repeat containing 3

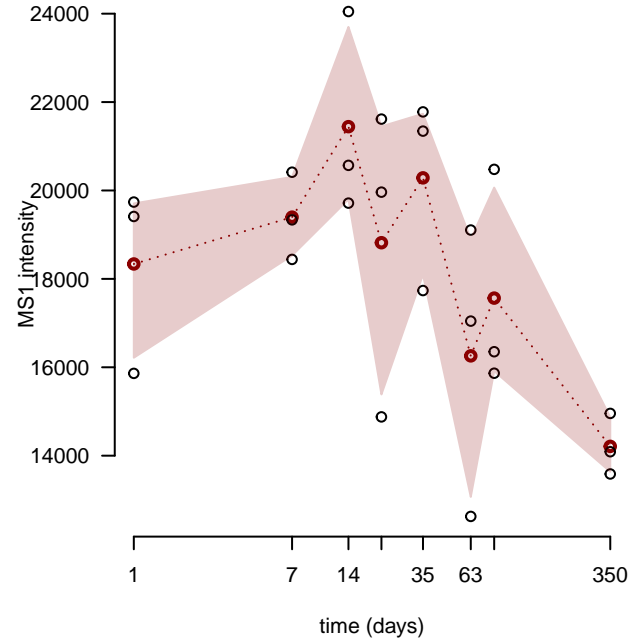

**Q8BQN6**  
**GN=Znf146**

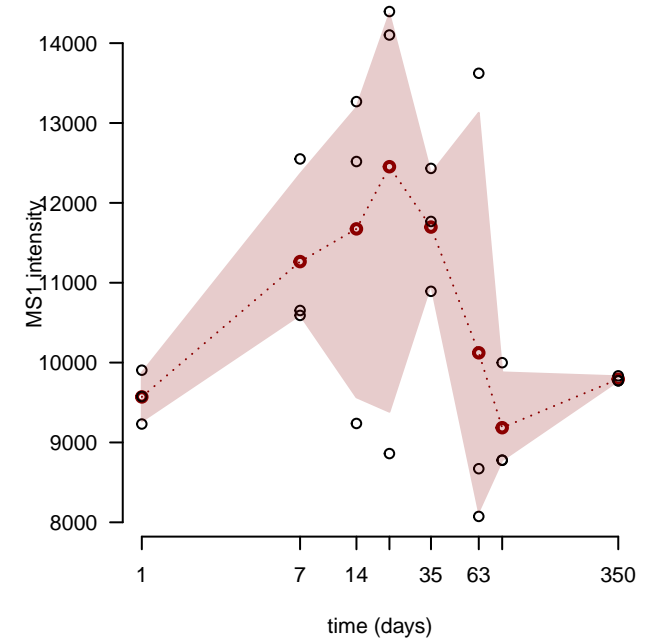

**Q8BQP8**  
**GN=Rab11fp4**

RAB11 family interacting protein 4 (clas ...

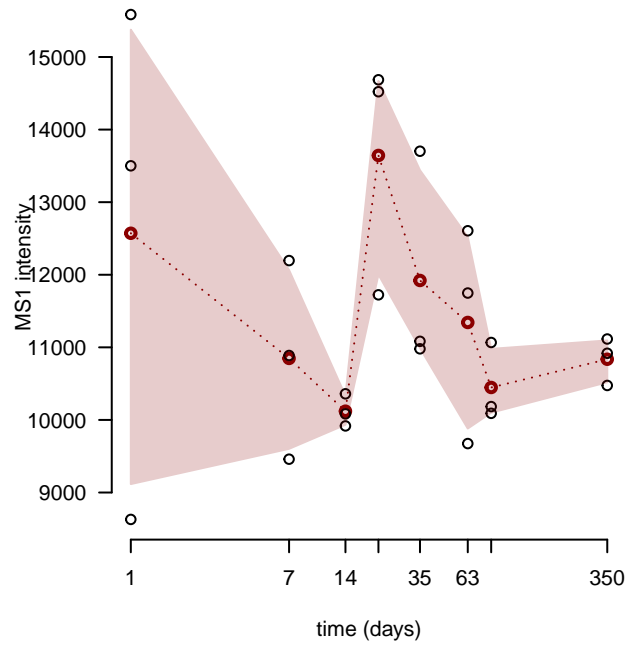

**Q8BQR4**  
**GN=Kansl2**

KAT8 regulatory NSL complex subunit 2

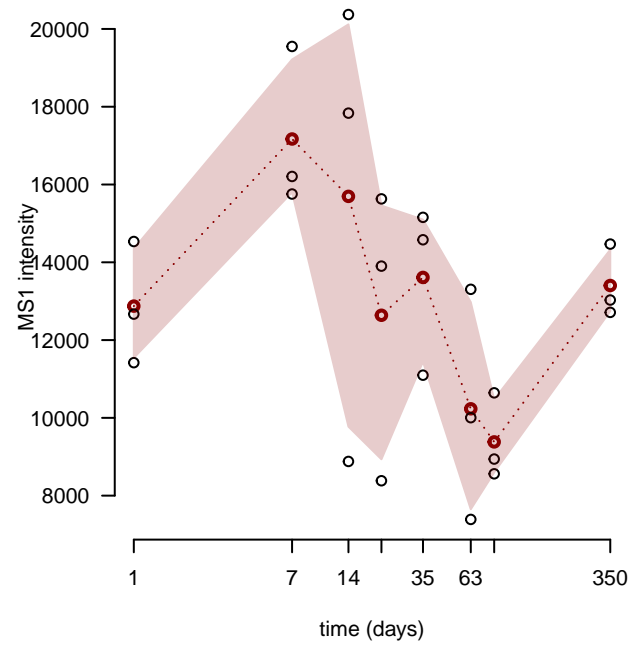

**Q8BQX5**  
**GN=Tmco6**

transmembrane and coiled-coil domains 6

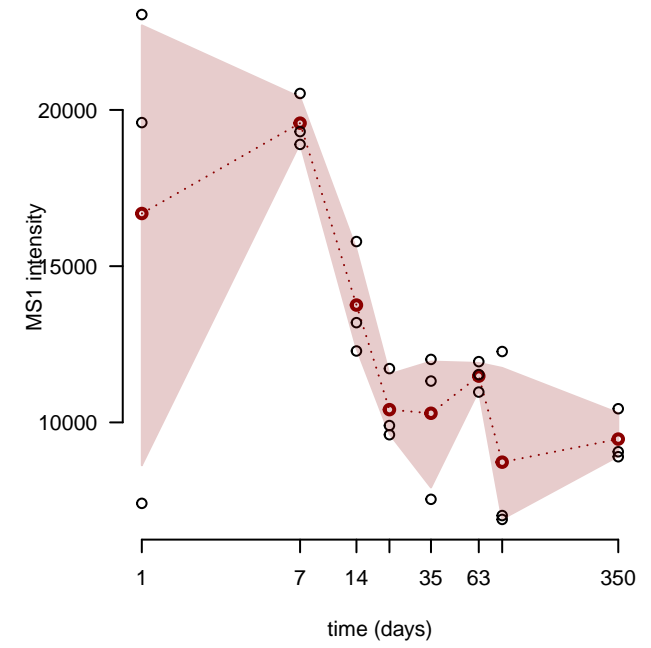

**Q8BQY8**  
**GN=Hus1**

HUS1 checkpoint clamp component

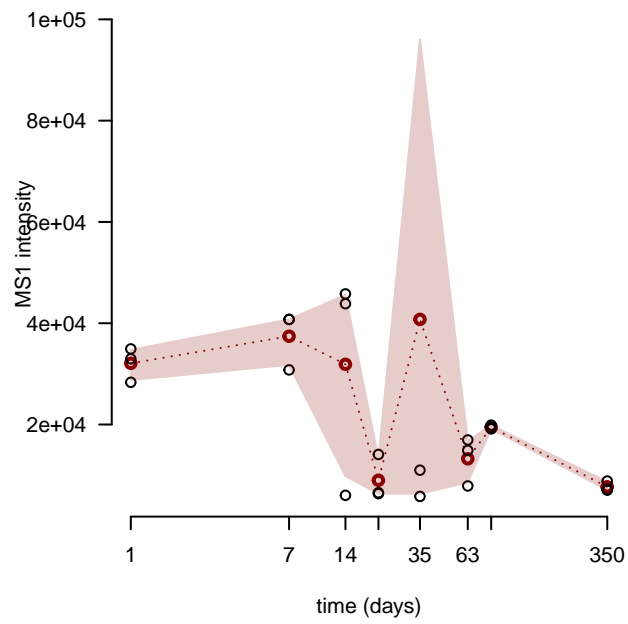

**Q8BQZ4**  
**GN=Ralgapb**

Ral GTPase activating protein, beta subu ...

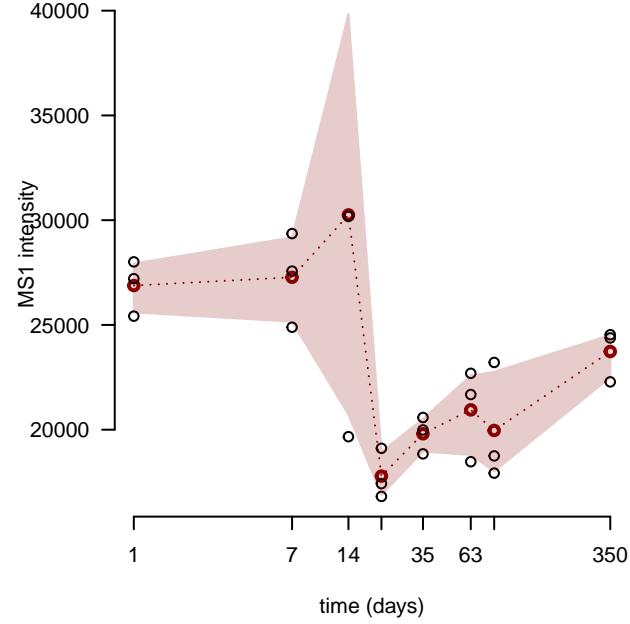

**Q8BQZ5**  
**GN=Cpsf4**

cleavage and polyadenylation specific fa ...

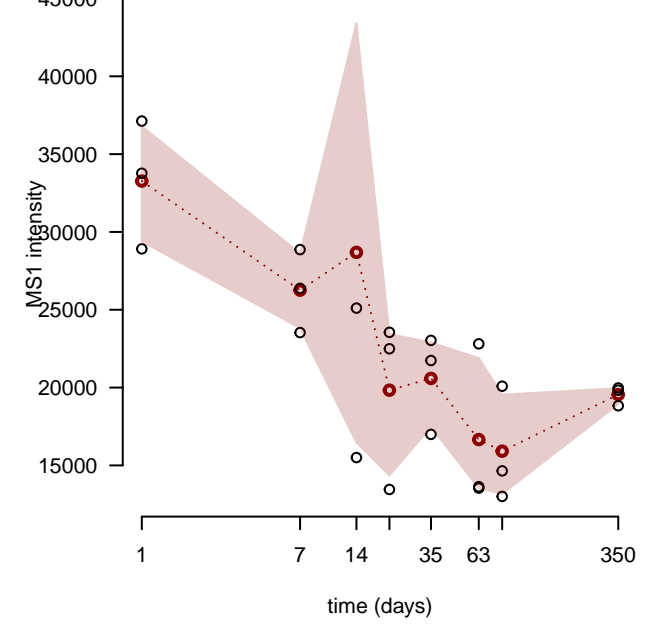

**Q8BQZ5**  
**GN=Cpsf4**

cleavage and polyadenylation specific fa ...

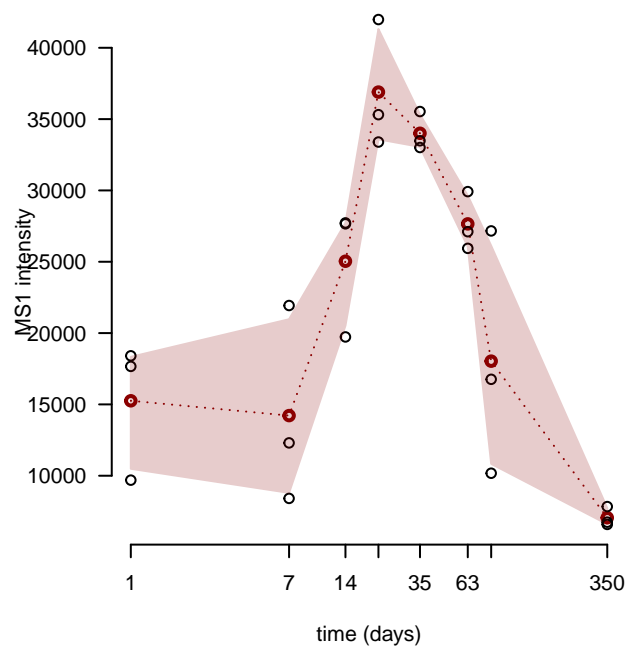

**Q8BR07**  
**GN=Bicd1**

BICD cargo adaptor 1

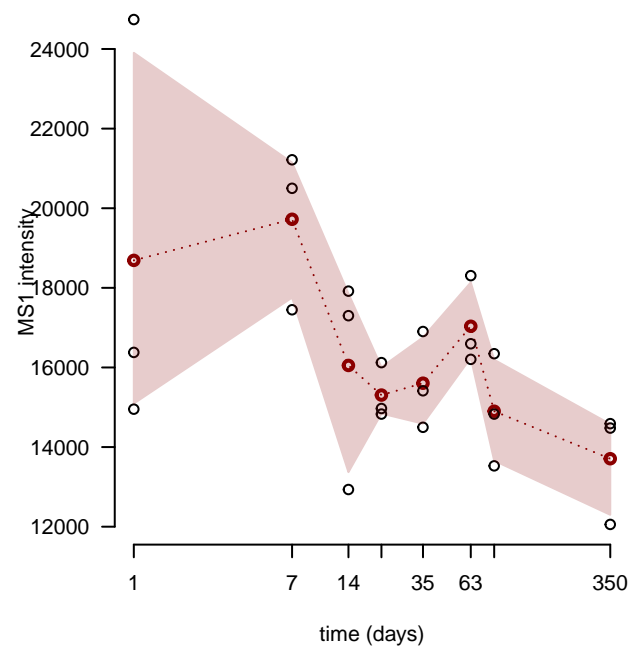

**Q8BR63**  
**GN=Fam177a1**

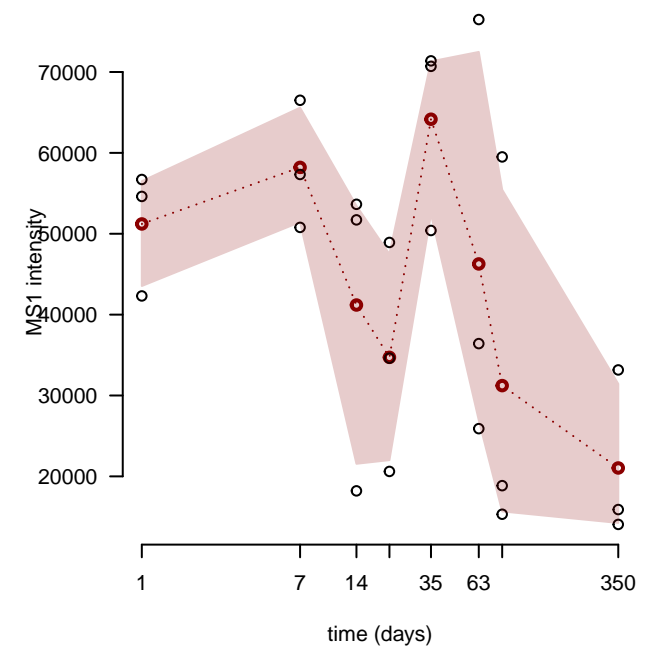

**Q8BR65**  
**GN=Suds3**  
suppressor of defective silencing 3 homo ...

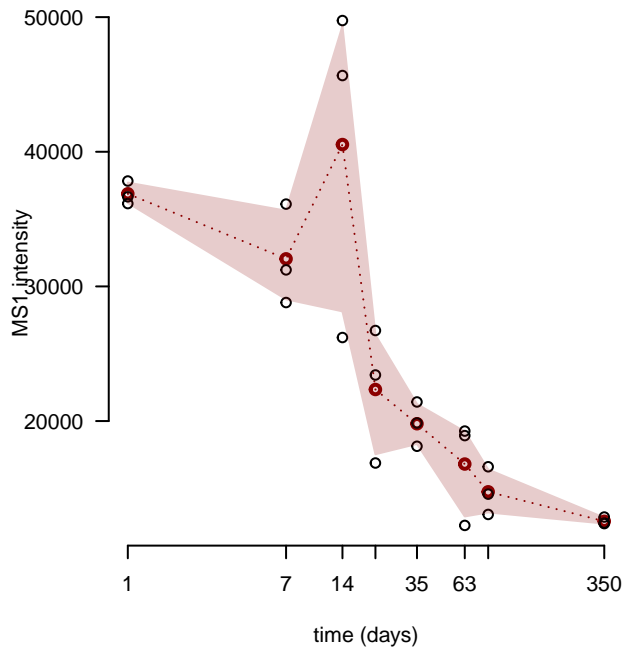

**Q8BR70**  
**GN=Yip6**  
Yip1 domain family, member 6

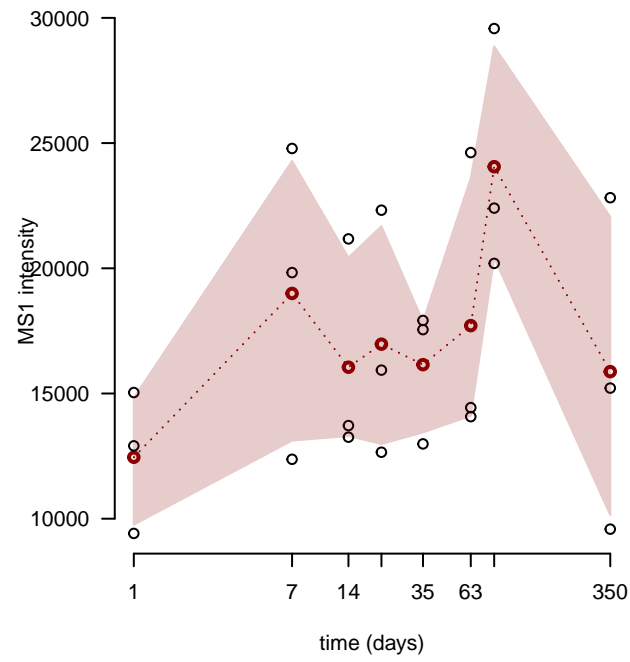

**Q8BR76**  
**GN=Tmem67**  
transmembrane protein 67

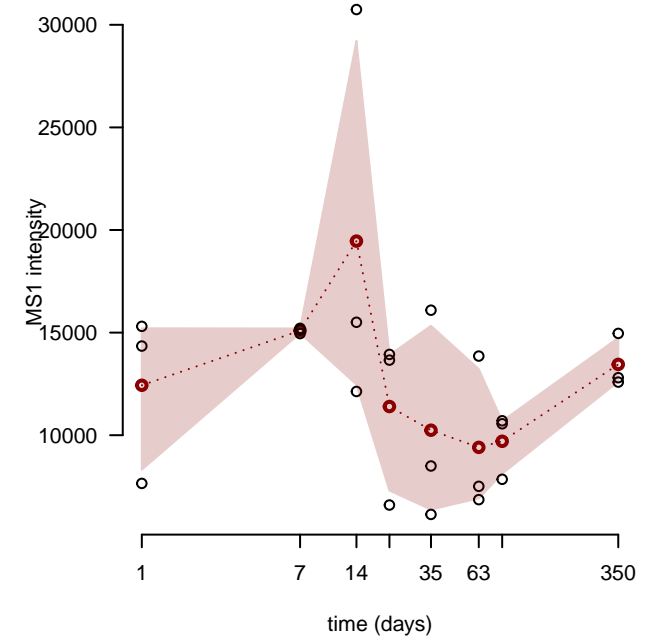

**Q8BR90**  
**GN=**

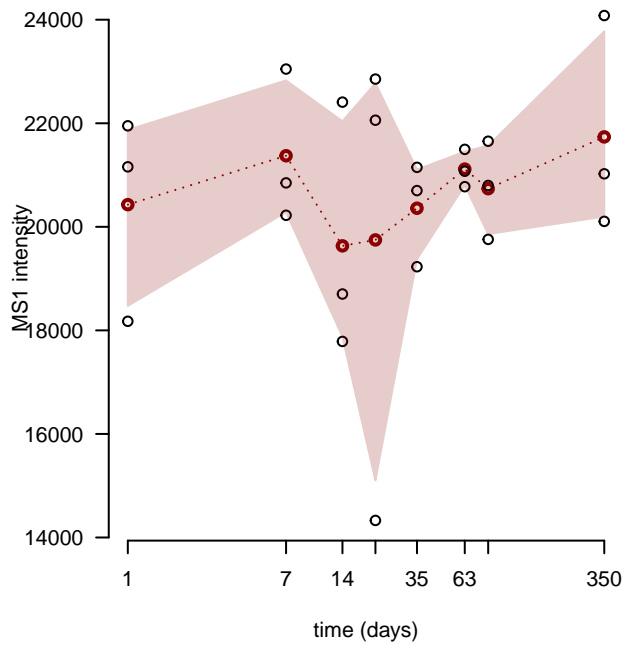

**Q8BR92**  
**GN=Palm2**

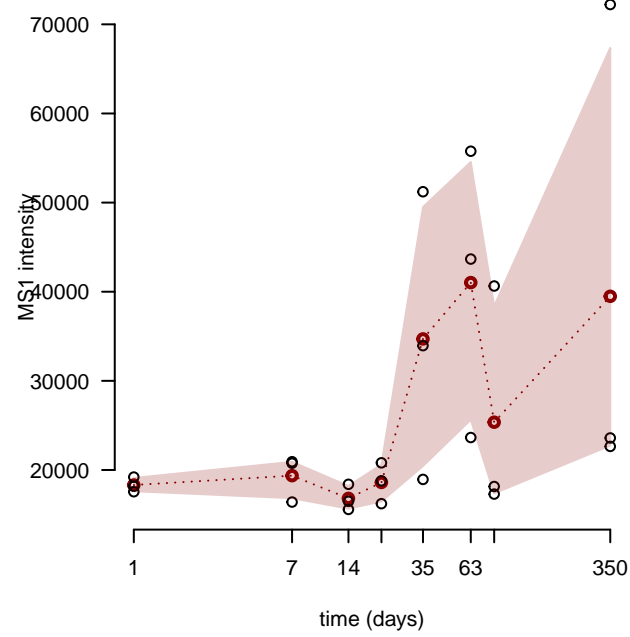

**Q8BRF7**  
**GN=Scfd1**  
Sec1 family domain containing 1

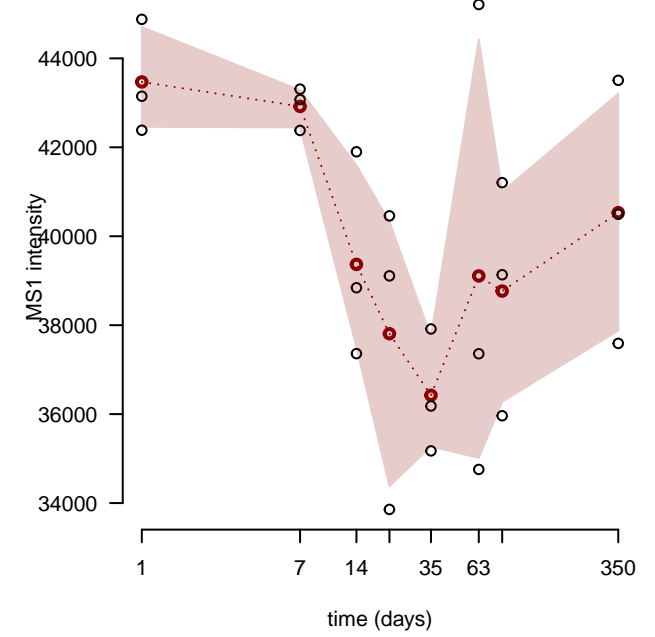

**Q8BRG8**  
**GN=Tmem209**  
transmembrane protein 209

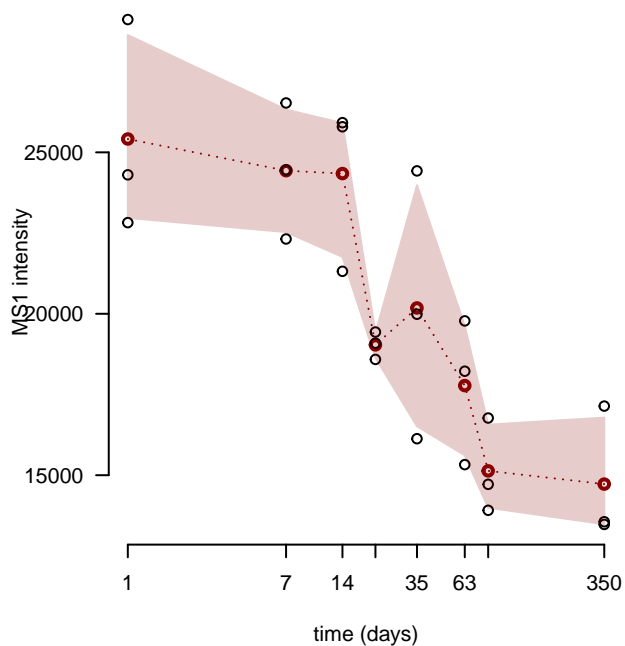

**Q8BRH0**  
**GN=Tmtc3**  
transmembrane and tetratricopeptide repe ...

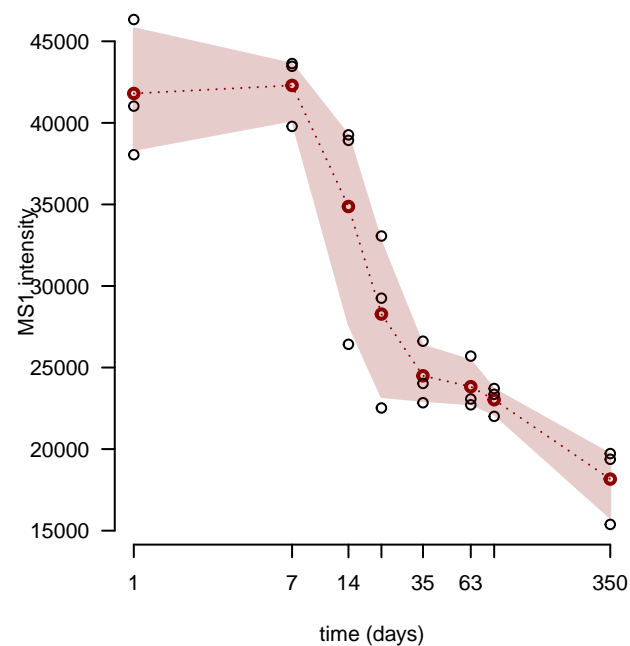

**Q8BRH4**  
**GN=Kmt2c**  
lysine (K)-specific methyltransferase 2C

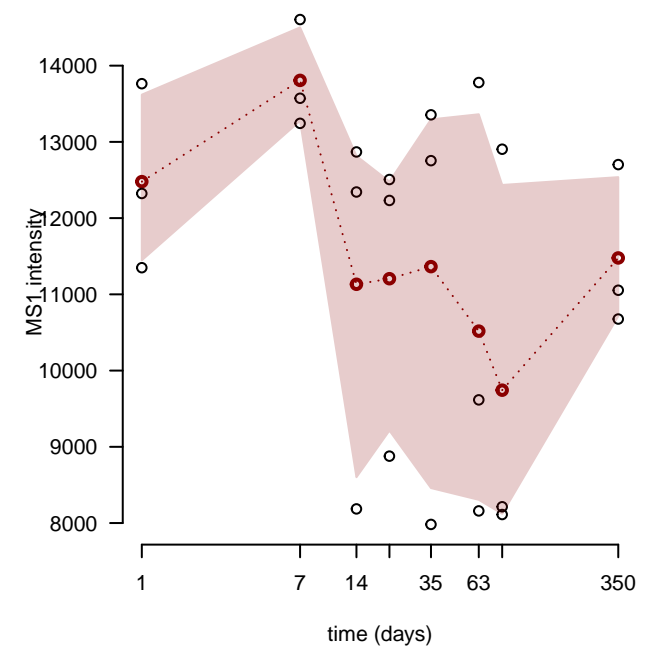

**Q8BRK9**  
GN=Man2a2  
mannosidase 2, alpha 2

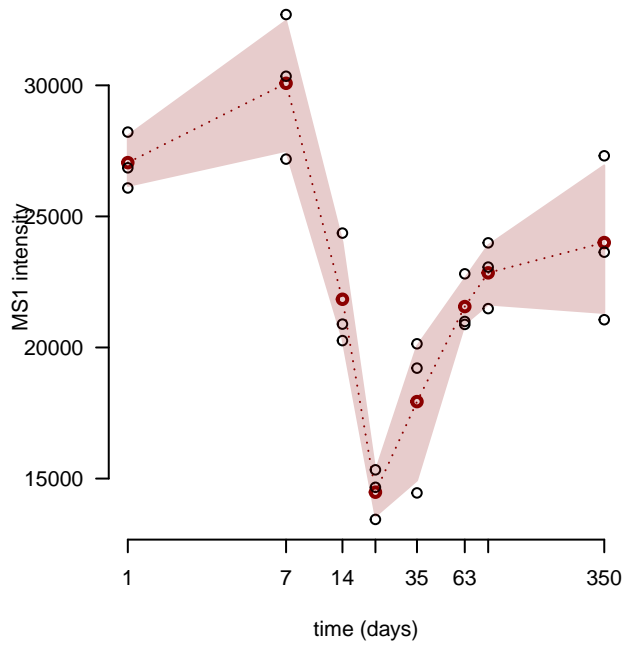

**Q8BRM2**  
GN=Gorab  
golgin, RAB6-interacting

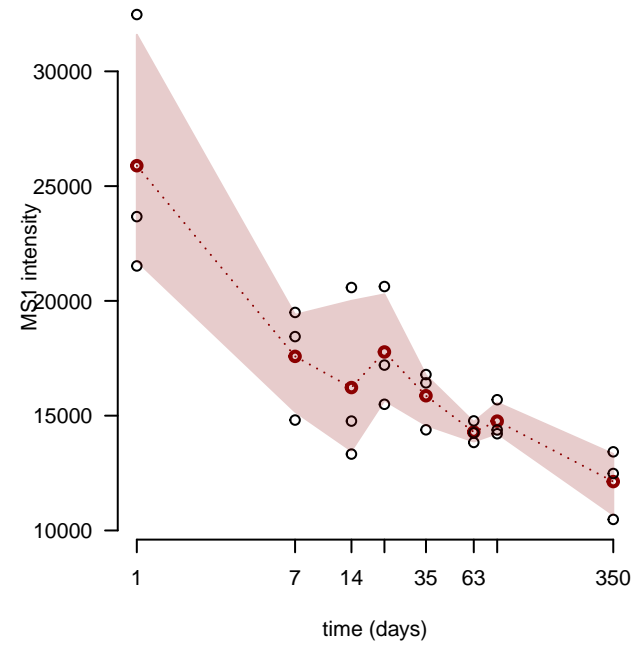

**Q8BRN9**  
GN=Cc2d1b  
coiled-coil and C2 domain containing 1B

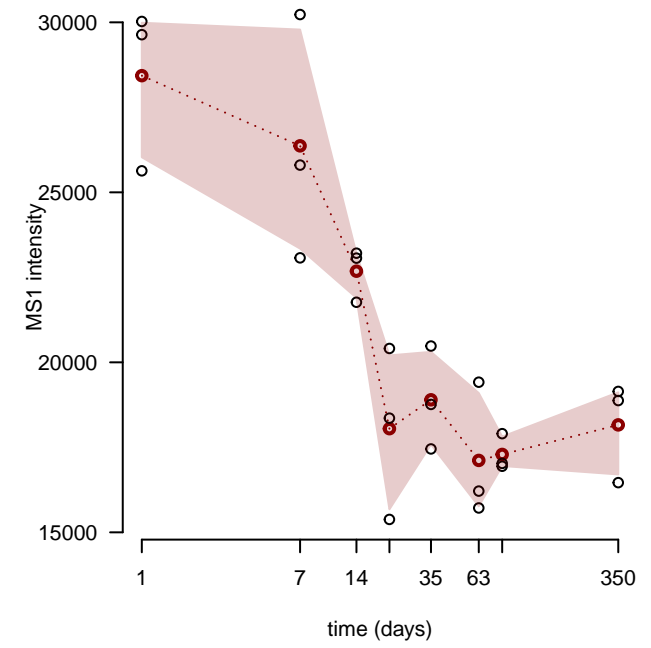

**Q8BRT1**  
GN=Clasp2  
CLIP associating protein 2

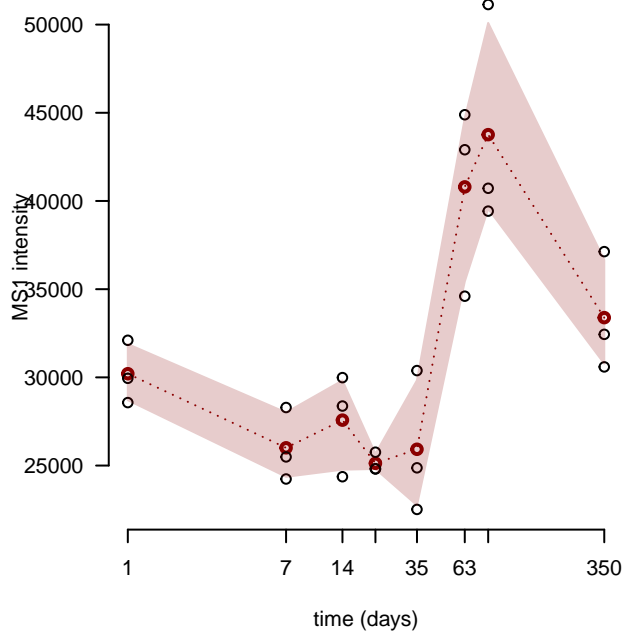

**Q8BRT1**  
GN=Clasp2  
CLIP associating protein 2

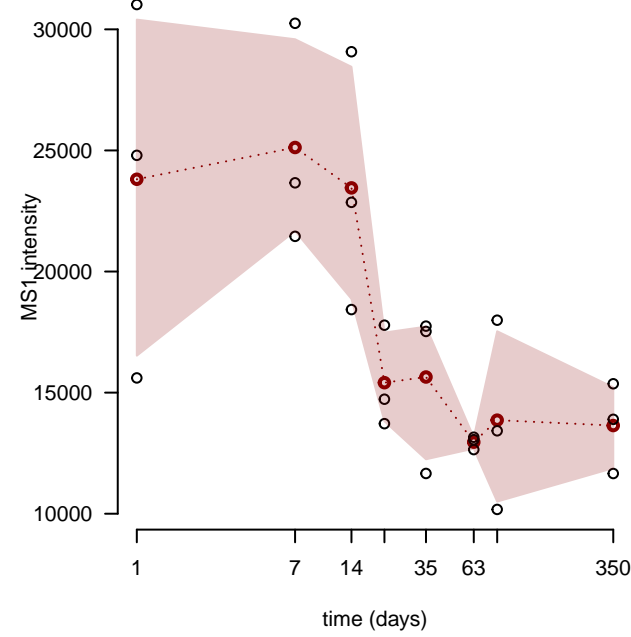

**Q8BRU6**  
GN=Slc18a2  
solute carrier family 18 (vesicular mono ...

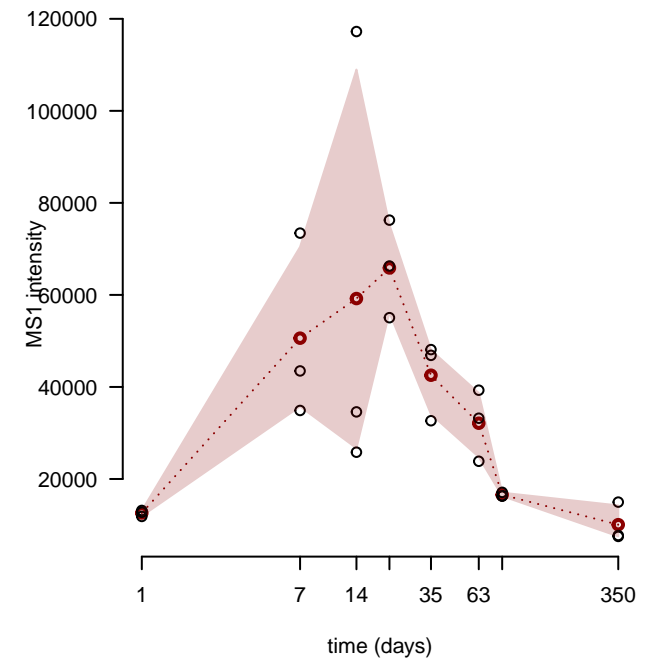

**Q8BRV5**  
GN=Kiaa1671

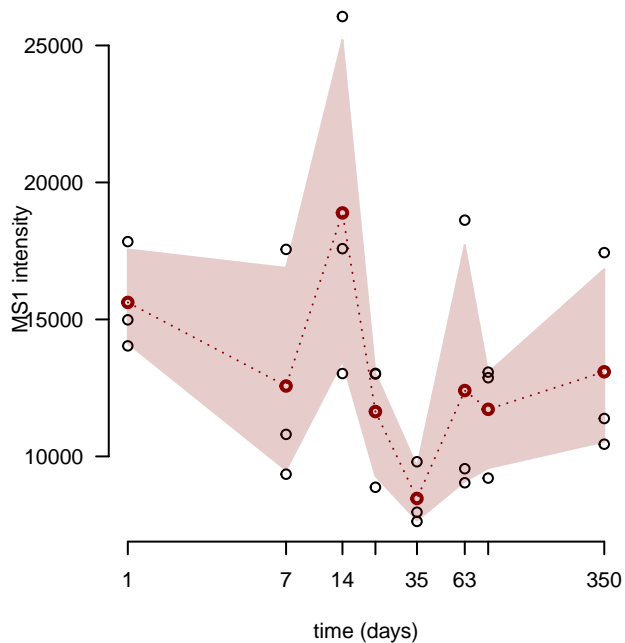

**Q8BS45**  
GN=Ttc26  
tetratricopeptide repeat domain 26

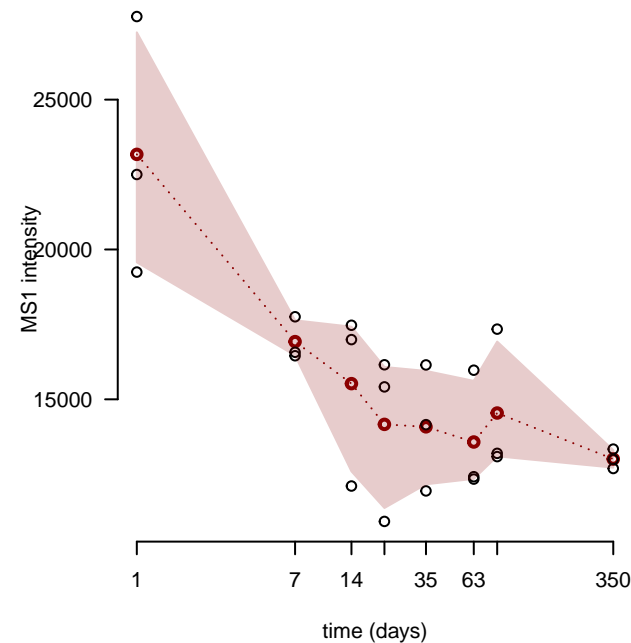

**Q8BS95**  
GN=Gpr89a

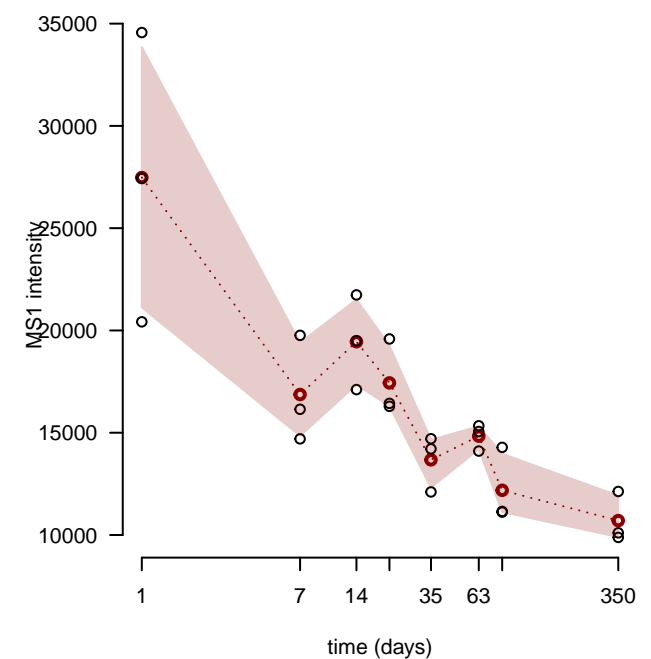

**Q8BSA9**  
**GN=Tyw3**

tRNA-yW synthesizing protein 3 homolog ( ...

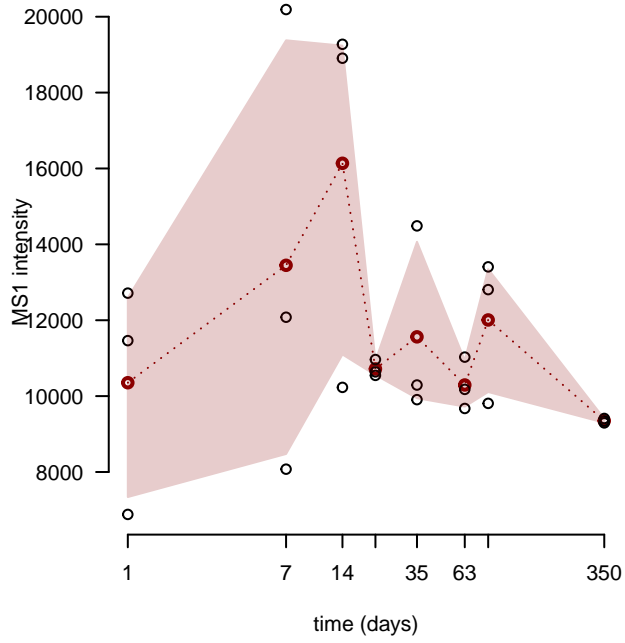

**Q8BSD5**  
**GN=She**

src homology 2 domain-containing transfo ...

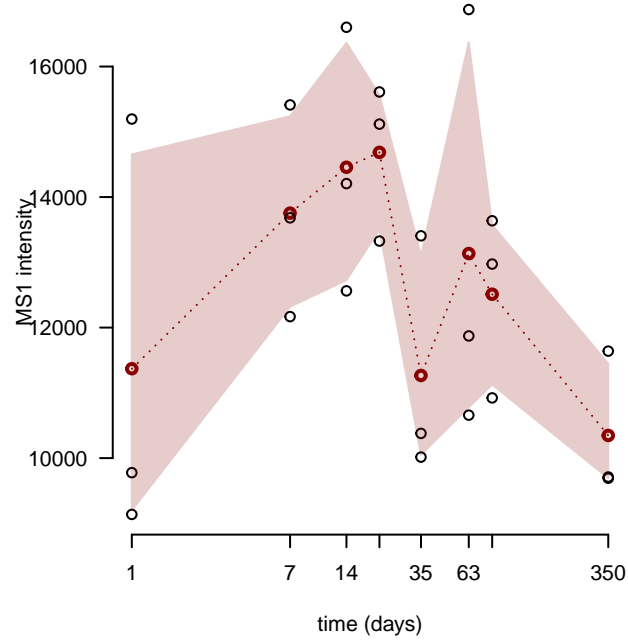

**Q8BSE0**  
**GN=Rmdn2**

regulator of microtubule dynamics 2

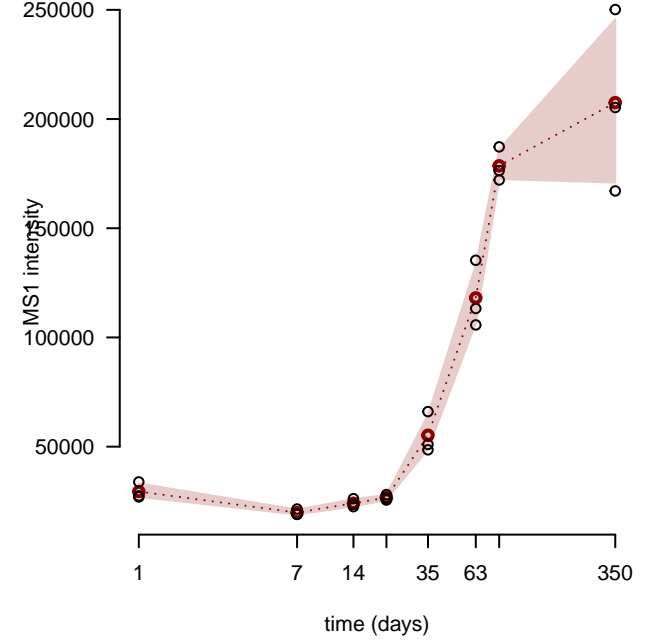

**Q8BSF4**  
**GN=Pisd**

phosphatidylserine decarboxylase

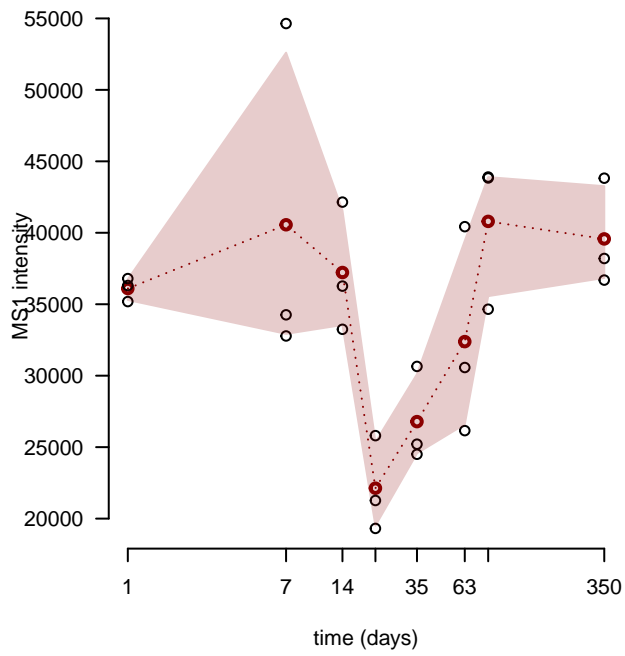

**Q8BSI6**  
**GN=R3hcc1**

R3H domain and coiled-coil containing 1

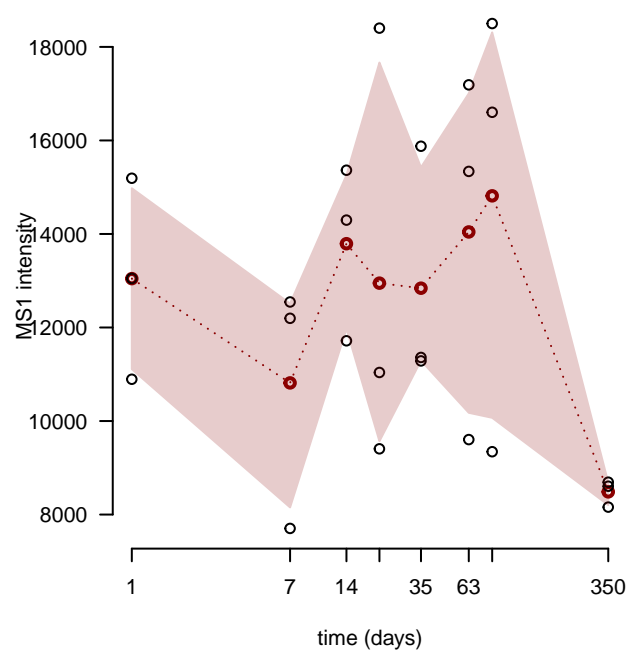

**Q8BSK8**  
**GN=Rps6kb1**

ribosomal protein S6 kinase, polypeptide ...

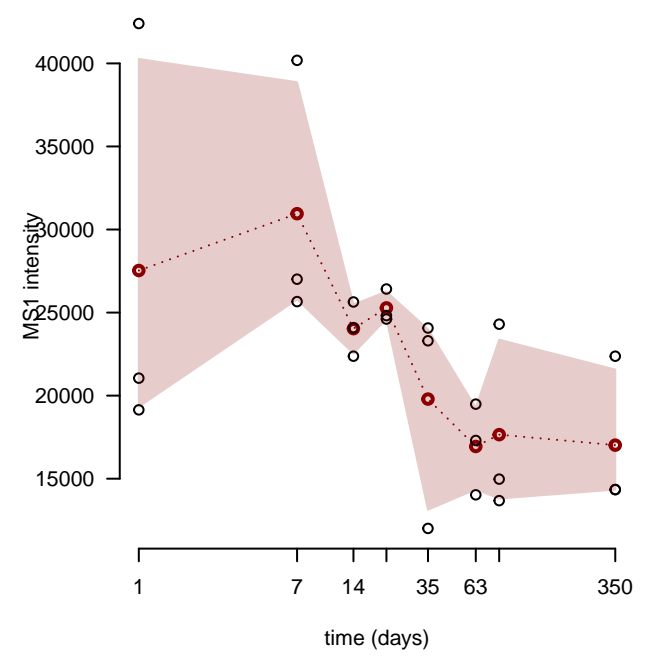

**Q8BSL7**  
**GN=Arf2**

ADP-ribosylation factor 2

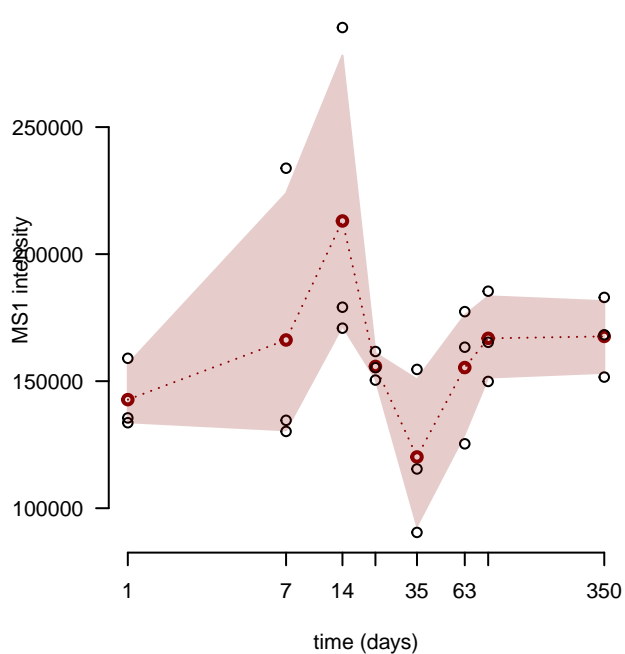

**Q8BSM7**  
**GN=Slc43a1**

solute carrier family 43, member 1

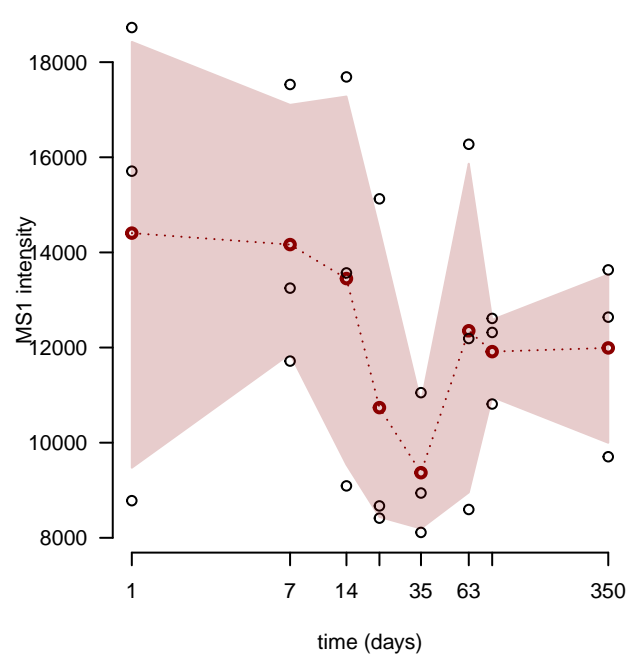

**Q8BSN5**  
**GN=Phf23**

PHD finger protein 23

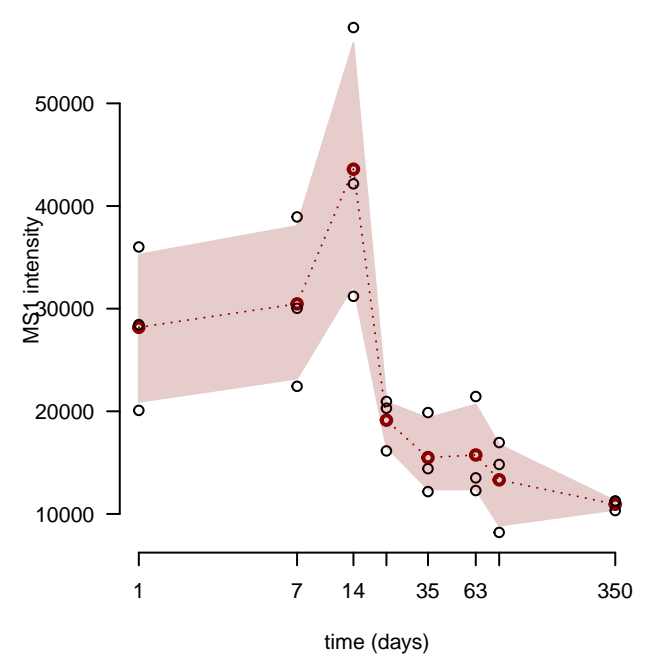

**Q8BSP2**  
GN=Ncaph2  
non-SMC condensin II complex, subunit H2

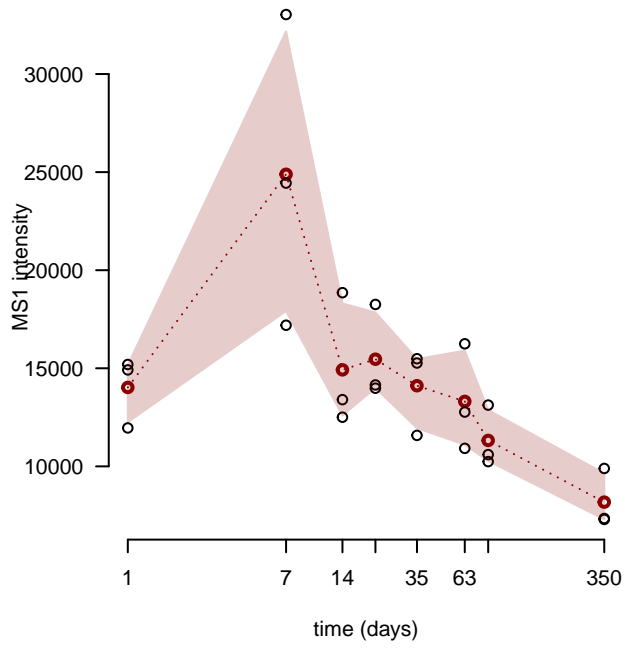

**Q8BSQ9**  
GN=Pbrm1  
polybromo 1

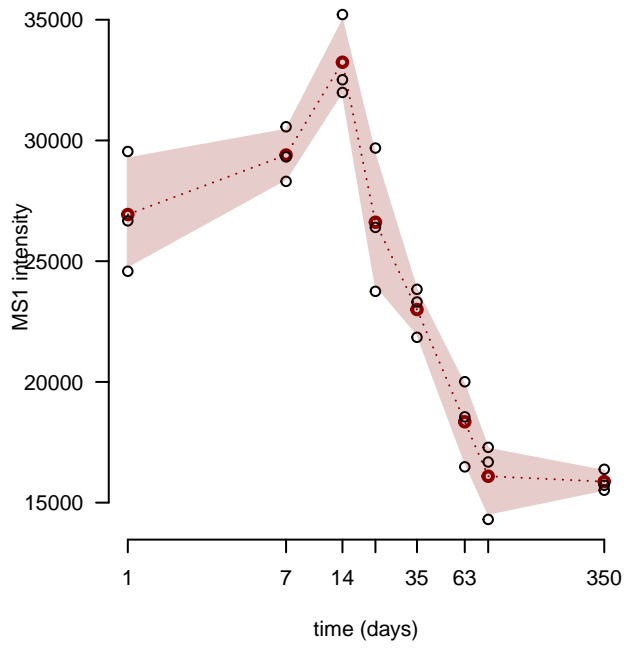

**Q8BSS9**  
GN=Ppfia2  
protein tyrosine phosphatase, receptor t...

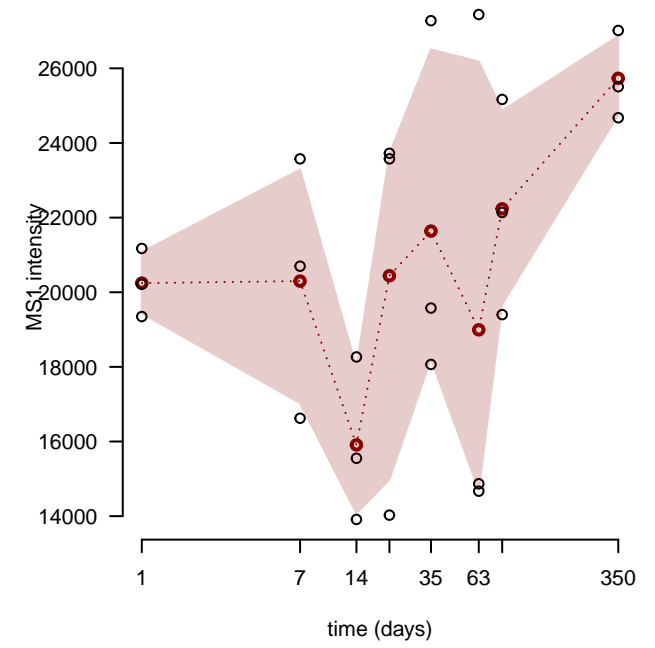

**Q8BST6**  
GN=Peli2  
pellino 2

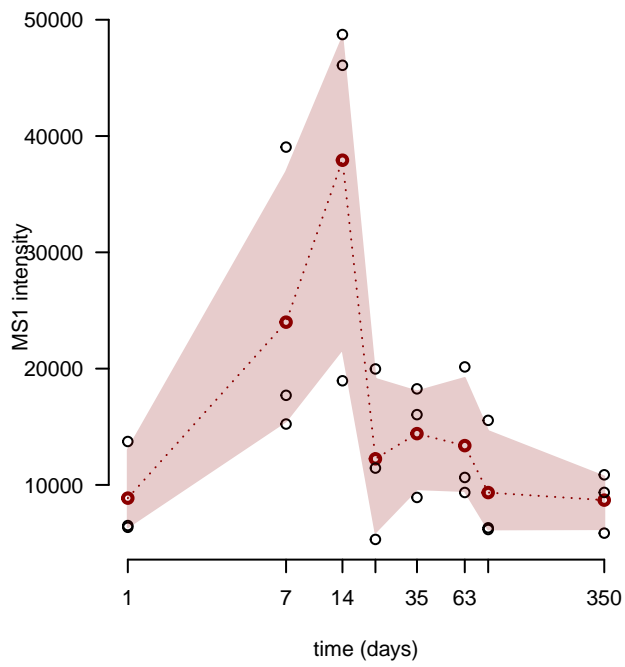

**Q8BSU7**  
GN=Mob3a  
MOB kinase activator 3A

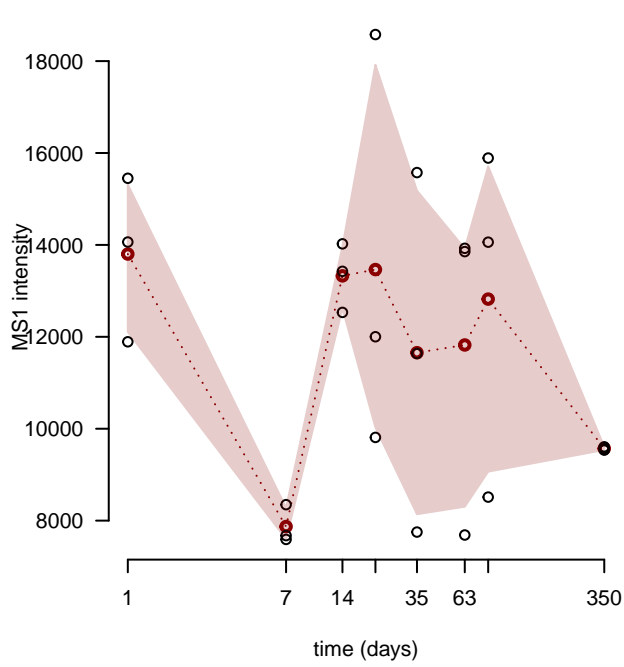

**Q8BSY0**  
GN=Asph  
aspartate-beta-hydroxylase

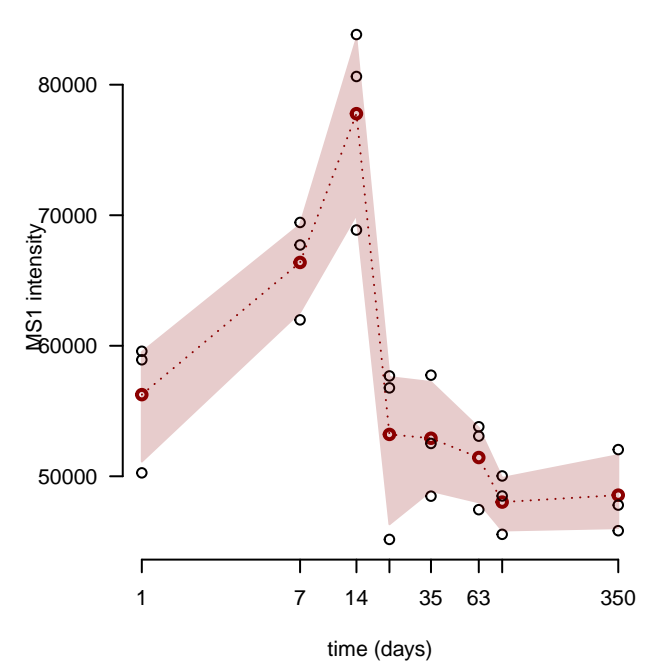

**Q8BSZ2**  
GN=Ap3s2  
adaptor-related protein complex 3, sigma ...

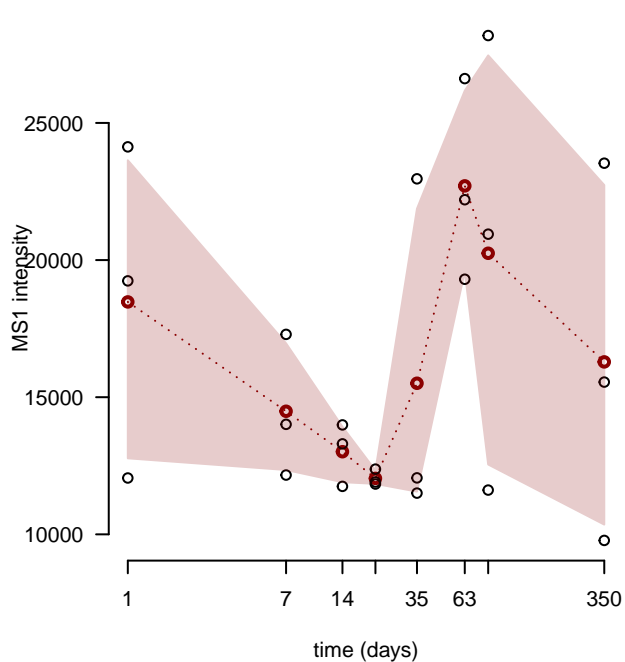

**Q8BT07**  
GN=Cep55  
centrosomal protein 55

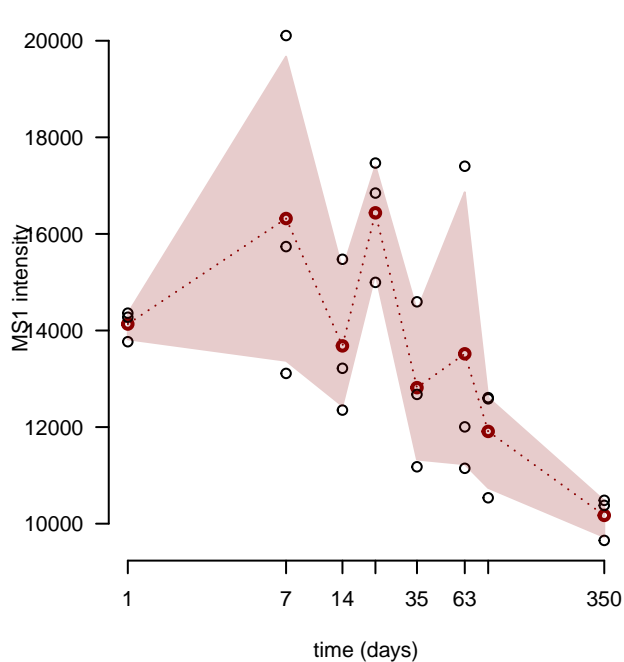

**Q8BT14**  
GN=Cnot4  
CCR4-NOT transcription complex, subunit ...

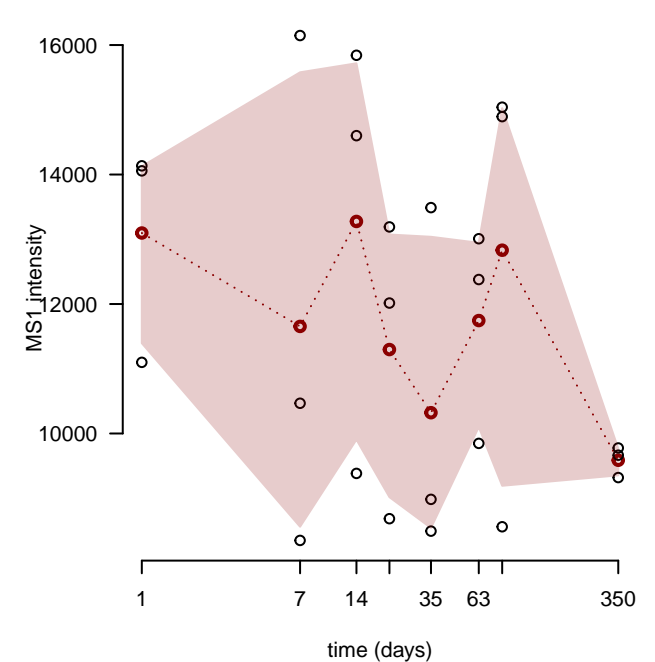

**Q8BT51**  
GN=COA4

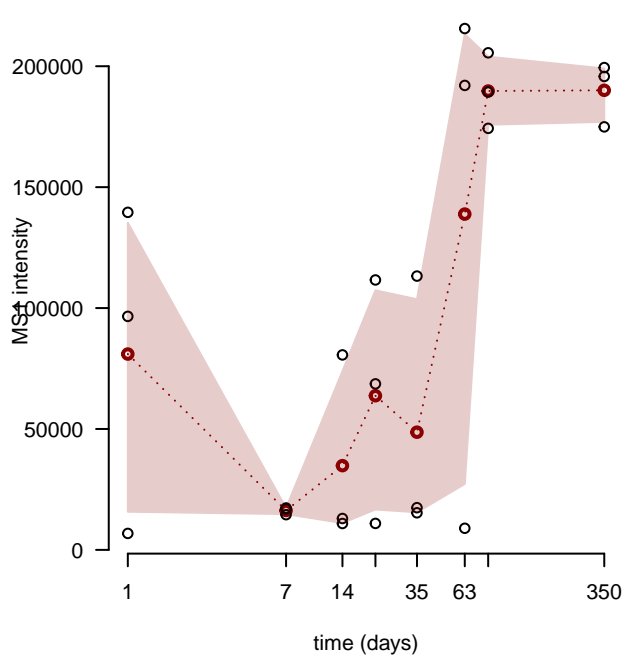

**Q8BT60**  
GN=Cpne3  
copine III

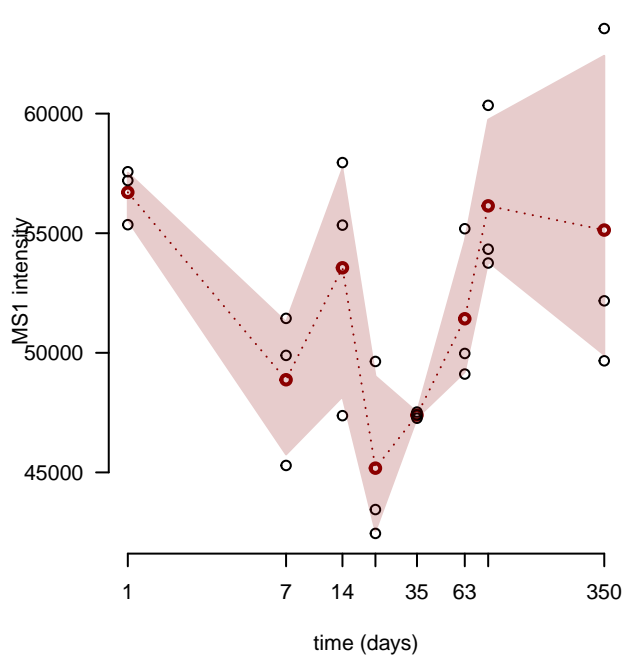

**Q8BTE0**  
GN=Sdhaf4  
succinate dehydrogenase complex assembly ...

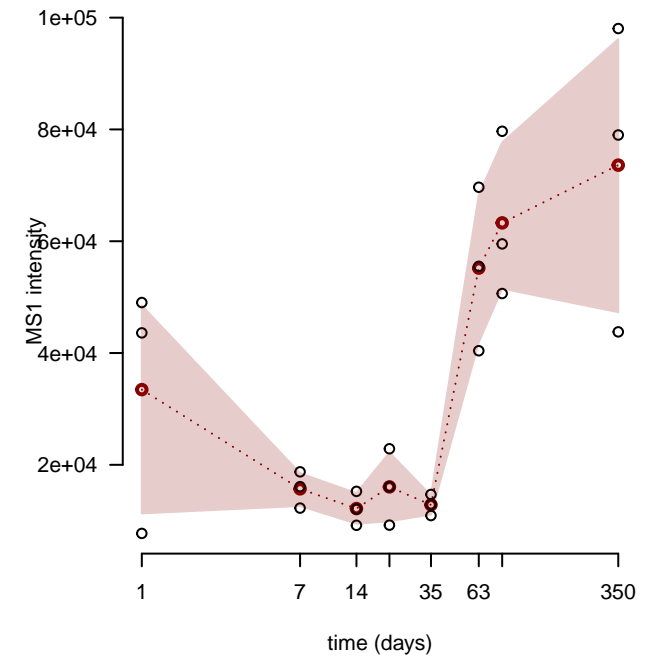

**Q8BTE5**  
GN=Cebpzos  
CCAAT/enhancer binding protein (C/EBP), ...

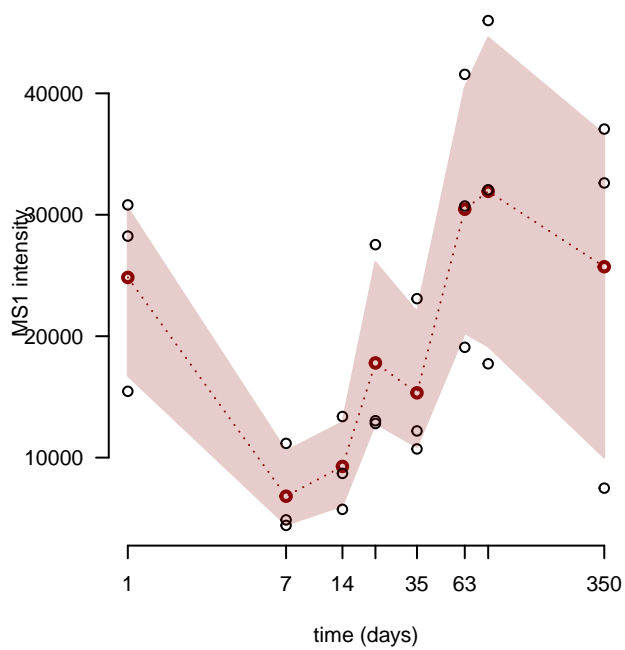

**Q8BTG3**  
GN=Tcp111  
t-complex 11 like 1

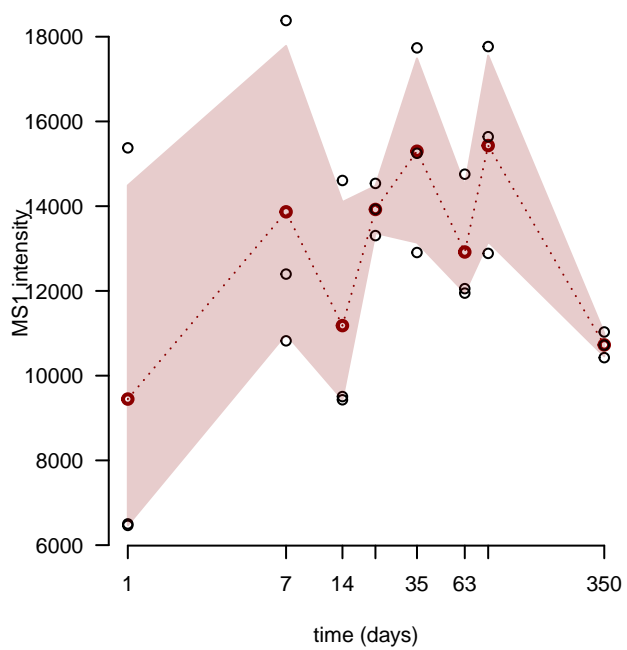

**Q8BTG7**  
GN=Ndr4  
N-myc downstream regulated gene 4

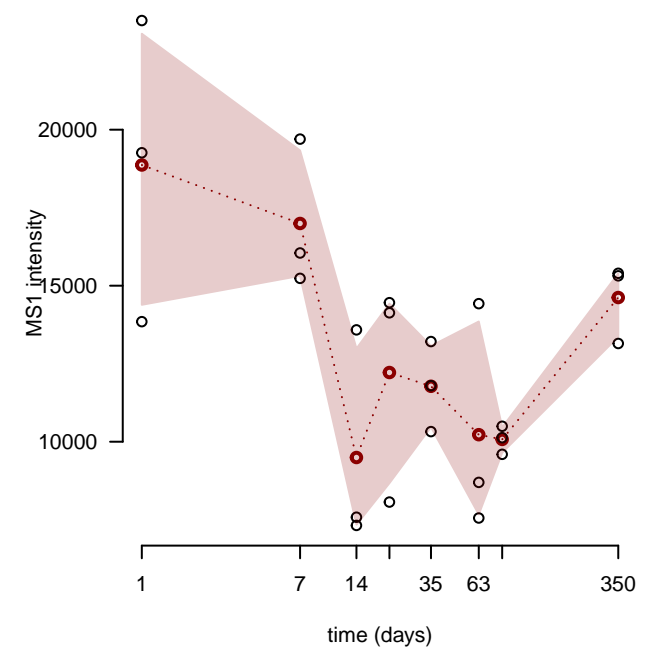

**Q8BTH8**  
GN=Csnk1g1  
casein kinase 1, gamma 1

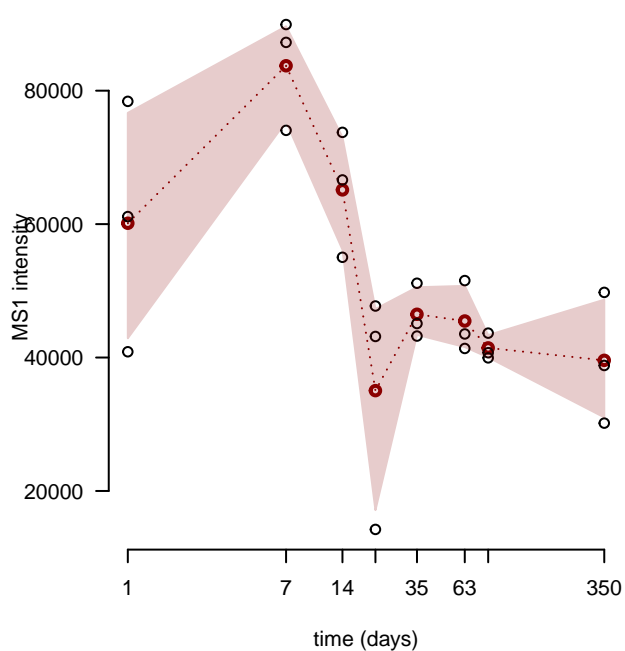

**Q8BTI7**  
GN=Ankrd52  
ankyrin repeat domain 52

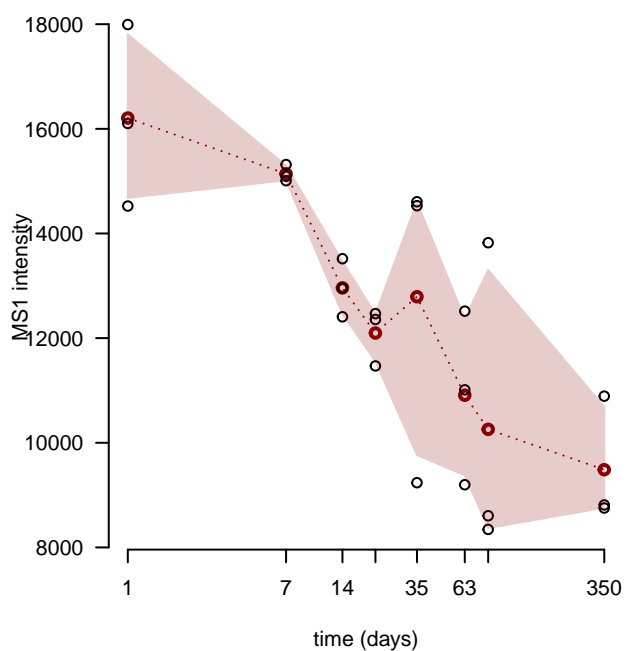

**Q8BTI8**  
GN=Srrm2  
serine/arginine repetitive matrix 2

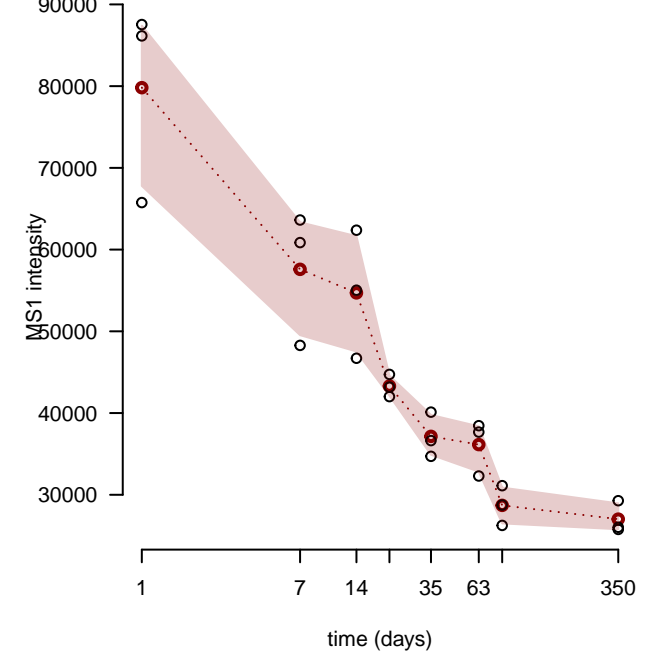



**Q8BTJ4**  
GN=Enpp4  
ectonucleotide pyrophosphatase/phosphodi ...

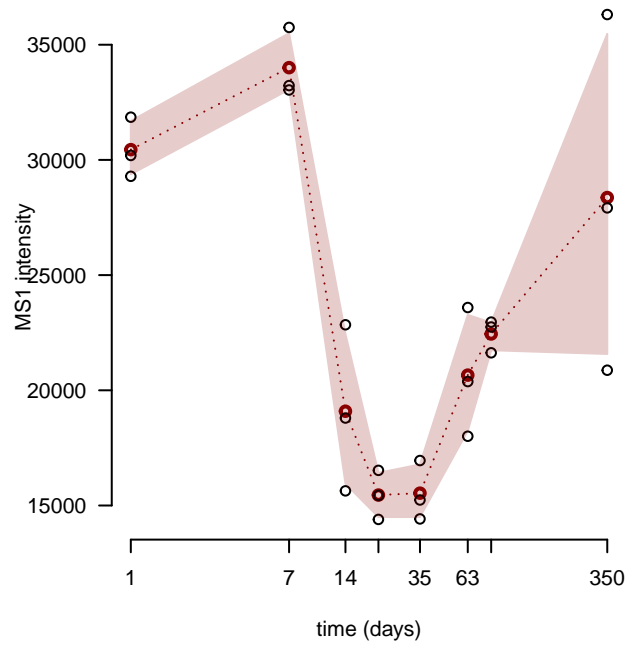

**Q8BTK5**  
GN=Smyd4  
SET and MYND domain containing 4

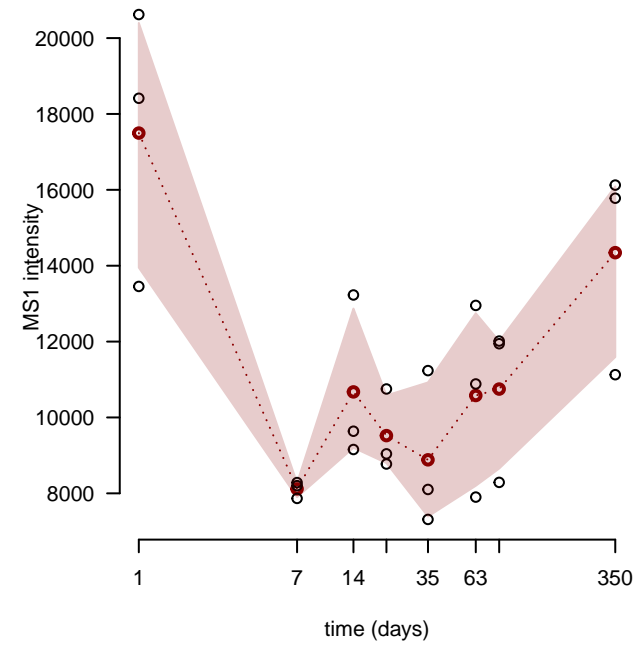

**Q8BTM8**  
GN=Flna  
filamin, alpha

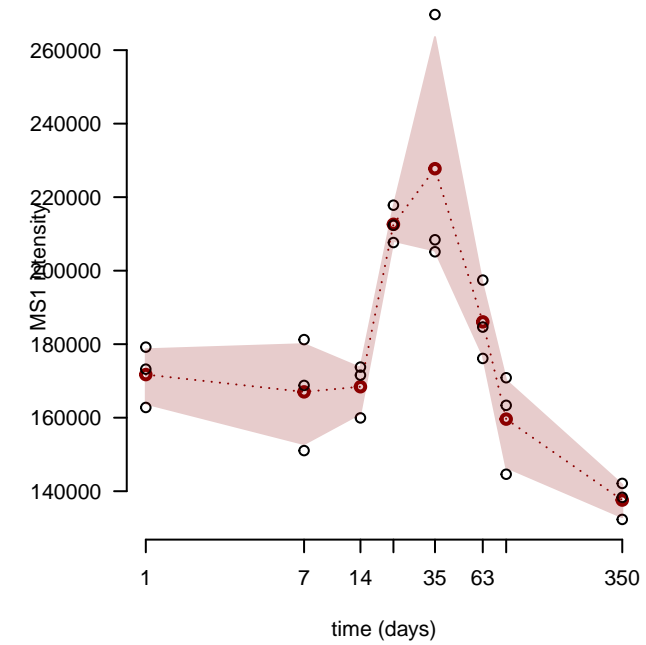

**Q8BTR5**  
GN=Dusp28  
dual specificity phosphatase 28

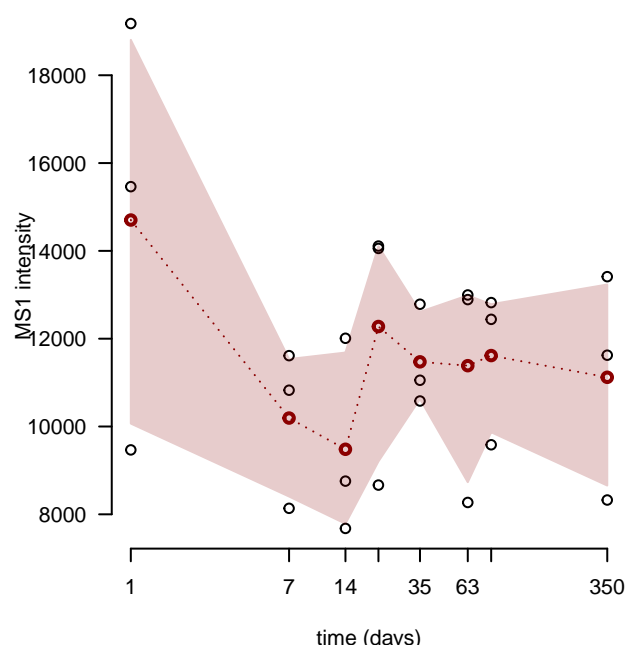

**Q8BTS4**  
GN=Nup54  
nucleoporin 54

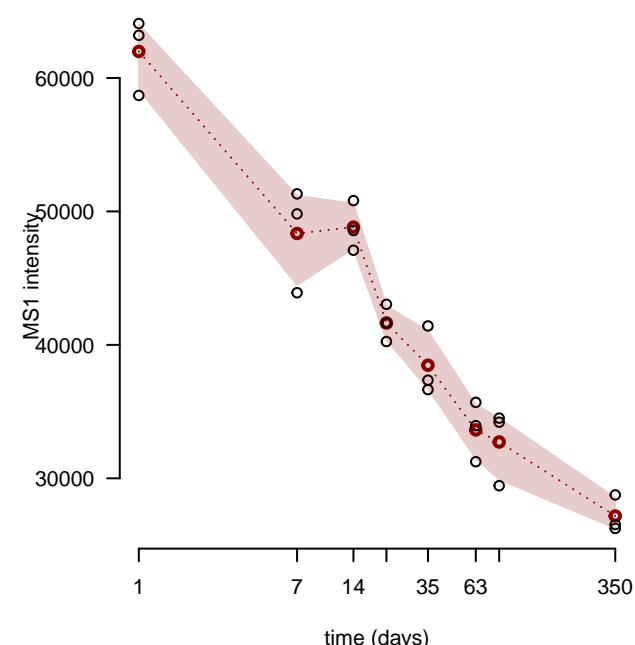

**Q8BTT6**  
GN=Diexf

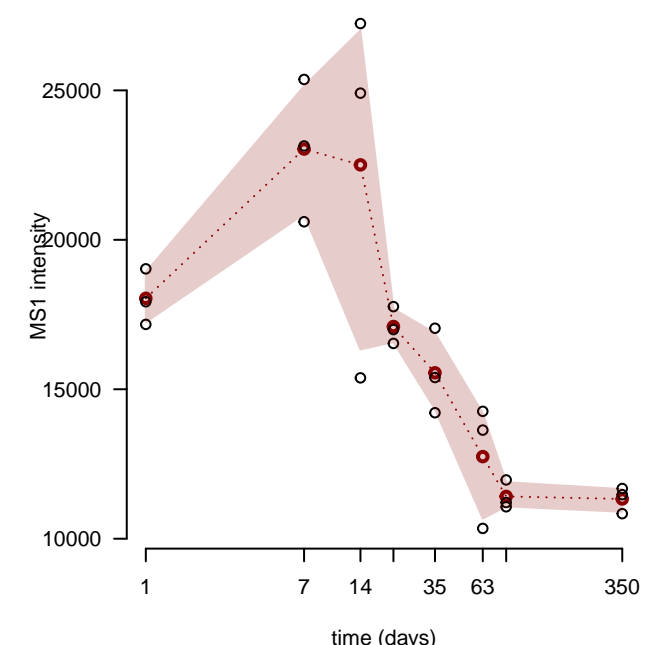

**Q8BTU1**  
GN=Cfap20  
cilia and flagella associated protein 20

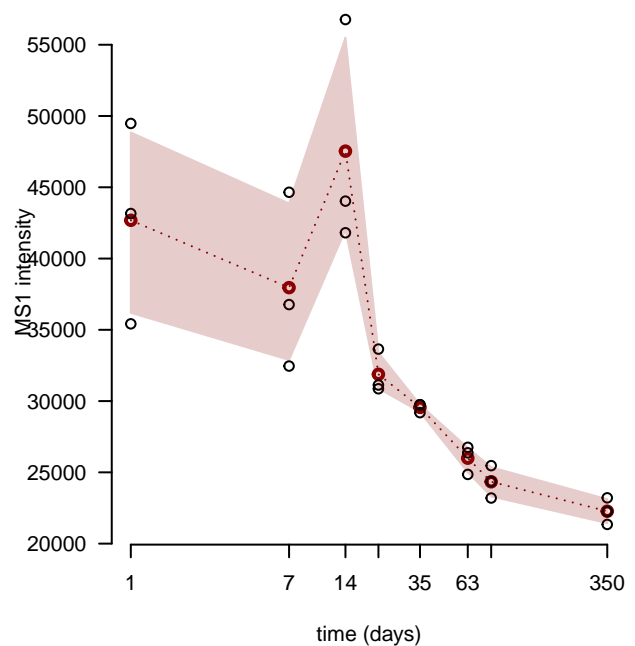

**Q8BTV1**  
GN=Tusc3  
tumor suppressor candidate 3

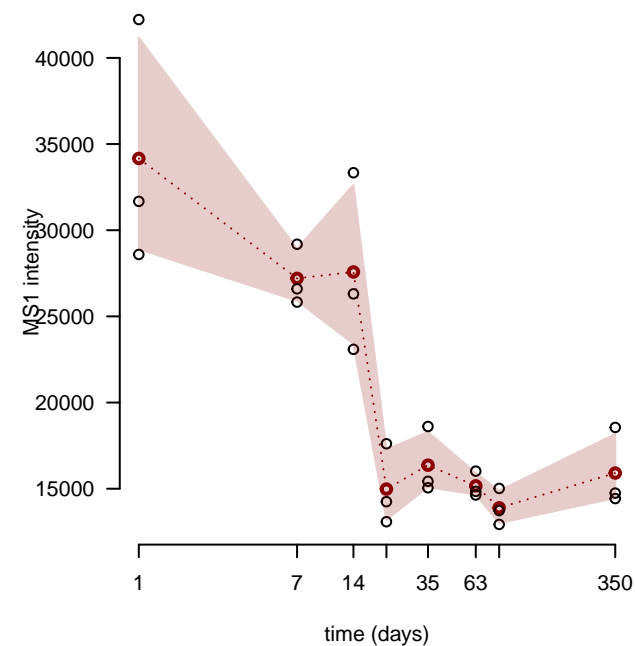

**Q8BTV2**  
GN=Cpsf7  
cleavage and polyadenylation specific fa ...

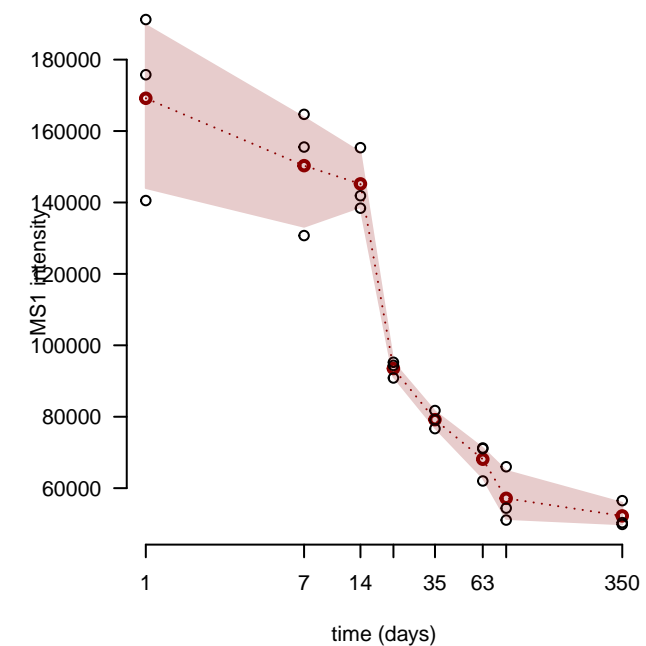

**Q8BTW3**  
**GN=Exosc6**  
exosome component 6

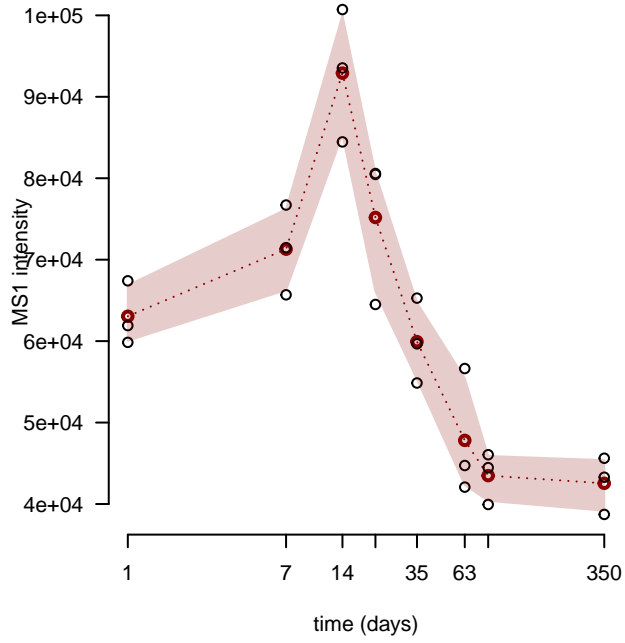

**Q8BTW8**  
**GN=Cdk5rap1**  
CDK5 regulatory subunit associated prote ...

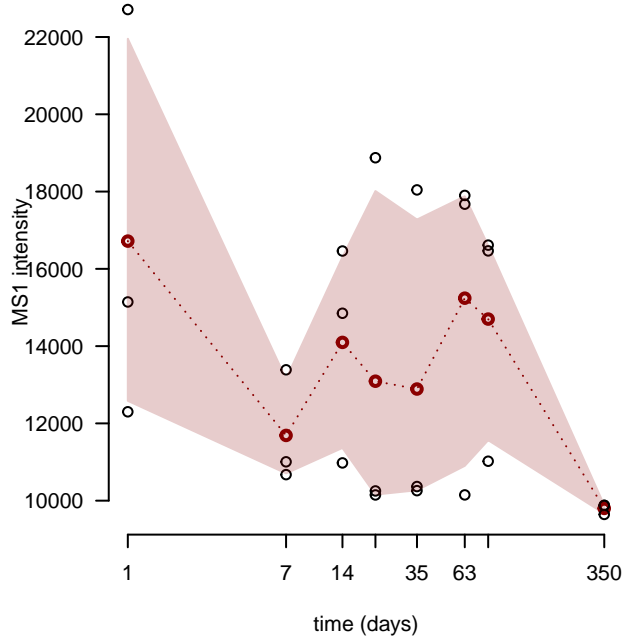

**Q8BTW9**  
**GN=Pak4**  
p21 (RAC1) activated kinase 4

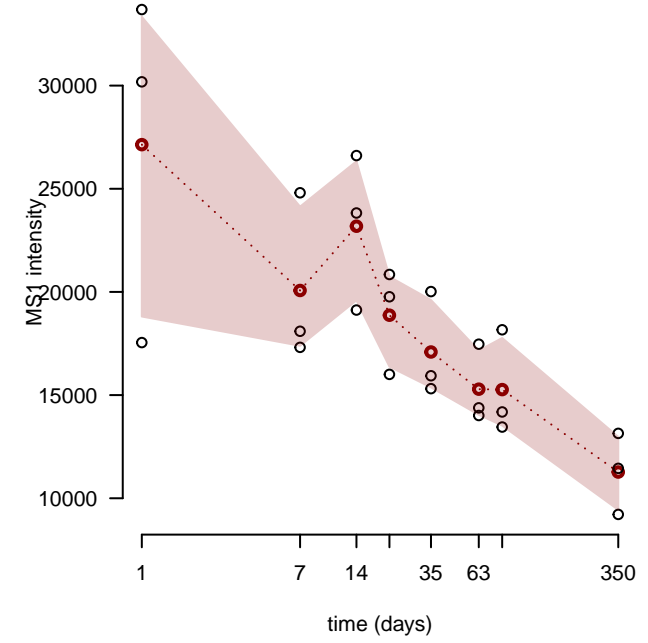

**Q8BTX9**  
**GN=Hsd11**  
hydroxysteroid dehydrogenase like 1

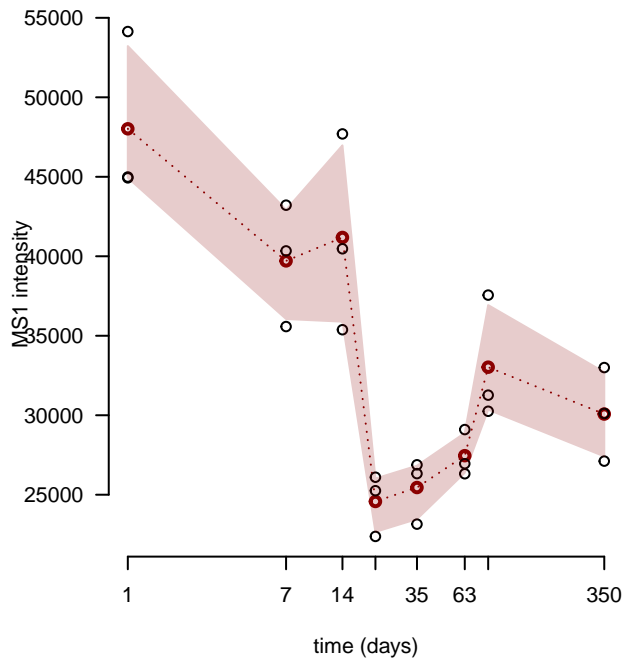

**Q8BTY1**  
**GN=Kyat1**  
kynurenine aminotransferase 1

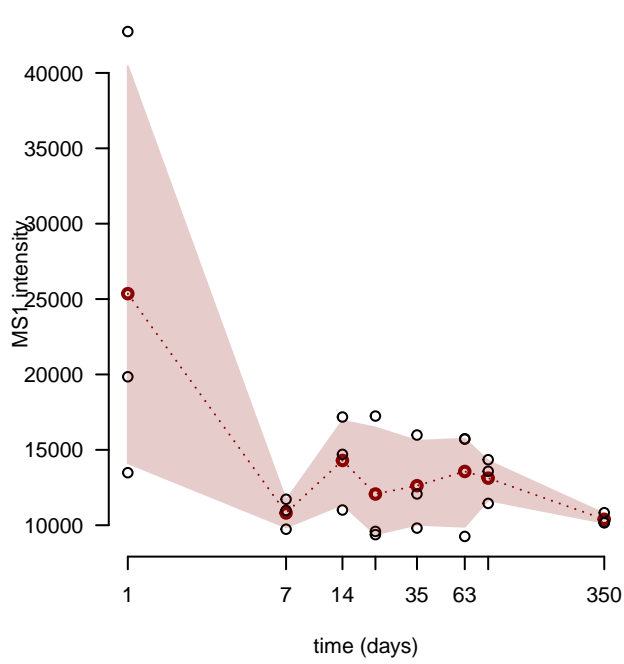

**Q8BTY2**  
**GN=Slc4a7**  
solute carrier family 4, sodium bicarbon ...

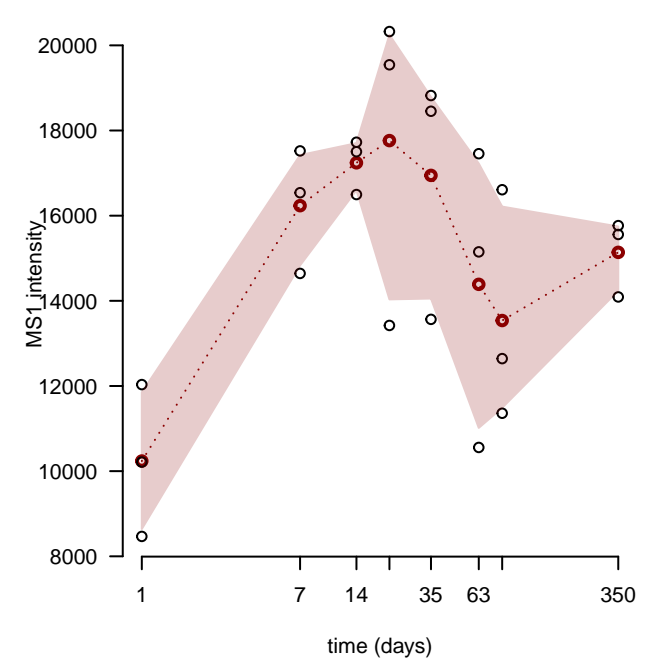

**Q8BTY8**  
**GN=Scfd2**  
Sec1 family domain containing 2

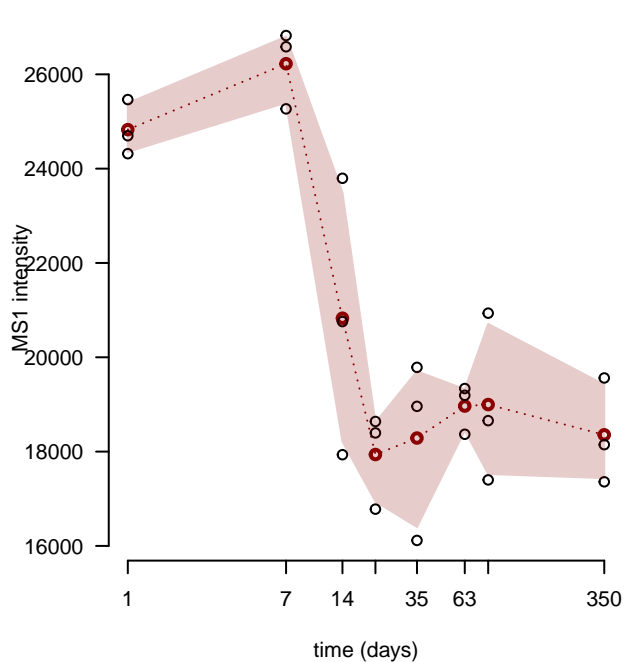

**Q8BTZ4**  
**GN=Anapc5**  
anaphase-promoting complex subunit 5

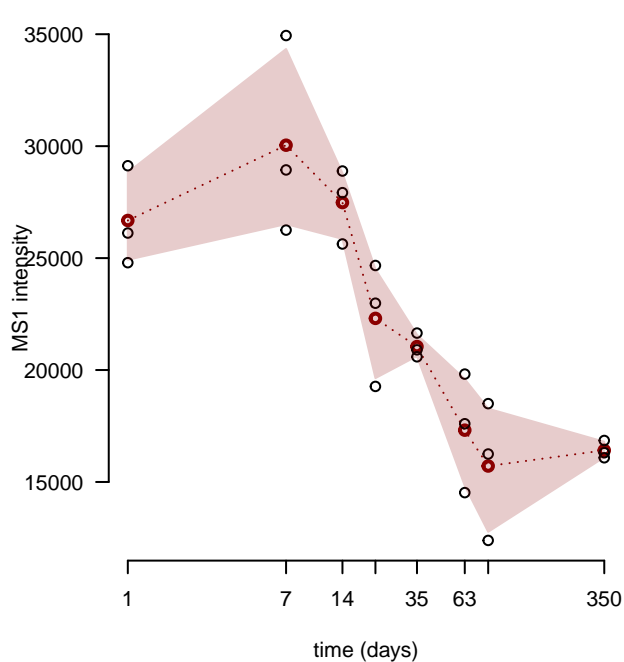

**Q8BTZ5**  
**GN=Ankrd46**  
ankyrin repeat domain 46

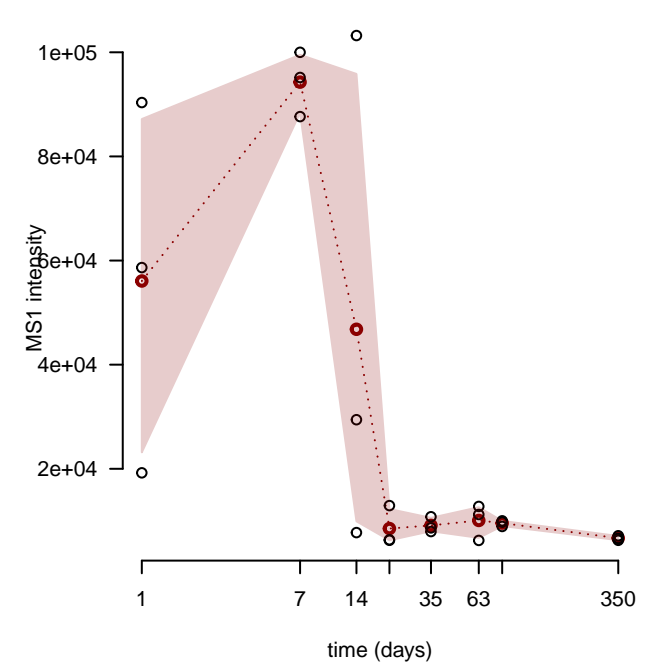

**Q8BTZ7**  
**GN=Gmppb**  
GDP-mannose pyrophosphorylase B

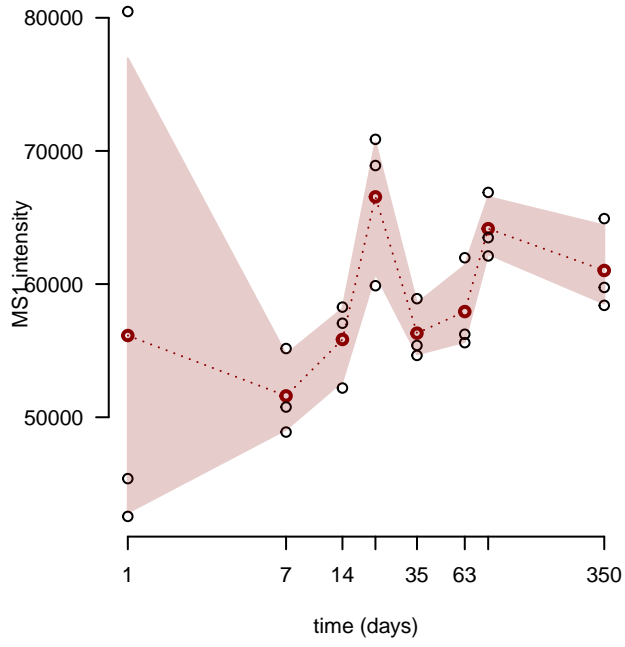

**Q8BU00**  
**GN=Ikzf5**  
IKAROS family zinc finger 5

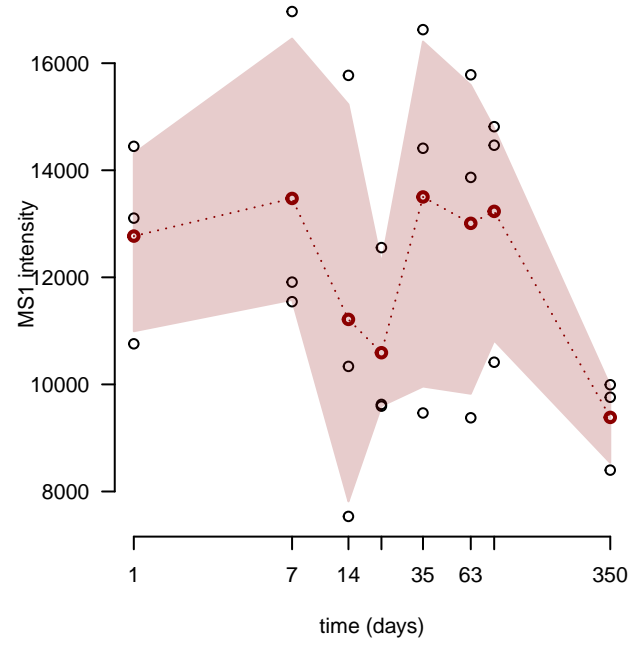

**Q8BU03**  
**GN=Pwp2**  
PWP2 periodic tryptophan protein homolog ...

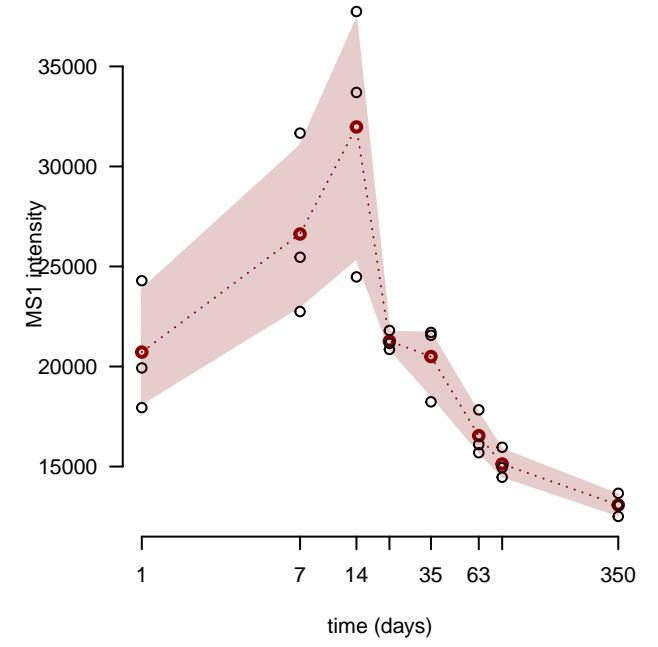

**Q8BU04**  
**GN=Ubr7**  
ubiquitin protein ligase E3 component n- ...

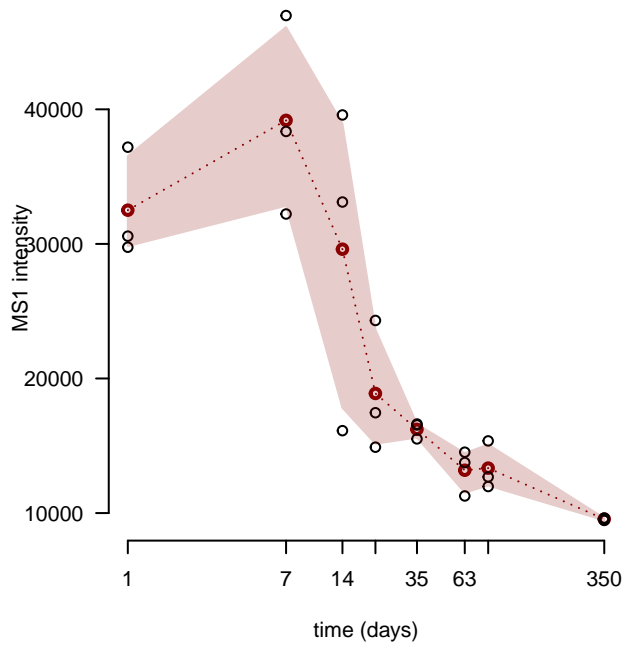

**Q8BU11**  
**GN=Tox4**  
TOX high mobility group box family membe ...

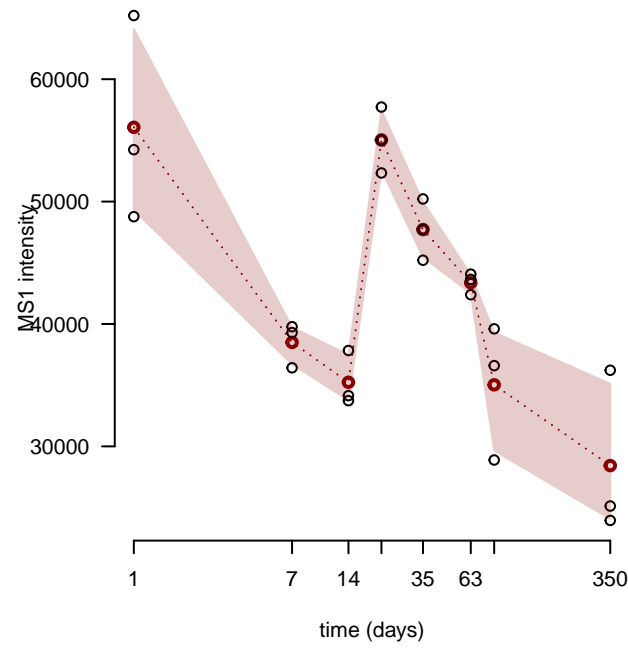

**Q8BU14**  
**GN=Sec62**  
SEC62 homolog (S. cerevisiae)

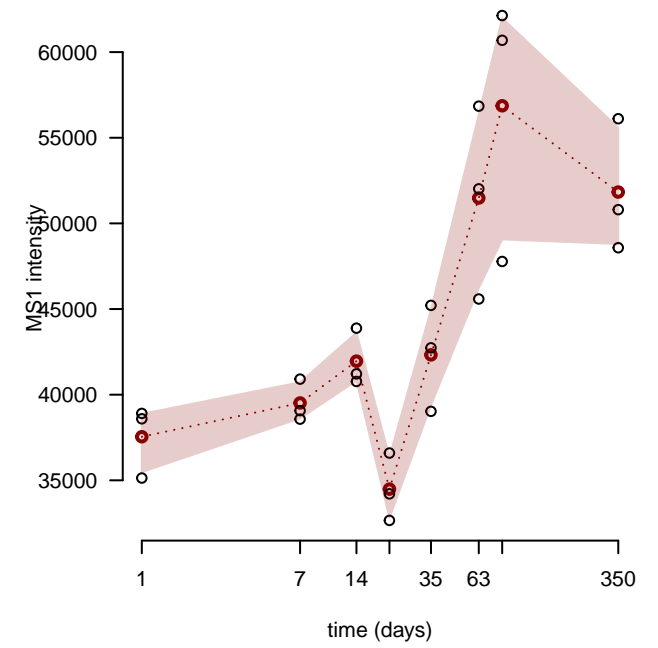

**Q8BU25**  
**GN=Pamr1**  
peptidase domain containing associated w ...

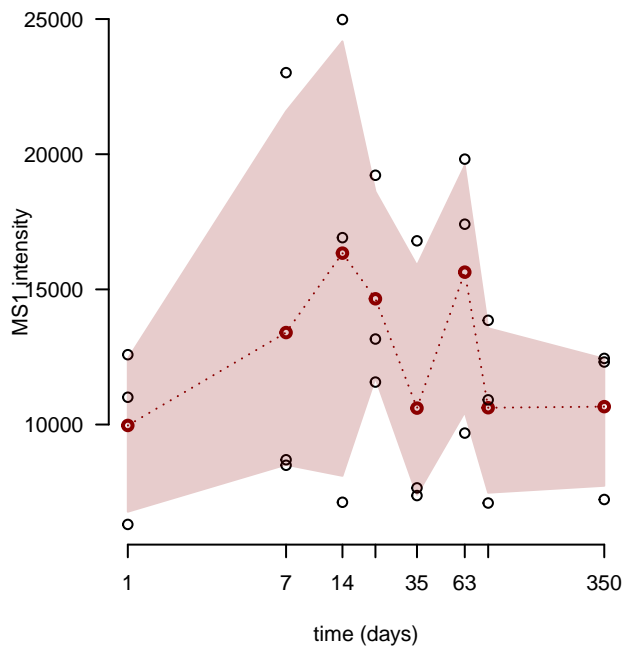

**Q8BU30**  
**GN=lars**  
isoleucine-tRNA synthetase

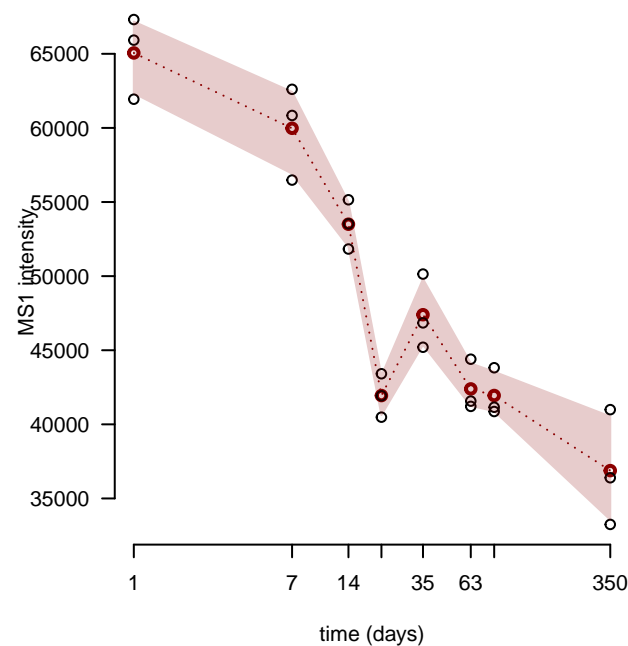

**Q8BU31**  
**GN=Rap2c**  
RAP2C, member of RAS oncogene family

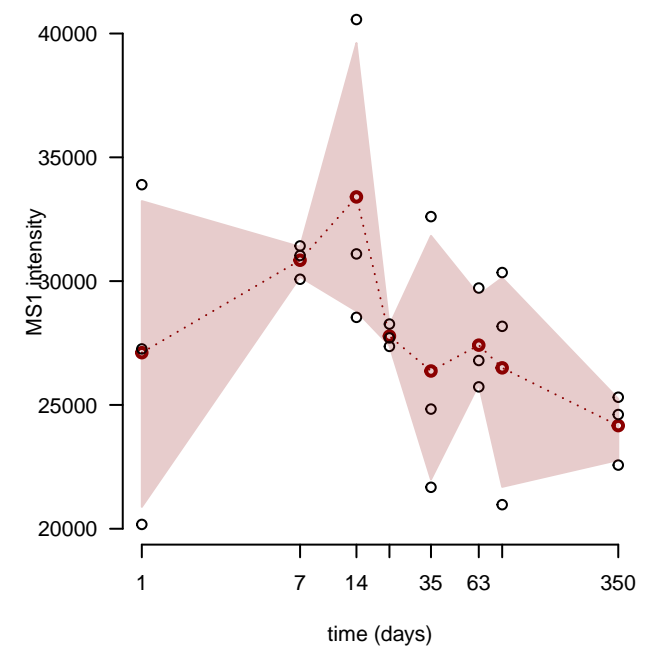

**Q8BU33**

**GN=Ilvbl**

ilvB (bacterial acetolactate synthase)-l ...

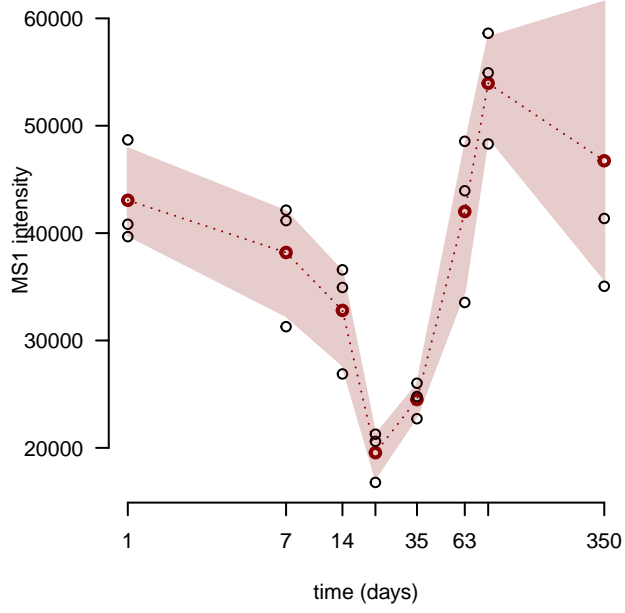

**Q8BU40**

**GN=Nlrp4a**

NLR family, pyrin domain containing 4A

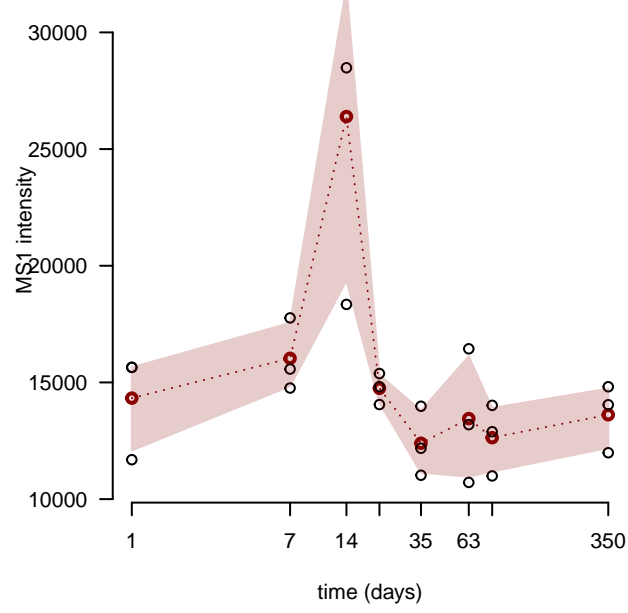

**Q8BU85**

**GN=Msrb3**

methionine sulfoxide reductase B3

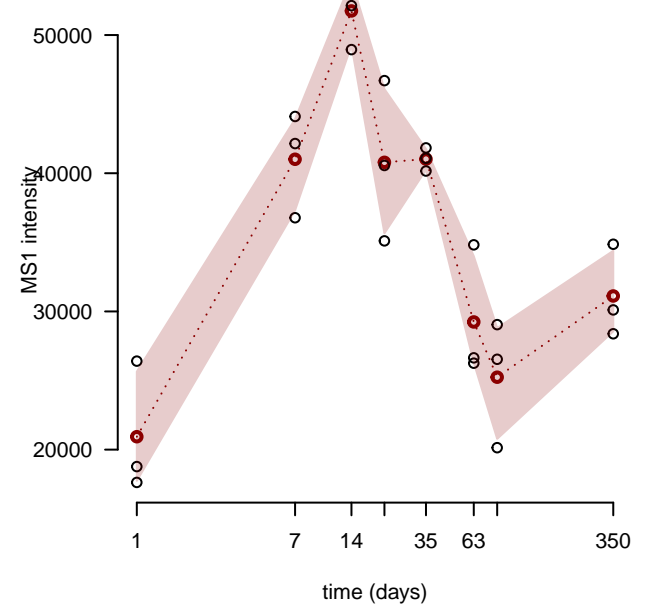

**Q8BU88**

**GN=Mrpl22**

mitochondrial ribosomal protein L22

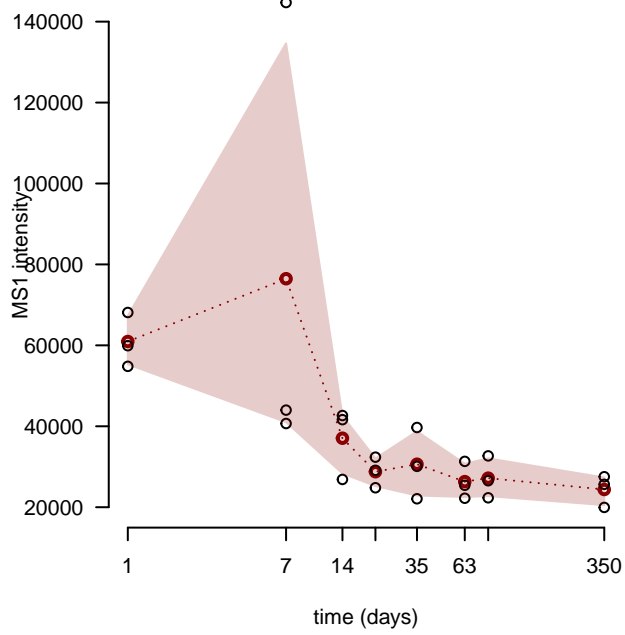

**Q8BUB4**

**GN=Wdfy2**

WD repeat and FYVE domain containing 2

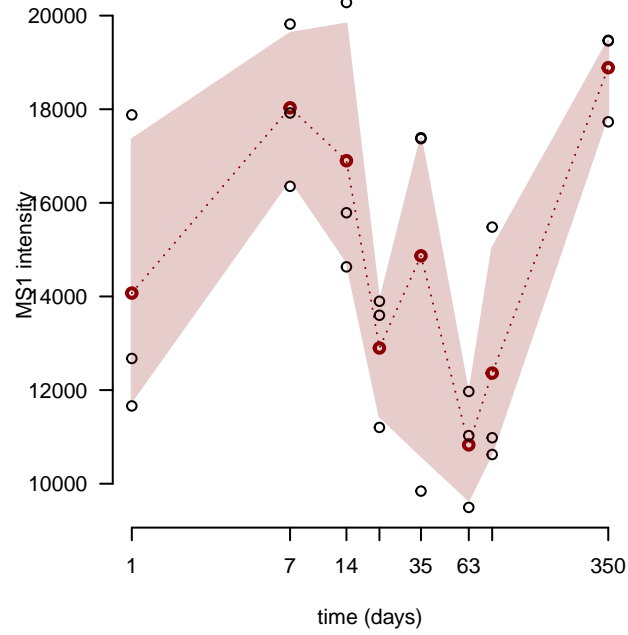

**Q8BUB6**

**GN=Ust**

uronyl-2-sulfotransferase

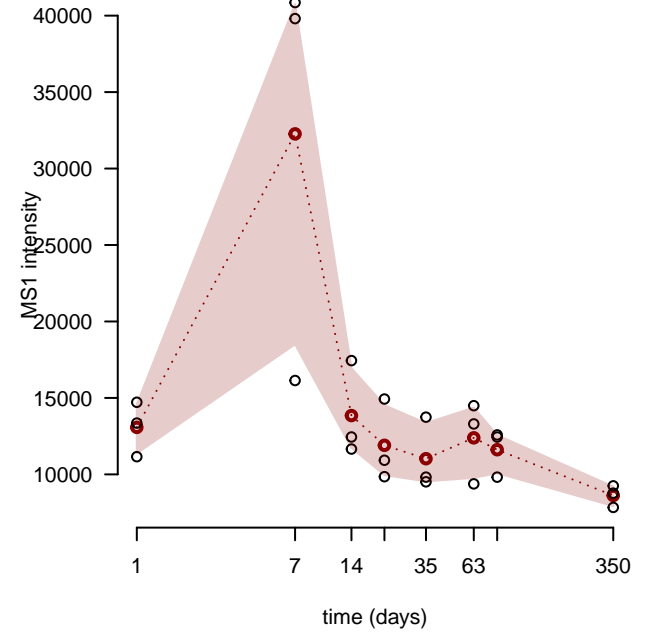

**Q8BUE4**

**GN=Aifm2**

apoptosis-inducing factor, mitochondrion ...

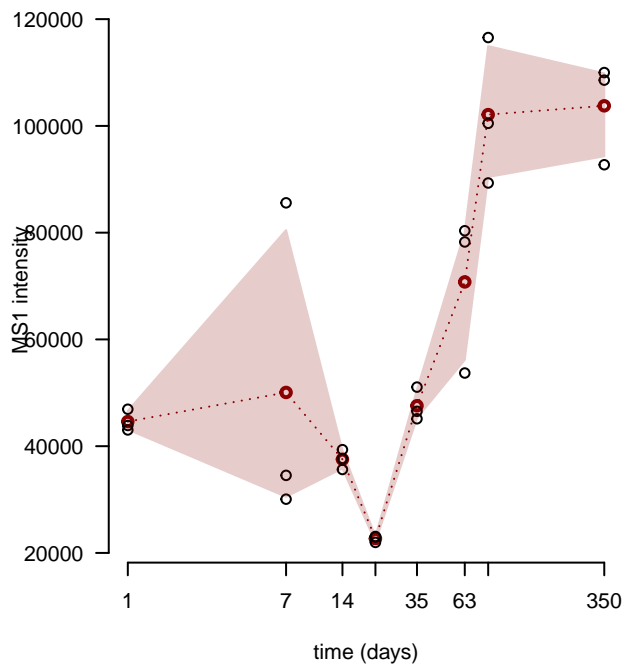

**Q8BUH8**

**GN=Senp7**

SUMO1/sentrin specific peptidase 7

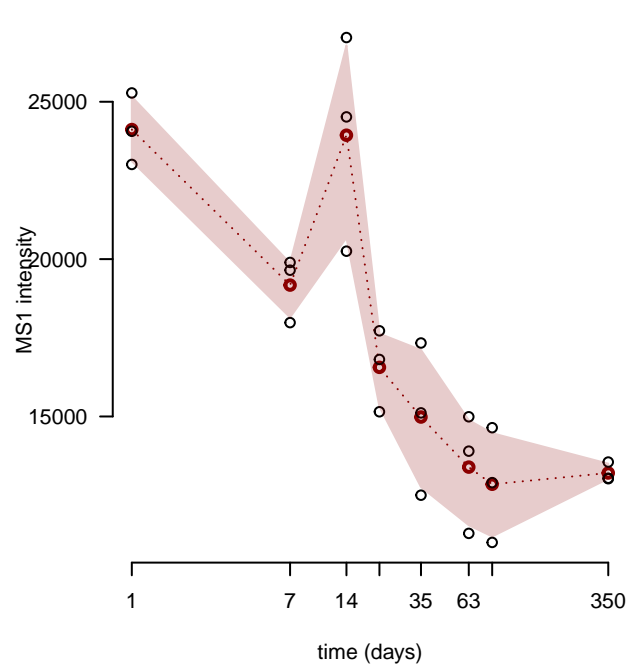

**Q8BUI3**

**GN=LRWD1**

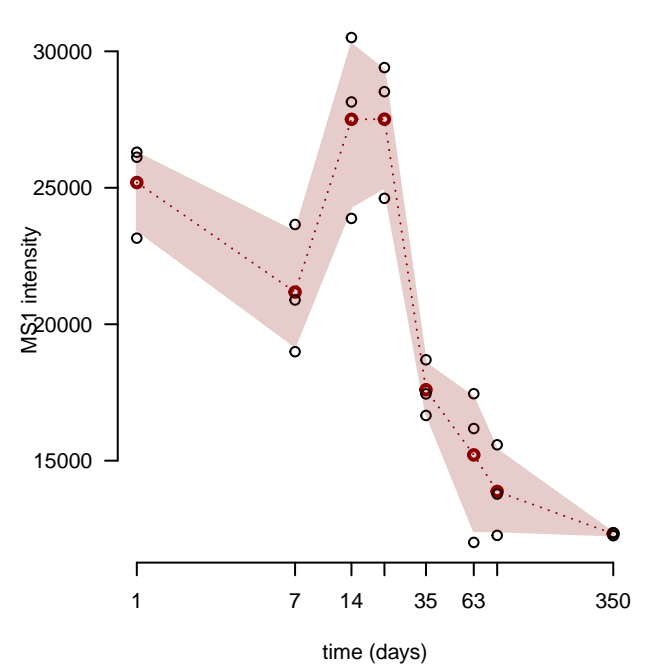

**Q8BUK6**  
**GN=Hook3**  
hook microtubule tethering protein 3

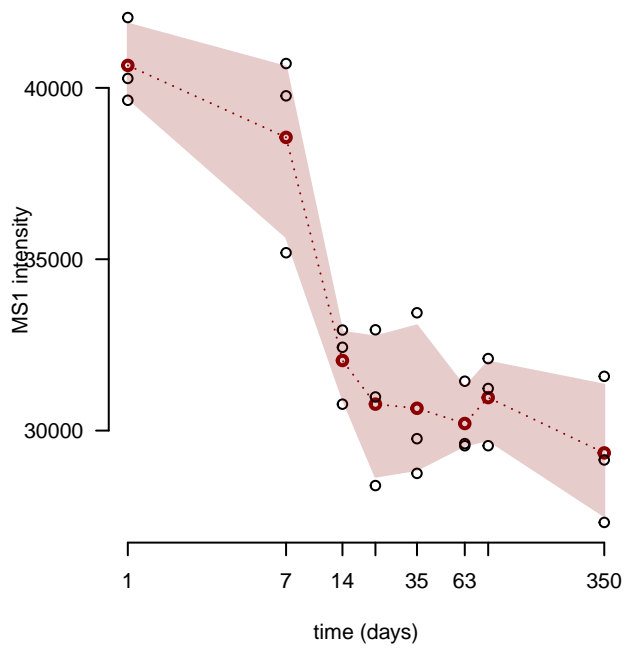

**Q8BUL5**  
**GN=Kih17**  
kelch-like 7

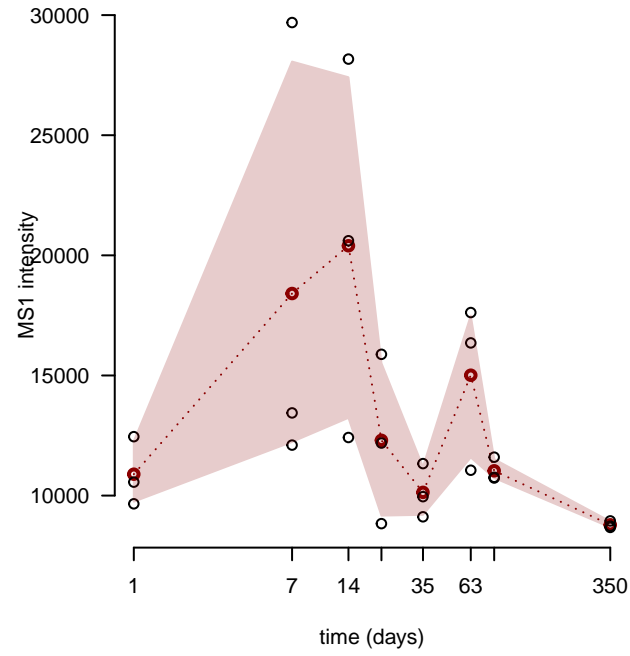

**Q8BUL6**  
**GN=Plekha1**  
pleckstrin homology domain containing, f ...

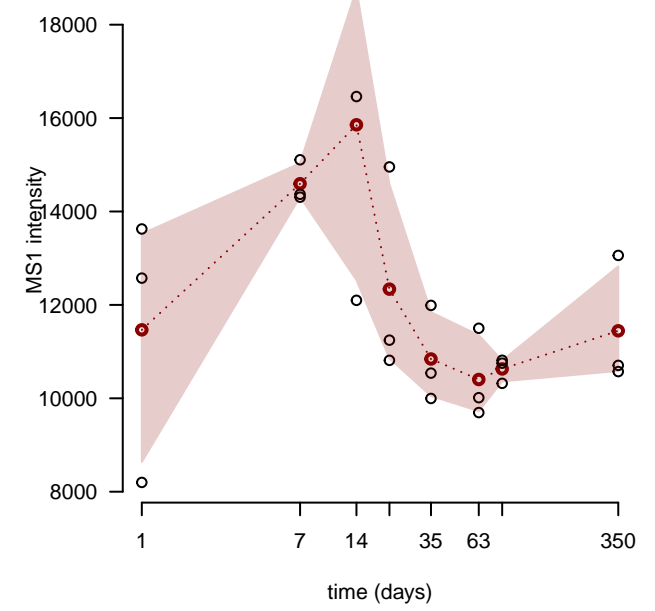

**Q8BUN5**  
**GN=Smad3**  
SMAD family member 3

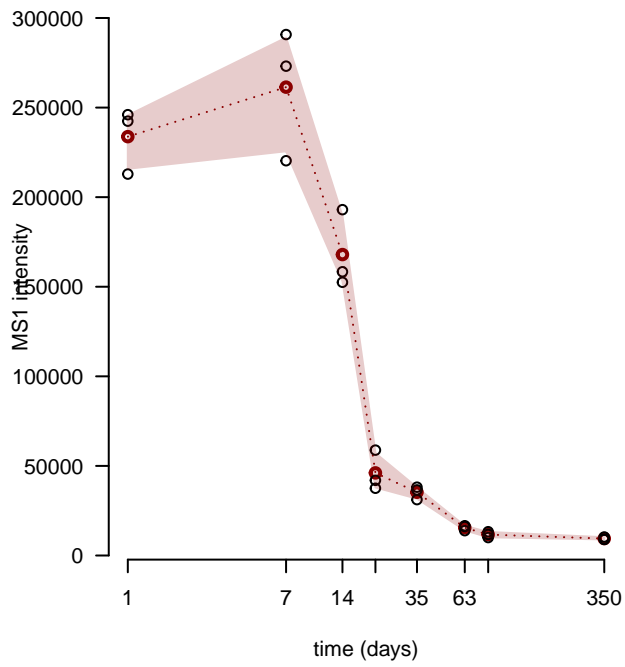

**Q8BUR3**  
**GN=Foxj3**  
forkhead box J3

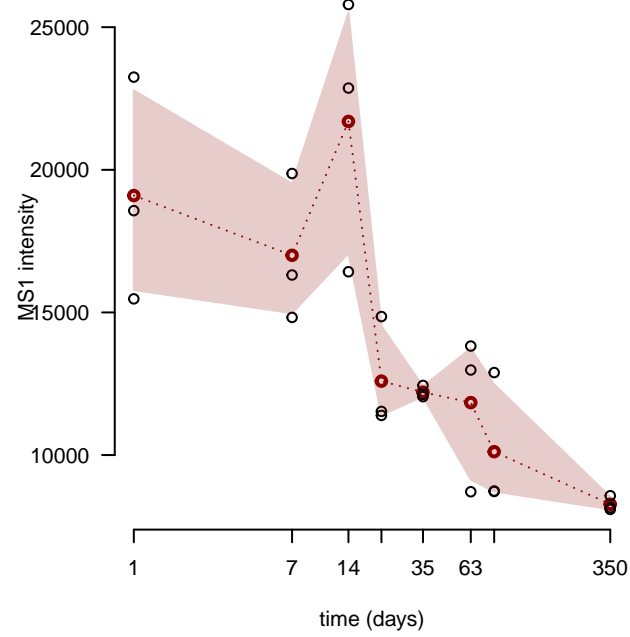

**Q8BUR4**  
**GN=Dock1**  
dedicator of cytokinesis 1

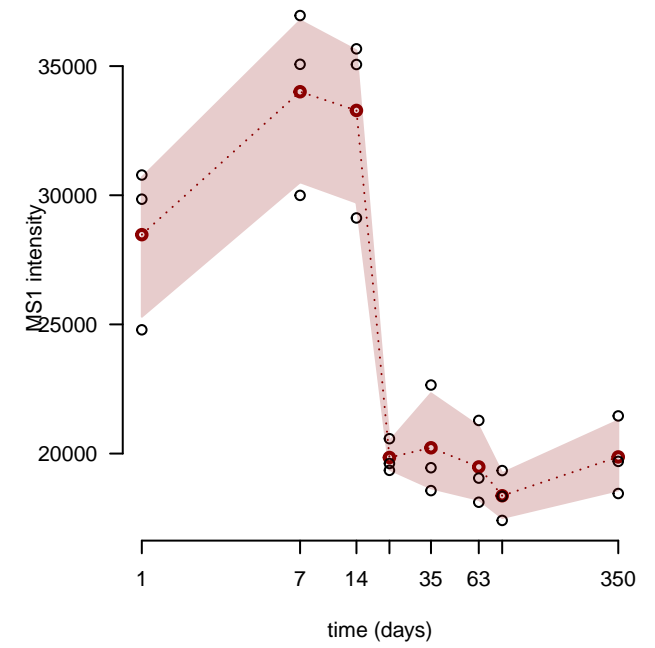

**Q8BUV3**  
**GN=Gphn**  
gephyrin

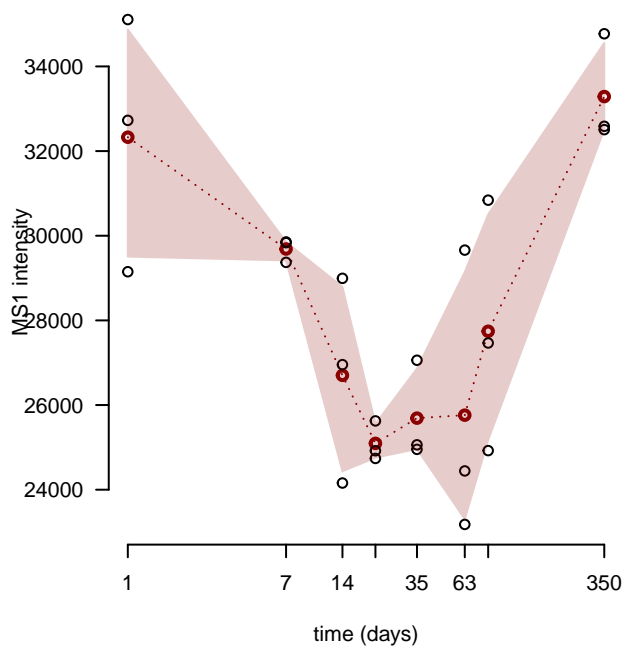

**Q8BUV8**  
**GN=Gpr107**  
G protein-coupled receptor 107

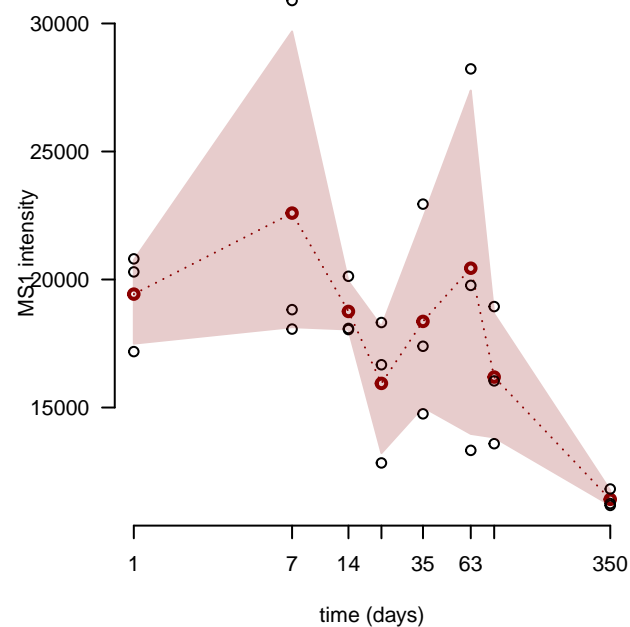

**Q8BUY5**  
**GN=Timmdc1**  
translocase of inner mitochondrial membr ...

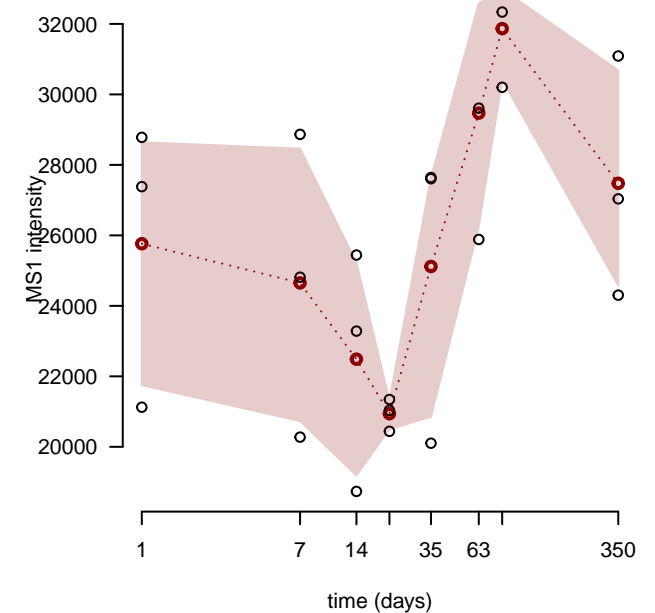

**Q8BUY8**  
**GN=Gprasp2**  
G protein-coupled receptor associated so ...

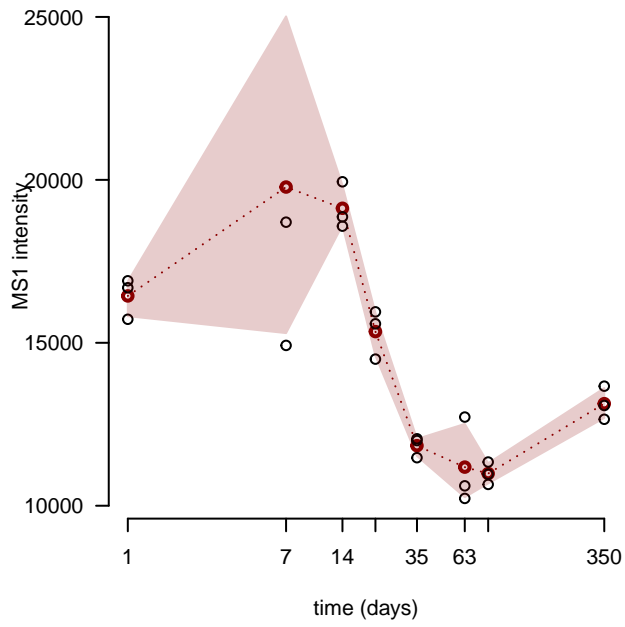

**Q8BUY9**  
**GN=Pggt1b**  
protein geranylgeranyltransferase type I ...

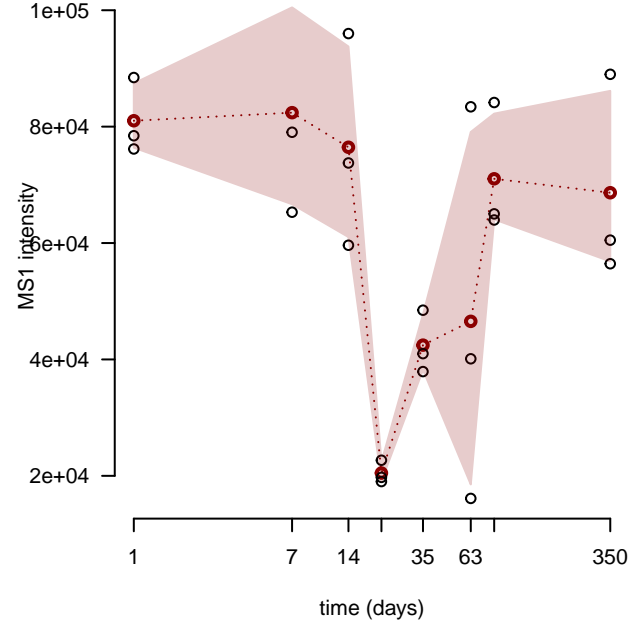

**Q8BV13**  
**GN=Cops7b**  
COP9 signalosome subunit 7B

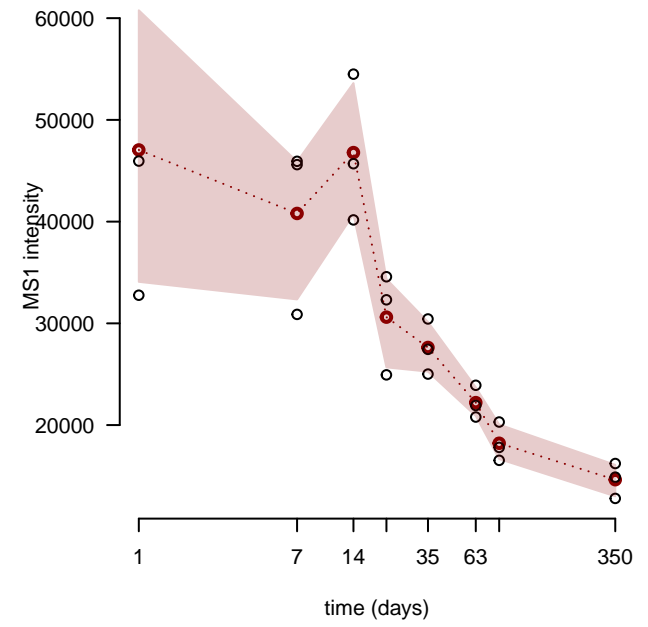

**Q8BVA2**  
**GN=Tmem222**  
transmembrane protein 222

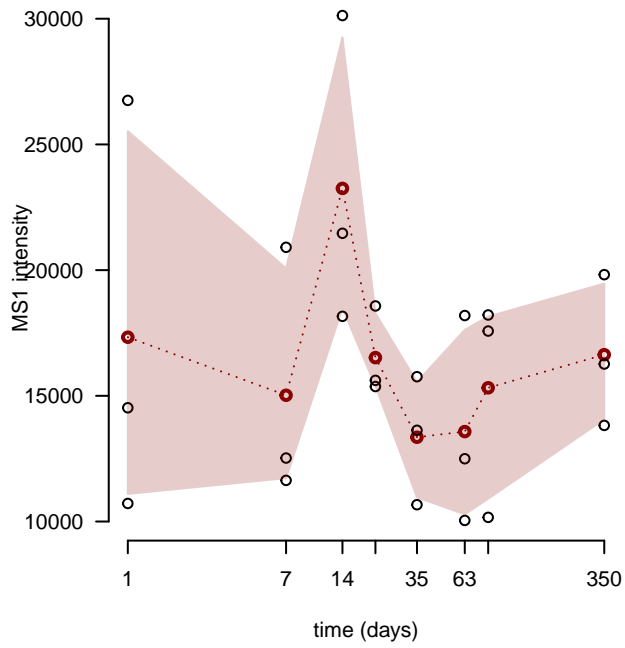

**Q8BVA4**  
**GN=Lmod1**  
leiomodlin 1 (smooth muscle)

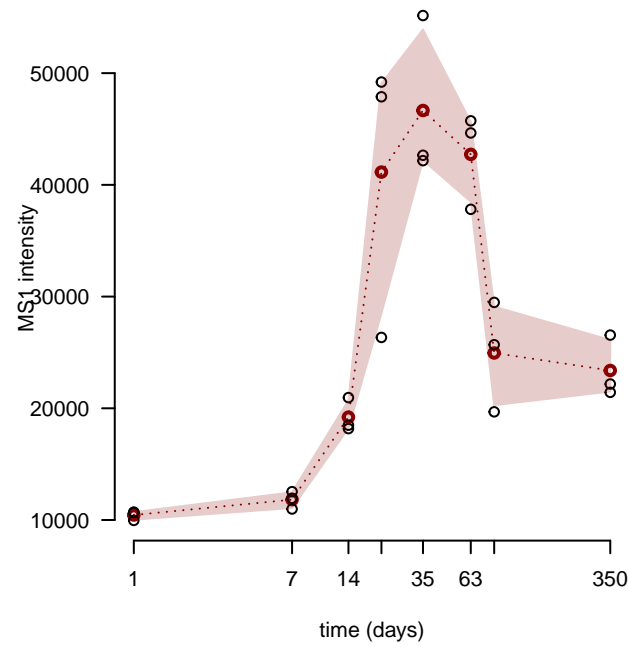

**Q8BVA5**  
**GN=Ldah**  
lipid droplet associated hydrolase

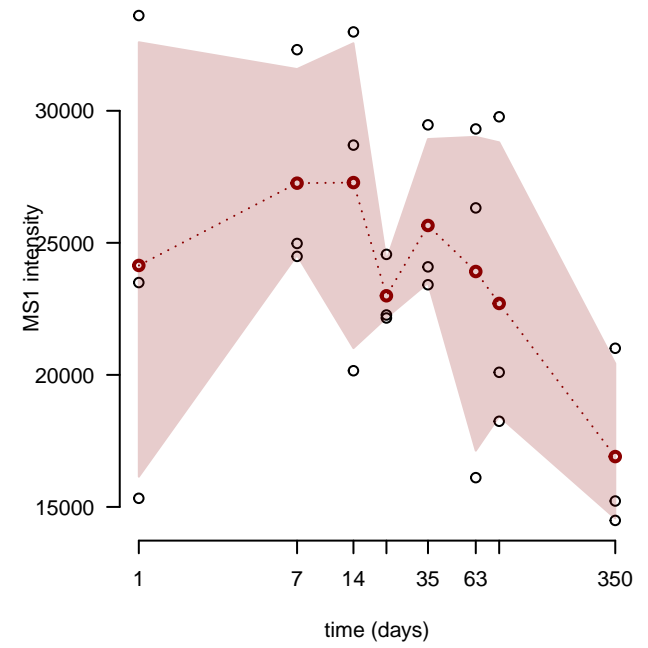

**Q8BVD5**  
**GN=Mpp7**  
membrane protein, palmitoylated 7 (MAGUK ...

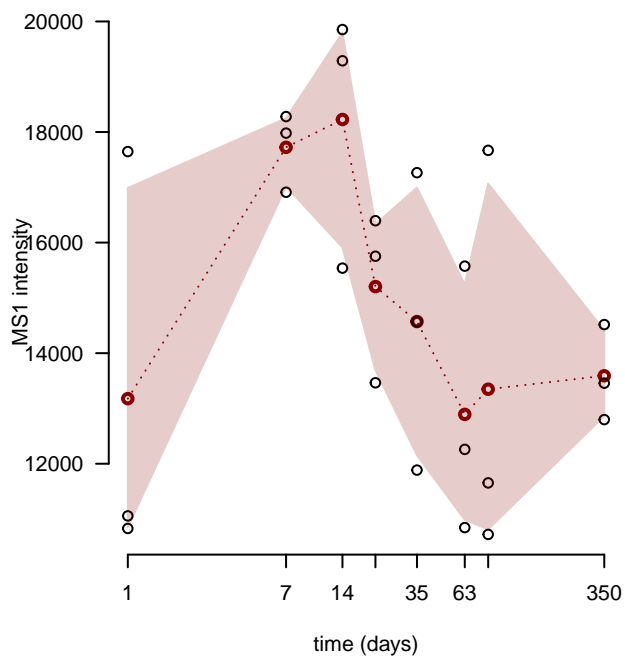

**Q8BVD7**  
**GN=C1qtnf7**  
C1q and tumor necrosis factor related pr ...

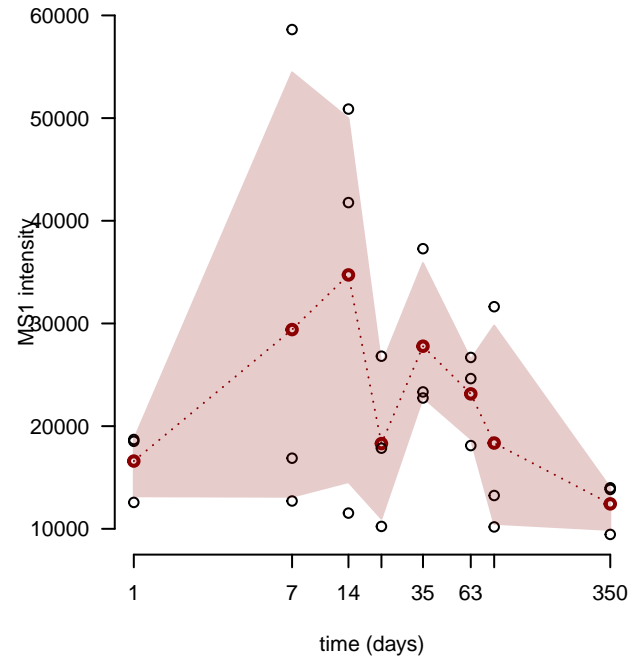

**Q8BVE3**  
**GN=Atp6v1h**  
ATPase, H+ transporting, lysosomal V1 su ...

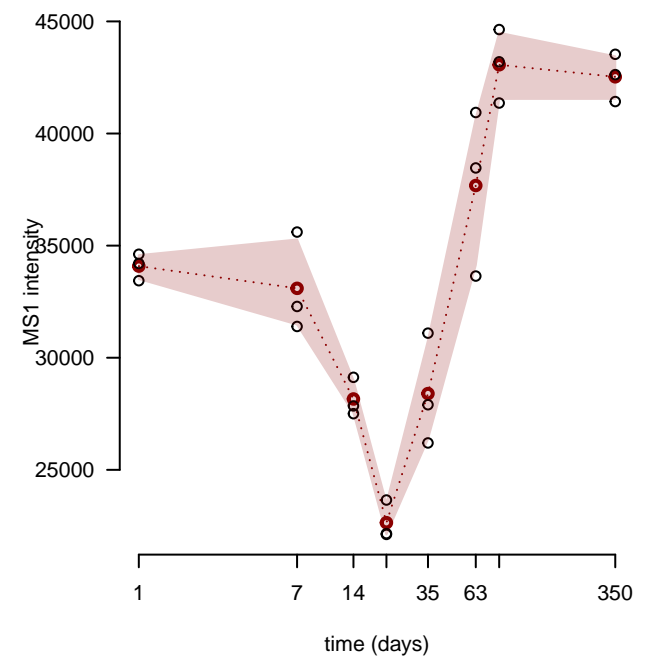

**Q8BVE8**  
GN=Nsd2  
nuclear receptor binding SET domain prot ...

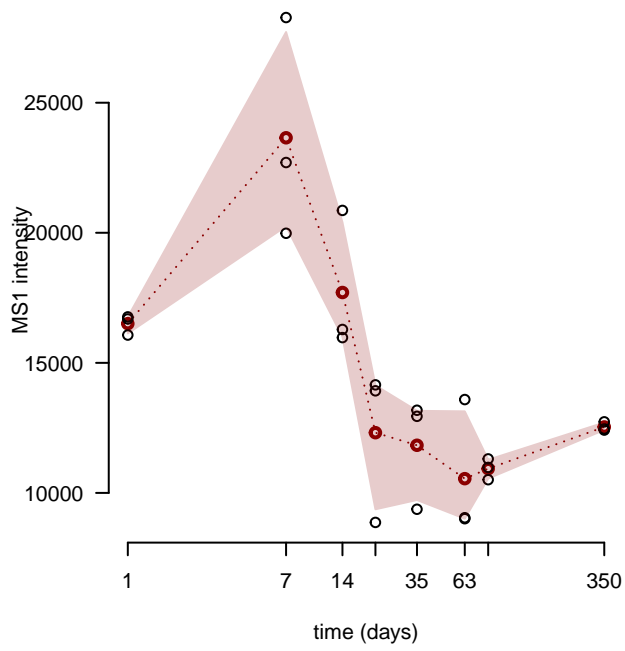

**Q8BVF2**  
GN=Pdcl3  
phosducin-like 3

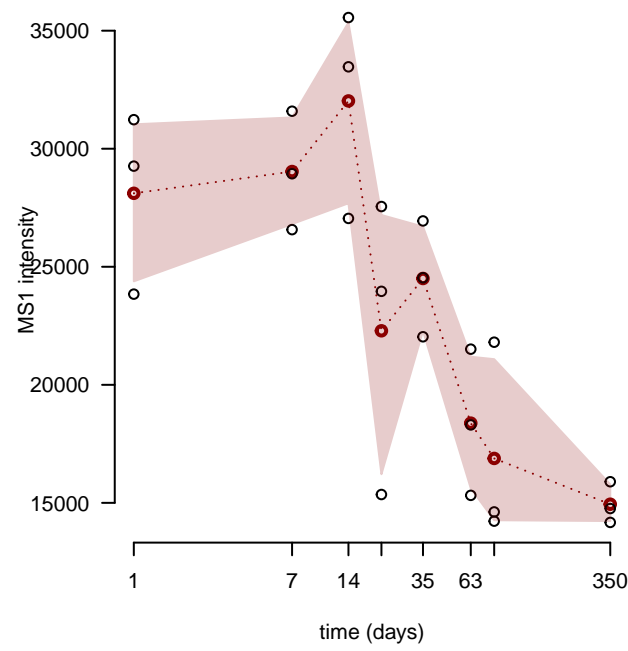

**Q8BVF7**  
GN=Aph1a  
aph1 homolog A, gamma secretase subunit

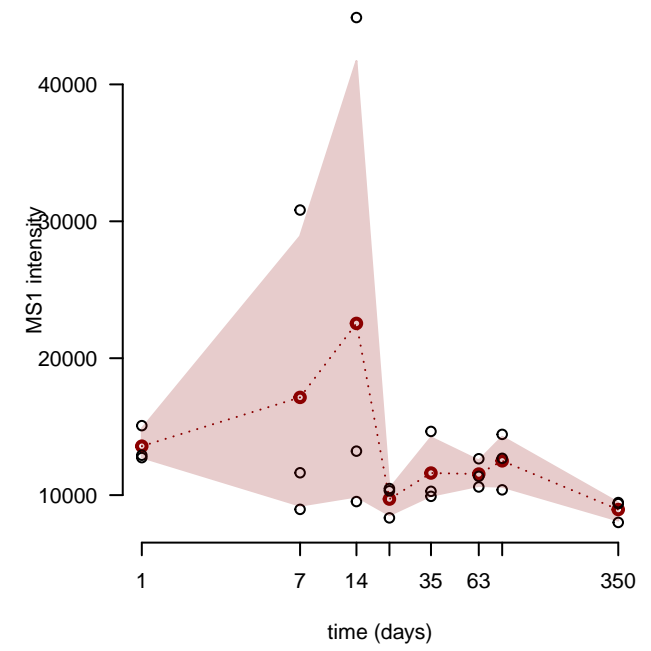

**Q8BVG4**  
GN=Dpp9  
dipeptidylpeptidase 9

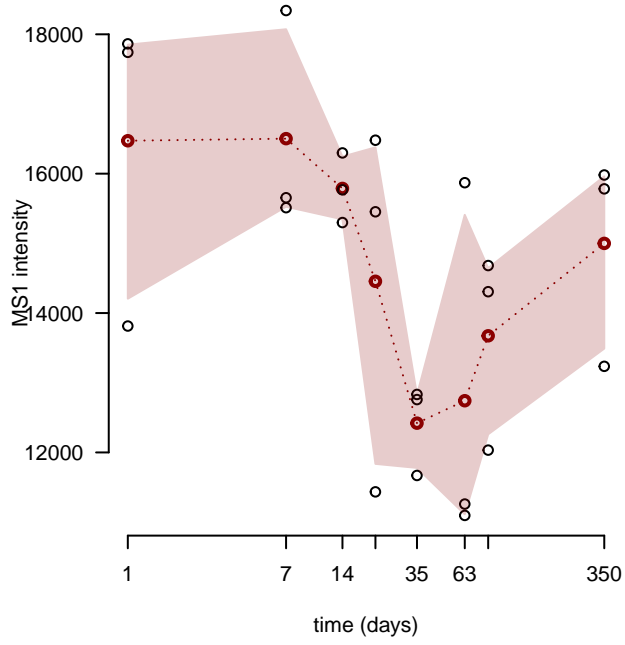

**Q8BVI4**  
GN=Qdpr  
quinoid dihydropteridine reductase

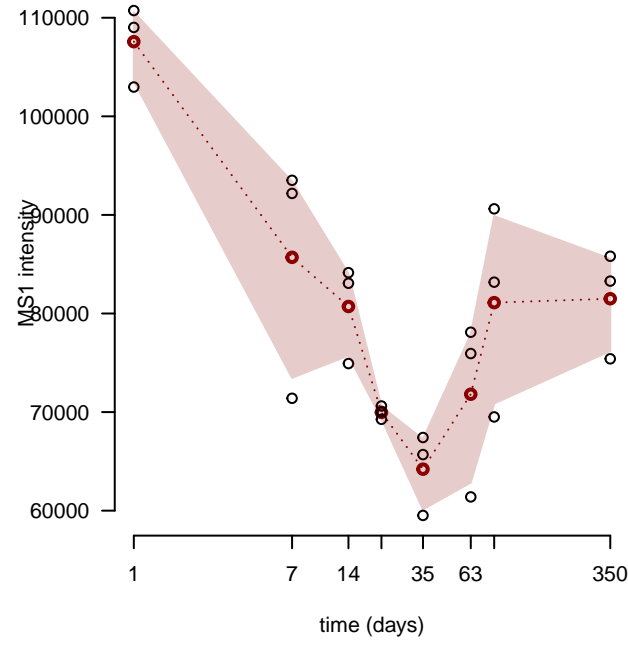

**Q8BVI5**  
GN=Stx16  
syntaxin 16

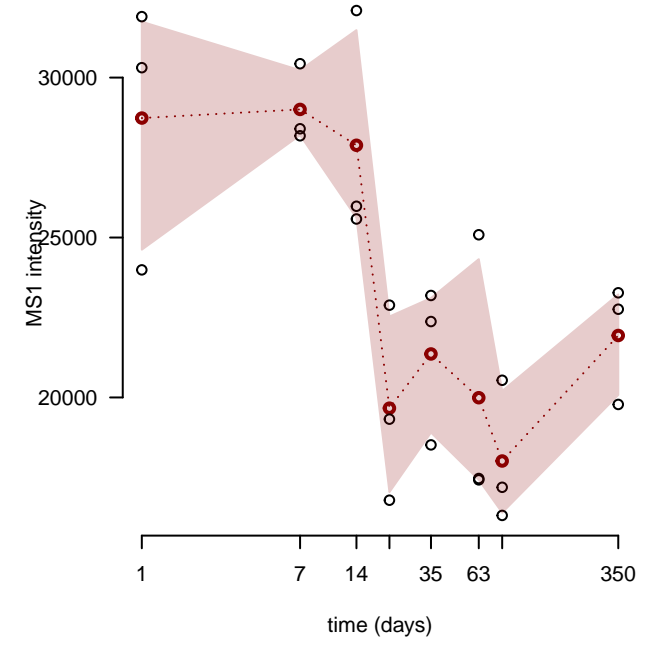

**Q8BVL3**  
GN=Snx17  
sorting nexin 17

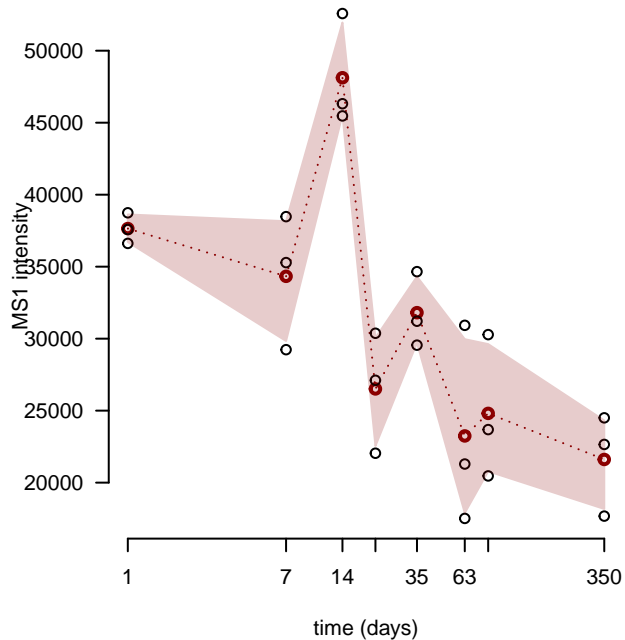

**Q8BVL9**  
GN=Jakmip1  
janus kinase and microtubule interacting ...

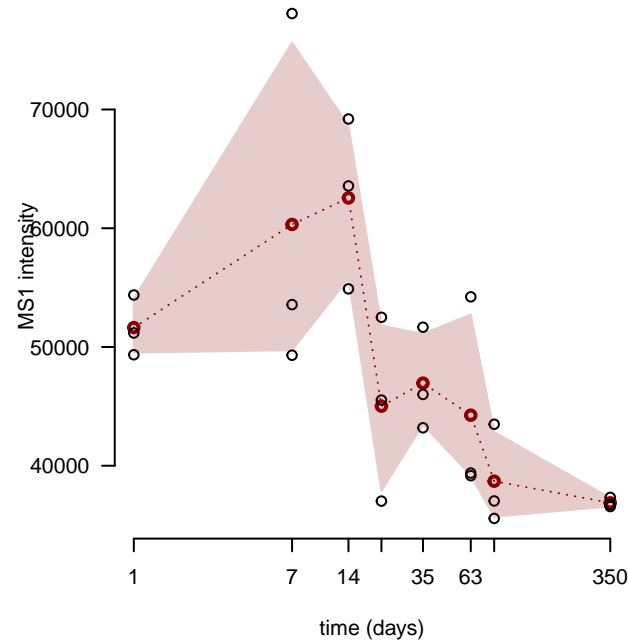

**Q8BVN4**  
GN=Mterf4  
mitochondrial transcription termination ...

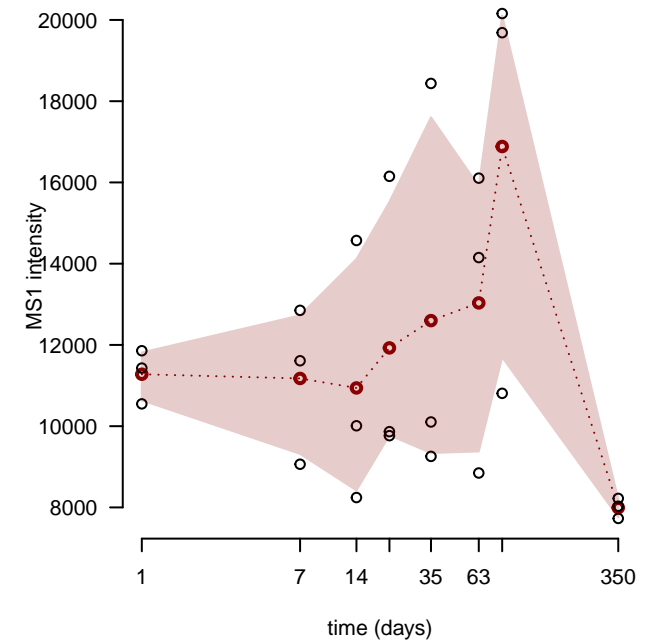

**Q8BVN9**  
GN=Mael  
maelstrom spermatogenic transposon silen ...

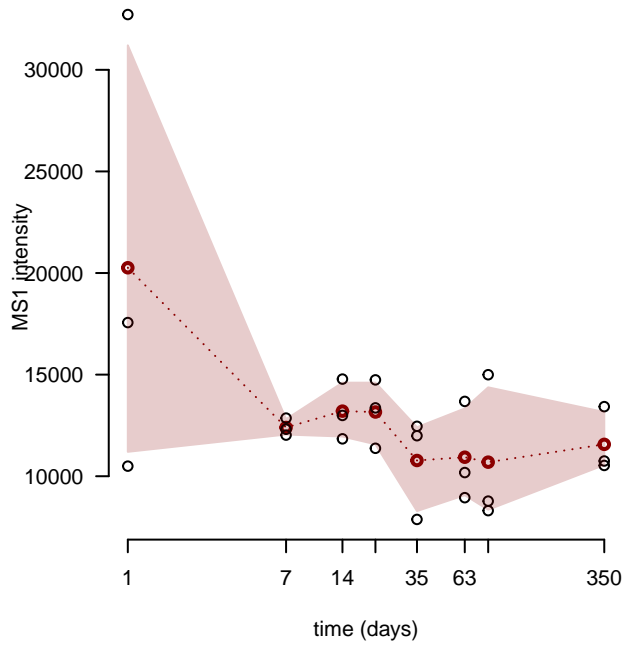

**Q8BVQ5**  
GN=Ppme1  
protein phosphatase methylesterase 1

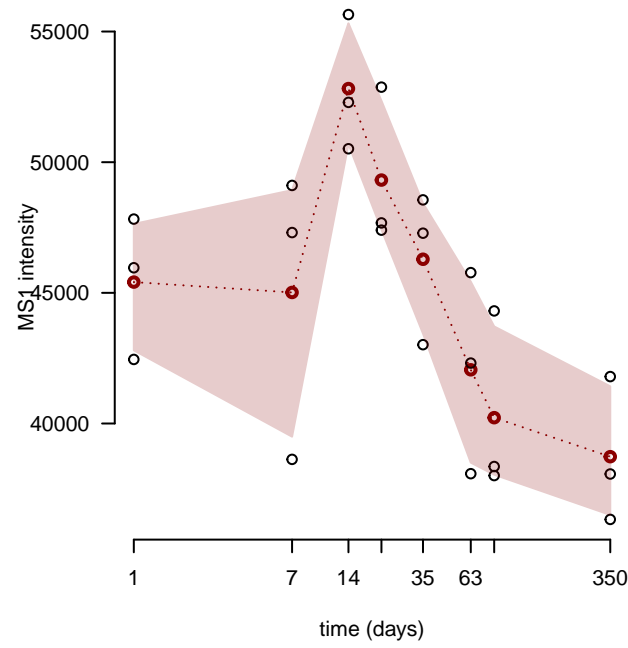

**Q8BVR6**  
GN=Rspry1  
ring finger and SPRY domain containing 1

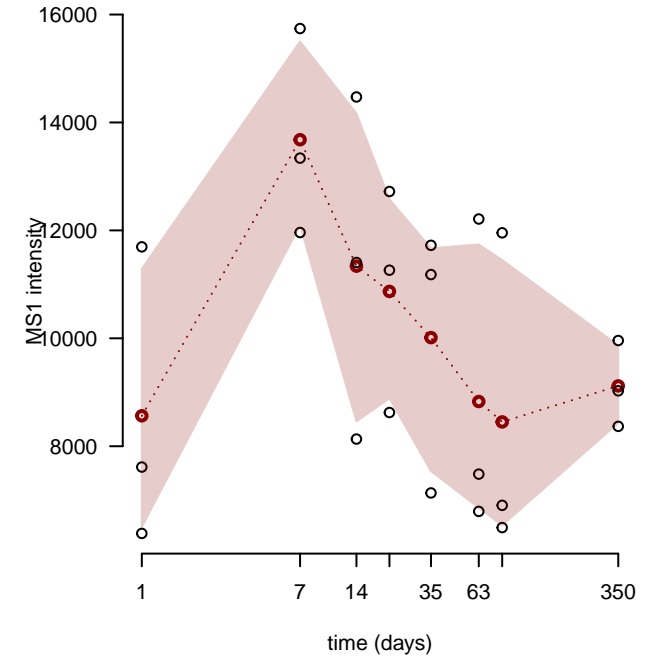

**Q8BVU0**  
GN=Lrch3  
leucine-rich repeats and calponin homolo ...

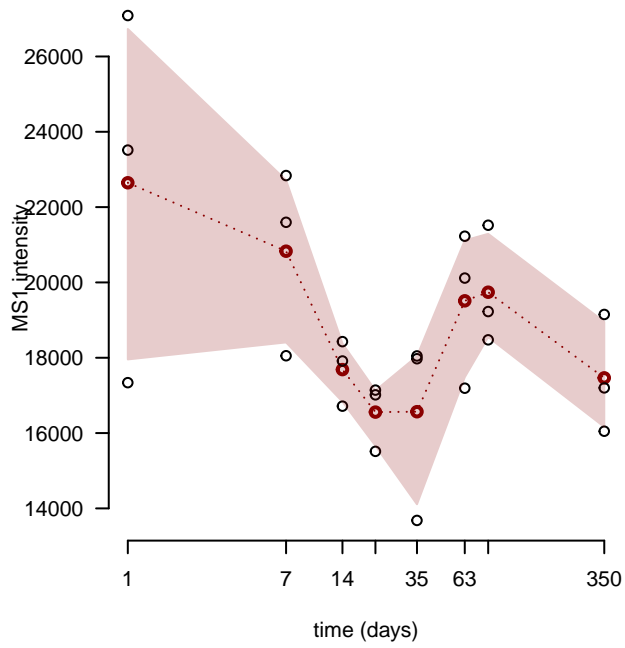

**Q8BVU5**  
GN=Nudt9  
nudix (nucleoside diphosphate linked moi ...

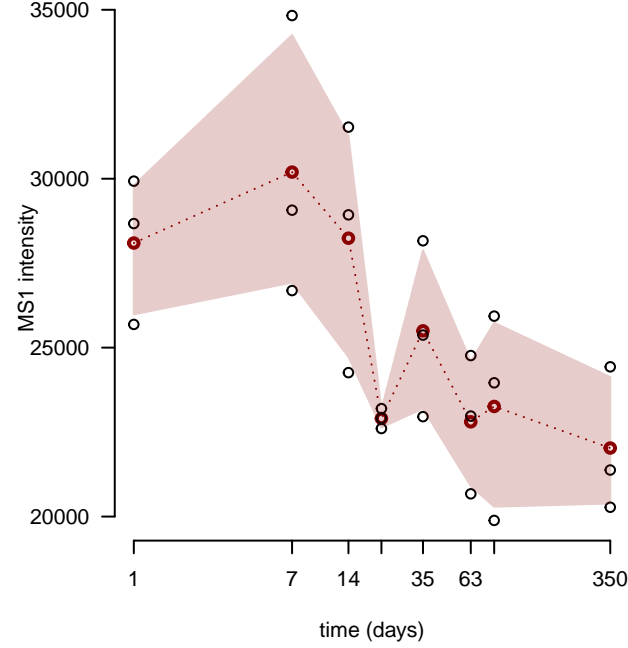

**Q8BVW0**  
GN=Ganc  
glucosidase, alpha; neutral C

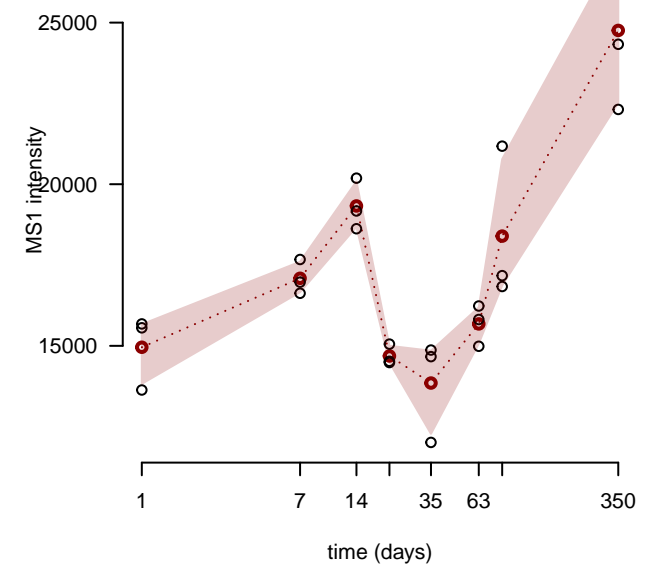

**Q8BVW3**  
GN=Trim14  
tripartite motif-containing 14

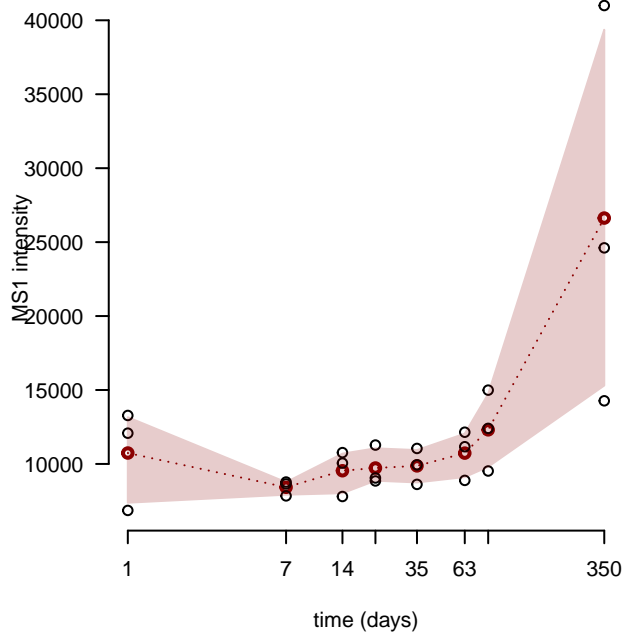

**Q8BVY0**  
GN=Rsl1d1  
ribosomal L1 domain containing 1

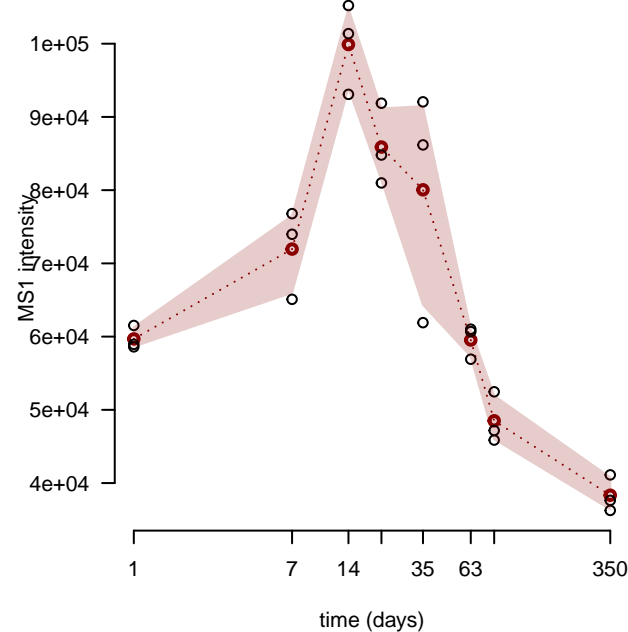

**Q8BVZ1**  
GN=Plin5  
perilipin 5

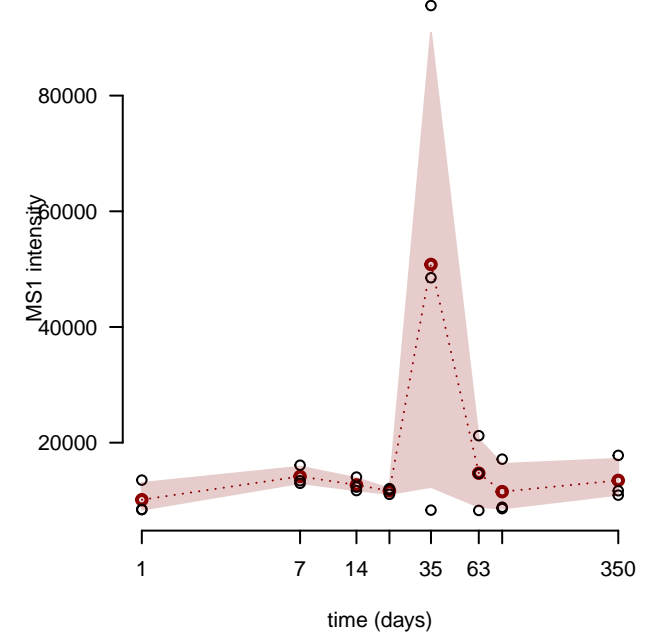



**Q8BW10**  
**GN=Nob1**  
NIN1/RPN12 binding protein 1 homolog

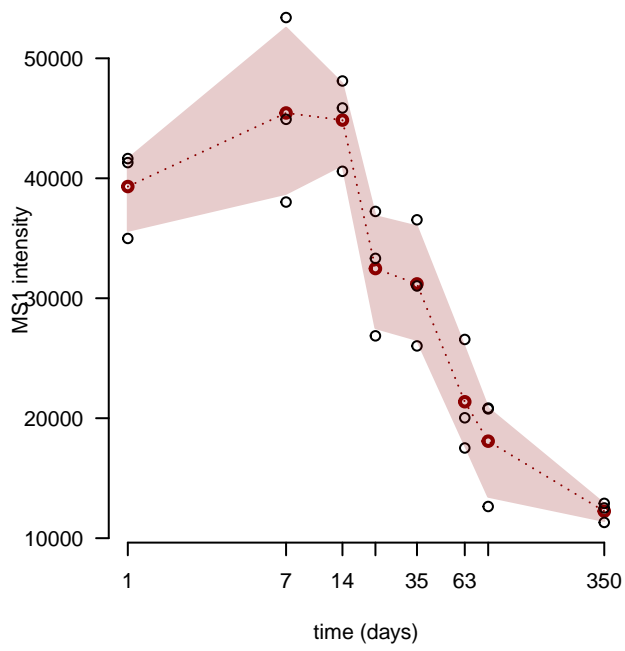

**Q8BW41**  
**GN=Pomgnt2**  
protein O-linked mannose beta 1,4-N-acet ...

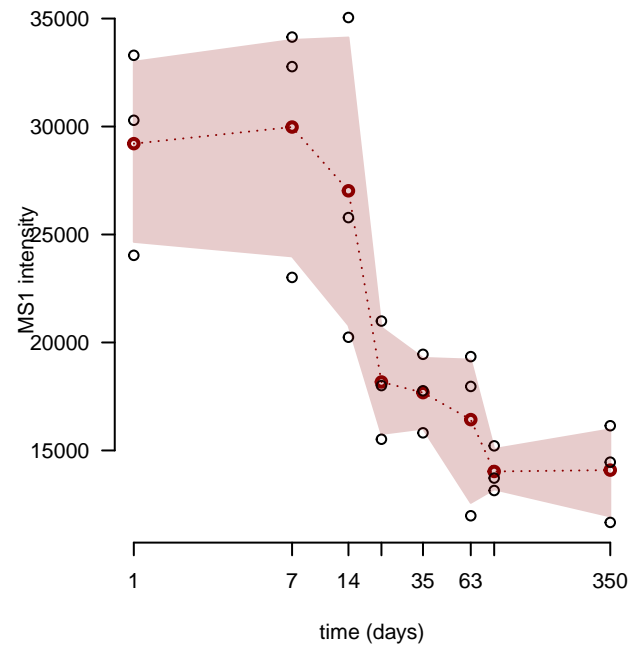

**Q8BW56**  
**GN=Gtdc1**  
glycosyltransferase-like domain containi ...

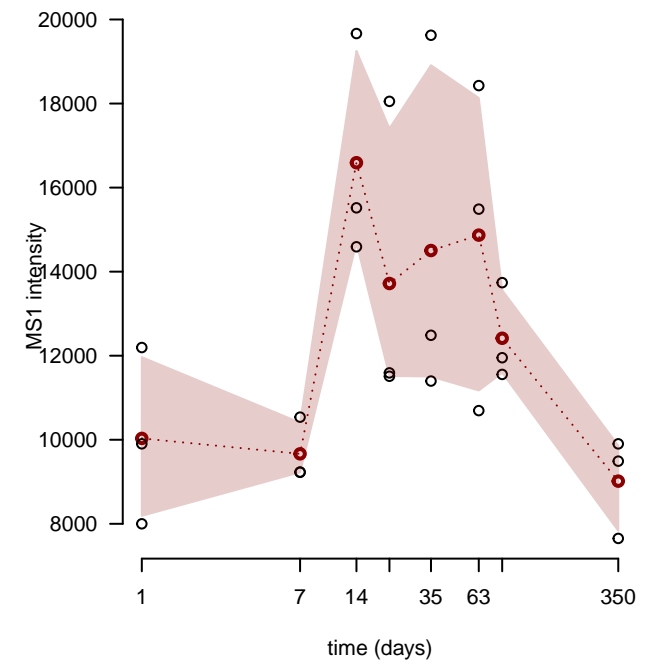

**Q8BW70**  
**GN=Usp38**  
ubiquitin specific peptidase 38

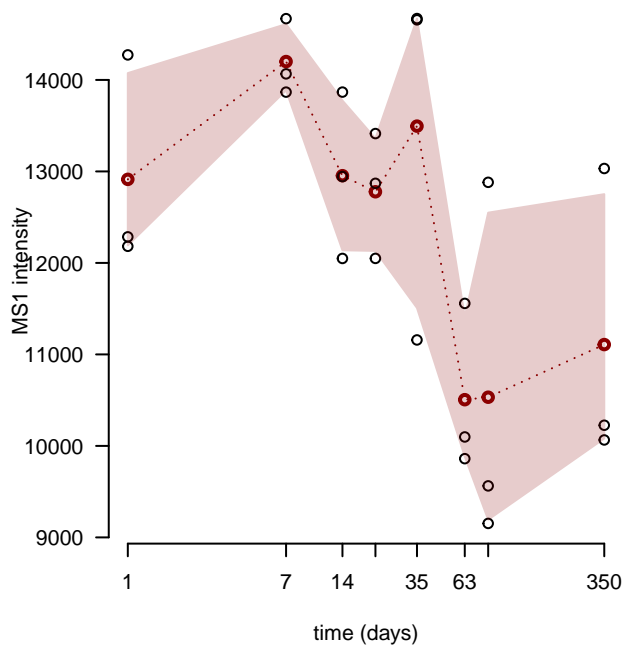

**Q8BW72**  
**GN=Kdm4a**  
lysine (K)-specific demethylase 4A

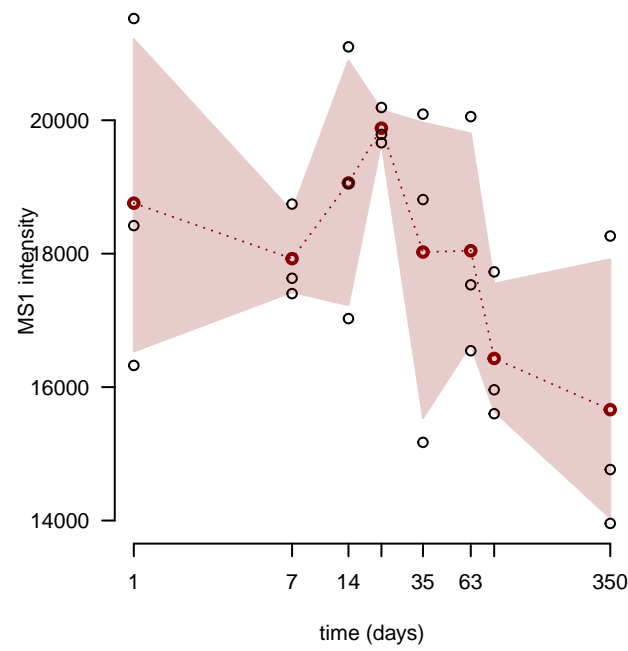

**Q8BW75**  
**GN=Maob**  
monoamine oxidase B

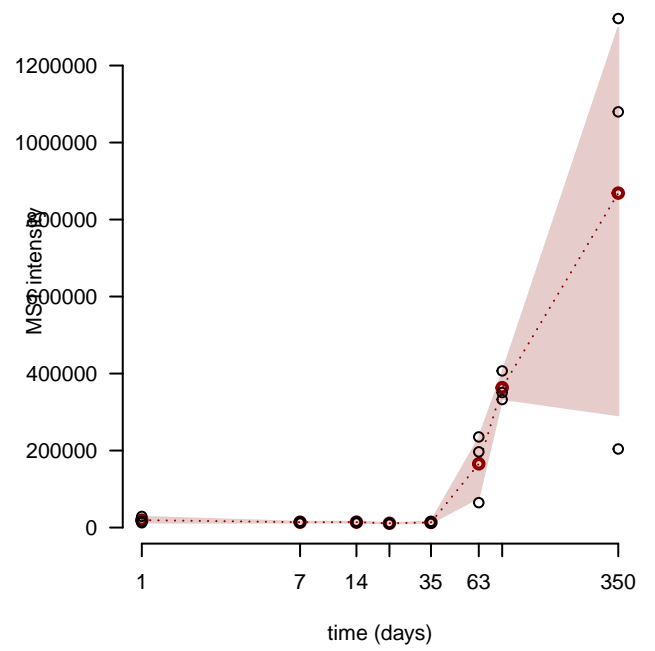

**Q8BW96**  
**GN=Camk1d**  
calcium/calmodulin-dependent protein kin ...

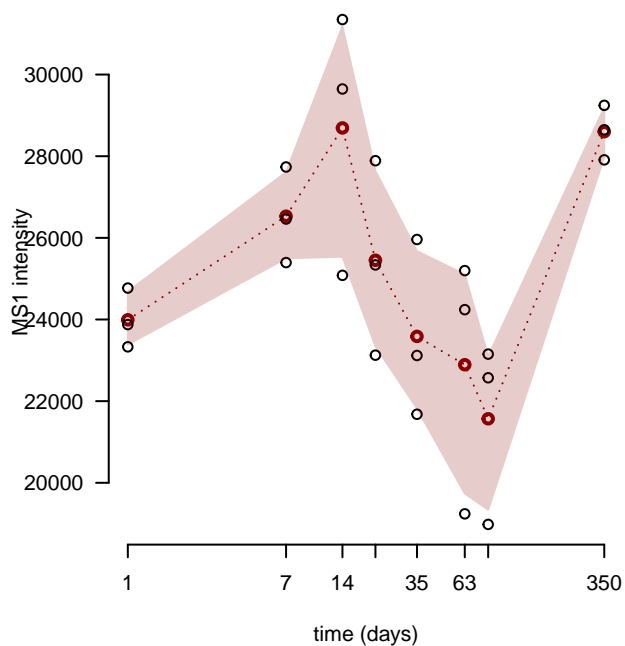

**Q8BWD8**  
**GN=Cdk19**  
cyclin-dependent kinase 19

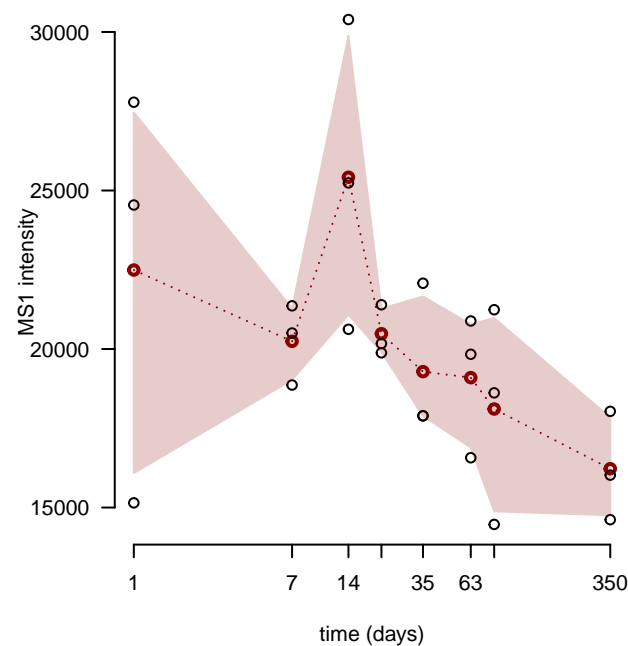

**Q8BWF0**  
**GN=Aldh5a1**  
aldehyde dehydrogenase family 5, subfam ...

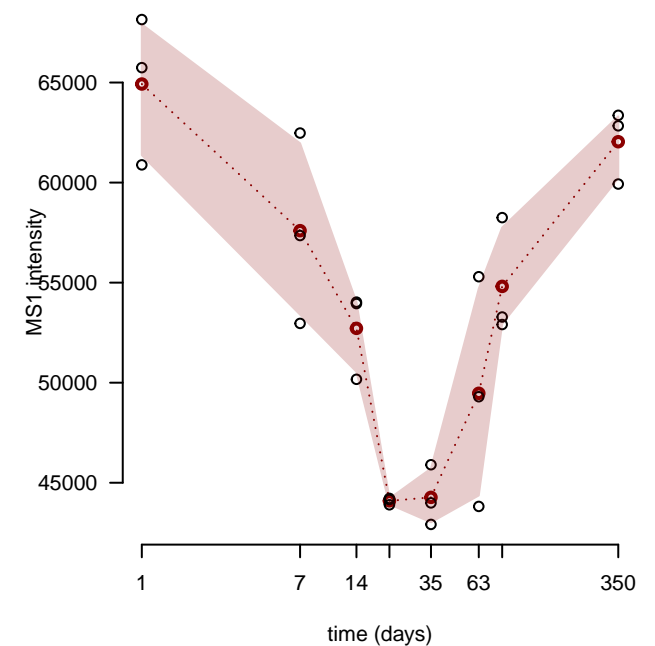

**Q8BWG8**  
**GN=Arrb1**  
arrestin, beta 1

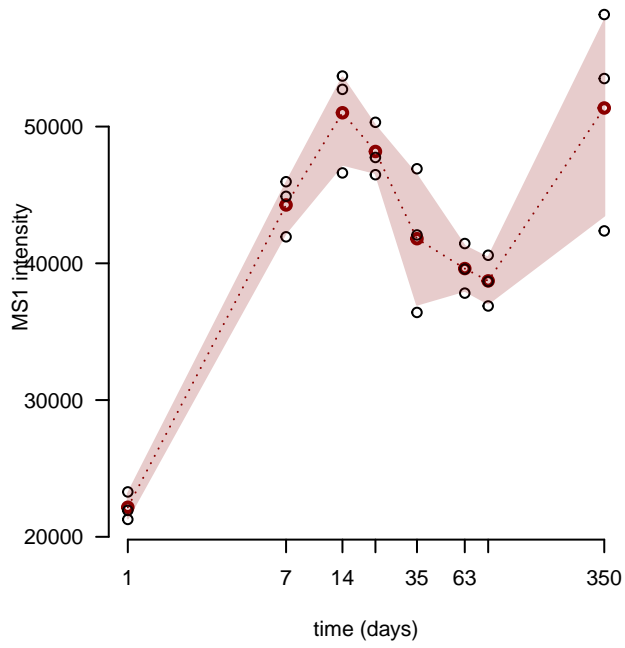

**Q8BWG8**  
**GN=Arrb1**  
arrestin, beta 1

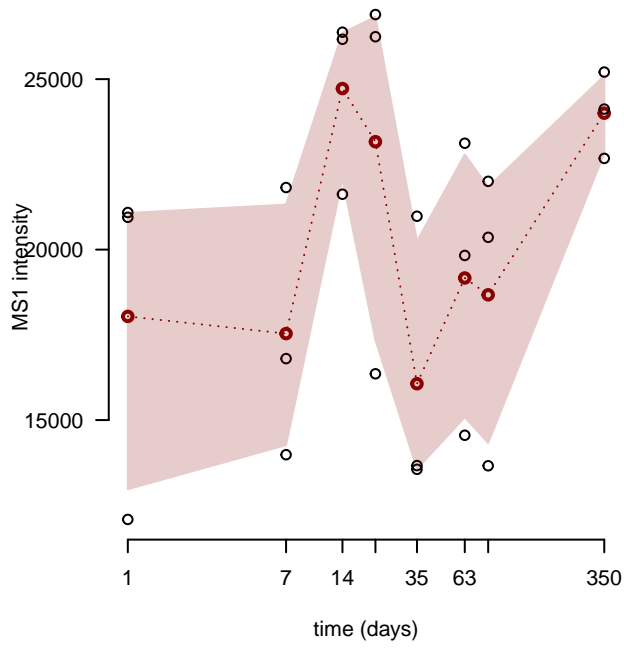

**Q8BWH0**  
**GN=Slc38a7**  
solute carrier family 38, member 7

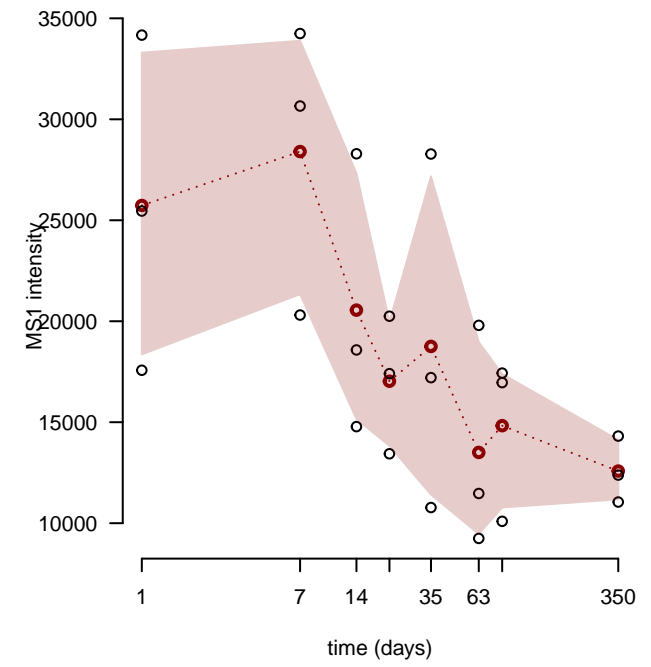

**Q8BWJ3**  
**GN=Phka2**  
phosphorylase kinase alpha 2

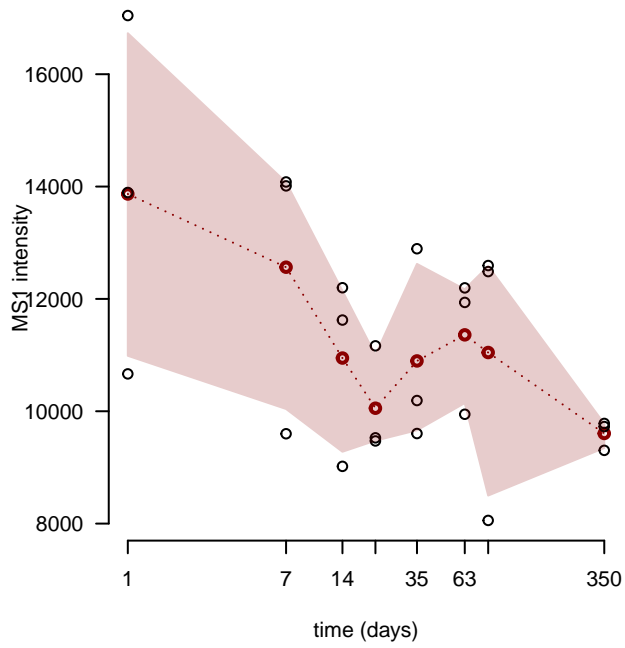

**Q8BWL5**  
**GN=Rbms3**  
RNA binding motif, single stranded inter ...

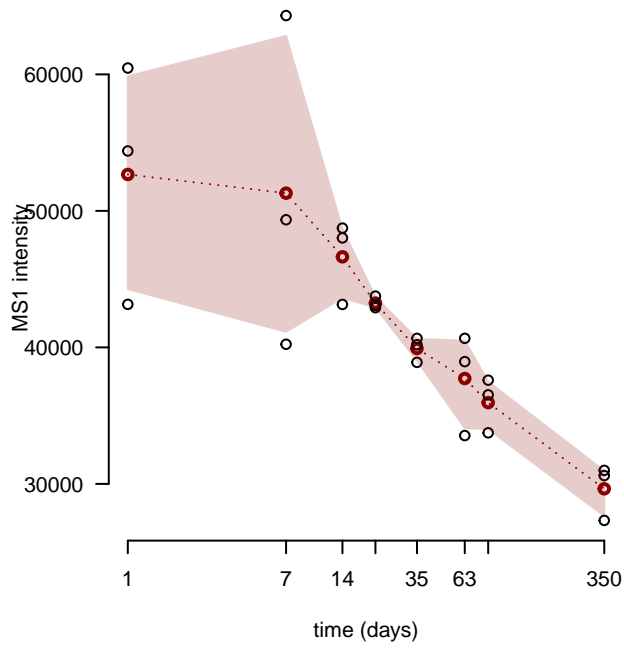

**Q8BWM0**  
**GN=Ptges2**  
prostaglandin E synthase 2

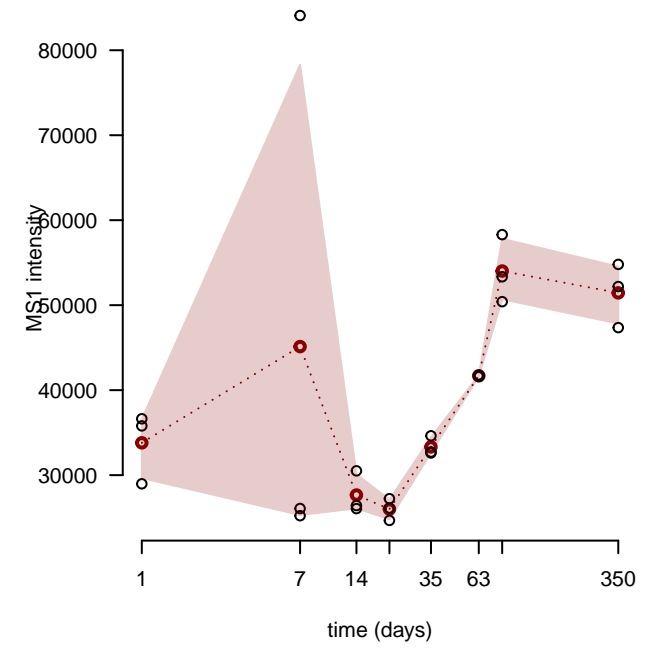

**Q8BWN8**  
**GN=Acot4**  
acyl-CoA thioesterase 4

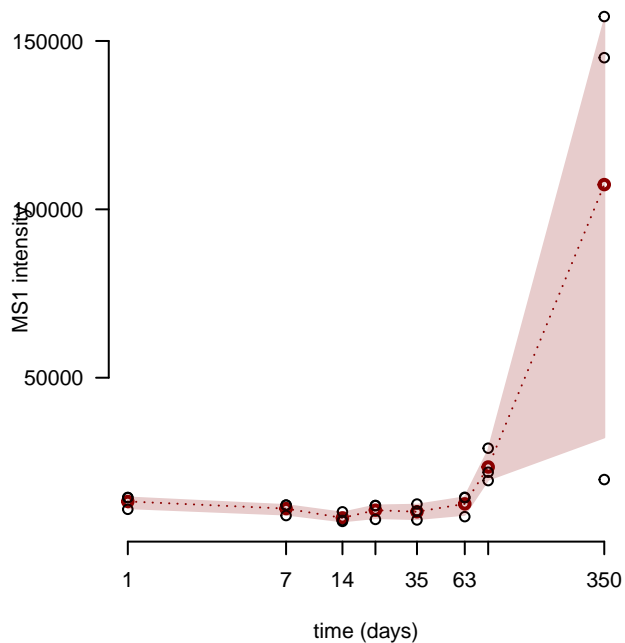

**Q8BWP5**  
**GN=Ttpa**  
tocopherol (alpha) transfer protein

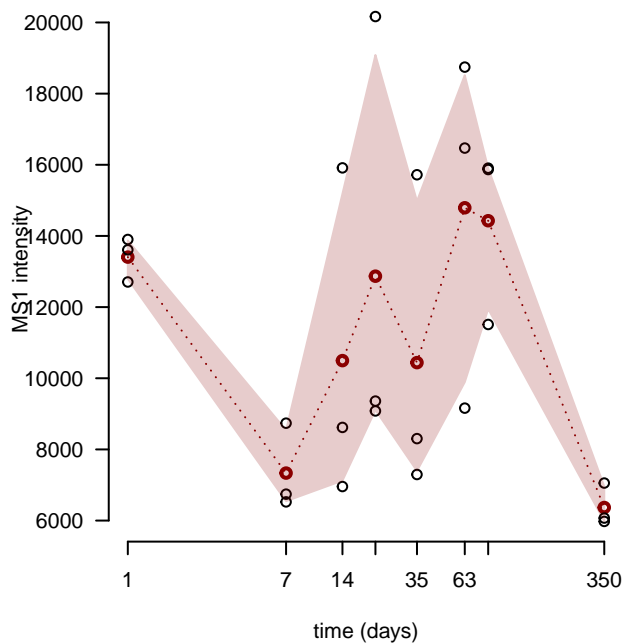

**Q8BWP8**  
**GN=B4gat1**  
beta-1,4-glucuronyltransferase 1

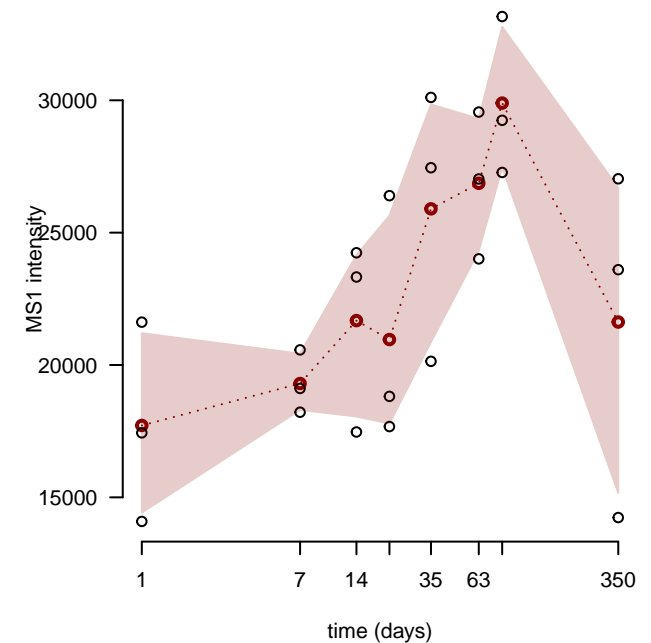

**Q8BWQ6**  
GN=Vps35l  
VPS35 endosomal protein sorting factor 1 ...

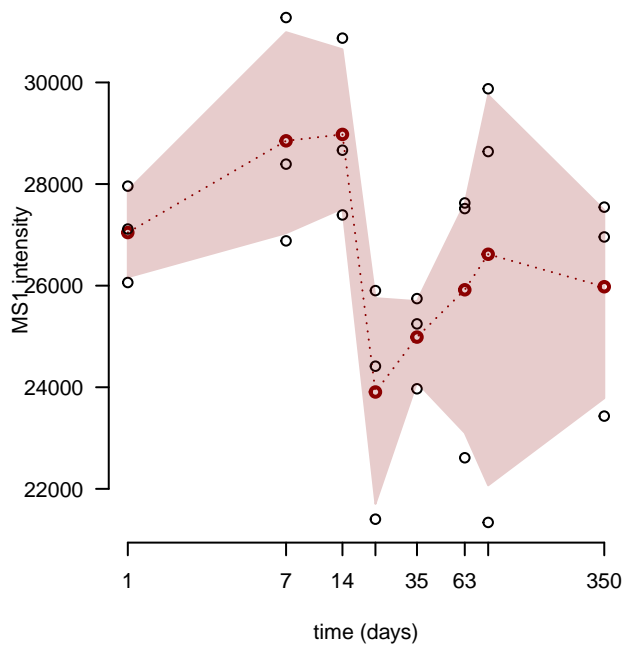

**Q8BWR2**  
GN=Pithd1  
PITH (C-terminal proteasome-interacting ...

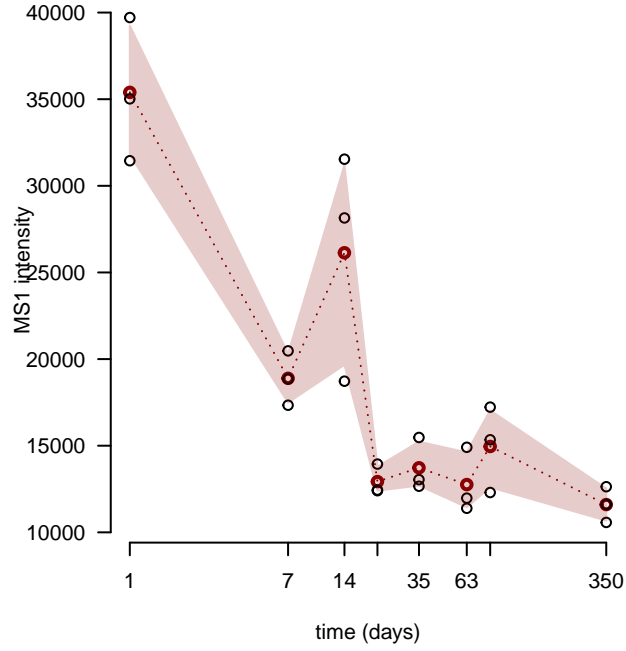

**Q8BWR4**  
GN=Usp40  
ubiquitin specific peptidase 40

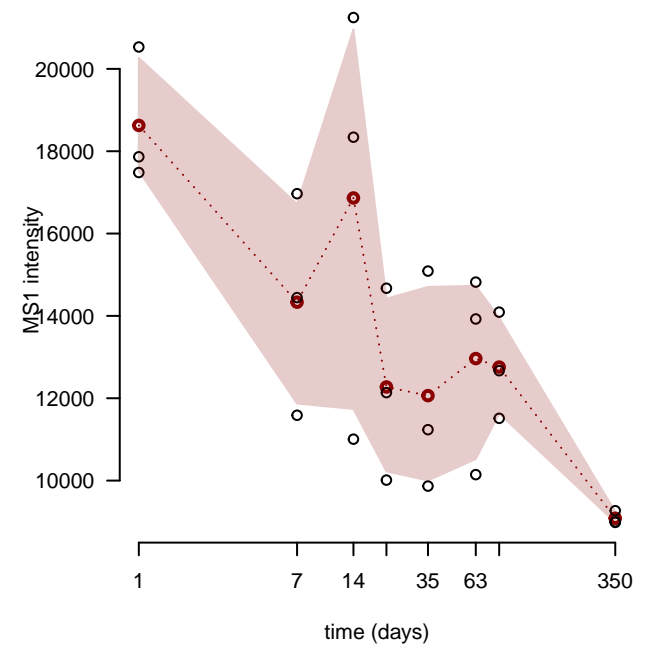

**Q8BWR8**  
GN=Rhpn2  
rhopilin, Rho GTPase binding protein 2

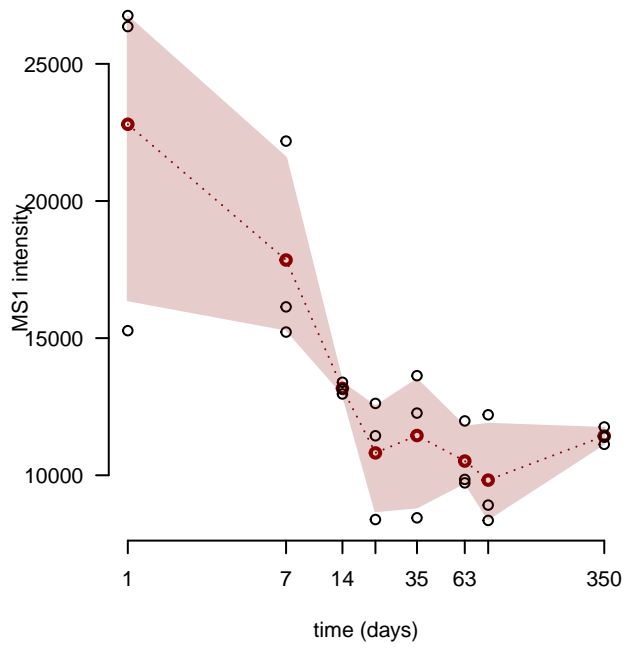

**Q8BWT1**  
GN=Acaa2  
acetyl-Coenzyme A acyltransferase 2 (mit ...

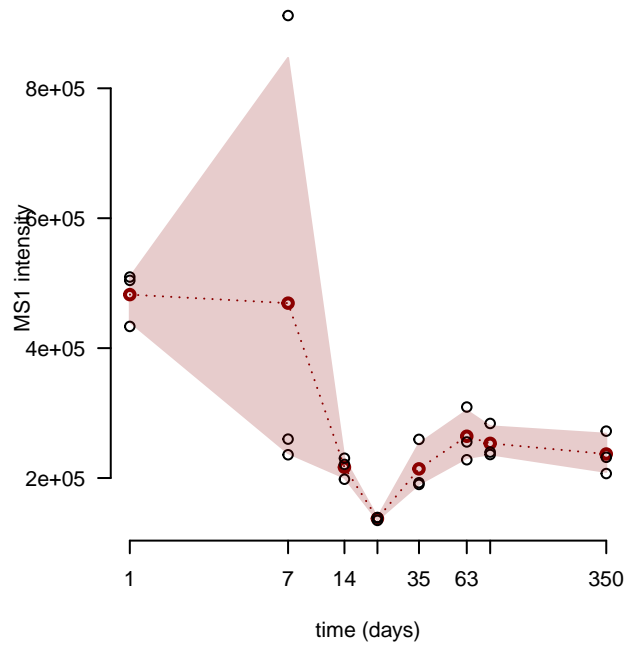

**Q8BWT5**  
GN=Dip2a  
disco interacting protein 2 homolog A

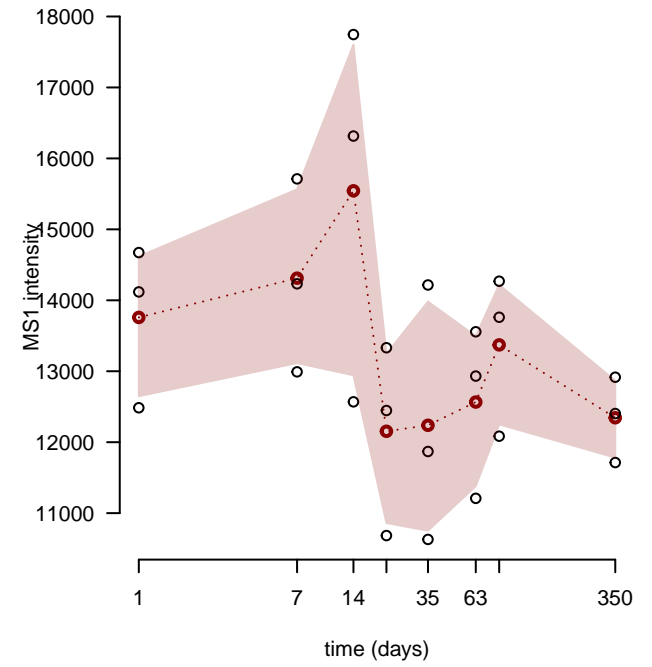

**Q8BWU5**  
GN=Osgep  
O-sialoglycoprotein endopeptidase

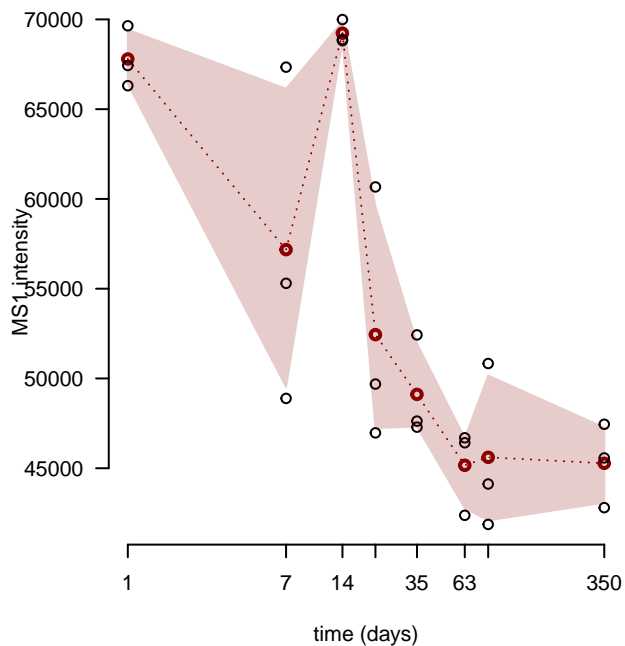

**Q8BWW4**  
GN=Larp4  
La ribonucleoprotein 4

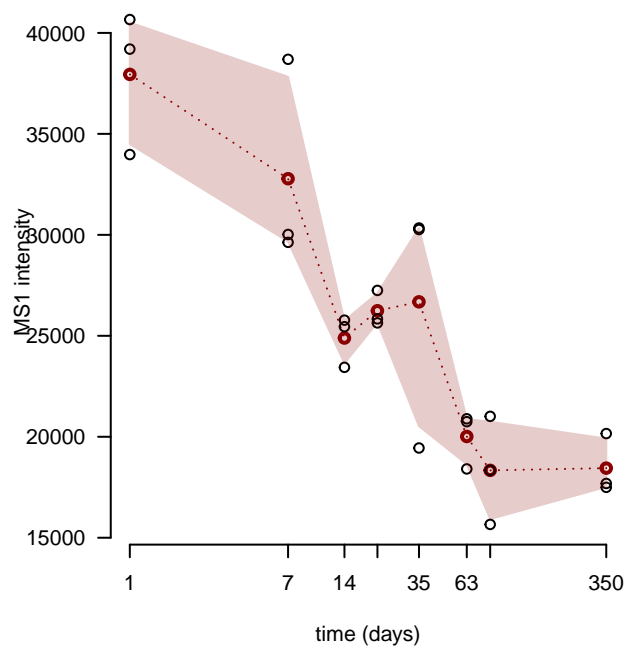

**Q8BWW9**  
GN=Pkn2  
protein kinase N2

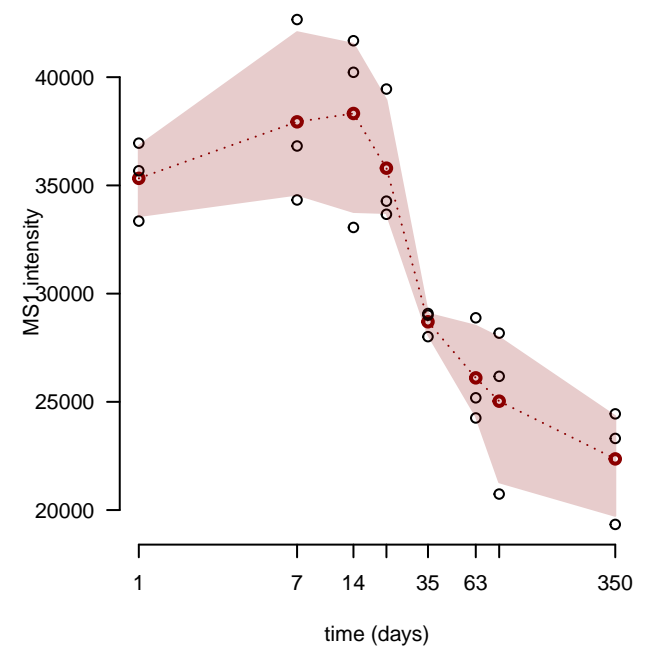

**Q8BWY2**  
**GN=Clec1a**  
C-type lectin domain family 1, member a

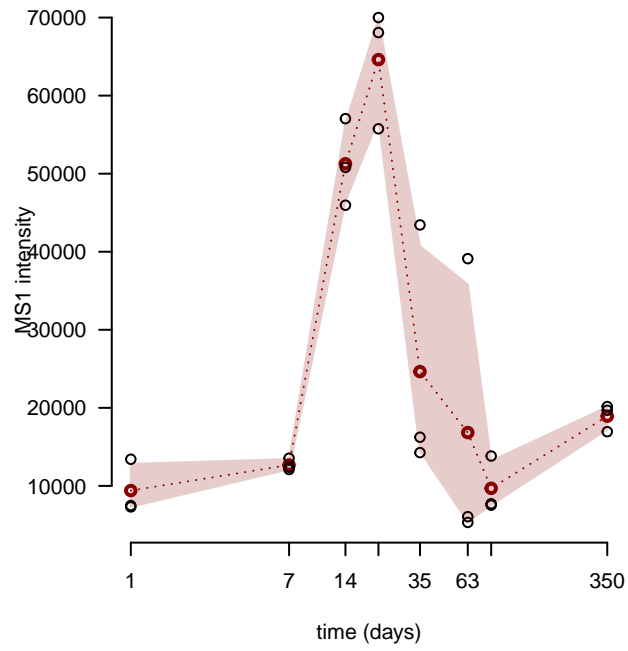

**Q8BWY3**  
**GN=Etf1**  
eukaryotic translation termination facto ...

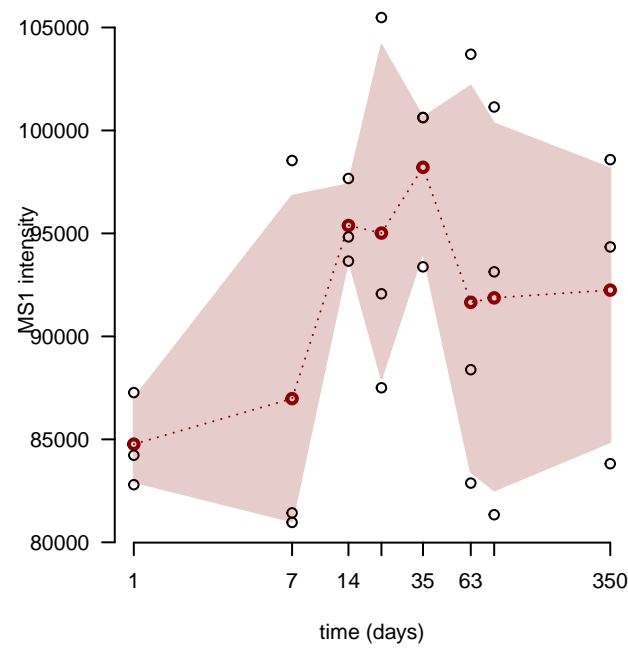

**Q8BWY4**  
**GN=Mblac1**  
metallo-beta-lactamase domain containing ...

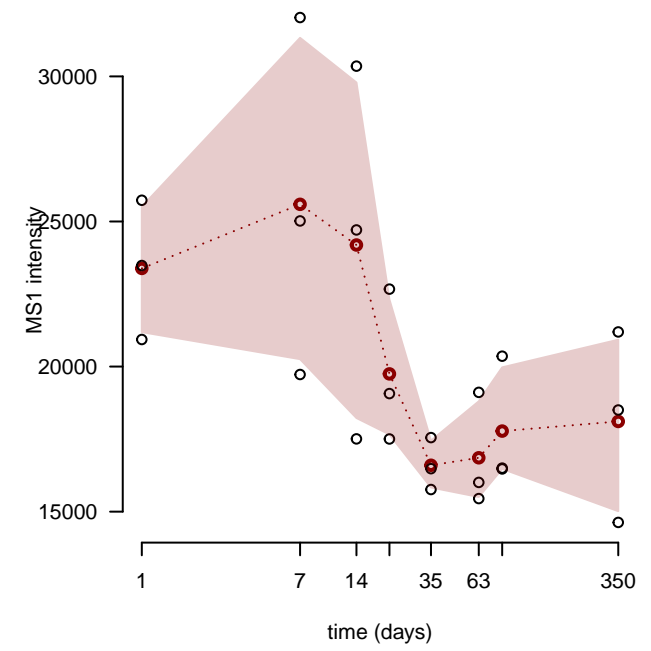

**Q8BWY7**  
**GN=Slc39a11**  
solute carrier family 39 (metal ion tran ...

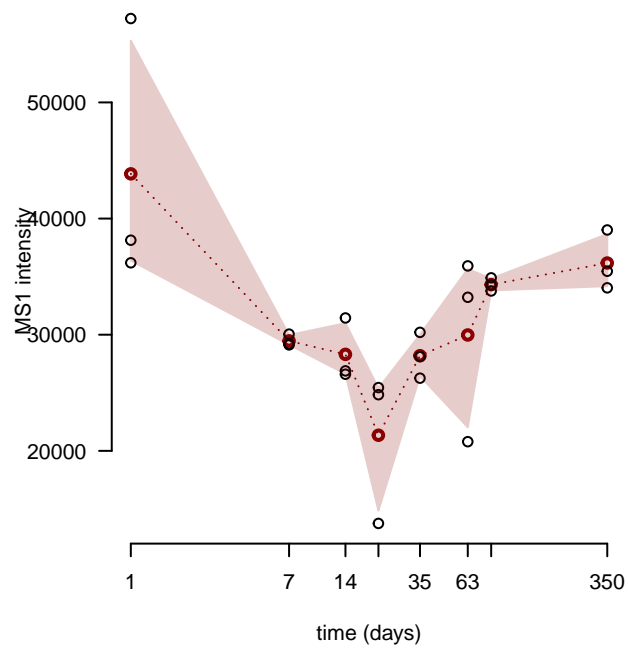

**Q8BWY9**  
**GN=Cip2a**  
cell proliferation regulating inhibitor ...

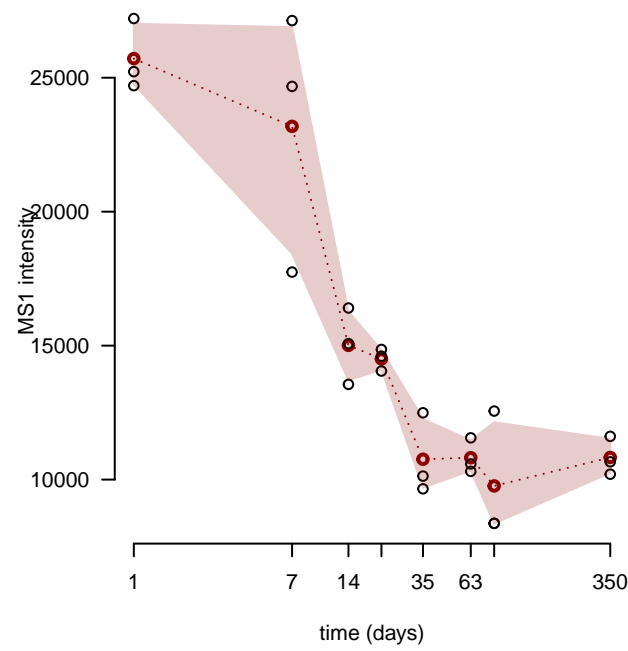

**Q8BWZ3**  
**GN=Naa25**  
N(alpha)-acetyltransferase 25, NatB auxi ...

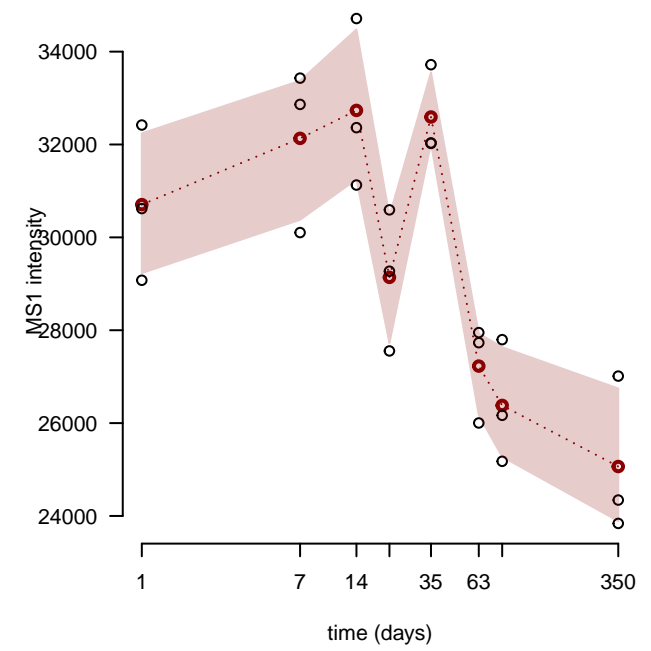

**Q8BX02**  
**GN=Kank2**  
KN motif and ankyrin repeat domains 2

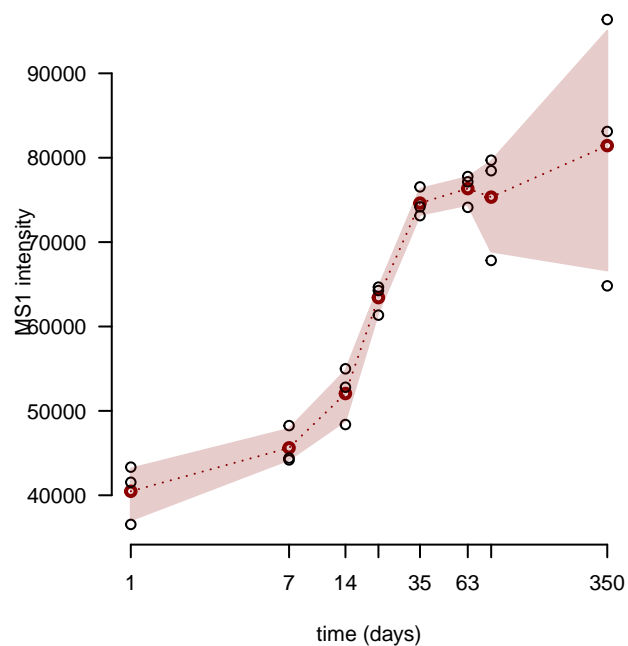

**Q8BX05**  
**GN=Gk5**  
glycerol kinase 5 (putative)

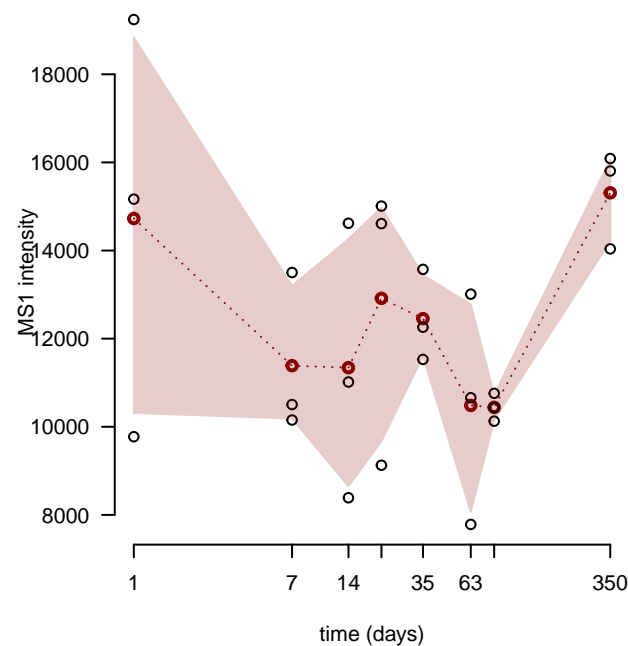

**Q8BX07**  
**GN=Ctdsp2**  
CTD (carboxy-terminal domain, RNA polyme ...

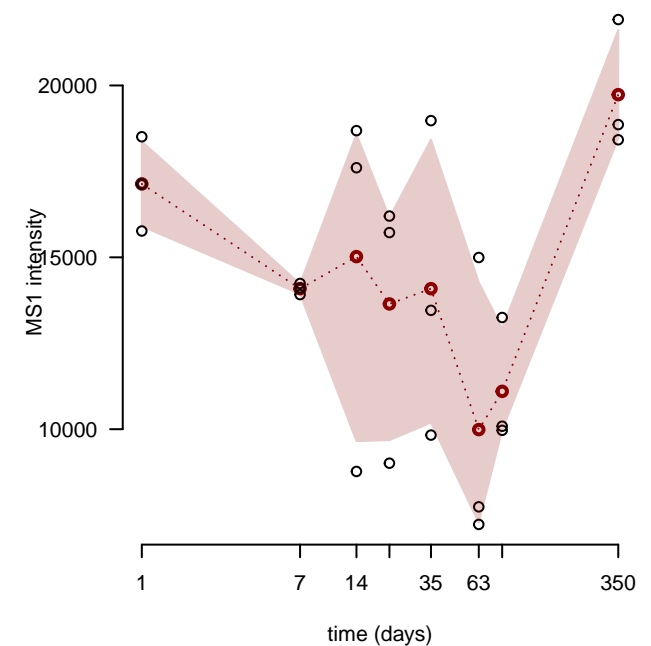

**Q8BX09**  
**GN=Rbbp5**

retinoblastoma binding protein 5, histon ...

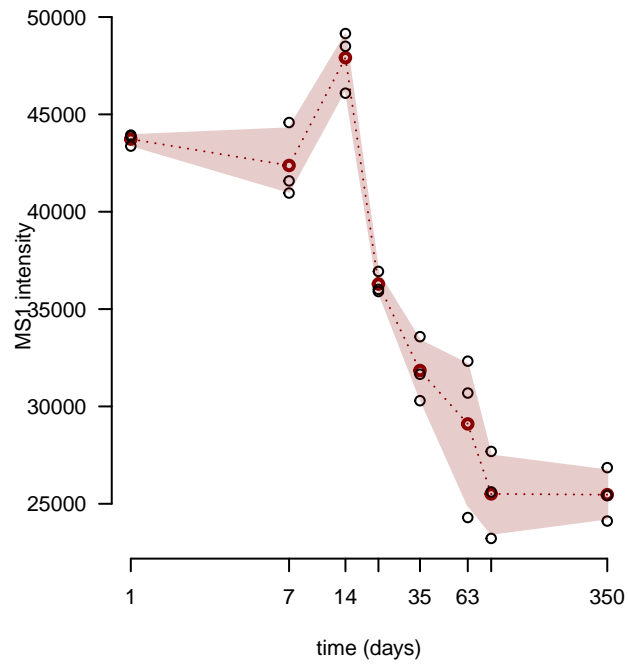

**Q8BX10**  
**GN=Pgam5**

phosphoglycerate mutase family member 5

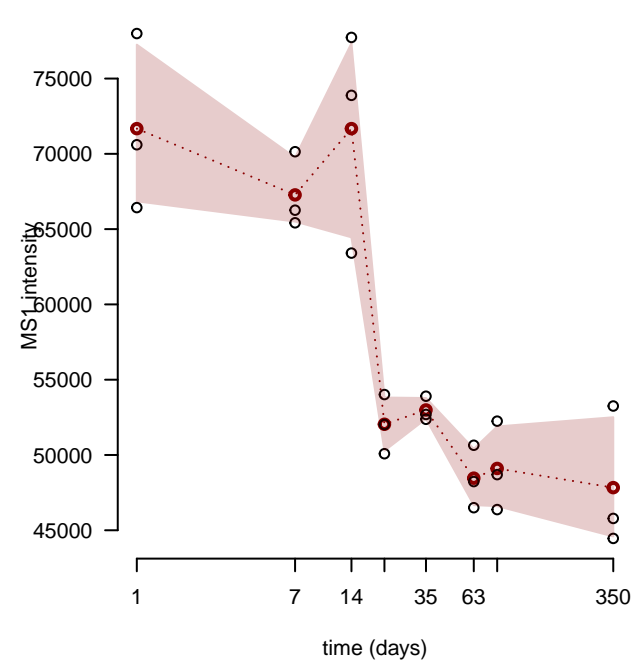

**Q8BX13**  
**GN=Ube3d**

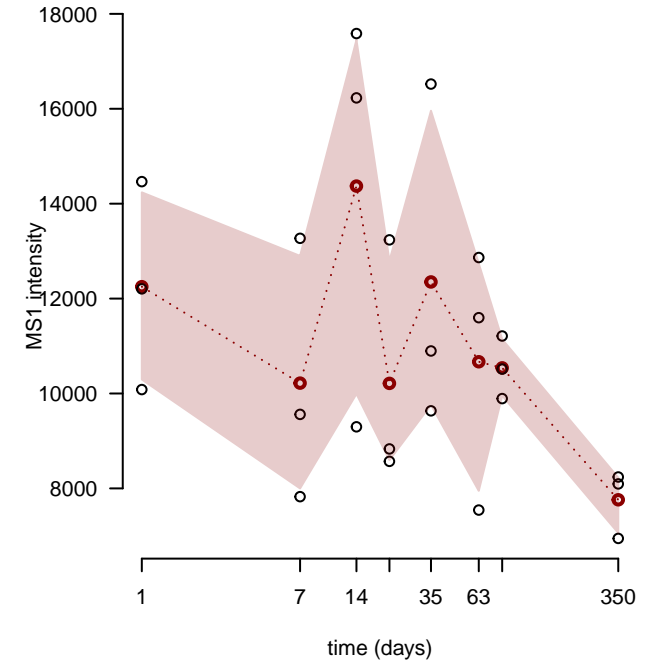

**Q8BX17**  
**GN=Gemin5**

gem nuclear organelle associated protein ...

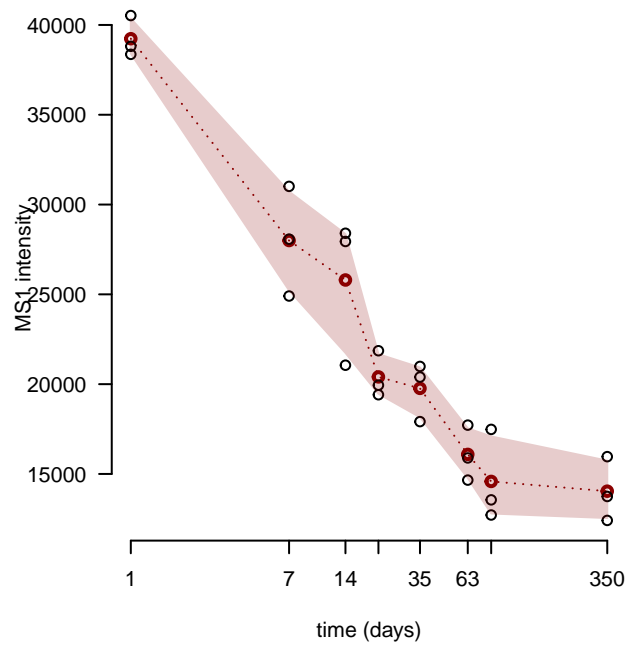

**Q8BX57**  
**GN=Ppk**

PX domain containing serine/threonine ki ...

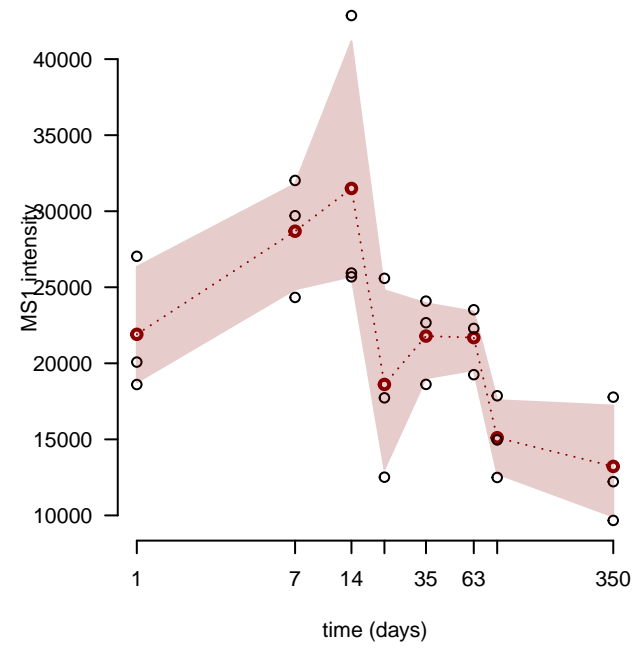

**Q8BX70**  
**GN=Vps13c**

vacuolar protein sorting 13C

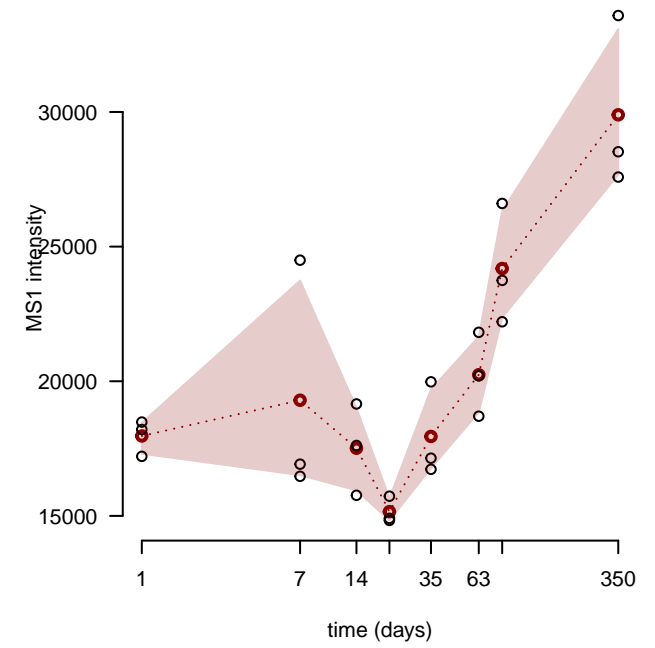

**Q8BX80**  
**GN=Engase**

endo-beta-N-acetylglucosaminidase

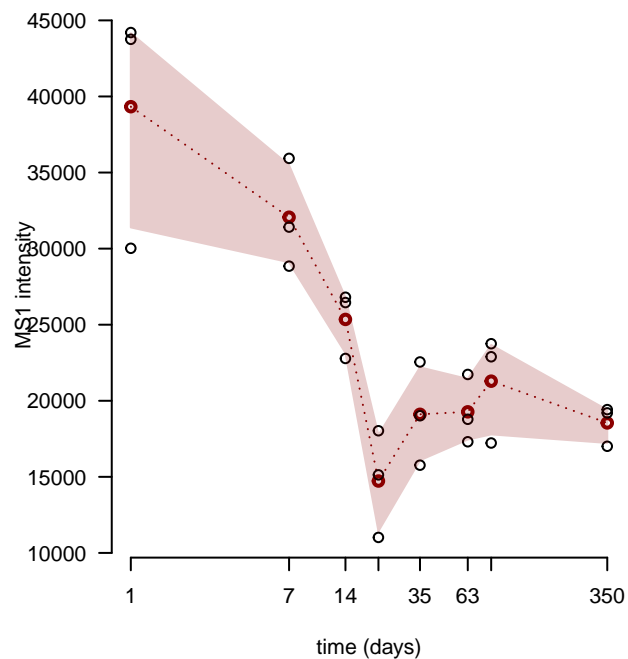

**Q8BX90**  
**GN=Fndc3a**

fibronectin type III domain containing 3 ...

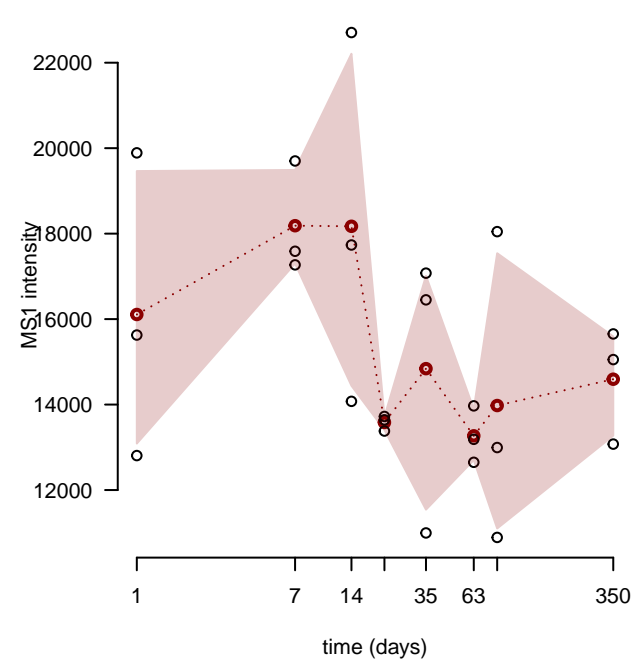

**Q8BX94**  
**GN=Osblp2**

oxysterol binding protein-like 2

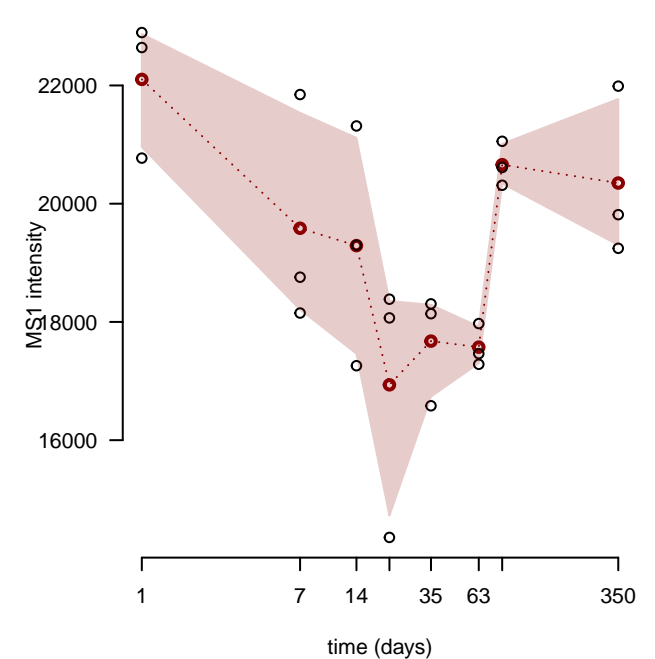

**Q8BXA1**  
GN=Golim4  
golgi integral membrane protein 4

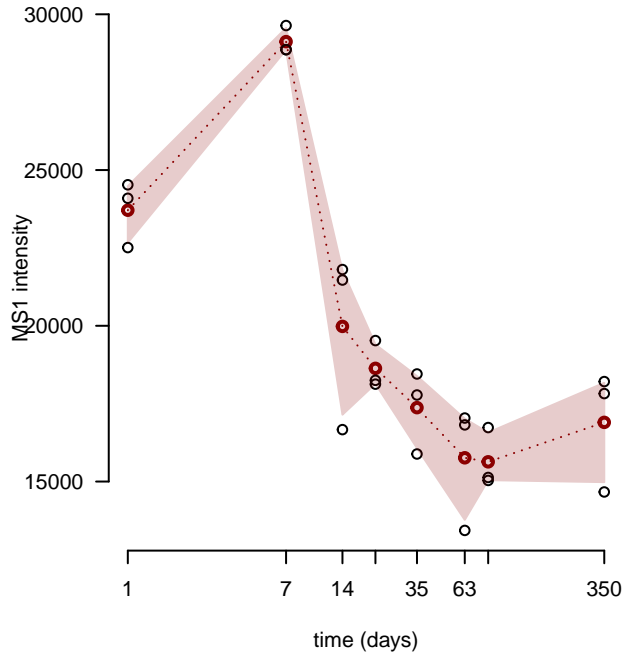

**Q8BXA5**  
GN=Clptm1l  
CLPTM1-like

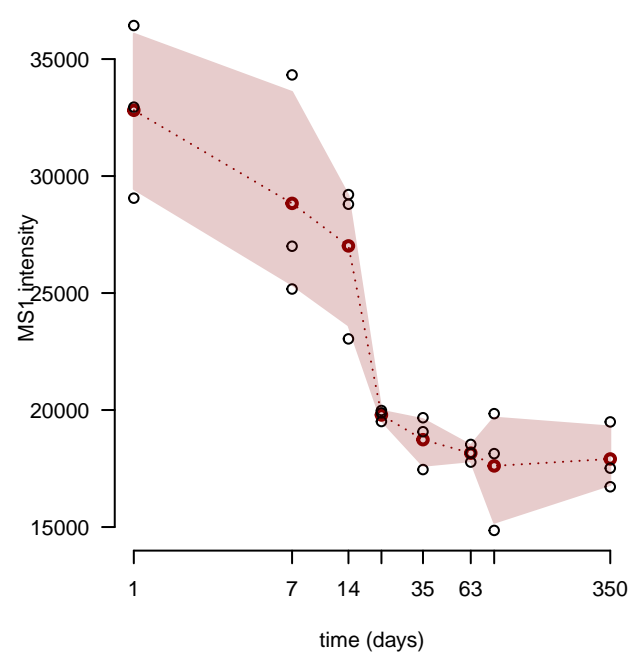

**Q8BXA7**  
GN=Phlpp2  
PH domain and leucine rich repeat protei ...

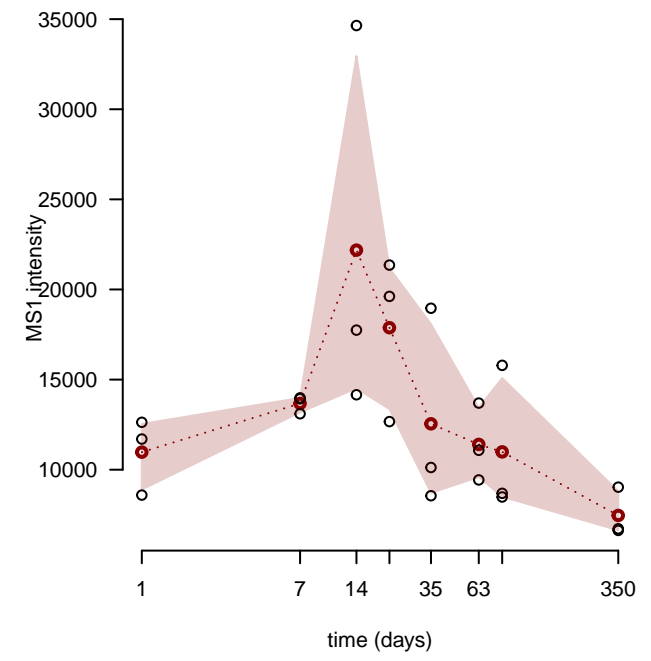

**Q8BXC6**  
GN=Commd2  
COMM domain containing 2

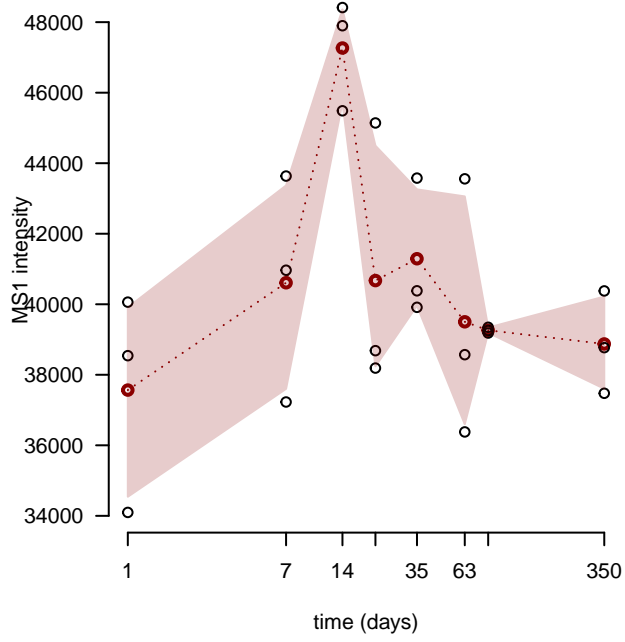

**Q8BXG3**  
GN=Ift57  
intraflagellar transport 57

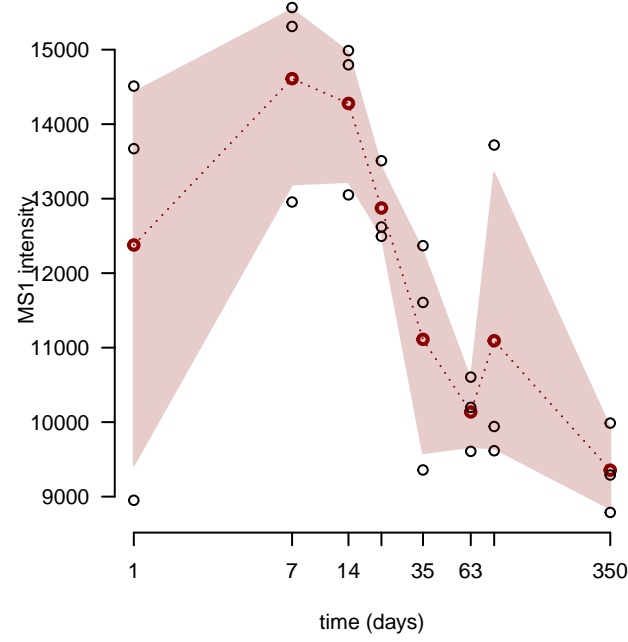

**Q8BXJ8**  
GN=Znf385b

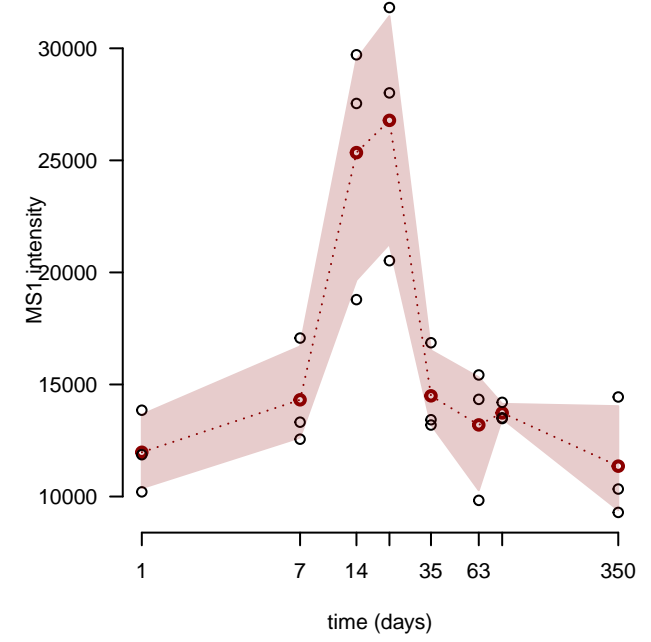

**Q8BXJ9**  
GN=Tmem62  
transmembrane protein 62

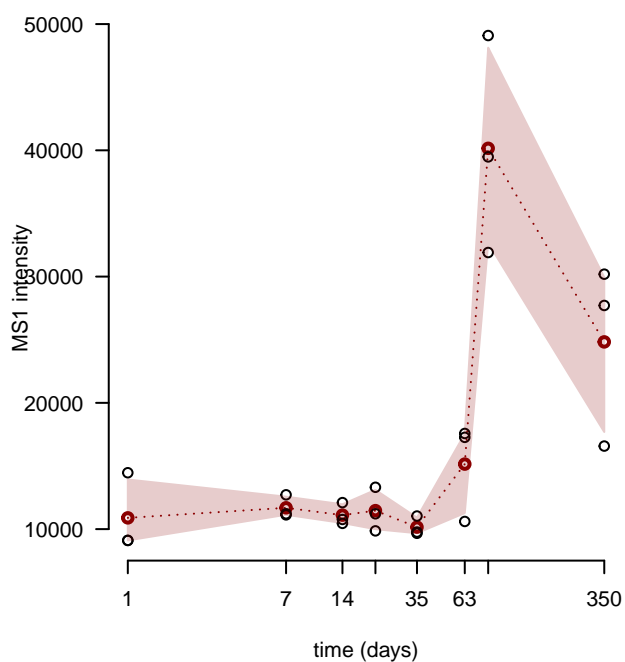

**Q8BXK8**  
GN=Agap1  
ArfGAP with GTPase domain, ankyrin repea ...

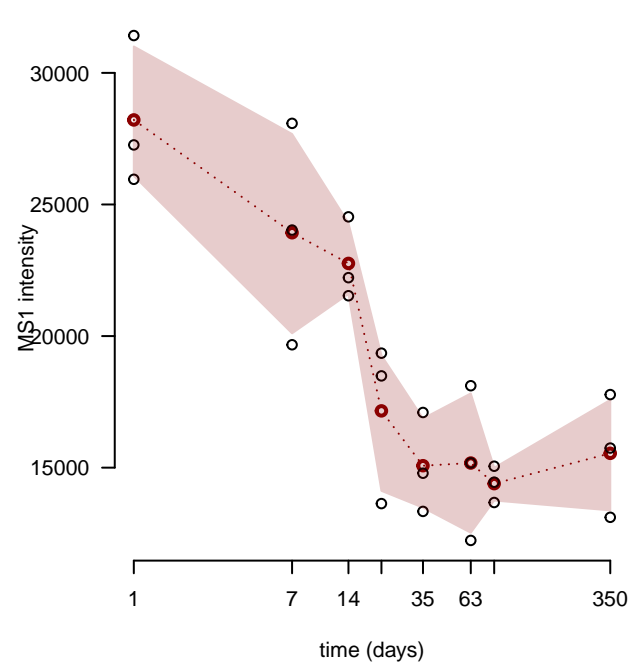

**Q8BXK9**  
GN=Clic5  
chloride intracellular channel 5

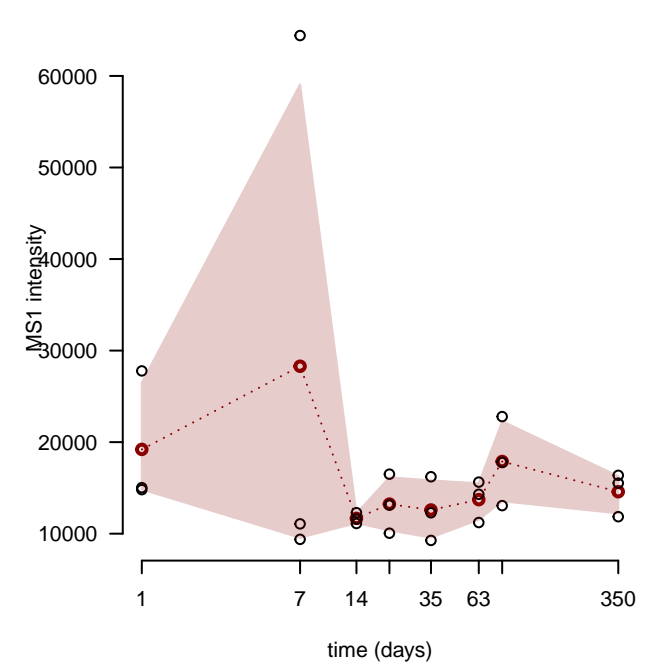

**Q8BXL7**  
**GN=Arfrp1**

ADP-ribosylation factor related protein ...

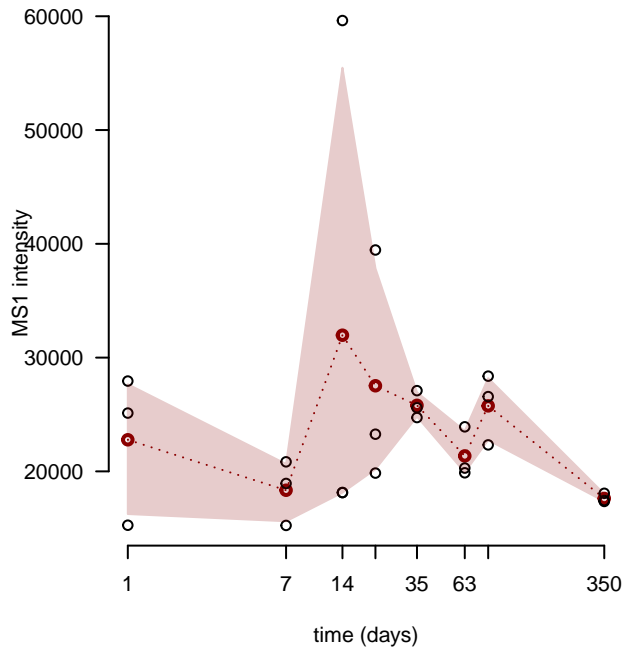

**Q8BXN7**  
**GN=Ppm1k**

protein phosphatase 1K (PP2C domain cont ...

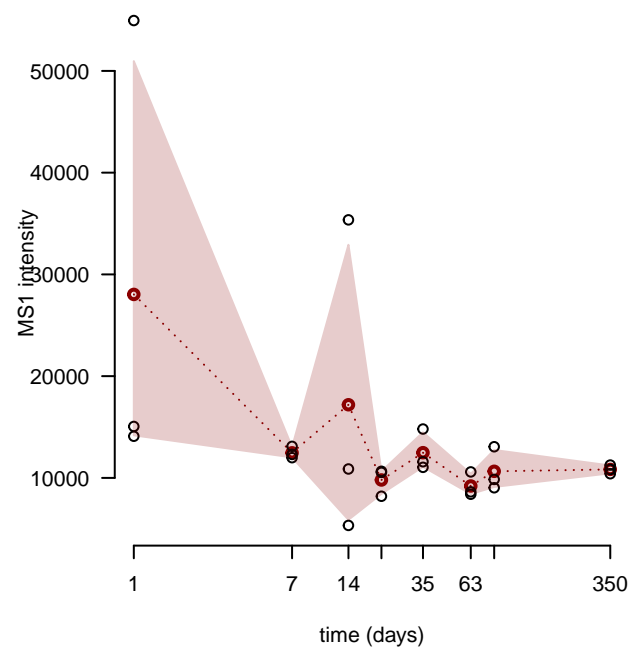

**Q8BXN9**  
**GN=Tmem87a**

transmembrane protein 87A

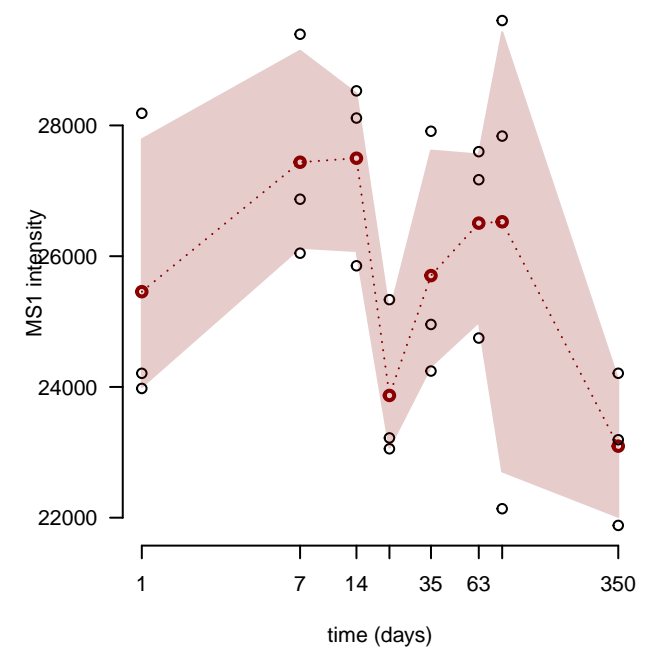

**Q8BXQ2**  
**GN=Pigt**

phosphatidylinositol glycan anchor biosy ...

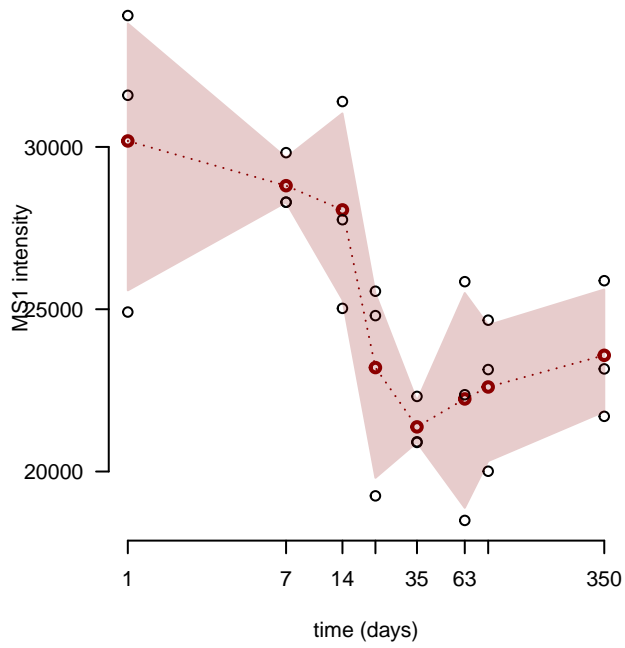

**Q8BXR9**  
**GN=Osbp16**

oxysterol binding protein-like 6

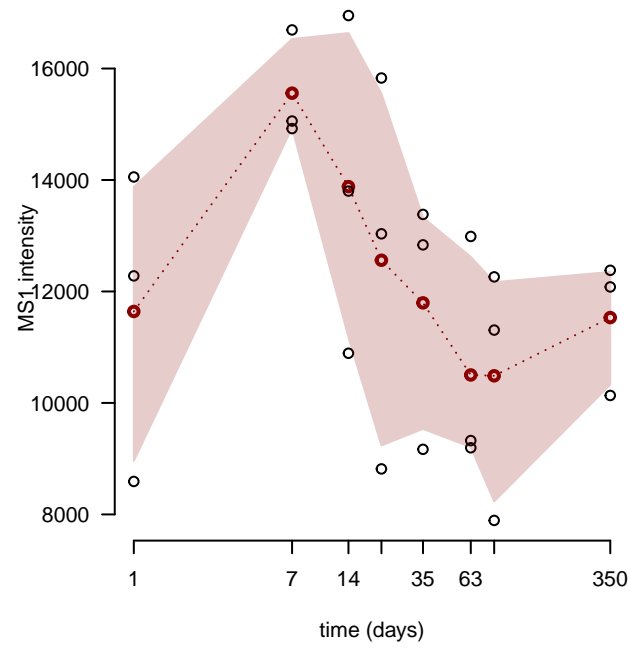

**Q8BXV2**  
**GN=Bri3bp**

Bri3 binding protein

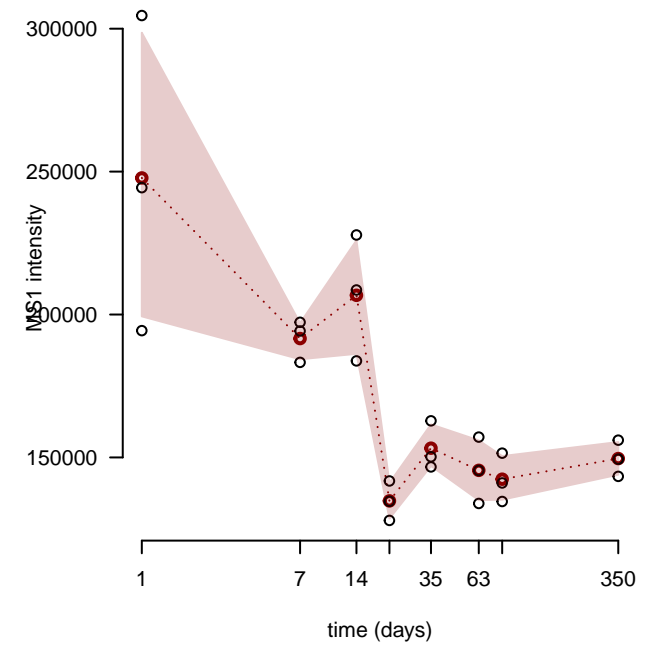

**Q8BXZ1**  
**GN=Tmx3**

thioredoxin-related transmembrane protei ...

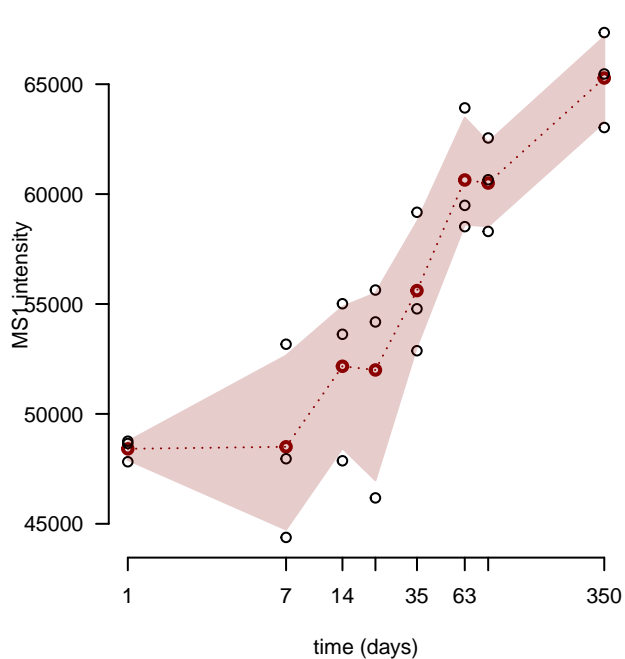

**Q8BY02**  
**GN=Nkrf**

NF-kappaB repressing factor

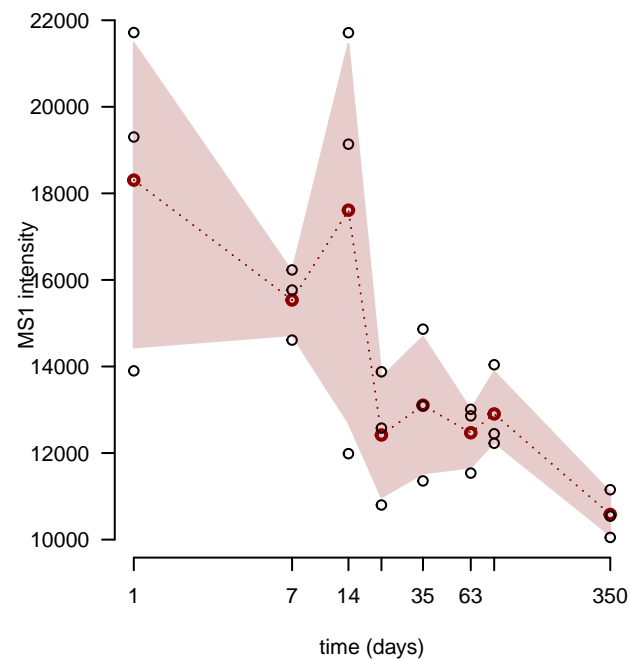

**Q8BY46**  
**GN=Znf574**

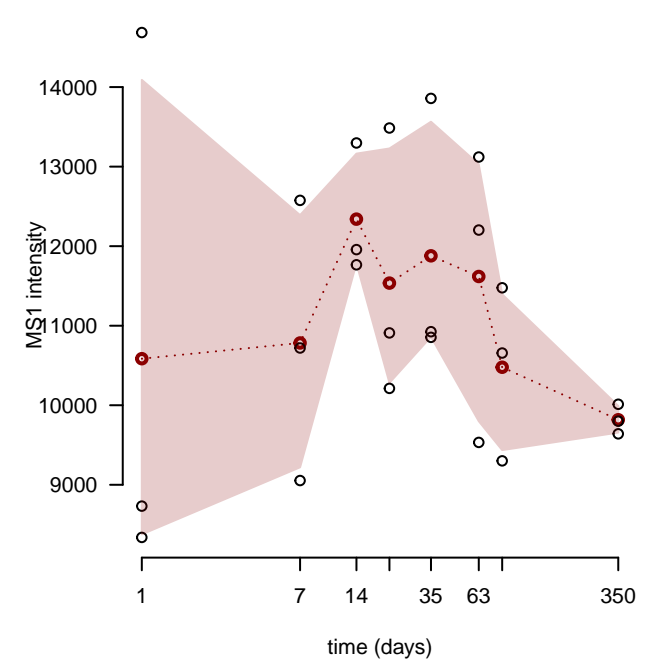

**Q8BY71**  
**GN=Hat1**  
histone aminotransferase 1

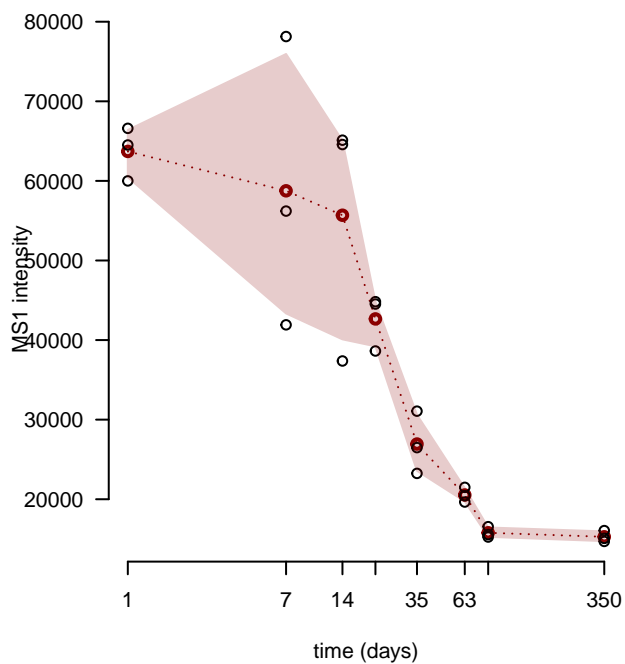

**Q8BY87**  
**GN=Usp47**  
ubiquitin specific peptidase 47

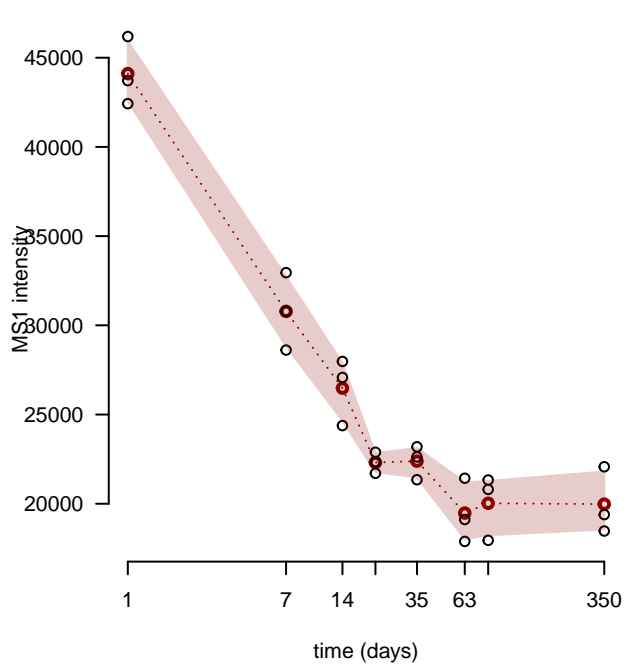

**Q8BY89**  
**GN=Slc44a2**  
solute carrier family 44, member 2

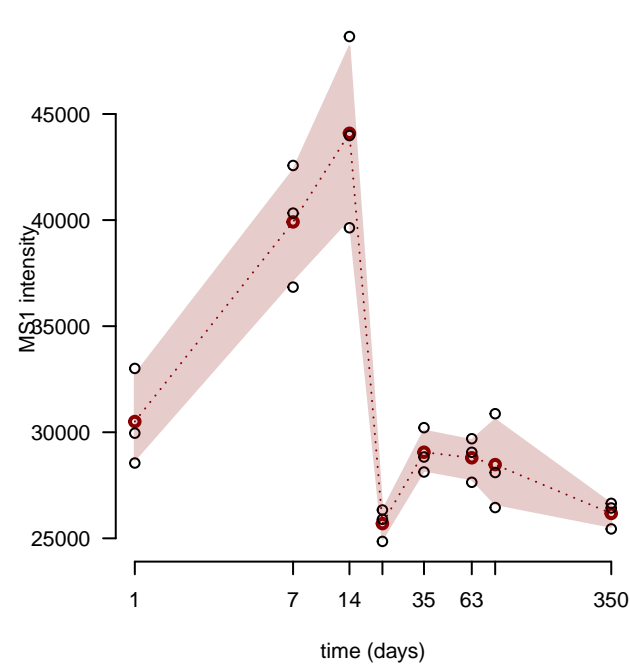

**Q8BYA0**  
**GN=Tbcd**  
tubulin-specific chaperone d

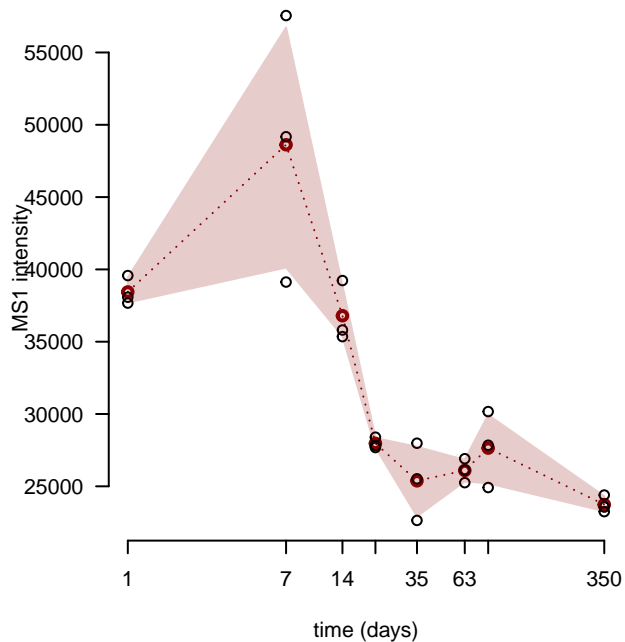

**Q8BYB9**  
**GN=Poglut1**  
protein O-glucosyltransferase 1

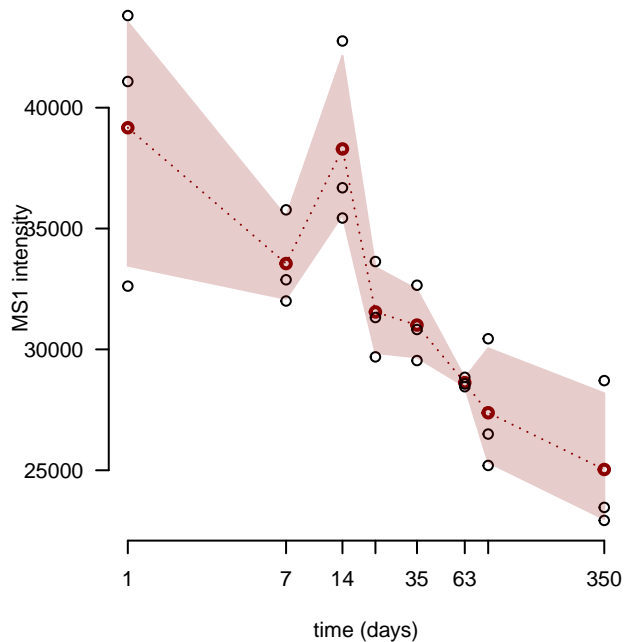

**Q8BYC6**  
**GN=Taok3**  
TAO kinase 3

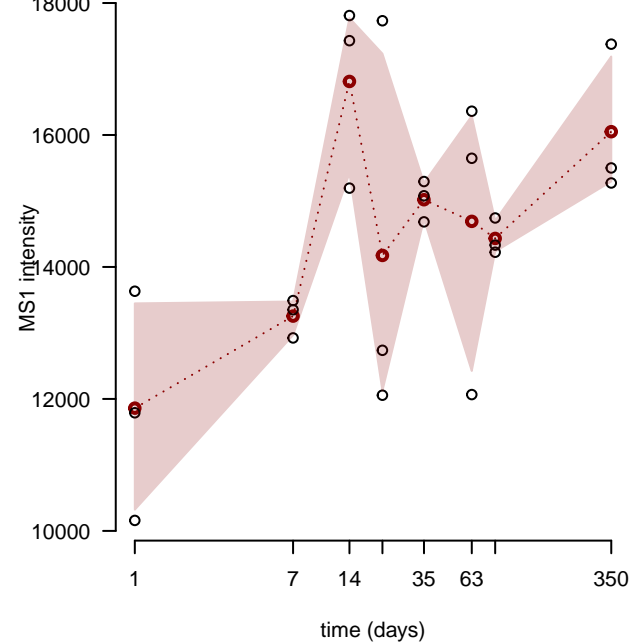

**Q8BYH3**  
**GN=Trmt13**  
tRNA methyltransferase 13

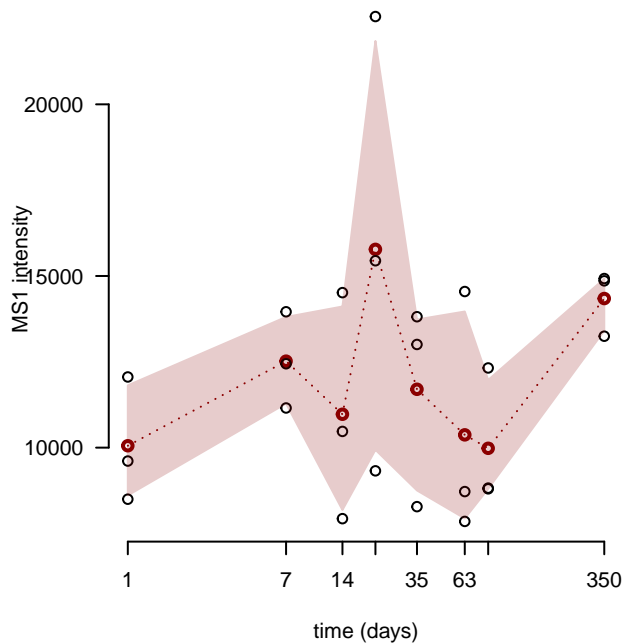

**Q8BYH7**  
**GN=Tbc1d17**  
TBC1 domain family, member 17

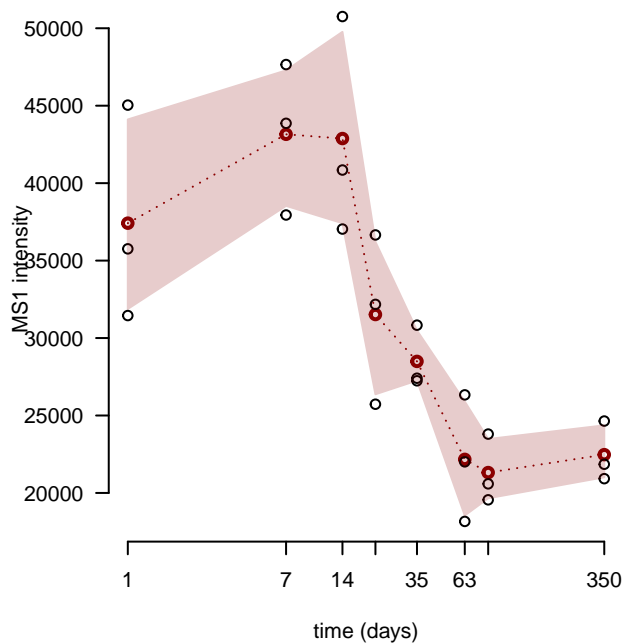

**Q8BYH8**  
**GN=Chd9**  
chromodomain helicase DNA binding protei ...

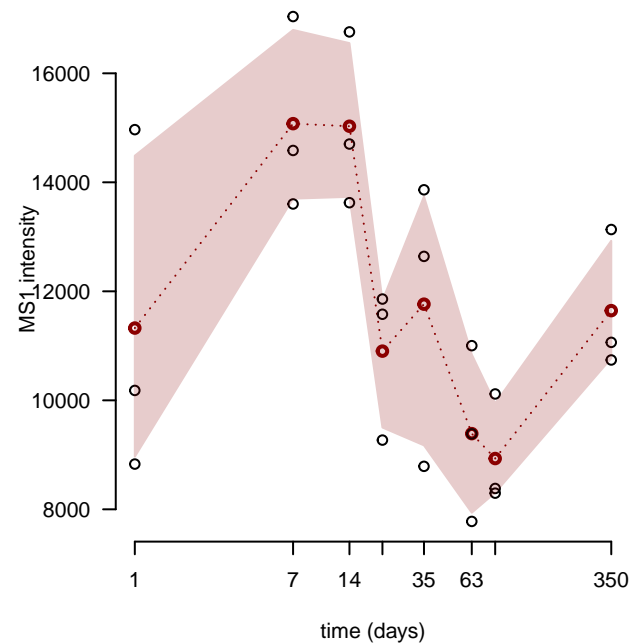



**Q8BYI6**  
**GN=Lpcat2**  
lysophosphatidylcholine acyltransferase ...

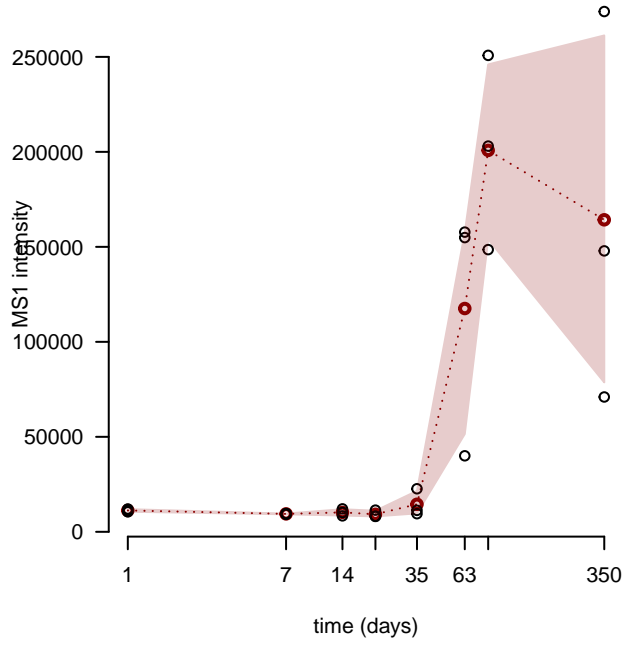

**Q8BYJ6**  
**GN=Tbc1d4**  
TBC1 domain family, member 4

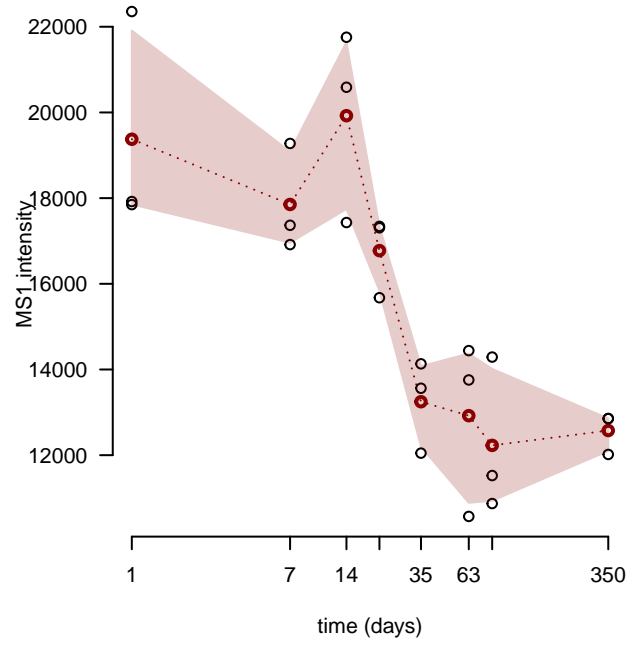

**Q8BYK4**  
**GN=Rdh12**  
retinol dehydrogenase 12

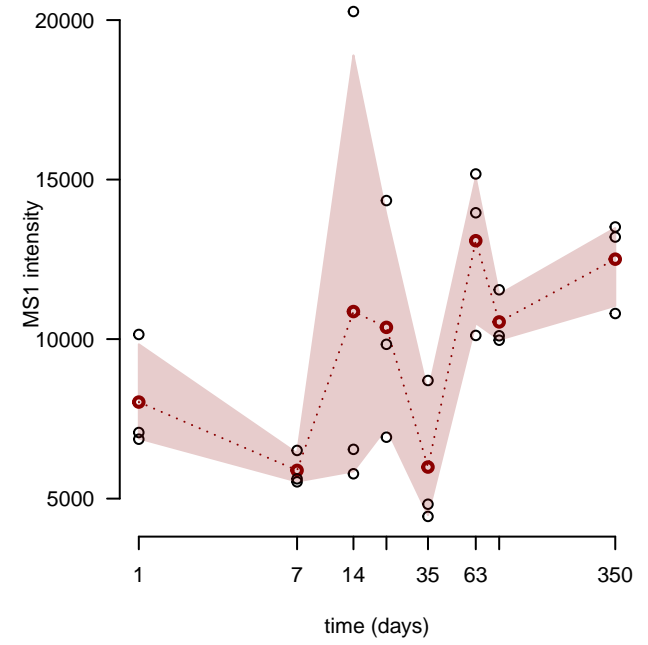

**Q8BYK6**  
**GN=Ythdf3**  
YTH N6-methyladenosine RNA binding prote ...

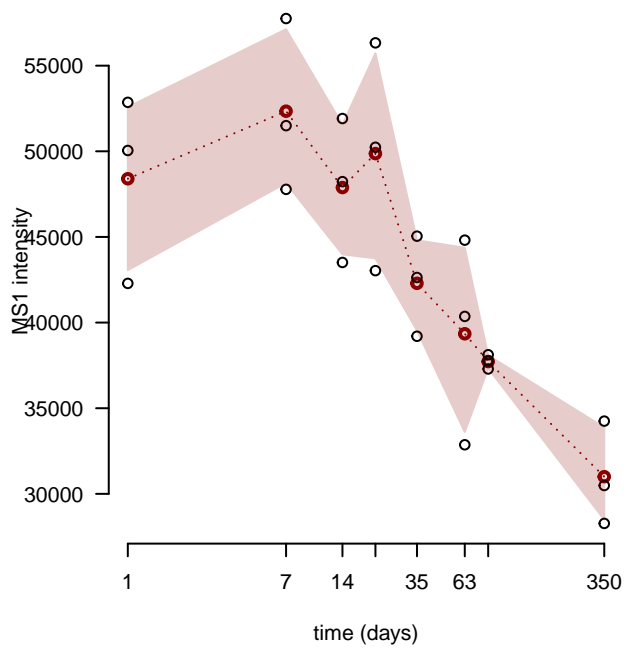

**Q8BYL4**  
**GN=Yars2**  
tyrosyl-tRNA synthetase 2 (mitochondrial ...

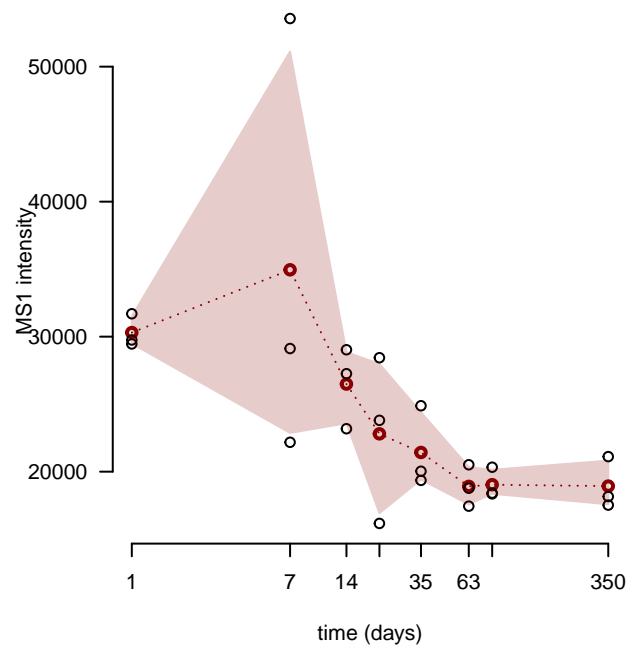

**Q8BYM8**  
**GN=Cars2**  
cysteinyl-tRNA synthetase 2 (mitochondri ...

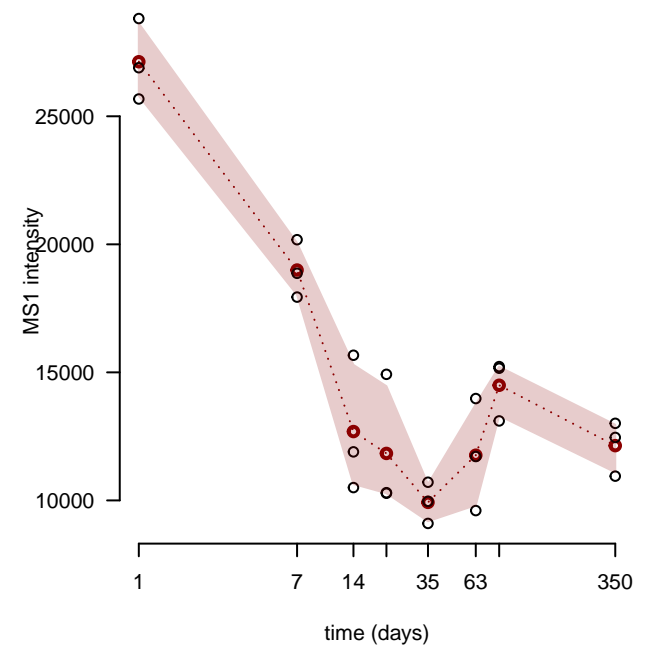

**Q8BYN3**  
**GN=Itpk1**  
inositol 1,3,4-triphosphate 5/6 kinase

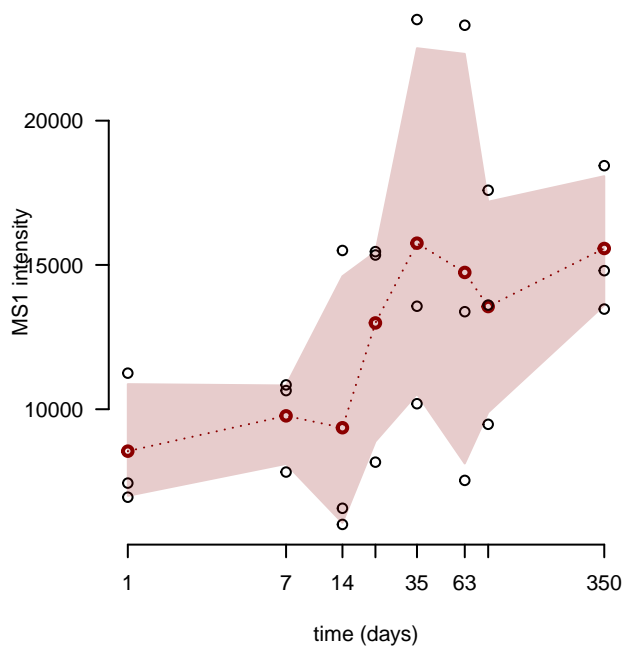

**Q8BYR1**  
**GN=Lcmt2**  
leucine carboxyl methyltransferase 2

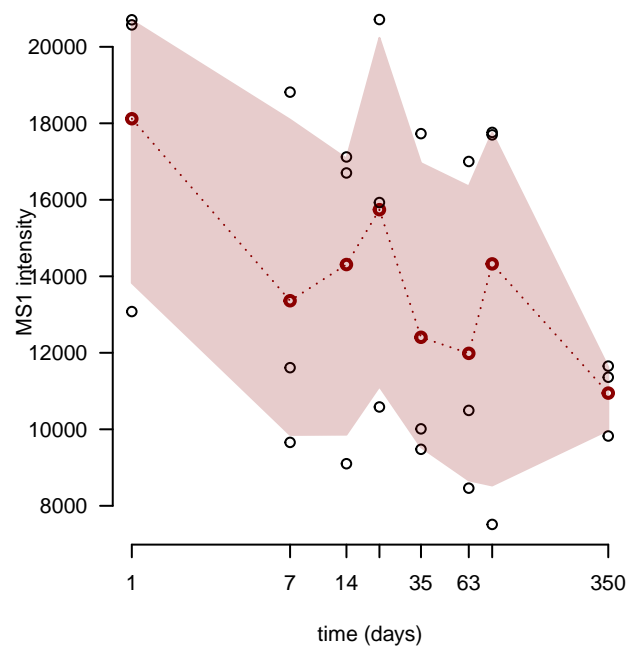

**Q8BYR2**  
**GN=Lats1**  
large tumor suppressor

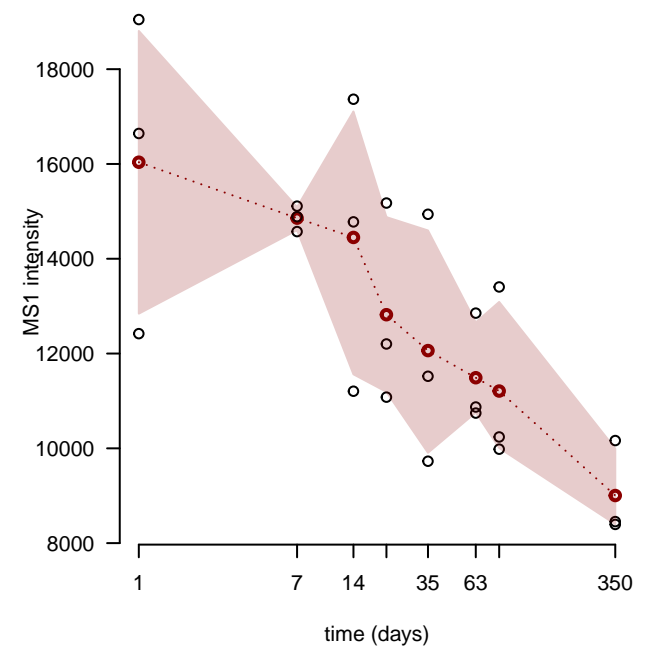

**Q8BYU6**  
**GN=Tor1aip2**  
torsin A interacting protein 2

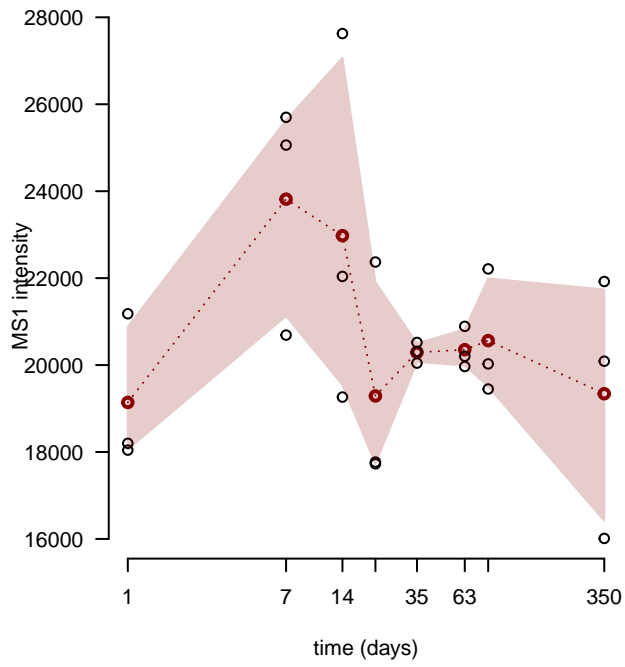

**Q8BYW1**  
**GN=Arhgap25**  
Rho GTPase activating protein 25

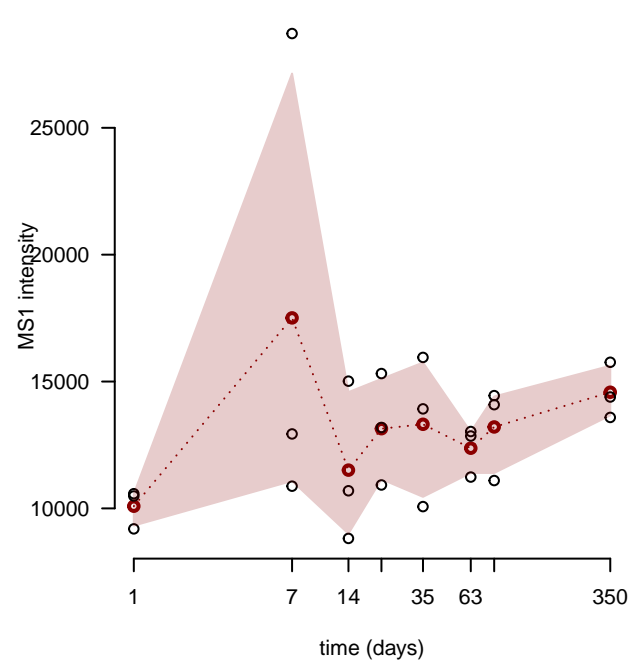

**Q8BYW9**  
**GN=Eogt**  
EGF domain-specific O-linked N-acetylglu ...

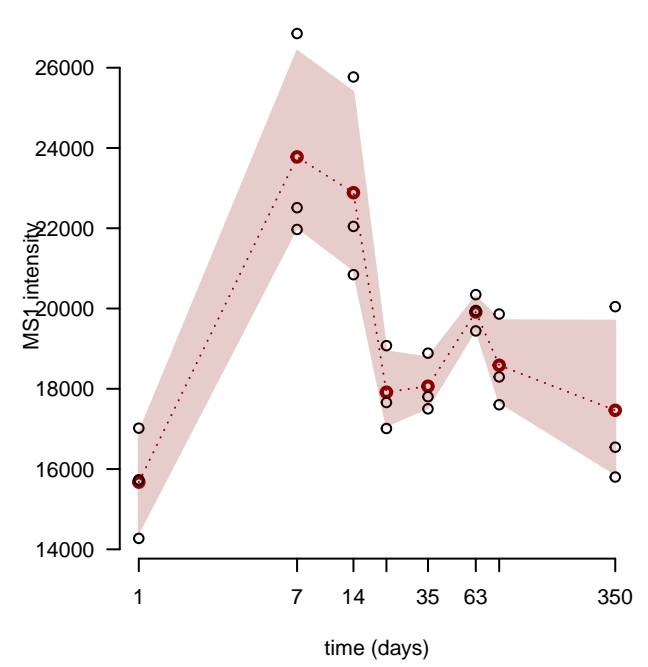

**Q8BYY4**  
**GN=Ttc39b**  
tetratricopeptide repeat domain 39B

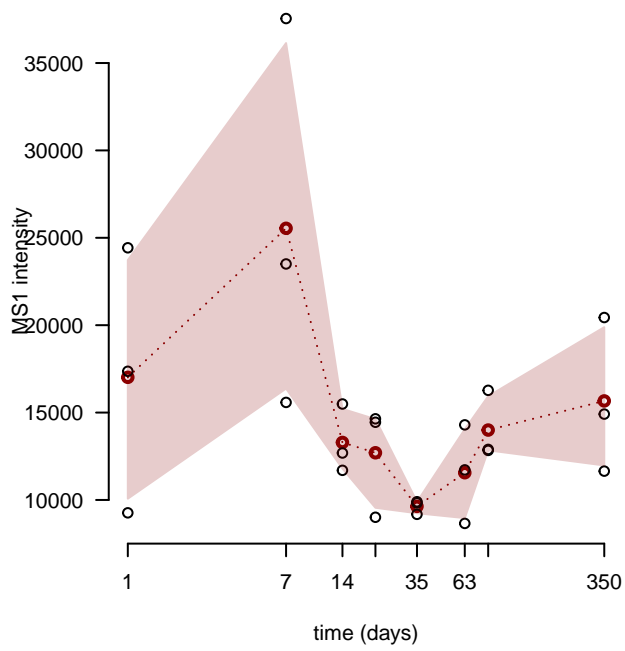

**Q8BYZ7**  
**GN=Elmo3**  
engulfment and cell motility 3

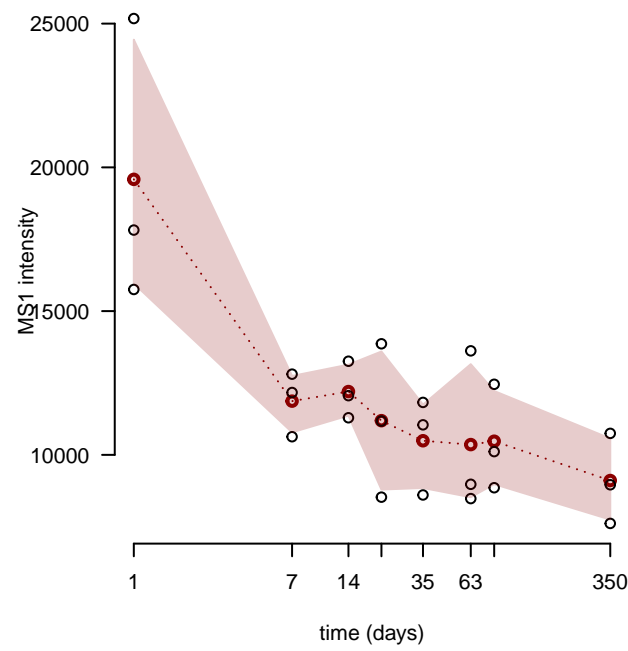

**Q8BZ03**  
**GN=Prkd2**  
protein kinase D2

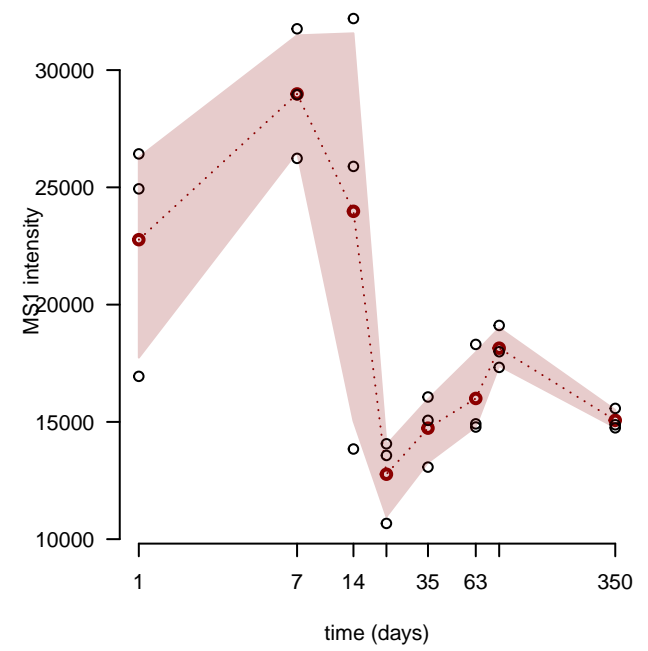

**Q8BZ05**  
**GN=Arap2**  
ArfGAP with RhoGAP domain, ankyrin repea ...

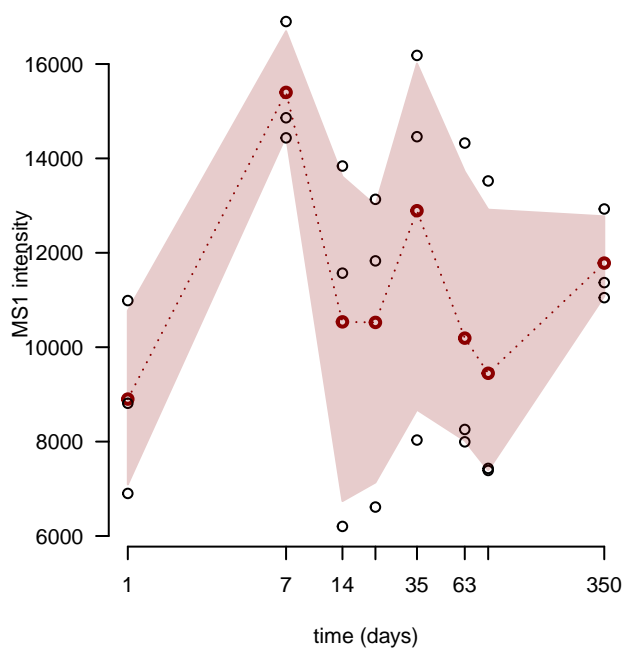

**Q8BZ09**  
**GN=Slc25a21**  
solute carrier family 25 (mitochondrial ...

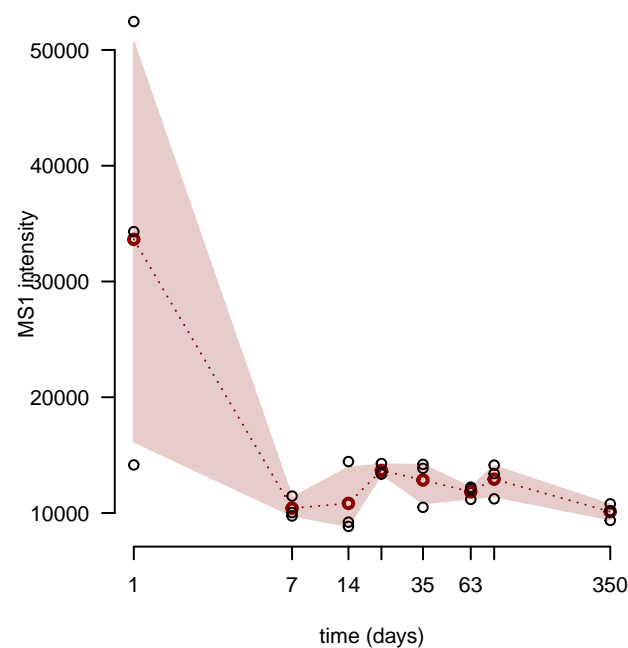

**Q8BZ20**  
**GN=Parp12**  
poly (ADP-ribose) polymerase family, mem ...

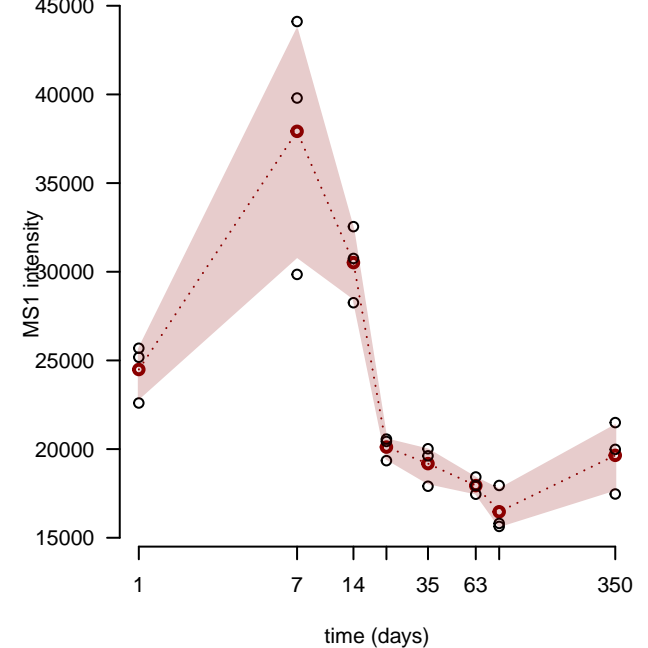

**Q8BZ21**  
**GN=Kat6a**  
K(lysine) acetyltransferase 6A

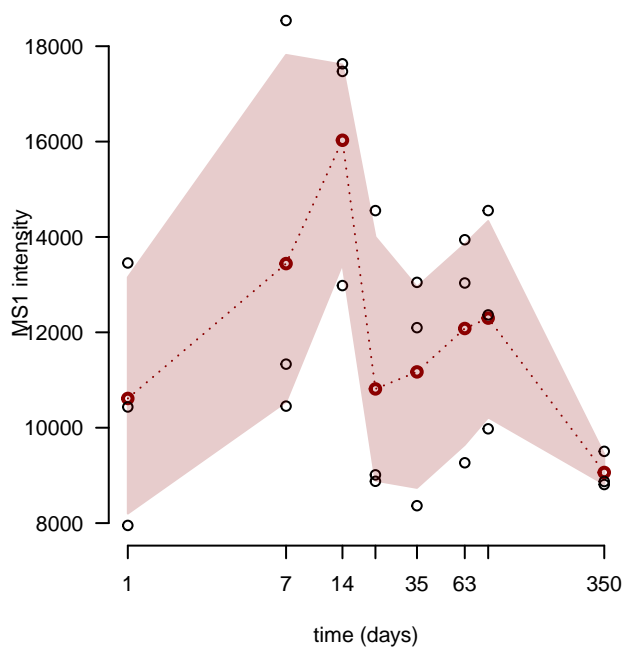

**Q8BZ32**  
**GN=Asxl2**  
ASXL transcriptional regulator 2

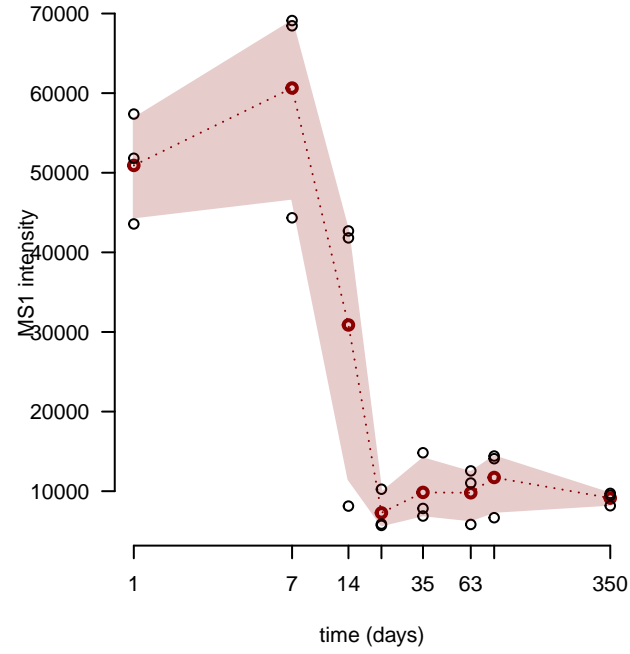

**Q8BZ36**  
**GN=Rint1**  
RAD50 interactor 1

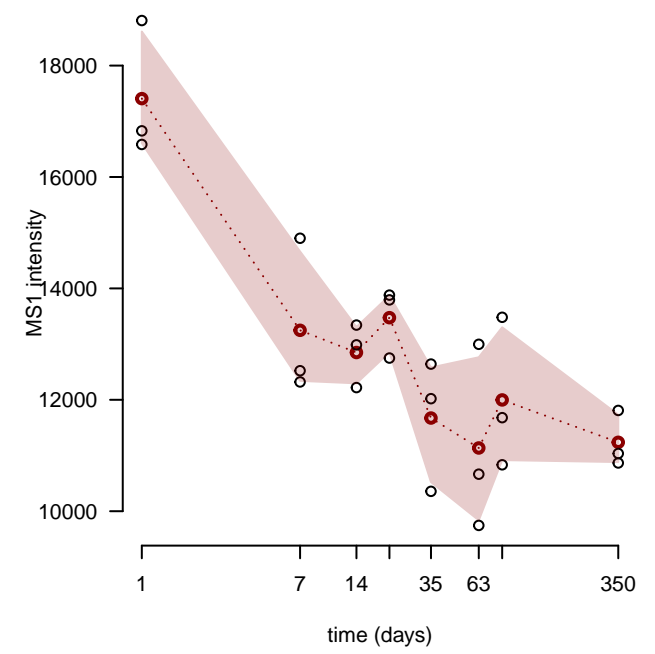

**Q8BZ47**  
**GN=Znf609**

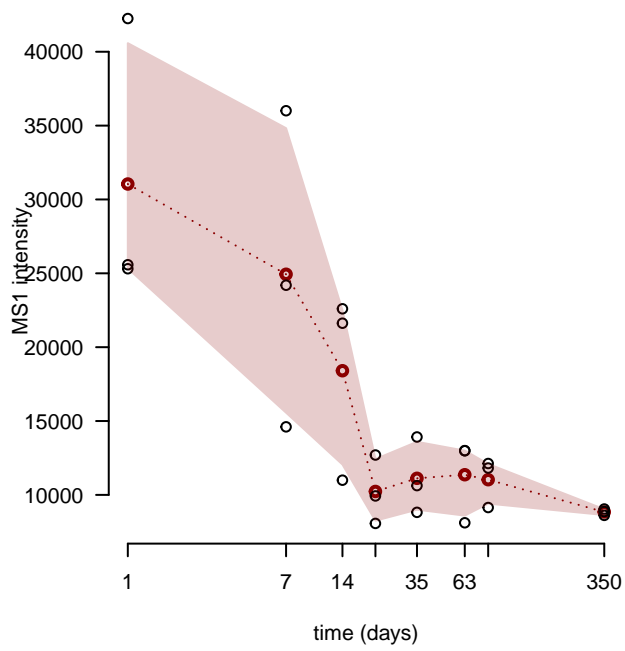

**Q8BZ60**  
**GN=Ston2**  
stonin 2

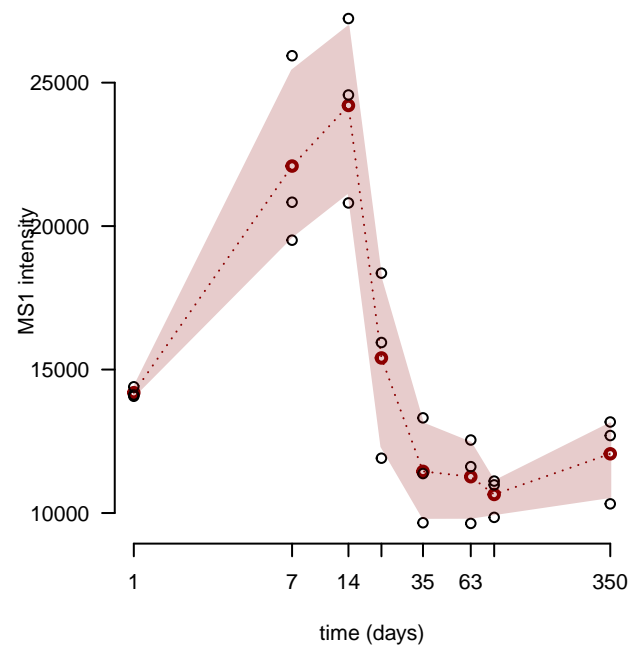

**Q8BZ98**  
**GN=Dnm3**  
dynamin 3

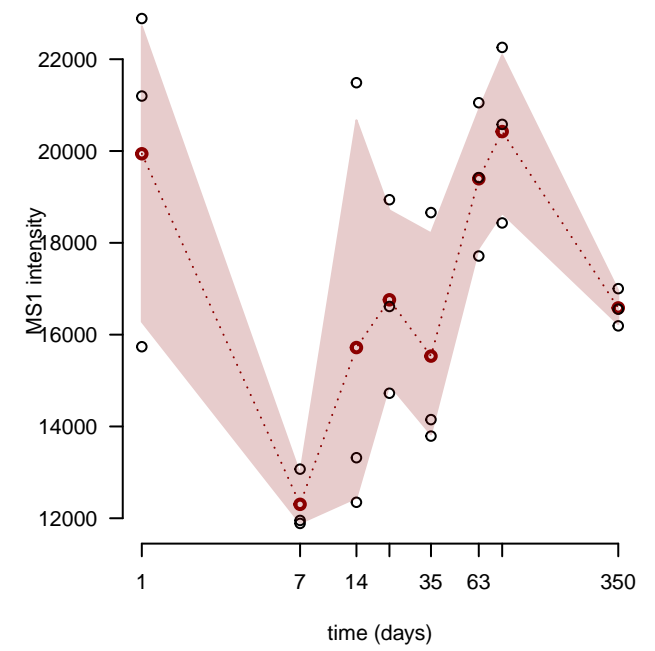

**Q8BZA9**  
**GN=Tigar**  
Trp53 induced glycolysis regulatory phos ...

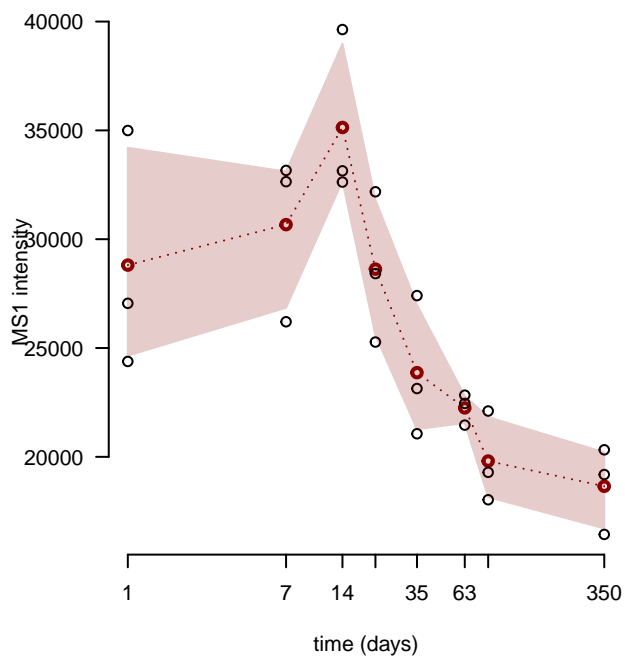

**Q8BZB2**  
**GN=Ppcdc**  
phosphopantothenoylcysteine decarboxylas ...

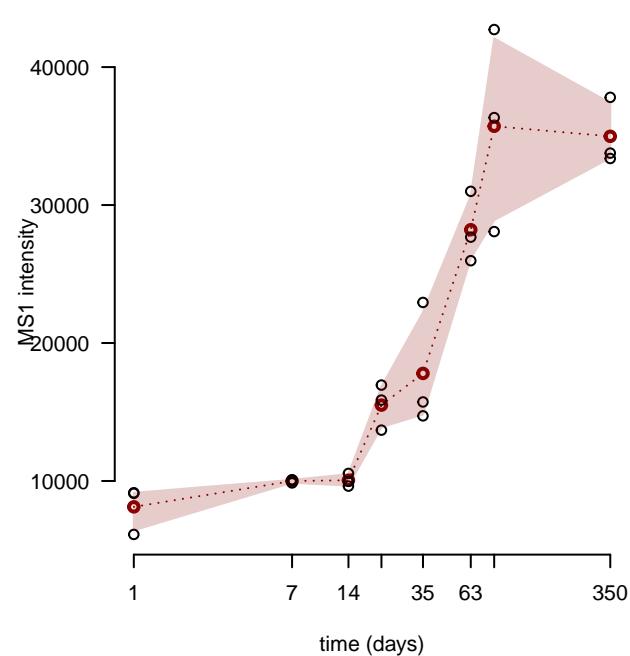

**Q8BZF8**  
**GN=Pgm5**  
phosphoglucomutase 5

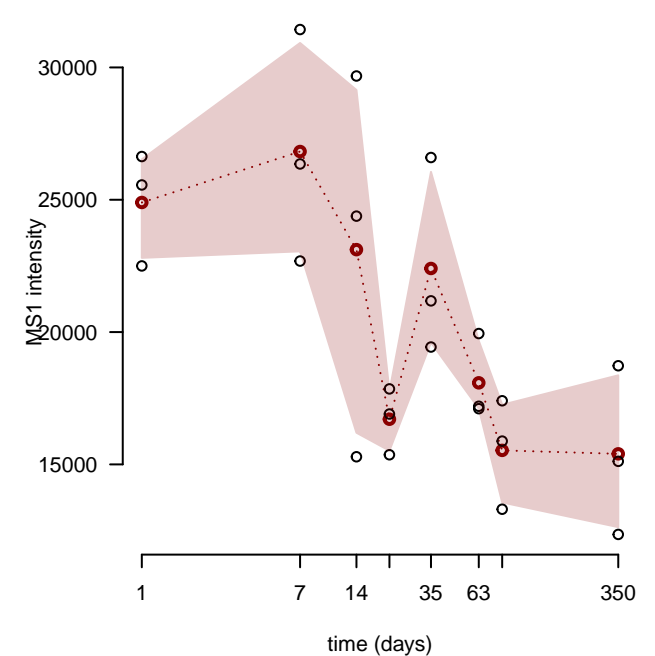

**Q8BZH4**  
**GN=Pogz**

pogo transposable element with ZNF domai ...

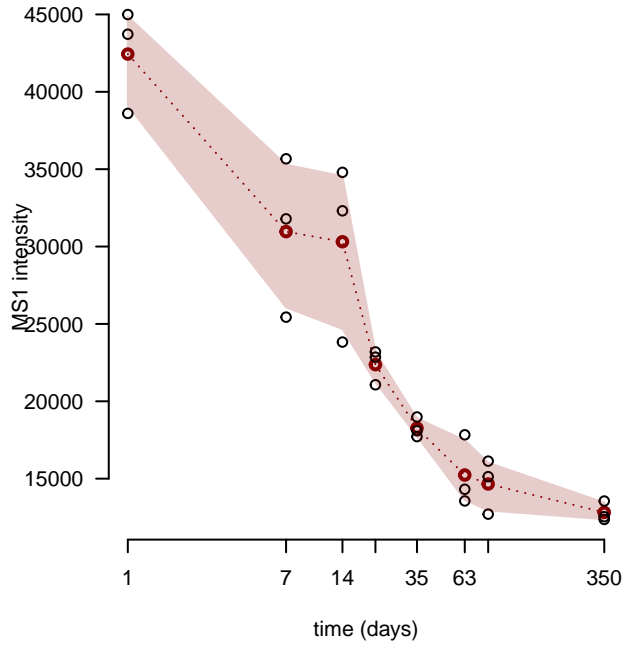

**Q8BZJ7**  
**GN=Dcun1d2**

DCN1, defective in cullin neddylation 1, ...

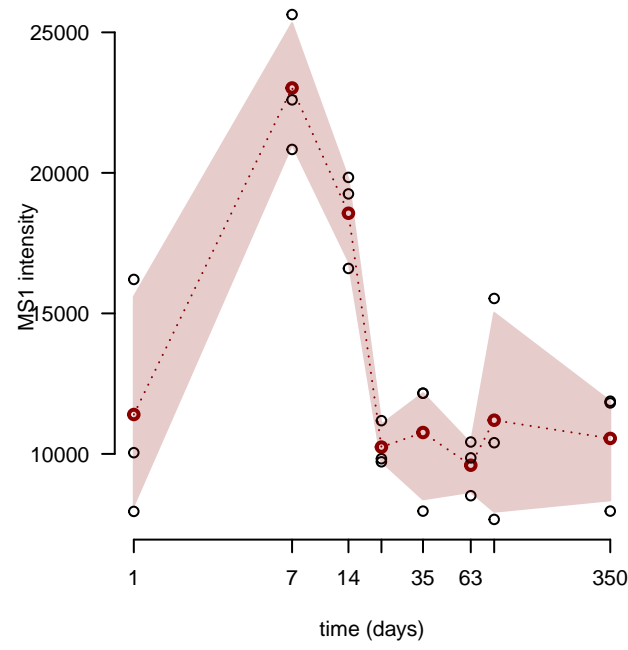

**Q8BZM0**  
**GN=Klh12**

kelch-like 12

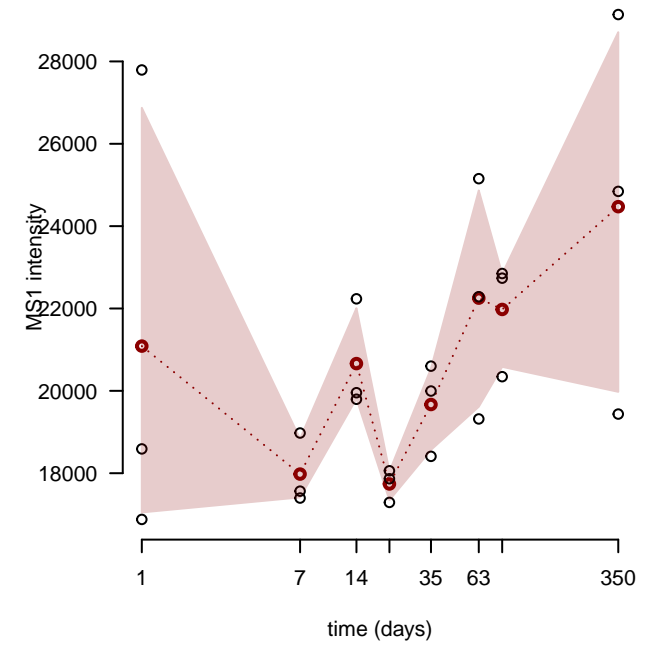

**Q8BZM1**  
**GN=Glmn**

glomulin, FKBP associated protein

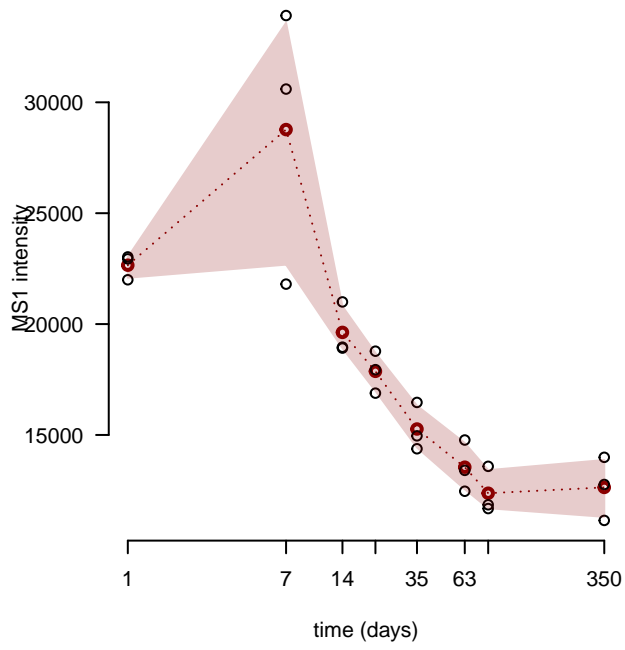

**Q8BZN6**  
**GN=Dock10**

dedicator of cytokinesis 10

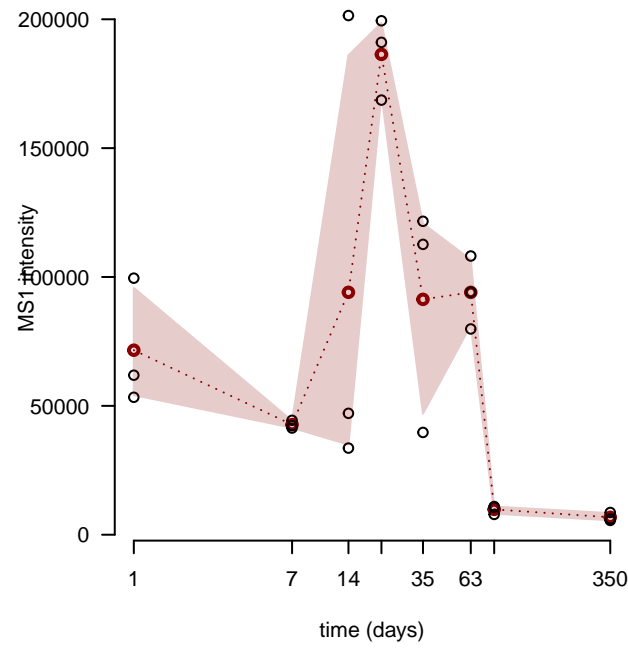

**Q8BZQ7**  
**GN=Anapc2**

anaphase promoting complex subunit 2

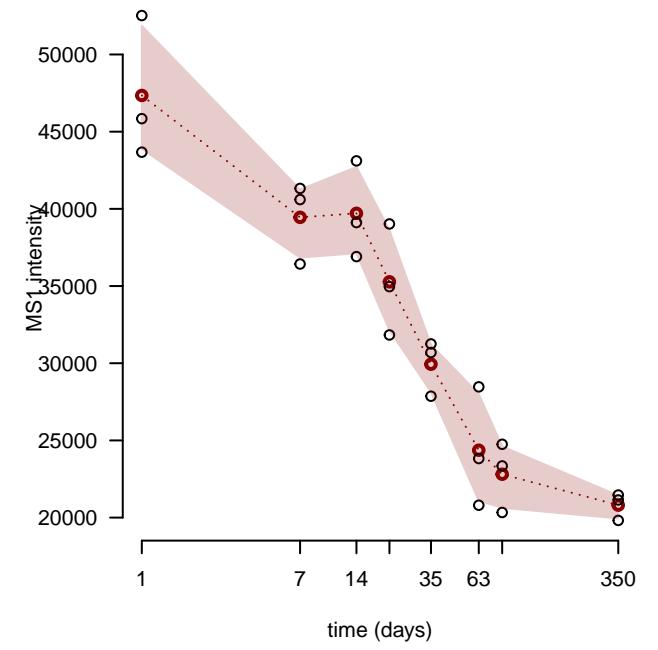

**Q8BZR9**  
**GN=Ncbp3**

nuclear cap binding subunit 3

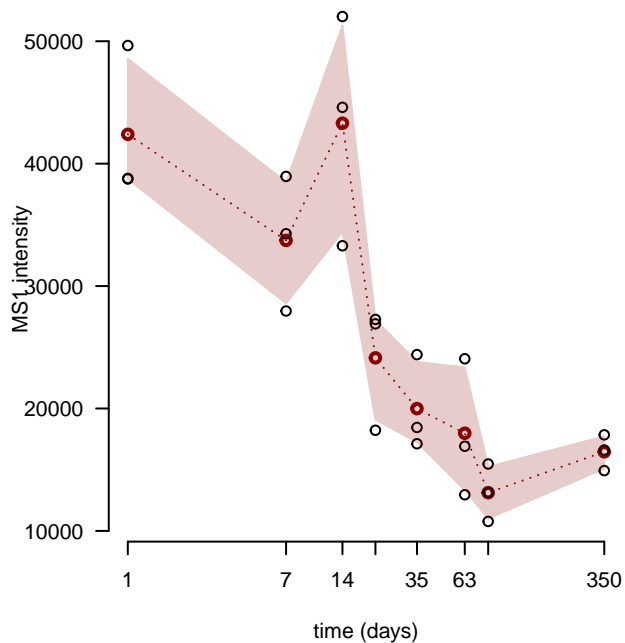

**Q8BZS9**  
**GN=Dhx32**

DEAH (Asp-Glu-Ala-His) box polypeptide 3 ...

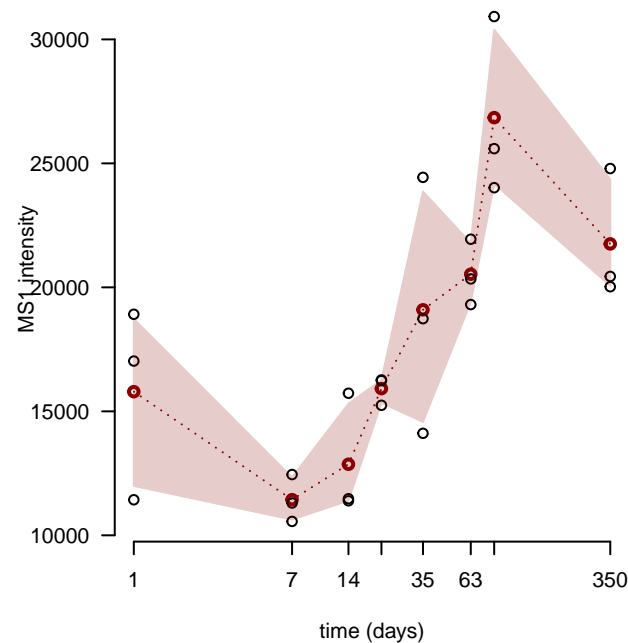

**Q8BZW8**  
**GN=Nhlrc2**

NHL repeat containing 2

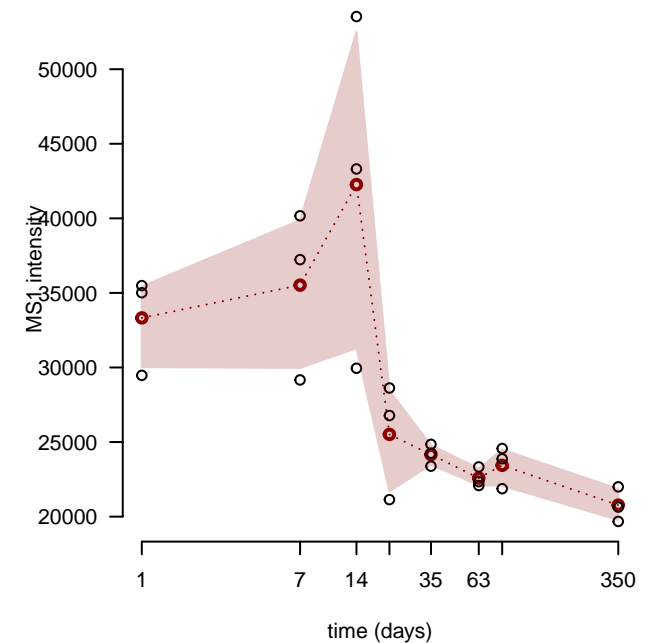

**Q8BZX4**

**GN=Srek1**

splicing regulatory glutamine/lysine-ric ...

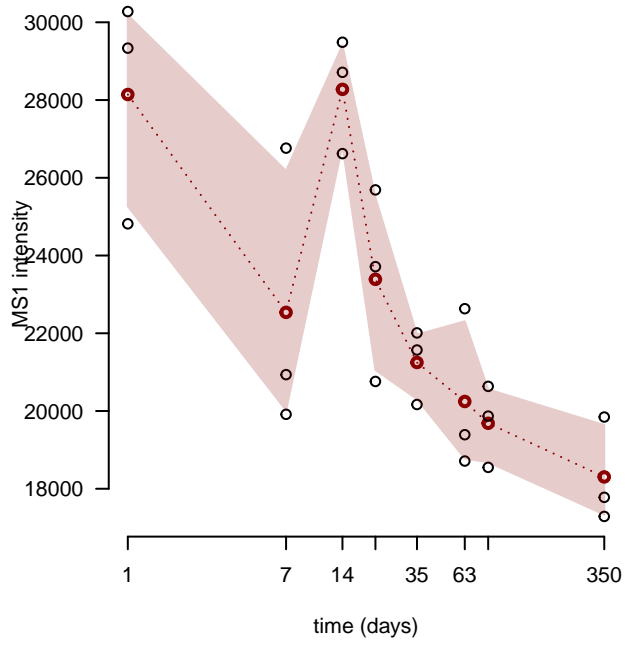

**Q8BZZ3**

**GN=Wwp1**

WW domain containing E3 ubiquitin protei ...

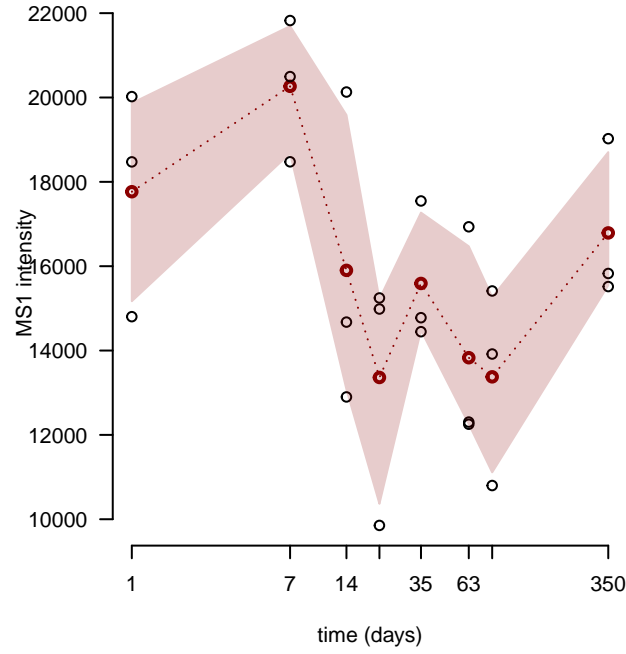

**Q8C006**

**GN=Trim35**

tripartite motif-containing 35

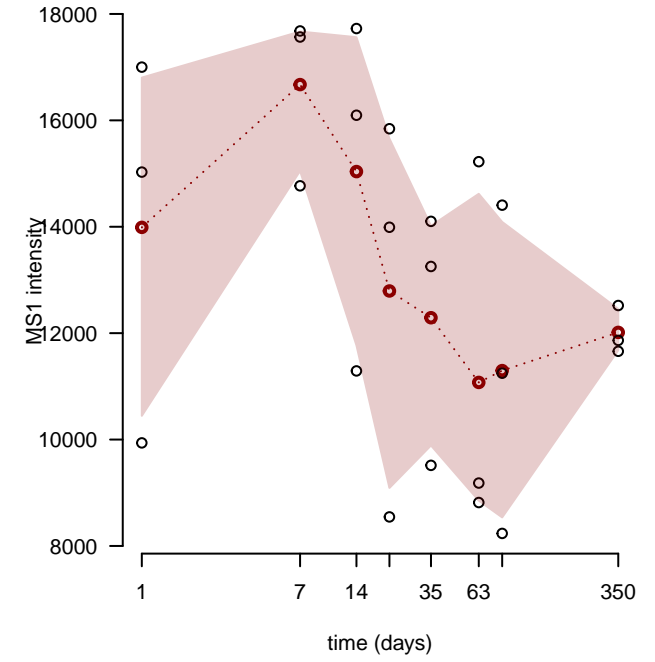

**Q8C013**

**GN=Tpbgl**

trophoblast glycoprotein-like

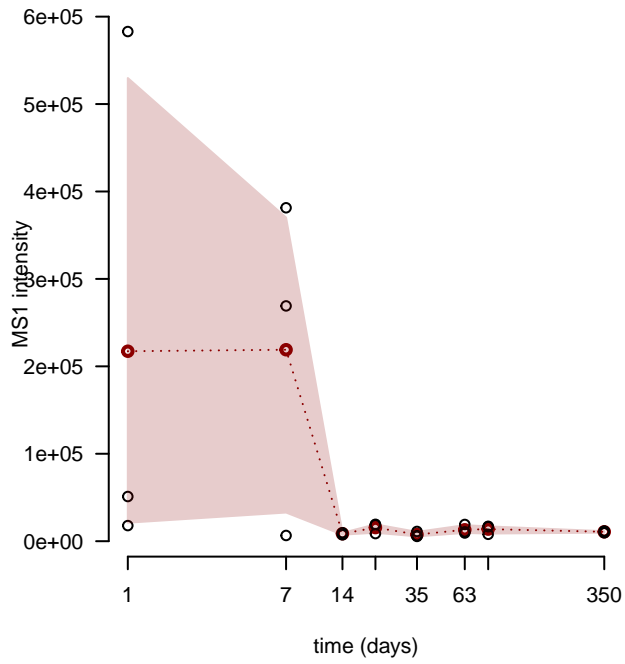

**Q8C025**

**GN=Chpt1**

choline phosphotransferase 1

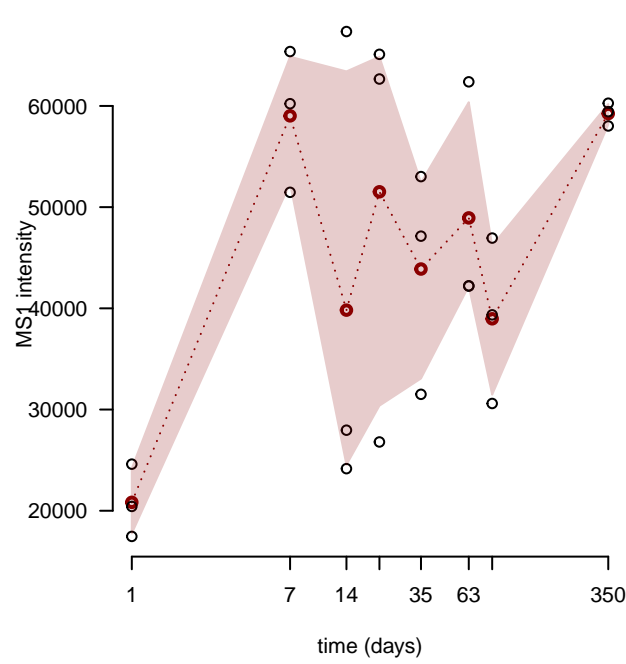

**Q8C033**

**GN=Arhgef10**

Rho guanine nucleotide exchange factor ( ...

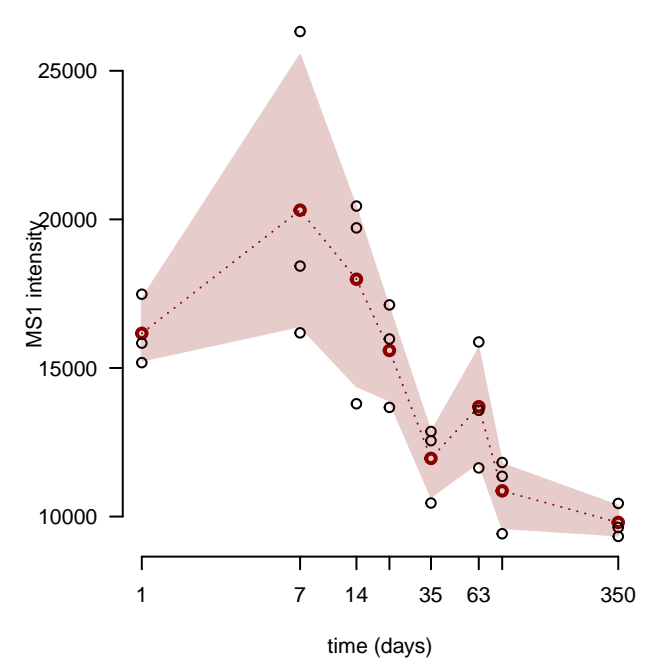

**Q8C050**

**GN=Rps6ka5**

ribosomal protein S6 kinase, polypeptide ...

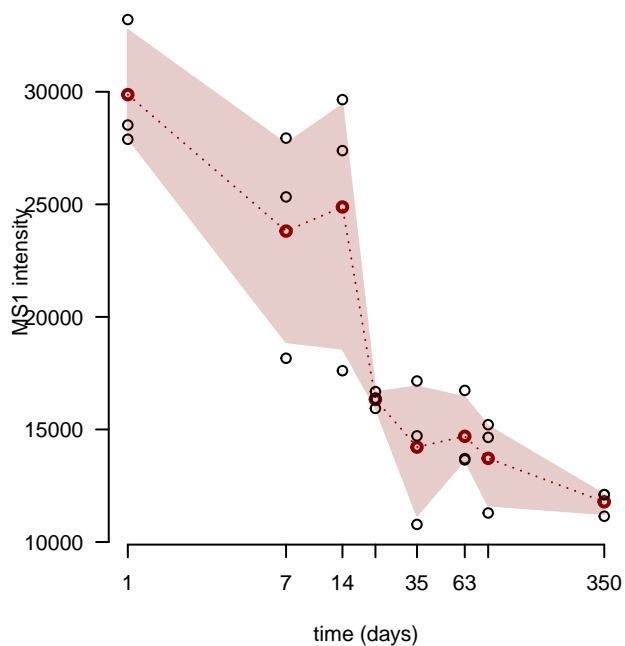

**Q8C052**

**GN=Map1s**

microtubule-associated protein 1S

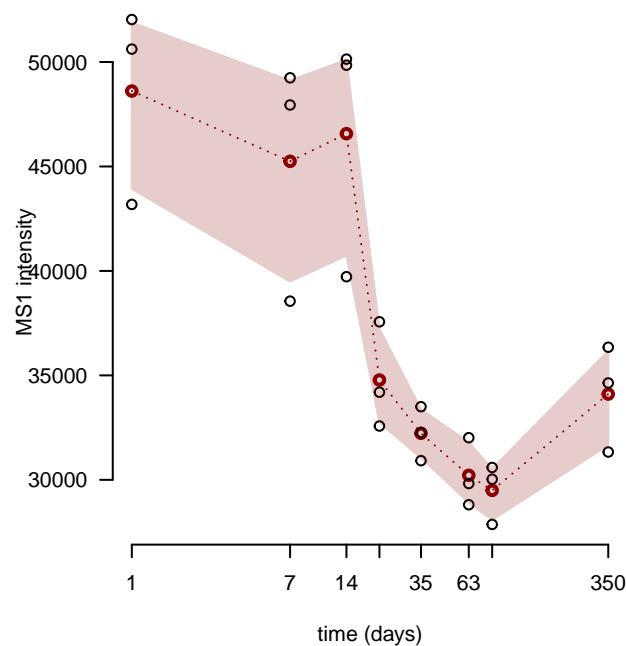

**Q8C078**

**GN=Camkk2**

calcium/calmodulin-dependent protein kin ...

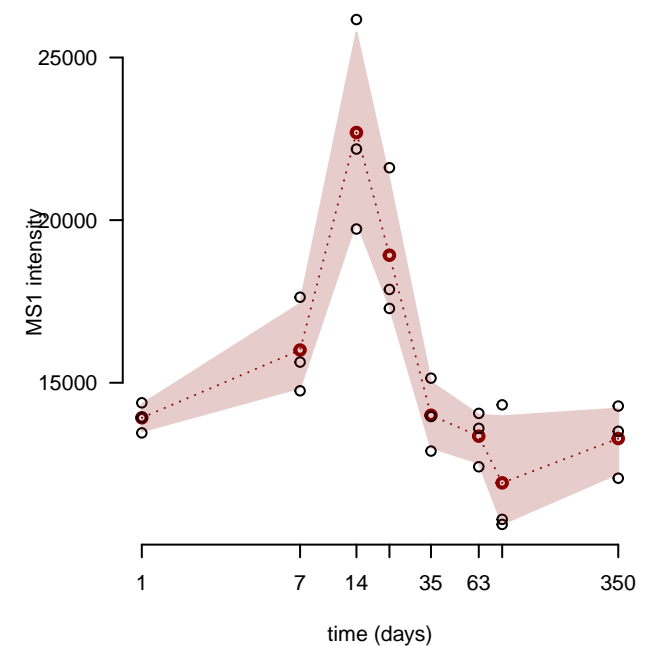

**Q8C079**  
**GN=Strip1**  
striatin interacting protein 1

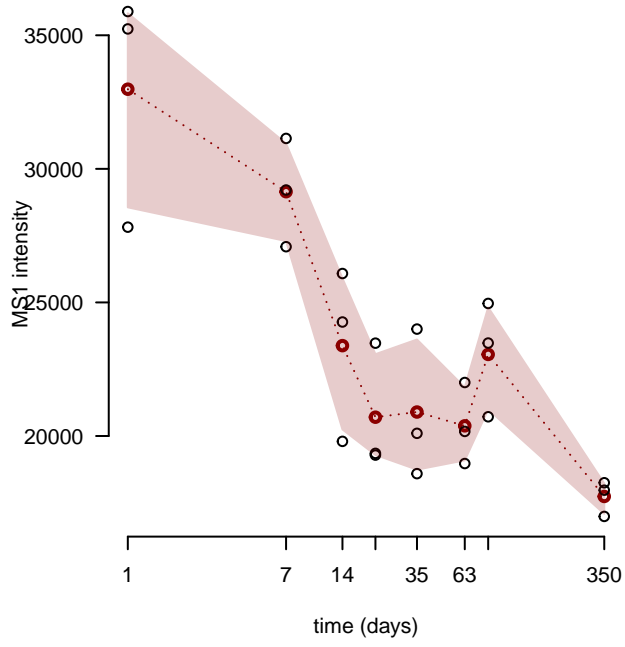

**Q8C080**  
**GN=Snx16**  
sorting nexin 16

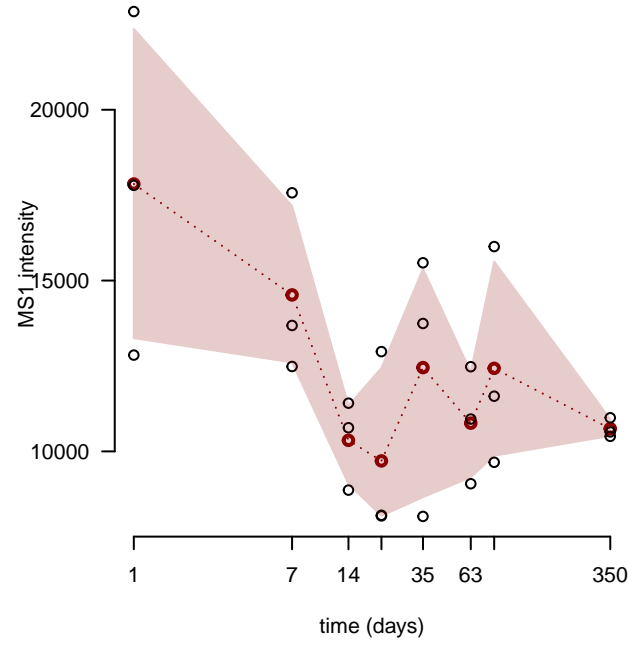

**Q8C092**  
**GN=Taf5**  
TATA-box binding protein associated fact ...

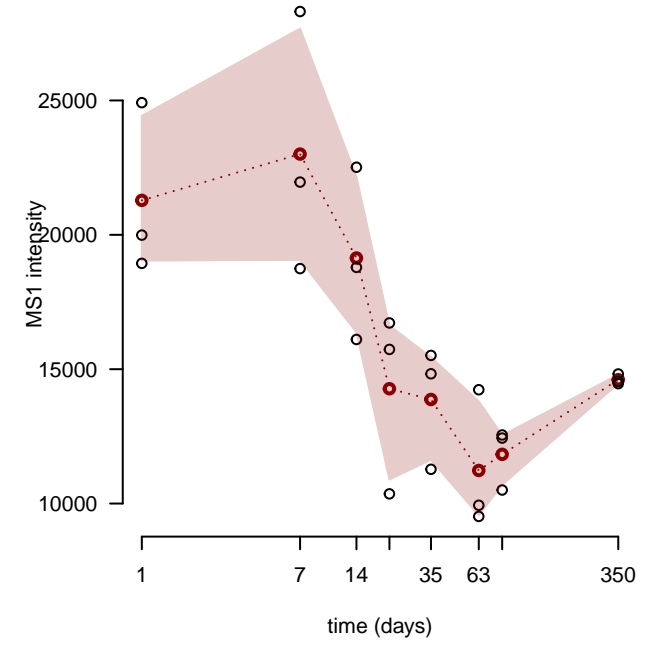

**Q8C0C0**  
**GN=Zhx2**  
zinc fingers and homeoboxes 2

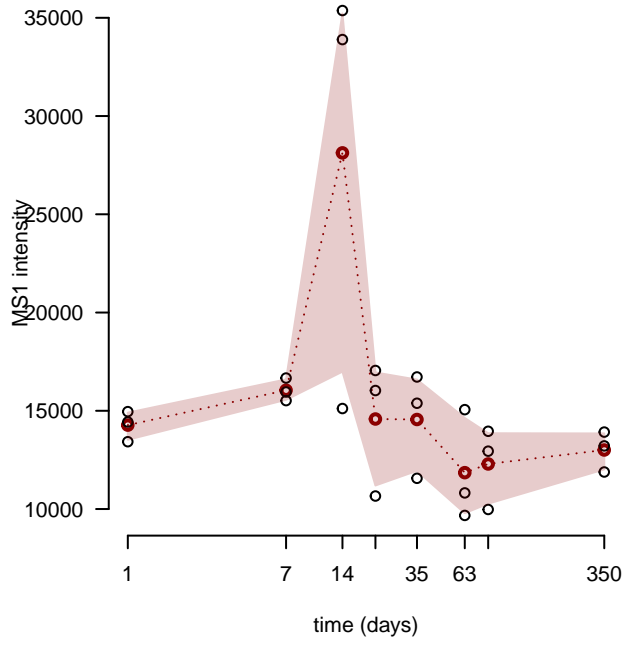

**Q8C0C7**  
**GN=Farsa**  
phenylalanyl-tRNA synthetase, alpha subu ...

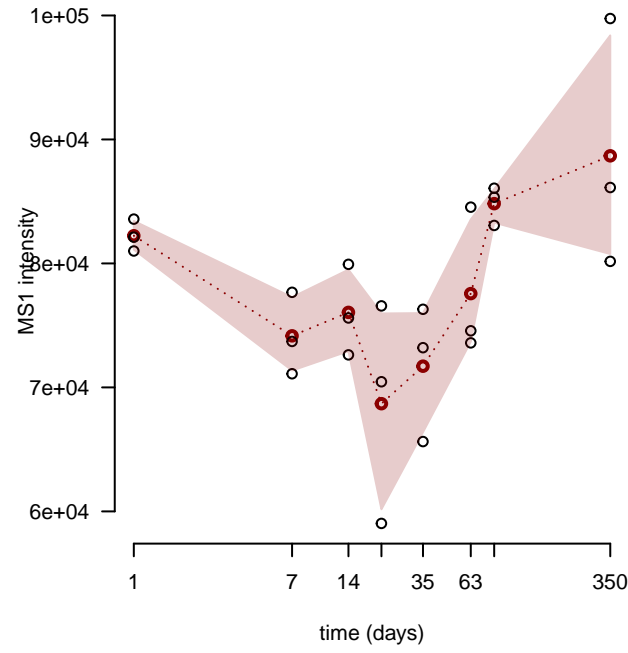

**Q8C0D0**  
**GN=Trub1**  
TruB pseudouridine (psi) synthase family ...

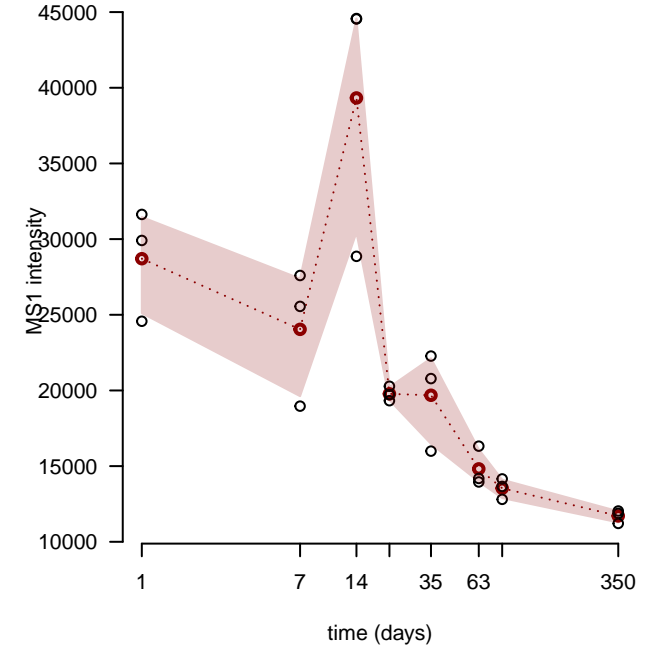

**Q8C0D4**  
**GN=Arhgap12**  
Rho GTPase activating protein 12

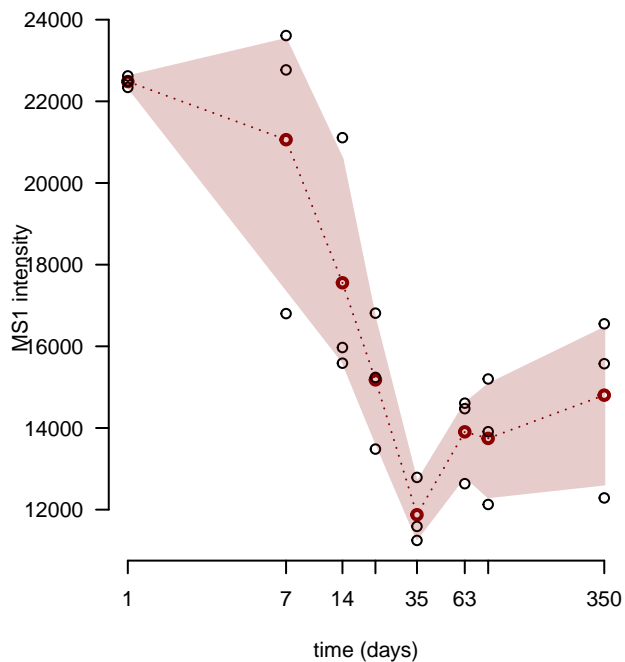

**Q8C0D5**  
**GN=Efl1**  
elongation factor like GTPase 1

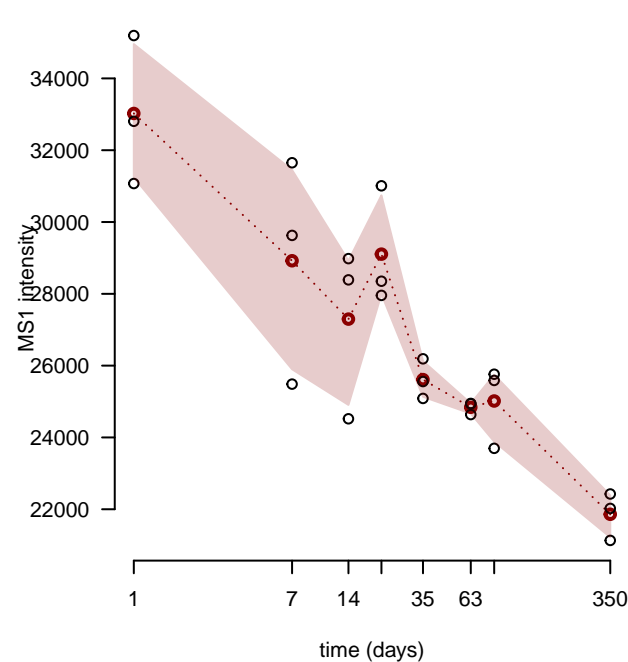

**Q8C0D7**  
**GN=Ing4**  
inhibitor of growth family, member 4

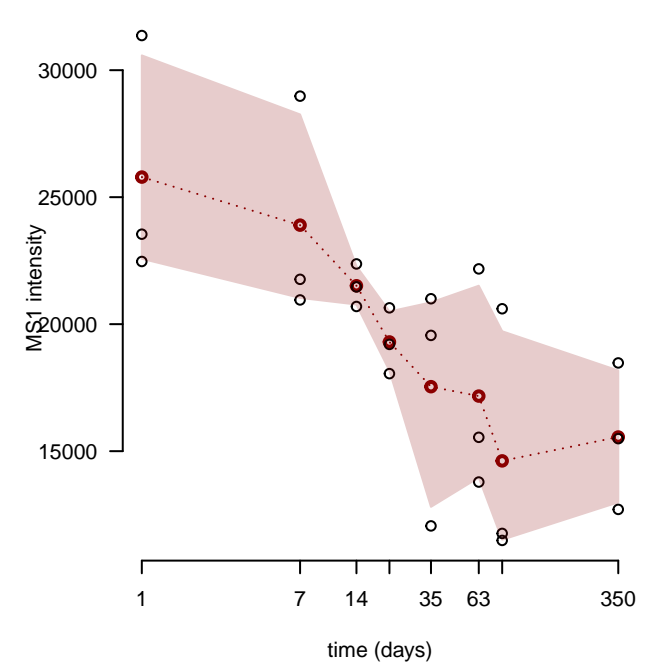

**Q8C0D9**  
**GN=Cep68**  
centrosomal protein 68

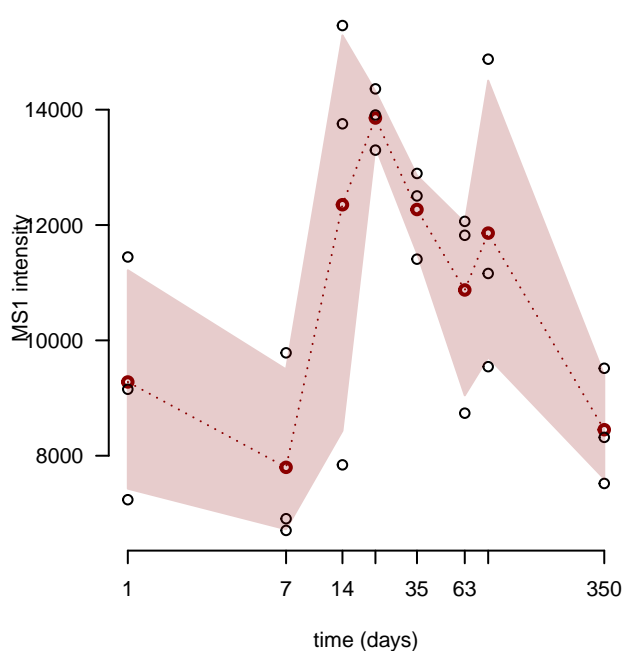

**Q8C0E2**  
**GN=Vps26b**  
VPS26 retromer complex component B

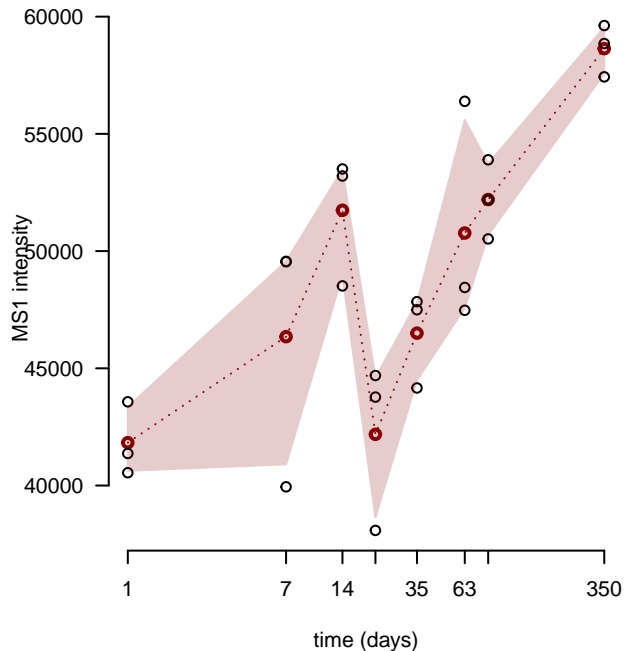

**Q8C0E3**  
**GN=Trim47**  
tripartite motif-containing 47

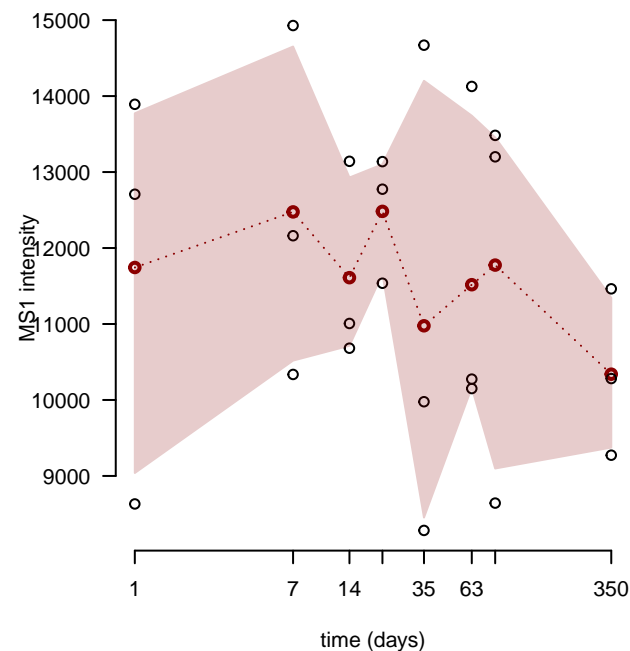

**Q8C0F9**  
**GN=Prss35**  
protease, serine 35

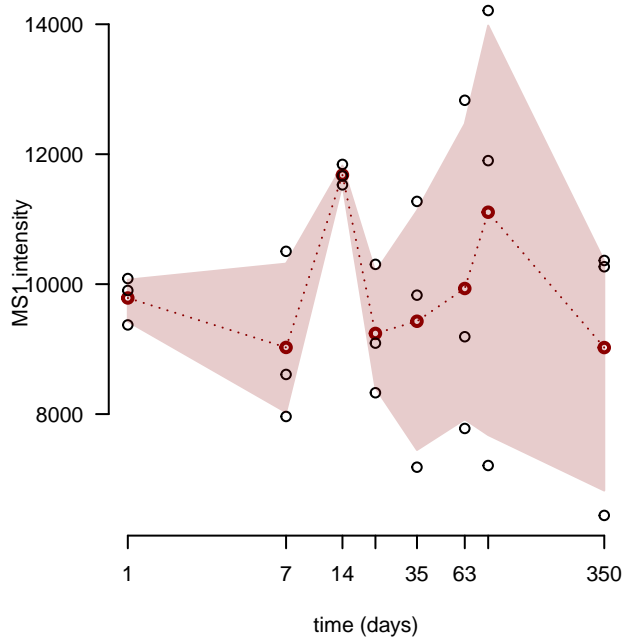

**Q8C0I1**  
**GN=Agps**  
alkylglycerone phosphate synthase

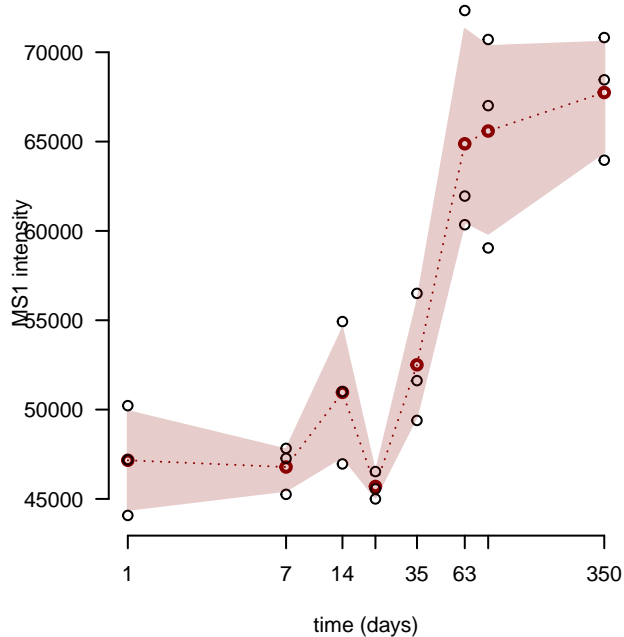

**Q8C0J2**  
**GN=Atg16l1**  
autophagy related 16-like 1 (S. cerevisi ...

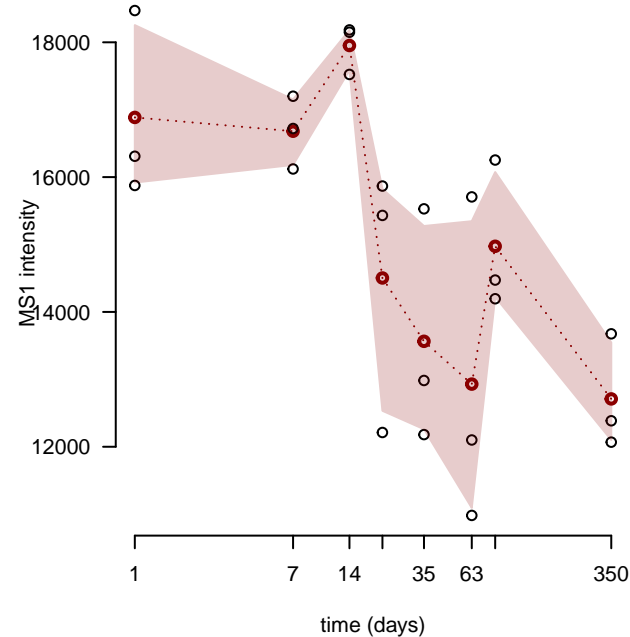

**Q8C0J6**  
**GN=Sowahc**  
sosondowah ankyrin repeat domain family ...

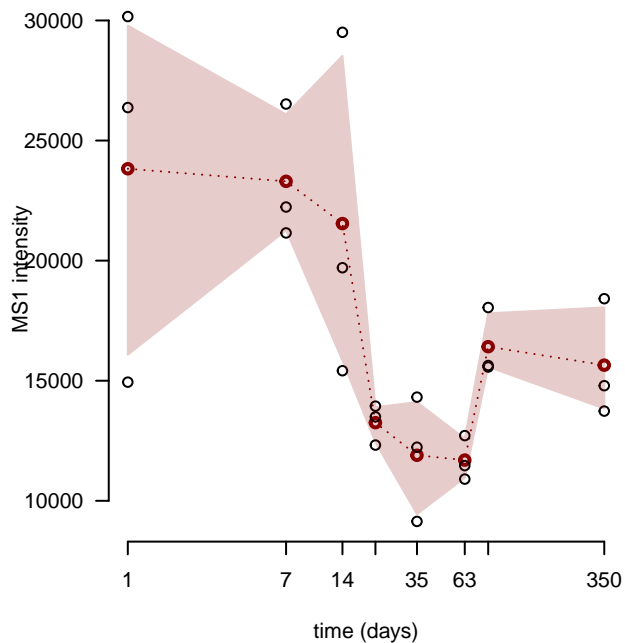

**Q8C0K5**  
**GN=Slc25a16**  
solute carrier family 25 (mitochondrial ...

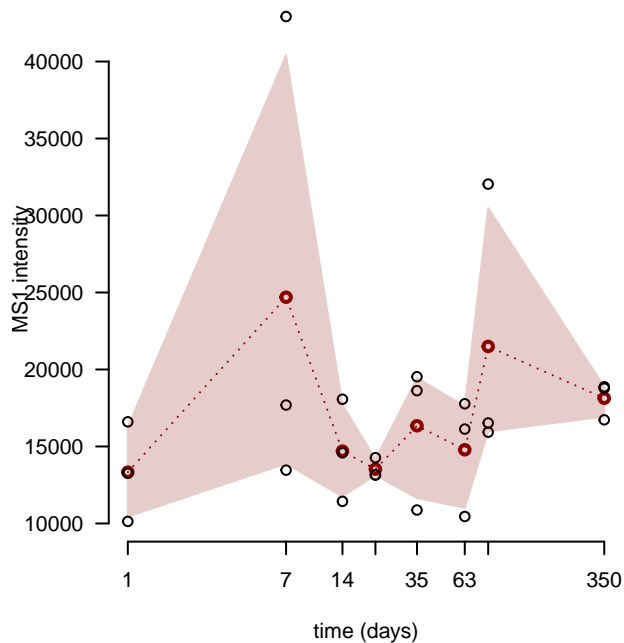

**Q8C0L0**  
**GN=Tmx4**  
thioredoxin-related transmembrane protei ...

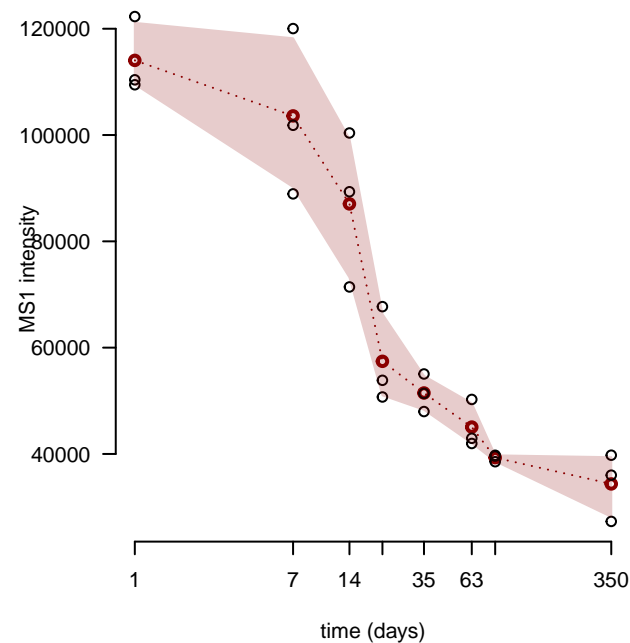

**Q8C0L6**  
**GN=Paox**  
polyamine oxidase (exo-N4-amino)

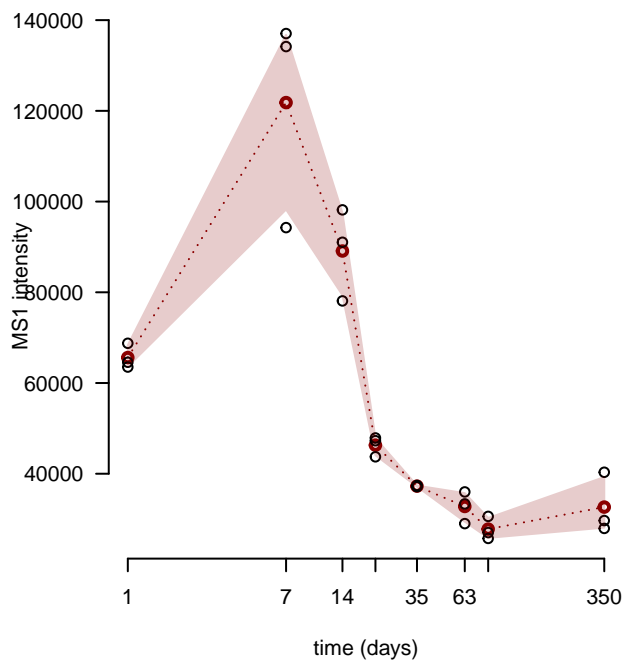

**Q8C0L8**  
**GN=Cog5**  
component of oligomeric golgi complex 5

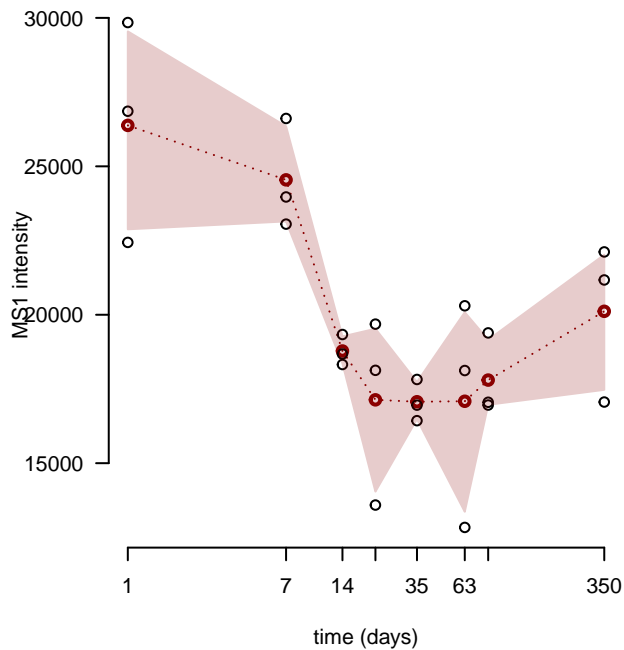

**Q8C0L9**  
**GN=Gpcpd1**  
glycerophosphocholine phosphodiesterase ...

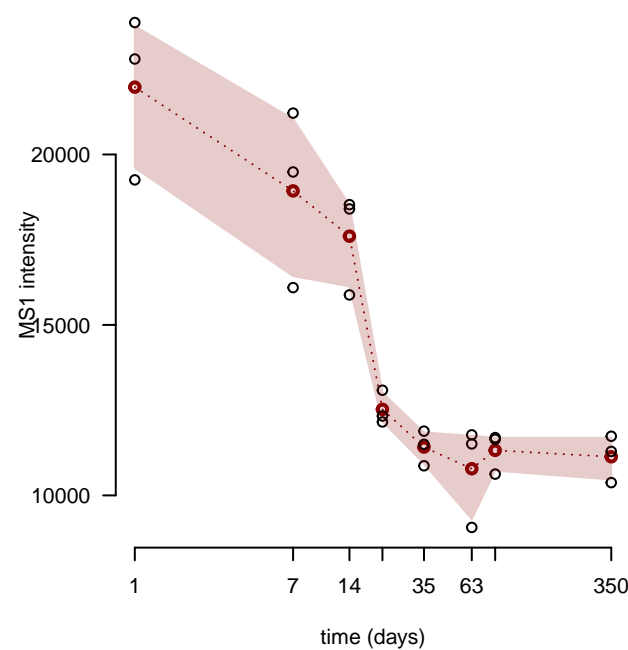

**Q8C0M0**  
**GN=Wdr59**  
WD repeat domain 59

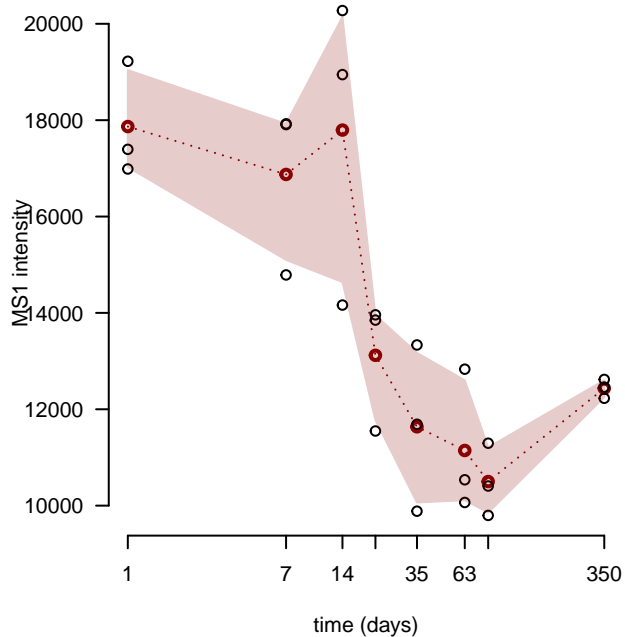

**Q8C0M9**  
**GN=Asrgl1**  
asparaginase like 1

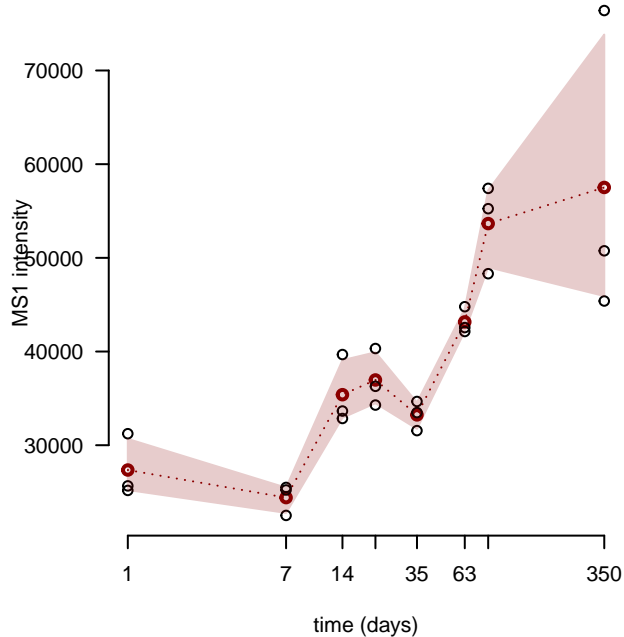

**Q8C0N2**  
**GN=Gpat3**  
glycerol-3-phosphate acyltransferase 3

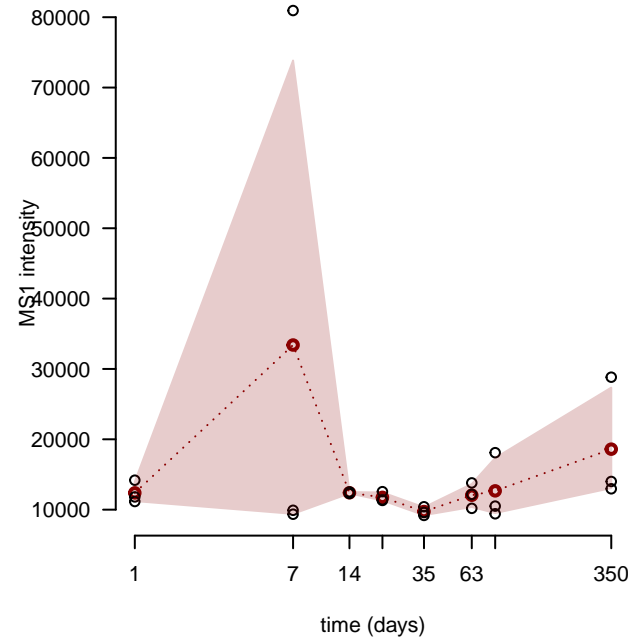

**Q8C0P0**  
**GN=Mastl**  
microtubule associated serine/threonine ...

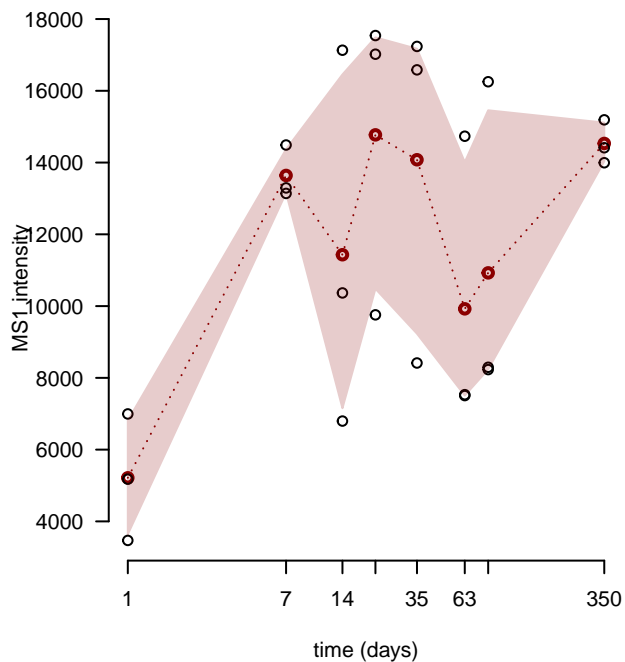

**Q8C0P5**  
**GN=Coro2a**  
coronin, actin binding protein 2A

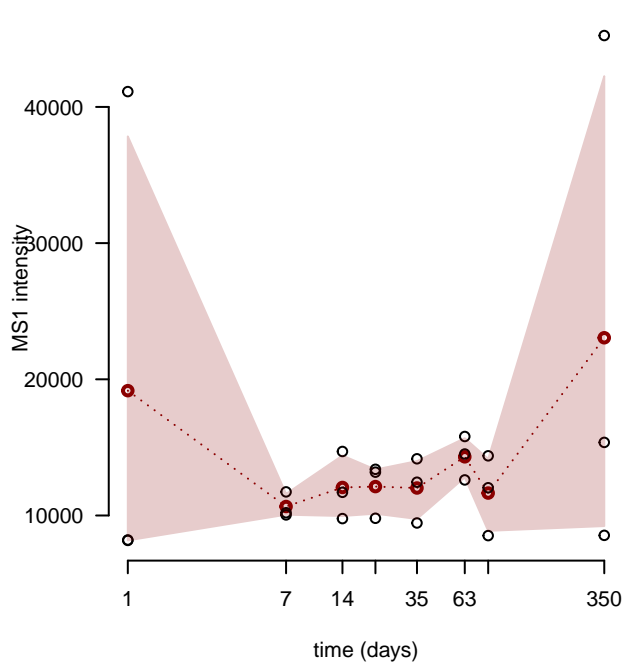

**Q8C0P7**  
**GN=Znf451**

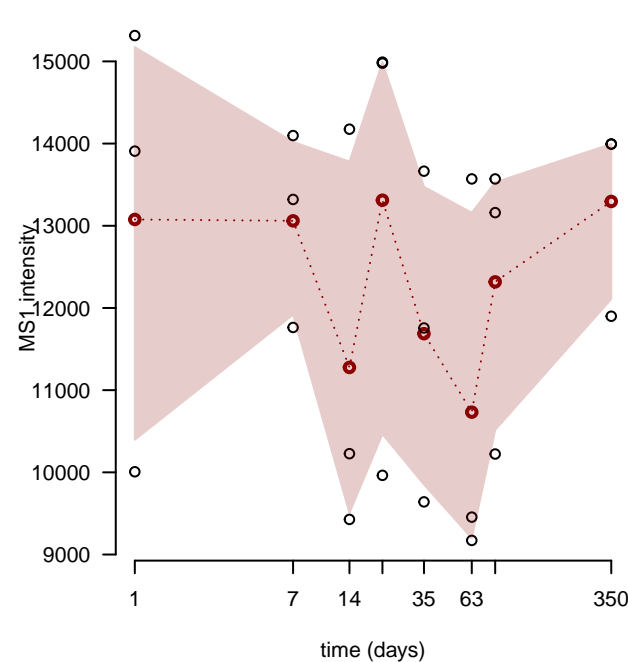



**Q8C0Q2**  
**GN=Zhx3**  
zinc fingers and homeoboxes 3

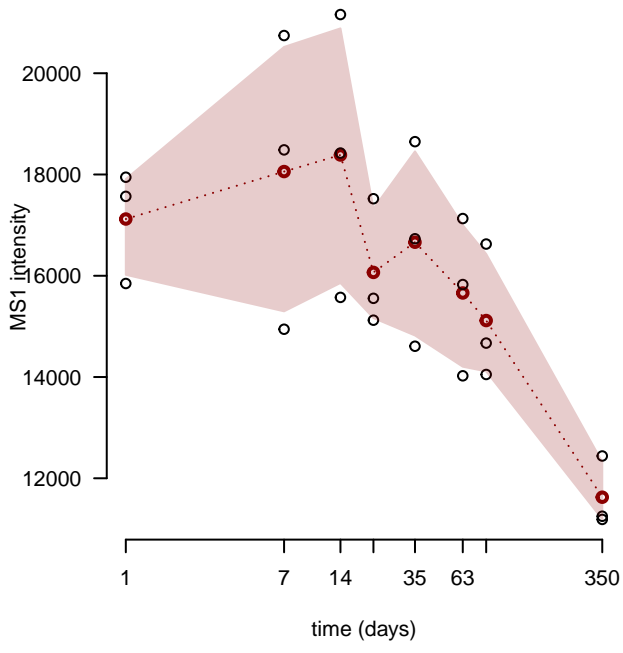

**Q8C0Q9**  
**GN=Rapgef5**  
Rap guanine nucleotide exchange factor ( ...

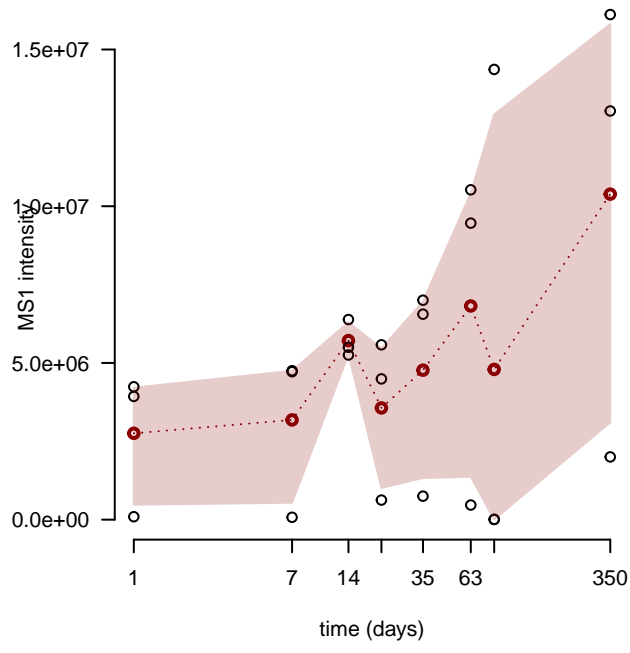

**Q8C0R0**  
**GN=Usp37**  
ubiquitin specific peptidase 37

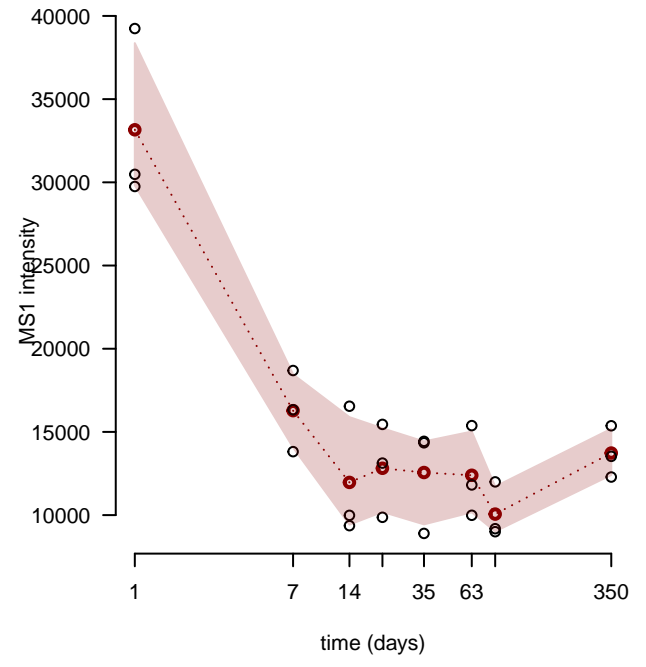

**Q8C0S1**  
**GN=Dis3l**  
DIS3 like exosome 3'-5' exoribonuclease

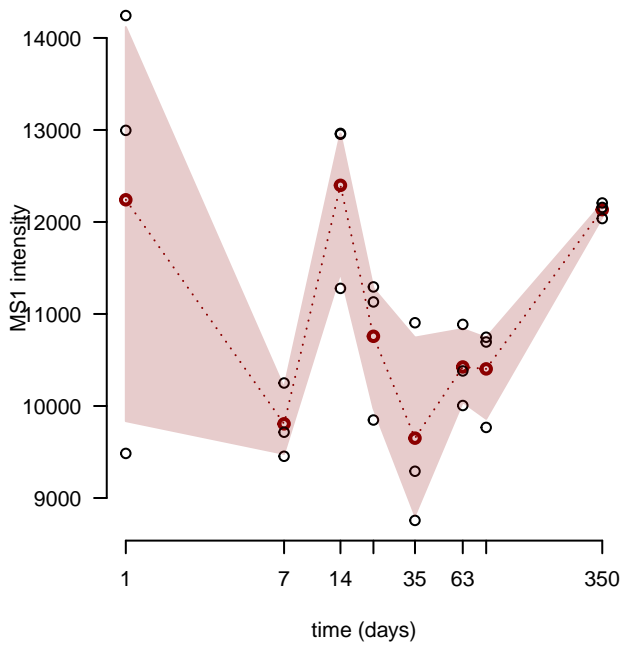

**Q8C0V0**  
**GN=Tlk1**  
tousled-like kinase 1

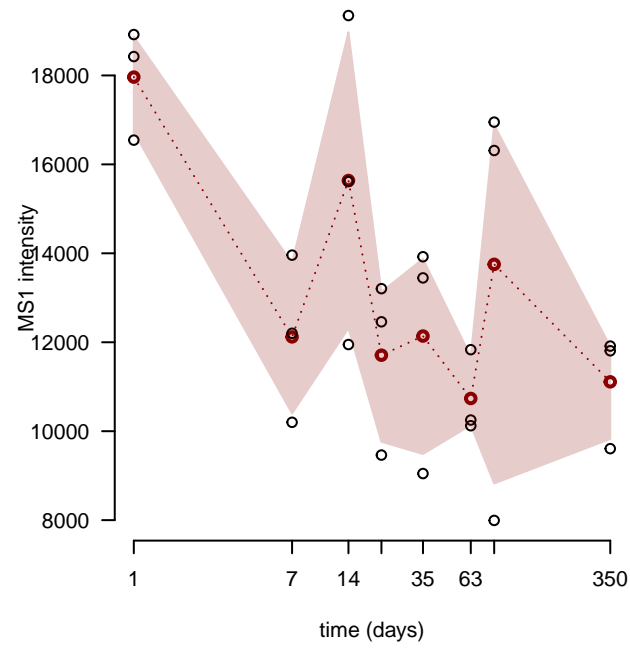

**Q8C0V9**  
**GN=Frmd6**  
FERM domain containing 6

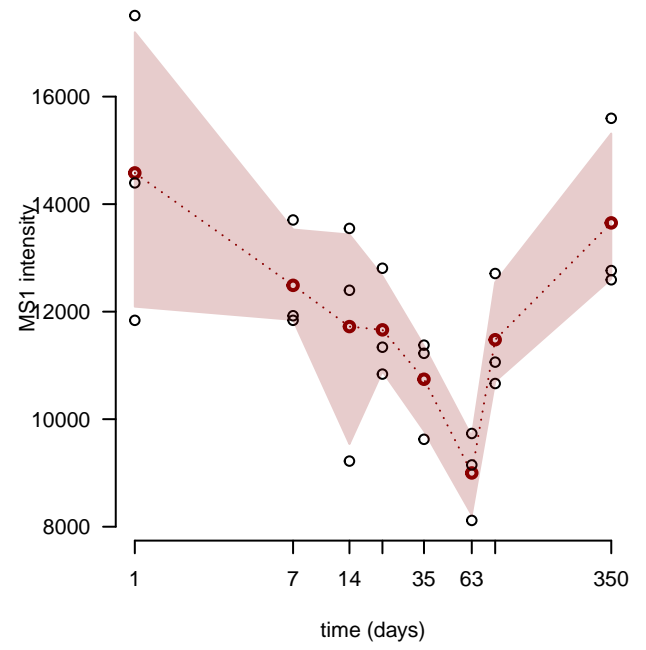

**Q8C0Y0**  
**GN=Ppp4r4**  
protein phosphatase 4, regulatory subuni ...

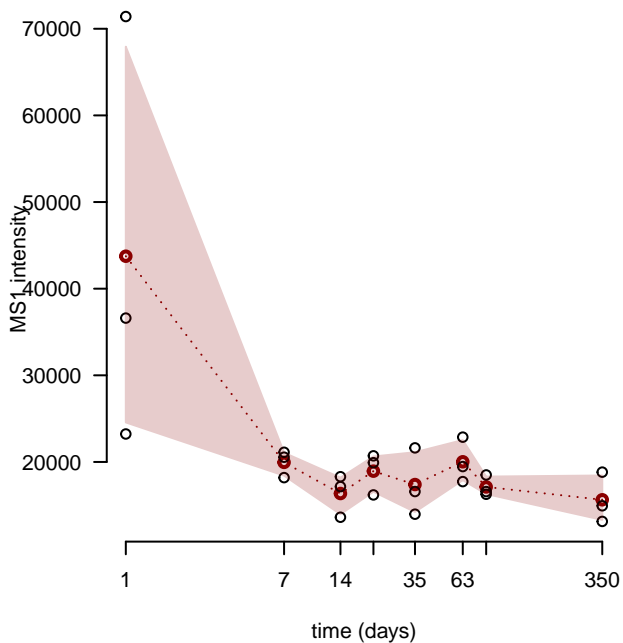

**Q8C0Y1**  
**GN=Tgif2**  
TGFB-induced factor homeobox 2

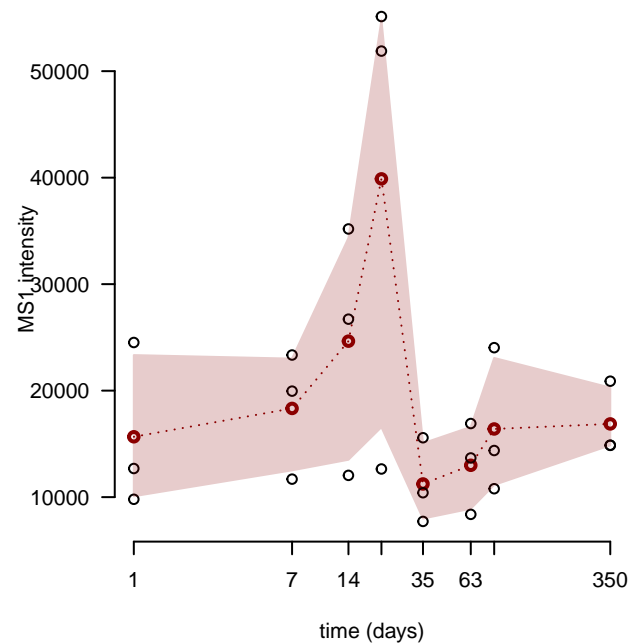

**Q8C0Z1**  
**GN=Fam234a**  
family with sequence similarity 234, mem ...

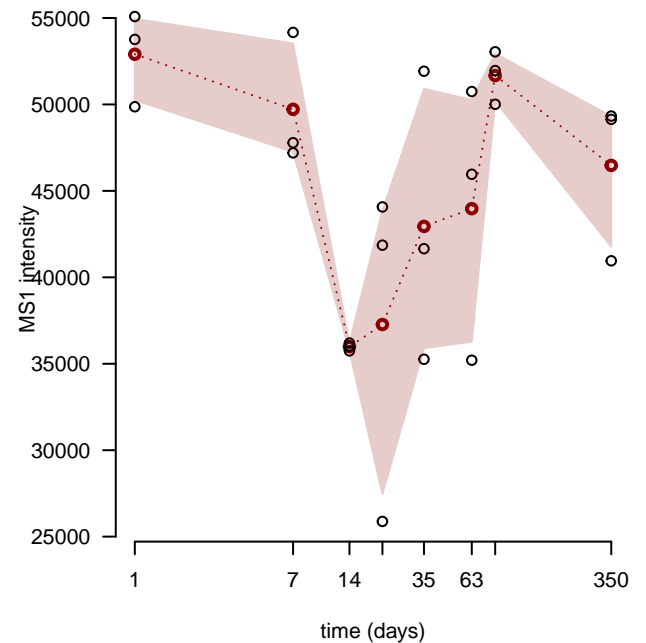

**Q8C129**  
GN=Lnpep  
leucyl/cystinyl aminopeptidase

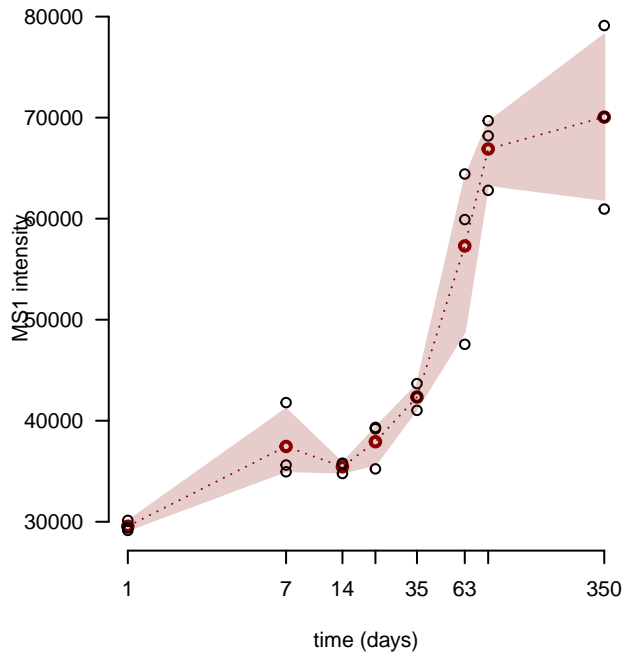

**Q8C142**  
GN=Ldlrap1  
low density lipoprotein receptor adaptor ...

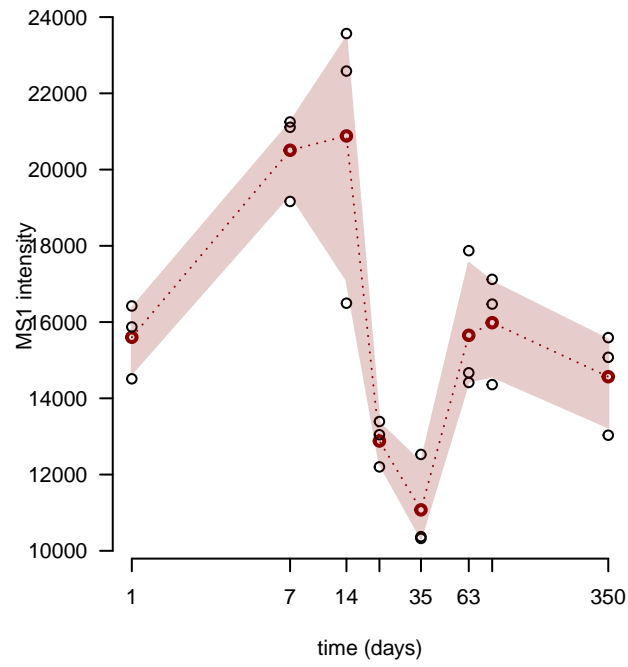

**Q8C145**  
GN=Slc39a6  
solute carrier family 39 (metal ion tran ...

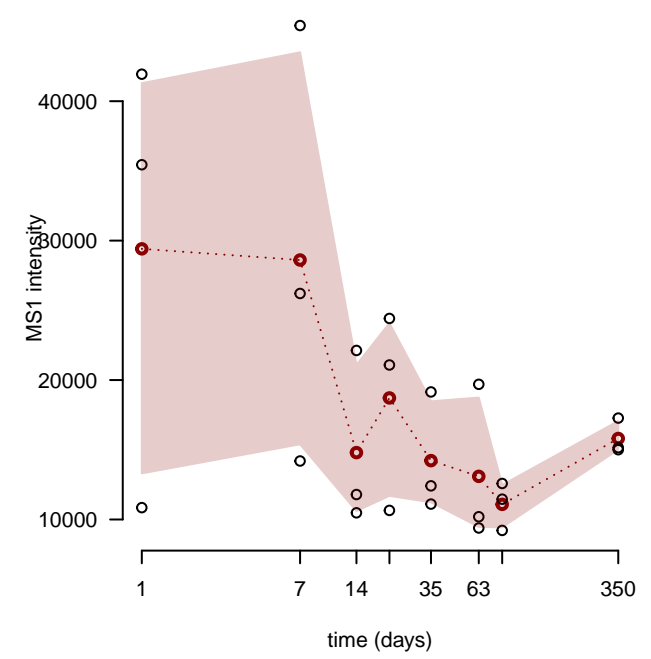

**Q8C147**  
GN=Dock8  
dedicator of cytokinesis 8

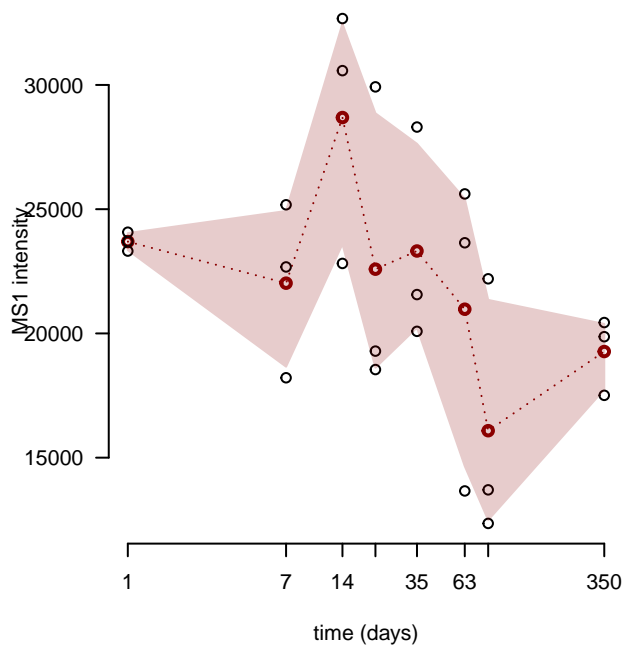

**Q8C156**  
GN=Ncaph  
non-SMC condensin I complex, subunit H

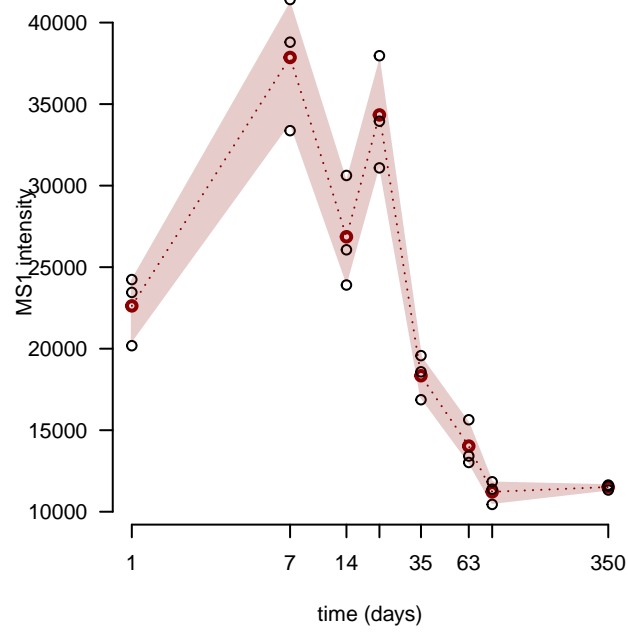

**Q8C163**  
GN=Exog  
endo/exonuclease (5'-3'), endonuclease G ...

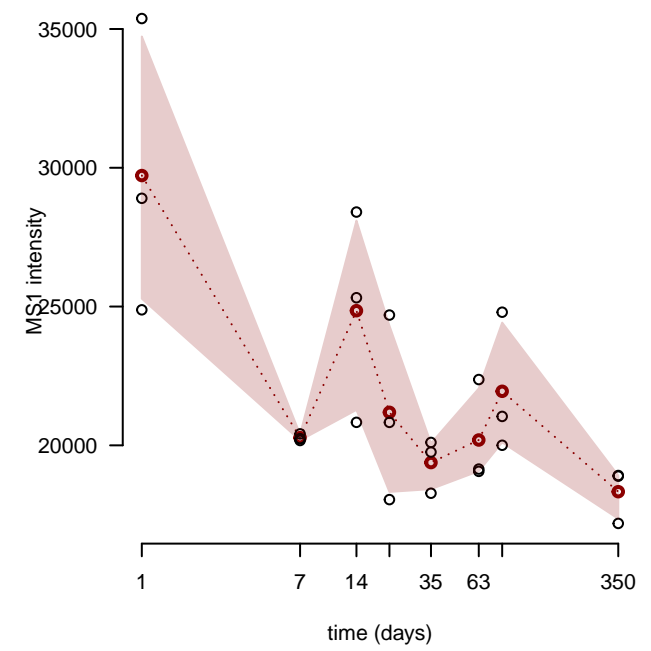

**Q8C165**  
GN=Pm20d1  
peptidase M20 domain containing 1

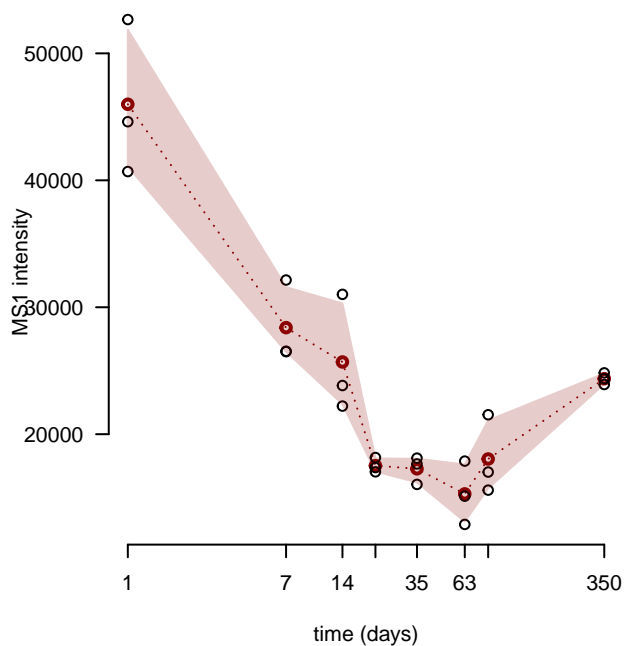

**Q8C166**  
GN=Cpne1  
copine I

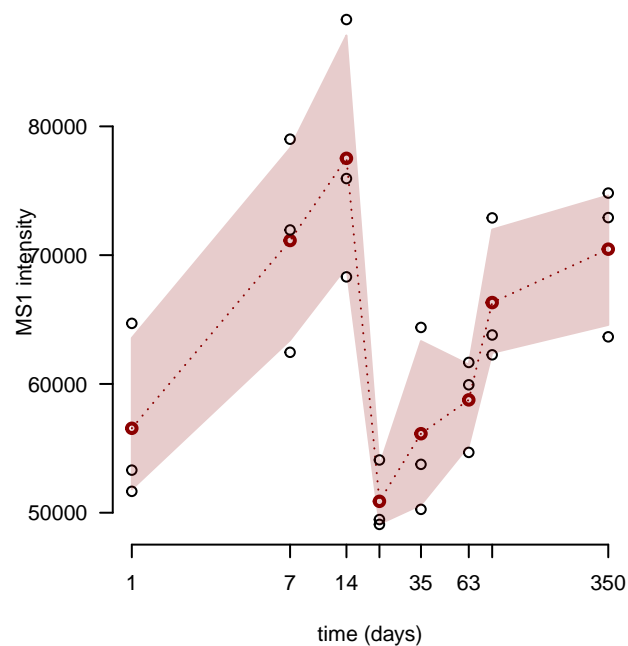

**Q8C167**  
GN=Prepl  
prolyl endopeptidase-like

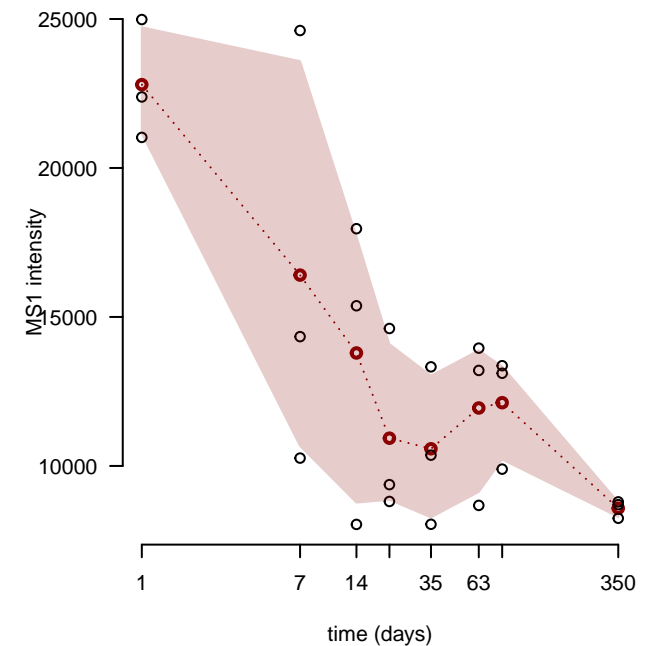

**Q8C170**  
GN=Myo9a  
myosin IXa

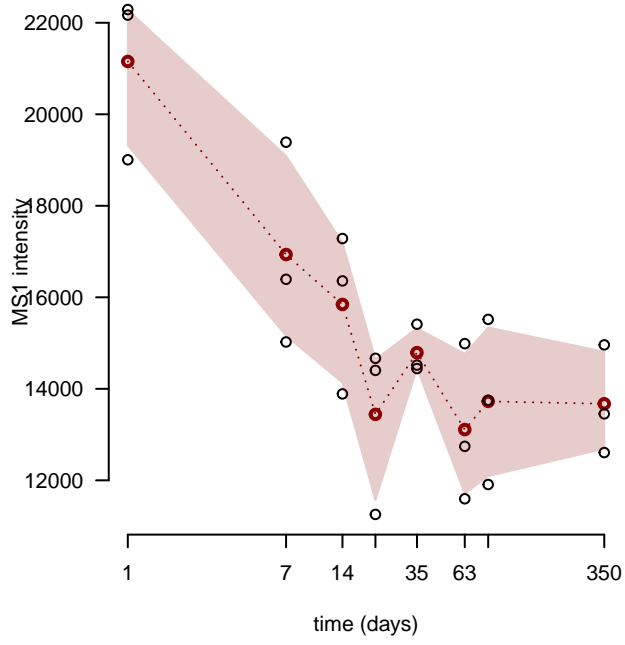

**Q8C172**  
GN=Cers6  
ceramide synthase 6

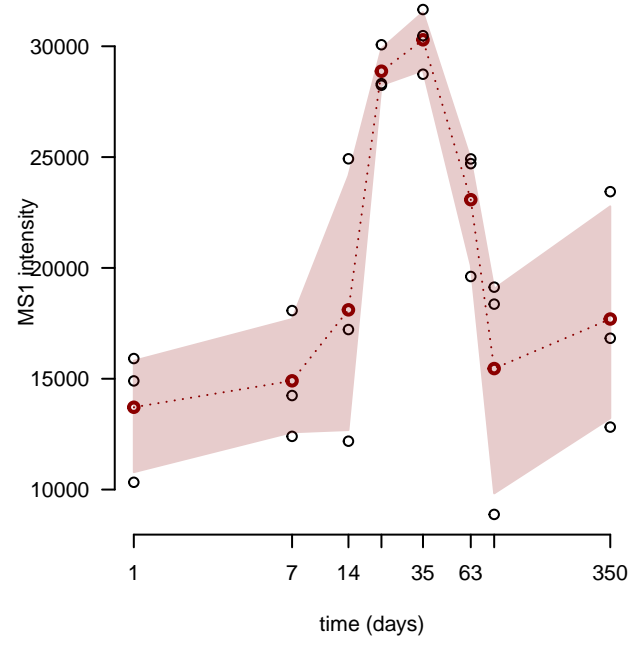

**Q8C176**  
GN=Taf2  
TATA-box binding protein associated fact ...

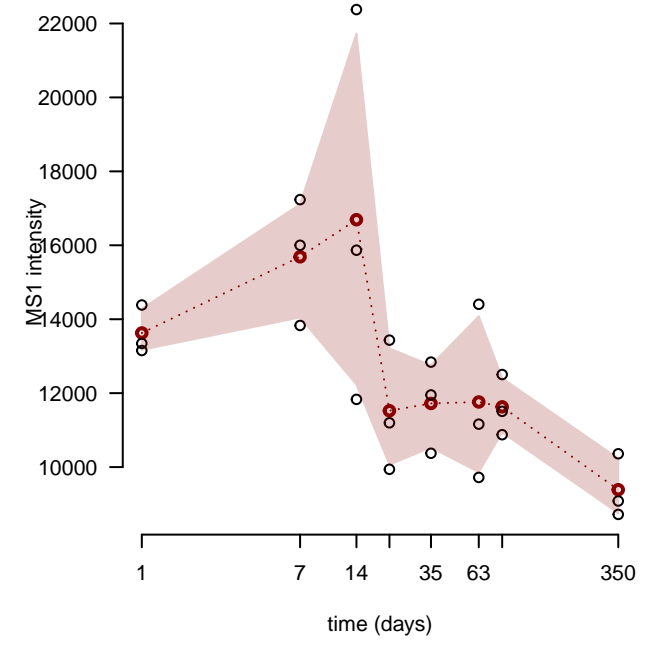

**Q8C180**  
GN=Frs2  
fibroblast growth factor receptor substr ...

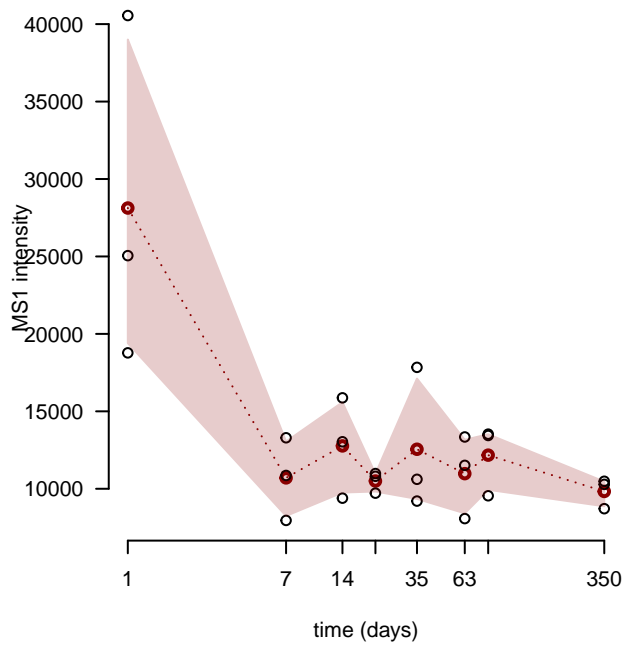

**Q8C181**  
GN=Mbnl2  
muscleblind like splicing factor 2

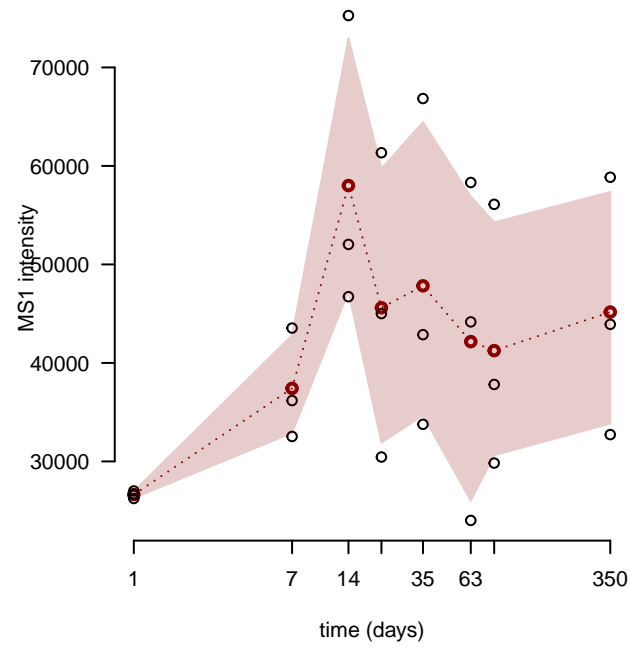

**Q8C196**  
GN=Cps1  
carbamoyl-phosphate synthetase 1

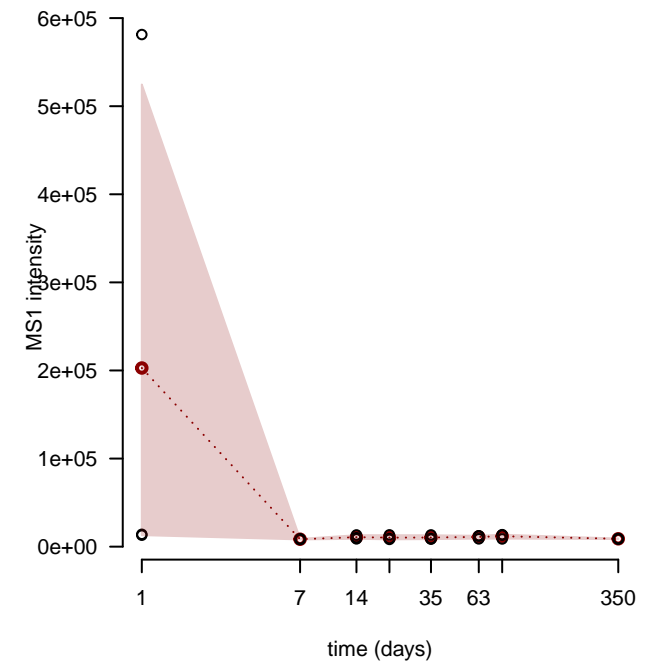

**Q8C1A3**  
GN=Mtrr  
5-methyltetrahydrofolate-homocysteine me ...

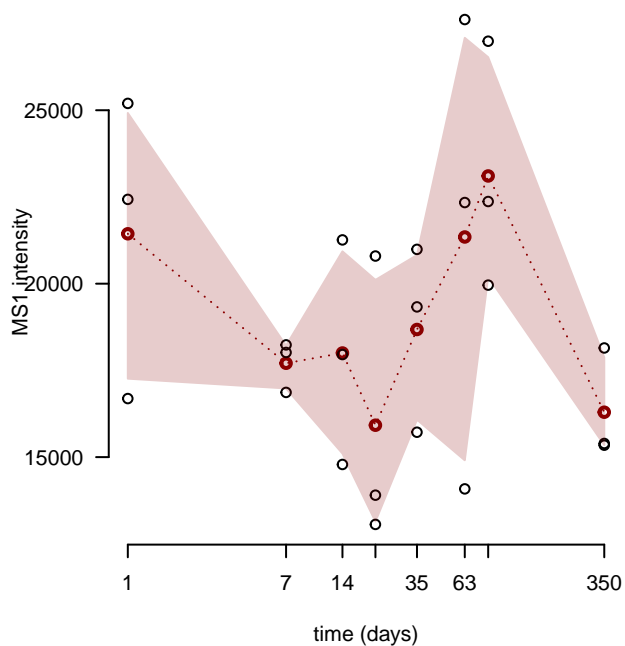

**Q8C1A5**  
GN=Thop1  
thimet oligopeptidase 1

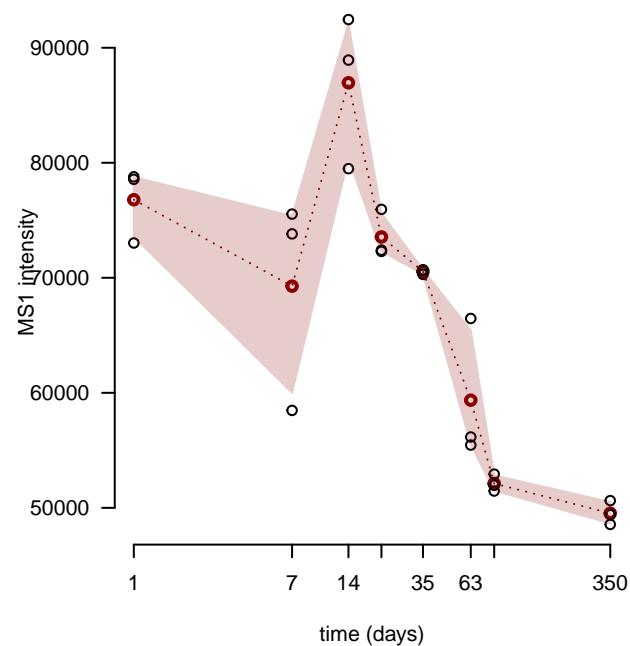

**Q8C1B1**  
GN=Camsap2  
calmodulin regulated spectrin-associated ...

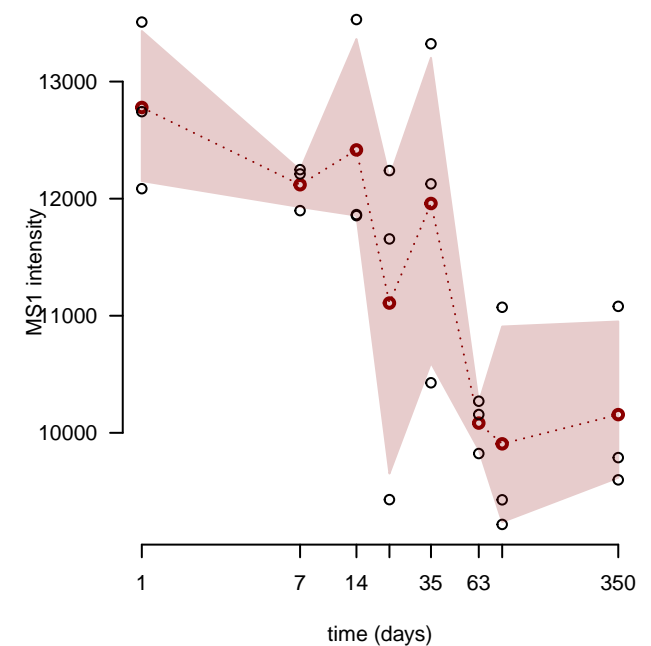

**Q8C1B7**  
GN=Sept11

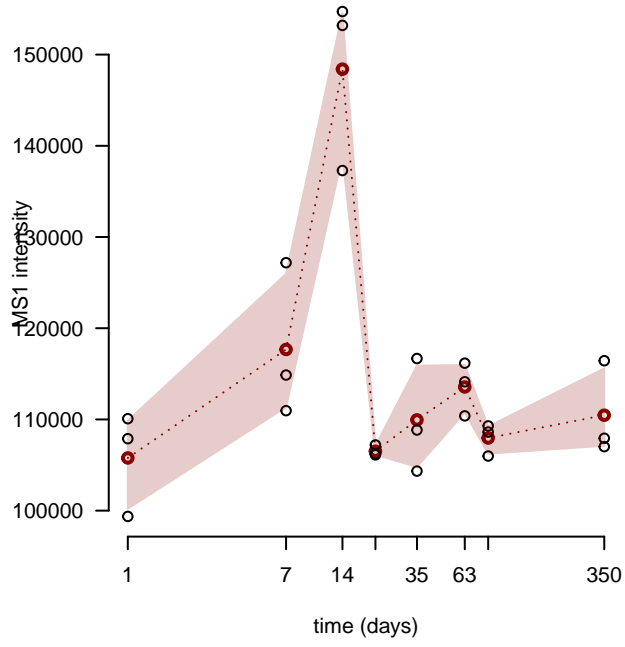

**Q8C1D8**  
GN=lws1  
IWS1, SUPT6 interacting protein

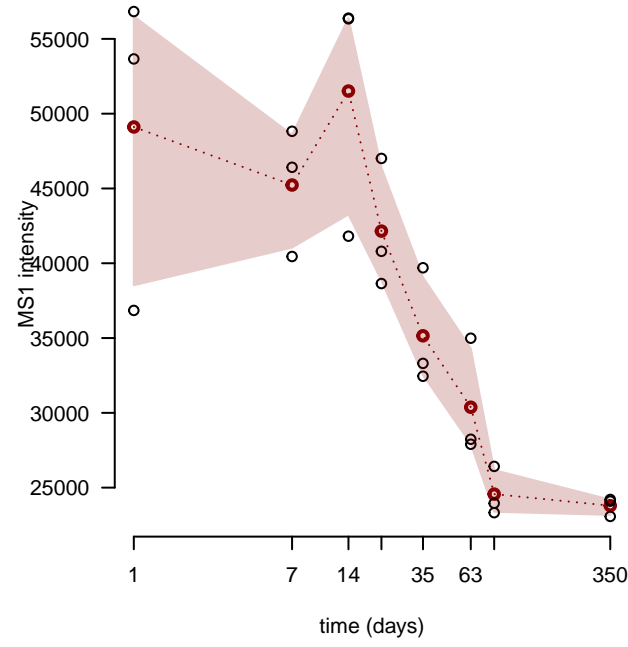

**Q8C1E7**  
GN=Tmem120a  
transmembrane protein 120A

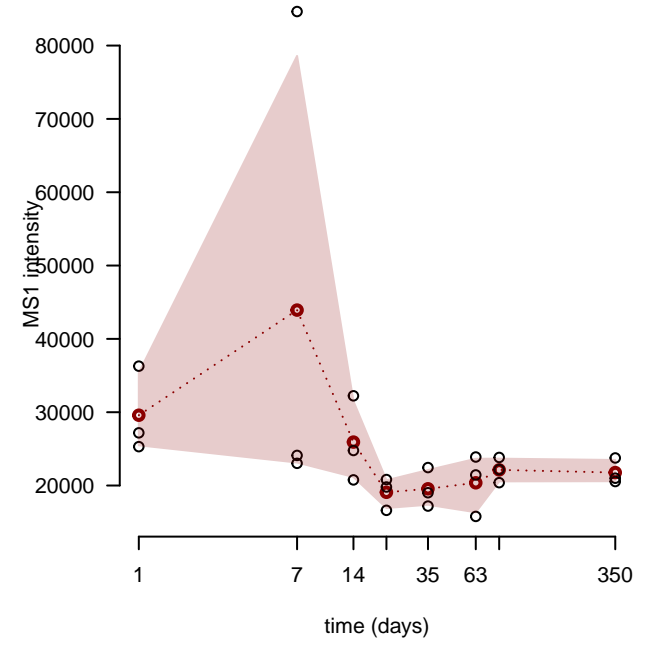

**Q8C1F4**  
GN=Csgalact2  
chondroitin sulfate N-acetylgalactosamin ...

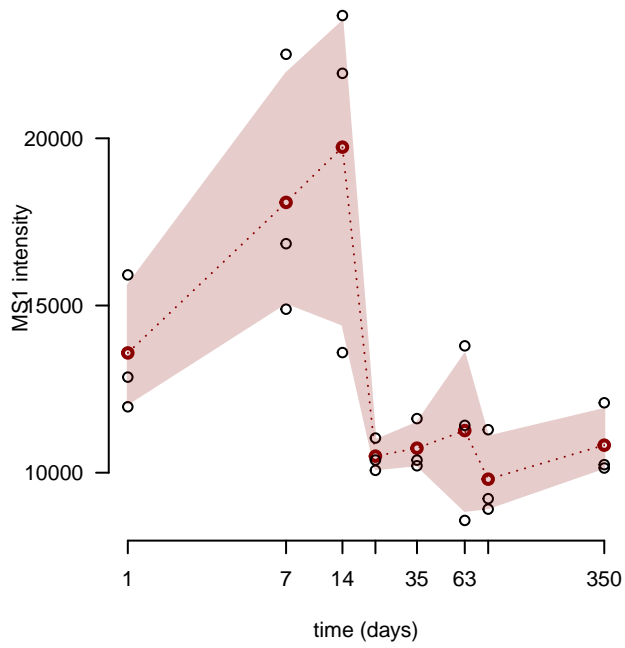

**Q8C1M2**  
GN=Znf428

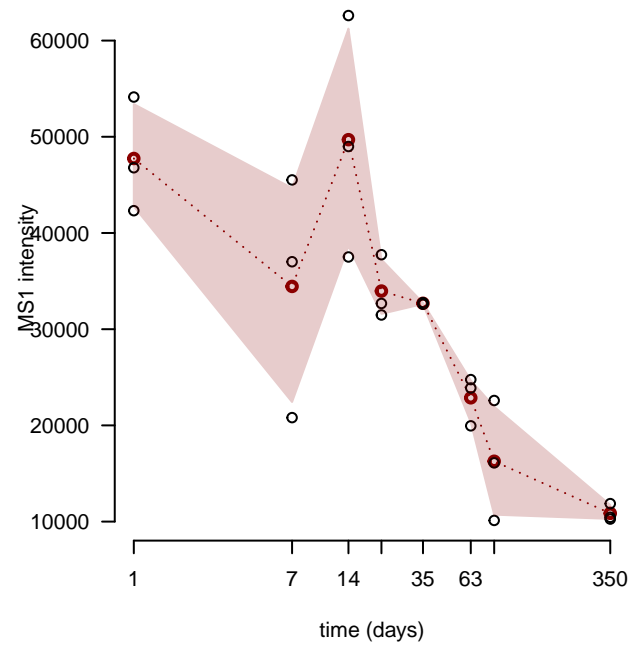

**Q8C1Q6**  
GN=Smim4  
small integral membrane protein 4

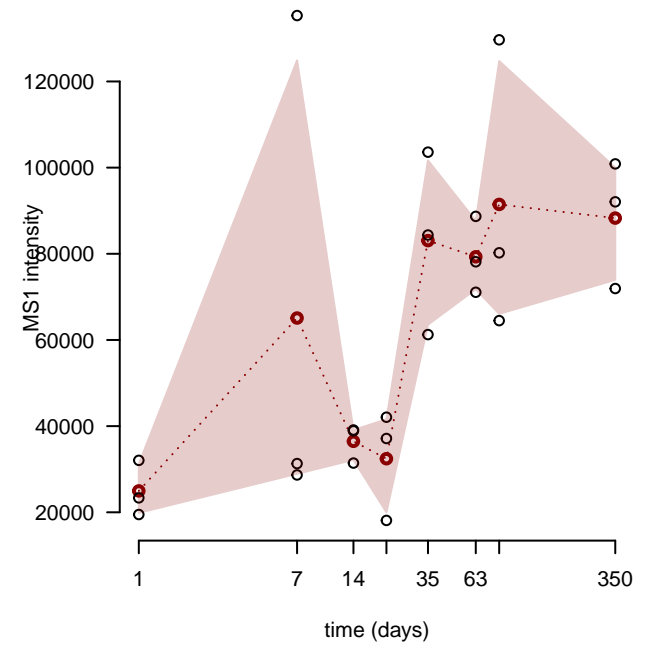

**Q8C1S0**  
GN=Med19  
mediator complex subunit 19

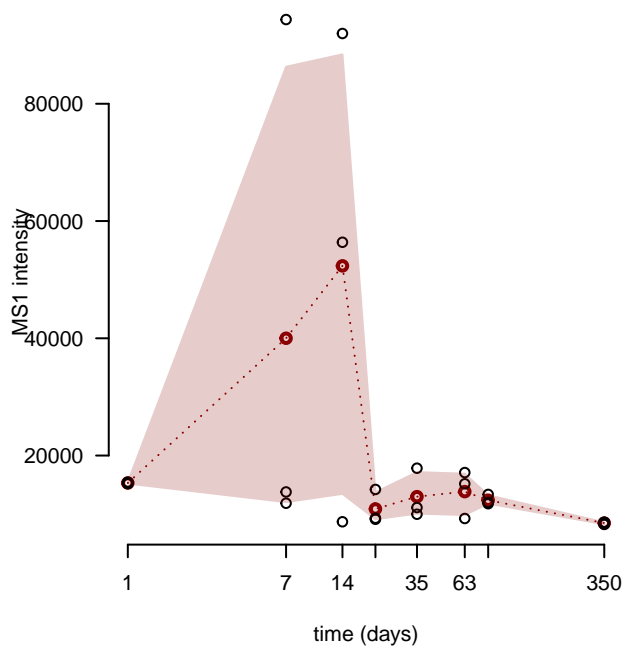

**Q8C1Y8**  
GN=Ccz1  
CCZ1 vacuolar protein trafficking and bi ...

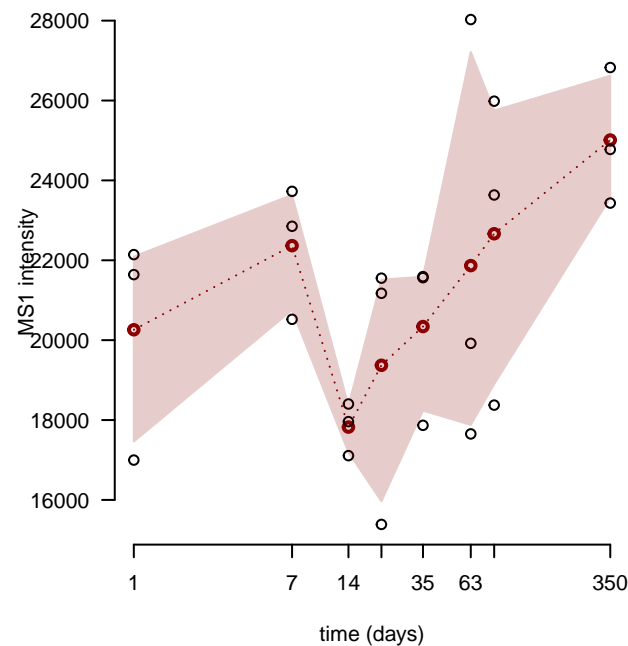

**Q8C1Z7**  
GN=Bbs4  
Bardet-Biedl syndrome 4 (human)

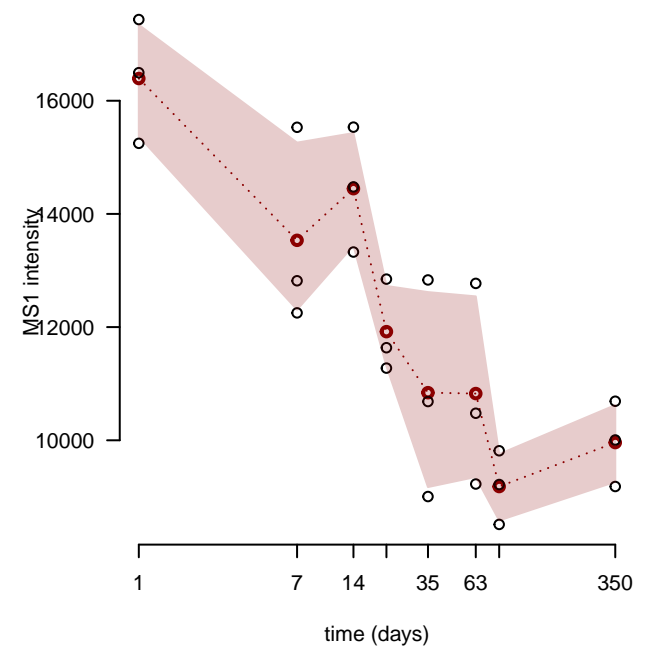

**Q8C1Z8**  
**GN=Trmt10a**  
tRNA methyltransferase 10A

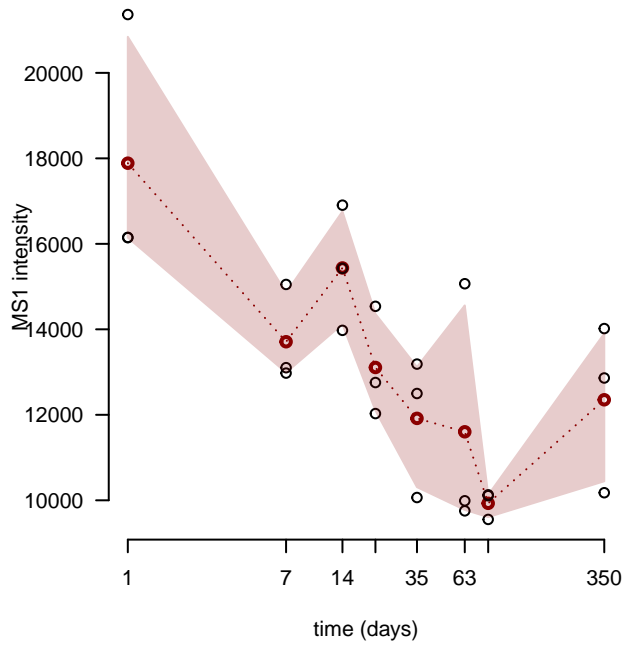

**Q8C2A2**  
**GN=Tsen54**  
tRNA splicing endonuclease subunit 54

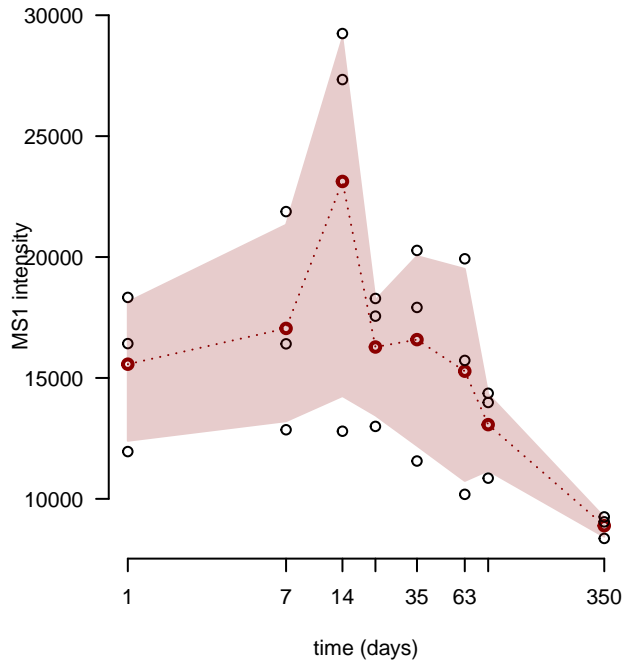

**Q8C2B3**  
**GN=Hdac7**  
histone deacetylase 7

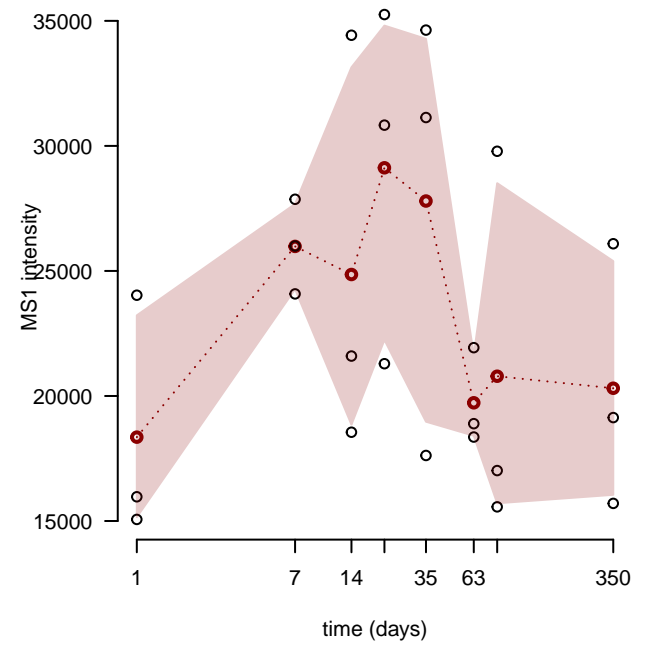

**Q8C2E4**  
**GN=Ptcd1**  
pentatricopeptide repeat domain 1

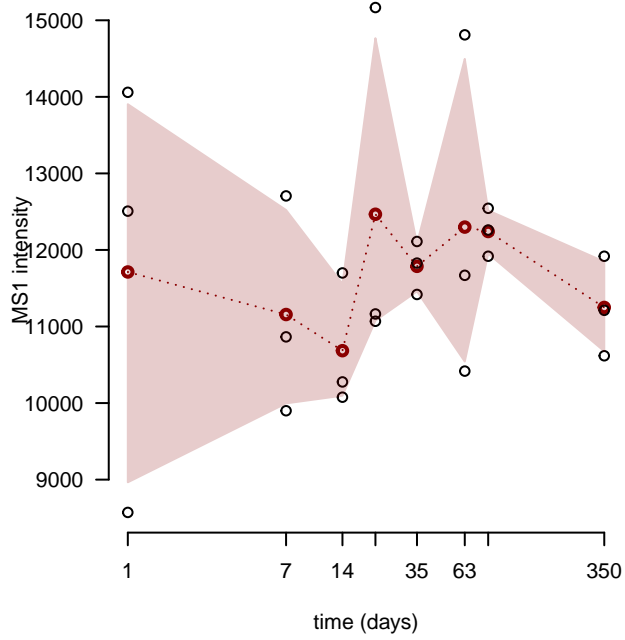

**Q8C2E7**  
**GN=Washc5**  
WASH complex subunit 5

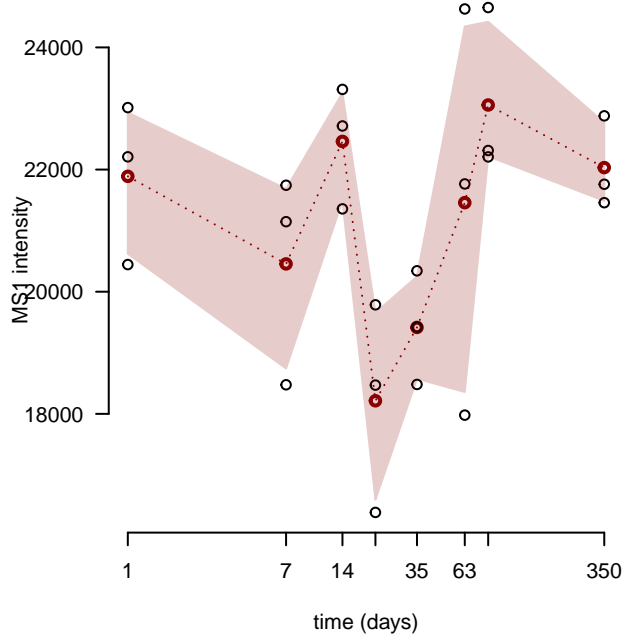

**Q8C2Q3**  
**GN=Rbm14**  
RNA binding motif protein 14

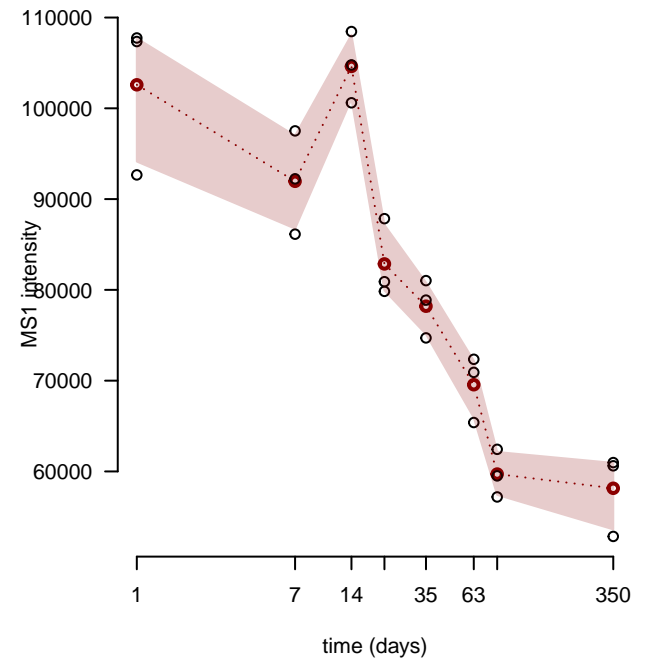

**Q8C310**  
**GN=Robo4**  
roundabout guidance receptor 4

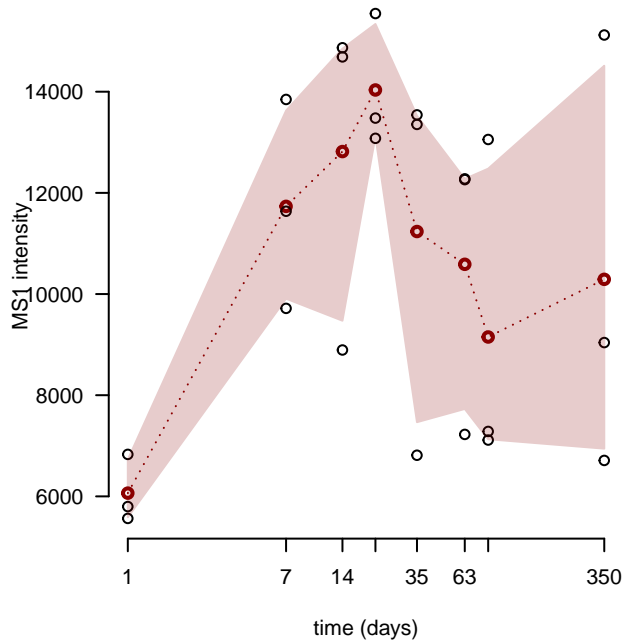

**Q8C341**  
**GN=Suco**  
SUN domain containing ossification facto ...

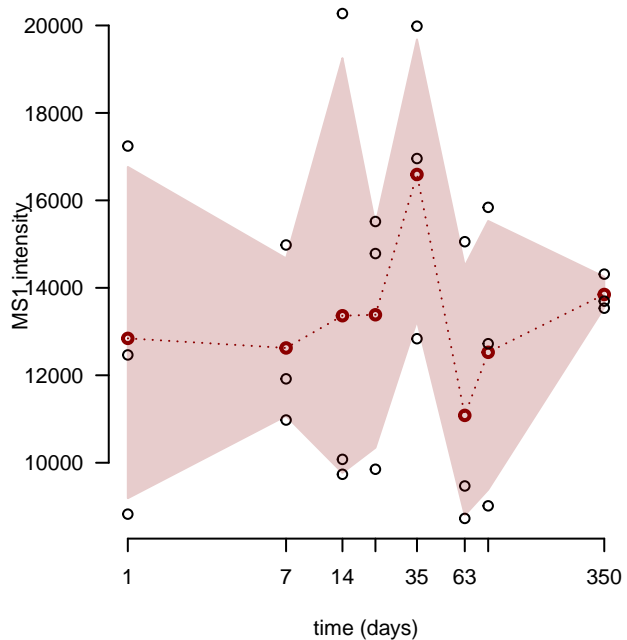

**Q8C398**  
**GN=Pigw**  
phosphatidylinositol glycan anchor biosy ...

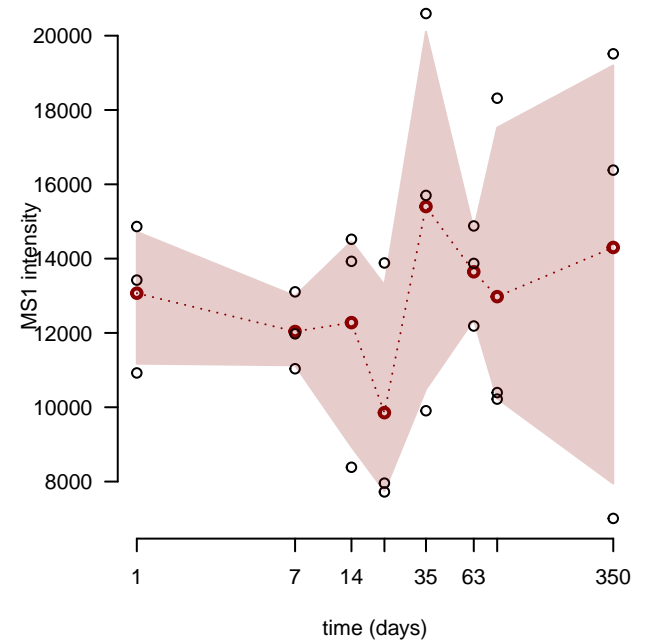

**Q8C3B8**  
GN=Rft1  
RFT1 homolog

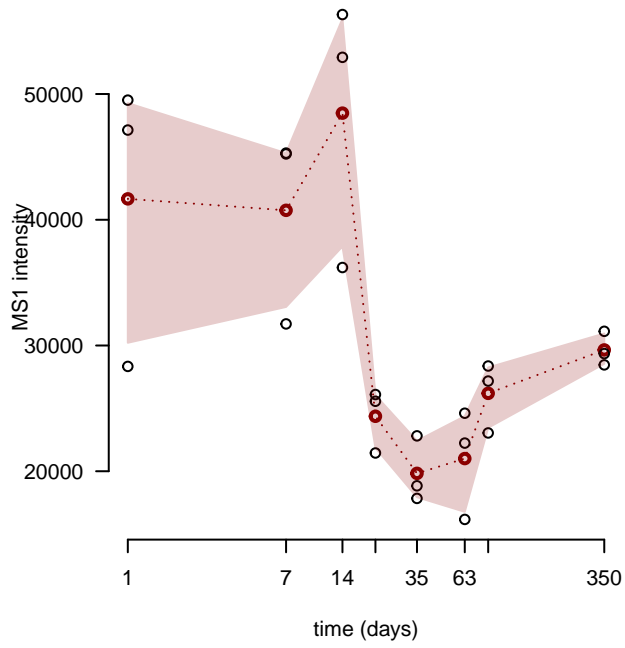

**Q8C3F2**  
GN=Fam120c  
family with sequence similarity 120, mem ...

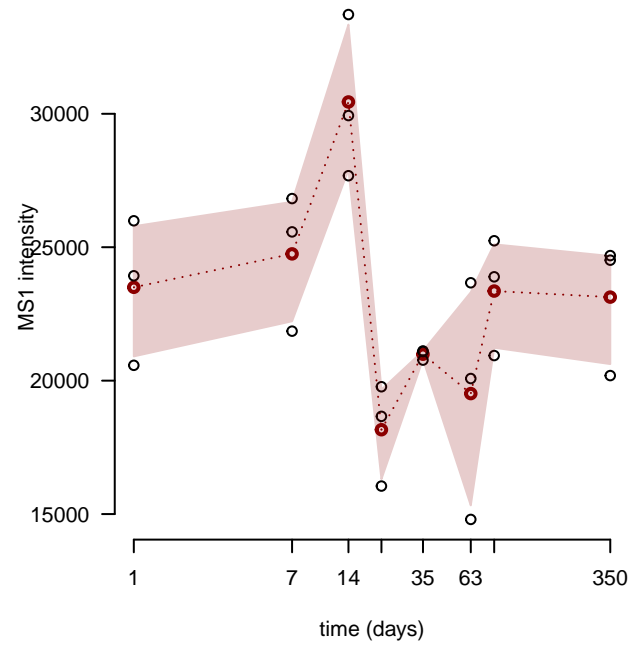

**Q8C3I8**  
GN=Hgh1  
HGH1 homolog

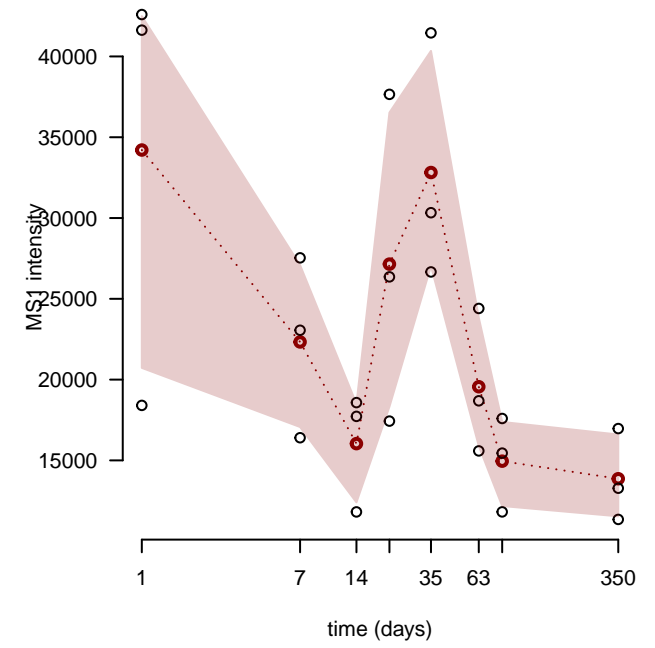

**Q8C3J5**  
GN=Dock2  
dedicator of cyto-kinesis 2

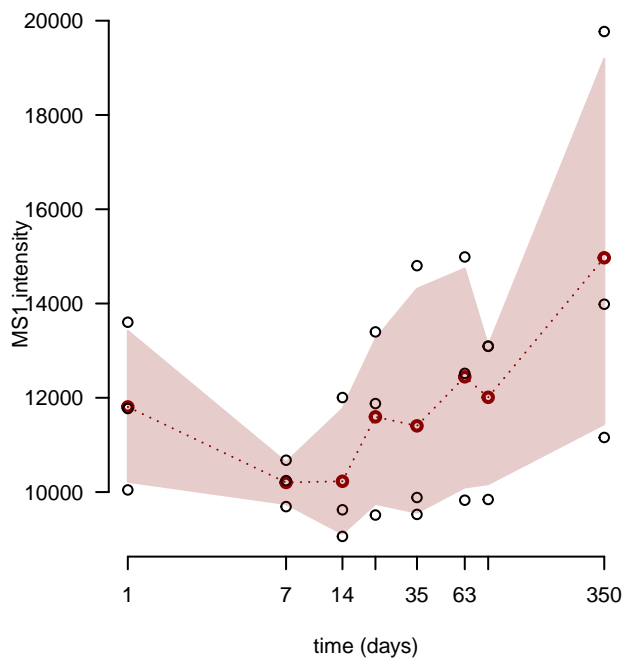

**Q8C3P7**  
GN=Mettl3  
methyltransferase like 3

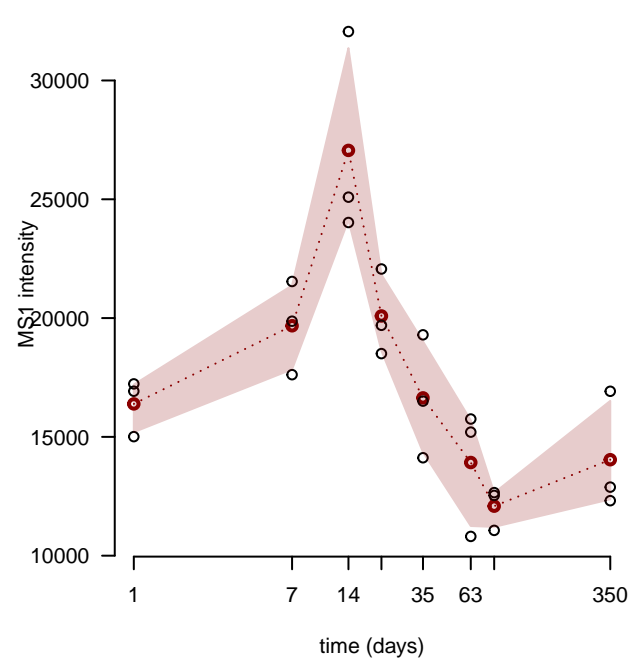

**Q8C3Q9**  
GN=Casp9  
caspase 9

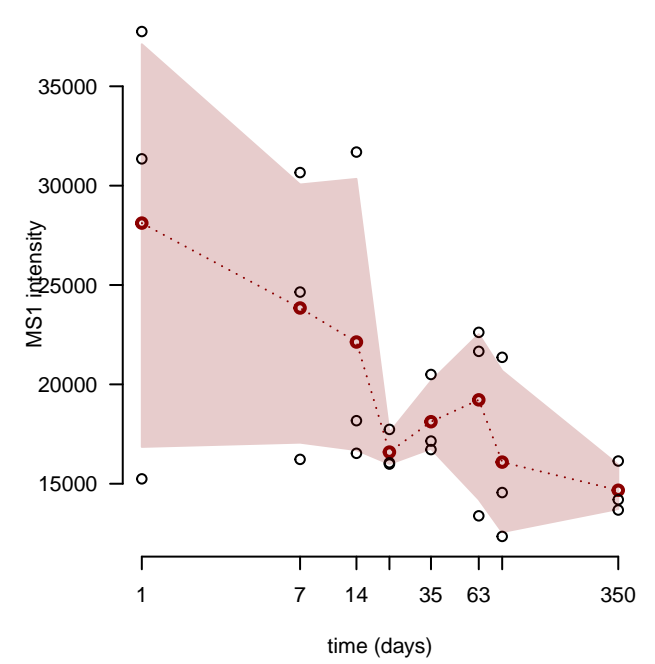

**Q8C3R1**  
GN=Brat1  
BRCA1-associated ATM activator 1

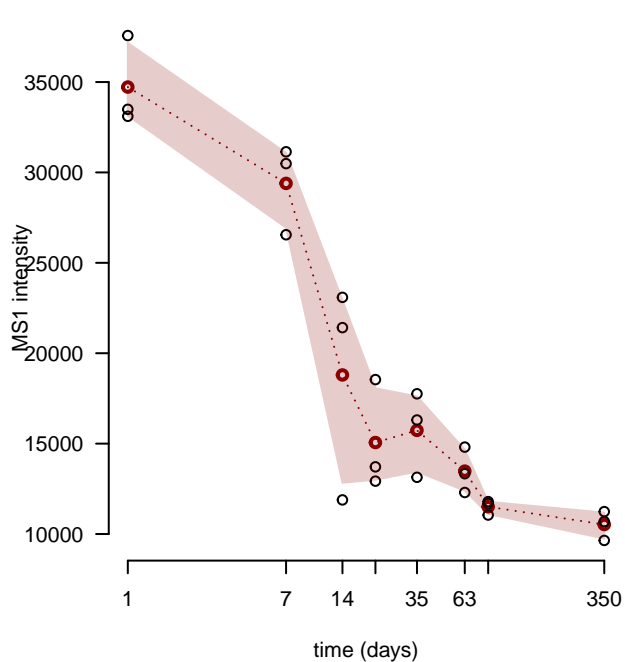

**Q8C3S2**  
GN=Tango6  
transport and golgi organization 6

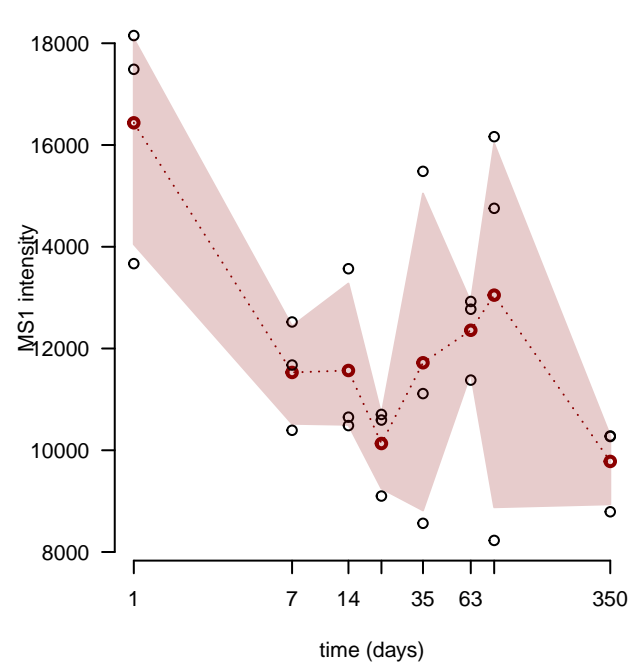

**Q8C3W1**  
GN=

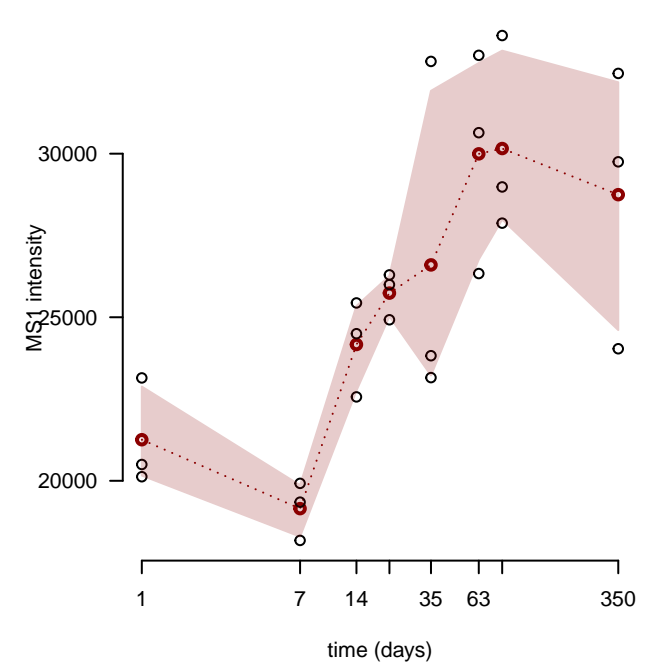

**Q8C3X2**  
**GN=Ccdc90b**  
coiled-coil domain containing 90B

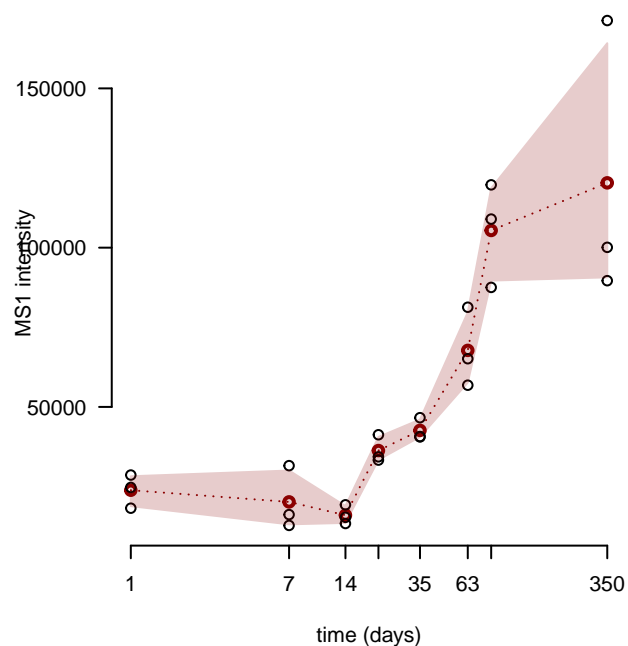

**Q8C3X4**  
**GN=Guf1**  
GUF1 homolog, GTPase

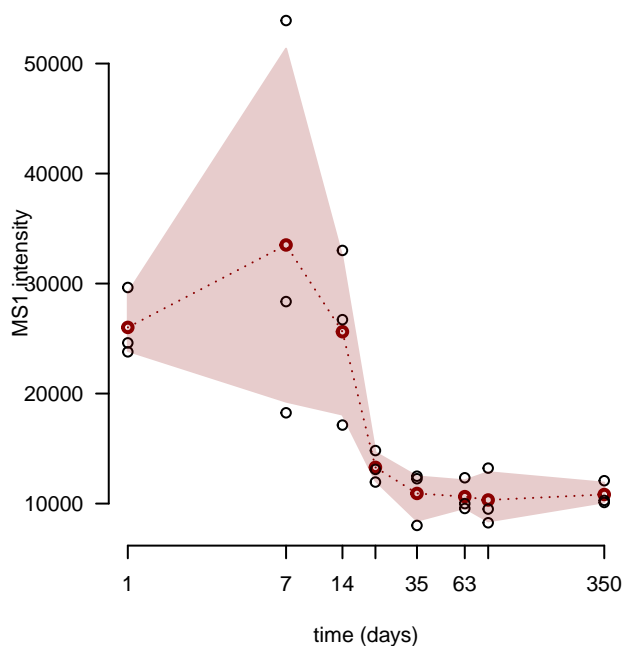

**Q8C3X8**  
**GN=Lmf2**  
lipase maturation factor 2

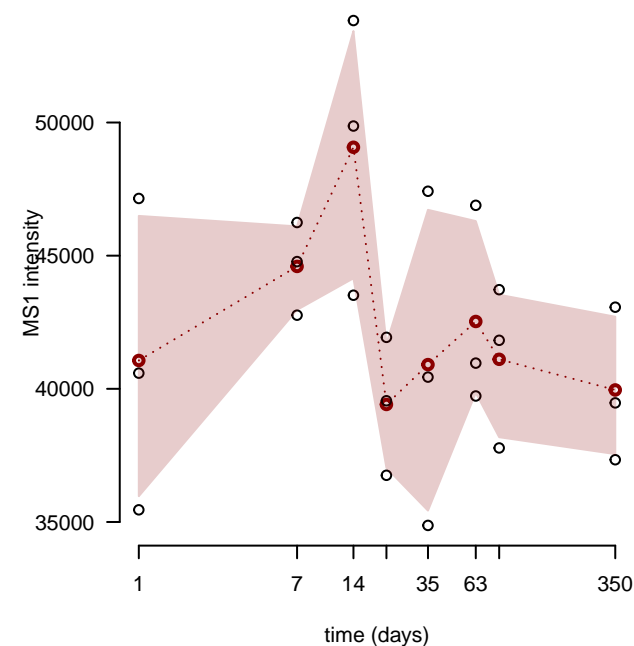

**Q8C3Y4**  
**GN=Kntc1**  
kinetochore associated 1

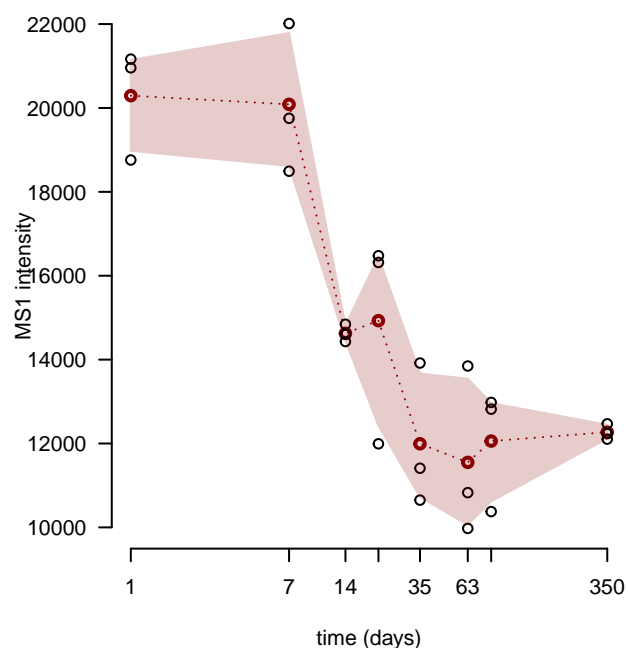

**Q8C407**  
**GN=Yipf4**  
Yip1 domain family, member 4

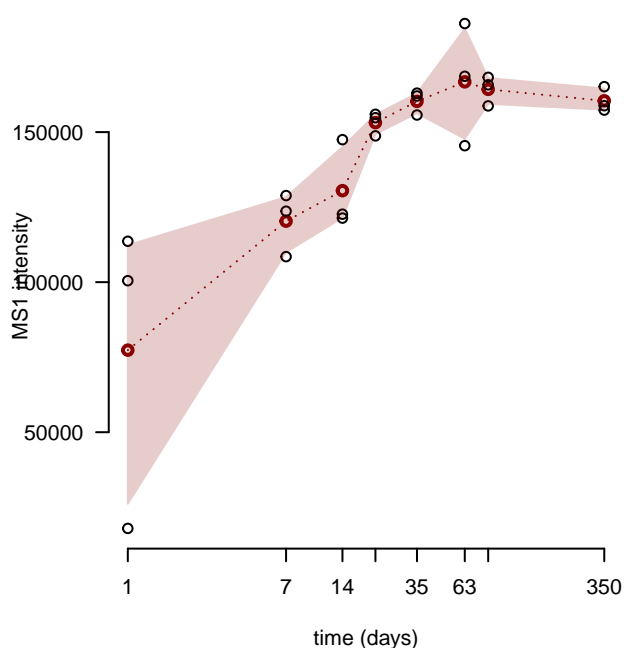

**Q8C436**  
**GN=Vcpkmt**  
valosin containing protein lysine (K) me ...

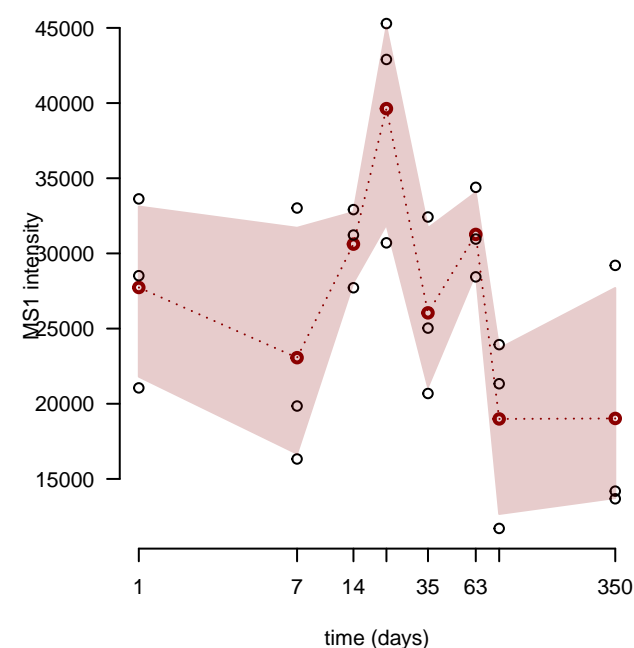

**Q8C460**  
**GN=Eri3**  
exoribonuclease 3

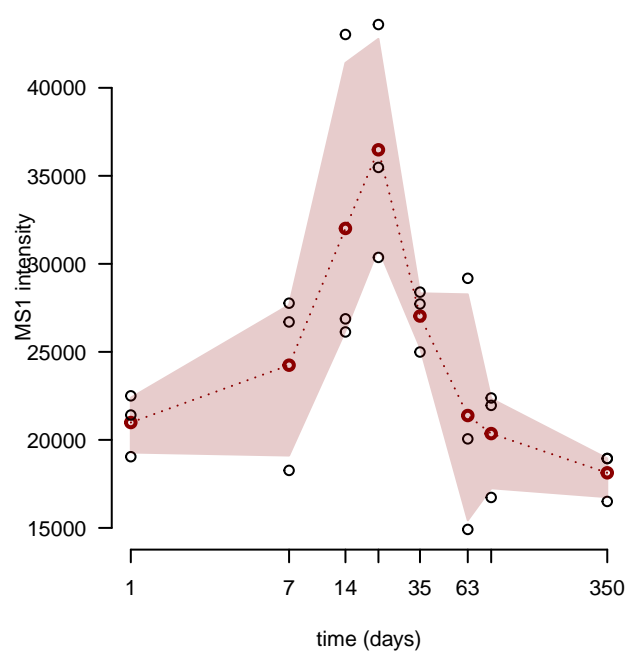

**Q8C4A5**  
**GN=Asx13**  
ASXL transcriptional regulator 3

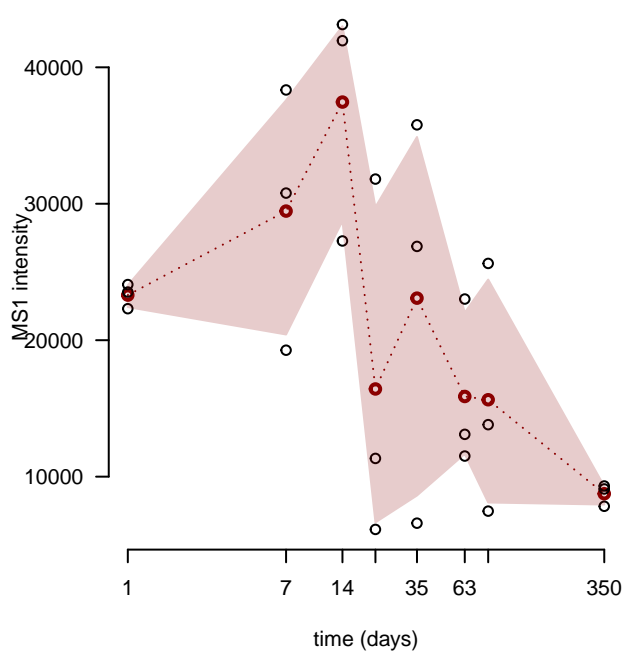

**Q8C4B4**  
**GN=Unc119b**  
unc-119 lipid binding chaperone B

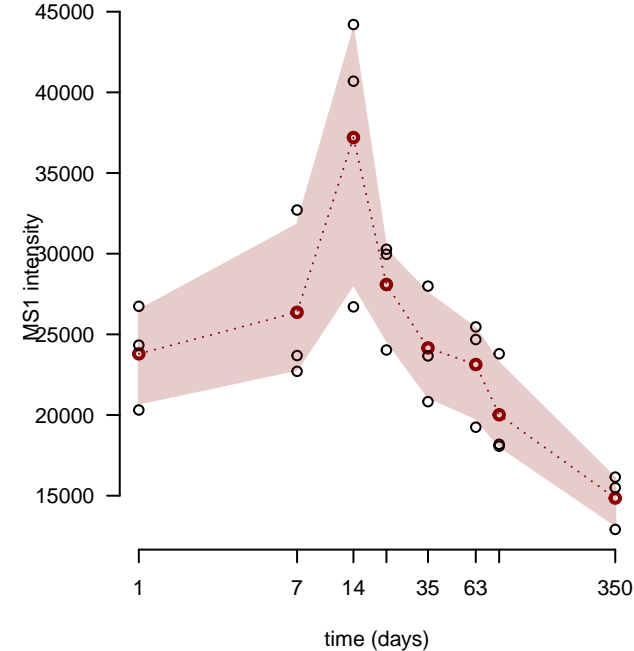

**Q8C4J7**  
GN=Tbl3  
transducin (beta)-like 3

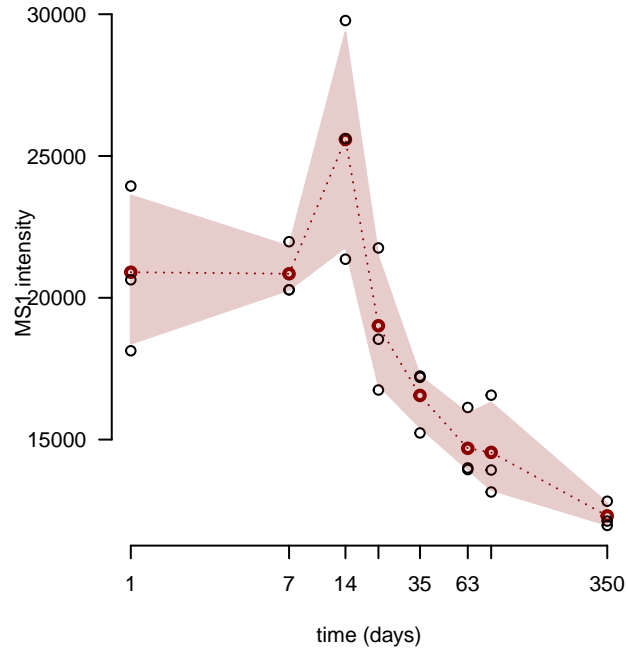

**Q8C4P0**  
GN=

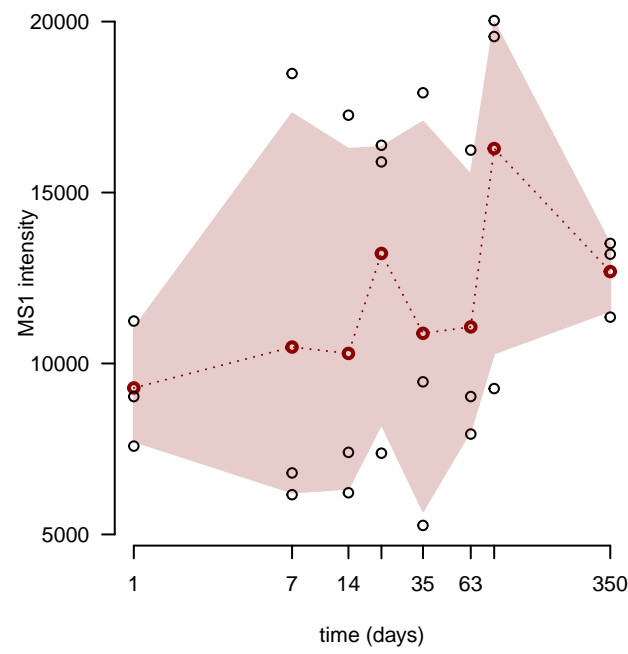

**Q8C4Q6**  
GN=Aida  
axin interactor, dorsalization associate ...

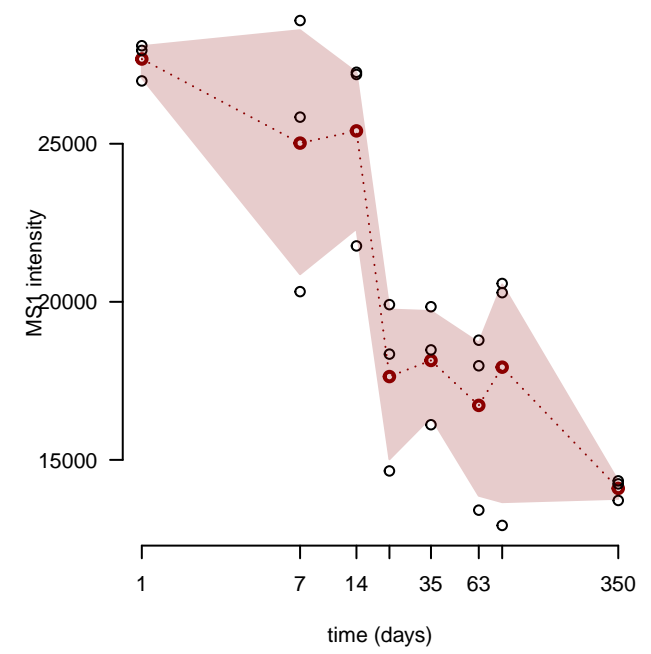

**Q8C4S8**  
GN=Dennd2a  
DENN/MADD domain containing 2A

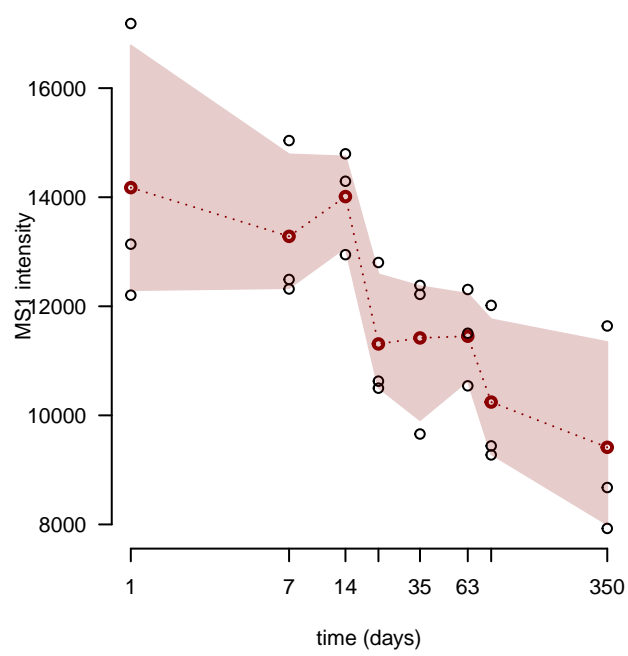

**Q8C4U3**  
GN=Sfrp1  
secreted frizzled-related protein 1

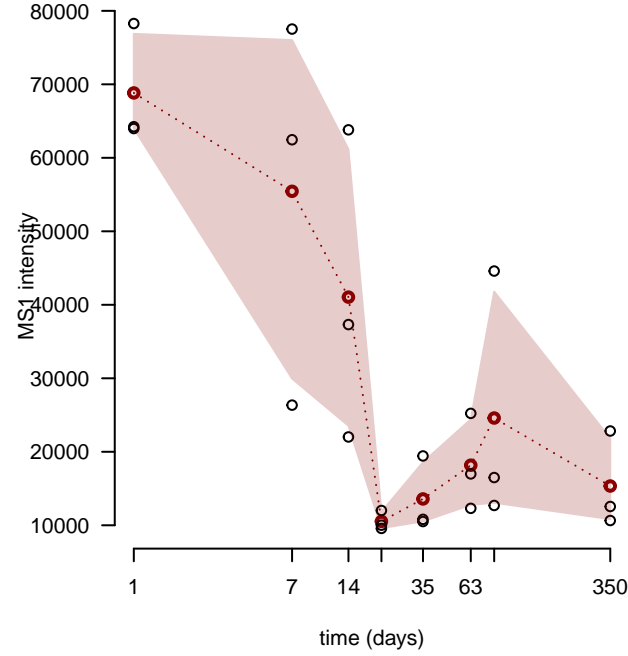

**Q8C4X2**  
GN=Csnk1g3  
casein kinase 1, gamma 3

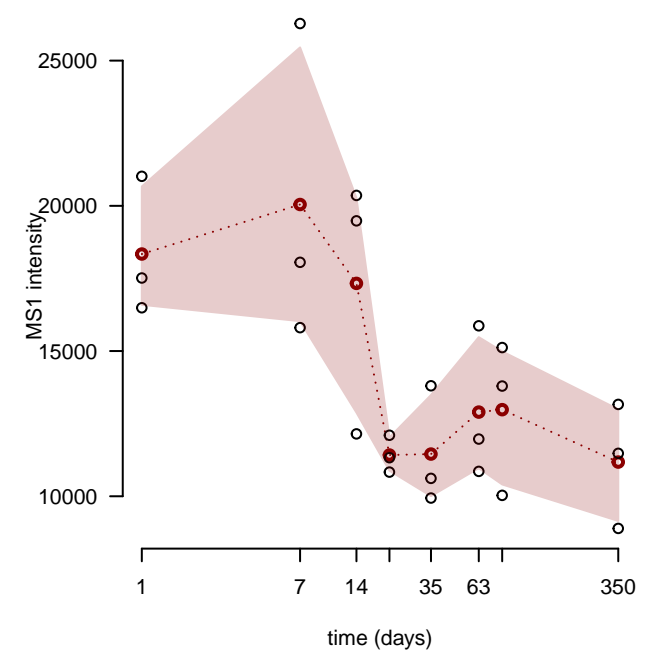

**Q8C4Y3**  
GN=Nelfb  
negative elongation factor complex membe ...

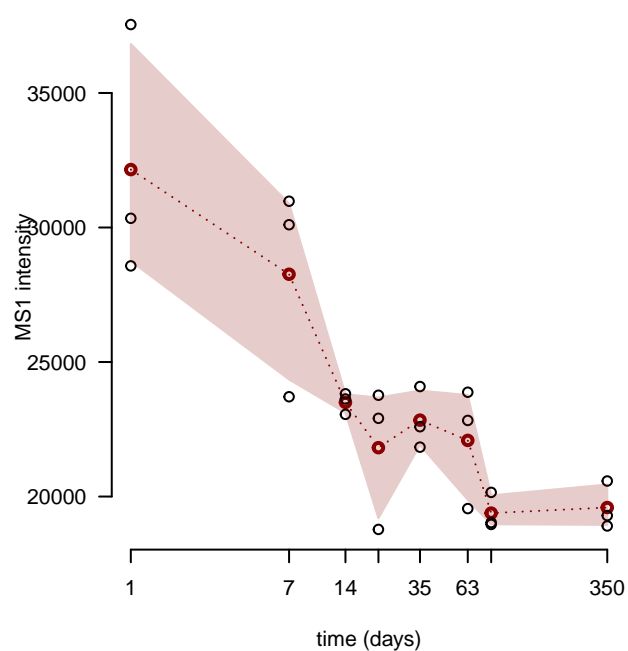

**Q8C522**  
GN=Endod1  
endonuclease domain containing 1

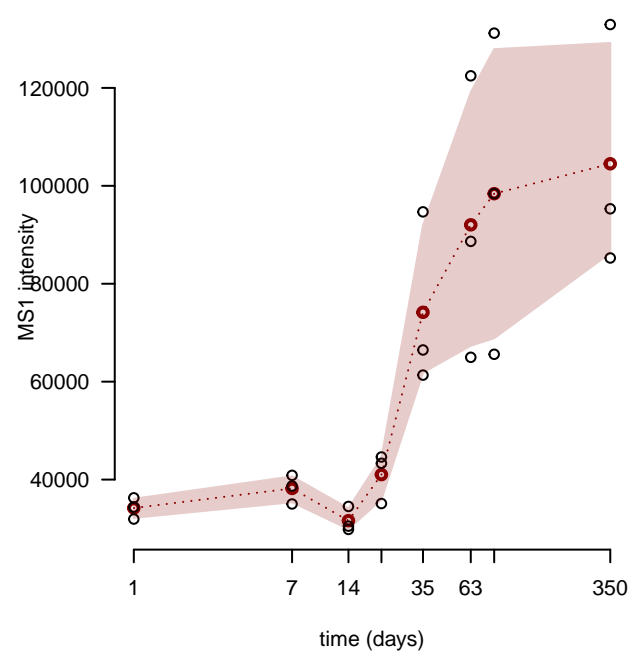

**Q8C525**  
GN=Mb21d2  
Mab-21 domain containing 2

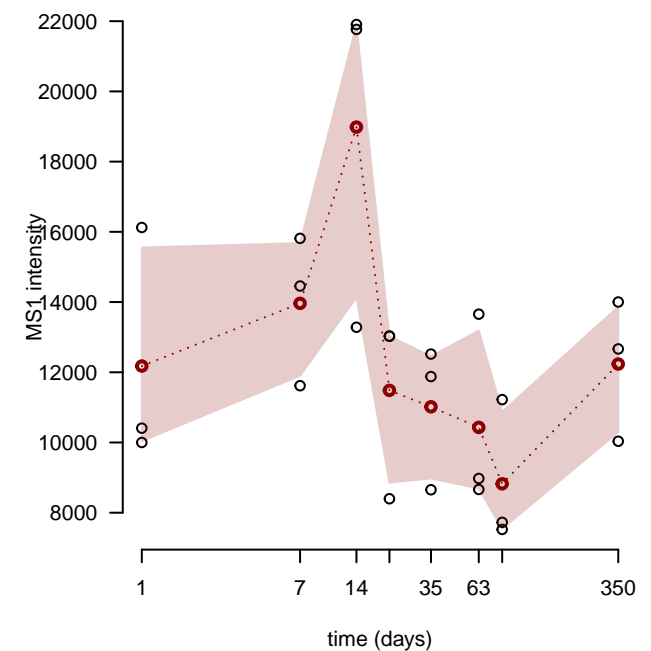



**Q8C547**  
GN=Heatr5b  
HEAT repeat containing 5B

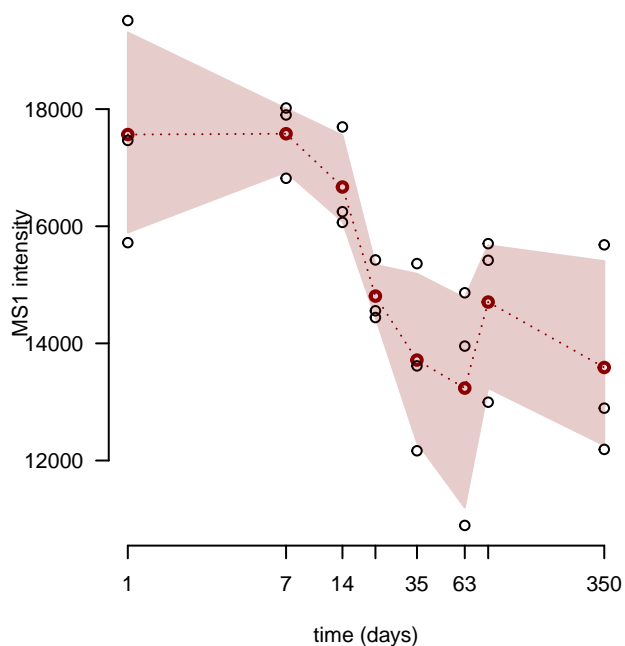

**Q8C551**  
GN=Rad51ap1  
RAD51 associated protein 1

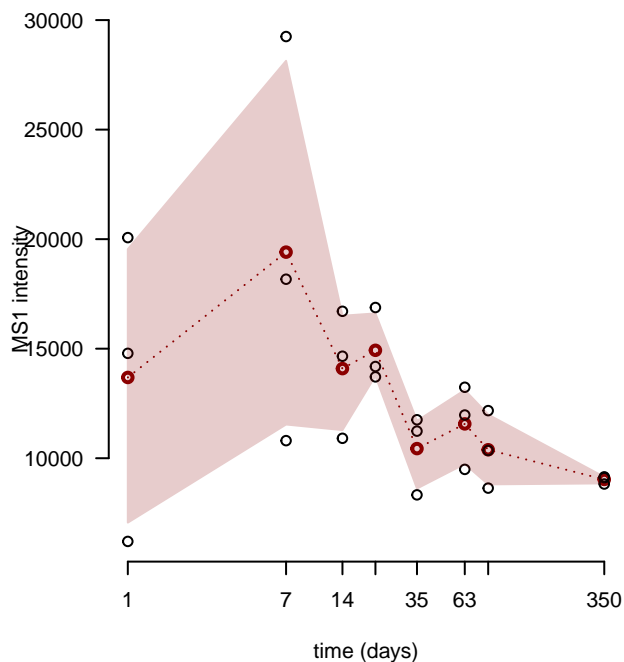

**Q8C561**  
GN=Lmbrd2  
LMBR1 domain containing 2

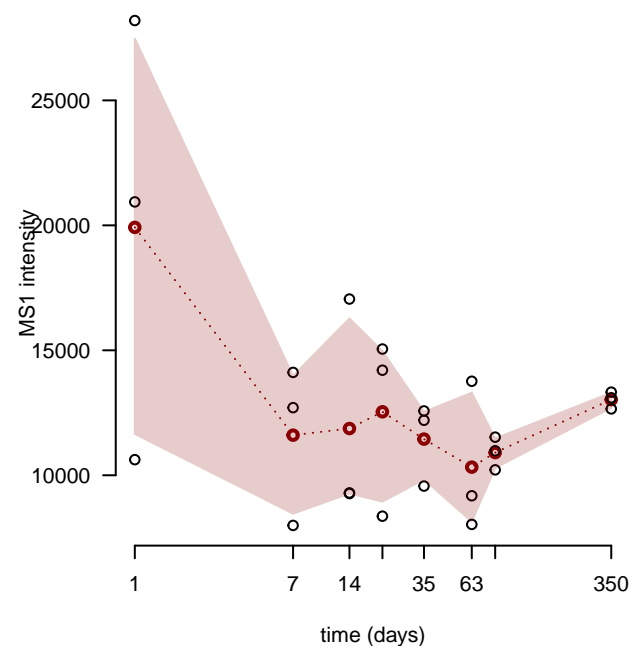

**Q8C569**  
GN=Fam118b  
family with sequence similarity 118, mem ...

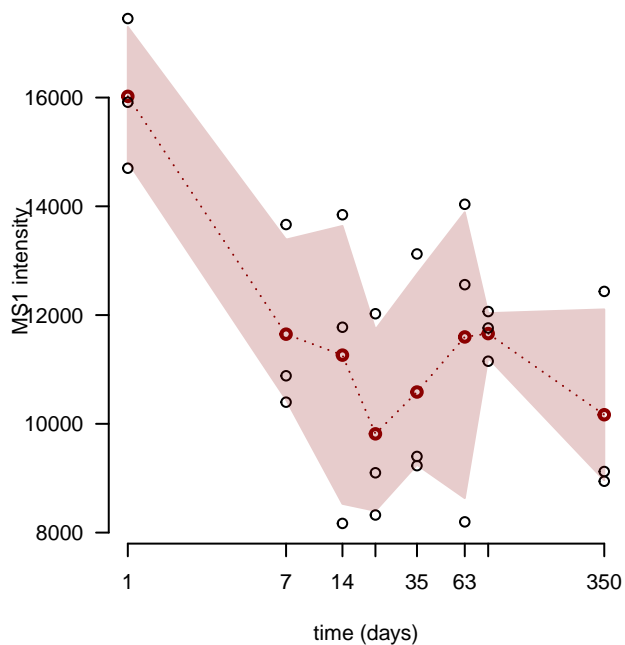

**Q8C570**  
GN=Rae1  
ribonucleic acid export 1

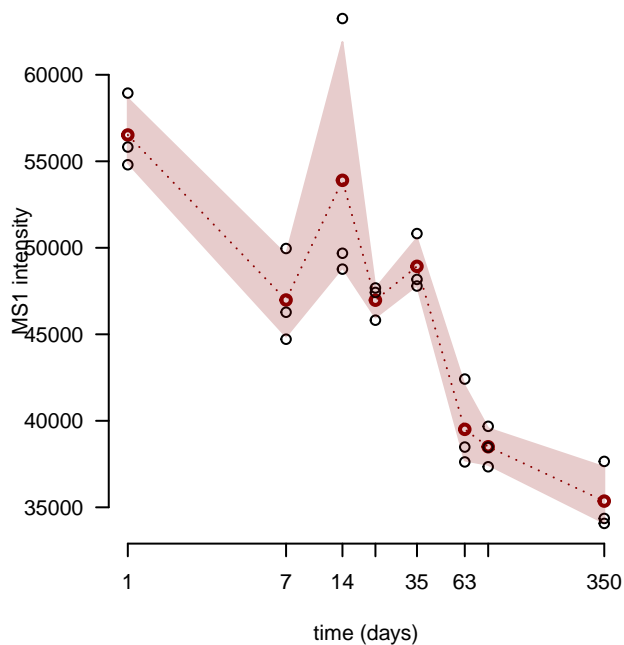

**Q8C5D8**  
GN=Pias2  
protein inhibitor of activated STAT 2

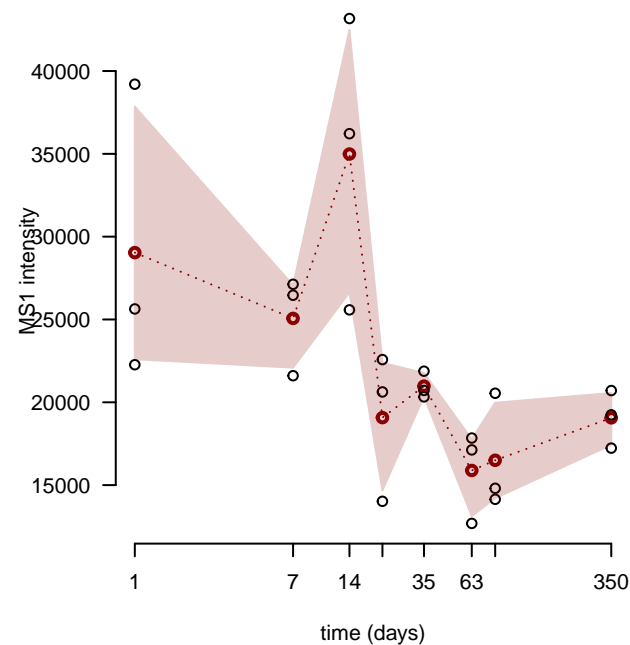

**Q8C5H8**  
GN=Nadk2  
NAD kinase 2, mitochondrial

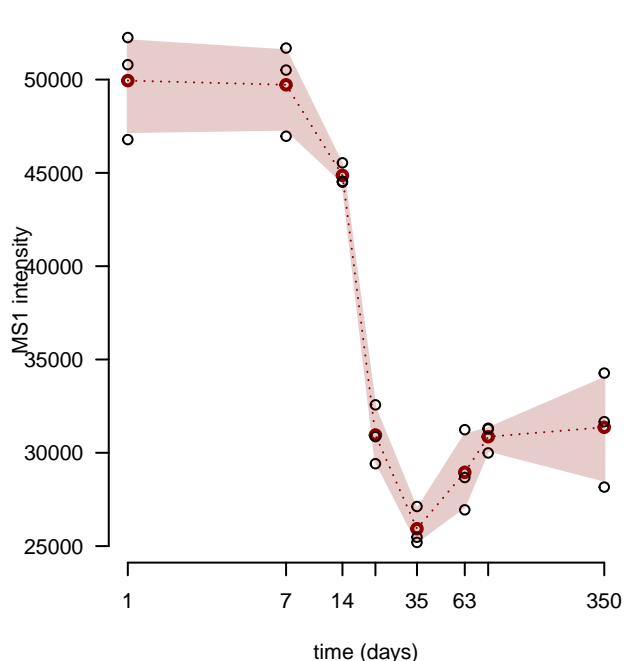

**Q8C5K5**  
GN=

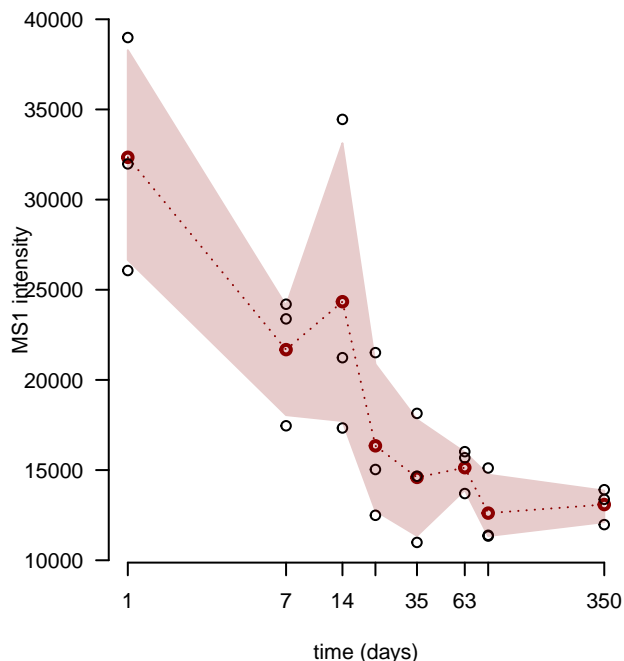

**Q8C5L3**  
GN=Cnot2  
CCR4-NOT transcription complex, subunit ...

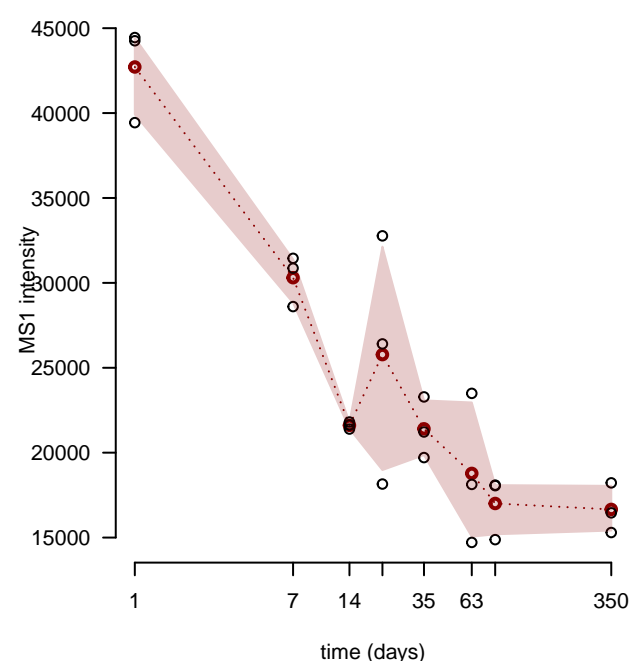

**Q8C5L6**  
GN=Inpp5k  
inositol polyphosphate 5-phosphatase K

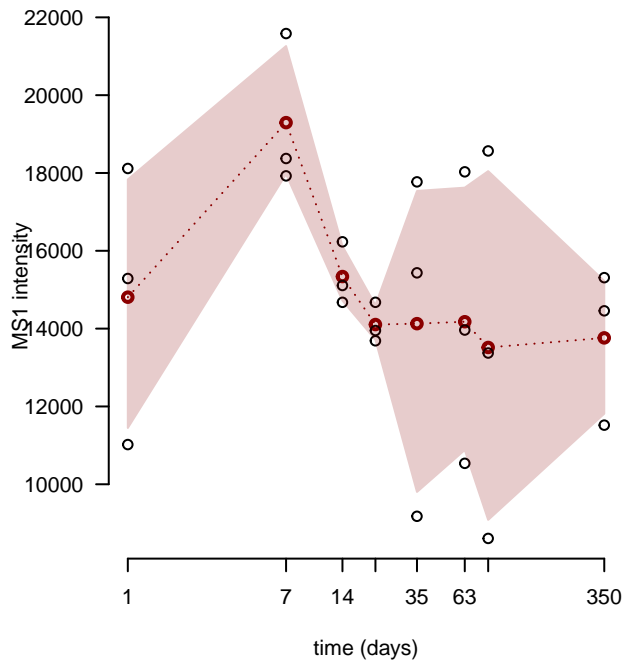

**Q8C5L7**  
GN=Rbm34  
RNA binding motif protein 34

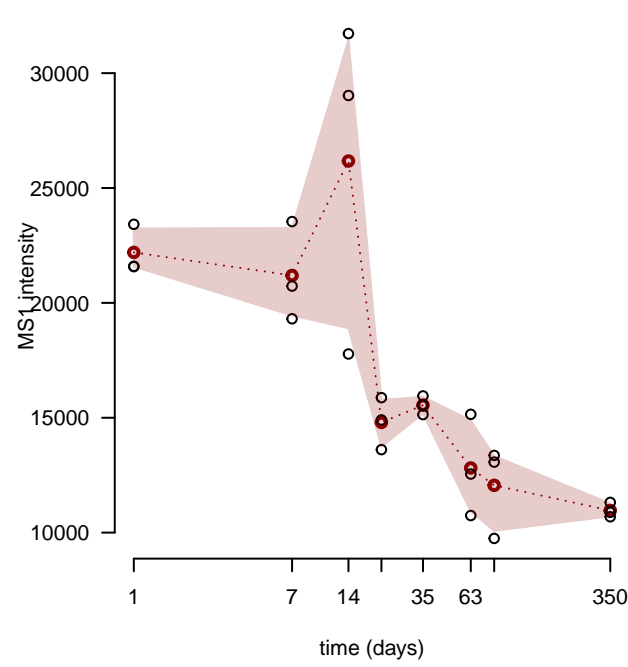

**Q8C5N3**  
GN=Cwc22  
CWC22 spliceosome-associated protein

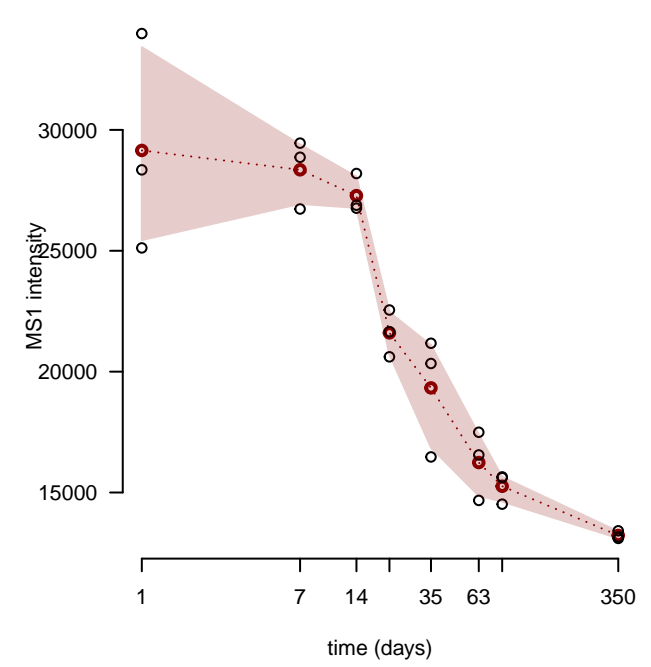

**Q8C5P5**  
GN=Nt5dc1  
5'-nucleotidase domain containing 1

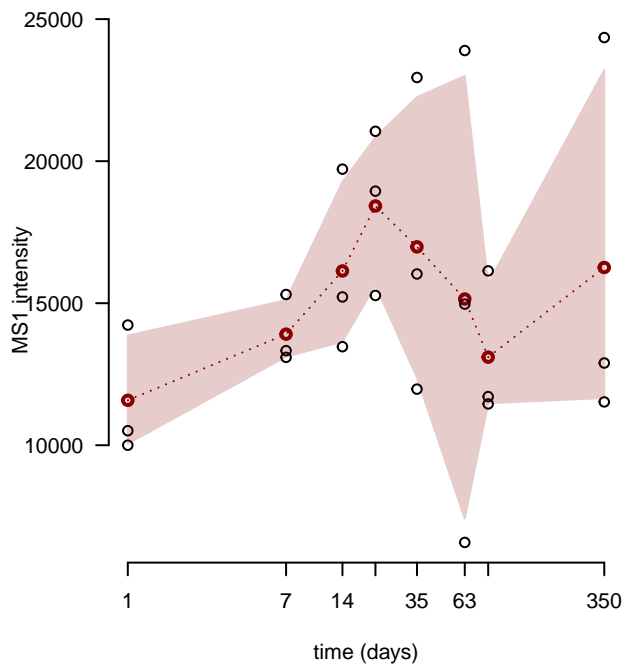

**Q8C5P7**  
GN=Tdrp  
testis development related protein

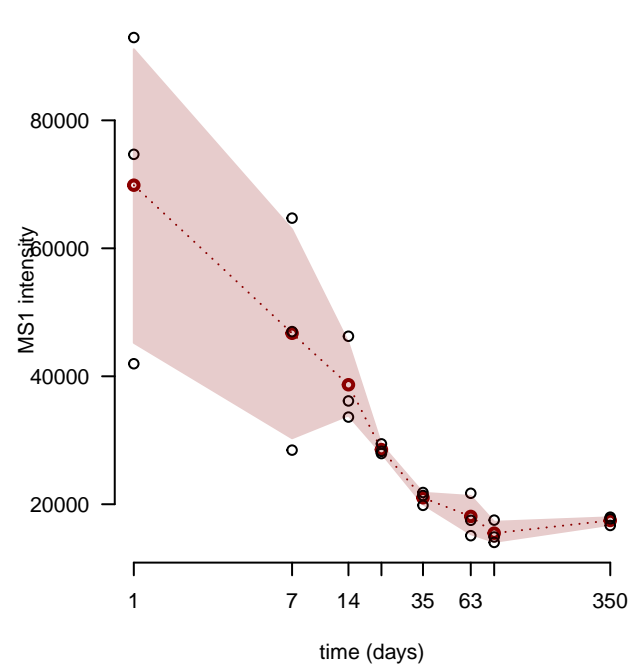

**Q8C5Q4**  
GN=Grsf1  
G-rich RNA sequence binding factor 1

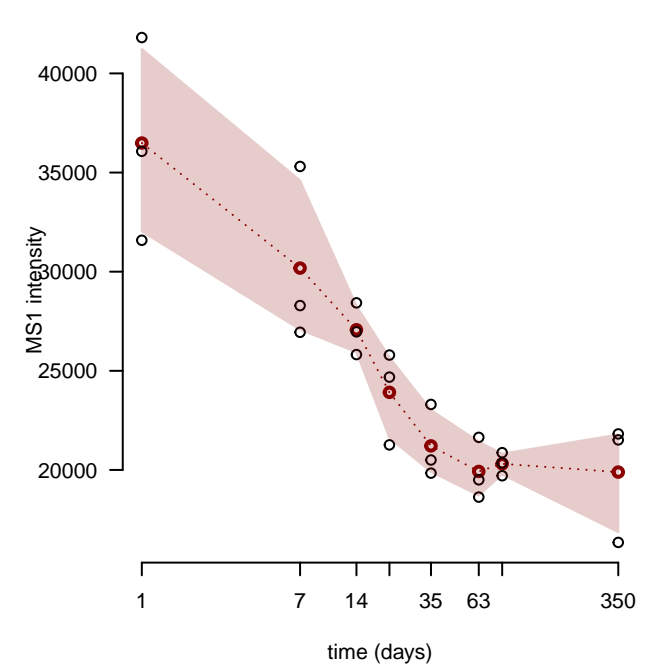

**Q8C5W0**  
GN=Clmn  
calmin

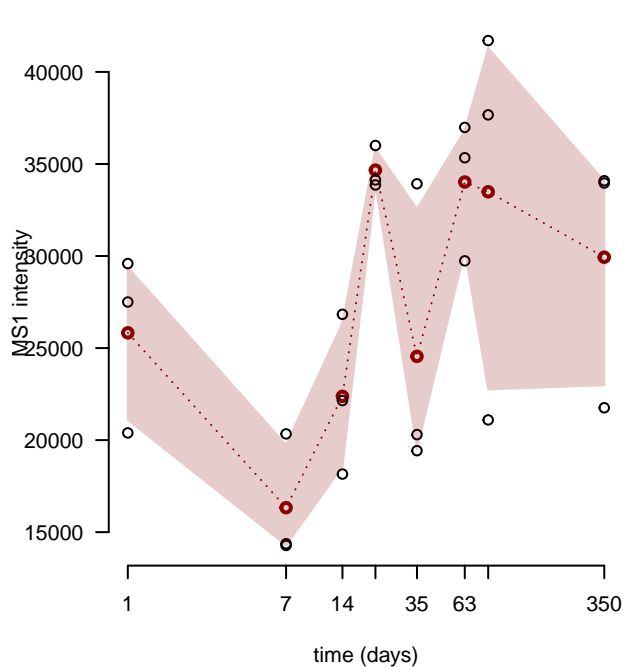

**Q8C5W3**  
GN=Tbcel  
tubulin folding cofactor E-like

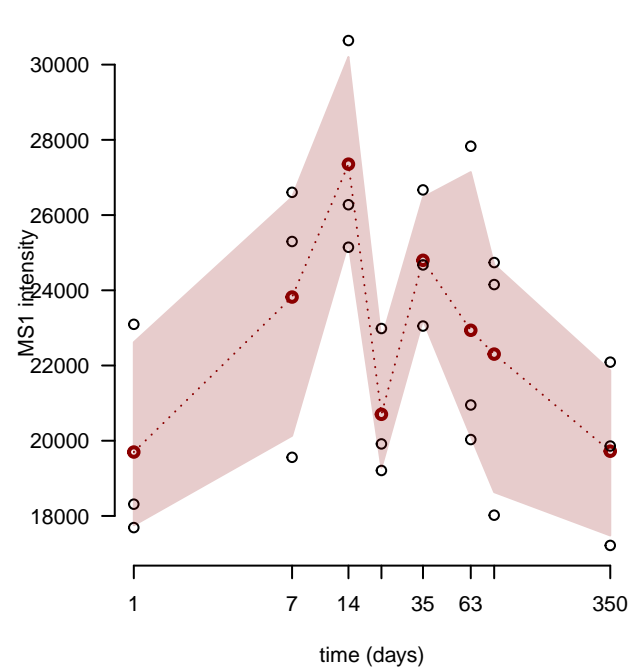

**Q8C633**  
GN=Cabs1  
calcium binding protein, spermatid speci ...

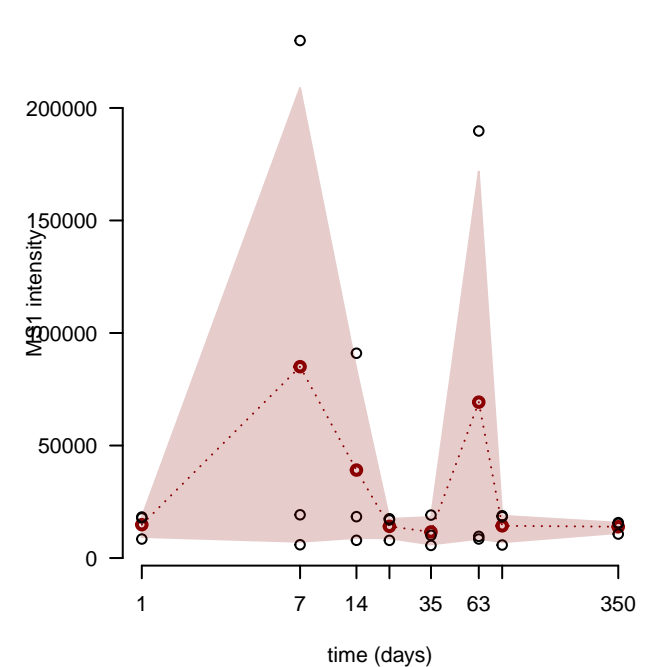

Q8C650  
GN=Sept10

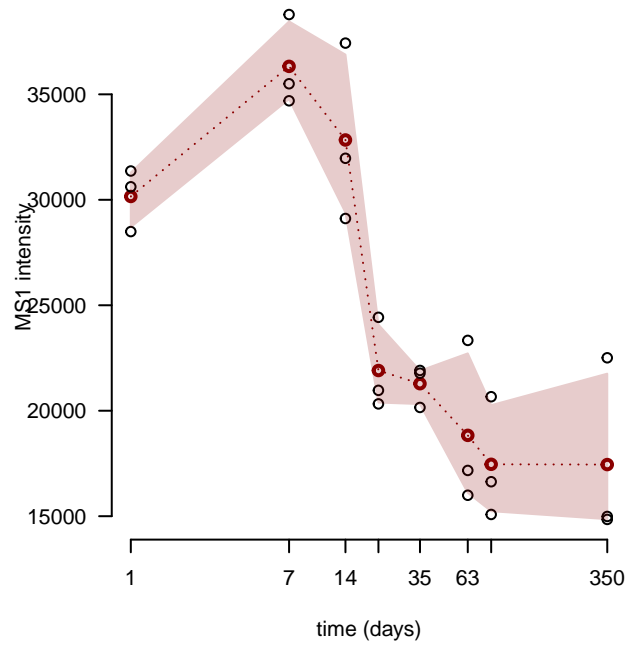

Q8C6B2  
GN=Rtkn  
rhotekin

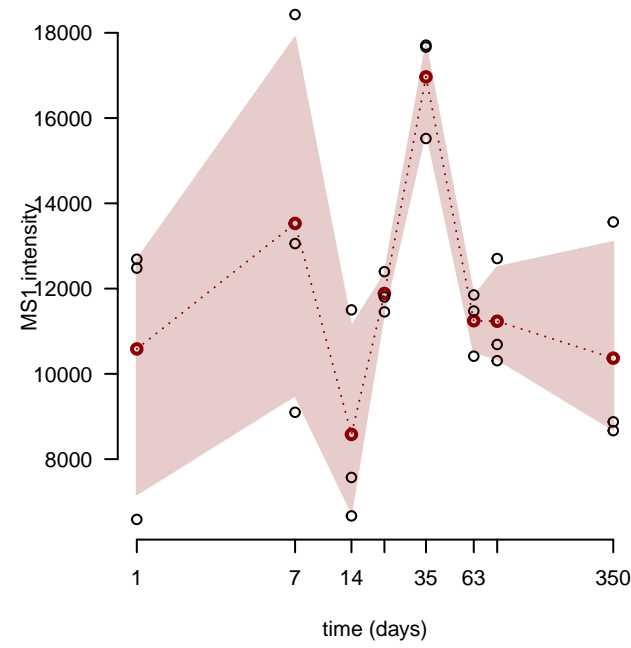

Q8C6B9  
GN=Rps19bp1  
ribosomal protein S19 binding protein 1

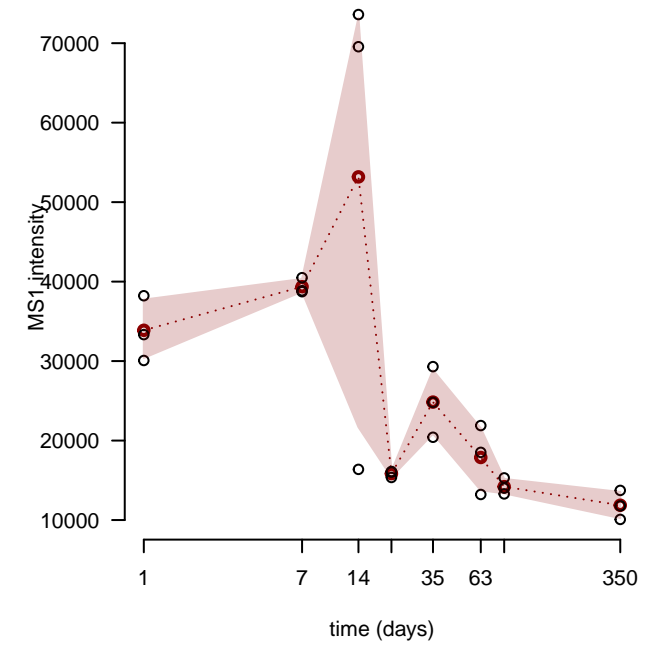

Q8C6E0  
GN=Cfap36  
cilia and flagella associated protein 36

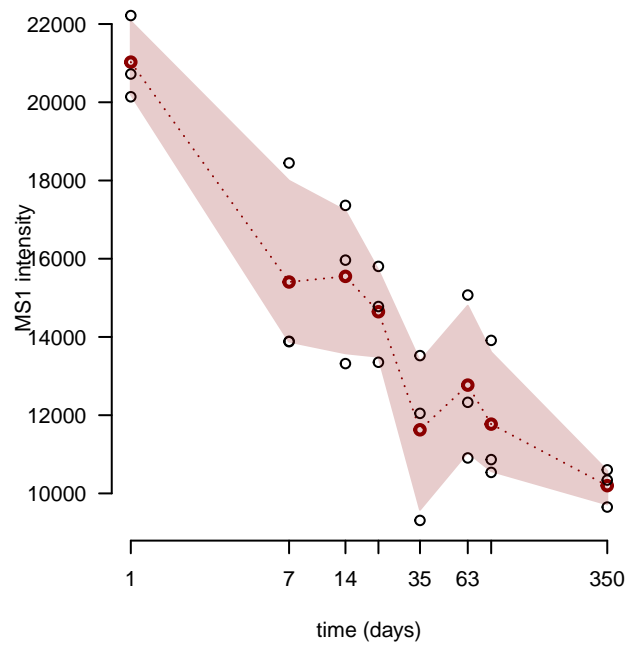

Q8C6G1  
GN=Cfap410  
cilia and flagella associated protein 41 ...

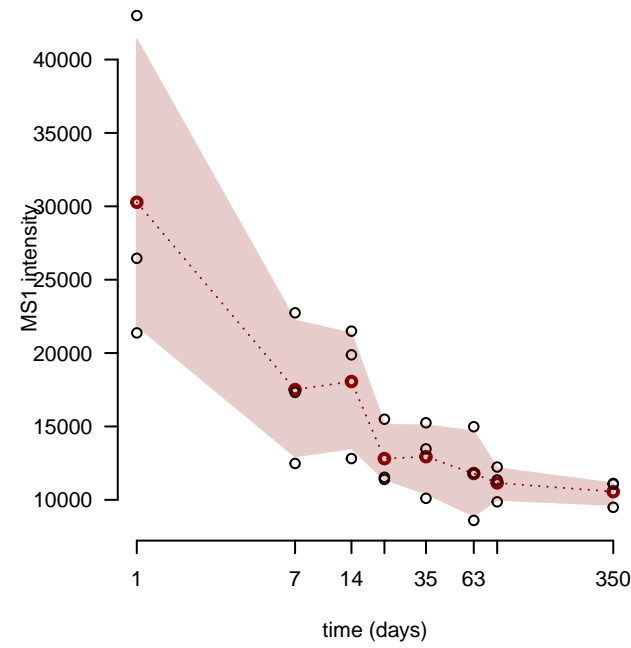

Q8C6G8  
GN=Wdr26  
WD repeat domain 26

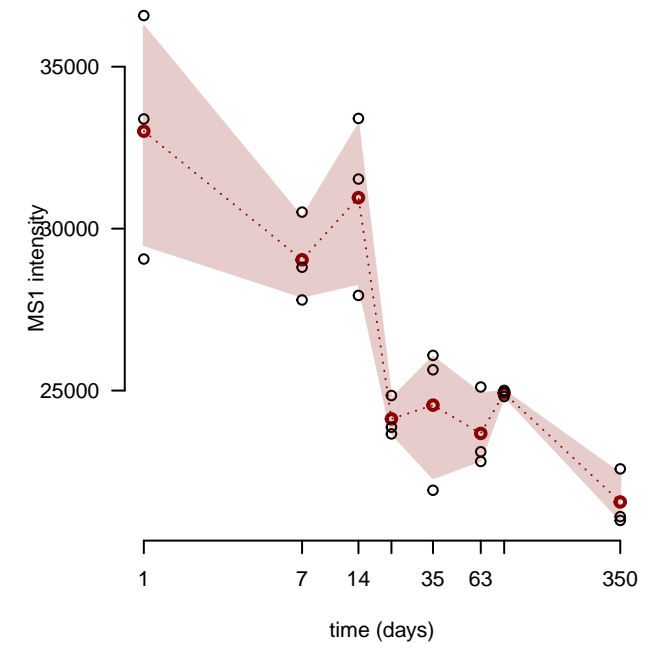

Q8C6I2  
GN=Sdhaf2  
succinate dehydrogenase complex assembly ...

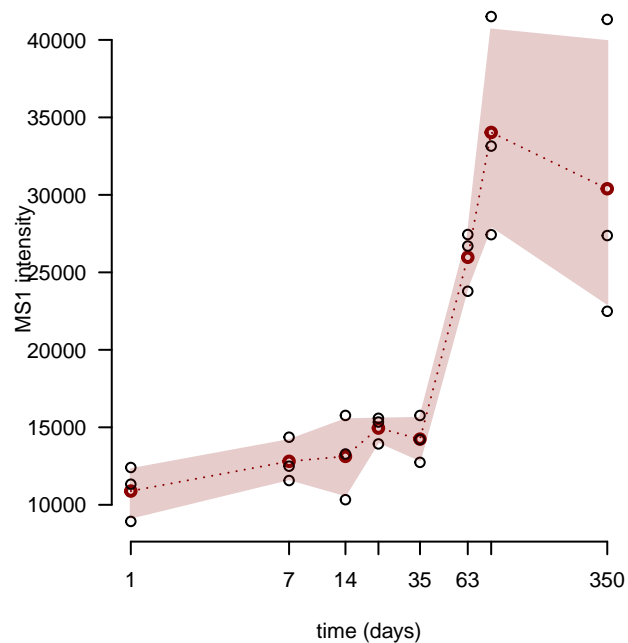

Q8C6J9  
GN=Nlrp4b  
NLR family, pyrin domain containing 4B

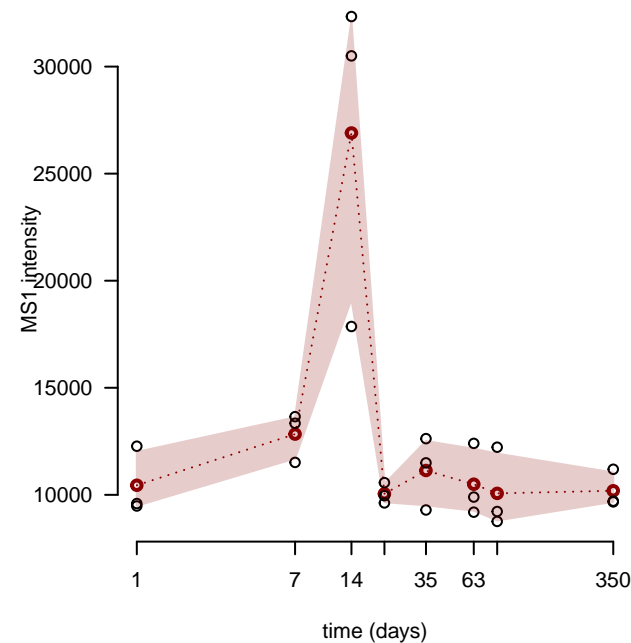

Q8C6K9  
GN=Col6a6  
collagen, type VI, alpha 6

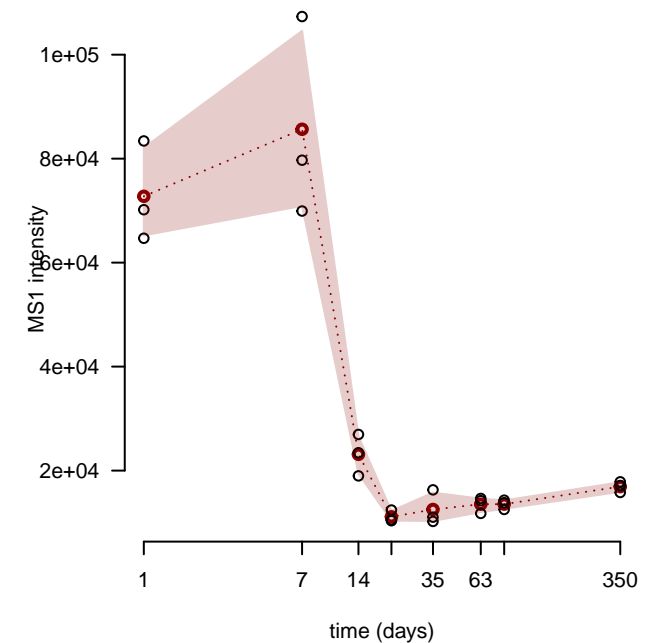

**Q8C6L5**  
**GN=Cgas**  
cyclic GMP-AMP synthase

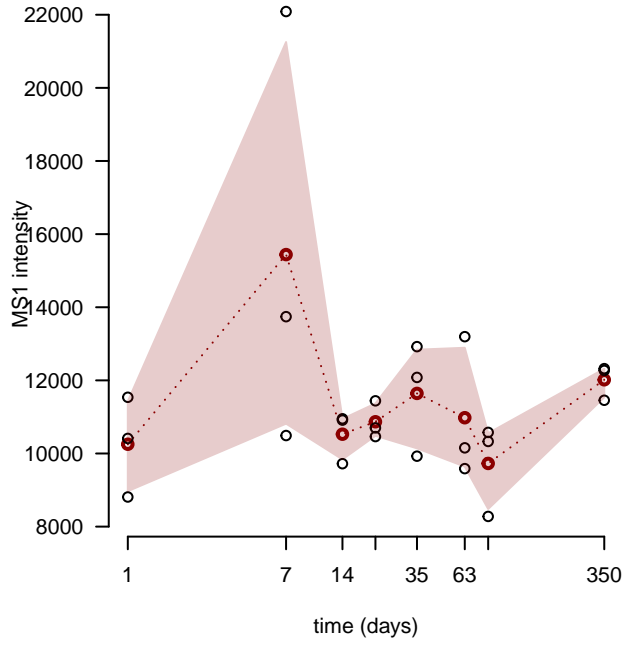

**Q8C6P8**  
**GN=Zfp57**  
zinc finger protein 57

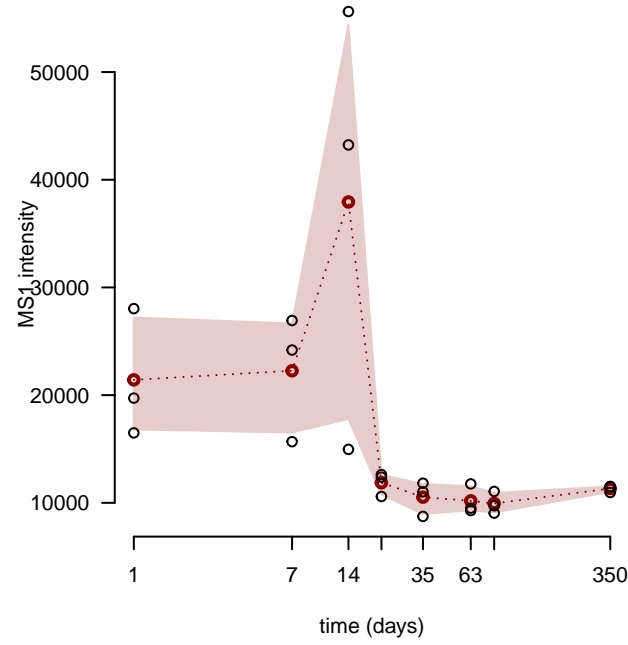

**Q8C6U2**  
**GN=Pqlc3**  
PQ loop repeat containing

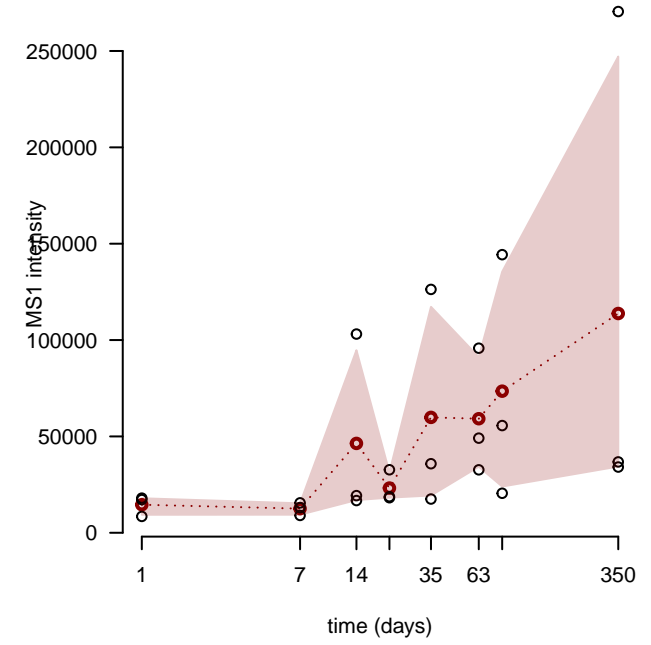

**Q8C735**  
**GN=Lin9**  
lin-9 DREAM MuvB core complex component

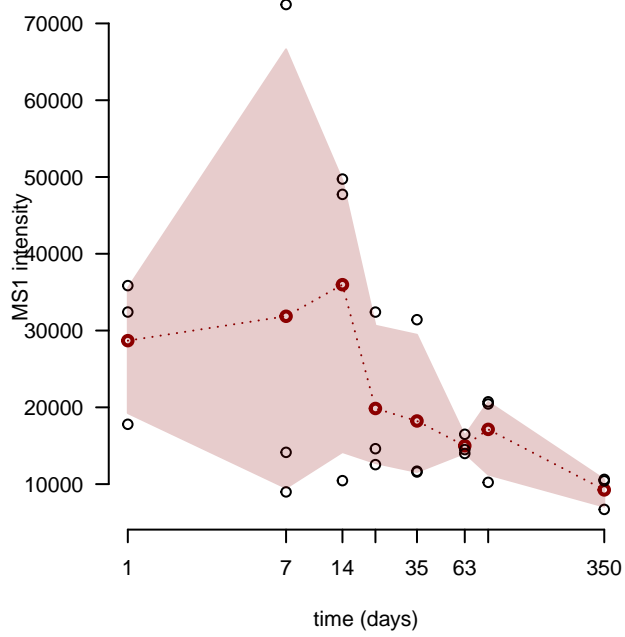

**Q8C754**  
**GN=Vps52**  
VPS52 GARP complex subunit

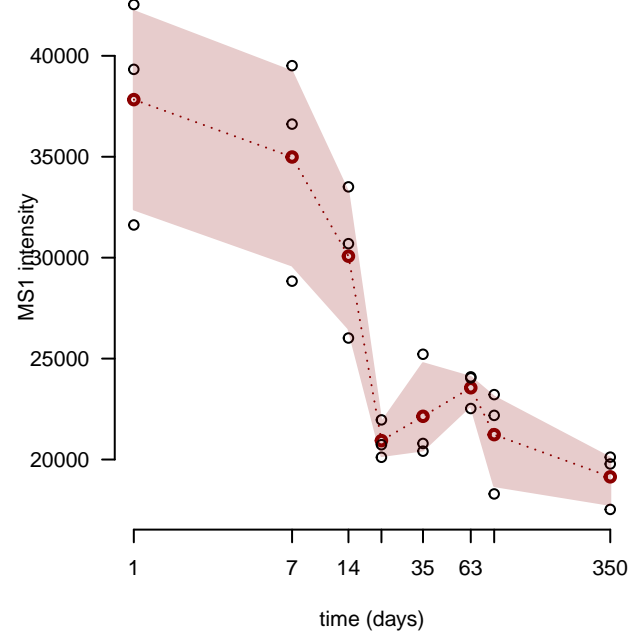

**Q8C761**  
**GN=Wdr60**

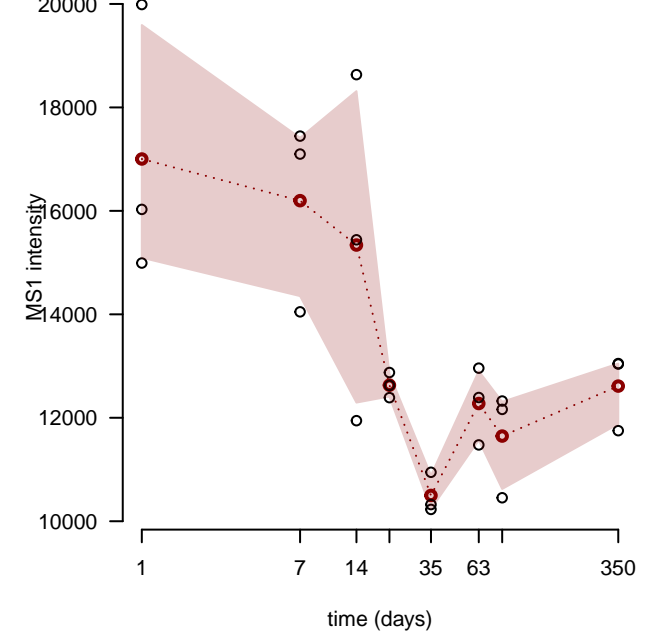

**Q8C790**  
**GN=Fam221a**  
family with sequence similarity 221, mem ...

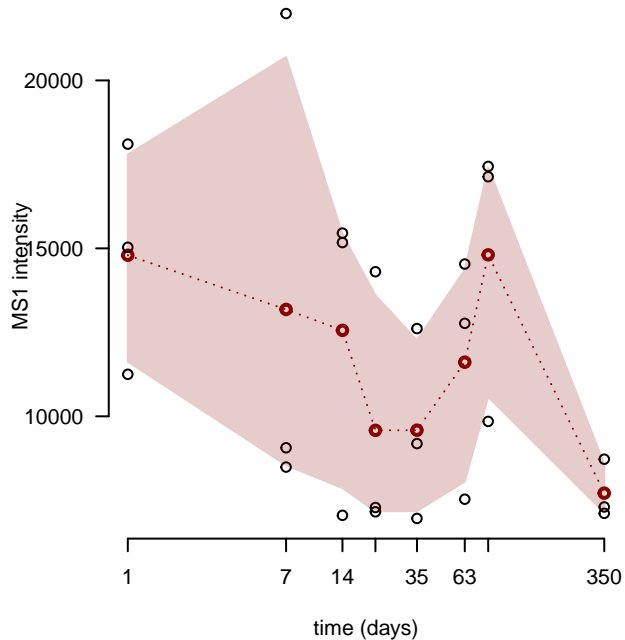

**Q8C796**  
**GN=Rcor2**  
REST corepressor 2

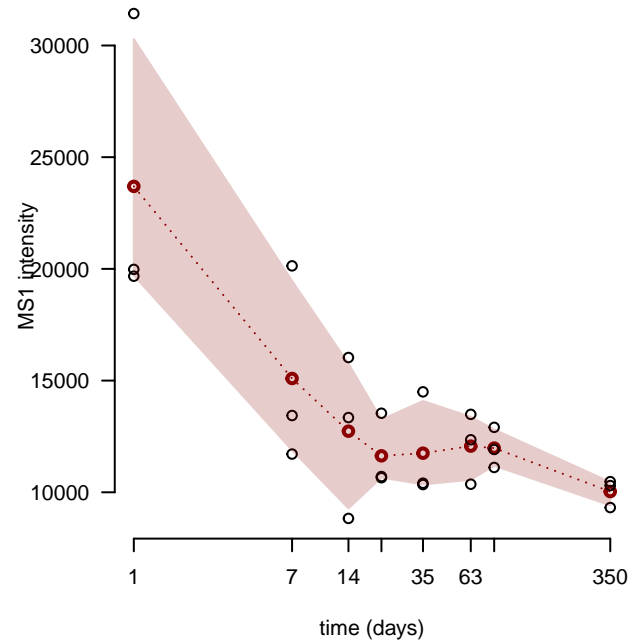

**Q8C7D2**  
**GN=Crbn**  
cereblon

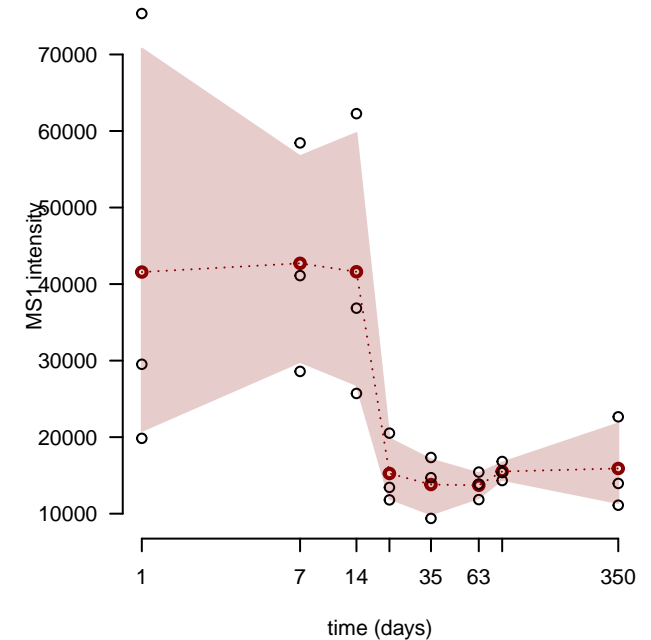

**Q8C7E7**  
GN=Stbd1  
starch binding domain 1

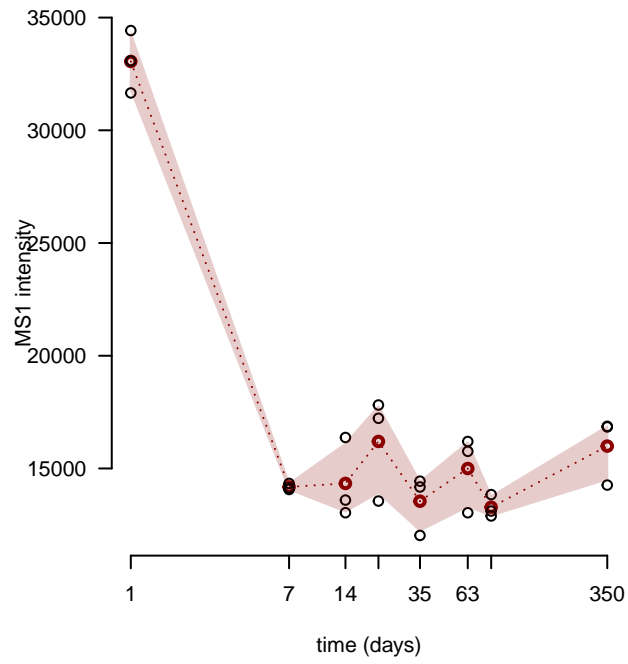

**Q8C7E9**  
GN=Cstf2t  
cleavage stimulation factor, 3' pre-RNA ...

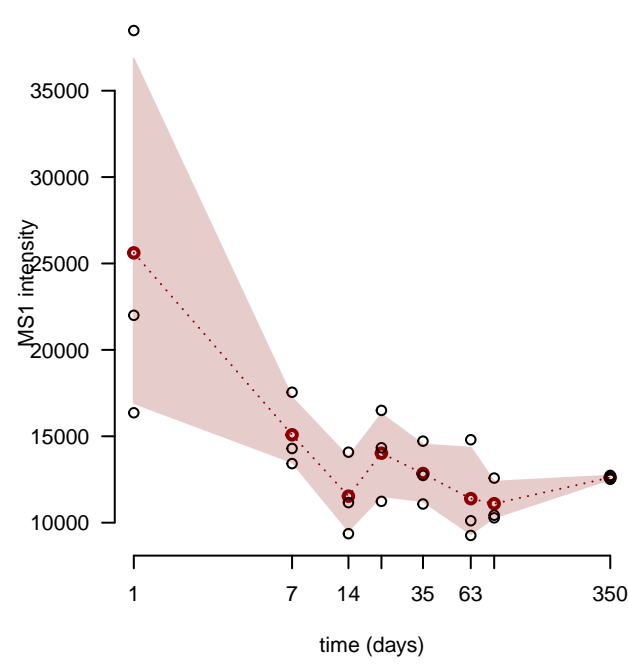

**Q8C7H1**  
GN=Mmaa  
methylmalonic aciduria (cobalamin defici ...

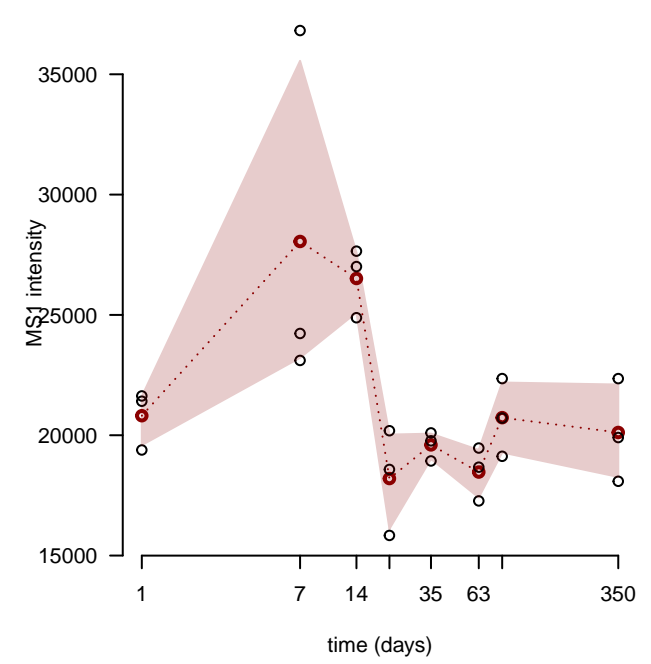

**Q8C7K6**  
GN=Pcyox1l  
prenylcysteine oxidase 1 like

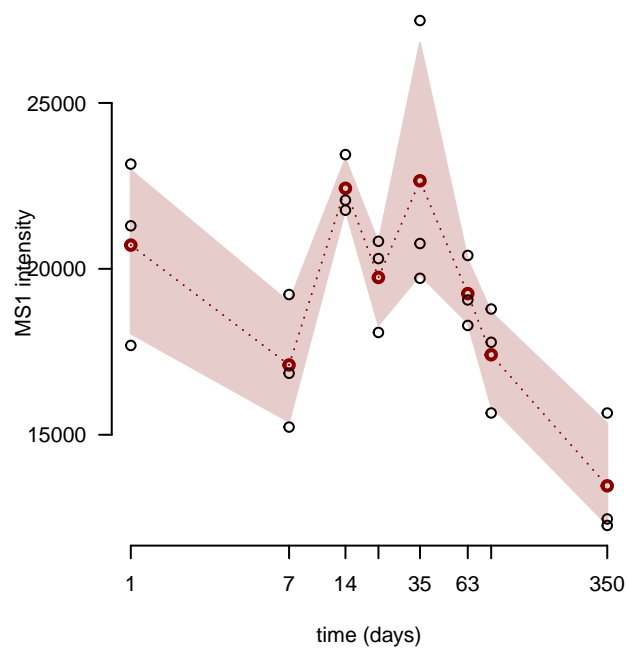

**Q8C7Q4**  
GN=Rbm4  
RNA binding motif protein 4

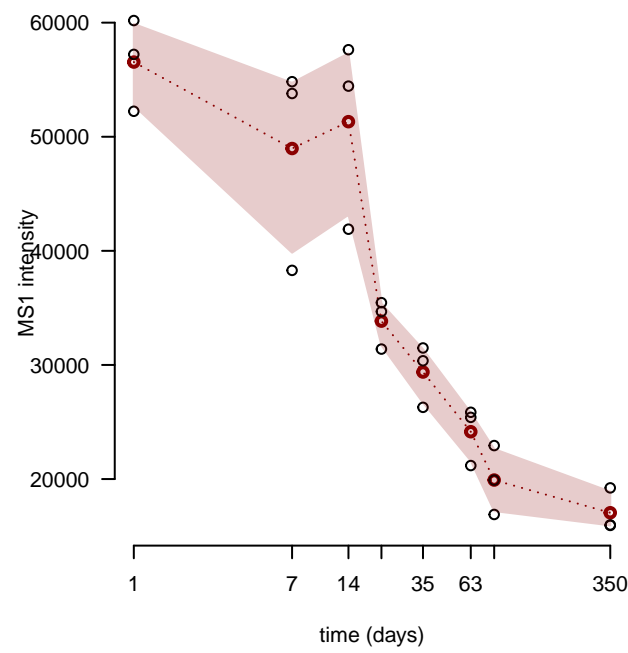

**Q8C7R4**  
GN=Uba6  
ubiquitin-like modifier activating enzym ...

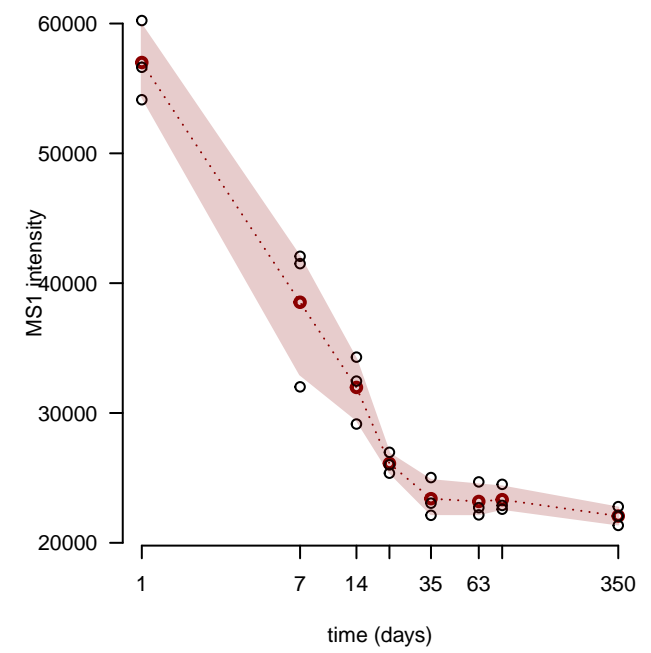

**Q8C7U1**  
GN=N4bp3  
NEDD4 binding protein 3

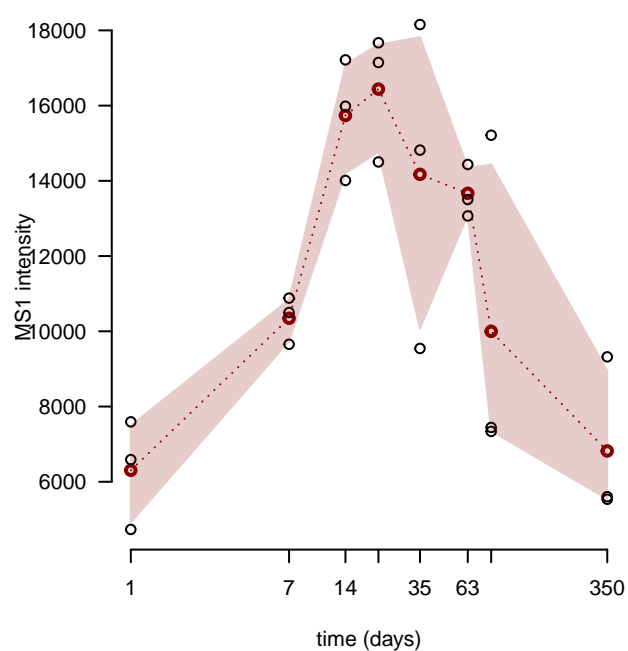

**Q8C7V3**  
GN=Utp15  
UTP15 small subunit processome component

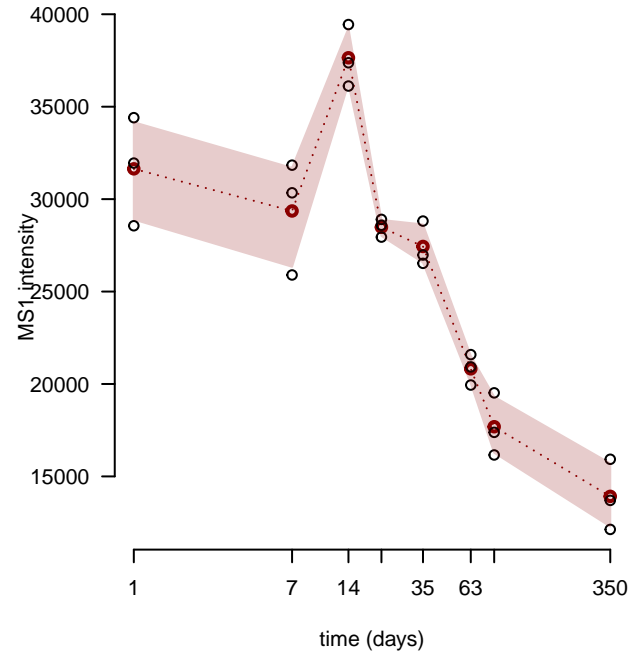

**Q8C7V8**  
GN=Ccdc134  
coiled-coil domain containing 134

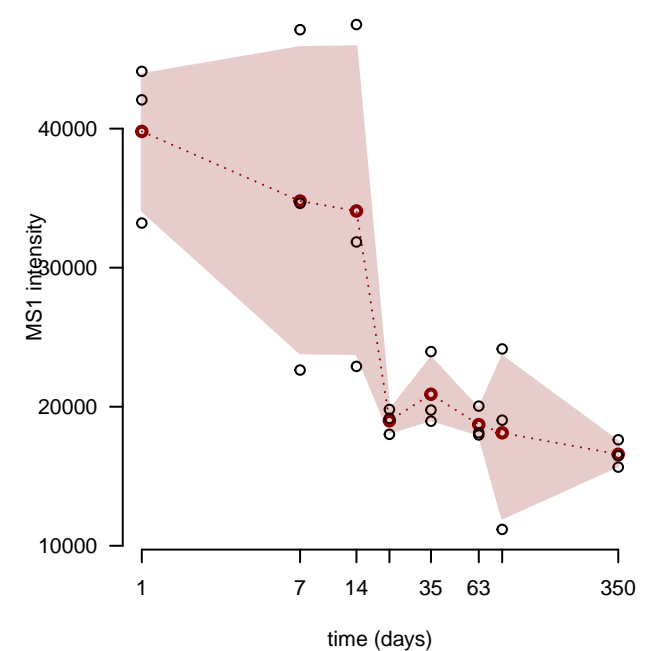

**Q8C7X2**  
**GN=Emc1**  
ER membrane protein complex subunit 1

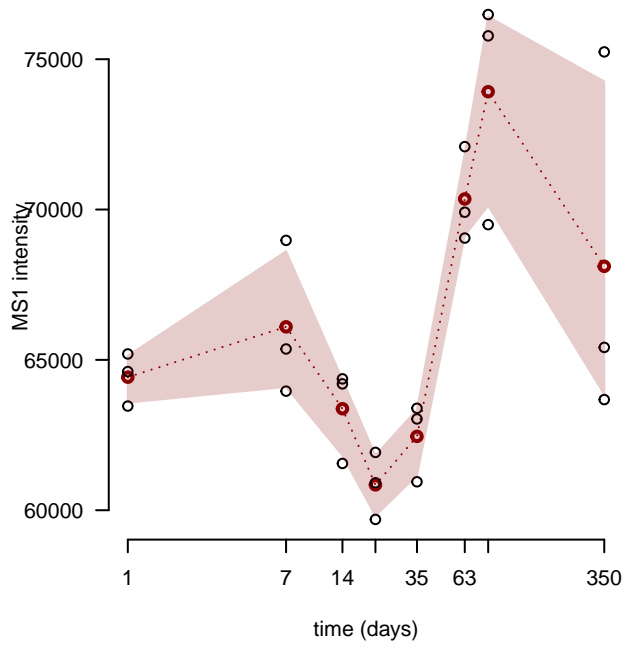

**Q8C804**  
**GN=Spice1**  
spindle and centriole associated protein ...

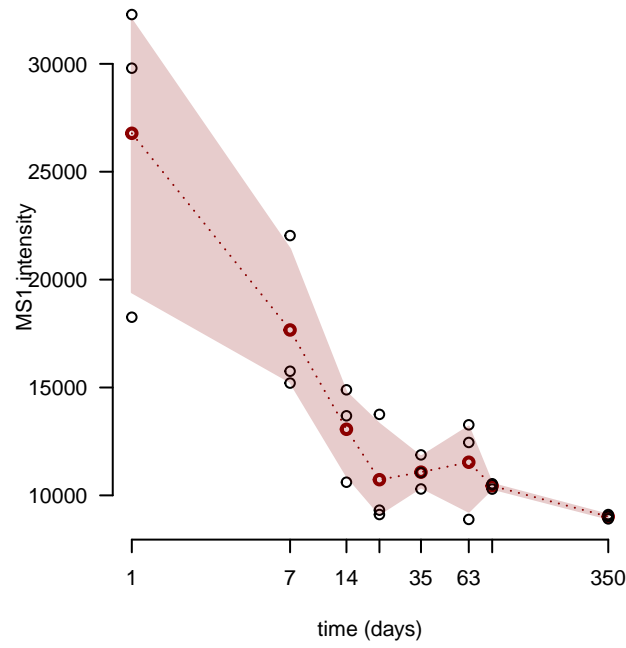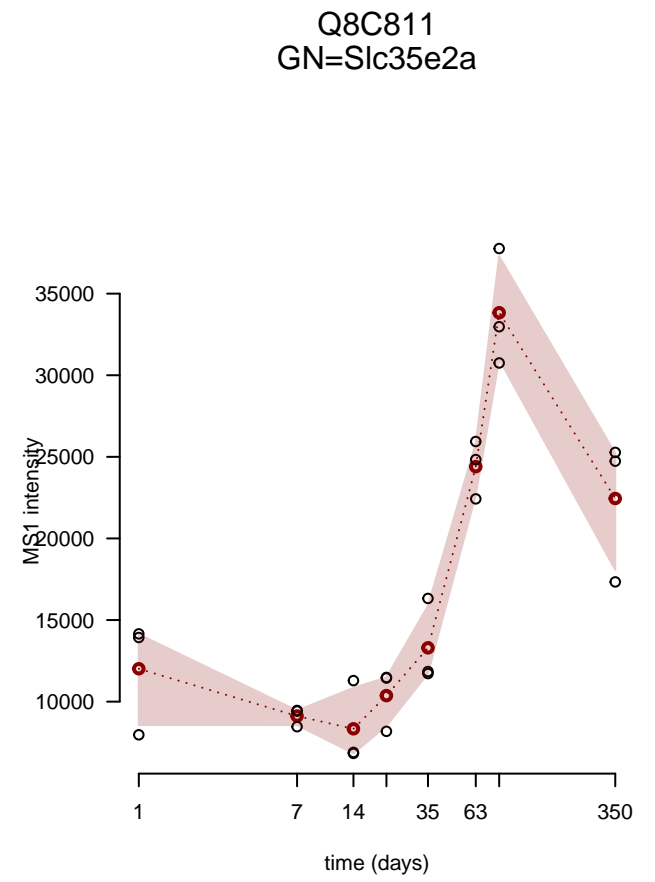

**Q8C827**  
**GN=Zfp62**  
zinc finger protein 62

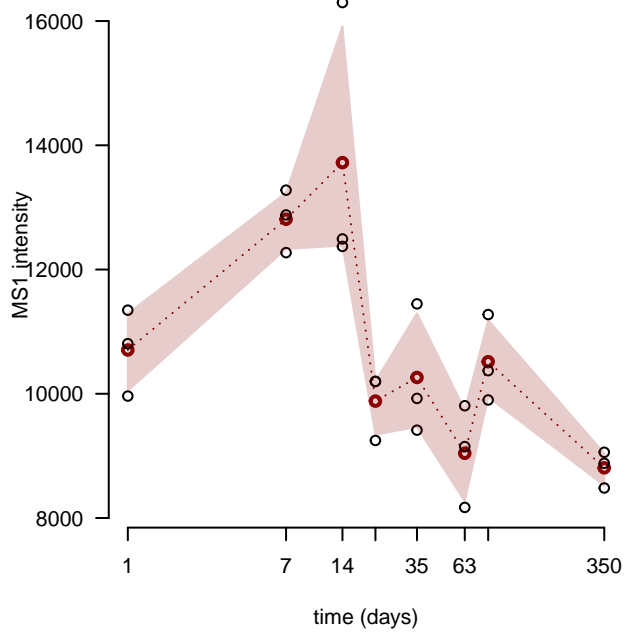

**Q8C838**  
**GN=Trarg1**  
trafficking regulator of GLUT4 (SLC2A4) ...

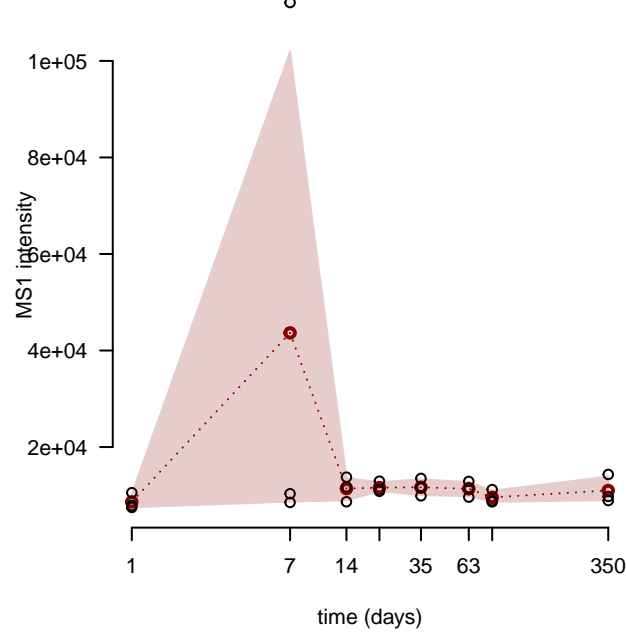

**Q8C850**  
**GN=Scara3**  
scavenger receptor class A, member 3

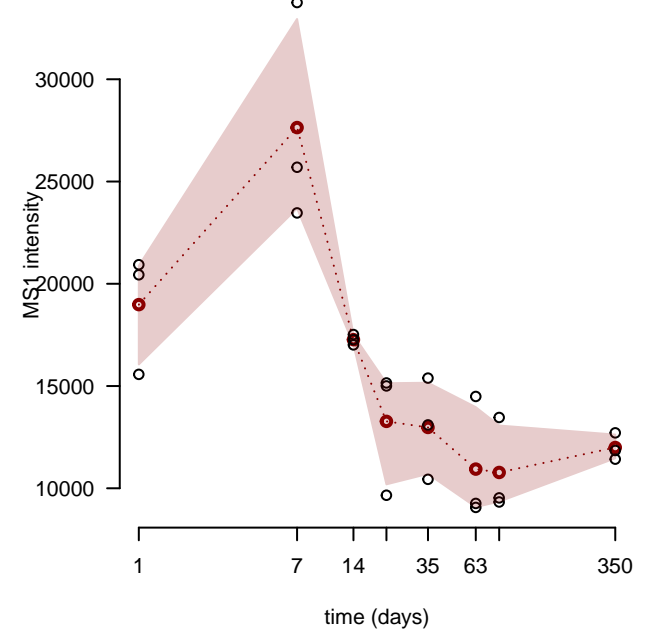

**Q8C854**  
**GN=Myef2**  
myelin basic protein expression factor 2 ...

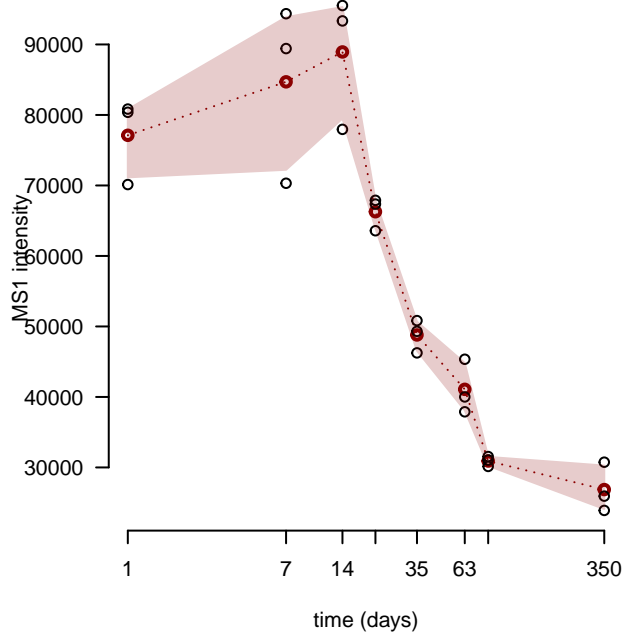

**Q8C863**  
**GN=Itch**  
itchy, E3 ubiquitin protein ligase

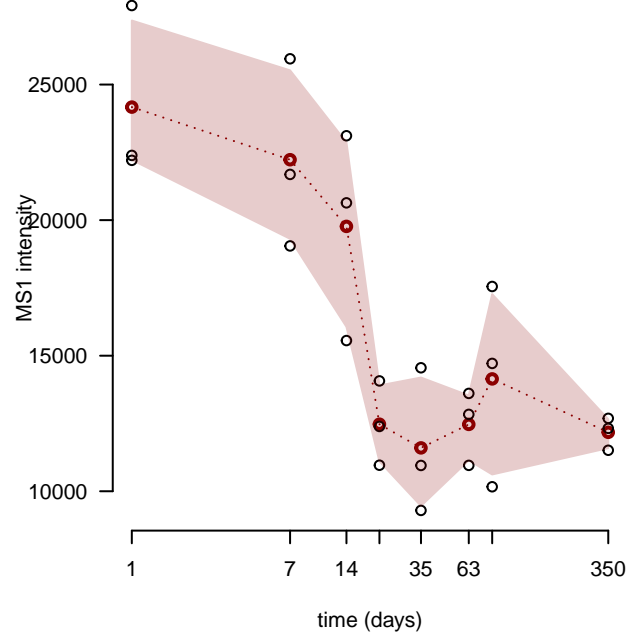

**Q8C878**  
**GN=Uba3**  
ubiquitin-like modifier activating enzym ...

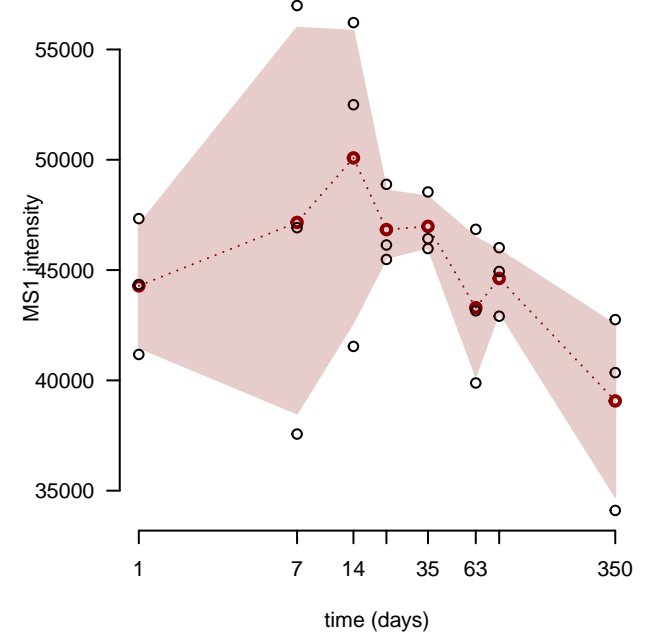

**Q8C8N2**  
**GN=Scai**  
suppressor of cancer cell invasion

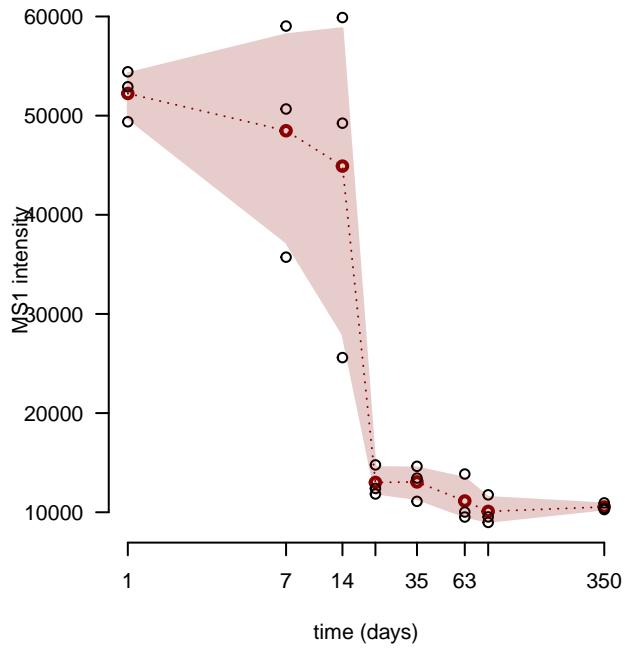

**Q8C8R3**  
**GN=Ank2**  
ankyrin 2, brain

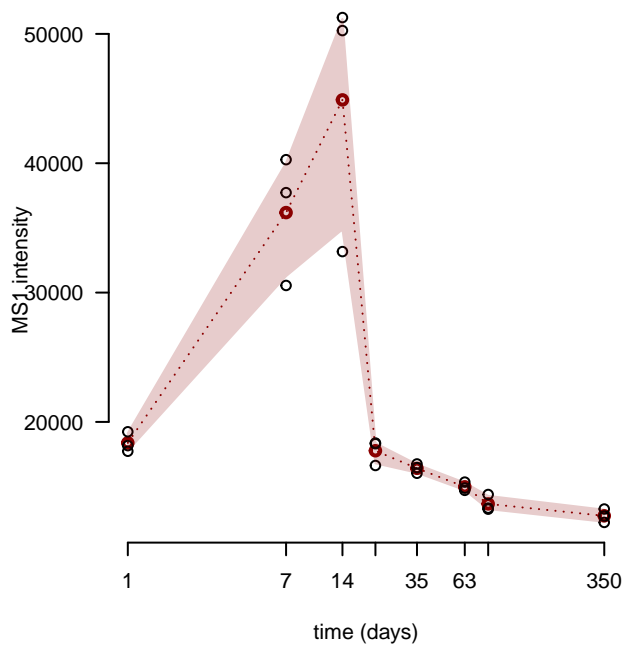

**Q8C8R3**  
**GN=Ank2**  
ankyrin 2, brain

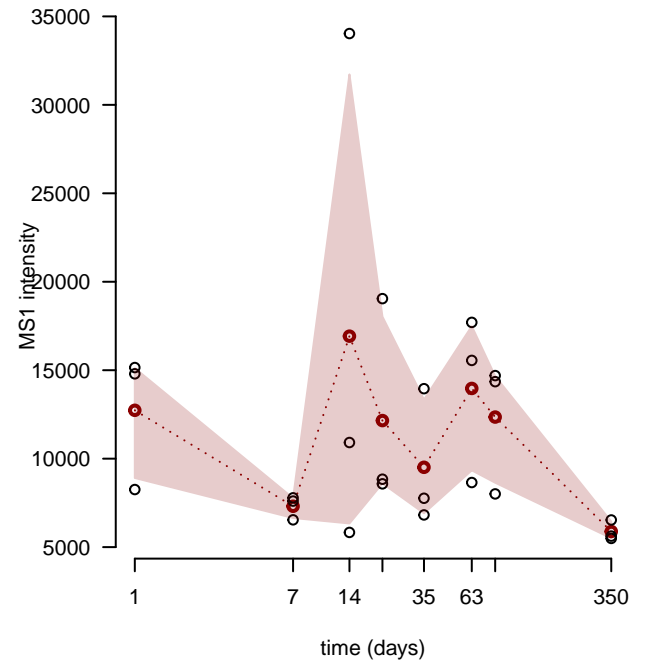

**Q8C8T8**  
**GN=Tsr2**  
TSR2 20S rRNA accumulation

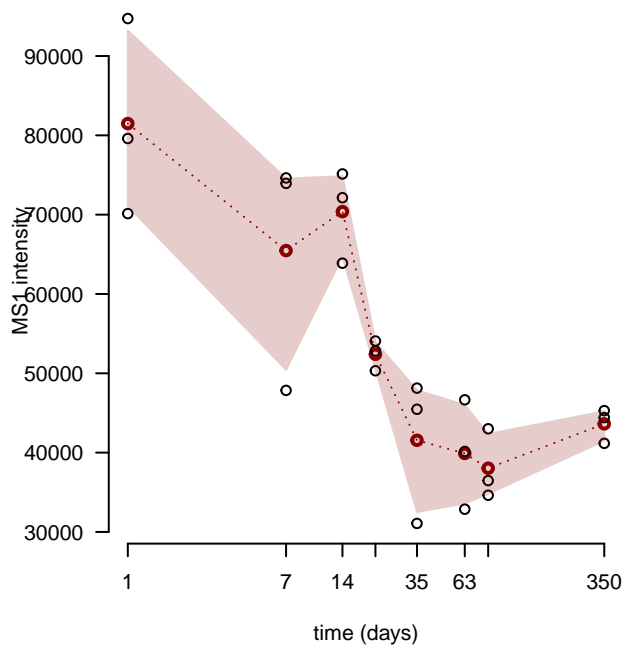

**Q8C8U0**  
**GN=Ppfibp1**  
PTPRF interacting protein, binding prote ...

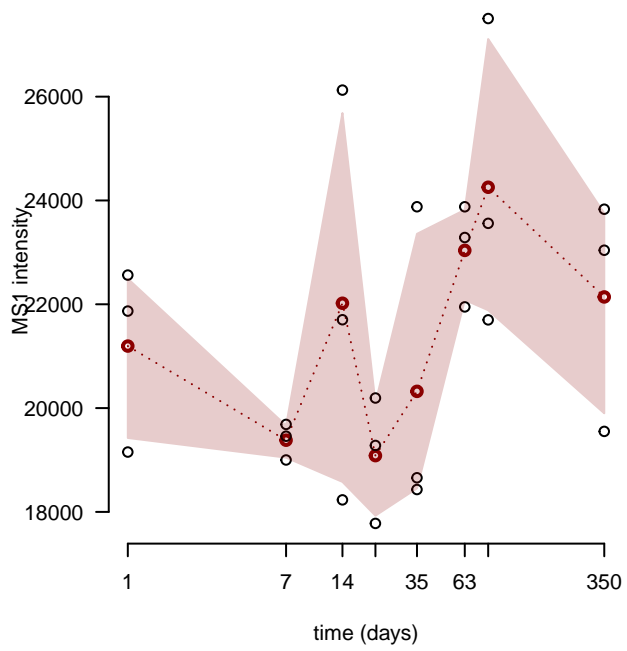

**Q8C9A2**  
**GN=Endov**  
endonuclease V

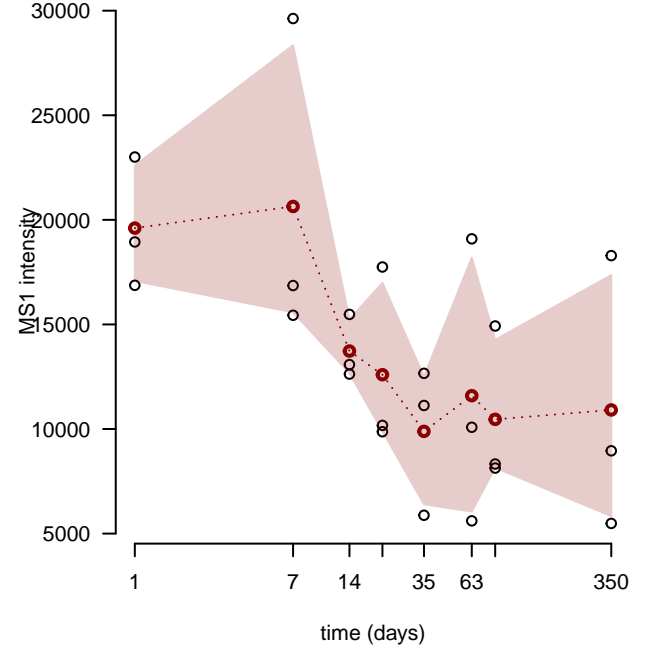

**Q8C9B9**  
**GN=Dido1**  
death inducer-obliterator 1

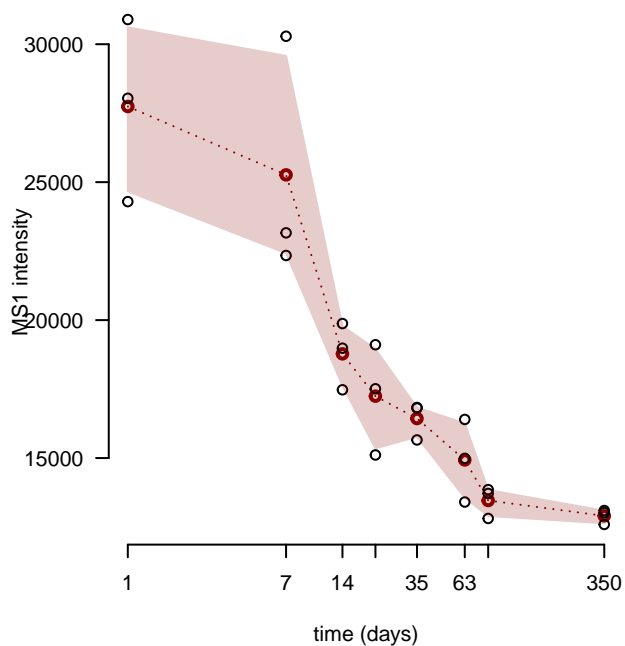

**Q8C9M2**  
**GN=Ccdc15**  
coiled-coil domain containing 15

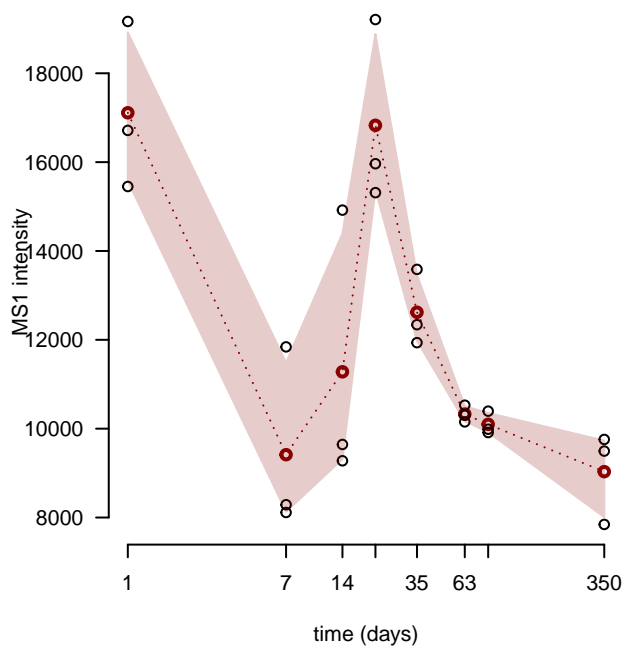

**Q8C9S4**  
**GN=Ccdc186**  
coiled-coil domain containing 186

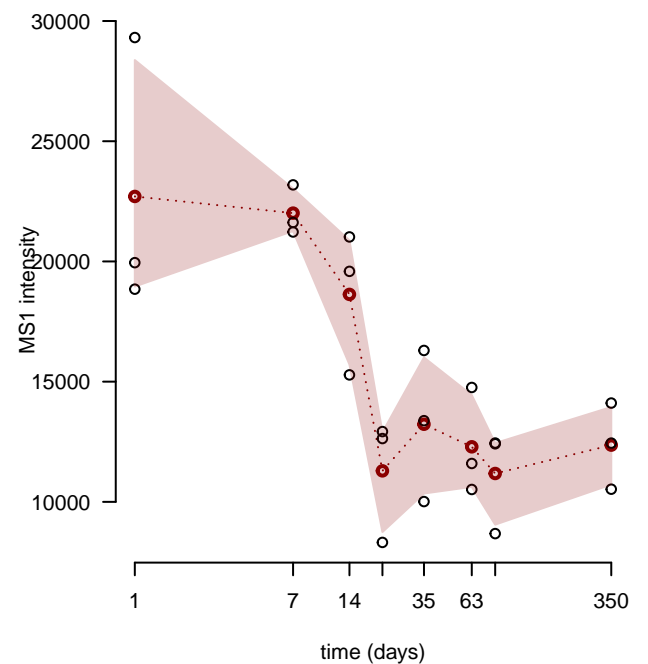

**Q8C9S8**  
**GN=Atg4a**

autophagy related 4A, cysteine peptidase

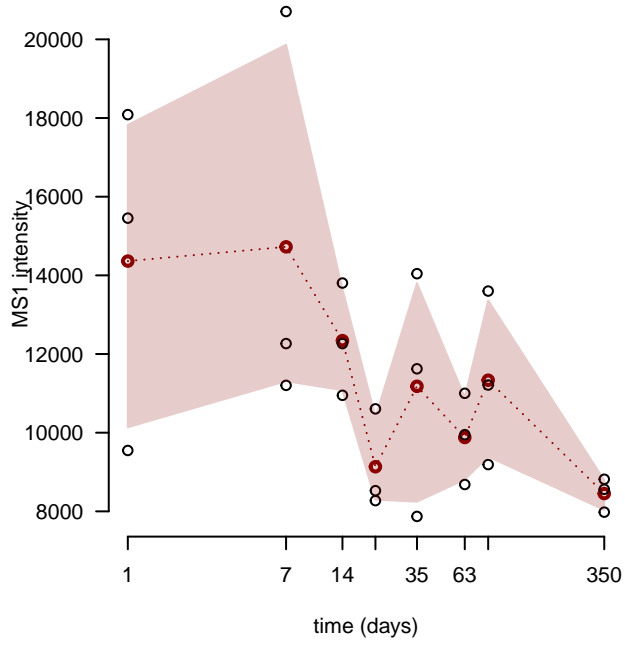

**Q8C9X6**  
**GN=Epc1**

enhancer of polycomb homolog 1

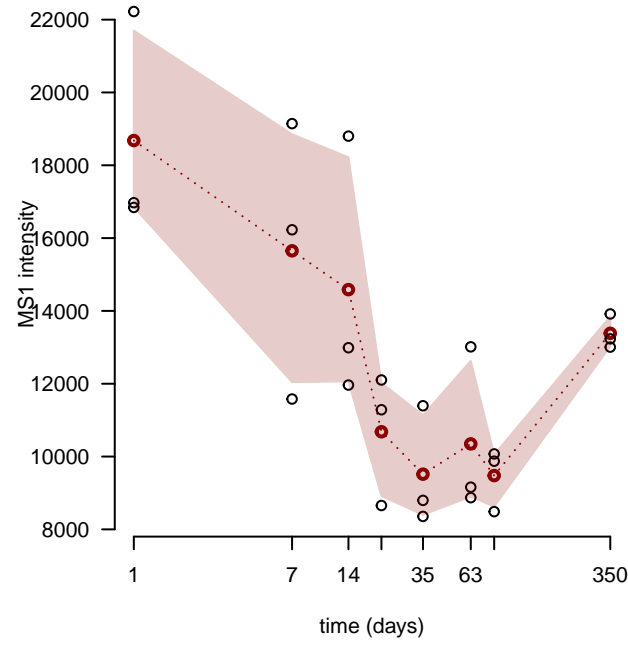

**Q8CA71**  
**GN=Shisa4**

shisa family member 4

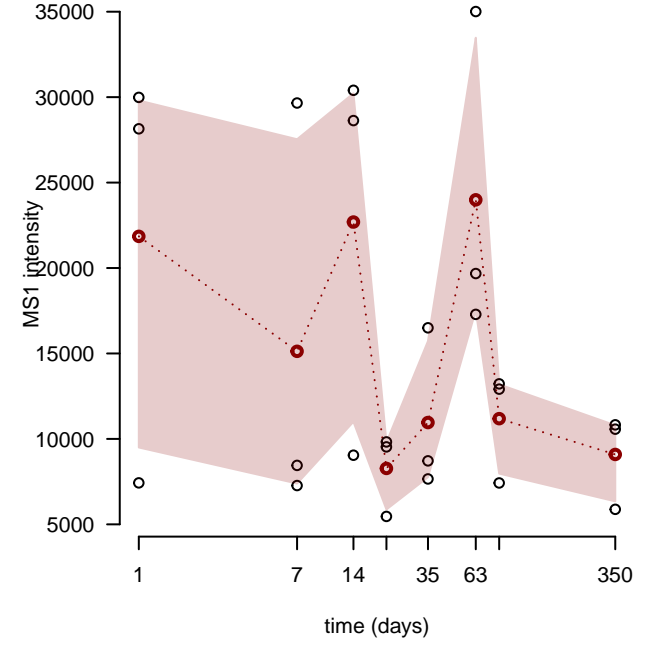

**Q8CA72**  
**GN=Gan**

giant axonal neuropathy

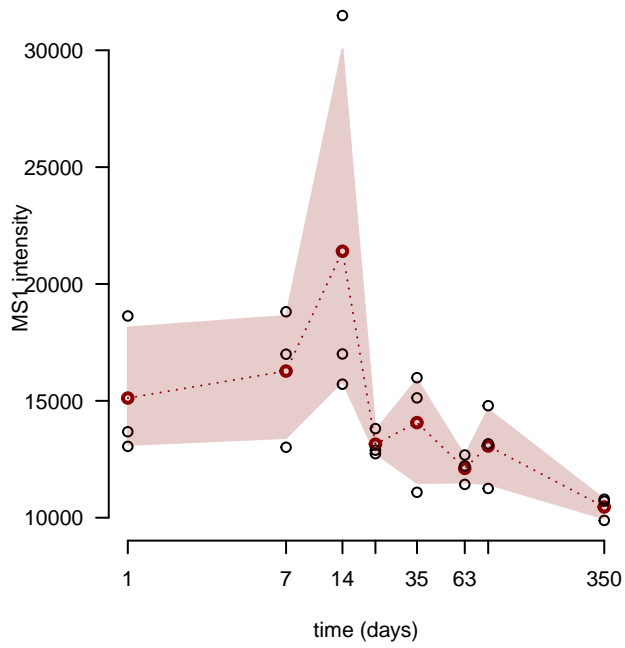

**Q8CAA7**  
**GN=Pgm211**

phosphoglucomutase 2-like 1

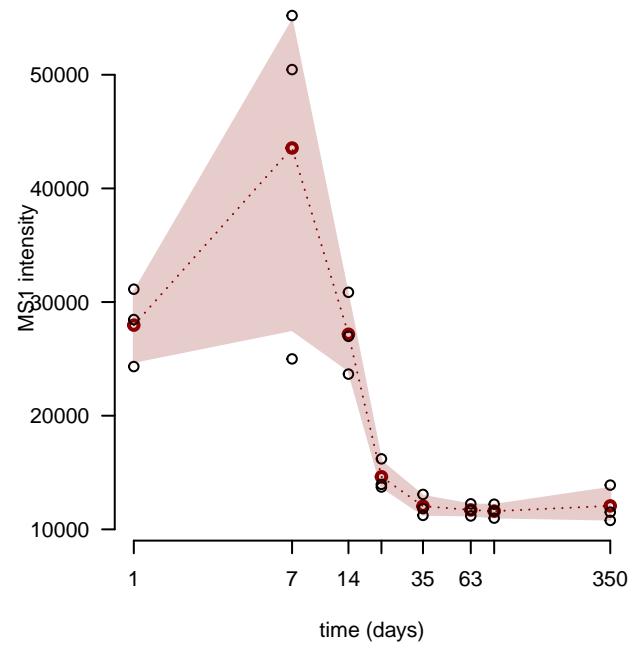

**Q8CAB8**  
**GN=Castor2**

cytosolic arginine sensor for mTORC1 sub ...

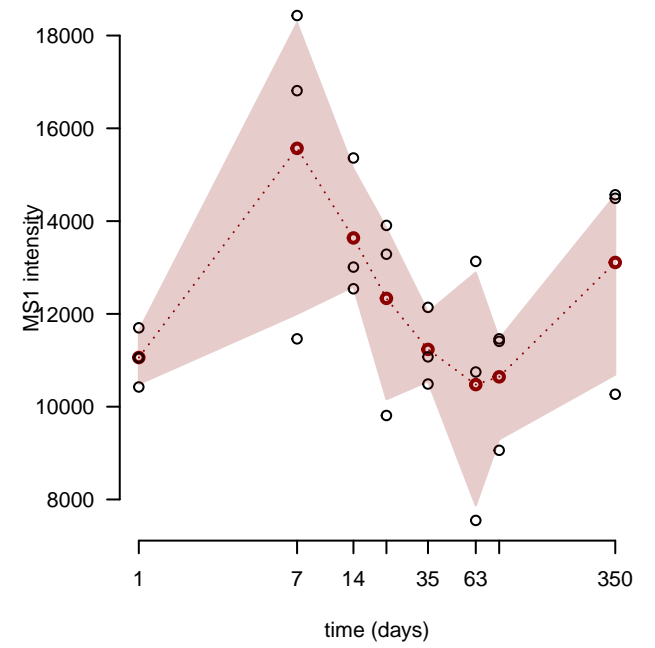

**Q8CAK1**  
**GN=Iba57**

IBA57 homolog, iron-sulfur cluster assem ...

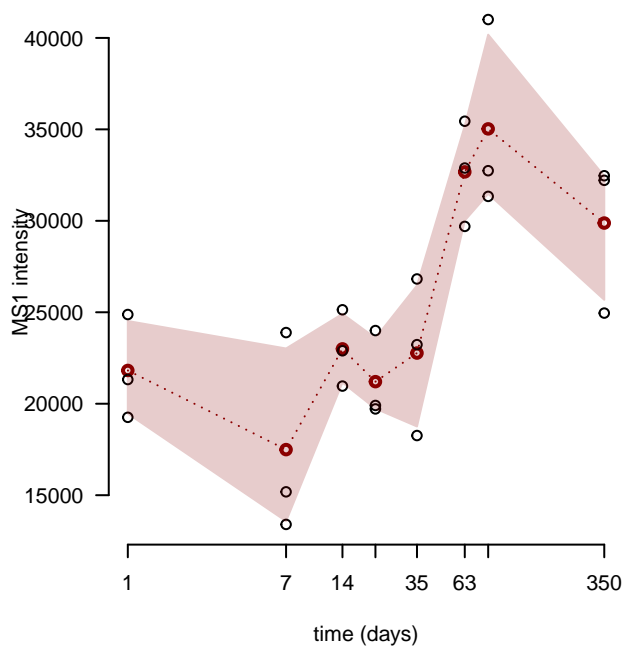

**Q8CAK3**  
**GN=Ryden**

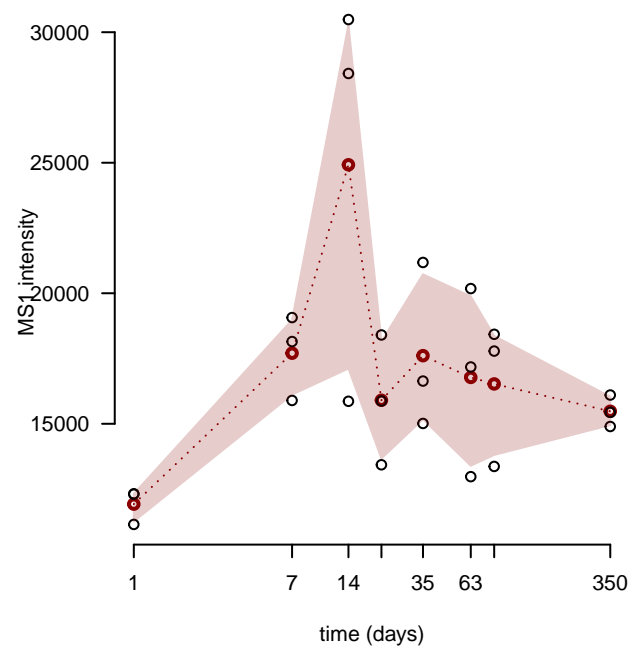

**Q8CAM5**  
**GN=Rab36**

RAB36, member RAS oncogene family

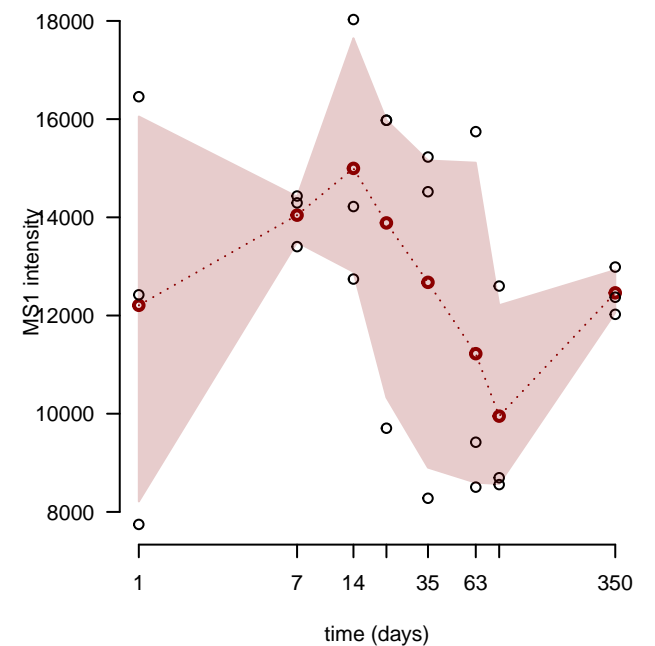



**Q8CAQ8**  
**GN=Immt**  
inner membrane protein, mitochondrial

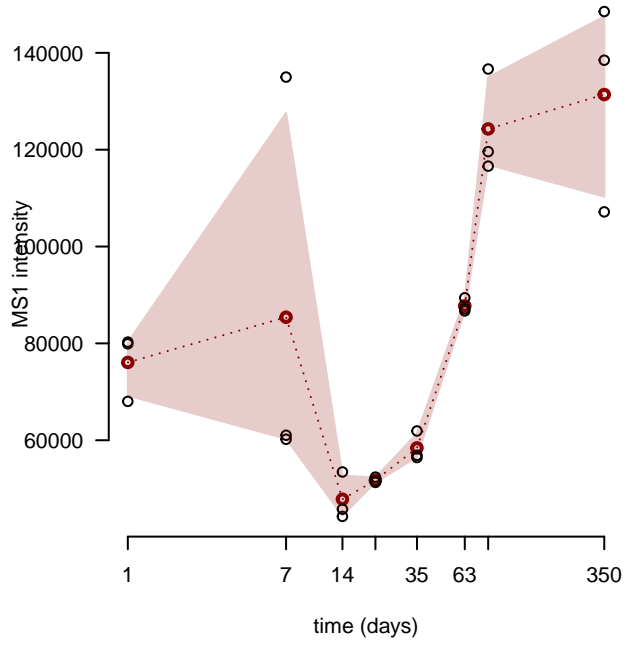

**Q8CAQ8**  
**GN=Immt**  
inner membrane protein, mitochondrial

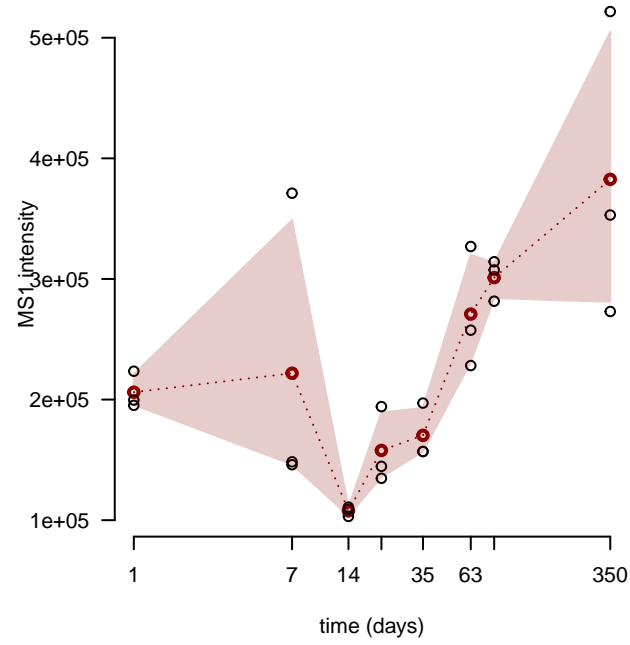

**Q8CAS9**  
**GN=Parp9**  
poly (ADP-ribose) polymerase family, mem ...

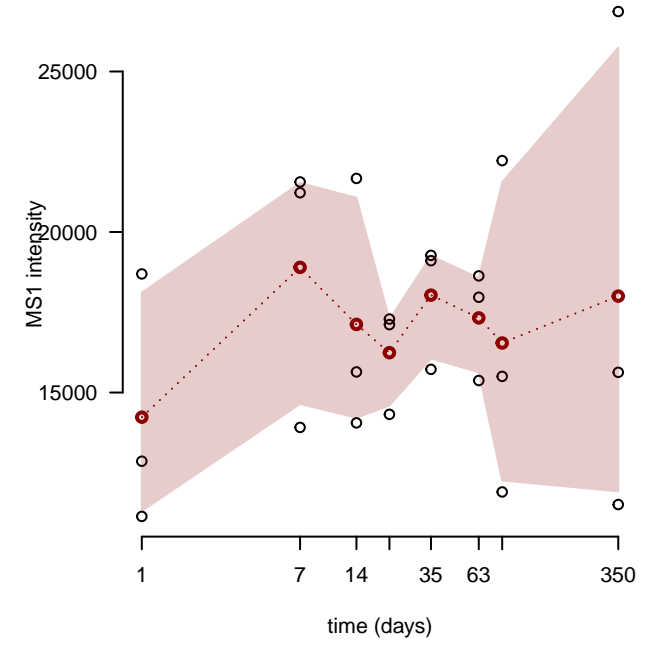

**Q8CAY6**  
**GN=Acat2**  
acetyl-Coenzyme A acetyltransferase 2

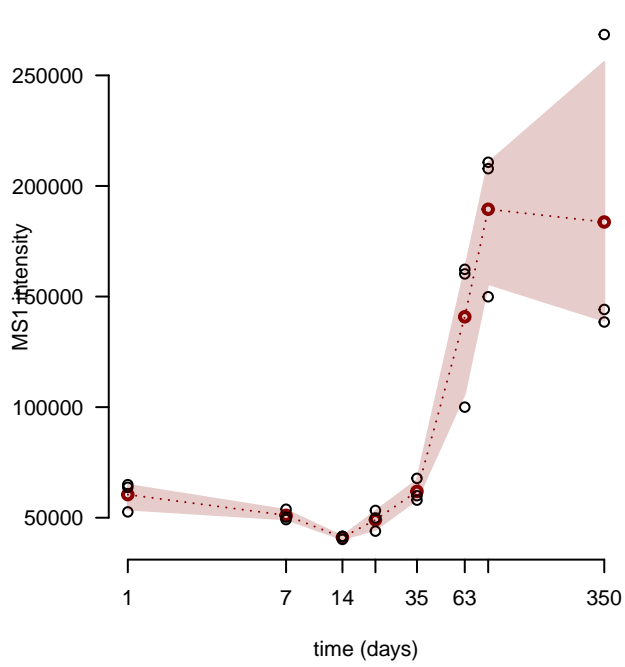

**Q8CB44**  
**GN=Gramd4**  
GRAM domain containing 4

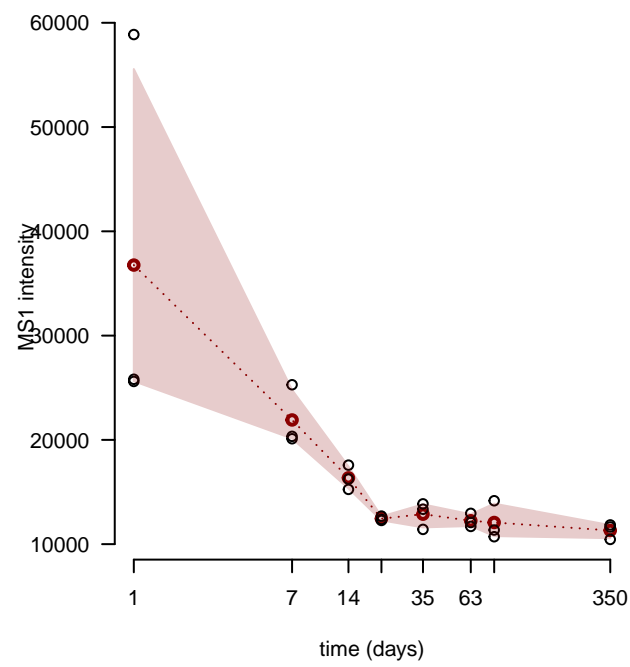

**Q8CB62**  
**GN=Cntrob**  
centrobin, centrosomal BRCA2 interacting ...

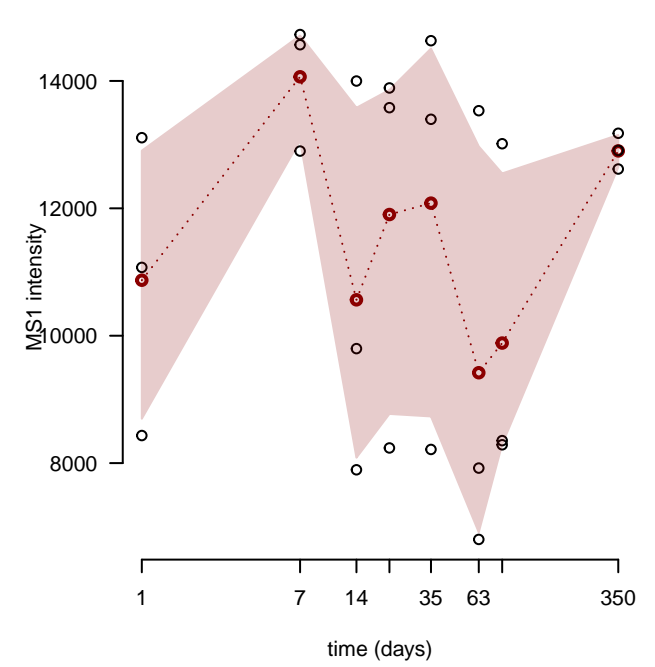

**Q8CB77**  
**GN=Eloa**  
elongin A

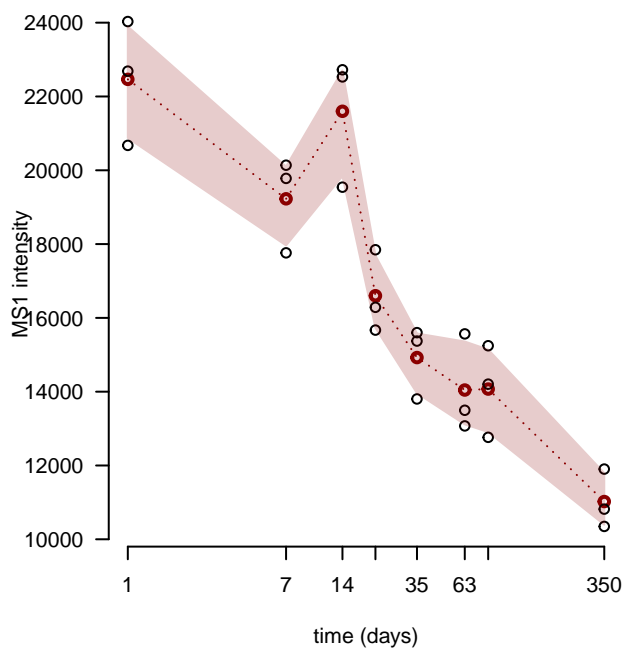

**Q8CB96**  
**GN=Rassf4**  
Ras association (RalGDS/AF-6) domain fam ...

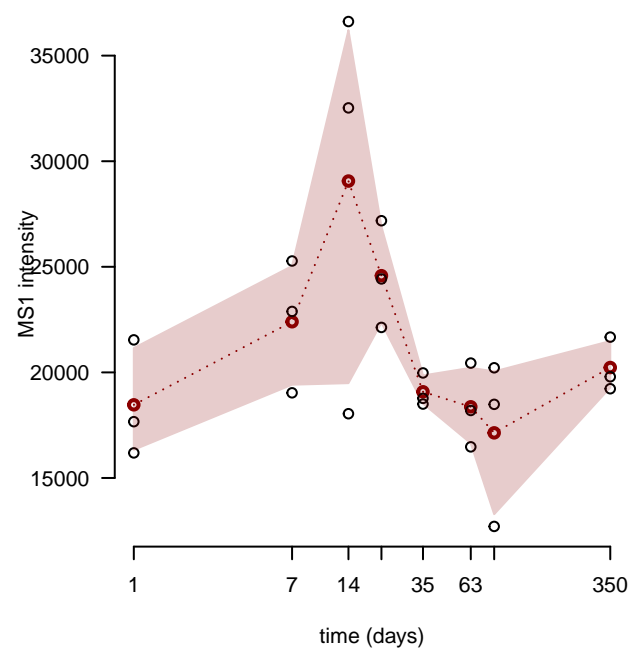

**Q8CBA2**  
**GN=Slfn5**  
schlafen 5

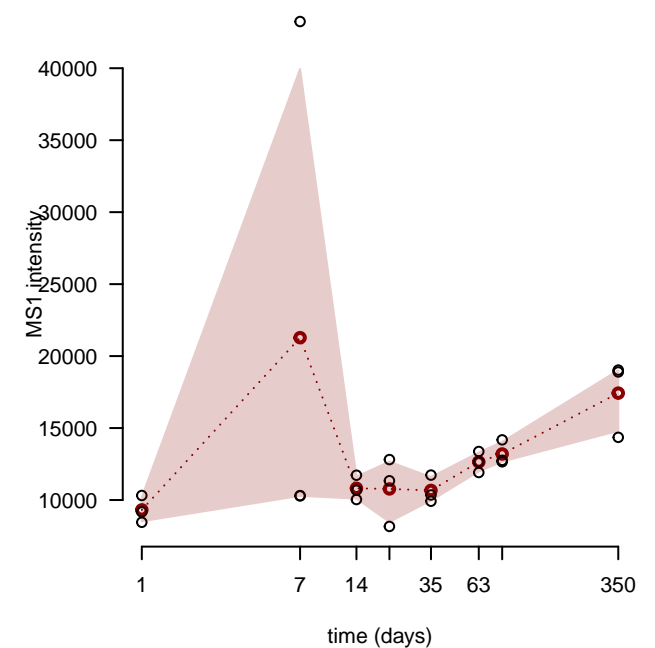

**Q8CBC4**  
GN=Cnst  
consortin, connexin sorting protein

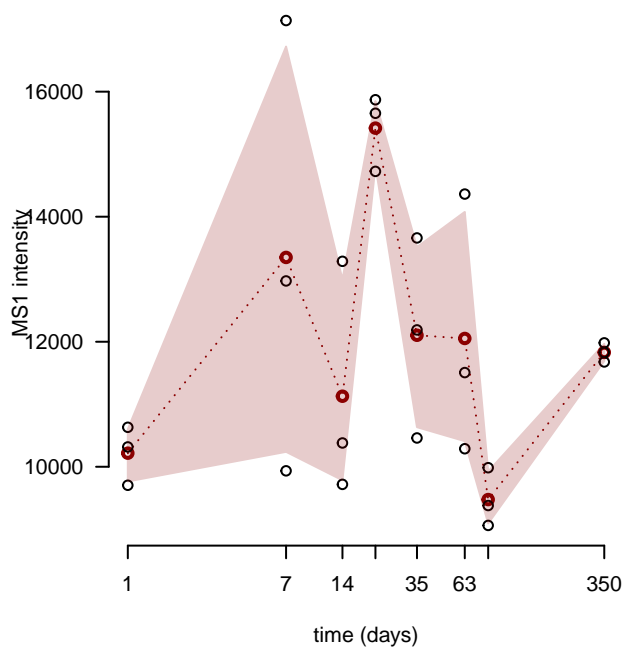

**Q8CBE3**  
GN=Wdr37  
WD repeat domain 37

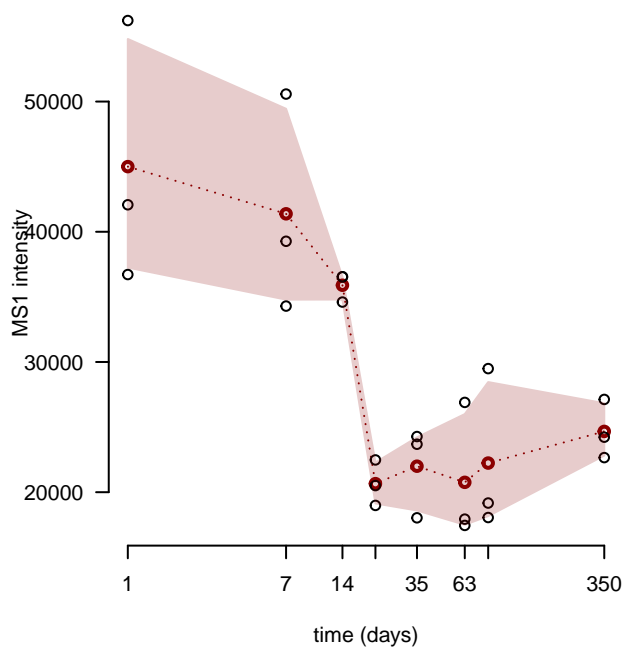

**Q8CBG9**  
GN=Rnf170  
ring finger protein 170

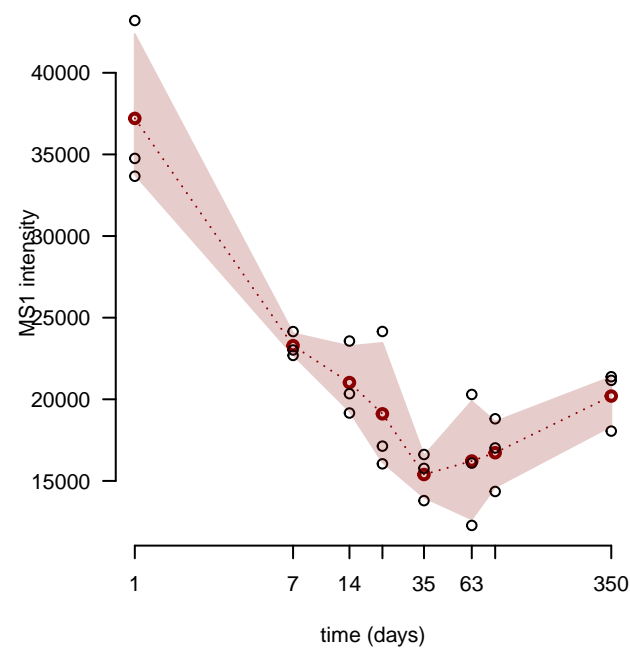

**Q8CBQ5**  
GN=Pi4k2b  
phosphatidylinositol 4-kinase type 2 bet ...

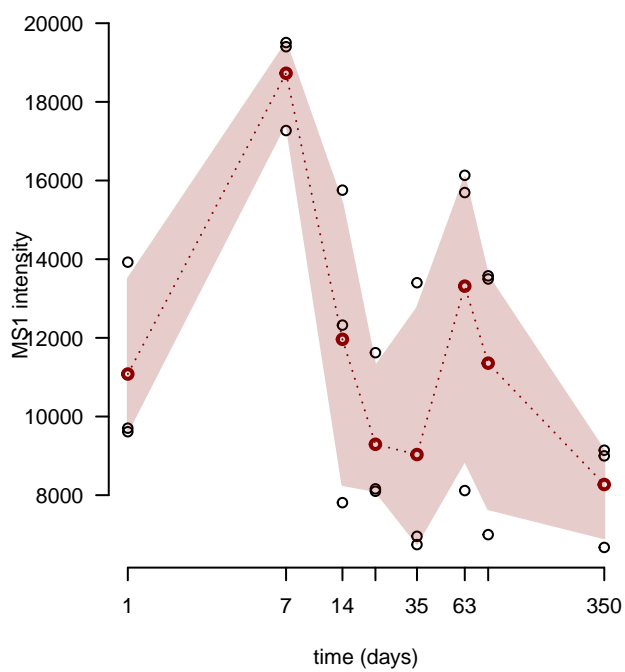

**Q8CBW3**  
GN=Abi1  
abl interactor 1

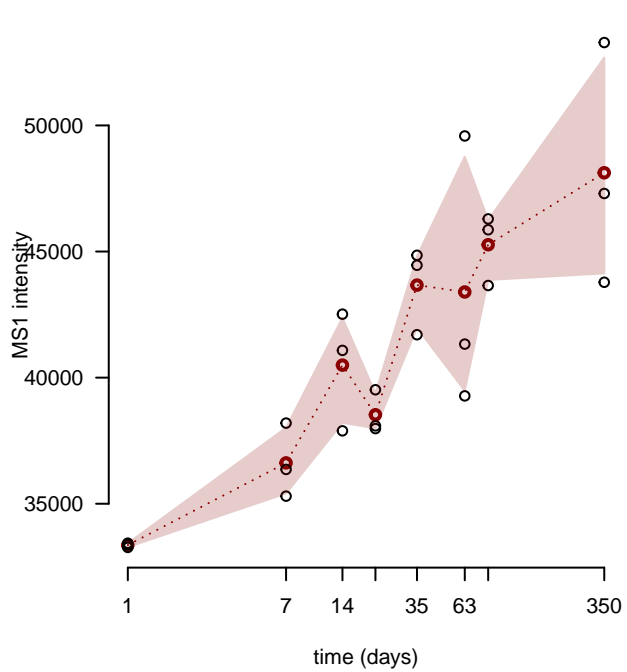

**Q8CBW4**  
GN=Dcaf12l1  
DDB1 and CUL4 associated factor 12-like ...

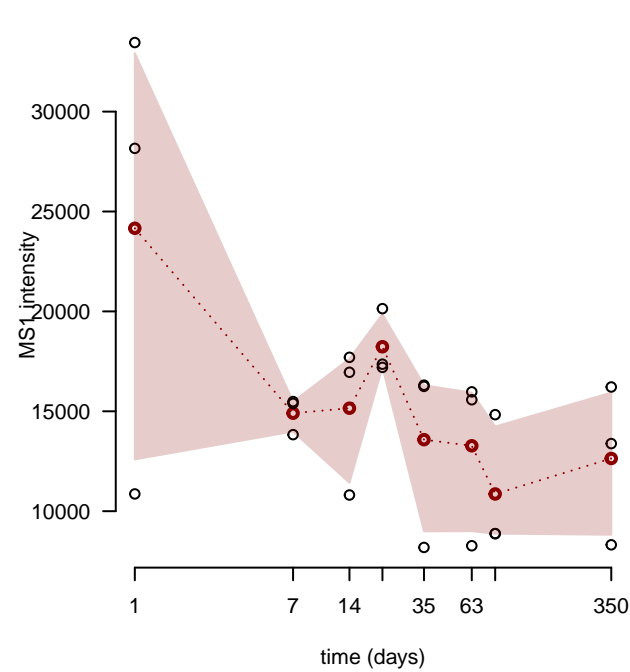

**Q8CBY1**  
GN=Samd4a

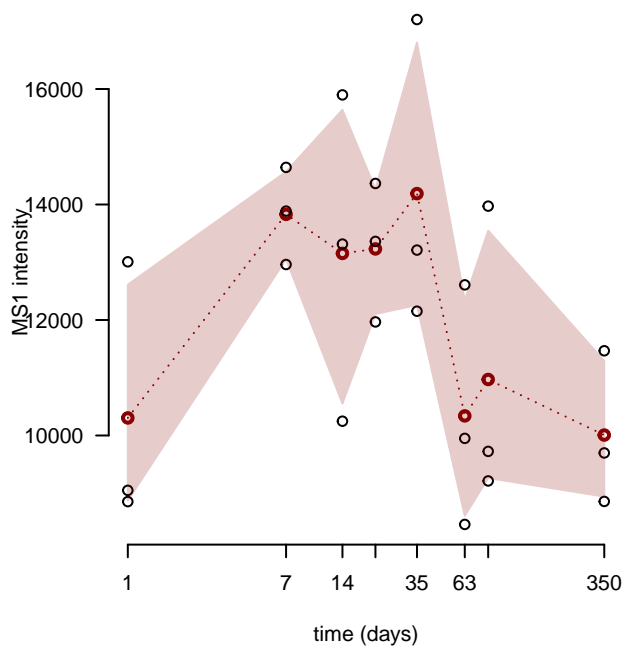

**Q8CBY3**  
GN=Leng8  
leukocyte receptor cluster (LRC) member ...

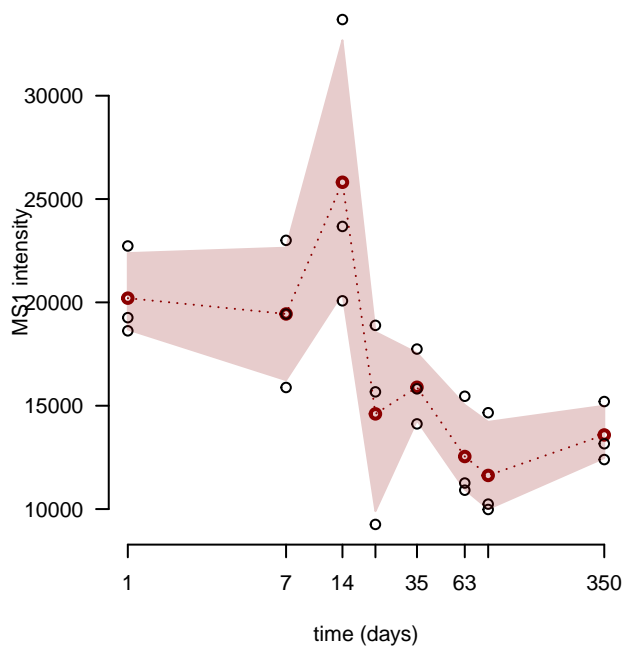

**Q8CBY8**  
GN=Dctn4  
dynactin 4

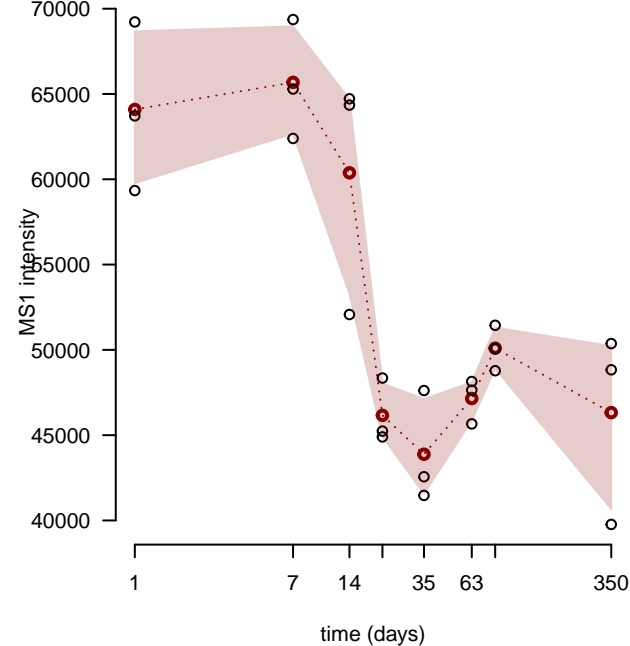

**Q8CC12**  
GN=Cdan1  
congenital dyserythropoietic anemia, typ ...

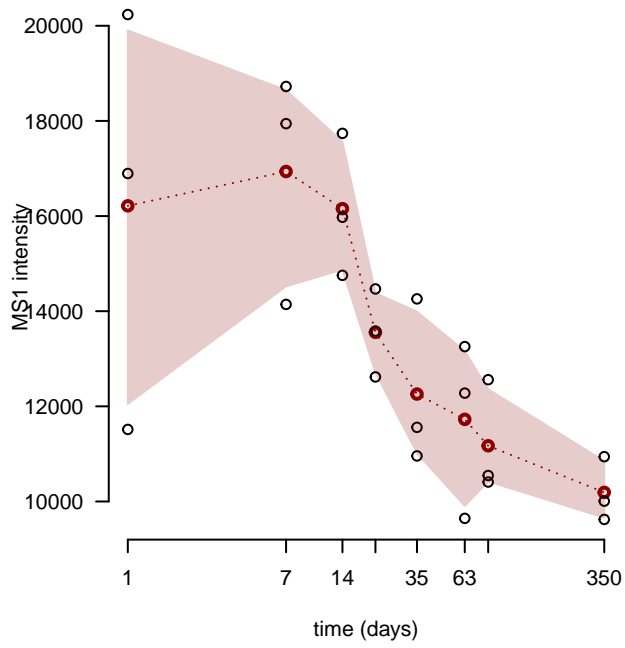

**Q8CC21**  
GN=Ttc19  
tetratricopeptide repeat domain 19

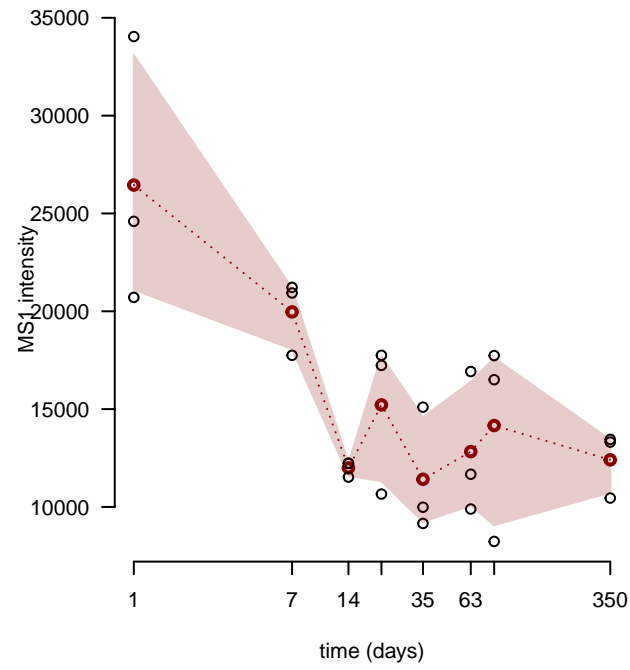

**Q8CC27**  
GN=Cacnb2  
calcium channel, voltage-dependent, beta ...

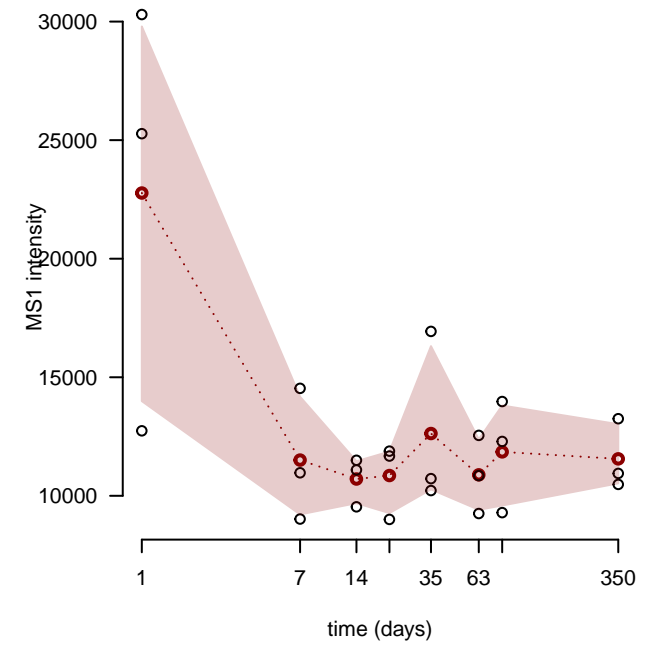

**Q8CC35**  
GN=Synpo  
synaptopodin

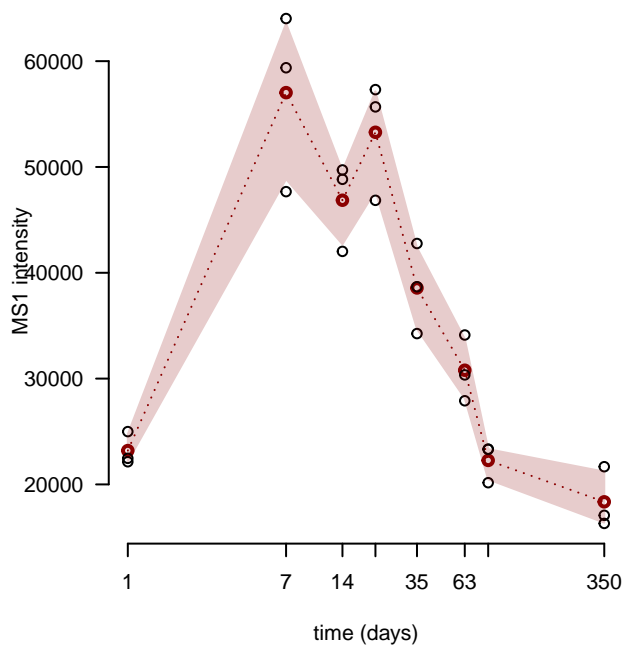

**Q8CC35**  
GN=Synpo  
synaptopodin

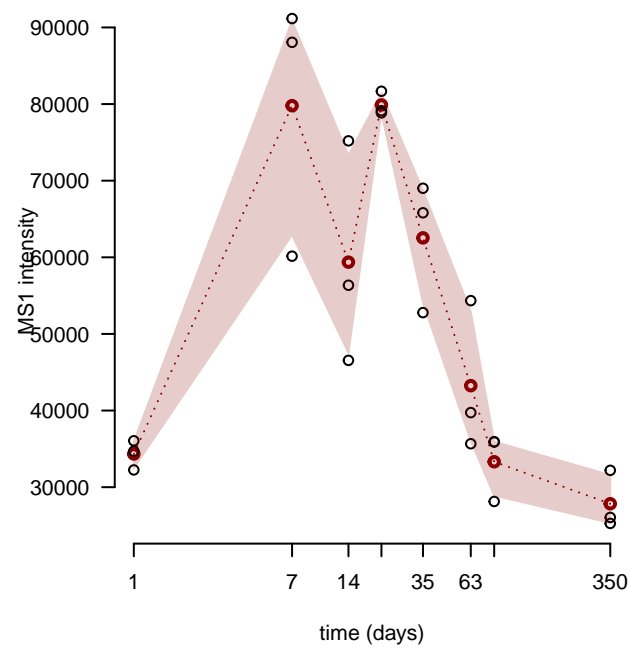

**Q8CC70**  
GN=Cfap300  
cilia and flagella associated protein 30 ...

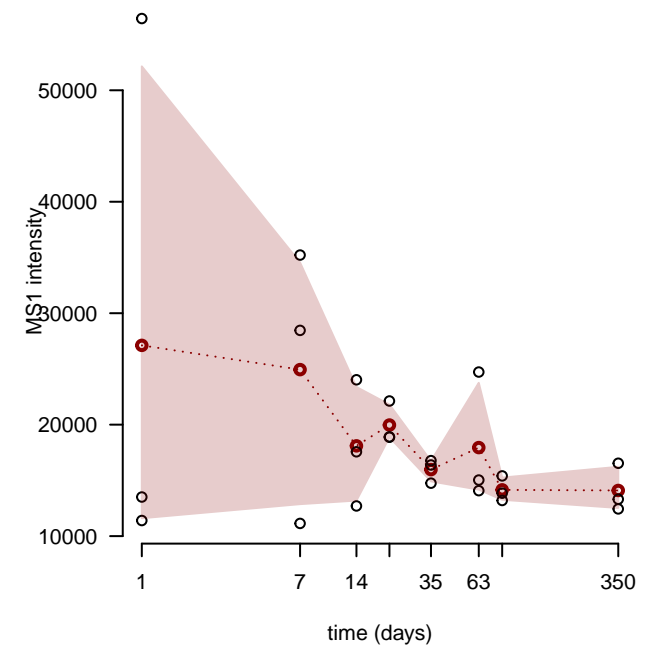

**Q8CC86**  
GN=Naprt  
nicotinate phosphoribosyltransferase

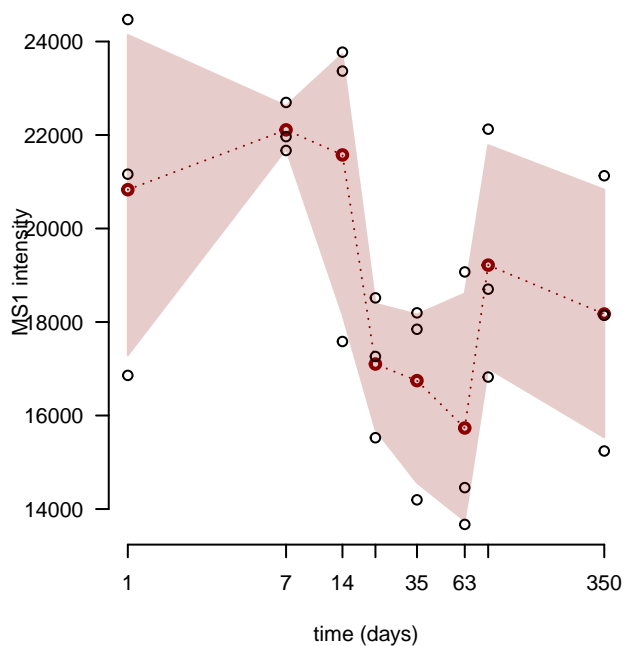

**Q8CC88**  
GN=Vwa8  
von Willebrand factor A domain containin ...

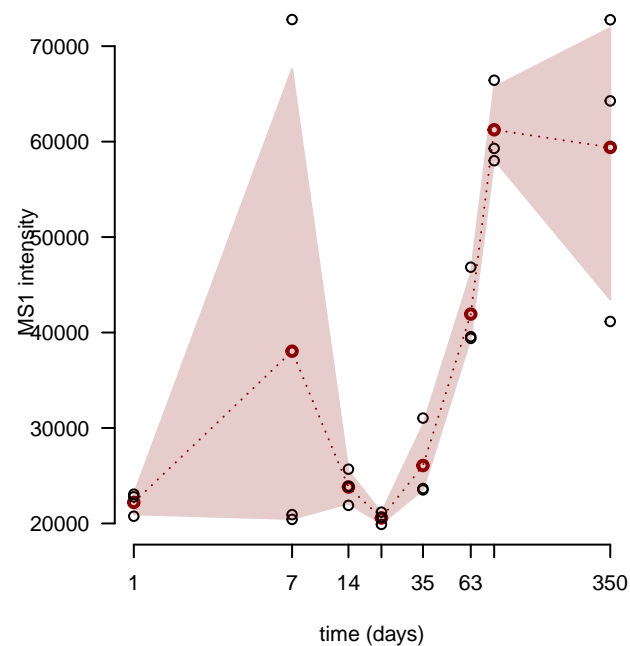

**Q8CCA0**  
GN=Dcun1d4  
DCN1, defective in cullin neddylation 1, ...

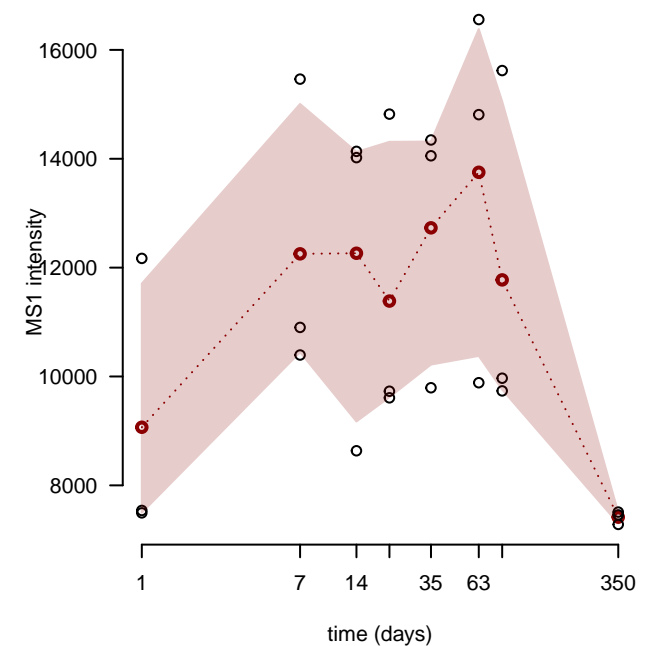

**Q8CCB4**  
GN=Vps53  
VPS53 GARP complex subunit

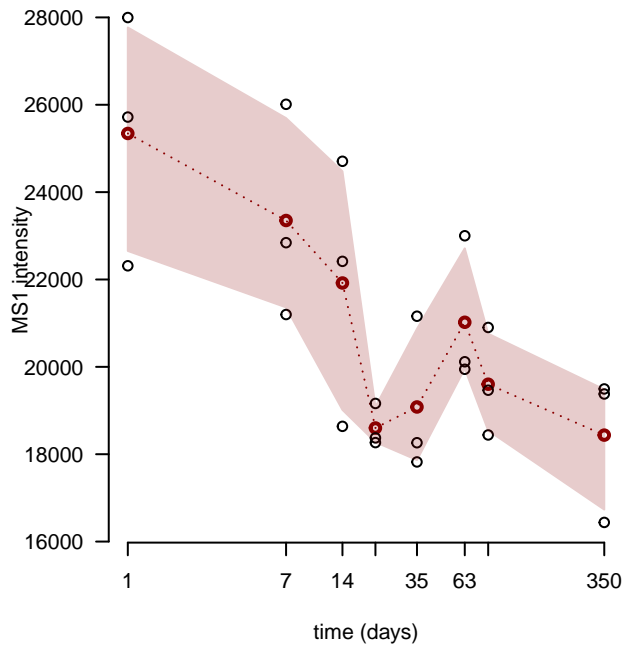

**Q8CCB5**  
GN=Mettl24  
methyltransferase like 24

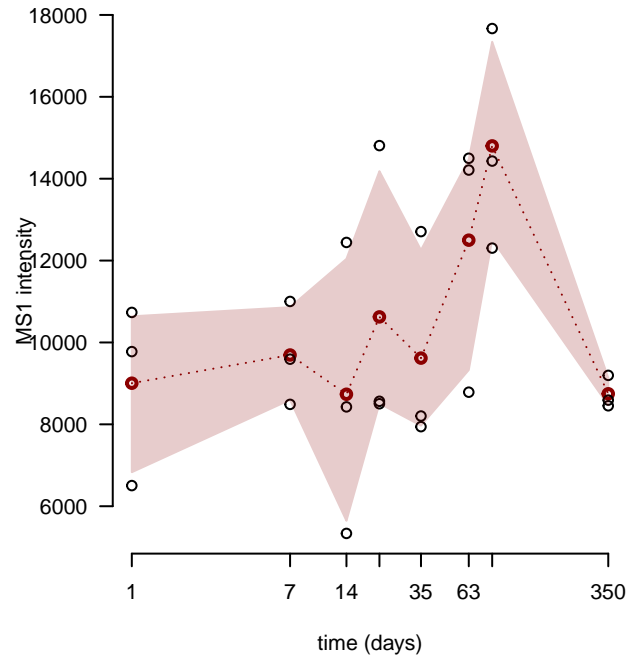

**Q8CCF0**  
GN=Prpf31  
pre-mRNA processing factor 31

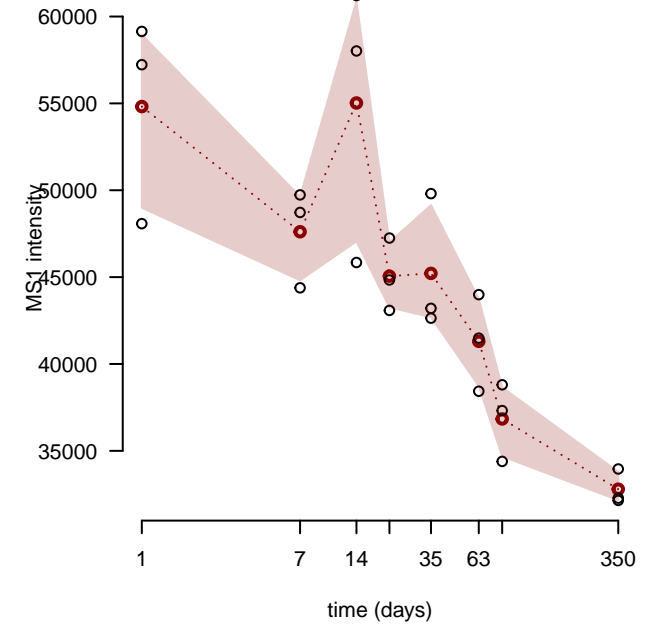

**Q8CCH2**  
GN=Nhlrc3  
NHL repeat containing 3

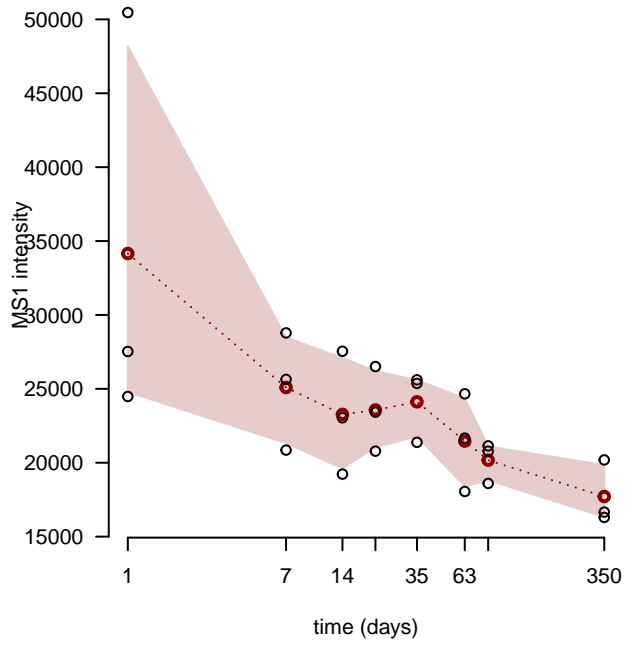

**Q8CCH7**  
GN=Zfpn2  
zinc finger protein, multitype 2

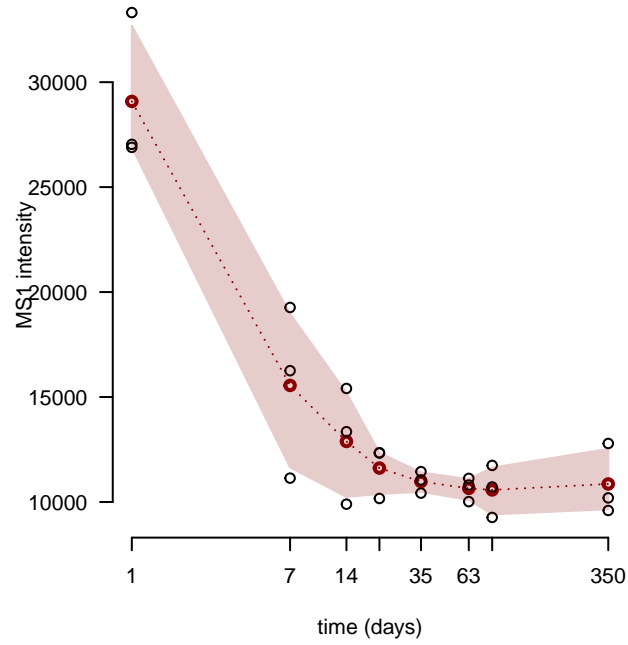

**Q8CCI5**  
GN=Rybp  
RING1 and YY1 binding protein

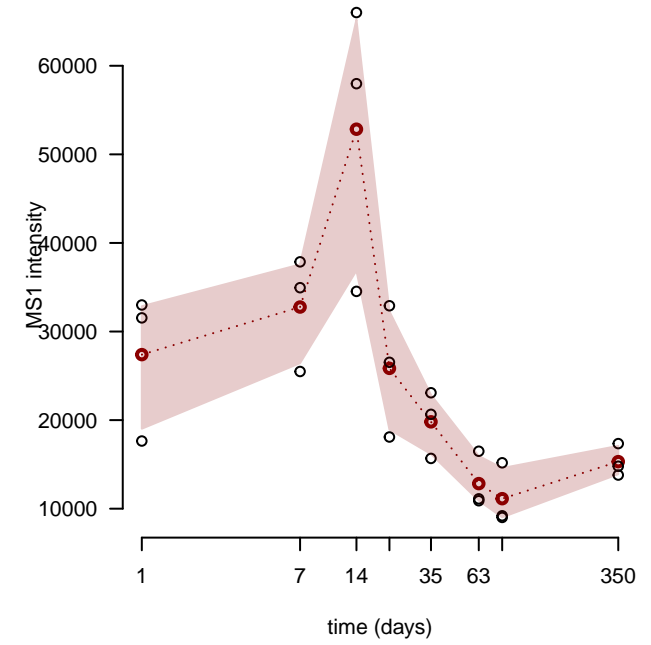

**Q8CCJ3**  
GN=Ufl1  
UFM1 specific ligase 1

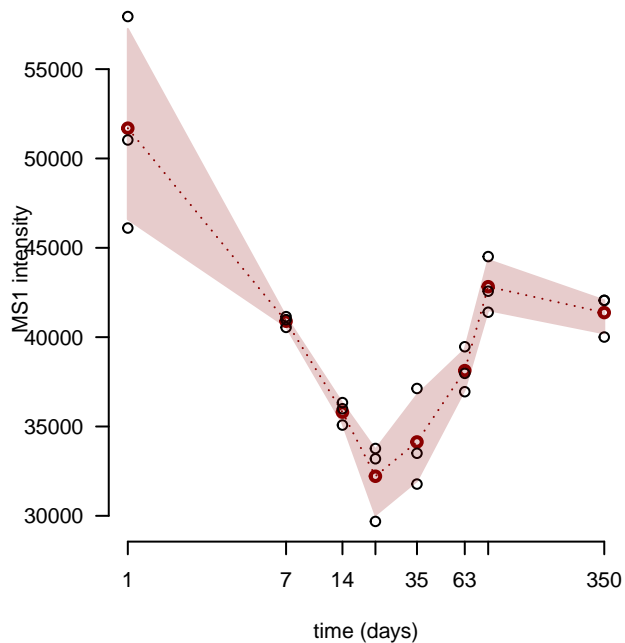

**Q8CCJ9**  
GN=Phf2011  
PHD finger protein 20-like 1

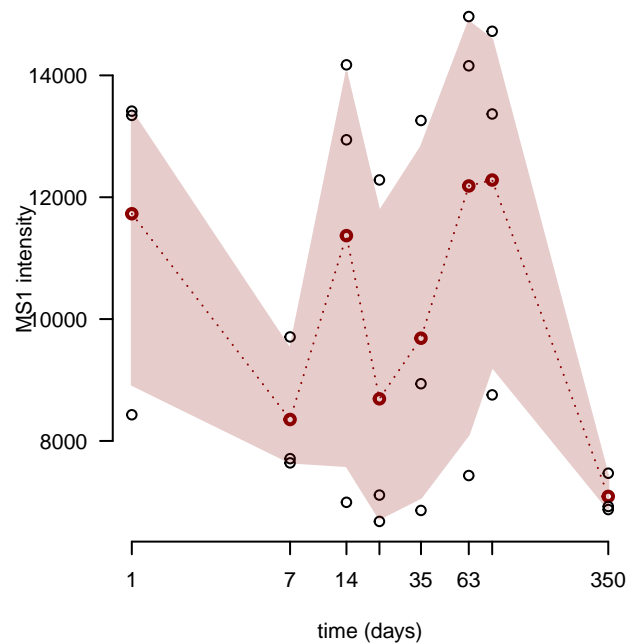

**Q8CCK0**  
GN=H2afy2

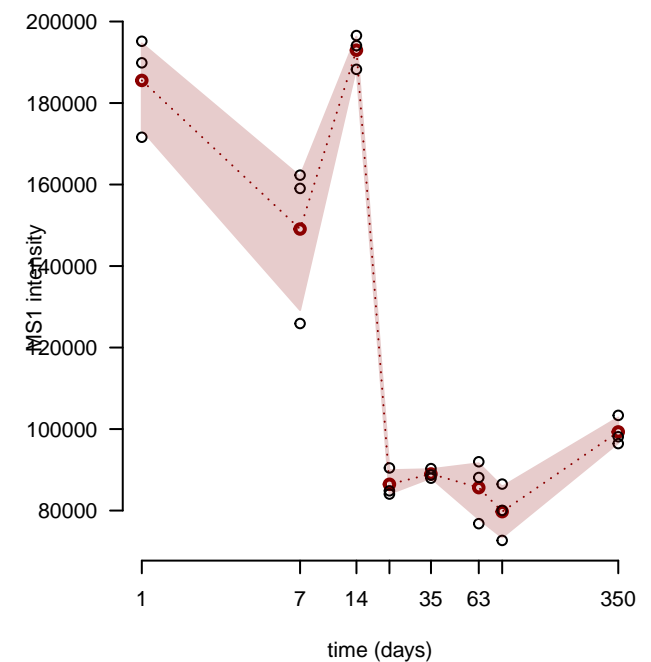

**Q8CCM6**  
GN=Timm21  
translocase of inner mitochondrial membr ...

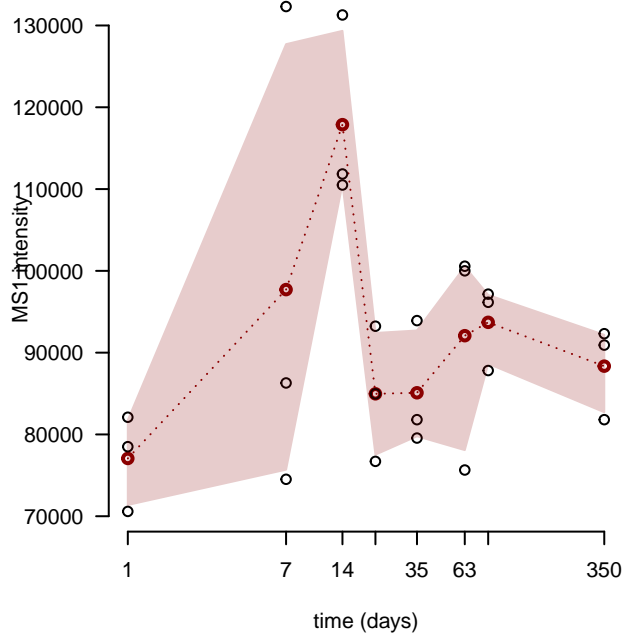

**Q8CCN5**  
GN=Bcas3  
BCAS3 microtubule associated cell migrat ...

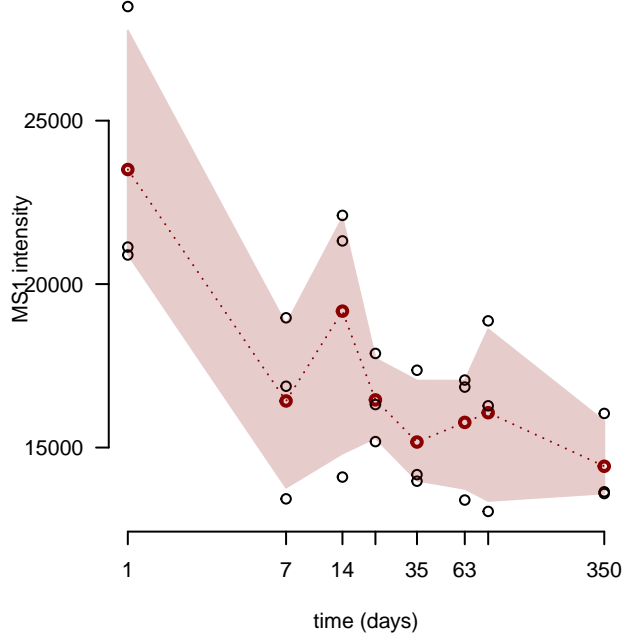

**Q8CCP0**  
GN=Nemf  
nuclear export mediator factor

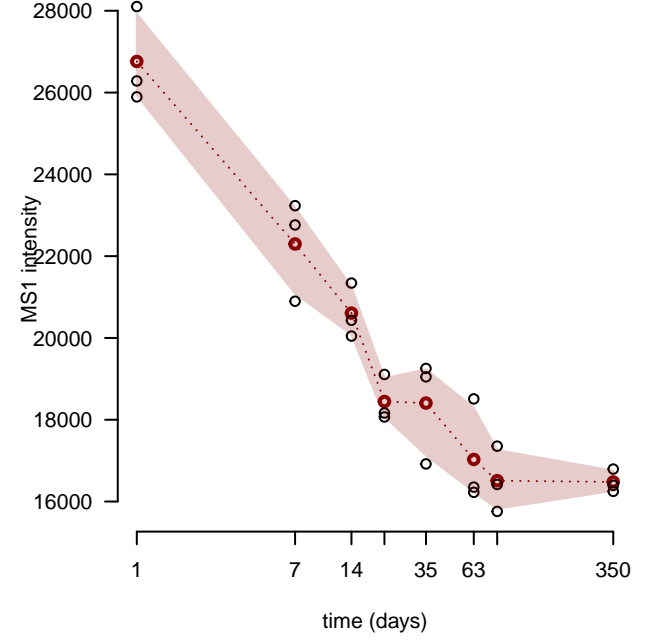

**Q8CCS6**  
GN=Pabpn1  
poly(A) binding protein, nuclear 1

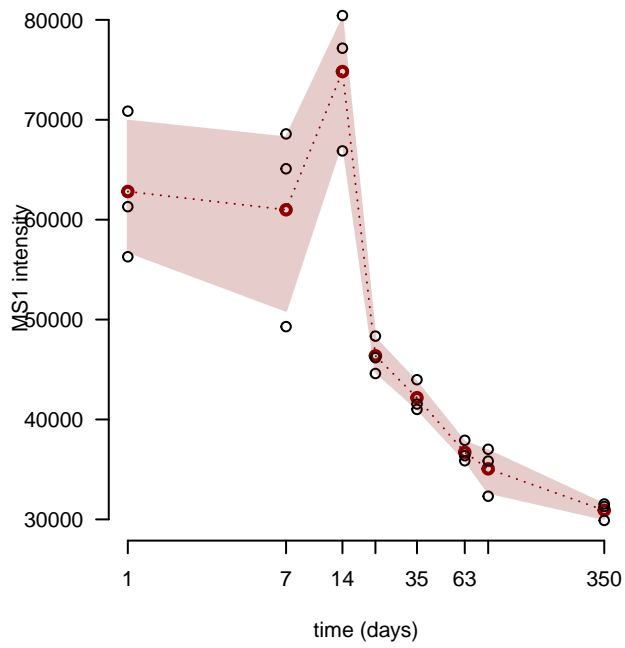

**Q8CCT4**  
GN=Tceal5  
transcription elongation factor A (SII)- ...

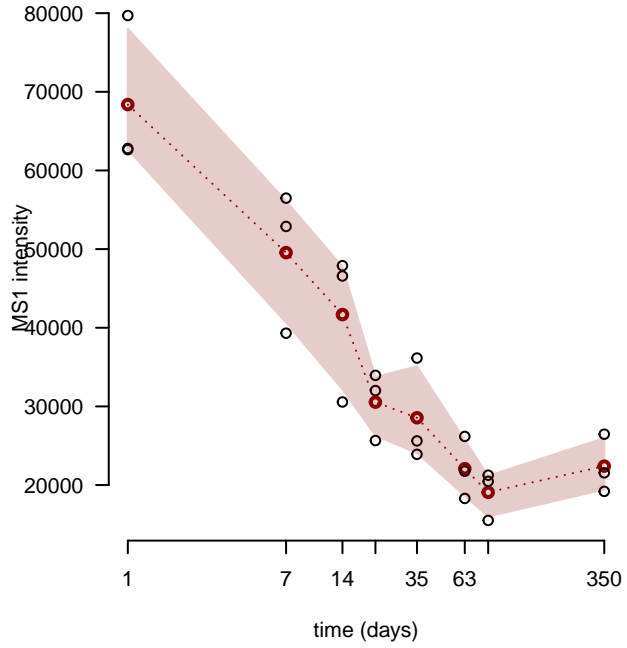

**Q8CCX5**  
GN=Krt222  
keratin 222

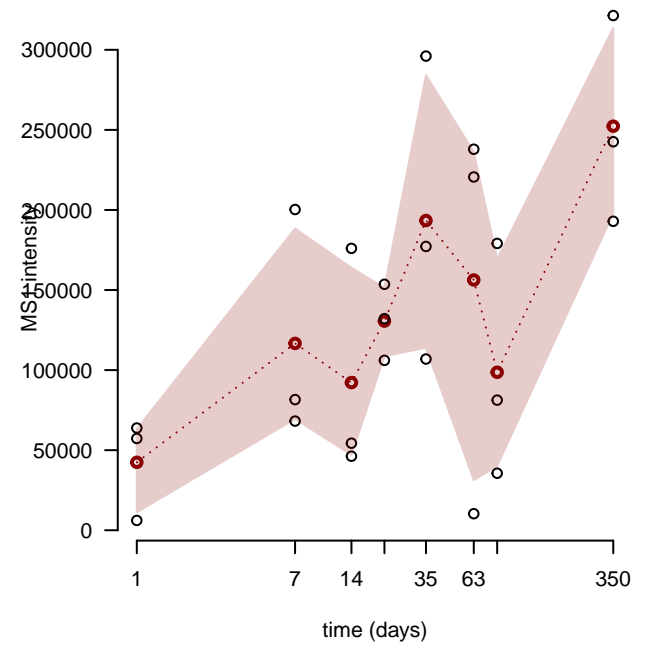

**Q8CD10**  
GN=Micu2  
mitochondrial calcium uptake 2

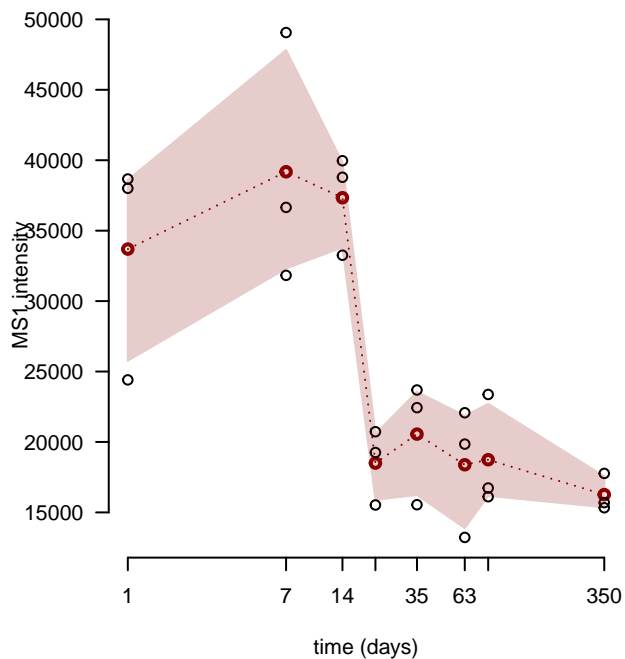

**Q8CD15**  
GN=Riox2  
ribosomal oxygenase 2

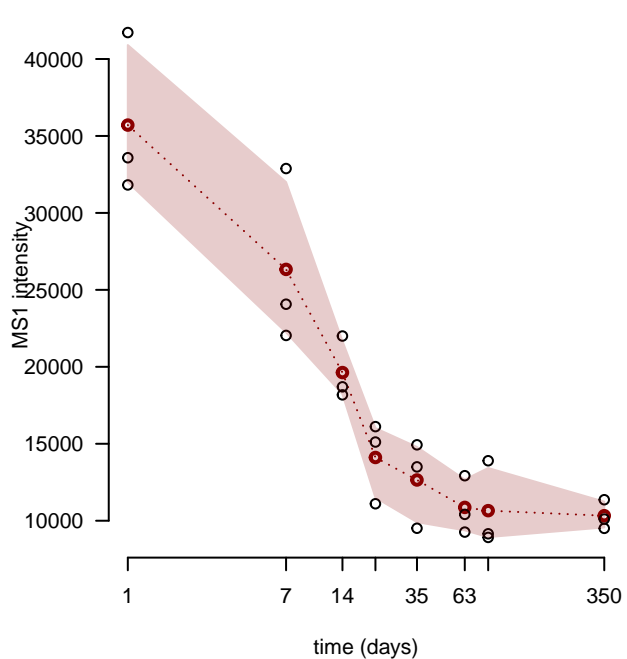

**Q8CD19**  
GN=Lancl3  
LanC lantibiotic synthetase component C- ...

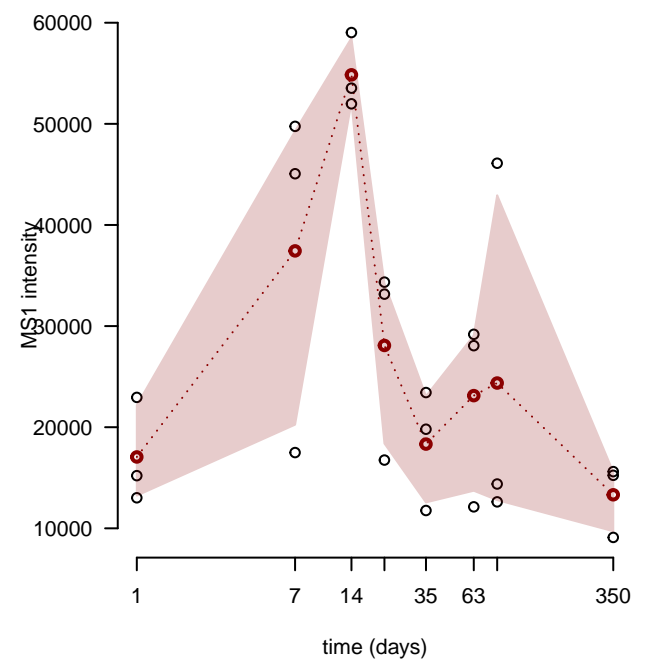

**Q8CD26**  
**GN=Slc35e1**  
solute carrier family 35, member E1

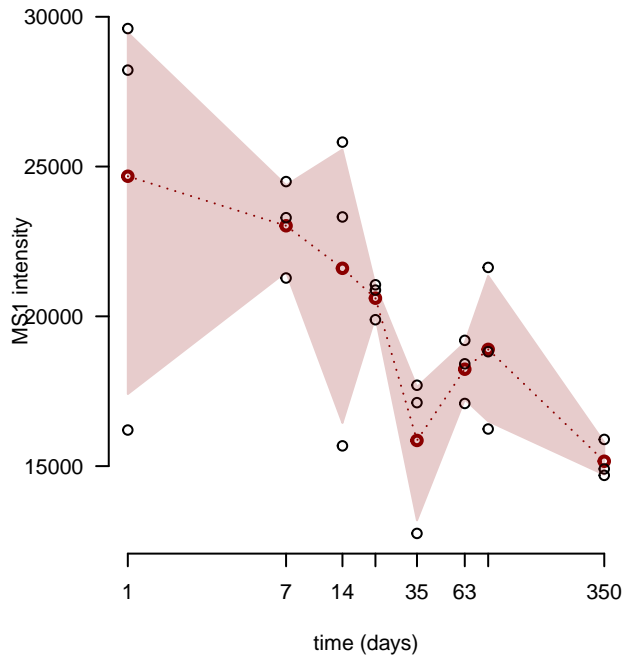

**Q8CD91**  
**GN=Smoc2**  
SPARC related modular calcium binding 2

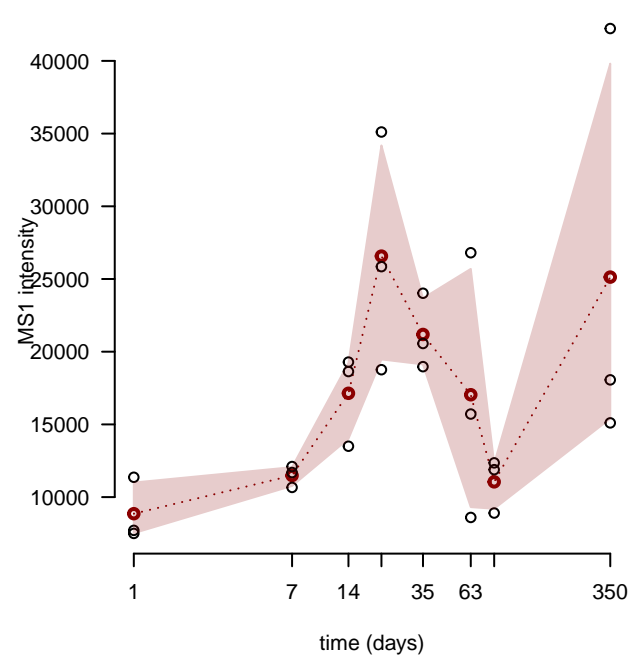

**Q8CD92**  
**GN=Ttc27**  
tetratricopeptide repeat domain 27

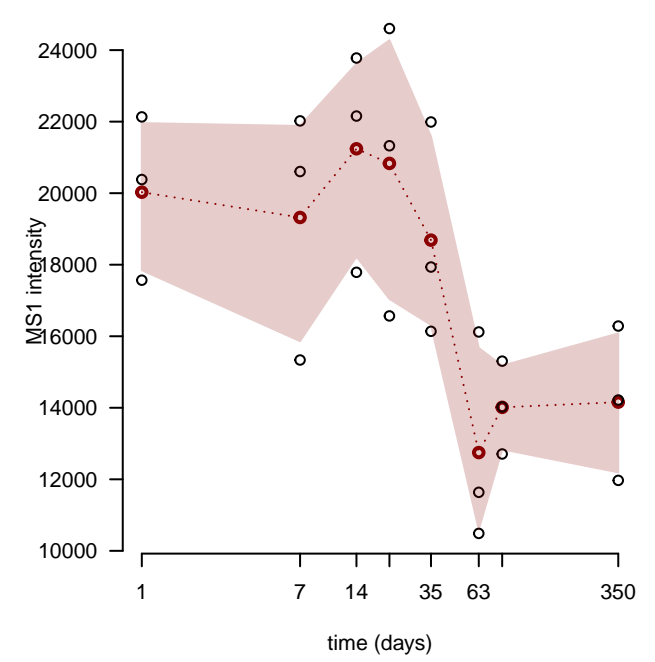

**Q8CDA1**  
**GN=Inpp5f**  
inositol polyphosphate-5-phosphatase F

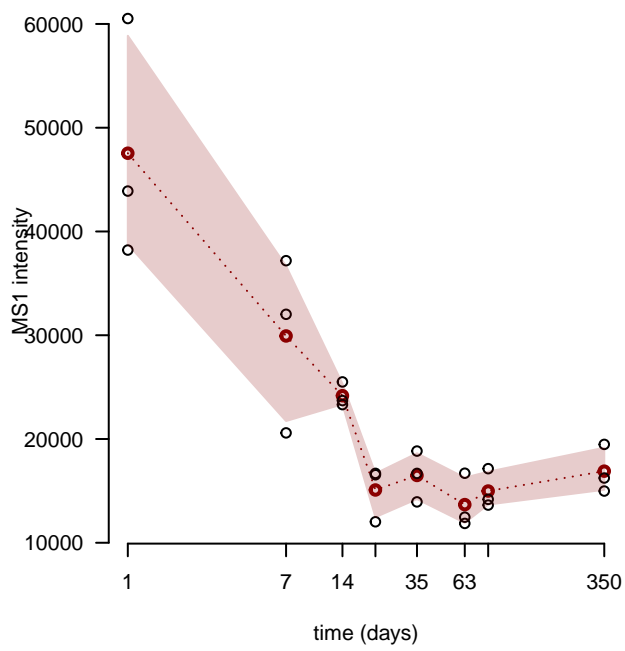

**Q8CDF7**  
**GN=Exd1**  
exonuclease 3'-5' domain containing 1

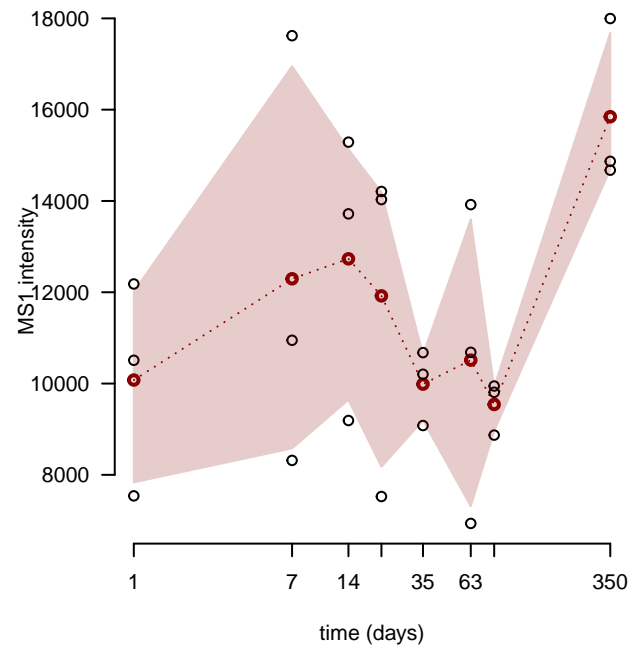

**Q8CDG1**  
**GN=Piwil2**  
piwi-like RNA-mediated gene silencing 2

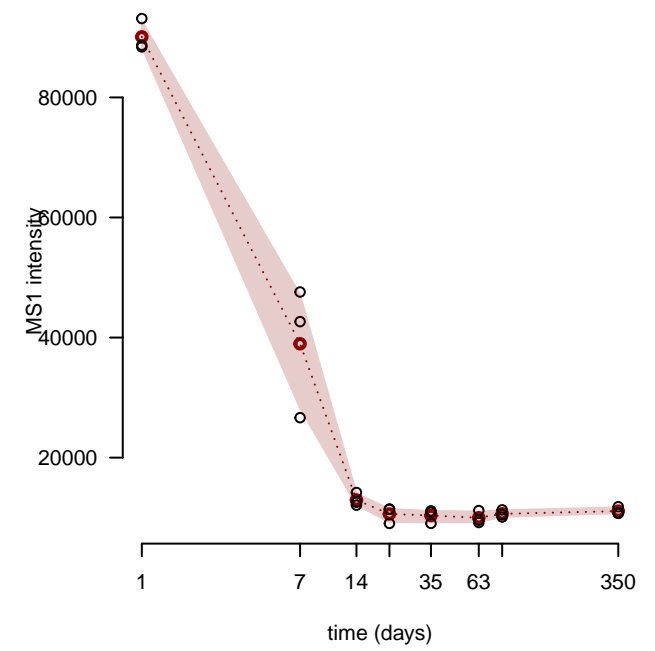

**Q8CDG3**  
**GN=Vcpip1**  
valosin containing protein (p97)/p47 com ...

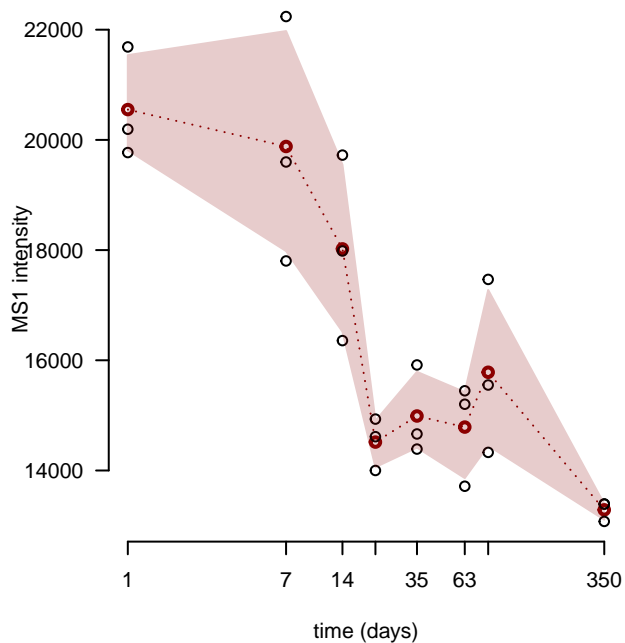

**Q8CDG5**  
**GN=Crebrf**  
CREB3 regulatory factor

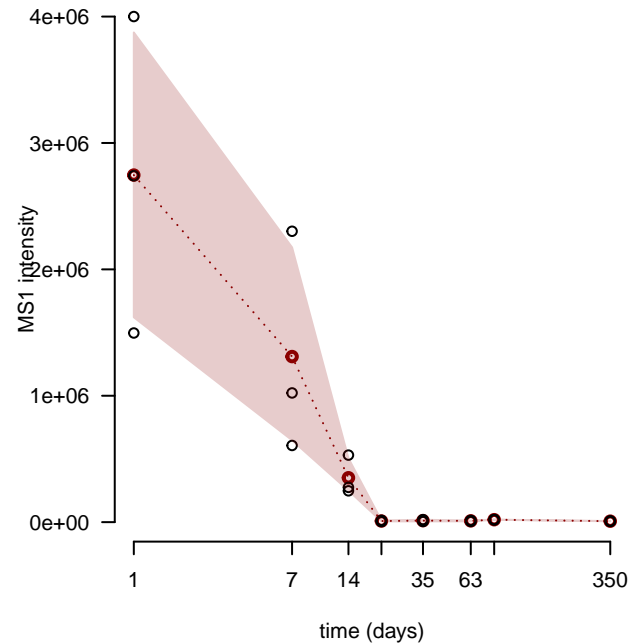

**Q8CDJ3**  
**GN=Atg14**  
autophagy related 14

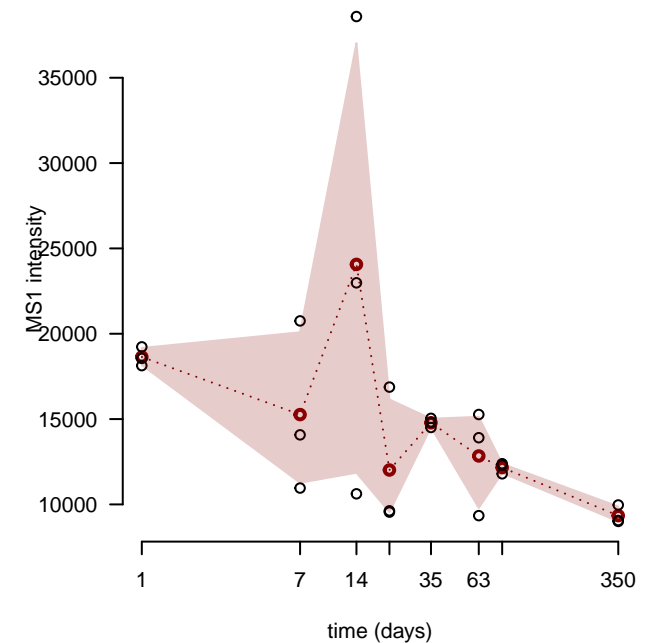

**Q8CDJ8**  
GN=Ston1  
stonin 1

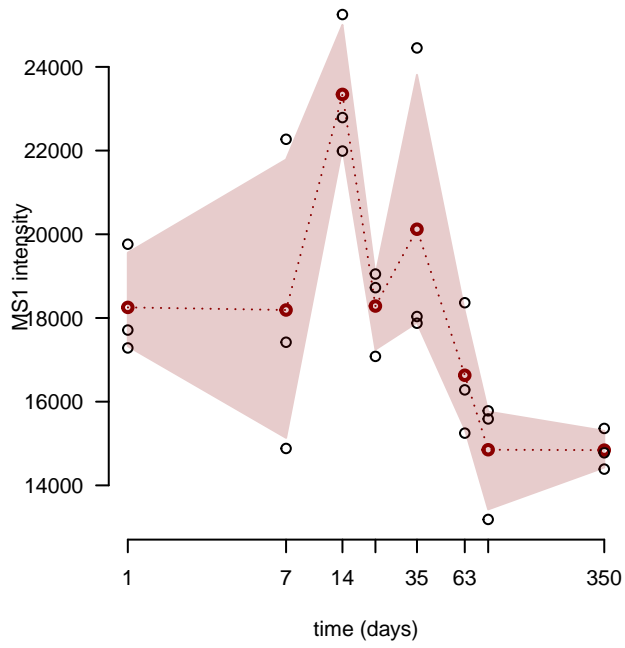

**Q8CDM1**  
GN=Atad2  
ATPase family, AAA domain containing 2

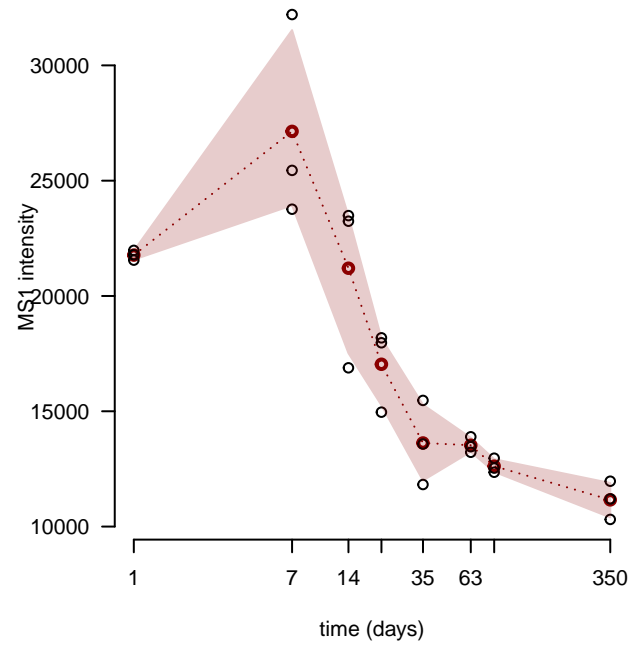

**Q8CDM8**  
GN=Fam160b1

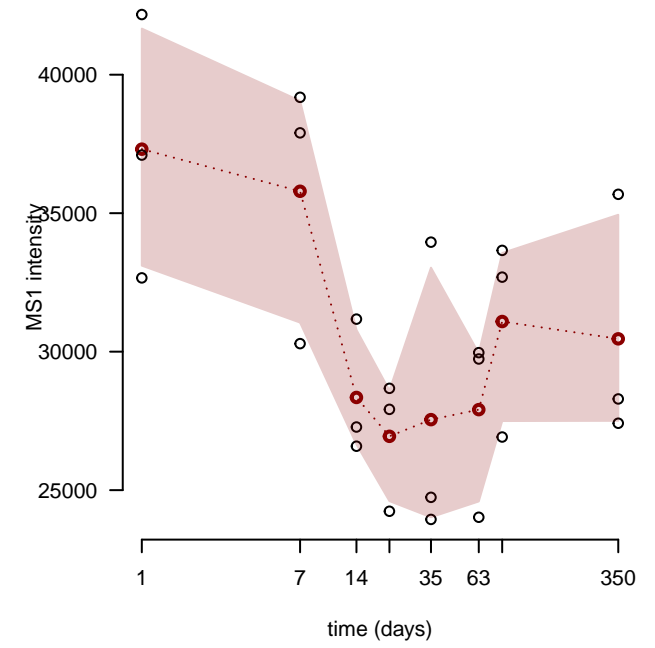

**Q8CDN6**  
GN=Txn1  
thioredoxin-like 1

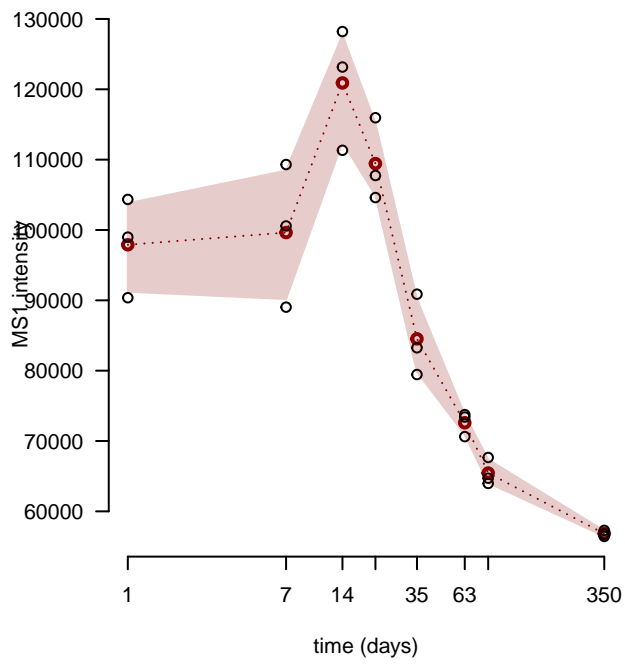

**Q8CE33**  
GN=Klh11  
kelch-like 11

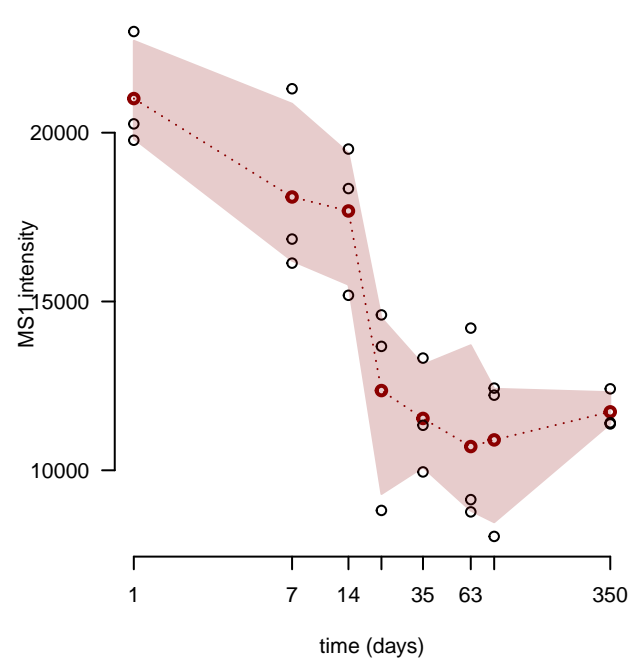

**Q8CE46**  
GN=Pus7l  
pseudouridylate synthase 7-like

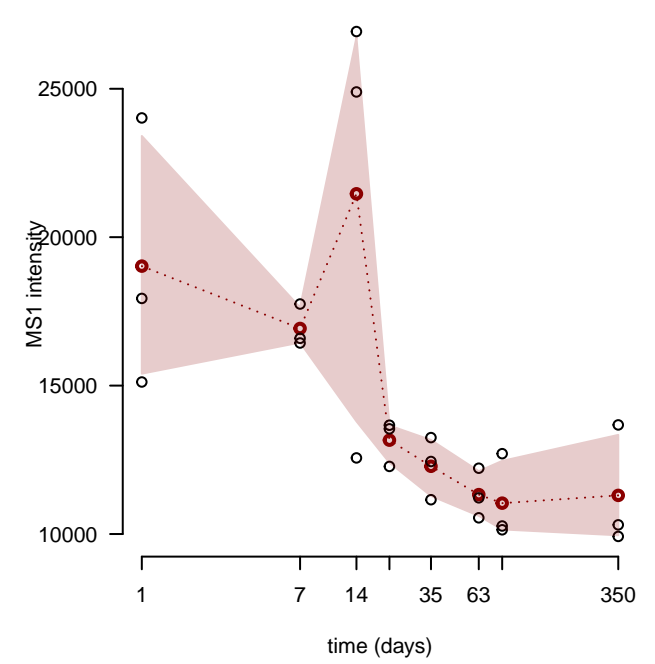

**Q8CE50**  
GN=Snx30  
sorting nexin family member 30

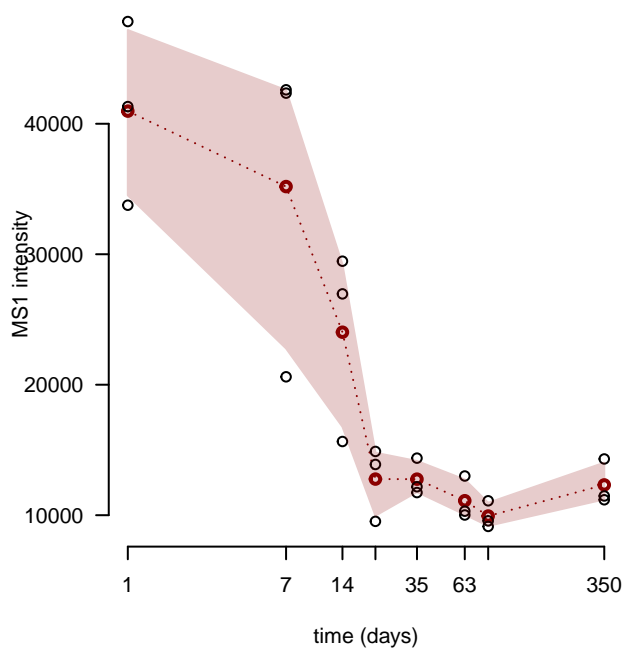

**Q8CE64**  
GN=Znf276

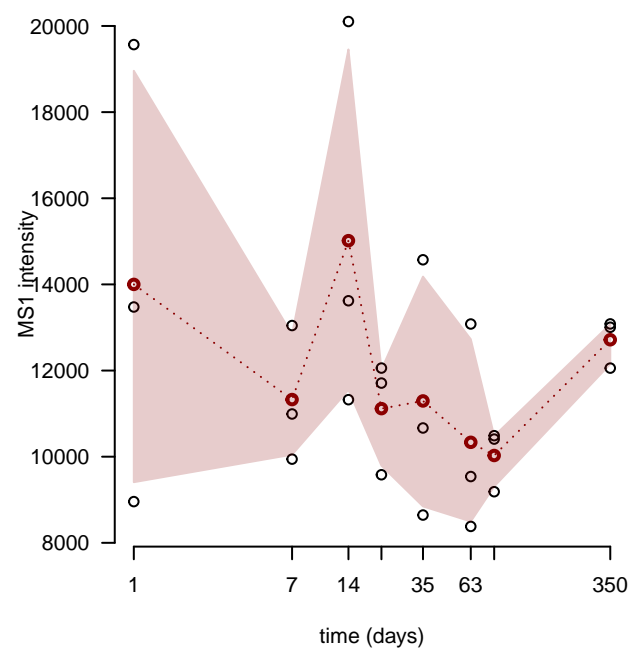

**Q8CE90**  
GN=Map2k7  
mitogen-activated protein kinase kinase ...

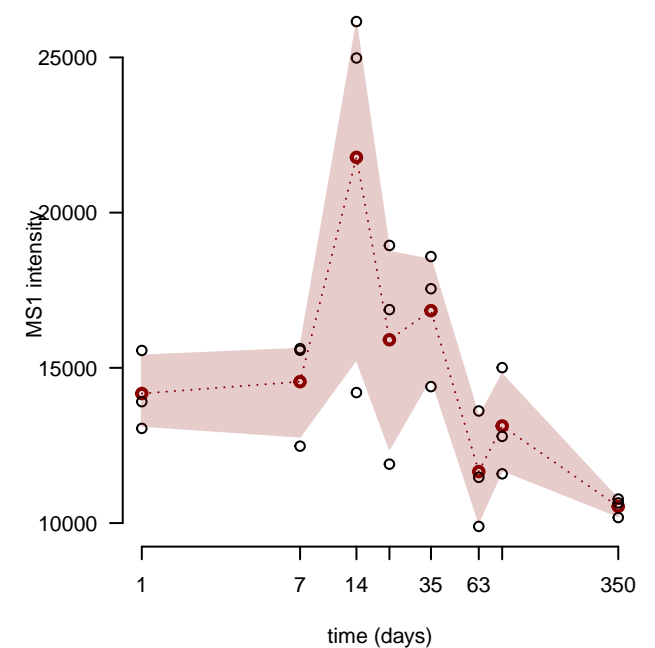

**Q8CE96**  
**GN=Trmt6**  
tRNA methyltransferase 6

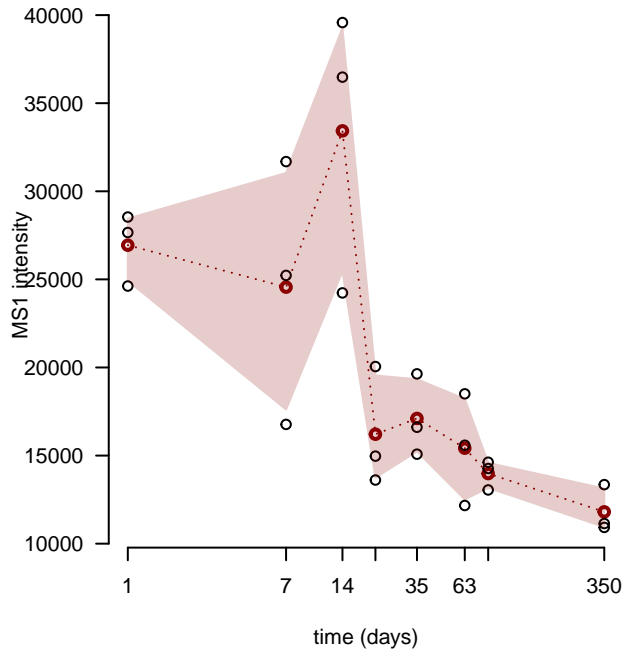

**Q8CEC0**  
**GN=Nup88**  
nucleoporin 88

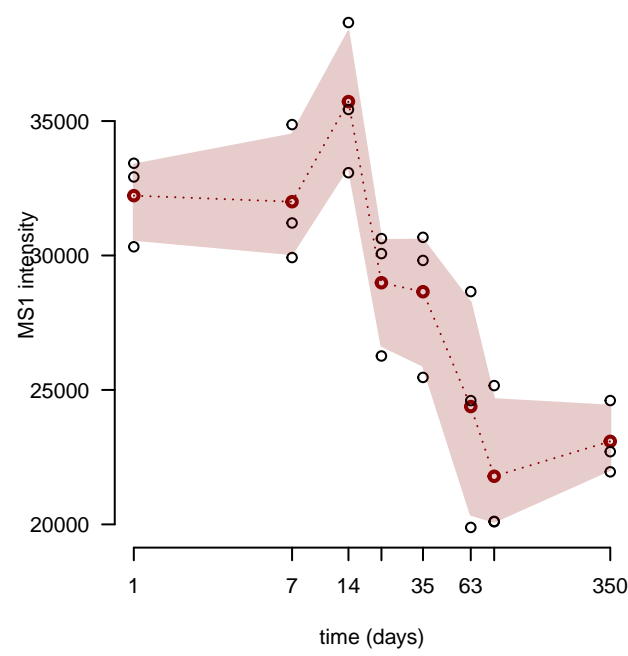

**Q8CEC6**  
**GN=Ppwd1**  
peptidylprolyl isomerase domain and WD r...

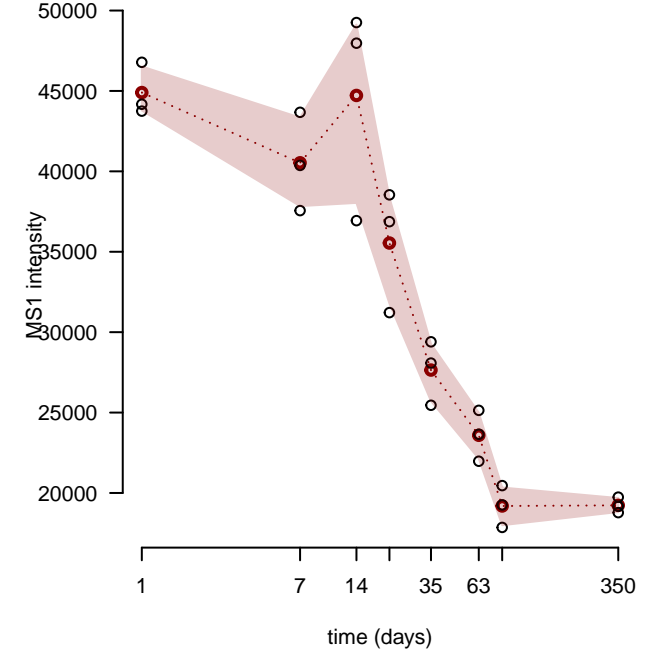

**Q8CEE6**  
**GN=Pask**  
PAS domain containing serine/threonine k...

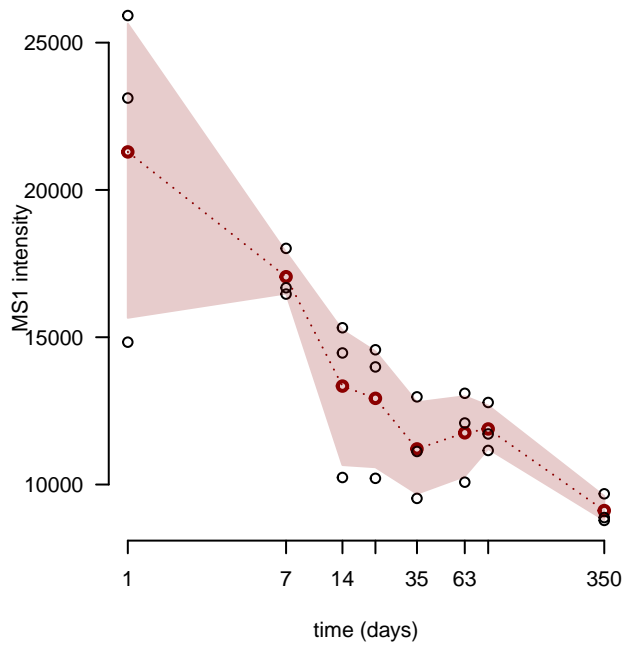

**Q8CEE7**  
**GN=Rdh13**  
retinol dehydrogenase 13 (all-trans and ...

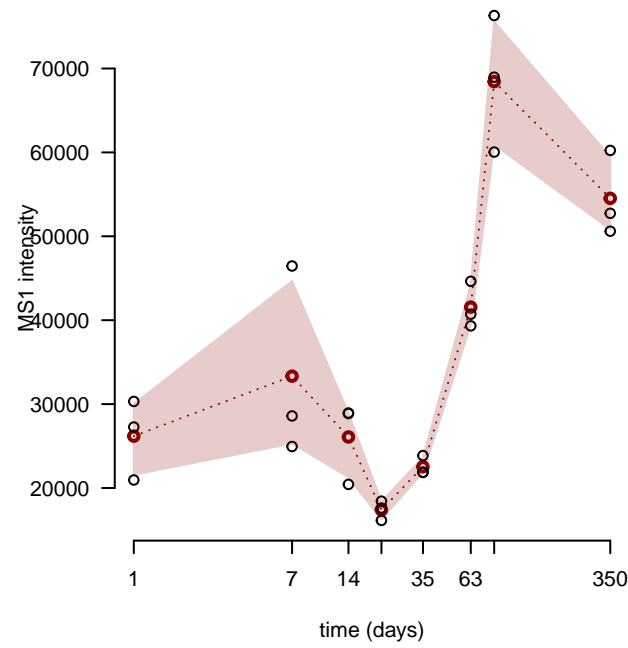

**Q8CEG5**  
**GN=Ccdc28b**  
coiled coil domain containing 28B

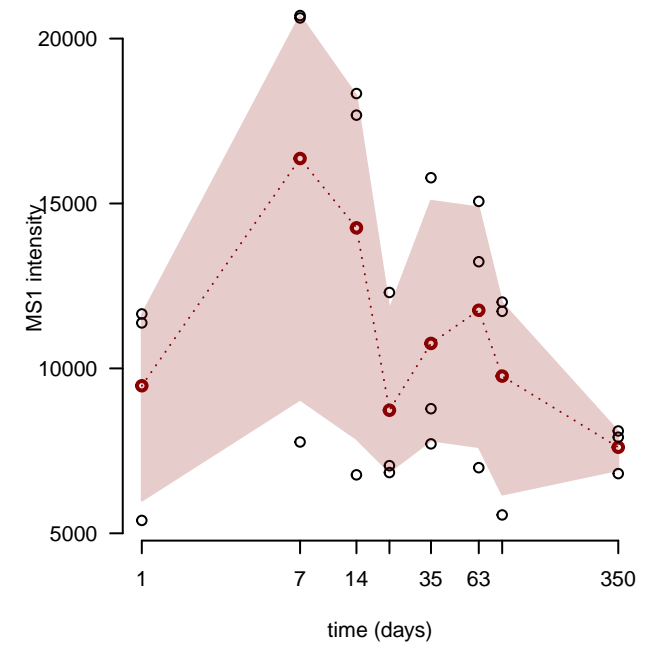

**Q8CEI1**  
**GN=Bola3**  
bola-like 3 (E. coli)

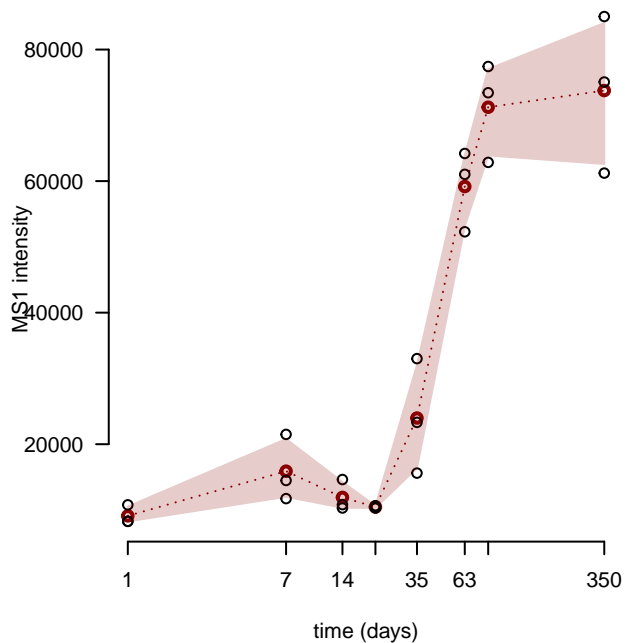

**Q8CES0**  
**GN=Naa30**  
N(alpha)-acetyltransferase 30, NatC cata...

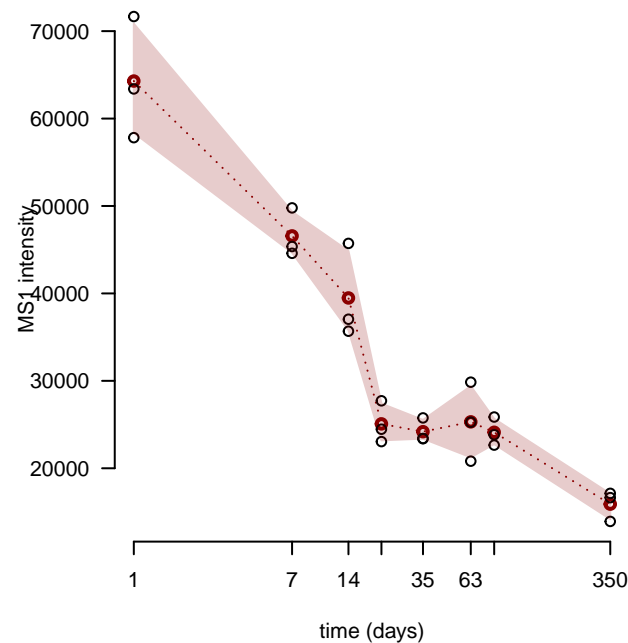

**Q8CF60**  
**GN=**

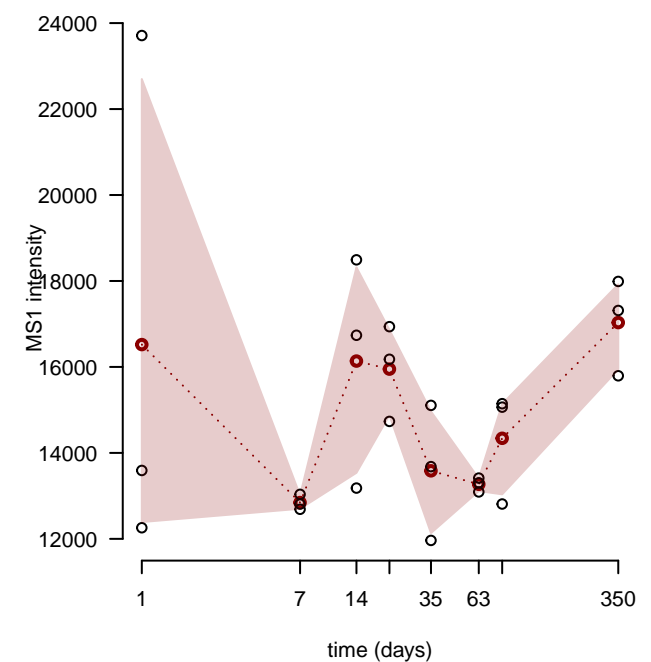



**Q8CF66**  
**GN=Lamtor4**

late endosomal/lysosomal adaptor, MAPK a ...

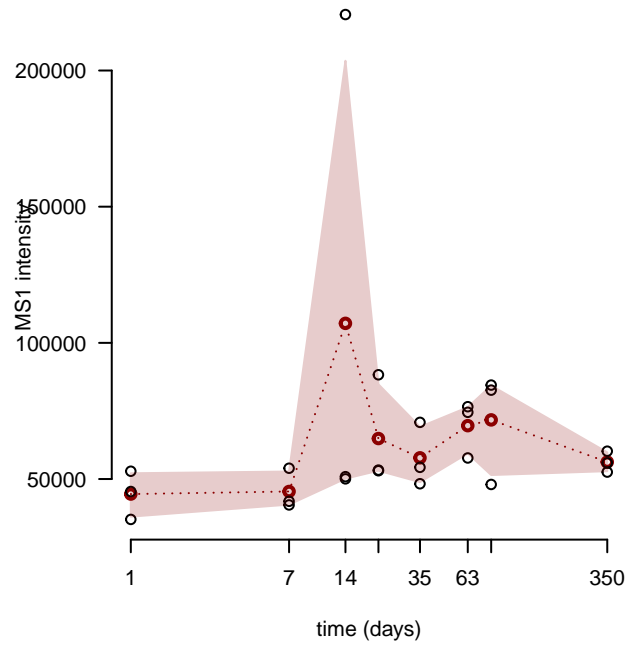

**Q8CF89**  
**GN=Tab1**

TGF-beta activated kinase 1/MAP3K7 bindi ...

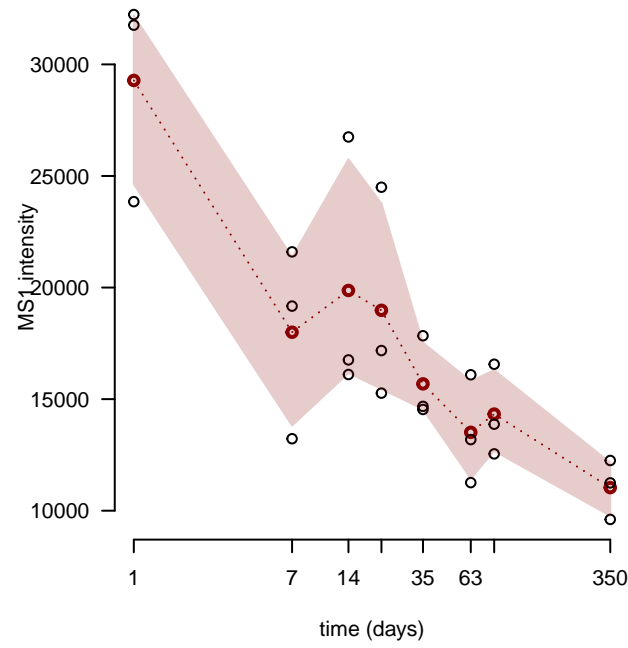

**Q8CFA2**  
**GN=Amt**

aminomethyltransferase

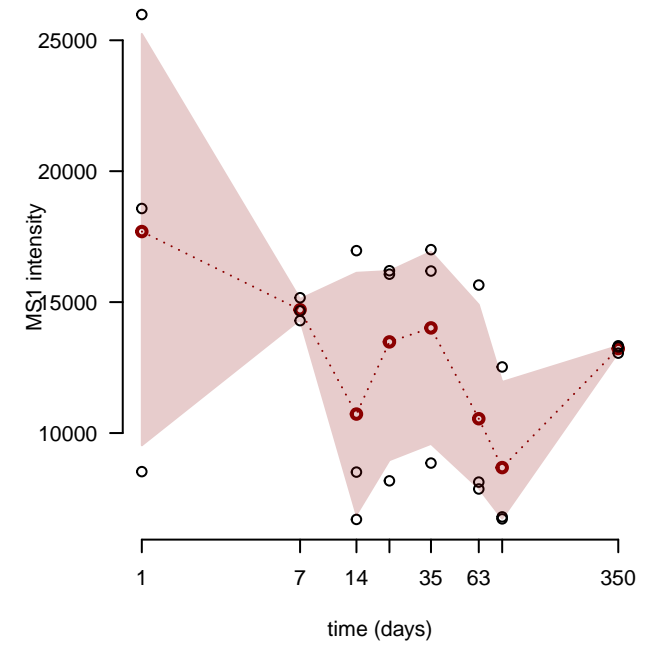

**Q8CFC7**  
**GN=Clasrp**

CLK4-associating serine/arginine rich pr ...

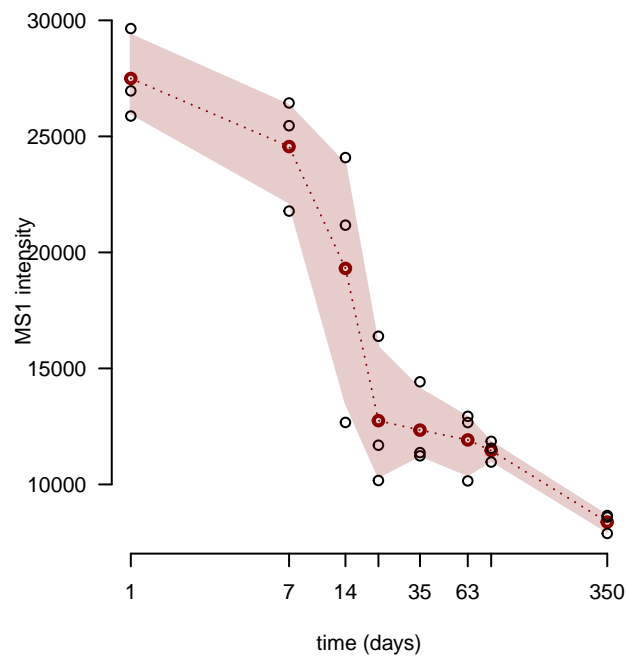

**Q8CFD4**  
**GN=Snx8**

sorting nexin 8

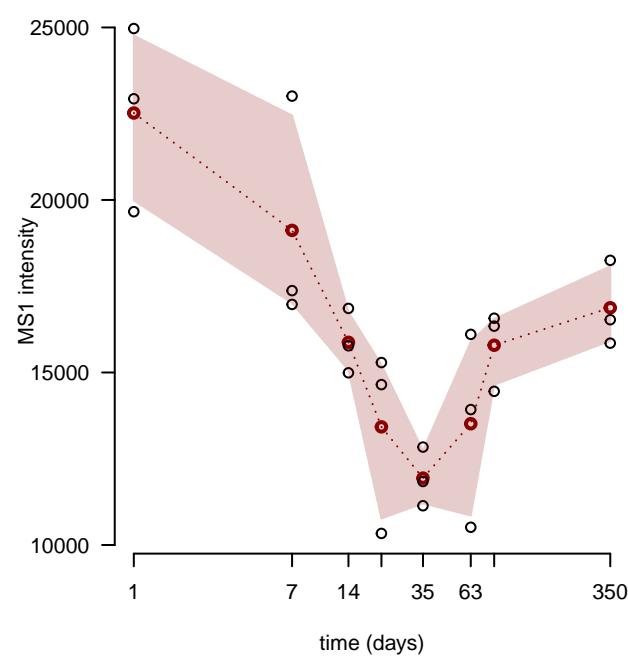

**Q8CFD5**  
**GN=Ercc8**

excision repair- complementing rodent ...

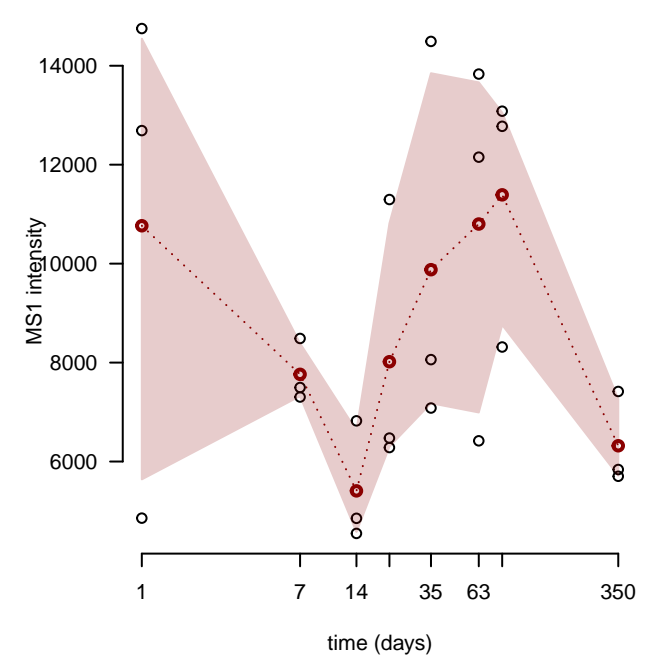

**Q8CFE2**  
**GN=Hpf1**

histone PARylation factor 1

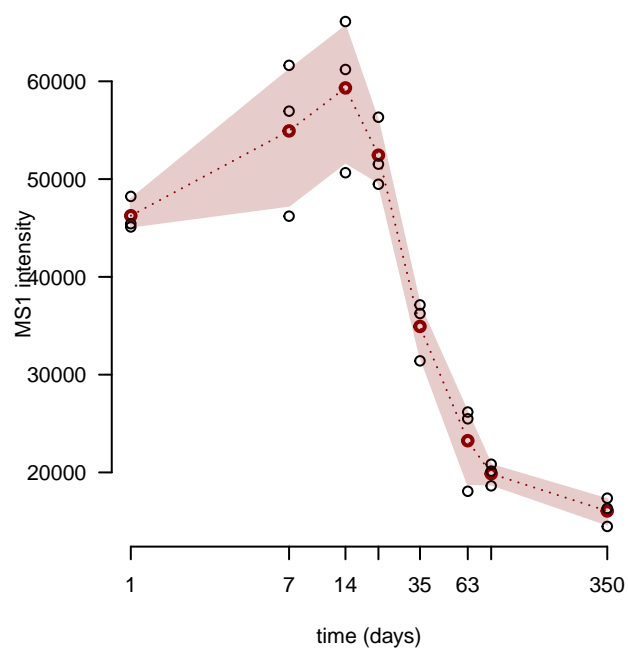

**Q8CFE3**  
**GN=Rcor1**

REST corepressor 1

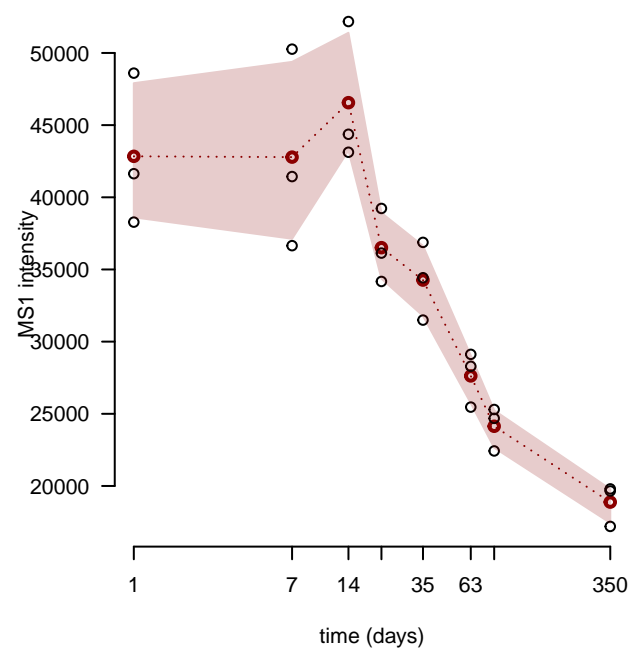

**Q8CFE4**  
**GN=Scyl2**

SCY1-like 2 (*S. cerevisiae*)

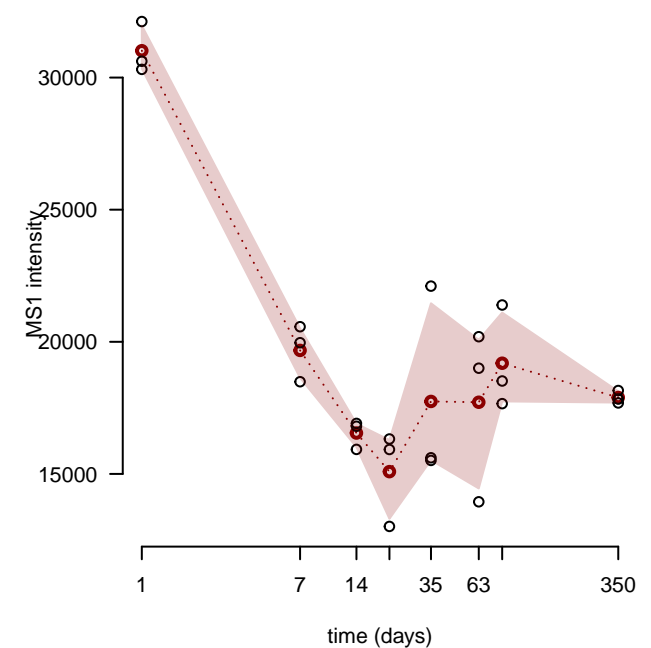

**Q8CFE6**  
**GN=Slc38a2**  
solute carrier family 38, member 2

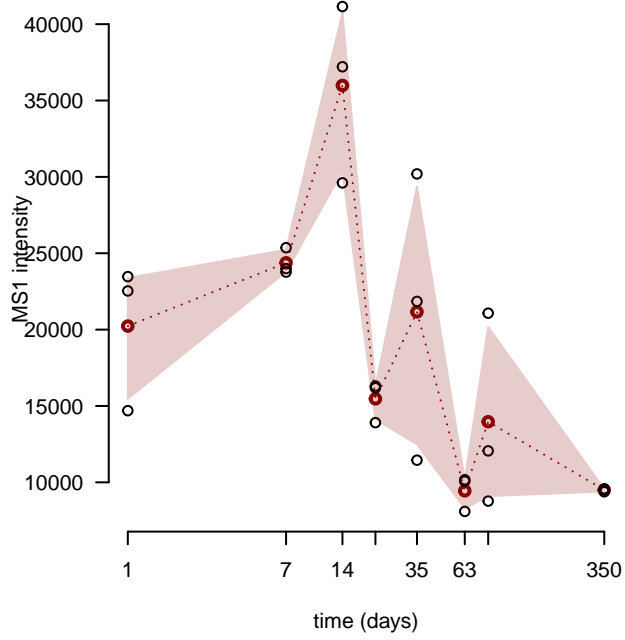

**Q8CFG0**  
**GN=Sulf2**  
sulfatase 2

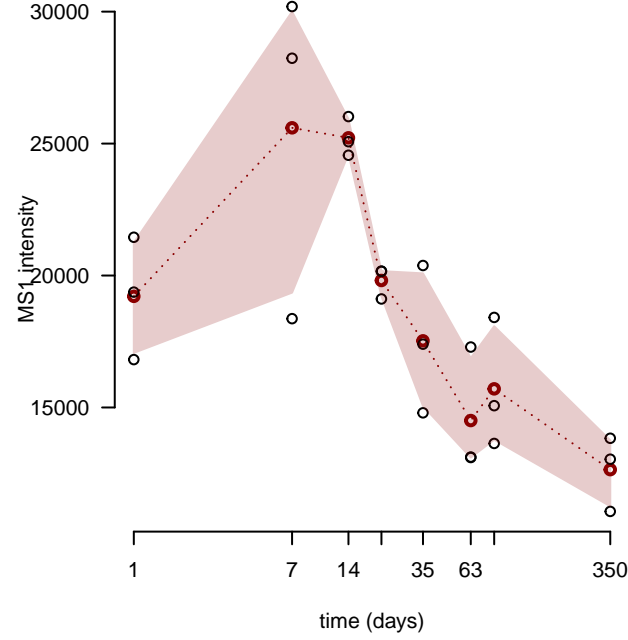

**Q8CFG9**  
**GN=C1rb**  
complement component 1, r subcomponent B

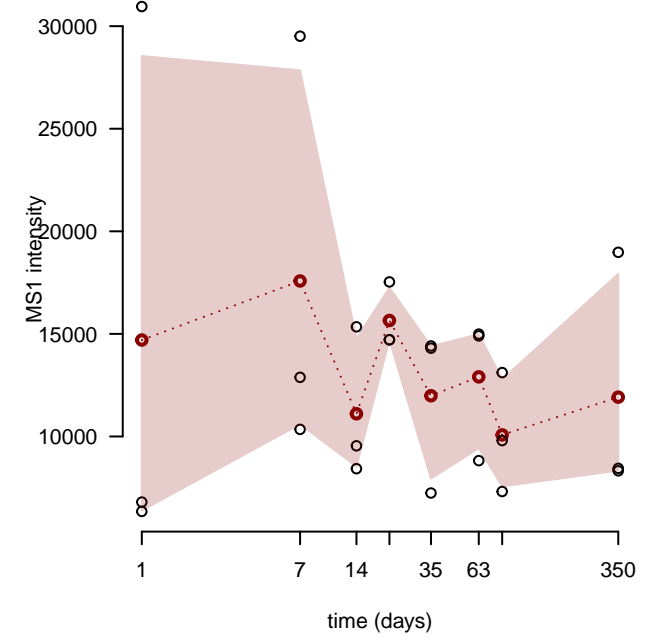

**Q8CFH6**  
**GN=Sik2**  
salt inducible kinase 2

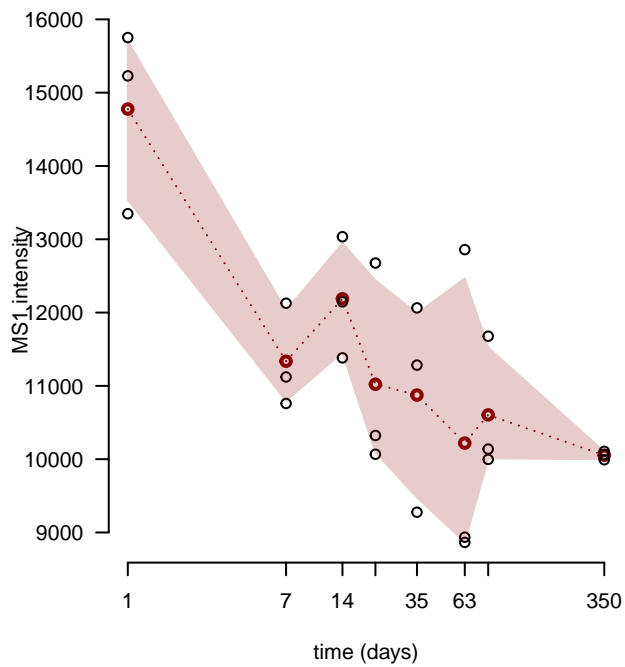

**Q8CFI0**  
**GN=Nedd4l**  
neural precursor cell expressed, develop ...

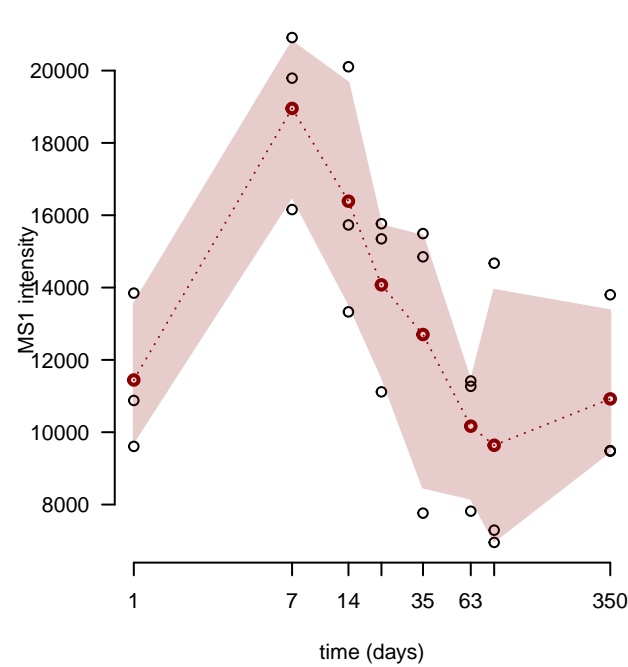

**Q8CFI0**  
**GN=Nedd4l**  
neural precursor cell expressed, develop ...

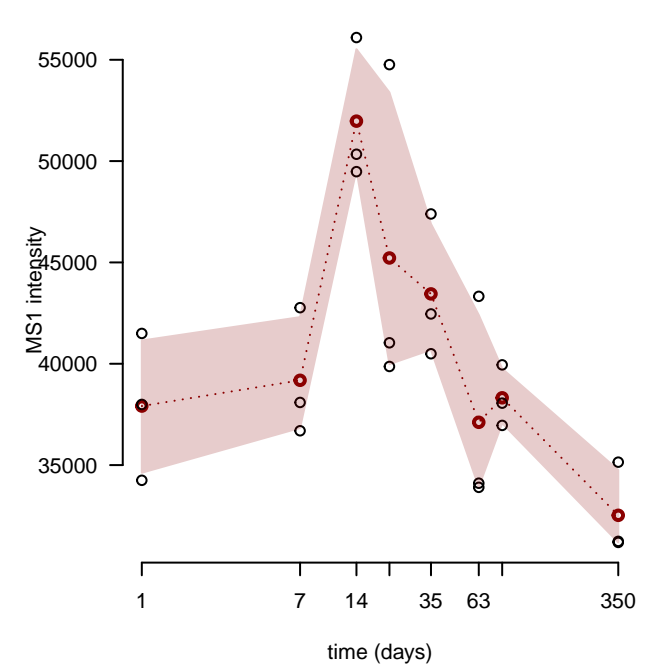

**Q8CFI2**  
**GN=Cdc34**  
cell division cycle 34

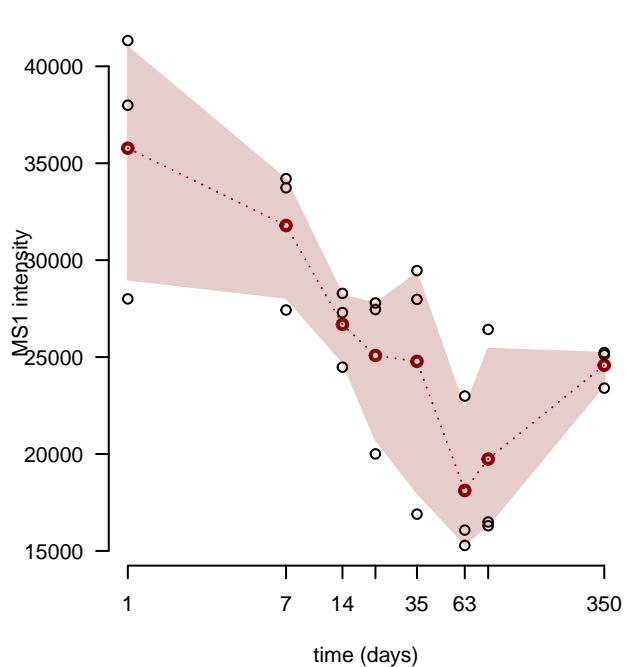

**Q8CFI5**  
**GN=Pars2**  
prolyl-tRNA synthetase (mitochondrial)(p ...

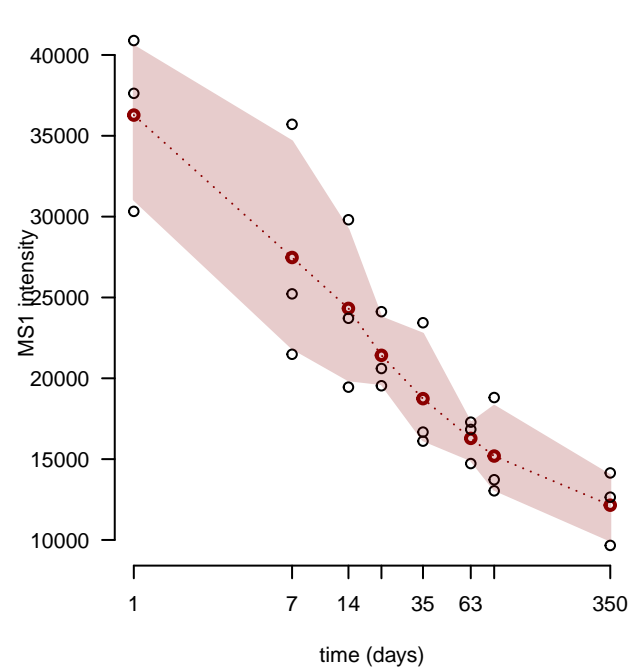

**Q8CFI7**  
**GN=Polr2b**  
polymerase (RNA) II (DNA directed) polyp ...

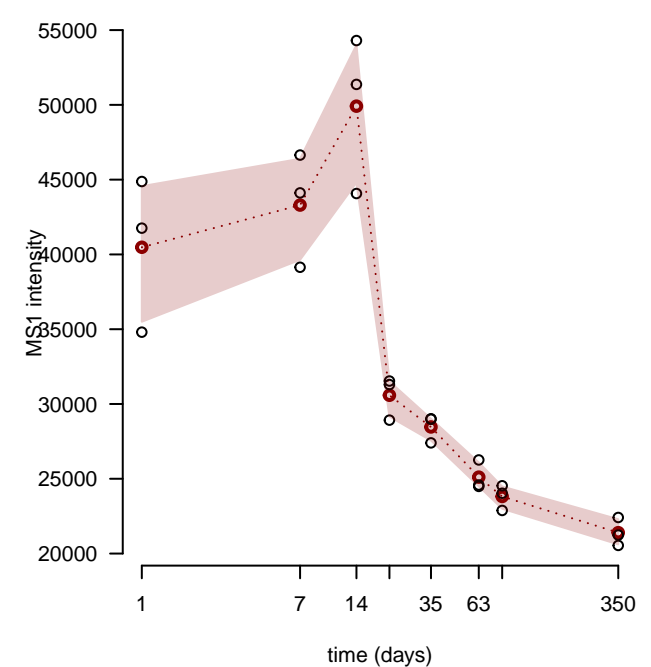

**Q8CFJ7**  
**GN=Slc25a45**  
solute carrier family 25, member 45

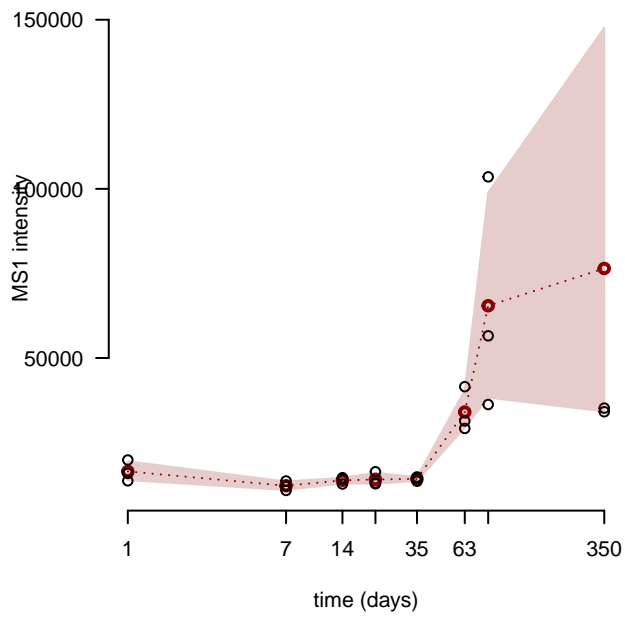

**Q8CFJ9**  
**GN=Wdr24**  
WD repeat domain 24

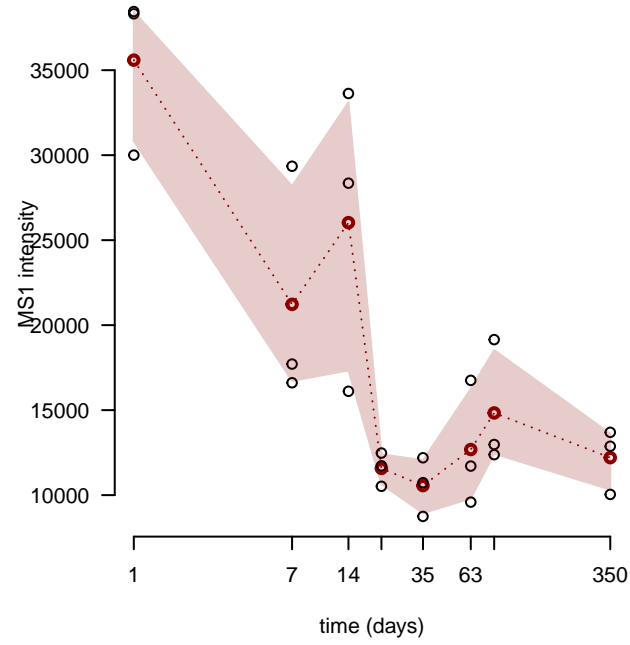

**Q8CFK2**  
**GN=Brf1**  
BRF1, RNA polymerase III transcription i ...

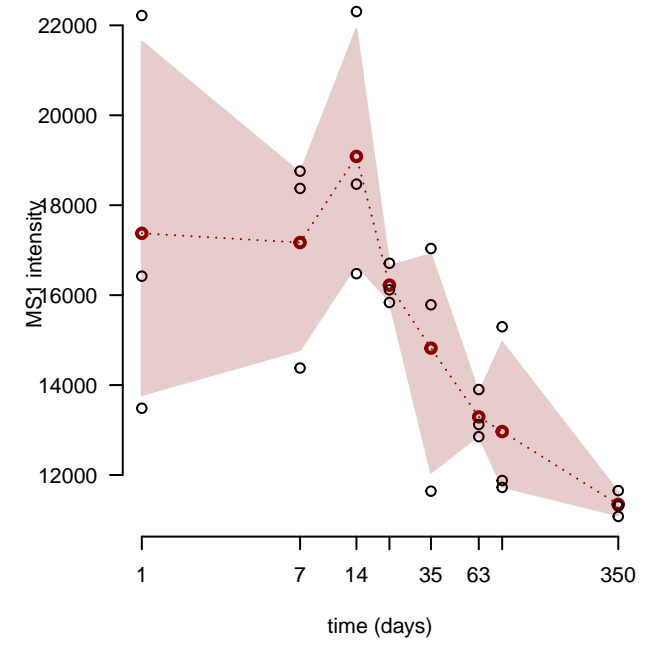

**Q8CFQ3**  
**GN=Aqr**  
aquarius

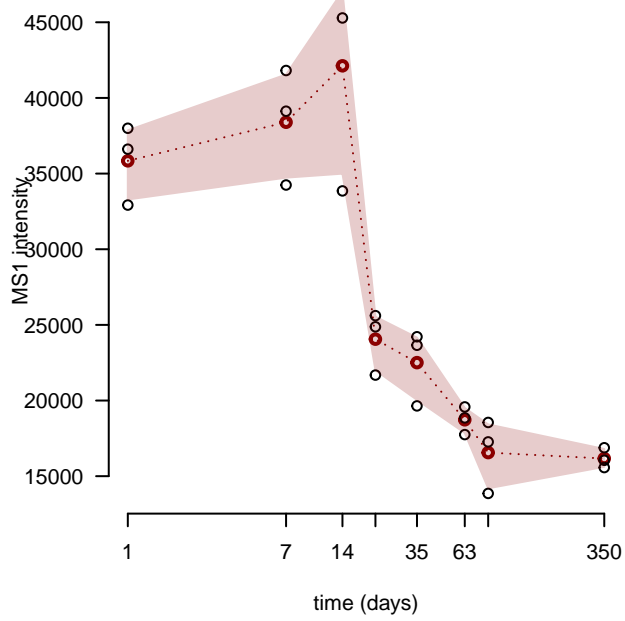

**Q8CFT2**  
**GN=Setd1b**  
SET domain containing 1B

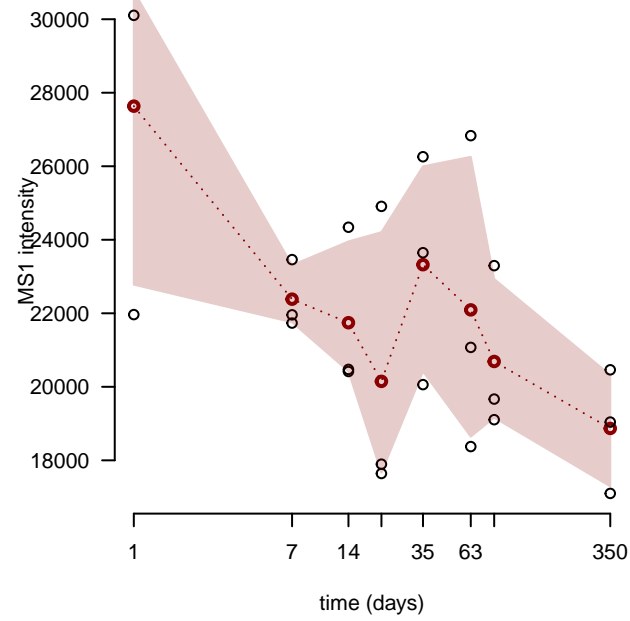

**Q8CFV4**  
**GN=Nrn1**  
neurtin 1

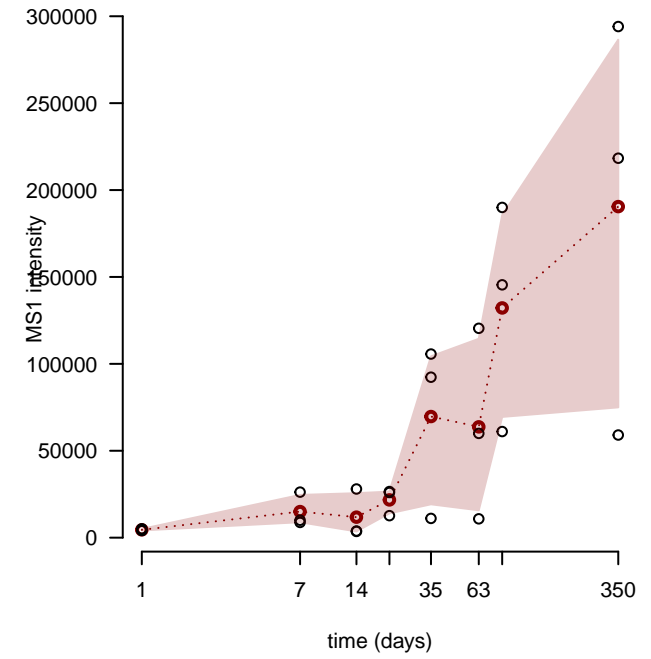

**Q8CFV9**  
**GN=Rfk**  
riboflavin kinase

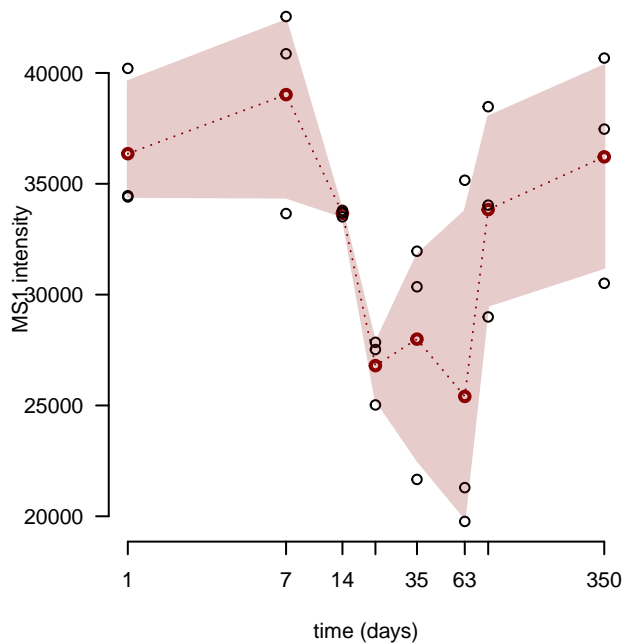

**Q8CFX1**  
**GN=H6pd**  
hexose-6-phosphate dehydrogenase (glucos ...

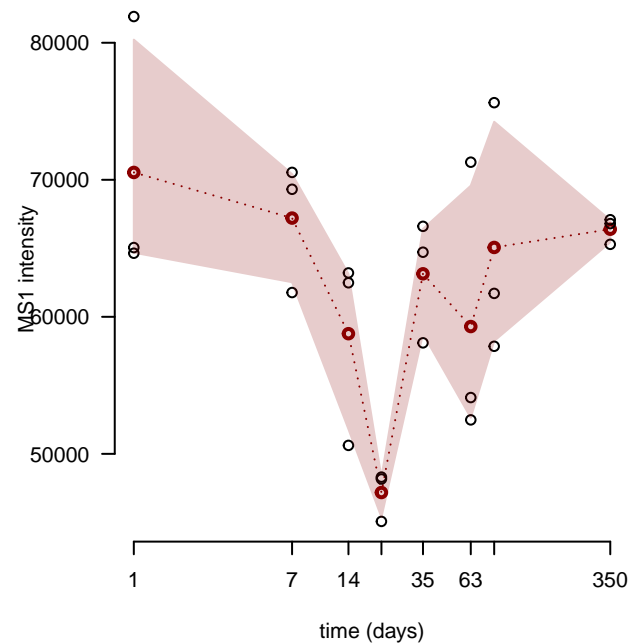

**Q8CFY5**  
**GN=Cox10**  
heme A:farnesyltransferase cytochrome c ...

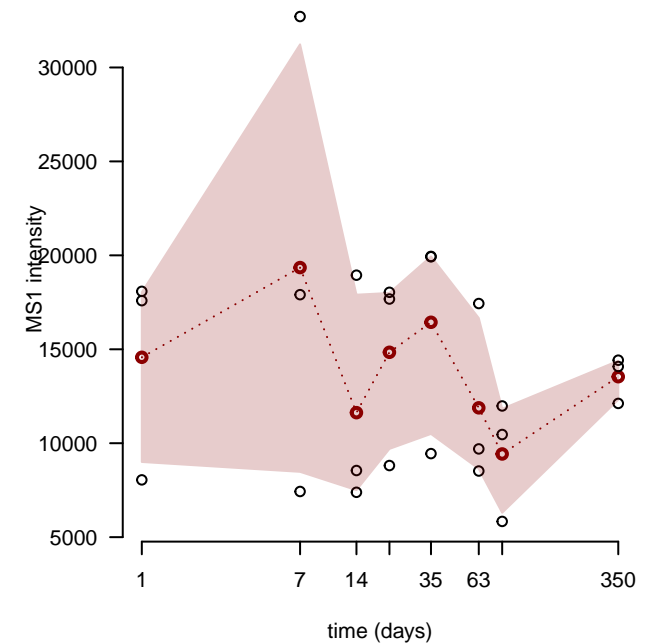

**Q8CFZ4**  
GN=Gpc3  
glypican 3

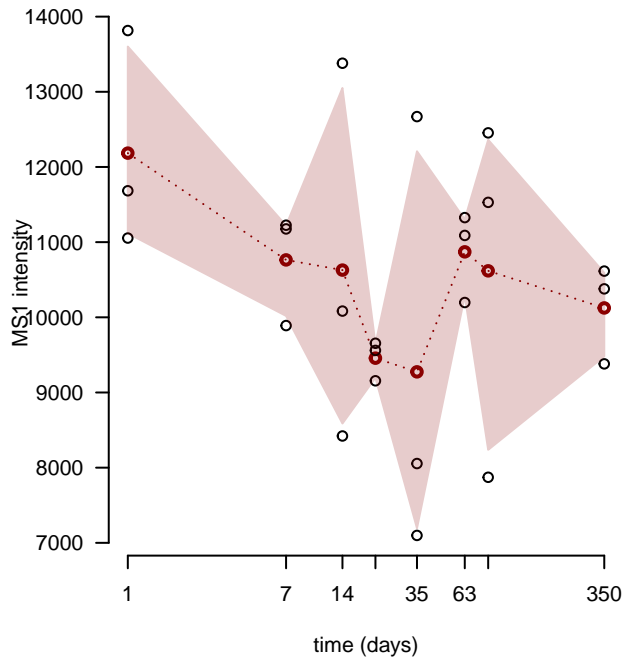

**Q8CG03**  
GN=Pde5a  
phosphodiesterase 5A, cGMP-specific

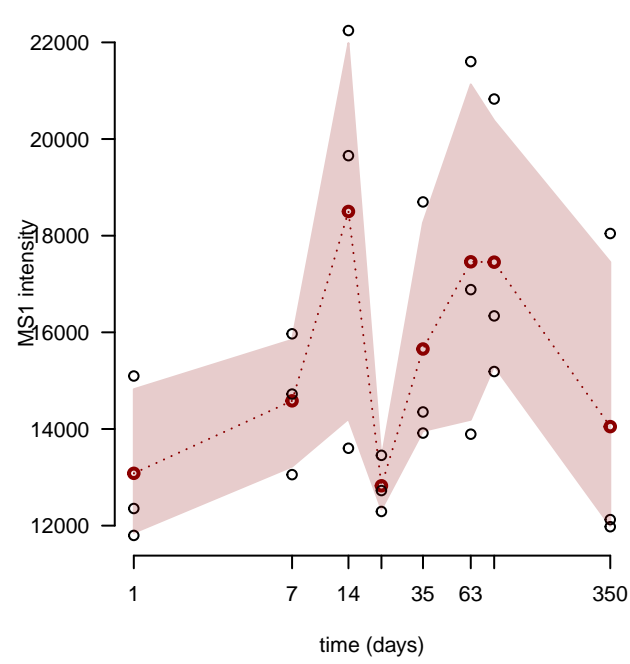

**Q8CG14**  
GN=C1sa

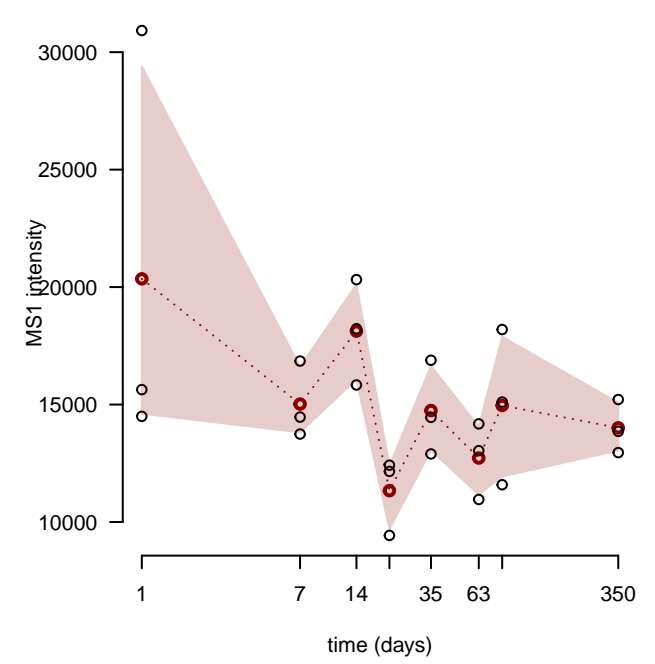

**Q8CG19**  
GN=Ltpb1  
latent transforming growth factor beta b ...

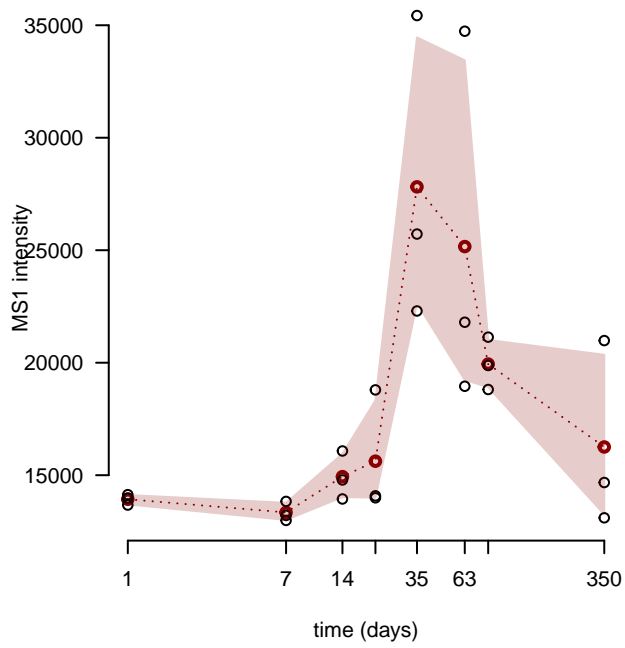

**Q8CG46**  
GN=Smc5  
structural maintenance of chromosomes 5

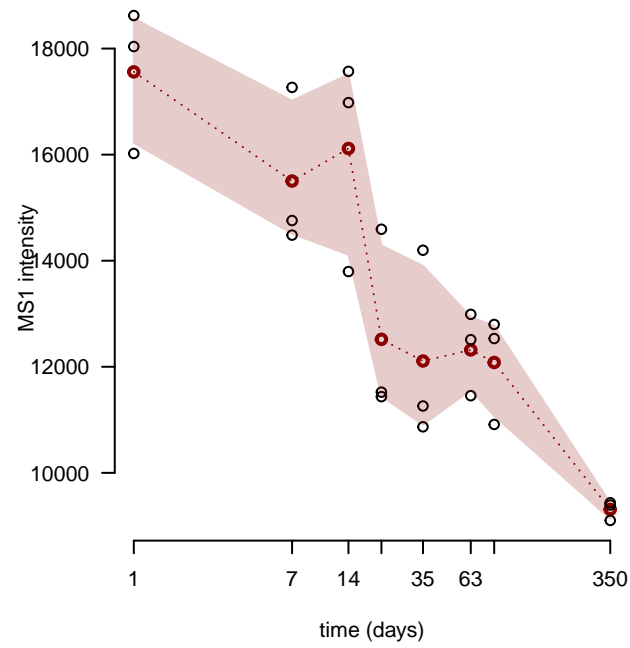

**Q8CG47**  
GN=Smc4  
structural maintenance of chromosomes 4

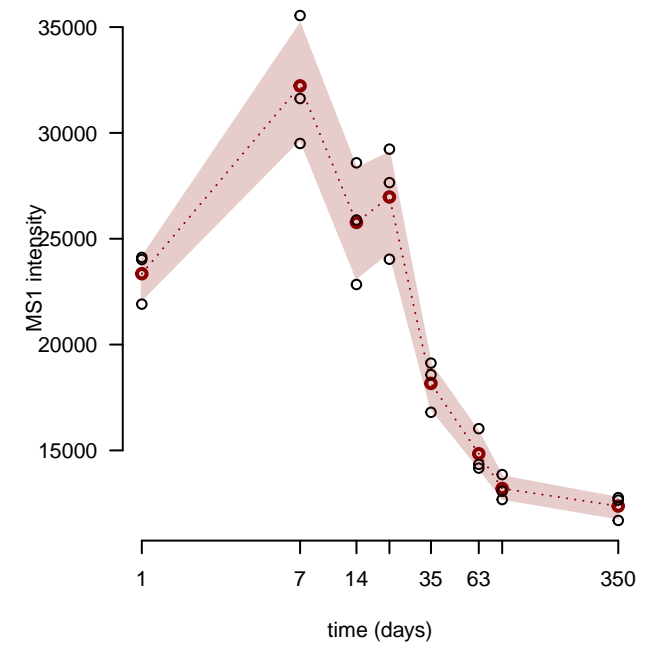

**Q8CG48**  
GN=Smc2  
structural maintenance of chromosomes 2

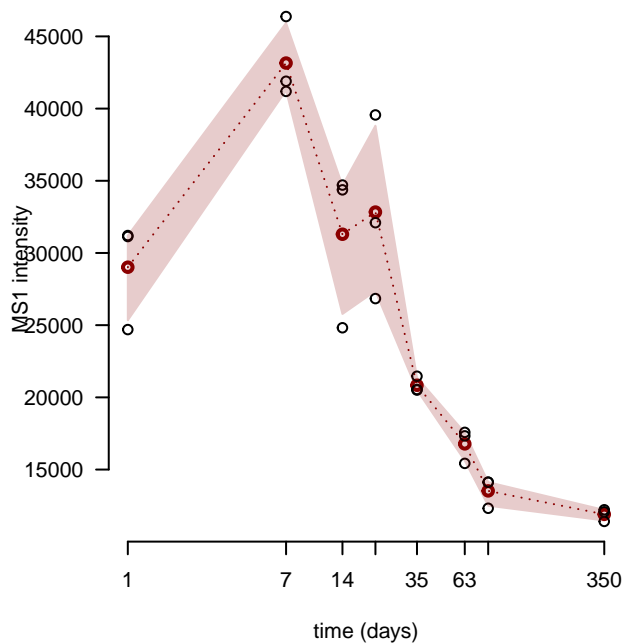

**Q8CG50**  
GN=Rab43  
RAB43, member RAS oncogene family

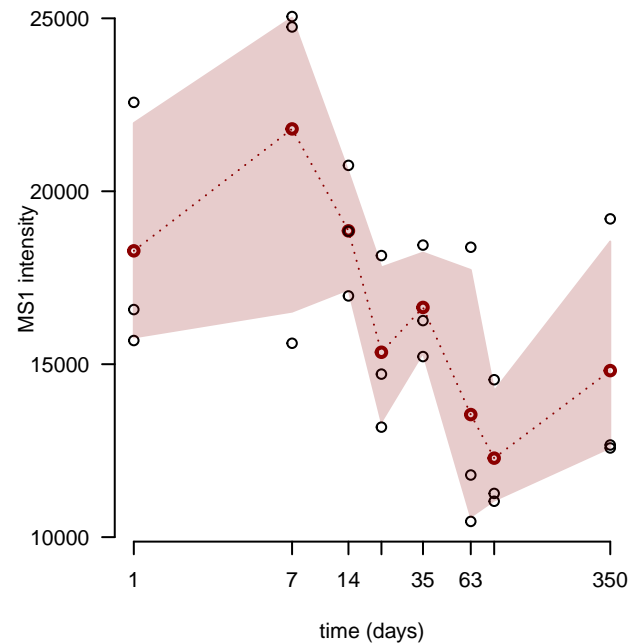

**Q8CG70**  
GN=P3h3  
prolyl 3-hydroxylase 3

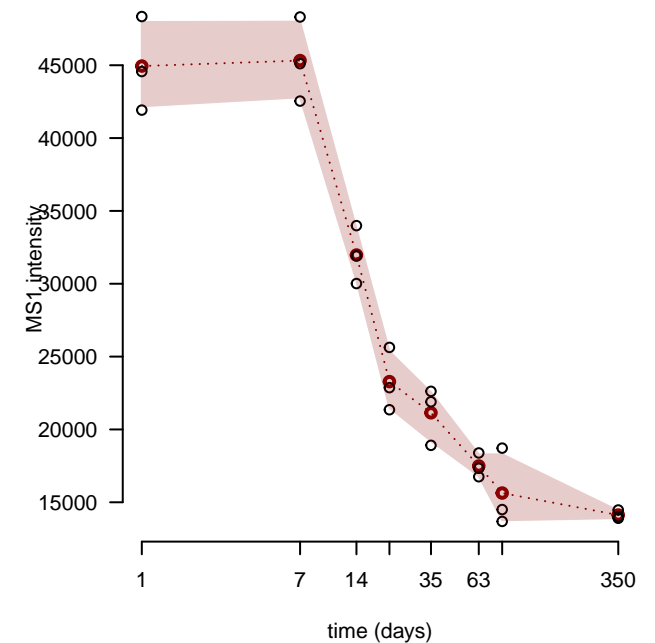

**Q8CG71**  
**GN=P3h2**  
prolyl 3-hydroxylase 2

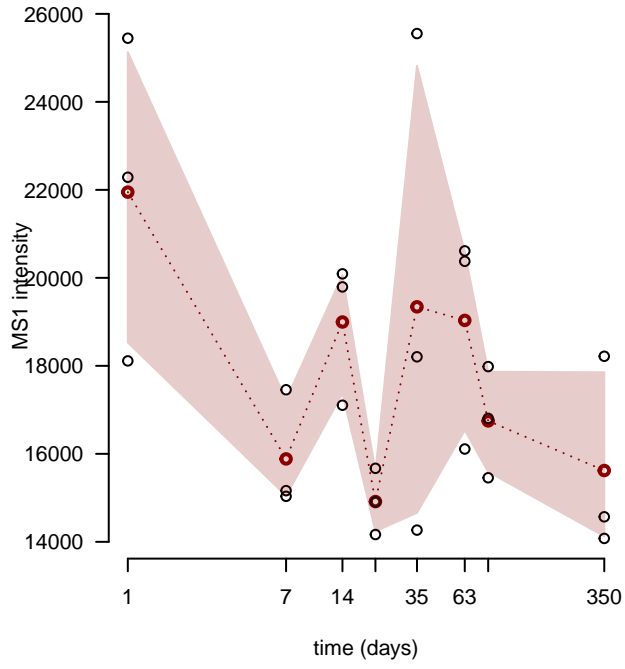

**Q8CG72**  
**GN=Adprh12**

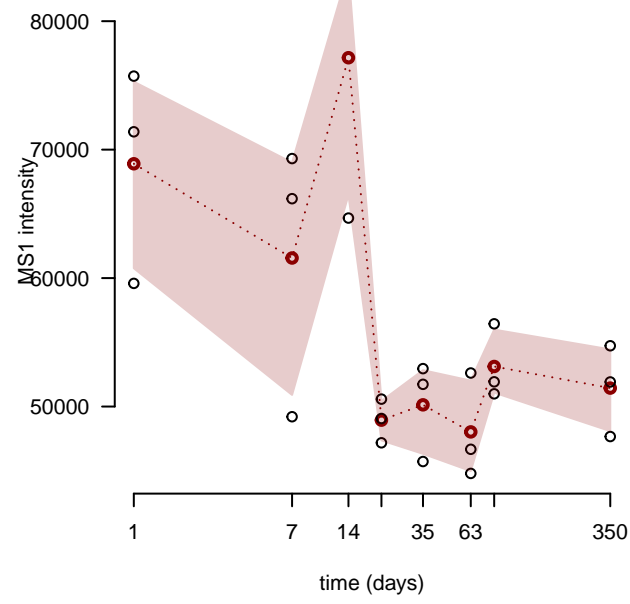

**Q8CG76**  
**GN=Akr7a2**

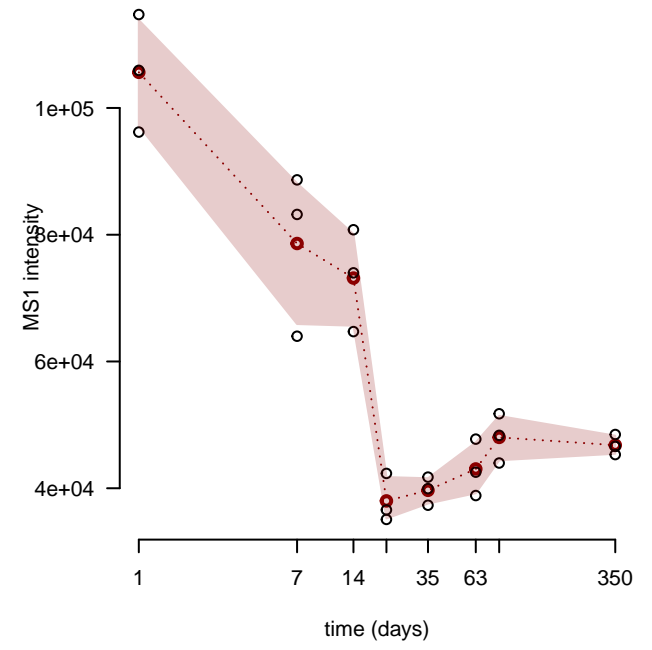

**Q8CG79**  
**GN=Tp53bp2**

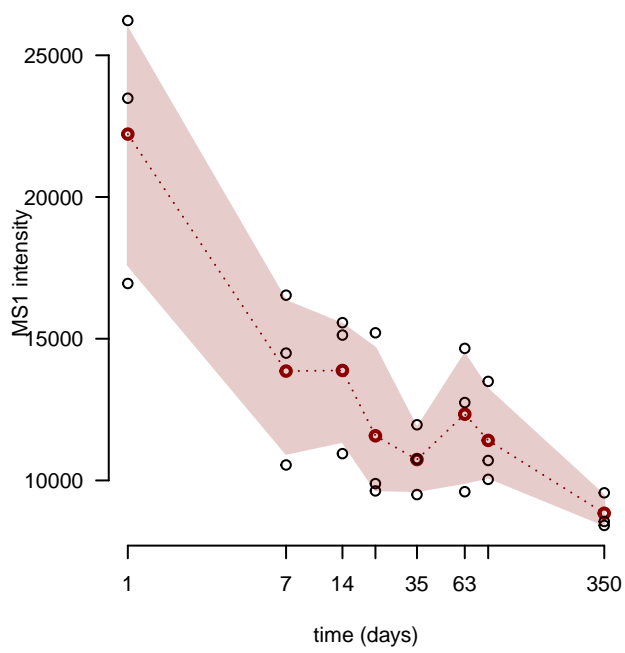

**Q8CGA0**  
**GN=Ppm1f**  
protein phosphatase 1F (PP2C domain cont ...

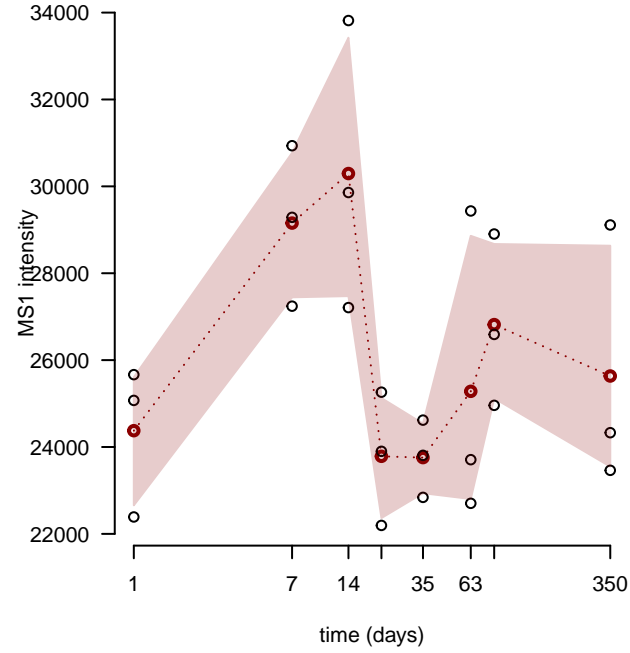

**Q8CGA3**  
**GN=Slc43a2**  
solute carrier family 43, member 2

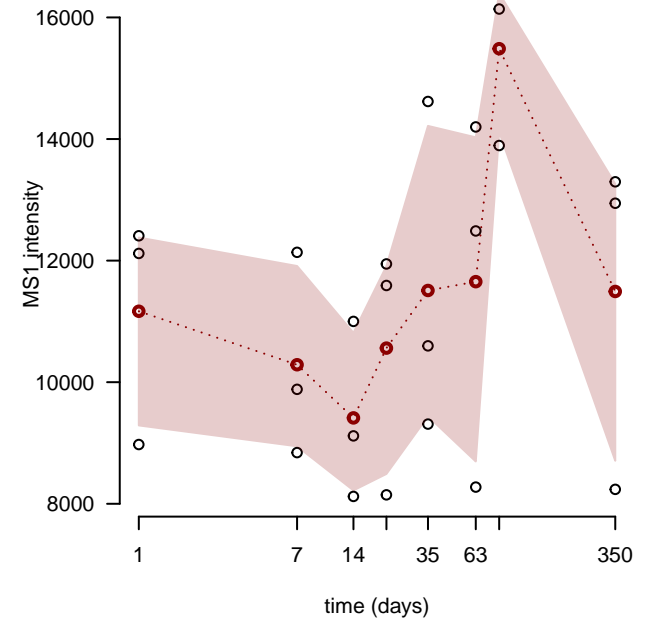

**Q8CGA4**  
**GN=Mturn**  
maturin, neural progenitor differentiati ...

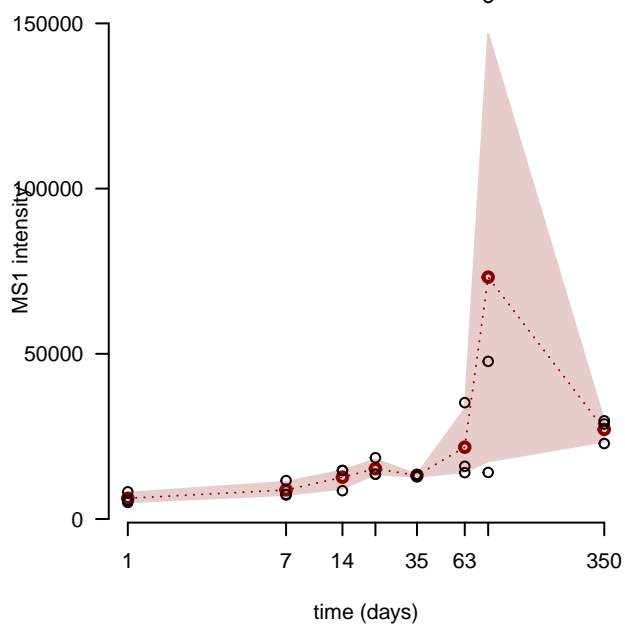

**Q8CGB3**  
**GN=Uaca**  
uveal autoantigen with coiled-coil domai ...

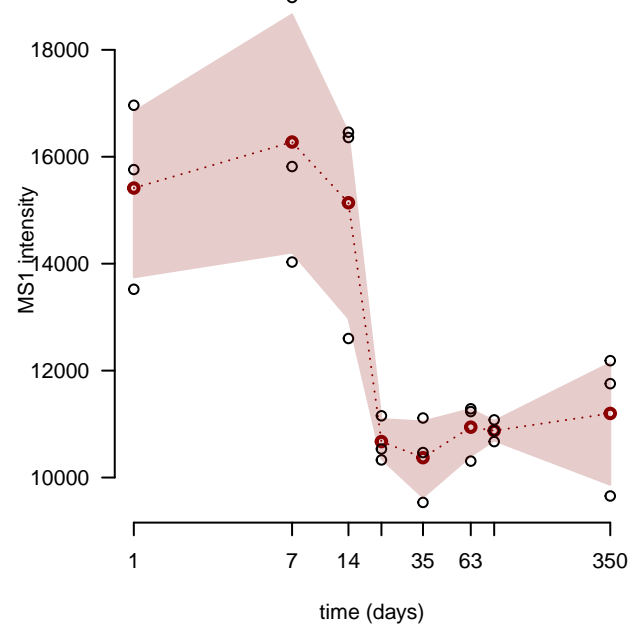

**Q8CGB6**  
**GN=Tns2**  
tensin 2

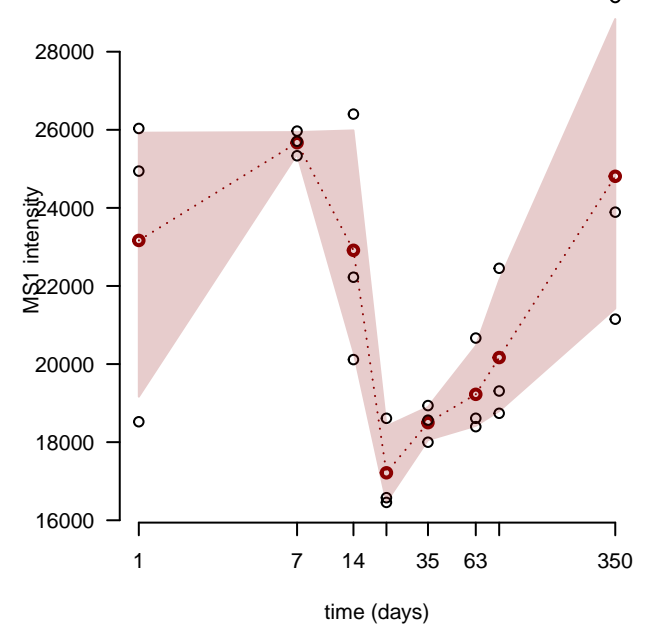

**Q8CGC4**  
GN=Lsm14b  
LSM family member 14B

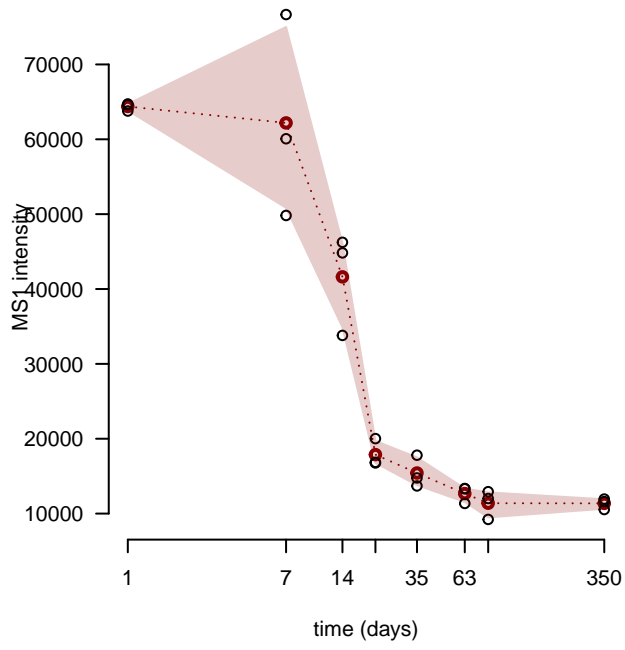

**Q8CGC6**  
GN=Rbm28  
RNA binding motif protein 28

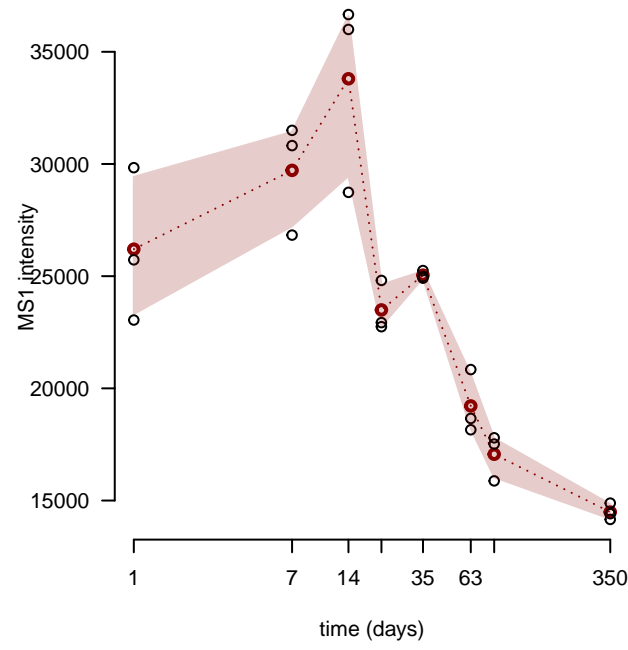

**Q8CGC7**  
GN=Eprs  
glutamyl-prolyl-tRNA synthetase

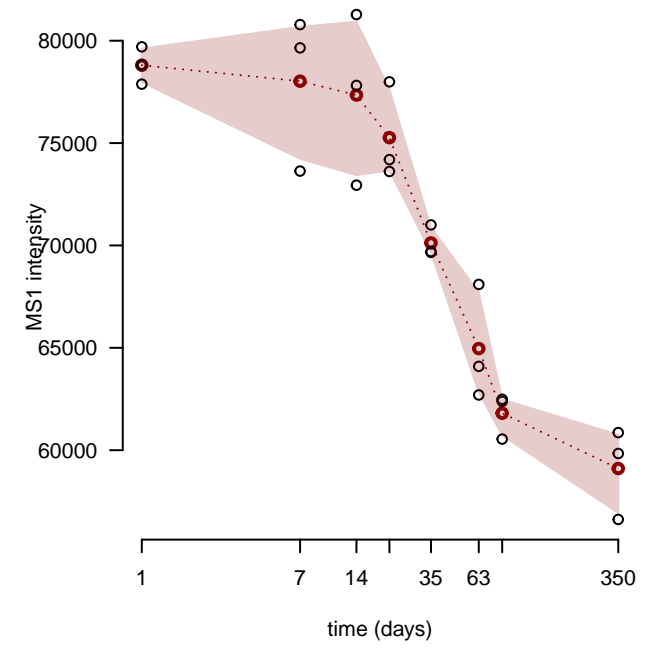

**Q8CGE9**  
GN=Rgs12  
regulator of G-protein signaling 12

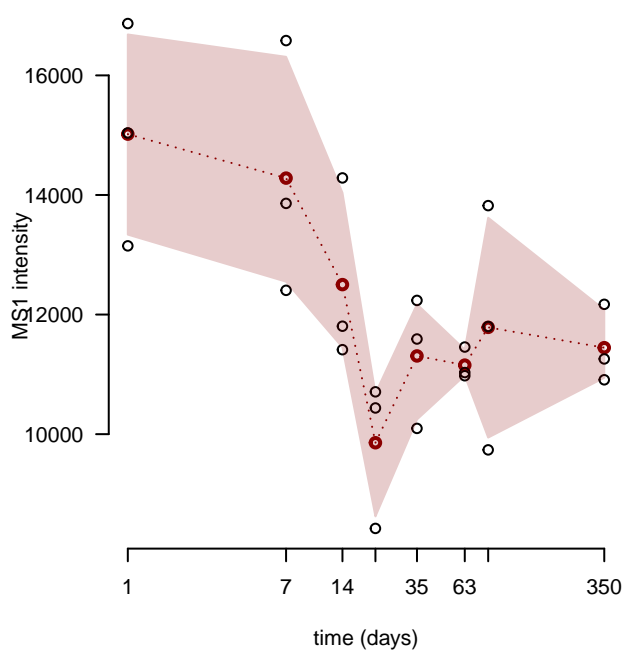

**Q8CGF1**  
GN=Arhgap29  
Rho GTPase activating protein 29

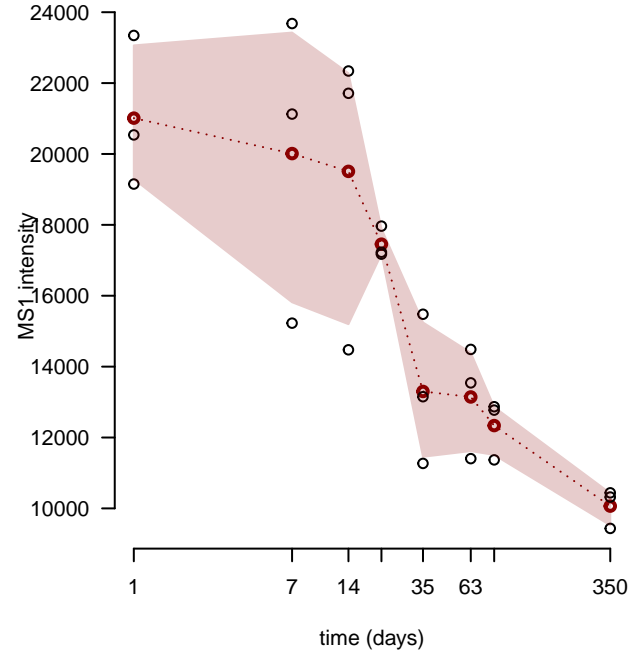

**Q8CGF5**  
GN=Tmem56

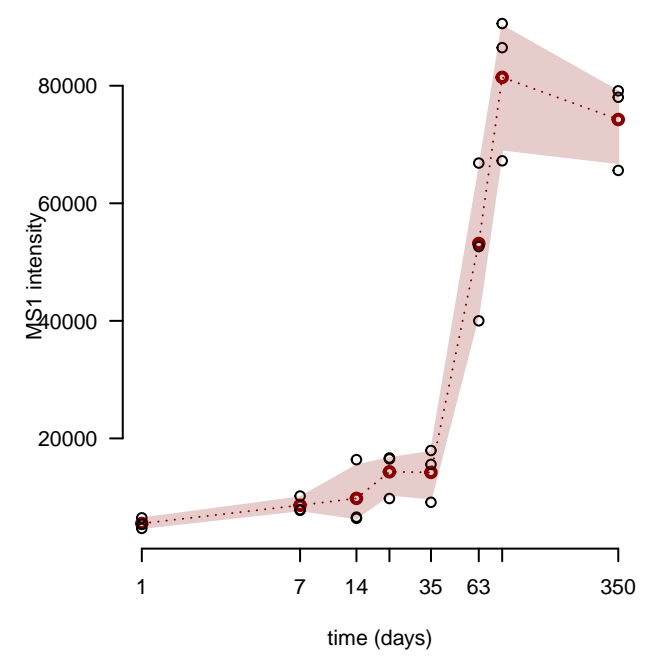

**Q8CGF6**  
GN=Wdr47  
WD repeat domain 47

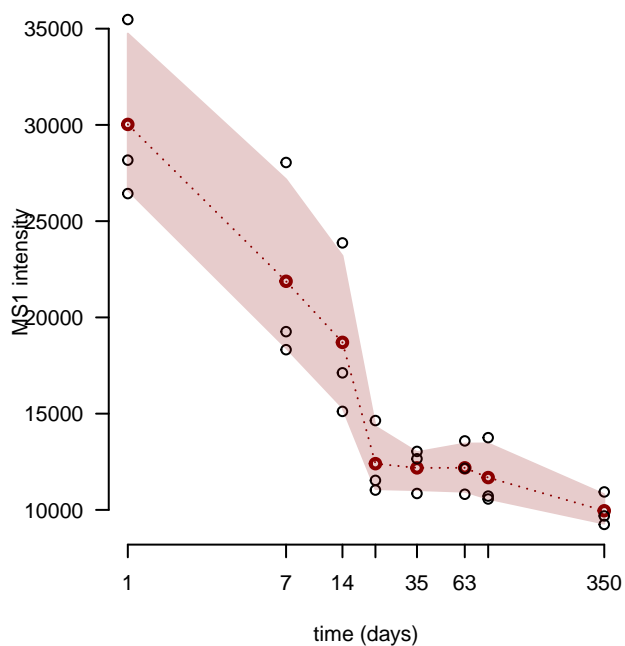

**Q8CGF7**  
GN=Tcerg1  
transcription elongation regulator 1 (CA ...

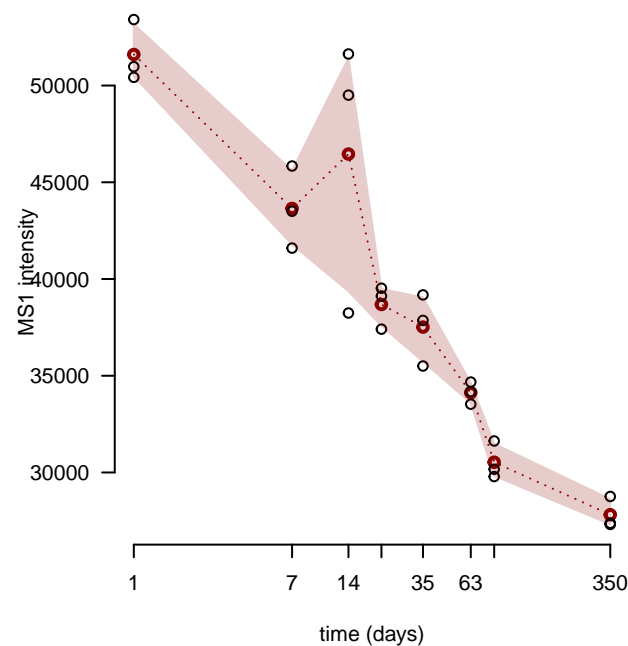

**Q8CGI1**  
GN=Fam193a  
family with sequence homology 193, membe ...

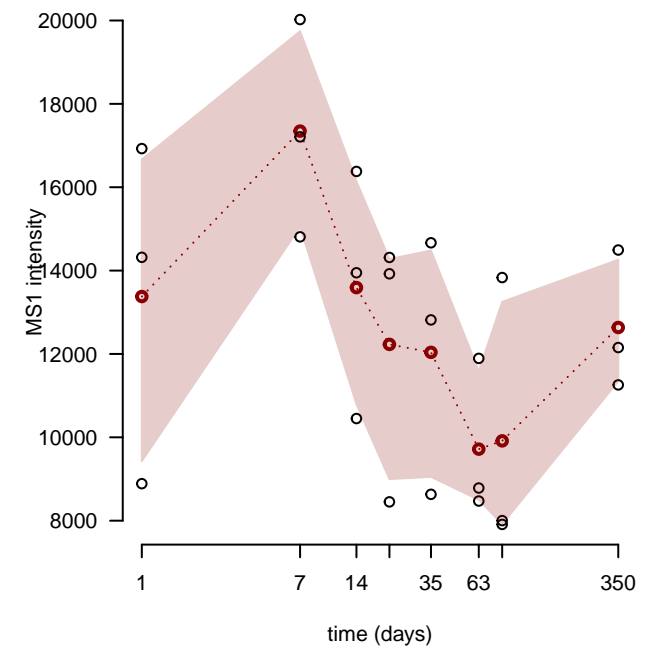

**Q8CGK3**  
GN=Lonp1  
lon peptidase 1, mitochondrial

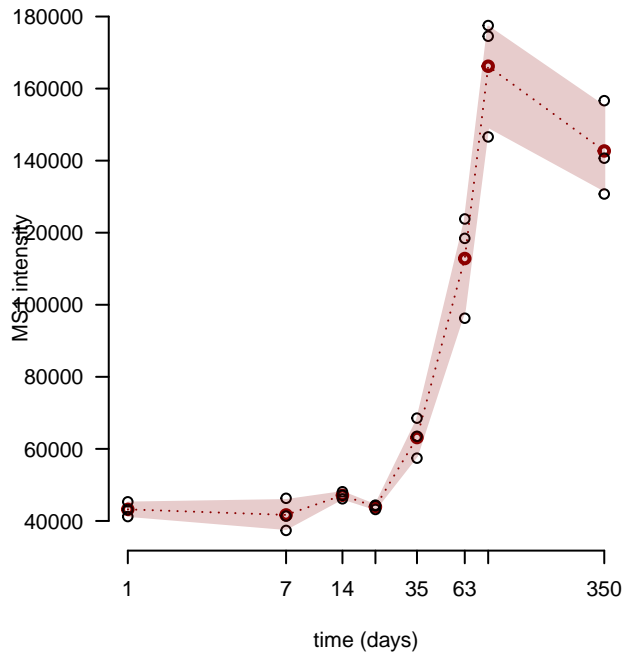

**Q8CGN4**  
GN=Bcor  
BCL6 interacting corepressor

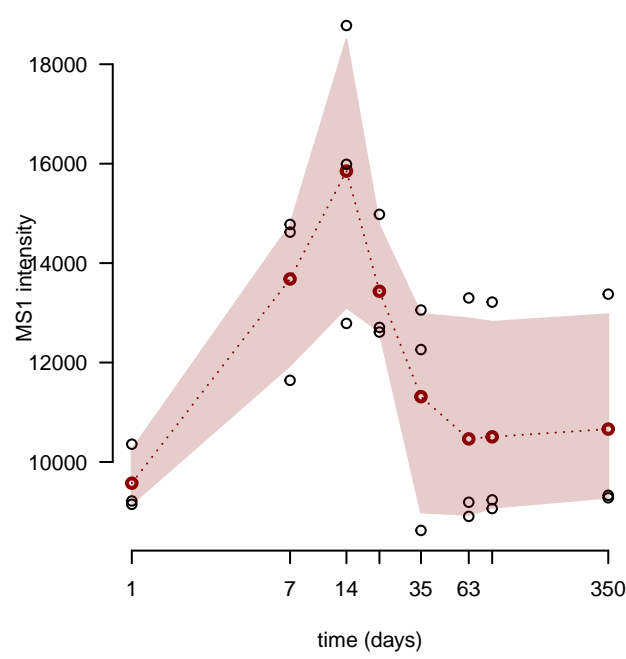

**Q8CGN5**  
GN=Plin1  
perilipin 1

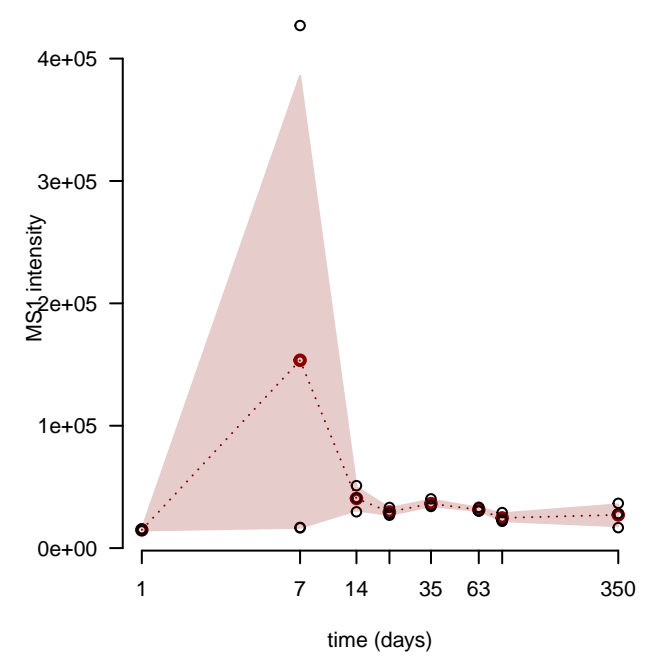

**Q8CGP0**  
GN=Hist3h2bb

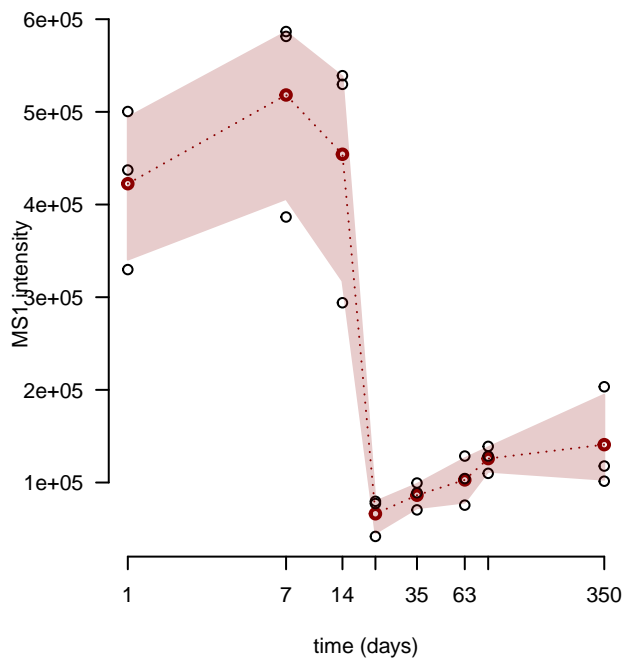

**Q8CGU1**  
GN=Calcoco1  
calcium binding and coiled coil domain 1

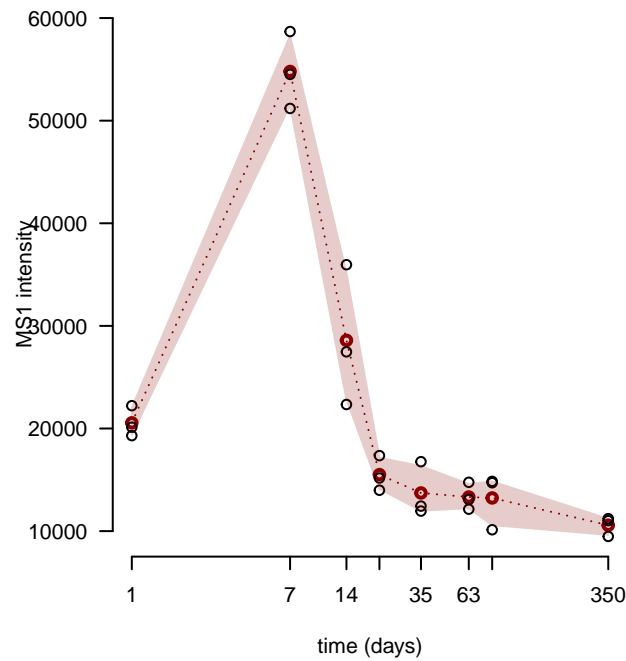

**Q8CGY6**  
GN=Unc45b  
unc-45 myosin chaperone B

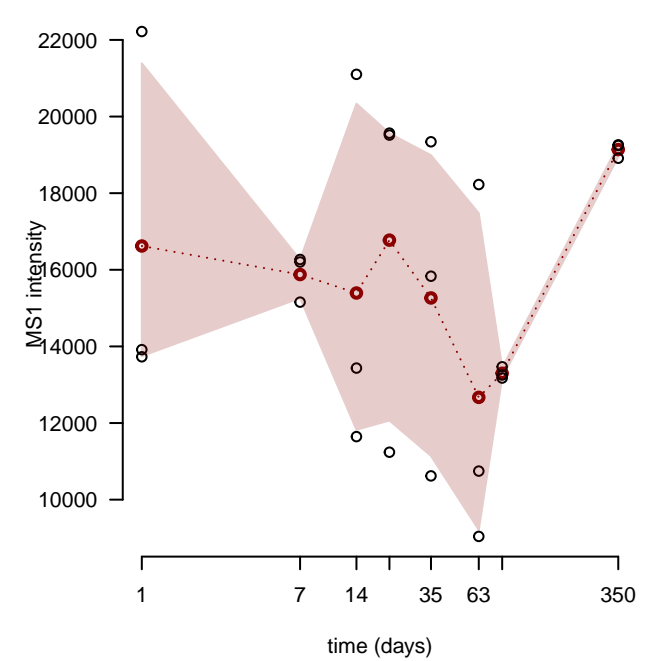

**Q8CGY8**  
GN=Ogt  
O-linked N-acetylglucosamine (GlcNAc) tr ...

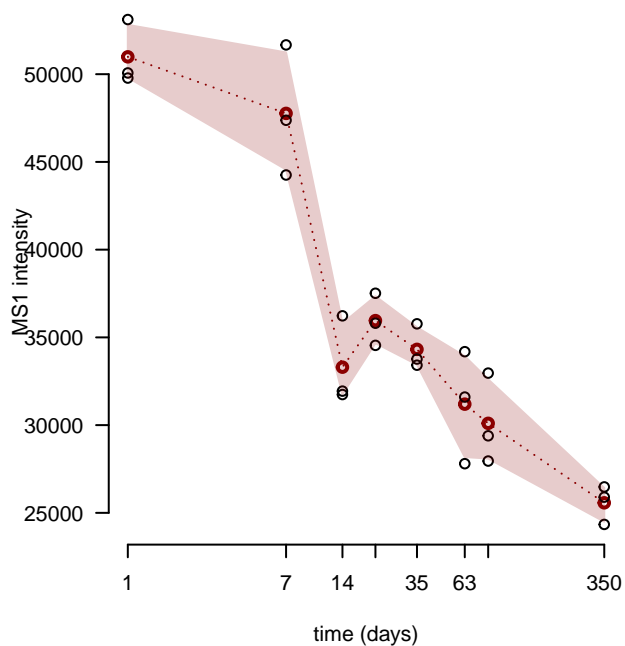

**Q8CGY8**  
GN=Ogt  
O-linked N-acetylglucosamine (GlcNAc) tr ...

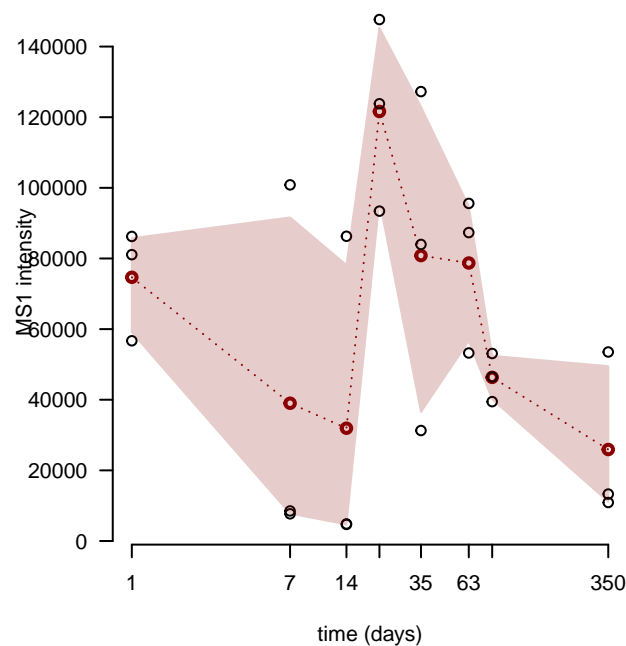

**Q8CGZ0**  
GN=Cherp  
calcium homeostasis endoplasmic reticu ...

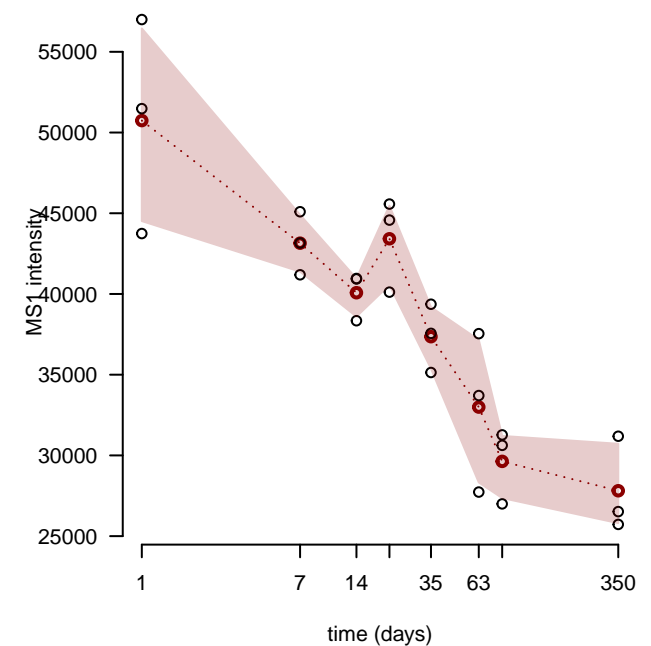

**Q8CH02**  
**GN=Supg1**

SURP and G patch domain containing 1

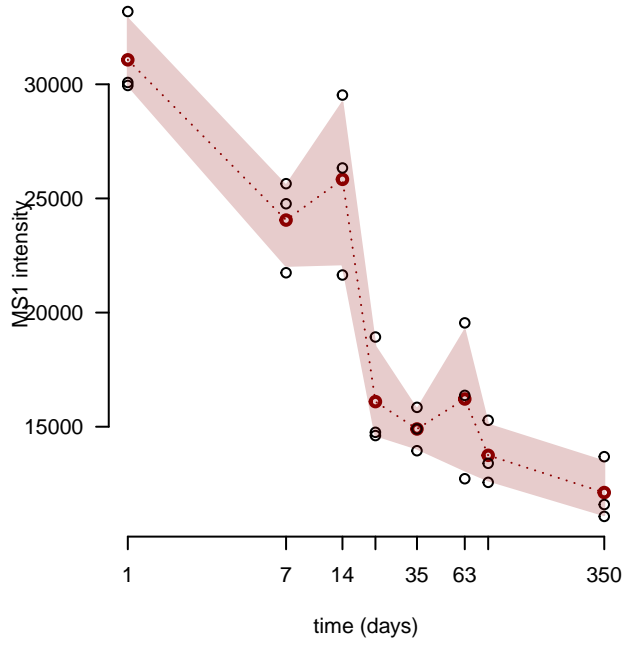

**Q8CH09**  
**GN=Supg2**

SURP and G patch domain containing 2

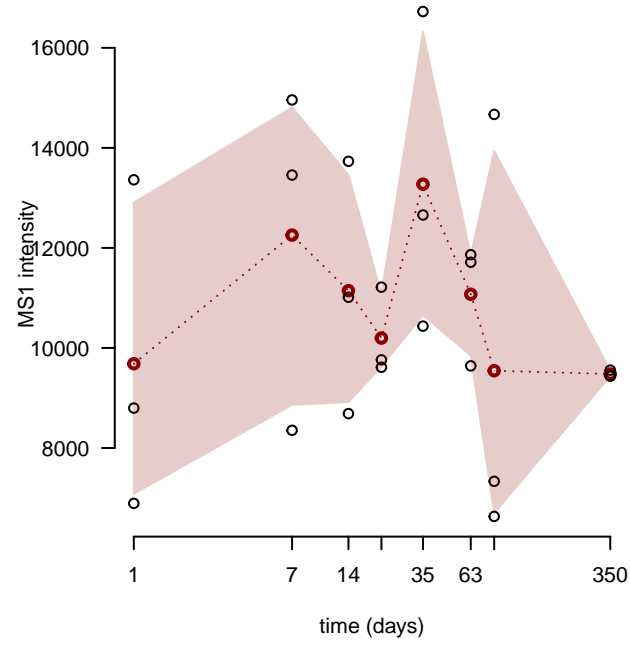

**Q8CH18**  
**GN=Ccar1**

cell division cycle and apoptosis regula ...

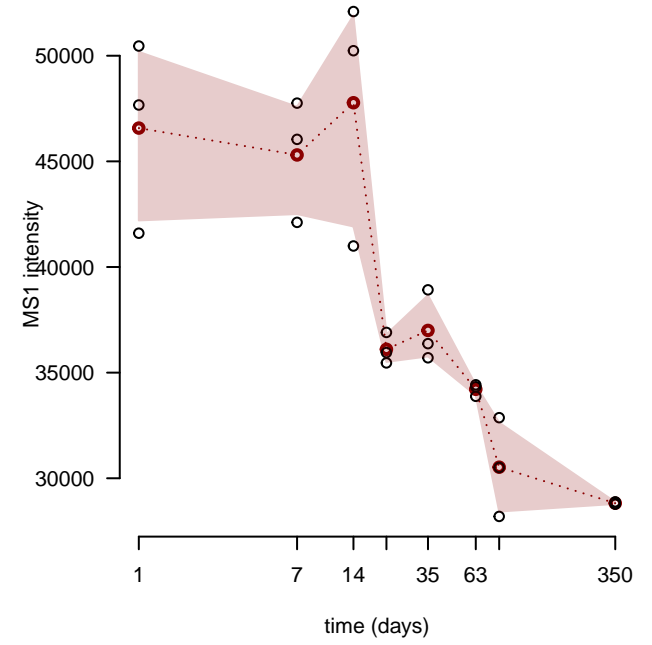

**Q8CH25**  
**GN=Sltm**

SAFB-like, transcription modulator

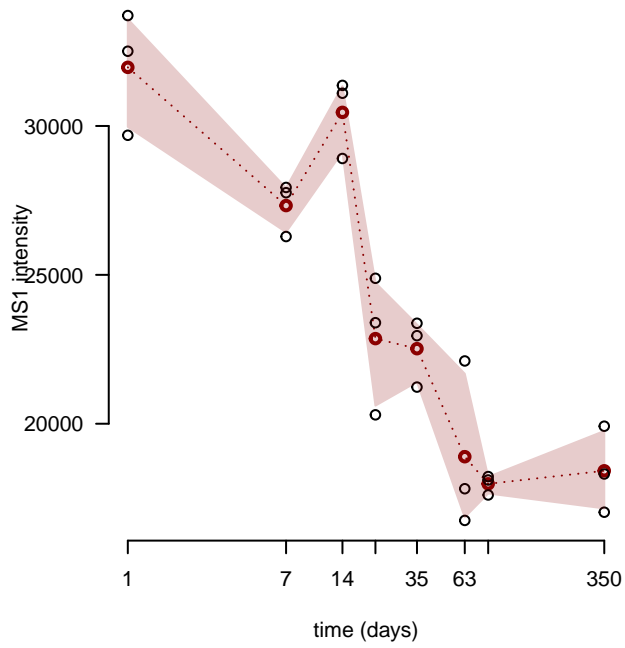

**Q8CH36**  
**GN=Slc36a4**

solute carrier family 36 (proton/amino a ...

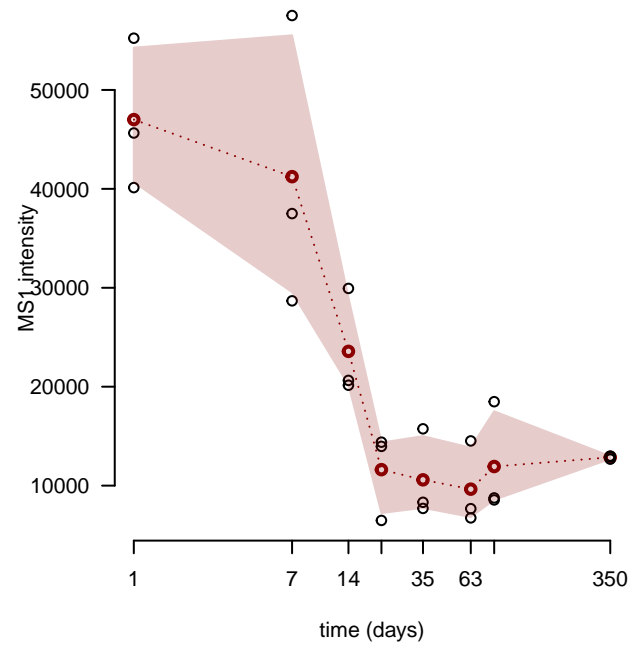

**Q8CH40**  
**GN=Nudt6**

nudix (nucleoside diphosphate linked moi ...

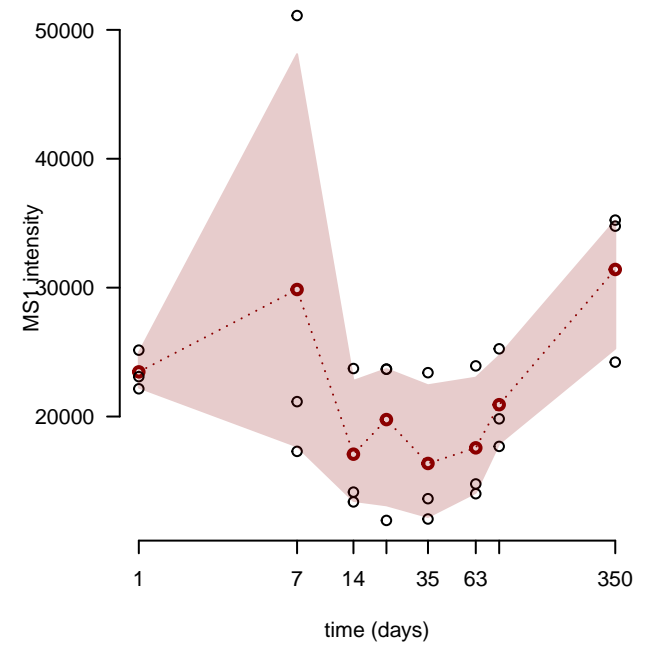

**Q8CH62**  
**GN=Lto1**

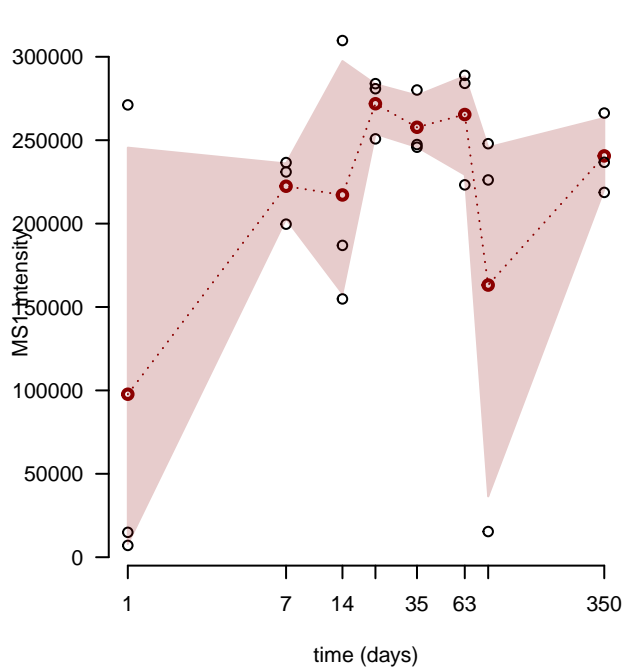

**Q8CH72**  
**GN=Trim32**

tripartite motif-containing 32

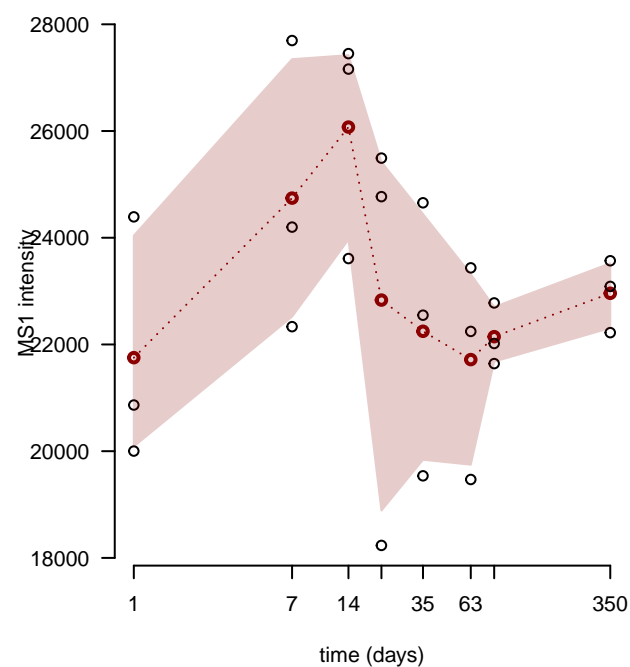

**Q8CH77**  
**GN=Nav1**

neuron navigator 1

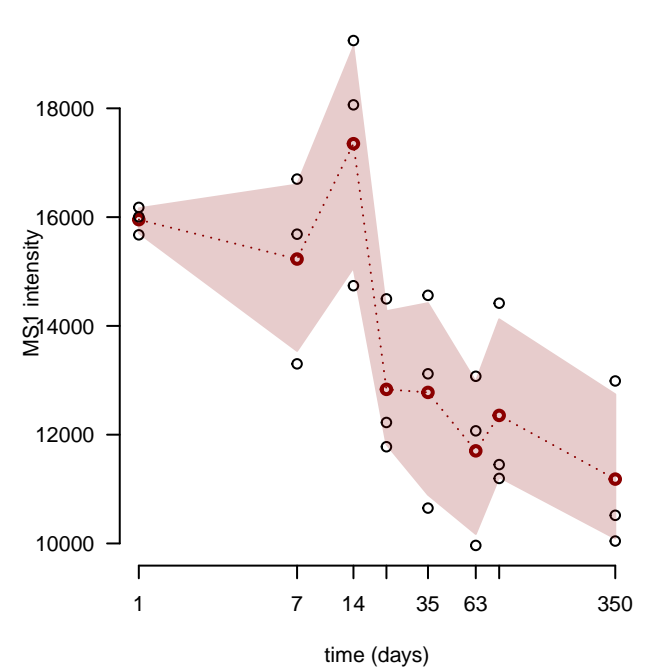



**Q8CHC4**  
GN=Synj1  
synaptojanin 1

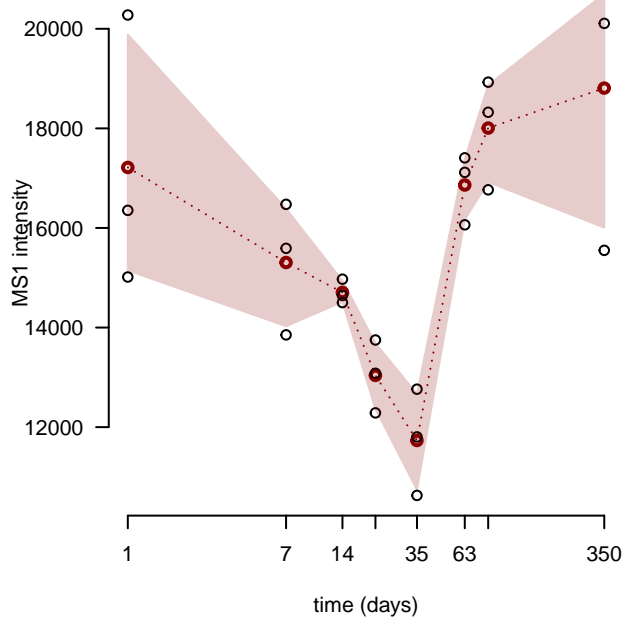

**Q8CHC8**  
GN=Adnp2  
ADNP homeobox 2

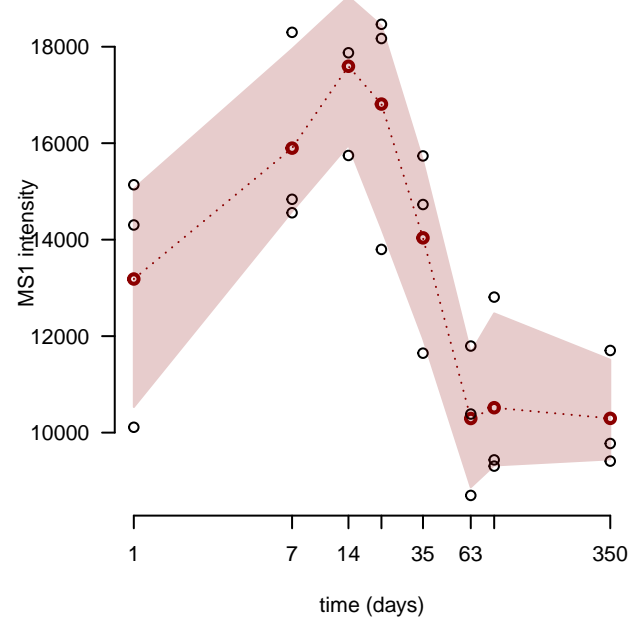

**Q8CHE4**  
GN=Phlpp1  
PH domain and leucine rich repeat protei ...

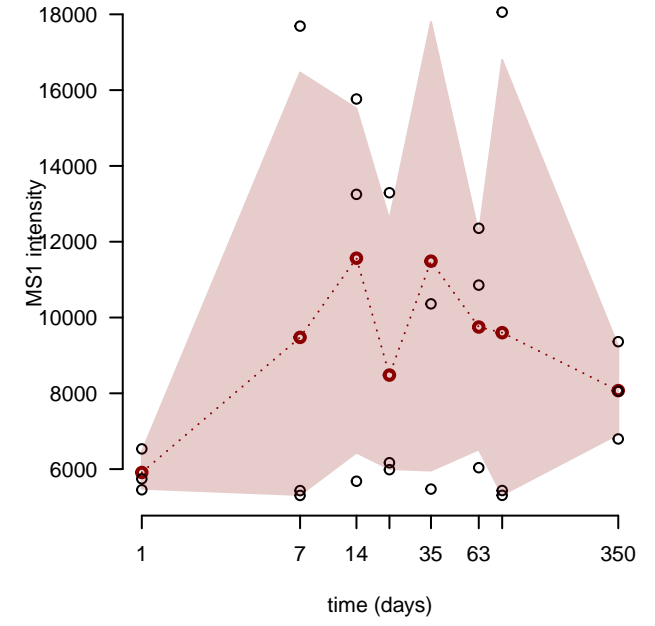

**Q8CHG3**  
GN=Gcc2  
GRIP and coiled-coil domain containing 2

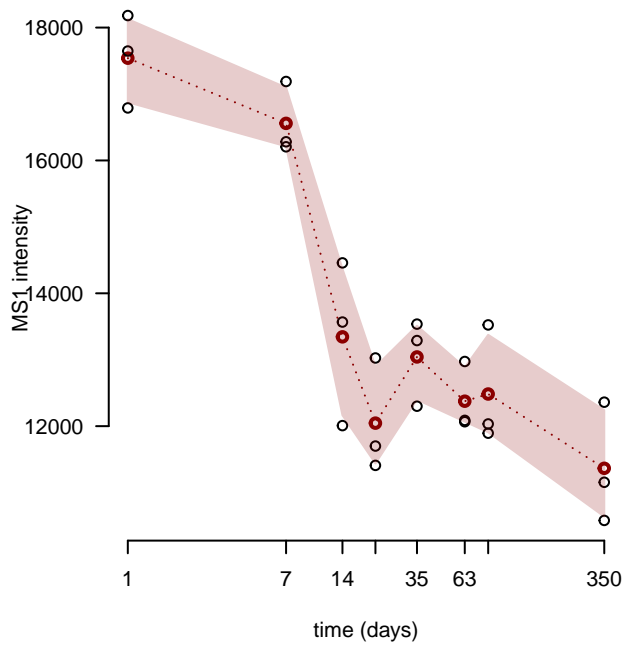

**Q8CHG5**  
GN=Arel1  
apoptosis resistant E3 ubiquitin protein ...

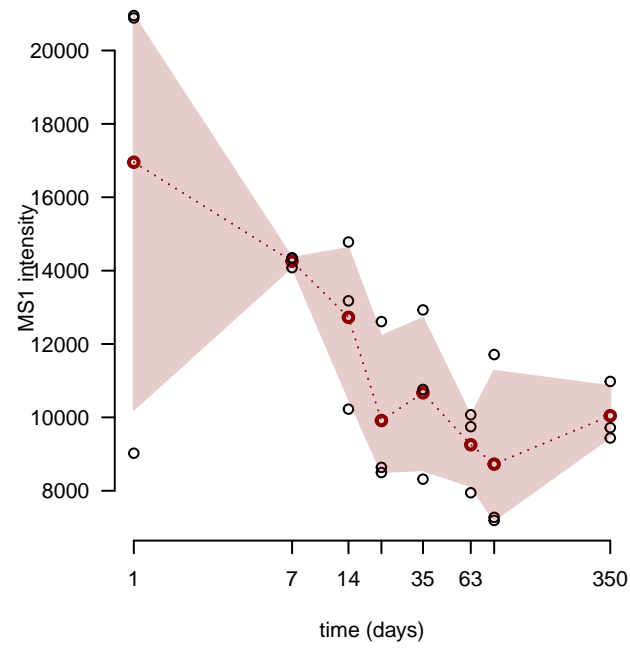

**Q8CHG7**  
GN=Rapgef2  
Rap guanine nucleotide exchange factor ( ...

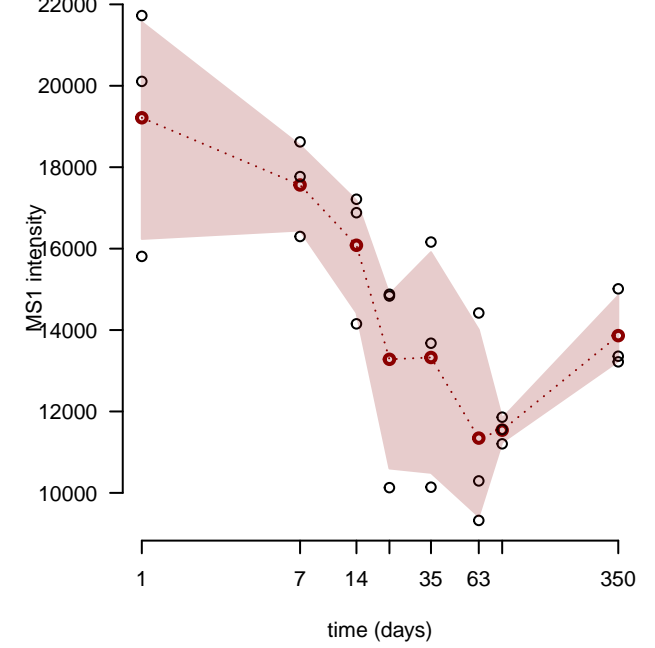

**Q8CHH9**  
GN=Sept8

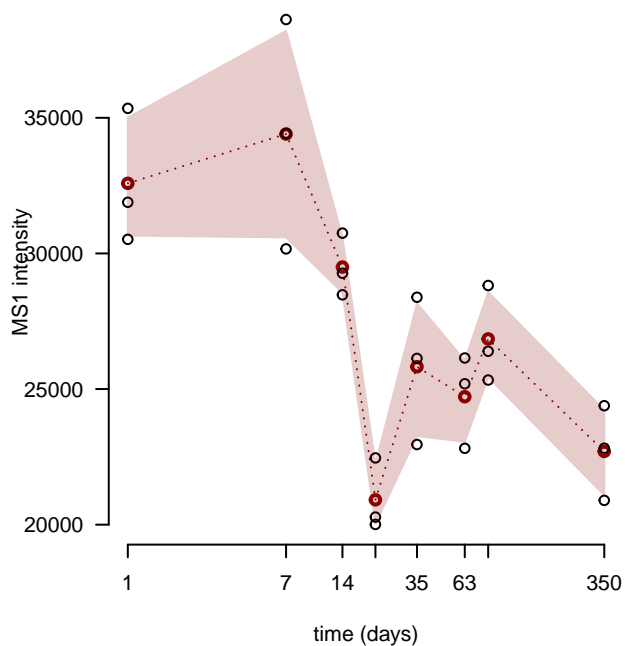

**Q8CHI8**  
GN=Ep400  
E1A binding protein p400

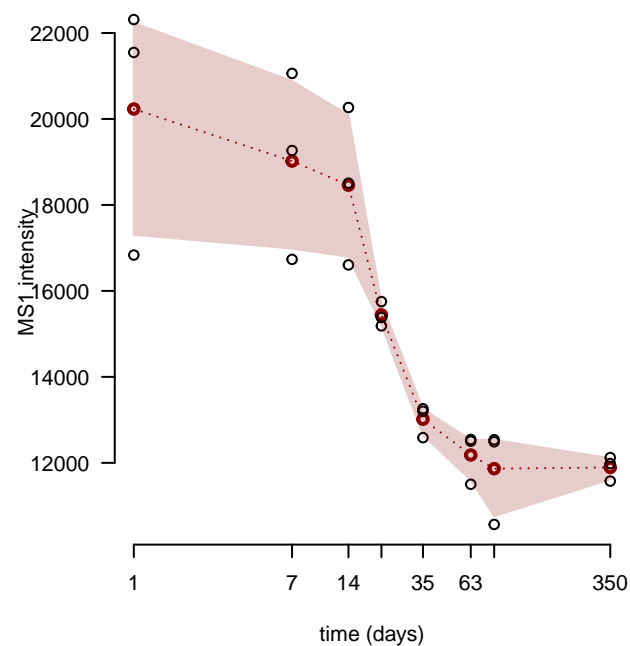

**Q8CHK3**  
GN=Mboat7  
membrane bound O-acyltransferase domain ...

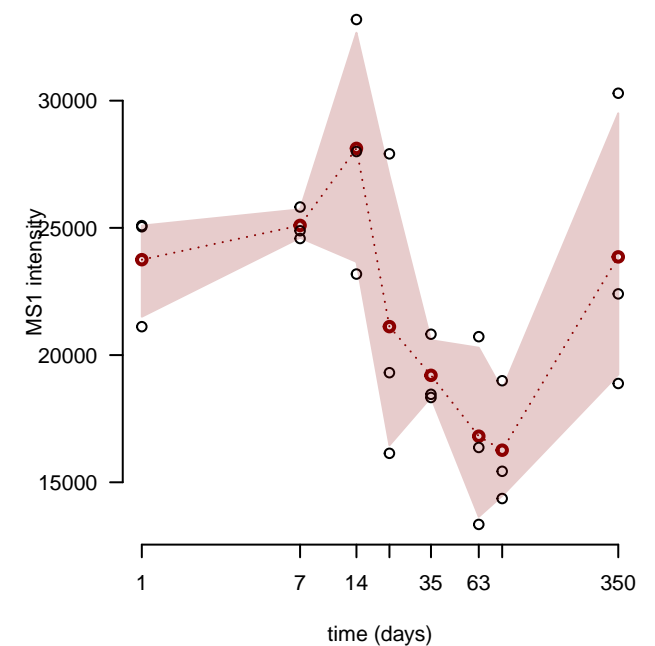

**Q8CHK4**  
GN=Kat5  
K(lysine) acetyltransferase 5

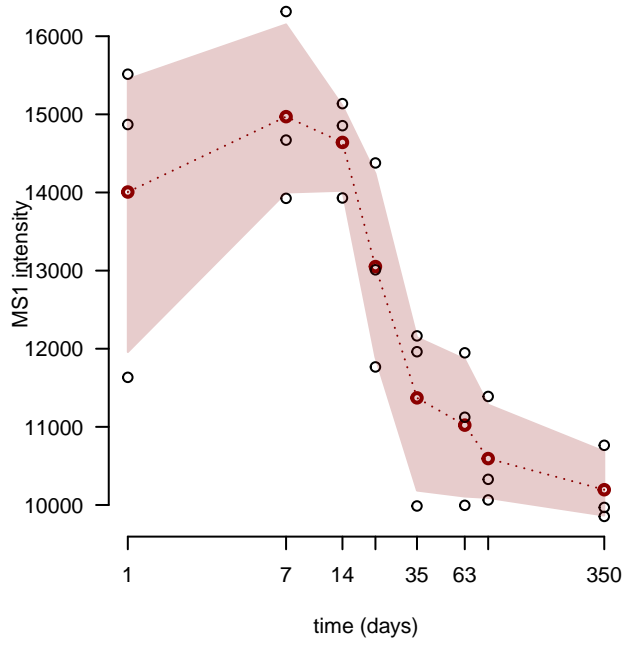

**Q8CHP0**  
GN=Zc3h3  
zinc finger CCCH type containing 3

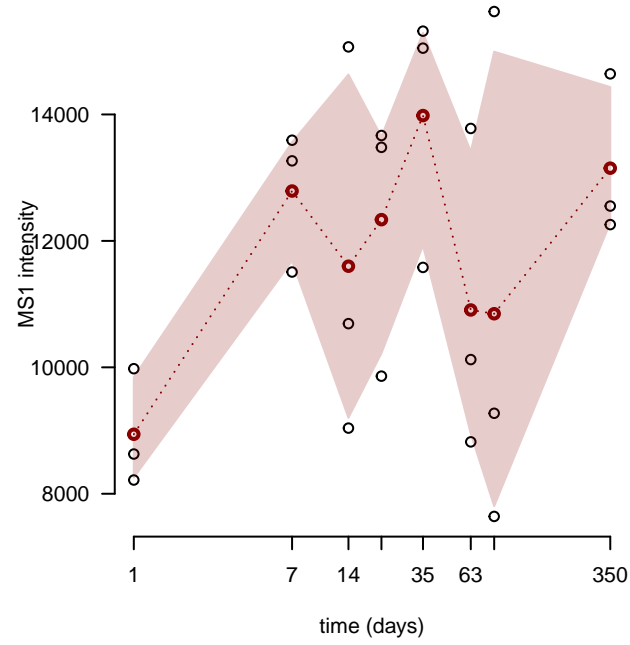

**Q8CHP5**  
GN=Pym1  
PYM homolog 1, exon junction complex ass ...

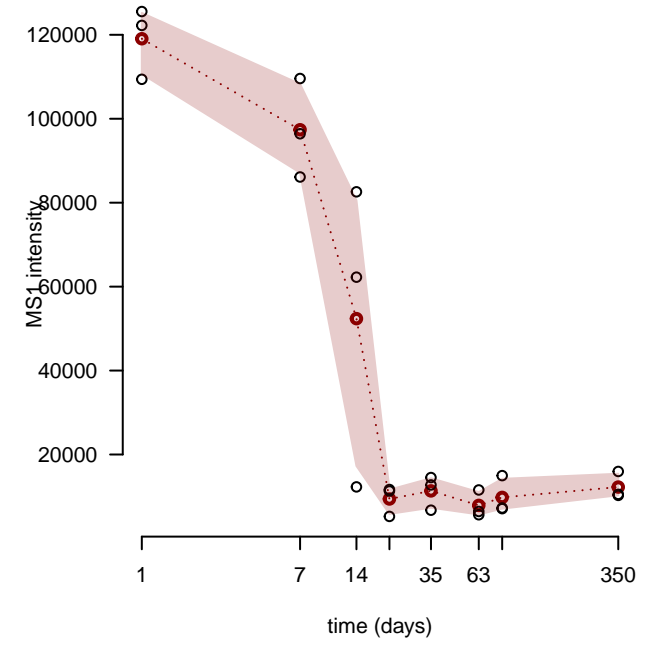

**Q8CHP5**  
GN=Pym1  
PYM homolog 1, exon junction complex ass ...

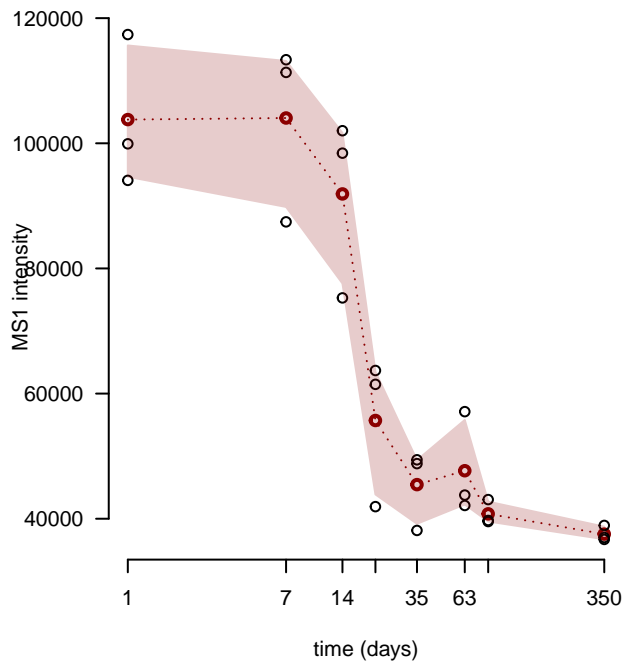

**Q8CHP6**  
GN=Phc3  
polyhomeotic 3

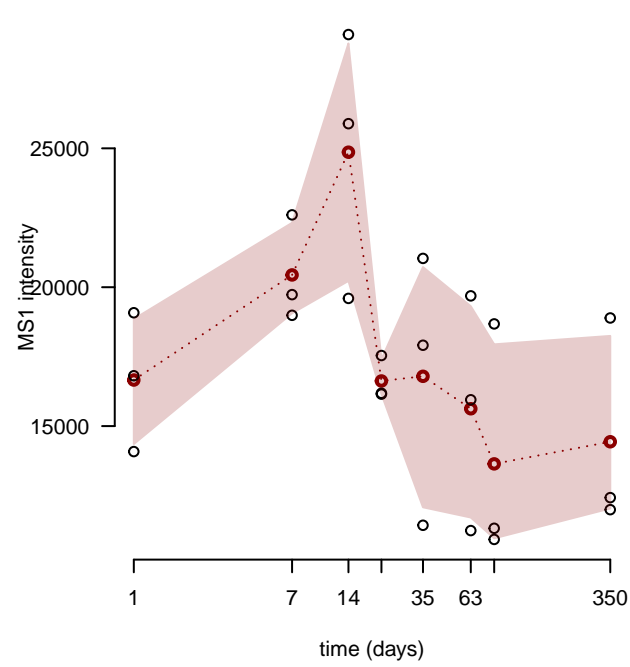

**Q8CHP8**  
GN=Pgp  
phosphoglycolate phosphatase

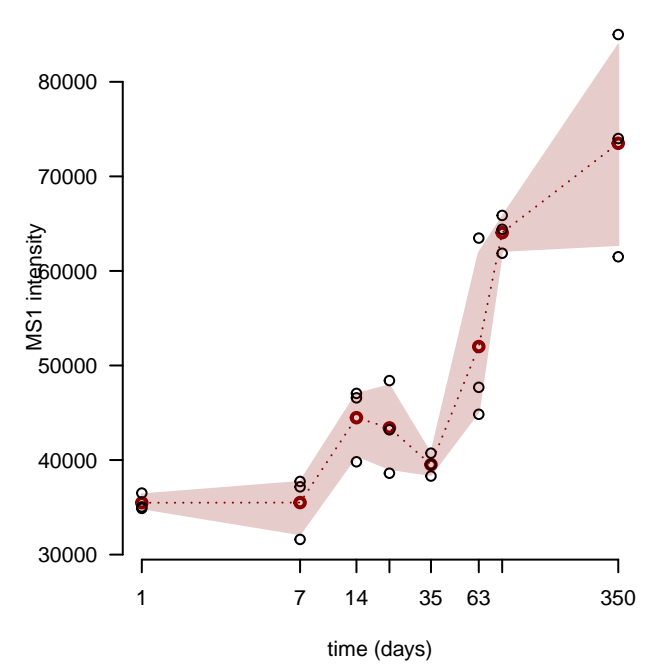

**Q8CHQ0**  
GN=Fbxo4  
F-box protein 4

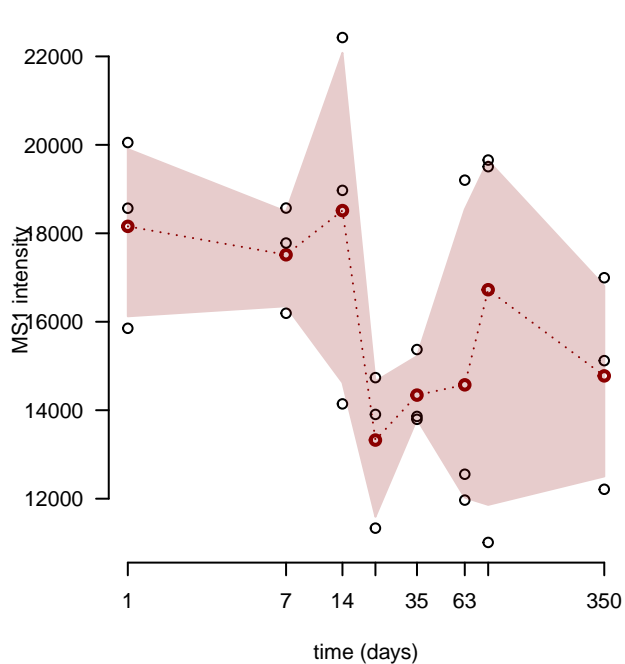

**Q8CHR6**  
GN=Dpyd  
dihydropyrimidine dehydrogenase

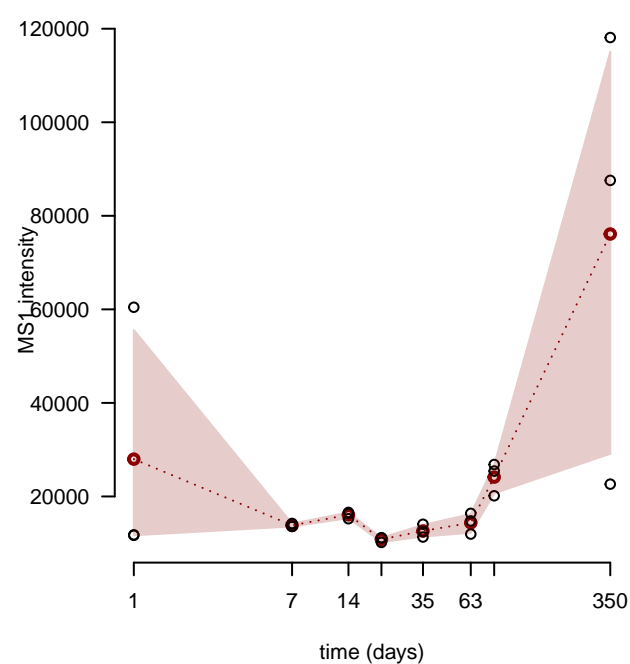

**Q8CHS8**  
GN=Vps37a  
vacuolar protein sorting 37A

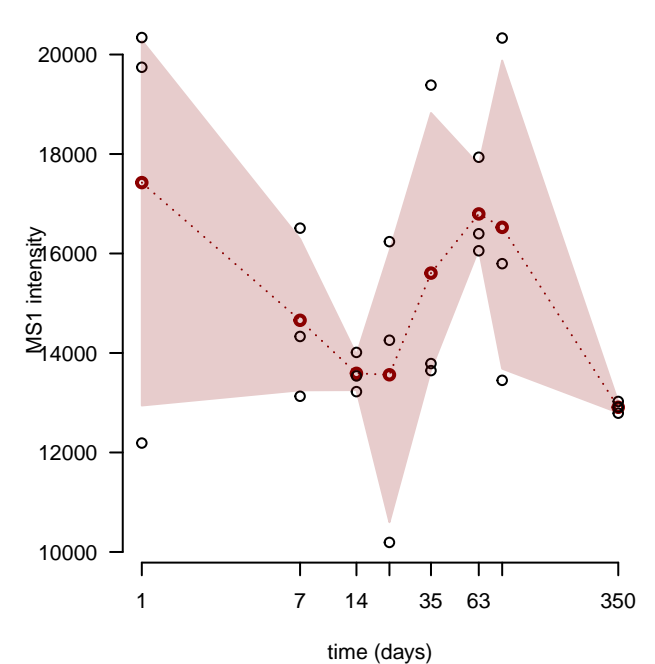

**Q8CHT0**  
GN=Aldh4a1  
aldehyde dehydrogenase 4 family, member ...

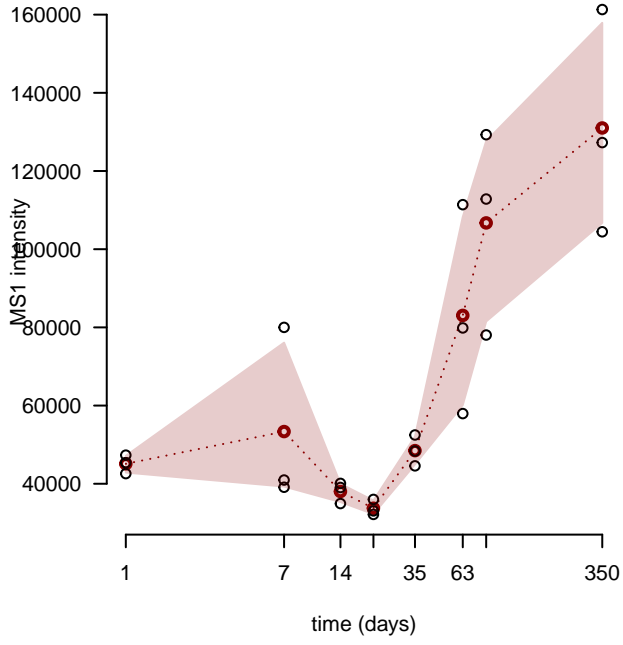

**Q8CHT1**  
GN=Ngef  
neuronal guanine nucleotide exchange fac ...

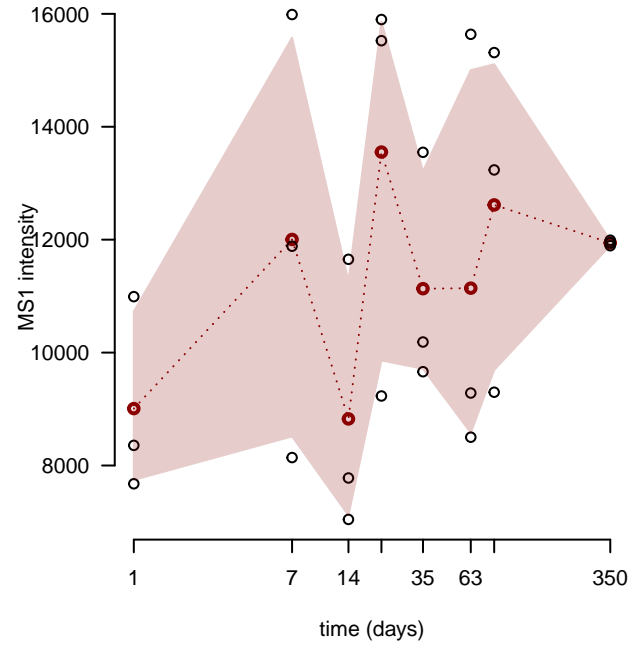

**Q8CHT3**  
GN=Ints5  
integrator complex subunit 5

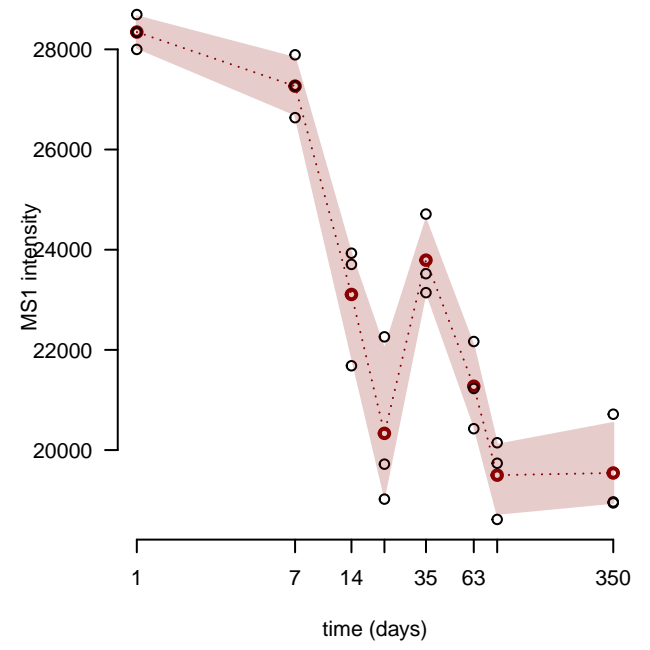

**Q8CHU3**  
GN=Epn2  
epsin 2

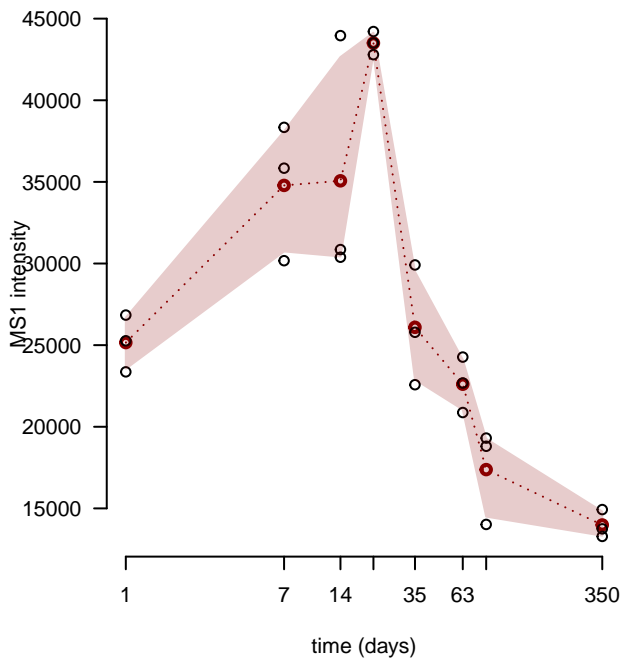

**Q8CHV6**  
GN=Tada2a  
transcriptional adaptor 2A

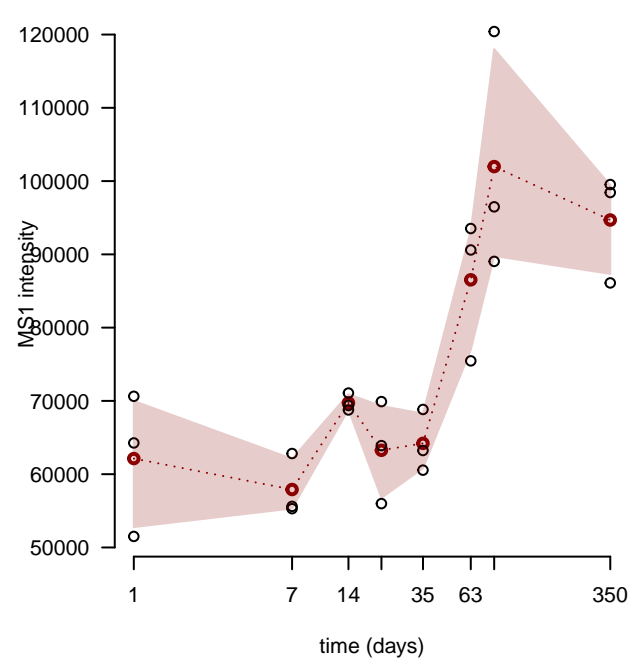

**Q8CHW4**  
GN=Eif2b5  
eukaryotic translation initiation factor ...

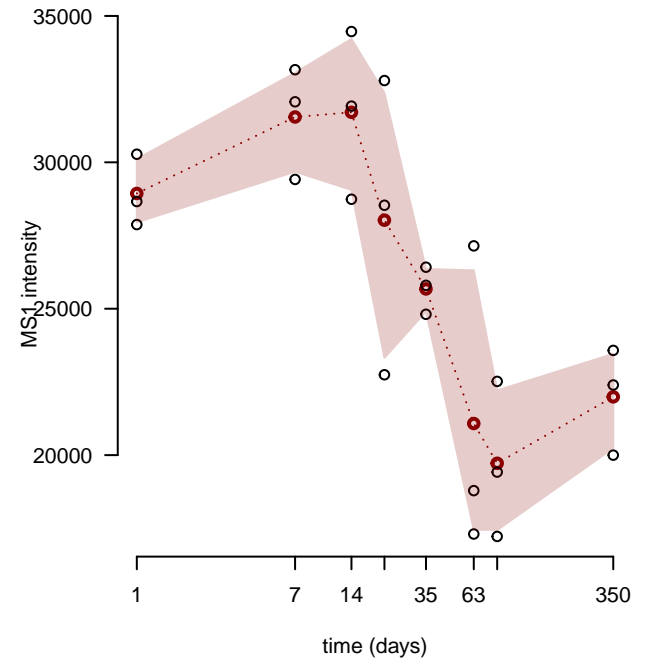

**Q8CHX7**  
GN=Rftn2  
raftlin family member 2

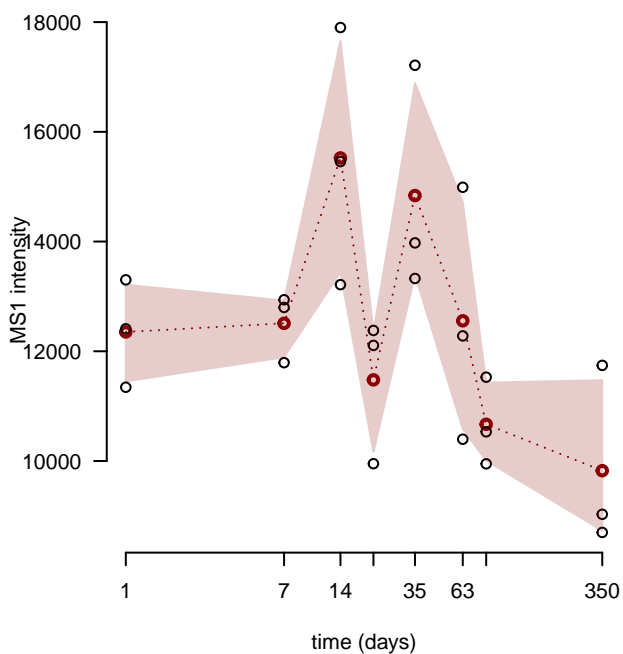

**Q8CHY3**  
GN=Dym  
dymeclin

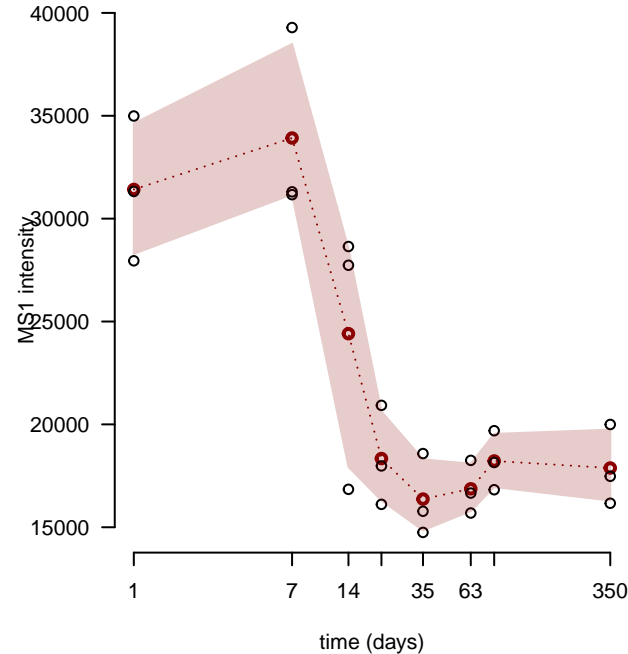

**Q8CHY6**  
GN=Gatad2a  
GATA zinc finger domain containing 2A

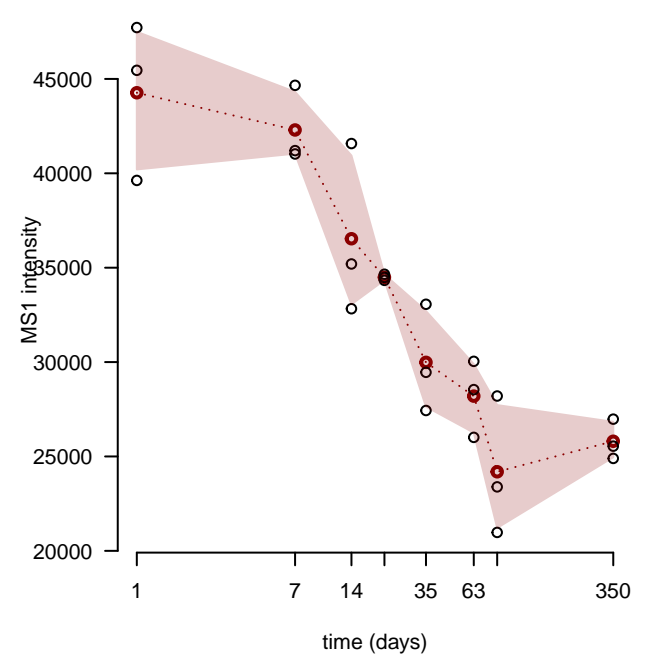

**Q8CI04**  
**GN=Cog3**

component of oligomeric golgi complex 3

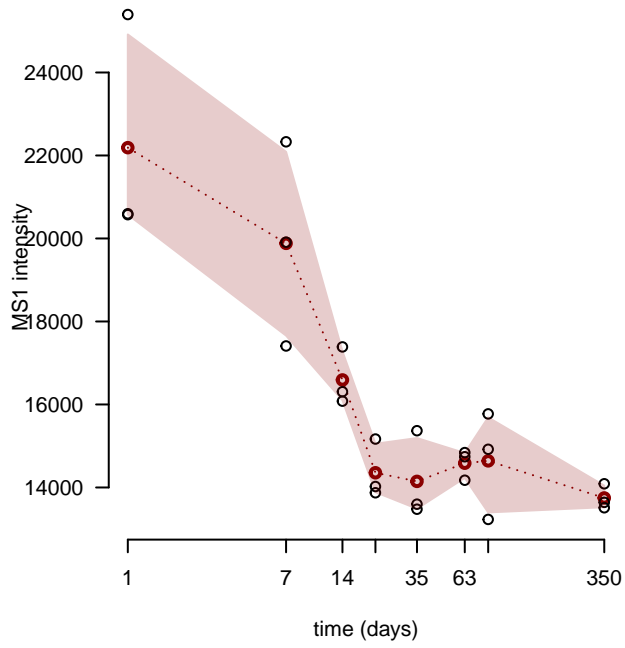

**Q8CI08**  
**GN=Slain2**

SLAIN motif family, member 2

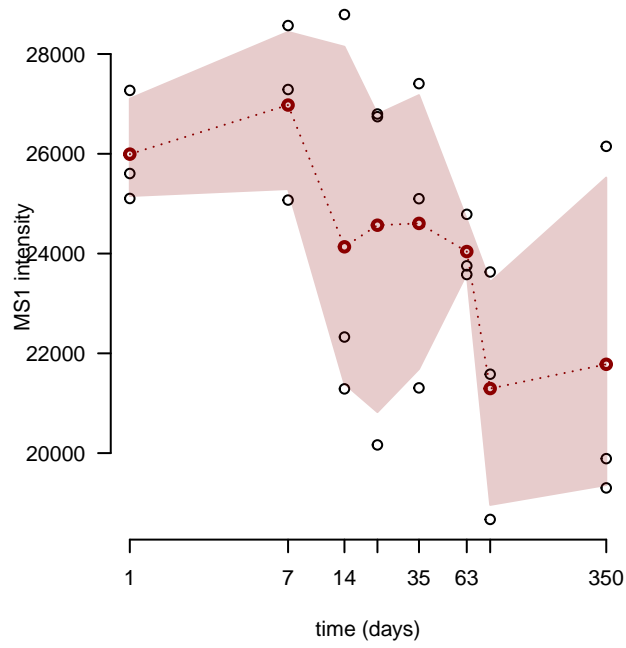

**Q8CI11**  
**GN=Gnl3**

guanine nucleotide binding protein-like ...

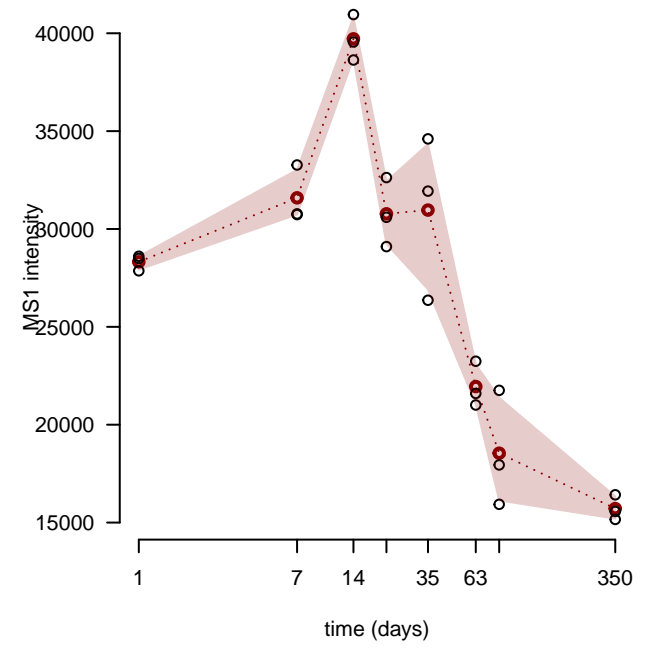

**Q8CI12**  
**GN=Smtnl2**

smoothelin-like 2

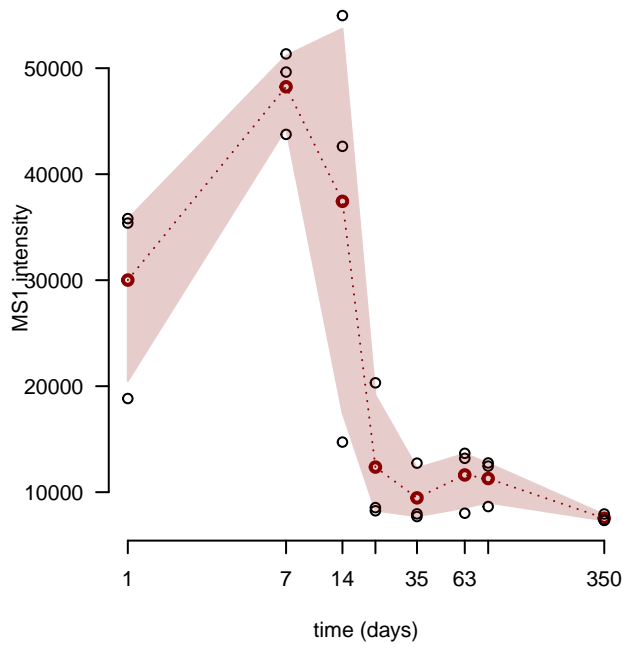

**Q8CI32**  
**GN=Bag5**

BCL2-associated athanogene 5

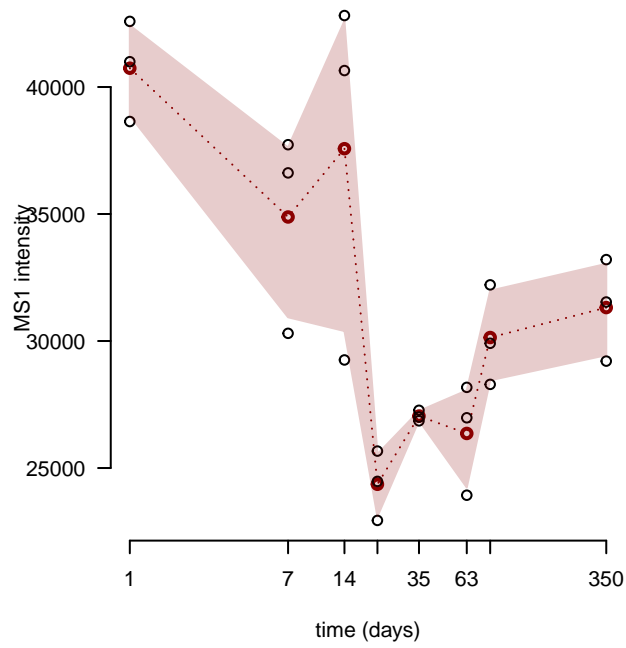

**Q8CI33**  
**GN=Cwf1911**

CWF19-like 1, cell cycle control (S. pom ...

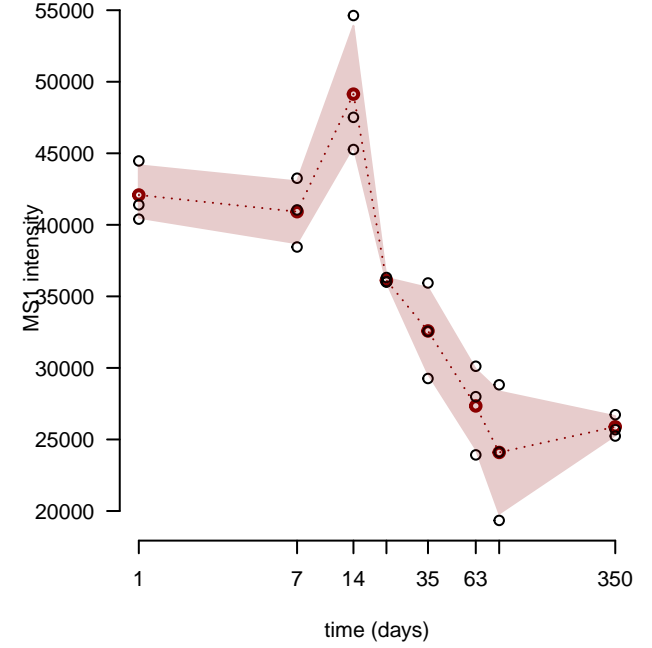

**Q8CI43**  
**GN=Myl6b**

myosin, light polypeptide 6B

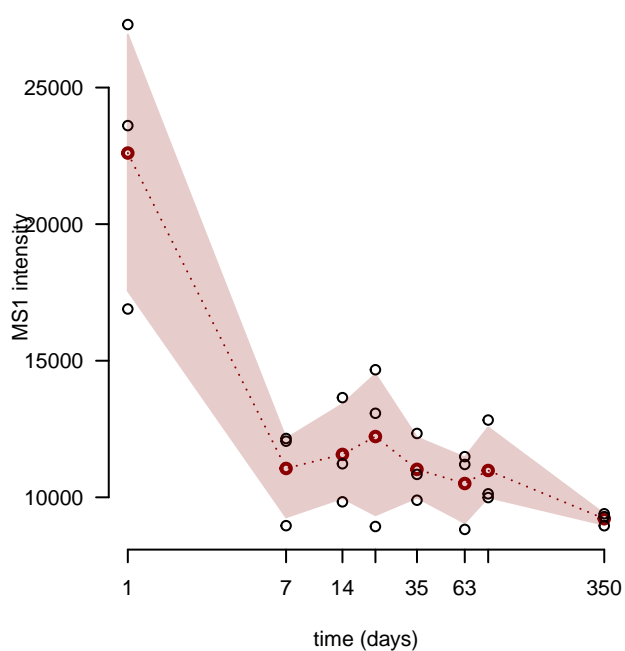

**Q8CI51**  
**GN=Pdlim5**

PDZ and LIM domain 5

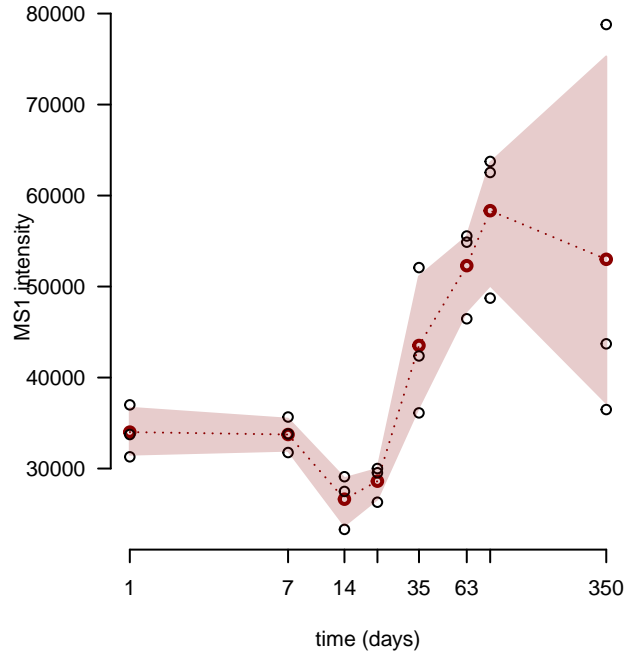

**Q8CI51**  
**GN=Pdlim5**

PDZ and LIM domain 5

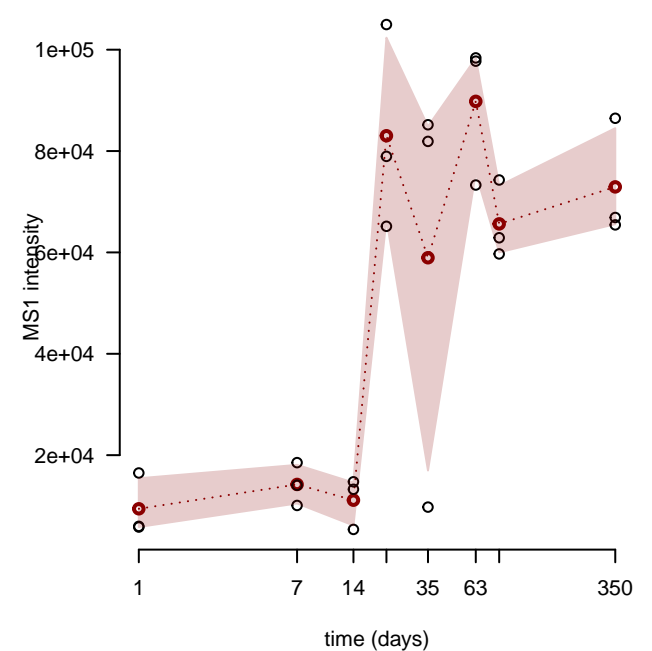

**Q8CI59**  
**GN=Steap3**  
STEAP family member 3

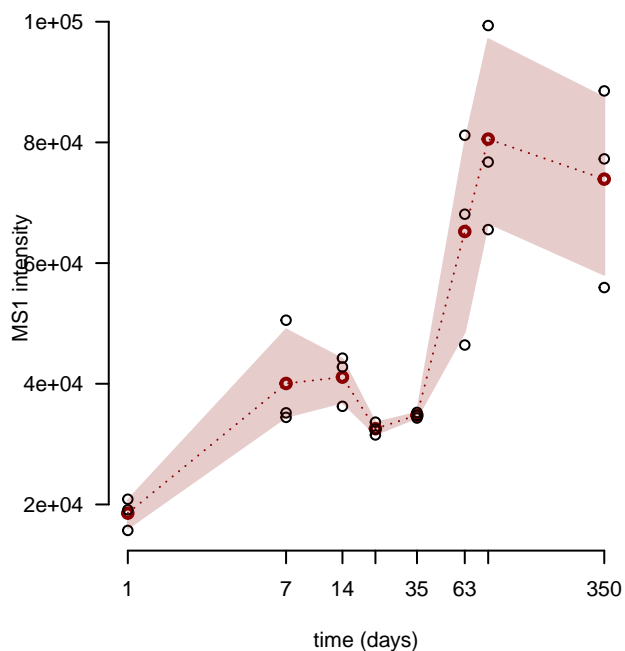

**Q8CI59**  
**GN=Steap3**  
STEAP family member 3

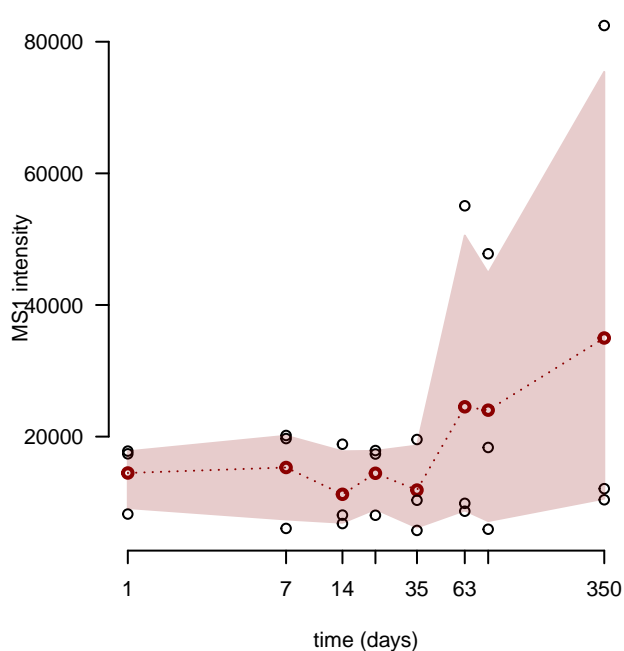

**Q8CI61**  
**GN=Bag4**  
BCL2-associated athanogene 4

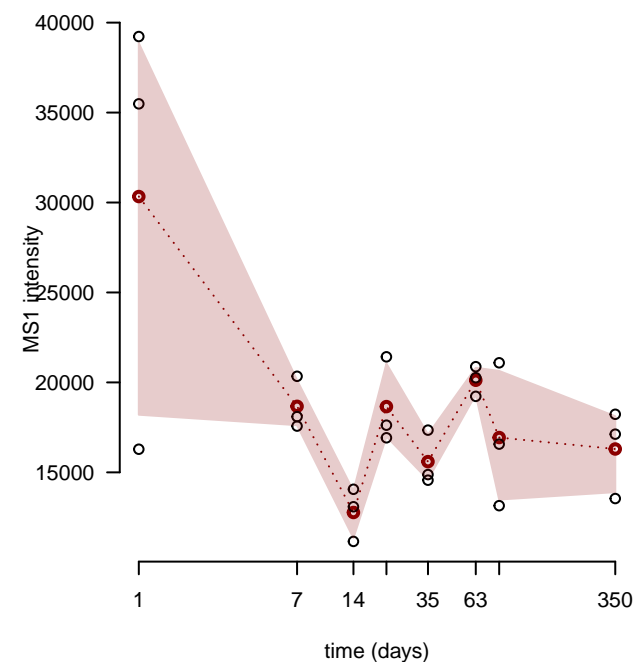

**Q8CI70**  
**GN=Lrrc20**  
leucine rich repeat containing 20

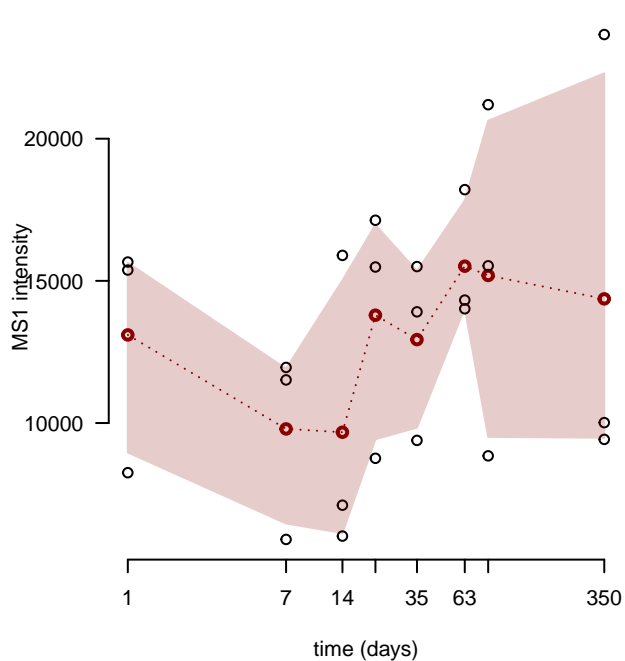

**Q8CI71**  
**GN=Vps50**  
VPS50 EARP/GARPII complex subunit

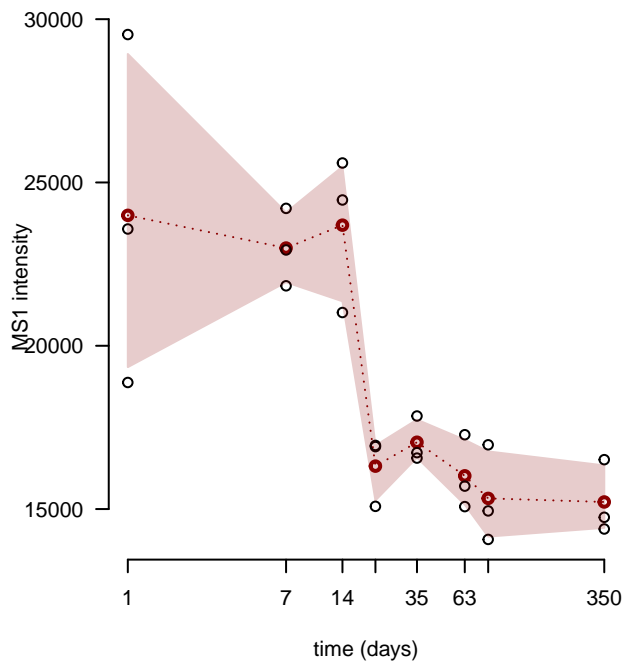

**Q8CI75**  
**GN=Dis3l2**  
DIS3 like 3'-5' exoribonuclease 2

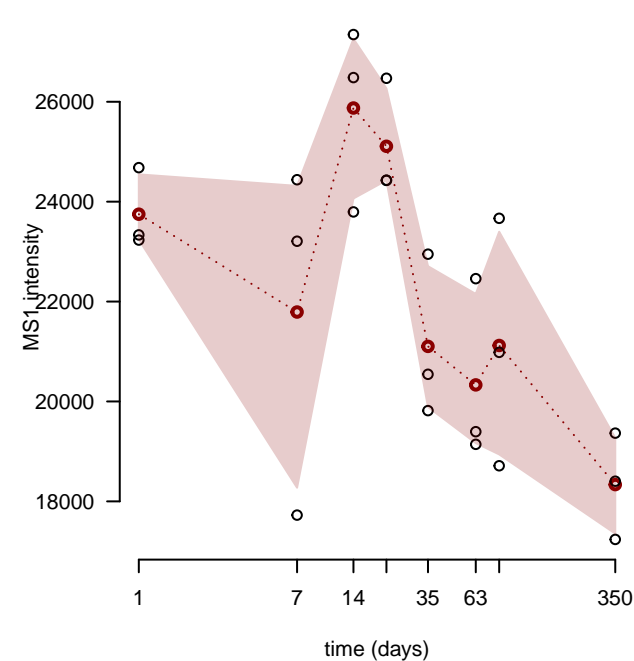

**Q8CI78**  
**GN=Rmnd1**  
required for meiotic nuclear division 1 ...

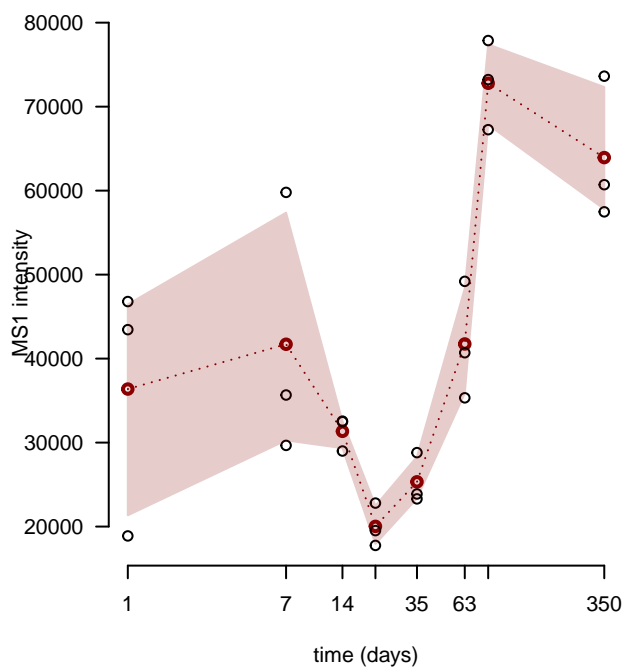

**Q8CI94**  
**GN=Pygb**  
brain glycogen phosphorylase

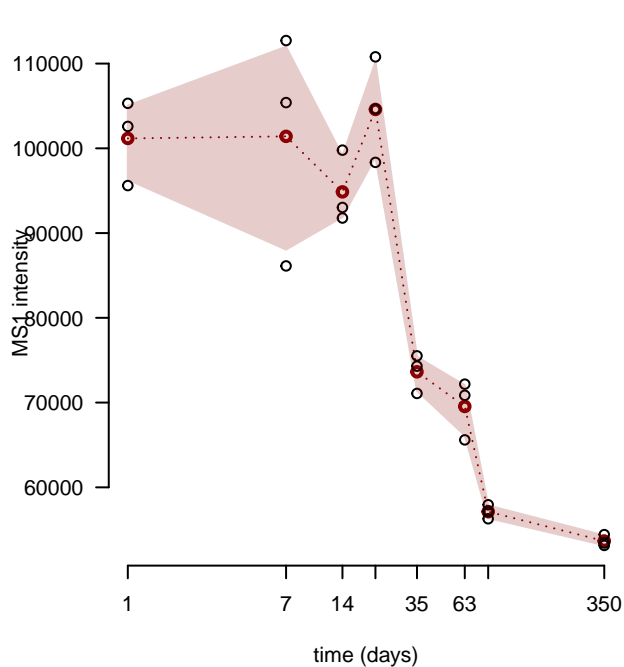

**Q8CI95**  
**GN=Osbp11**  
oxysterol binding protein-like 11

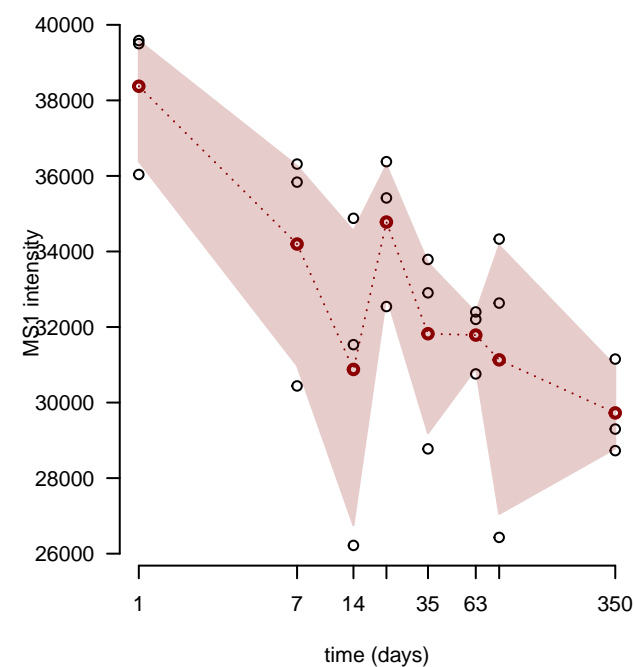

**Q8CIA5**  
**GN=Slc35b4**  
solute carrier family 35, member B4

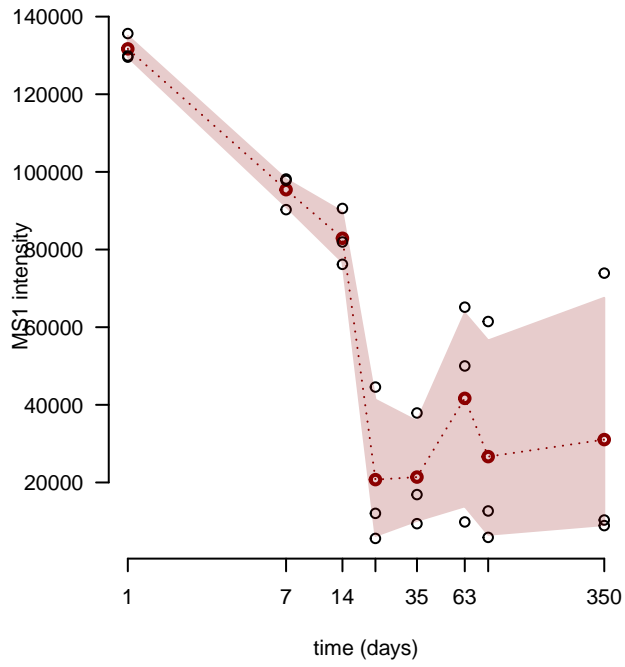

**Q8CIB5**  
**GN=Fermt2**  
fermitin family member 2

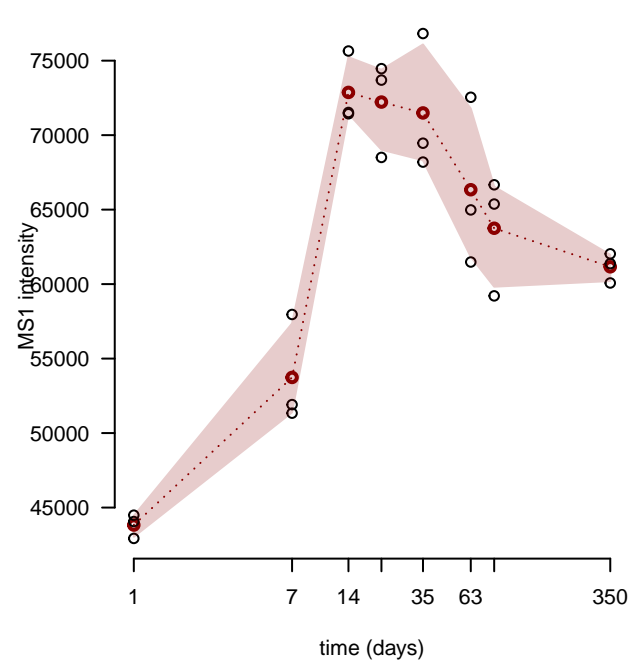

**Q8CIB6**  
**GN=Tmem230**  
transmembrane protein 230

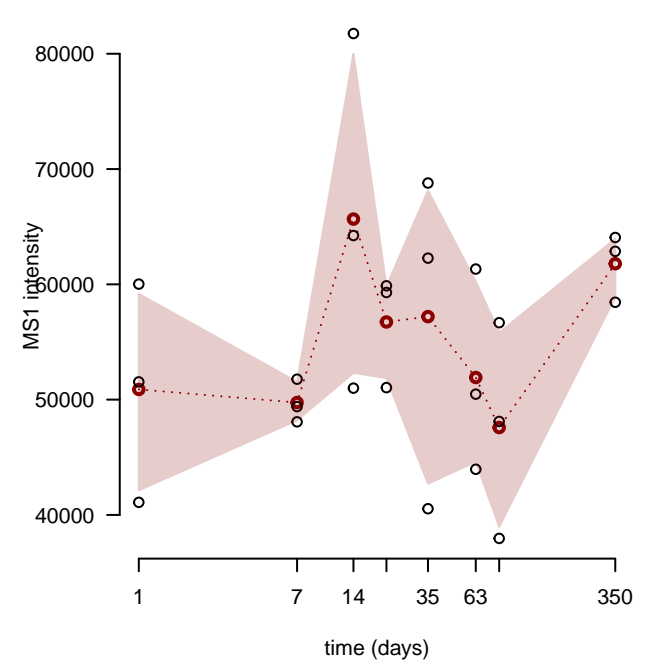

**Q8CIB9**  
**GN=Esco2**  
establishment of sister chromatid cohesi ...

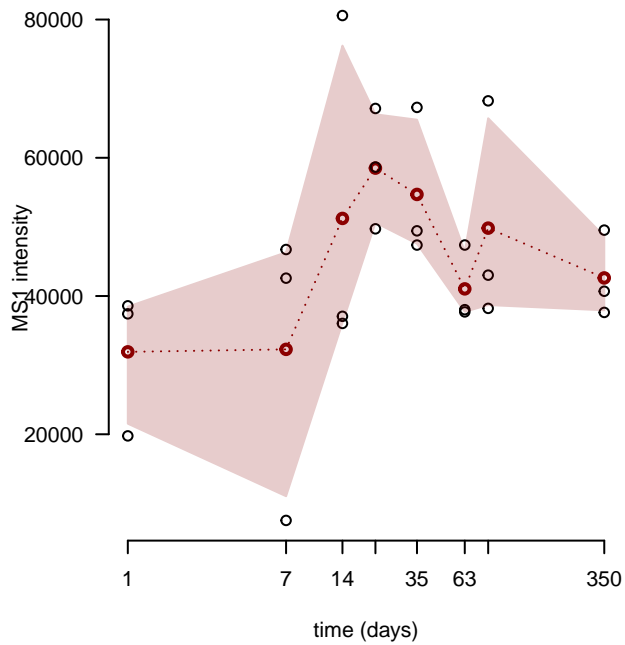

**Q8CIC2**  
**GN=Nup12**  
nucleoporin like 2

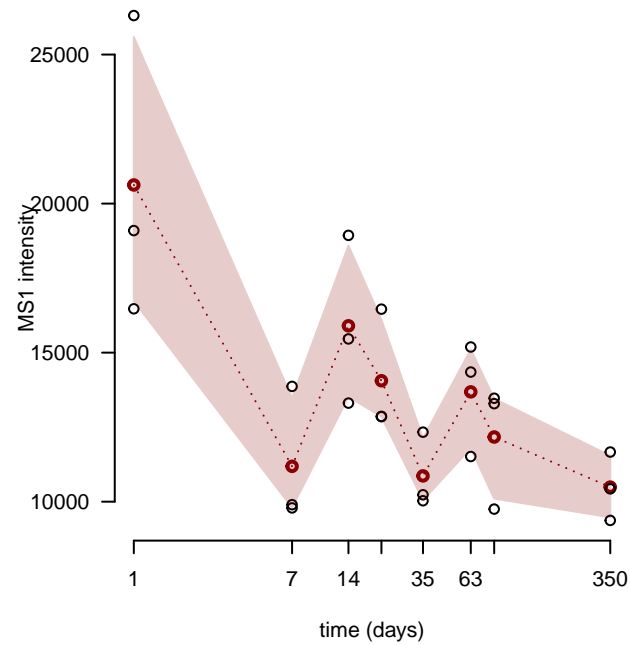

**Q8CID0**  
**GN=Kat14**  
lysine acetyltransferase 14

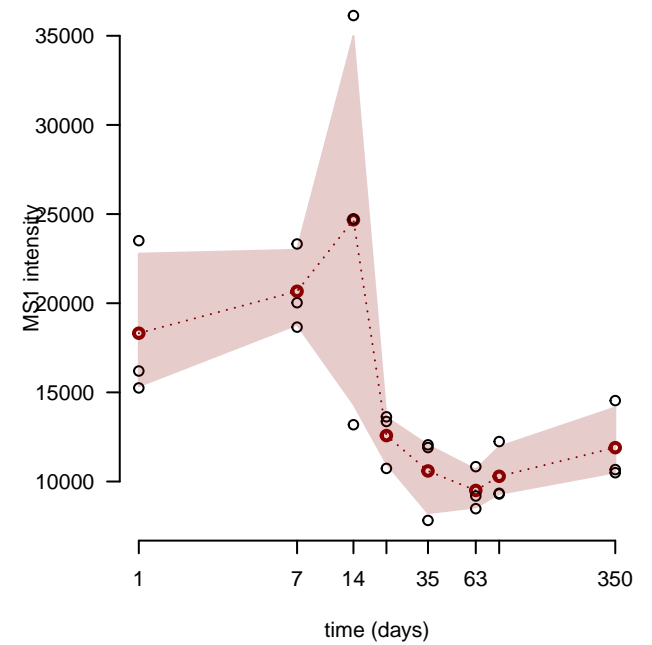

**Q8CIE0**  
**GN=Serpina11**  
serine (or cysteine) peptidase inhibitor ...

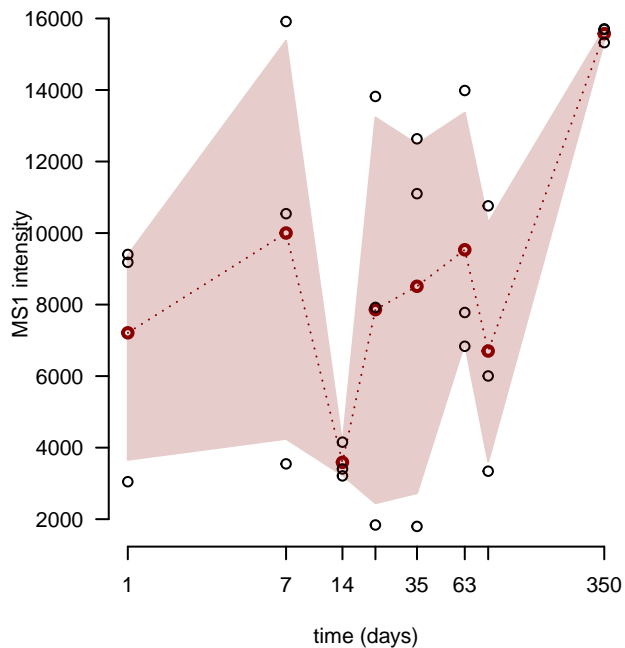

**Q8CIE2**  
**GN=Zmiz2**  
zinc finger, MIZ-type containing 2

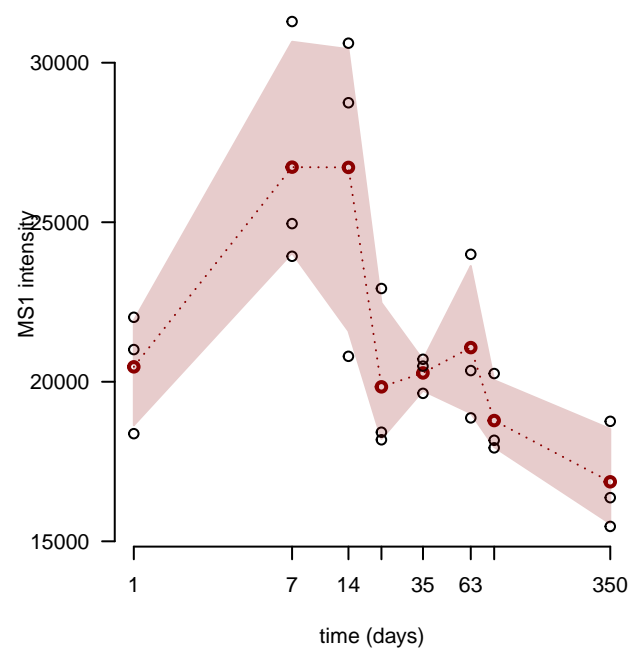

**Q8CIE4**  
**GN=Parp10**  
poly (ADP-ribose) polymerase family, mem ...

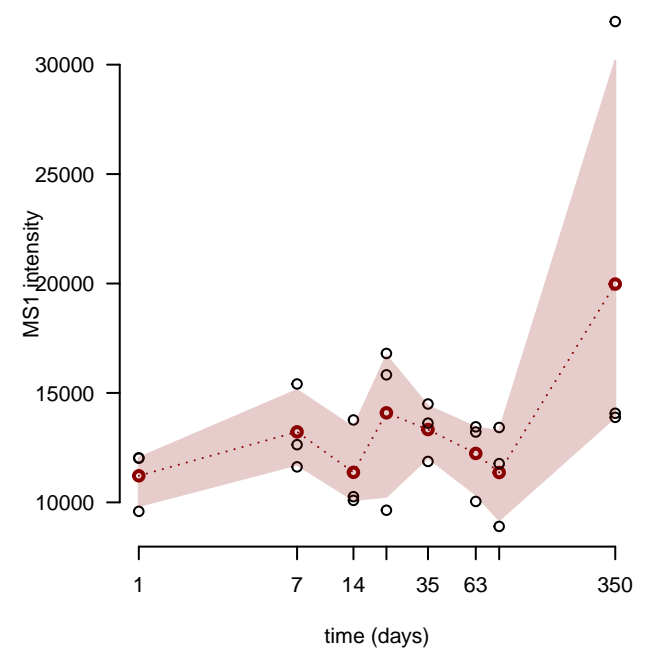

**Q8CIE6**  
**GN=Copa**  
coatomer protein complex subunit alpha

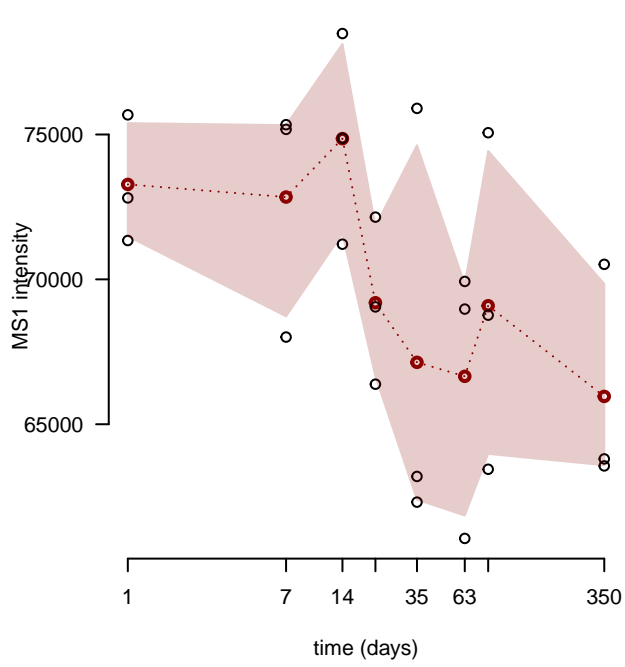

**Q8CIF4**  
**GN=Btd**  
biotinidase

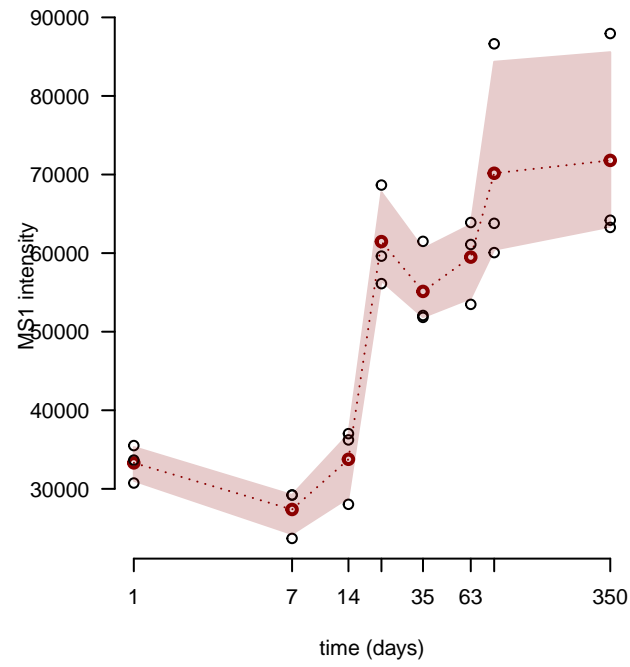

**Q8CIF6**  
**GN=Sid2**  
SID1 transmembrane family, member 2

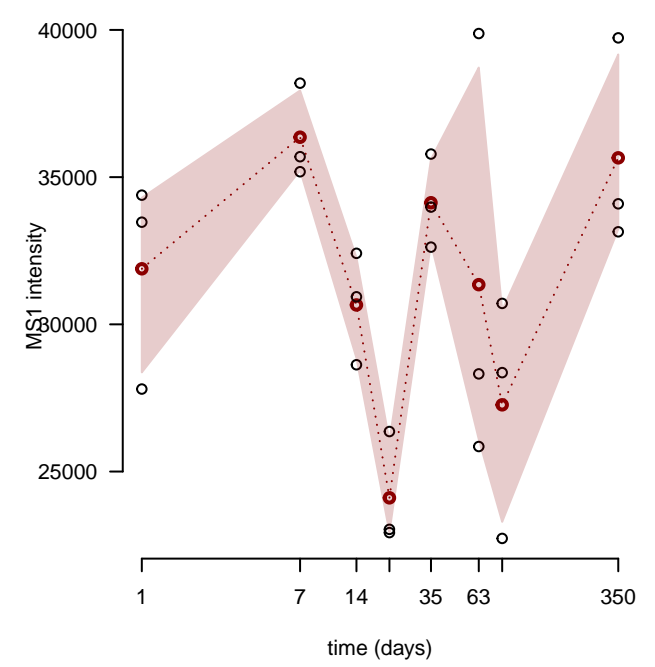

**Q8CIG3**  
**GN=Kdm1b**  
lysine (K)-specific demethylase 1B

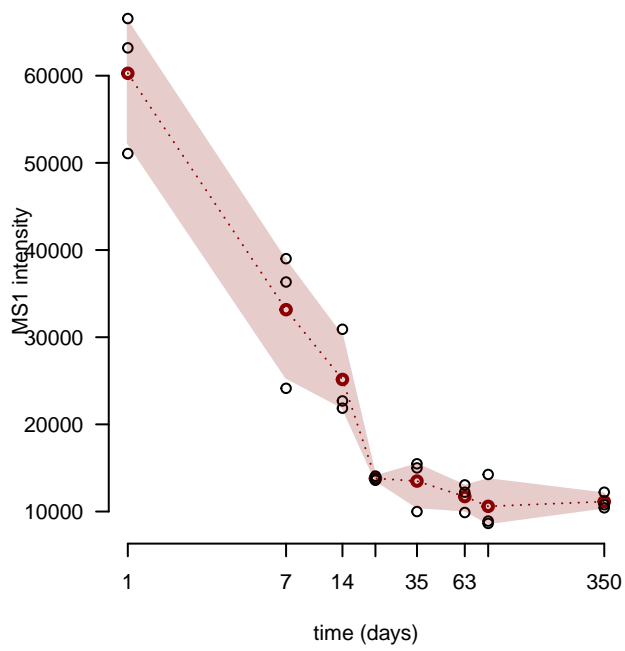

**Q8CIG8**  
**GN=Prmt5**  
protein arginine N-methyltransferase 5

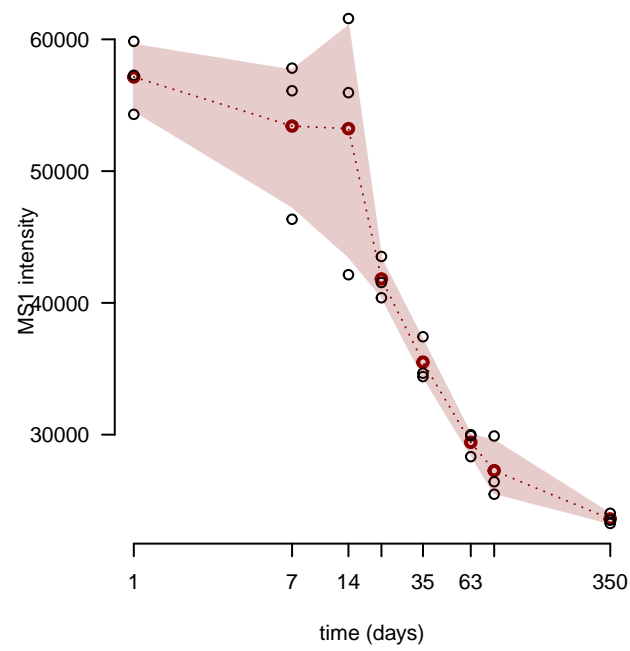

**Q8CIG9**  
**GN=Fbx18**  
F-box and leucine-rich repeat protein 8

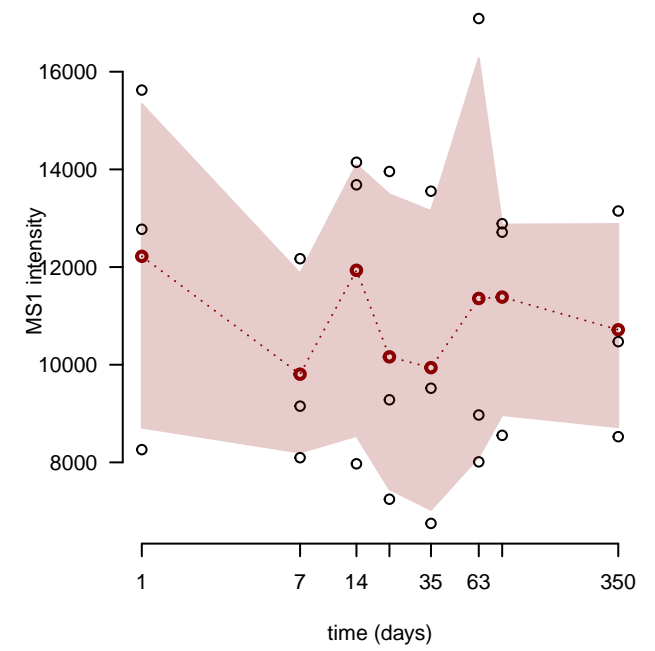

**Q8CIH5**  
**GN=Plcg2**  
phospholipase C, gamma 2

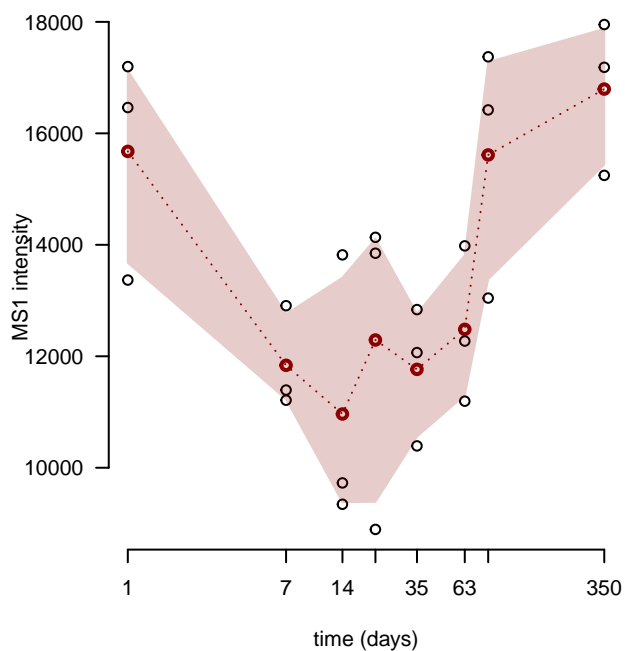

**Q8CII2**  
**GN=Cdc123**  
cell division cycle 123

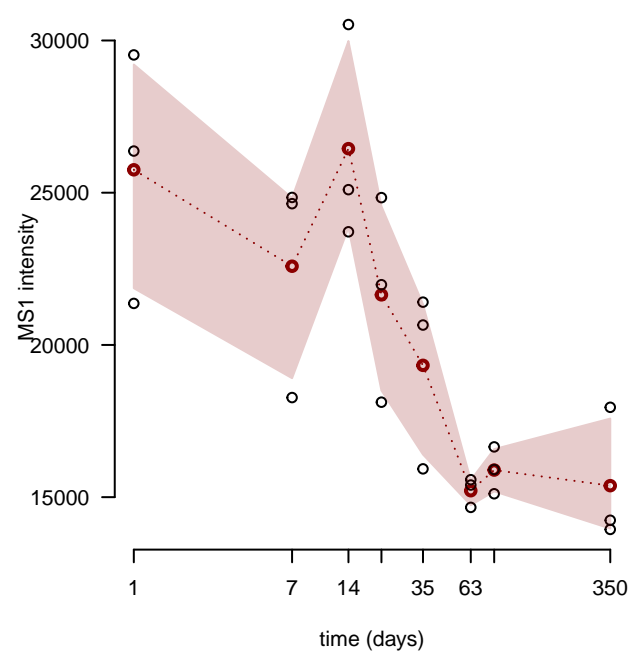

**Q8CIL4**  
**GN=**

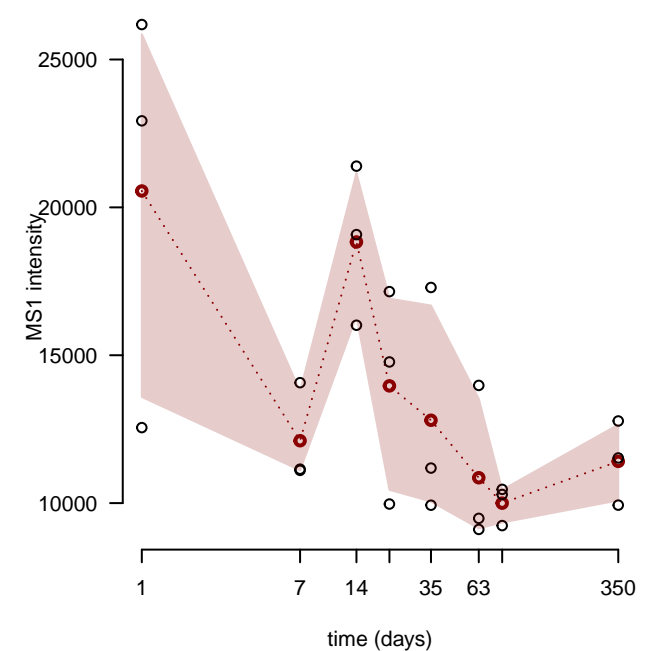

**Q8CIM3**  
**GN=D2hgdh**  
D-2-hydroxyglutarate dehydrogenase

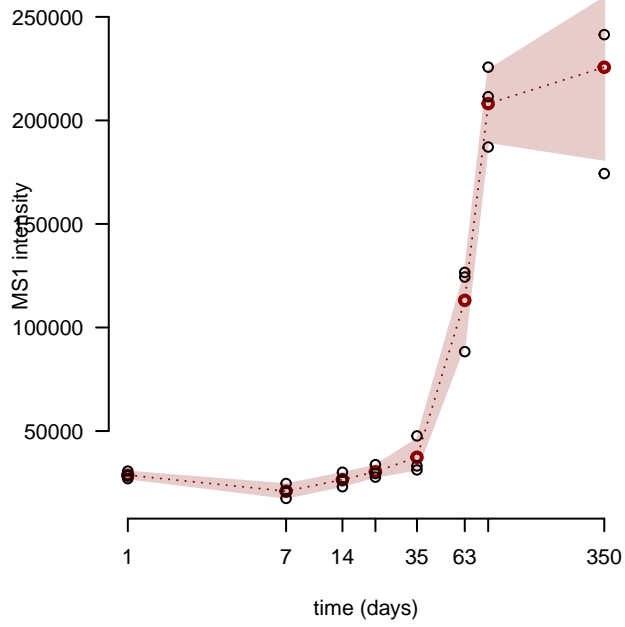

**Q8CIM7**  
**GN=Cyp2d26**  
cytochrome P450, family 2, subfamily d, ...

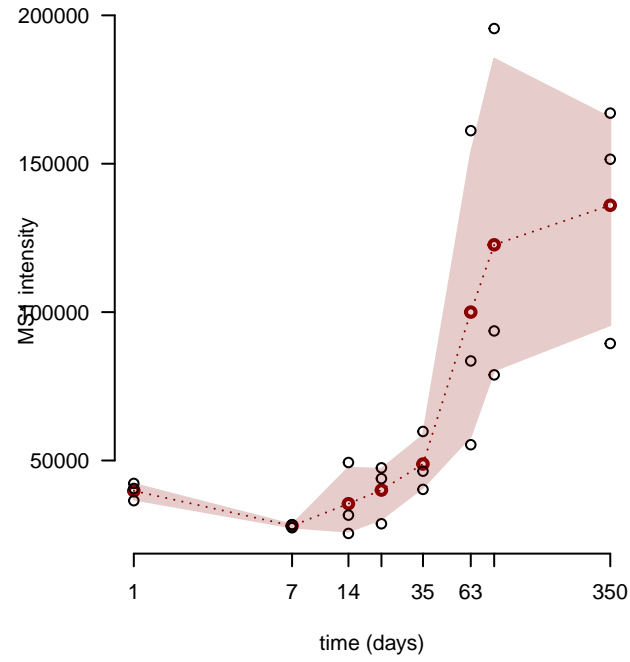

**Q8CIM8**  
**GN=Ints4**  
integrator complex subunit 4

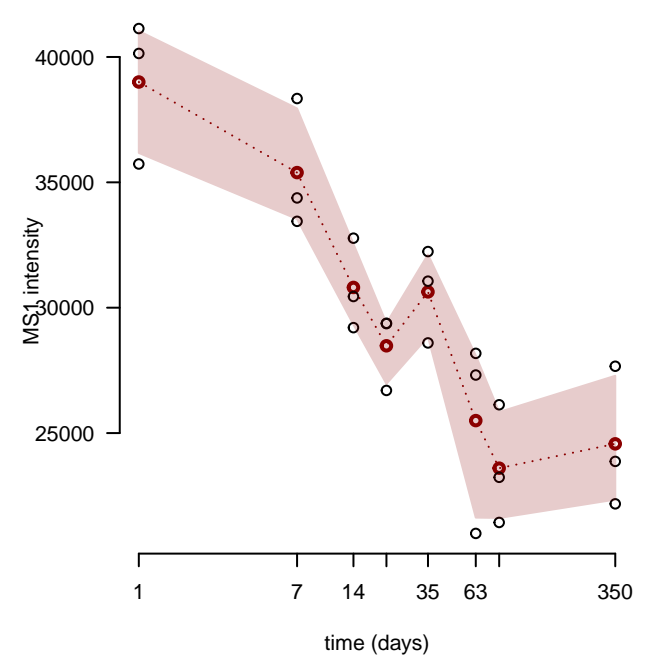

**Q8CIN4**  
**GN=Pak2**  
p21 (RAC1) activated kinase 2

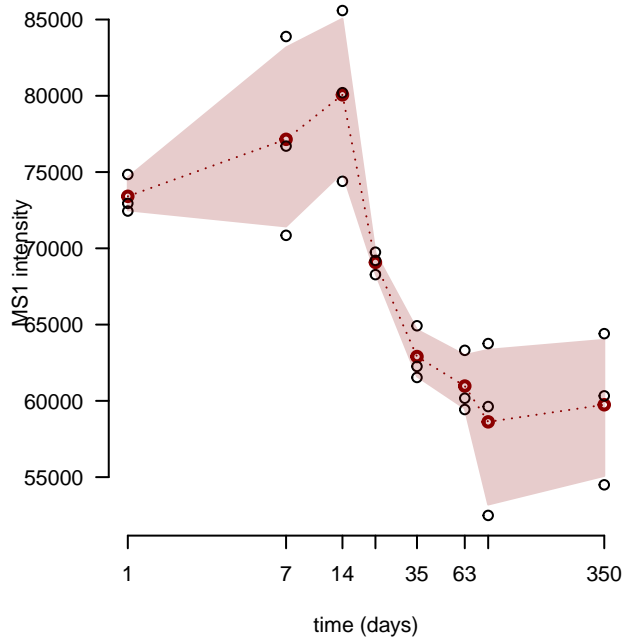

**Q8CIP4**  
**GN=Mark4**  
MAP/microtubule affinity regulating kina ...

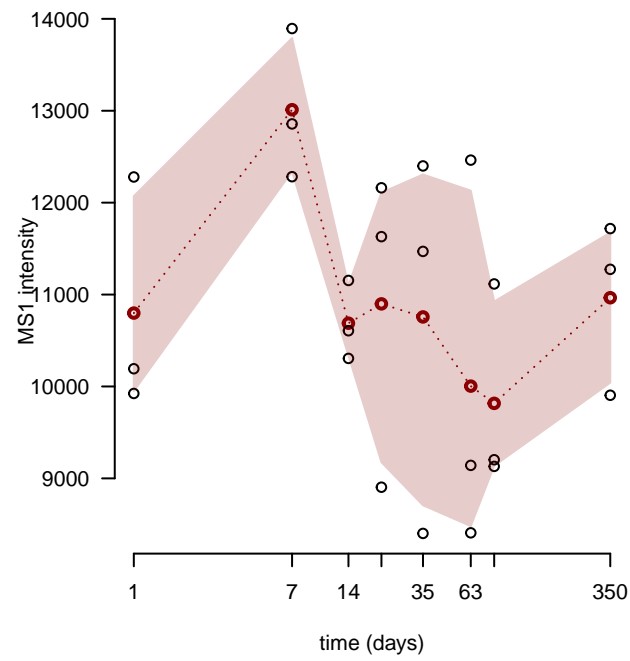

**Q8CIQ7**  
**GN=Dock3**  
dedicator of cyto-kinesis 3

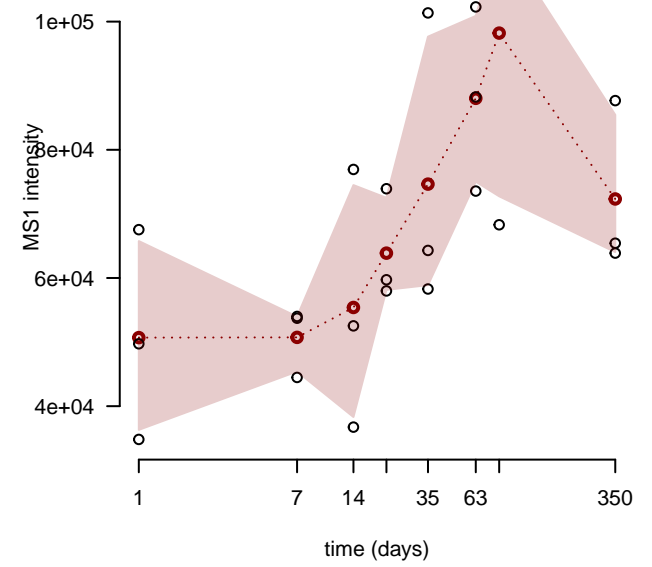

**Q8CIR4**  
**GN=Trpm6**  
transient receptor potential cation chan ...

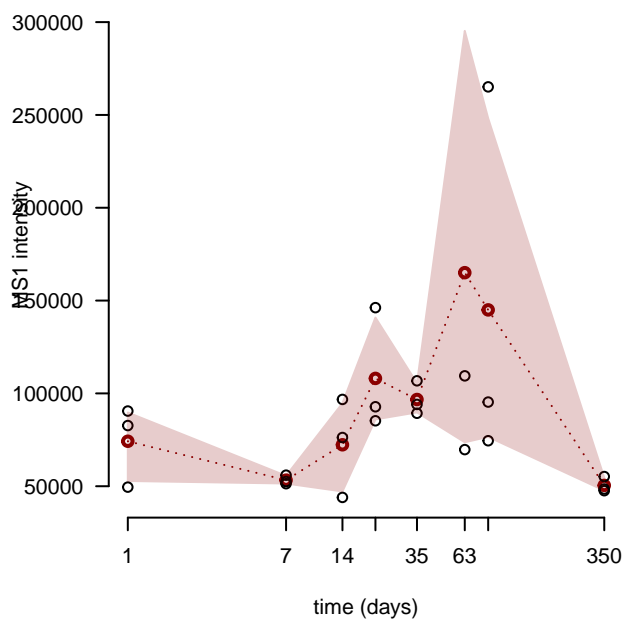

**Q8CIT9**  
**GN=Sbsn**  
suprabasin

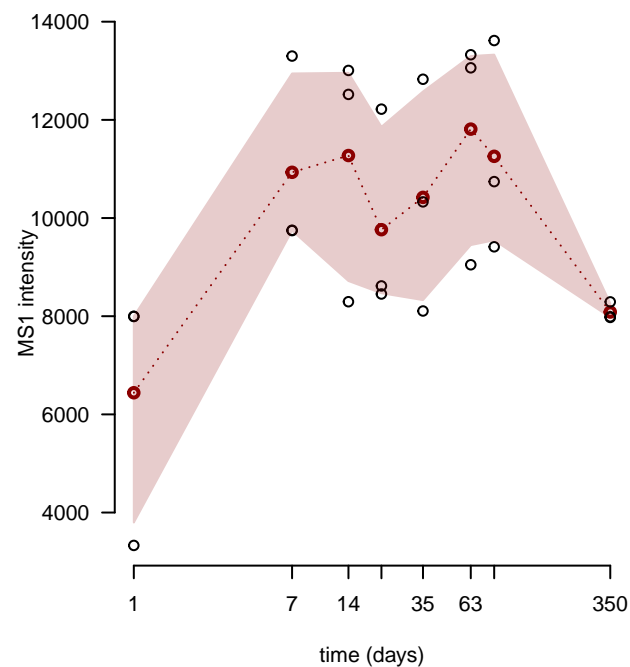

**Q8CIV2**  
**GN=Tmem259**  
transmembrane protein 259

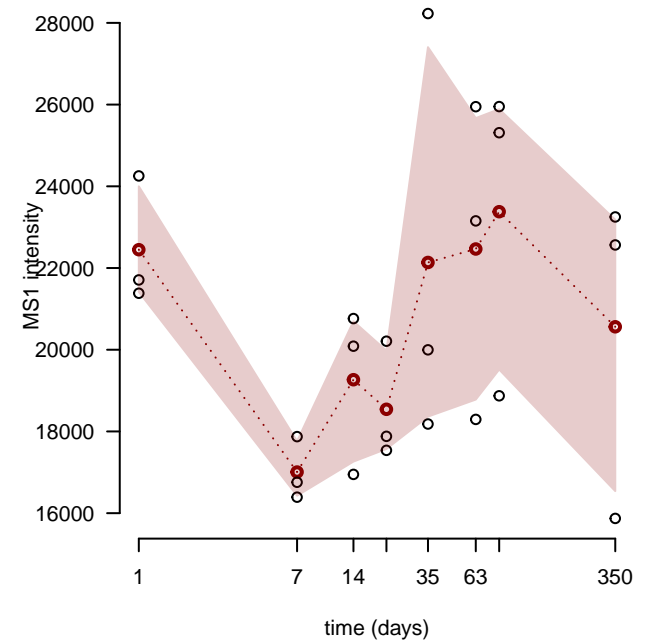



**Q8CIV8**  
**GN=Tbce**  
tubulin-specific chaperone E

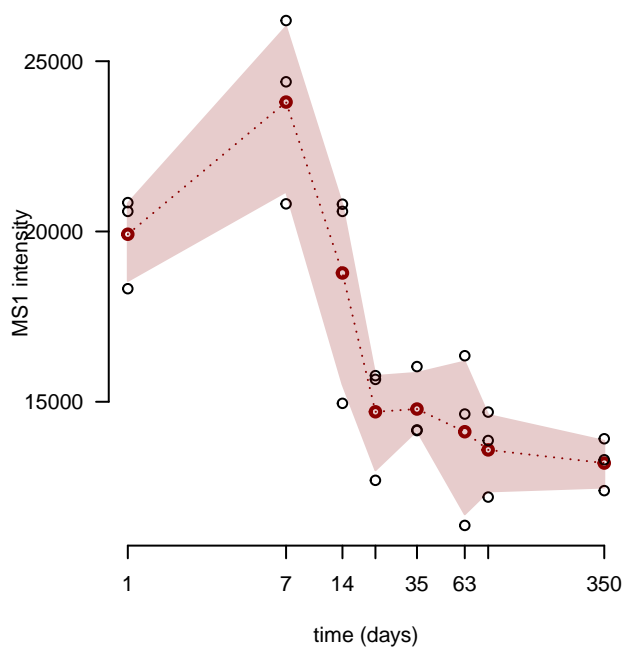

**Q8CIZ8**  
**GN=Vwf**  
Von Willebrand factor

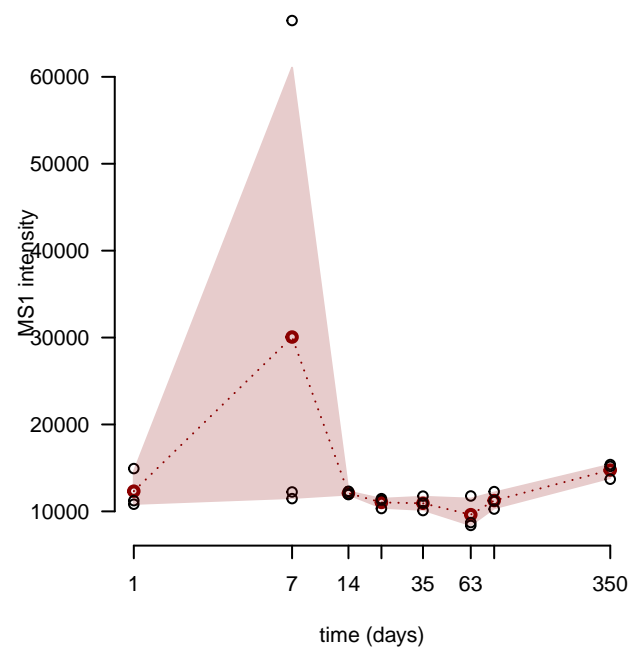

**Q8CJ19**  
**GN=Mical3**  
microtubule associated monooxygenase, ca ...

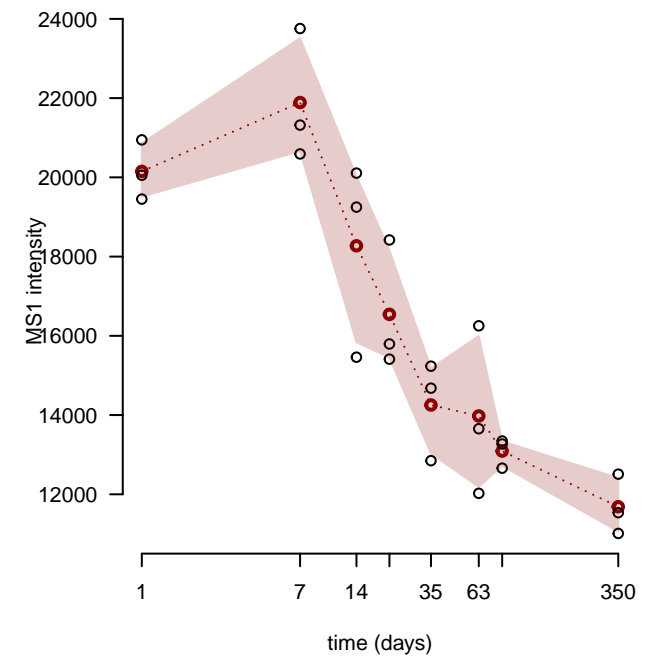

**Q8CJ26**  
**GN=Nradd**  
neurotrophin receptor associated death d ...

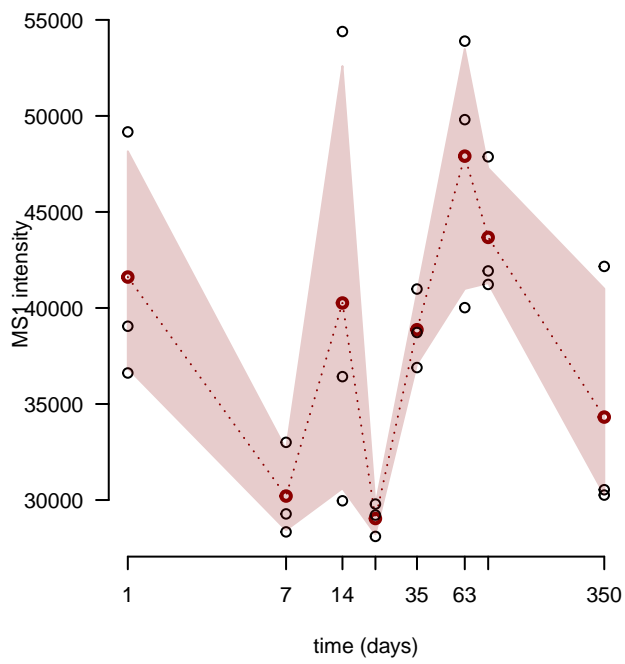

**Q8CJ27**  
**GN=Aspm**  
abnormal spindle microtubule assembly

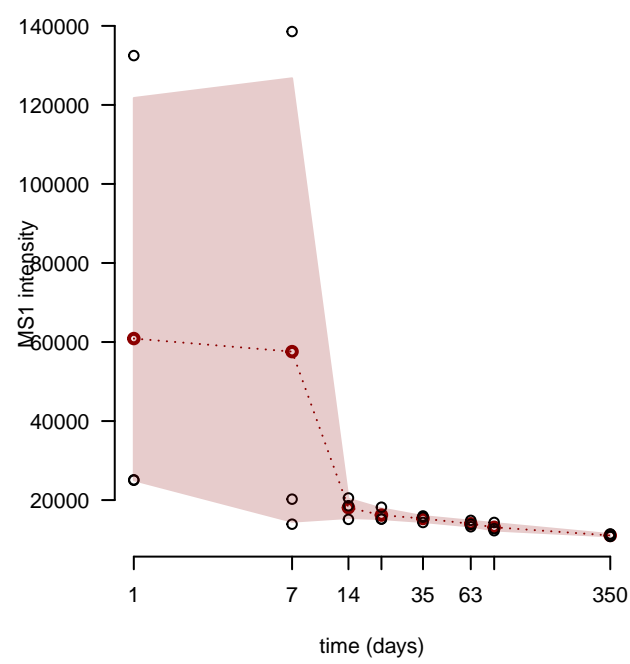

**Q8CJ40**  
**GN=Crocc**  
ciliary rootlet coiled-coil, rootletin

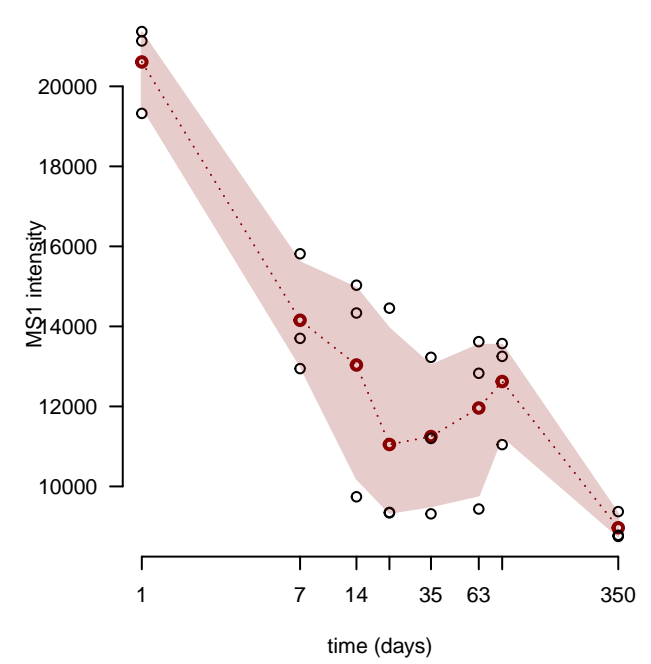

**Q8CJ53**  
**GN=Trip10**  
thyroid hormone receptor interactor 10

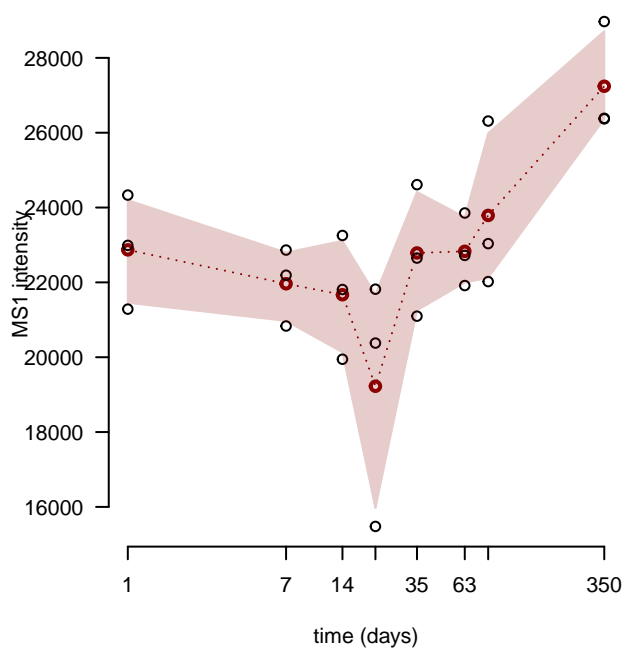

**Q8CJ61**  
**GN=Cmtm4**  
CKLF-like MARVEL transmembrane domain co ...

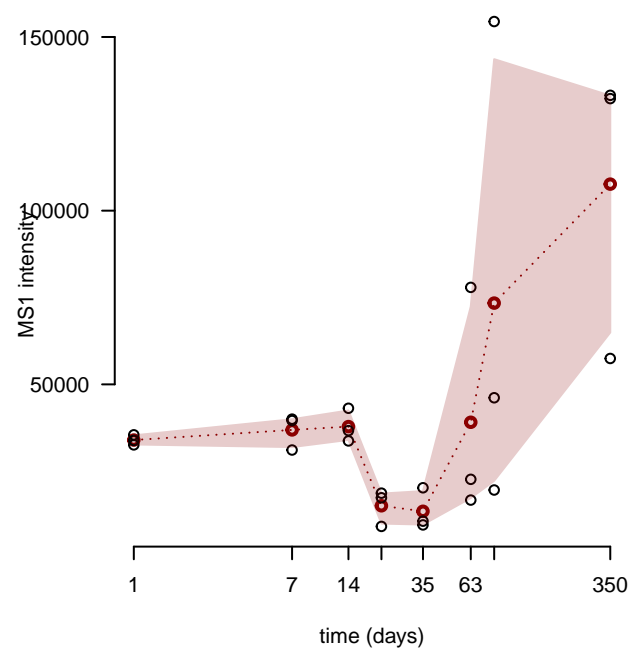

**Q8CJ67**  
**GN=Stau2**  
staufen double-stranded RNA binding prot ...

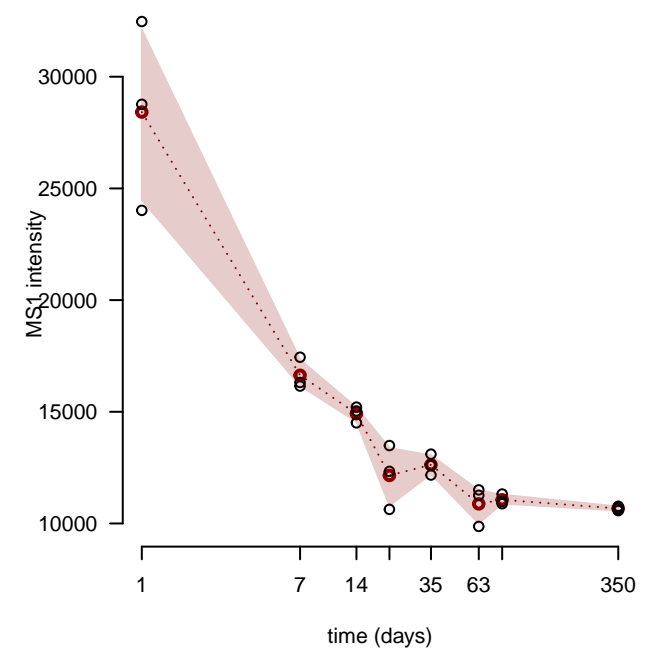

**Q8CJ96**  
**GN=Rassf8**

Ras association (RalGDS/AF-6) domain fam ...

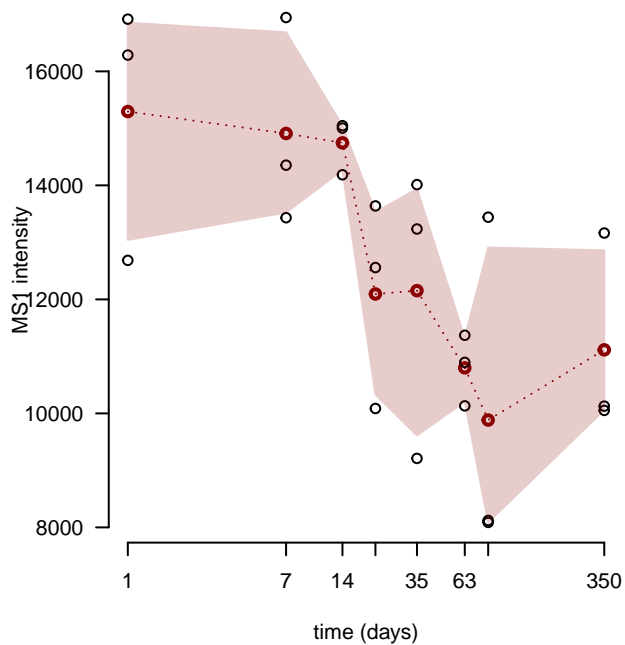

**Q8CJF7**  
**GN=Ahctf1**

AT hook containing transcription factor ...

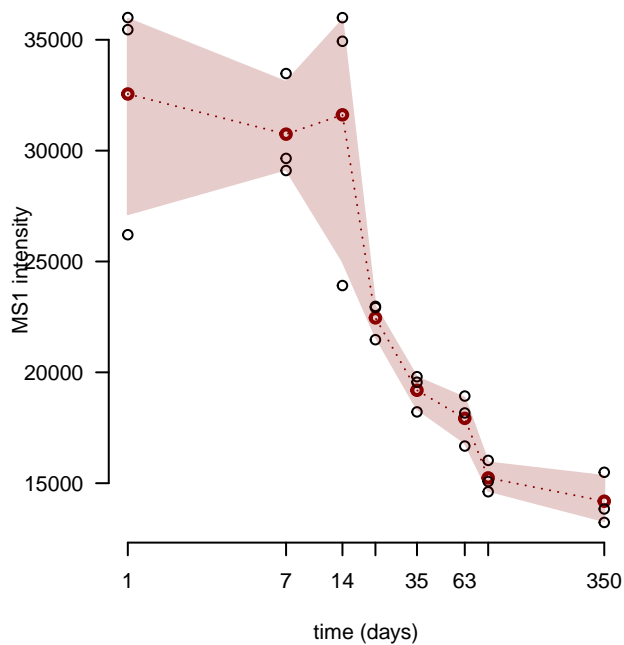

**Q8CJF9**  
**GN=Ago3**

argonaute RISC catalytic subunit 3

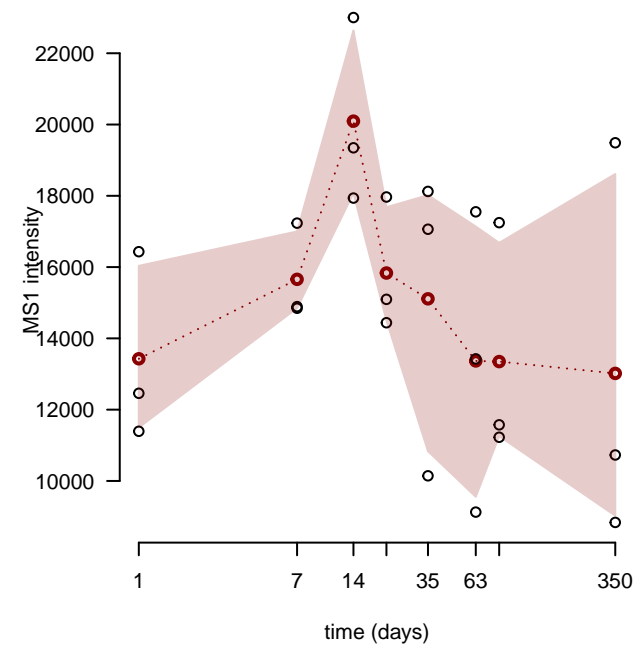

**Q8CJG0**  
**GN=Ago2**

argonaute RISC catalytic subunit 2

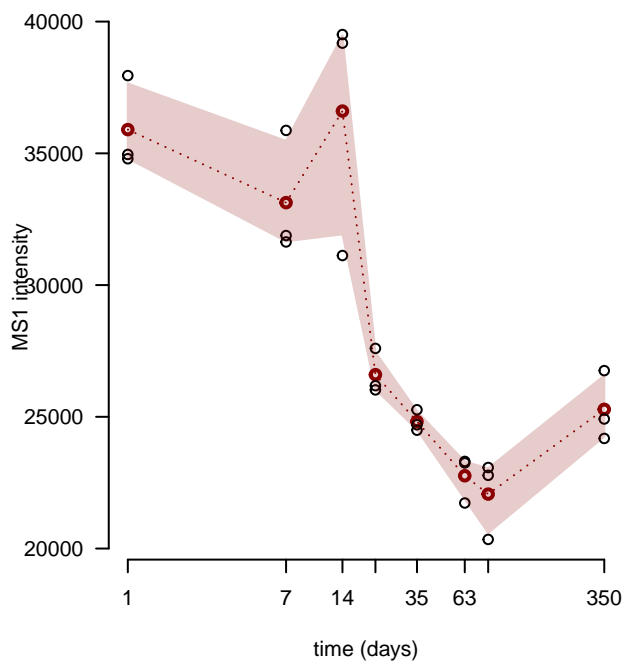

**Q8CJG1**  
**GN=Ago1**

argonaute RISC catalytic subunit 1

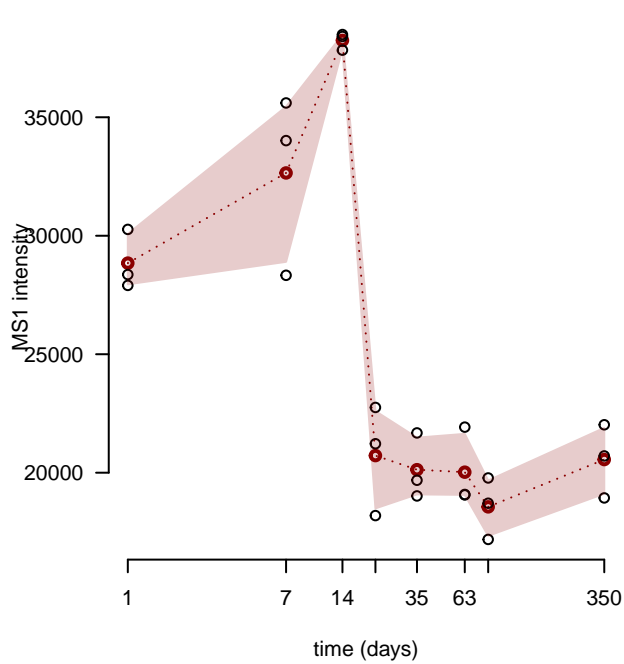

**Q8CJH3**  
**GN=PlxnB1**

plexin B1

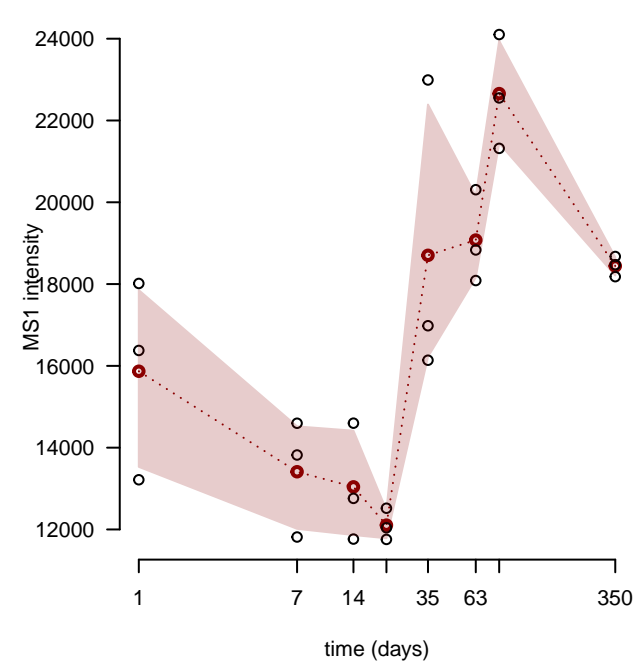

**Q8JZK9**  
**GN=Hmgcs1**

3-hydroxy-3-methylglutaryl-Coenzyme A sy ...

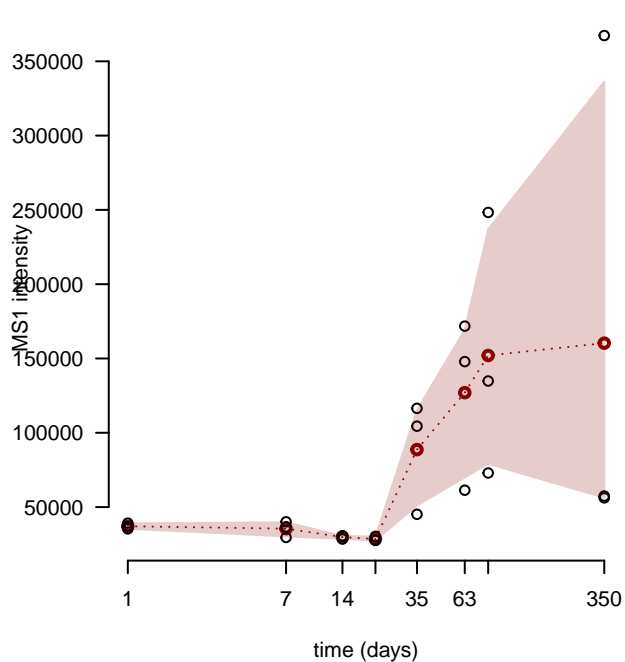

**Q8JZL0**  
**GN=Znf467**

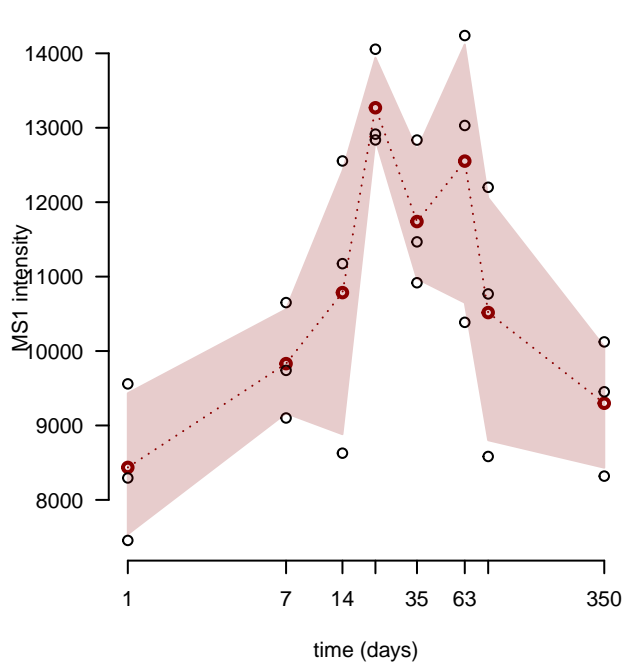

**Q8JZL1**  
**GN=Il17rd**

interleukin 17 receptor D

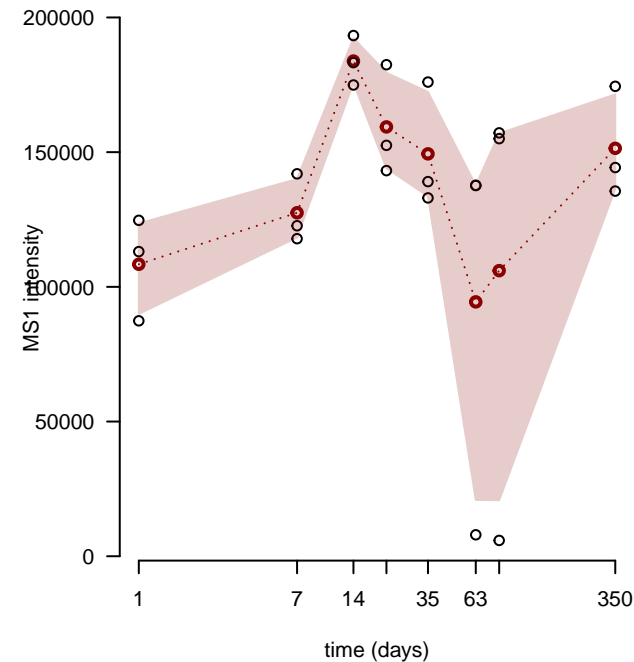

**Q8JZL3**  
GN=Thtpa  
thiamine triphosphatase

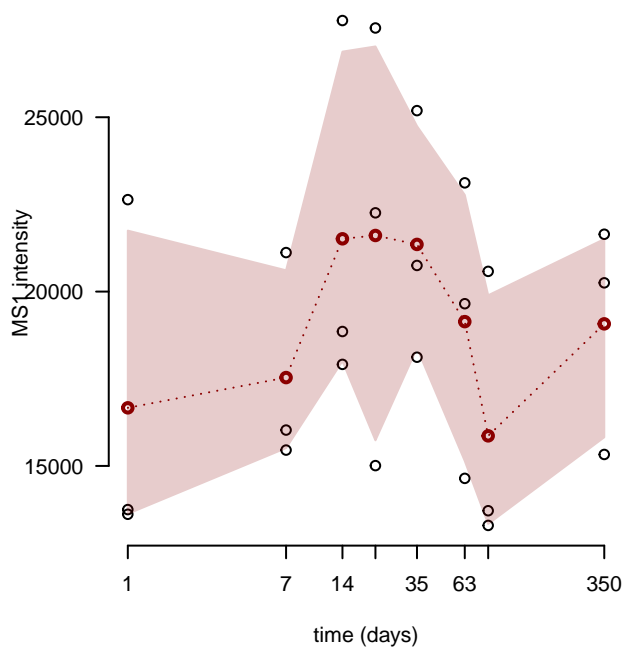

**Q8JZM0**  
GN=Tfb1m  
transcription factor B1, mitochondrial

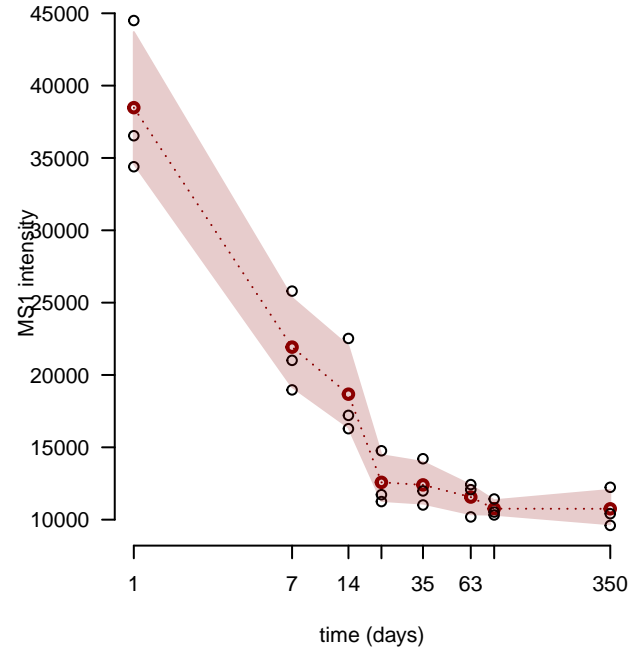

**Q8JZM7**  
GN=Cdc73  
cell division cycle 73, Paf1/RNA polymer ...

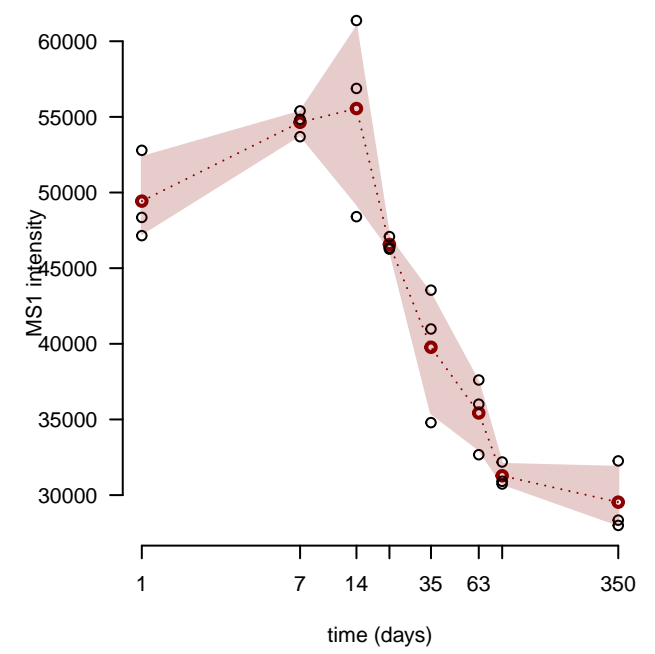

**Q8JZN5**  
GN=Acad9  
acyl-Coenzyme A dehydrogenase family, me ...

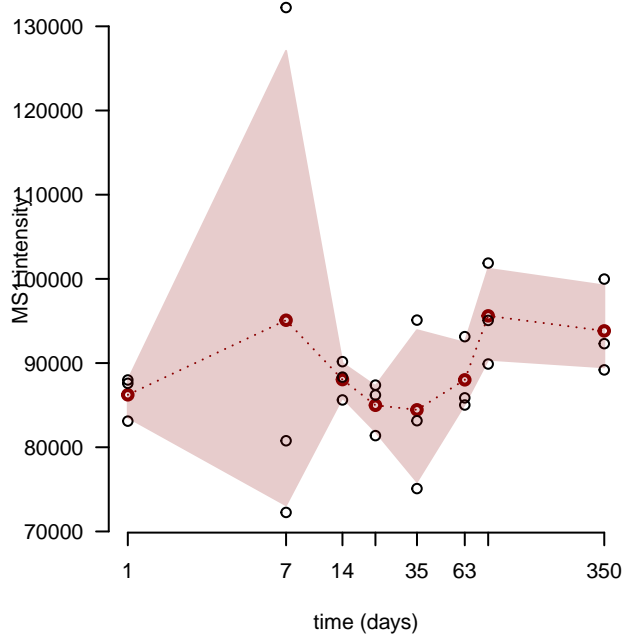

**Q8JZN7**  
GN=Rhot2  
ras homolog family member T2

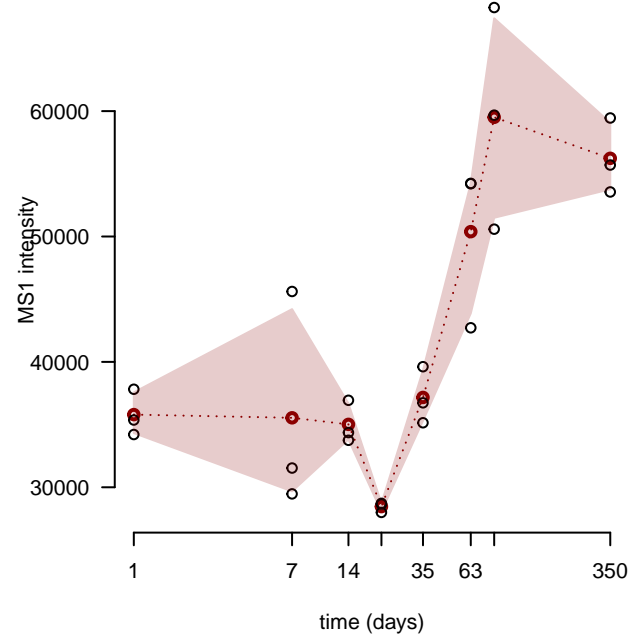

**Q8JZP9**  
GN=Gas2l1  
growth arrest-specific 2 like 1

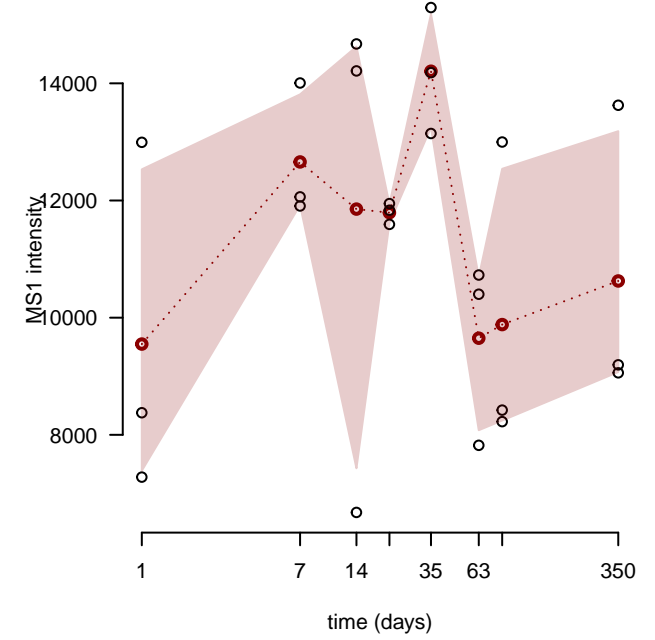

**Q8JZQ2**  
GN=Afg3l2  
AFG3-like AAA ATPase 2

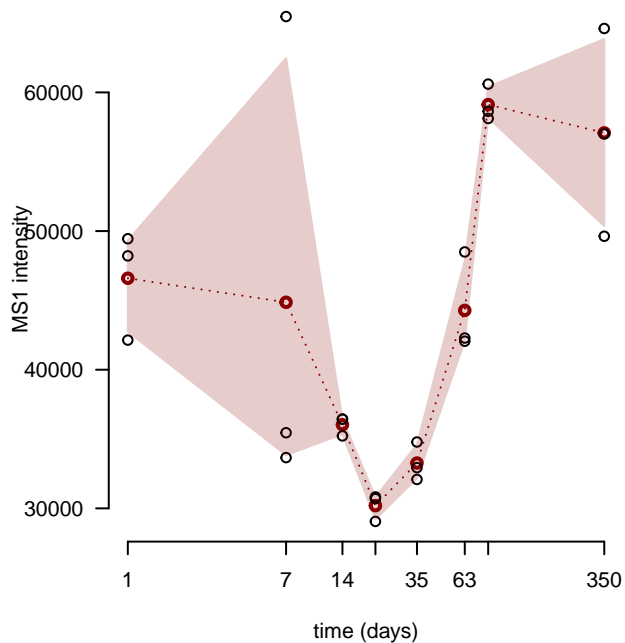

**Q8JZQ5**  
GN=Aoc1  
amine oxidase, copper-containing 1

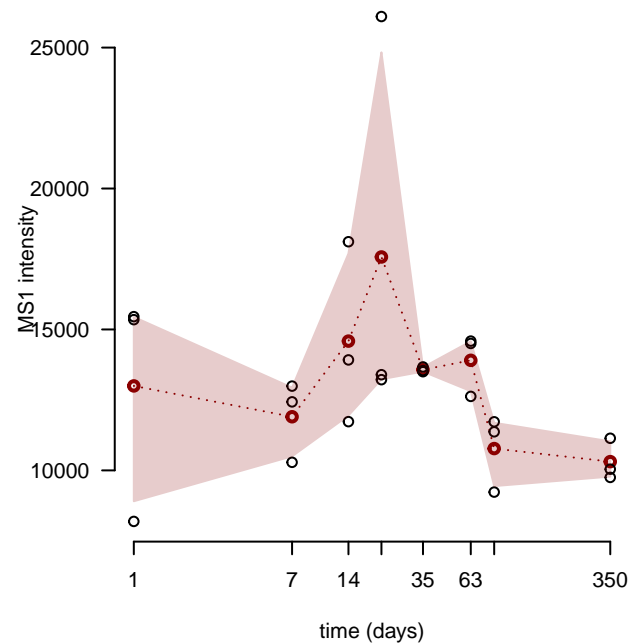

**Q8JZQ9**  
GN=Eif3b  
eukaryotic translation initiation factor ...

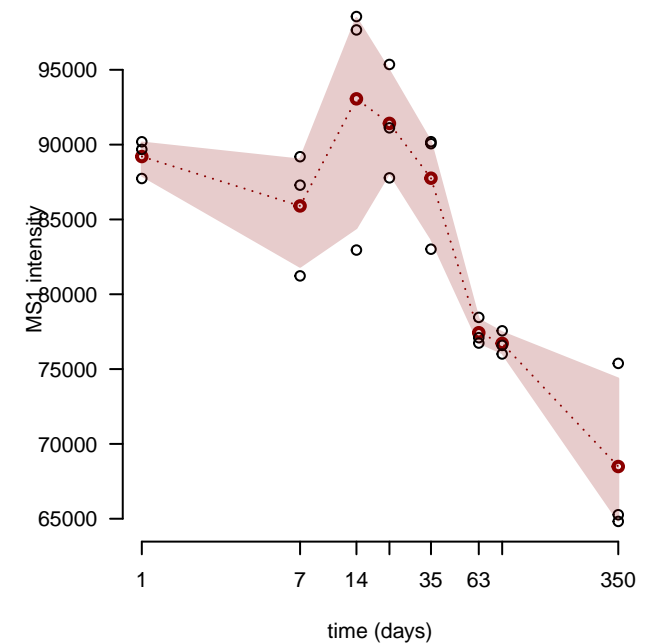

**Q8JZR0**  
**GN=Acs15**  
acyl-CoA synthetase long-chain family me ...

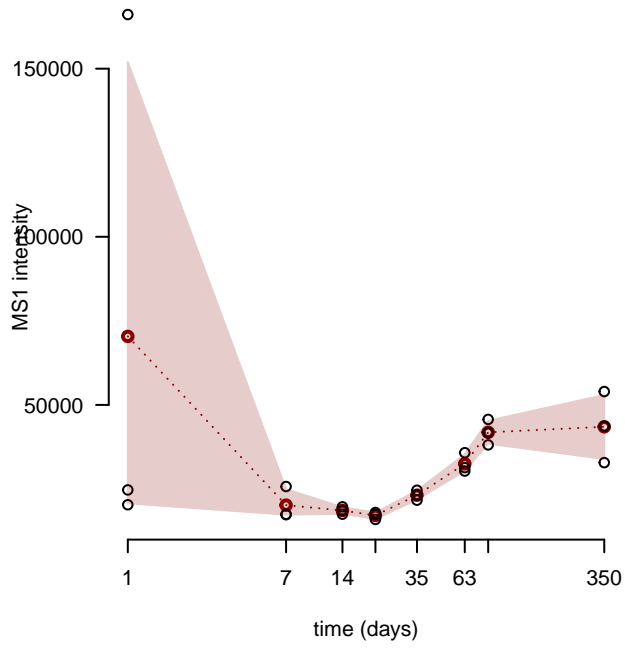

**Q8JZR6**  
**GN=Slc4a8**  
solute carrier family 4 (anion exchanger ...

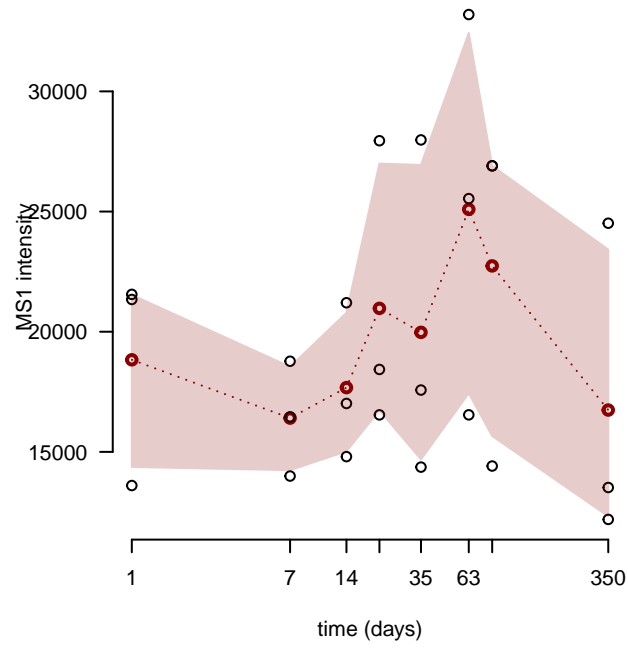

**Q8JZS6**  
**GN=N4bp212**  
NEDD4 binding protein 2-like 2

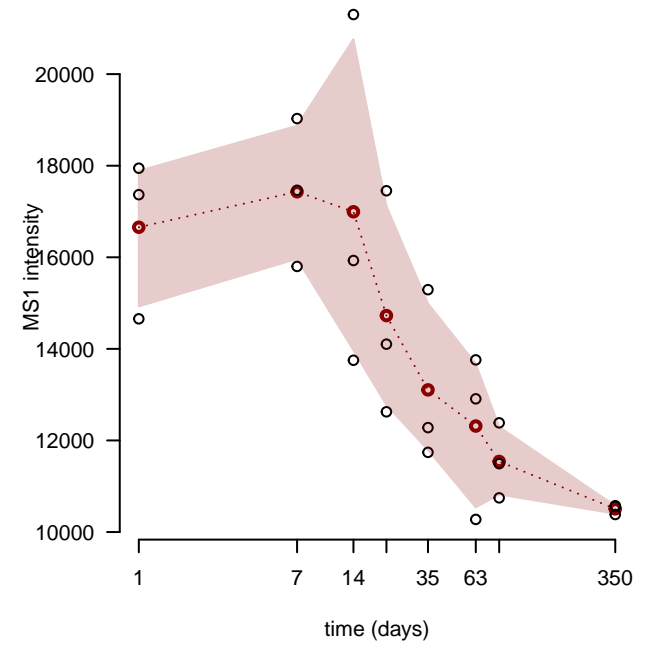

**Q8JZS9**  
**GN=Mrpl48**  
mitochondrial ribosomal protein L48

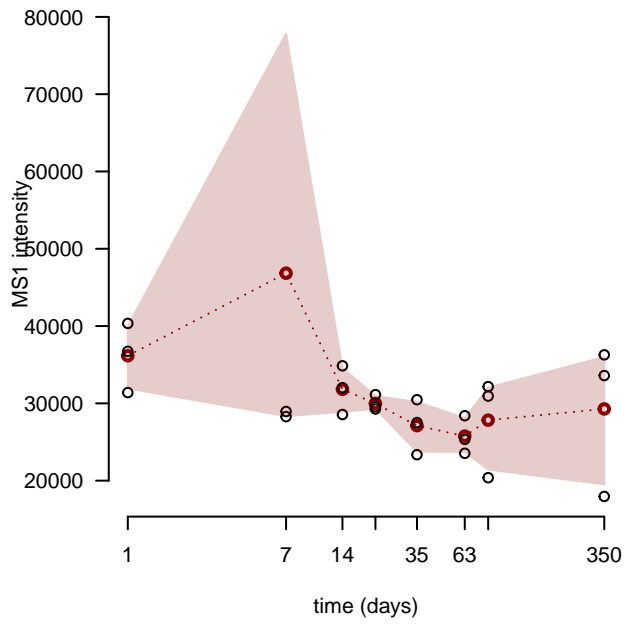

**Q8JZU2**  
**GN=Slc25a1**  
solute carrier family 25 (mitochondrial ...

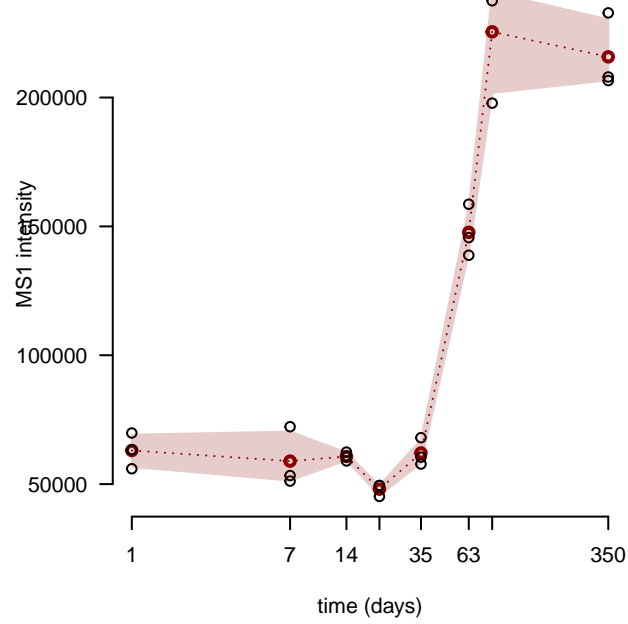

**Q8JZV7**  
**GN=Amdhd2**  
amidohydrolase domain containing 2

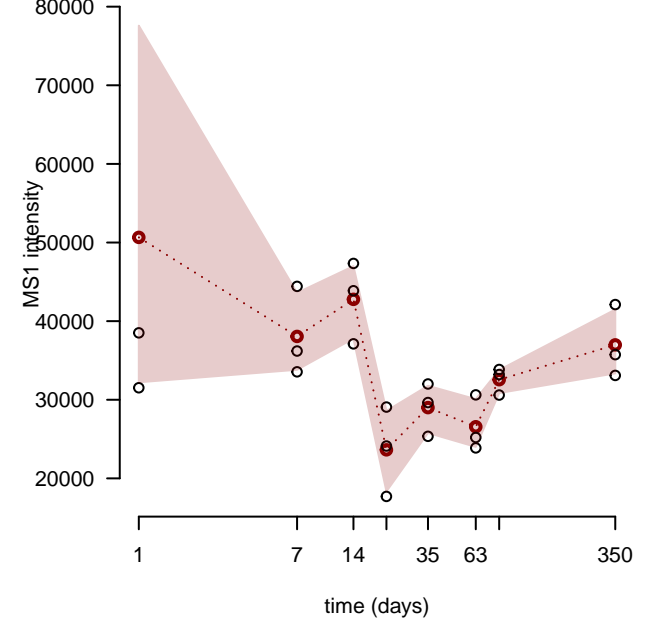

**Q8JZV9**  
**GN=Bdh2**  
3-hydroxybutyrate dehydrogenase, type 2

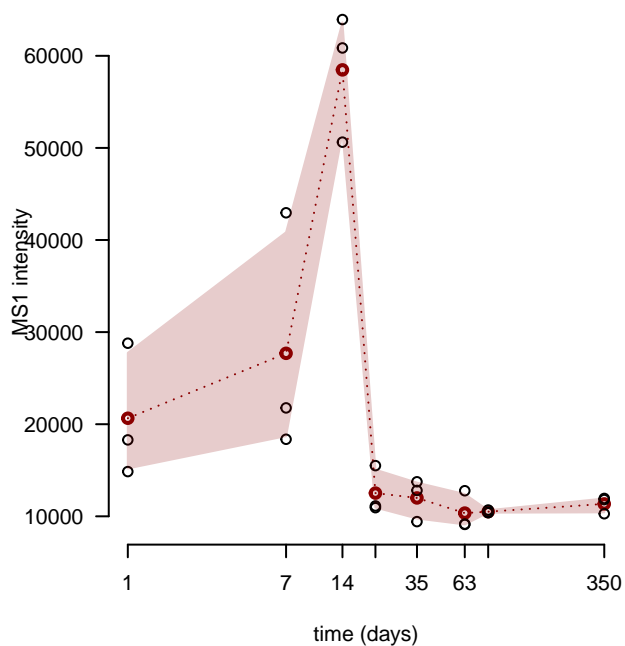

**Q8JZX3**  
**GN=Poc1a**  
POC1 centriolar protein A

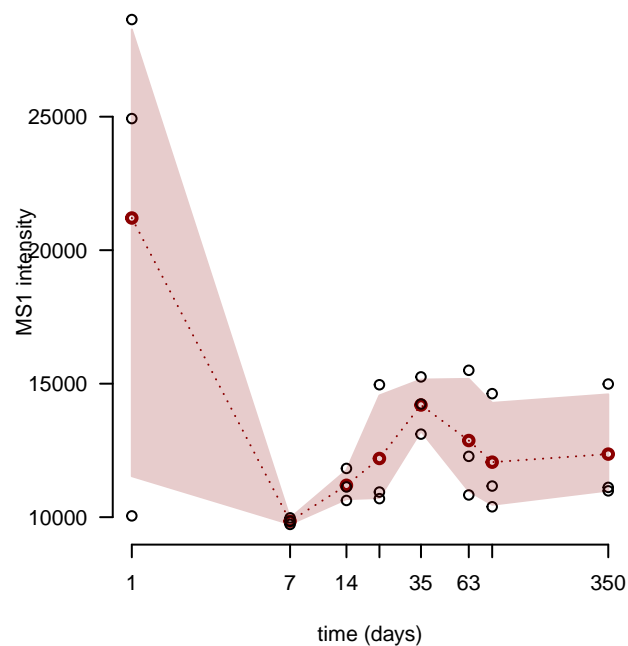

**Q8JZX4**  
**GN=Rbm17**  
RNA binding motif protein 17

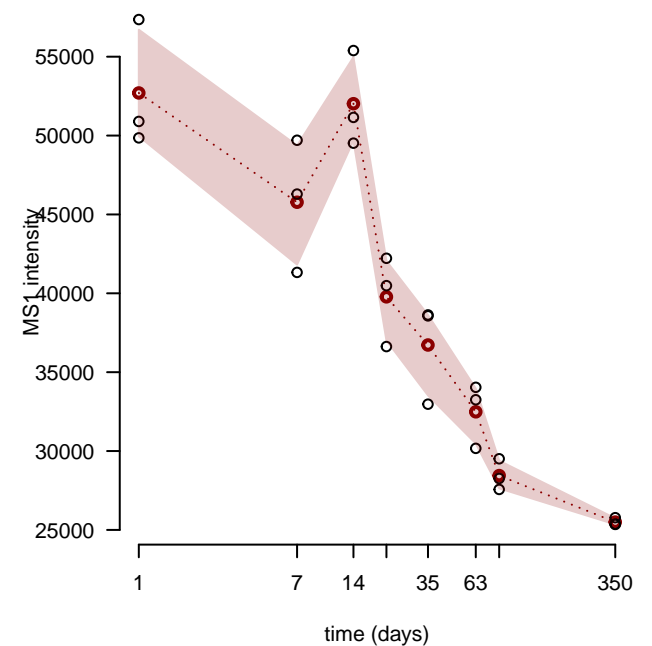

**Q8JZX9**  
**GN=Cdc42ep2**  
CDC42 effector protein (Rho GTPase bindi ...

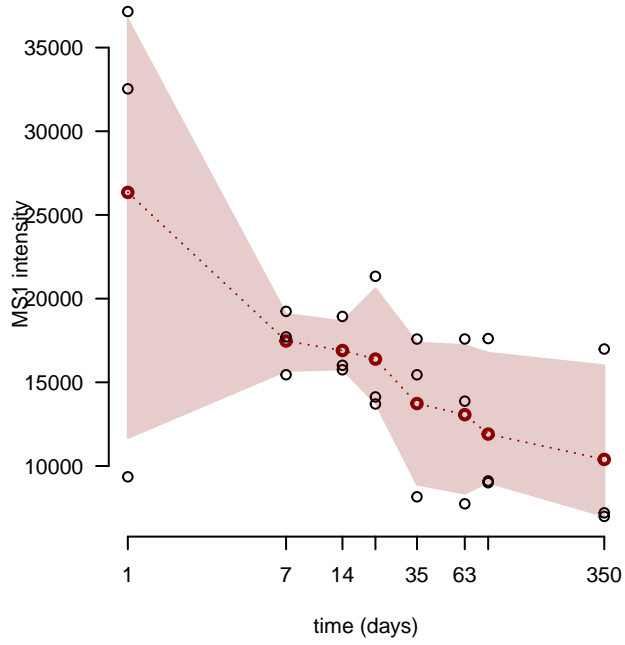

**Q8JZY2**  
**GN=Commd10**  
COMM domain containing 10

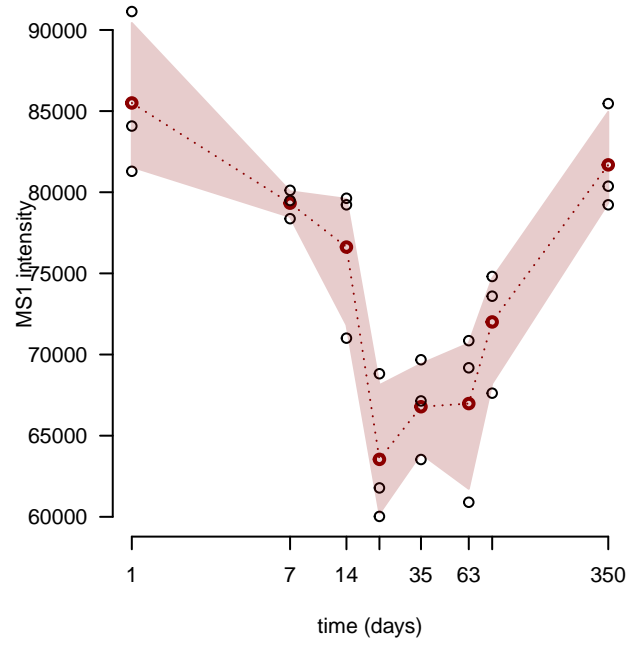

**Q8JZY4**  
**GN=Kiaa0391**

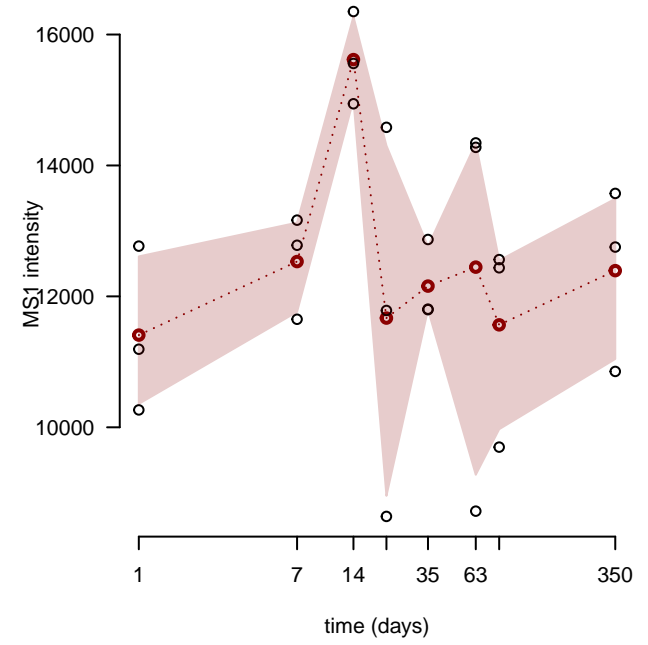

**Q8JZZ6**  
**GN=Ammecr1l**  
AMME chromosomal region gene 1-like

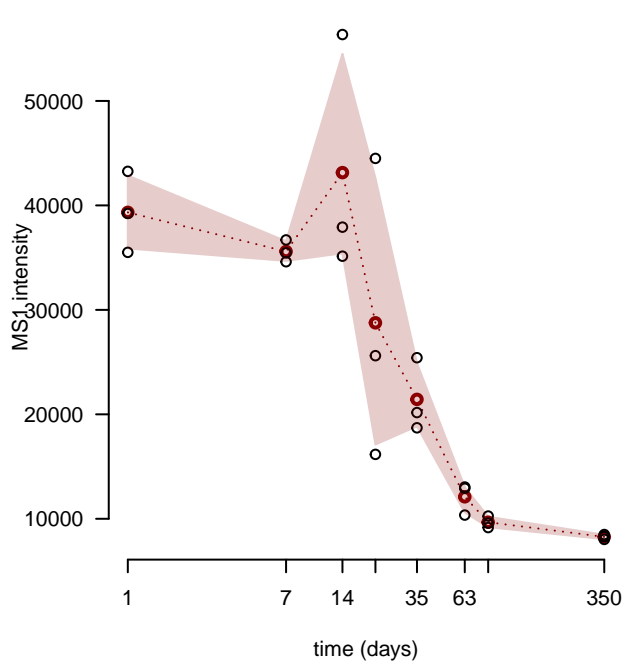

**Q8JZZ7**  
**GN=Adgrl2**  
adhesion G protein-coupled receptor L2

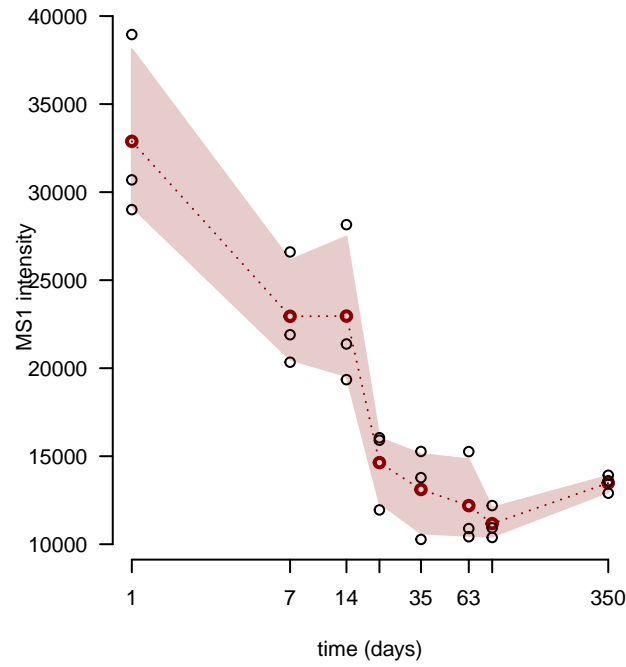

**Q8K003**  
**GN=Tma7**  
translational machinery associated 7

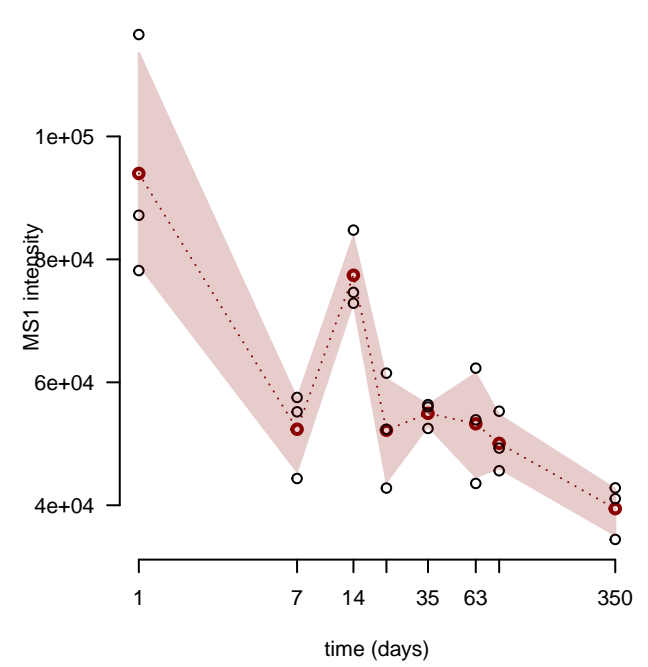

**Q8K004**  
**GN=Spata2**  
spermatogenesis associated 2

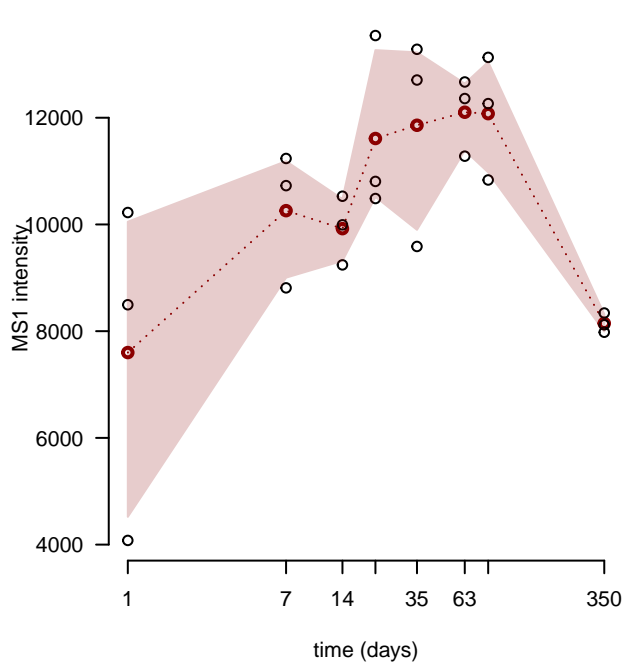

**Q8K007**  
**GN=Sulf1**  
sulfatase 1

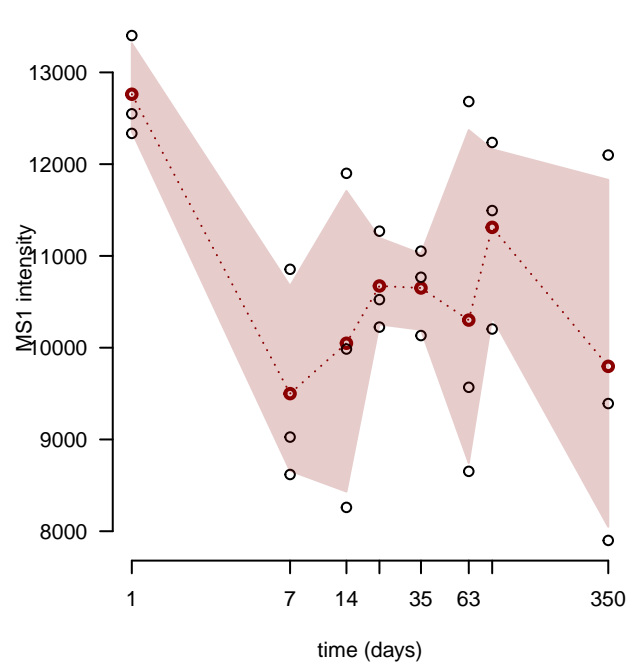

**Q8K009**  
**GN=Aldh1l2**  
aldehyde dehydrogenase 1 family, member ...

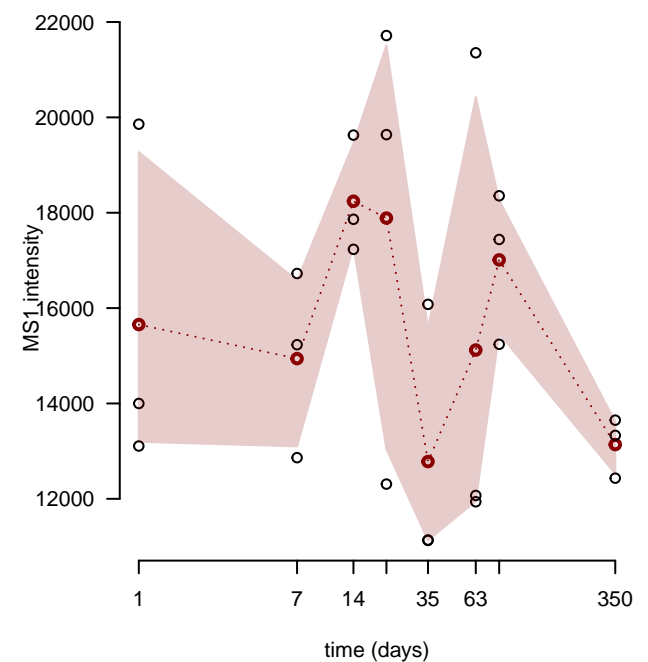

**Q8K010**  
GN=Oplah  
5-oxoprolinase (ATP-hydrolysing)

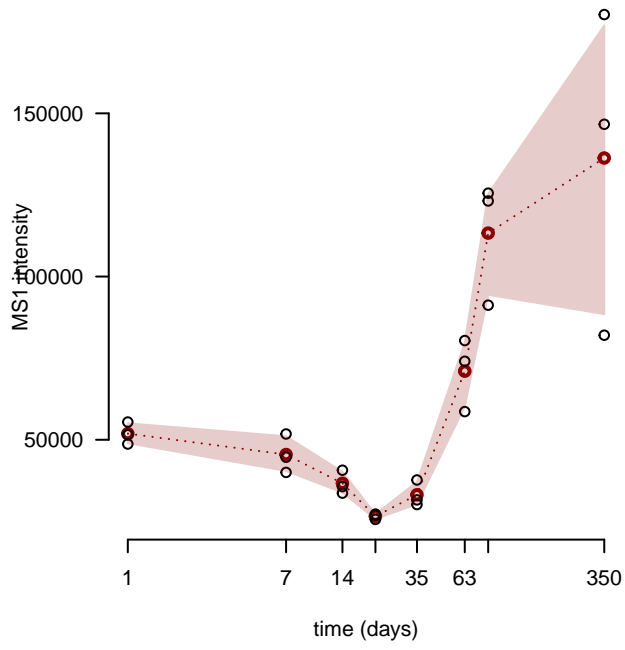

**Q8K012**  
GN=Fnbp1l  
formin binding protein 1-like

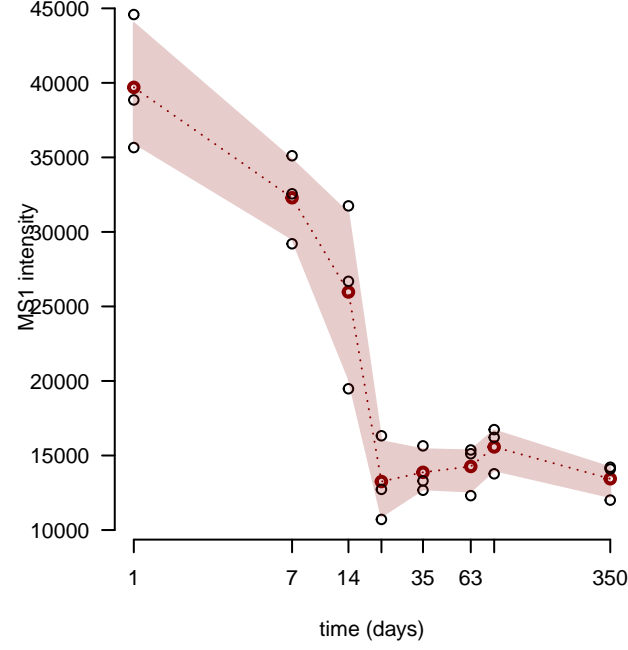

**Q8K013**  
GN=Gtpbp10  
GTP-binding protein 10 (putative)

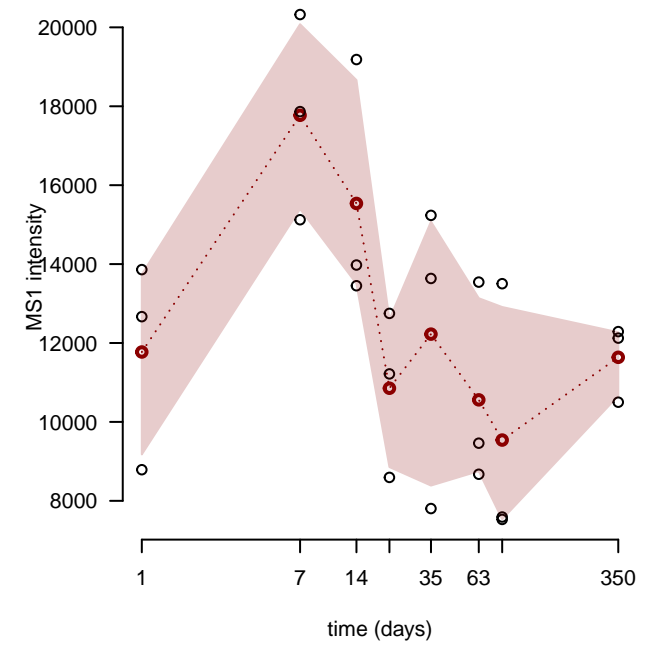

**Q8K015**  
GN=Cenpo  
centromere protein O

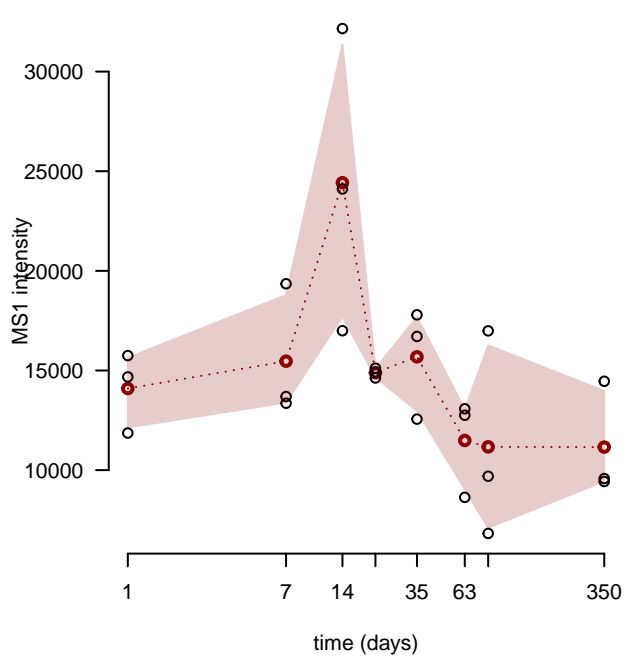

**Q8K019**  
GN=Bclaf1  
BCL2-associated transcription factor 1

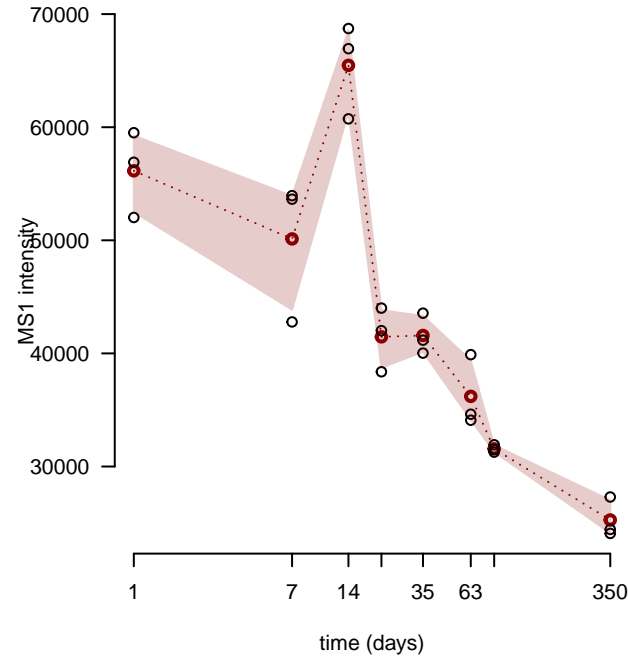

**Q8K021**  
GN=Scamp1  
secretory carrier membrane protein 1

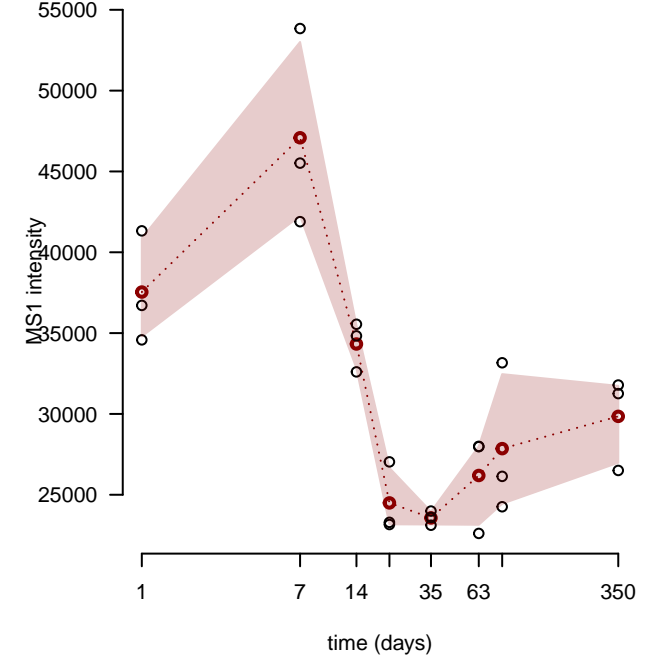

**Q8K023**  
GN=Akr1c18  
aldo-keto reductase family 1, member C18

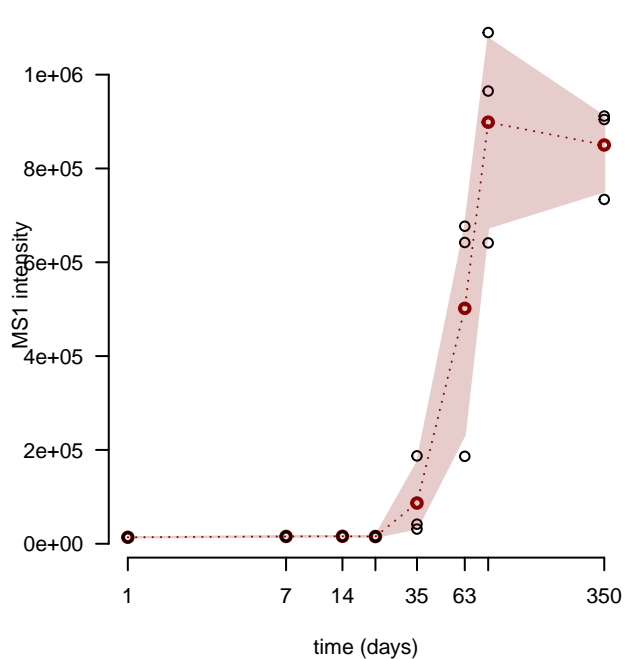

**Q8K031**  
GN=Stard8  
START domain containing 8

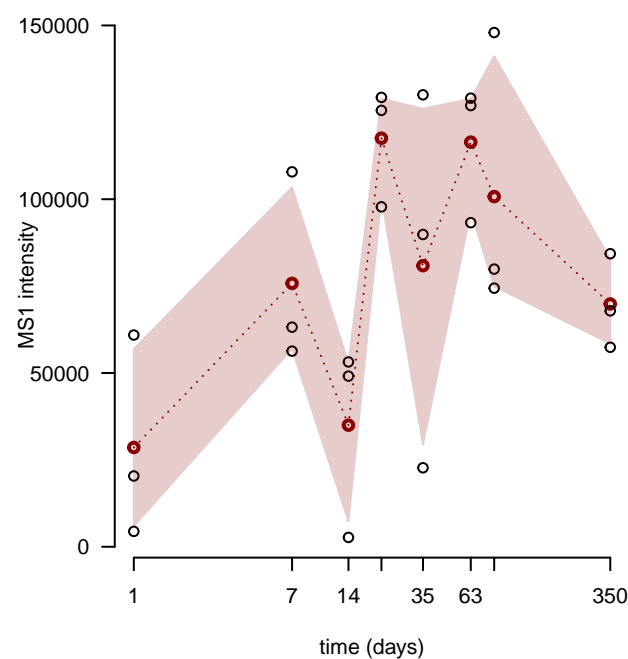

**Q8K039**  
GN=

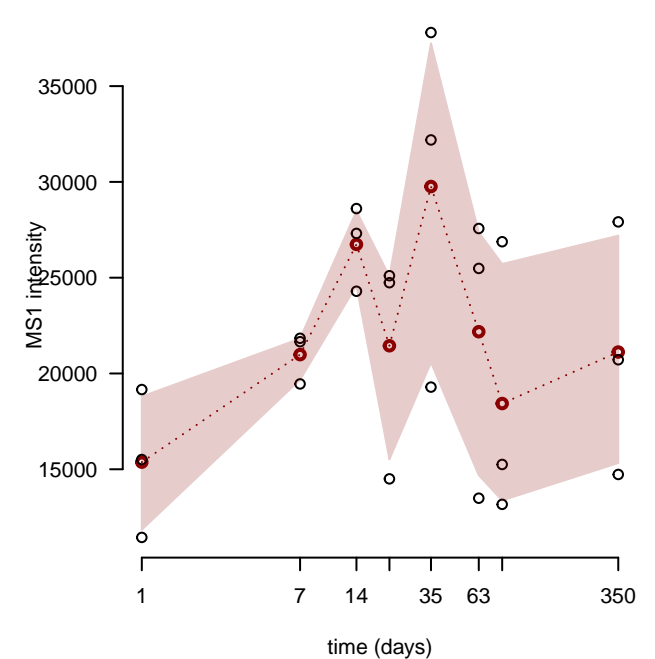

**Q8K057**  
**GN=Ift80**  
intraflagellar transport 80

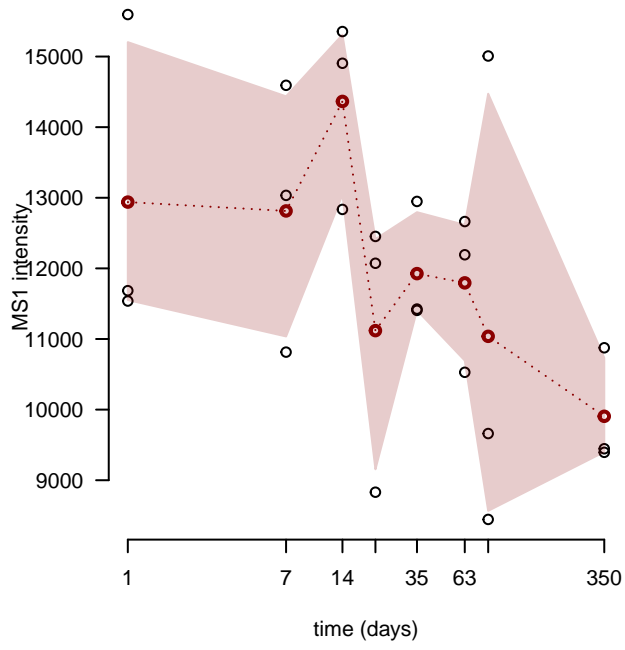

**Q8K072**  
**GN=Reep4**  
receptor accessory protein 4

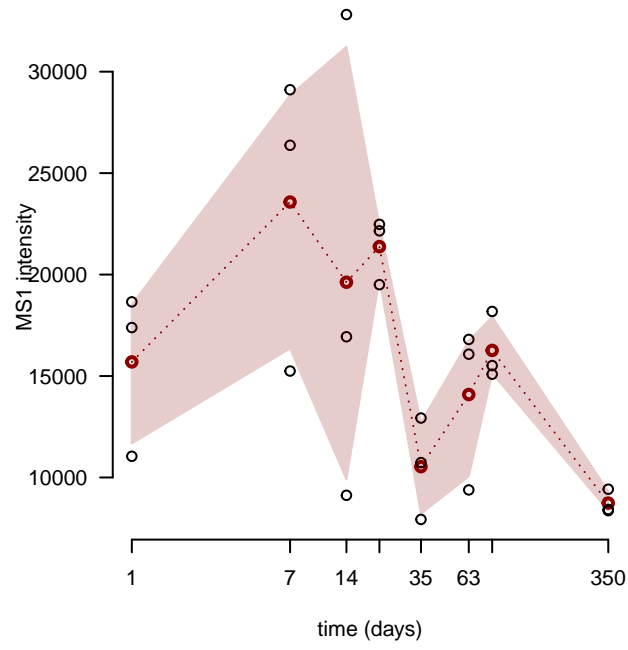

**Q8K0B2**  
**GN=Lmbrd1**  
LMBR1 domain containing 1

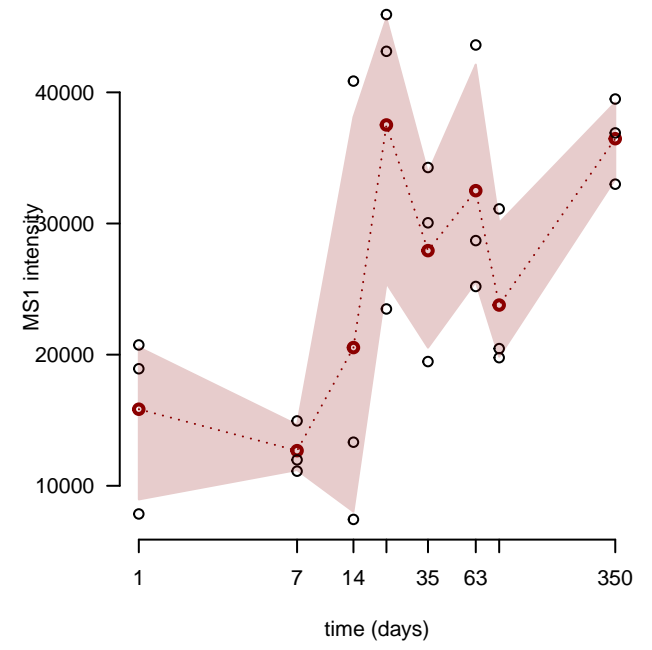

**Q8K0C1**  
**GN=Ipo13**  
importin 13

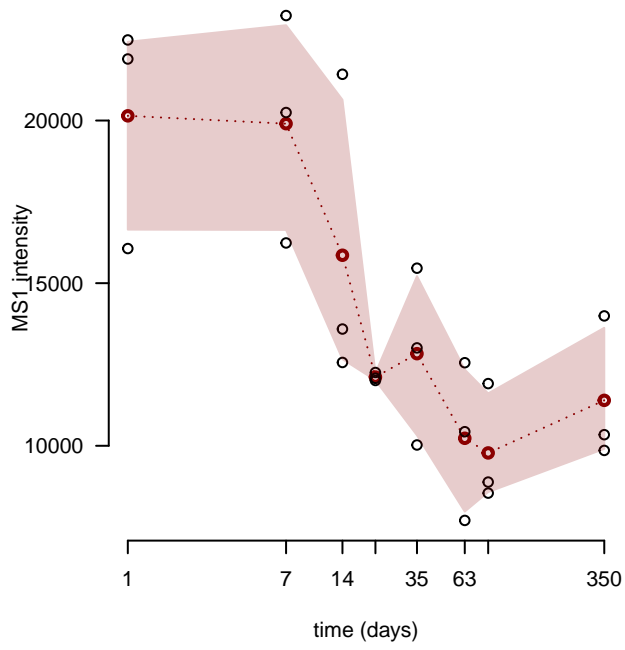

**Q8K0C4**  
**GN=Cyp51a1**

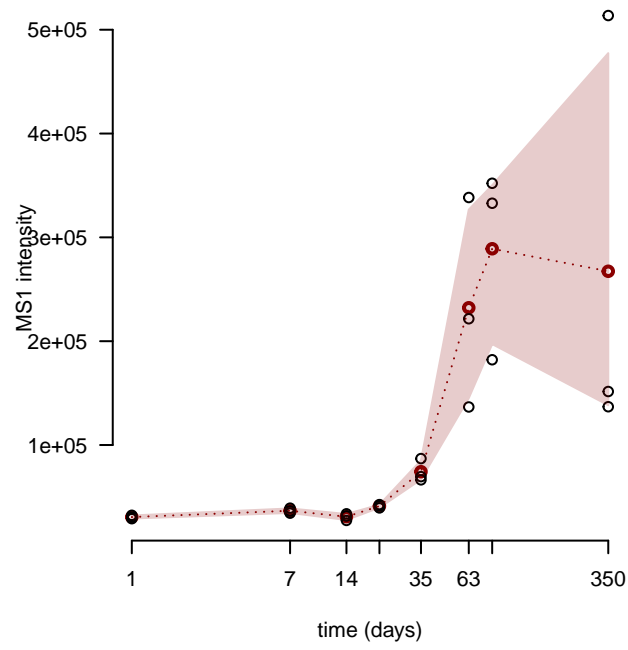

**Q8K0C5**  
**GN=Zg16**  
zymogen granule protein 16

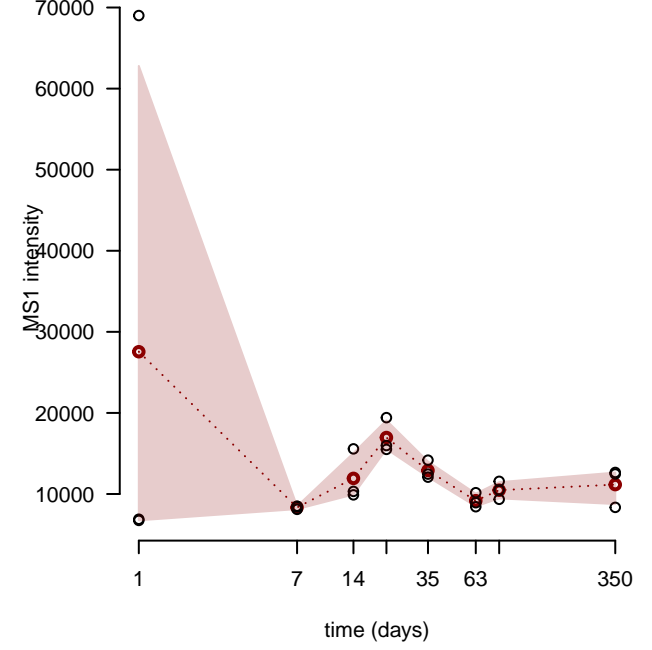

**Q8K0C8**  
**GN=Cox19**  
cytochrome c oxidase assembly protein 19

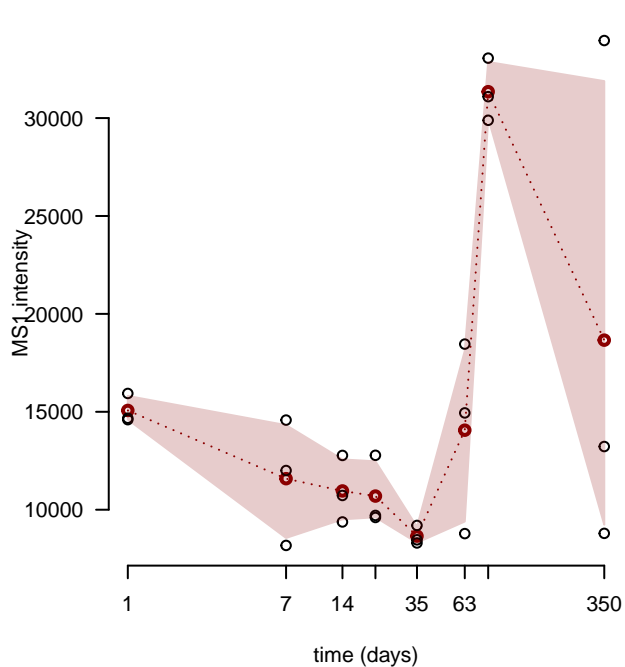

**Q8K0C9**  
**GN=Gmds**  
GDP-mannose 4, 6-dehydratase

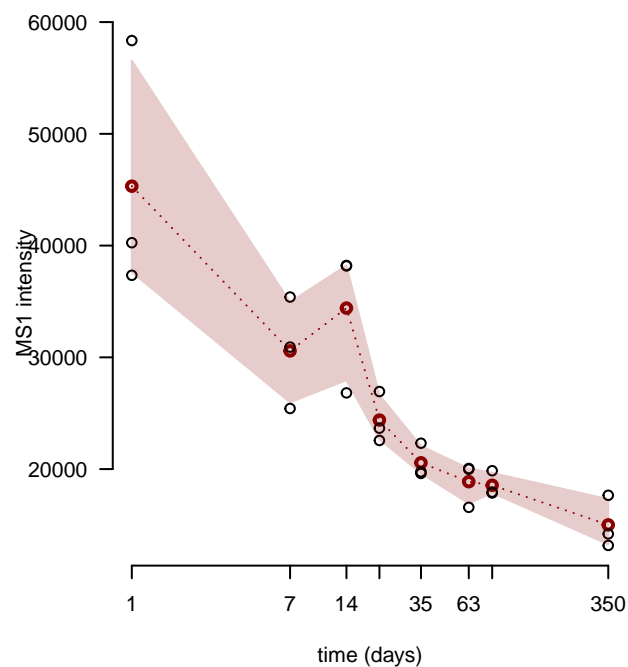

**Q8K0D0**  
**GN=Cdk17**  
cyclin-dependent kinase 17

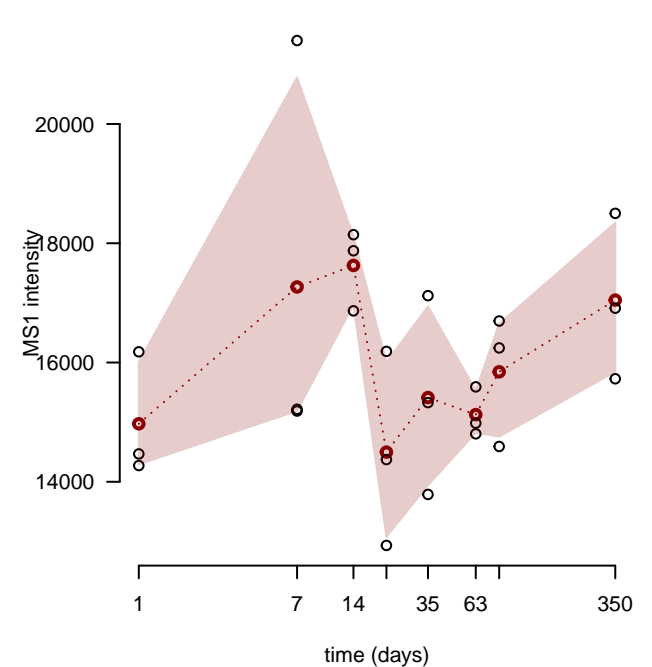

**Q8K0D5**  
**GN=Gfm1**  
G elongation factor, mitochondrial 1

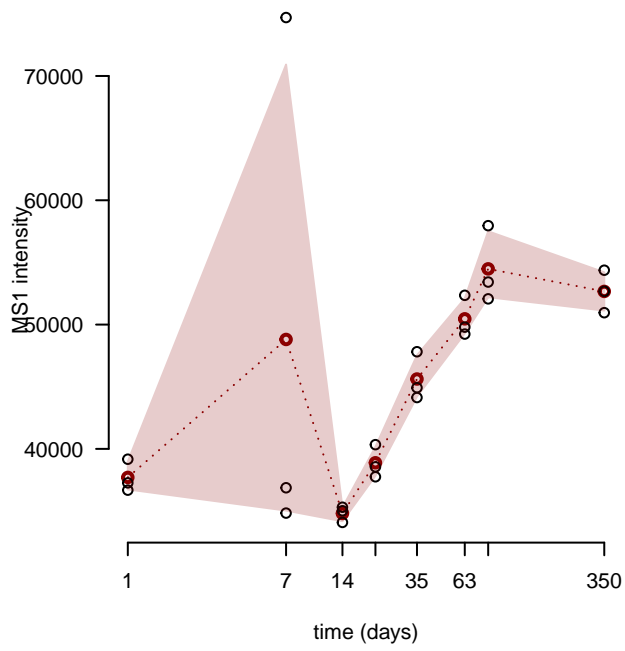

**Q8K0D7**  
**GN=Wrb**

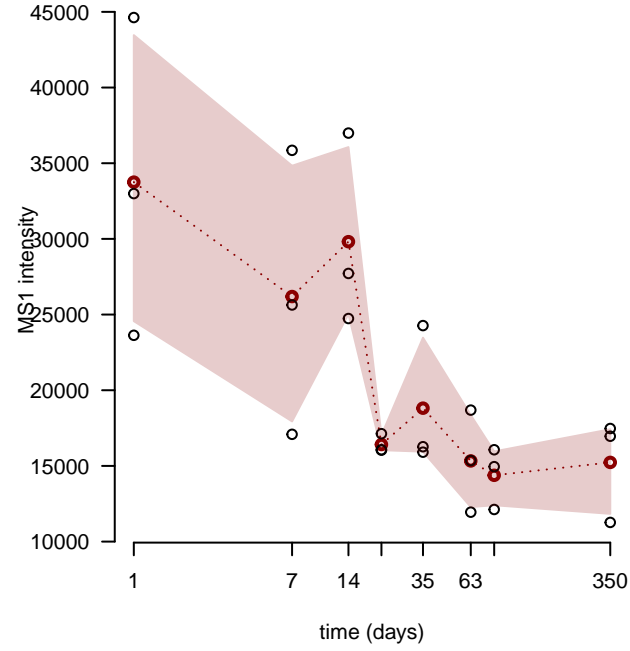

**Q8K0E1**  
**GN=Kctd15**  
potassium channel tetramerisation domain ...

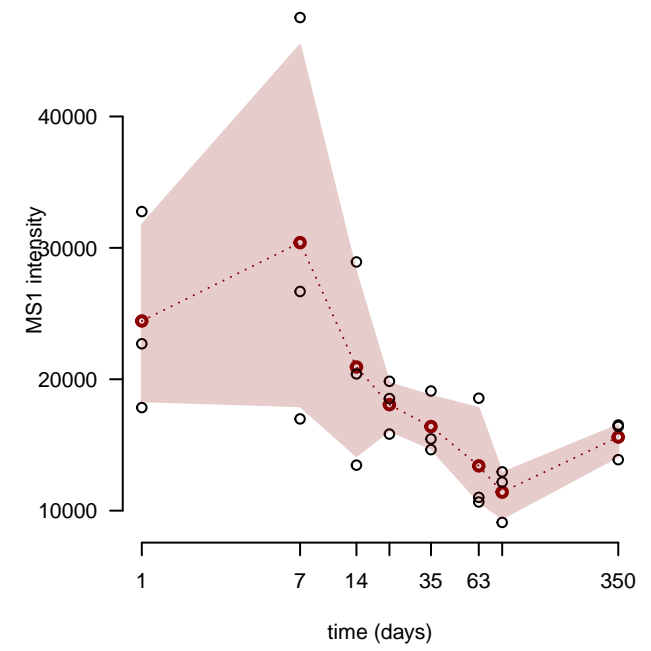

**Q8K0E8**  
**GN=Fgb**  
fibrinogen beta chain

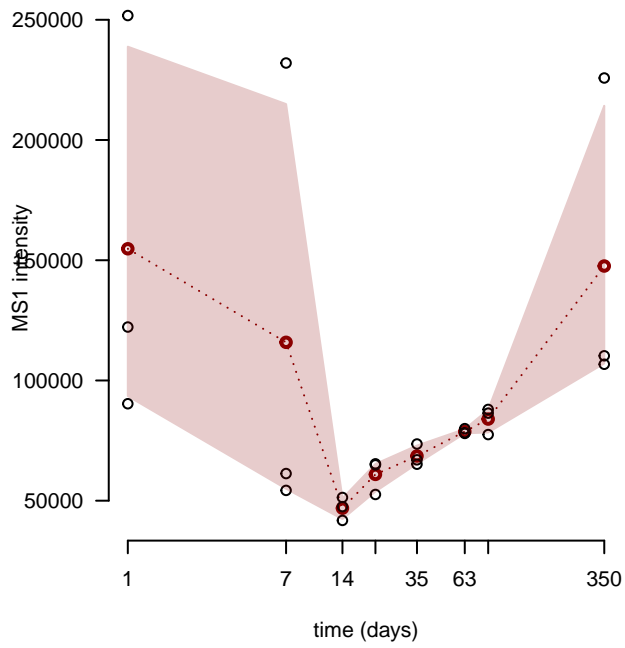

**Q8K0F1**  
**GN=Tbc1d23**  
TBC1 domain family, member 23

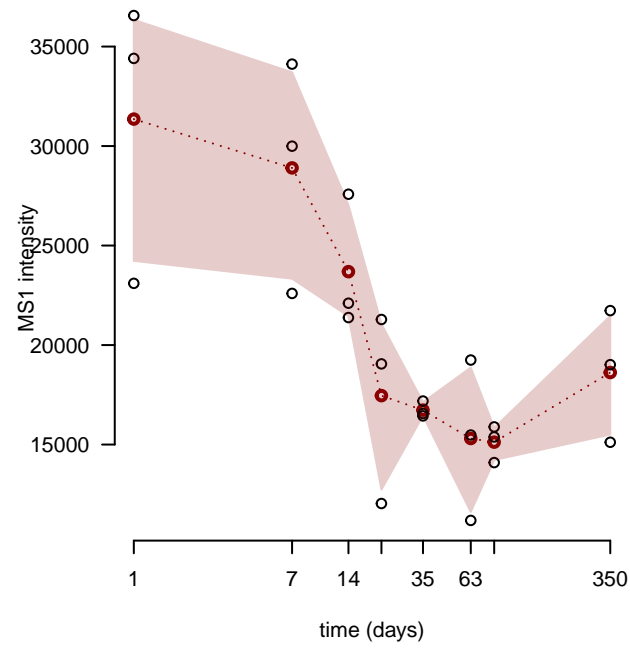

**Q8K0G5**  
**GN=Eipr1**  
EARP complex and GARP complex interactin ...

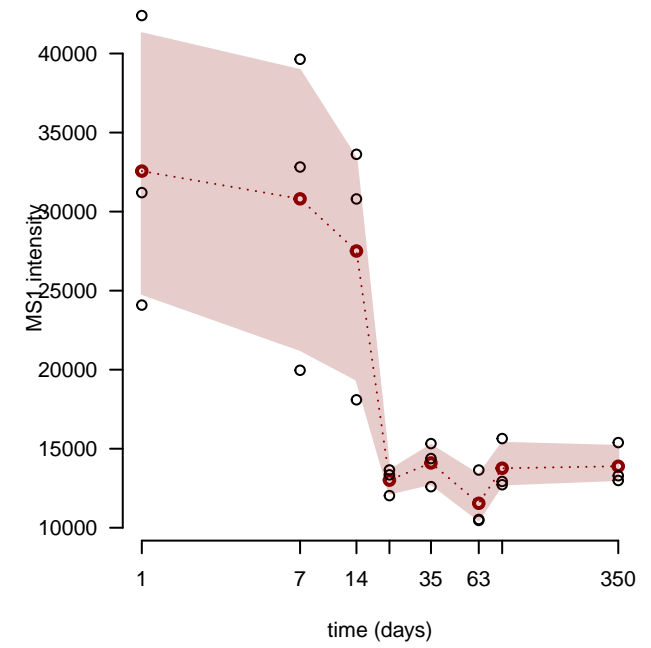

**Q8K0G8**  
**GN=Esrp2**  
epithelial splicing regulatory protein 2

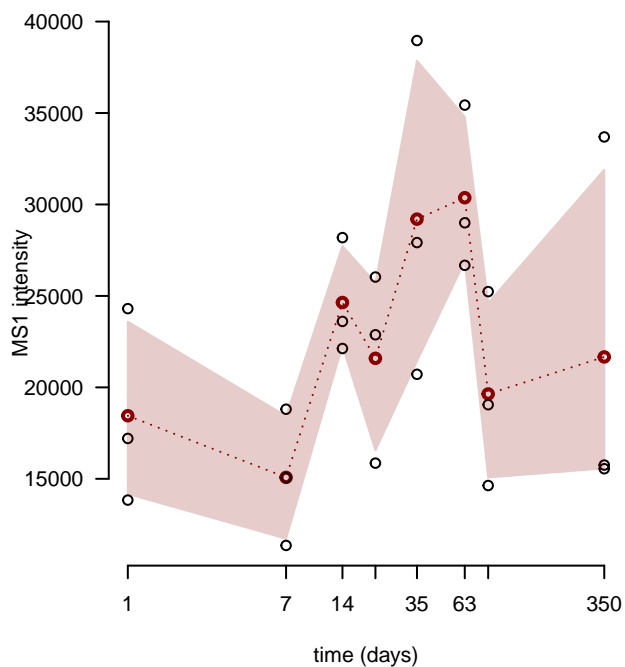

**Q8K0H5**  
**GN=Taf10**  
TATA-box binding protein associated fact ...

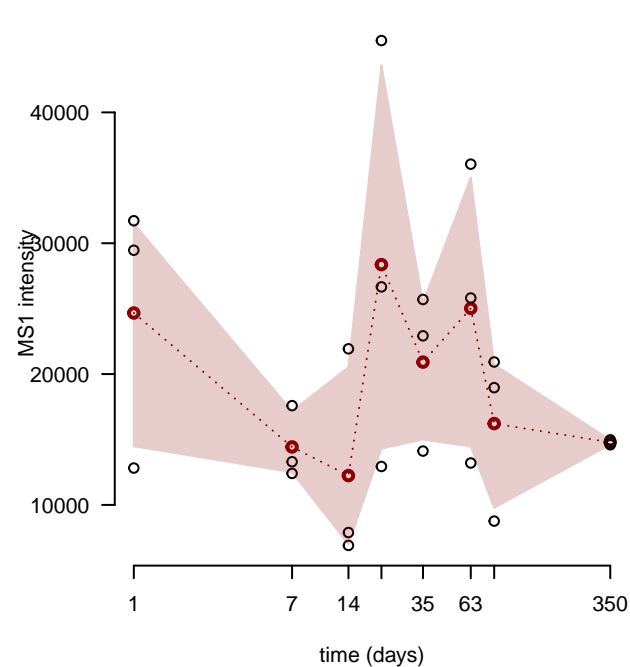

**Q8K0H7**  
**GN=Slc45a3**  
solute carrier family 45, member 3

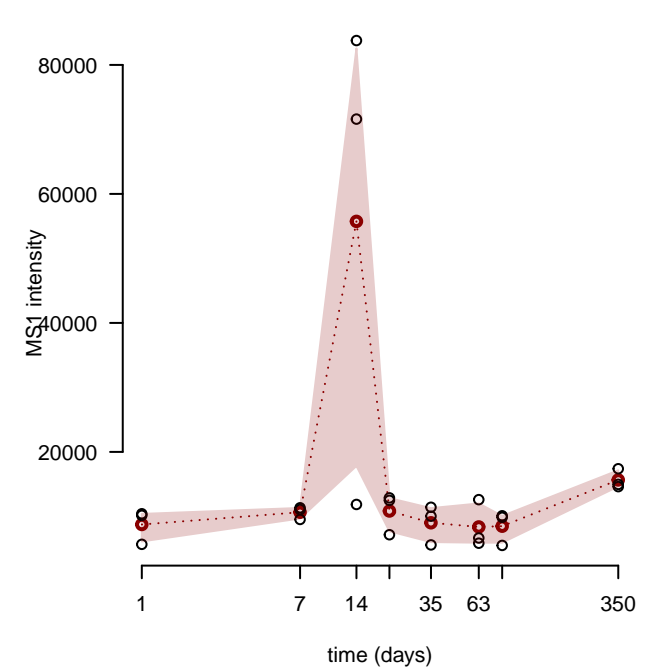



**Q8K0L9**  
**GN=Zbtb20**  
zinc finger and BTB domain containing 20

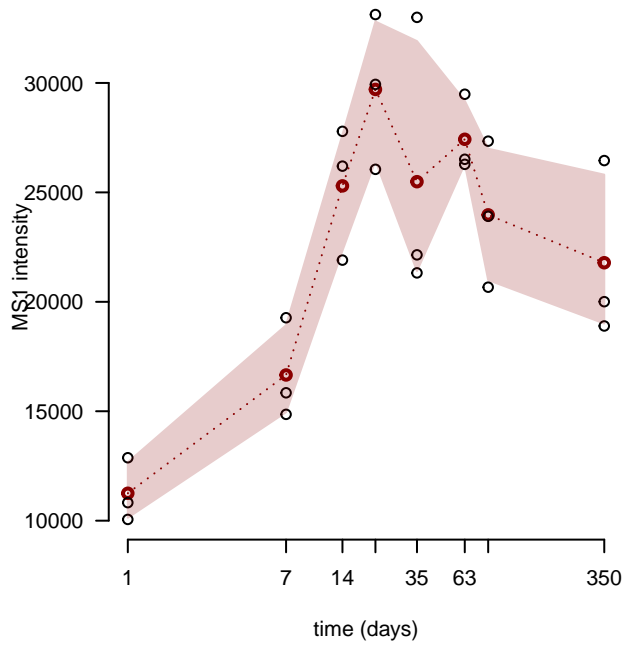

**Q8K0P3**  
**GN=Meak7**  
MTOR associated protein , eak-7 homolog

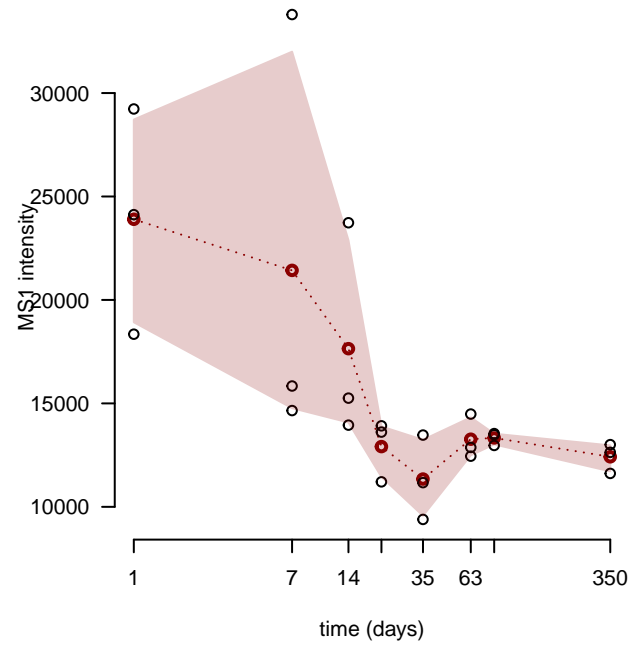

**Q8K0Q5**  
**GN=Arhgap18**  
Rho GTPase activating protein 18

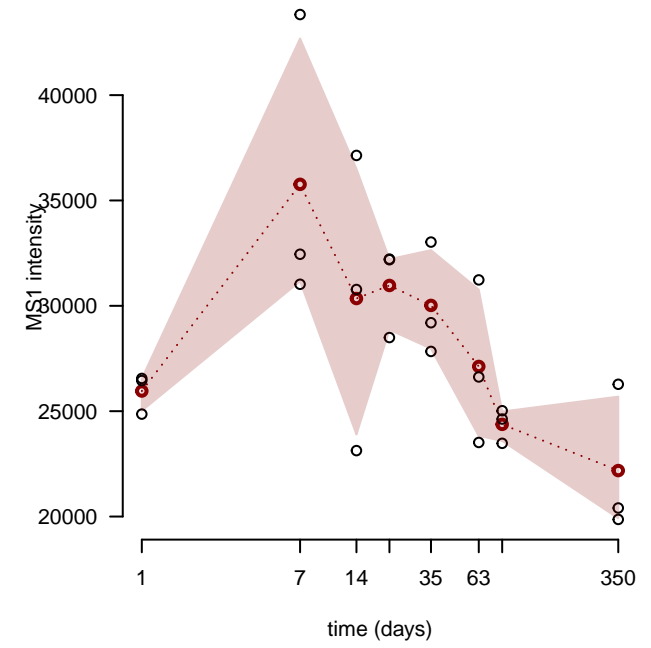

**Q8K0T0**  
**GN=Rtn1**  
reticulon 1

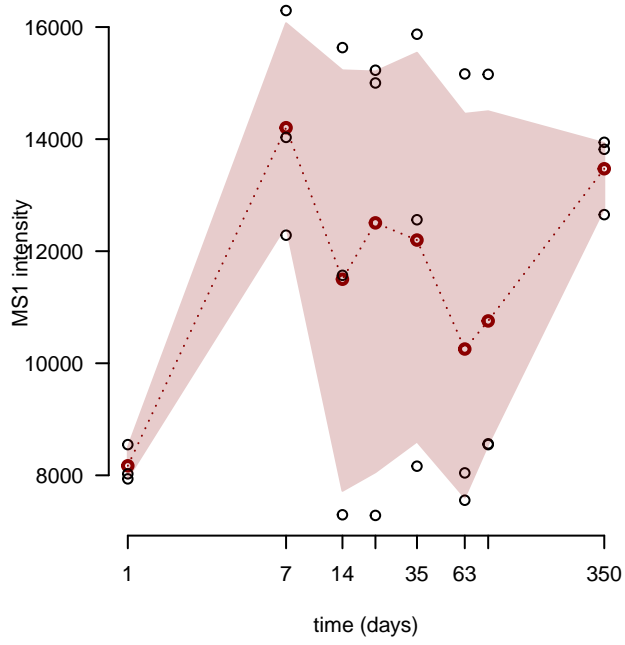

**Q8K0T2**  
**GN=Dync2li1**  
dynein cytoplasmic 2 light intermediate ...

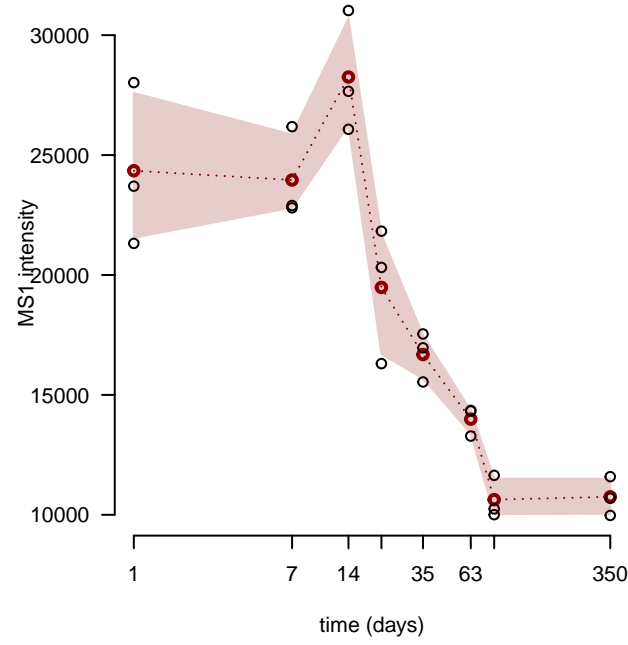

**Q8K0T4**  
**GN=Katnal1**  
katanin p60 subunit A-like 1

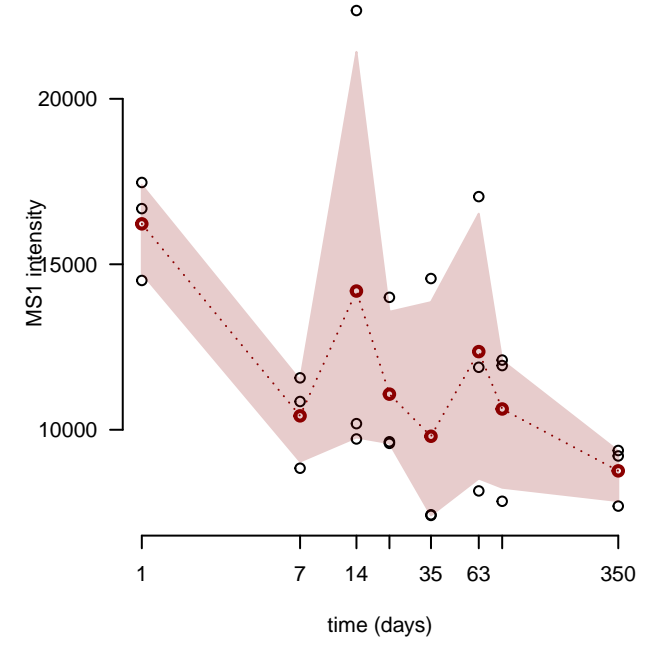

**Q8K0U4**  
**GN=Hspa12a**  
heat shock protein 12A

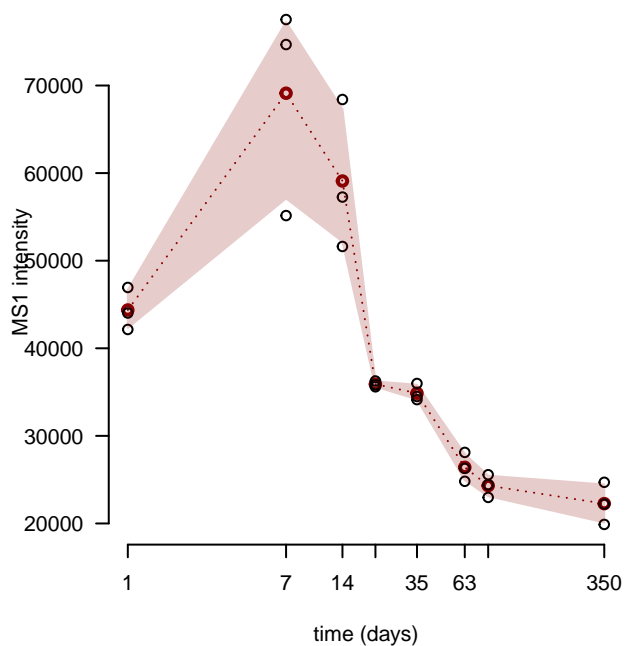

**Q8K0V2**  
**GN=Dcun1d3**  
DCN1, defective in cullin neddylation 1, ...

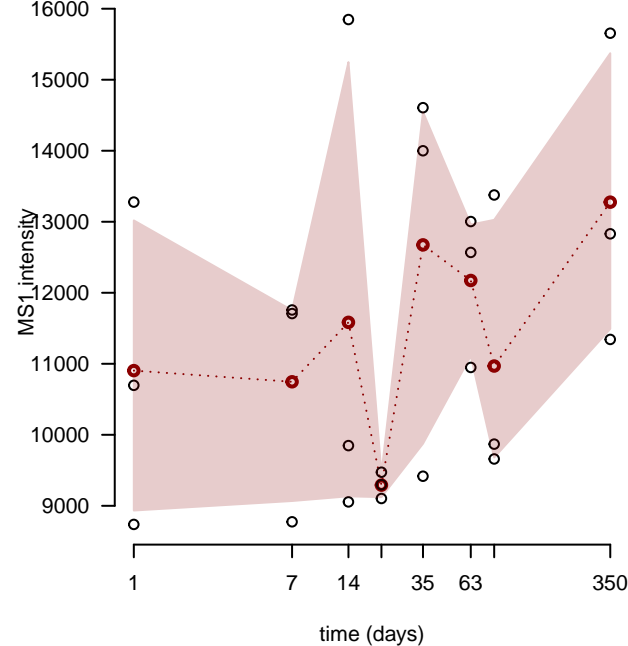

**Q8K0V4**  
**GN=Cnot3**  
CCR4-NOT transcription complex, subunit ...

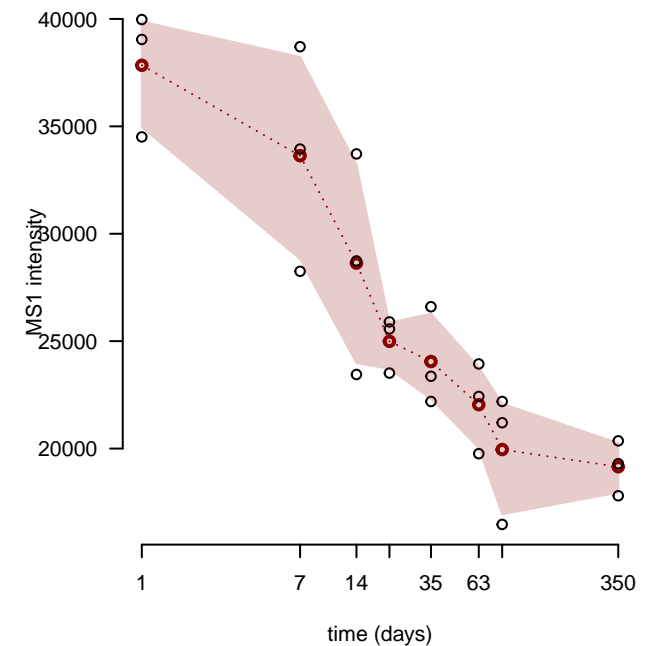

**Q8K0Y2**  
**GN=Krt33a**  
keratin 33A

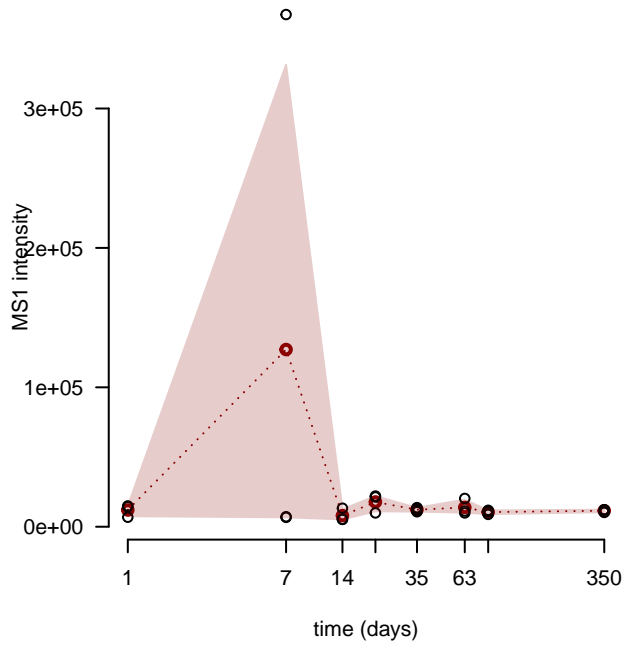

**Q8K0Z7**  
**GN=Taco1**  
translational activator of mitochondrial ...

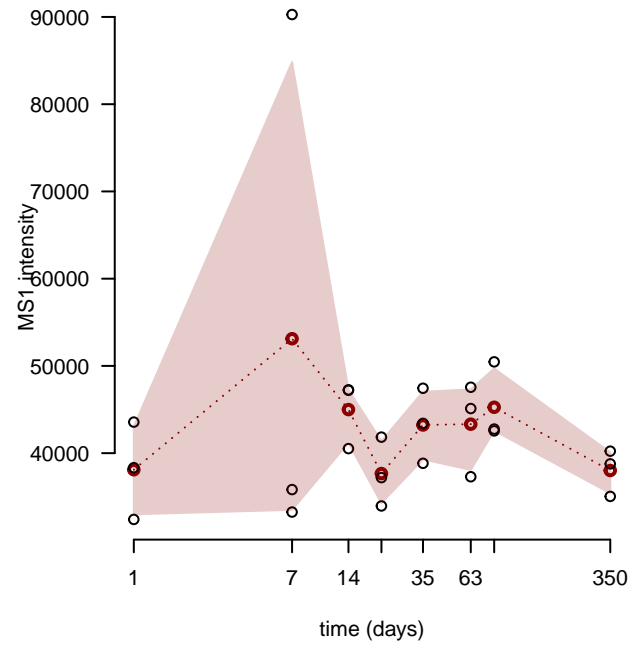

**Q8K114**  
**GN=Ints9**  
integrator complex subunit 9

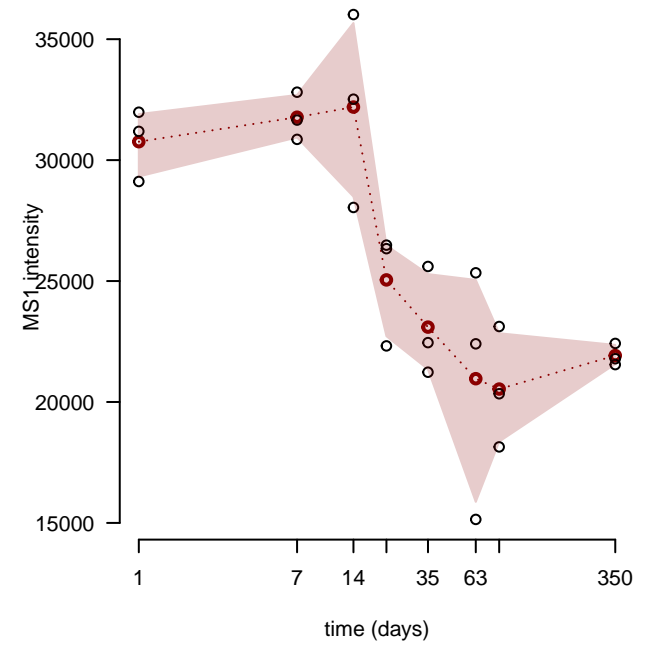

**Q8K120**  
**GN=Nfatc4**  
nuclear factor of activated T cells, cyt ...

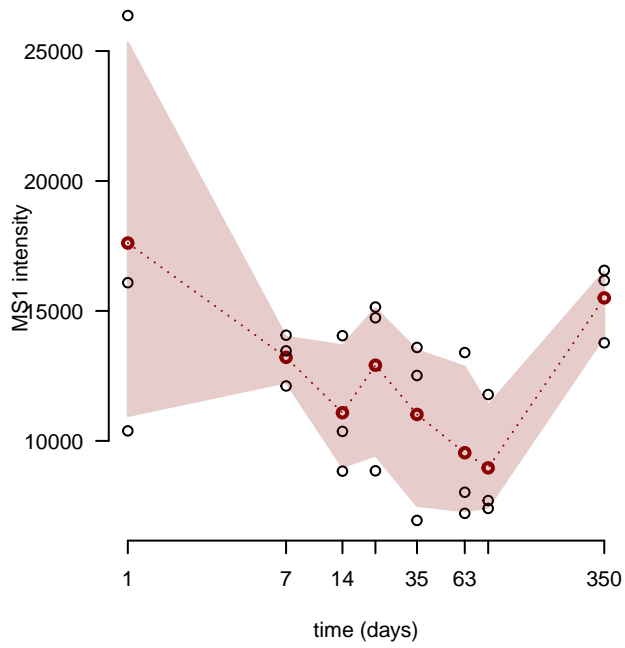

**Q8K124**  
**GN=Plekho2**  
pleckstrin homology domain containing, f ...

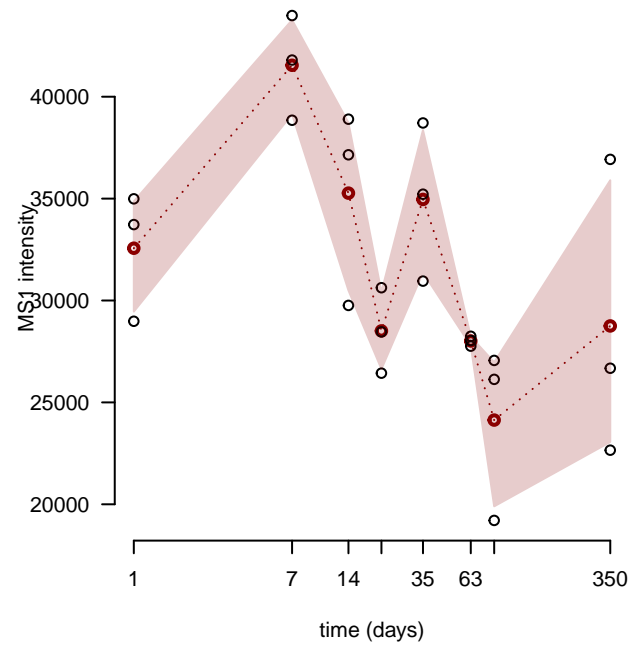

**Q8K135**  
**GN=Kiaa0319l**

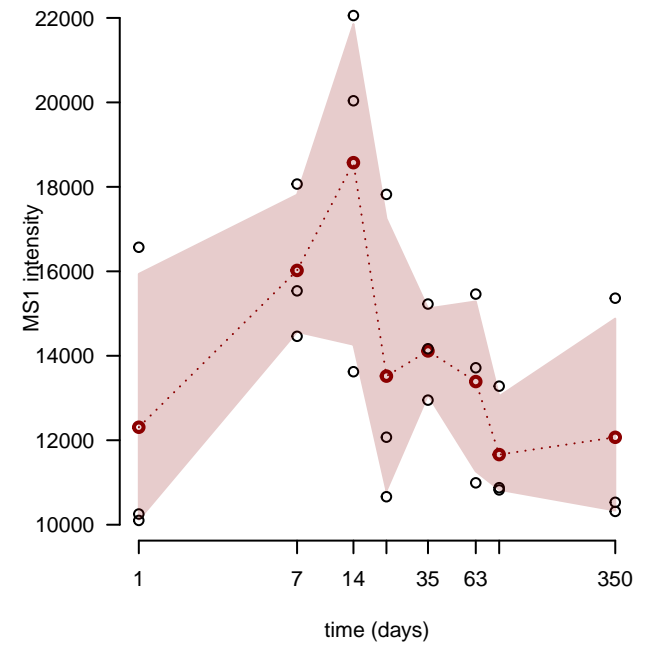

**Q8K157**  
**GN=Galm**  
galactose mutarotase

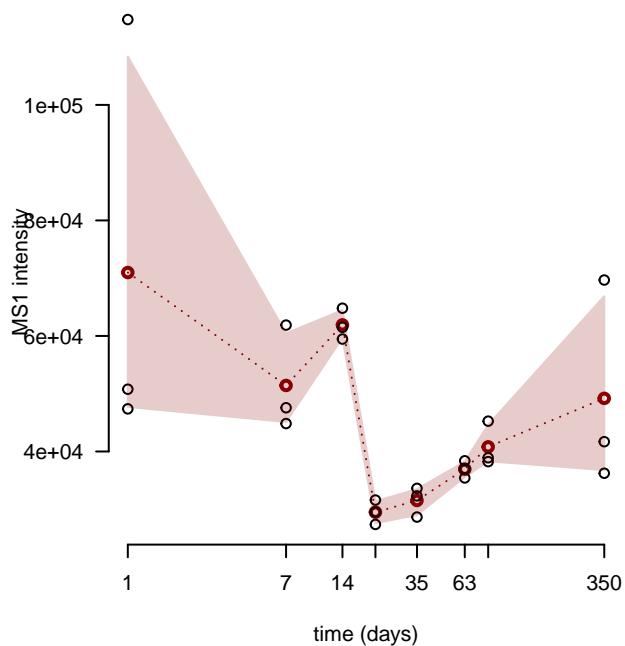

**Q8K182**  
**GN=C8a**  
complement component 8, alpha polypeptid ...

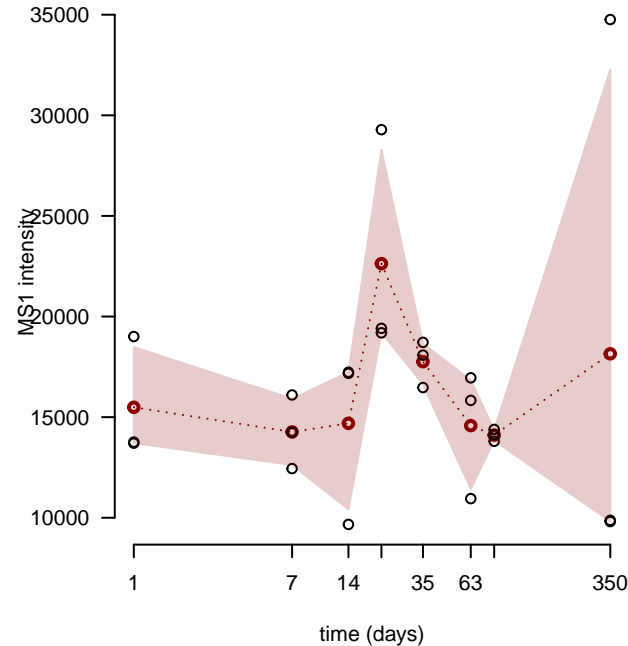

**Q8K183**  
**GN=Pdxk**  
pyridoxal (pyridoxine, vitamin B6) kinas ...

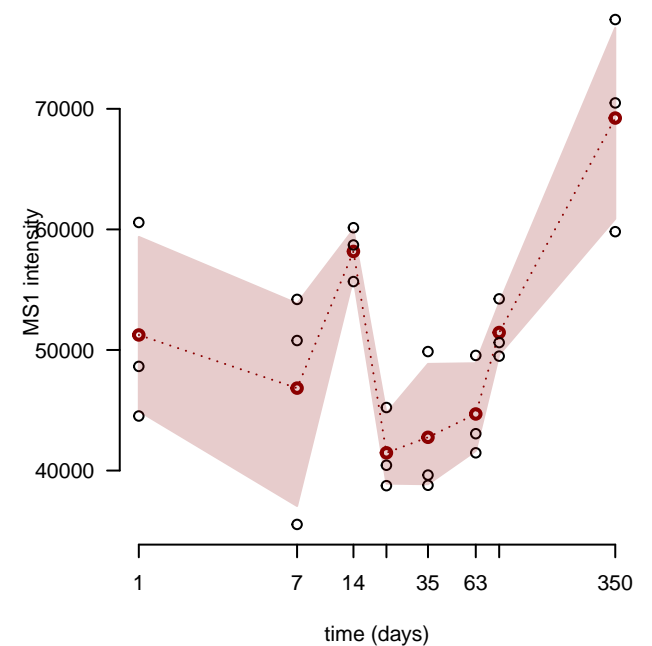

**Q8K190**  
**GN=Saysd1**  
SAYSVFN motif domain containing 1

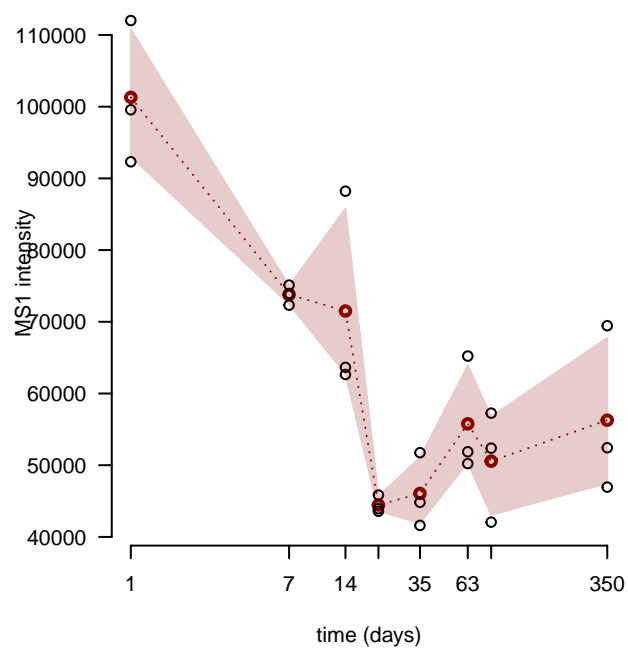

**Q8K194**  
**GN=Snrnp27**  
small nuclear ribonucleoprotein 27 (U4/U ...

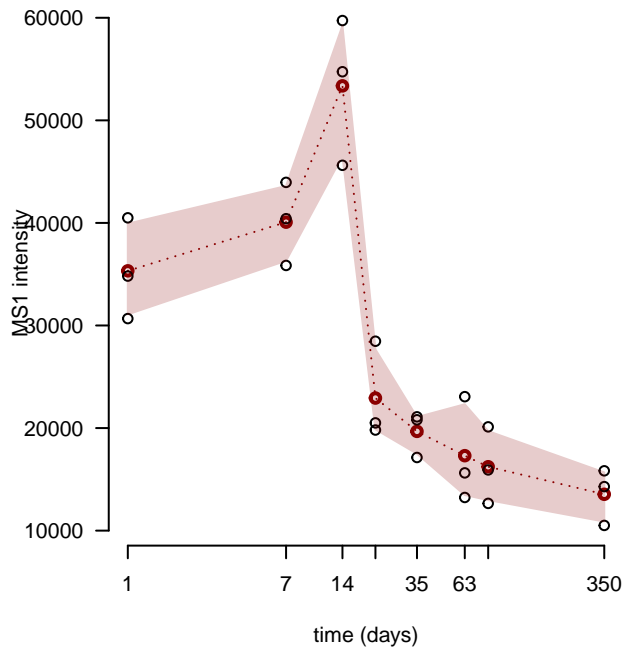

**Q8K199**  
**GN=Cmc2**  
COX assembly mitochondrial protein 2

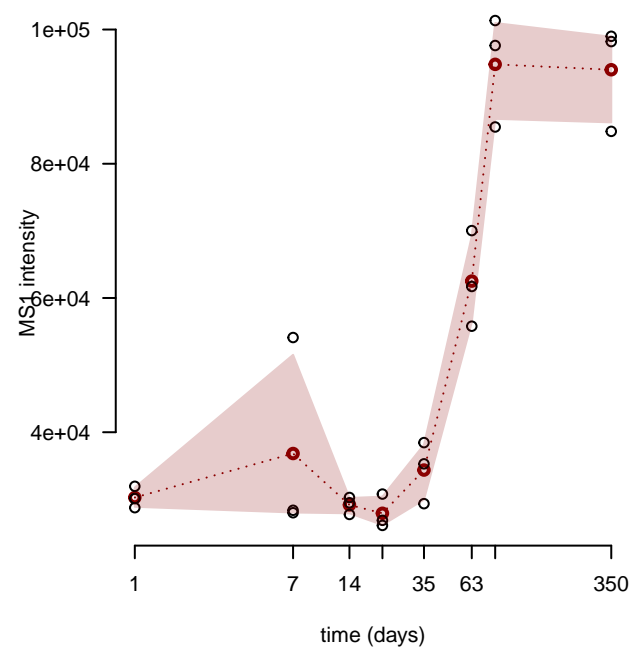

**Q8K1A0**  
**GN=Mettl5**  
methyltransferase like 5

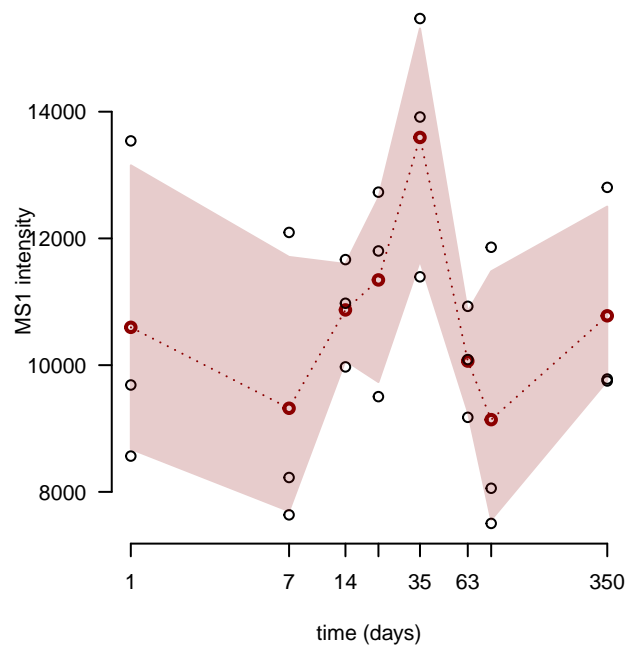

**Q8K1A5**  
**GN=Tmem41b**  
transmembrane protein 41B

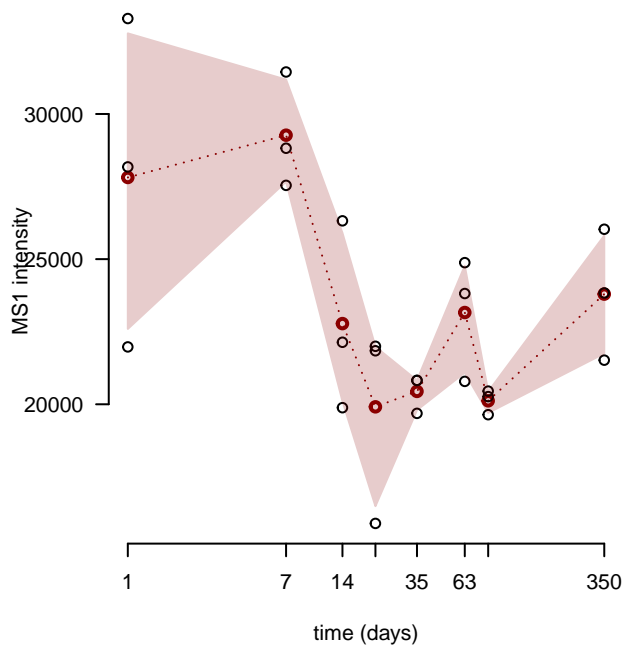

**Q8K1A6**  
**GN=Cc2d1a**  
coiled-coil and C2 domain containing 1A

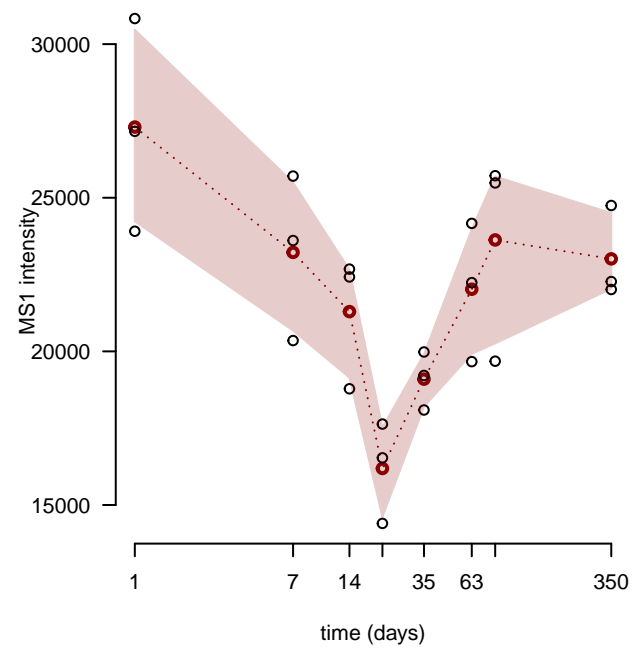

**Q8K1B8**  
**GN=Fermt3**  
fermitin family member 3

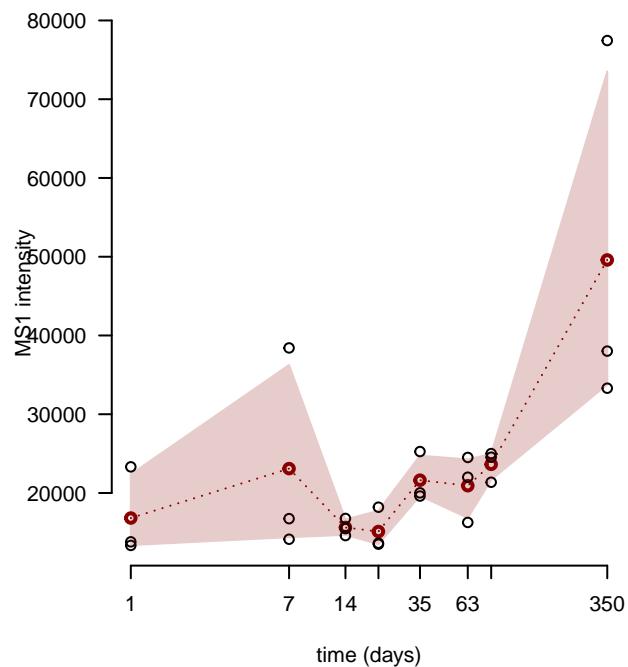

**Q8K1B9**  
**GN=Galnt18**  
polypeptide N-acetylgalactosaminyltransf ...

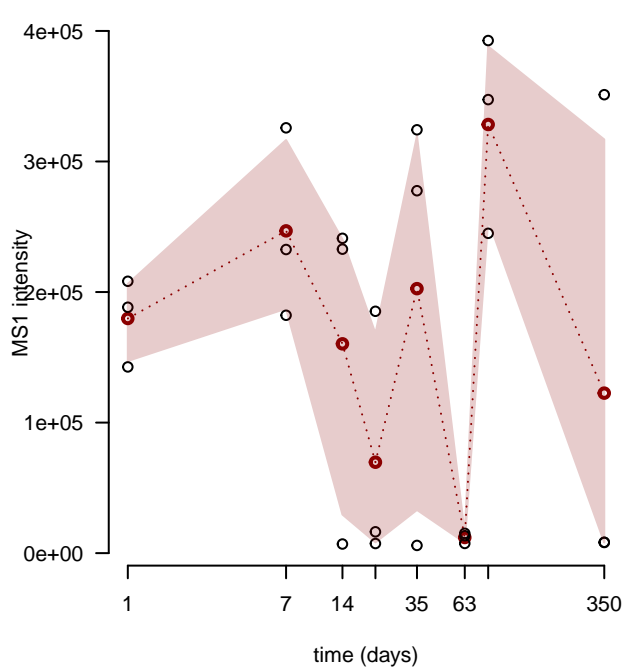

**Q8K1C0**  
**GN=Angel2**  
angel homolog 2

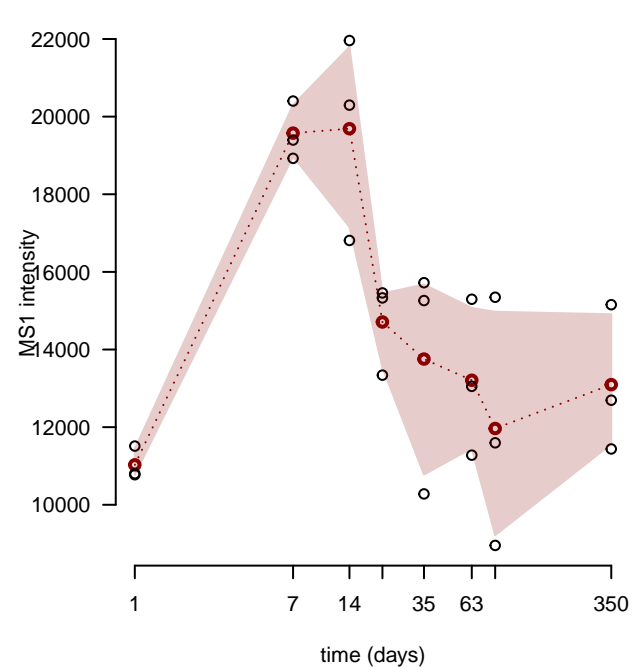

**Q8K1C9**  
**GN=Lrrc41**  
leucine rich repeat containing 41

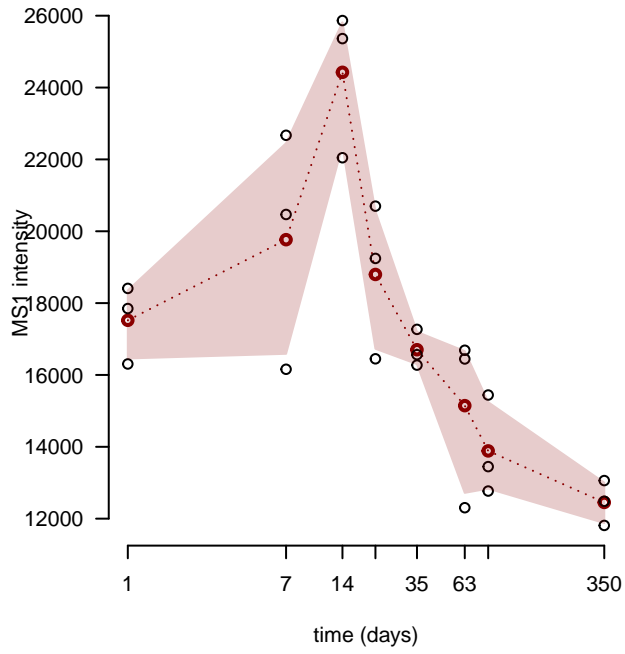

**Q8K1E0**  
**GN=Stx5**

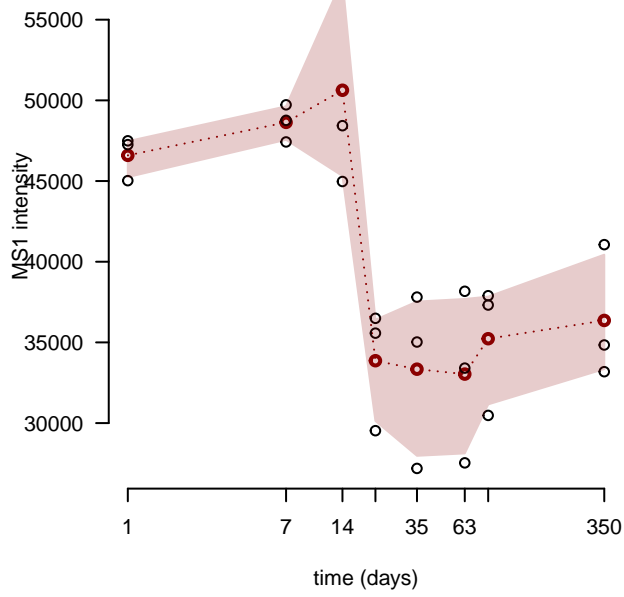

**Q8K1E6**  
**GN=Aikbh3**  
alkB homolog 3, alpha-ketoglutarate-depe ...

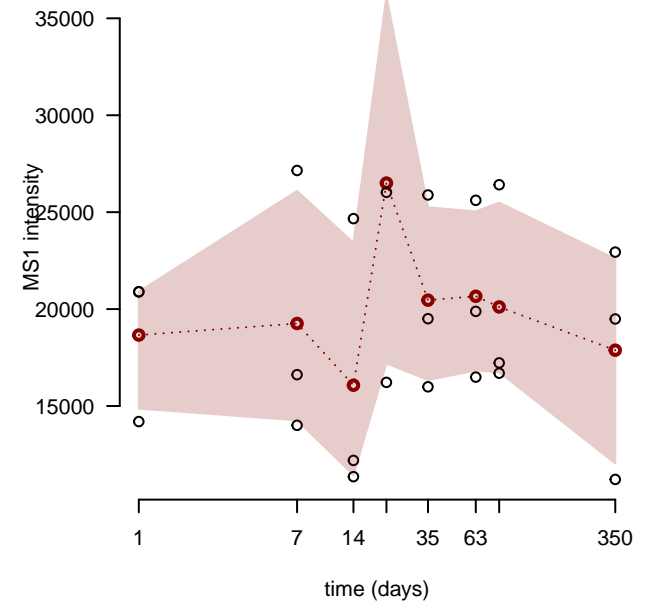

**Q8K1F9**  
**GN=Lctl**  
lactase-like

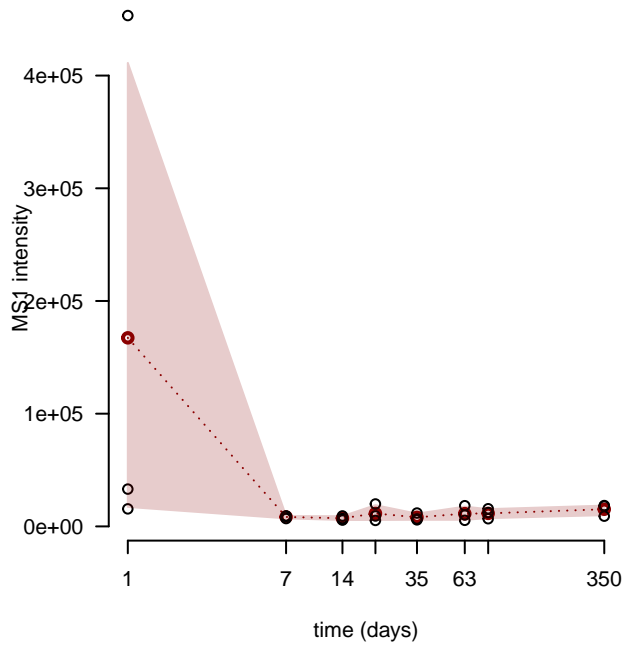

**Q8K1H1**  
**GN=Tdrd7**  
tudor domain containing 7

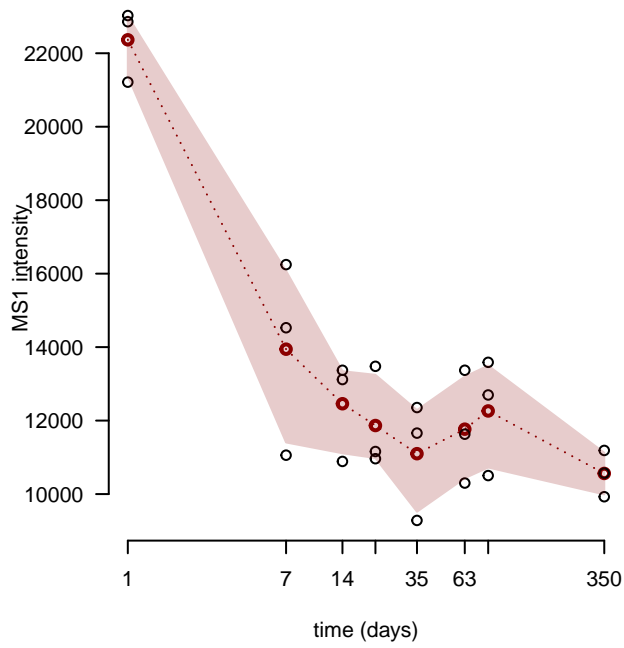

**Q8K1I7**  
**GN=Wipf1**  
WAS/WASL interacting protein family, mem ...

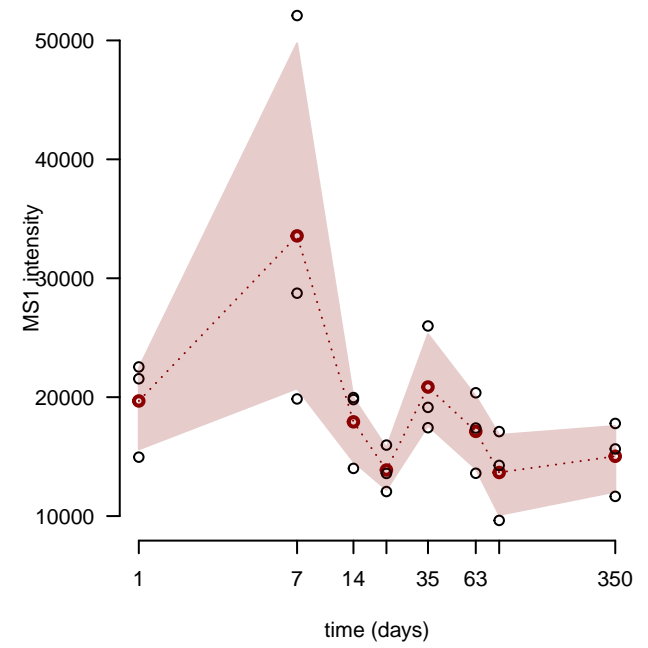

**Q8K1J5**  
**GN=Sde2**  
SDE2 telomere maintenance homolog (S. po ...

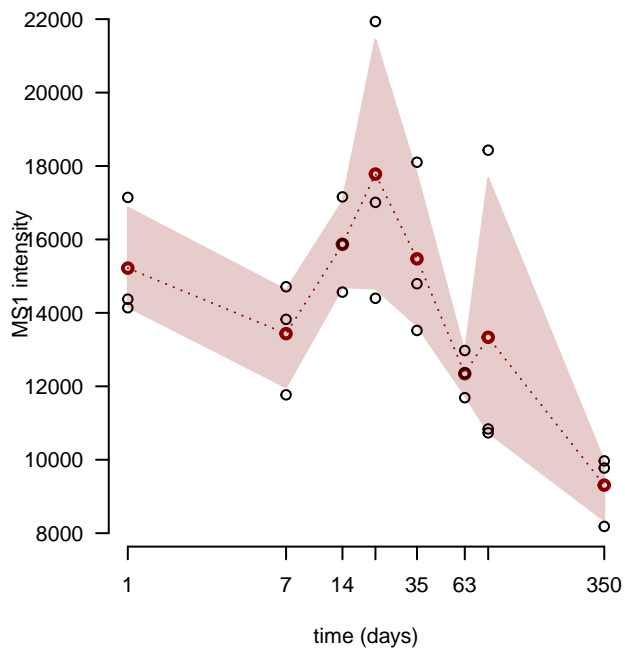

**Q8K1J6**  
**GN=Trnt1**  
tRNA nucleotidyl transferase, CCA-adding ...

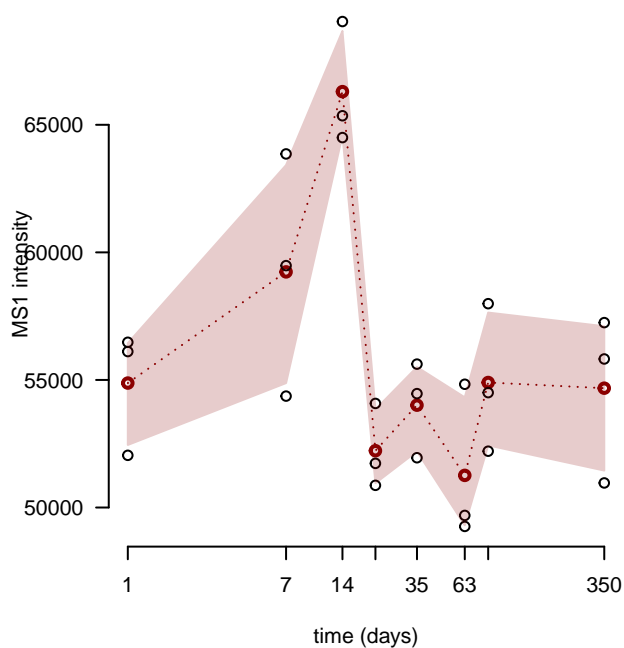

**Q8K1K4**  
**GN=Cenpi**  
centromere protein I

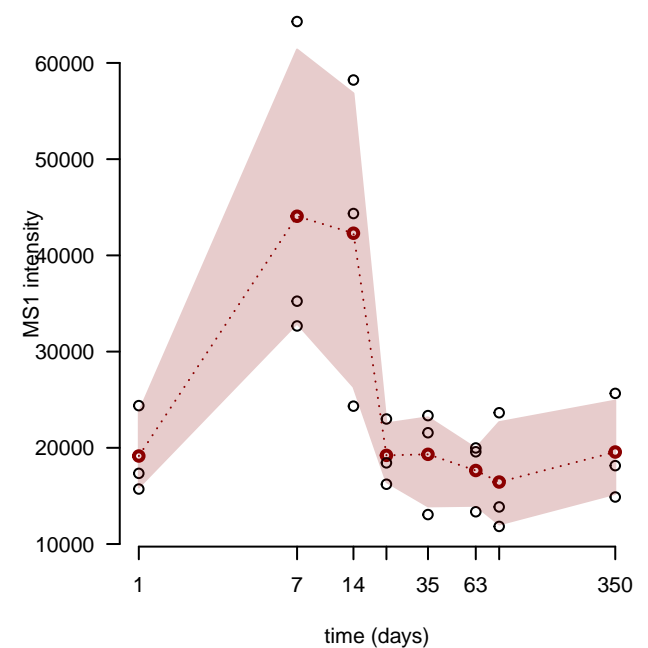

**Q8K1L2**  
GN=Spin4  
spindlin family, member 4

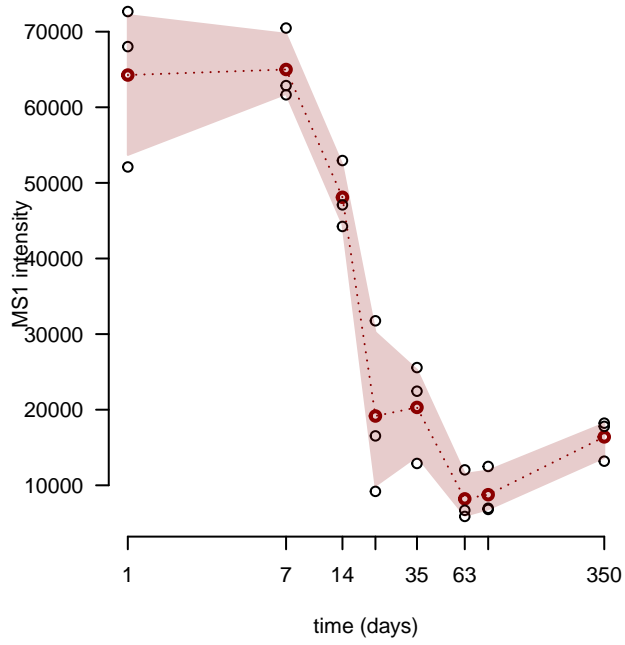

**Q8K1L5**  
GN=Ppp1r11  
protein phosphatase 1, regulatory inhibi ...

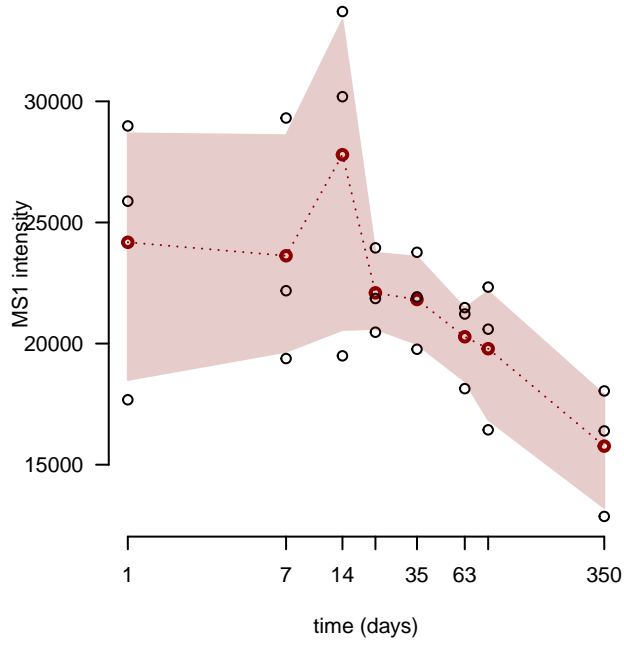

**Q8K1M6**  
GN=Dnm1l  
dynamin 1-like

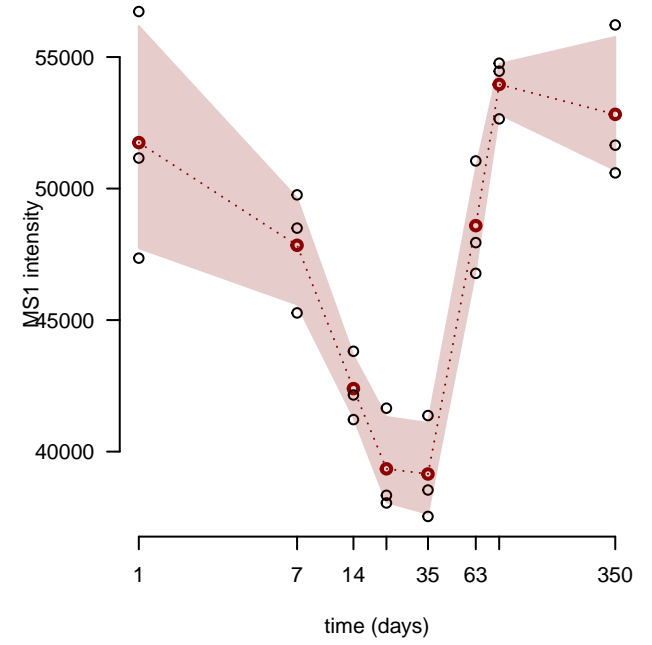

**Q8K1M6**  
GN=Dnm1l  
dynamin 1-like

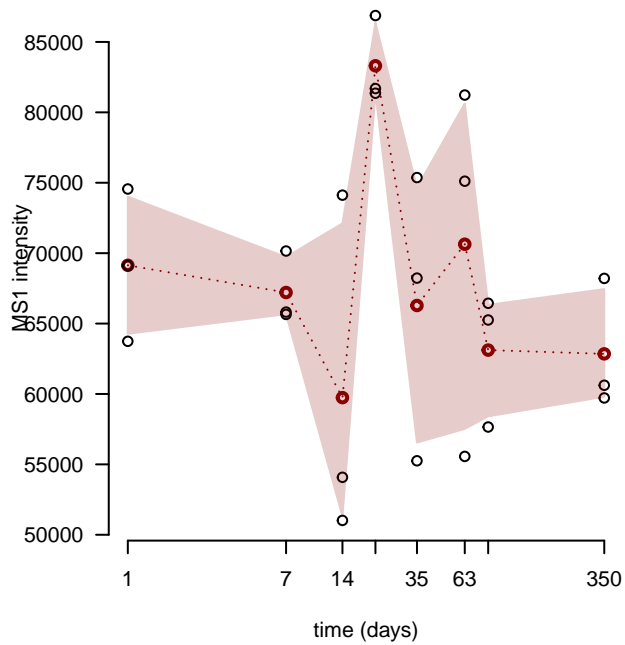

**Q8K1N1**  
GN=Pnpla8  
patatin-like phospholipase domain contai ...

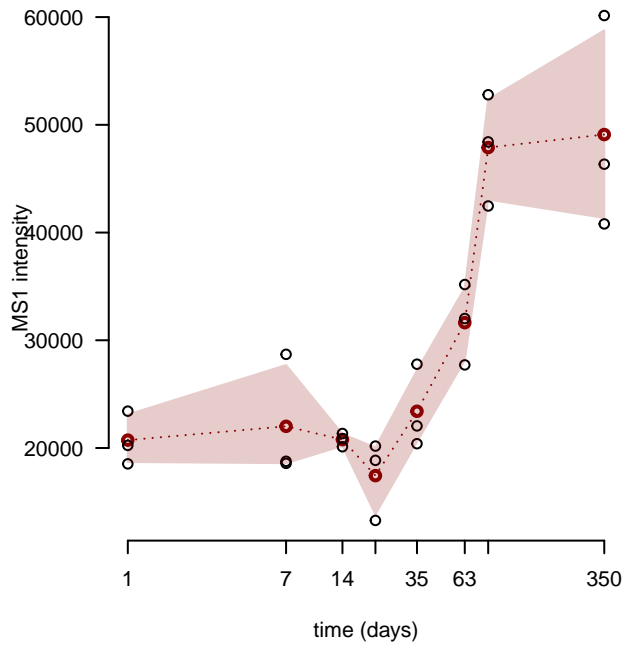

**Q8K1N2**  
GN=Phldb2  
pleckstrin homology like domain, family ...

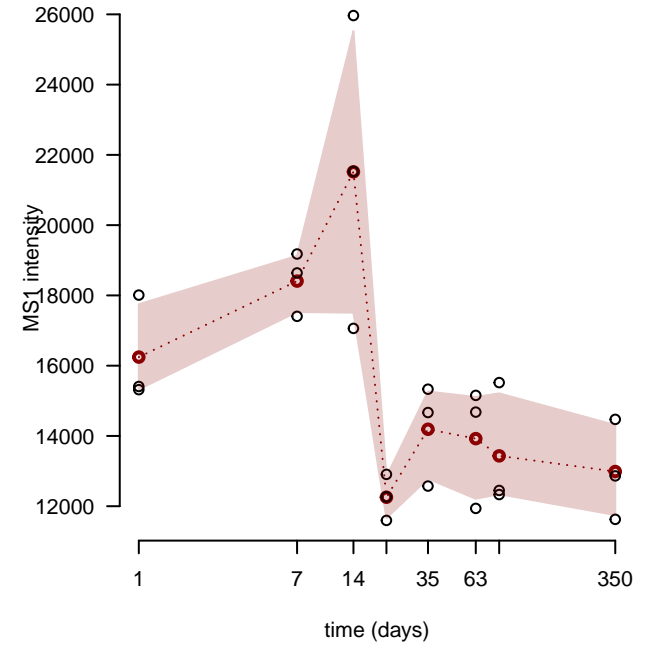

**Q8K1N4**  
GN=Spats2  
spermatogenesis associated, serine-rich ...

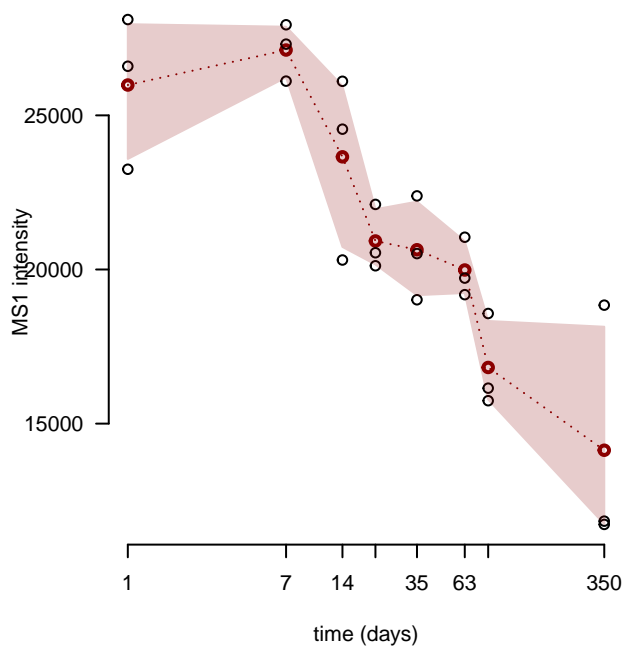

**Q8K1R3**  
GN=Pnpt1  
polyribonucleotide nucleotidyltransferas ...

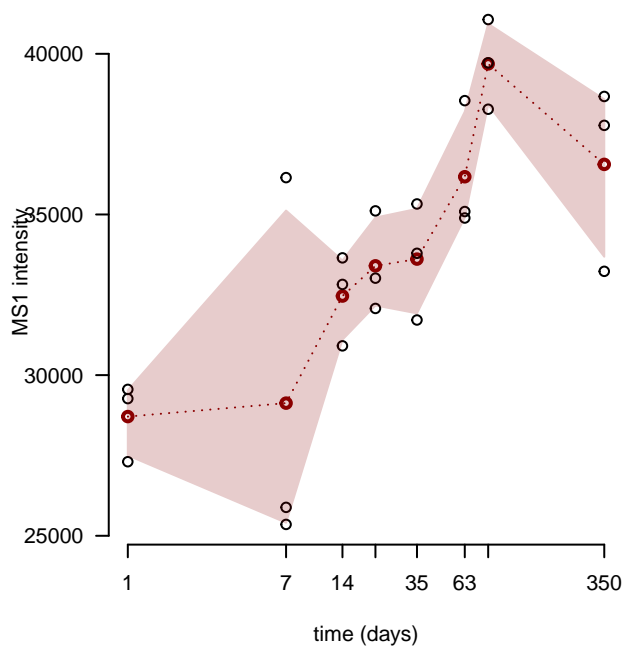

**Q8K1R7**  
GN=Nek9  
NIMA (never in mitosis gene a)-related e ...

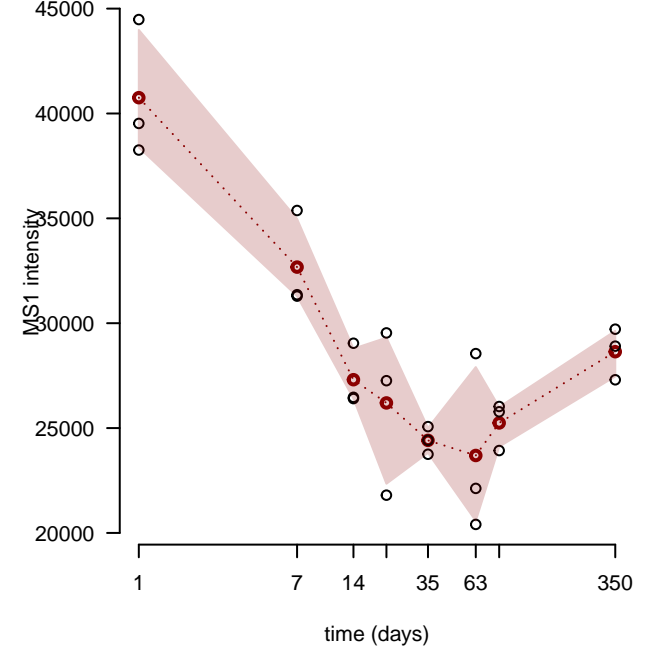

**Q8K1X1**  
**GN=Wdr11**  
WD repeat domain 11

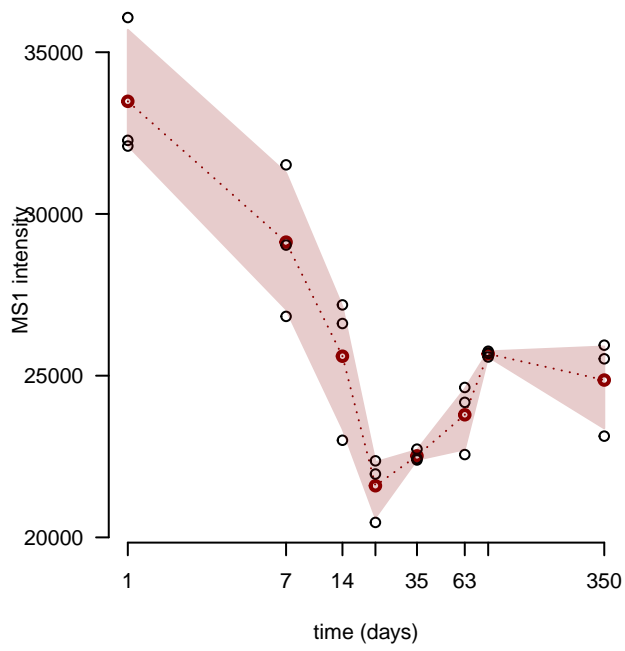

**Q8K1Y2**  
**GN=Prkd3**  
protein kinase D3

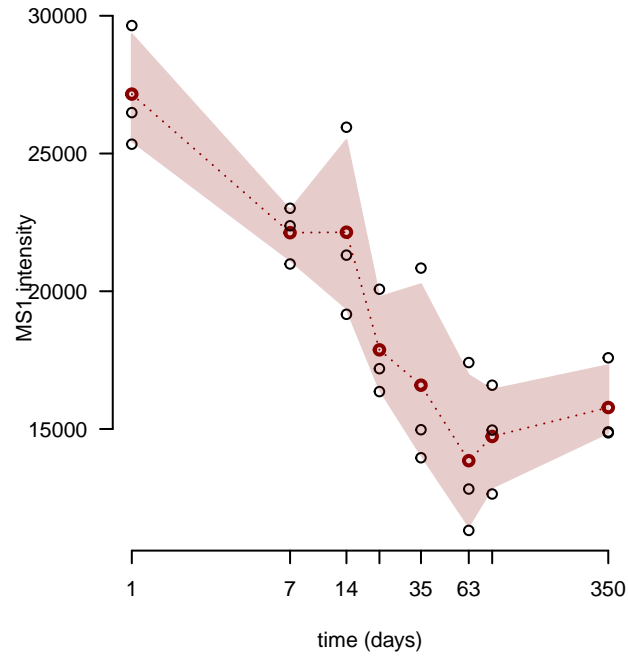

**Q8K1Z0**  
**GN=Coq9**  
coenzyme Q9

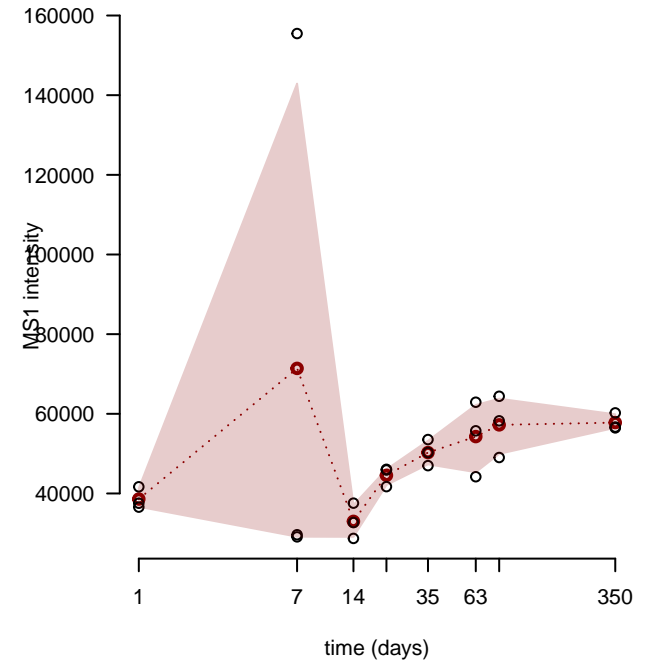

**Q8K201**  
**GN=Kct2**

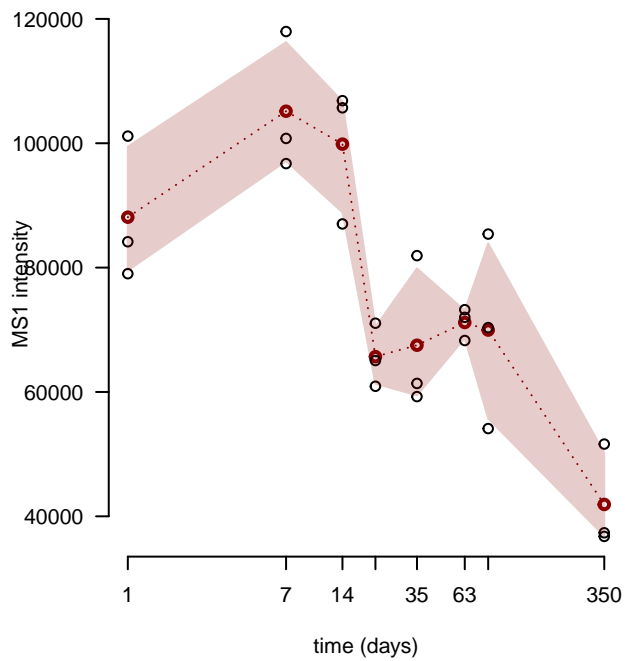

**Q8K202**  
**GN=Polr1e**  
polymerase (RNA) I polypeptide E

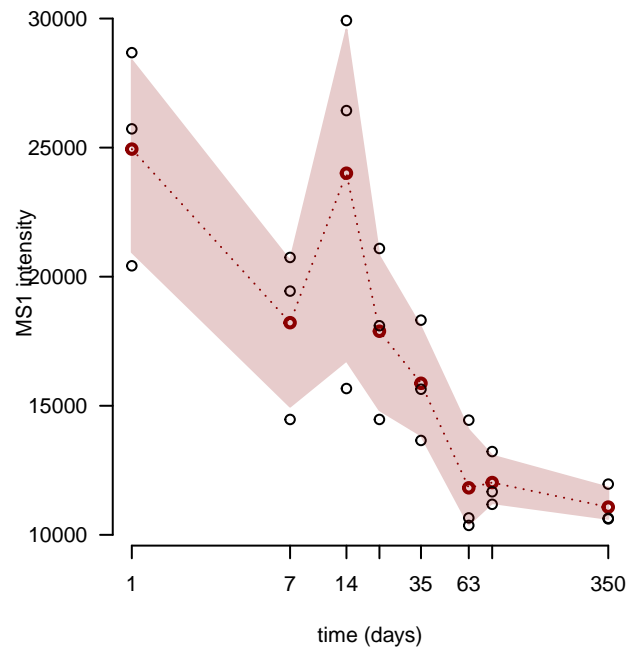

**Q8K207**  
**GN=**

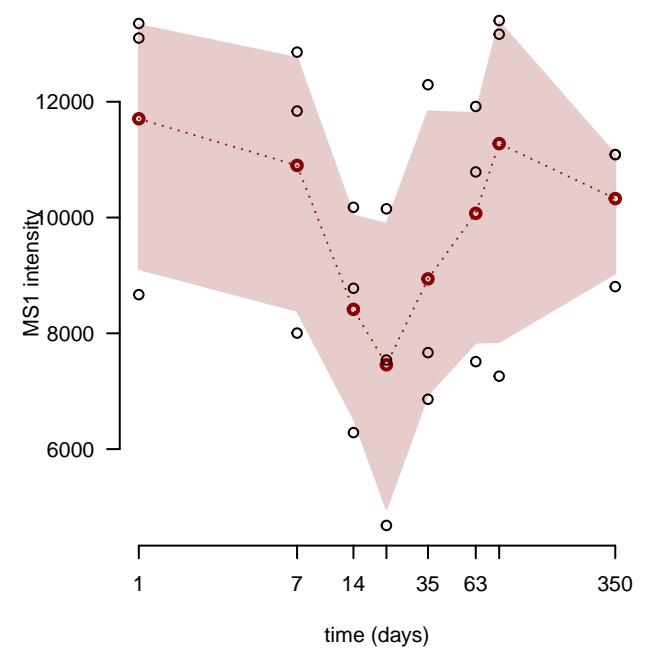

**Q8K209**  
**GN=Adgrg1**  
adhesion G protein-coupled receptor G1

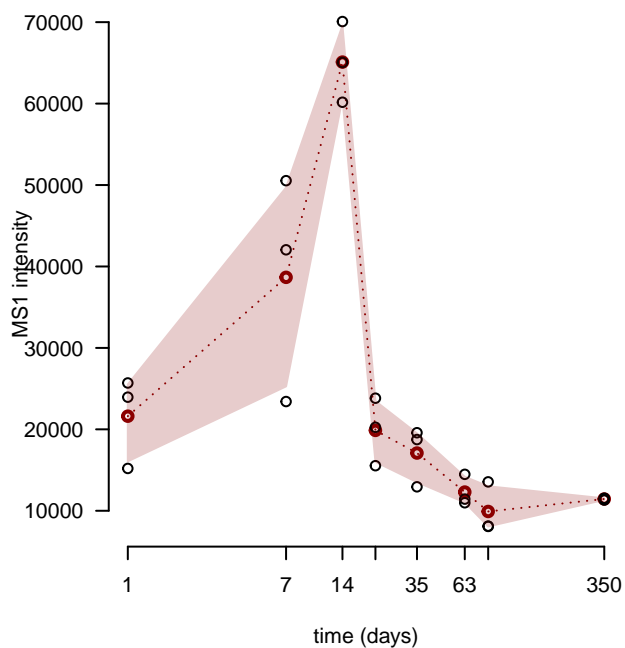

**Q8K212**  
**GN=Pacs1**  
phosphofurin acidic cluster sorting prot ...

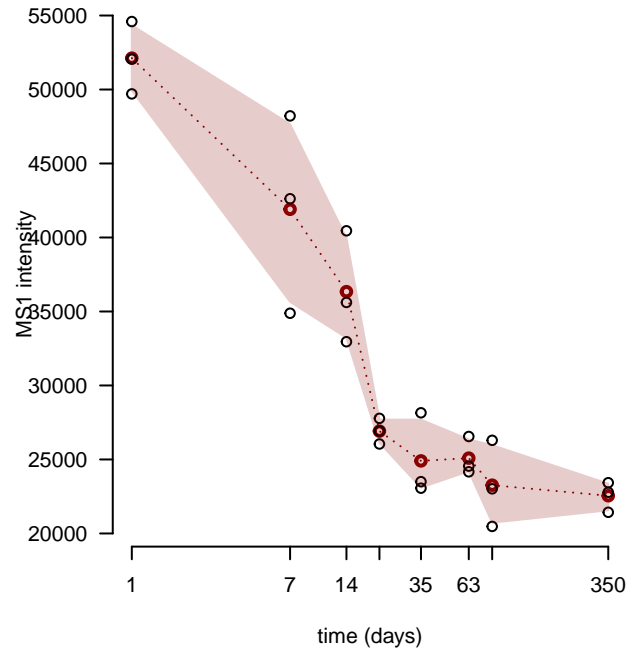

**Q8K214**  
**GN=Scmh1**  
sex comb on midleg homolog 1

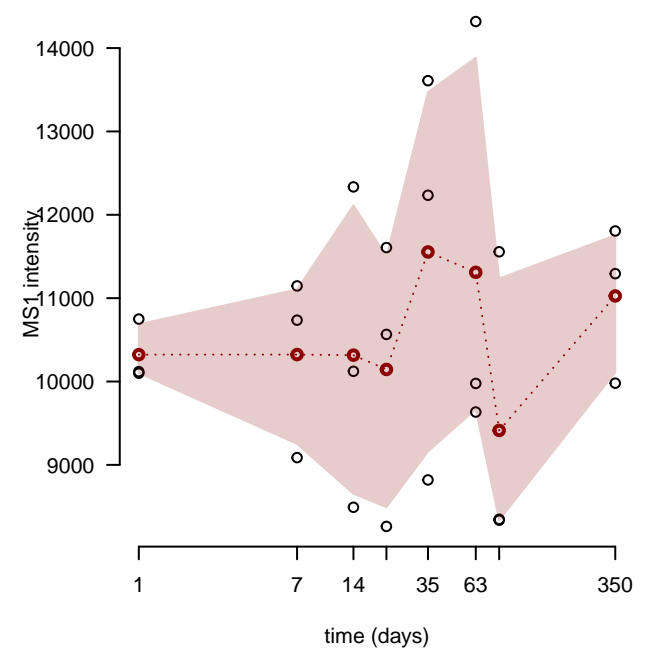

**Q8K215**  
GN=Lymr4  
LYR motif containing 4

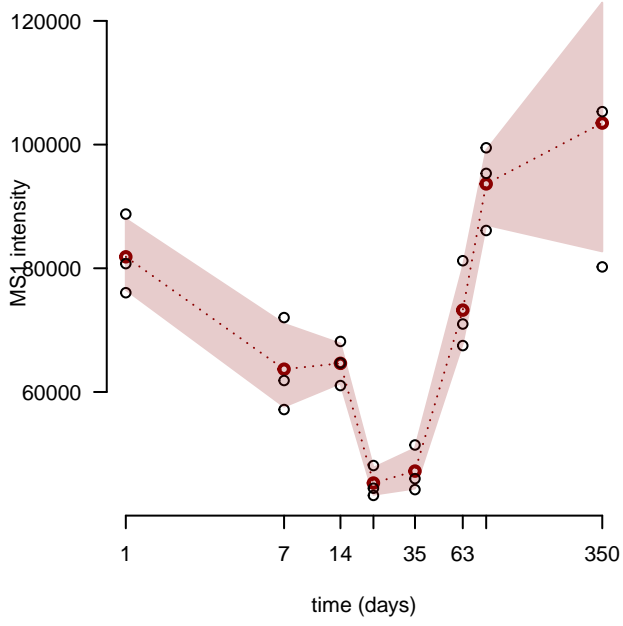

**Q8K221**  
GN=Arfp2  
ADP-ribosylation factor interacting prot ...

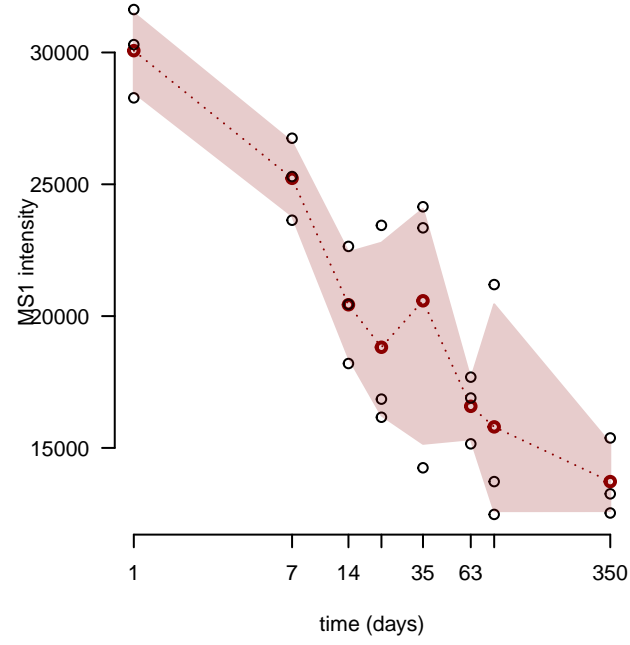

**Q8K224**  
GN=Nat10  
N-acetyltransferase 10

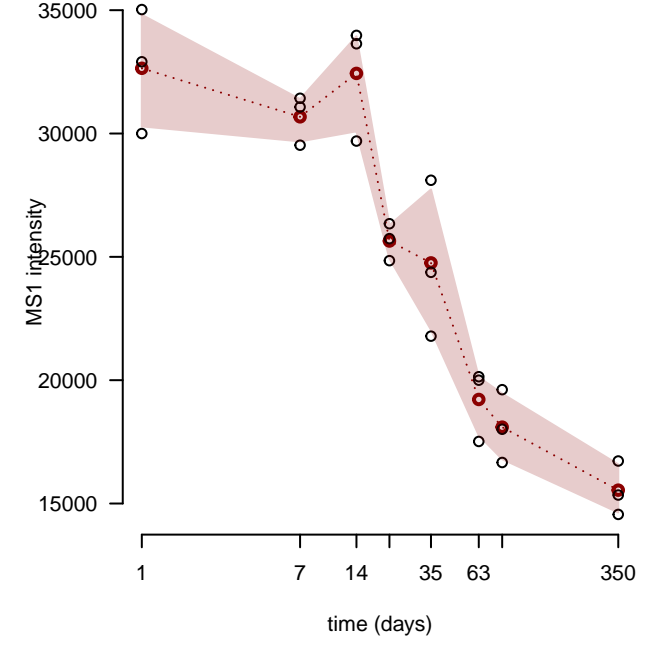

**Q8K245**  
GN=Uvrq  
UV radiation resistance associated gene

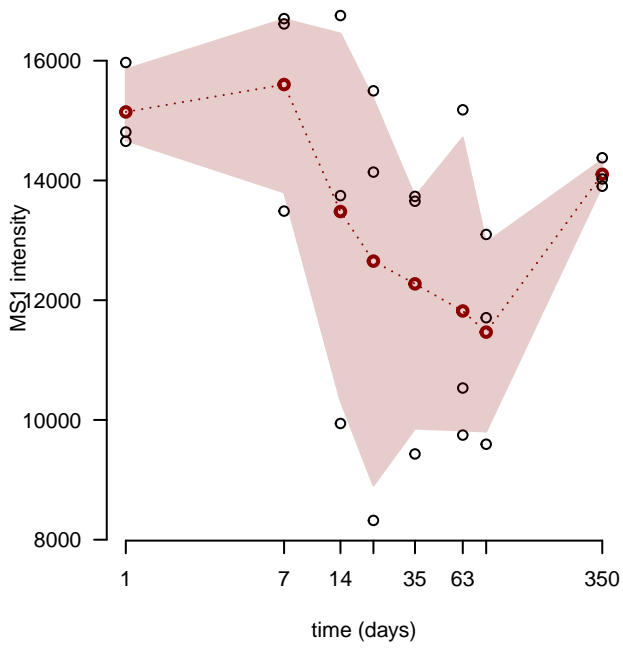

**Q8K248**  
GN=Hpdl  
4-hydroxyphenylpyruvate dioxygenase-like

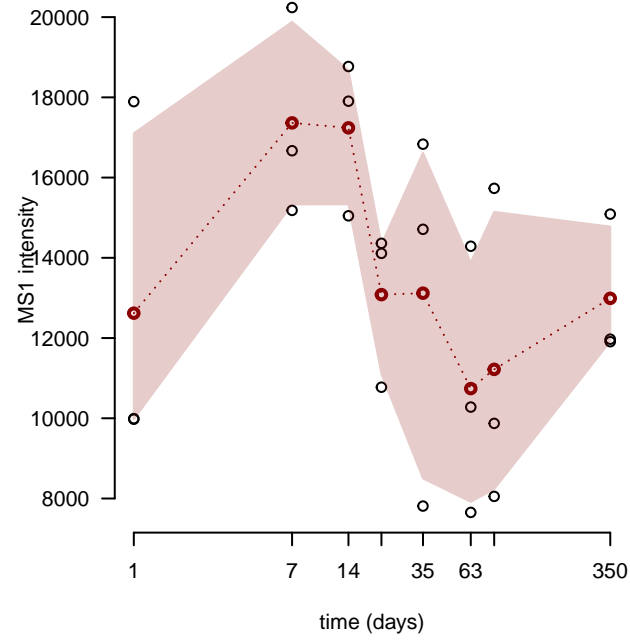

**Q8K268**  
GN=Abcf3  
ATP-binding cassette, sub-family F (GCN2 ...

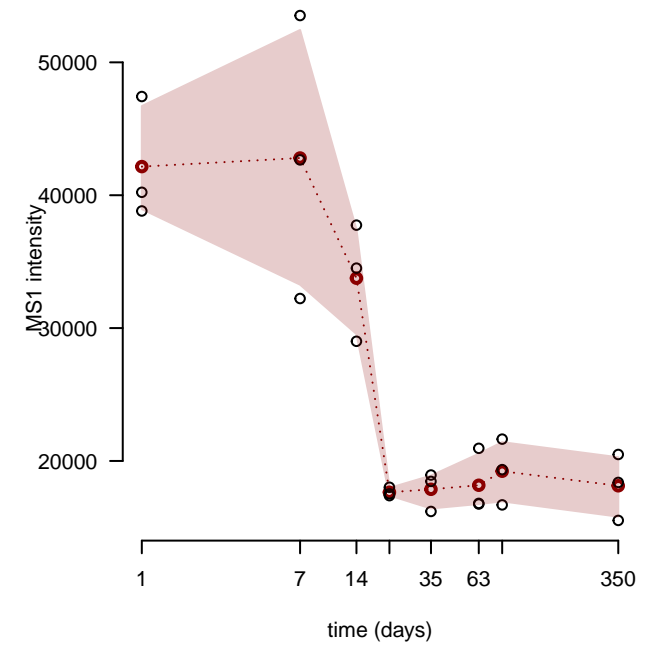

**Q8K273**  
GN=Mmg1  
membrane magnesium transporter 1

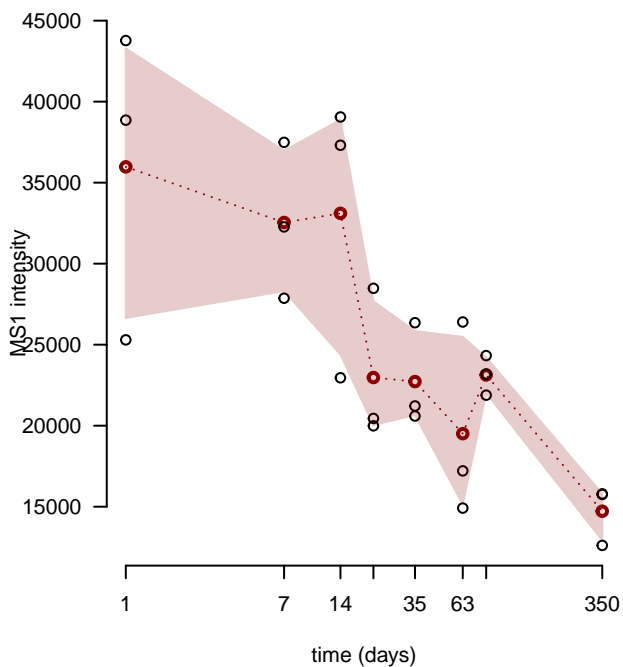

**Q8K274**  
GN=Fn3krp  
fructosamine 3 kinase related protein

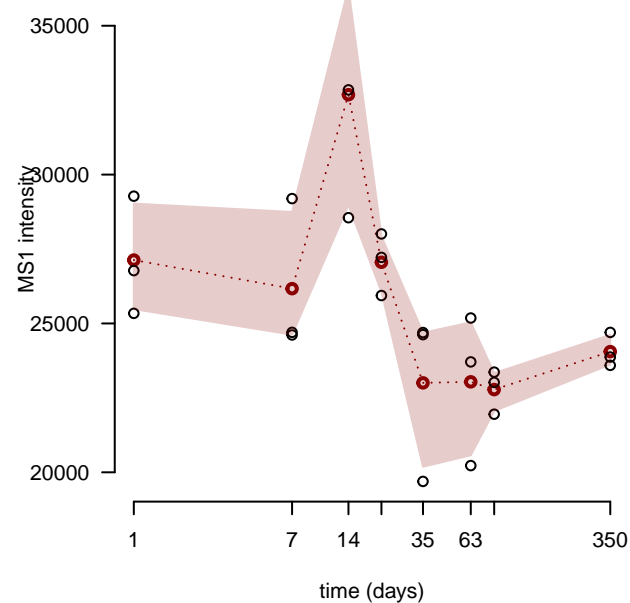

**Q8K284**  
GN=Gtf3c1  
general transcription factor III C 1

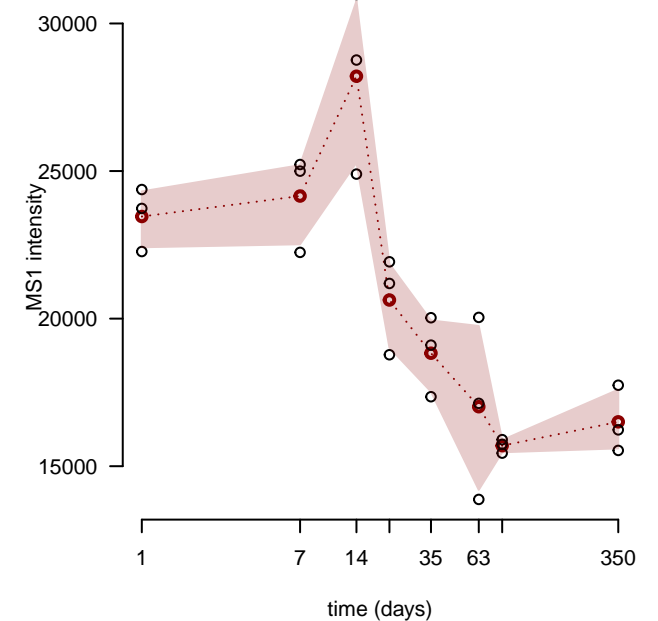

**Q8K296**  
**GN=Mttr3**  
myotubularin related protein 3

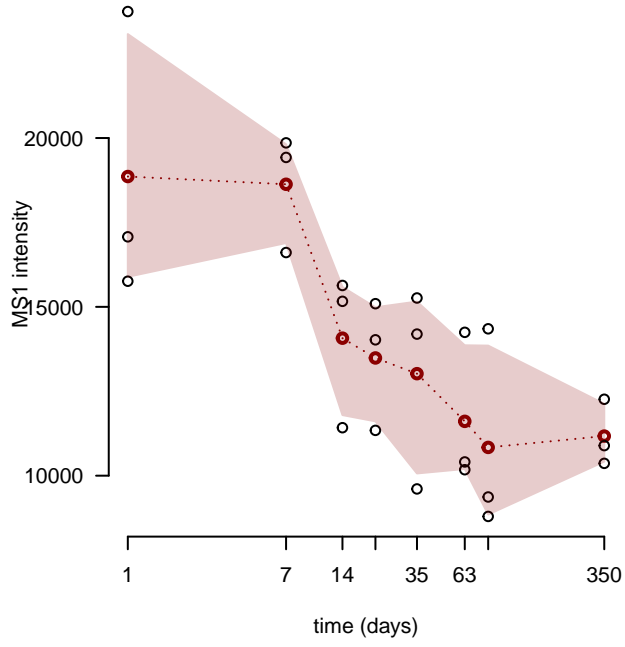

**Q8K297**  
**GN=Colgalt1**  
collagen beta(1-O)galactosyltransferase ...

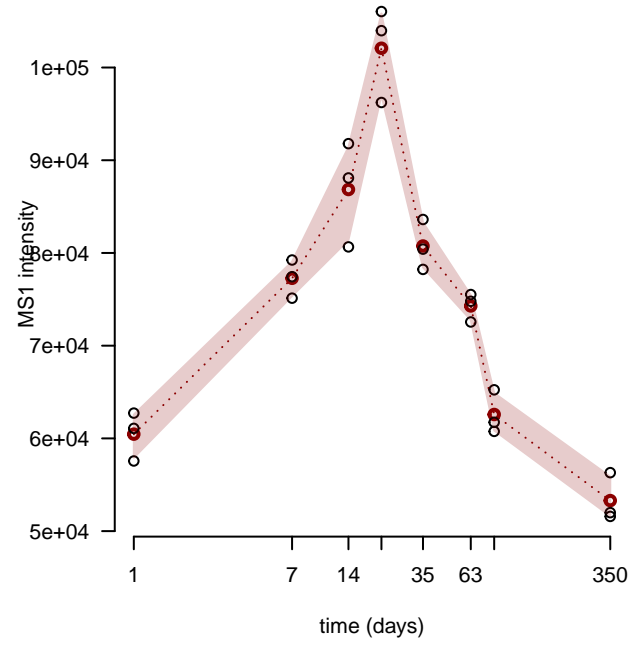

**Q8K298**  
**GN=Anln**  
anillin, actin binding protein

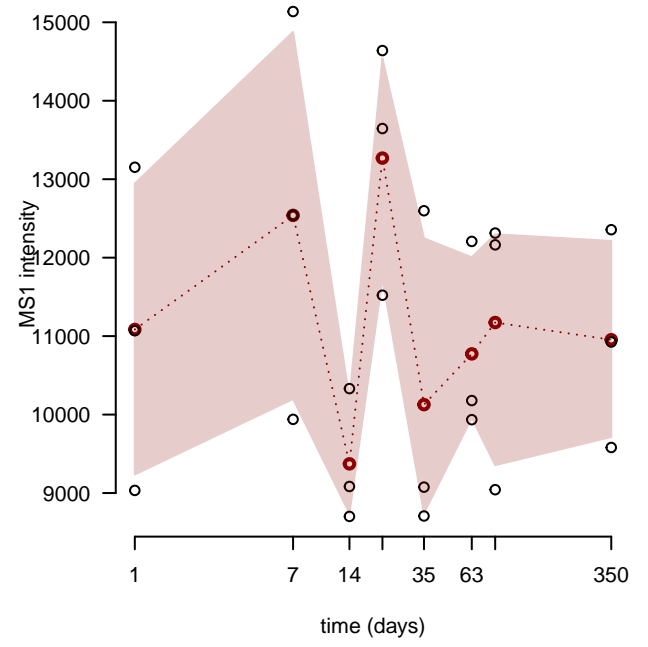

**Q8K299**  
**GN=Scara5**  
scavenger receptor class A, member 5

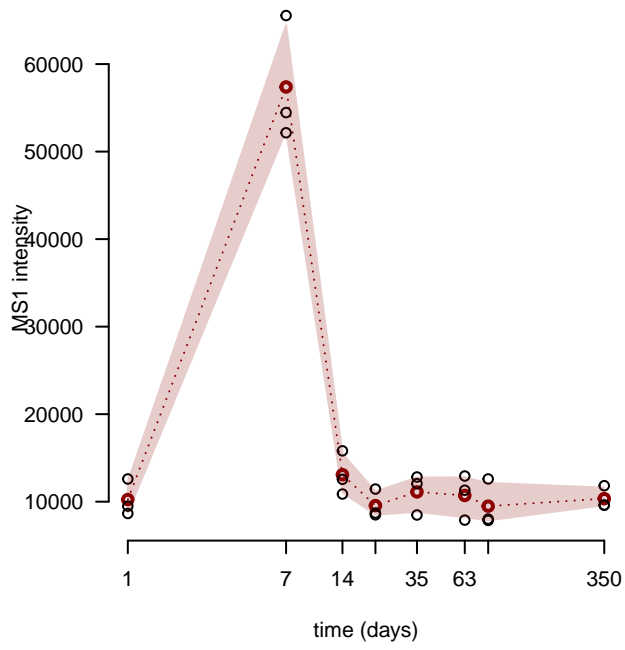

**Q8K2A1**  
**GN=Gulp1**  
GULP, engulfment adaptor PTB domain cont ...

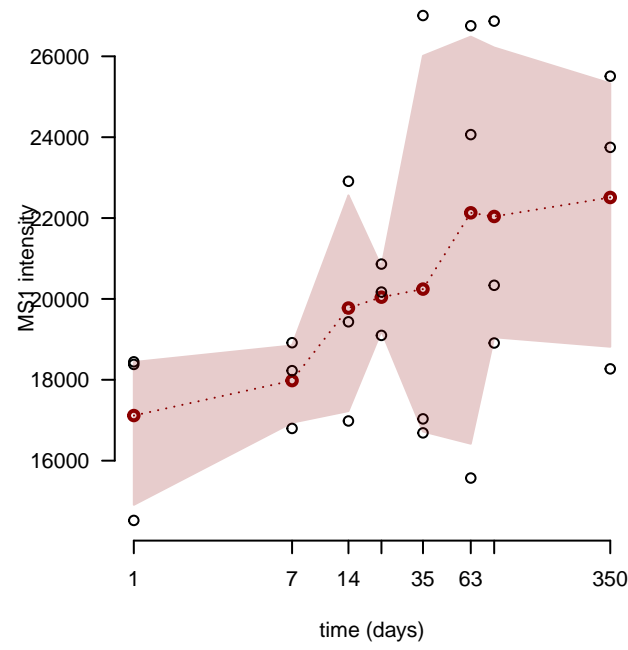

**Q8K2A7**  
**GN=Ints10**  
integrator complex subunit 10

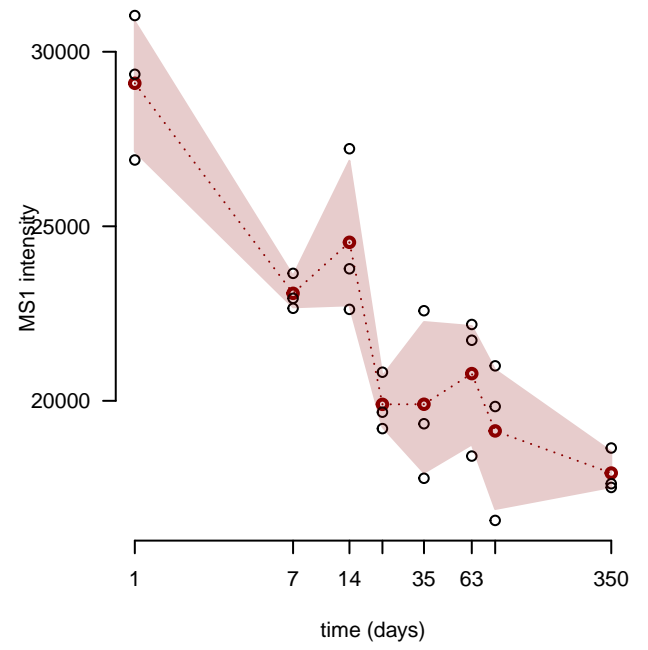

**Q8K2A8**  
**GN=Alg3**  
asparagine-linked glycosylation 3 (alpha ...

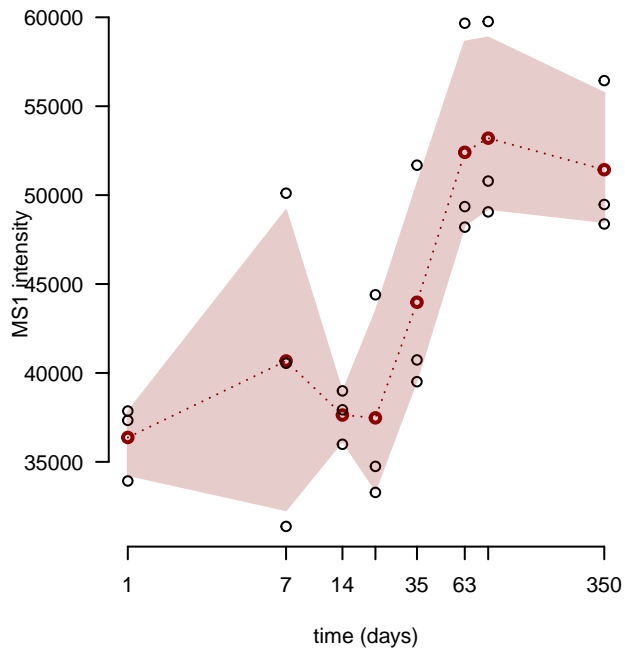

**Q8K2B0**  
**GN=P3h4**  
prolyl 3-hydroxylase family member 4 (no ...

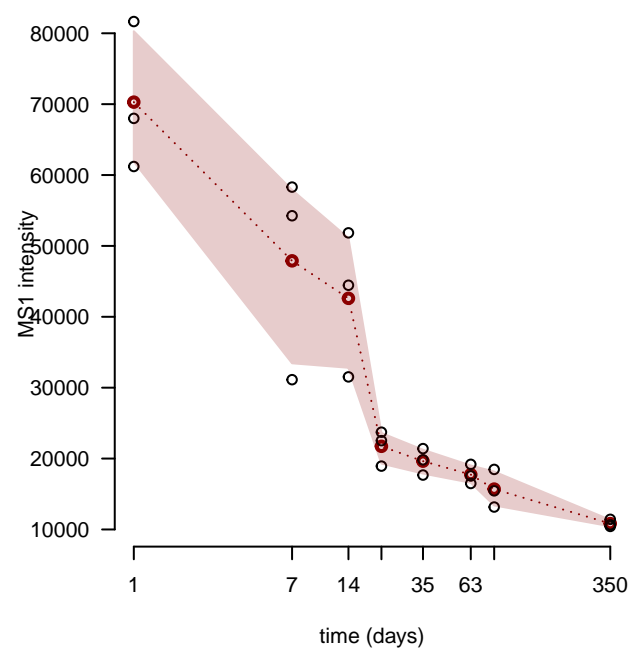

**Q8K2B3**  
**GN=Sdha**  
succinate dehydrogenase complex, subunit ...

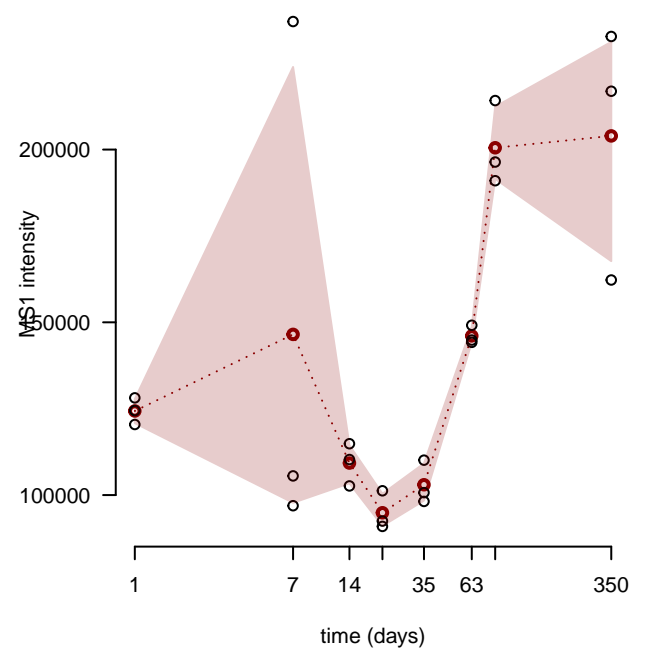



**Q8K2C6**  
**GN=Sirt5**  
sirtuin 5

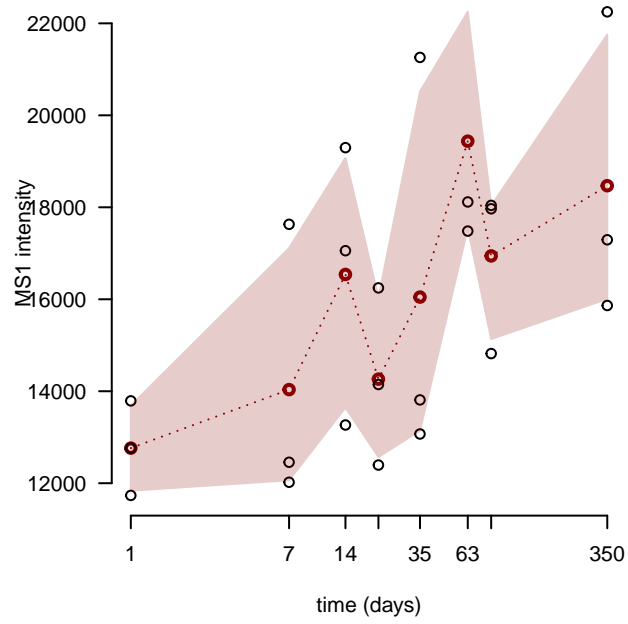

**Q8K2C7**  
**GN=Os9**  
amplified in osteosarcoma

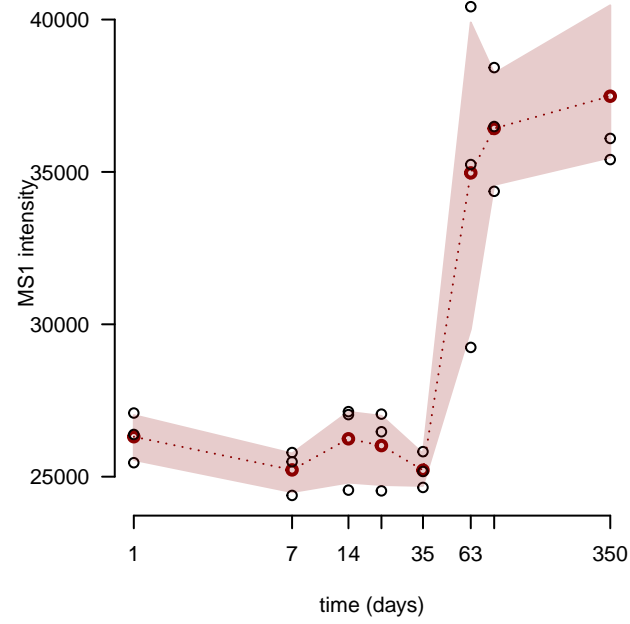

**Q8K2C8**  
**GN=Gpat4**  
glycerol-3-phosphate acyltransferase 4

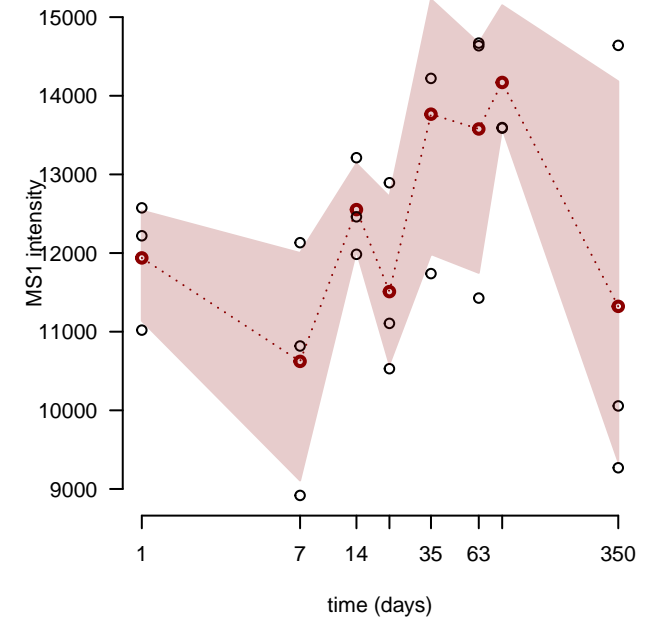

**Q8K2C9**  
**GN=Hacd3**  
3-hydroxyacyl-CoA dehydratase 3

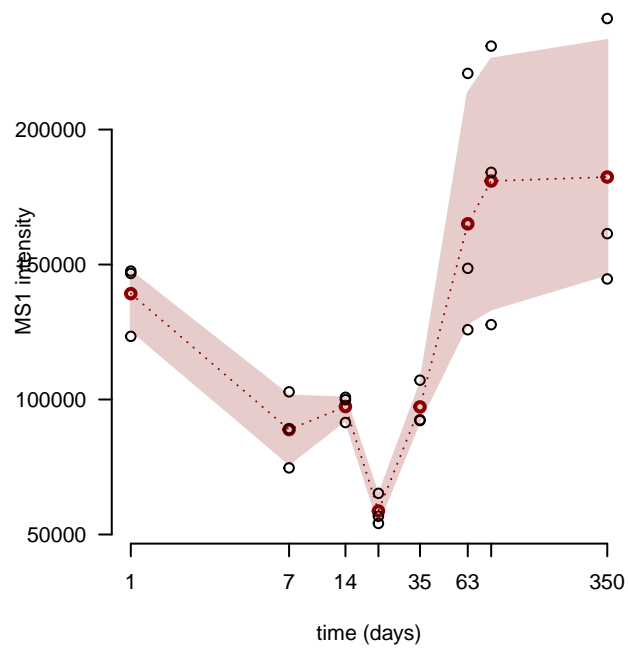

**Q8K2D3**  
**GN=Edc3**  
enhancer of mRNA decapping 3

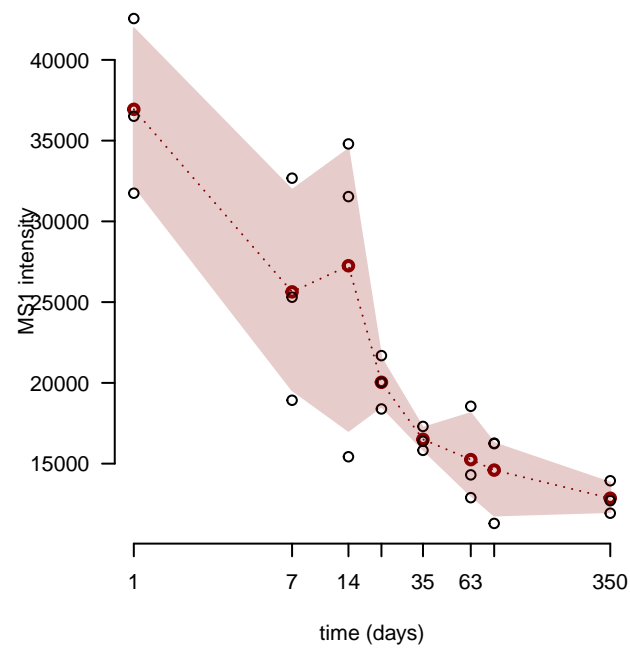

**Q8K2D6**  
**GN=Dctd**  
dCMP deaminase

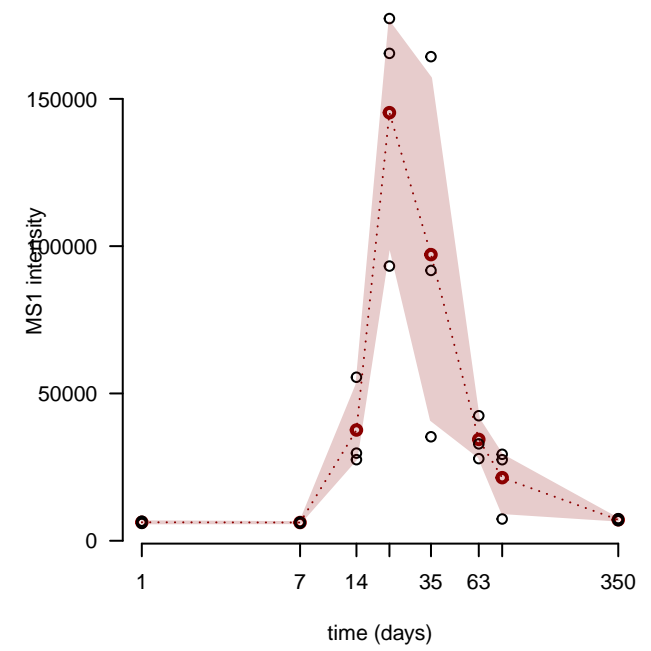

**Q8K2F0**  
**GN=Brd3**  
bromodomain containing 3

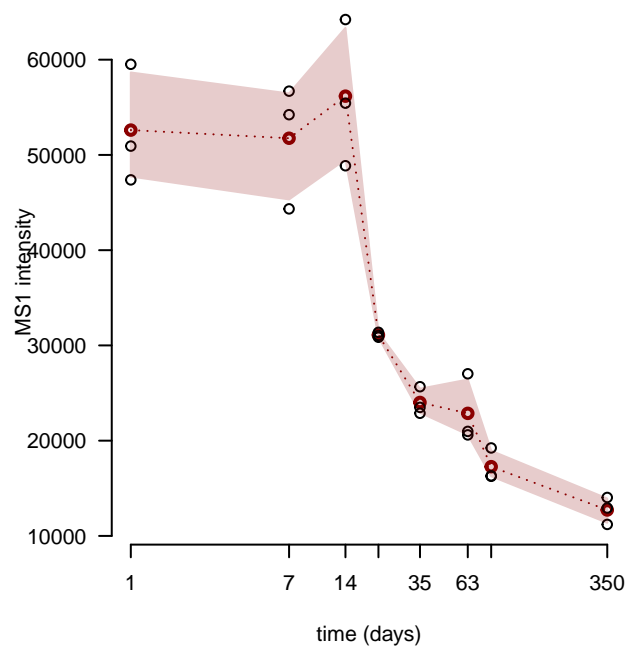

**Q8K2F8**  
**GN=Lsm14a**  
LSM14A mRNA processing body assembly fac ...

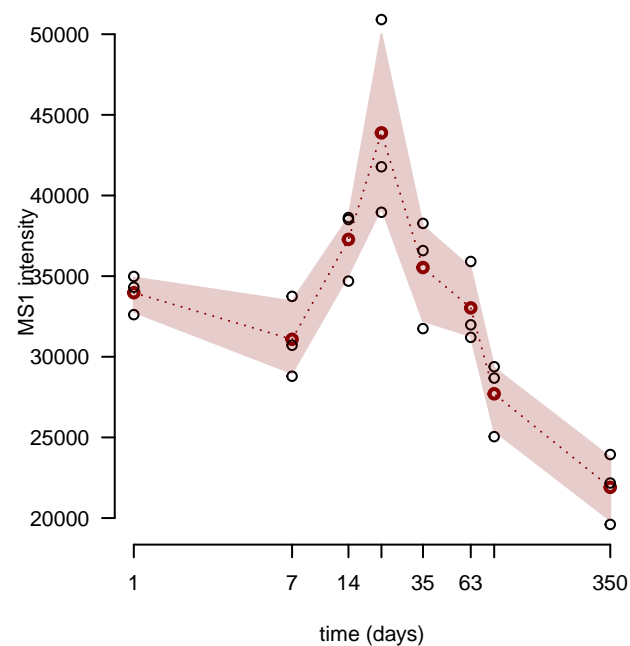

**Q8K2G4**  
**GN=Bbs7**  
Bardet-Biedl syndrome 7 (human)

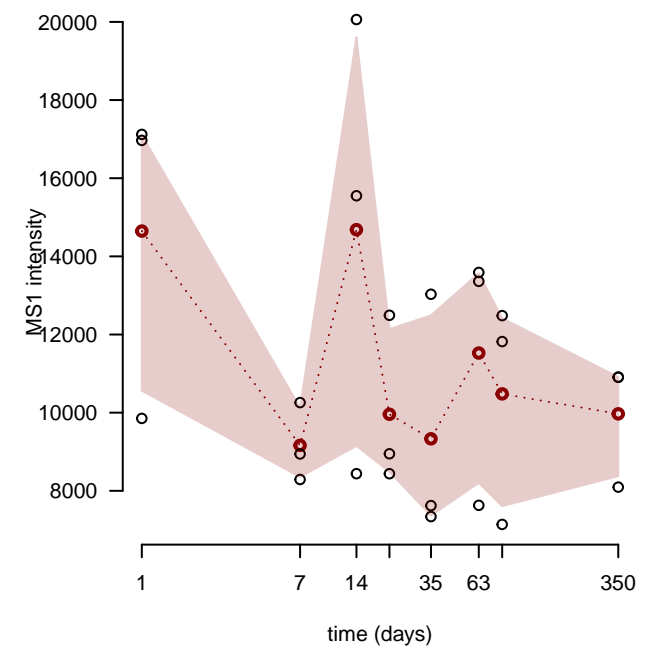

**Q8K2H1**  
GN=Pph1n1  
periphilin 1

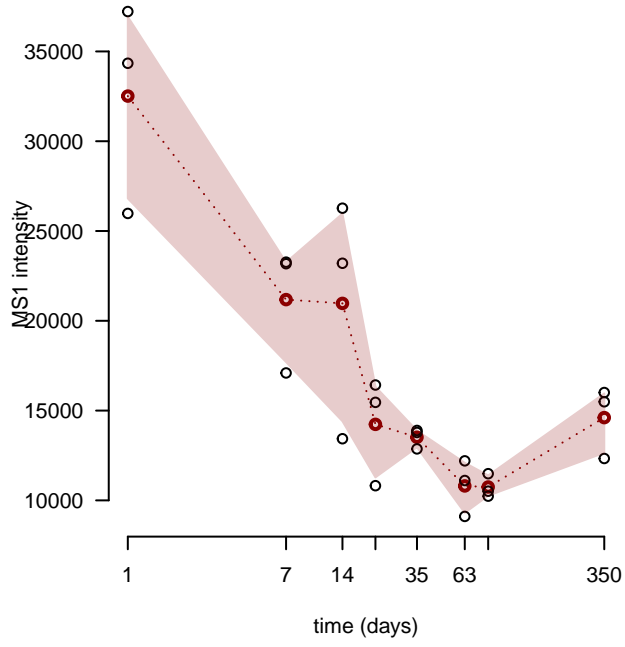

**Q8K2H2**  
GN=Otud6b  
OTU domain containing 6B

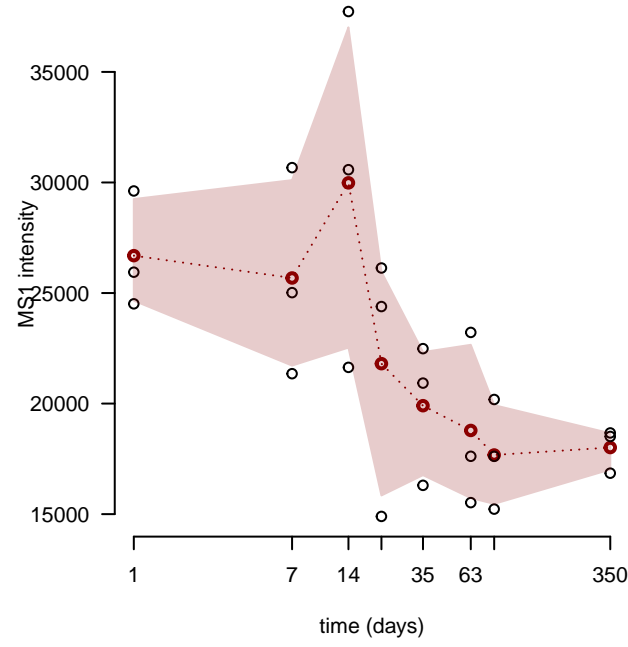

**Q8K2H6**  
GN=Anapc10  
anaphase promoting complex subunit 10

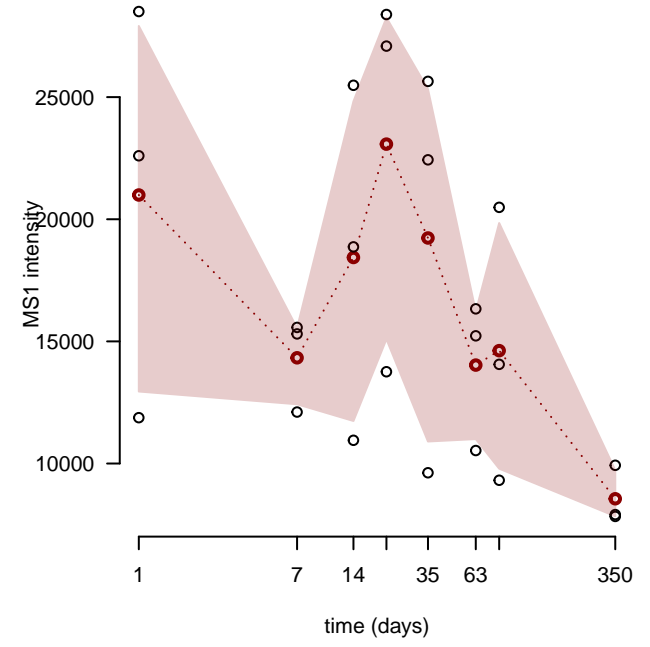

**Q8K2I1**  
GN=Fntb  
farnesyltransferase, CAAX box, beta

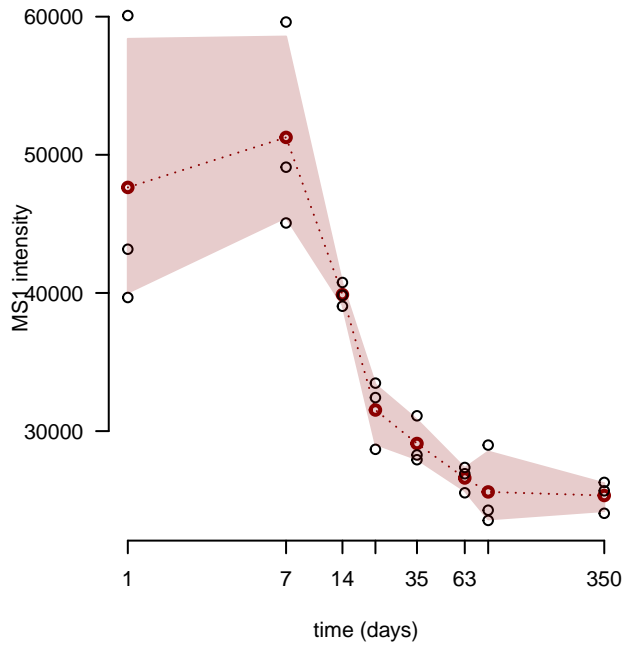

**Q8K2I3**  
GN=Fmo2  
flavin containing monooxygenase 2

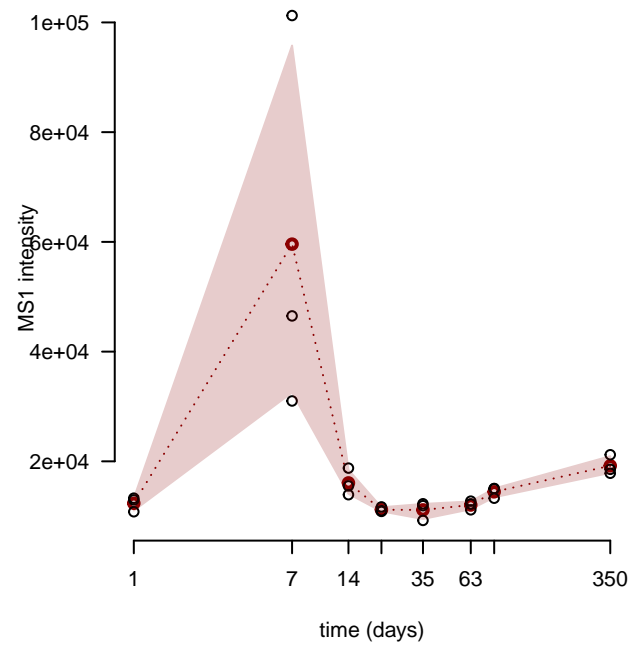

**Q8K2I4**  
GN=Manba  
mannosidase, beta A, lysosomal

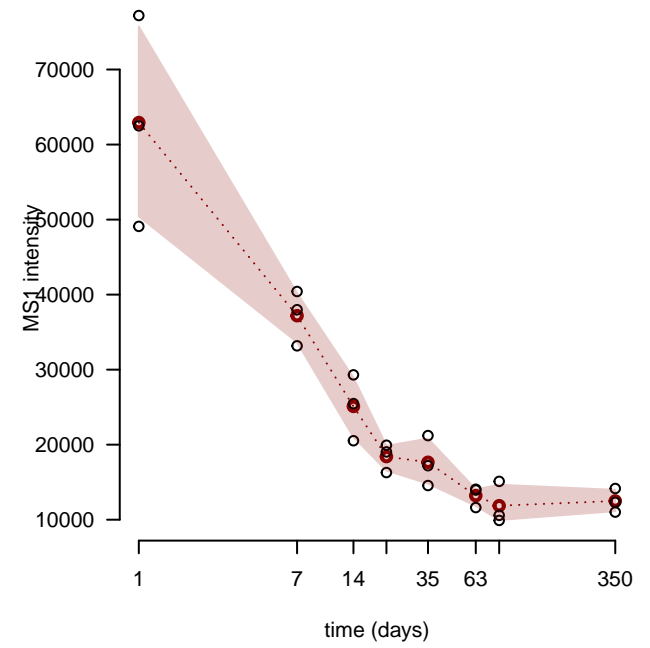

**Q8K2I9**  
GN=Fbh1  
F-box DNA helicase 1

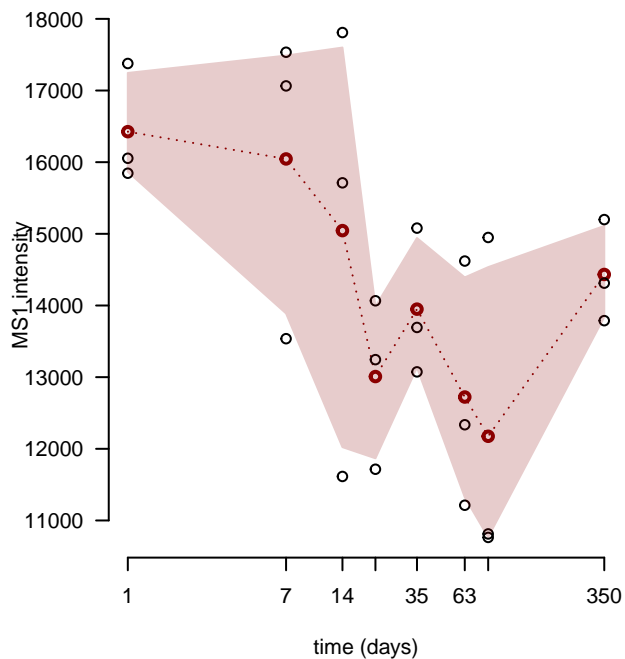

**Q8K2J0**  
GN=Plcd3  
phospholipase C, delta 3

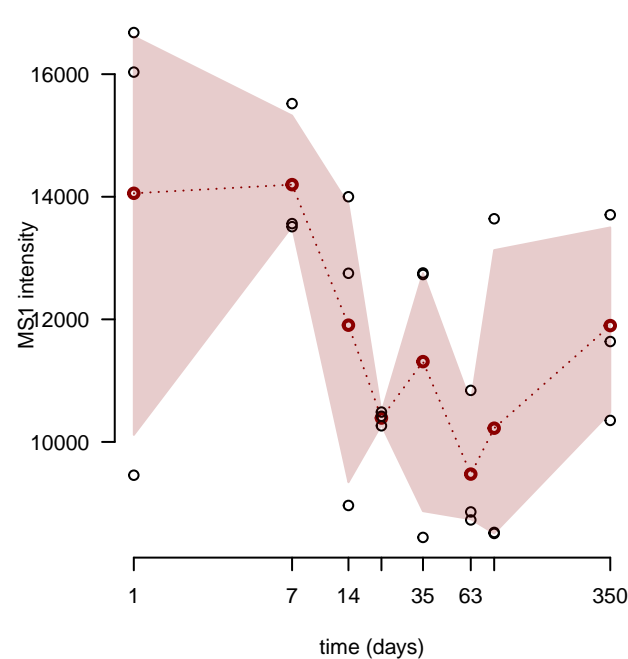

**Q8K2K6**  
GN=Agfg1  
ArfGAP with FG repeats 1

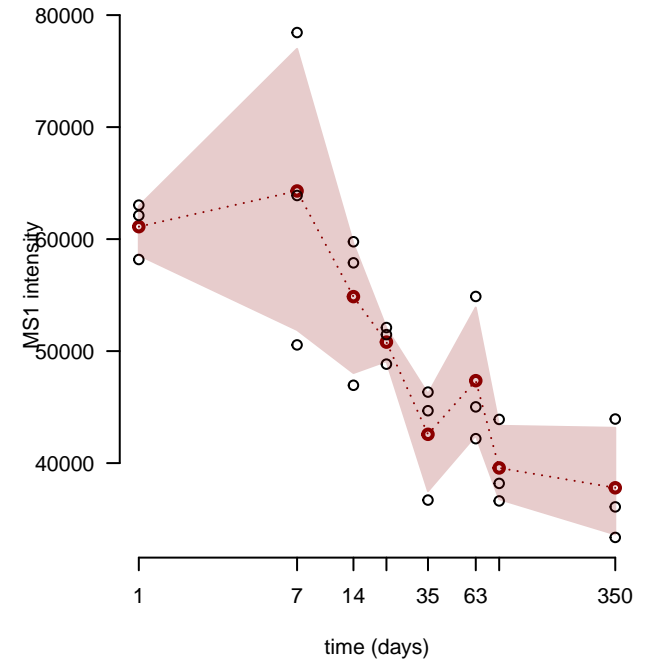

**Q8K2L8**  
**GN=Trappc12**  
trafficking protein particle complex 12

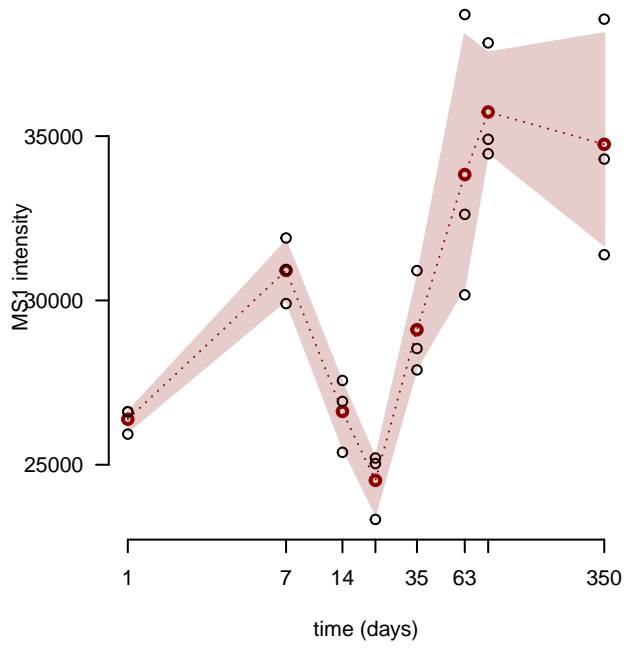

**Q8K2M0**  
**GN=Mrpl38**  
mitochondrial ribosomal protein L38

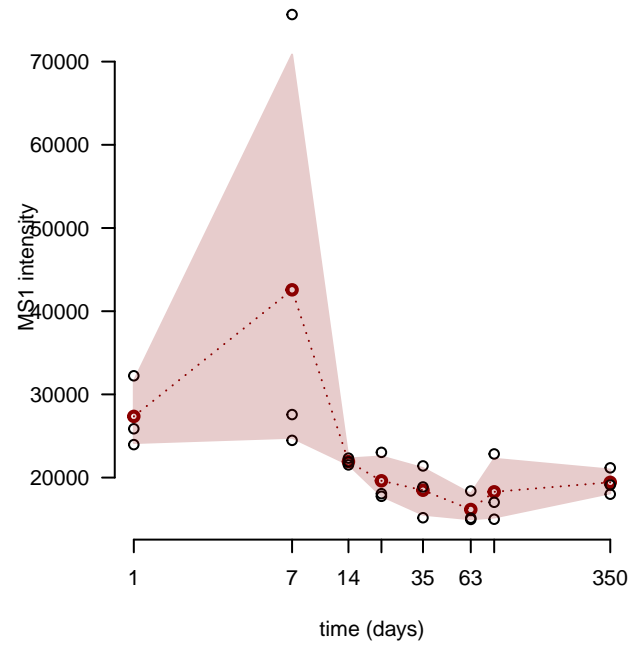

**Q8K2Q0**  
**GN=Commd9**  
COMM domain containing 9

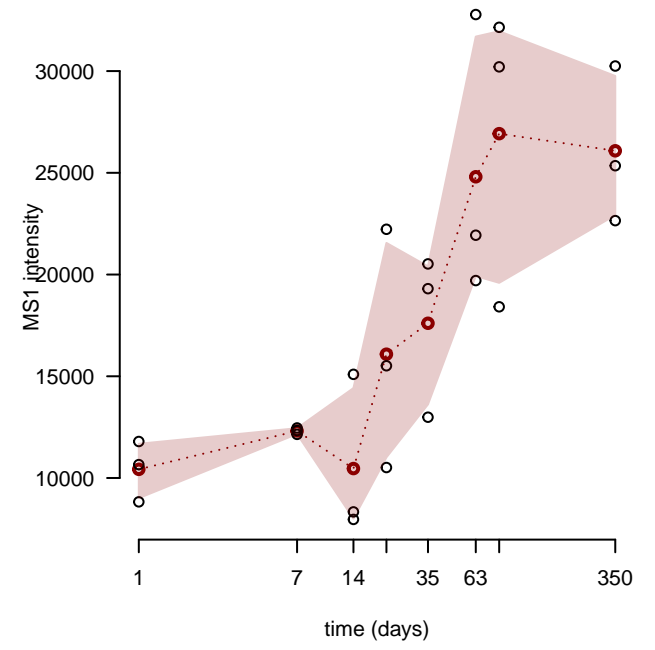

**Q8K2Q5**  
**GN=Chchd7**  
coiled-coil-helix-coiled-coil-helix doma ...

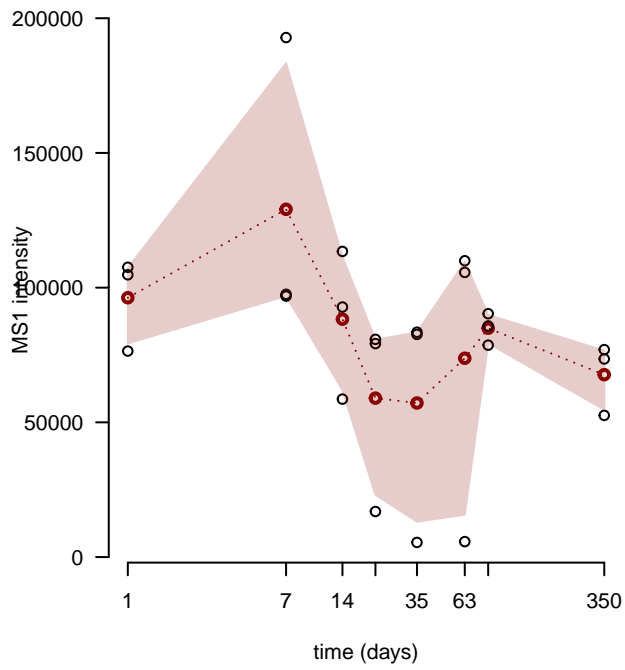

**Q8K2Q7**  
**GN=Brox**  
BRO1 domain and CAAX motif containing

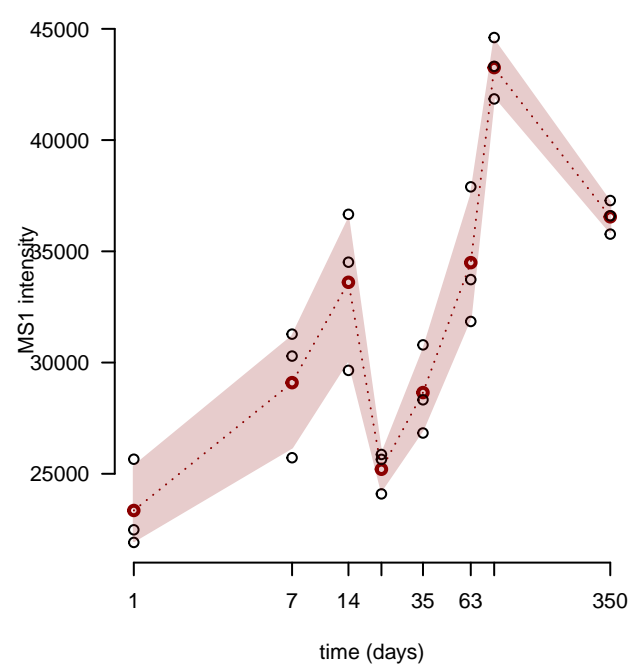

**Q8K2Q9**  
**GN=Shtn1**  
shootin 1

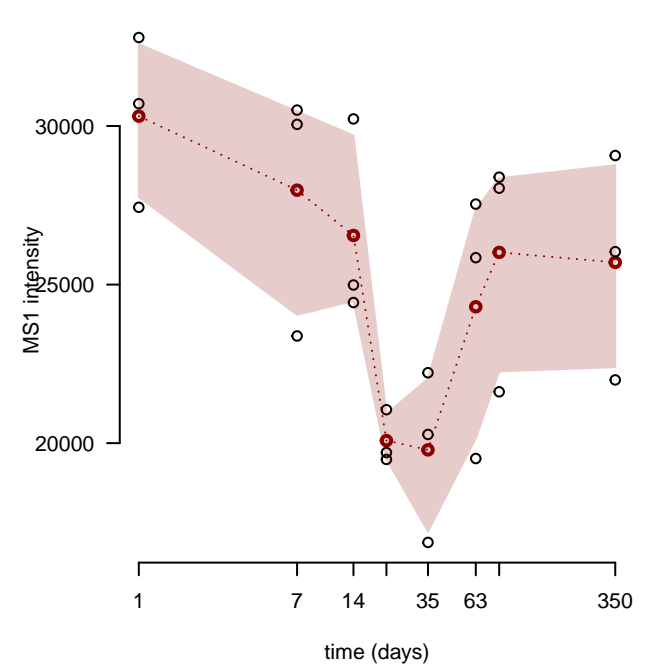

**Q8K2R5**  
**GN=Znf668**

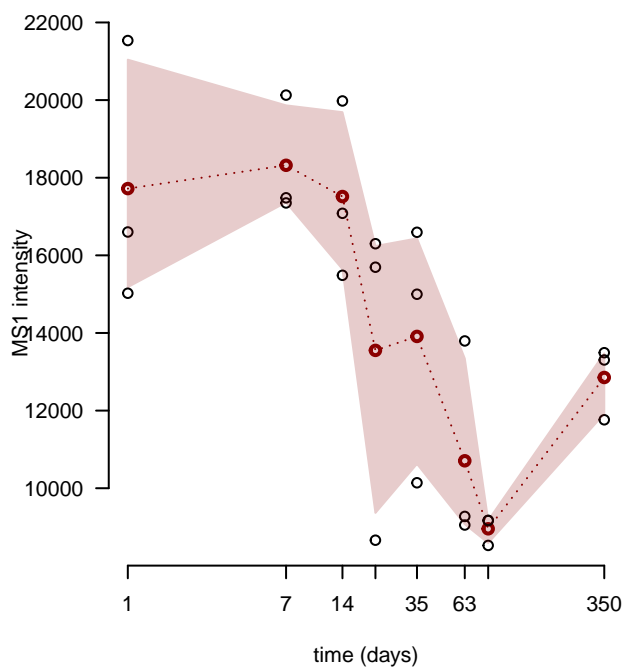

**Q8K2T1**  
**GN=Nmra1**  
NmrA-like family domain containing 1

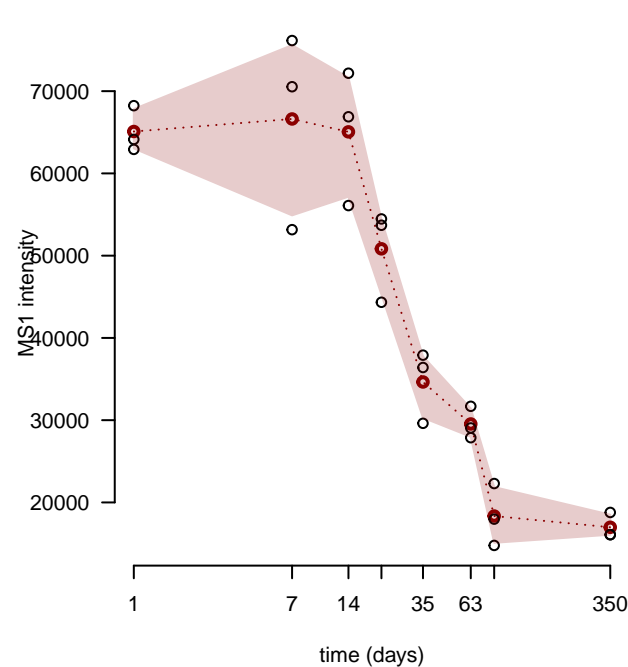

**Q8K2T4**  
**GN=Uqc3**  
ubiquinol-cytochrome c reductase complex ...

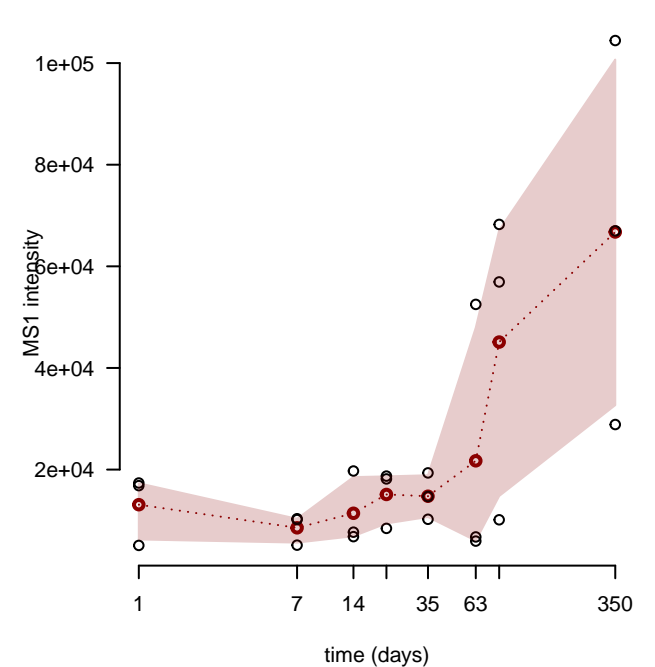

**Q8K2T8**  
**GN=Paf1**

Paf1, RNA polymerase II complex componen ...

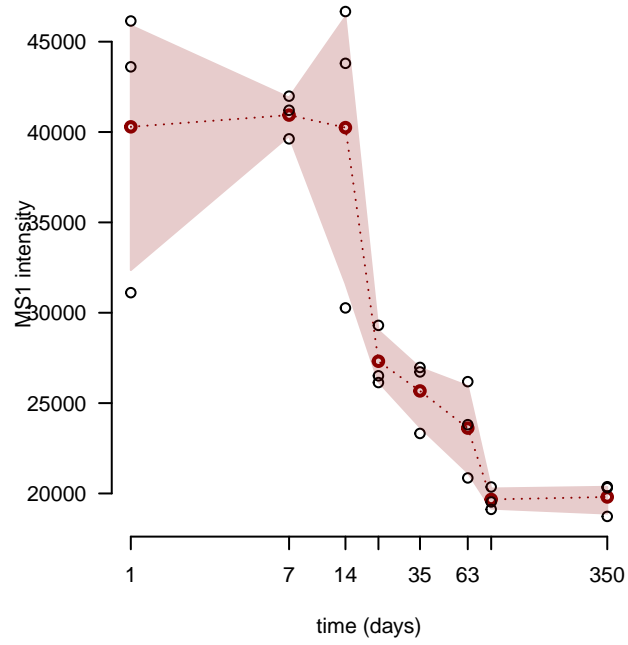

**Q8K2U2**  
**GN=Alkbh6**

alkB homolog 6

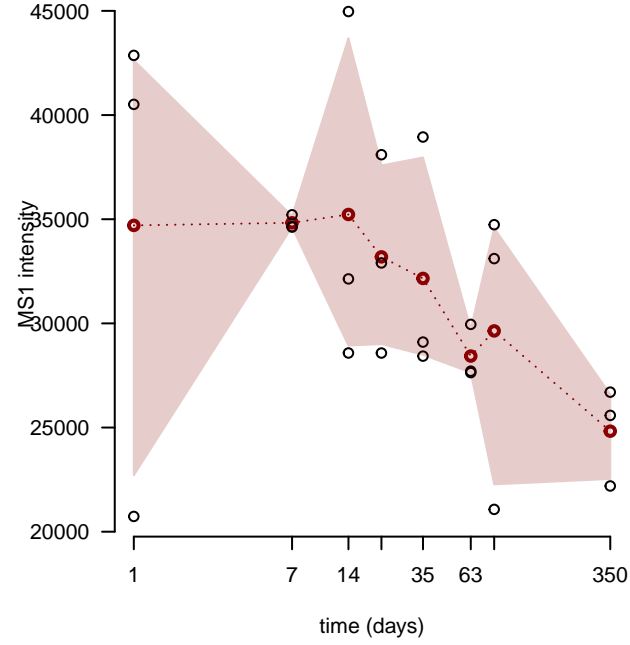

**Q8K2V1**  
**GN=Ppp4r1**

protein phosphatase 4, regulatory subuni ...

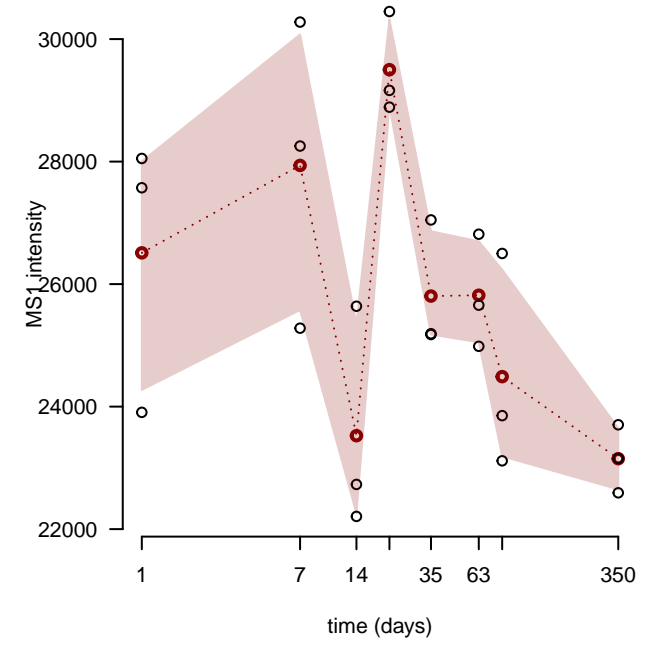

**Q8K2V6**  
**GN=Ipo11**

importin 11

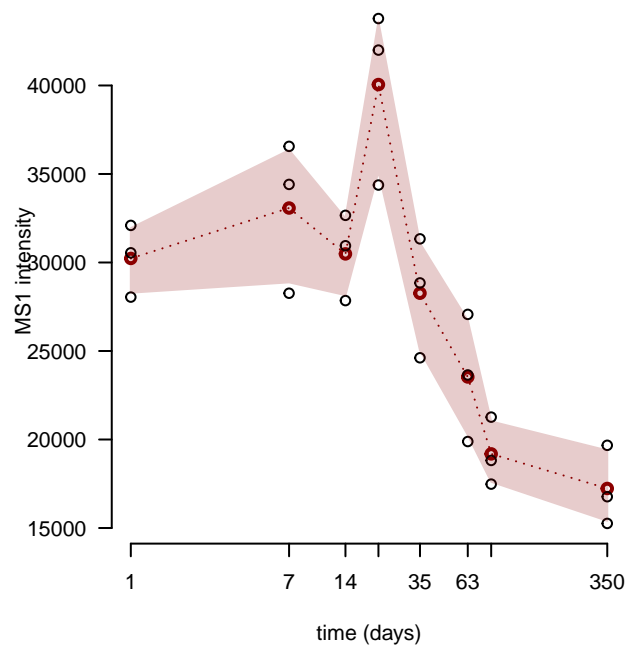

**Q8K2W3**  
**GN=Txndc11**

thioredoxin domain containing 11

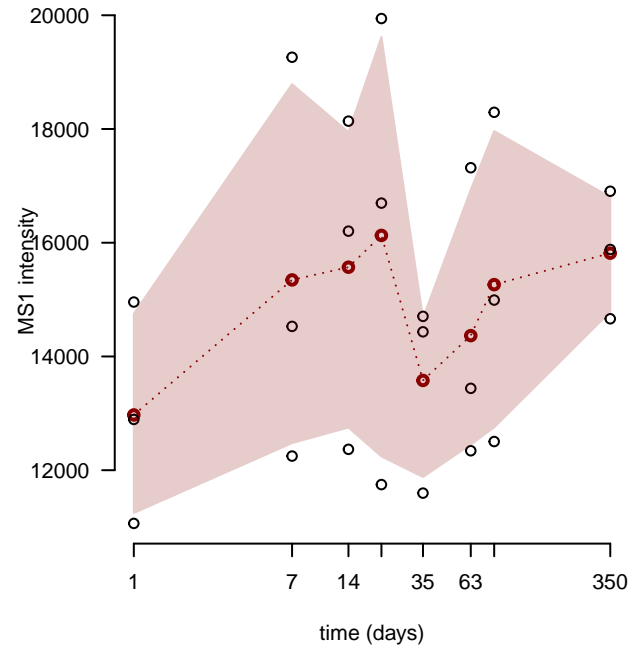

**Q8K2W9**  
**GN=**

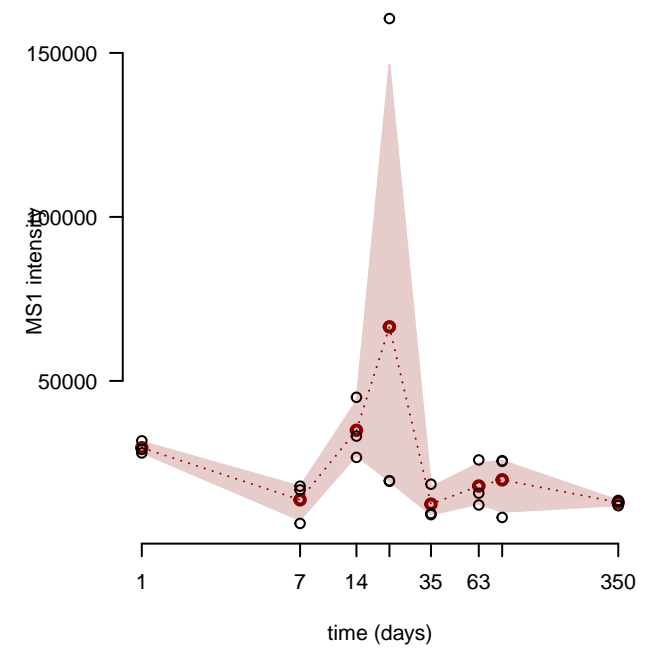

**Q8K2X1**  
**GN=Atp10d**

ATPase, class V, type 10D

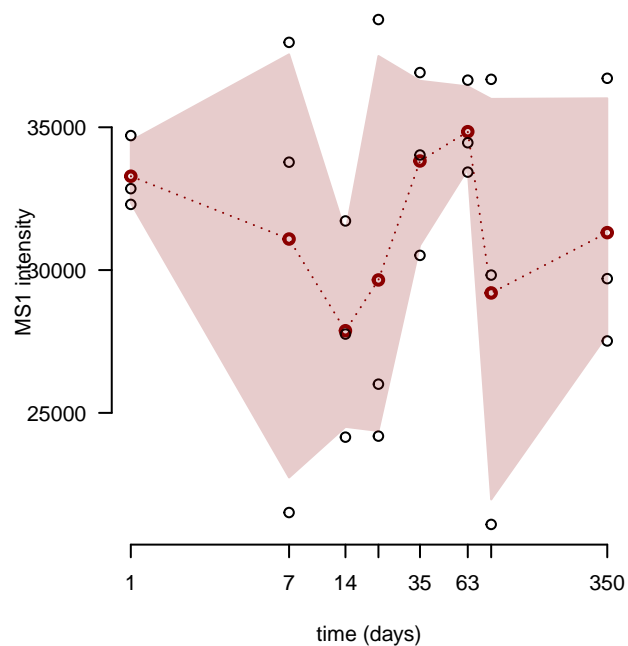

**Q8K2X3**  
**GN=Stn1**

STN1, CST complex subunit

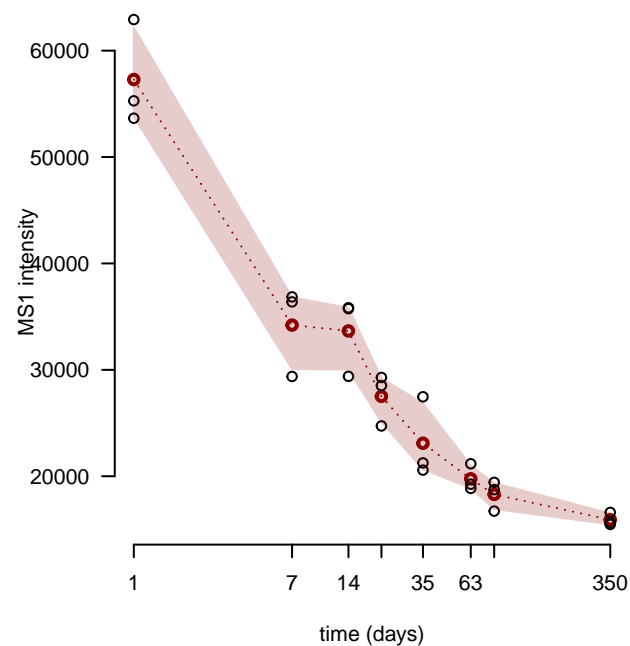

**Q8K2Y0**  
**GN=Rnf219**

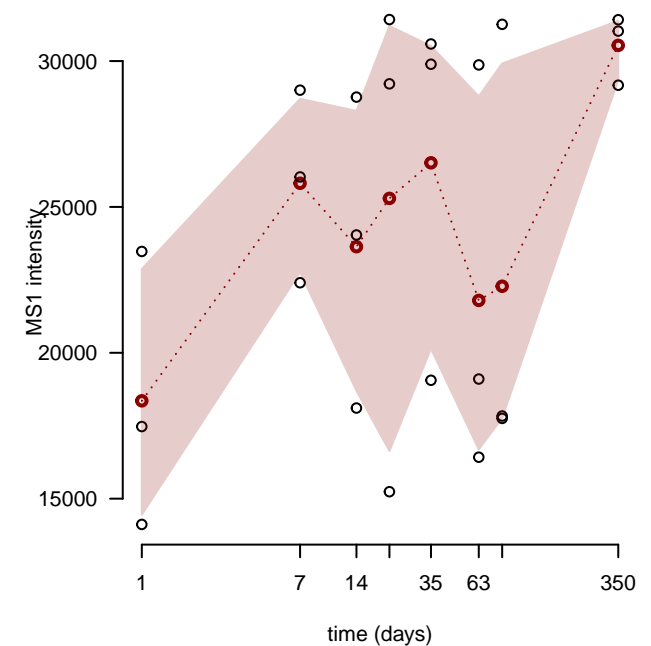

**Q8K2Y3**  
**GN=Eva1b**  
eva-1 homolog B (*C. elegans*)

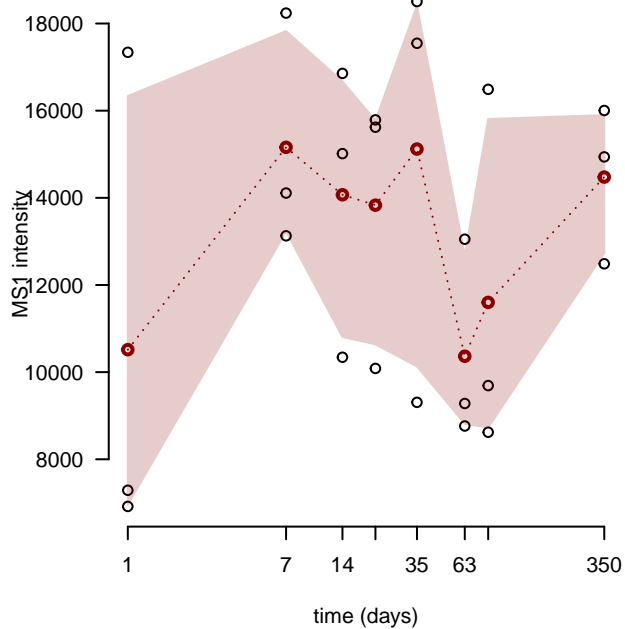

**Q8K2Y7**  
**GN=Mrpl47**  
mitochondrial ribosomal protein L47

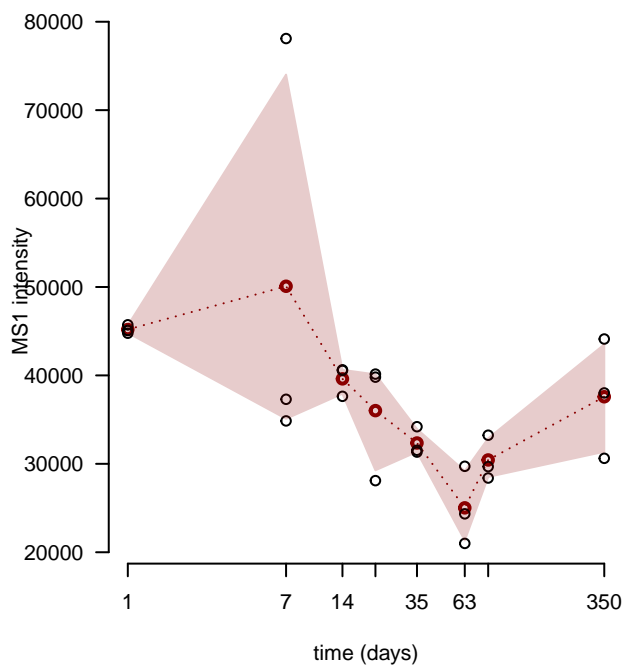

**Q8K2Y9**  
**GN=Ccm2**  
cerebral cavernous malformation 2

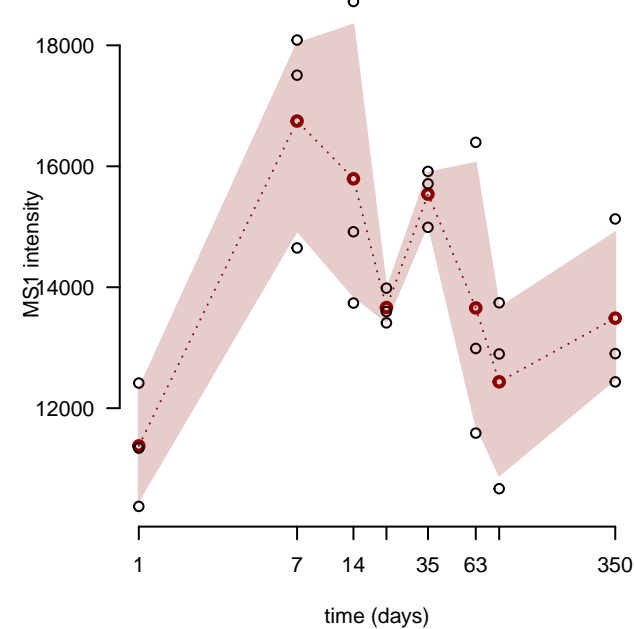

**Q8K2Z2**  
**GN=Prpf39**  
pre-mRNA processing factor 39

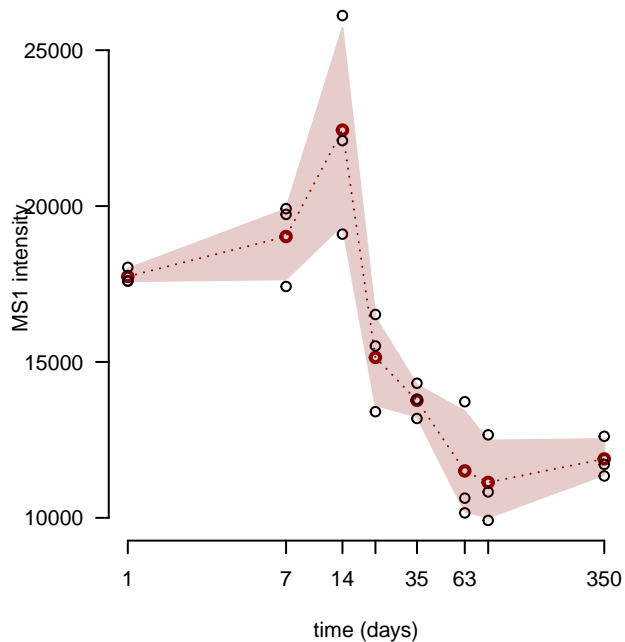

**Q8K2Z4**  
**GN=Ncapd2**  
non-SMC condensin I complex, subunit D2

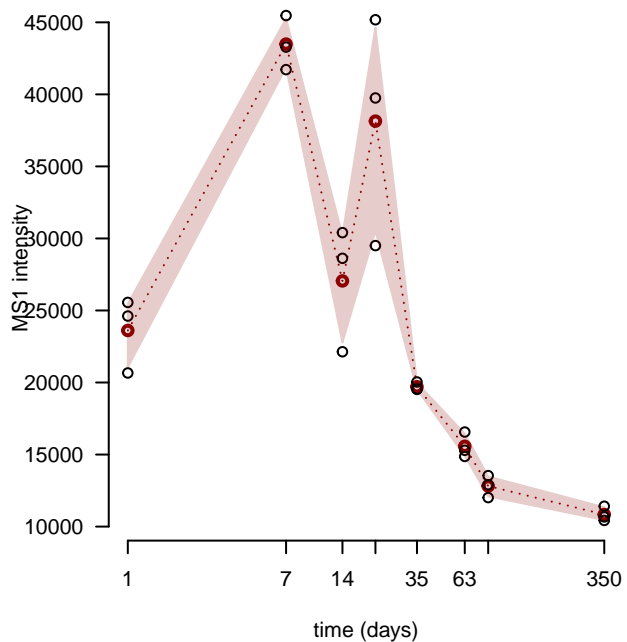

**Q8K2Z8**  
**GN=Ube2q2**  
ubiquitin-conjugating enzyme E2Q family ...

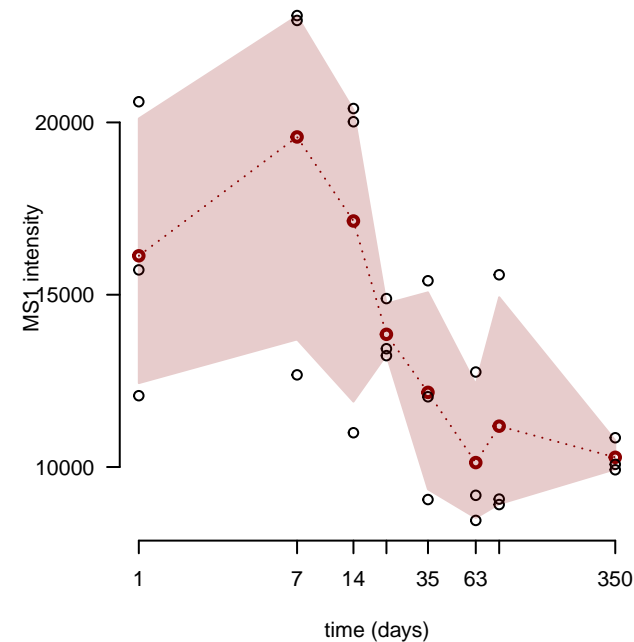

**Q8K301**  
**GN=Ddx52**  
DEXD box helicase 52

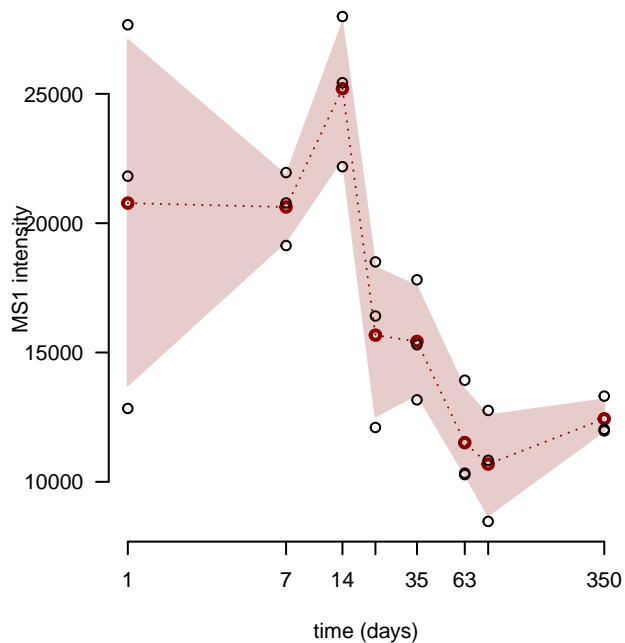

**Q8K305**  
**GN=Nsl1**  
NSL1, MIS12 kinetochore complex componen ...

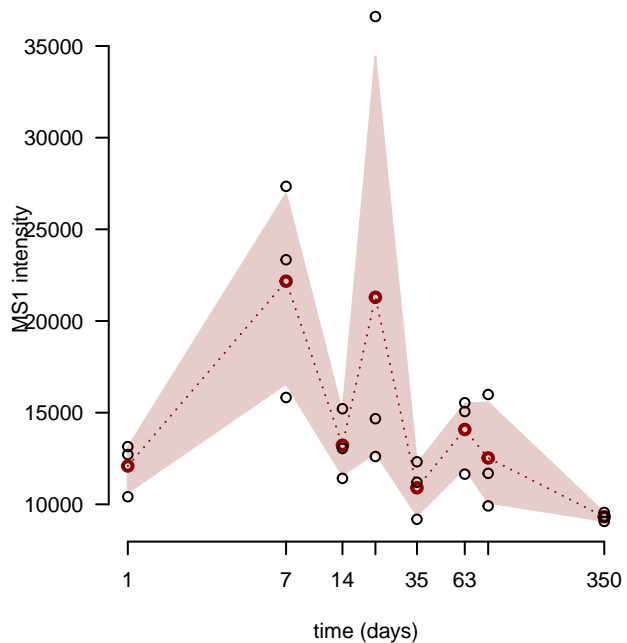

**Q8K310**  
**GN=Matr3**  
matrin 3

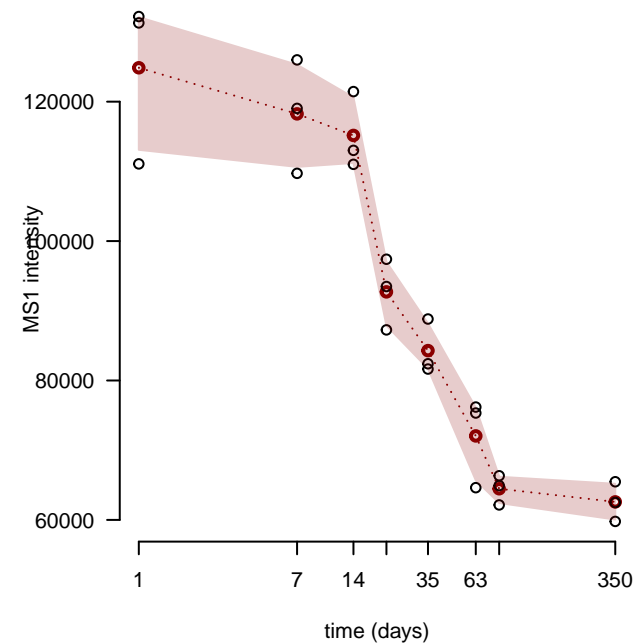

**Q8K327**  
**GN=Champ1**

chromosome alignment maintaining phospho ...

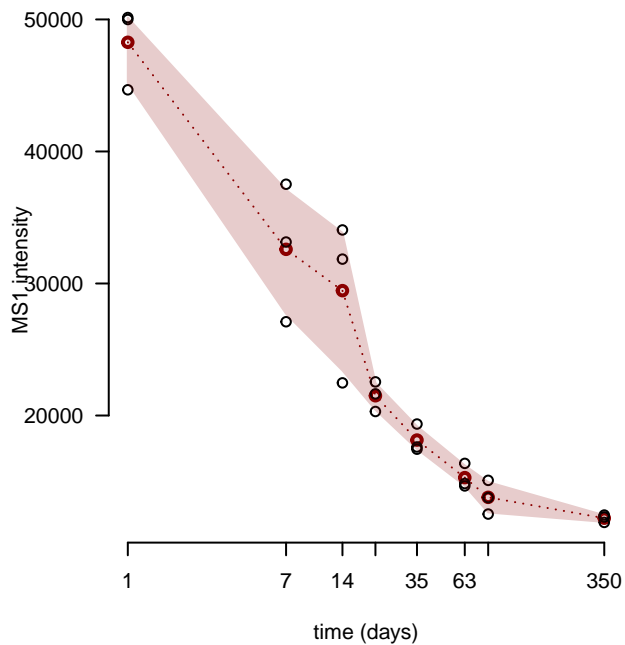

**Q8K330**  
**GN=Ssh3**

slingshot protein phosphatase 3

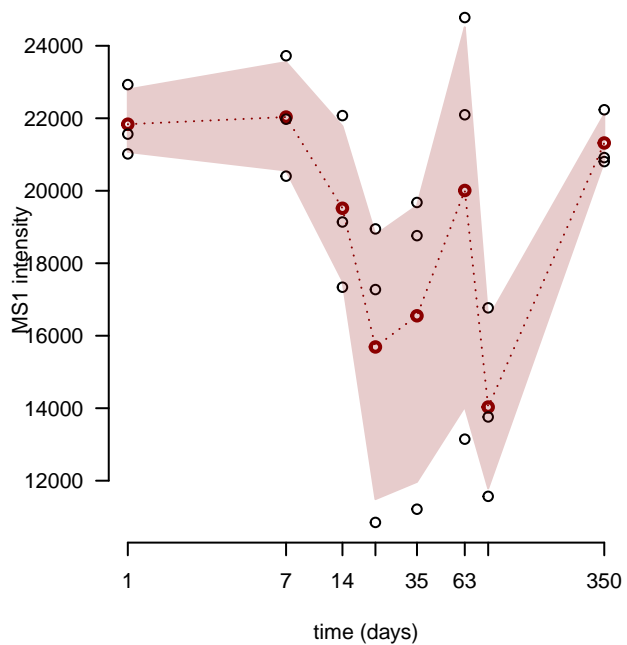

**Q8K337**  
**GN=Inpp5b**

inositol polyphosphate-5-phosphatase B

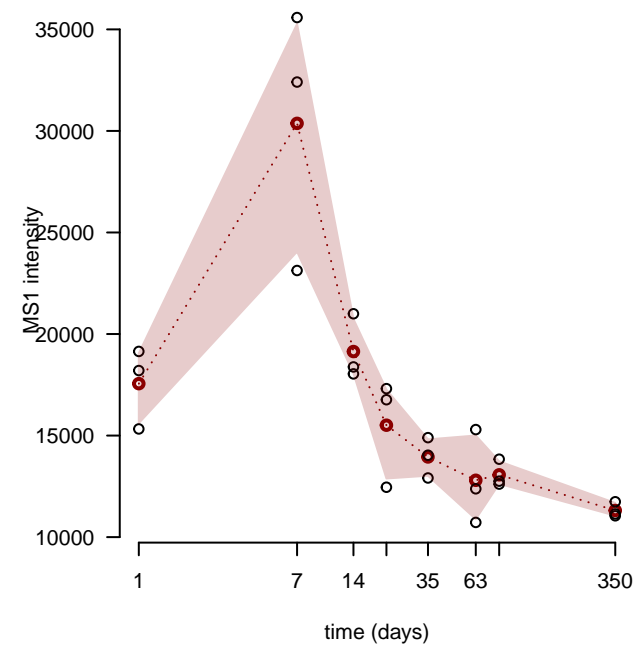

**Q8K339**  
**GN=Kin**

Kin17 DNA and RNA binding protein

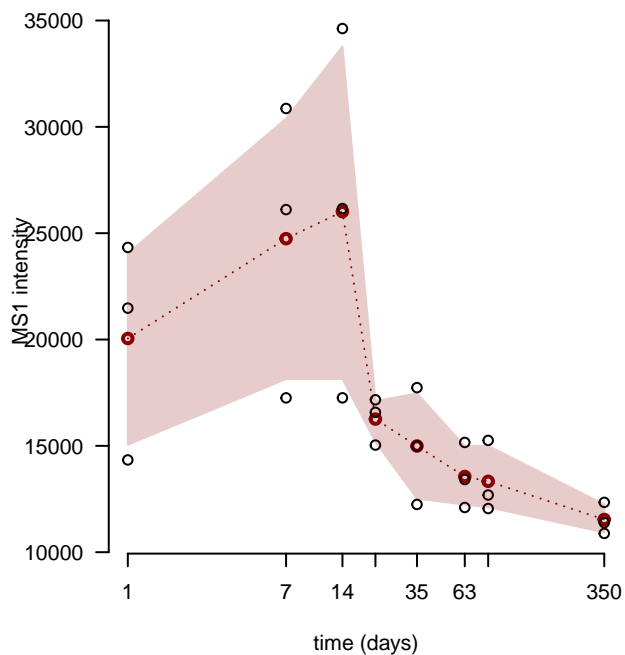

**Q8K341**  
**GN=Atat1**

alpha tubulin acetyltransferase 1

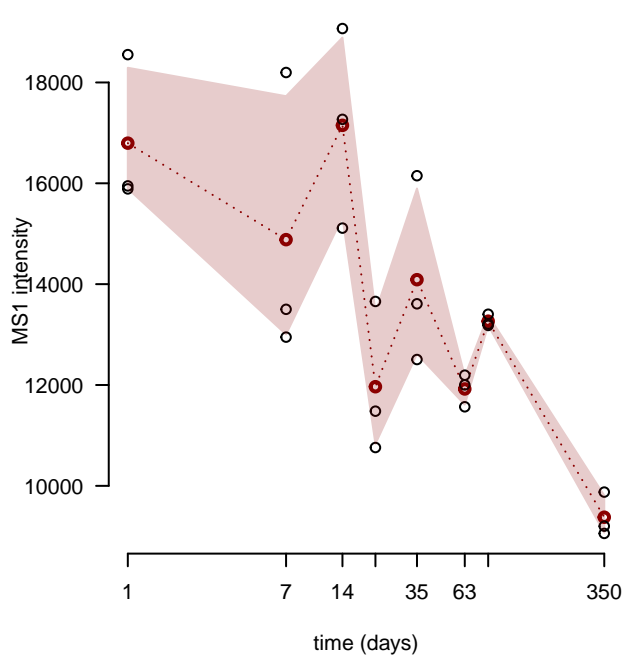

**Q8K353**  
**GN=Cystm1**

cysteine-rich transmembrane module conta ...

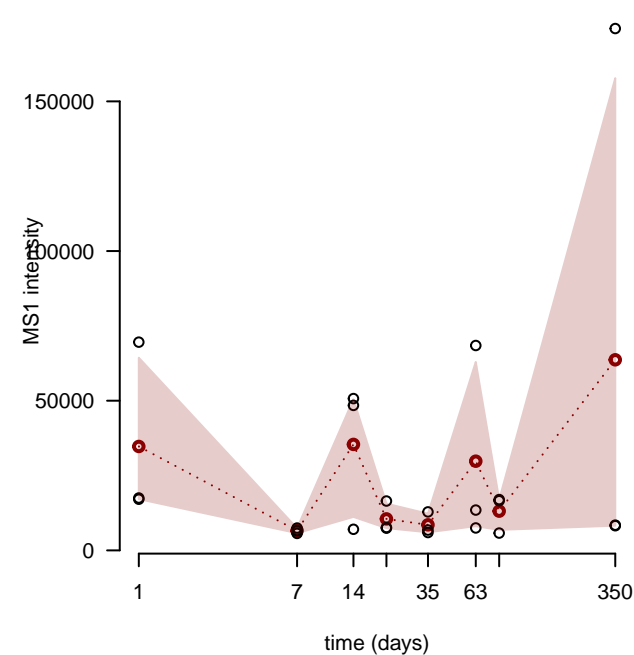

**Q8K354**  
**GN=Cbr3**

carbonyl reductase 3

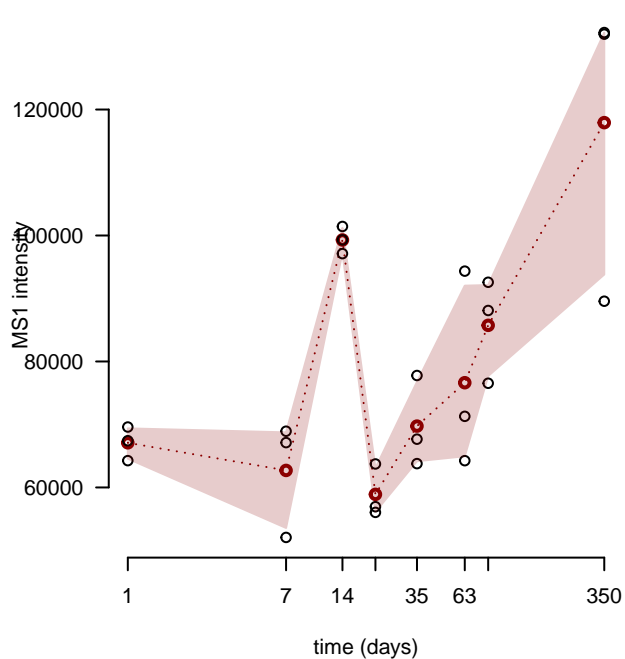

**Q8K358**  
**GN=Pigu**

phosphatidylinositol glycan anchor biosy ...

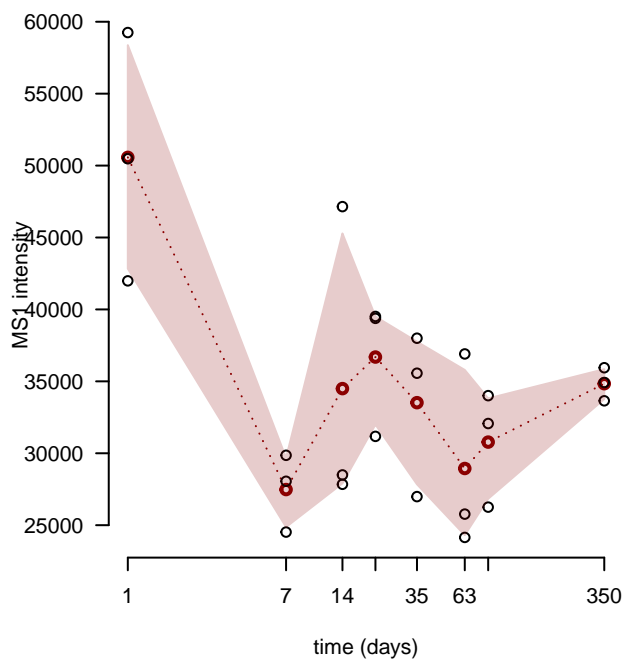

**Q8K363**  
**GN=Ddx18**

DEAD box helicase 18

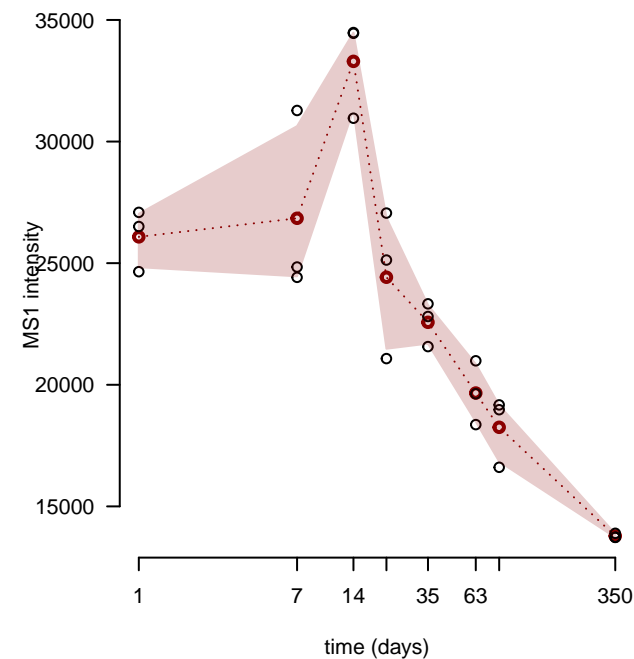

**Q8K368**  
**GN=Fanci**  
Fanconi anemia, complementation group I

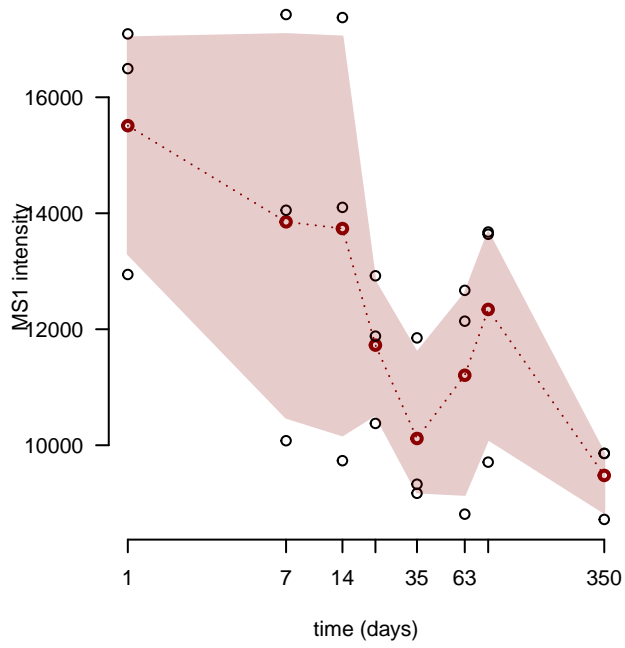

**Q8K370**  
**GN=Acad10**  
acyl-Coenzyme A dehydrogenase family, me ...

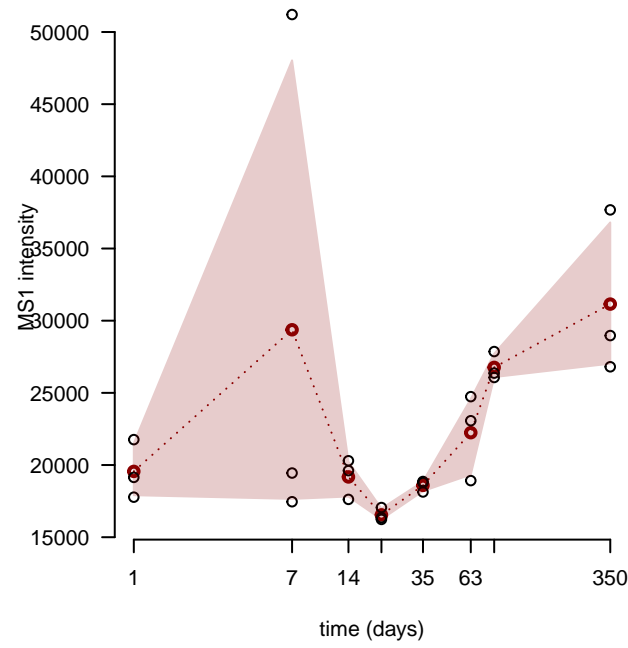

**Q8K382**  
**GN=Dennd1a**  
DENN/MADD domain containing 1A

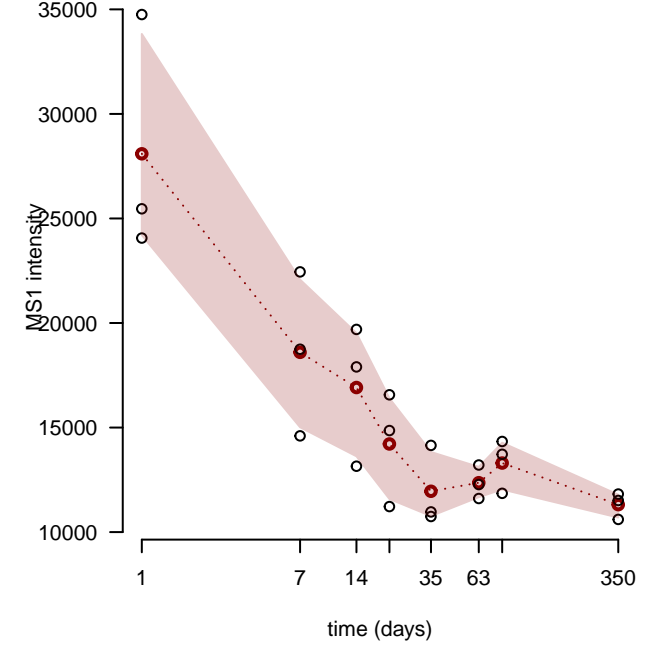

**Q8K385**  
**GN=FRRS1**

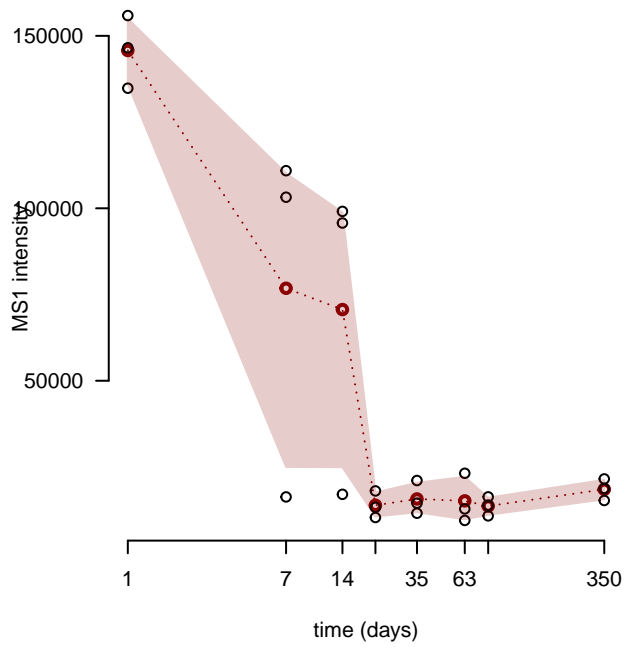

**Q8K389**  
**GN=Cdk5rap2**  
CDK5 regulatory subunit associated prote ...

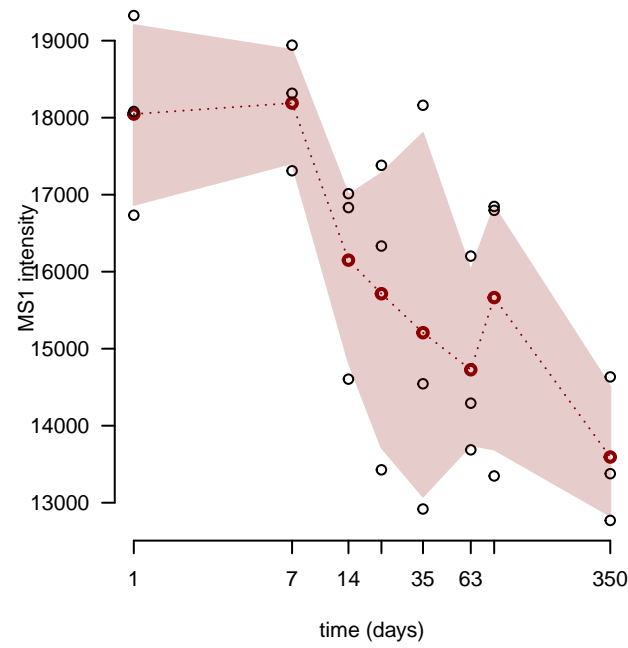

**Q8K394**  
**GN=Plc12**  
phospholipase C-like 2

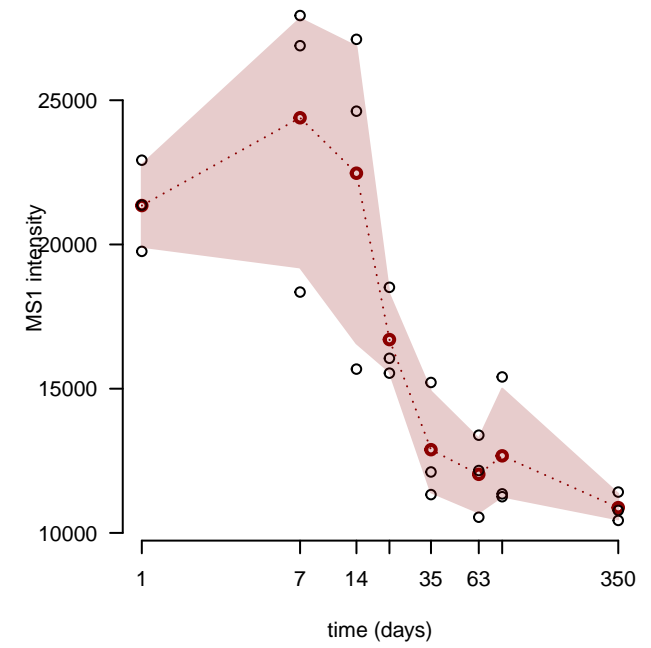

**Q8K396**  
**GN=Mnd1**  
meiotic nuclear divisions 1

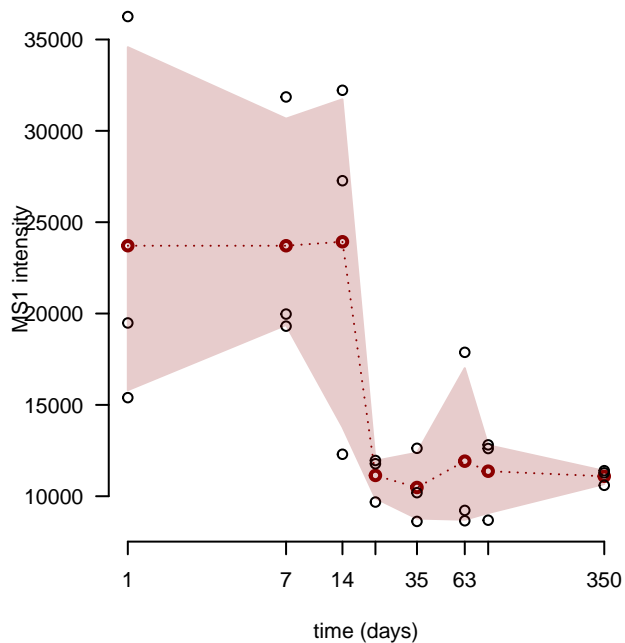

**Q8K3A0**  
**GN=Hscb**  
HscB iron-sulfur cluster co-chaperone

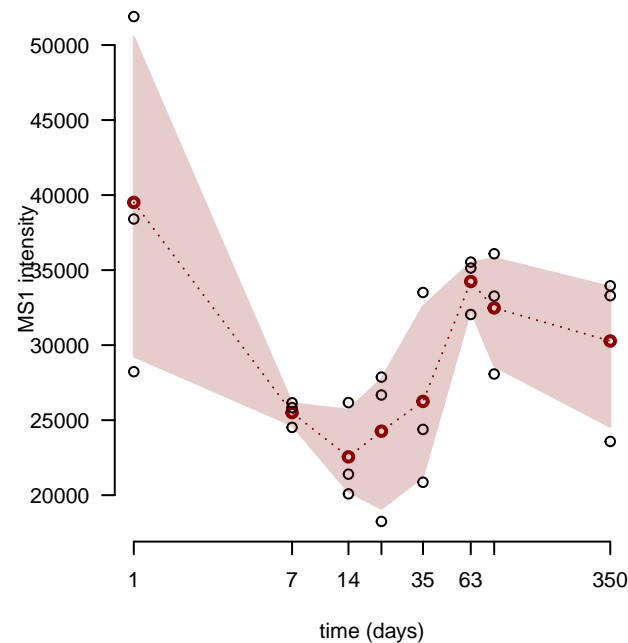

**Q8K3A6**  
**GN=Armcx6**  
armadillo repeat containing, X-linked 6

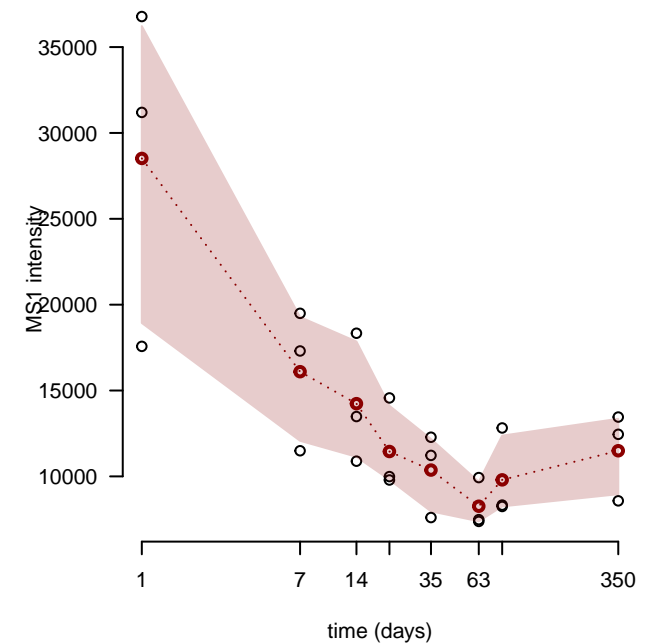

**Q8K3A9**  
GN=Mepce  
methylphosphate capping enzyme

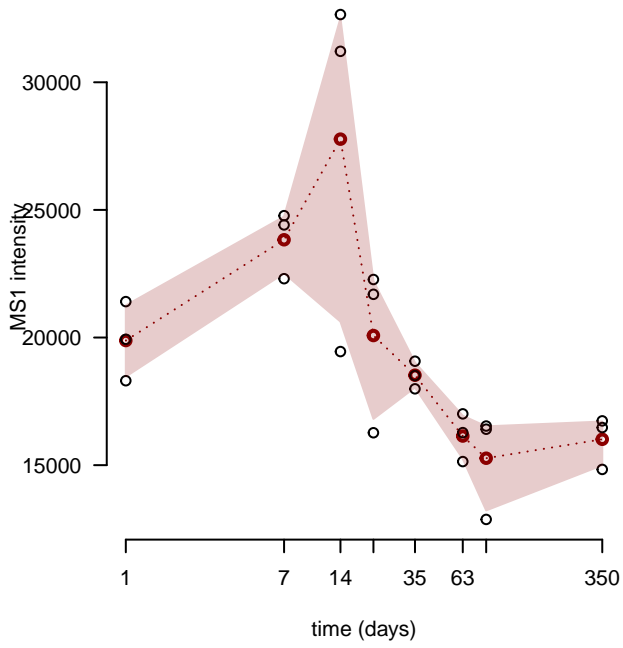

**Q8K3B1**  
GN=Fbxo45  
F-box protein 45

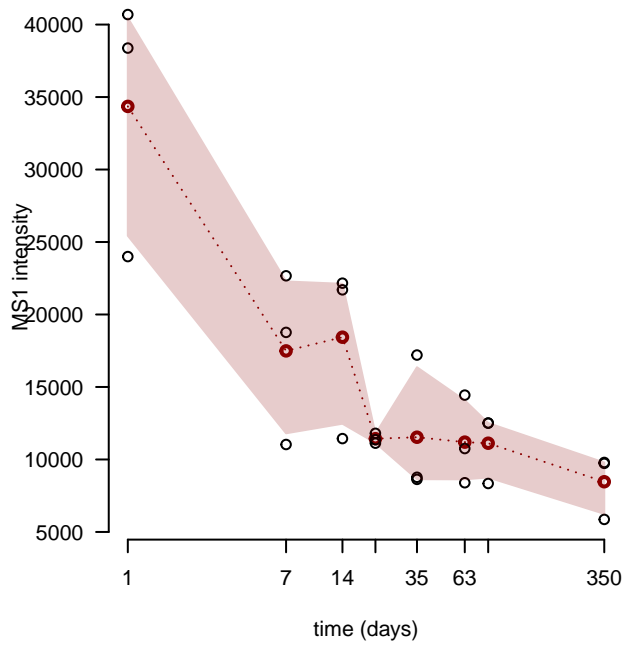

**Q8K3C3**  
GN=Lzic  
leucine zipper and CTNNBIP1 domain conta ...

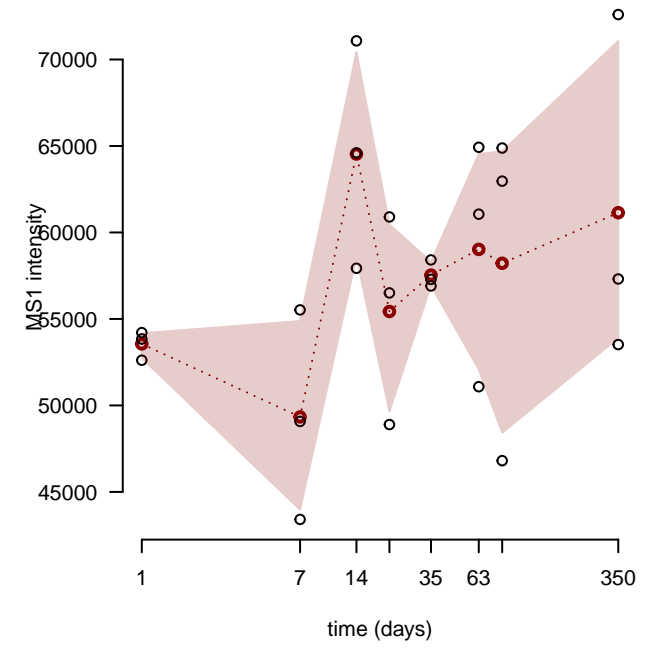

**Q8K3D3**  
GN=Swi5  
SWI5 recombination repair homolog (yeast ...

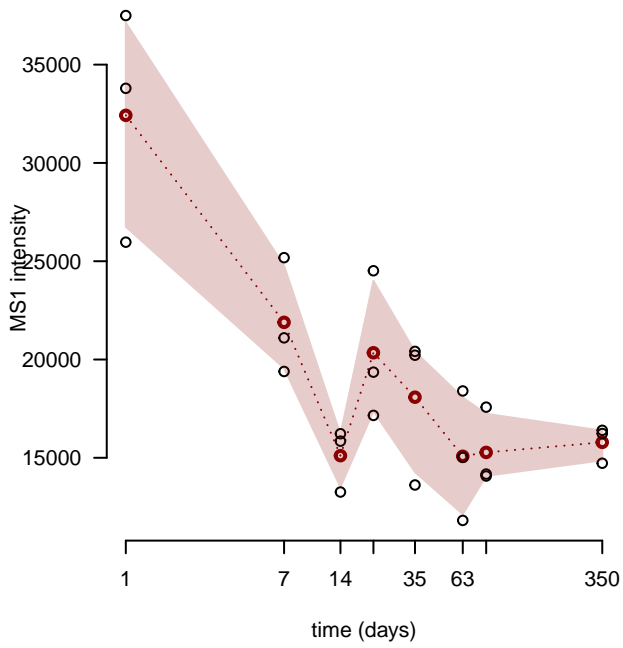

**Q8K3F7**  
GN=Tdh  
L-threonine dehydrogenase

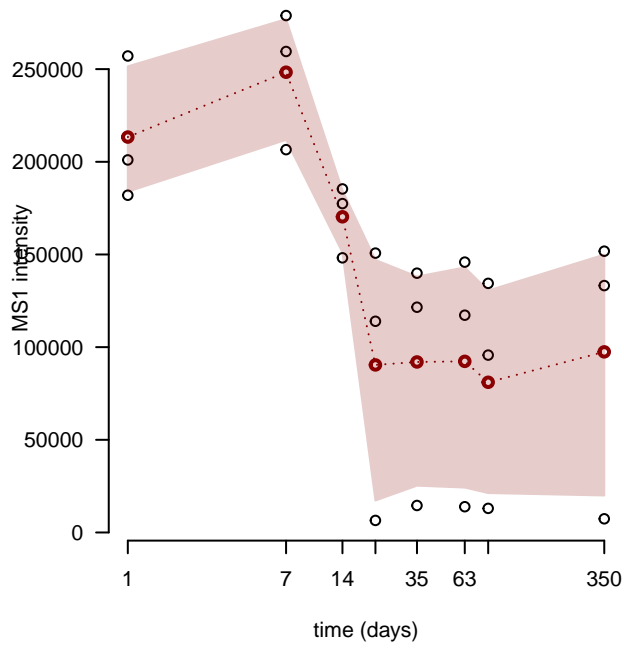

**Q8K3G5**  
GN=Vrk3  
vaccinia related kinase 3

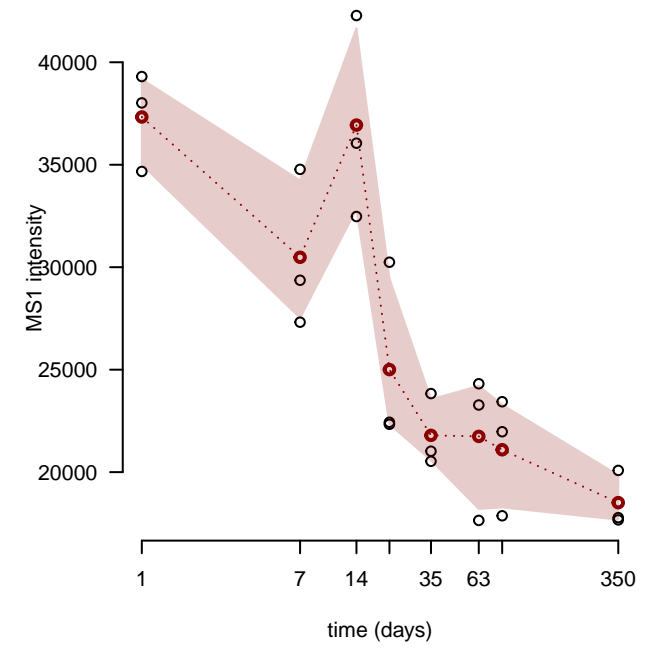

**Q8K3G9**  
GN=App12  
adaptor protein, phosphotyrosine interac ...

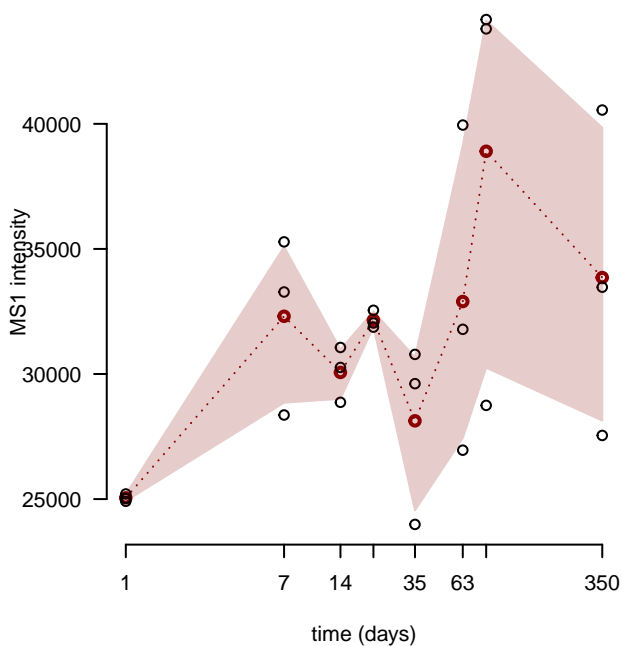

**Q8K3H0**  
GN=App11  
adaptor protein, phosphotyrosine interac ...

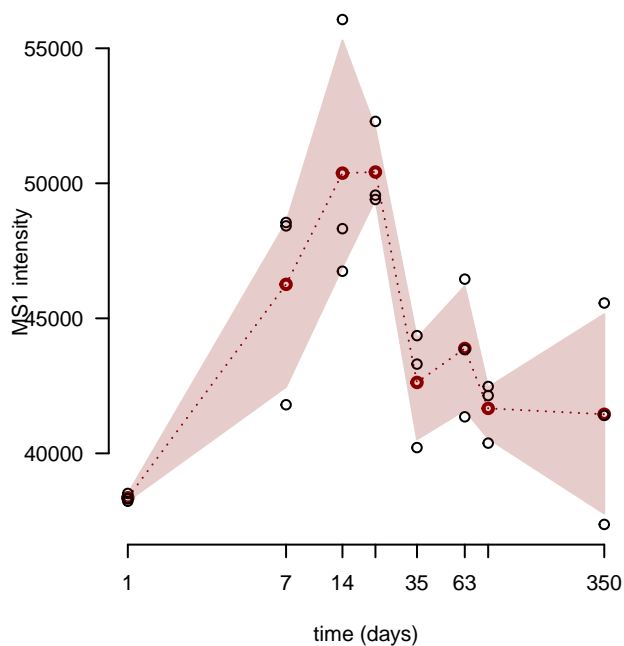

**Q8K3I9**  
GN=Glicc1  
glucocorticoid induced transcript 1

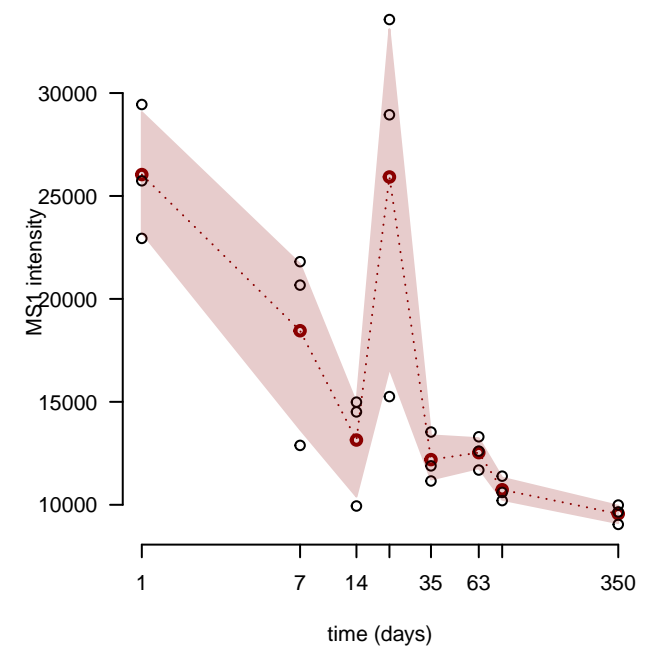



**Q8K3J1**  
**GN=Ndufs8**  
NADH:ubiquinone oxidoreductase core subu ...

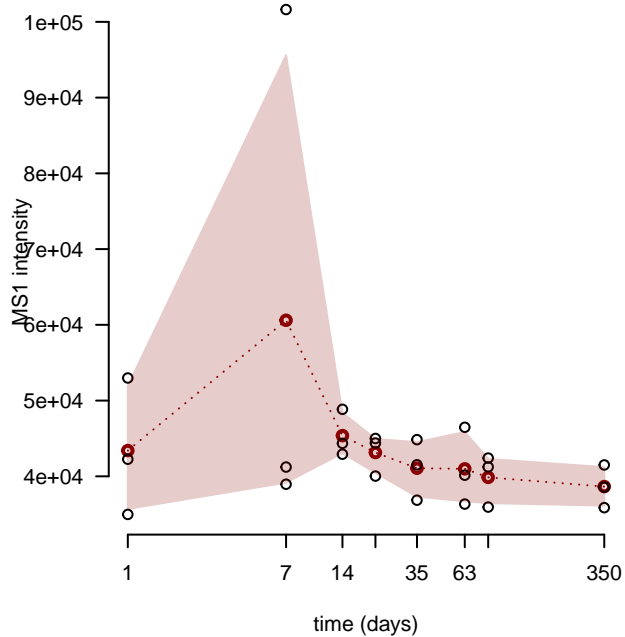

**Q8K3J5**  
**GN=Znf131**

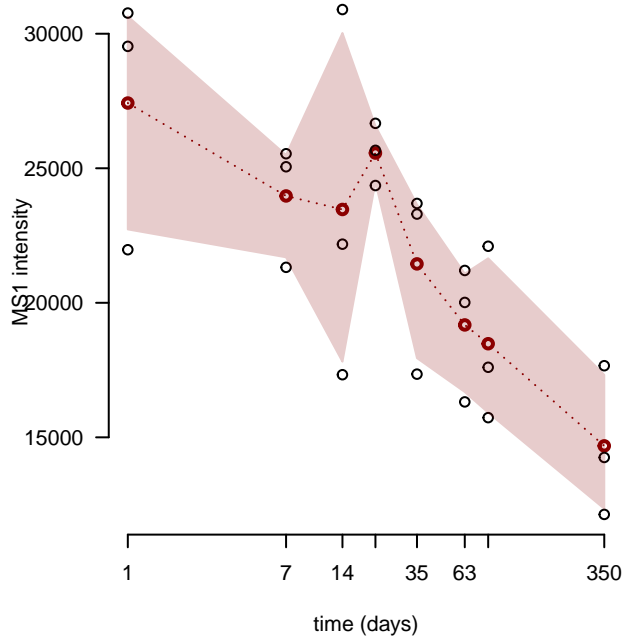

**Q8K3J9**  
**GN=Gprc5c**  
G protein-coupled receptor, family C, gr ...

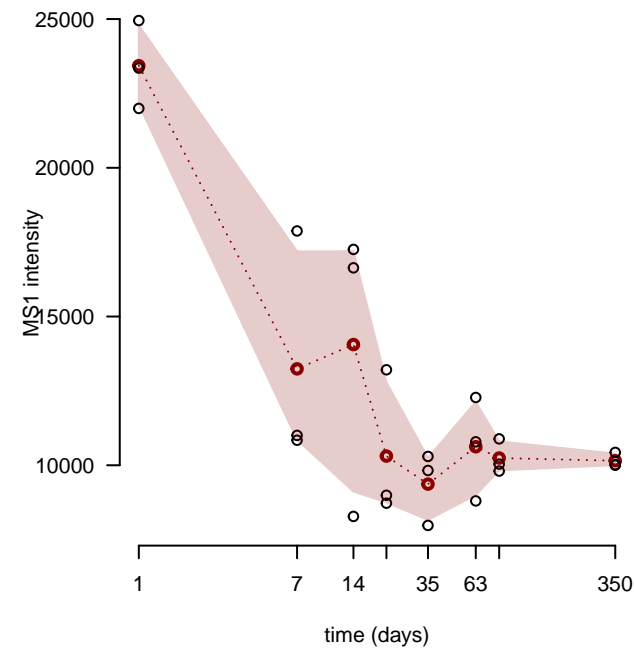

**Q8K3K7**  
**GN=Agpat2**  
1-acylglycerol-3-phosphate O-acyltransfe ...

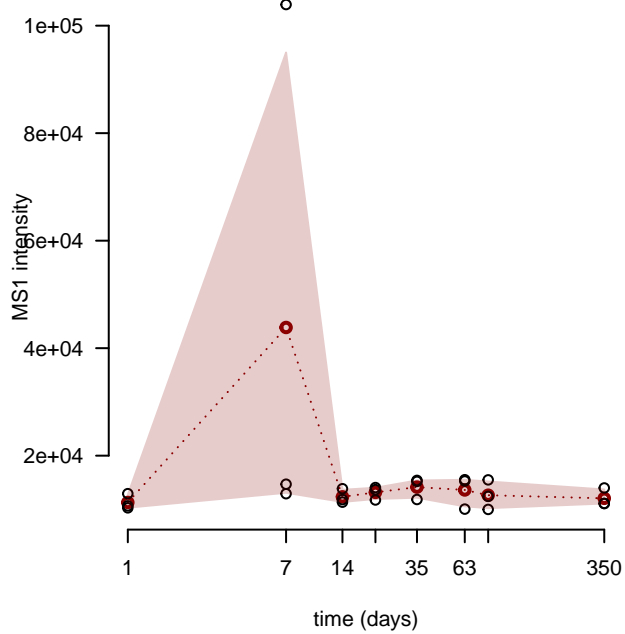

**Q8K3K8**  
**GN=Optn**  
optineurin

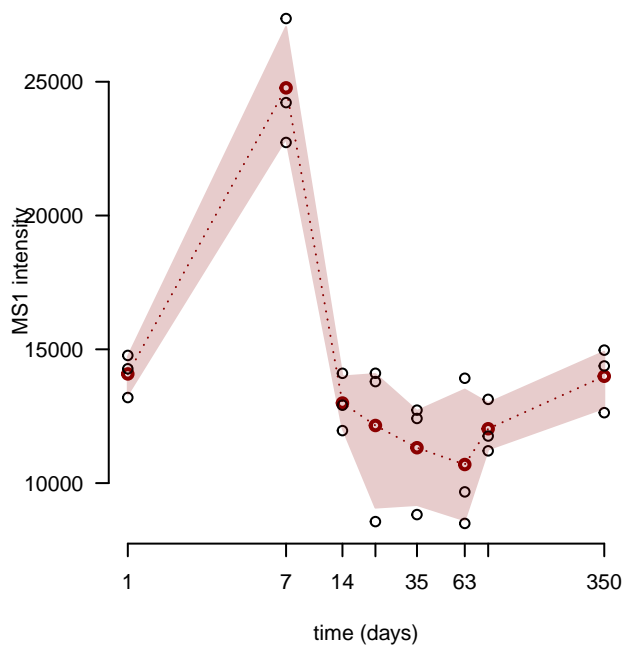

**Q8K3P5**  
**GN=Cnot6**  
CCR4-NOT transcription complex, subunit ...

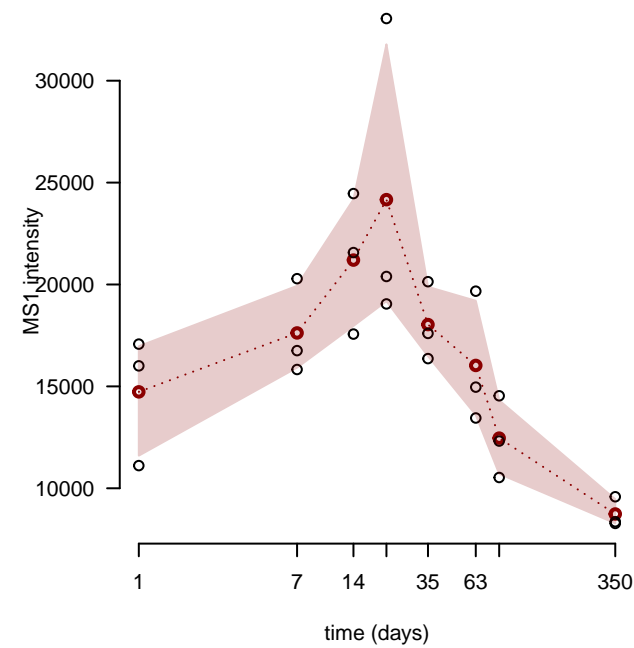

**Q8K3V4**  
**GN=Padi6**  
peptidyl arginine deiminase, type VI

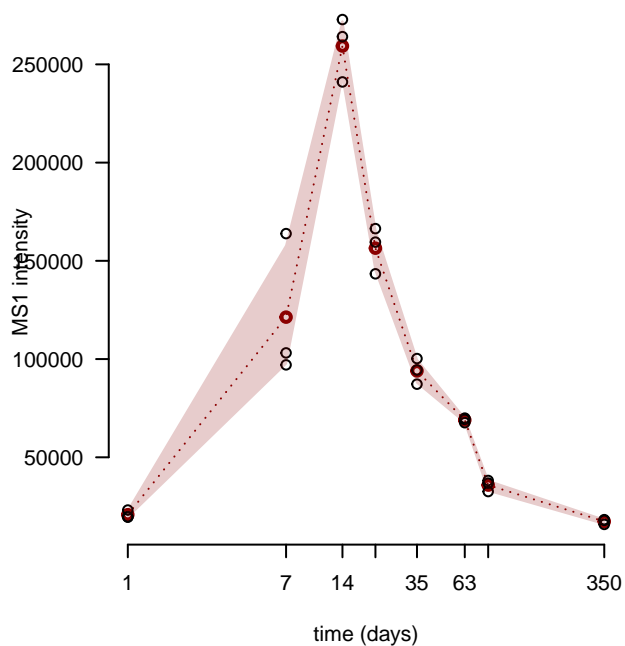

**Q8K3W0**  
**GN=Babam2**  
BRISC and BRCA1 A complex member 2

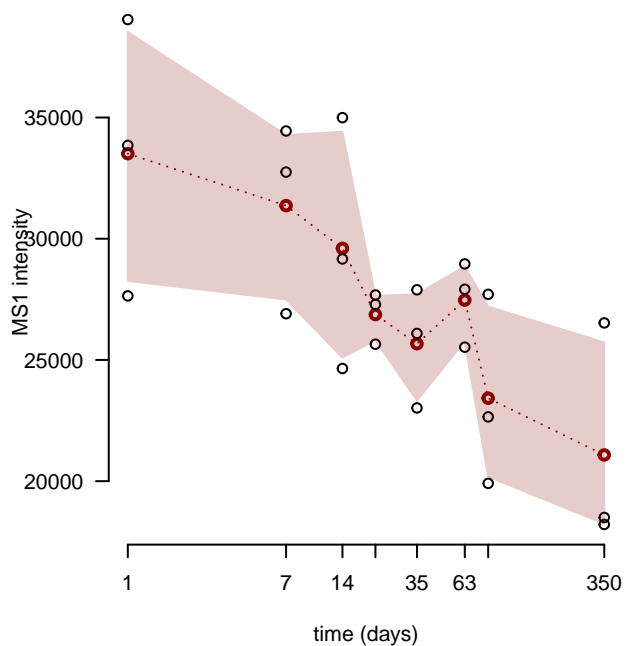

**Q8K3W3**  
**GN=Casc3**  
cancer susceptibility candidate 3

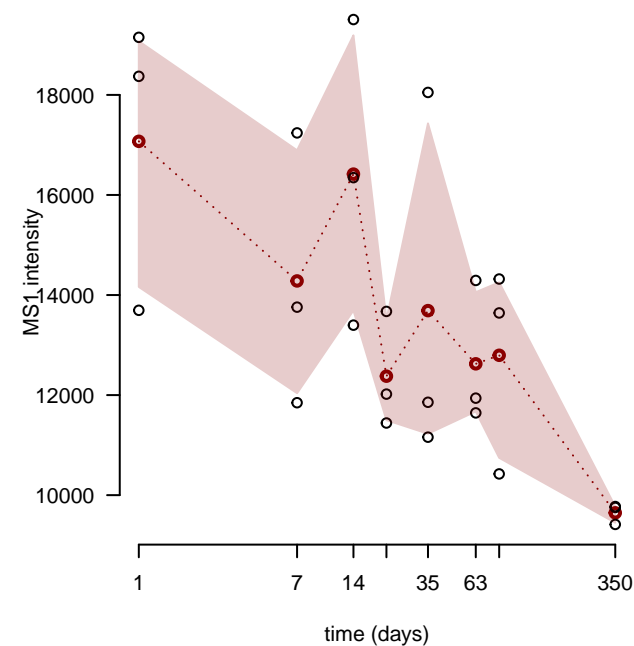

**Q8K3X4**  
GN=Irf2bp1  
interferon regulatory factor 2 binding p ...

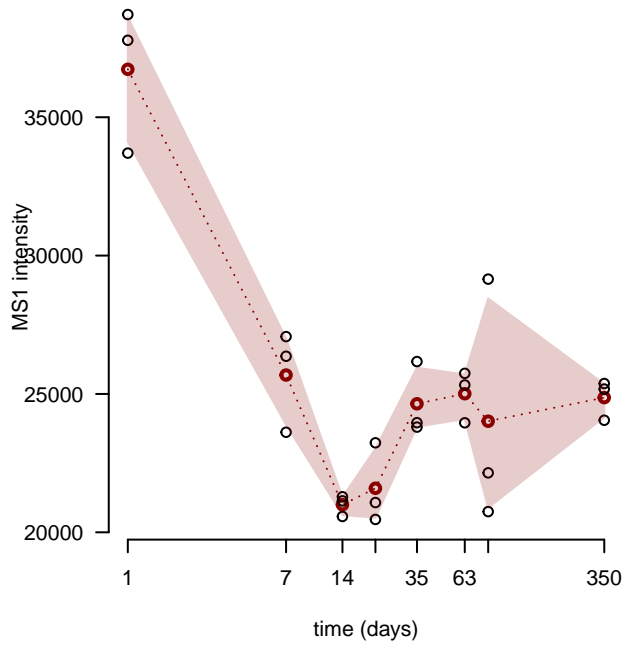

**Q8K3Y3**  
GN=Lin28a  
lin-28 homolog A

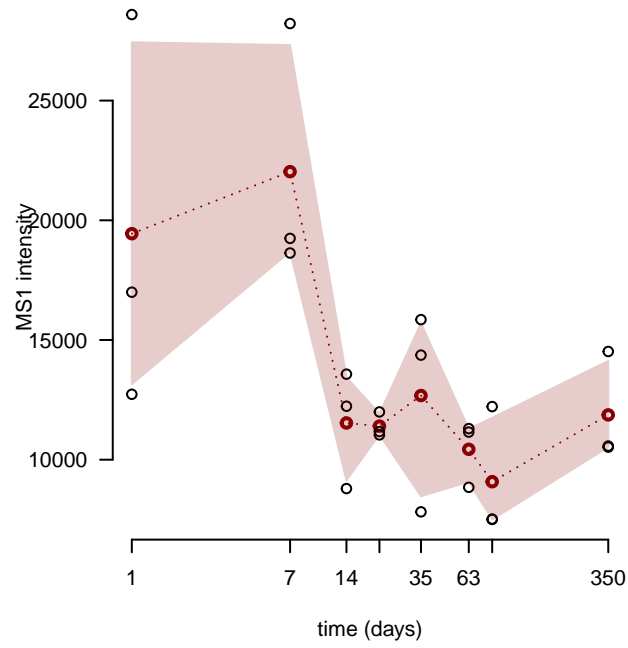

**Q8K3Z9**  
GN=Pom121  
nuclear pore membrane protein 121

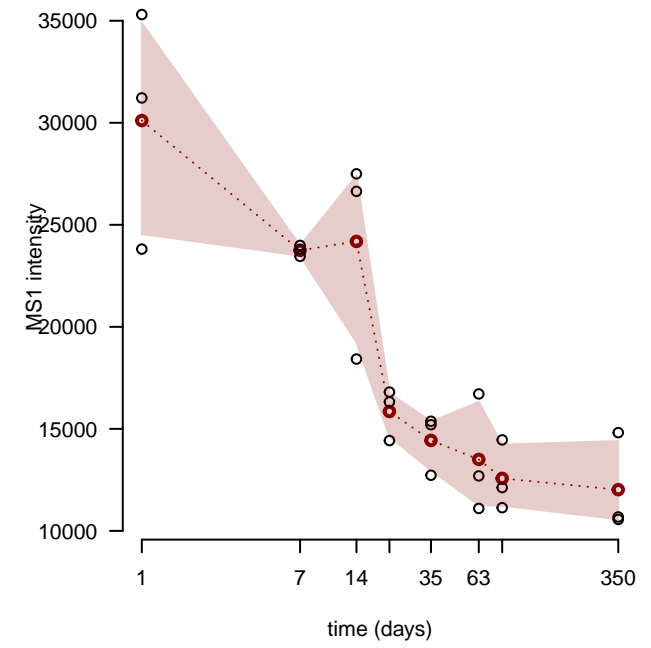

**Q8K400**  
GN=Stxbp5  
syntaxin binding protein 5 (tomosyn)

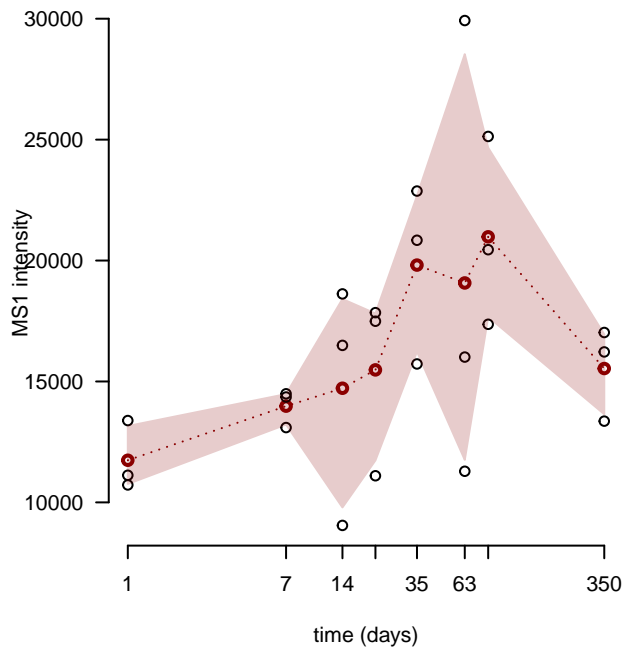

**Q8K409**  
GN=Polb  
polymerase (DNA directed), beta

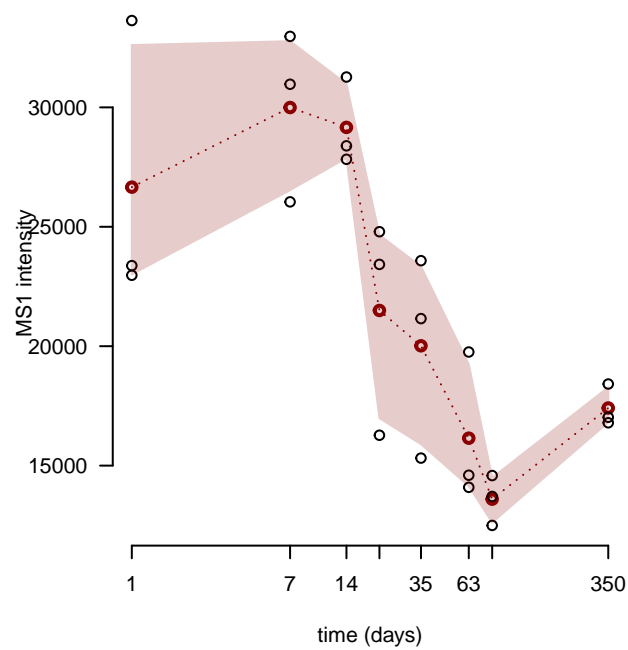

**Q8K411**  
GN=Pitrm1  
pitrilysin metalloproteinase 1

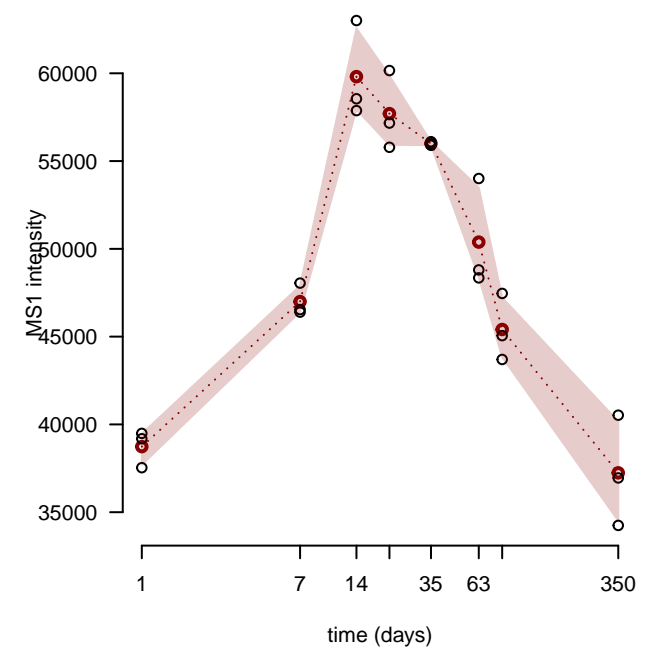

**Q8K419**  
GN=Lgals4  
lectin, galactose binding, soluble 4

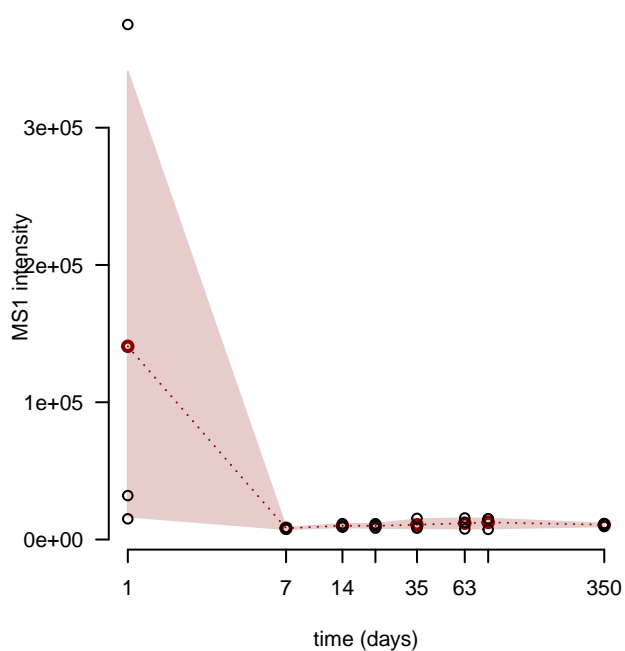

**Q8K441**  
GN=Abca6  
ATP-binding cassette, sub-family A (ABC1 ...

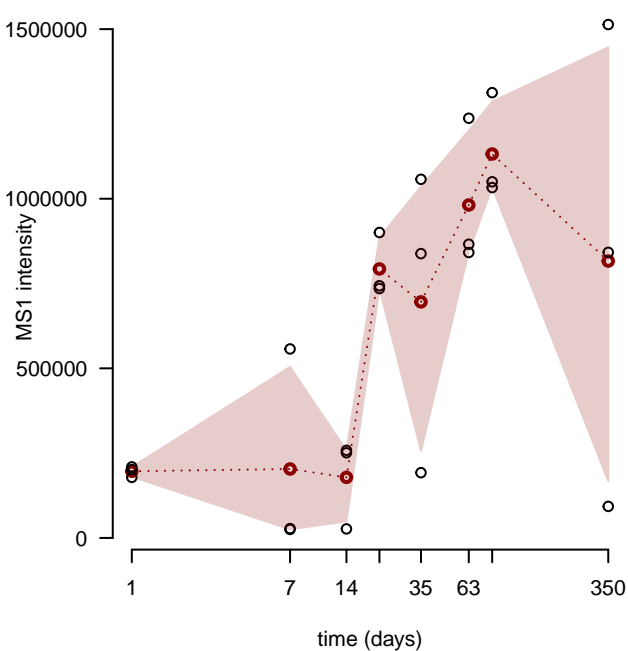

**Q8K449**  
GN=Abca9  
ATP-binding cassette, sub-family A (ABC1 ...

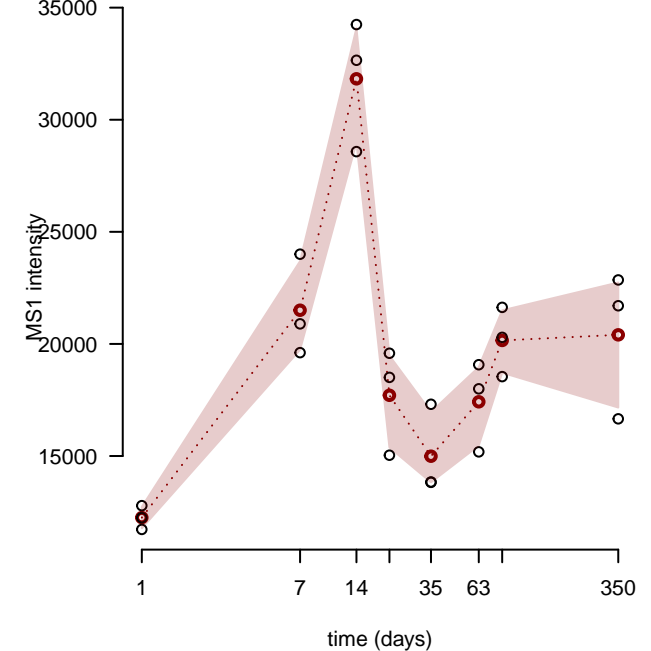

**Q8K482**  
**GN=Emilin2**  
elastin microfibril interfacier 2

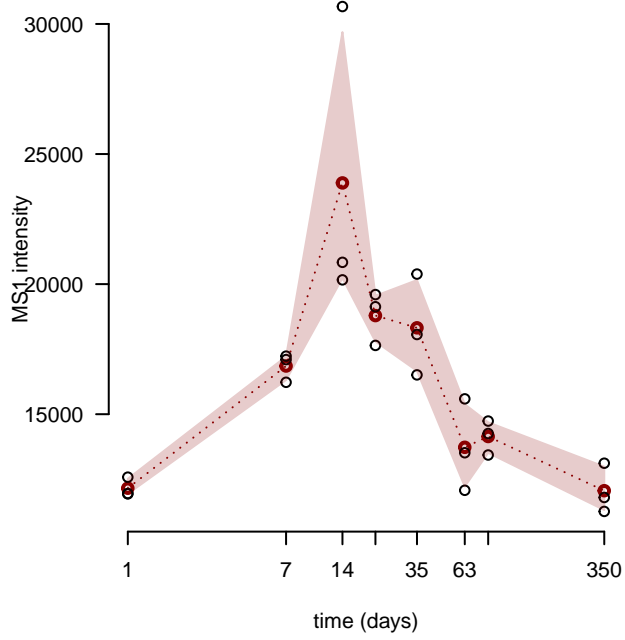

**Q8K4B0**  
**GN=Mta1**  
metastasis associated 1

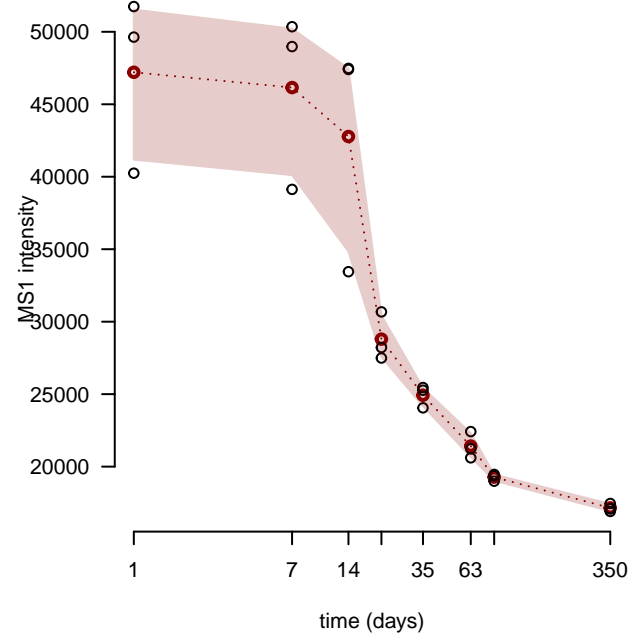

**Q8K4D3**  
**GN=Slc36a1**  
solute carrier family 36 (proton/amino a ...

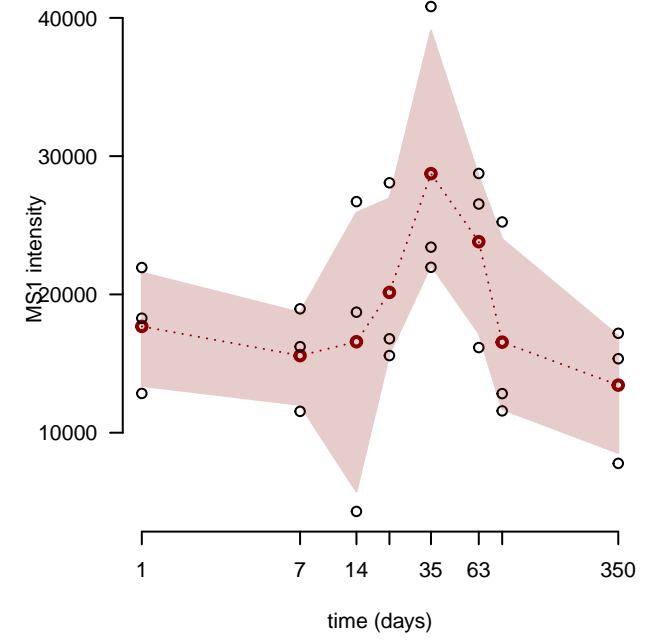

**Q8K4E0**  
**GN=Alms1**  
ALMS1, centrosome and basal body associa ...

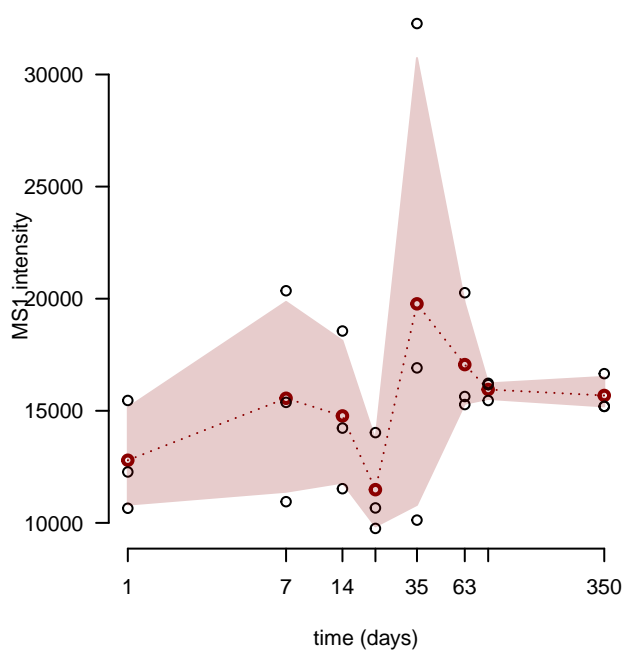

**Q8K4F5**  
**GN=Abhd11**  
abhydrolase domain containing 11

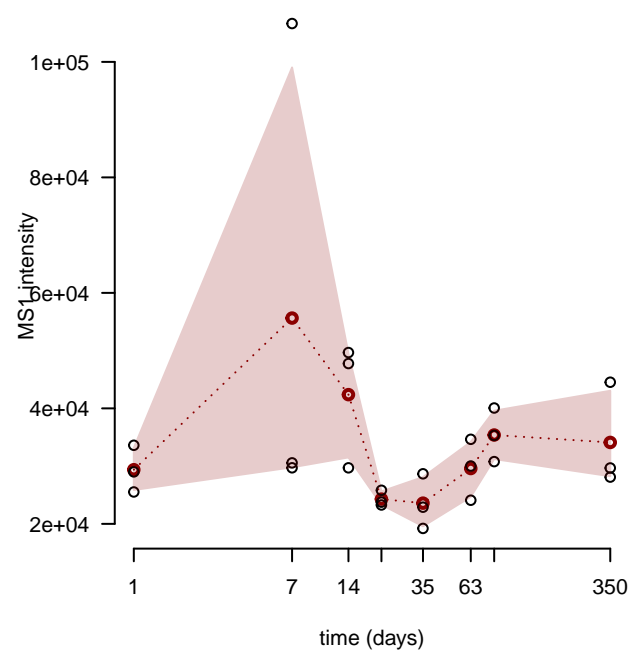

**Q8K4F6**  
**GN=Nsun5**  
NOL1/NOP2/Sun domain family, member 5

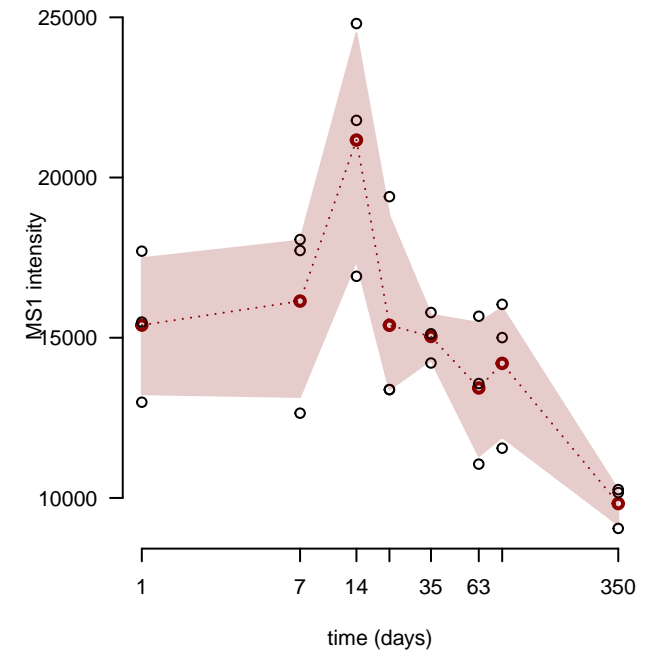

**Q8K4G1**  
**GN=Ltbp4**  
latent transforming growth factor beta b ...

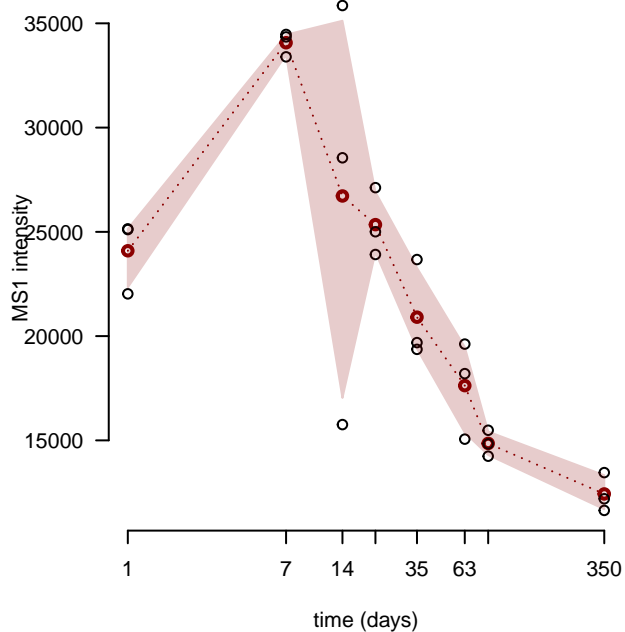

**Q8K4G5**  
**GN=Ablim1**  
actin-binding LIM protein 1

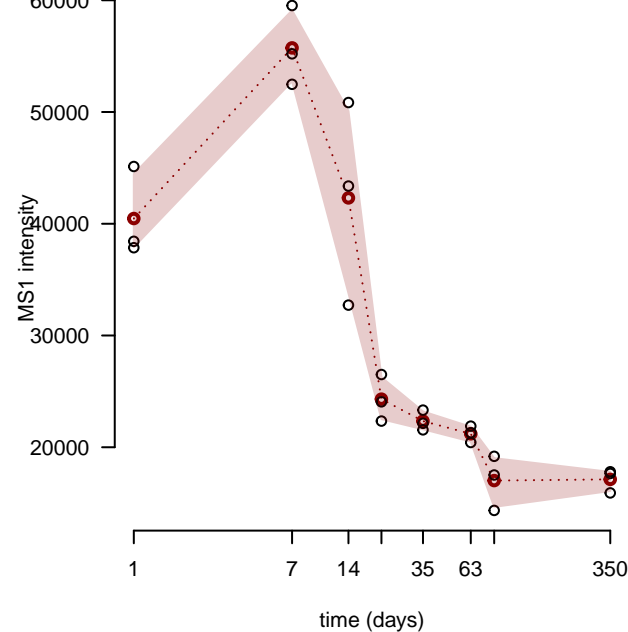

**Q8K4H1**  
**GN=Afmid**  
arylformamidase

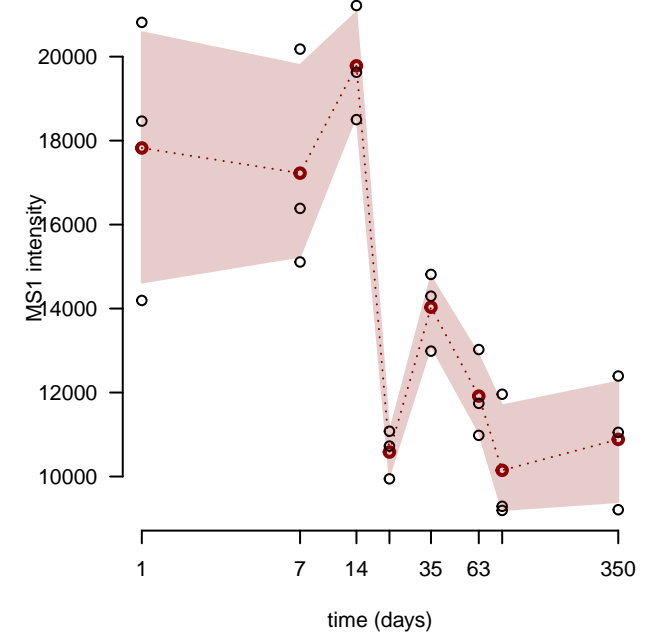

**Q8K4I3**  
GN=Arhgef6  
Rac/Cdc42 guanine nucleotide exchange fa ...

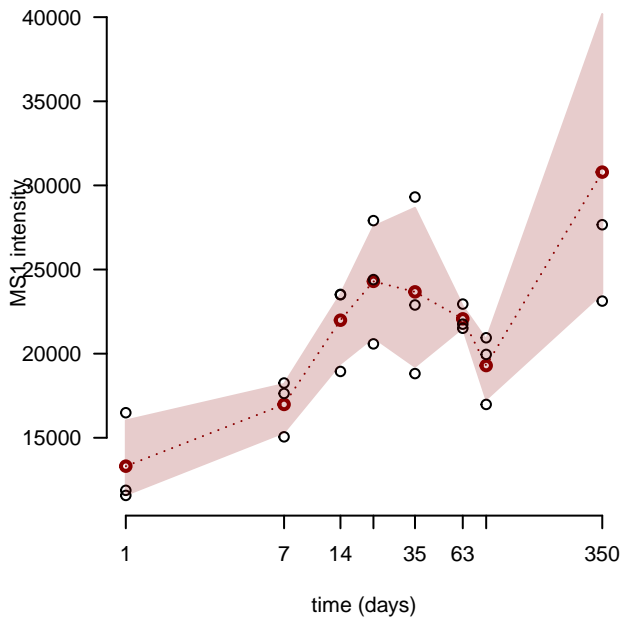

**Q8K4J6**  
GN=Mrtfa  
myocardin related transcription factor A

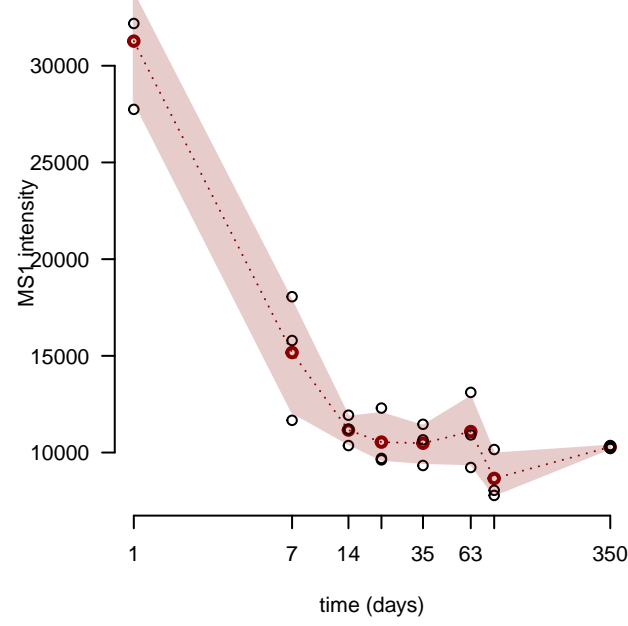

**Q8K4K6**  
GN=Pank1  
pantothenate kinase 1

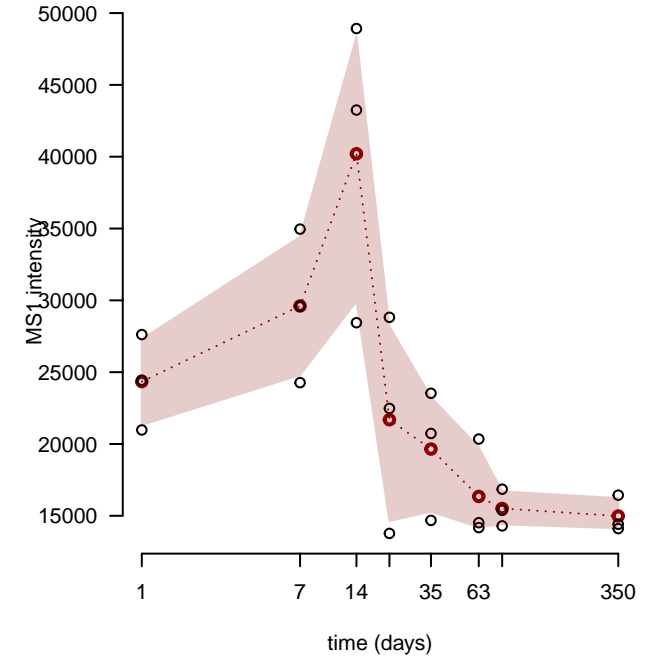

**Q8K4L0**  
GN=Ddx54  
DEAD box helicase 54

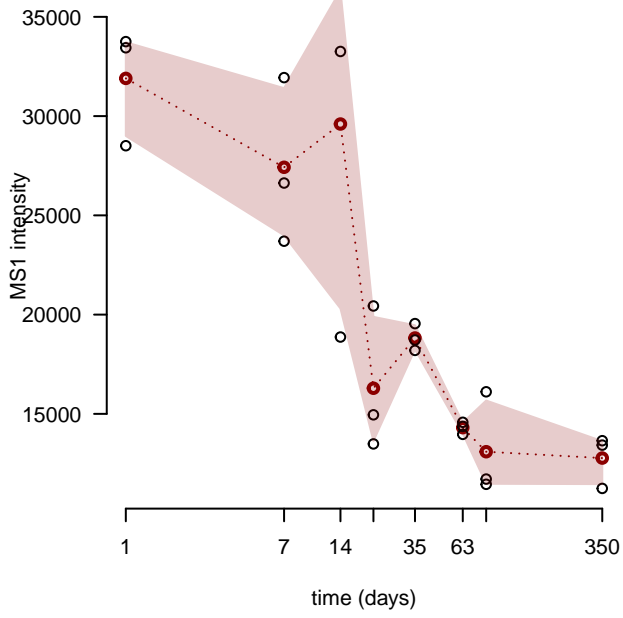

**Q8K4L3**  
GN=Svil  
supervillin

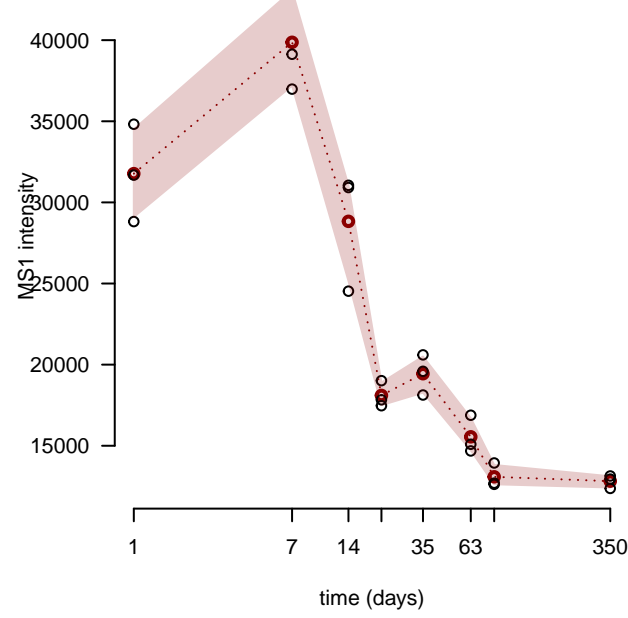

**Q8K4L4**  
GN=Pof1b  
premature ovarian failure 1B

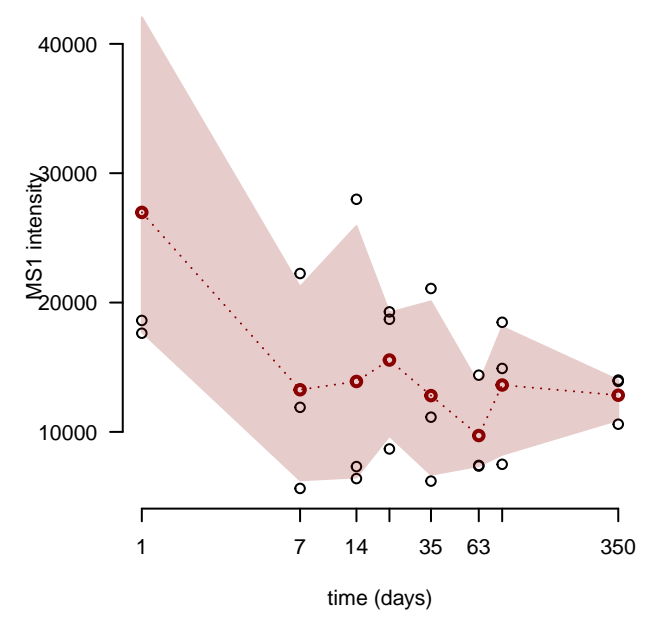

**Q8K4M5**  
GN=Commd1  
COMM domain containing 1

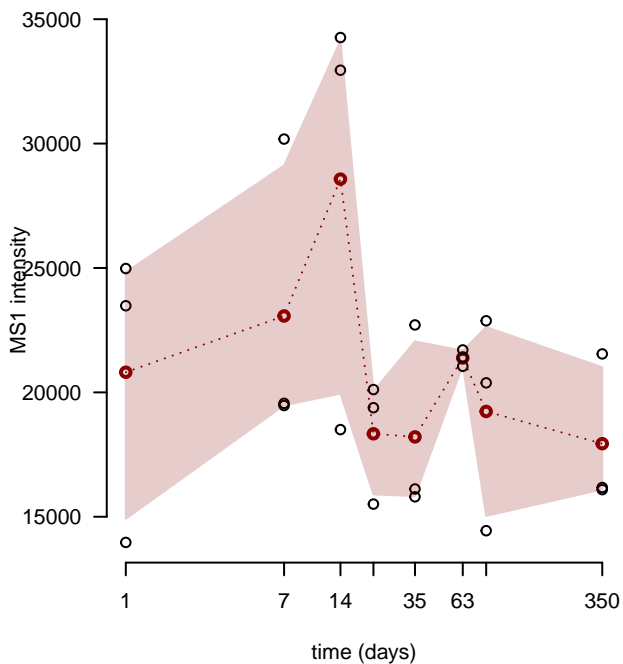

**Q8K4P0**  
GN=Wdr33  
WD repeat domain 33

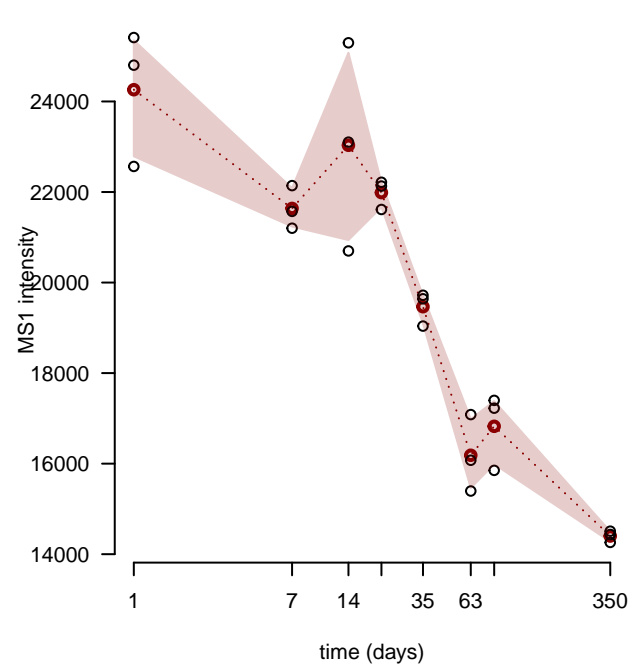

**Q8K4P7**  
GN=St7l  
suppression of tumorigenicity 7-like

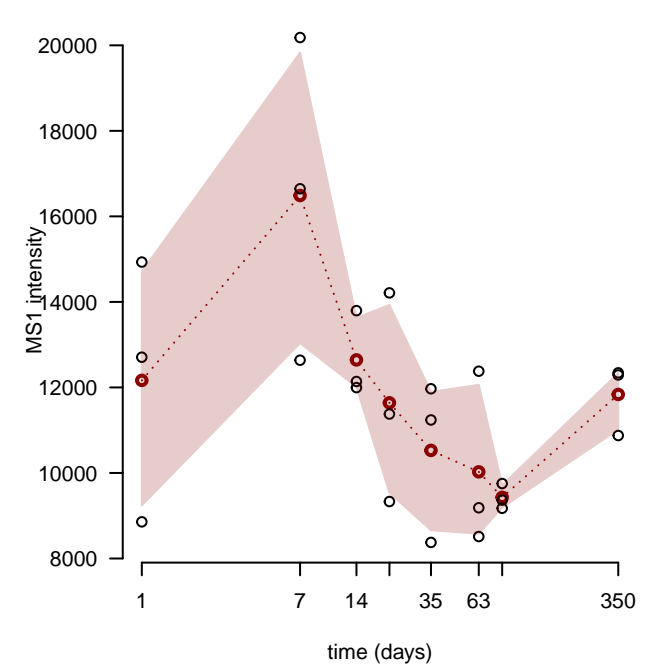

**Q8K4Q0**  
GN=Rptor  
regulatory associated protein of MTOR, c ...

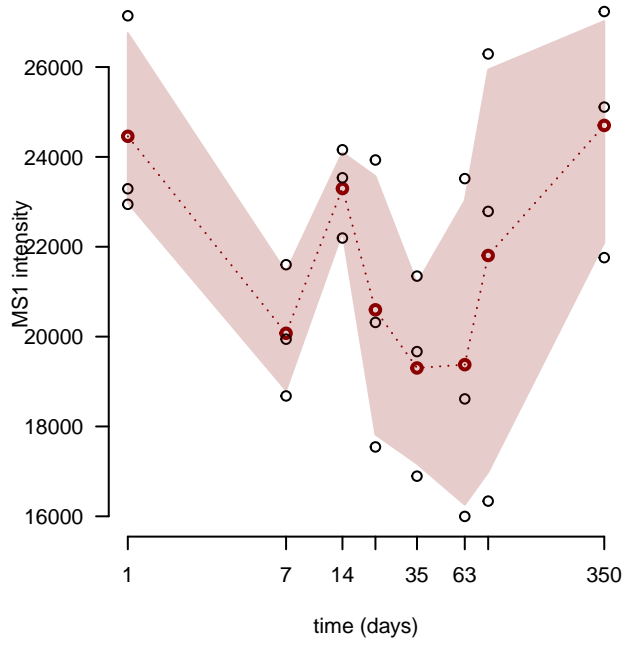

**Q8K4Q8**  
GN=Colec12  
collectin sub-family member 12

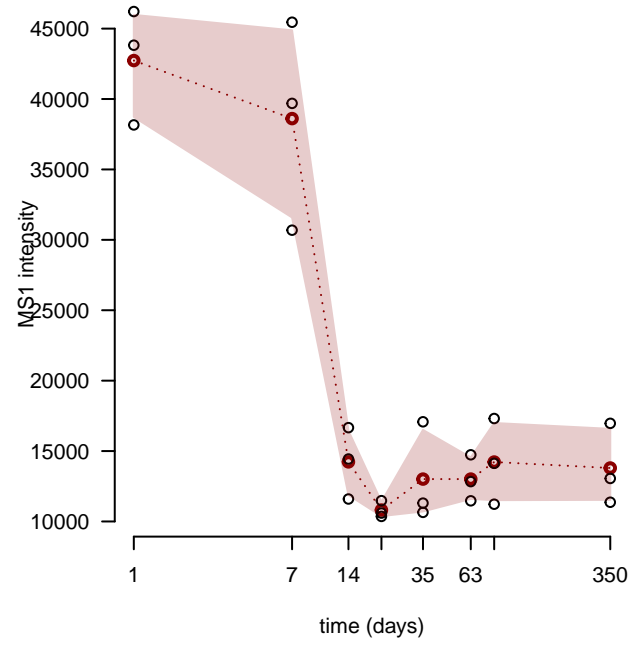

**Q8K4R4**  
GN=Pitpnc1  
phosphatidylinositol transfer protein, c ...

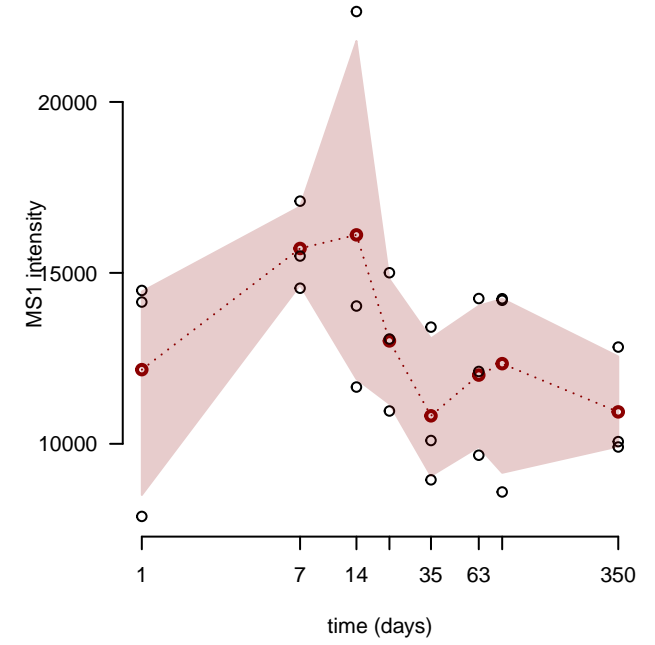

**Q8K4R9**  
GN=Dlgap5  
DLG associated protein 5

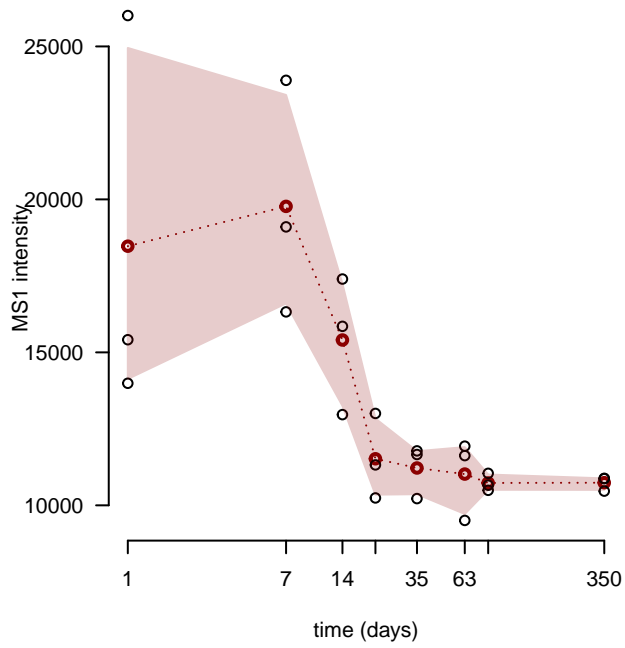

**Q8K4X7**  
GN=Agpat4  
1-acylglycerol-3-phosphate O-acyltransfe ...

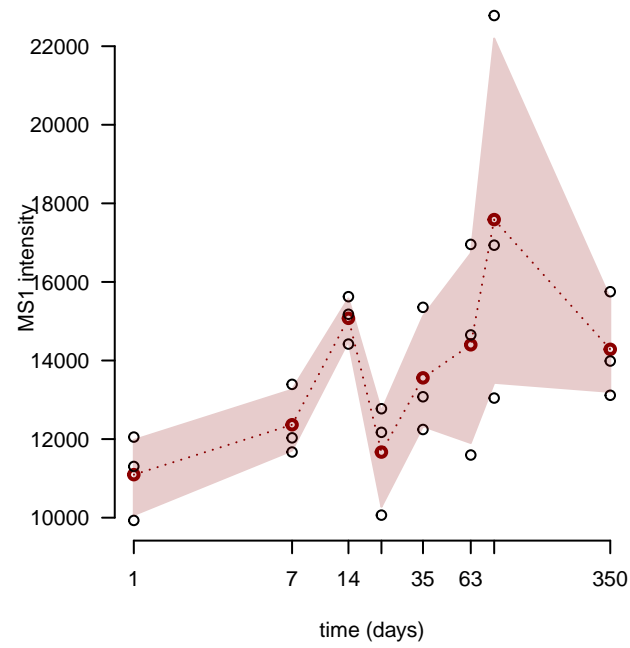

**Q8K4Z3**  
GN=Naxe  
NAD(P)HX epimerase

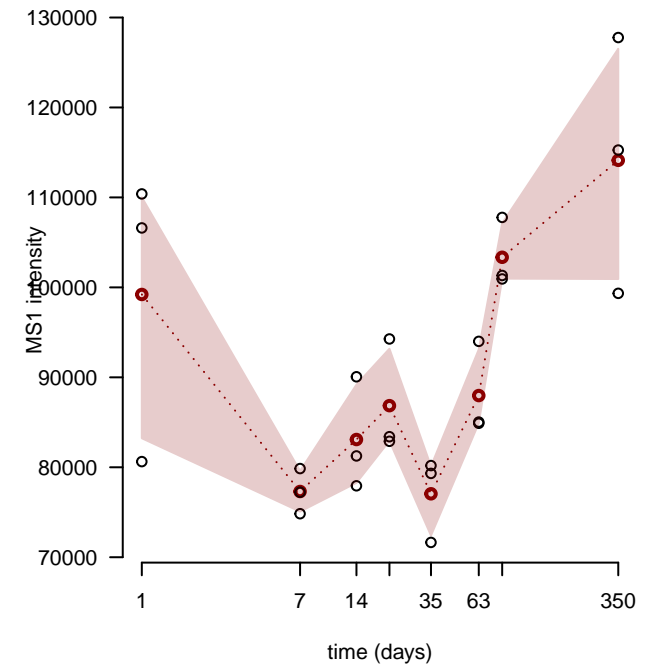

**Q8K4Z5**  
GN=Sf3a1  
splicing factor 3a, subunit 1

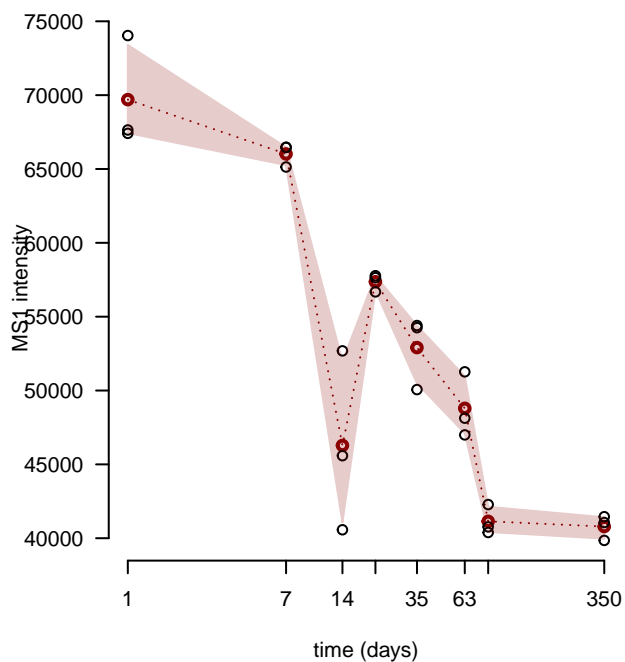

**Q8K558**  
GN=Trem1  
triggering receptor expressed on myeloid ...

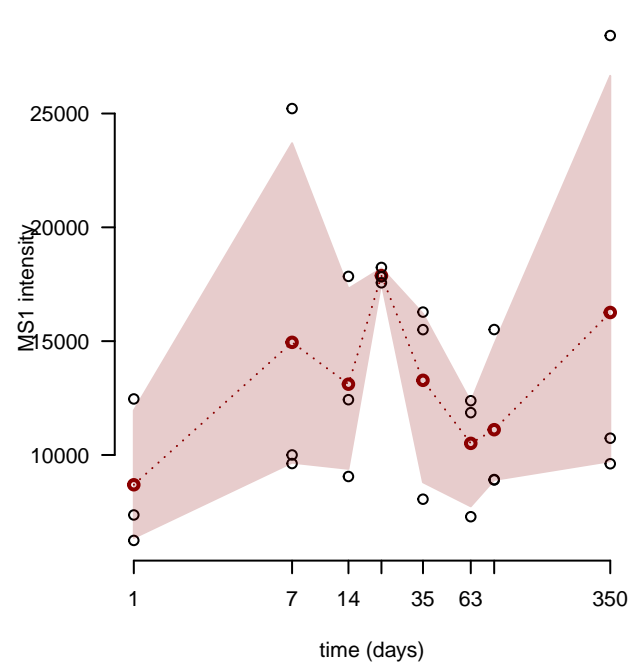

**Q8K592**  
GN=Amhr2  
anti-Mullerian hormone type 2 receptor

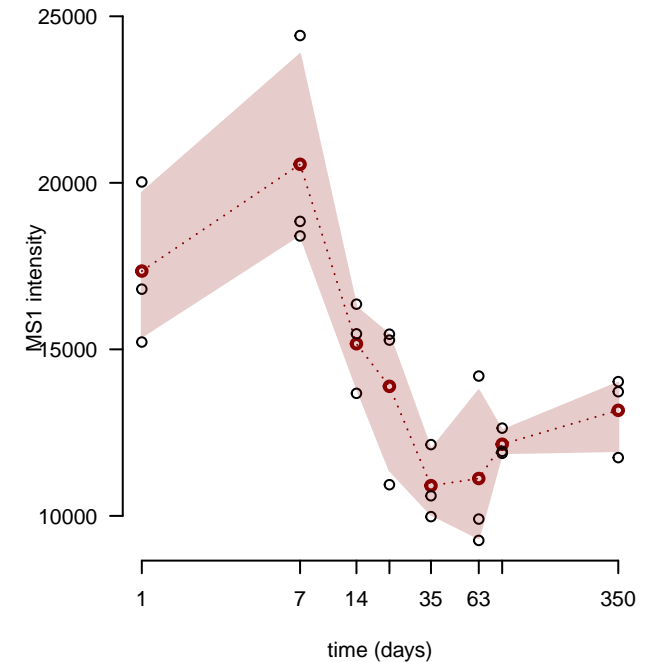

**Q8K596**  
**GN=Slc8a2**  
solute carrier family 8 (sodium/calcium ...

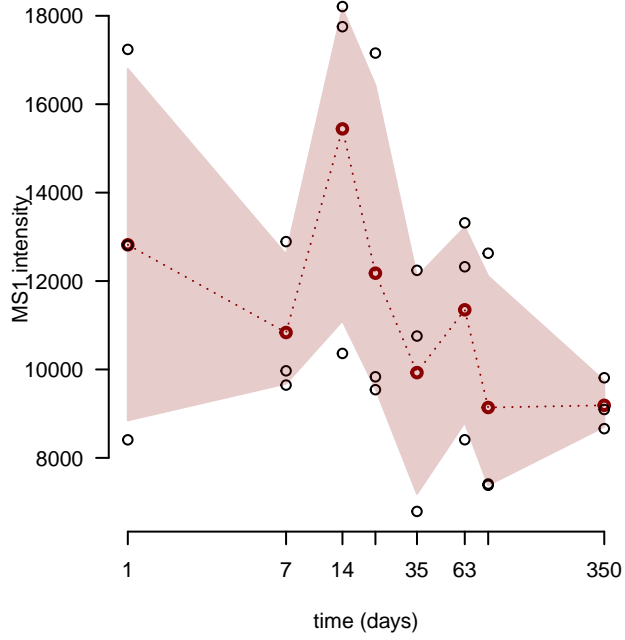

**Q8K5B2**  
**GN=Mcf2**  
multiple coagulation factor deficiency 2

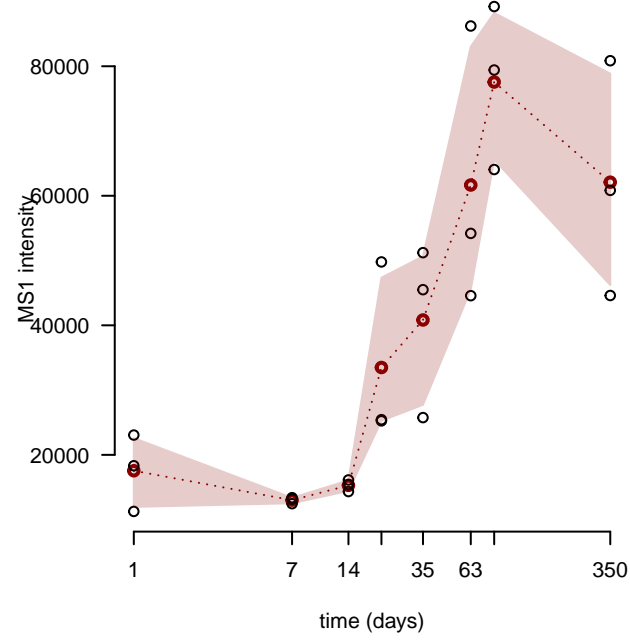

**Q8N7N5**  
**GN=Dcaf8**  
DDB1 and CUL4 associated factor 8

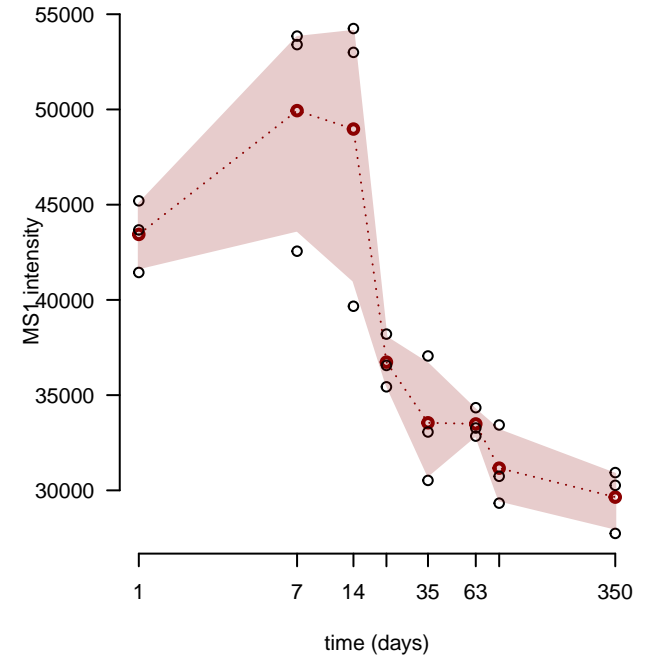

**Q8N7N6**  
**GN=**

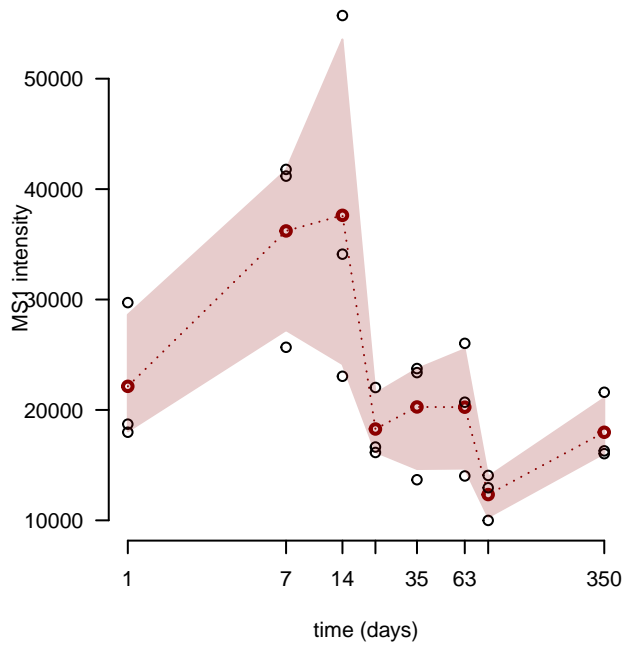

**Q8N9S3**  
**GN=Ahsa2**  
AHA1, activator of heat shock protein AT ...

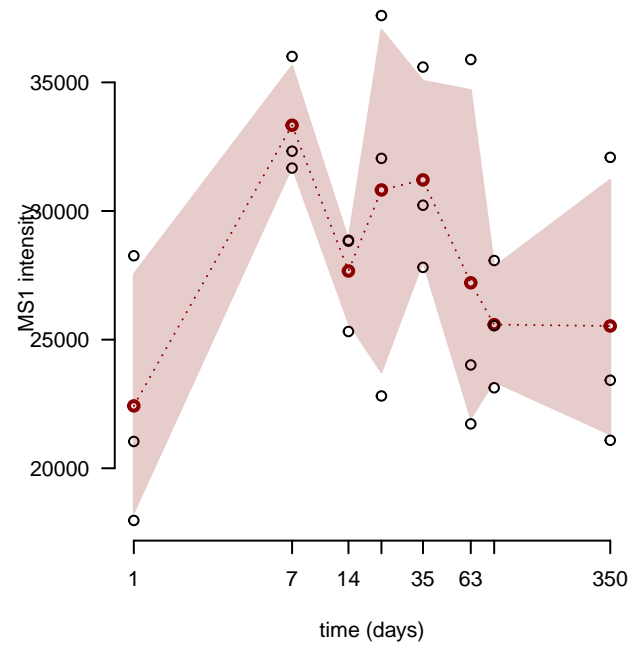

**Q8QZR3**  
**GN=Ces2a**  
carboxylesterase 2A

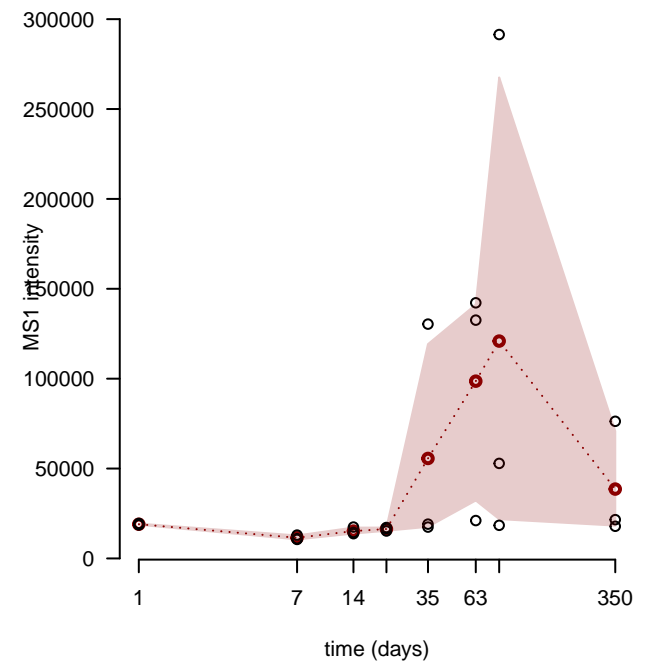

**Q8QZR5**  
**GN=Gpt**  
glutamic pyruvic transaminase, soluble

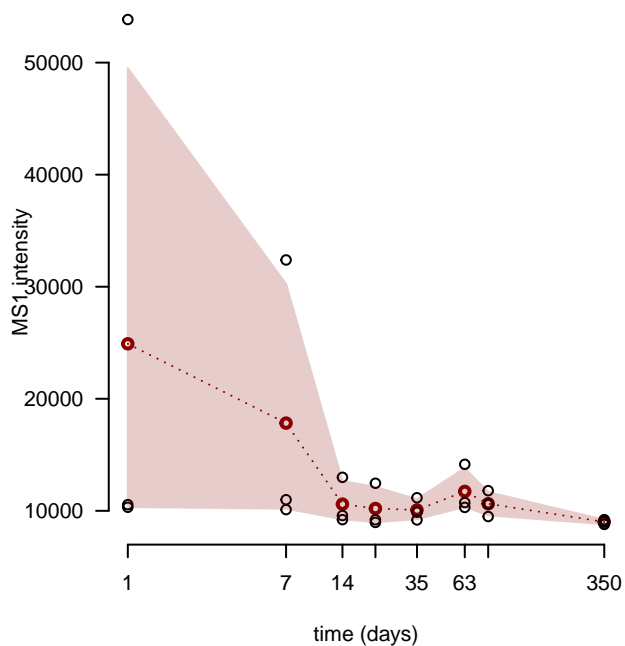

**Q8QZS1**  
**GN=Hibch**  
3-hydroxyisobutyryl-Coenzyme A hydrolase

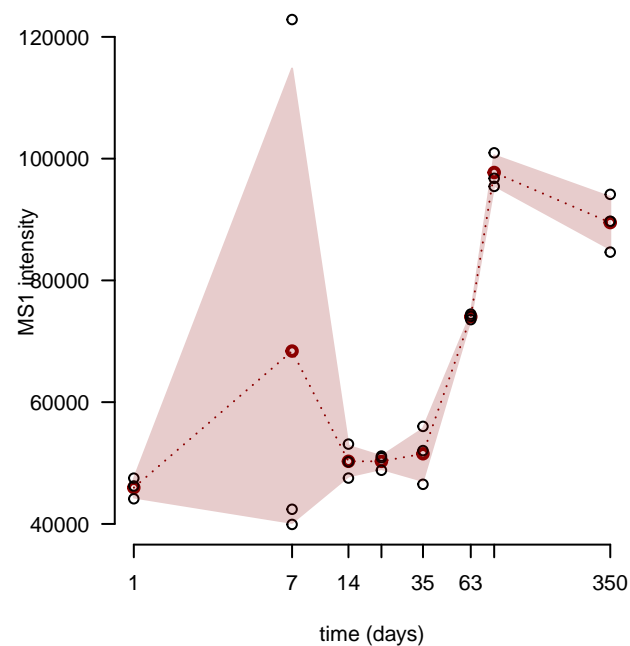

**Q8QZS3**  
**GN=Flcn**  
foliculin

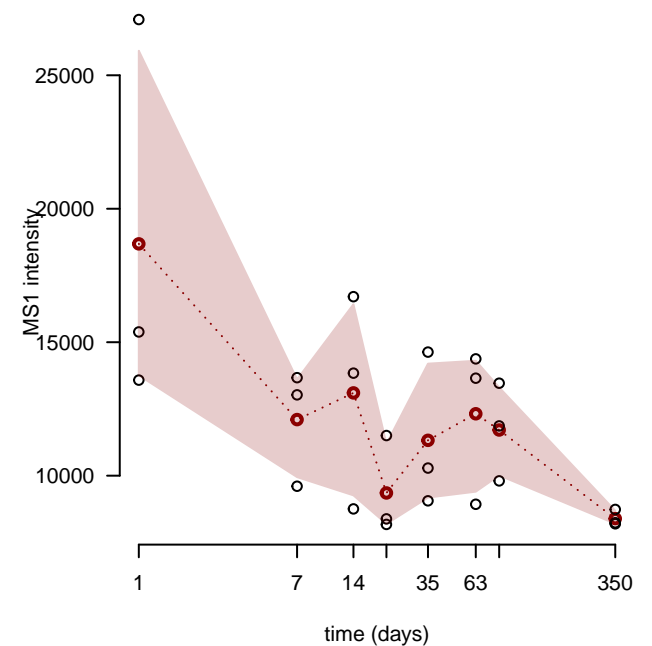

**Q8QZT1**  
**GN=Acat1**  
acetyl-Coenzyme A acetyltransferase 1

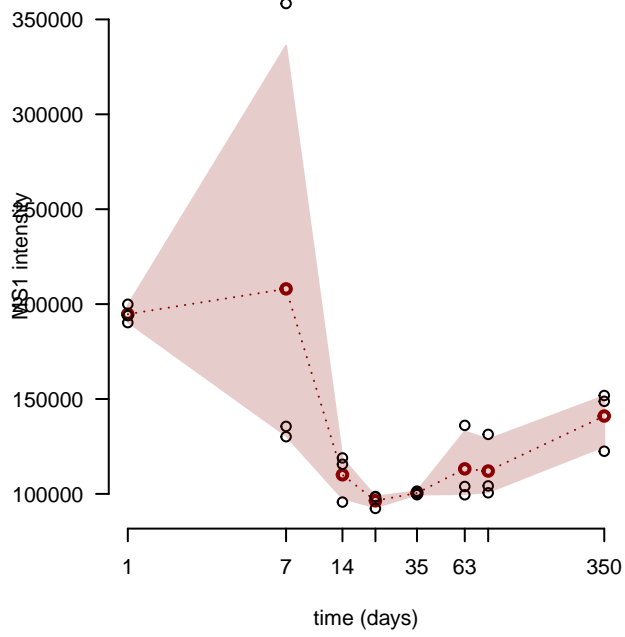

**Q8QZV7**  
**GN=IntS13**

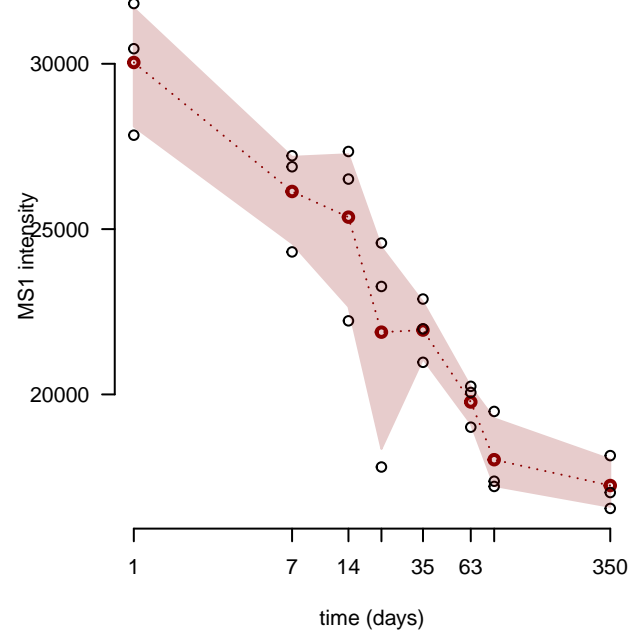

**Q8QZW3**  
**GN=Fam151a**  
family with sequence simliarity 151, mem ...

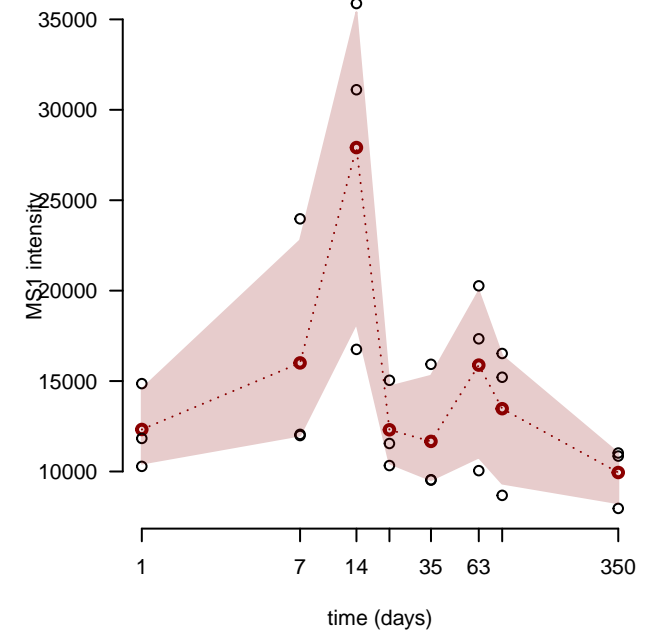

**Q8QZX2**  
**GN=Haus3**  
HAUS augmin-like complex, subunit 3

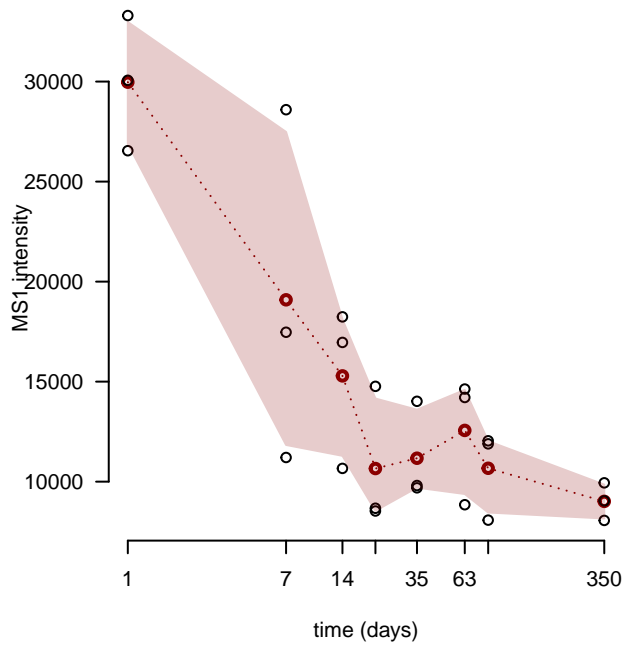

**Q8QZX5**  
**GN=Lsm10**  
U7 snRNP-specific Sm-like protein LSM10

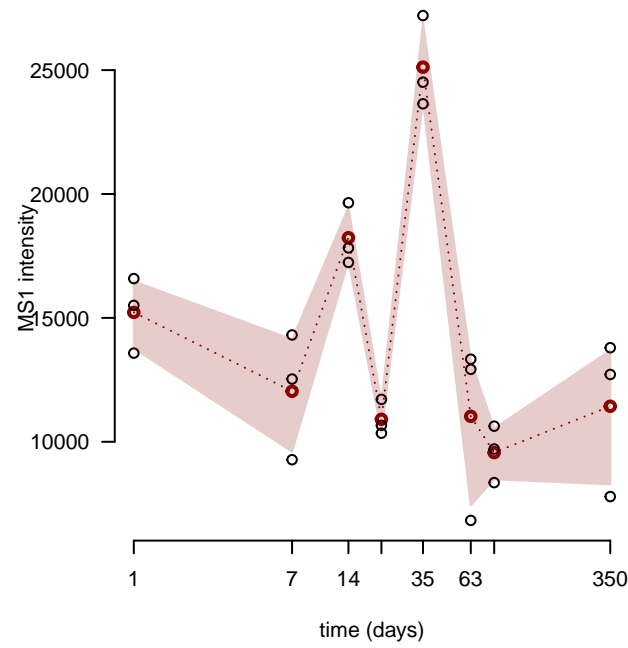

**Q8QZY1**  
**GN=Eif3I**  
eukaryotic translation initiation factor ...

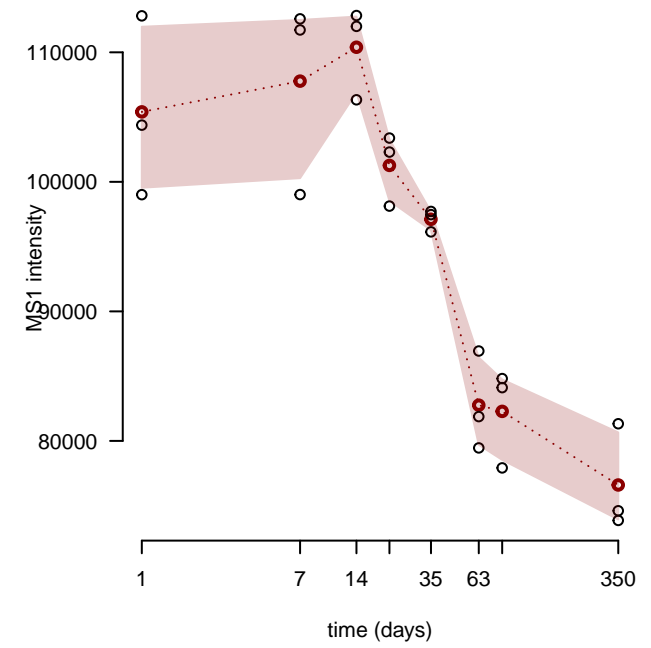

**Q8QZY3**  
**GN=Dppa3**  
developmental pluripotency-associated 3

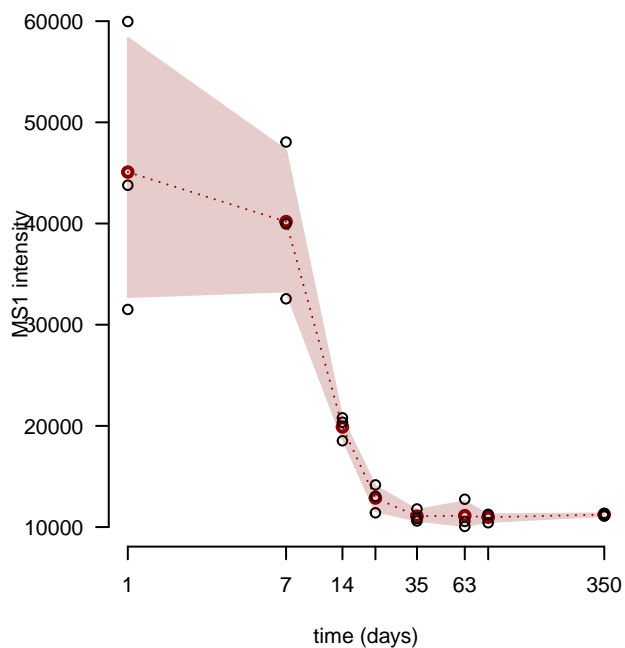

**Q8QZY6**  
**GN=Tspan14**  
tetraspanin 14

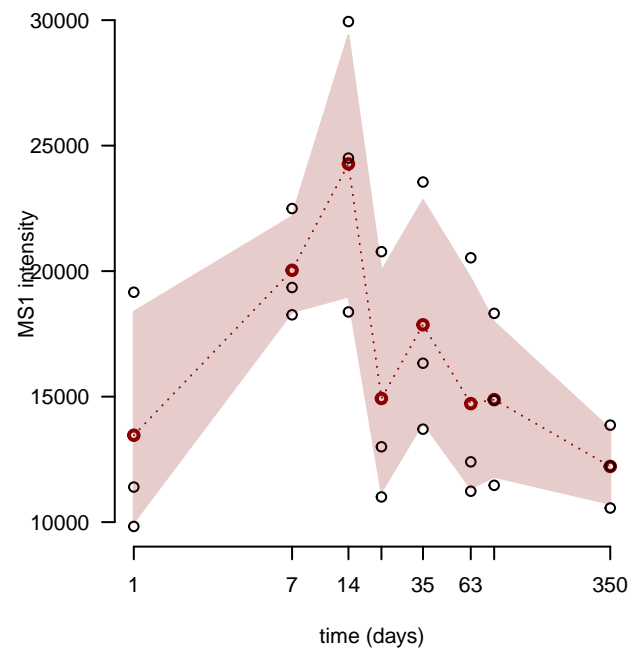

**Q8QZY9**  
**GN=Sf3b4**  
splicing factor 3b, subunit 4

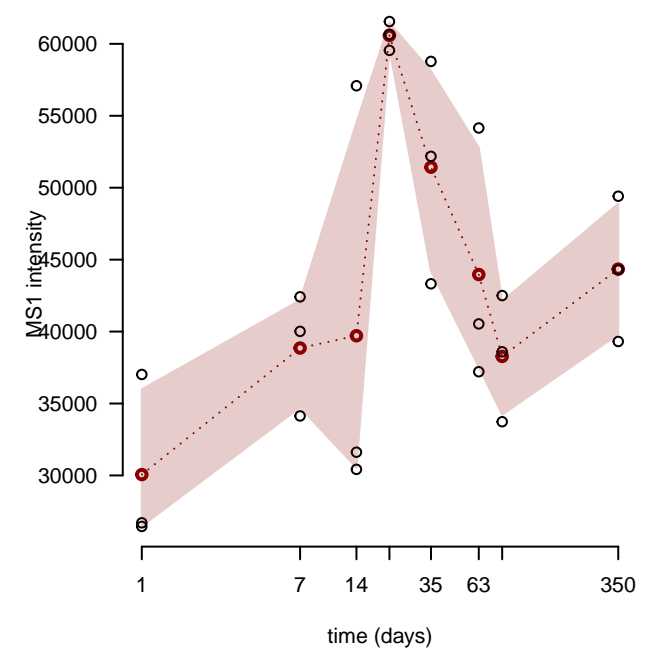

**Q8QZZ7**  
GN=Tprkb  
Tp53rk binding protein

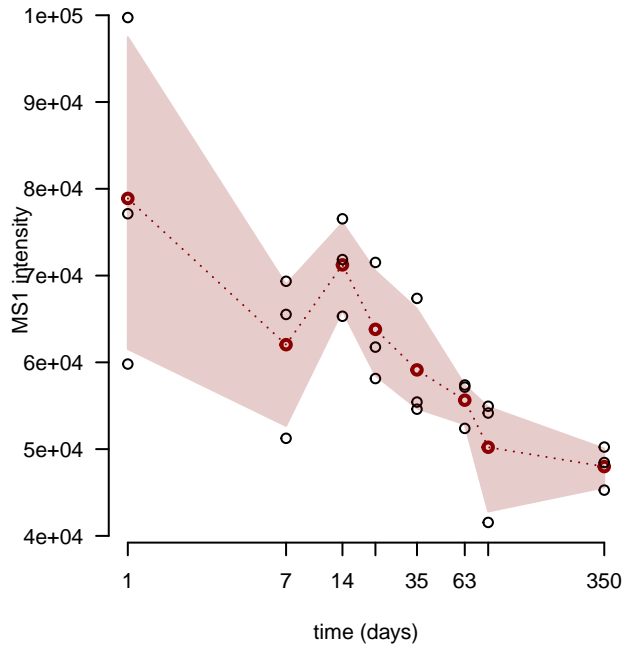

**Q8R001**  
GN=Mapre2  
microtubule-associated protein, RP/EB fa ...

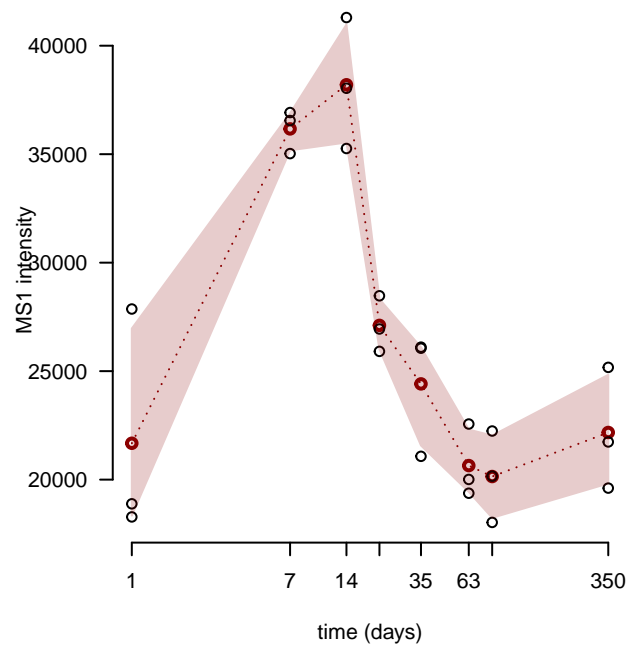

**Q8R003**  
GN=Mbnl3  
muscleblind like splicing factor 3

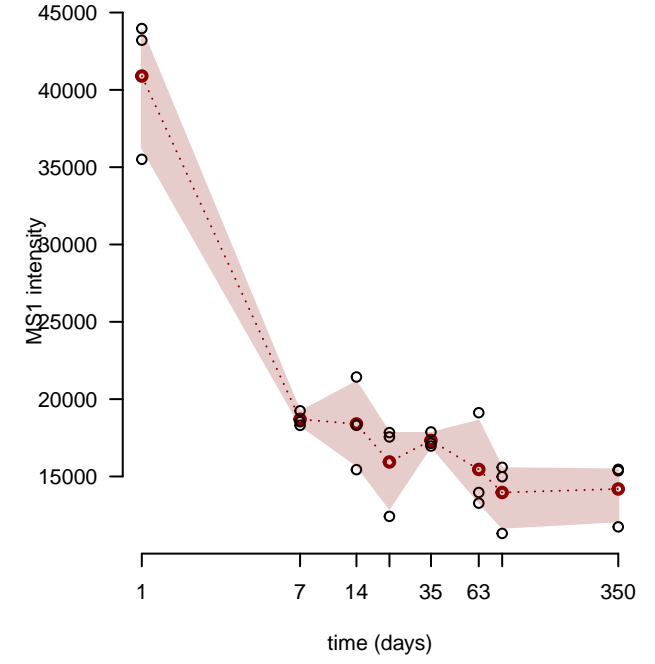

**Q8R007**  
GN=Nectin4  
nectin cell adhesion molecule 4

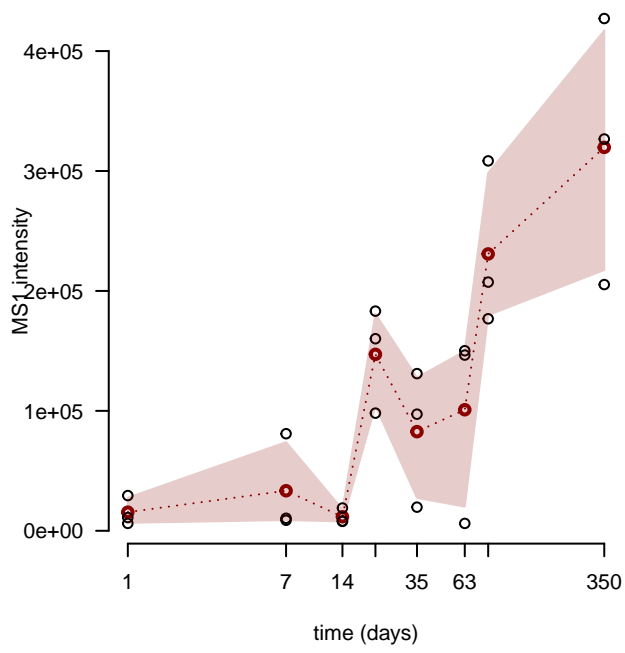

**Q8R010**  
GN=Aimp2  
aminoacyl tRNA synthetase complex-intera ...

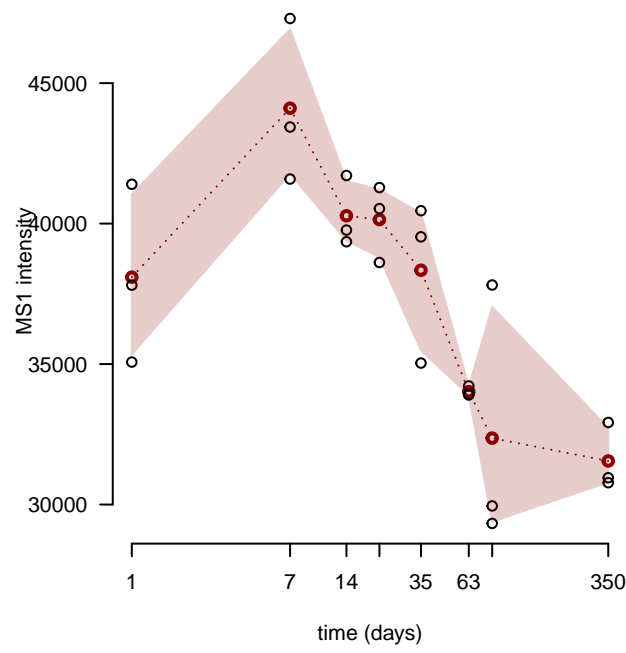

**Q8R015**  
GN=Blc1s5  
biogenesis of lysosomal organelles compl ...

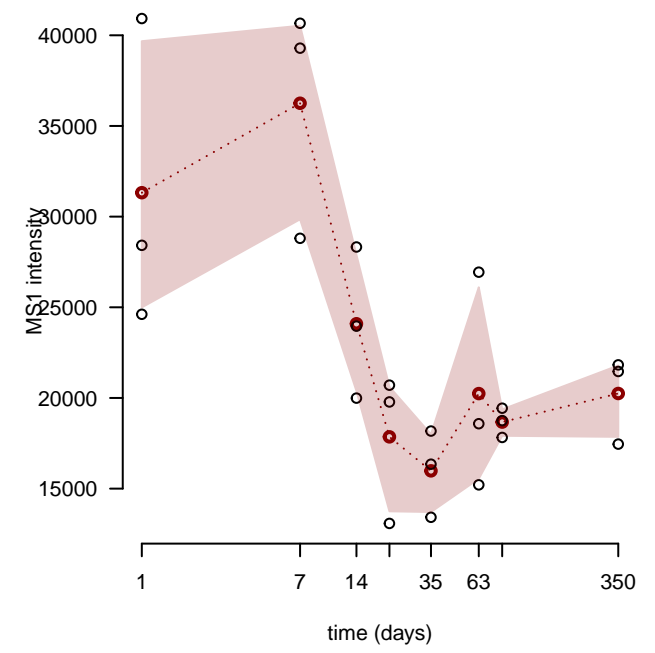

**Q8R016**  
GN=Blmh  
bleomycin hydrolase

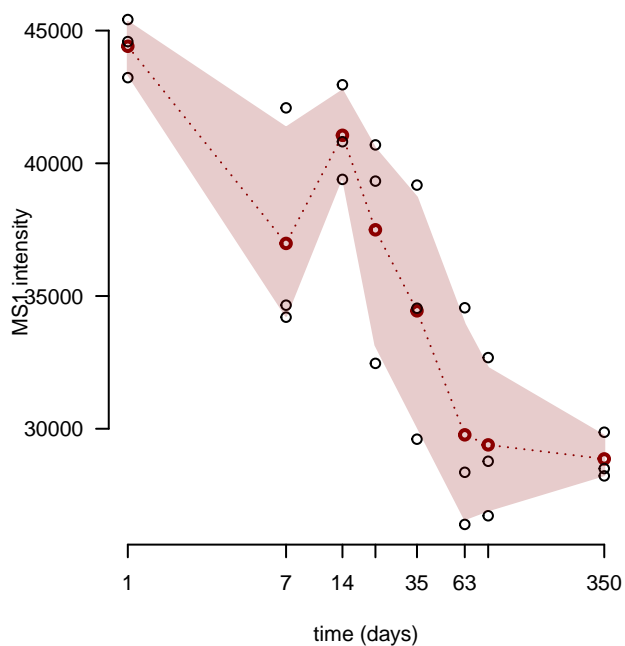

**Q8R023**  
GN=Pcgf1  
polycomb group ring finger 1

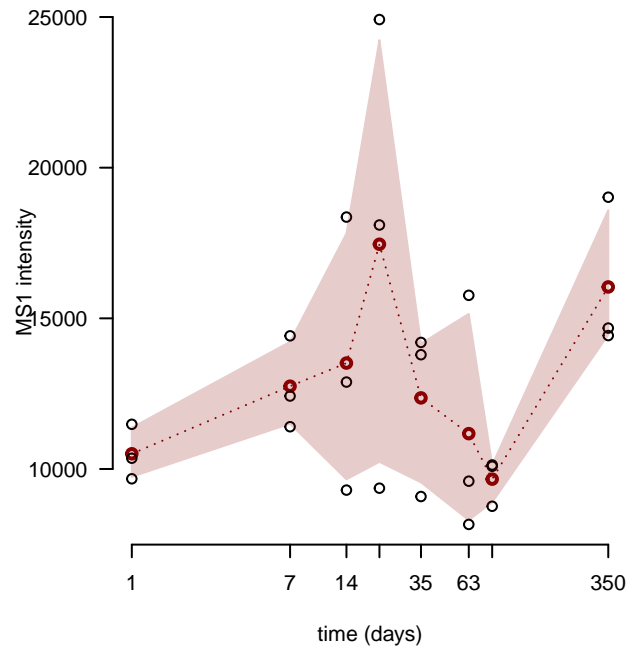

**Q8R033**  
GN=Lymr2  
LYR motif containing 2

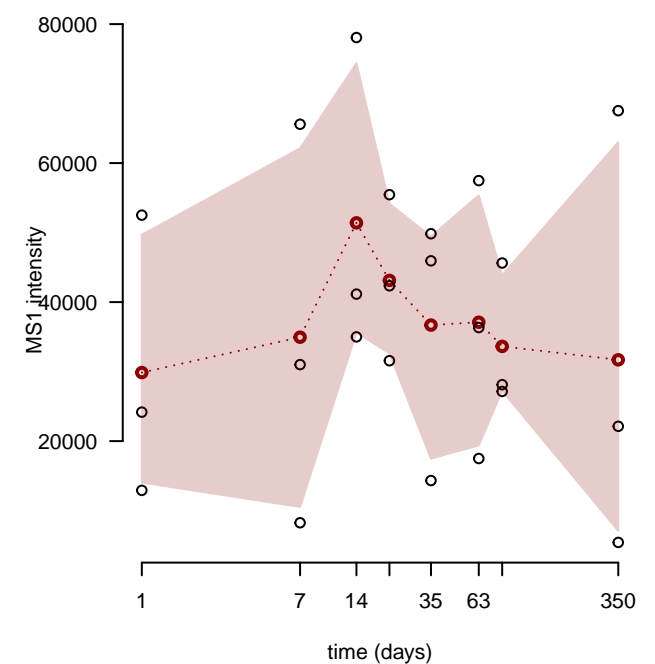



**Q8R035**  
**GN=Mrp158**  
mitochondrial ribosomal protein L58

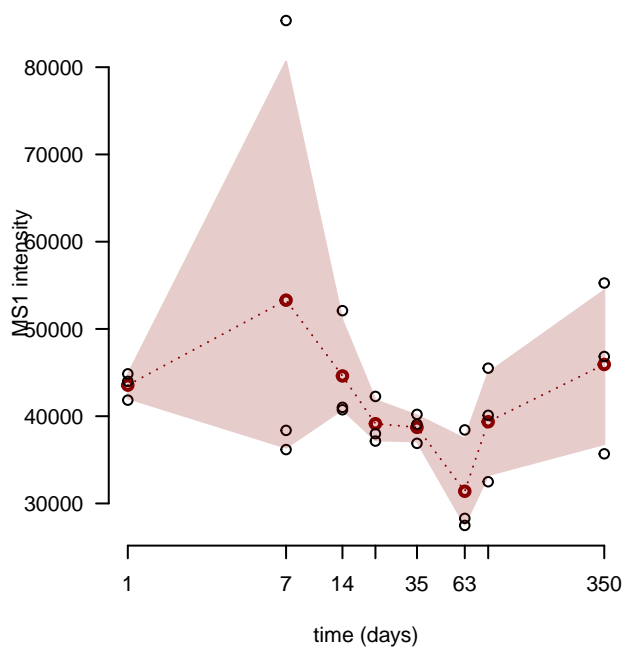

**Q8R050**  
**GN=Gsp1**  
G1 to S phase transition 1

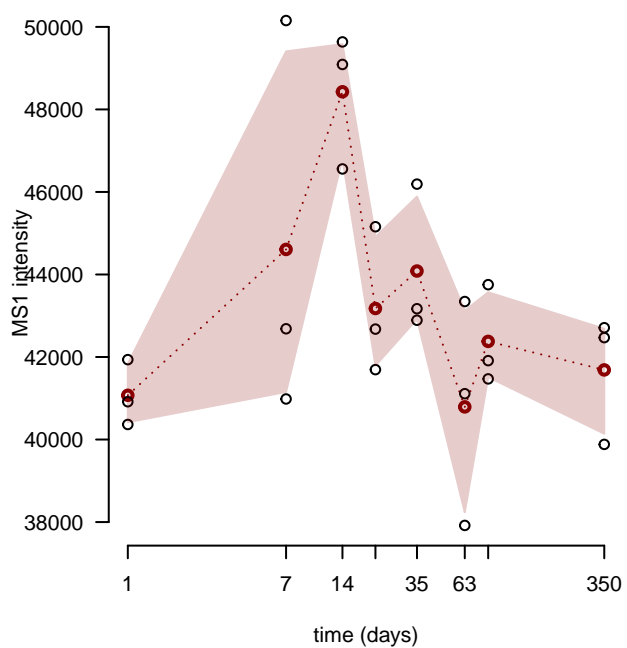

**Q8R054**  
**GN=SrpX2**  
sushi-repeat-containing protein, X-link...

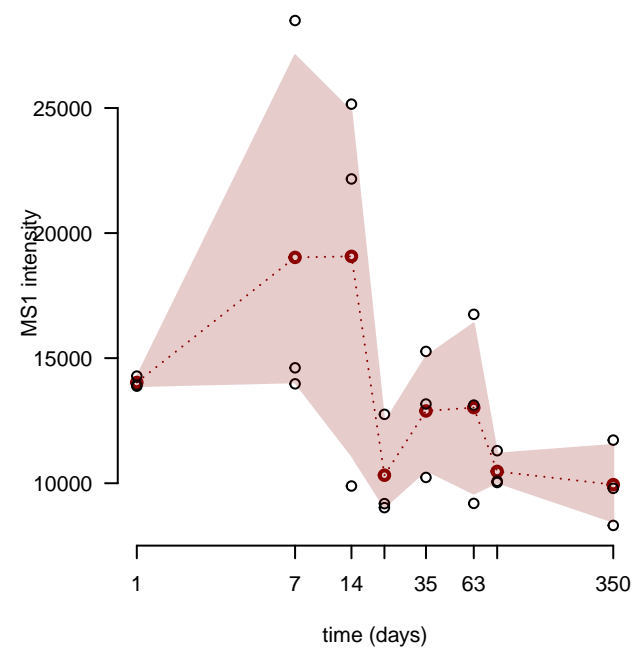

**Q8R059**  
**GN=Gale**  
galactose-4-epimerase, UDP

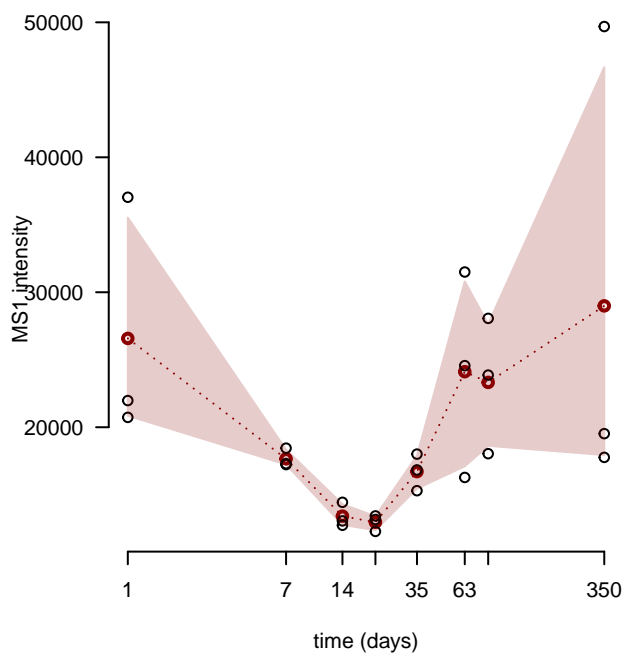

**Q8R060**  
**GN=Zwilch**  
zwilch kinetochore protein

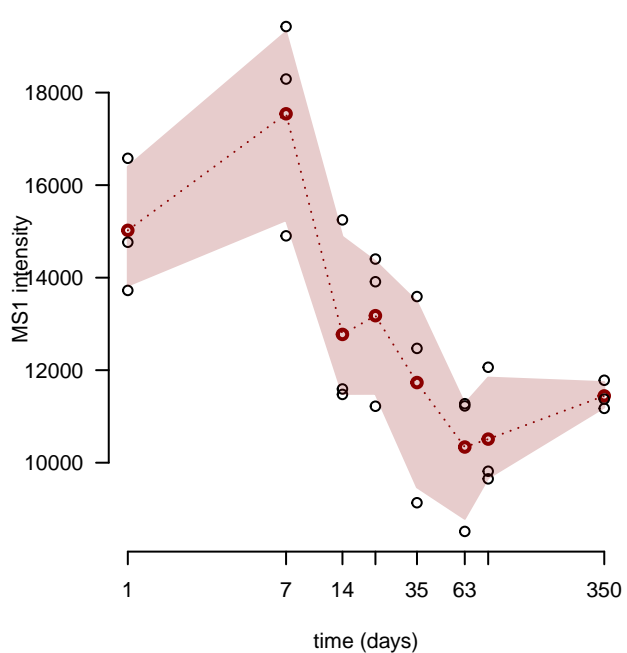

**Q8R071**  
**GN=Itpka**  
inositol 1,4,5-trisphosphate 3-kinase A

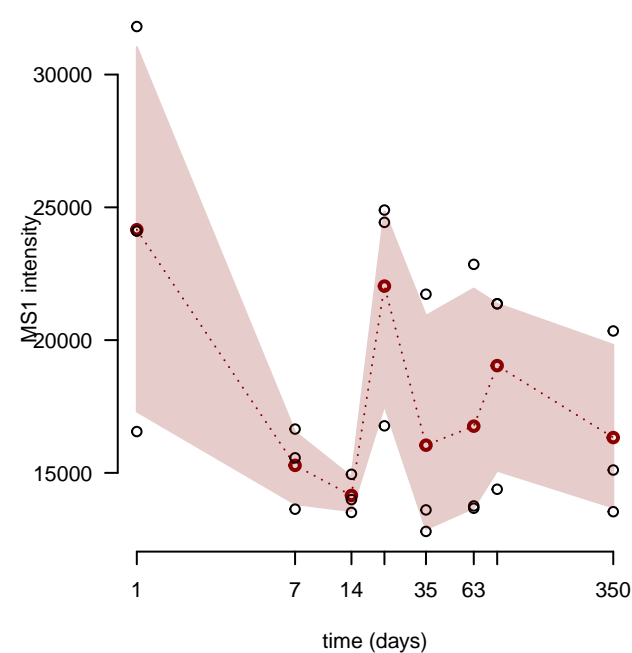

**Q8R079**  
**GN=Bfar**  
bifunctional apoptosis regulator

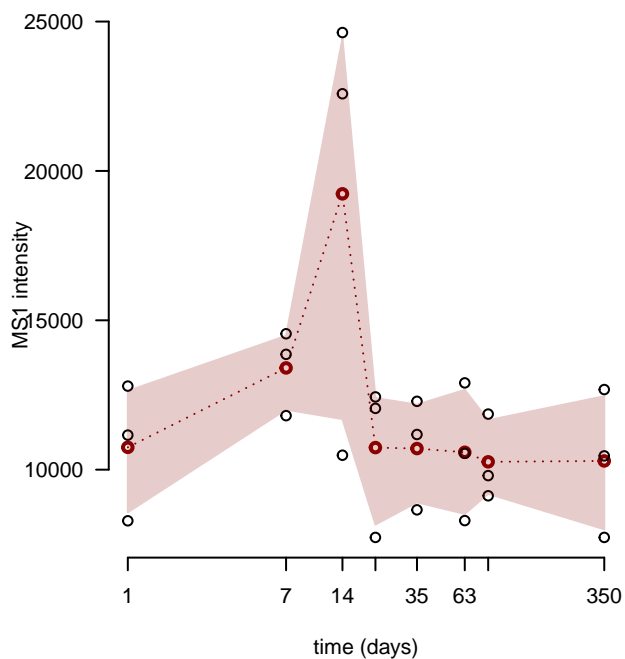

**Q8R081**  
**GN=Hnrnpl**  
heterogeneous nuclear ribonucleoprotein ...

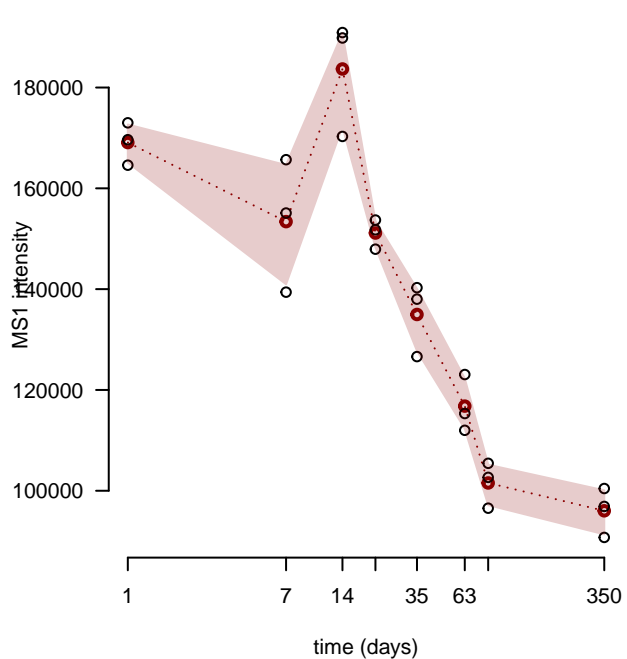

**Q8R086**  
**GN=Suox**  
sulfite oxidase

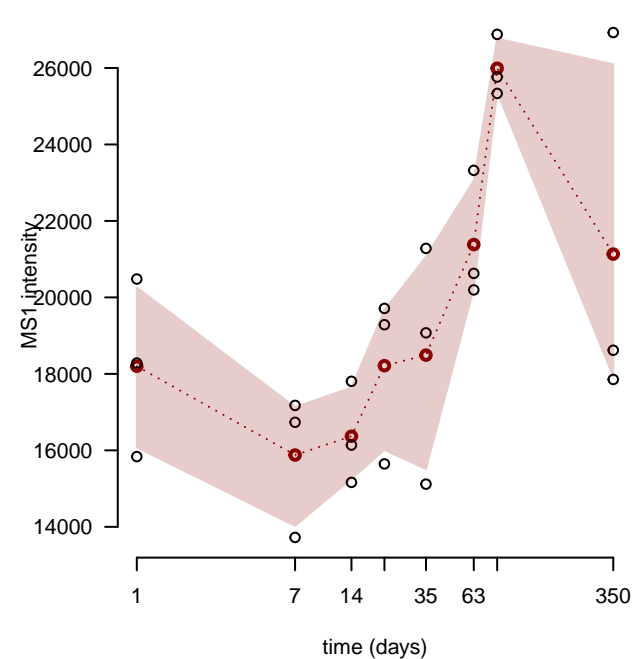

**Q8R087**  
**GN=B4galt7**  
xylosylprotein beta1,4-galactosyltransfe ...

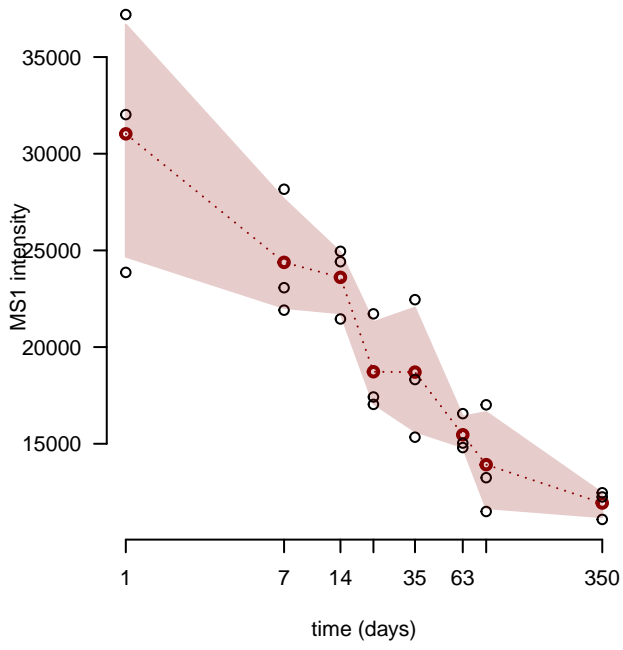

**Q8R088**  
**GN=Golph3l**  
golgi phosphoprotein 3-like

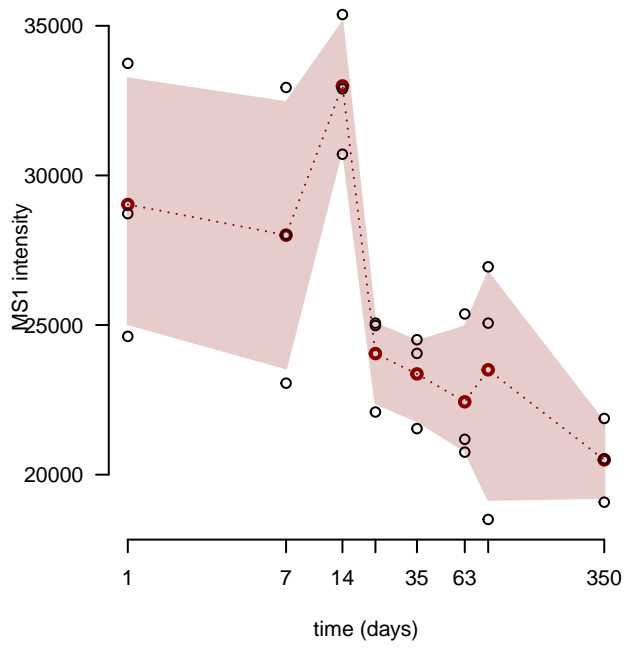

**Q8R0A0**  
**GN=Gtf2f2**  
general transcription factor IIF, polype ...

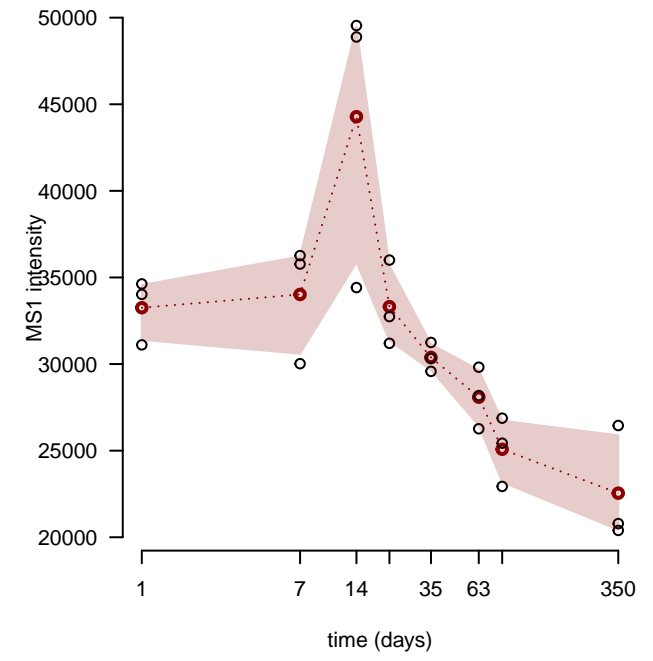

**Q8R0A5**  
**GN=Tceal3**  
transcription elongation factor A (SII)- ...

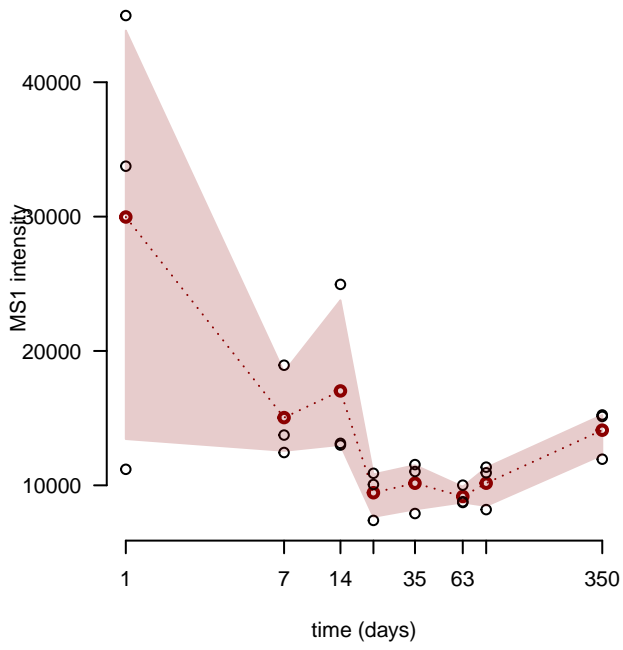

**Q8R0A7**  
**GN=Kiaa0513**

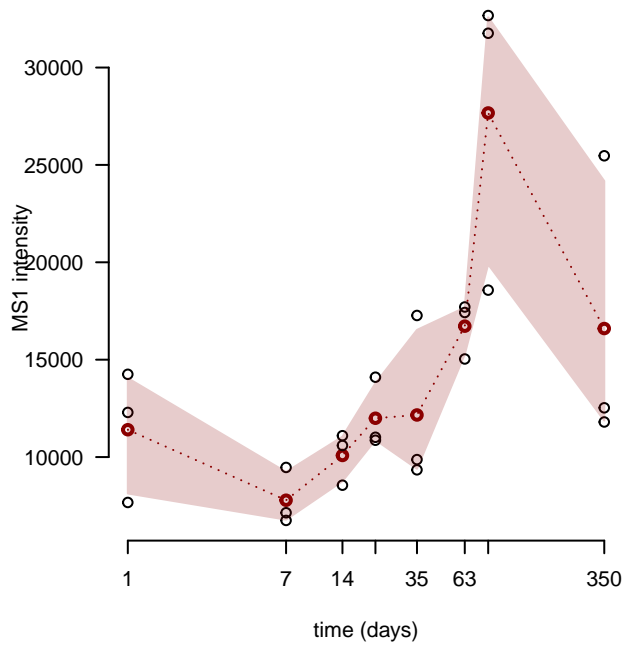

**Q8R0F3**  
**GN=Sumf1**  
sulfatase modifying factor 1

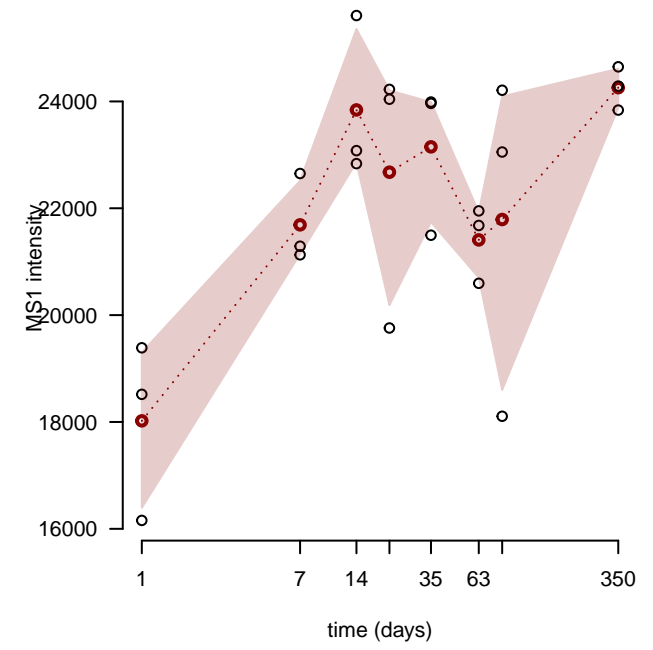

**Q8R0F5**  
**GN=Rbmx2**  
RNA binding motif protein, X-linked 2

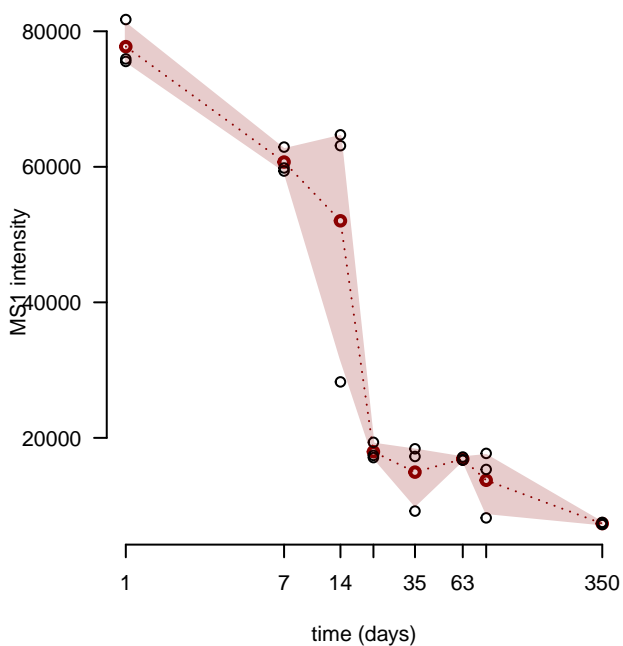

**Q8R0F6**  
**GN=Ilkap**  
integrin-linked kinase-associated serine ...

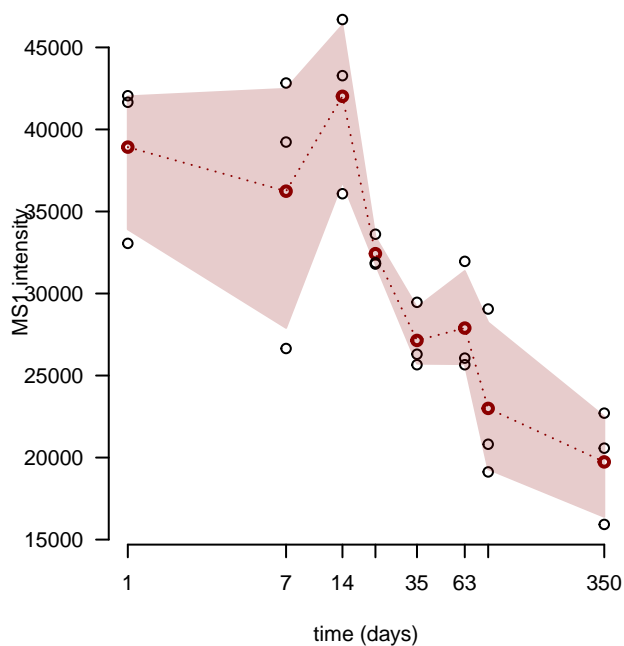

**Q8R0F8**  
**GN=Fahd1**  
fumarylacetoacetate hydrolase domain con ...

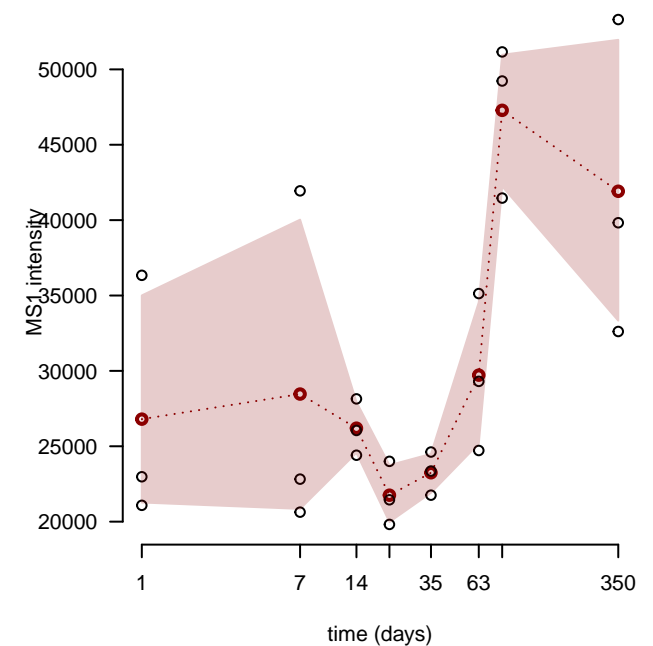

**Q8R0G7**  
GN=Spns1  
spinster homolog 1

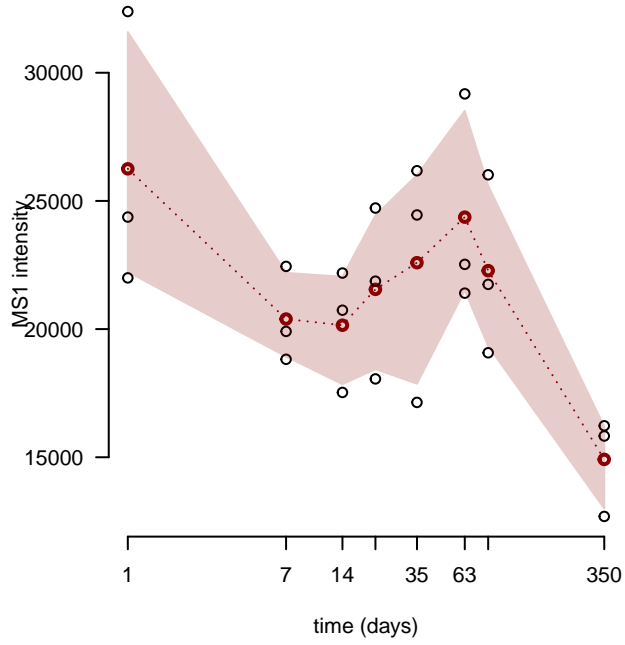

**Q8R0G9**  
GN=Nup133  
nucleoporin 133

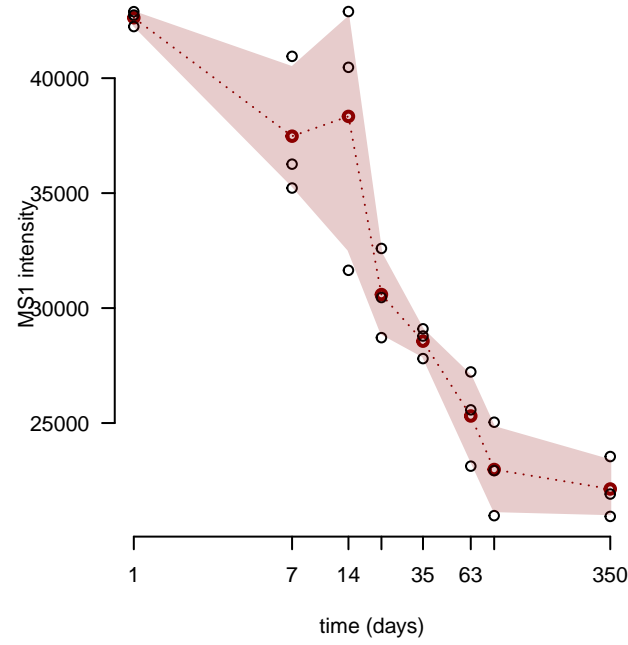

**Q8R0H9**  
GN=Gga1  
golgi associated, gamma adaptin ear cont ...

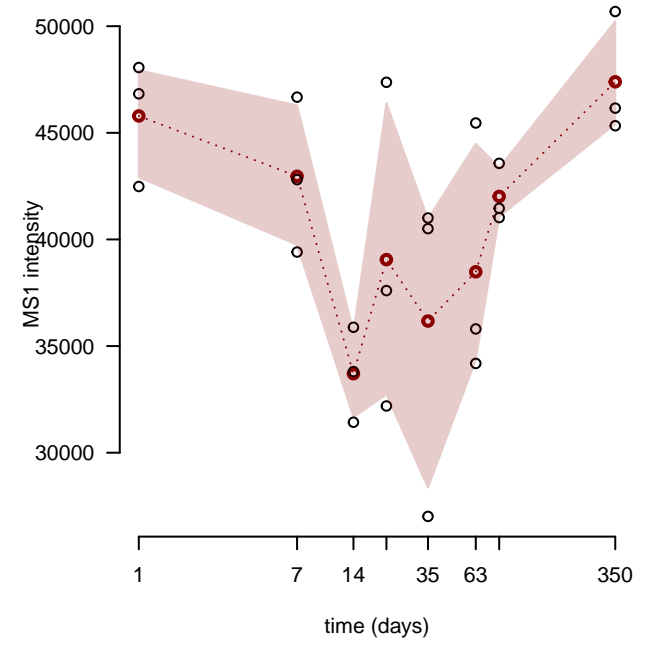

**Q8R0I0**  
GN=Ace2  
angiotensin I converting enzyme (peptidy ...

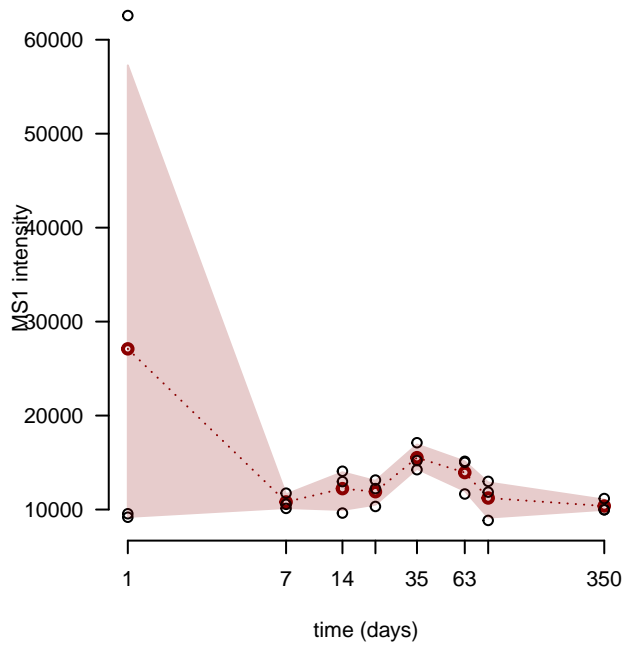

**Q8R0J7**  
GN=Vps37b  
vacuolar protein sorting 37B

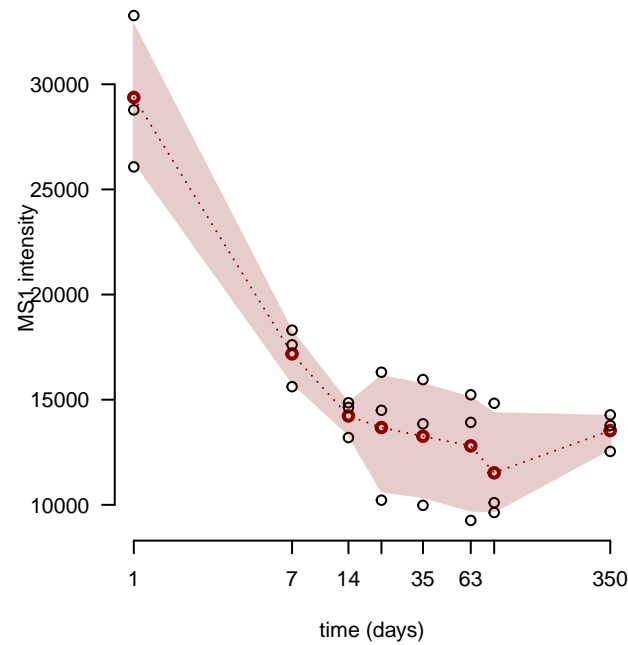

**Q8R0K4**  
GN=Ccdc137  
coiled-coil domain containing 137

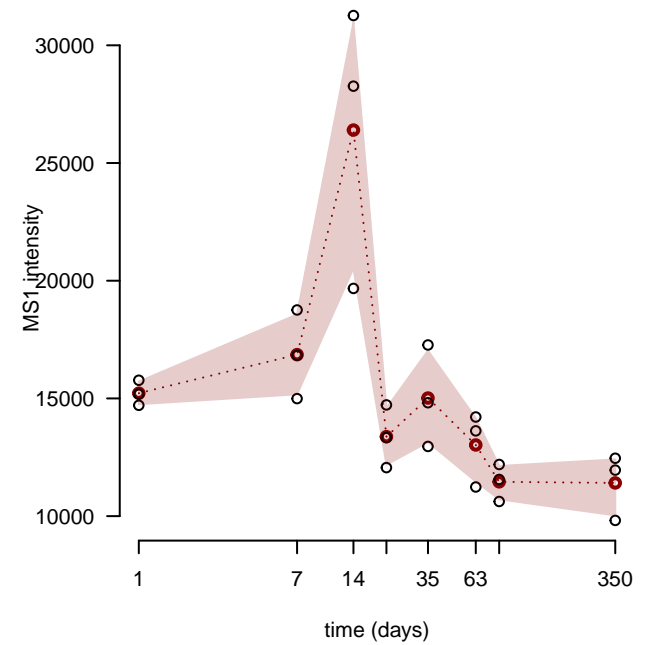

**Q8R0K9**  
GN=E2f4  
E2F transcription factor 4

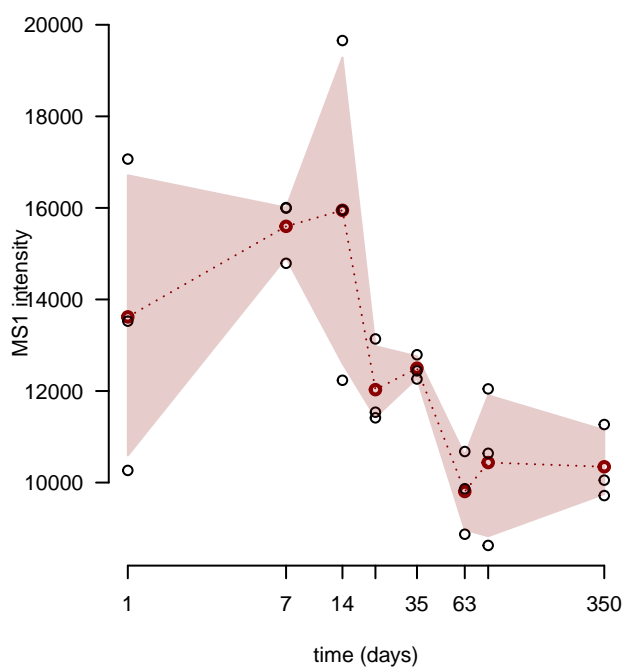

**Q8R0L9**  
GN=Tada3  
transcriptional adaptor 3

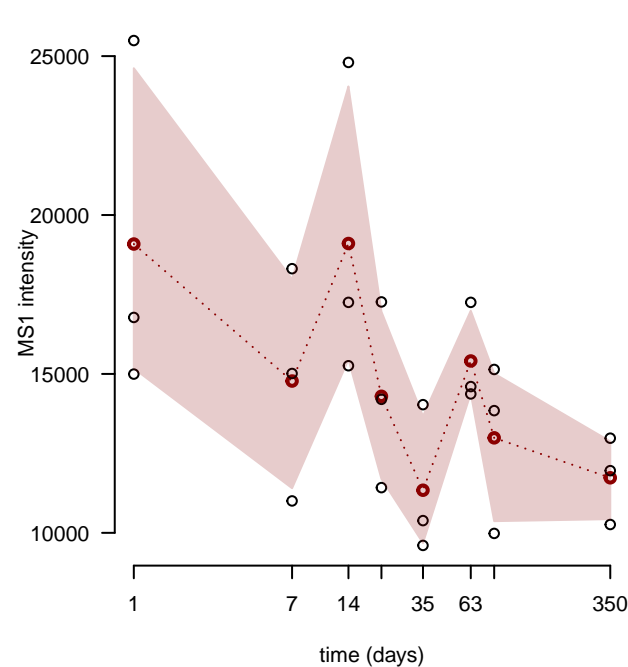

**Q8R0N6**  
GN=Adhfe1  
alcohol dehydrogenase, iron containing, ...

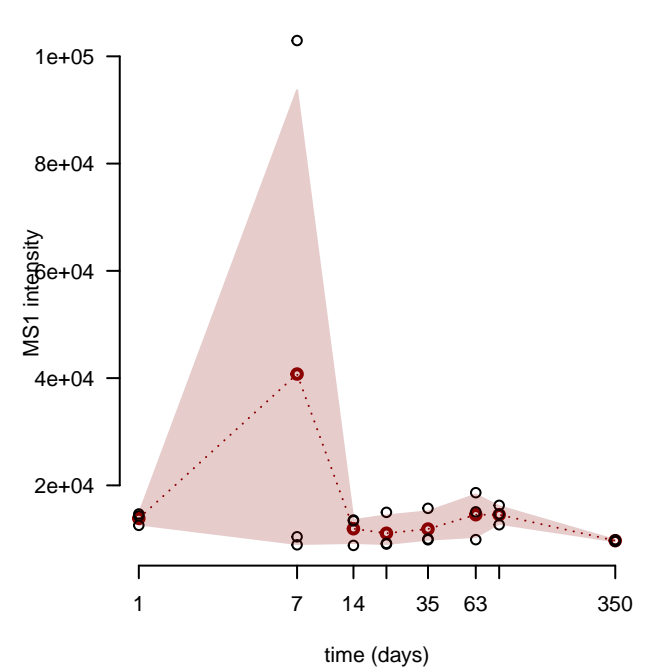

**Q8R0P4**  
GN=Aamdc  
adipogenesis associated Mth938 domain co ...

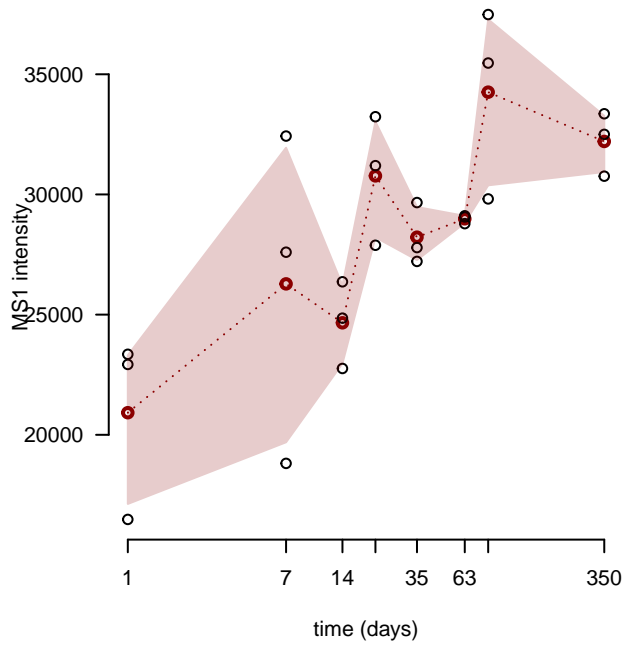

**Q8R0S1**  
GN=Atf7  
activating transcription factor 7

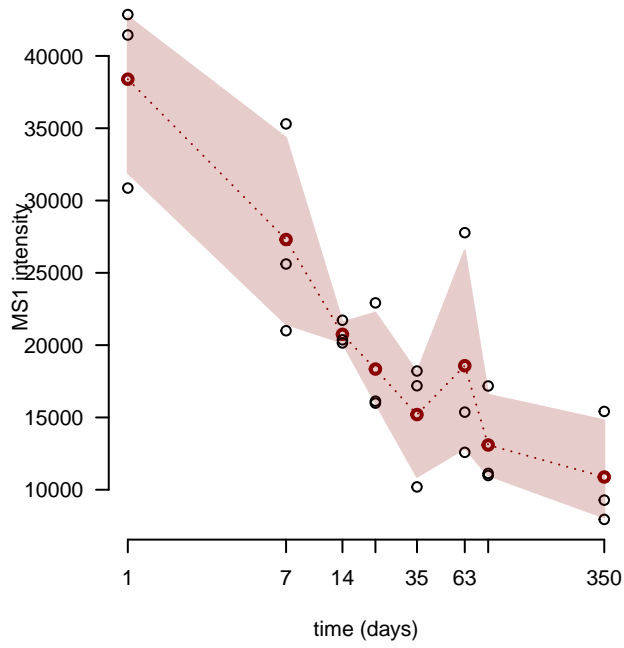

**Q8R0S2**  
GN=lqsec1  
IQ motif and Sec7 domain 1

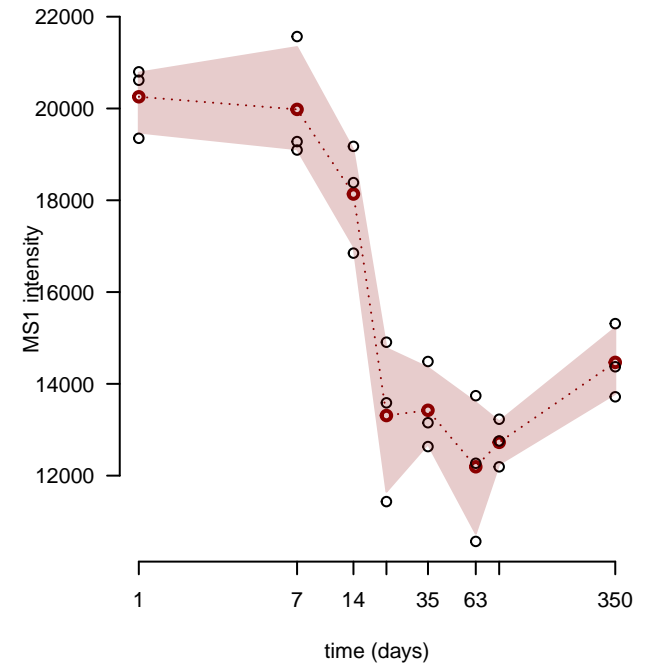

**Q8R0T2**  
GN=Znf768

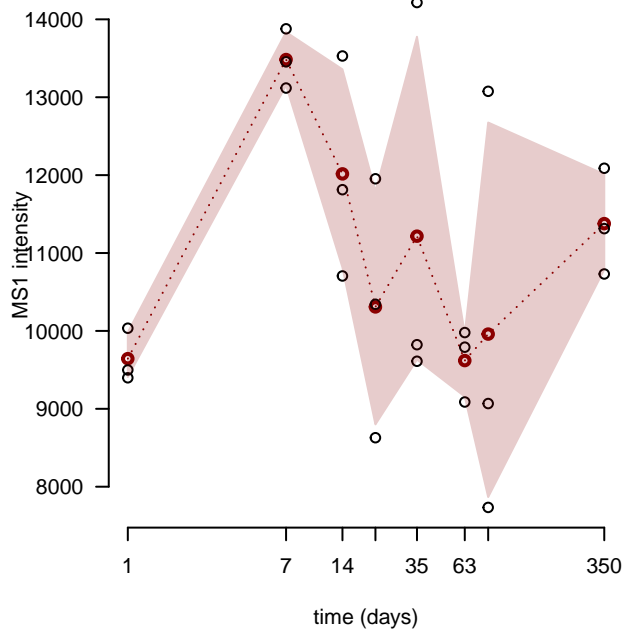

**Q8R0W0**  
GN=Eppk1  
epiplakin 1

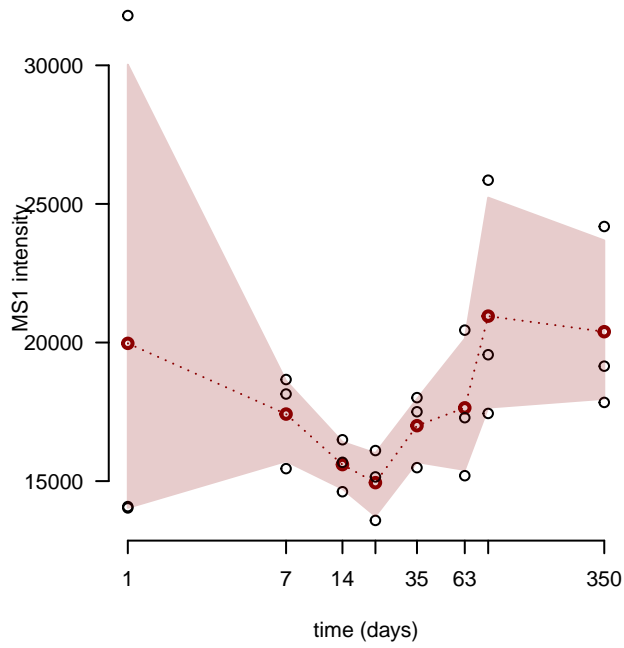

**Q8R0X2**  
GN=Cacul1  
CDK2 associated, cullin domain 1

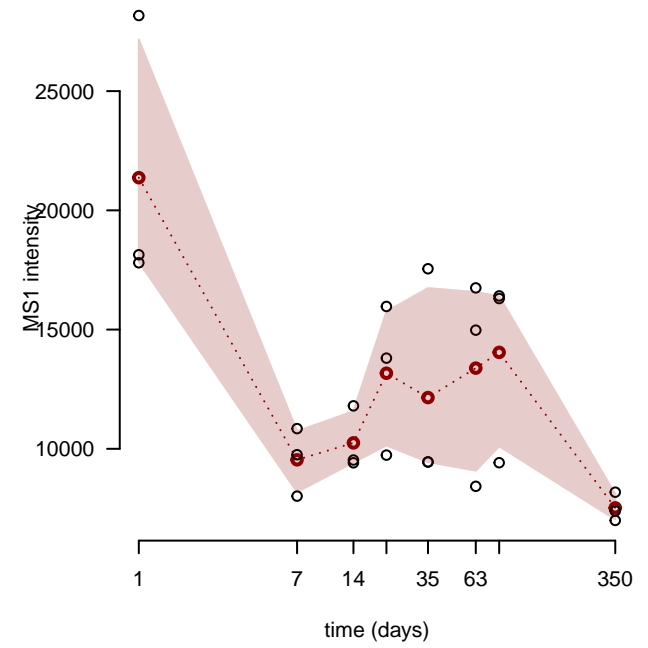

**Q8R0X7**  
GN=Sgpl1  
sphingosine phosphate lyase 1

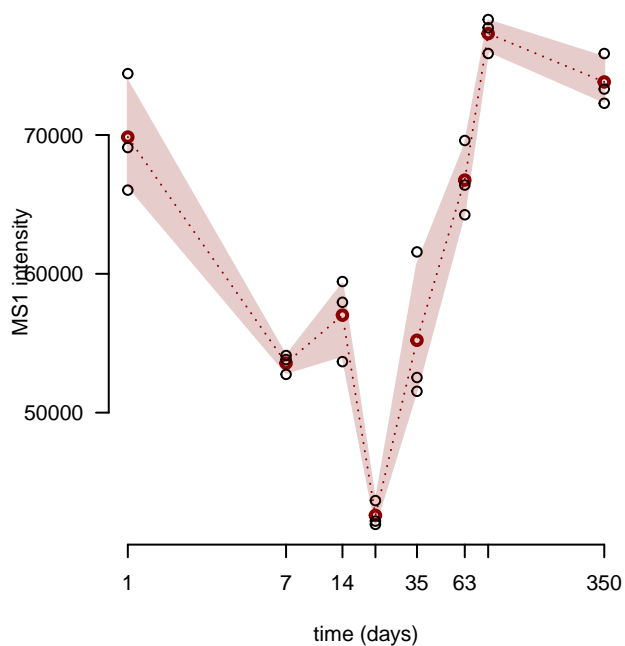

**Q8R0Y6**  
GN=Aldh111  
aldehyde dehydrogenase 1 family, member ...

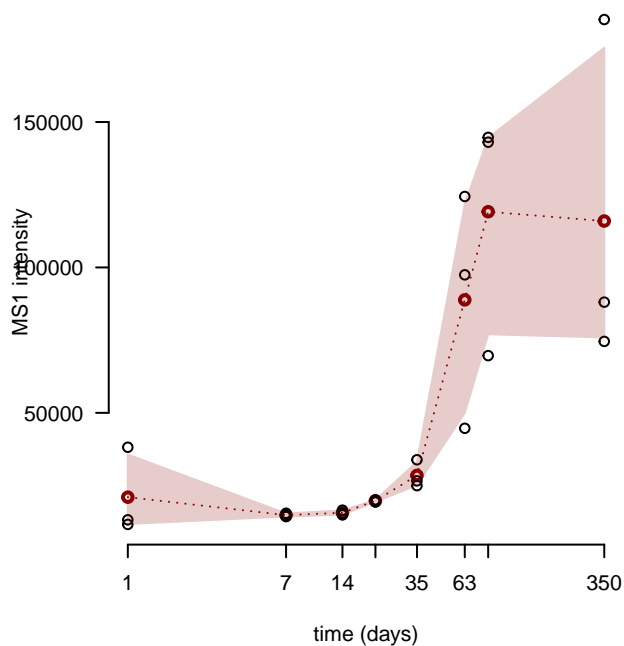

**Q8R0Y8**  
GN=Slc25a42  
solute carrier family 25, member 42

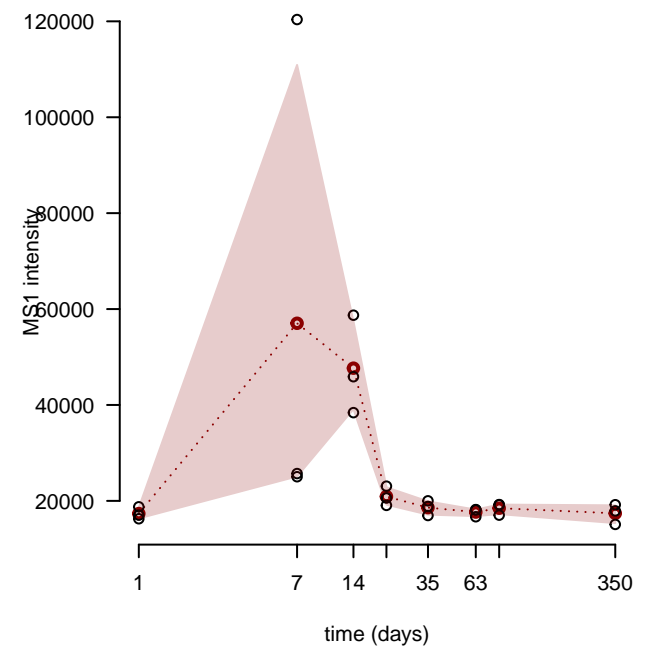

**Q8R0Z5**  
**GN=Slc25a28**  
solute carrier family 25, member 28

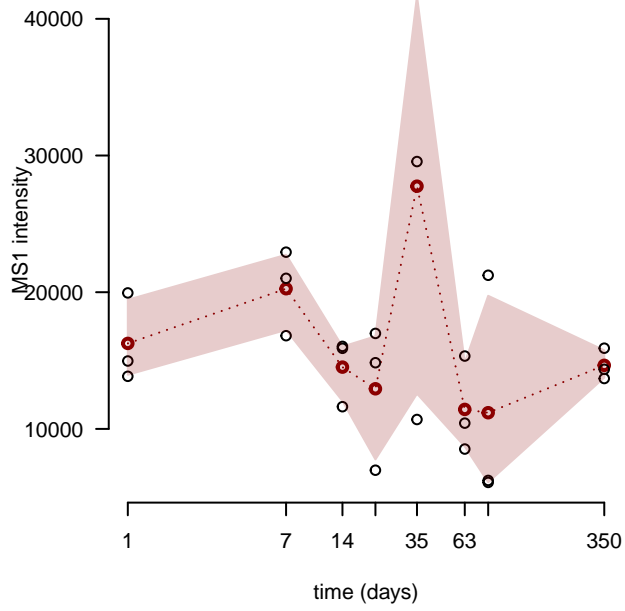

**Q8R0Z6**  
**GN=Angptl6**  
angiotensin-like 6

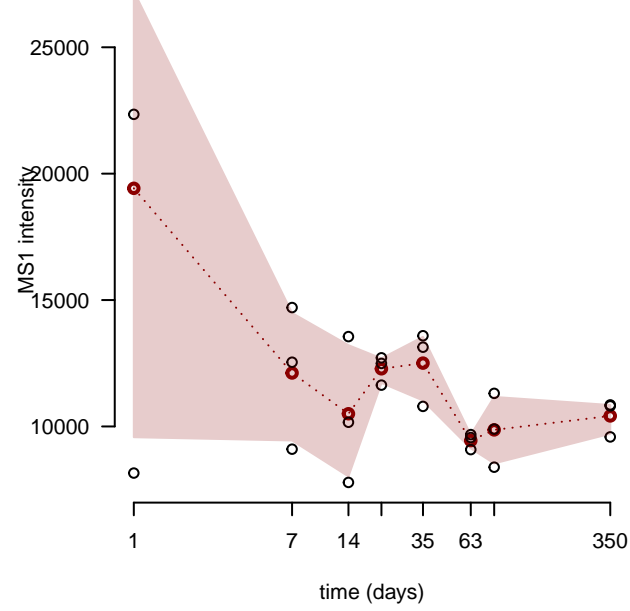

**Q8R104**  
**GN=Sirt3**  
sirtuin 3

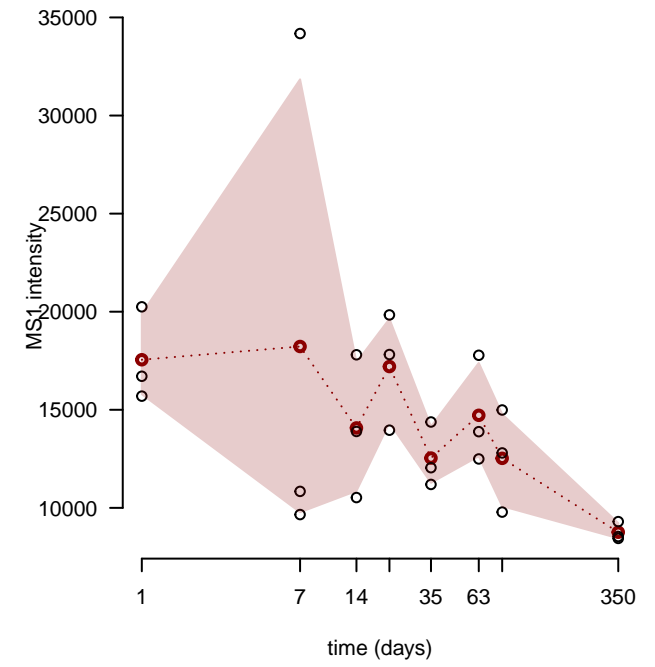

**Q8R105**  
**GN=Vps37c**  
vacuolar protein sorting 37C

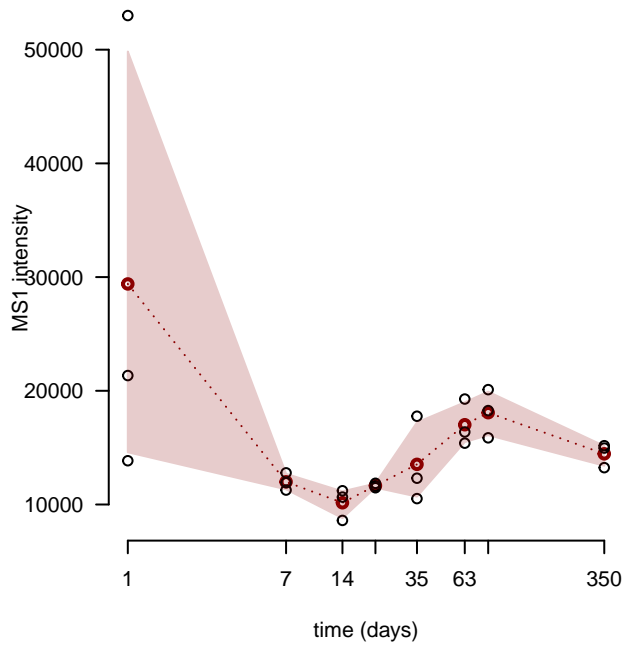

**Q8R121**  
**GN=Serpina10**  
serine (or cysteine) peptidase inhibitor ...

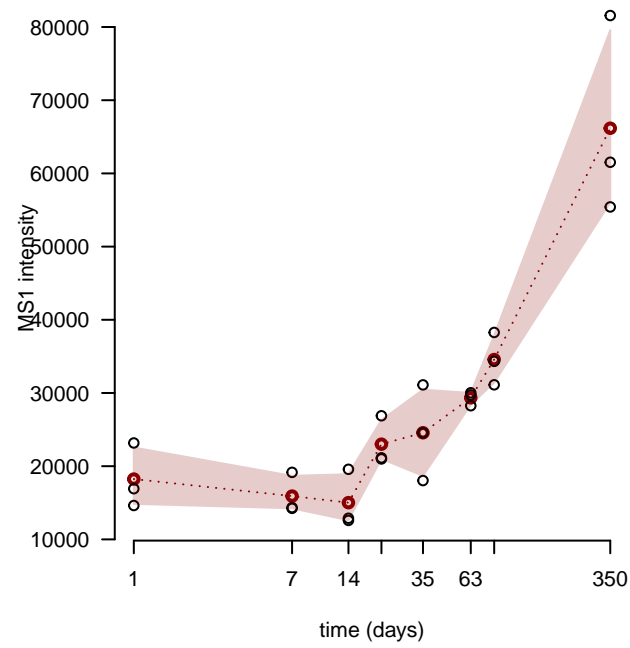

**Q8R123**  
**GN=Flad1**  
flavin adenine dinucleotide synthetase 1

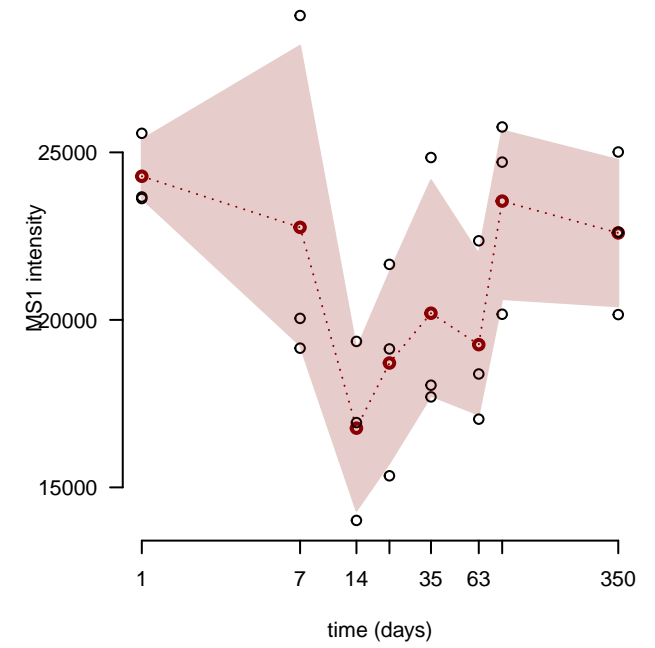

**Q8R124**  
**GN=Klhl36**  
kelch-like 36

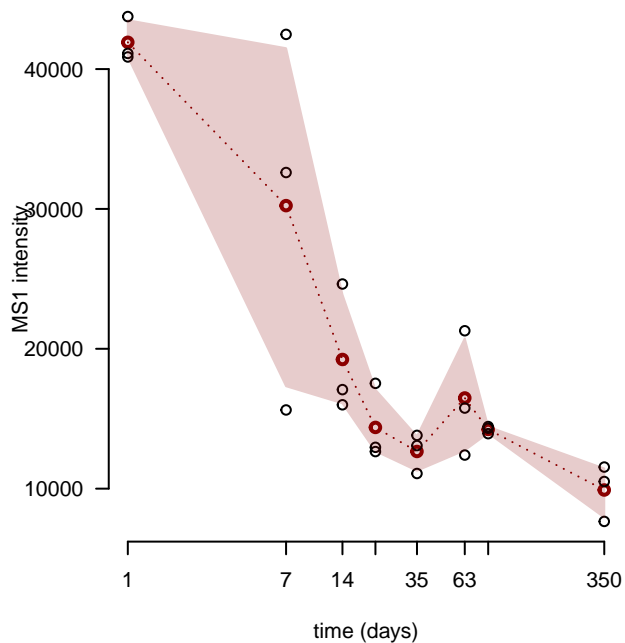

**Q8R127**  
**GN=Sccpdh**  
saccharopine dehydrogenase (putative)

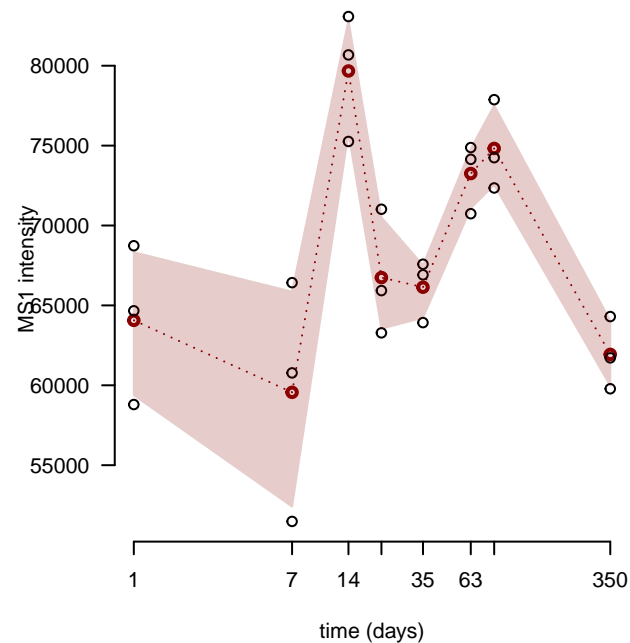

**Q8R138**  
**GN=Tmem119**  
transmembrane protein 119

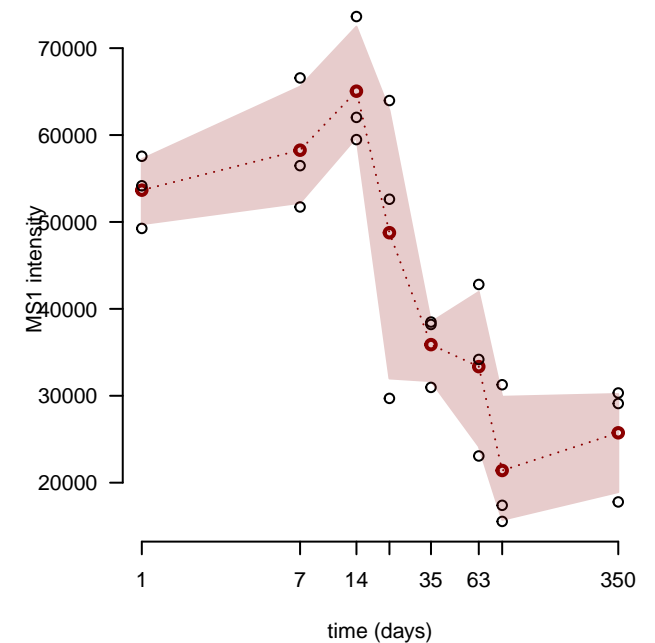

**Q8R143**  
GN=Pttg1ip  
pituitary tumor-transforming 1 interacti ...

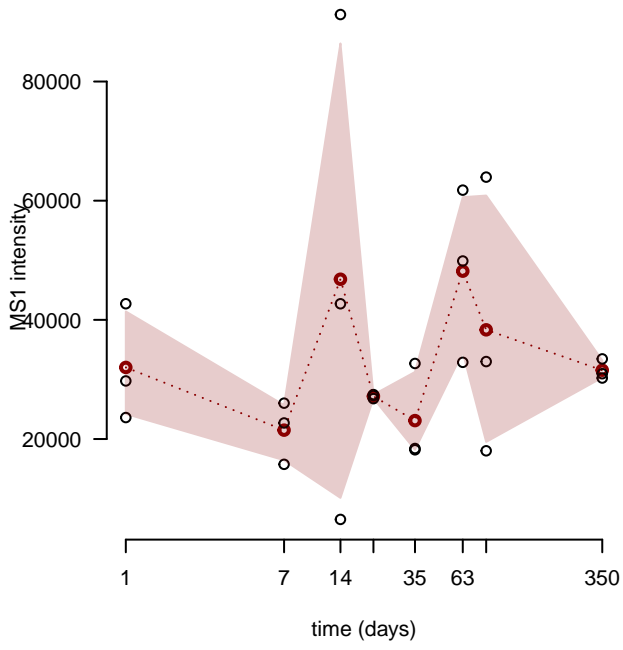

**Q8R146**  
GN=Apeh  
acylpeptide hydrolase

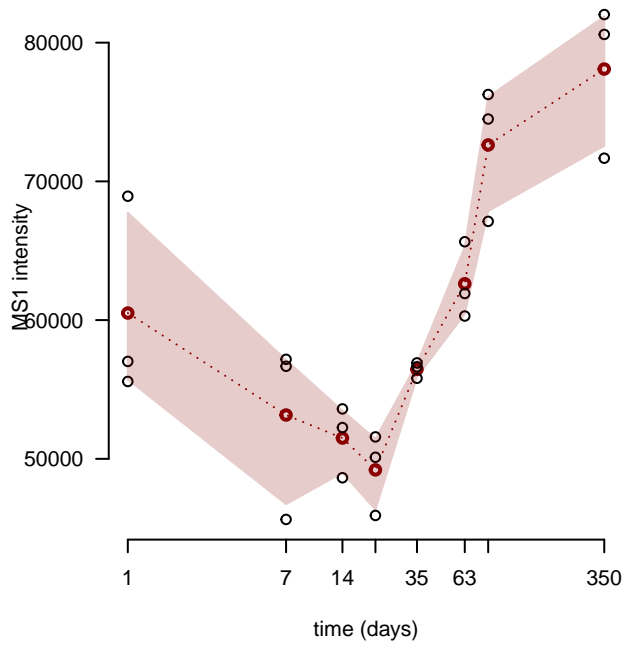

**Q8R149**  
GN=Bud13  
BUD13 homolog

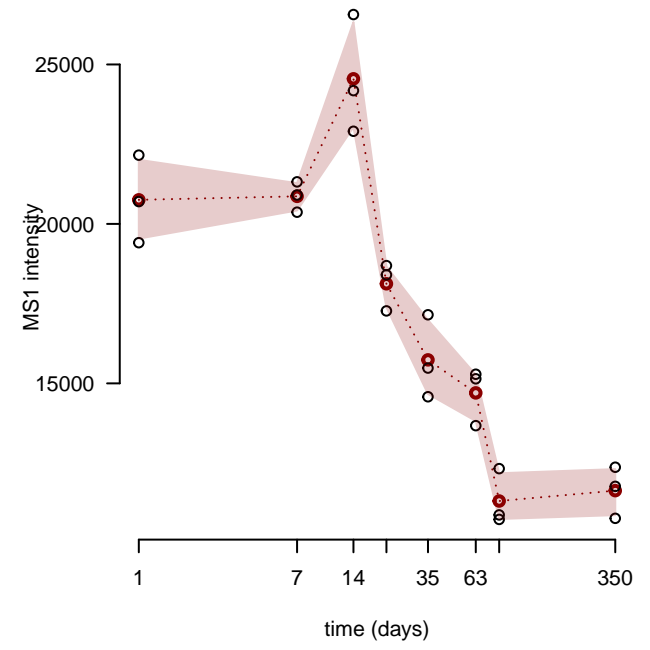

**Q8R151**  
GN=Znfx1  
zinc finger, NFX1-type containing 1

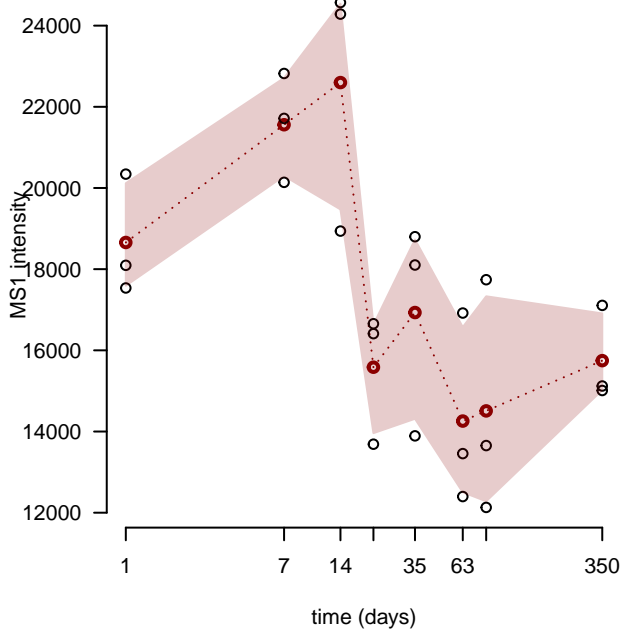

**Q8R164**  
GN=Bphl  
biphenyl hydrolase-like (serine hydrolas ...

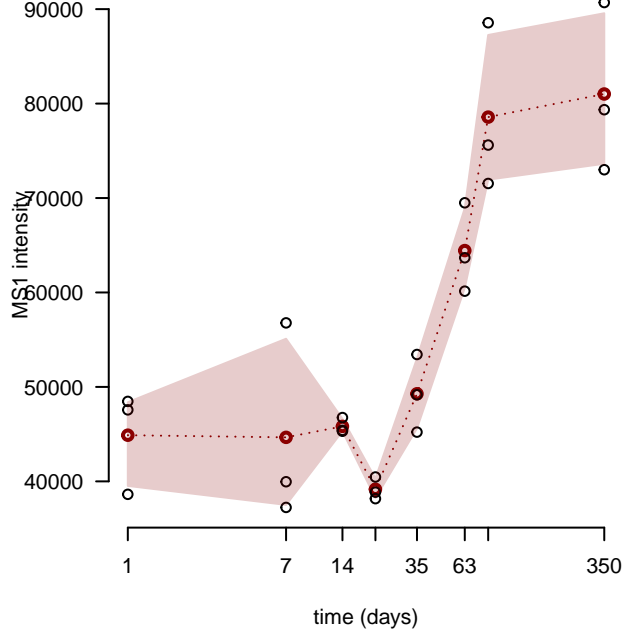

**Q8R173**  
GN=Zdhhc3  
zinc finger, DHHC domain containing 3

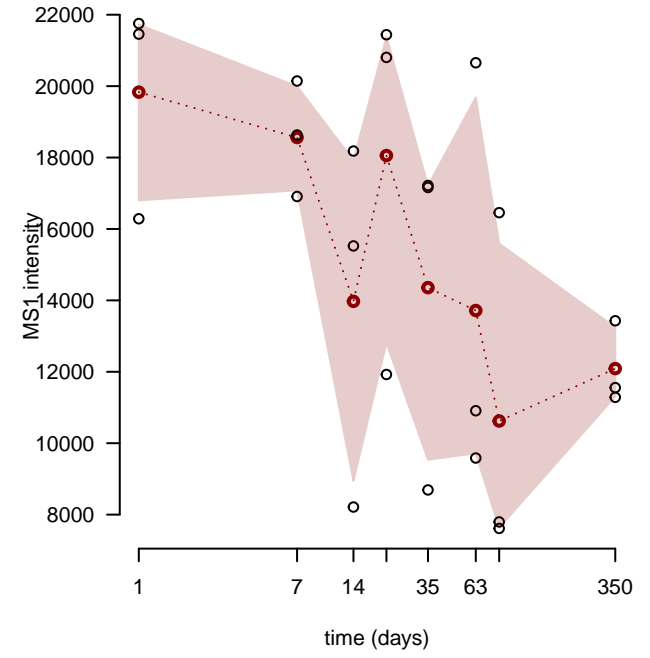

**Q8R179**  
GN=Kbtbd4  
kelch repeat and BTB (POZ) domain contai ...

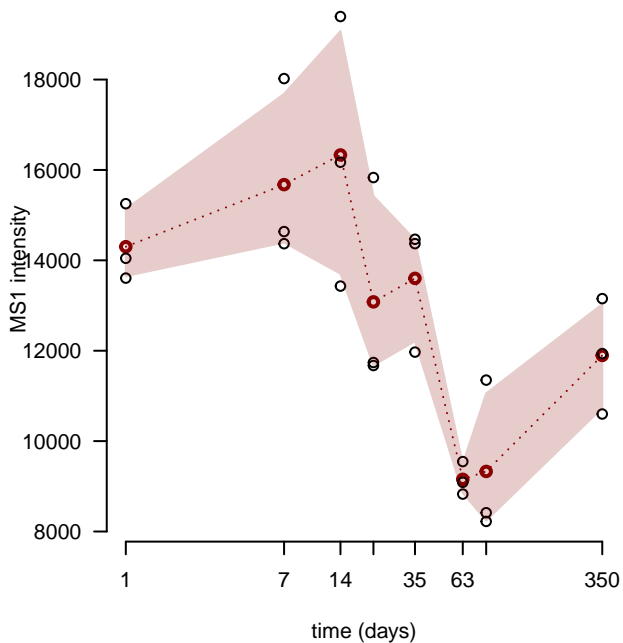

**Q8R180**  
GN=Ero1a  
endoplasmic reticulum oxidoreductase 1 a ...

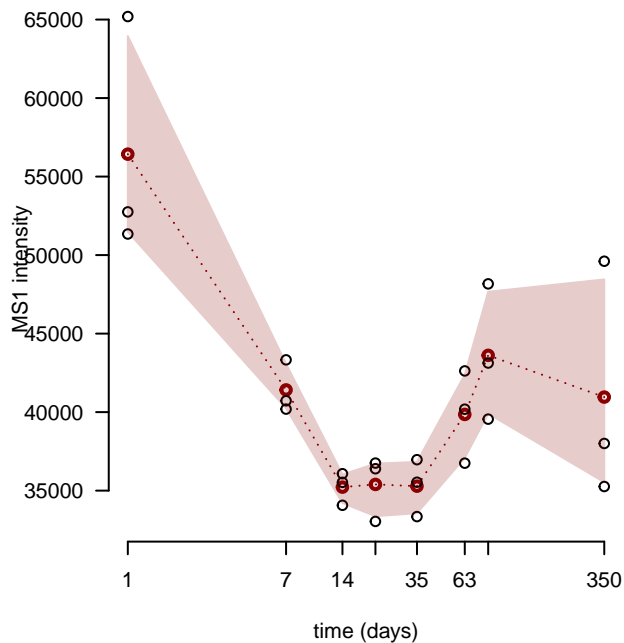

**Q8R1A4**  
GN=Dock7  
dedicator of cytokinesis 7

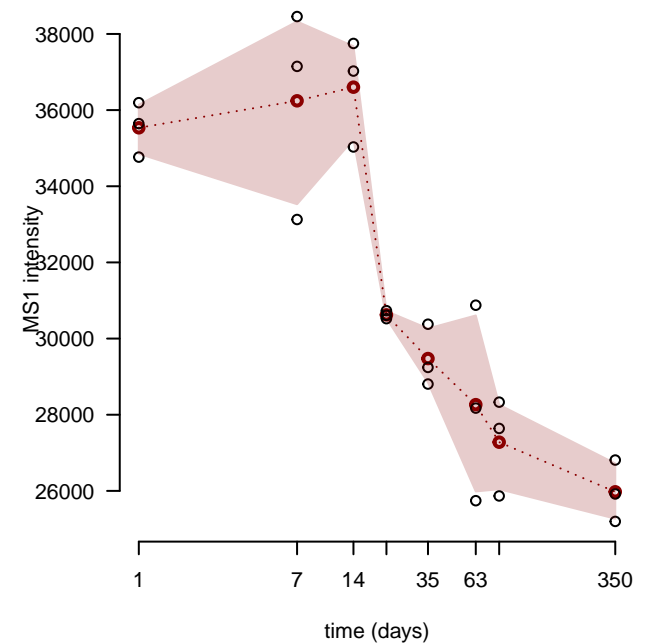

**Q8R1B4**  
**GN=Eif3c**  
eukaryotic translation initiation factor ...

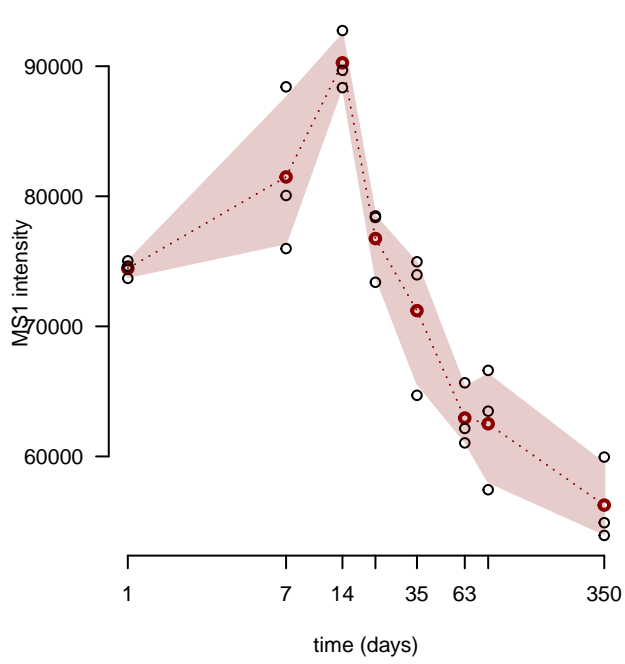

**Q8R1F0**  
**GN=D8ErtD738e**  
DNA segment, Chr 8, ERATO Doi 738, expe ...

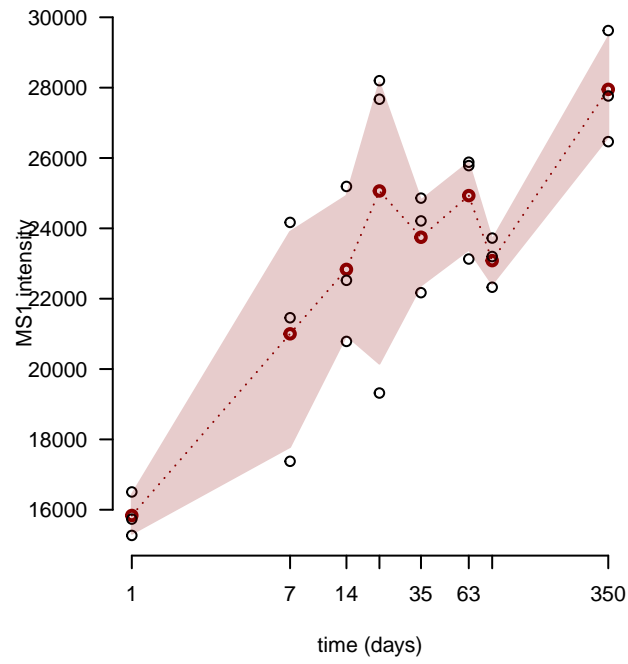

**Q8R1F1**  
**GN=Fam129b**

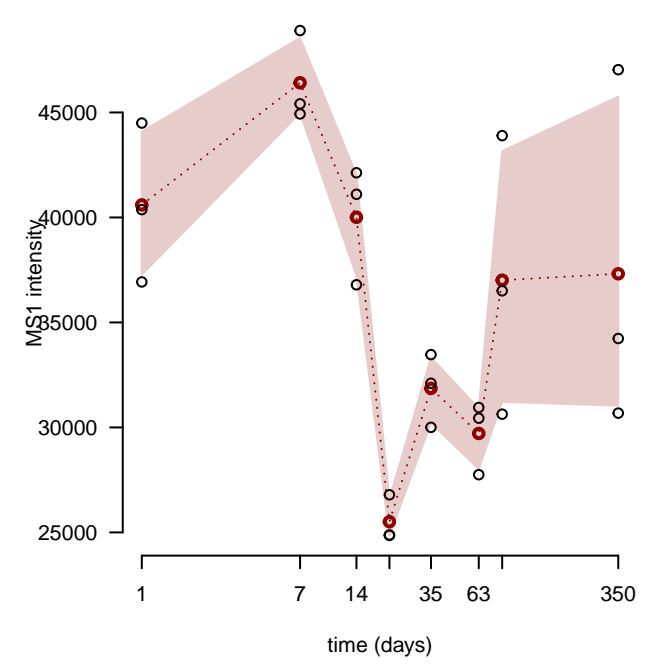

**Q8R1F5**  
**GN=Hyi**  
hydroxypyruvate isomerase (putative)

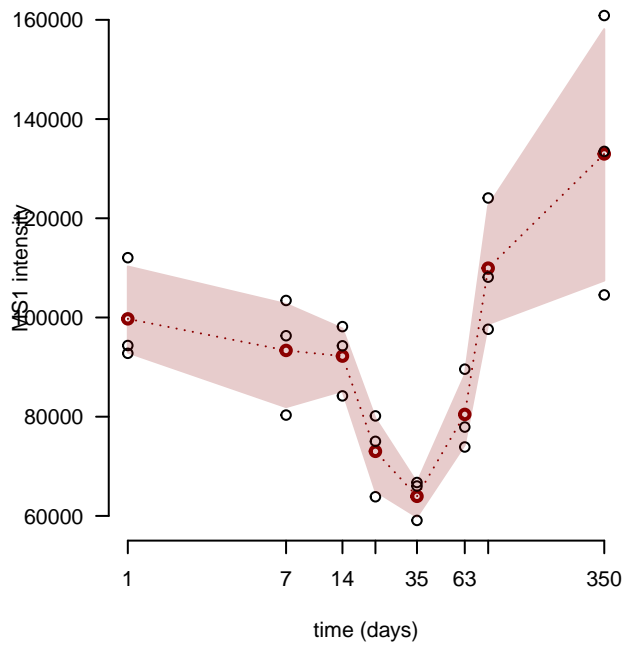

**Q8R1F6**  
**GN=Hid1**  
HID1 domain containing

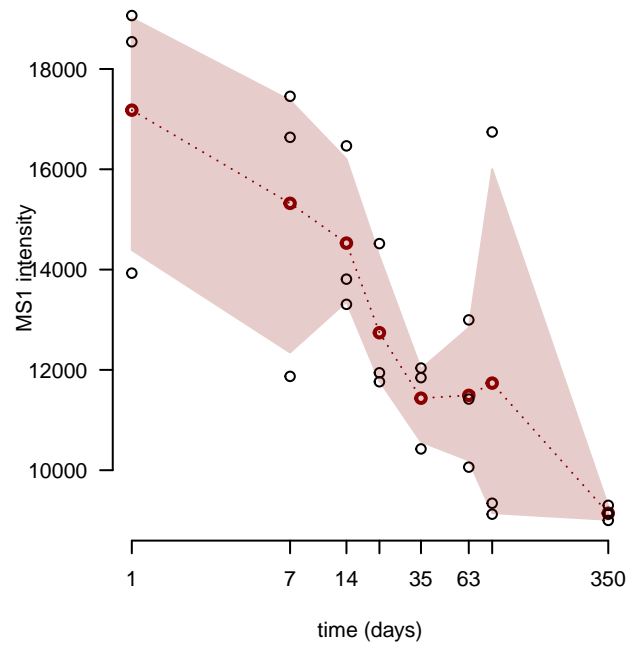

**Q8R1F9**  
**GN=Rpp40**  
ribonuclease P 40 subunit

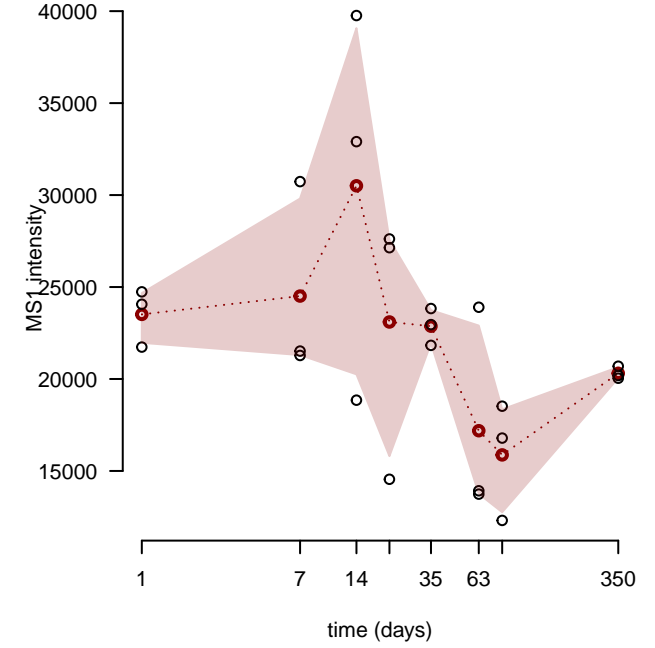

**Q8R1G2**  
**GN=Cmb1**  
carboxymethylenebutenolidase-like (Pseud ...

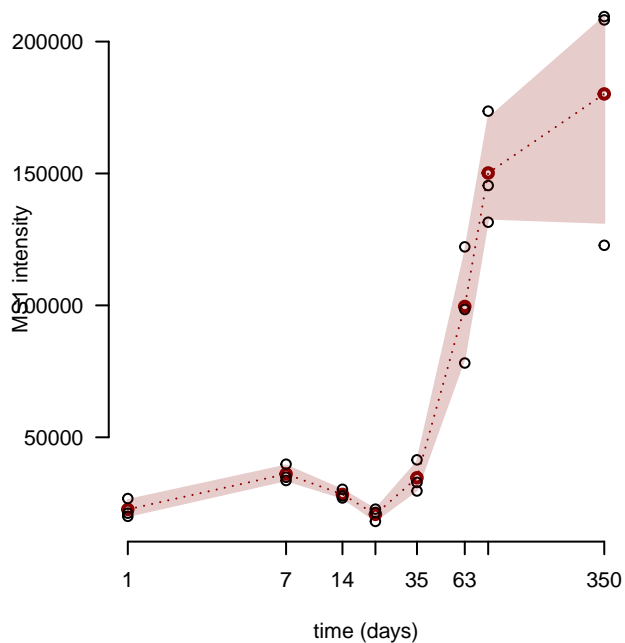

**Q8R1G6**  
**GN=Pdlim2**  
PDZ and LIM domain 2

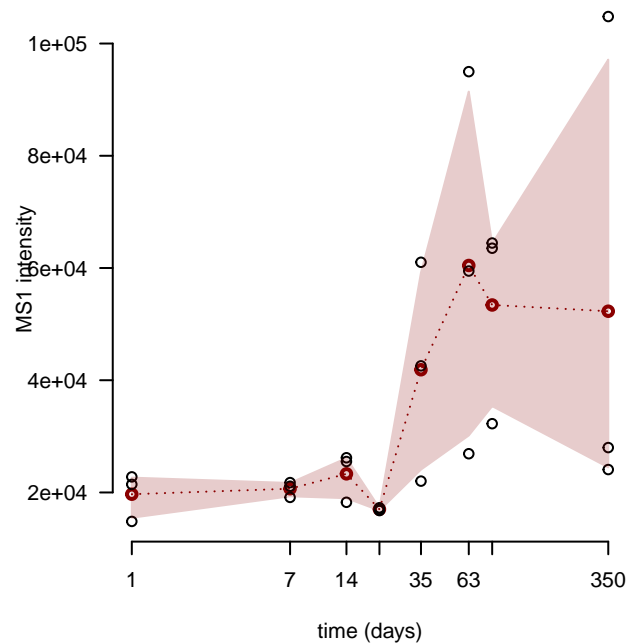

**Q8R1I1**  
**GN=UqcR10**  
ubiquinol-cytochrome c reductase, comple ...

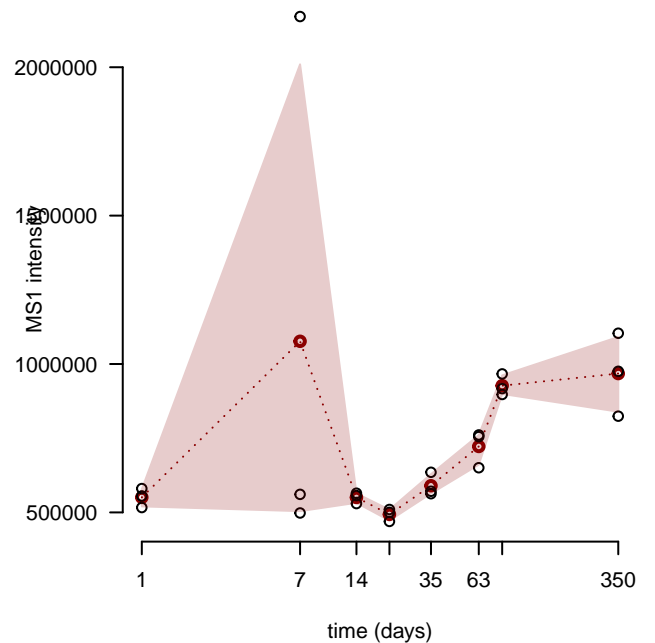

**Q8R1J3**  
GN=Zcchc9  
zinc finger, CCHC domain containing 9

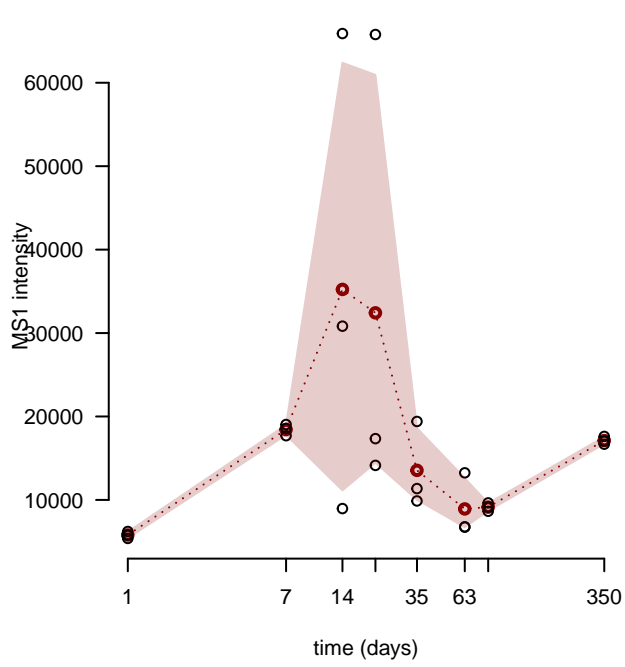

**Q8R1J9**  
GN=Tor2a  
torsin family 2, member A

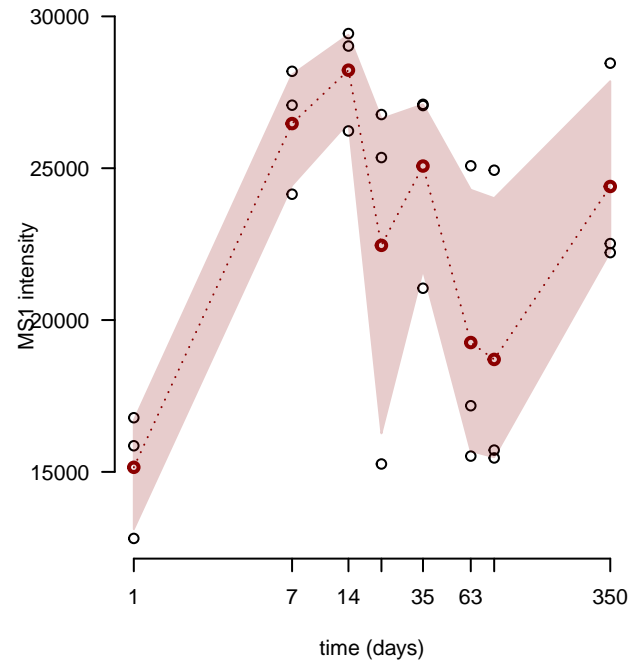

**Q8R1K1**  
GN=Ubac2  
ubiquitin associated domain containing 2

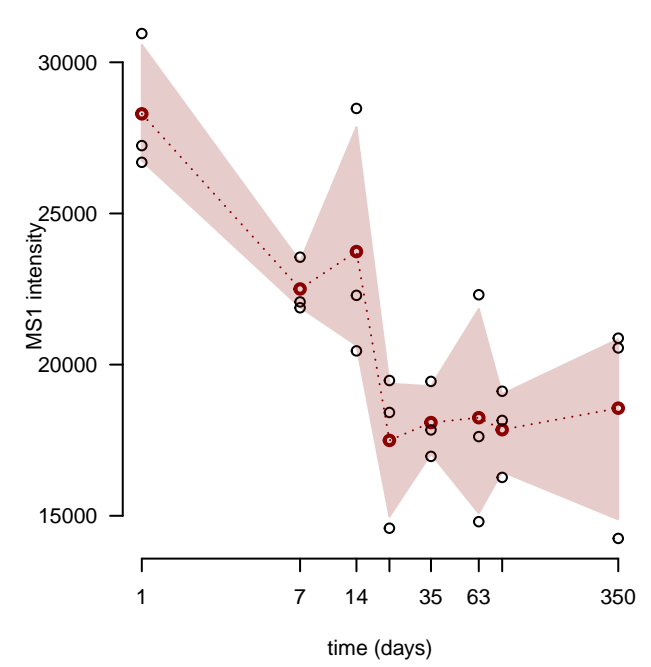

**Q8R1K4**  
GN=Phykpl  
5-phosphohydroxy-L-lysine phosphylase

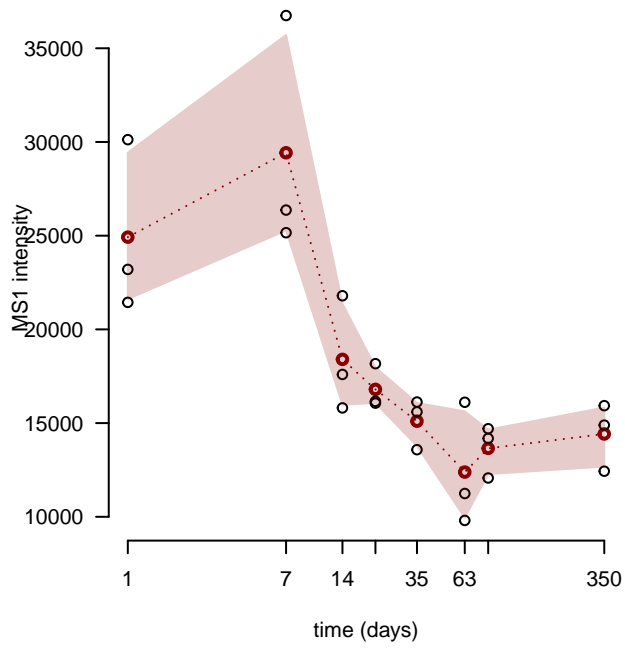

**Q8R1L4**  
GN=Kdelr3  
KDEL (Lys-Asp-Glu-Leu) endoplasmic retic ...

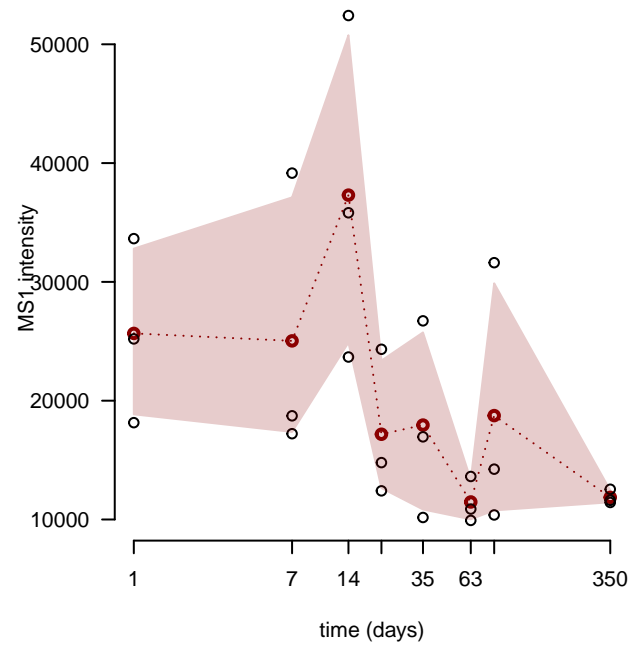

**Q8R1M0**  
GN=Hmces  
5-hydroxymethylcytosine (hmC) binding, E ...

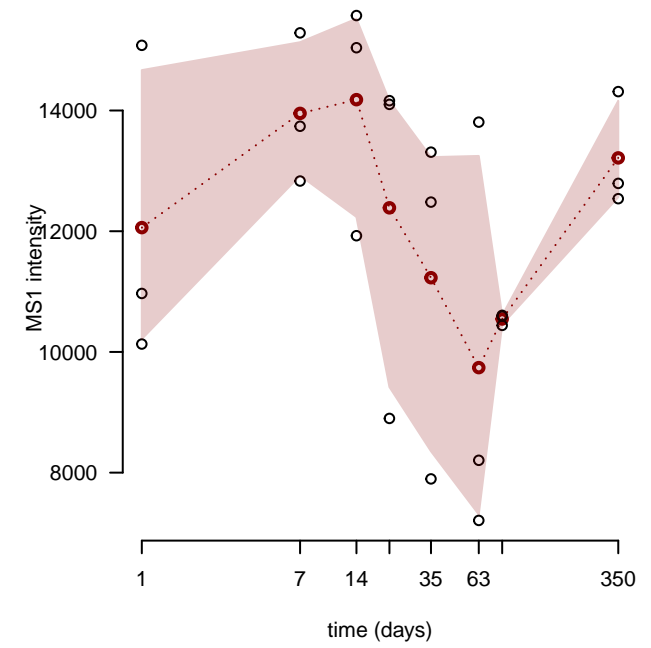

**Q8R1M8**  
GN=Mptx1  
mucosal pentraxin 1

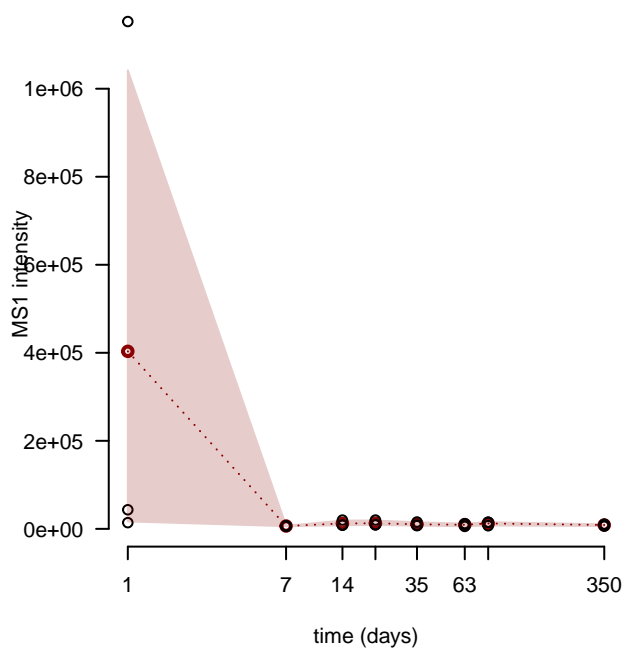

**Q8R1N0**  
GN=Znf830

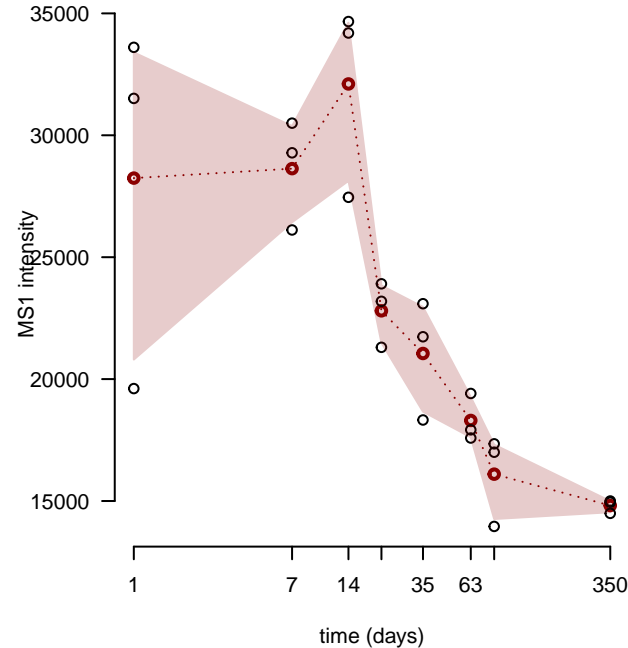

**Q8R1N4**  
GN=Nudcd3  
NudC domain containing 3

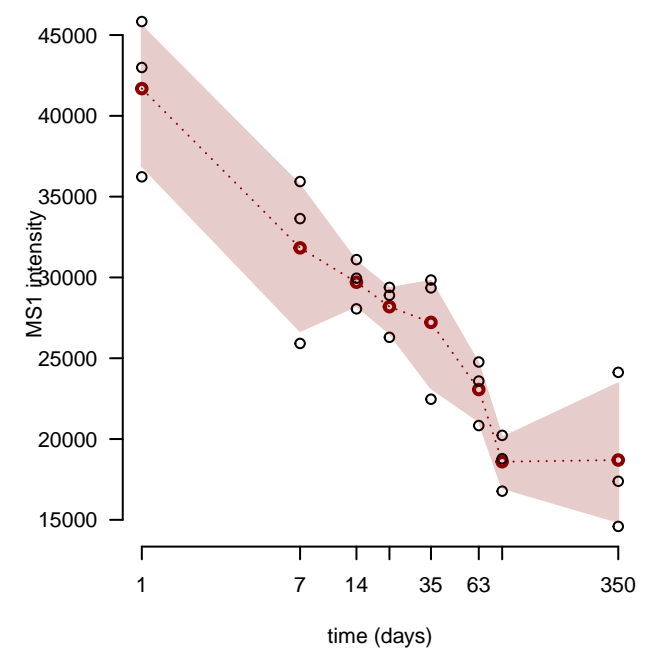



**Q8R1Q8**  
GN=Dync1li1  
dynein cytoplasmic 1 light intermediate ...

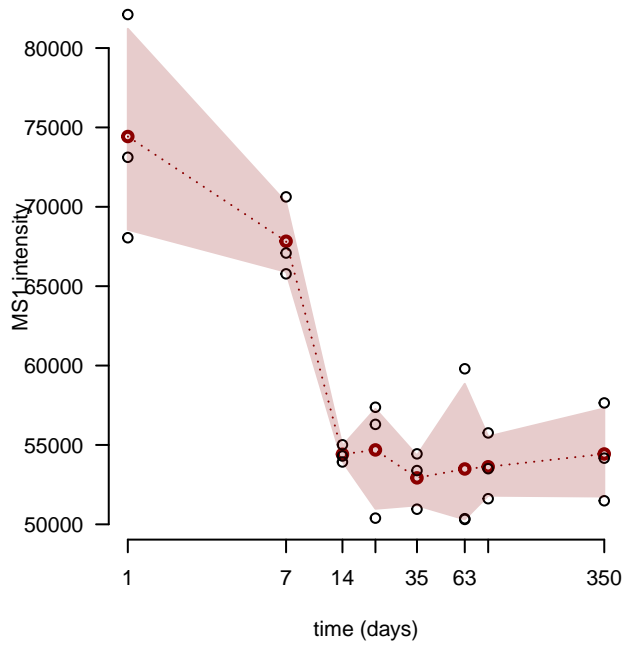

**Q8R1R3**  
GN=Stard7  
START domain containing 7

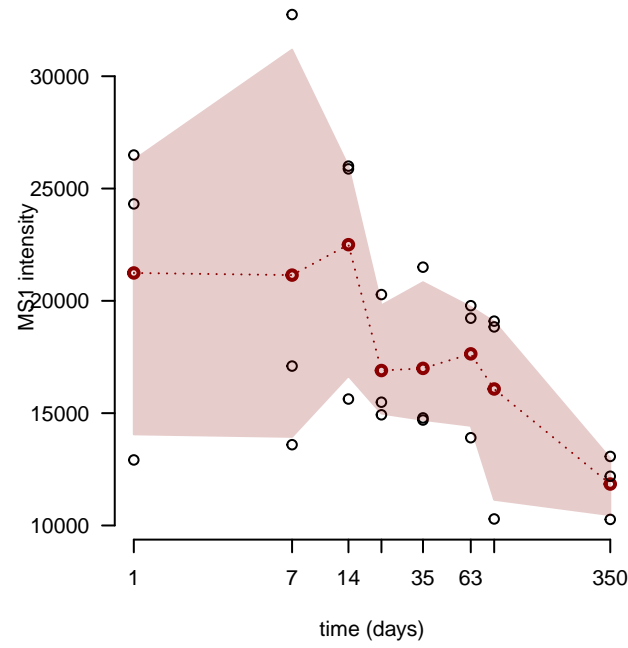

**Q8R1S0**  
GN=Coq6  
coenzyme Q6 monoxygenase

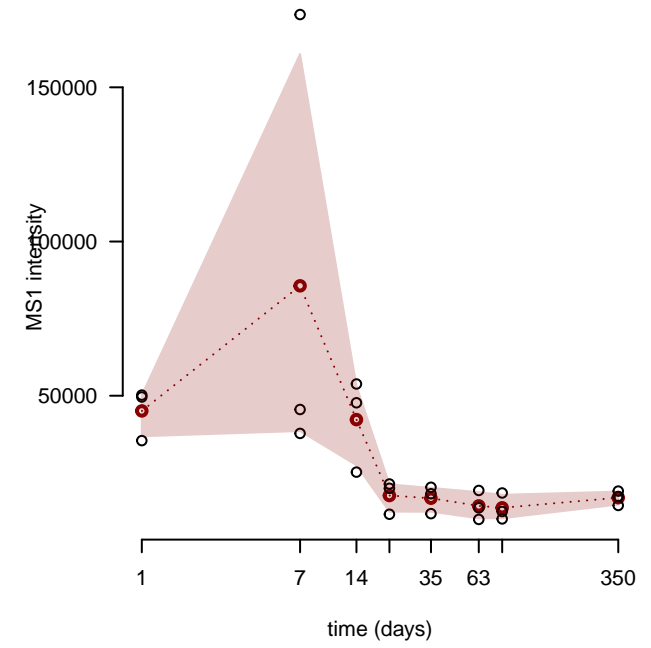

**Q8R1S4**  
GN=Mtss1  
MTSS I-BAR domain containing 1

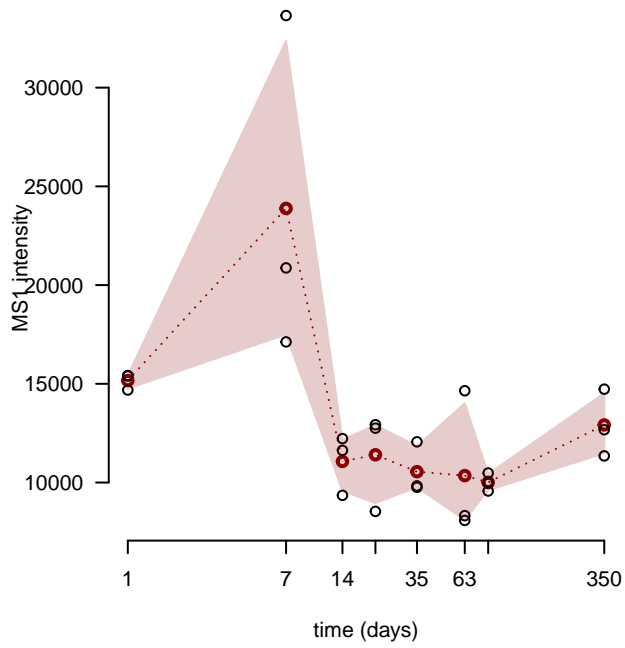

**Q8R1T1**  
GN=Chmp7  
charged multivesicular body protein 7

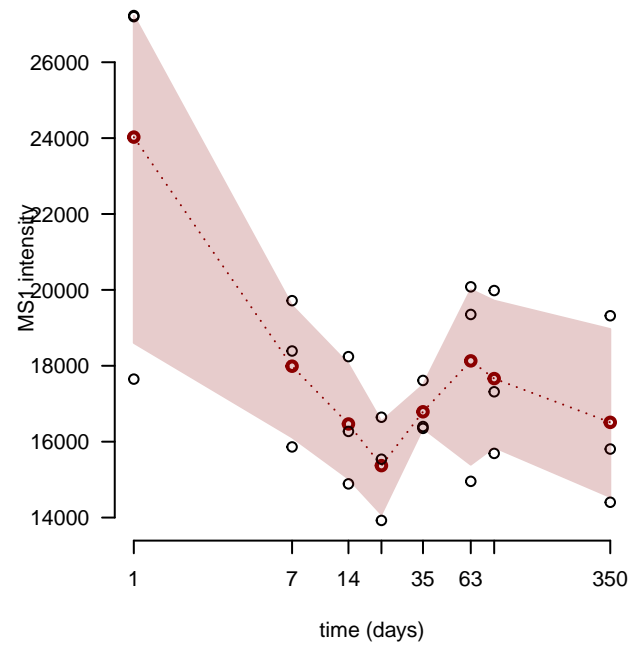

**Q8R1U1**  
GN=Cog4  
component of oligomeric golgi complex 4

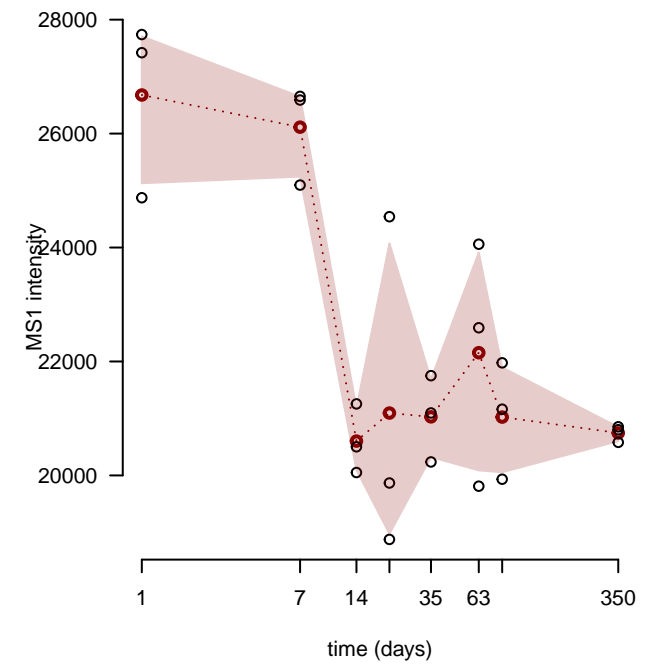

**Q8R1U2**  
GN=Cgref1  
cell growth regulator with EF hand domai ...

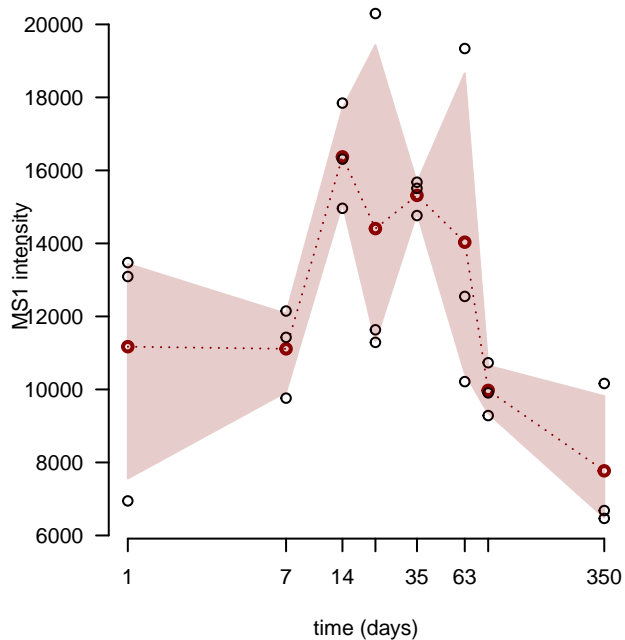

**Q8R1V4**  
GN=Tmed4  
transmembrane p24 trafficking protein 4

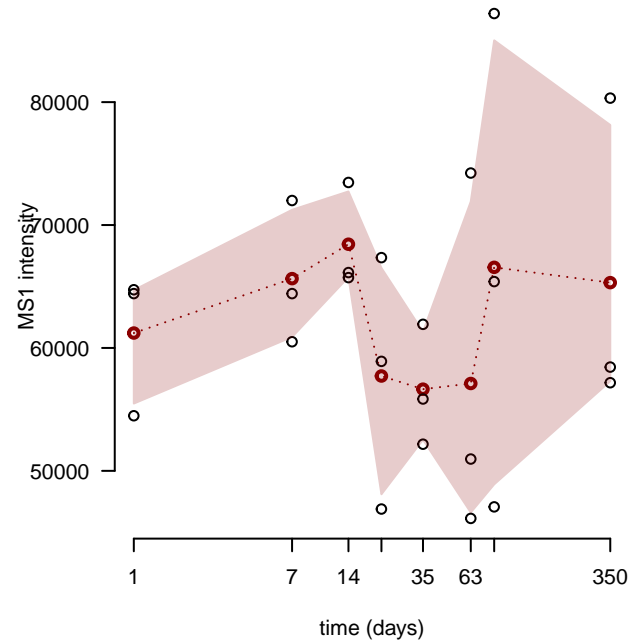

**Q8R1X6**  
GN=Spart

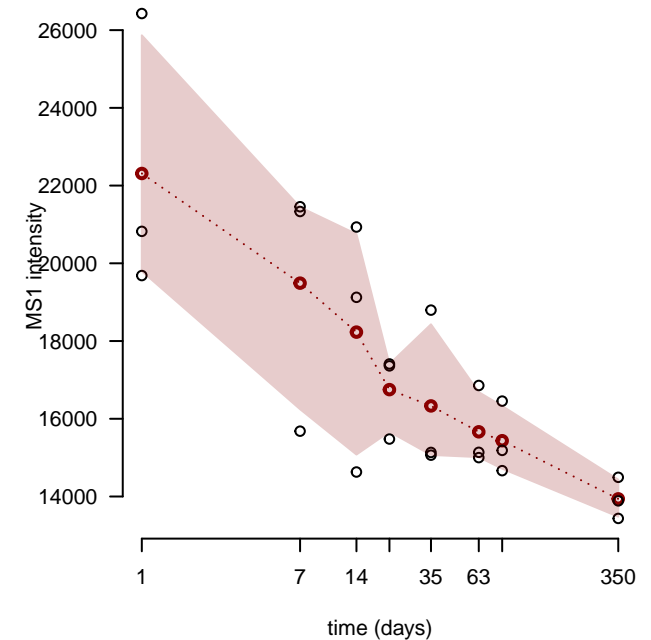

**Q8R1Z9**  
**GN=Rnf121**  
ring finger protein 121

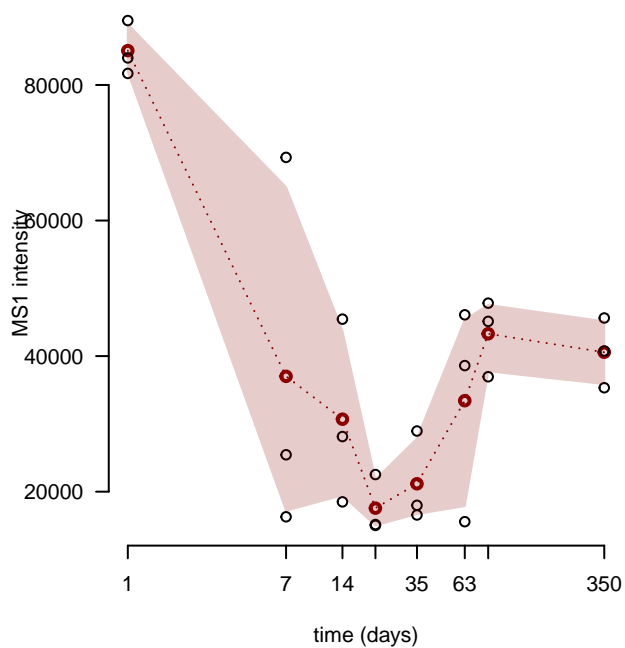

**Q8R205**  
**GN=Zc3h10**  
zinc finger CCCH type containing 10

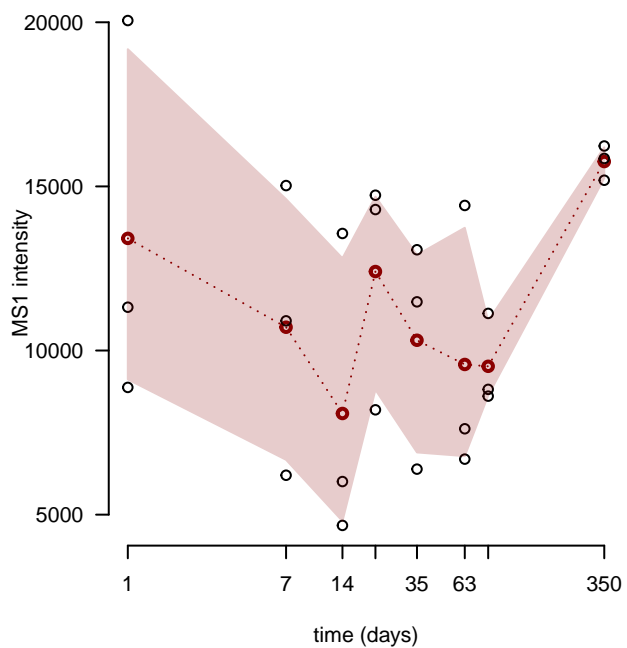

**Q8R216**  
**GN=Sirt4**  
sirtuin 4

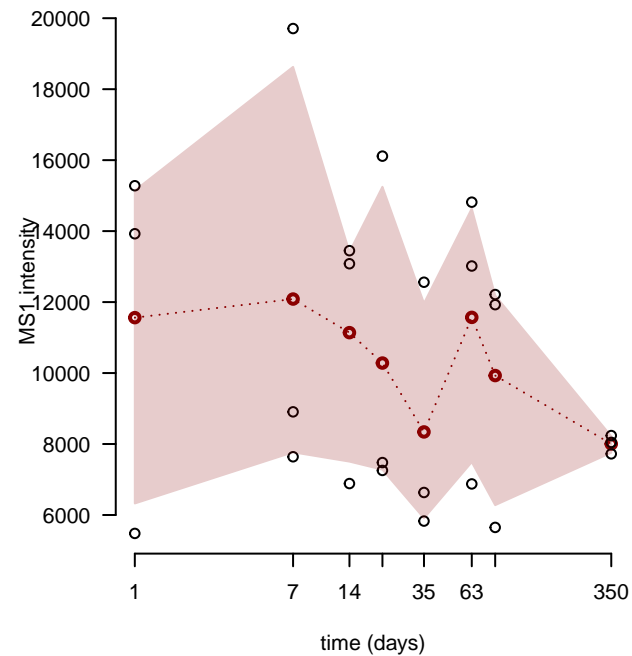

**Q8R238**  
**GN=Sds1**  
serine dehydratase-like

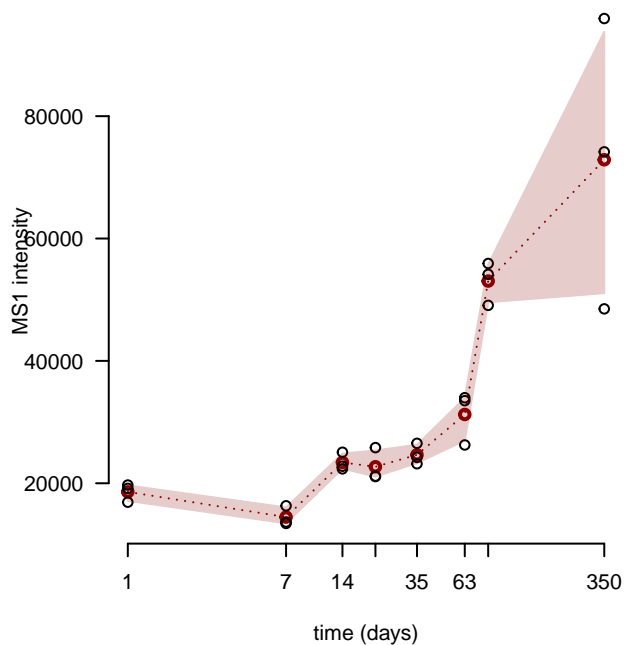

**Q8R242**  
**GN=Ctbs**  
chitinase

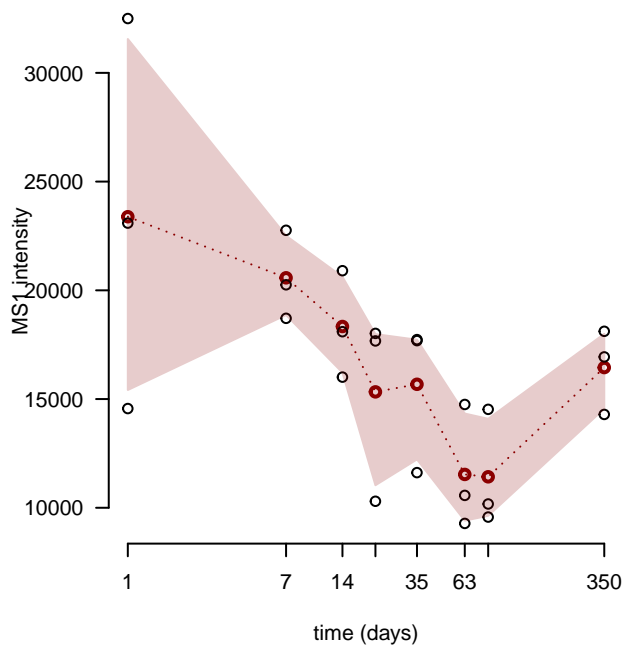

**Q8R2E9**  
**GN=Ero1b**  
endoplasmic reticulum oxidoreductase 1 b ...

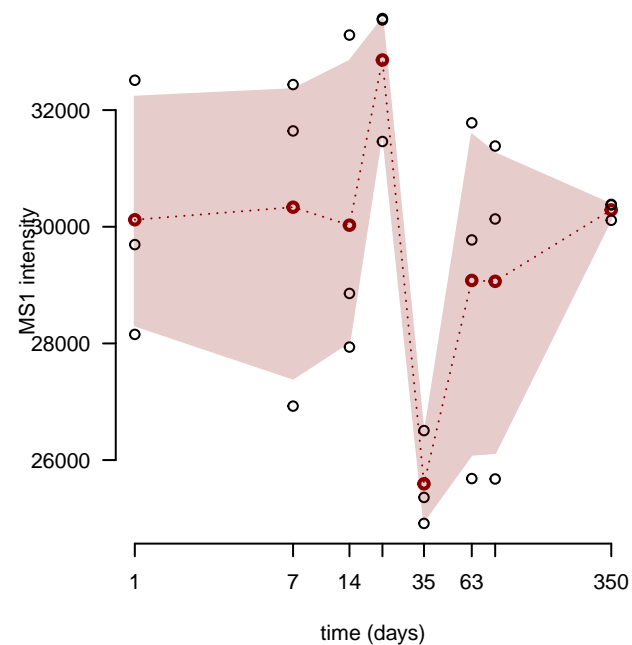

**Q8R2G4**  
**GN=Art3**  
ADP-ribosyltransferase 3

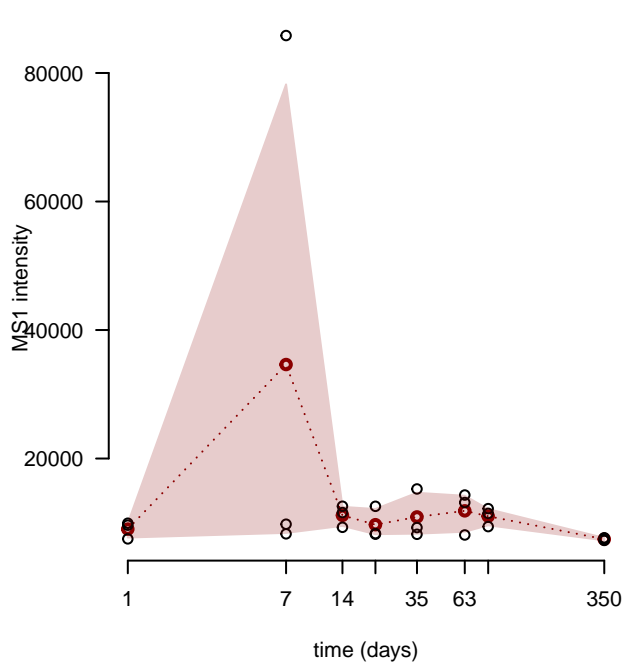

**Q8R2G6**  
**GN=Ccdc80**  
coiled-coil domain containing 80

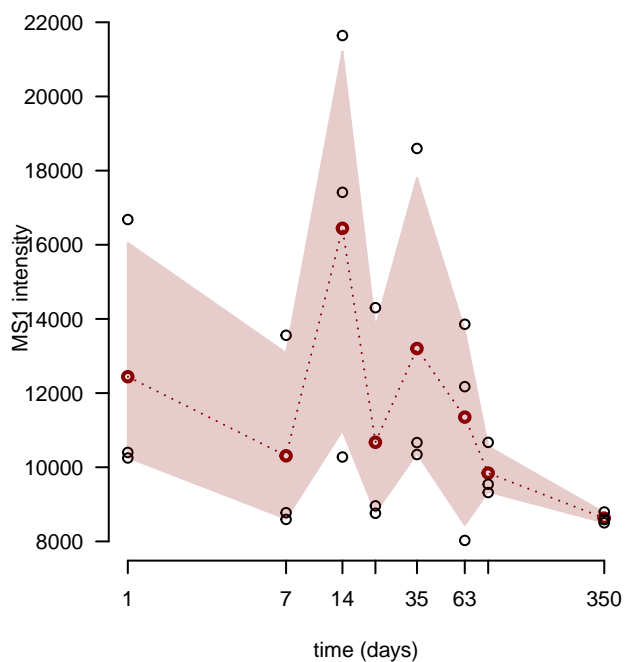

**Q8R2K4**  
**GN=Taf6l**  
TATA-box binding protein associated fact ...

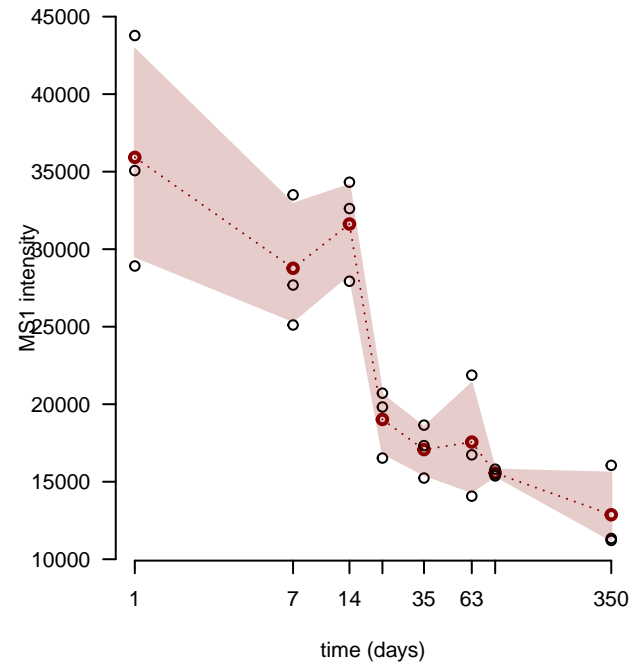

**Q8R2M2**  
**GN=Dnttip2**  
deoxynucleotidyltransferase, terminal, i ...

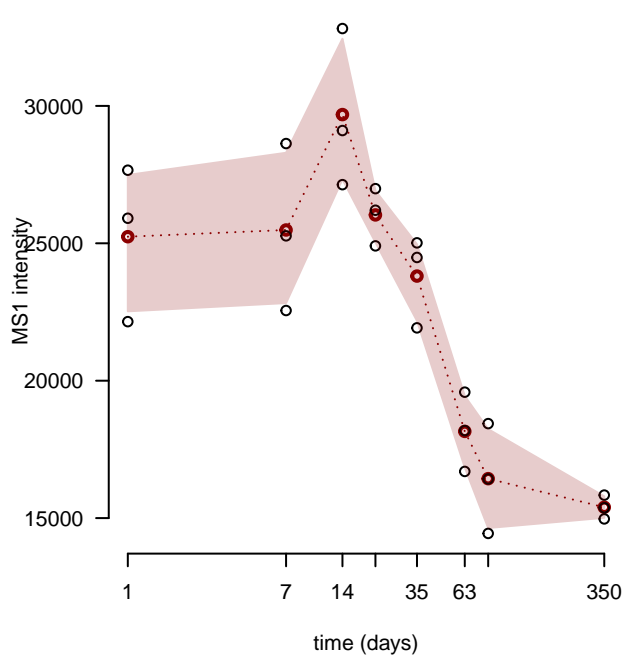

**Q8R2N0**  
**GN=Ccdc59**  
coiled-coil domain containing 59

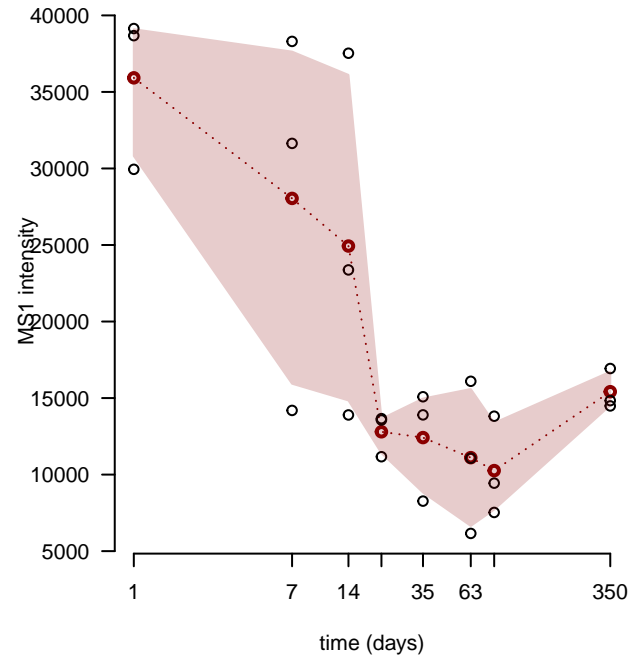

**Q8R2N2**  
**GN=Utp4**  
UTP4 small subunit processome component

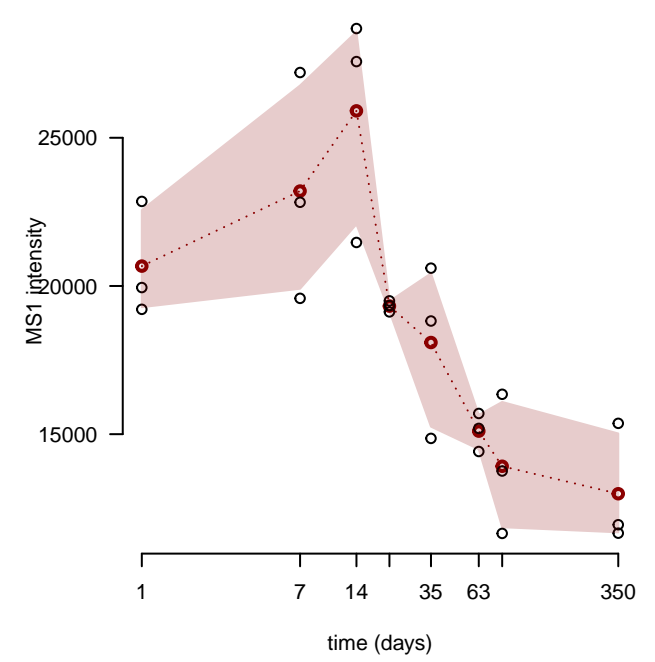

**Q8R2P1**  
**GN=Klh125**  
kelch-like 25

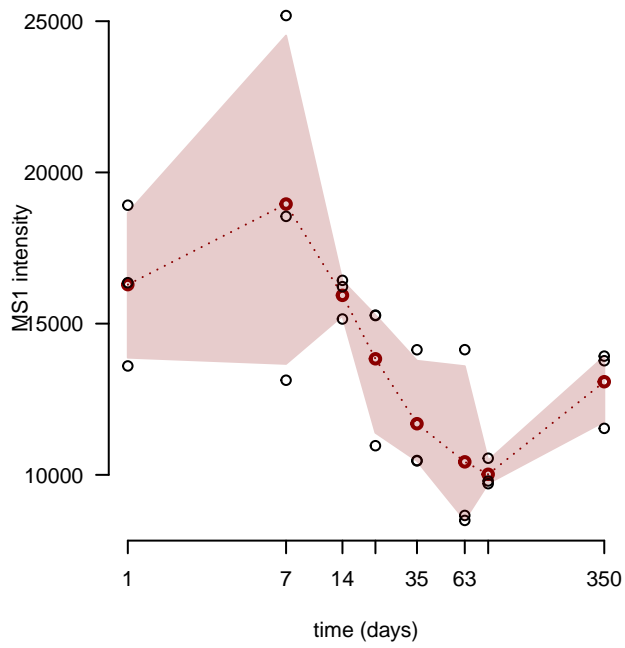

**Q8R2Q4**  
**GN=Gfm2**  
G elongation factor, mitochondrial 2

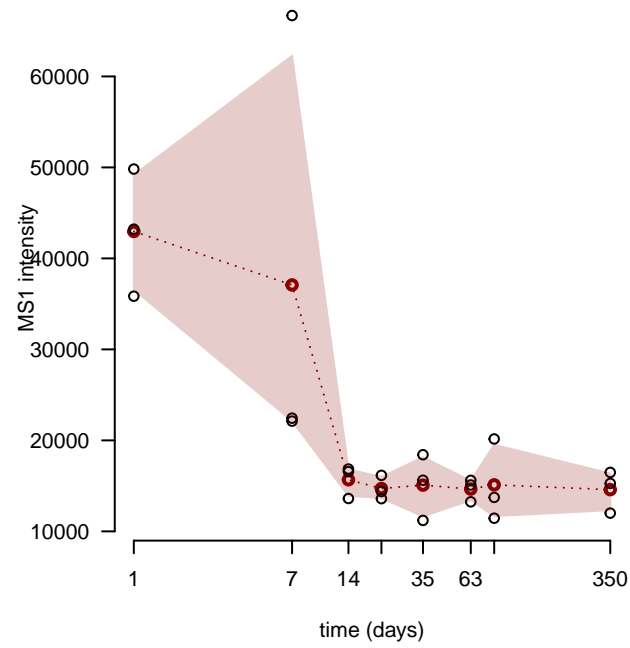

**Q8R2Q8**  
**GN=Bst2**  
bone marrow stromal cell antigen 2

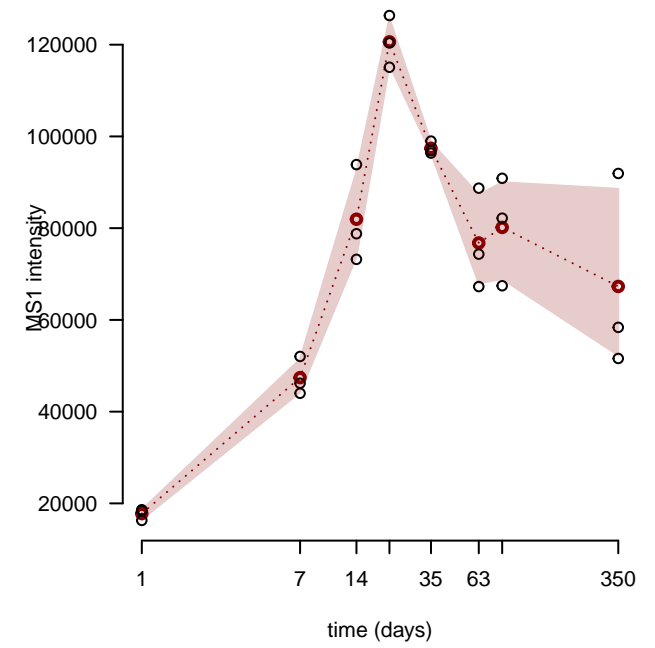

**Q8R2R1**  
**GN=Pomt1**  
protein-O-mannosyltransferase 1

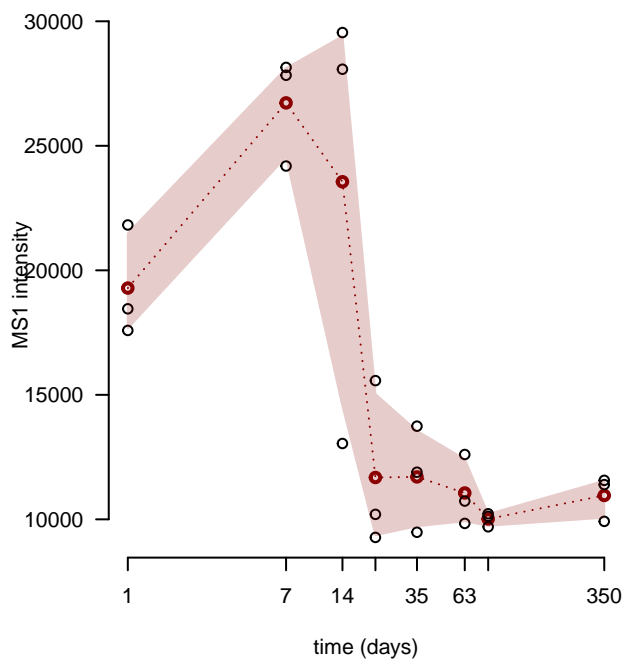

**Q8R2R3**  
**GN=Aagab**  
alpha- and gamma-adaptin binding protein

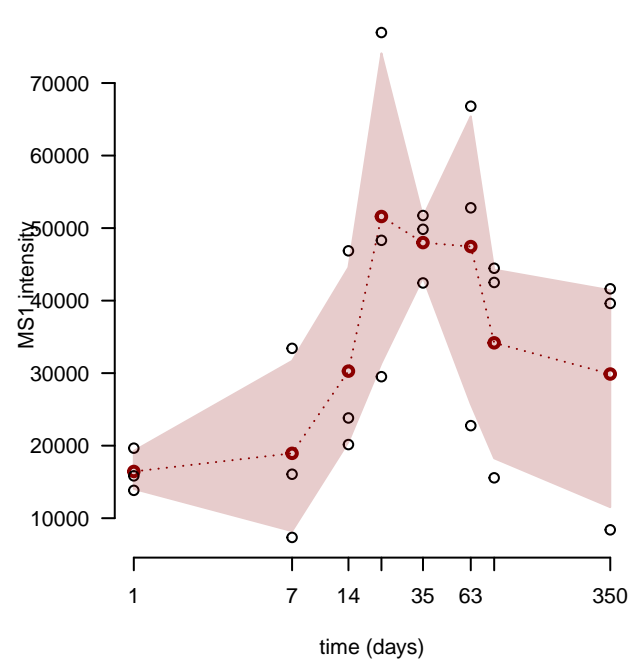

**Q8R2S9**  
**GN=Actr8**  
ARP8 actin-related protein 8

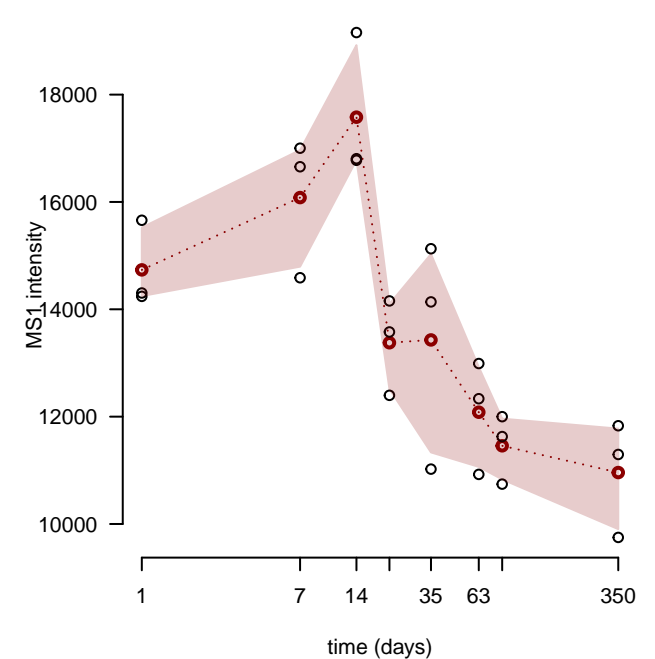

**Q8R2T8**  
**GN=Gtf3c5**  
general transcription factor IIIc, polyp ...

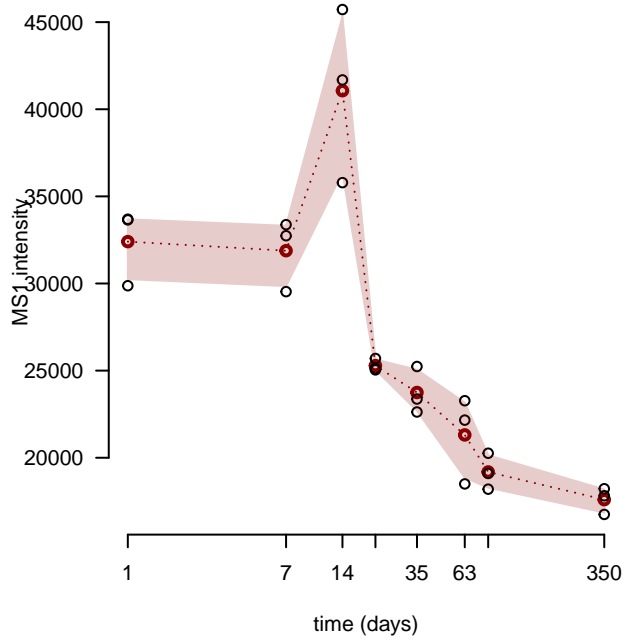

**Q8R2U0**  
**GN=Seh1l**  
SEH1-like (S. cerevisiae)

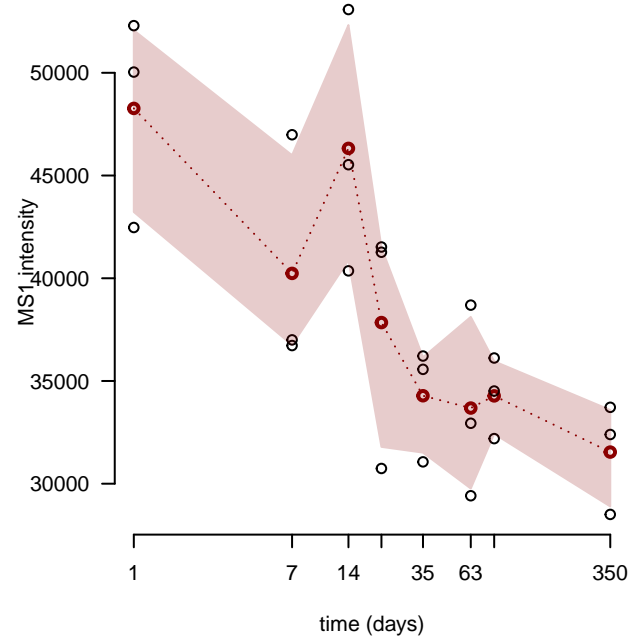

**Q8R2U2**  
**GN=Nepro**  
nucleolus and neural progenitor protein

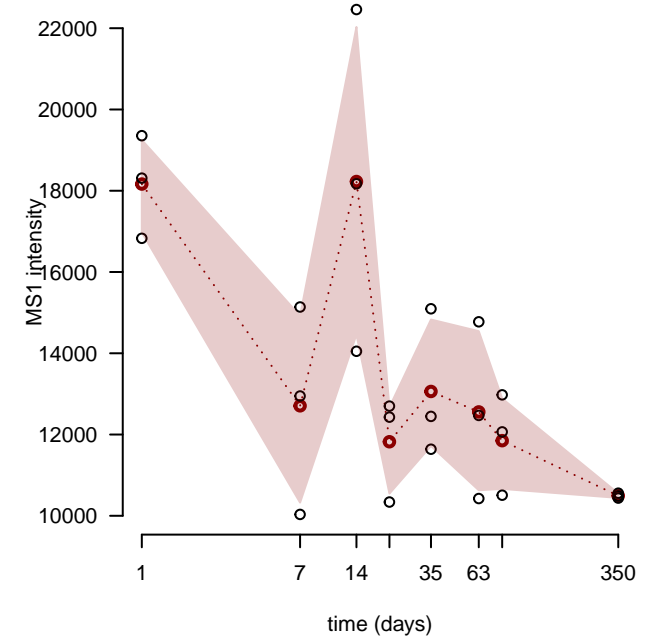

**Q8R2U4**  
**GN=Ntmt1**  
N-terminal Xaa-Pro-Lys N-methyltransfera ...

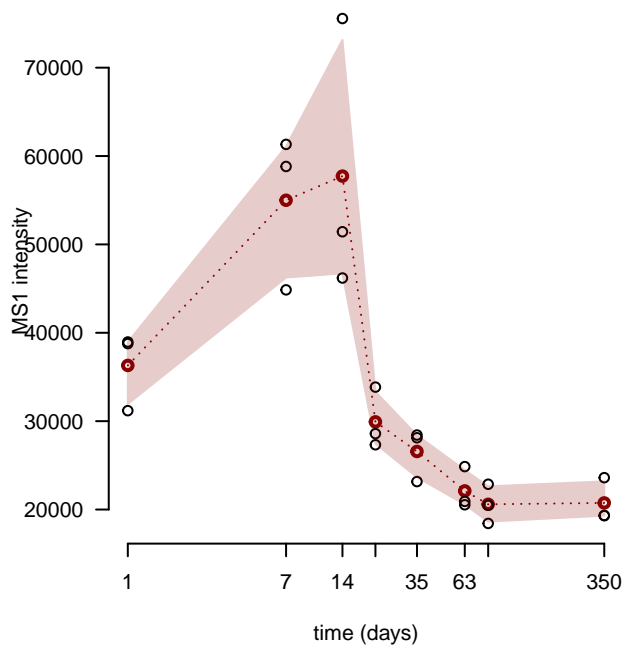

**Q8R2U6**  
**GN=Nudt4**  
nudix (nucleoside diphosphate linked moi ...

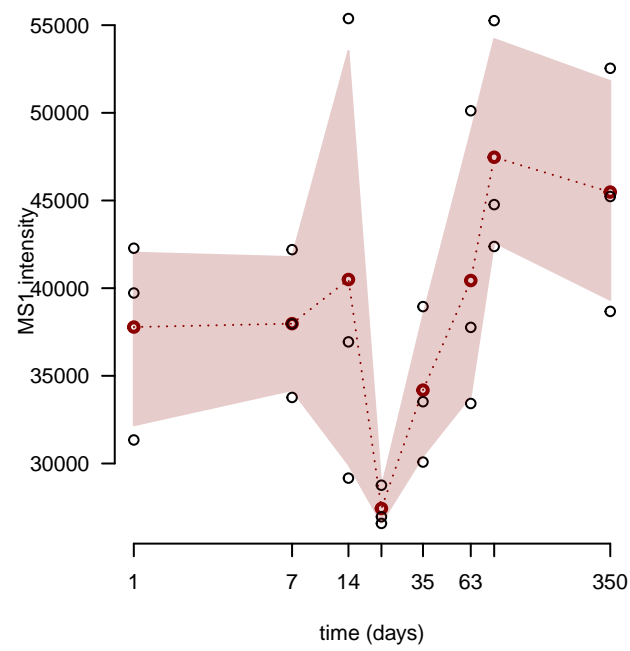

**Q8R2U7**  
**GN=Lrrc42**  
leucine rich repeat containing 42

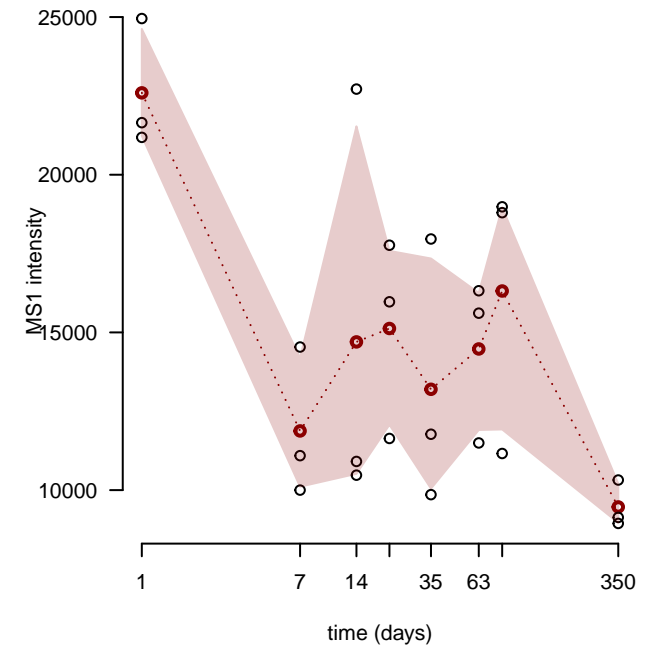

**Q8R2V3**  
**GN=Znf445**

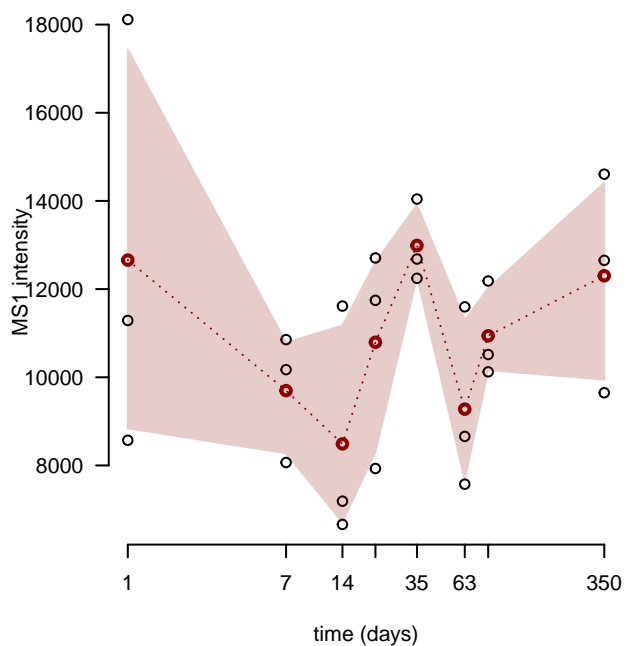

**Q8R2V5**  
**GN=Adap2**  
ArfGAP with dual PH domains 2

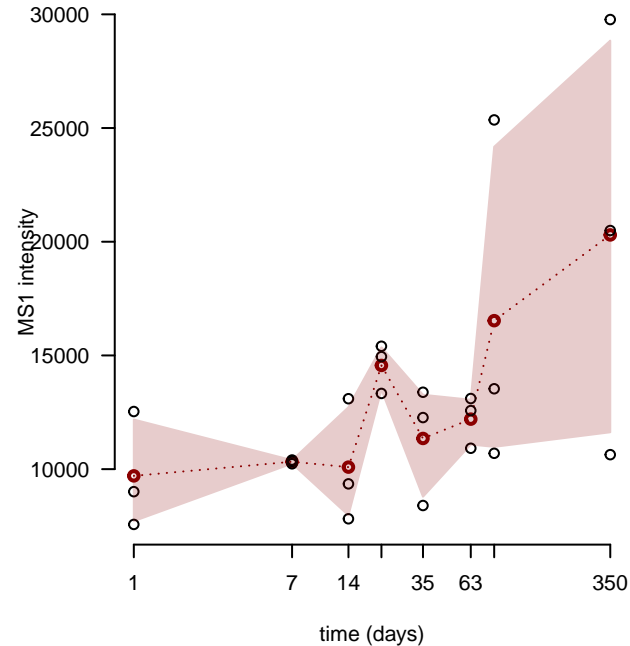

**Q8R2W9**  
**GN=Pank3**  
pantothenate kinase 3

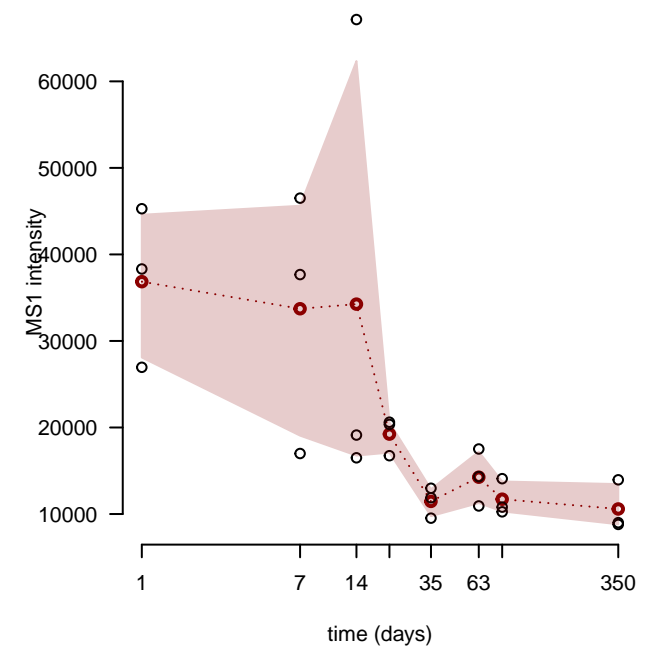

**Q8R2Y0**  
**GN=Abhd6**  
abhydrolase domain containing 6

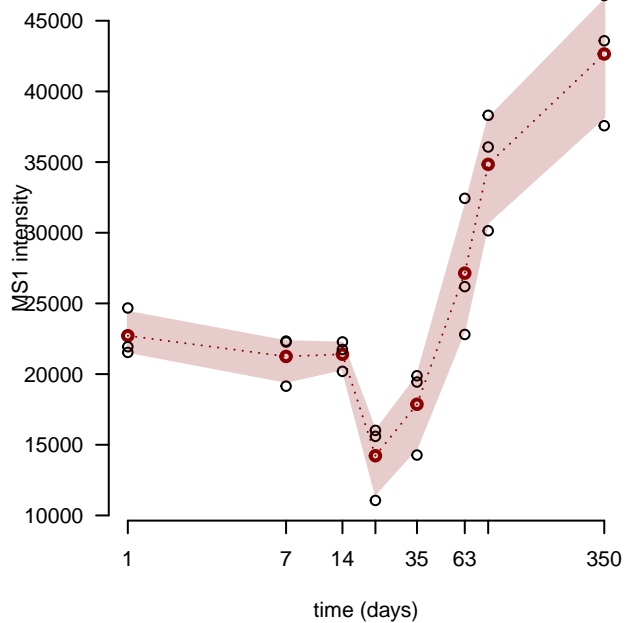

**Q8R2Y2**  
**GN=Mcam**  
melanoma cell adhesion molecule

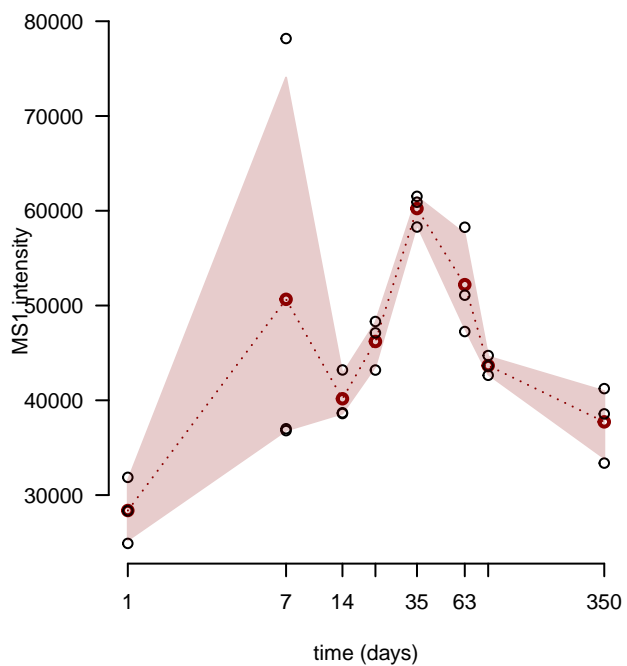

**Q8R2Y3**  
**GN=Dolk**  
dolichol kinase

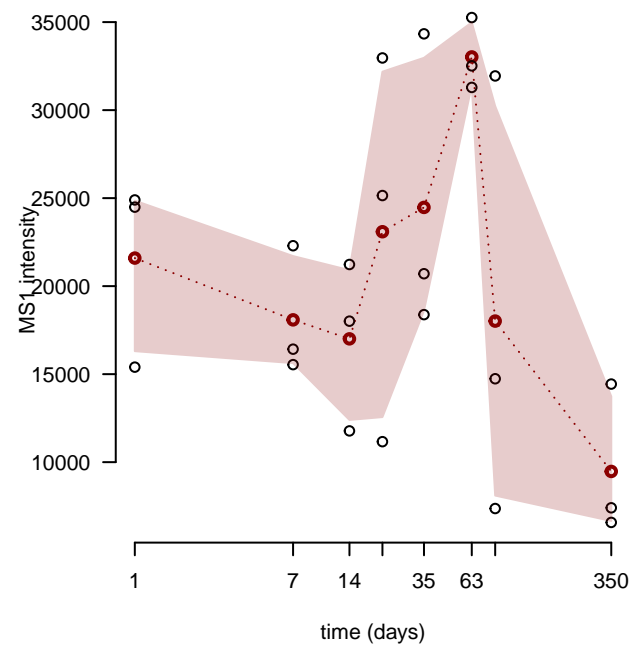

**Q8R2Y8**  
**GN=Pth2**  
peptidyl-tRNA hydrolase 2

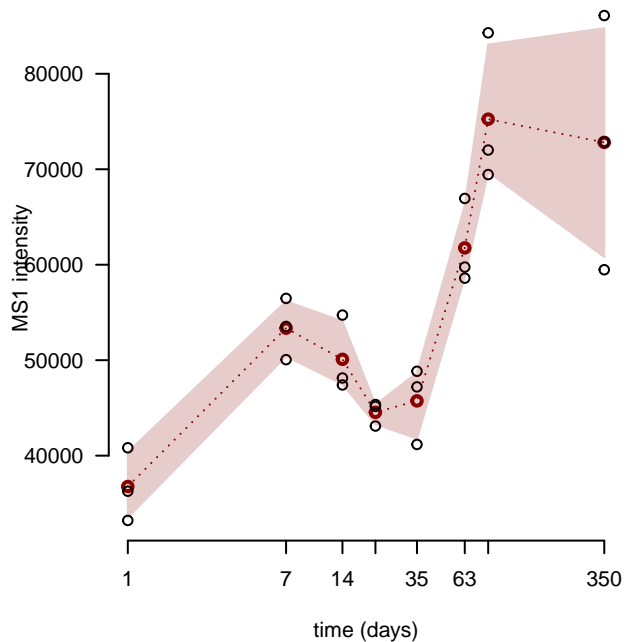

**Q8R2Y9**  
**GN=Nabp2**  
nucleic acid binding protein 2

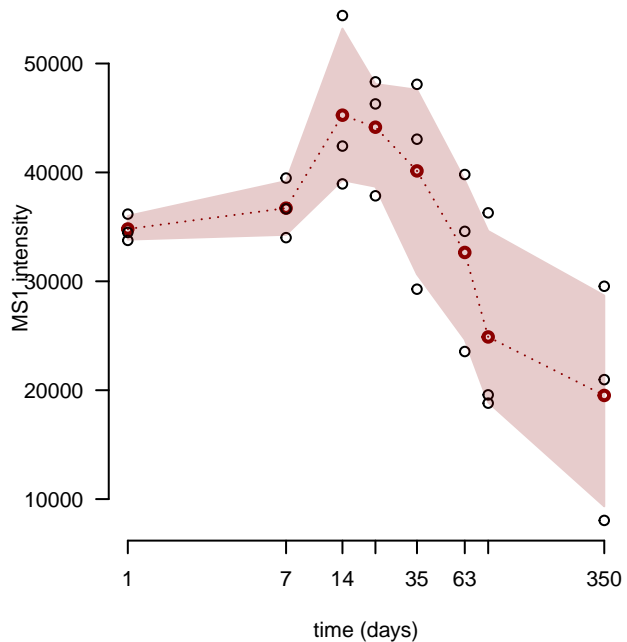

**Q8R2Z3**  
**GN=Slc26a7**  
solute carrier family 26, member 7

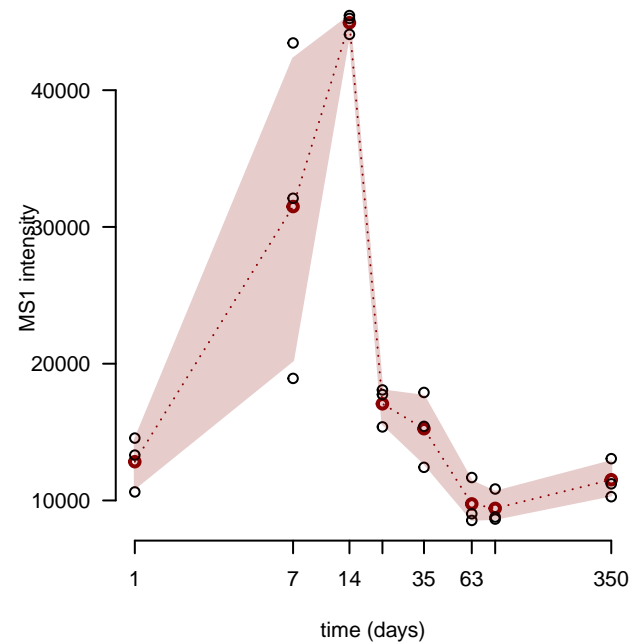

**Q8R2Z5**  
**GN=Vwa1**  
von Willebrand factor A domain containin ...

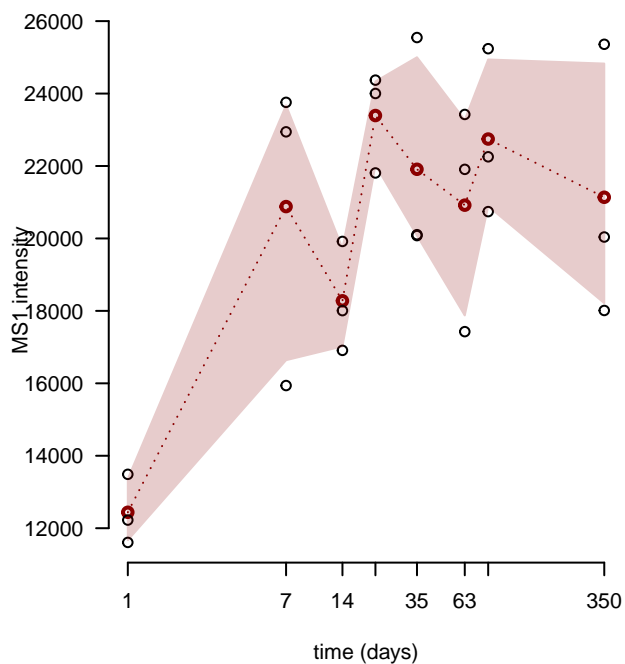

**Q8R307**  
**GN=Vps18**  
VPS18 CORVET/HOPS core subunit

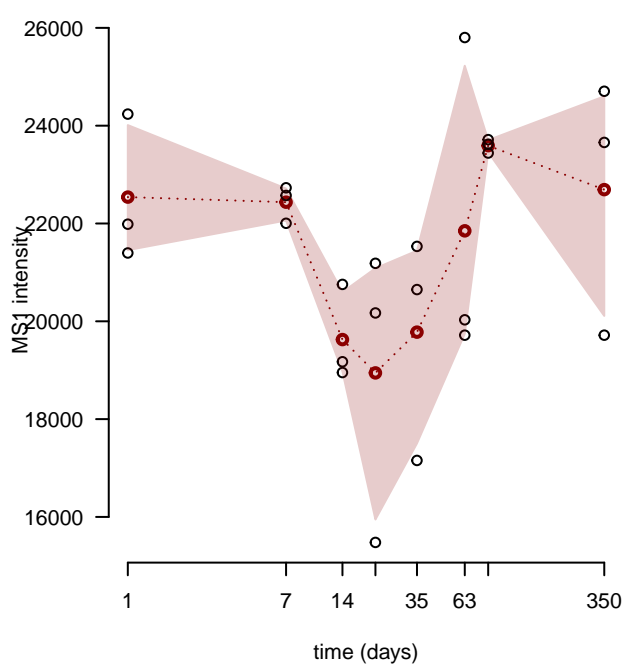

**Q8R310**  
**GN=Tmcc3**  
transmembrane and coiled coil domains 3

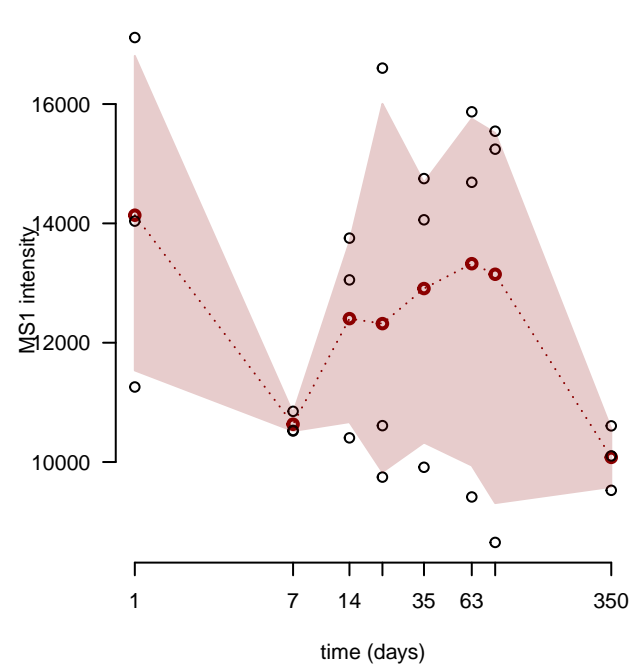

**Q8R313**  
**GN=Exoc6**  
exocyst complex component 6

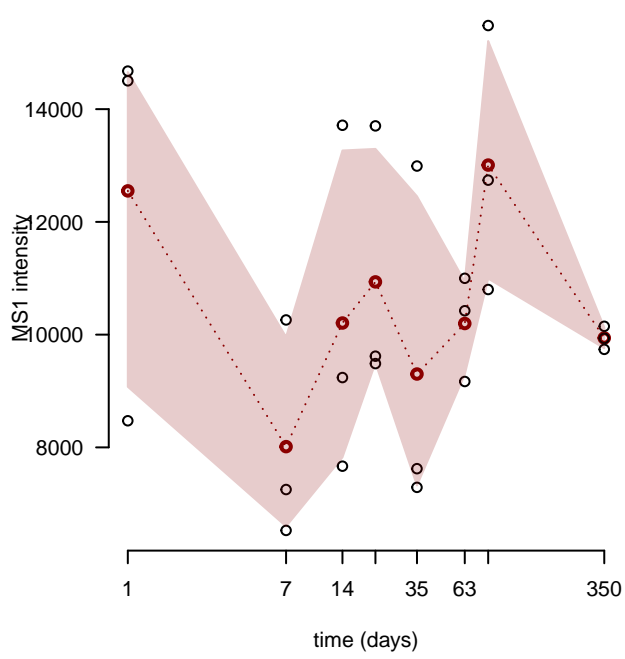

**Q8R317**  
**GN=Ubq1n1**  
ubiquilin 1

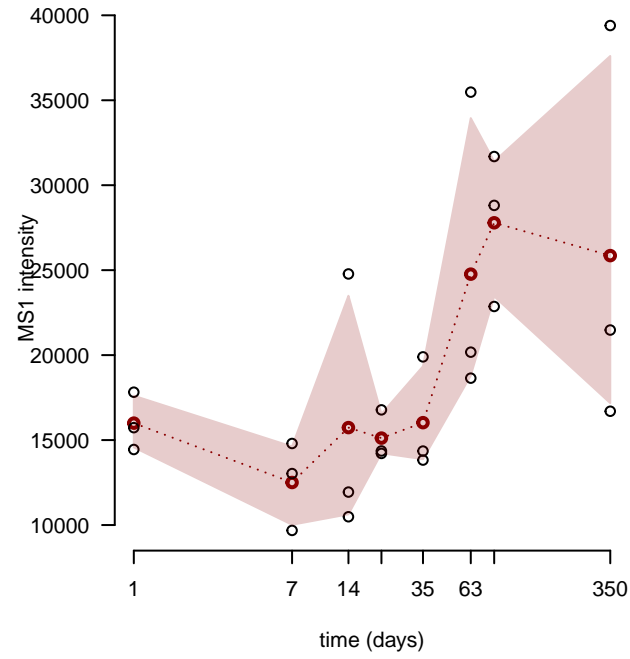

**Q8R322**  
**GN=Gle1**  
GLE1 RNA export mediator (yeast)

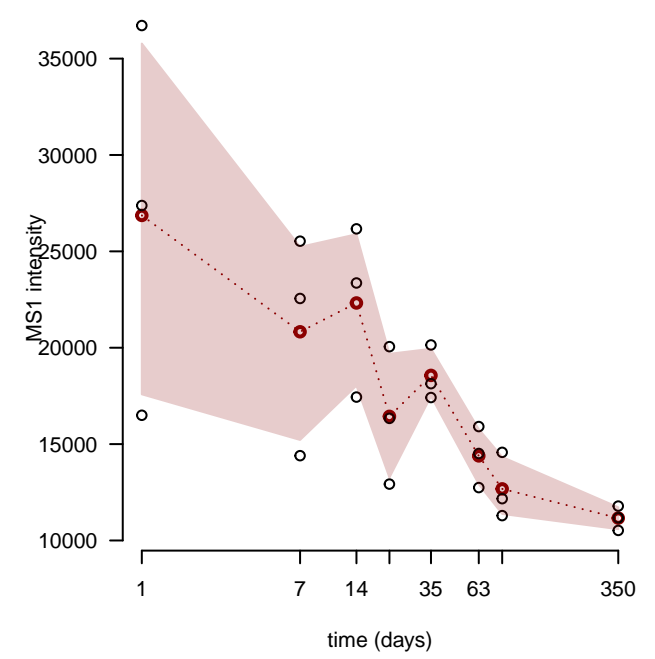

**Q8R323**  
**GN=Rfc3**  
replication factor C (activator 1) 3

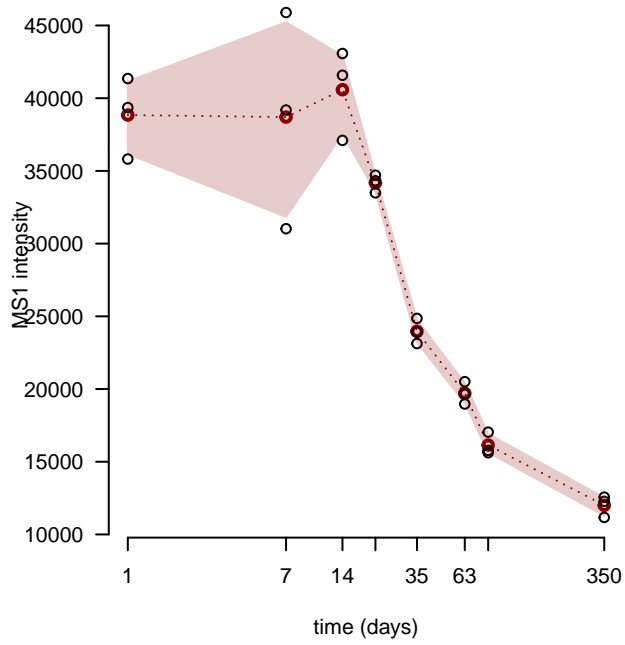

**Q8R326**  
**GN=Pspc1**  
paraspeckle protein 1

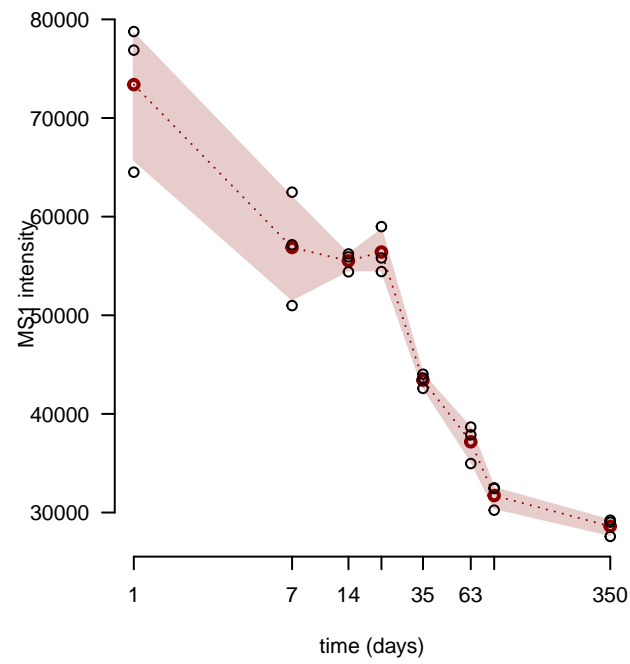

**Q8R332**  
**GN=Nup58**

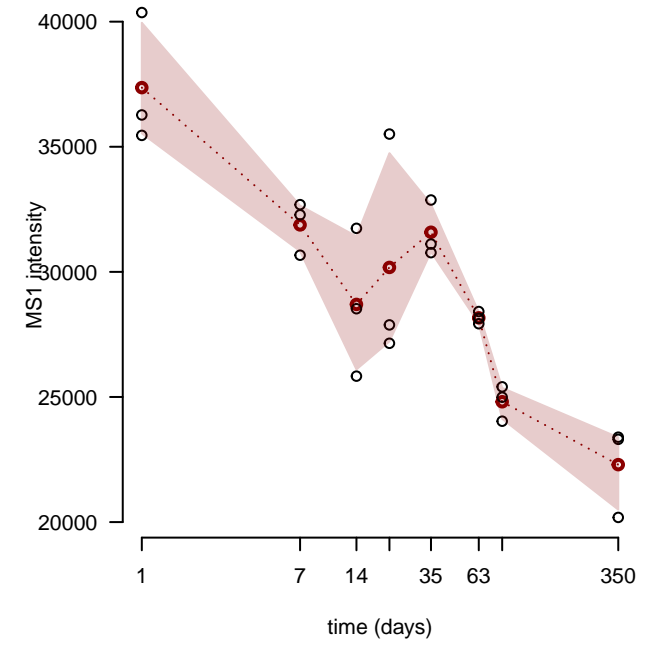

**Q8R344**  
**GN=Ccdc12**  
coiled-coil domain containing 12

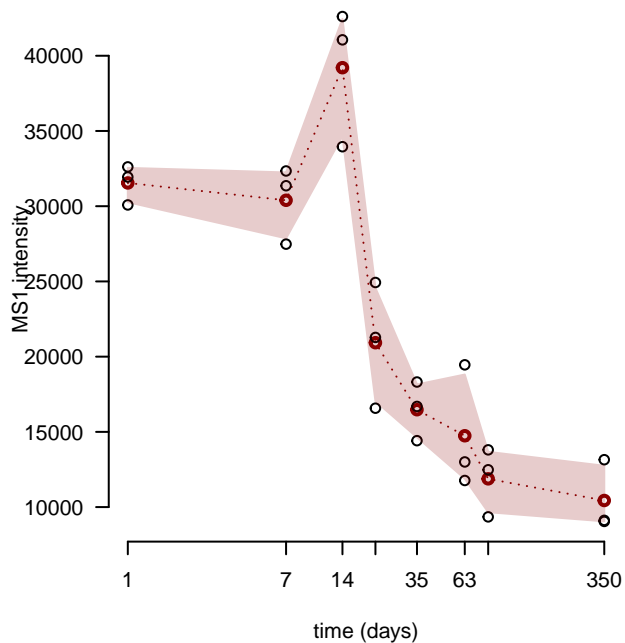

**Q8R349**  
**GN=Cdc16**  
CDC16 cell division cycle 16

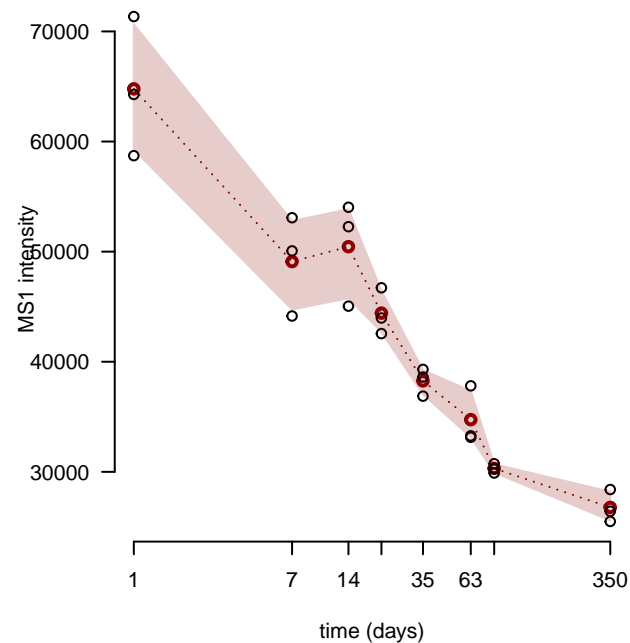

**Q8R361**  
**GN=Rab11fip5**  
RAB11 family interacting protein 5 (clas ...

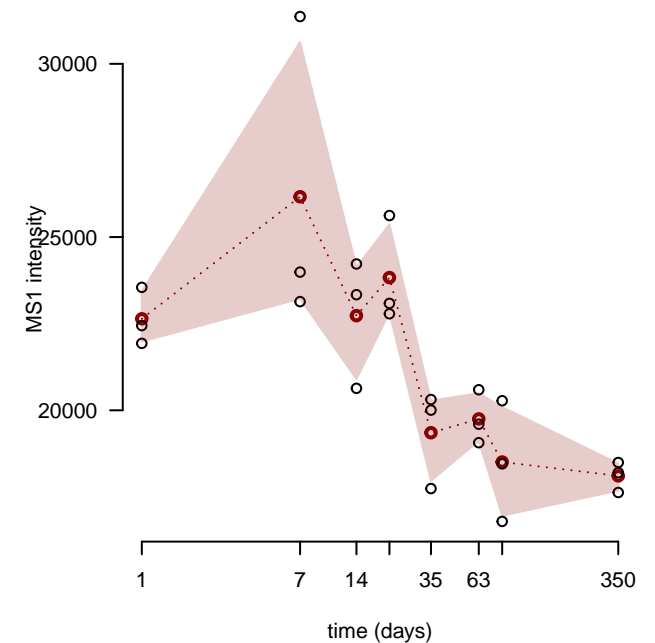

**Q8R366**  
**GN=Igsf8**  
immunoglobulin superfamily, member 8

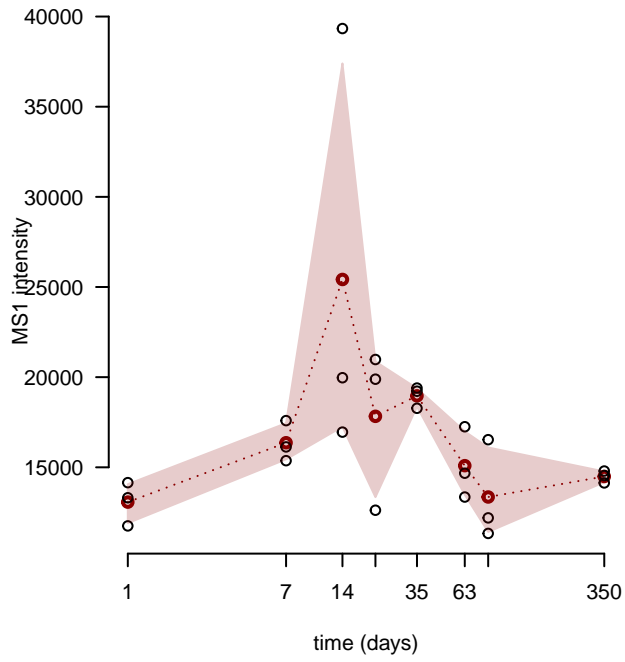

**Q8R367**  
**GN=Rerg**  
RAS-like, estrogen-regulated, growth-inh ...

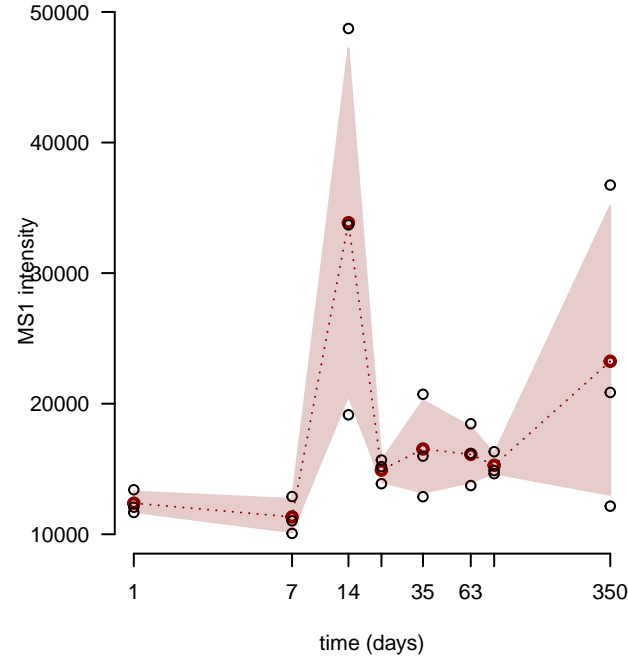

**Q8R368**  
**GN=Dnaaf4**  
dynein axonemal assembly factor 4

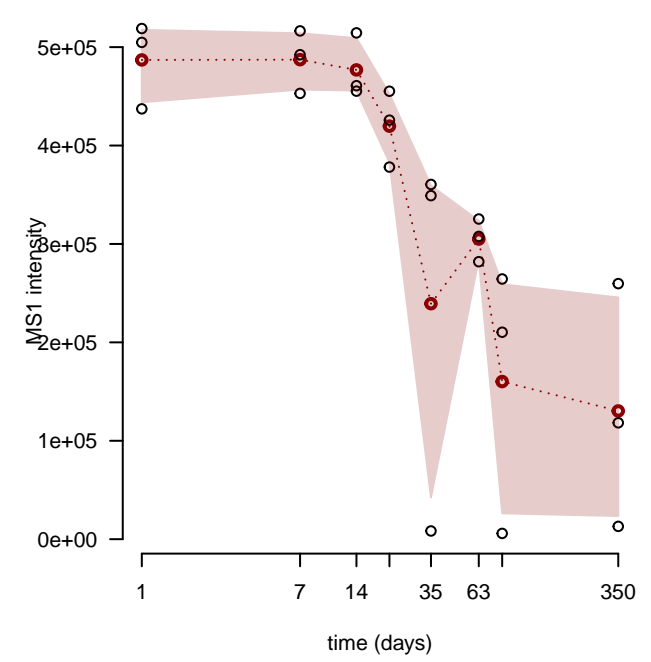

**Q8R373**  
**GN=CImp**  
CXADR-like membrane protein

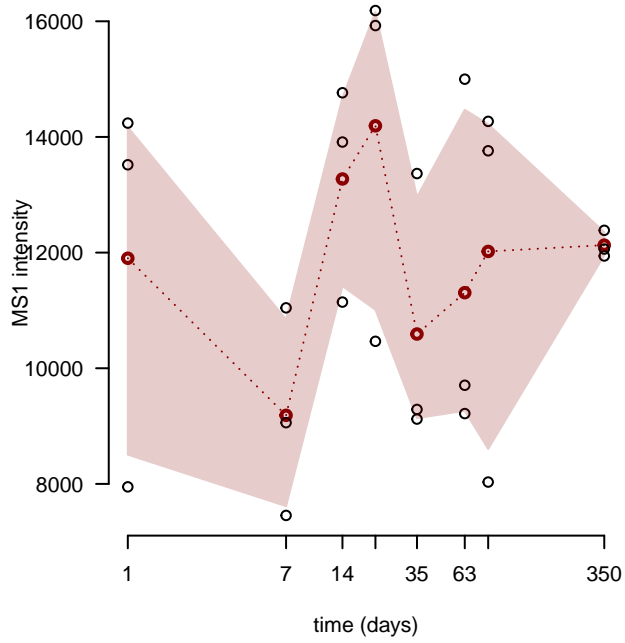

**Q8R395**  
**GN=Commd5**  
COMM domain containing 5

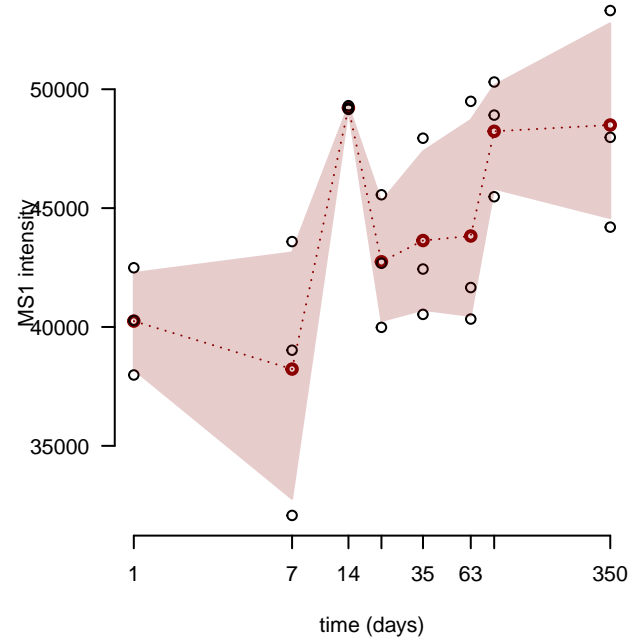

**Q8R3B1**  
**GN=Plcd1**  
phospholipase C, delta 1

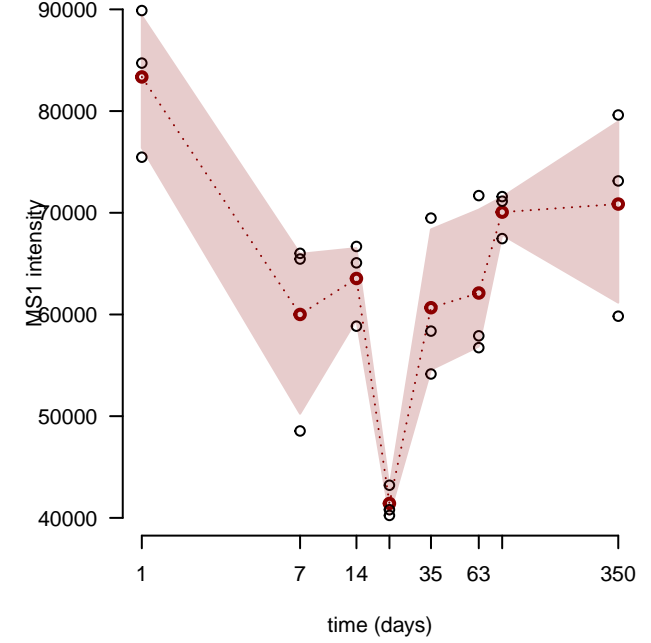

**Q8R3B7**  
**GN=Brd8**  
bromodomain containing 8

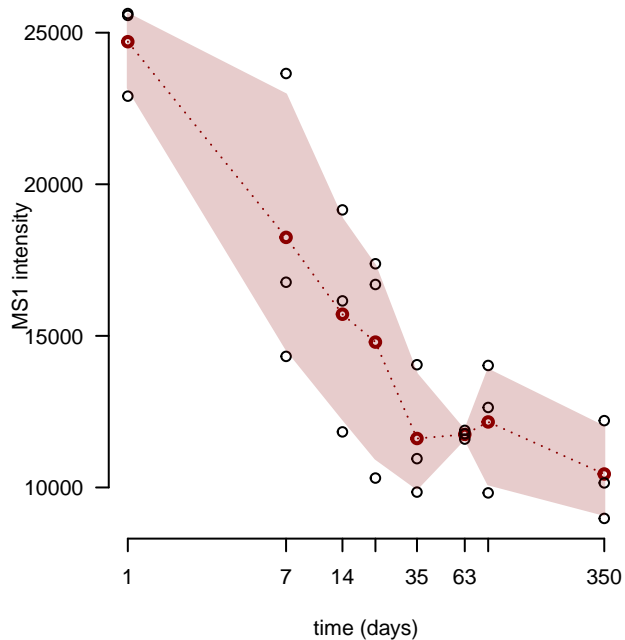

**Q8R3C0**  
**GN=Mcmbp**  
minichromosome maintenance complex bindi ...

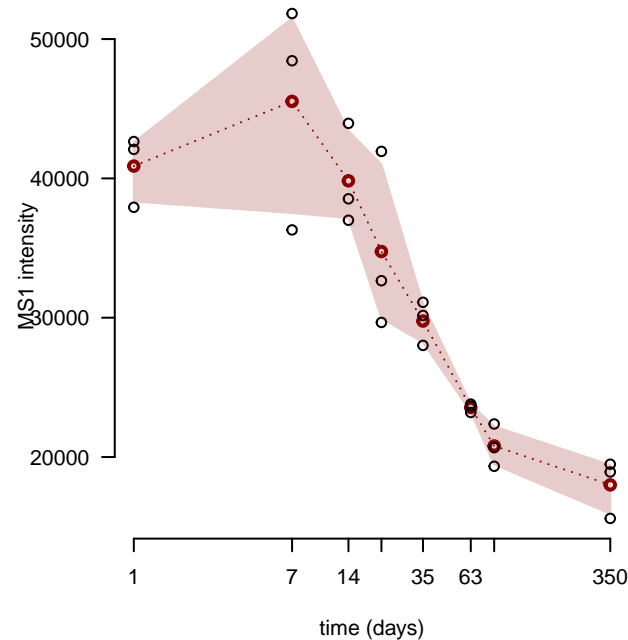

**Q8R3C6**  
**GN=Rbm19**  
RNA binding motif protein 19

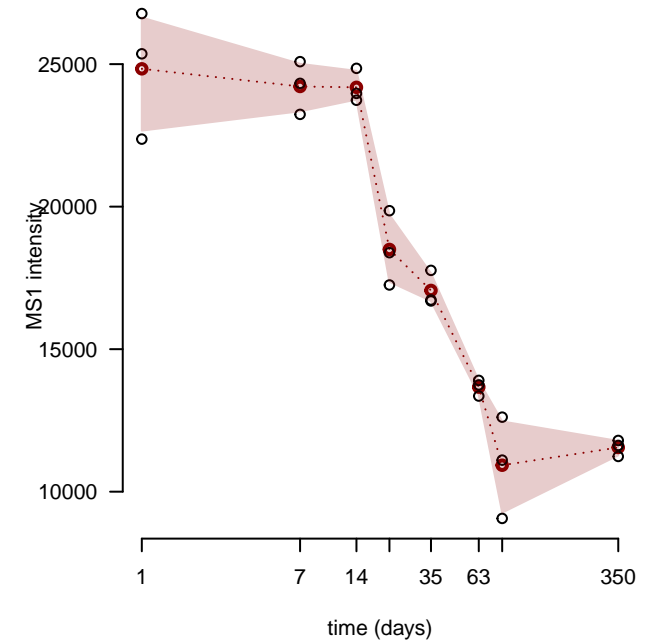

**Q8R3D1**  
**GN=Tbc1d13**  
TBC1 domain family, member 13

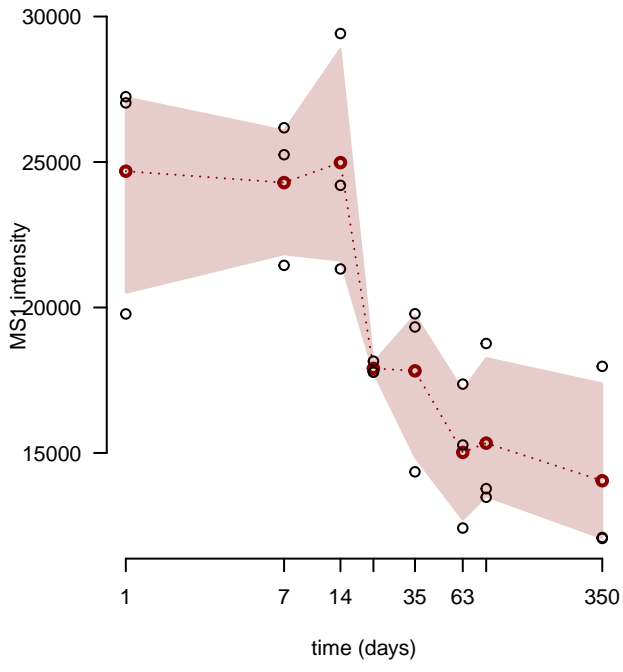

**Q8R3E3**  
**GN=Wipi1**  
WD repeat domain, phosphoinositide inter ...

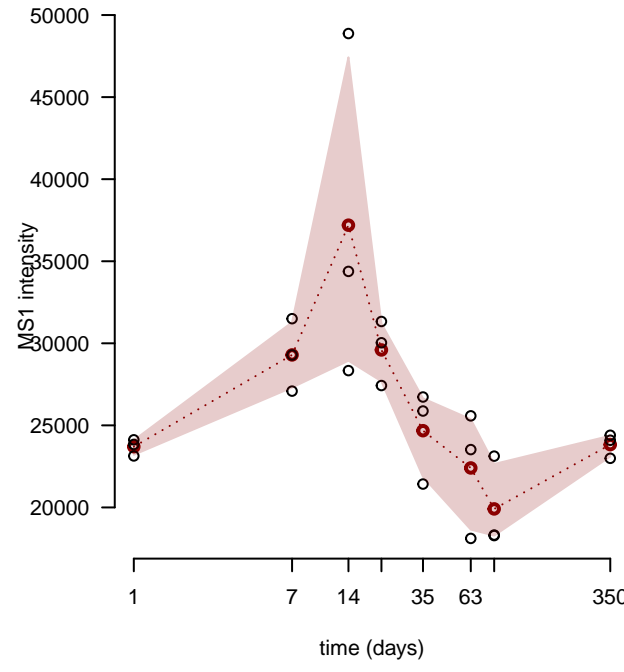

**Q8R3F5**  
**GN=Mcat**  
malonyl CoA:ACP acyltransferase (mitocho ...

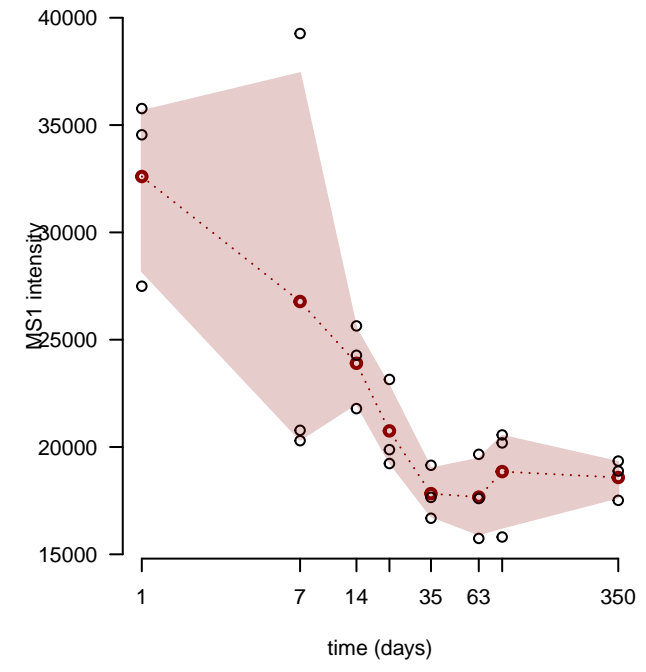

**Q8R3F9**  
**GN=Tut1**  
terminal uridylyl transferase 1, U6 snRN ...

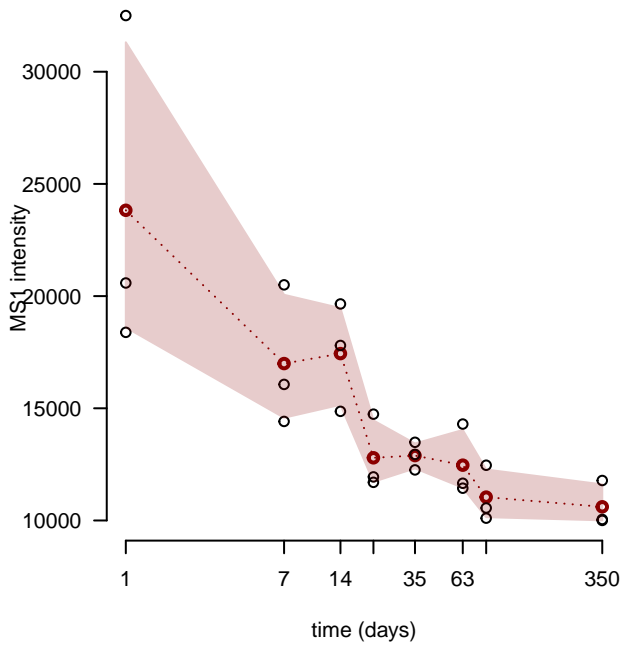

**Q8R3G1**  
**GN=Ppp1r8**  
protein phosphatase 1, regulatory subuni ...

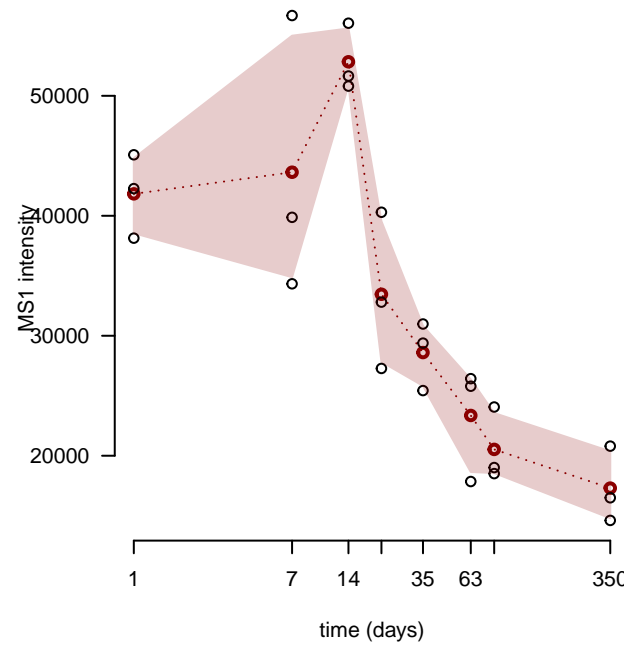

**Q8R3G9**  
**GN=Tspan8**  
tetraspanin 8

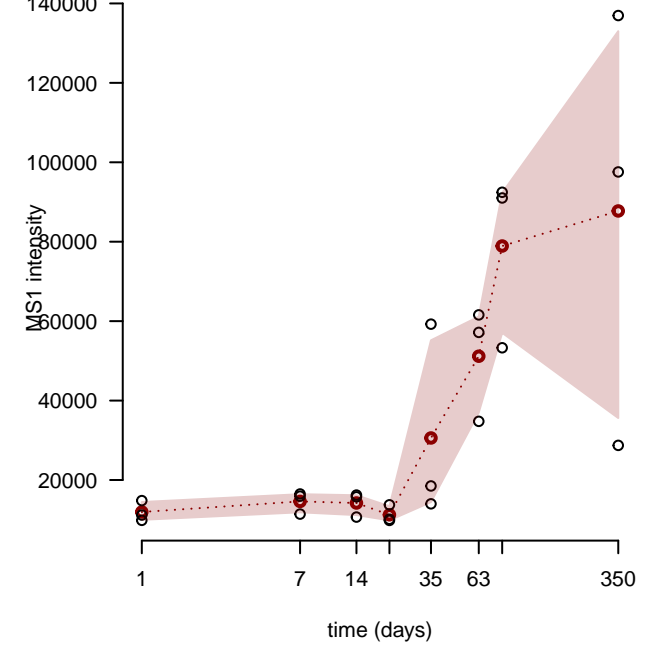

**Q8R3H7**  
**GN=Hs2st1**  
heparan sulfate 2-O-sulfotransferase 1

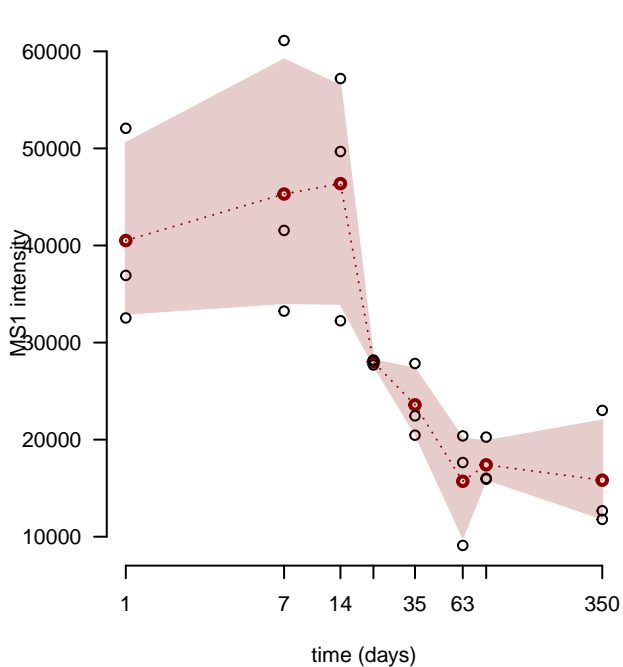

**Q8R3H9**  
**GN=Ttc4**  
tetratricopeptide repeat domain 4

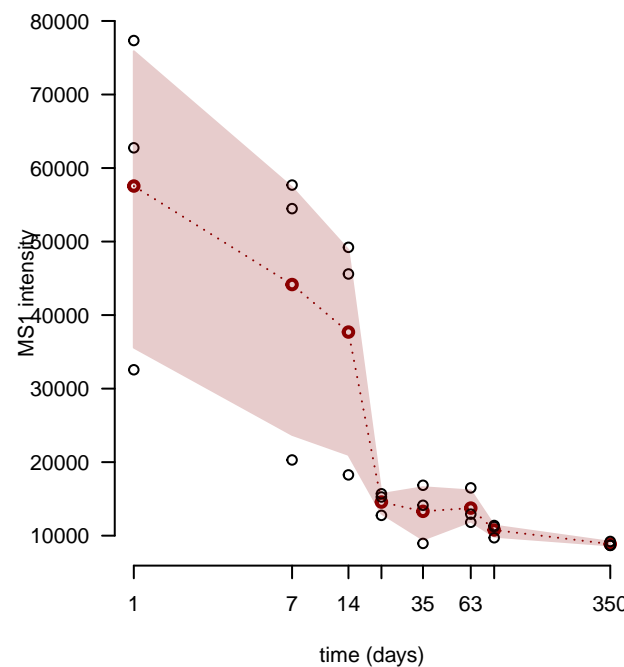

**Q8R3I2**  
**GN=Mboat2**  
membrane bound O-acyltransferase domain ...

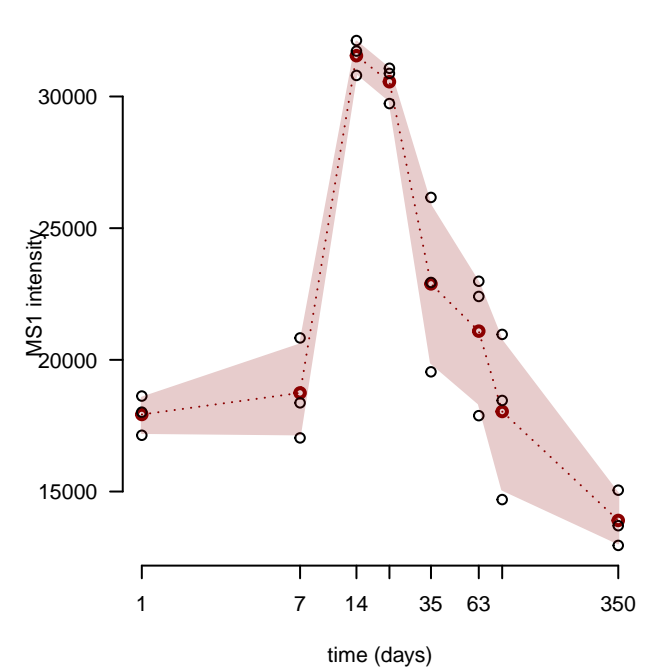



**Q8R3I3**  
**GN=Cog6**

component of oligomeric golgi complex 6

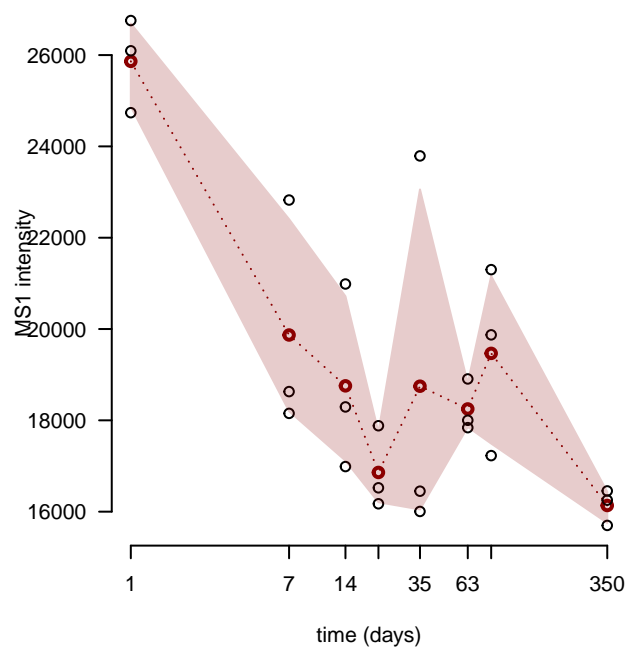

**Q8R3K3**  
**GN=Ptc2**

pentatricopeptide repeat domain 2

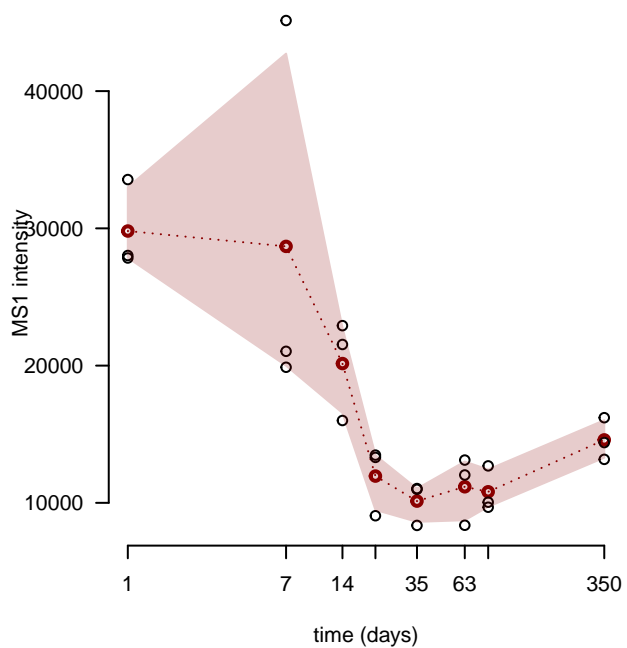

**Q8R3L2**  
**GN=Tcf25**

transcription factor 25 (basic helix-loop ...

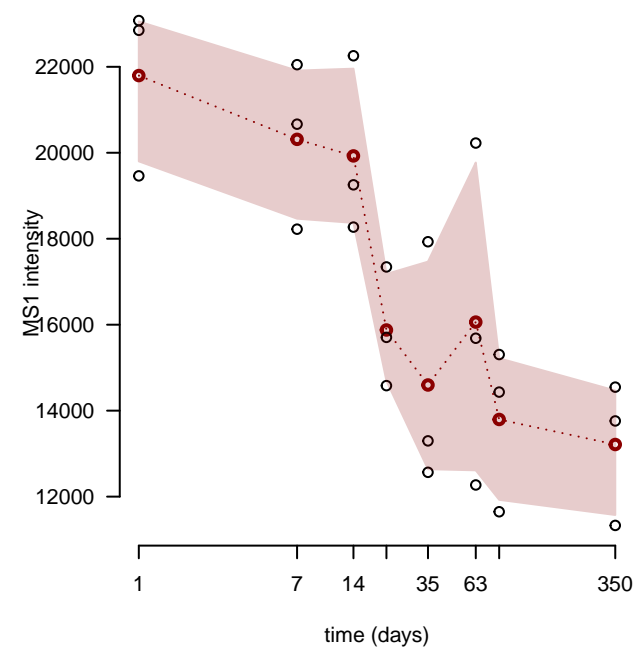

**Q8R3L5**  
**GN=Slco3a1**

solute carrier organic anion transporter ...

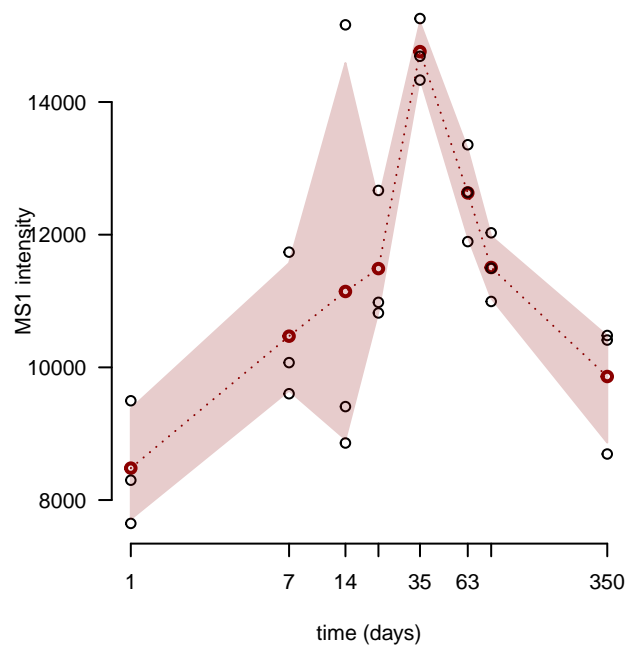

**Q8R3N1**  
**GN=Nop14**

NOP14 nucleolar protein

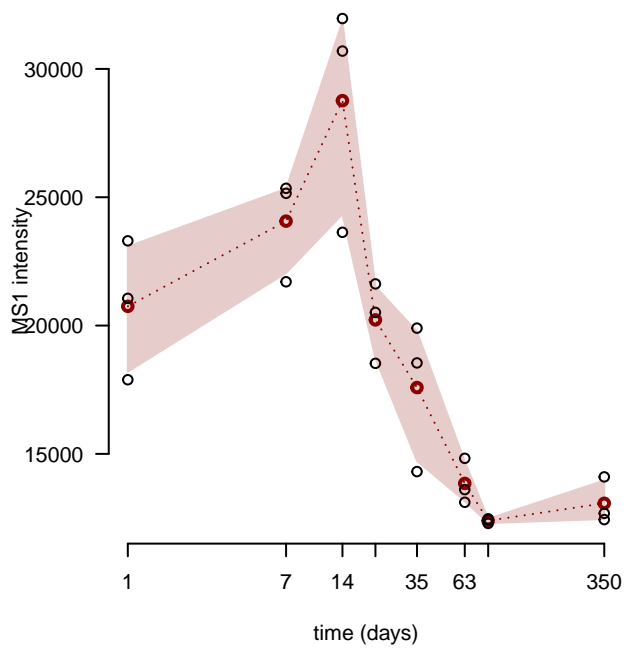

**Q8R3N6**  
**GN=Thoc1**

THO complex 1

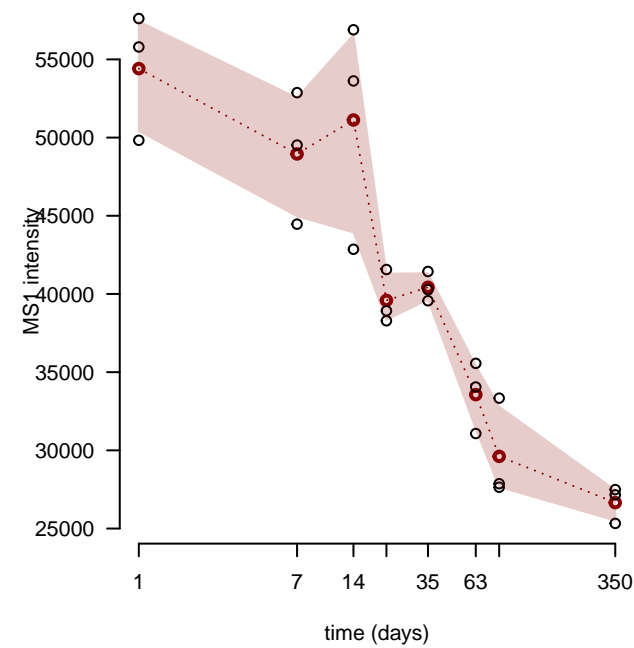

**Q8R3P2**  
**GN=Dtx2**

deltex 2, E3 ubiquitin ligase

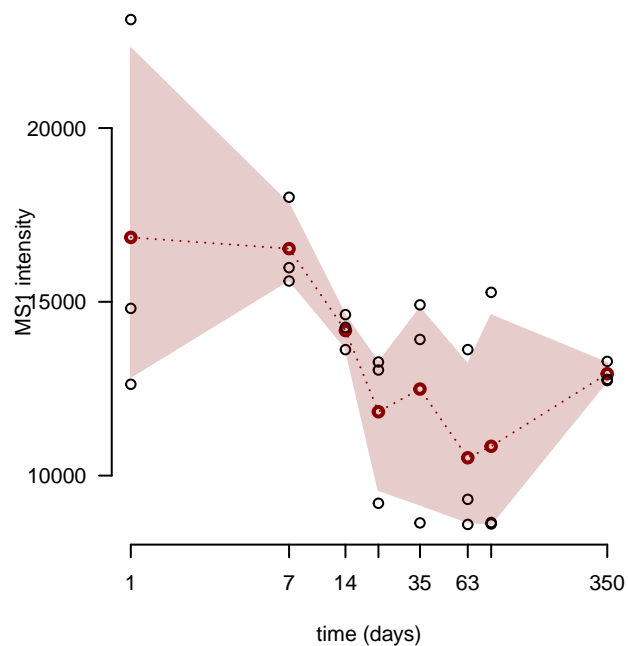

**Q8R3P2**  
**GN=Dtx2**

deltex 2, E3 ubiquitin ligase

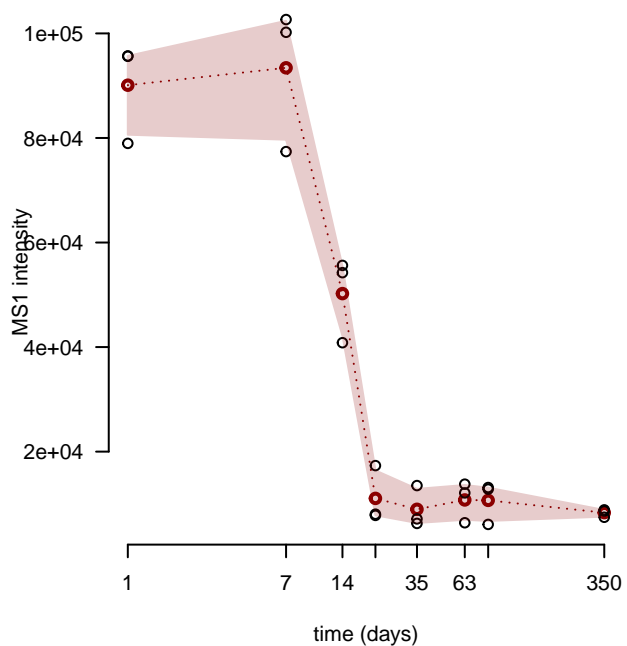

**Q8R3P6**  
**GN=Ints14**

integrator complex subunit 14

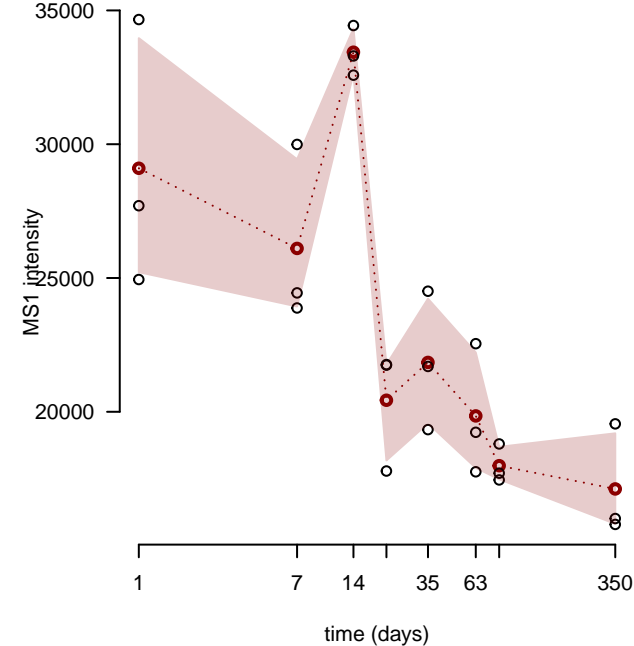

**Q8R3P7**  
**GN=Cluap1**  
clusterin associated protein 1

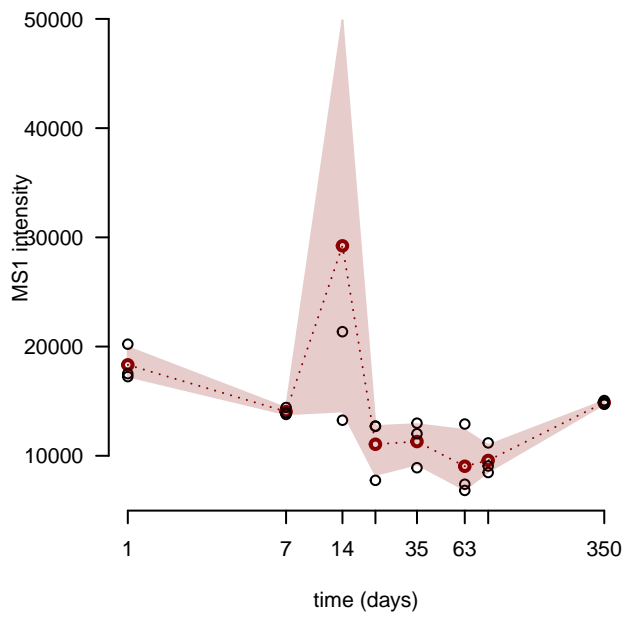

**Q8R3Q0**  
**GN=Saraf**  
store-operated calcium entry-associated ...

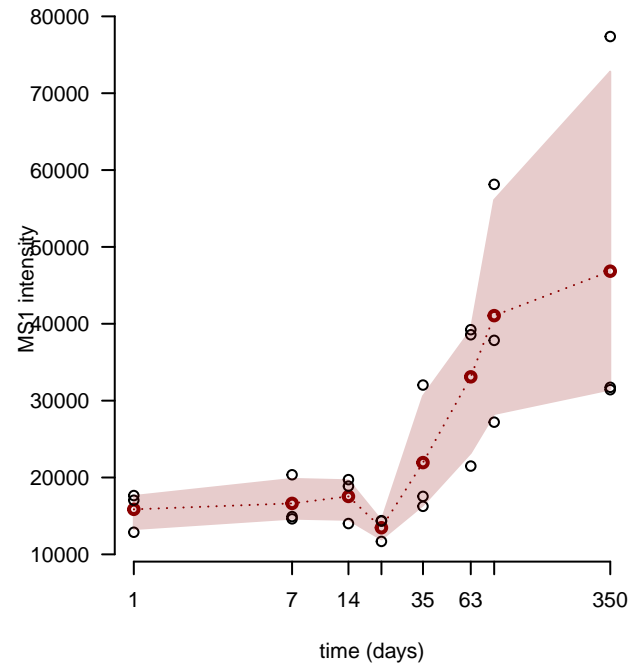

**Q8R3Q2**  
**GN=Ppp6r2**  
protein phosphatase 6, regulatory subuni ...

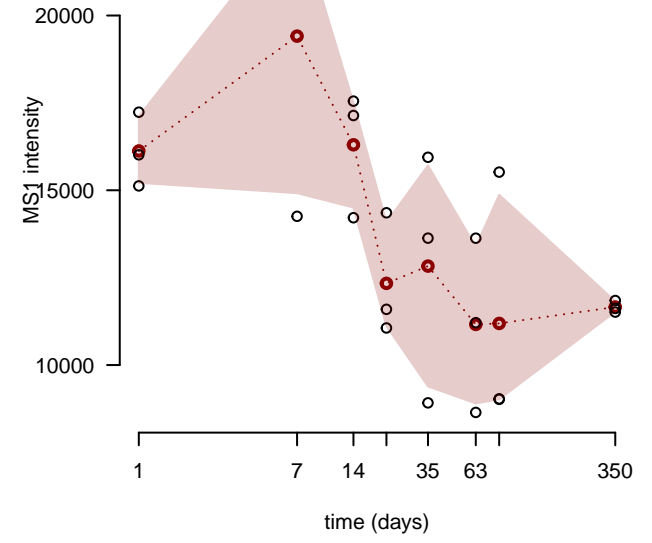

**Q8R3Q6**  
**GN=Ccdc58**  
coiled-coil domain containing 58

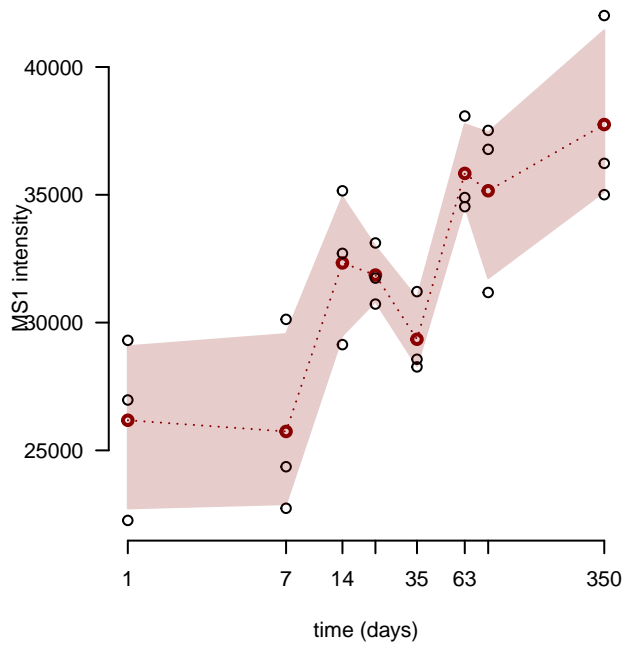

**Q8R3R8**  
**GN=Gabarap1**  
gamma-aminobutyric acid (GABA) A recepto ...

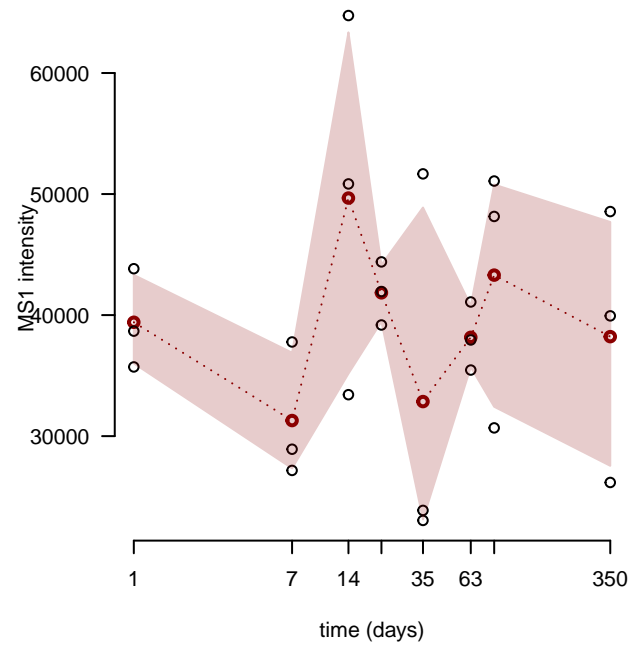

**Q8R3S6**  
**GN=Exoc1**  
exocyst complex component 1

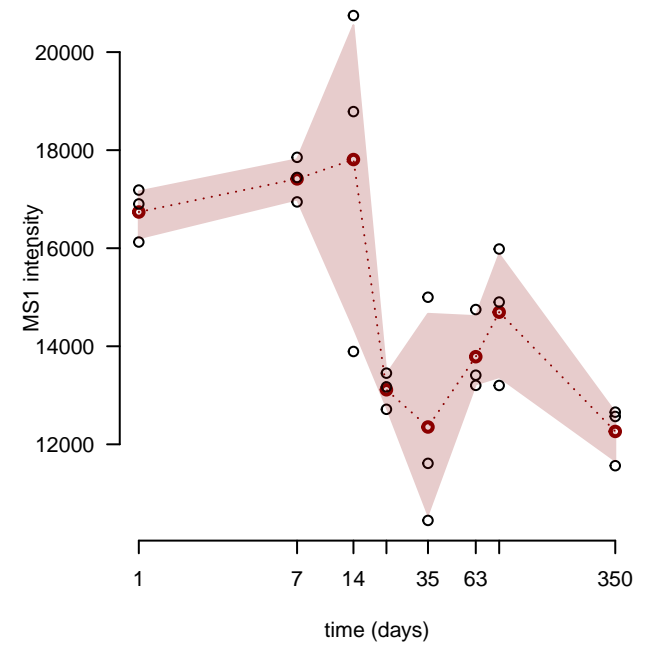

**Q8R3T5**  
**GN=Stxbp6**  
syntaxin binding protein 6 (amisyn)

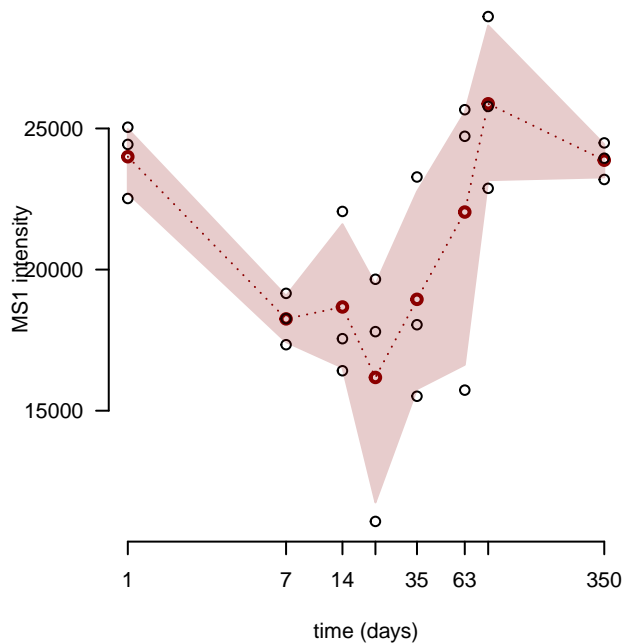

**Q8R3U1**  
**GN=Plaat3**  
phospholipase A and acyltransferase 3

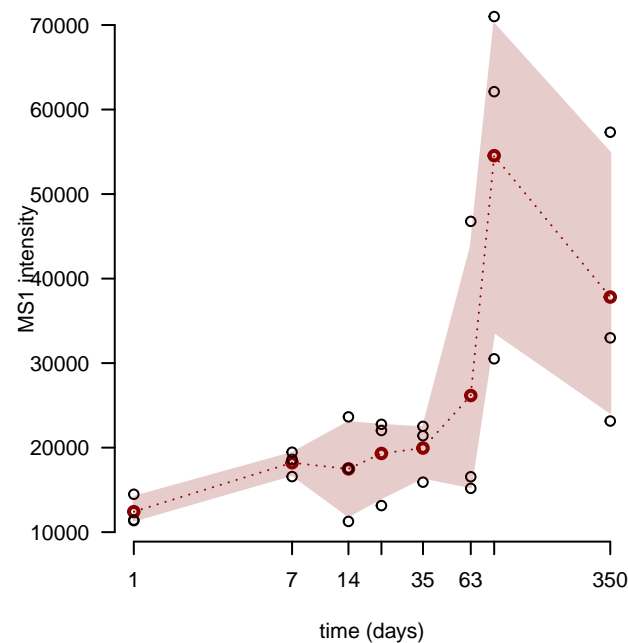

**Q8R3V5**  
**GN=Sh3glb2**  
SH3-domain GRB2-like endophilin B2

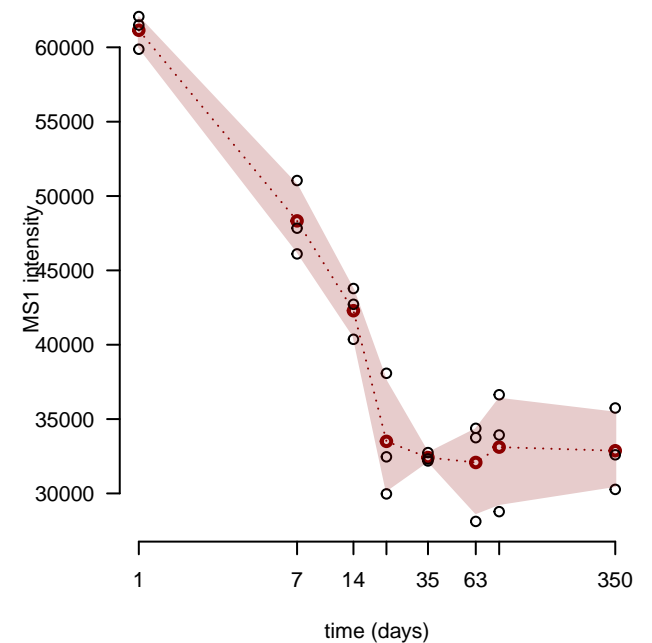

**Q8R3V6**  
GN=Cuedc1  
CUE domain containing 1

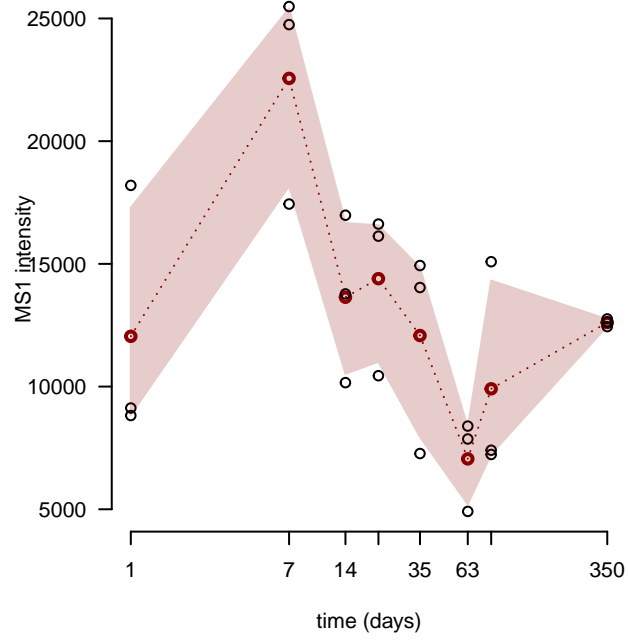

**Q8R3W5**  
GN=Tsen15  
tRNA splicing endonuclease subunit 15

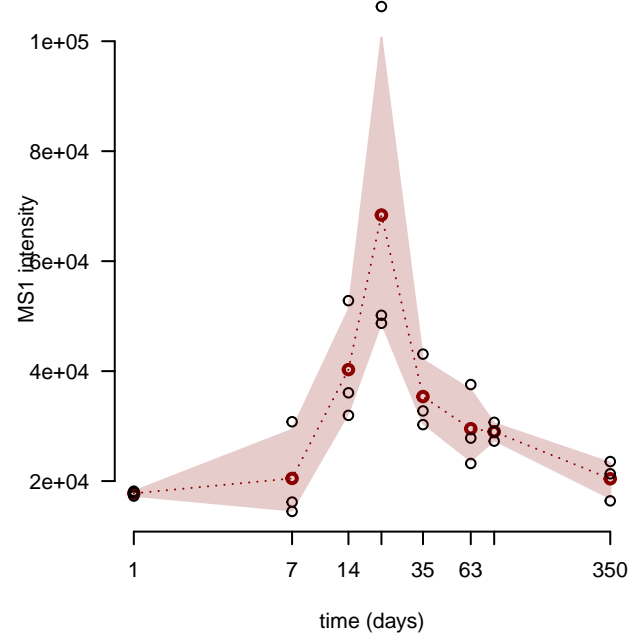

**Q8R3W7**  
GN=Agr3  
anterior gradient 3

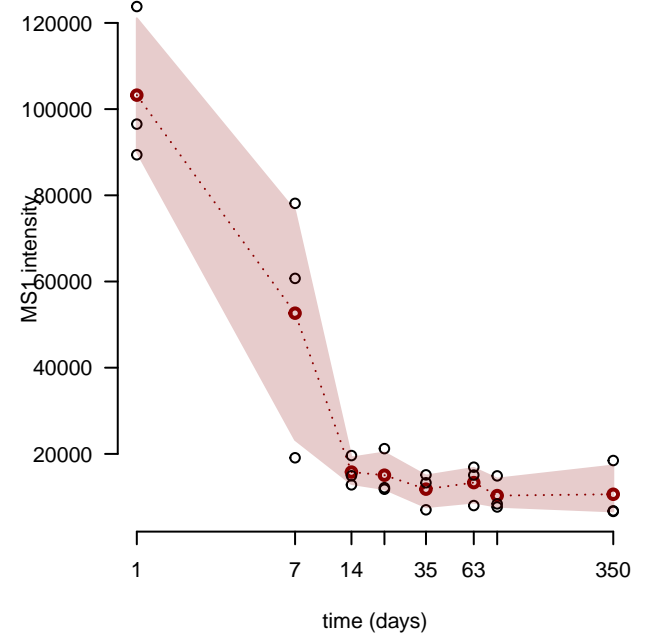

**Q8R3Y5**  
GN=

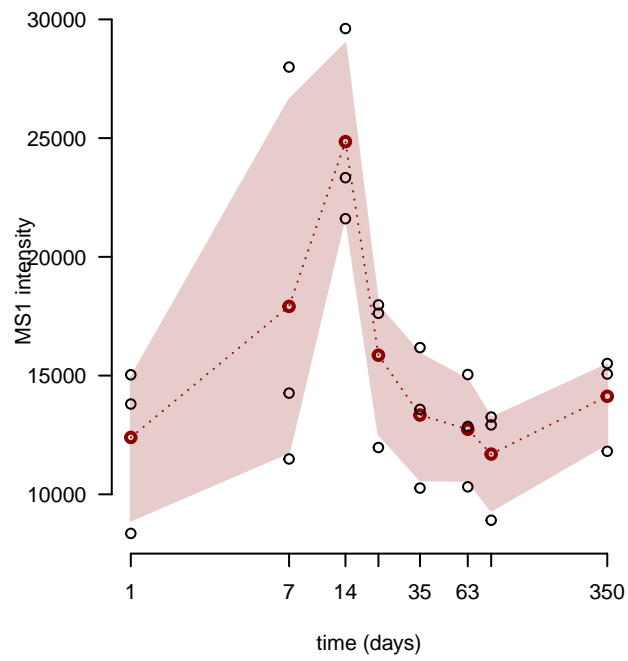

**Q8R3Y8**  
GN=lrf2bp1  
interferon regulatory factor 2 binding p...

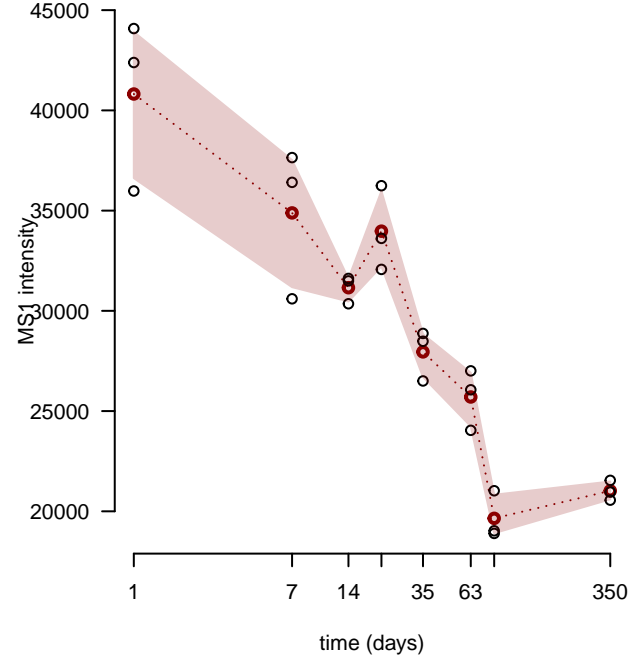

**Q8R404**  
GN=Micos13  
mitochondrial contact site and cristae o...

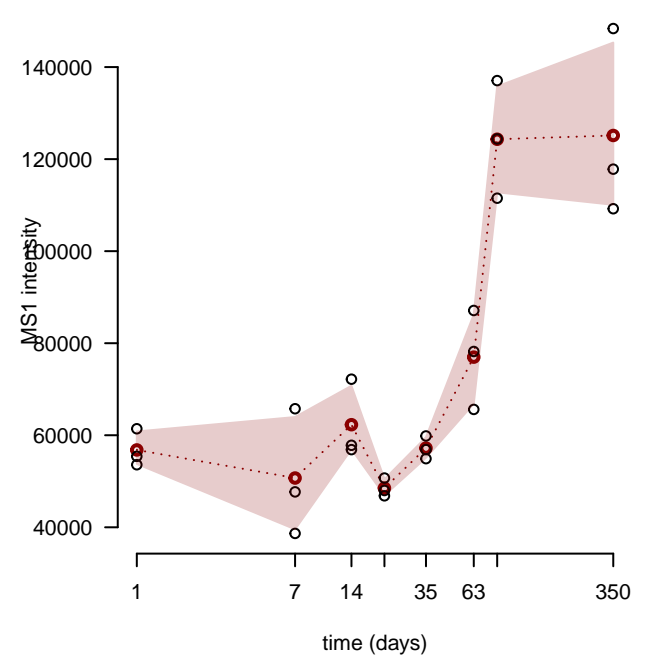

**Q8R409**  
GN=Hexim1  
hexamethylene bis-acetamide inducible 1

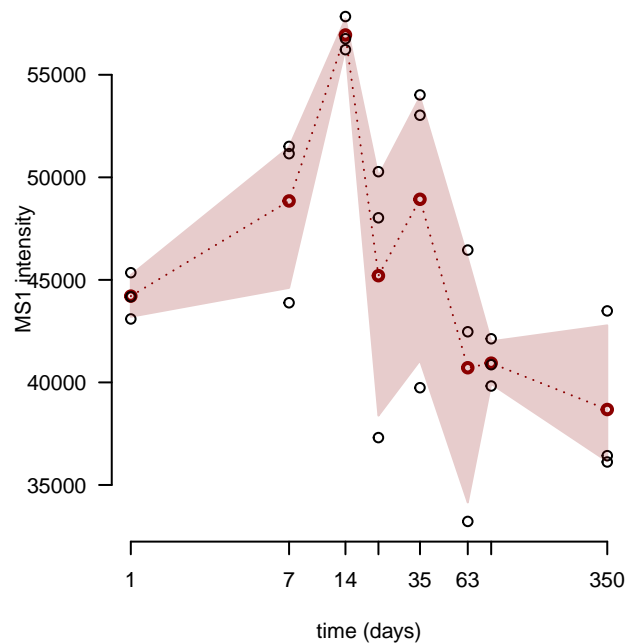

**Q8R418**  
GN=Dicer1  
dicer 1, ribonuclease type III

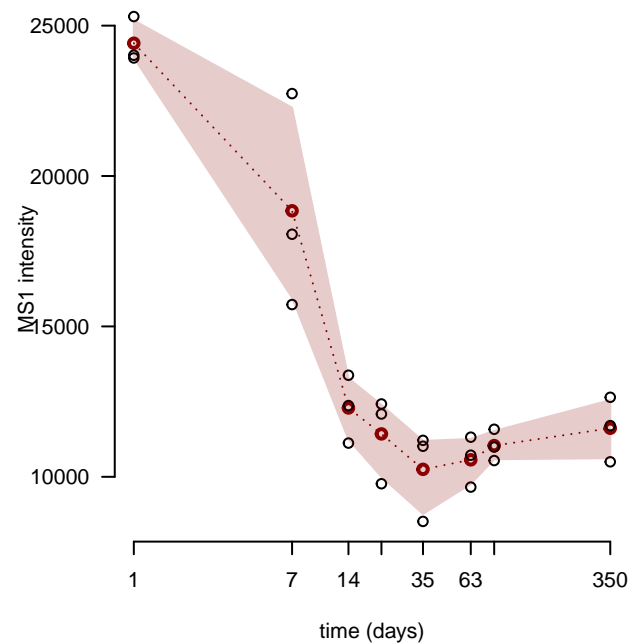

**Q8R420**  
GN=Abca3  
ATP-binding cassette, sub-family A (ABC1 ...

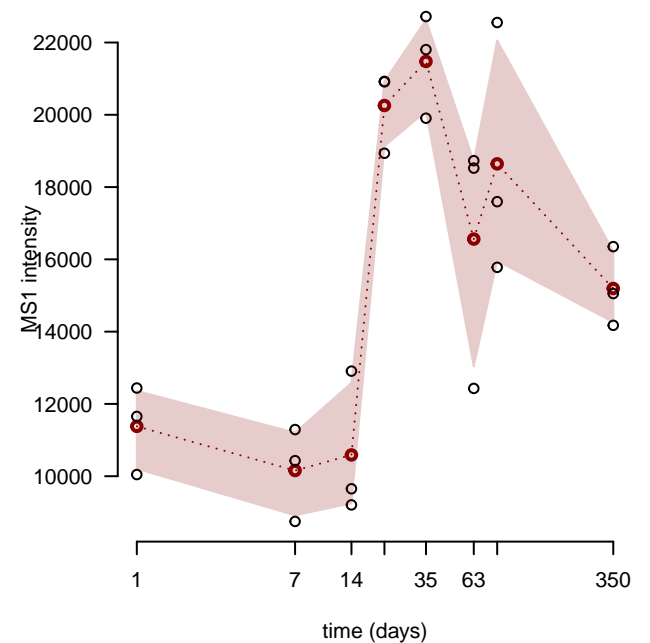

**Q8R422**  
GN=Cd109  
CD109 antigen

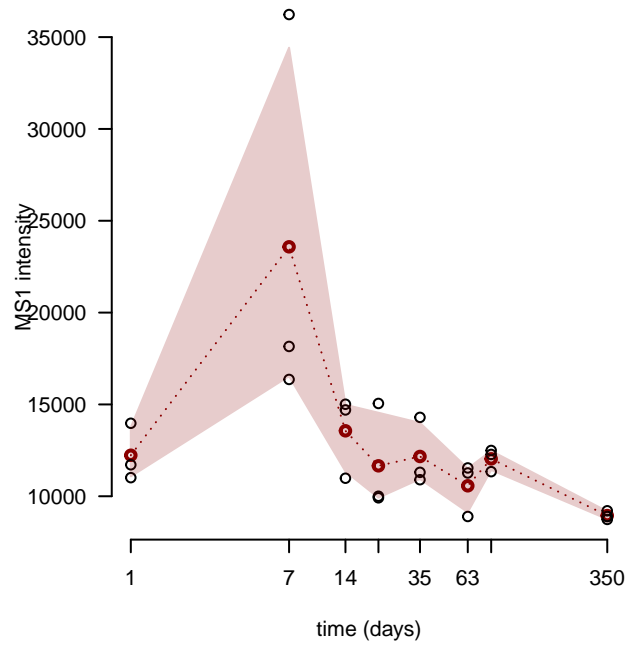

**Q8R429**  
GN=Atp2a1  
ATPase, Ca++ transporting, cardiac muscl ...

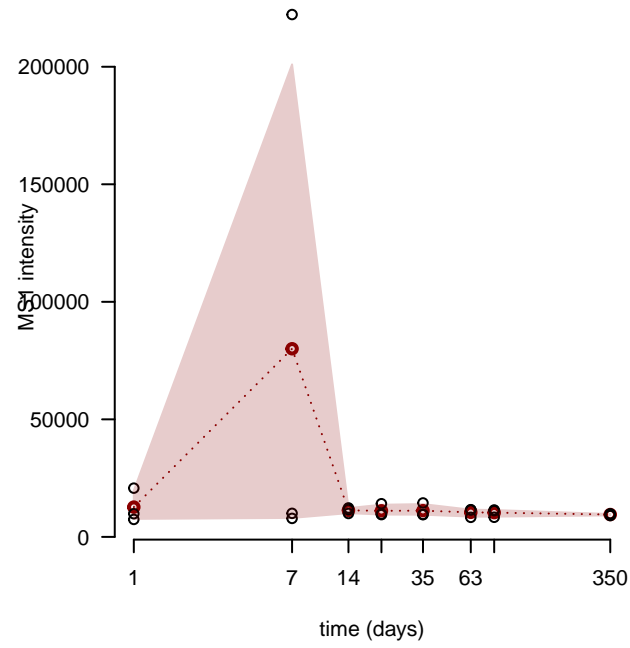

**Q8R464**  
GN=Cadm4  
cell adhesion molecule 4

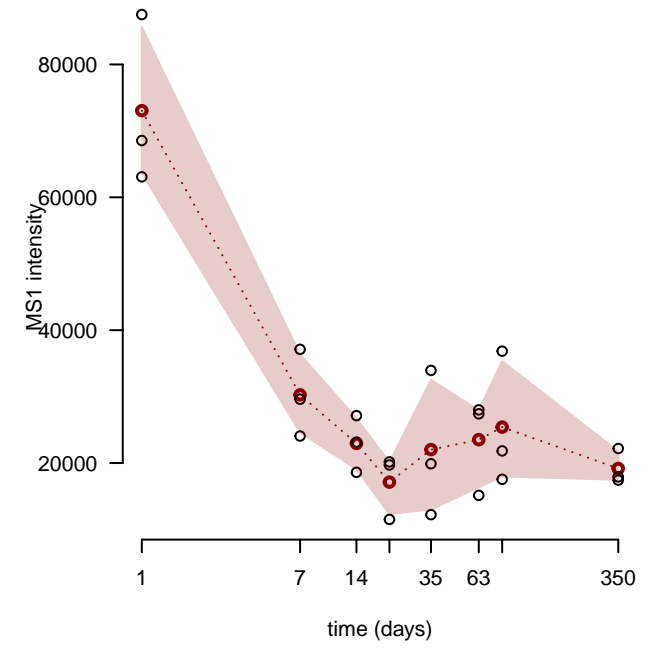

**Q8R480**  
GN=Nup85  
nucleoporin 85

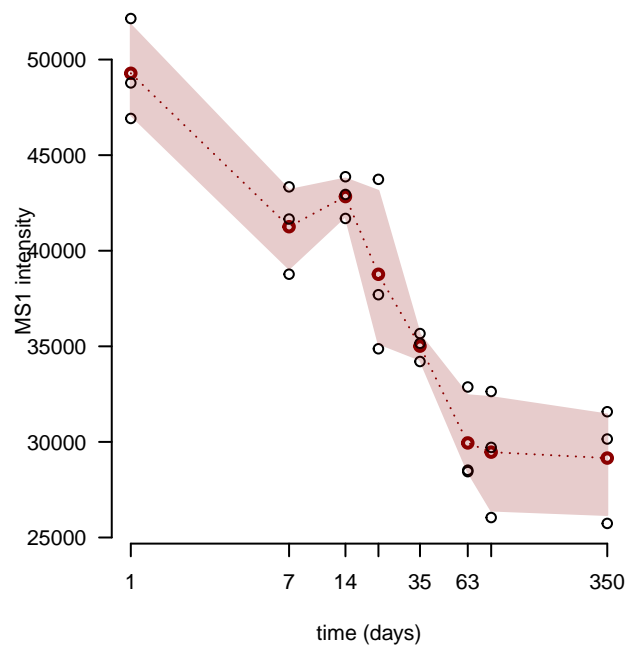

**Q8R4C2**  
GN=Rufy2  
RUN and FYVE domain-containing 2

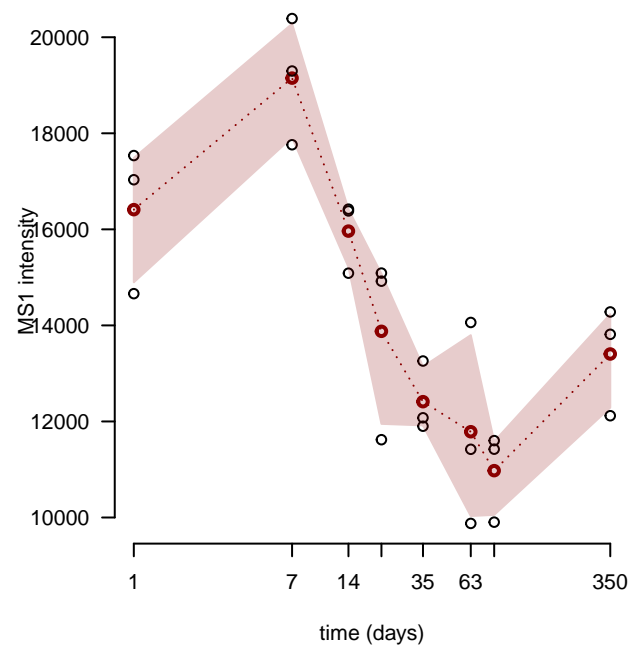

**Q8R4D1**  
GN=Slc9a8  
solute carrier family 9 (sodium/hydrogen ...

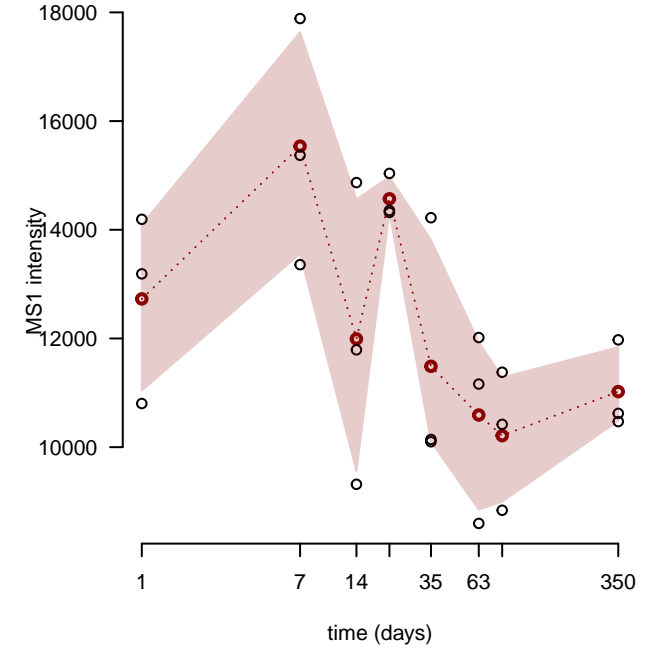

**Q8R4E6**  
GN=Purg  
purine-rich element binding protein G

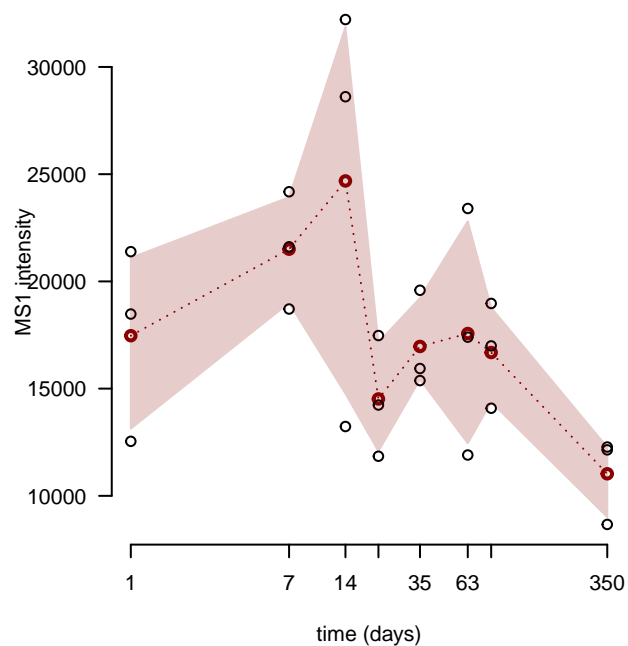

**Q8R4G6**  
GN=Mgat5  
mannoside acetylglucosaminyltransferase ...

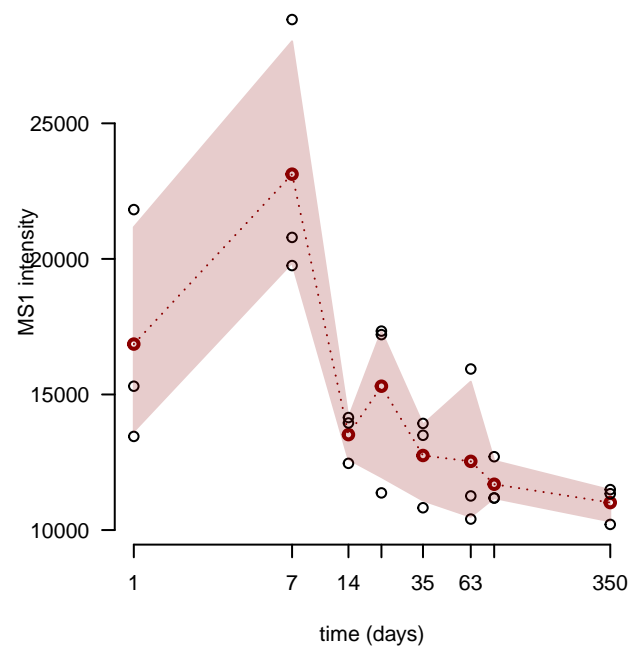

**Q8R4H2**  
GN=Arhgef12  
Rho guanine nucleotide exchange factor ( ...

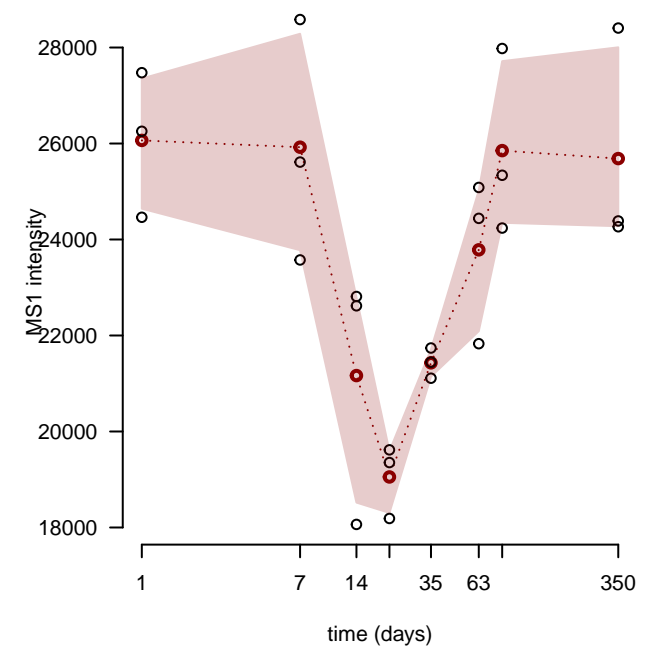

**Q8R4H9**  
**GN=Slc30a5**  
solute carrier family 30 (zinc transport ...

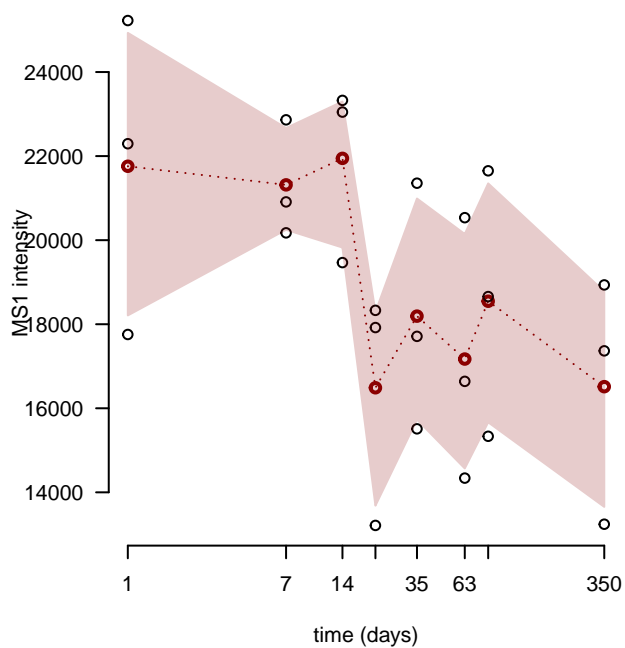

**Q8R4N0**  
**GN=Clybl**  
citrate lyase beta like

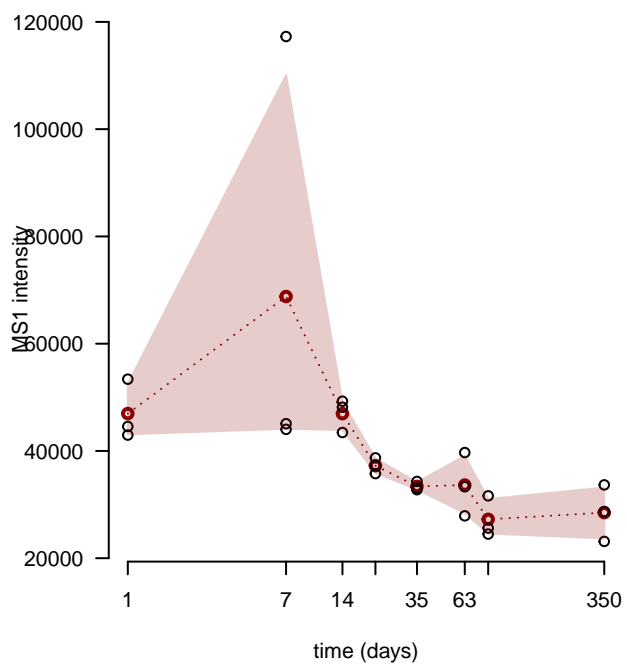

**Q8R4P9**  
**GN=Abcc10**  
ATP-binding cassette, sub-family C (CFTR ...

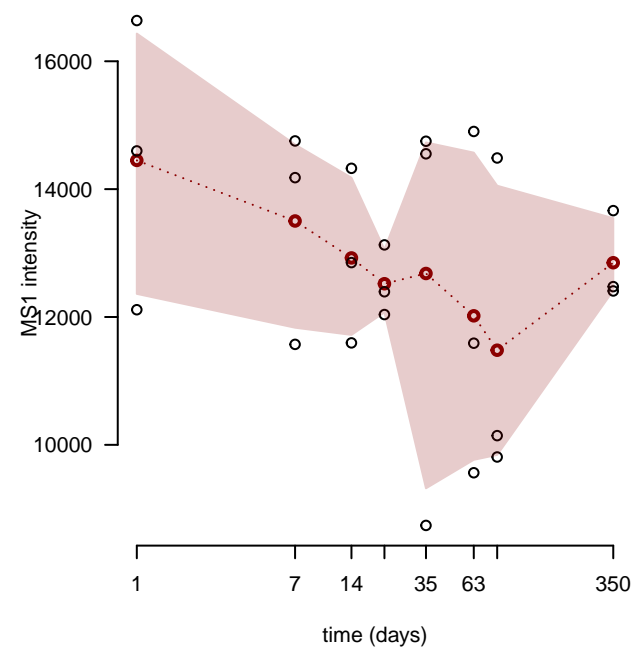

**Q8R4R6**  
**GN=Nup35**  
nucleoporin 35

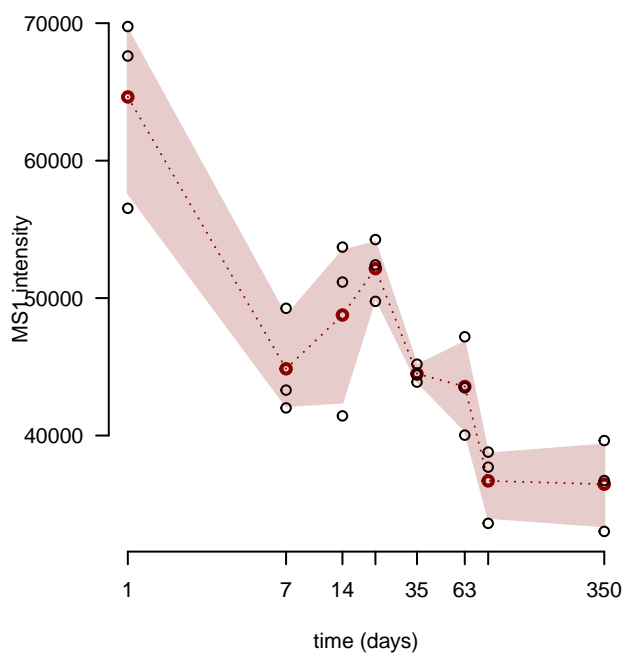

**Q8R4U6**  
**GN=Top1mt**  
DNA topoisomerase 1, mitochondrial

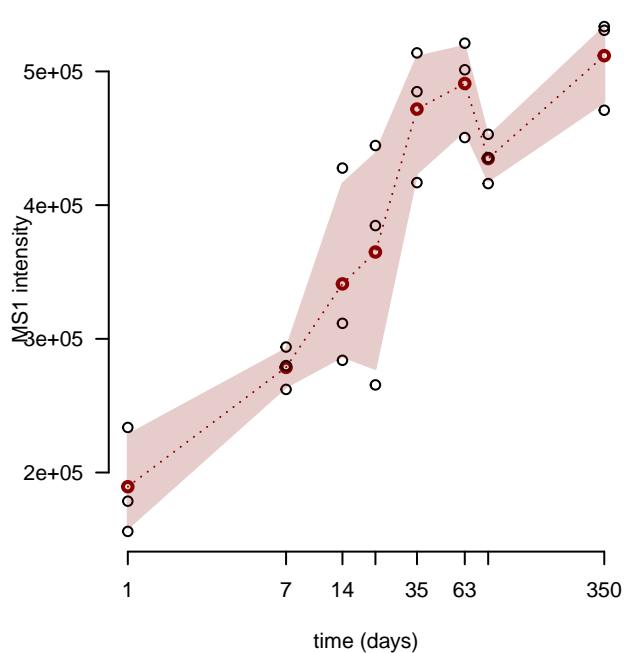

**Q8R4U7**  
**GN=Luzp1**  
leucine zipper protein 1

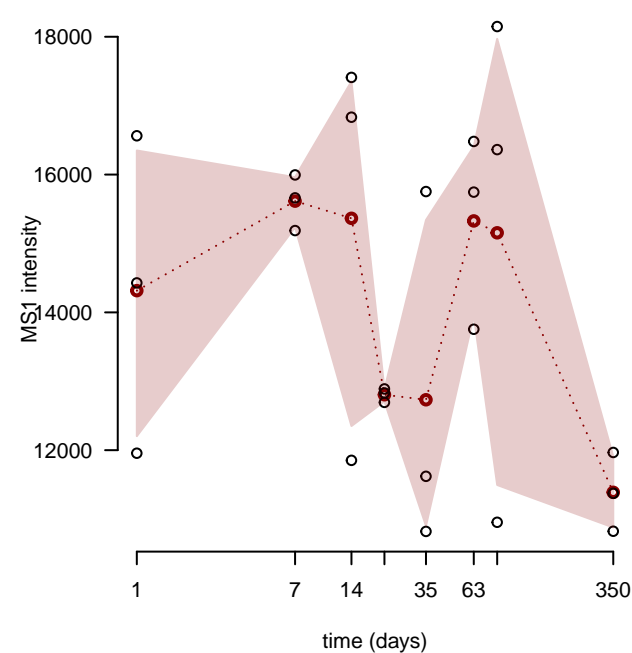

**Q8R4V4**  
**GN=Cpz**  
carboxypeptidase Z

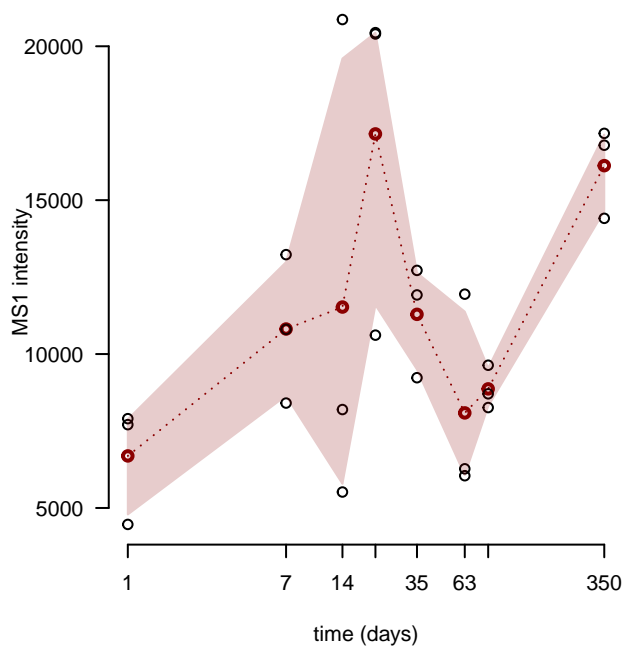

**Q8R4X3**  
**GN=Rbm12**  
RNA binding motif protein 12

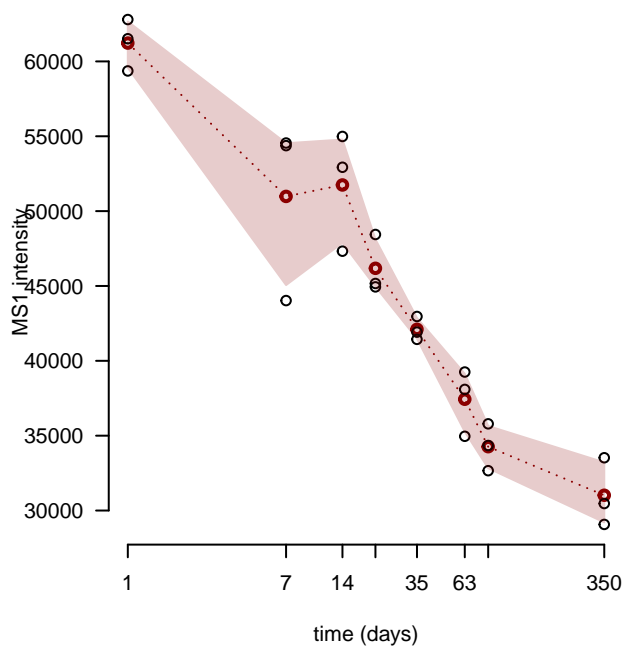

**Q8R4Y4**  
**GN=Stab1**  
stabilin 1

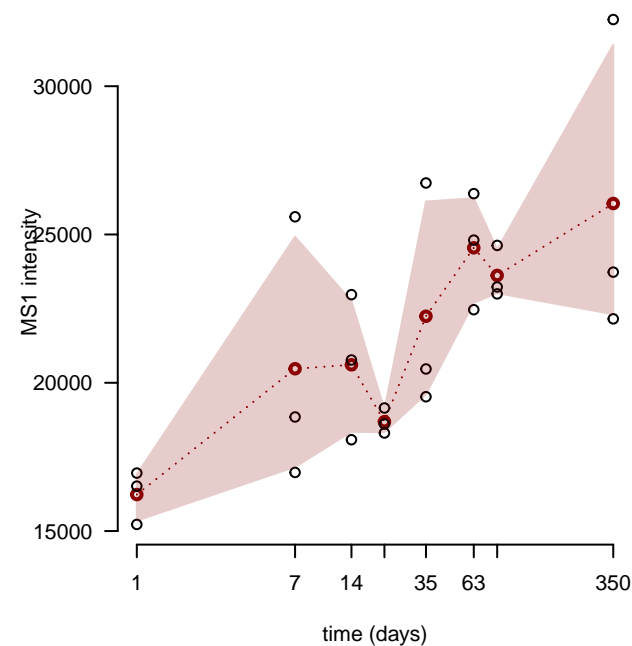

**Q8R4Y8**  
GN=Rttn  
rotatin

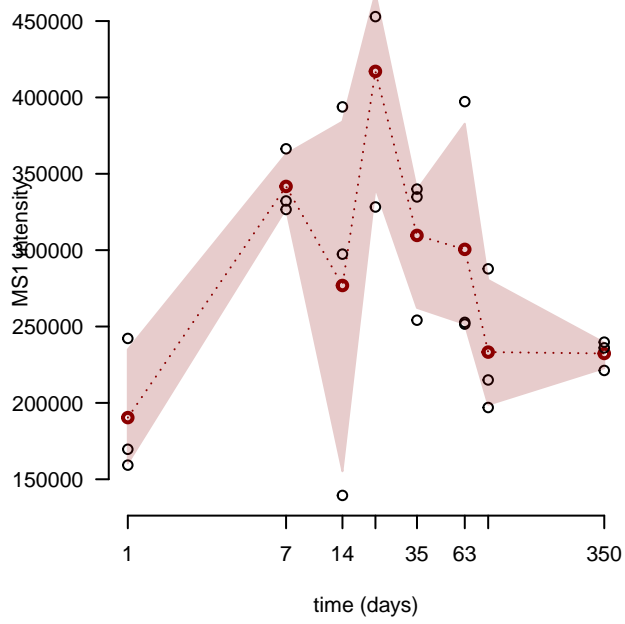

**Q8R502**  
GN=Lrrc8c  
leucine rich repeat containing 8 family, ...

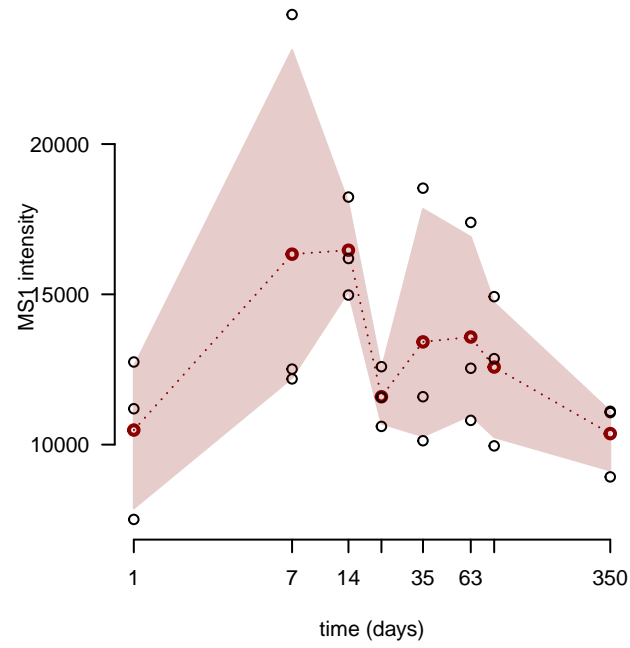

**Q8R516**  
GN=Mib2  
mindbomb E3 ubiquitin protein ligase 2

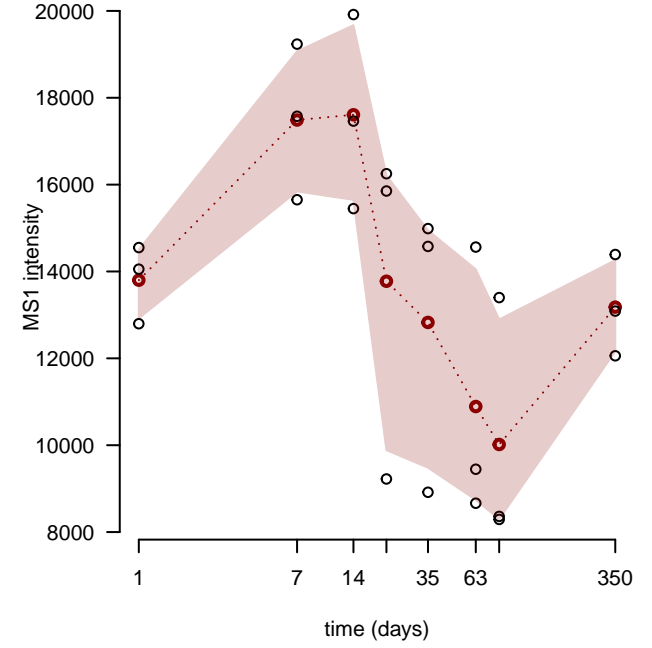

**Q8R527**  
GN=Rhoq  
ras homolog family member Q

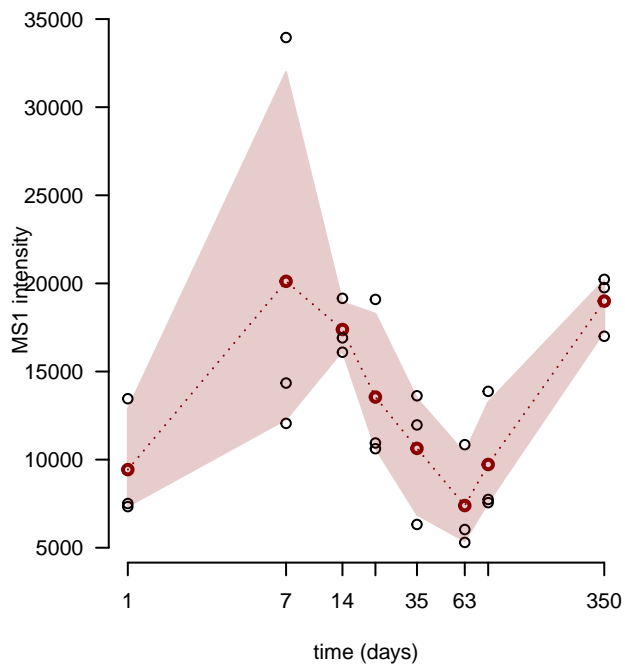

**Q8R550**  
GN=Sh3kbp1  
SH3-domain kinase binding protein 1

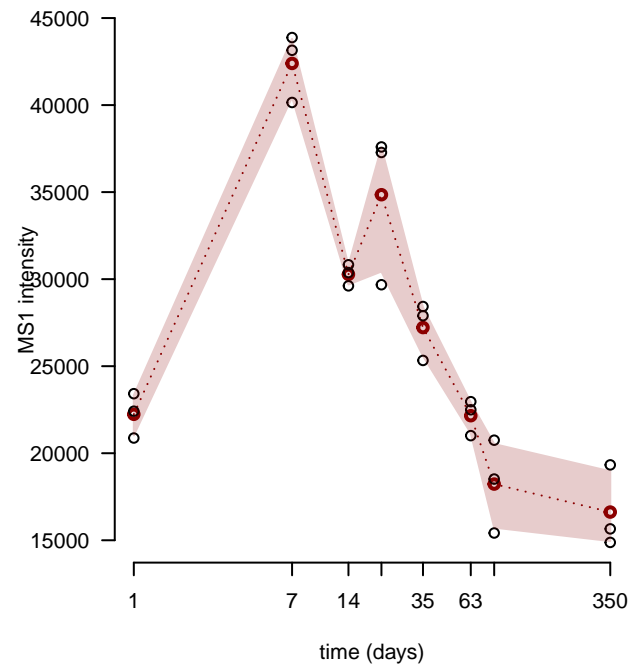

**Q8R570**  
GN=Snap47  
synaptosomal-associated protein, 47

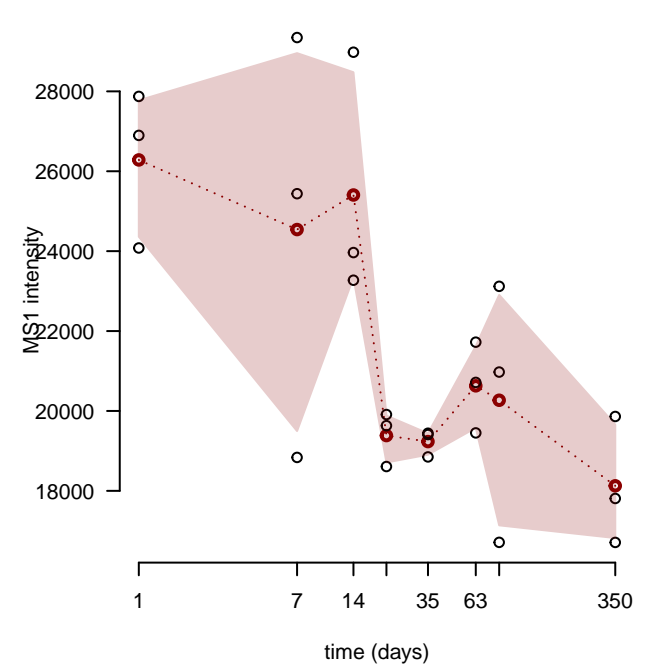

**Q8R574**  
GN=Prpsap2  
phosphoribosyl pyrophosphate synthetase- ...

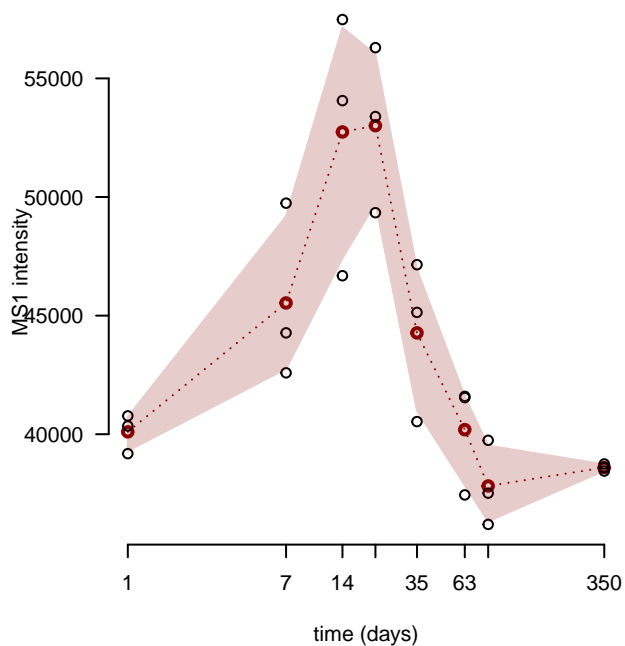

**Q8R5A0**  
GN=Smyd2  
SET and MYND domain containing 2

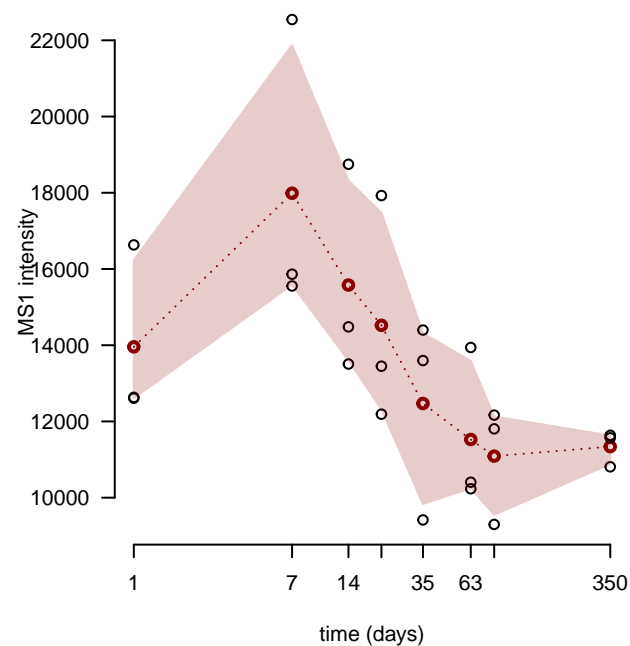

**Q8R5A3**  
GN=Apbb1ip  
amyloid beta (A4) precursor protein-bind ...

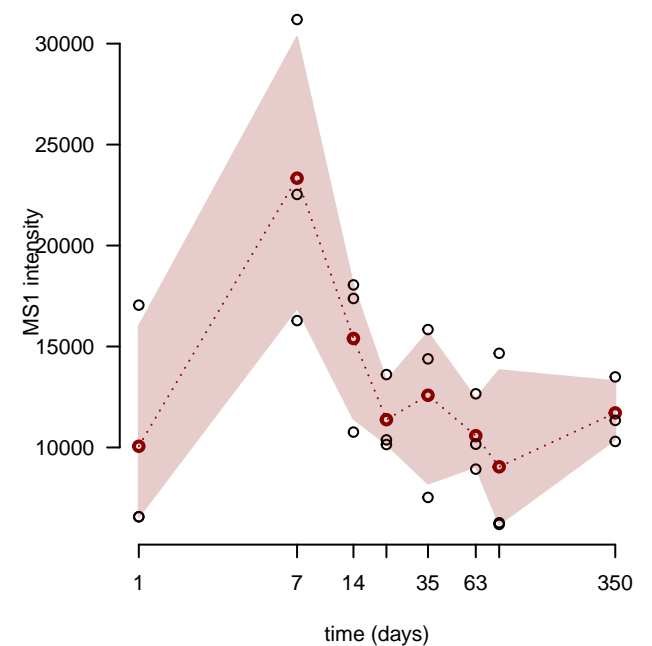

**Q8R5A6**  
**GN=Tbc1d22a**  
TBC1 domain family, member 22a

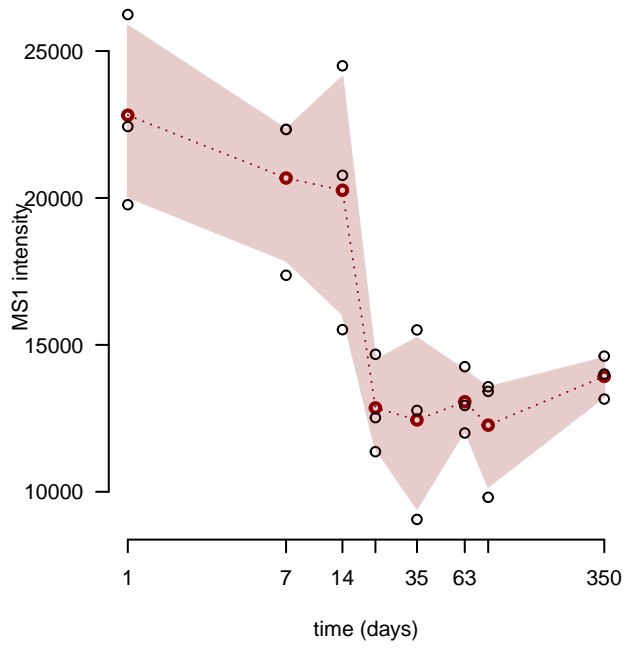

**Q8R5C5**  
**GN=Actr1b**  
ARP1 actin-related protein 1B, centractin ...

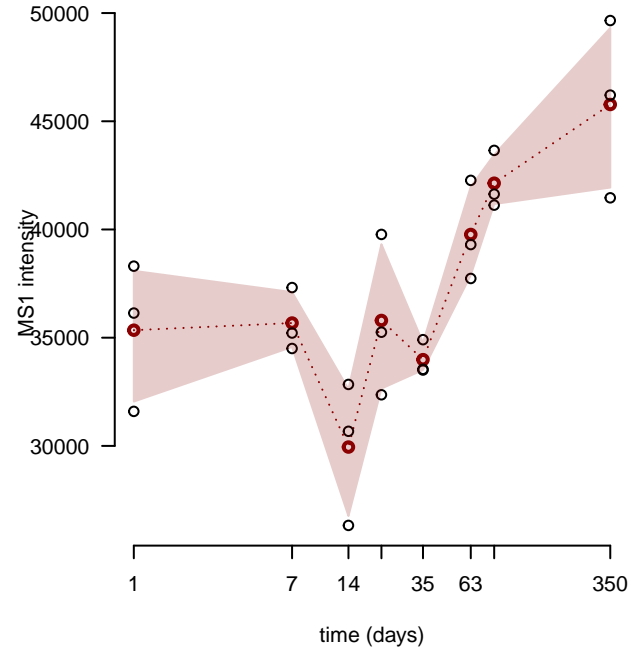

**Q8R5C8**  
**GN=Zmynd11**  
zinc finger, MYND domain containing 11

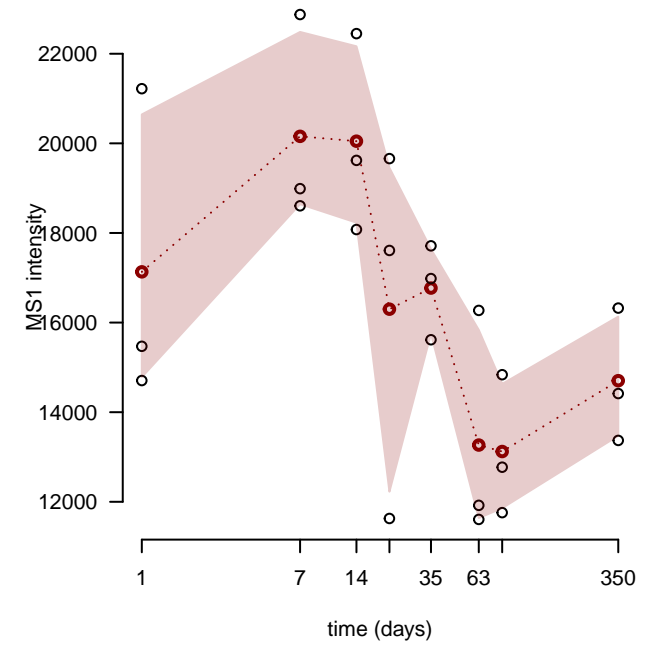

**Q8R5F3**  
**GN=Oard1**  
O-acyl-ADP-ribose deacylase 1

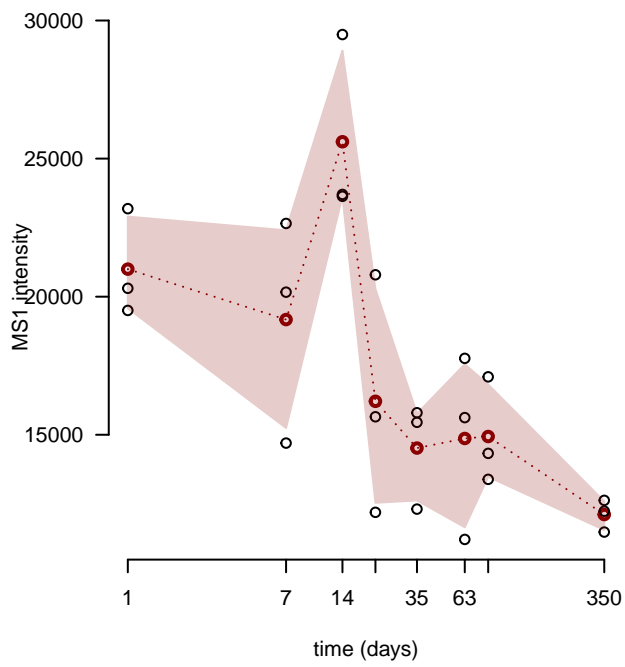

**Q8R5F7**  
**GN=Ifih1**  
interferon induced with helicase C domai ...

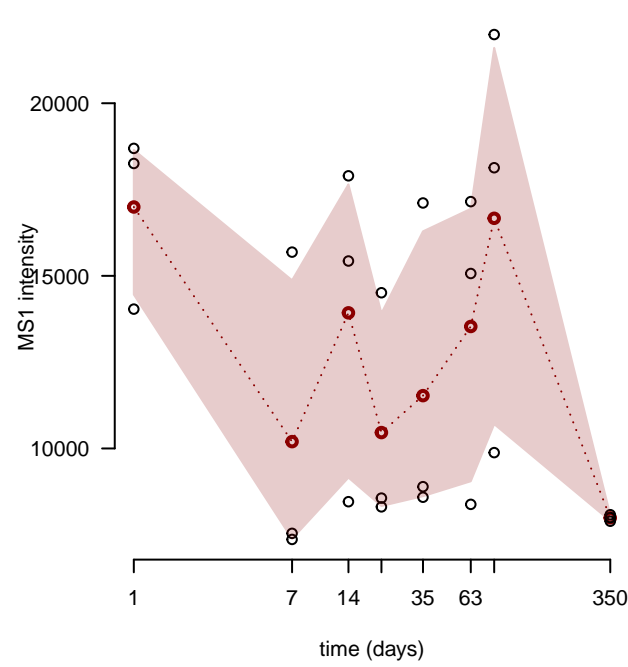

**Q8R5G7**  
**GN=Arap3**  
ArfGAP with RhoGAP domain, ankyrin repea ...

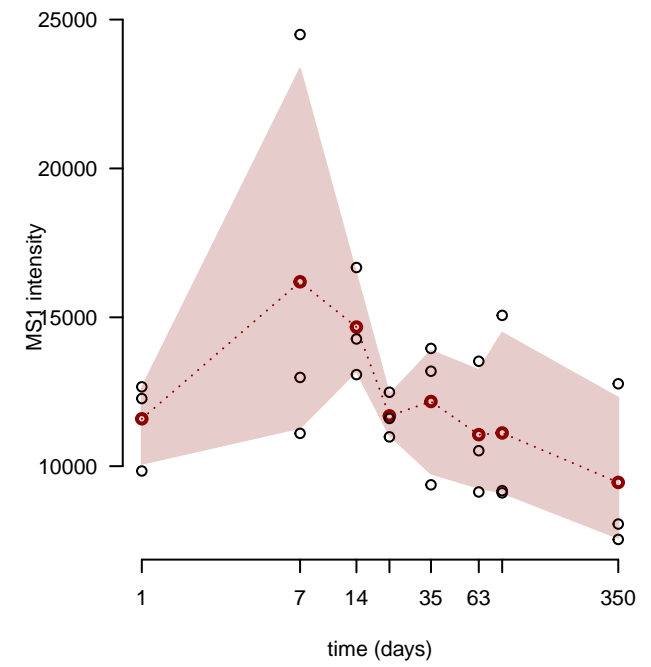

**Q8R5H1**  
**GN=Usp15**  
ubiquitin specific peptidase 15

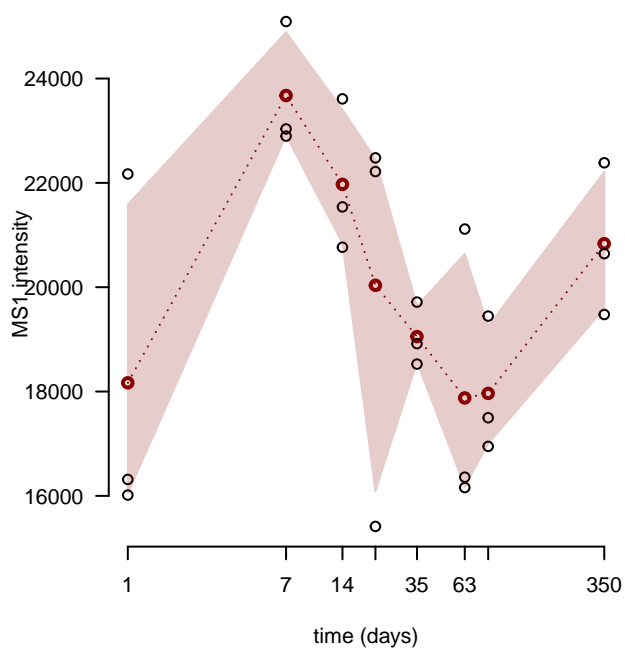

**Q8R5H6**  
**GN=Wasf1**  
WASP family, member 1

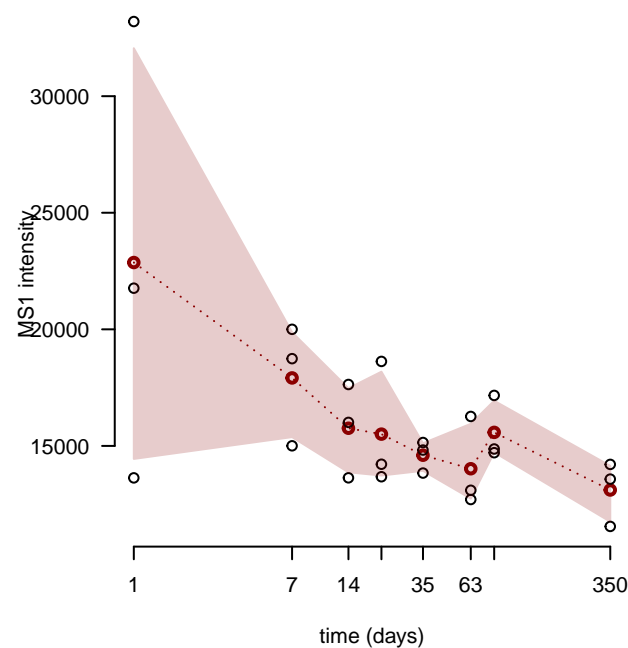

**Q8R5I6**  
**GN=**

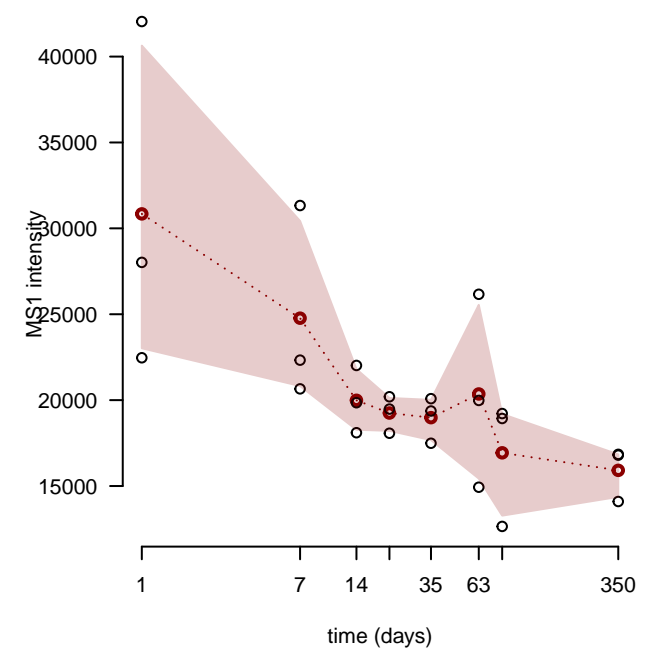

**Q8R5J9**  
GN=Arl6ip5  
ADP-ribosylation factor-like 6 interacti ...

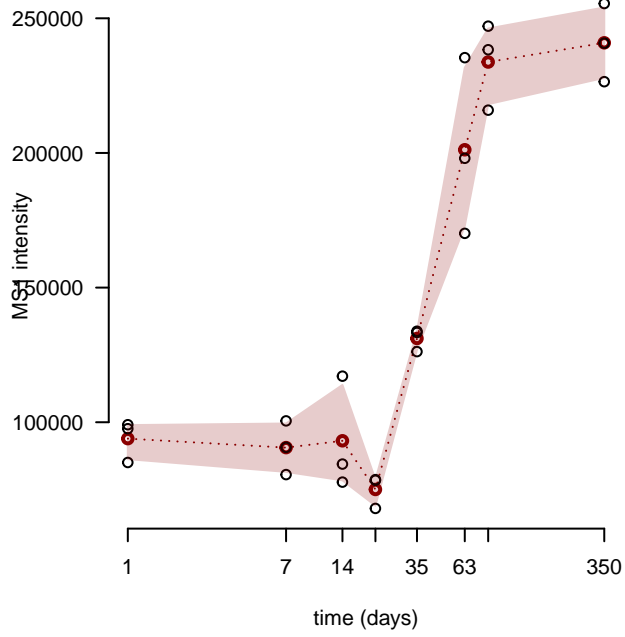

**Q8R5K2**  
GN=Usp33  
ubiquitin specific peptidase 33

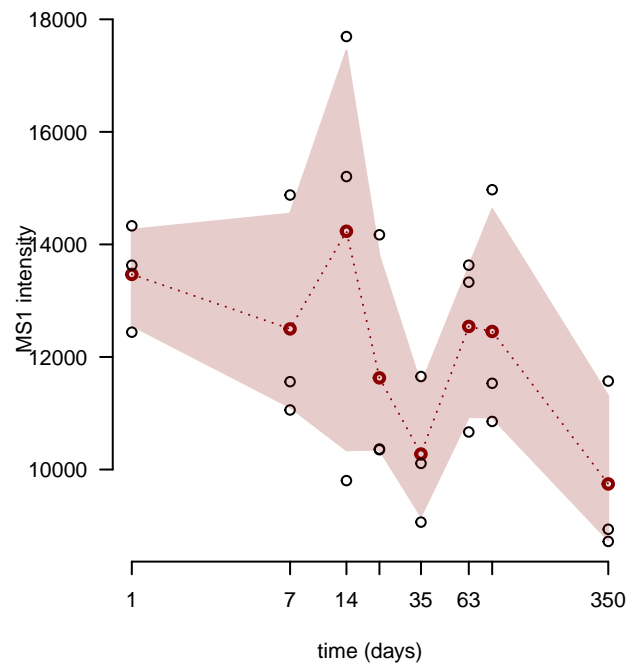

**Q8R5K4**  
GN=Nol6  
nucleolar protein family 6 (RNA-associat ...

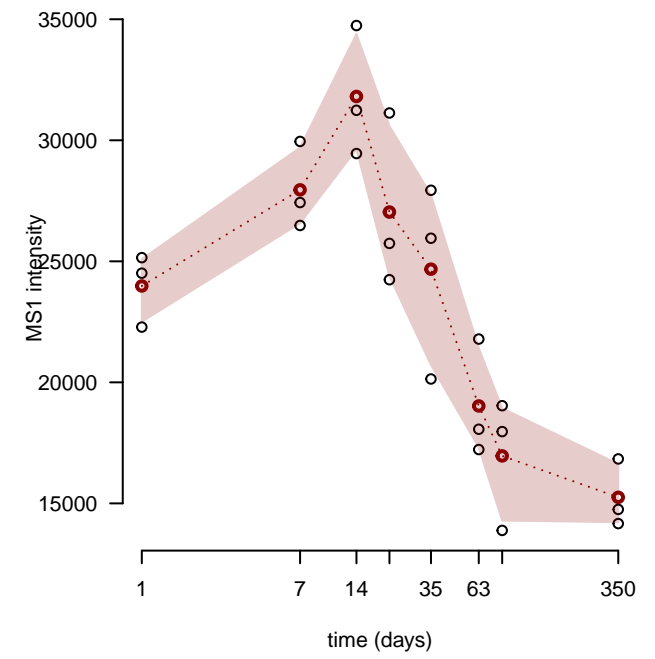

**Q8R5L3**  
GN=Vps39  
VPS39 HOPS complex subunit

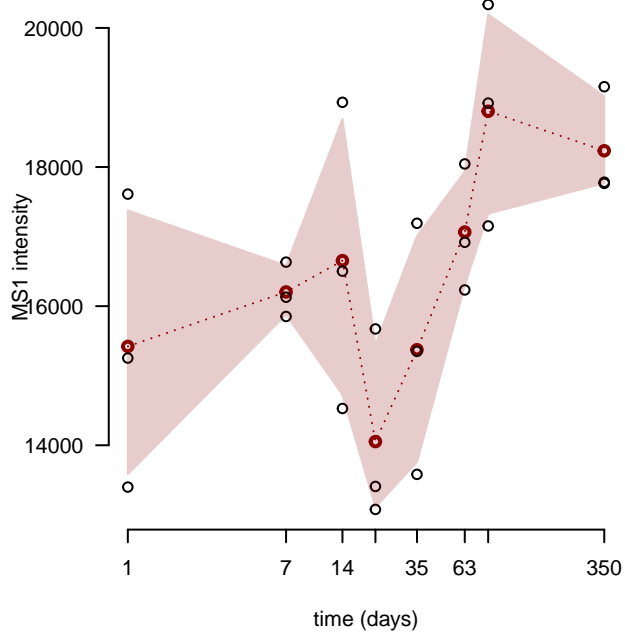

**Q8R5M8**  
GN=Cadm1  
cell adhesion molecule 1

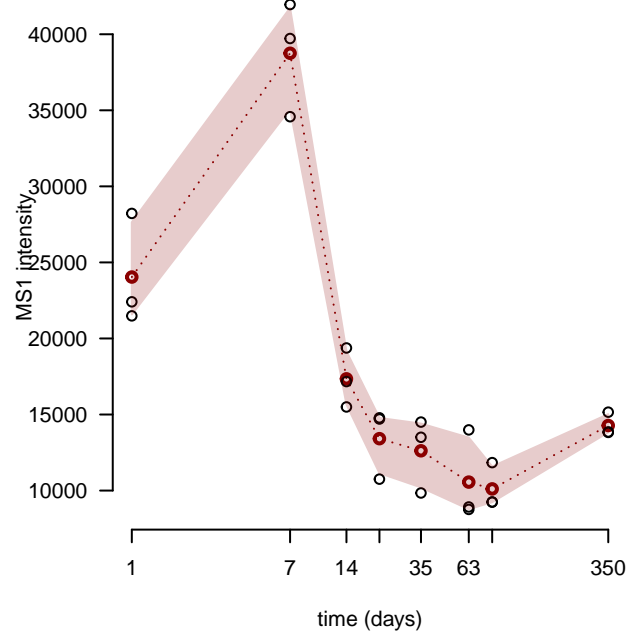

**Q8VBT0**  
GN=Tmx1  
thioredoxin-related transmembrane protei ...

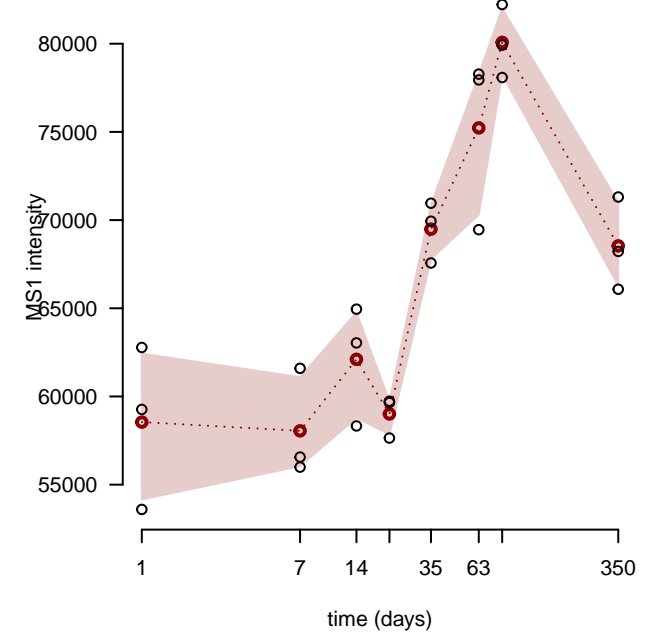

**Q8VBT9**  
GN=Aspscr1  
alveolar soft part sarcoma chromosome re ...

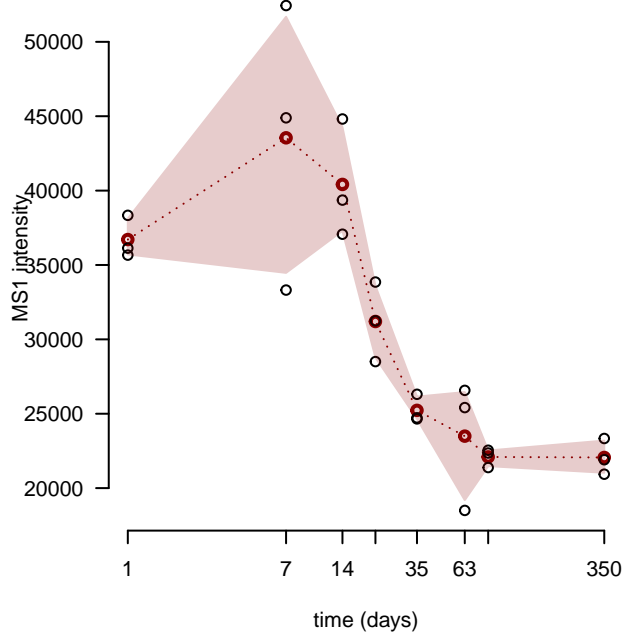

**Q8VBU8**  
GN=Banp  
BTG3 associated nuclear protein

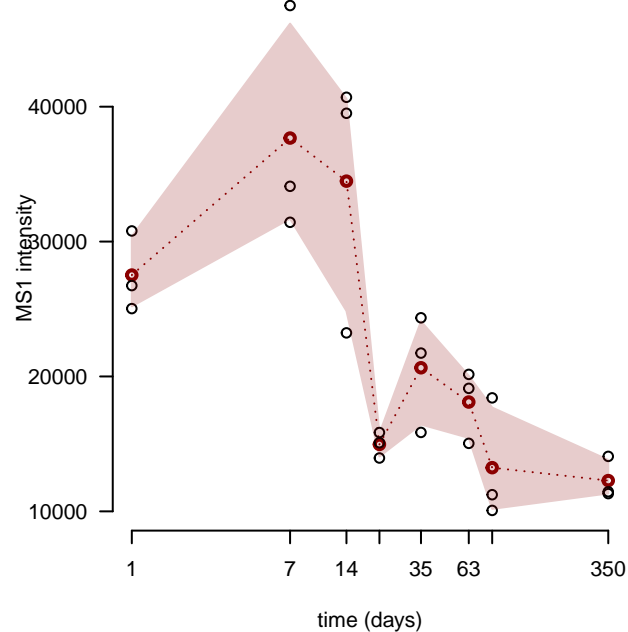

**Q8VBV3**  
GN=Exosc2  
exosome component 2

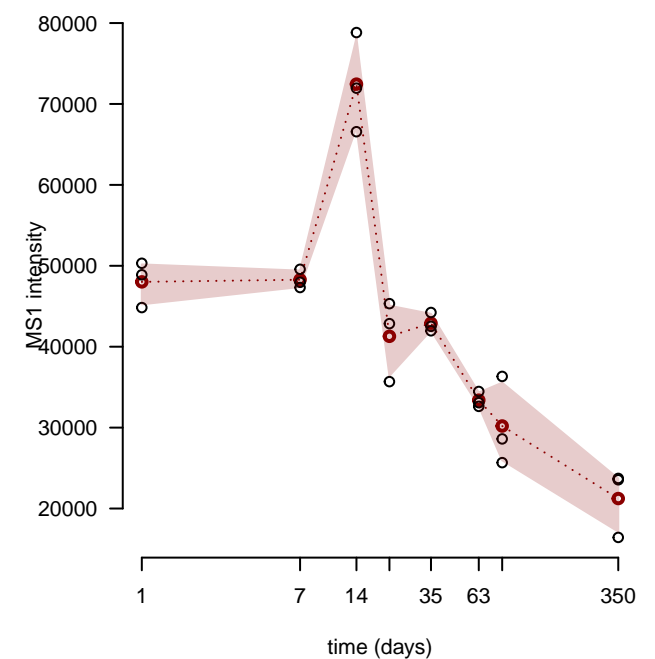



**Q8VBV7**  
**GN=Cops8**  
COP9 signalosome subunit 8

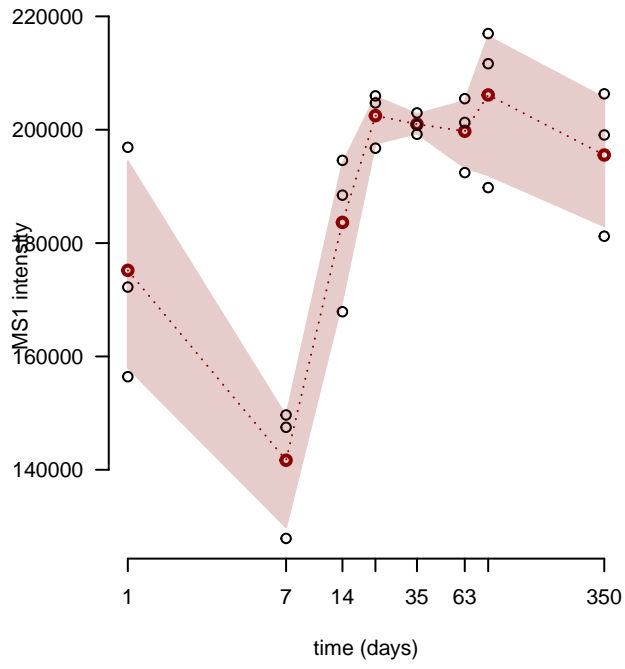

**Q8VBW5**  
**GN=Bbx**  
bobby sox HMG box containing

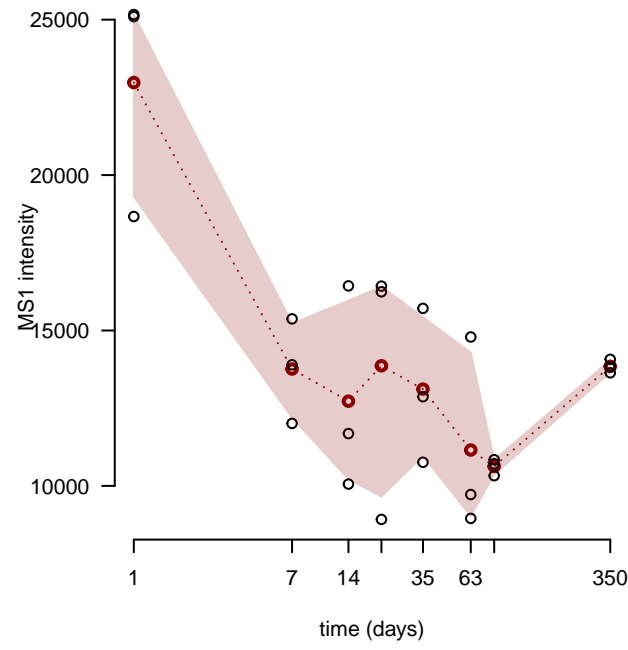

**Q8VBW6**  
**GN=Nae1**  
NEDD8 activating enzyme E1 subunit 1

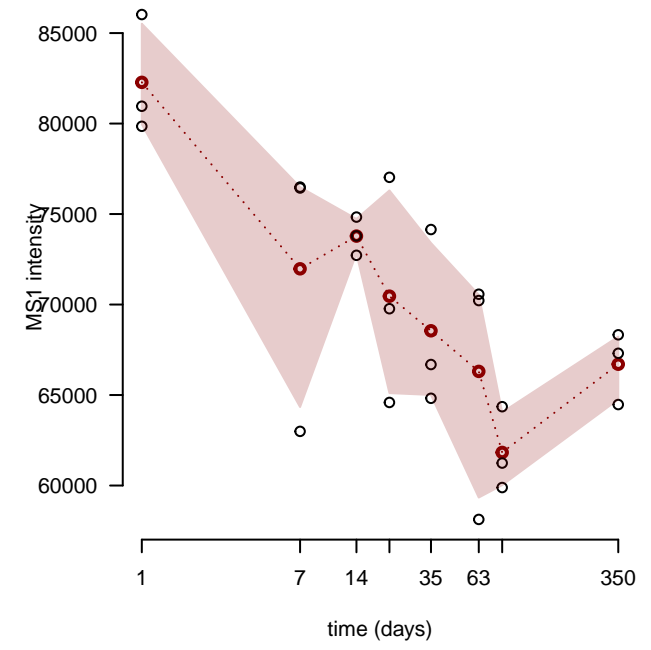

**Q8VBX6**  
**GN=Mpdz**  
multiple PDZ domain crumbs cell polarity ...

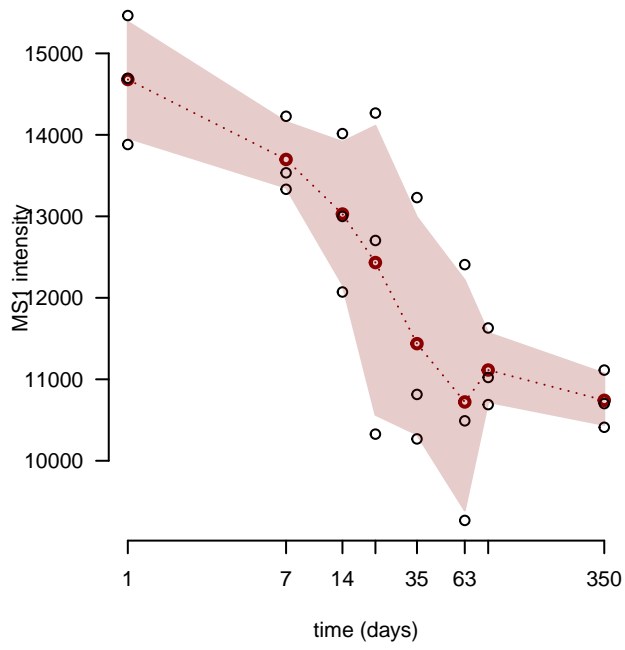

**Q8VBZ0**  
**GN=Dhrsx**  
dehydrogenase/reductase (SDR family) X c ...

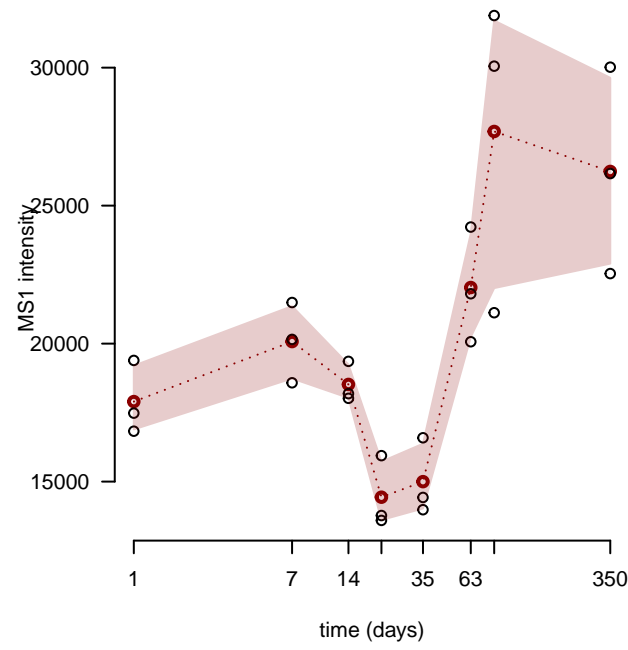

**Q8VBZ3**  
**GN=Clptm1**  
cleft lip and palate associated transmem ...

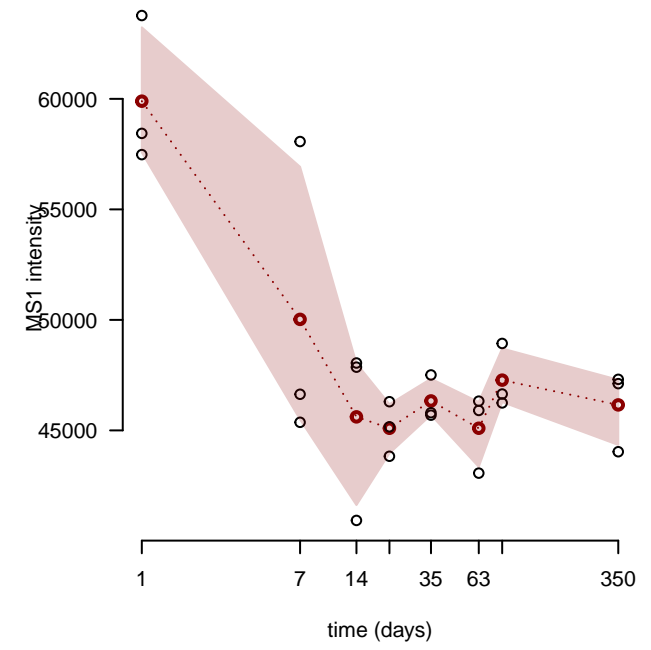

**Q8VC03**  
**GN=Eml3**  
echinoderm microtubule associated protei ...

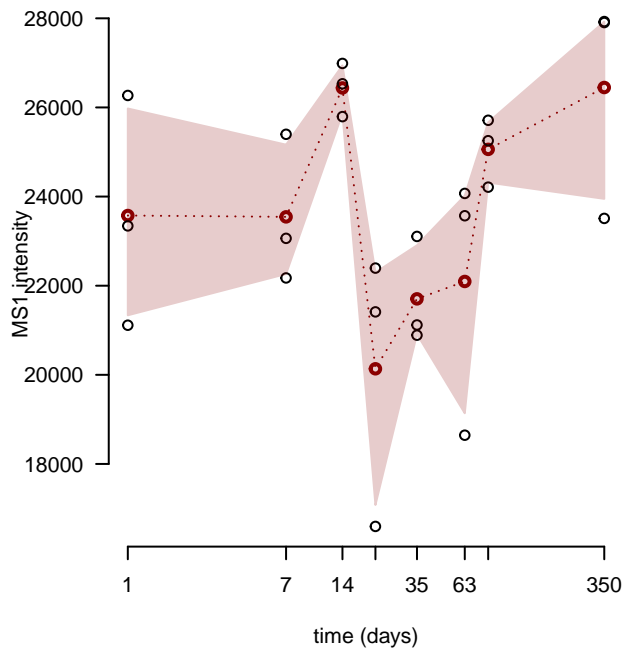

**Q8VC12**  
**GN=Uroc1**  
urocanase domain containing 1

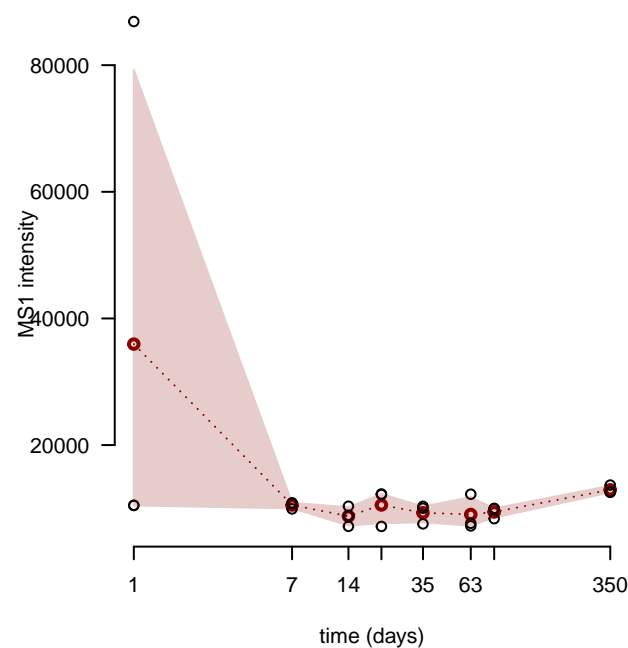

**Q8VC16**  
**GN=Lrrc14**  
leucine rich repeat containing 14

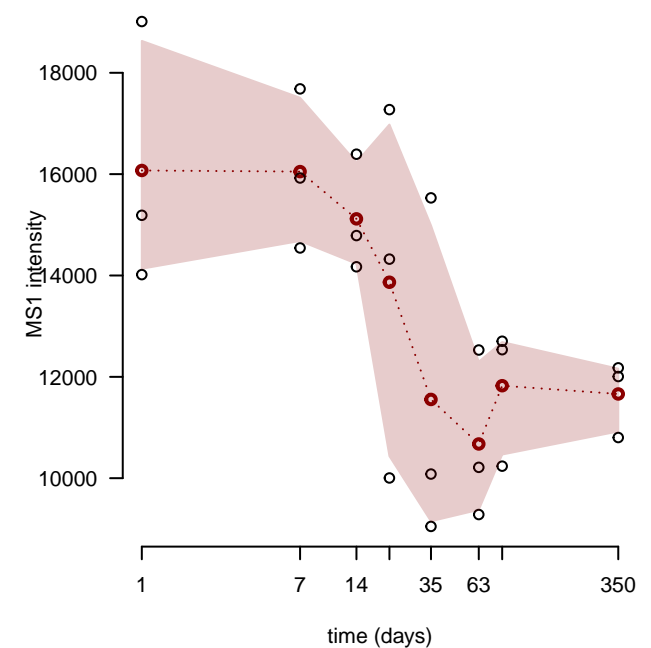

**Q8VC19**  
**GN=Alas1**  
aminolevulinic acid synthase 1

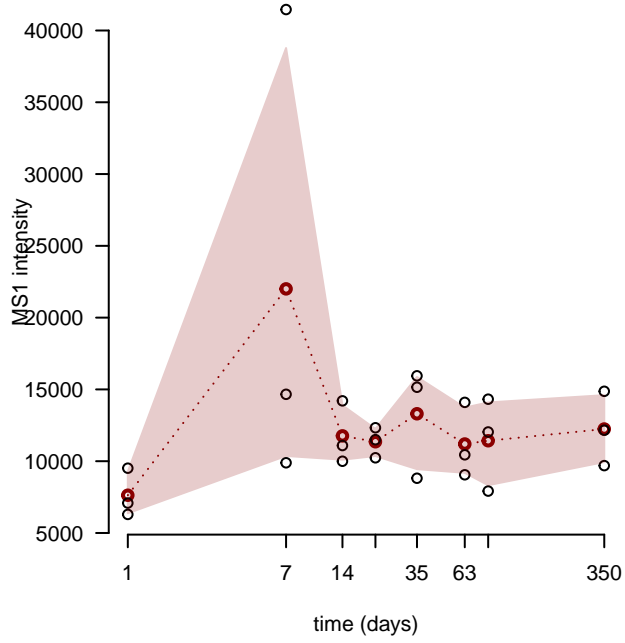

**Q8VC26**  
**GN=Tlcd2**  
TLC domain containing 2

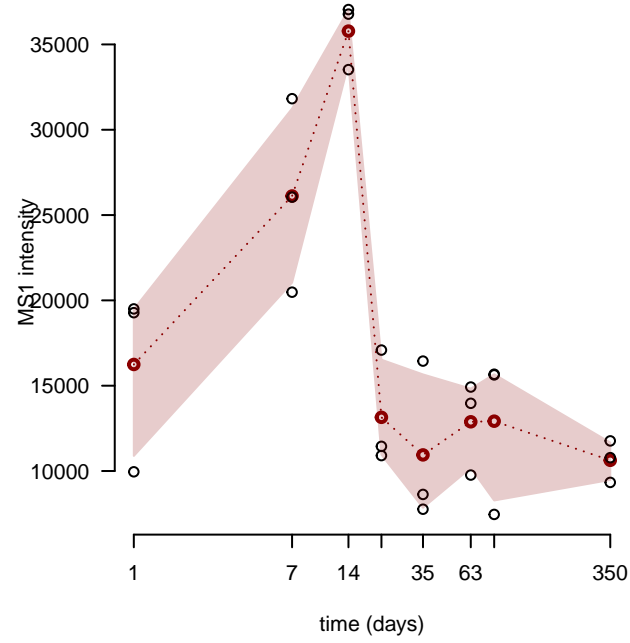

**Q8VC28**  
**GN=Akr1c13**  
aldo-keto reductase family 1, member C13

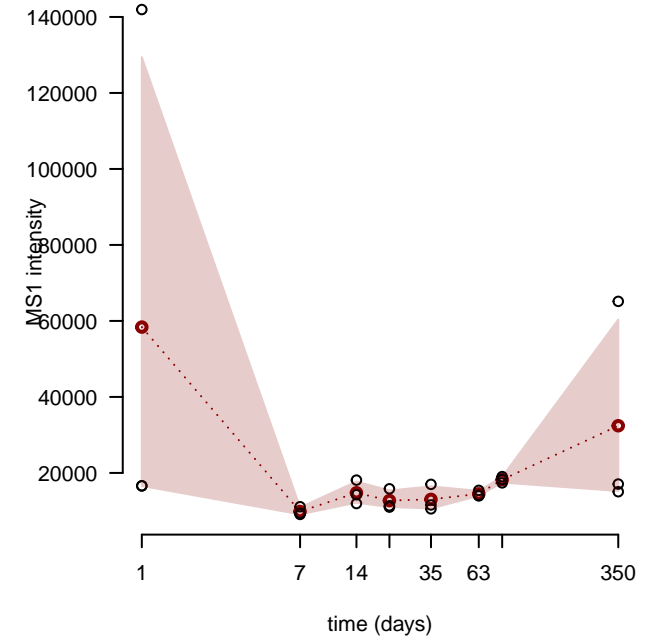

**Q8VC30**  
**GN=Tkfc**  
triokinase, FMN cyclase

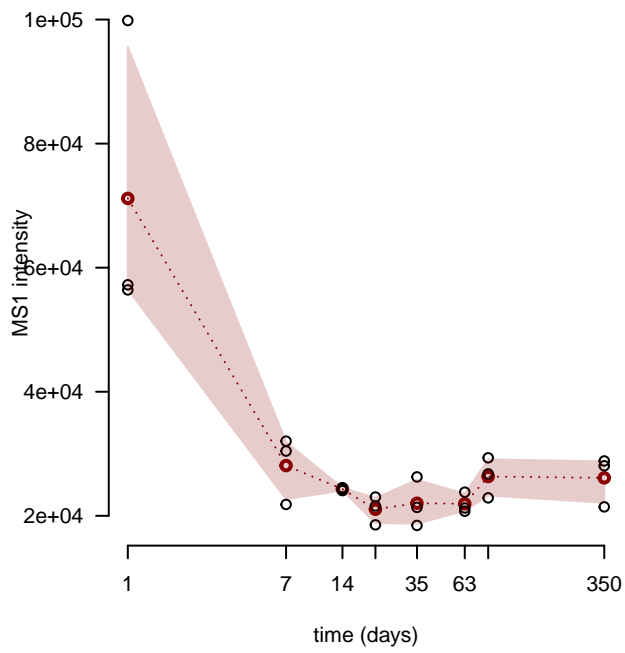

**Q8VC31**  
**GN=Ccdc9**  
coiled-coil domain containing 9

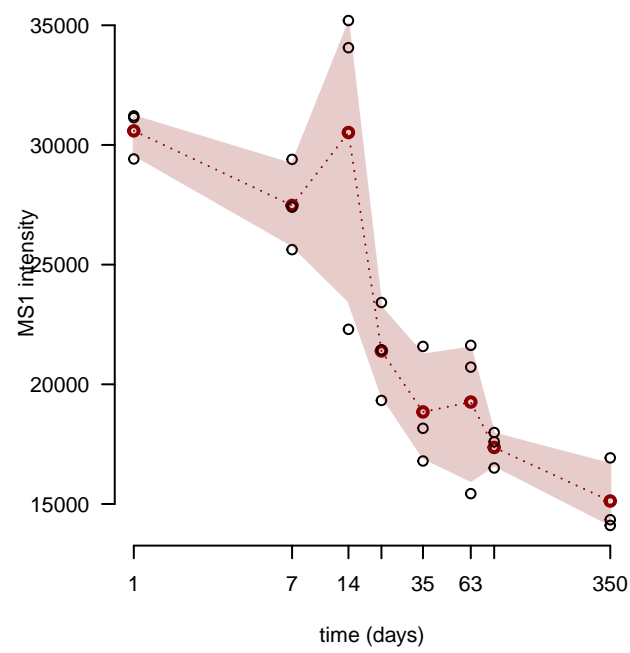

**Q8VC34**  
**GN=Rpap2**  
RNA polymerase II associated protein 2

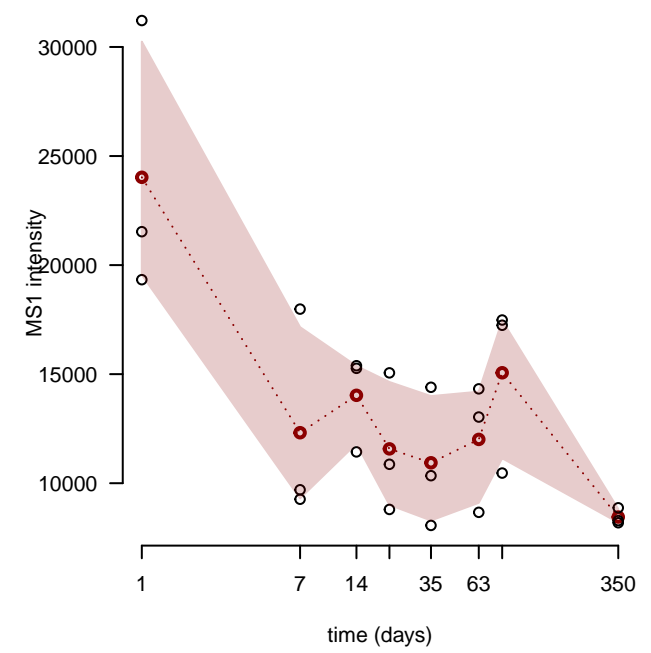

**Q8VC42**  
**GN=Rmc1**  
regulator of MON1-CCZ1

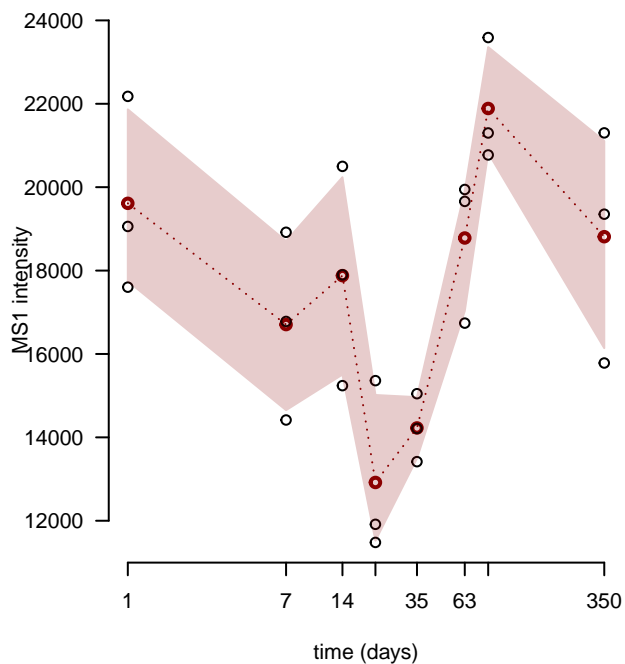

**Q8VC48**  
**GN=Pex12**  
peroxisomal biogenesis factor 12

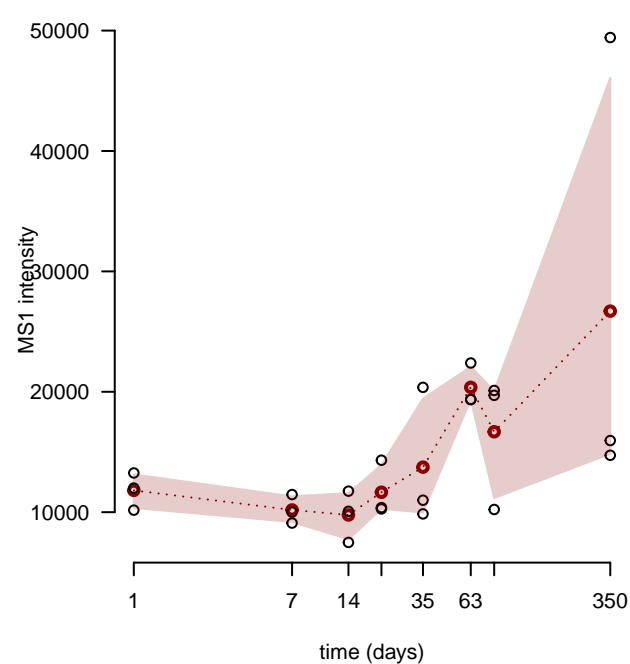

**Q8VC51**  
**GN=Wrap53**  
WD repeat containing, antisense to Trp53

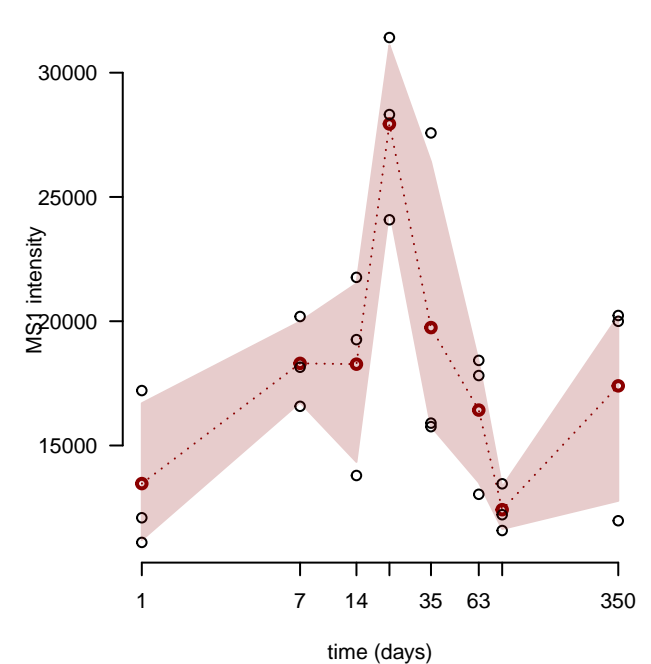

**Q8VC52**  
**GN=Rbpm2**

RNA binding protein with multiple splici ...

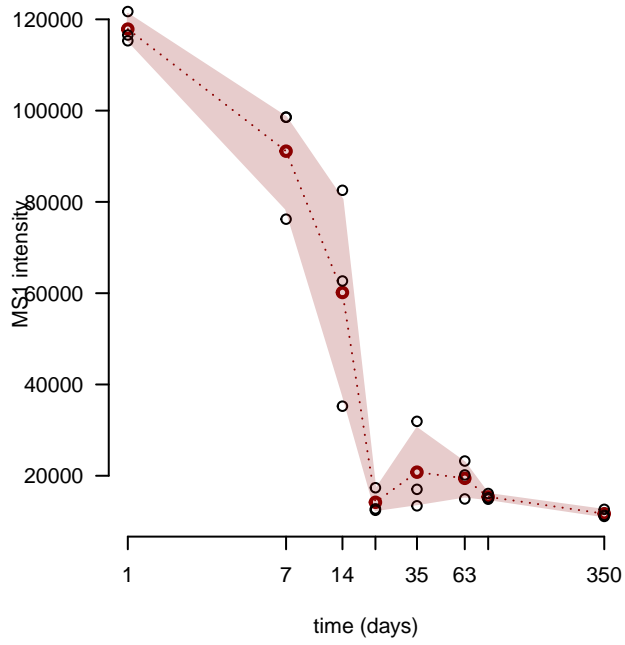

**Q8VC57**  
**GN=Kctd5**

potassium channel tetramerisation domain ...

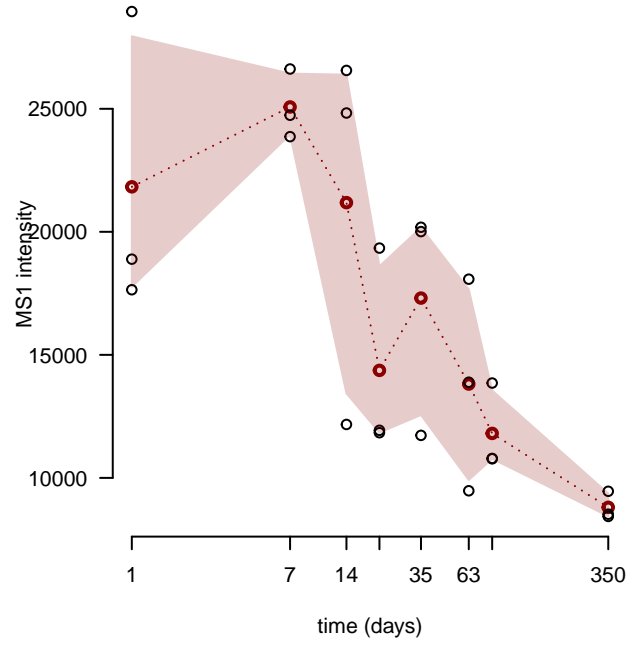

**Q8VC60**  
**GN=Glb1l**

galactosidase, beta 1-like

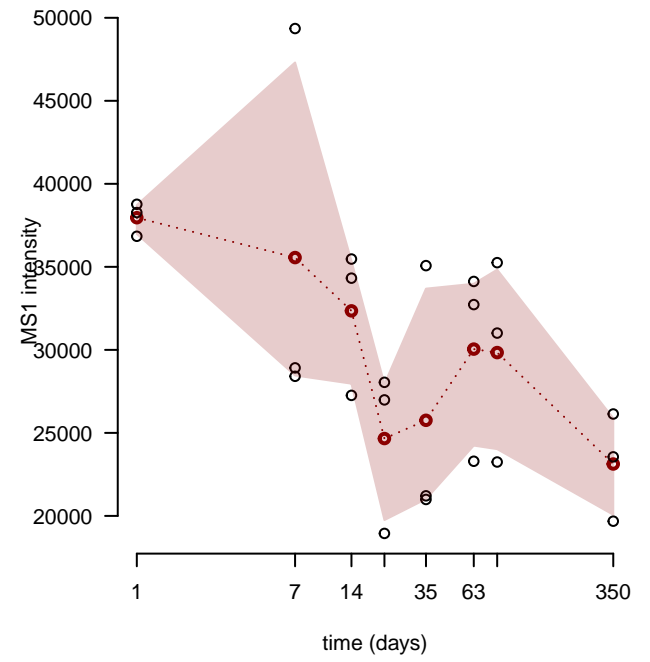

**Q8VC65**  
**GN=Nrm**

nurim (nuclear envelope membrane protein ...

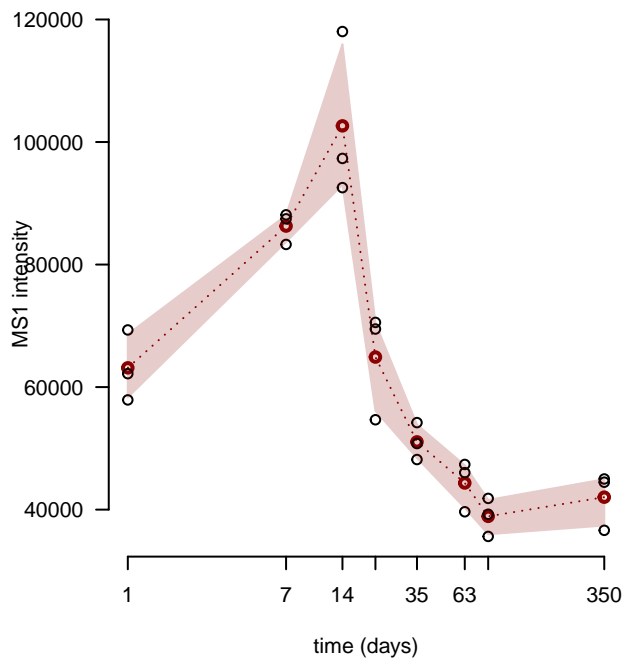

**Q8VC70**  
**GN=Rbms2**

RNA binding motif, single stranded inter ...

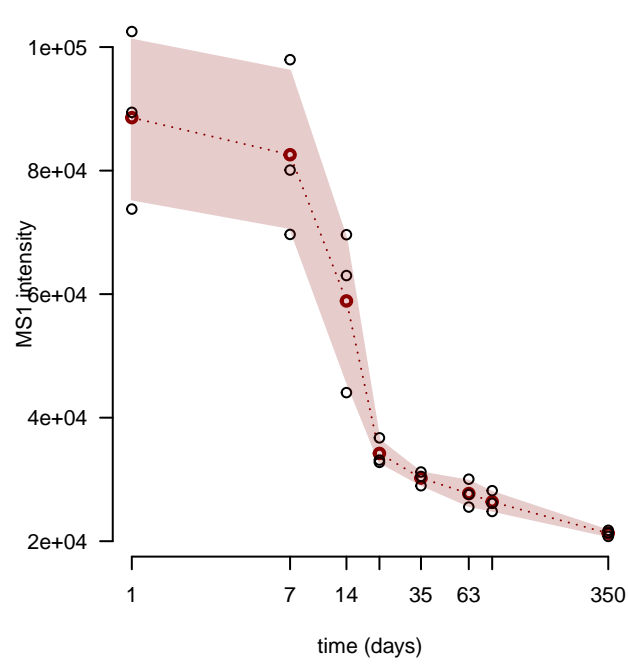

**Q8VC74**  
**GN=Cox18**

cytochrome c oxidase assembly protein 18

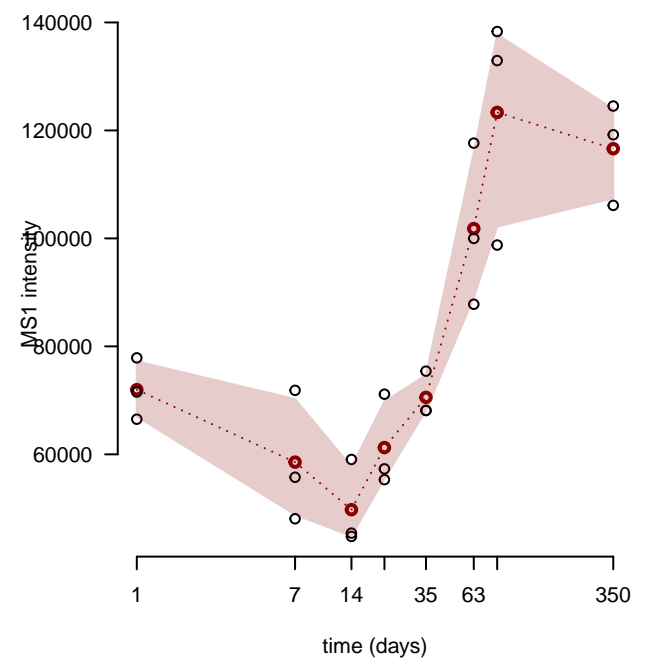

**Q8VC85**  
**GN=Lsm1**

LSM1 homolog, mRNA degradation associate ...

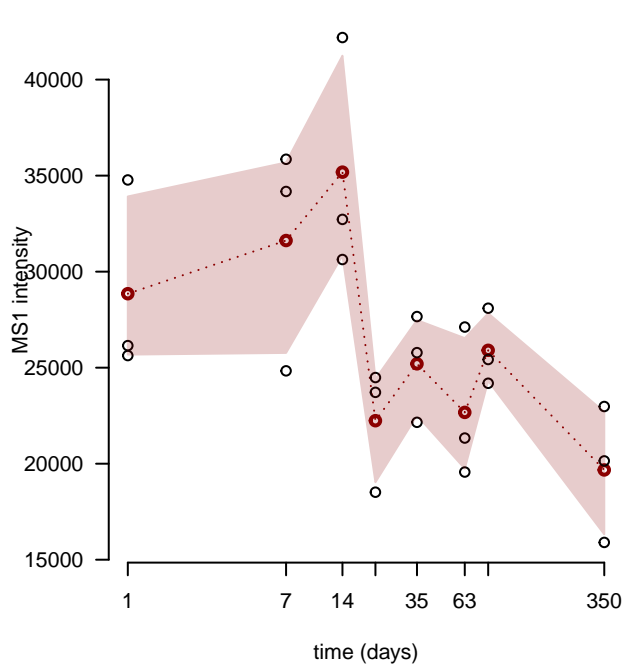

**Q8VC88**  
**GN=Gca**

grancalcin

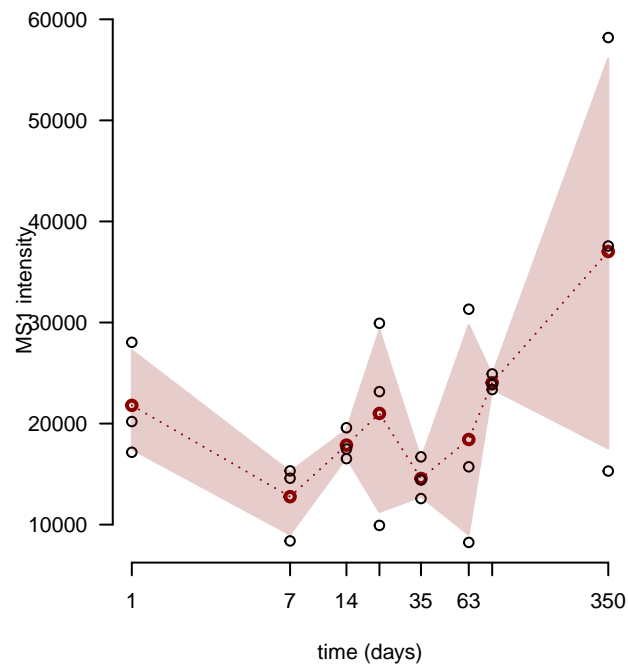

**Q8VCA6**  
**GN=Tmem161a**

transmembrane protein 161A

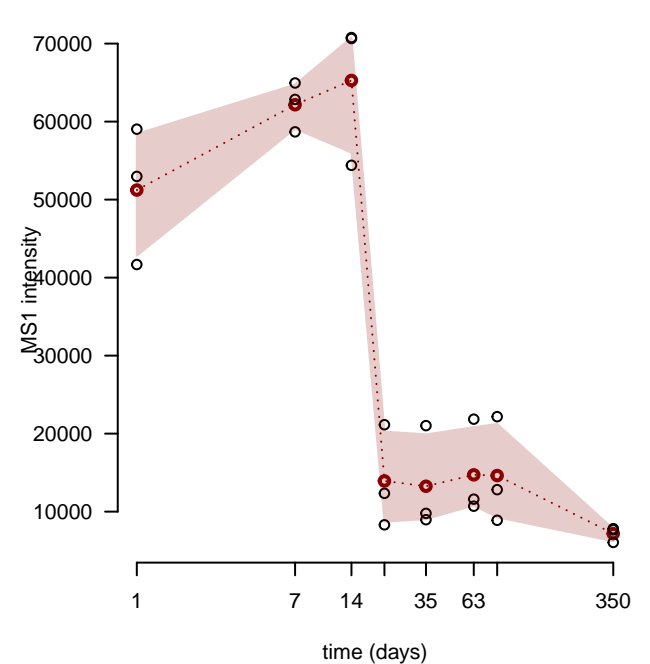

**Q8VCA8**  
GN=Scrn2  
secernin 2

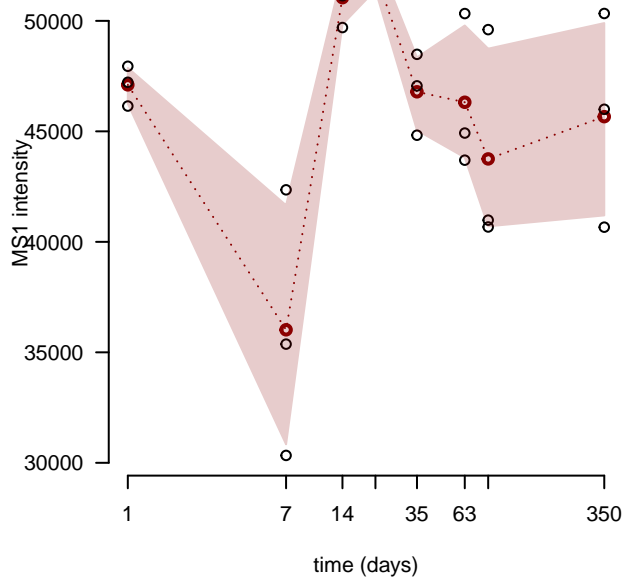

**Q8VCB1**  
GN=Ndc1  
NDC1 transmembrane nucleoporin

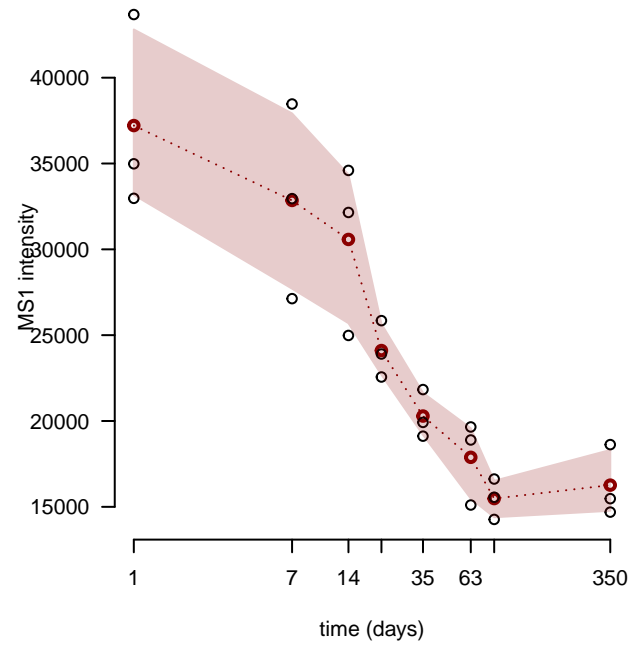

**Q8VCB2**  
GN=Med25  
mediator complex subunit 25

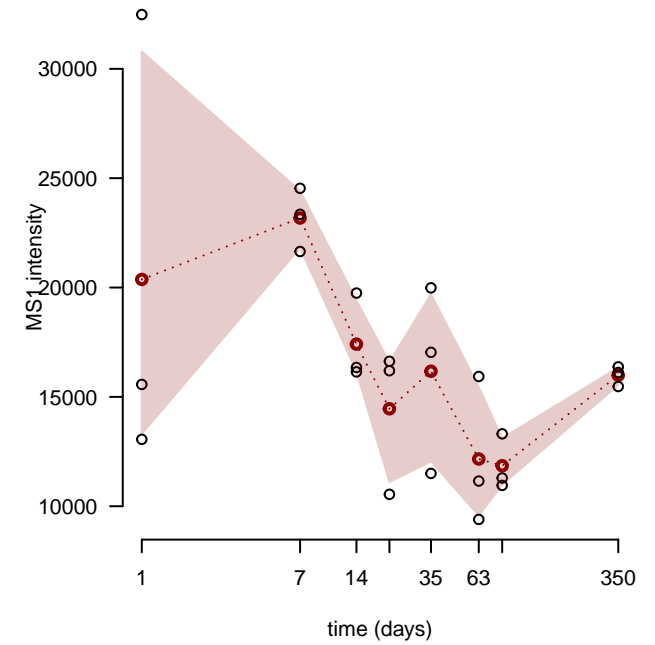

**Q8VCC1**  
GN=Hpgd  
hydroxyprostaglandin dehydrogenase 15 (N ...

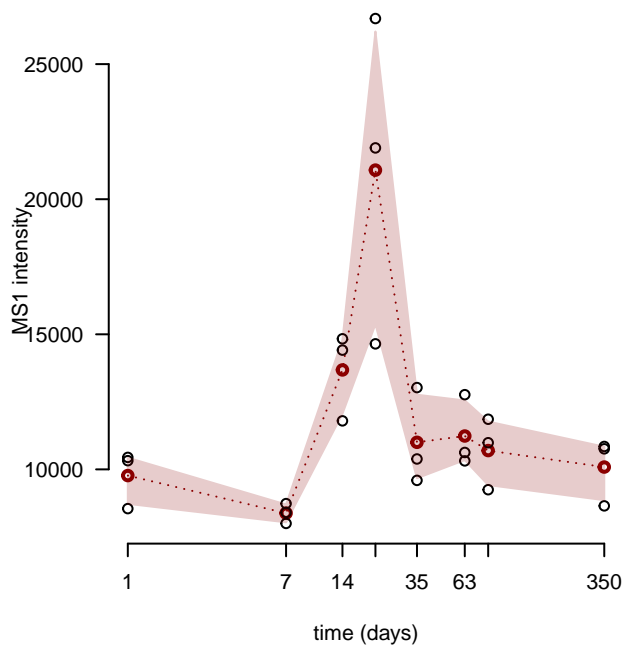

**Q8VCC2**  
GN=Ces1

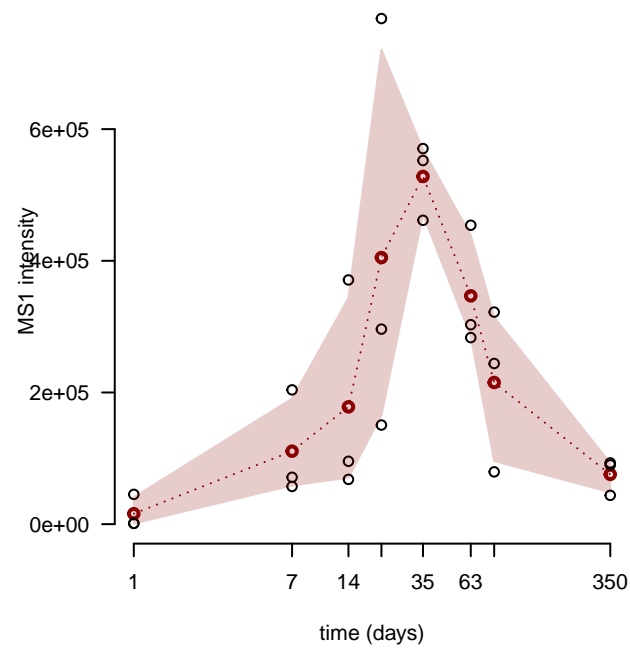

**Q8VCC8**  
GN=Rapgef3  
Rap guanine nucleotide exchange factor ( ...

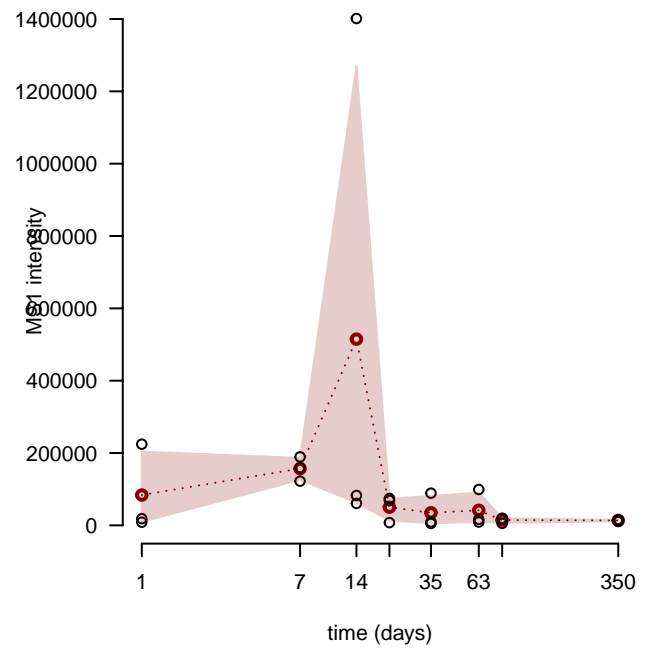

**Q8VCC9**  
GN=Spon1  
spondin 1, (f-spondin) extracellular mat ...

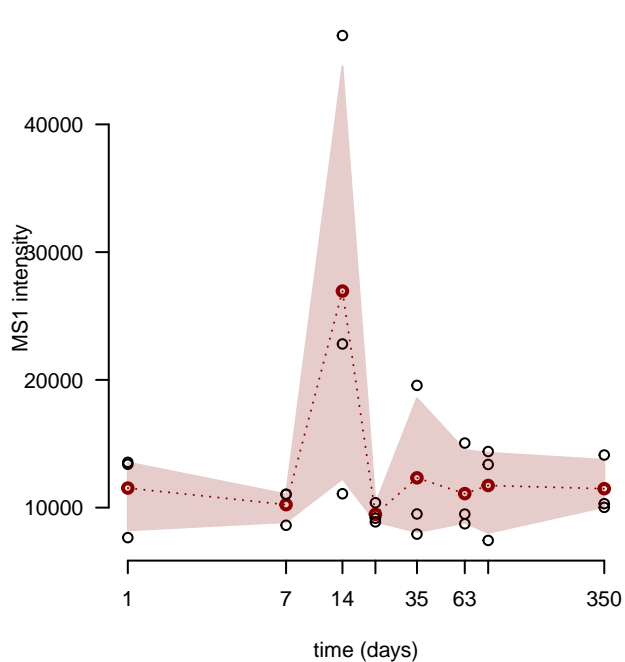

**Q8VCD5**  
GN=Med17  
mediator complex subunit 17

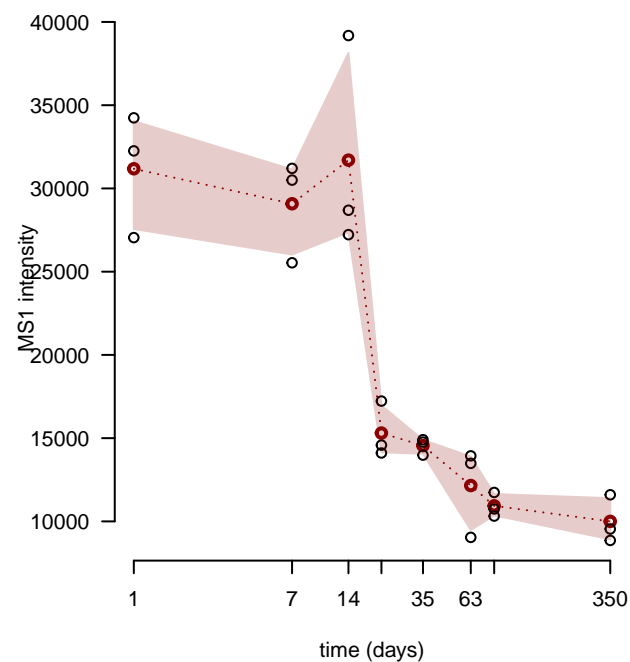

**Q8VCD6**  
GN=Reep2  
receptor accessory protein 2

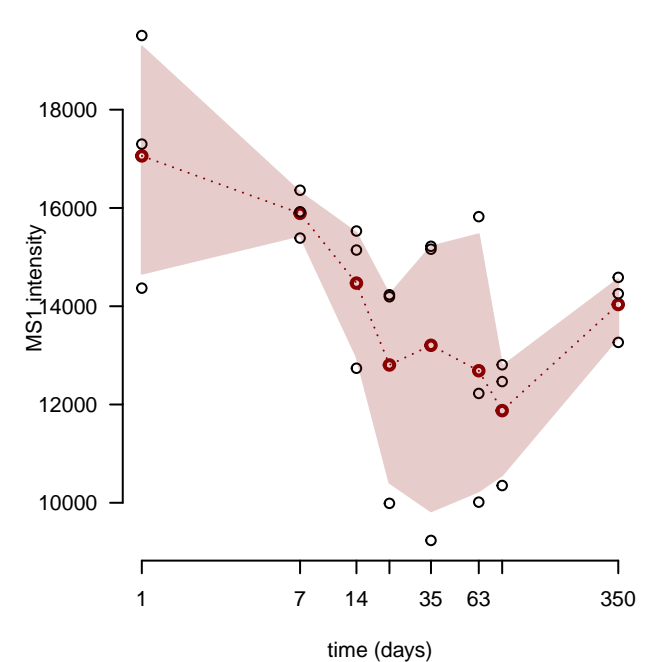

**Q8VCE1**  
**GN=Dnajc28**  
DnaJ heat shock protein family (Hsp40) m ...

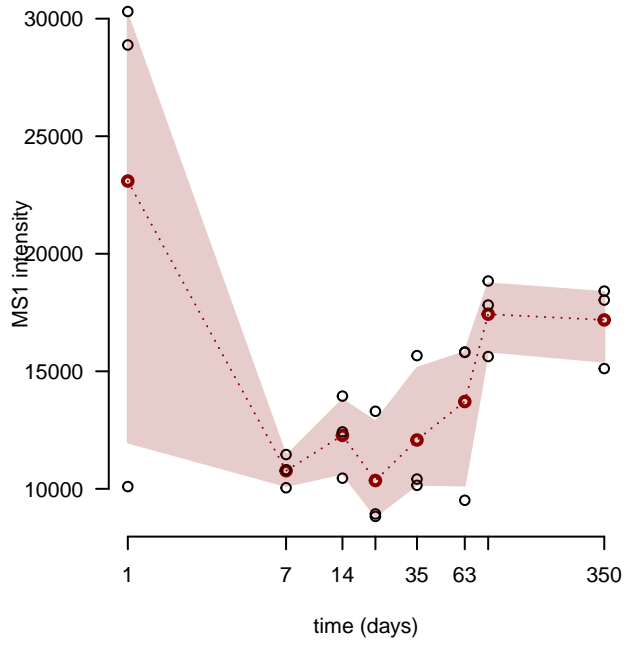

**Q8VCE2**  
**GN=Gpn1**  
GPN-loop GTPase 1

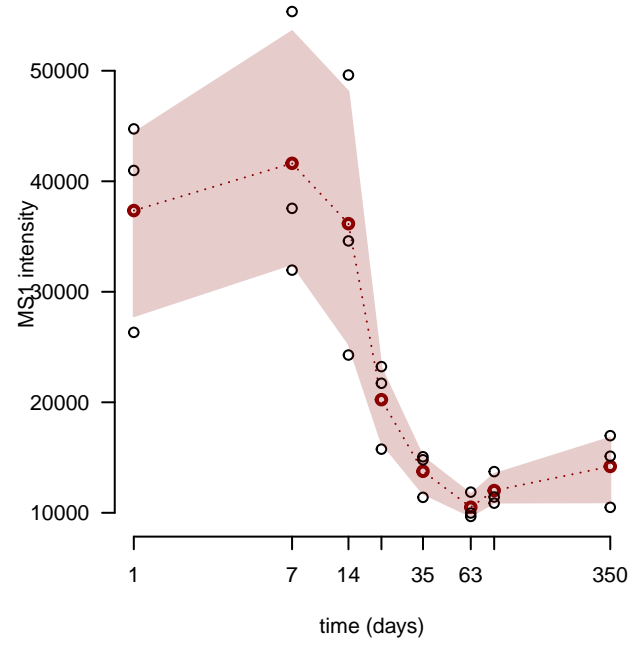

**Q8VCE4**  
**GN=**

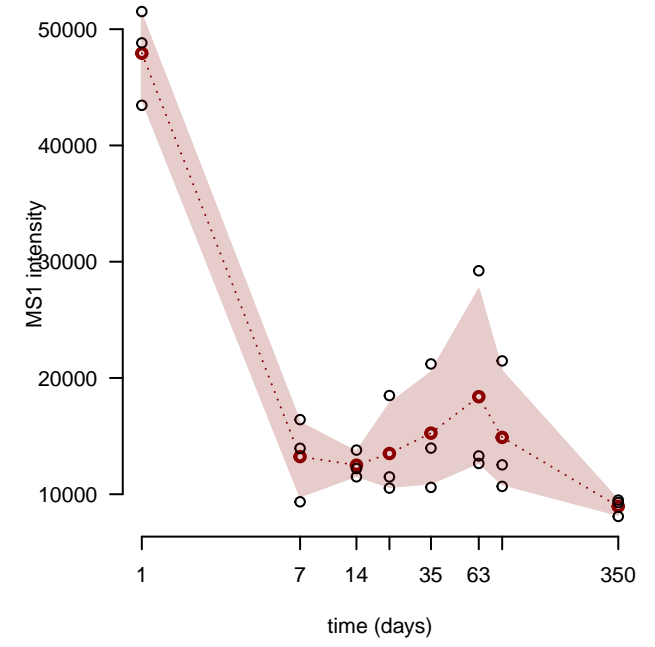

**Q8VCE6**  
**GN=Nt5m**  
5',3'-nucleotidase, mitochondrial

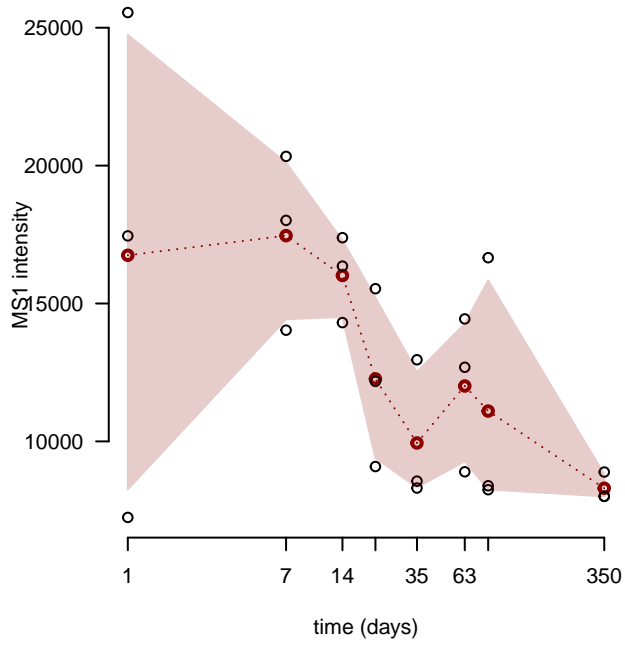

**Q8VCE9**  
**GN=Plekhh3**  
pleckstrin homology domain containing, f ...

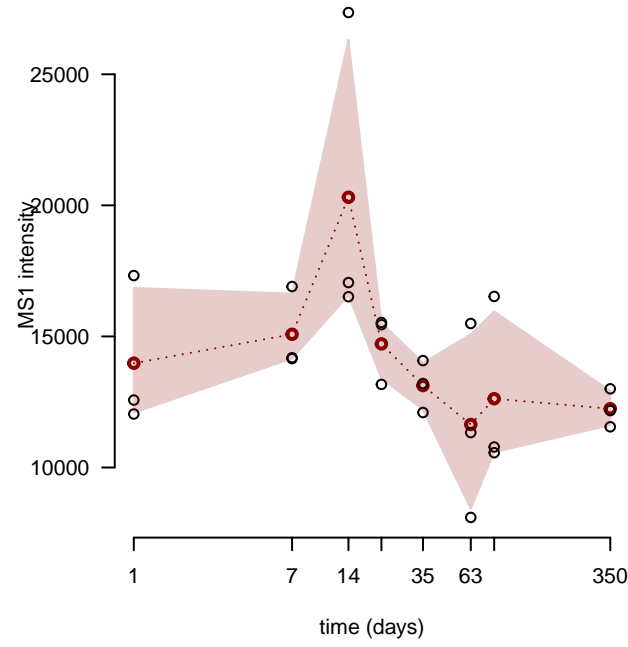

**Q8VCF0**  
**GN=Mavs**  
mitochondrial antiviral signaling protei ...

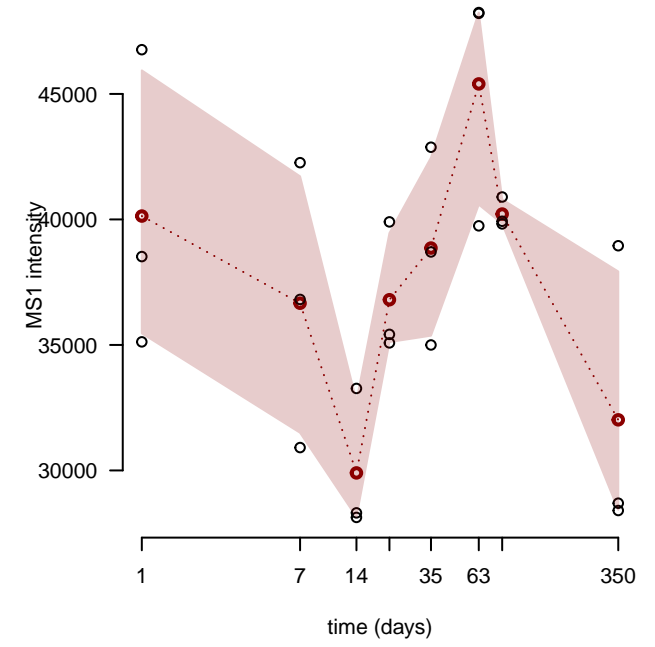

**Q8VCF1**  
**GN=Cant1**  
calcium activated nucleotidase 1

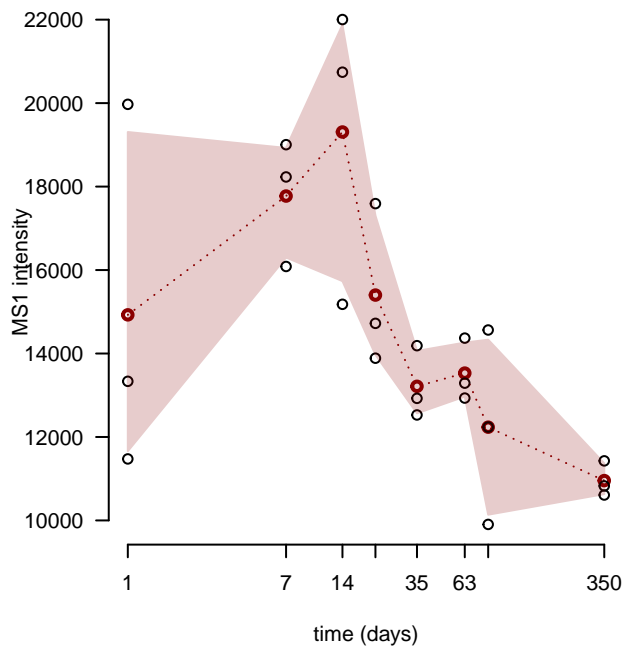

**Q8VCG3**  
**GN=Wdr74**  
WD repeat domain 74

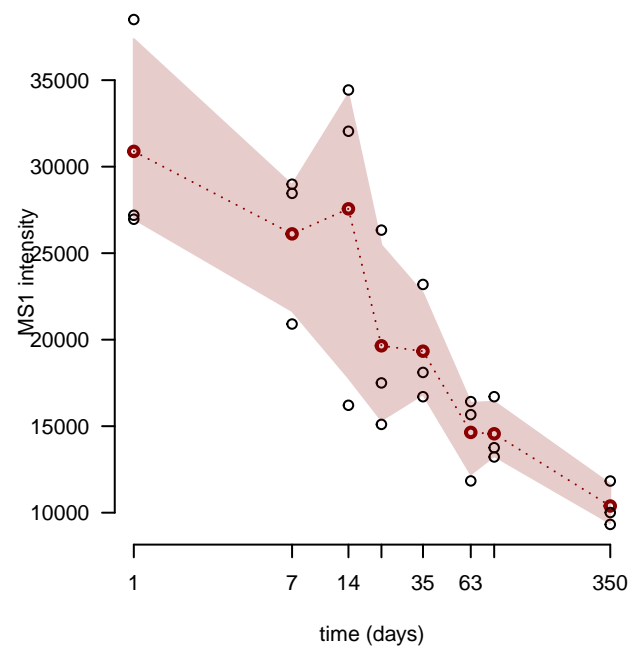

**Q8VCG4**  
**GN=C8g**  
complement component 8, gamma polypeptid ...

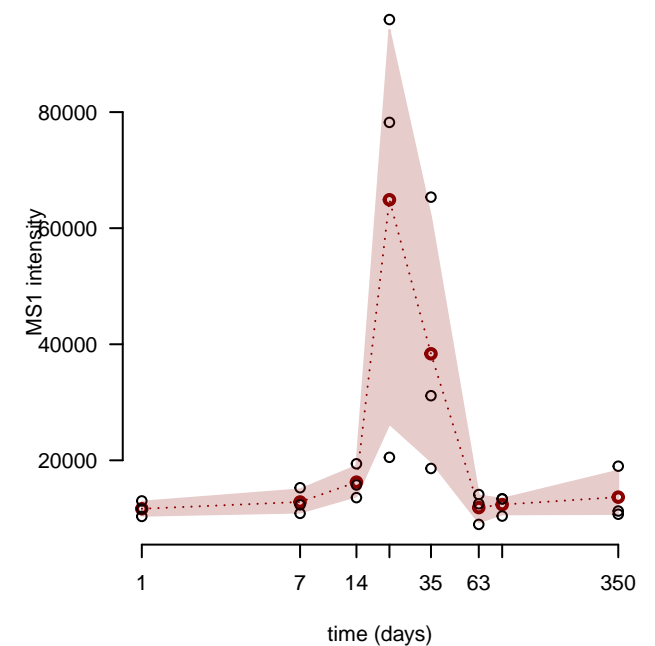

**Q8VCG9**  
GN=Rfxap  
regulatory factor X-associated protein

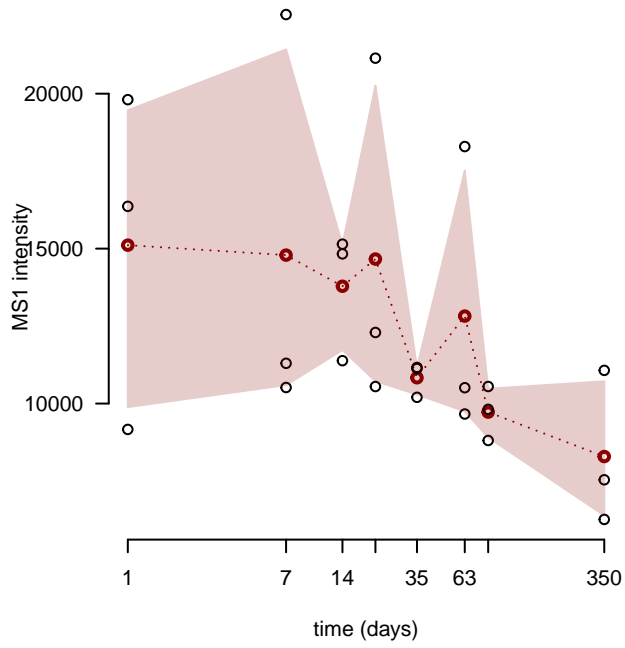

**Q8VCH5**  
GN=Rabepk  
Rab9 effector protein with kelch motifs

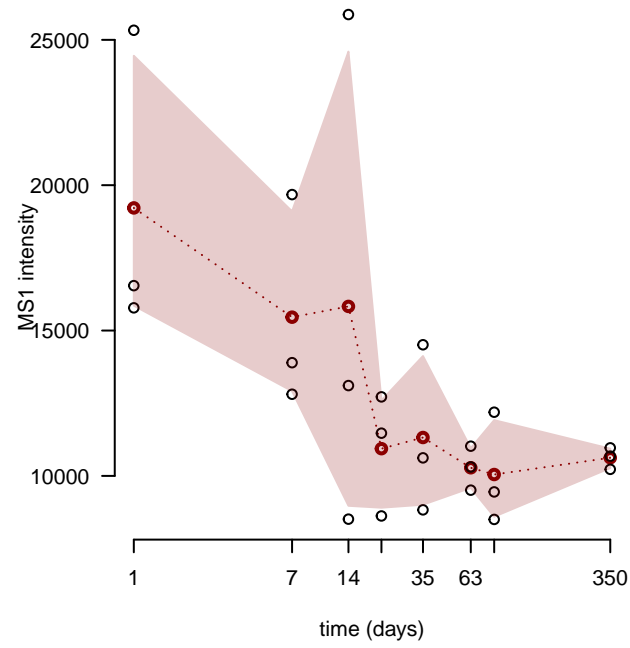

**Q8VCH6**  
GN=Dhcr24  
24-dehydrocholesterol reductase

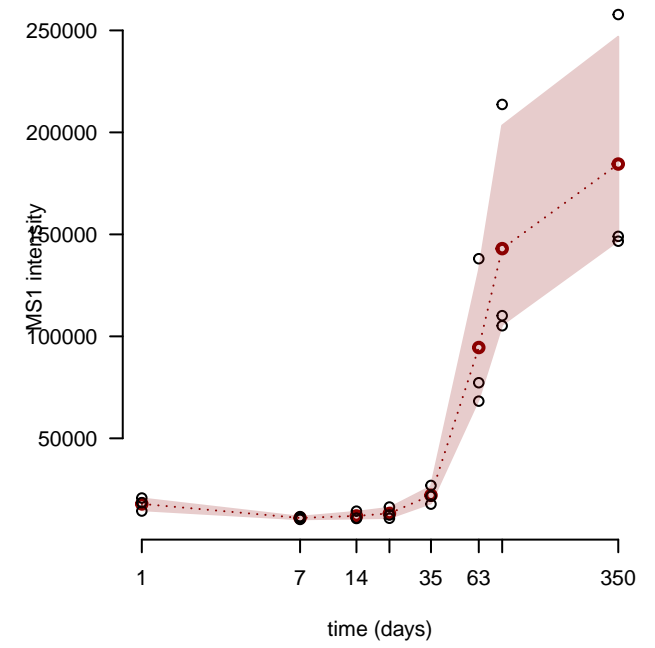

**Q8VCH7**  
GN=Rdh10  
retinol dehydrogenase 10 (all-trans)

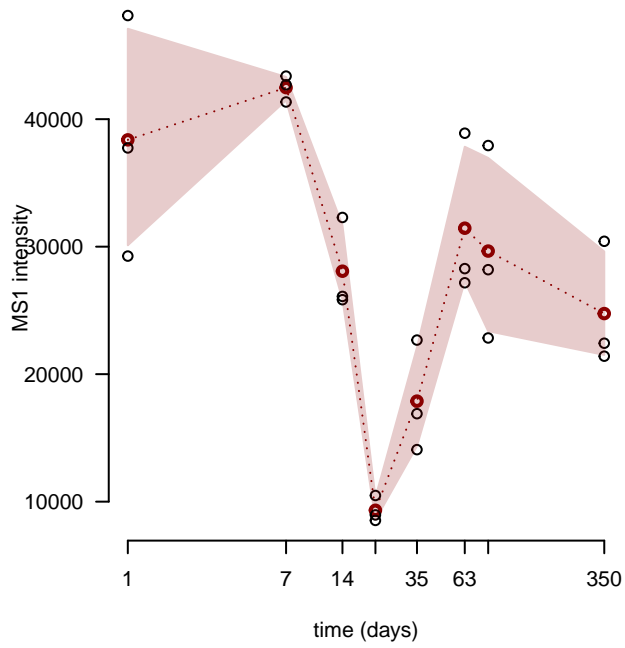

**Q8VCH8**  
GN=Ubxn4  
UBX domain protein 4

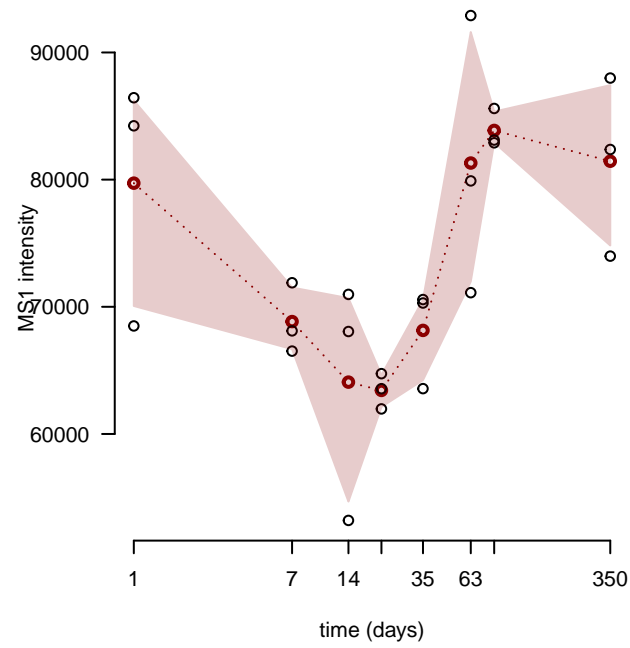

**Q8VC10**  
GN=Plbd1  
phospholipase B domain containing 1

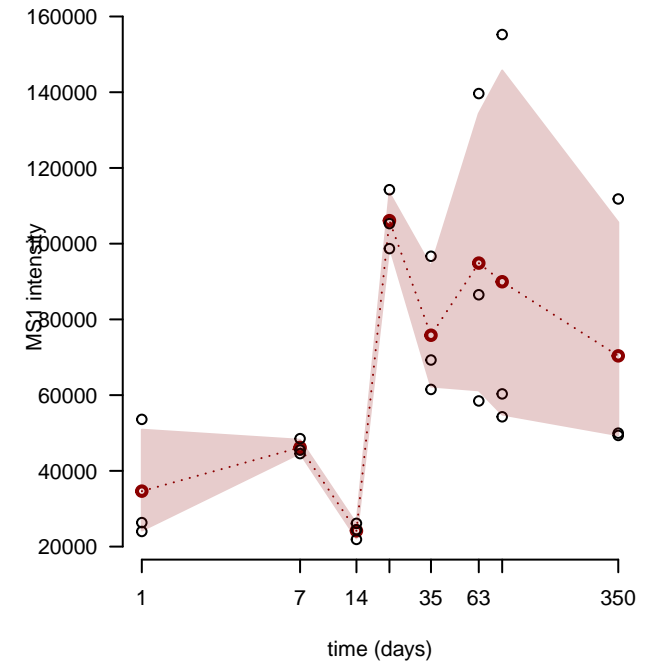

**Q8VC15**  
GN=Pex19  
peroxisomal biogenesis factor 19

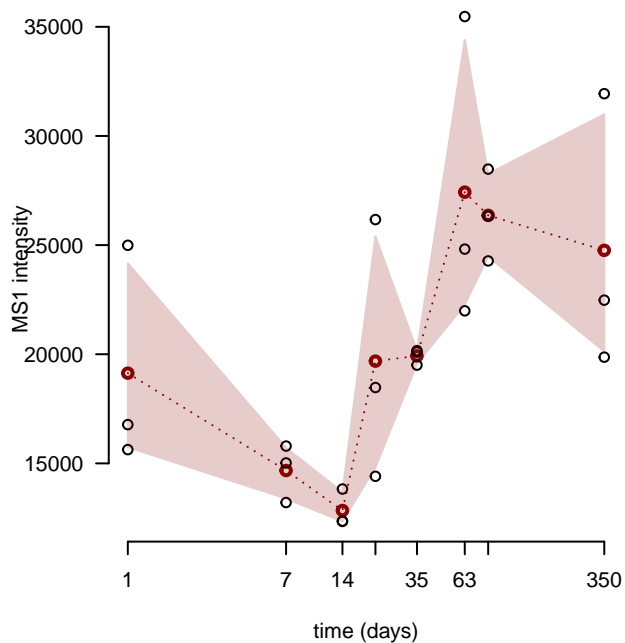

**Q8VCK5**  
GN=Klh20  
kelch-like 20

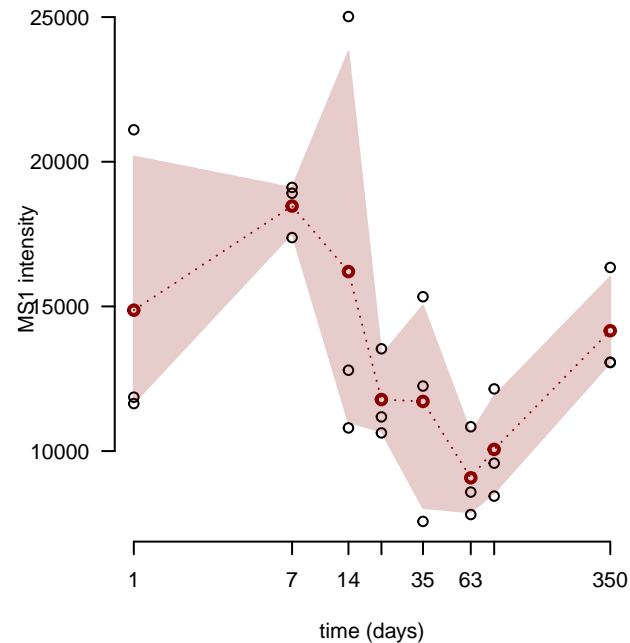

**Q8VCL2**  
GN=Sco2  
SCO2 cytochrome c oxidase assembly prote ...

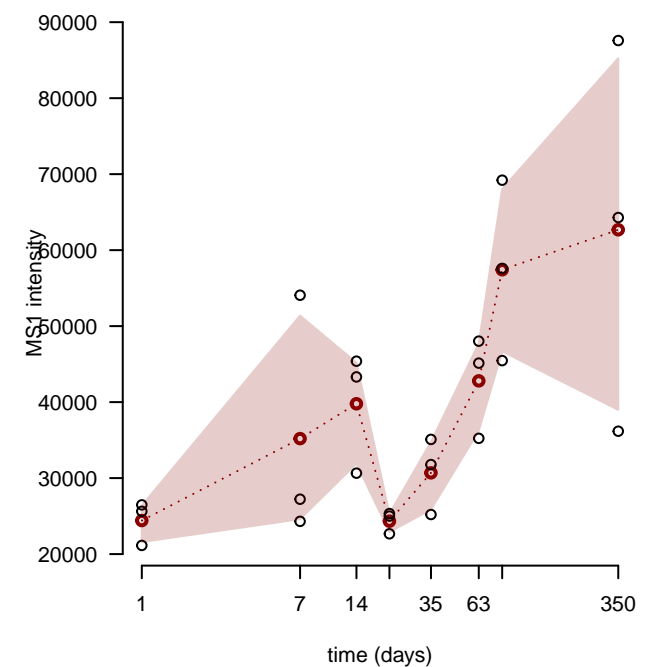

**Q8VCM3**  
GN=Zfyve21  
zinc finger, FYVE domain containing 21

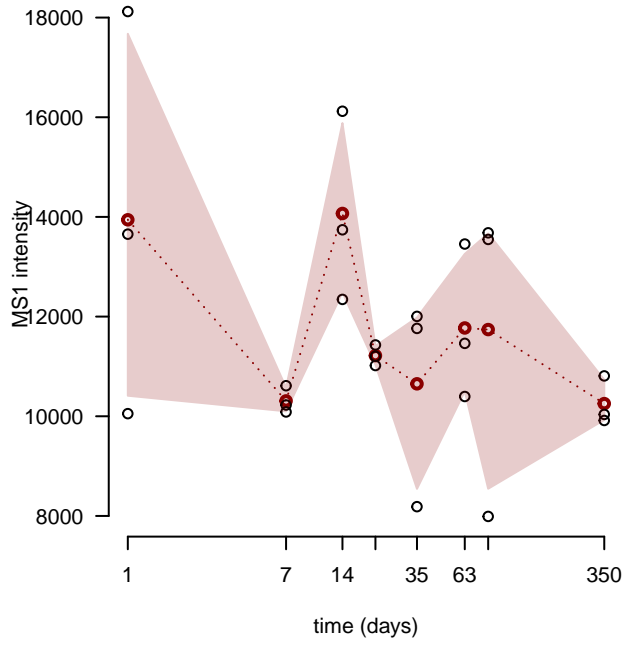

**Q8VCM4**  
GN=Lipt1  
lipoyltransferase 1

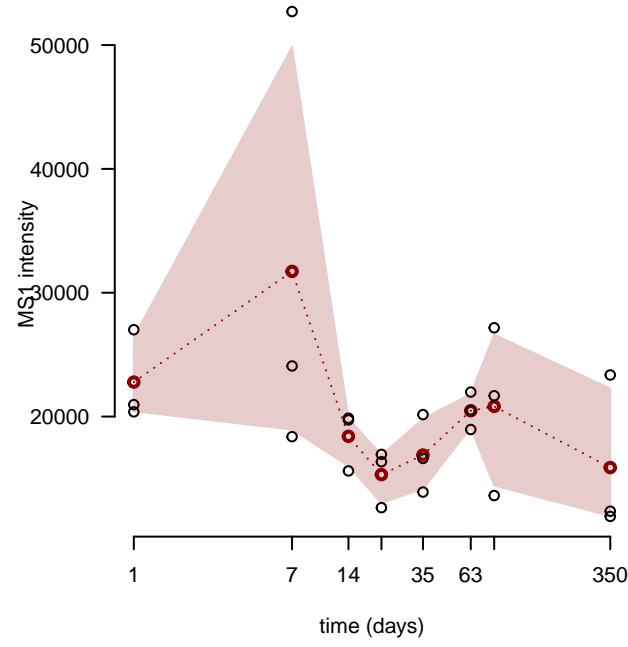

**Q8VCM5**  
GN=Mu11  
mitochondrial ubiquitin ligase activator ...

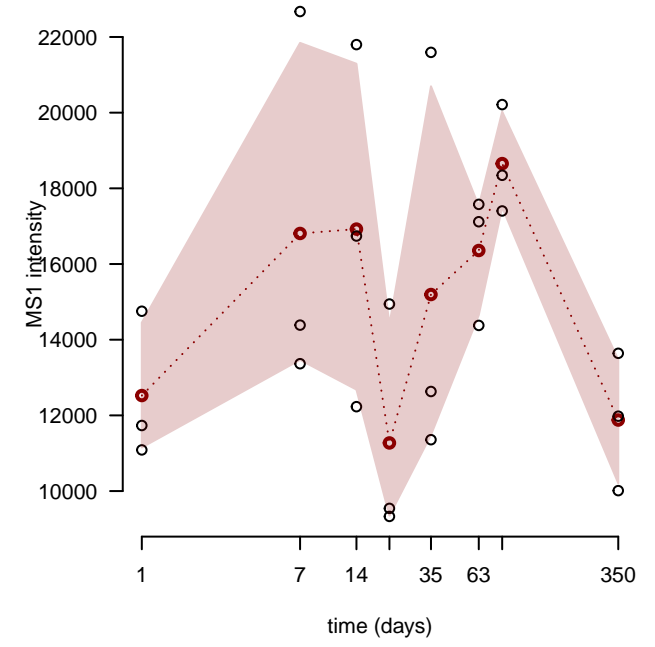

**Q8VCM7**  
GN=Fgg  
fibrinogen gamma chain

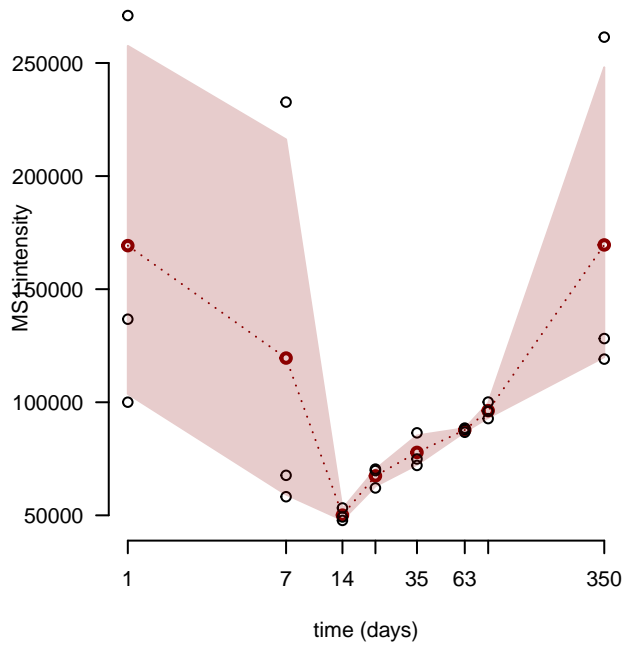

**Q8VCM8**  
GN=Ncln  
nicalin

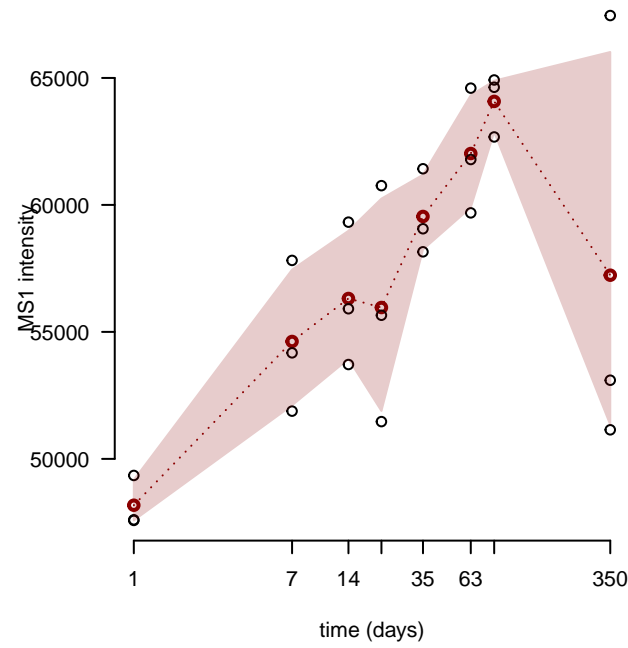

**Q8VCN5**  
GN=Cth  
cystathionase (cystathionine gamma-lyase ...

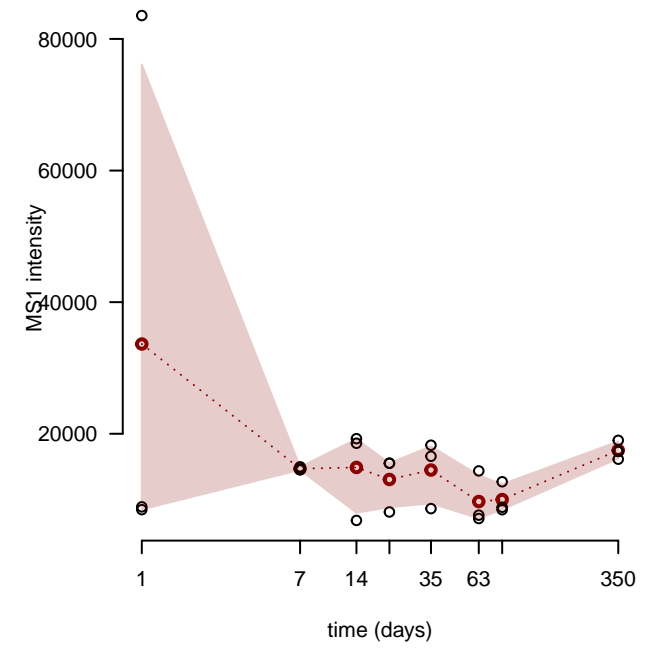

**Q8VCN6**  
GN=Cd99  
CD99 antigen

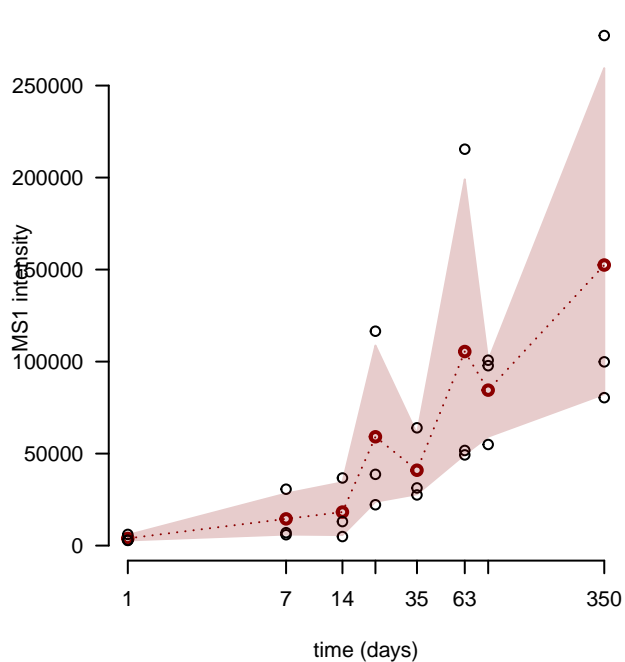

**Q8VCN9**  
GN=Tbcc  
tubulin-specific chaperone C

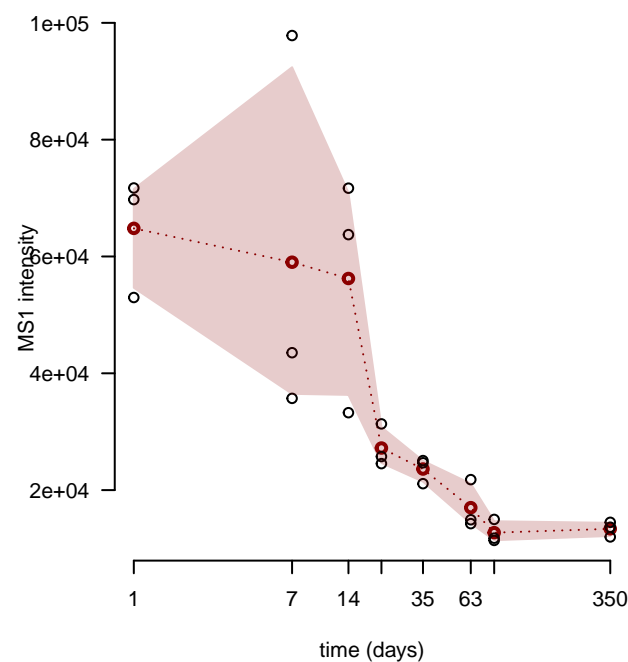

**Q8VCP8**  
GN=Ak6  
adenylate kinase 6

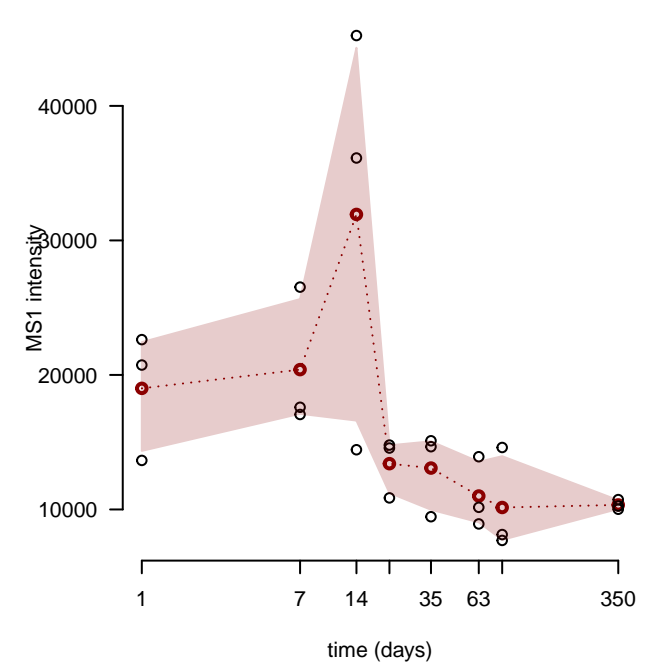

**Q8VCP9**  
**GN=Clec14a**  
C-type lectin domain family 14, member a

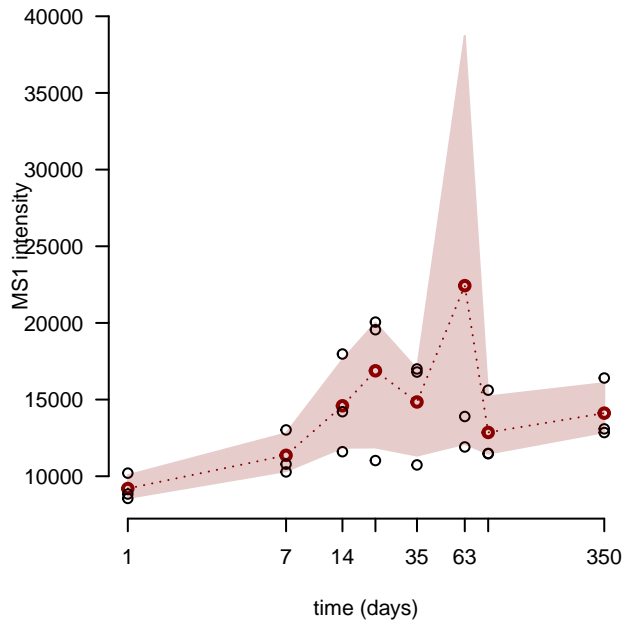

**Q8VCQ3**  
**GN=Nrbf2**  
nuclear receptor binding factor 2

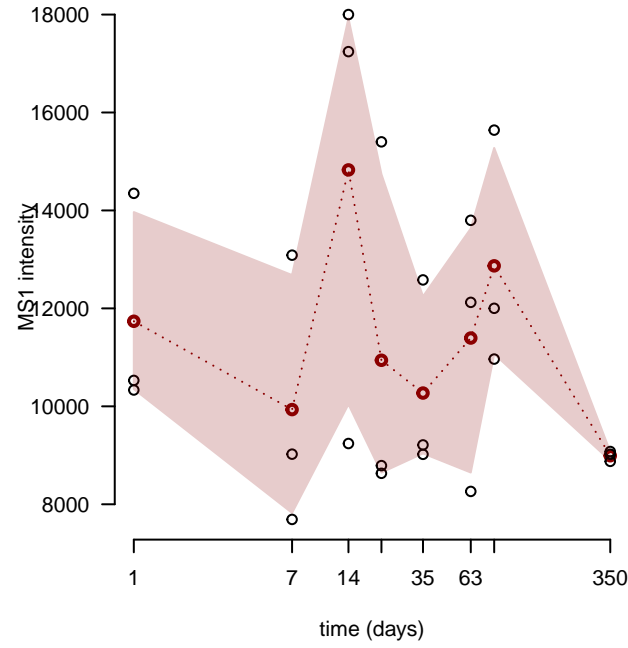

**Q8VCQ6**  
**GN=Sgms1**  
sphingomyelin synthase 1

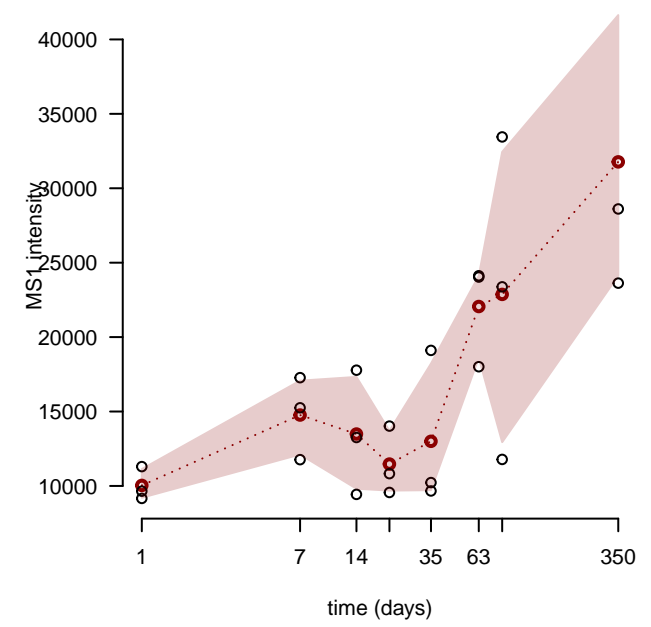

**Q8VCR7**  
**GN=Abhd14b**  
abhydrolase domain containing 14b

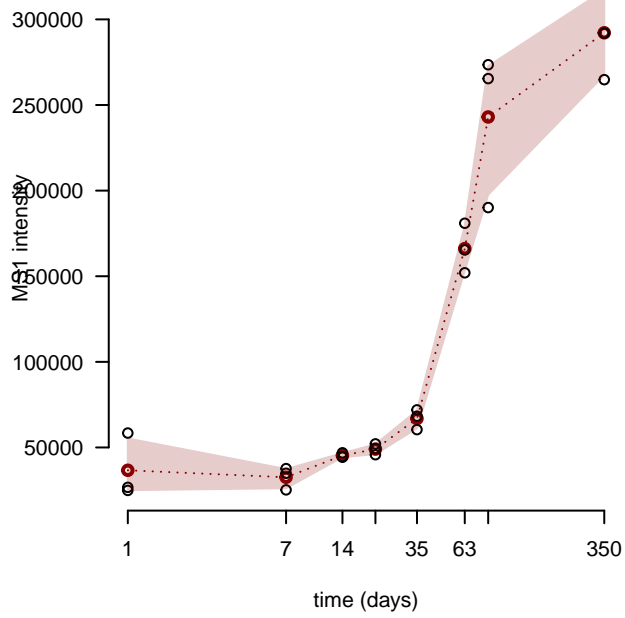

**Q8VCS0**  
**GN=Pglyrp2**  
peptidoglycan recognition protein 2

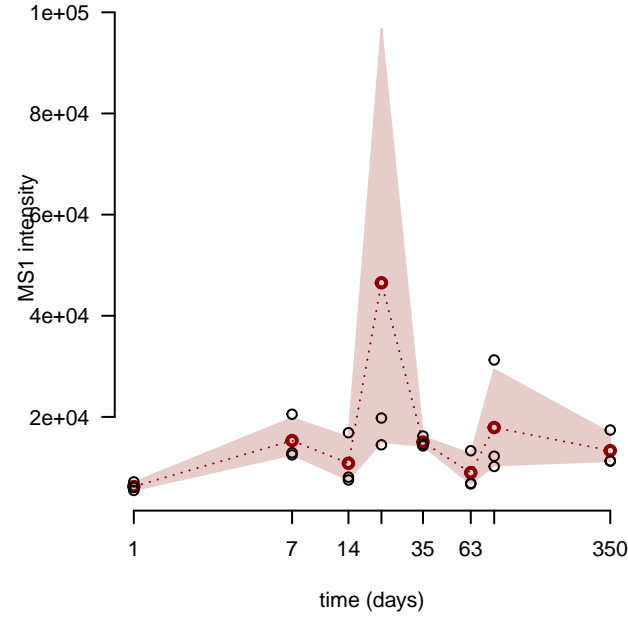

**Q8VCS3**  
**GN=Fam20b**  
FAM20B, glycosaminoglycan xylosylkinase

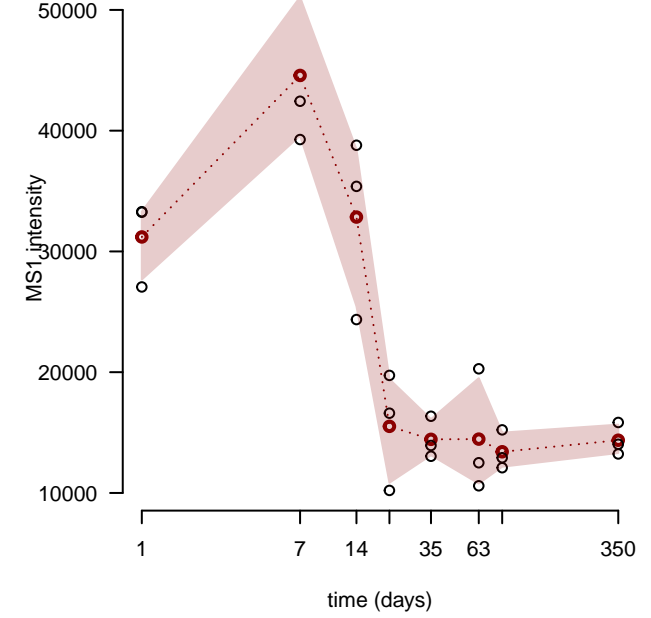

**Q8VCS6**  
**GN=Med9**  
mediator complex subunit 9

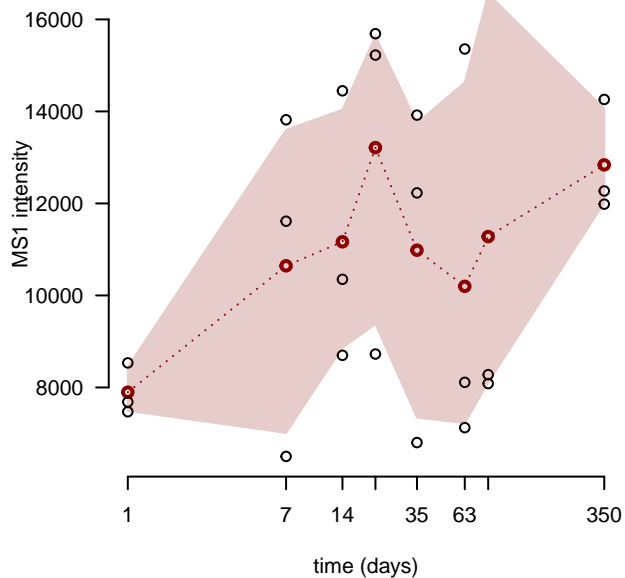

**Q8VCT3**  
**GN=Rnpep**  
arginyl aminopeptidase (aminopeptidase B ...)

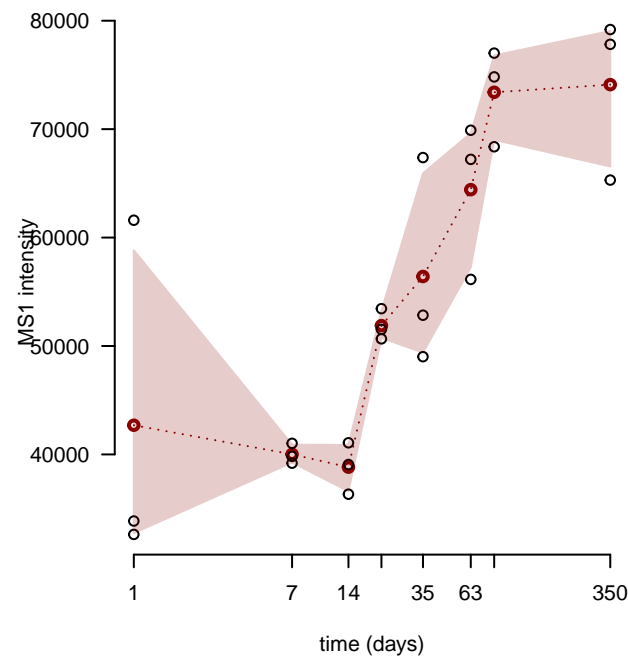

**Q8VCT4**  
**GN=Ces1d**  
carboxylesterase 1D

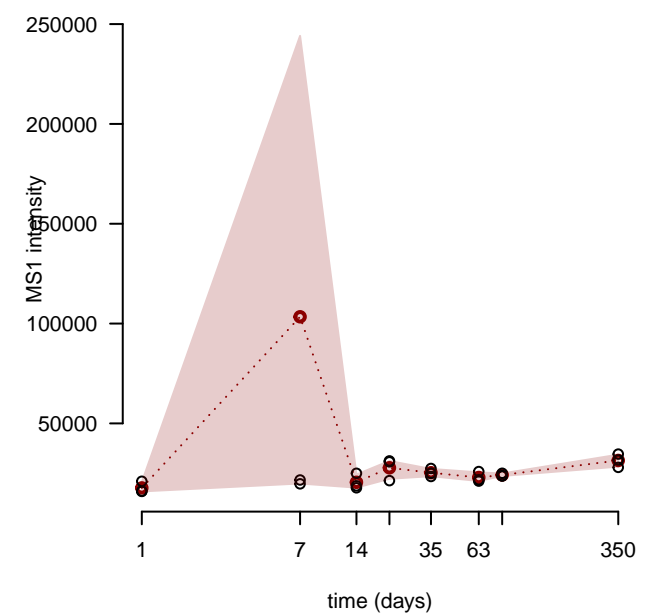



**Q8VCU0**  
GN=Angel1  
angel homolog 1

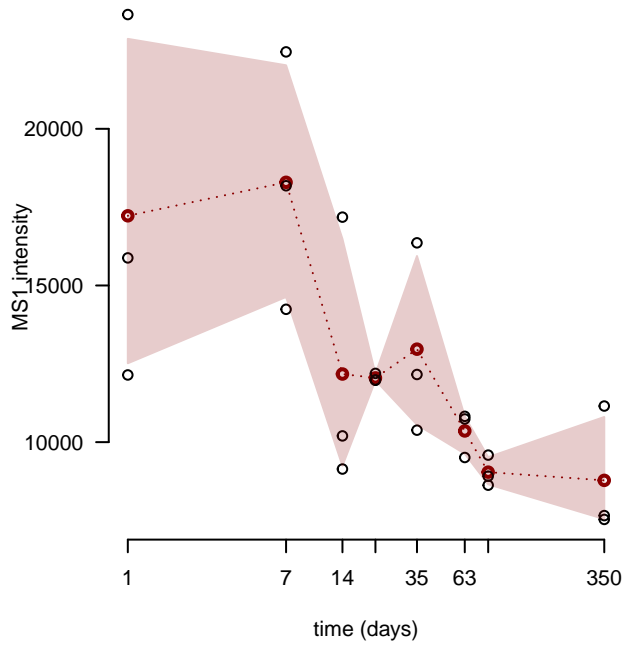

**Q8VCW4**  
GN=Unc93b1  
unc-93 homolog B1, TLR signaling regulat ...

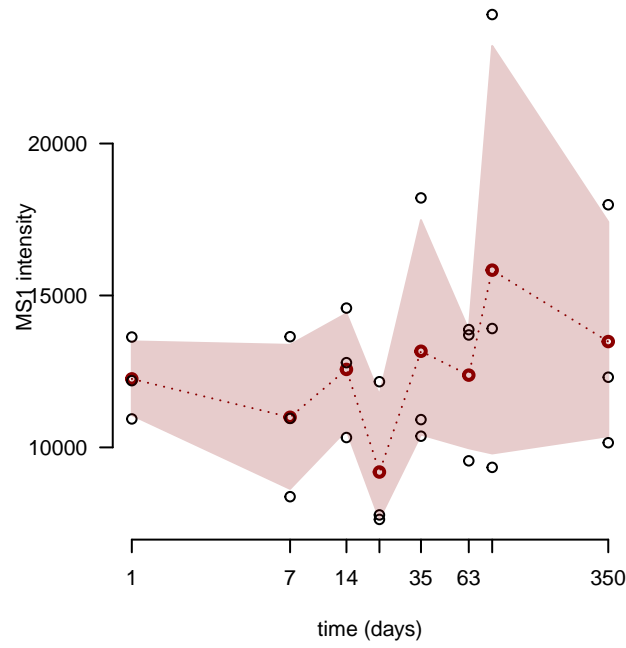

**Q8VCW8**  
GN=Acsf2  
acyl-CoA synthetase family member 2

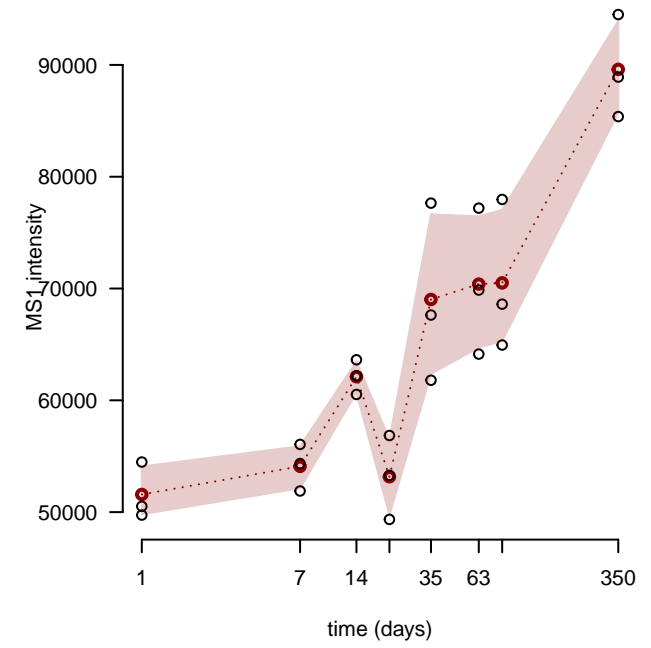

**Q8VCX1**  
GN=Akr1d1  
aldo-keto reductase family 1, member D1

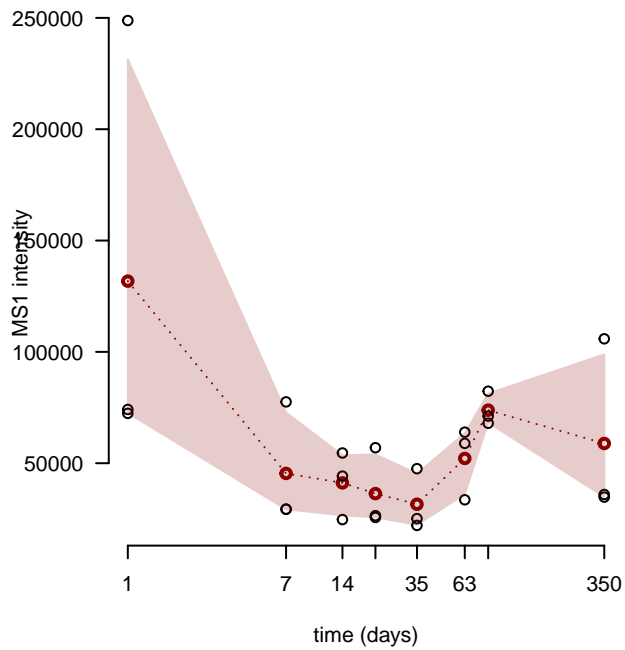

**Q8VCX5**  
GN=Micu1  
mitochondrial calcium uptake 1

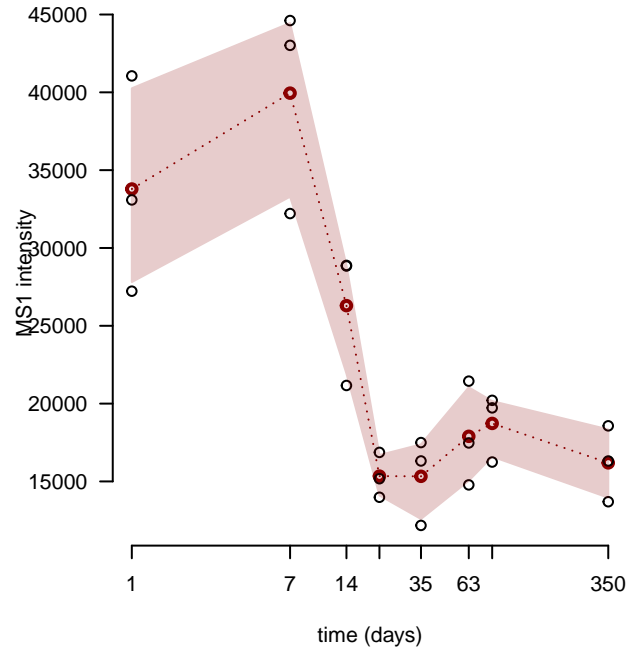

**Q8VCX6**  
GN=Kptn  
kaptin

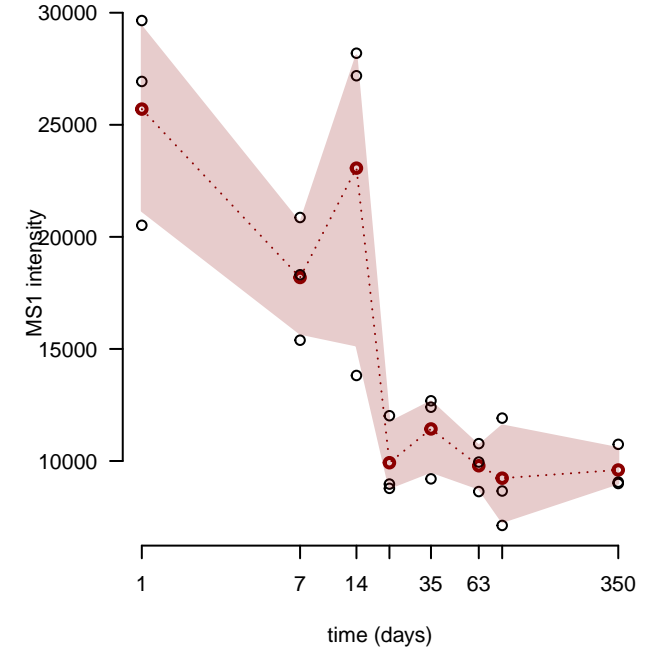

**Q8VCY6**  
GN=Utp6  
UTP6 small subunit processome component

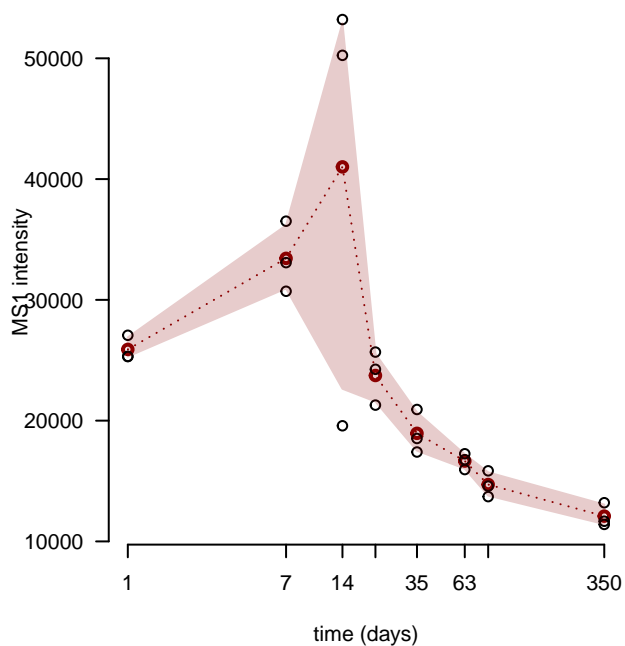

**Q8VCZ6**  
GN=Sgsm3  
small G protein signaling modulator 3

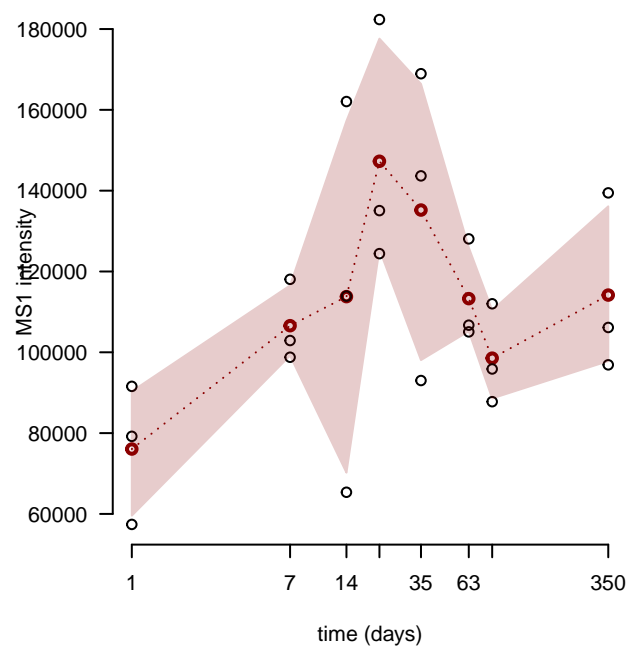

**Q8VCZ8**  
GN=Rpusd1  
RNA pseudouridylate synthase domain cont ...

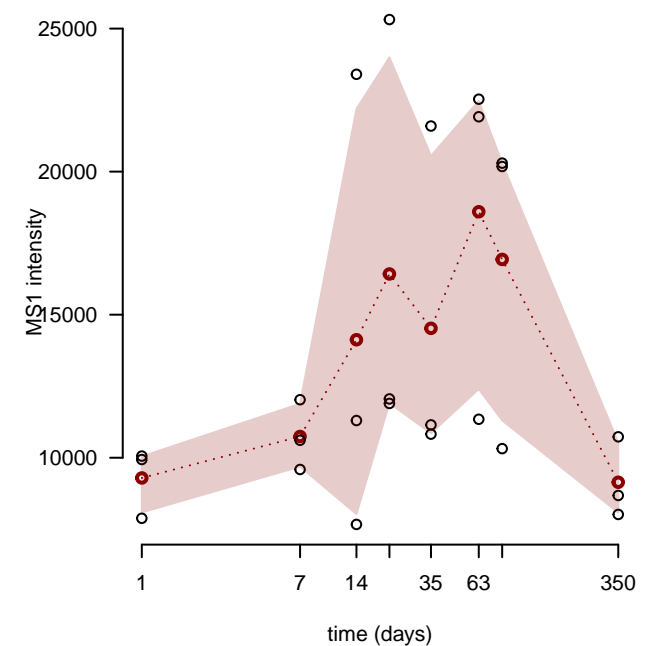

**Q8VD00**  
**GN=Tmem97**  
transmembrane protein 97

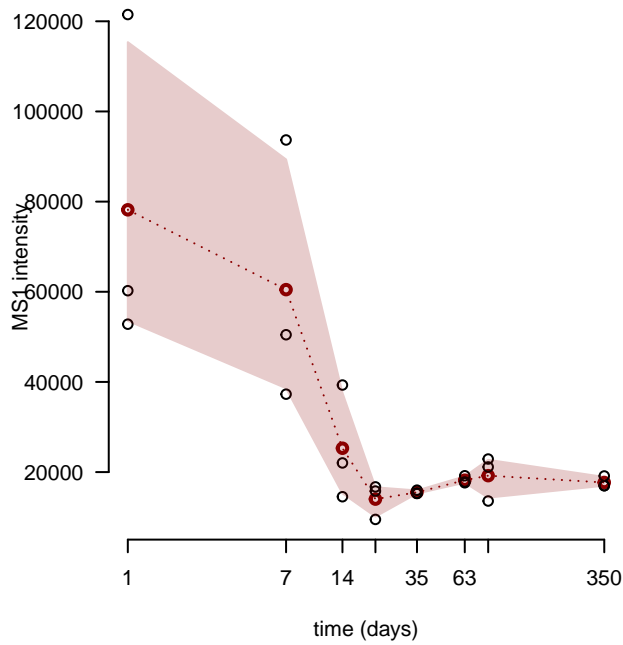

**Q8VD04**  
**GN=Gripap1**  
GRIP1 associated protein 1

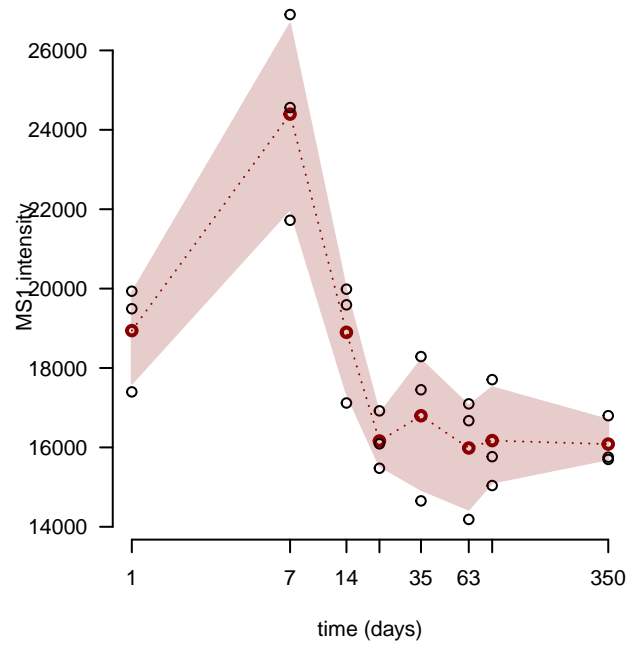

**Q8VD12**  
**GN=Znf385a**

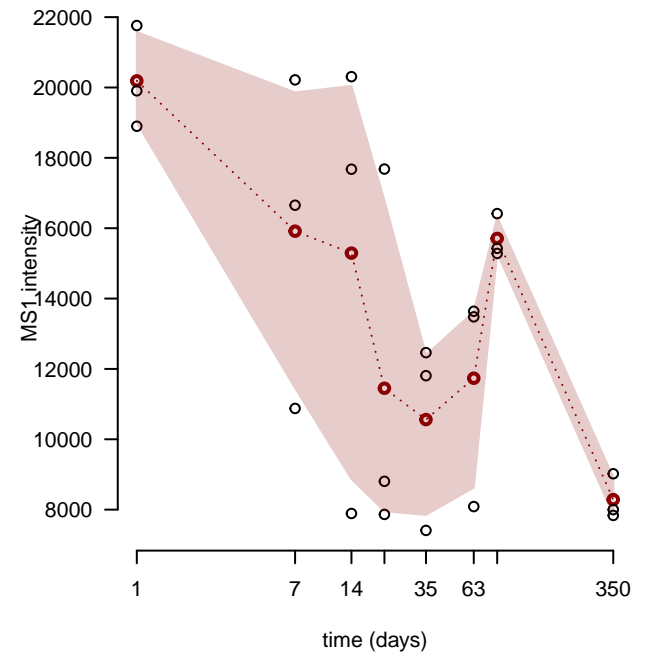

**Q8VD26**  
**GN=Tmem143**  
transmembrane protein 143

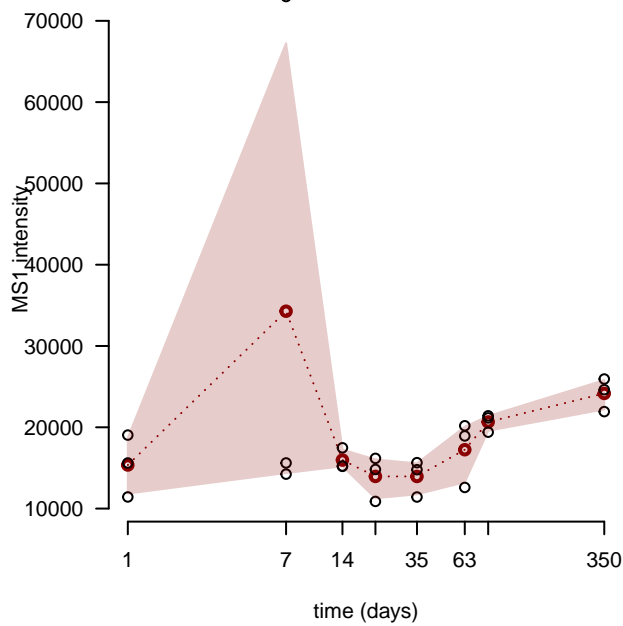

**Q8VD31**  
**GN=Tapbp1**  
TAP binding protein-like

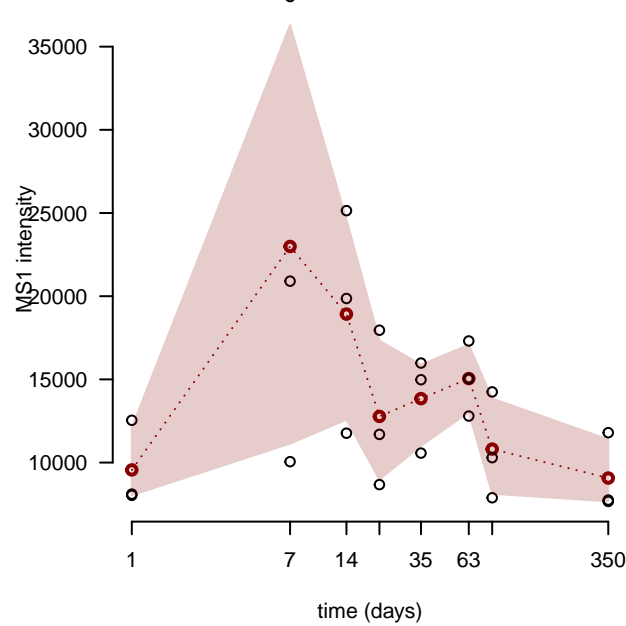

**Q8VD46**  
**GN=Asz1**  
ankyrin repeat, SAM and basic leucine zi ...

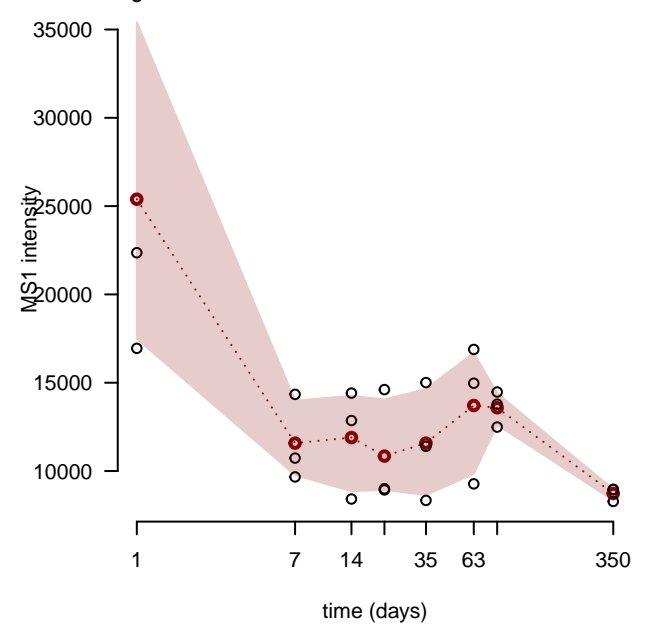

**Q8VD57**  
**GN=Sft2d2**  
SFT2 domain containing 2

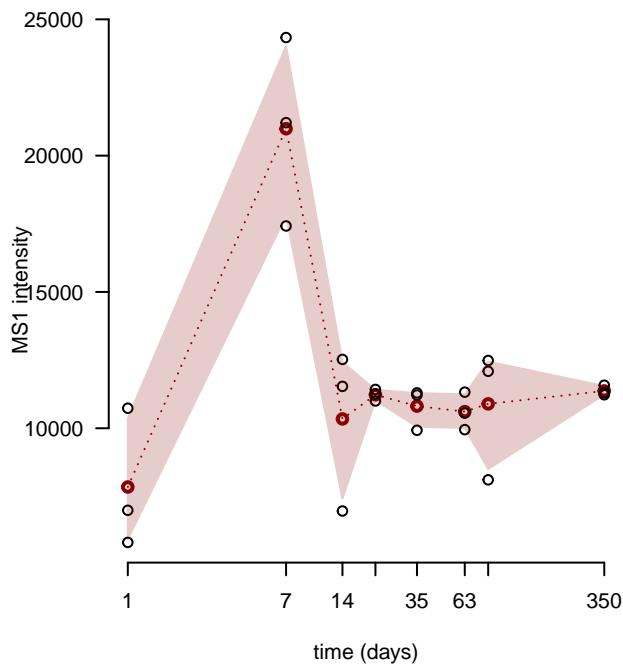

**Q8VD62**  
**GN=Bles03**

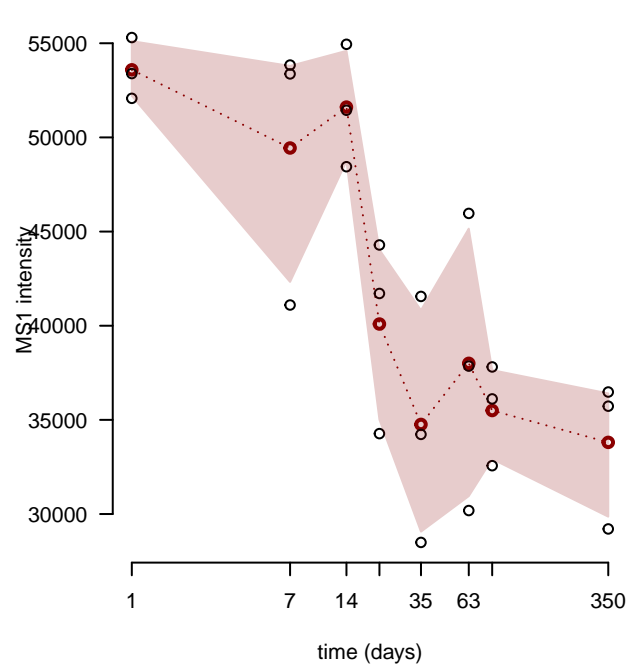

**Q8VD65**  
**GN=Pik3r4**  
phosphoinositide-3-kinase regulatory sub ...

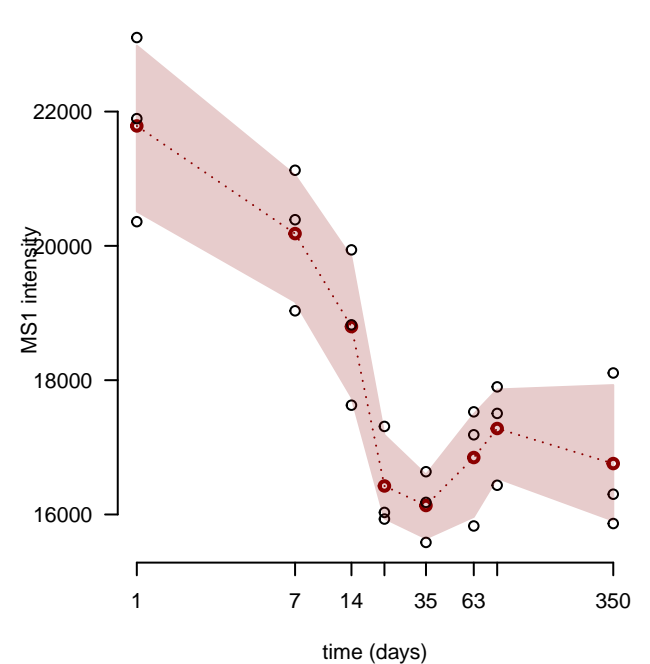

**Q8VD66**  
**GN=Abhd4**  
abhydrolase domain containing 4

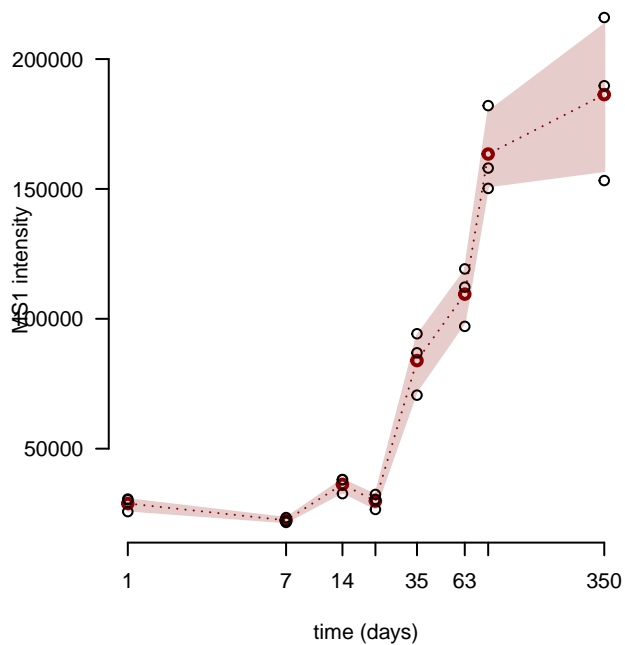

**Q8VD72**  
**GN=Ttc8**  
tetratricopeptide repeat domain 8

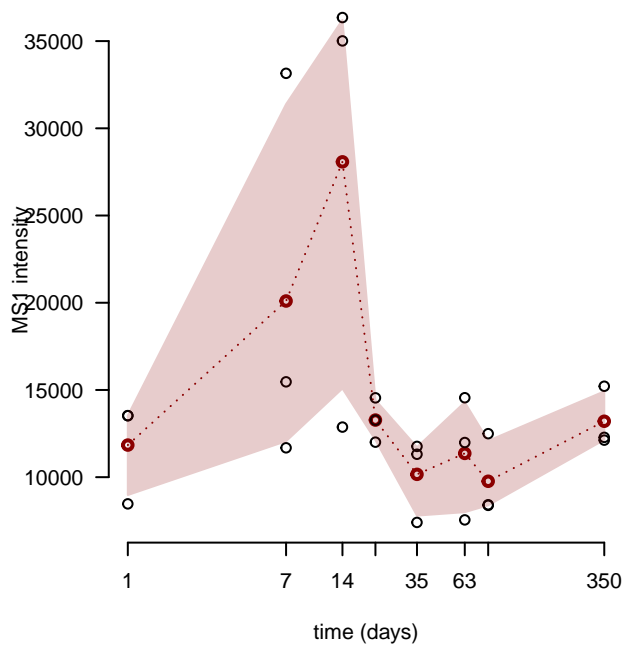

**Q8VD75**  
**GN=Hip1**  
huntingtin interacting protein 1

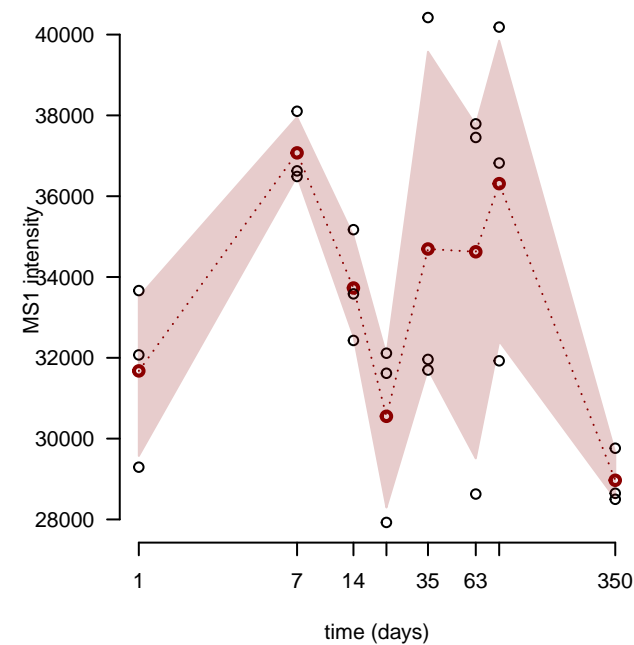

**Q8VD76**  
**GN=Gtf2h3**  
general transcription factor IIH, polypeptide ...

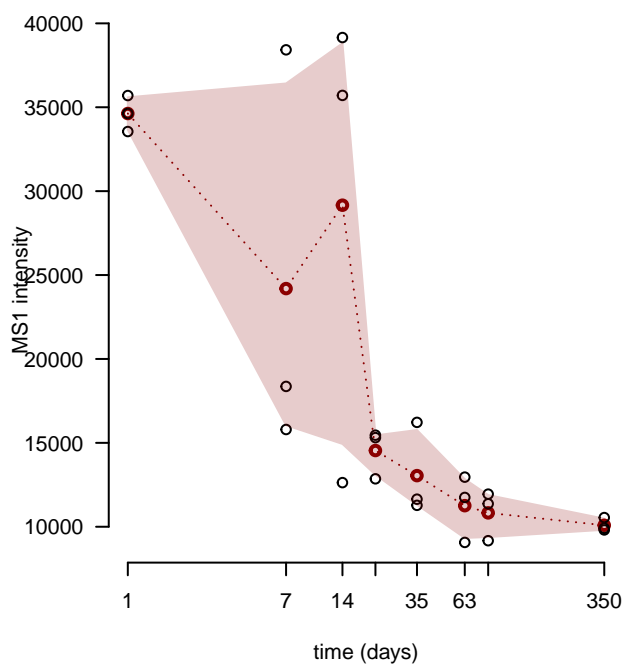

**Q8VDB2**  
**GN=Alg12**  
asparagine-linked glycosylation 12 (alpha ...

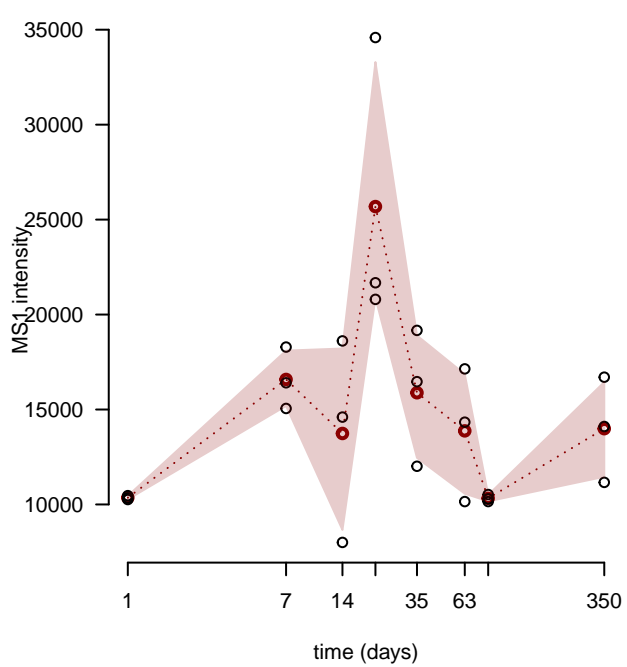

**Q8VDC0**  
**GN=Lars2**  
leucyl-tRNA synthetase, mitochondrial

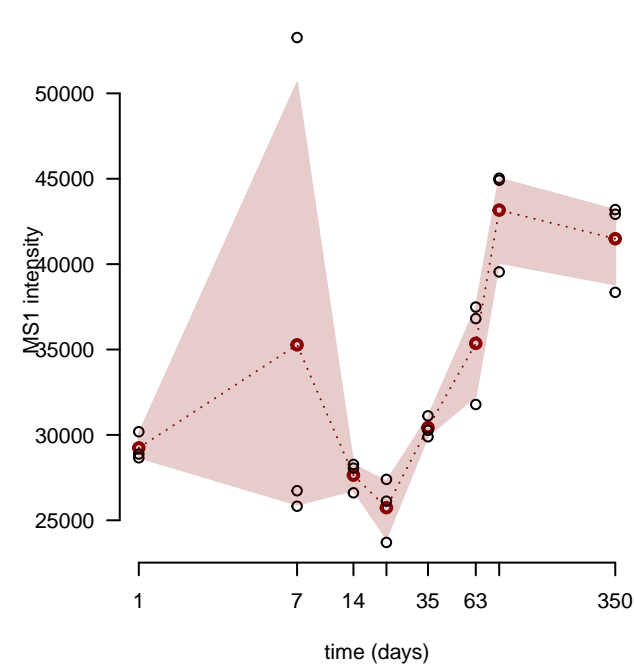

**Q8VDC1**  
**GN=Fyco1**  
FYVE and coiled-coil domain containing 1

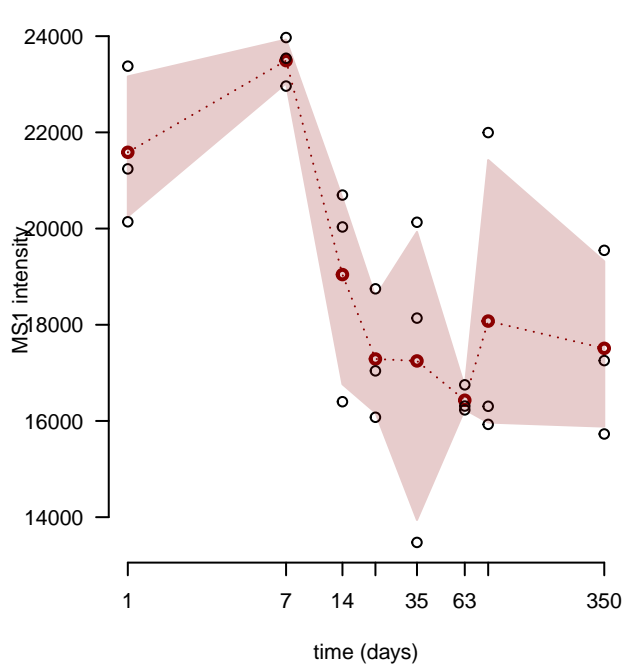

**Q8VDD5**  
**GN=Myh9**  
myosin, heavy polypeptide 9, non-muscle

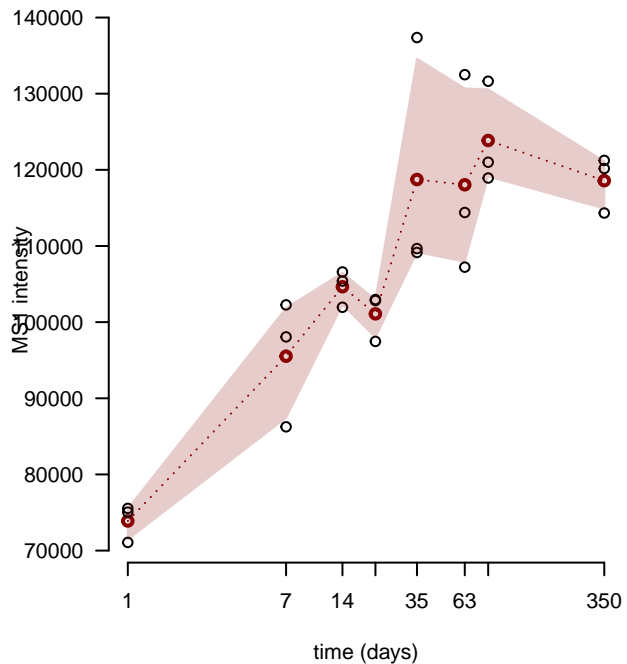

**Q8VDD8**  
**GN=Washc1**  
WASH complex subunit 1

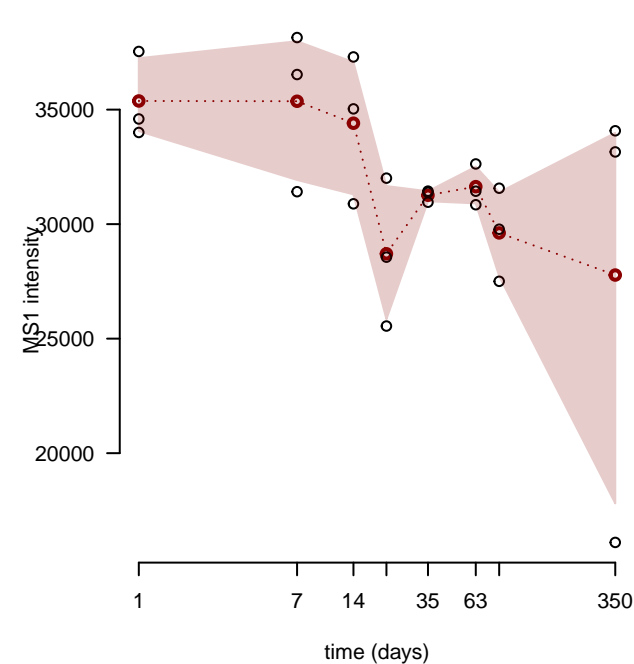

**Q8VDD9**  
**GN=Phip**

pleckstrin homology domain interacting p ...

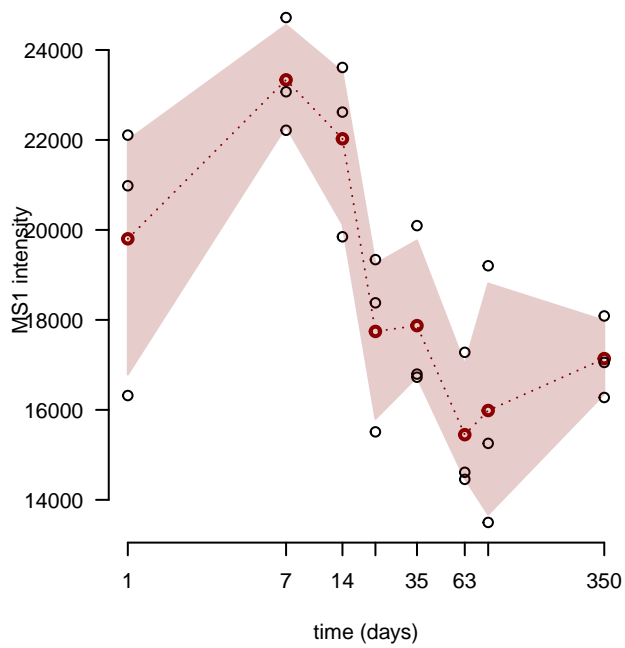

**Q8VDF2**  
**GN=Uhrf1**

ubiquitin-like, containing PHD and RING ...

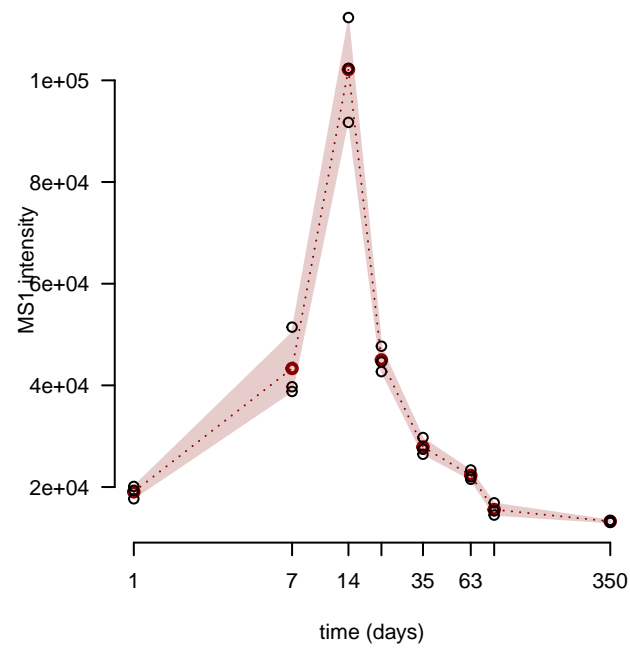

**Q8VDG3**  
**GN=Parn**

poly(A)-specific ribonuclease (deadenyla ...

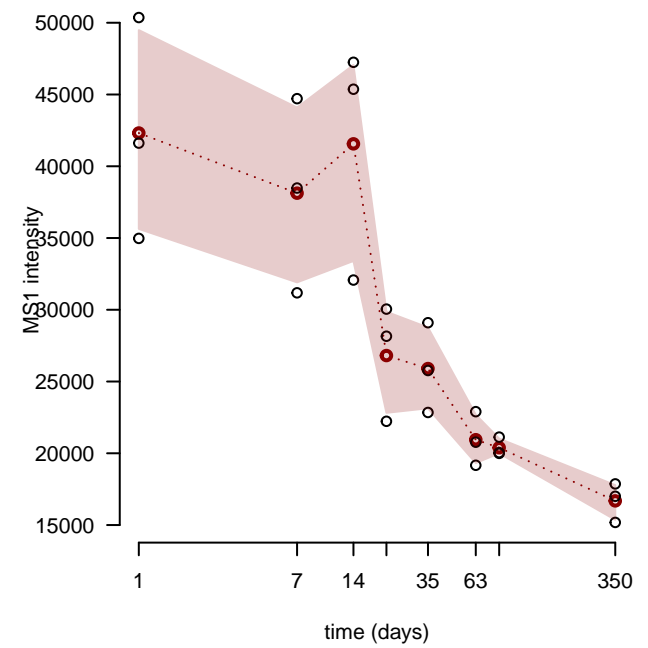

**Q8VDG5**  
**GN=Ppcs**

phosphopantothenoylcysteine synthetase

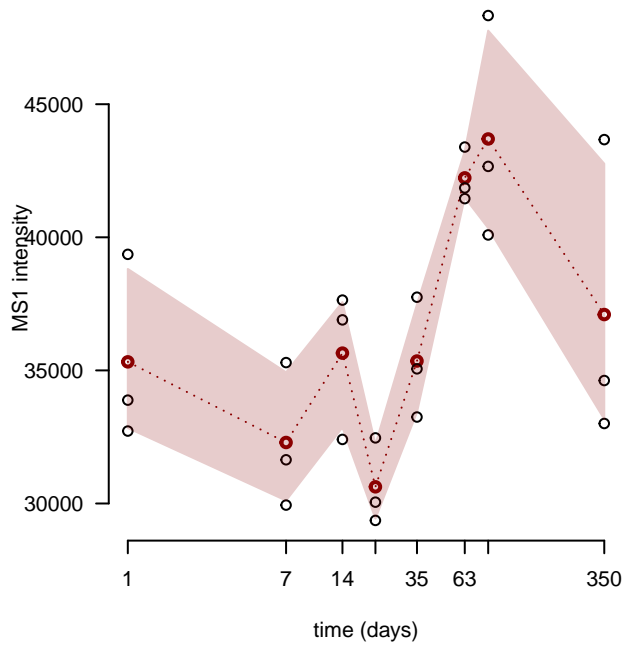

**Q8VDG7**  
**GN=Pafah2**

platelet-activating factor acetylhydra ...

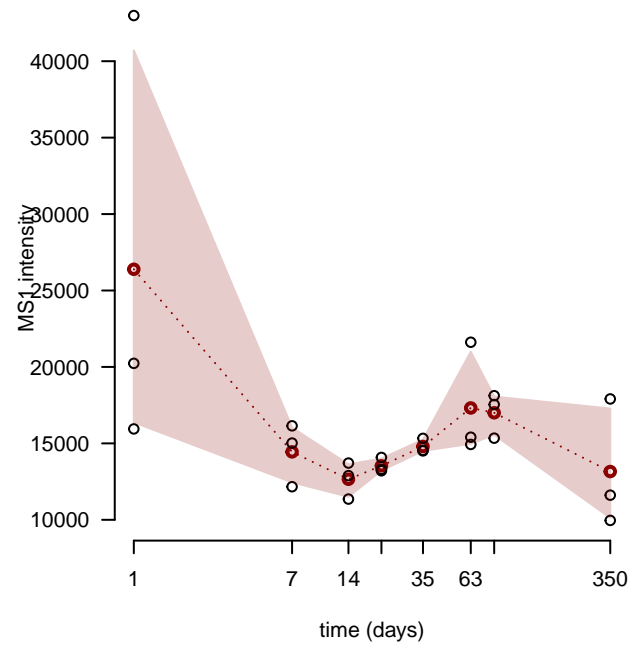

**Q8VDH1**  
**GN=Fbxo21**

F-box protein 21

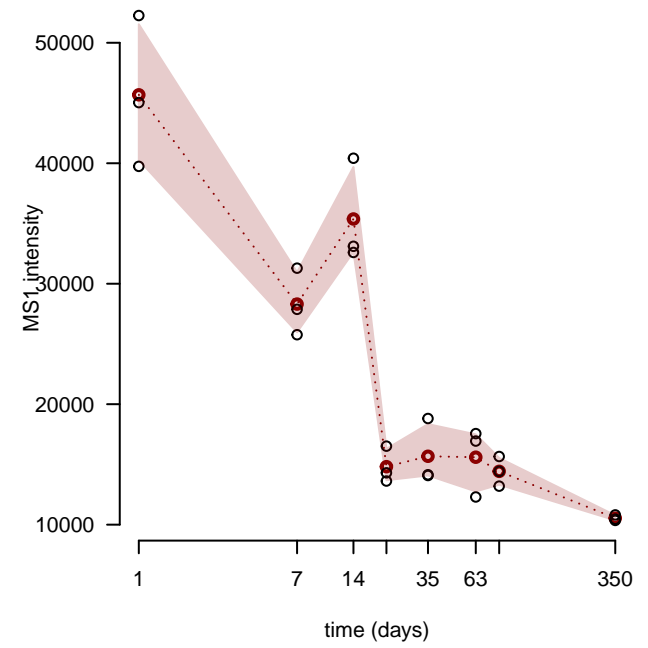

**Q8VDI7**  
**GN=Ubac1**

ubiquitin associated domain containing 1

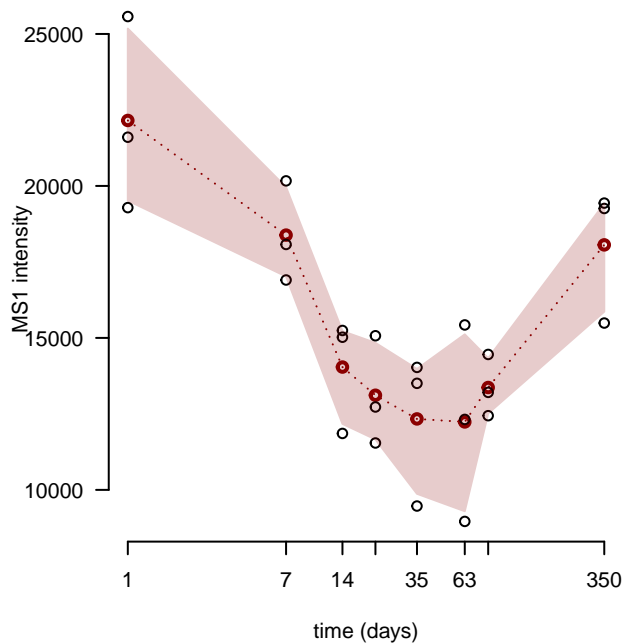

**Q8VDI9**  
**GN=Alg9**

asparagine-linked glycosylation 9 (alpha ...

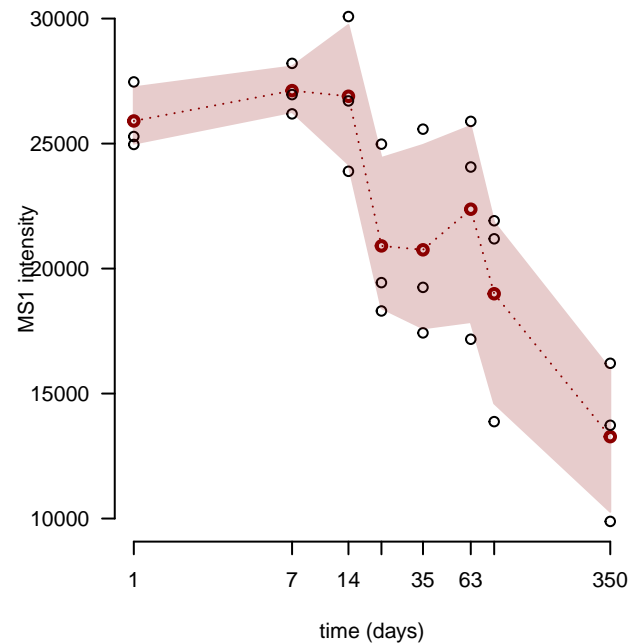

**Q8VDJ3**  
**GN=Hdlbp**

high density lipoprotein (HDL) binding p ...

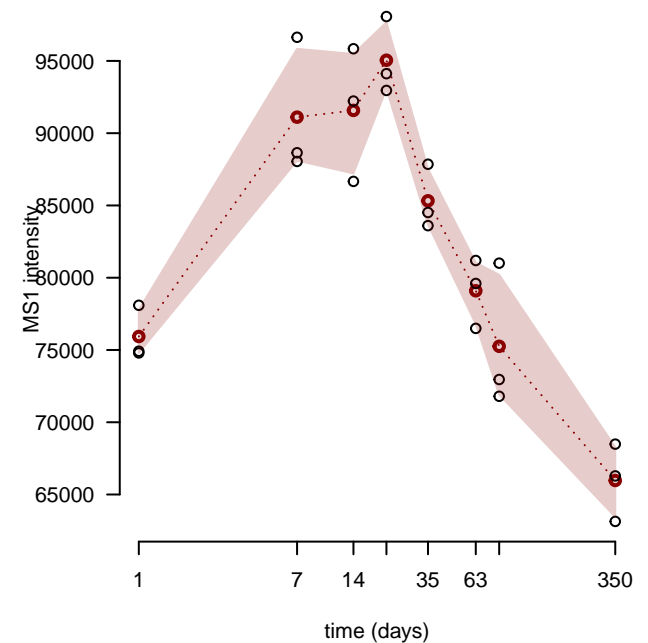

**Q8VDK1**  
GN=Nit1  
nitrilase 1

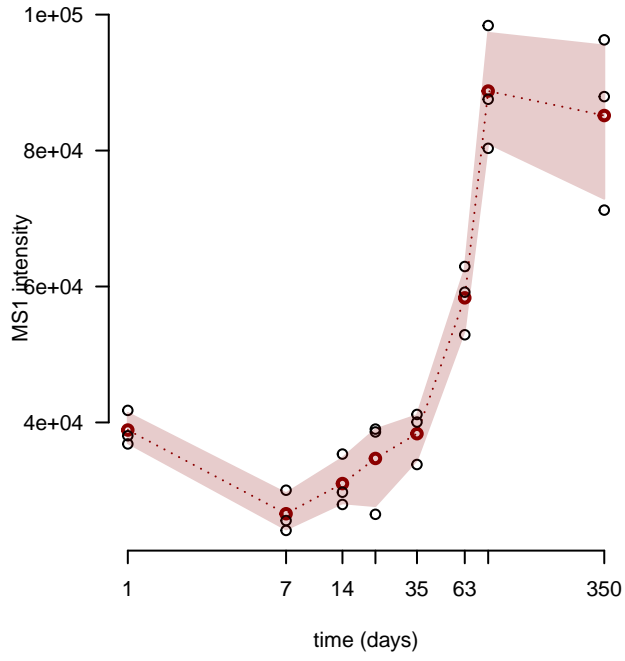

**Q8VDL4**  
GN=Adpgk  
ADP-dependent glucokinase

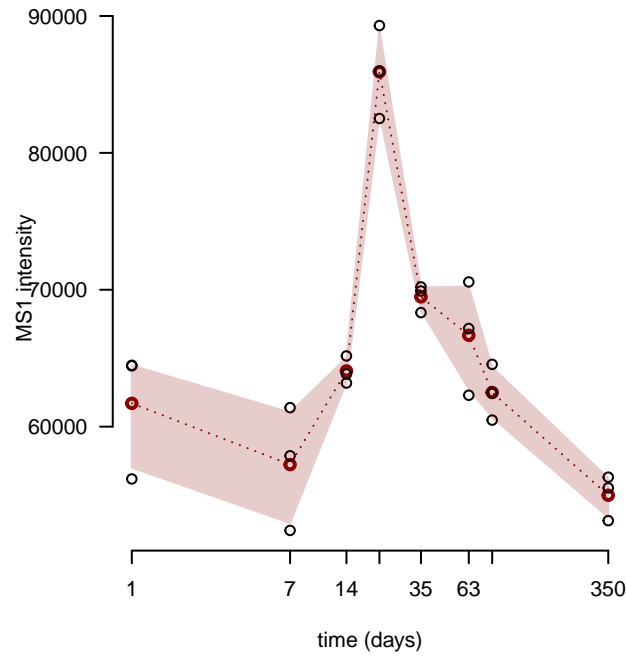

**Q8VDM1**  
GN=Zgpat  
zinc finger, CCCH-type with G patch doma ...

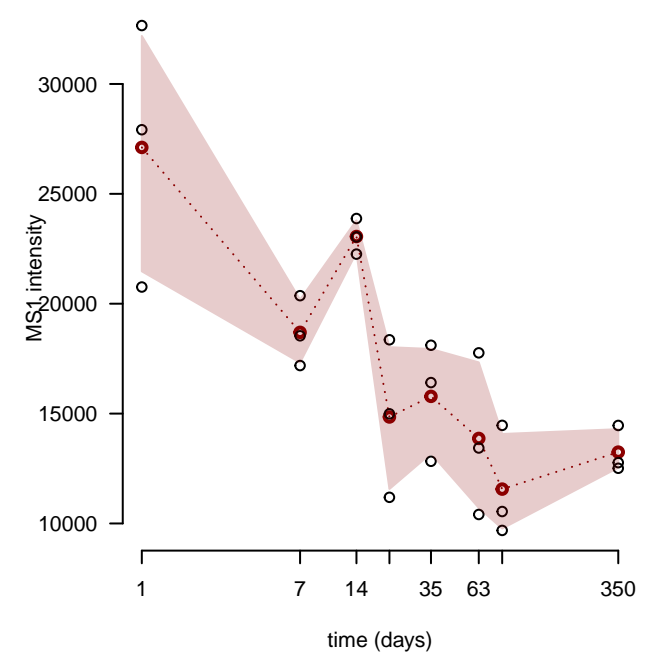

**Q8VDM4**  
GN=Psm2  
proteasome (prosome, macropain) 26S subu ...

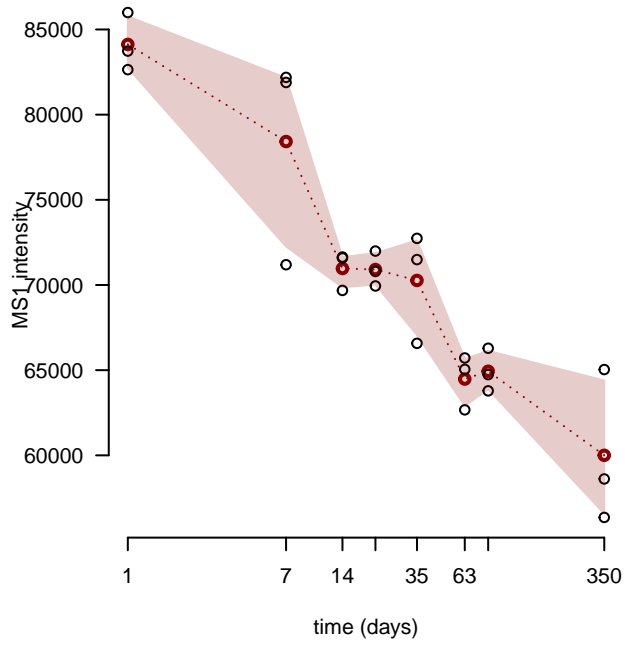

**Q8VDM6**  
GN=Hnrnpul1  
heterogeneous nuclear ribonucleoprotein ...

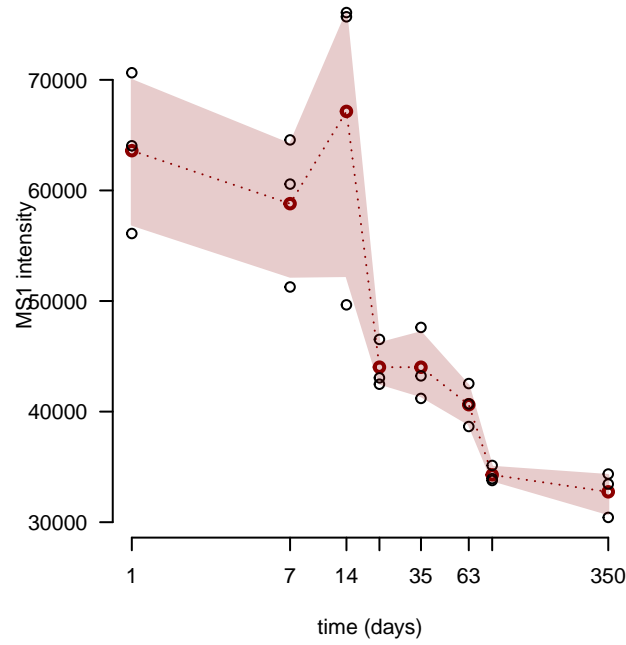

**Q8VDN2**  
GN=Atp1a1  
ATPase, Na+/K+ transporting, alpha 1 pol ...

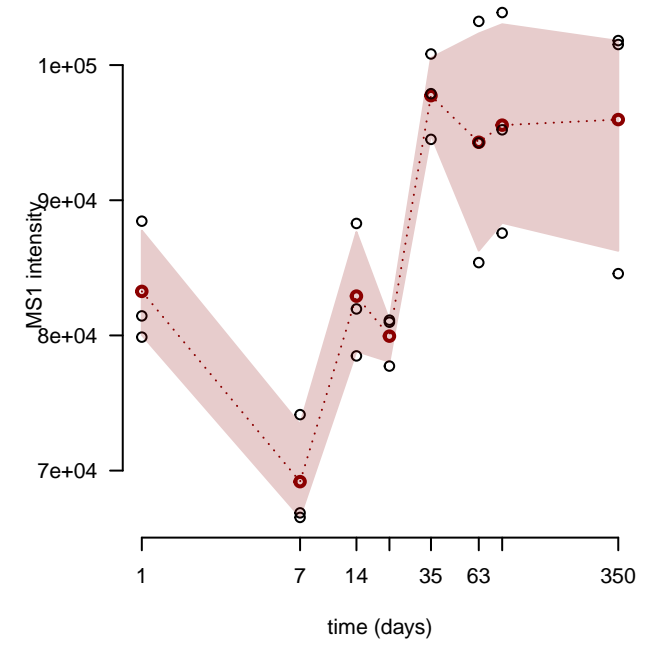

**Q8VDP2**  
GN=

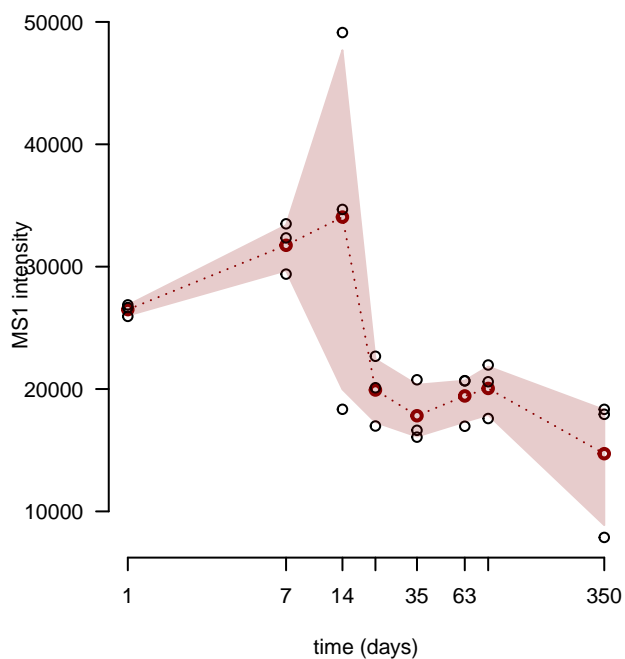

**Q8VDP3**  
GN=Mical1  
microtubule associated monoxygenase, ca ...

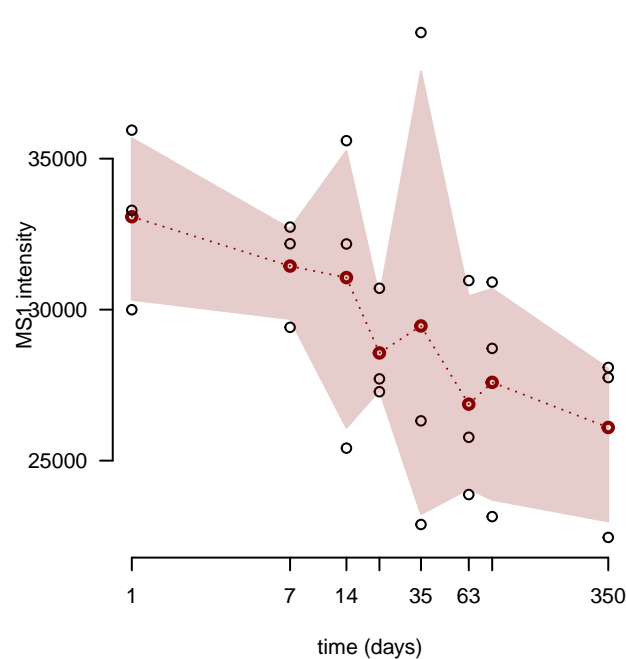

**Q8VDP4**  
GN=Ccar2  
cell cycle activator and apoptosis regul ...

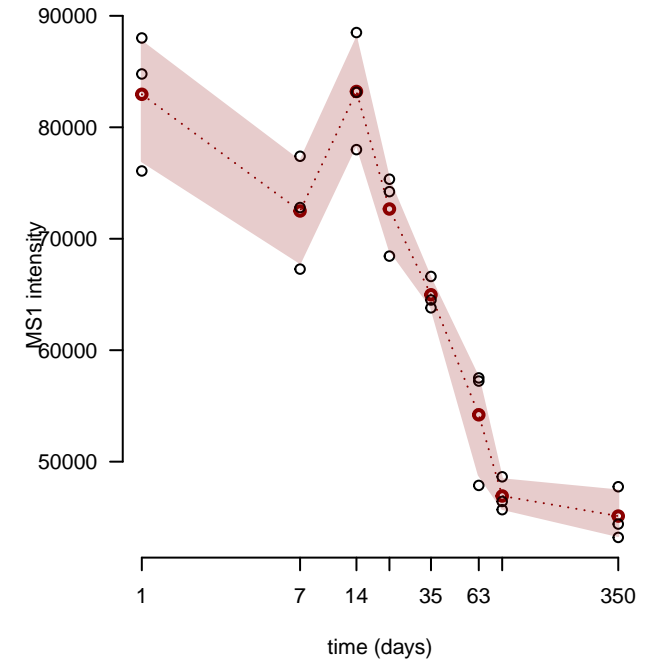

**Q8VDP6**  
**GN=Cdipt**  
CDP-diacylglycerol—inositol 3-phosphati ...

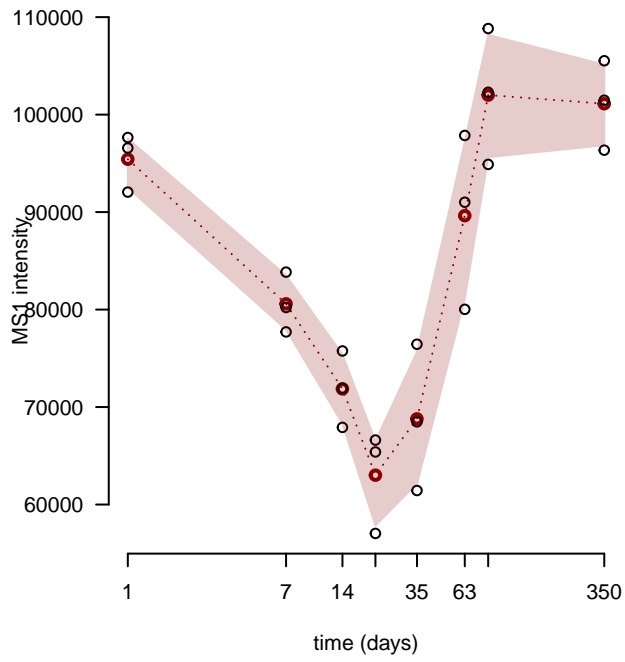

**Q8VDQ1**  
**GN=Ptgr2**  
prostaglandin reductase 2

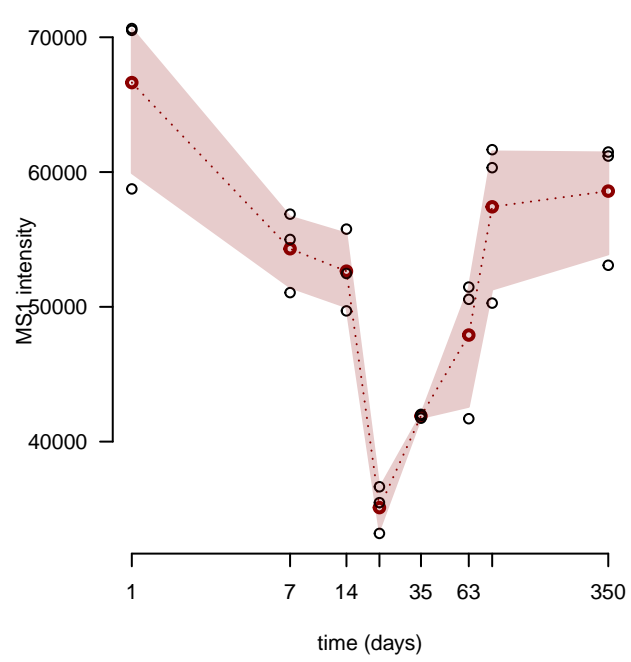

**Q8VDQ8**  
**GN=Sirt2**  
sirtuin 2

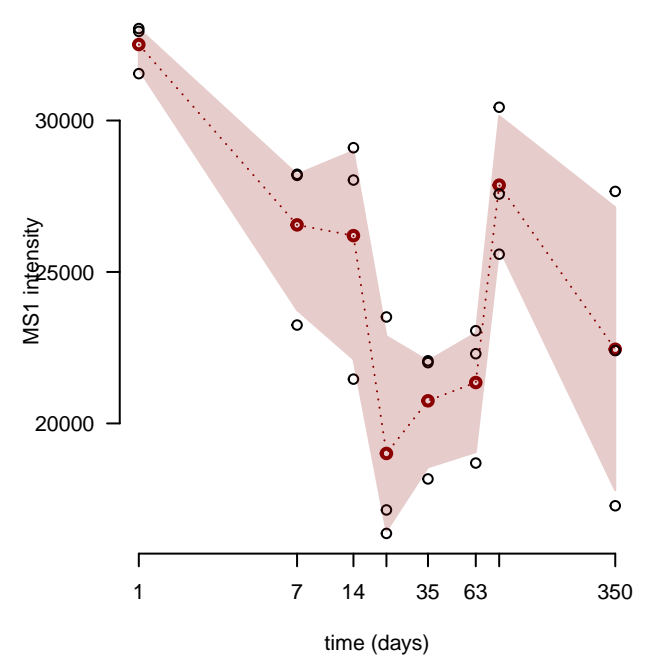

**Q8VDQ9**  
**GN=Kri1**  
KRI1 homolog

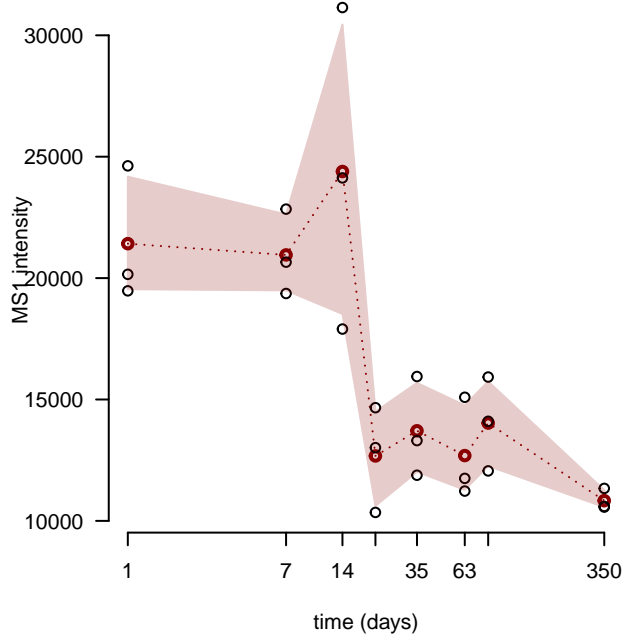

**Q8VDR5**  
**GN=Tmem267**  
transmembrane protein 267

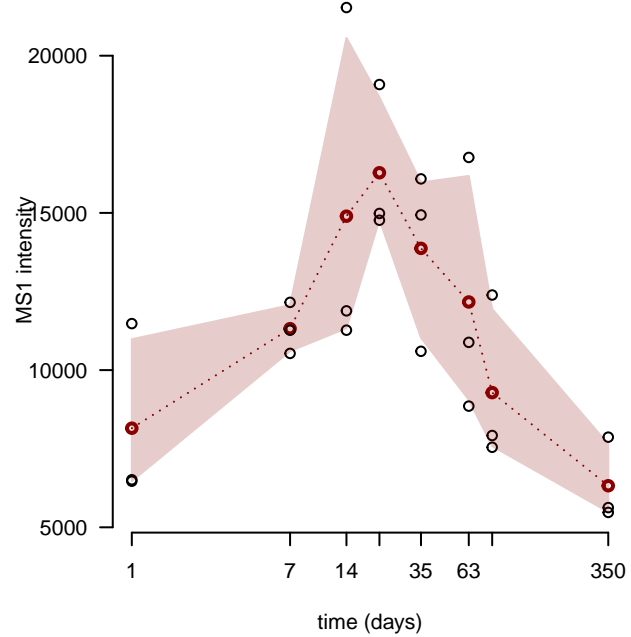

**Q8VDR9**  
**GN=Dock6**  
dedicator of cytokinesis 6

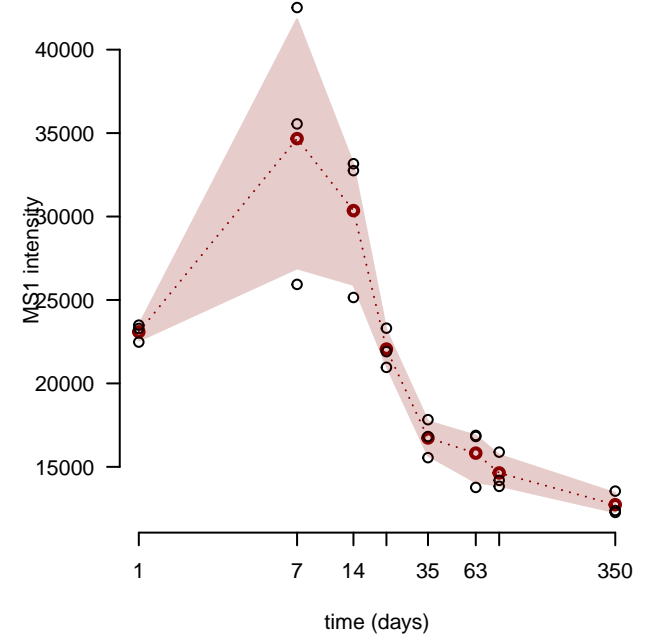

**Q8VDS4**  
**GN=Rprd1a**  
regulation of nuclear pre-mRNA domain co ...

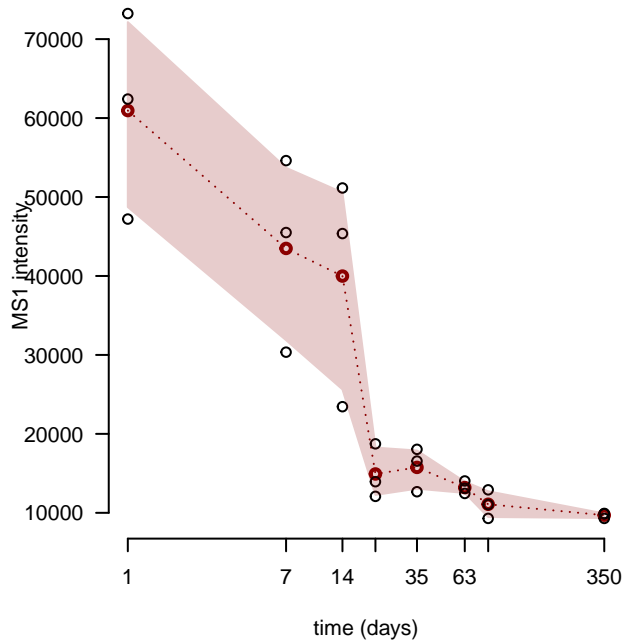

**Q8VDS8**  
**GN=Stx18**  
syntaxin 18

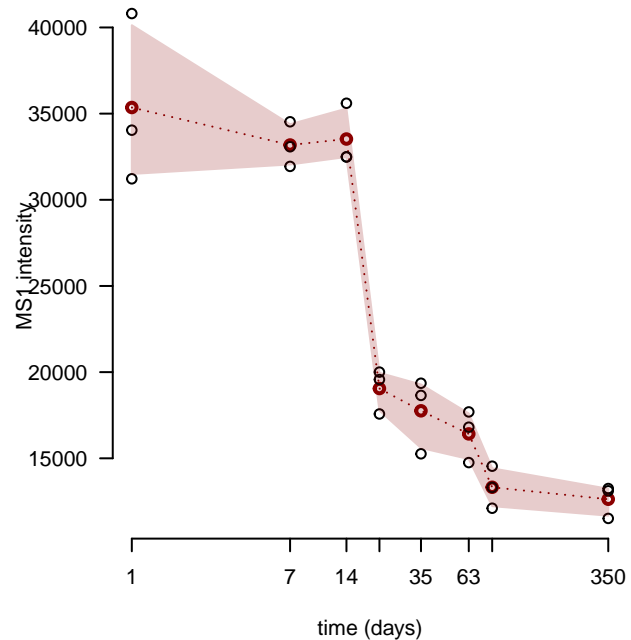

**Q8VDT9**  
**GN=Mrpl50**  
mitochondrial ribosomal protein L50

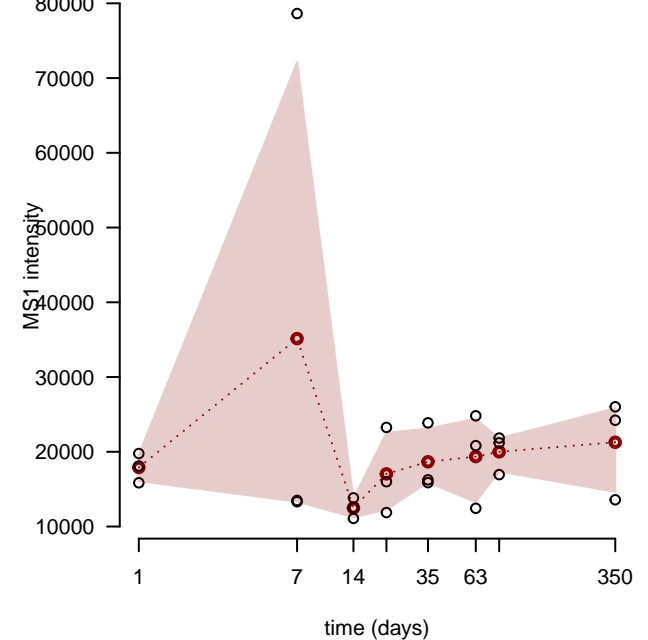

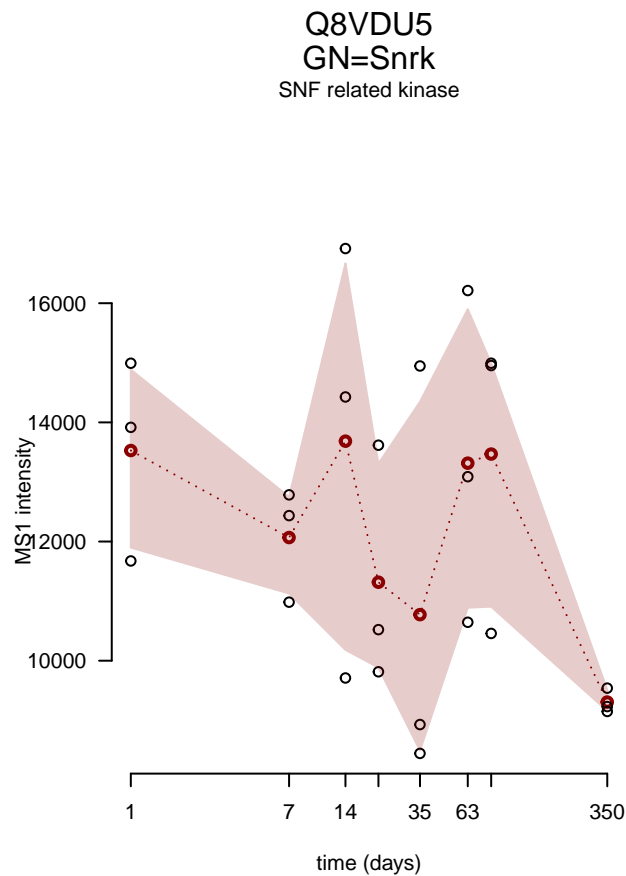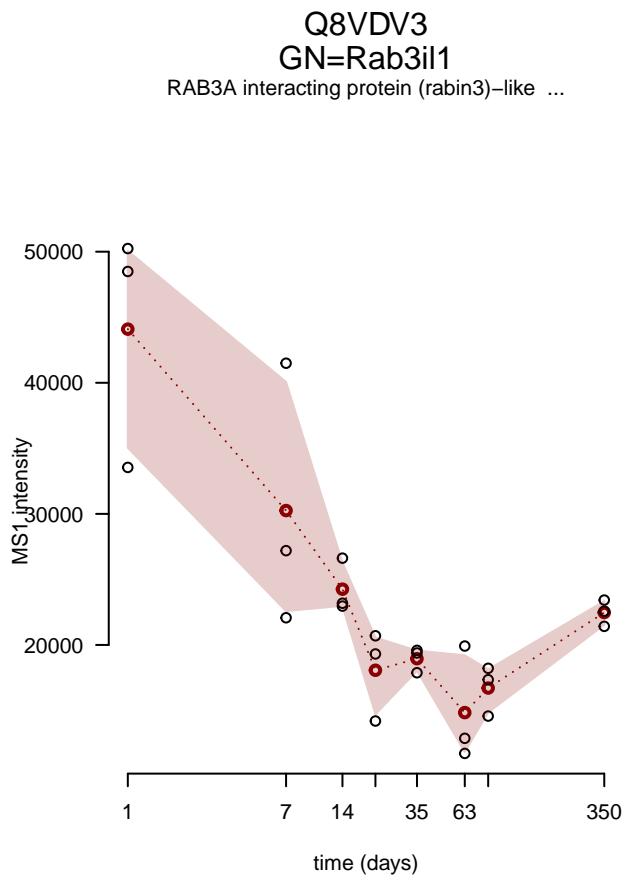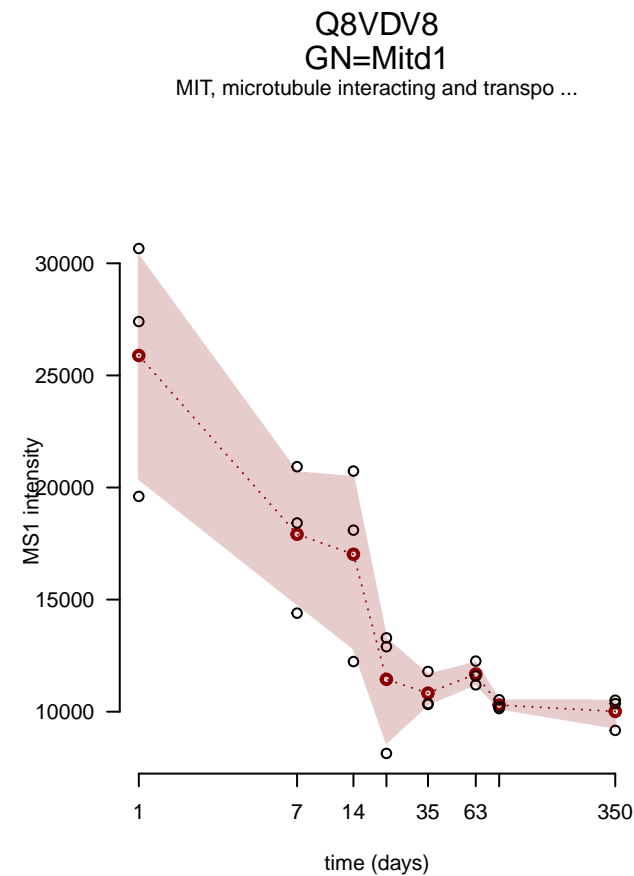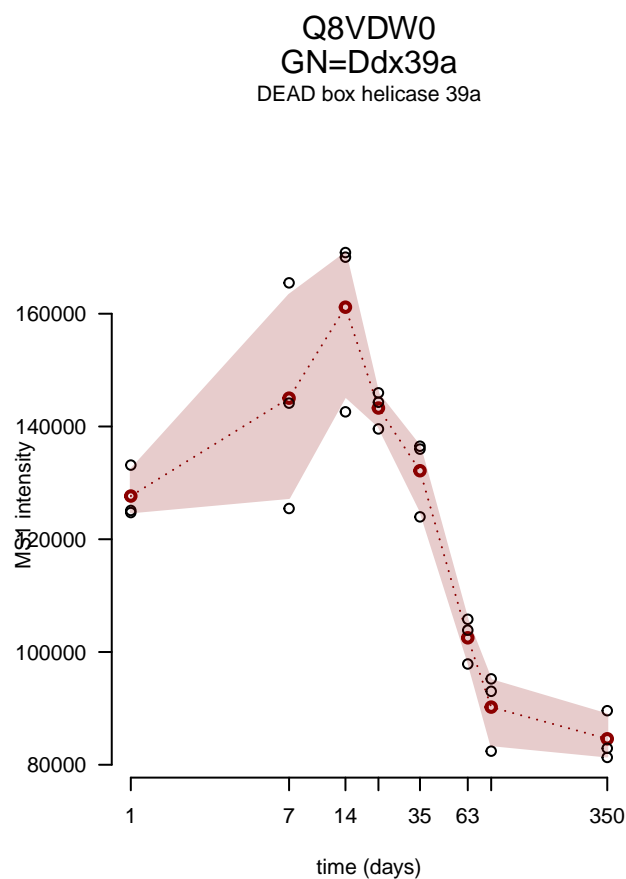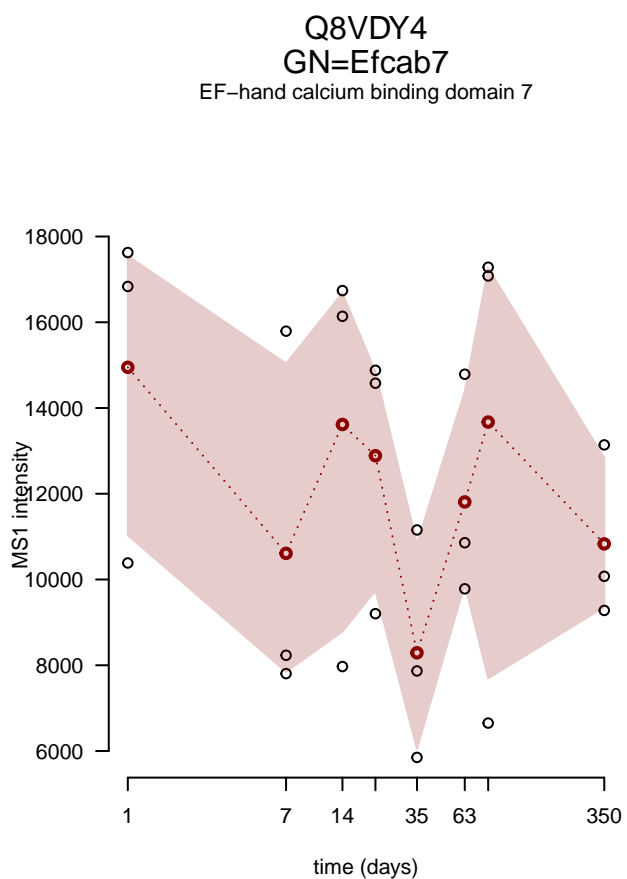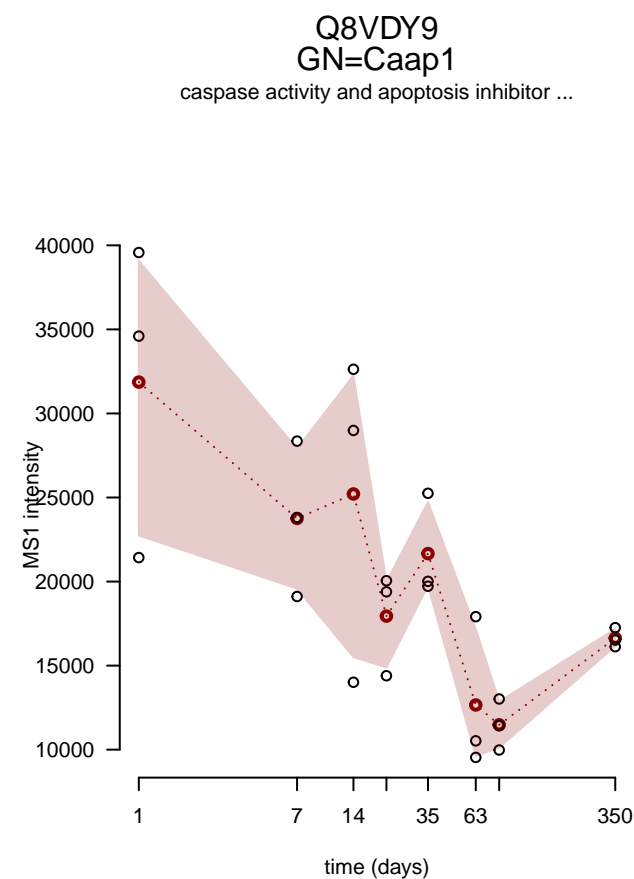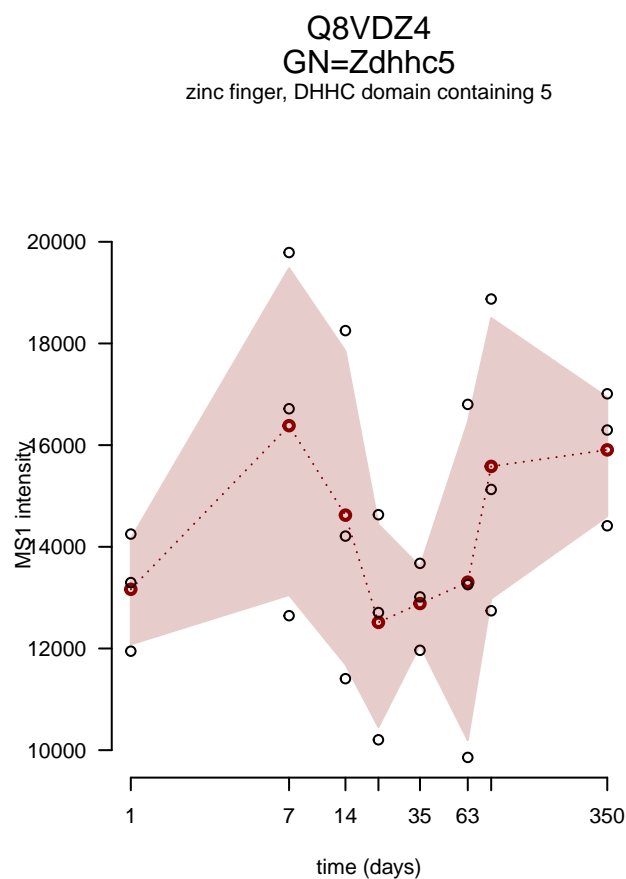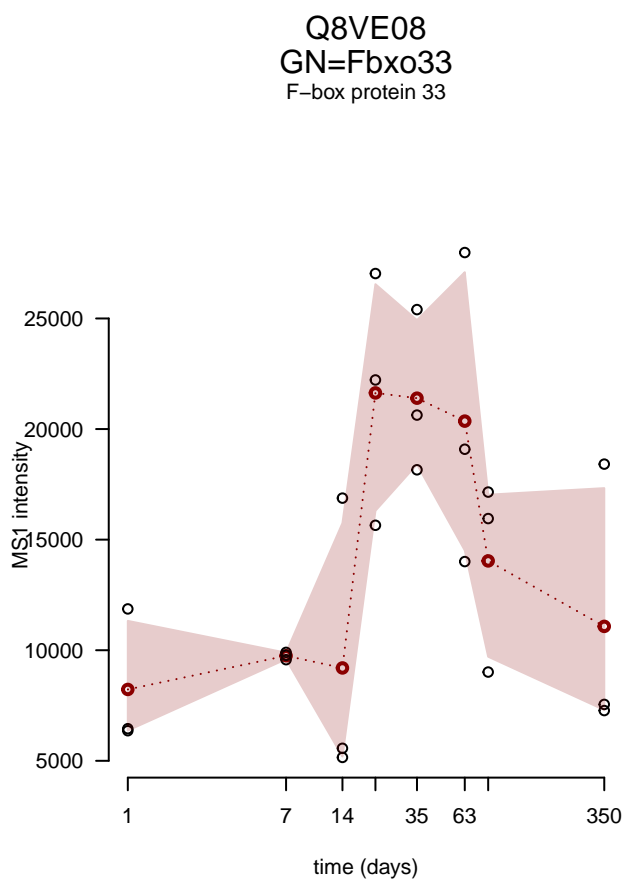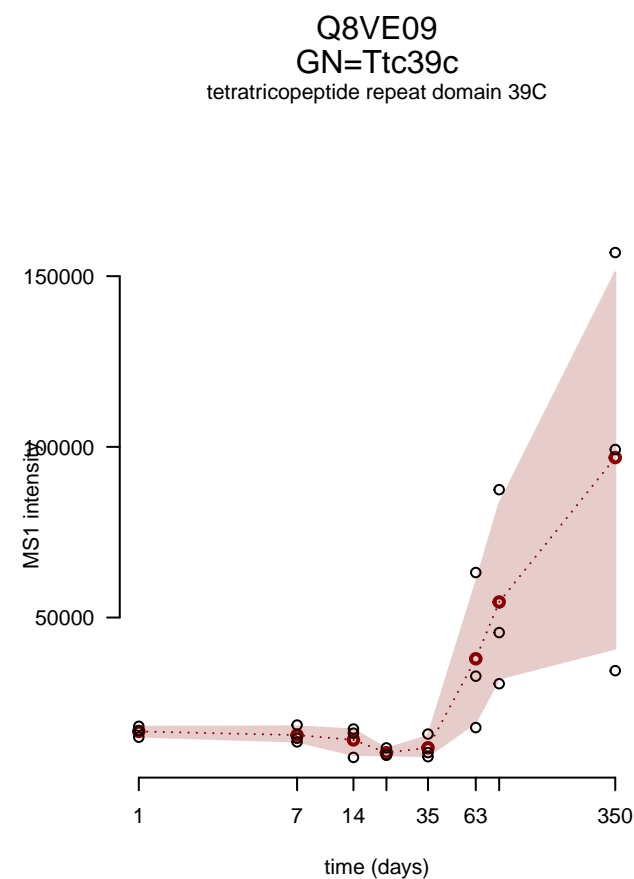

**Q8VE10**  
**GN=Naa40**  
N(alpha)-acetyltransferase 40, NatD cata ...

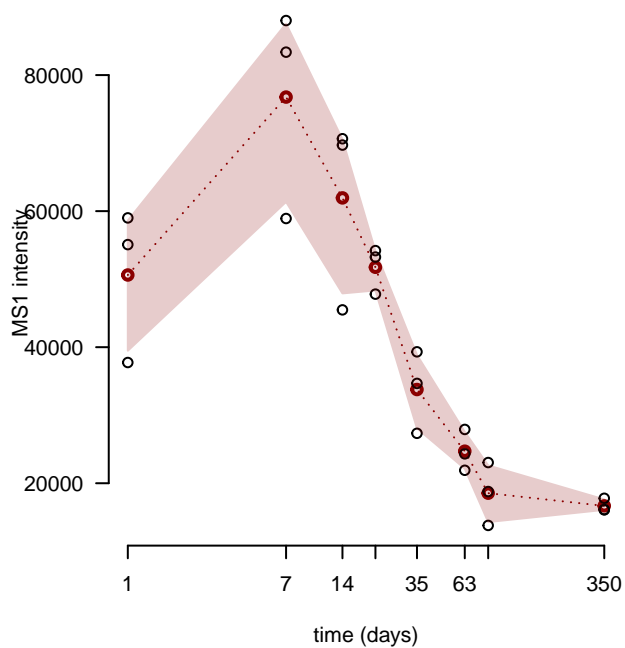

**Q8VE11**  
**GN=Mtmr6**  
myotubularin related protein 6

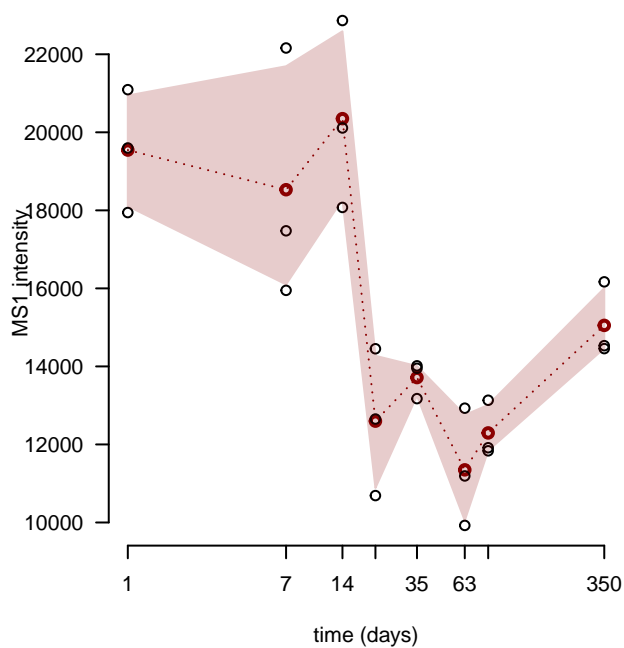

**Q8VE18**  
**GN=Smg8**  
SMG8 nonsense mediated mRNA decay factor

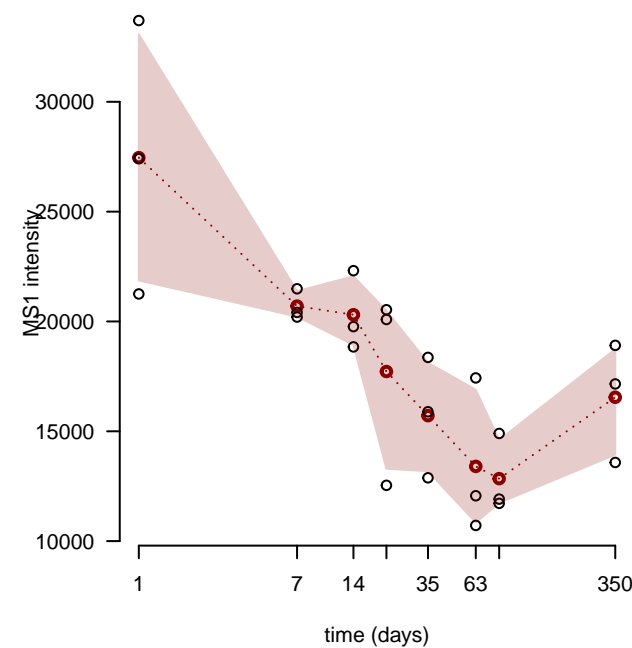

**Q8VE19**  
**GN=Mios**  
meiosis regulator for oocyte development

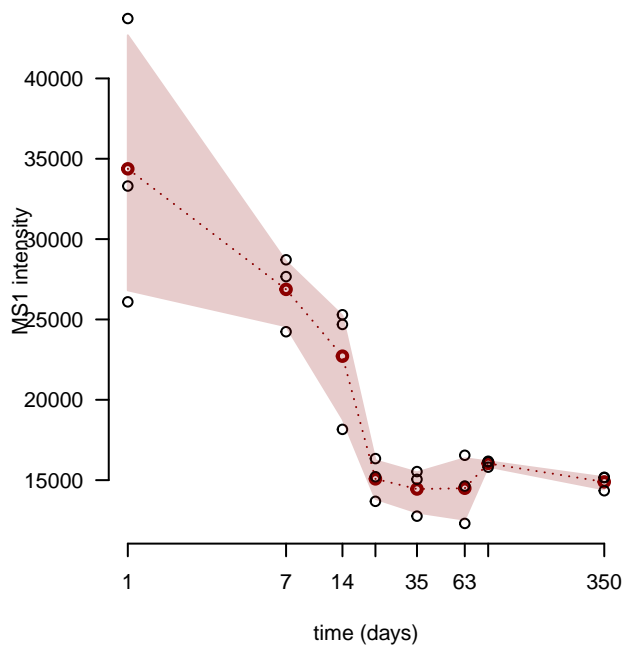

**Q8VE22**  
**GN=Mrps23**  
mitochondrial ribosomal protein S23

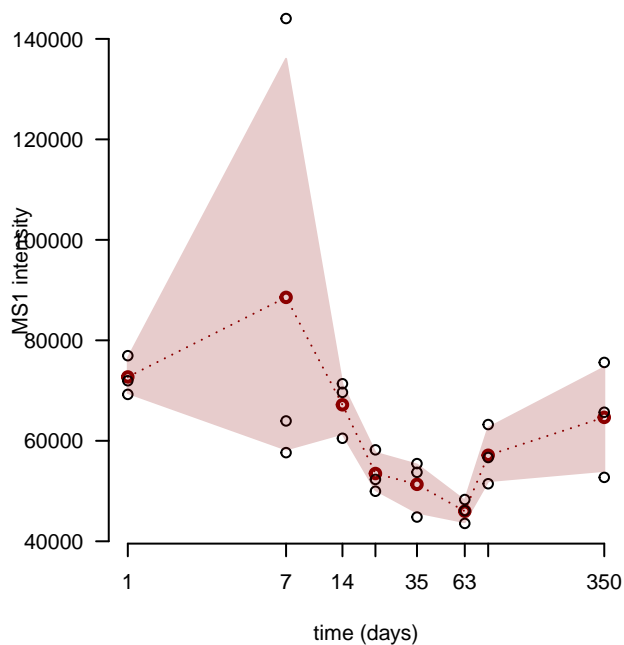

**Q8VE37**  
**GN=Rcc1**  
regulator of chromosome condensation 1

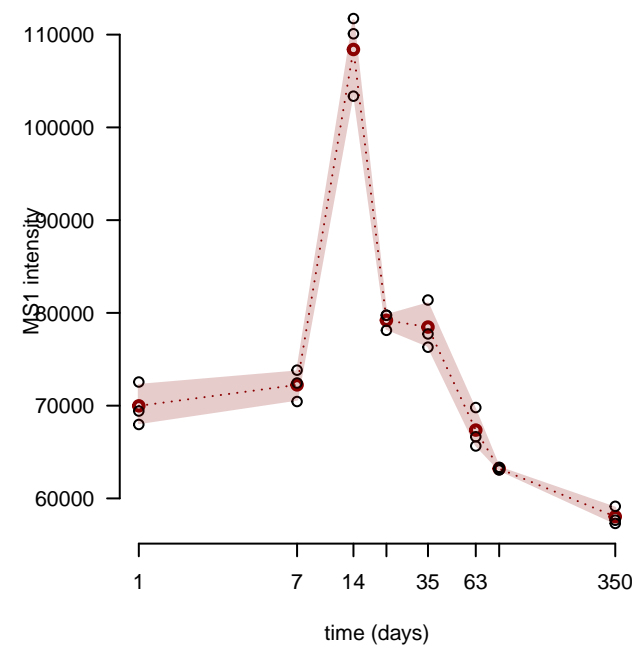

**Q8VE38**  
**GN=Oxnad1**  
oxidoreductase NAD-binding domain contai ...

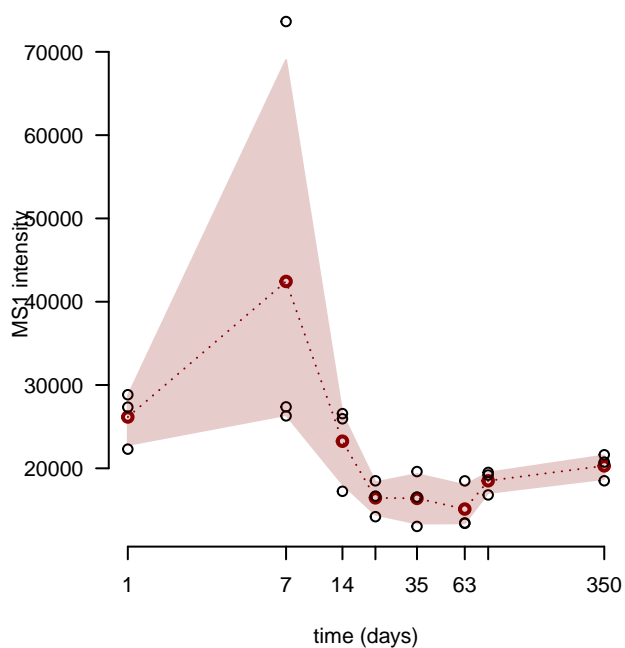

**Q8VE42**  
**GN=Ankrd49**  
ankyrin repeat domain 49

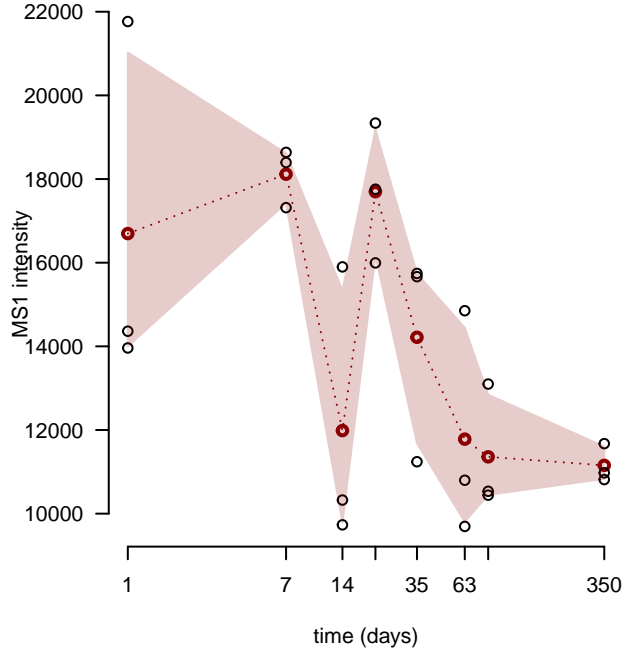

**Q8VE47**  
**GN=Uba5**  
ubiquitin-like modifier activating enzym ...

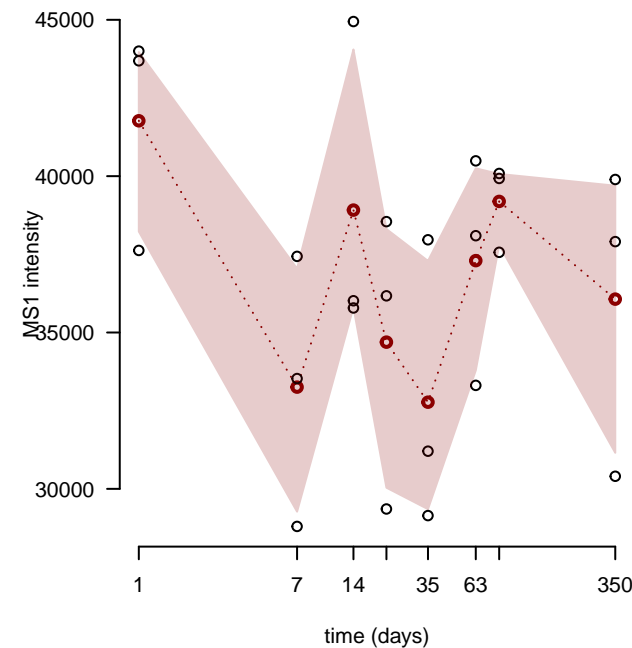



**Q8VE62**  
GN=Paip1  
polyadenylate binding protein–interactin ...

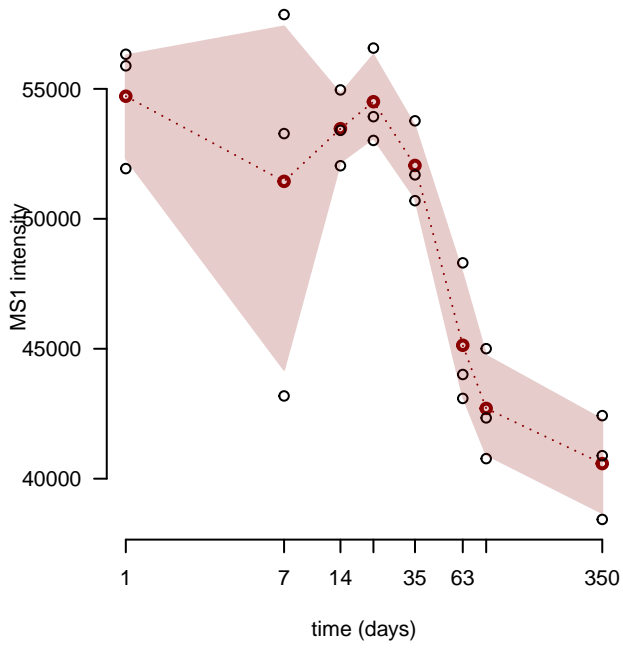

**Q8VE65**  
GN=Taf12  
TATA–box binding protein associated fact ...

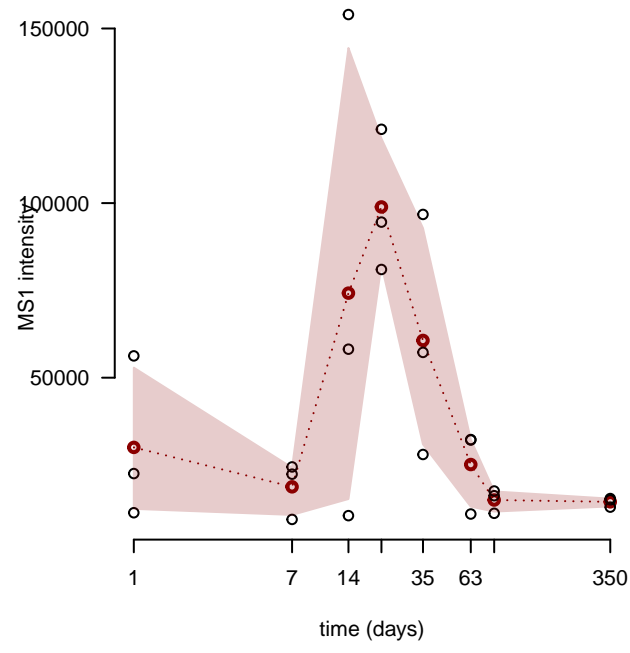

**Q8VE70**  
GN=Pdcd10  
programmed cell death 10

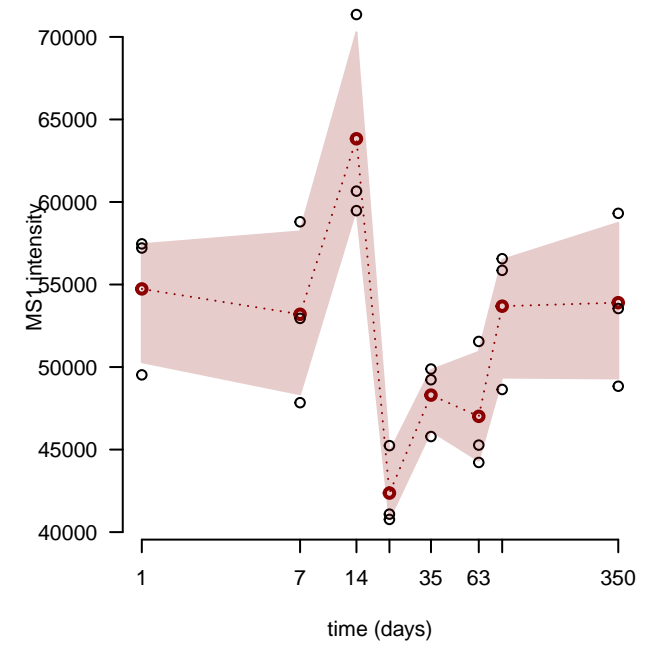

**Q8VE73**  
GN=Cul7  
cullin 7

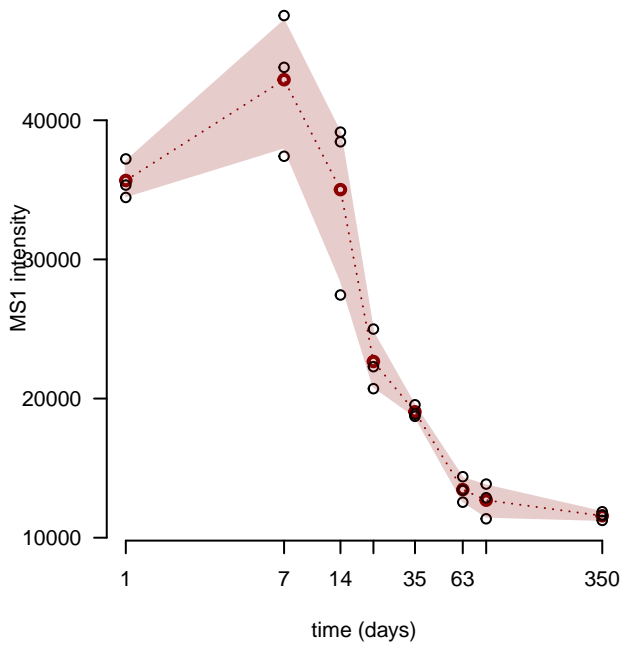

**Q8VE80**  
GN=Thoc3  
THO complex 3

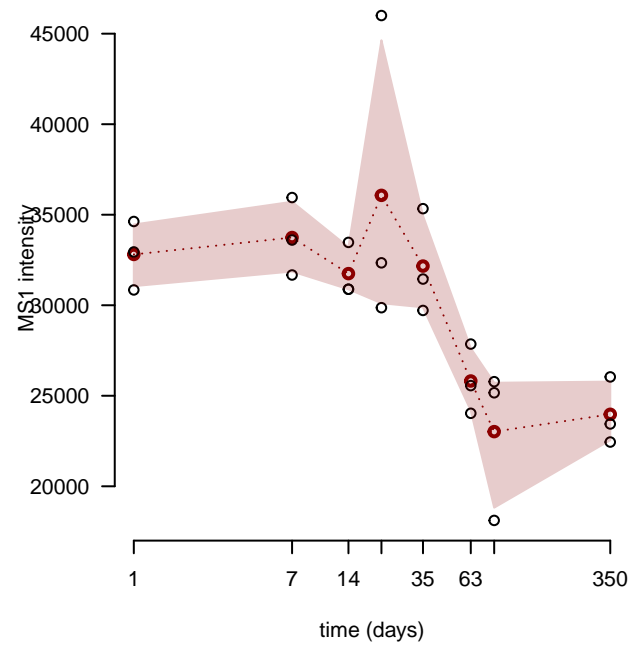

**Q8VE88**  
GN=Fam114a2  
family with sequence similarity 114, mem ...

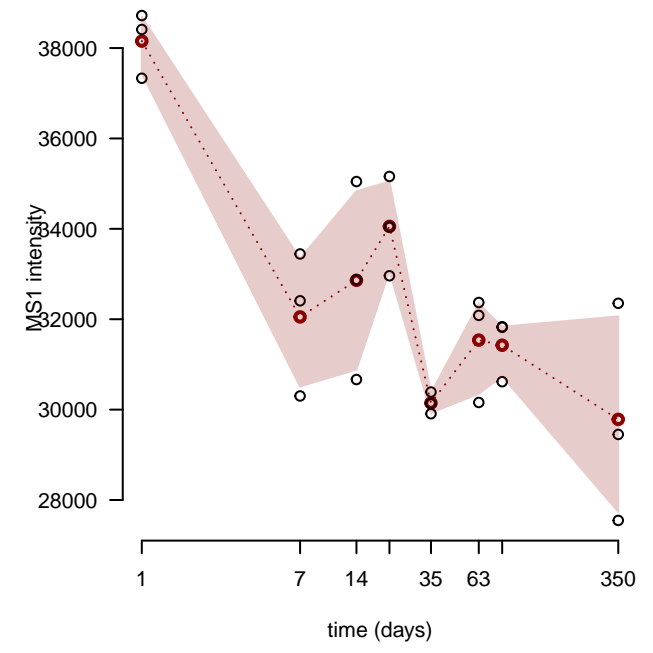

**Q8VE91**  
GN=Retreg1  
reticulophagy regulator 1

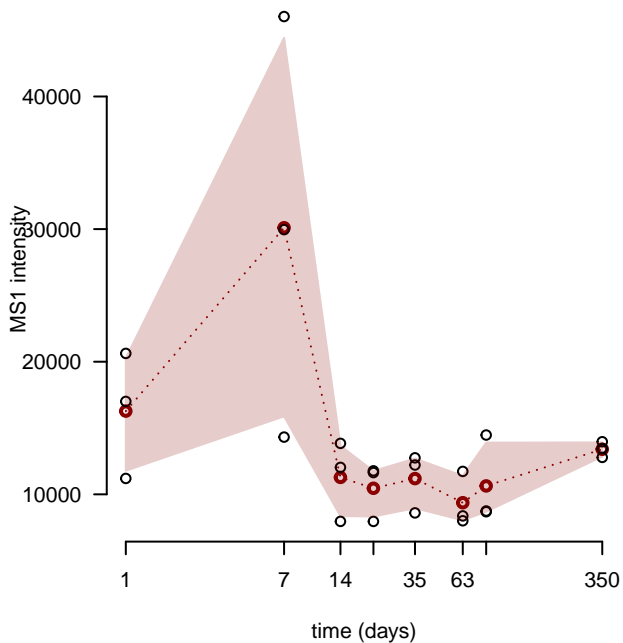

**Q8VE92**  
GN=Rbm4b  
RNA binding motif protein 4B

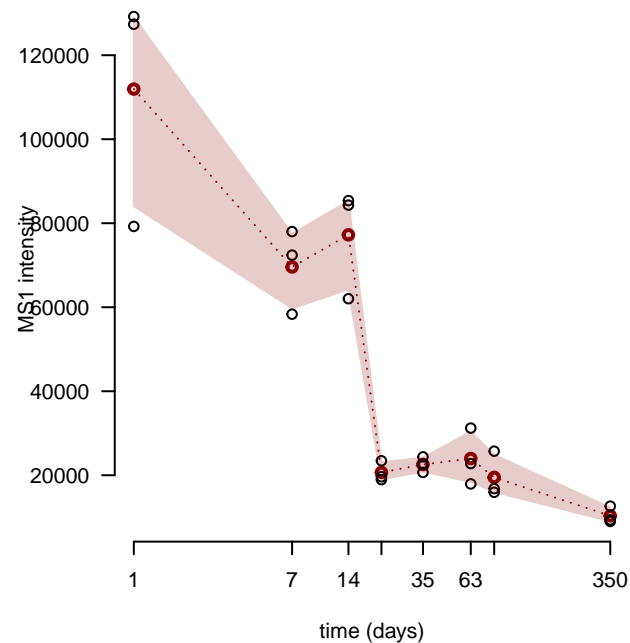

**Q8VE94**  
GN=Fam110c  
family with sequence similarity 110, mem ...

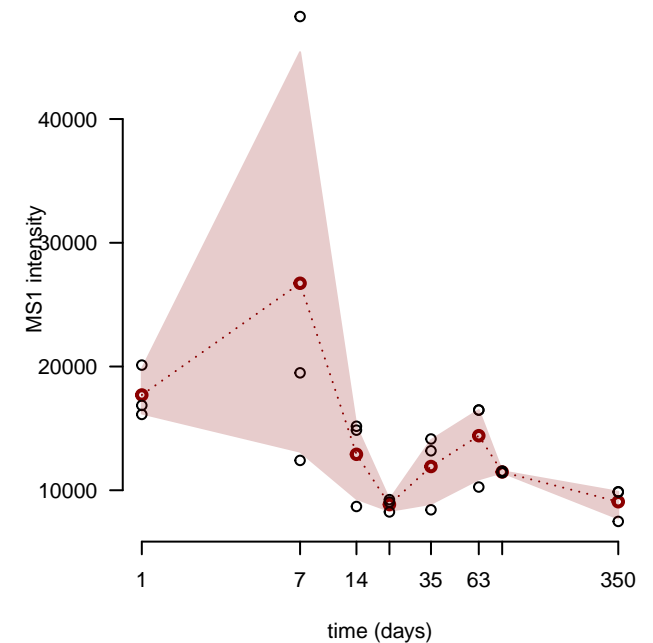

**Q8VE95**  
GN=

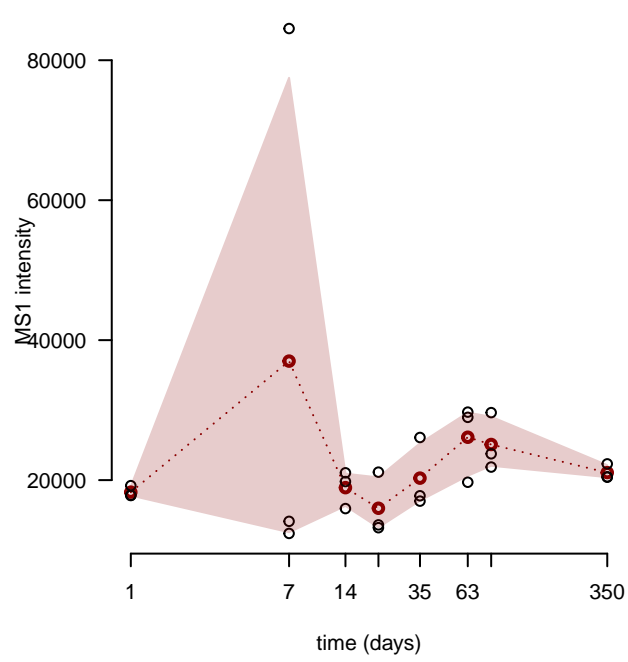

**Q8VE96**  
GN=Slc35f6  
solute carrier family 35, member F6

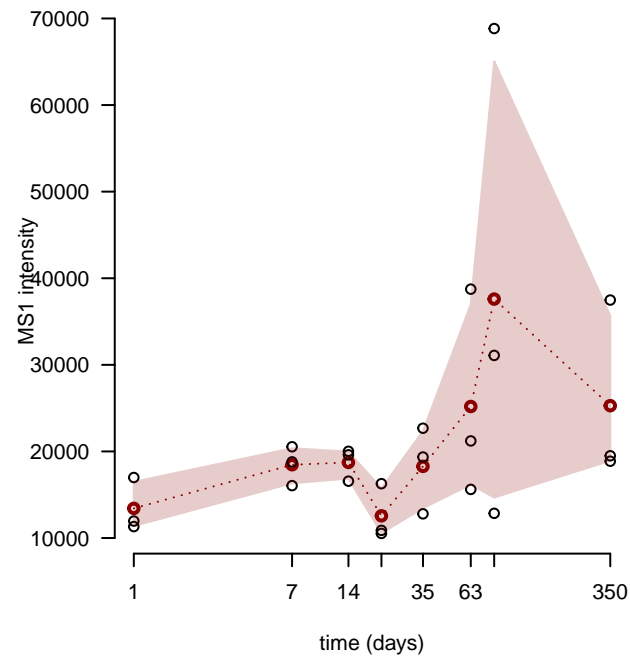

**Q8VE97**  
GN=Srsf4  
serine and arginine-rich splicing factor ...

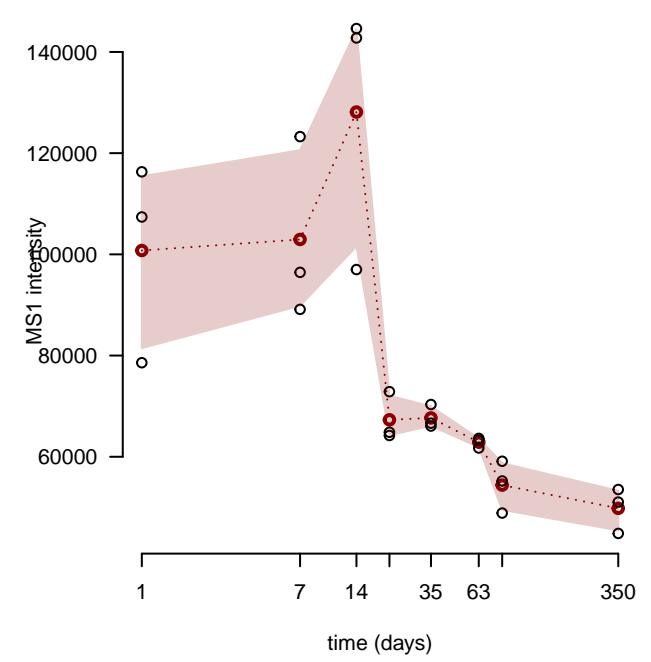

**Q8VE98**  
GN=Cd276  
CD276 antigen

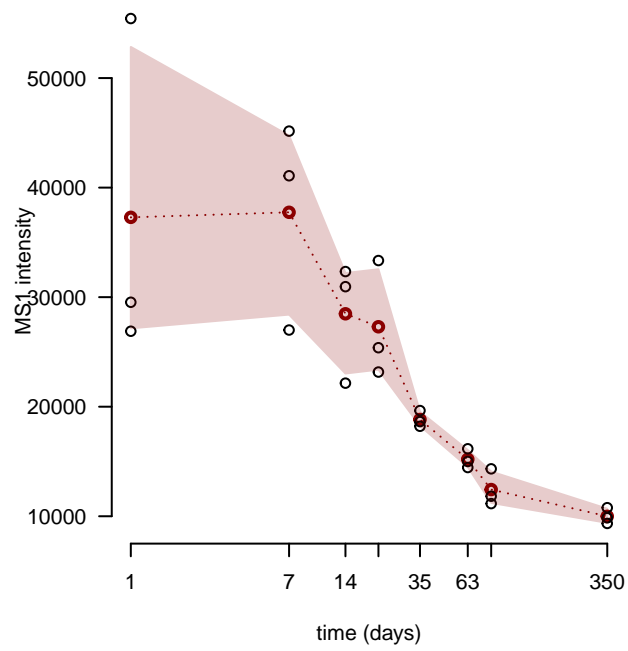

**Q8VE99**  
GN=Ccdc115  
coiled-coil domain containing 115

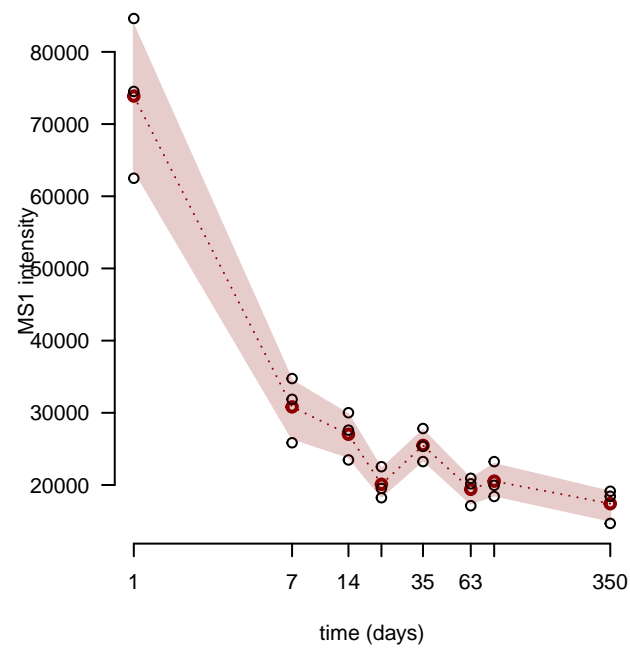

**Q8VEA4**  
GN=Chchd4  
coiled-coil-helix-coiled-coil-helix doma ...

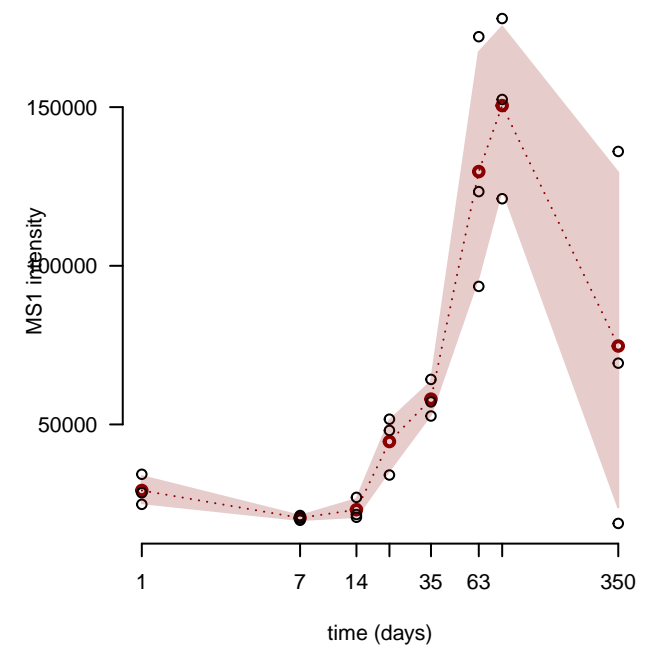

**Q8VEB1**  
GN=Grk5  
G protein-coupled receptor kinase 5

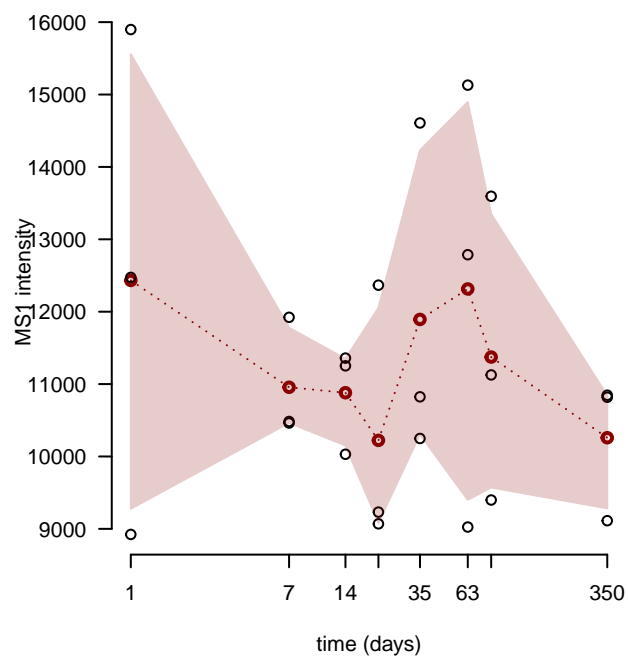

**Q8VEB2**  
GN=Sav1  
salvador family WW domain containing 1

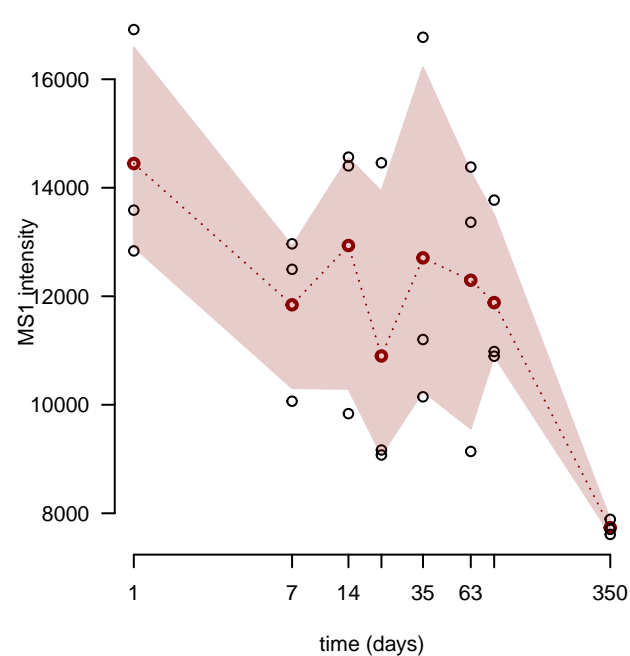

**Q8VEB4**  
GN=Pla2g15  
phospholipase A2, group XV

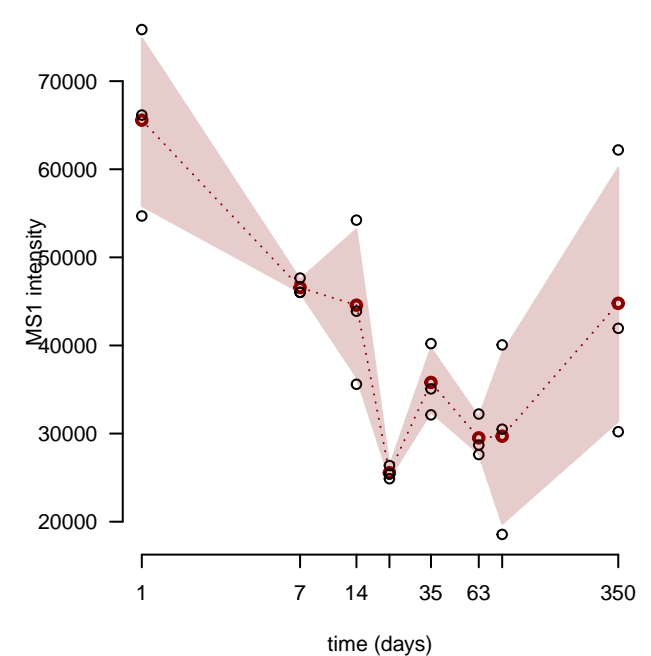

**Q8VEB6**  
GN=Elac1  
elaC ribonuclease Z 1

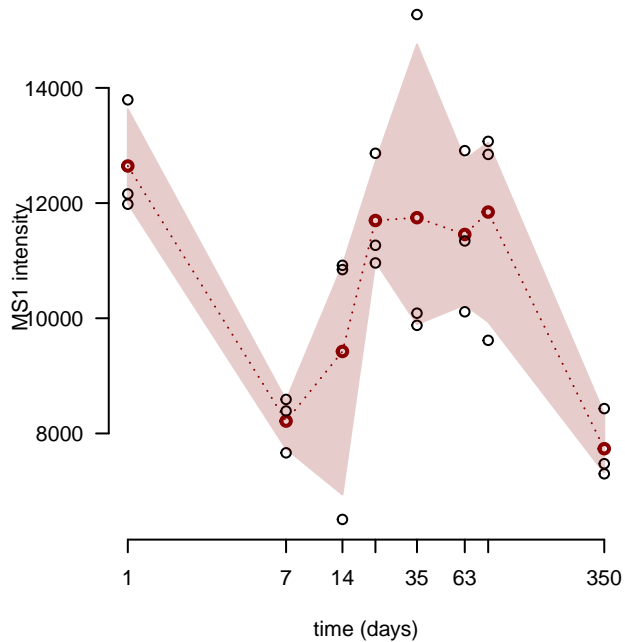

**Q8VEC4**  
GN=Calhm2  
calcium homeostasis modulator family mem ...

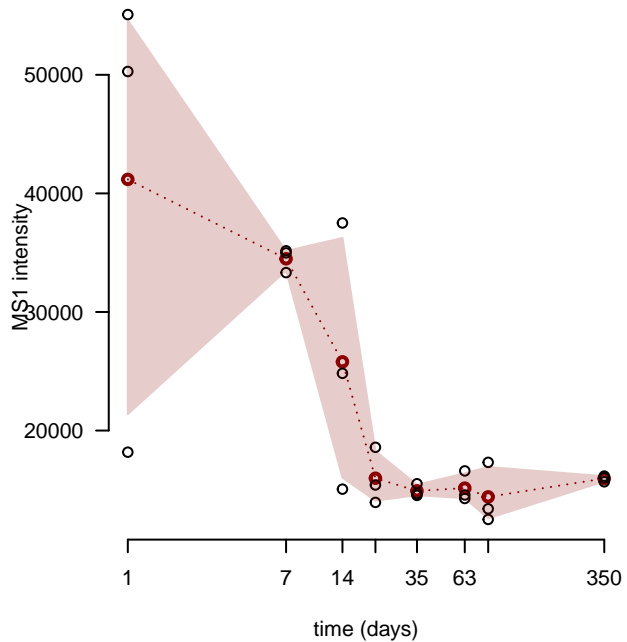

**Q8VED2**  
GN=Blc1s4  
biogenesis of lysosomal organelles compl ...

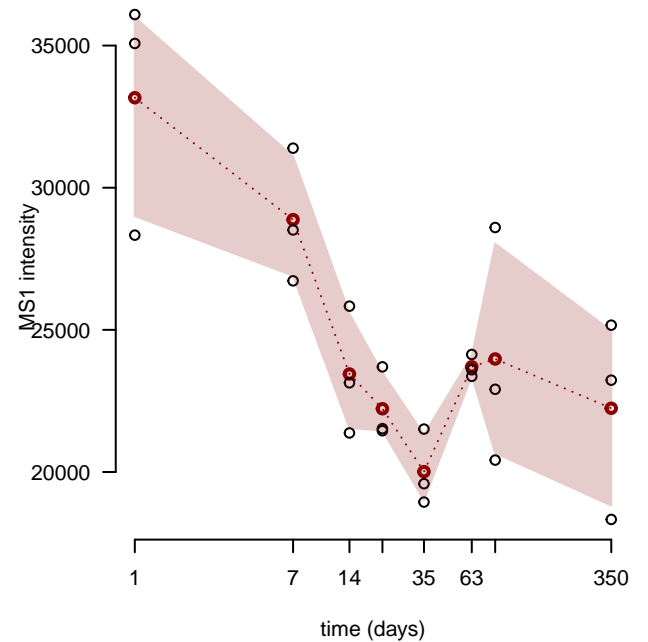

**Q8VED5**  
GN=Krt79  
keratin 79

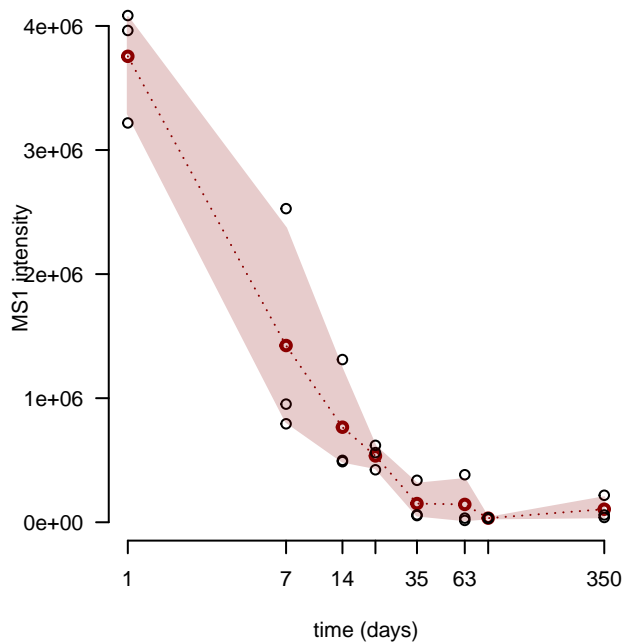

**Q8VED9**  
GN=Lgals1  
galectin like

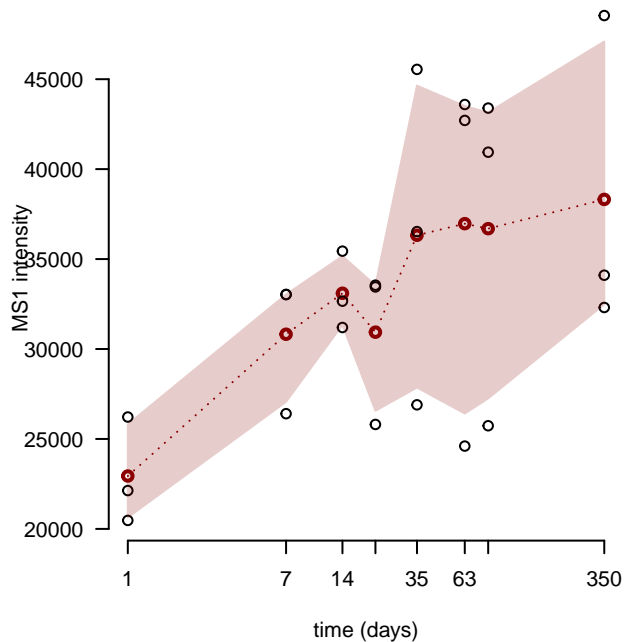

**Q8VEE1**  
GN=Lmcd1  
LIM and cysteine-rich domains 1

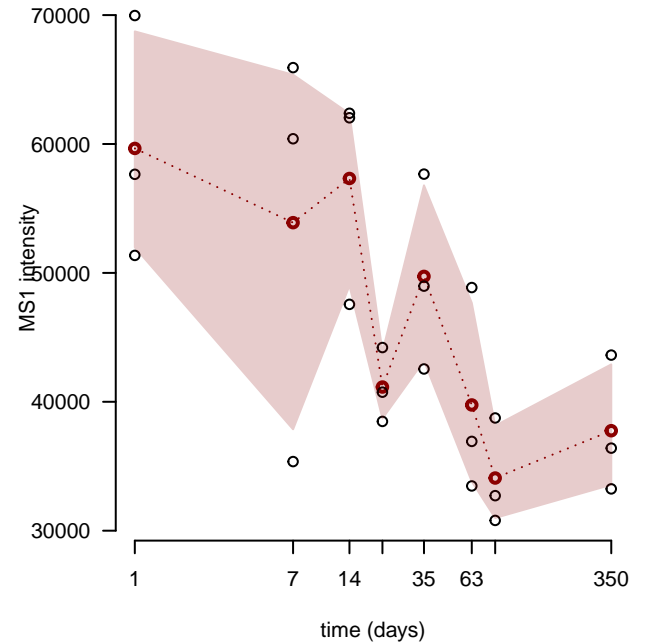

**Q8VEE4**  
GN=Rpa1  
replication protein A1

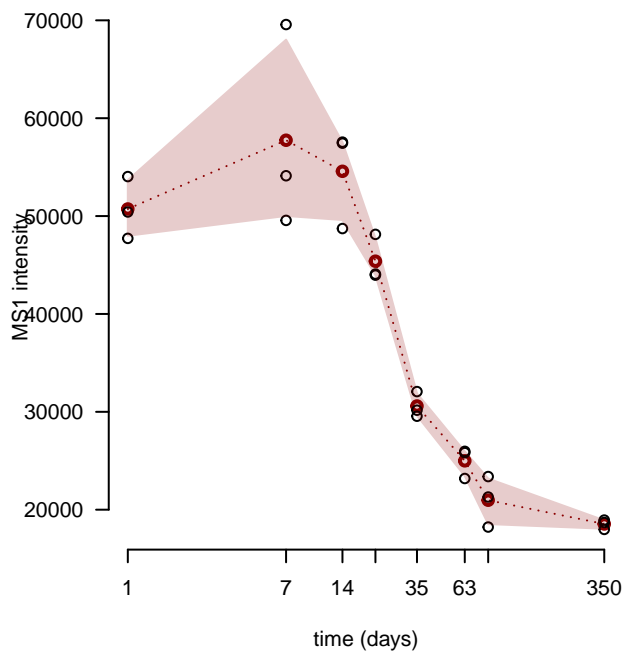

**Q8VEF1**  
GN=Gramd1a  
GRAM domain containing 1A

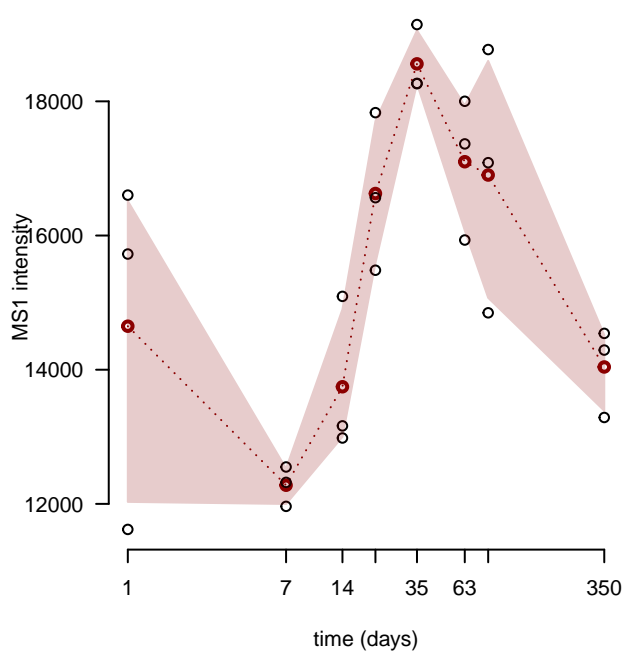

**Q8VEG0**  
GN=Ccdc71  
coiled-coil domain containing 71

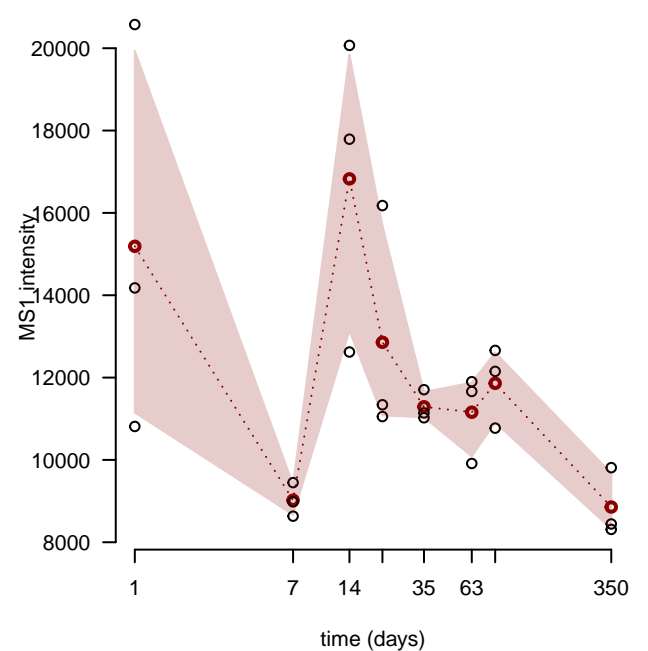

**Q8VEG4**  
GN=Exd2  
exonuclease 3'-5' domain containing 2

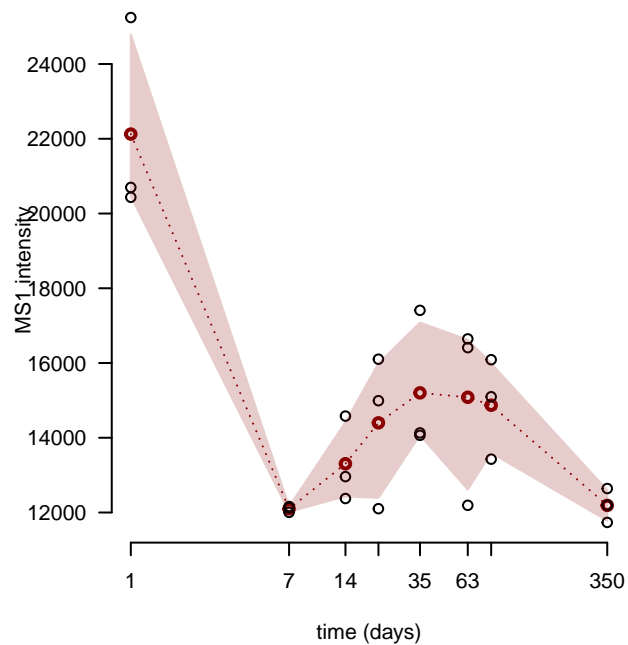

**Q8VEG6**  
GN=Cnot6l  
CCR4-NOT transcription complex, subunit ...

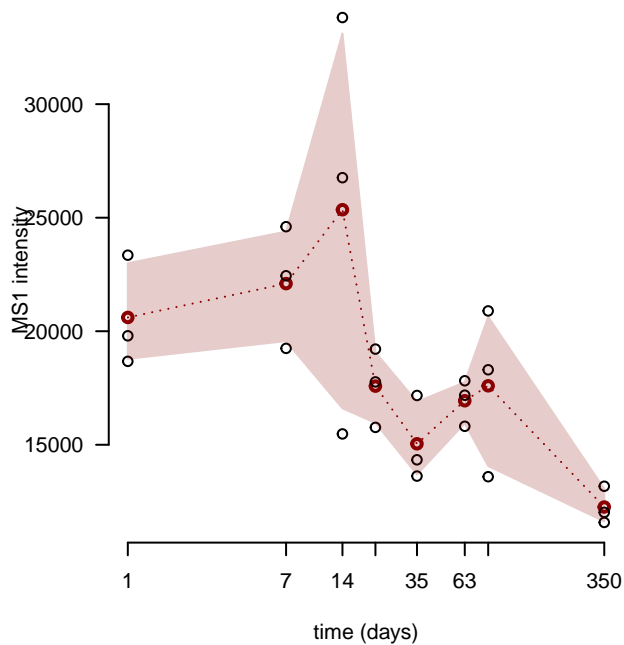

**Q8VEH3**  
GN=Arl8a  
ADP-ribosylation factor-like 8A

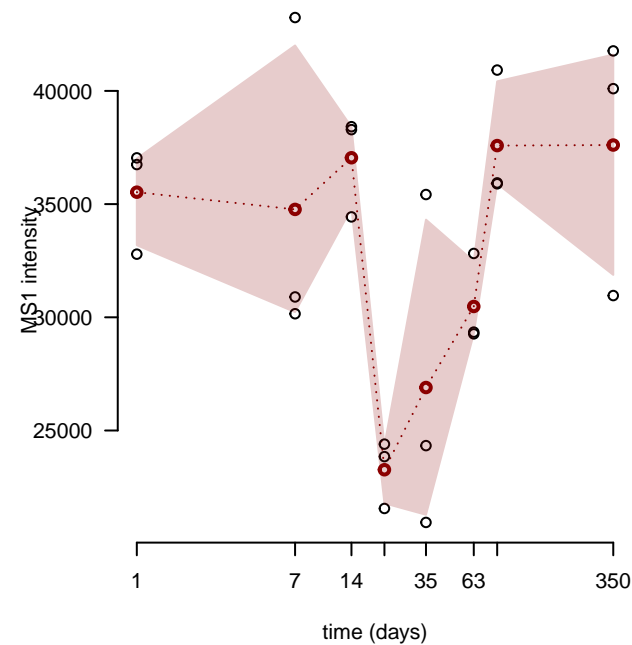

**Q8VEH5**  
GN=Epm2aip1  
EPM2A (laforin) interacting protein 1

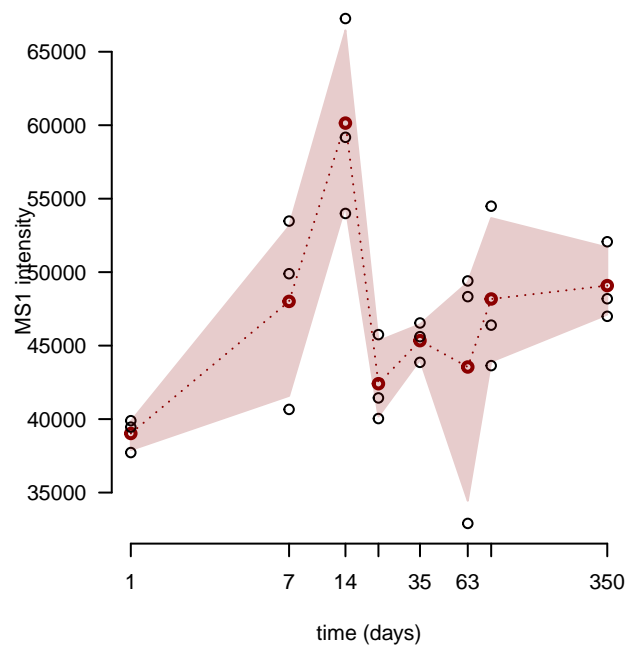

**Q8VEH6**  
GN=Cbwd1  
COBW domain containing 1

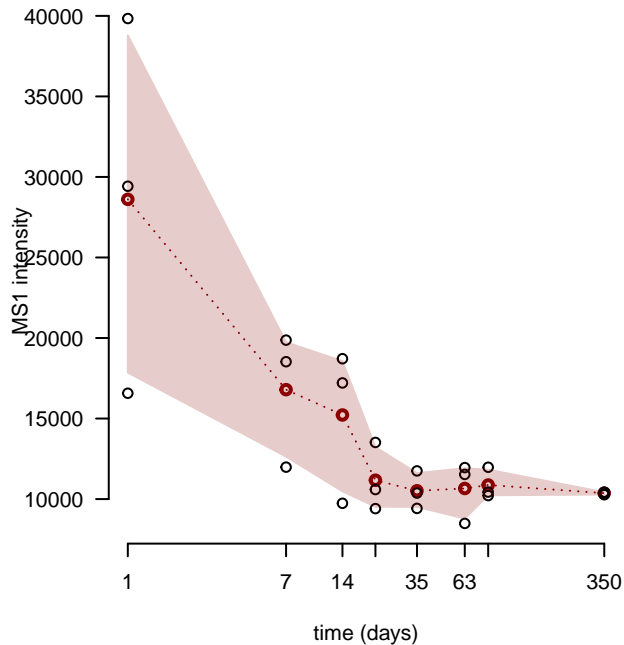

**Q8VEH8**  
GN=Erlec1  
endoplasmic reticulum lectin 1

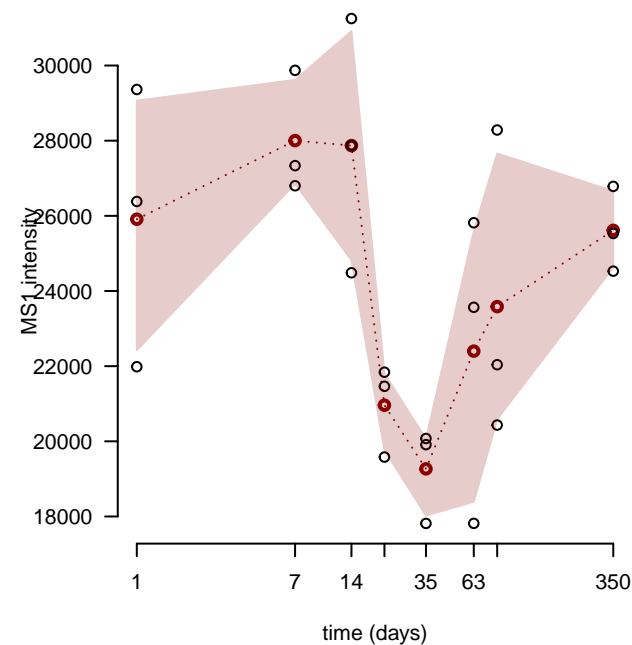

**Q8VEJ4**  
GN=Nle1  
notchless homolog 1

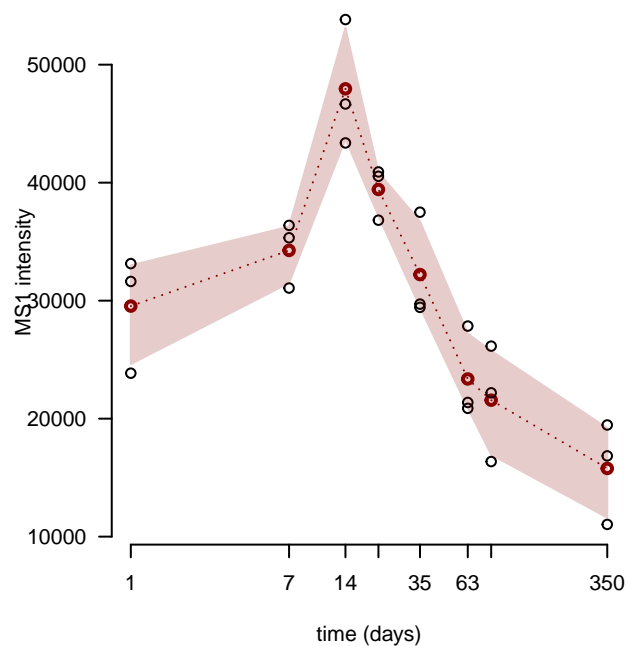

**Q8VEJ9**  
GN=Vps4a  
vacuolar protein sorting 4A

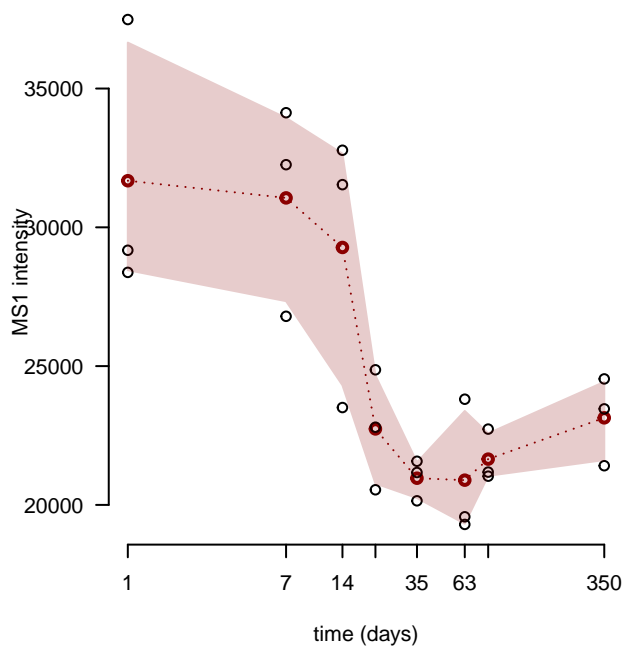

**Q8VEK0**  
GN=Tmem30a  
transmembrane protein 30A

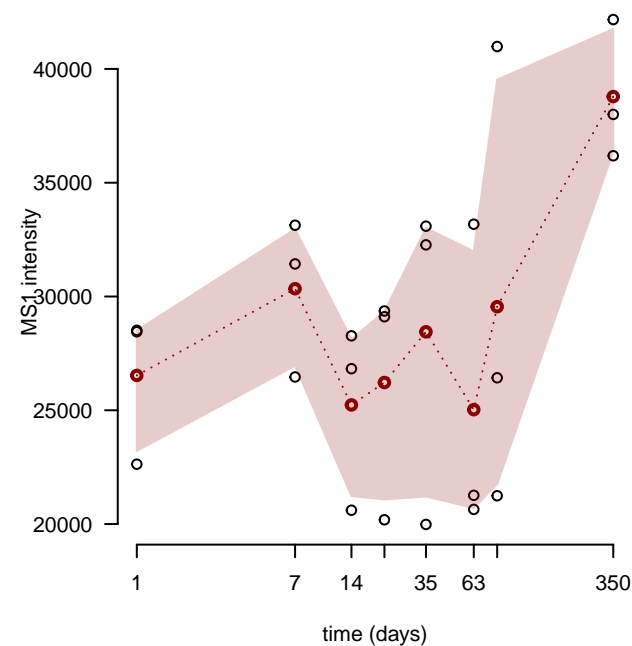

**Q8VEK2**  
GN=Rhbdd2  
rhomboïd domain containing 2

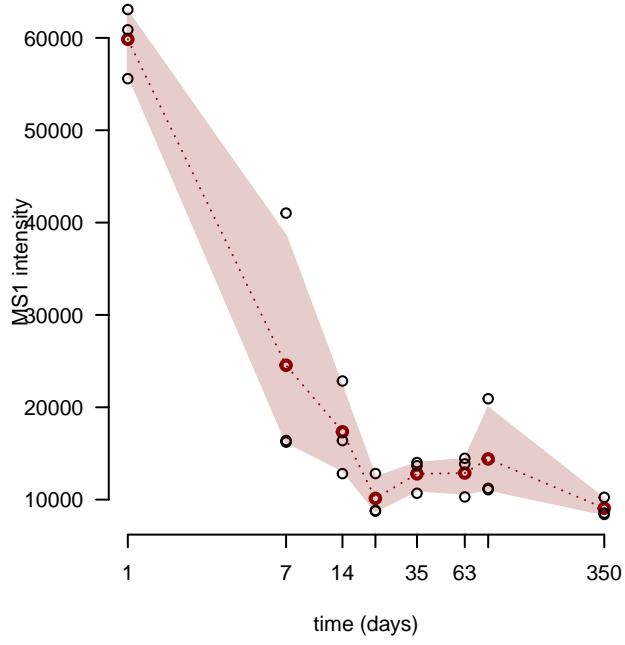

**Q8VEK3**  
GN=Hhrrnpu  
heterogeneous nuclear ribonucleoprotein ...

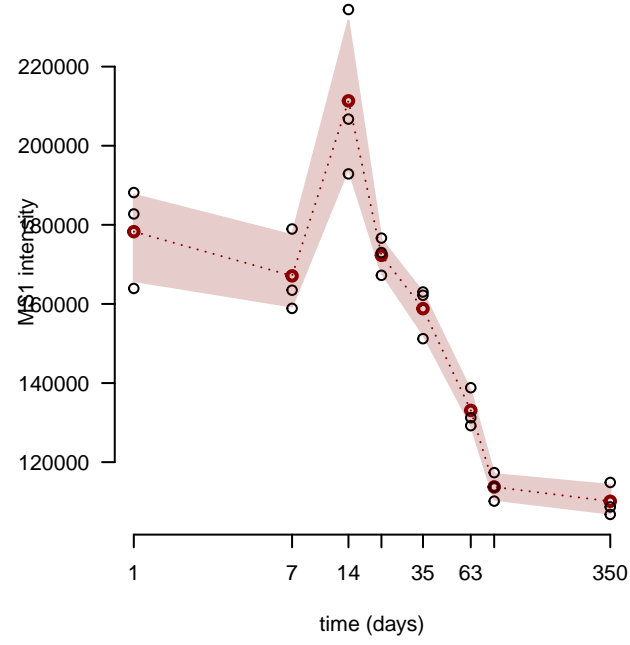

**Q8VEK6**  
GN=Ing3  
inhibitor of growth family, member 3

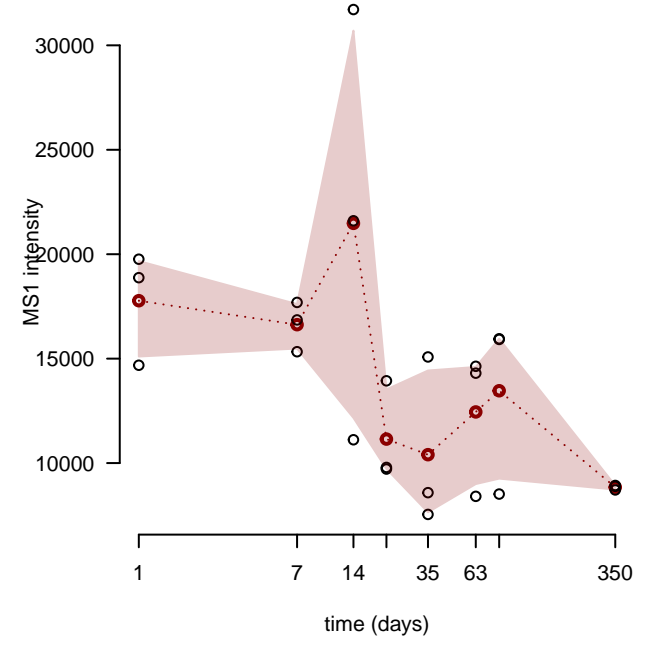

**Q8VEL0**  
GN=Mospd1  
motile sperm domain containing 1

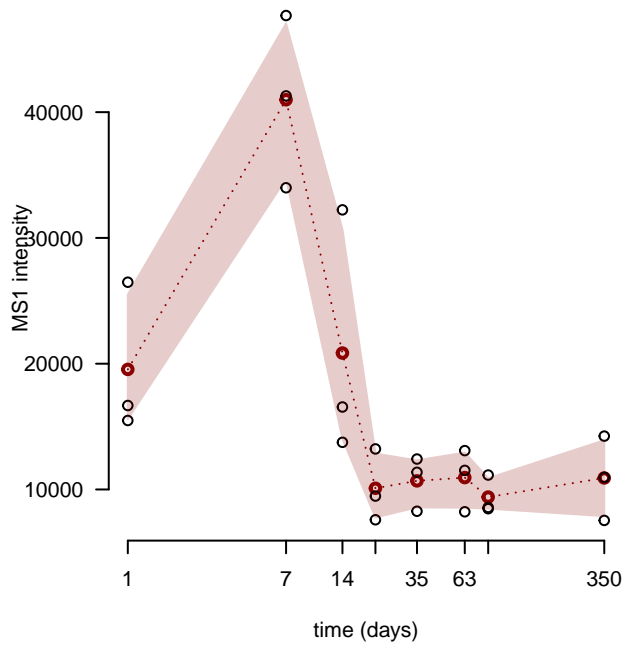

**Q8VEL2**  
GN=Mtnr14  
myotubularin related protein 14

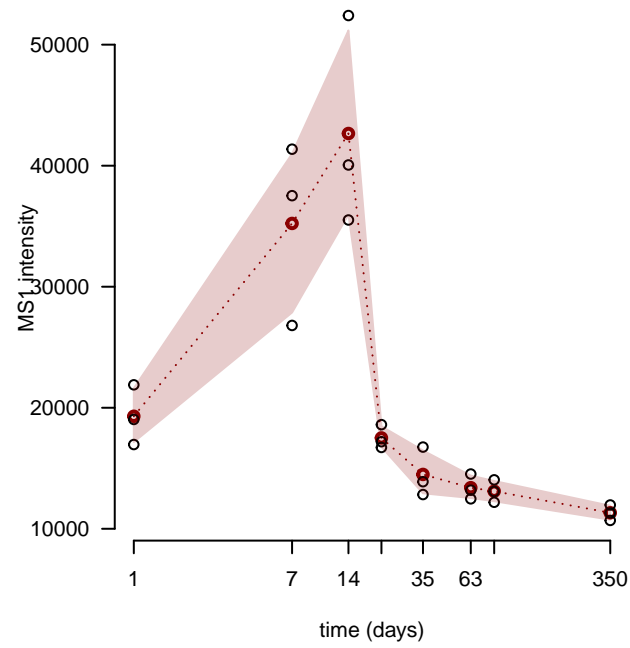

**Q8VEM8**  
GN=Slc25a3  
solute carrier family 25 (mitochondrial ...

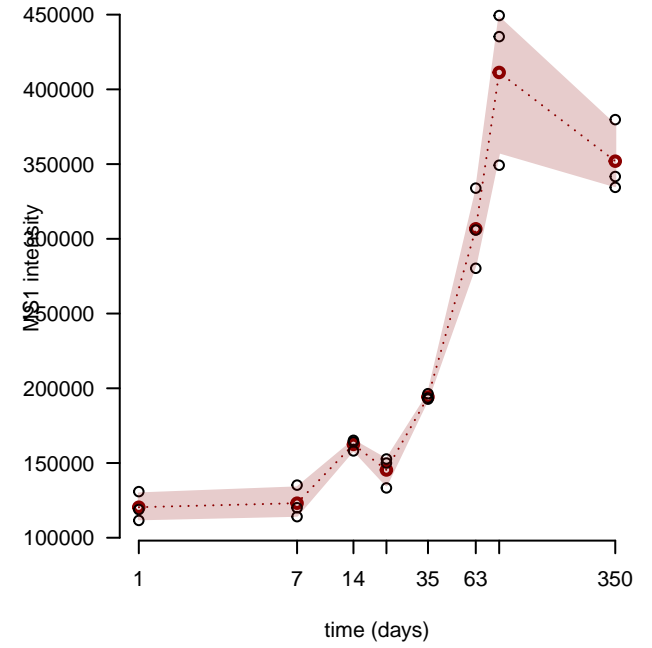

**Q8VGD6**  
GN=Olfr56

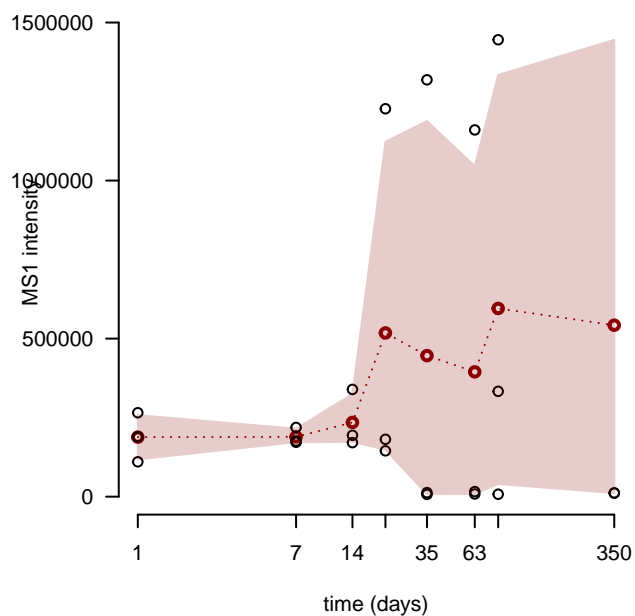

**Q8VH37**  
GN=Hdac8  
histone deacetylase 8

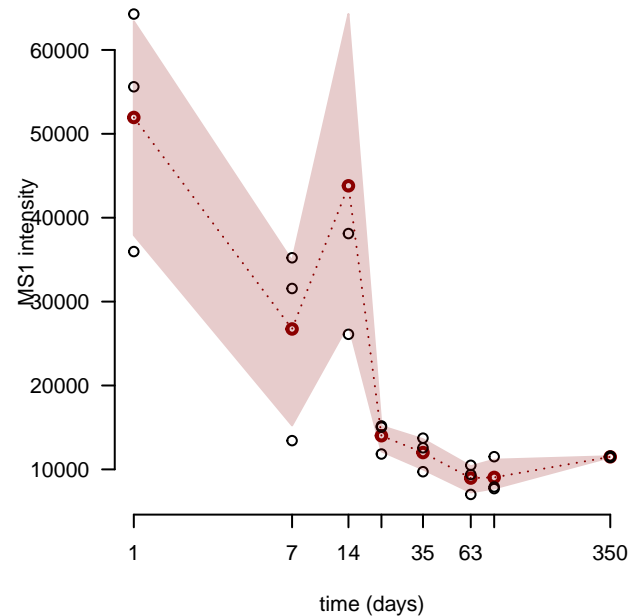

**Q8VH51**  
GN=Rbm39  
RNA binding motif protein 39

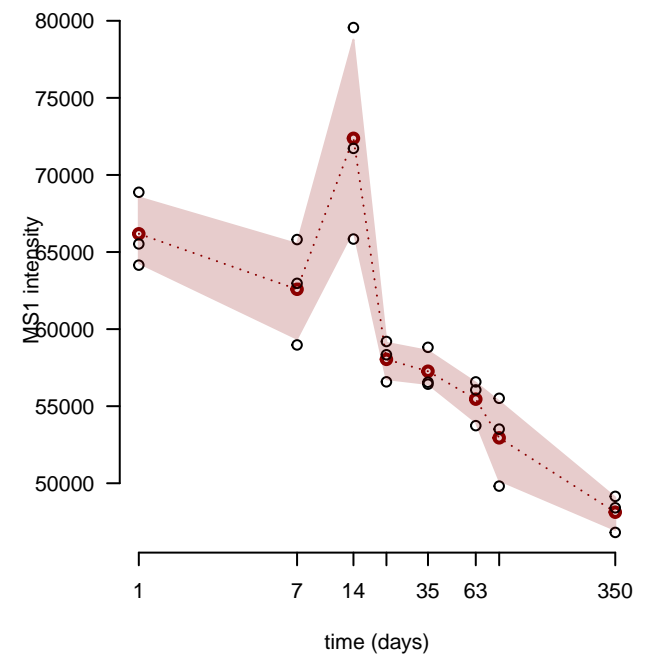

**Q8VHC3**  
GN=Selenom  
selenoprotein M

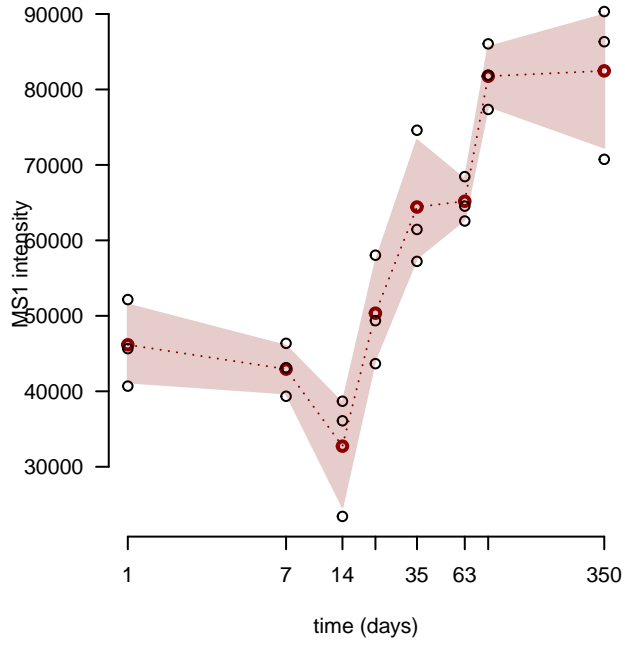

**Q8VHD8**  
GN=Hrnr  
hornerin

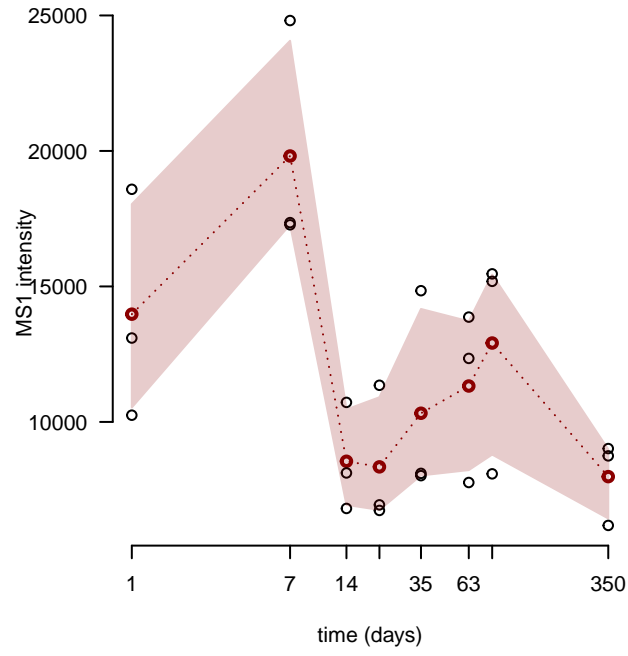

**Q8VHE0**  
GN=Sec63  
SEC63-like (*S. cerevisiae*)

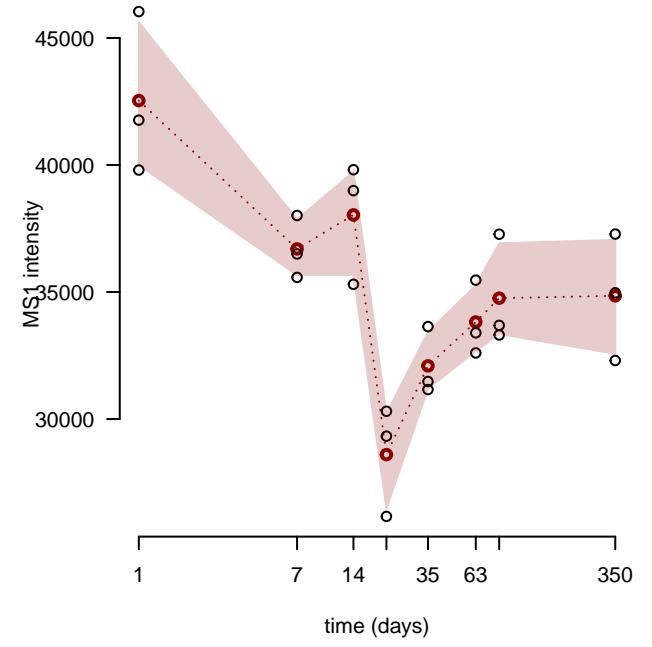

**Q8VHG2**  
GN=Amot  
angiomin

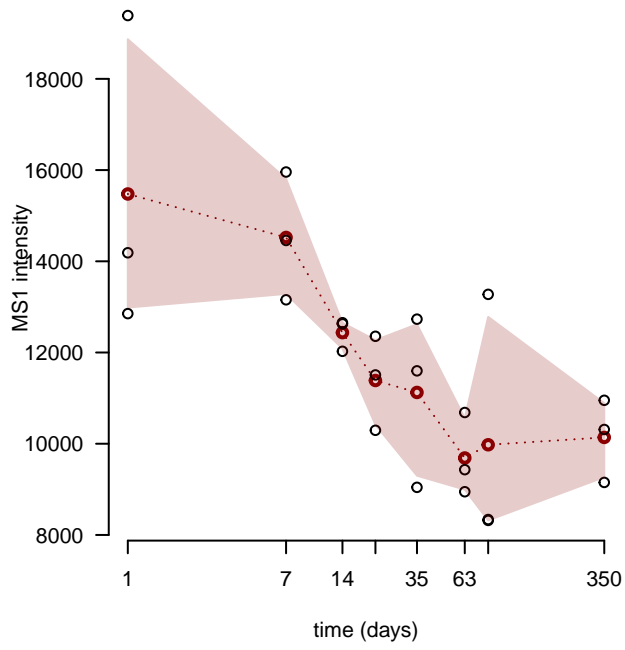

**Q8VHH5**  
GN=Agap3  
ArfGAP with GTPase domain, ankyrin repea ...

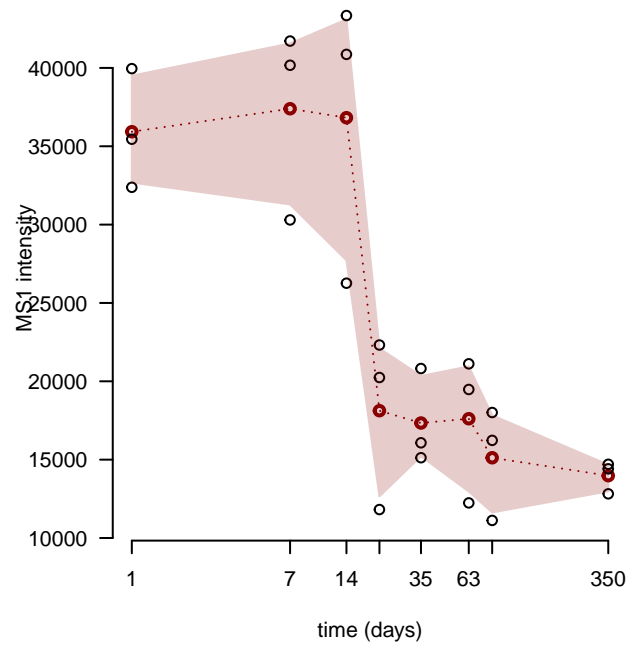

**Q8VHH7**  
GN=Adcy3  
adenylate cyclase 3

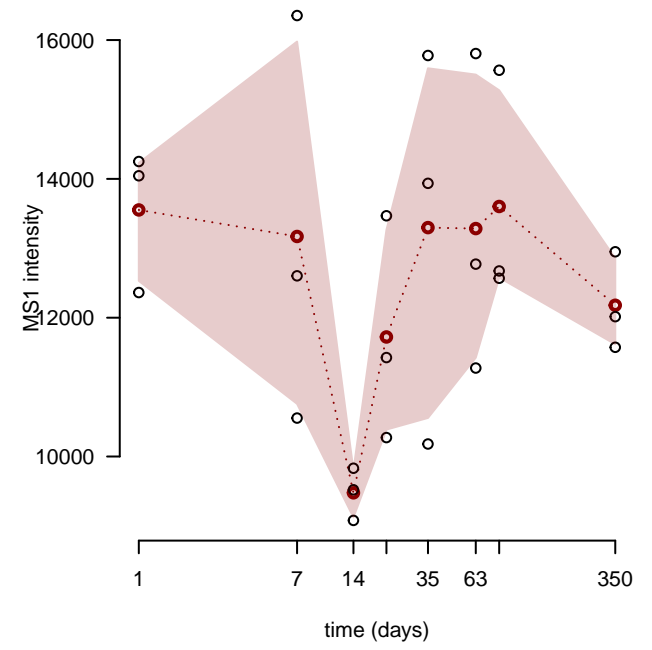

**Q8VHI3**  
GN=Pofut2  
protein O-fucosyltransferase 2

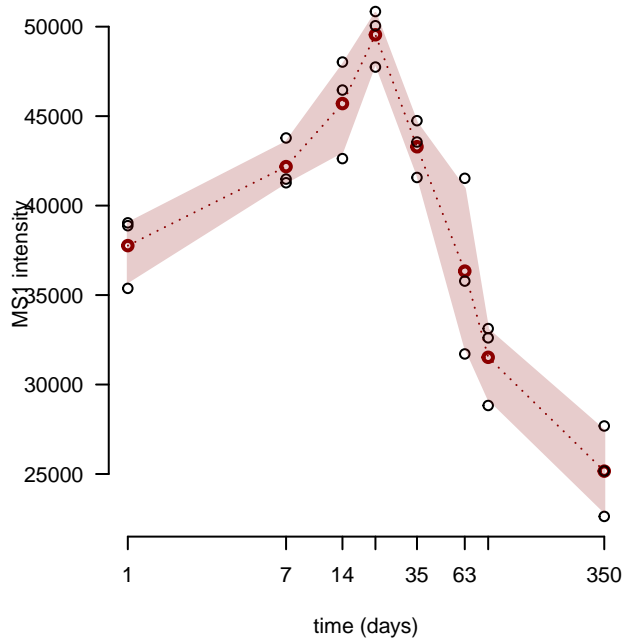

**Q8VHJ5**  
GN=Mark1  
MAP/microtubule affinity regulating kina ...

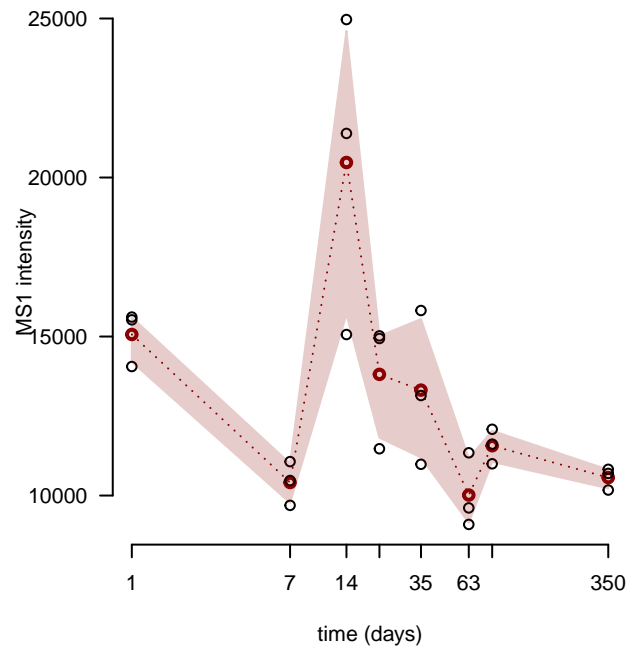

**Q8VHK1**  
GN=Caskin2  
CASK-interacting protein 2

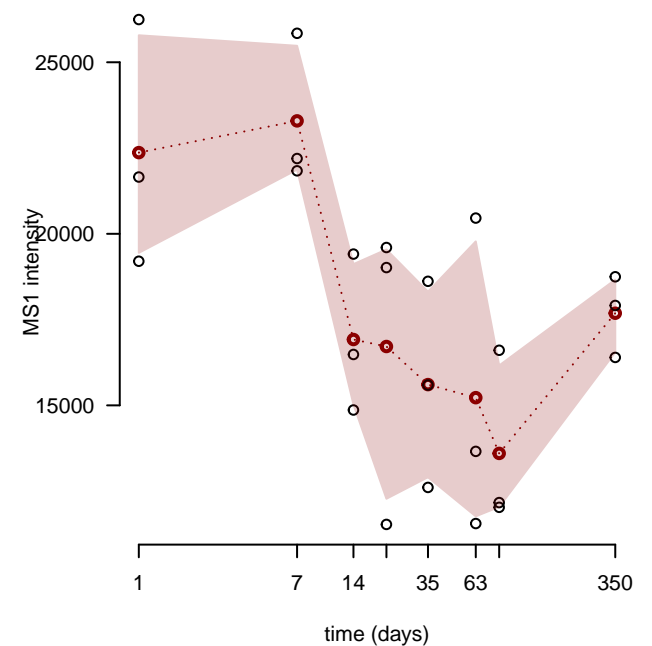

**Q8VHK9**  
**GN=Dhx36**

DEAH (Asp-Glu-Ala-His) box polypeptide 3 ...

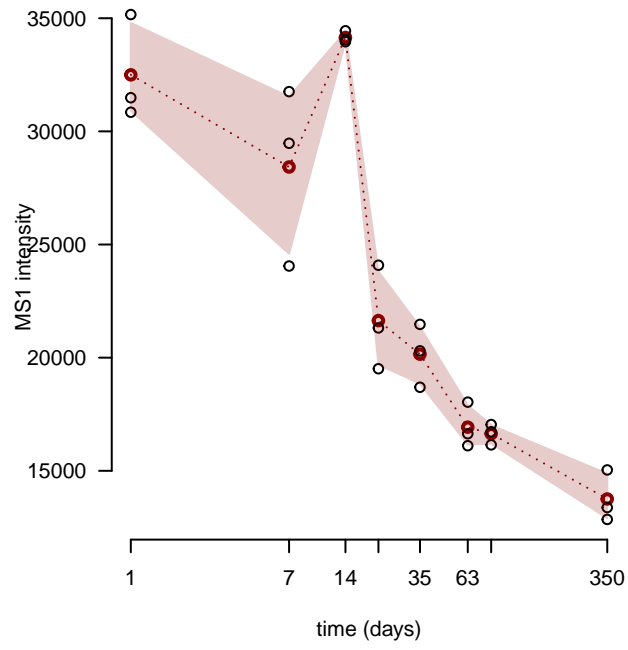

**Q8VHL0**  
**GN=Slc14a1**

solute carrier family 14 (urea transport ...

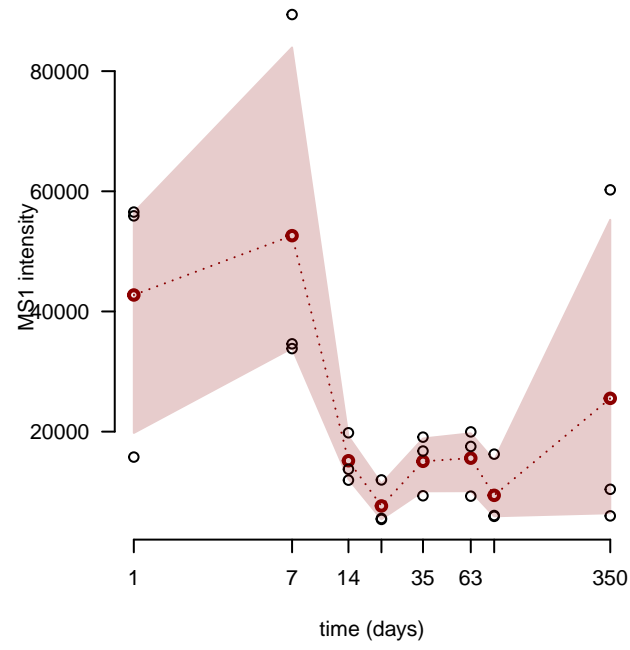

**Q8VHL1**  
**GN=Setd7**

SET domain containing (lysine methyltran ...

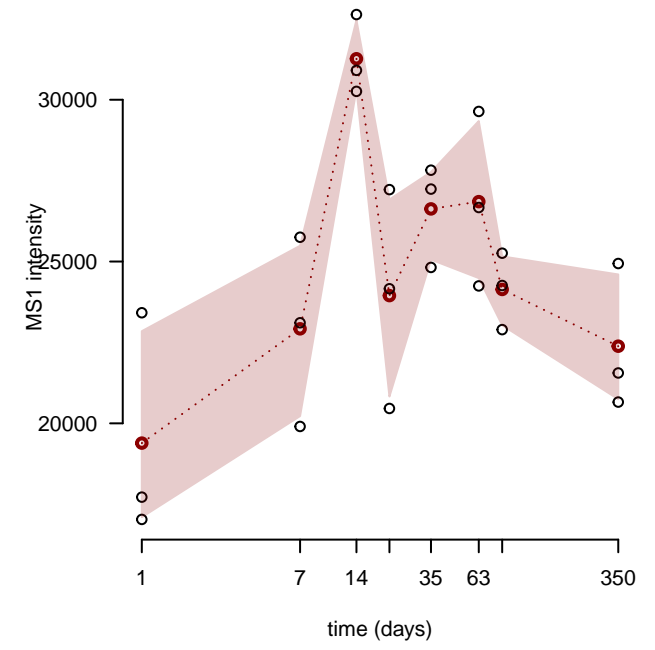

**Q8VHN7**  
**GN=Adgrv1**

adhesion G protein-coupled receptor V1

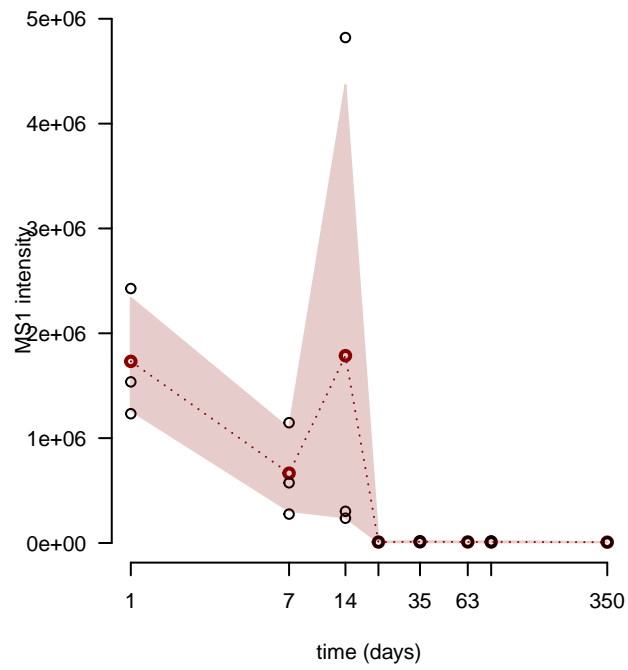

**Q8VHN8**  
**GN=Nudt16l1**

nudix (nucleoside diphosphate linked moi ...

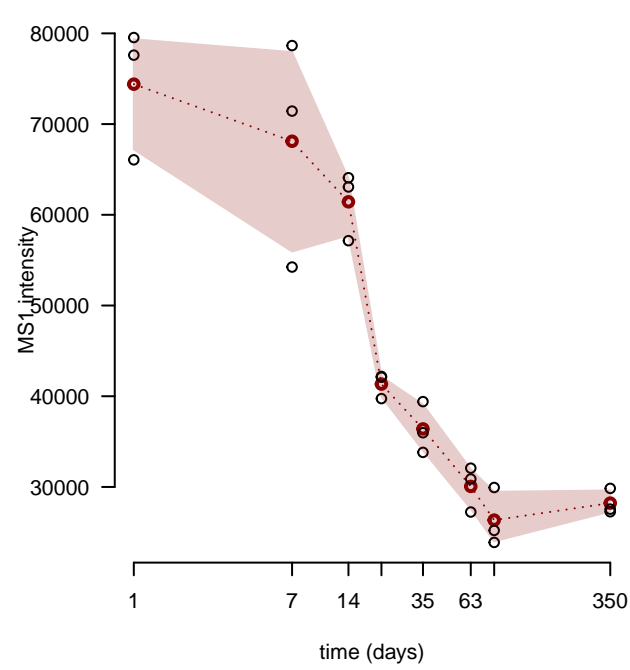

**Q8VHQ9**  
**GN=Acot11**

acyl-CoA thioesterase 11

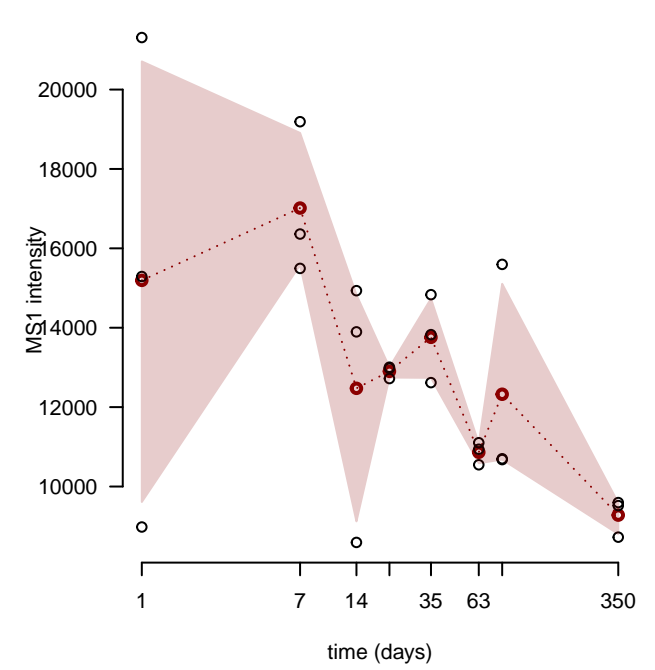

**Q8VHR5**  
**GN=Gatad2b**

GATA zinc finger domain containing 2B

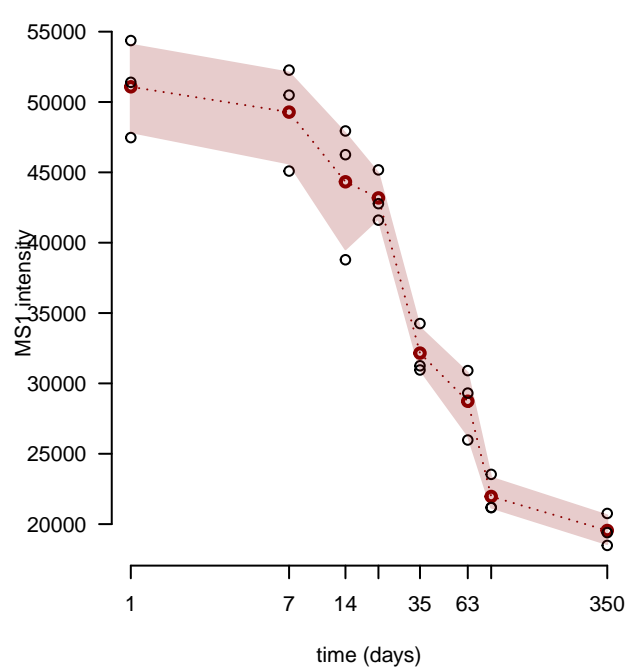

**Q8VHX6**  
**GN=Flnc**

filamin C, gamma

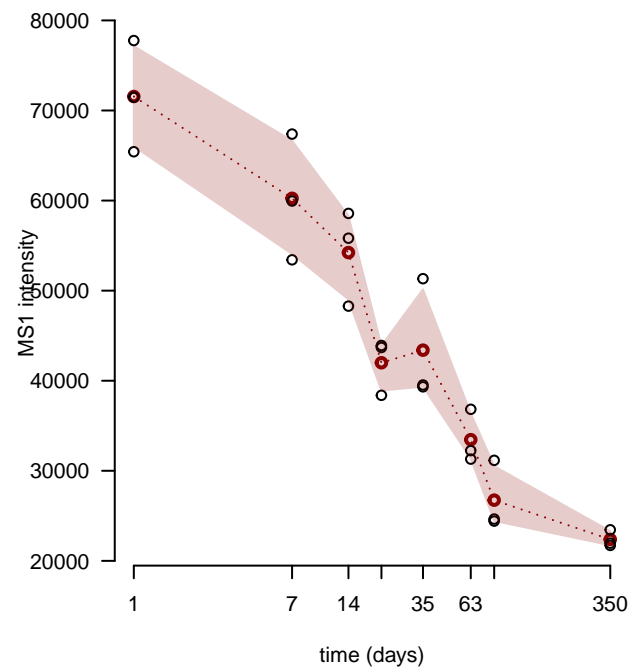

**Q8VHY0**  
**GN=Cspg4**

chondroitin sulfate proteoglycan 4

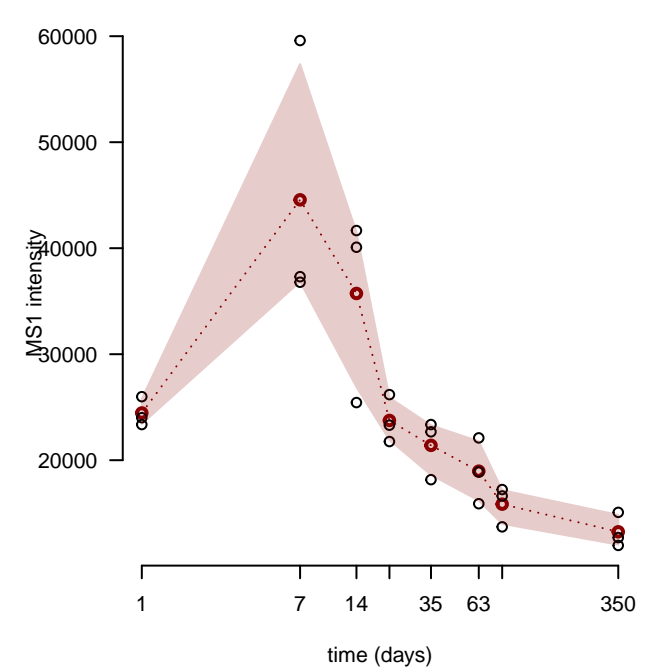

**Q8VHZ7**  
**GN=Imp4**

IMP4, U3 small nucleolar ribonucleoprote...

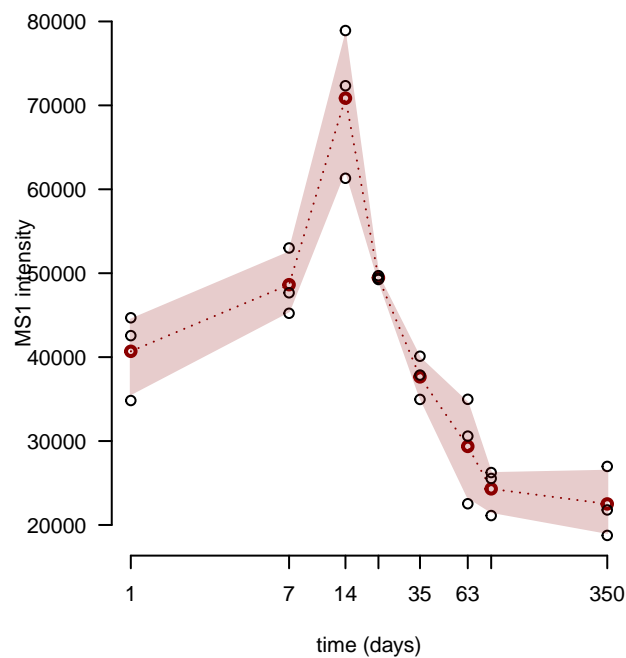

**Q8VI33**  
**GN=Taf9**

TATA-box binding protein associated fact...

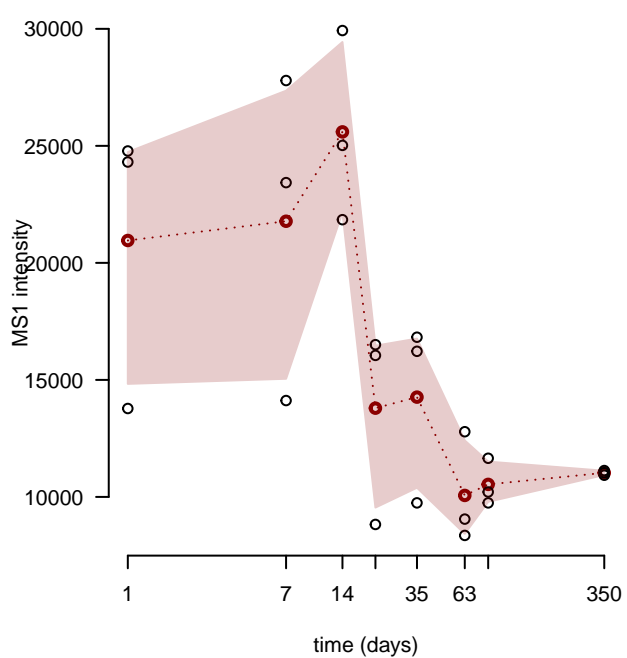

**Q8VI36**  
**GN=Pxn**

paxillin

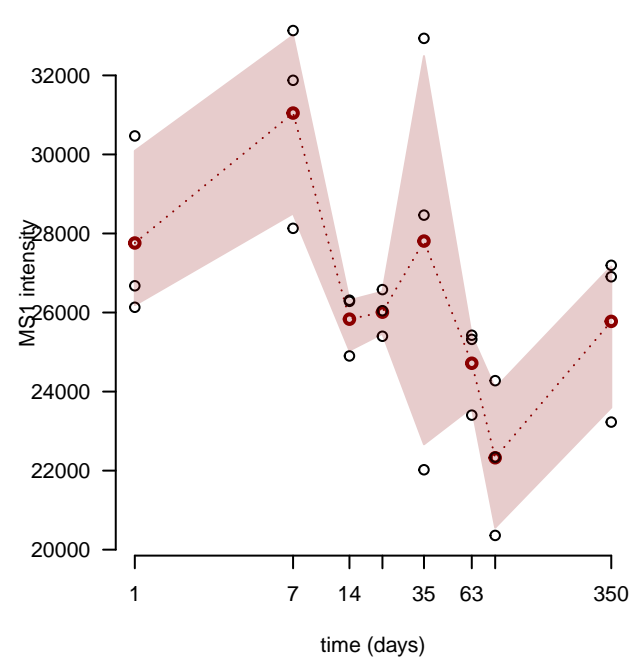

**Q8VI59**  
**GN=Pcnx3**

pecanex homolog 3

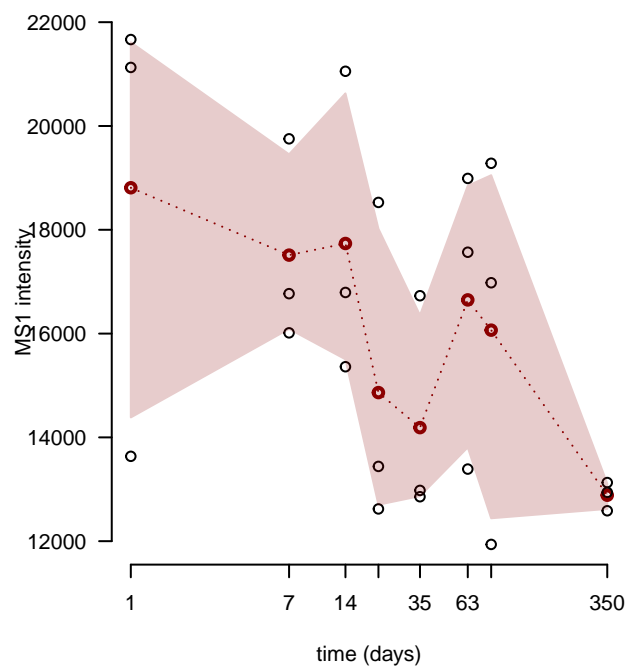

**Q8VI63**  
**GN=Mob2**

MOB kinase activator 2

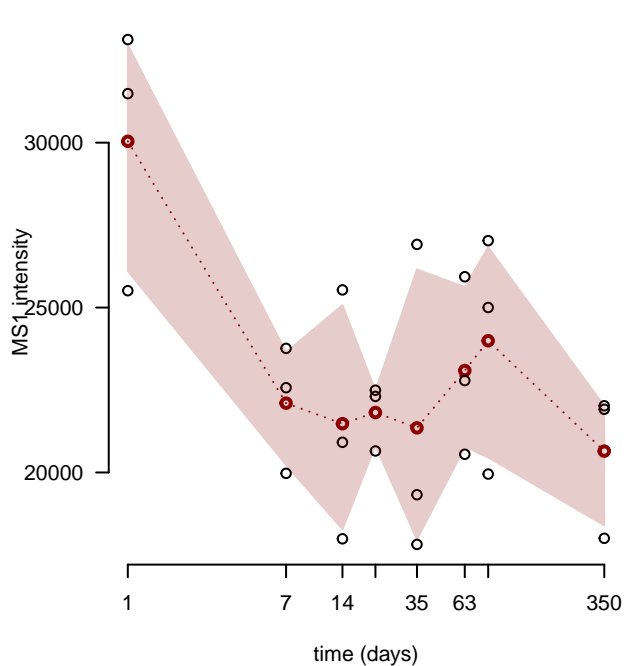

**Q8VI64**  
**GN=Mgarp**

mitochondria localized glutamic acid ric...

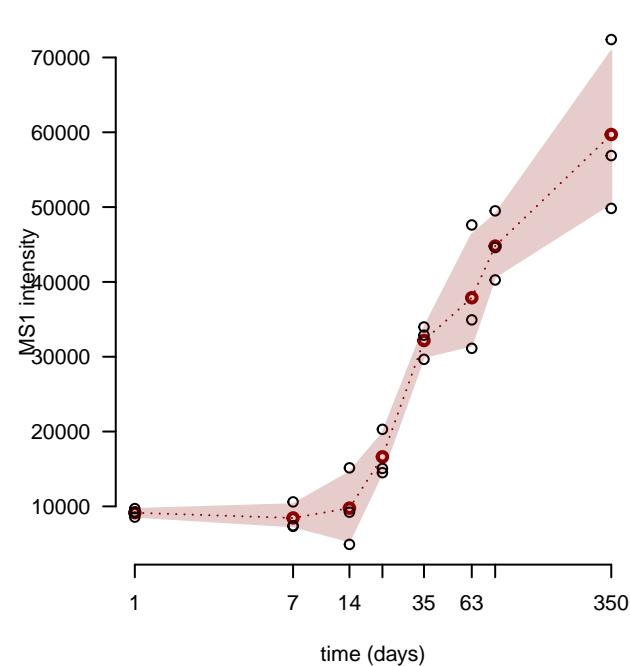

**Q8VI75**  
**GN=Ipo4**

importin 4

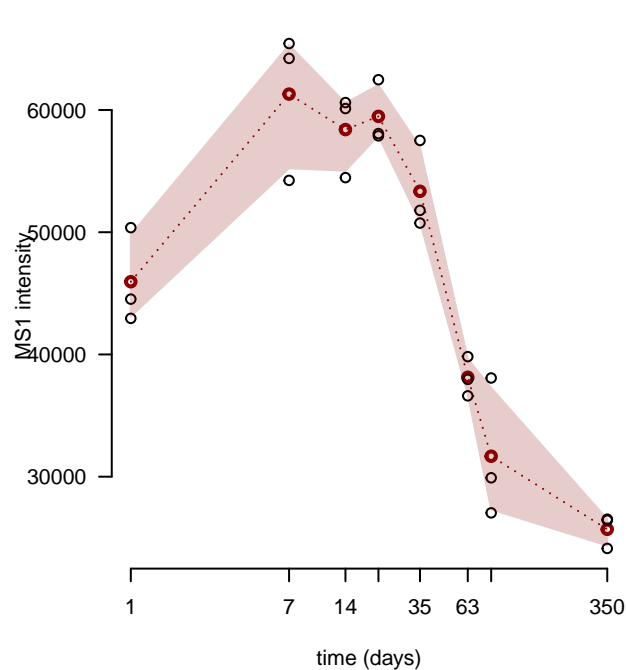

**Q8VI84**  
**GN=Noc3l**

NOC3 like DNA replication regulator

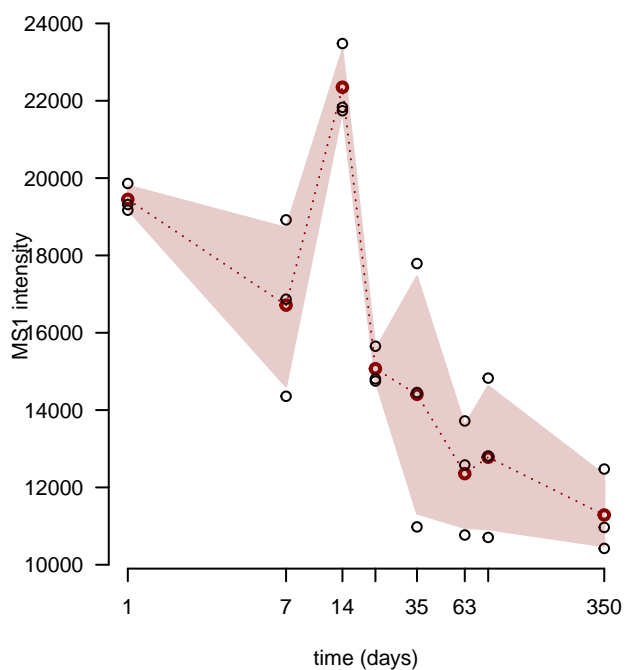

**Q8VI95**  
**GN=Oas1d**

2'-5' oligoadenylate synthetase 1D

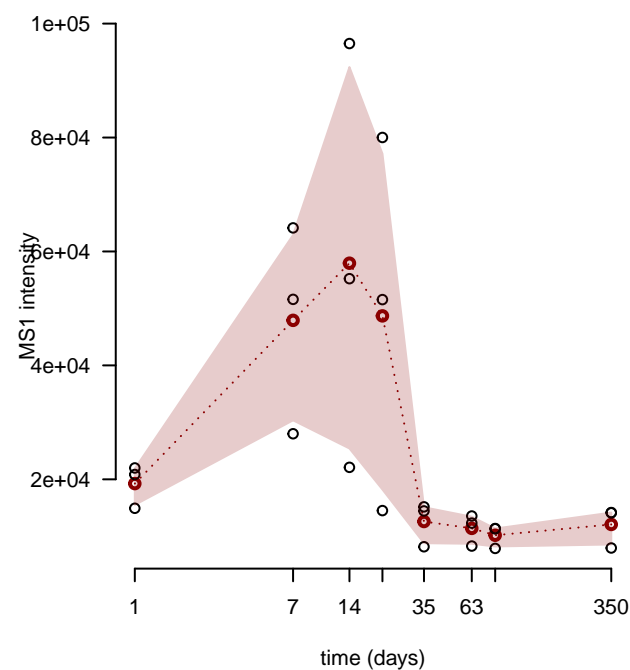



**Q8VID5**  
GN=Recq15  
RecQ protein-like 5

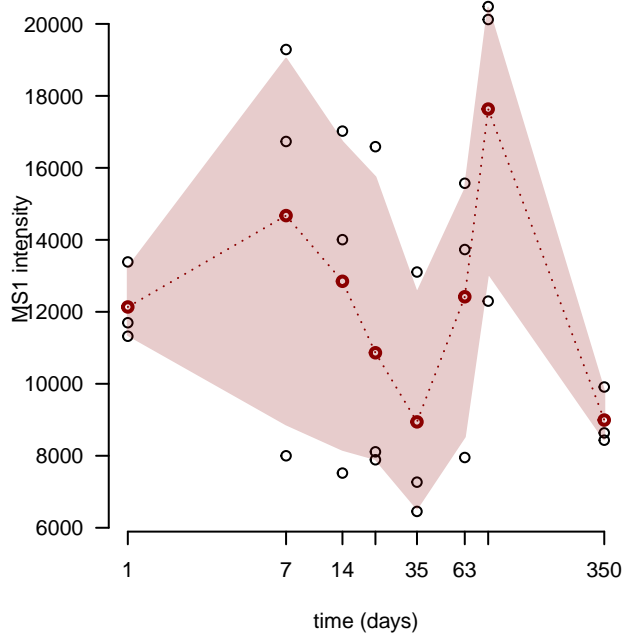

**Q8VIG1**  
GN=Rest  
RE1-silencing transcription factor

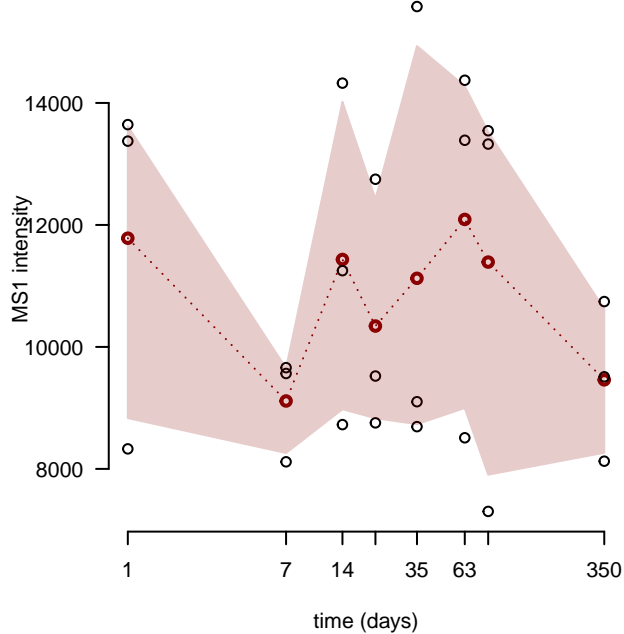

**Q8VIH1**  
GN=Nobox  
NOBOX oogenesis homeobox

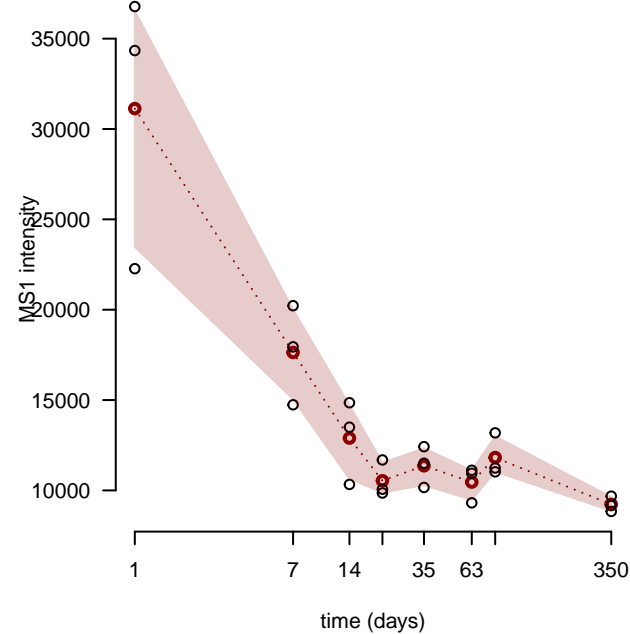

**Q8VIJ6**  
GN=Sfpq  
splicing factor proline/glutamine rich (...)

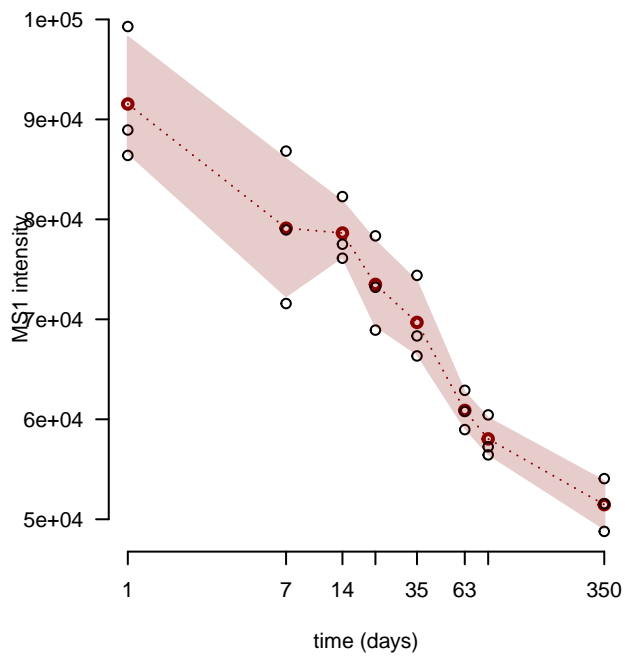

**Q8VIJ8**  
GN=Npr13  
nitrogen permease regulator-like 3

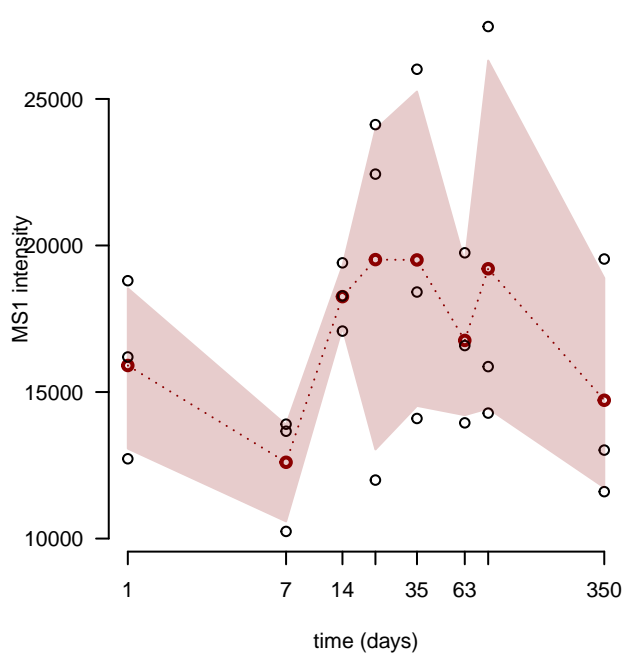

**Q8VIK2**  
GN=Mpv1712  
MPV17 mitochondrial membrane protein-like ...

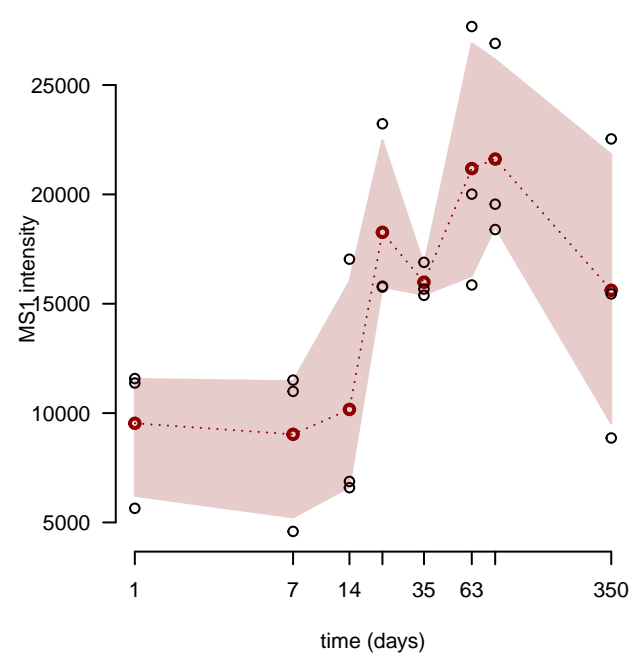

**Q8VIK3**  
GN=H1foo

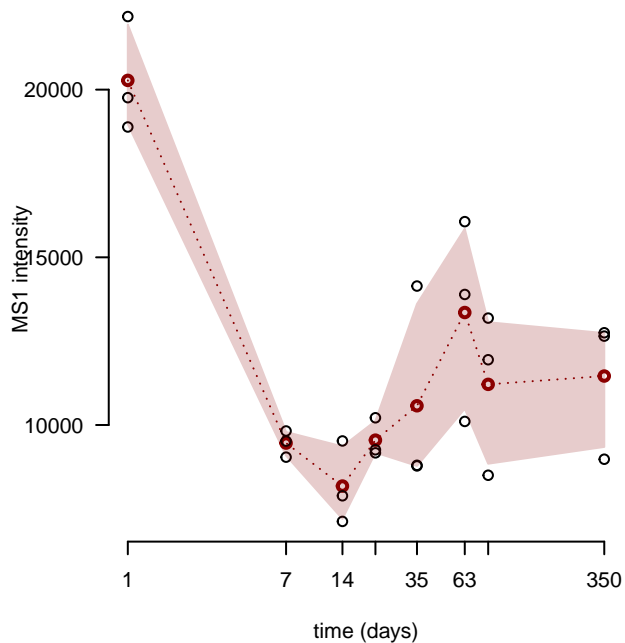

**Q8VIL2**  
GN=Rwdd3  
RWD domain containing 3

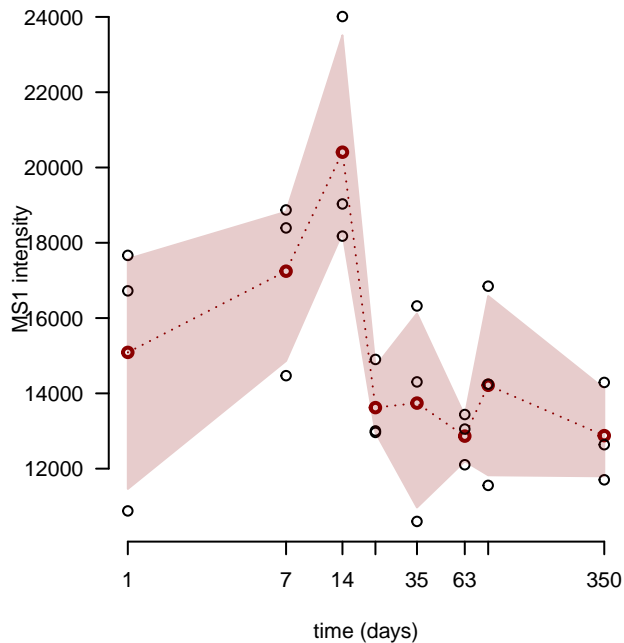

**Q8VIM9**  
GN=Irgq  
immunity-related GTPase family, Q

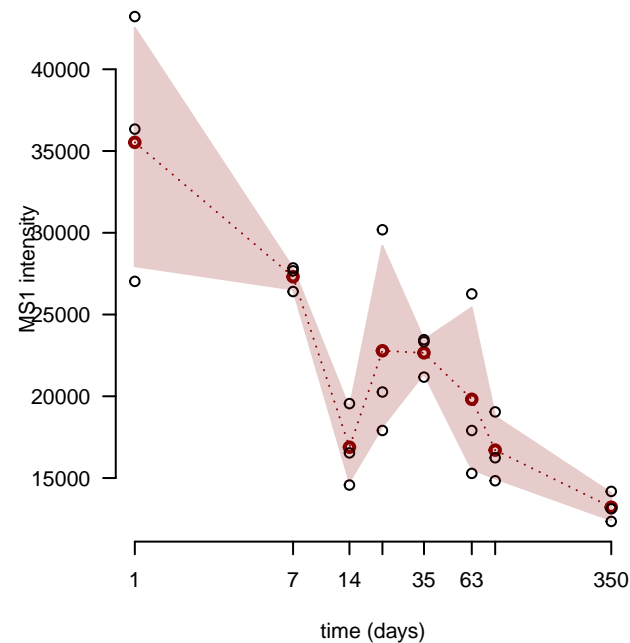

**Q8WTY4**  
GN=Ciabin1  
cytokine induced apoptosis inhibitor 1

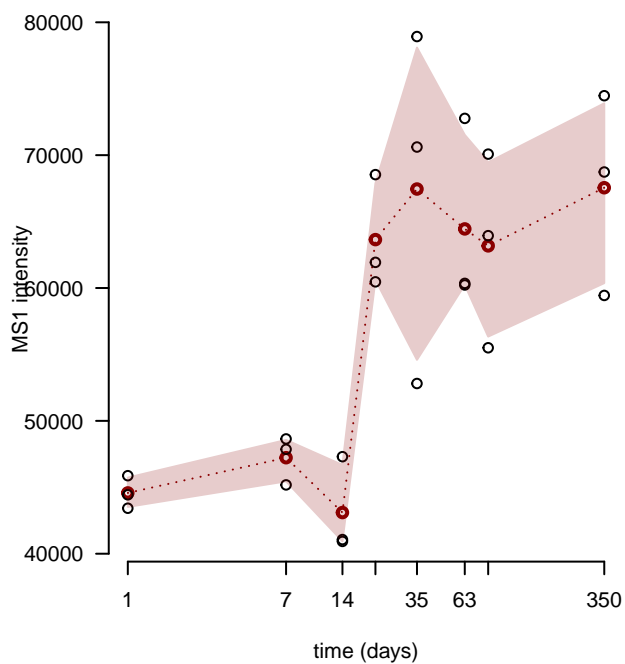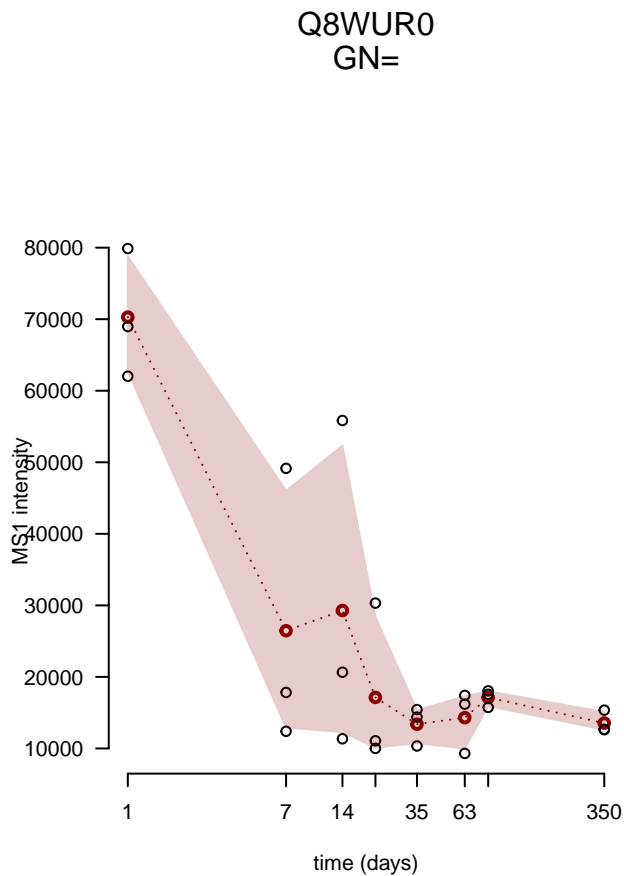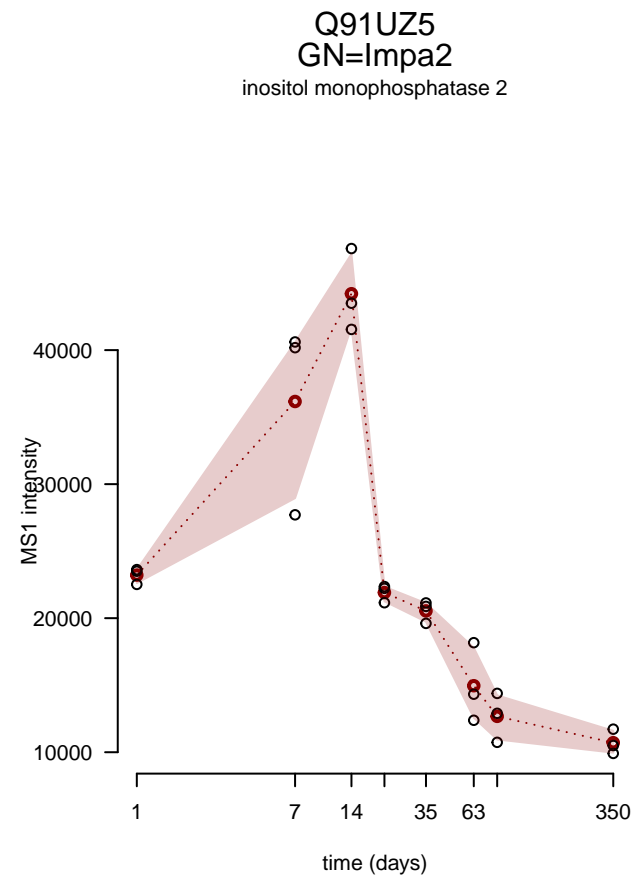

**Q91V01**  
GN=Lpcat3  
lysophosphatidylcholine acyltransferase ...

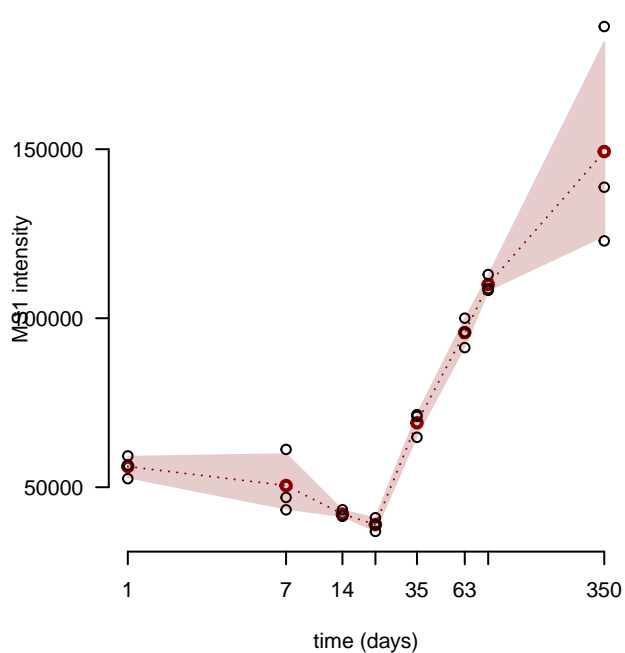

**Q91V04**  
GN=Tram1  
translocating chain-associated membrane ...

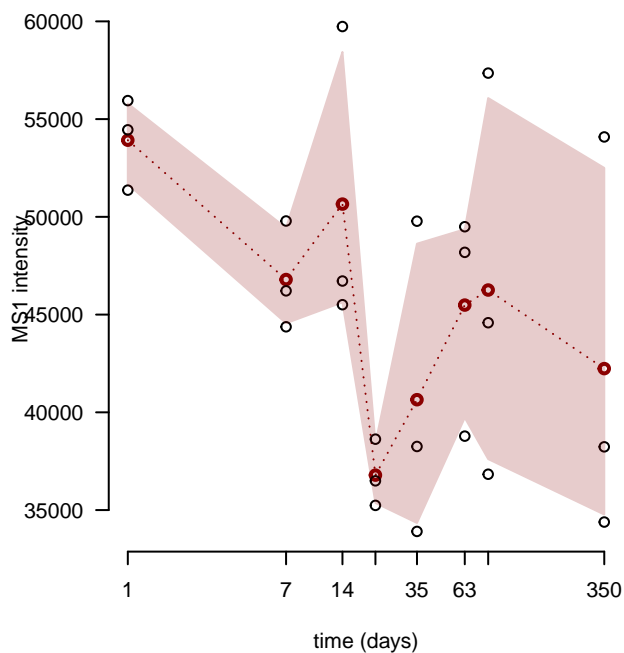

**Q91V09**  
GN=Wdr13  
WD repeat domain 13

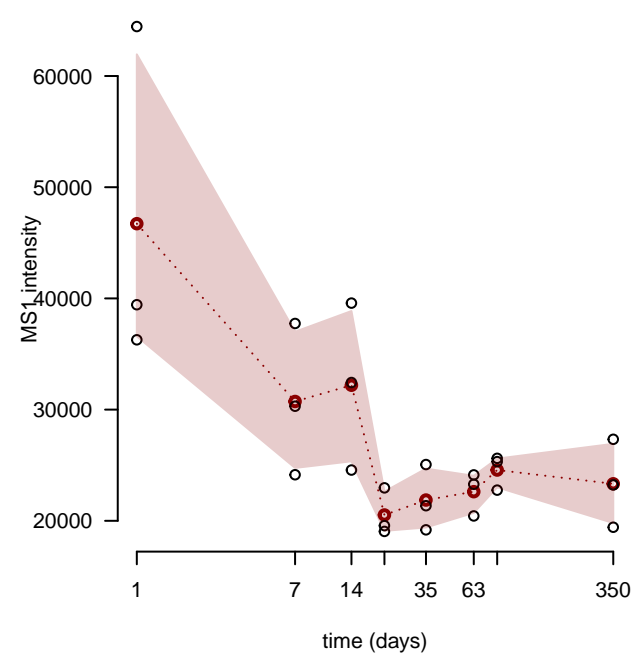

**Q91V12**  
GN=Acot7  
acyl-CoA thioesterase 7

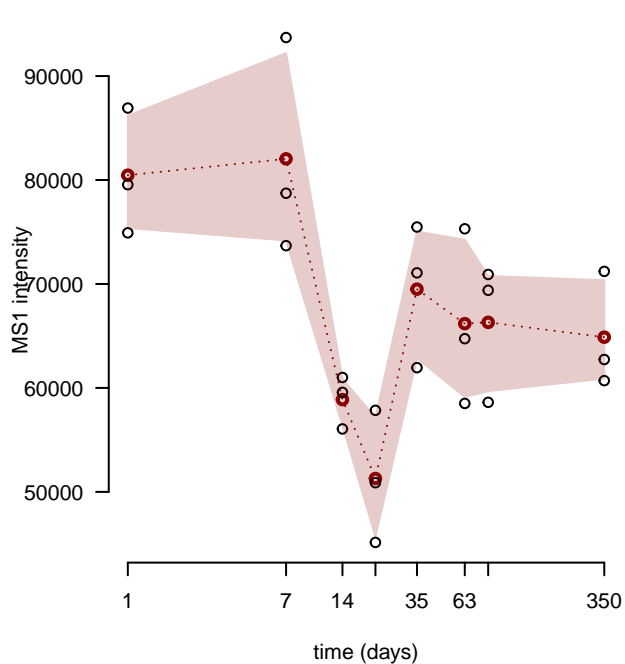

**Q91V14**  
GN=Slc12a5  
solute carrier family 12, member 5

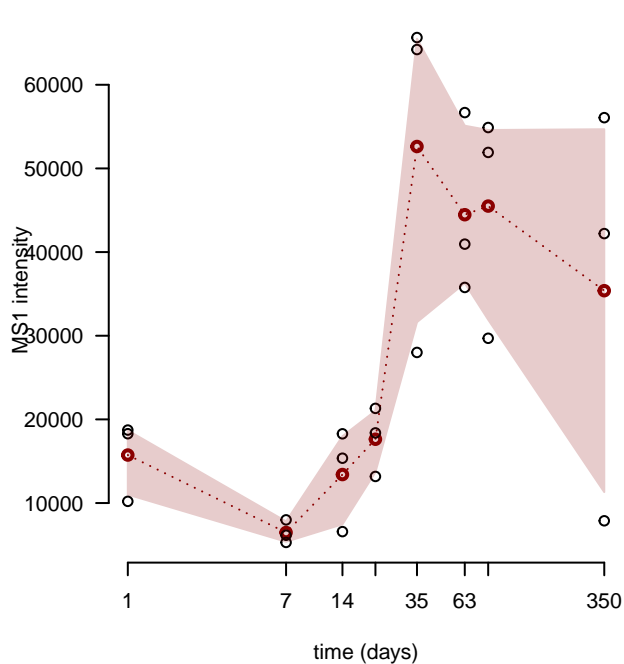

**Q91V16**  
GN=Etf1  
electron transfer flavoprotein regulator ...

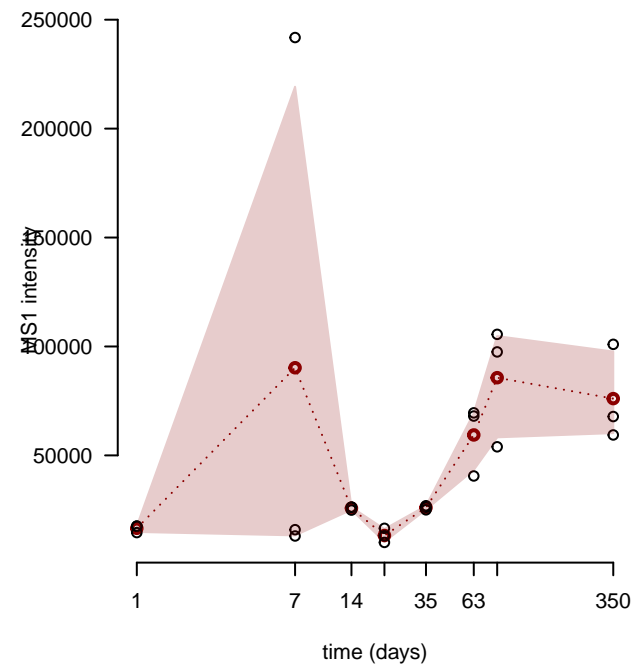

**Q91V24**  
GN=Abca7  
ATP-binding cassette, sub-family A (ABC1 ...

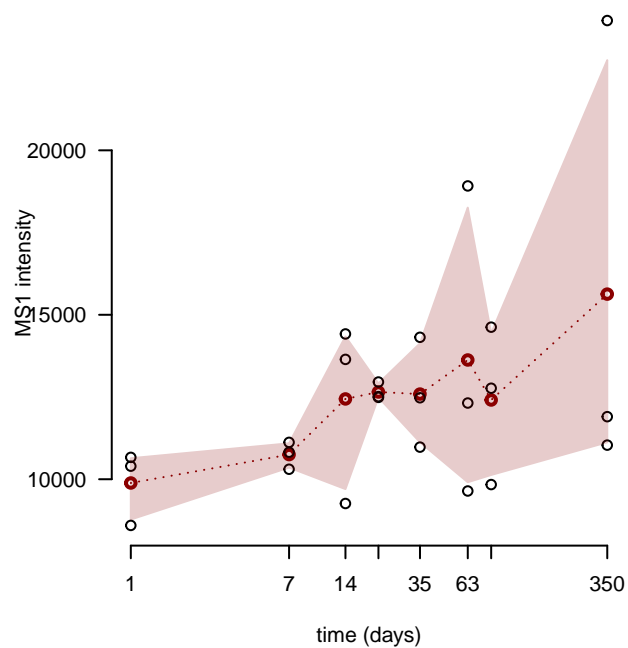

**Q91V36**  
GN=Nrbp2  
nuclear receptor binding protein 2

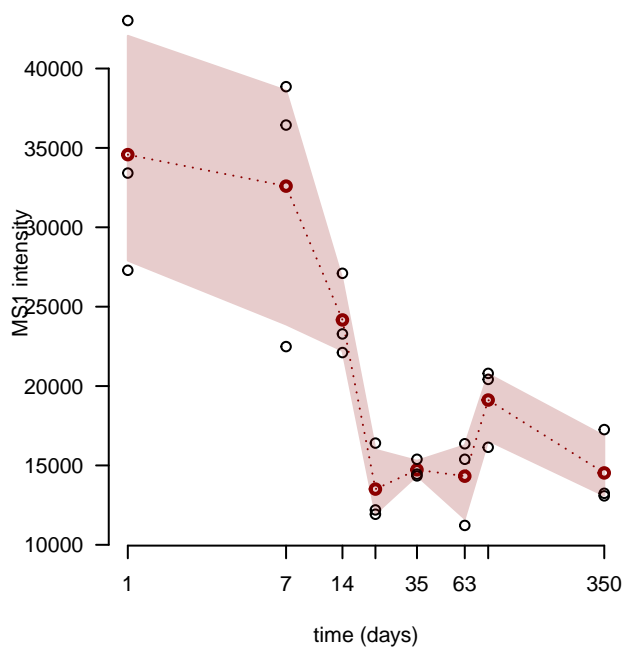

**Q91V41**  
GN=Rab14  
RAB14, member RAS oncogene family

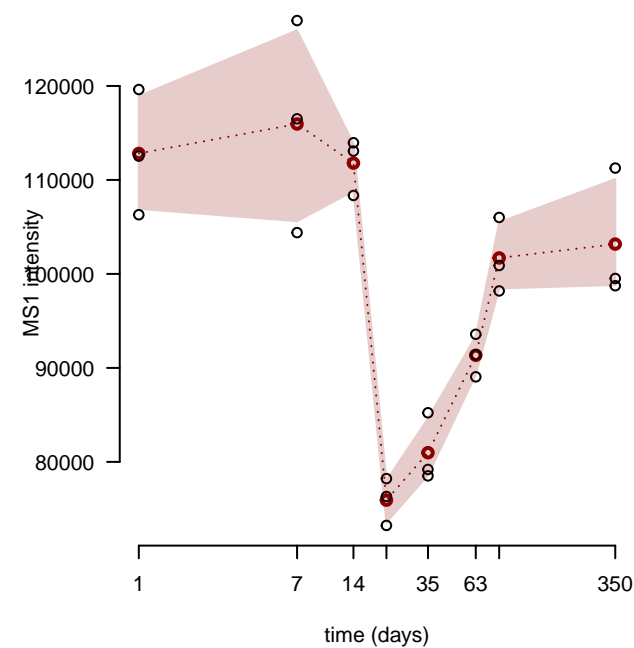

**Q91V57**  
GN=Chn1  
chimerin 1

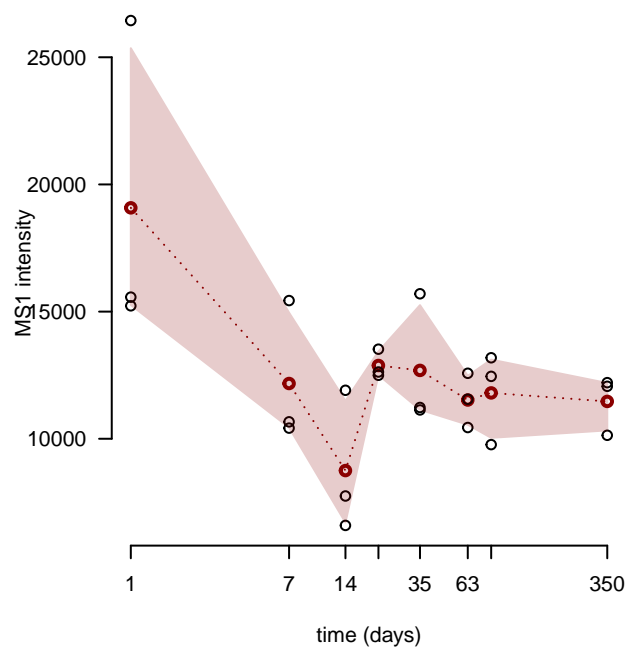

**Q91V61**  
GN=Sfxn3  
sideroflexin 3

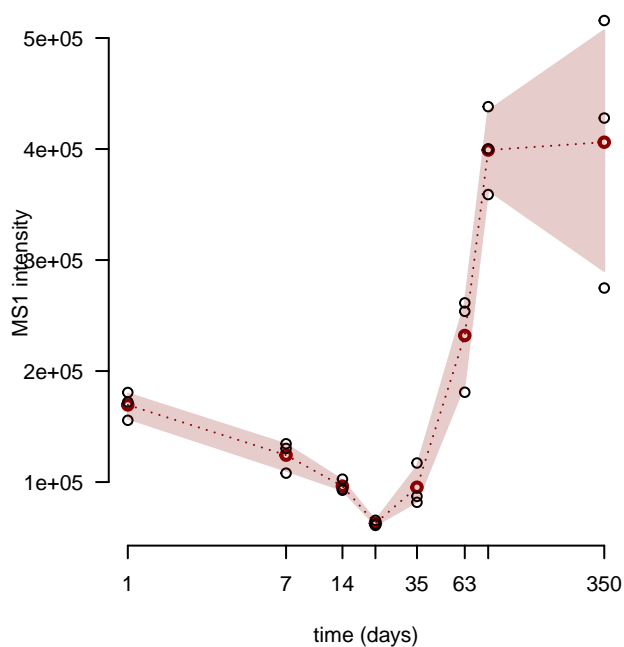

**Q91V64**  
GN=Isoc1  
isochorismatase domain containing 1

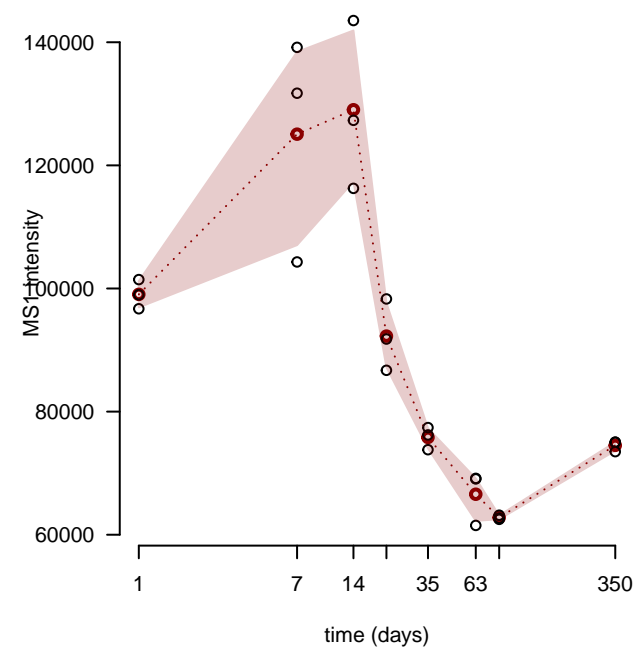

**Q91V76**  
GN=

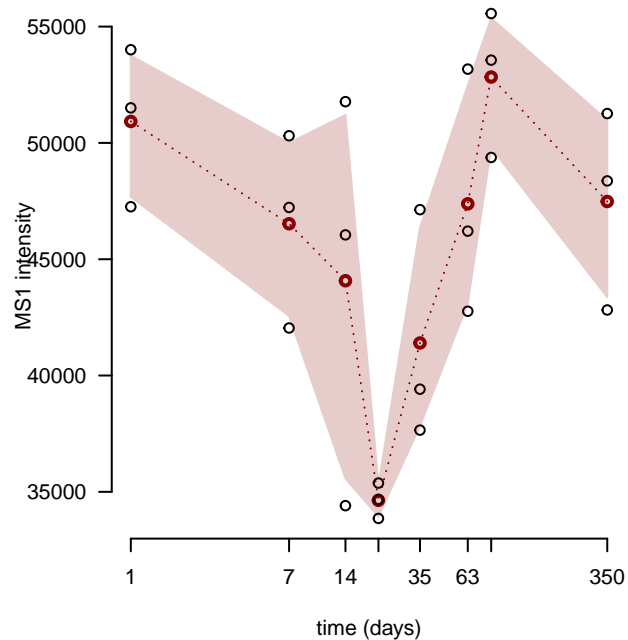

**Q91V81**  
GN=Rbm42  
RNA binding motif protein 42

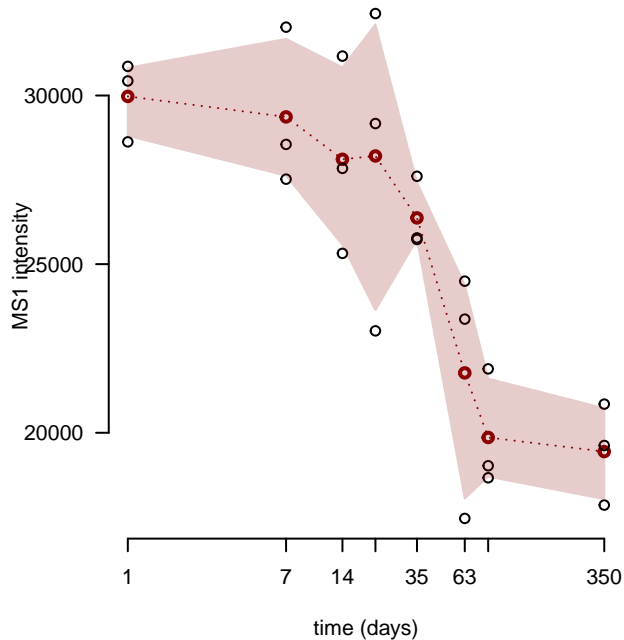

**Q91V83**  
GN=Tti1  
TELO2 interacting protein 1

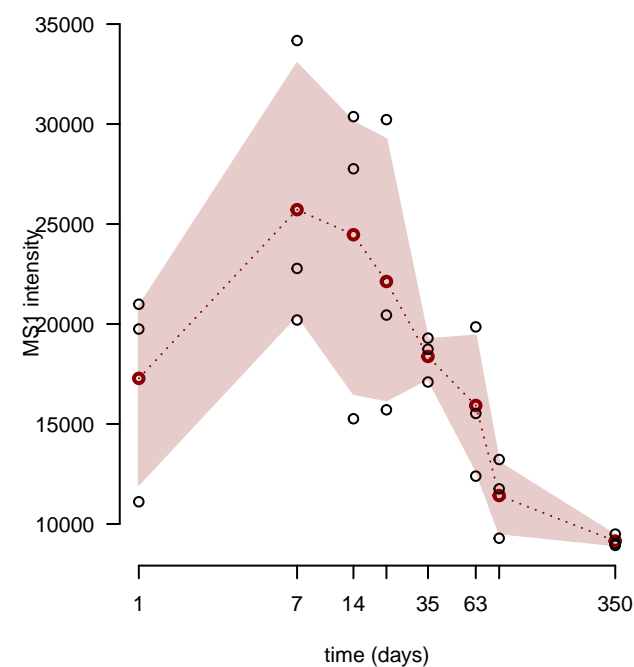

**Q91V92**  
**GN=Acly**  
 ATP citrate lyase

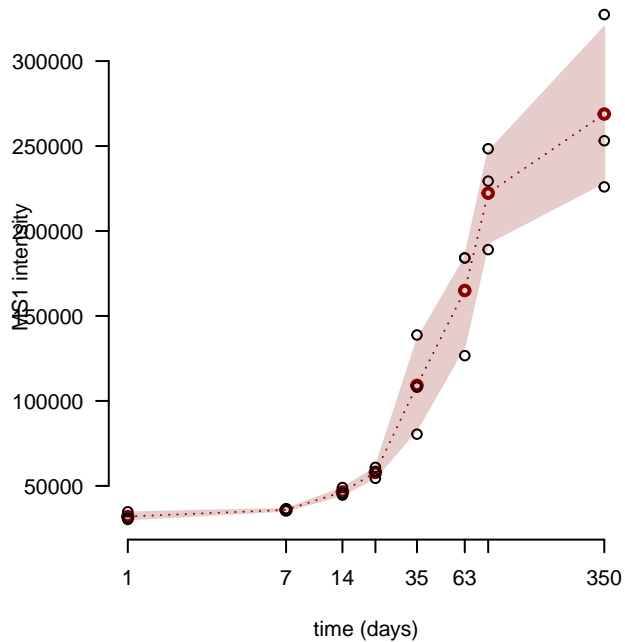

**Q91V98**  
**GN=Cd248**  
 CD248 antigen, endosialin

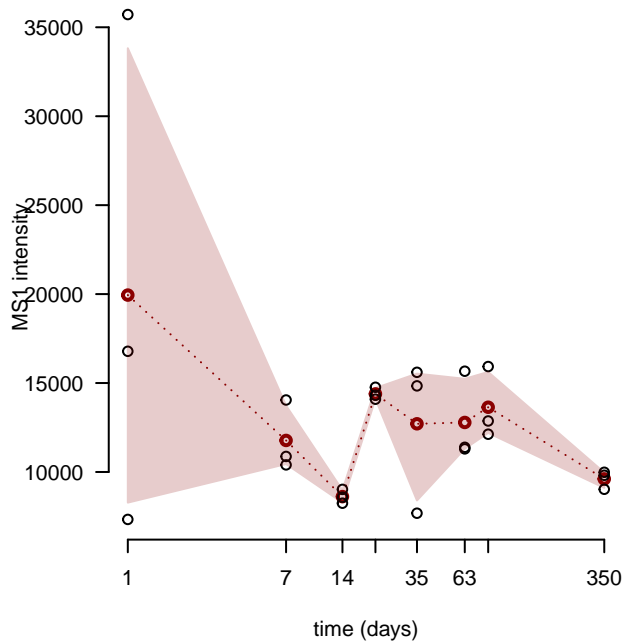

**Q91VA6**  
**GN=Poldip2**  
 polymerase (DNA-directed), delta interac ...

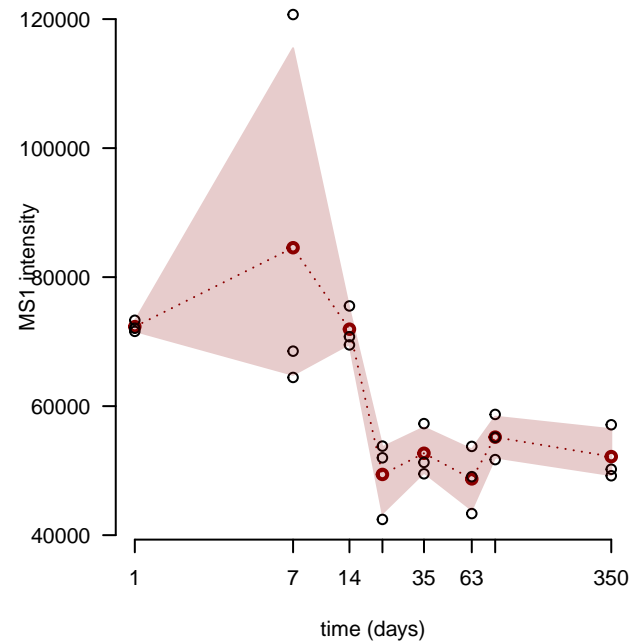

**Q91VB4**  
**GN=Hps3**  
 HPS3, biogenesis of lysosomal organelles ...

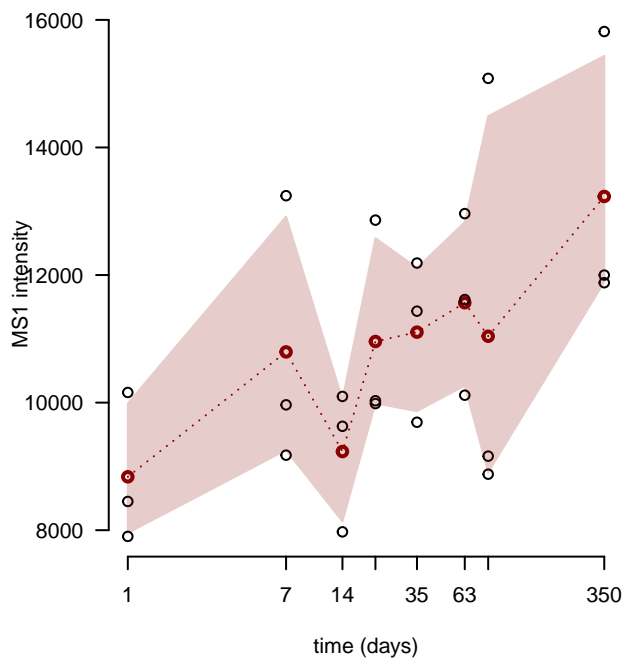

**Q91VC3**  
**GN=Eif4a3**  
 eukaryotic translation initiation factor ...

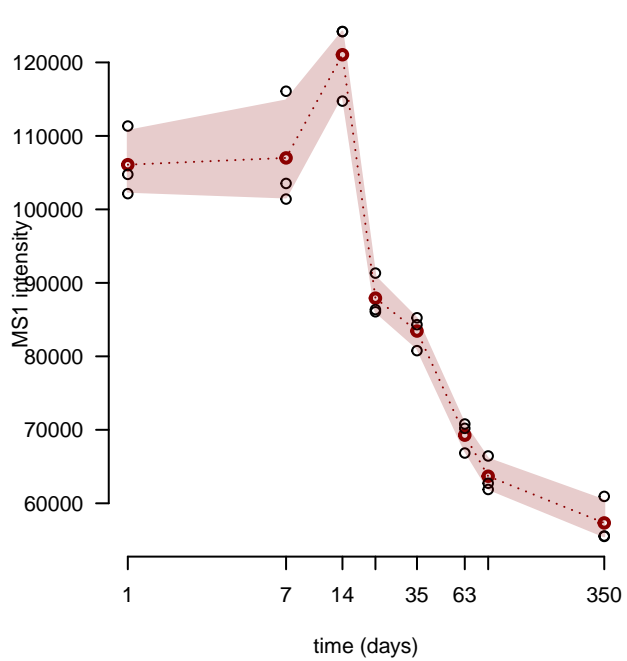

**Q91VC4**  
**GN=Pivap**  
 plasmalemma vesicle associated protein

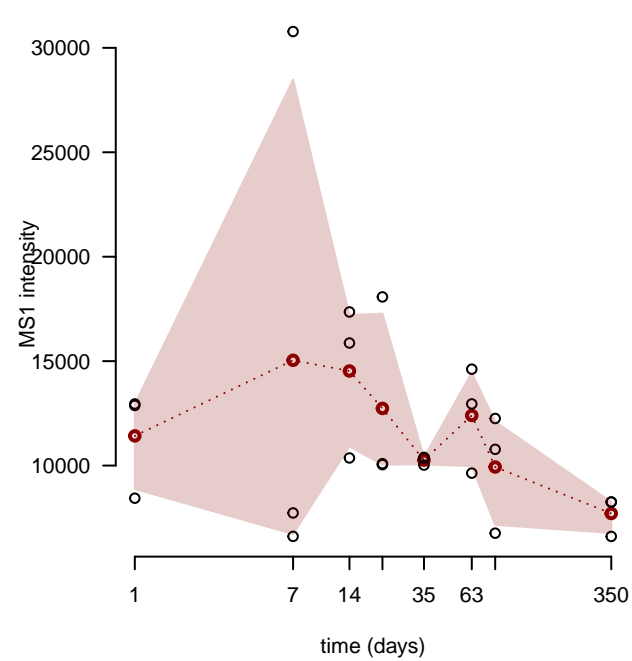

**Q91VC7**  
**GN=Ppp1r14a**  
 protein phosphatase 1, regulatory inhibi ...

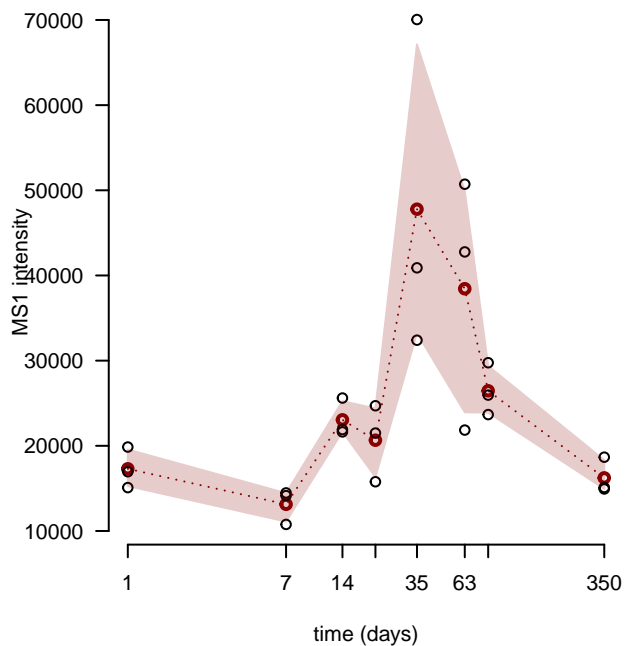

**Q91VC9**  
**GN=Ghitm**  
 growth hormone inducible transmembrane p ...

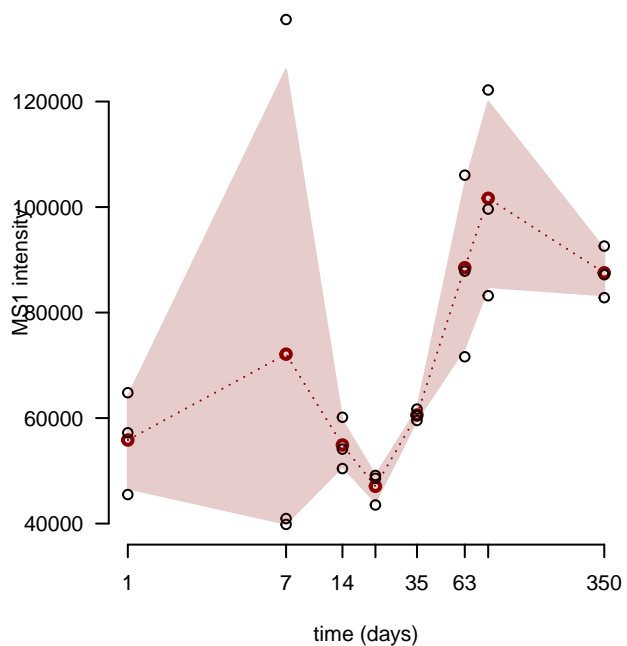

**Q91VD9**  
**GN=Ndufs1**  
 NADH:ubiquinone oxidoreductase core subu ...

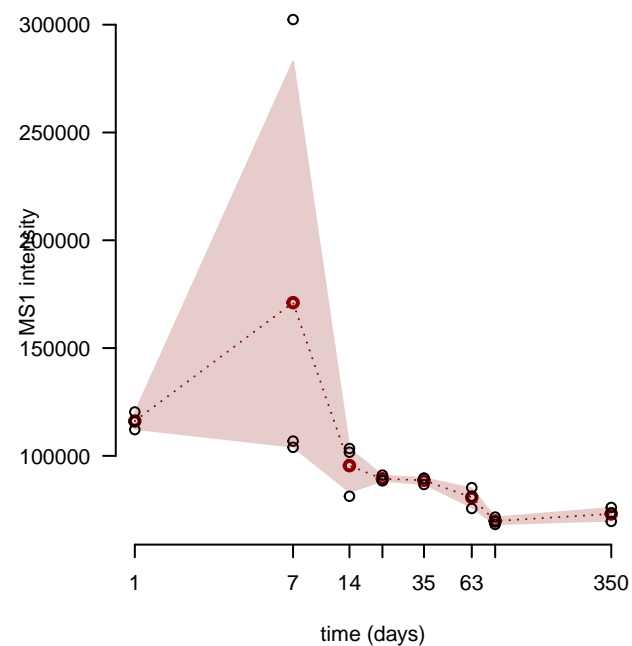

**Q91VE0**  
GN=Slc27a4  
solute carrier family 27 (fatty acid tra ...

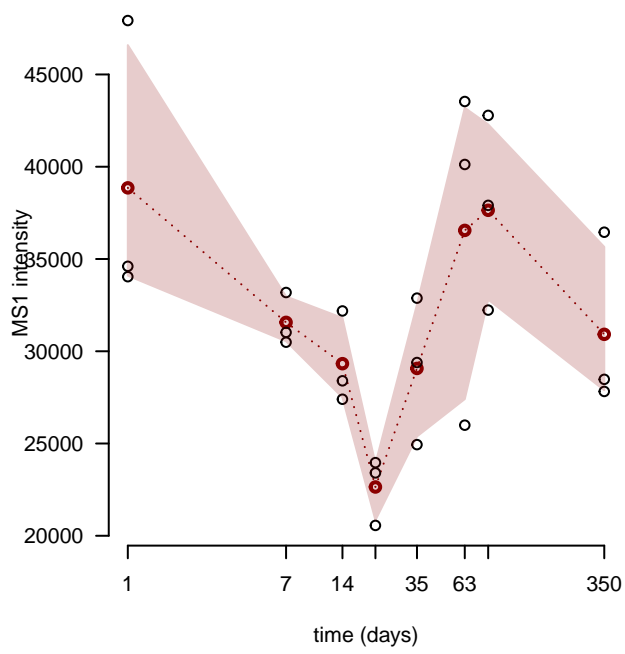

**Q91VE6**  
GN=Nifk  
nucleolar protein interacting with the F ...

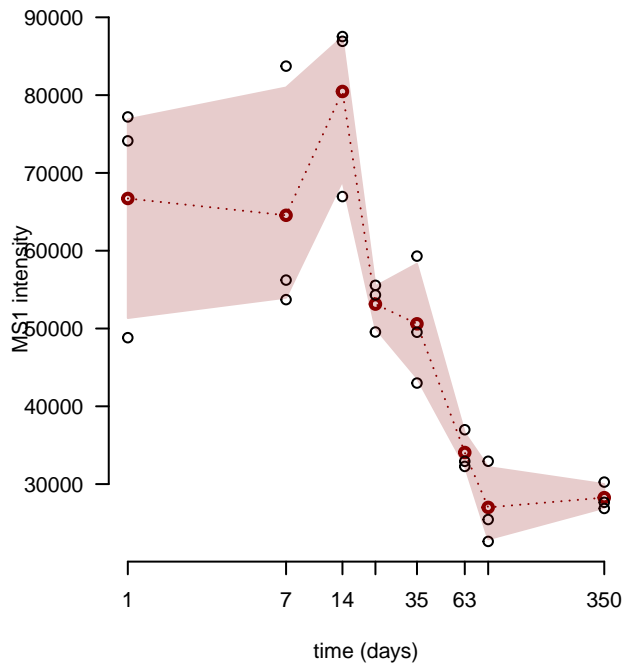

**Q91VF2**  
GN=Hnmt  
histamine N-methyltransferase

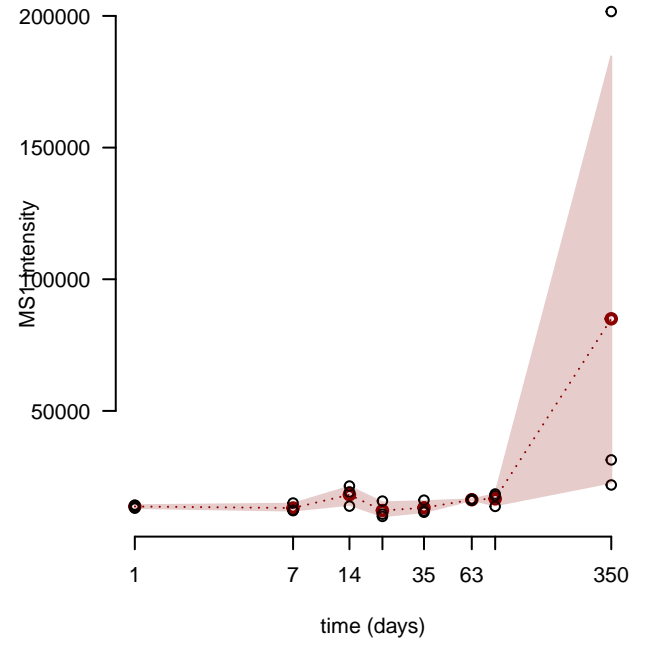

**Q91VF6**  
GN=Col26a1  
collagen, type XXVI, alpha 1

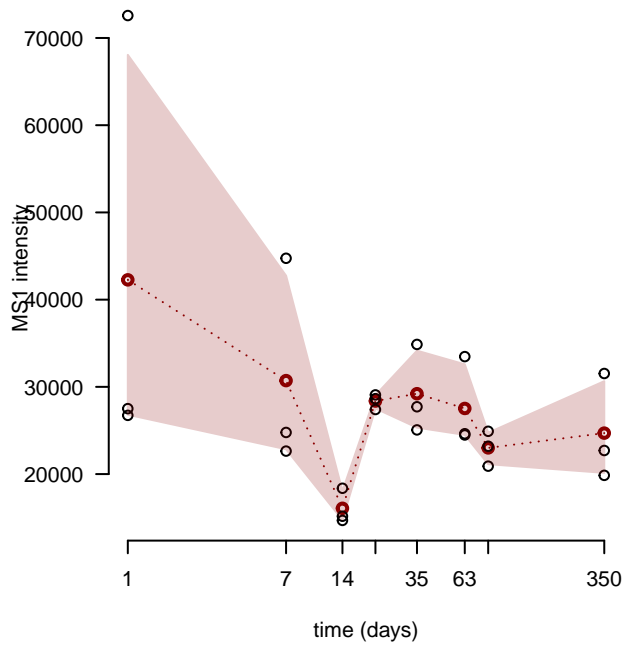

**Q91VH2**  
GN=Snx9  
sorting nexin 9

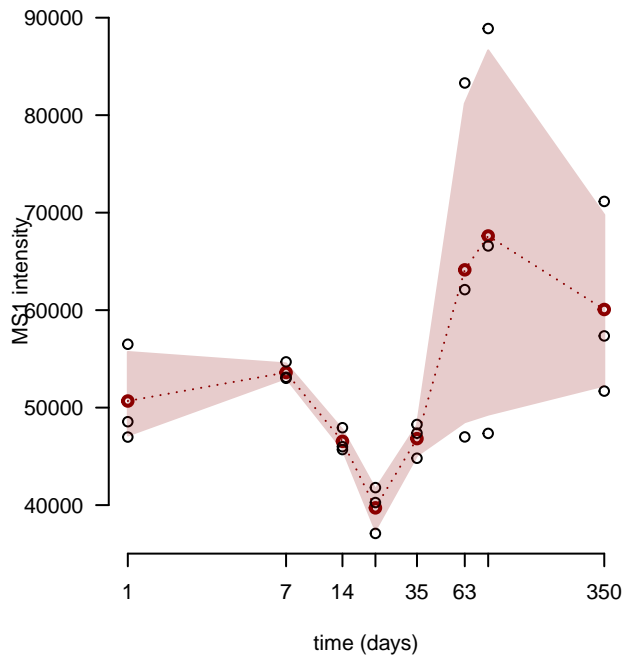

**Q91VH6**  
GN=Memo1  
mediator of cell motility 1

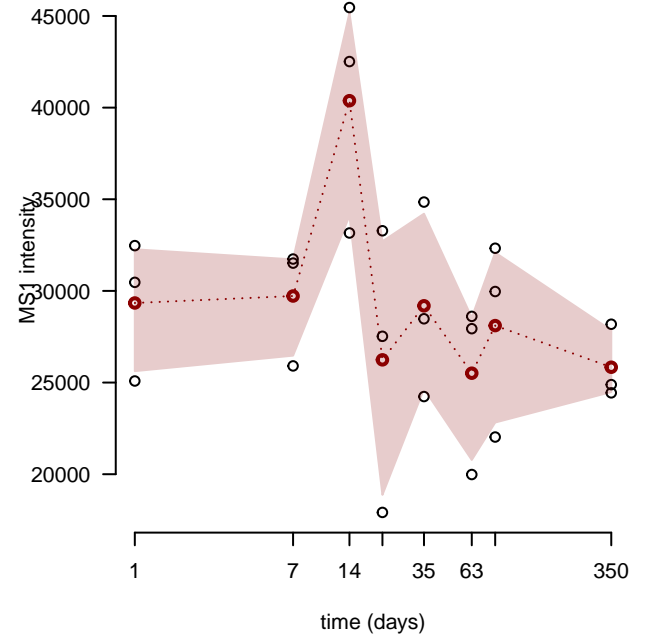

**Q91VI7**  
GN=Rnh1  
ribonuclease/angiogenin inhibitor 1

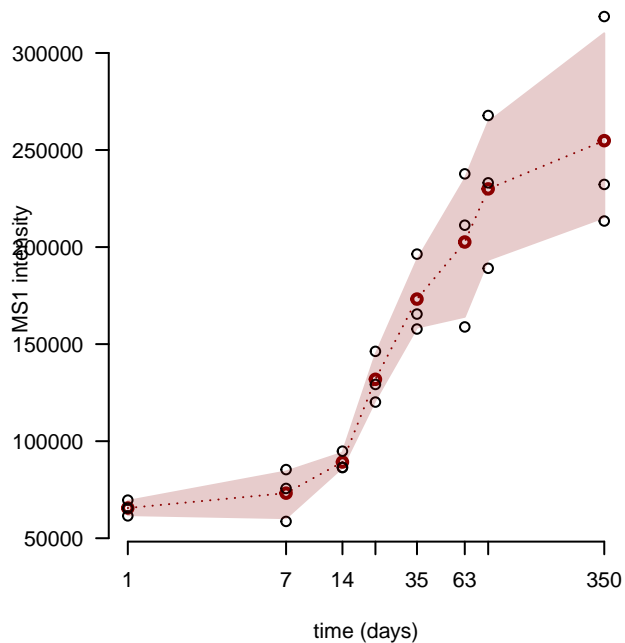

**Q91VJ1**  
GN=Aim2  
absent in melanoma 2

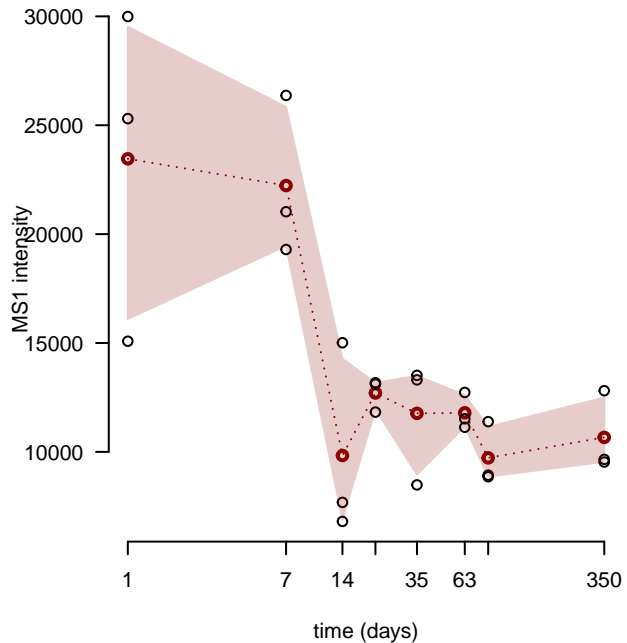

**Q91VJ2**  
GN=Cavin3  
caveolae associated 3

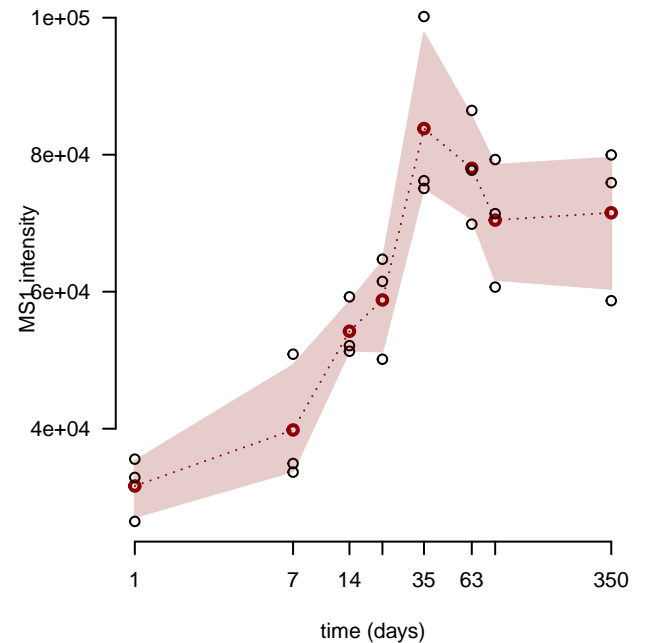

**Q91VJ4**  
**GN=Stk38**  
serine/threonine kinase 38

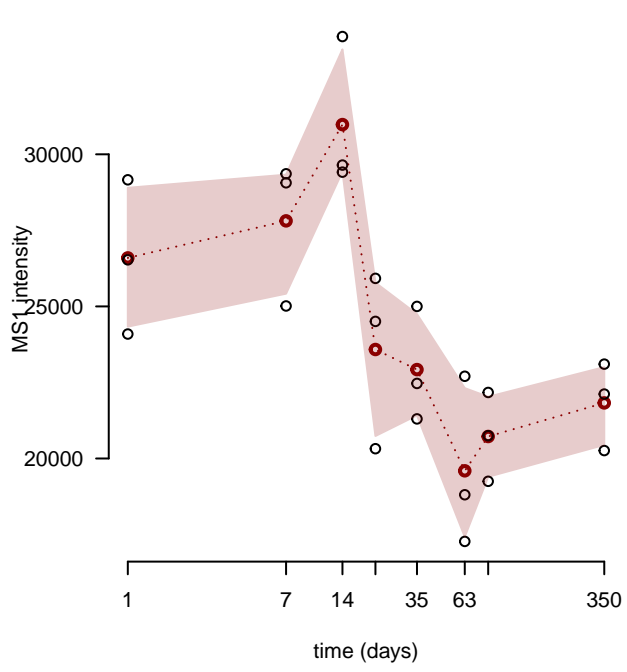

**Q91VJ5**  
**GN=Pqbp1**  
polyglutamine binding protein 1

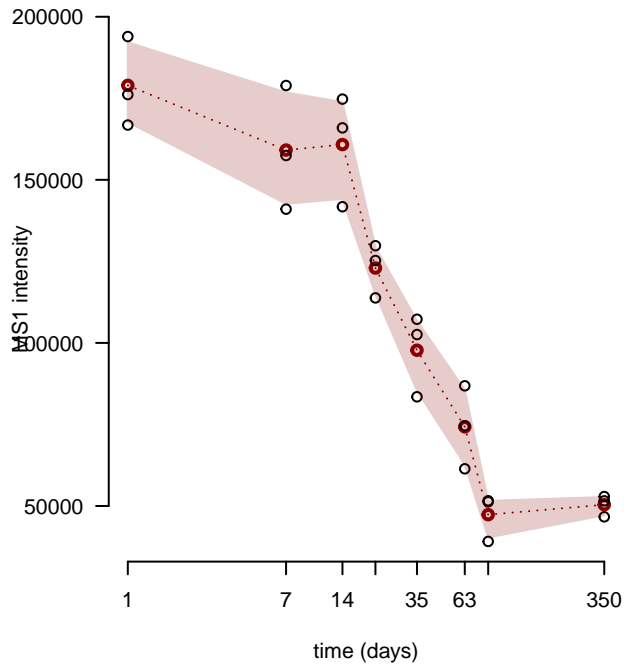

**Q91VK1**  
**GN=Bzw2**

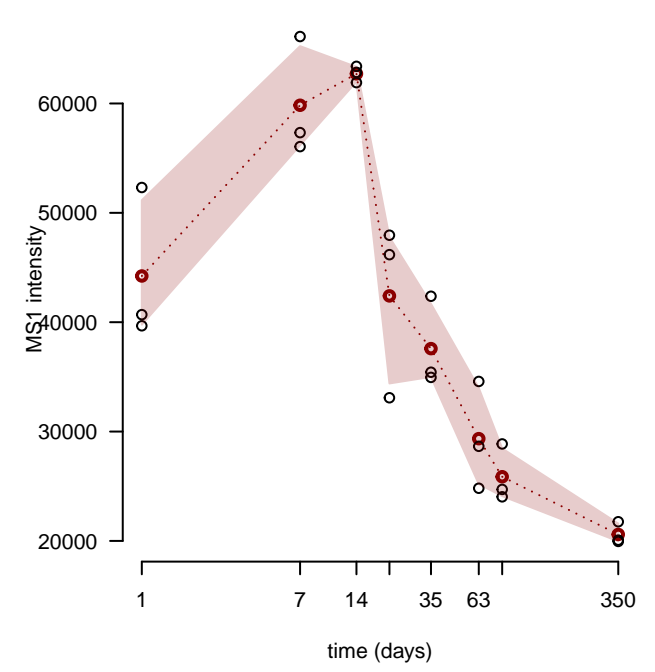

**Q91VK4**  
**GN=Itm2c**  
integral membrane protein 2C

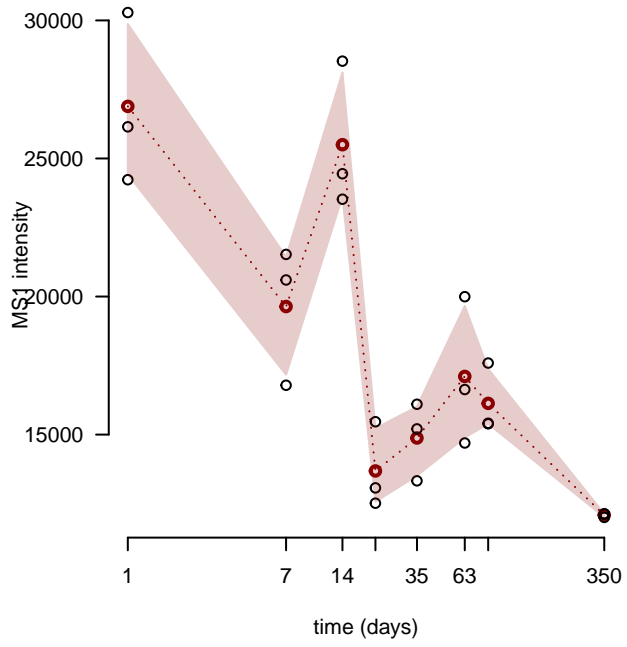

**Q91VL8**  
**GN=Terf2ip**  
telomeric repeat binding factor 2, inter ...

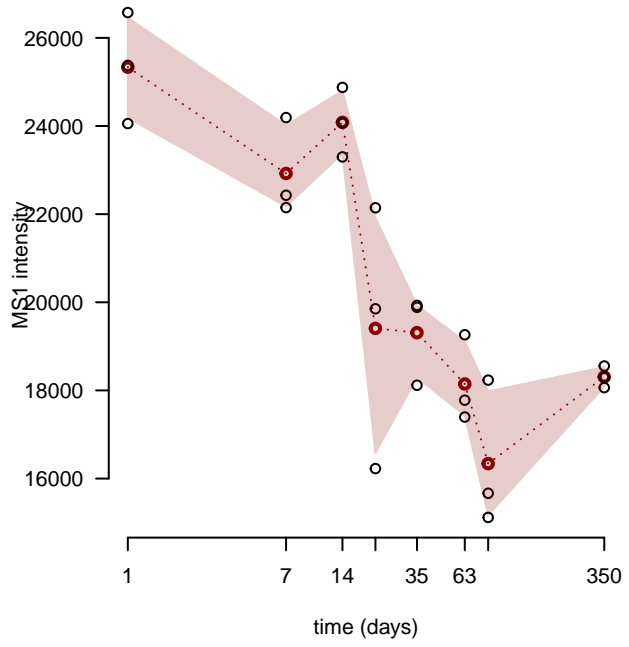

**Q91VL9**  
**GN=Zbtb1**  
zinc finger and BTB domain containing 1

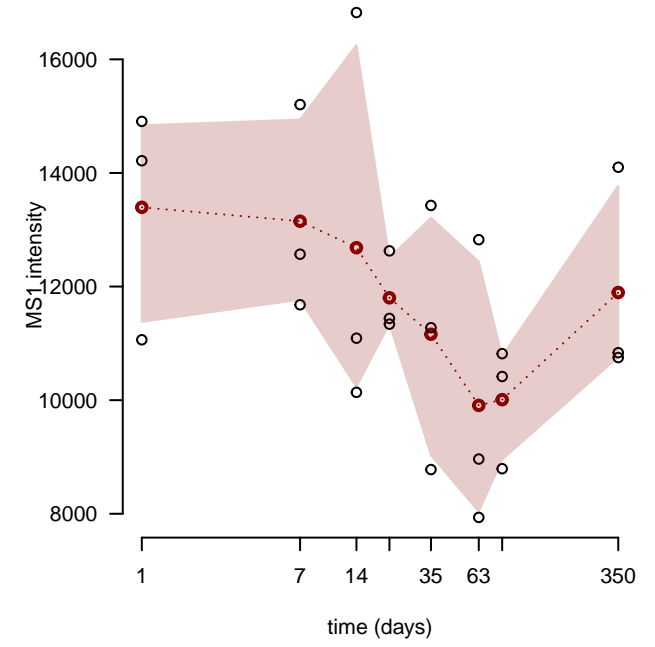

**Q91VM3**  
**GN=Wdr45**  
WD repeat domain 45

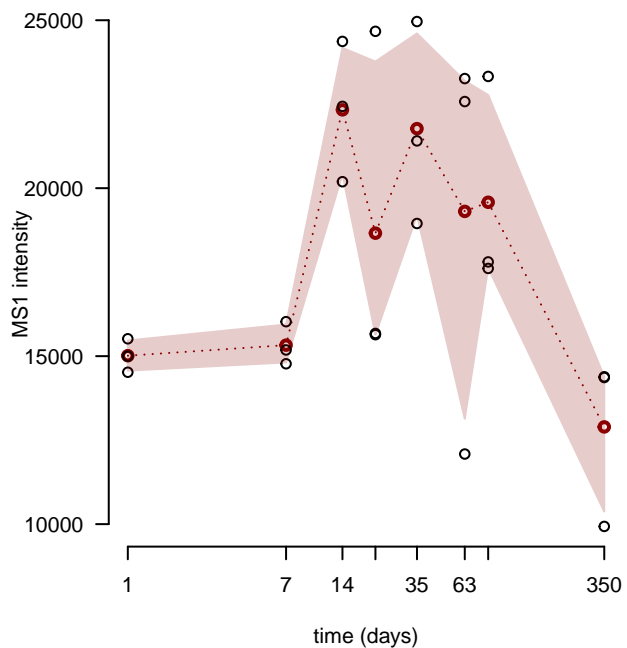

**Q91VM5**  
**GN=Rbmx11**  
RNA binding motif protein, X-linked like ...

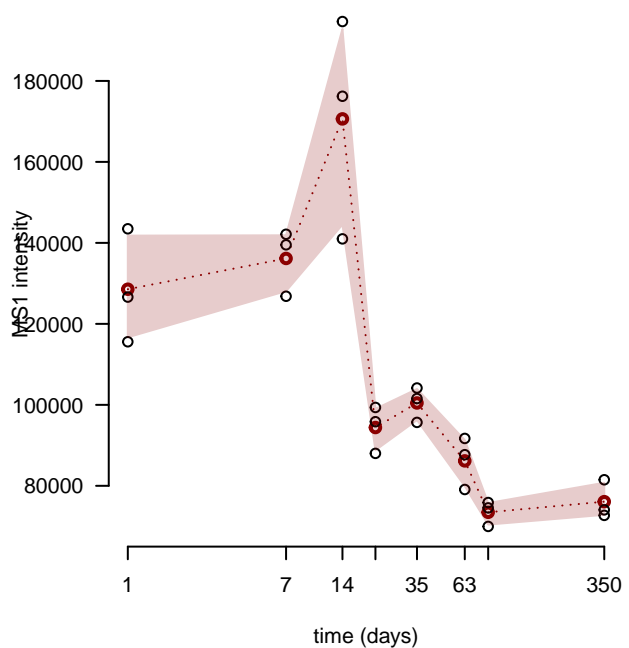

**Q91VM9**  
**GN=Ppa2**  
pyrophosphatase (inorganic) 2

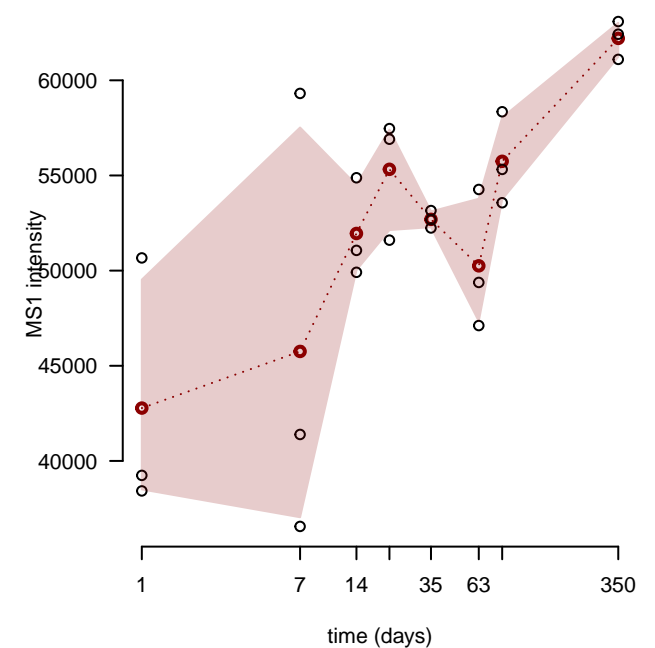

**Q91VN1**  
GN=Znf24

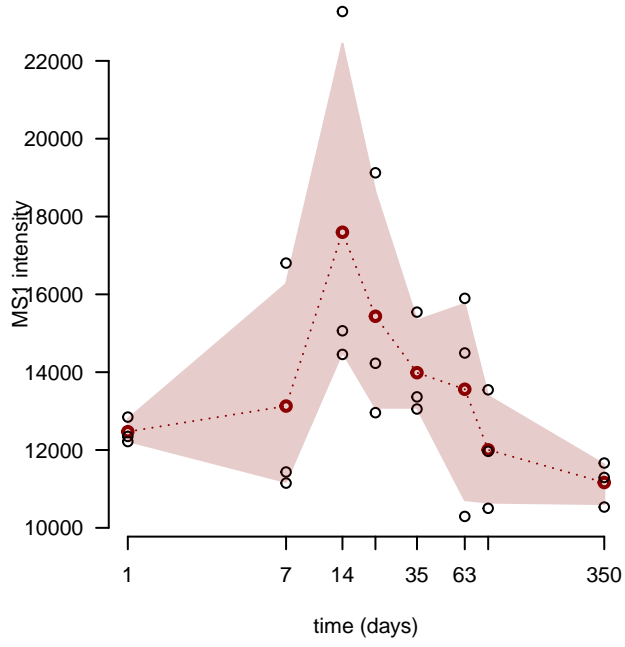

**Q91VN4**  
GN=Chchd6  
coiled-coil-helix-coiled-coil-helix doma ...

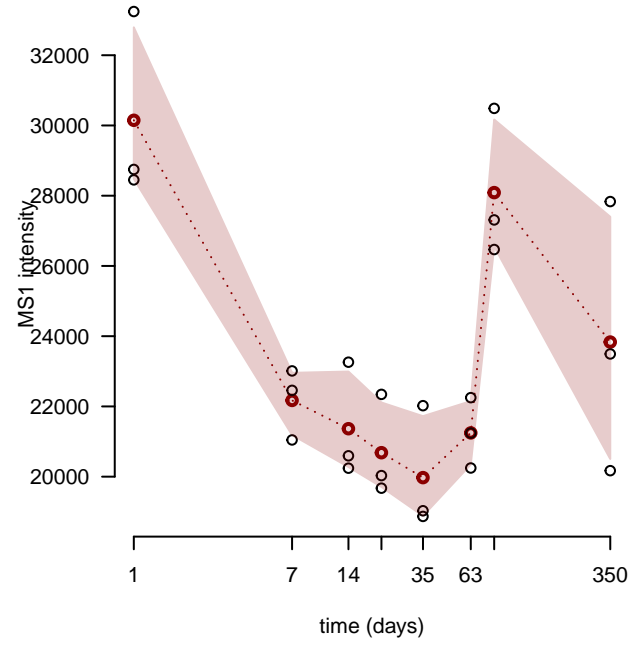

**Q91VN6**  
GN=Ddx41  
DEAD box helicase 41

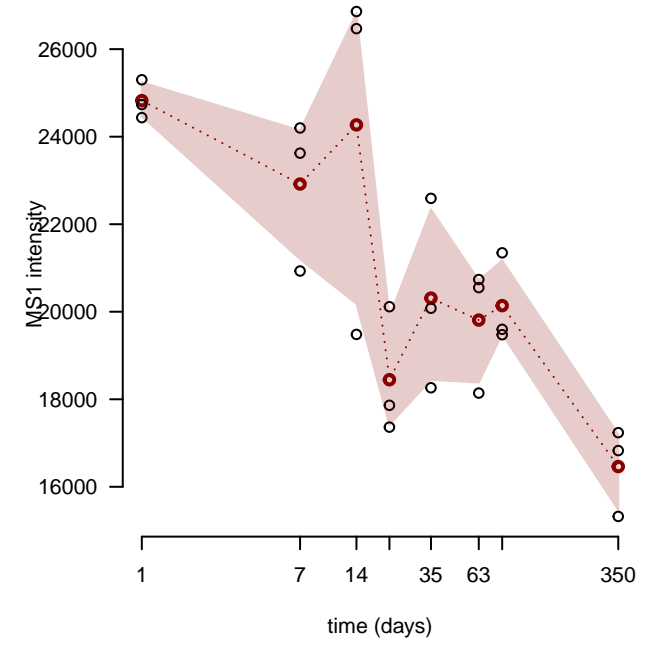

**Q91VR2**  
GN=Atp5f1c

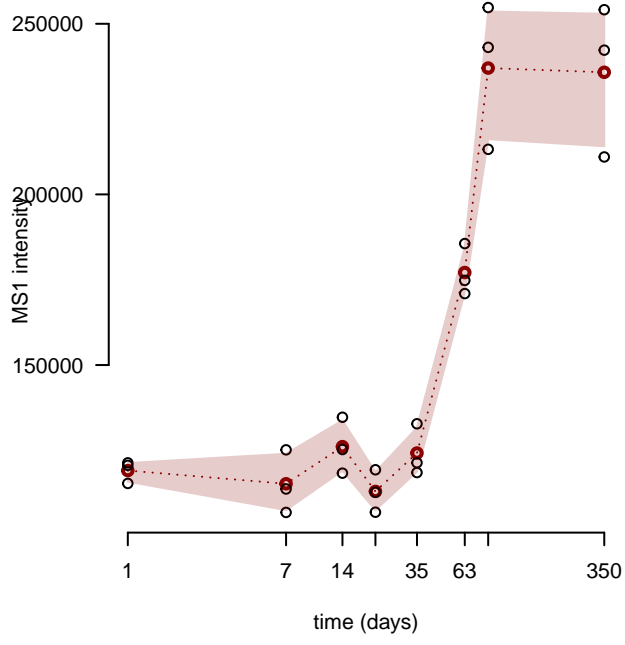

**Q91VR5**  
GN=Ddx1  
DEAD box helicase 1

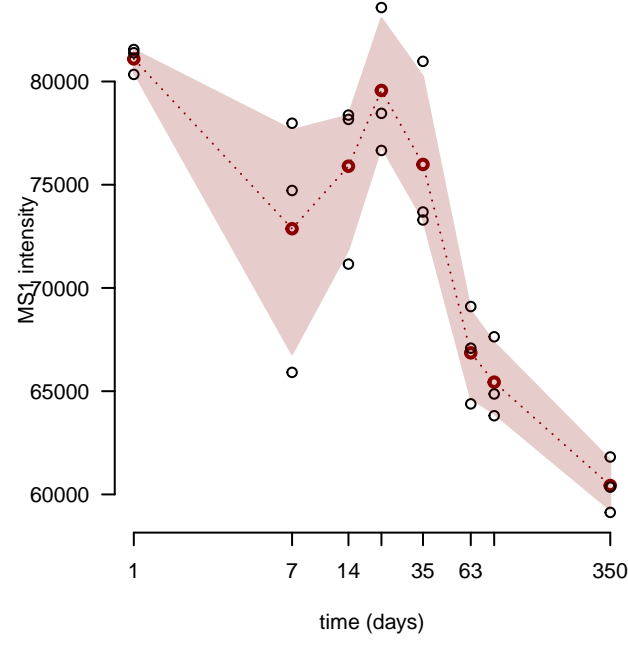

**Q91VR7**  
GN=Map1lc3a  
microtubule-associated protein 1 light c ...

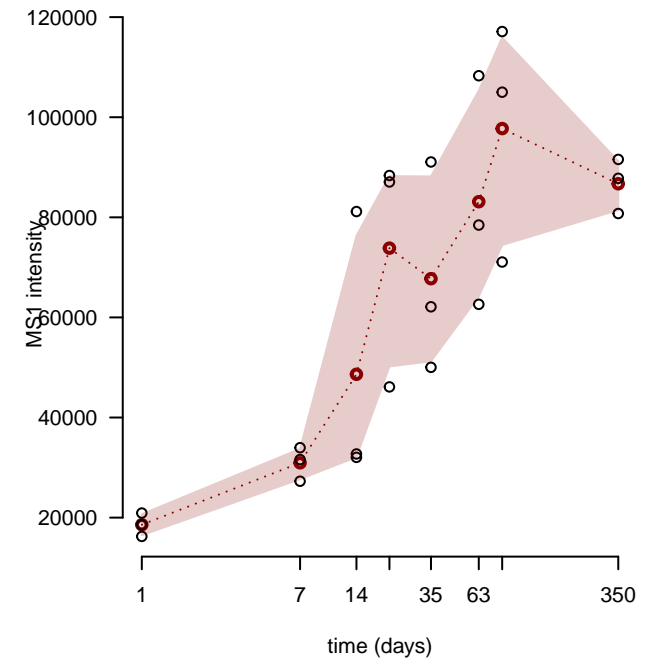

**Q91VS7**  
GN=Mgst1  
microsomal glutathione S-transferase 1

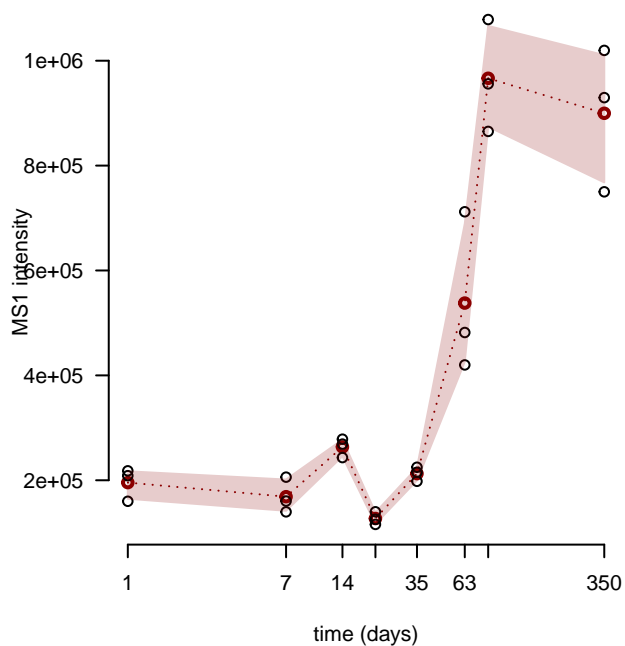

**Q91VS8**  
GN=Farp2  
FERM, RhoGEF and pleckstrin domain prote ...

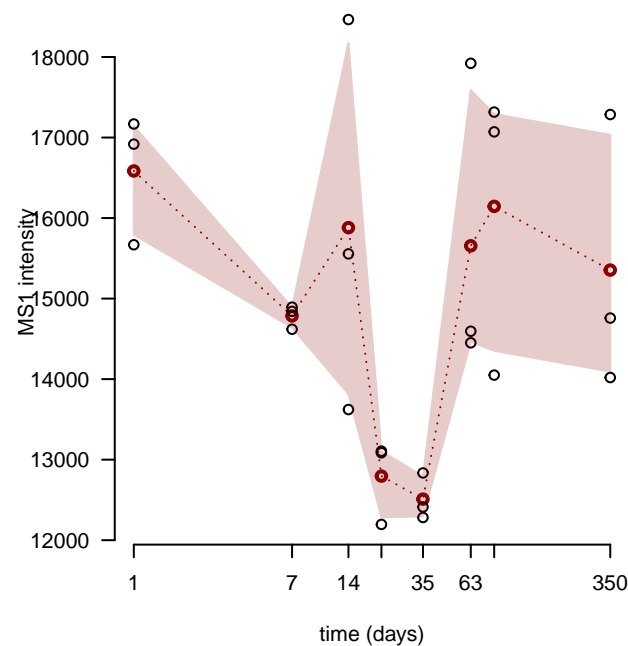

**Q91VT1**  
GN=Nsmce2  
NSE2/MMS21 homolog, SMC5-SMC6 complex SU ...

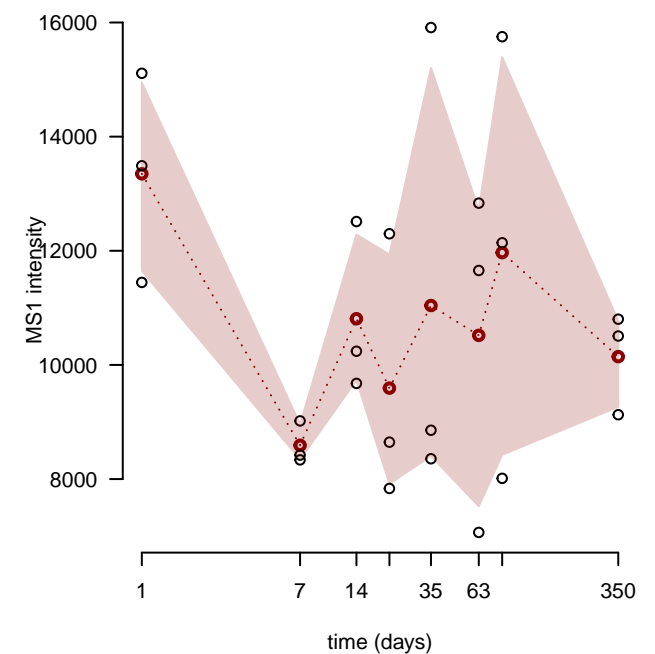

**Q91VT4**  
**GN=Cbr4**  
carbonyl reductase 4

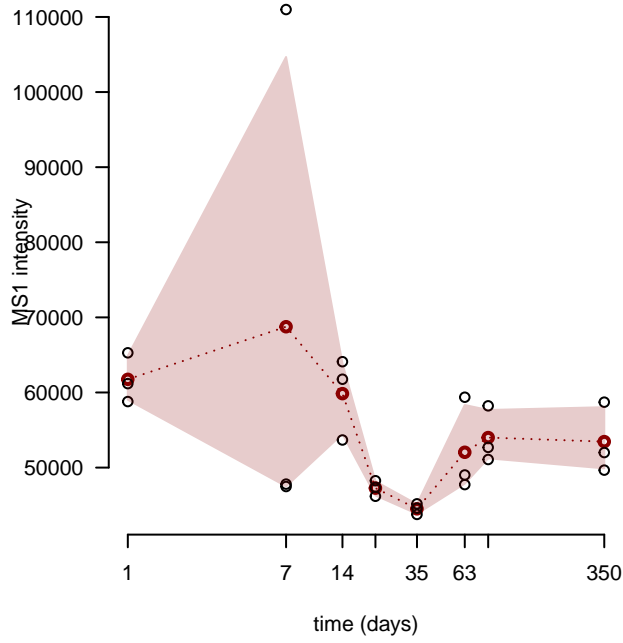

**Q91VU0**  
**GN=Fam3c**  
FAM3 metabolism regulating signaling mol ...

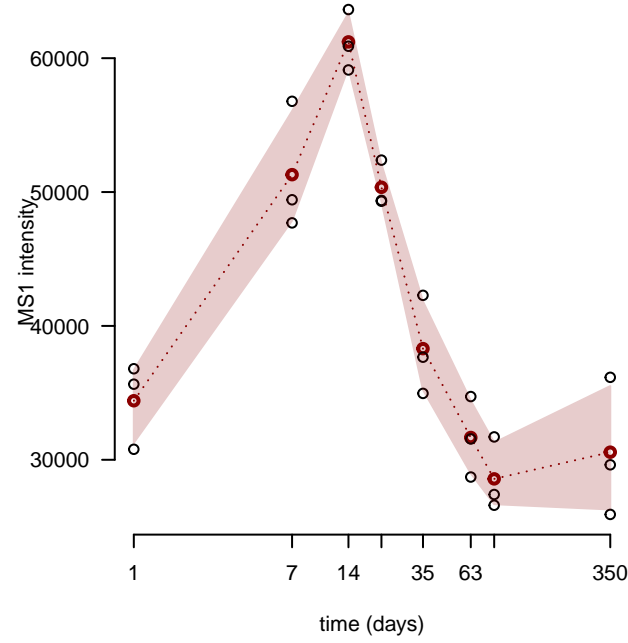

**Q91VU1**  
**GN=Yip1**  
Yip1 domain family, member 1

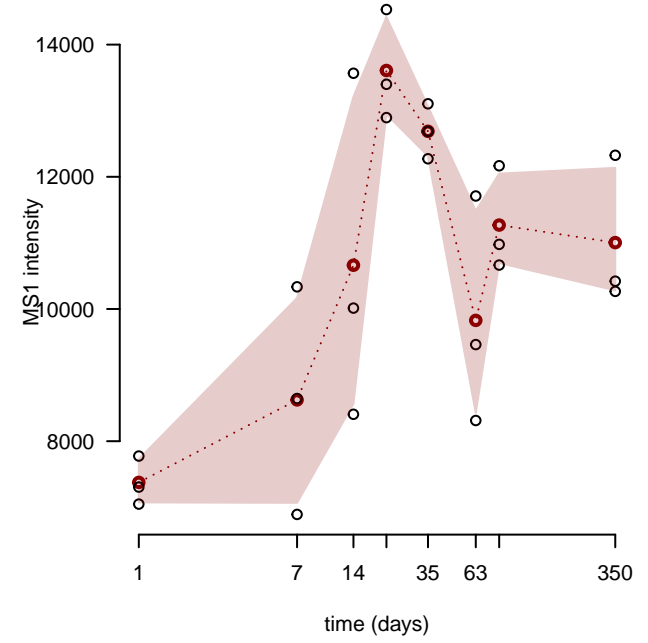

**Q91VU6**  
**GN=Dcaf11**  
DDB1 and CUL4 associated factor 11

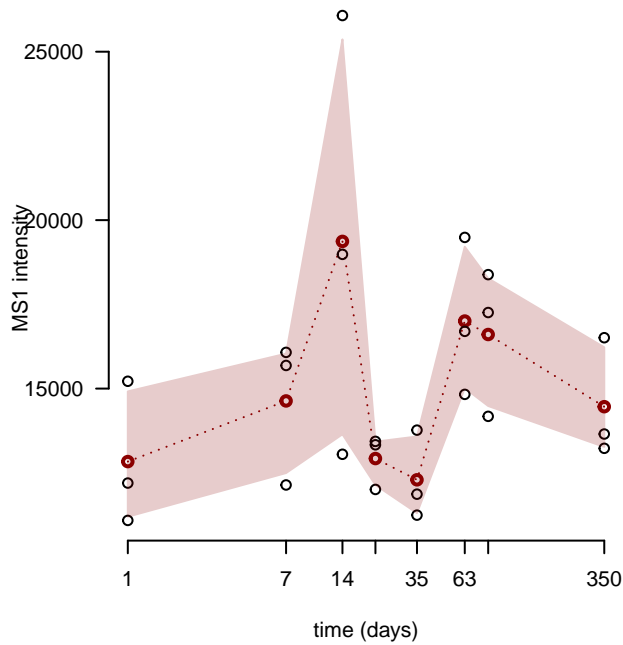

**Q91VU7**  
**GN=Pus7**  
pseudouridylate synthase 7

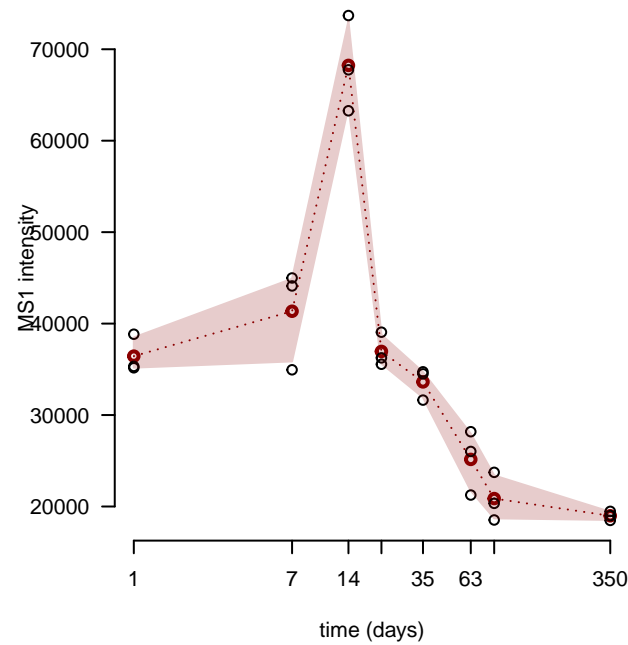

**Q91VU8**  
**GN=Ptov1**  
prostate tumor over expressed gene 1

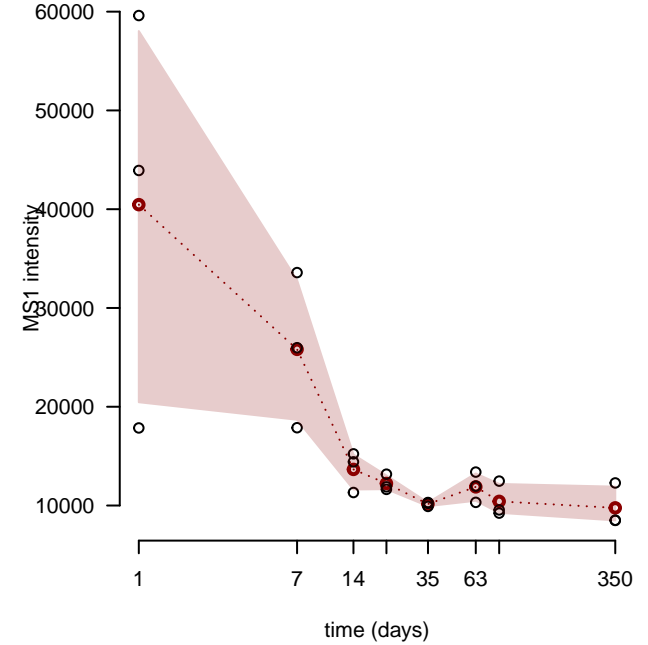

**Q91VW3**  
**GN=Sh3bgrl3**  
SH3 domain binding glutamic acid-rich pr ...

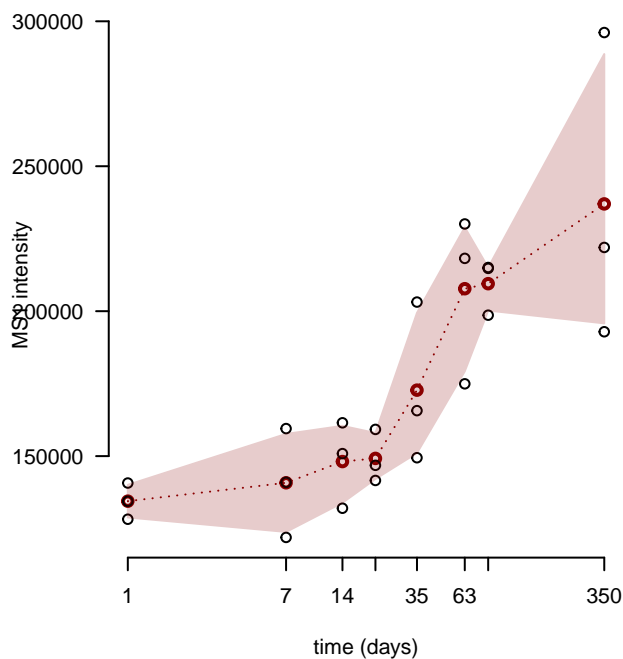

**Q91VW5**  
**GN=Golga4**  
golgi autoantigen, golgin subfamily a, 4

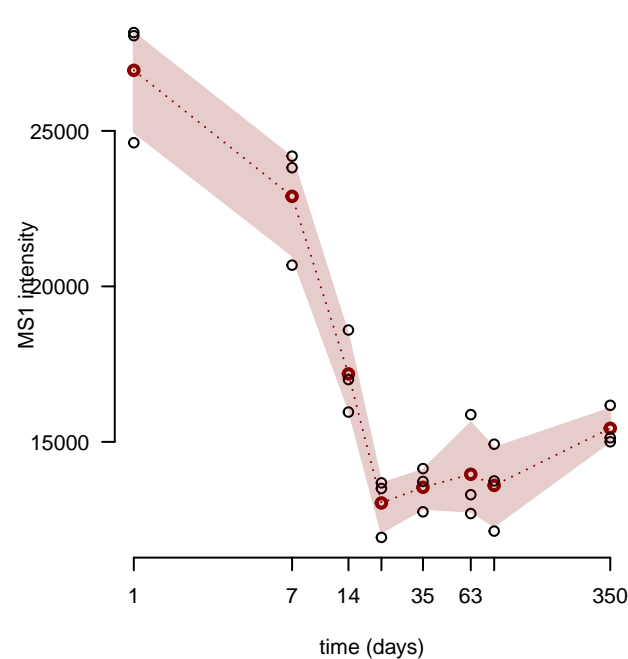

**Q91VW9**  
**GN=Zkscan3**  
zinc finger with KRAB and SCAN domains 3

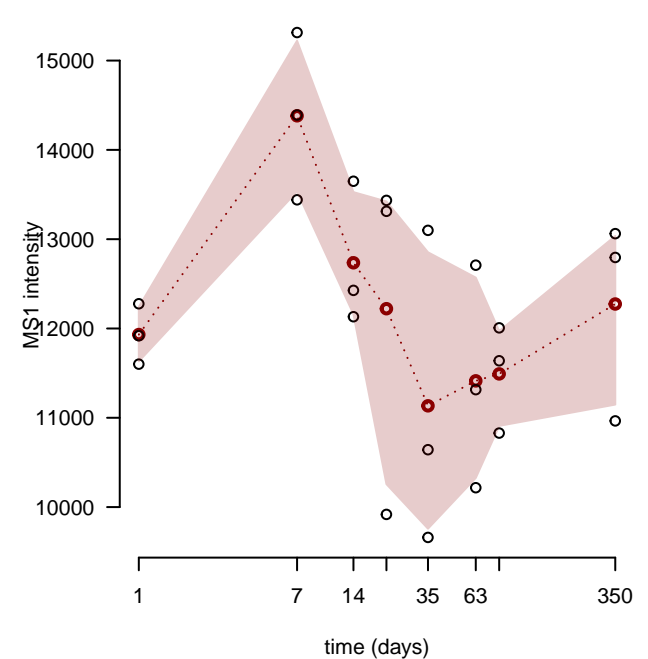



**Q91VX2**  
**GN=Ubp2**  
ubiquitin-associated protein 2

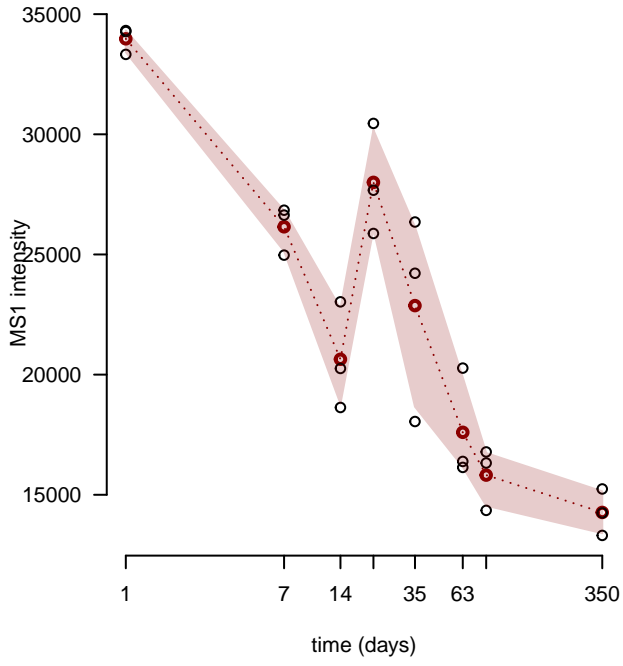

**Q91VX9**  
**GN=Tmem168**  
transmembrane protein 168

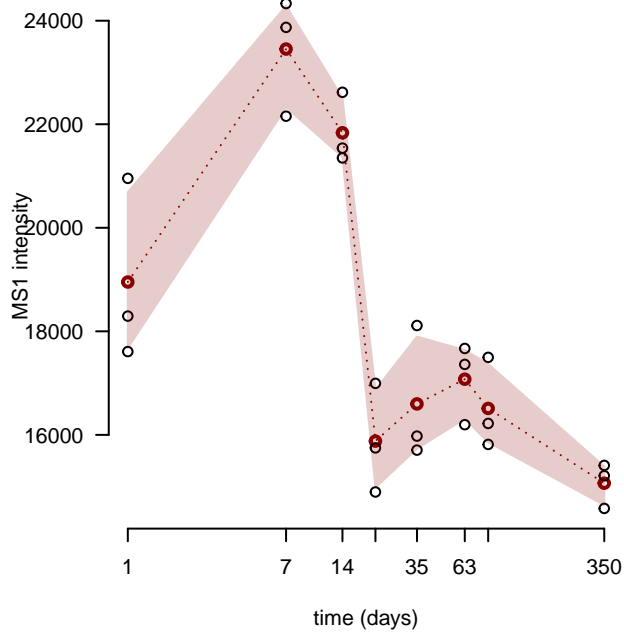

**Q91VY5**  
**GN=Kdm4b**  
lysine (K)-specific demethylase 4B

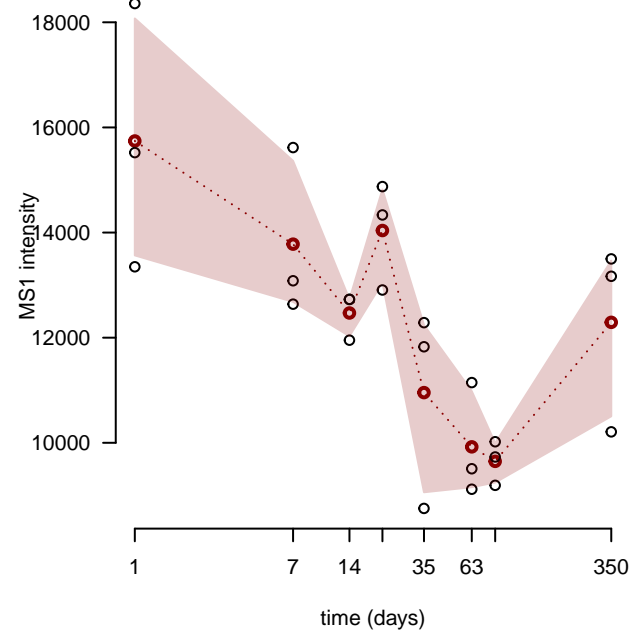

**Q91VY9**  
**GN=Znf622**

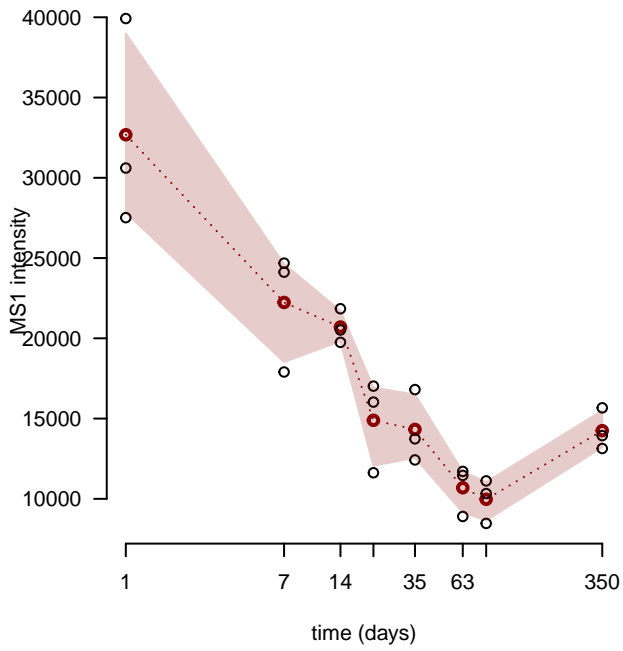

**Q91VZ6**  
**GN=Smap1**  
small ArfGAP 1

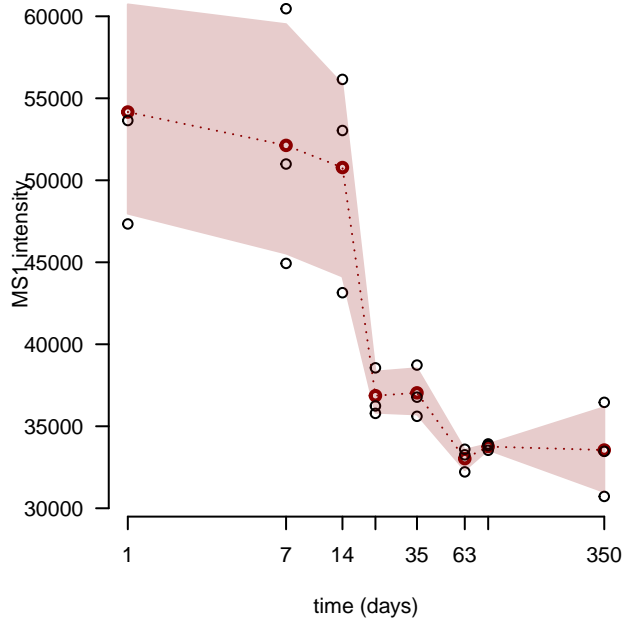

**Q91W10**  
**GN=Slc39a8**  
solute carrier family 39 (metal ion tran ...

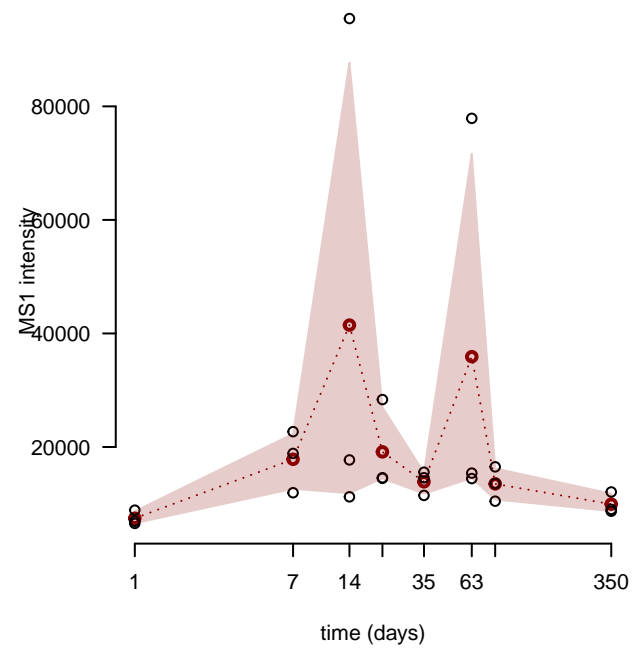

**Q91W18**  
**GN=Tdrd3**  
tudor domain containing 3

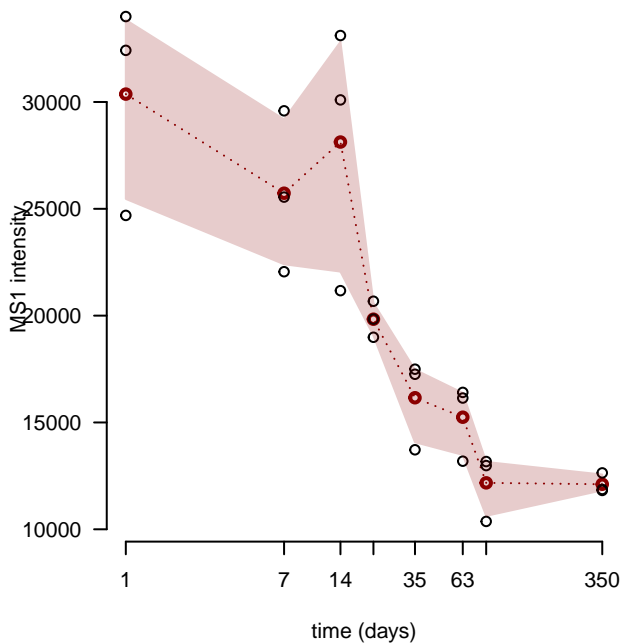

**Q91W29**  
**GN=Cox4i2**  
cytochrome c oxidase subunit 4i2

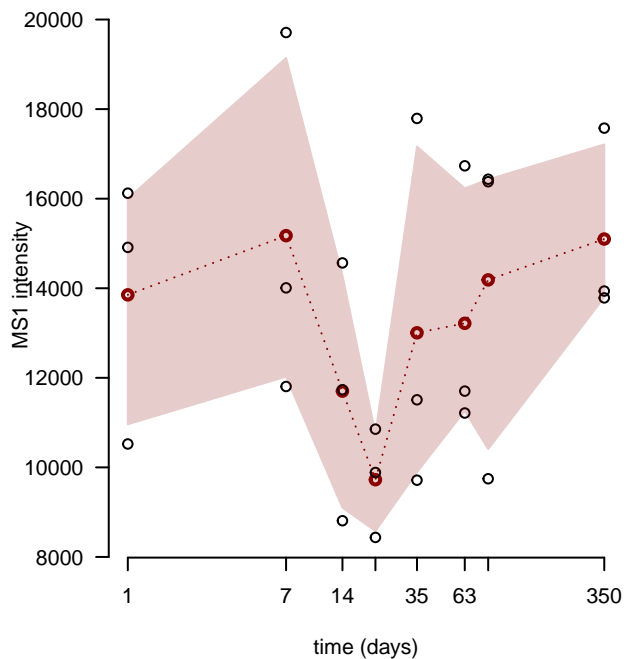

**Q91W34**  
**GN=**

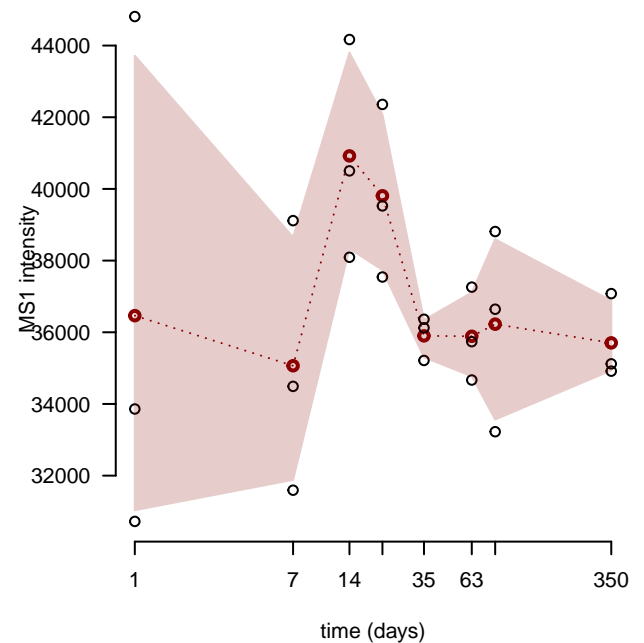

**Q91W36**  
**GN=Usp3**  
ubiquitin specific peptidase 3

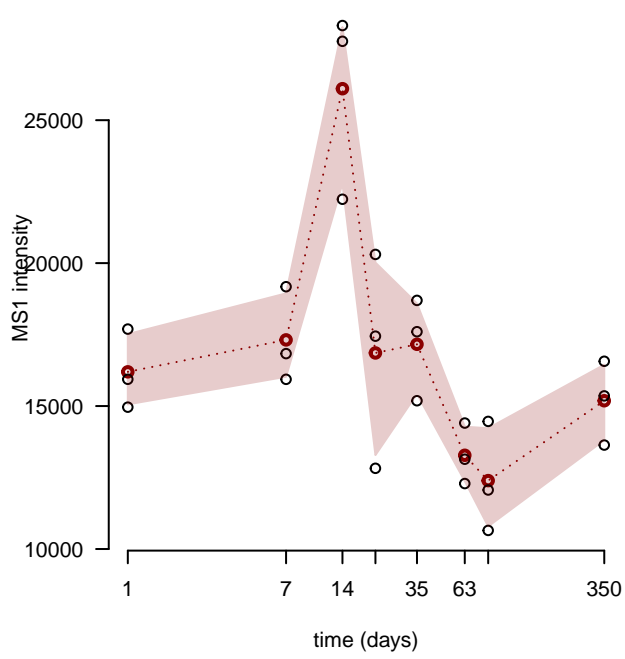

**Q91W39**  
**GN=Ncoa5**  
nuclear receptor coactivator 5

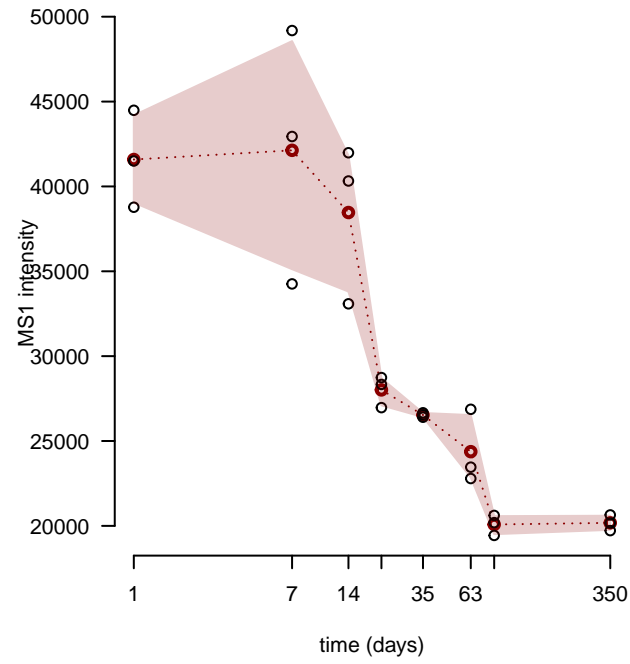

**Q91W45**  
**GN=Paip2b**  
poly(A) binding protein interacting prot ...

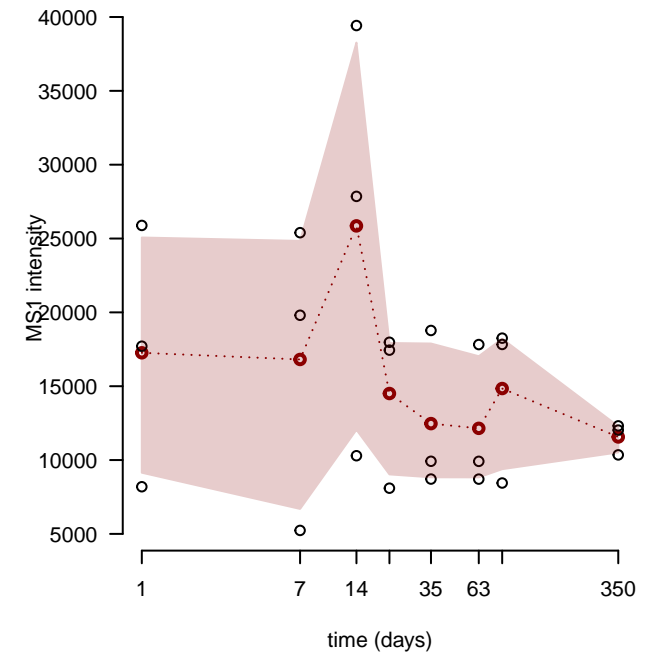

**Q91W50**  
**GN=Csde1**  
cold shock domain containing E1, RNA bin ...

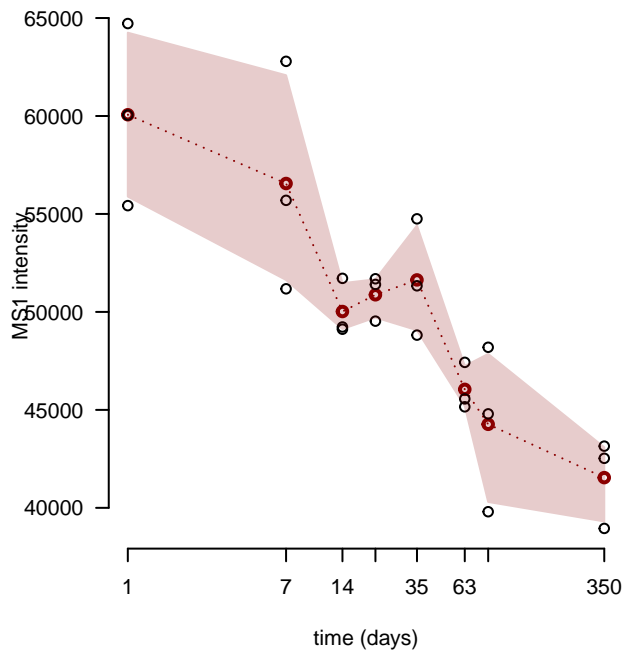

**Q91W52**  
**GN=Tmem19**  
transmembrane protein 19

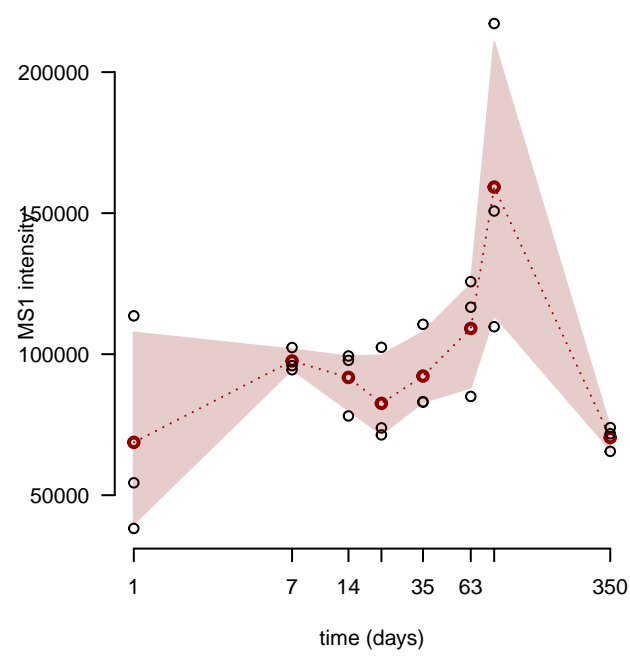

**Q91W53**  
**GN=Golga7**  
golgi autoantigen, golgin subfamily a, 7

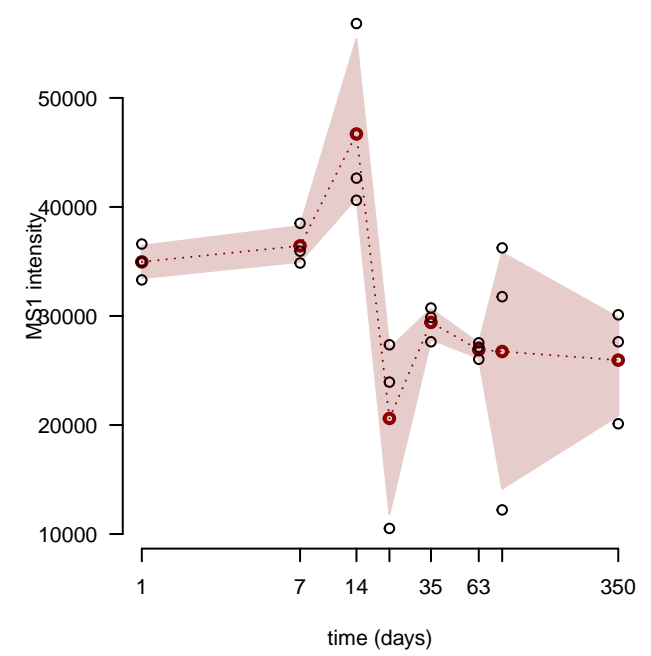

**Q91W59**  
**GN=Rbms1**  
RNA binding motif, single stranded inter ...

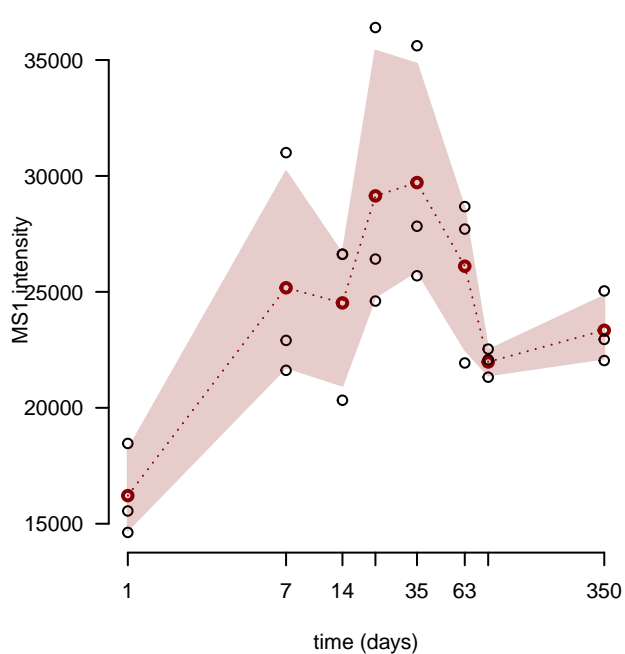

**Q91W67**  
**GN=Ubl7**  
ubiquitin-like 7 (bone marrow stromal ce ...

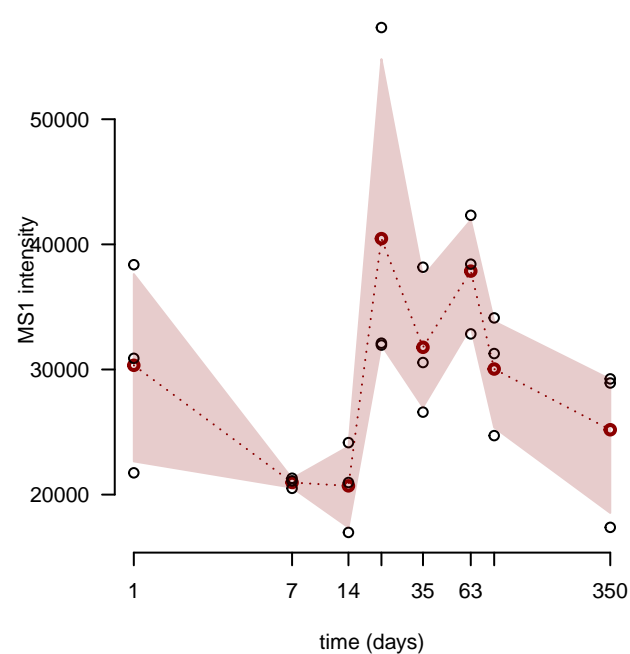

**Q91W69**  
**GN=Epn3**  
epsin 3

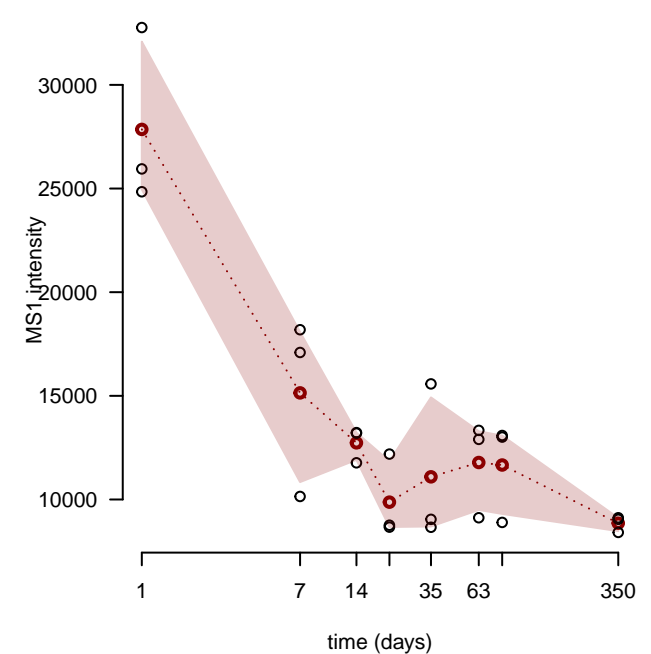

**Q91W78**  
**GN=Usb1**  
U6 snRNA biogenesis 1

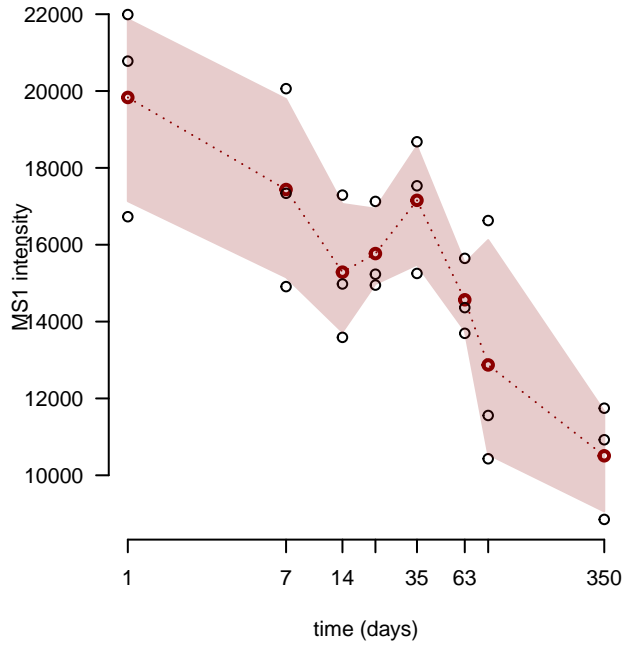

**Q91W82**  
**GN=Ube2e2**  
ubiquitin-conjugating enzyme E2 E 2

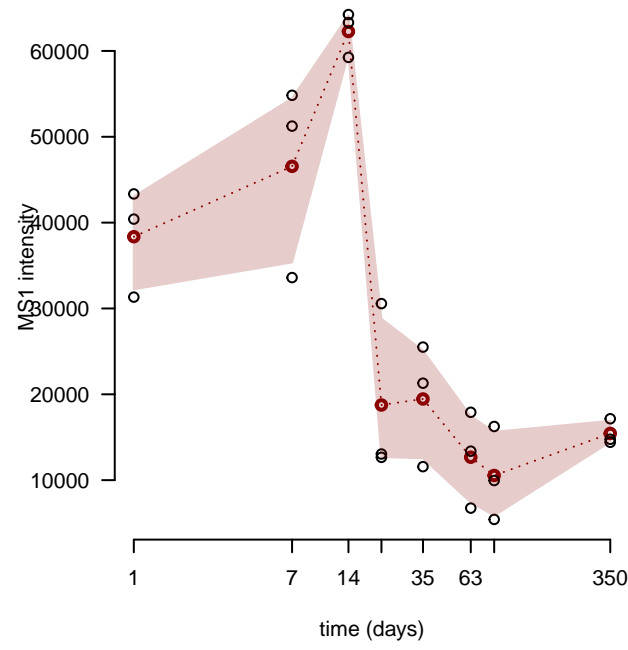

**Q91W86**  
**GN=Vps11**  
VPS11, CORVET/HOPS core subunit

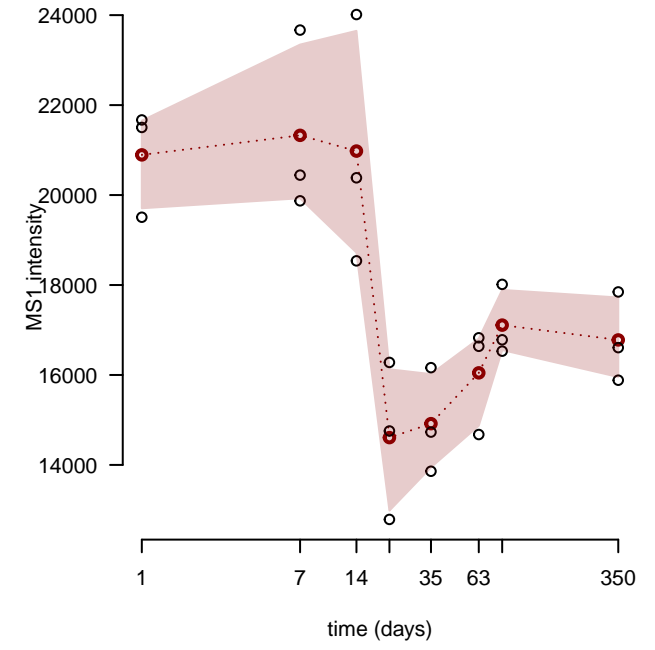

**Q91W89**  
**GN=Man2c1**  
mannosidase, alpha, class 2C, member 1

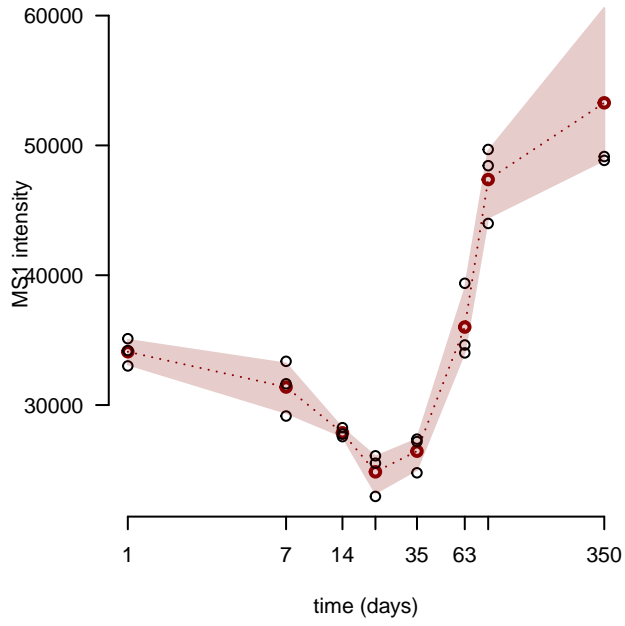

**Q91W90**  
**GN=Txndc5**  
thioredoxin domain containing 5

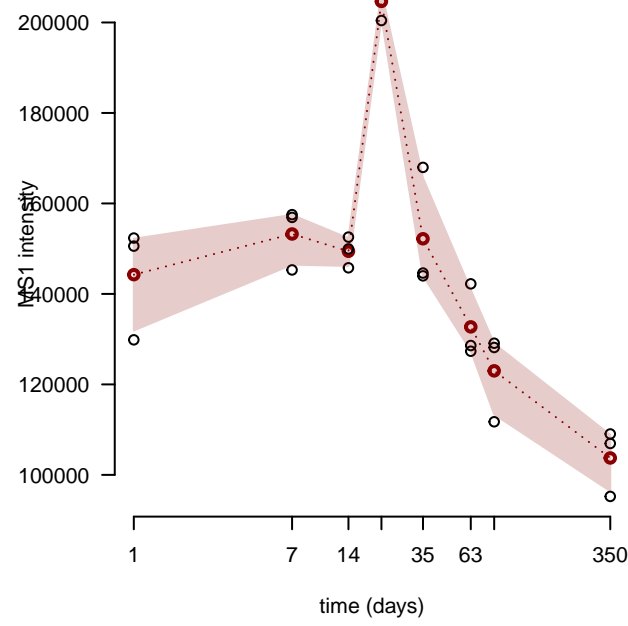

**Q91W92**  
**GN=Cdc42ep1**  
CDC42 effector protein (Rho GTPase bindi ...

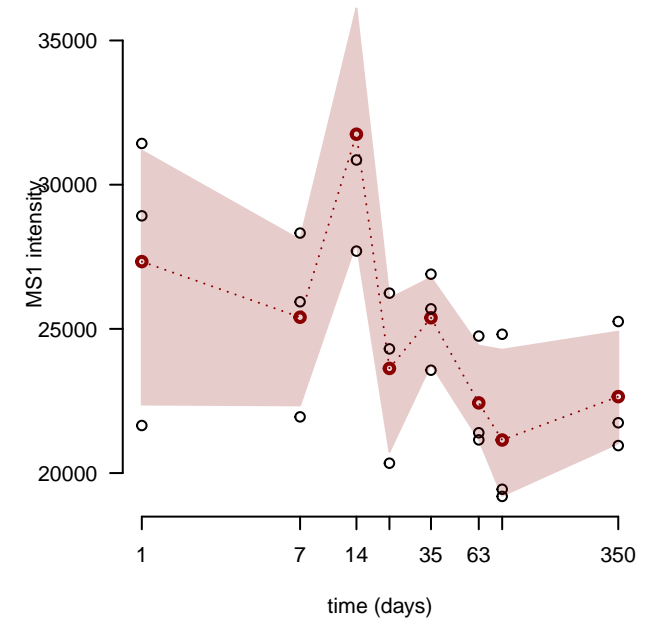

**Q91W96**  
**GN=Anapc4**  
anaphase promoting complex subunit 4

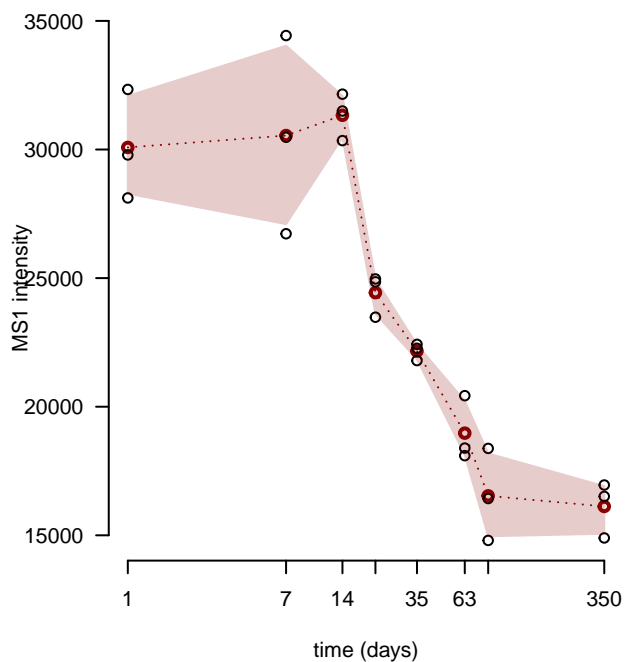

**Q91W98**  
**GN=Slc15a4**  
solute carrier family 15, member 4

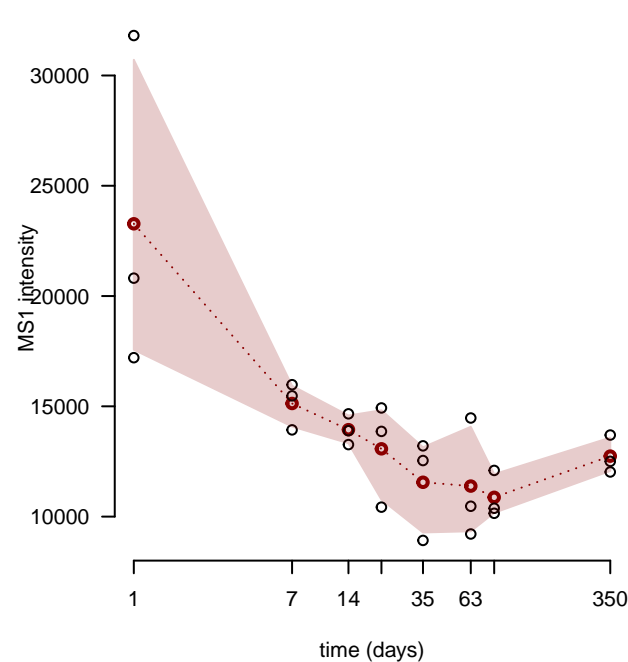

**Q91WA1**  
**GN=Tipin**  
timeless interacting protein

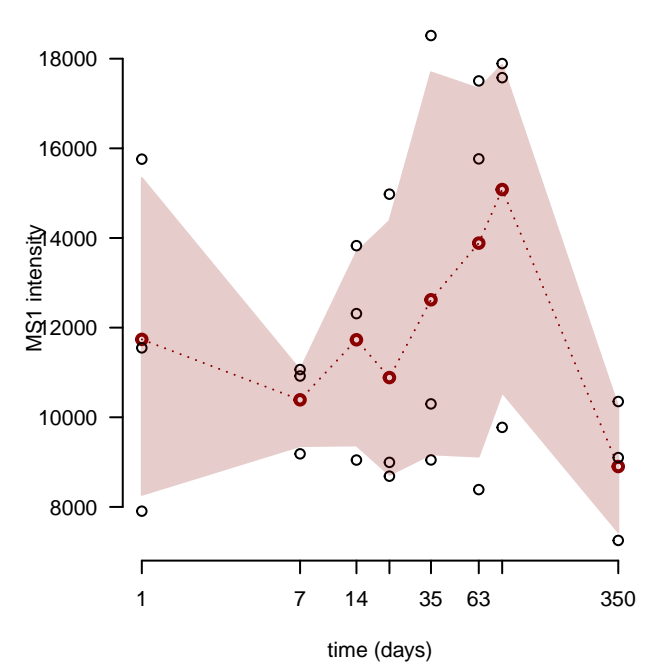

**Q91WA4**  
**GN=Cxxc5**  
CXXC finger 5

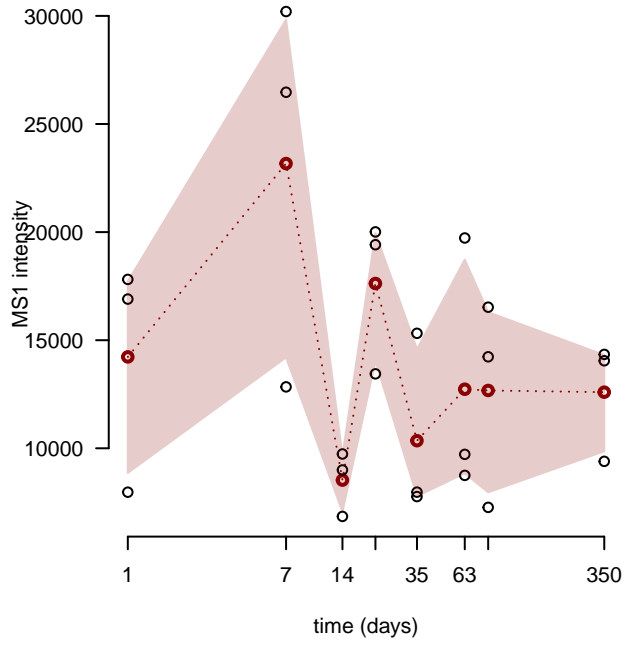

**Q91WA6**  
**GN=Sharpin**  
SHANK-associated RH domain interacting p ...

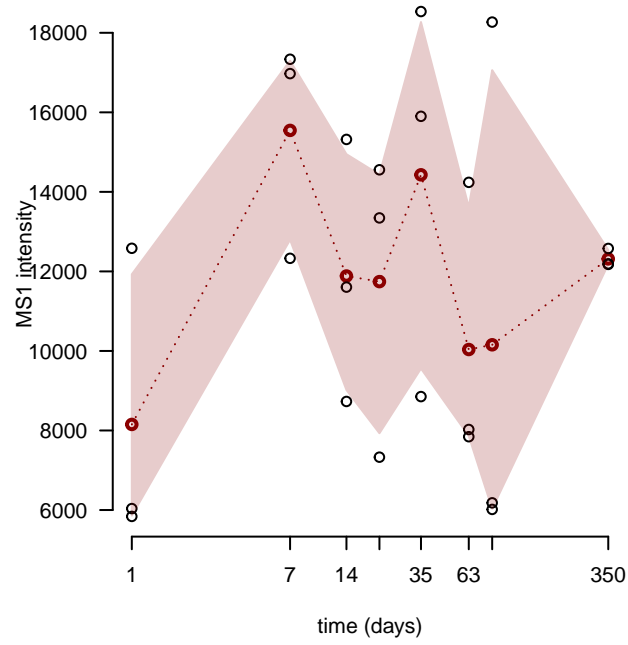

**Q91WB4**  
**GN=Plekhf2**  
pleckstrin homology domain containing, f ...

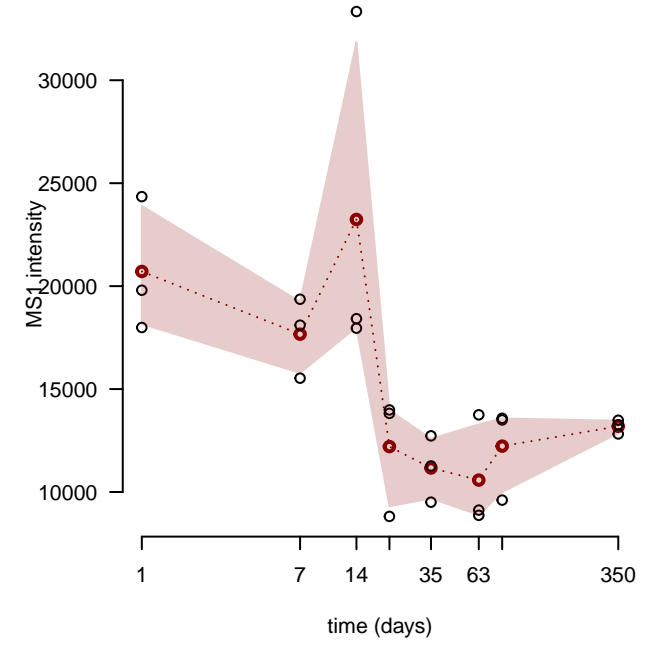

**Q91WC0**  
**GN=Setd3**  
SET domain containing 3

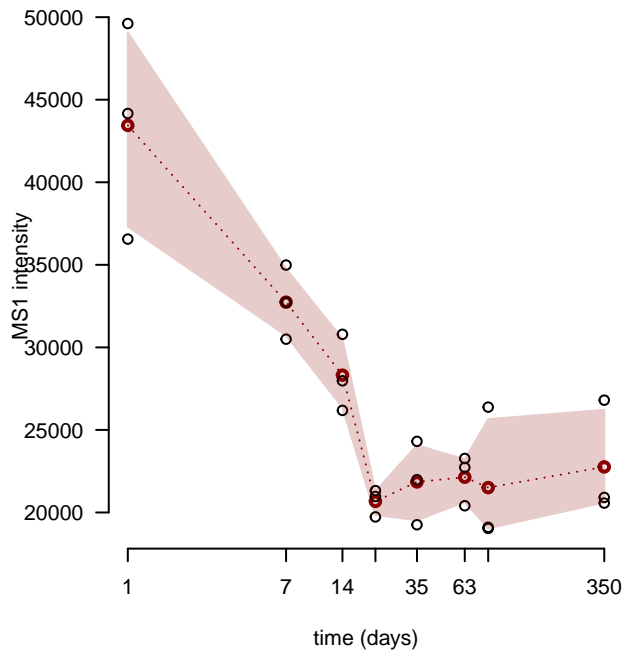

**Q91WC3**  
**GN=Acsl6**  
acyl-CoA synthetase long-chain family me ...

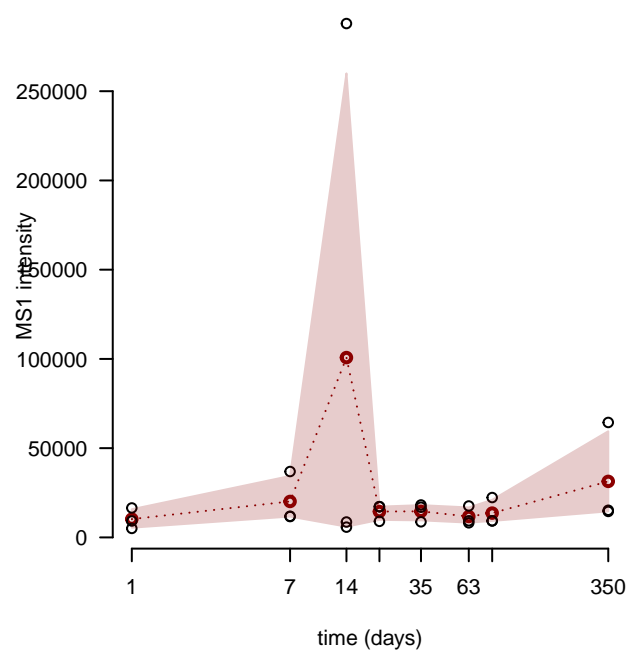

**Q91WC9**  
**GN=Daglb**  
diacylglycerol lipase, beta

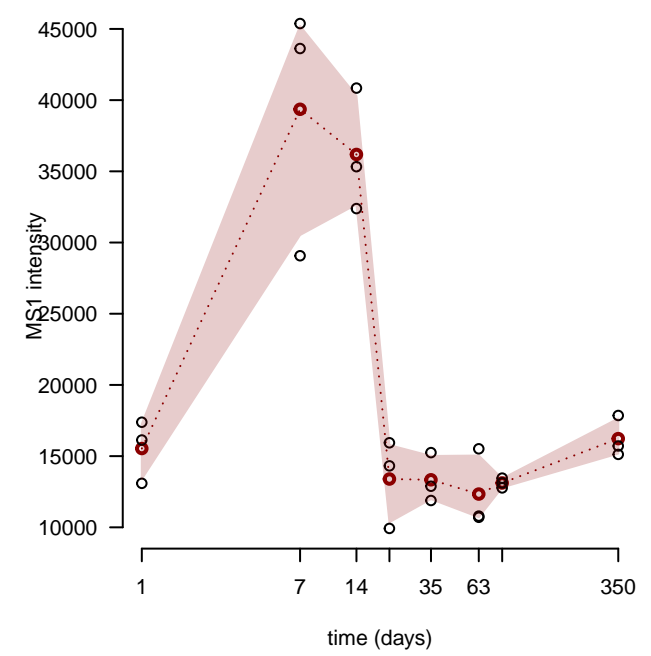

**Q91WD0**  
**GN=Gpr108**  
G protein-coupled receptor 108

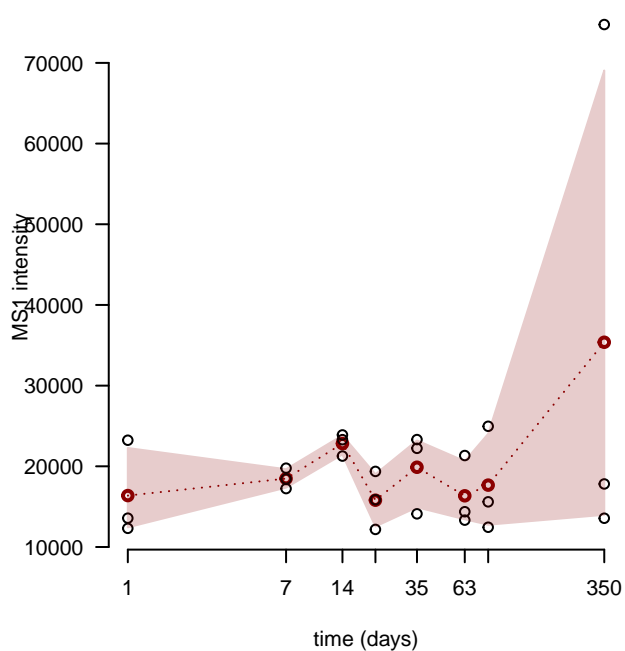

**Q91WD1**  
**GN=Polr3d**  
polymerase (RNA) III (DNA directed) poly ...

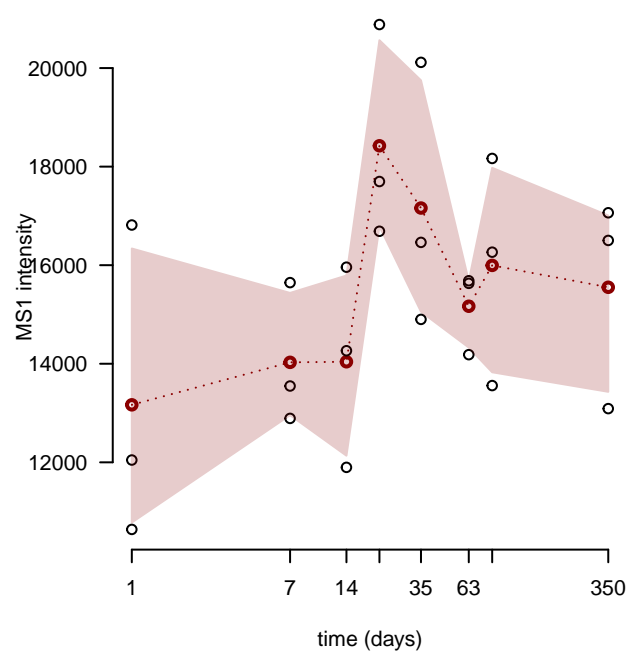

**Q91WD5**  
**GN=Ndufs2**  
NADH:ubiquinone oxidoreductase core subu ...

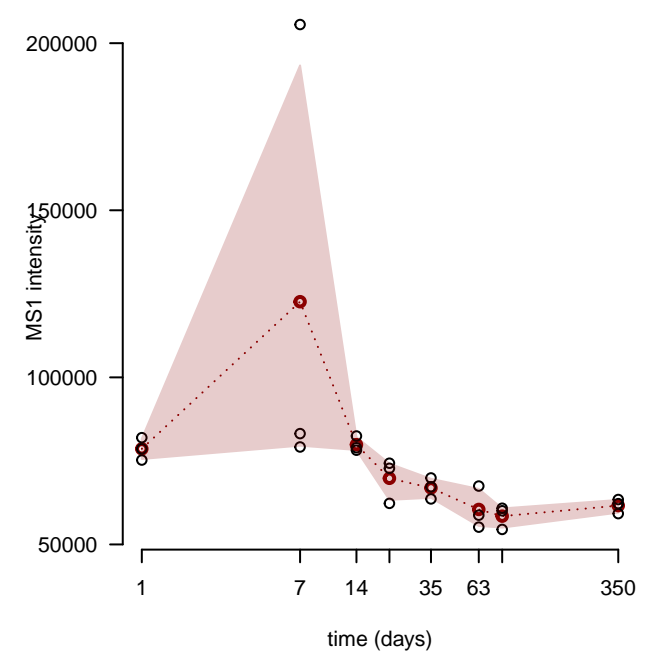

Q91WE1  
GN=Snx15  
sorting nexin 15

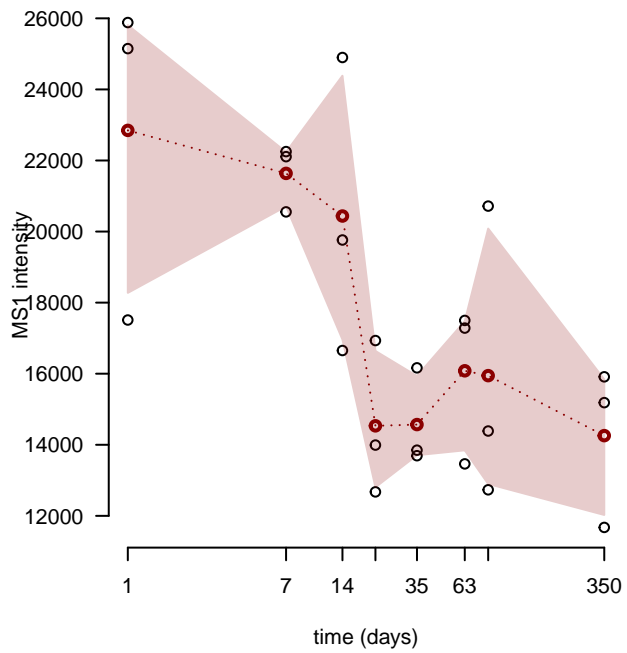

Q91WE2  
GN=Fam192a

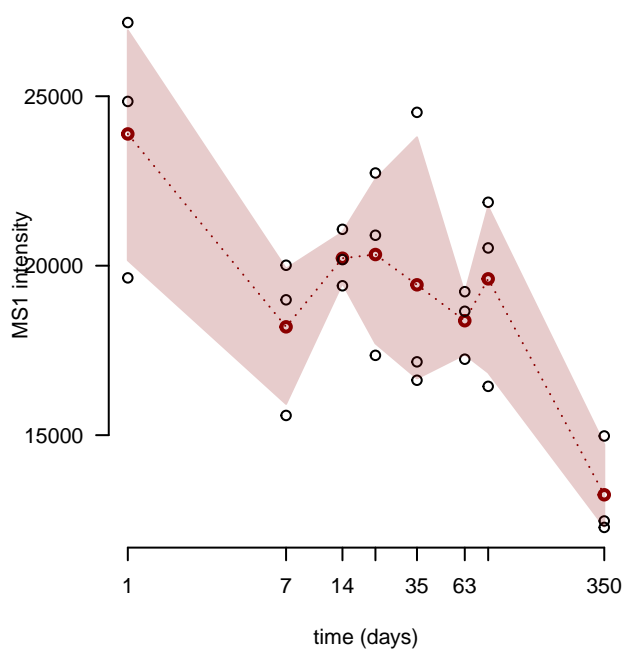

Q91WE3  
GN=Rpp25  
ribonuclease P/MRP 25 subunit

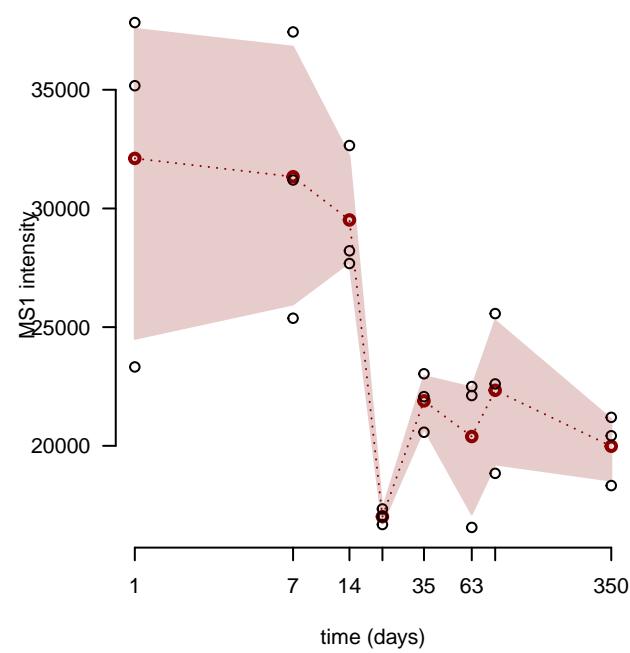

Q91WE4  
GN=

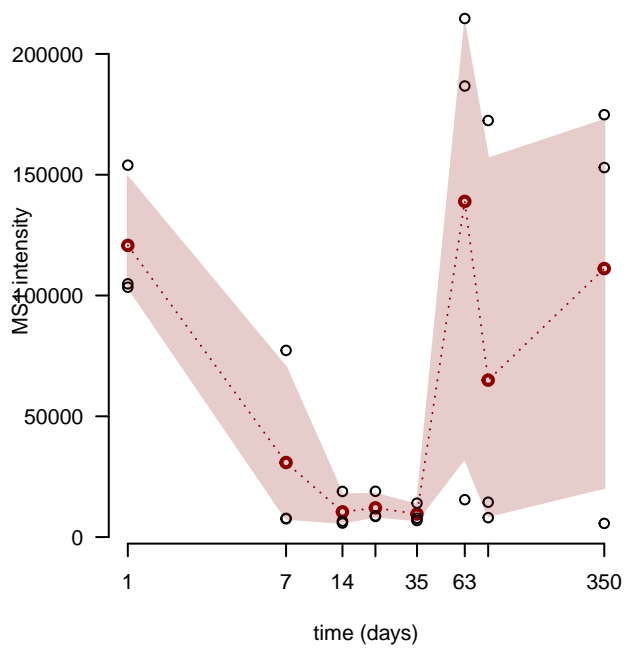

Q91WE6  
GN=Cdkal1  
CDK5 regulatory subunit associated prote ...

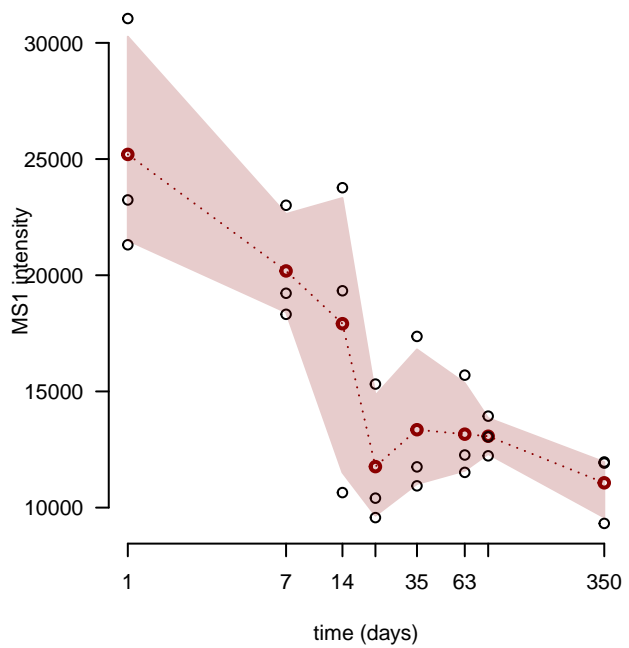

Q91WF0  
GN=

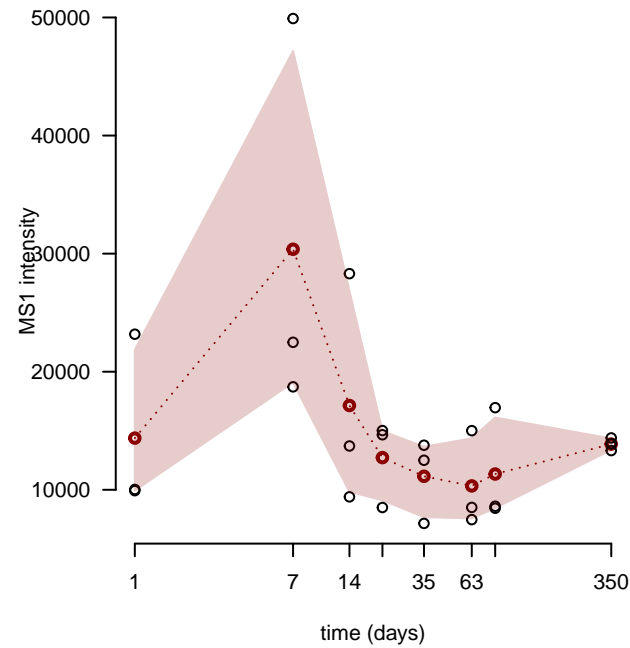

Q91WF7  
GN=Fig4  
FIG4 phosphoinositide 5-phosphatase

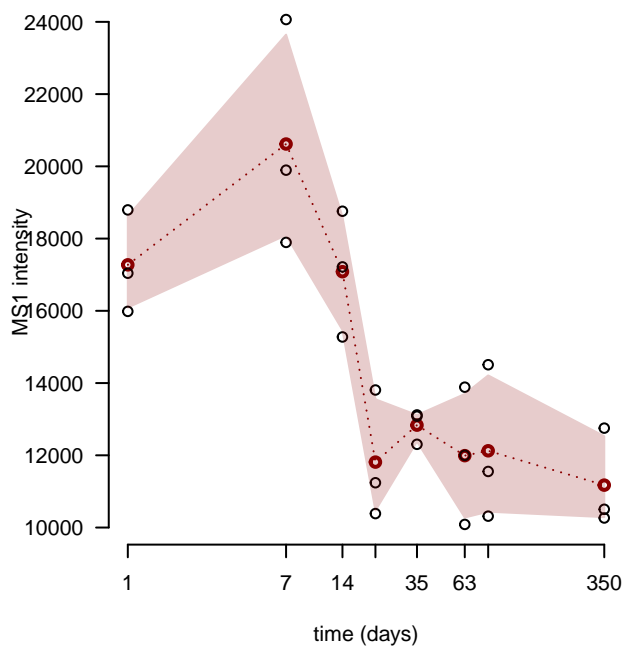

Q91WG0  
GN=Ces2c  
carboxylesterase 2C

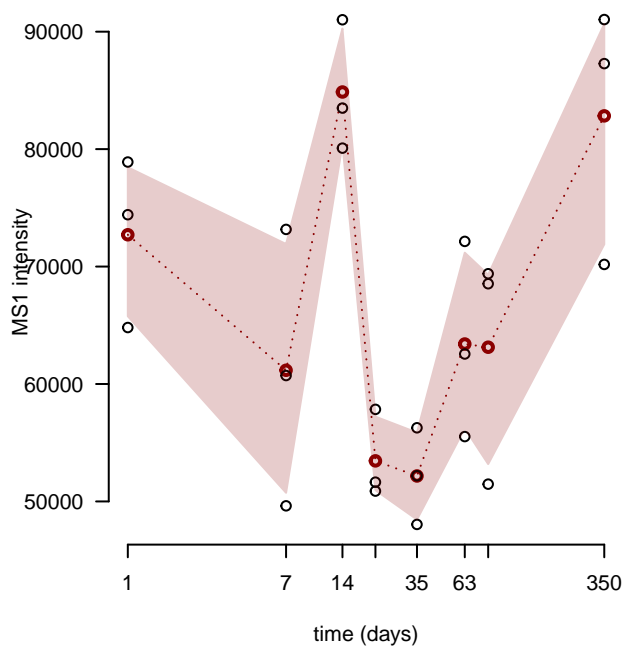

Q91WG2  
GN=Rabep2  
rabaptin, RAB GTPase binding effector pr ...

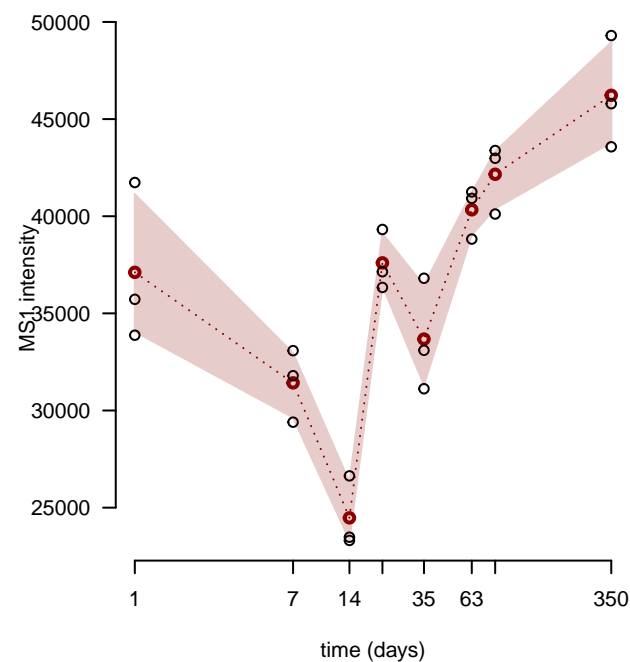

**Q91WG4**  
**GN=Elp2**

elongator acetyltransferase complex subu ...

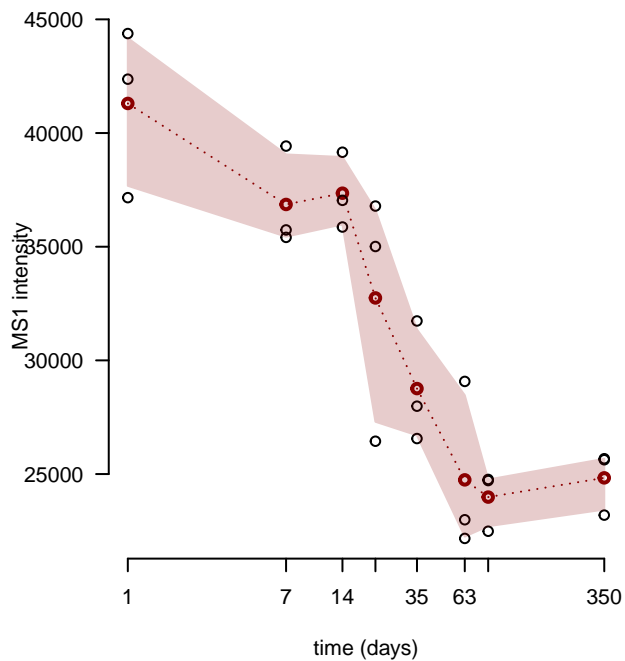

**Q91WG5**  
**GN=Prkag2**

protein kinase, AMP-activated, gamma 2 n ...

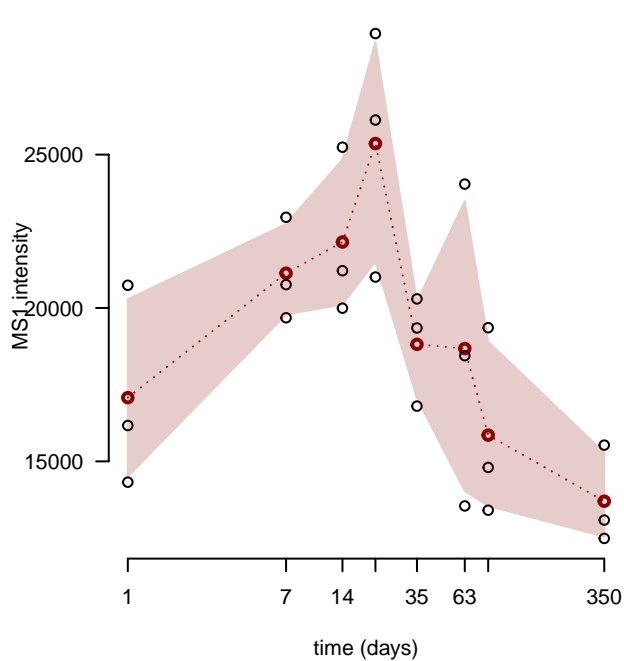

**Q91WG8**  
**GN=Gne**

glucosamine (UDP-N-acetyl)-2-epimerase/N ...

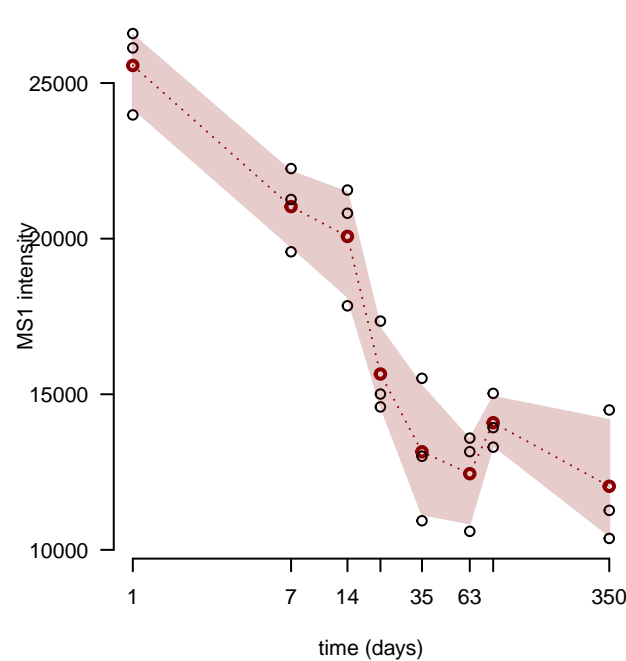

**Q91WI7**  
**GN=Itfg2**

integrin alpha FG-GAP repeat containing ...

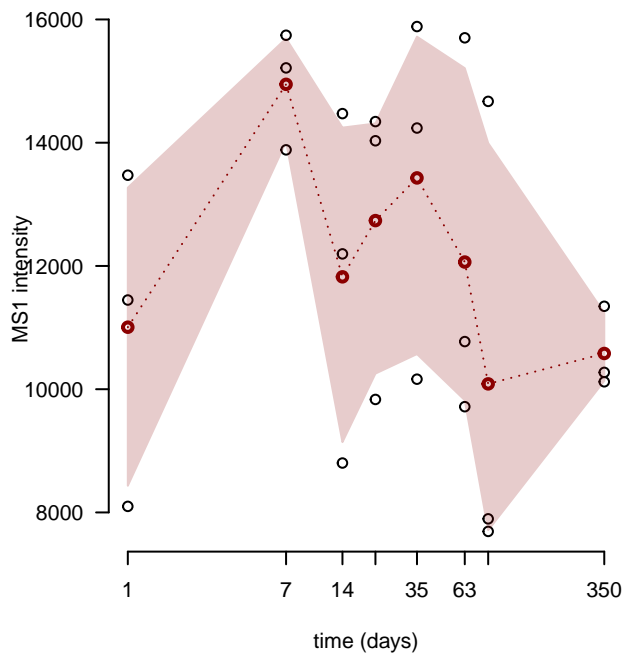

**Q91WJ7**  
**GN=Spats2l**

spermatogenesis associated, serine-rich ...

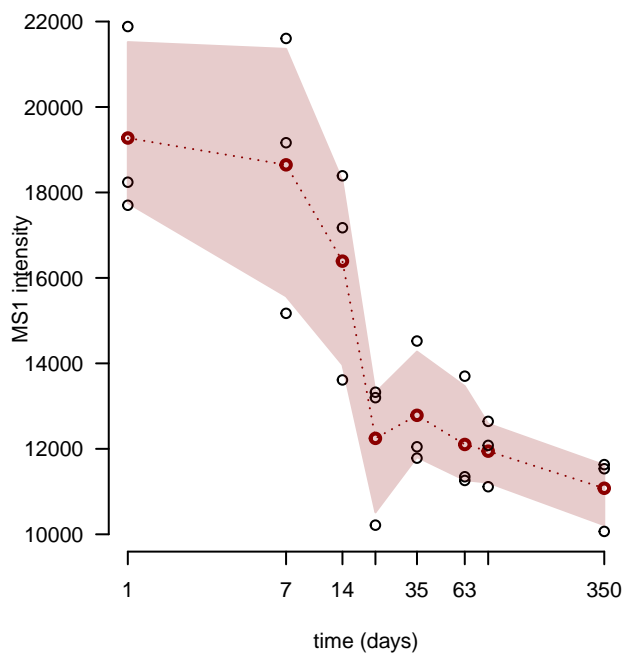

**Q91WJ8**  
**GN=Fubp1**

far upstream element (FUSE) binding prot ...

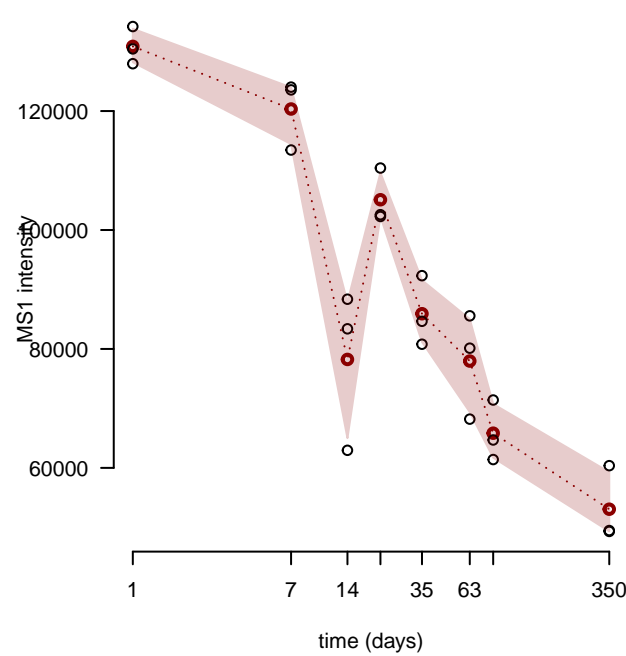

**Q91WK0**  
**GN=Lrrfip2**

leucine rich repeat (in FLII) interactin ...

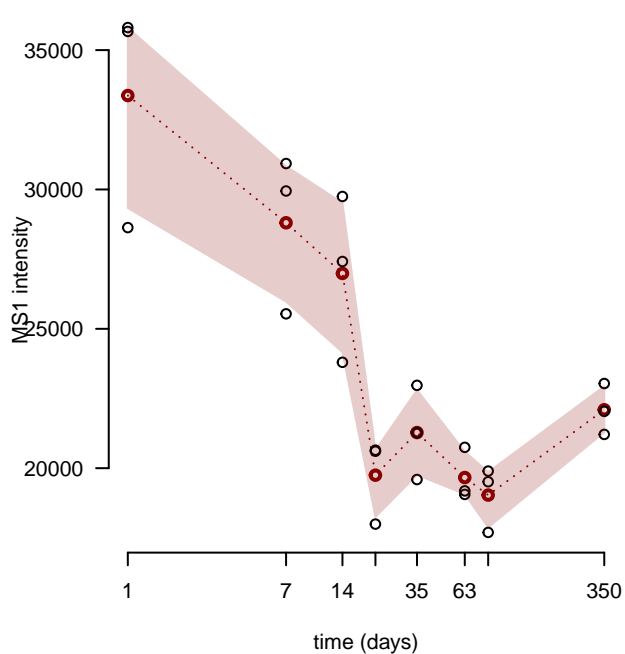

**Q91WK1**  
**GN=Spryd4**

SPRY domain containing 4

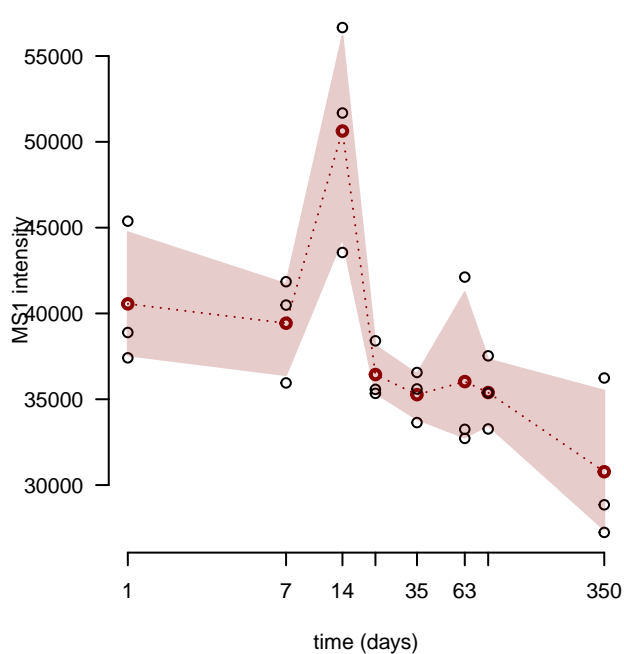

**Q91WK2**  
**GN=Eif3h**

eukaryotic translation initiation factor ...

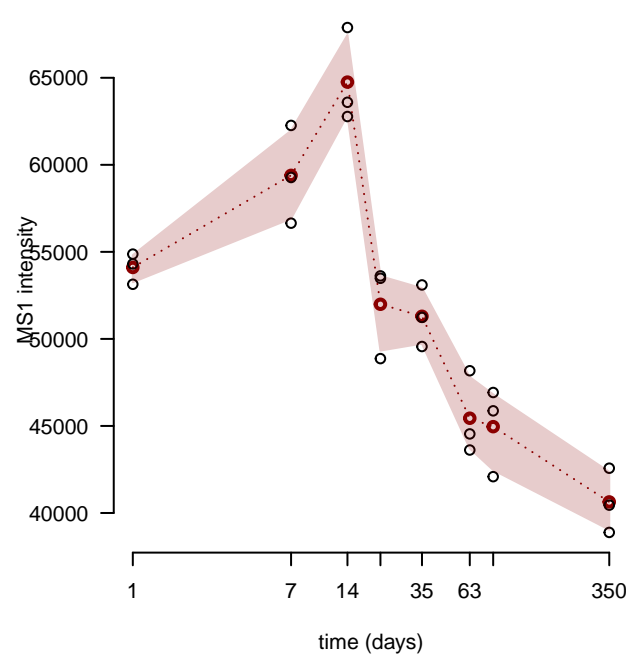

**Q91WK5**  
GN=Gcsh  
glycine cleavage system protein H (amino ...

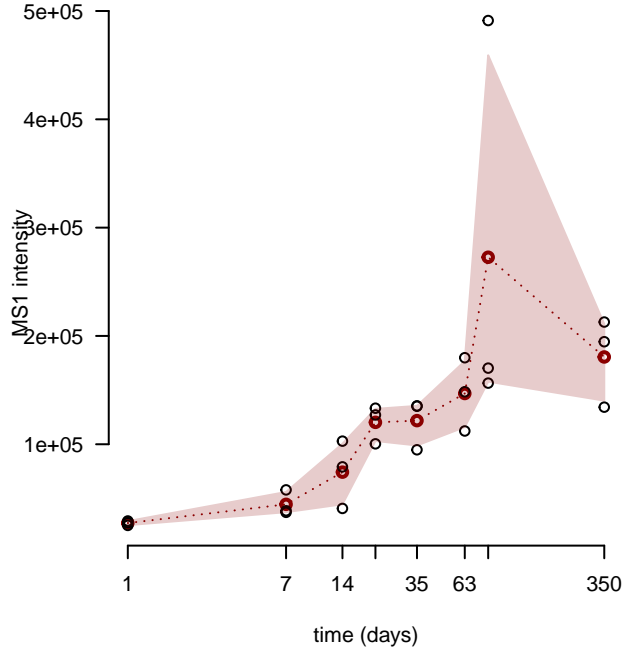

**Q91WL0**  
GN=Eps8I3  
EPS8-like 3

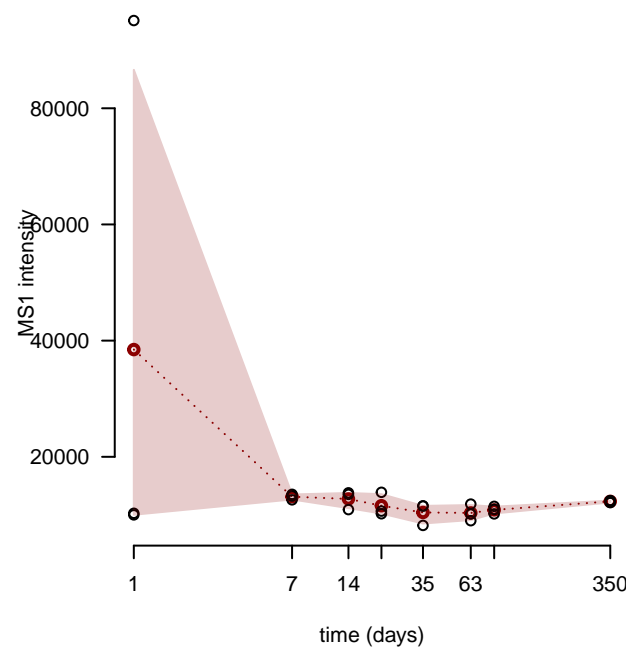

**Q91WL6**  
GN=Snx11  
sorting nexin 11

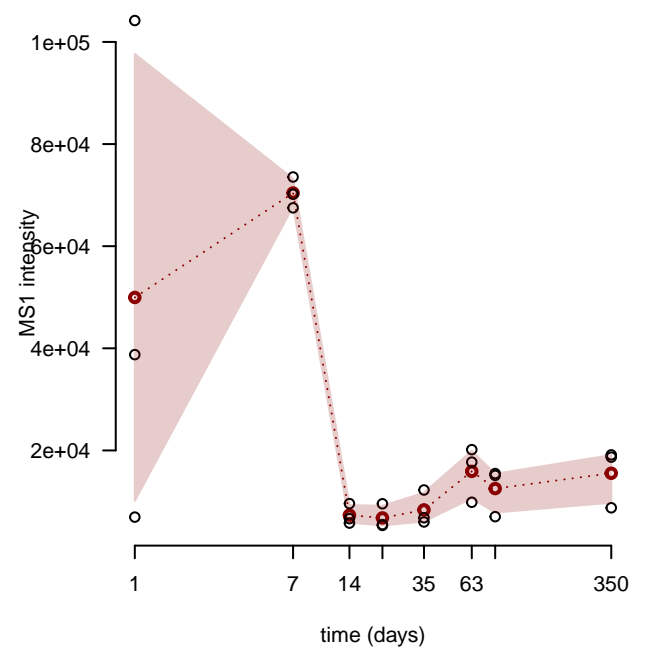

**Q91WL8**  
GN=Wwox  
WW domain-containing oxidoreductase

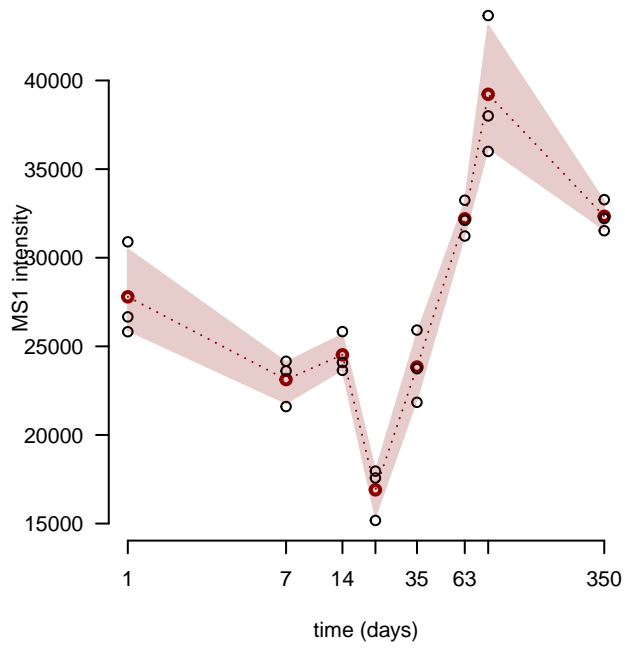

**Q91WM1**  
GN=Strbp  
spermatid perinuclear RNA binding protei ...

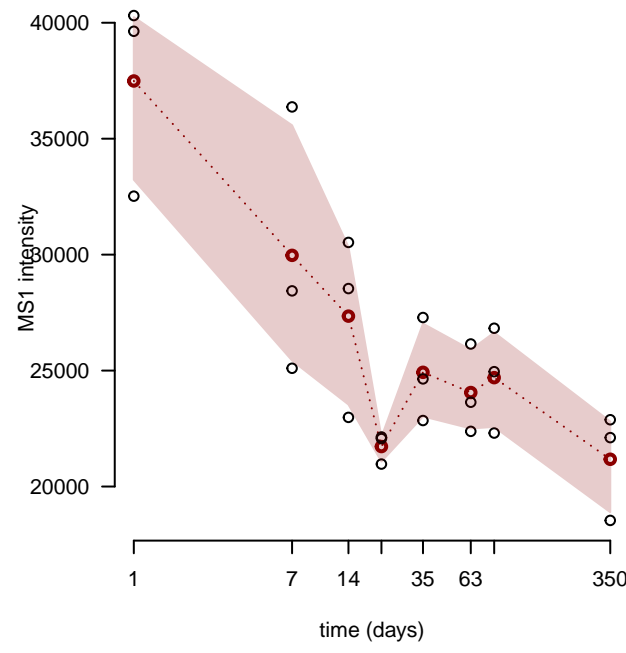

**Q91WM2**  
GN=Hdhd5  
haloacid dehalogenase like hydrolase dom ...

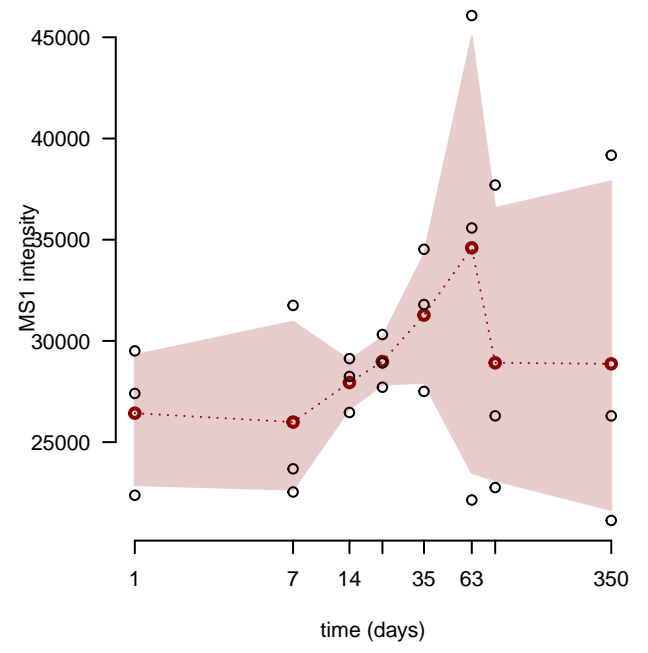

**Q91WM3**  
GN=Rrp9  
ribosomal RNA processing 9, U3 small nuc ...

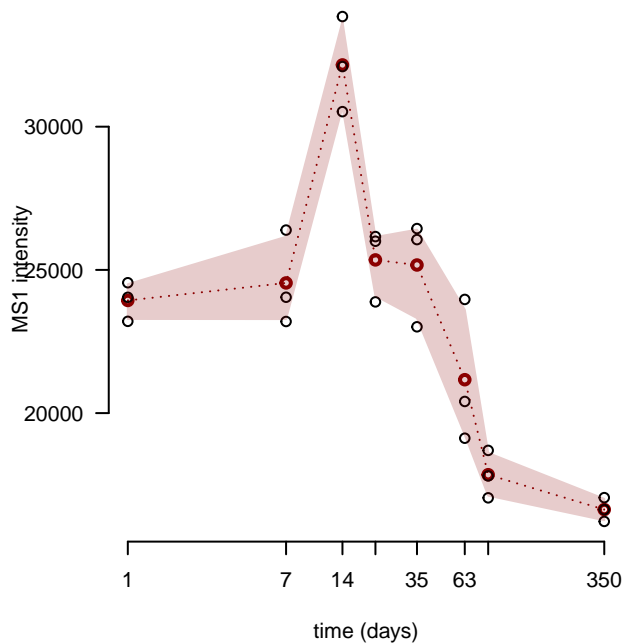

**Q91WN1**  
GN=Dnajc9  
DnaJ heat shock protein family (Hsp40) m ...

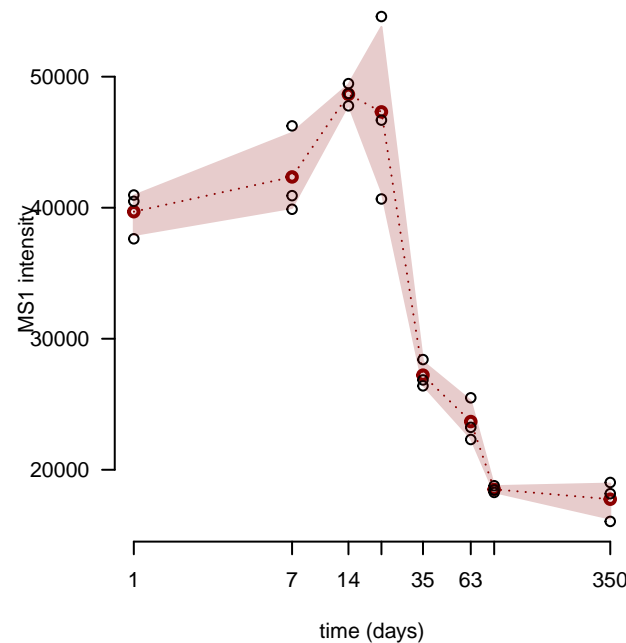

**Q91WP0**  
GN=Masp2  
mannan-binding lectin serine peptidase 2

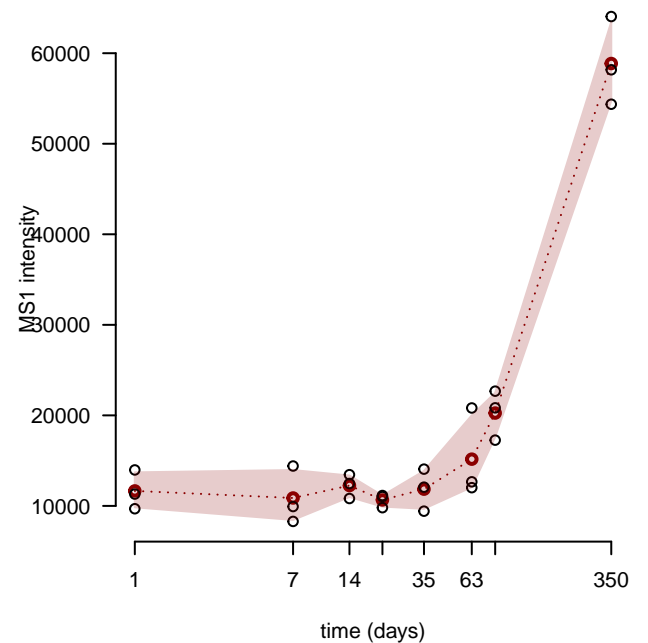

**Q91WP6**  
GN=Serpina3n  
serine (or cysteine) peptidase inhibitor ...

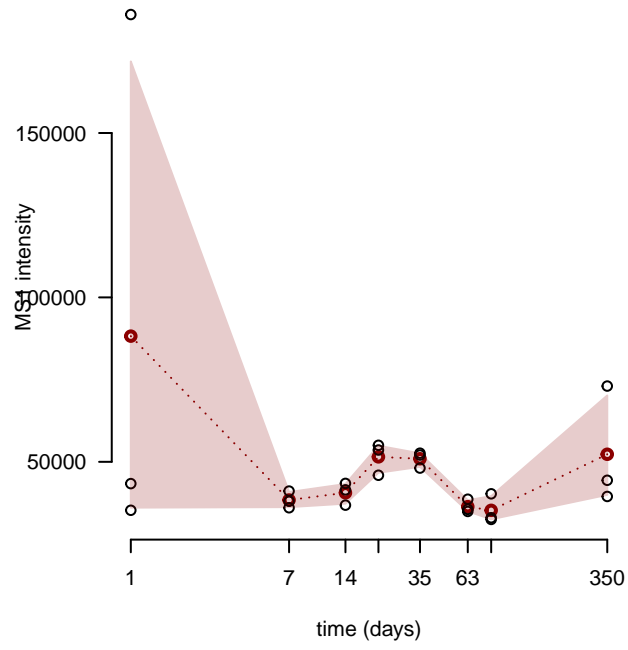

**Q91WQ3**  
GN=Yars  
tyrosyl-tRNA synthetase

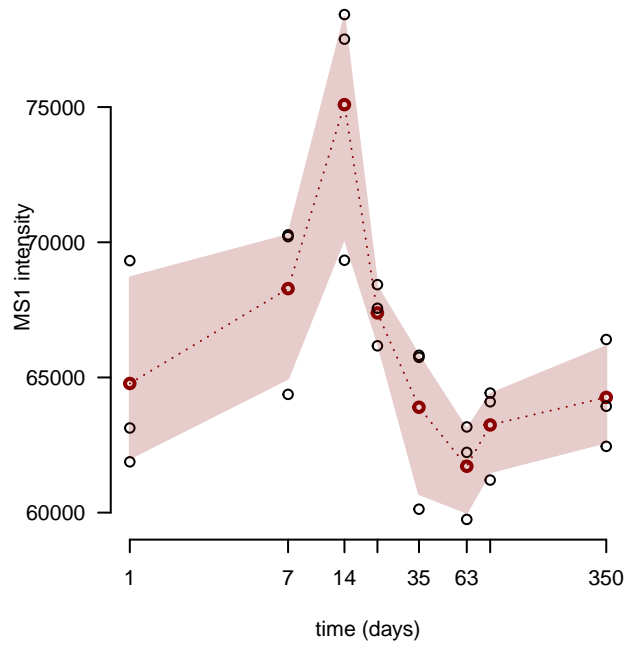

**Q91WQ5**  
GN=Taf5l  
TATA-box binding protein associated fact ...

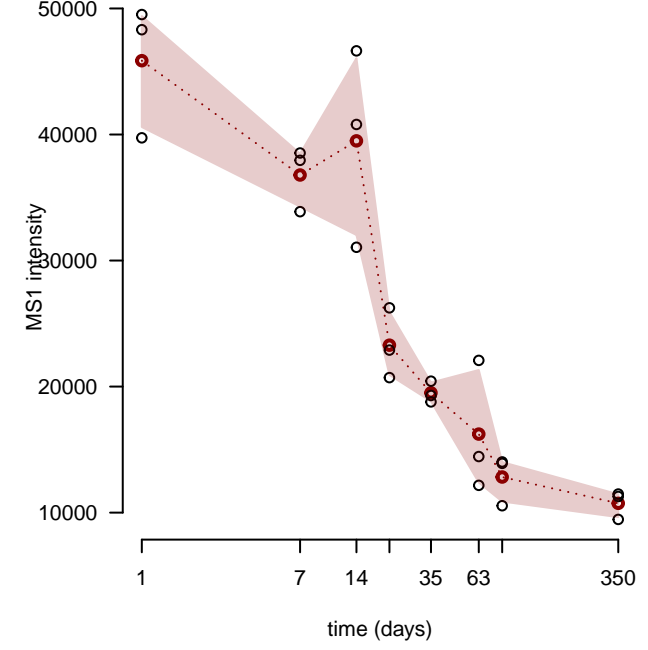

**Q91WR3**  
GN=Ascc2  
activating signal cointegrator 1 complex ...

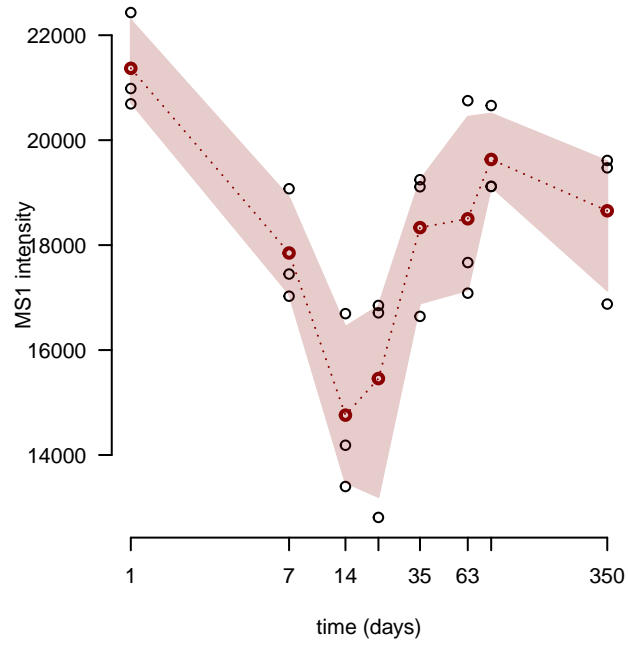

**Q91WS0**  
GN=Cisd1  
CDGSH iron sulfur domain 1

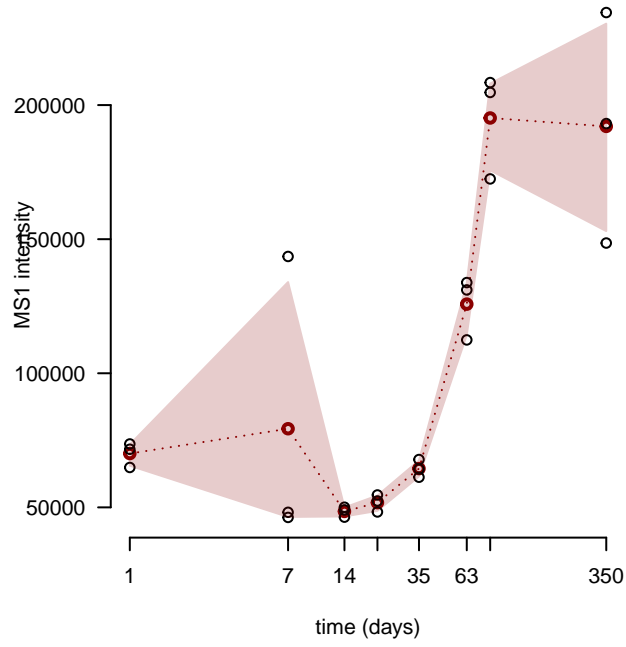

**Q91WS4**  
GN=Bhmt2  
betaine-homocysteine methyltransferase 2

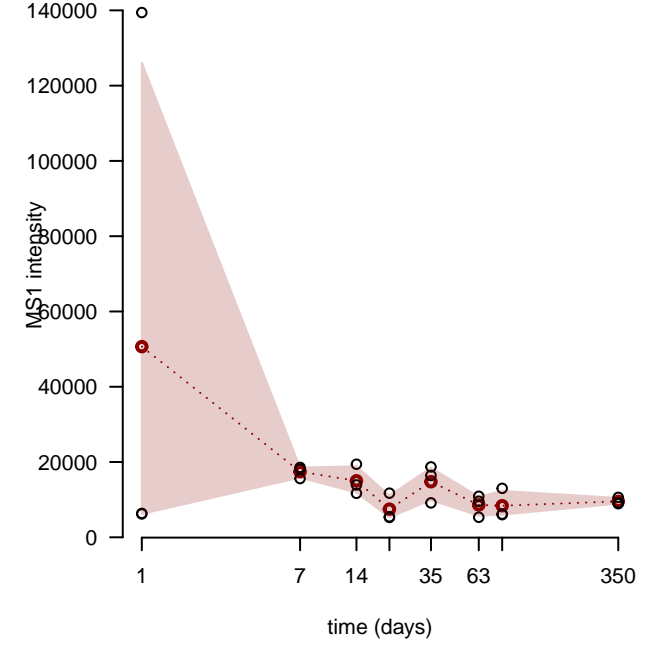

**Q91WS7**  
GN=Depdc7  
DEP domain containing 7

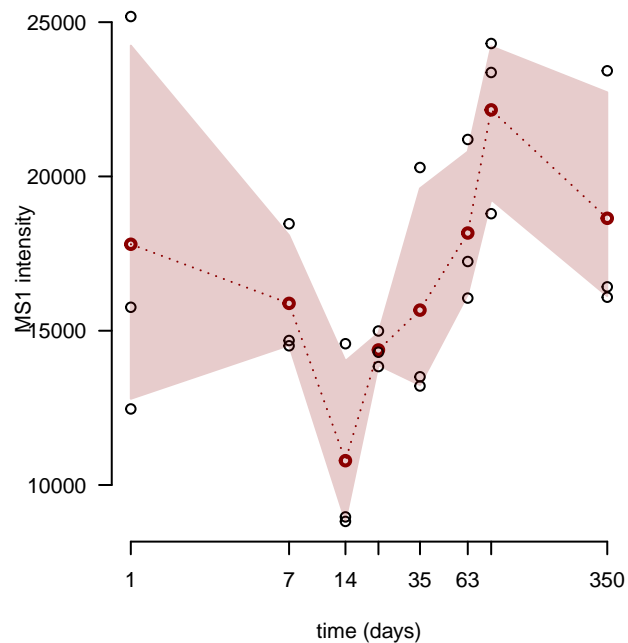

**Q91WT4**  
GN=Dnajc17  
DnaJ heat shock protein family (Hsp40) m ...

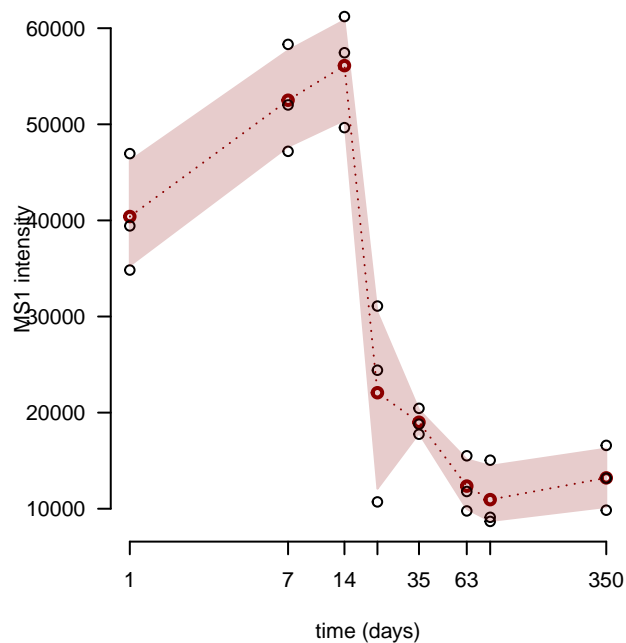

**Q91WT8**  
GN=Rbm47  
RNA binding motif protein 47

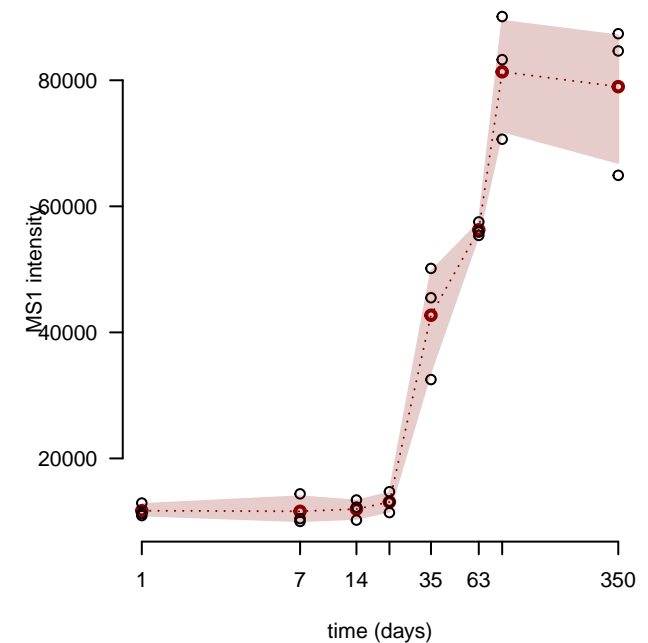



**Q91WT9**  
GN=Cbs  
cystathionine beta-synthase

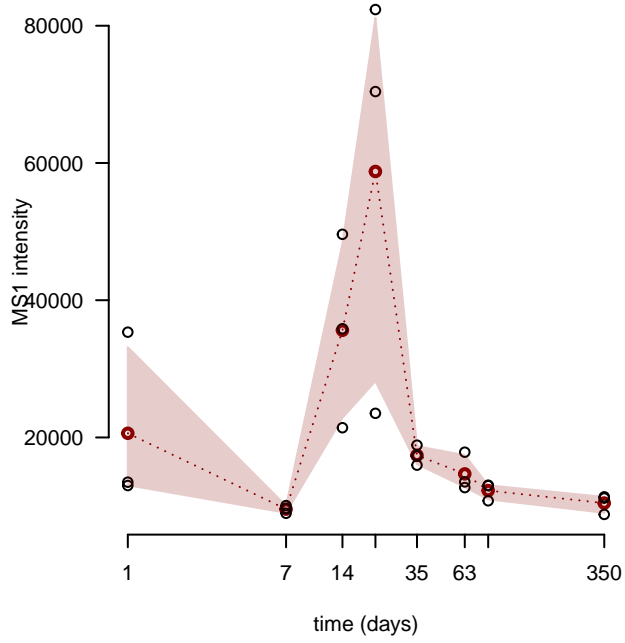

**Q91WU5**  
GN=As3mt  
arsenite methyltransferase

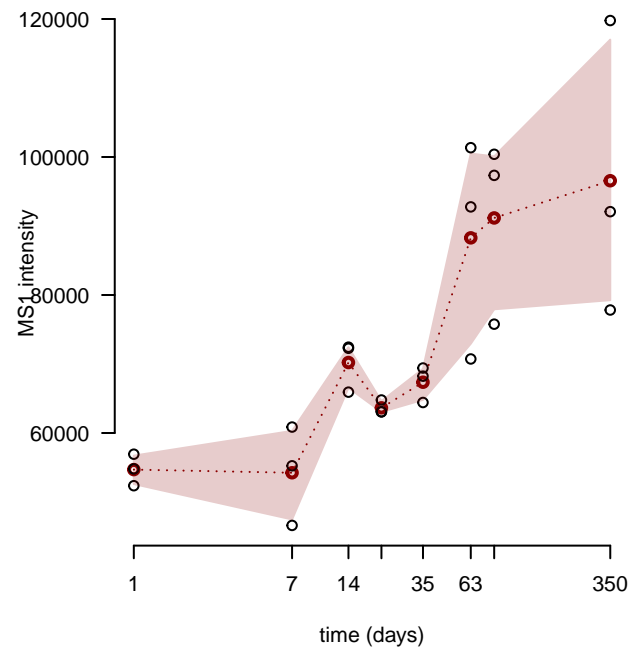

**Q91WV0**  
GN=Dr1  
down-regulator of transcription 1

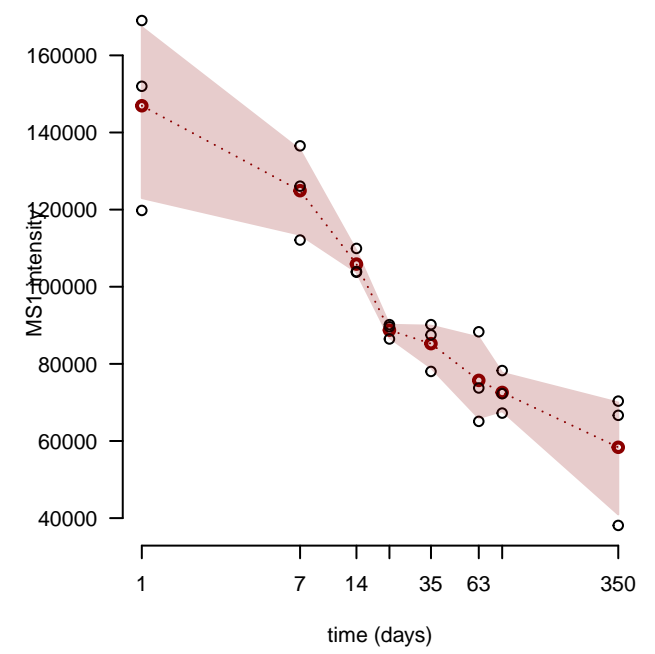

**Q91WZ8**  
GN=Dtnbp1  
dystrobrevin binding protein 1

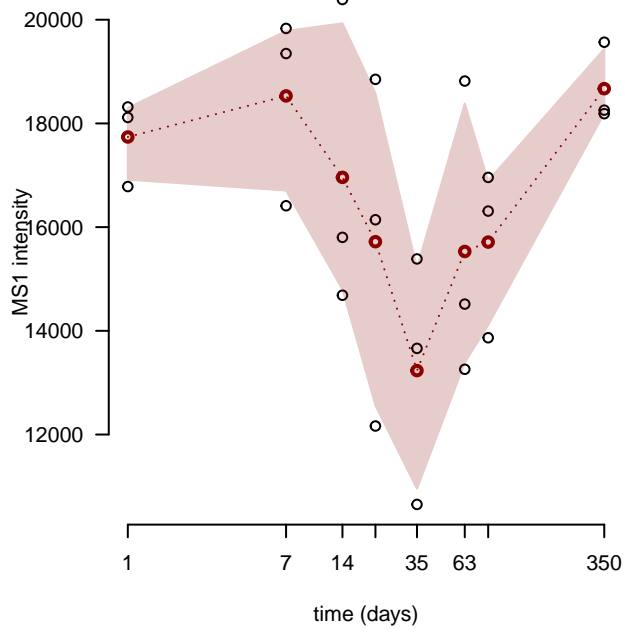

**Q91X20**  
GN=Ash2l  
ASH2 like histone lysine methyltransferase

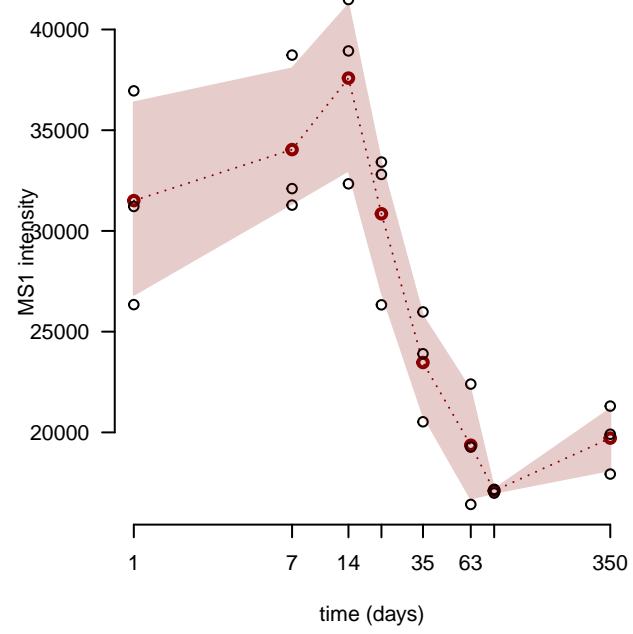

**Q91X21**  
GN=Kiaa2013

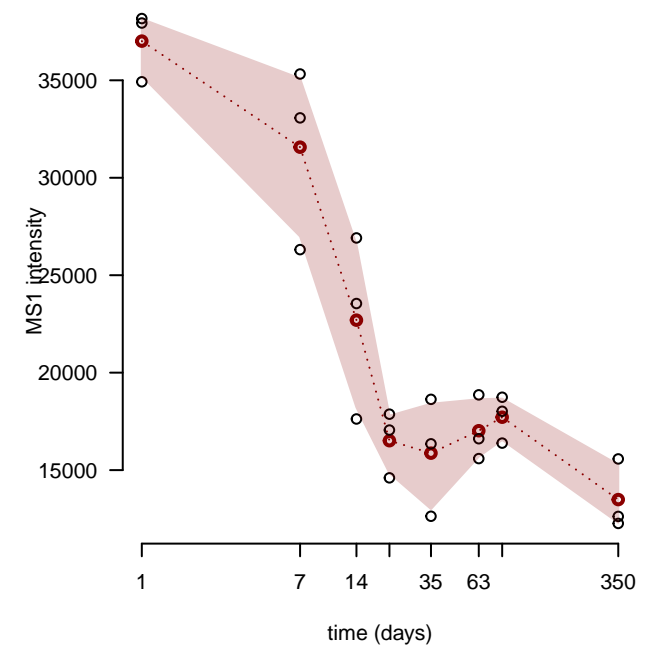

**Q91X43**  
GN=Sh3d19  
SH3 domain protein D19

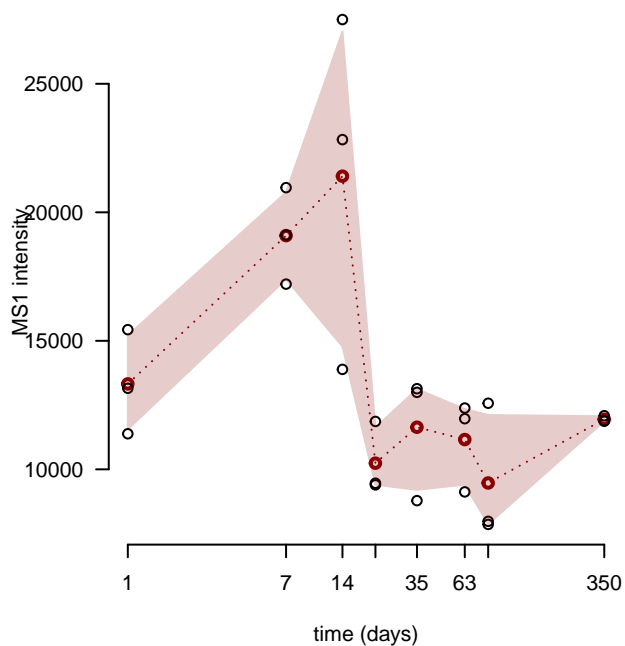

**Q91X51**  
GN=Gorasp1  
golgi reassembly stacking protein 1

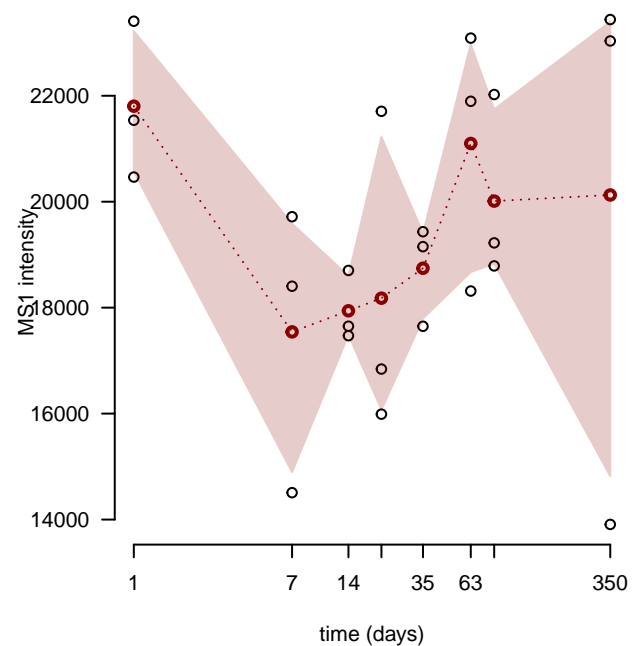

**Q91X52**  
GN=Dcxr  
dicarbonyl L-xylulose reductase

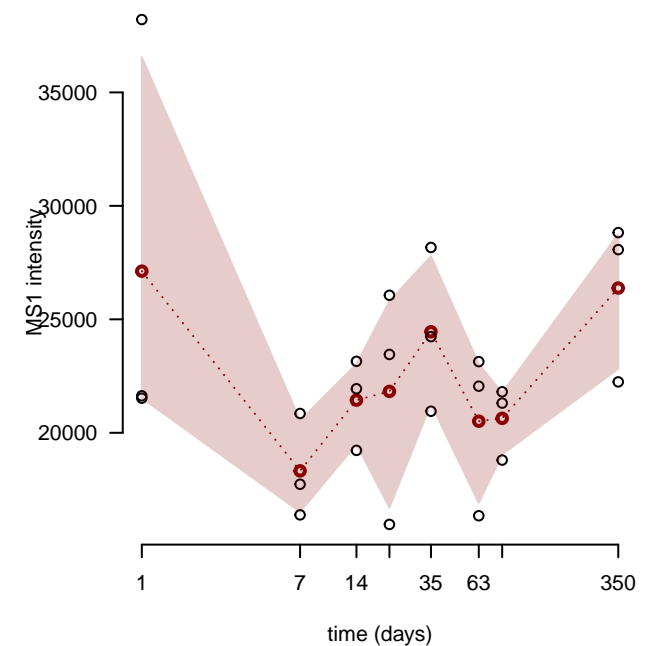

**Q91X58**  
**GN=Zfand2b**  
zinc finger, AN1 type domain 2B

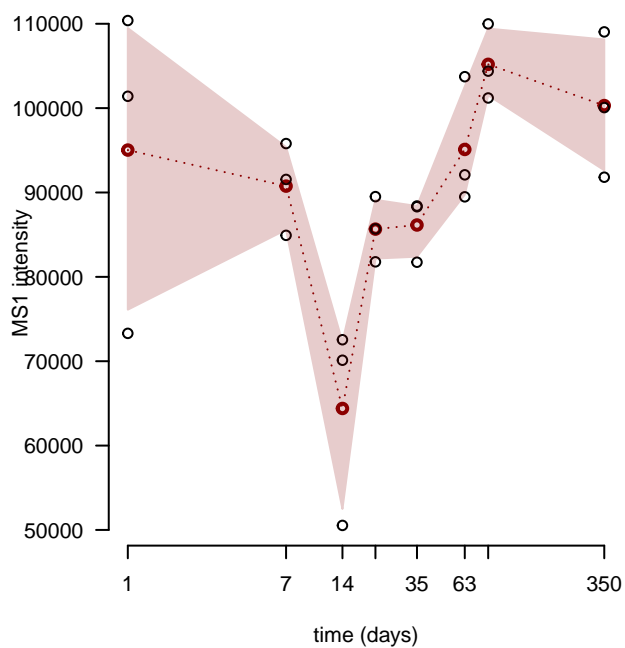

**Q91X72**  
**GN=Hpx**  
hemopexin

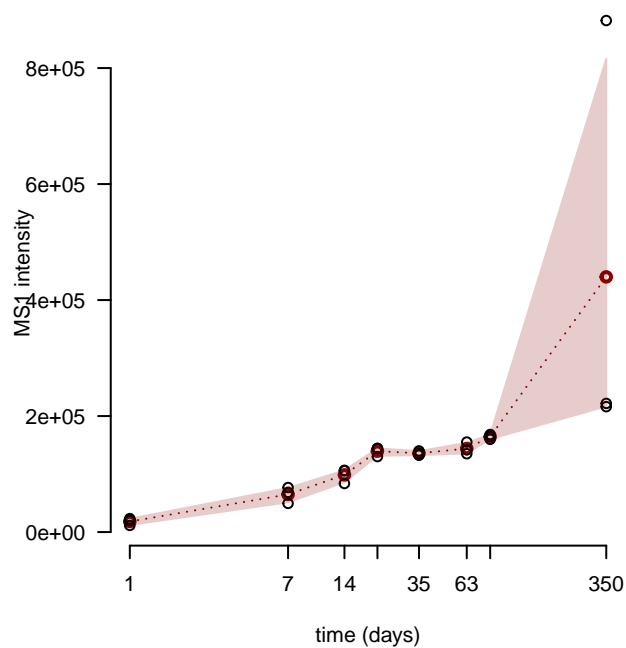

**Q91X78**  
**GN=Erln1**  
ER lipid raft associated 1

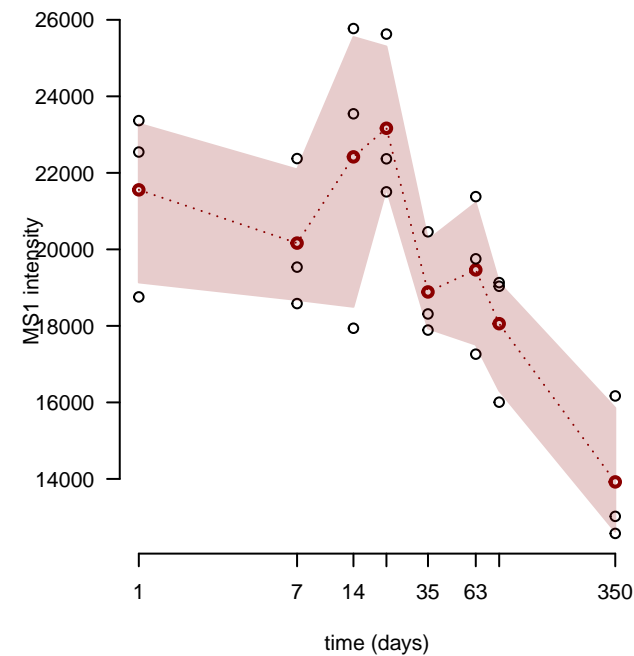

**Q91X79**  
**GN=Cela1**  
chymotrypsin-like elastase family, membe ...

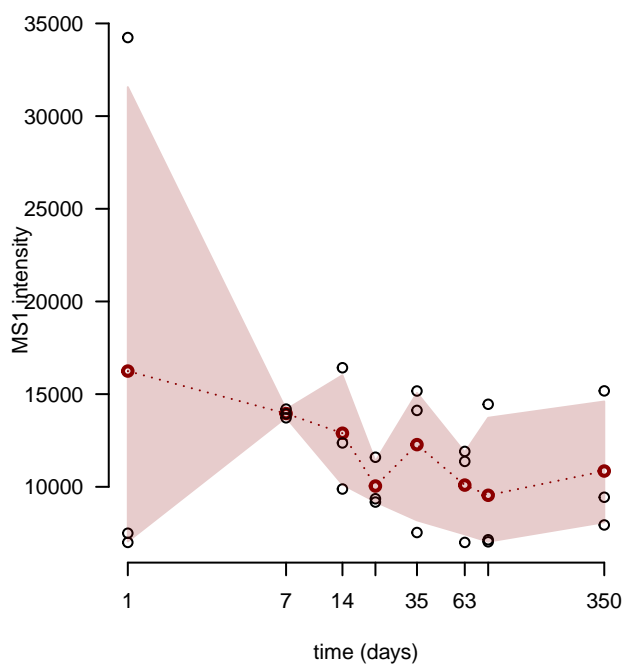

**Q91X83**  
**GN=Mat1a**  
methionine adenosyltransferase I, alpha

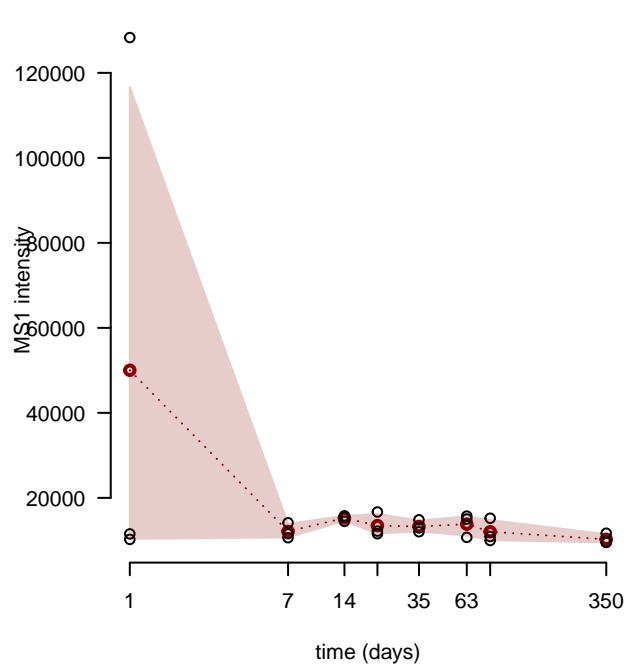

**Q91X84**  
**GN=Crtc3**  
CREB regulated transcription coactivator ...

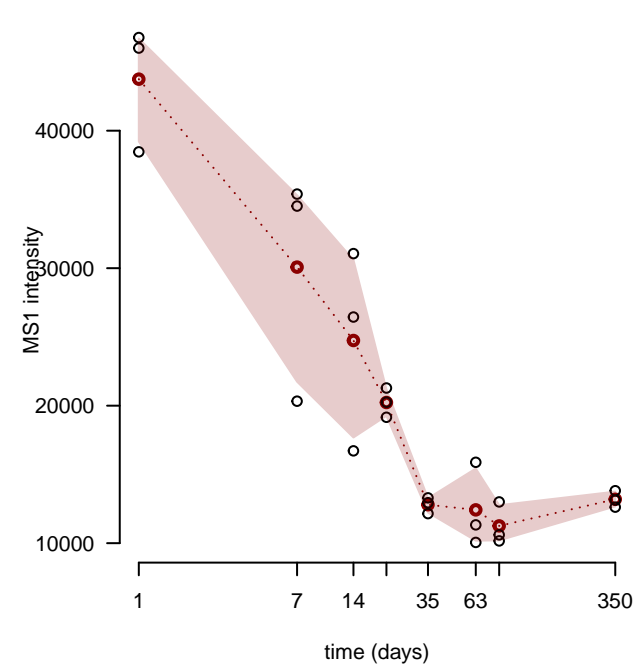

**Q91X88**  
**GN=Pomgnt1**  
protein O-linked mannose beta 1,2-N-acet ...

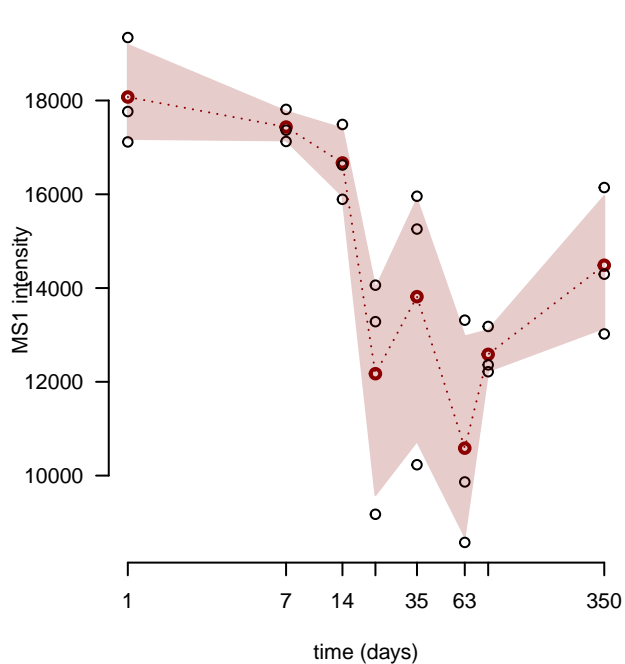

**Q91X91**  
**GN=Qprt**  
quinolinate phosphoribosyltransferase

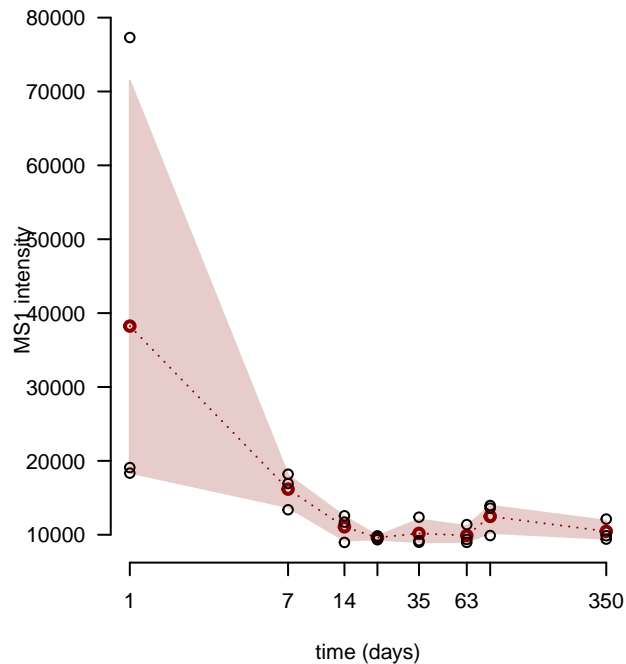

**Q91X96**  
**GN=Rabif**  
RAB interacting factor

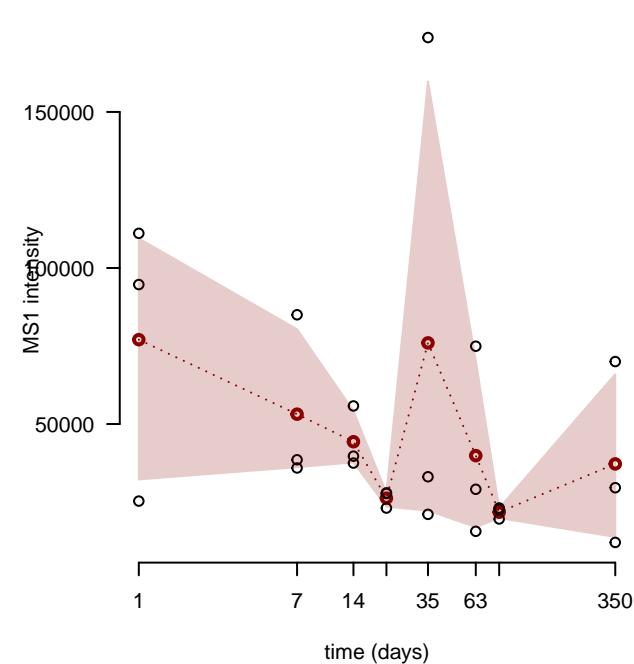

**Q91X97**  
**GN=Ncald**  
neurocalcin delta

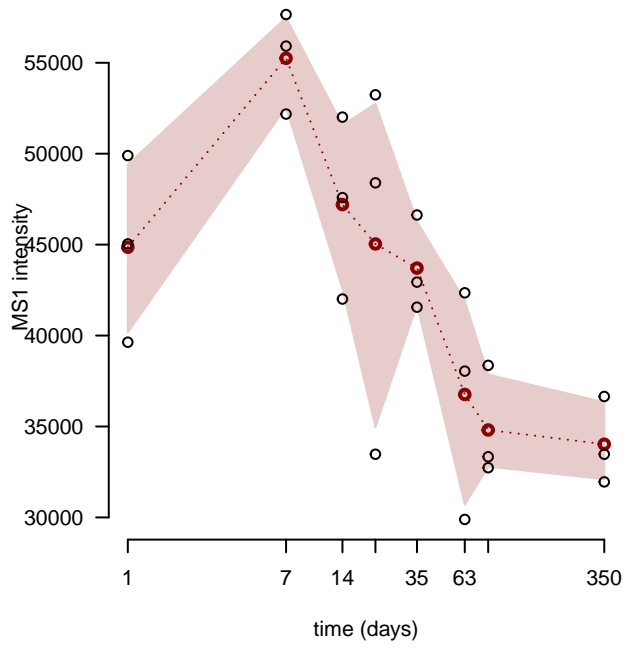

**Q91XA2**  
**GN=Golm1**  
golgi membrane protein 1

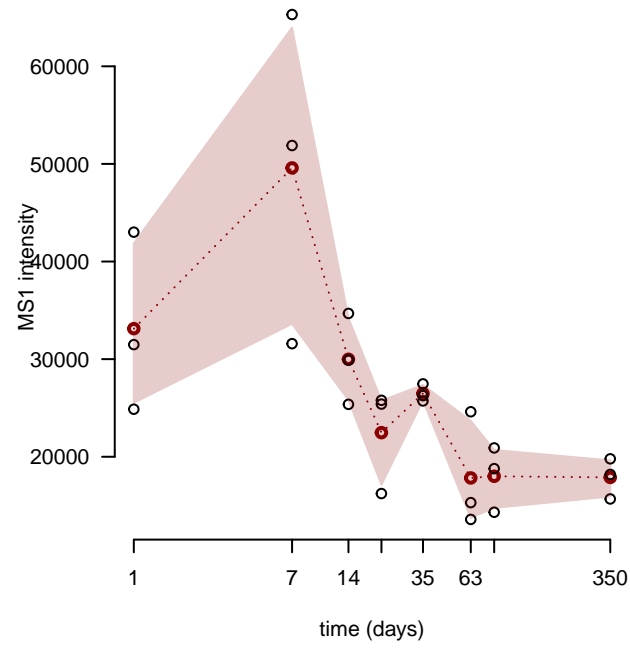

**Q91XB0**  
**GN=Trex1**  
three prime repair exonuclease 1

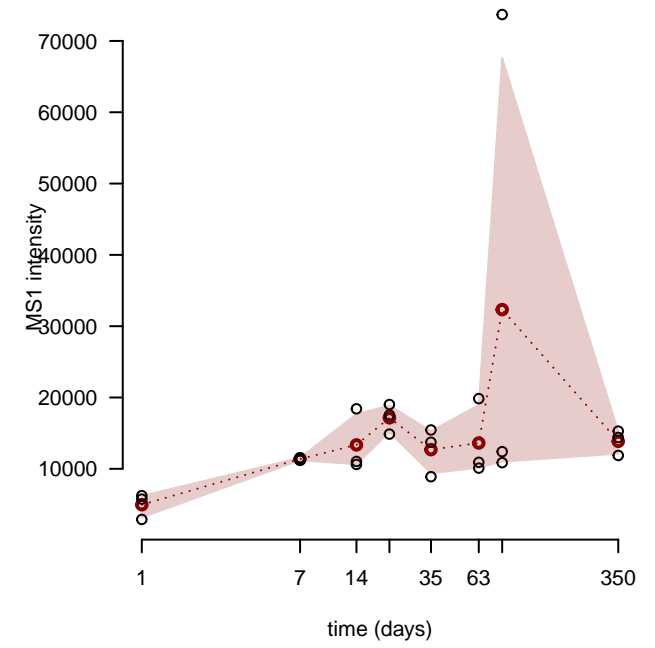

**Q91XB7**  
**GN=Yif1a**  
Yip1 interacting factor homolog A (S. ce ...

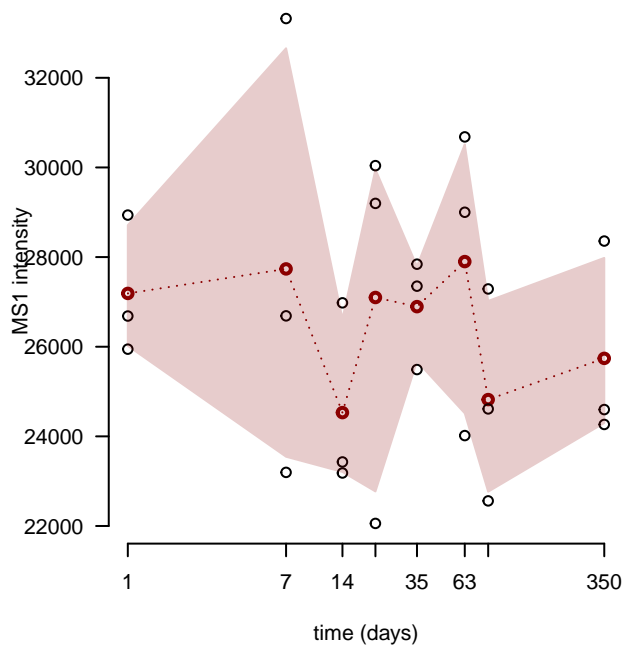

**Q91XC8**  
**GN=Dap**  
death-associated protein

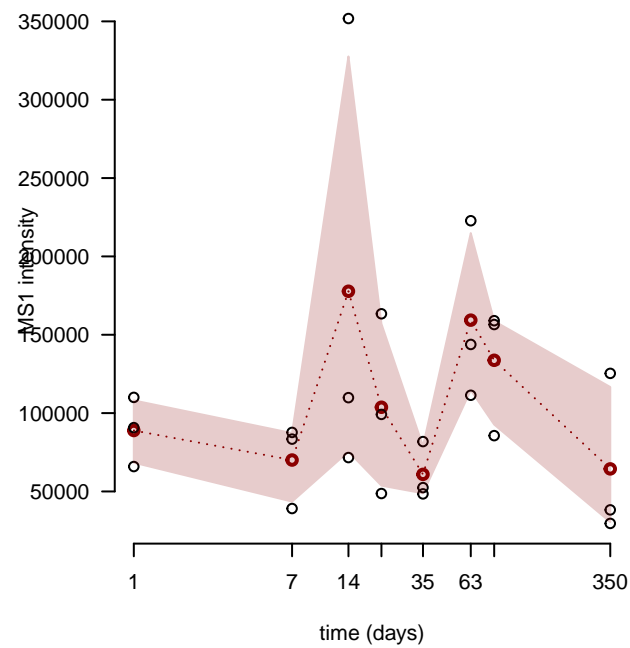

**Q91XC9**  
**GN=Pex16**  
peroxisomal biogenesis factor 16

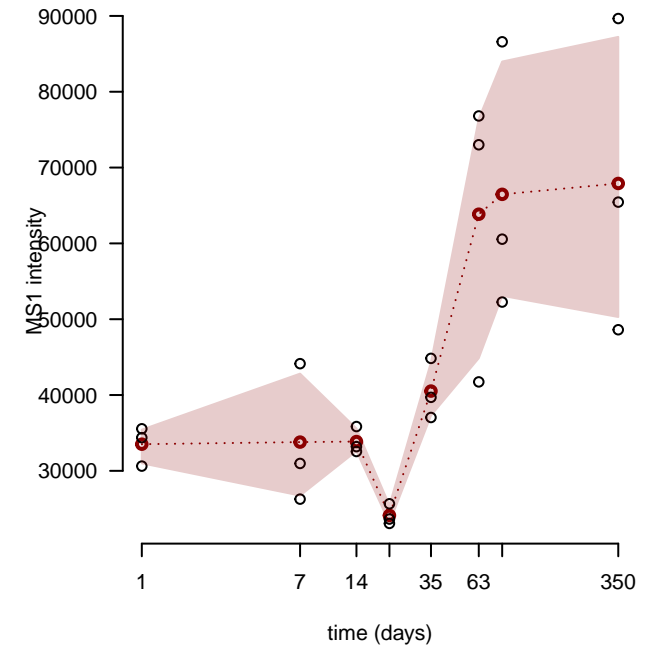

**Q91XD4**  
**GN=Ftcd**  
formiminotransferase cyclodeaminase

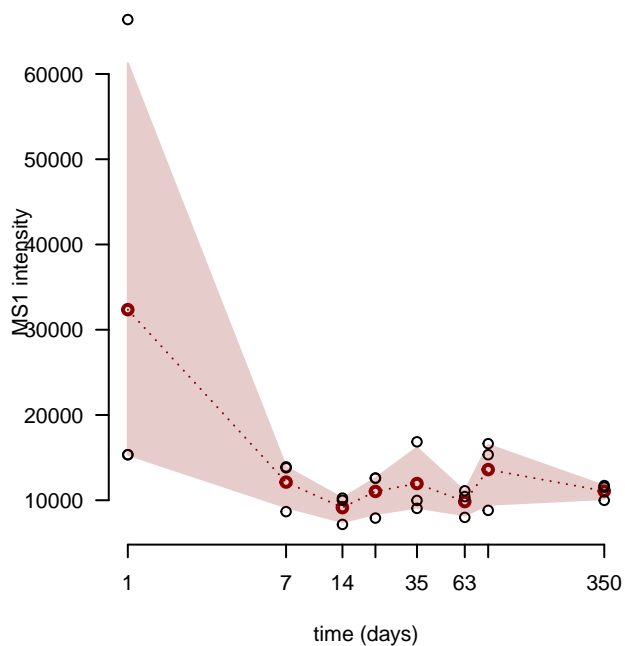

**Q91XD6**  
**GN=Vps36**  
vacuolar protein sorting 36

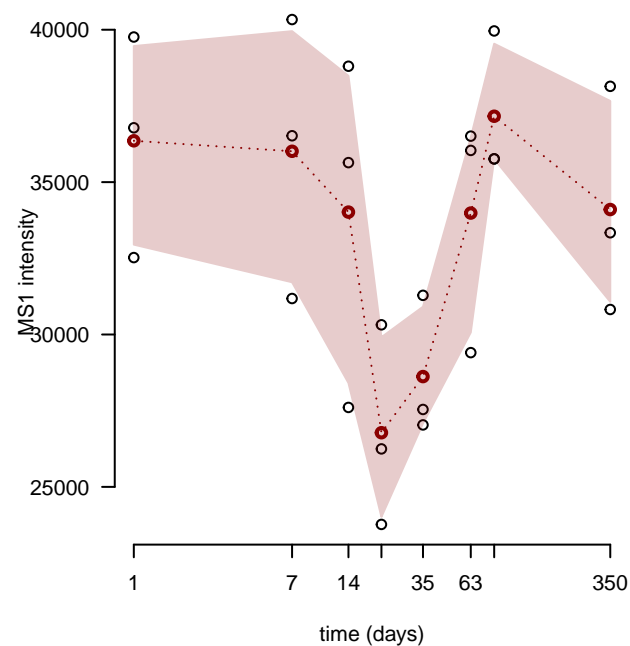

**Q91XD7**  
**GN=Cred1**  
cysteine-rich with EGF-like domains 1

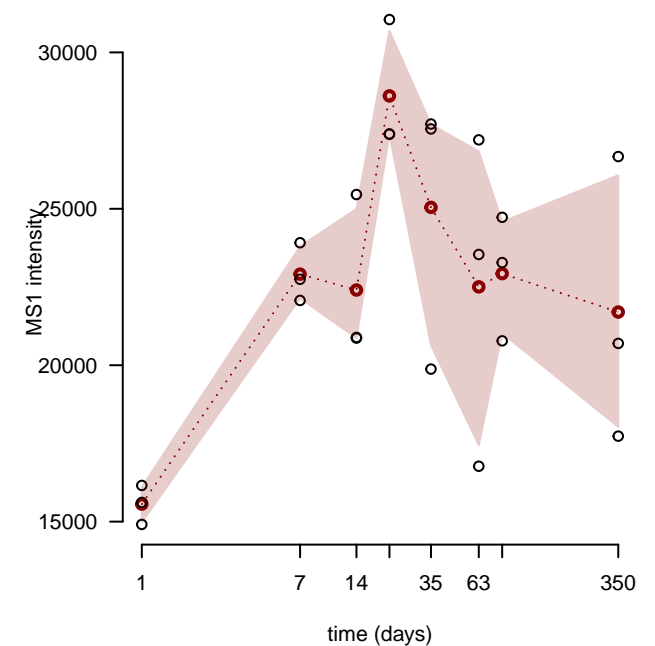

**Q91XE4**  
GN=Acy3  
aspartoacylase (aminoacylase) 3

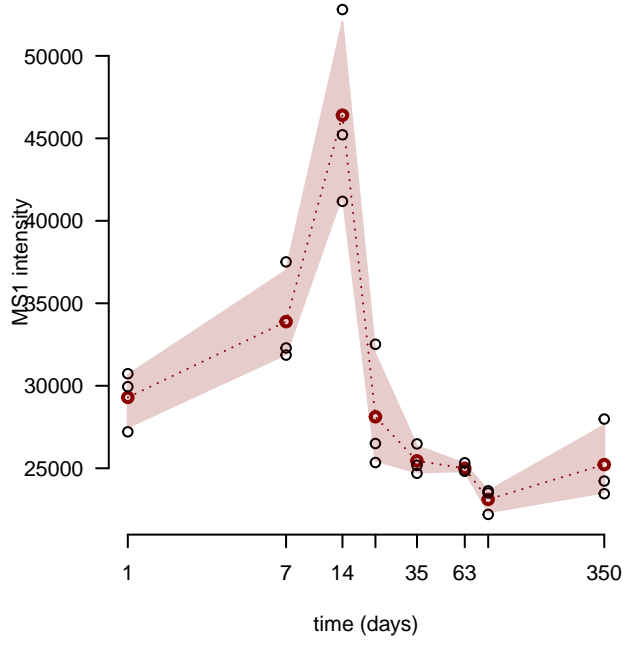

**Q91XE8**  
GN=Tmem205  
transmembrane protein 205

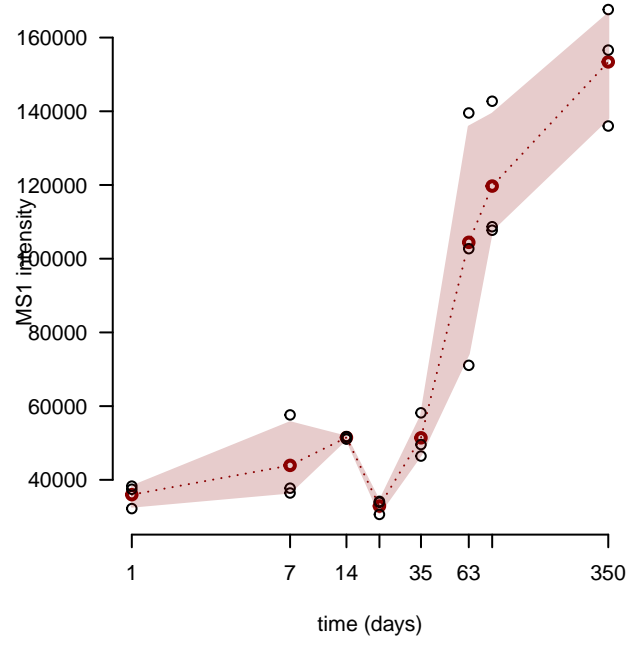

**Q91XF0**  
GN=Pnp0  
pyridoxine 5'-phosphate oxidase

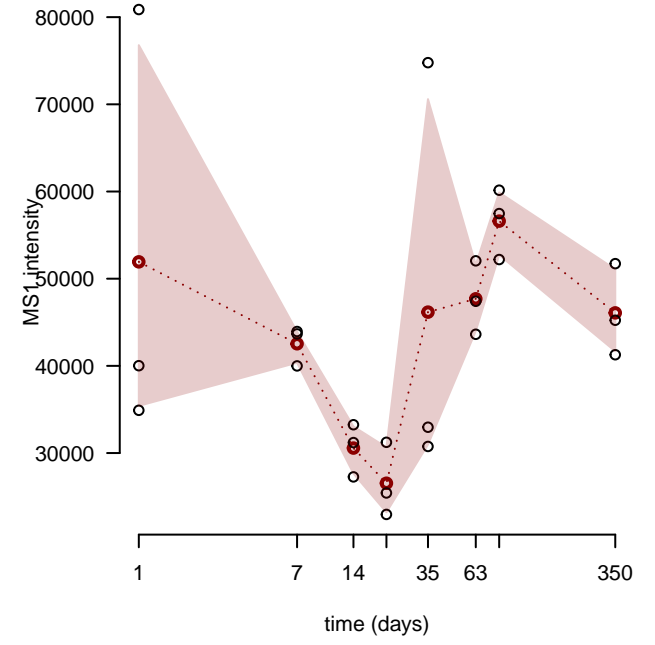

**Q91X11**  
GN=Dus3l  
dihydrouridine synthase 3-like (S. cerev ...

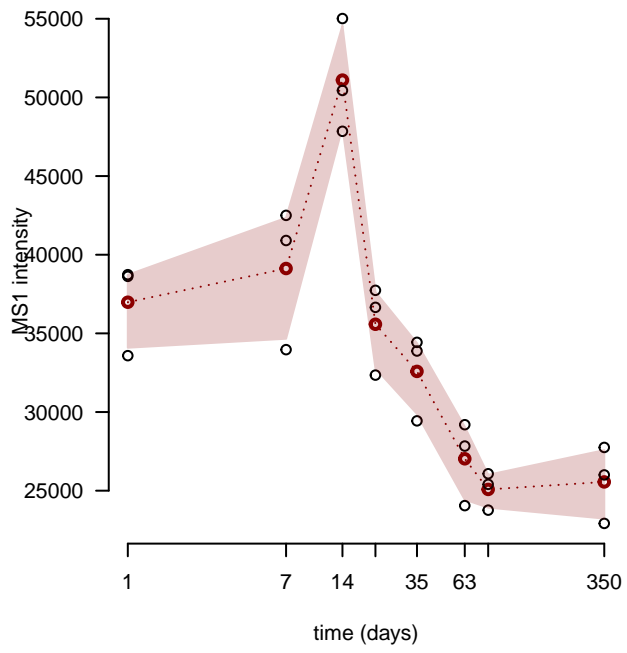

**Q91XL3**  
GN=Uxs1  
UDP-glucuronate decarboxylase 1

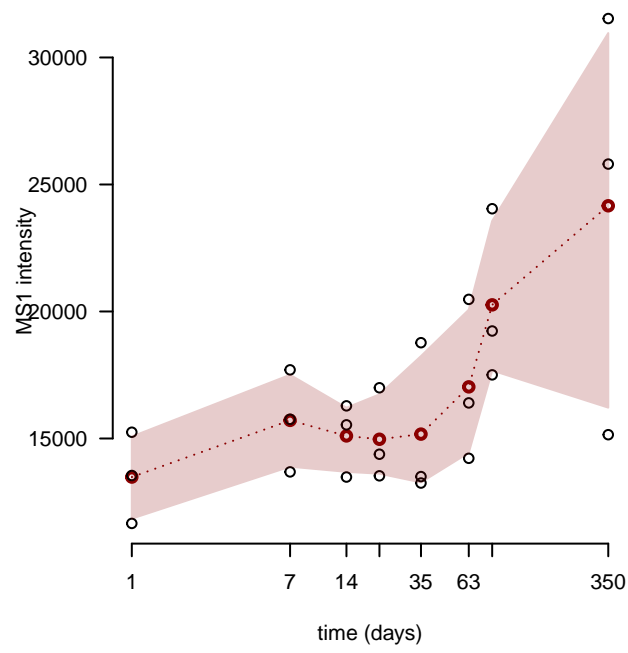

**Q91XL9**  
GN=Osbp1a  
oxysterol binding protein-like 1A

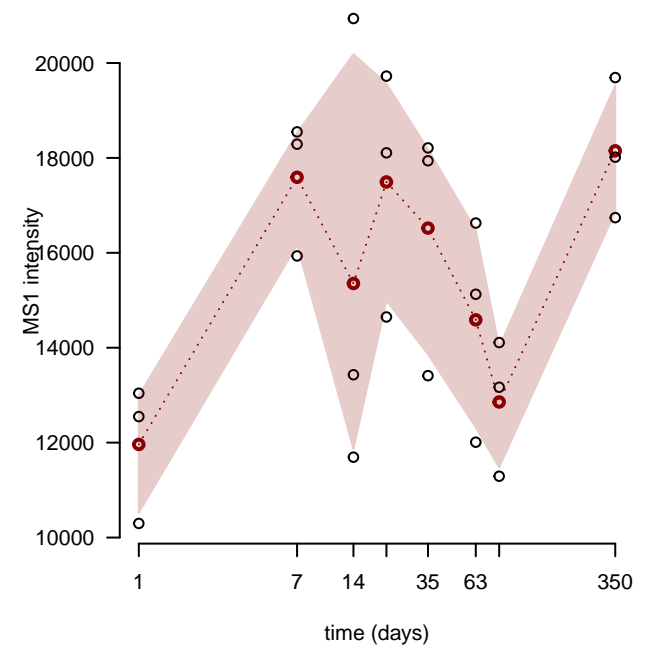

**Q91XM9**  
GN=Dlg2  
discs large MAGUK scaffold protein 2

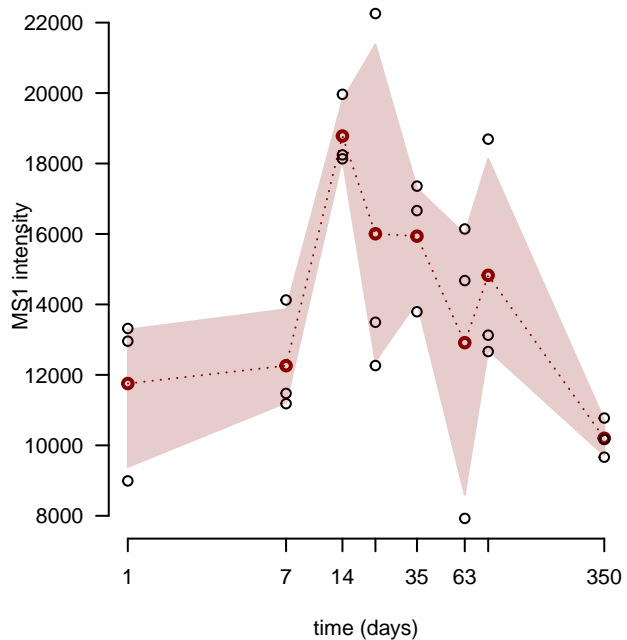

**Q91XQ5**  
GN=Chst15  
carbohydrate sulfotransferase 15

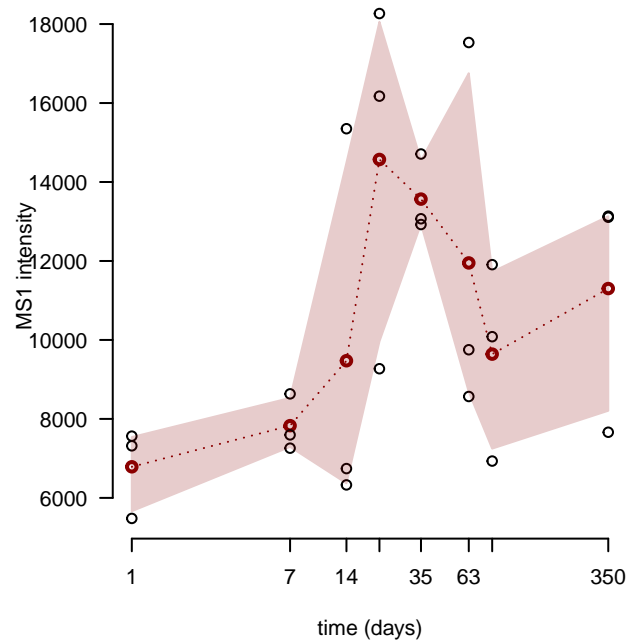

**Q91XS1**  
GN=Mtmr4  
myotubularin related protein 4

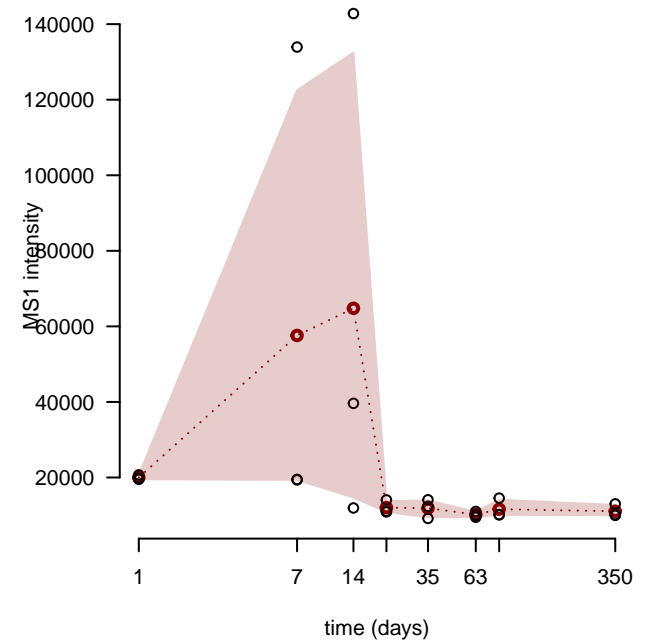

**Q91XU0**  
**GN=Wrnip1**  
Werner helicase interacting protein 1

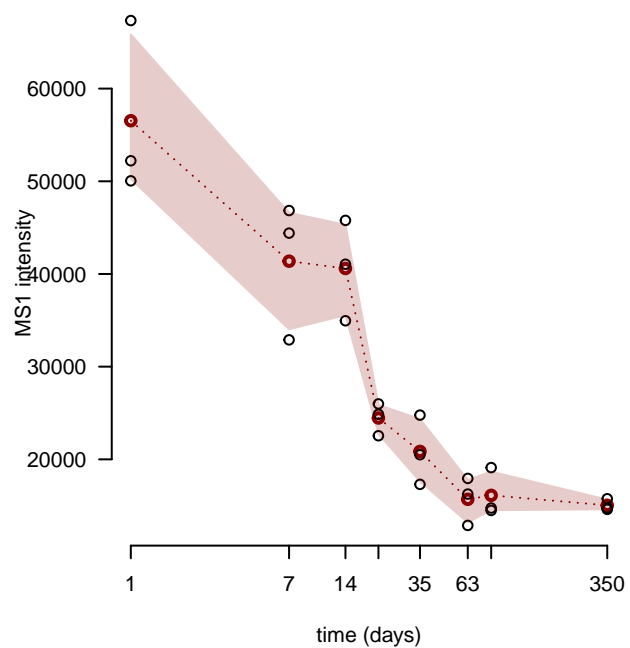

**Q91XU3**  
**GN=Pip4k2c**  
phosphatidylinositol-5-phosphate 4-kinas ...

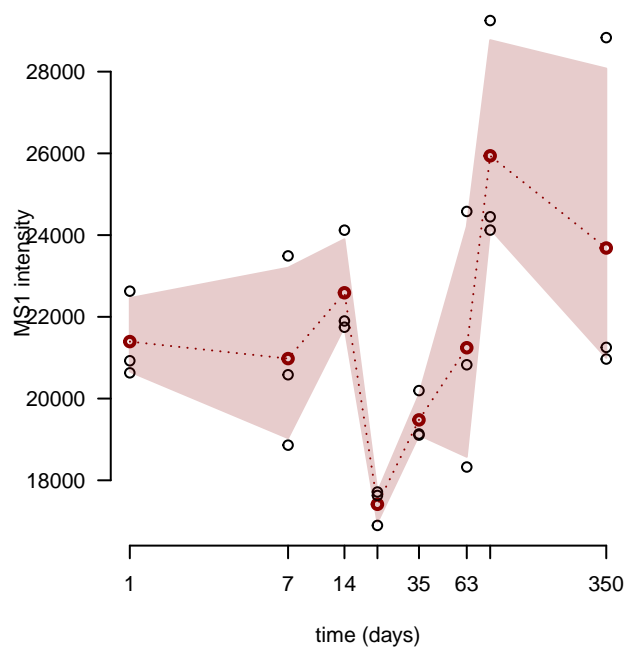

**Q91XV3**  
**GN=Basp1**  
brain abundant, membrane attached signal ...

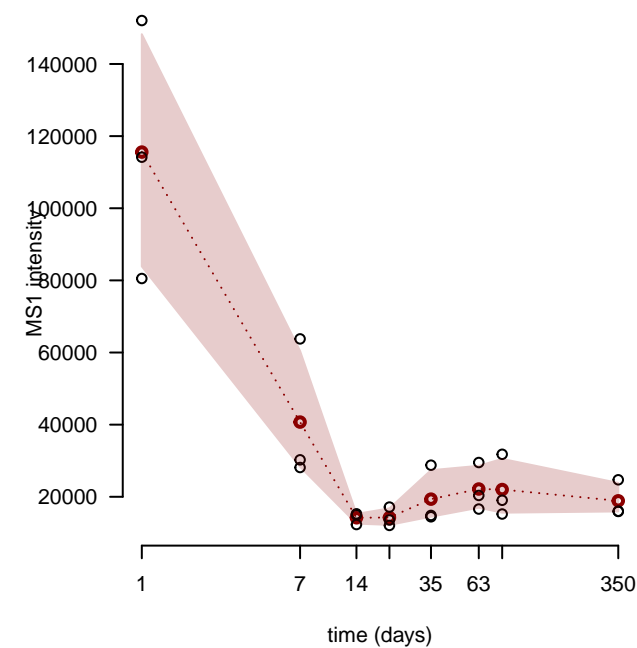

**Q91XW8**  
**GN=Fkbp6**  
FK506 binding protein 6

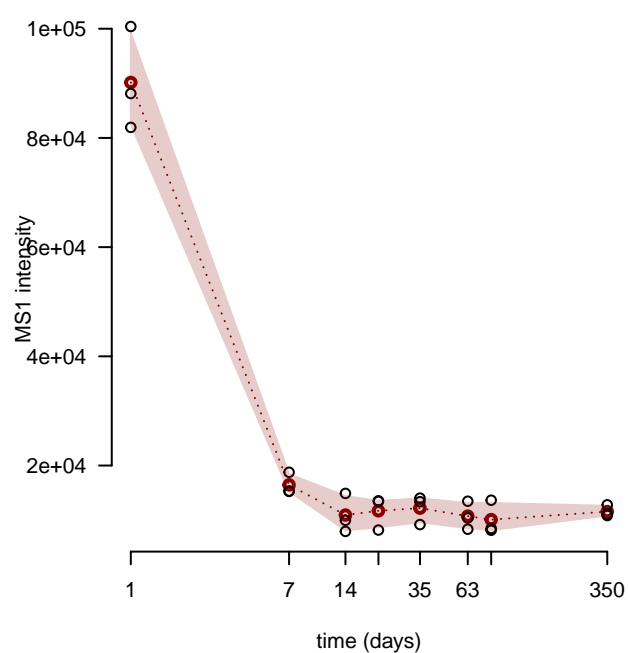

**Q91XY4**  
**GN=Pcdhga4**  
protocadherin gamma subfamily A, 4

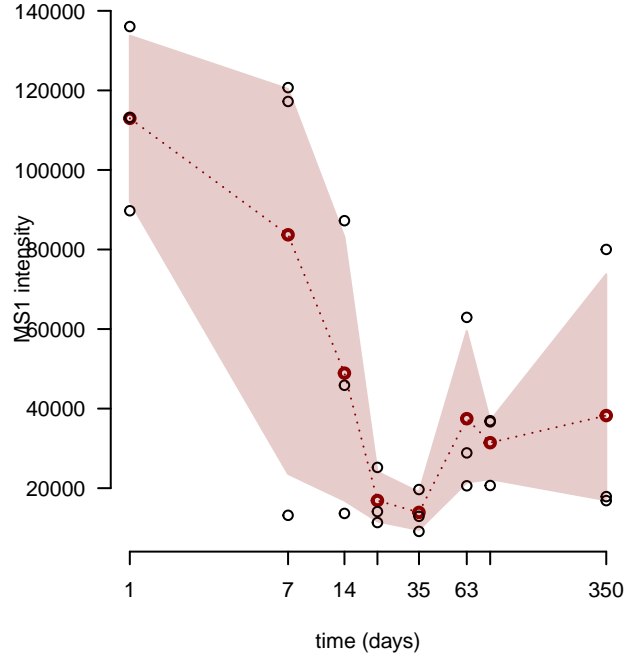

**Q91XZ4**  
**GN=Pcdhb6**  
protocadherin beta 6

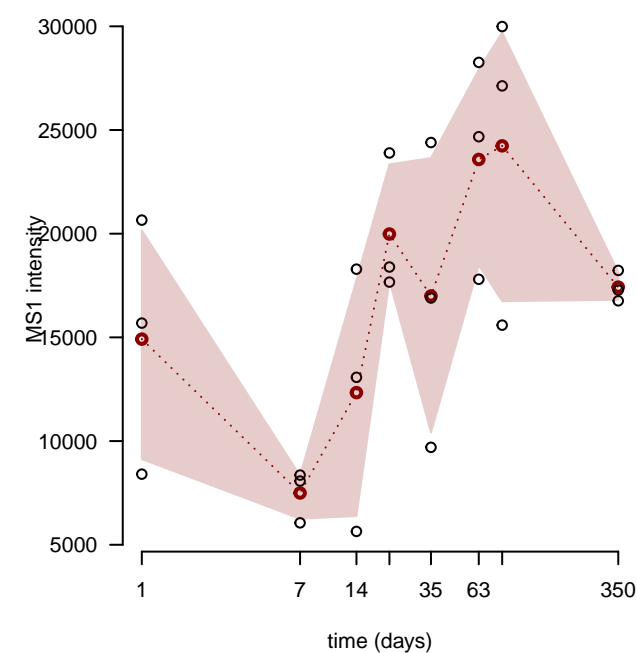

**Q91Y74**  
**GN=St3gal4**  
ST3 beta-galactoside alpha-2,3-sialyltra ...

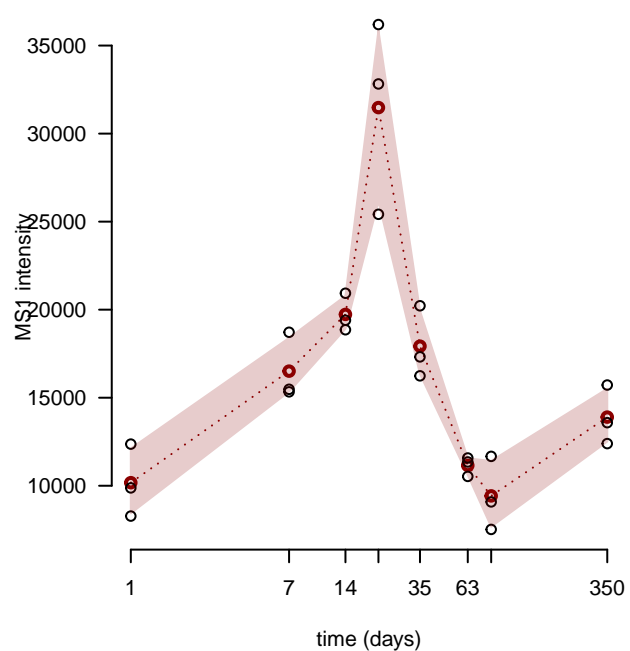

**Q91Y86**  
**GN=Mapk8**  
mitogen-activated protein kinase 8

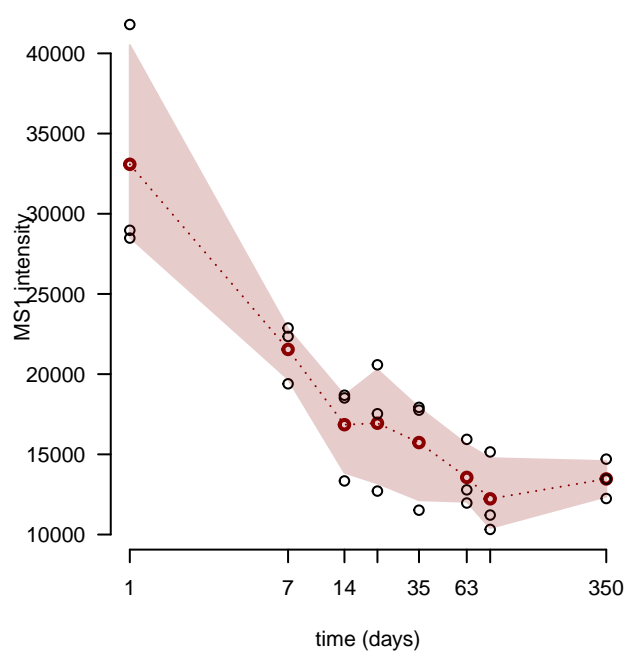

**Q91Y97**  
**GN=Aldob**  
aldolase B, fructose-bisphosphate

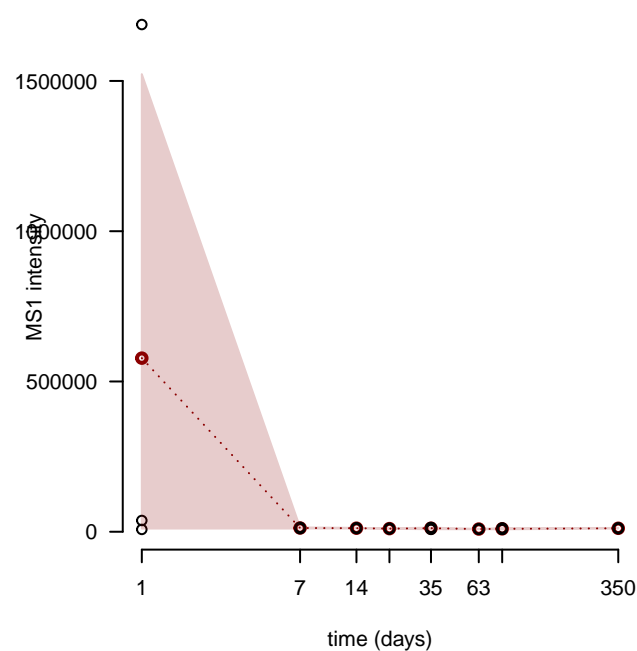

**Q91YD3**  
GN=Dcp1a  
decapping mRNA 1A

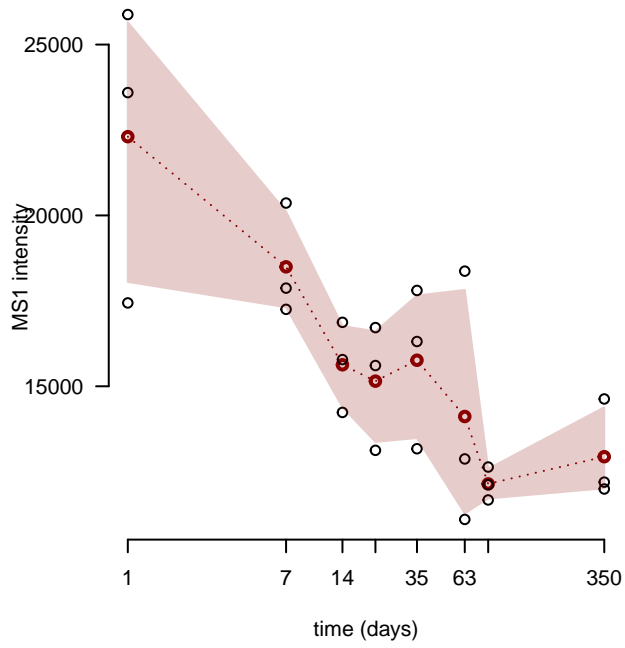

**Q91YD9**  
GN=Wasl  
WASP like actin nucleation promoting fac ...

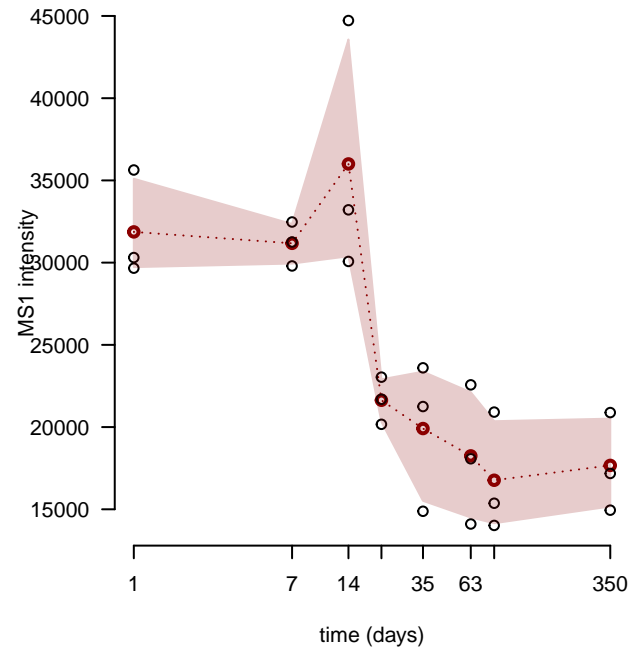

**Q91YE3**  
GN=Egl1  
egl-9 family hypoxia-inducible factor 1

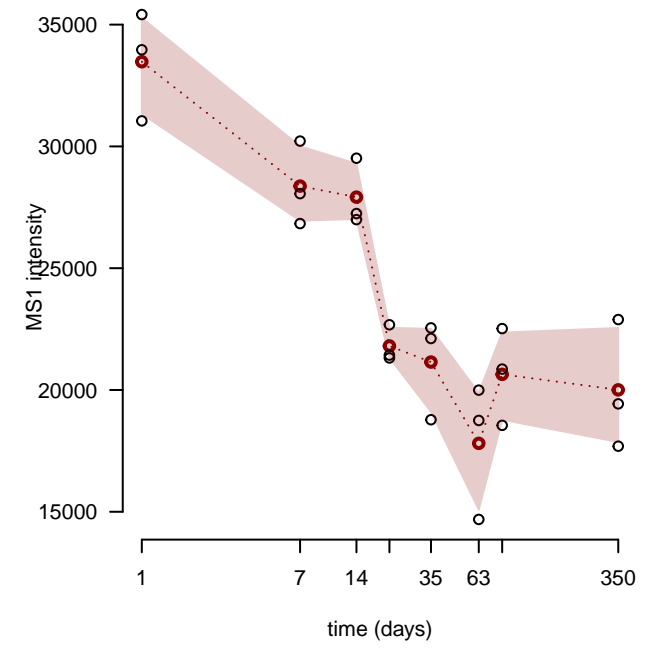

**Q91YE5**  
GN=Baz2a  
bromodomain adjacent to zinc finger doma ...

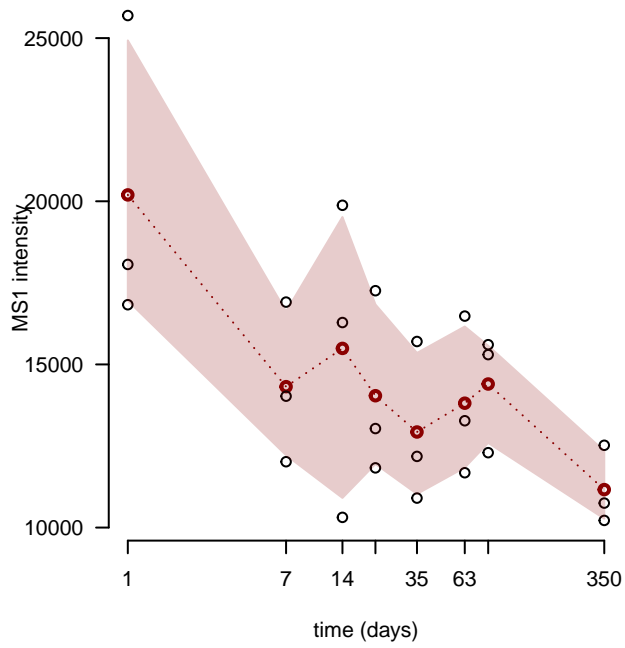

**Q91YE6**  
GN=Ipo9  
importin 9

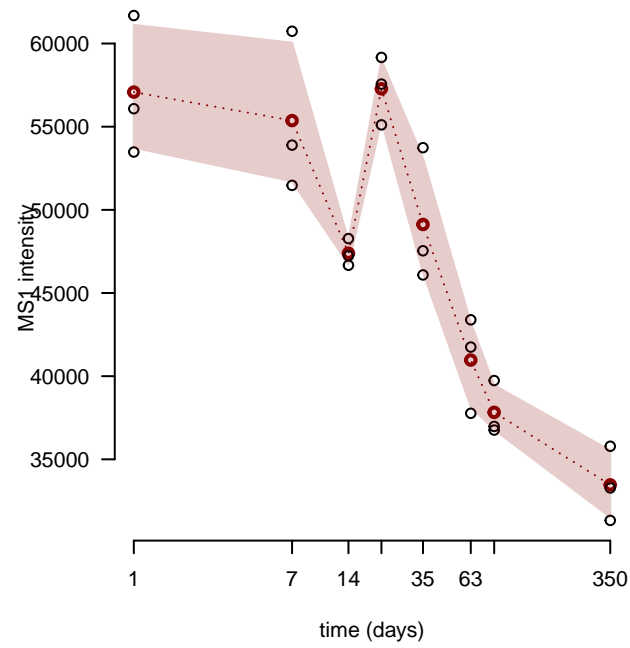

**Q91YE7**  
GN=Rbm5  
RNA binding motif protein 5

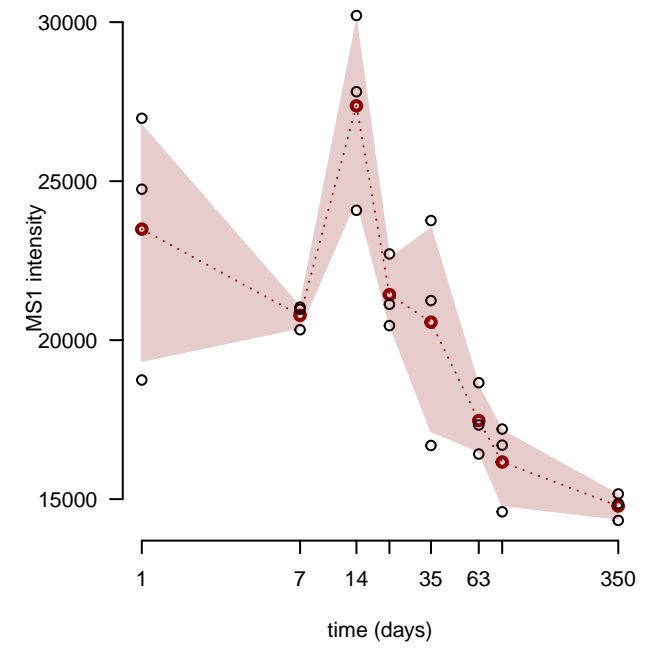

**Q91YE8**  
GN=Synpo2  
synaptopodin 2

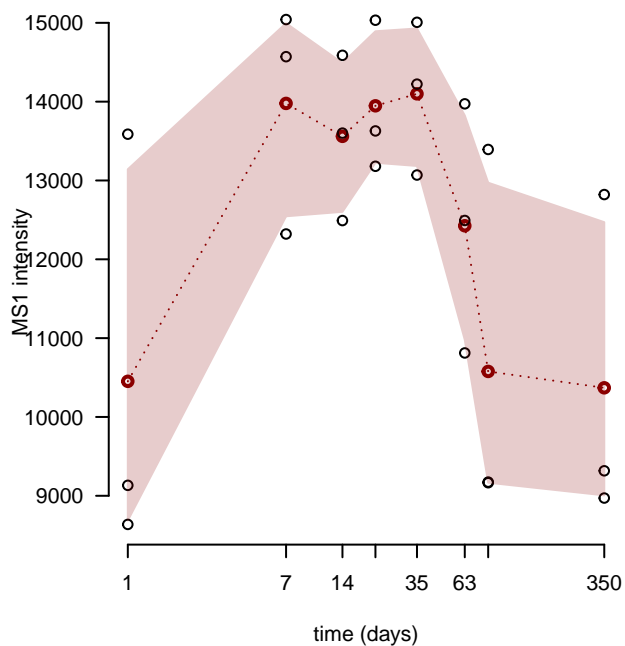

**Q91YH5**  
GN=Atl3  
atlastin GTPase 3

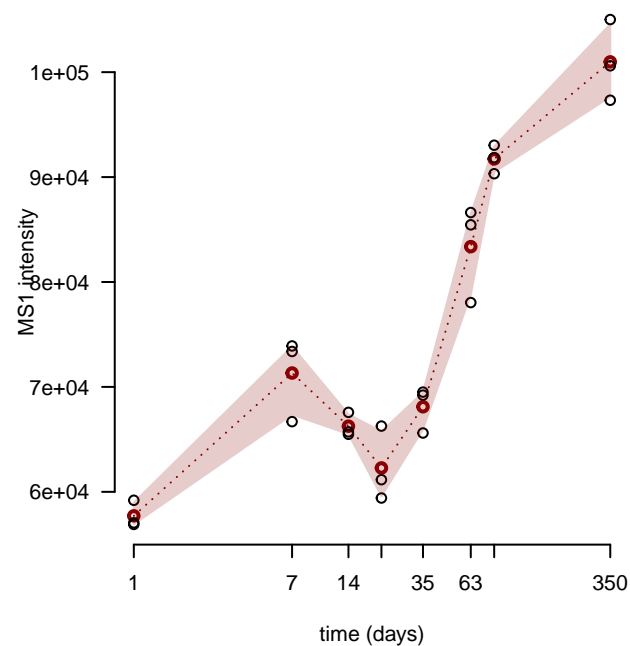

**Q91YI0**  
GN=Asl  
argininosuccinate lyase

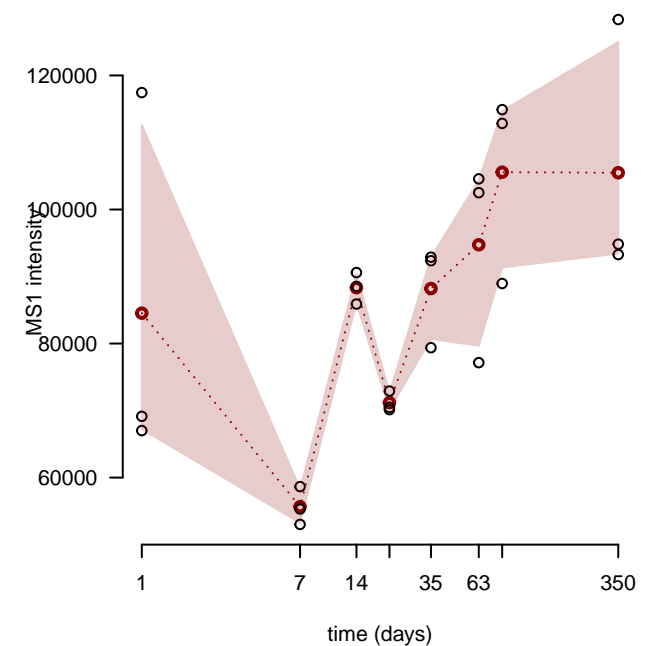

**Q91YI1**  
GN=Atg13  
autophagy related 13

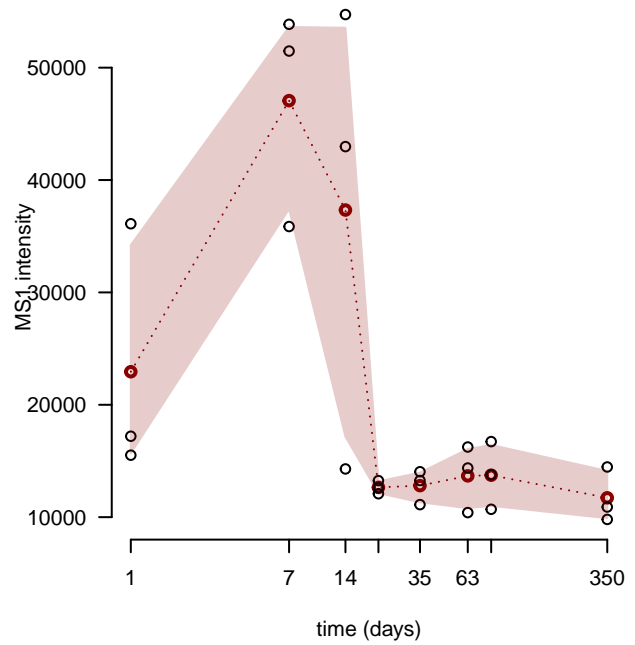

**Q91YI4**  
GN=Arrb2  
arrestin, beta 2

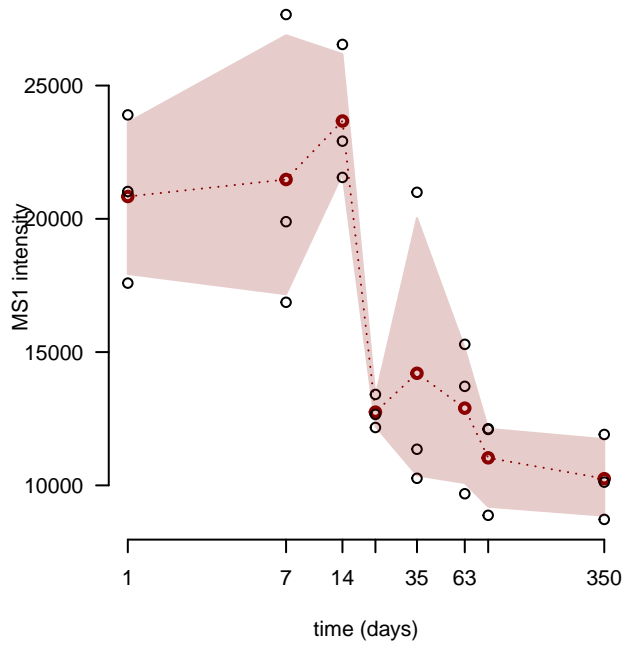

**Q91YI6**  
GN=Tent2  
terminal nucleotidyltransferase 2

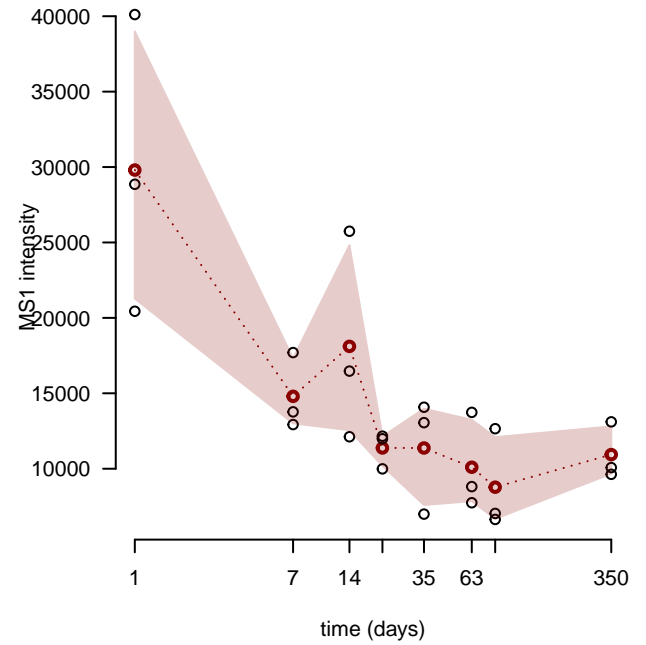

**Q91YJ2**  
GN=Snx4  
sorting nexin 4

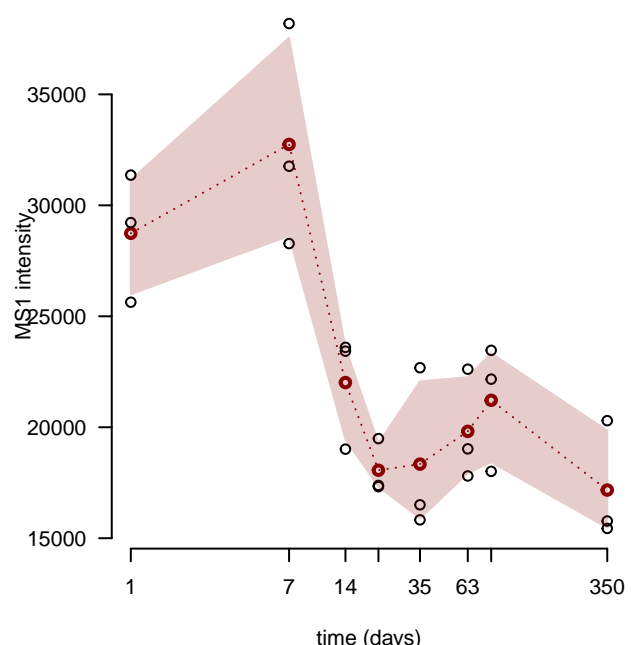

**Q91YJ3**  
GN=Thyn1  
thymocyte nuclear protein 1

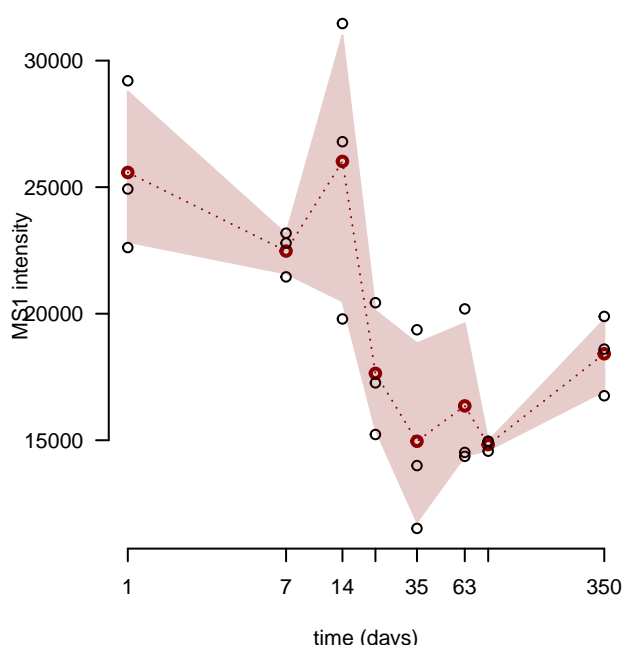

**Q91YJ5**  
GN=Mtif2  
mitochondrial translational initiation f...

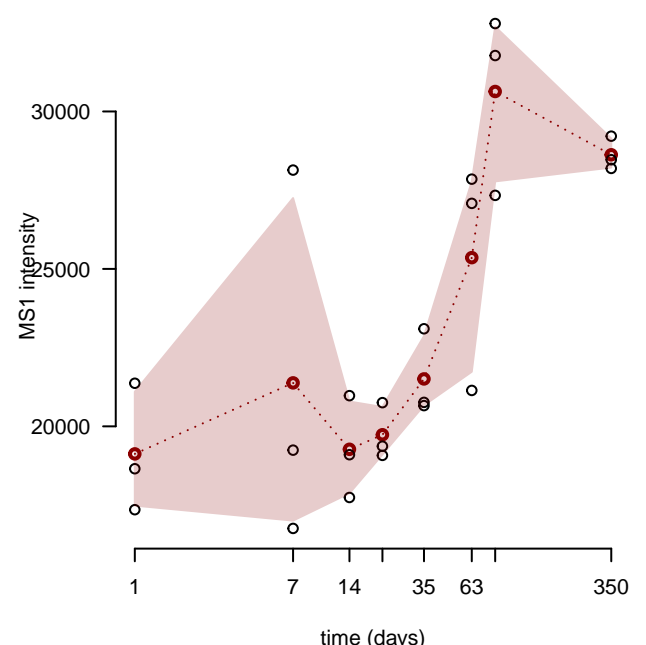

**Q91YK0**  
GN=Lrrc49  
leucine rich repeat containing 49

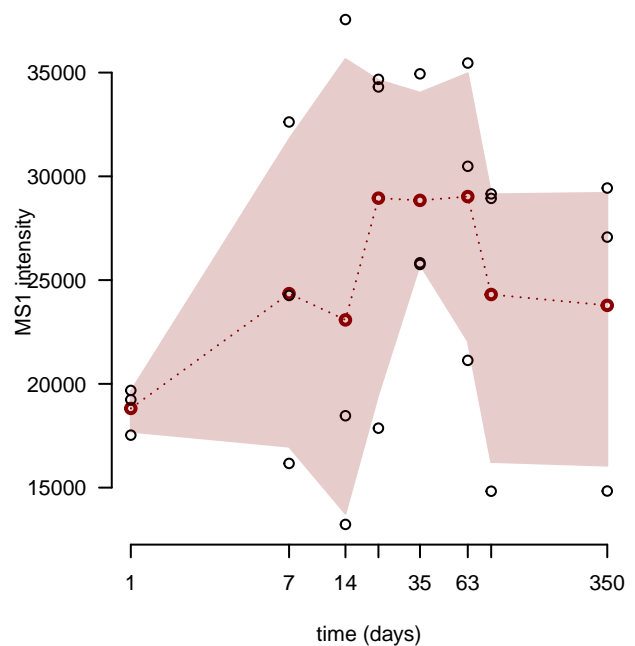

**Q91YK2**  
GN=Rrp1b  
ribosomal RNA processing 1B

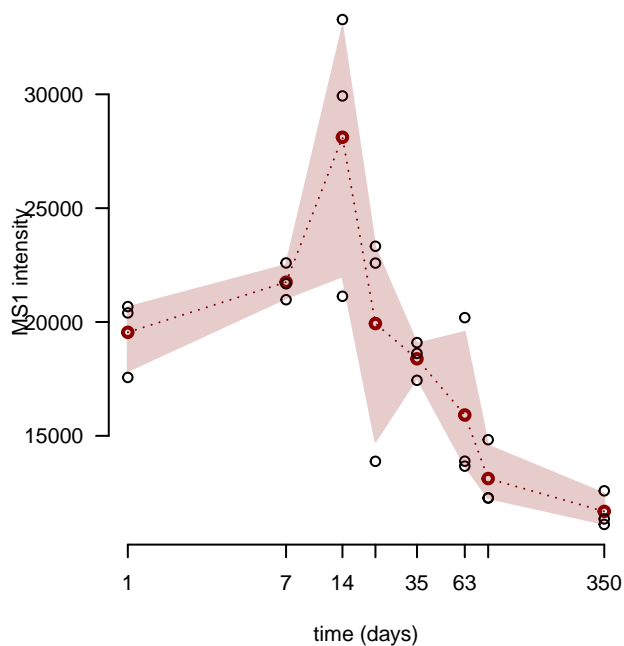

**Q91YL2**  
GN=Rnf126  
ring finger protein 126

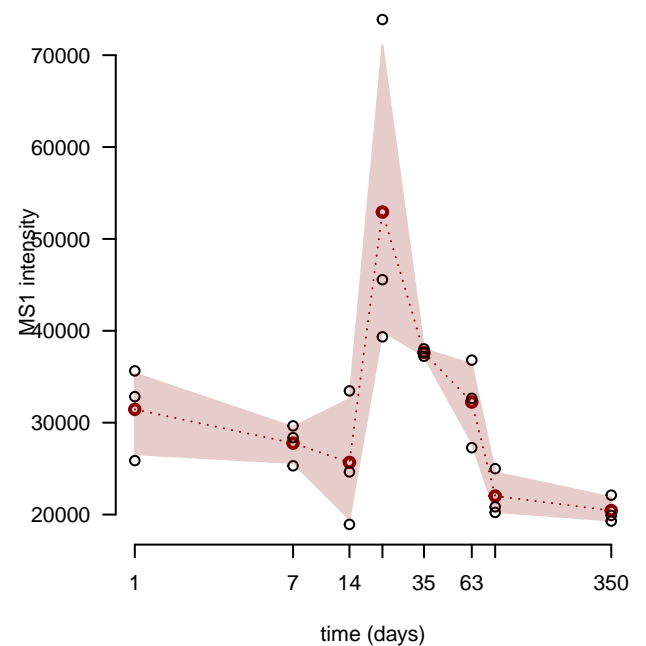

**Q91YL3**  
GN=Uck11  
uridine-cytidine kinase 1-like 1

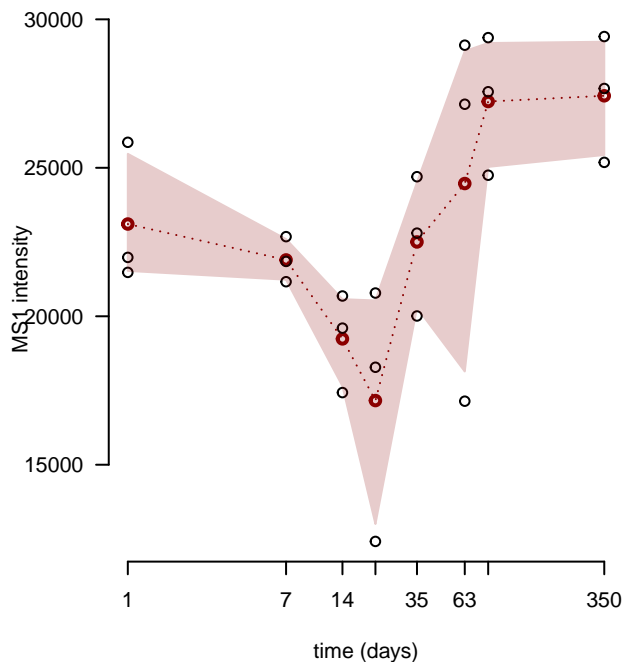

**Q91YM2**  
GN=Arhgap35  
Rho GTPase activating protein 35

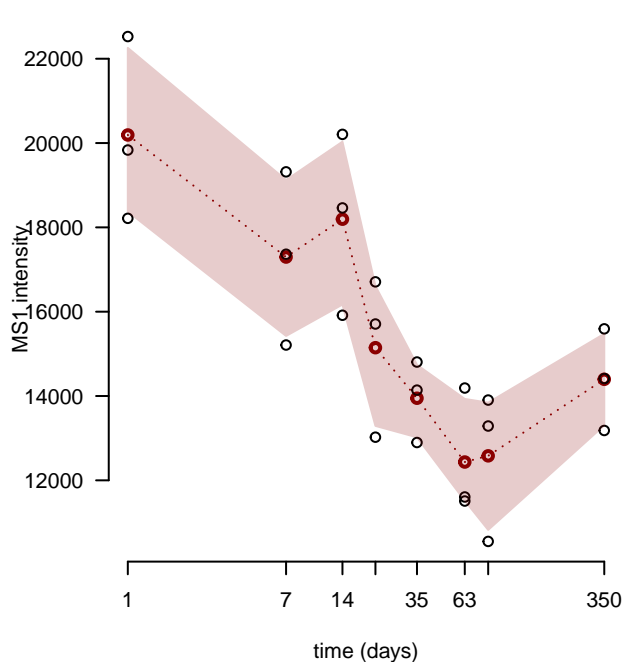

**Q91YM4**  
GN=Tbrg4  
transforming growth factor beta regulate ...

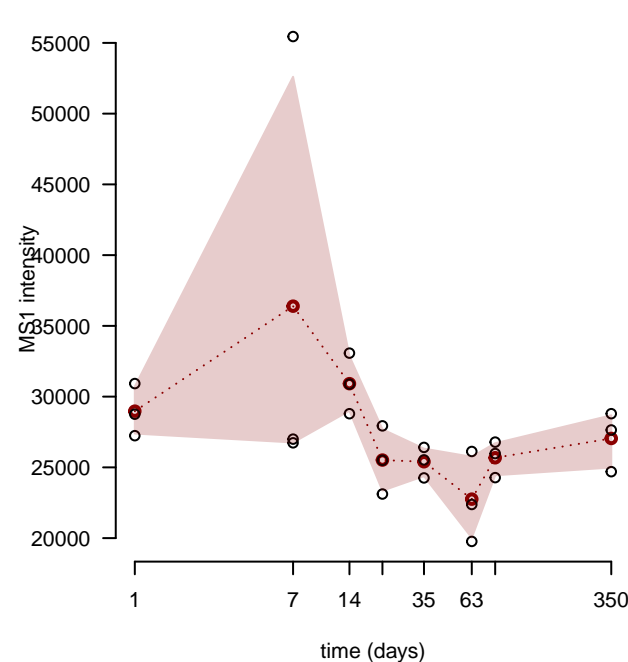

**Q91YN0**  
GN=D6Wsu163e  
DNA segment, Chr 6, Wayne State Universi ...

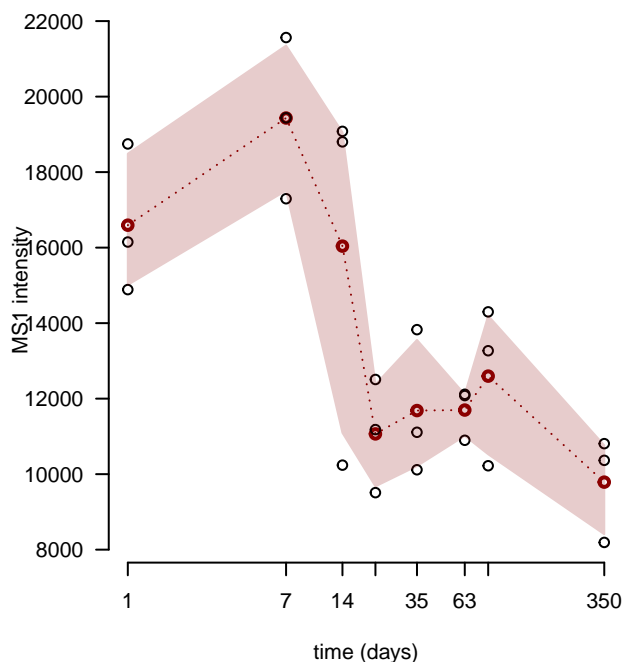

**Q91YN1**  
GN=Fam118a  
family with sequence similarity 118, mem ...

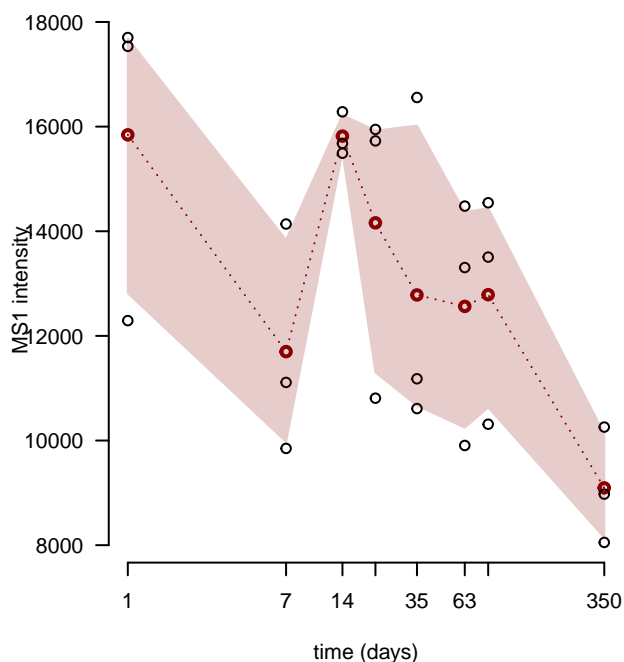

**Q91YN5**  
GN=Uap1  
UDP-N-acetylglucosamine pyrophosphorylas ...

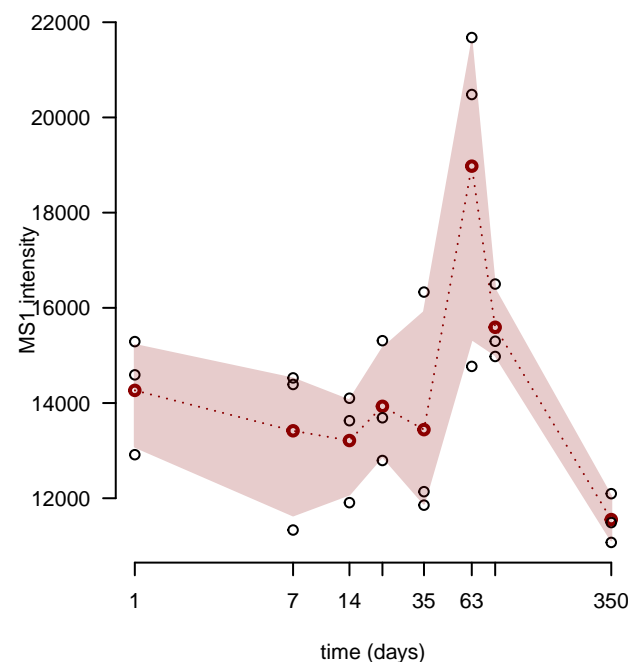

**Q91YN9**  
GN=Bag2  
BCL2-associated athanogene 2

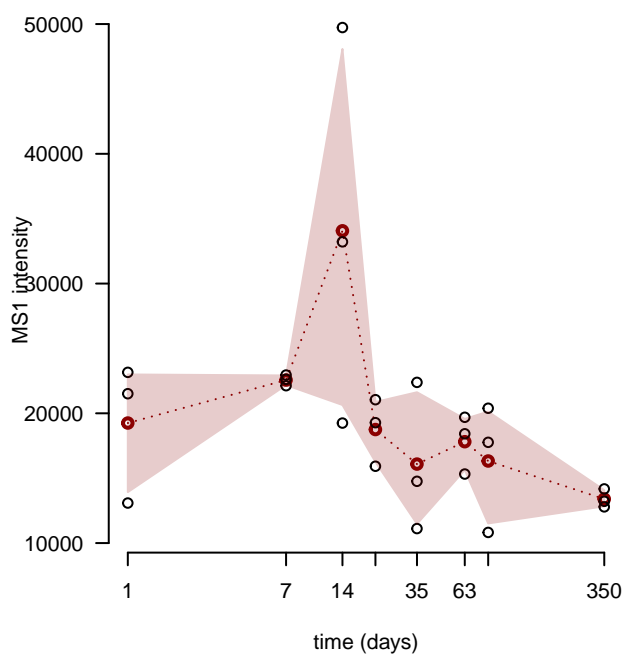

**Q91YP0**  
GN=L2hgdh  
L-2-hydroxyglutarate dehydrogenase

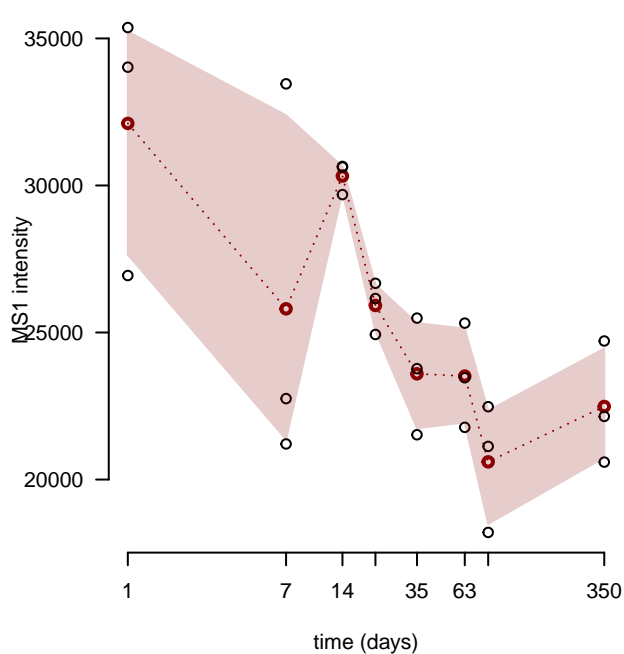

**Q91YP1**  
GN=Bcdin3d  
BCDIN3 domain containing

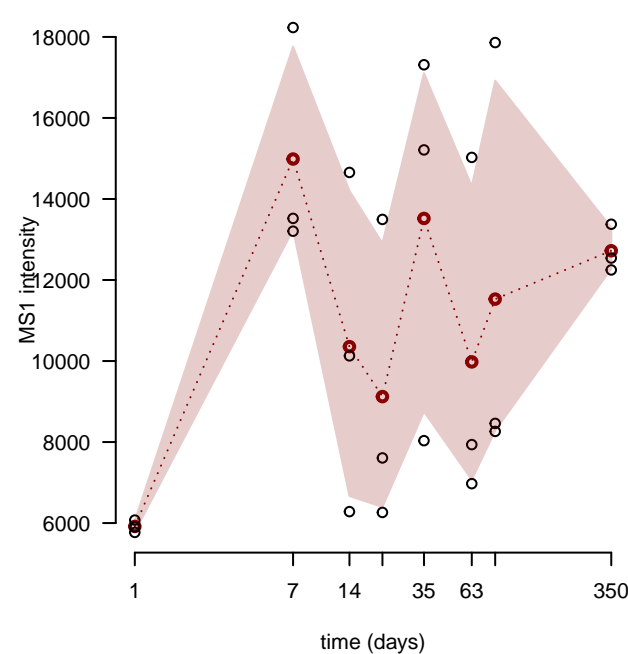



**Q91YP2**  
GN=Nln  
neurolysin (metallopeptidase M3 family)

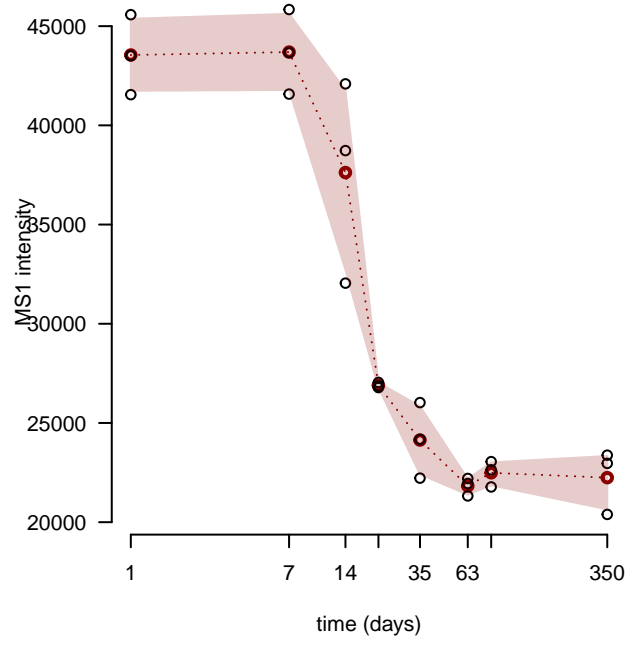

**Q91YP3**  
GN=Dera  
deoxyribose-phosphate aldolase (putative ...)

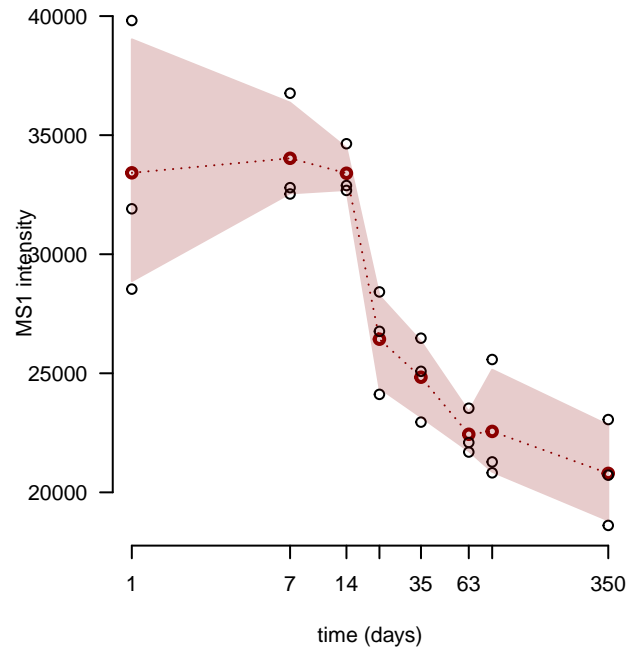

**Q91YQ3**  
GN=Csdc2  
cold shock domain containing C2, RNA bin ...

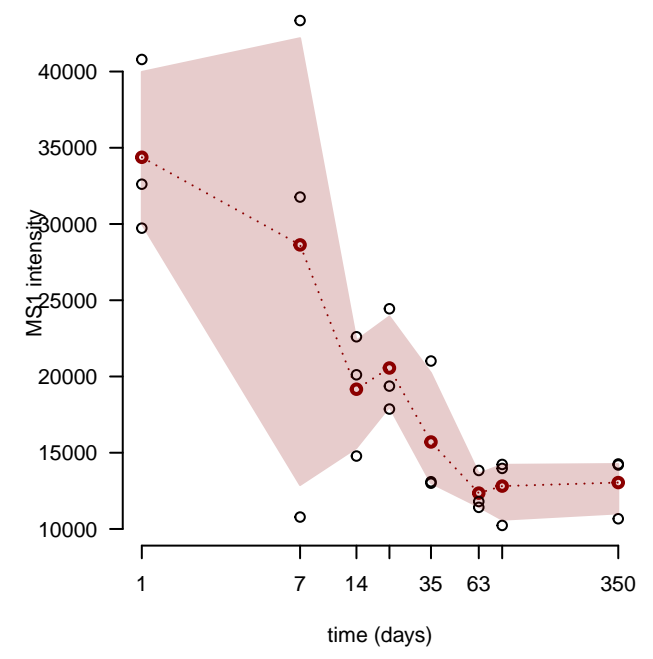

**Q91YQ5**  
GN=Rpn1  
ribophorin I

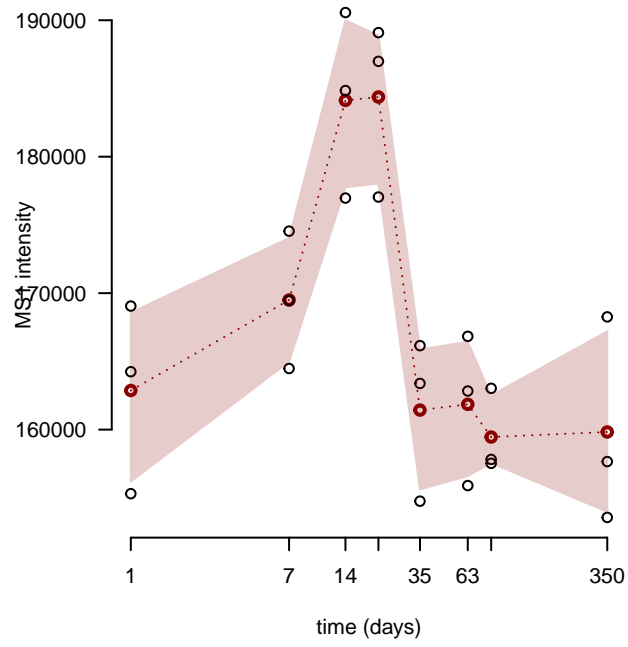

**Q91YR1**  
GN=Twf1  
twinfilin actin binding protein 1

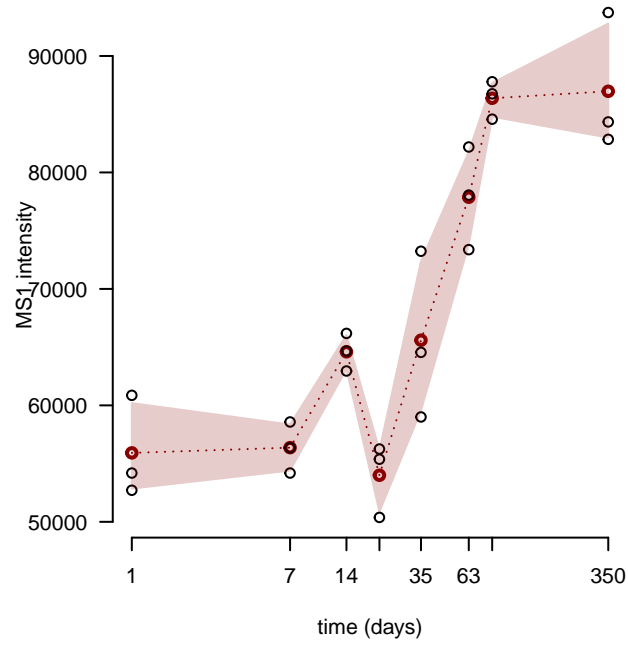

**Q91YR5**  
GN=EEF1AKNMT

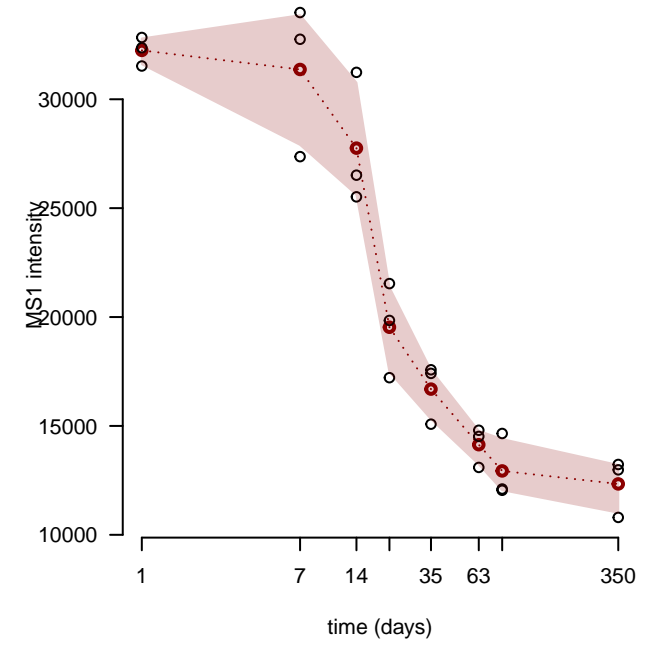

**Q91YR7**  
GN=Prpf6  
pre-mRNA splicing factor 6

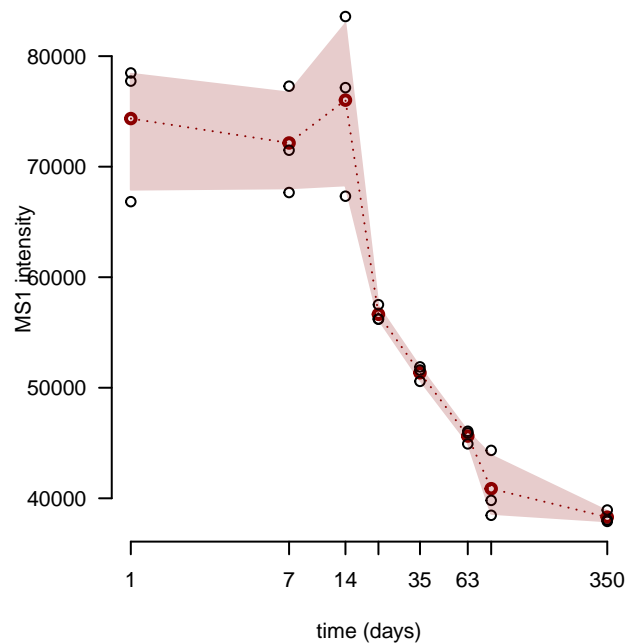

**Q91YR9**  
GN=Ptgr1  
prostaglandin reductase 1

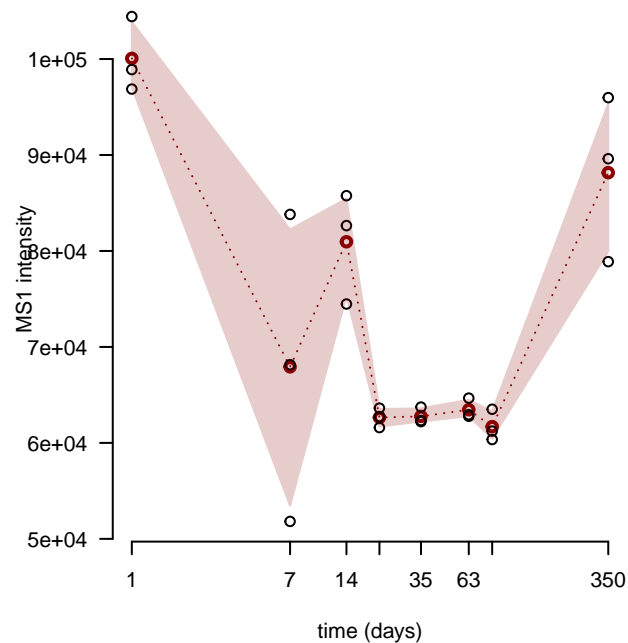

**Q91YS8**  
GN=Camk1  
calcium/calmodulin-dependent protein kin ...

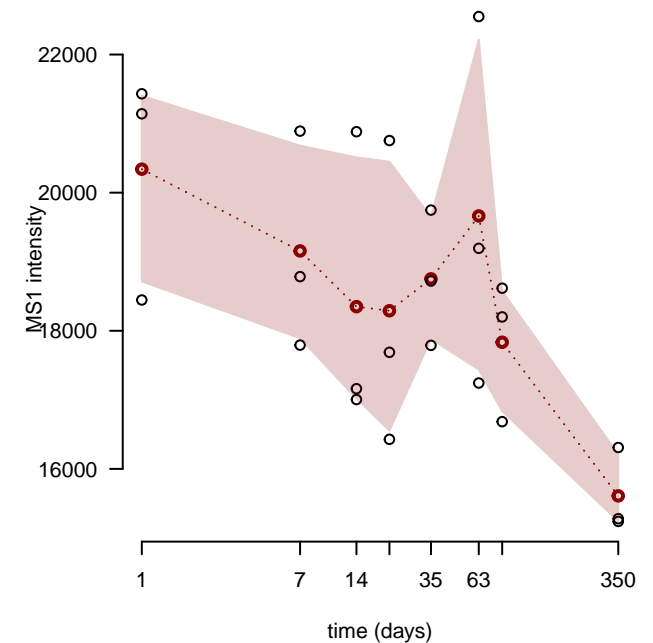

**Q91YT0**  
**GN=Ndufv1**  
NADH:ubiquinone oxidoreductase core subu ...

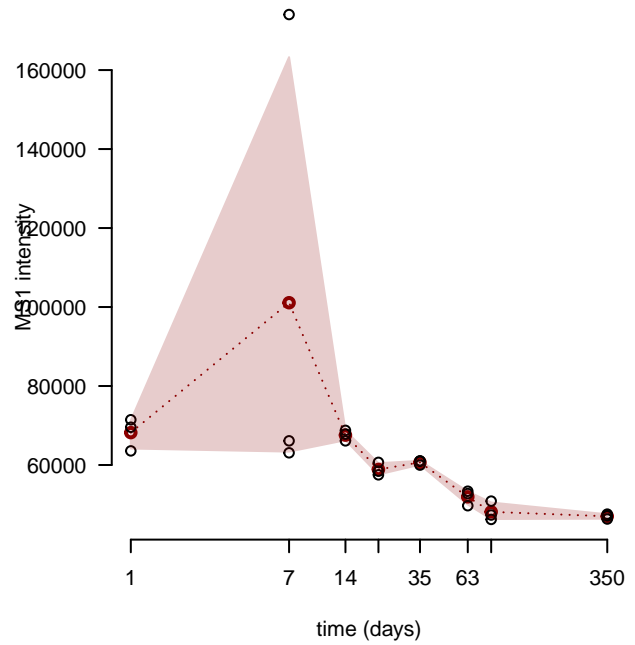

**Q91YT2**  
**GN=Rnf185**  
ring finger protein 185

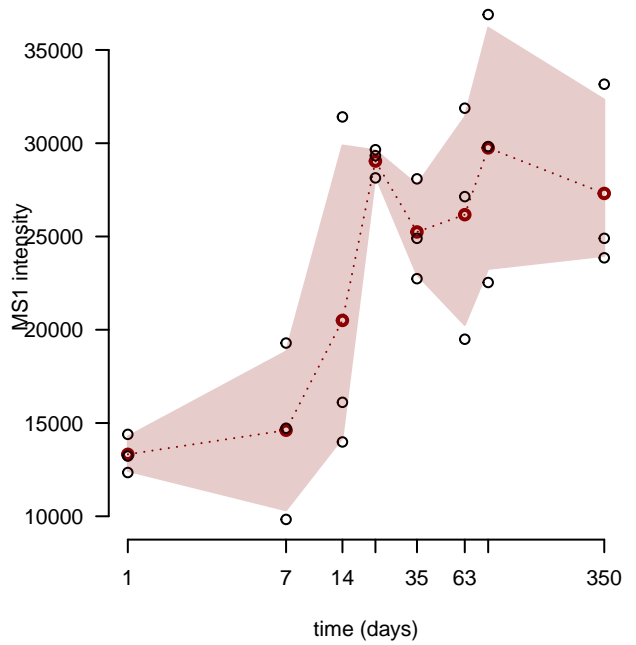

**Q91YT7**  
**GN=Ythdf2**  
YTH N6-methyladenosine RNA binding prote ...

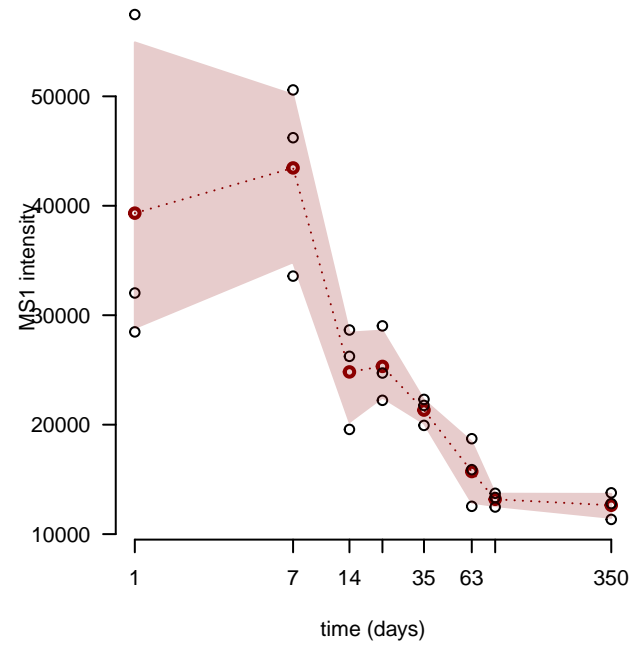

**Q91YT8**  
**GN=Tmem63a**  
transmembrane protein 63a

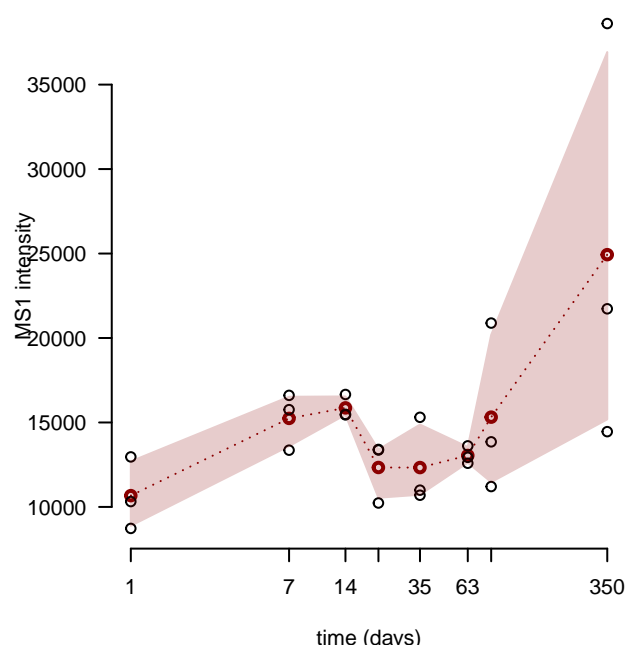

**Q91YU6**  
**GN=Lzts2**  
leucine zipper, putative tumor suppresso ...

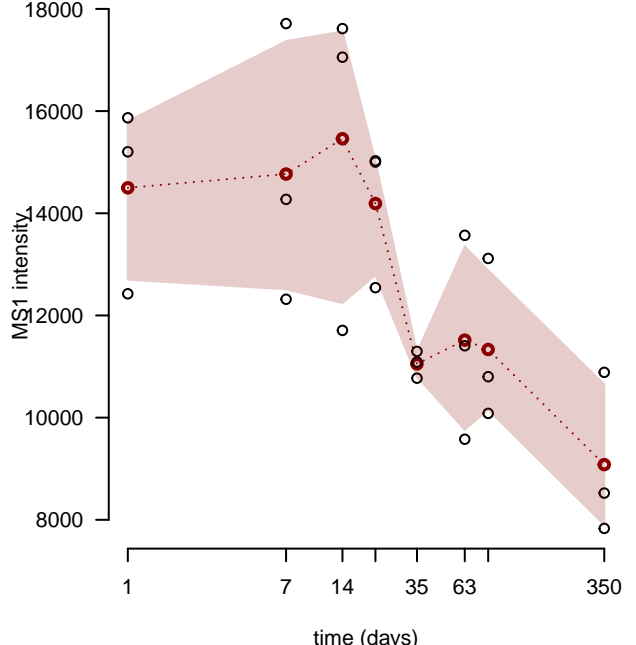

**Q91YU8**  
**GN=Ppan**  
peter pan homolog

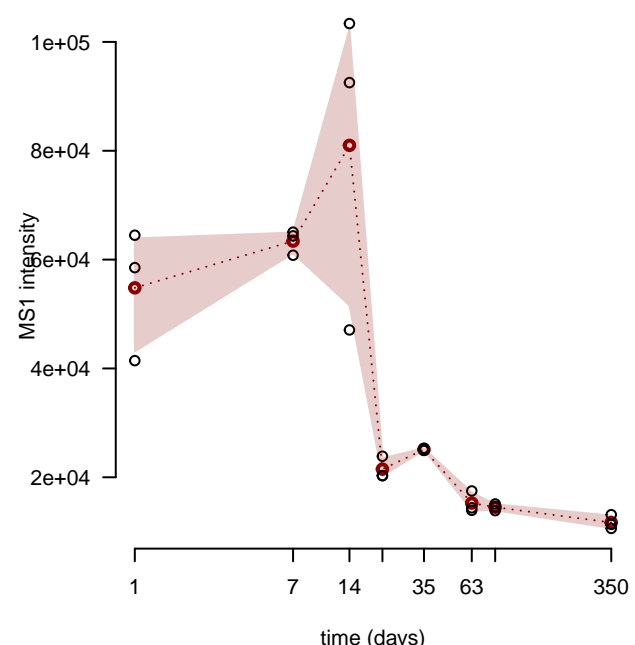

**Q91YW3**  
**GN=Dnajc3**  
DnaJ heat shock protein family (Hsp40) m ...

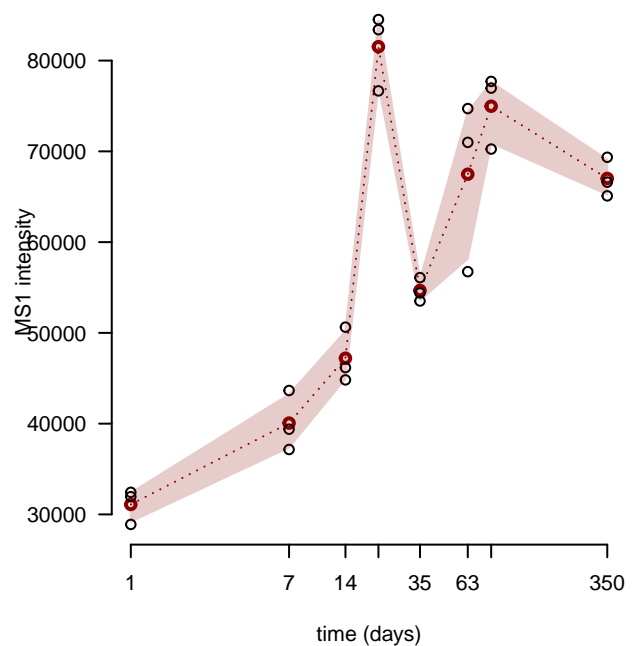

**Q91YX5**  
**GN=Lpgat1**  
lysophosphatidylglycerol acyltransferase ...

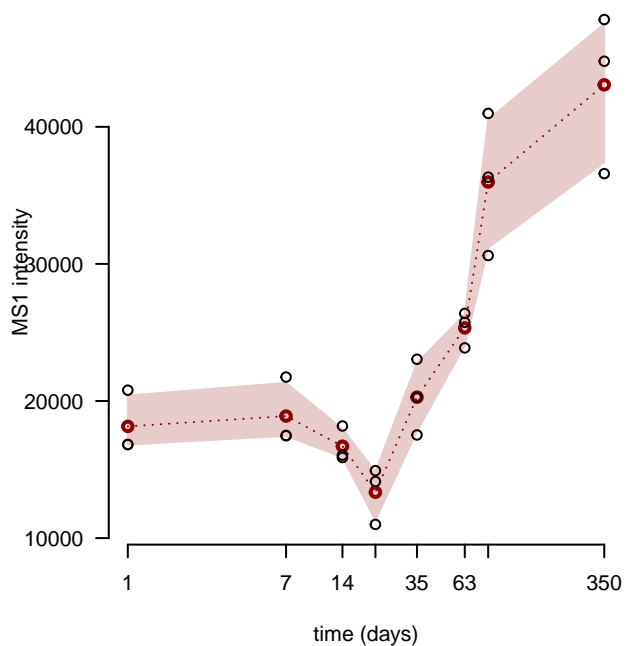

**Q91YY4**  
**GN=Atfaf2**  
ATP synthase mitochondrial F1 complex as ...

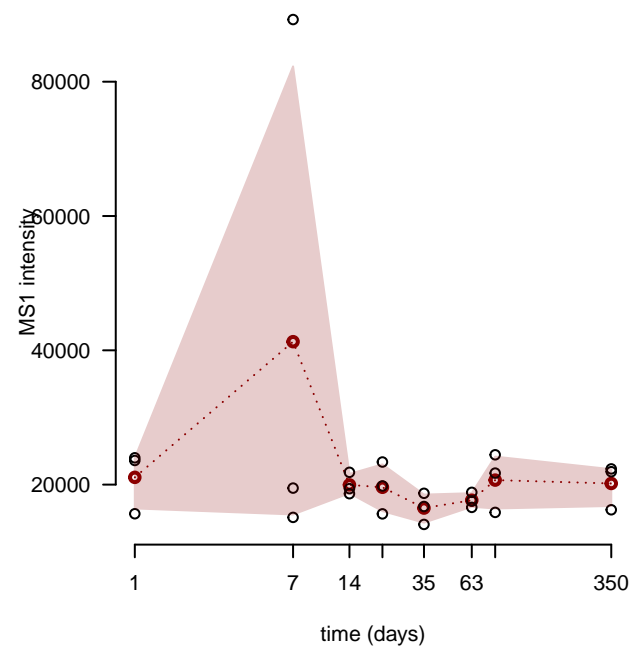

Q91Z31  
GN=Ptp2

polypyrimidine tract binding protein 2

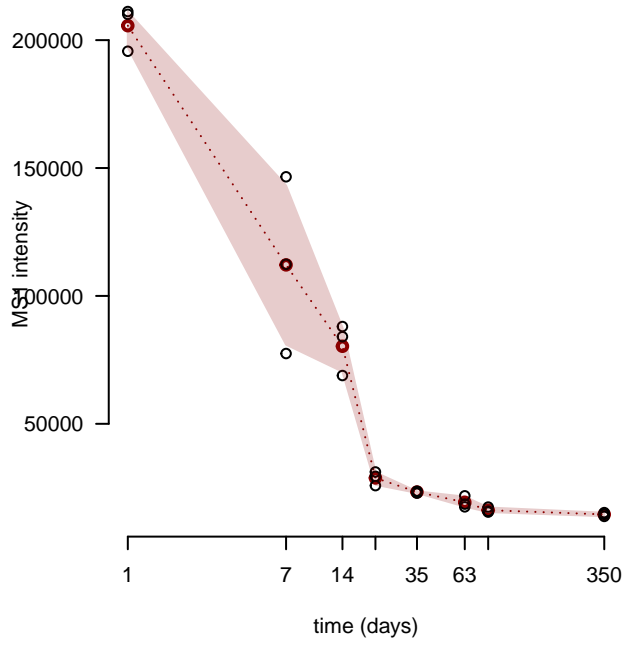

Q91Z38  
GN=Ttc1

tetratricopeptide repeat domain 1

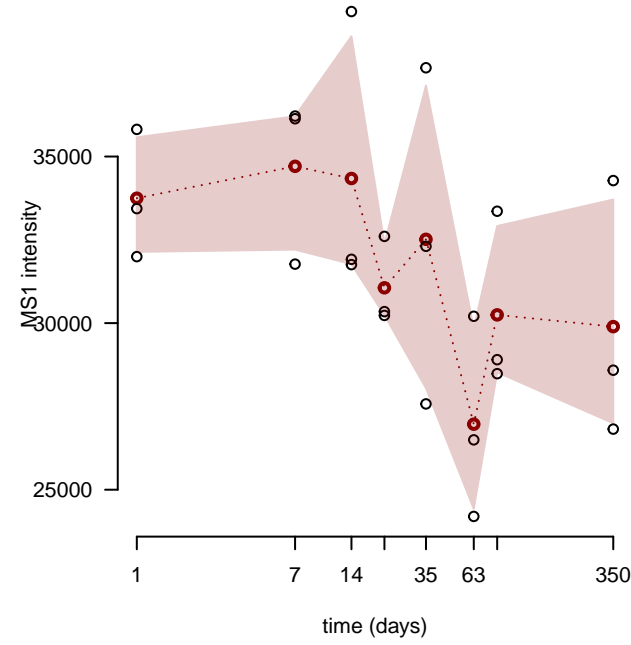

Q91Z49  
GN=Fyttd1

forty-two-three domain containing 1

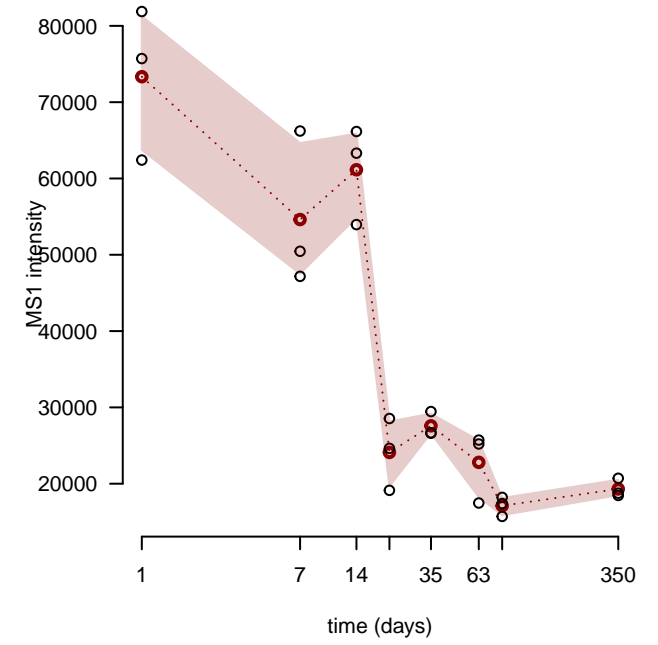

Q91Z53  
GN=Grhpr

glyoxylate reductase/hydroxypyruvate red ...

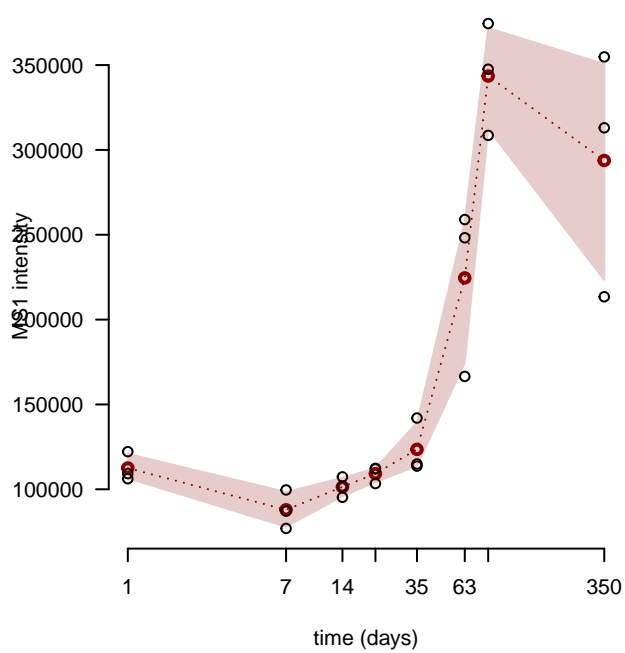

Q91Z67  
GN=Srgap2

SLIT-ROBO Rho GTPase activating protein ...

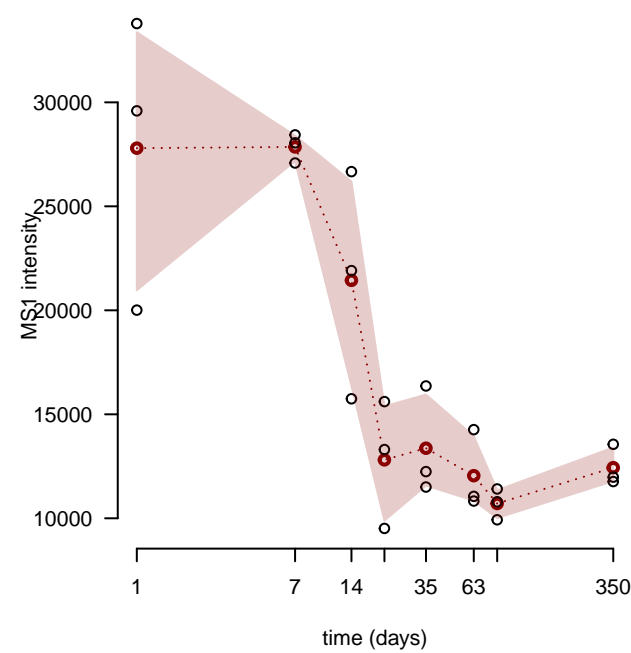

Q91Z69  
GN=Srgap1

SLIT-ROBO Rho GTPase activating protein ...

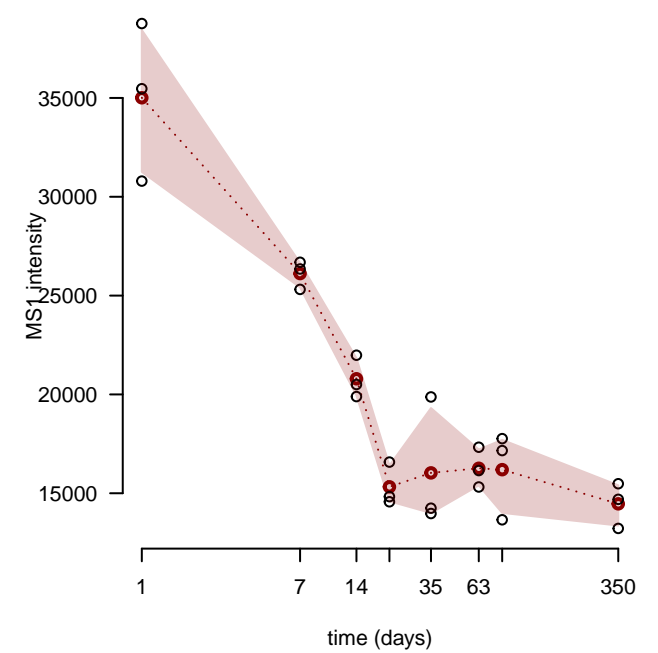

Q91Z92  
GN=B3galt6

UDP-Gal:betaGal beta 1,3-galactosyltrans ...

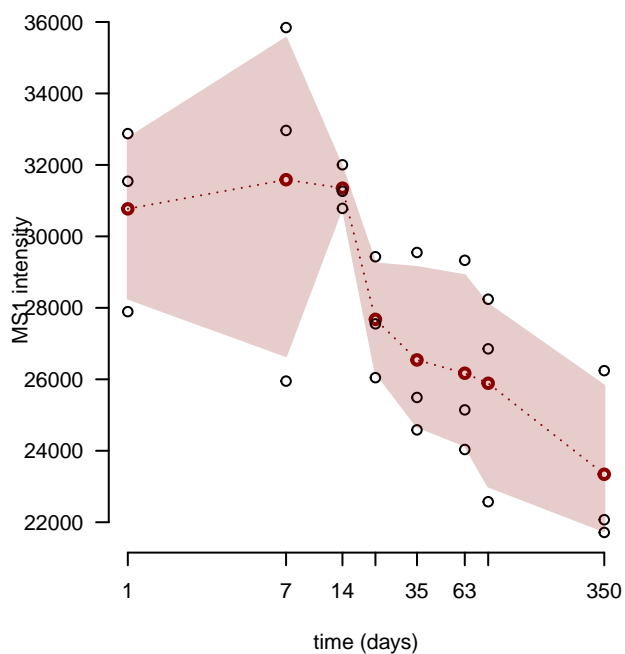

Q91Z96  
GN=Bmp2k

BMP2 inducible kinase

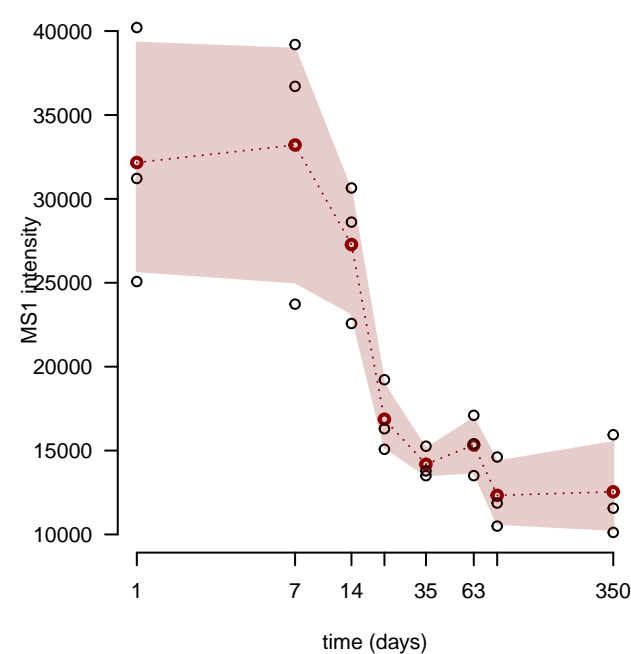

Q91ZA3  
GN=Pcca

propionyl-Coenzyme A carboxylase, alpha ...

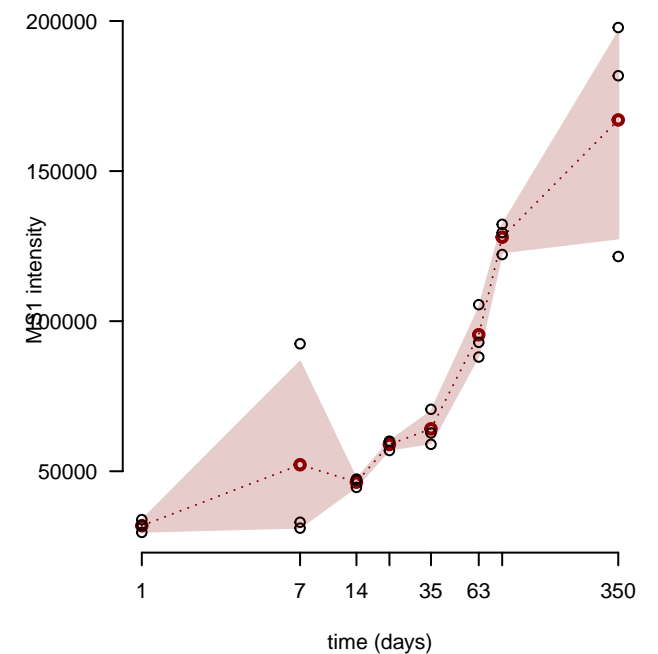

**Q91ZD4**  
GN=Vangl2  
VANGL planar cell polarity 2

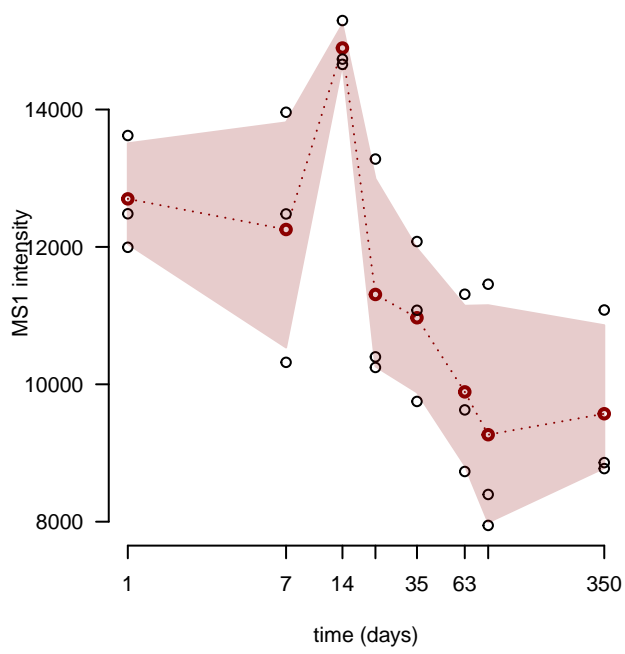

**Q91ZE0**  
GN=Tmlhe  
trimethyllysine hydroxylase, epsilon

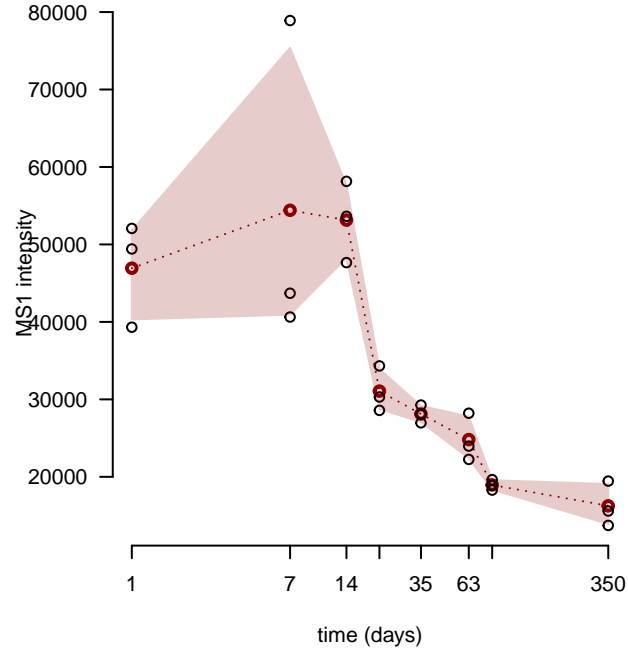

**Q91ZF0**  
GN=Dnajc24  
DnaJ heat shock protein family (Hsp40) m...

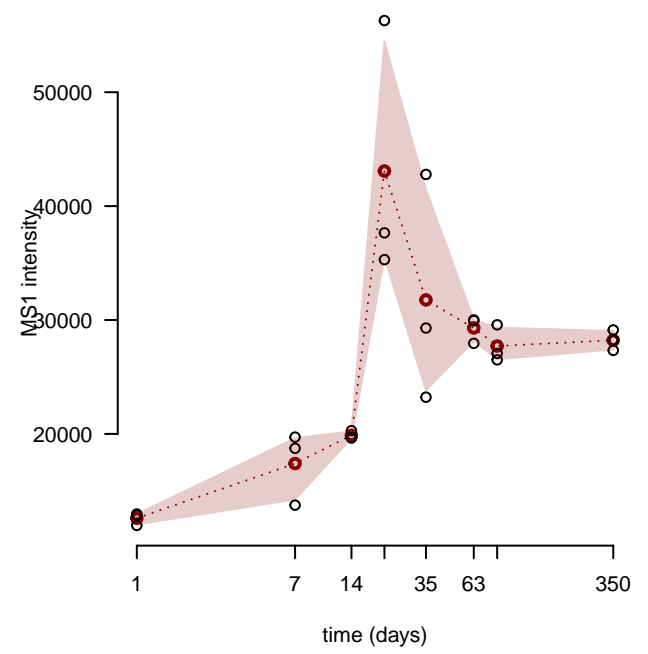

**Q91ZH7**  
GN=Abhd3  
abhydrolase domain containing 3

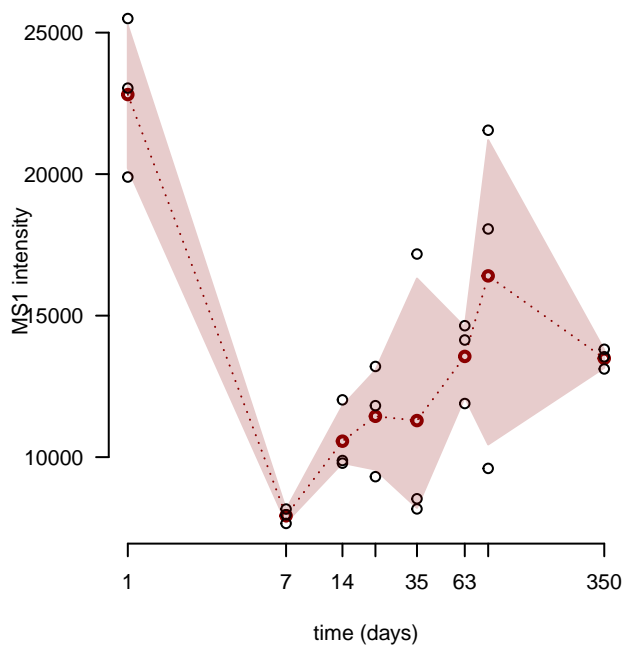

**Q91ZI0**  
GN=Celsr3  
cadherin, EGF LAG seven-pass G-type rece...

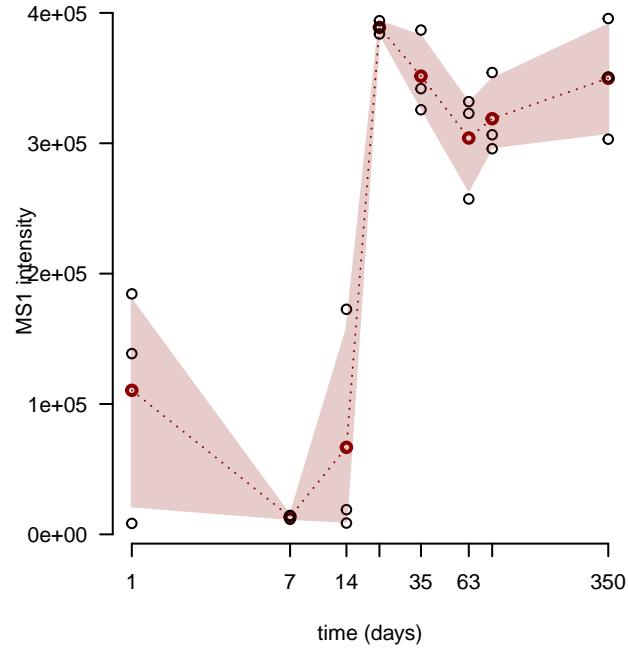

**Q91ZJ0**  
GN=Mus81  
MUS81 structure-specific endonuclease su...

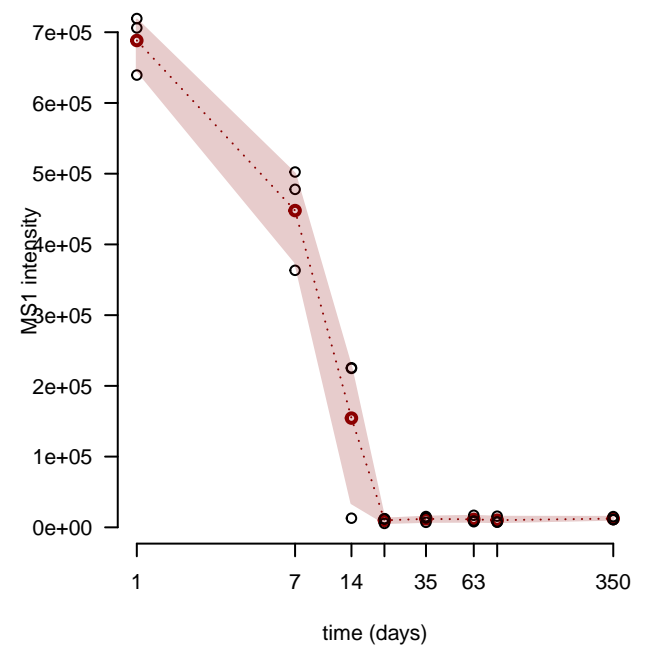

**Q91ZJ5**  
GN=Ugp2  
UDP-glucose pyrophosphorylase 2

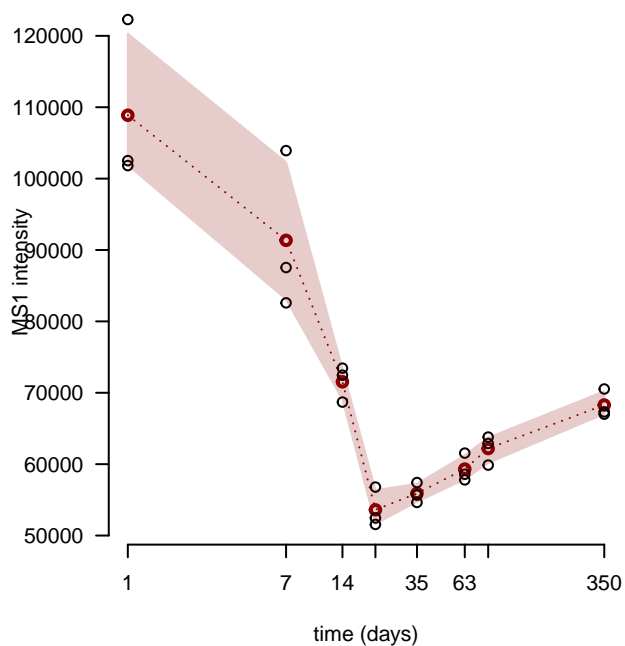

**Q91ZM2**  
GN=Sh2b1  
SH2B adaptor protein 1

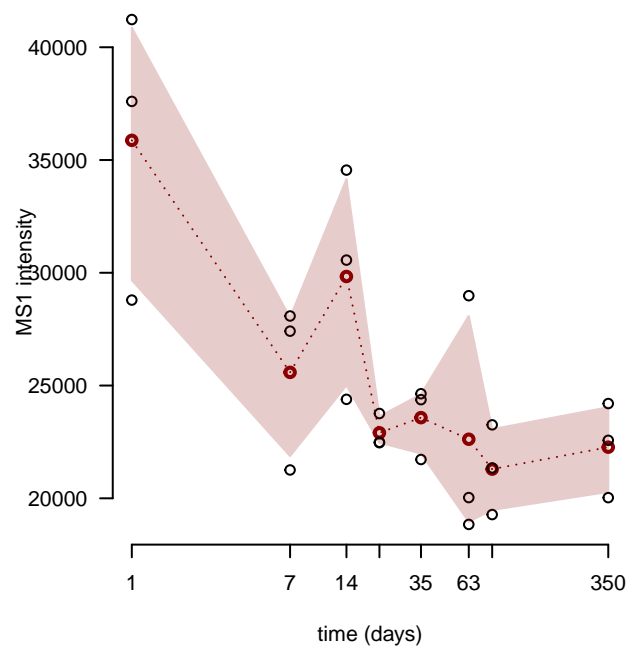

**Q91ZN5**  
GN=Slc35b2  
solute carrier family 35, member B2

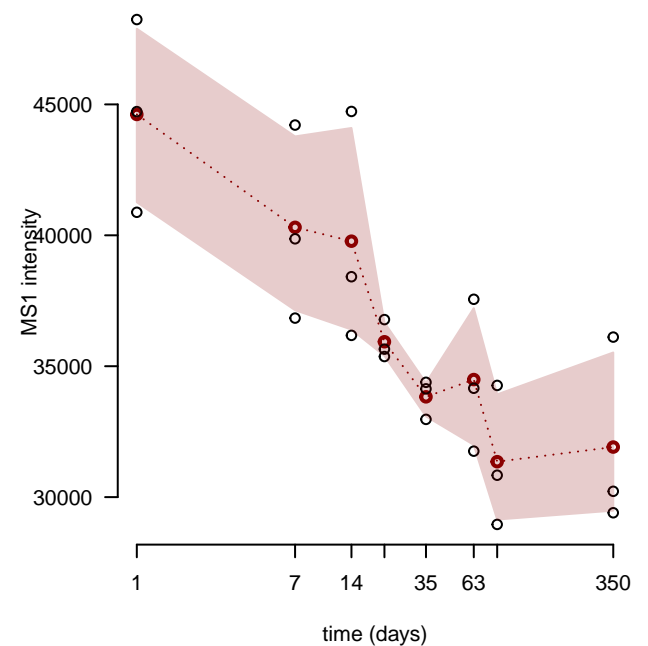

**Q91ZP3**  
GN=Lpin1  
lipin 1

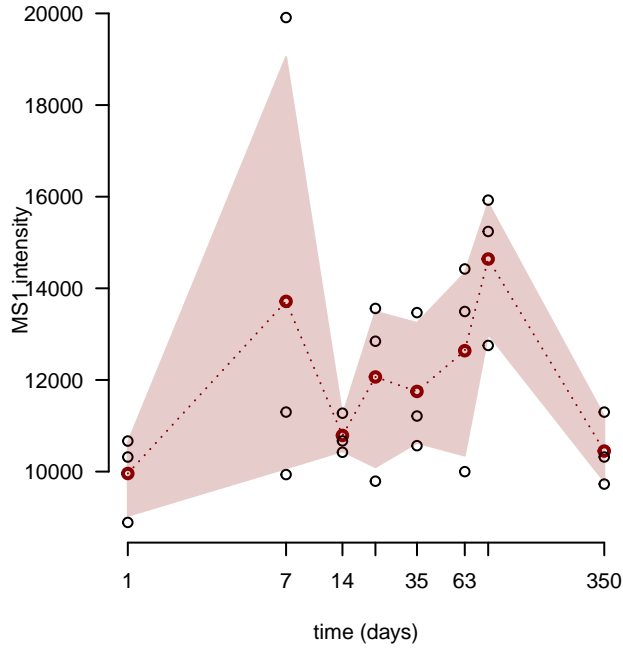

**Q91ZP9**  
GN=Necab2  
N-terminal EF-hand calcium binding prote ...

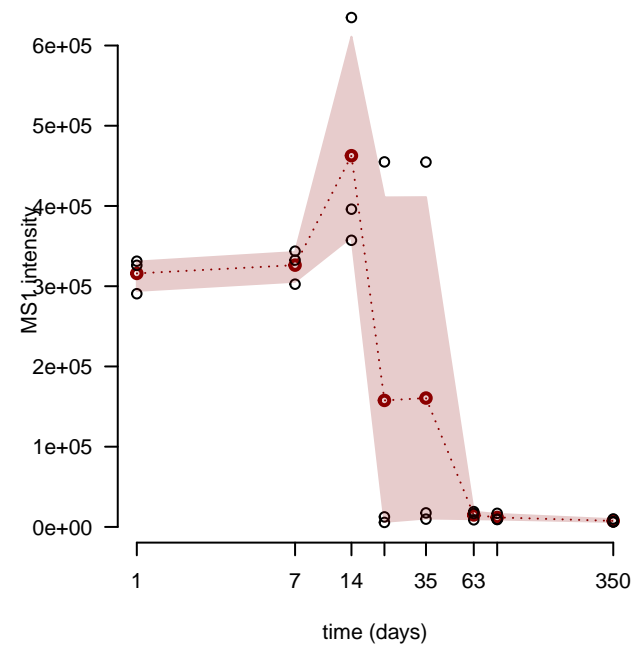

**Q91ZR1**  
GN=Rab4b  
RAB4B, member RAS oncogene family

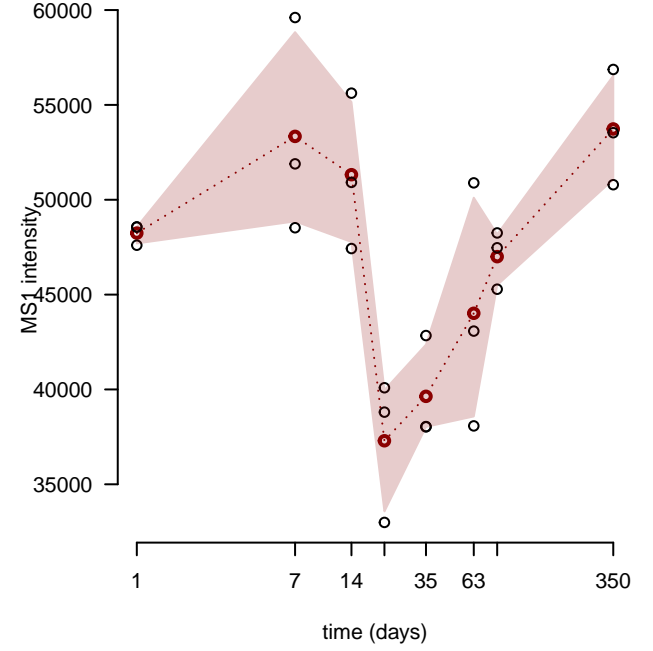

**Q91ZR2**  
GN=Snx18  
sorting nexin 18

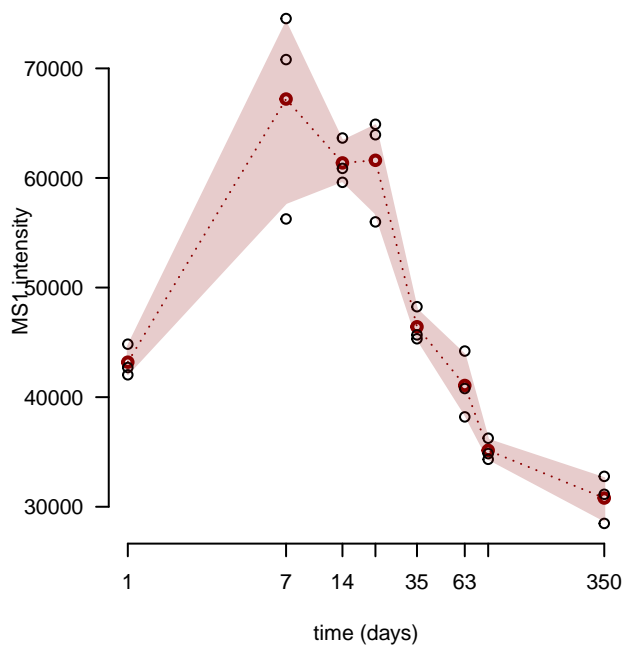

**Q91ZR4**  
GN=Nek8  
NIMA (never in mitosis gene a)-related e ...

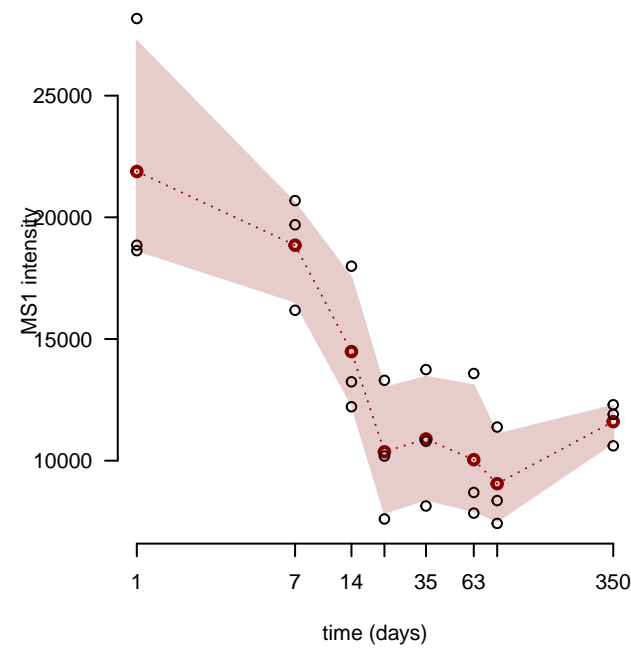

**Q91ZS8**  
GN=Adarb1  
adenosine deaminase, RNA-specific, B1

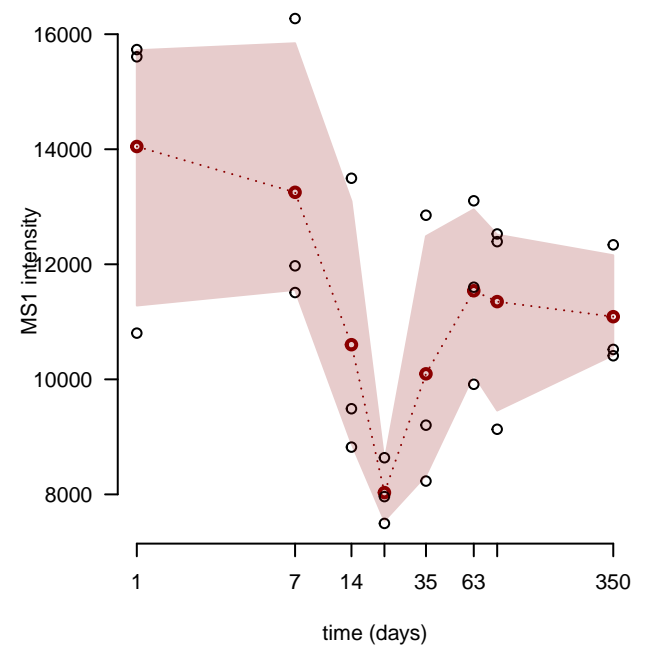

**Q91ZU1**  
GN=Asb6  
ankyrin repeat and SOCS box-containing 6

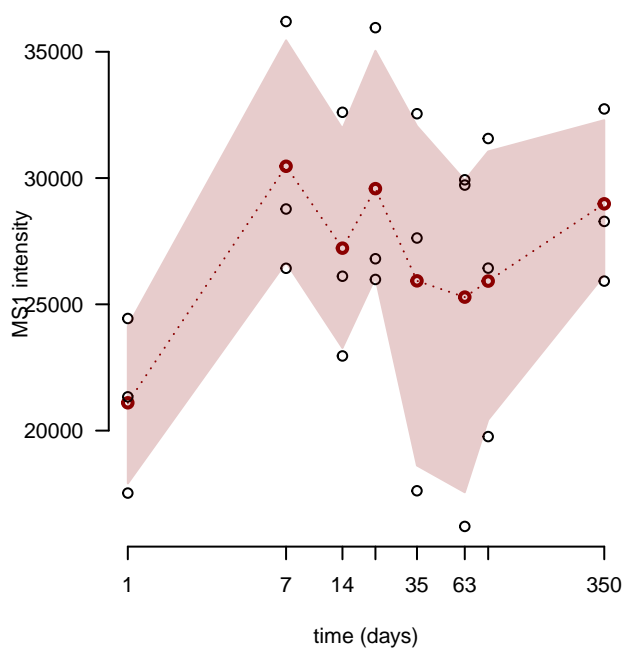

**Q91ZU6**  
GN=Dst  
dystonin

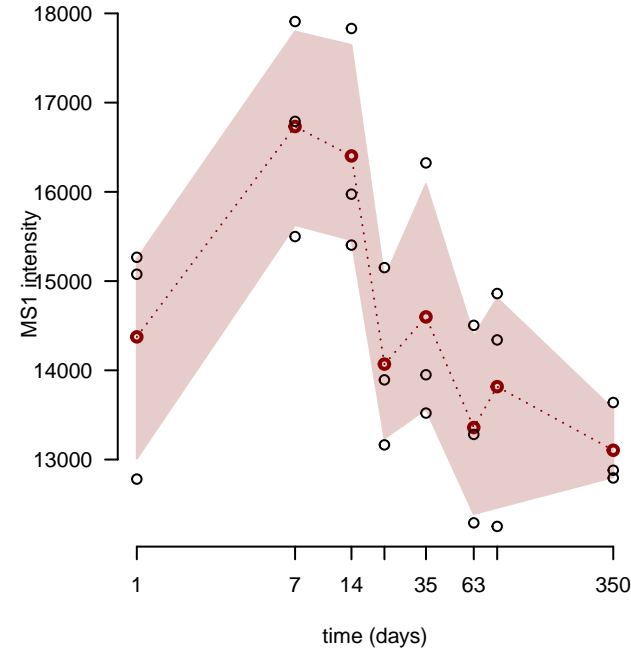

**Q91ZU6**  
GN=Dst  
dystonin

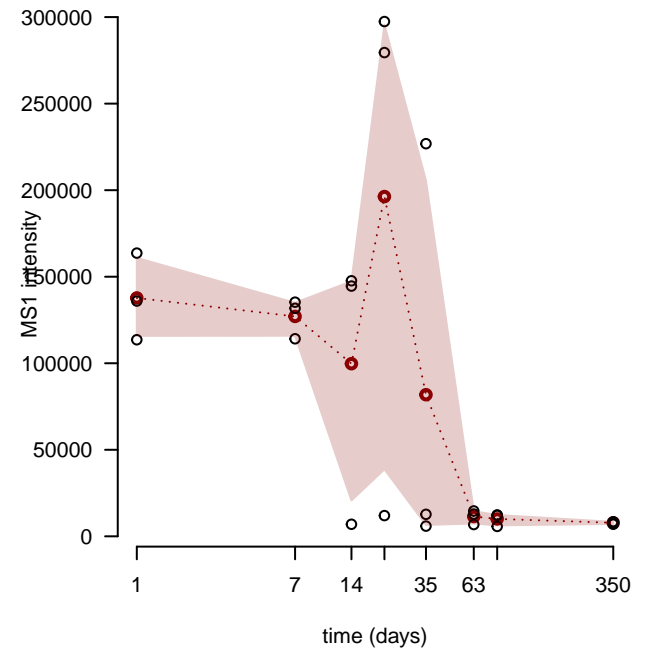

**Q91ZV0**  
**GN=Mia2**  
MIA SH3 domain ER export factor 2

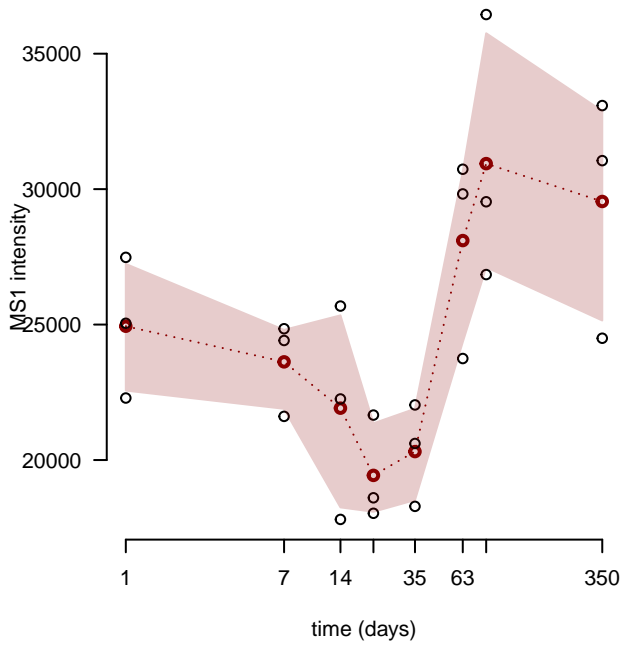

**Q91ZV7**  
**GN=Plxdc1**  
plexin domain containing 1

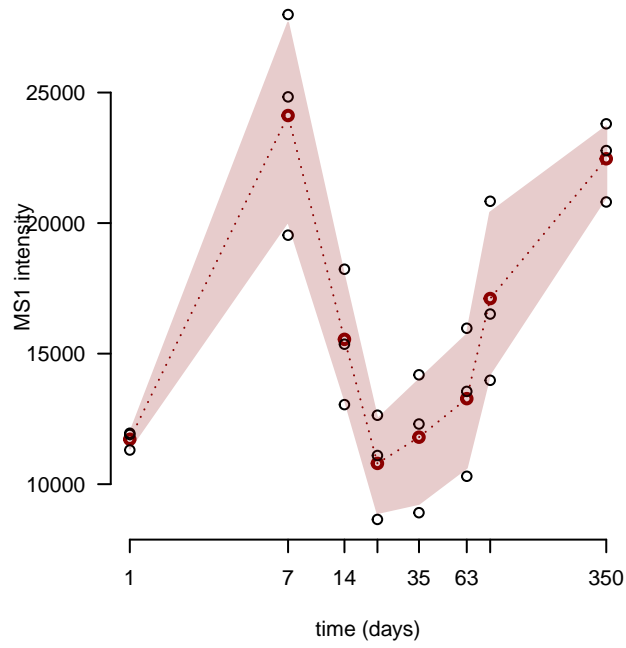

**Q91ZV8**  
**GN=Adgra2**  
adhesion G protein-coupled receptor A2

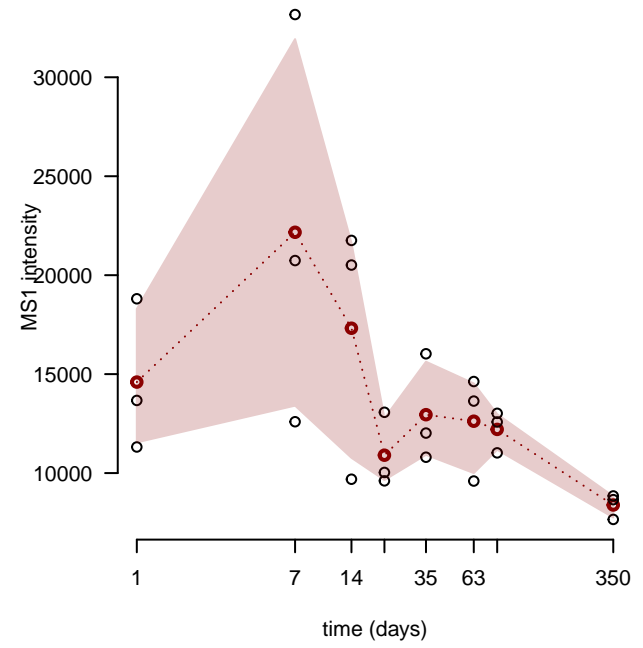

**Q91ZW2**  
**GN=Pofut1**  
protein O-fucosyltransferase 1

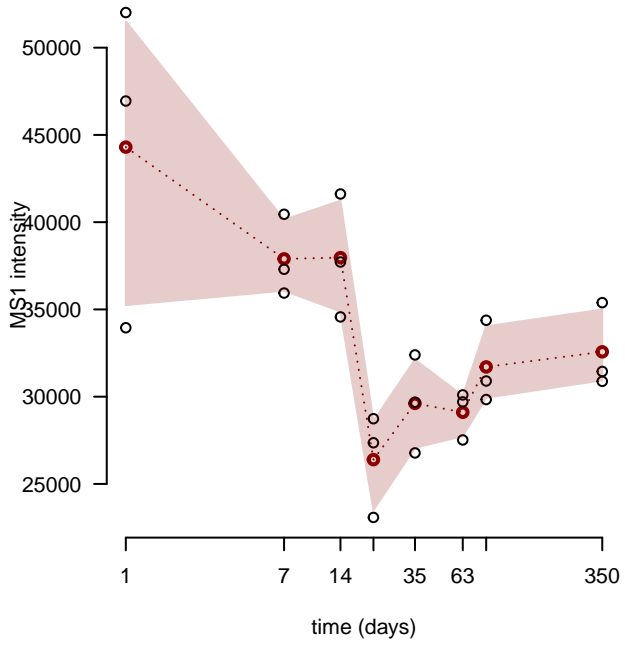

**Q91ZW3**  
**GN=Smarca5**  
SWI/SNF related, matrix associated, acti ...

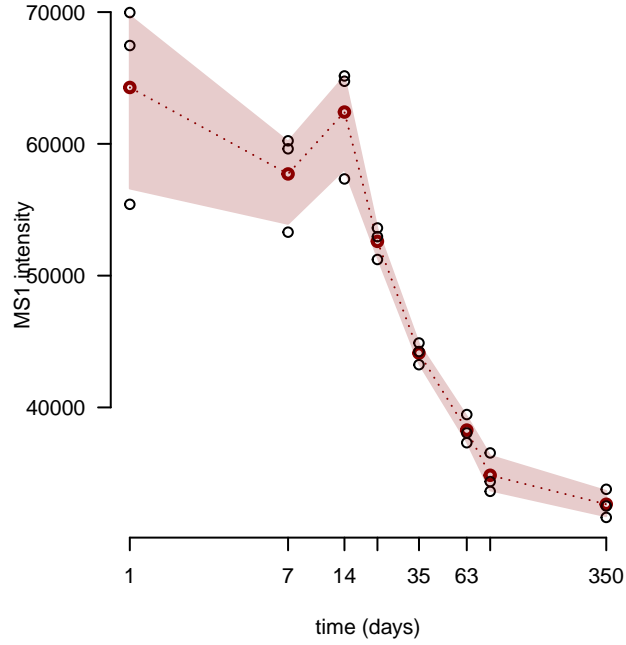

**Q91ZX7**  
**GN=Lrp1**  
low density lipoprotein receptor-related ...

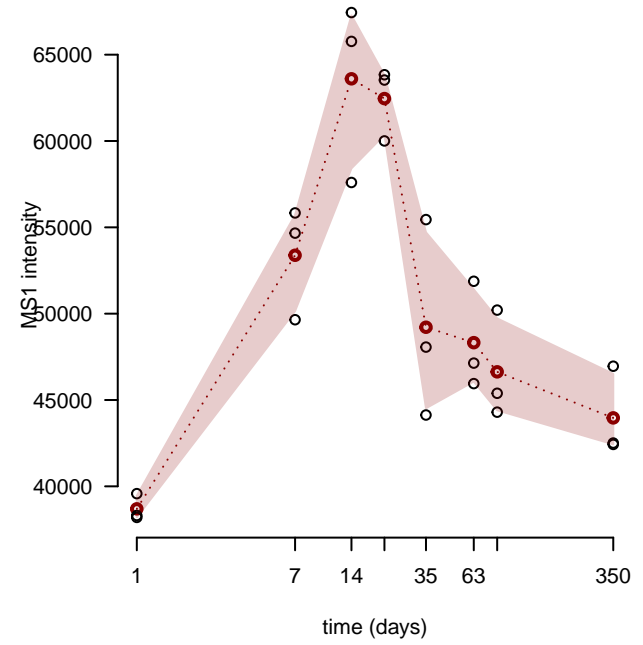

**Q920A5**  
**GN=Scpep1**  
serine carboxypeptidase 1

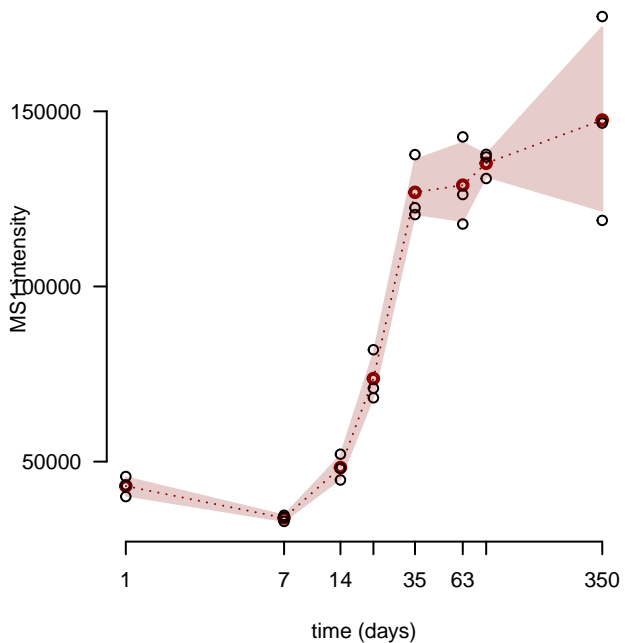

**Q920A7**  
**GN=Afg3l1**  
AFG3-like AAA ATPase 1

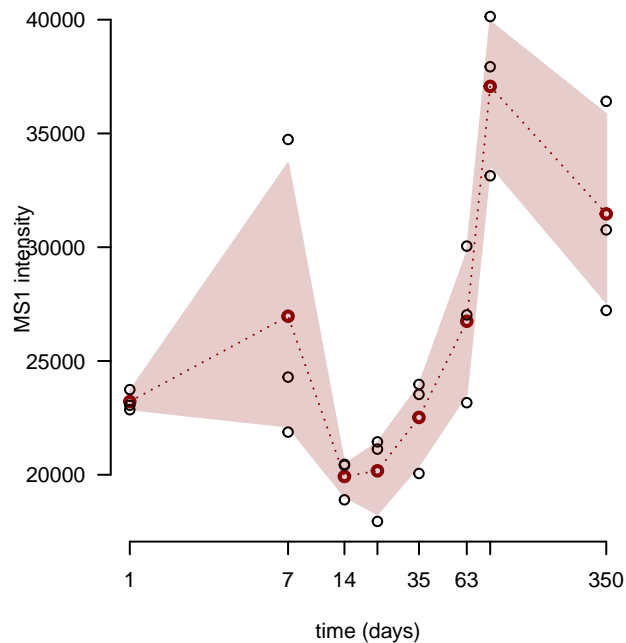

**Q920B0**  
**GN=Frmd4b**  
FERM domain containing 4B

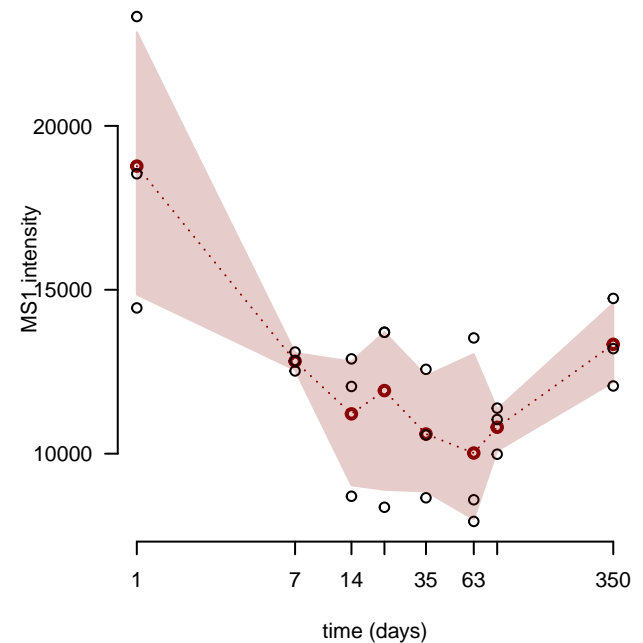

Q920B9  
GN=Supt16h

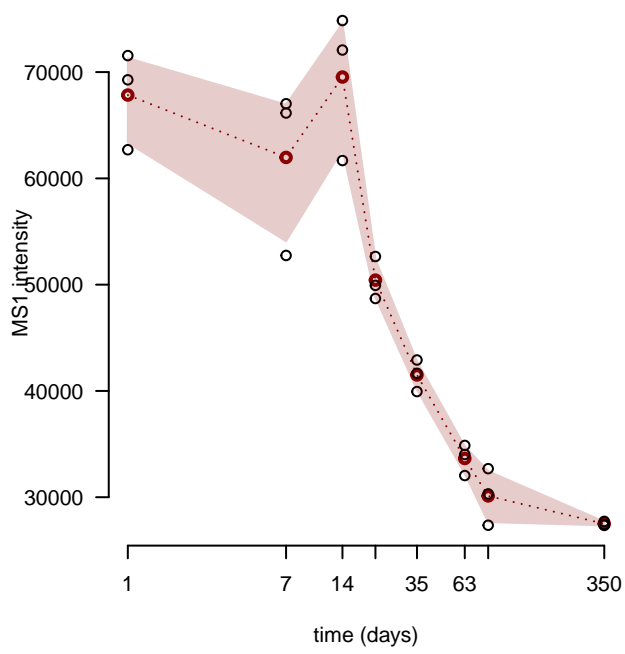

Q920D3  
GN=Med28  
mediator complex subunit 28

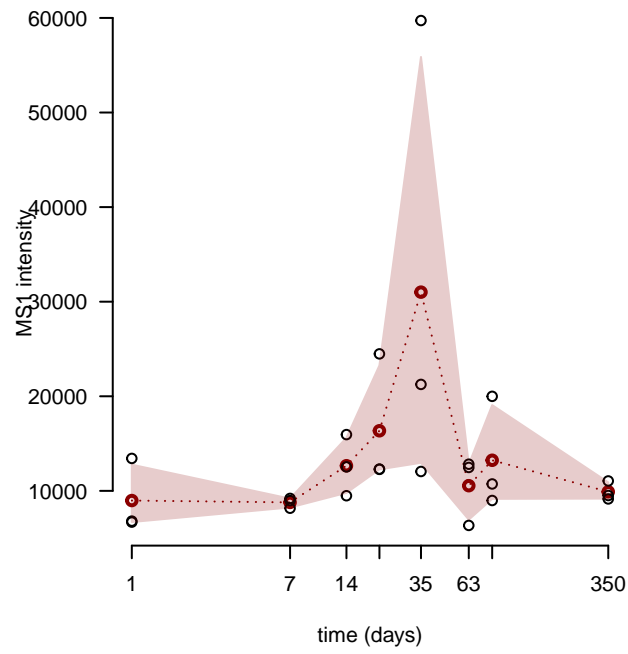

Q920E5  
GN=Fdps  
farnesyl diphosphate synthetase

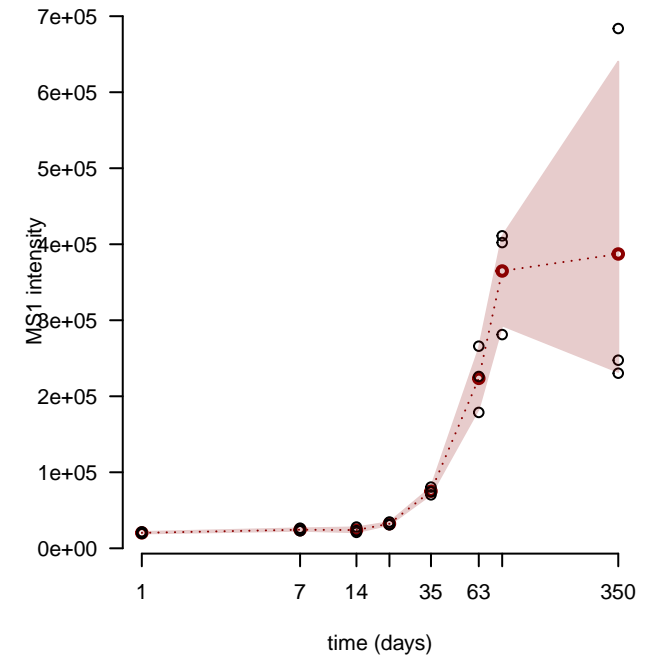

Q920I9  
GN=Wdr7  
WD repeat domain 7

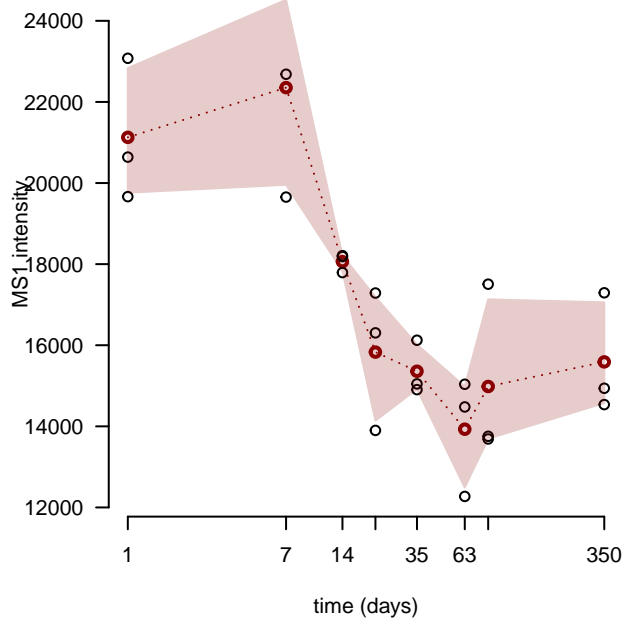

Q920L1  
GN=Fads1  
fatty acid desaturase 1

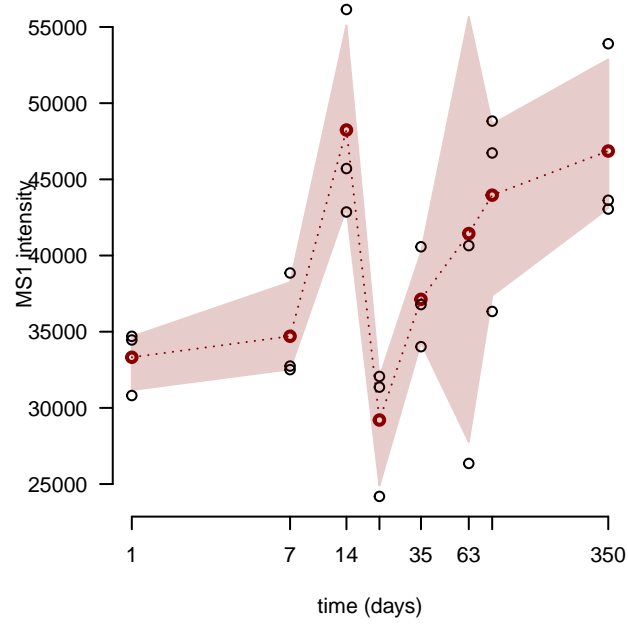

Q920L5  
GN=Elovl6  
ELOVL family member 6, elongation of lon ...

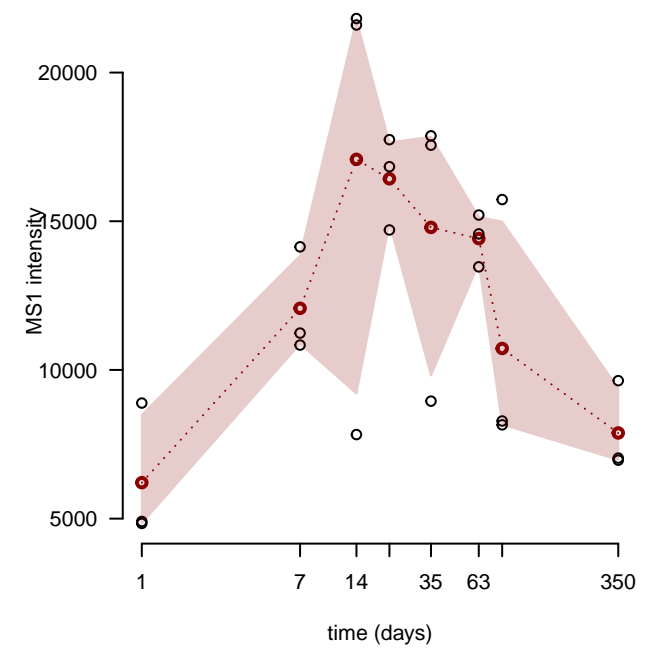

Q920N2  
GN=Hlcs  
holocarboxylase synthetase (biotin- [pro ...

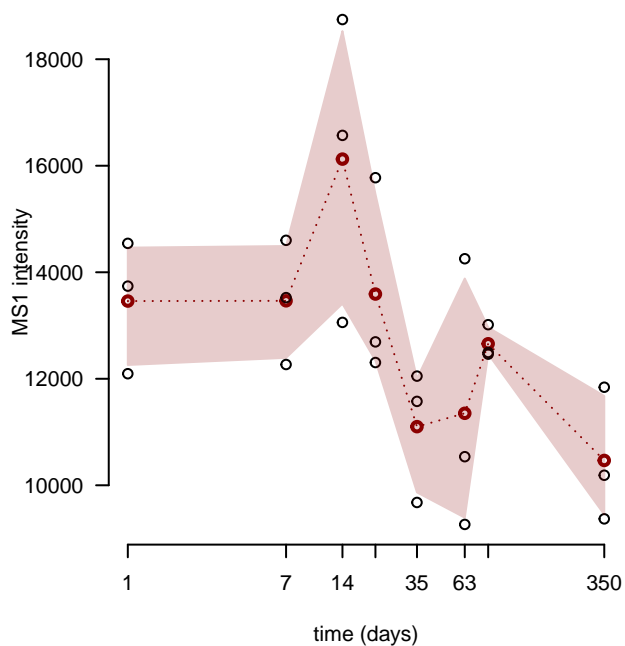

Q920Q4  
GN=Vps16  
VSP16 CORVET/HOPS core subunit

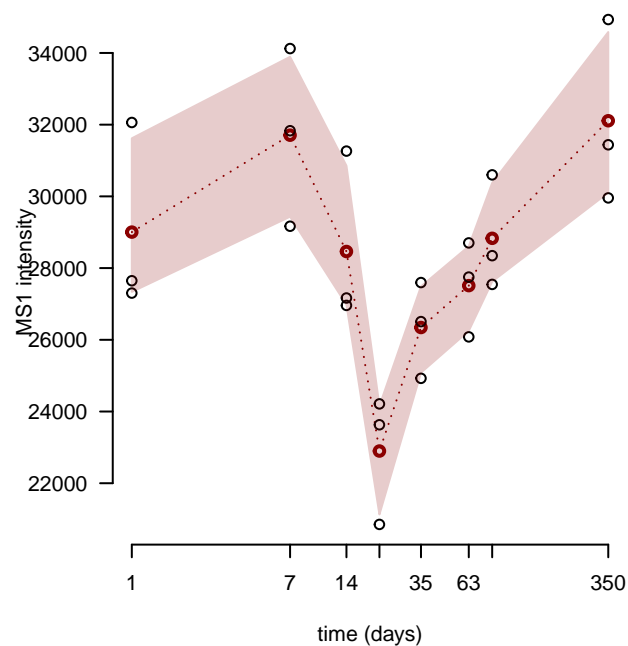

Q920Q6  
GN=Msi2  
musashi RNA-binding protein 2

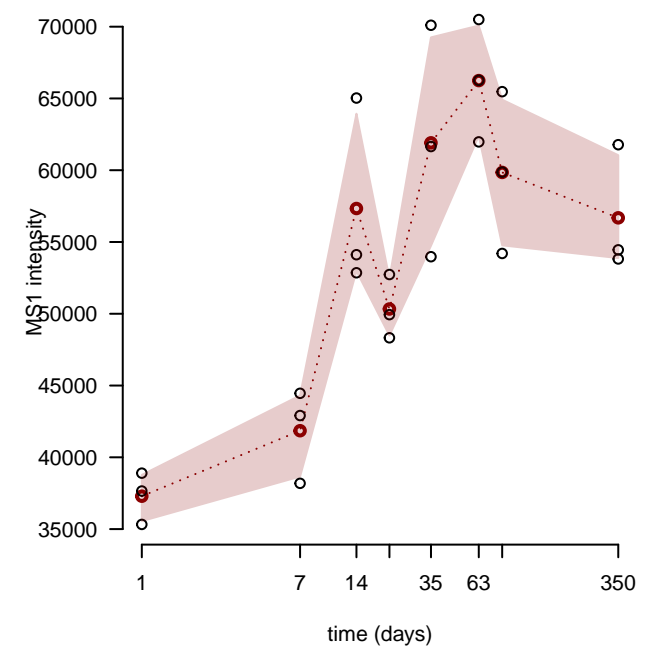

**Q920Q8**  
GN=Ivns1abp  
influenza virus NS1A binding protein

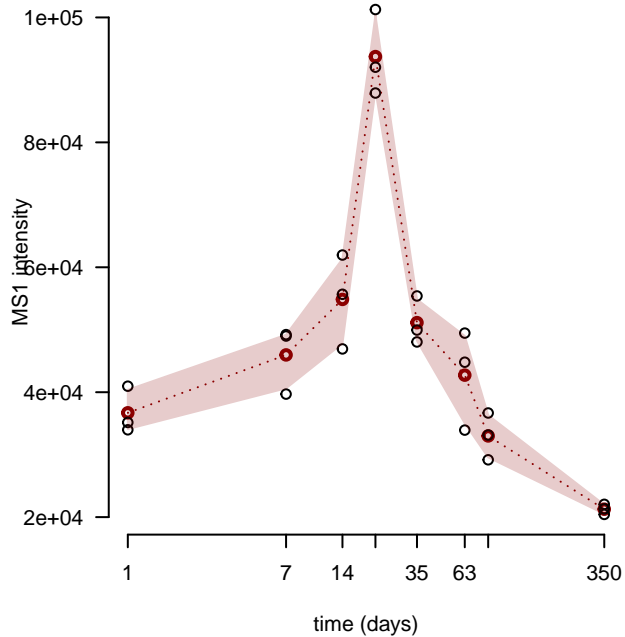

**Q920R0**  
GN=AIs2  
alsin Rho guanine nucleotide exchange fa ...

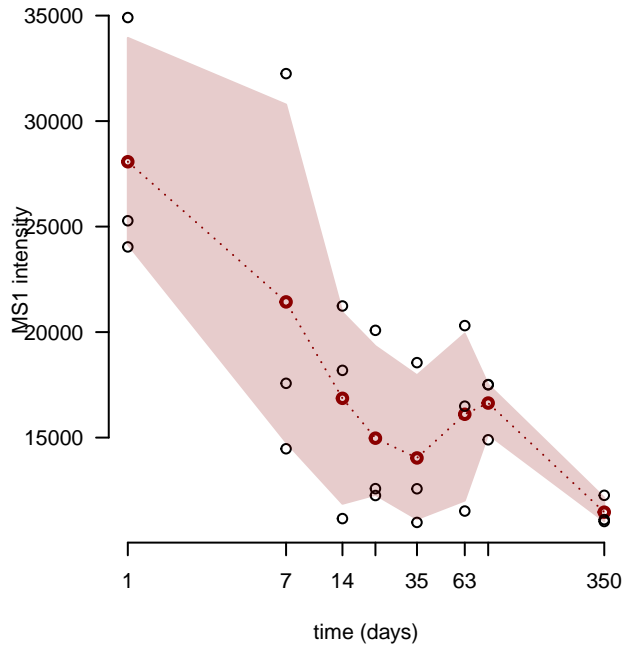

**Q920S3**  
GN=Gatad1  
GATA zinc finger domain containing 1

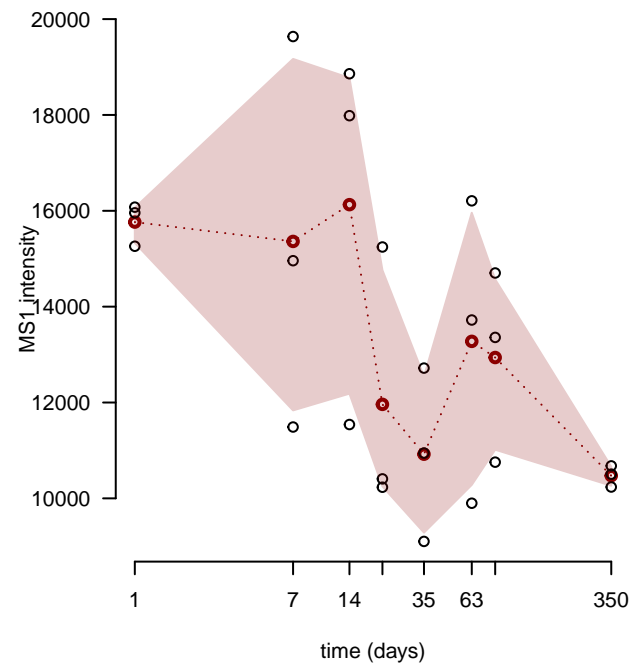

**Q920V1**  
GN=B3galnt1  
UDP-GalNAc:betaGlcNAc beta 1,3-galactosa ...

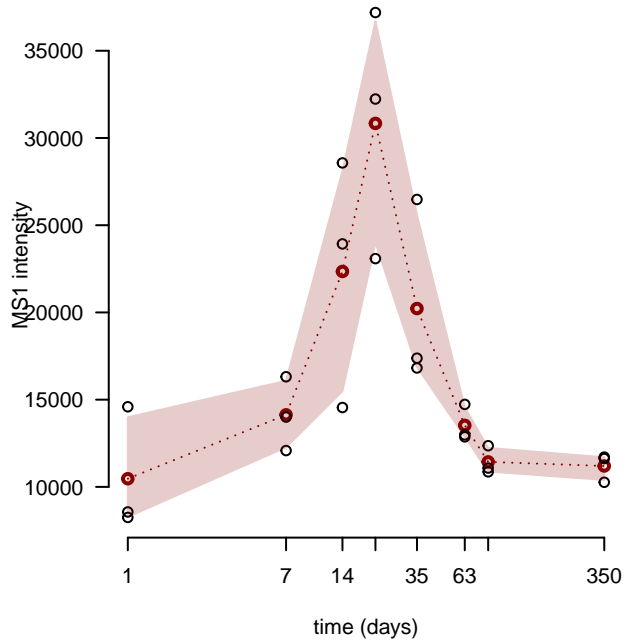

**Q921C3**  
GN=Brwd1  
bromodomain and WD repeat domain contain ...

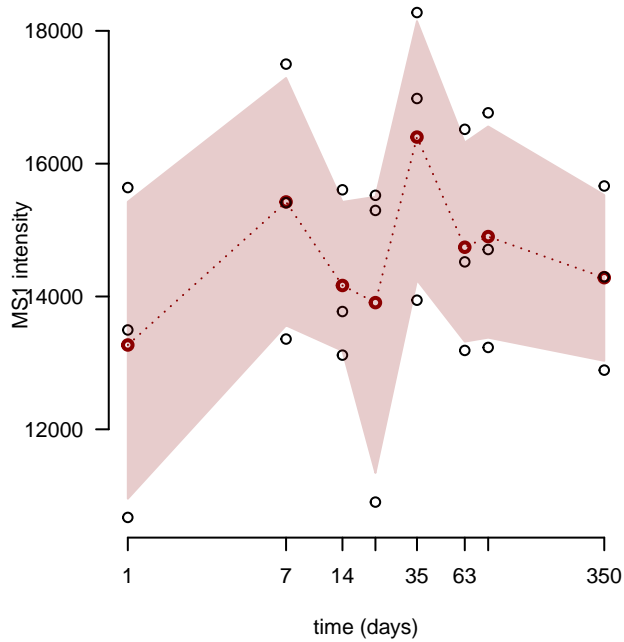

**Q921C5**  
GN=Bicd2  
BICD cargo adaptor 2

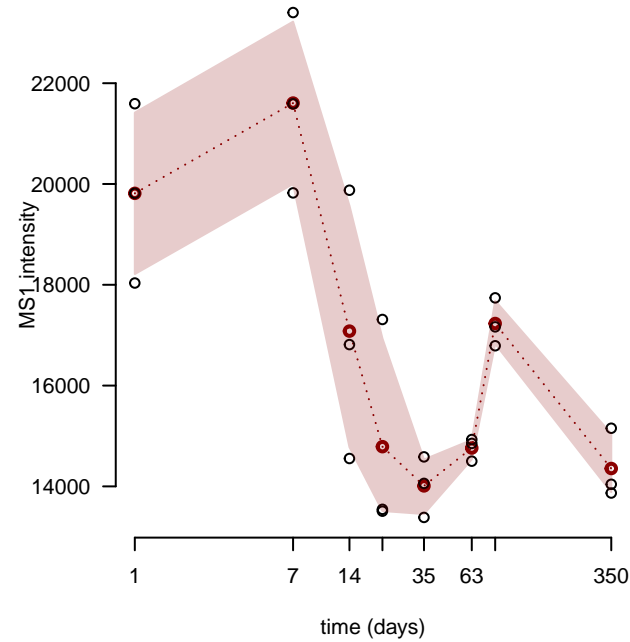

**Q921D4**  
GN=Med6  
mediator complex subunit 6

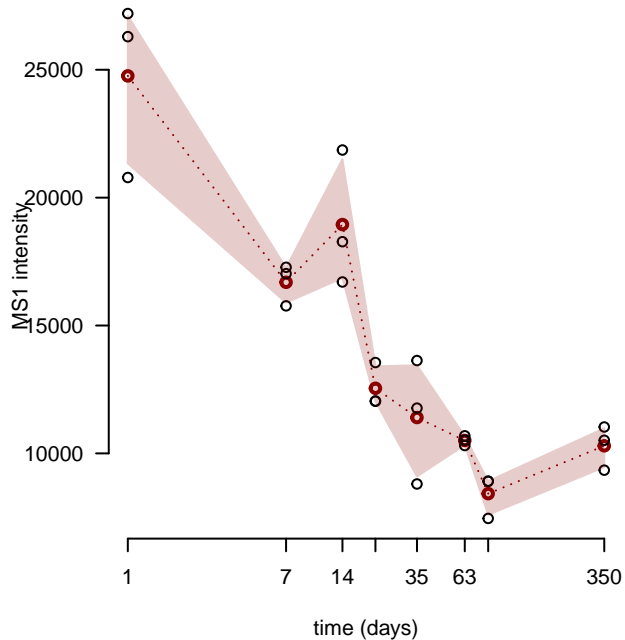

**Q921E2**  
GN=Rab31  
RAB31, member RAS oncogene family

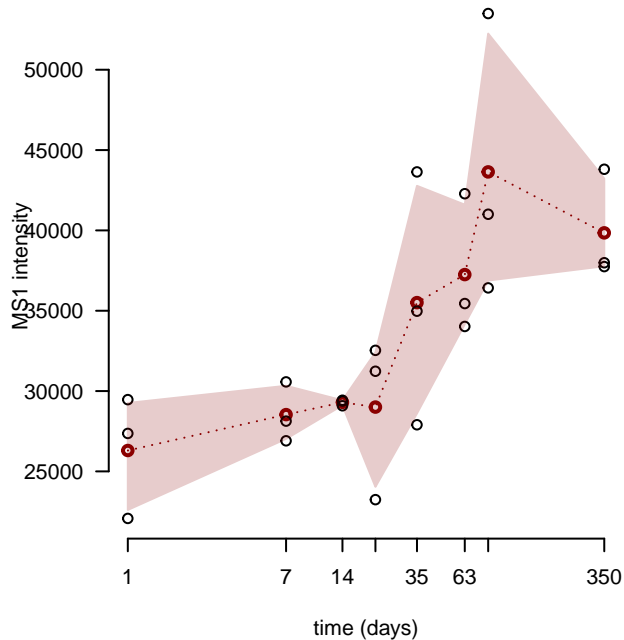

**Q921E6**  
GN=Eed  
embryonic ectoderm development

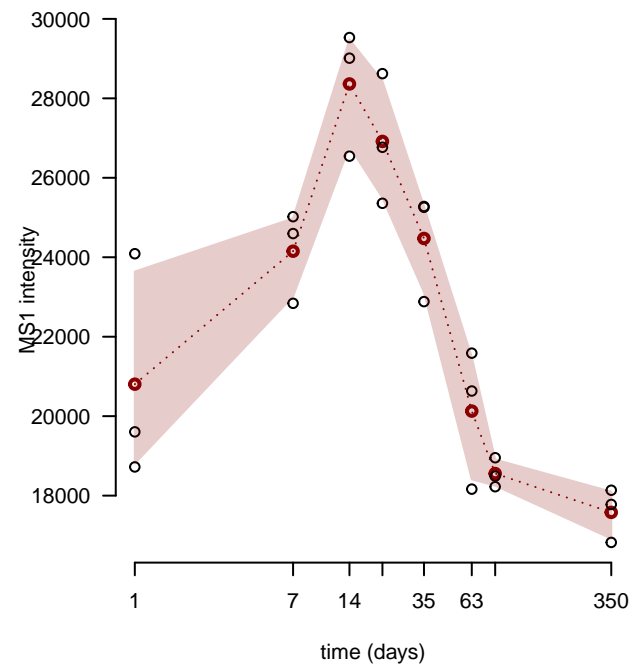



**Q921F2**  
**GN=Tardbp**  
TAR DNA binding protein

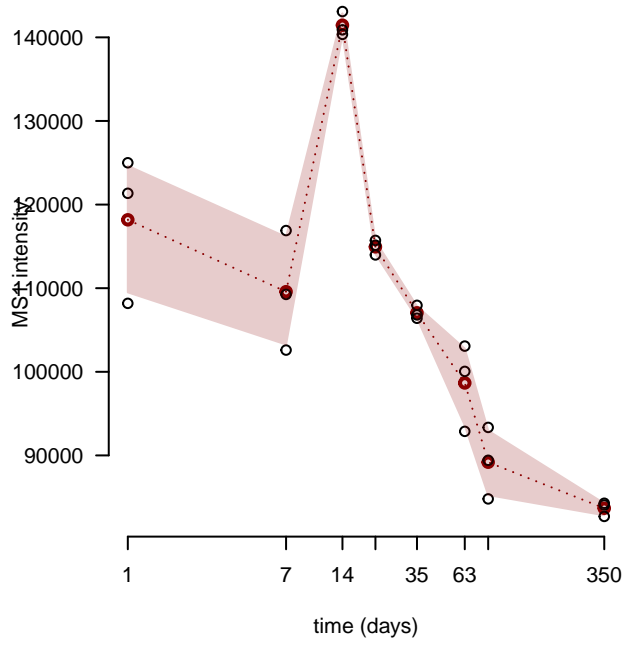

**Q921F4**  
**GN=Hnrrp1l**  
heterogeneous nuclear ribonucleoprotein ...

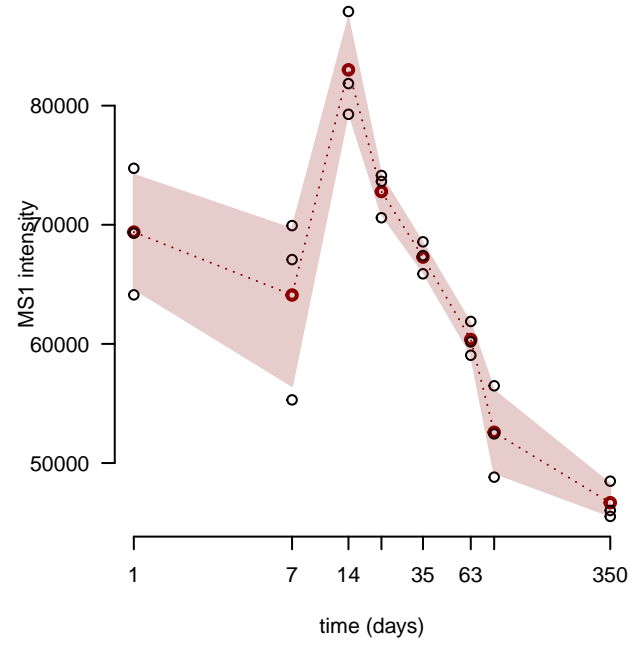

**Q921G6**  
**GN=Lrch4**  
leucine-rich repeats and calponin homolo ...

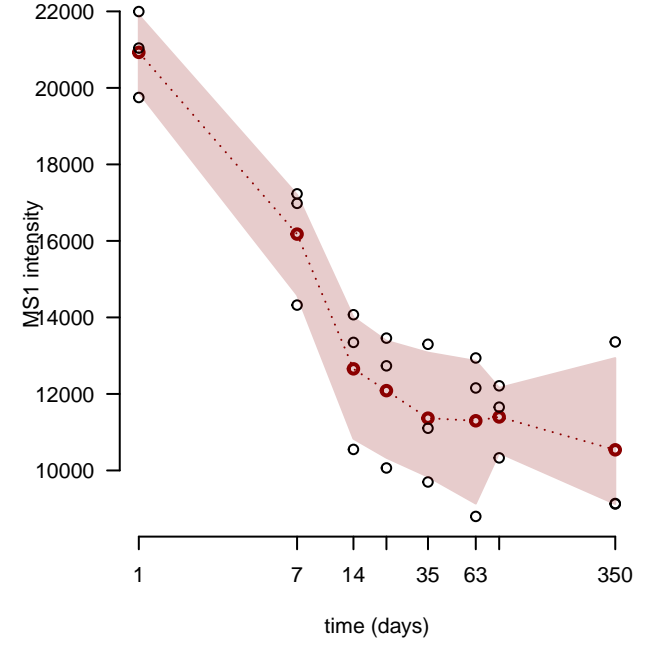

**Q921G7**  
**GN=Etfdh**  
electron transferring flavoprotein, dehy ...

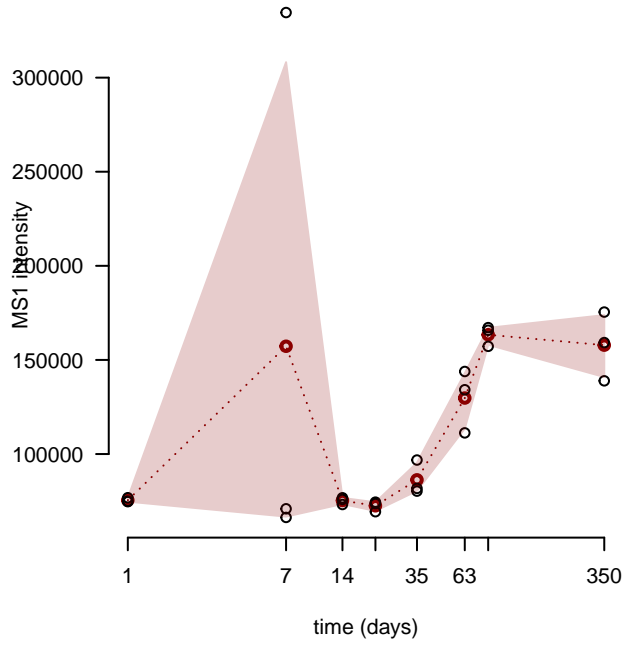

**Q921G8**  
**GN=Tubgcp2**  
tubulin, gamma complex associated protei ...

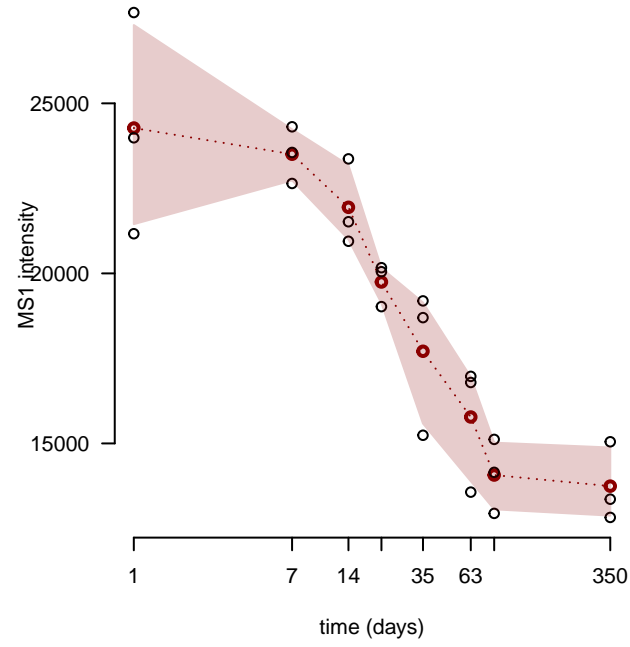

**Q921H8**  
**GN=Acaa1a**  
acetyl-Coenzyme A acyltransferase 1A

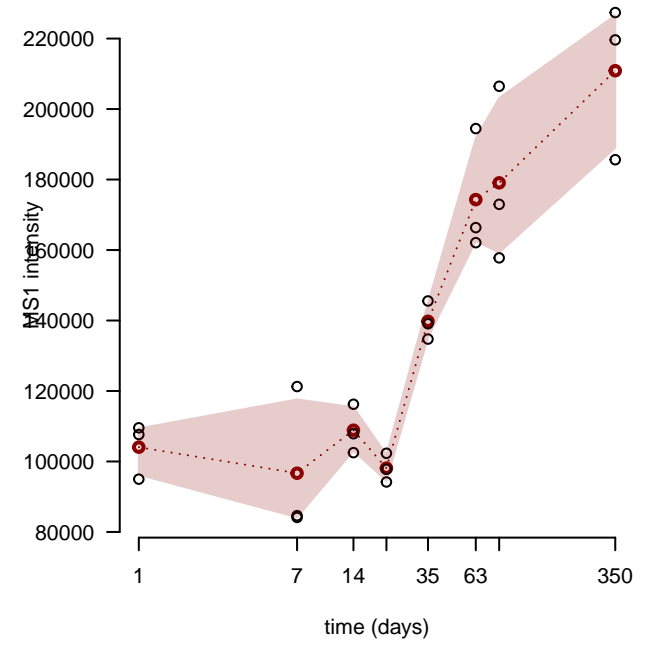

**Q921H9**  
**GN=Coa7**  
cytochrome c oxidase assembly factor 7

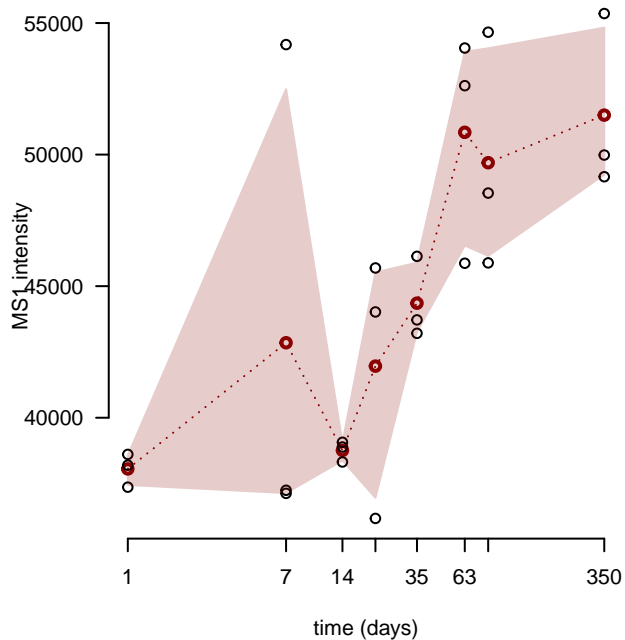

**Q921I0**  
**GN=Ormdl1**  
ORM1-like 1 (*S. cerevisiae*)

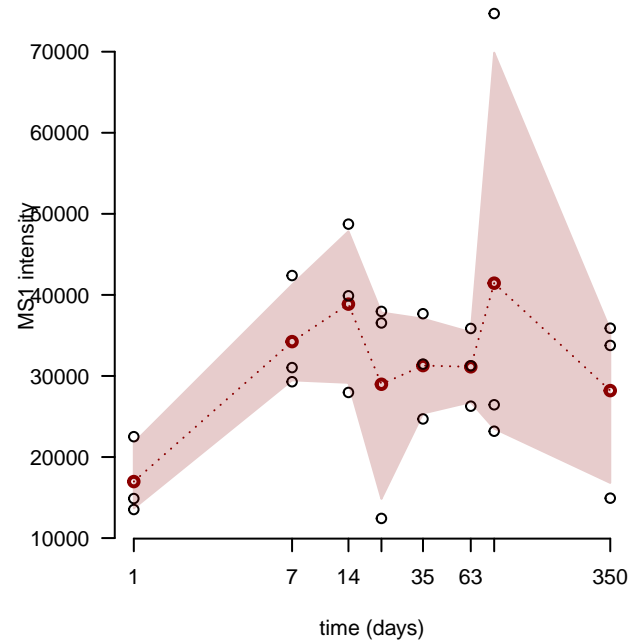

**Q921I1**  
**GN=Tf**

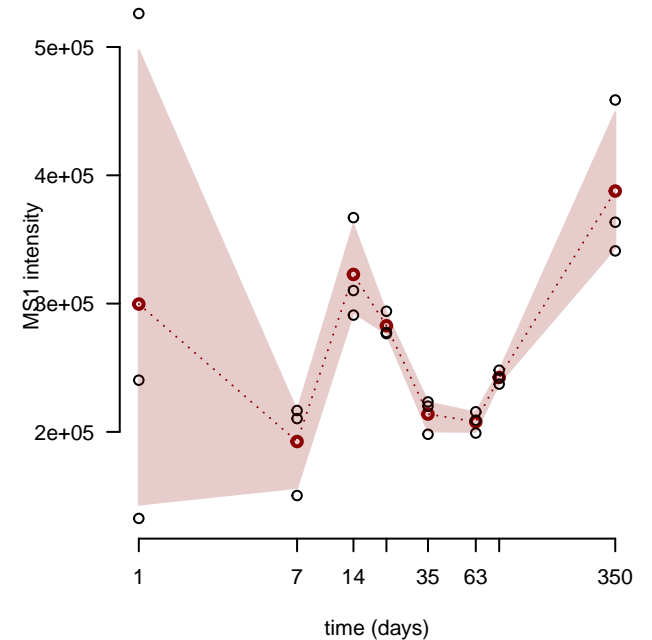

**Q921I2**  
**GN=Klhdc4**  
kelch domain containing 4

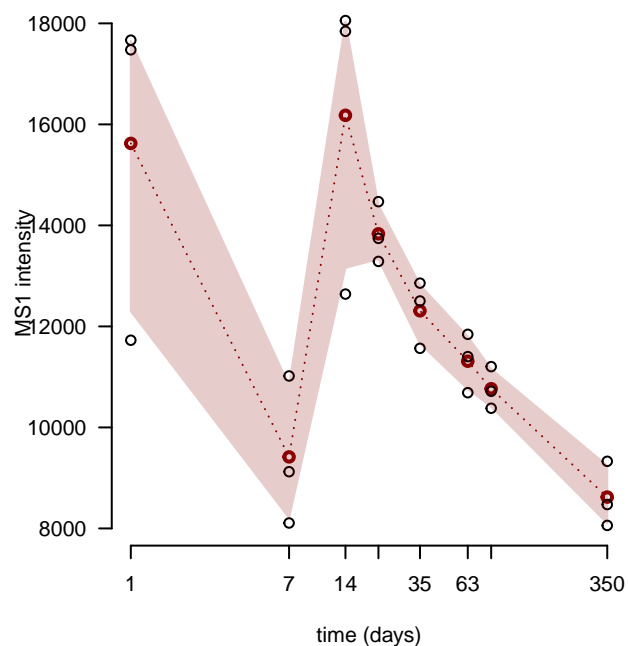

**Q921I6**  
**GN=Sh3bp4**  
SH3-domain binding protein 4

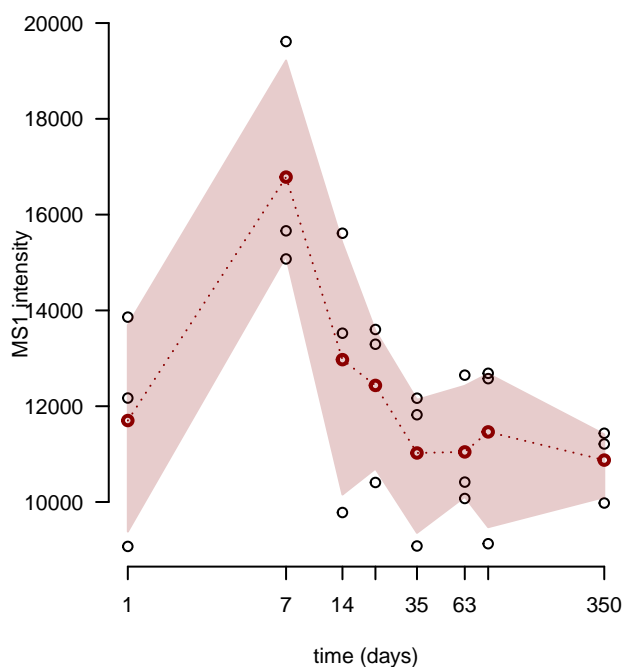

**Q921I9**  
**GN=Exosc4**  
exosome component 4

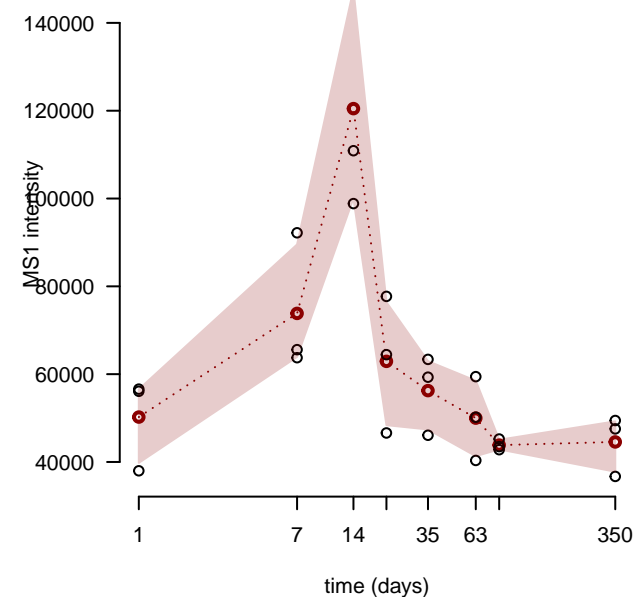

**Q921J2**  
**GN=Rheb**  
Ras homolog enriched in brain

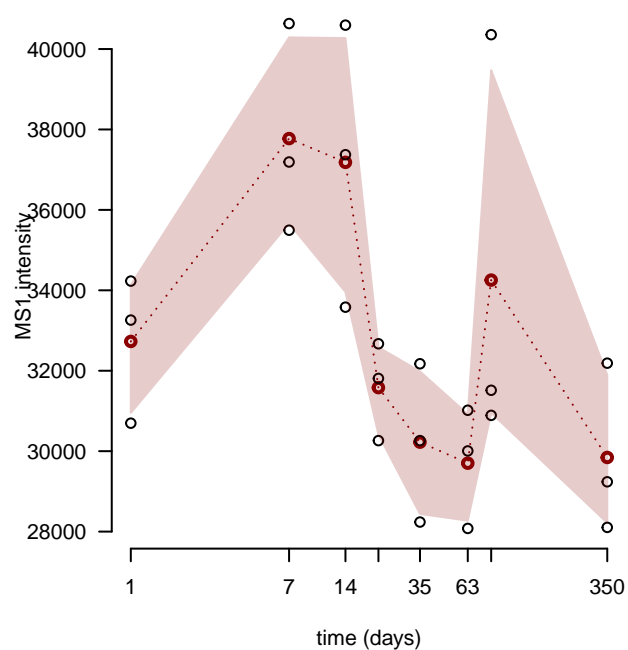

**Q921J4**  
**GN=Ube2s**  
ubiquitin-conjugating enzyme E2S

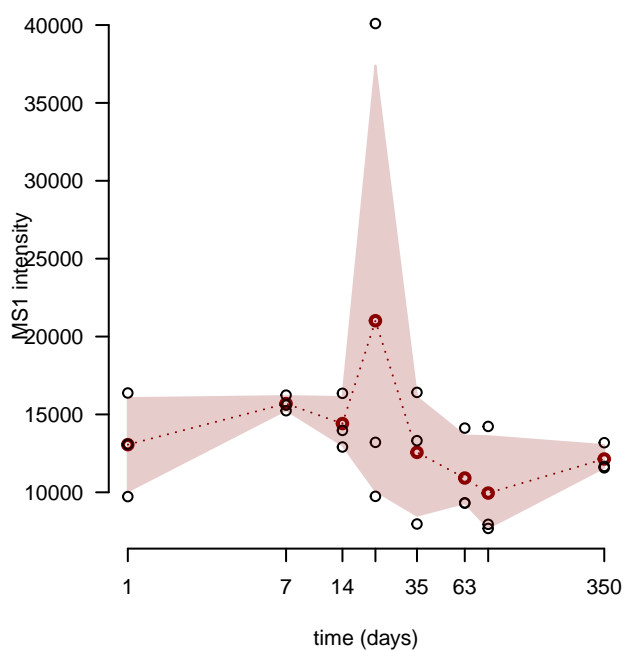

**Q921K8**  
**GN=Tcaf2**  
TRPM8 channel-associated factor 2

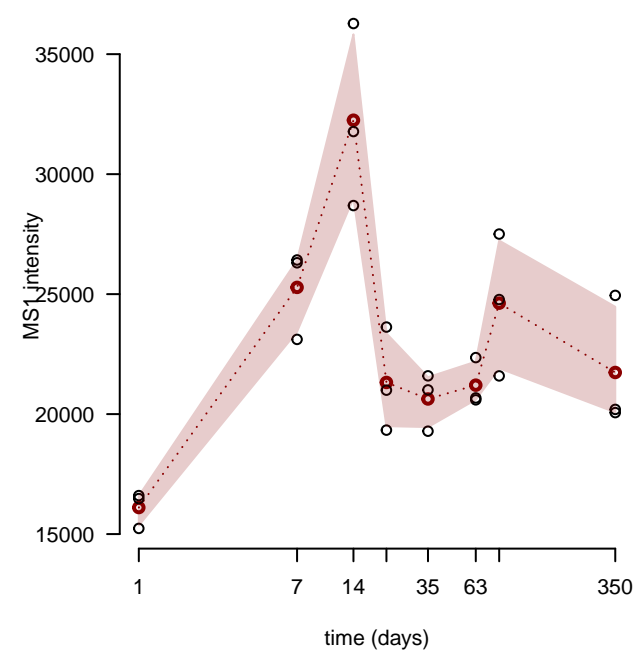

**Q921K9**  
**GN=Bcl7b**  
B cell CLL/lymphoma 7B

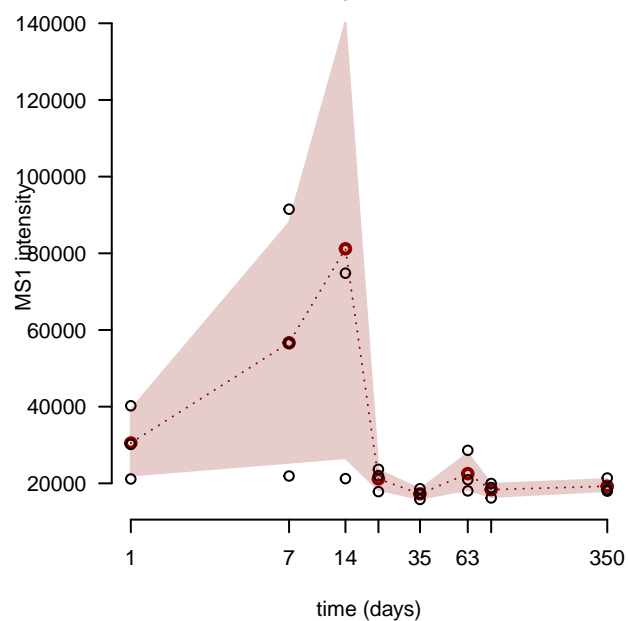

**Q921L3**  
**GN=Tmco1**  
transmembrane and coiled-coil domains 1

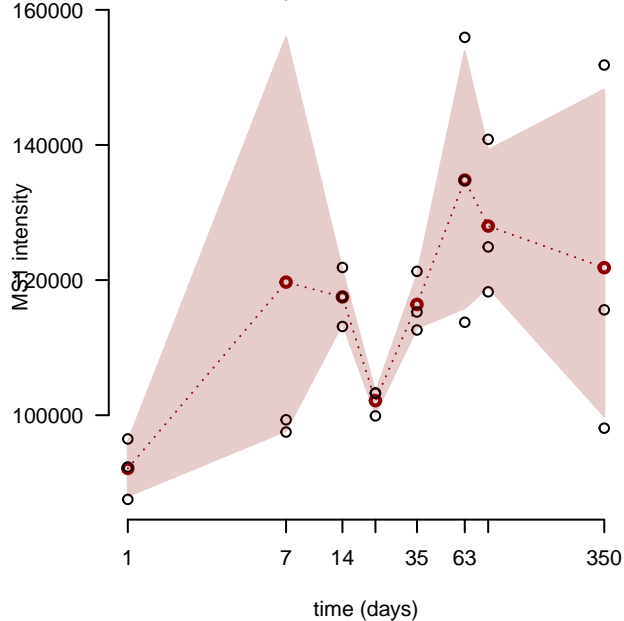

**Q921L5**  
**GN=Cog2**  
component of oligomeric golgi complex 2

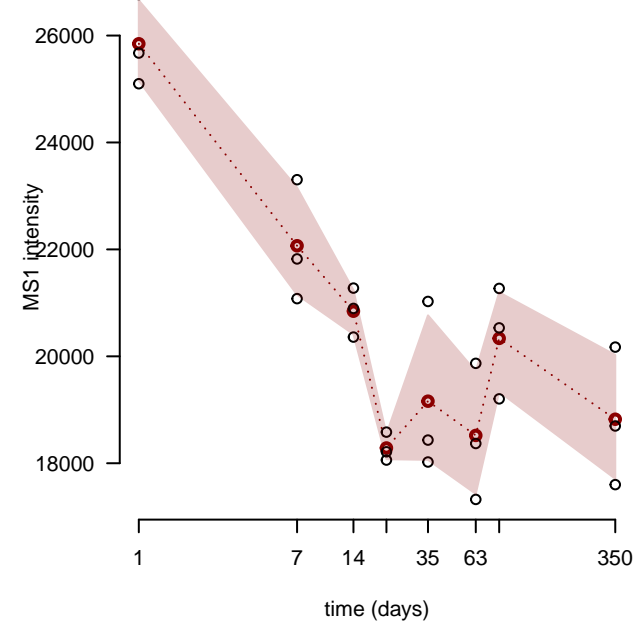

**Q921L8**  
**GN=Galnt11**  
polypeptide N-acetylgalactosaminyltransf ...

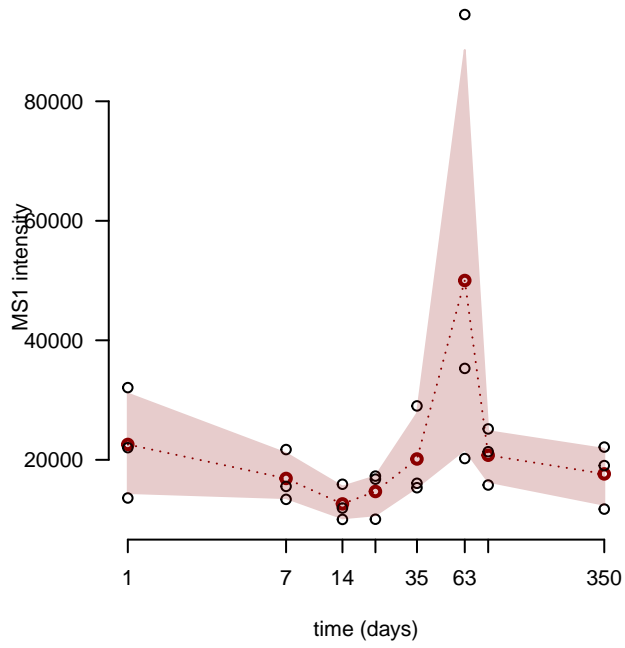

**Q921M3**  
**GN=Sf3b3**  
splicing factor 3b, subunit 3

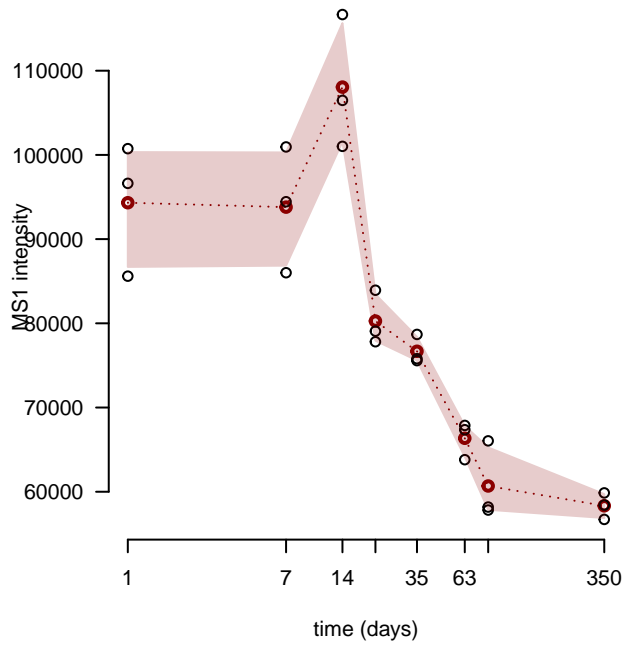

**Q921M4**  
**GN=Golga2**  
golgi autoantigen, golgin subfamily a, 2

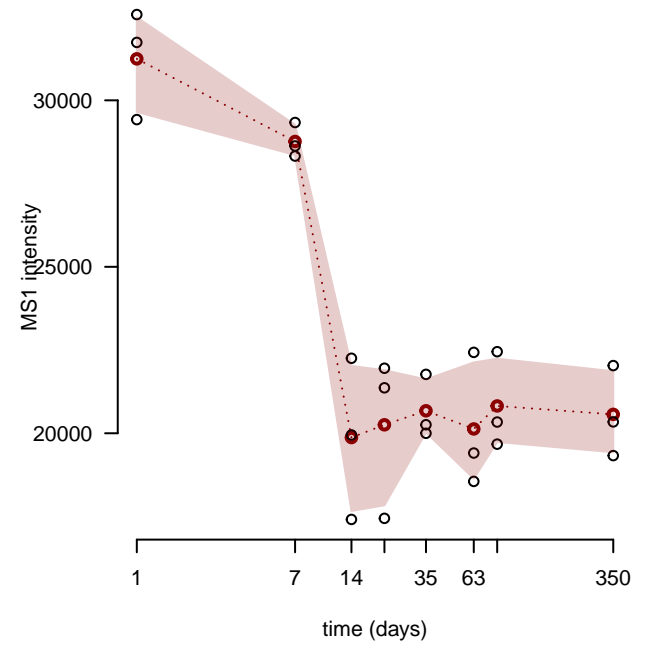

**Q921M7**  
**GN=Fam49b**

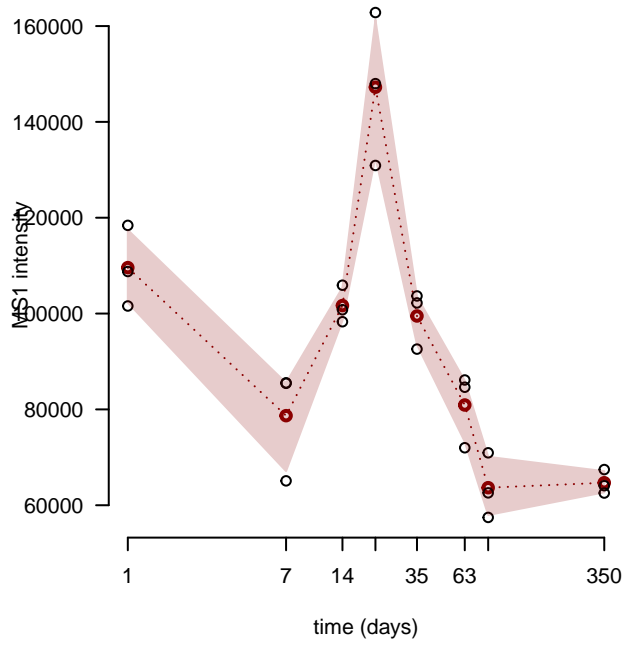

**Q921N6**  
**GN=Ddx27**  
DEAD box helicase 27

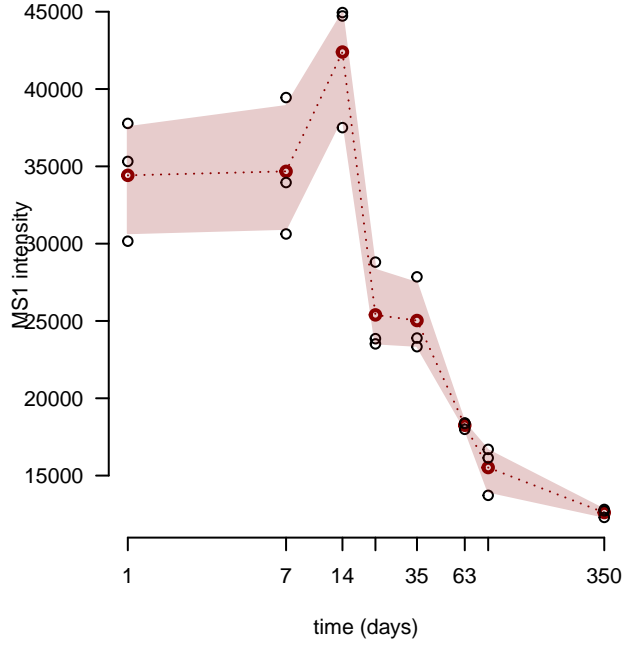

**Q921N7**  
**GN=Tmem70**  
transmembrane protein 70

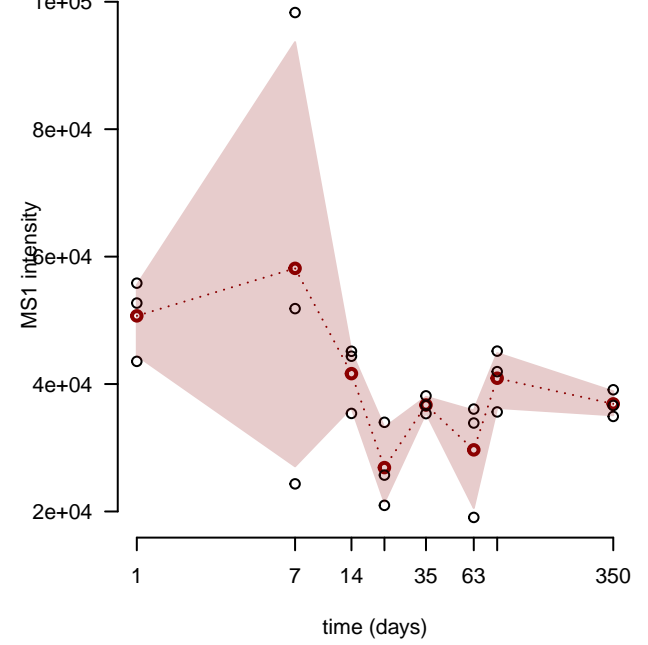

**Q921N8**  
**GN=Gps2**  
G protein pathway suppressor 2

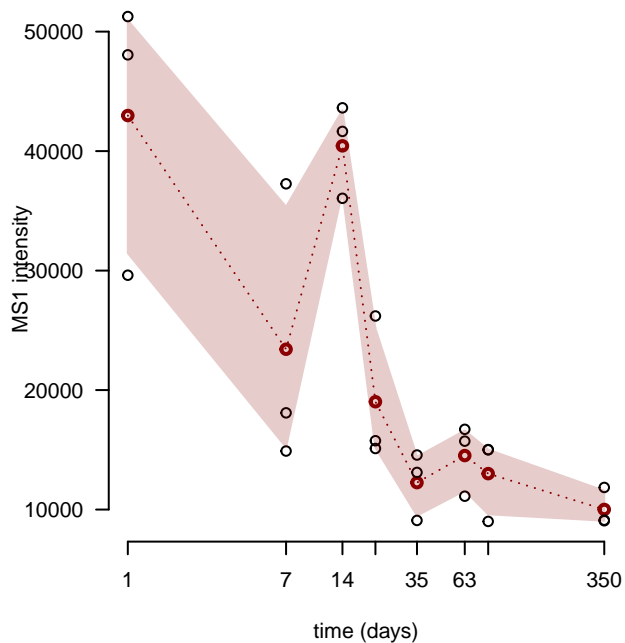

**Q921P9**  
**GN=Tceal1**  
transcription elongation factor A (SII)- ...

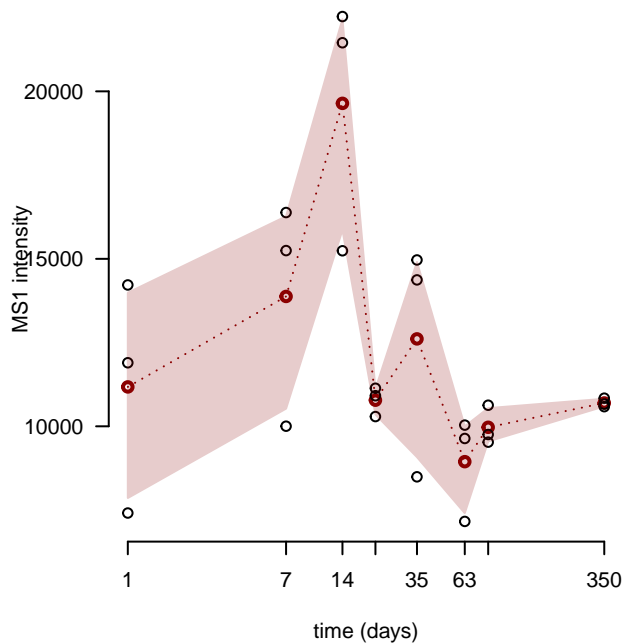

**Q921Q3**  
**GN=Alg1**  
asparagine-linked glycosylation 1 (beta- ...

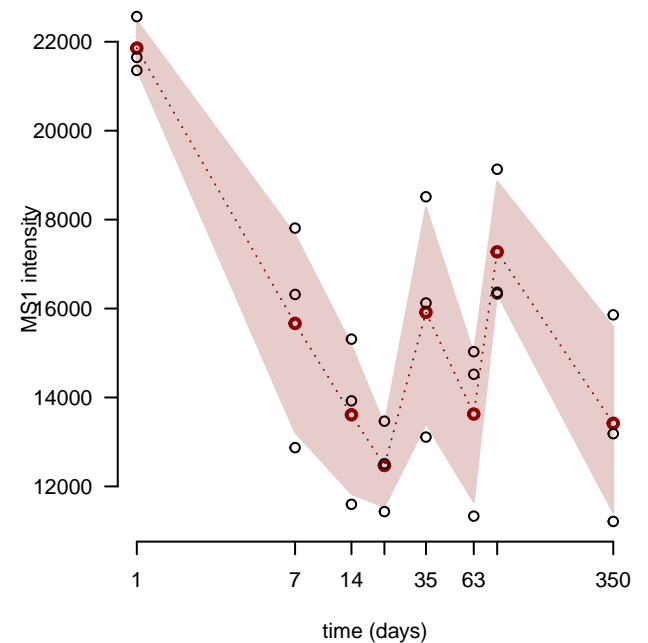

**Q921Q7**  
**GN=Rin1**  
Ras and Rab interactor 1

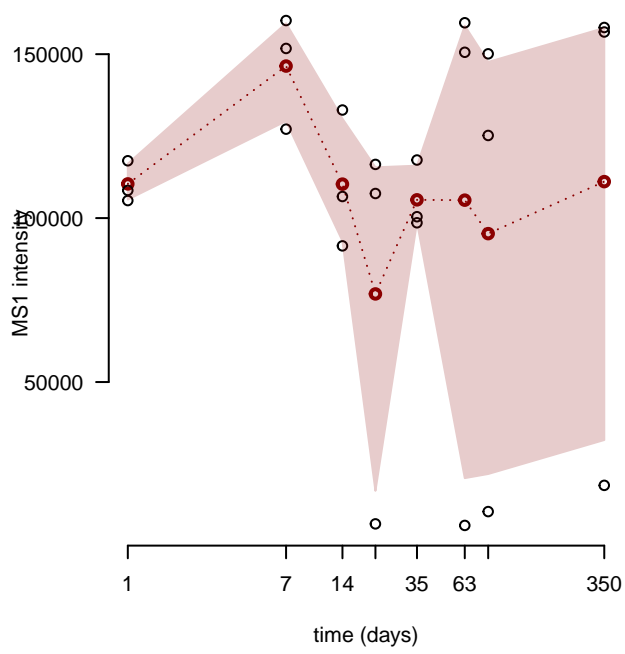

**Q921R8**  
**GN=Slc41a3**  
solute carrier family 41, member 3

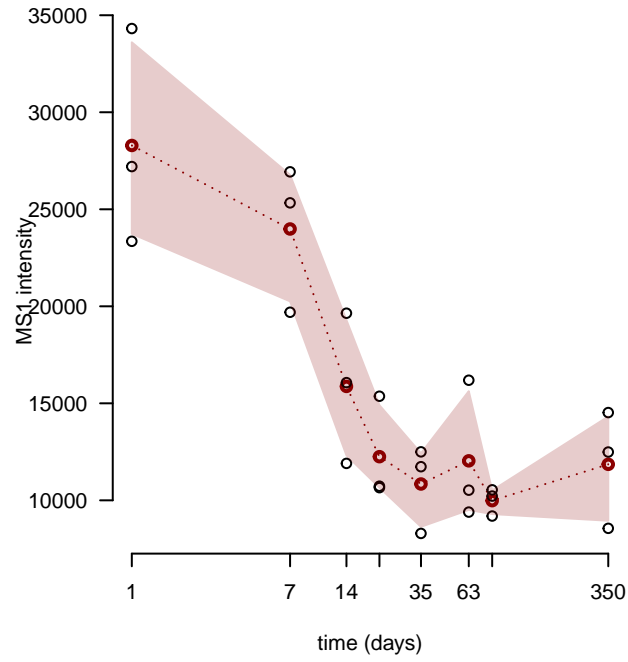

**Q921S7**  
**GN=Mrpl37**  
mitochondrial ribosomal protein L37

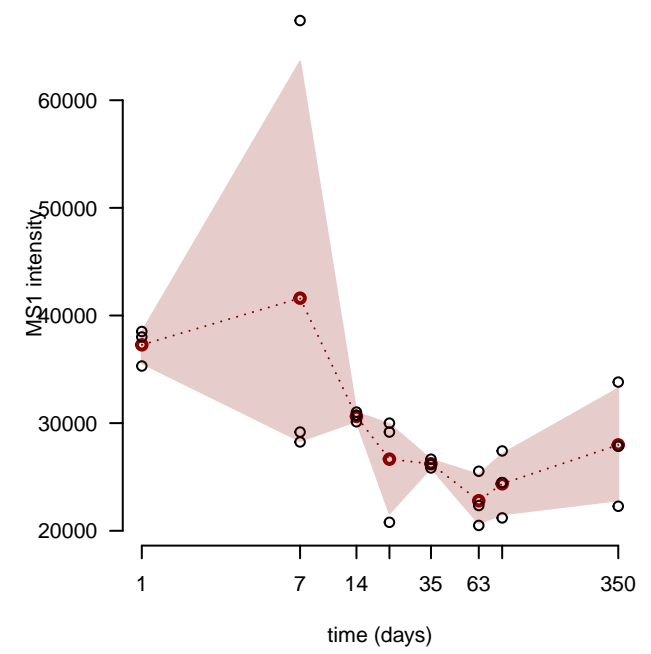

**Q921T2**  
**GN=Tor1aip1**  
torsin A interacting protein 1

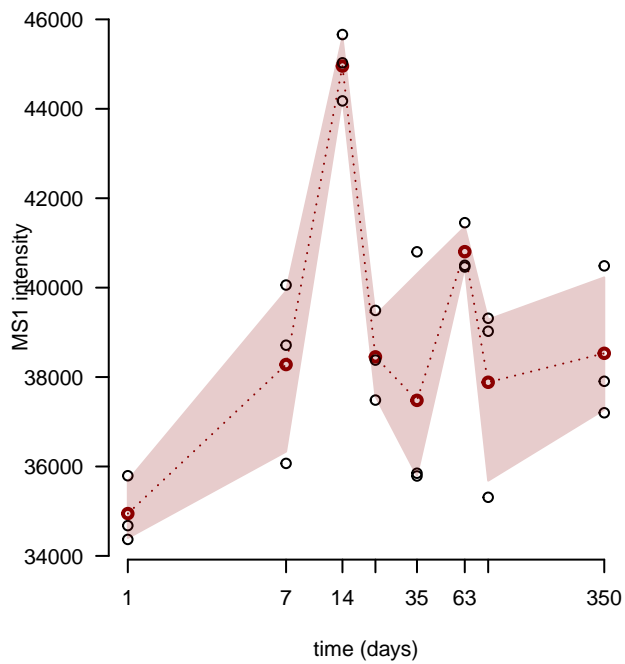

**Q921U8**  
**GN=Smtn**  
smoothelin

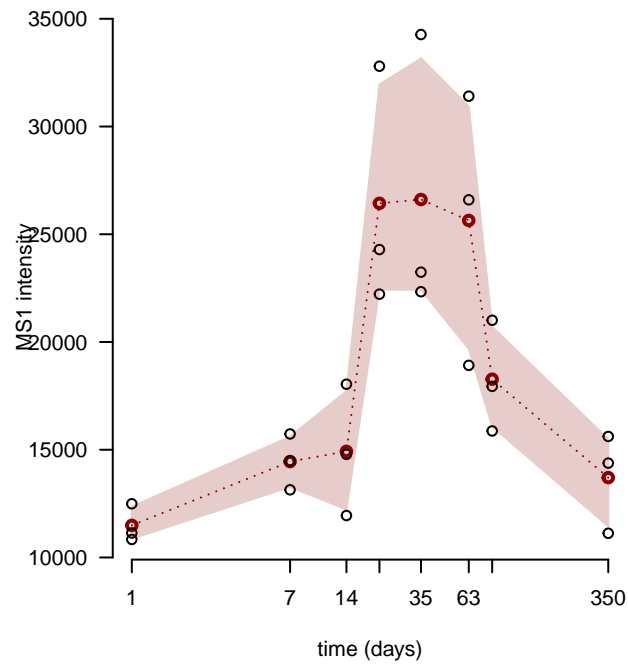

**Q921V5**  
**GN=Mgat2**  
mannoside acetylglucosaminyltransferase ...

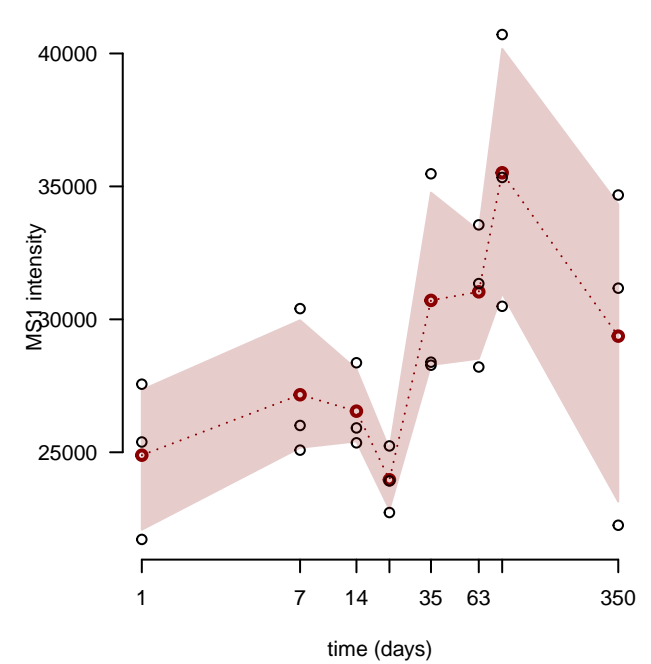

**Q921V7**  
**GN=Slc44a3**  
solute carrier family 44, member 3

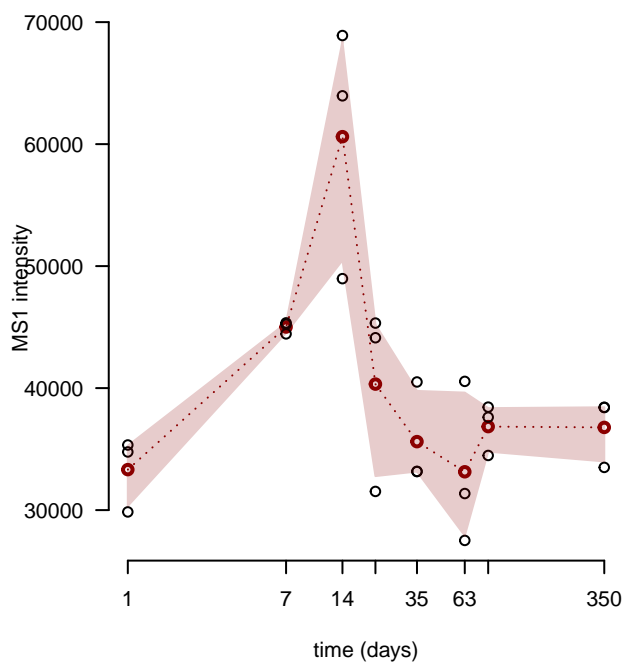

**Q921W0**  
**GN=Chmp1a**  
charged multivesicular body protein 1A

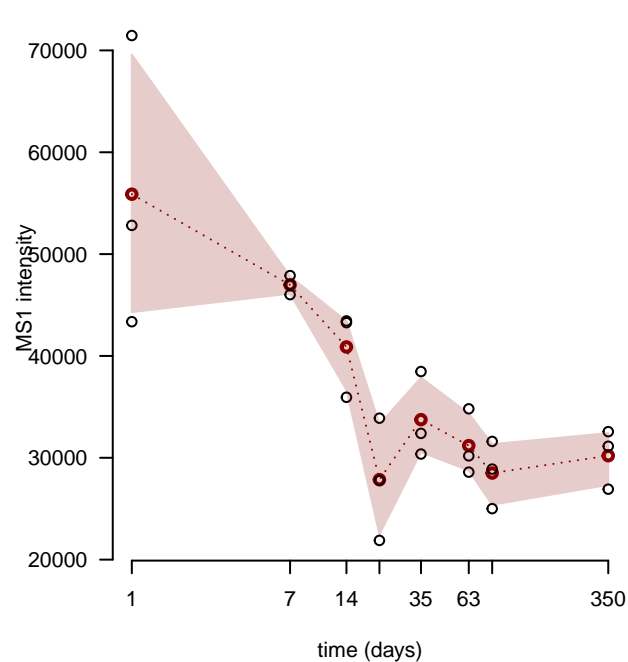

**Q921W4**  
**GN=Cryz11**  
crystallin, zeta (quinone reductase)-lik ...

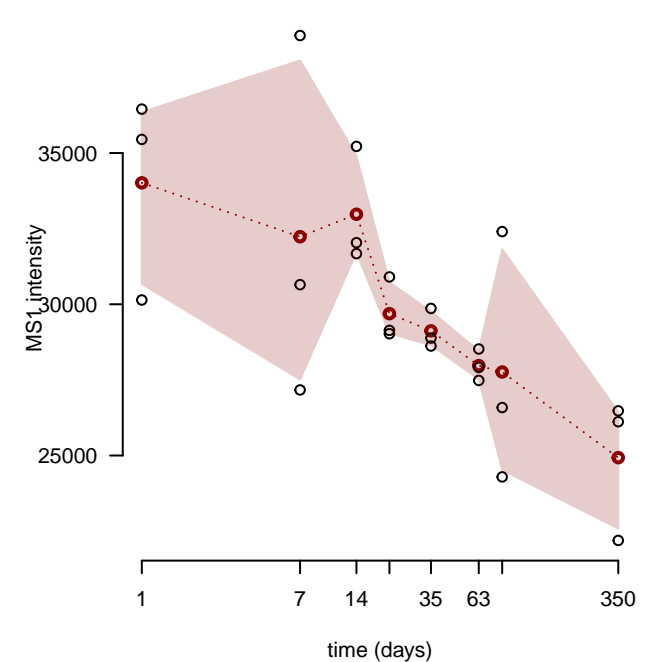

**Q921X6**  
**GN=Polr3f**  
polymerase (RNA) III (DNA directed) poly ...

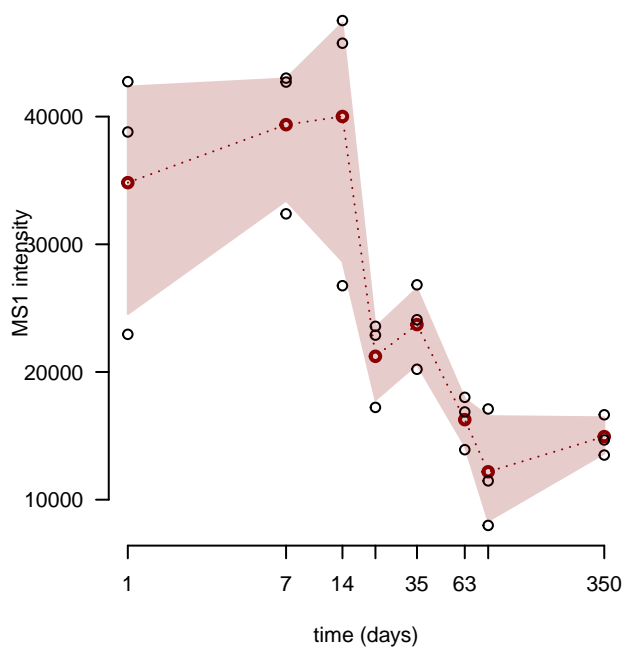

**Q921X9**  
**GN=Pdia5**  
protein disulfide isomerase associated 5

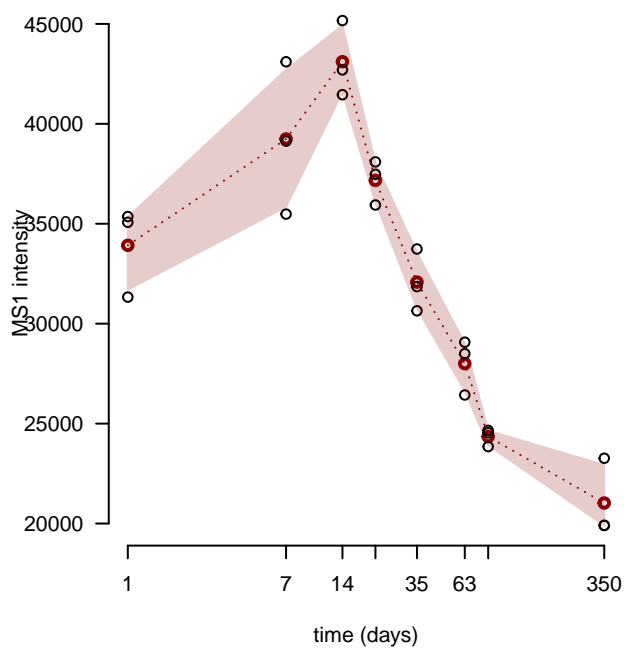

**Q921Y0**  
**GN=Mob1a**  
MOB kinase activator 1A

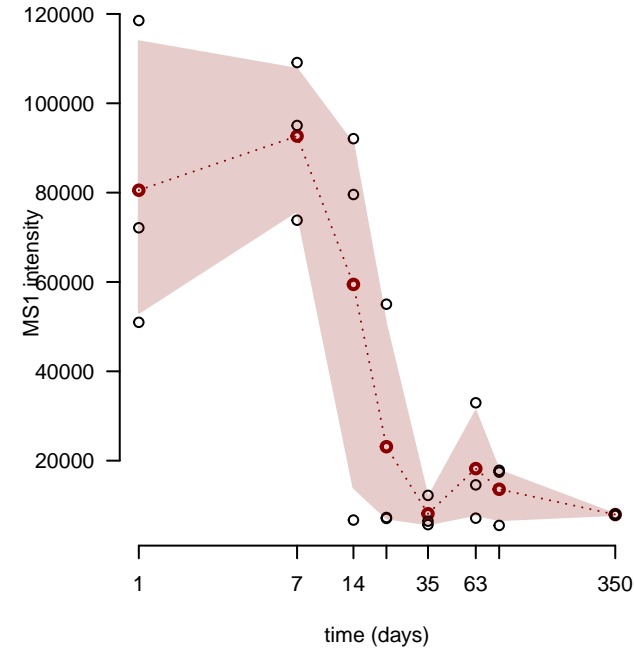

**Q921Y2**  
**GN=Imp3**  
IMP3, U3 small nucleolar ribonucleoprote ...

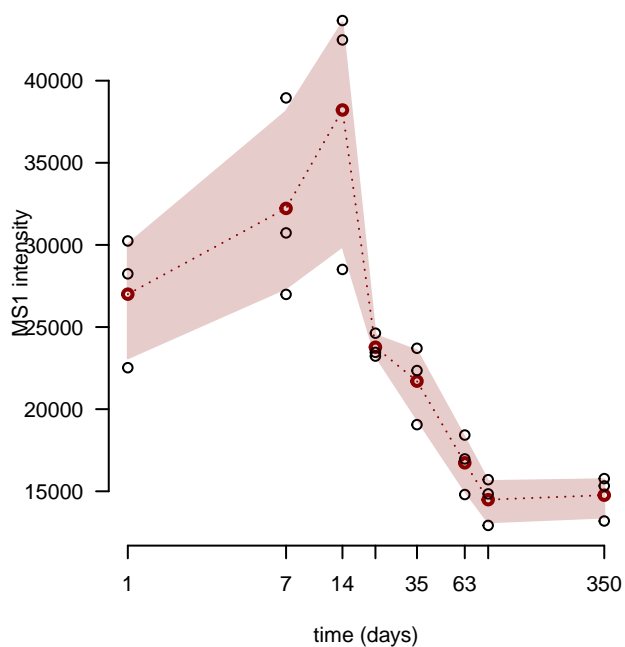

**Q921Y4**  
**GN=Mfsd5**  
major facilitator superfamily domain con ...

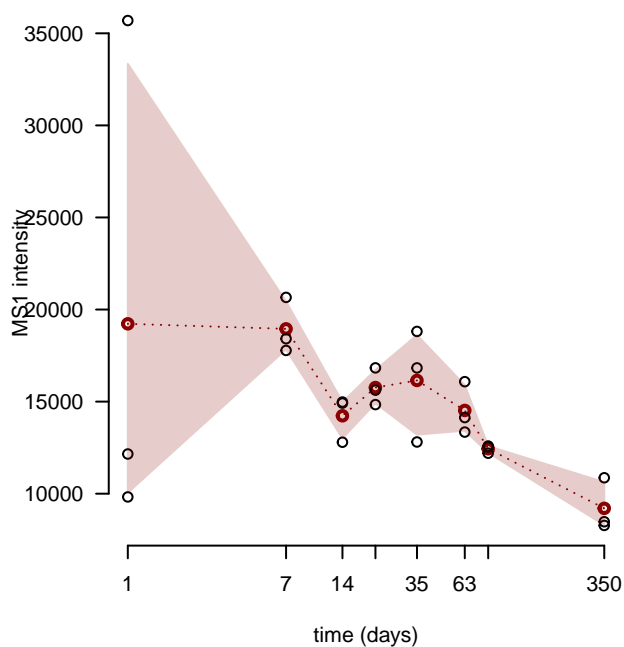

**Q921Z5**  
**GN=Tnfaip8**  
tumor necrosis factor, alpha-induced pro ...

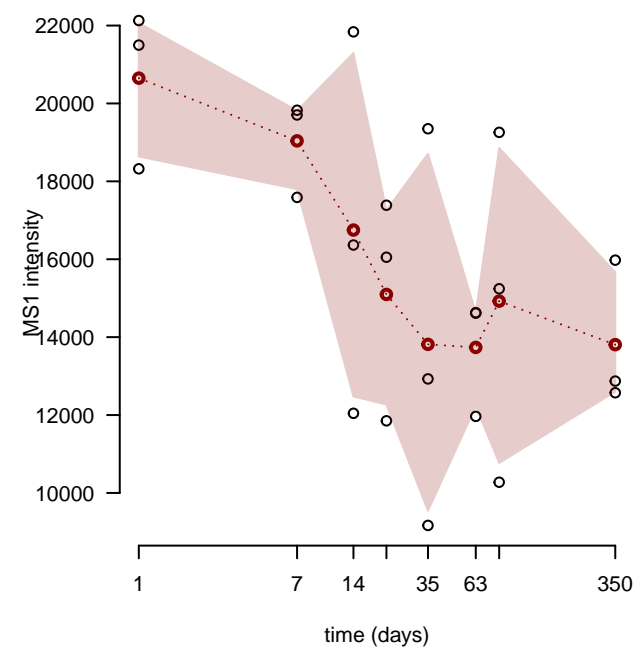

**Q922B1**  
**GN=Macrod1**  
mono-ADP ribosylhydrolase 1

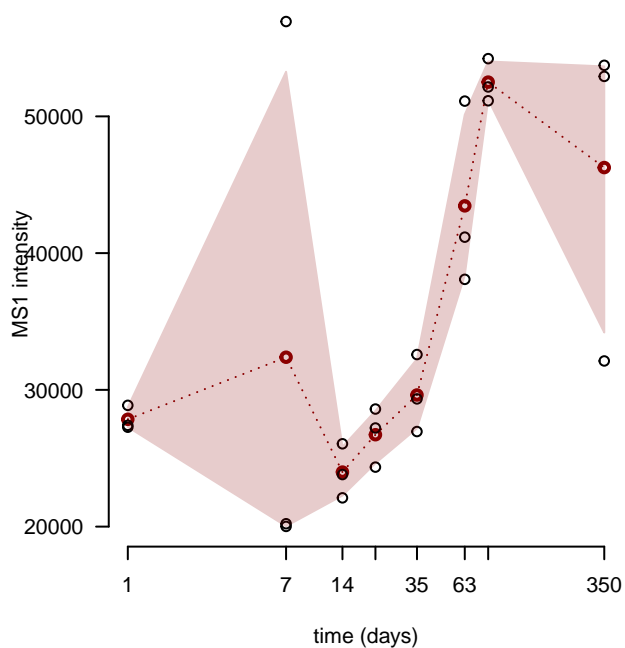

**Q922B2**  
**GN=Dars**  
aspartyl-tRNA synthetase

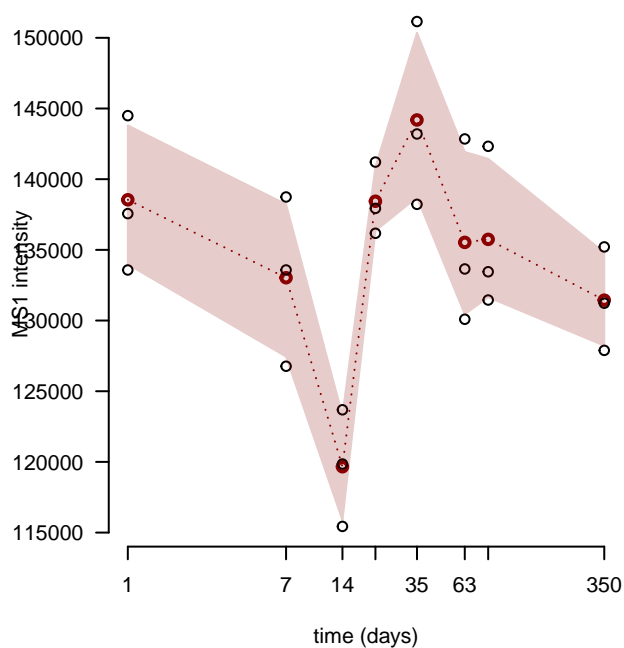

**Q922B6**  
**GN=Traf7**  
TNF receptor-associated factor 7

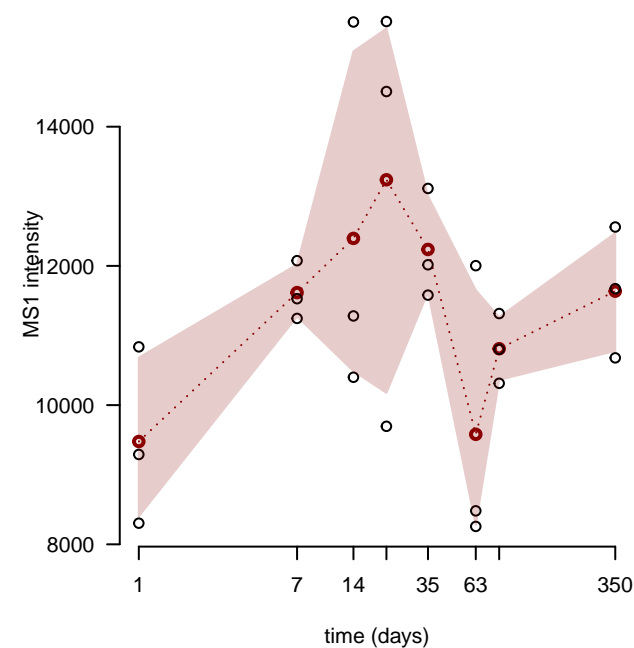

**Q922B9**  
GN=Itpri2  
ITPR interacting domain containing 2

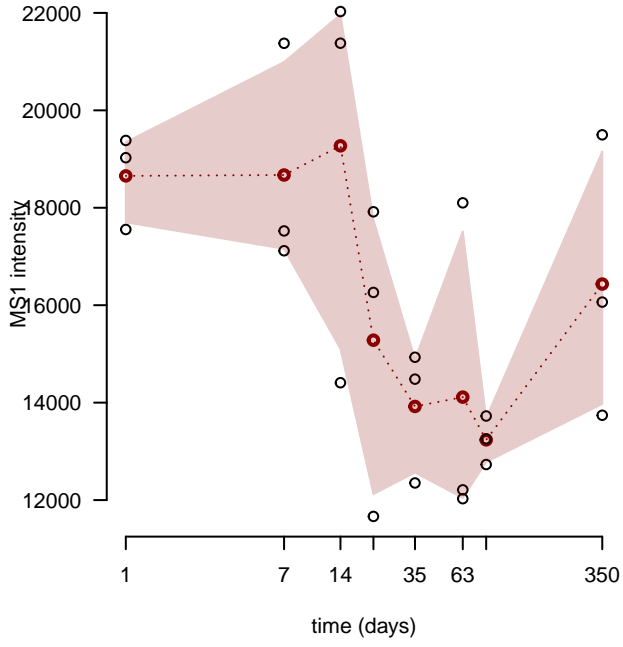

**Q922D4**  
GN=Ppp6r3  
protein phosphatase 6, regulatory subuni ...

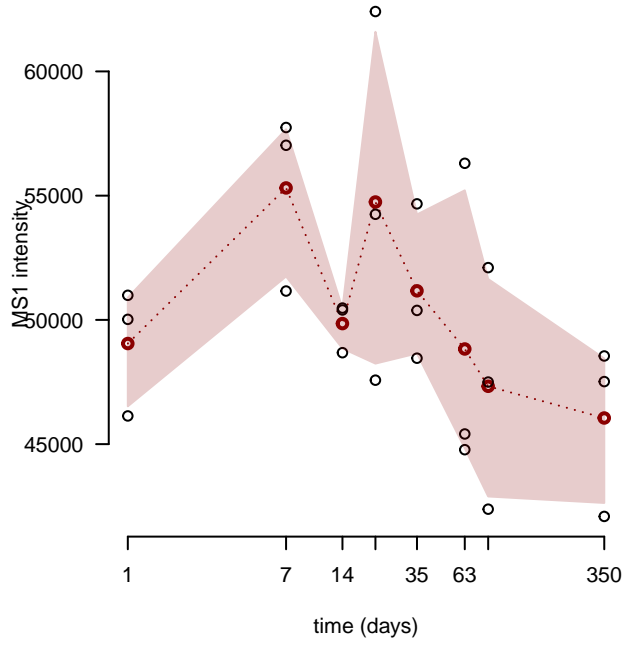

**Q922D8**  
GN=Mthfd1  
methylenetetrahydrofolate dehydrogenase ...

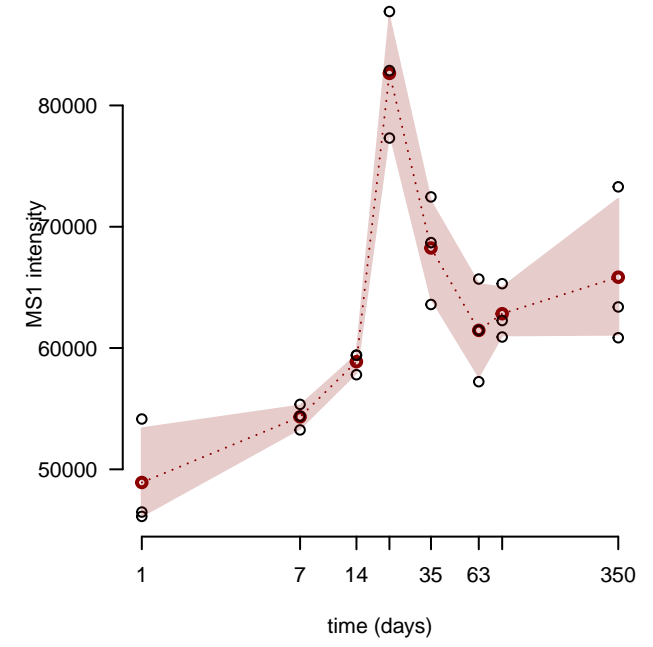

**Q922E4**  
GN=Pcyt2  
phosphate cytidyltransferase 2, ethano ...

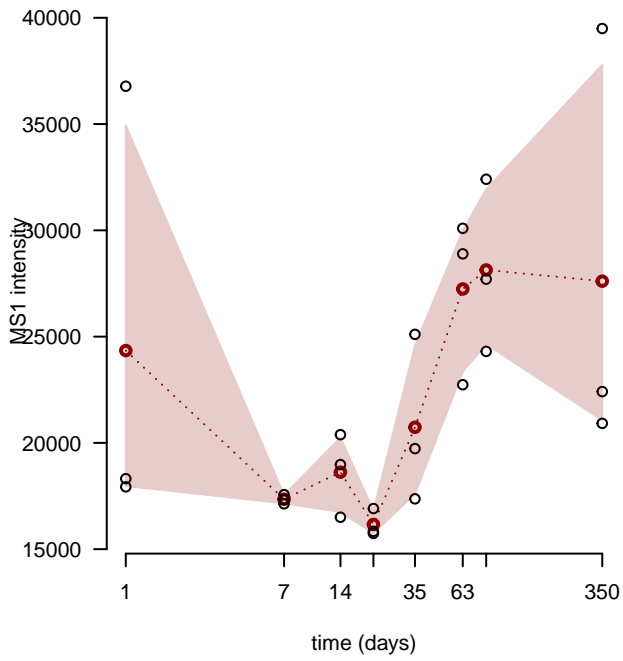

**Q922E6**  
GN=Fastkd2  
FAST kinase domains 2

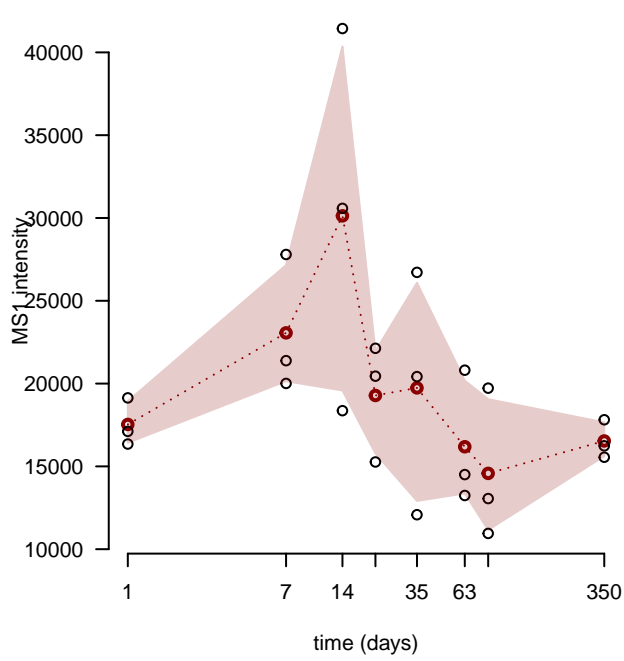

**Q922F4**  
GN=Tubb6  
tubulin, beta 6 class V

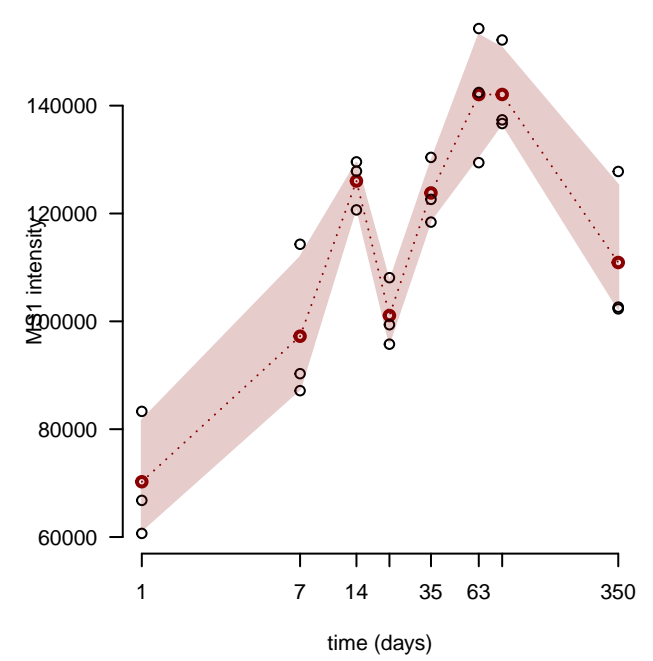

**Q922G0**  
GN=Slc25a36  
solute carrier family 25, member 36

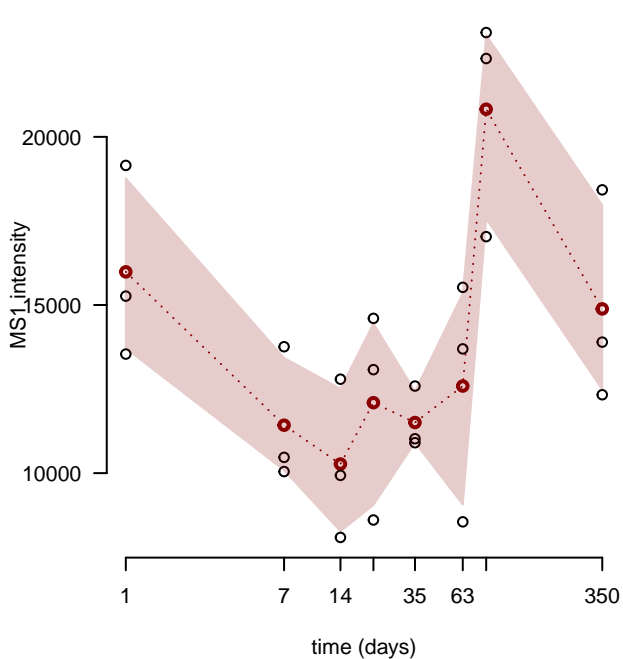

**Q922G2**  
GN=Fam76a  
family with sequence similarity 76, memb ...

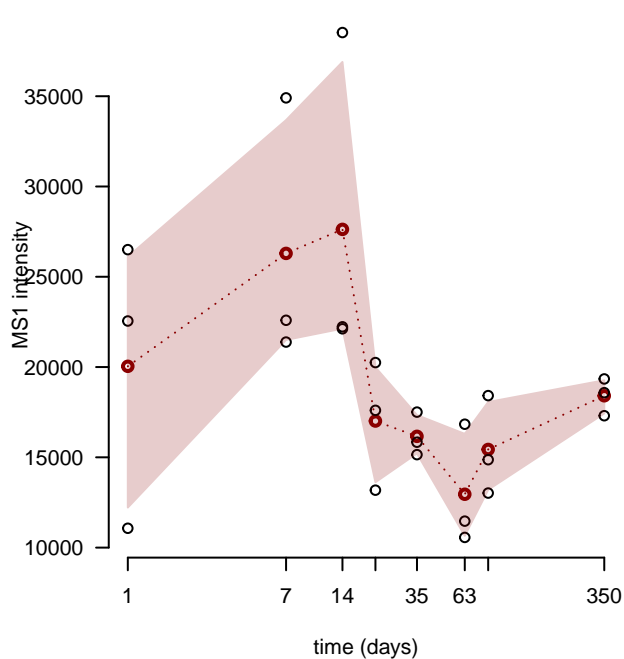

**Q922H1**  
GN=Prmt3  
protein arginine N-methyltransferase 3

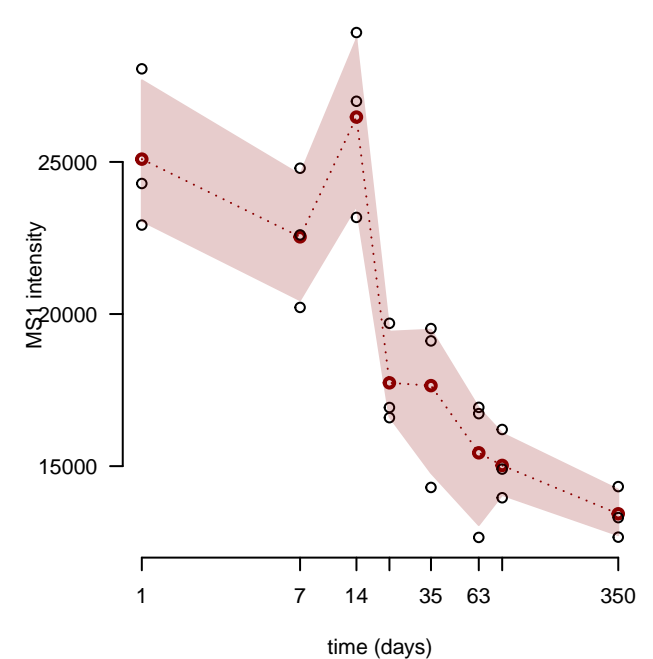

**Q922H2**  
**GN=Pdk3**

pyruvate dehydrogenase kinase, isoenzyme ...

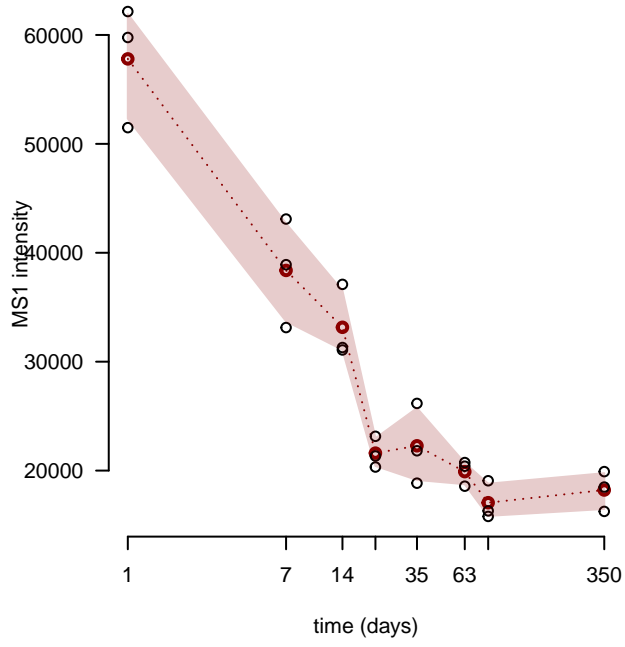

**Q922H4**  
**GN=Gmppa**

GDP-mannose pyrophosphorylase A

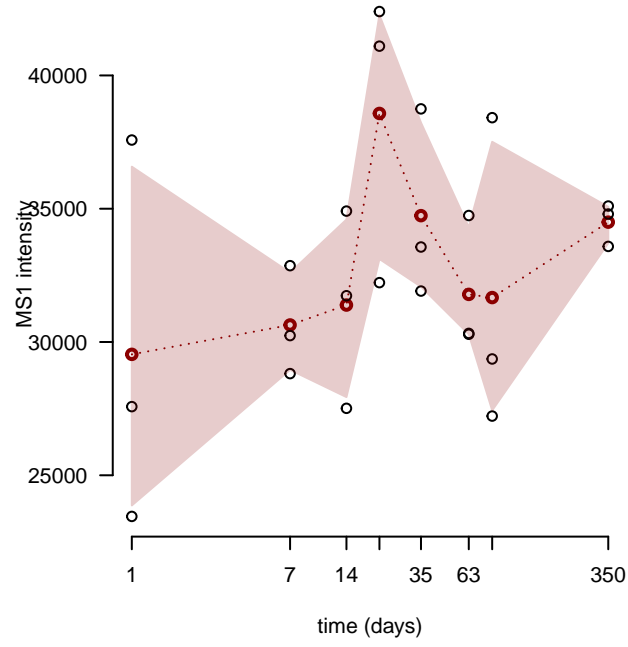

**Q922H9**  
**GN=Znf330**

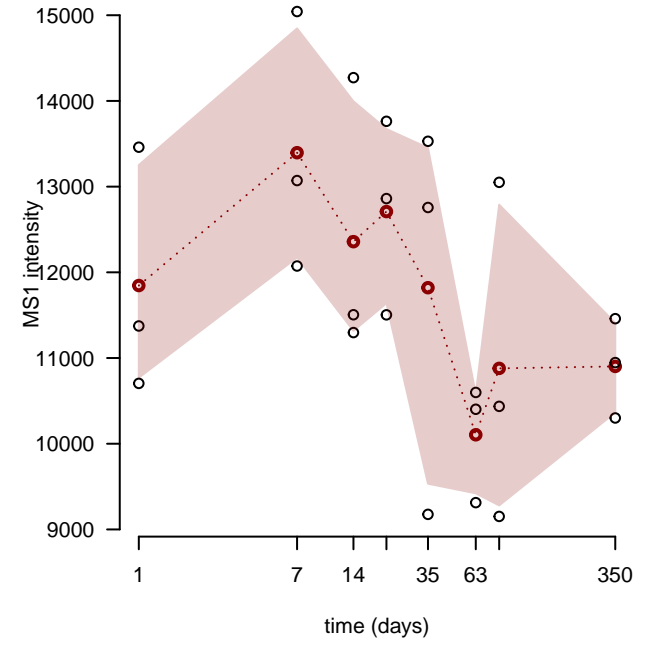

**Q922J3**  
**GN=Clip1**

CAP-GLY domain containing linker protein ...

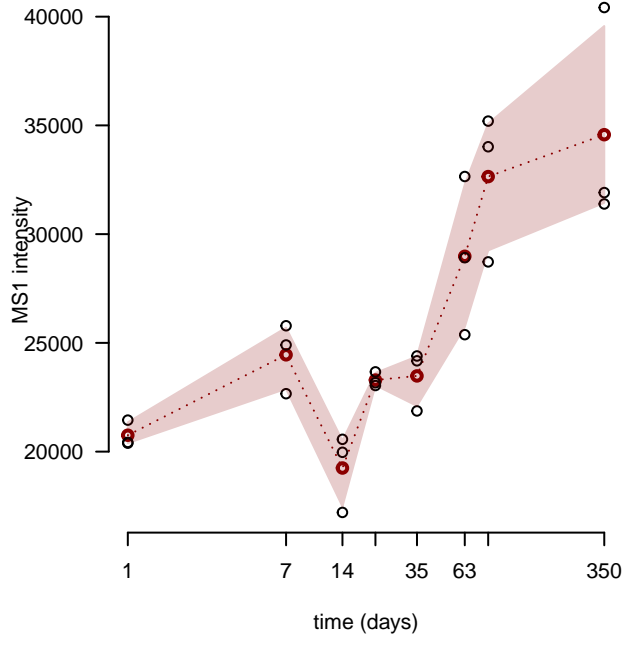

**Q922J6**  
**GN=Tspan2**

tetraspanin 2

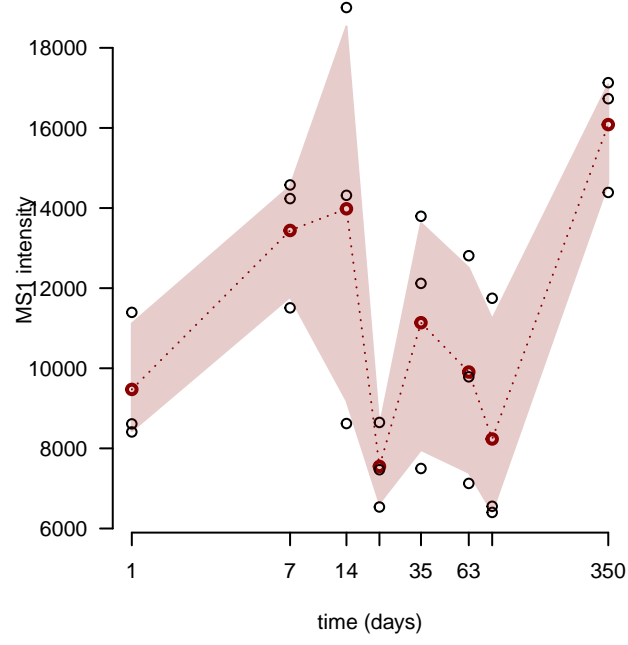

**Q922J9**  
**GN=Far1**

fatty acyl CoA reductase 1

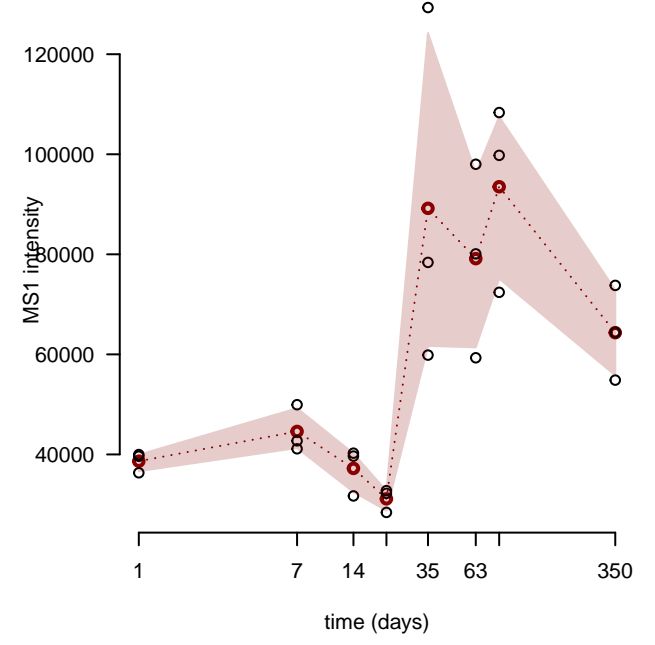

**Q922K7**  
**GN=Nop2**

NOP2 nucleolar protein

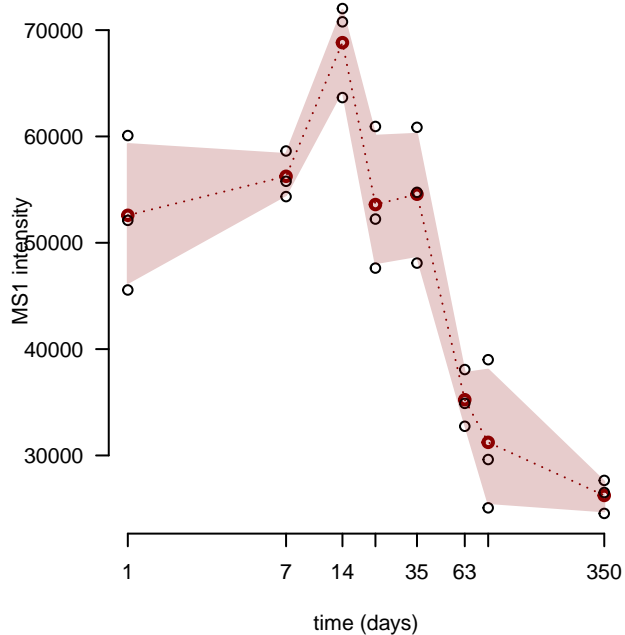

**Q922L6**  
**GN=Nelfcd**

negative elongation factor complex membe ...

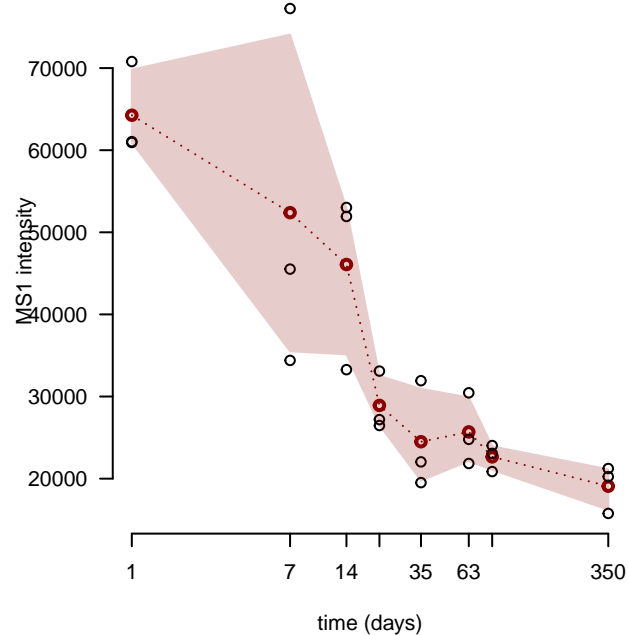

**Q922M3**  
**GN=Kctd10**

potassium channel tetramerisation domain ...

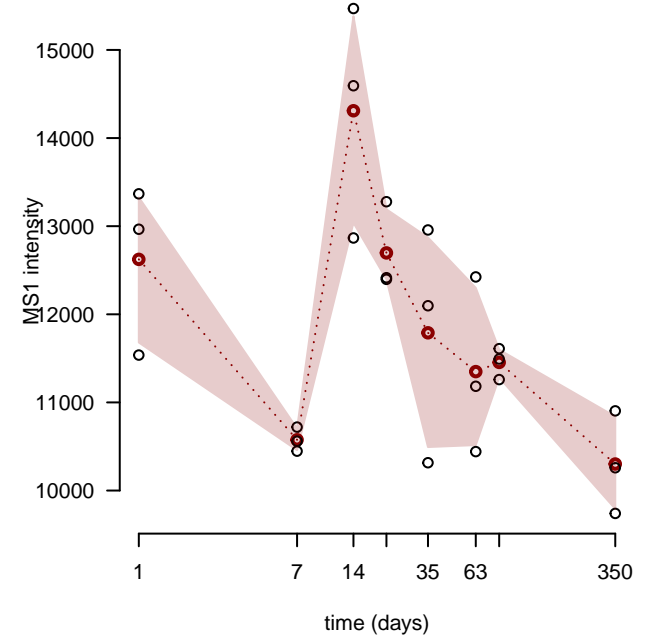

**Q922M7**  
GN=

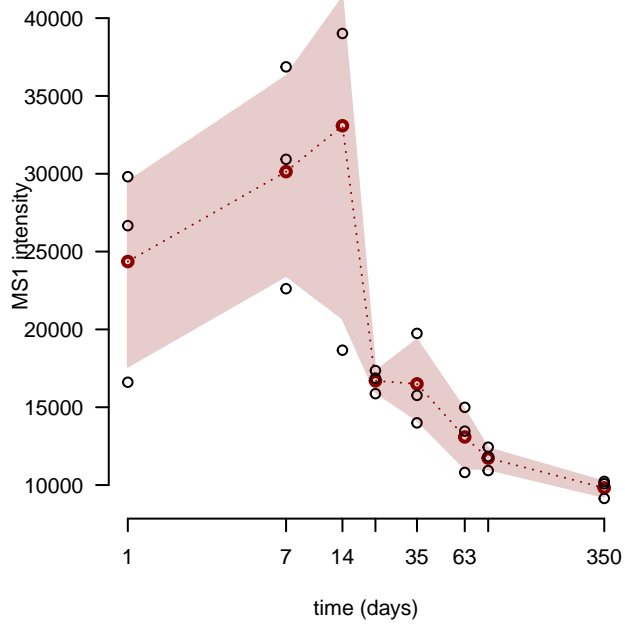

**Q922P8**  
GN=Tmem132a  
transmembrane protein 132A

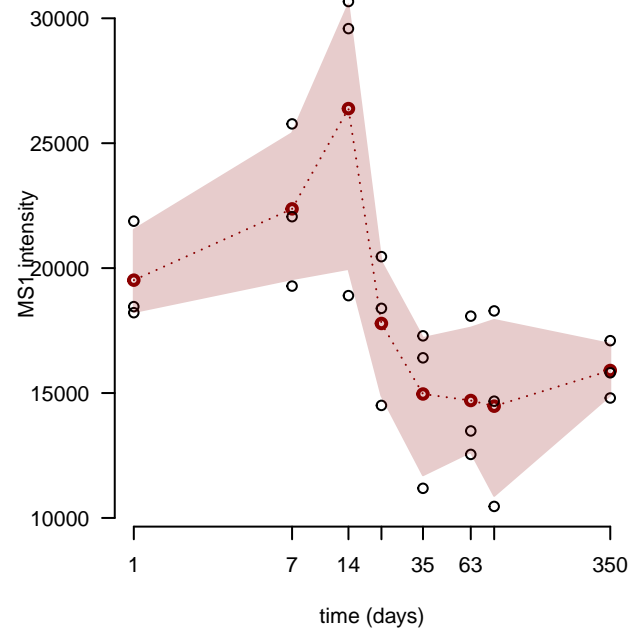

**Q922P9**  
GN=Glyr1  
glyoxylate reductase 1 homolog (Arabidop ...

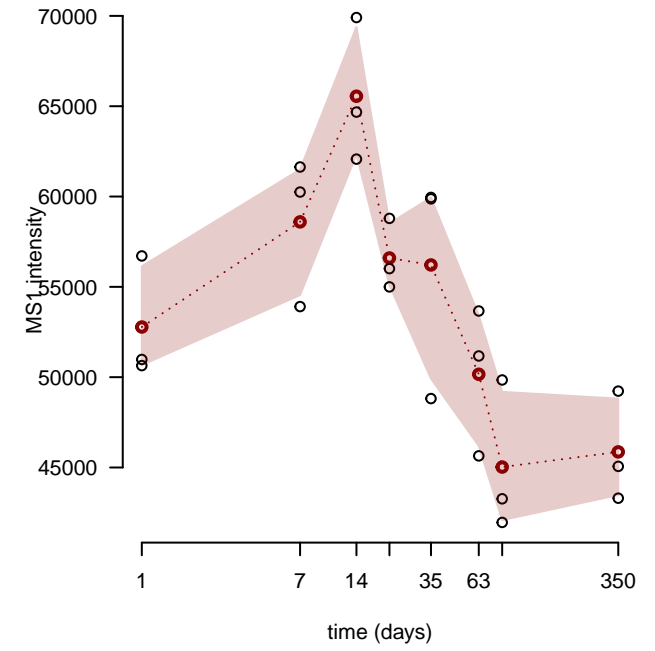

**Q922Q1**  
GN=Marc2

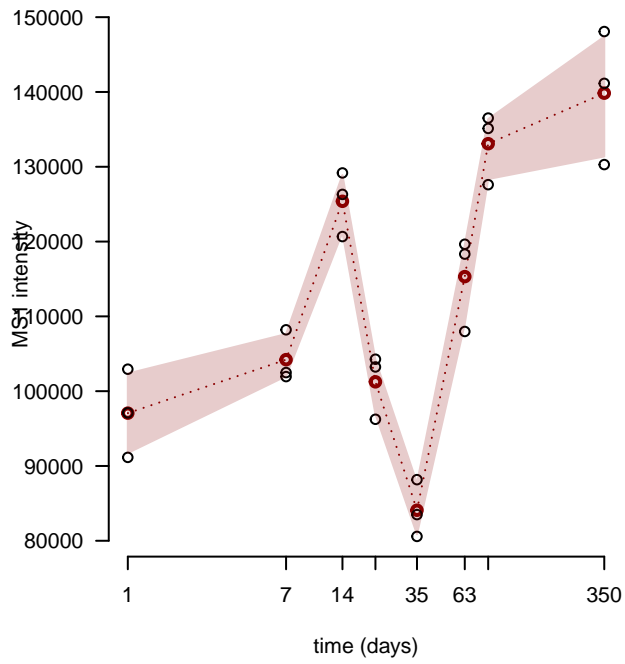

**Q922Q2**  
GN=Riok1  
RIO kinase 1

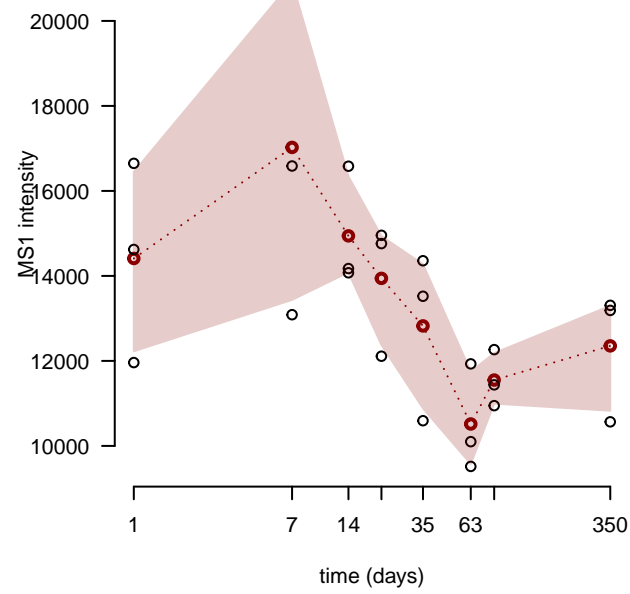

**Q922Q4**  
GN=Pycr2  
pyrroline-5-carboxylate reductase family ...

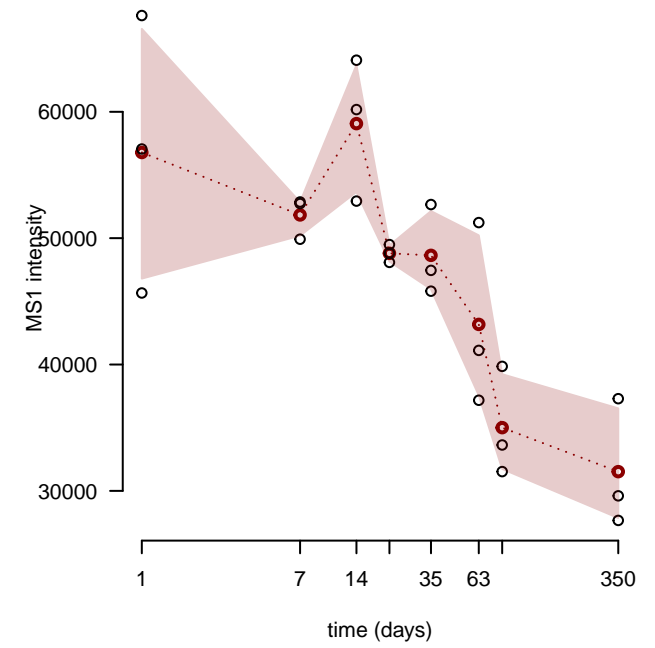

**Q922Q5**  
GN=Slc35b3  
solute carrier family 35, member B3

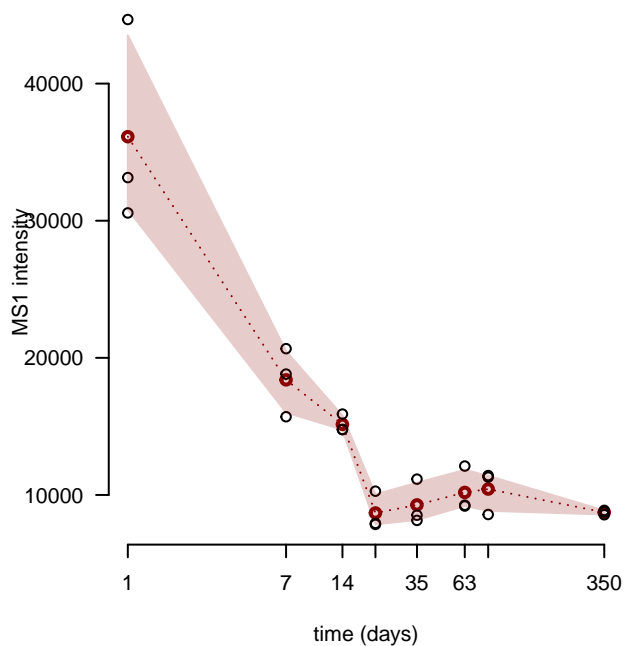

**Q922Q8**  
GN=Lrrc59  
leucine rich repeat containing 59

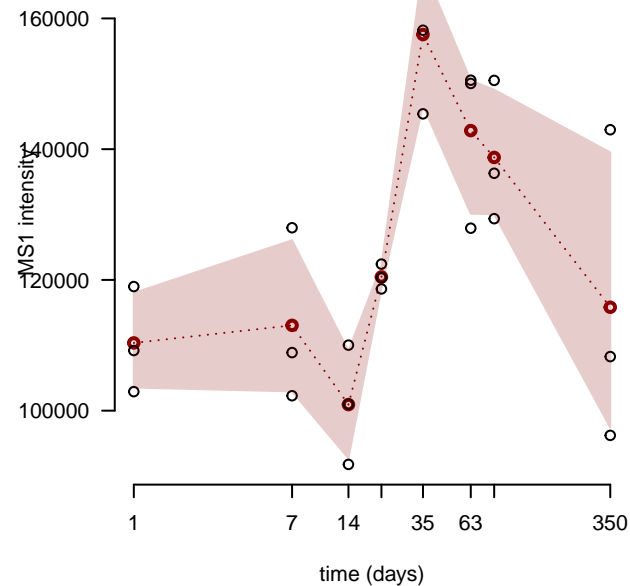

**Q922Q9**  
GN=Chid1  
chitinase domain containing 1

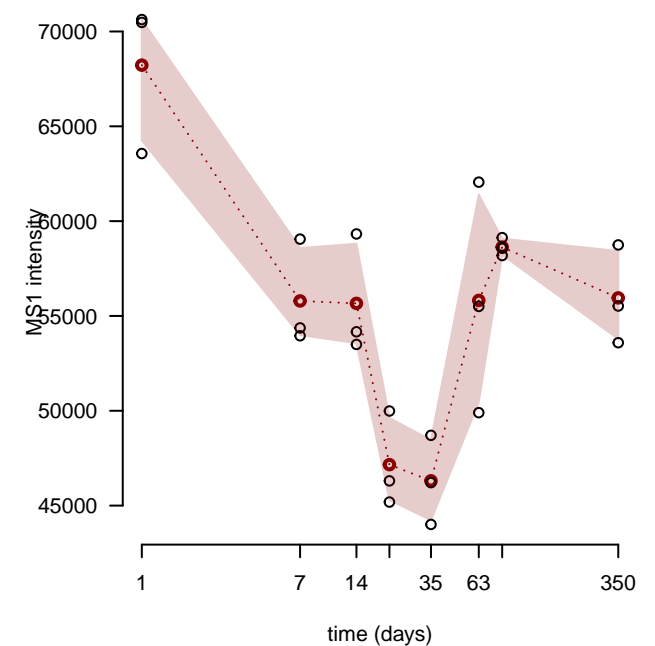



**Q922R1**  
GN=

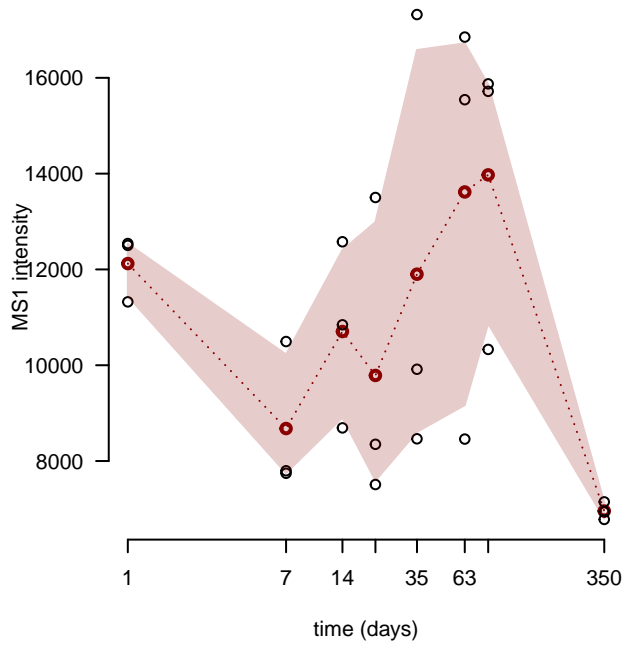

**Q922R5**  
GN=Ppp4r3b  
protein phosphatase 4 regulatory subunit ...

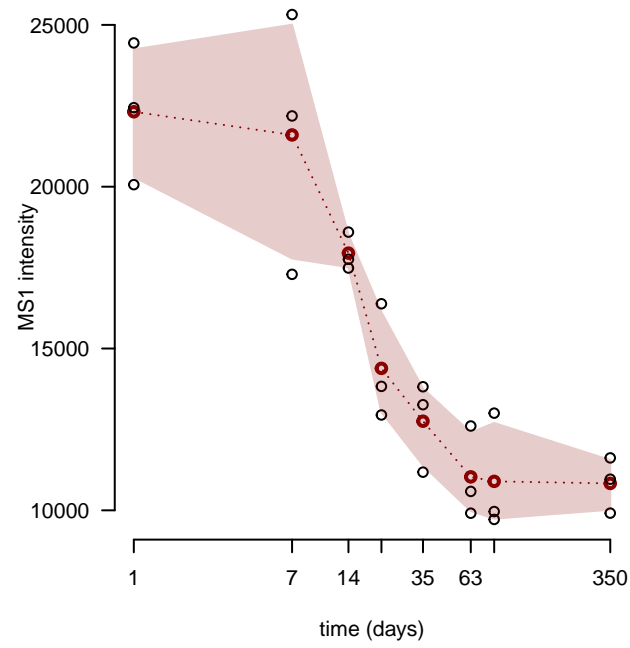

**Q922R8**  
GN=Pdia6  
protein disulfide isomerase associated 6

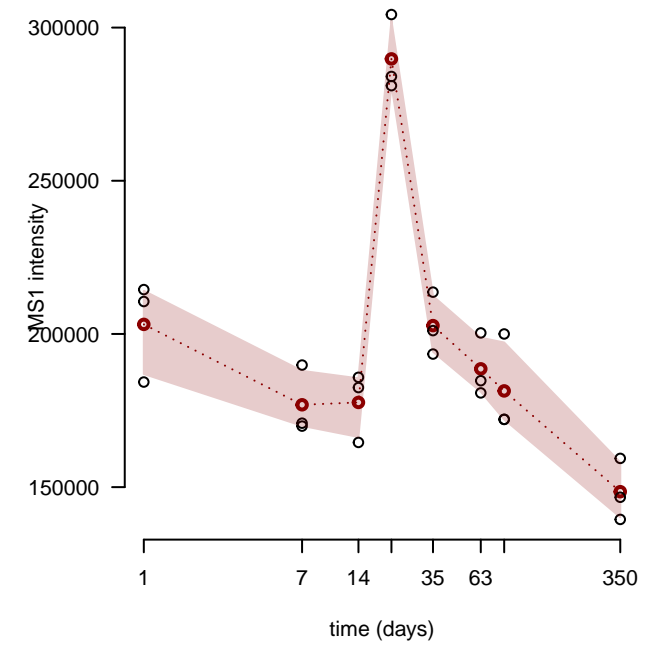

**Q922S4**  
GN=Pde2a  
phosphodiesterase 2A, cGMP-stimulated

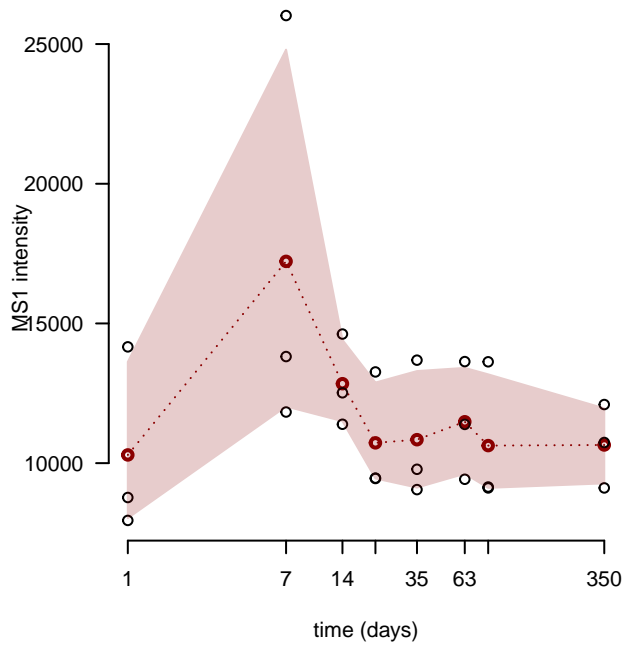

**Q922S8**  
GN=Kif2c  
kinesin family member 2C

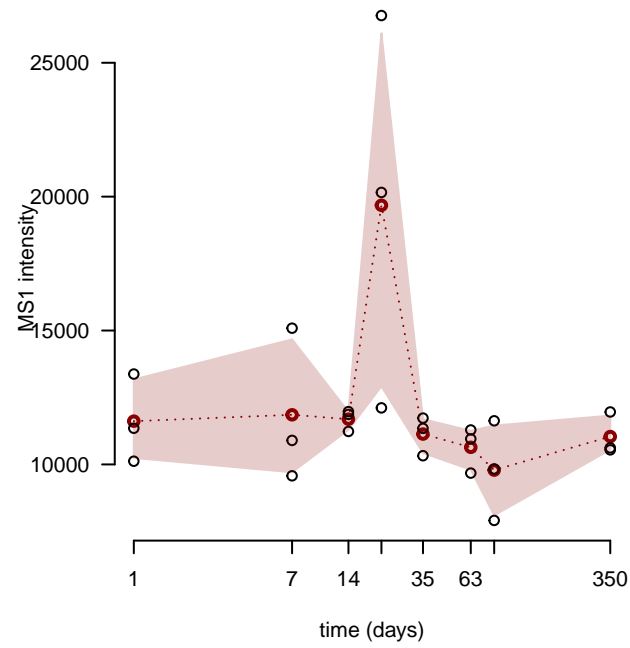

**Q922U1**  
GN=Prpf3  
pre-mRNA processing factor 3

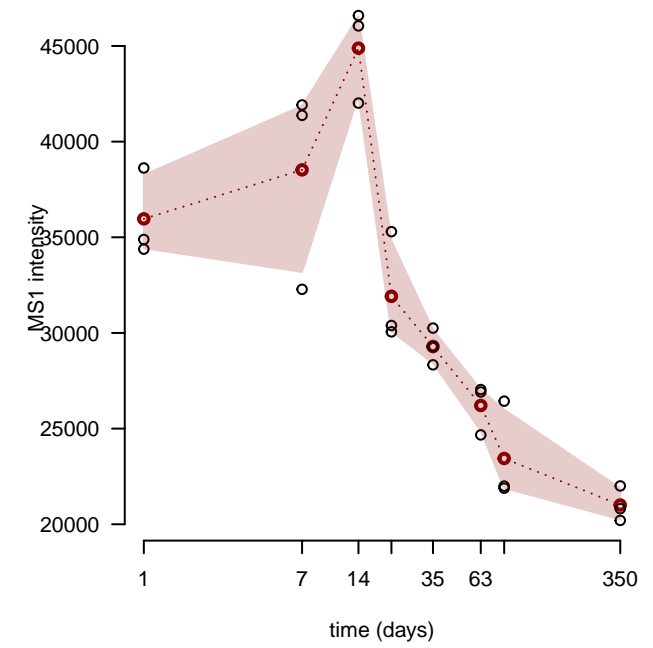

**Q922U2**  
GN=Krt5  
keratin 5

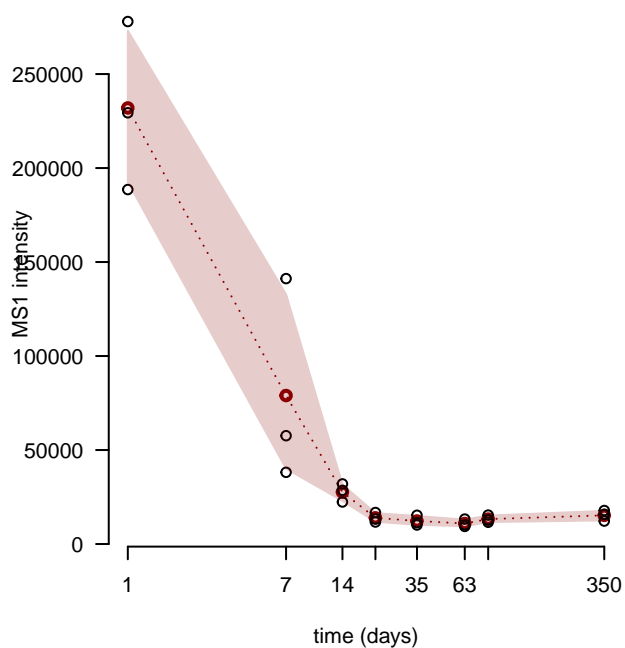

**Q922V4**  
GN=Plrg1  
pleiotropic regulator 1

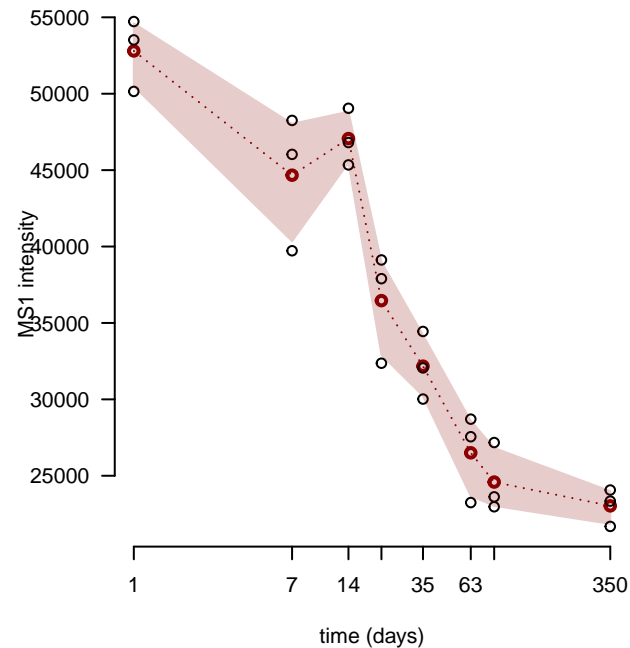

**Q922W5**  
GN=Pycr1  
pyrroline-5-carboxylate reductase 1

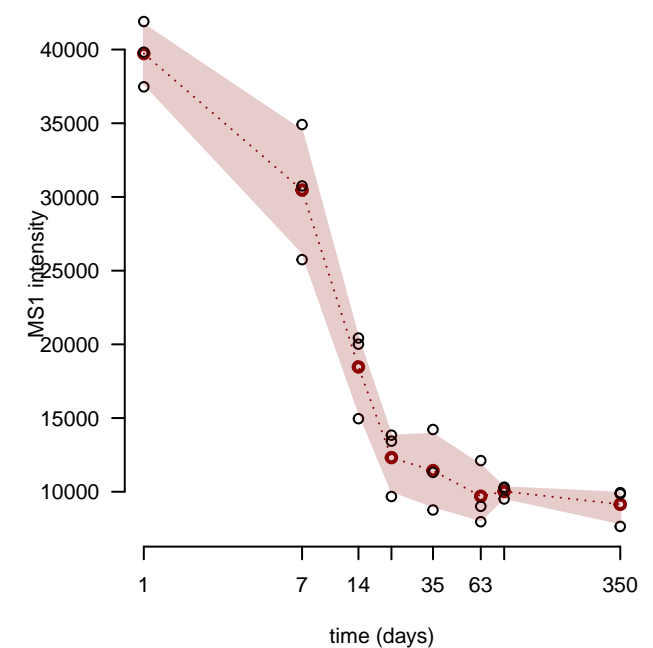

**Q922X9**  
**GN=Prmt7**  
protein arginine N-methyltransferase 7

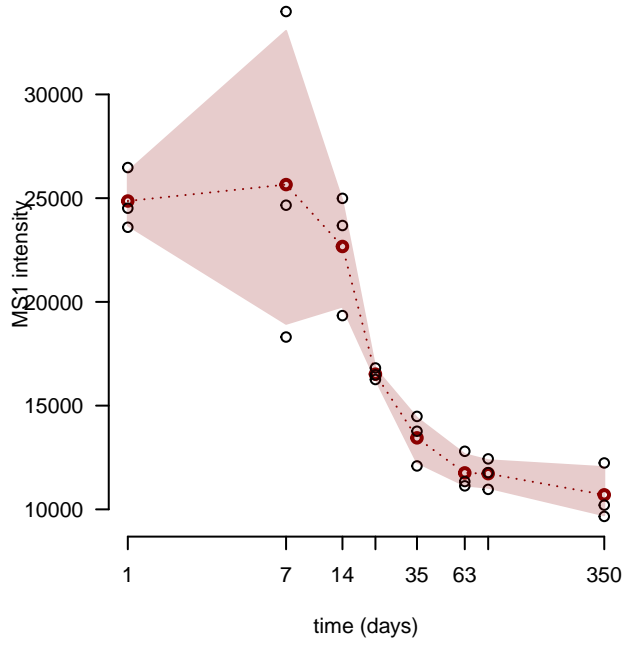

**Q922Y1**  
**GN=Ubx1**  
UBX domain protein 1

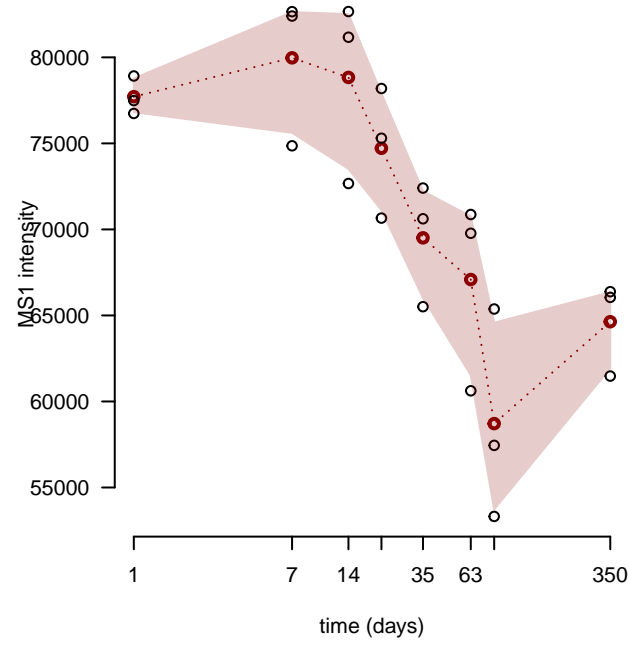

**Q922Y2**  
**GN=Trim59**  
tripartite motif-containing 59

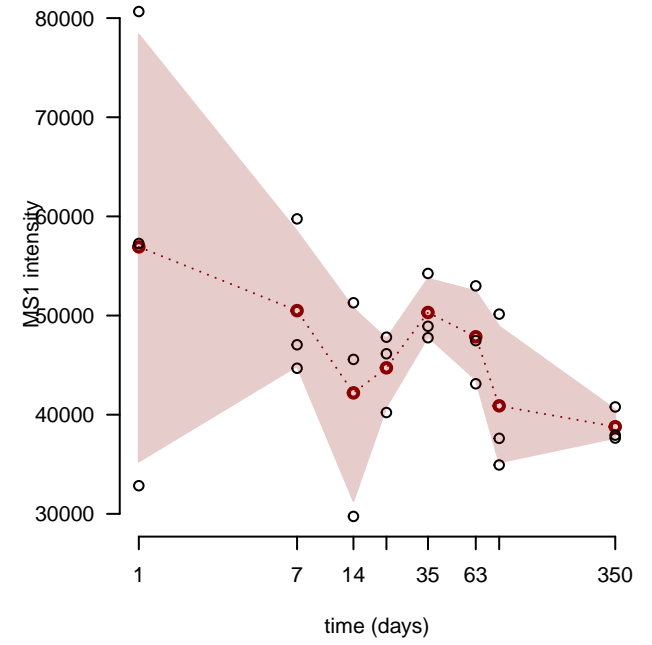

**Q922Z1**  
**GN=Tmem159**  
transmembrane protein 159

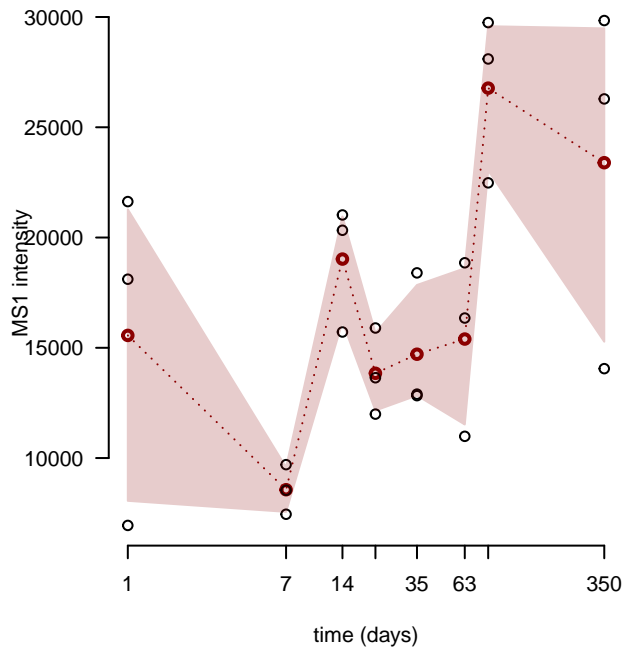

**Q923B0**  
**GN=Ggact**  
gamma-glutamylamine cyclotransferase

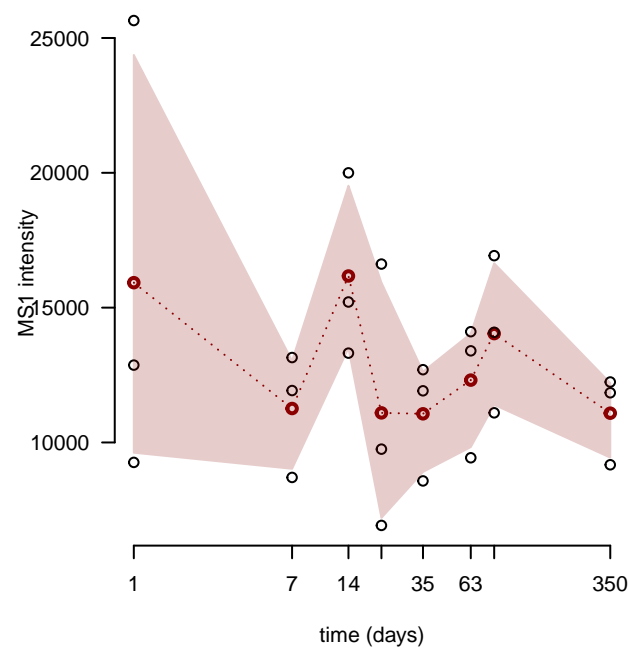

**Q923B1**  
**GN=Dbr1**  
debranching RNA lariats 1

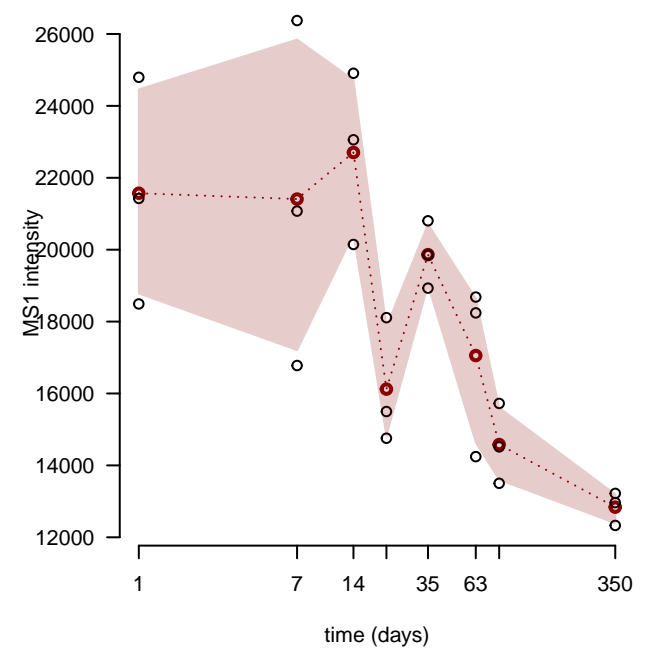

**Q923B6**  
**GN=Steap4**  
STEAP family member 4

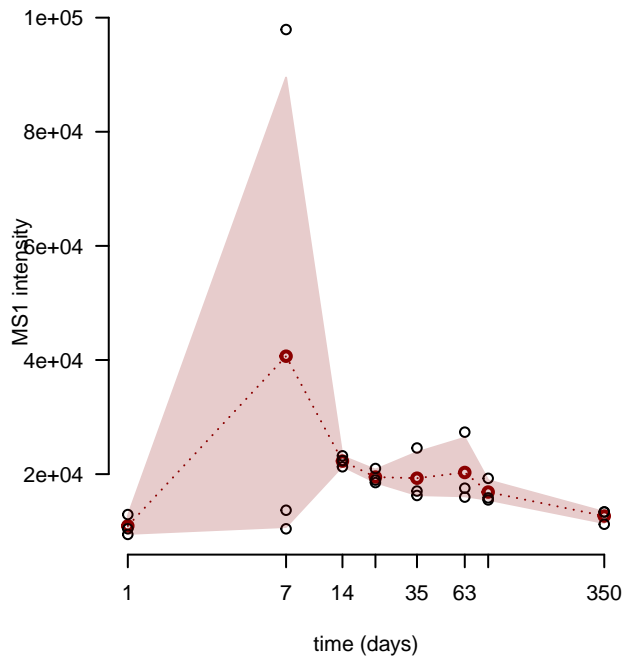

**Q923D2**  
**GN=Blvrb**  
biliverdin reductase B (flavin reductase ...)

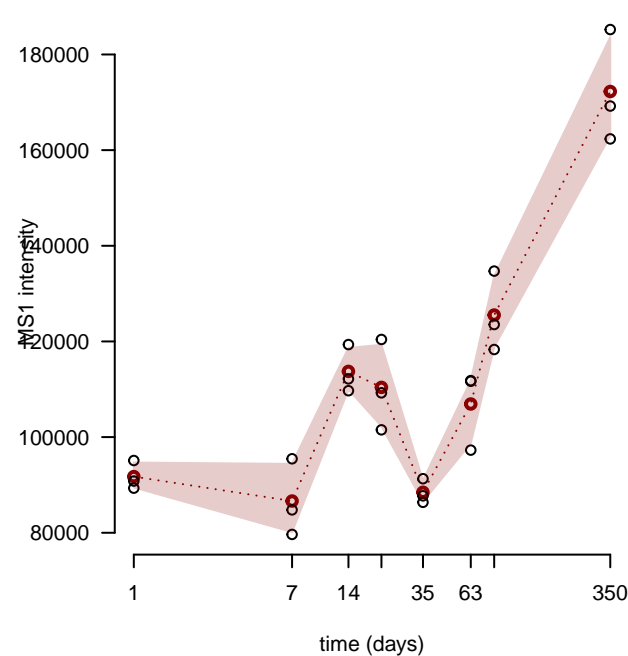

**Q923D4**  
**GN=Sf3b5**  
splicing factor 3b, subunit 5

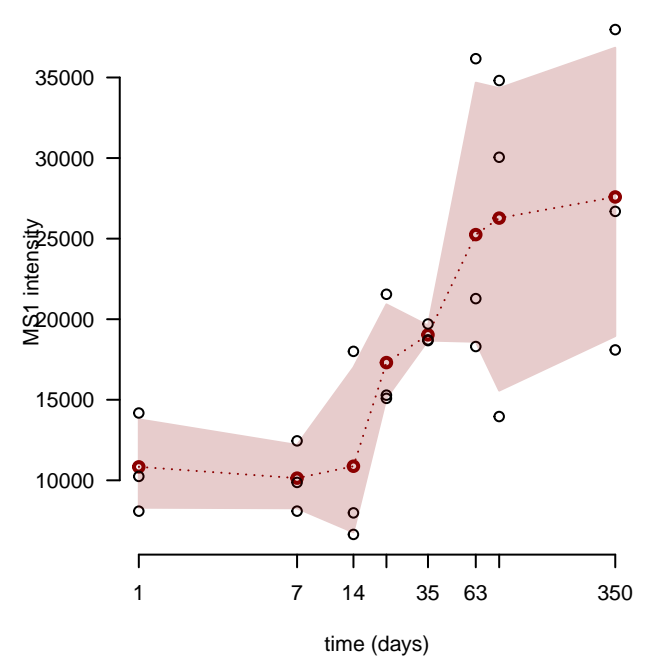

**Q923D5**  
**GN=Wbp11**  
WW domain binding protein 11

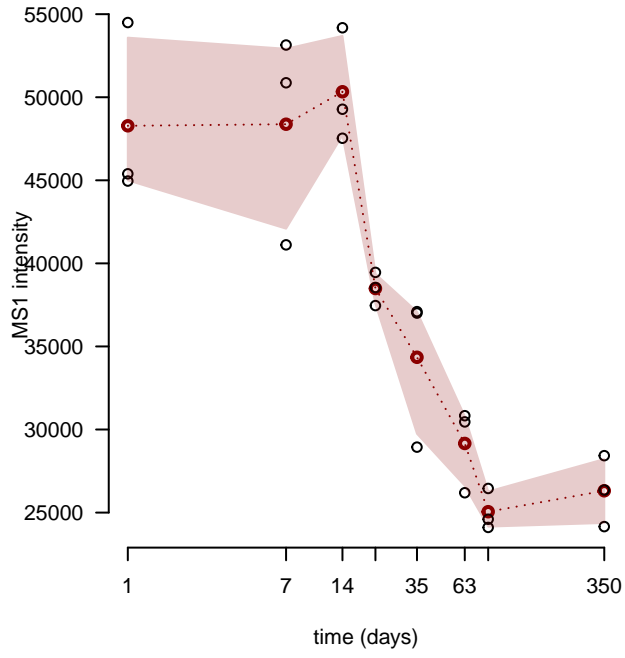

**Q923E4**  
**GN=Sirt1**  
sirtuin 1

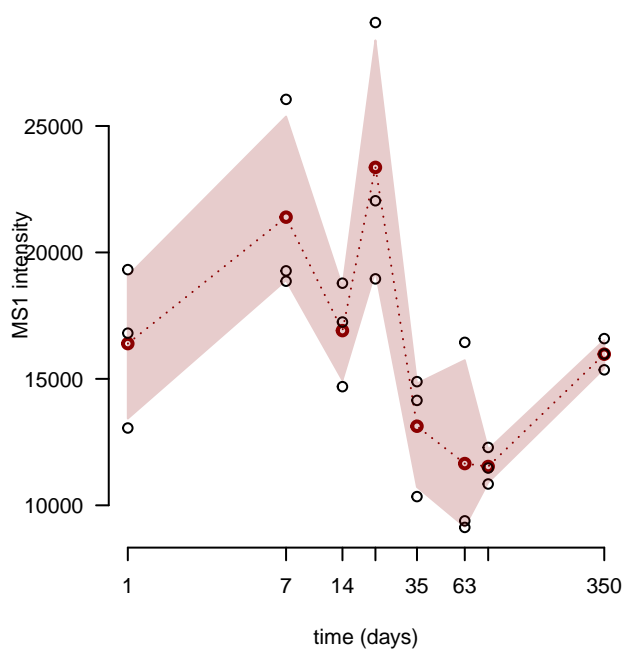

**Q923G2**  
**GN=Polr2h**  
polymerase (RNA) II (DNA directed) polyp ...

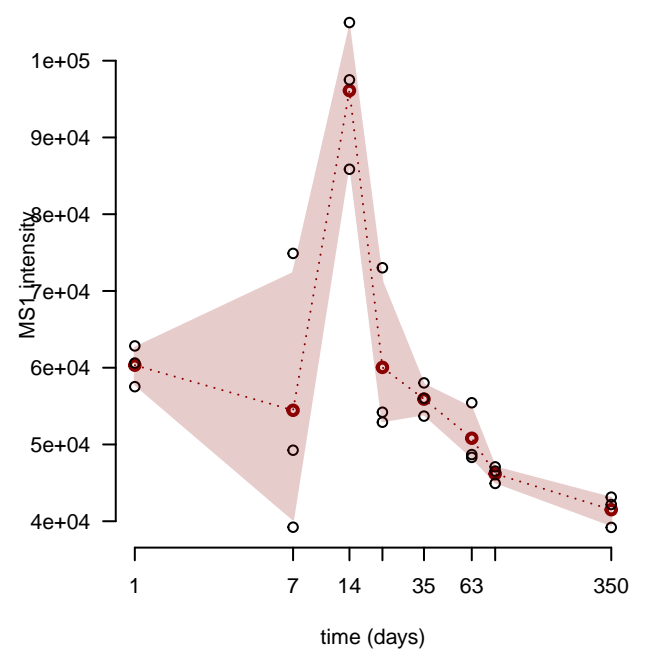

**Q923J1**  
**GN=Trpm7**  
transient receptor potential cation chan ...

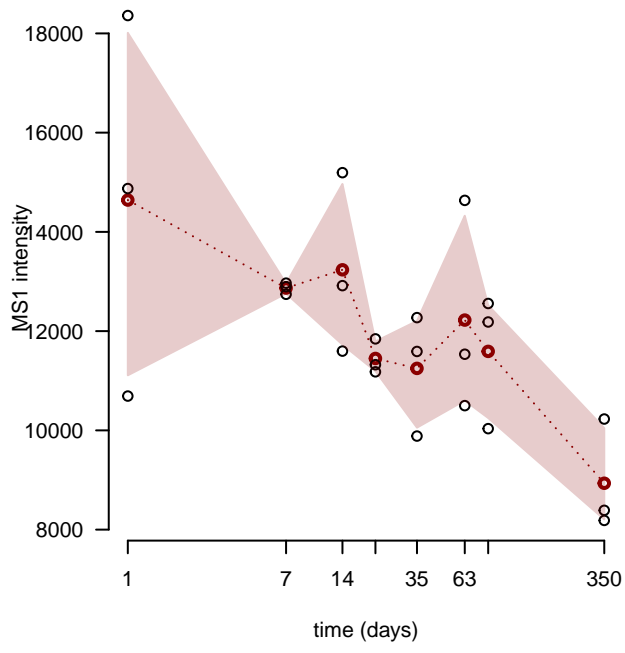

**Q923K4**  
**GN=Gtpbp3**  
GTP binding protein 3

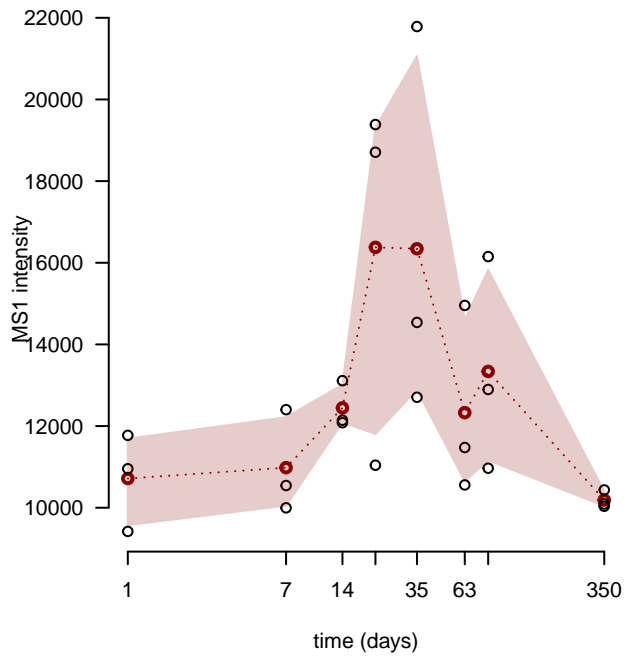

**Q923Q2**  
**GN=Stard13**  
StAR-related lipid transfer (START) doma ...

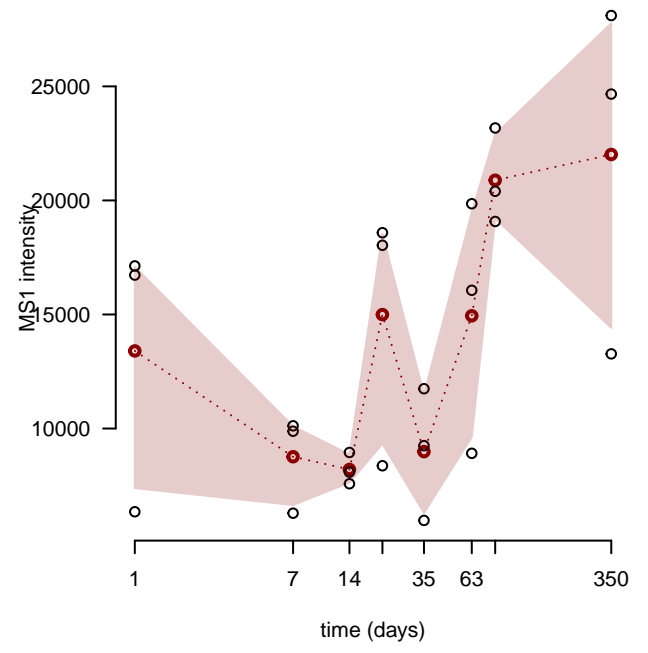

**Q923S9**  
**GN=Rab30**  
RAB30, member RAS oncogene family

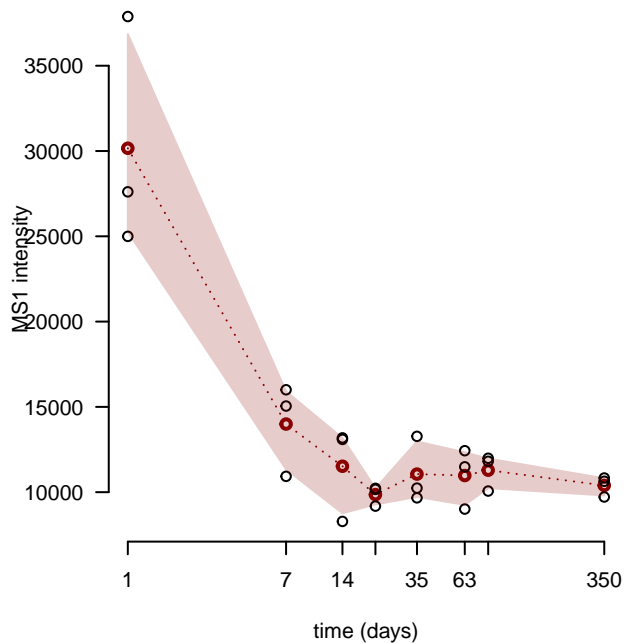

**Q923T9**  
**GN=Camk2g**  
calcium/calmodulin-dependent protein kin ...

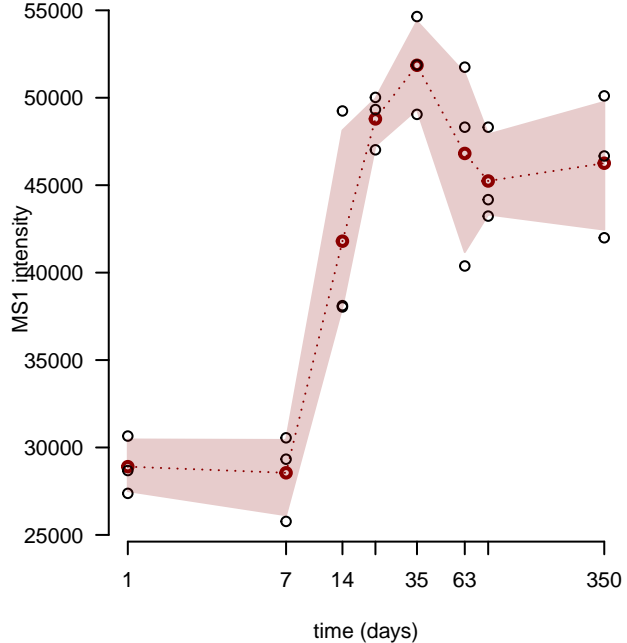

**Q923T9**  
**GN=Camk2g**  
calcium/calmodulin-dependent protein kin ...

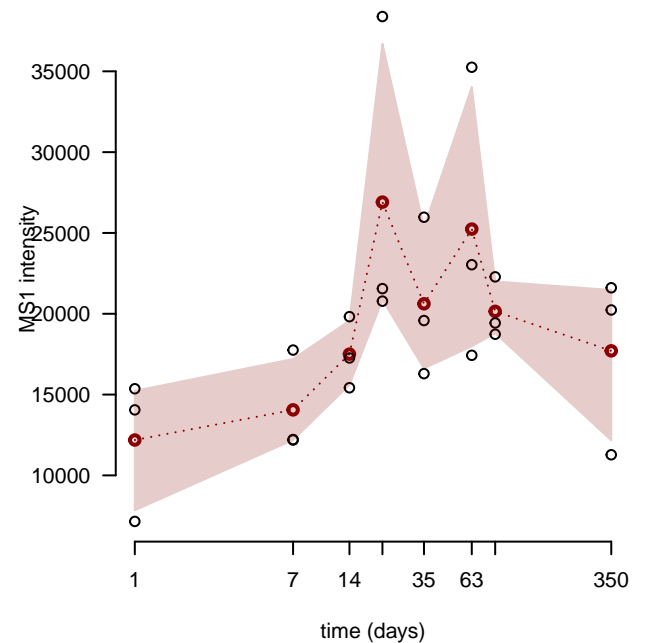

**Q923U0**  
**GN=Tom111**  
target of myb1-like 1 (chicken)

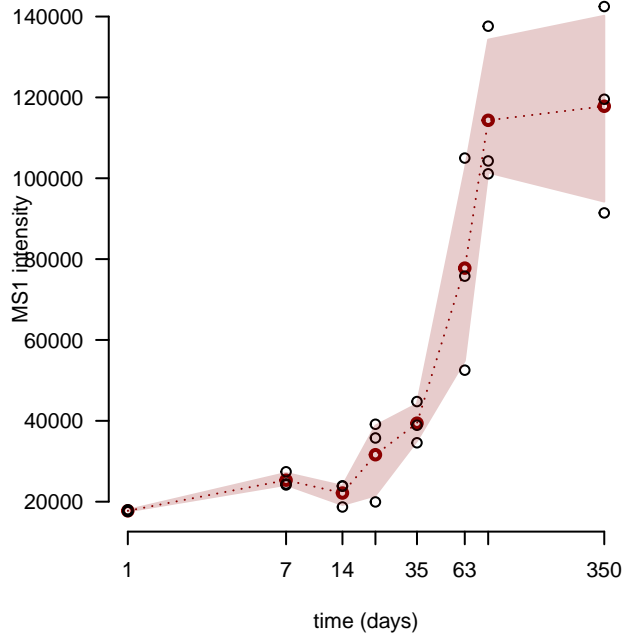

**Q923W1**  
**GN=Tgs1**  
trimethylguanosine synthase 1

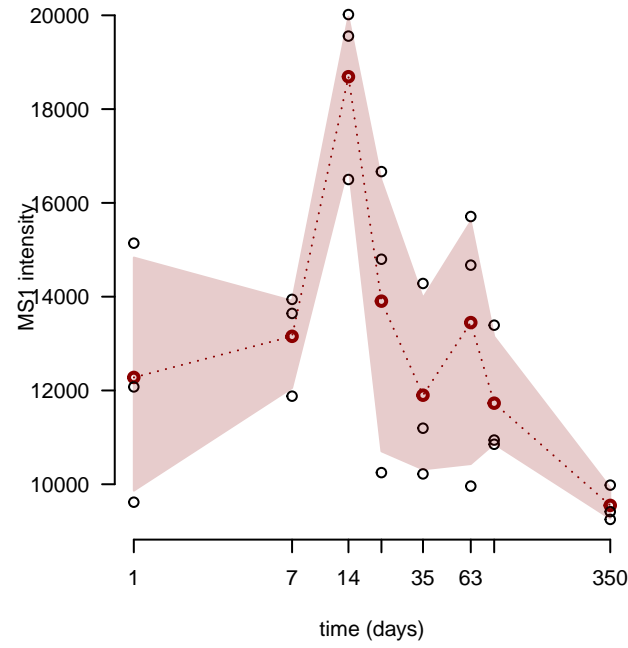

**Q923X4**  
**GN=Glrx2**  
glutaredoxin 2 (thioltransferase)

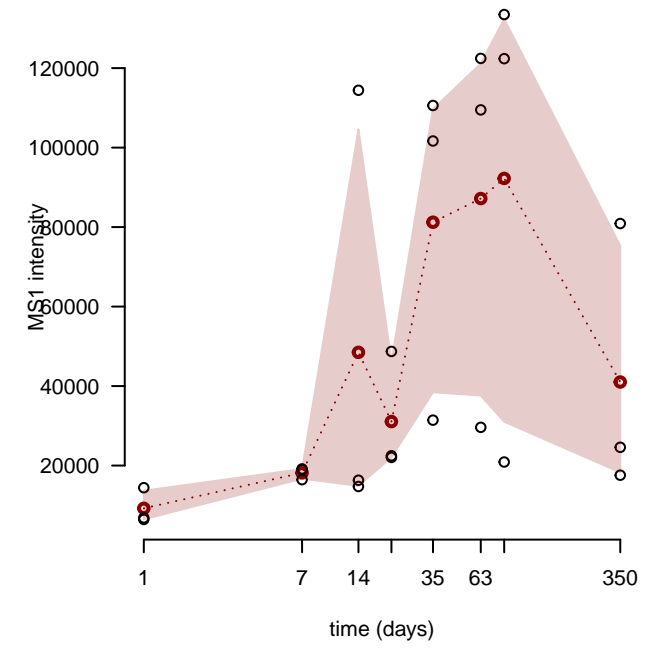

**Q923Z0**  
**GN=Gprc5b**  
G protein-coupled receptor, family C, gr ...

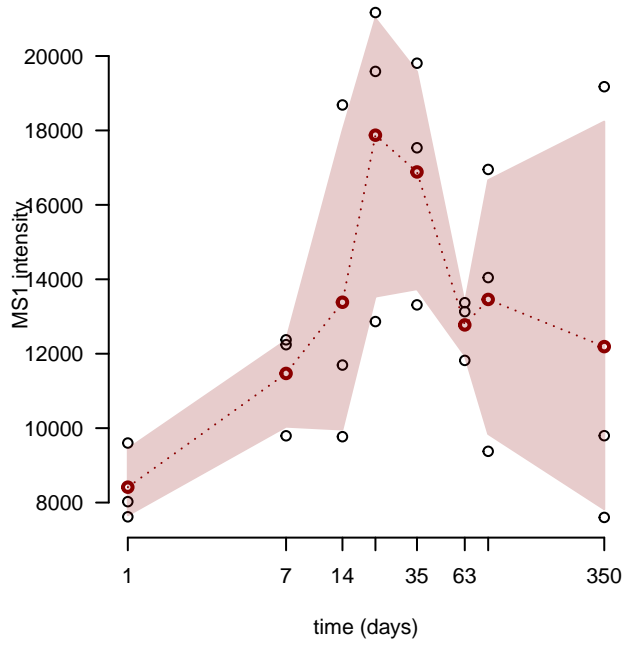

**Q923Z3**  
**GN=Mto1**  
mitochondrial tRNA translation optimizat ...

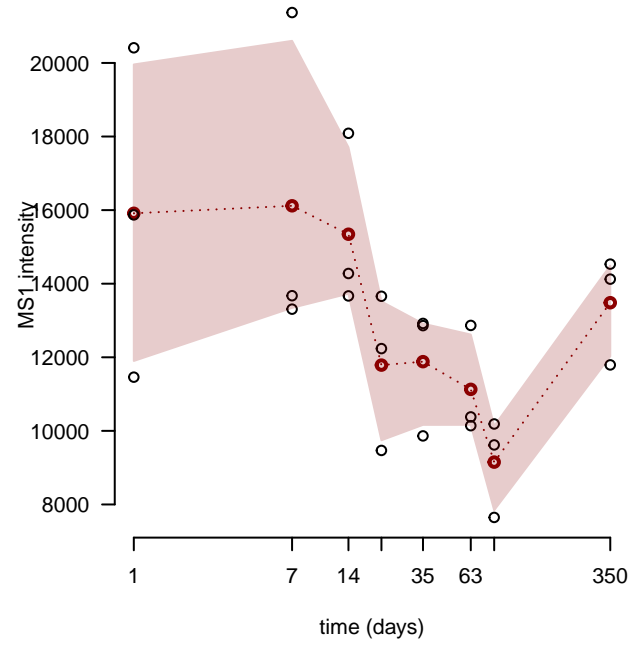

**Q924A0**  
**GN=Tcf712**  
transcription factor 7 like 2, T cell sp ...

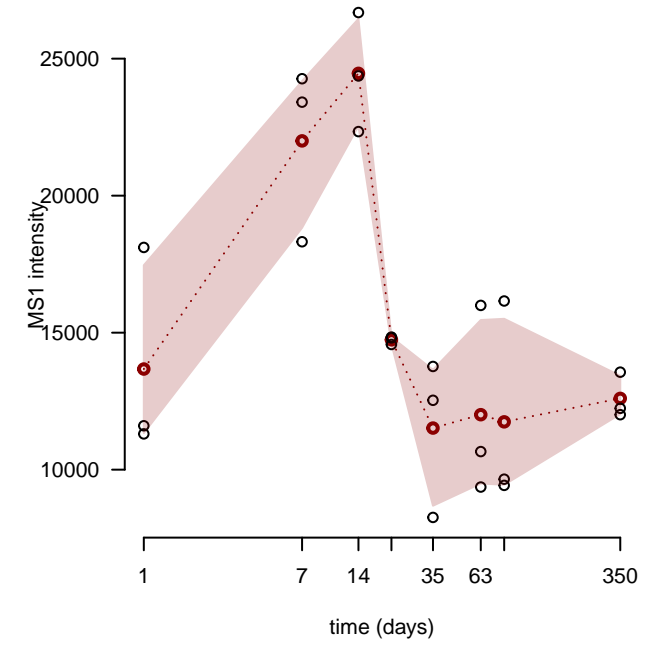

**Q924A2**  
**GN=Cic**  
capicua transcriptional repressor

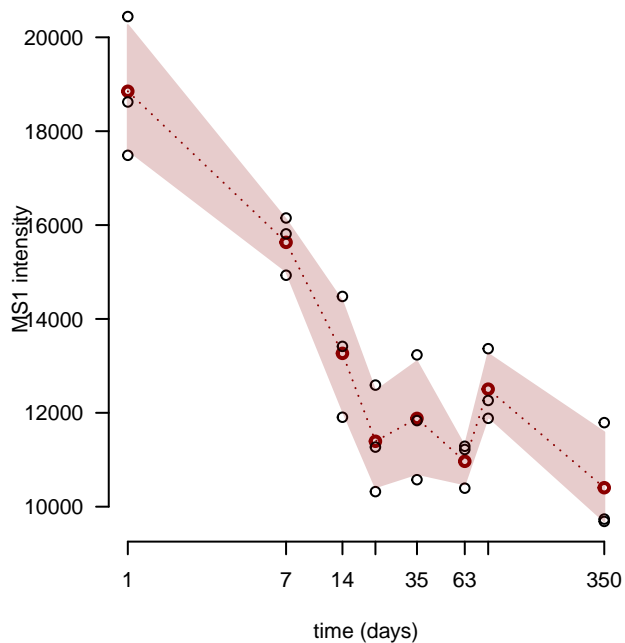

**Q924C1**  
**GN=Xpo5**  
exportin 5

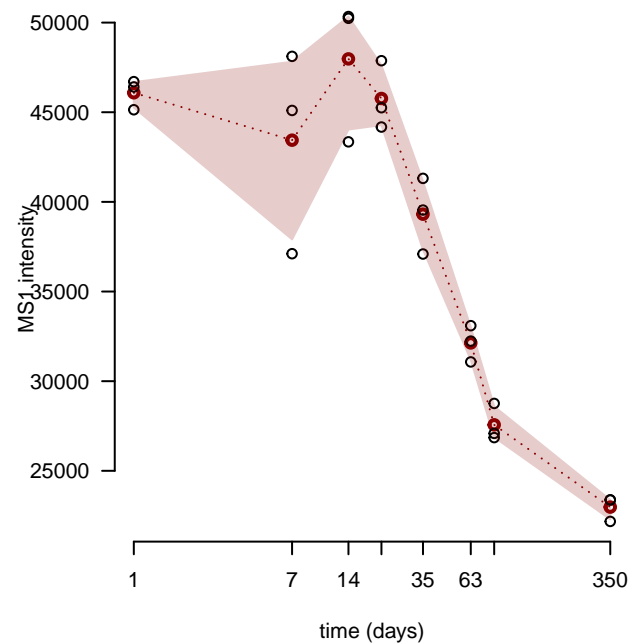

**Q924D0**  
**GN=Rtn4ip1**  
reticulon 4 interacting protein 1

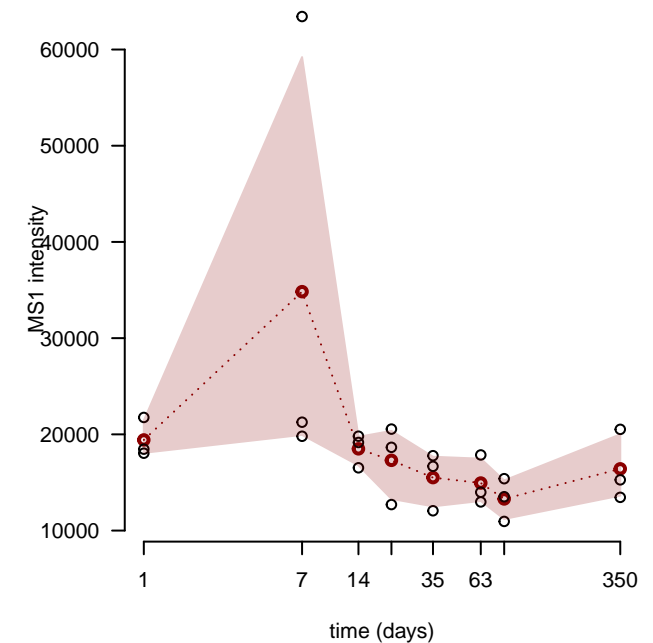

**Q924H2**  
**GN=Med15**  
mediator complex subunit 15

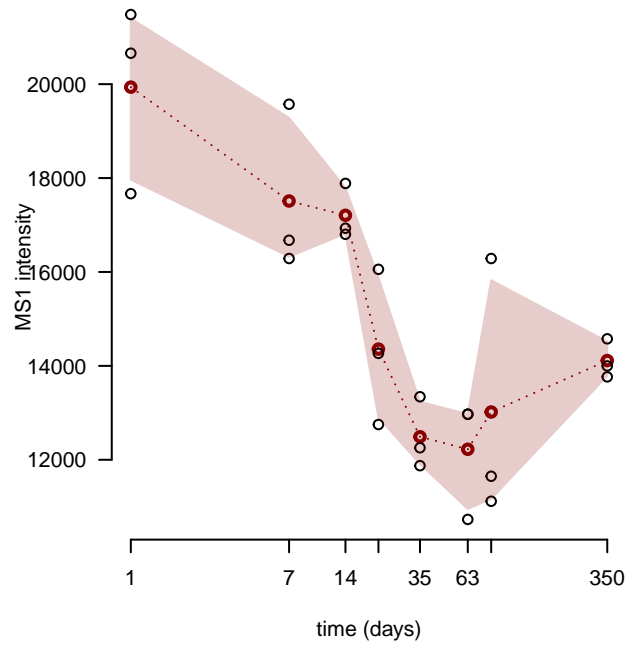

**Q924H5**  
**GN=Rad51c**  
RAD51 paralogs C

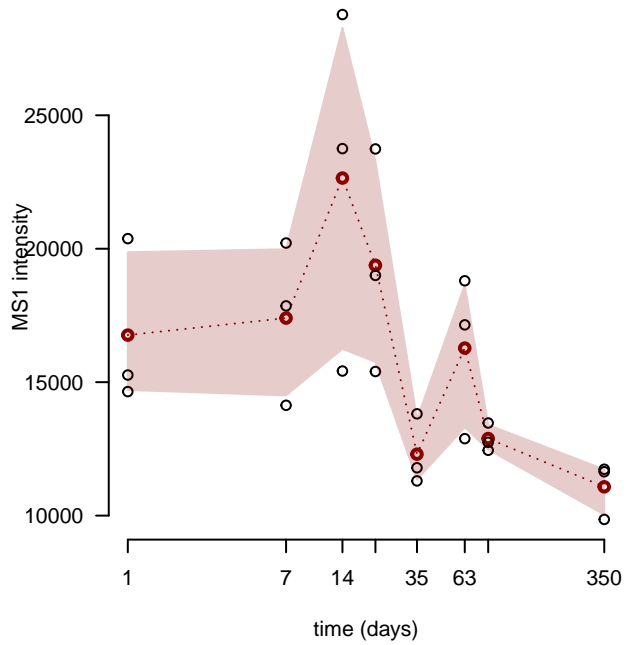

**Q924H7**  
**GN=Wac**  
WW domain containing adaptor with coiled ...

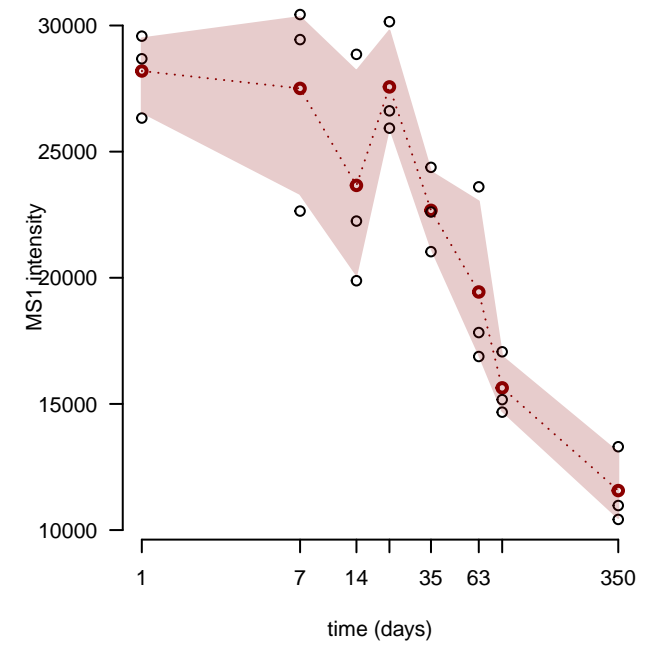

**Q924K8**  
**GN=Mta3**  
metastasis associated 3

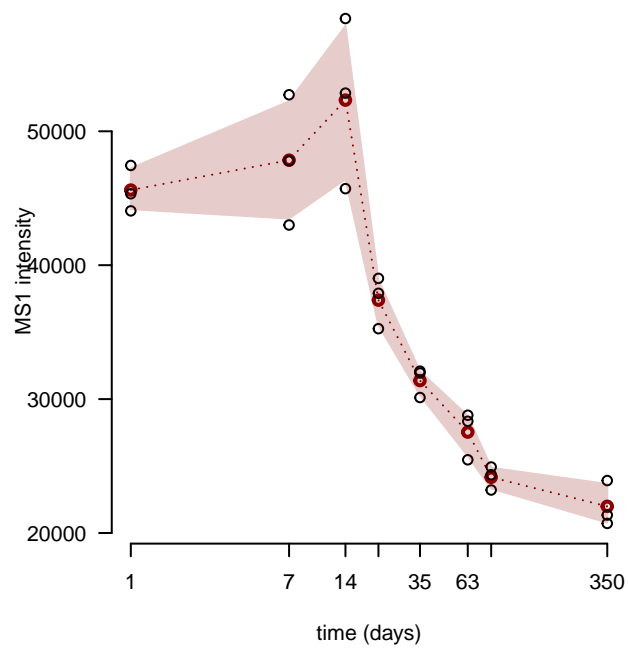

**Q924L1**  
**GN=Letmd1**  
LETM1 domain containing 1

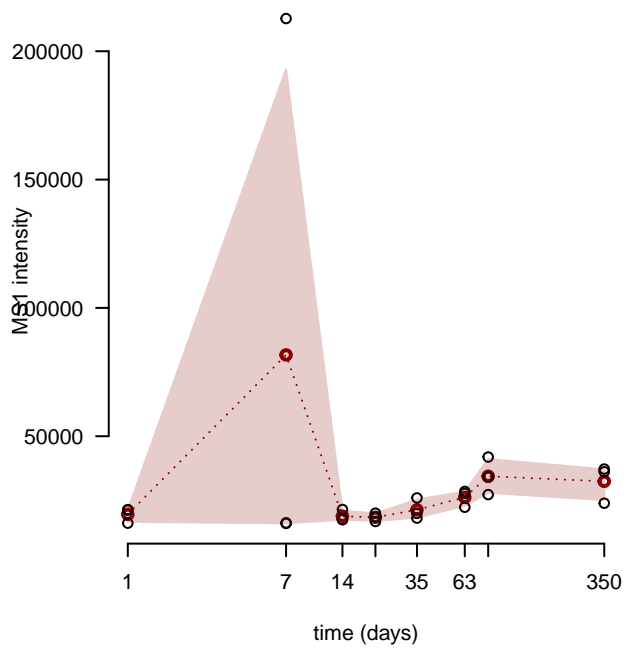

**Q924M7**  
**GN=Mpi**  
mannose phosphate isomerase

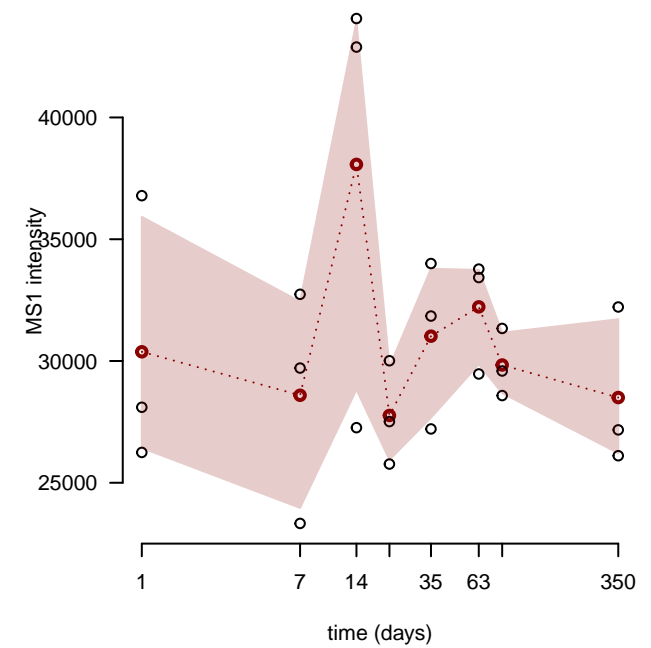

**Q924N4**  
**GN=Slc12a6**  
solute carrier family 12, member 6

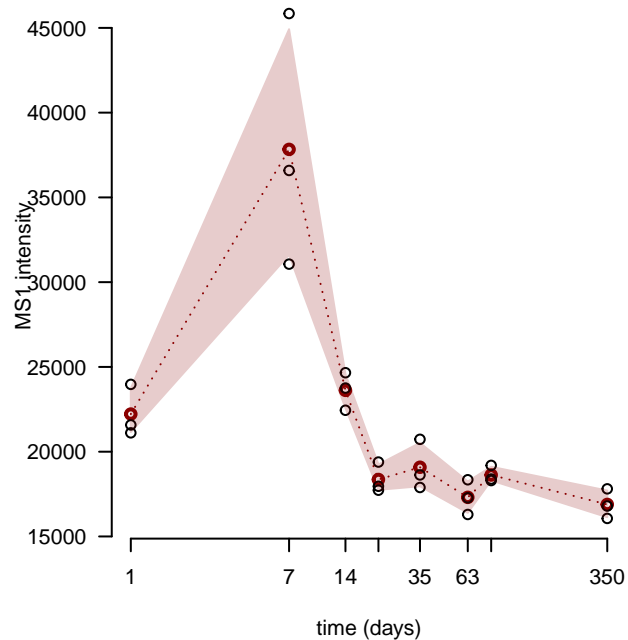

**Q924N4**  
**GN=Slc12a6**  
solute carrier family 12, member 6

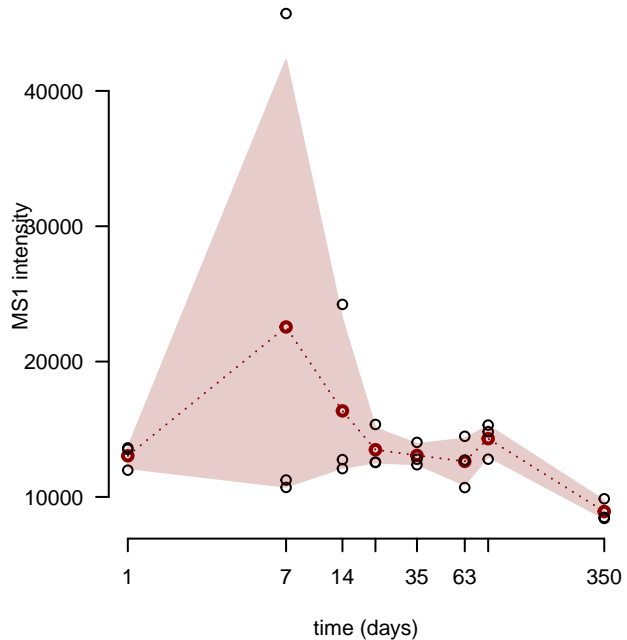

**Q924S2**  
**GN=Oas1c**  
2'-5' oligoadenylate synthetase 1C

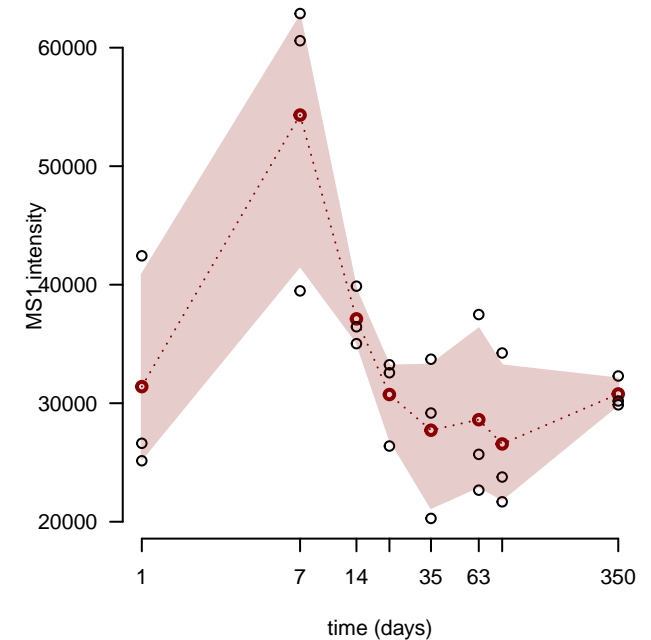

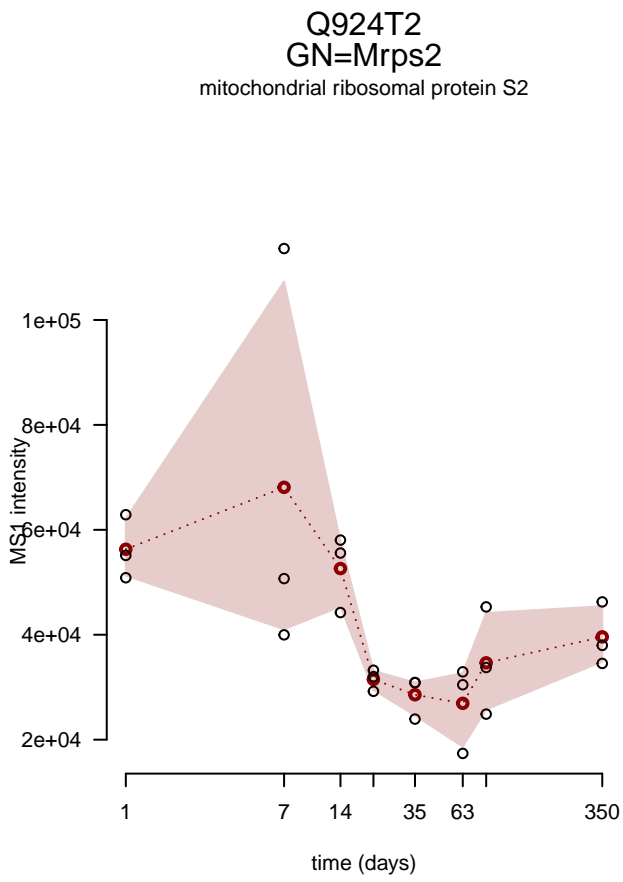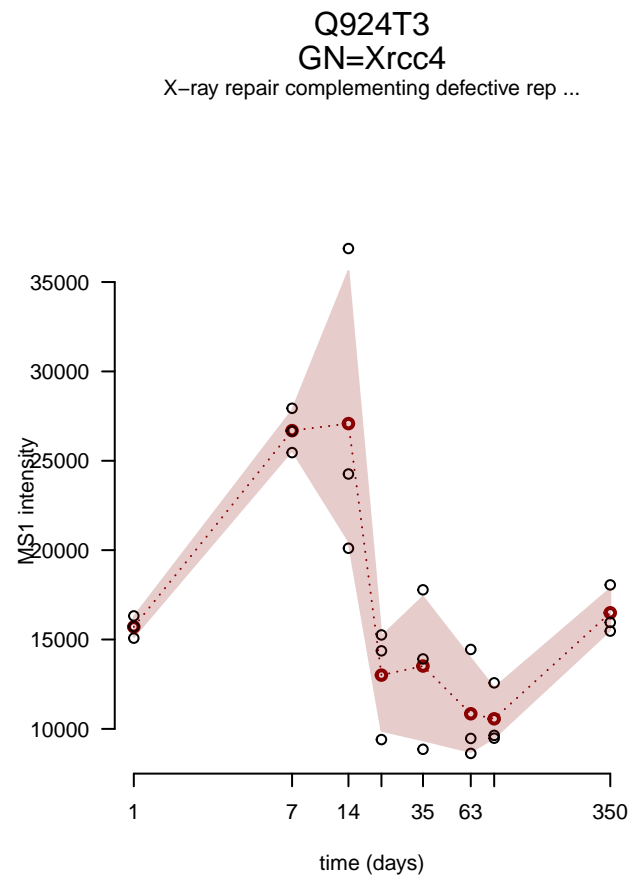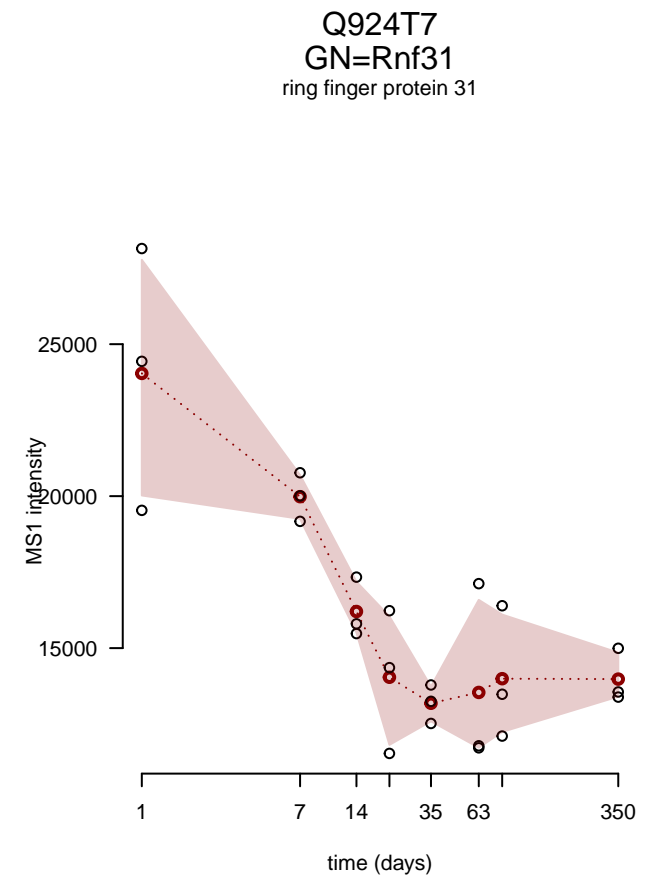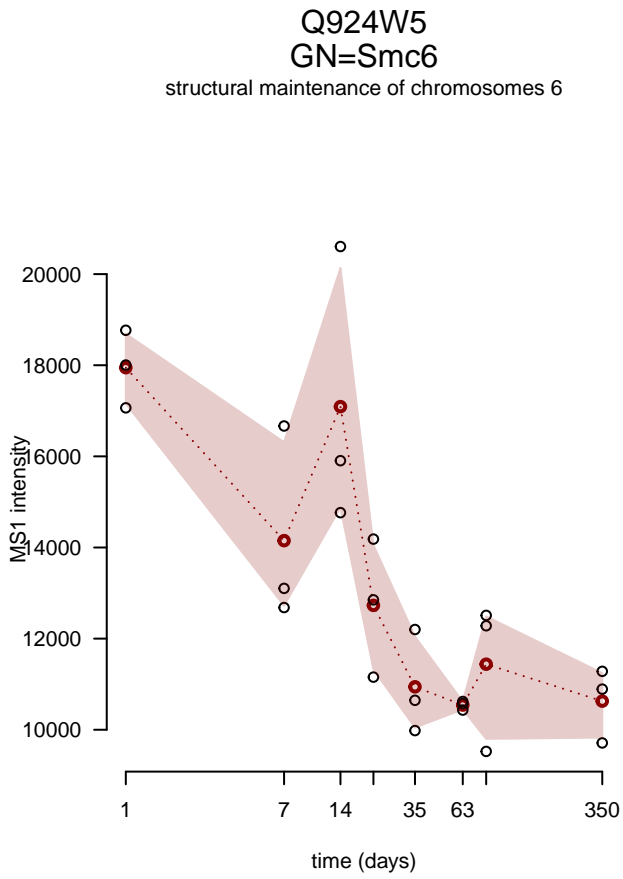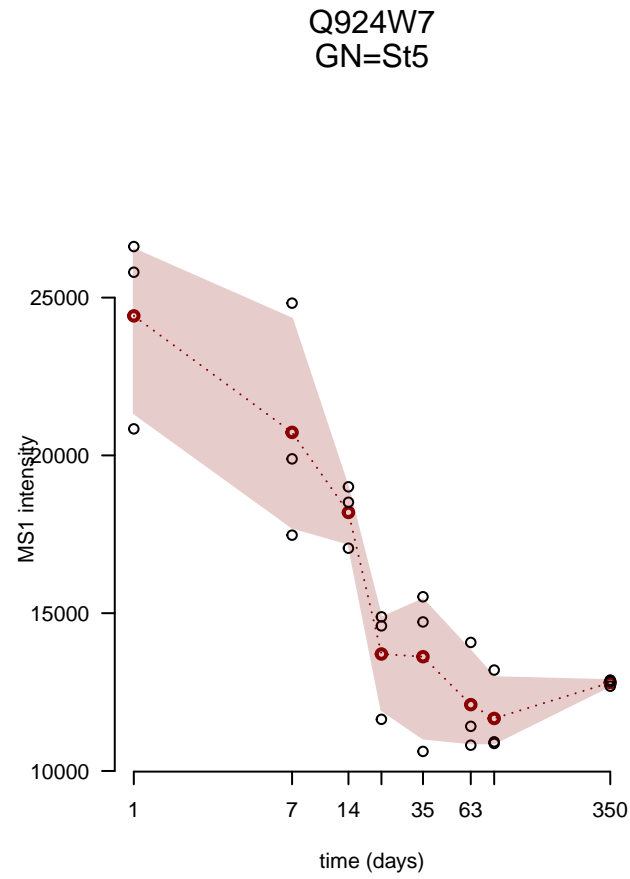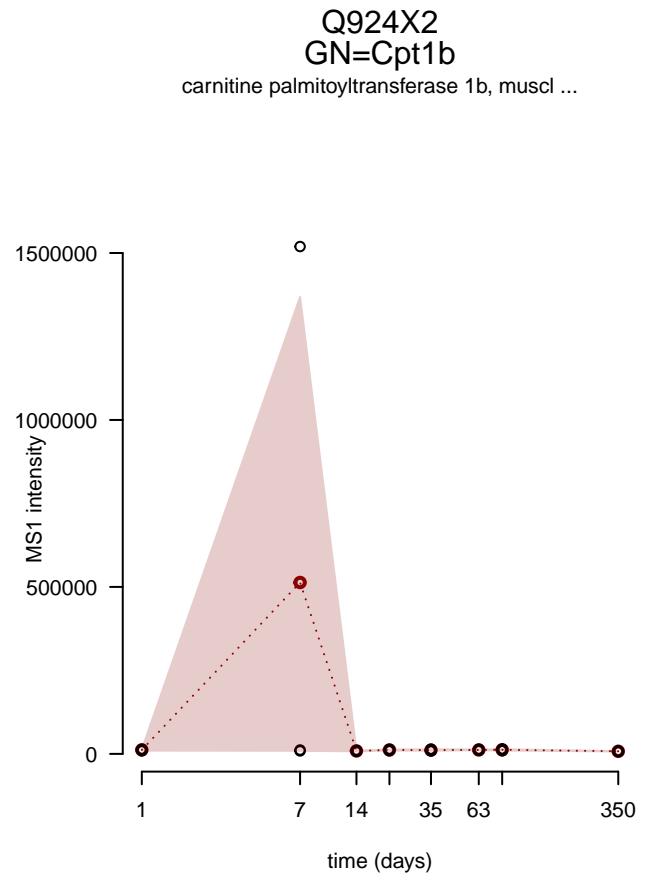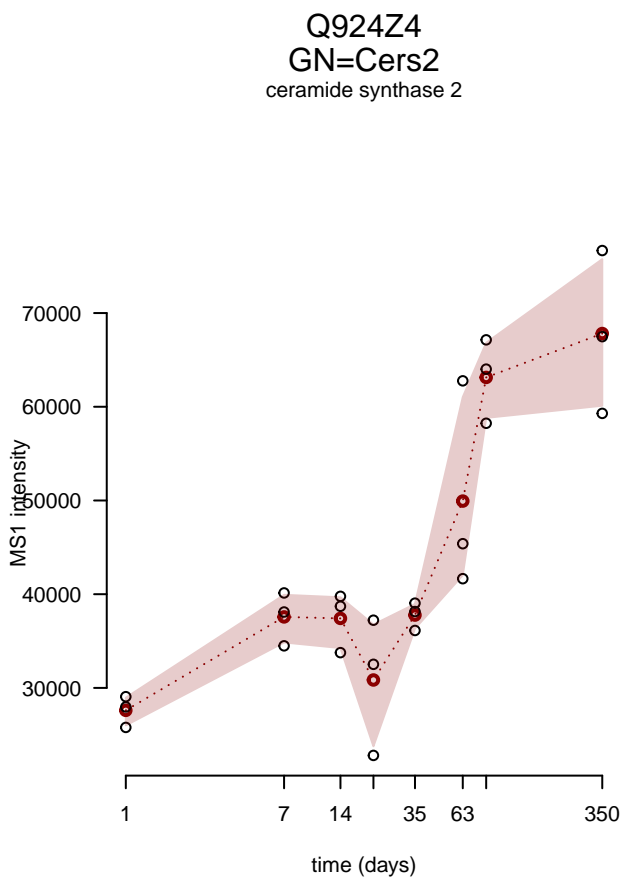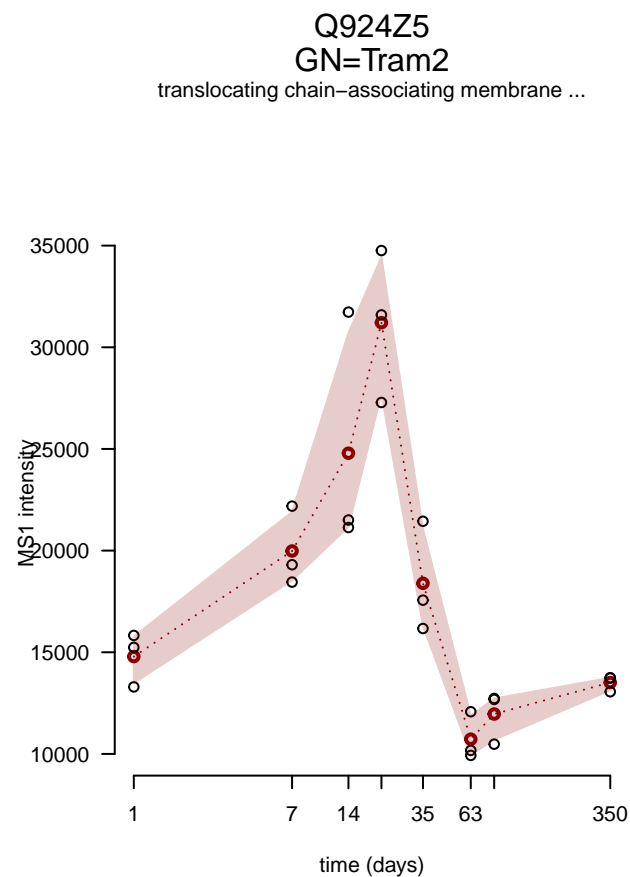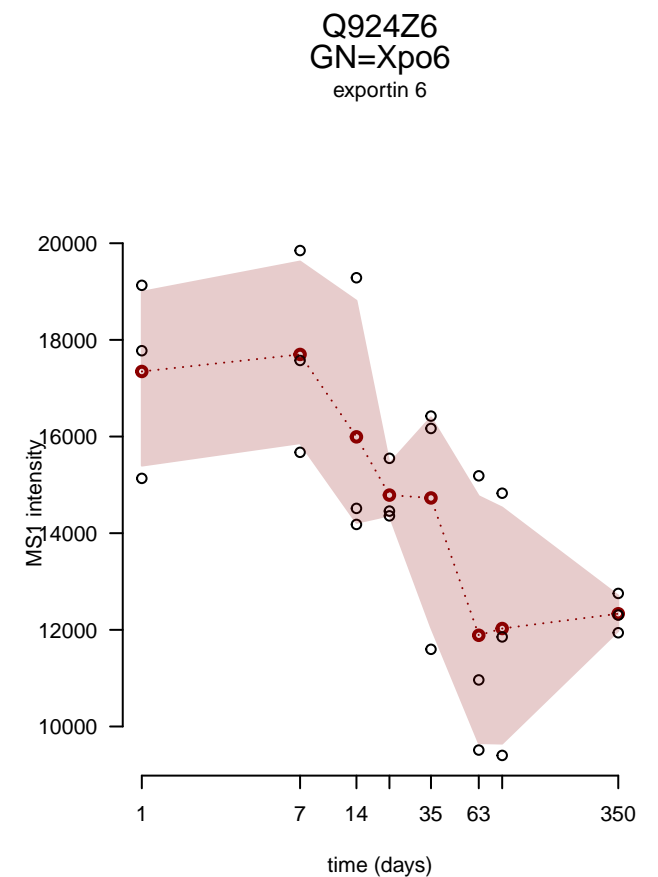

**Q925B0**  
GN=Pawr  
PRKC, apoptosis, WT1, regulator

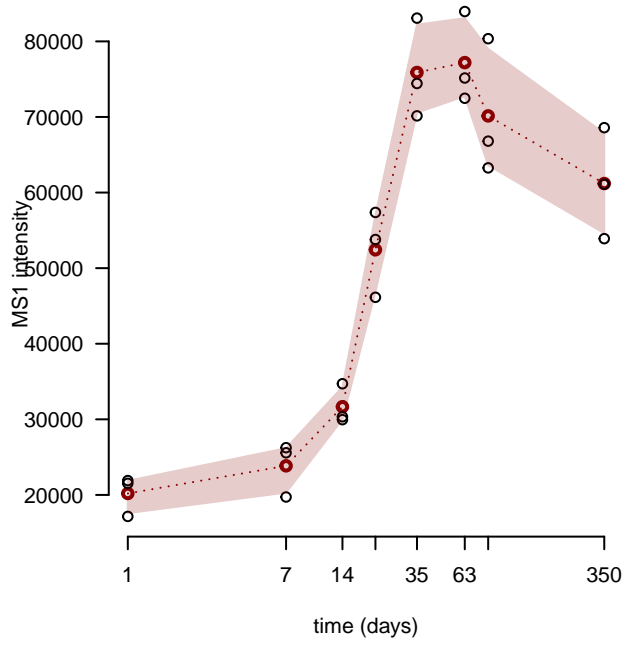

**Q925E7**  
GN=Ppp2r2d  
protein phosphatase 2, regulatory subuni ...

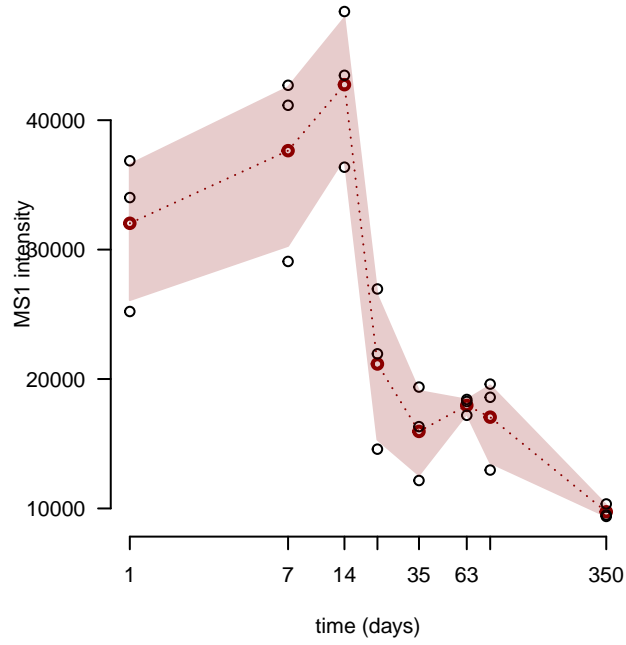

**Q925F2**  
GN=Esam  
endothelial cell-specific adhesion molec ...

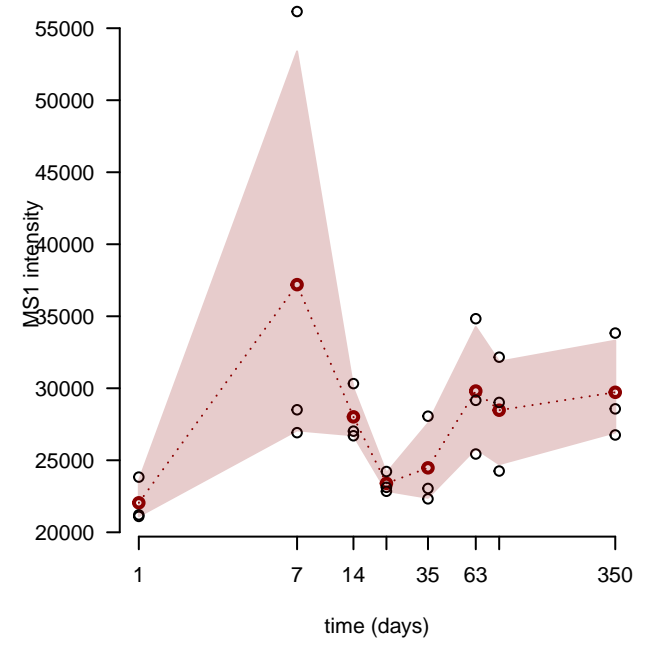

**Q925H1**  
GN=Trps1  
transcriptional repressor GATA binding 1

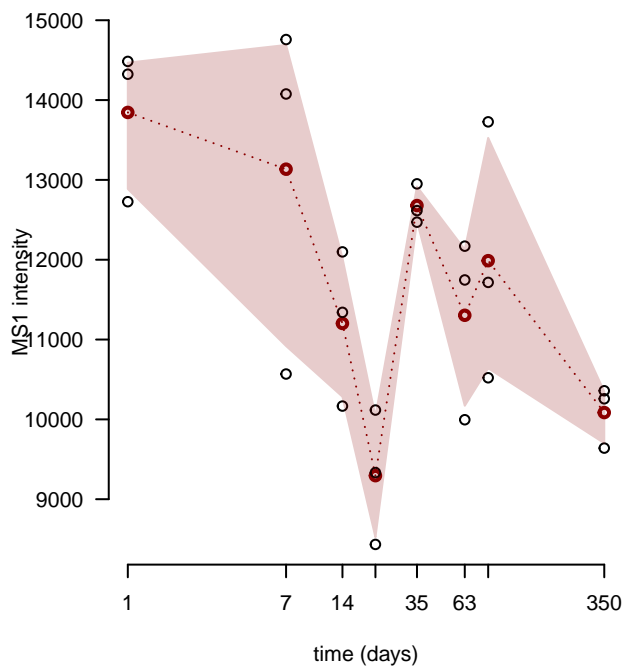

**Q925I1**  
GN=Atad3

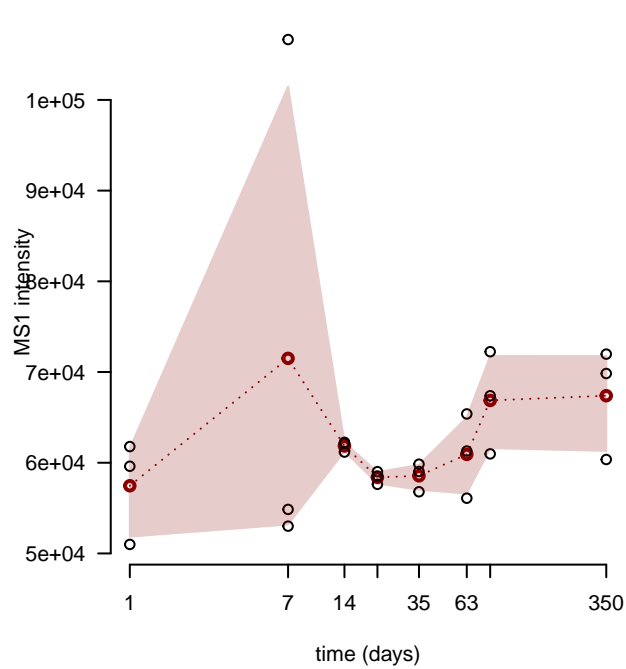

**Q925J9**  
GN=Med1  
mediator complex subunit 1

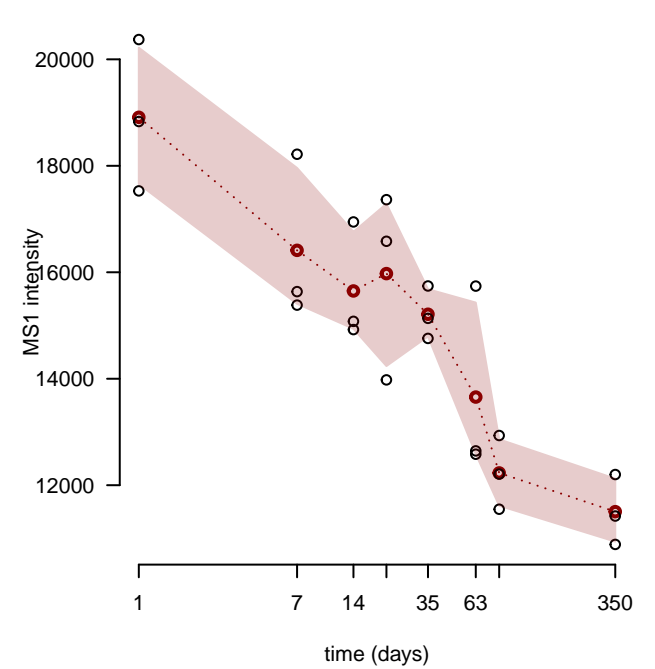

**Q925N0**  
GN=Sfxn5  
sideroflexin 5

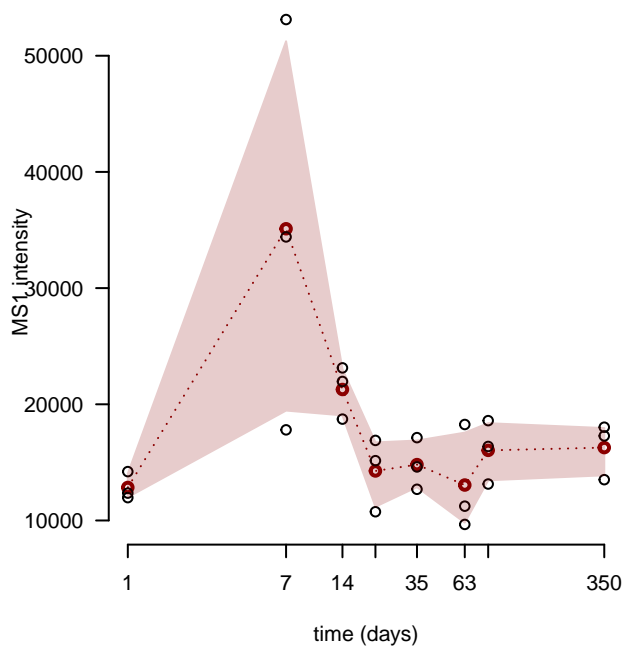

**Q925N1**  
GN=Sfxn4  
sideroflexin 4

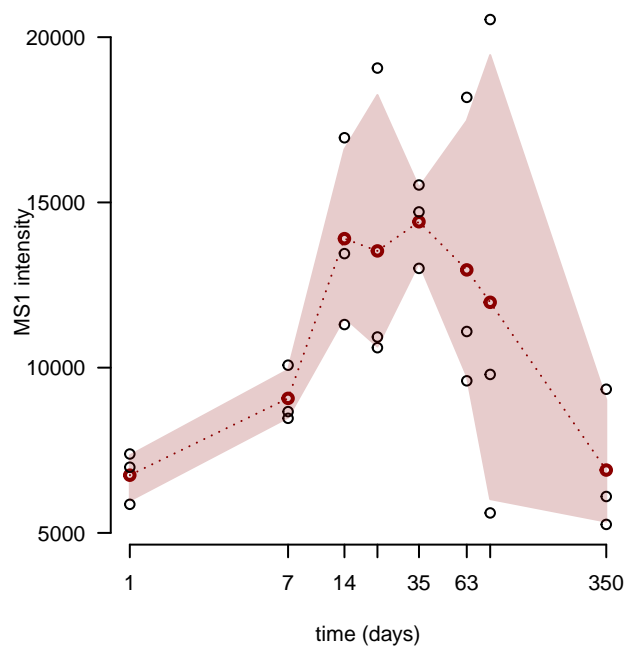

**Q925N2**  
GN=Sfxn2  
sideroflexin 2

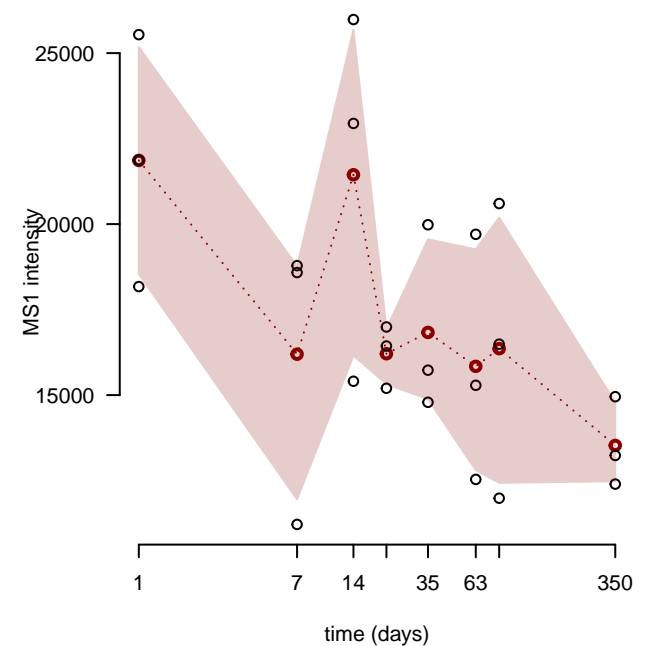

**Q925T6**  
GN=Grip1  
glutamate receptor interacting protein 1

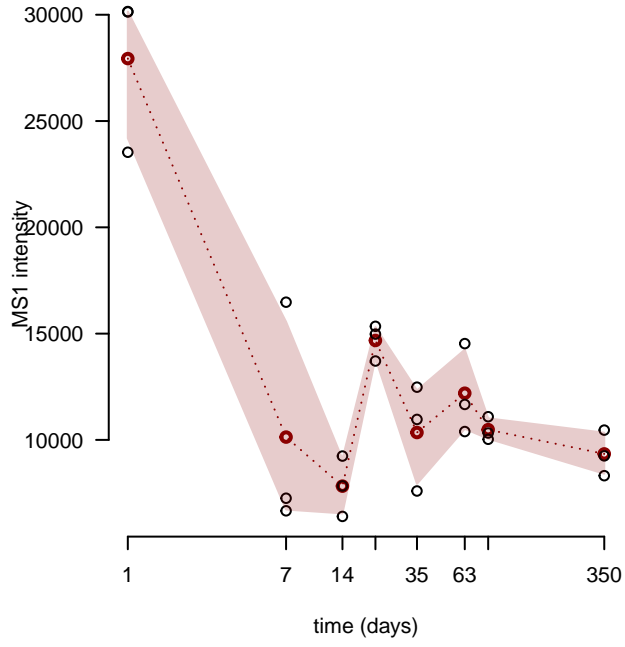

**Q925U4**  
GN=Edem1  
ER degradation enhancer, mannosidase alp ...

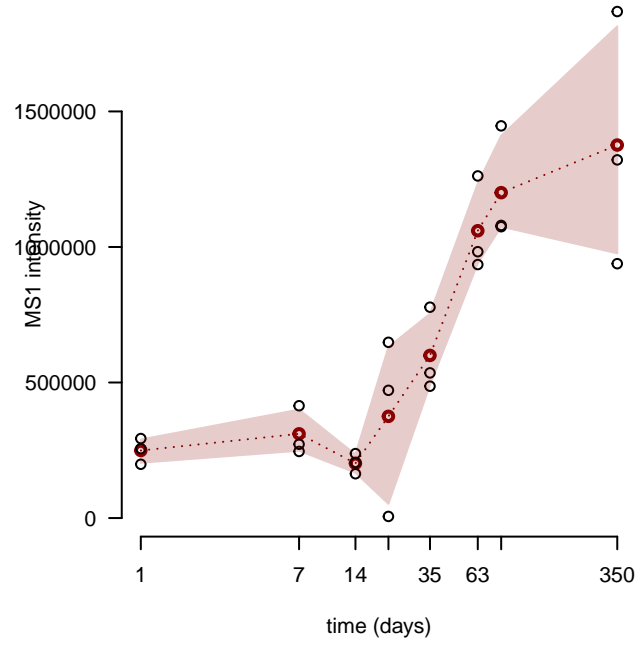

**Q93092**  
GN=Taldo1  
transaldolase 1

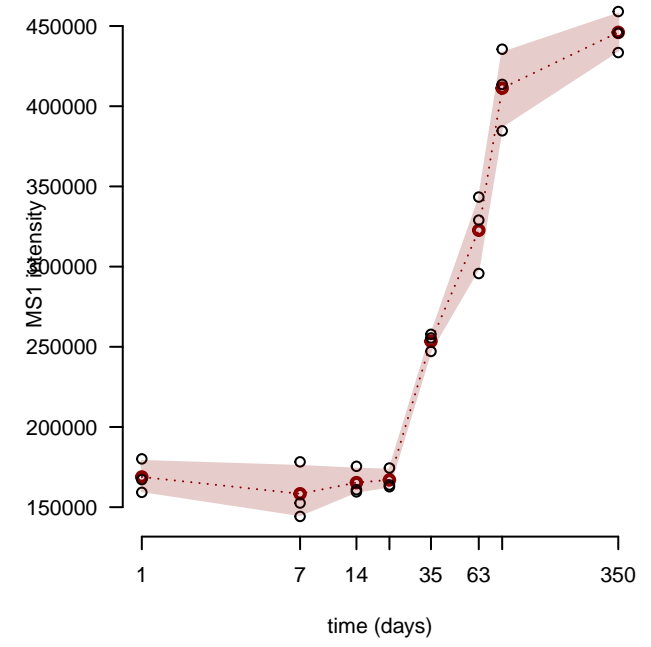

**Q99020**  
GN=Hnrnpab  
heterogeneous nuclear ribonucleoprotein ...

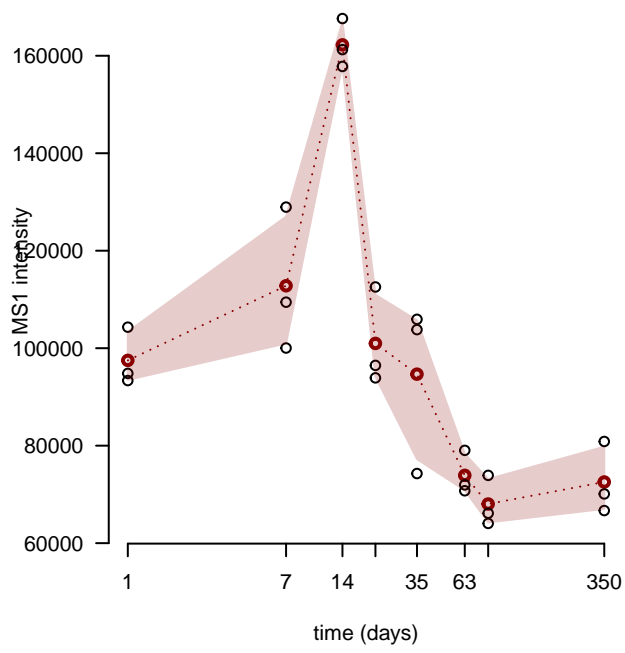

**Q99104**  
GN=Myo5a  
myosin VA

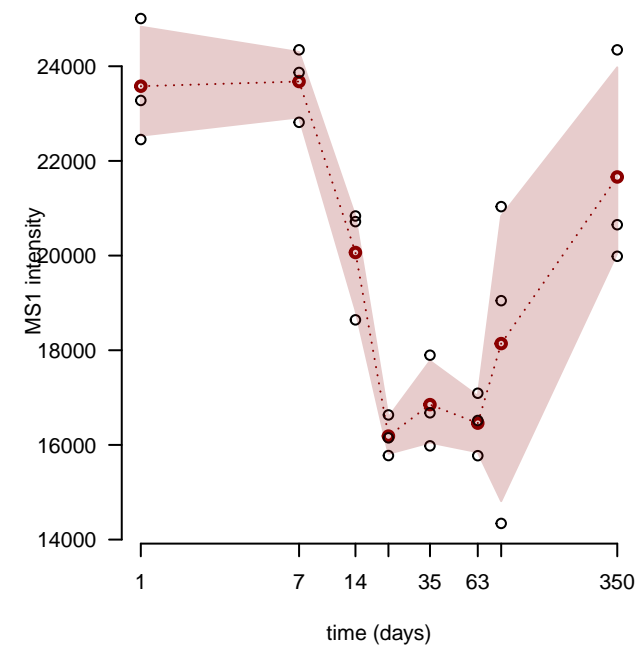

**Q99J08**  
GN=Sec14I2  
SEC14-like lipid binding 2

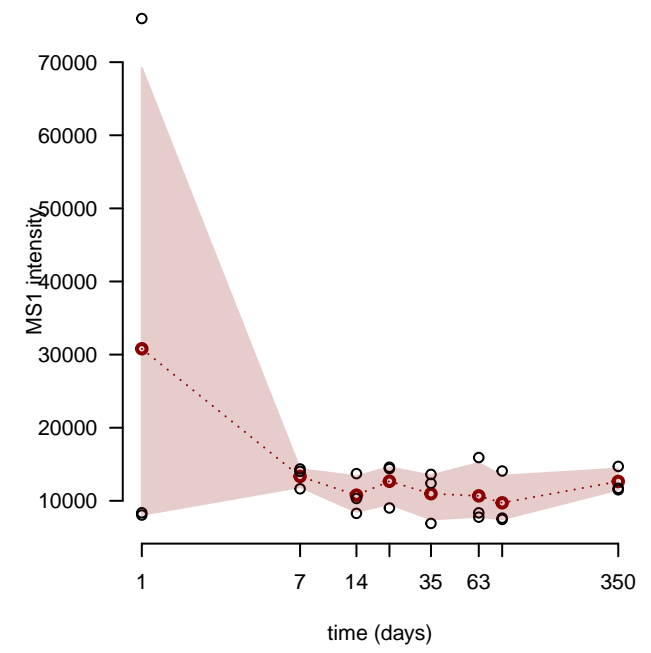

**Q99J09**  
GN=Wdr77  
WD repeat domain 77

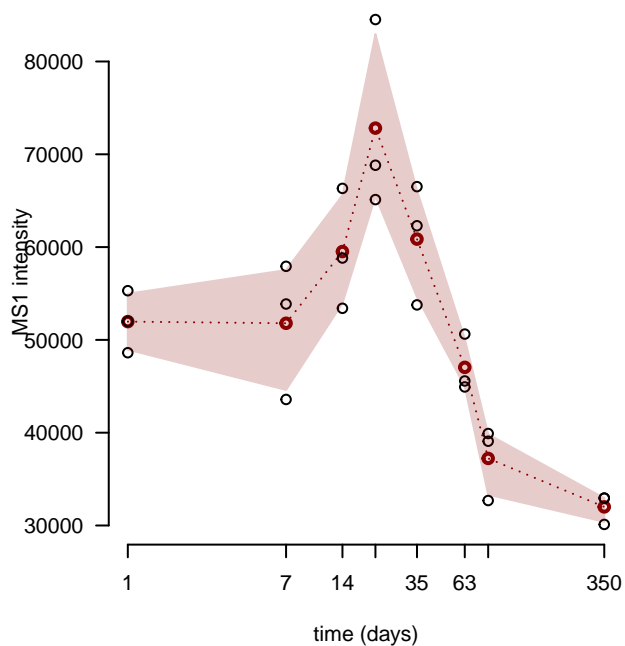

**Q99J10**  
GN=Ctu1  
cytosolic thiouridylase subunit 1

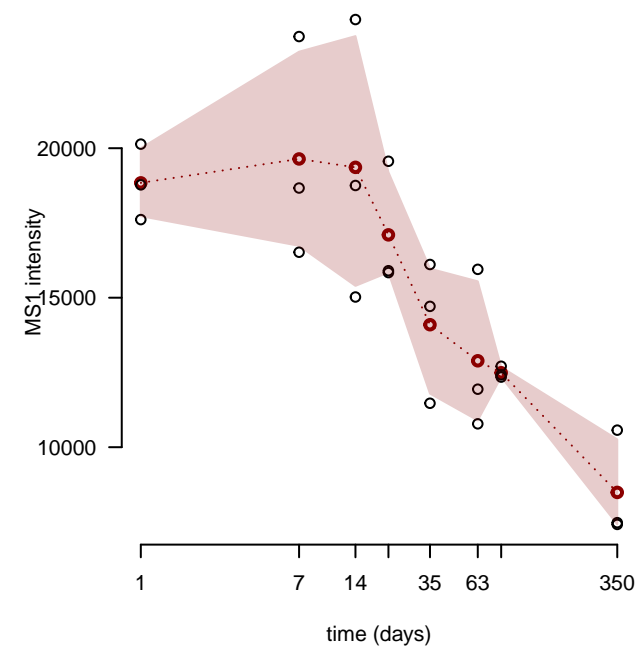

**Q99J19**  
GN=Smim11a

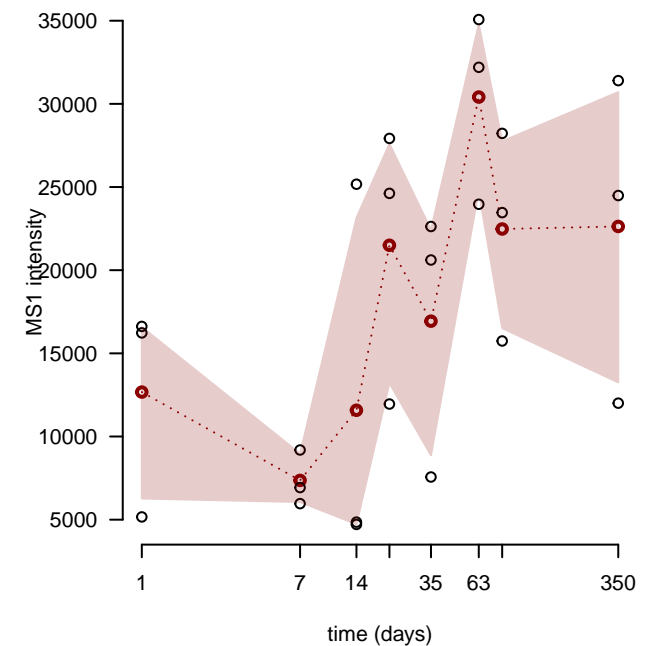



**Q99J21**  
GN=Mcoln1  
mucolin 1

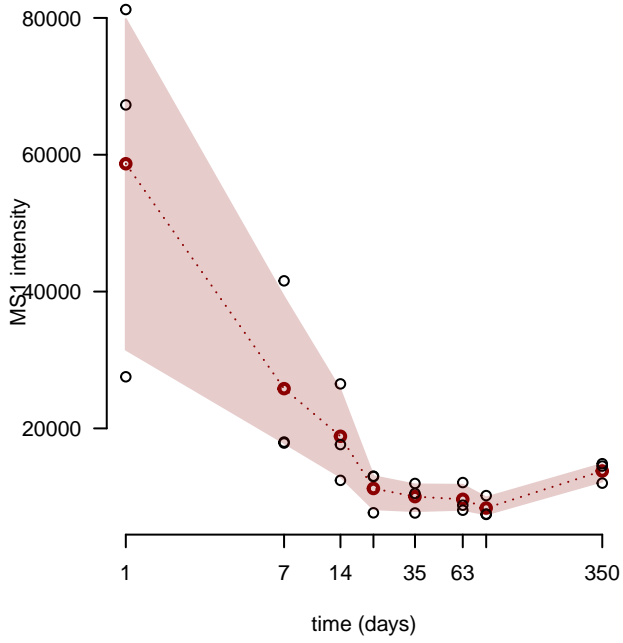

**Q99J23**  
GN=Ghdc  
GH3 domain containing

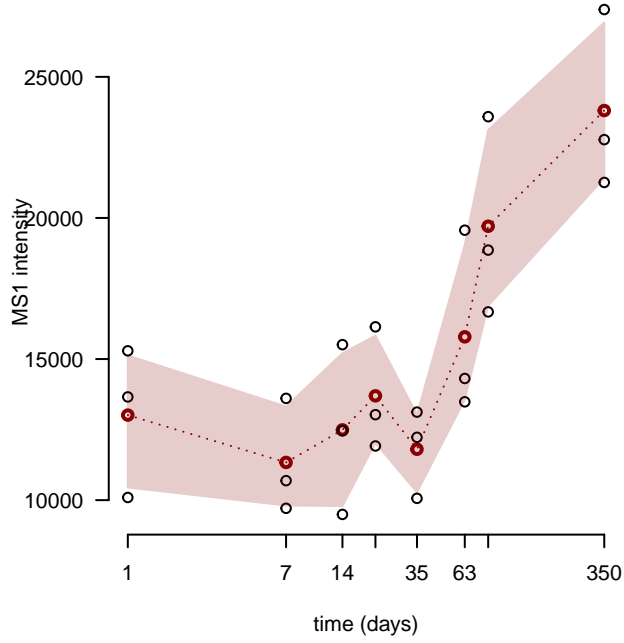

**Q99J25**  
GN=Mrm1  
mitochondrial rRNA methyltransferase 1

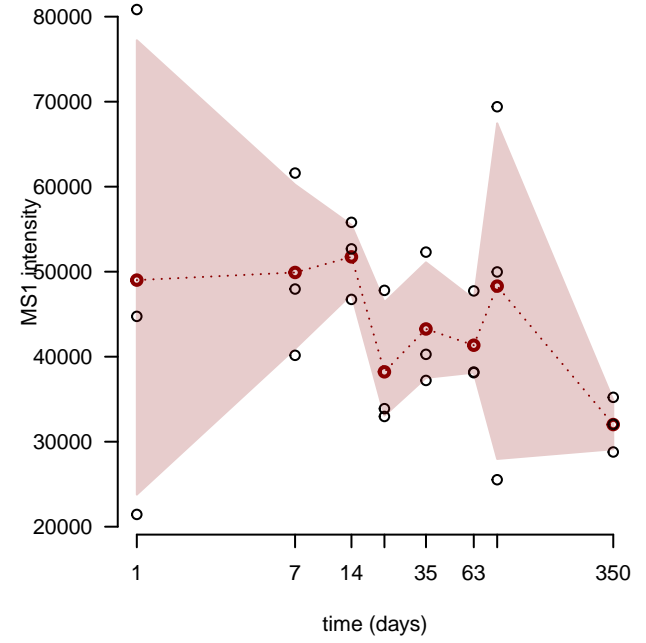

**Q99J27**  
GN=Slc33a1  
solute carrier family 33 (acetyl-CoA tra ...

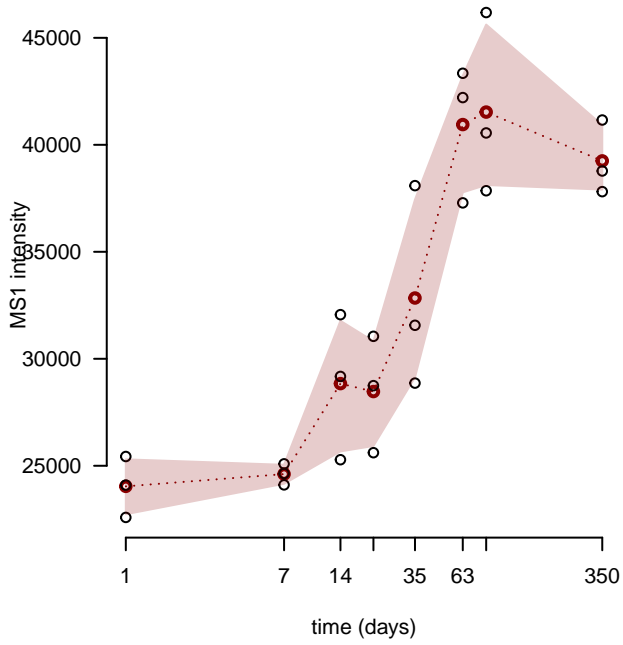

**Q99J31**  
GN=Ophn1  
oligophrenin 1

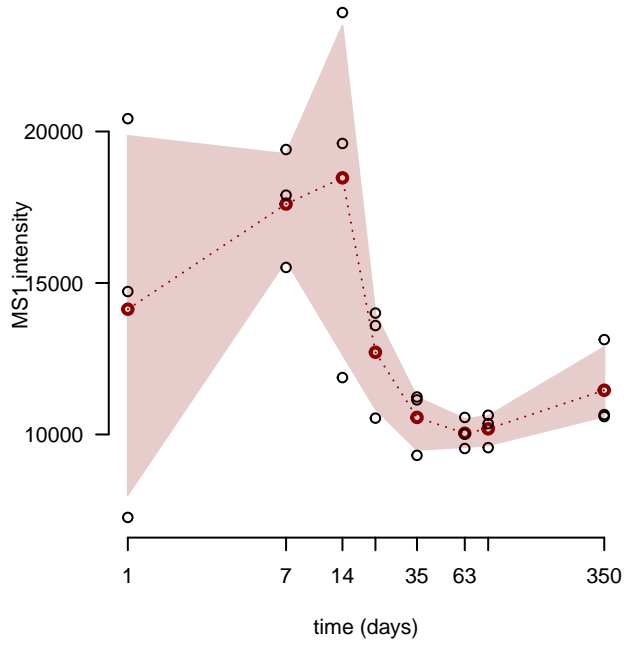

**Q99J36**  
GN=Thumpd1  
THUMP domain containing 1

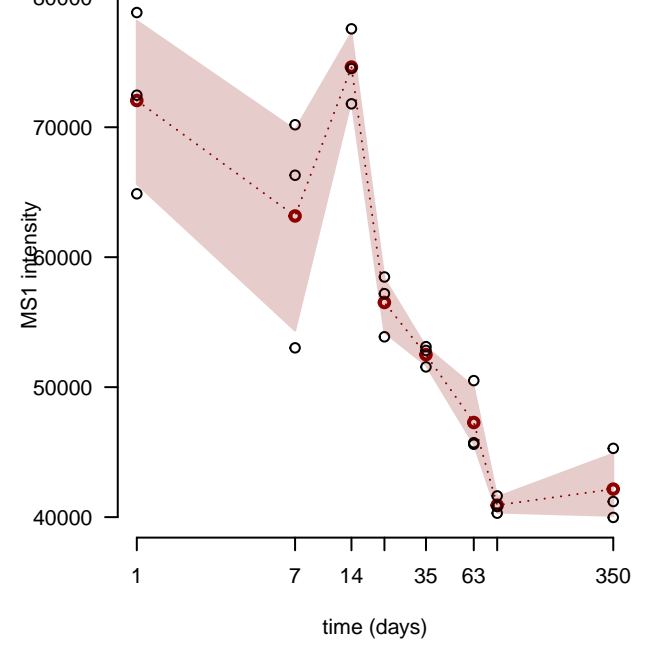

**Q99J39**  
GN=Mlycd  
malonyl-CoA decarboxylase

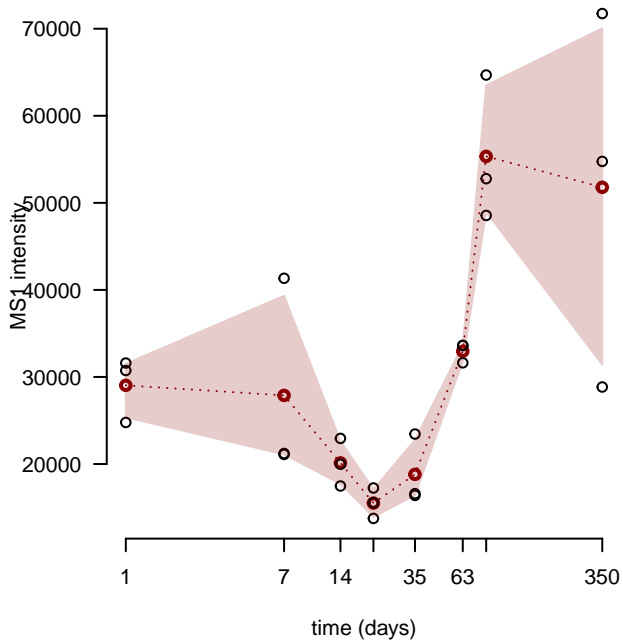

**Q99J45**  
GN=Nrbp1  
nuclear receptor binding protein 1

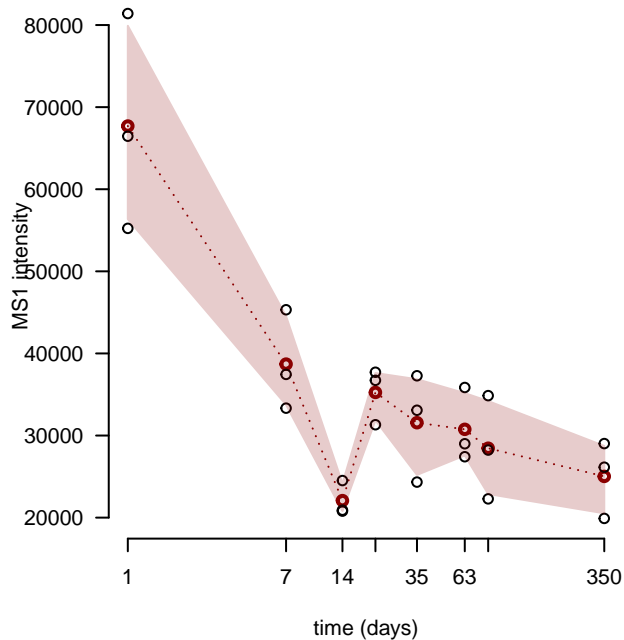

**Q99J47**  
GN=Dhrs7b  
dehydrogenase/reductase (SDR family) mem ...

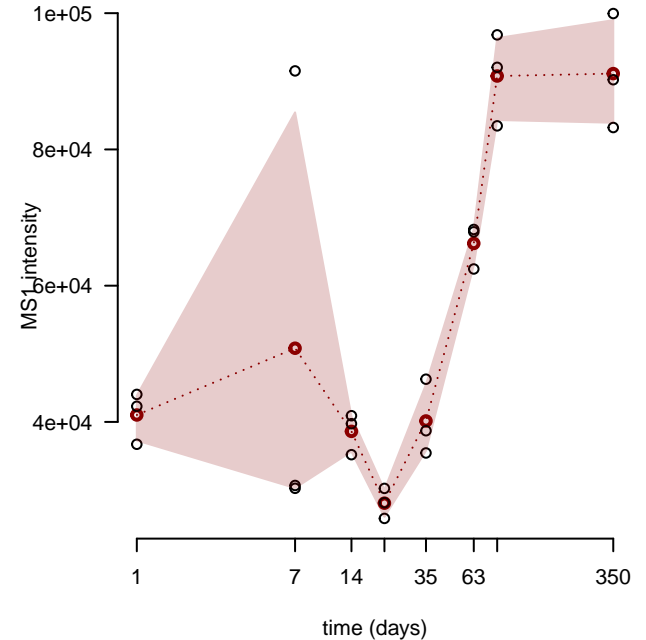

**Q99J56**  
**GN=Der11**  
Der1-like domain family, member 1

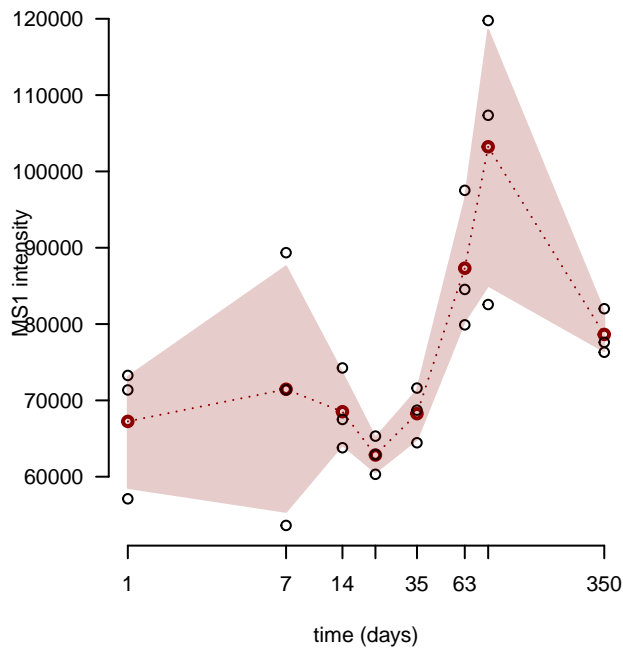

**Q99J62**  
**GN=Rfc4**  
replication factor C (activator 1) 4

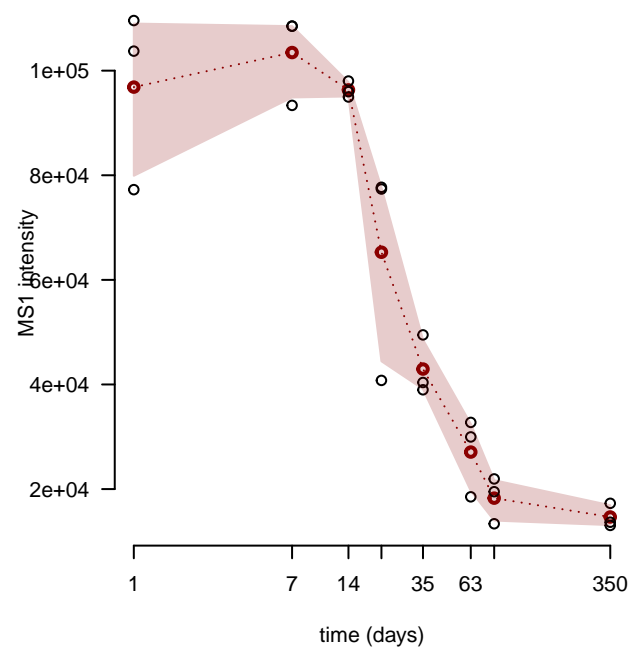

**Q99J64**  
**GN=Rbm43**  
RNA binding motif protein 43

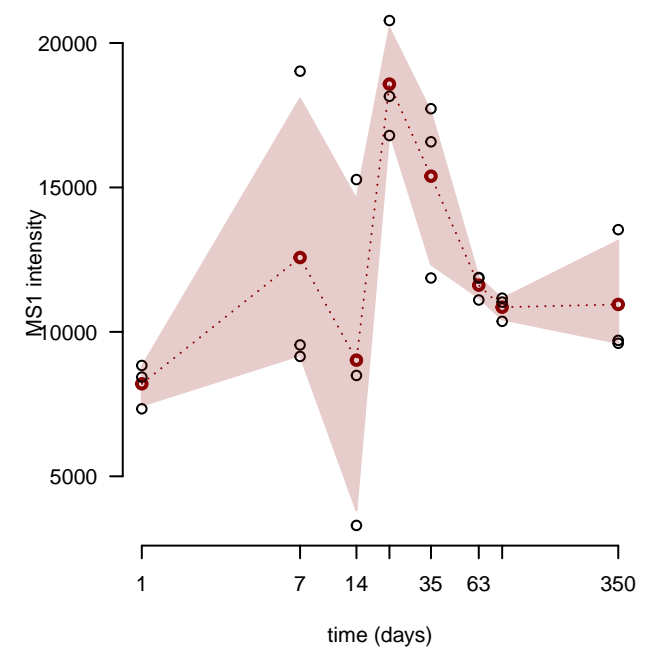

**Q99J72**  
**GN=Apobec3**  
apolipoprotein B mRNA editing enzyme, ca ...

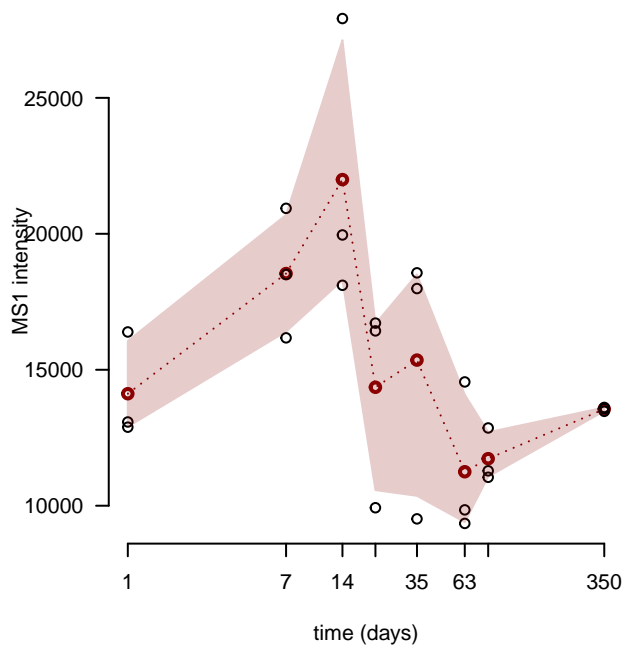

**Q99J77**  
**GN=Nans**  
N-acetylneuraminic acid synthase (sialic ...

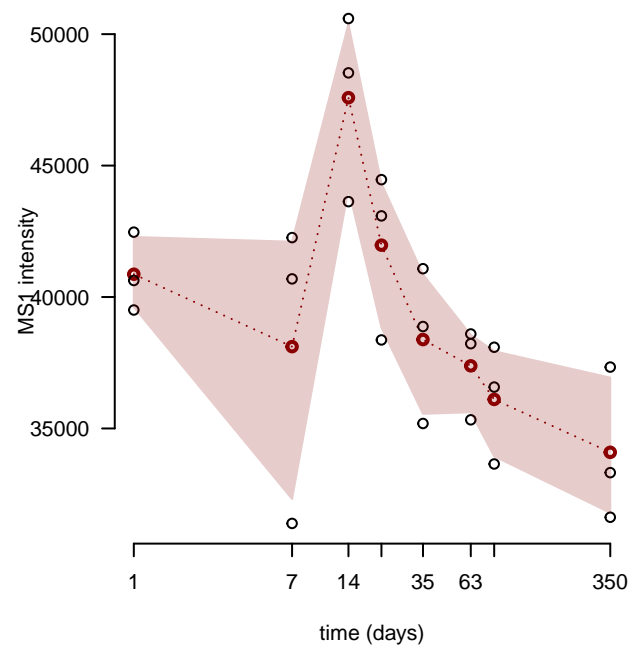

**Q99J79**  
**GN=Ddb2**  
damage specific DNA binding protein 2

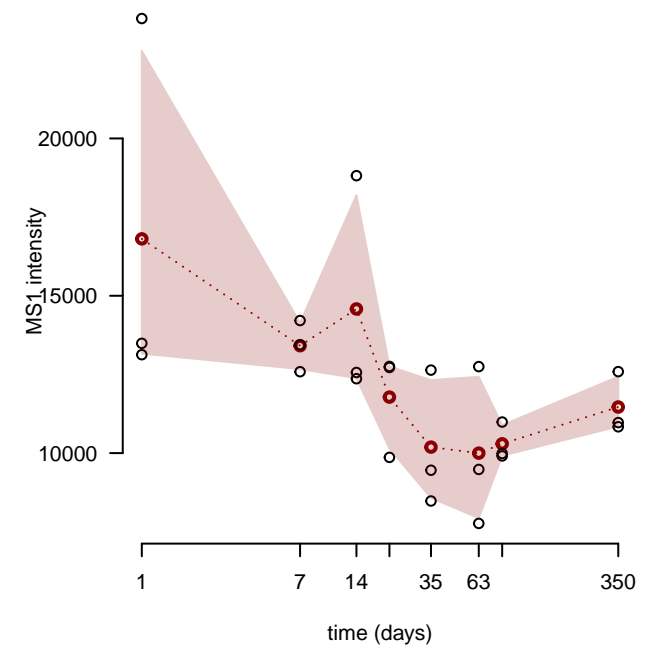

**Q99J83**  
**GN=Atg5**  
autophagy related 5

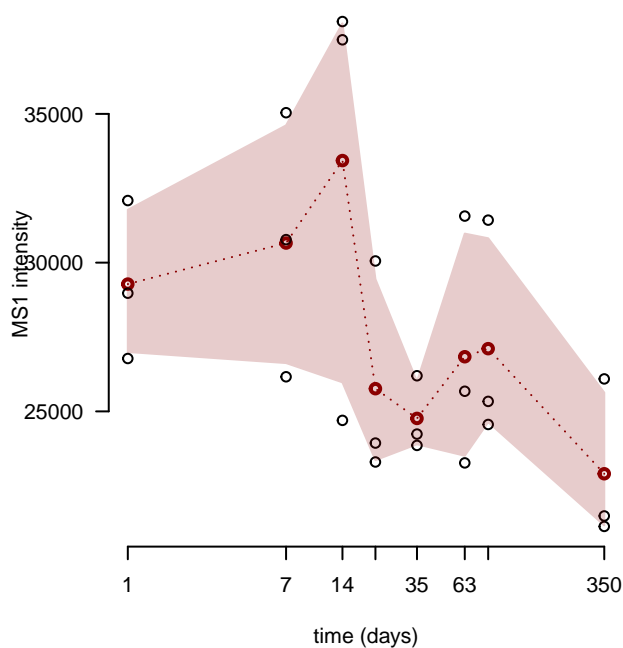

**Q99J85**  
**GN=Nptxr**  
neuronal pentraxin receptor

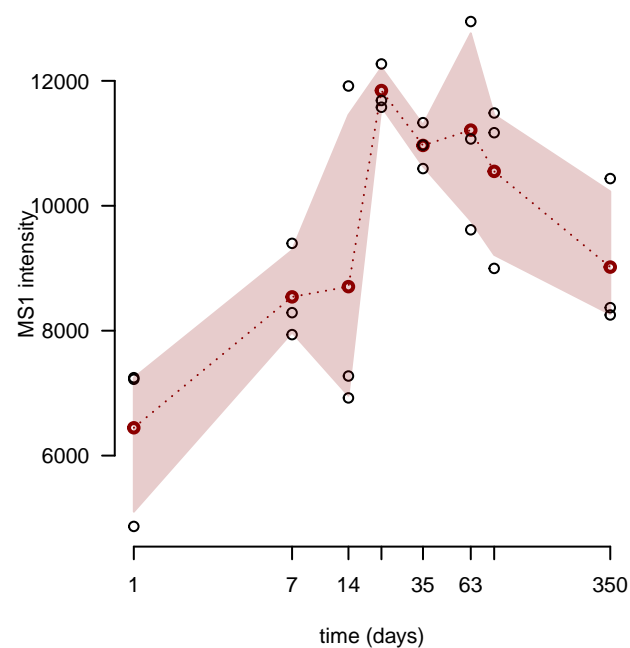

**Q99J93**  
**GN=Ifitm2**  
interferon induced transmembrane protein ...

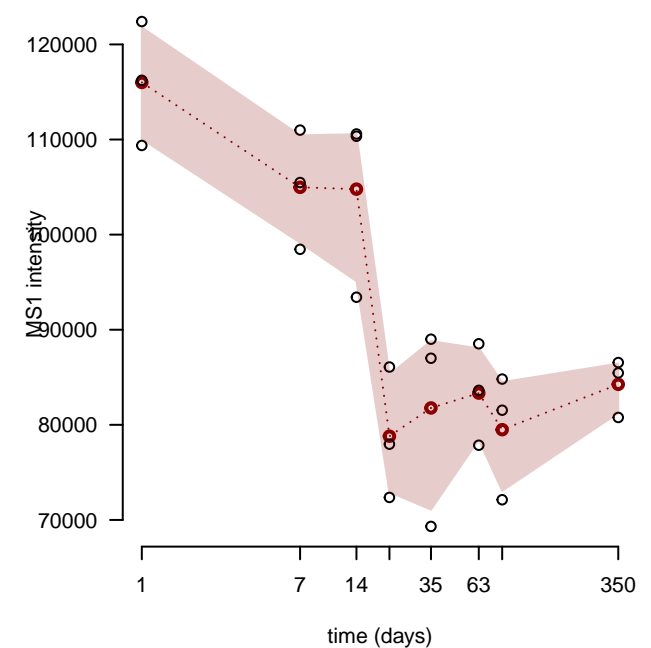

**Q99J95**  
**GN=Cdk9**  
cyclin-dependent kinase 9 (CDC2-related ...

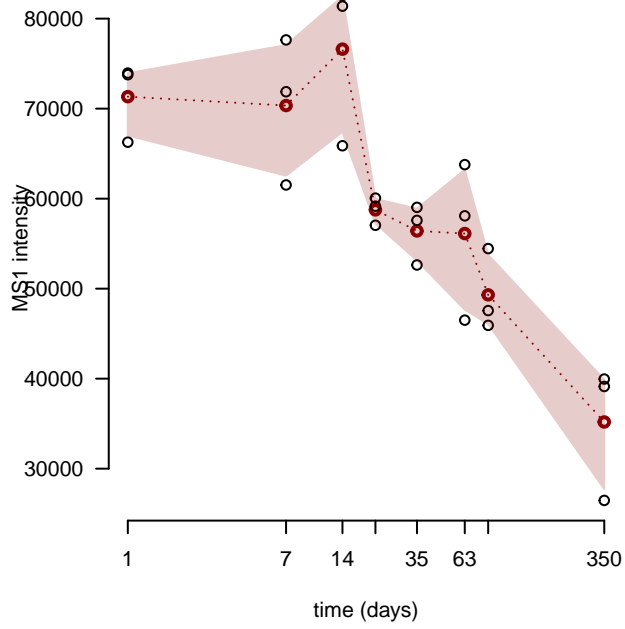

**Q99J95**  
**GN=Cdk9**  
cyclin-dependent kinase 9 (CDC2-related ...

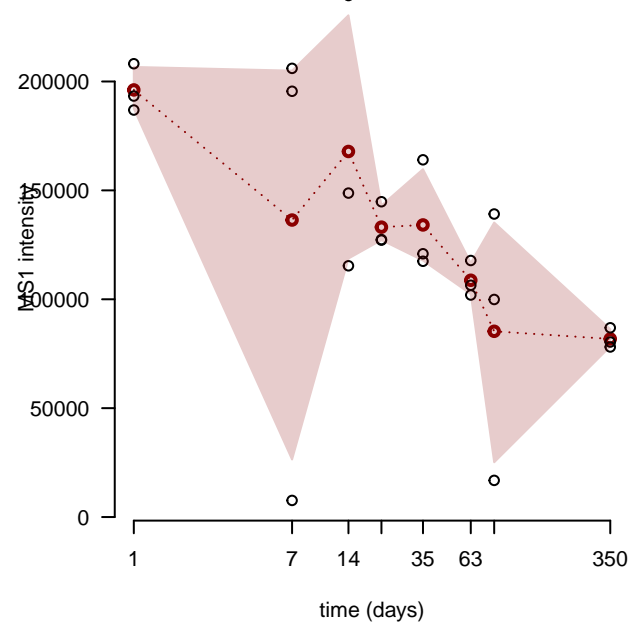

**Q99J99**  
**GN=Mpst**  
mercaptopyruvate sulfurtransferase

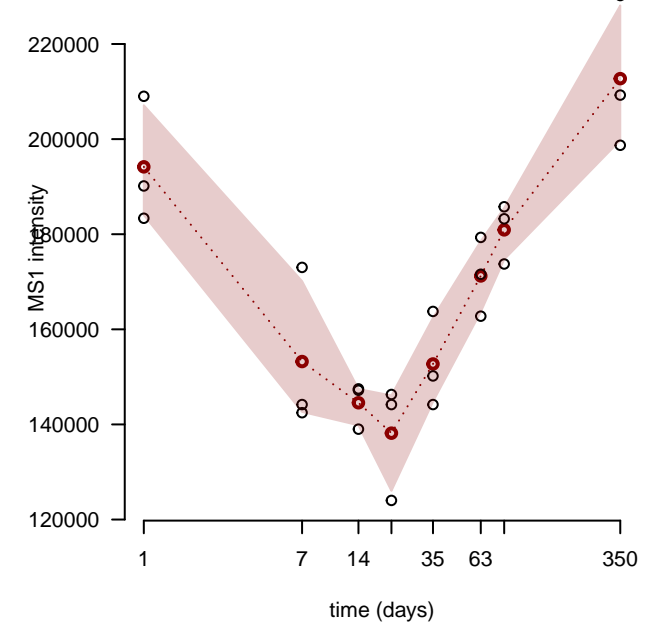

**Q99JB2**  
**GN=Stoml2**  
stomatin (Epb7.2)-like 2

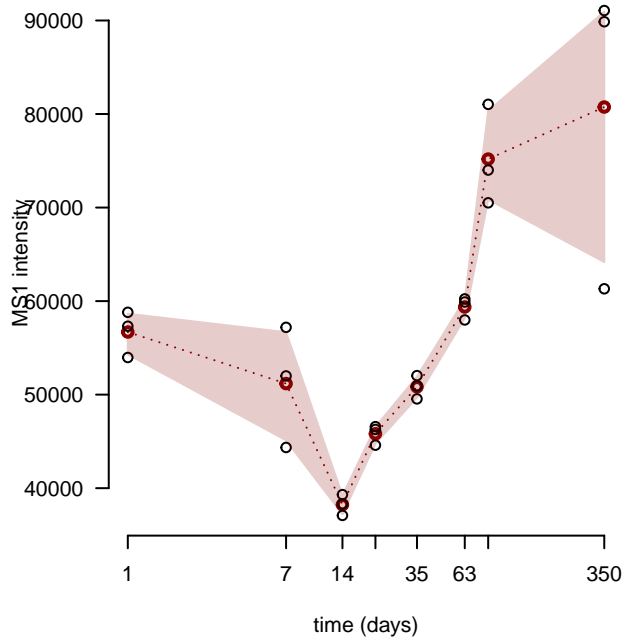

**Q99JB8**  
**GN=Pacsin3**  
protein kinase C and casein kinase subst ...

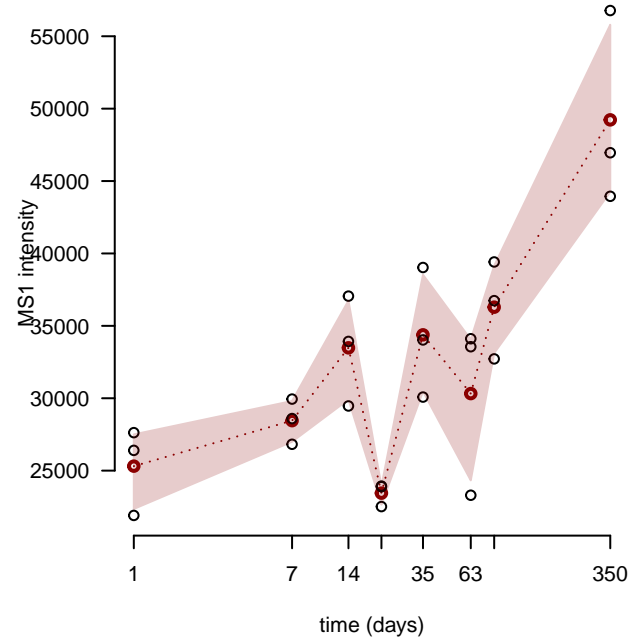

**Q99JF5**  
**GN=Mvd**  
mevalonate (diphospho) decarboxylase

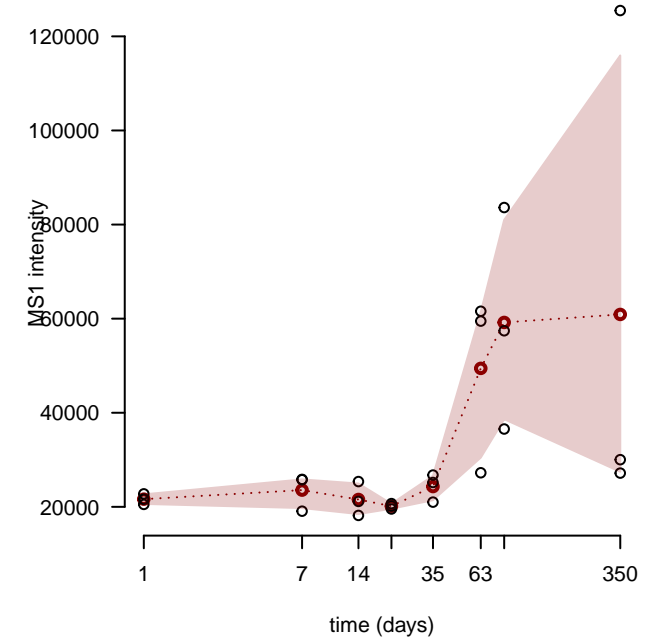

**Q99JF8**  
**GN=Psp1**  
PC4 and SFRS1 interacting protein 1

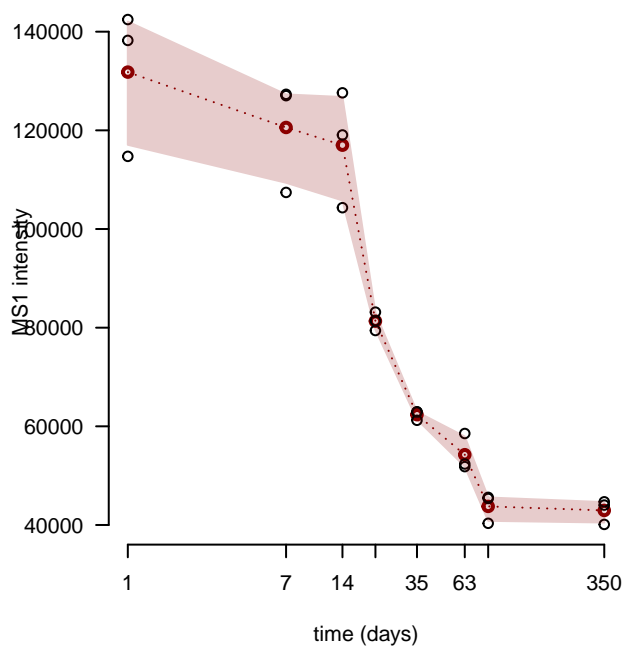

**Q99JG3**  
**GN=Anxa13**  
annexin A13

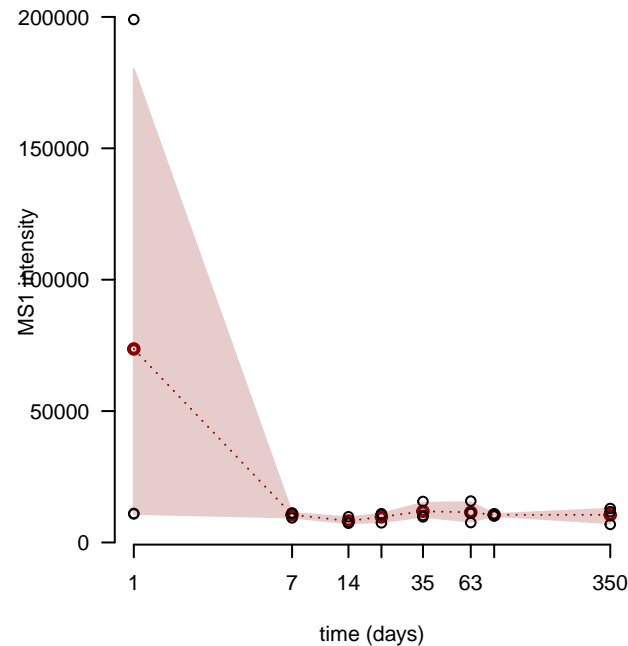

**Q99JH1**  
**GN=Rpp25l**  
ribonuclease P/MRP 25 subunit-like

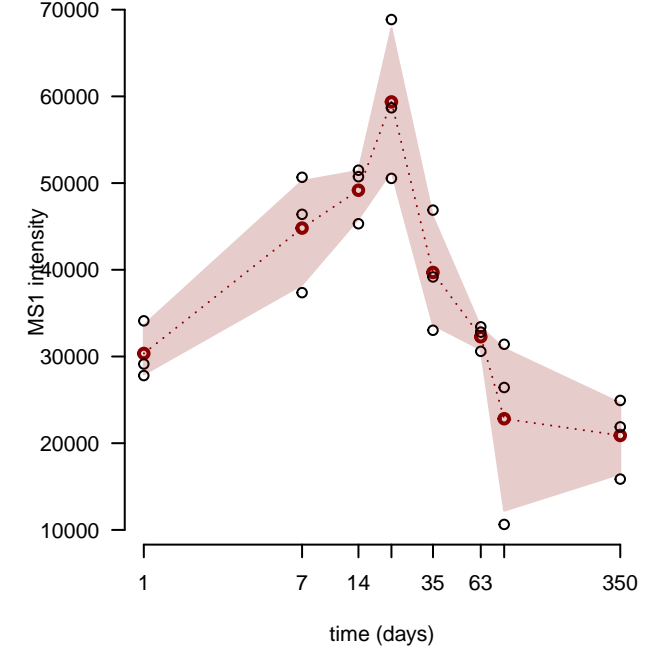

**Q99JH8**  
**GN=Kdelr1**

KDEL (Lys-Asp-Glu-Leu) endoplasmic retic ...

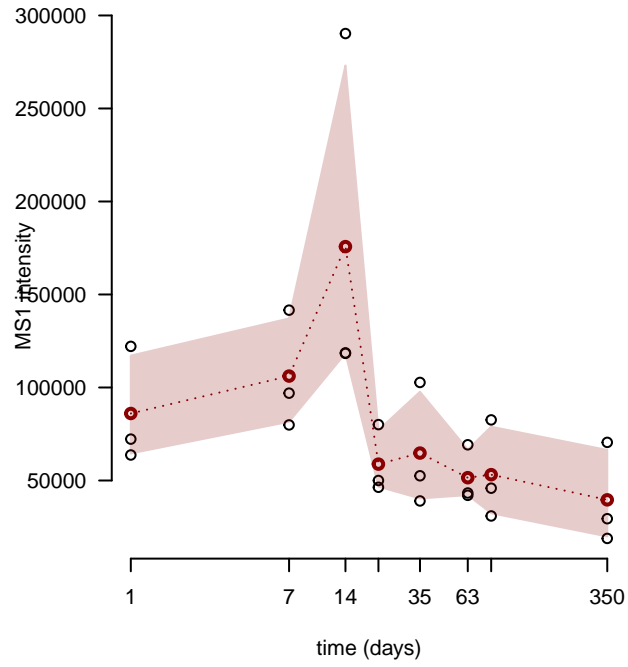

**Q99JI1**  
**GN=Mustn1**

musculoskeletal, embryonic nuclear prote ...

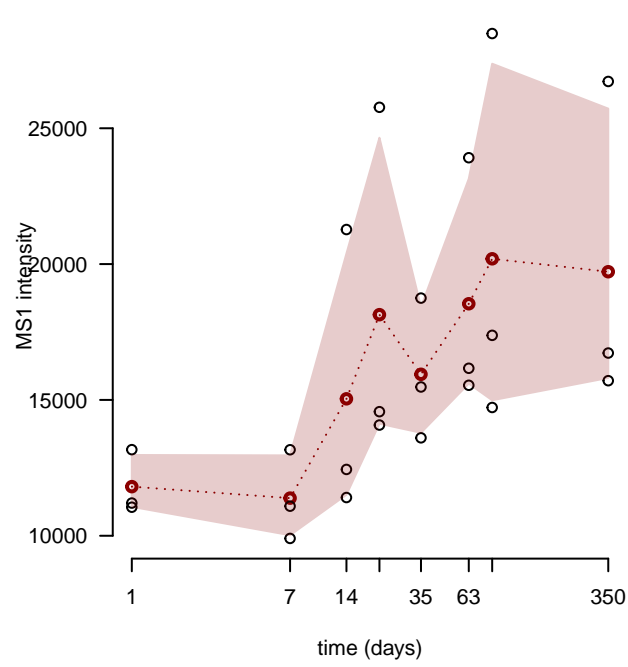

**Q99JI4**  
**GN=Psm6**

proteasome (prosome, macropain) 26S subu ...

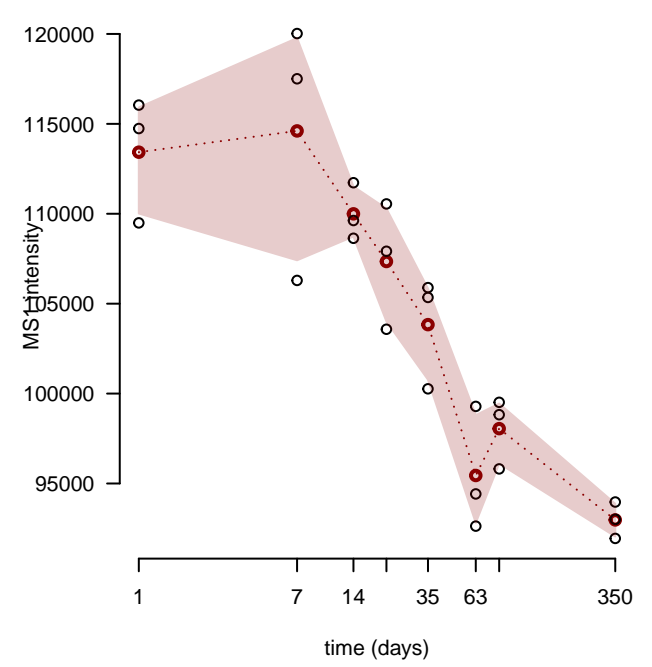

**Q99JI6**  
**GN=Rap1b**

RAS related protein 1b

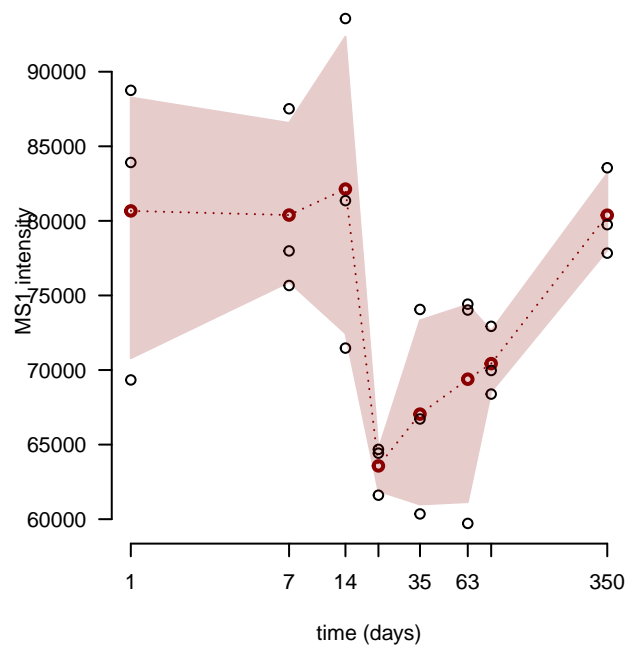

**Q99JN2**  
**GN=Klh22**

kelch-like 22

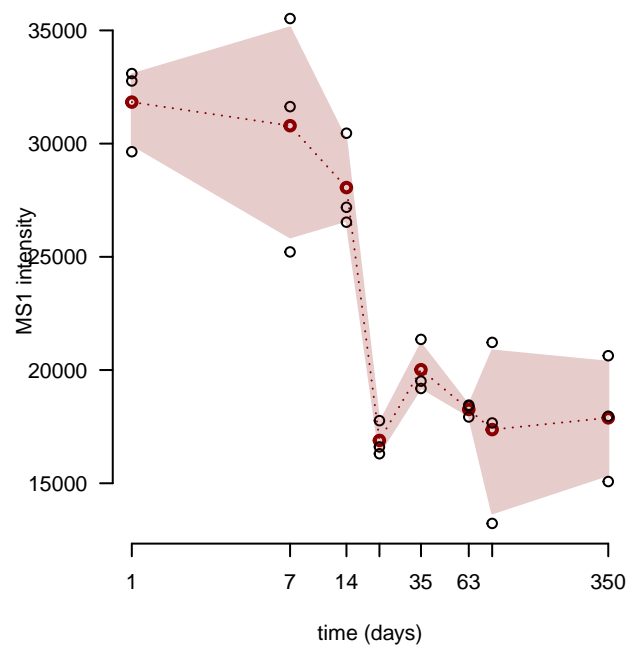

**Q99JP0**  
**GN=Map4k3**

mitogen-activated protein kinase kinase ...

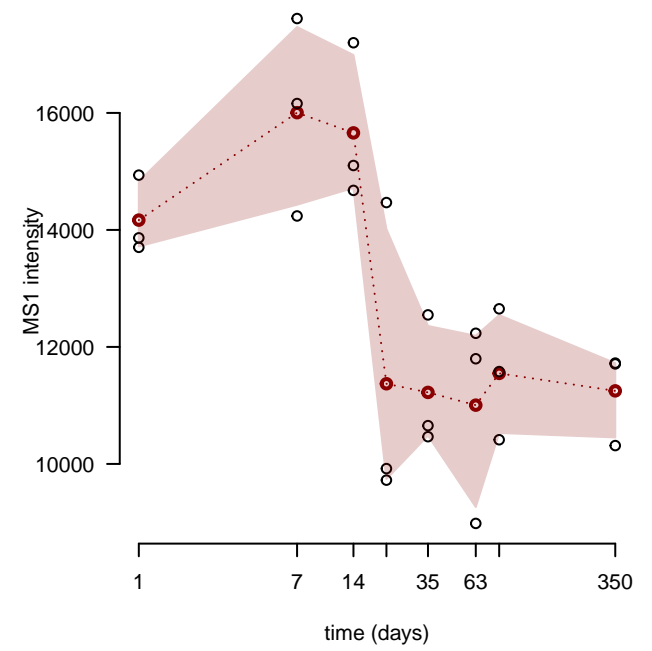

**Q99JP4**  
**GN=Cdc26**

cell division cycle 26

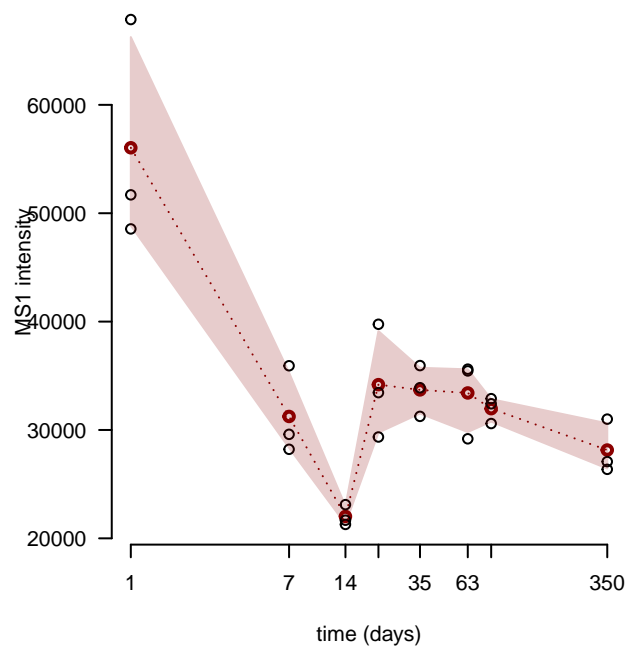

**Q99JP6**  
**GN=Homer3**

homer scaffolding protein 3

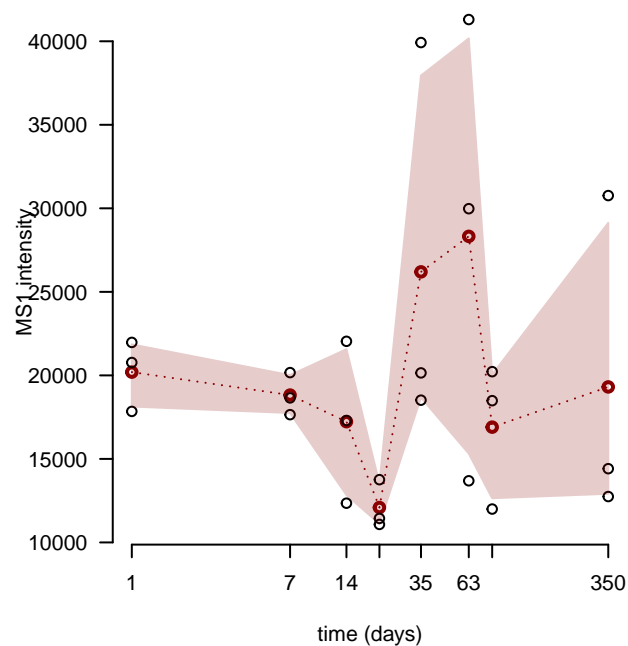

**Q99JR1**  
**GN=Sfxn1**

sideroflexin 1

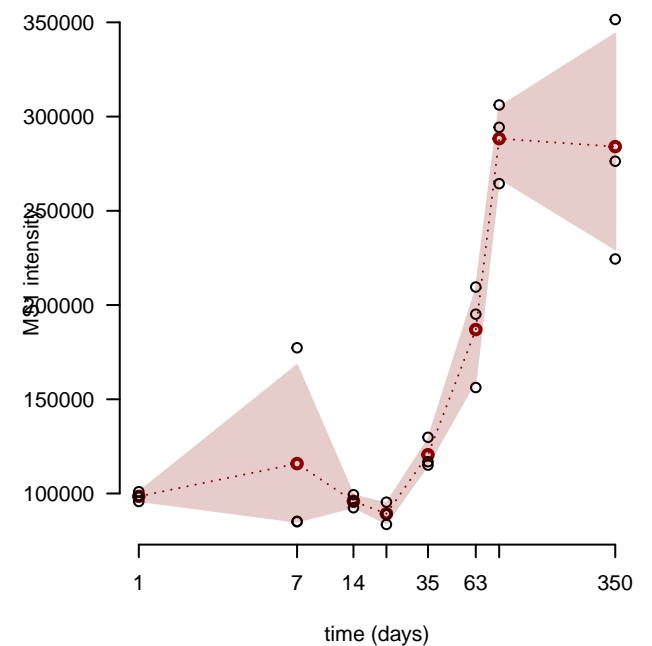

**Q99JR5**  
**GN=Tinagl1**  
 tubulointerstitial nephritis antigen-lik ...

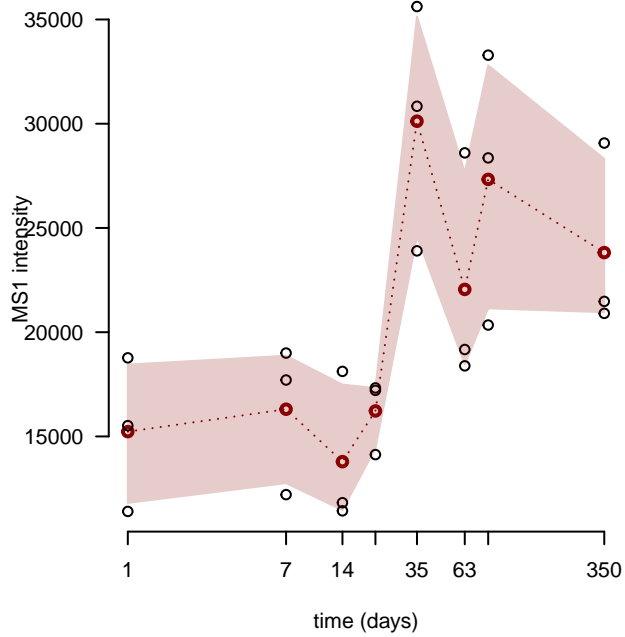

**Q99JR6**  
**GN=Nmnat3**  
 nicotinamide nucleotide adenyltransfer ...

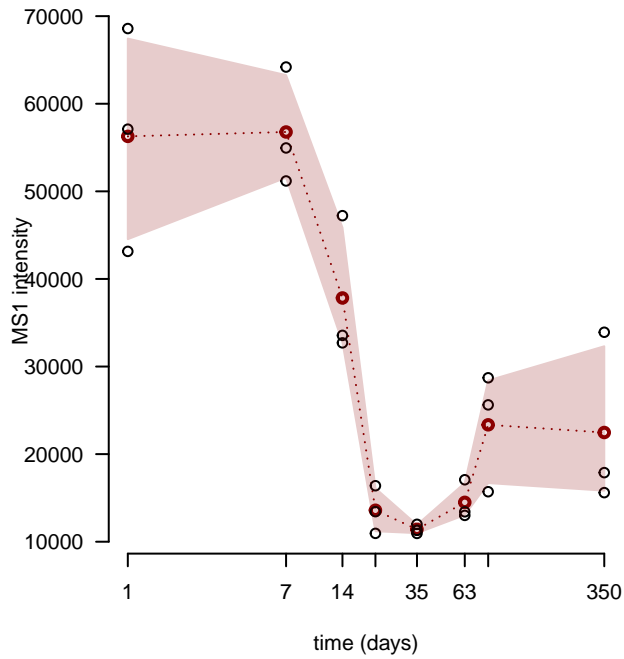

**Q99JR8**  
**GN=Smarcd2**  
 SWI/SNF related, matrix associated, acti ...

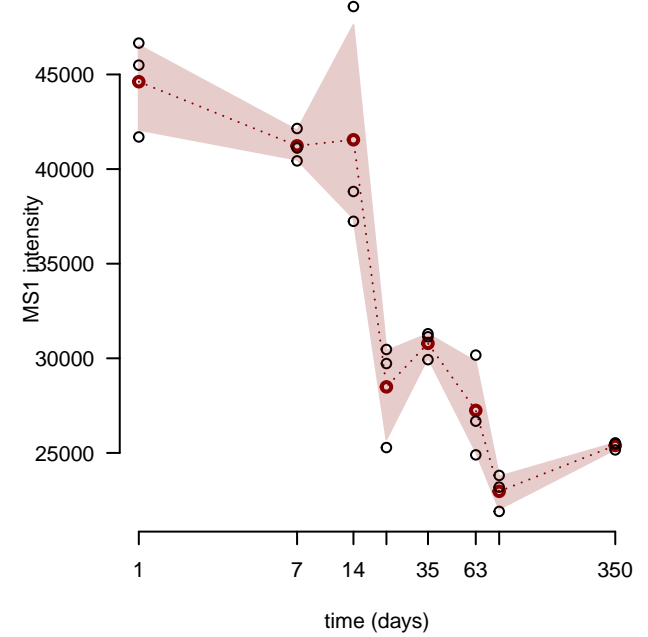

**Q99JT1**  
**GN=Gatb**  
 glutamyl-tRNA(Gln) amidotransferase, sub ...

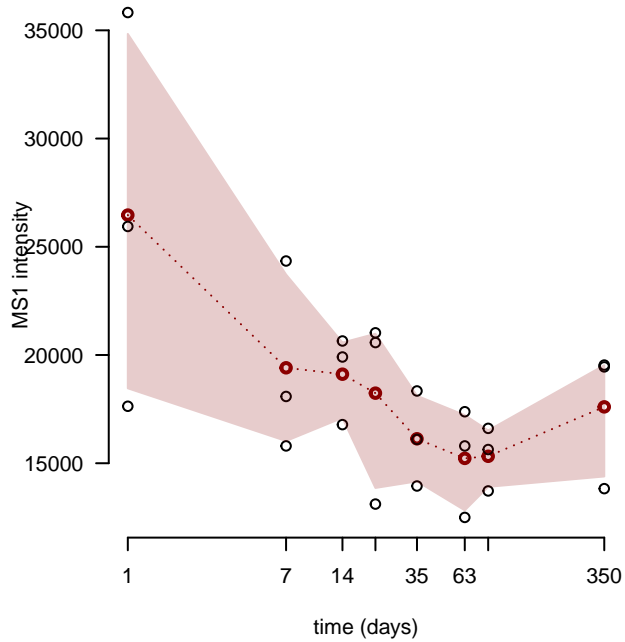

**Q99JT2**  
**GN=Stk26**  
 serine/threonine kinase 26

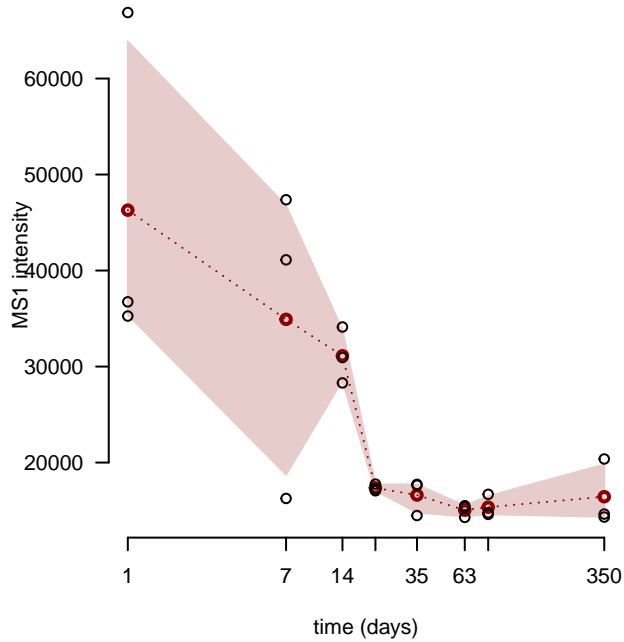

**Q99JT6**  
**GN=Trcd1**  
 TLC domain containing 1

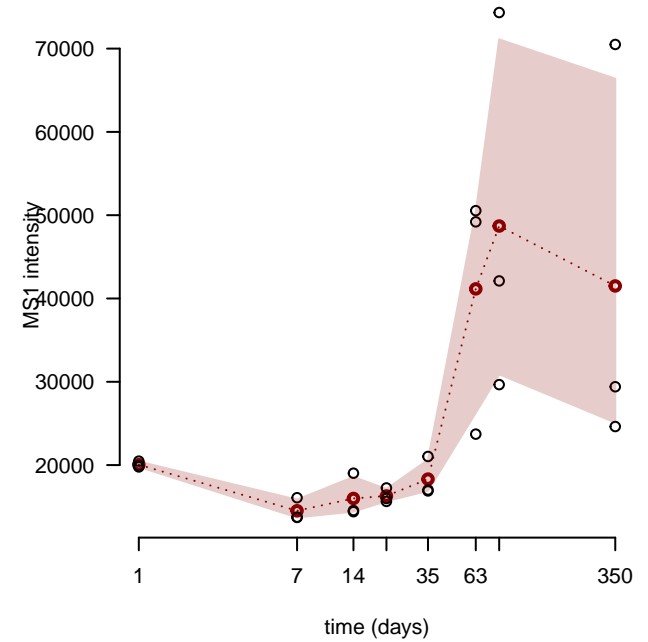

**Q99JT9**  
**GN=Adi1**  
 acireductone dioxygenase 1

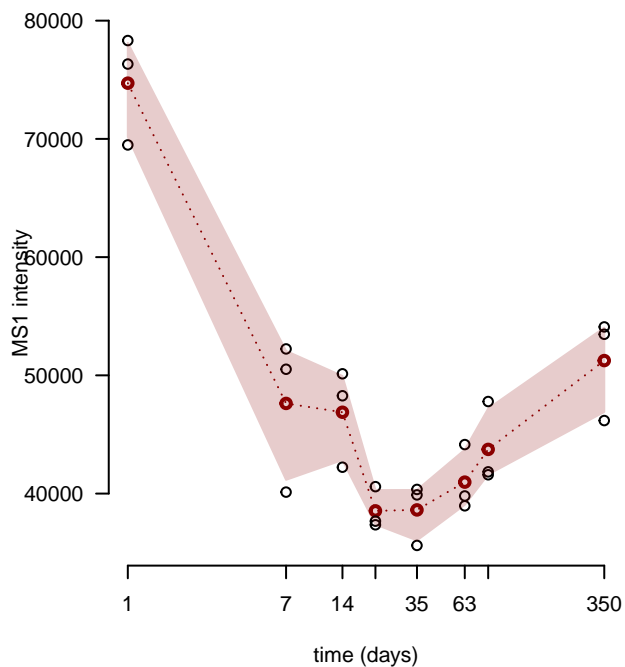

**Q99JV5**  
**GN=Stard4**  
 StAR-related lipid transfer (START) doma ...

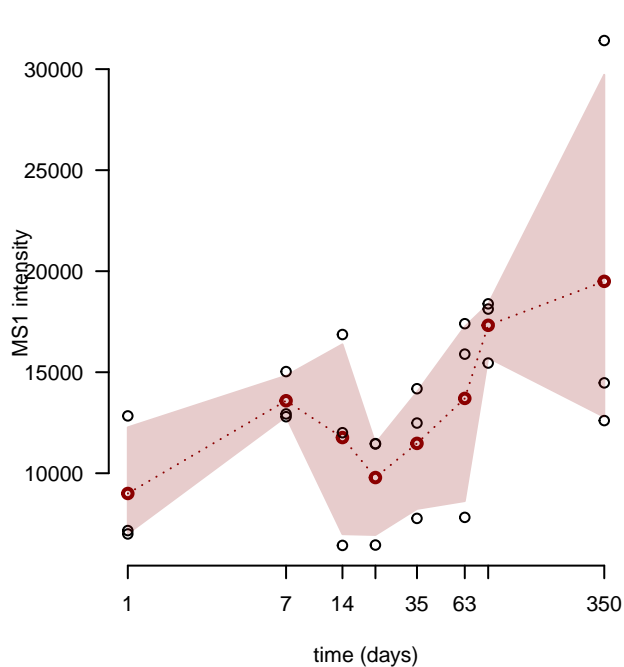

**Q99JW2**  
**GN=Acy1**  
 aminoacylase 1

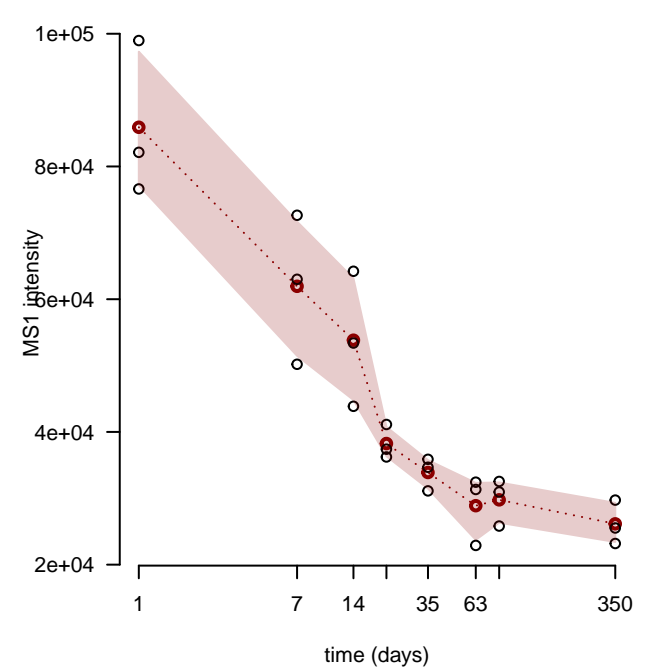

**Q99JW4**

**GN=Lims1**

LIM and senescent cell antigen-like doma ...

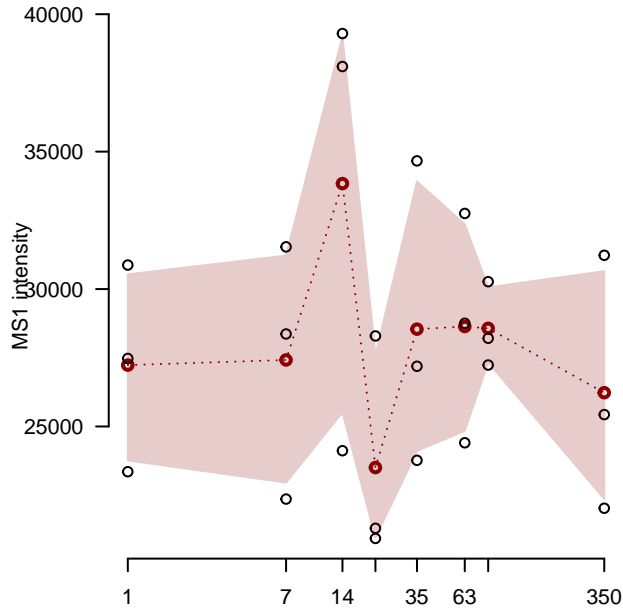

time (days)

**Q99JW5**

**GN=Epcam**

epithelial cell adhesion molecule

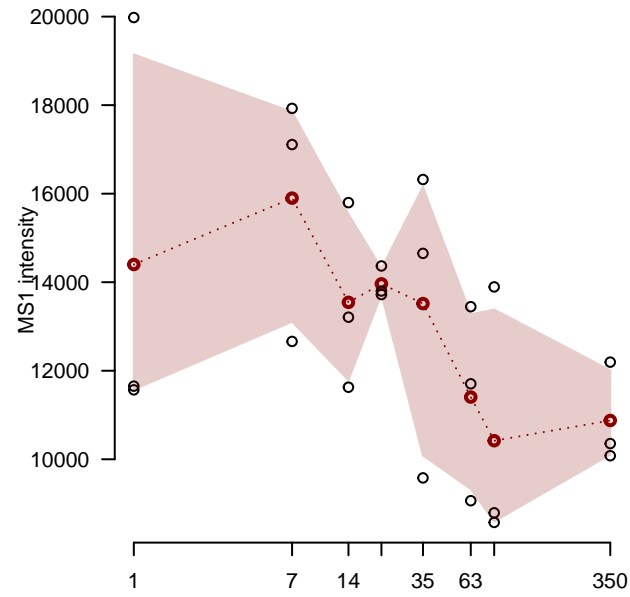

time (days)

**Q99JX1**

**GN=Taf11**

TATA-box binding protein associated fact ...

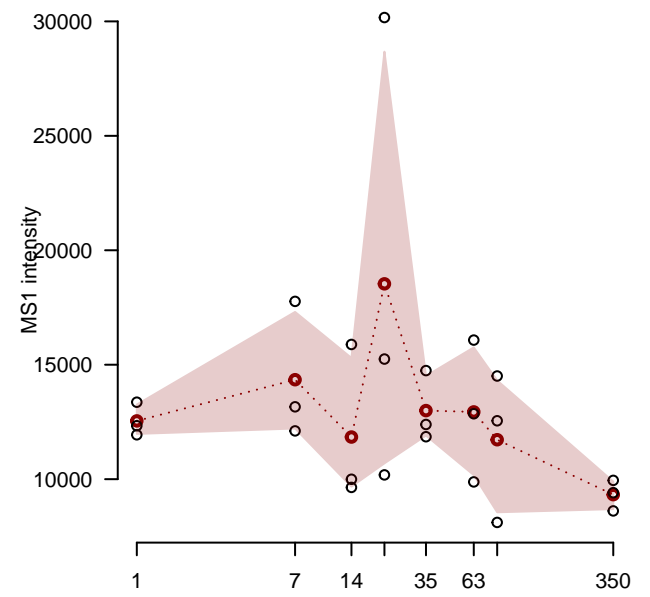

time (days)

**Q99JX3**

**GN=Gorasp2**

golgi reassembly stacking protein 2

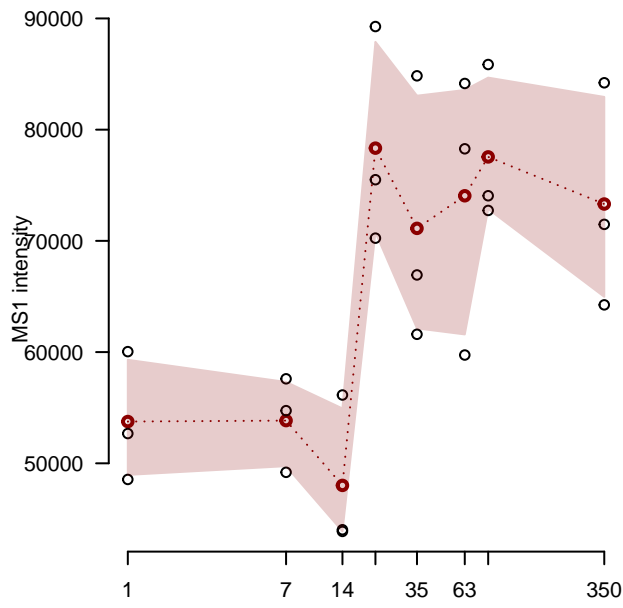

time (days)

**Q99JX4**

**GN=Eif3m**

eukaryotic translation initiation factor ...

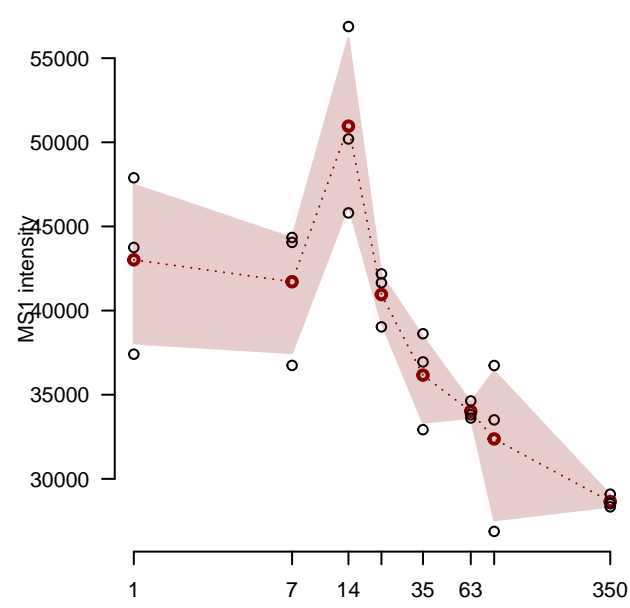

time (days)

**Q99JX7**

**GN=Nxf1**

nuclear RNA export factor 1

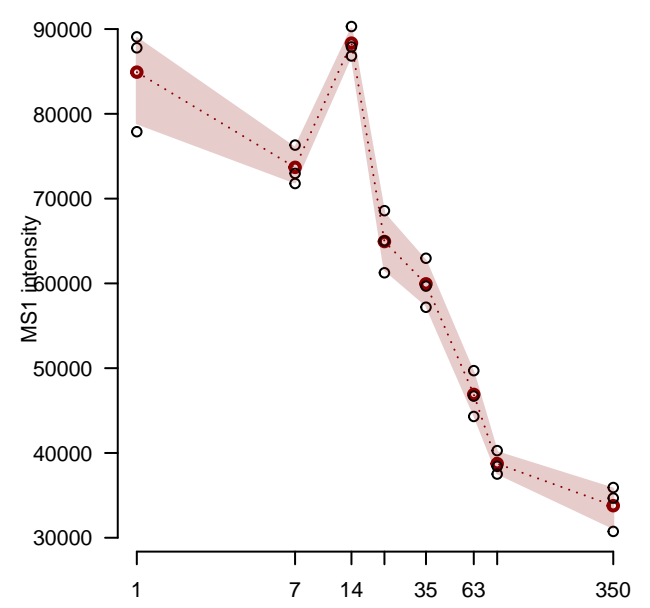

time (days)

**Q99JY0**

**GN=Hadhb**

hydroxyacyl-CoA dehydrogenase trifunctio ...

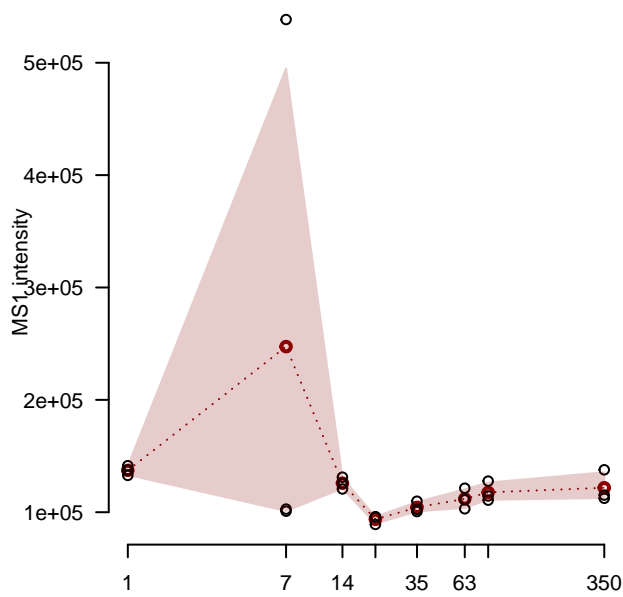

time (days)

**Q99JY3**

**GN=Gimap4**

GTPase, IMAP family member 4

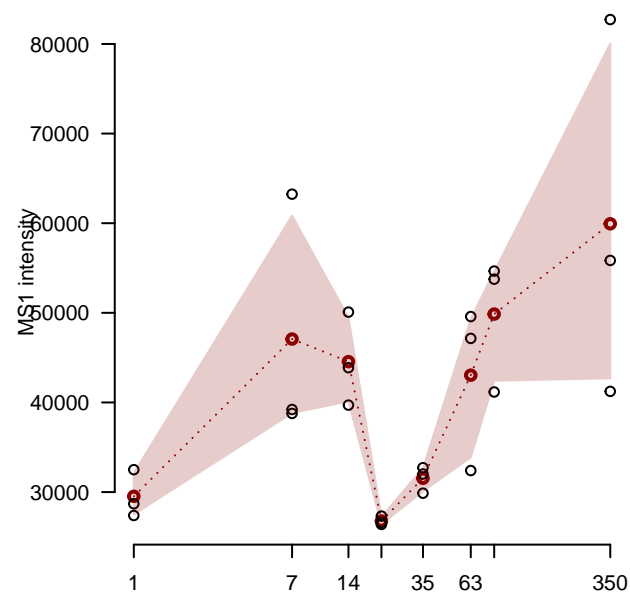

time (days)

**Q99JY4**

**GN=Trabd**

TraB domain containing

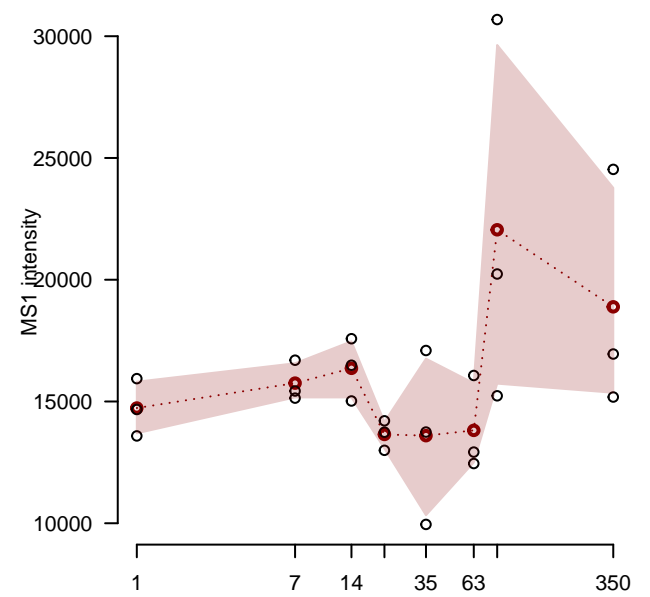

time (days)

**Q99JY8**  
GN=Plpp3  
phospholipid phosphatase 3

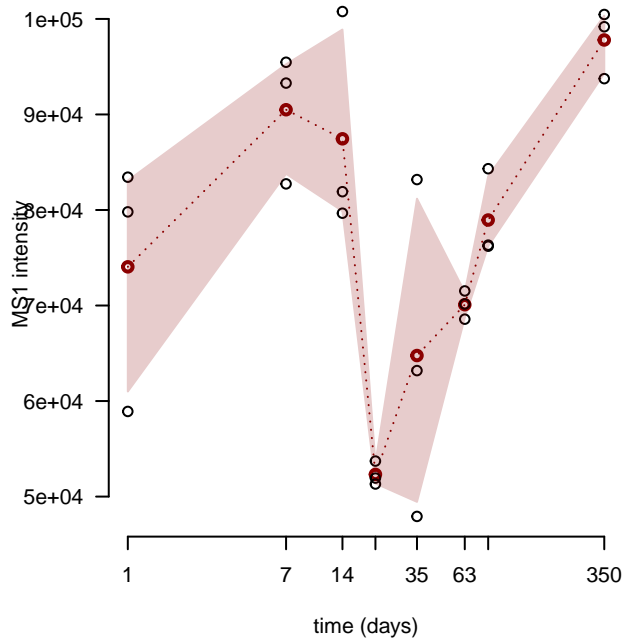

**Q99JY9**  
GN=Actr3  
ARP3 actin-related protein 3

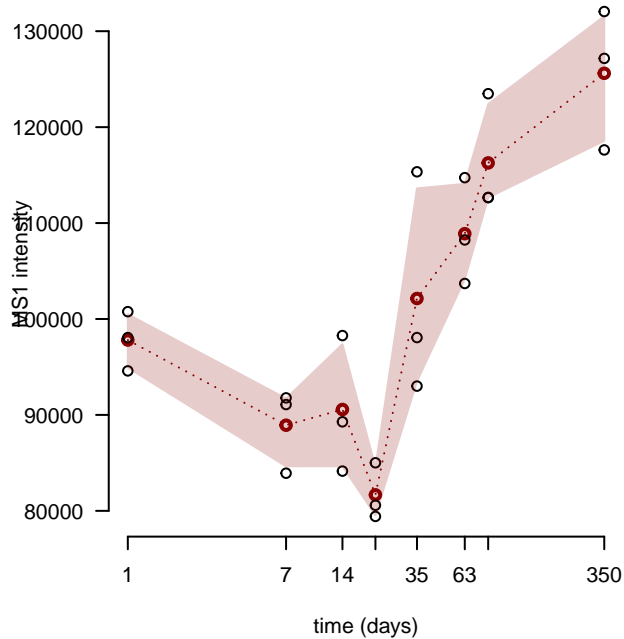

**Q99K01**  
GN=Pdxdc1  
pyridoxal-dependent decarboxylase domain ...

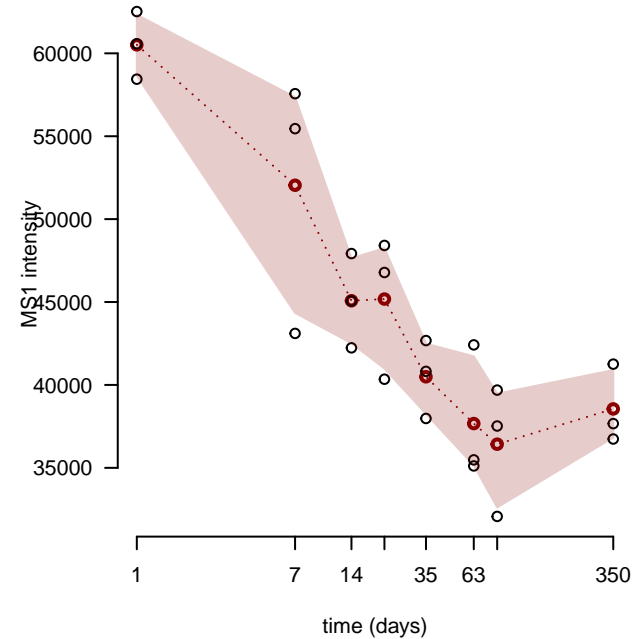

**Q99K01**  
GN=Pdxdc1  
pyridoxal-dependent decarboxylase domain ...

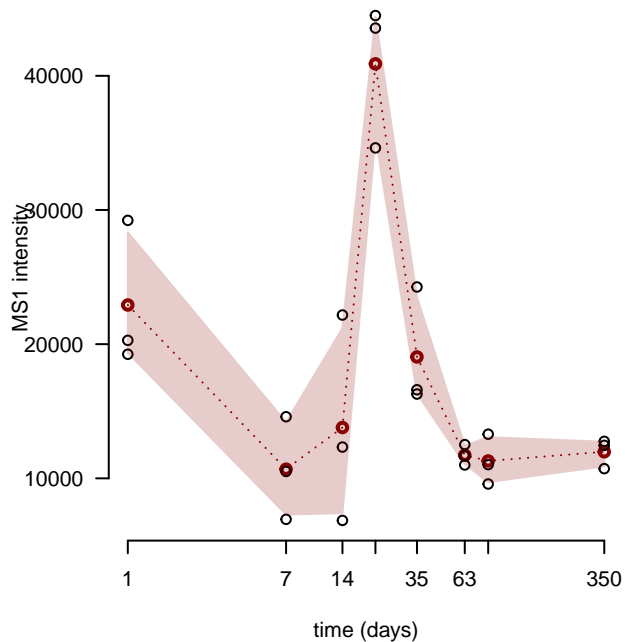

**Q99K23**  
GN=Ufsp2  
UFM1-specific peptidase 2

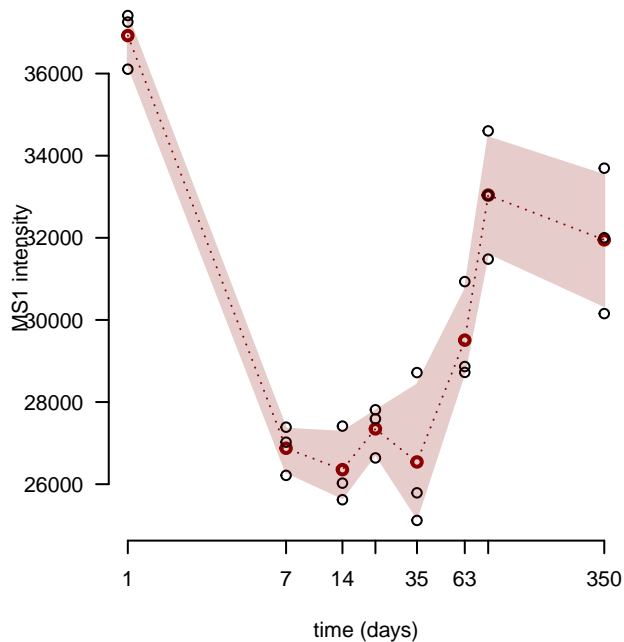

**Q99K24**  
GN=Slc39a3  
solute carrier family 39 (zinc transport ...

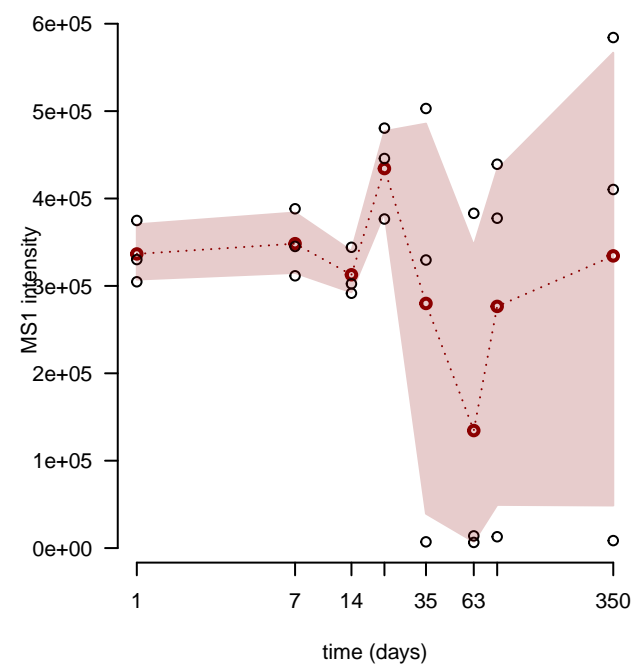

**Q99K28**  
GN=Arfgap2  
ADP-ribosylation factor GTPase activatin ...

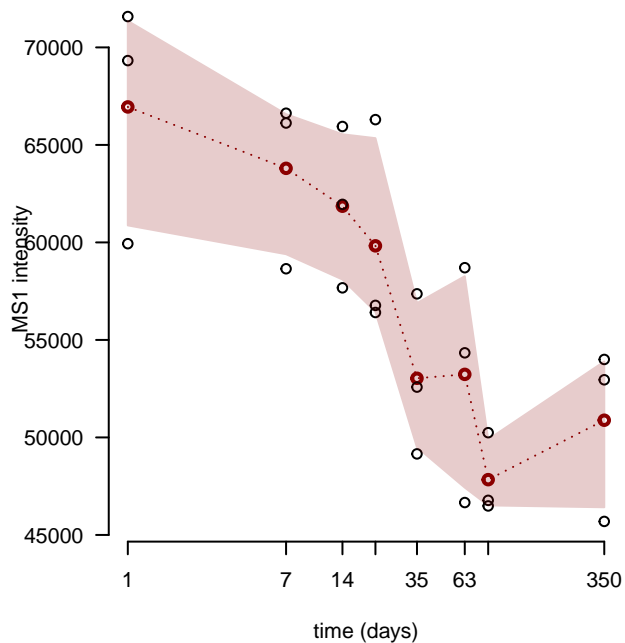

**Q99K30**  
GN=Eps8I2  
EPS8-like 2

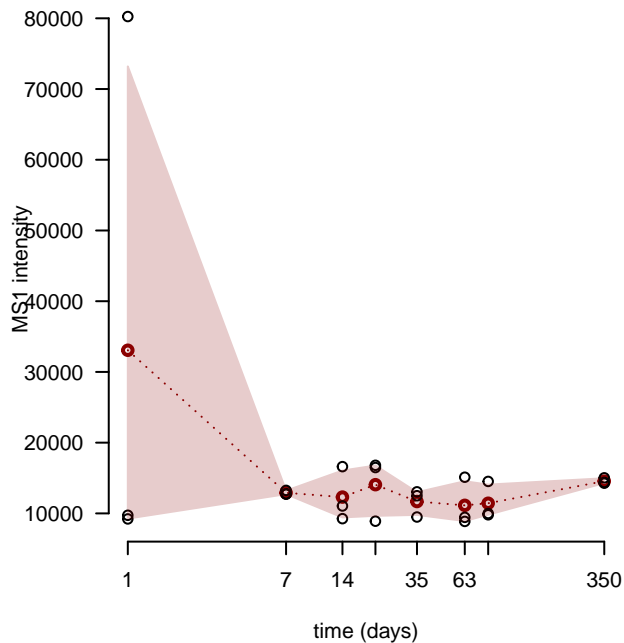

**Q99K41**  
GN=Emilin1  
elastin microfibril interfacier 1

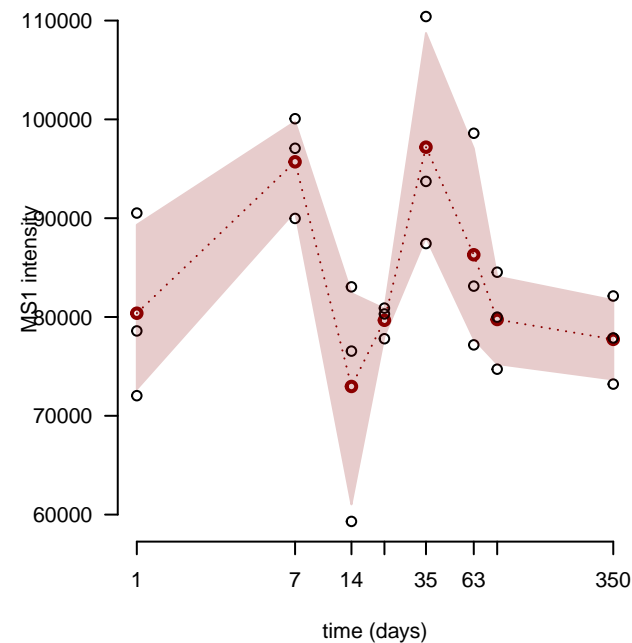

**Q99K43**  
**GN=Prc1**  
protein regulator of cytokinesis 1

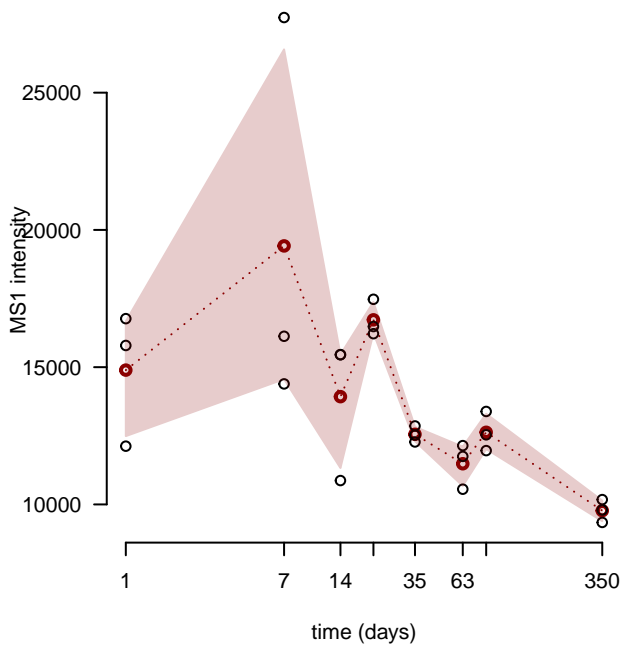

**Q99K46**  
**GN=Usp11**  
ubiquitin specific peptidase 11

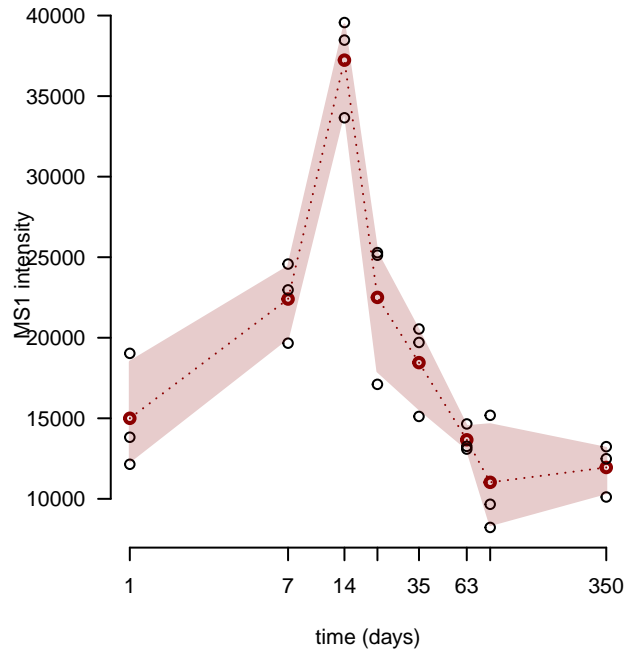

**Q99K48**  
**GN=Nono**  
non-POU-domain-containing, octamer bindi ...

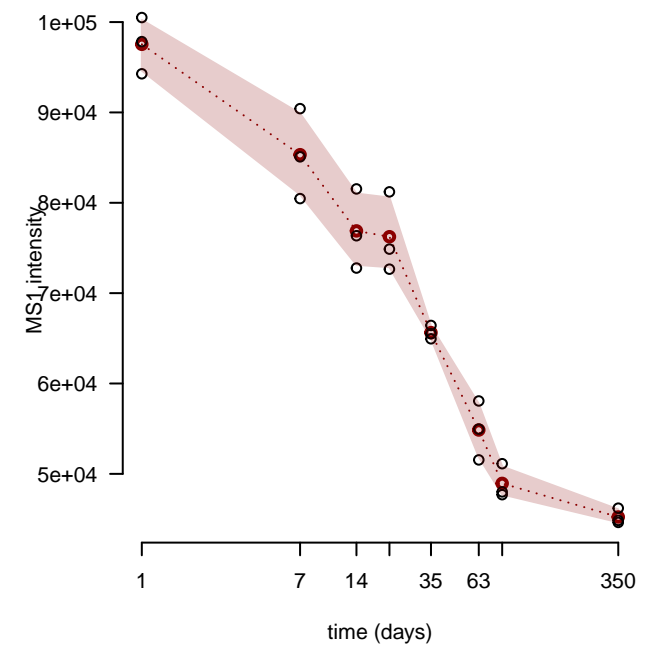

**Q99K51**  
**GN=Pls3**  
plastin 3 (T-isoform)

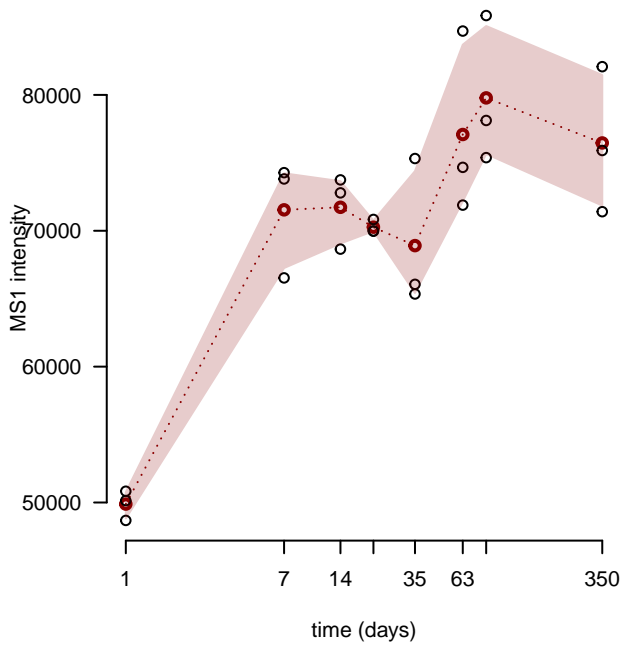

**Q99K67**  
**GN=Aass**  
aminoadipate-semialdehyde synthase

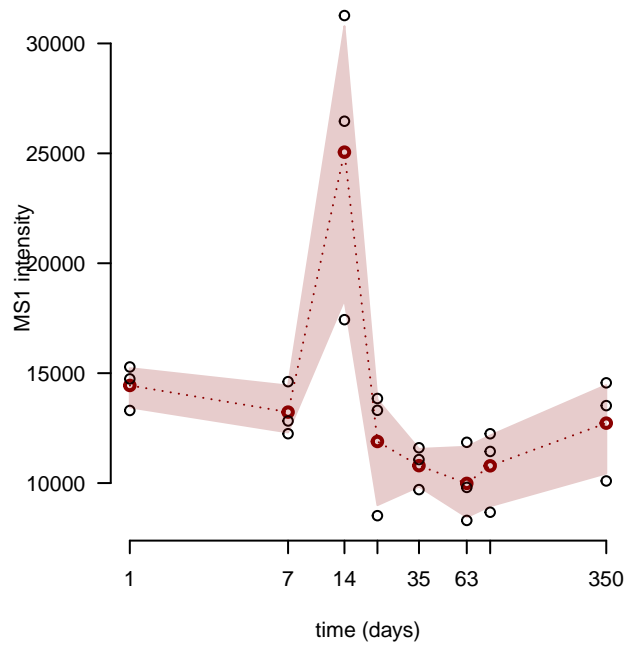

**Q99K70**  
**GN=Rragc**  
Ras-related GTP binding C

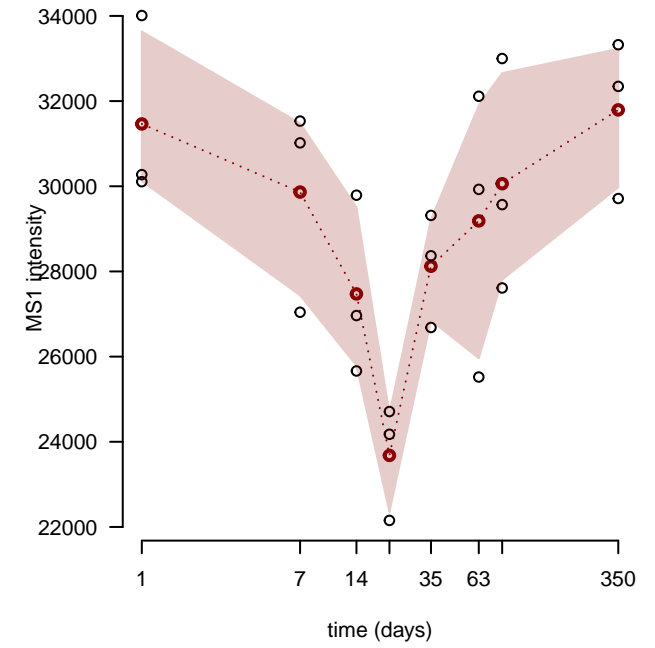

**Q99K74**  
**GN=Med24**  
mediator complex subunit 24

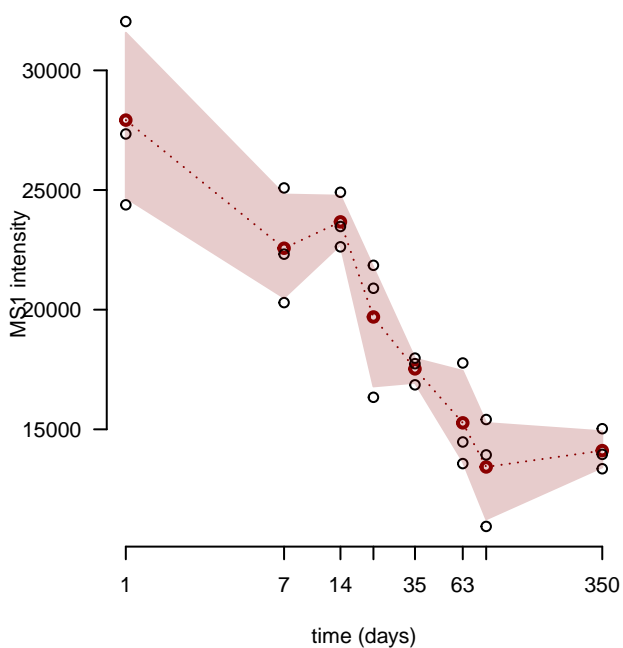

**Q99K85**  
**GN=Psat1**  
phosphoserine aminotransferase 1

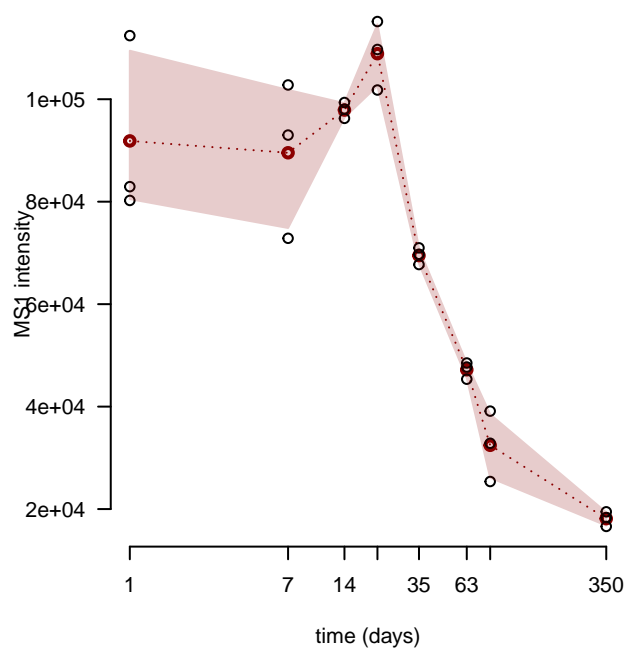

**Q99K90**  
**GN=Tab2**  
TGF-beta activated kinase 1/MAP3K7 bindi ...

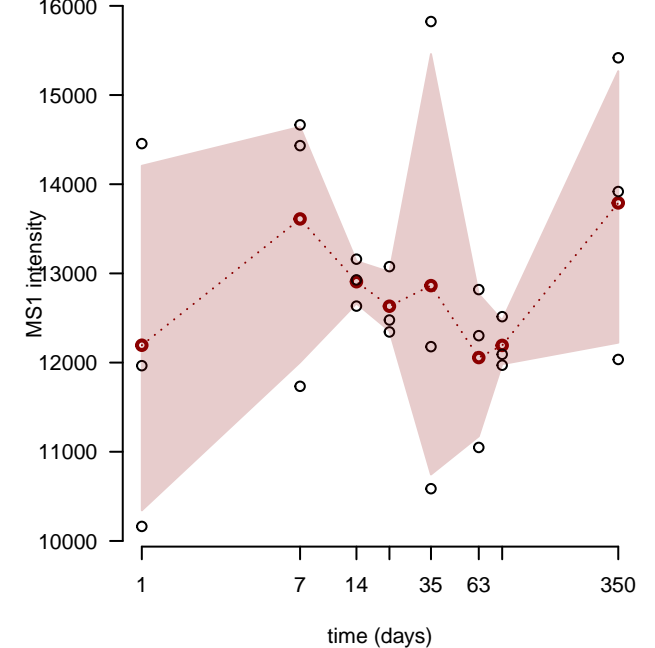



**Q99K95**  
**GN=Rtf2**  
replication termination factor 2

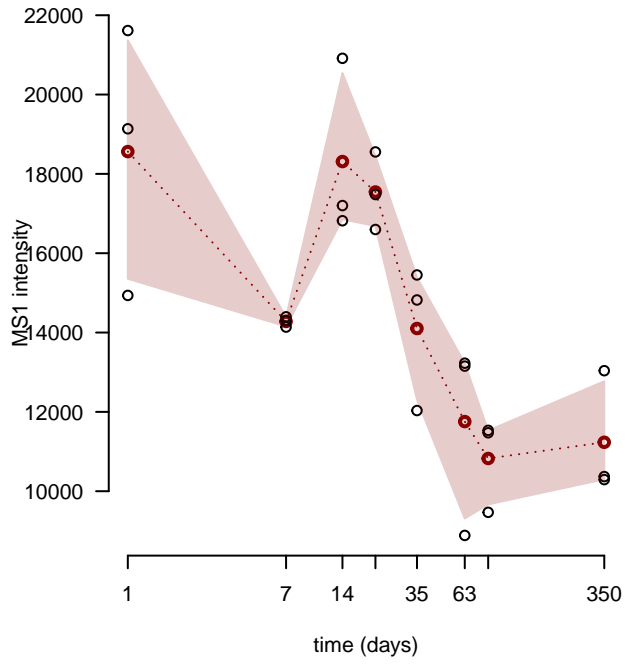

**Q99KB8**  
**GN=Hagh**  
hydroxyacyl glutathione hydrolase

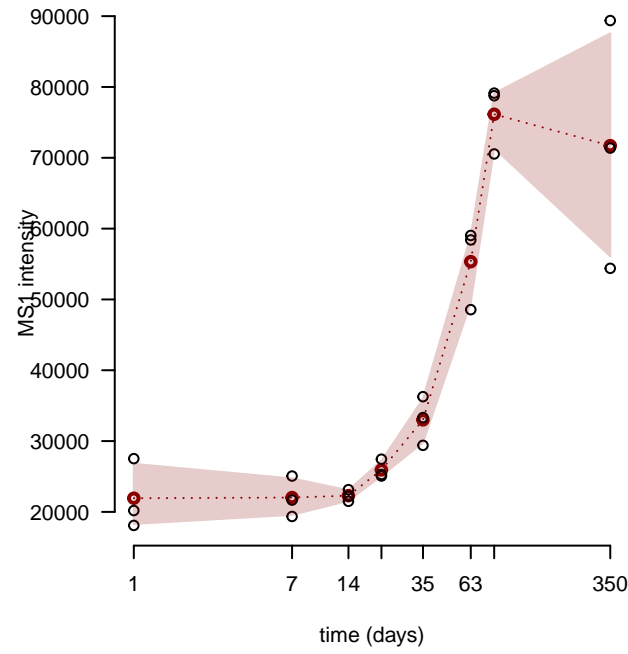

**Q99KC8**  
**GN=Vwa5a**  
von Willebrand factor A domain containin ...

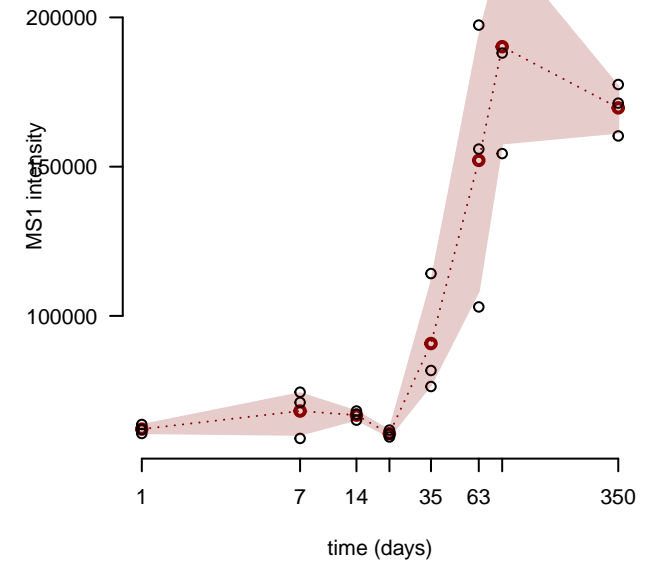

**Q99KD5**  
**GN=Unc45a**  
unc-45 myosin chaperone A

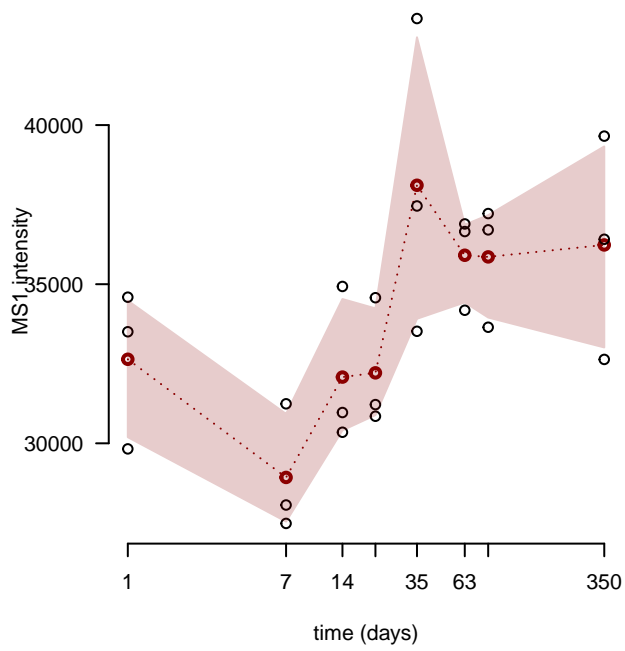

**Q99KE1**  
**GN=Me2**  
malic enzyme 2, NAD(+)-dependent, mitoch ...

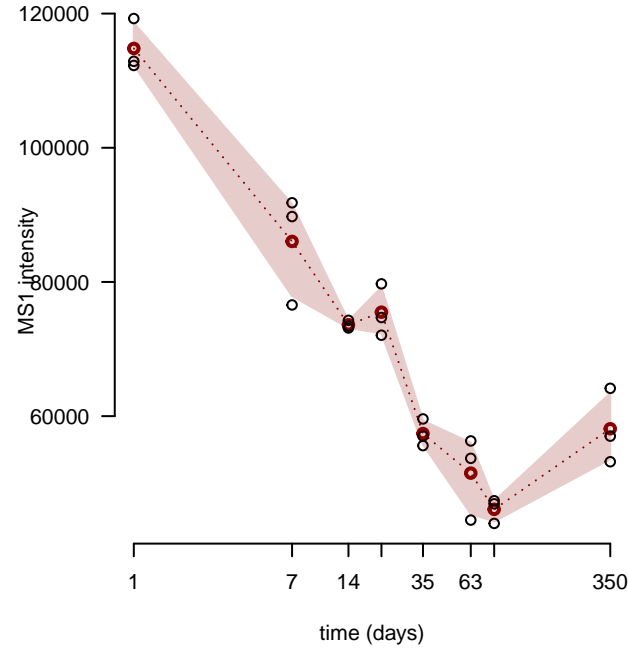

**Q99KF1**  
**GN=Tmed9**  
transmembrane p24 trafficking protein 9

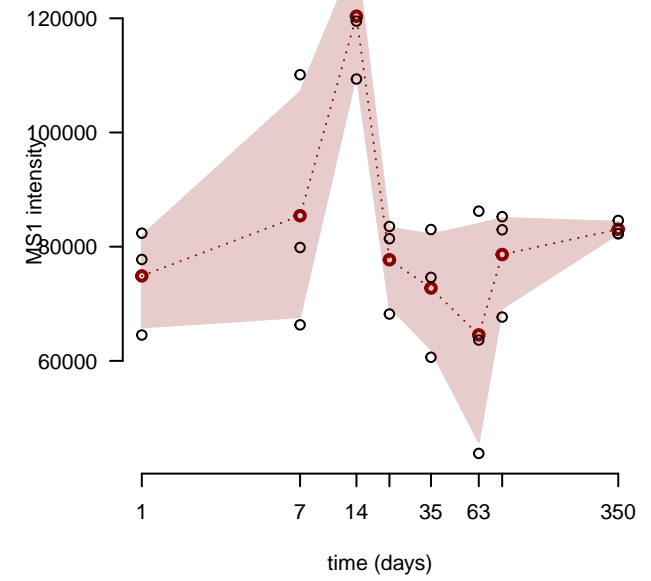

**Q99KG3**  
**GN=Rbm10**  
RNA binding motif protein 10

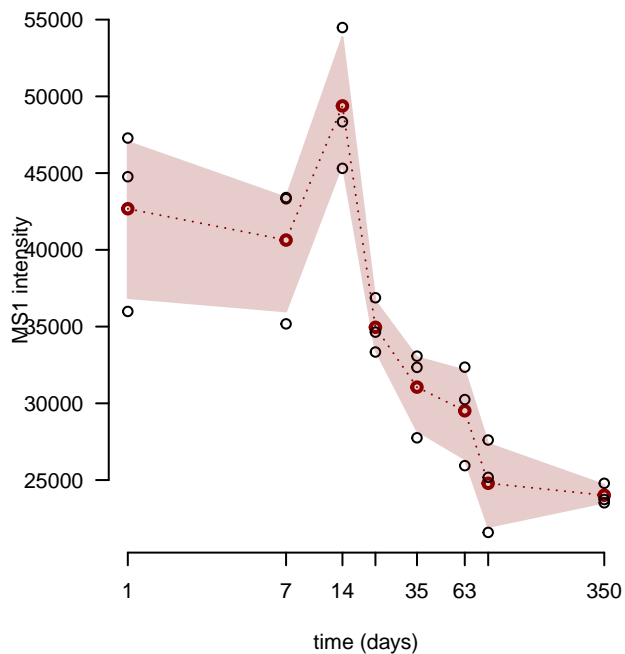

**Q99KG3**  
**GN=Rbm10**  
RNA binding motif protein 10

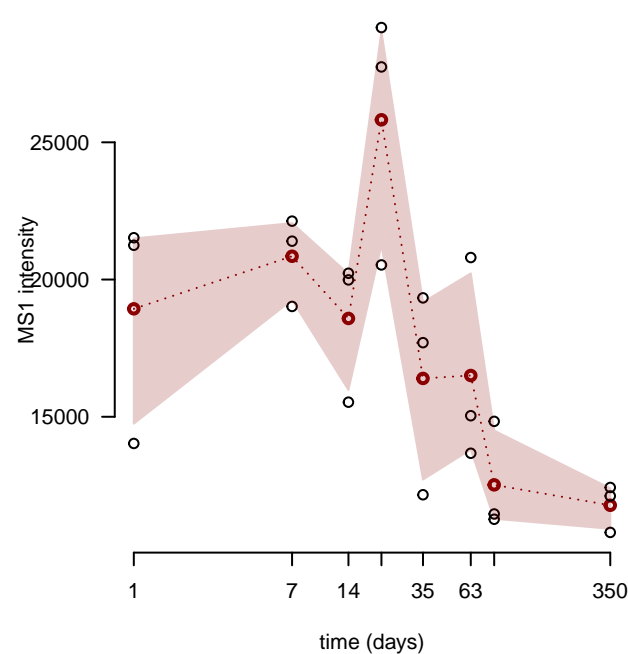

**Q99KG5**  
**GN=Lsr**  
lipolysis stimulated lipoprotein recepto ...

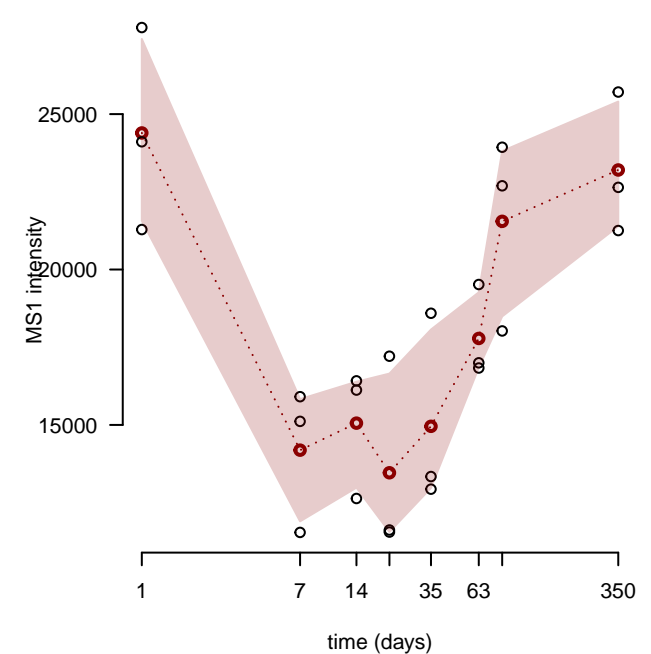

**Q99KG7**  
GN=Hps4  
HPS4, biogenesis of lysosomal organelles ...

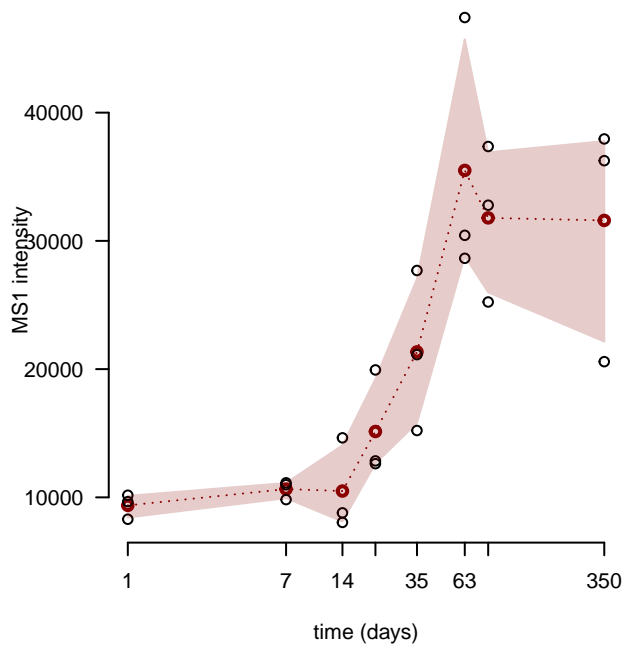

**Q99KH8**  
GN=Stk24  
serine/threonine kinase 24

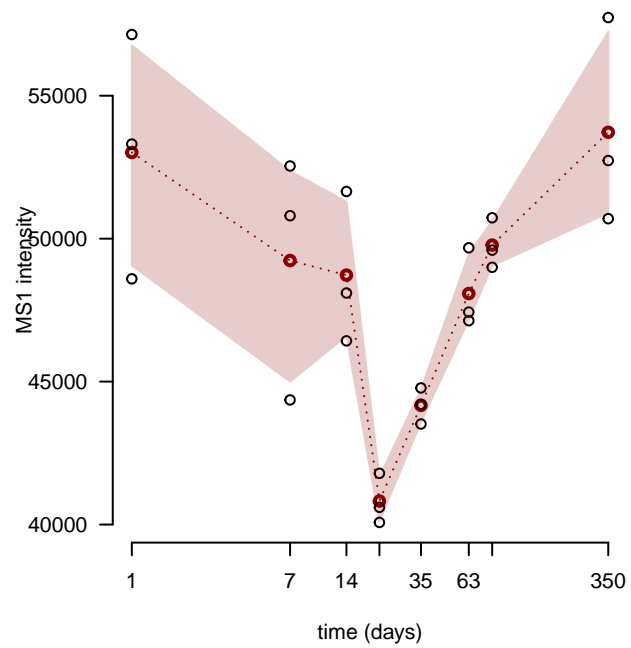

**Q99K10**  
GN=Aco2  
aconitase 2, mitochondrial

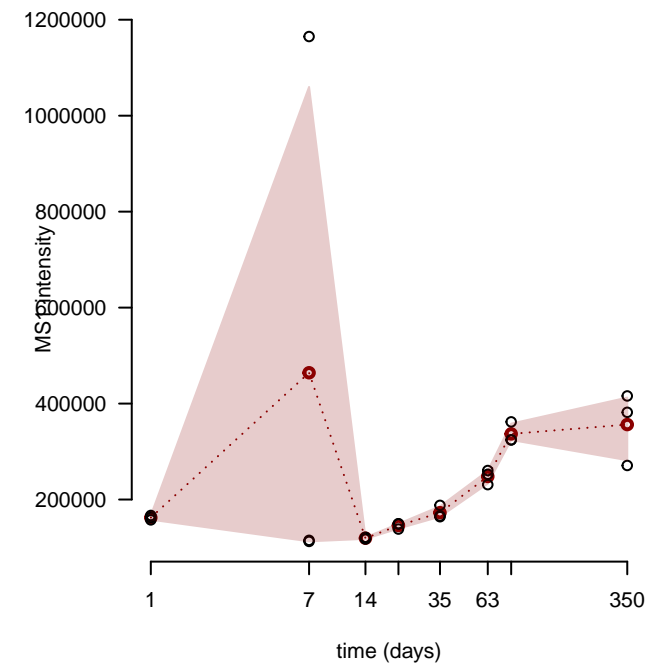

**Q99K13**  
GN=Emc3  
ER membrane protein complex subunit 3

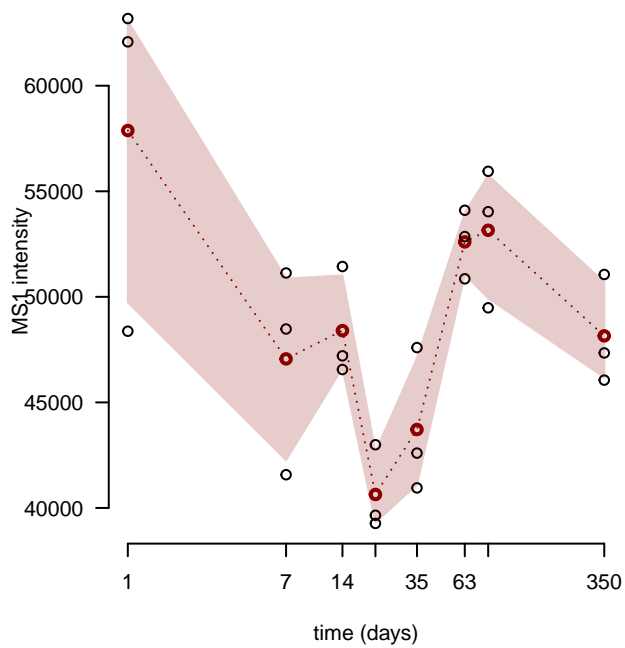

**Q99KJ0**  
GN=Ubxn2a  
UBX domain protein 2A

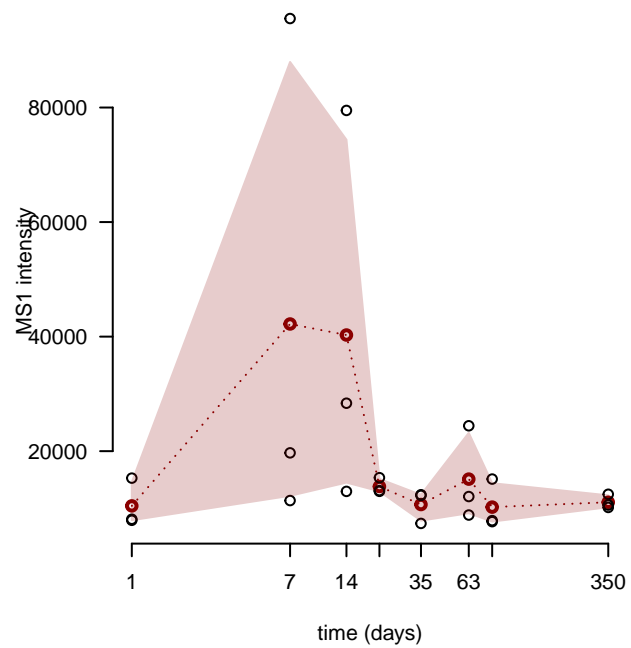

**Q99KJ8**  
GN=Dctn2  
dynactin 2

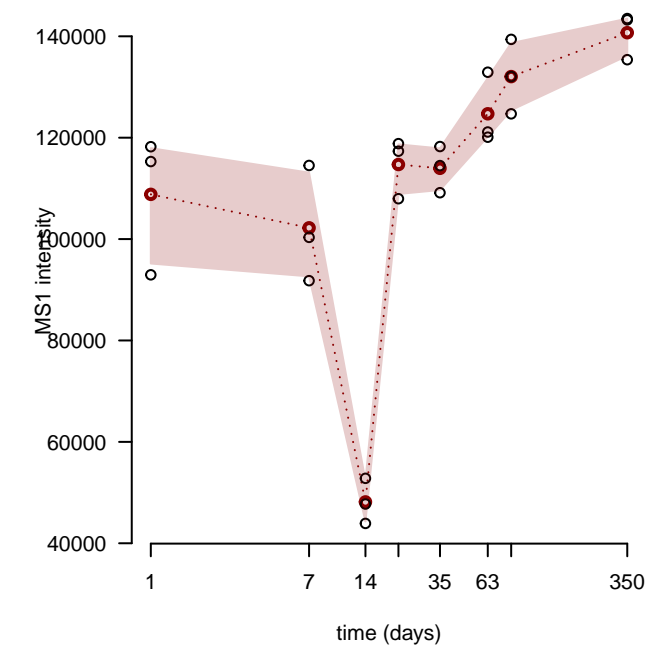

**Q99KK1**  
GN=Reep3  
receptor accessory protein 3

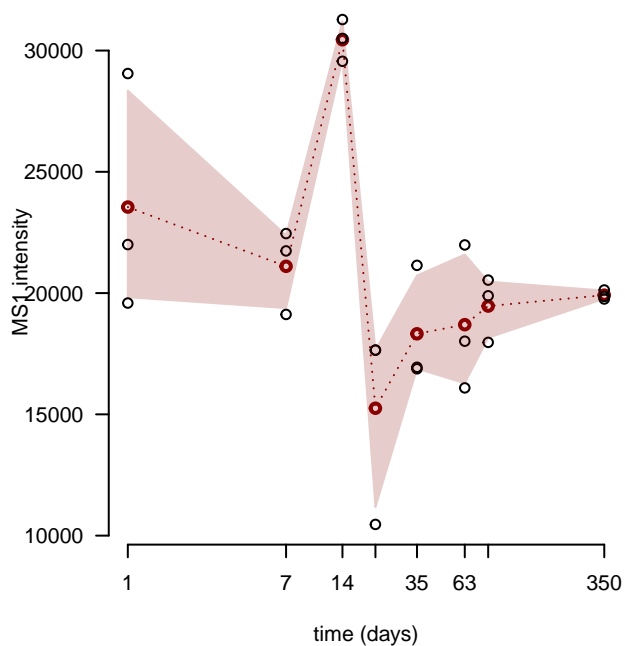

**Q99KK2**  
GN=Cmas  
cytidine monophospho-N-acetylneuraminic ...

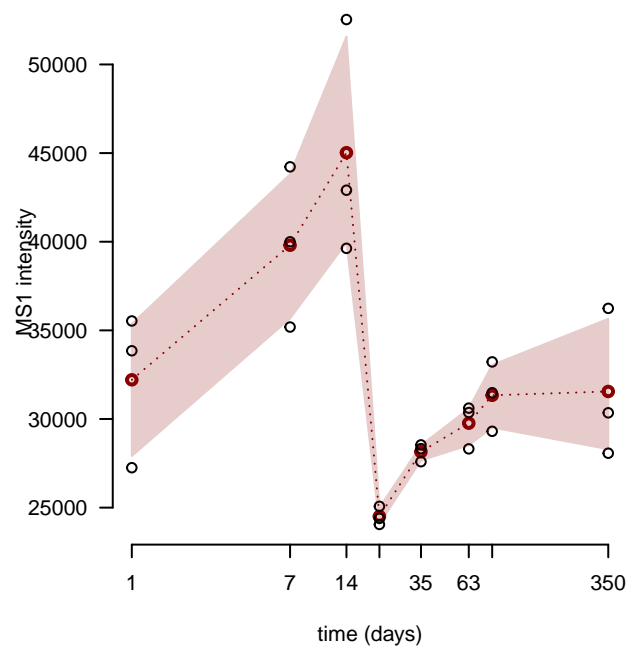

**Q99KK7**  
GN=Dpp3  
dipeptidylpeptidase 3

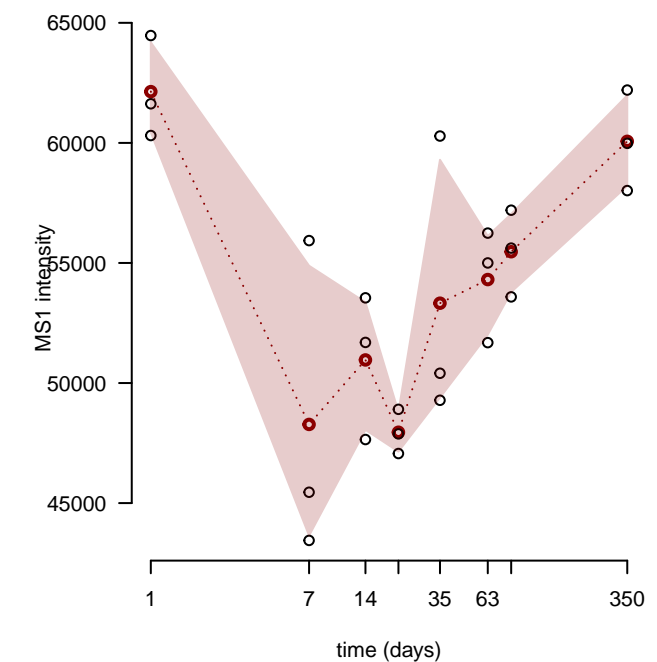

**Q99KK9**  
**GN=Hars2**  
histidyl-tRNA synthetase 2

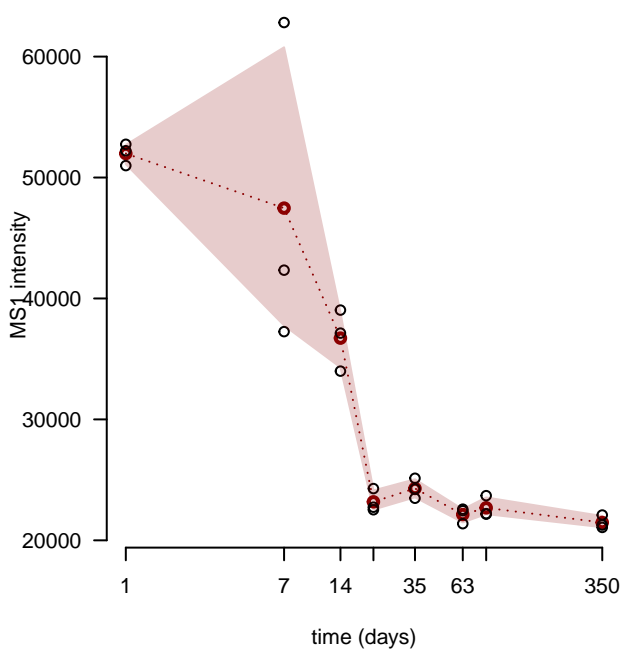

**Q99KL7**  
**GN=Rab28**  
RAB28, member RAS oncogene family

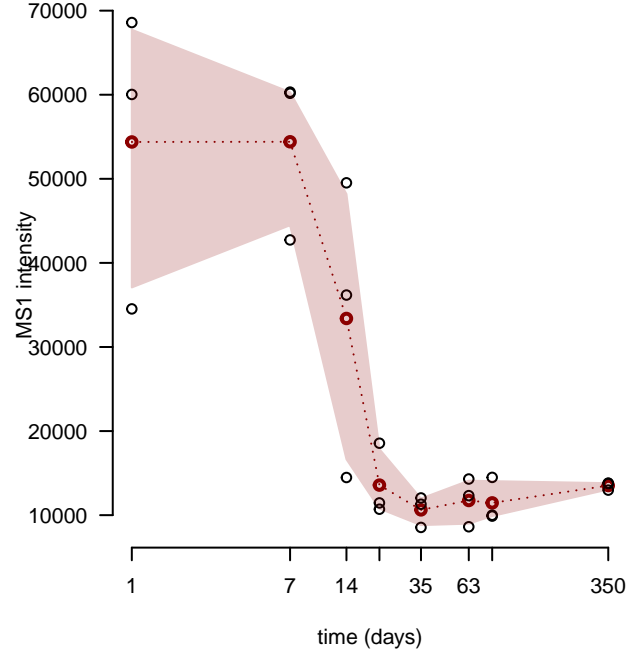

**Q99KN1**  
**GN=Arrdc1**  
arrestin domain containing 1

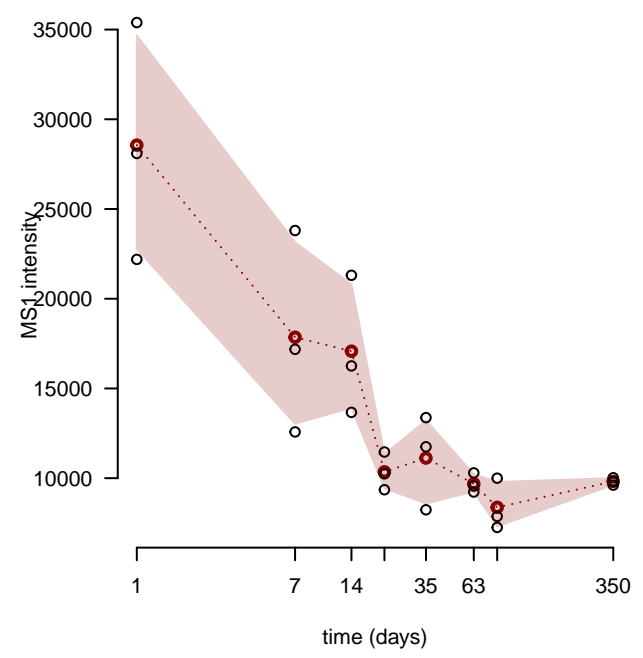

**Q99KN2**  
**GN=Ciao1**  
cytosolic iron-sulfur protein assembly 1

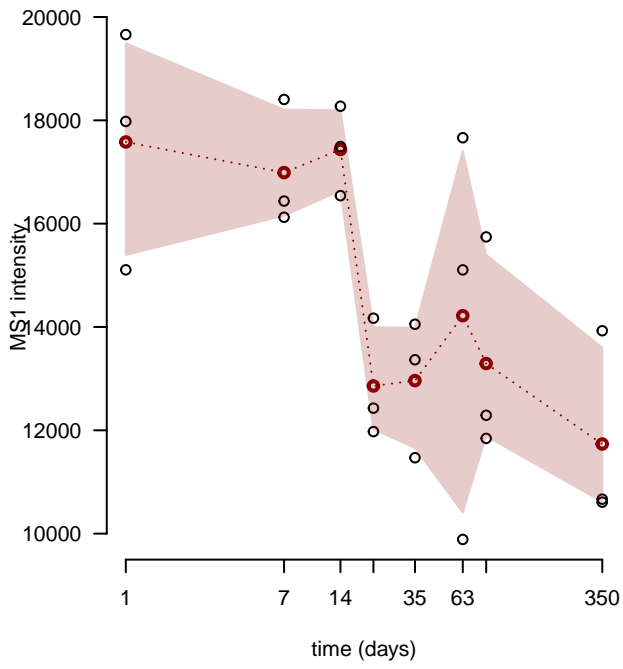

**Q99KN9**  
**GN=Clint1**  
clathrin interactor 1

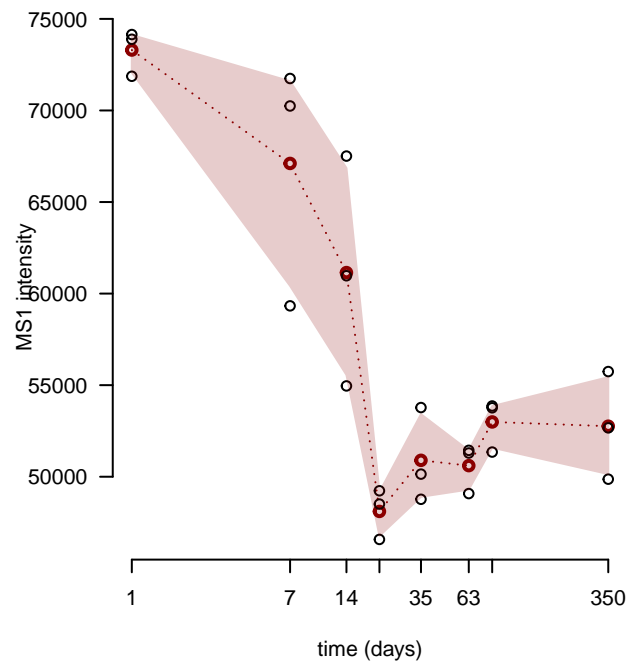

**Q99KP3**  
**GN=Cry11**  
crystallin, lambda 1

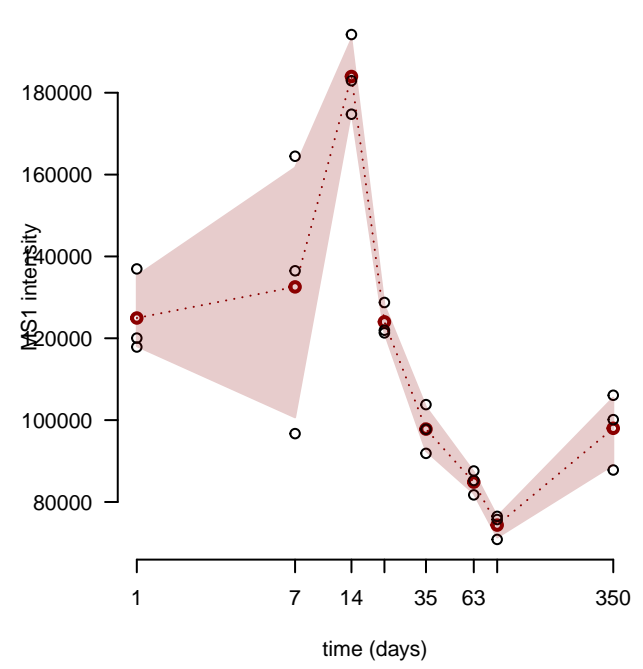

**Q99KP6**  
**GN=Prpf19**  
pre-mRNA processing factor 19

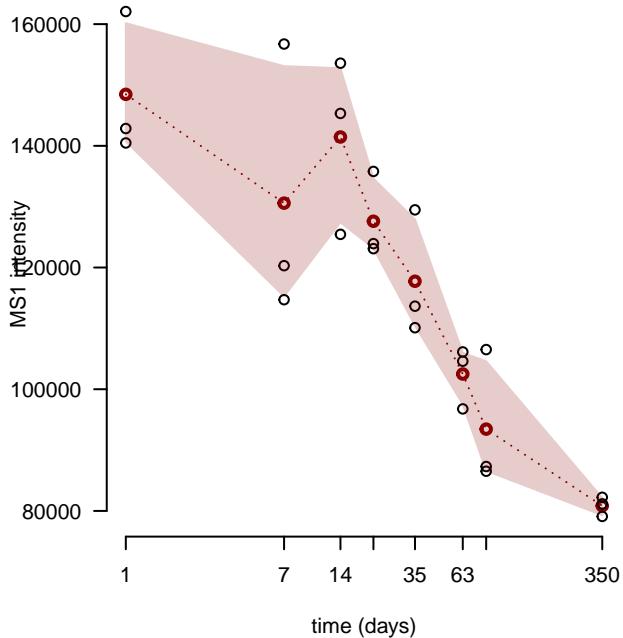

**Q99KQ4**  
**GN=Nampt**  
nicotinamide phosphoribosyltransferase

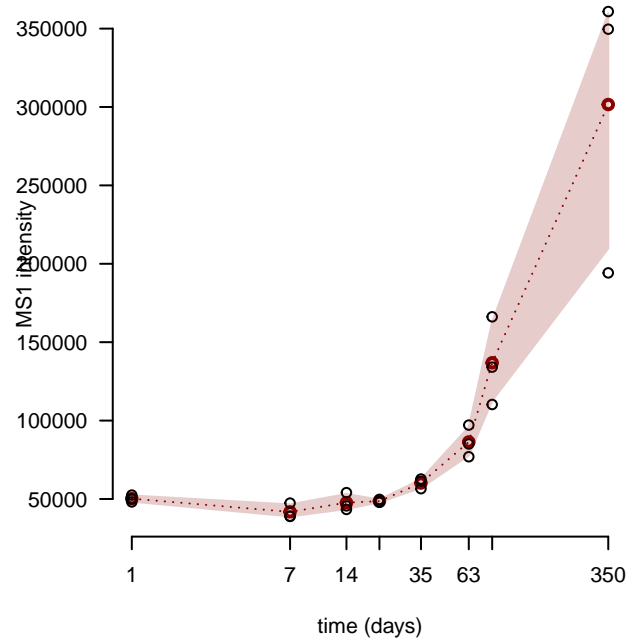

**Q99KR3**  
**GN=Lactb2**  
lactamase, beta 2

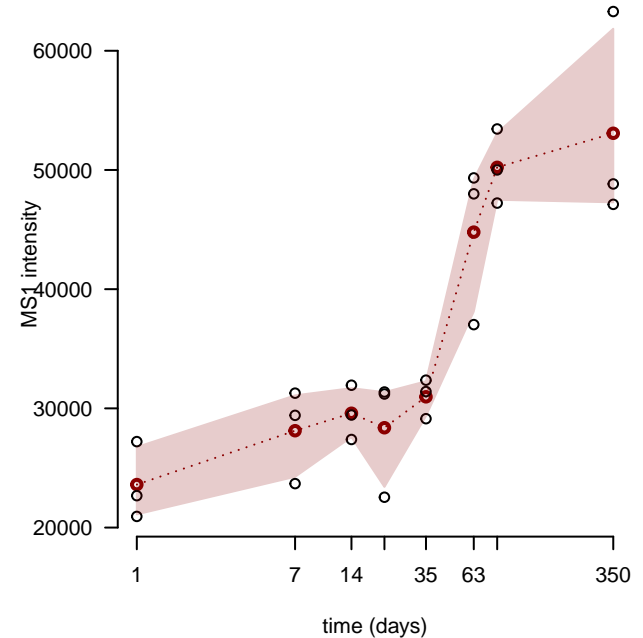

**Q99KR6**  
**GN=Rnf34**  
ring finger protein 34

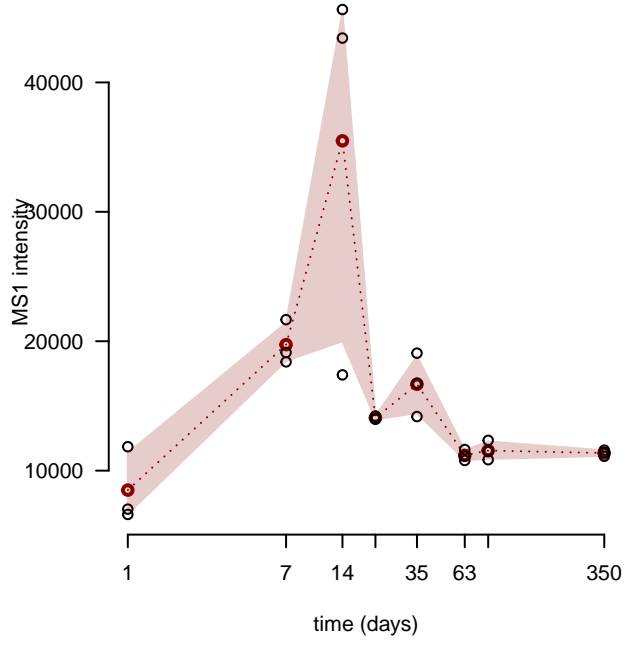

**Q99KR7**  
**GN=Ppif**  
peptidylprolyl isomerase F (cyclophilin ...

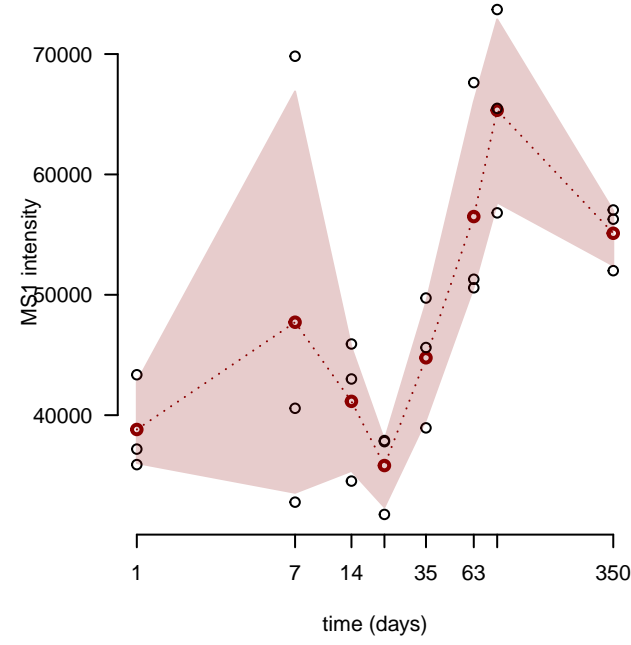

**Q99KR8**  
**GN=Fuca2**  
fucosidase, alpha-L- 2, plasma

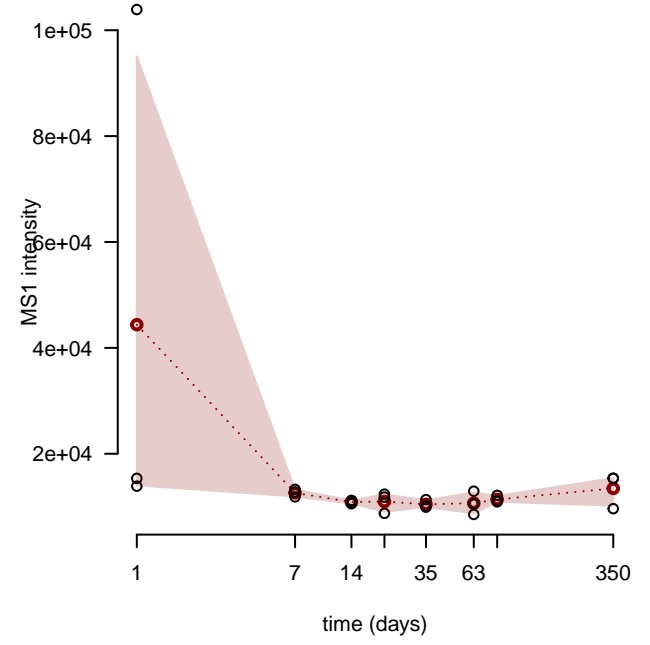

**Q99KU0**  
**GN=Vmp1**  
vacuole membrane protein 1

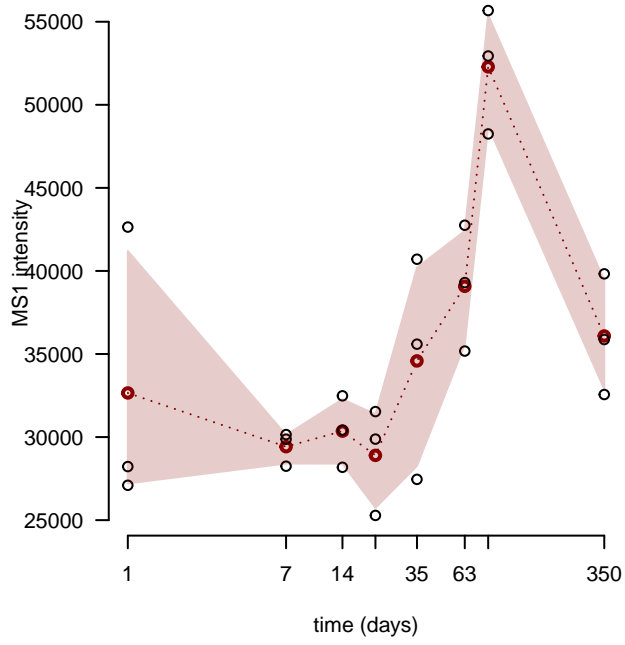

**Q99KV1**  
**GN=Dnajb11**  
DnaJ heat shock protein family (Hsp40) m ...

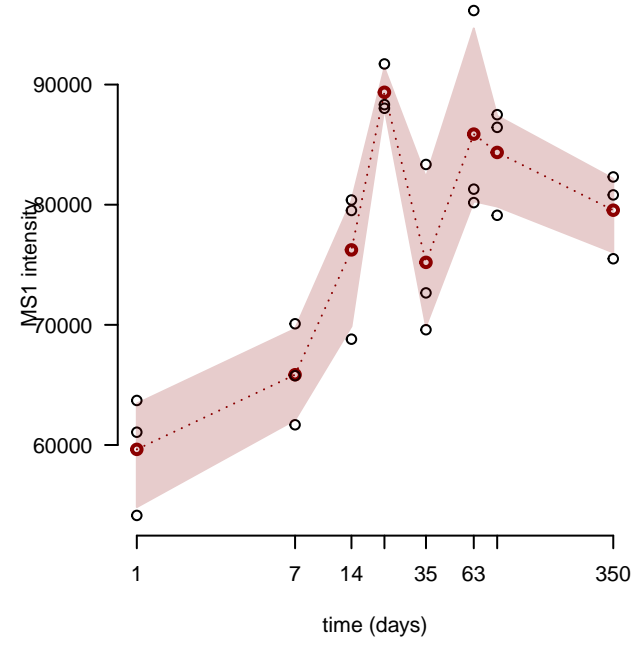

**Q99KW3**  
**GN=Triobp**  
TRIO and F-actin binding protein

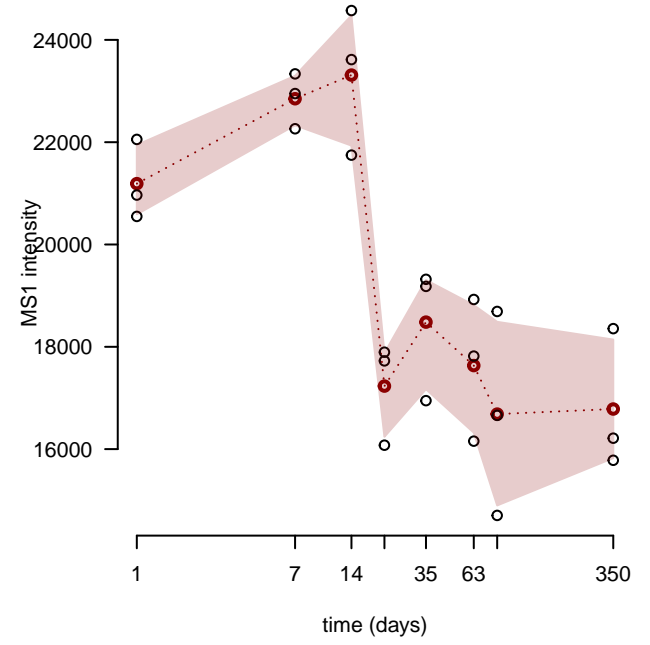

**Q99KW9**  
**GN=Itfg1**  
integrin alpha FG-GAP repeat containing ...

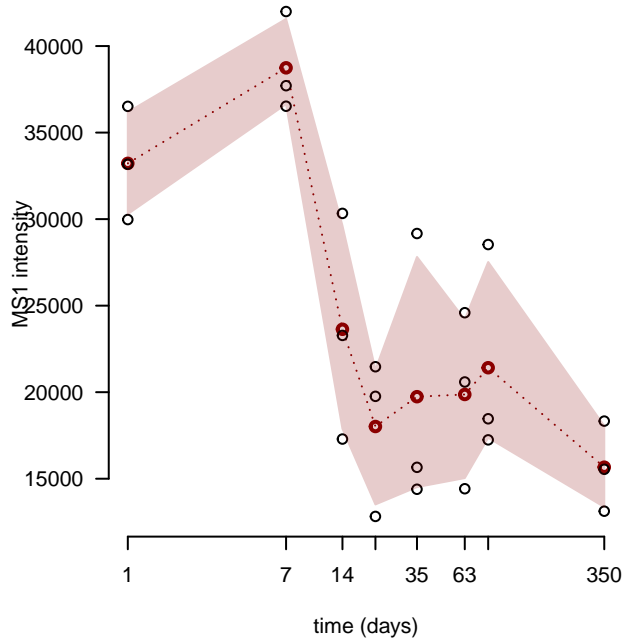

**Q99KX1**  
**GN=Mlf2**  
myeloid leukemia factor 2

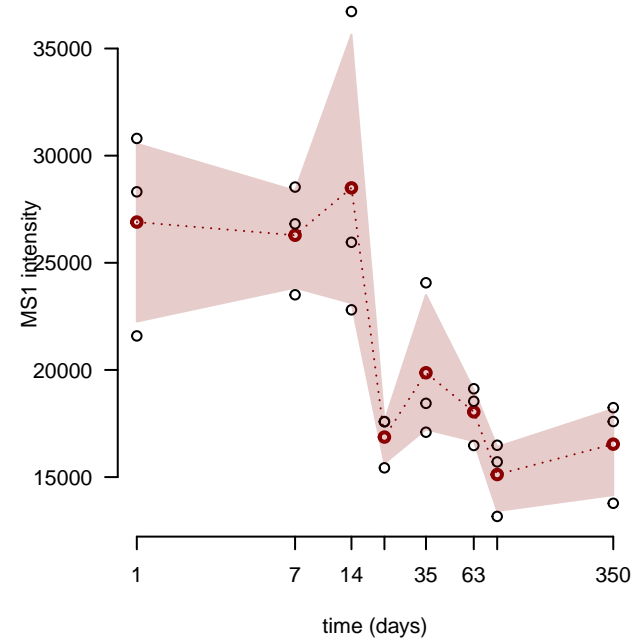

**Q99KY4**  
**GN=Gak**  
cyclin G associated kinase

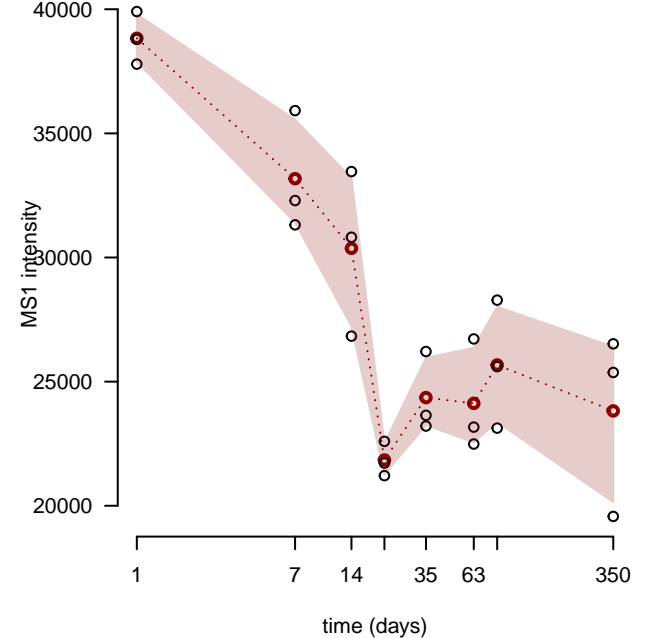

**Q99KZ6**  
GN=Znf639

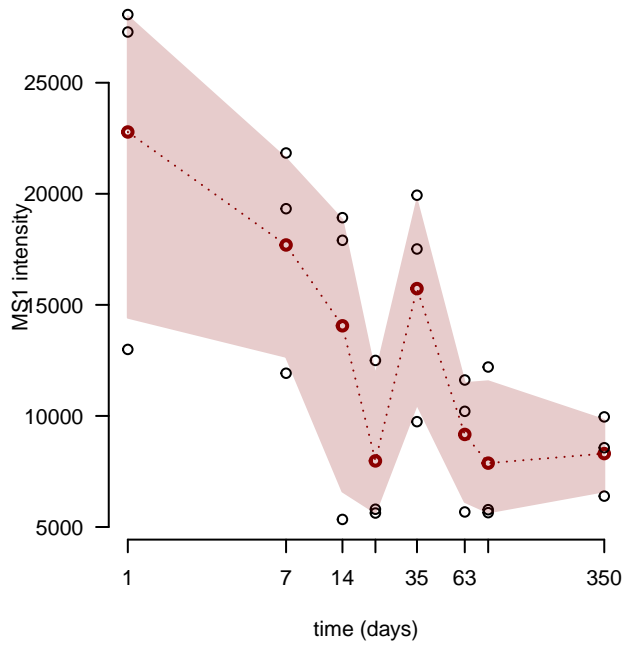

**Q99L02**  
GN=Pagr1a  
PAXIP1 associated glutamate rich protein ...

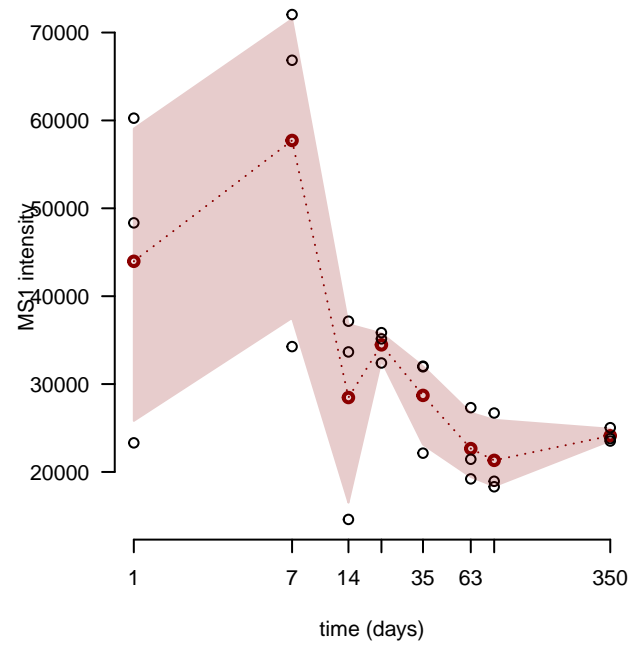

**Q99L04**  
GN=Dhrs1  
dehydrogenase/reductase (SDR family) mem ...

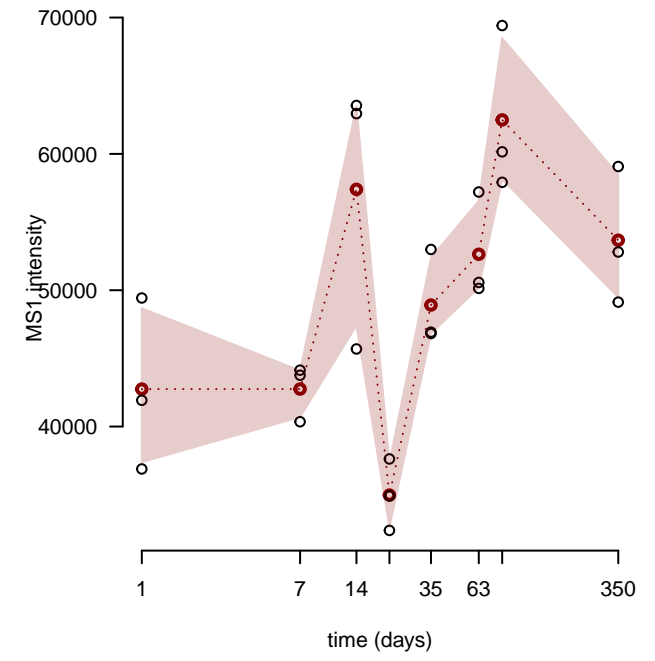

**Q99L13**  
GN=Hibadh  
3-hydroxyisobutyrate dehydrogenase

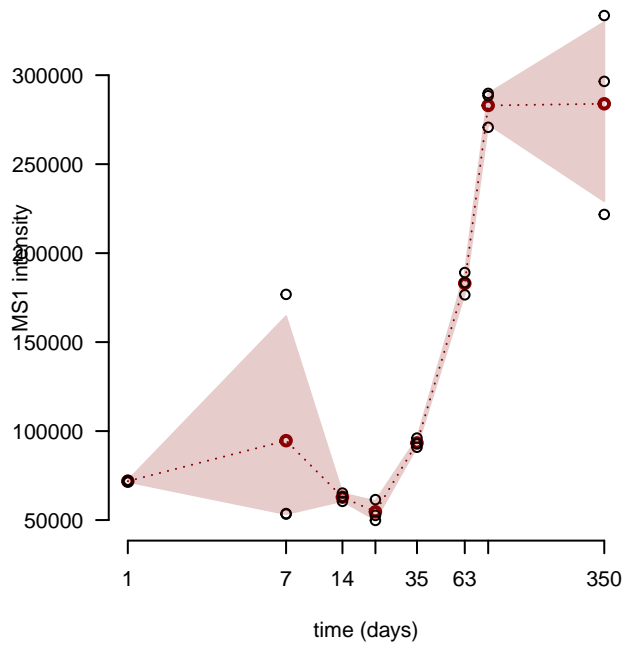

**Q99L20**  
GN=Gstt3  
glutathione S-transferase, theta 3

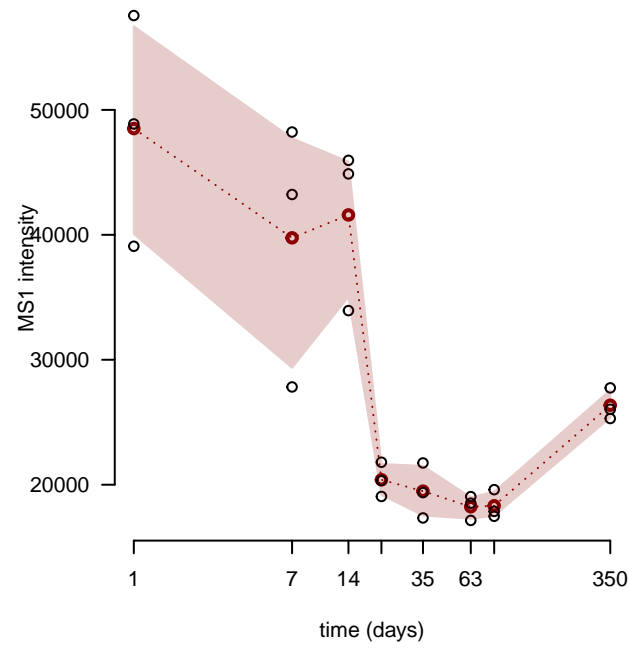

**Q99L27**  
GN=Gmpr2  
guanosine monophosphate reductase 2

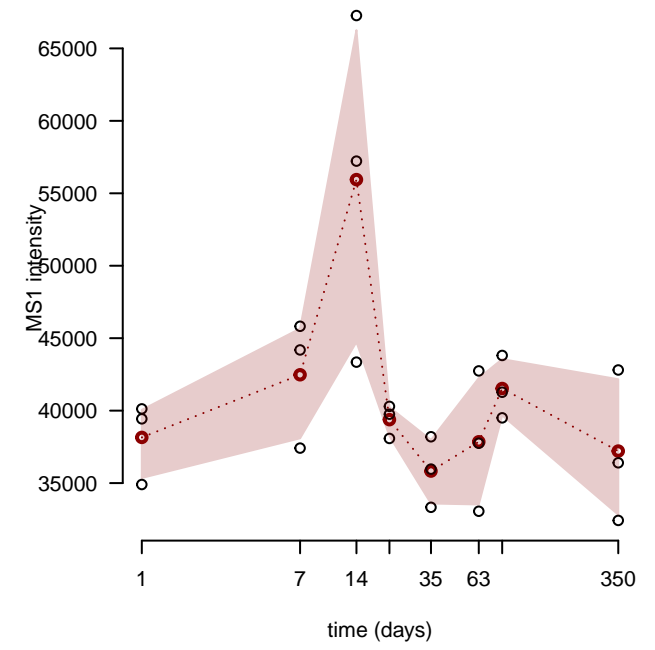

**Q99L28**  
GN=Rsl24d1  
ribosomal L24 domain containing 1

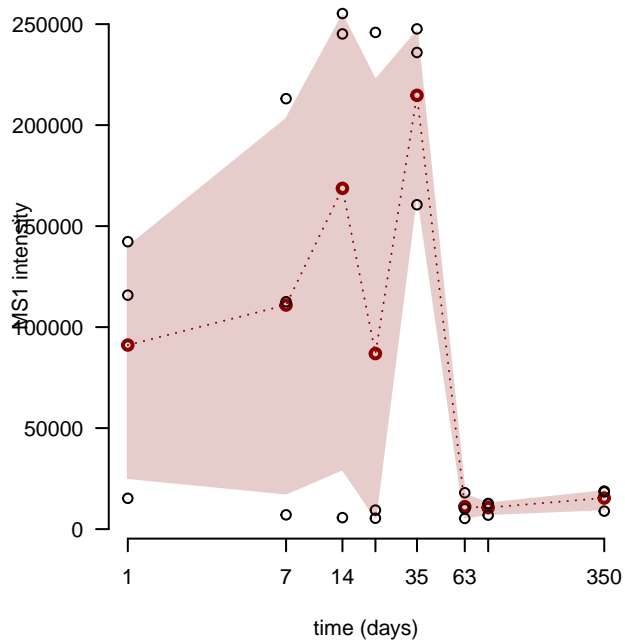

**Q99L43**  
GN=Cds2  
CDP-diacylglycerol synthase (phosphatida ...

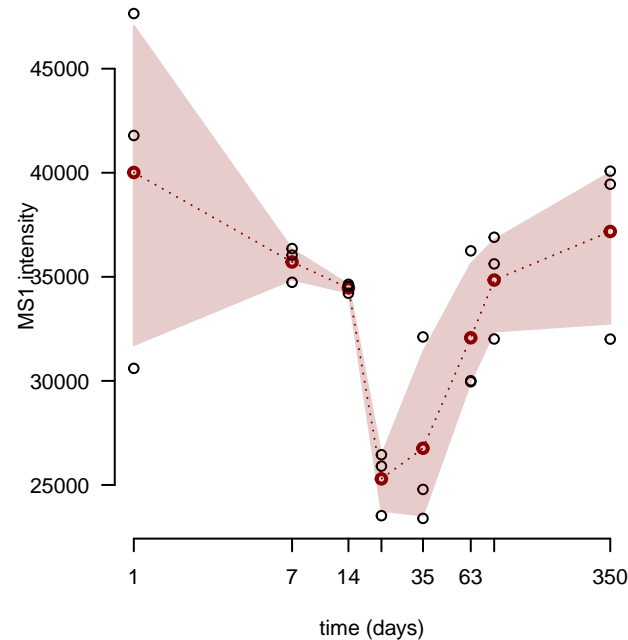

**Q99L45**  
GN=Eif2s2  
eukaryotic translation initiation factor ...

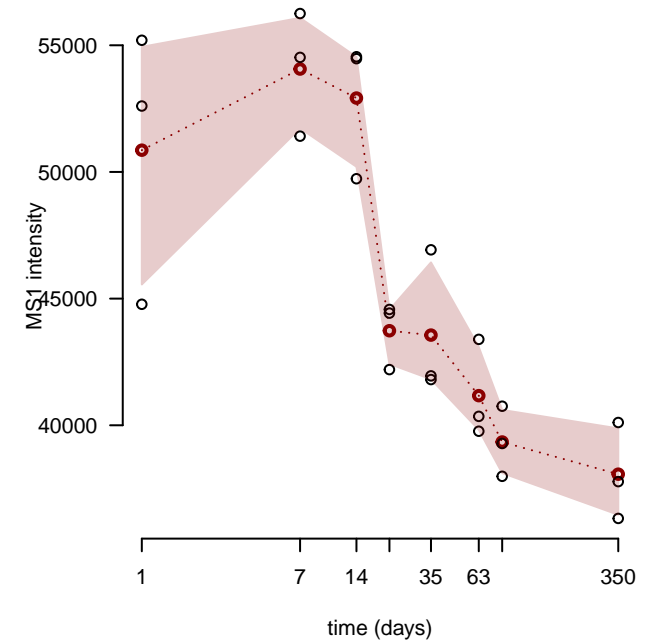

**Q99L47**  
**GN=St13**  
suppression of tumorigenicity 13

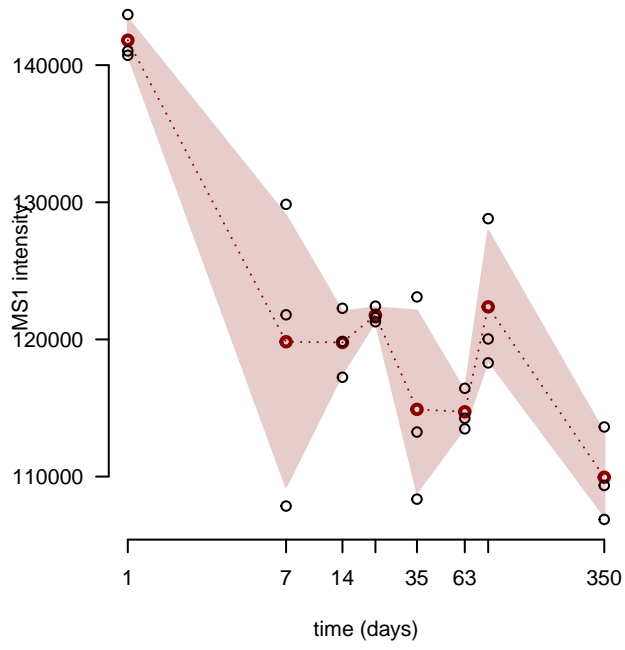

**Q99L48**  
**GN=Nmd3**  
NMD3 ribosome export adaptor

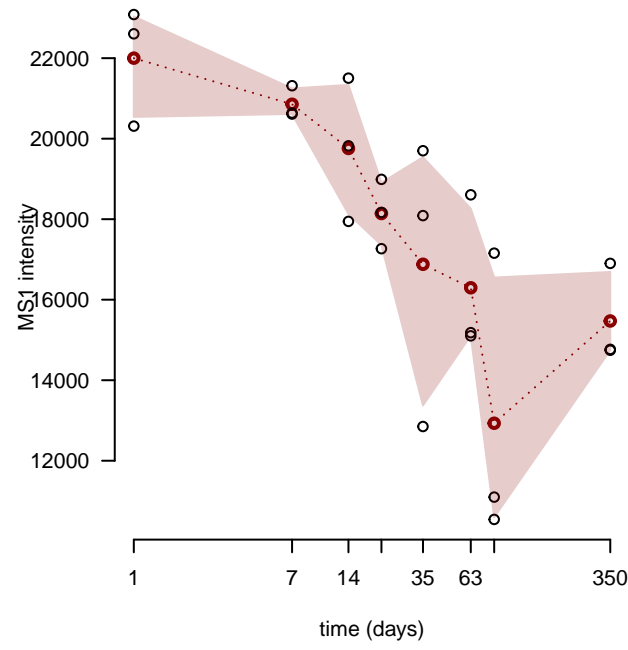

**Q99L85**  
**GN=Elp5**  
elongator acetyltransferase complex subu ...

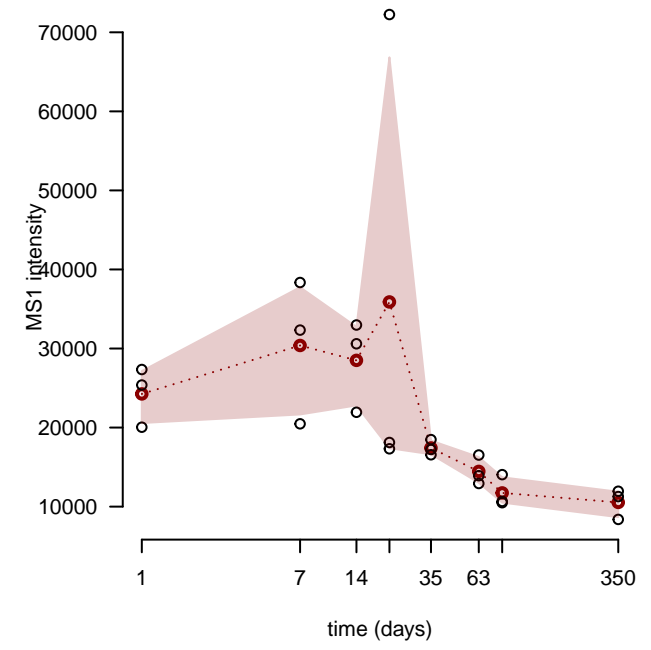

**Q99L88**  
**GN=Sntb1**  
syntrophin, basic 1

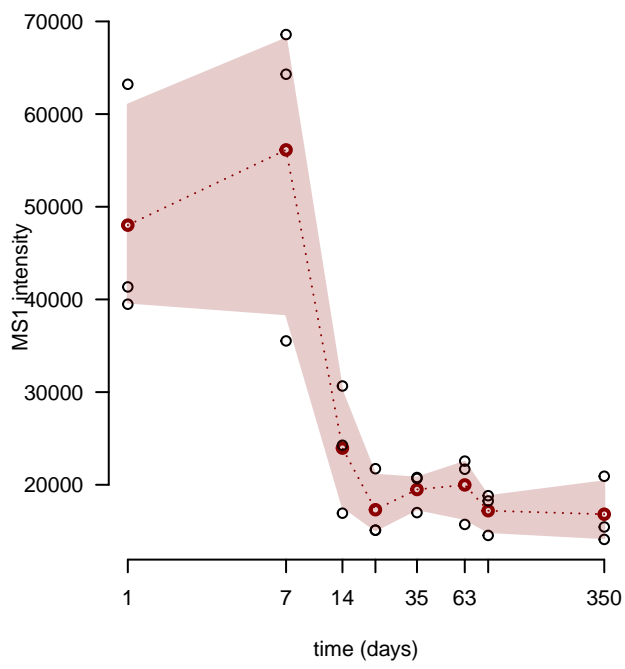

**Q99L90**  
**GN=Mcrs1**  
microspherule protein 1

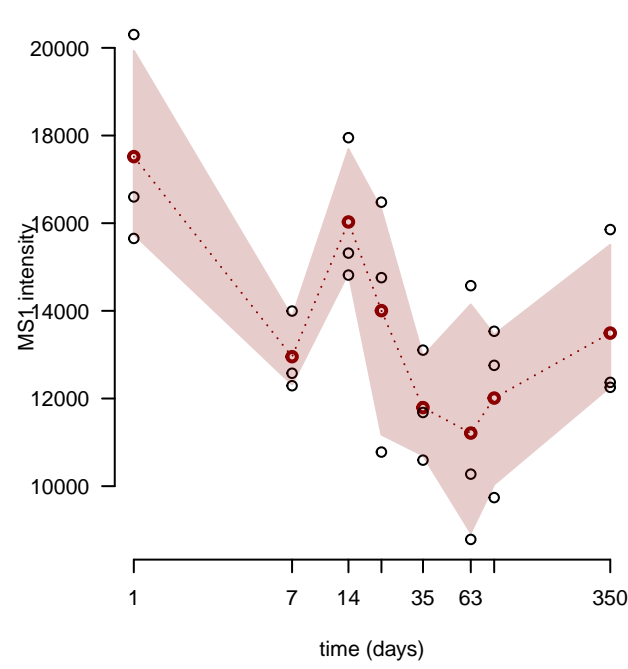

**Q99LB0**  
**GN=Dnttp1**  
deoxynucleotidyltransferase, terminal, i ...

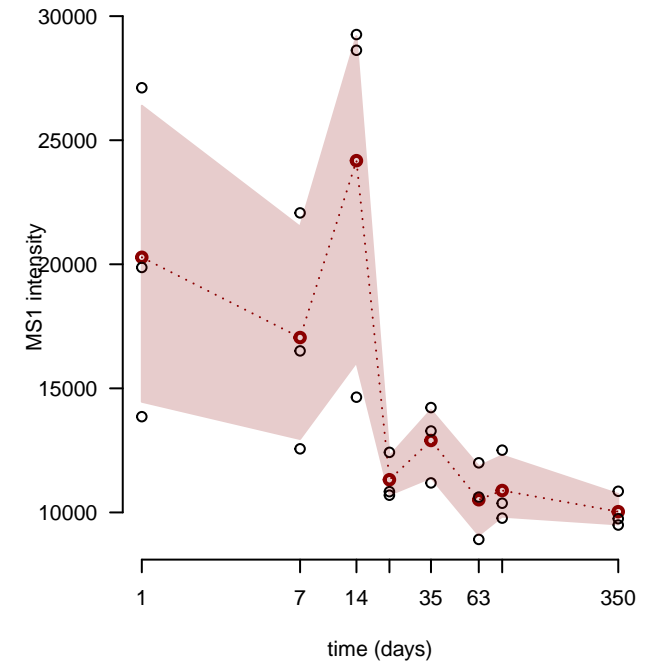

**Q99LB2**  
**GN=Dhrs4**  
dehydrogenase/reductase (SDR family) mem ...

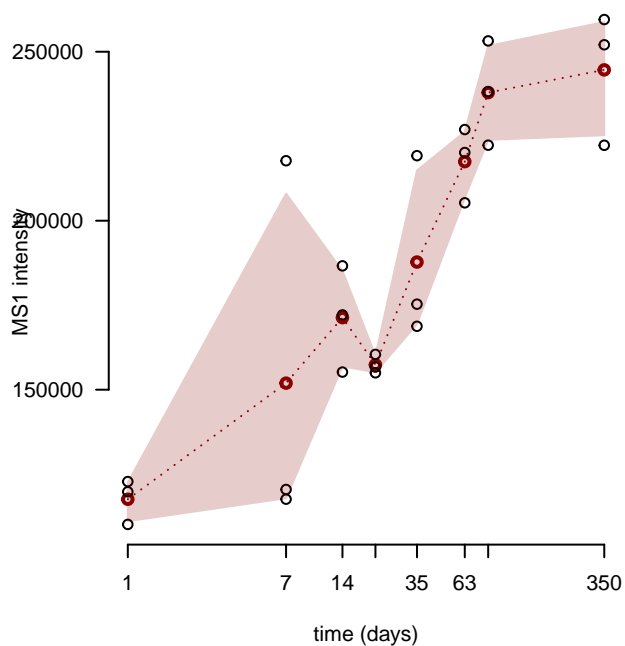

**Q99LB6**  
**GN=Mat2b**  
methionine adenosyltransferase II, beta

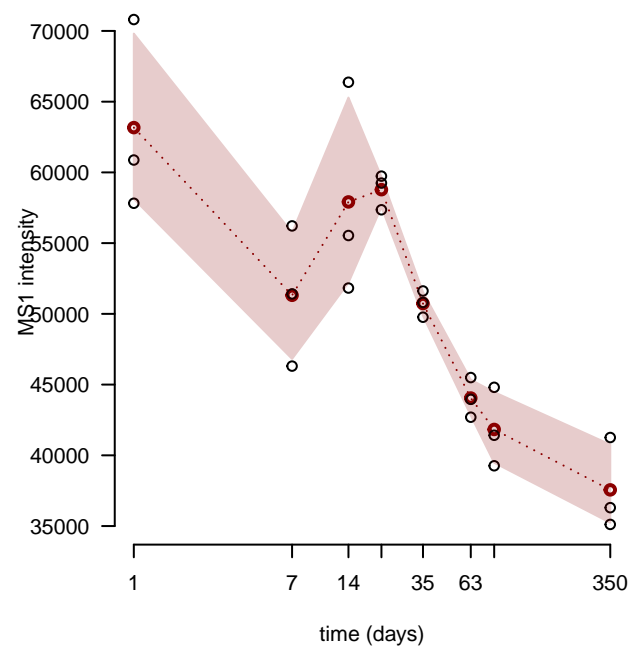

**Q99LB7**  
**GN=Sardh**  
sarcosine dehydrogenase

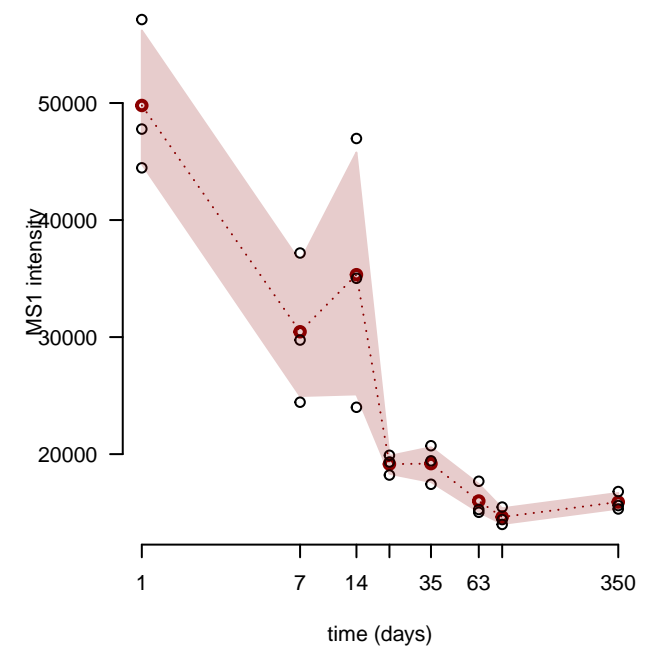

**Q99LC2**  
GN=Cstf1  
cleavage stimulation factor, 3' pre-RNA, ...

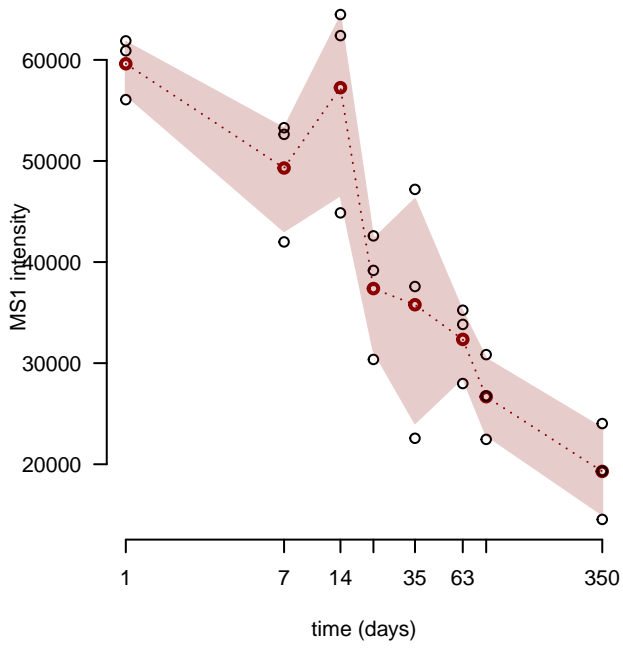

**Q99LC3**  
GN=Ndufa10  
NADH:ubiquinone oxidoreductase subunit A ...

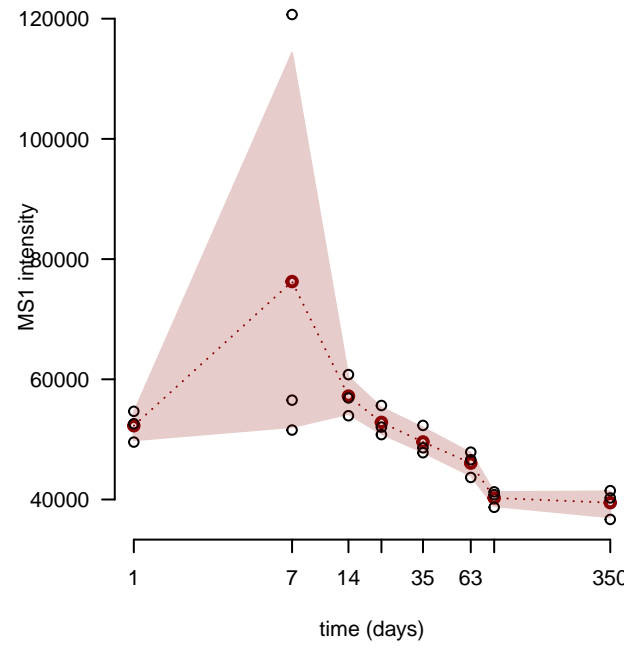

**Q99LC5**  
GN=Etfa  
electron transferring flavoprotein, alph ...

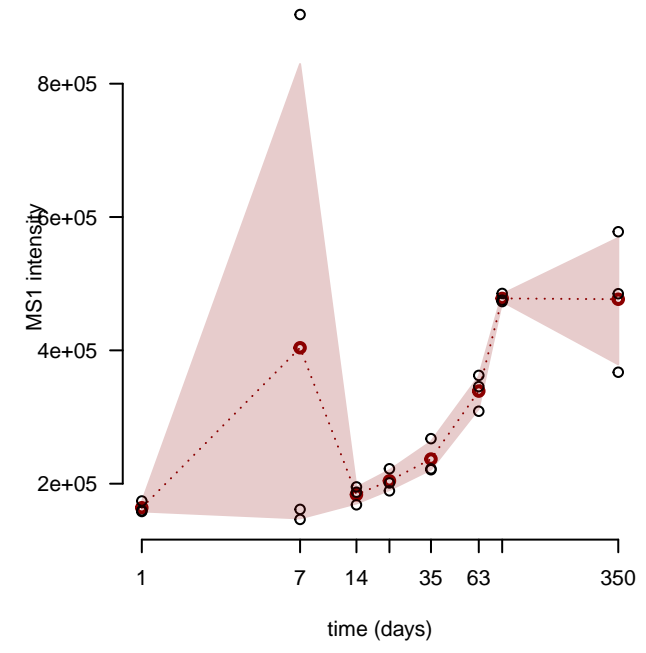

**Q99LC8**  
GN=Eif2b1  
eukaryotic translation initiation factor ...

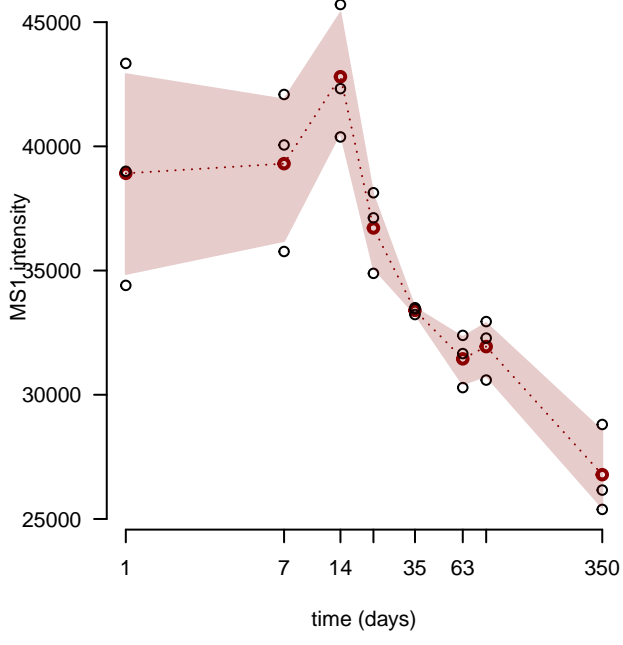

**Q99LC9**  
GN=Pex6  
peroxisomal biogenesis factor 6

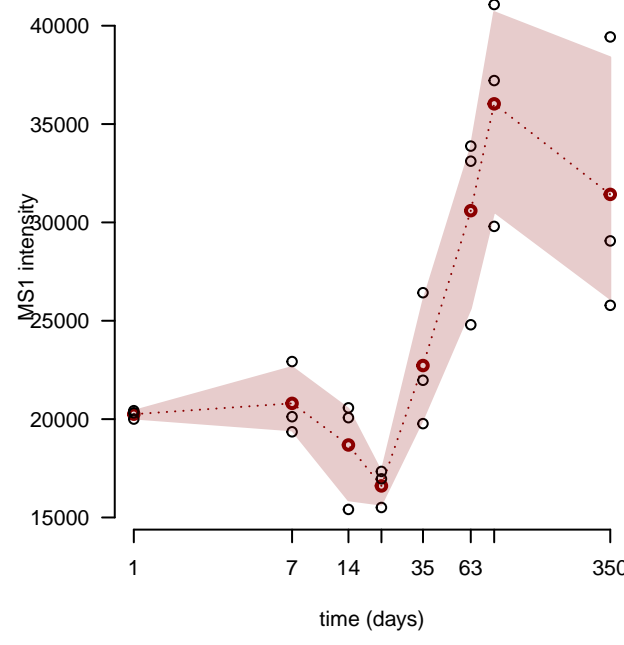

**Q99LD4**  
GN=Gps1  
G protein pathway suppressor 1

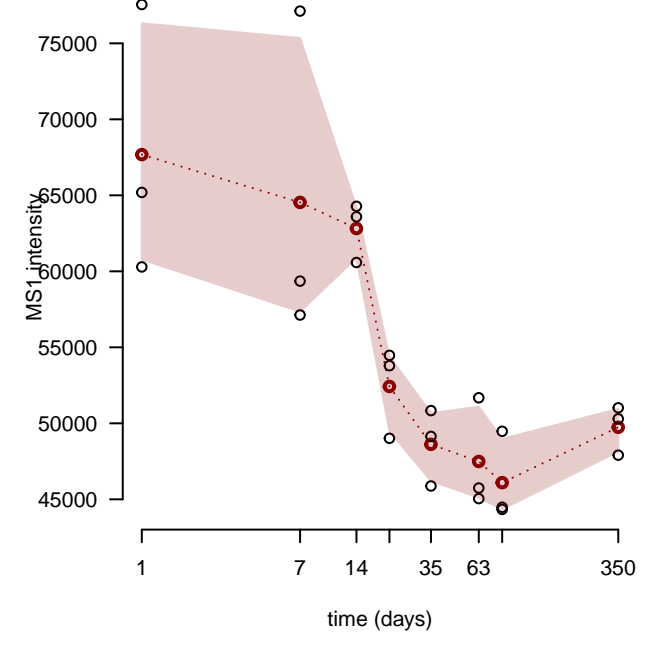

**Q99LD8**  
GN=Ddah2  
dimethylarginine dimethylaminohydrolase ...

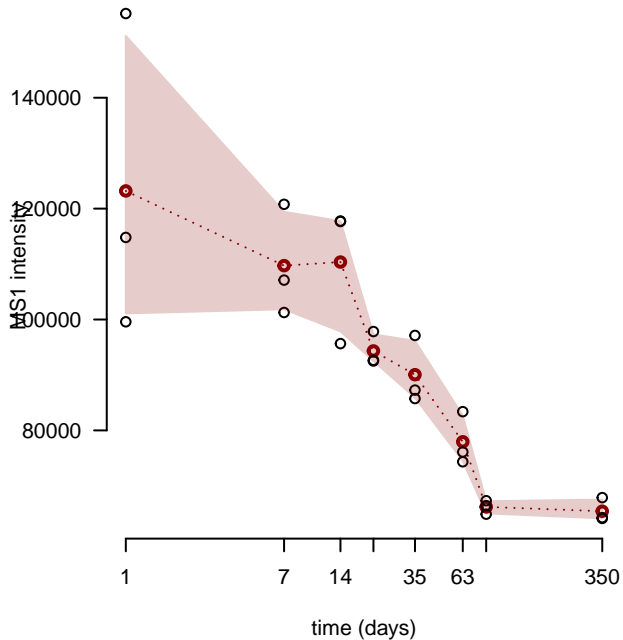

**Q99LD9**  
GN=Eif2b2  
eukaryotic translation initiation factor ...

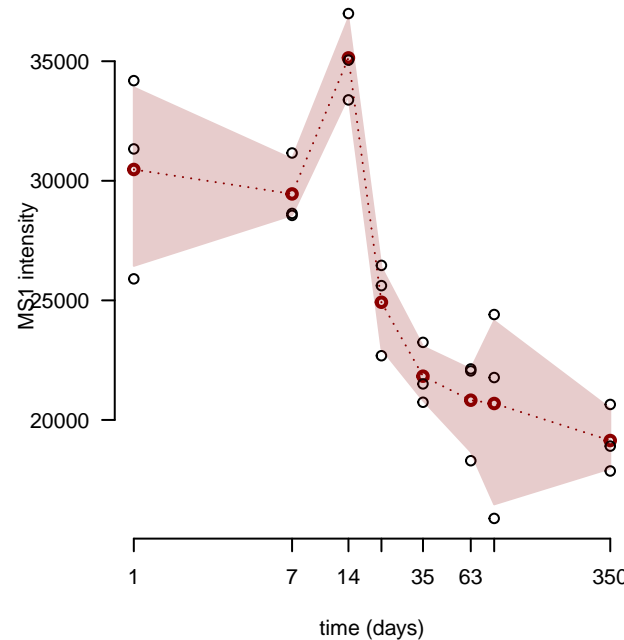

**Q99LE1**  
GN=Rilpl2  
Rab interacting lysosomal protein-like 2

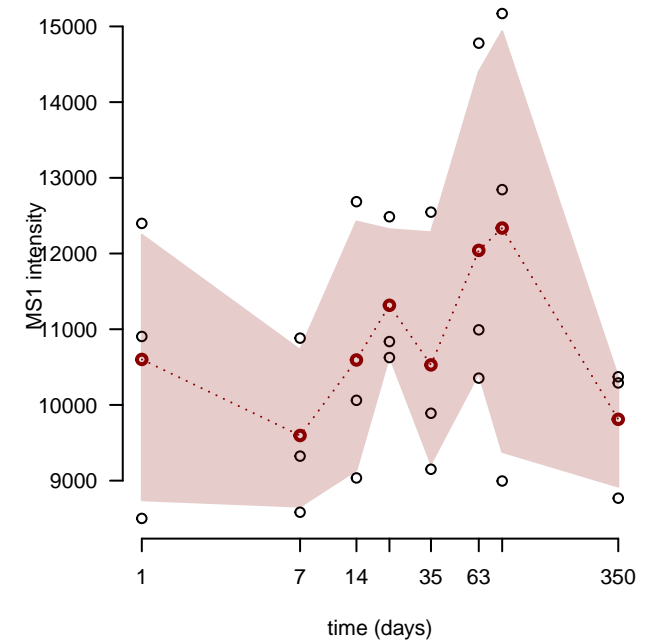

**Q99LE6**  
**GN=Abcf2**

ATP-binding cassette, sub-family F (GCN2 ...

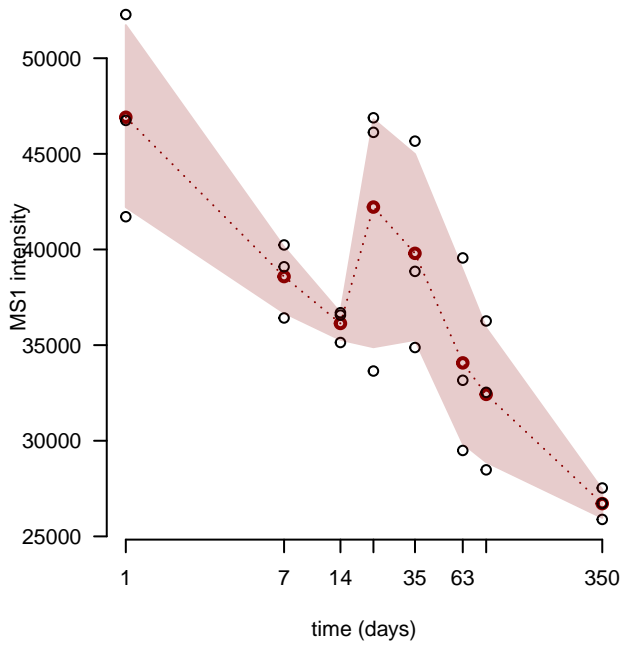

**Q99LF4**  
**GN=Rtcb**

RNA 2',3'-cyclic phosphate and 5'-OH lig ...

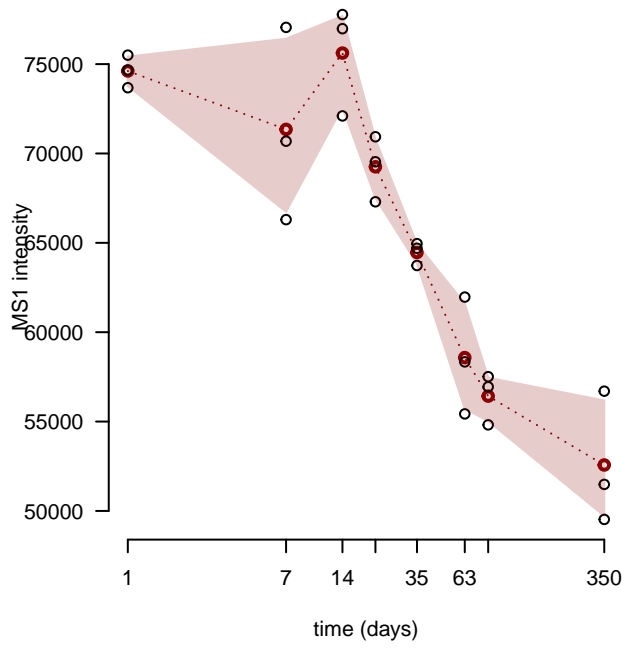

**Q99LG0**  
**GN=Usp16**

ubiquitin specific peptidase 16

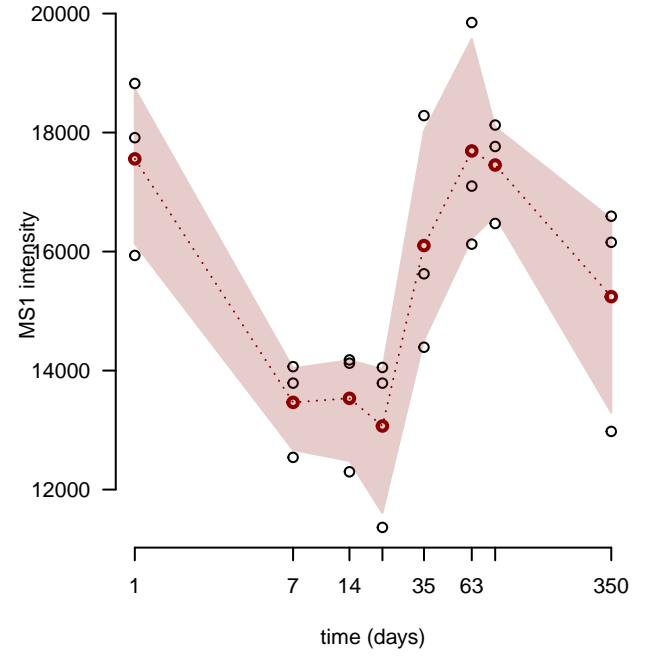

**Q99LG2**  
**GN=Tnpo2**

transportin 2 (importin 3, karyopherin b ...

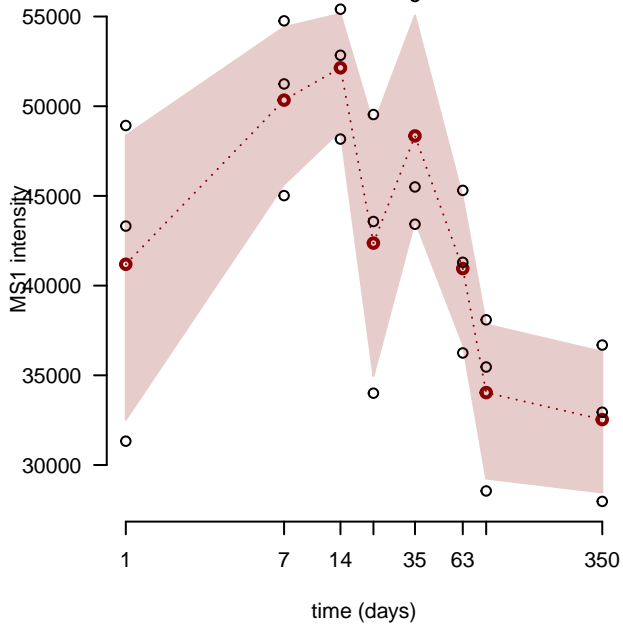

**Q99LG4**  
**GN=Ttc5**

tetratricopeptide repeat domain 5

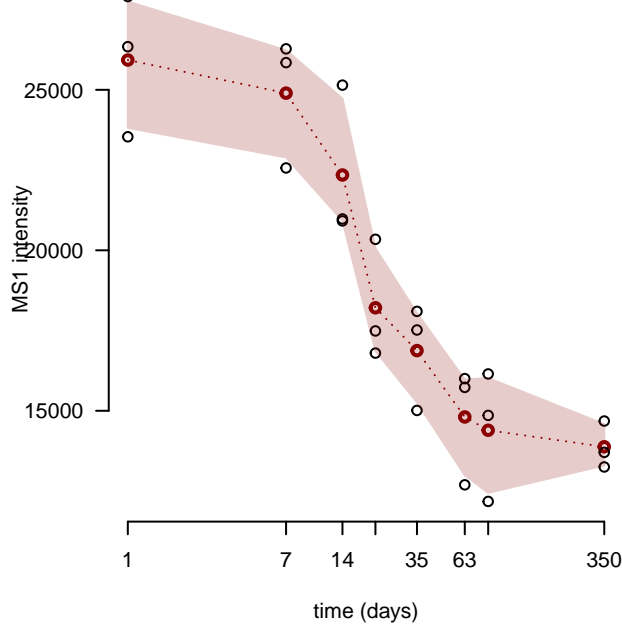

**Q99LH1**  
**GN=Gnl2**

guanine nucleotide binding protein-like ...

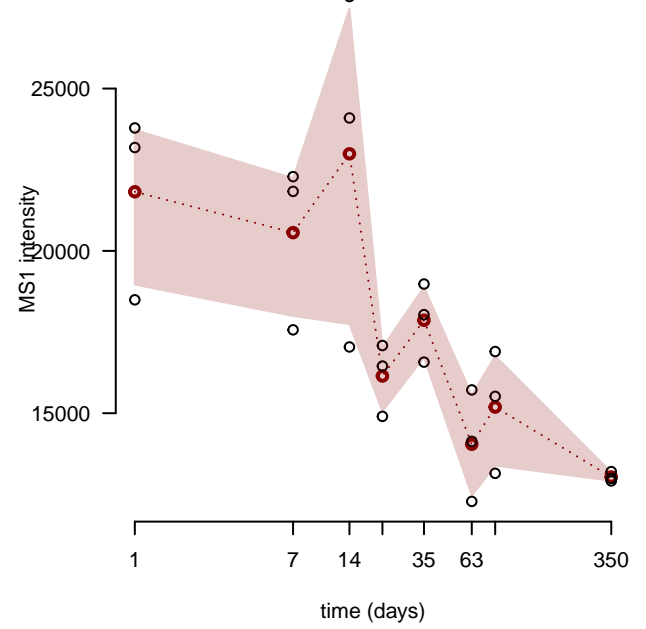

**Q99LH2**  
**GN=Ptdss1**

phosphatidylserine synthase 1

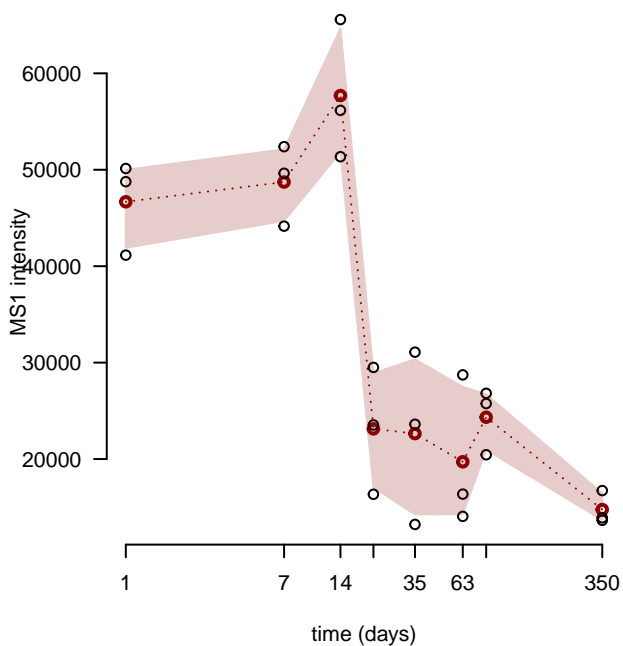

**Q99LH4**  
**GN=Znf672**

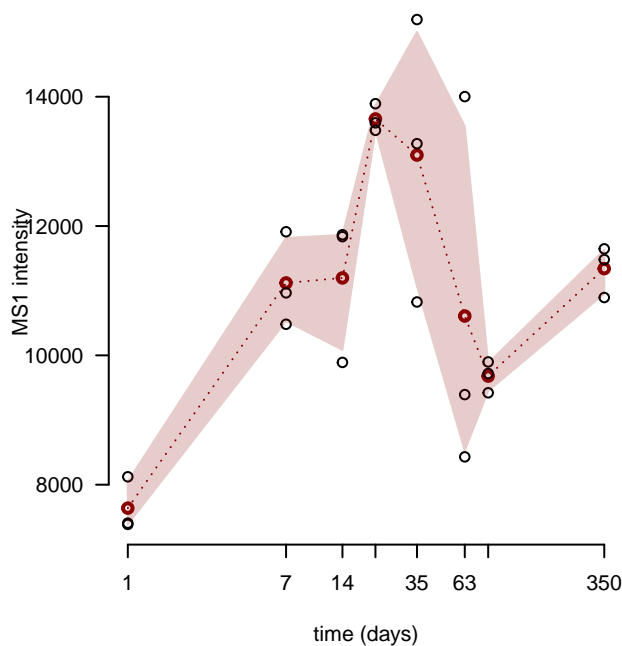

**Q99LH9**  
**GN=Sh3bp5l**

SH3 binding domain protein 5 like

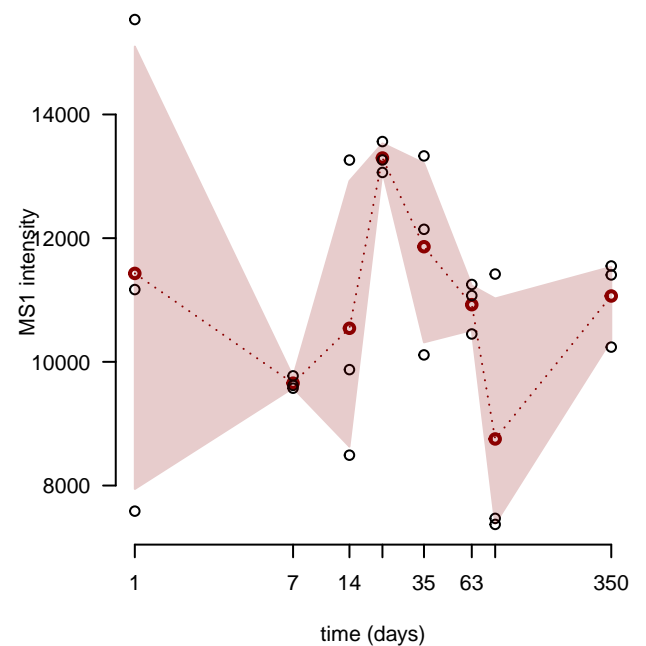



**Q99LI2**  
**GN=Clcc1**  
chloride channel CLIC-like 1

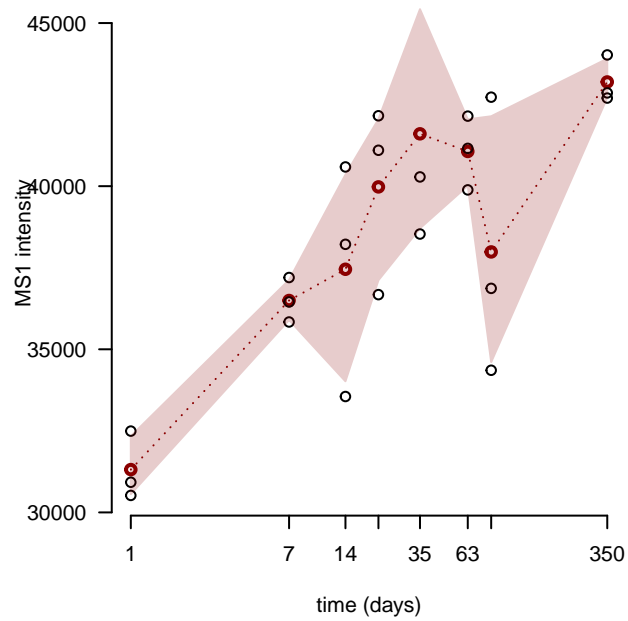

**Q99LI5**  
**GN=Znf281**

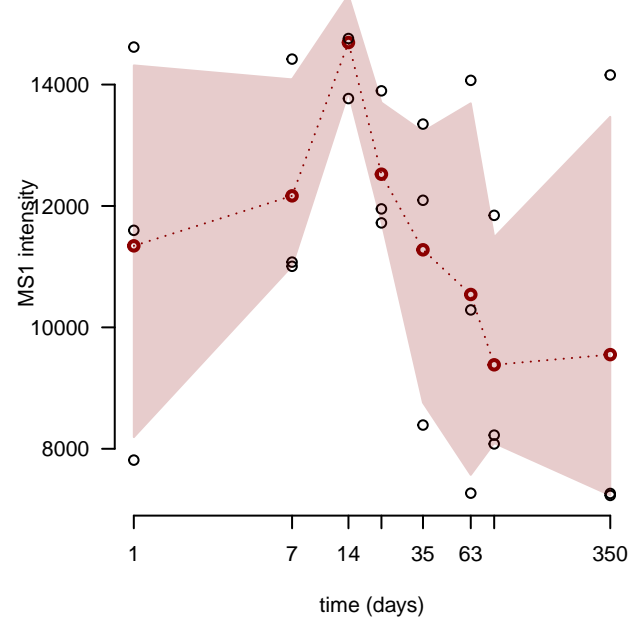

**Q99LI7**  
**GN=Cstf3**  
cleavage stimulation factor, 3' pre-RNA, ...

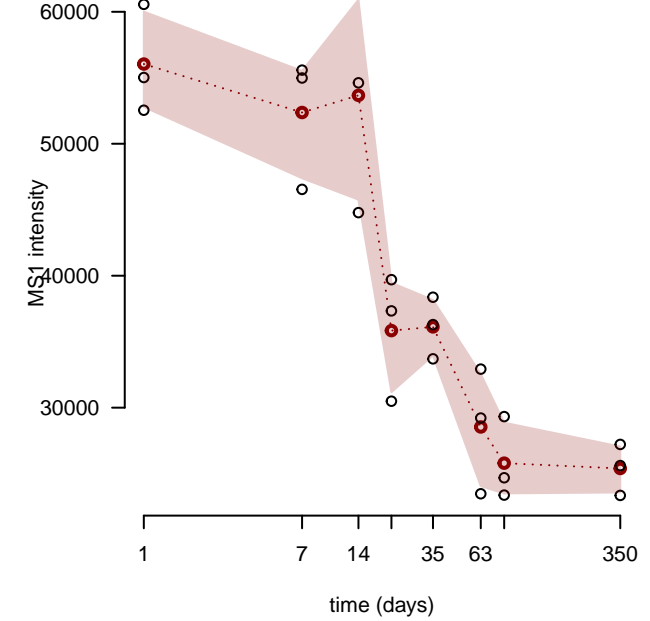

**Q99LI8**  
**GN=Hgs**  
HGF-regulated tyrosine kinase substrate

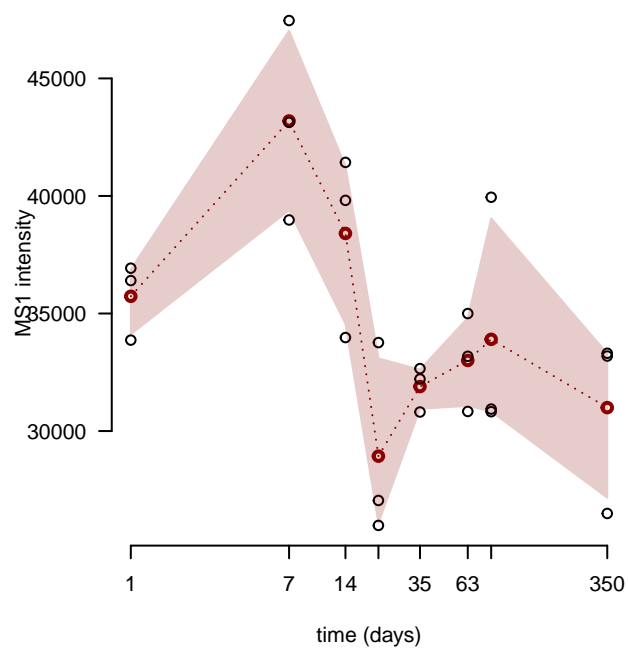

**Q99LI9**  
**GN=Clp1**  
CLP1, cleavage and polyadenylation facto ...

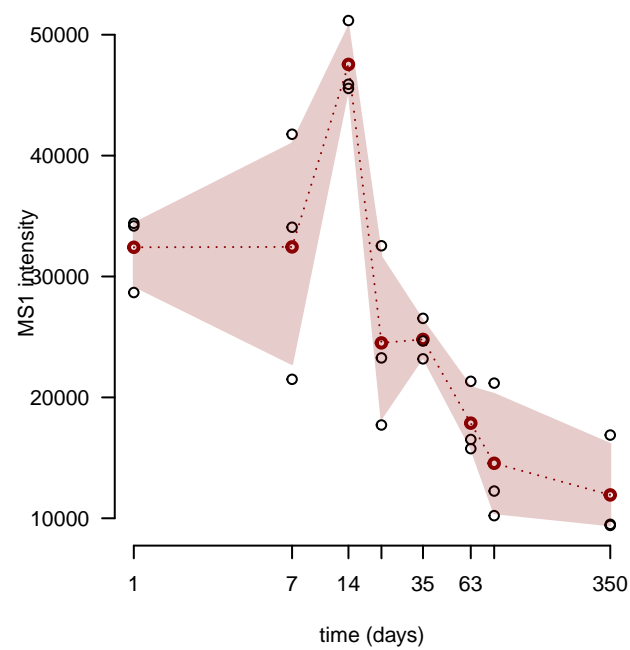

**Q99LJ0**  
**GN=Cttnbp2nl**  
CTTNBP2 N-terminal like

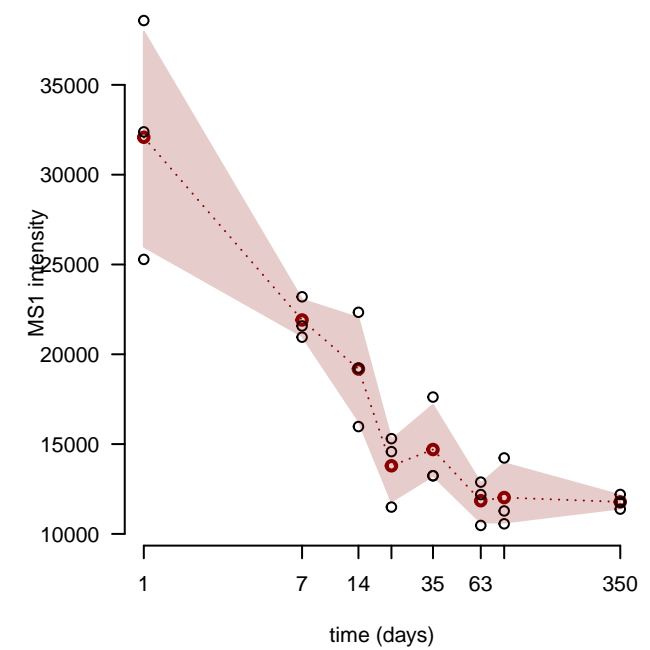

**Q99LJ1**  
**GN=Fuca1**  
fucosidase, alpha-L- 1, tissue

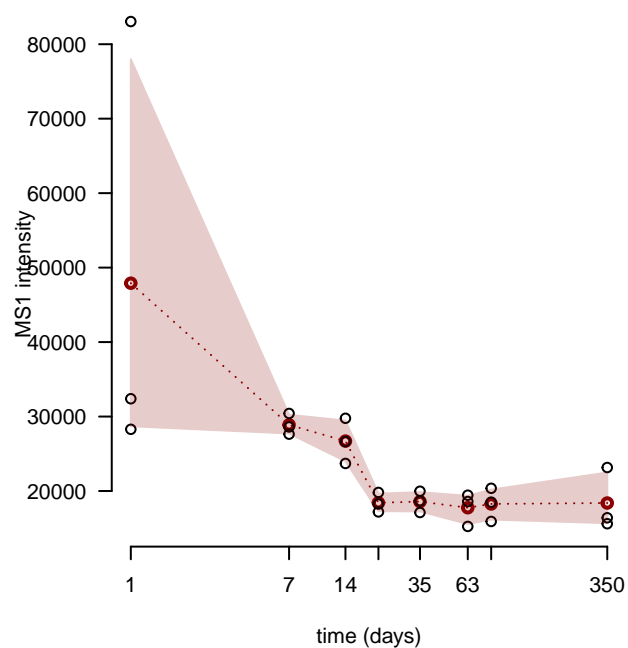

**Q99LJ5**  
**GN=Cmtm3**  
CKLF-like MARVEL transmembrane domain co ...

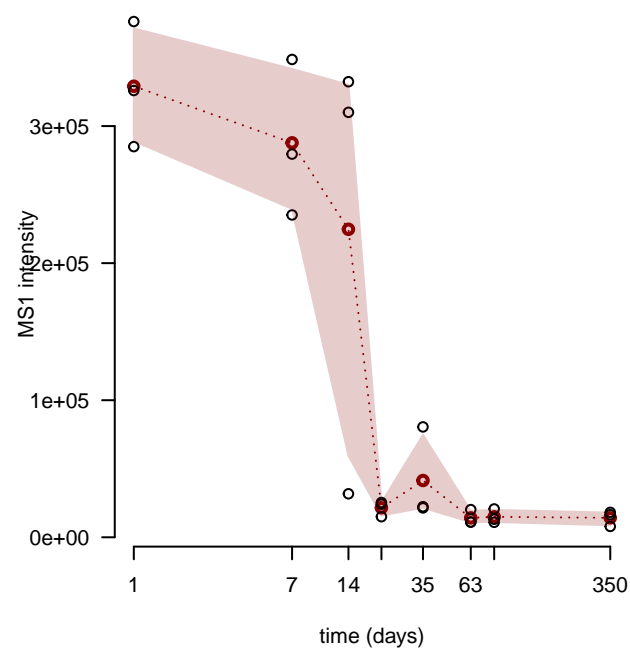

**Q99LJ6**  
**GN=Gpx7**  
glutathione peroxidase 7

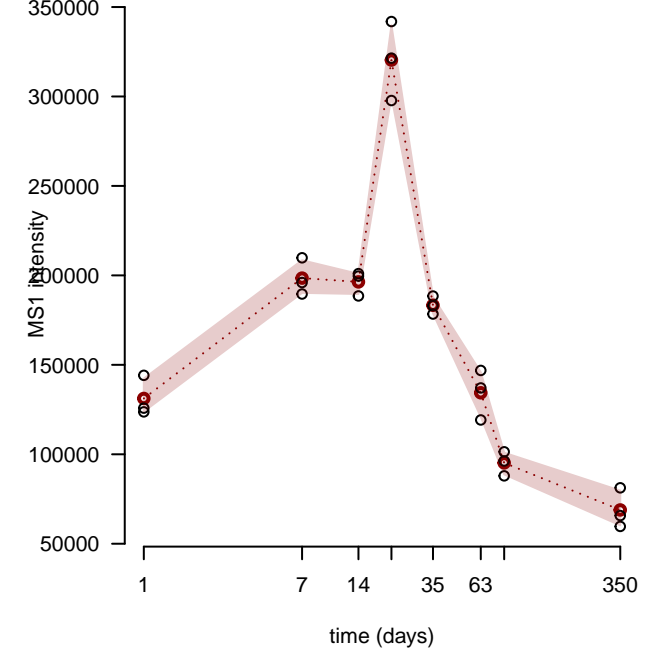

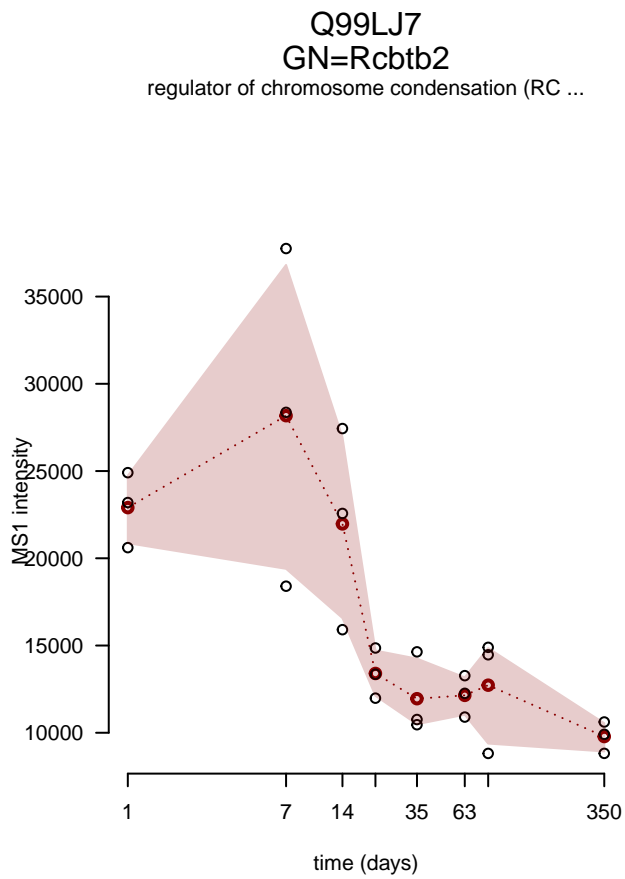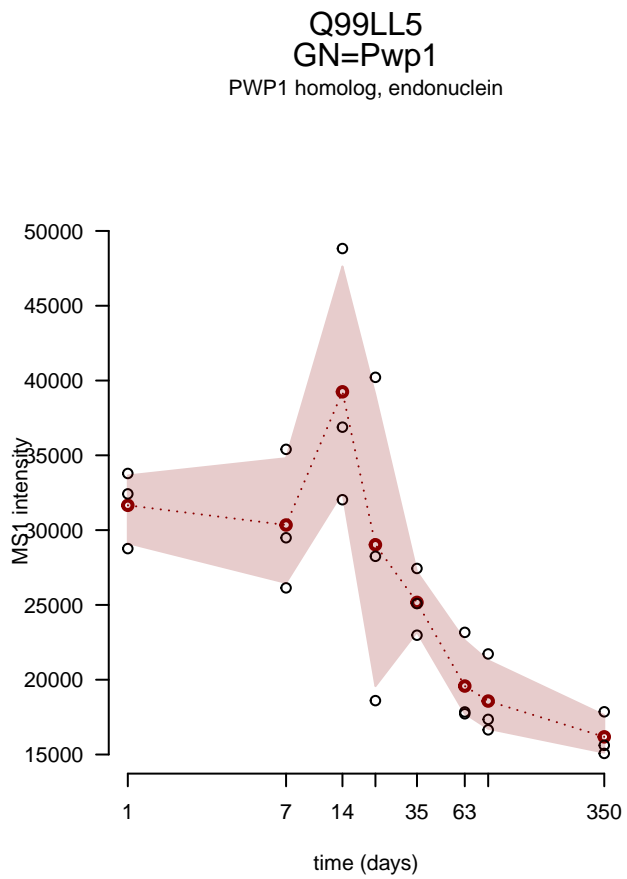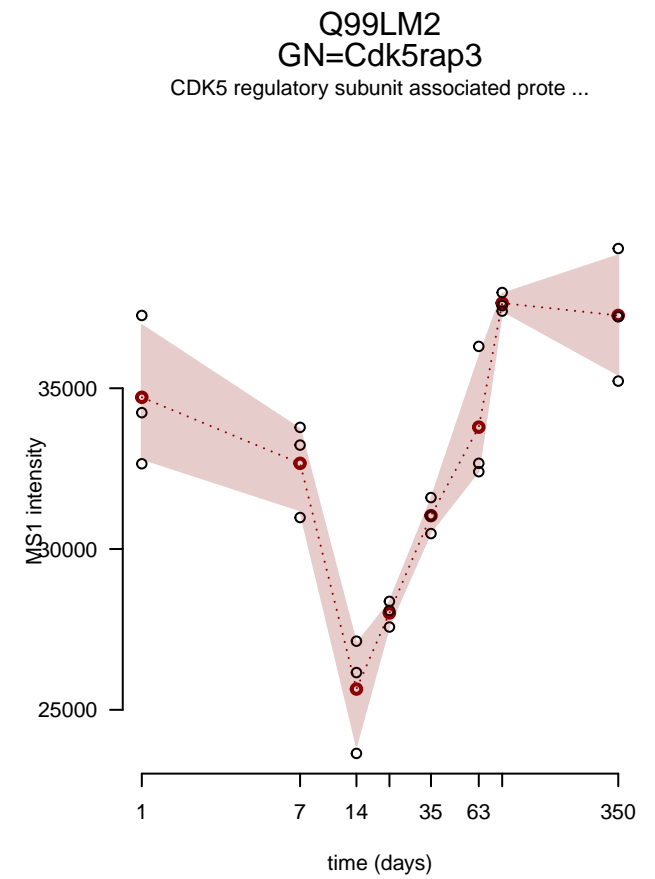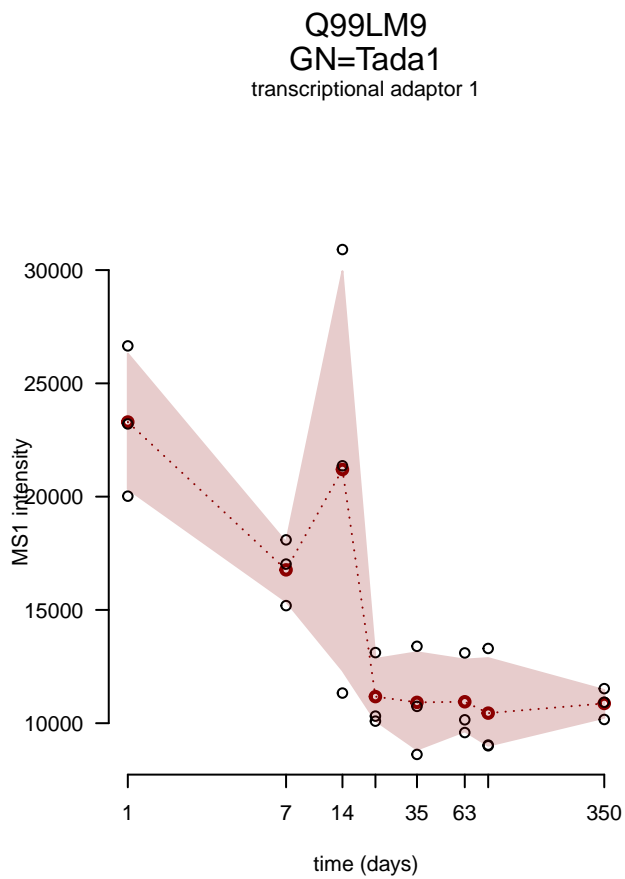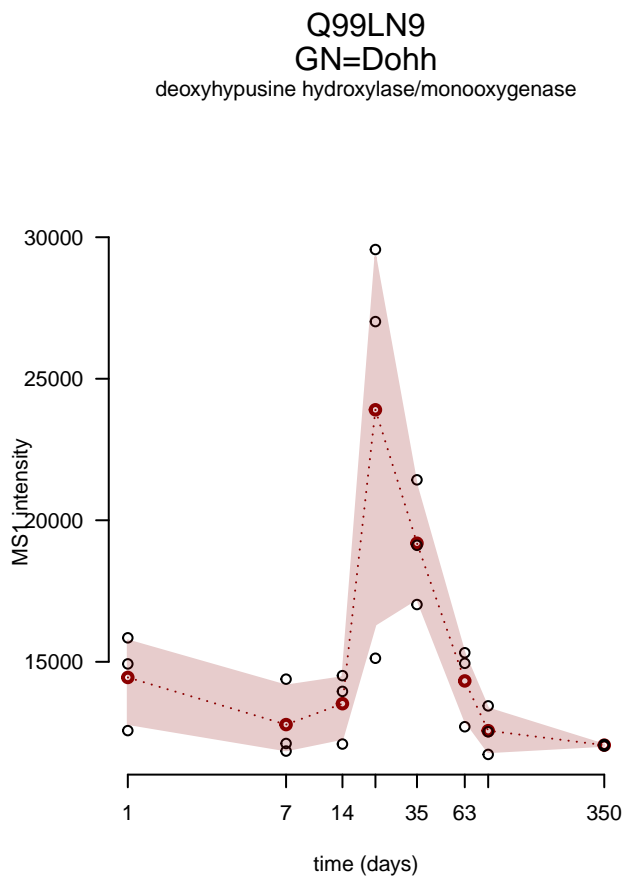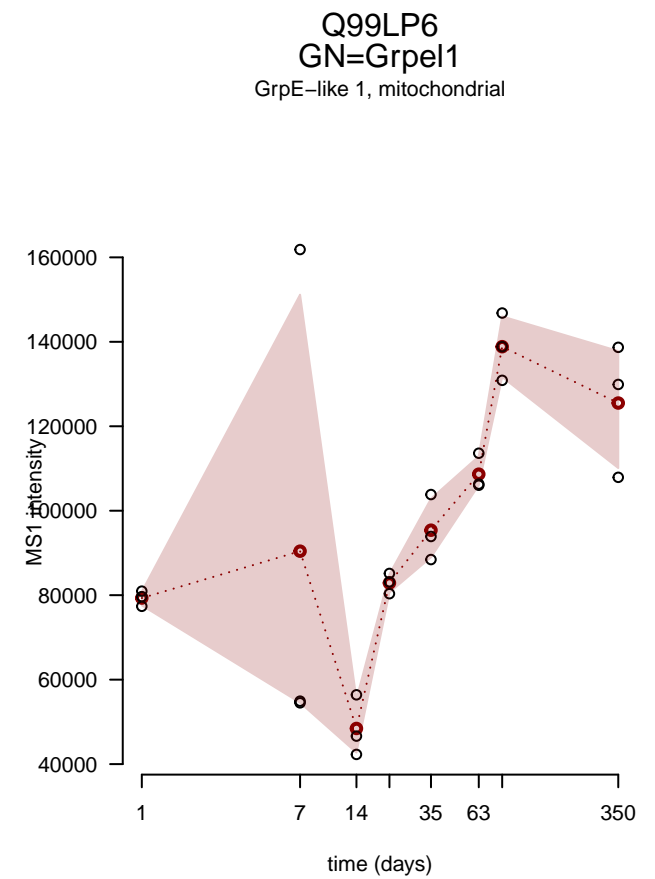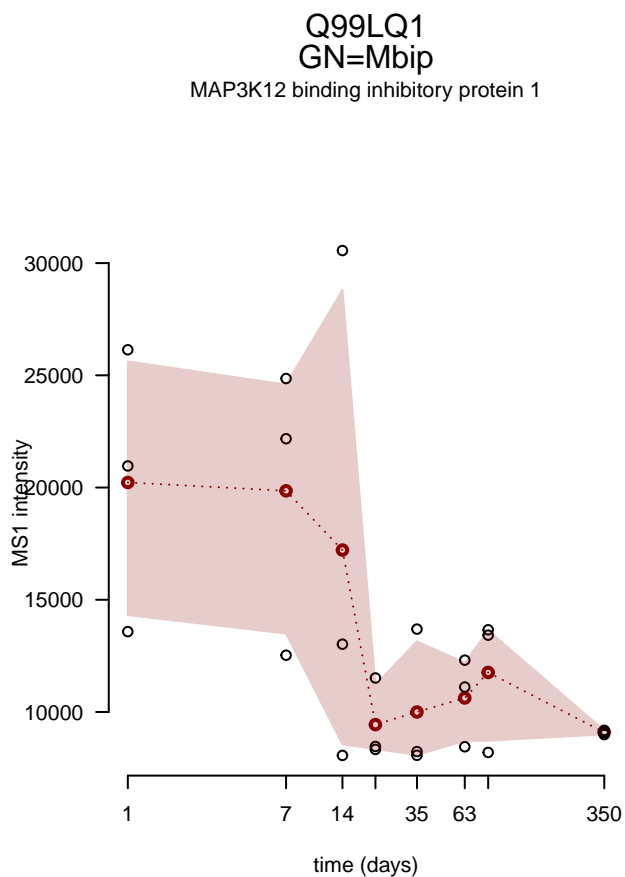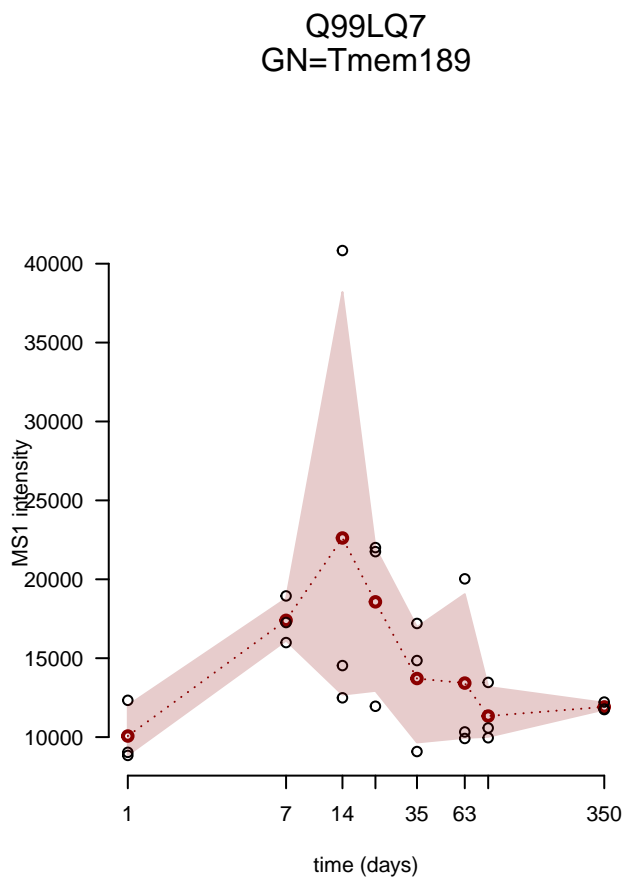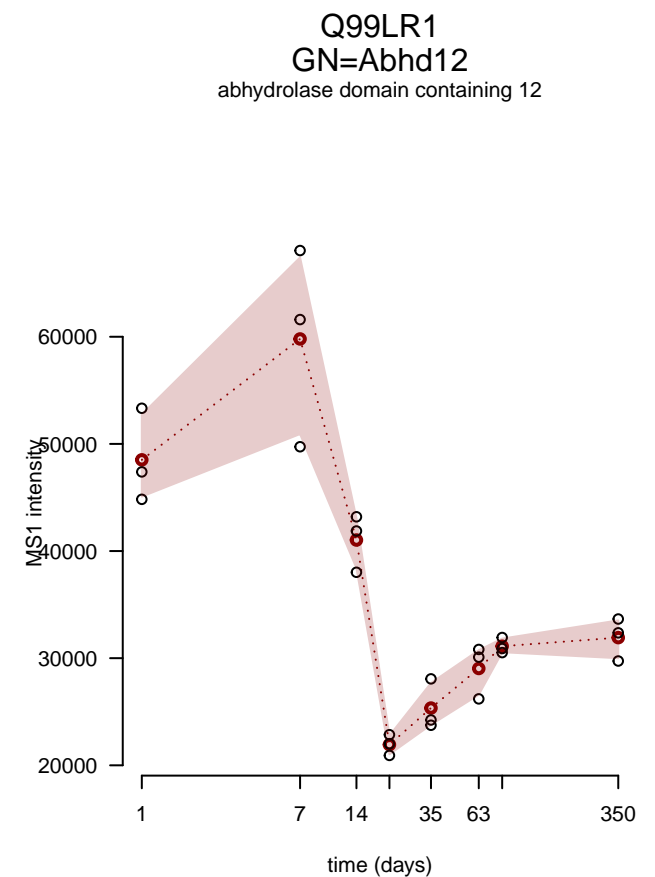

**Q99LS3**  
**GN=PspH**  
phosphoserine phosphatase

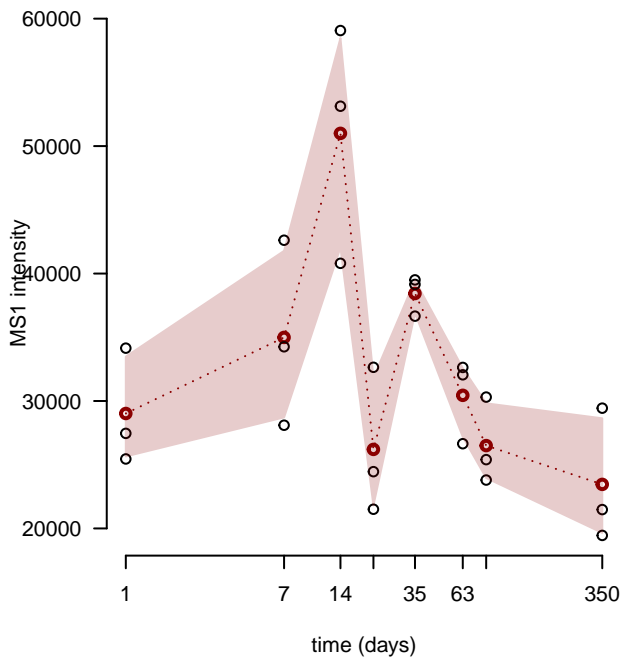

**Q99LT0**  
**GN=Dpy30**  
dpy-30, histone methyltransferase comple ...

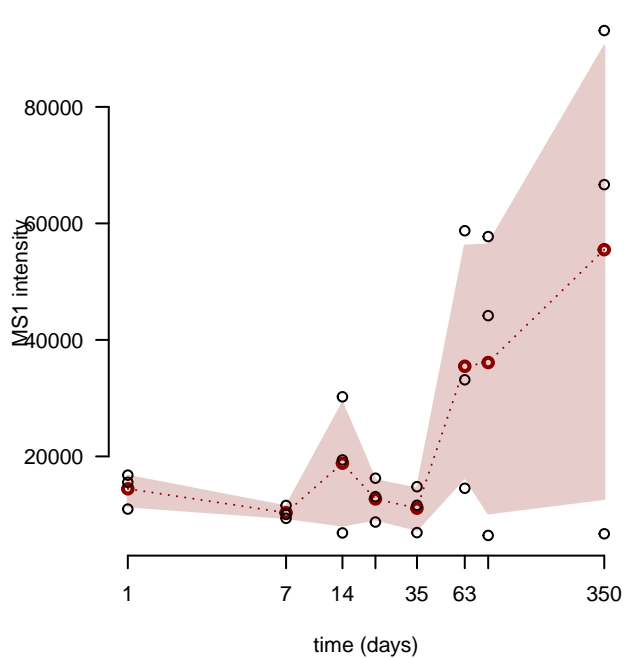

**Q99LU0**  
**GN=Chmp1b1**

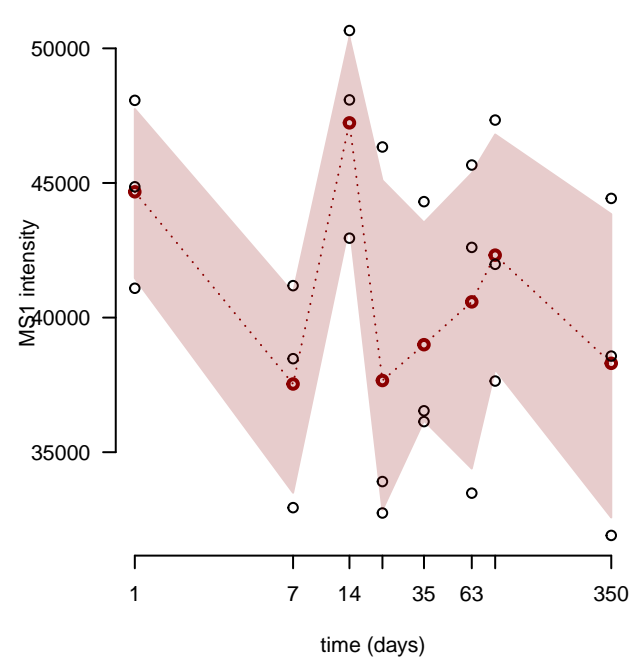

**Q99LW0**  
**GN=Ankrd10**  
ankyrin repeat domain 10

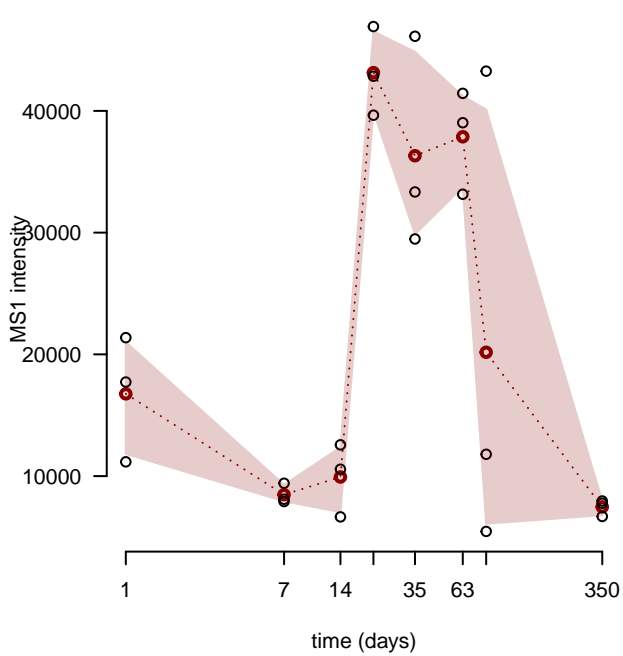

**Q99LW6**  
**GN=Yaf2**  
YY1 associated factor 2

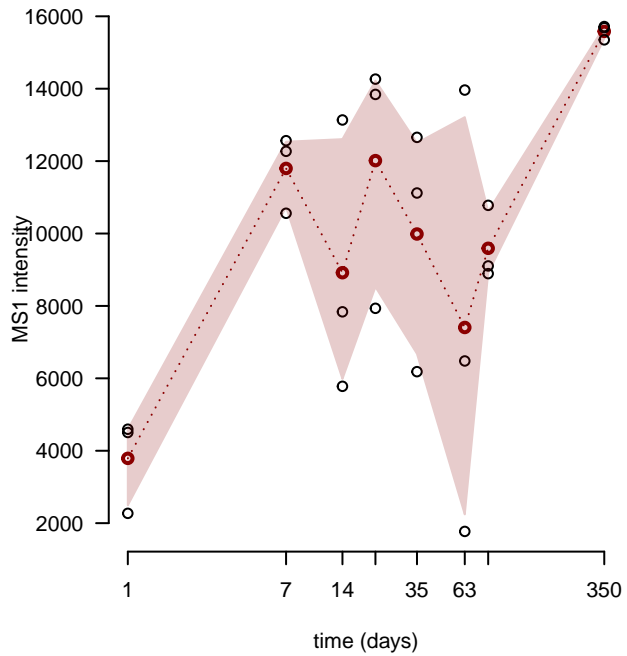

**Q99LX0**  
**GN=Park7**  
Parkinson disease (autosomal recessive, ...

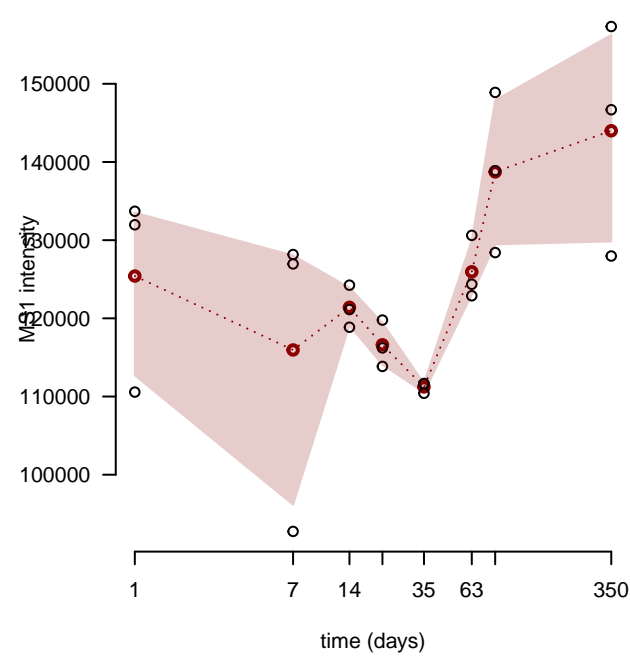

**Q99LX5**  
**GN=Mmtag2**

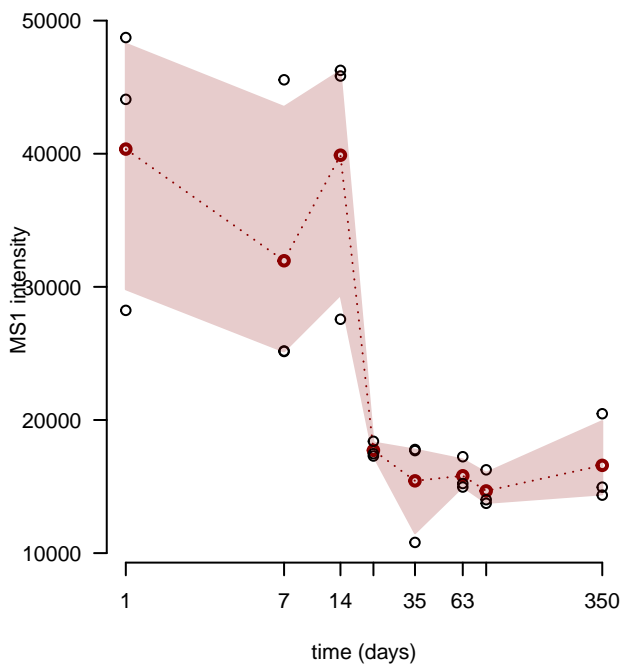

**Q99LY9**  
**GN=Ndufs5**  
NADH:ubiquinone oxidoreductase core subu ...

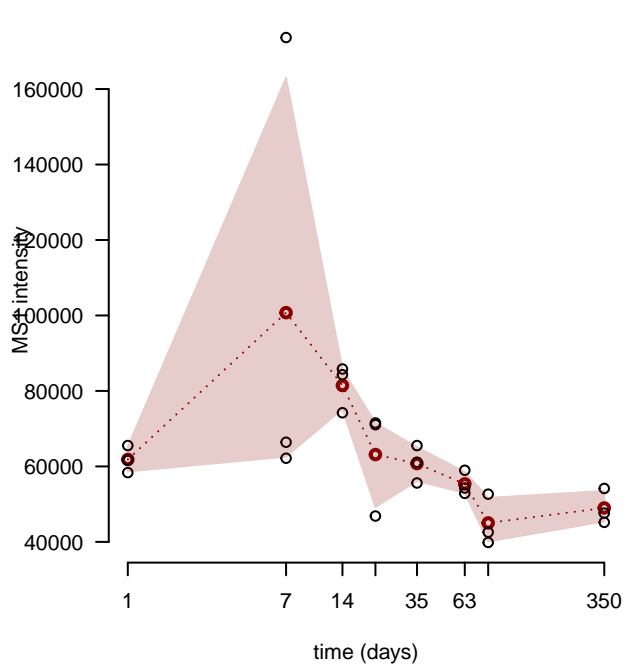

**Q99LZ3**  
**GN=Gins4**  
GINS complex subunit 4 (Sld5 homolog)

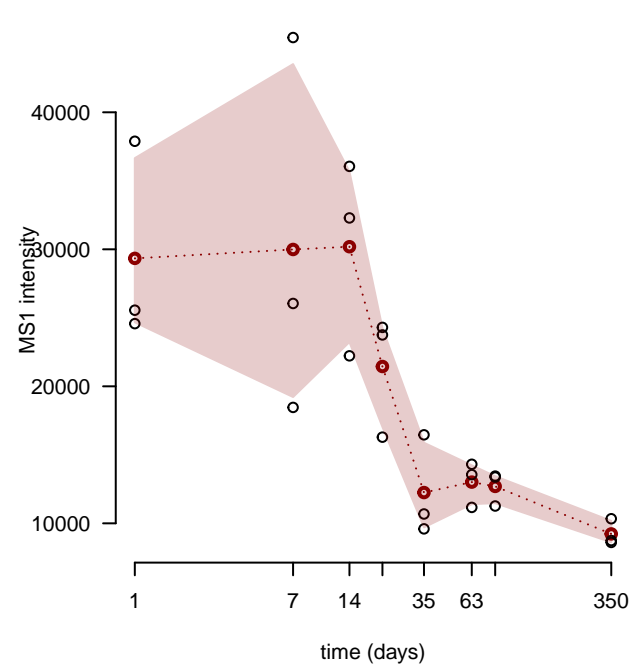

**Q99M01**  
GN=Fars2  
phenylalanine-tRNA synthetase 2 (mitocho ...

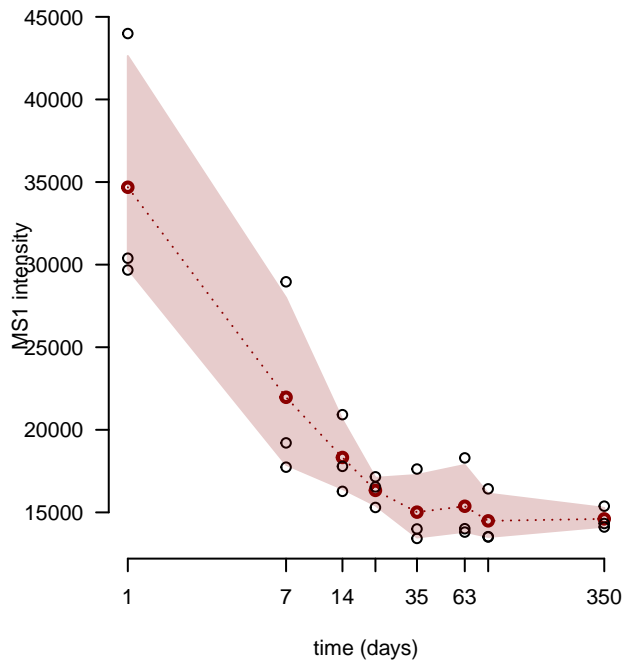

**Q99M04**  
GN=Lias  
lipoic acid synthetase

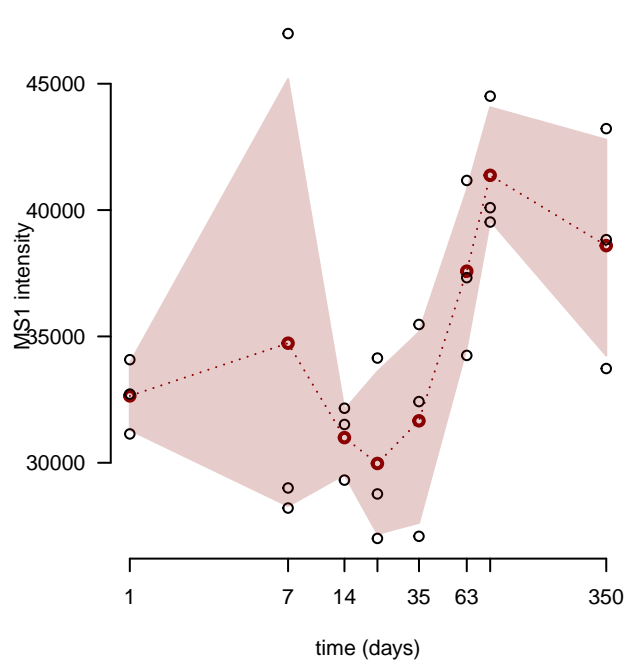

**Q99M07**  
GN=Coa5  
cytochrome C oxidase assembly factor 5

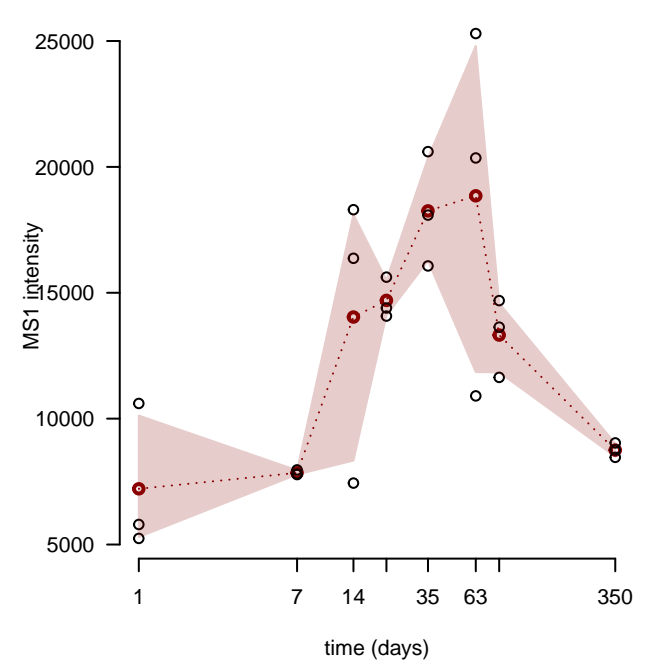

**Q99M08**  
GN=

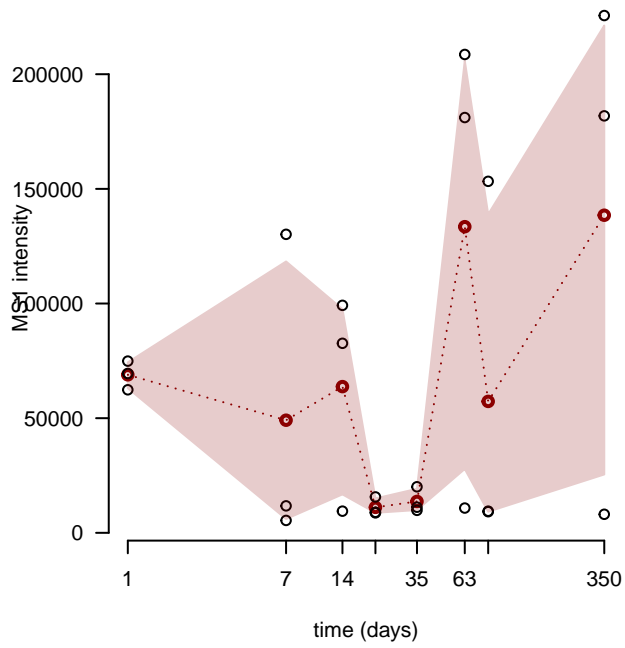

**Q99M28**  
GN=Rnps1  
RNA binding protein with serine rich dom ...

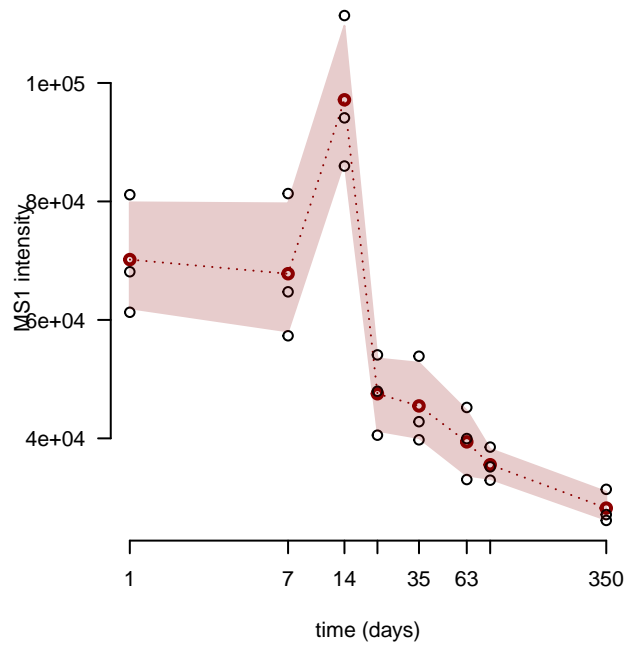

**Q99M31**  
GN=Hspa14  
heat shock protein 14

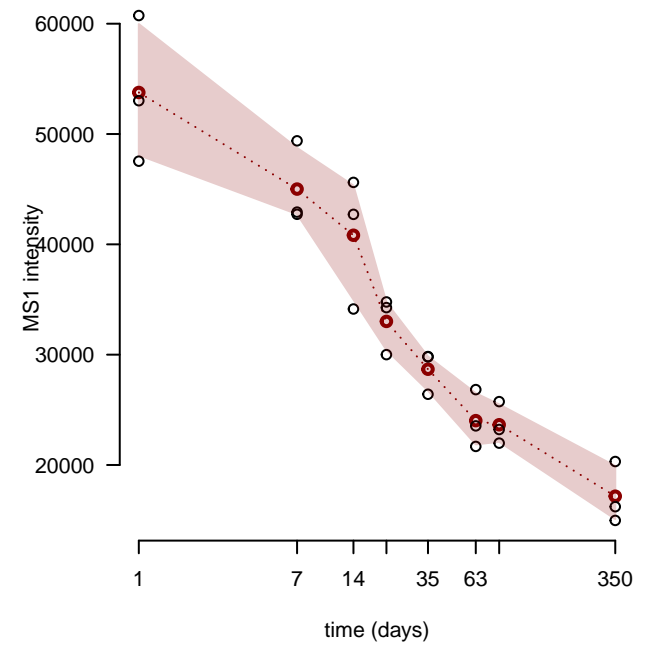

**Q99M51**  
GN=Nck1  
non-catalytic region of tyrosine kinase ...

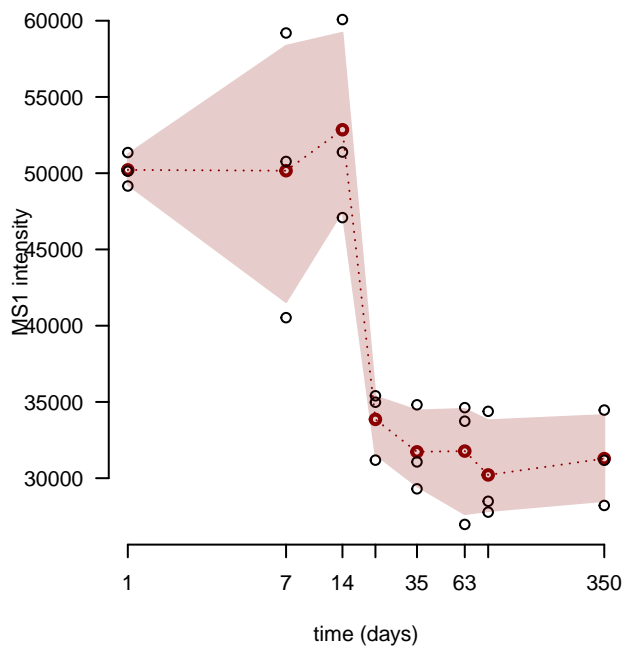

**Q99M71**  
GN=Epdr1  
ependymin related protein 1 (zebrafish)

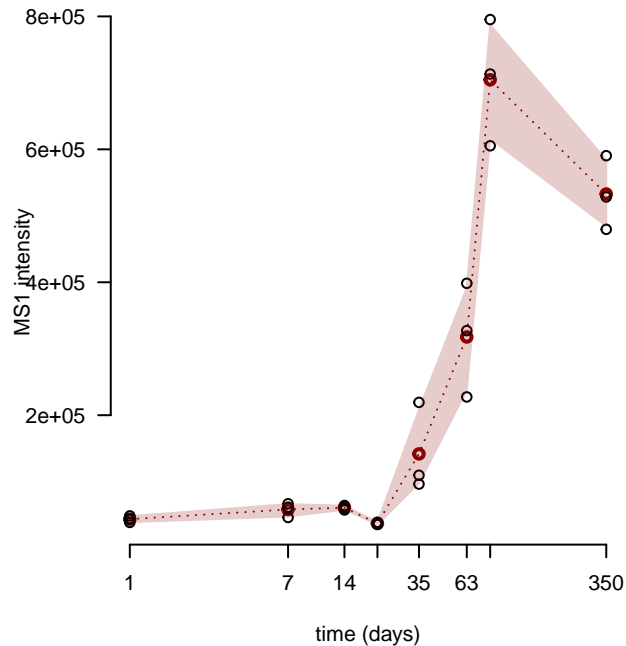

**Q99M73**  
GN=Krt84  
keratin 84

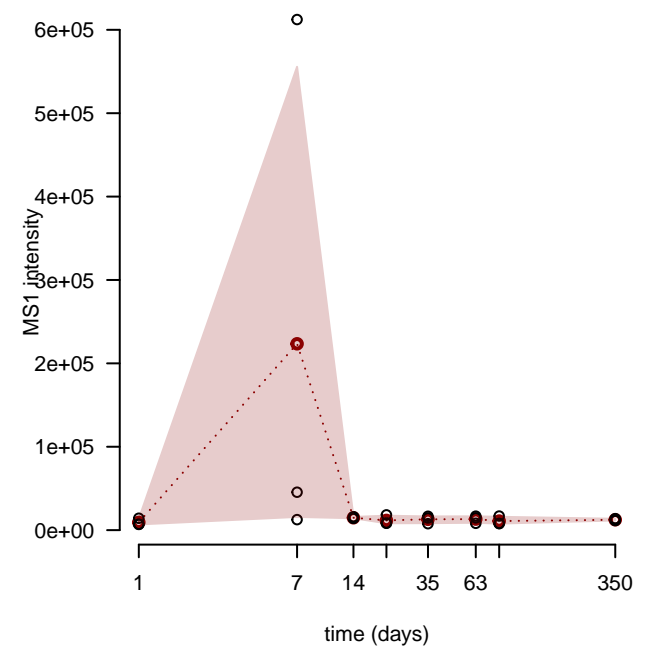

**Q99M74**  
GN=Krt82  
keratin 82

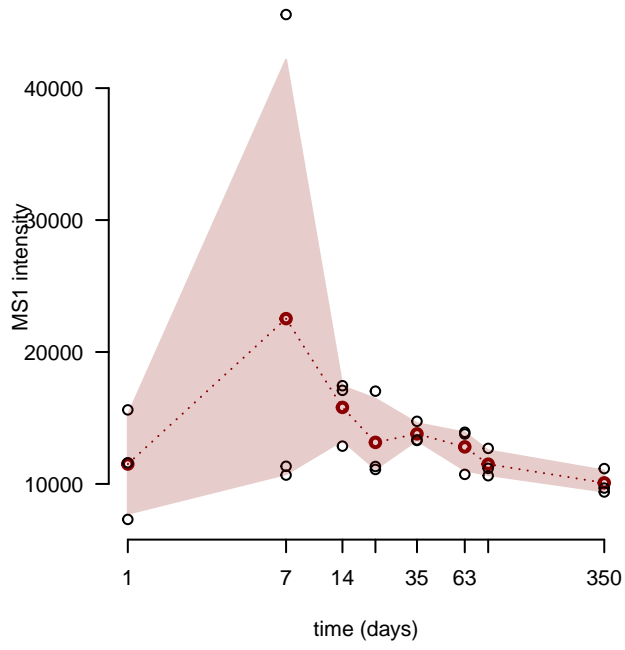

**Q99M87**  
GN=Dnaja3  
DnaJ heat shock protein family (Hsp40) m ...

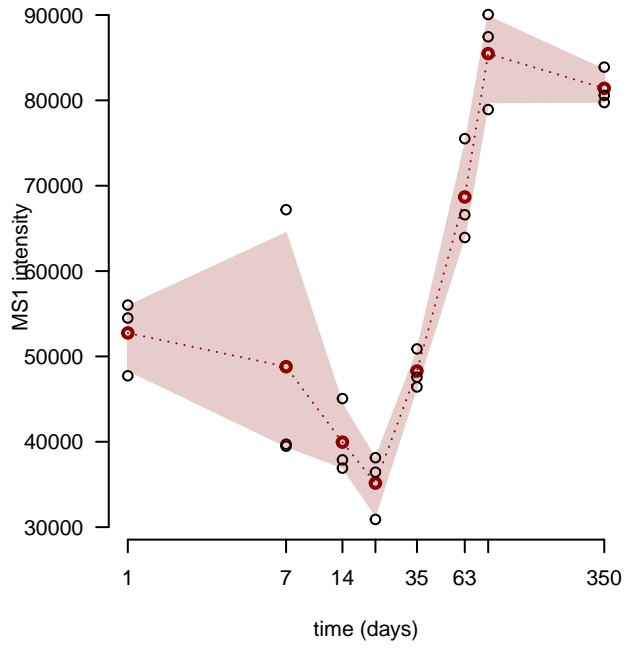

**Q99M87**  
GN=Dnaja3  
DnaJ heat shock protein family (Hsp40) m ...

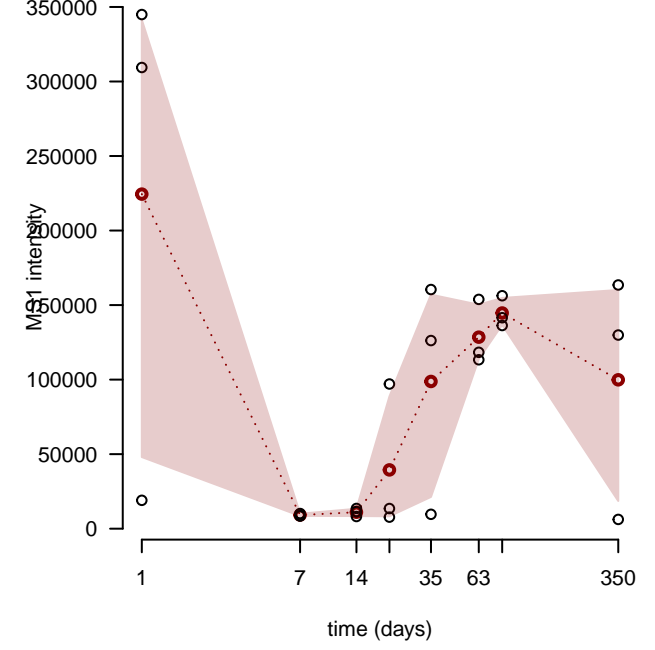

**Q99M96**  
GN=St7  
suppression of tumorigenicity 7

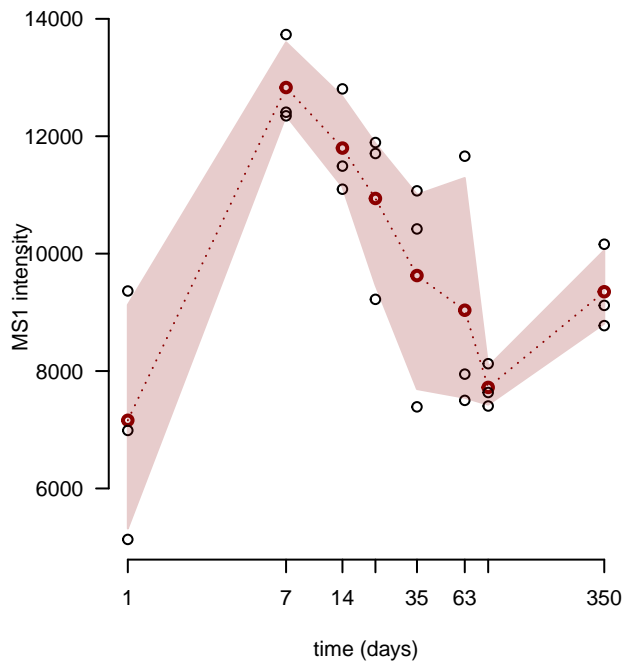

**Q99MB7**  
GN=Rnf141  
ring finger protein 141

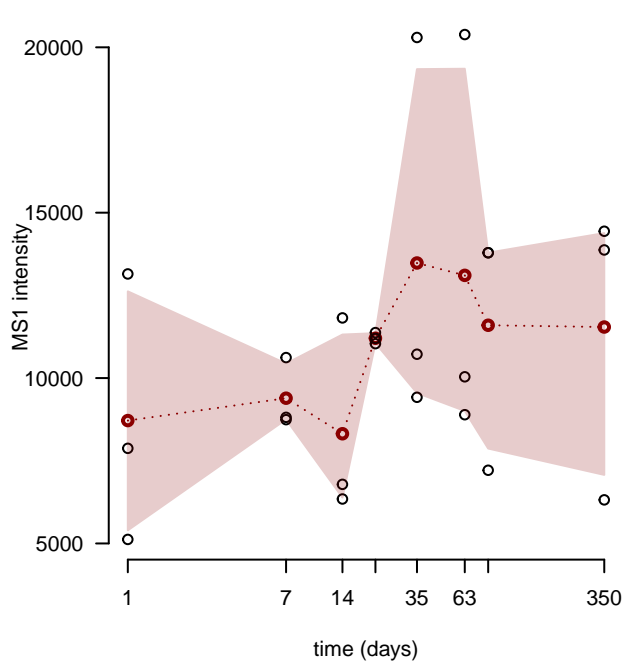

**Q99MD6**  
GN=Txnrd3  
thioredoxin reductase 3

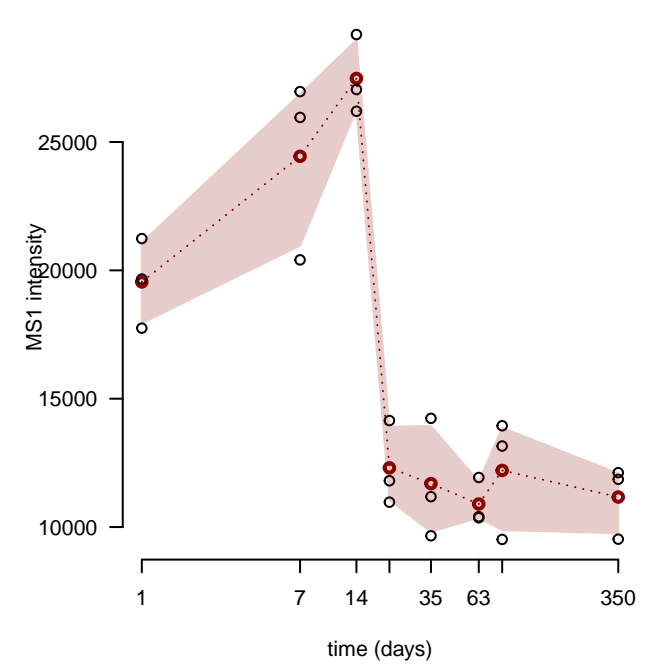

**Q99MD8**  
GN=Mynn  
myoneurin

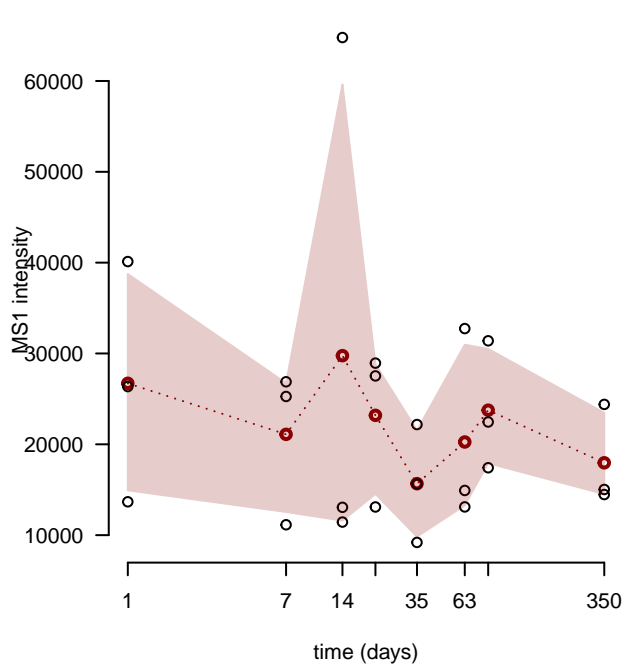

**Q99MD9**  
GN=Nasp  
nuclear autoantigenic sperm protein (his ...

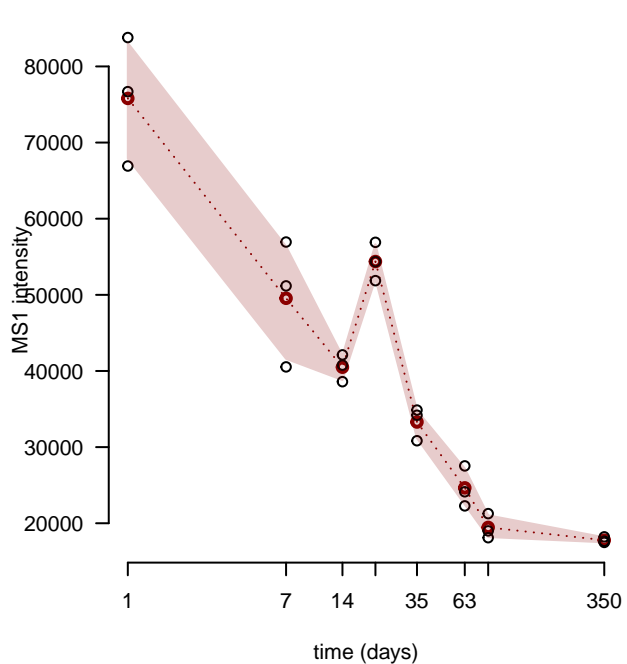

**Q99ME2**  
GN=Wdr6  
WD repeat domain 6

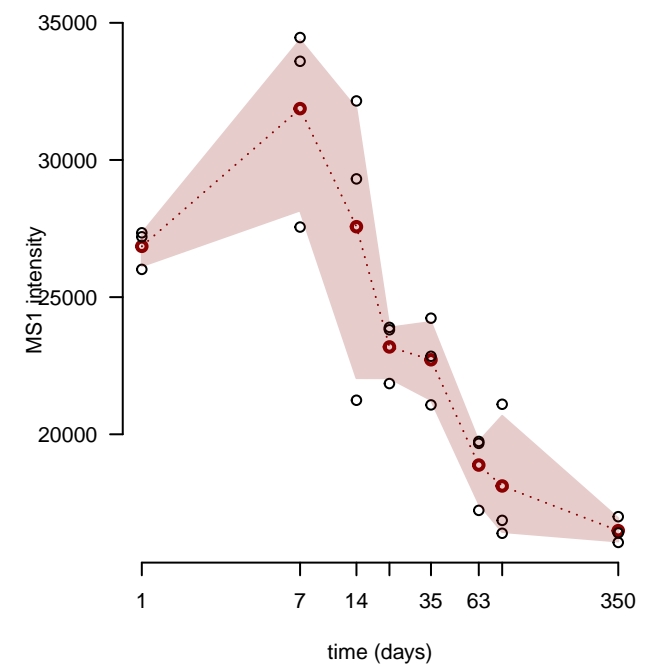

**Q99ME3**  
**GN=Sncap**  
synuclein, alpha interacting protein (sy ...

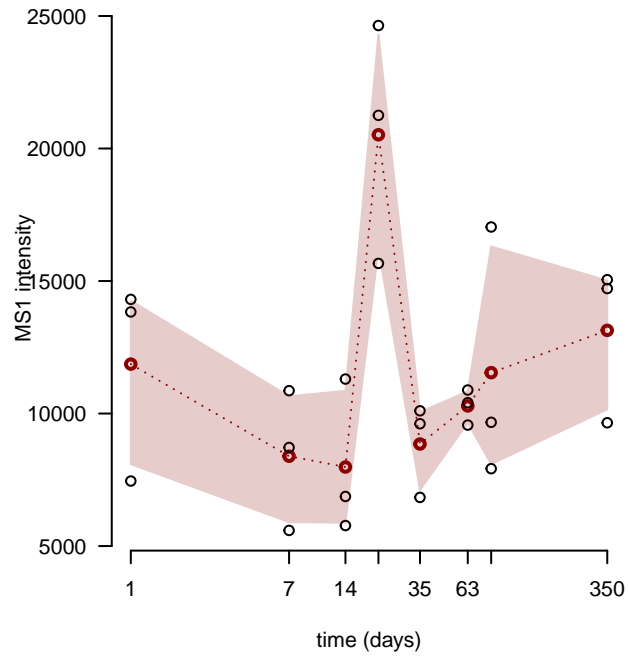

**Q99ME9**  
**GN=Gtpbp4**  
GTP binding protein 4

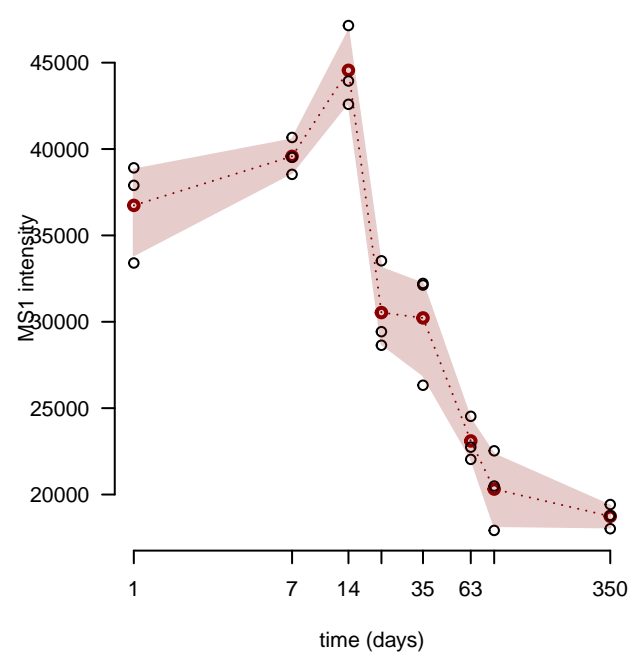

**Q99MI1**  
**GN=Erc1**  
ELKS/RAB6-interacting/CAST family member ...

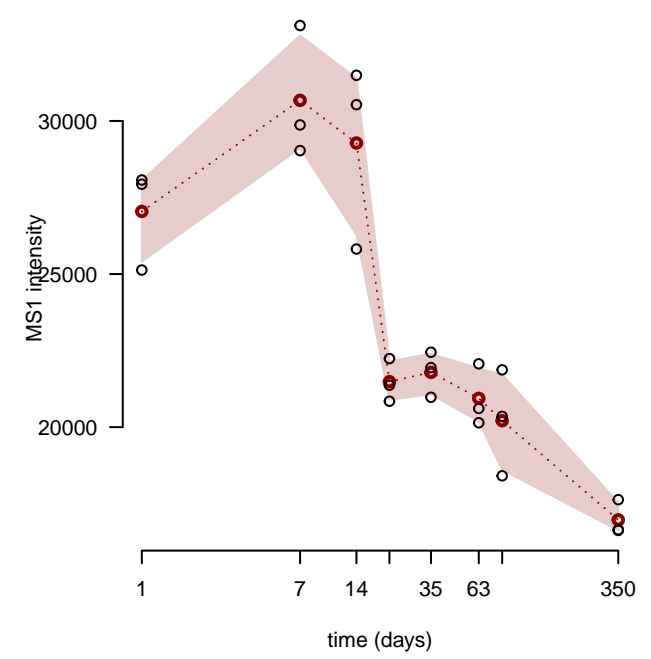

**Q99MJ9**  
**GN=Ddx50**  
DEd box helicase 50

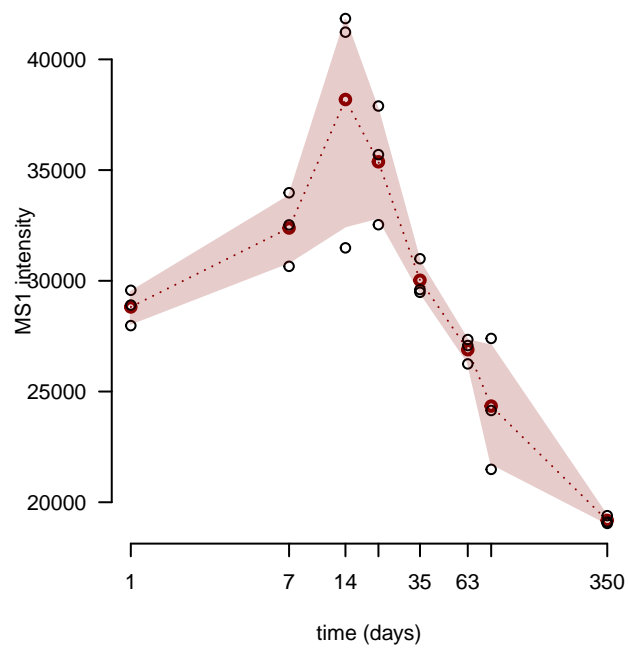

**Q99MK8**  
**GN=Grk2**  
G protein-coupled receptor kinase 2

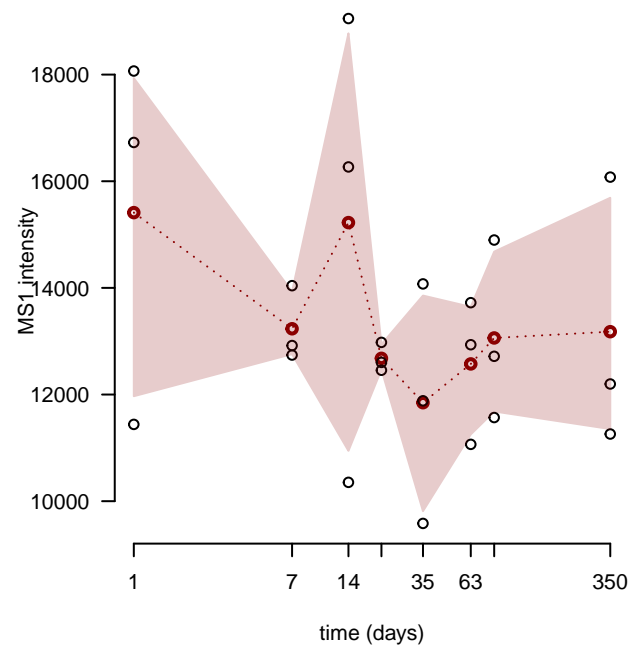

**Q99MK9**  
**GN=Rassf1**  
Ras association (RalGDS/AF-6) domain fam ...

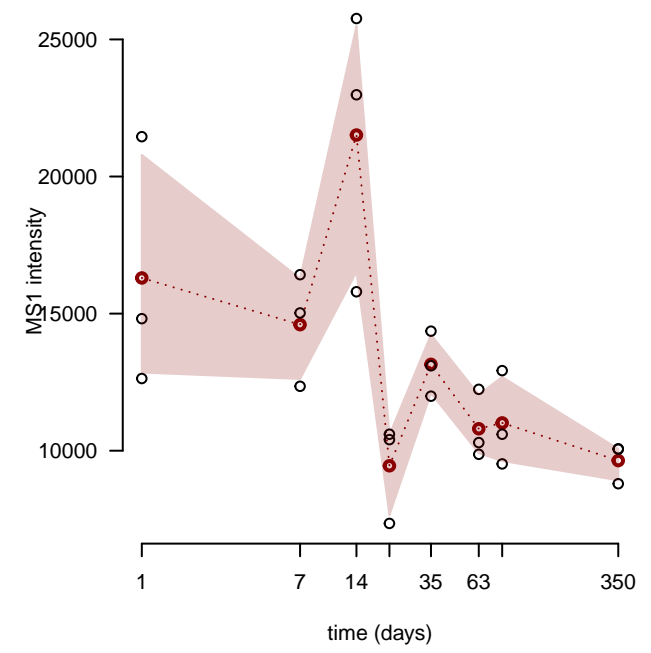

**Q99ML0**  
**GN=Zmynd10**  
zinc finger, MYND domain containing 10

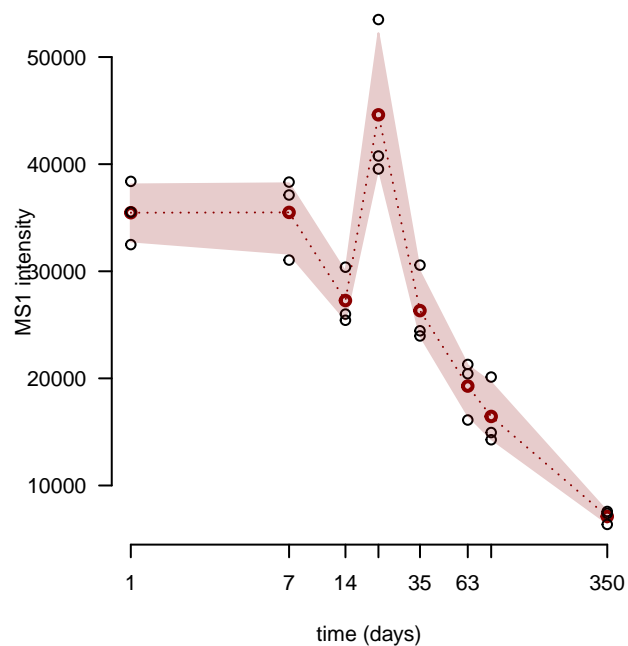

**Q99ML4**  
**GN=Dipk1b**  
divergent protein kinase domain 1B

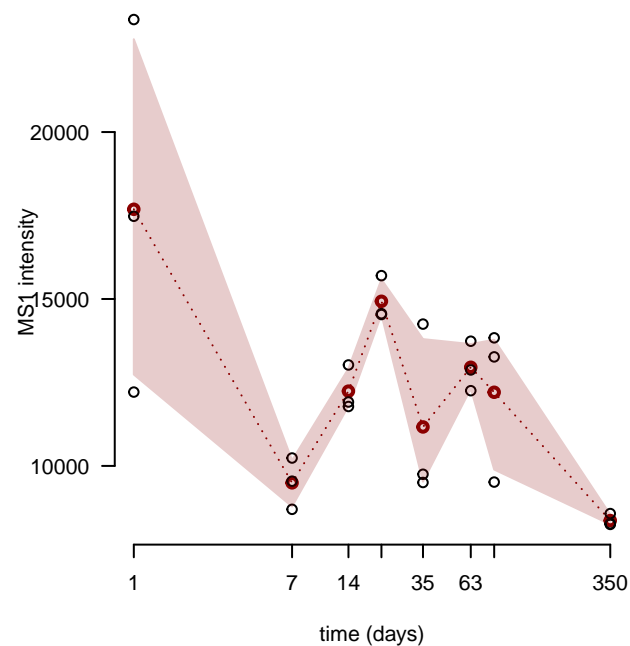

**Q99MN1**  
**GN=Kars**  
lysyl-tRNA synthetase

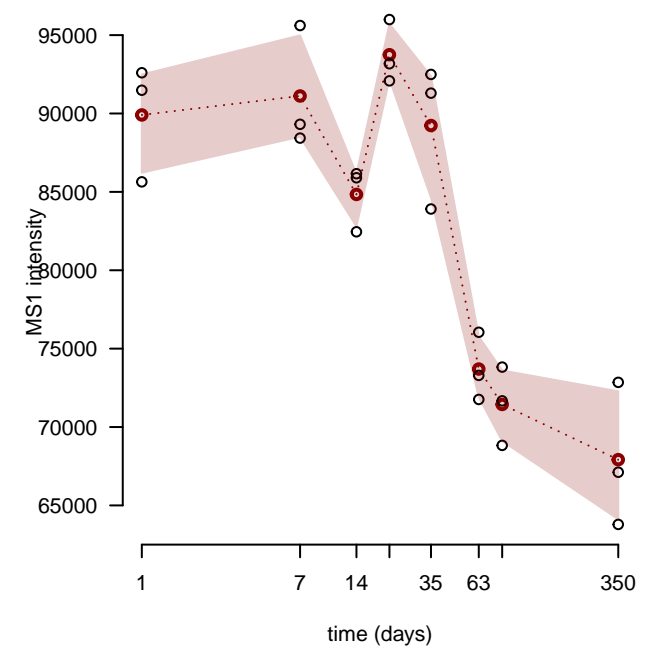

**Q99MN9**  
**GN=Pccb**  
propionyl Coenzyme A carboxylase, beta p ...

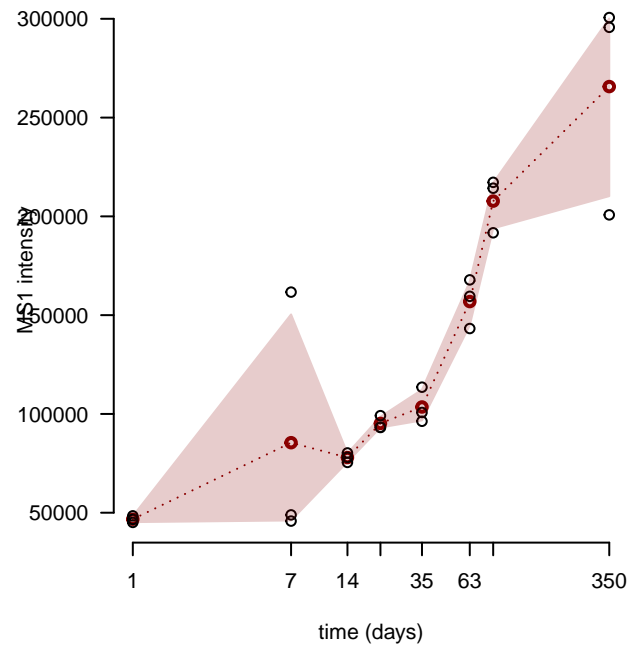

**Q99MP8**  
**GN=Brap**  
BRCA1 associated protein

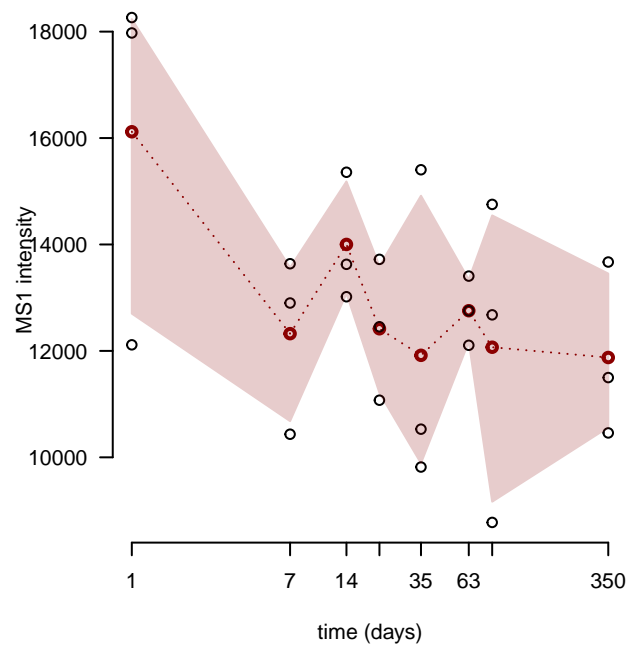

**Q99MQ1**  
**GN=Bicc1**  
BicC family RNA binding protein 1

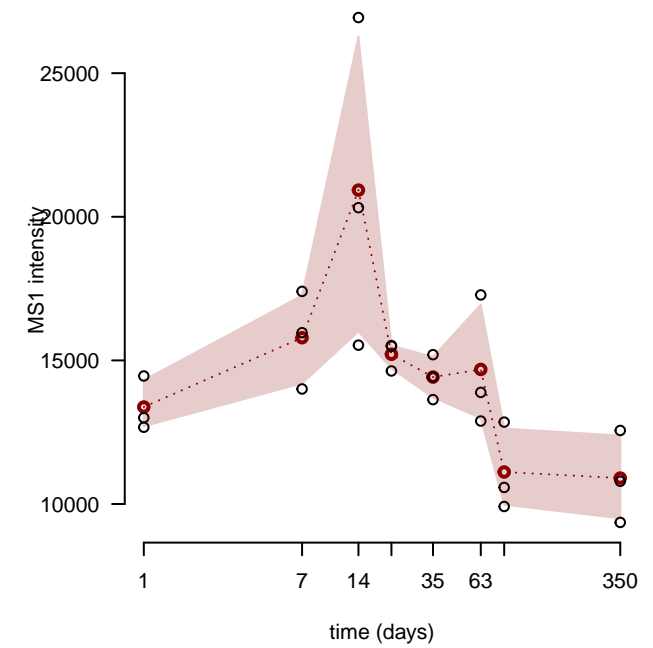

**Q99MQ4**  
**GN=Aspn**  
asporin

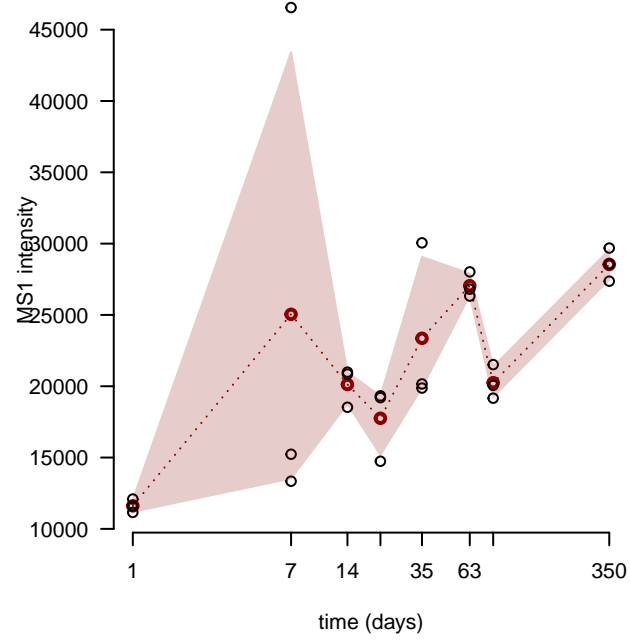

**Q99MR1**  
**GN=Gigyf1**  
GRB10 interacting GYF protein 1

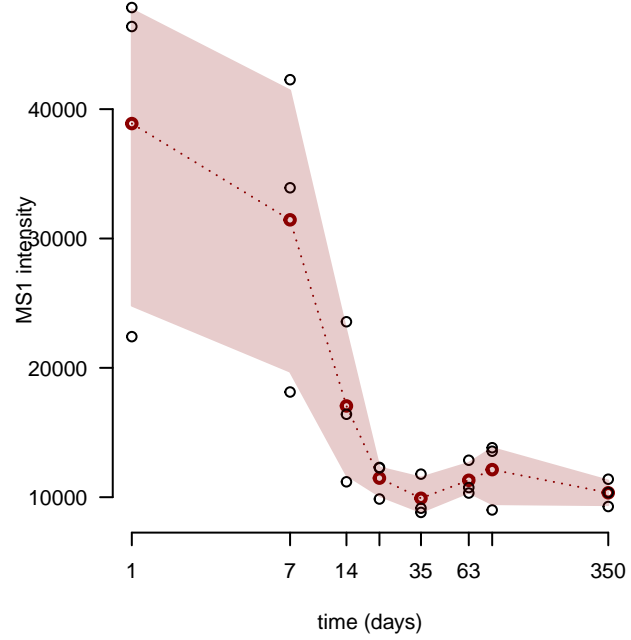

**Q99MR3**  
**GN=Slc12a9**  
solute carrier family 12 (potassium/chlo ...

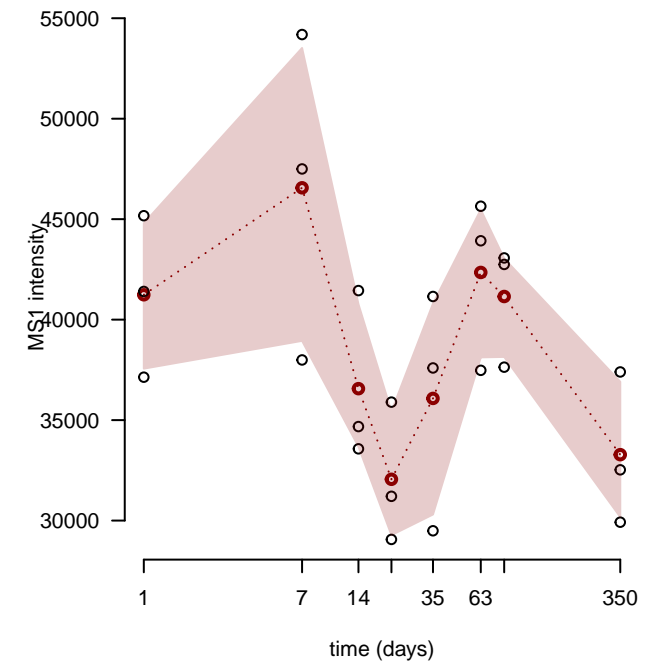

**Q99MR6**  
**GN=Srrt**  
serrate RNA effector molecule homolog (A ...

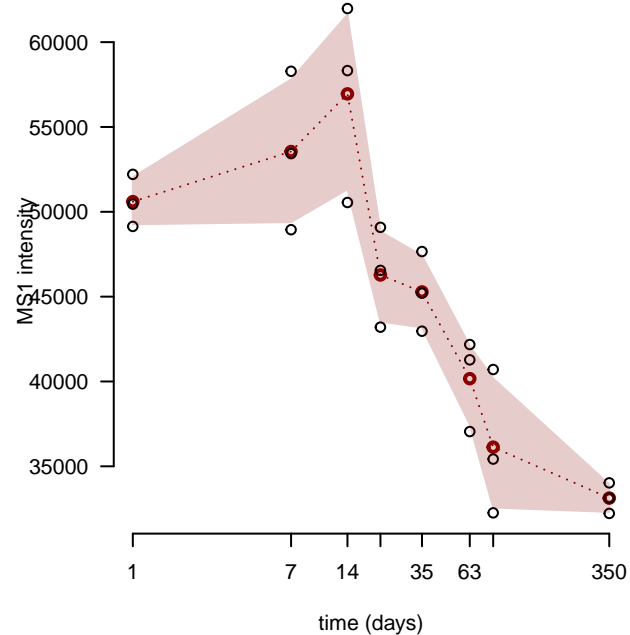

**Q99MR8**  
**GN=Mccc1**  
methylcrotonoyl-Coenzyme A carboxylase 1 ...

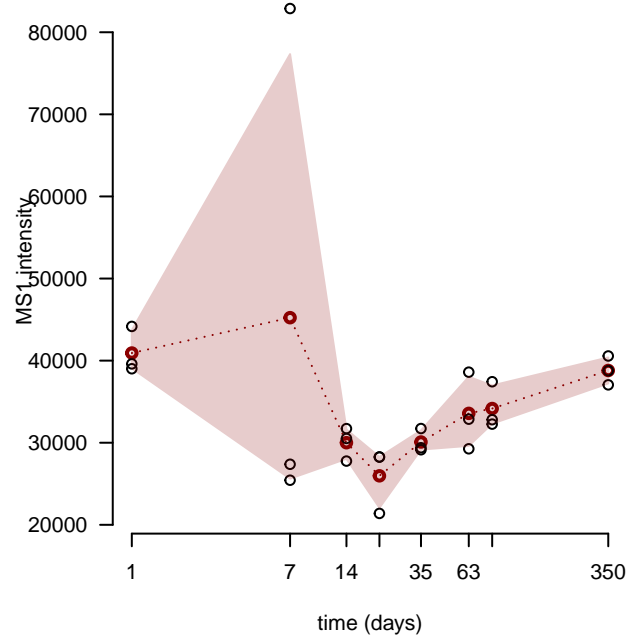

**Q99MS7**  
**GN=Ehbp111**  
EH domain binding protein 1-like 1

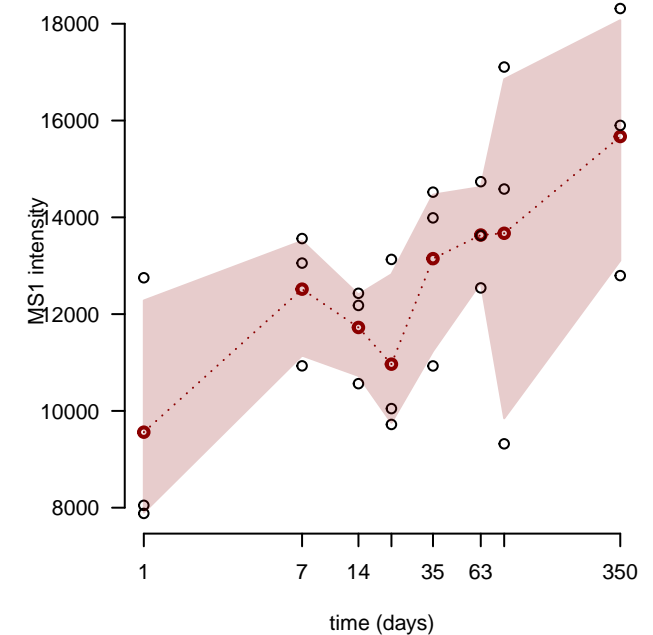

**Q99MS8**  
GN=Tpgs1

tubulin polyglutamylase complex subunit ...

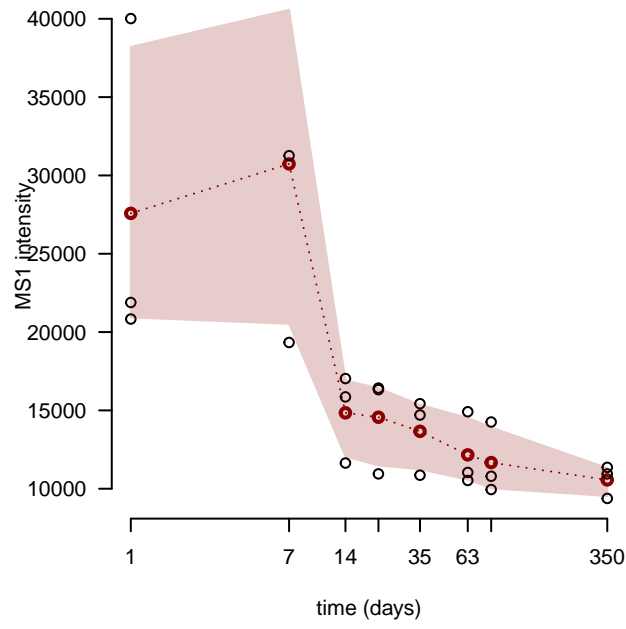

**Q99MU3**  
GN=Adar

adenosine deaminase, RNA-specific

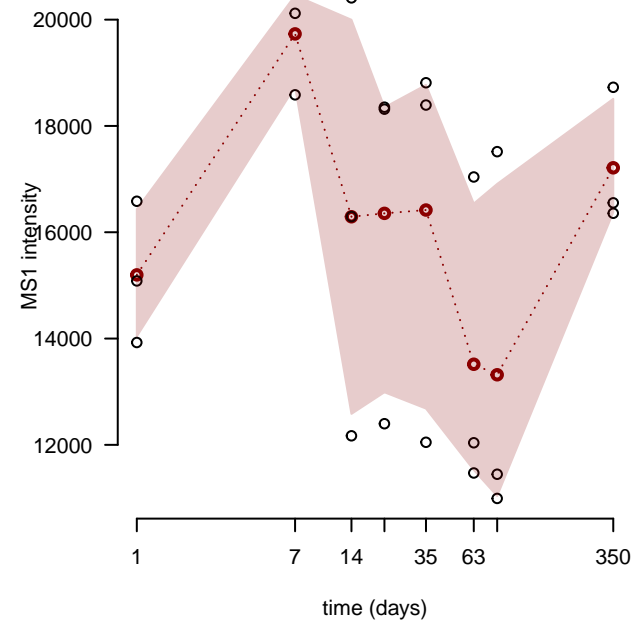

**Q99MV1**  
GN=Tdrd1

tudor domain containing 1

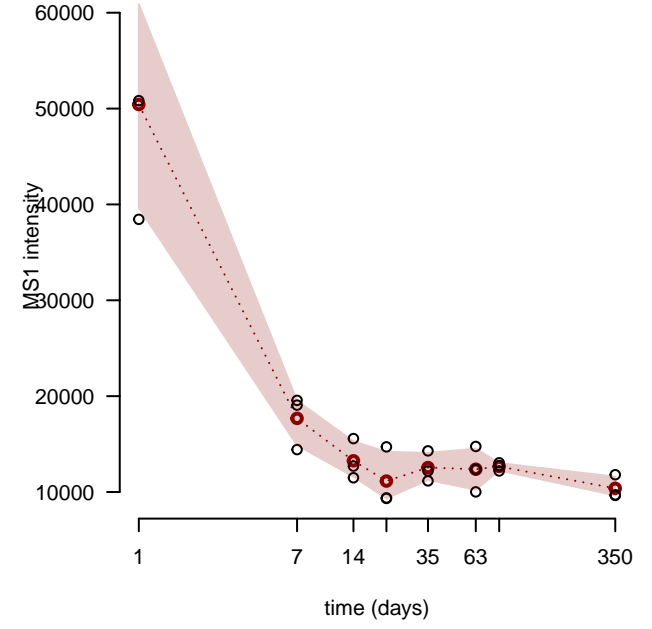

**Q99MV5**  
GN=Mov10I1

Mov10 like RISC complex RNA helicase 1

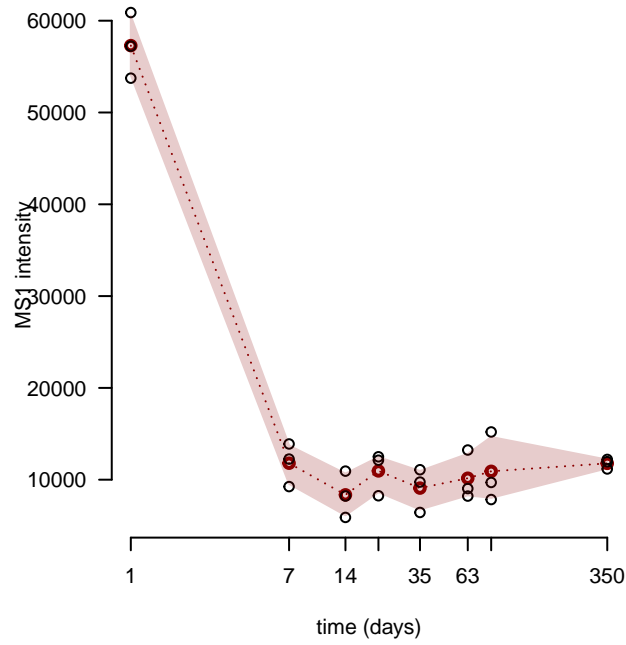

**Q99MV7**  
GN=Rnf17

ring finger protein 17

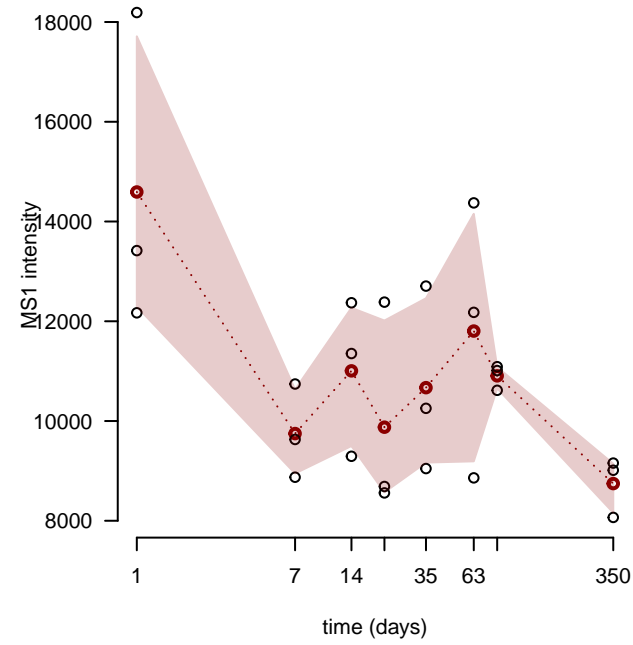

**Q99MW1**  
GN=Stk31

serine threonine kinase 31

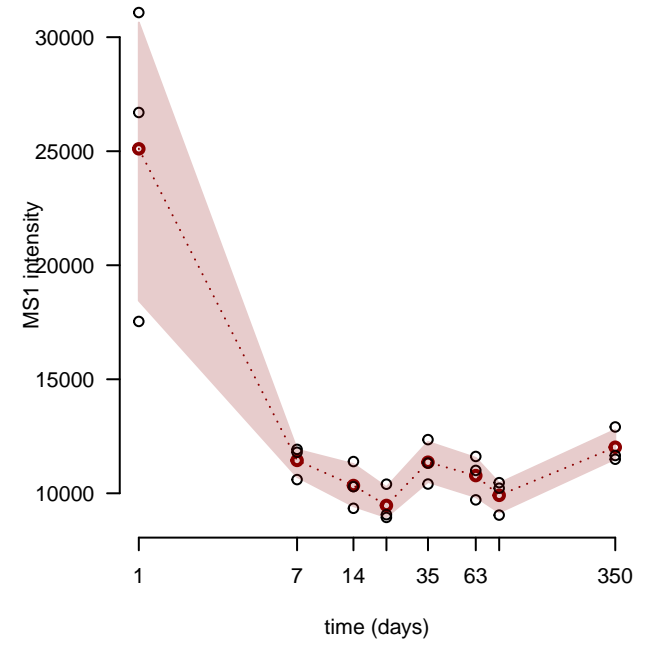

**Q99MX0**  
GN=Tkt1I

transketolase-like 1

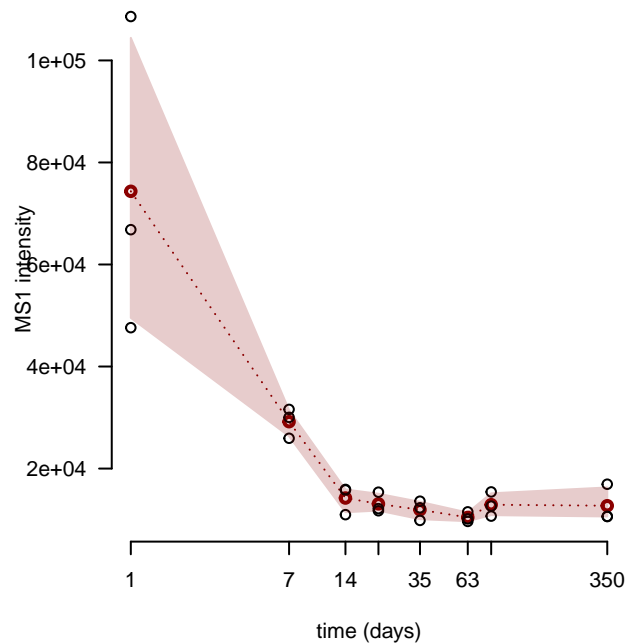

**Q99MY8**  
GN=Ash1I

ASH1 like histone lysine methyltransfera ...

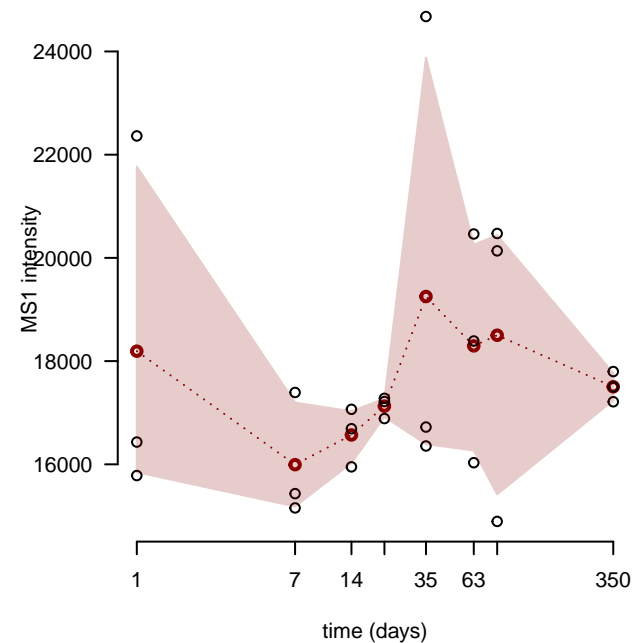

**Q99MZ6**  
GN=Myo7b

myosin VIIb

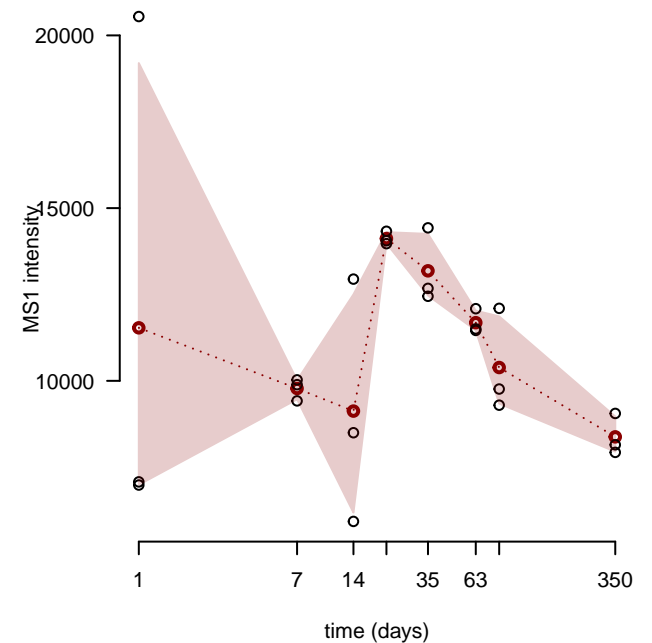



**Q99MZ7**  
**GN=Pecr**  
peroxisomal trans-2-enoyl-CoA reductase

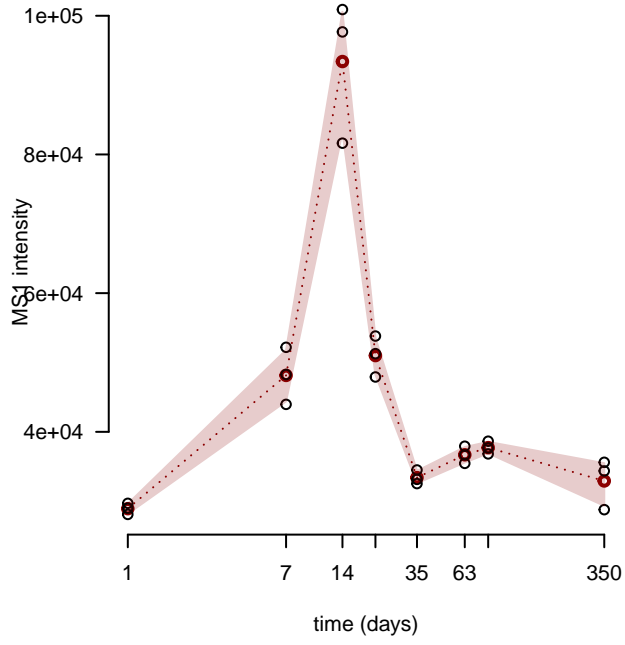

**Q99N16**  
**GN=Cyp4f3**

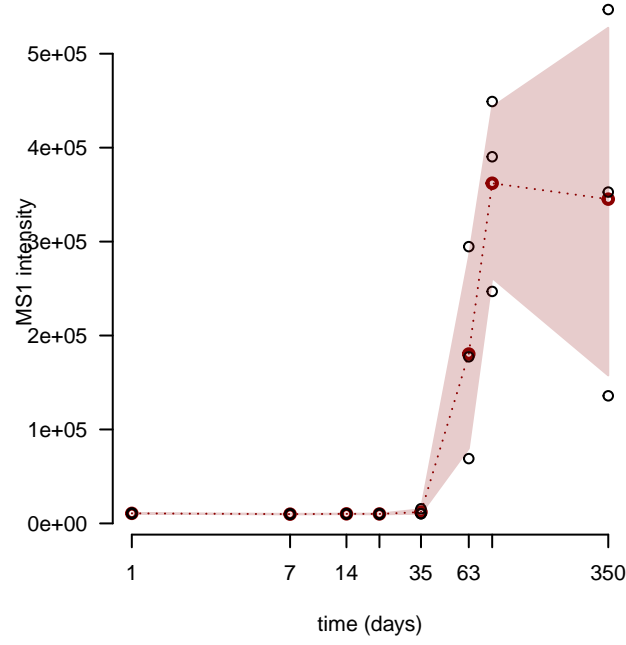

**Q99N50**  
**GN=Syt12**  
synaptotagmin-like 2

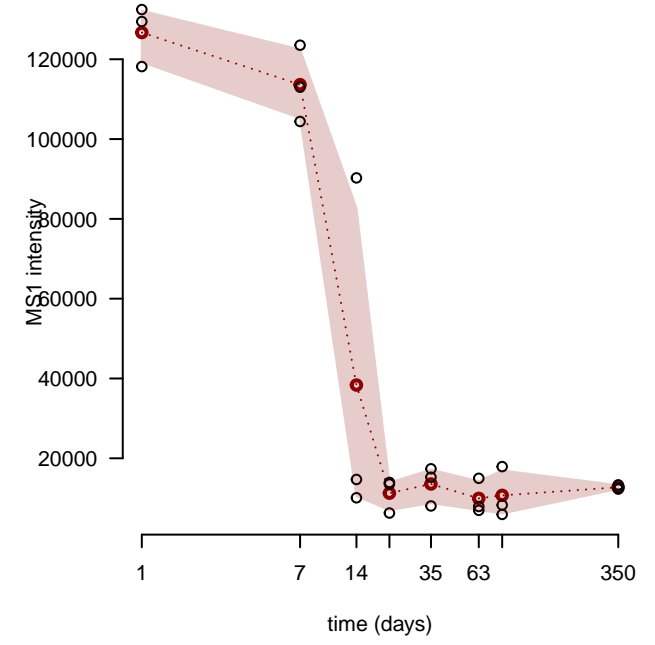

**Q99N57**  
**GN=Raf1**  
v-raf-leukemia viral oncogene 1

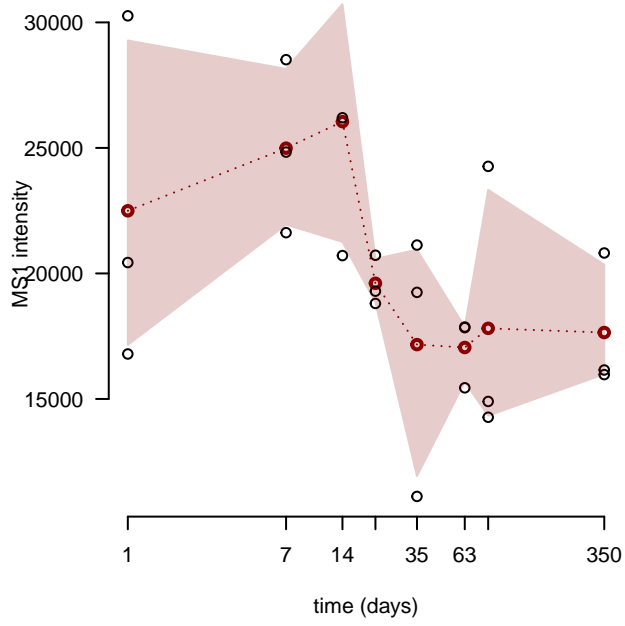

**Q99N69**  
**GN=Lpxn**  
leupaxin

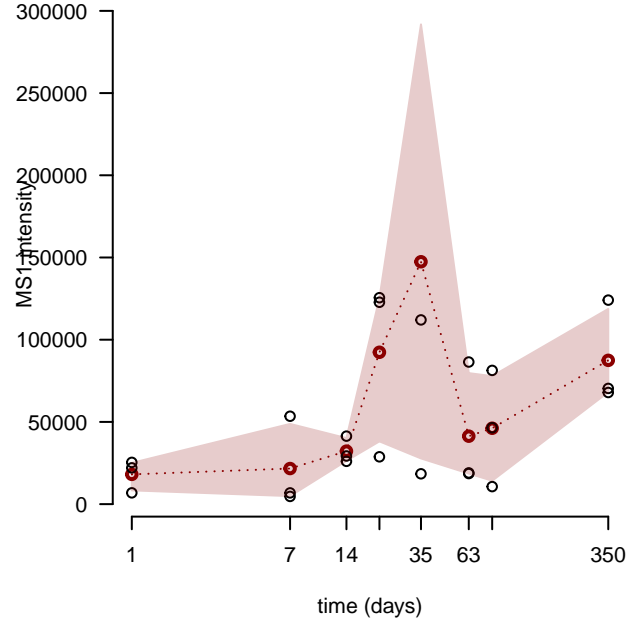

**Q99N84**  
**GN=Mrps18b**  
mitochondrial ribosomal protein S18B

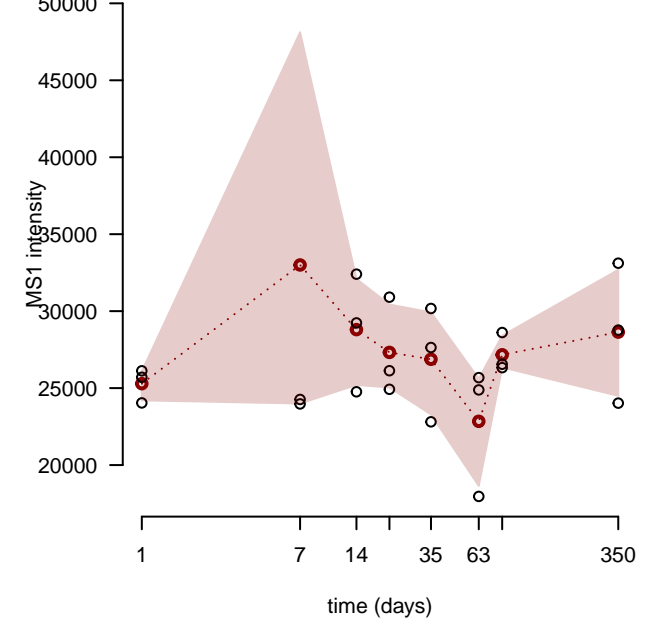

**Q99N85**  
**GN=Mrps18a**  
mitochondrial ribosomal protein S18A

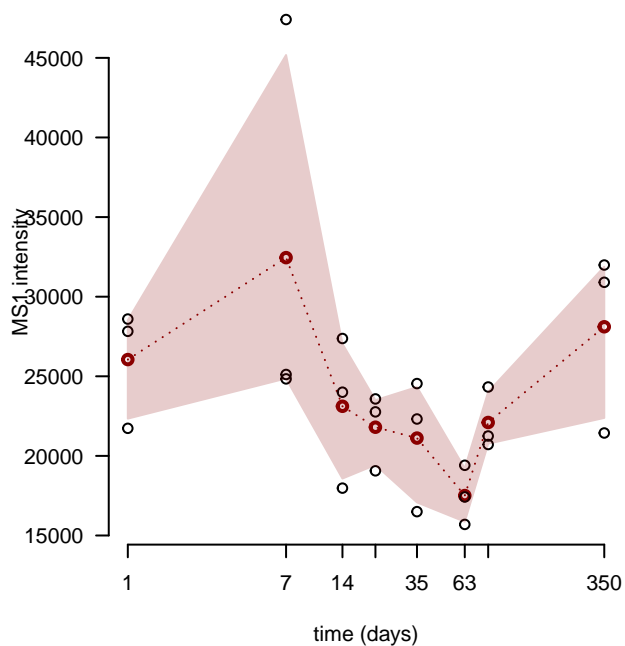

**Q99N87**  
**GN=Mrps5**  
mitochondrial ribosomal protein S5

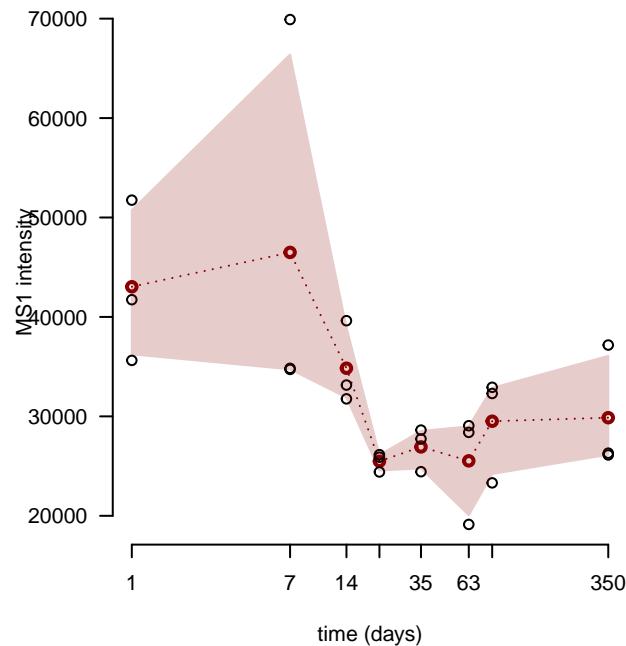

**Q99N89**  
**GN=Mrpl43**  
mitochondrial ribosomal protein L43

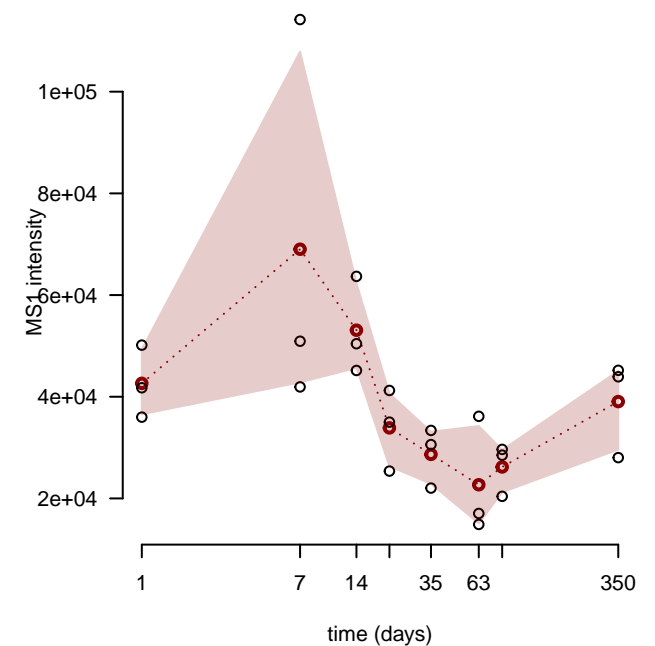

**Q99N91**  
GN=Mrpl34  
mitochondrial ribosomal protein L34

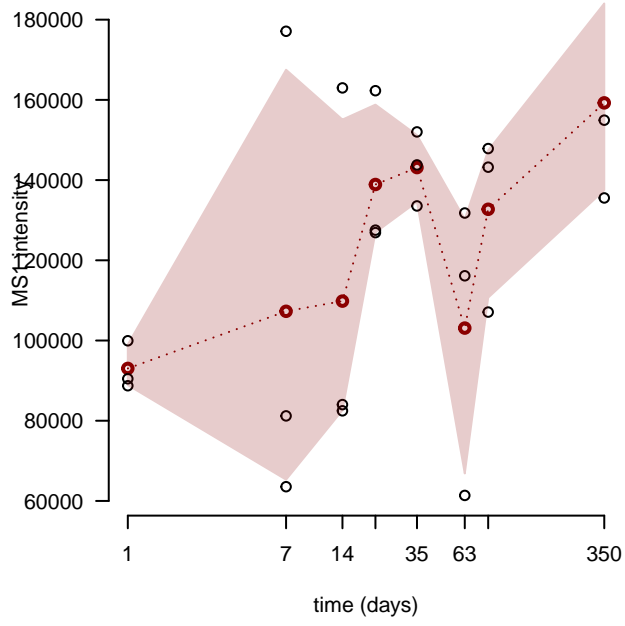

**Q99N92**  
GN=Mrpl27  
mitochondrial ribosomal protein L27

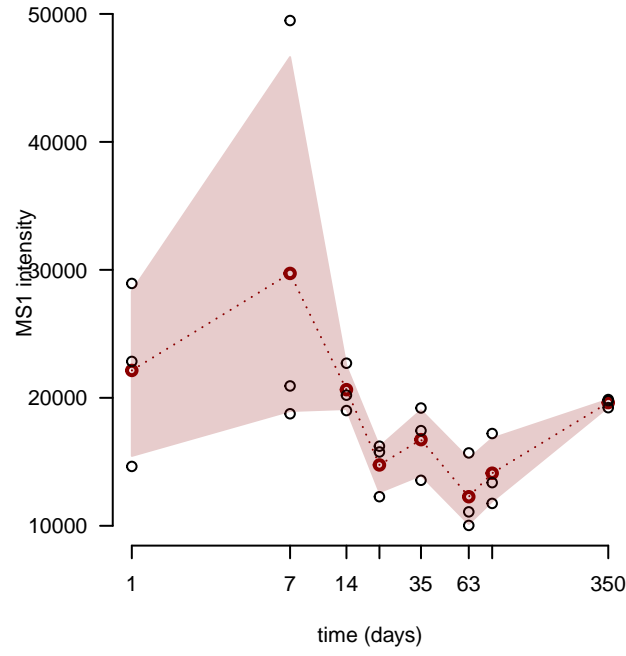

**Q99N93**  
GN=Mrpl16  
mitochondrial ribosomal protein L16

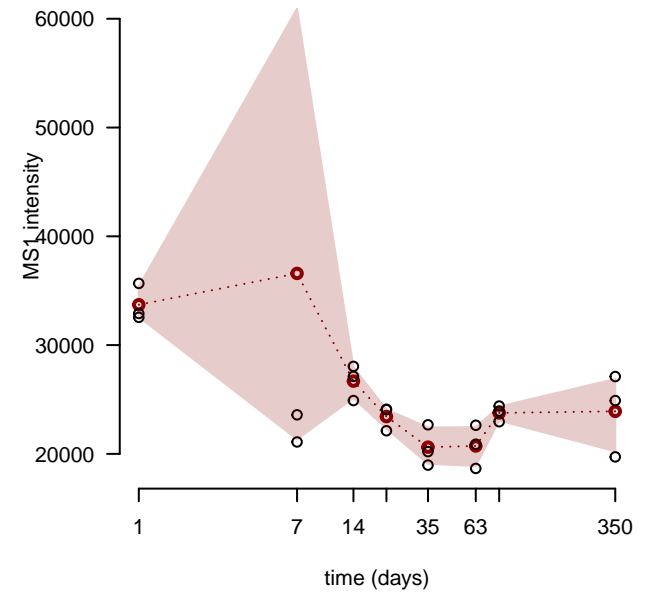

**Q99N94**  
GN=Mrpl9  
mitochondrial ribosomal protein L9

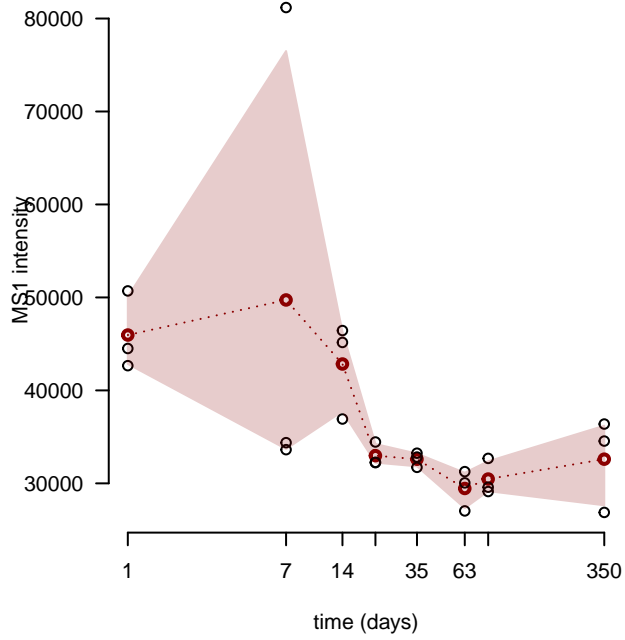

**Q99N95**  
GN=Mrpl3  
mitochondrial ribosomal protein L3

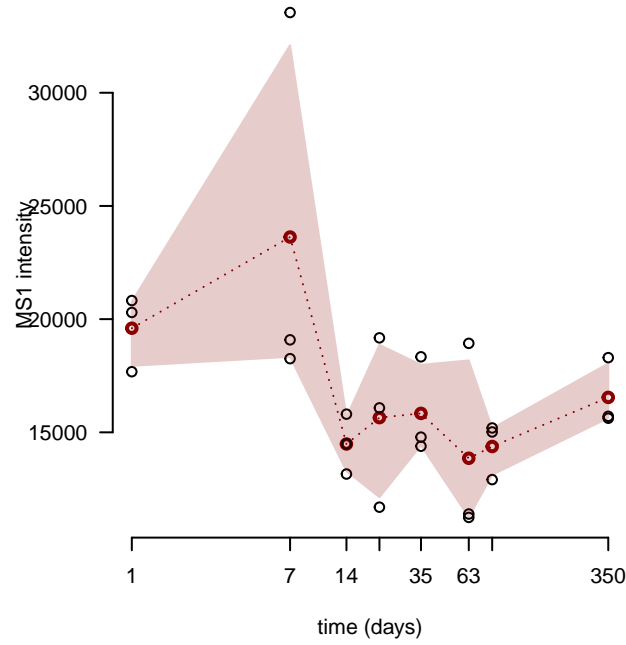

**Q99N96**  
GN=Mrpl1  
mitochondrial ribosomal protein L1

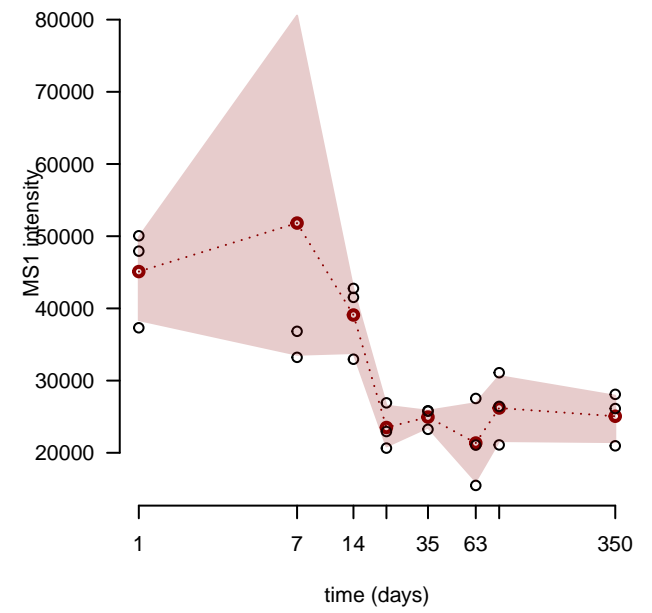

**Q99N99**  
GN=Srd5a2  
steroid 5 alpha-reductase 2

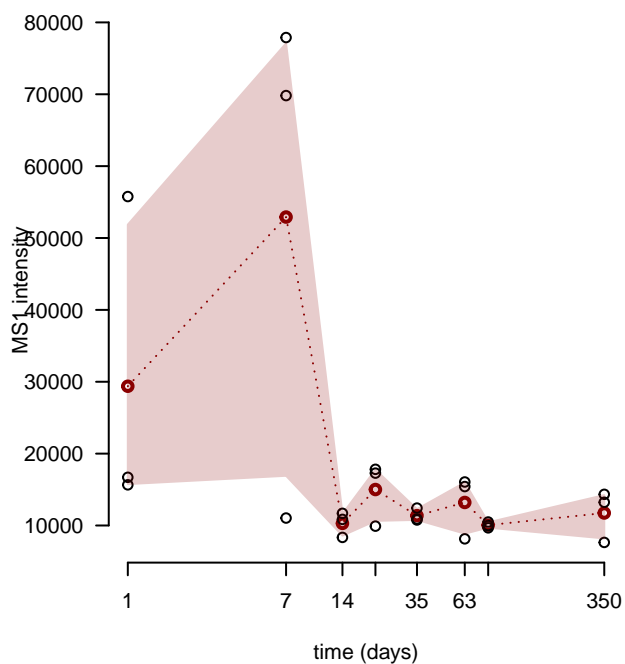

**Q99NA9**  
GN=Pcgf6  
polycomb group ring finger 6

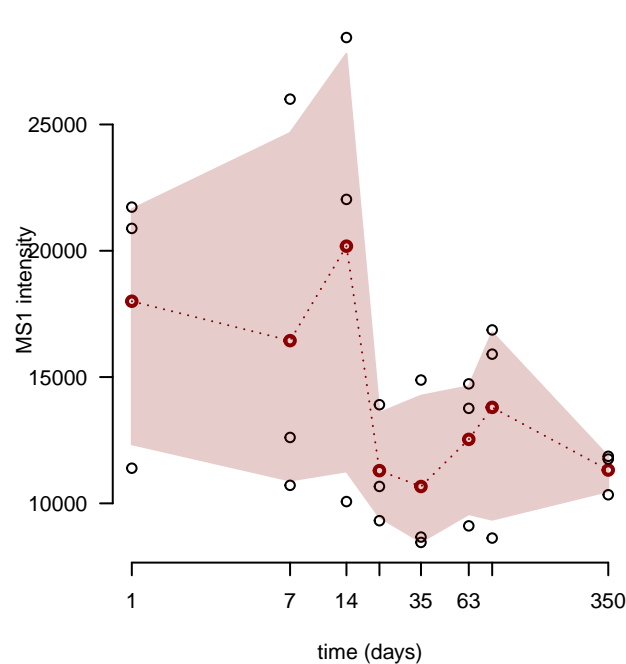

**Q99NB1**  
GN=Acss1  
acyl-CoA synthetase short-chain family m ...

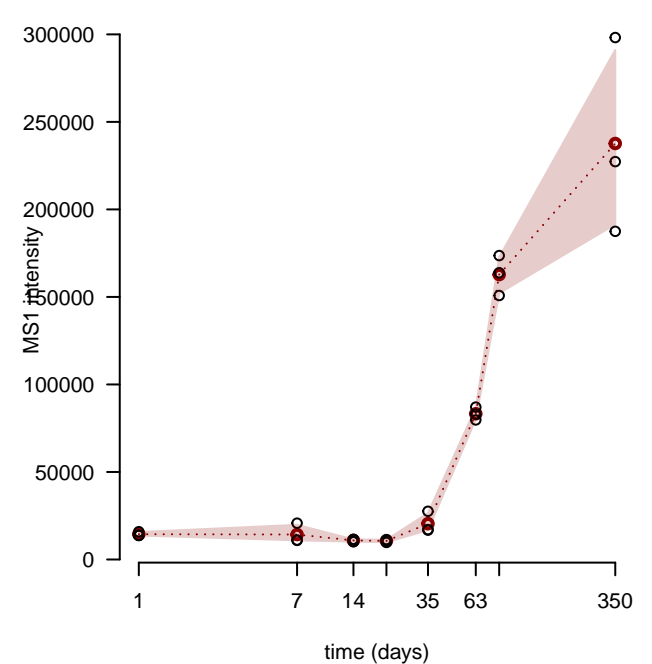

**Q99NB8**  
GN=Ubp1n4  
ubiquilin 4

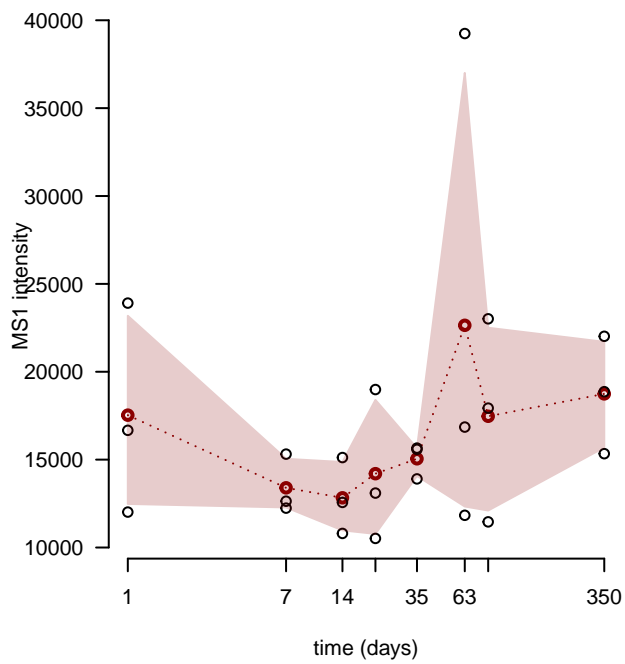

**Q99NB9**  
GN=Sf3b1  
splicing factor 3b, subunit 1

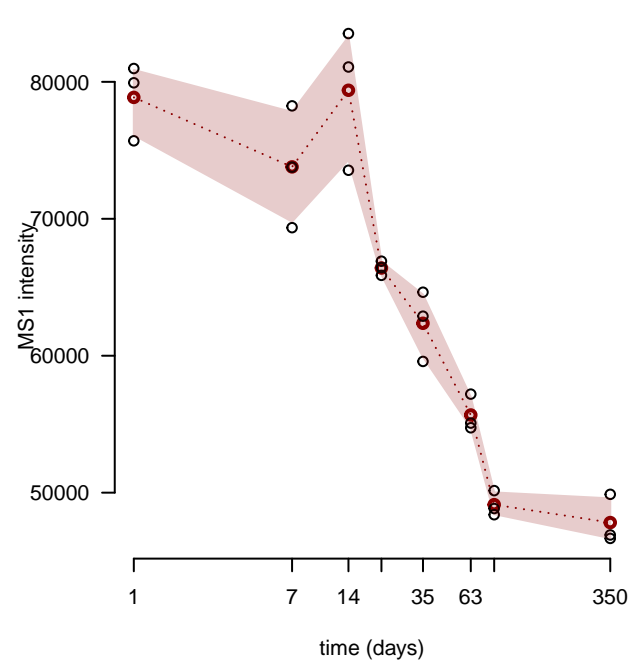

**Q99NF3**  
GN=Cep41  
centrosomal protein 41

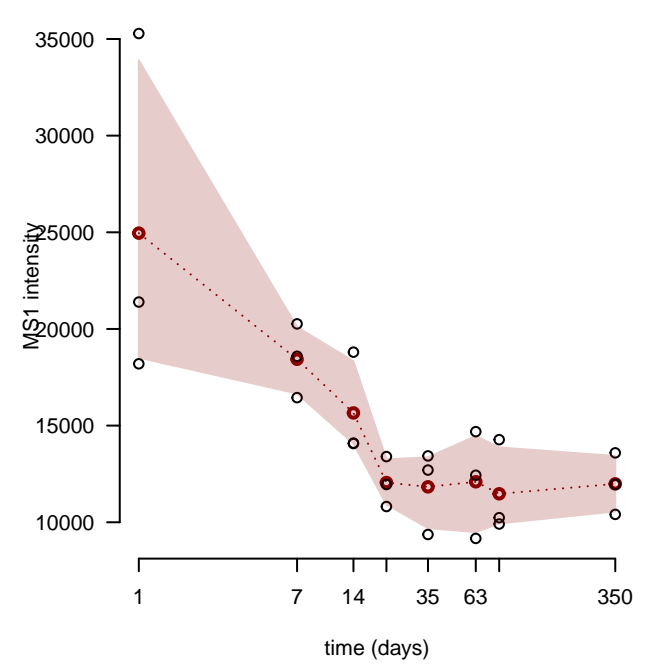

**Q99NF8**  
GN=Ranbp17  
RAN binding protein 17

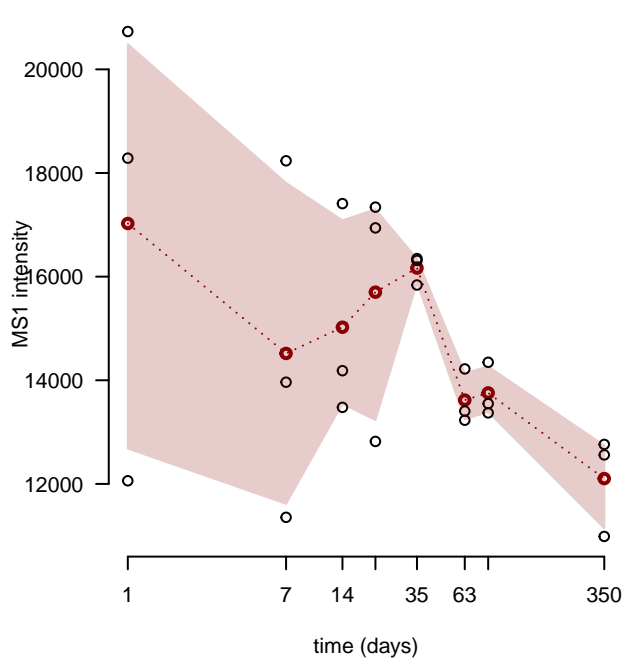

**Q99NG0**  
GN=Rad54I2  
RAD54 like 2 (*S. cerevisiae*)

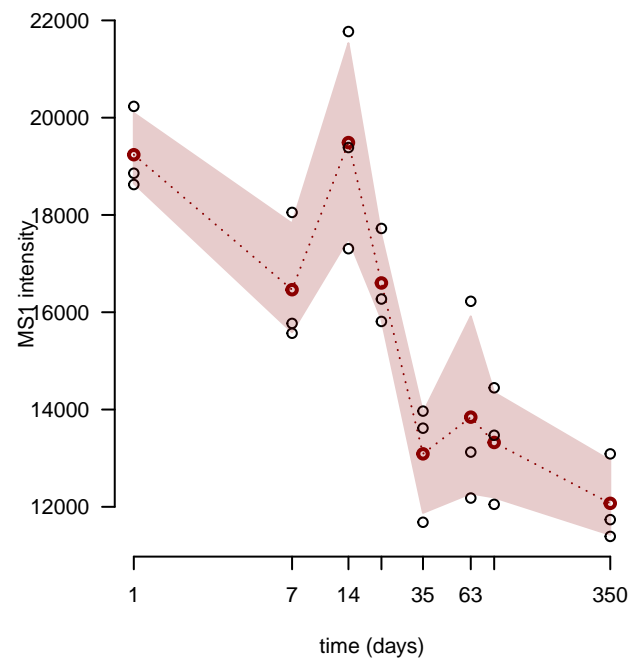

**Q99NH0**  
GN=Ankrd17  
ankyrin repeat domain 17

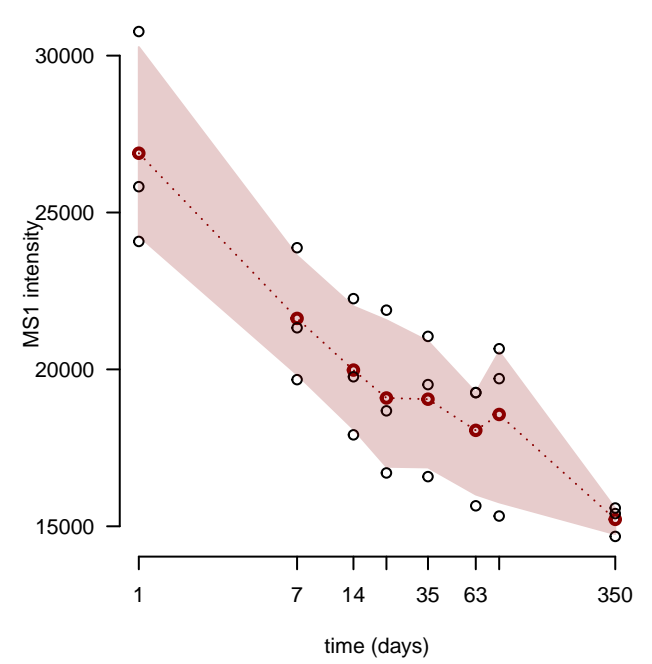

**Q99NH2**  
GN=Pard3  
par-3 family cell polarity regulator

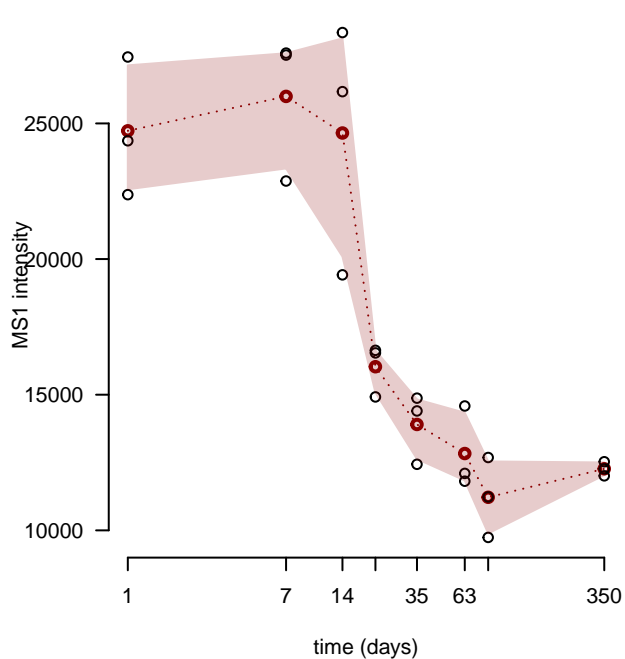

**Q99P30**  
GN=Nudt7  
nudix (nucleoside diphosphate linked moi ...

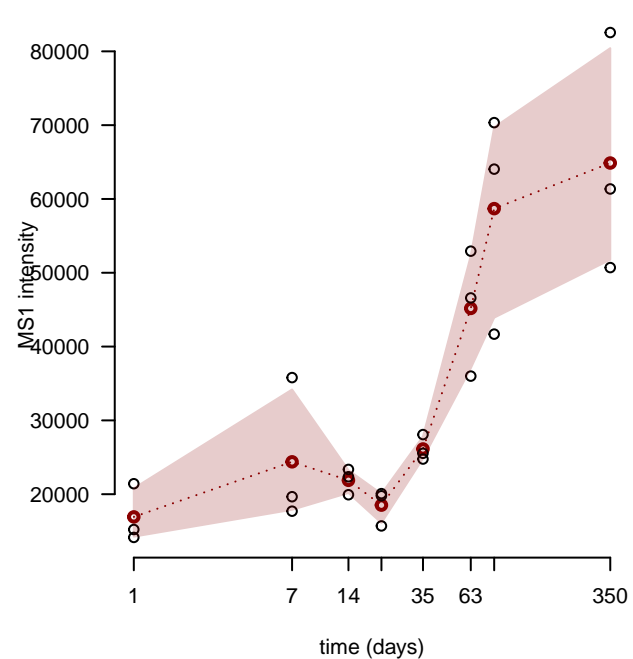

**Q99P31**  
GN=Hspbp1  
HSPA (heat shock 70kDa) binding protein, ...

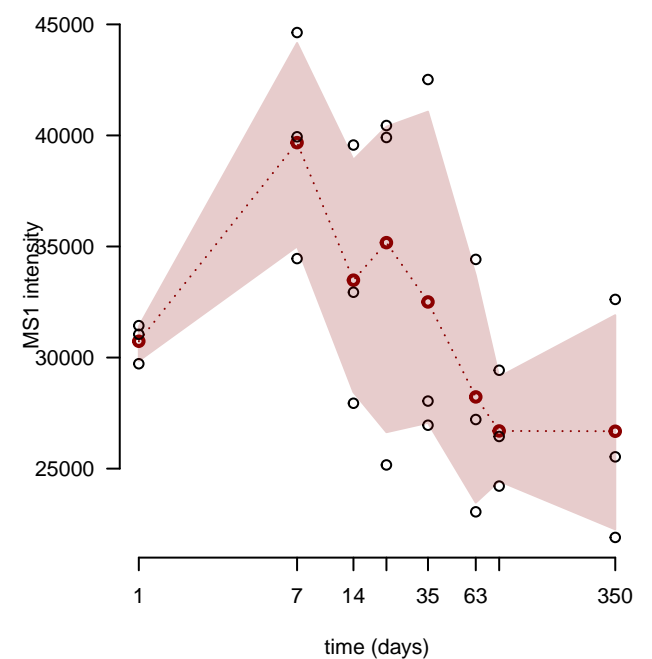

**Q99P58**  
**GN=Rab27b**  
RAB27B, member RAS oncogene family

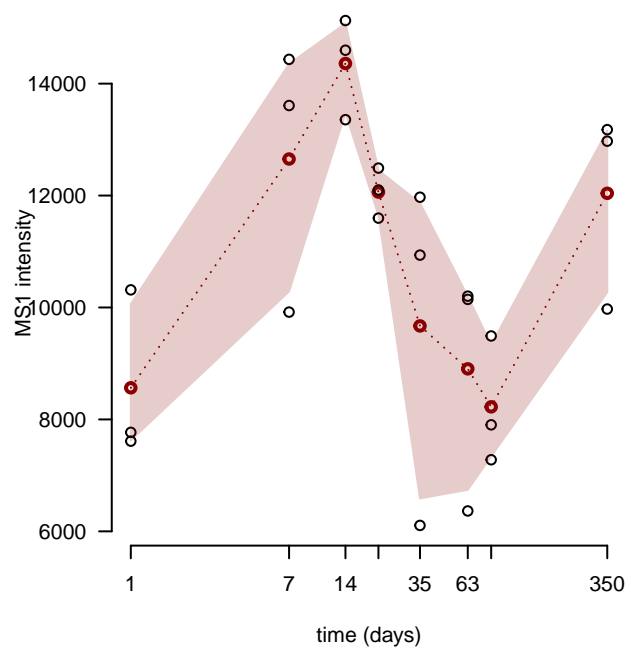

**Q99P65**  
**GN=Slc29a3**  
solute carrier family 29 (nucleoside tra ...

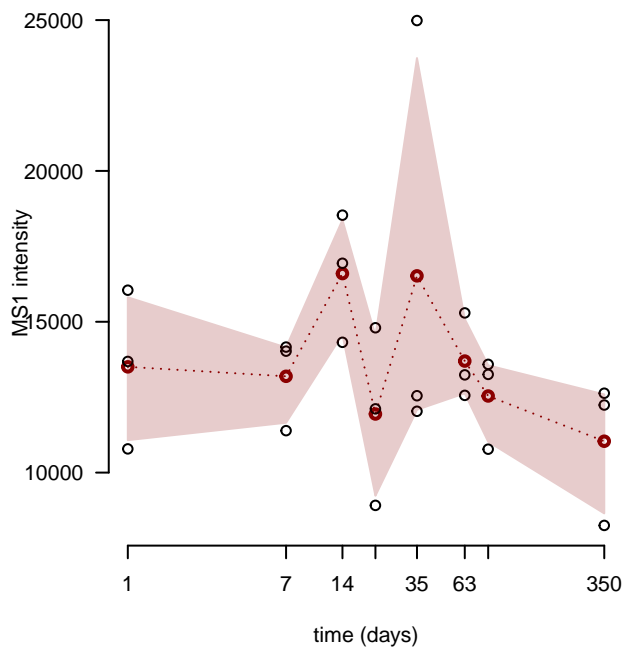

**Q99P72**  
**GN=Rtn4**  
reticulon 4

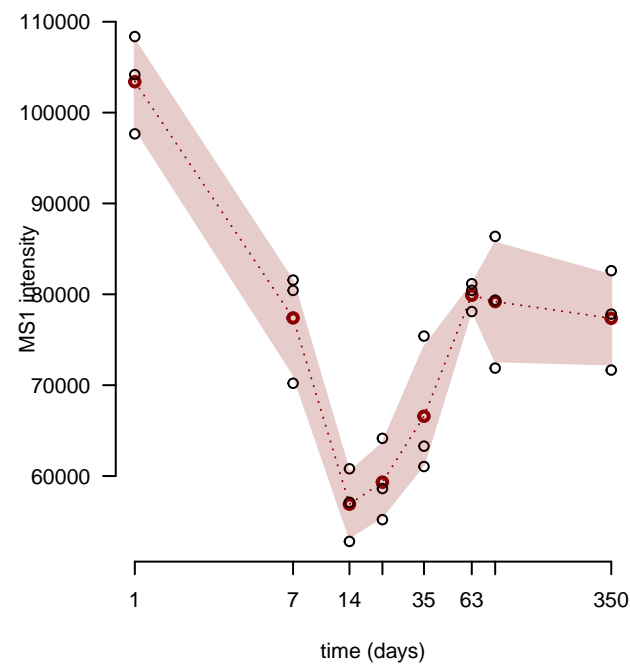

**Q99P72**  
**GN=Rtn4**  
reticulon 4

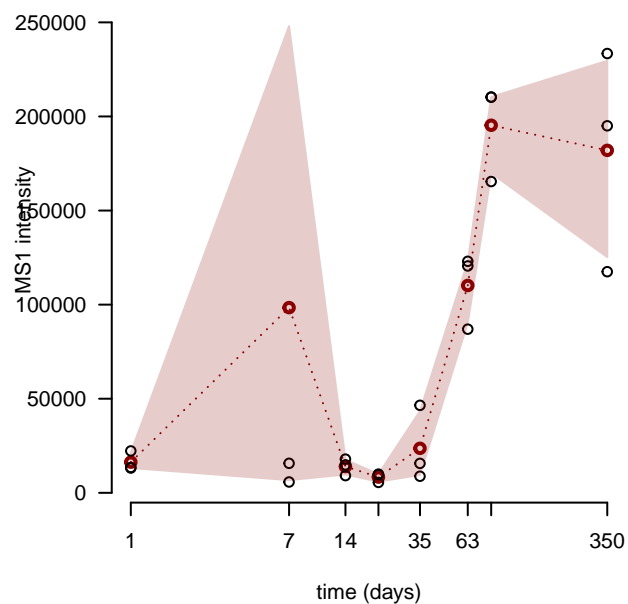

**Q99P72**  
**GN=Rtn4**  
reticulon 4

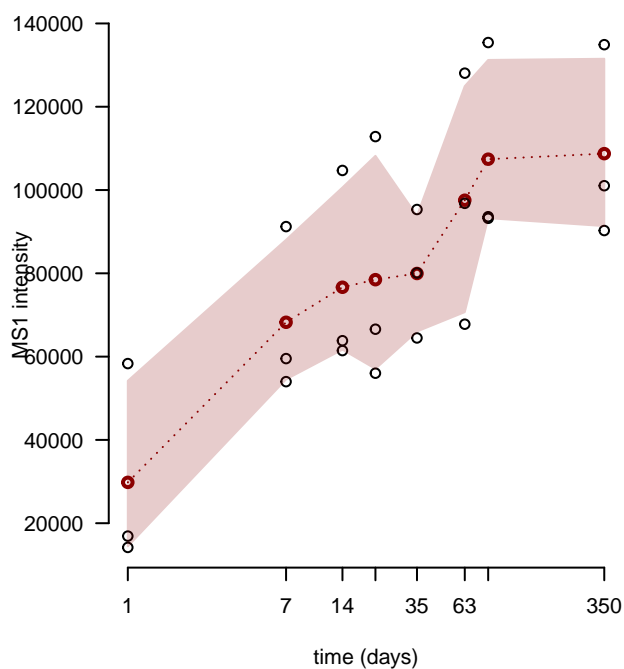

**Q99P88**  
**GN=Nup155**  
nucleoporin 155

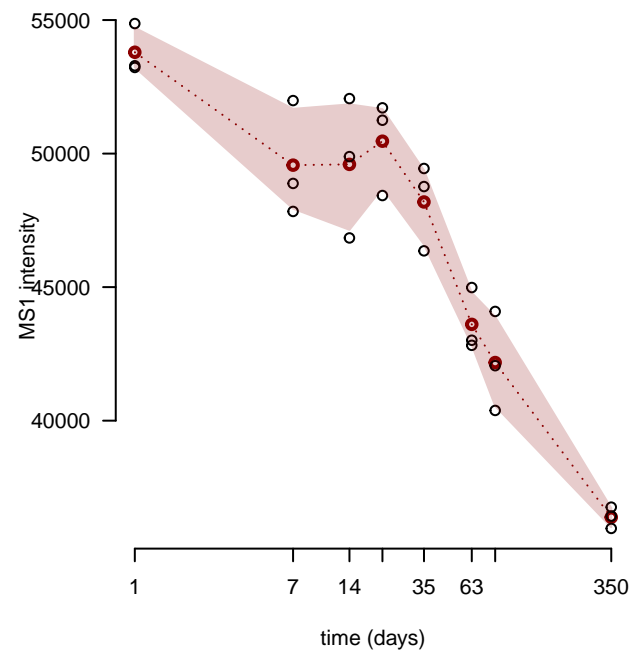

**Q99P91**  
**GN=Gpnm**  
glycoprotein (transmembrane) nmb

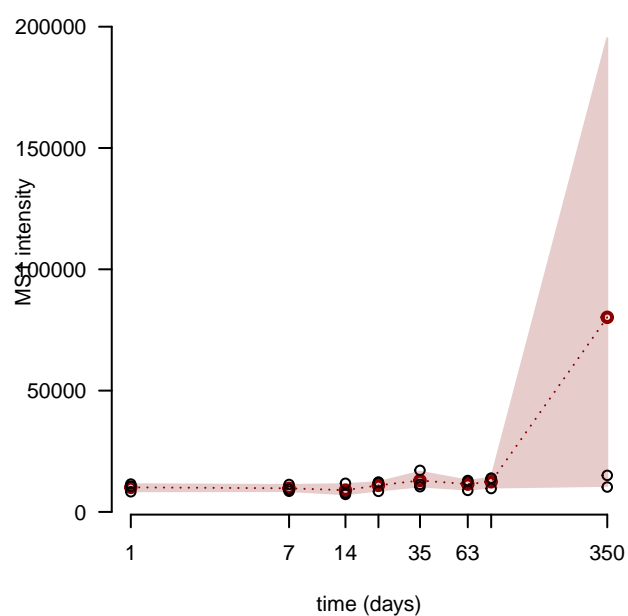

**Q99PG2**  
**GN=Ogfr**  
opioid growth factor receptor

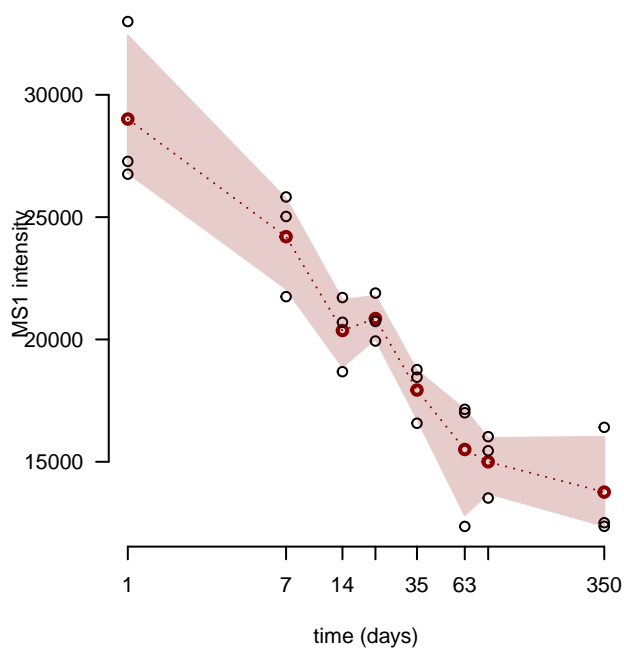

**Q99PI4**  
**GN=Lpin3**  
lipin 3

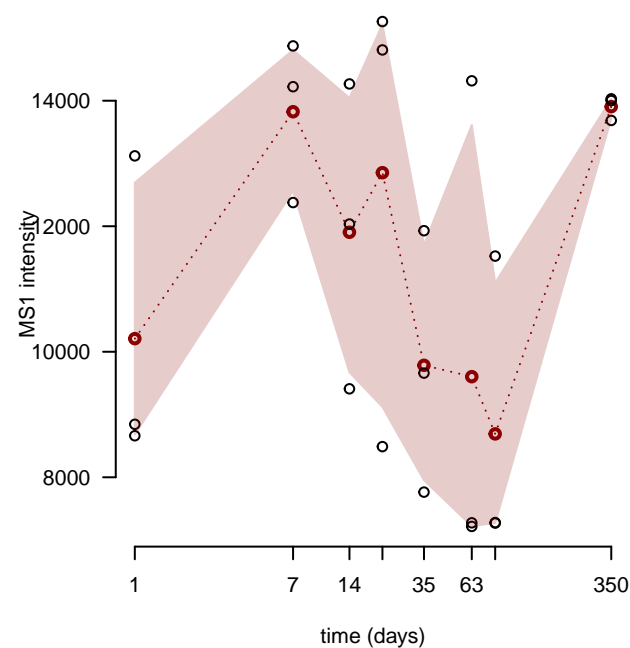

**Q99PI5**  
**GN=Lpin2**  
lipin 2

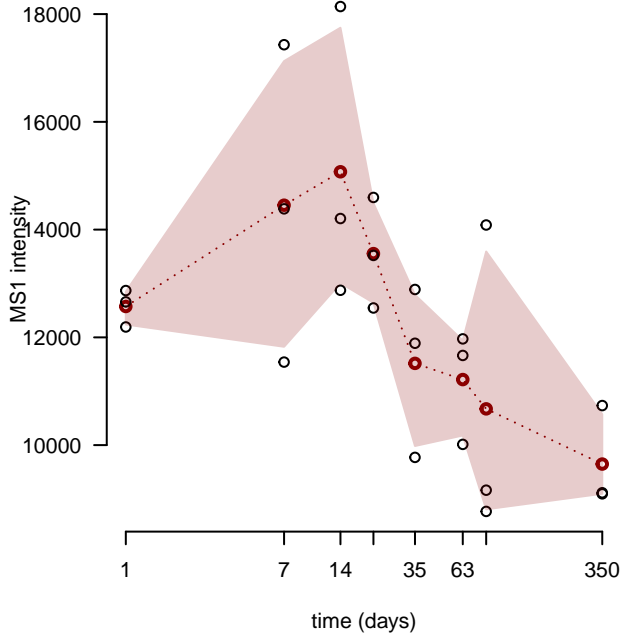

**Q99PL5**  
**GN=Rrbp1**  
ribosome binding protein 1

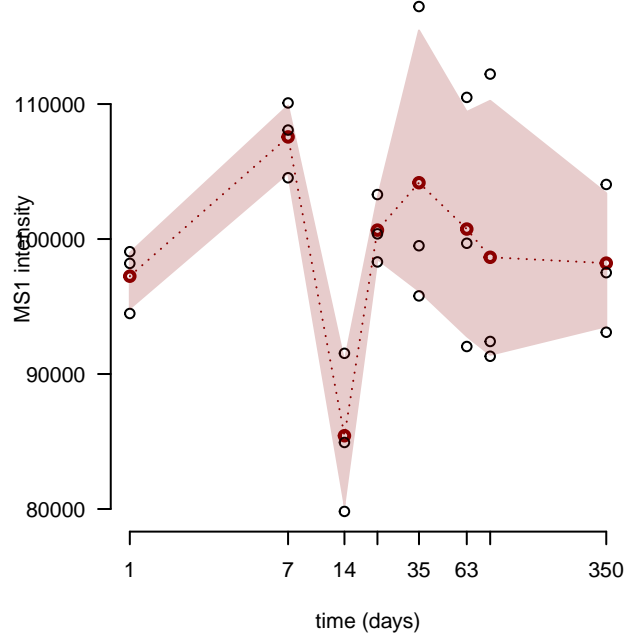

**Q99PL6**  
**GN=Ubxn6**  
UBX domain protein 6

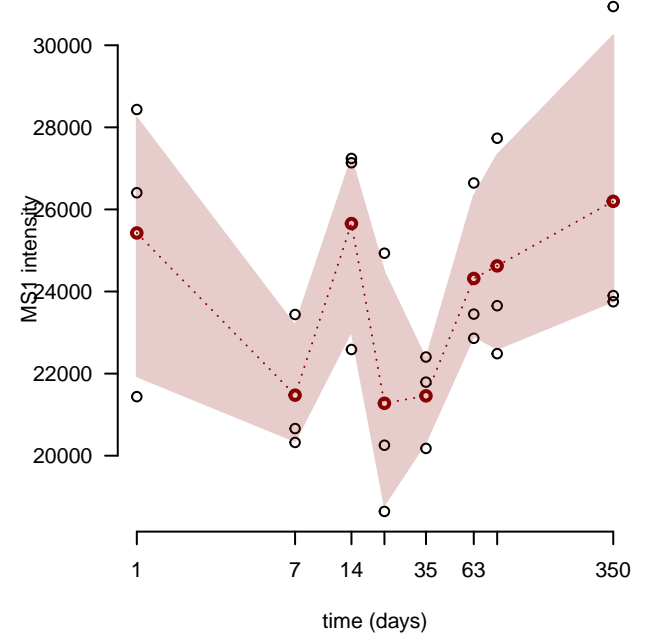

**Q99PM3**  
**GN=Gtf2a1**  
general transcription factor II A, 1

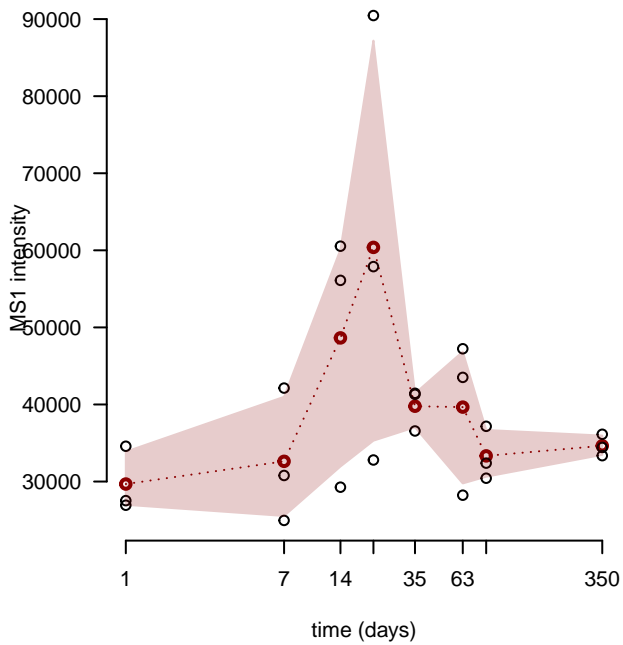

**Q99PM9**  
**GN=Uck2**  
uridine-cytidine kinase 2

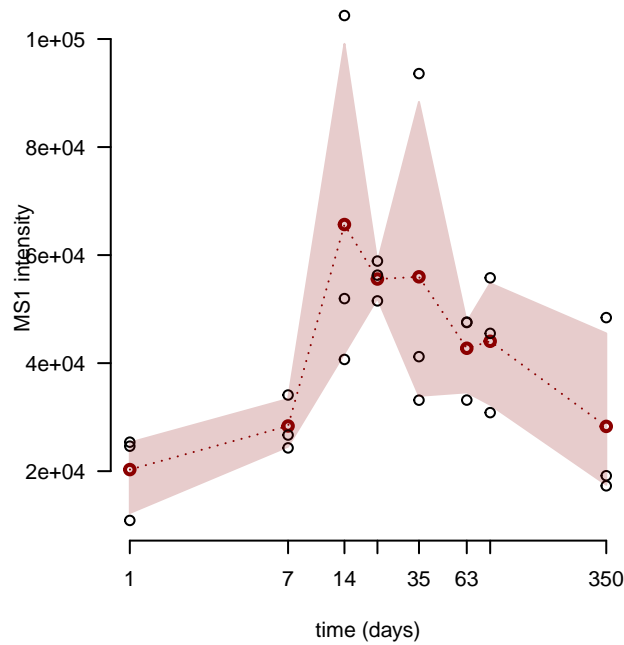

**Q99PN3**  
**GN=Trim26**  
tripartite motif-containing 26

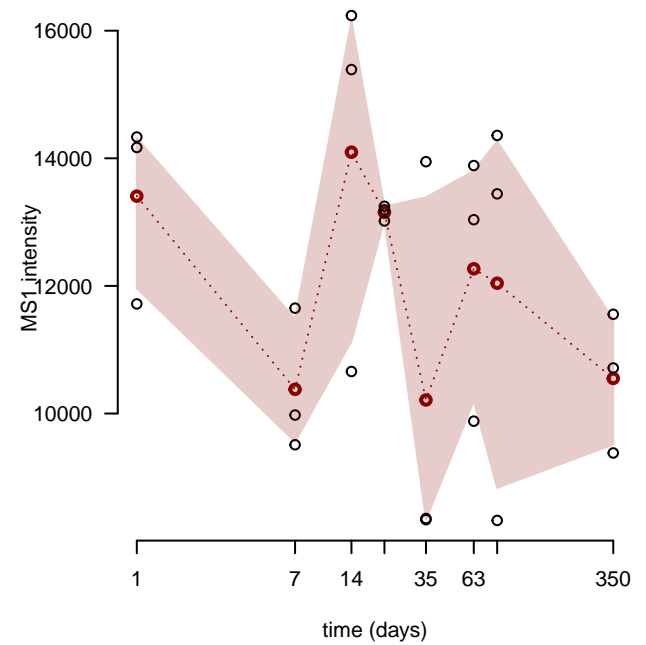

**Q99PP2**  
**GN=Znf318**

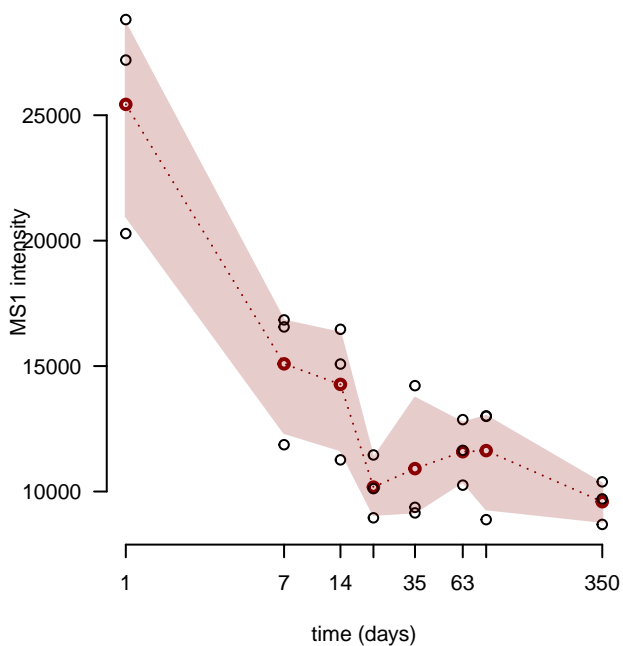

**Q99PP7**  
**GN=Trim33**  
tripartite motif-containing 33

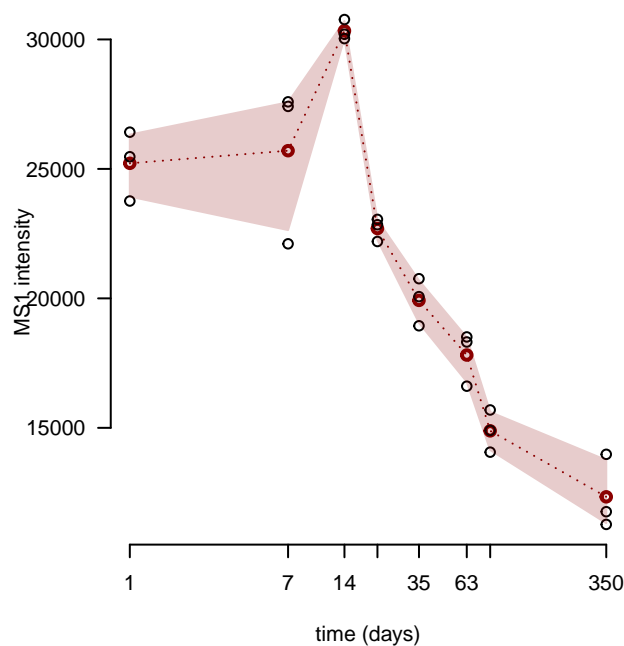

**Q99PP7**  
**GN=Trim33**  
tripartite motif-containing 33

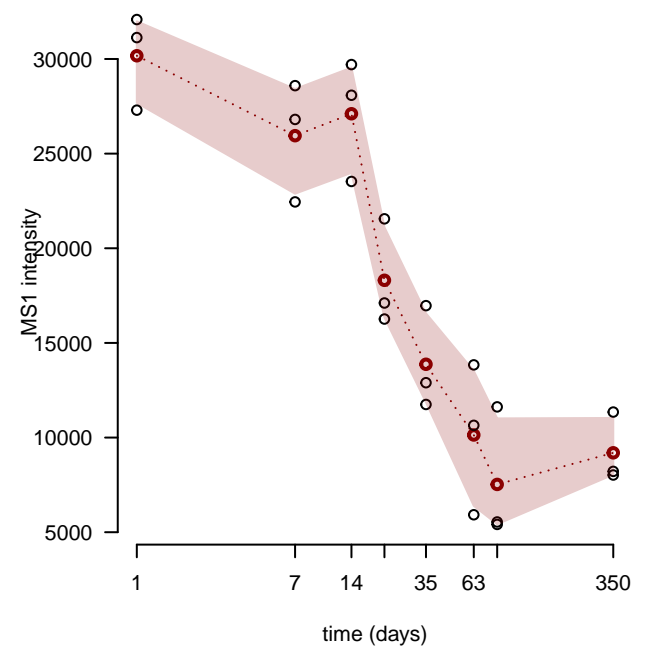

**Q99PS0**  
**GN=Krt23**  
keratin 23

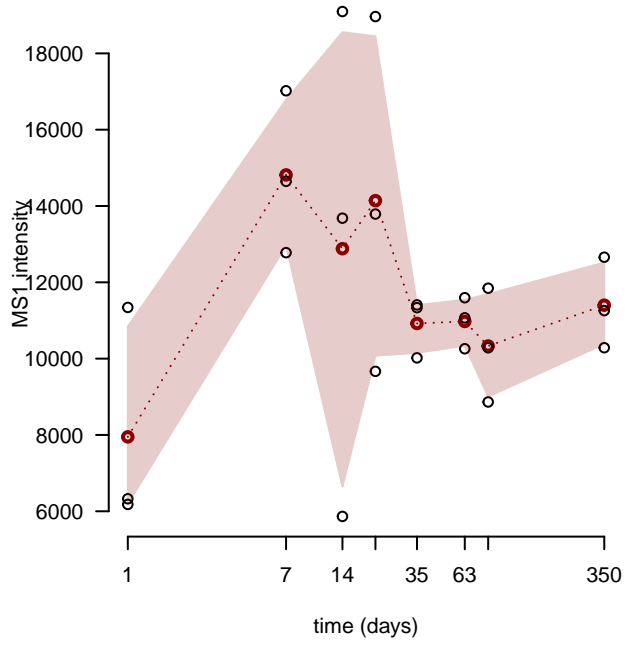

**Q99PT1**  
**GN=Arhgdia**  
Rho GDP dissociation inhibitor (GDI) alp ...

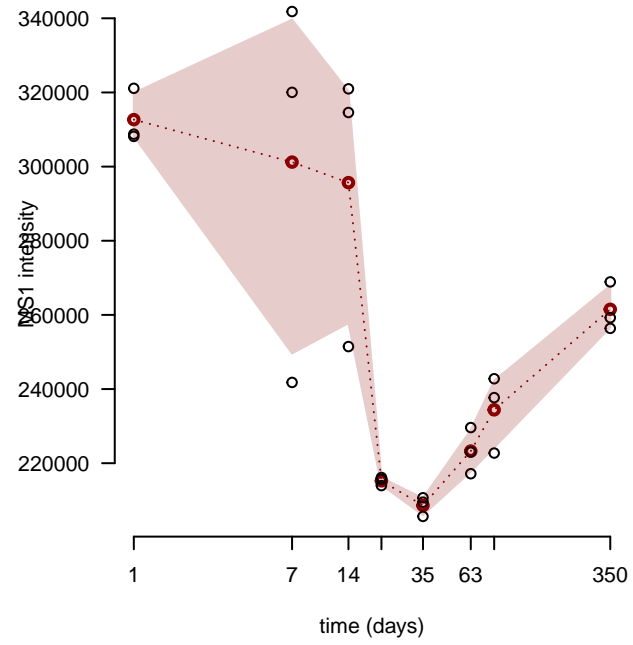

**Q99PT3**  
**GN=Ino80b**  
INO80 complex subunit B

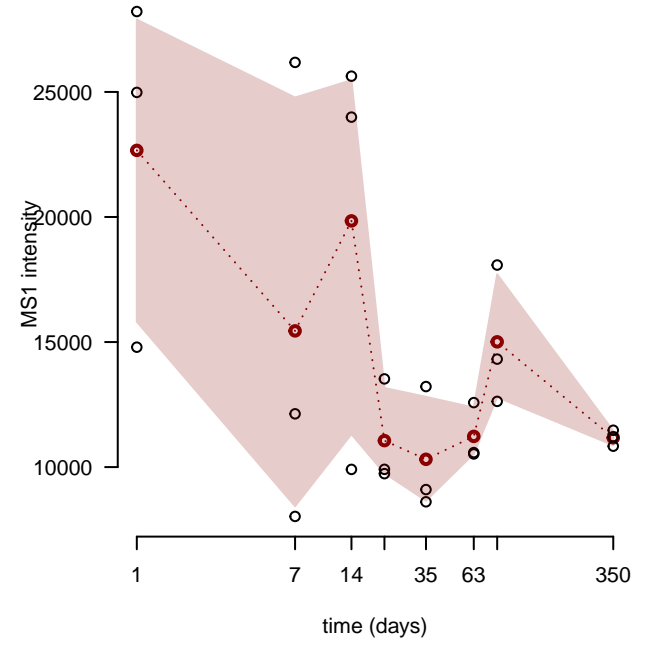

**Q99PT9**  
**GN=Kif19**

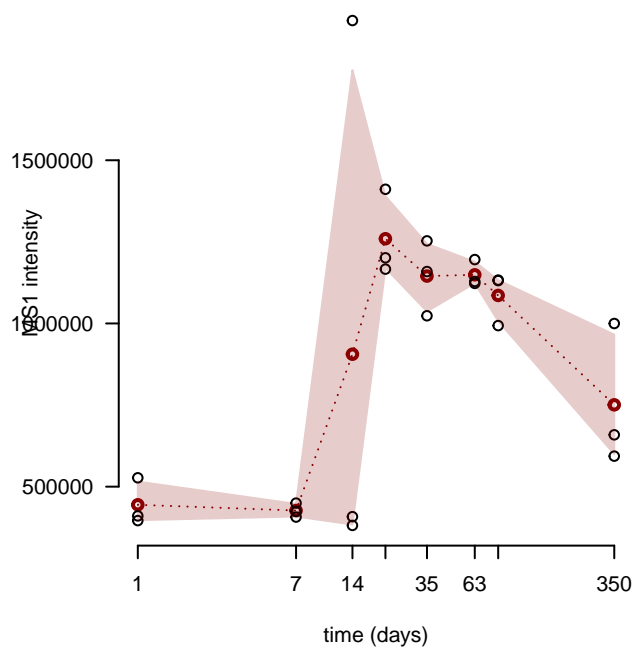

**Q99PU5**  
**GN=Acsbg1**  
acyl-CoA synthetase bubblegum family mem ...

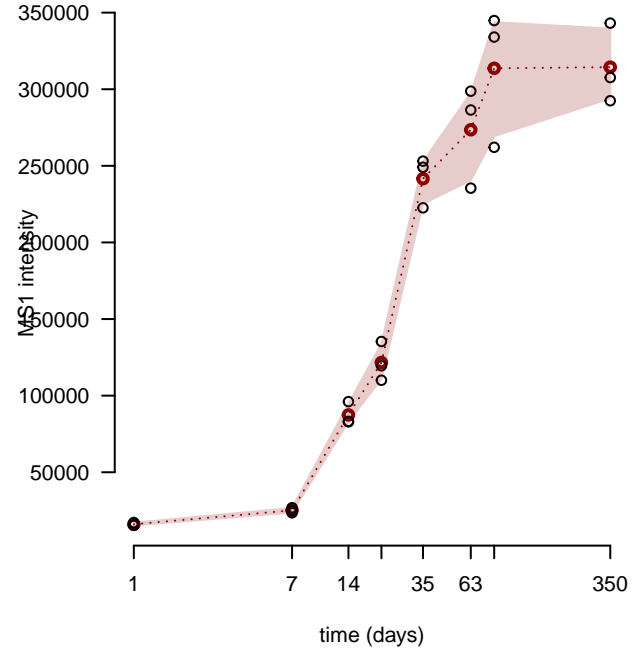

**Q99PU7**  
**GN=Bap1**  
Brca1 associated protein 1

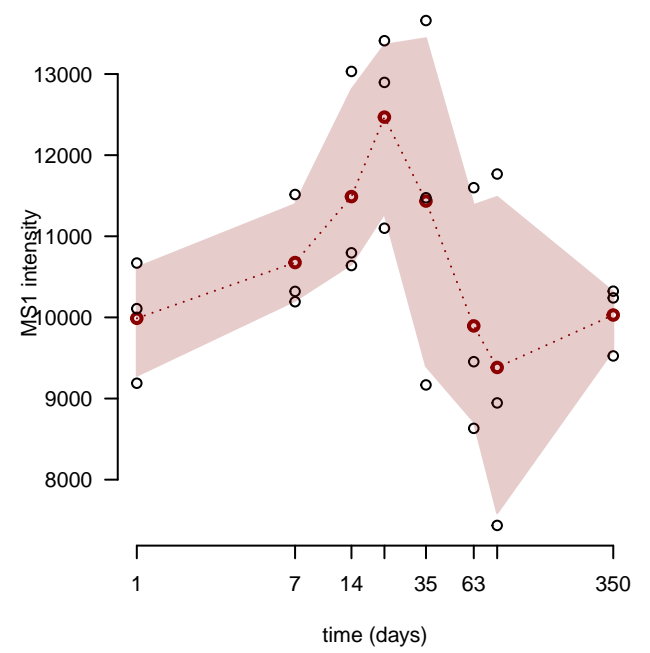

**Q99PU8**  
**GN=Dhx30**  
DEAH (Asp-Glu-Ala-His) box polypeptide 3 ...

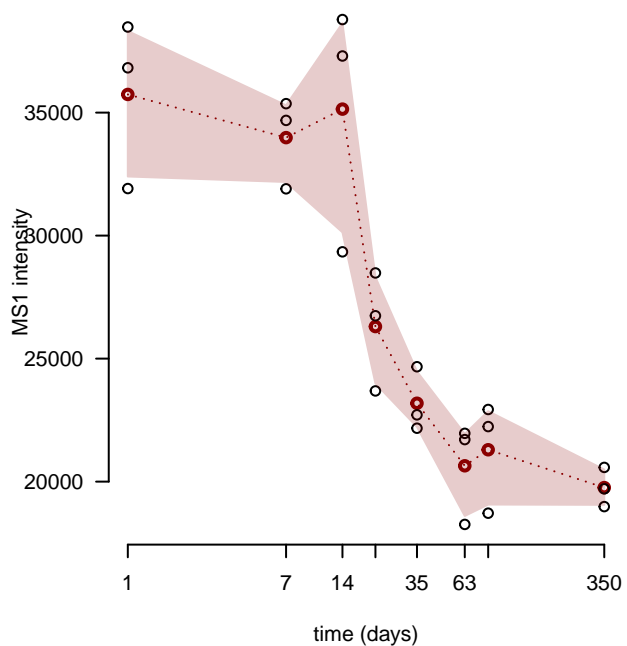

**Q99PV0**  
**GN=Prpf8**  
pre-mRNA processing factor 8

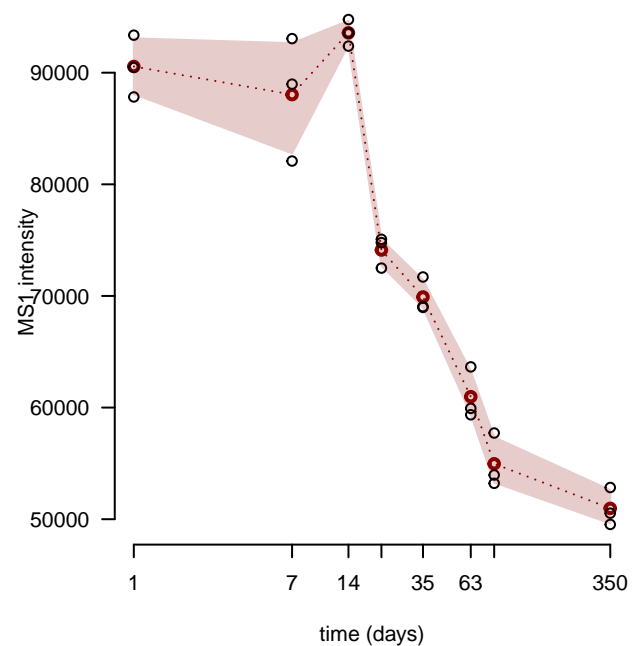

**Q99PW4**  
**GN=Tp53rk**

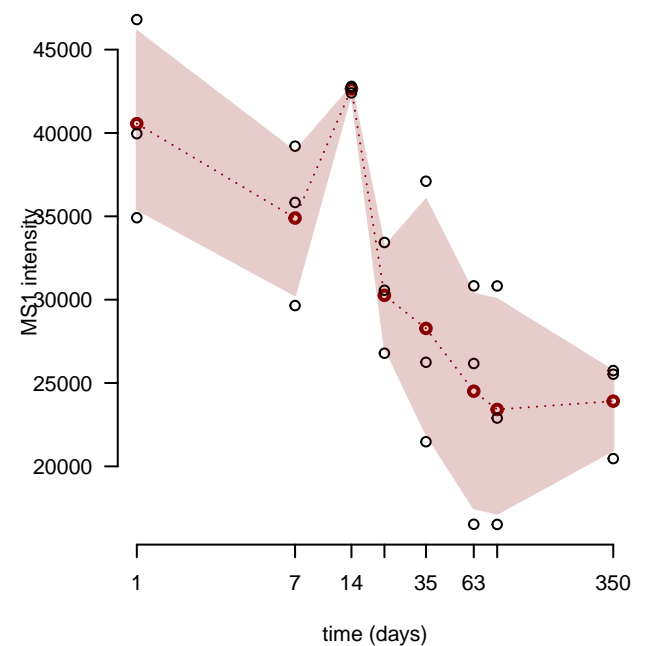

**Q9BCZ4**  
**GN=Selenos**  
selenoprotein S

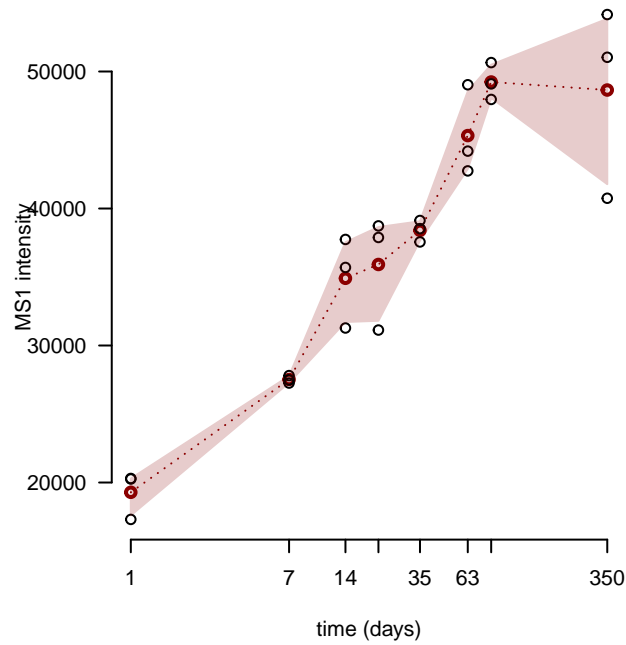

**Q9CPN8**  
**GN=Igf2bp3**  
insulin-like growth factor 2 mRNA bindin ...

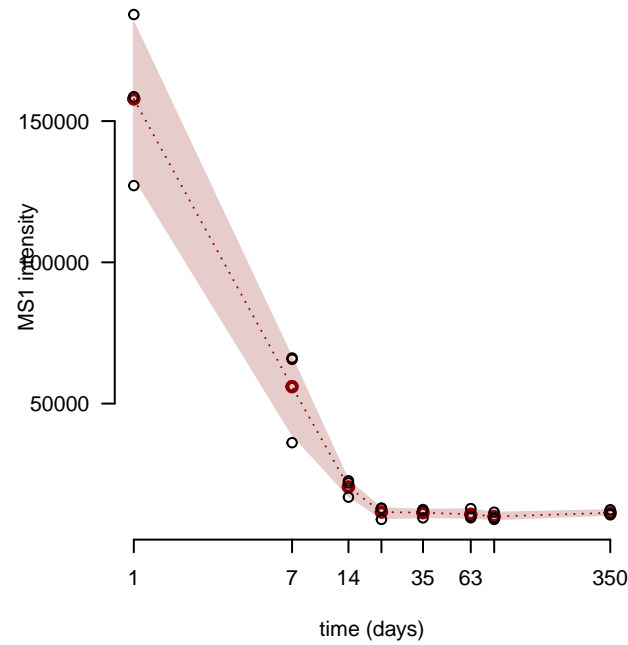

**Q9CPP0**  
**GN=Npm3**  
nucleoplasmin 3

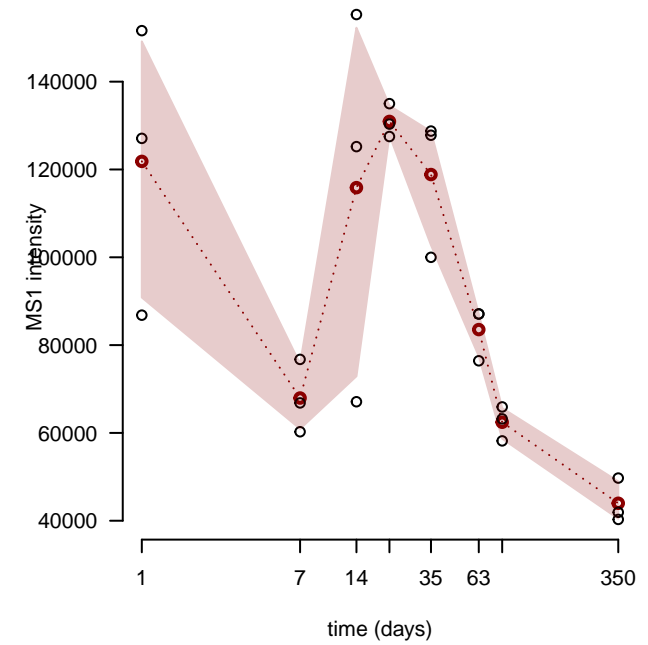

**Q9CPP6**  
**GN=Ndufa5**  
NADH:ubiquinone oxidoreductase subunit A ...

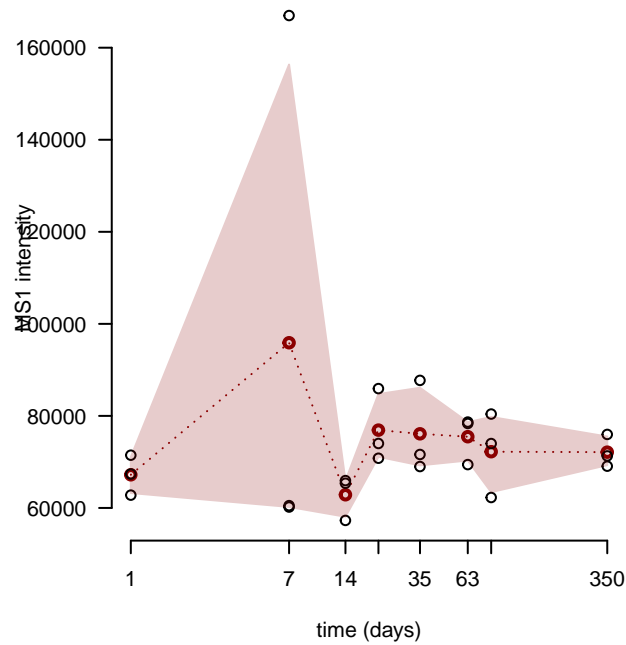

**Q9CPQ1**  
**GN=Cox6c**  
cytochrome c oxidase subunit 6C

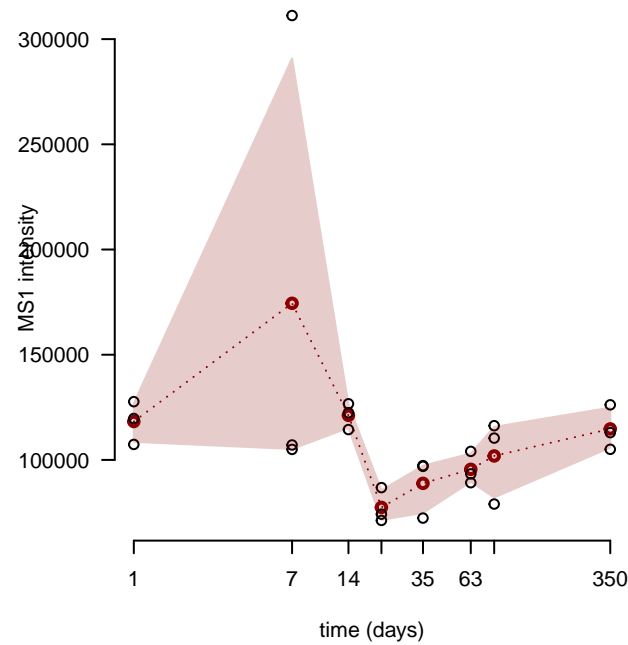

**Q9CPQ3**  
**GN=Tom22**  
translocase of outer mitochondrial membr ...

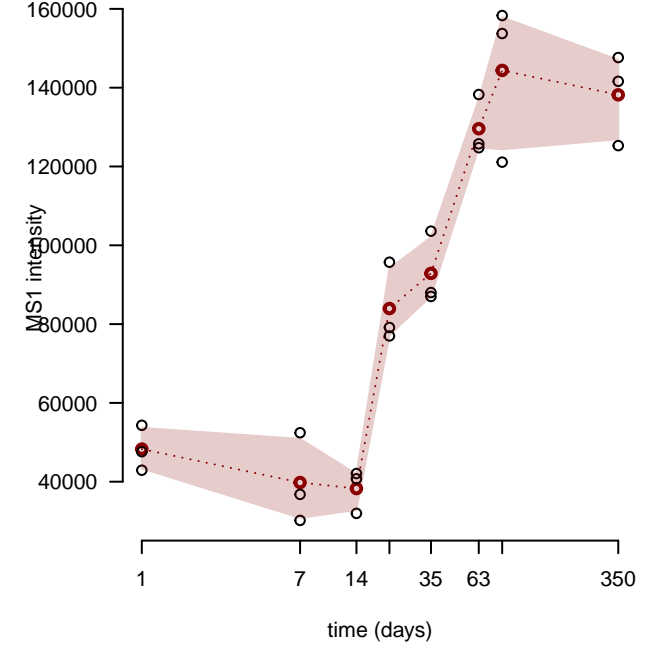

**Q9CPQ5**  
**GN=Cenpq**  
centromere protein Q

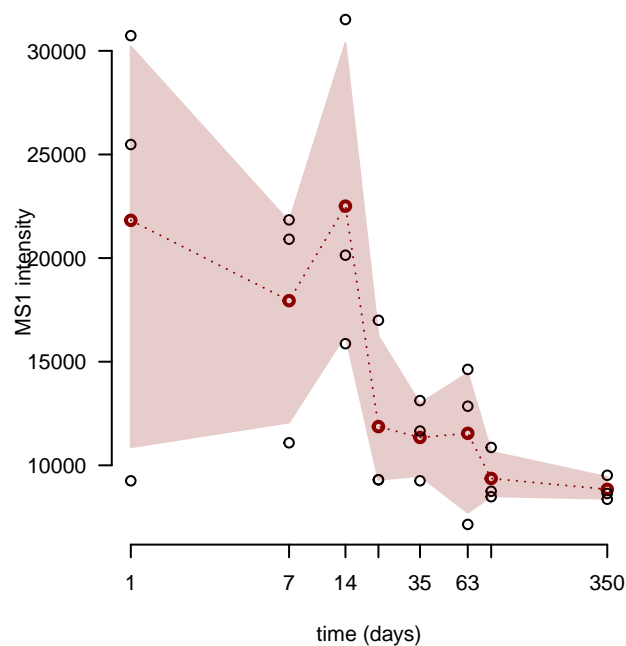

**Q9CPQ8**  
**GN=Atp5mg**

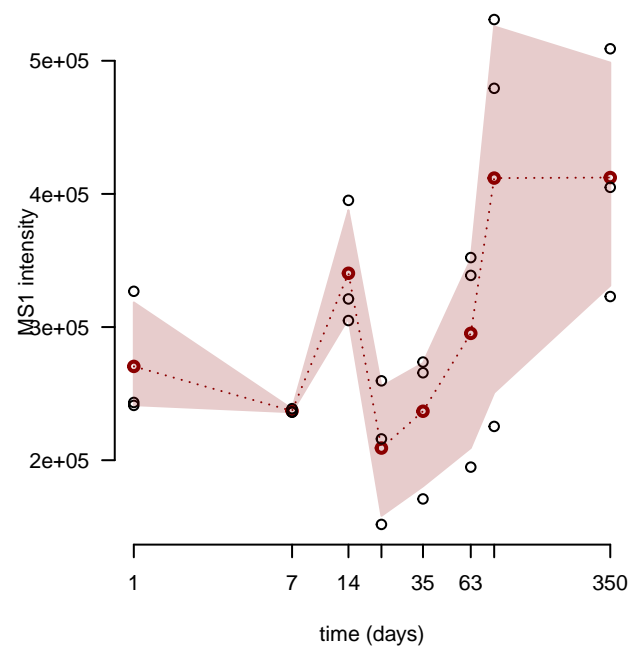

**Q9CPR1**  
**GN=Rwdd4**

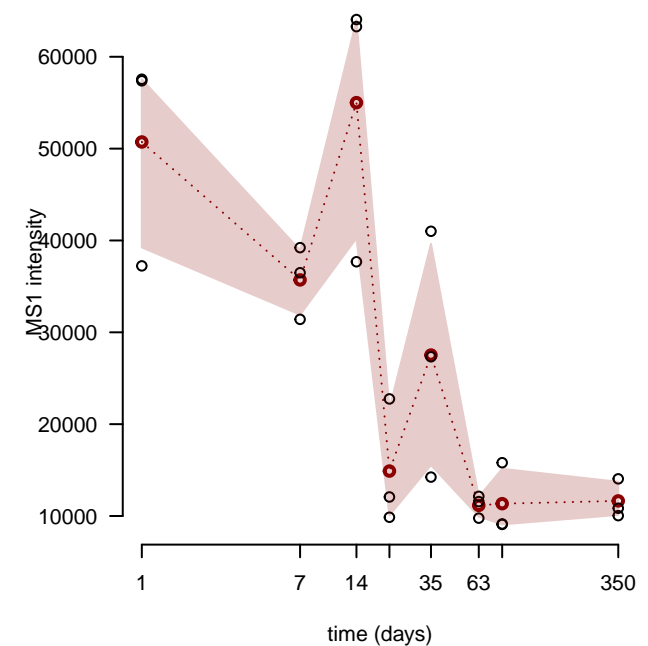

**Q9CPR4**  
**GN=Rpl17**  
ribosomal protein L17

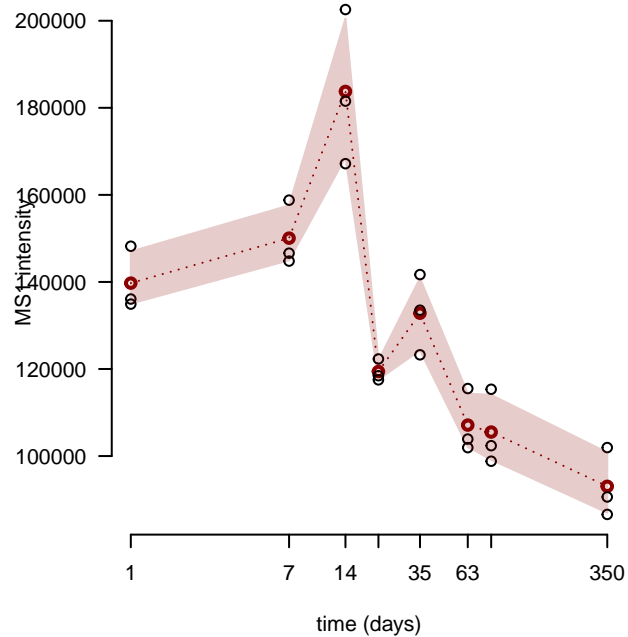

**Q9CPR5**  
**GN=Mrpl15**  
mitochondrial ribosomal protein L15

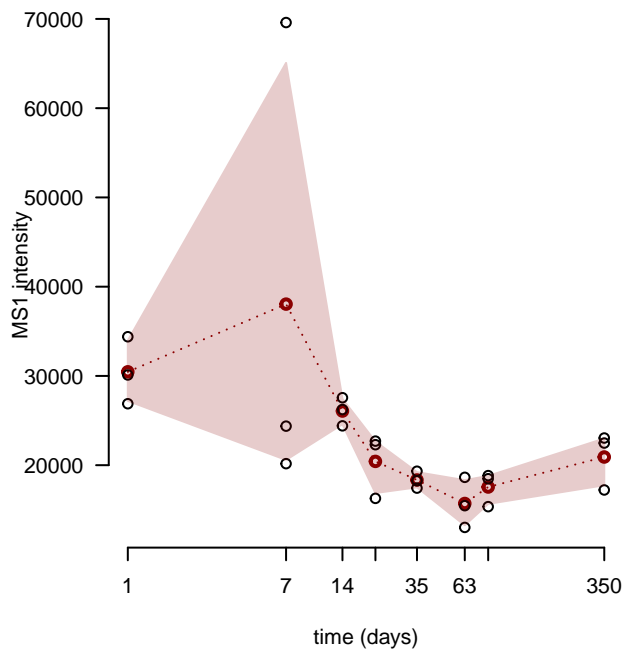

**Q9CPR7**  
**GN=Stk1**  
suppressor of IKBKE 1

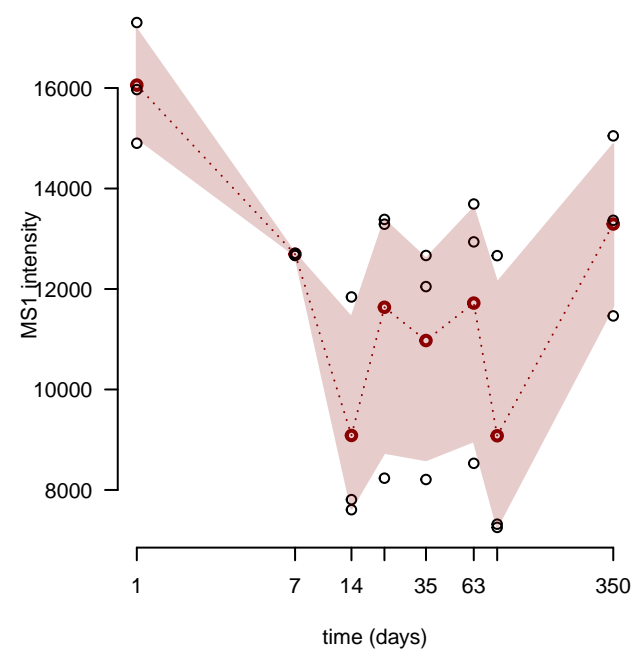

**Q9CPR8**  
**GN=Nsmce3**  
NSE3 homolog, SMC5-SMC6 complex componen ...

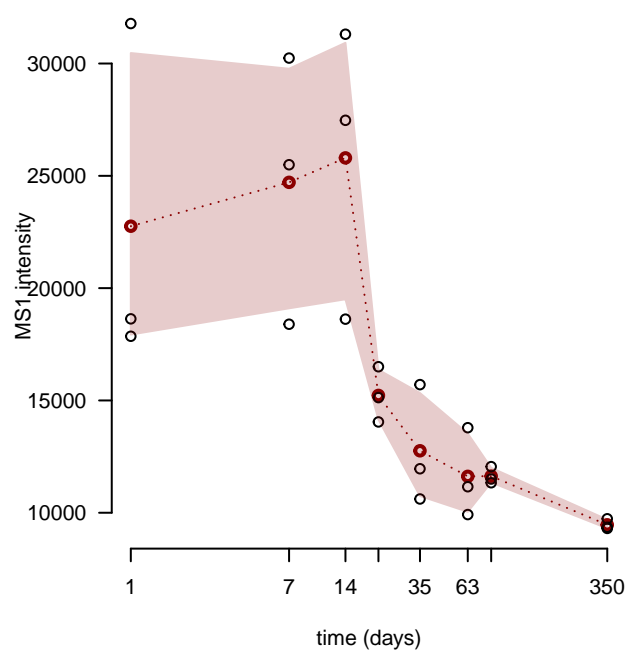

**Q9CPS6**  
**GN=Hint3**  
histidine triad nucleotide binding prote ...

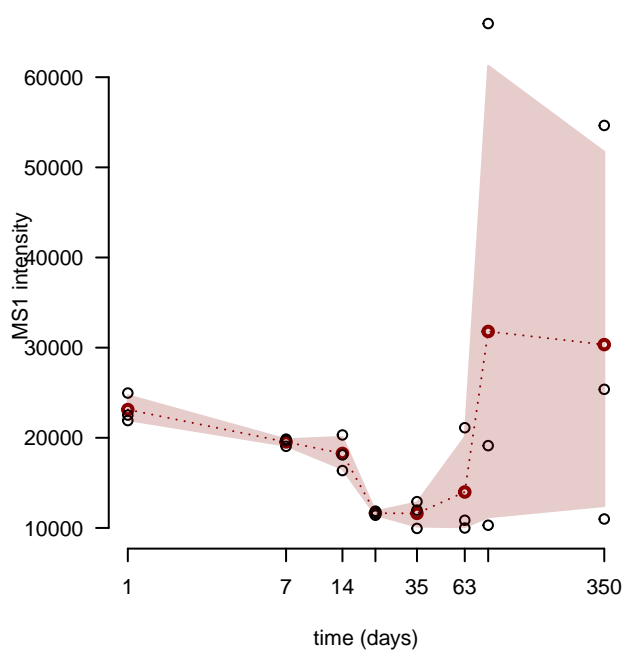

**Q9CPS7**  
**GN=Pno1**  
partner of NOB1 homolog

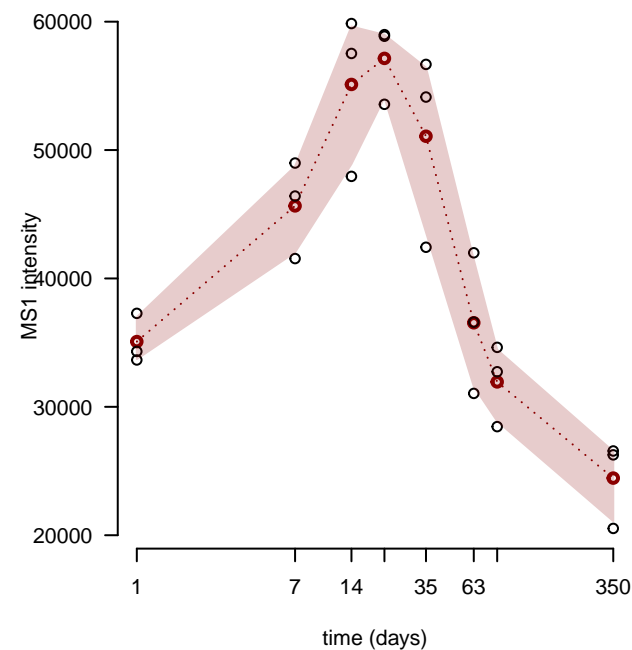

**Q9CPT3**  
**GN=Nanp**  
N-acetylneuraminic acid phosphatase

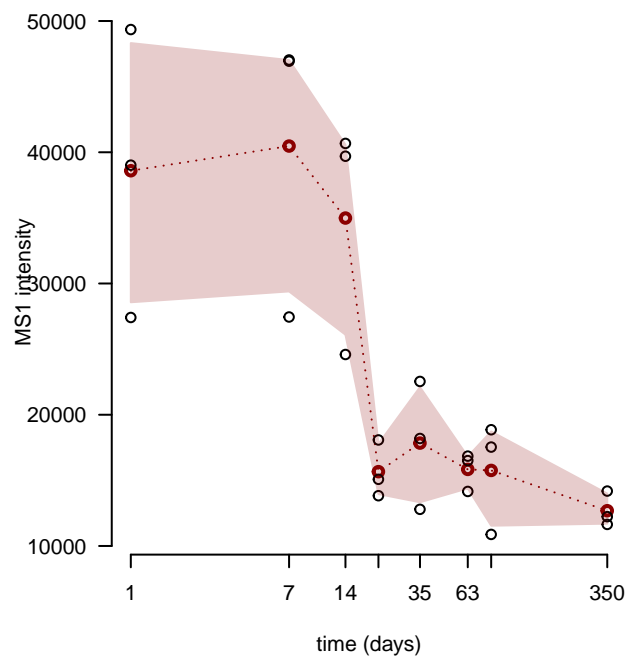

**Q9CPT4**  
**GN=Mydgf**  
myeloid derived growth factor

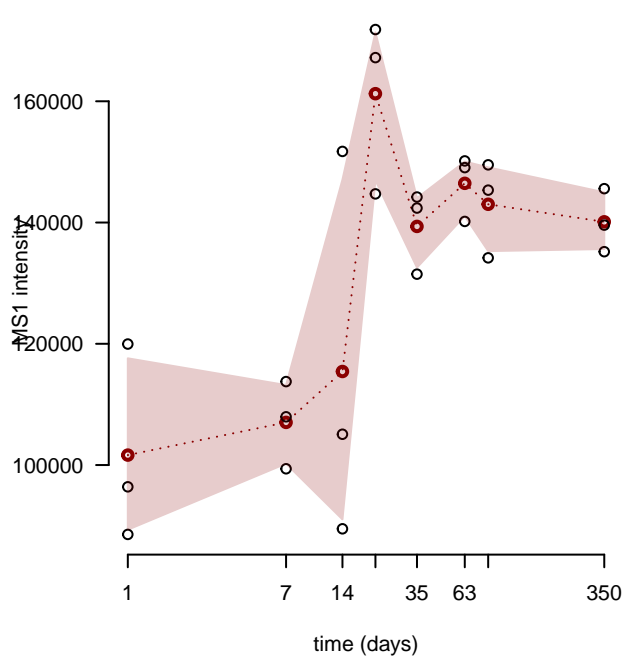

**Q9CPT5**  
**GN=Nop16**  
NOP16 nucleolar protein

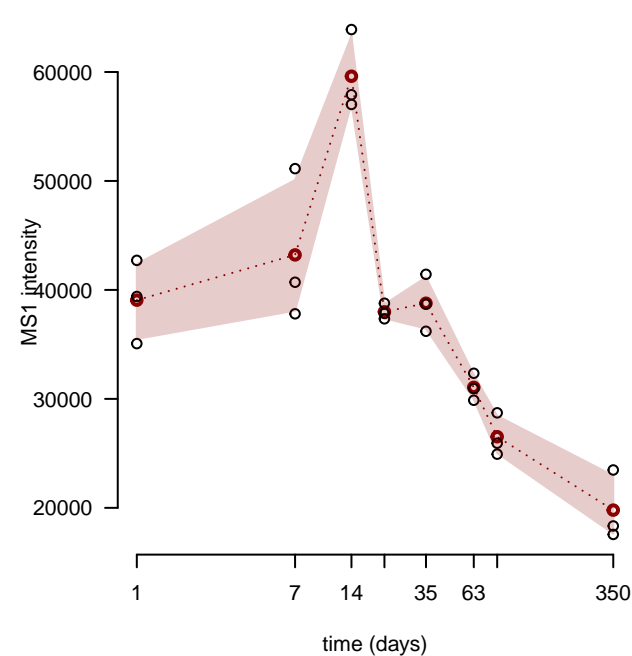



**Q9CPU0**  
GN=Glo1  
glyoxalase 1

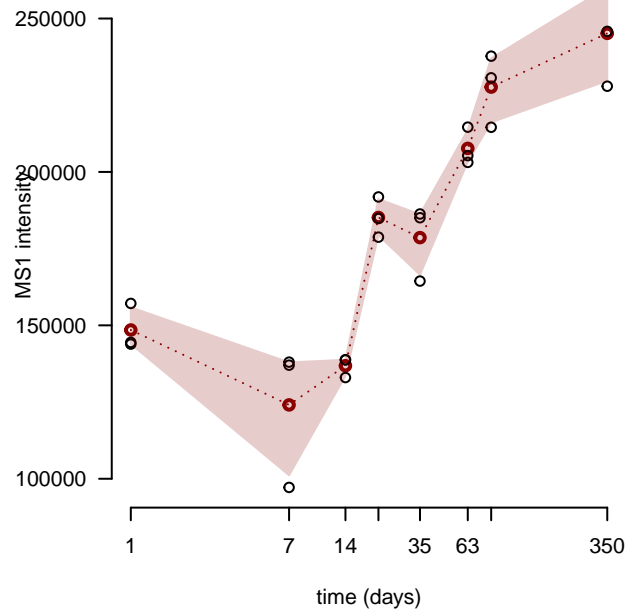

**Q9CPU2**  
GN=Ndufb2  
NADH:ubiquinone oxidoreductase subunit B ...

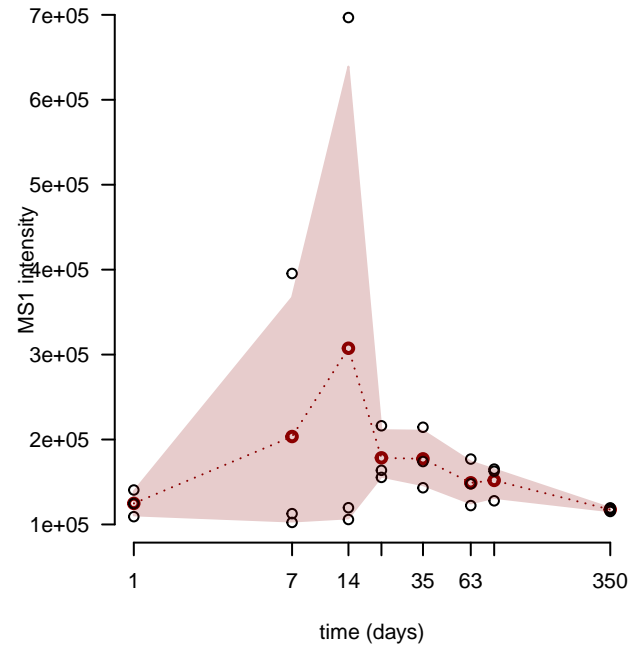

**Q9CPU4**  
GN=Mgst3  
microsomal glutathione S-transferase 3

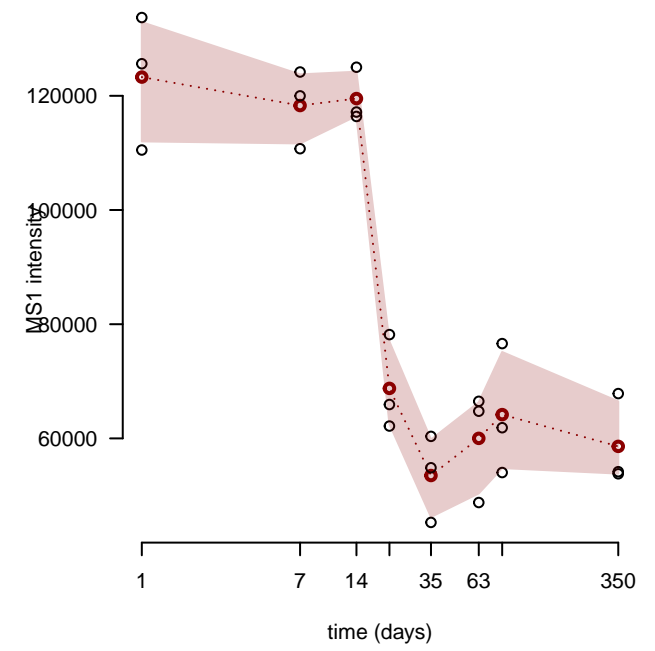

**Q9CPV3**  
GN=Mrpl42  
mitochondrial ribosomal protein L42

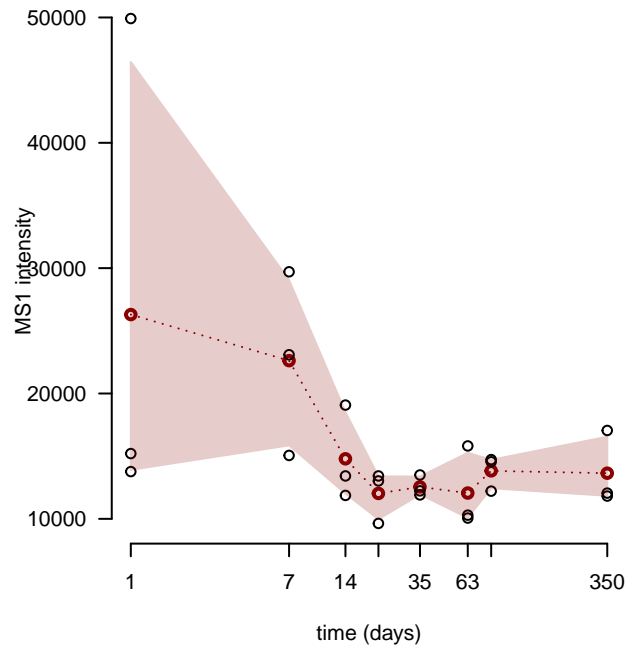

**Q9CPV4**  
GN=Glod4  
glyoxalase domain containing 4

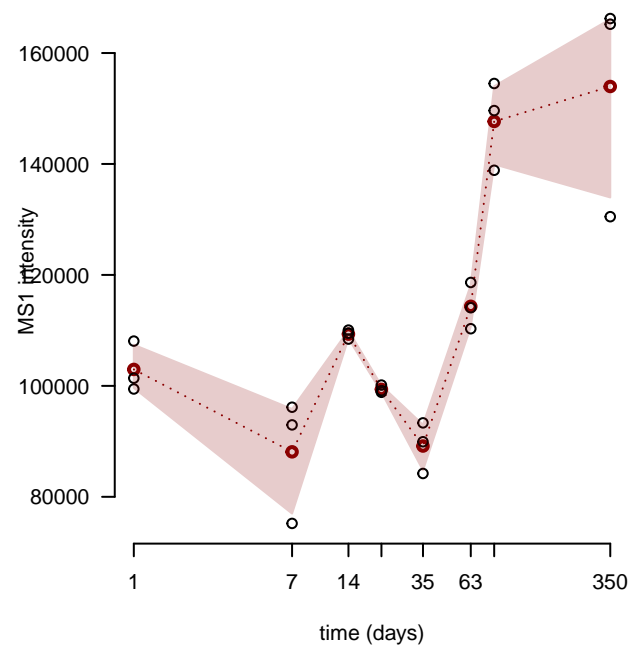

**Q9CPV5**  
GN=Pmf1  
polyamine-modulated factor 1

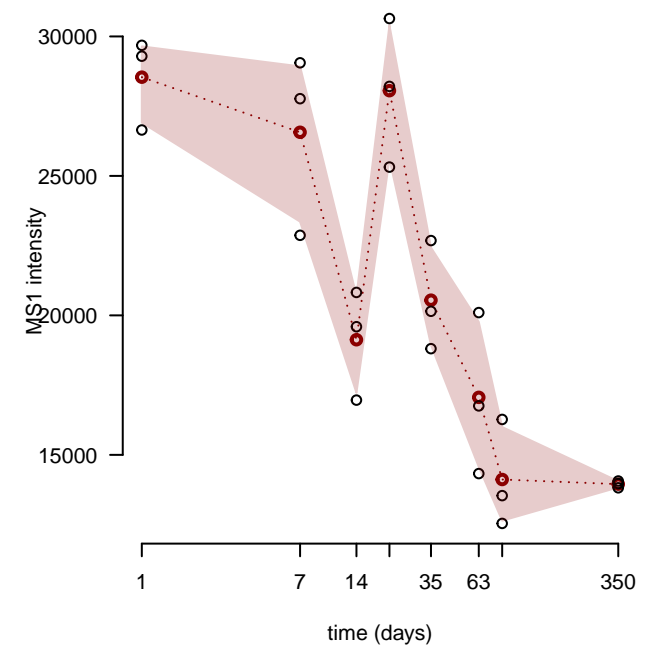

**Q9CPV7**  
GN=Zdhhc6  
zinc finger, DHHC domain containing 6

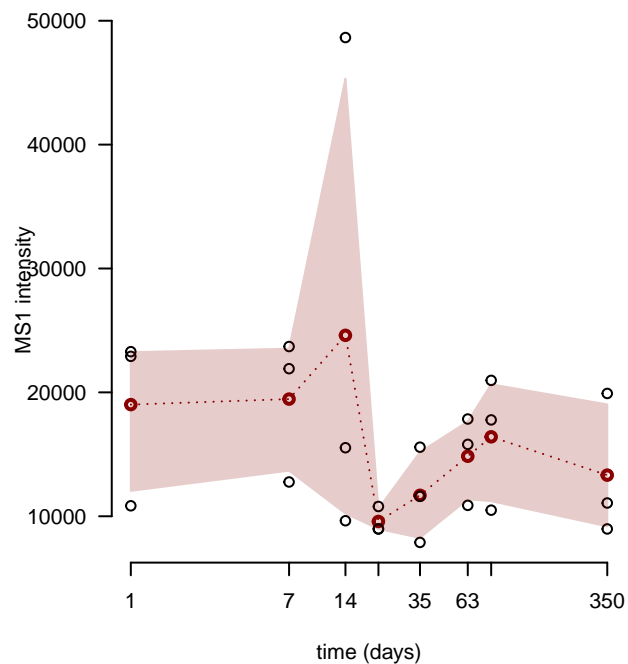

**Q9CPW2**  
GN=Fdx2  
ferredoxin 2

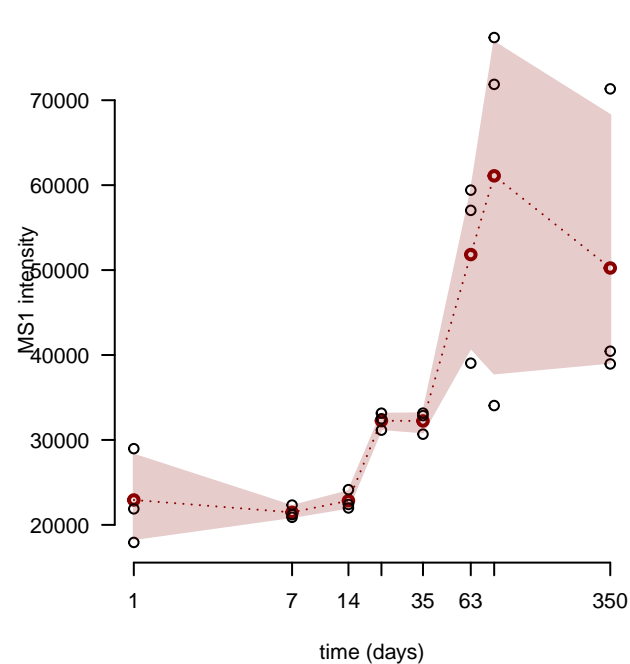

**Q9CPW3**  
GN=Mrpl54  
mitochondrial ribosomal protein L54

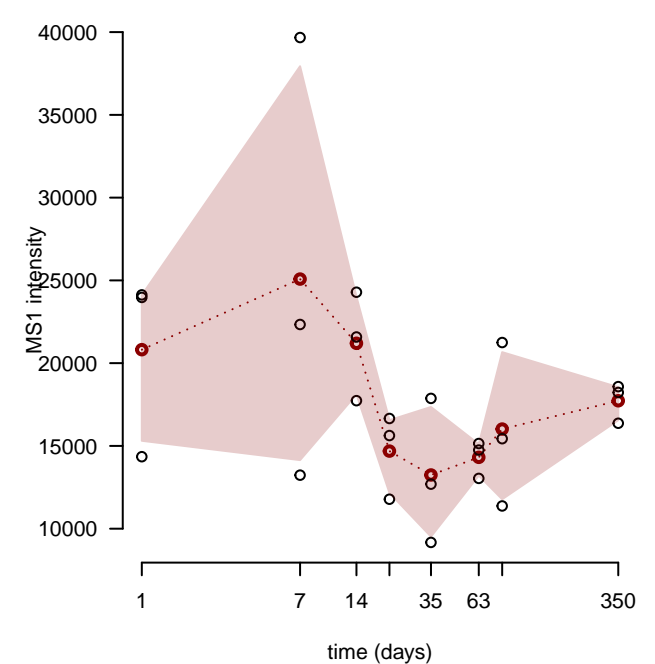

**Q9CPW4**  
**GN=Arpc5**  
actin related protein 2/3 complex, subun ...

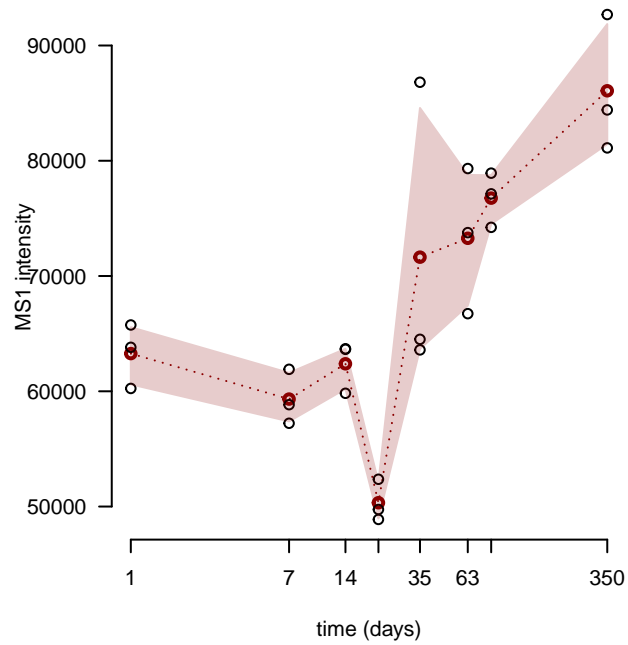

**Q9CPW7**  
**GN=Zmat2**  
zinc finger, matrin type 2

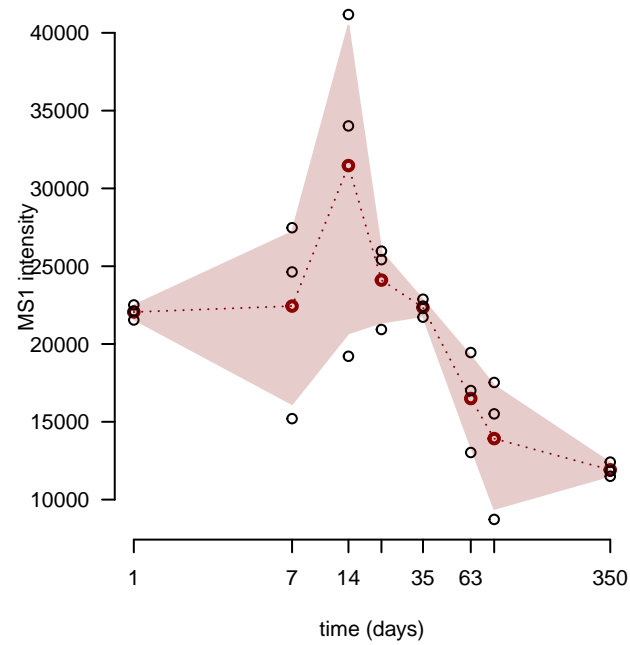

**Q9CPW9**  
**GN=Metap1d**  
methionyl aminopeptidase type 1D (mitoch ...

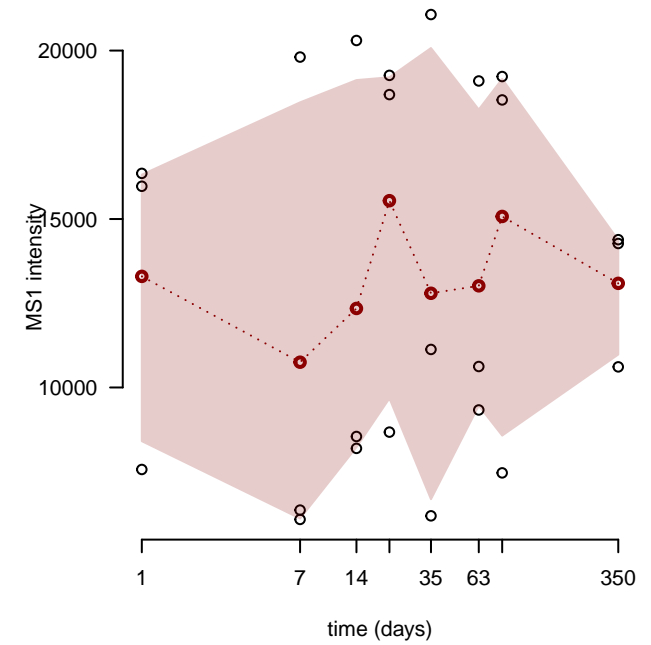

**Q9CPX6**  
**GN=Atg3**  
autophagy related 3

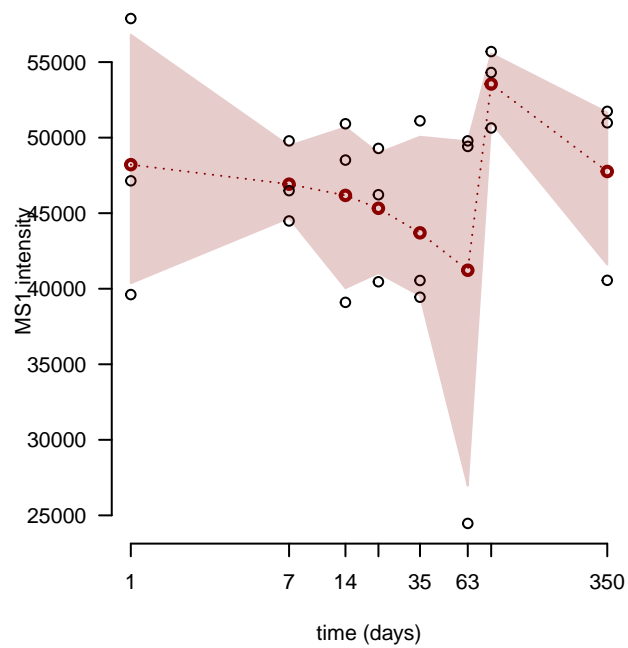

**Q9CPX7**  
**GN=Mrps16**  
mitochondrial ribosomal protein S16

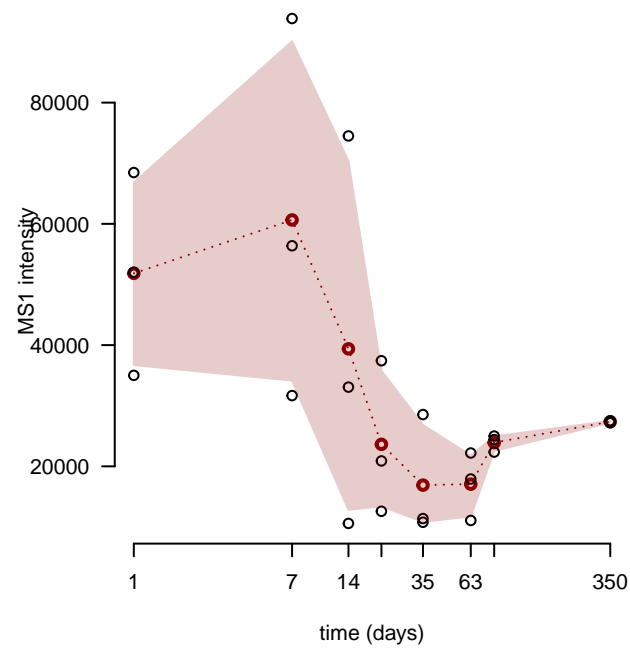

**Q9CPX8**  
**GN=Uqcrl1**  
ubiquinol-cytochrome c reductase, comple ...

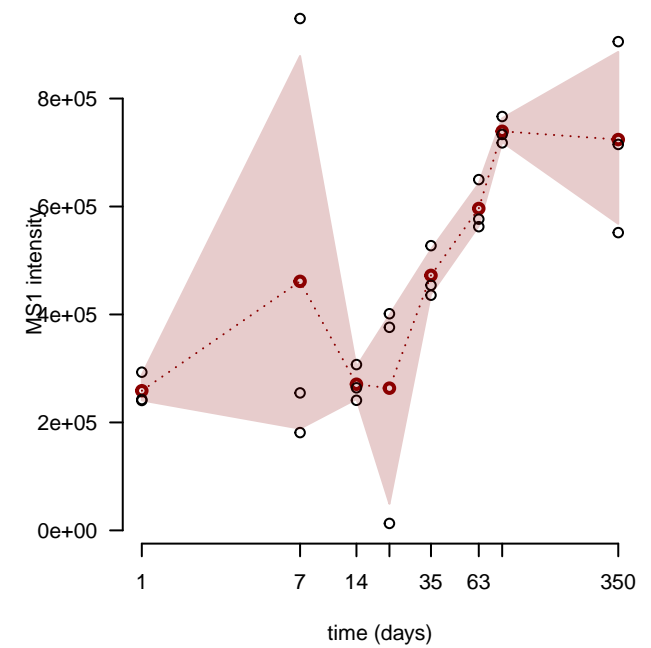

**Q9CPY0**  
**GN=Mrm2**  
mitochondrial rRNA methyltransferase 2

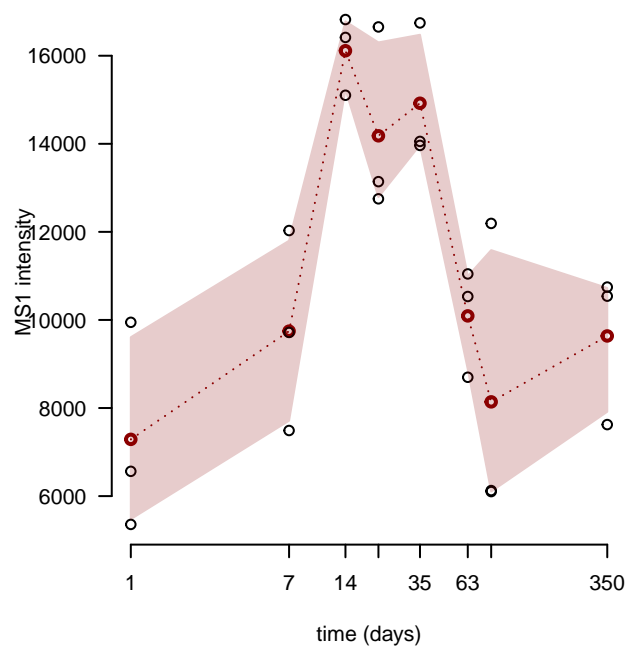

**Q9CPY1**  
**GN=Mrpl51**  
mitochondrial ribosomal protein L51

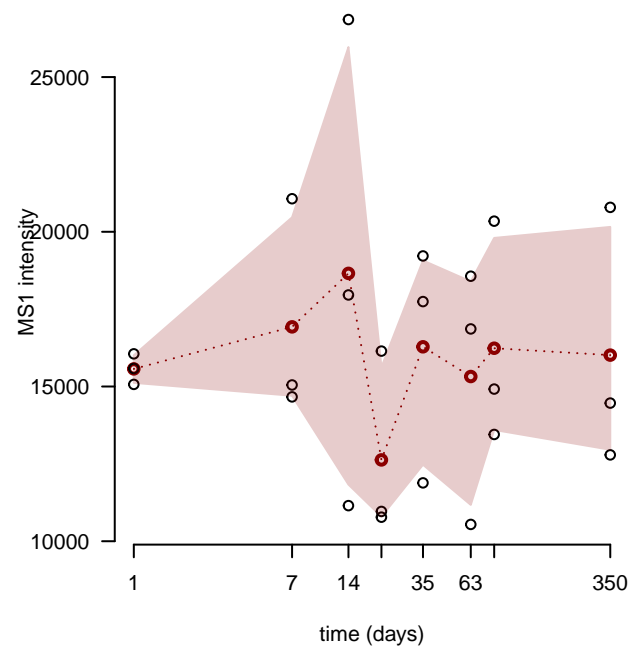

**Q9CPY3**  
**GN=Cdca5**  
cell division cycle associated 5

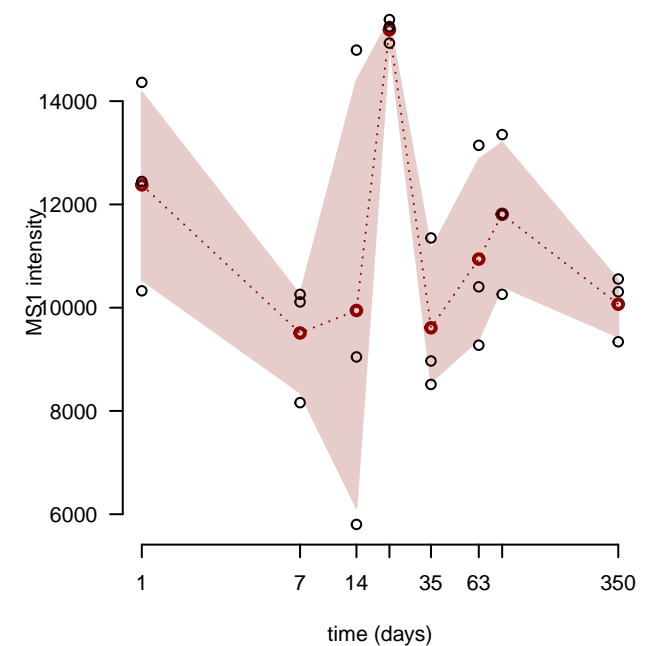

**Q9CPY7**  
**GN=Lap3**  
leucine aminopeptidase 3

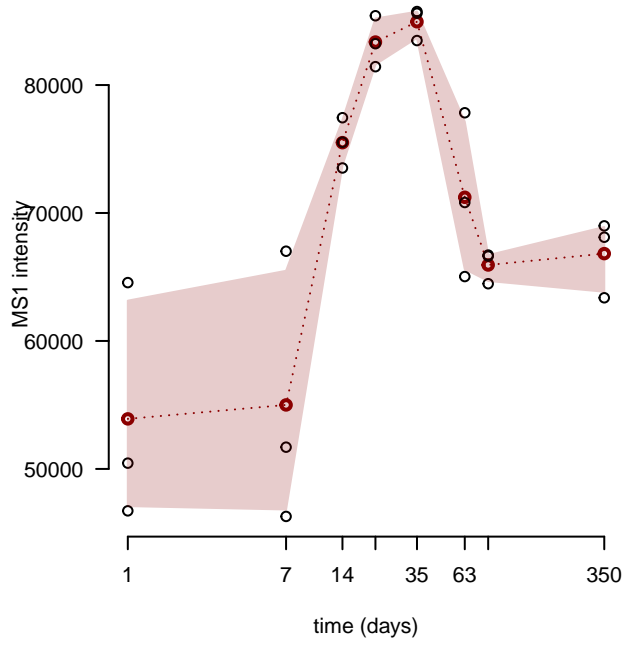

**Q9CPZ6**  
**GN=Ormdl3**  
ORM1-like 3 (S. cerevisiae)

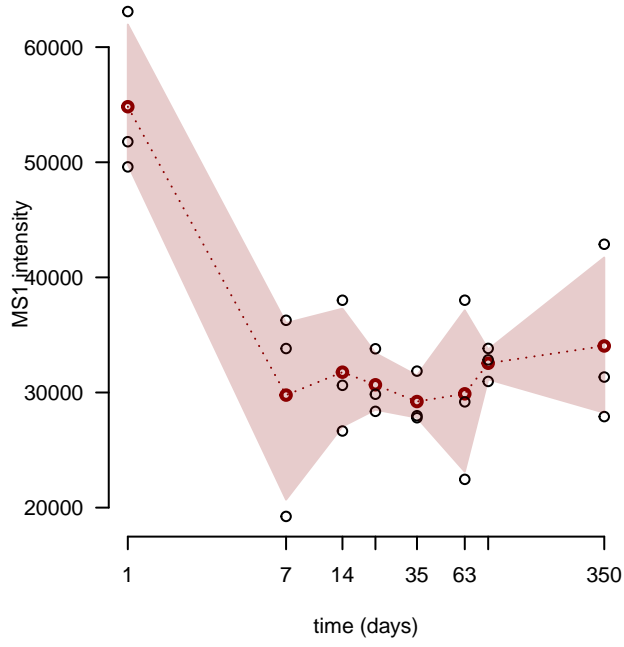

**Q9CPZ8**  
**GN=Cmc1**  
COX assembly mitochondrial protein 1

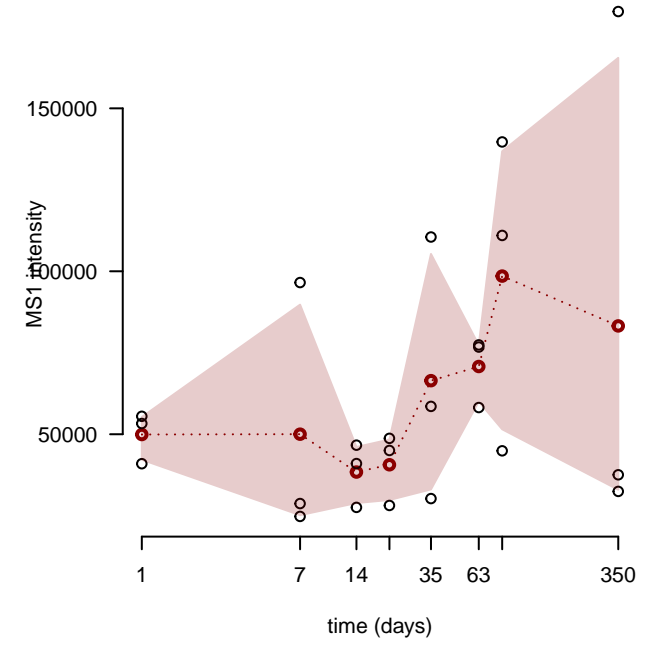

**Q9CQ00**  
**GN=Dmac1**  
distal membrane arm assembly complex 1

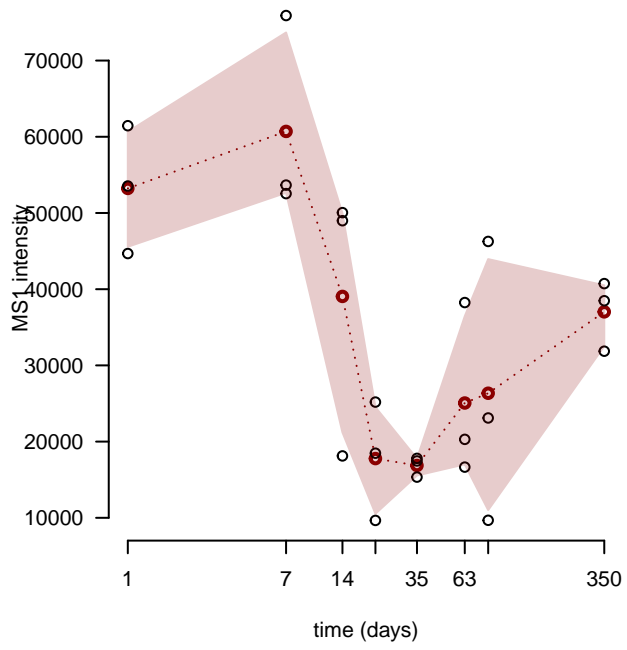

**Q9CQ02**  
**GN=Commd4**  
COMM domain containing 4

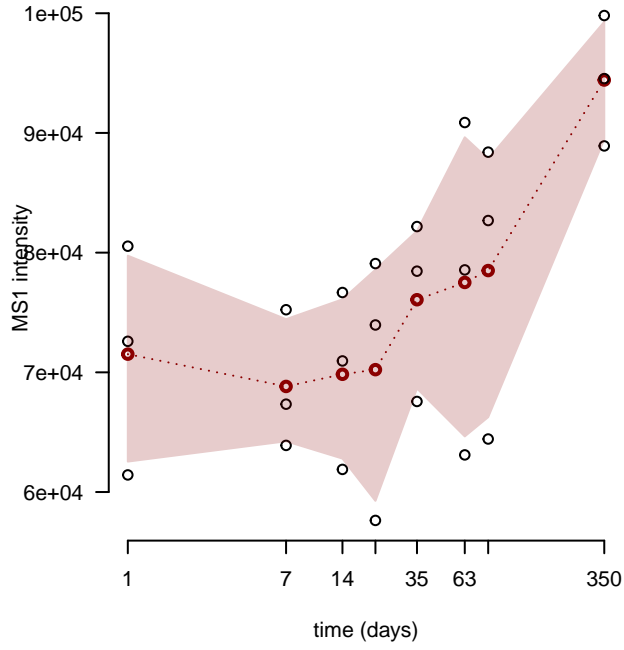

**Q9CQ04**  
**GN=Ogfod2**  
2-oxoglutarate and iron-dependent oxygen ...

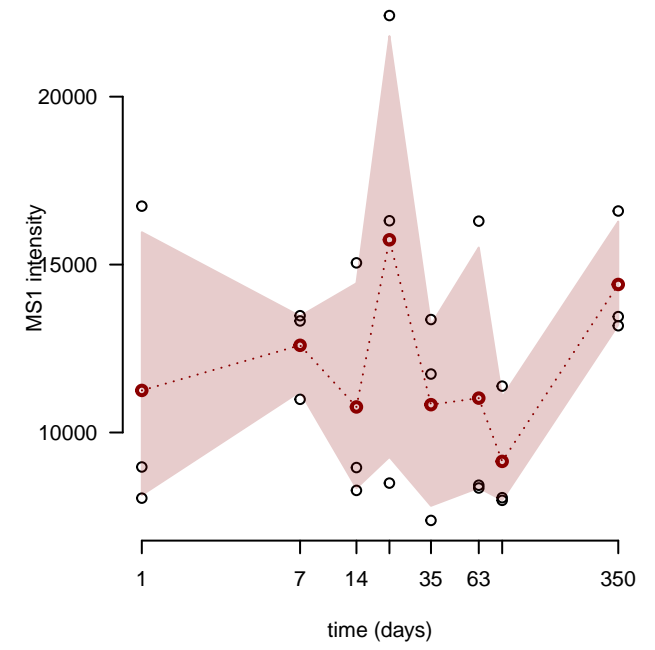

**Q9CQ06**  
**GN=Mrpl24**  
mitochondrial ribosomal protein L24

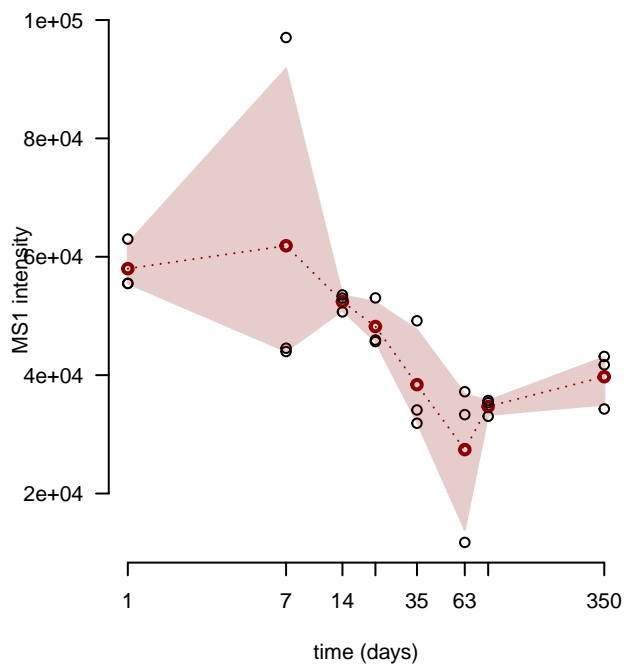

**Q9CQ10**  
**GN=Chmp3**  
charged multivesicular body protein 3

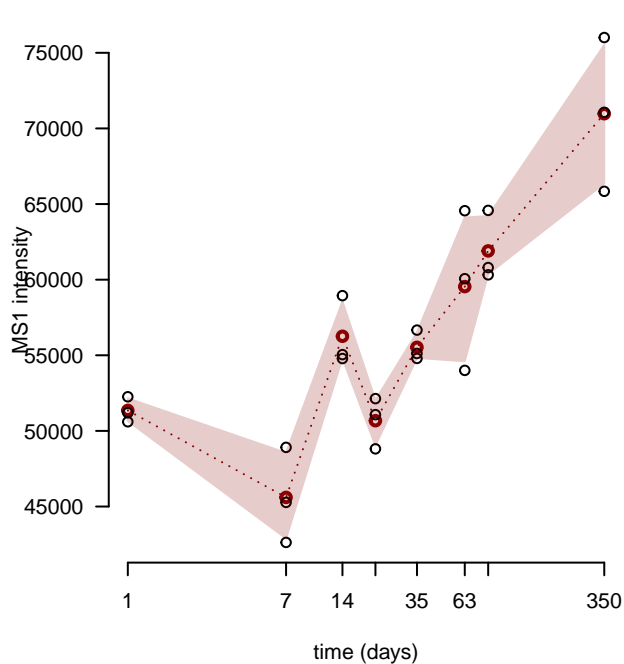

**Q9CQ13**  
**GN=Coprs**  
coordinator of PRMT5, differentiation st ...

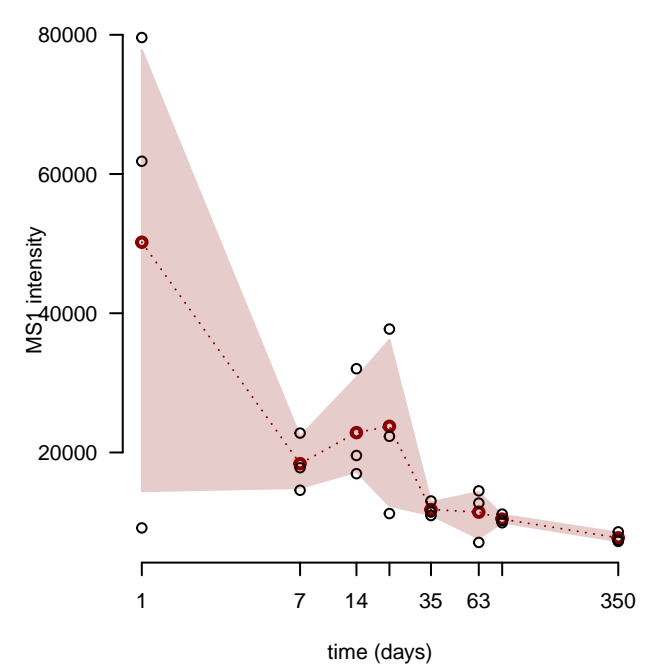

**Q9CQ18**  
**GN=Rnaseh2c**  
ribonuclease H2, subunit C

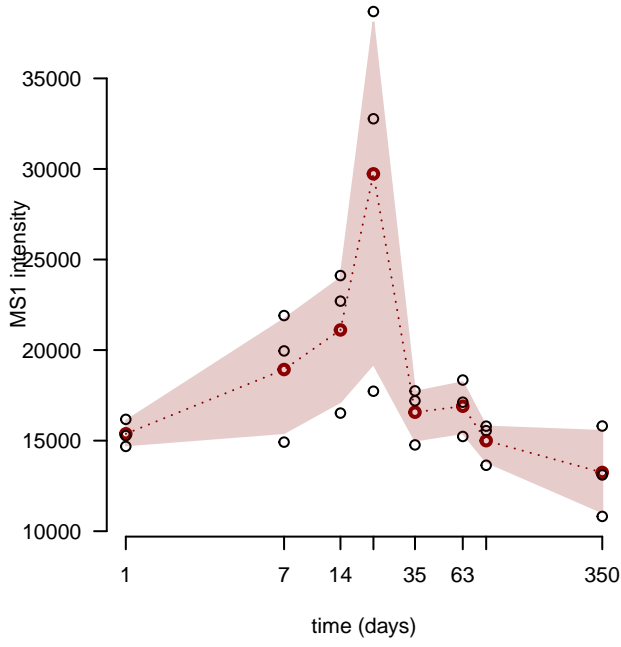

**Q9CQ19**  
**GN=Myl9**  
myosin, light polypeptide 9, regulatory

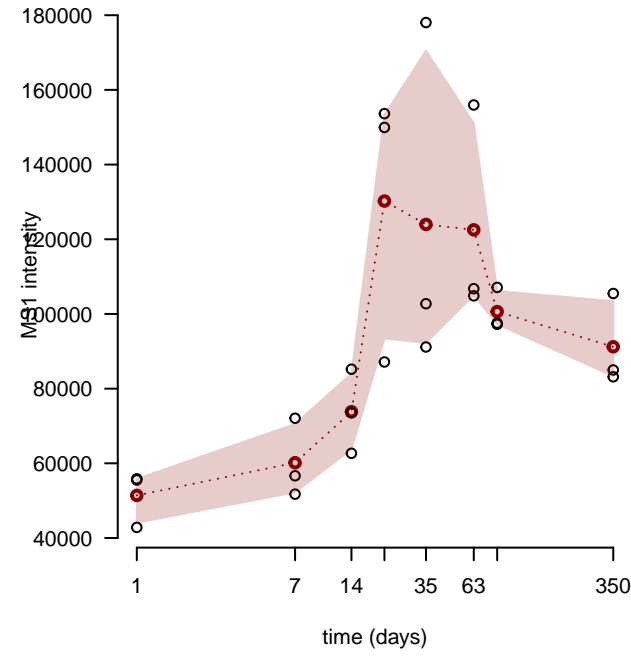

**Q9CQ20**  
**GN=Mid1ip1**  
Mid1 interacting protein 1 (gastrulation ...)

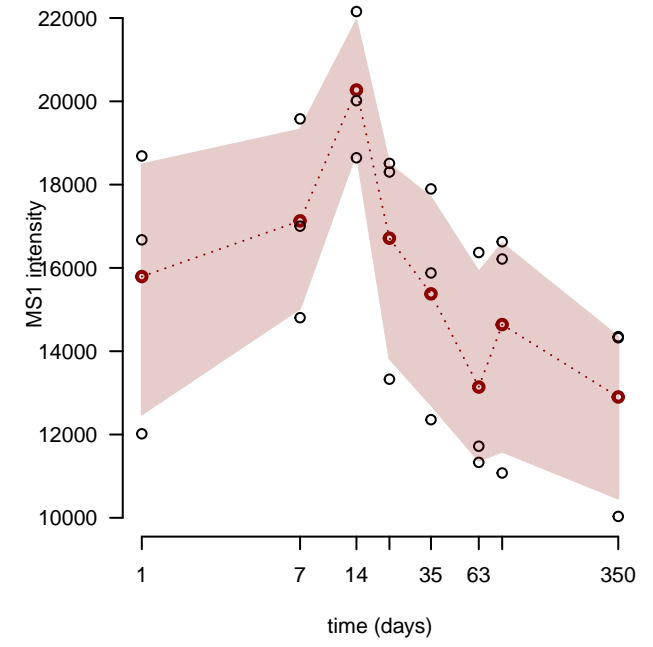

**Q9CQ21**  
**GN=Mcts2**  
malignant T cell amplified sequence 2

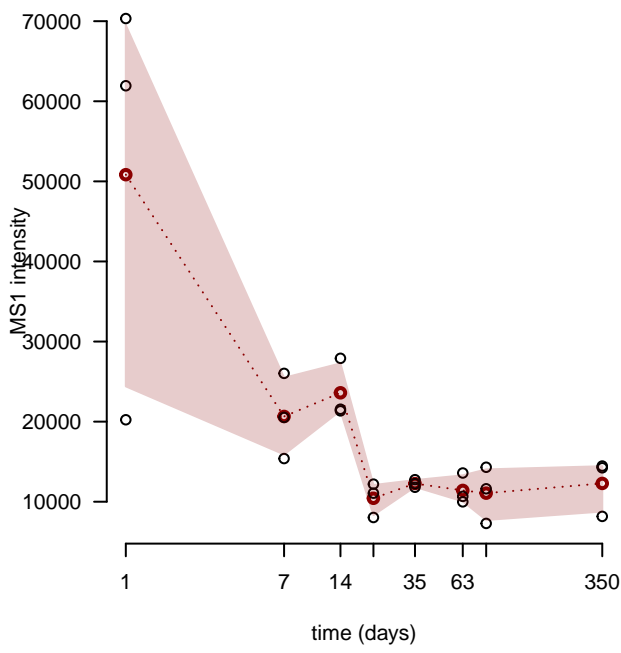

**Q9CQ22**  
**GN=Lamtor1**  
late endosomal/lysosomal adaptor, MAPK a ...

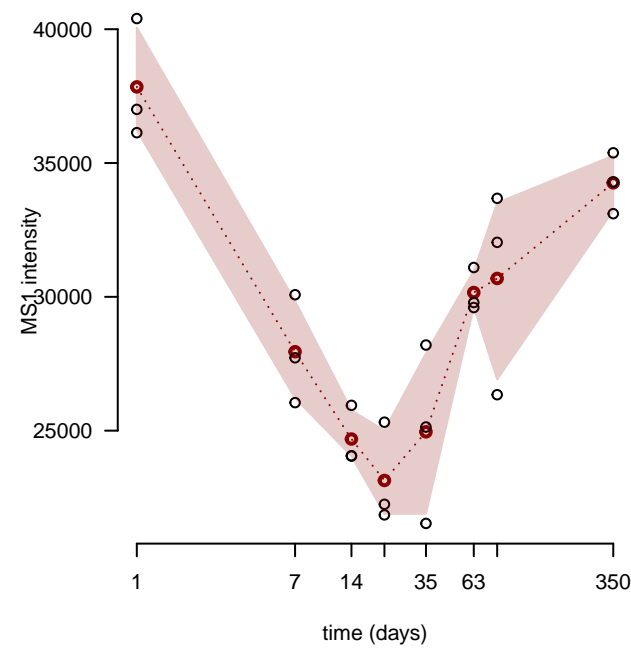

**Q9CQ26**  
**GN=Stamp**  
STAM binding protein

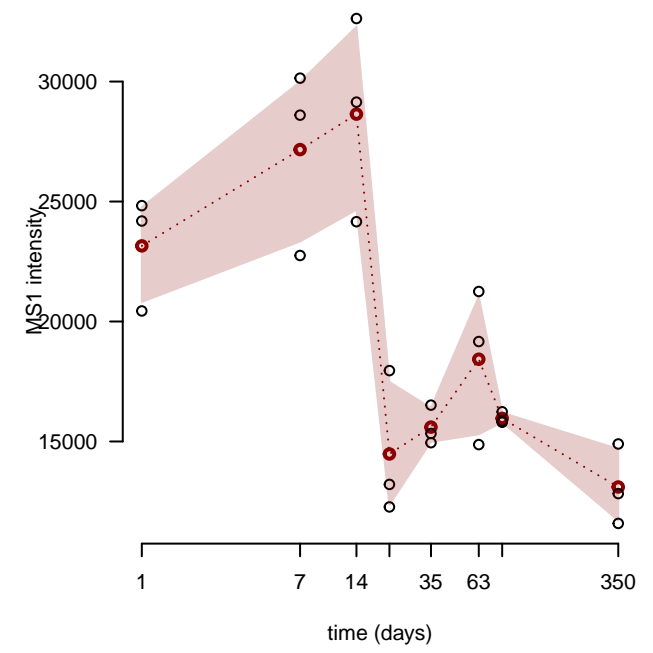

**Q9CQ28**  
**GN=Dph6**  
diphthamine biosynthesis 6

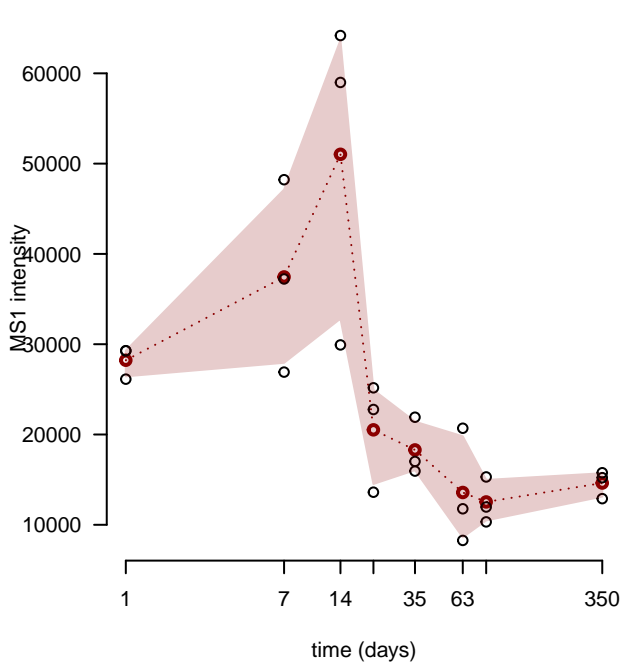

**Q9CQ36**  
**GN=Pole4**  
polymerase (DNA-directed), epsilon 4 (p1 ...)

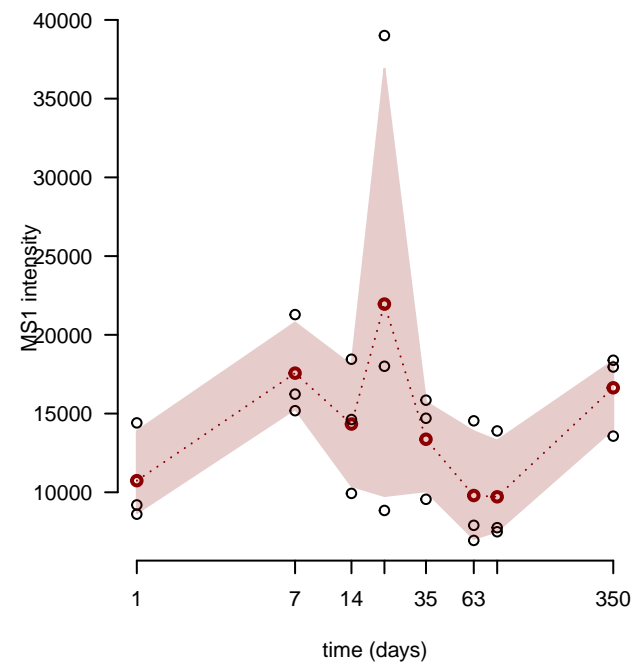

**Q9CQ37**  
**GN=Ube2t**  
ubiquitin-conjugating enzyme E2T

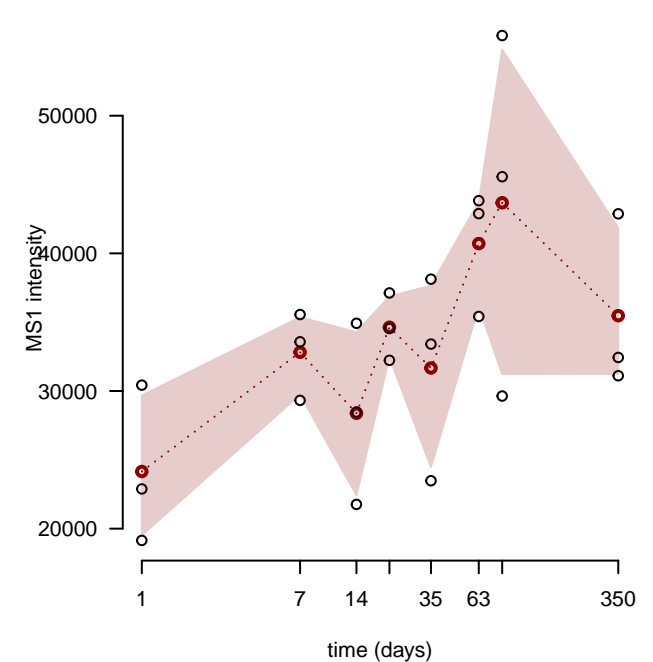

**Q9CQ40**  
GN=Mrpl49  
mitochondrial ribosomal protein L49

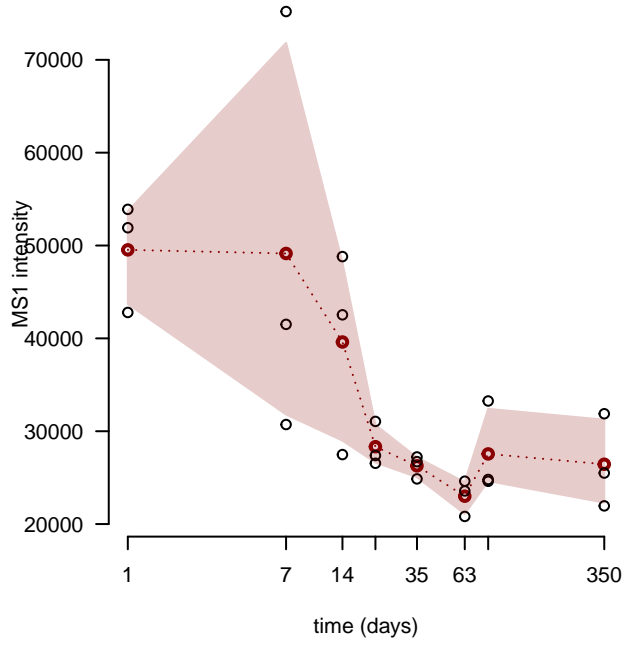

**Q9CQ45**  
GN=Nenf  
neuron derived neurotrophic factor

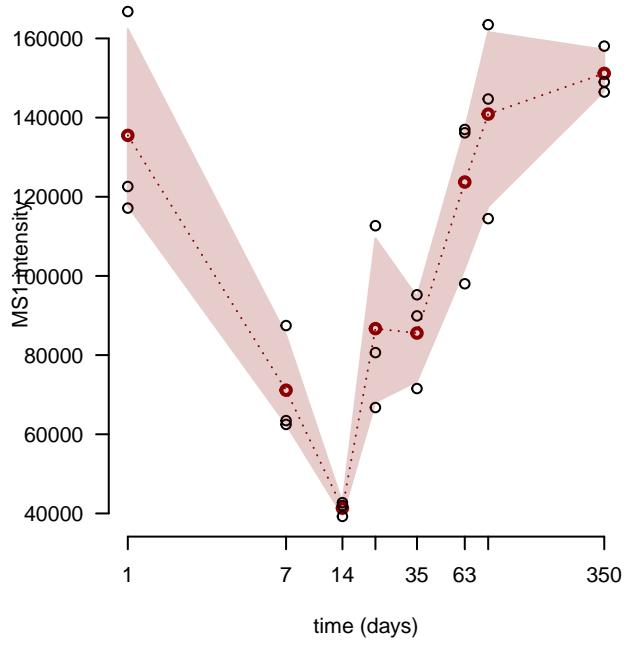

**Q9CQ48**  
GN=Nudcd2  
NudC domain containing 2

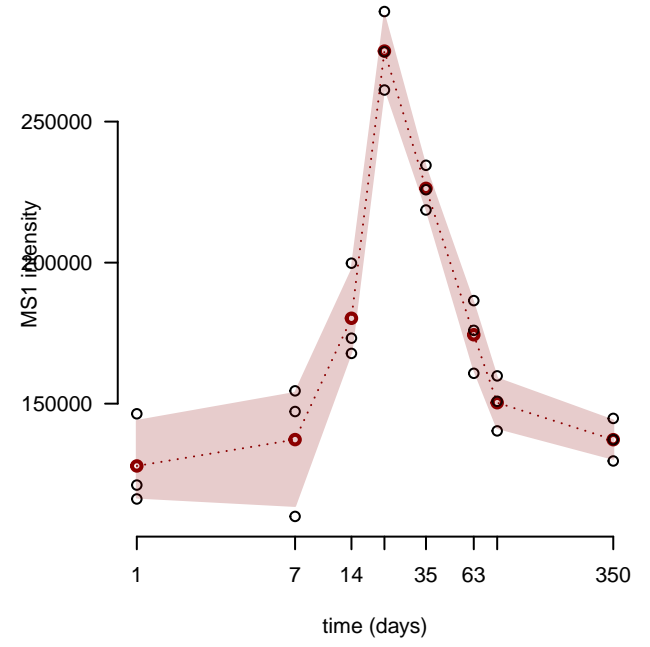

**Q9CQ49**  
GN=Ncbp2  
nuclear cap binding protein subunit 2

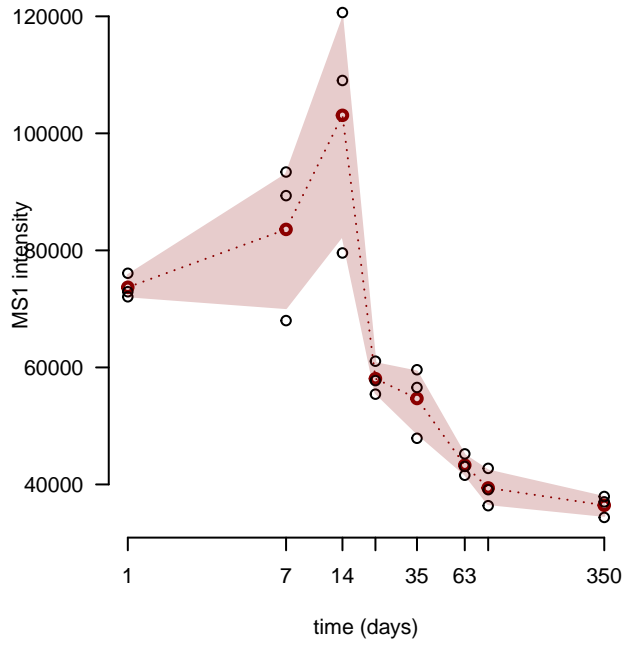

**Q9CQ52**  
GN=Cela3b  
chymotrypsin-like elastase family, membe ...

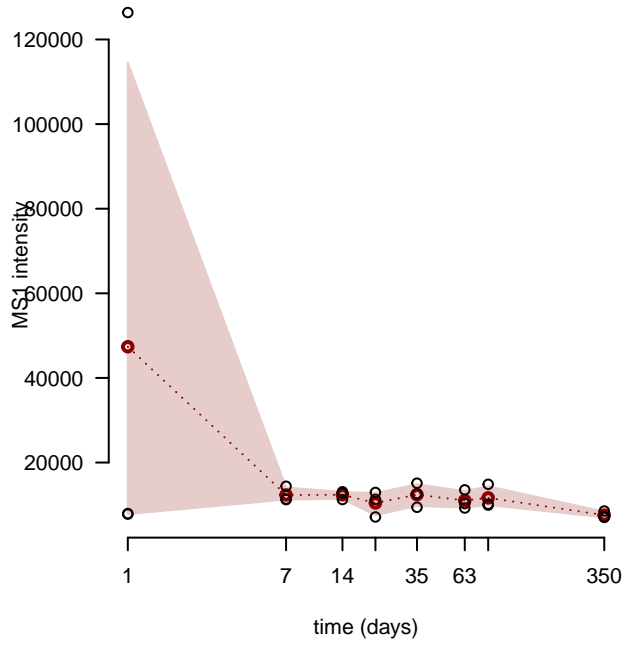

**Q9CQ54**  
GN=Ndufc2  
NADH:ubiquinone oxidoreductase subunit C ...

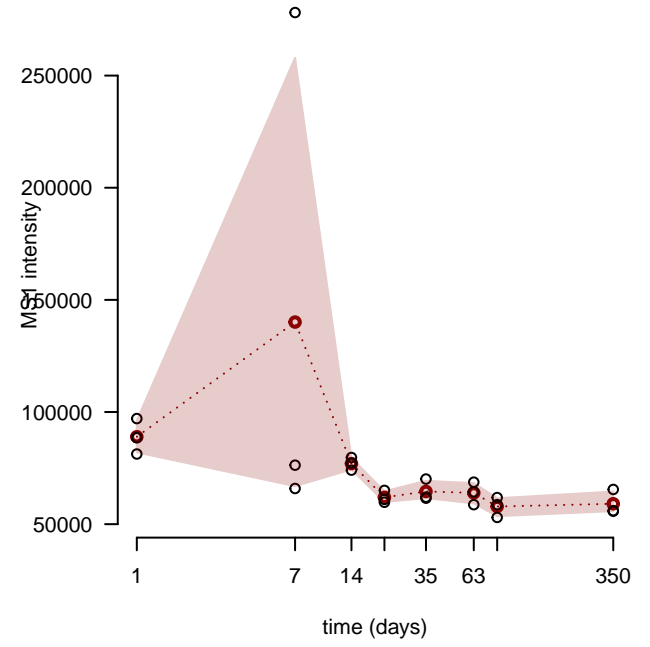

**Q9CQ56**  
GN=Use1  
unconventional SNARE in the ER 1 homolog ...

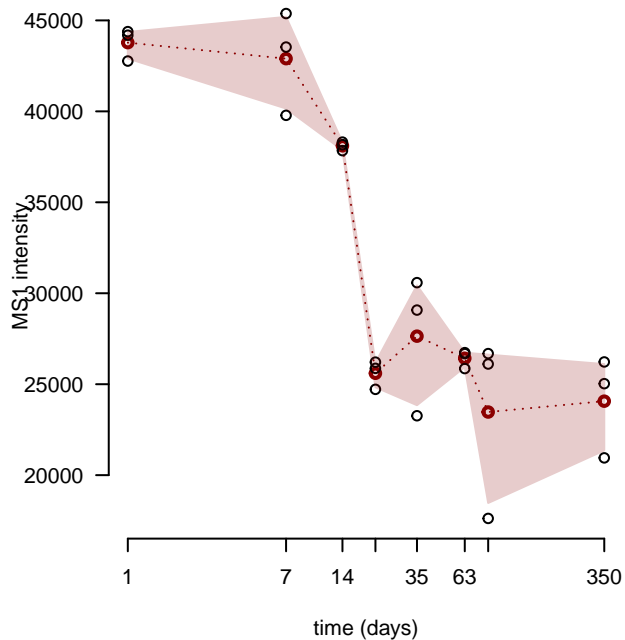

**Q9CQ60**  
GN=Pgls  
6-phosphogluconolactonase

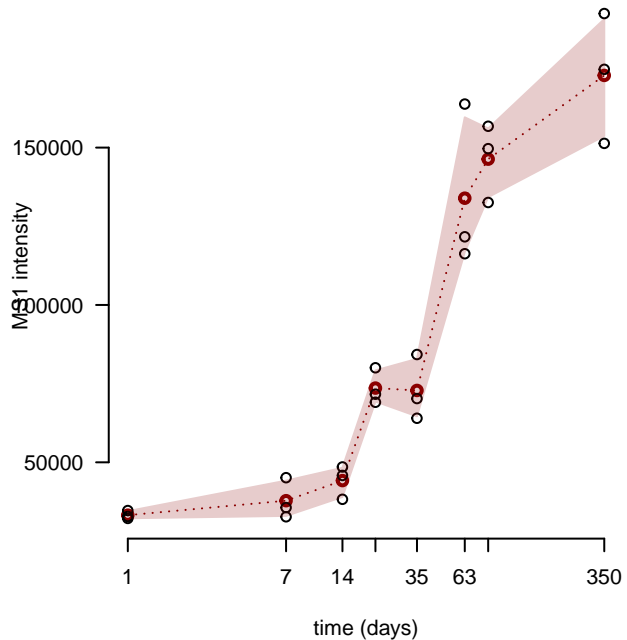

**Q9CQ62**  
GN=Decr1  
2,4-dienoyl CoA reductase 1, mitochondri ...

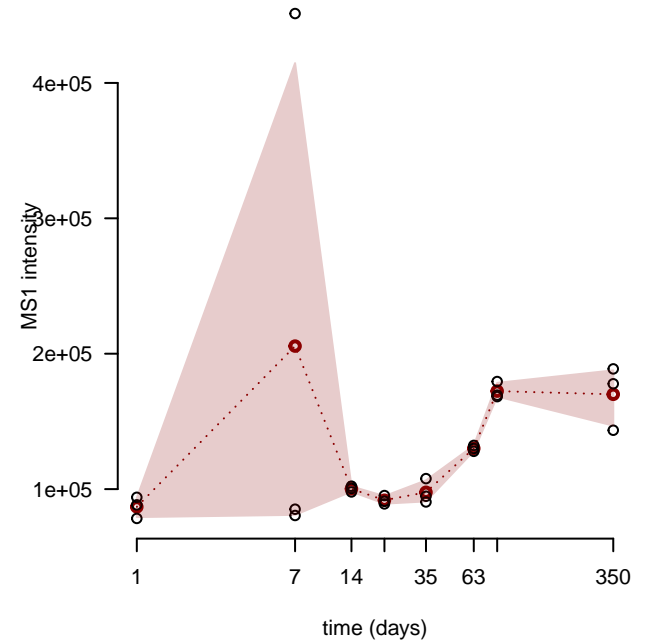

**Q9CQ65**  
**GN=Mtap**  
methylthioadenosine phosphorylase

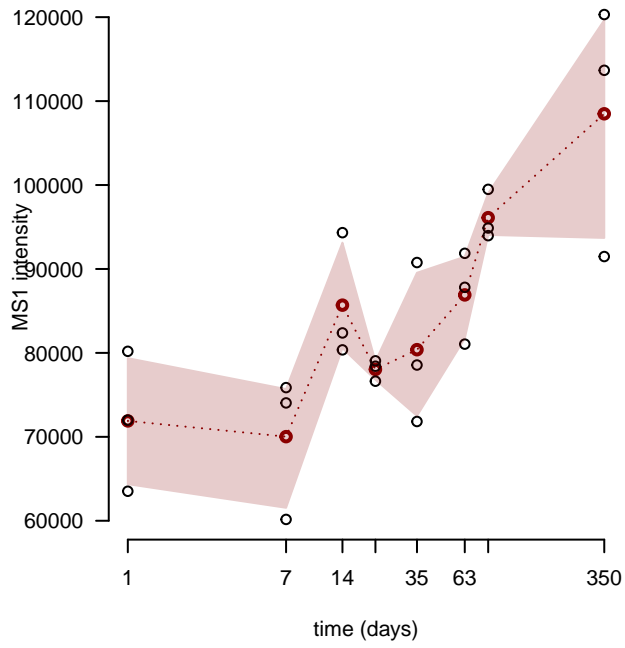

**Q9CQ69**  
**GN=Uqcrq**  
ubiquinol-cytochrome c reductase, comple ...

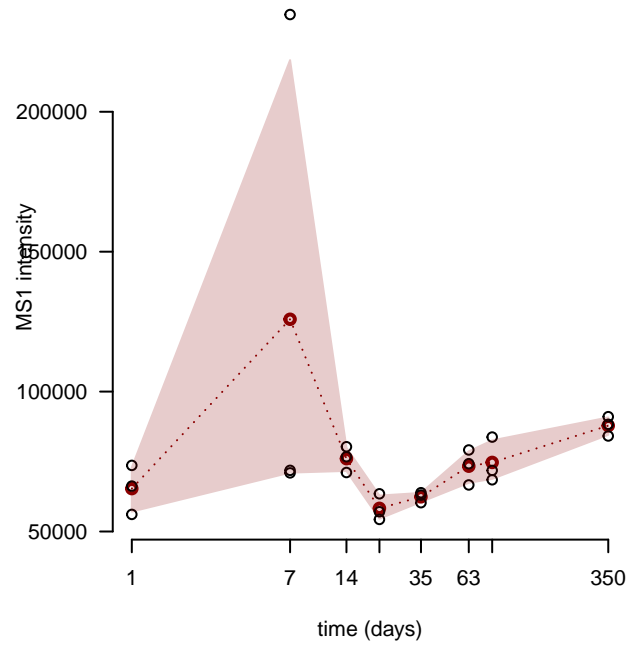

**Q9CQ71**  
**GN=Rpa3**  
replication protein A3

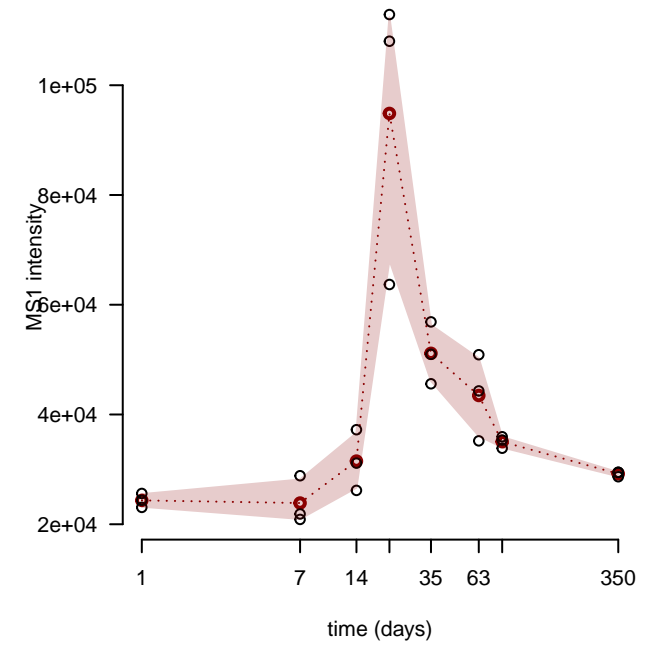

**Q9CQ75**  
**GN=Ndufa2**  
NADH:ubiquinone oxidoreductase subunit A ...

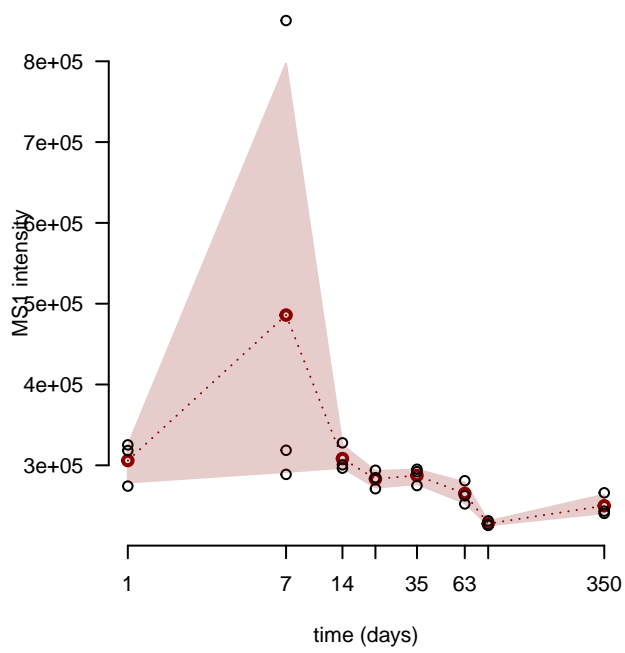

**Q9CQ79**  
**GN=Txndc9**  
thioredoxin domain containing 9

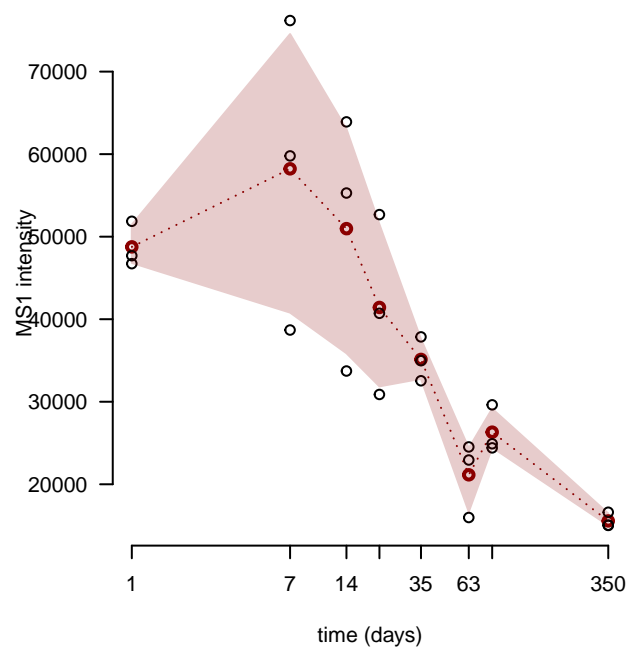

**Q9CQ80**  
**GN=Vps25**  
vacuolar protein sorting 25

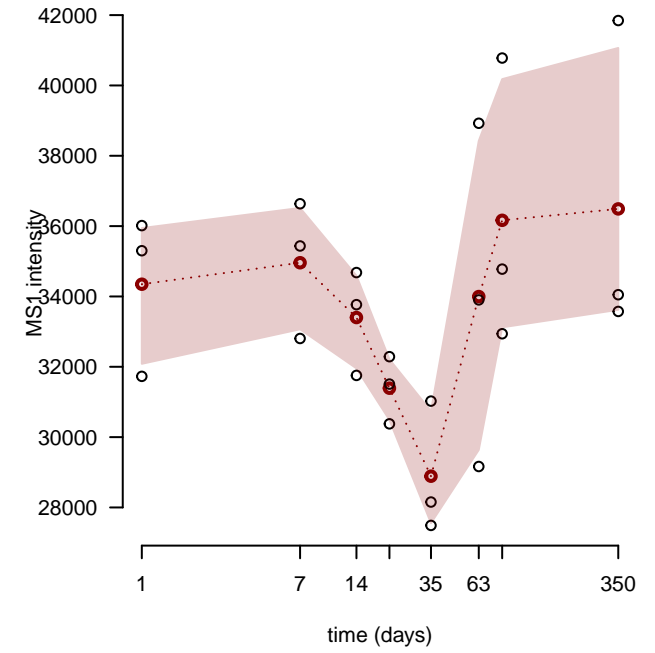

**Q9CQ85**  
**GN=Timm22**  
translocase of inner mitochondrial membr ...

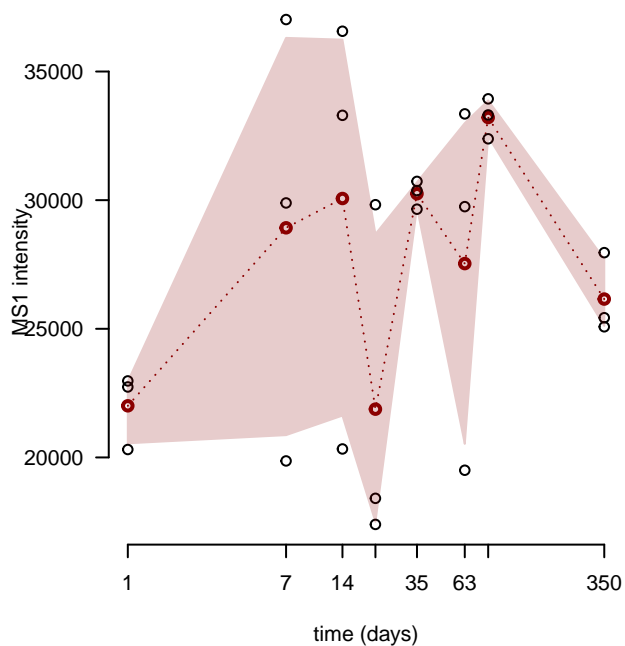

**Q9CQ86**  
**GN=Mien1**  
migration and invasion enhancer 1

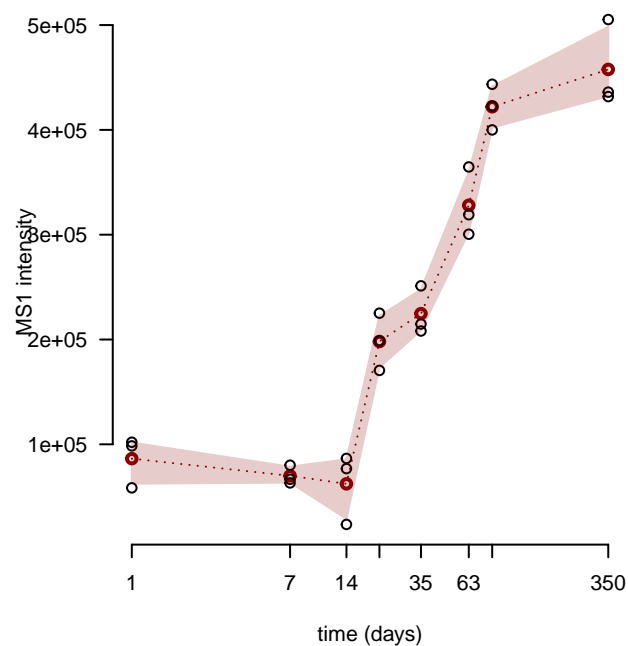

**Q9CQ88**  
**GN=Tspan31**  
tetraspanin 31

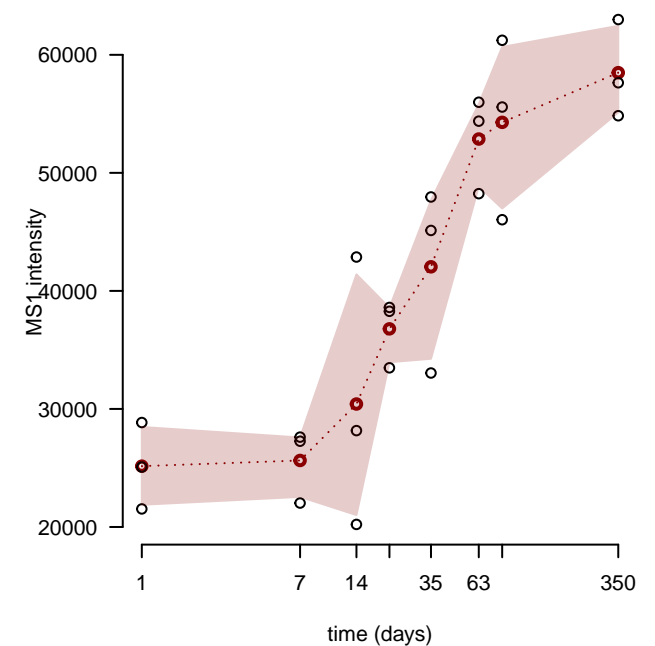

Q9CQ89  
GN=Cuta

cutA divalent cation tolerance homolog

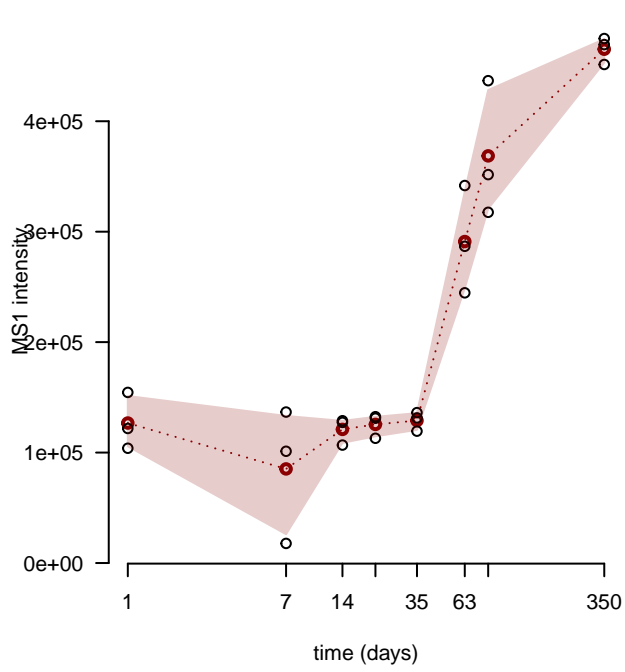

Q9CQ90  
GN=

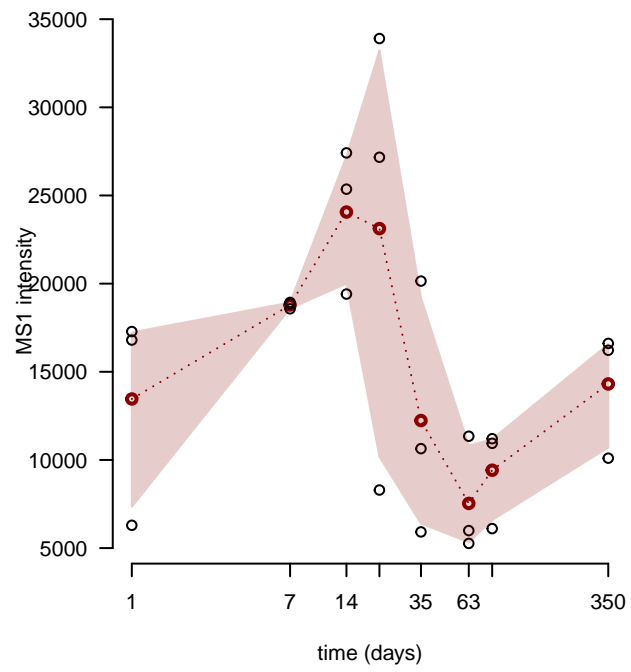

Q9CQ91  
GN=Ndufa3

NADH:ubiquinone oxidoreductase subunit A ...

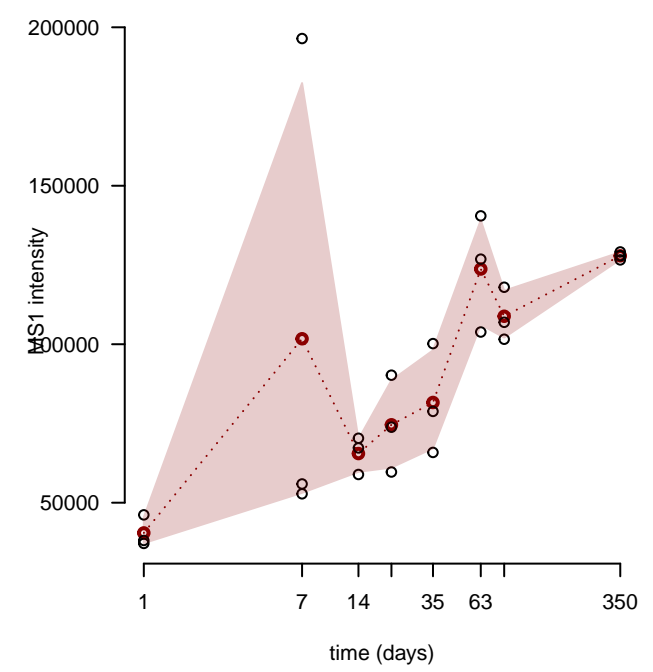

Q9CQ92  
GN=Fis1

fission, mitochondrial 1

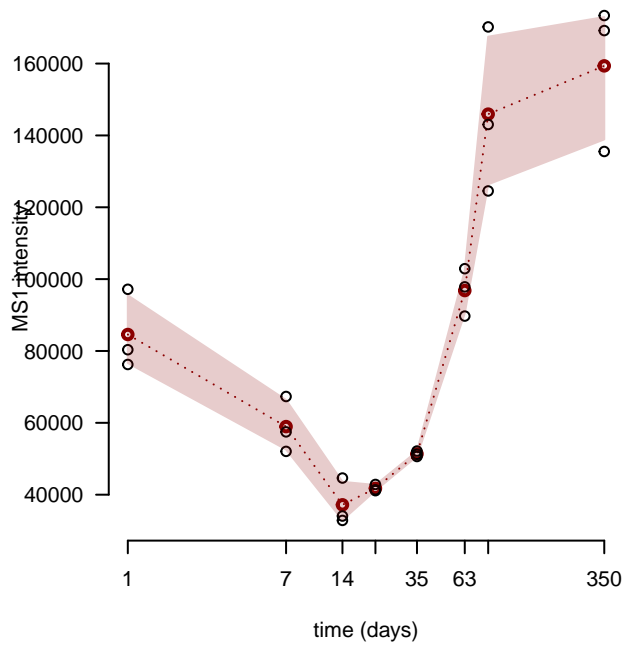

Q9CQA1  
GN=Trappc5

trafficking protein particle complex 5

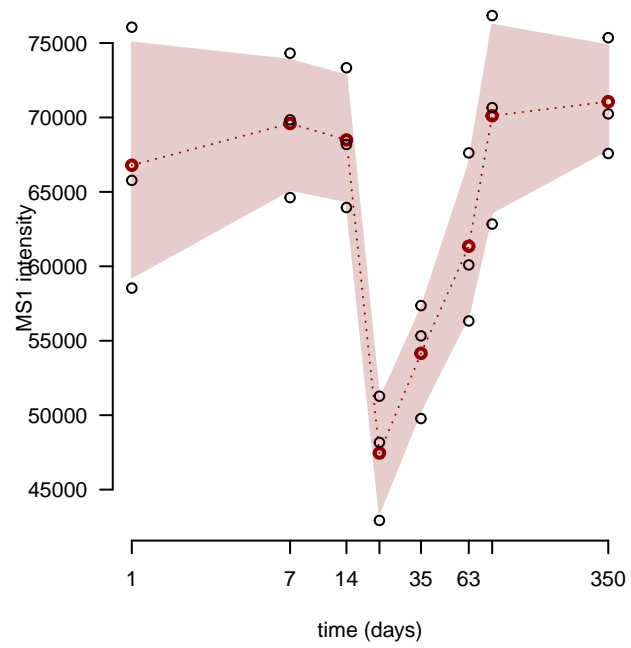

Q9CQA3  
GN=Sdhb

succinate dehydrogenase complex, subunit ...

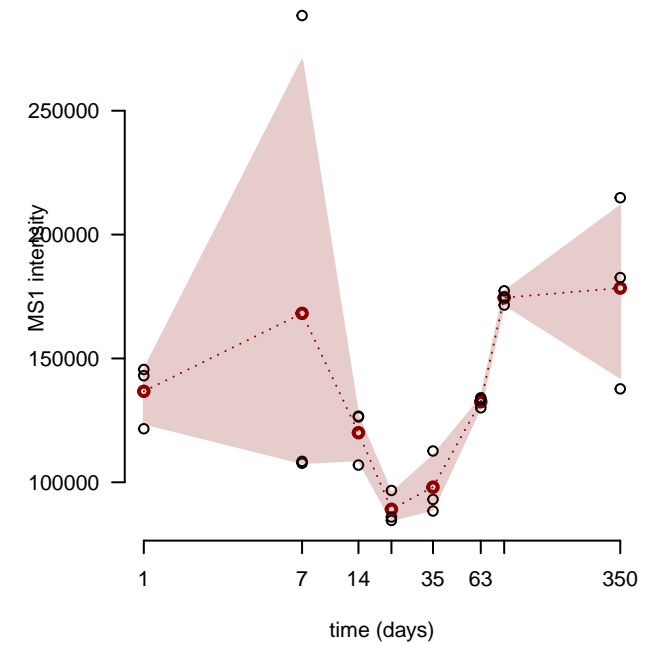

Q9CQA5  
GN=Med4

mediator complex subunit 4

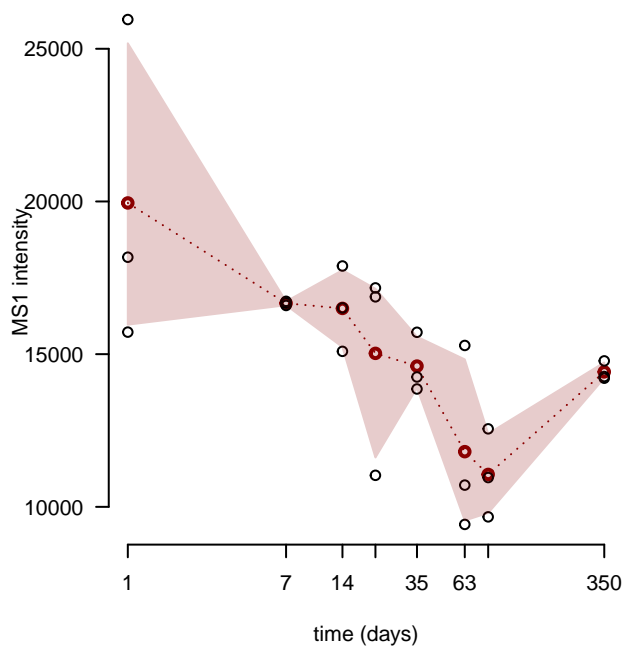

Q9CQA6  
GN=Chchd1

coiled-coil-helix-coiled-coil-helix doma ...

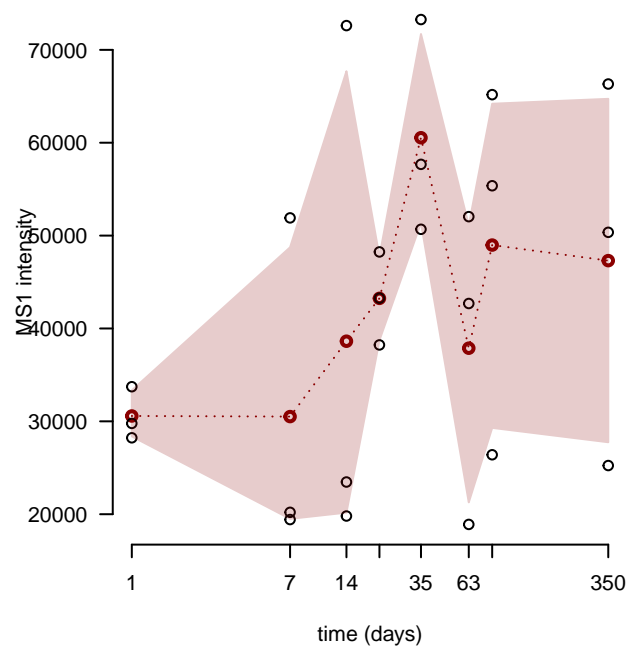

Q9CQA9  
GN=Ntpcr

nucleoside-triphosphatase, cancer-relate ...

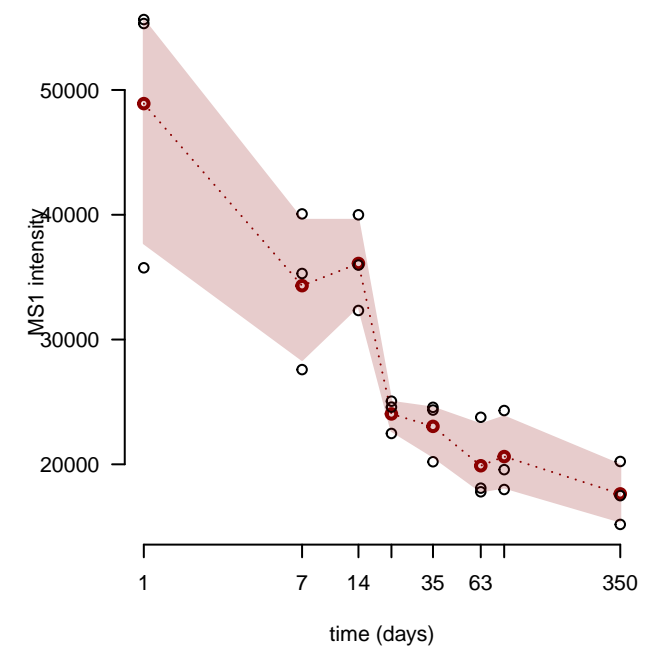

**Q9CQB2**  
**GN=Mcrip2**  
MAPK regulated corepressor interacting p ...

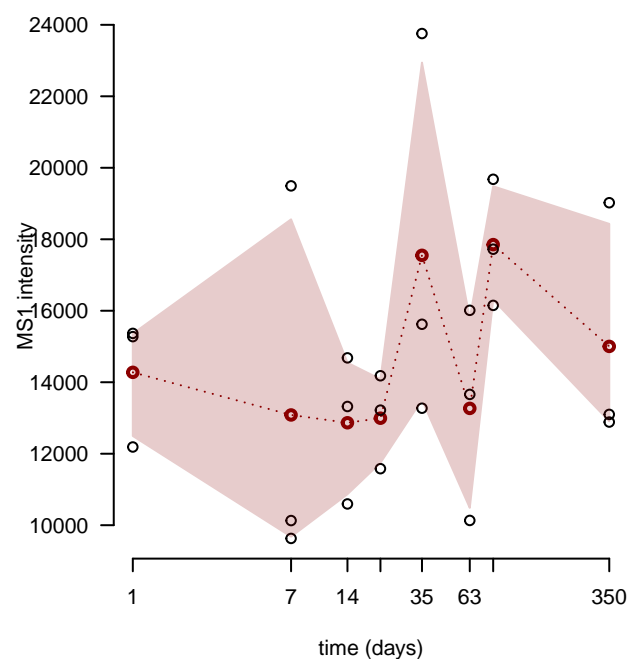

**Q9CQB5**  
**GN=Cisd2**  
CDGSH iron sulfur domain 2

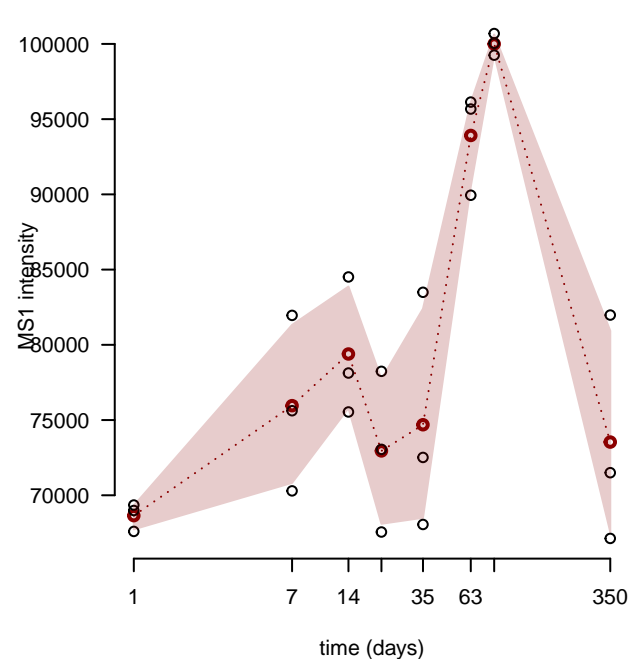

**Q9CQC6**  
**GN=Bzw1**  
basic leucine zipper and W2 domains 1

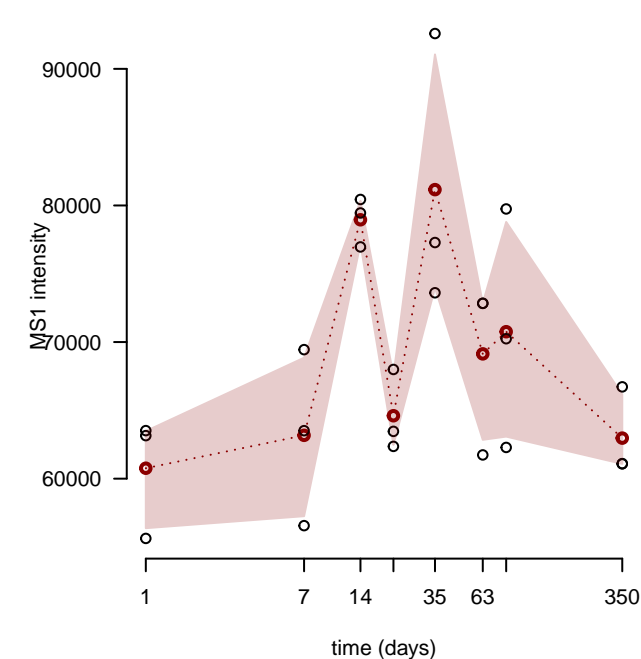

**Q9CQC7**  
**GN=Ndufb4**  
NADH:ubiquinone oxidoreductase subunit B ...

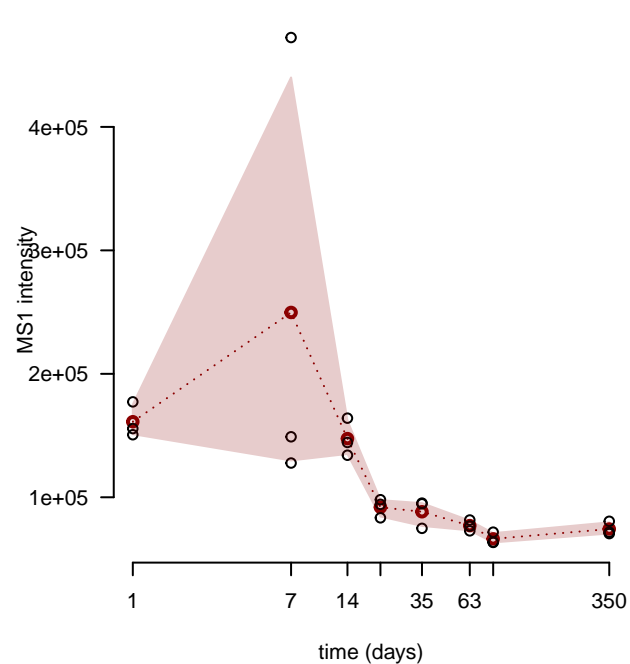

**Q9CQC8**  
**GN=Spq21**  
SPG21, maspardin

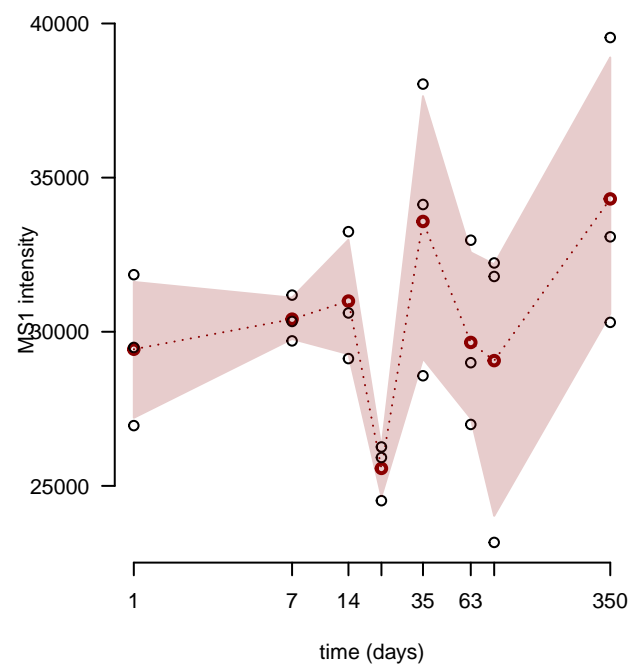

**Q9CQC9**  
**GN=Sar1b**  
secretion associated Ras related GTPase ...

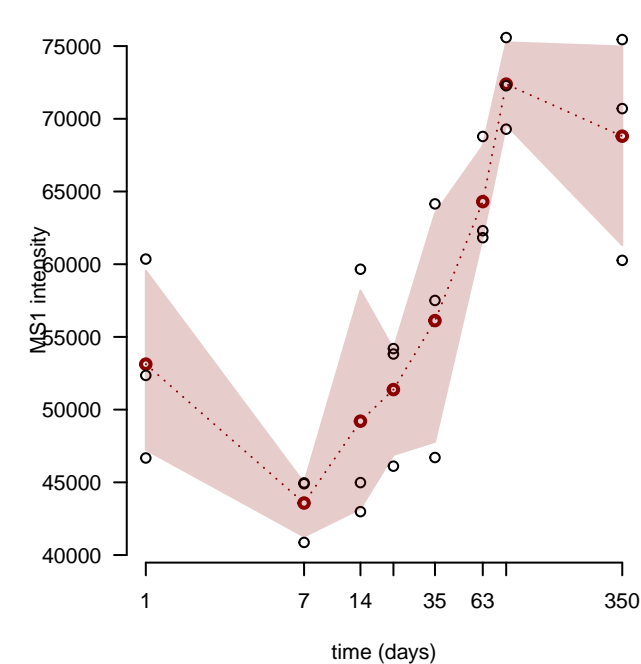

**Q9CQD1**  
**GN=Rab5a**  
RAB5A, member RAS oncogene family

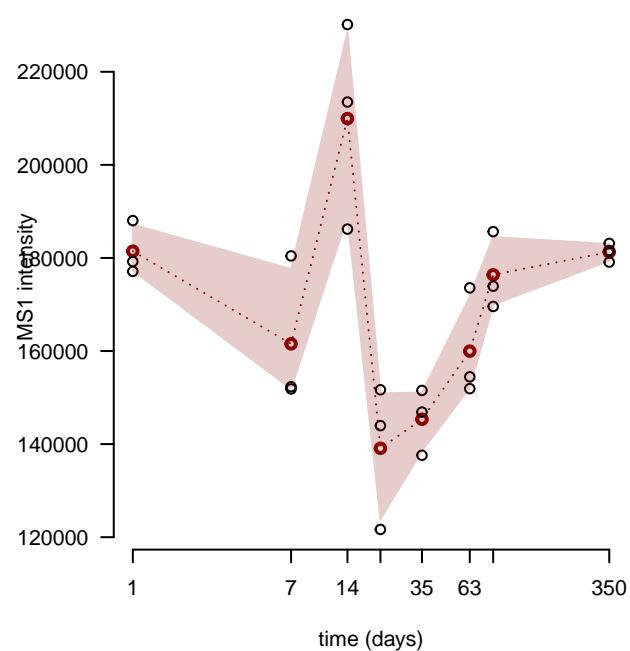

**Q9CQD4**  
**GN=Chmp1b2**  
charged multivesicular body protein 1B2

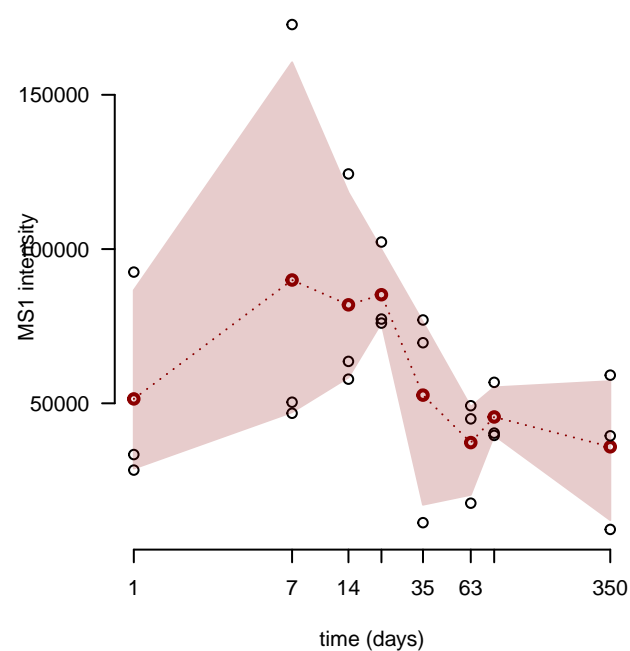

**Q9CQE0**  
**GN=Rnf138**  
ring finger protein 138

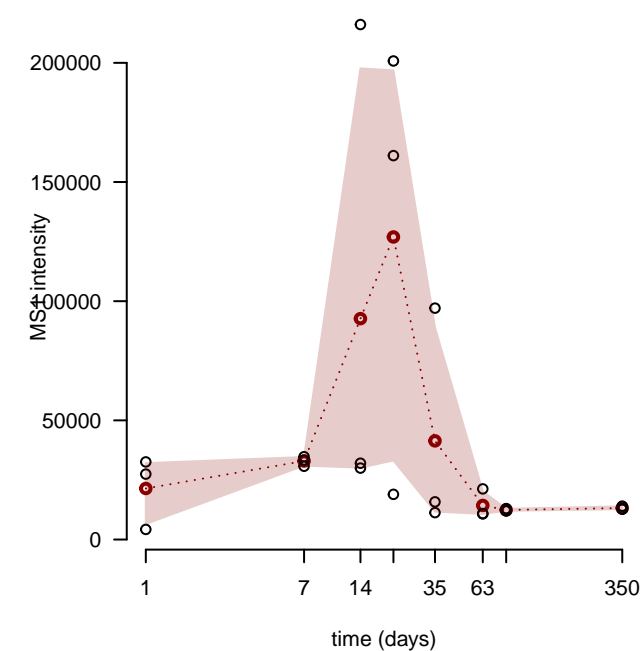



**Q9CQE1**  
**GN=Nipsnap3b**  
nipsnap homolog 3B

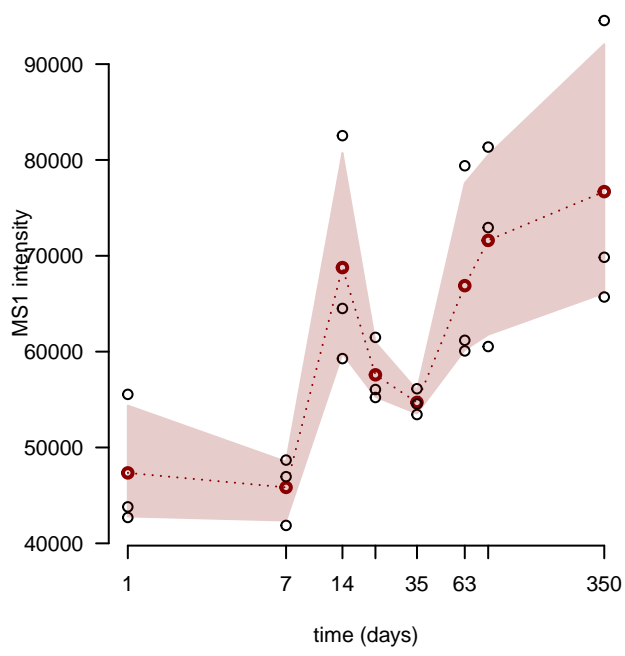

**Q9CQE2**  
**GN=Tmem223**  
transmembrane protein 223

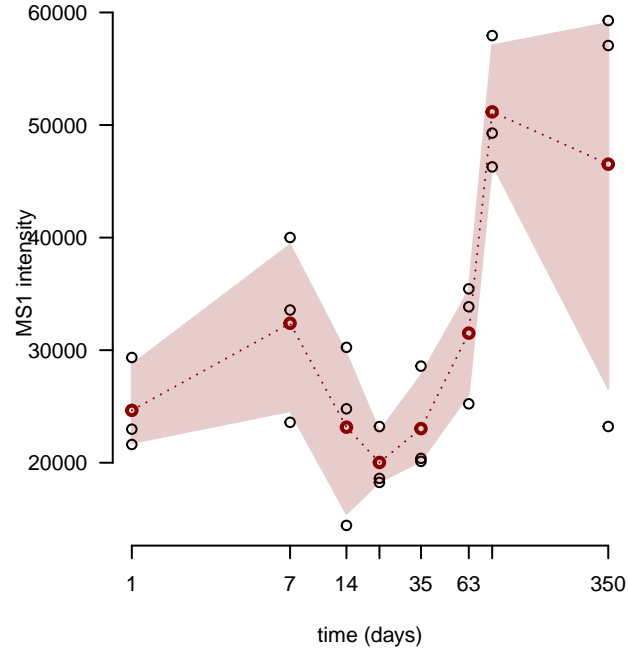

**Q9CQE3**  
**GN=Mrps17**  
mitochondrial ribosomal protein S17

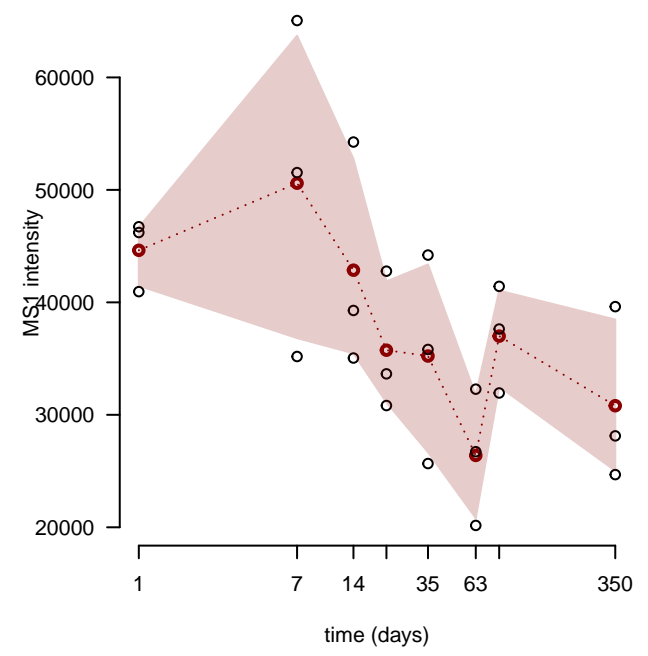

**Q9CQE5**  
**GN=Rgs10**  
regulator of G-protein signalling 10

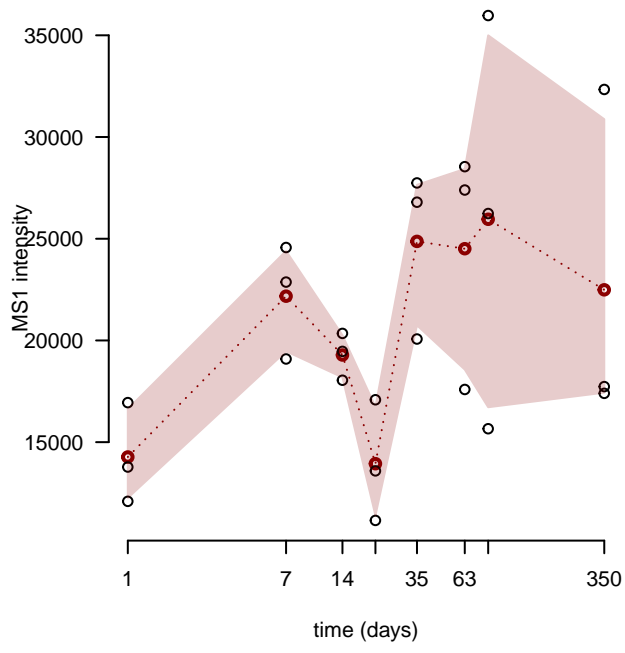

**Q9CQE6**  
**GN=Asf1a**  
anti-silencing function 1A histone chape ...

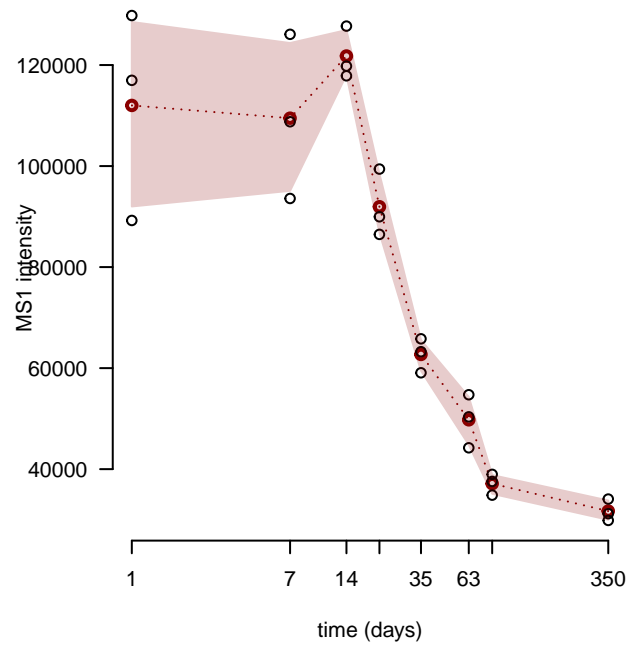

**Q9CQE7**  
**GN=Ergic3**  
ERGIC and golgi 3

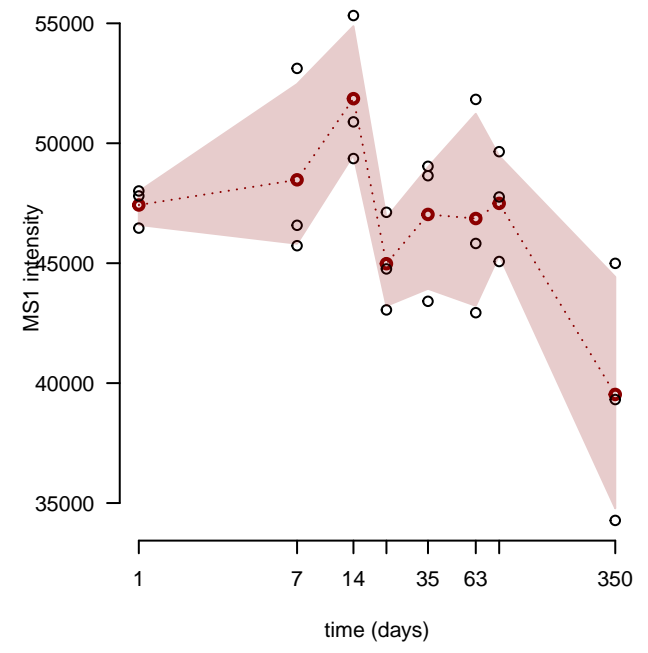

**Q9CQE8**  
**GN=RTRAF**

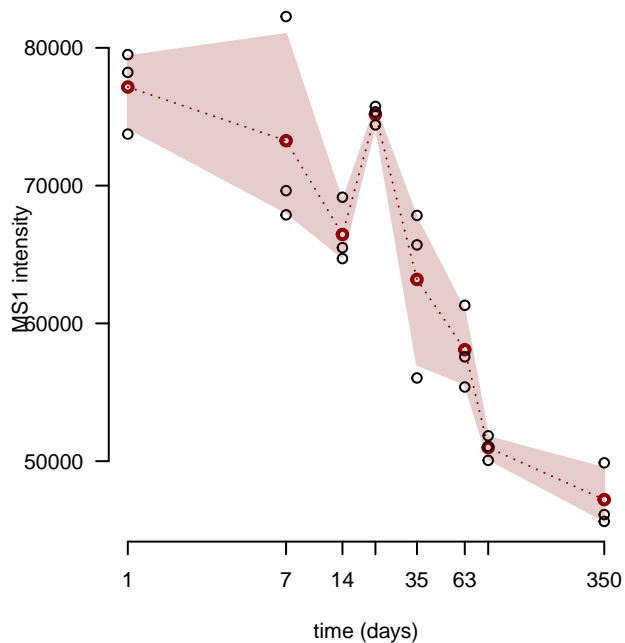

**Q9CQE9**  
**GN=Flywch2**  
FLYWCH family member 2

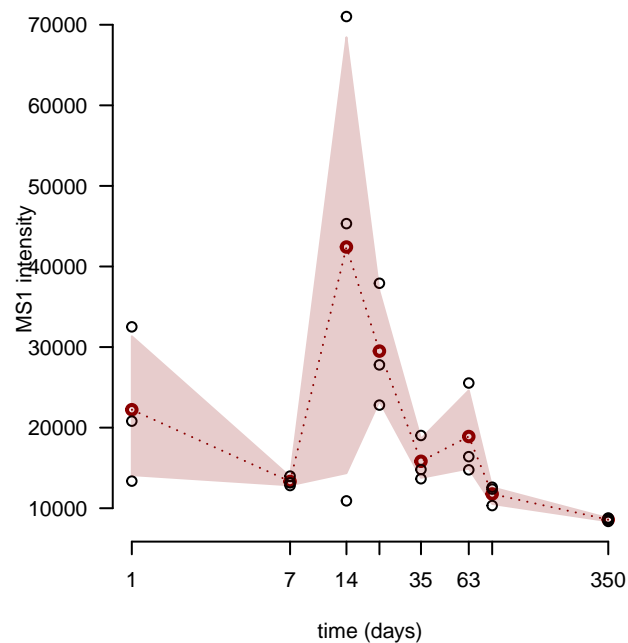

**Q9CQF0**  
**GN=Mrpl11**  
mitochondrial ribosomal protein L11

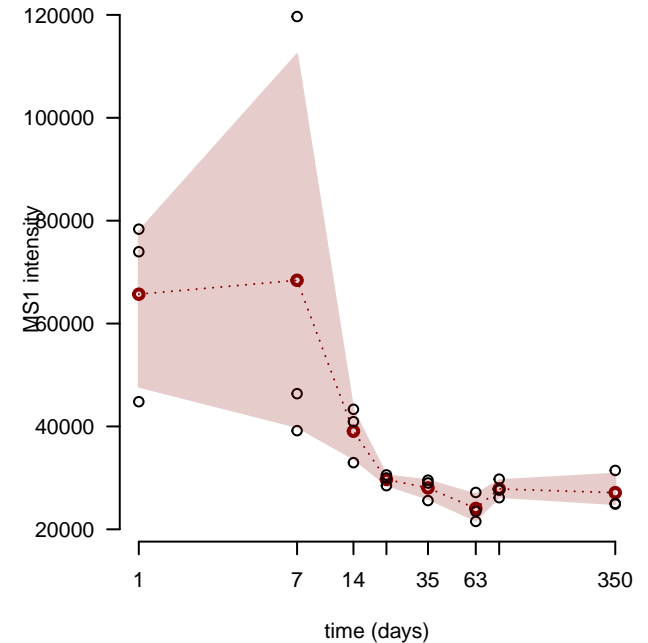

**Q9CQF3**  
GN=Nudt21  
nudix (nucleoside diphosphate linked moi ...

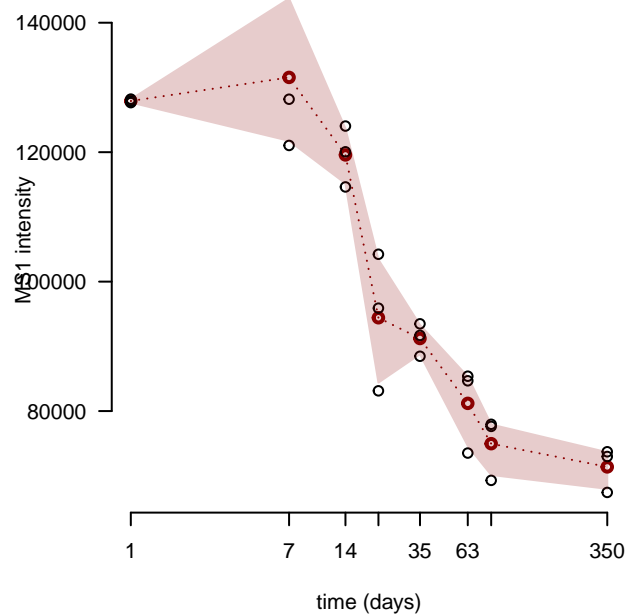

**Q9CQF4**  
GN=

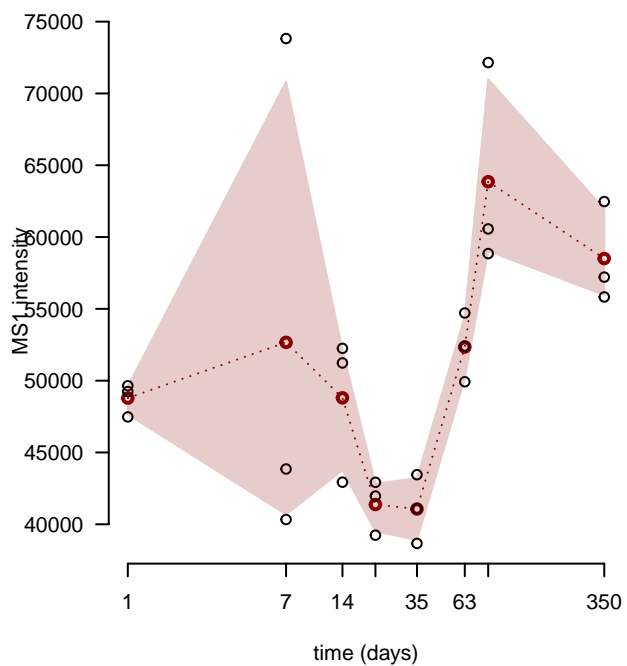

**Q9CQF6**  
GN=Aasdhppt  
aminoadipate-semialdehyde dehydrogenase- ...

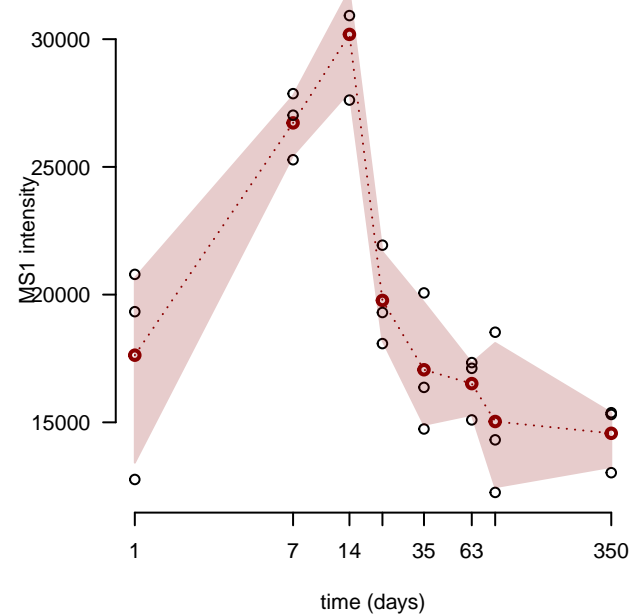

**Q9CQF8**  
GN=Mrp157  
mitochondrial ribosomal protein L57

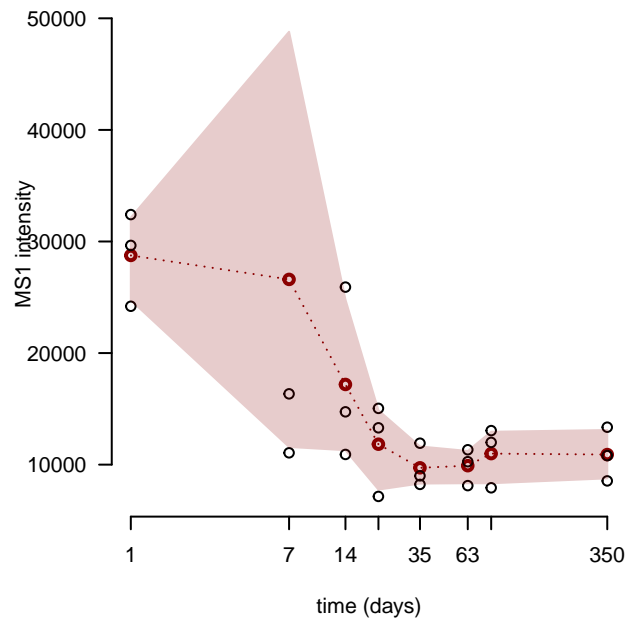

**Q9CQF9**  
GN=Pcyox1  
prenylcysteine oxidase 1

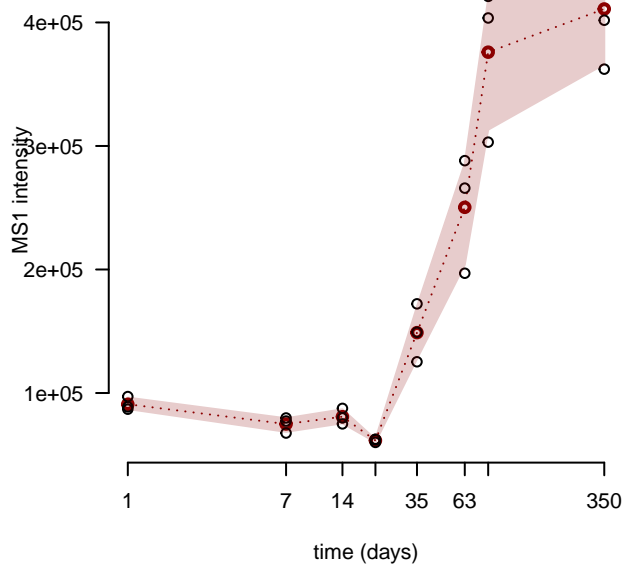

**Q9CQG2**  
GN=Mettl16  
methyltransferase like 16

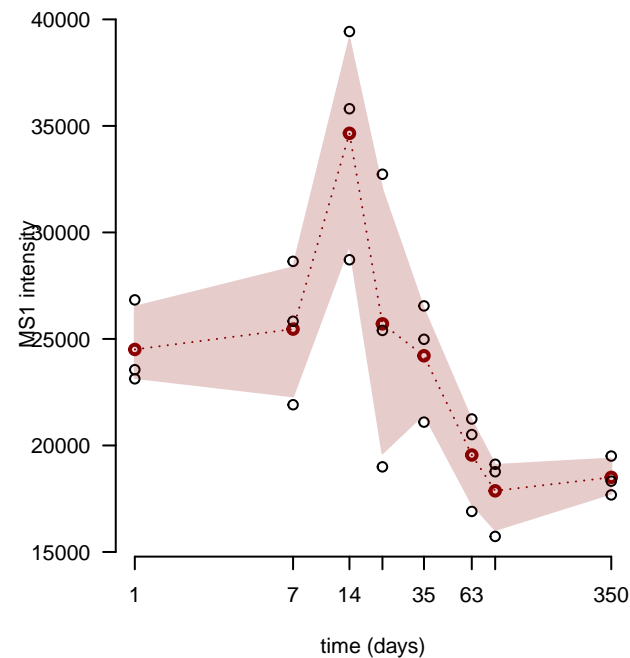

**Q9CQG6**  
GN=Tmem147  
transmembrane protein 147

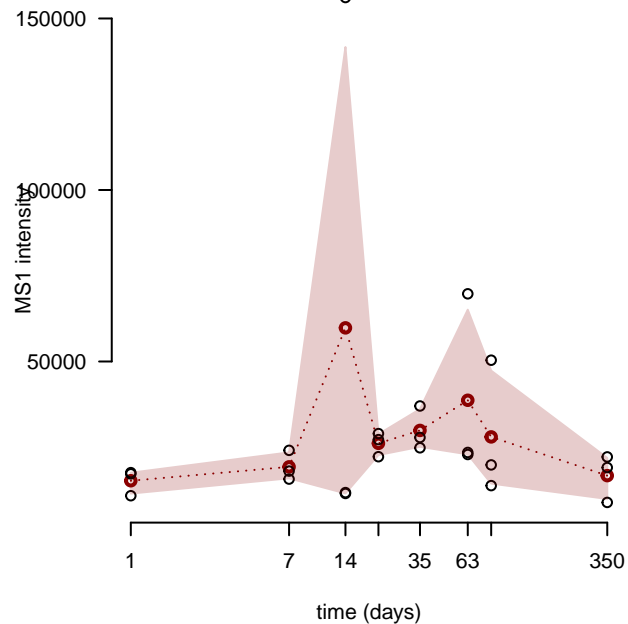

**Q9CQG9**  
GN=Tmem100  
transmembrane protein 100

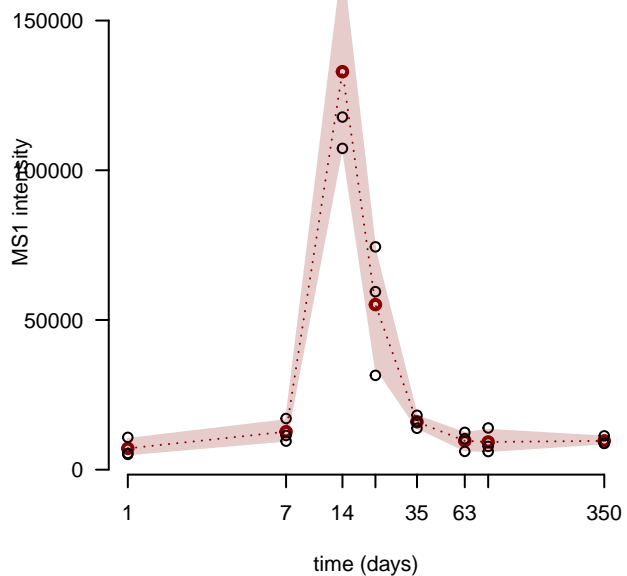

**Q9CQH3**  
GN=Ndufb5  
NADH:ubiquinone oxidoreductase subunit B ...

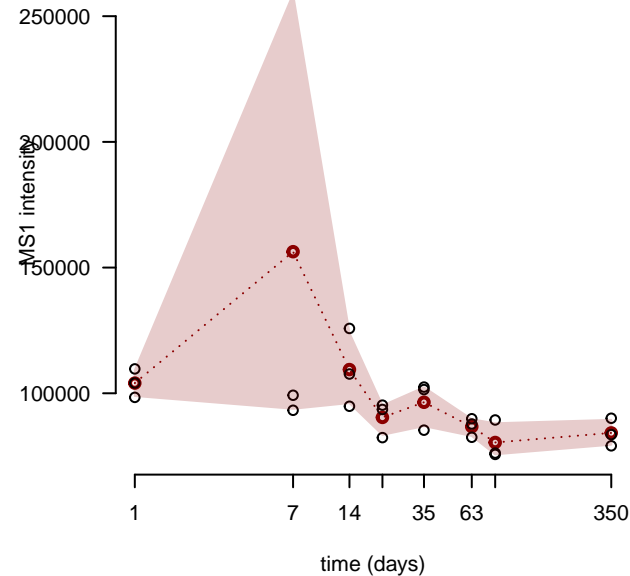

**Q9CQH7**  
GN=Btf3l4  
basic transcription factor 3-like 4

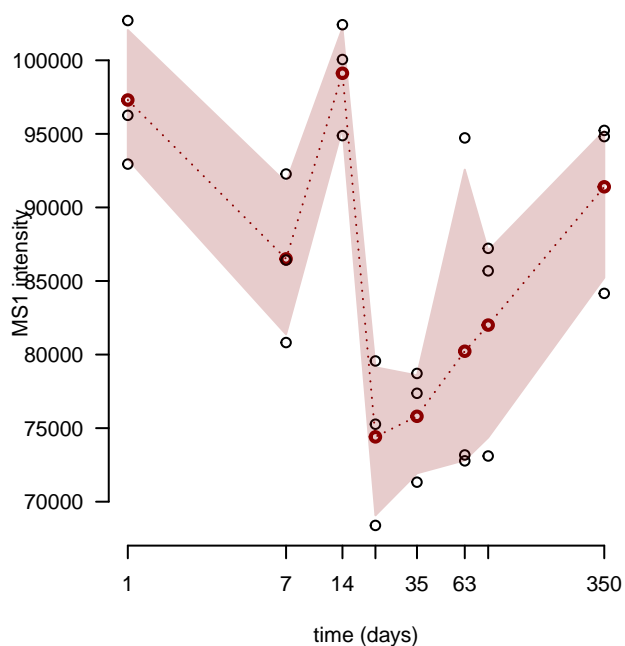

**Q9CQH8**  
GN=Rpp14  
ribonuclease P 14 subunit

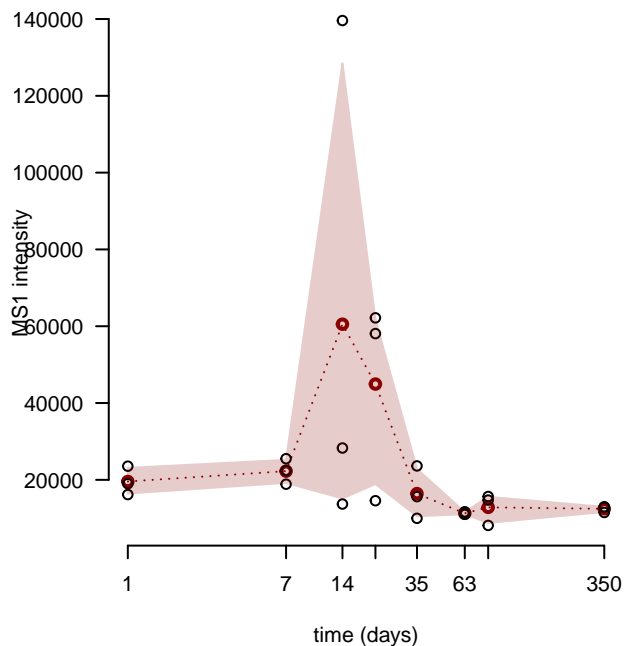

**Q9CQI3**  
GN=Gmfb  
glia maturation factor, beta

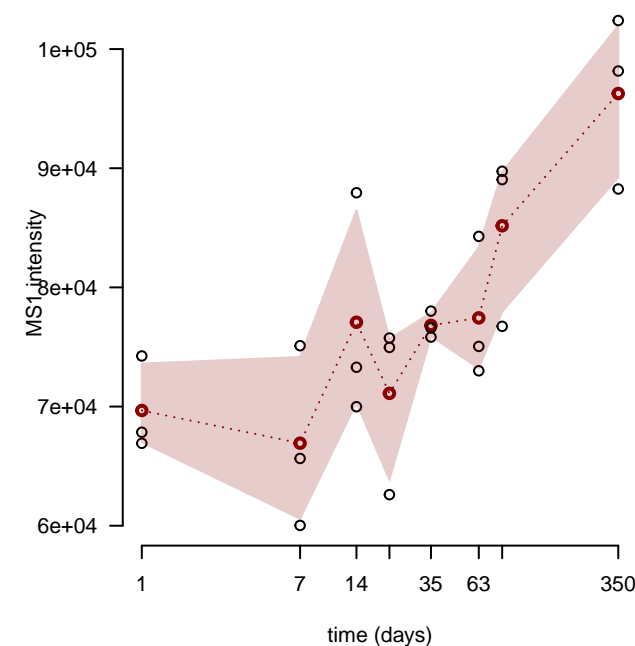

**Q9CQI6**  
GN=Cot1l  
coactosin-like 1 (Dictyostelium)

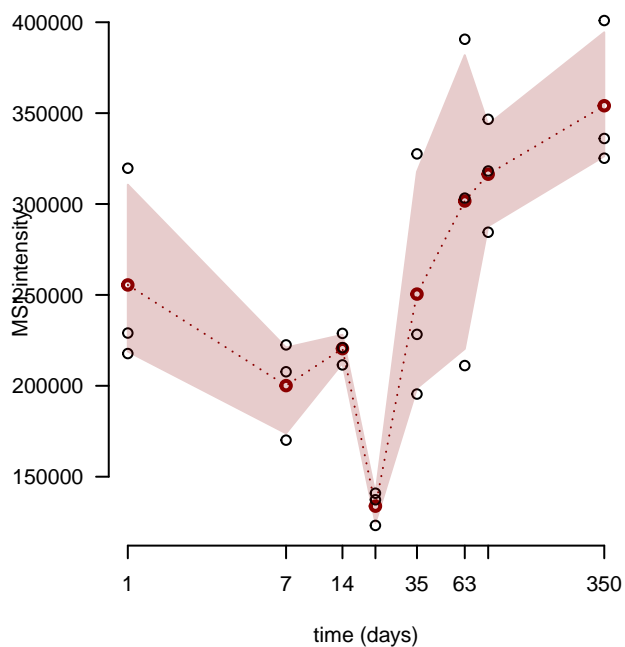

**Q9CQI7**  
GN=Snrpb2  
U2 small nuclear ribonucleoprotein B

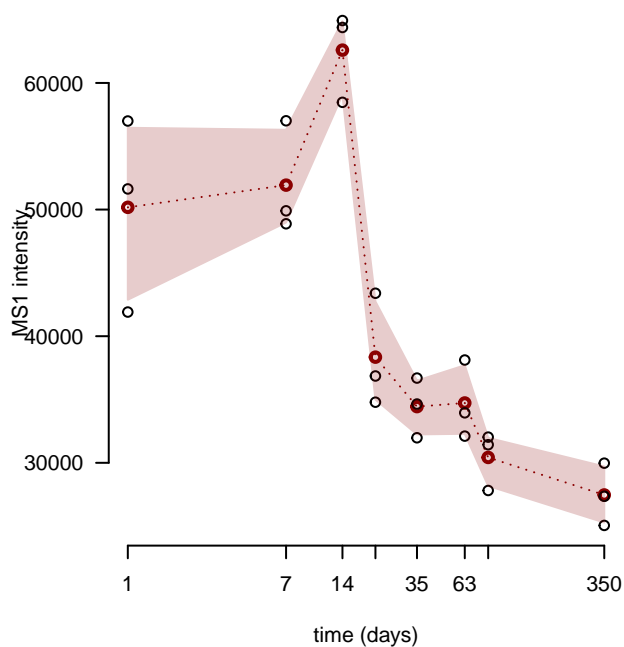

**Q9CQI9**  
GN=Med30  
mediator complex subunit 30

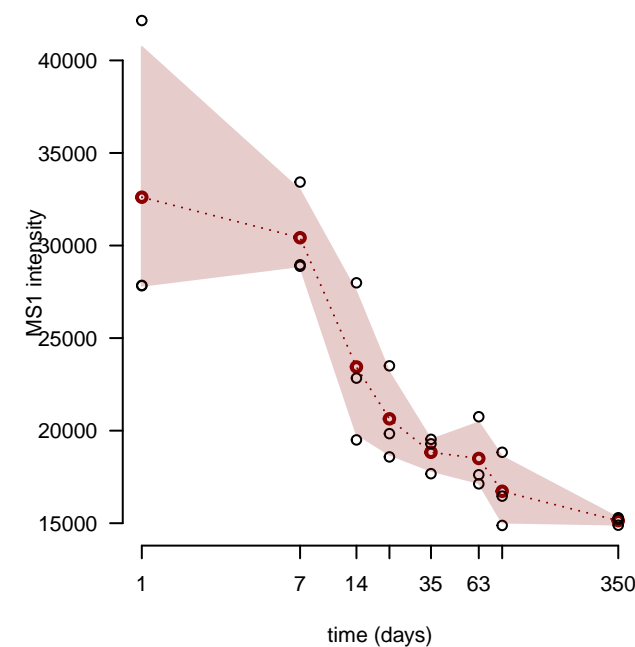

**Q9CQJ2**  
GN=Pih1d1  
PIH1 domain containing 1

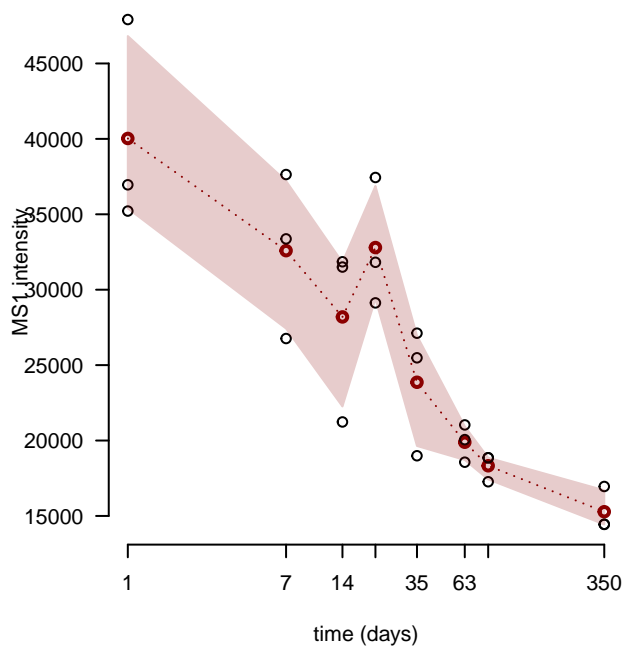

**Q9CQJ4**  
GN=Rnf2  
ring finger protein 2

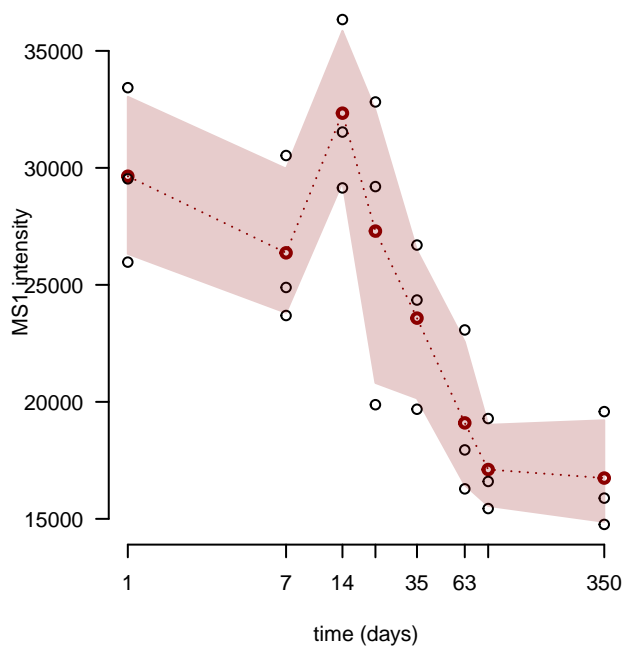

**Q9CQJ6**  
GN=Denr  
density-regulated protein

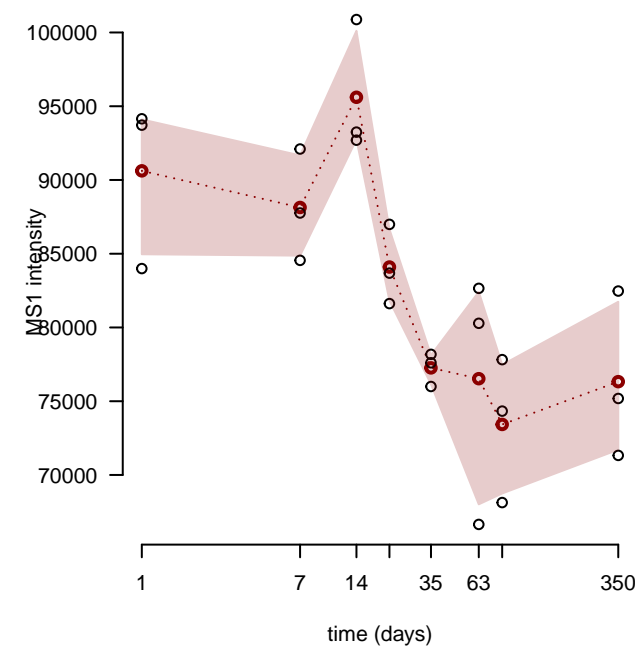

**Q9CQJ7**  
**GN=Pttg1**  
pituitary tumor-transforming gene 1

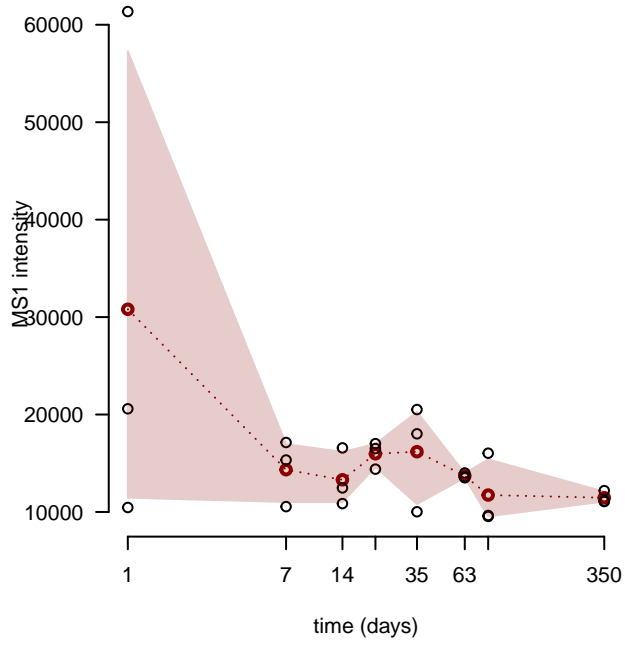

**Q9CQJ8**  
**GN=Ndufb9**  
NADH:ubiquinone oxidoreductase subunit B ...

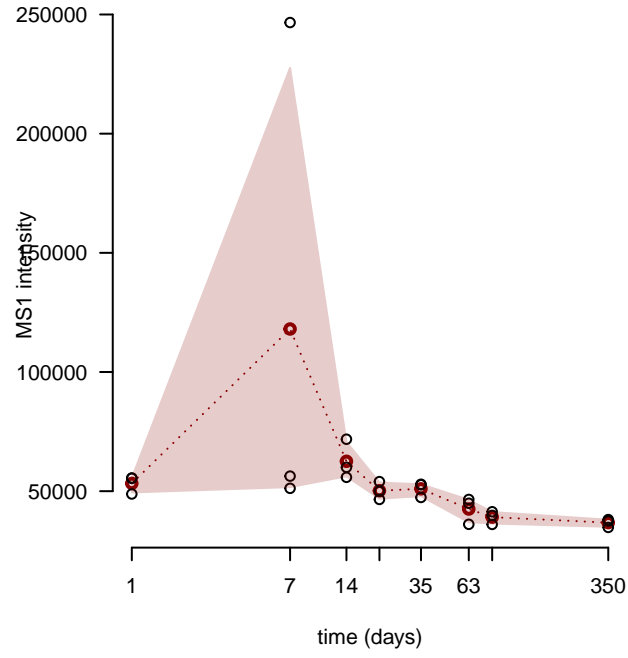

**Q9CQK7**  
**GN=Rwdd1**  
RWD domain containing 1

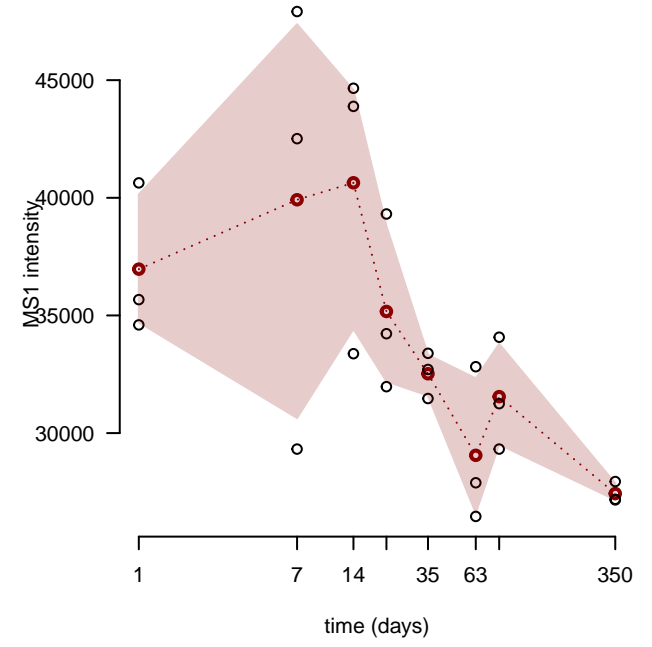

**Q9CQL0**  
**GN=Mettl21A**

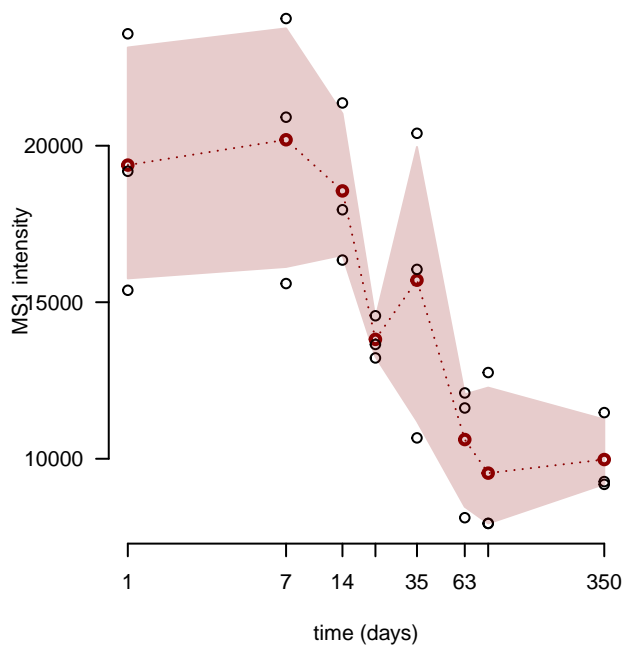

**Q9CQL4**  
**GN=Mrpl20**  
mitochondrial ribosomal protein L20

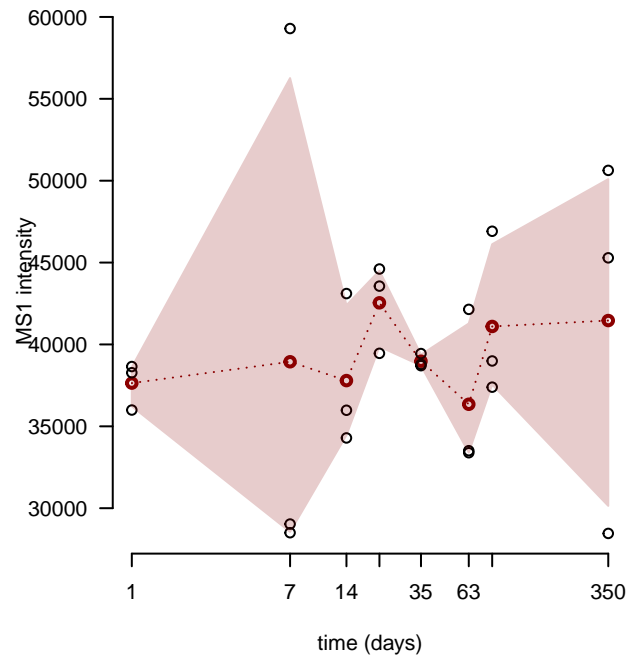

**Q9CQL5**  
**GN=Mrpl18**  
mitochondrial ribosomal protein L18

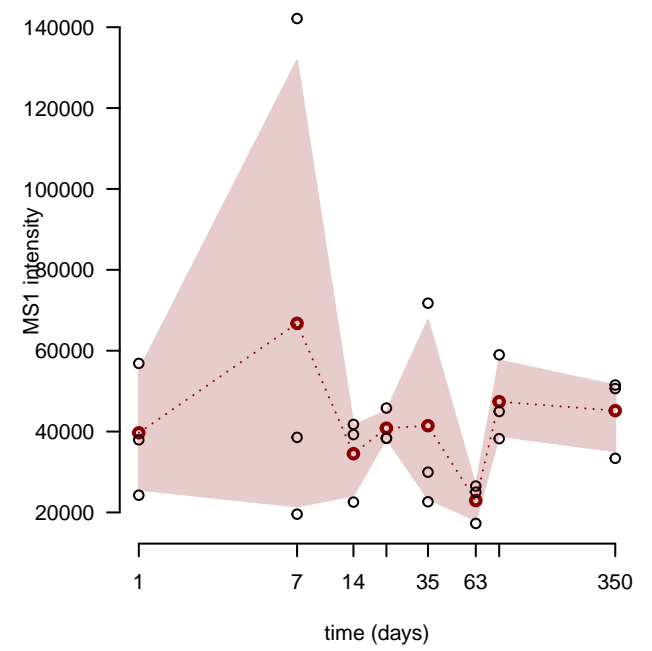

**Q9CQL7**  
**GN=Mrfap1**  
Morf4 family associated protein 1

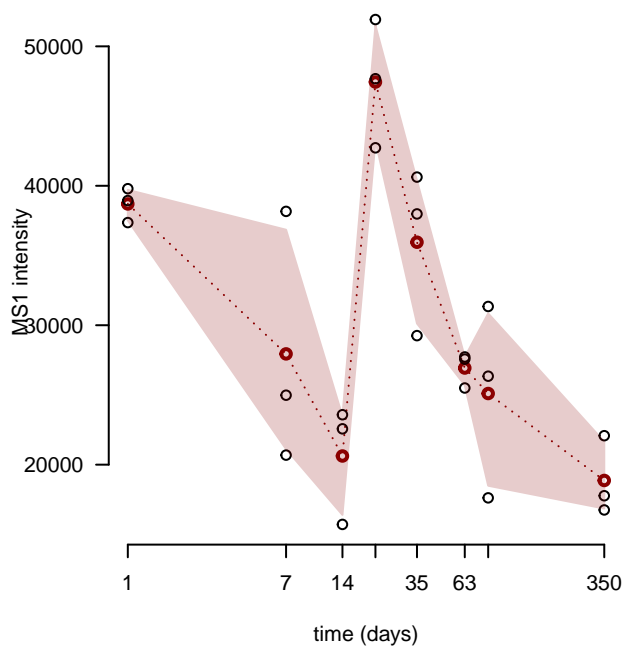

**Q9CQM5**  
**GN=Txndc17**  
thioredoxin domain containing 17

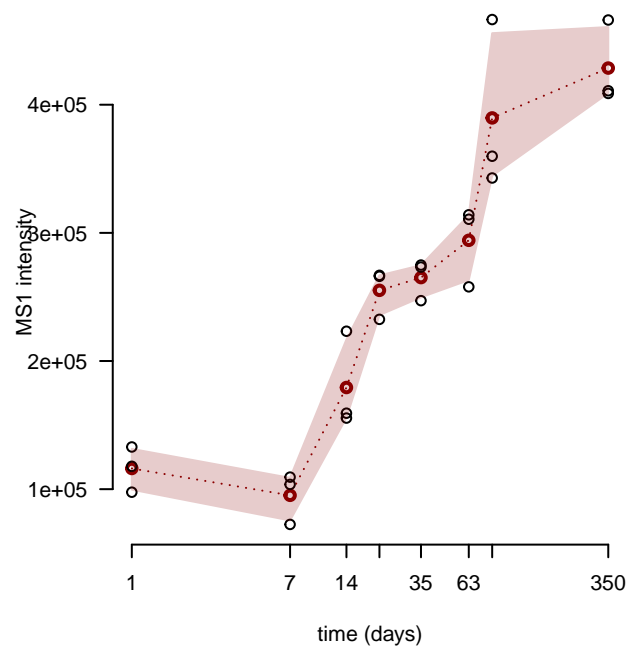

**Q9CQM9**  
**GN=Glrx3**  
glutaredoxin 3

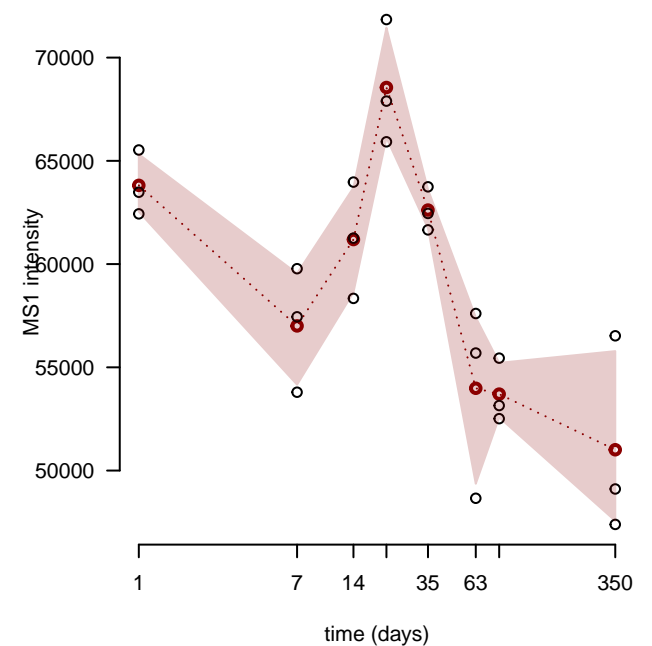

**Q9CQN1**  
**GN=Trap1**  
TNF receptor-associated protein 1

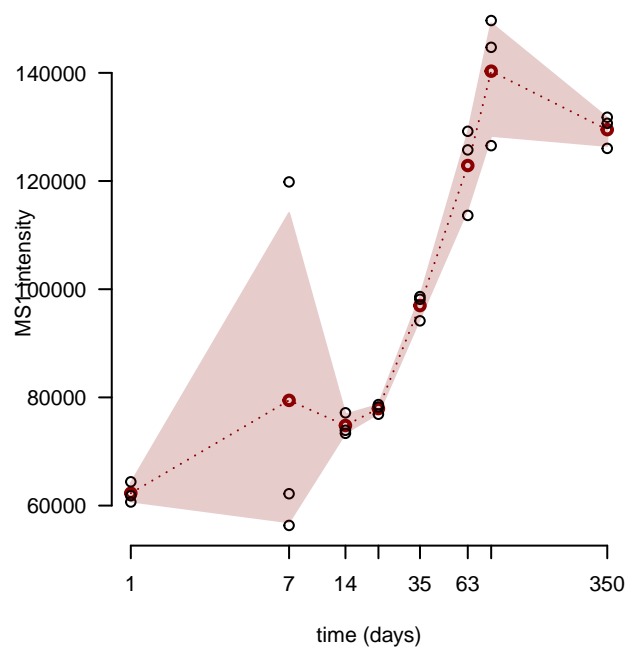

**Q9CQN6**  
**GN=Tmem14c**  
transmembrane protein 14C

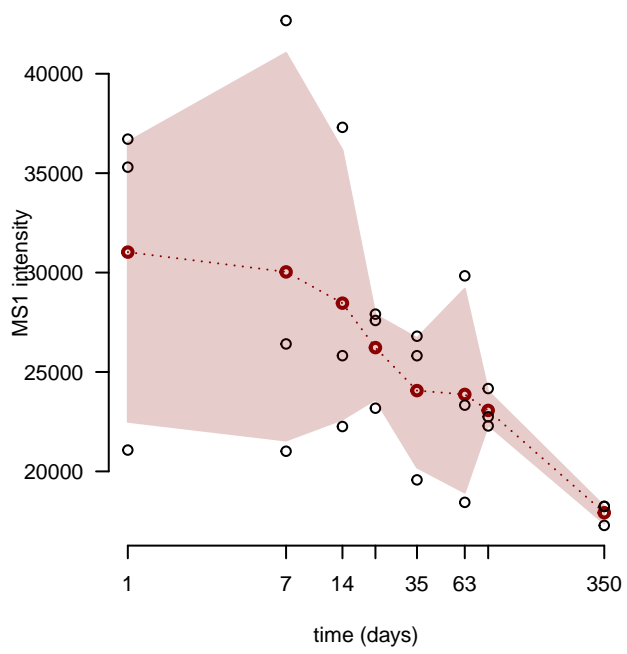

**Q9CQN7**  
**GN=Mrpl41**  
mitochondrial ribosomal protein L41

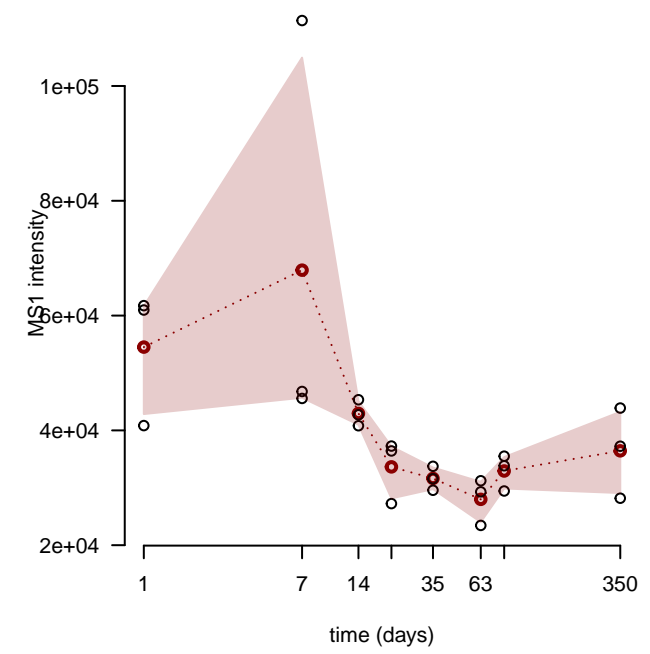

**Q9CQP0**  
**GN=Mrpl33**  
mitochondrial ribosomal protein L33

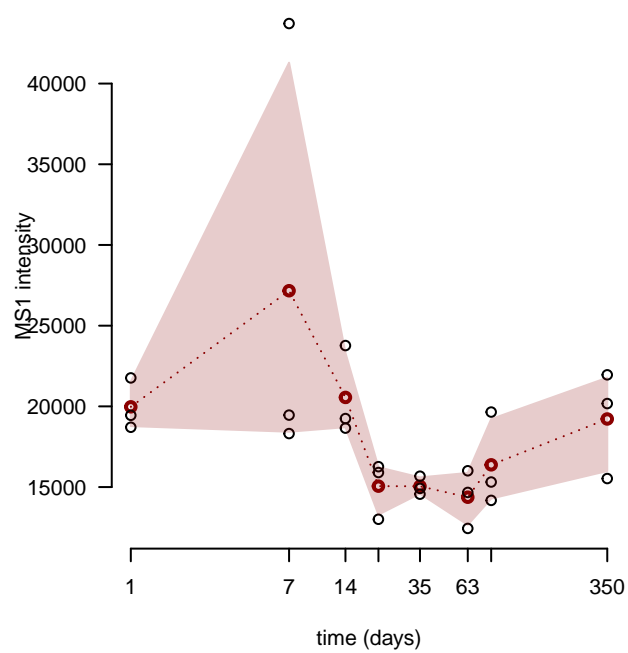

**Q9CQP2**  
**GN=Trappc2**  
trafficking protein particle complex 2

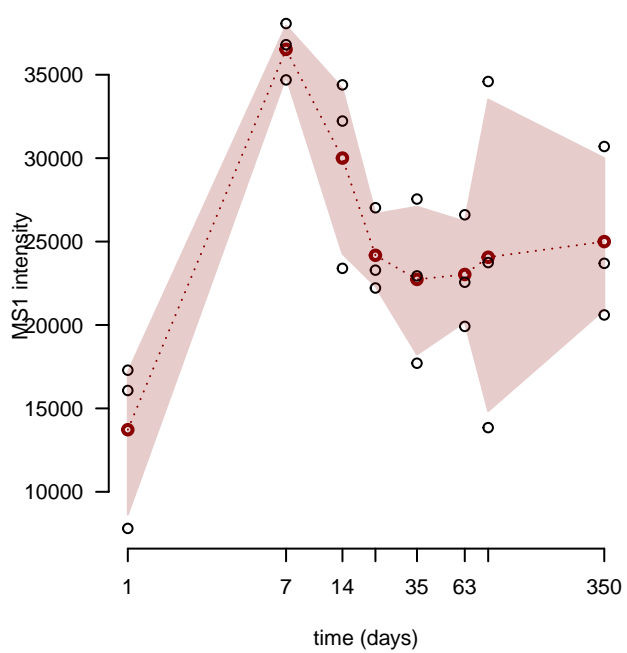

**Q9CQQ0**  
**GN=Smim8**  
small integral membrane protein 8

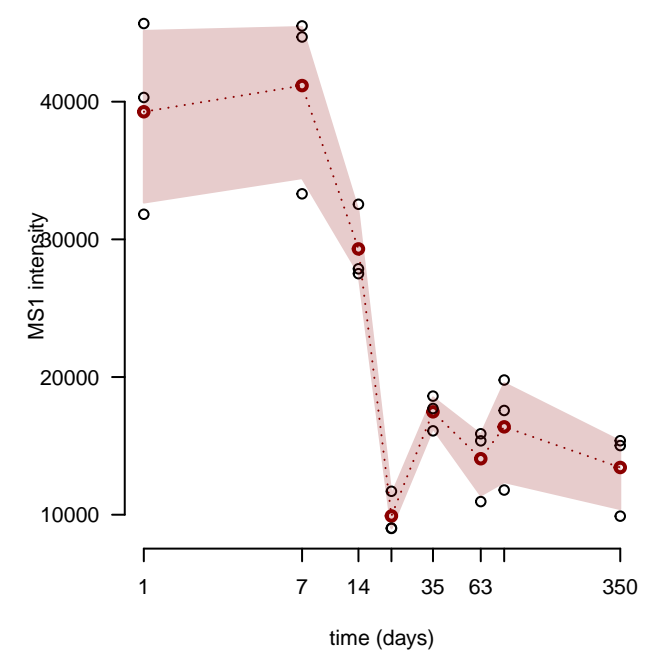

**Q9CQQ4**  
**GN=Gemin2**  
gem nuclear organelle associated protein ...

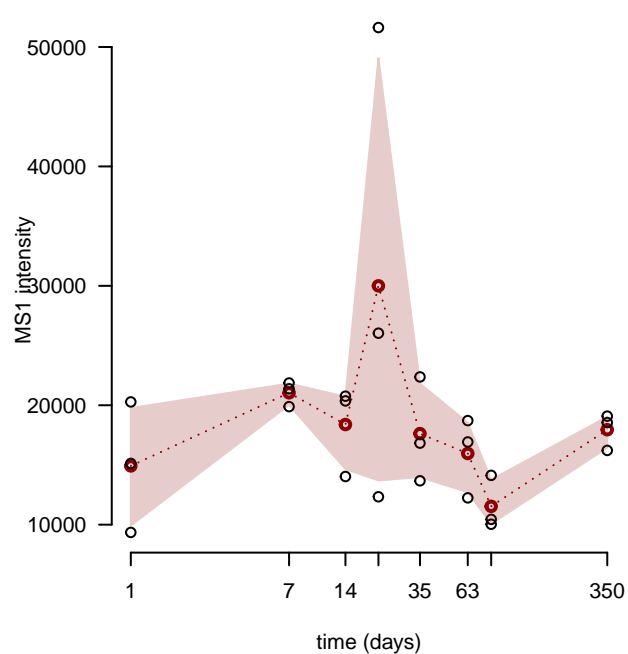

**Q9CQQ7**  
**GN=Atp5pb**  
ATP synthase peripheral stalk-membrane s ...

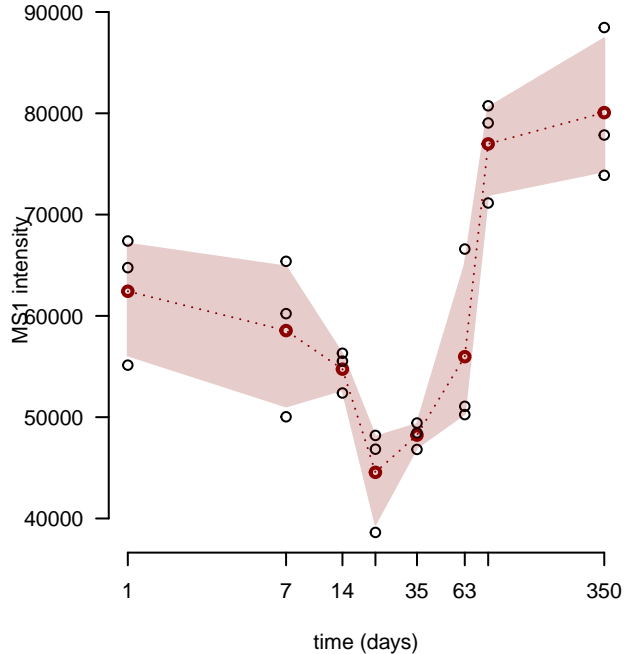

**Q9CQQ8**  
**GN=Lsm7**  
LSM7 homolog, U6 small nuclear RNA and m ...

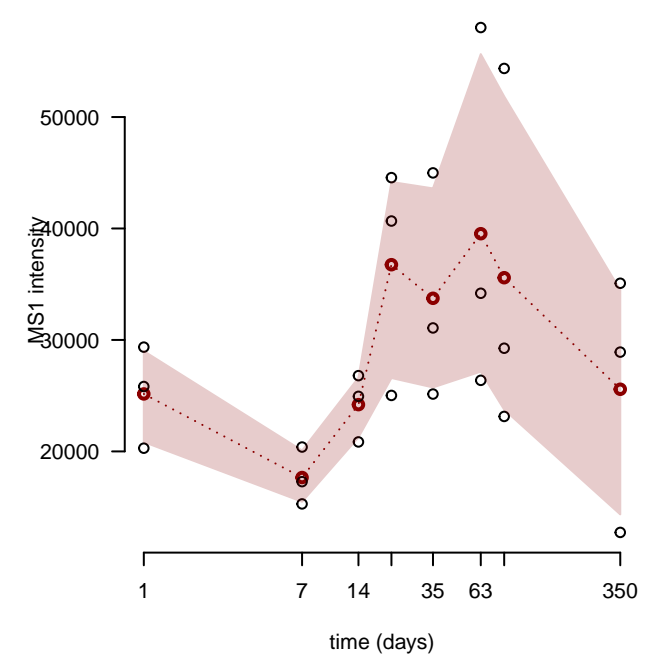

**Q9CQR2**  
**GN=Rps21**  
ribosomal protein S21

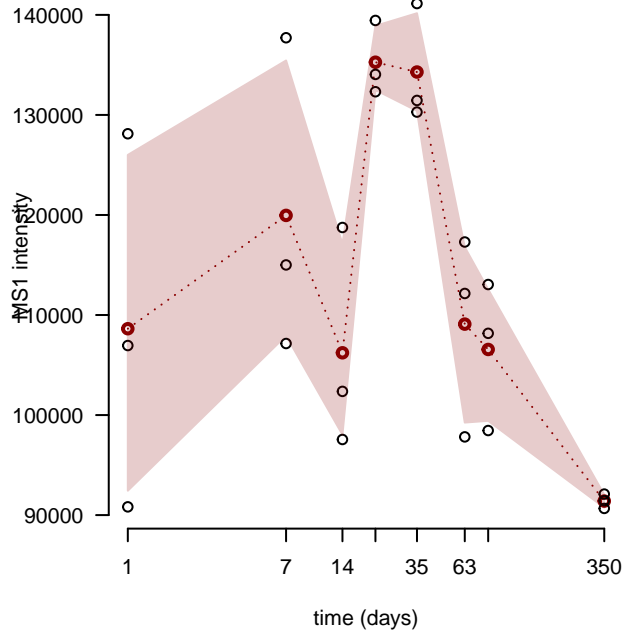

**Q9CQR4**  
**GN=Acot13**  
acyl-CoA thioesterase 13

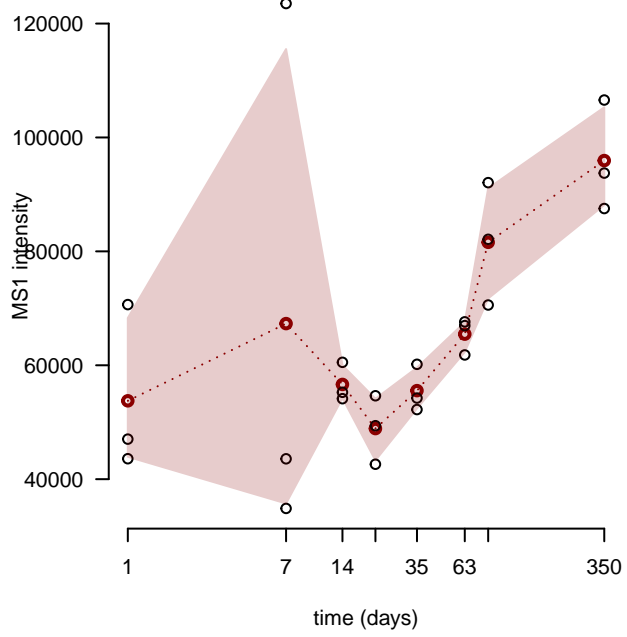

**Q9CQR6**  
**GN=Ppp6c**  
protein phosphatase 6, catalytic subunit

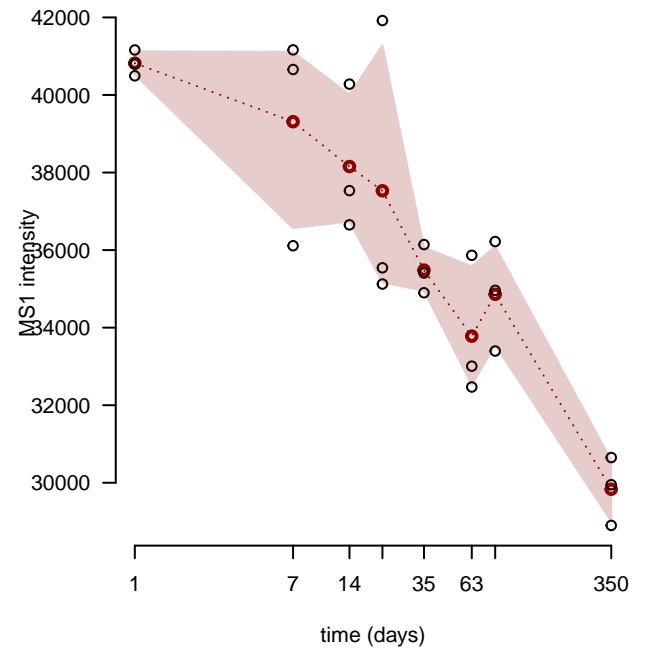

**Q9CQR7**  
**GN=Psenen**  
presenilin enhancer gamma secretase subu ...

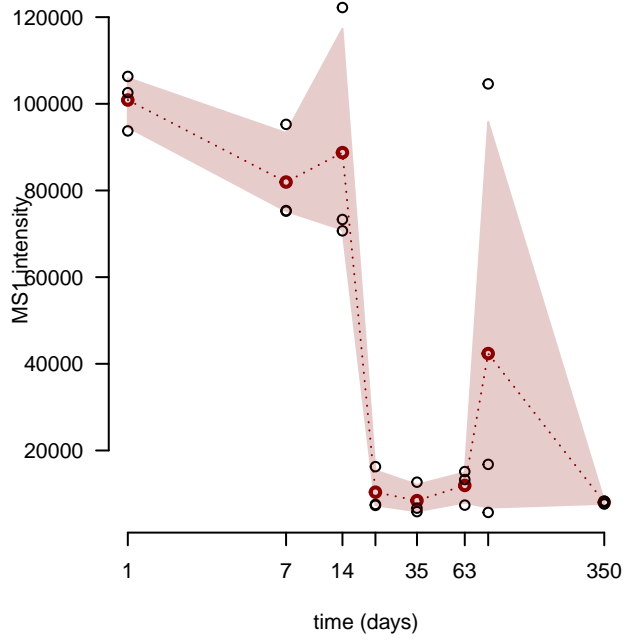

**Q9CQS2**  
**GN=Nop10**  
NOP10 ribonucleoprotein

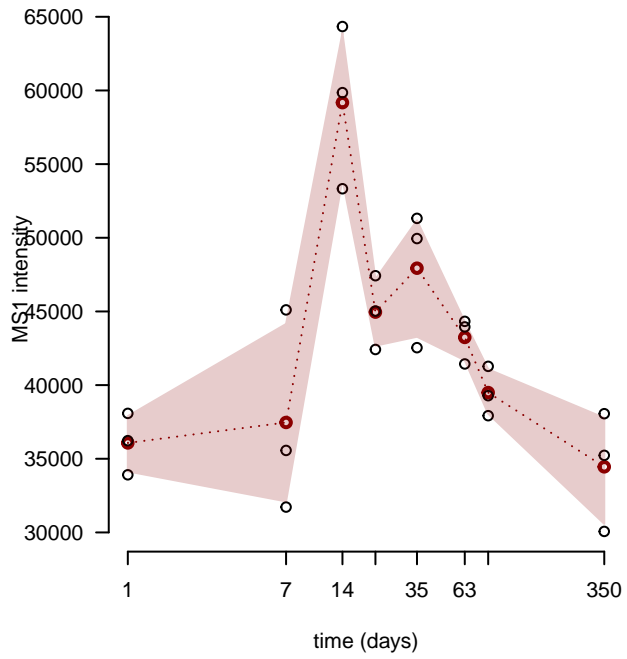

**Q9CQS4**  
**GN=Slc25a46**  
solute carrier family 25, member 46

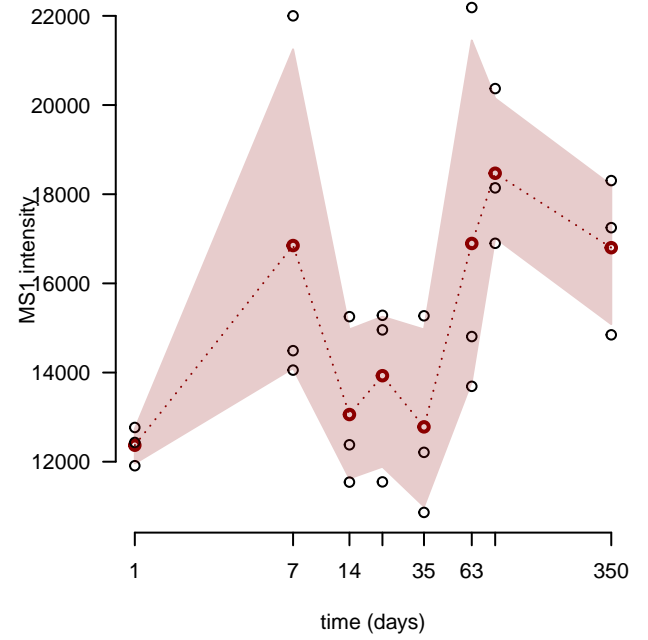

**Q9CQS8**  
**GN=Sec61b**  
Sec61 beta subunit

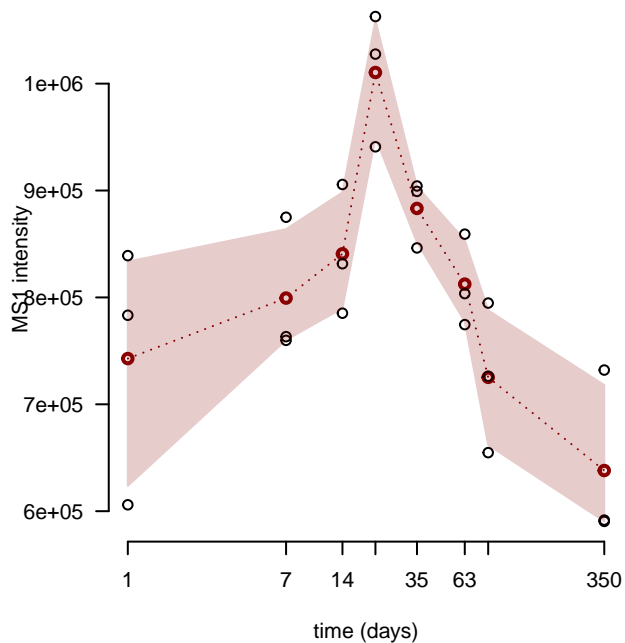

**Q9CQS9**  
**GN=Haus2**  
HAUS augmin-like complex, subunit 2

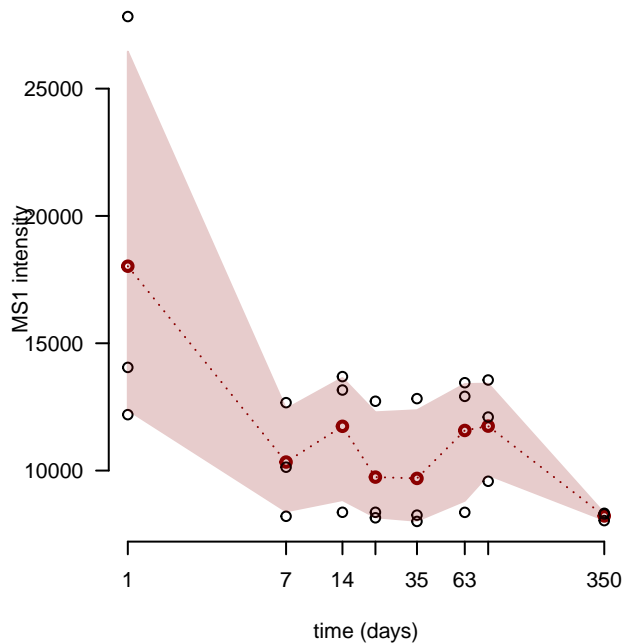

**Q9CQT1**  
**GN=Mri1**  
methylthioribose-1-phosphate isomerase 1

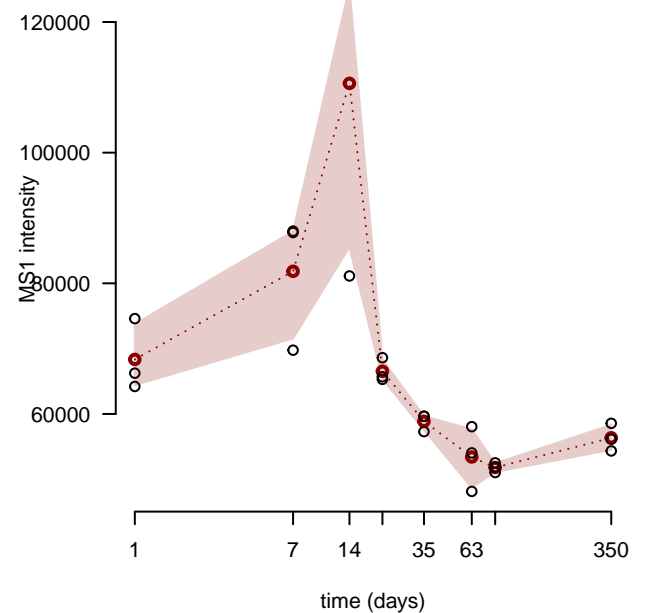

**Q9CQT2**  
GN=Rbm7  
RNA binding motif protein 7

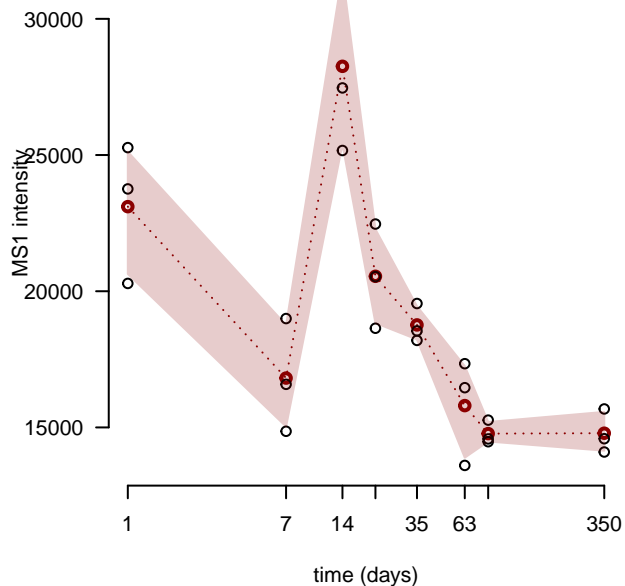

**Q9CQT7**  
GN=Desi1  
desumoylating isopeptidase 1

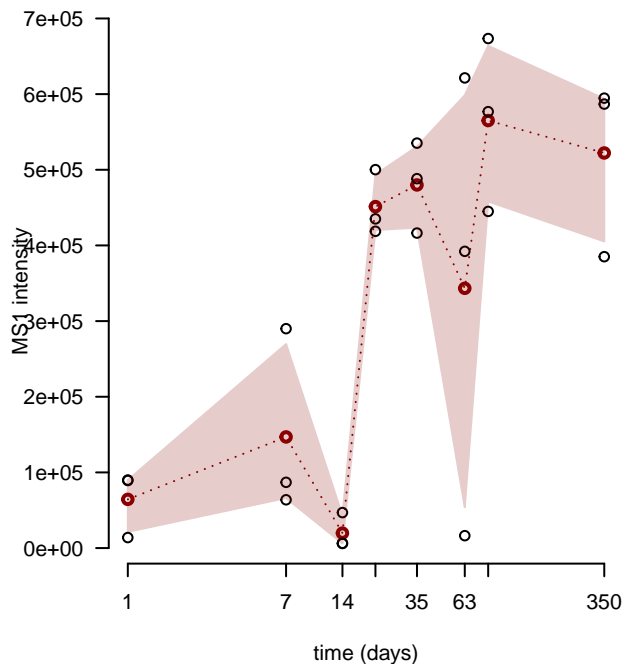

**Q9CQT9**  
GN=Rab5if  
RAB5 interacting factor

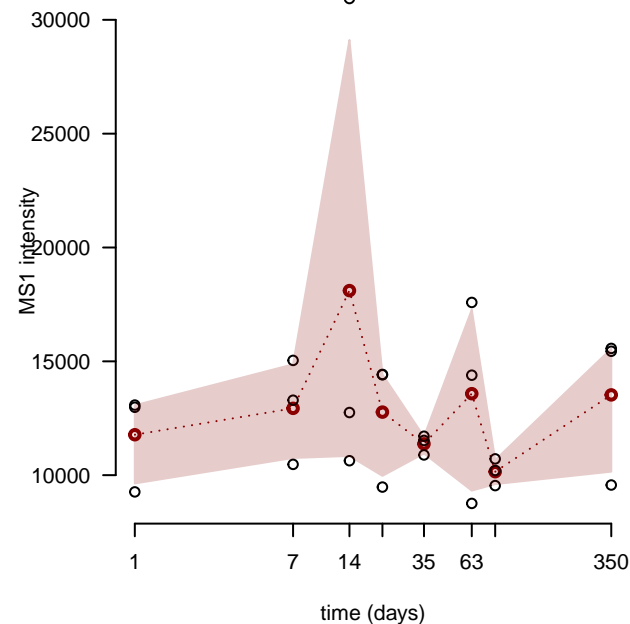

**Q9CQU0**  
GN=Txndc12  
thioredoxin domain containing 12 (endoplasmic ...

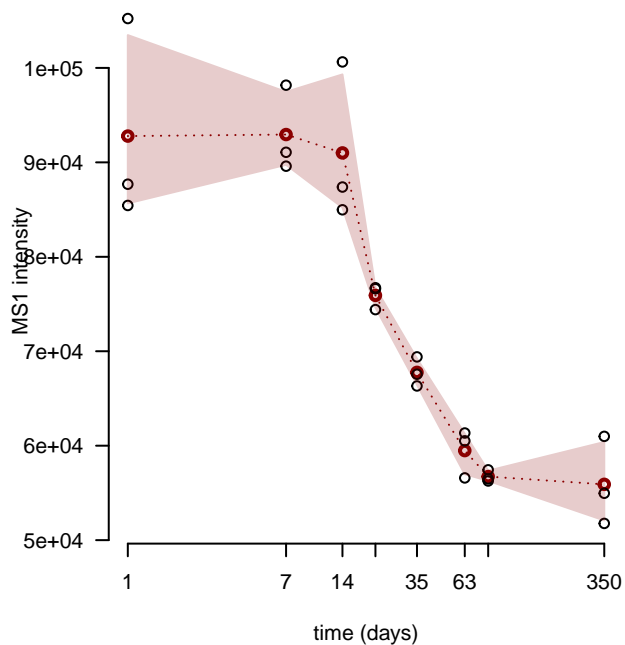

**Q9CQU3**  
GN=Rer1  
retention in endoplasmic reticulum sorti ...

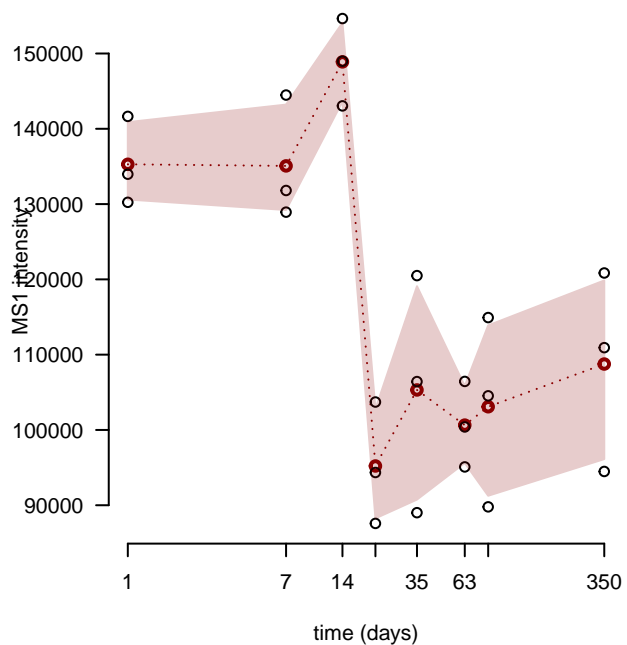

**Q9CQU5**  
GN=Zwint  
ZW10 interactor

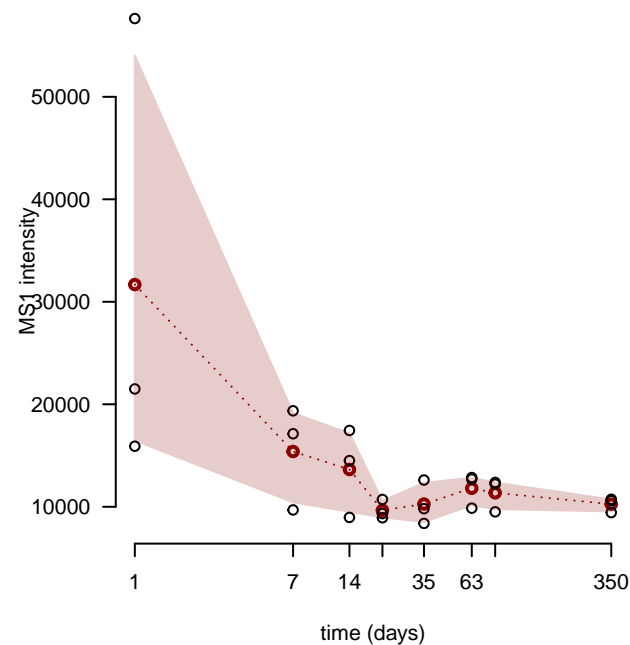

**Q9CQV1**  
GN=Pam16  
presequence translocase-associated moto ...

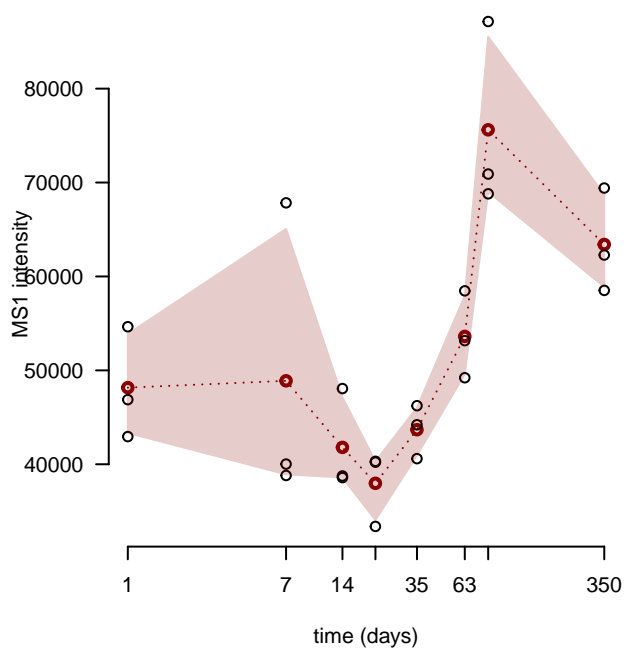

**Q9CQV4**  
GN=Retreg3  
reticulophagy regulator family member 3

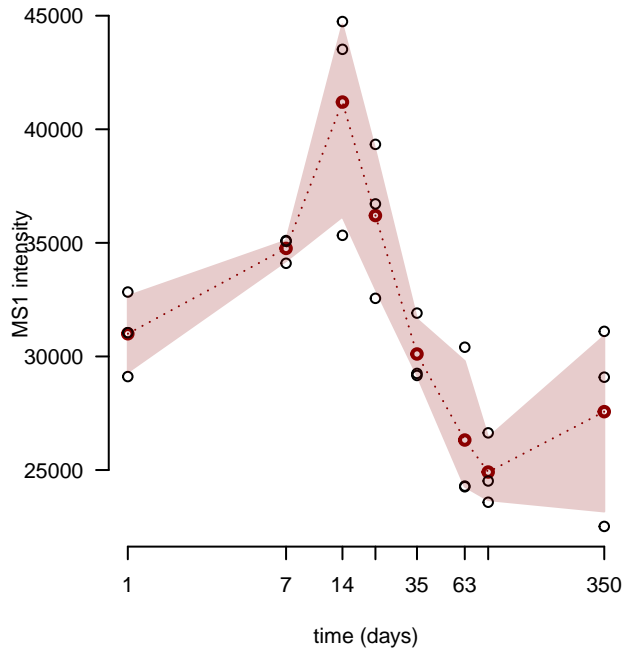

**Q9CQV5**  
GN=Mrps24  
mitochondrial ribosomal protein S24

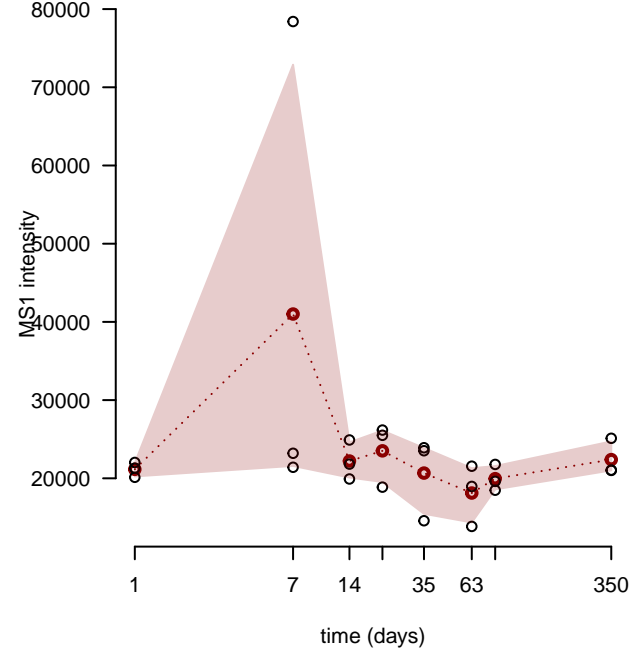

**Q9CQV6**  
**GN=Map1lc3b**  
microtubule-associated protein 1 light c ...

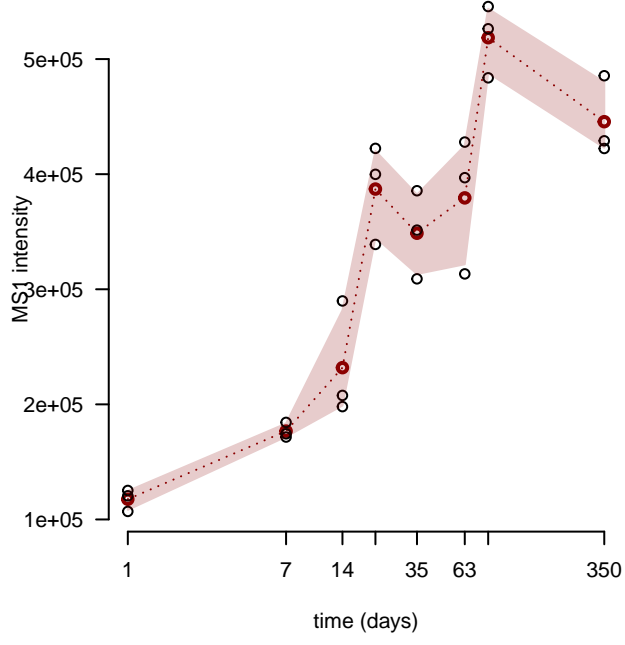

**Q9CQV7**  
**GN=Dnajc19**  
DnaJ heat shock protein family (Hsp40) m ...

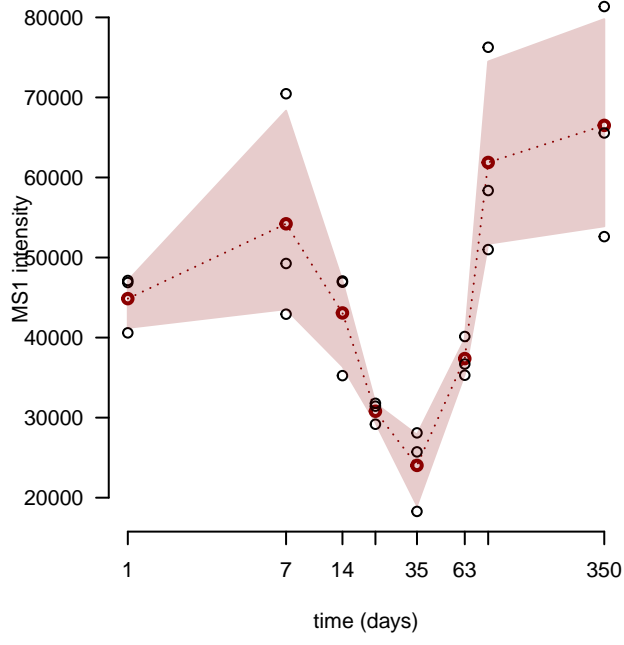

**Q9CQV8**  
**GN=Ywhab**  
tyrosine 3-monoxygenase/tryptophan 5-mo ...

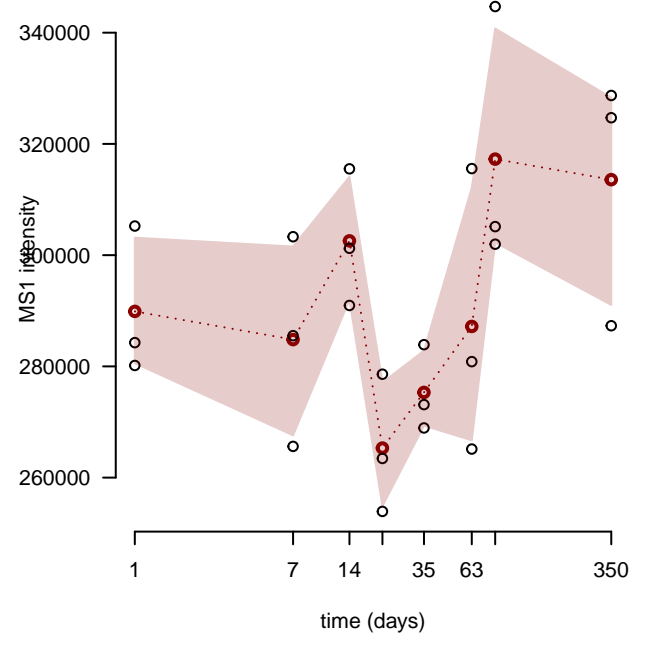

**Q9CQW0**  
**GN=Emc6**  
ER membrane protein complex subunit 6

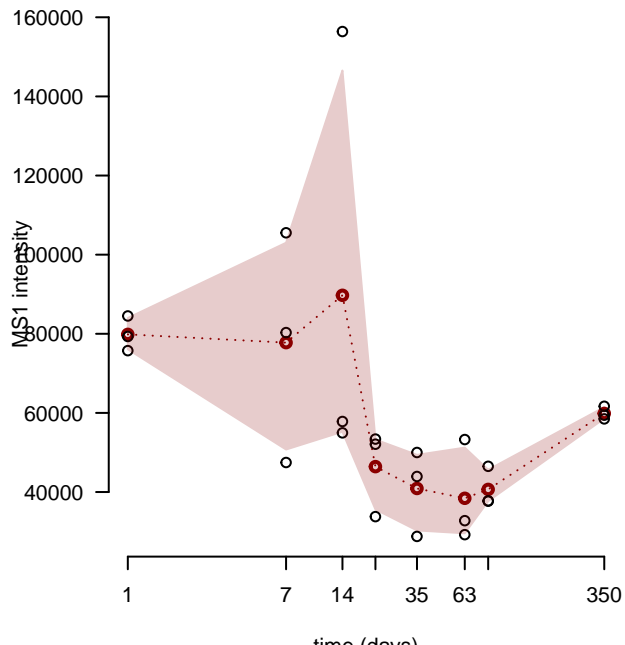

**Q9CQW1**  
**GN=Ykt6**  
YKT6 v-SNARE homolog (S. cerevisiae)

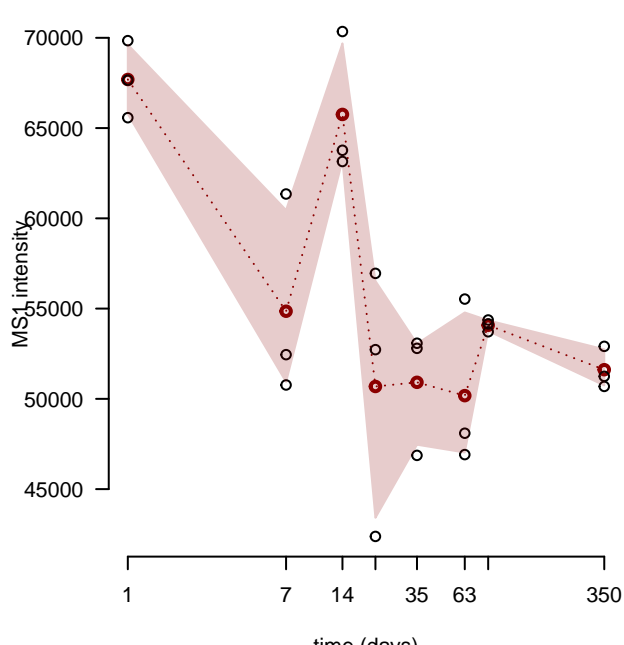

**Q9CQW2**  
**GN=Arl8b**  
ADP-ribosylation factor-like 8B

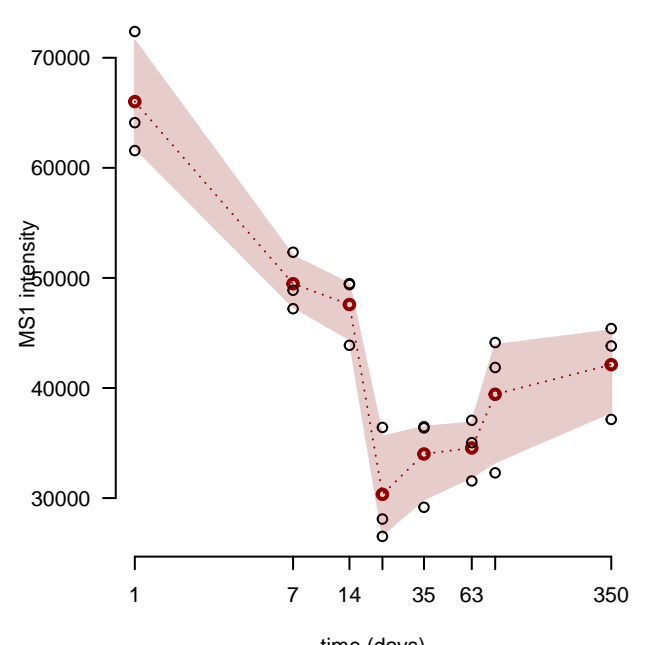

**Q9CQW5**  
**GN=Lgals2**  
lectin, galactose-binding, soluble 2

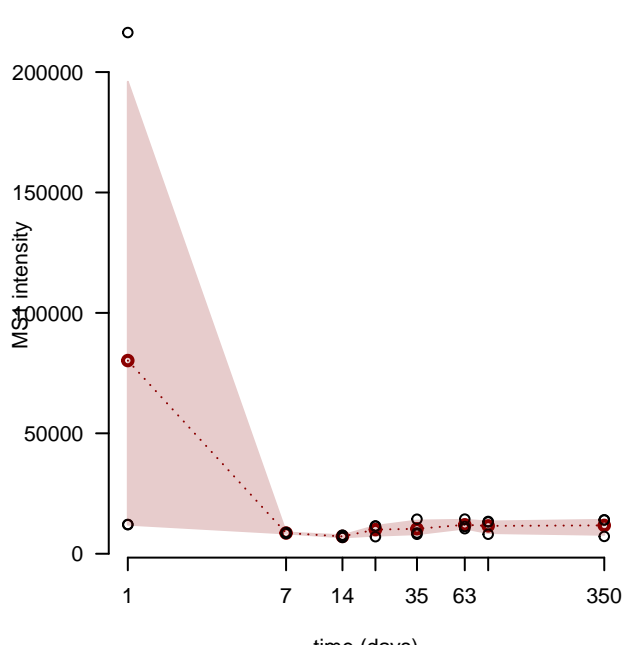

**Q9CQW9**  
**GN=Ifitm3**  
interferon induced transmembrane protein ...

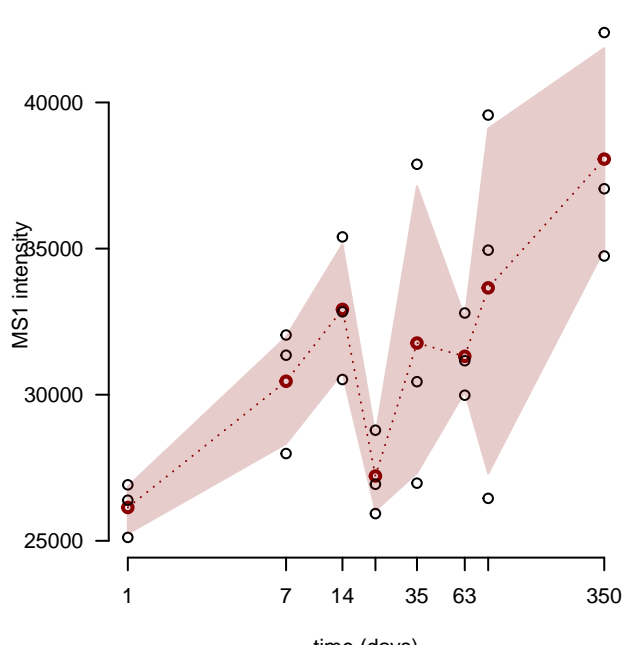

**Q9CQX0**  
**GN=Otub2**  
OTU domain, ubiquitin aldehyde binding 2

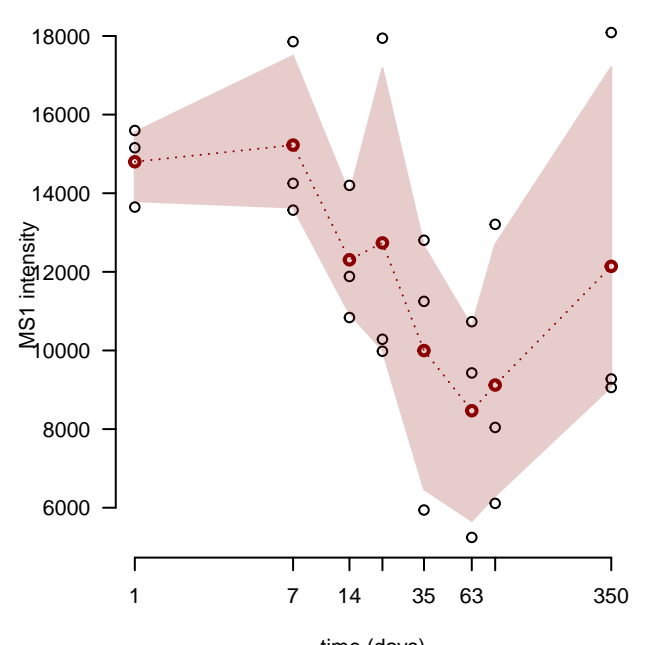



**Q9CQX2**  
GN=Cyb5b  
cytochrome b5 type B

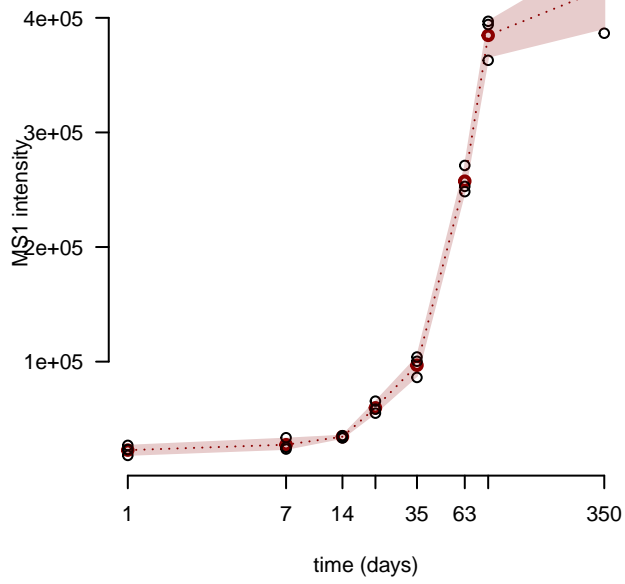

**Q9CQX4**  
GN=Pclaf  
PCNA clamp associated factor

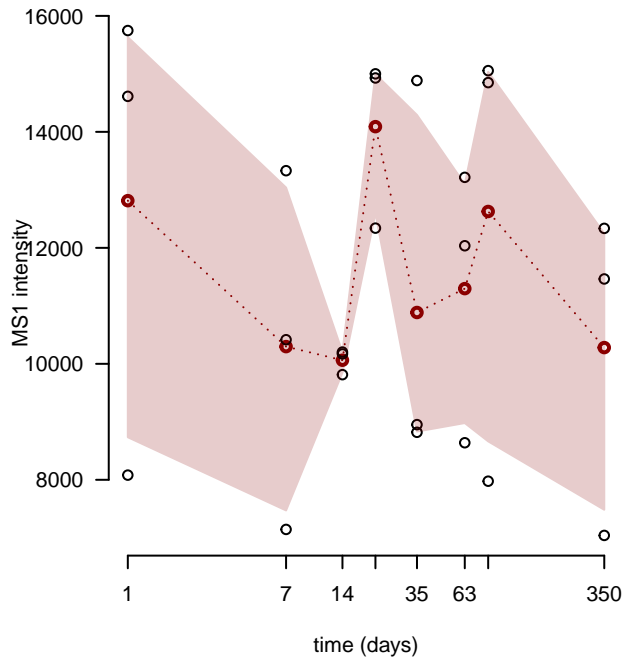

**Q9CQX5**  
GN=Cldnd1  
claudin domain containing 1

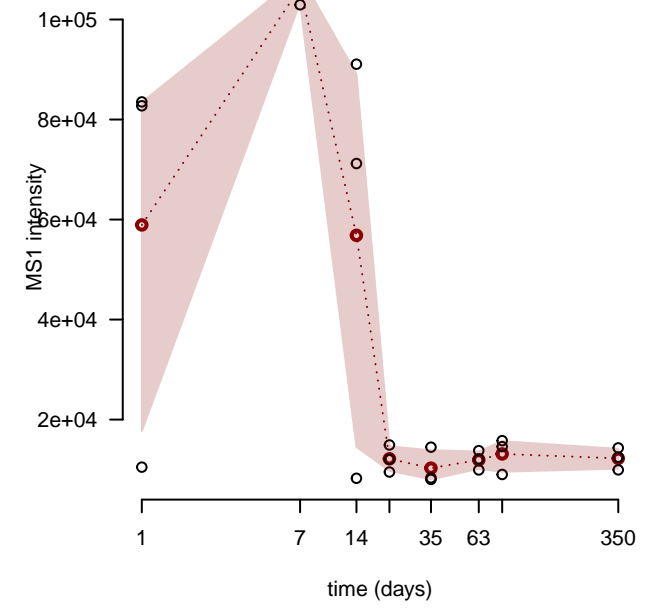

**Q9CQX8**  
GN=Mrps36  
mitochondrial ribosomal protein S36

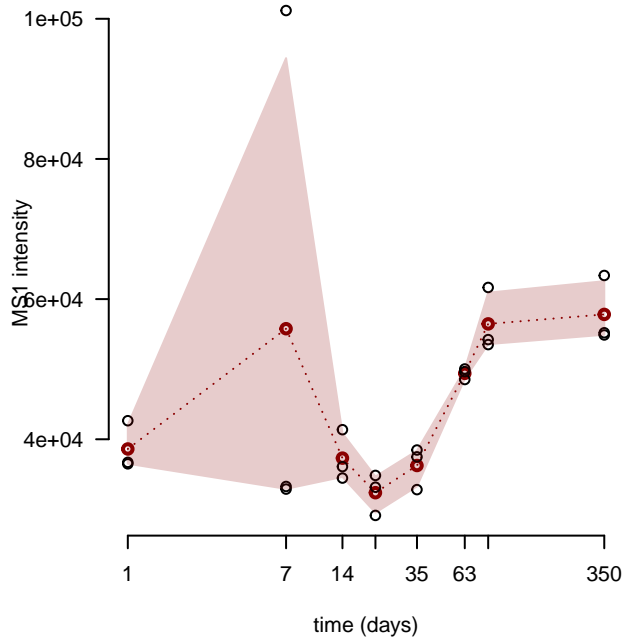

**Q9CQY1**  
GN=Atg12  
autophagy related 12

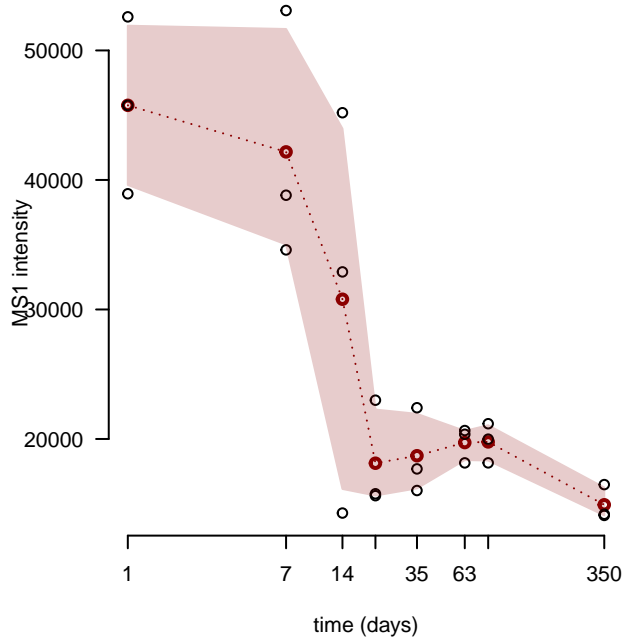

**Q9CQY2**  
GN=Ramac  
RNA guanine-7 methyltransferase activati ...

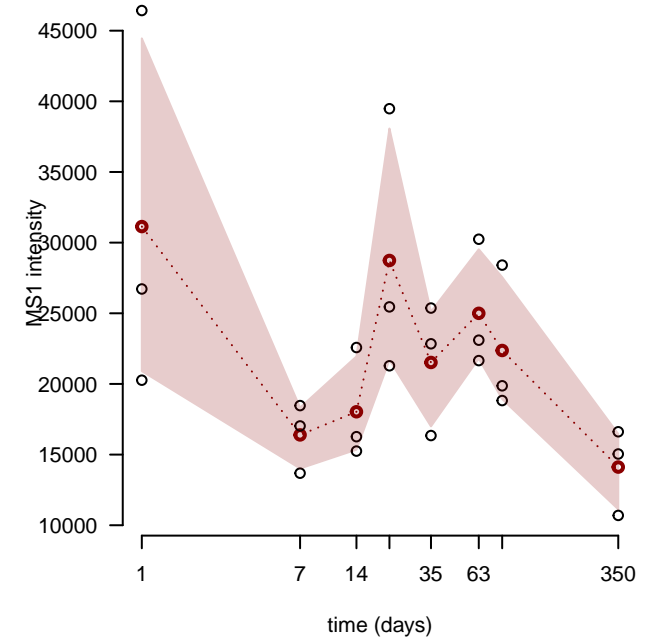

**Q9CQY5**  
GN=Magt1  
magnesium transporter 1

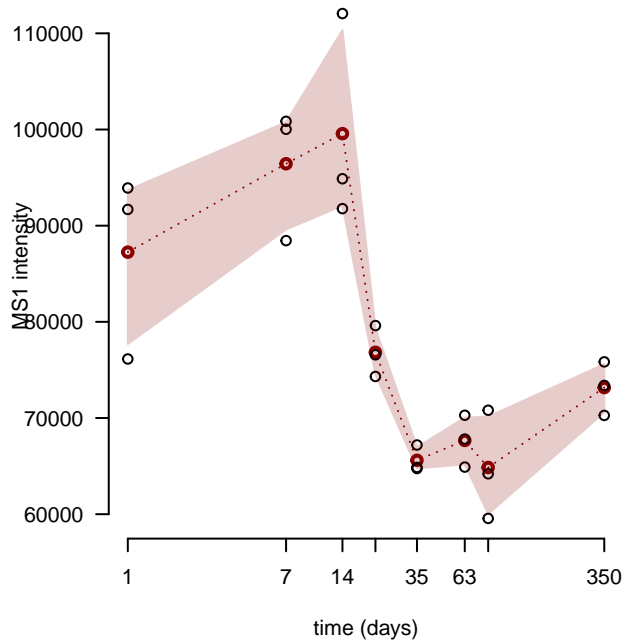

**Q9CQY6**  
GN=Uqcc2  
ubiquinol-cytochrome c reductase complex ...

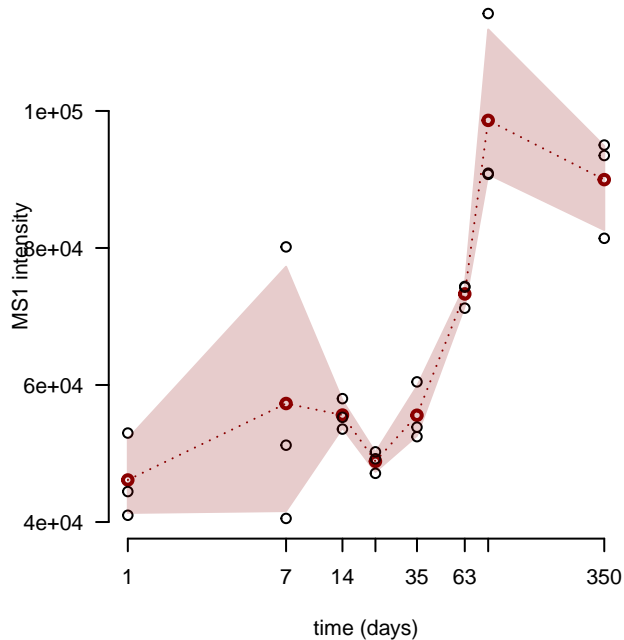

**Q9CQZ0**  
GN=Ormdl2  
ORM1-like 2 (*S. cerevisiae*)

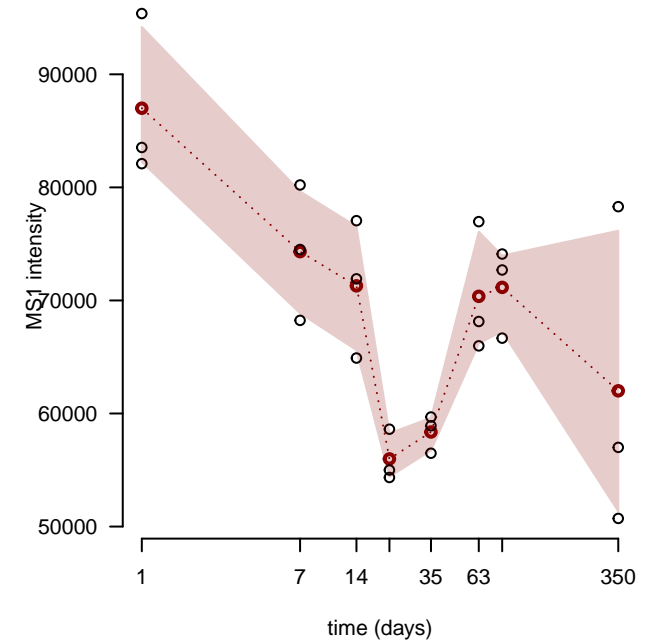

**Q9CQZ5**  
**GN=Ndufa6**  
NADH:ubiquinone oxidoreductase subunit A ...

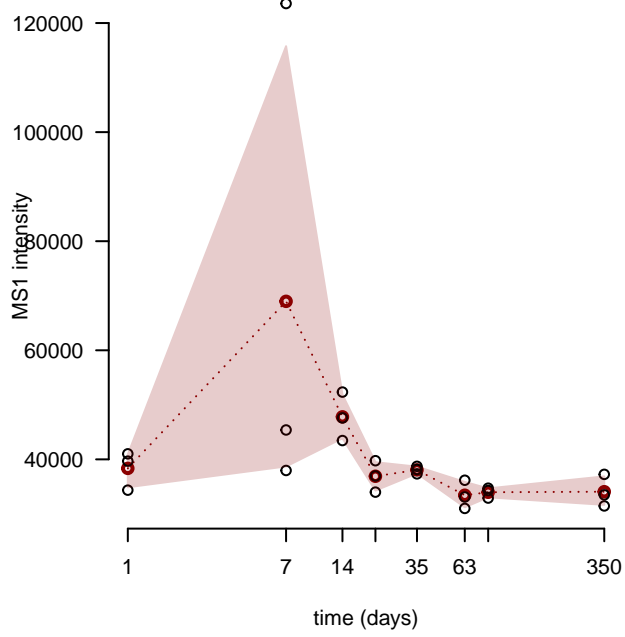

**Q9CQZ6**  
**GN=Ndufb3**  
NADH:ubiquinone oxidoreductase subunit B ...

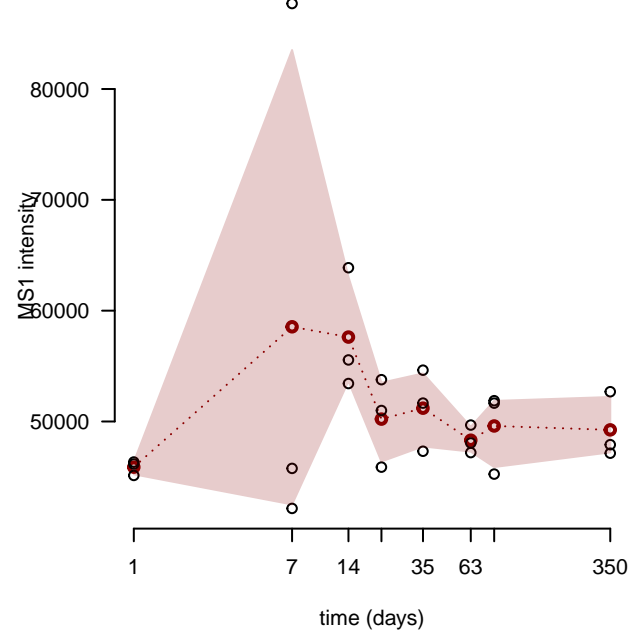

**Q9CR00**  
**GN=Psm9**  
proteasome (prosome, macropain) 26S subu ...

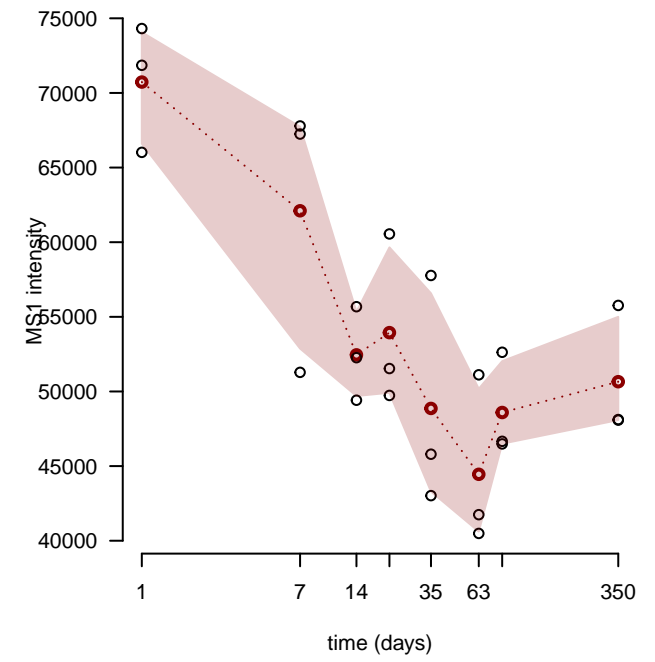

**Q9CR02**  
**GN=Tma16**  
translation machinery associated 16

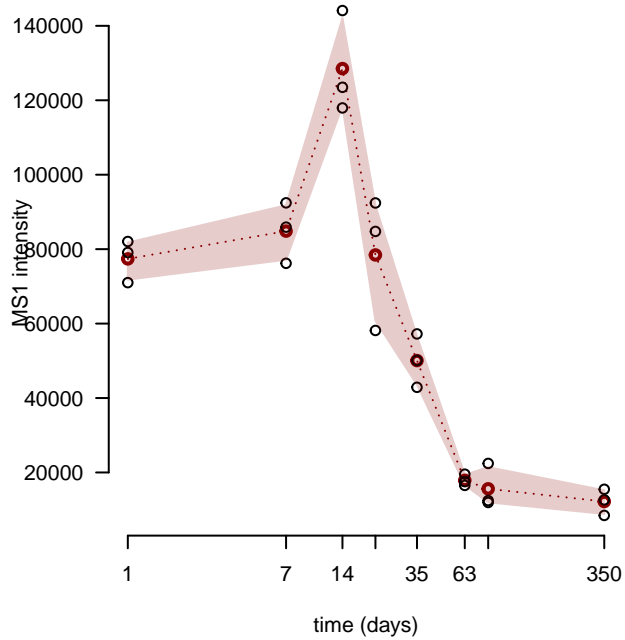

**Q9CR08**  
**GN=Pop4**  
processing of precursor 4, ribonuclease ...

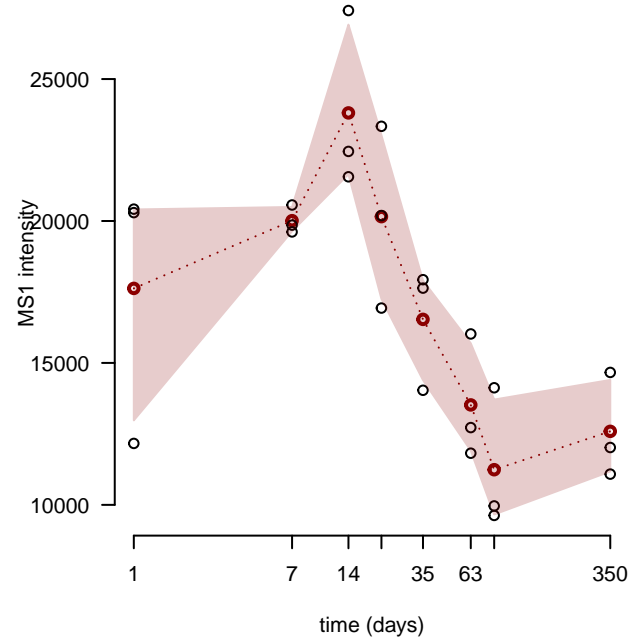

**Q9CR09**  
**GN=Ufc1**  
ubiquitin-fold modifier conjugating enzy ...

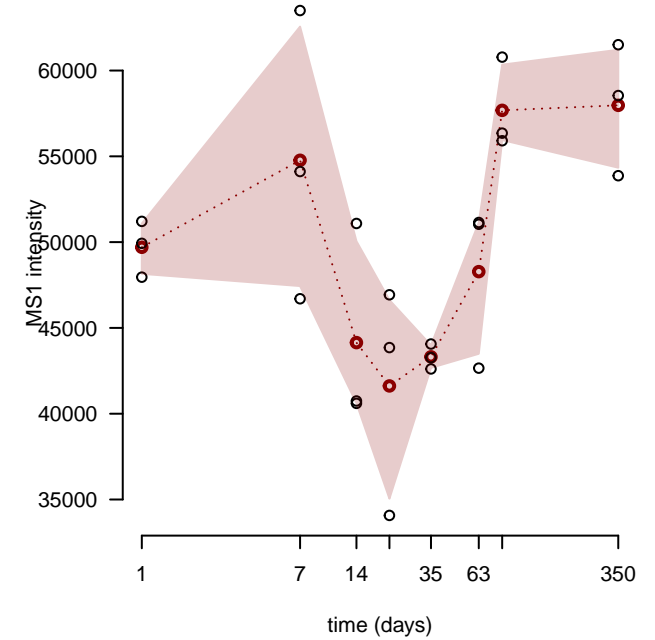

**Q9CR11**  
**GN=Yeats4**  
YEATS domain containing 4

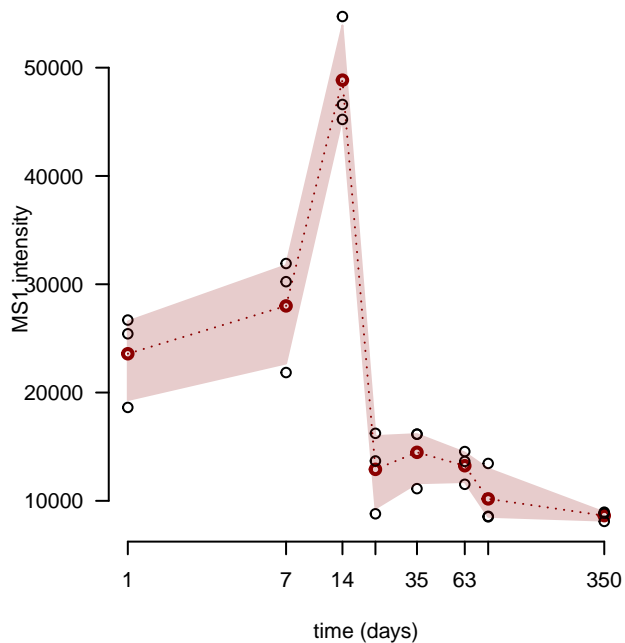

**Q9CR13**  
**GN=Fmc1**  
formation of mitochondrial complex V ass ...

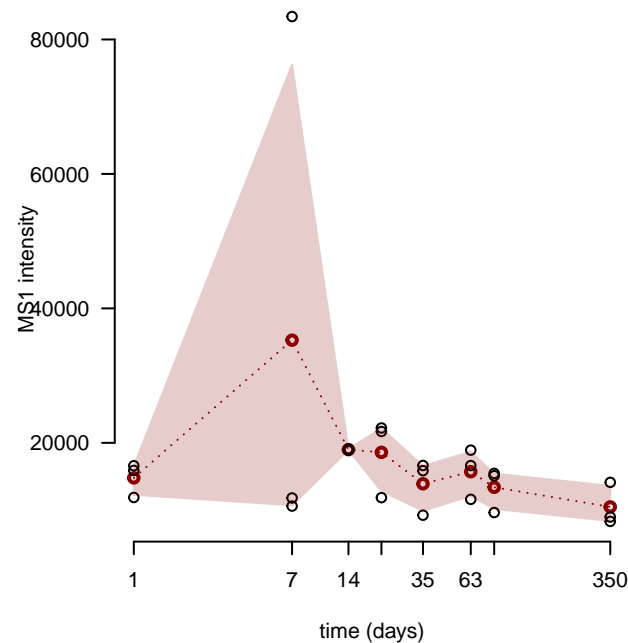

**Q9CR16**  
**GN=Ppid**  
peptidylprolyl isomerase D (cyclophilin ...

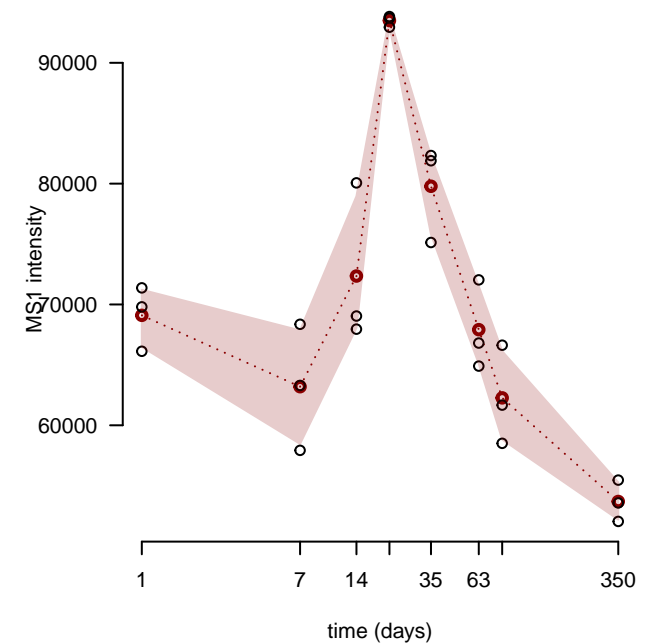

**Q9CR20**  
GN=*Ier3ip1*  
immediate early response 3 interacting p ...

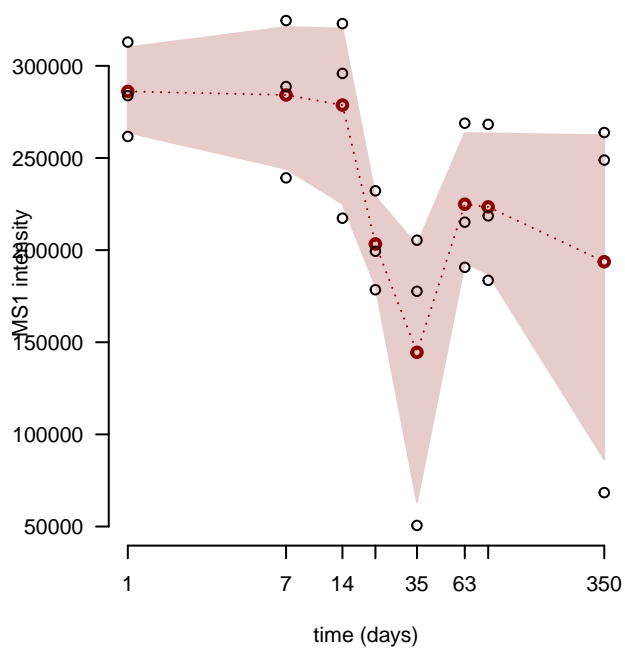

**Q9CR21**  
GN=*Ndufab1*  
NADH:ubiquinone oxidoreductase subunit A ...

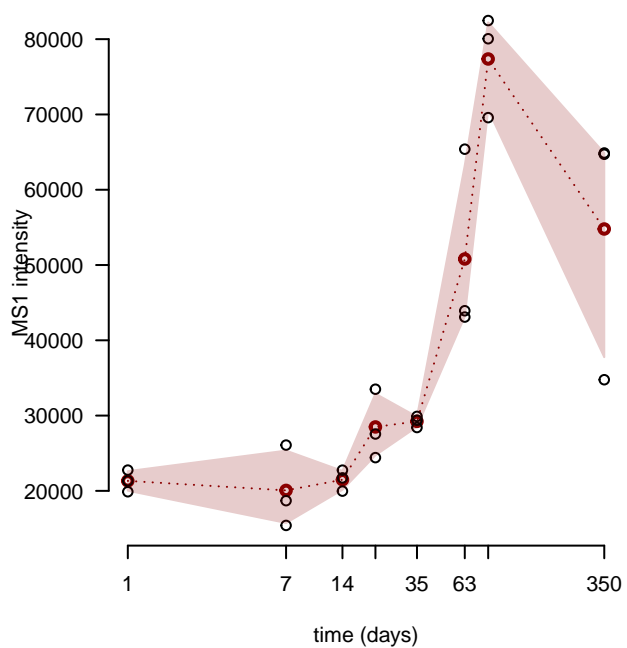

**Q9CR23**  
GN=*Tmem9*  
transmembrane protein 9

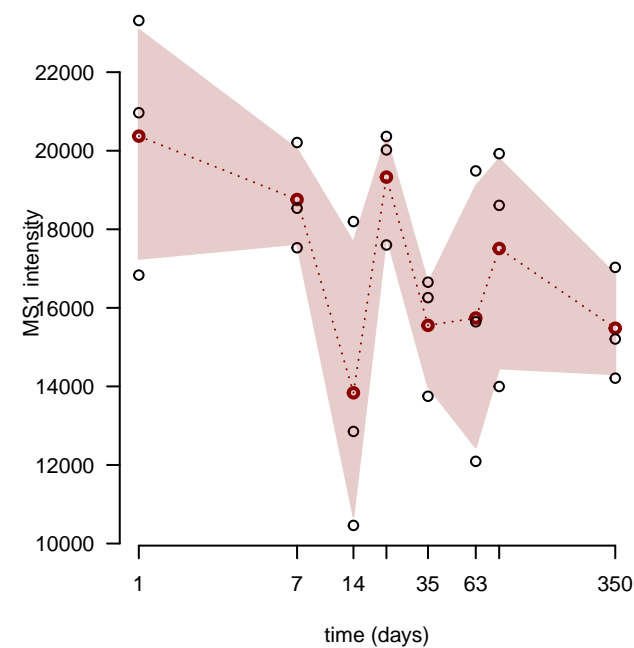

**Q9CR24**  
GN=*Nudt8*  
nudix (nucleoside diphosphate linked moi ...

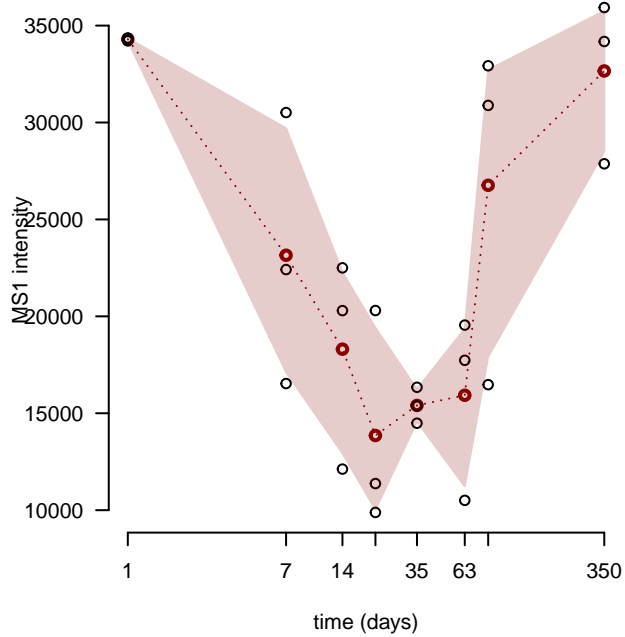

**Q9CR25**  
GN=*Dph2*  
DPH2 homolog

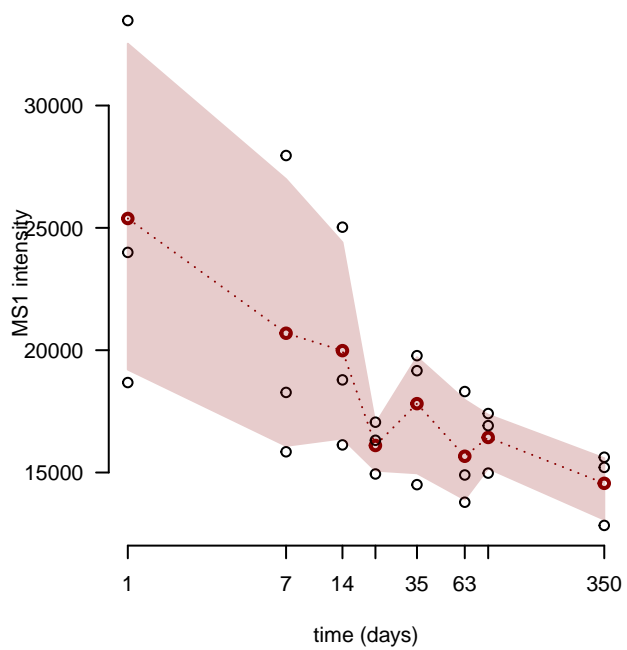

**Q9CR26**  
GN=*Vta1*  
vesicle (multivesicular body) traffickin ...

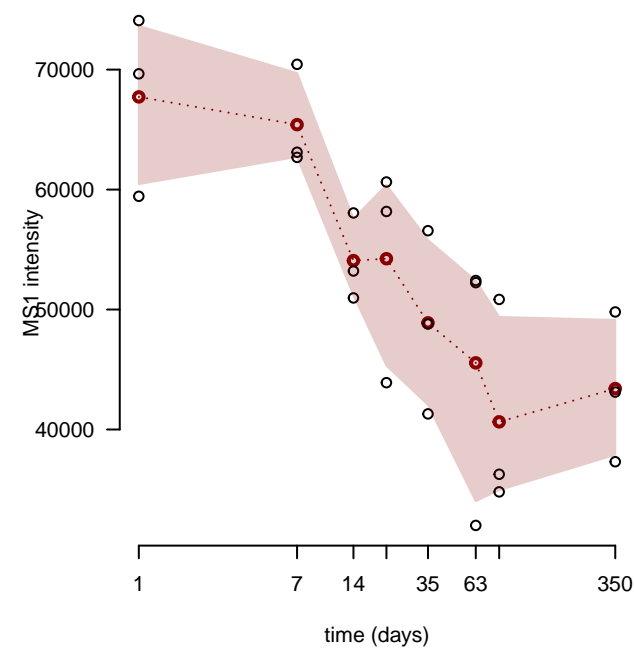

**Q9CR27**  
GN=*Washc3*  
WASH complex subunit 3

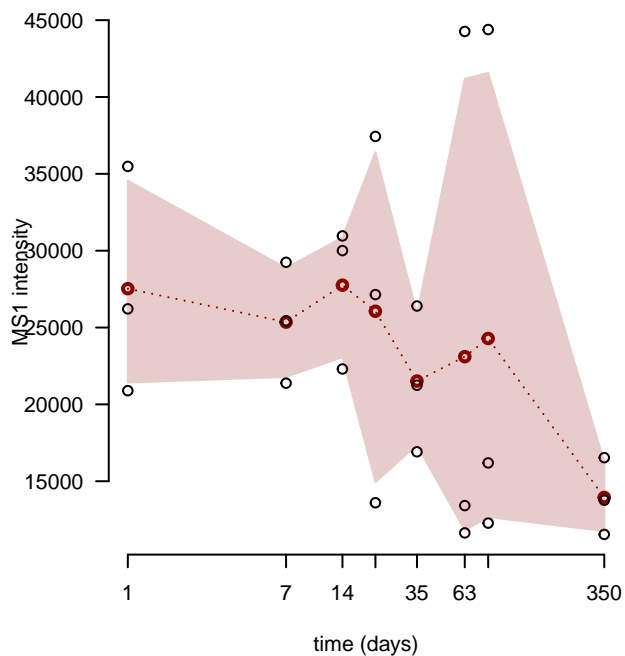

**Q9CR29**  
GN=*Ccdc43*  
coiled-coil domain containing 43

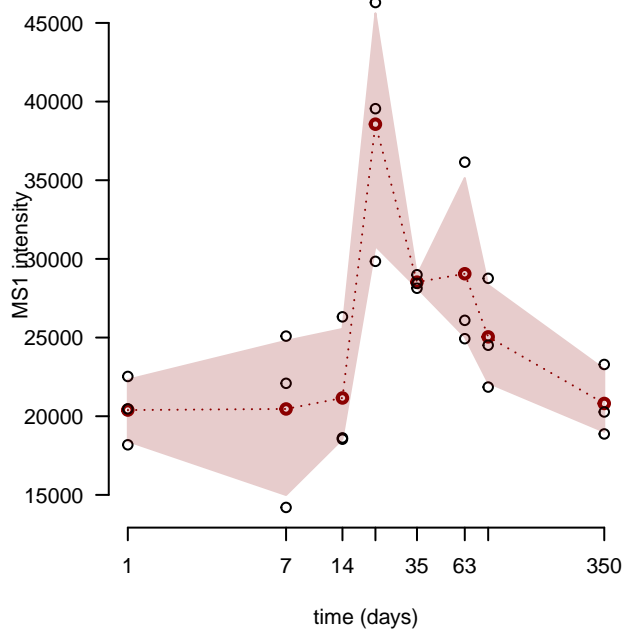

**Q9CR35**  
GN=*Ctrb1*  
chymotrypsinogen B1

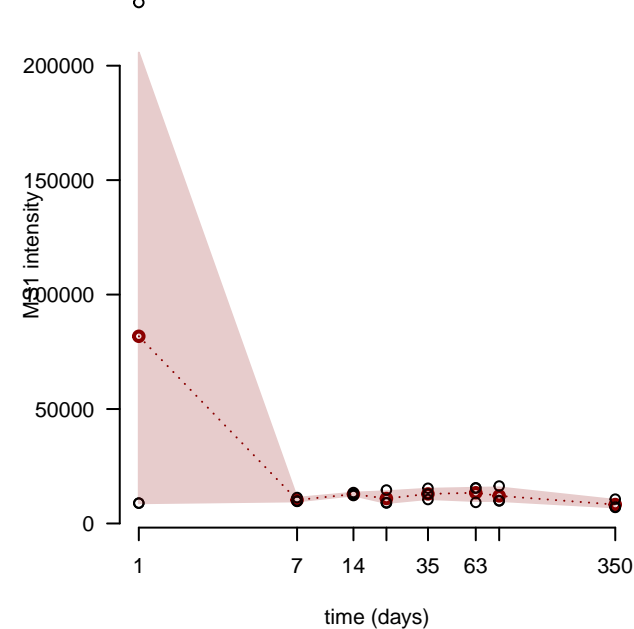

**Q9CR39**  
**GN=Wdr45b**  
WD repeat domain 45B

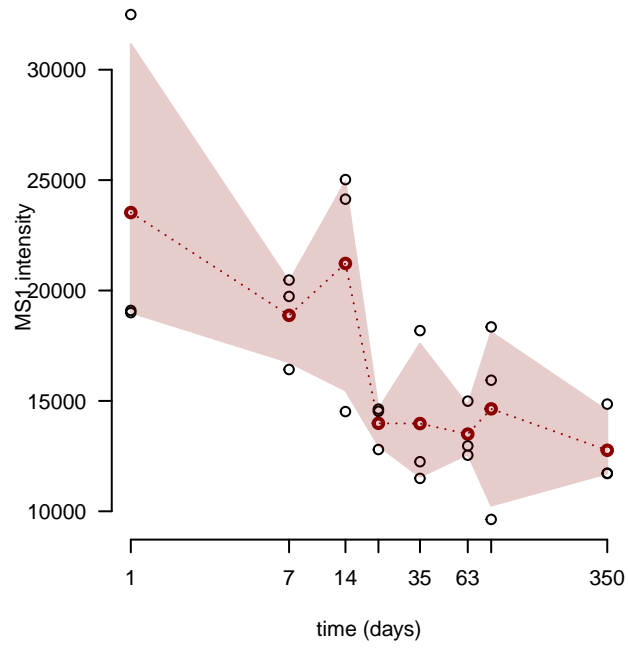

**Q9CR41**  
**GN=Hypk**  
huntingtin interacting protein K

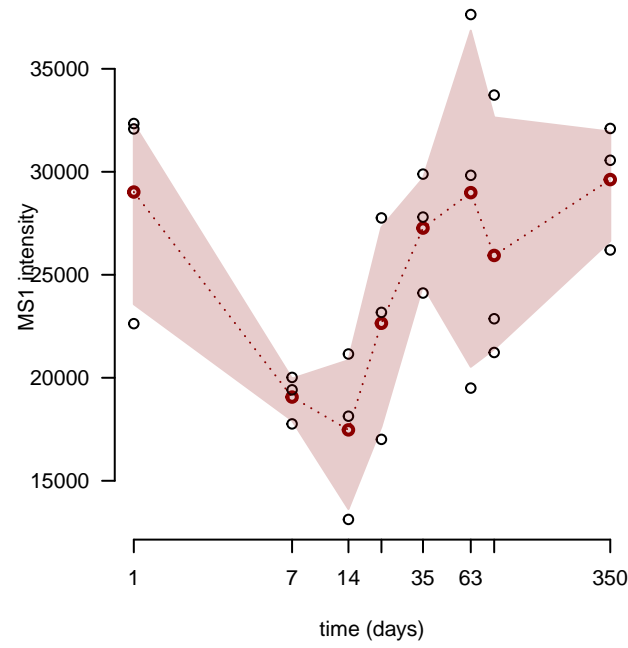

**Q9CR47**  
**GN=Nsa2**  
NSA2 ribosome biogenesis homolog

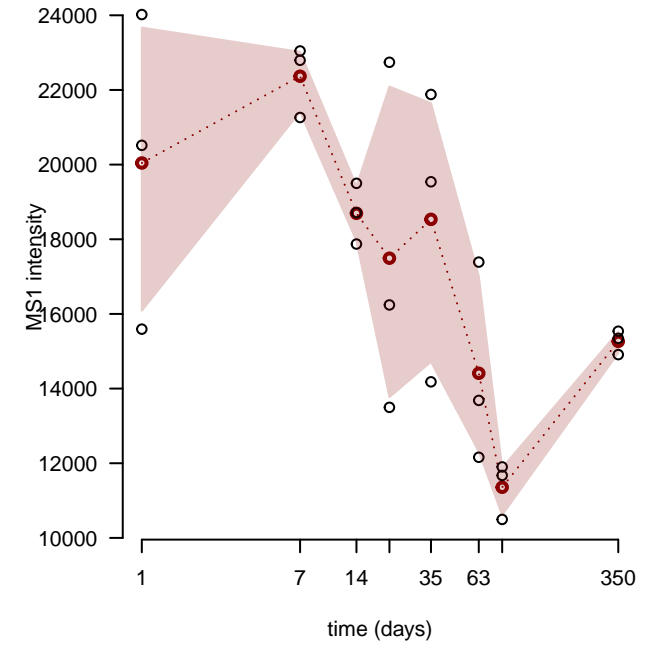

**Q9CR50**  
**GN=Rchy1**  
ring finger and CHY zinc finger domain c ...

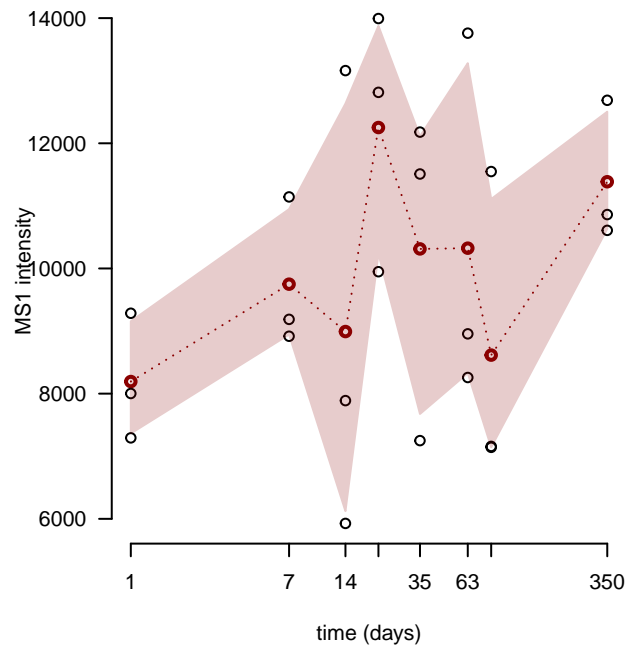

**Q9CR51**  
**GN=Atp6v1g1**  
ATPase, H+ transporting, lysosomal V1 su ...

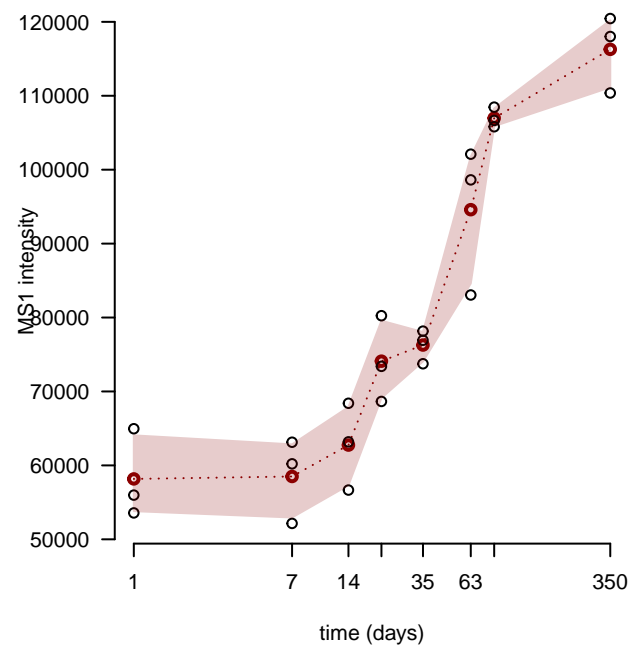

**Q9CR56**  
**GN=Nkiras2**  
NFKB inhibitor interacting Ras-like prot ...

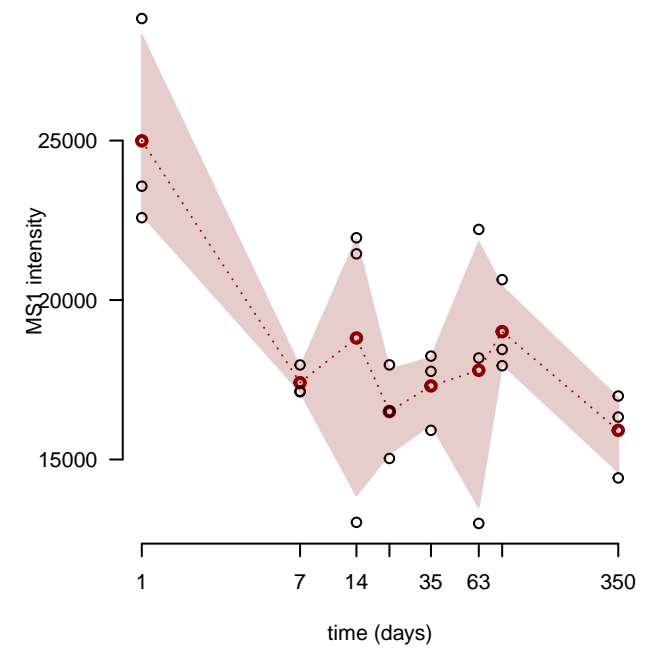

**Q9CR57**  
**GN=Rpl14**  
ribosomal protein L14

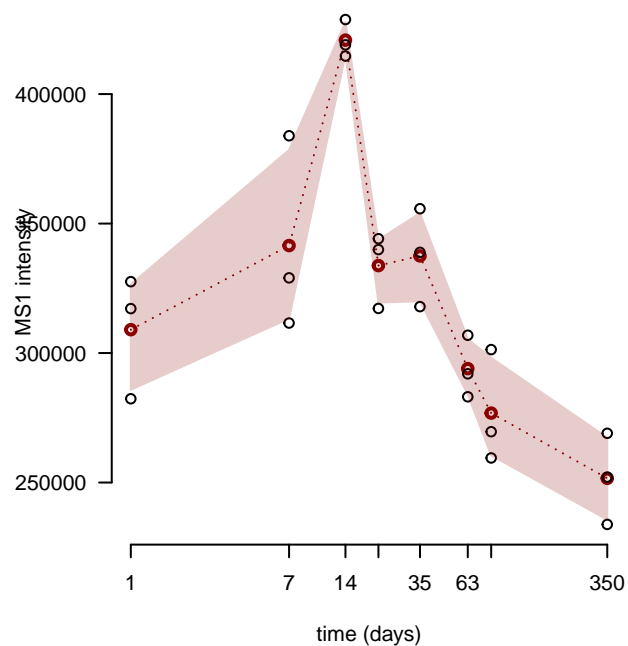

**Q9CR58**  
**GN=Slc25a30**  
solute carrier family 25, member 30

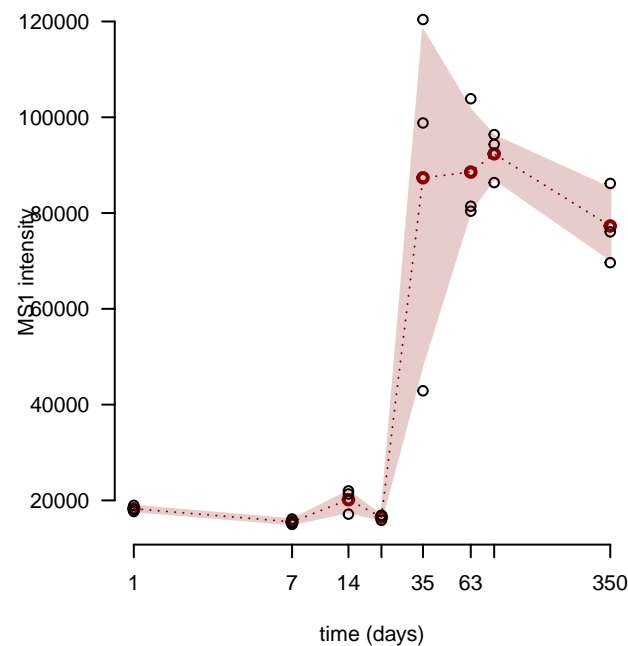

**Q9CR59**  
**GN=Gadd45gip1**  
growth arrest and DNA-damage-inducible, ...

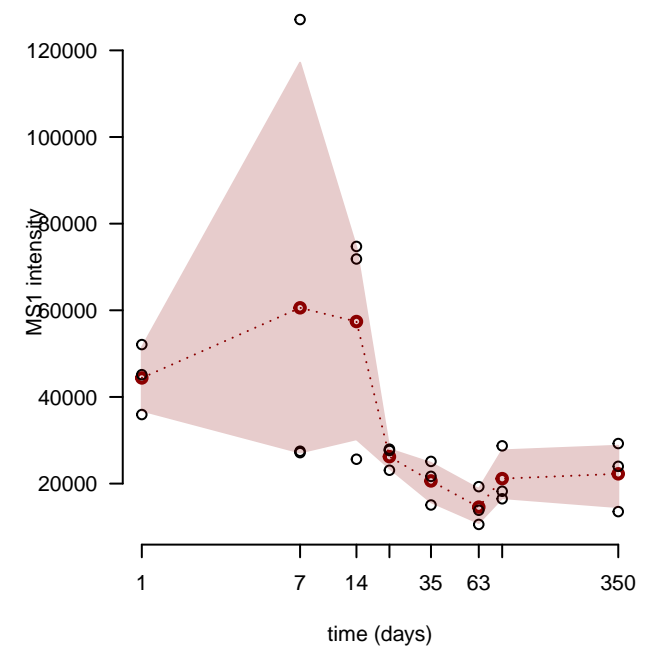

**Q9CR60**  
**GN=Golt1b**  
golgi transport 1B

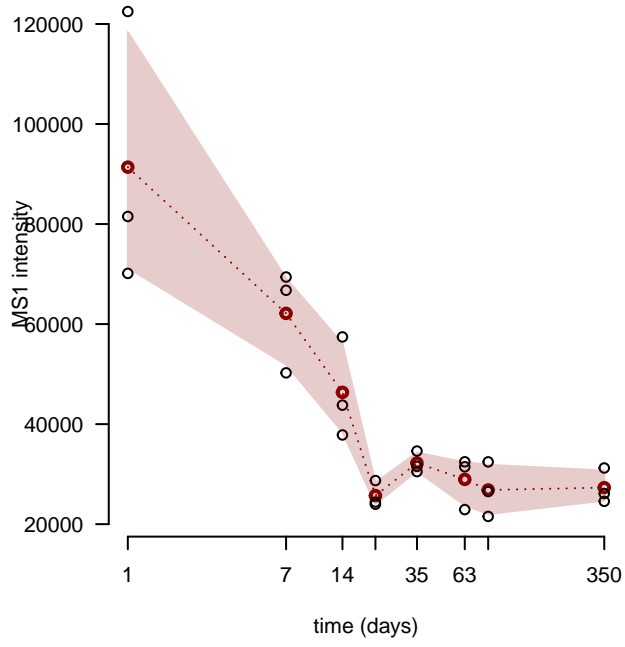

**Q9CR61**  
**GN=Ndufb7**  
NADH:ubiquinone oxidoreductase subunit B ...

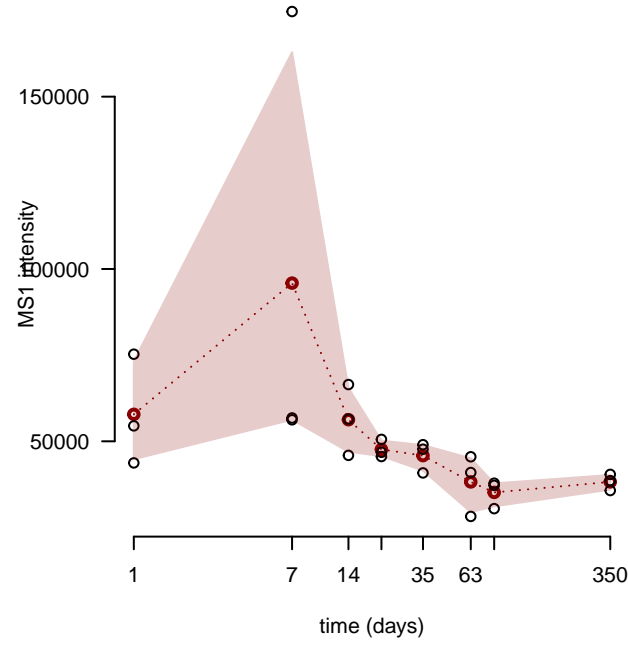

**Q9CR62**  
**GN=Slc25a11**  
solute carrier family 25 (mitochondrial ...

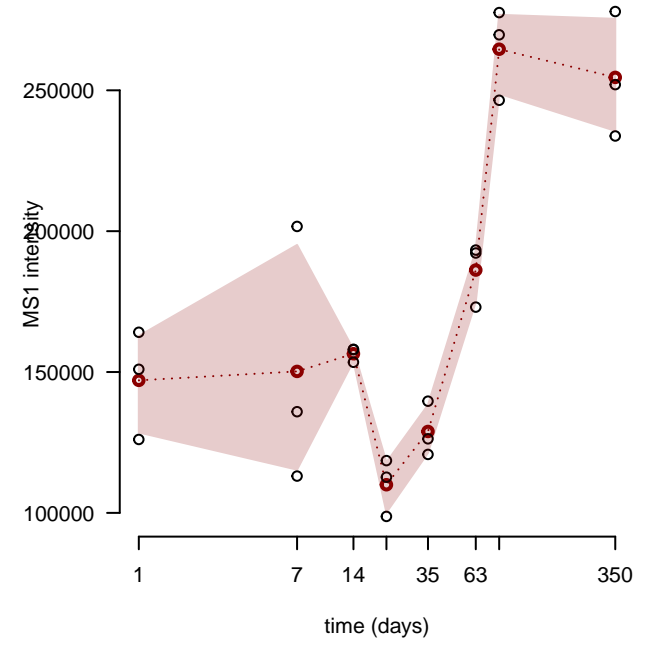

**Q9CR63**  
**GN=Cox16**  
cytochrome c oxidase assembly protein 16

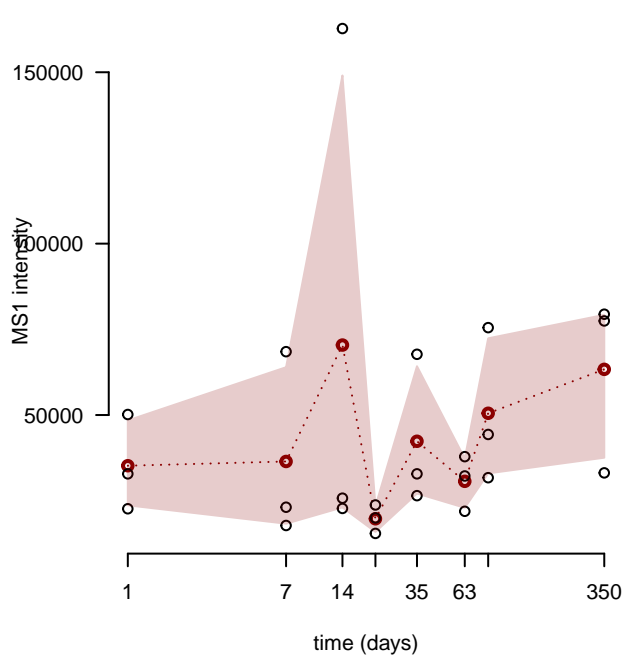

**Q9CR64**  
**GN=Tmem167a**

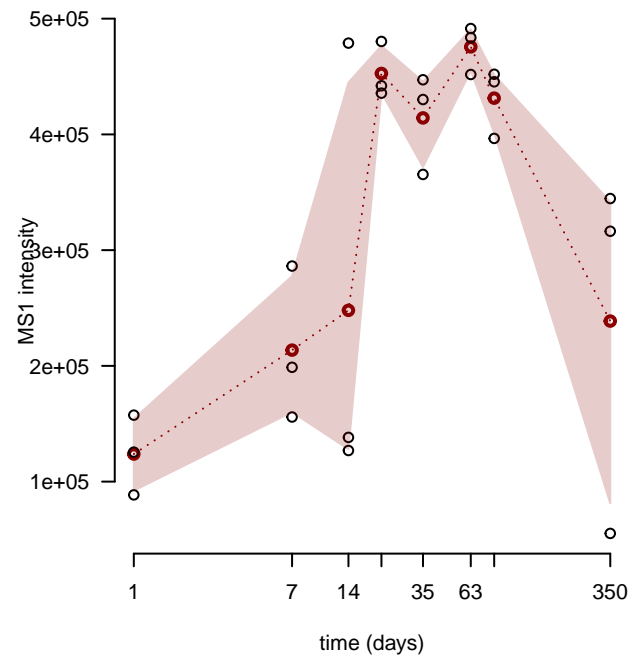

**Q9CR67**  
**GN=Tmem33**  
transmembrane protein 33

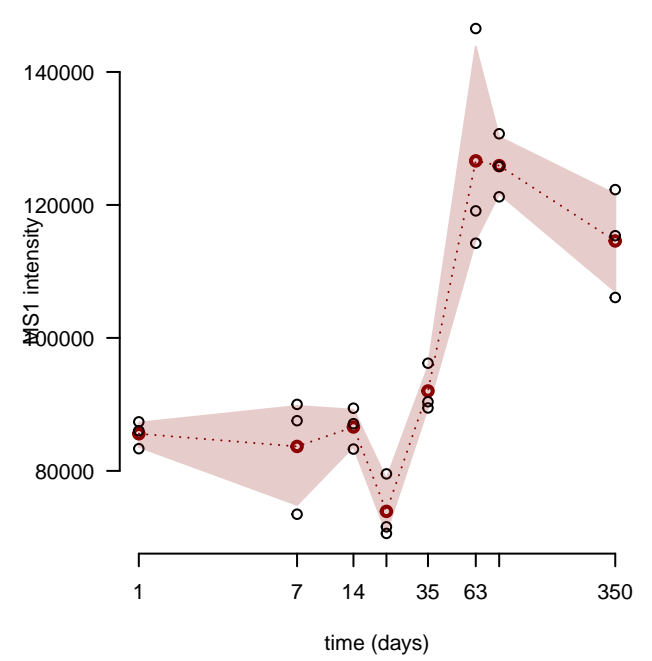

**Q9CR68**  
**GN=Uqcrcf1**  
ubiquinol-cytochrome c reductase, Rieske ...

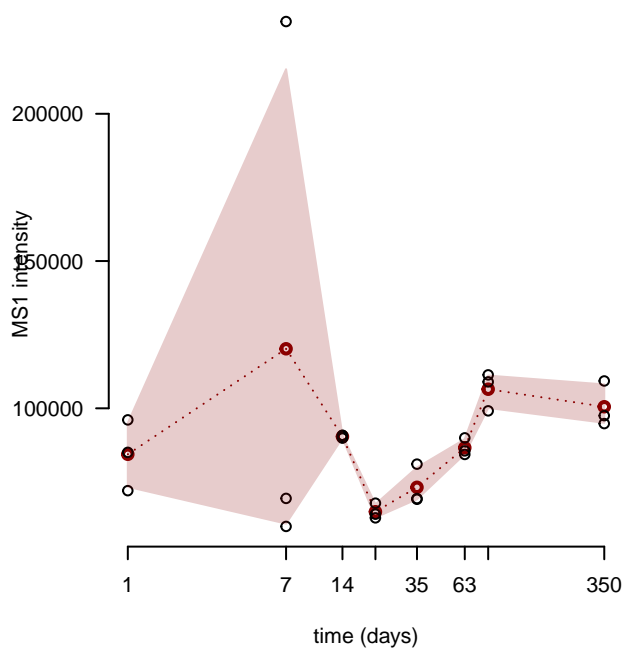

**Q9CR70**  
**GN=Lage3**  
L antigen family, member 3

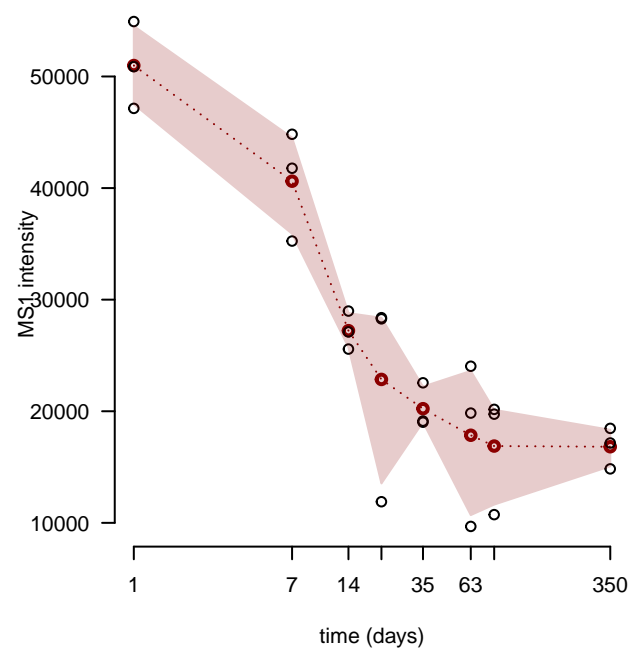

**Q9CR76**  
**GN=Tmem186**  
transmembrane protein 186

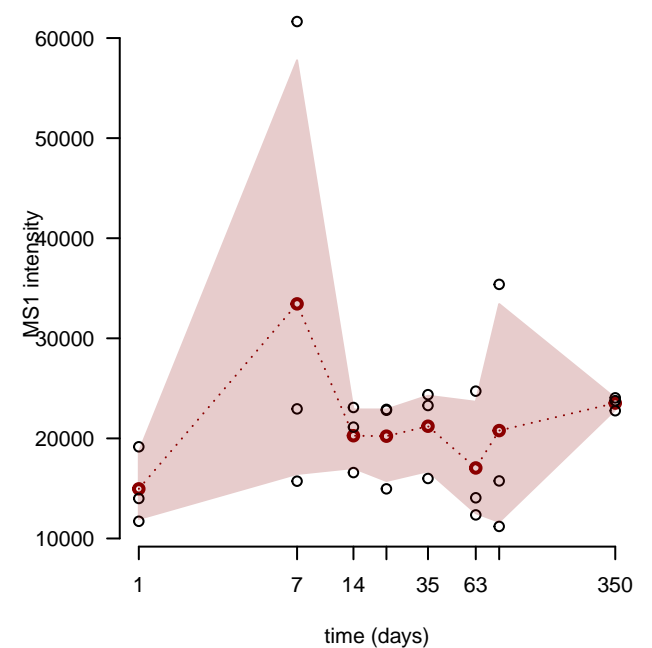

**Q9CR78**  
**GN=Msantd3**

Myb/SANT-like DNA-binding domain contain ...

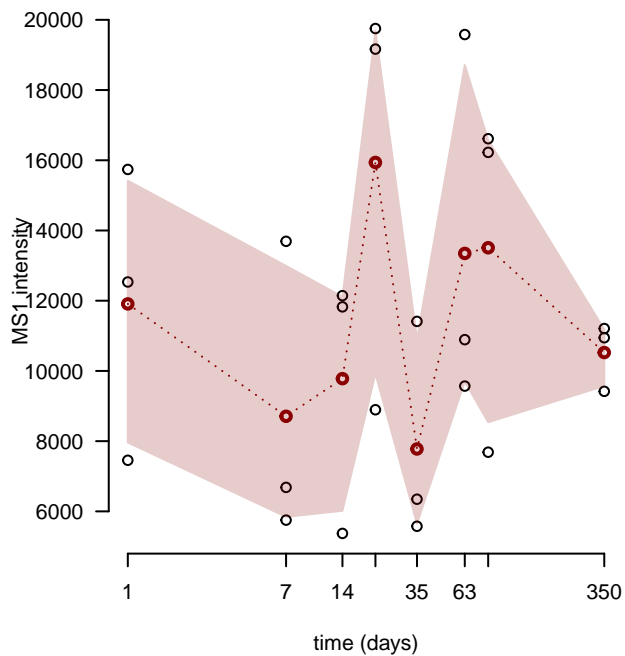

**Q9CR80**  
**GN=Fam32a**

family with sequence similarity 32, memb ...

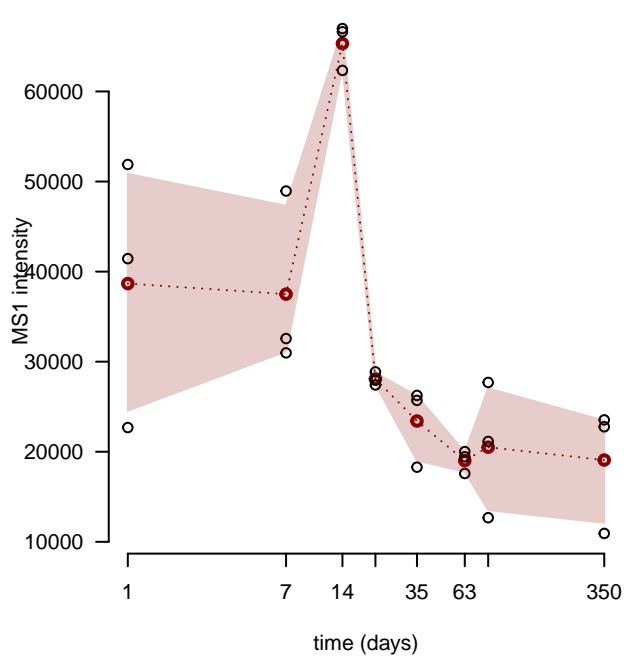

**Q9CR86**  
**GN=Carhsp1**

calcium regulated heat stable protein 1

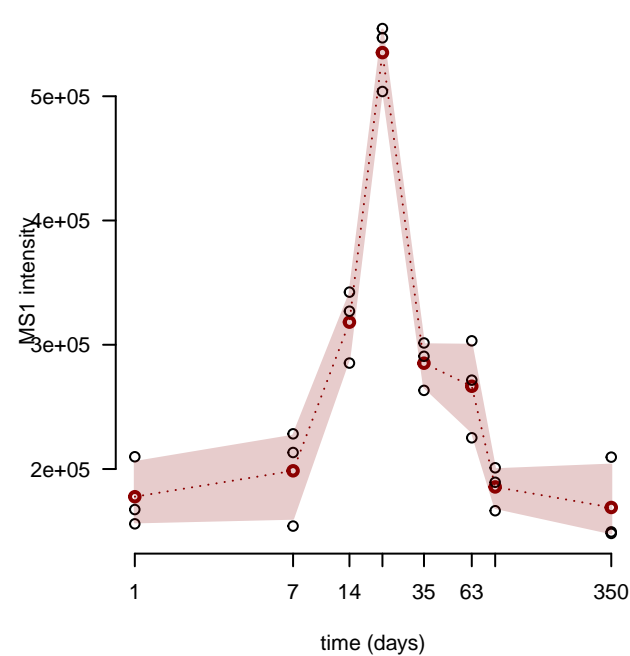

**Q9CR88**  
**GN=Mrps14**

mitochondrial ribosomal protein S14

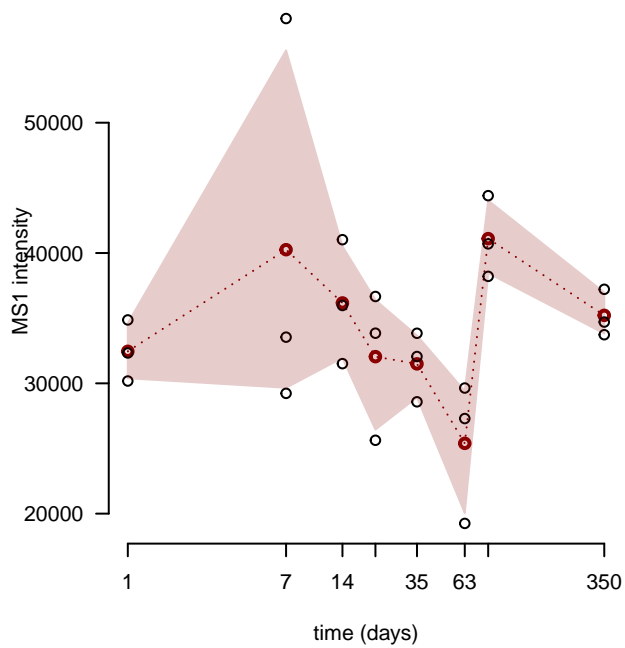

**Q9CR89**  
**GN=Ergic2**

ERGIC and golgi 2

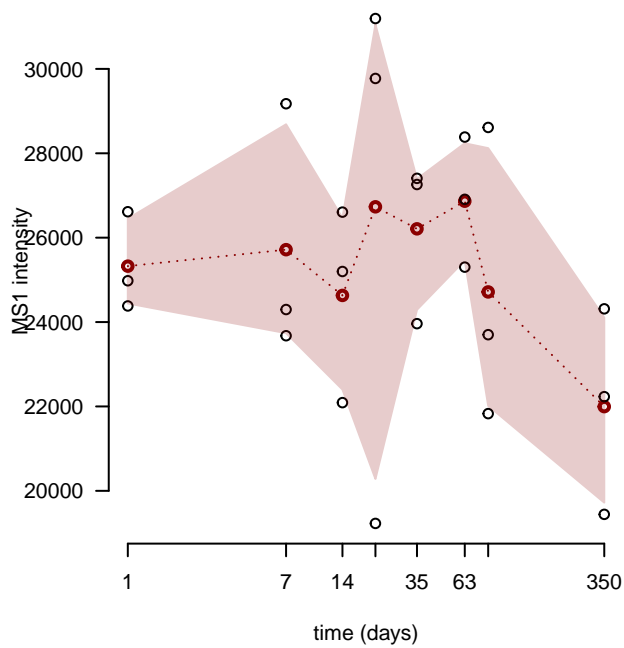

**Q9CR95**  
**GN=Necap1**

NECAP endocytosis associated 1

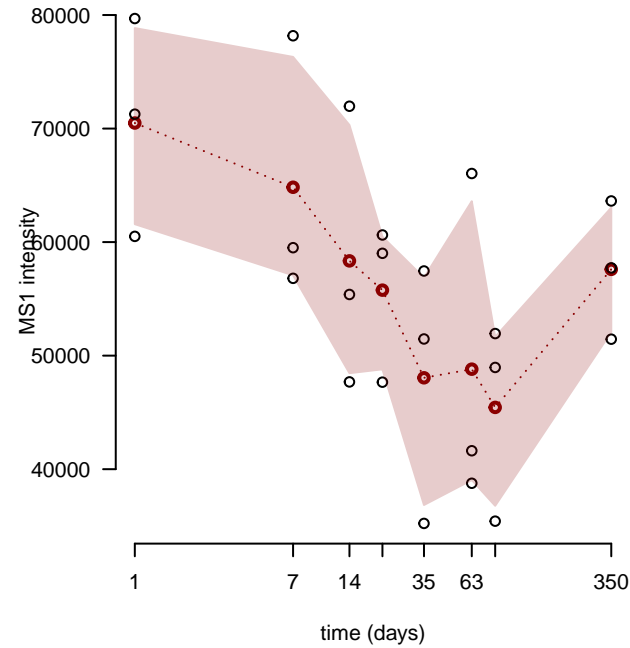

**Q9CR96**  
**GN=Tmem208**

transmembrane protein 208

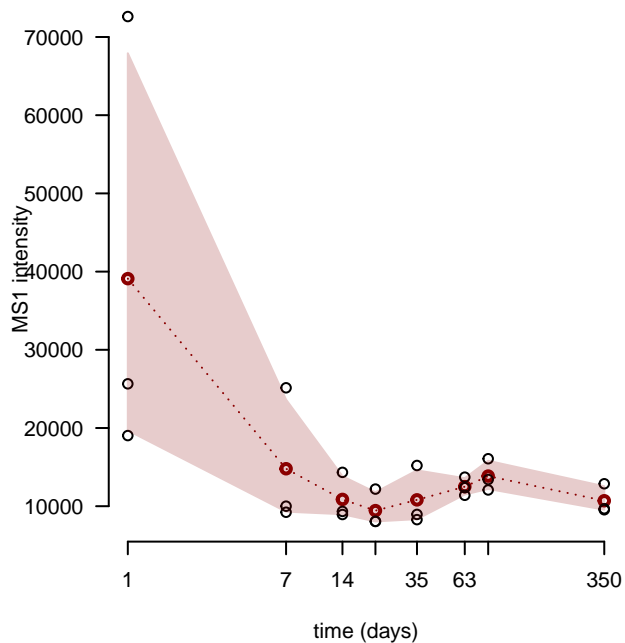

**Q9CR98**  
**GN=Fam136a**

family with sequence similarity 136, mem ...

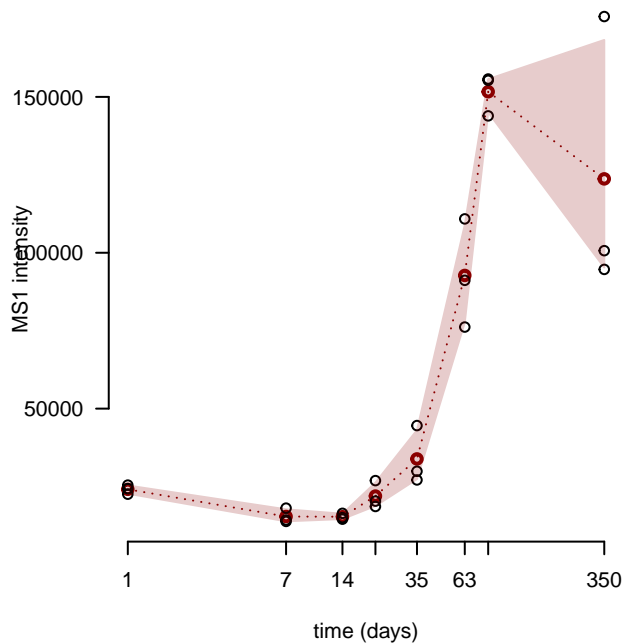

**Q9CRA0**  
**GN=Art4**

ADP-ribosyltransferase 4

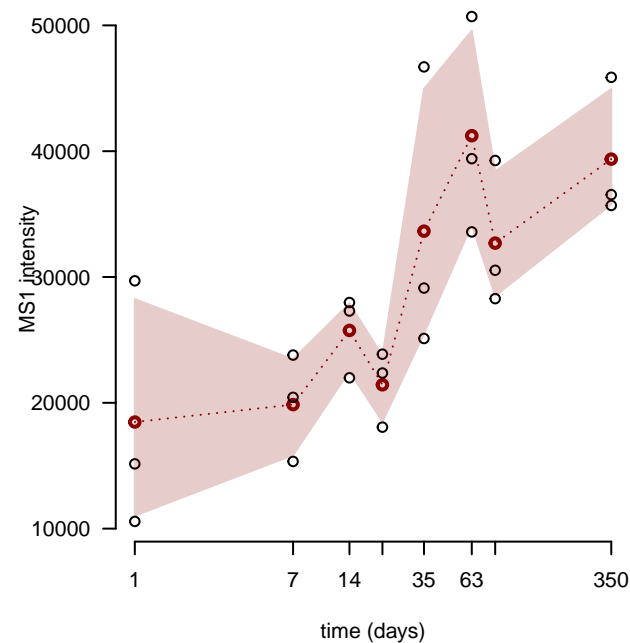

**Q9CRA4**  
GN=Msmo1  
methylsterol monooxygenase 1

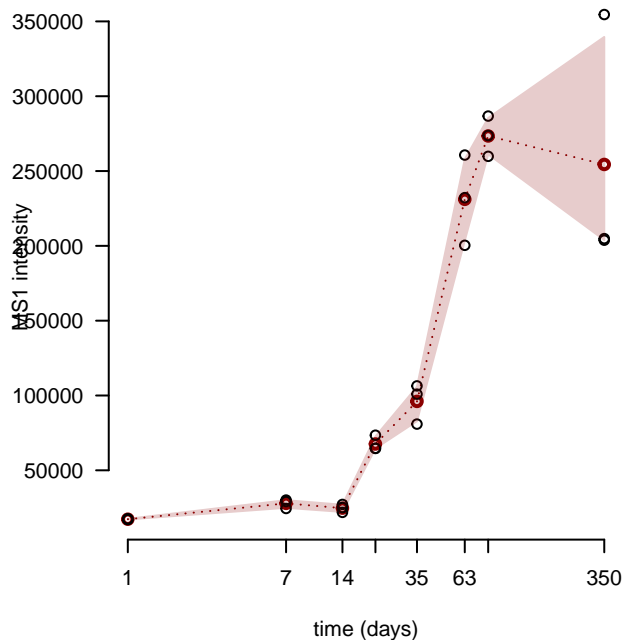

**Q9CRA5**  
GN=Golph3  
golgi phosphoprotein 3

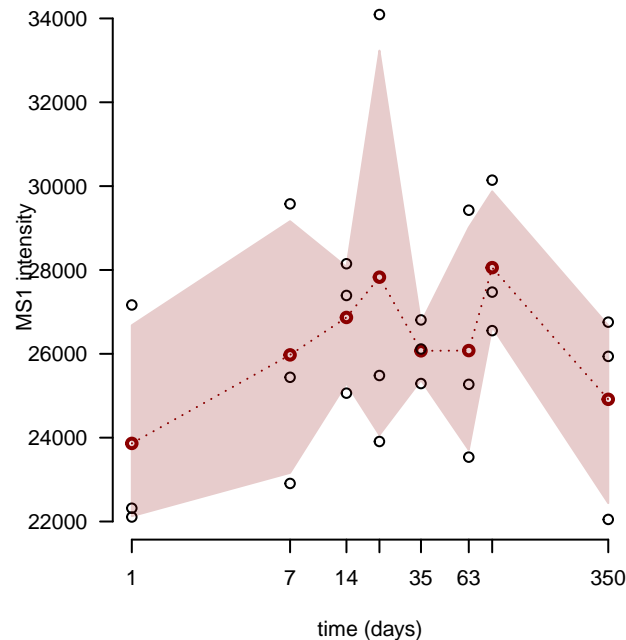

**Q9CRA7**  
GN=Dmac2l  
distal membrane arm assembly complex 2 l ...

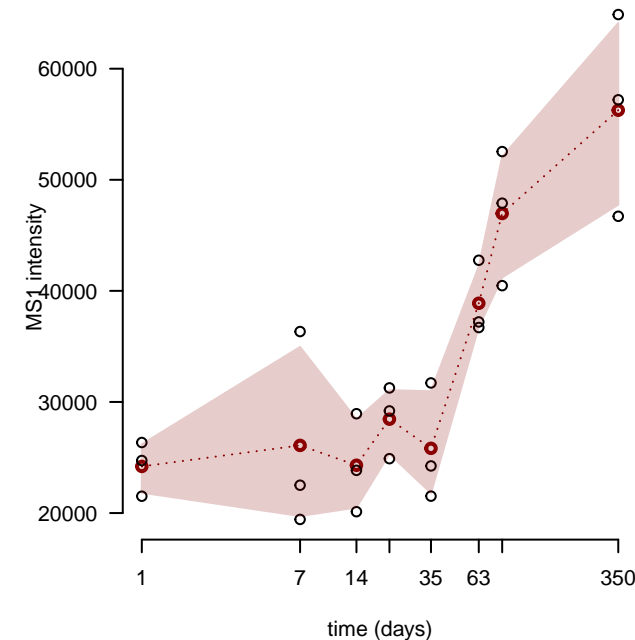

**Q9CRA8**  
GN=Exosc5  
exosome component 5

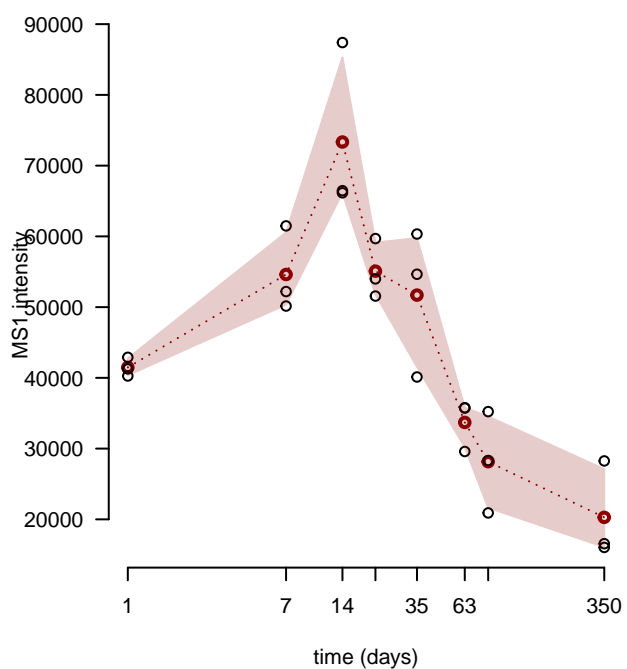

**Q9CRA9**  
GN=Fgfr1op2  
FGFR1 oncogene partner 2

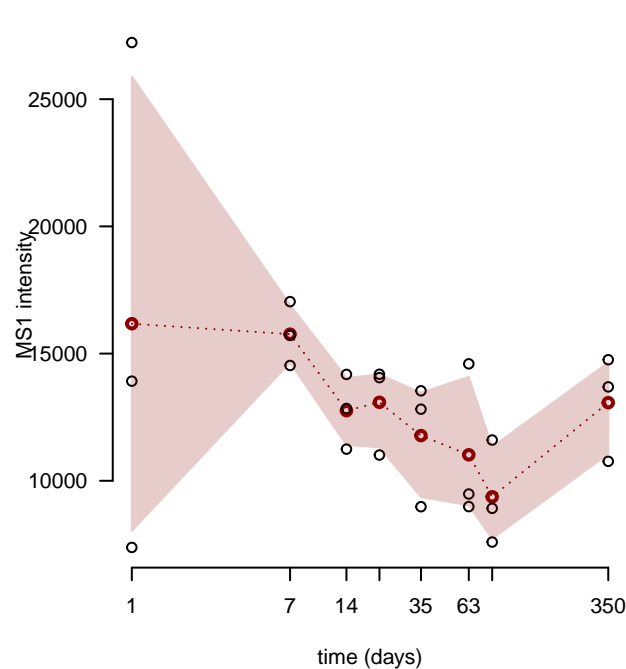

**Q9CRB0**  
GN=Snx24  
sorting nexin 24

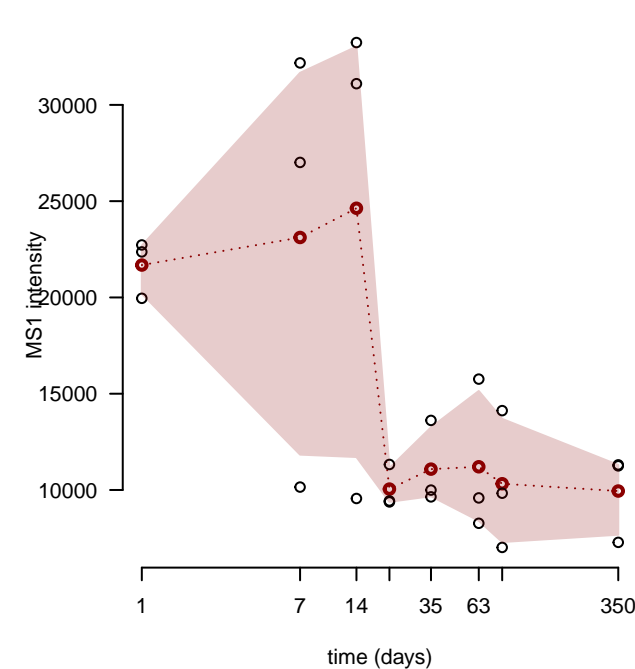

**Q9CRB2**  
GN=Nhp2  
NHP2 ribonucleoprotein

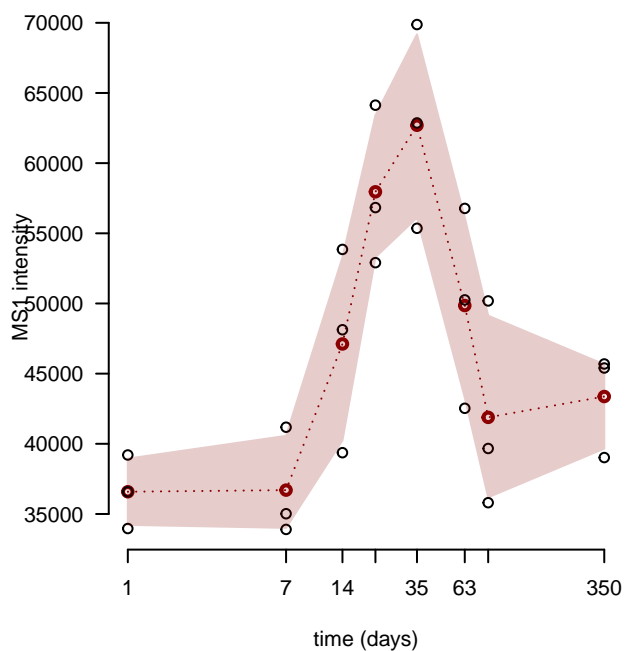

**Q9CRB5**  
GN=Pr17c1  
prolactin family 7, subfamily c, member ...

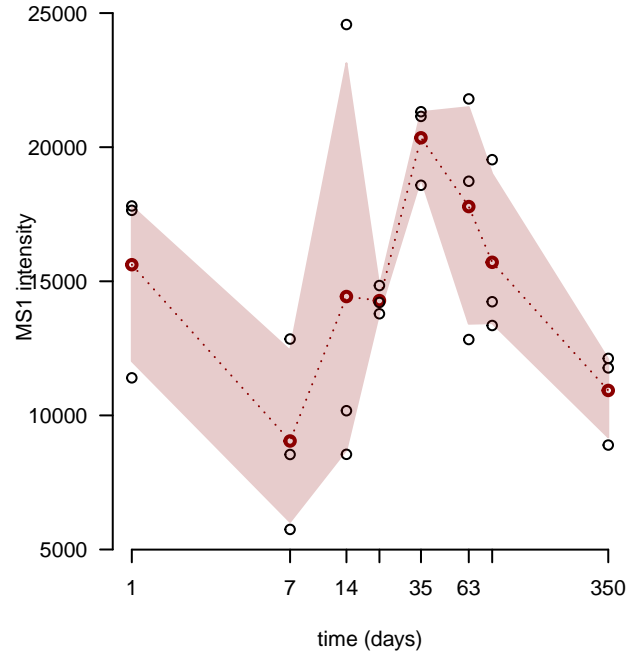

**Q9CRB6**  
GN=Tppp3  
tubulin polymerization-promoting protein ...

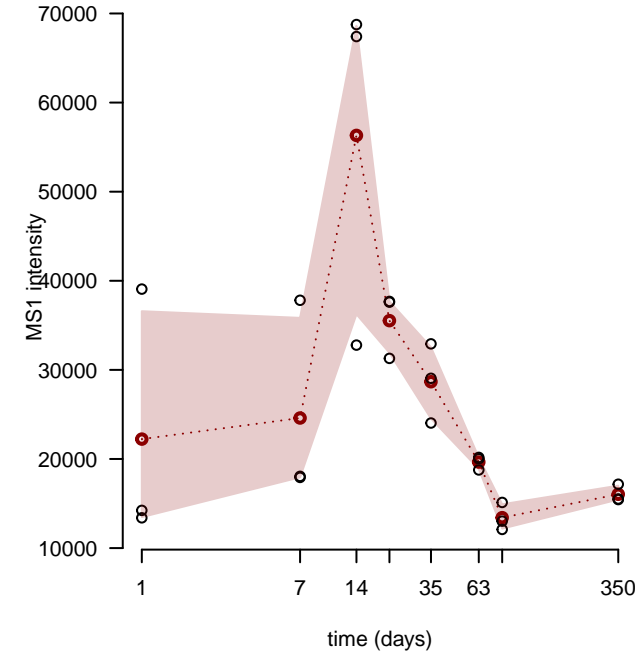

**Q9CRB8**  
GN=Mtfp1  
mitochondrial fission process 1

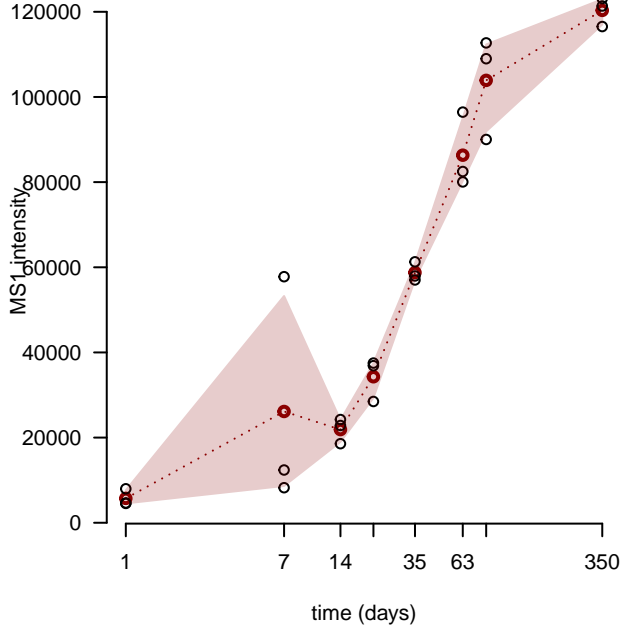

**Q9CRB9**  
GN=Chchd3  
coiled-coil-helix-coiled-coil-helix doma ...

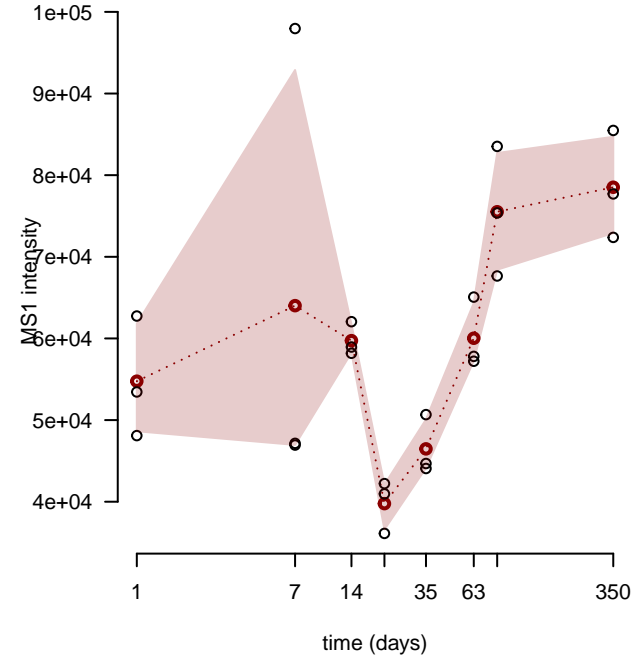

**Q9CRC0**  
GN=Vkorc1  
vitamin K epoxide reductase complex, sub ...

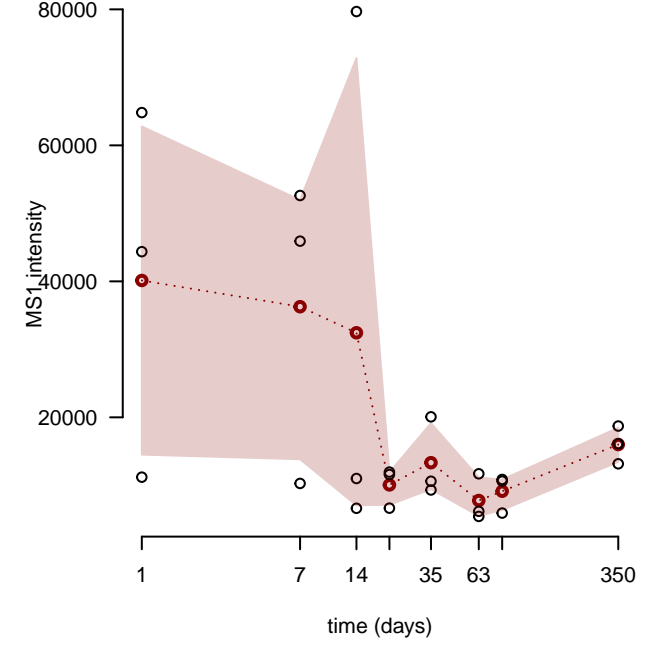

**Q9CRC3**  
GN=

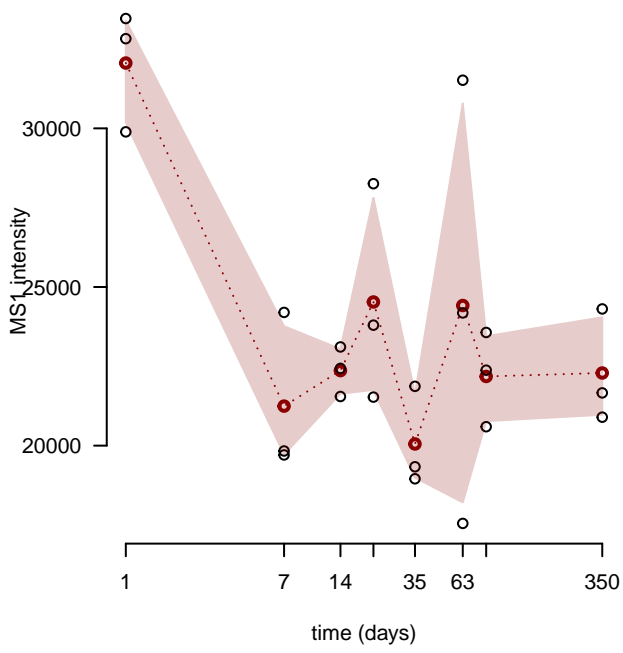

**Q9CRC8**  
GN=Lrrc40  
leucine rich repeat containing 40

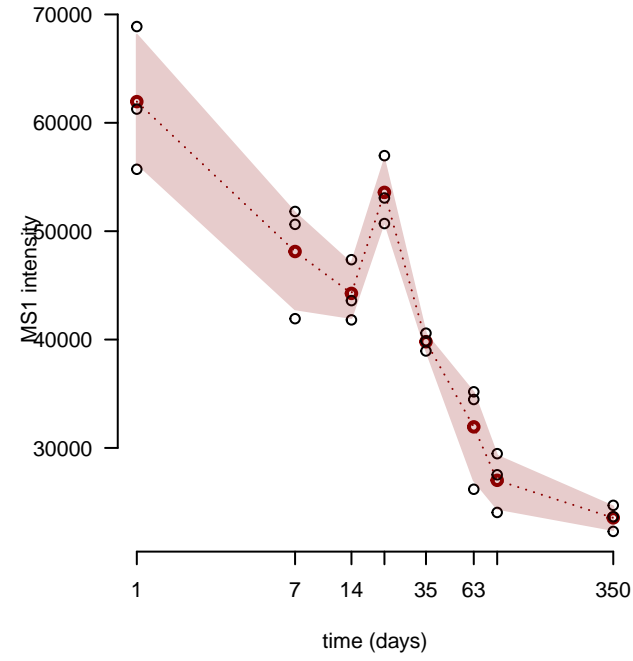

**Q9CRC9**  
GN=Gnpda2  
glucosamine-6-phosphate deaminase 2

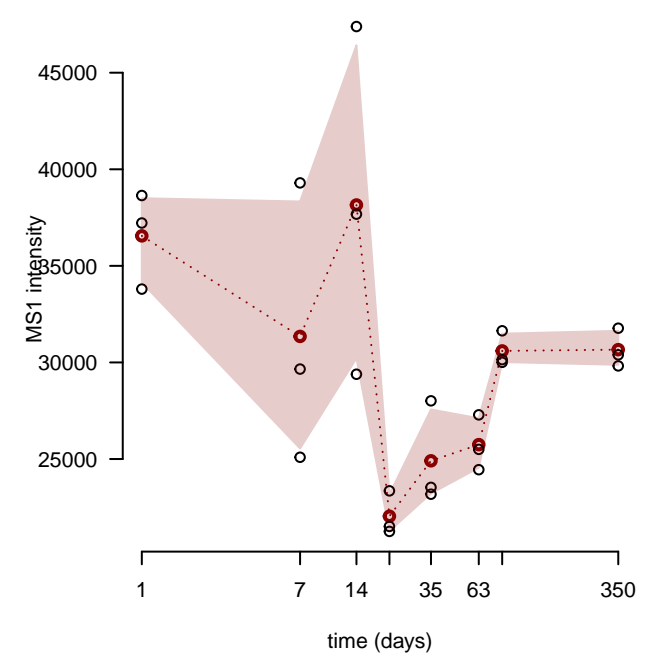

**Q9CRD0**  
GN=Ociad1  
OCIA domain containing 1

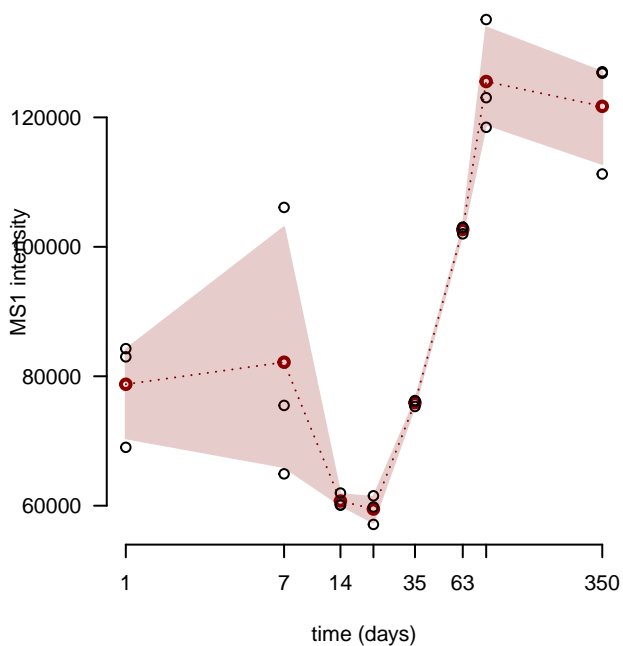

**Q9CRD2**  
GN=Emc2  
ER membrane protein complex subunit 2

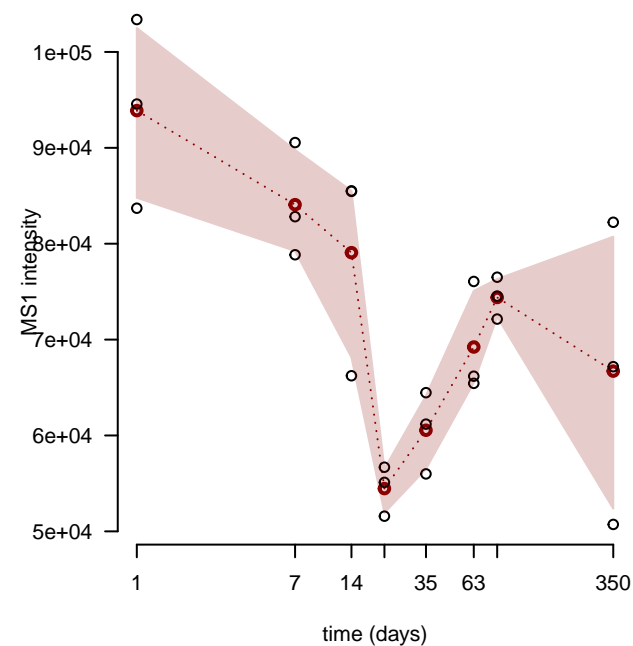

**Q9CRG1**  
GN=Tm7sf3  
transmembrane 7 superfamily member 3

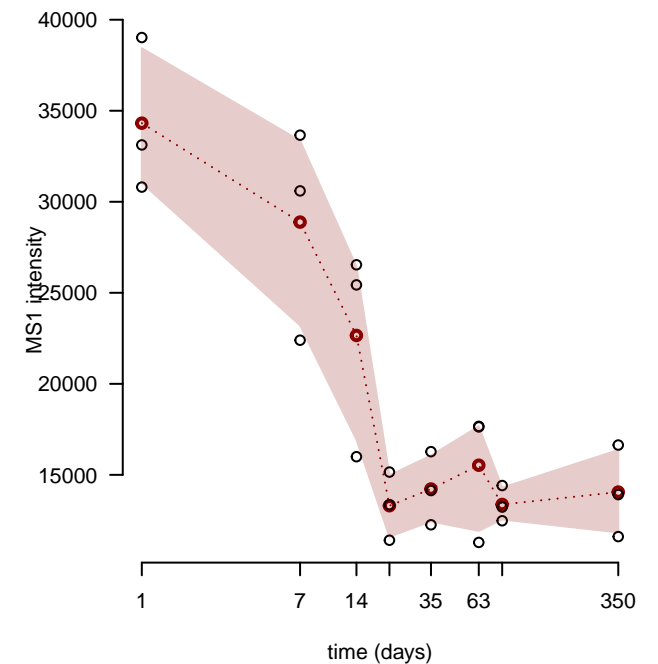



**Q9CRT8**  
**GN=Xpot**  
exportin, tRNA (nuclear export receptor ...

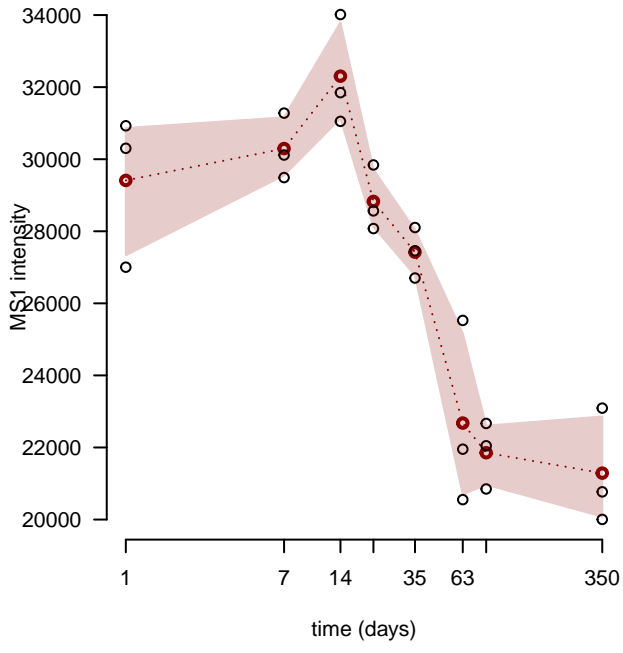

**Q9CRW3**  
**GN=**

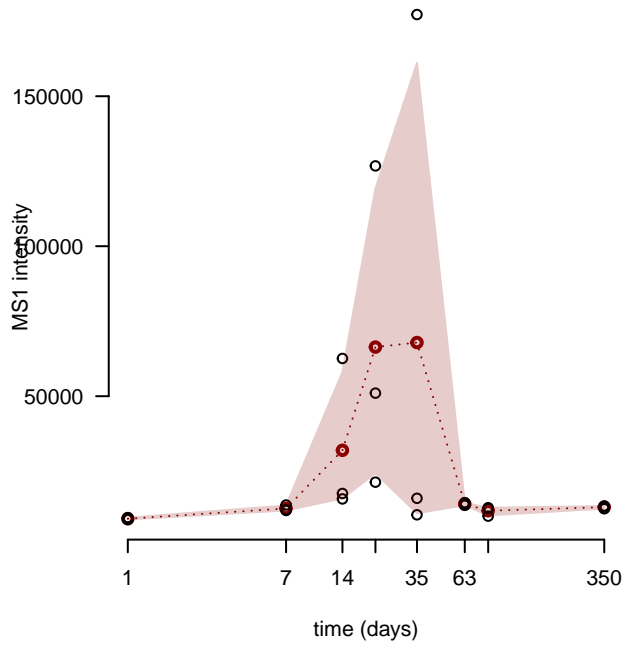

**Q9CRY7**  
**GN=Gdpd1**  
glycerophosphodiester phosphodiesterase ...

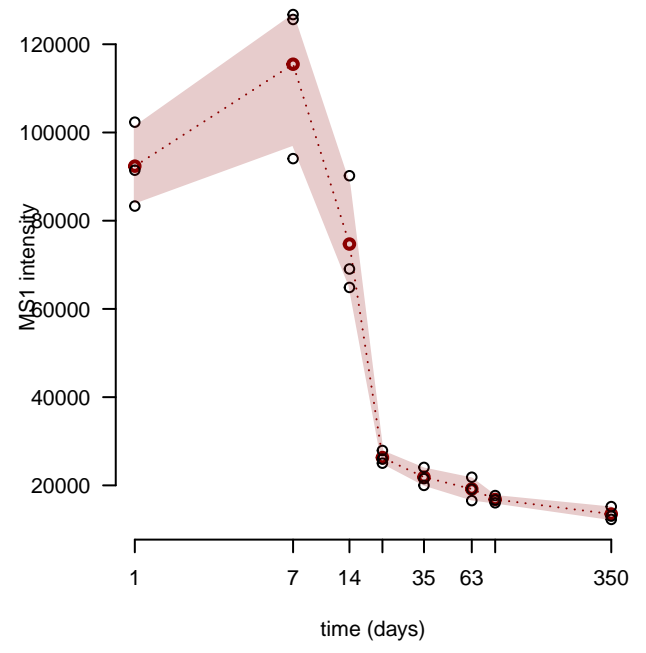

**Q9CS00**  
**GN=Cactin**  
cactin, spliceosome C complex subunit

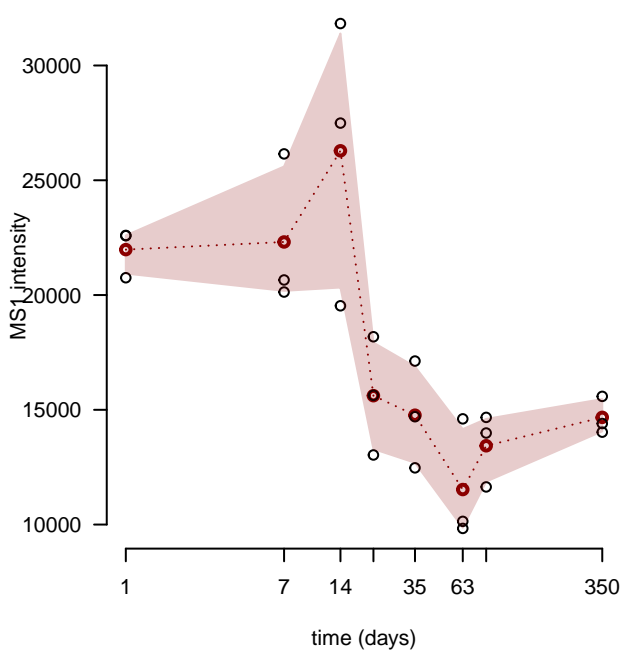

**Q9CS42**  
**GN=Prps2**  
phosphoribosyl pyrophosphate synthetase ...

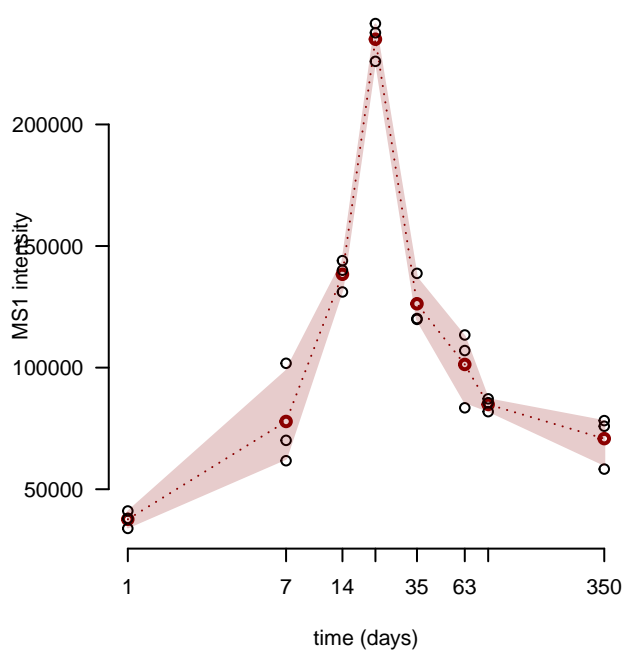

**Q9CS74**  
**GN=Ecd**  
ecdysoneless cell cycle regulator

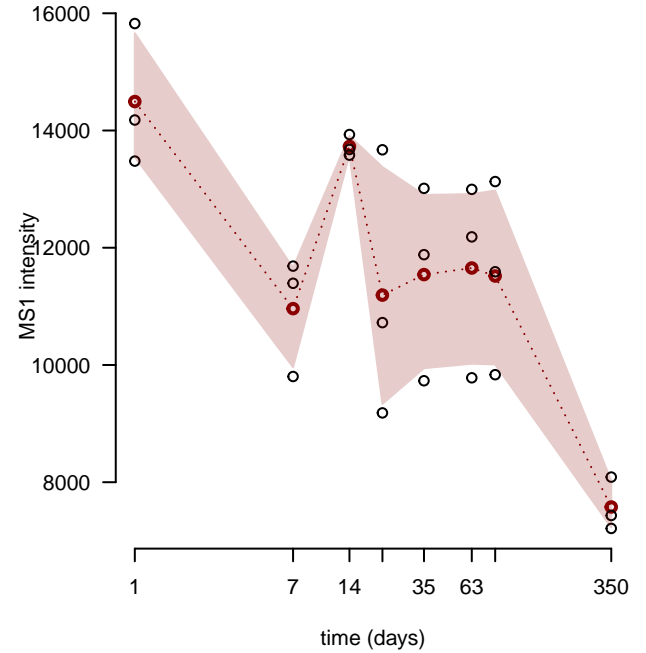

**Q9CSB4**  
**GN=Pard3b**  
par-3 family cell polarity regulator bet ...

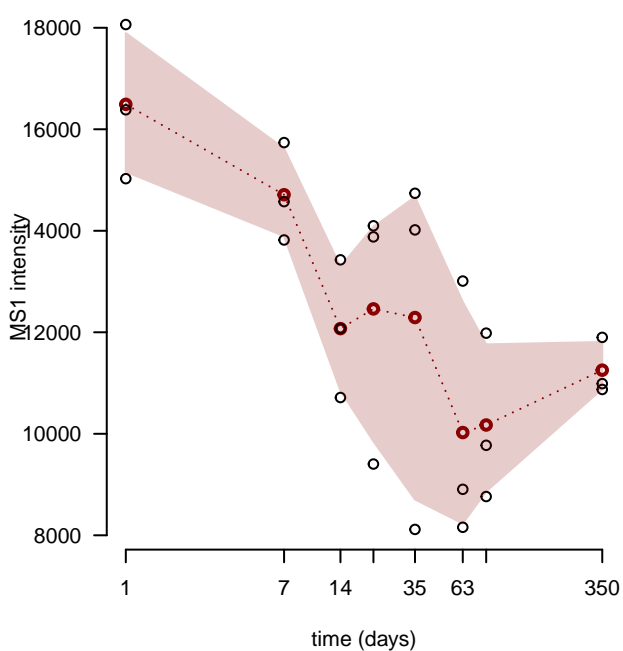

**Q9CSH3**  
**GN=Dis3**  
DIS3 homolog, exosome endoribonuclease a ...

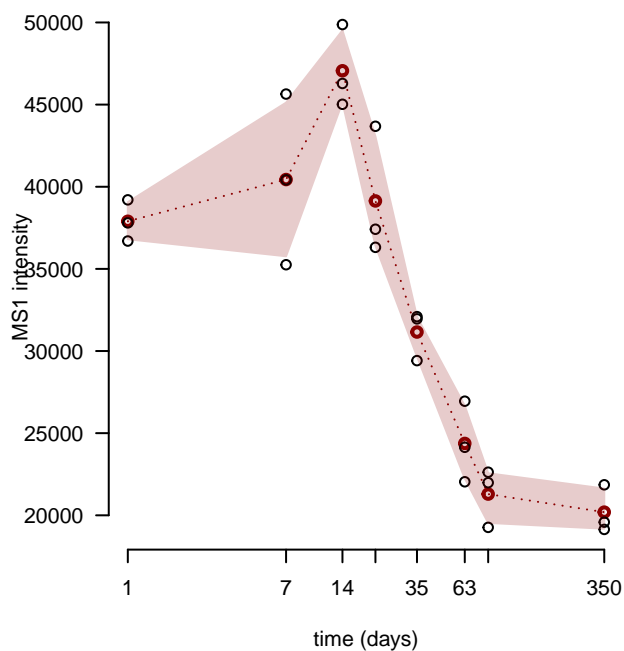

**Q9CSN1**  
**GN=Snw1**  
SNW domain containing 1

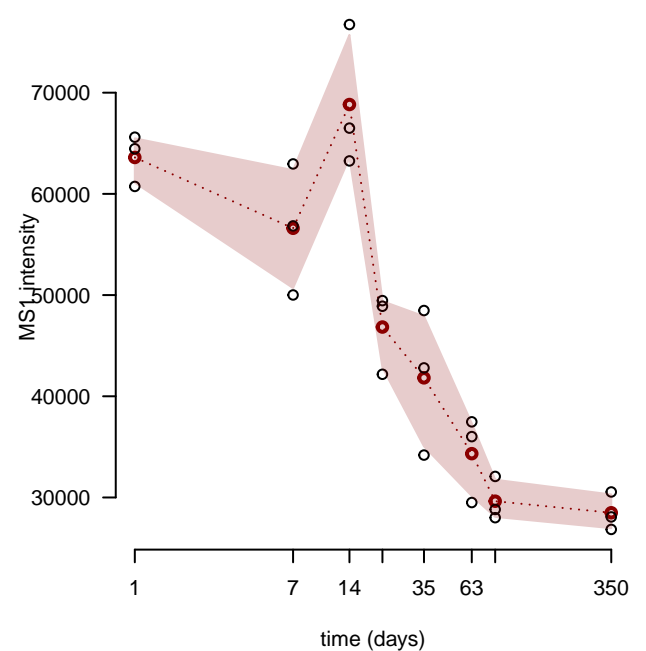

**Q9CSU0**  
**GN=Rprd1b**  
regulation of nuclear pre-mRNA domain co ...

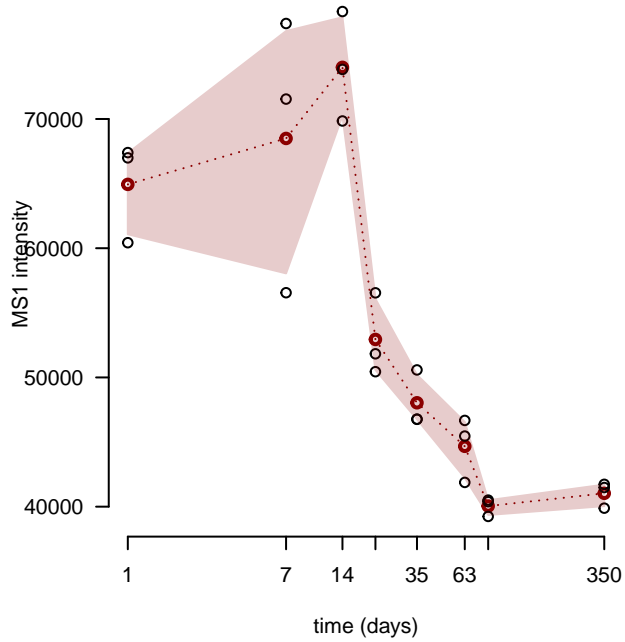

**Q9CSV6**  
**GN=Sft2d3**  
SFT2 domain containing 3

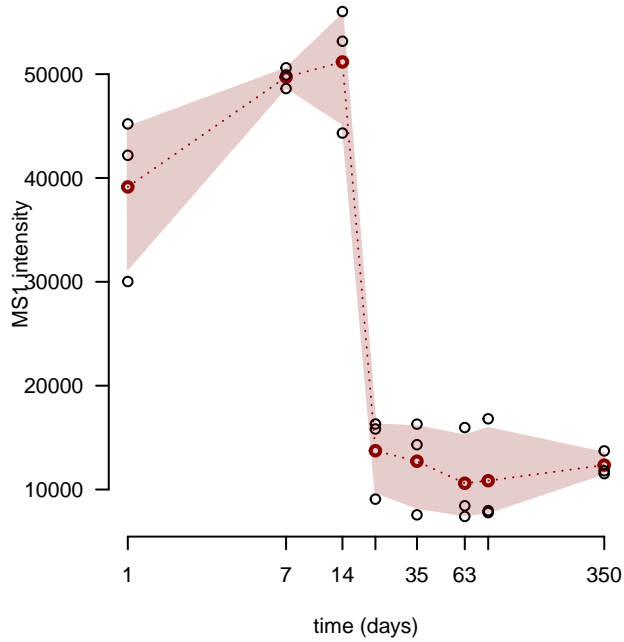

**Q9CT10**  
**GN=Ranbp3**  
RAN binding protein 3

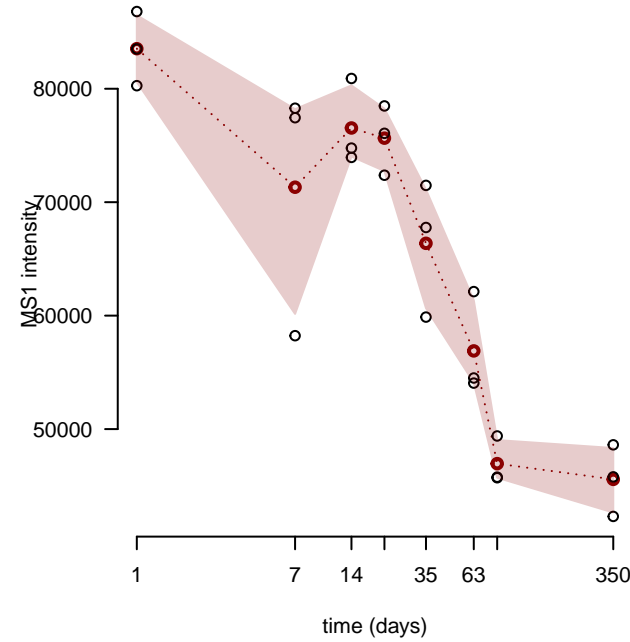

**Q9CTH6**  
**GN=Fcf1**  
FCF1 rRNA processing protein

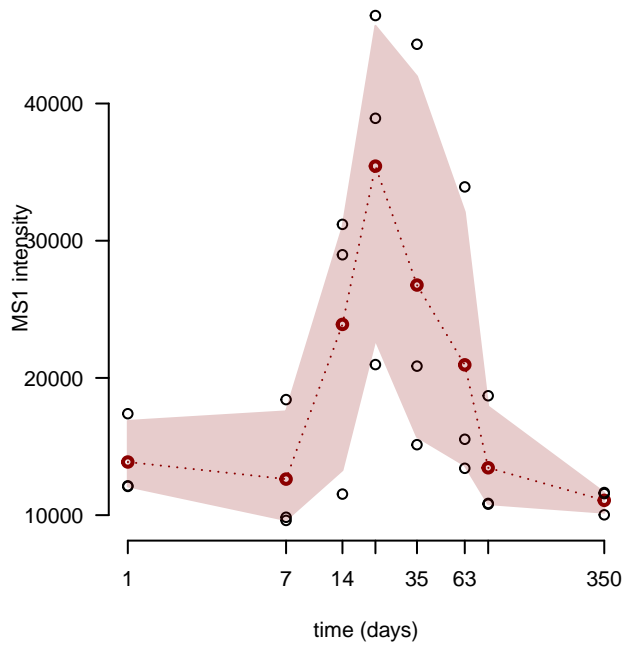

**Q9CTN4**  
**GN=Rhobtb3**  
Rho-related BTB domain containing 3

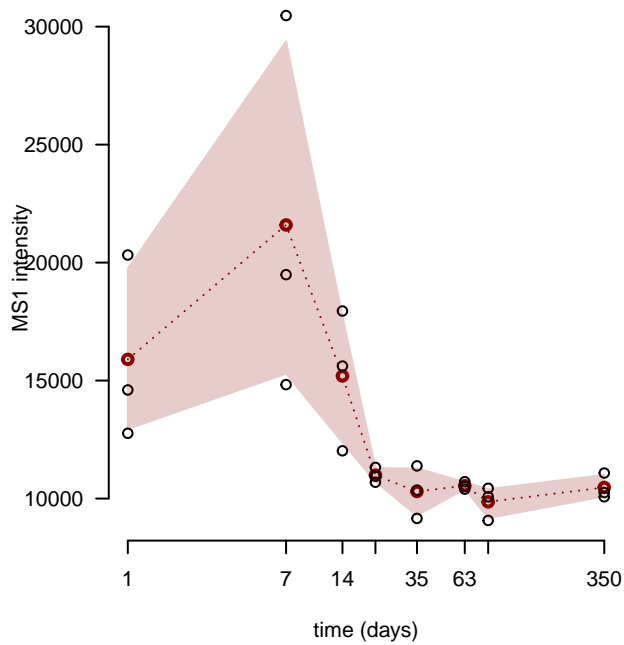

**Q9CTY5**  
**GN=Micu3**  
mitochondrial calcium uptake family, mem ...

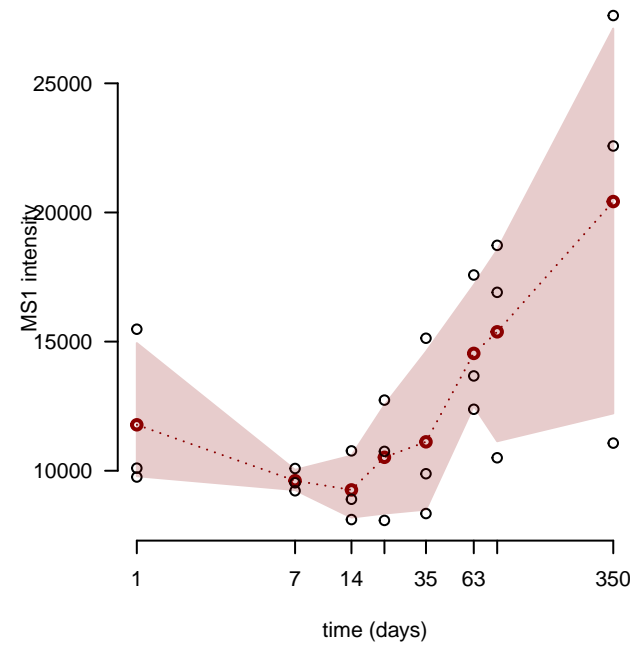

**Q9CU62**  
**GN=Smc1a**  
structural maintenance of chromosomes 1A

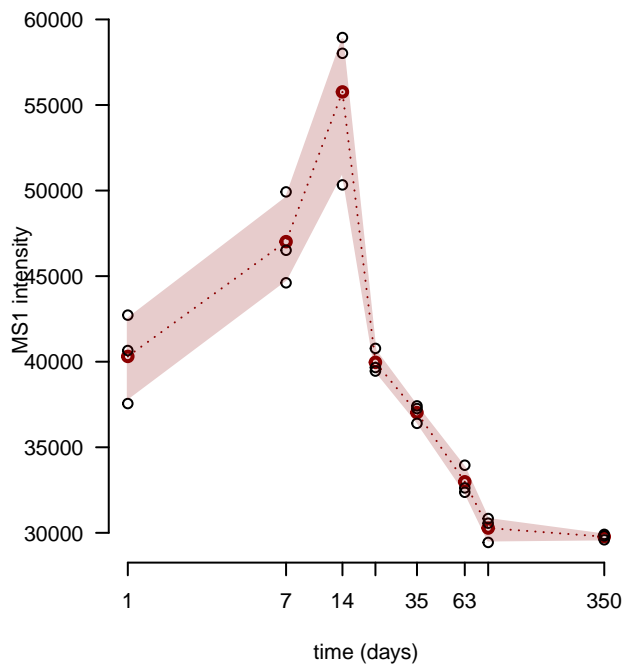

**Q9CU65**  
**GN=Zmym2**  
zinc finger, MYM-type 2

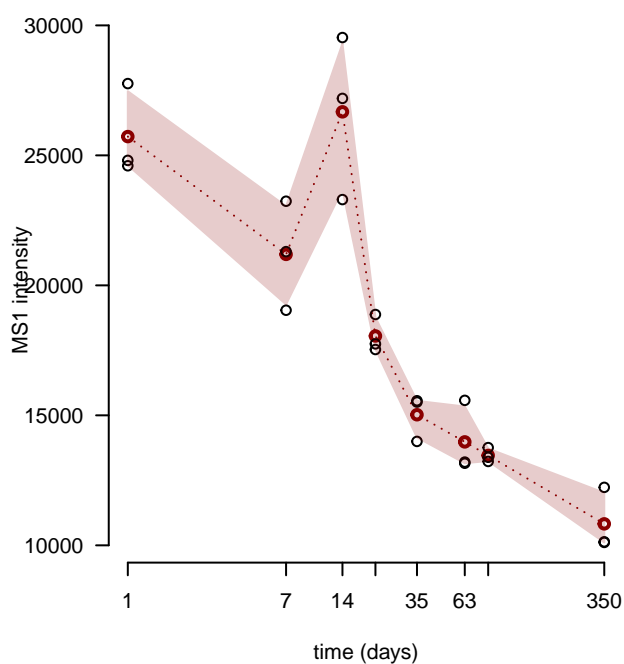

**Q9CUN6**  
**GN=Smurf1**  
SMAD specific E3 ubiquitin protein ligas ...

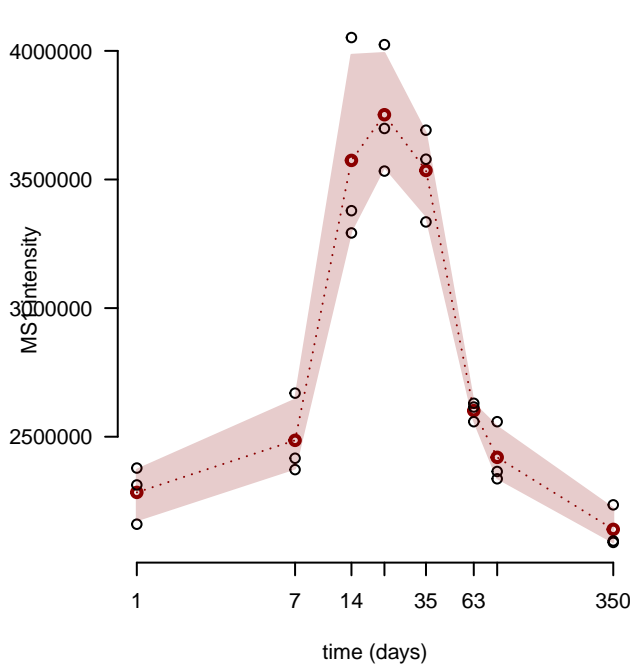

**Q9CUU3**  
GN=Sycp2  
synaptonemal complex protein 2

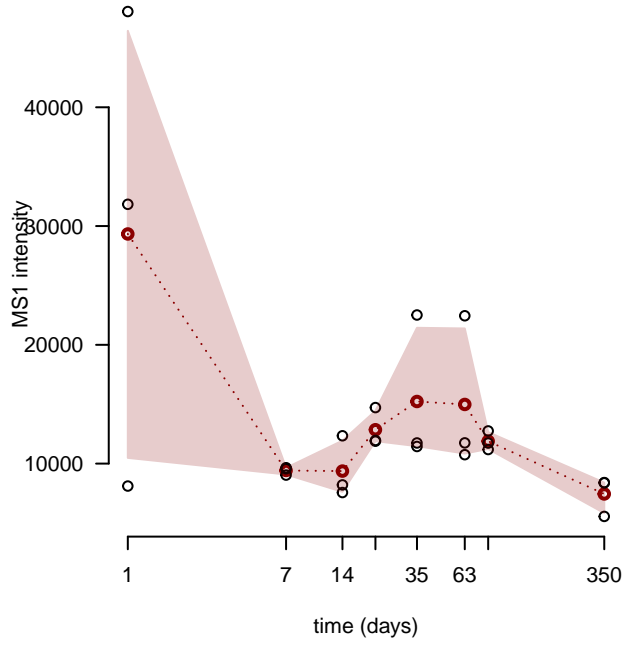

**Q9CUX1**  
GN=Thap12  
THAP domain containing 12

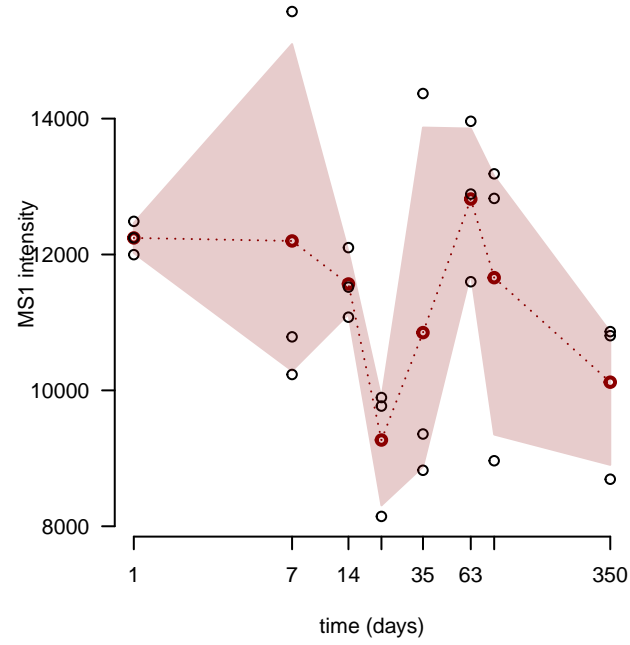

**Q9CV28**  
GN=MINDY3

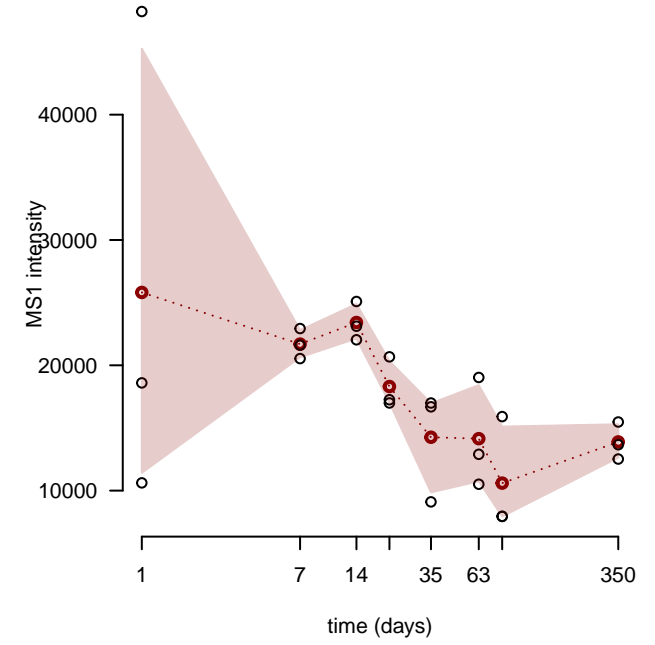

**Q9CVB6**  
GN=Arpc2  
actin related protein 2/3 complex, subun ...

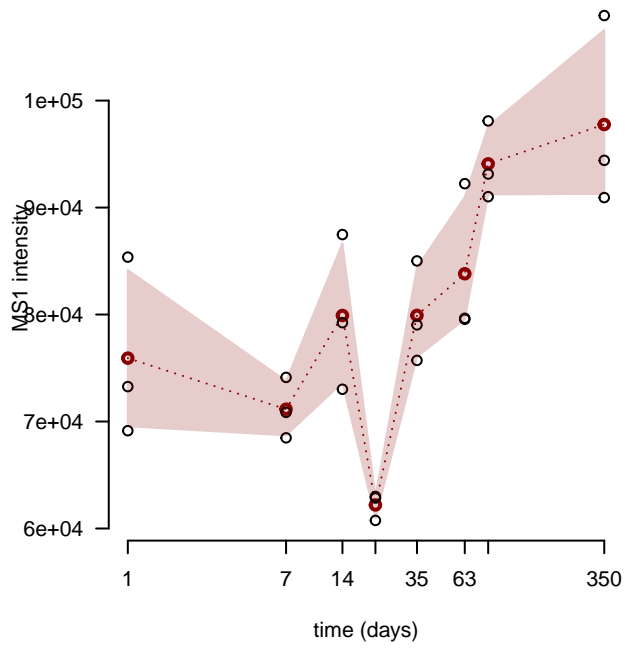

**Q9CVD2**  
GN=Atxn3  
ataxin 3

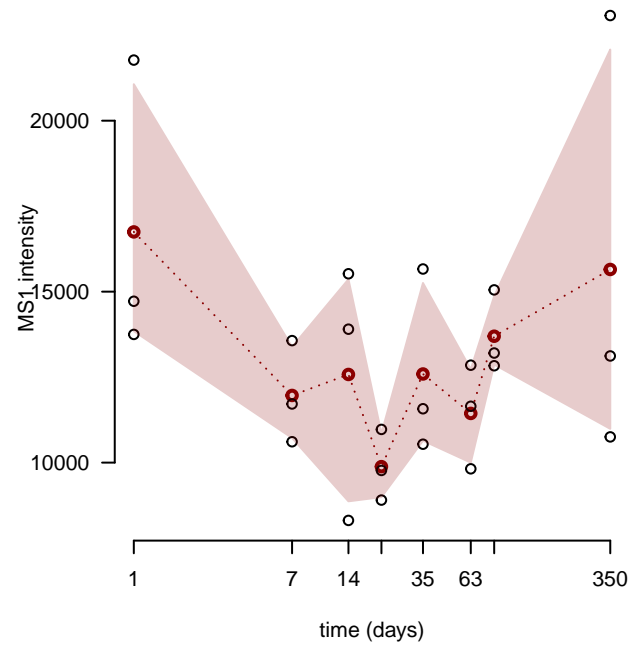

**Q9CVI2**  
GN=Fam133b  
family with sequence similarity 133, mem ...

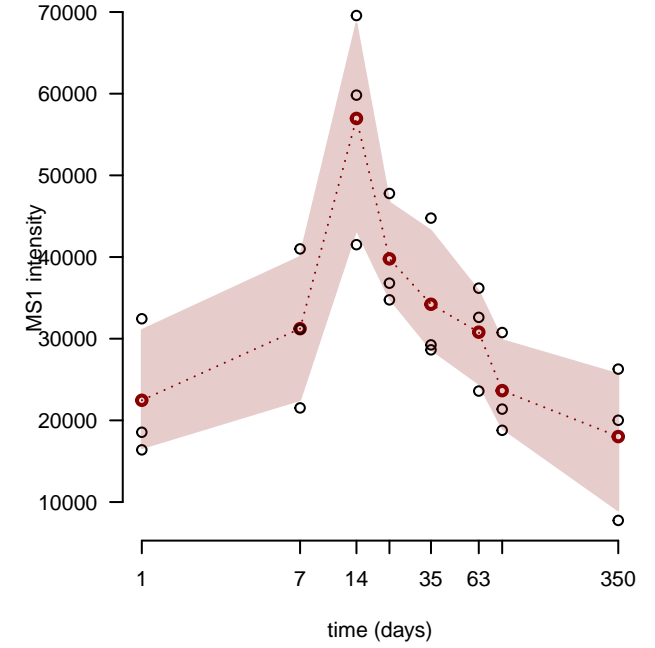

**Q9CW03**  
GN=Smc3  
structural maintenance of chromosomes 3

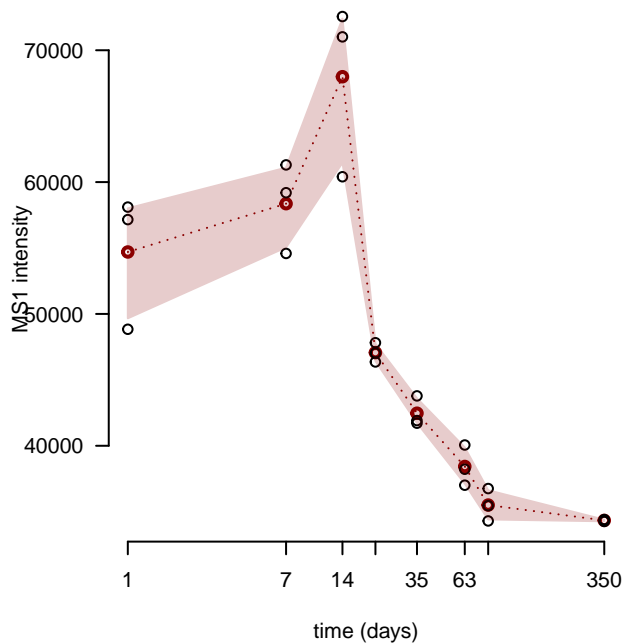

**Q9CW46**  
GN=Raver1  
ribonucleoprotein, PTB-binding 1

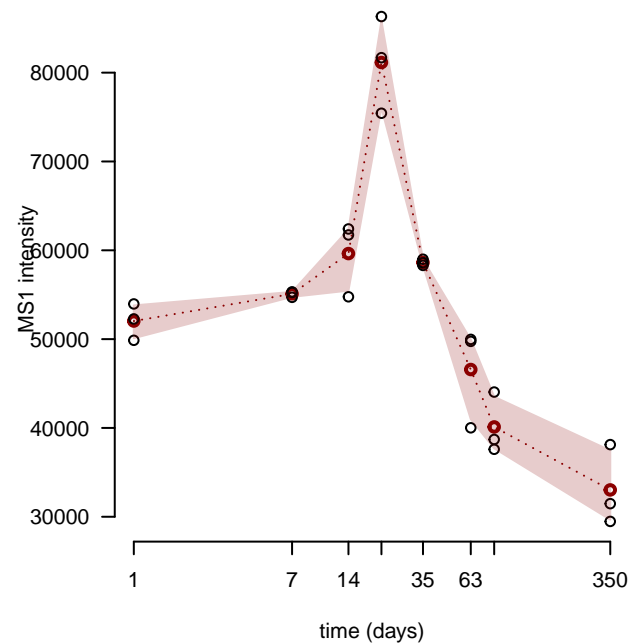

**Q9CW79**  
GN=Golga1  
golgi autoantigen, golgin subfamily a, 1

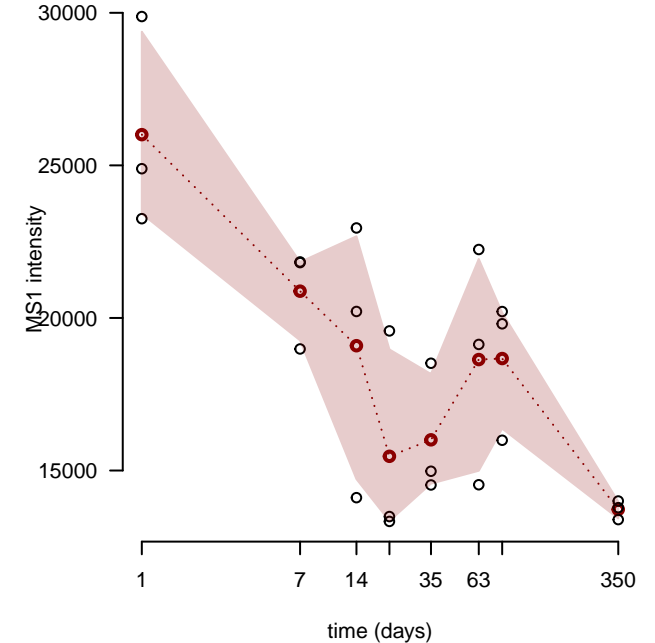

**Q9CWB7**  
GN=

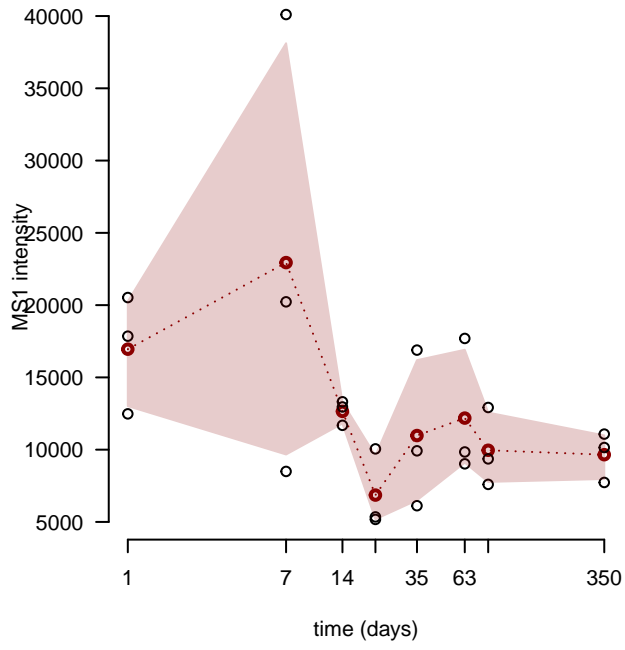

**Q9CWD3**  
GN=Nudt17  
nudix (nucleoside diphosphate linked moi ...

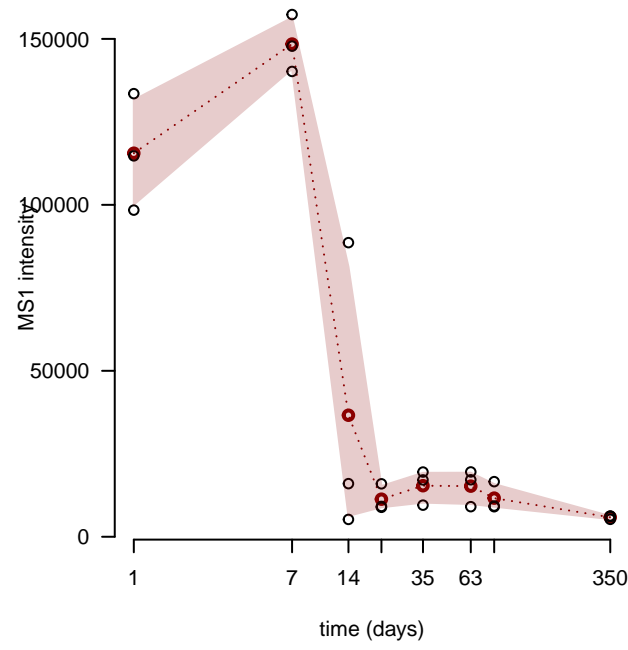

**Q9CWD8**  
GN=Nubpl  
nucleotide binding protein-like

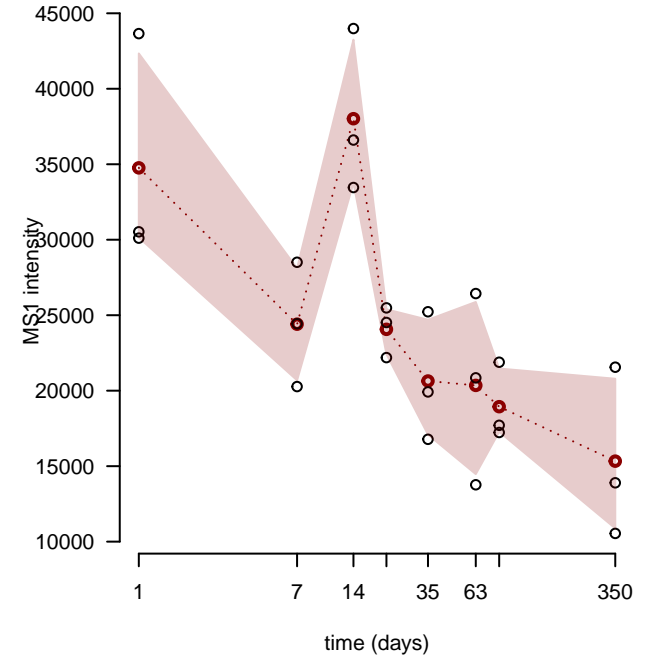

**Q9CWE0**  
GN=Mtfr1l  
mitochondrial fission regulator 1-like

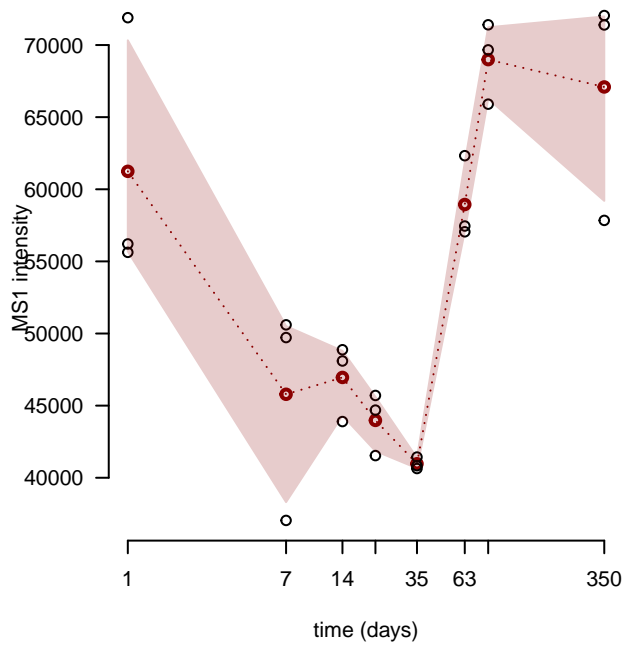

**Q9CWE6**  
GN=Ooep  
oocyte expressed protein

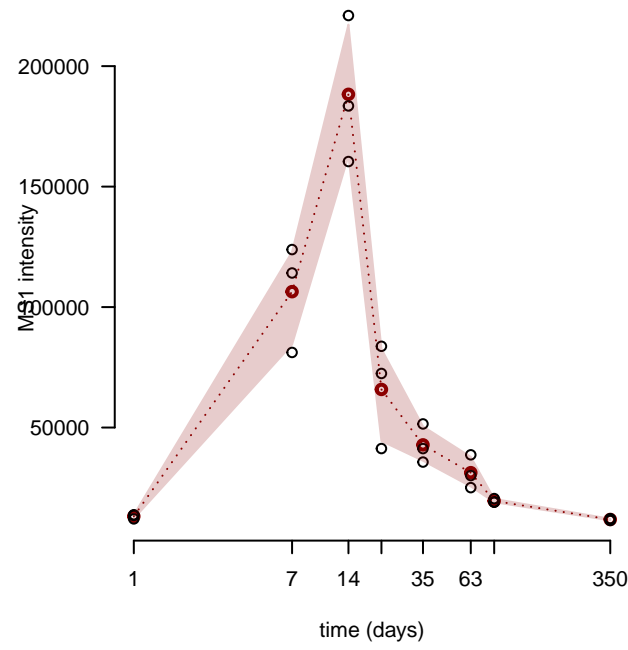

**Q9CWF2**  
GN=Tubb2b  
tubulin, beta 2B class IIB

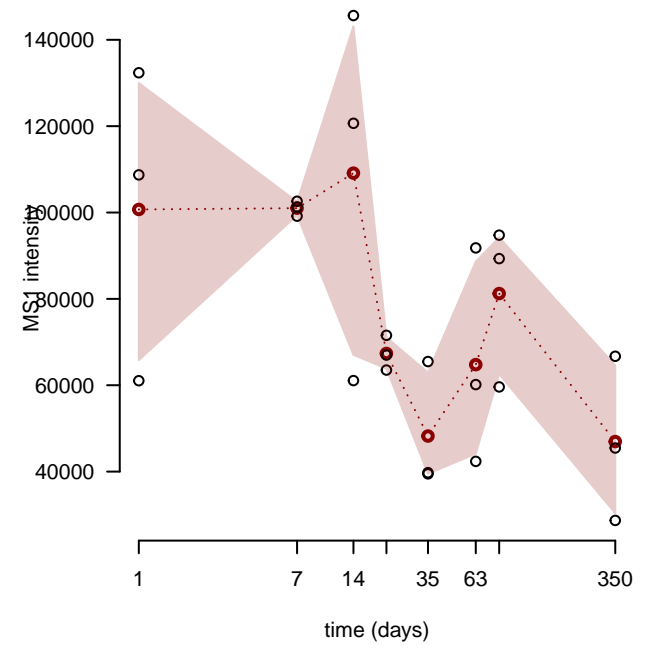

**Q9CWF6**  
GN=Bbs2  
Bardet-Biedl syndrome 2 (human)

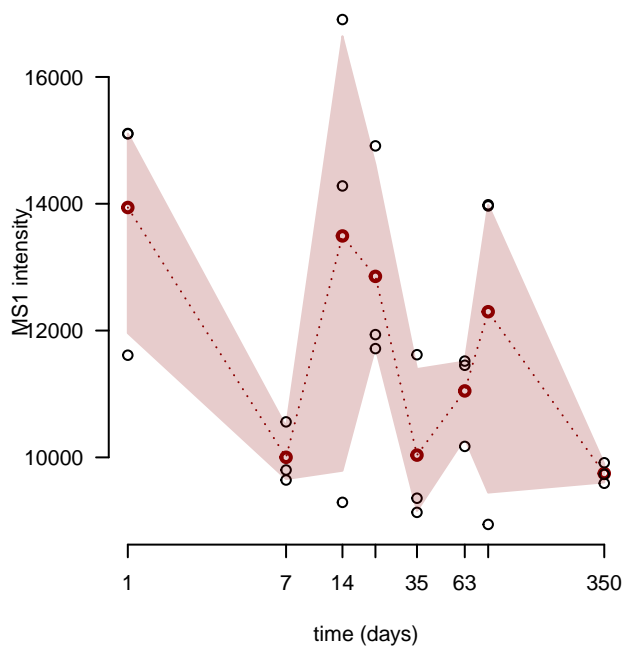

**Q9CWG8**  
GN=Ndufaf7  
NADH:ubiquinone oxidoreductase complex a ...

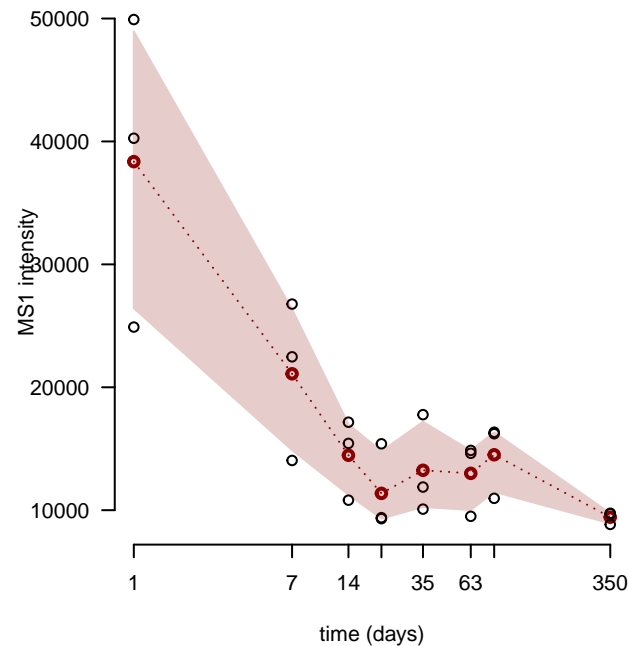

**Q9CWG9**  
GN=Bloc1s2  
biogenesis of lysosomal organelles compl ...

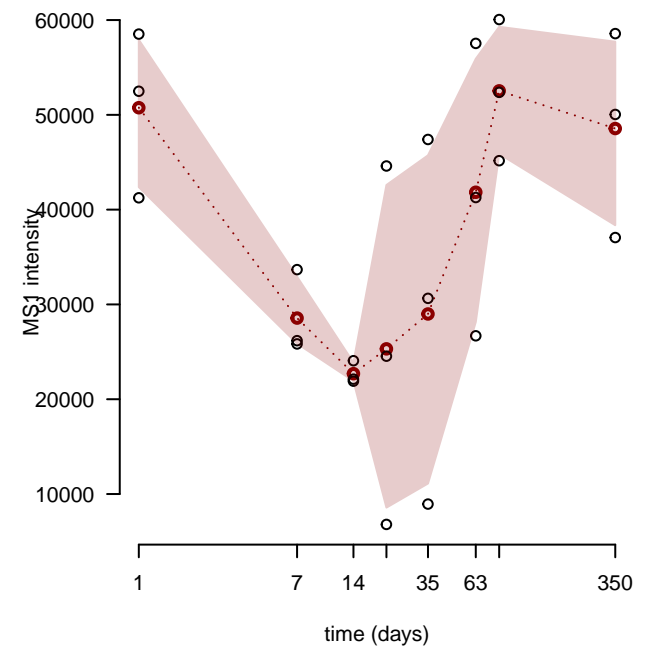

**Q9CWH5**  
GN=Trmt11  
tRNA methyltransferase 11

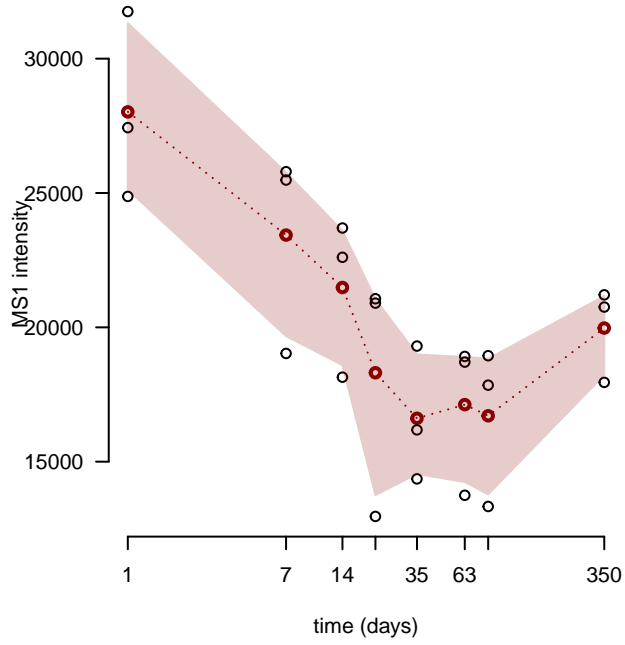

**Q9CWI3**  
GN=Bccip  
BRCA2 and CDKN1A interacting protein

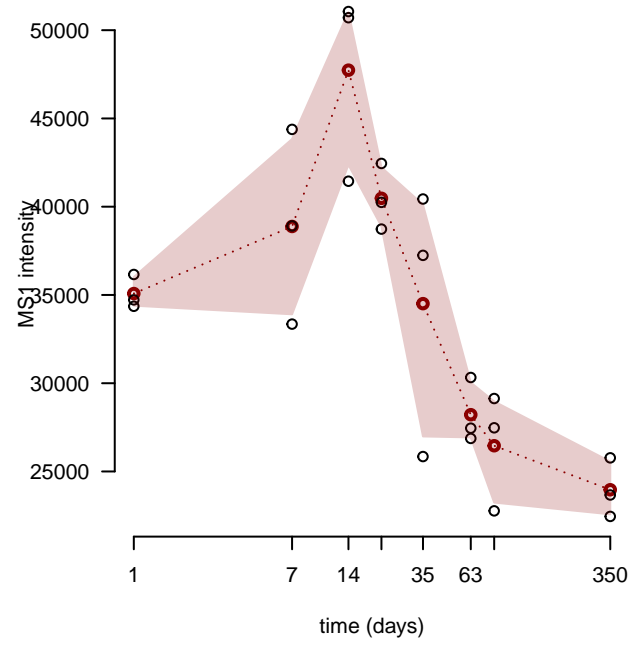

**Q9CWI9**  
GN=Atic  
5-aminoimidazole-4-carboxamide ribonucle...

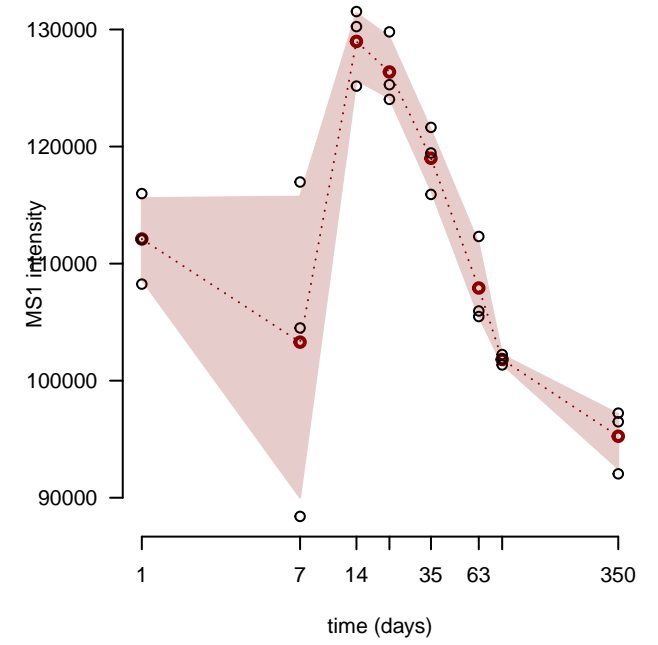

**Q9CWK3**  
GN=Cd2bp2  
CD2 cytoplasmic tail binding protein 2

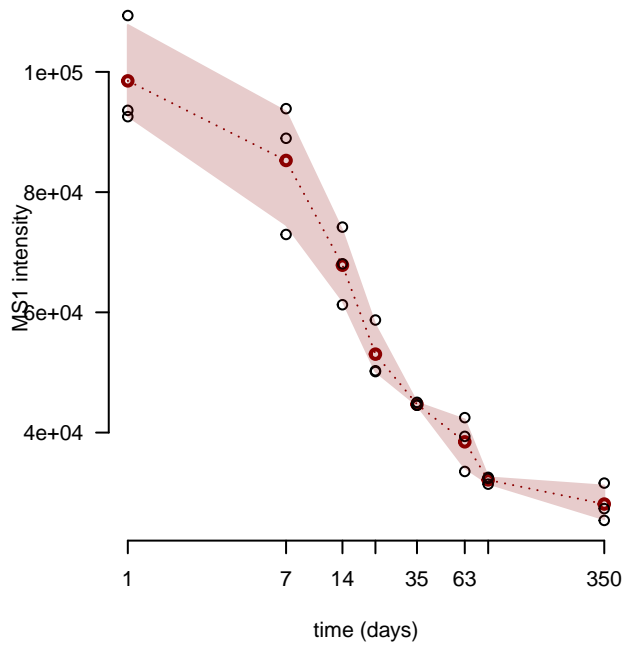

**Q9CWK8**  
GN=Snx2  
sorting nexin 2

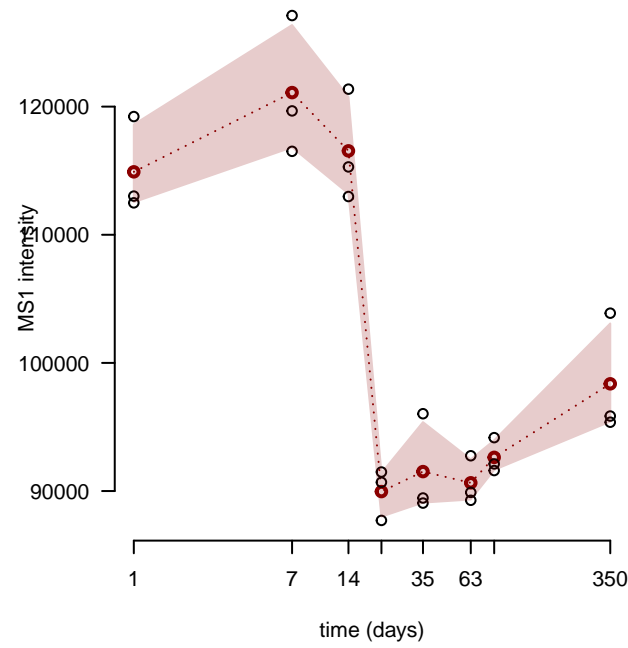

**Q9CWL8**  
GN=Ctnnb1  
catenin, beta like 1

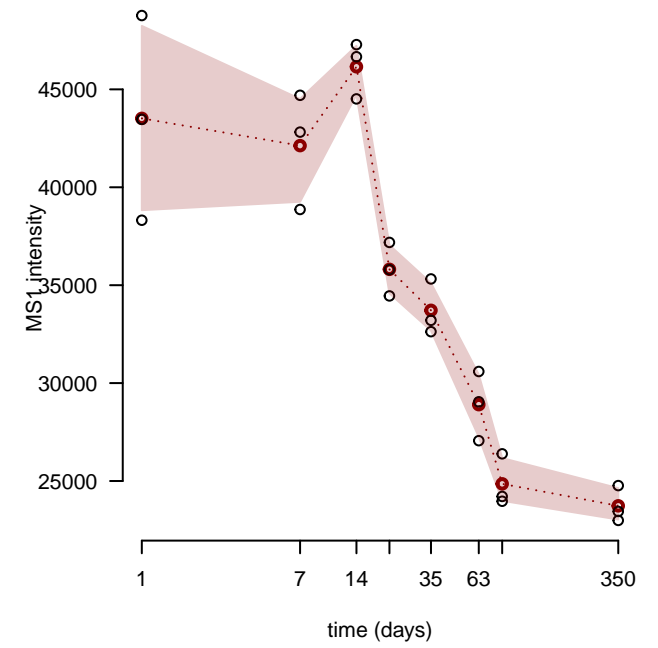

**Q9CWM4**  
GN=Pfdn1  
prefoldin 1

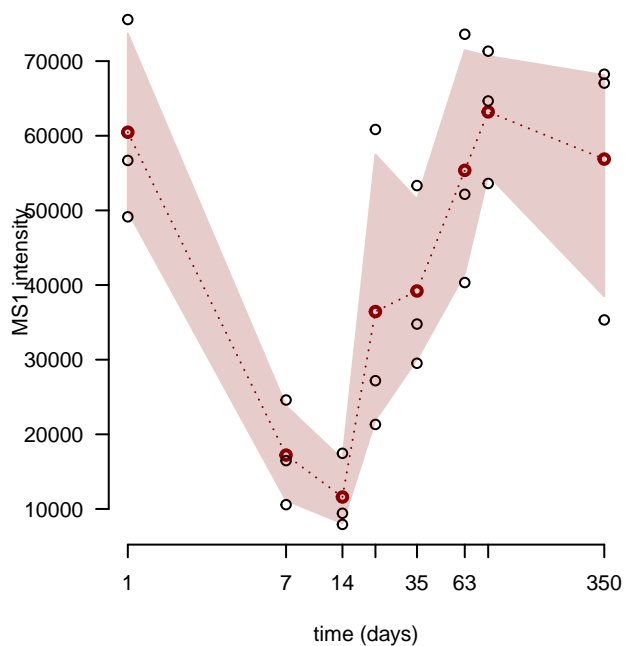

**Q9CWN7**  
GN=Cnot11  
CCR4-NOT transcription complex, subunit ...

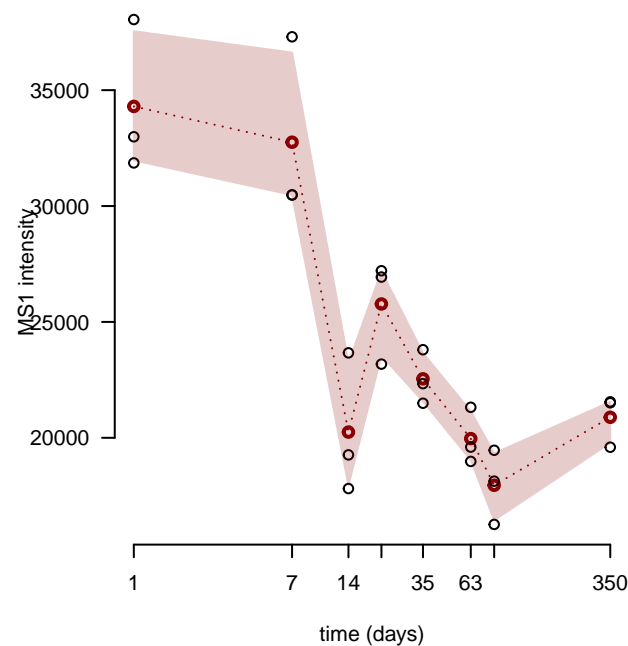

**Q9CWP6**  
GN=Mospd2  
motile sperm domain containing 2

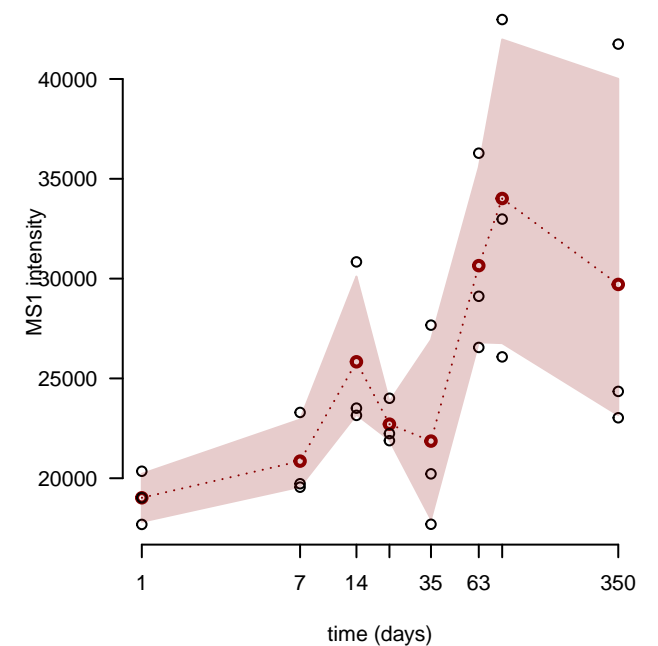

**Q9CWQ0**  
GN=Dph5  
diphthamide biosynthesis 5

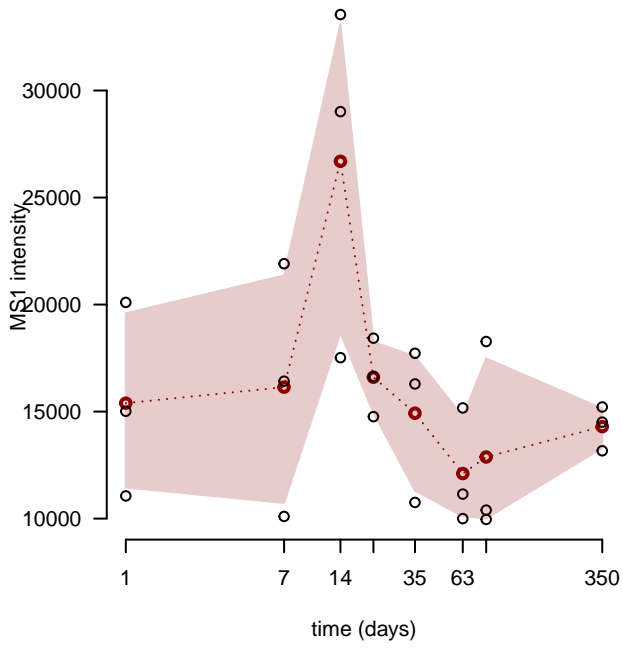

**Q9CWQ8**  
GN=Castor1  
cytosolic arginine sensor for mTORC1 sub ...

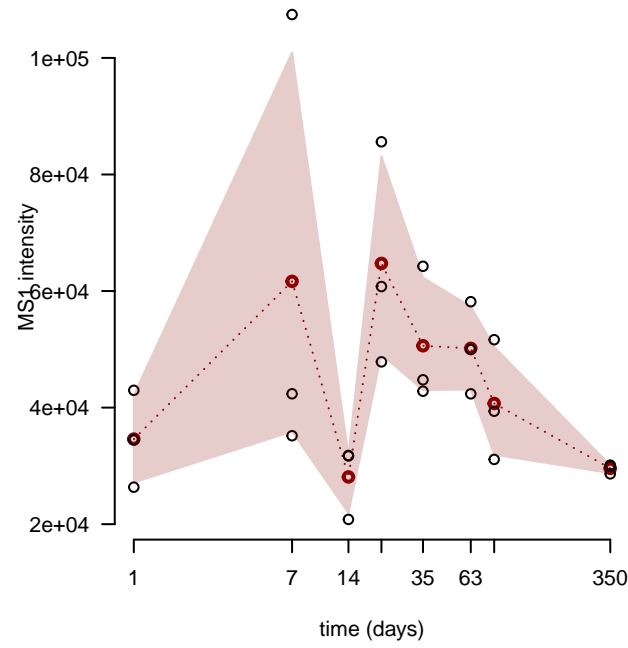

**Q9CWR0**  
GN=Arhgef25  
Rho guanine nucleotide exchange factor ( ...

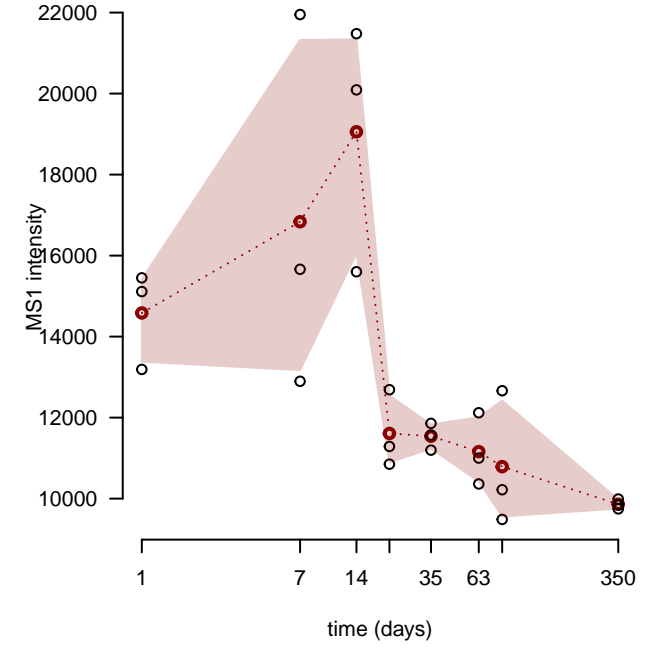

**Q9CWR1**  
GN=Wdr73  
WD repeat domain 73

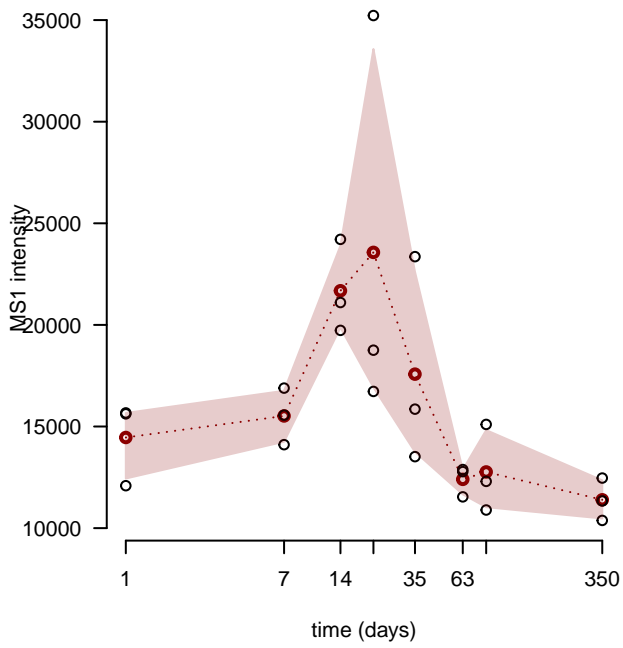

**Q9CWR2**  
GN=Smyd3  
SET and MYND domain containing 3

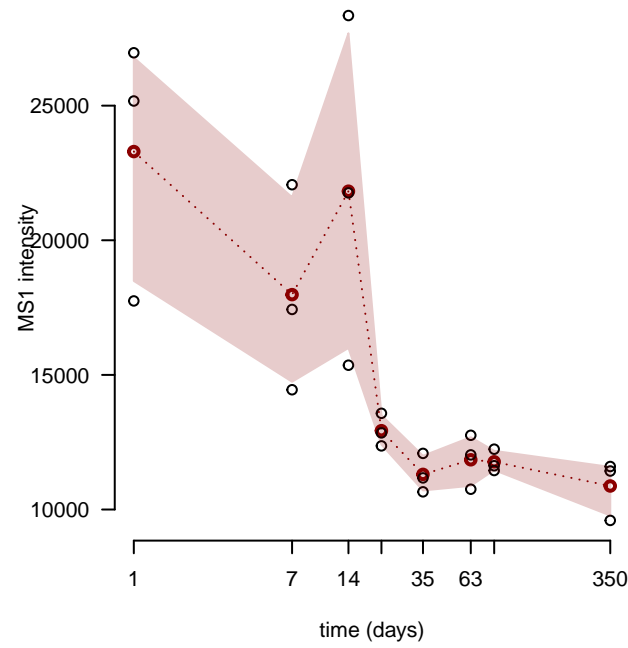

**Q9CWS0**  
GN=Ddah1  
dimethylarginine dimethylaminohydrolase ...

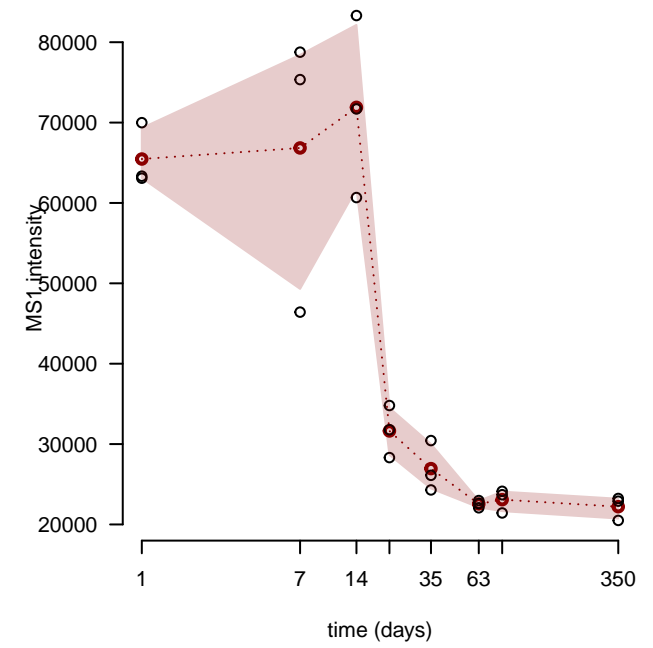

**Q9CWS4**  
GN=Ints11  
integrator complex subunit 11

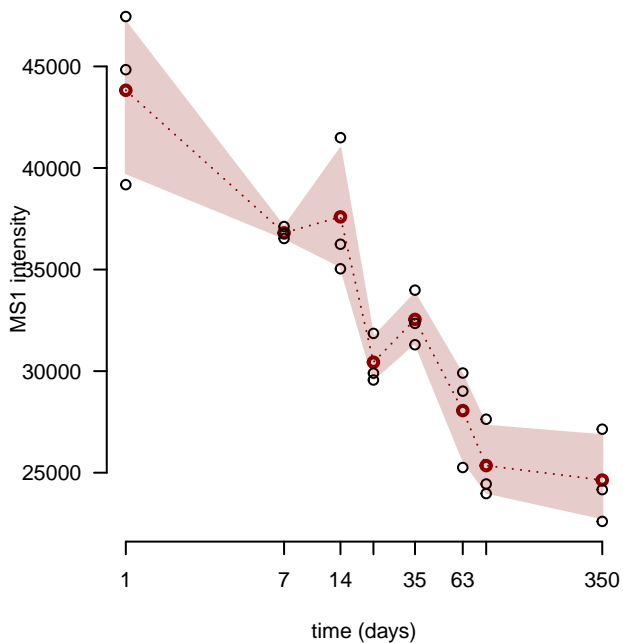

**Q9CWT6**  
GN=Ddx28  
DEAD box helicase 28

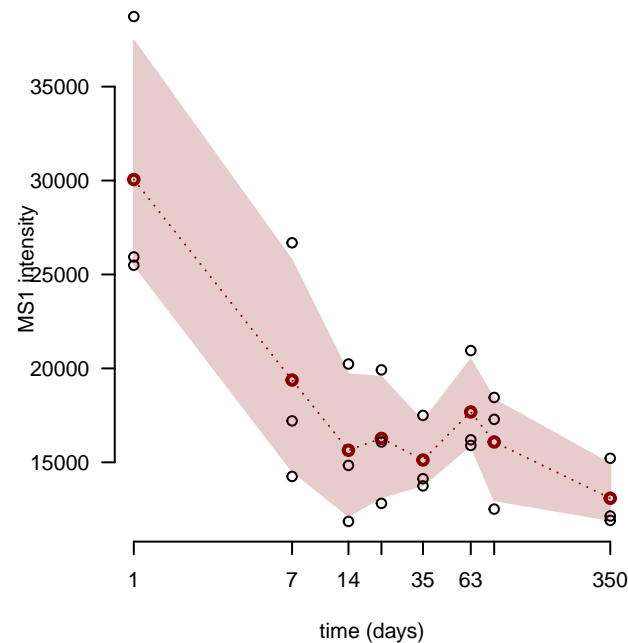

**Q9CWU2**  
GN=Zdhhc13  
zinc finger, DHHC domain containing 13

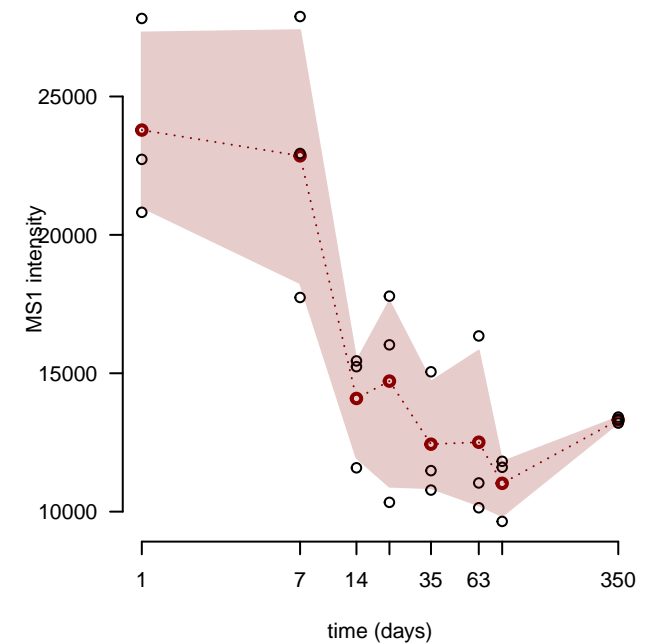

**Q9CWU4**  
GN=

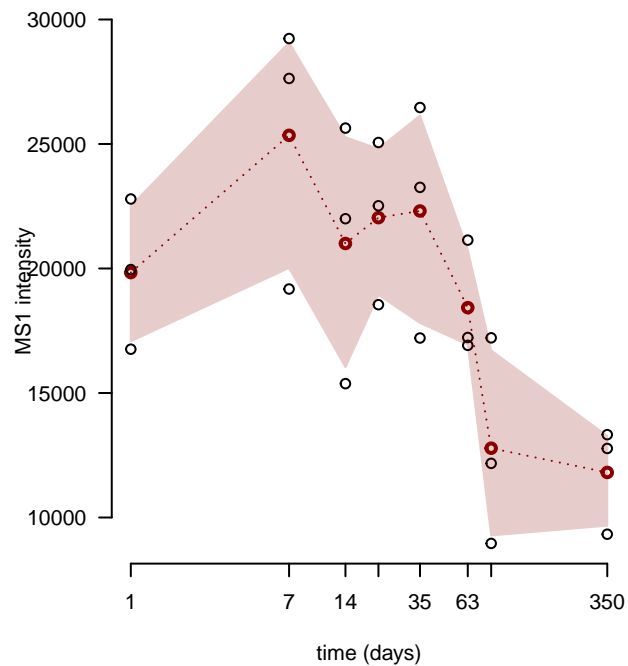

**Q9CWU5**  
GN=Khdc3  
KH domain containing 3, subcortical mate ...

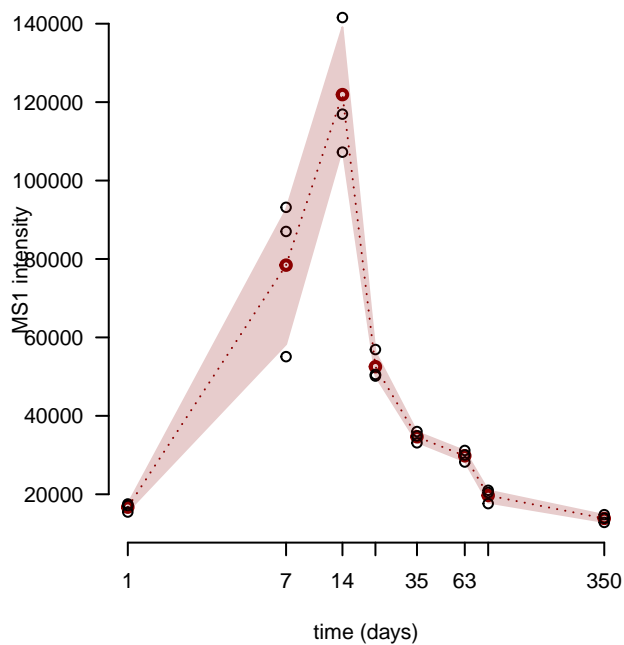

**Q9CWU5**  
GN=Khdc3  
KH domain containing 3, subcortical mate ...

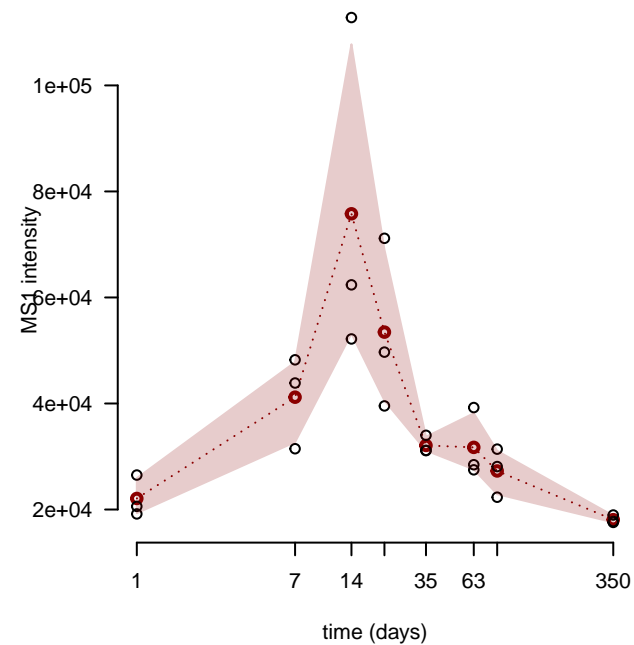

**Q9CWU6**  
GN=Uqcc1  
ubiquinol-cytochrome c reductase complex ...

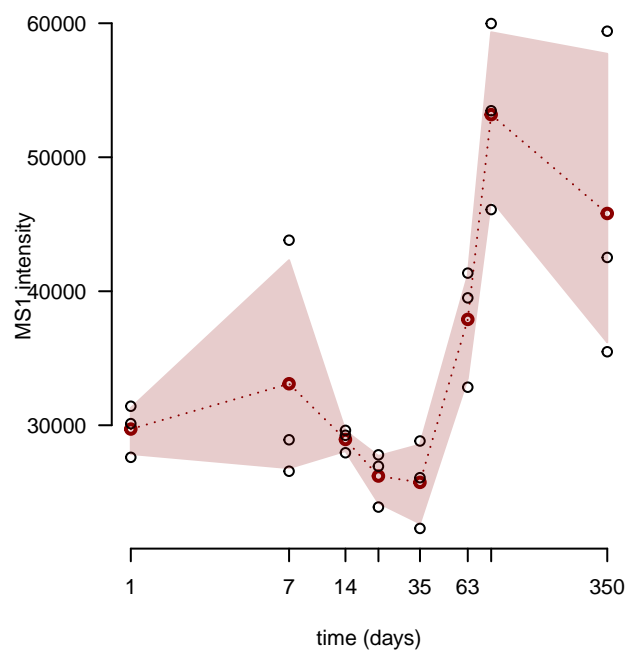

**Q9CWU9**  
GN=Nup37  
nucleoporin 37

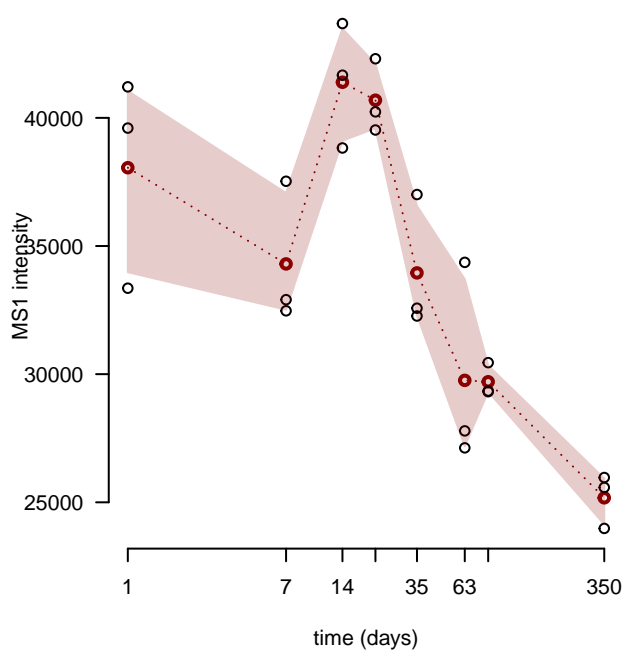

**Q9CWV6**  
GN=Prkrip1  
Prkr interacting protein 1 (IL11 inducib ...

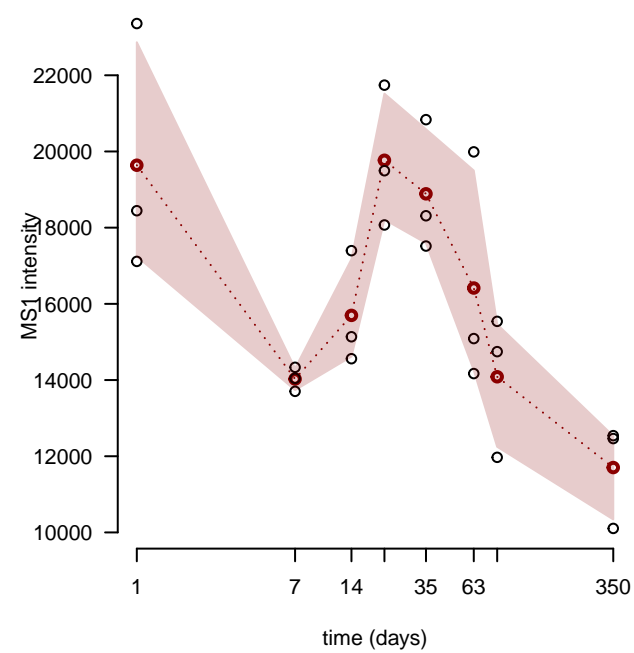

**Q9CWW6**  
GN=Pin4  
peptidyl-prolyl cis/trans isomerase, NIM ...

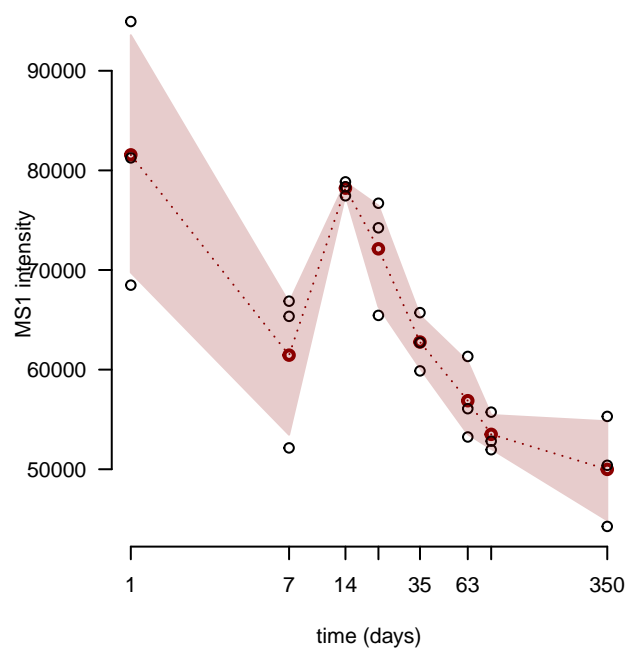

**Q9CWW7**  
GN=Cxxc1  
CXXC finger 1 (PHD domain)

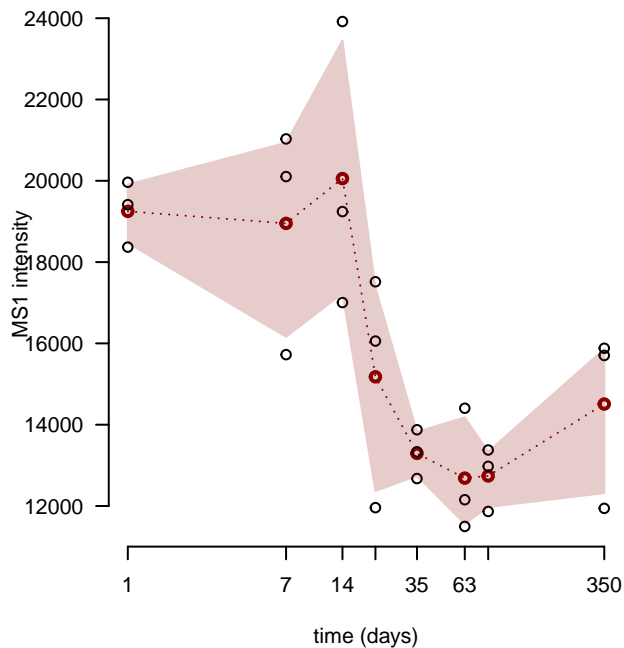

**Q9CWX2**  
GN=Ndufaf1  
NADH:ubiquinone oxidoreductase complex a ...

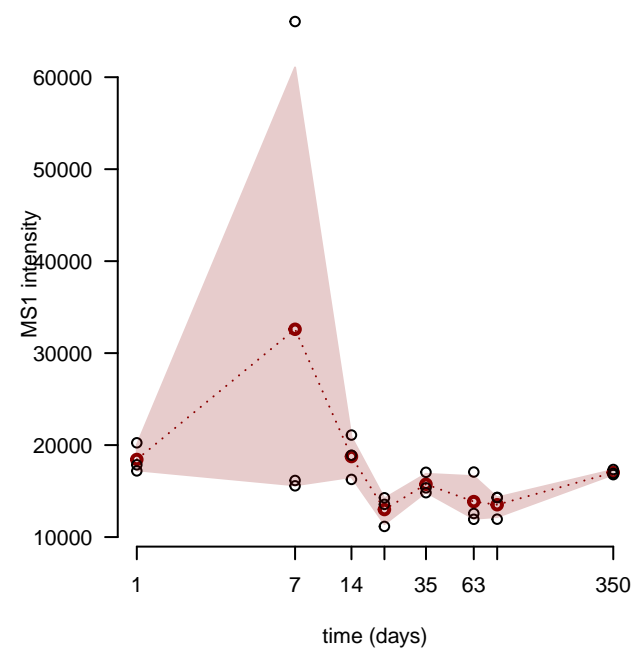

**Q9CWX4**  
GN=Rpusd4  
RNA pseudouridylate synthase domain cont ...

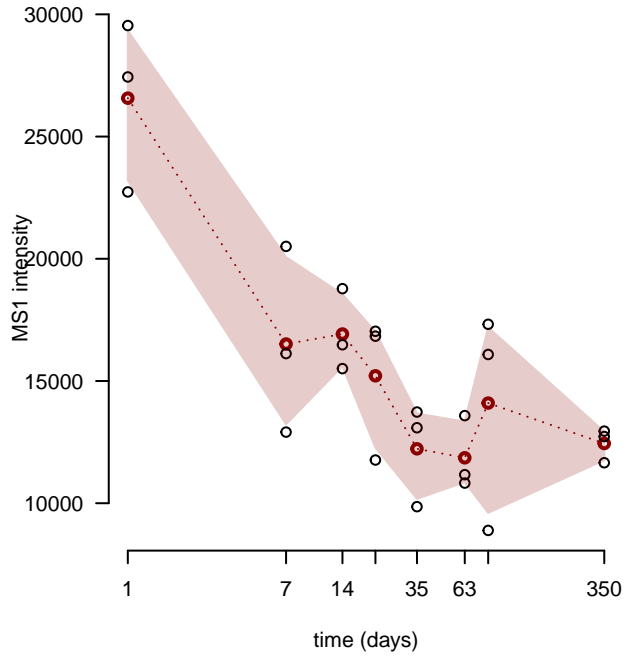

**Q9CWX9**  
GN=Ddx47  
DEAD box helicase 47

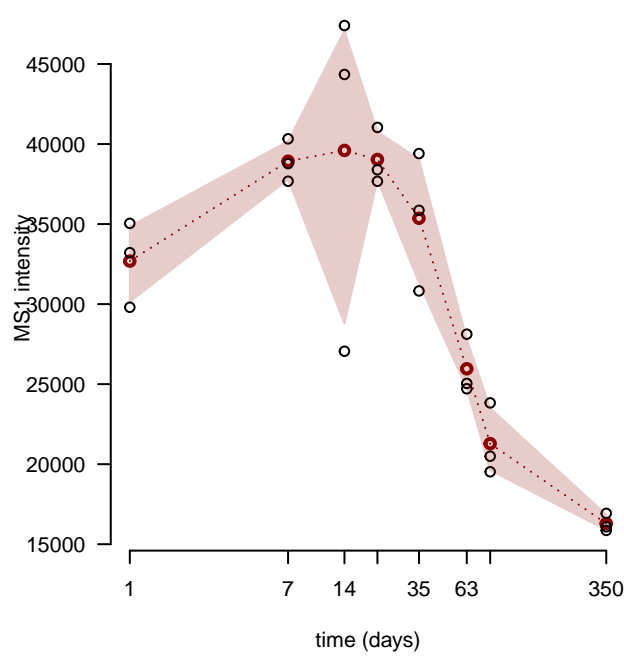

**Q9CWY3**  
GN=Setd6  
SET domain containing 6

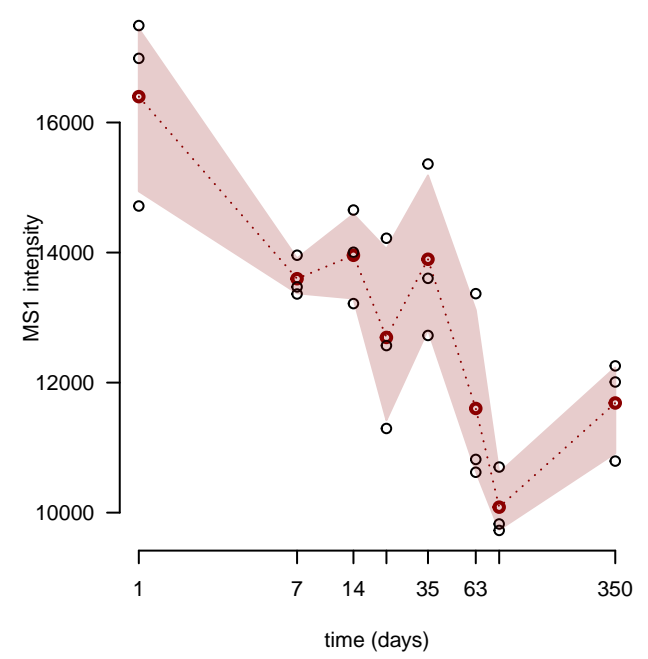

**Q9CWY8**  
GN=Rnaseh2a  
ribonuclease H2, large subunit

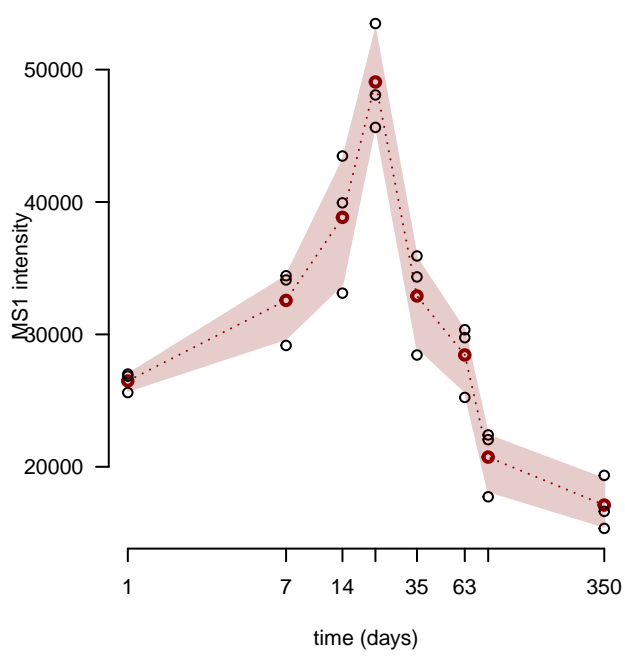

**Q9CWZ3**  
GN=Rbm8a  
RNA binding motif protein 8a

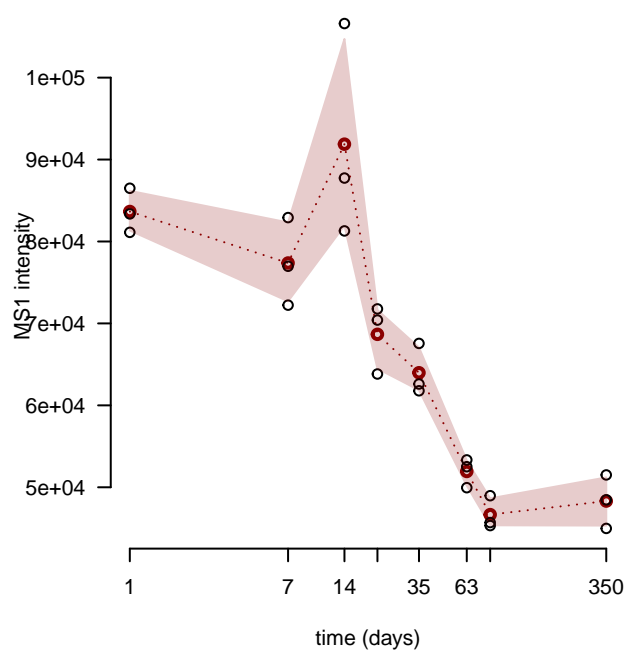

**Q9CWZ7**  
GN=Napg  
N-ethylmaleimide sensitive fusion protei ...

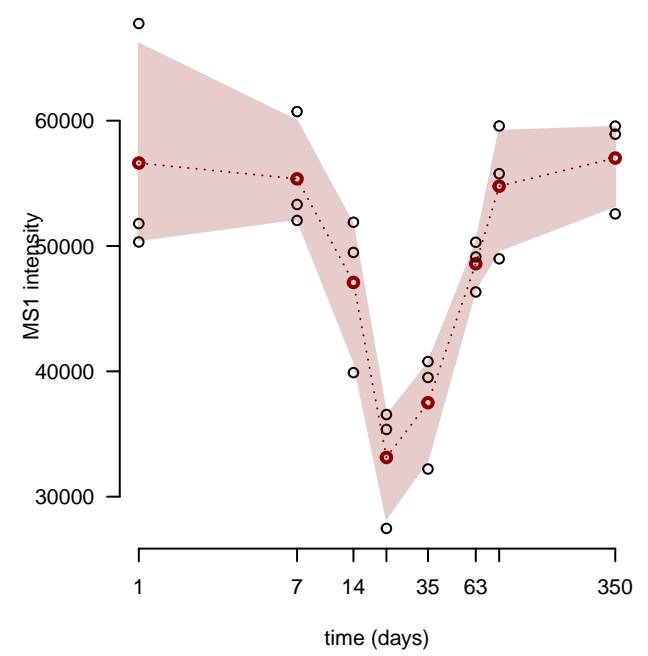

**Q9CX00**  
GN=Ist1  
increased sodium tolerance 1 homolog (ye ...

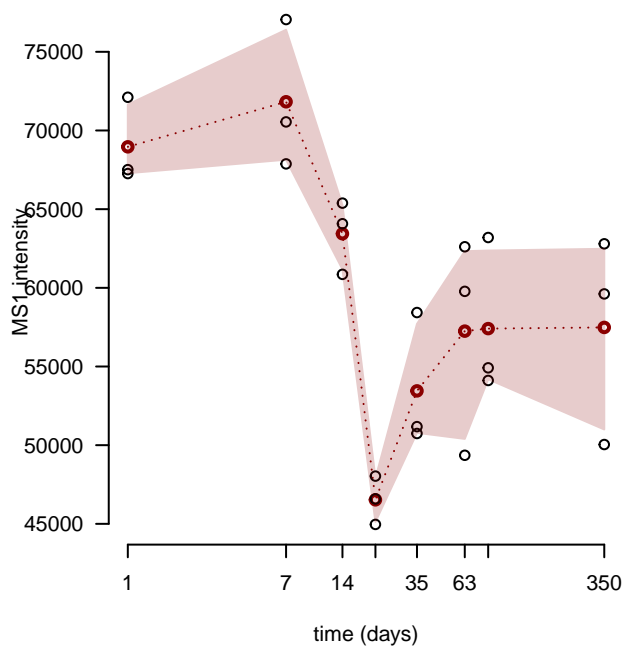

**Q9CX11**  
GN=Utp23  
UTP23 small subunit processome component

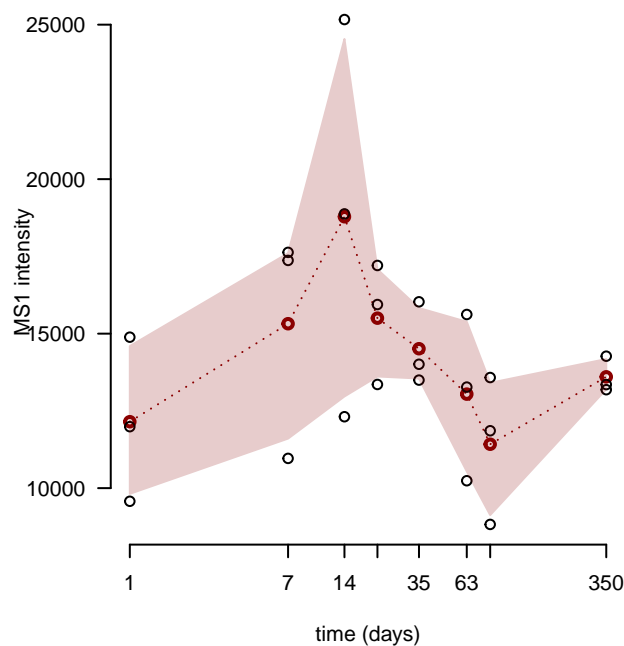

**Q9CX13**  
GN=Cnih4  
cornichon family AMPA receptor auxiliary ...

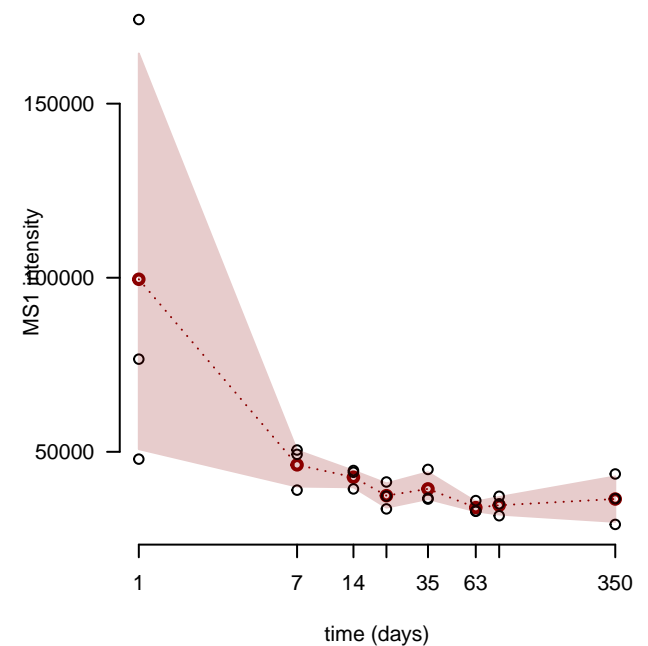



**Q9CX30**  
GN=Yif1b

Yip1 interacting factor homolog B (S. ce ...

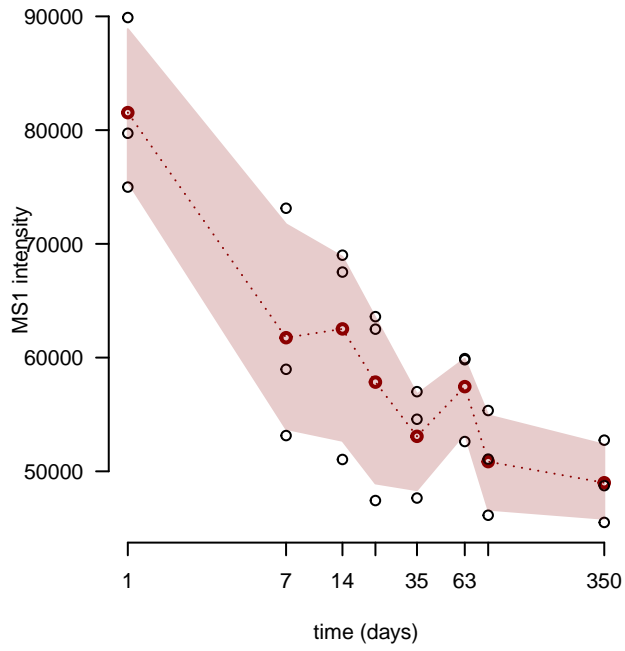

**Q9CX34**  
GN=Sugt1

SGT1, suppressor of G2 allele of SKP1 (S ...

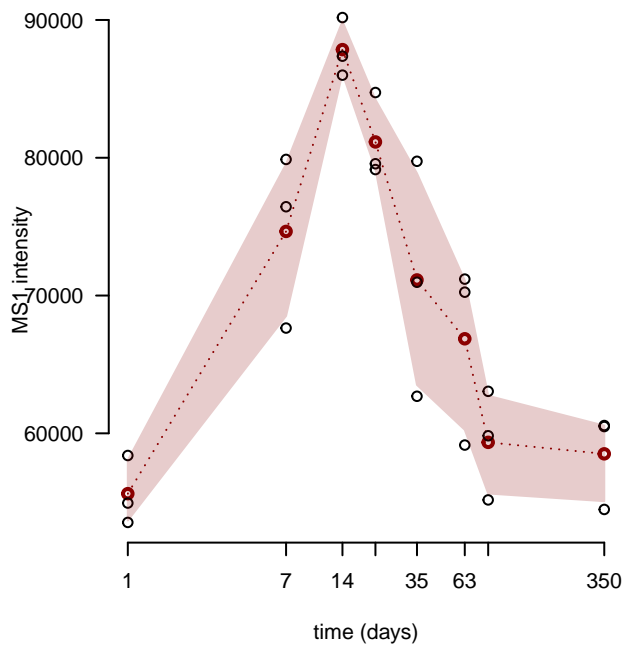

**Q9CX48**  
GN=Zcchc10

zinc finger, CCHC domain containing 10

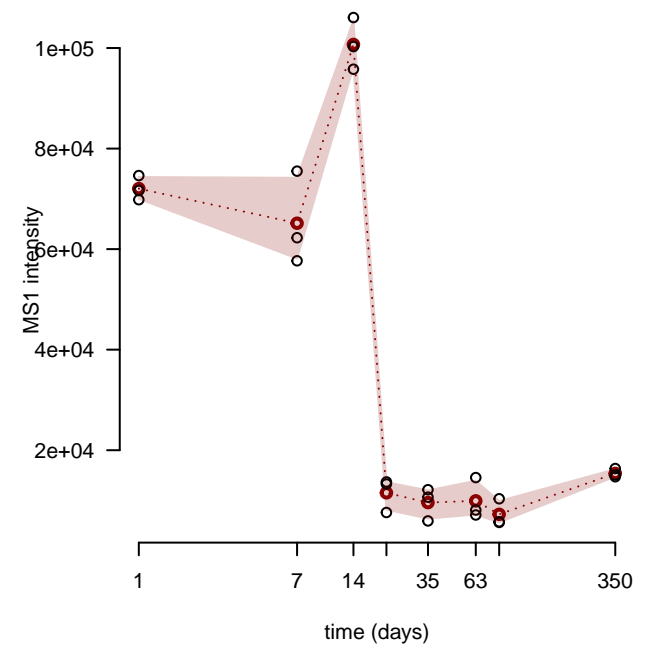

**Q9CX53**  
GN=Gemin6

gem nuclear organelle associated protein ...

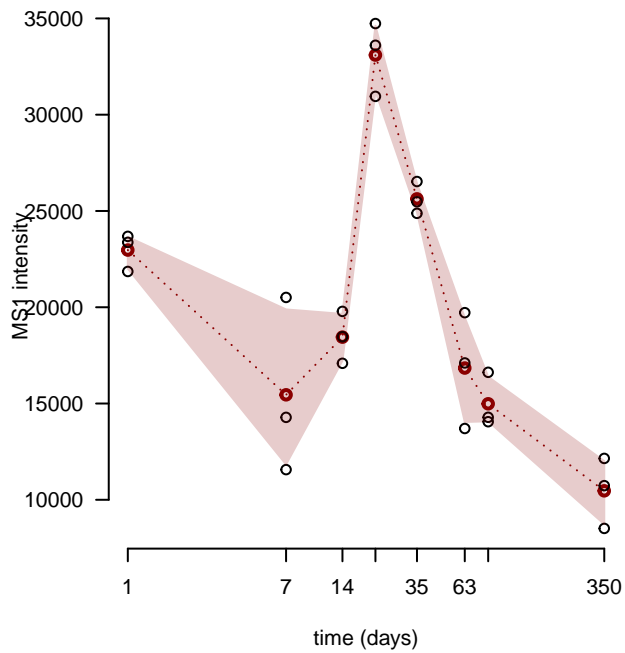

**Q9CX56**  
GN=Psm8

proteasome (prosome, macropain) 26S subu ...

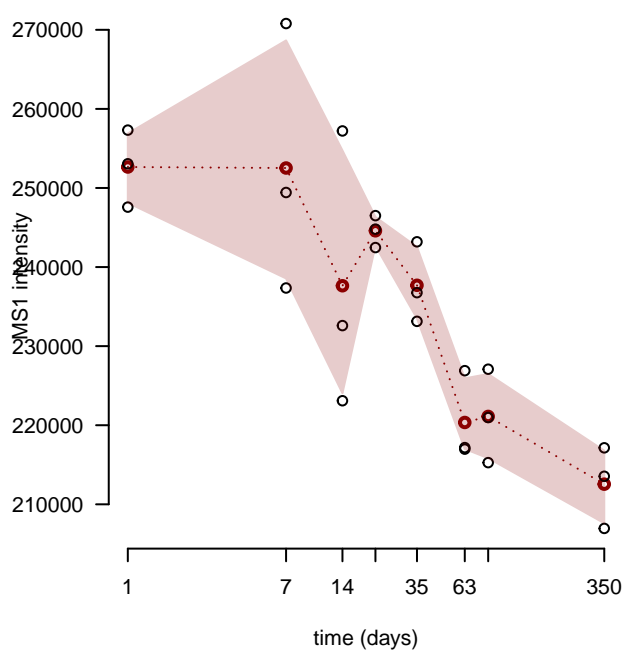

**Q9CX60**  
GN=Lbh

limb-bud and heart

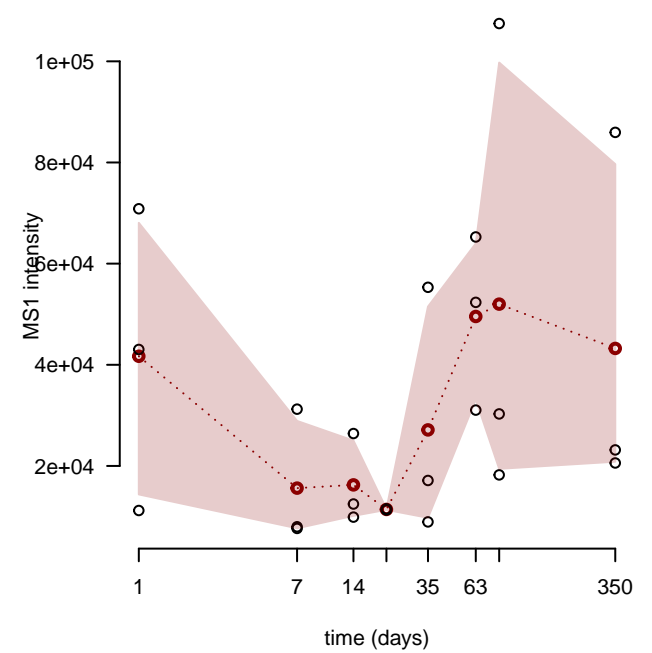

**Q9CX66**  
GN=D10Wsu102e

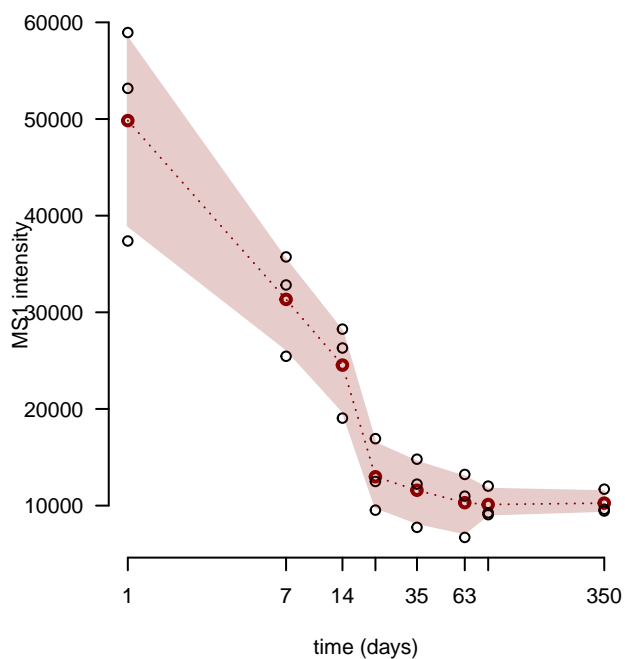

**Q9CX80**  
GN=Cygb

cytoglobin

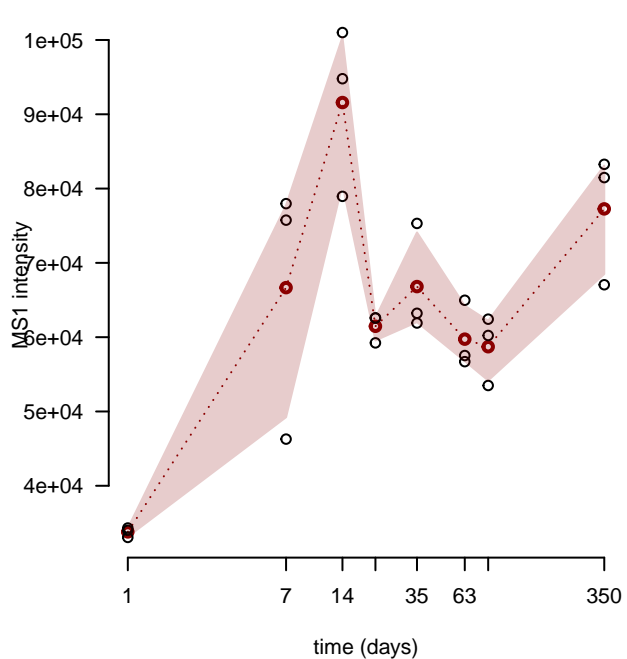

**Q9CX83**  
GN=Armcx1

armadillo repeat containing, X-linked 1

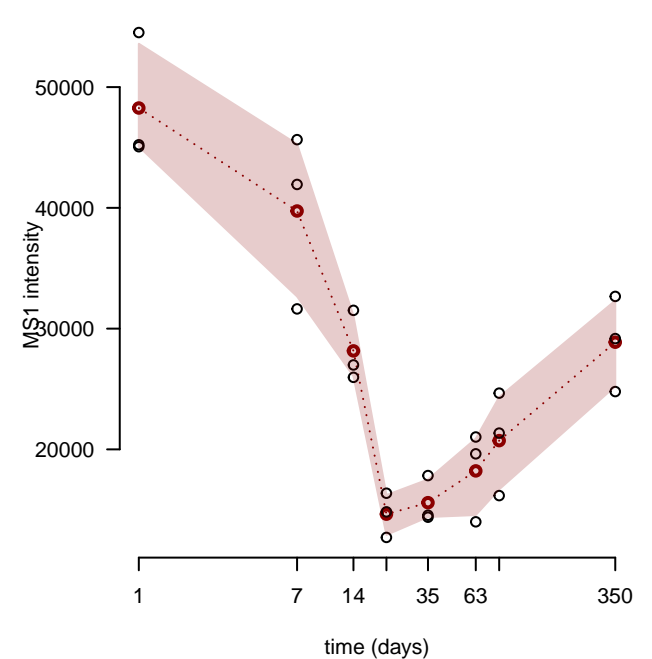

**Q9CX86**  
GN=Hnrnpa0  
heterogeneous nuclear ribonucleoprotein ...

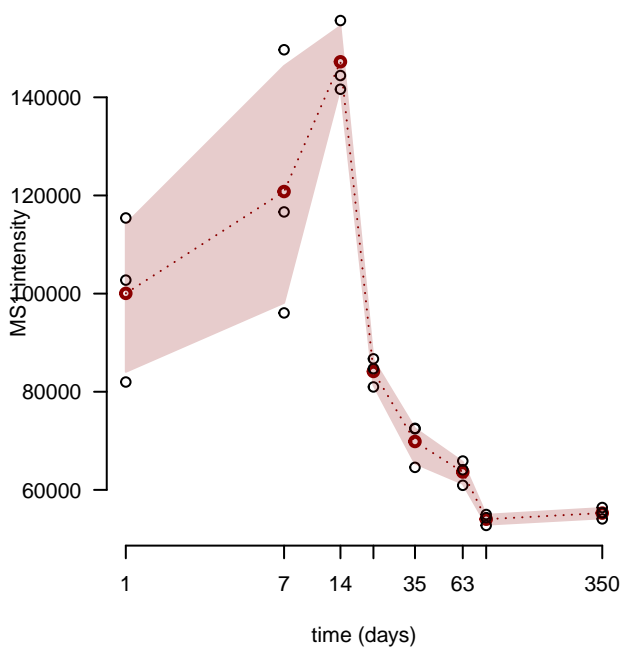

**Q9CX97**  
GN=Wdr55  
WD repeat domain 55

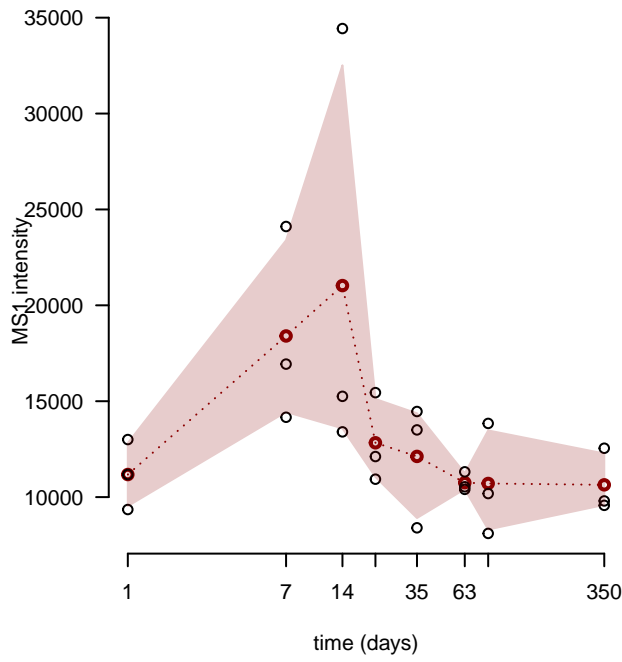

**Q9CXA2**  
GN=L3hypdh  
L-3-hydroxyproline dehydratase (trans-)

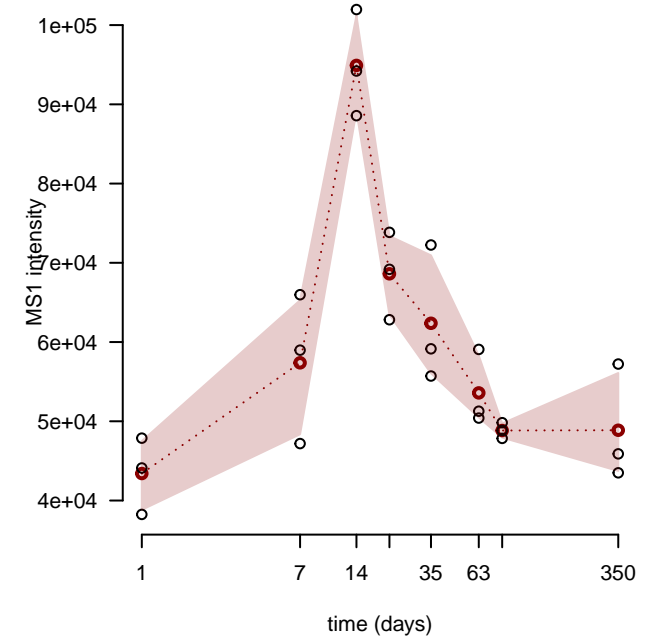

**Q9CXC3**  
GN=Mgme1  
mitochondrial genome maintenance exonucl ...

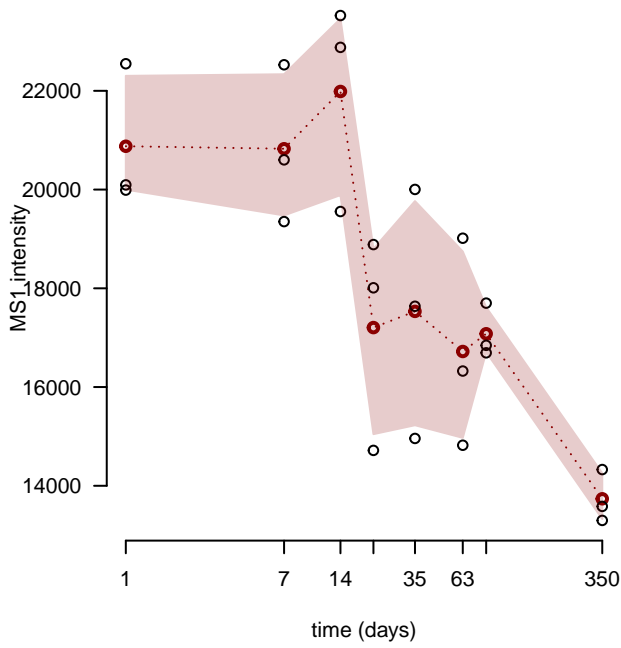

**Q9CXD6**  
GN=Mcur1  
mitochondrial calcium uniporter regulato ...

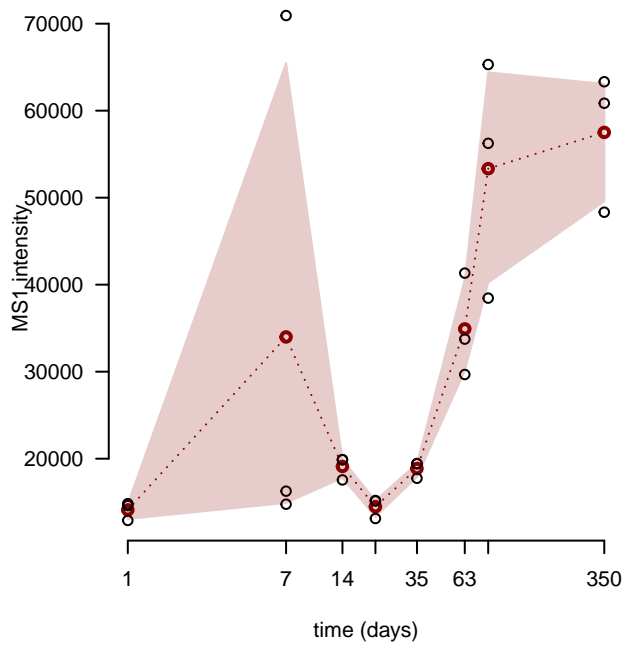

**Q9CXD9**  
GN=Lrrc17  
leucine rich repeat containing 17

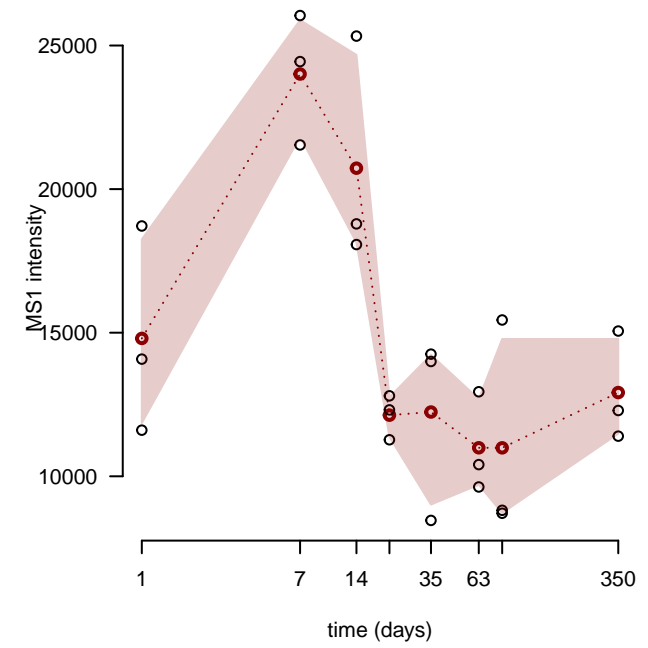

**Q9CXE0**  
GN=Prdm5  
PR domain containing 5

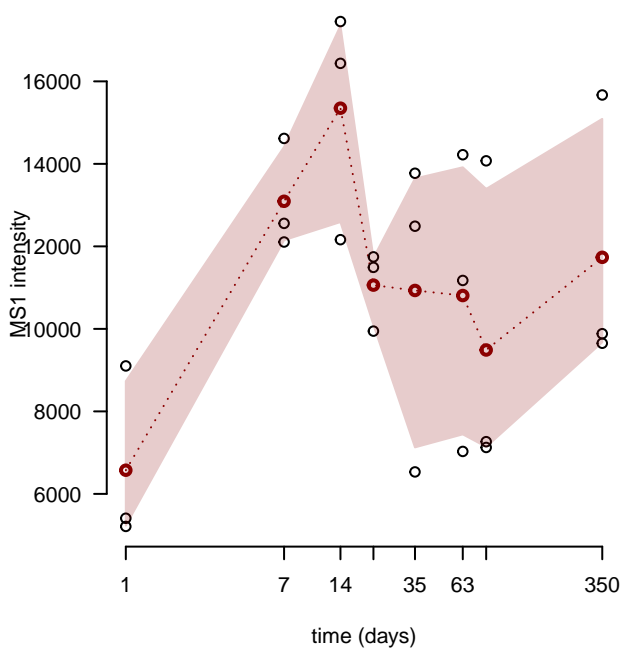

**Q9CXE2**  
GN=Bcl7a  
B cell CLL/lymphoma 7A

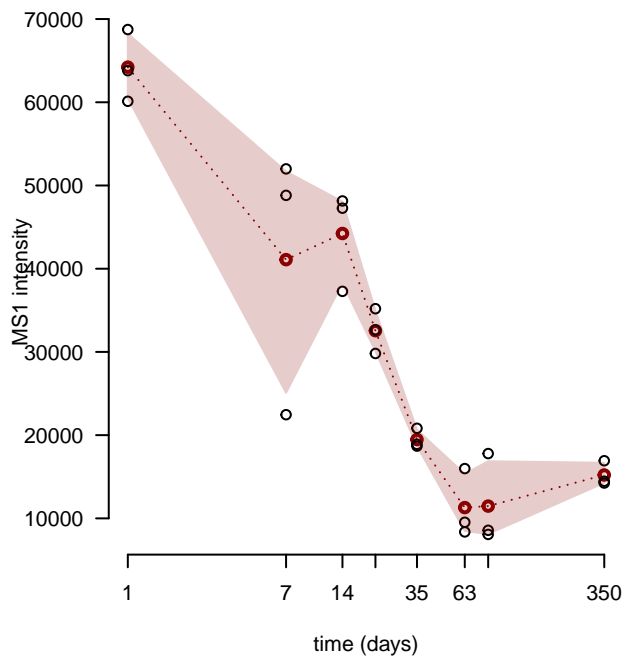

**Q9CXE7**  
GN=Tmed5  
transmembrane p24 trafficking protein 5

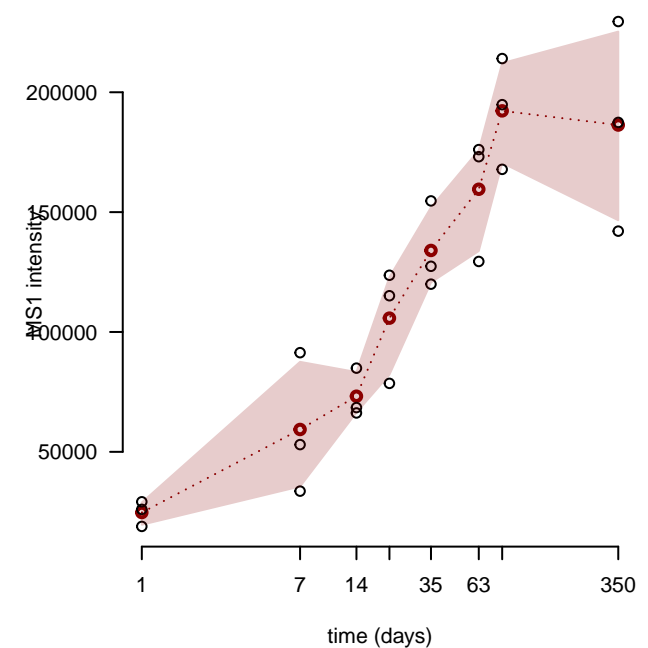

**Q9CXF4**  
GN=Tbc1d15  
TBC1 domain family, member 15

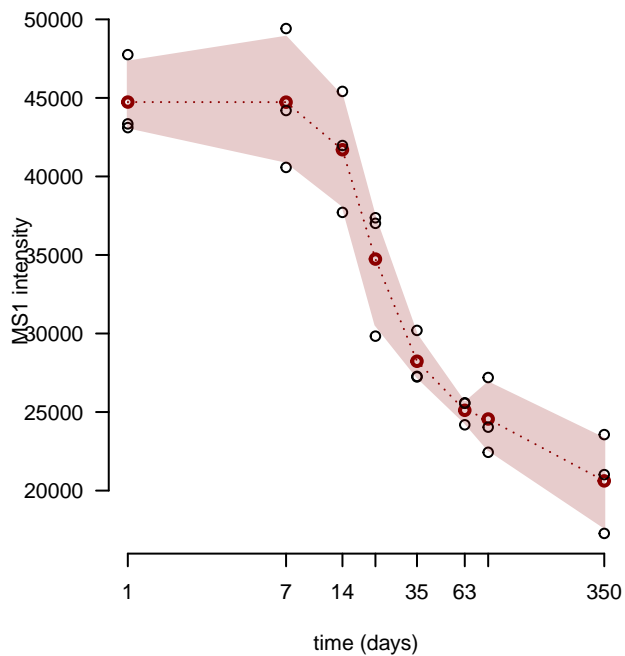

**Q9CXF7**  
GN=Chd11  
chromodomain helicase DNA binding protei ...

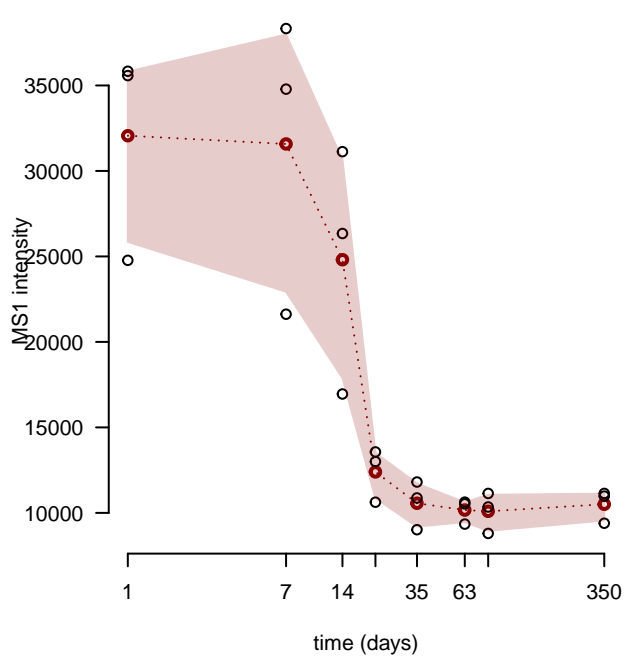

**Q9CXG3**  
GN=Ppil4  
peptidylprolyl isomerase (cyclophilin)-I ...

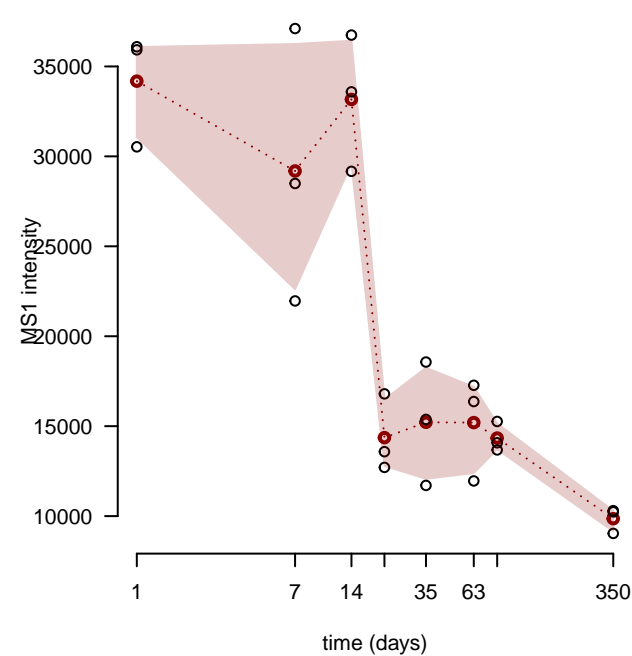

**Q9CXI0**  
GN=Coq5  
coenzyme Q5 methyltransferase

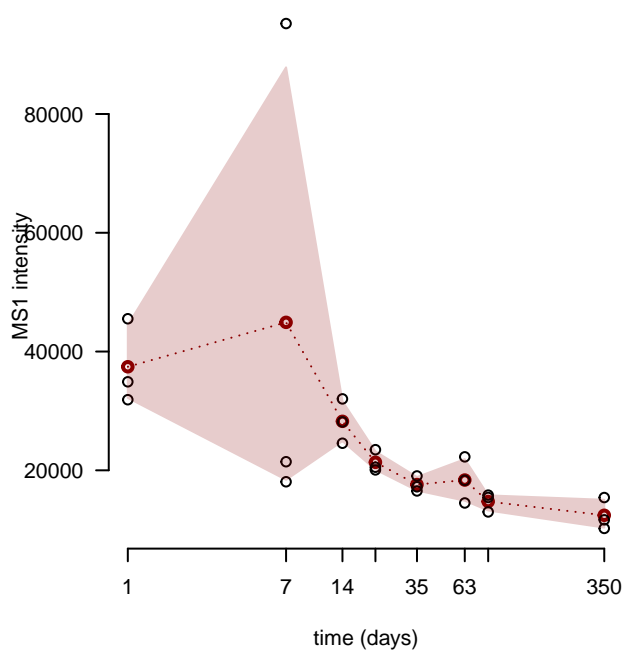

**Q9CXI3**  
GN=Moxd1  
monooxygenase, DBH-like 1

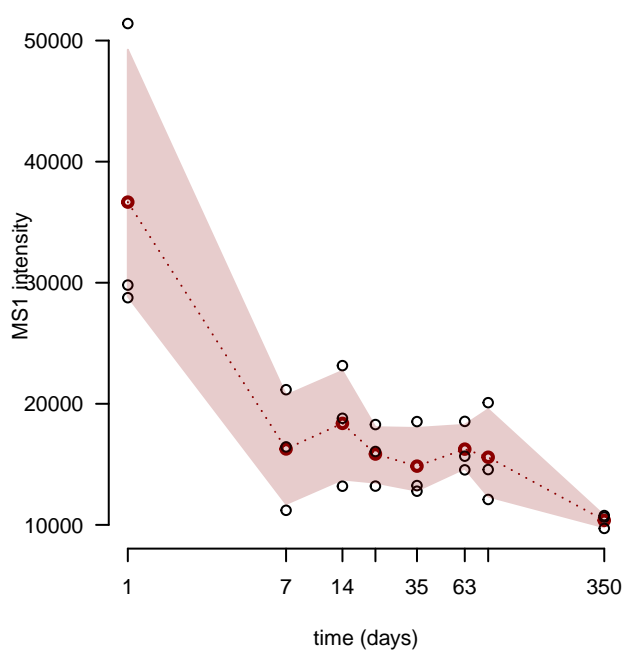

**Q9CXI5**  
GN=Manf  
mesencephalic astrocyte-derived neurotro ...

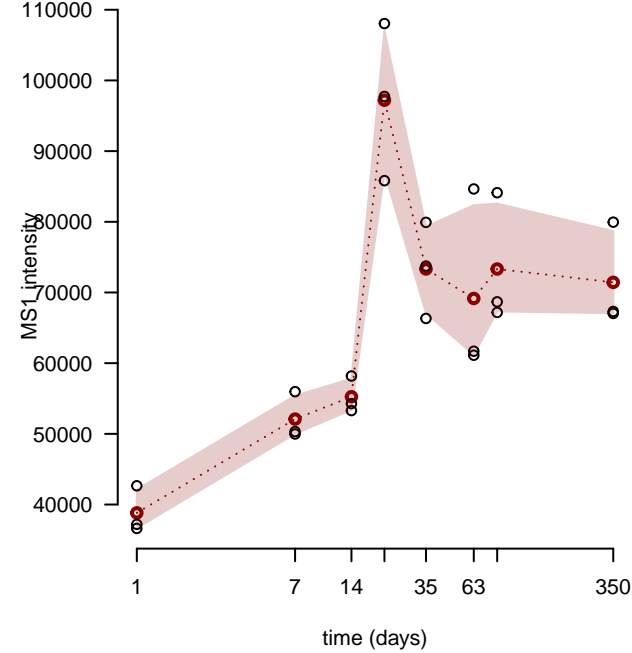

**Q9CXJ1**  
GN=Ears2  
glutamyl-tRNA synthetase 2, mitochondria ...

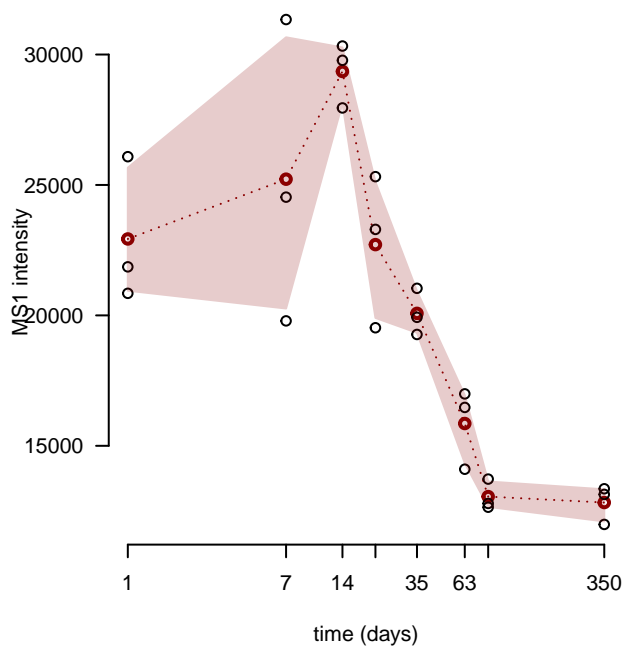

**Q9CXJ4**  
GN=Abcb8  
ATP-binding cassette, sub-family B (MDR/ ...

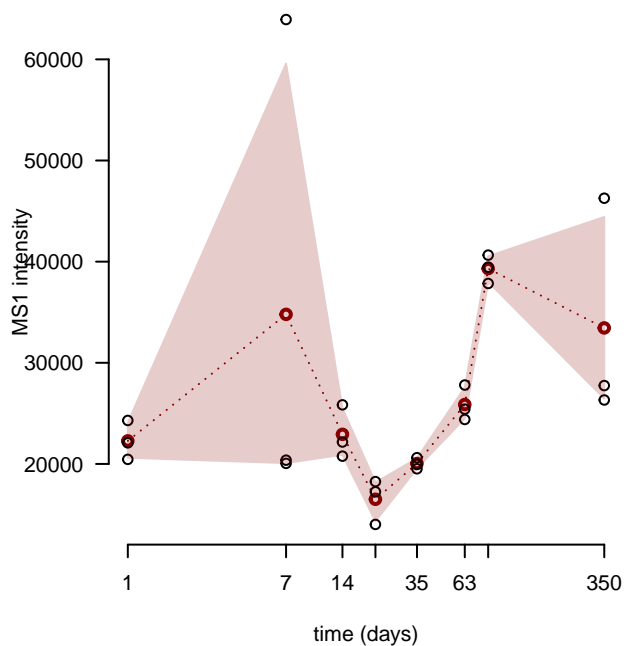

**Q9CXK8**  
GN=Nip7  
NIP7, nucleolar pre-rRNA processing prot ...

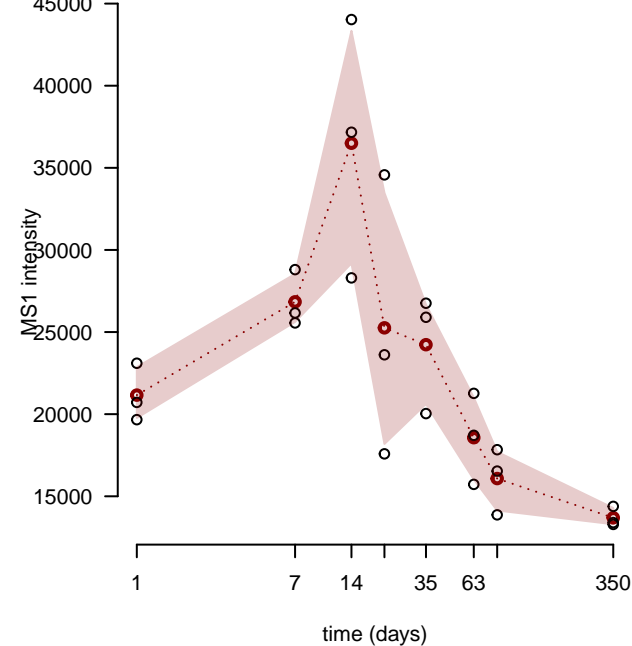

**Q9CXK9**  
GN=Rbm33  
RNA binding motif protein 33

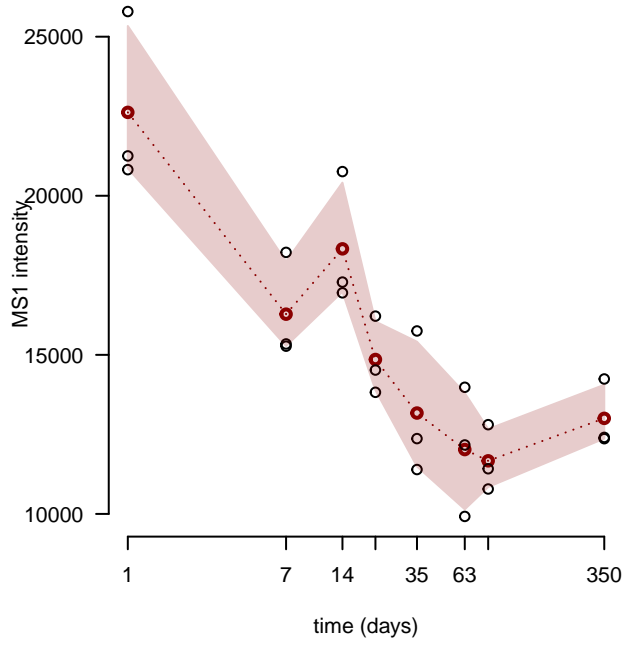

**Q9CXL3**  
GN=  
GN=  
GN=

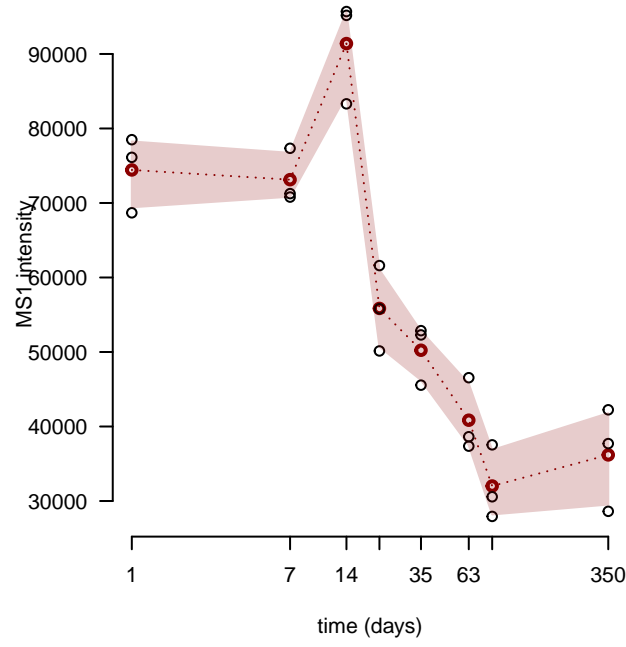

**Q9CXN7**  
GN=Pbld2  
phenazine biosynthesis-like protein doma ...

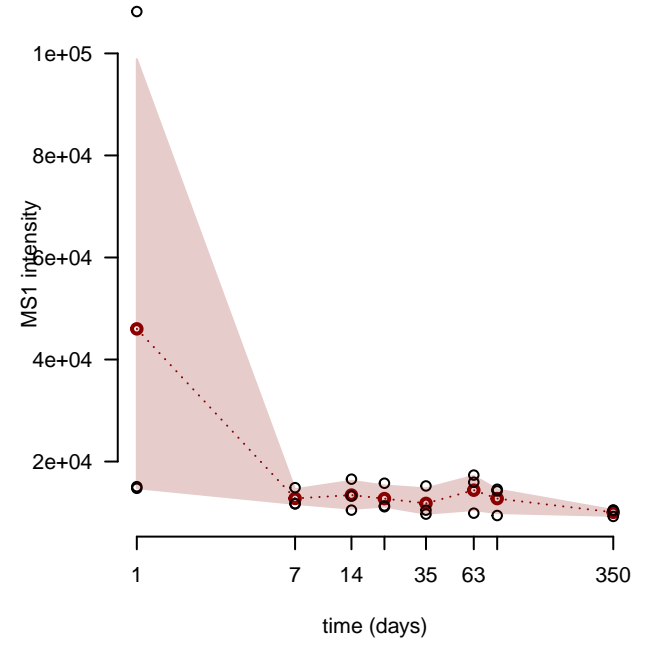

**Q9CXR1**  
GN=Dhrs7  
dehydrogenase/reductase (SDR family) mem ...

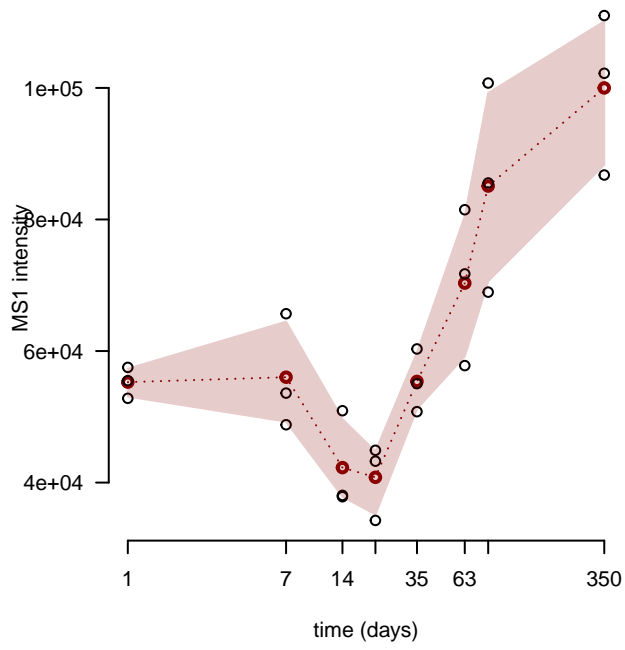

**Q9CXS4**  
GN=Cenpv  
centromere protein V

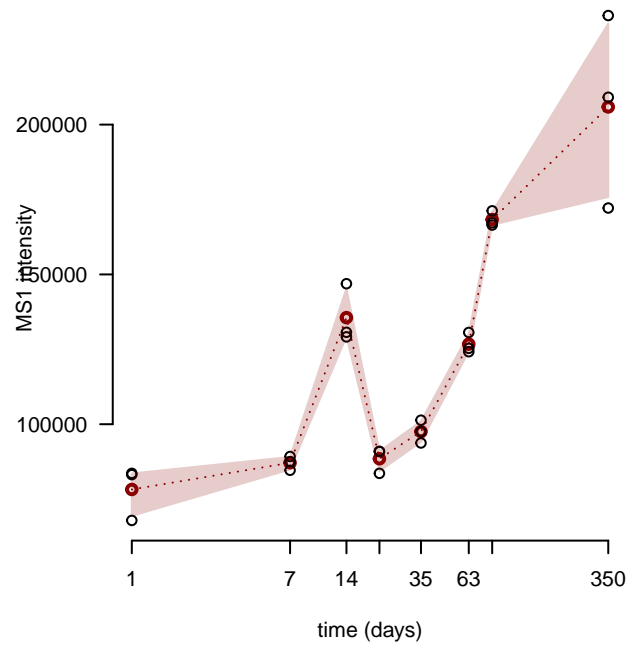

**Q9CXT7**  
GN=Tmem192  
transmembrane protein 192

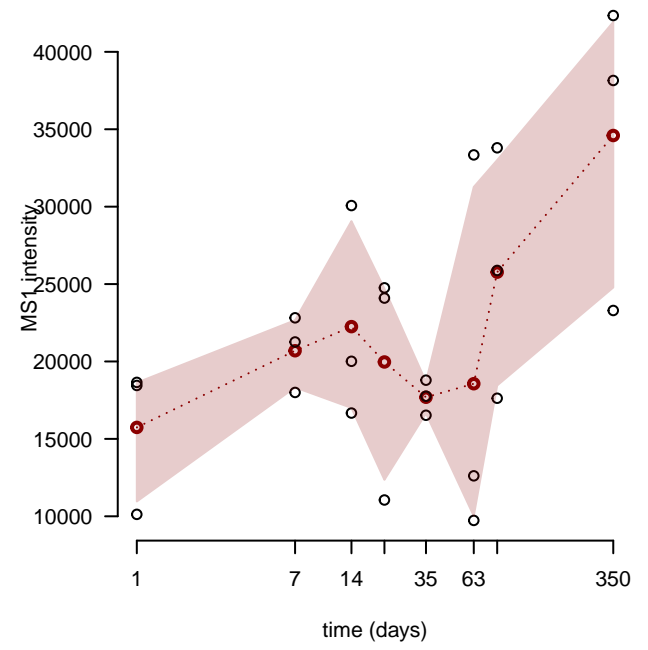

**Q9CXT8**  
GN=Pmpcb  
peptidase (mitochondrial processing) bet ...

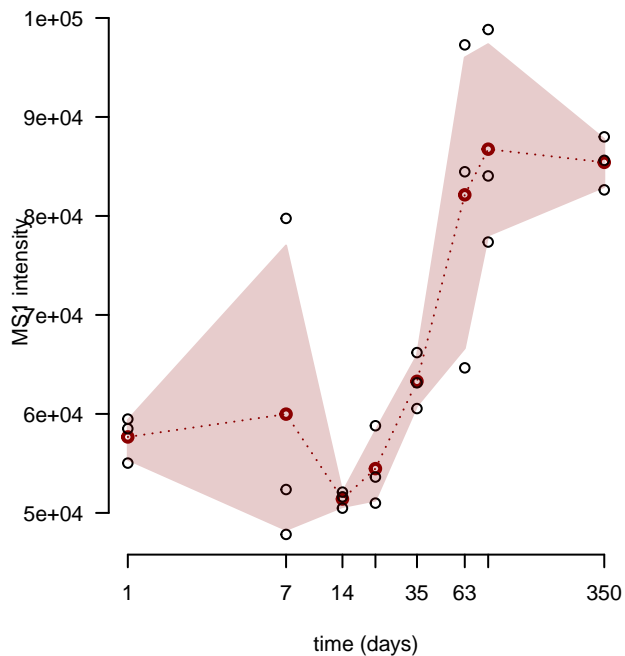

**Q9CXU0**  
GN=Med10  
mediator complex subunit 10

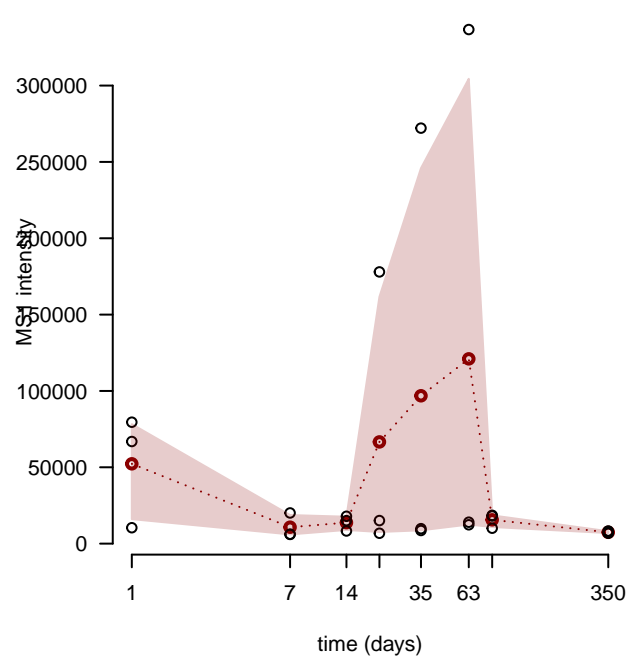

**Q9CXU1**  
GN=Med31  
mediator complex subunit 31

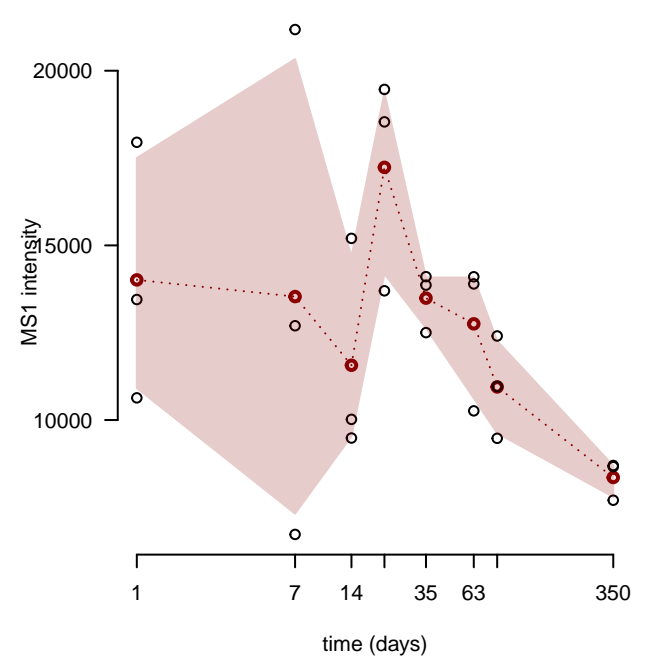

**Q9CXU9**  
**GN=Eif1b**  
eukaryotic translation initiation factor ...

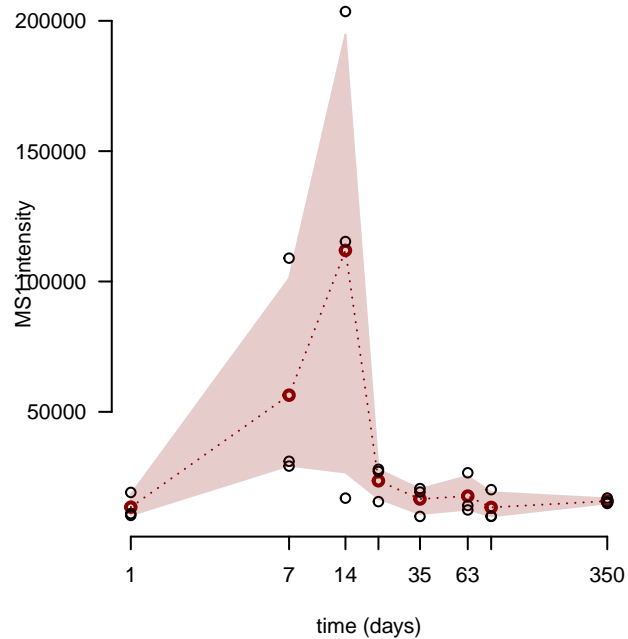

**Q9CXV1**  
**GN=Sdhb**  
succinate dehydrogenase complex, subunit ...

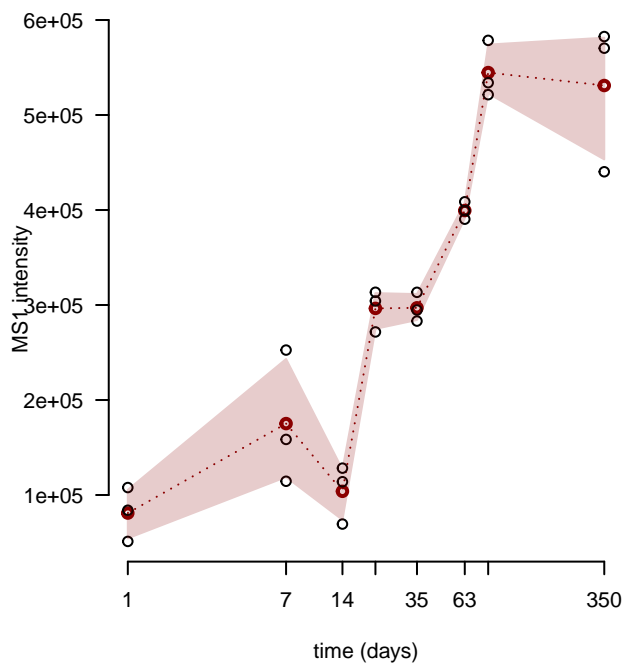

**Q9CXV9**  
**GN=Dcun1d5**  
DCN1, defective in cullin neddylation 1, ...

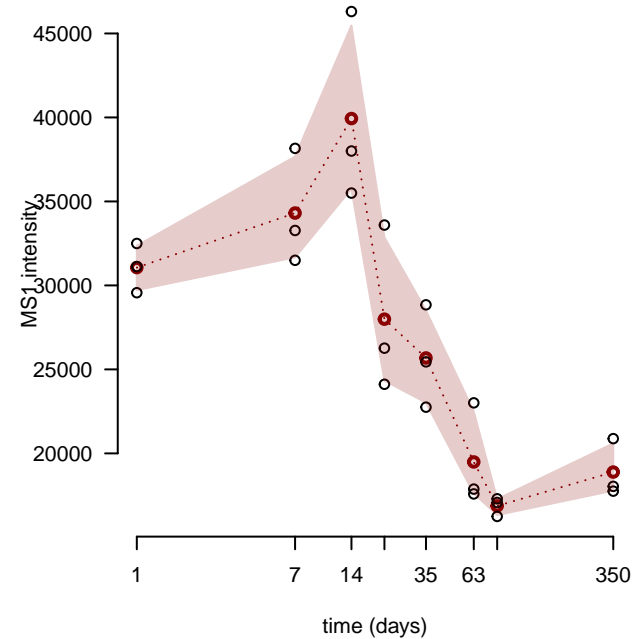

**Q9CXW2**  
**GN=Mrps22**  
mitochondrial ribosomal protein S22

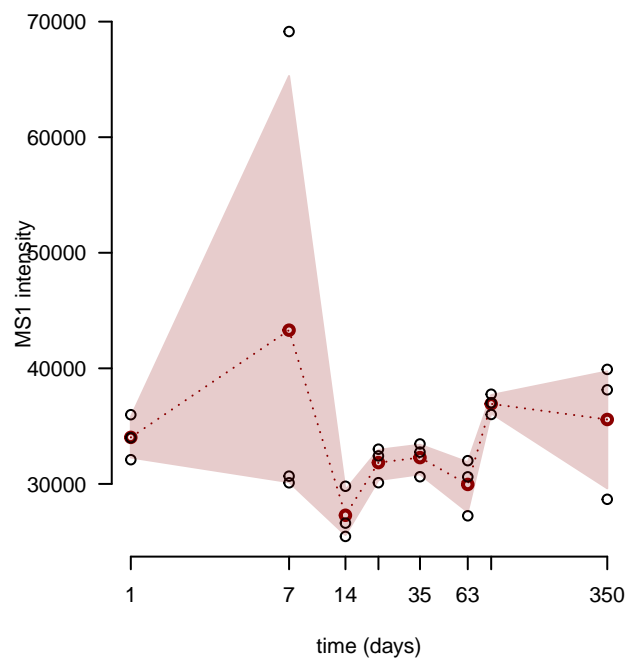

**Q9CXW3**  
**GN=Cacybp**  
calcyclin binding protein

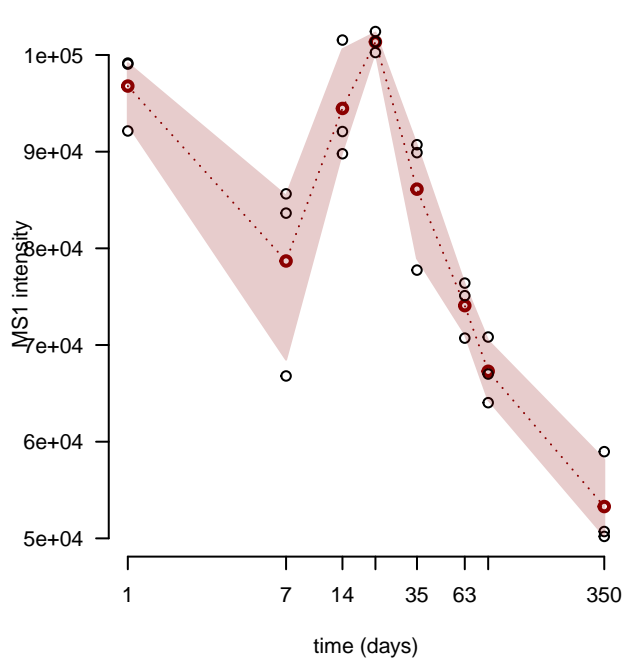

**Q9CXW4**  
**GN=Rpl11**  
ribosomal protein L11

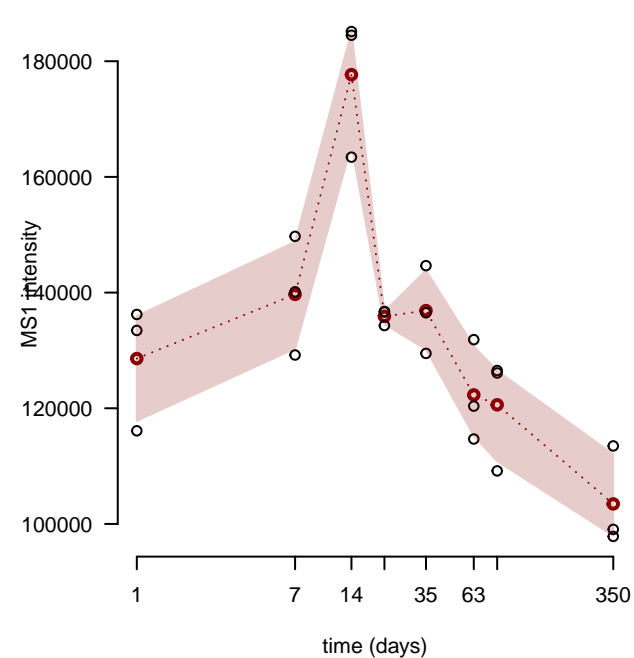

**Q9CXX9**  
**GN=Cuedc2**  
CUE domain containing 2

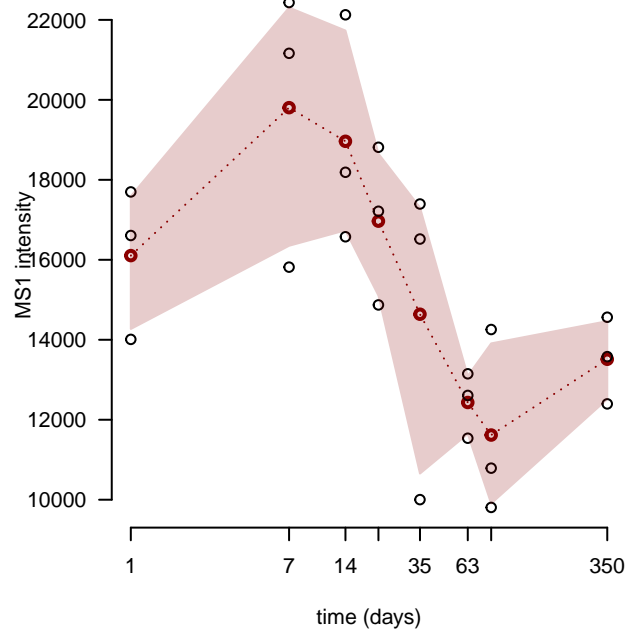

**Q9CXY1**  
**GN=Tmem175**  
transmembrane protein 175

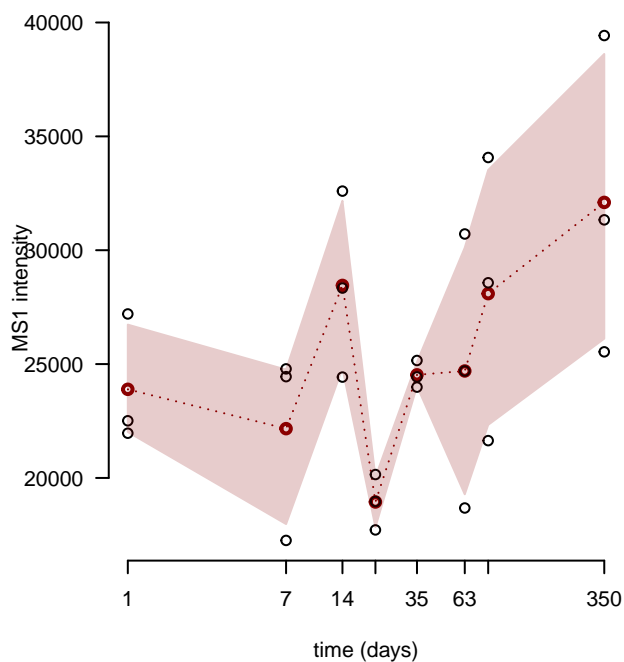

**Q9CXY6**  
**GN=Ilf2**  
interleukin enhancer binding factor 2

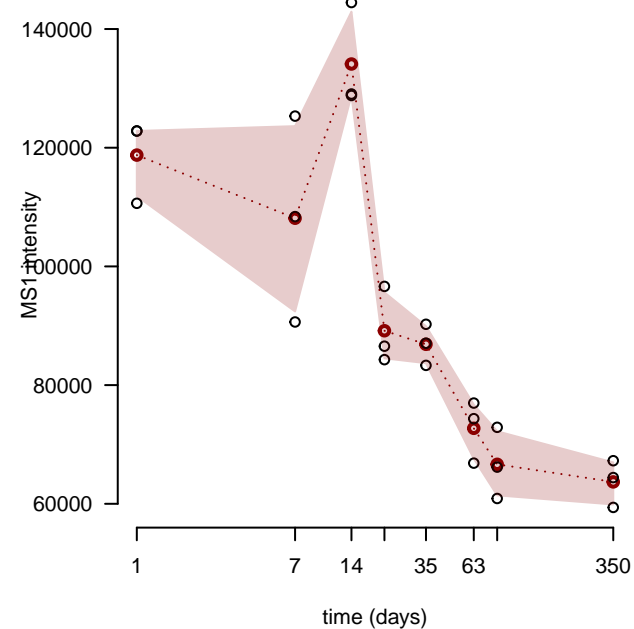

**Q9CXY9**  
GN=Pigk  
phosphatidylinositol glycan anchor biosy ...

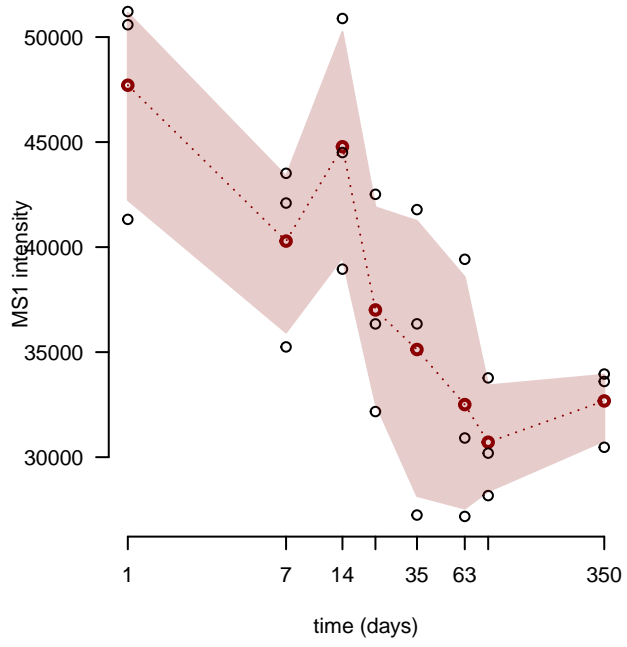

**Q9CXZ1**  
GN=Ndufs4  
NADH:ubiquinone oxidoreductase core subu ...

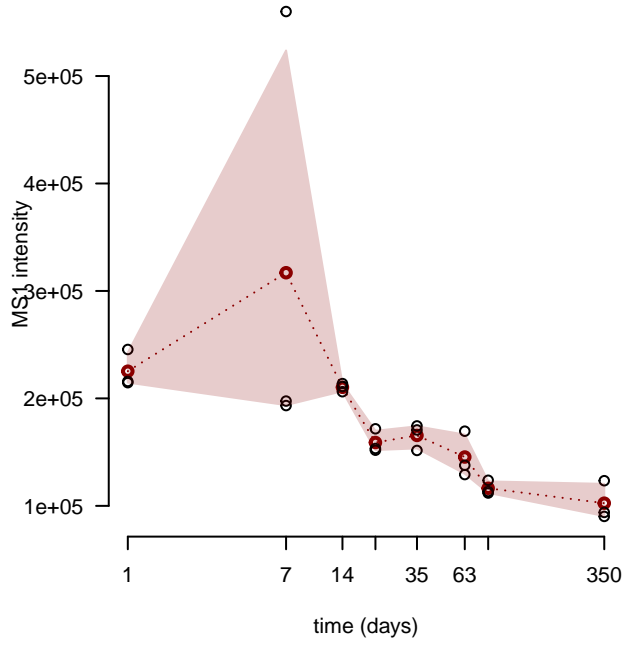

**Q9CY00**  
GN=Ttc30b  
tetratricopeptide repeat domain 30B

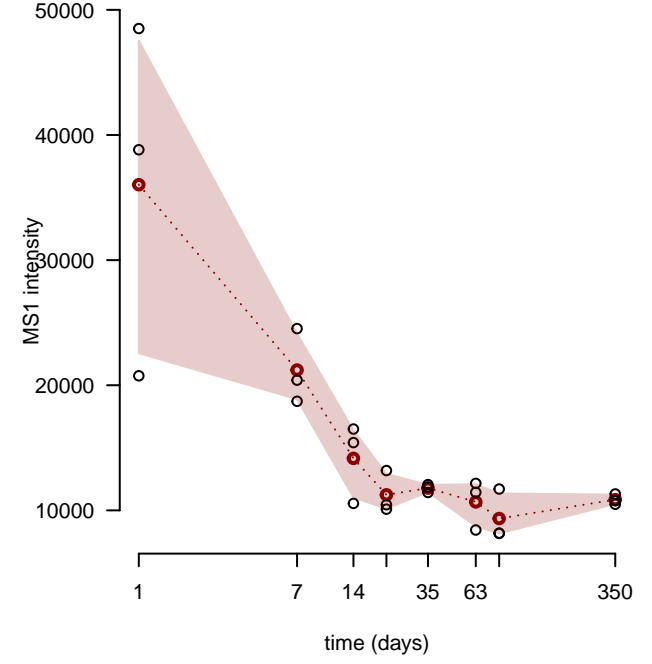

**Q9CY02**  
GN=Ahsp  
alpha hemoglobin stabilizing protein

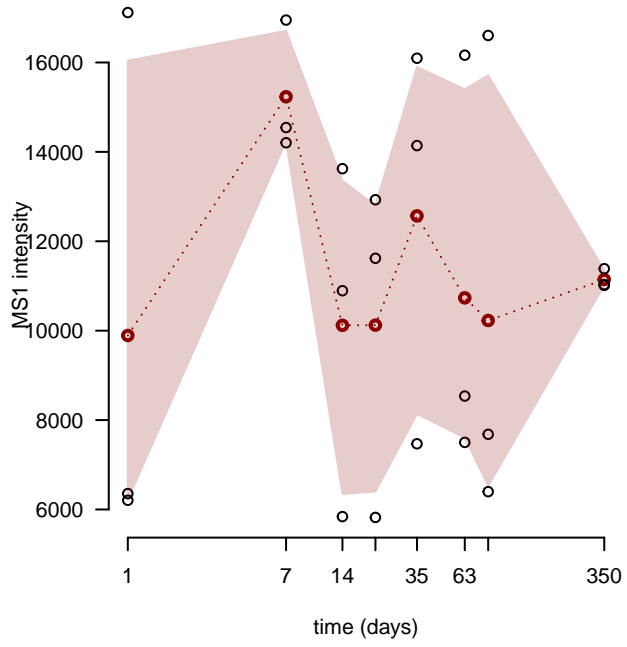

**Q9CY16**  
GN=Mrps28  
mitochondrial ribosomal protein S28

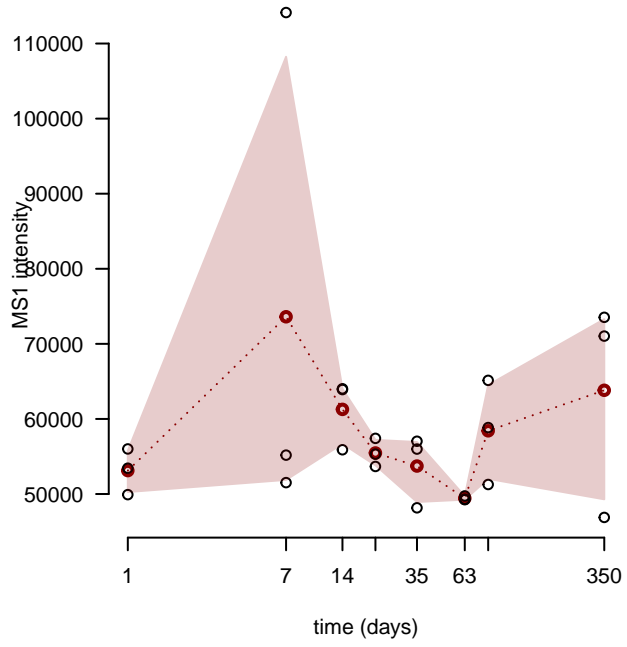

**Q9CY18**  
GN=Snx7  
sorting nexin 7

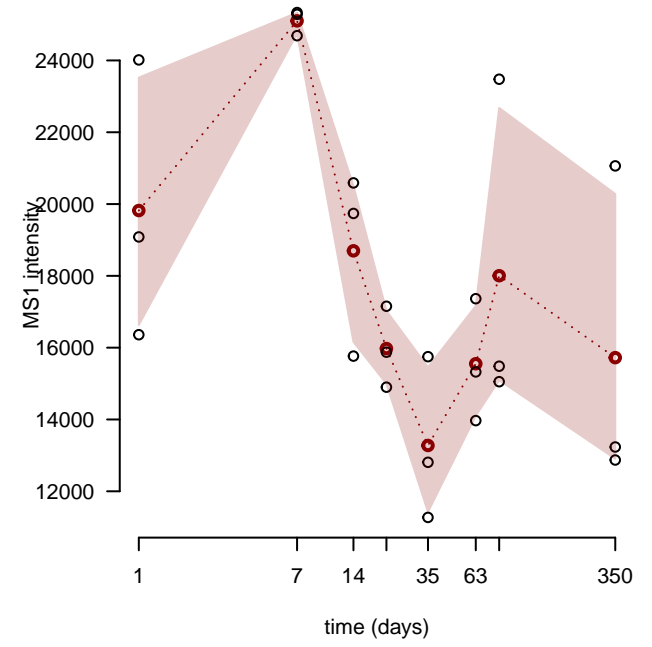

**Q9CY21**  
GN=Bud23  
BUD23, rRNA methyltransferase and riboso ...

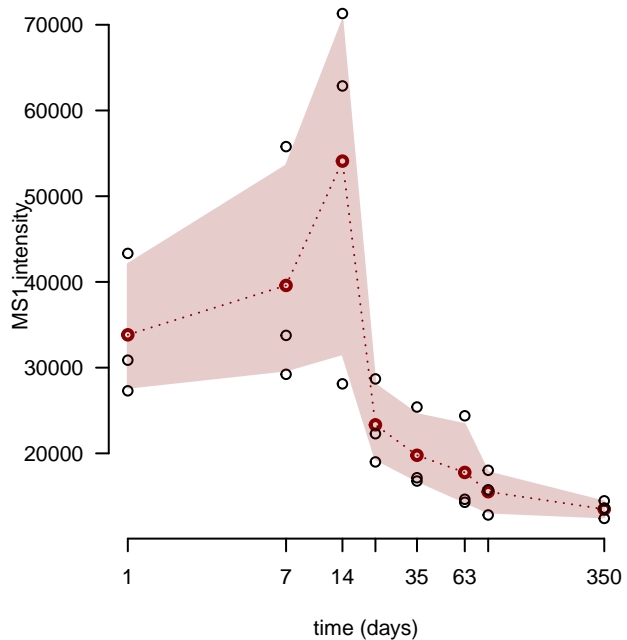

**Q9CY25**  
GN=Mis12  
MIS12 kinetochore complex component

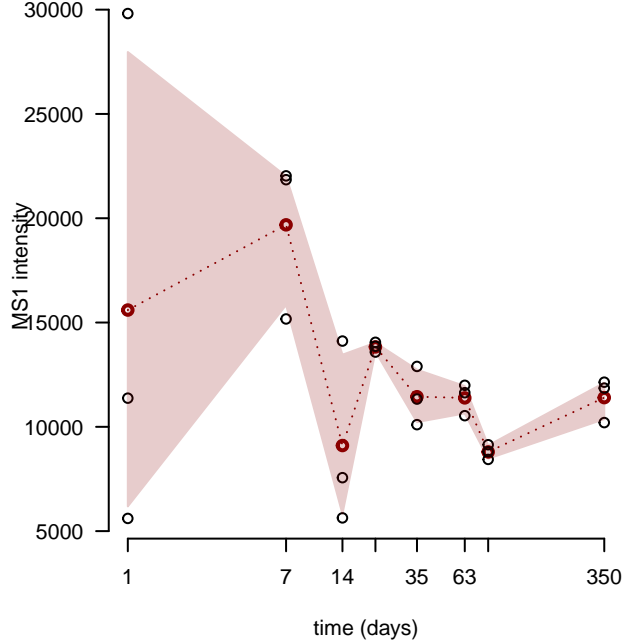

**Q9CY27**  
GN=Tecr  
trans-2,3-enoyl-CoA reductase

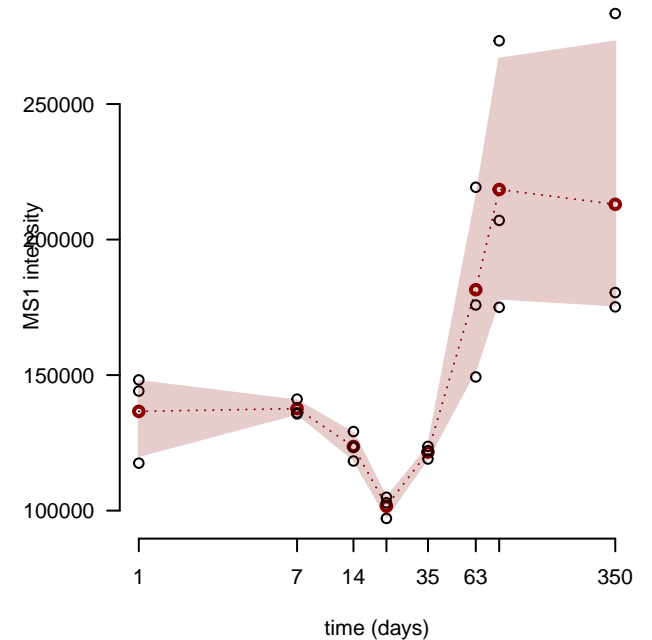

**Q9CY28**  
**GN=Gtpbp8**  
GTP-binding protein 8 (putative)

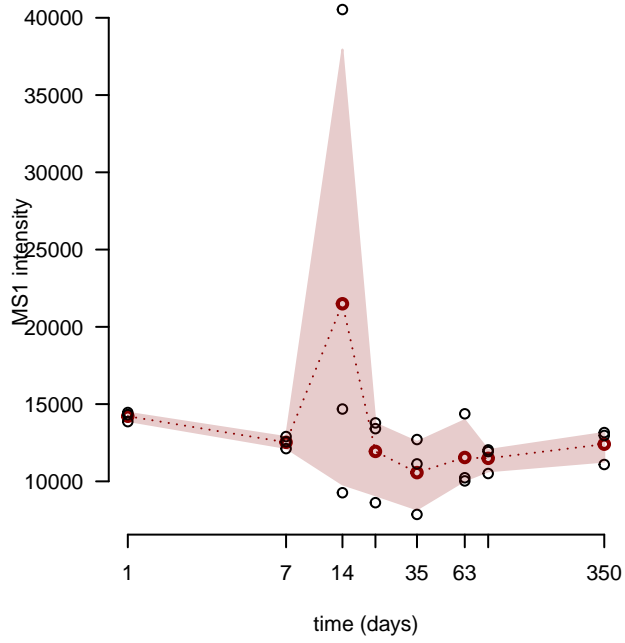

**Q9CY34**  
**GN=Ube2f**  
ubiquitin-conjugating enzyme E2F (putative)

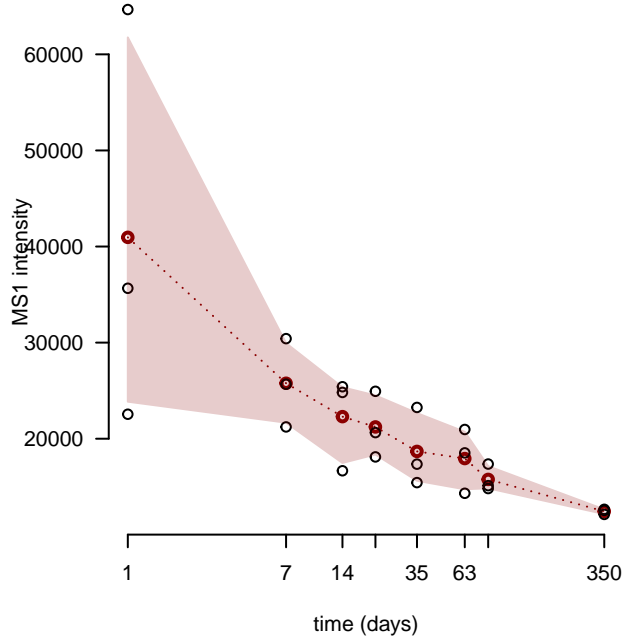

**Q9CY45**  
**GN=Eef1akmt1**  
EEF1A alpha lysine methyltransferase 1

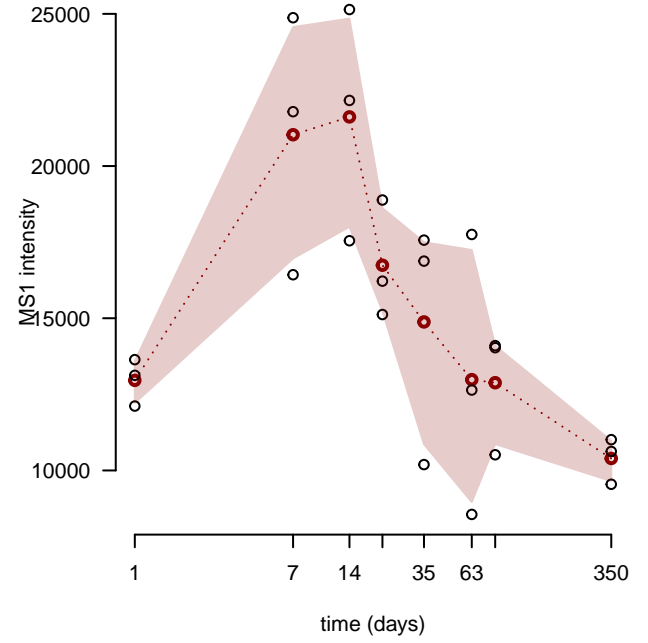

**Q9CY50**  
**GN=Ssr1**  
signal sequence receptor, alpha

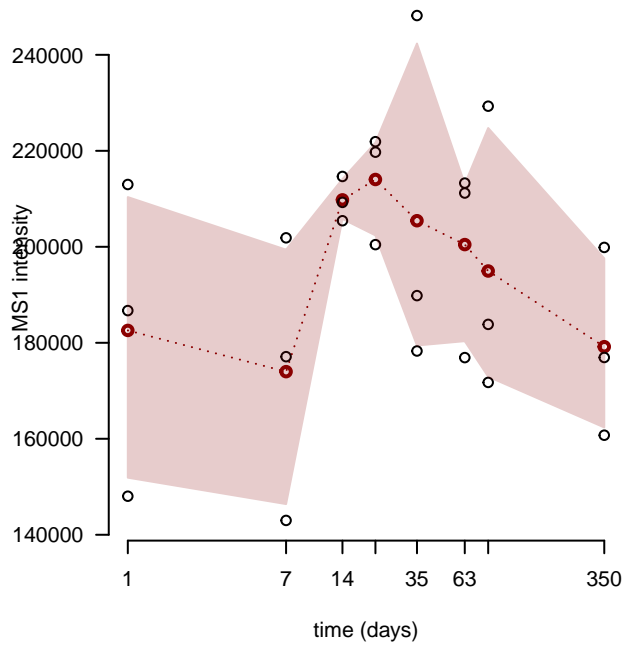

**Q9CY52**  
**GN=Thg1l**  
tRNA-histidine guanylyltransferase 1-like

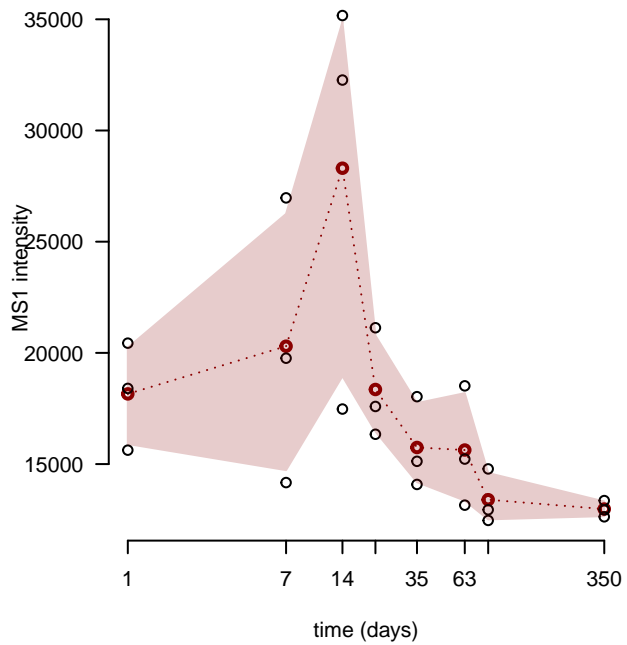

**Q9CY57**  
**GN=Chtop**  
chromatin target of PRMT1

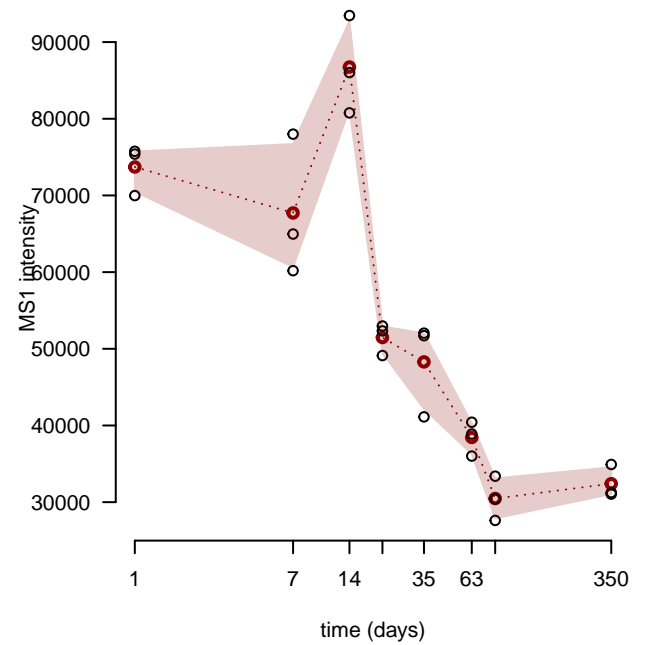

**Q9CY58**  
**GN=Serbp1**  
serpine1 mRNA binding protein 1

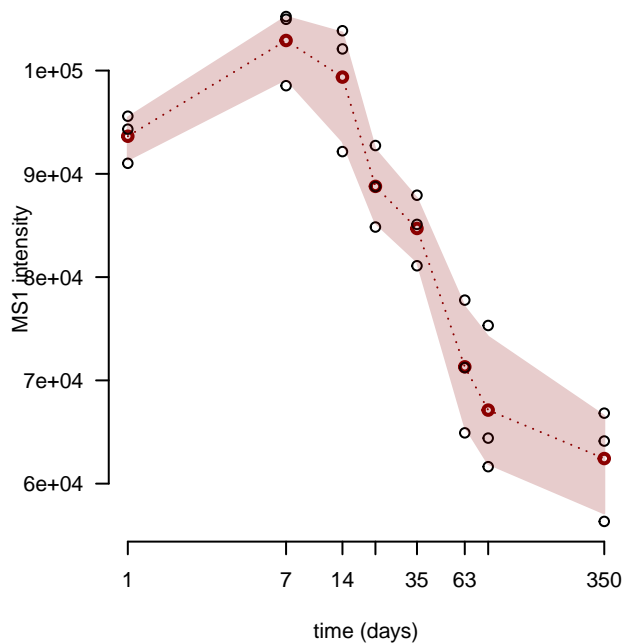

**Q9CY58**  
**GN=Serbp1**  
serpine1 mRNA binding protein 1

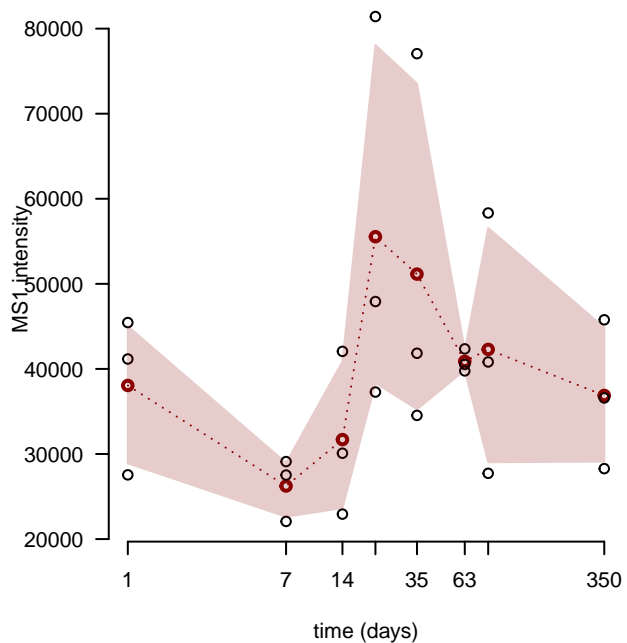

**Q9CY62**  
**GN=Rnf181**  
ring finger protein 181

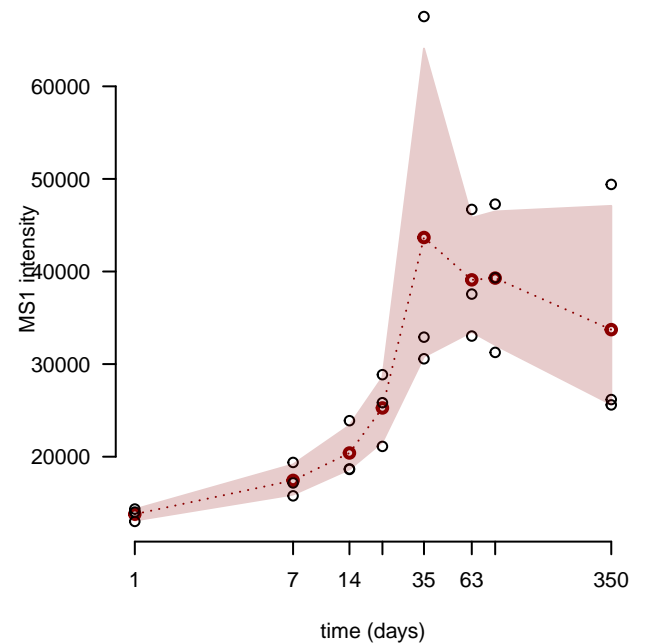

**Q9CY64**  
**GN=Blvra**  
biliverdin reductase A

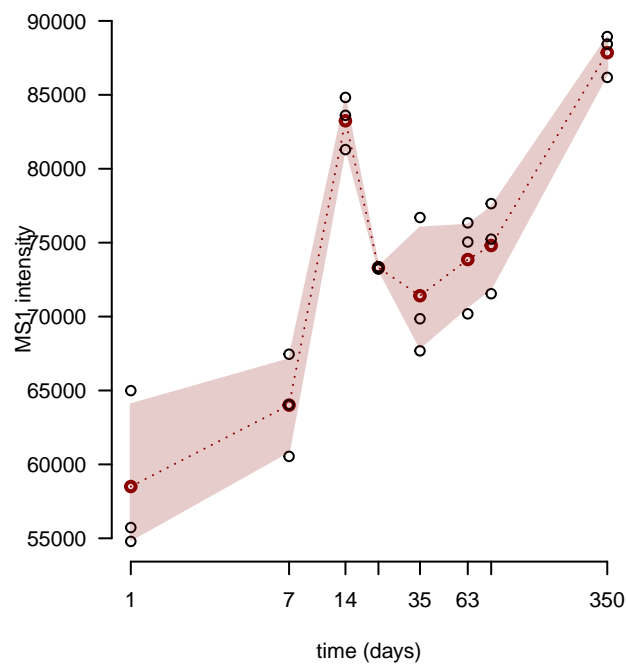

**Q9CY66**  
**GN=Gar1**  
GAR1 ribonucleoprotein

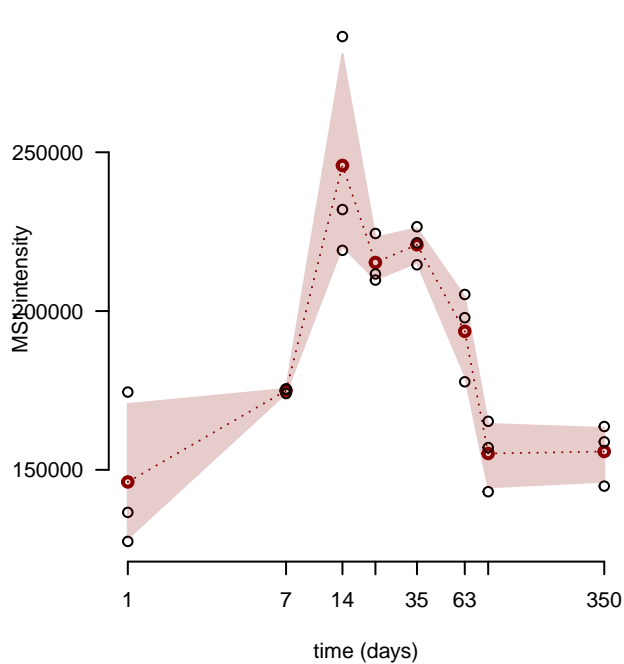

**Q9CY73**  
**GN=Mrpl44**  
mitochondrial ribosomal protein L44

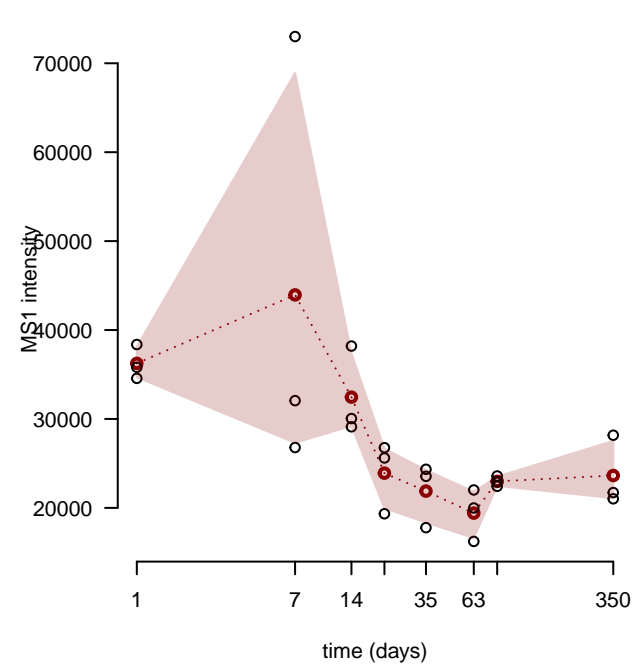

**Q9CY94**  
**GN=Gins3**  
GINS complex subunit 3 (Psf3 homolog)

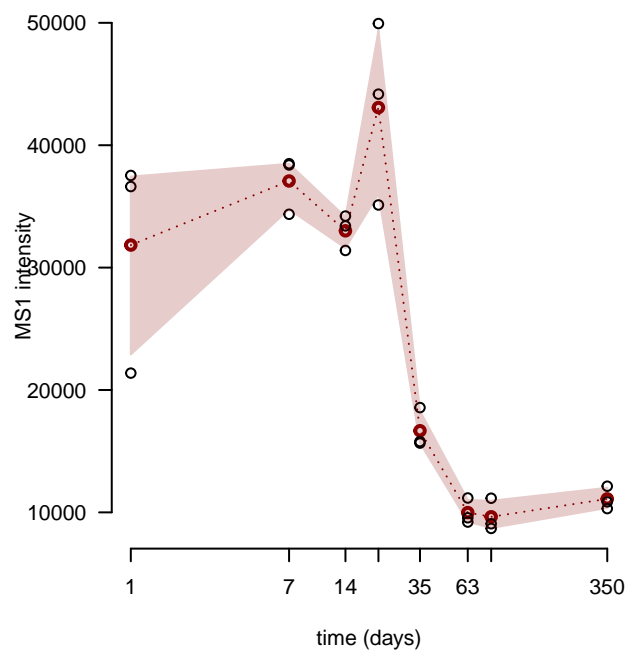

**Q9CY97**  
**GN=Ssu72**  
Ssu72 RNA polymerase II CTD phosphatase ...

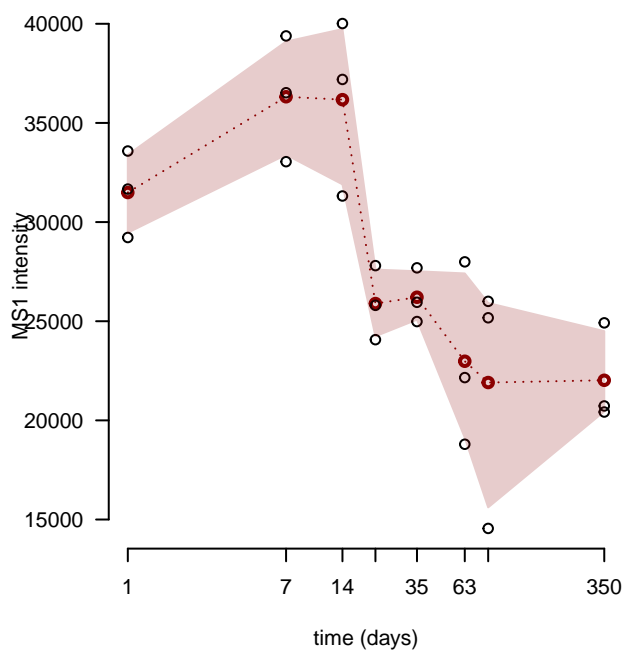

**Q9CYA0**  
**GN=Cred2**  
cysteine-rich with EGF-like domains 2

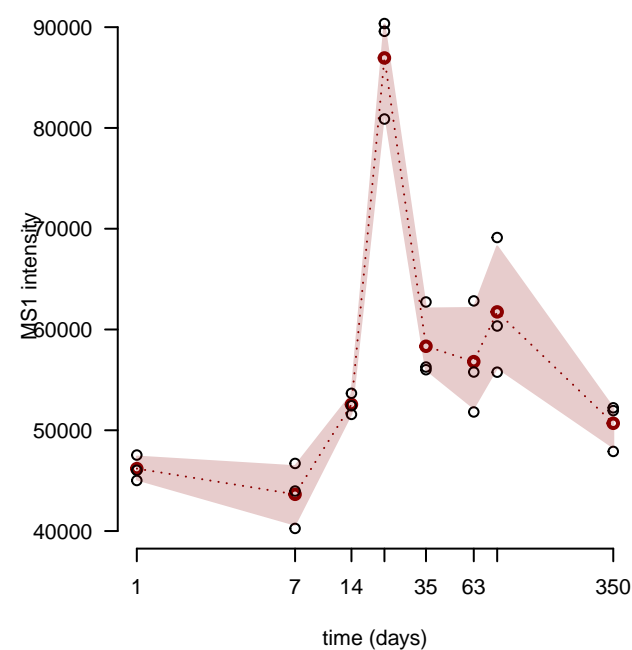

**Q9CYA6**  
**GN=Zcchc8**  
zinc finger, CCHC domain containing 8

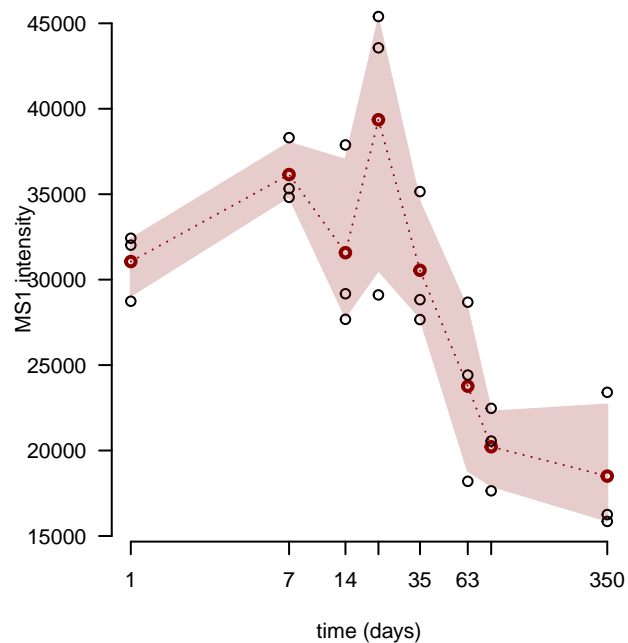

**Q9CYB0**  
**GN=Trim13**  
tripartite motif-containing 13

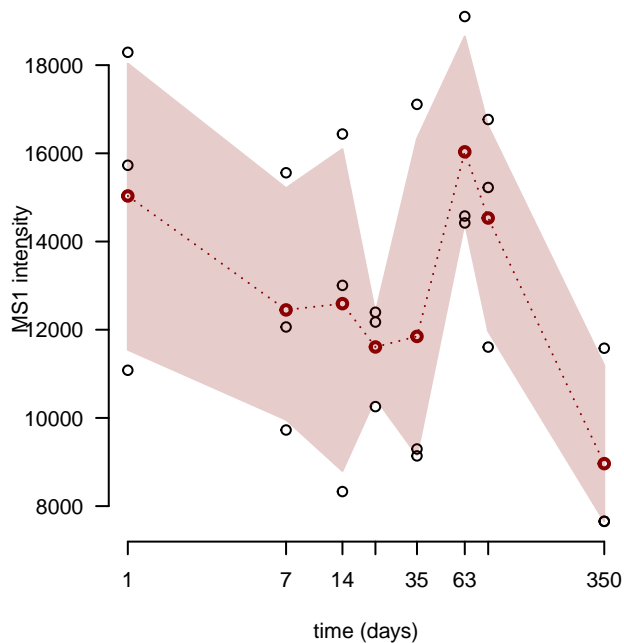

**Q9CYC5**  
**GN=Dsn1**  
DSN1 homolog, MIS12 kinetochore complex ...

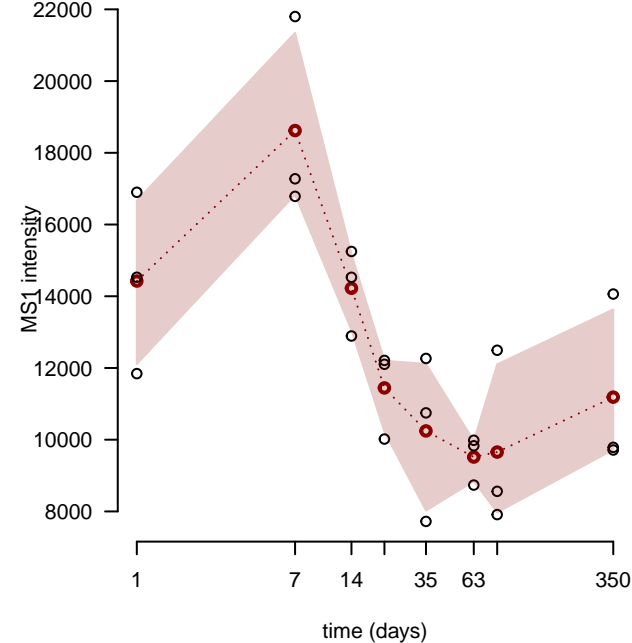



**Q9CYC6**  
GN=Dcp2  
decapping mRNA 2

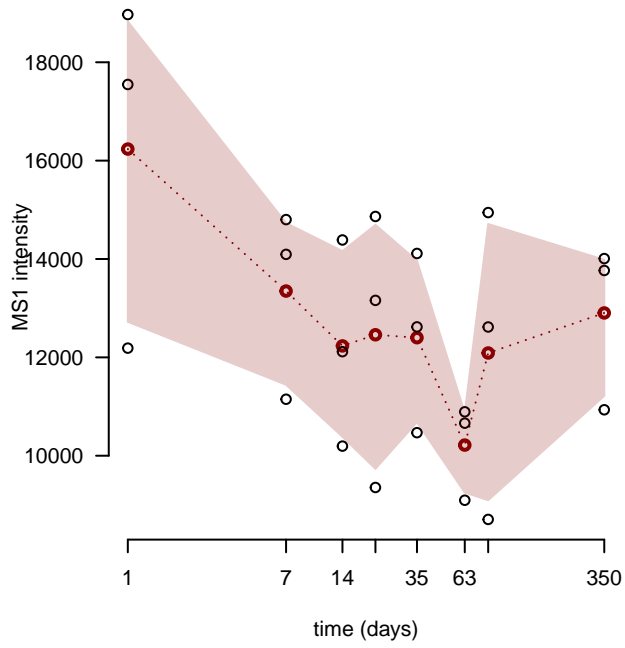

**Q9CYD3**  
GN=Crtap  
cartilage associated protein

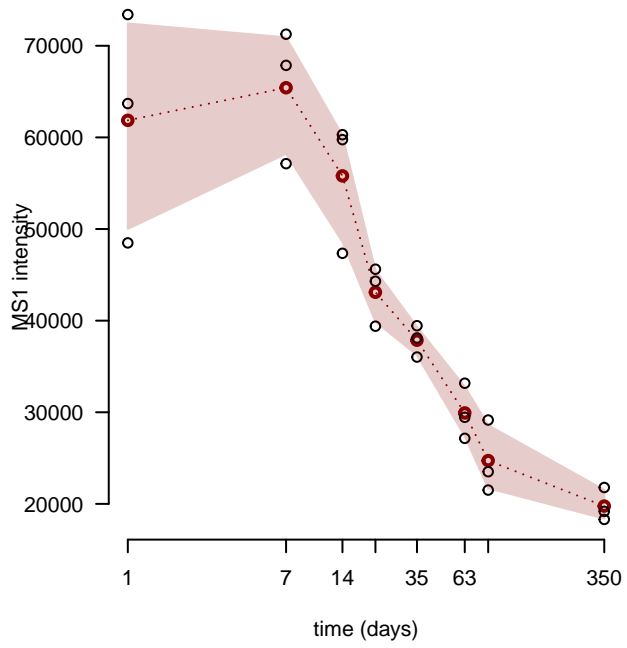

**Q9CYG7**  
GN=Tomm34  
translocase of outer mitochondrial membr ...

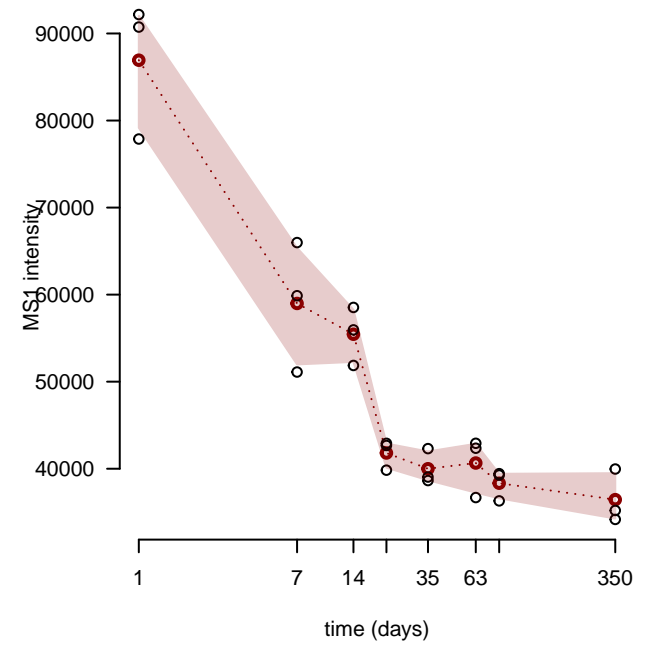

**Q9CYH2**  
GN=Prx12a  
peroxiredoxin like 2A

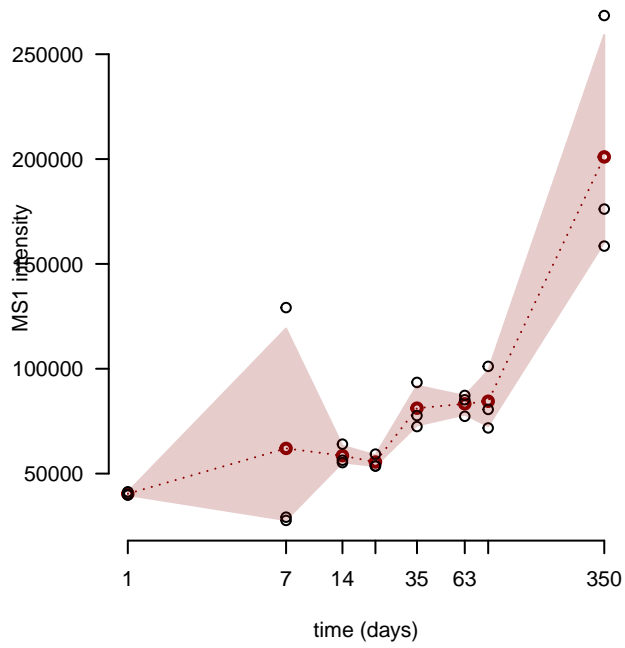

**Q9CYH6**  
GN=Rrs1  
ribosome biogenesis regulator 1

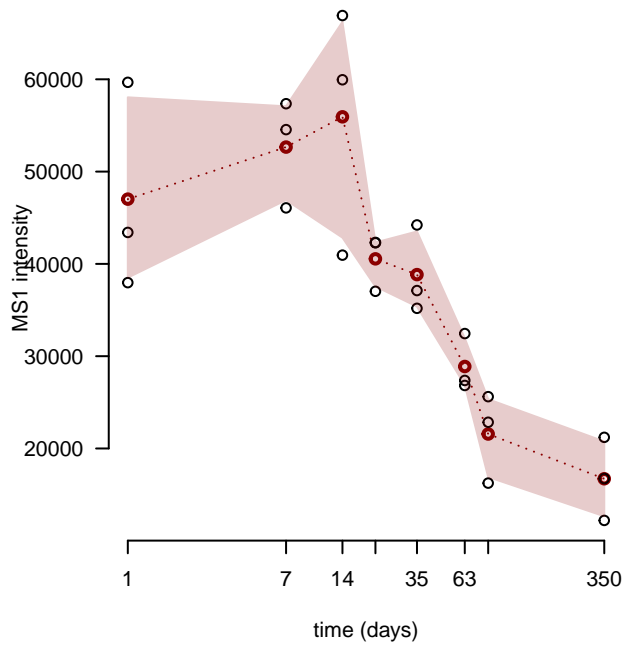

**Q9CYI0**  
GN=

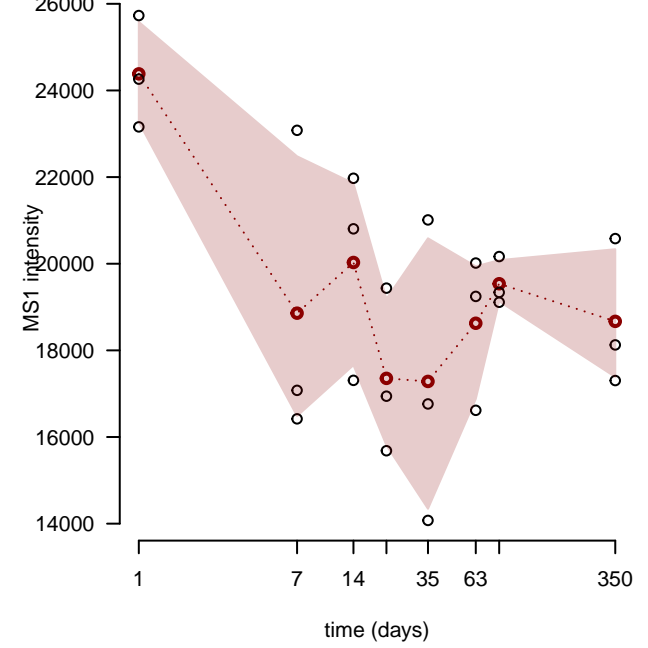

**Q9CYI4**  
GN=Luc7l  
Luc7-like

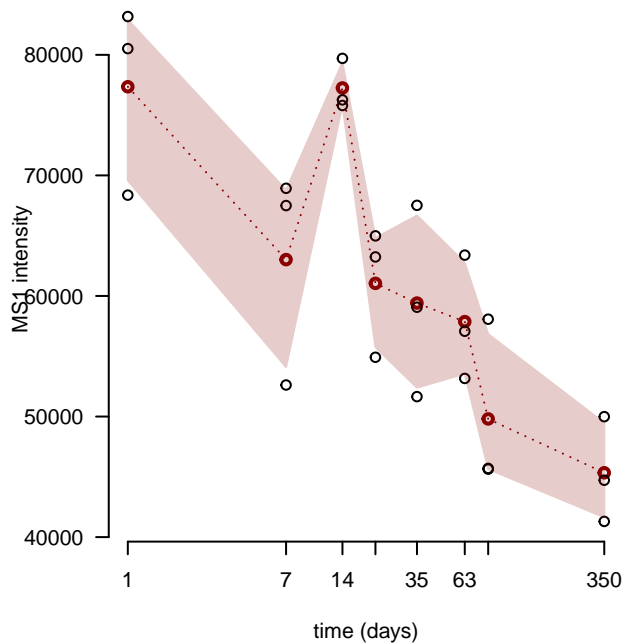

**Q9CYK1**  
GN=Wars2  
tryptophanyl tRNA synthetase 2 (mitochon ...

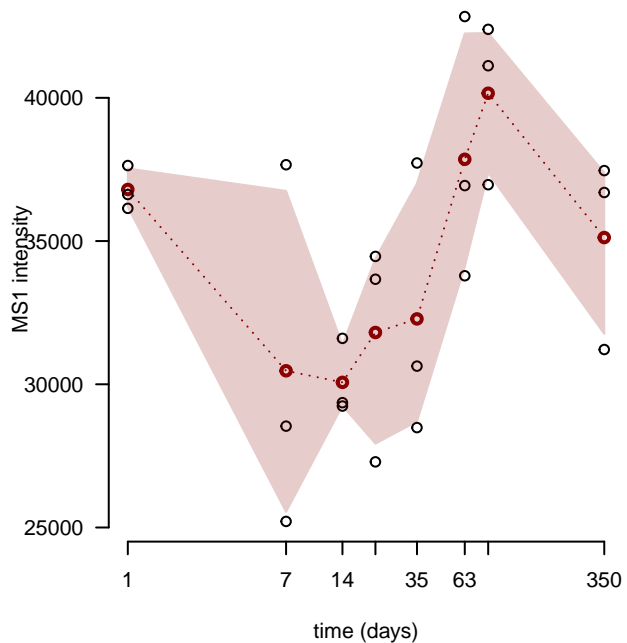

**Q9CYL5**  
GN=Glipr2  
GLI pathogenesis-related 2

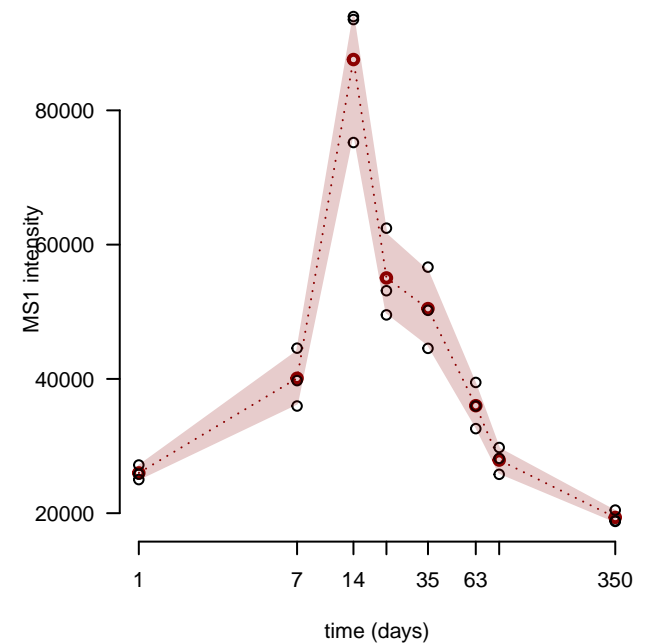

**Q9CYN2**  
GN=Spcs2

signal peptidase complex subunit 2 homol ...

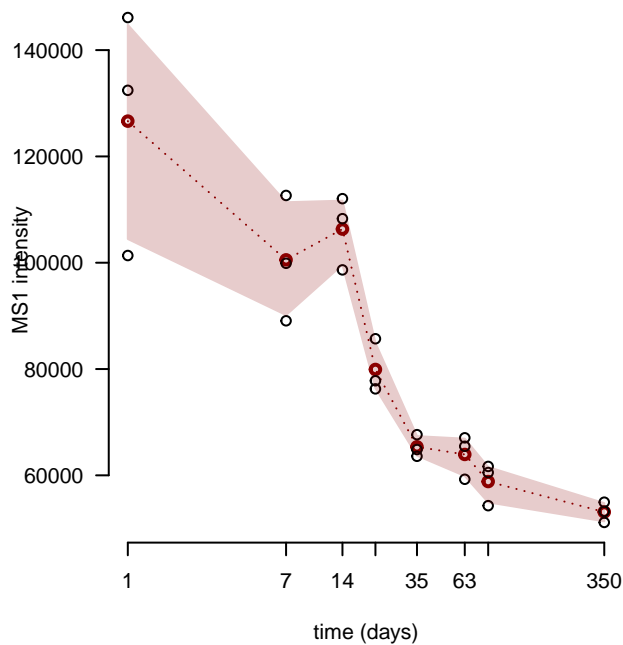

**Q9CYN9**  
GN=Atp6ap2

ATPase, H+ transporting, lysosomal acces ...

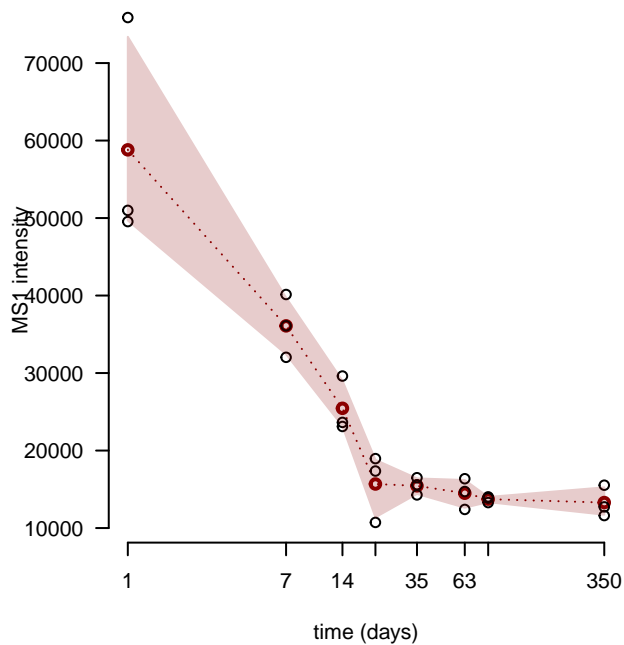

**Q9CYP7**  
GN=Sesn3

sestrin 3

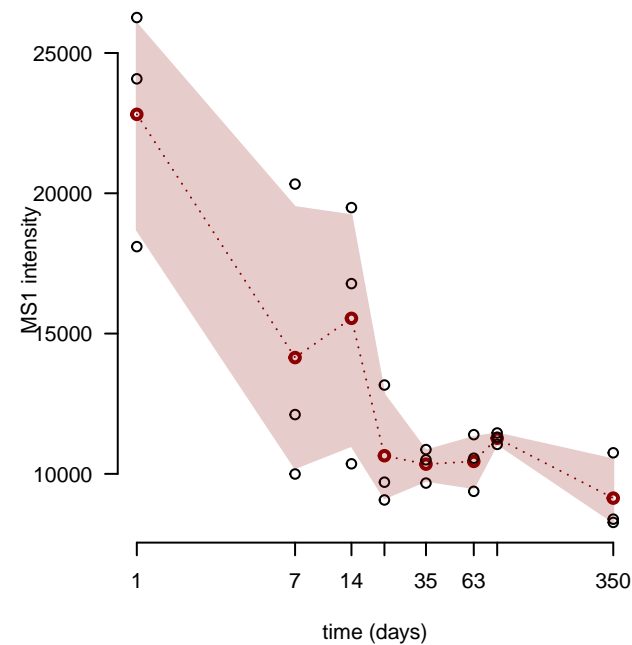

**Q9CYR0**  
GN=Ssbp1

single-stranded DNA binding protein 1

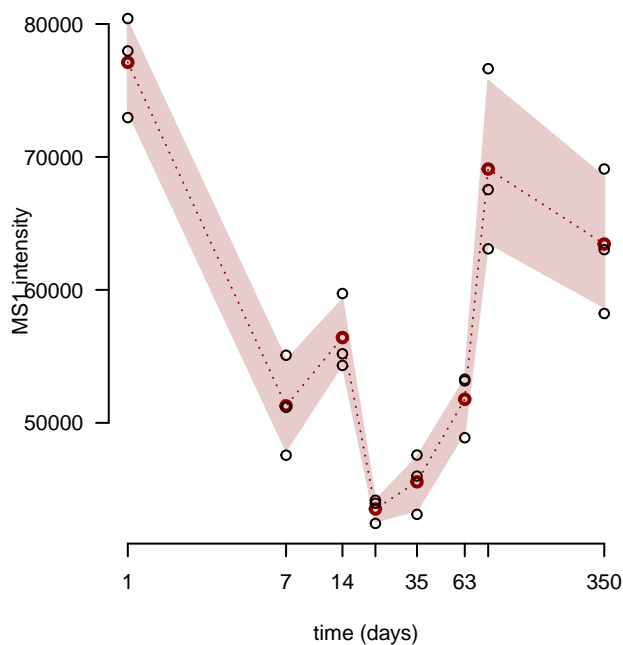

**Q9CYR6**  
GN=Pgm3

phosphoglucomutase 3

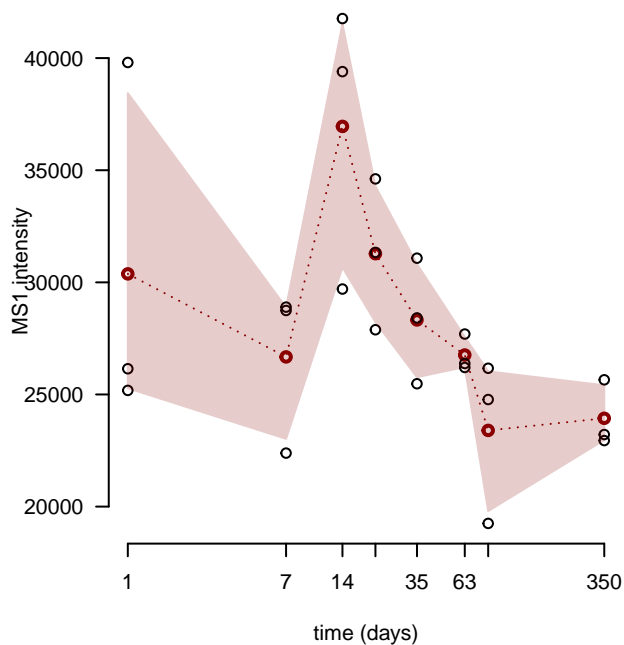

**Q9CYT6**  
GN=Cap2

CAP, adenylate cyclase-associated protei ...

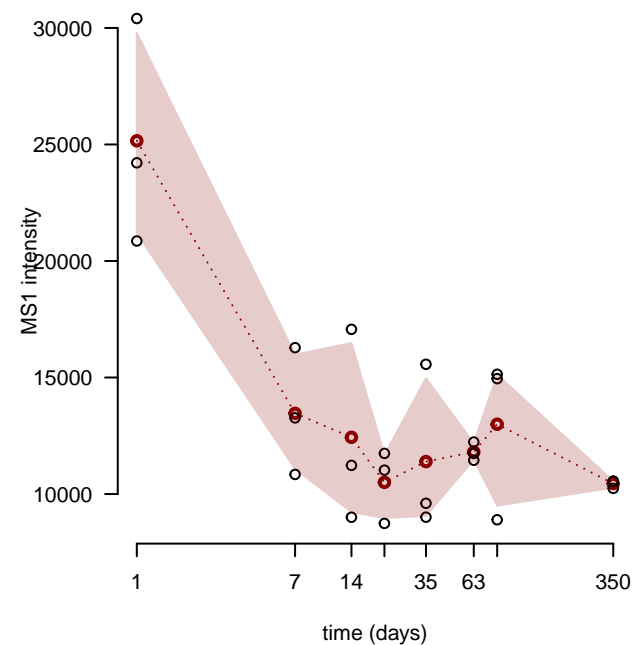

**Q9CYU6**  
GN=Dph7

diphthamine biosynthesis 7

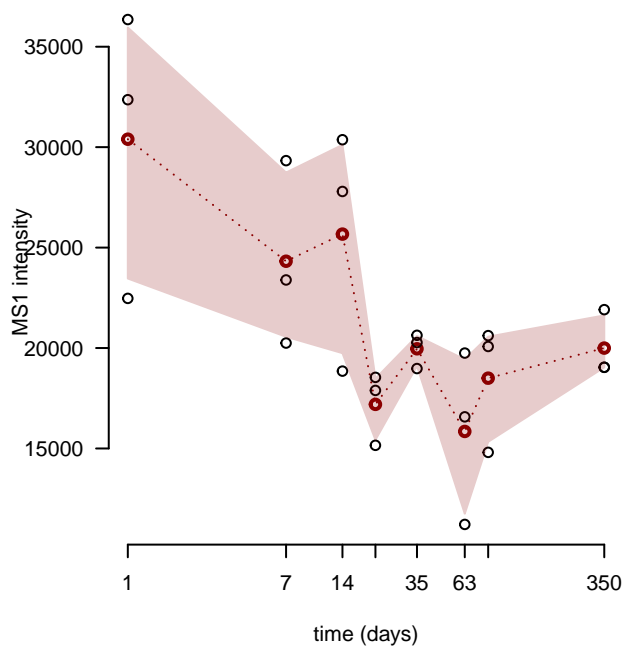

**Q9CYV5**  
GN=Tmem135

transmembrane protein 135

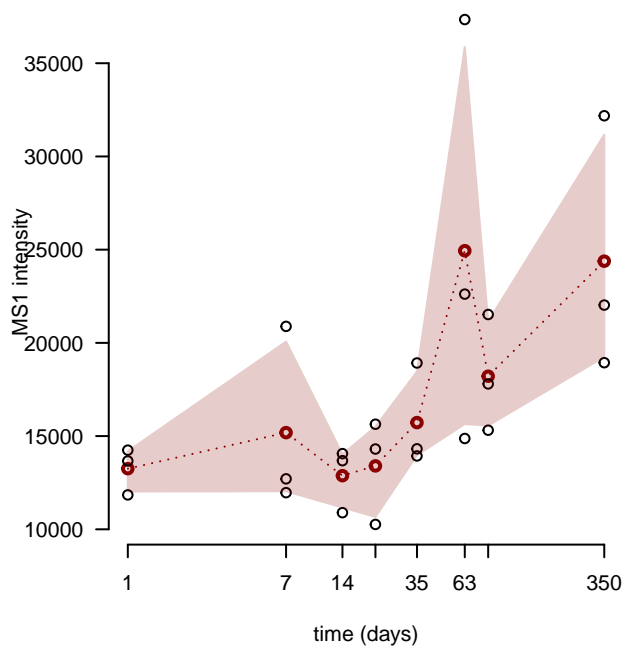

**Q9CYW4**  
GN=Hdhd3

haloacid dehalogenase-like hydrolase dom ...

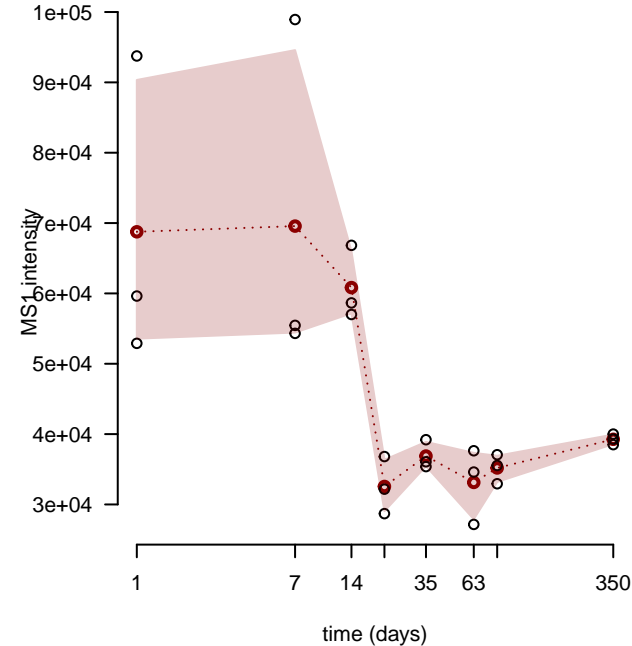

**Q9CYX7**  
**GN=Rrp15**

ribosomal RNA processing 15 homolog

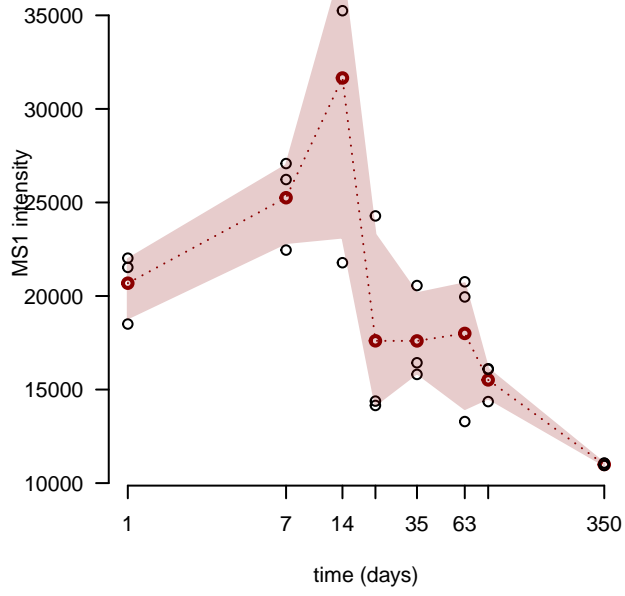

**Q9CYZ2**  
**GN=Tpd52l2**

tumor protein D52-like 2

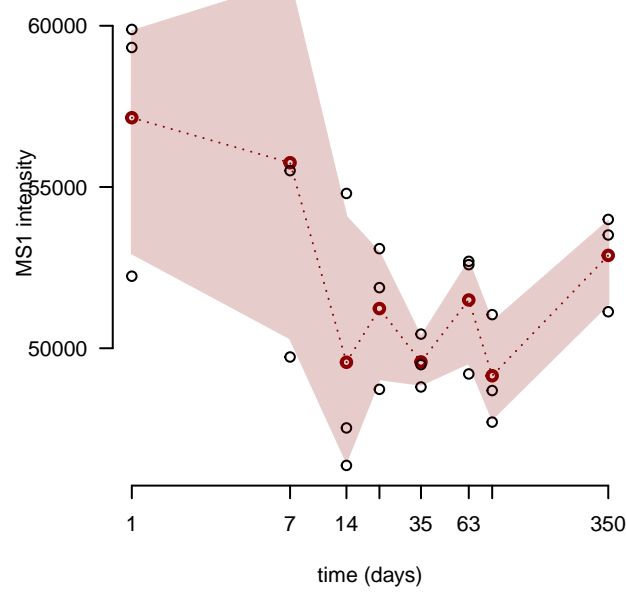

**Q9CYZ8**  
**GN=Ssbp2**

single-stranded DNA binding protein 2

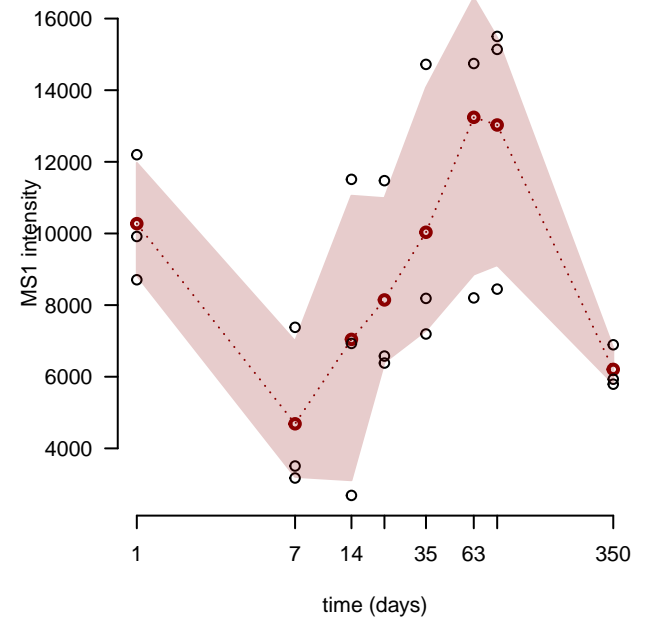

**Q9CZ04**  
**GN=Cops7a**

COP9 signalosome subunit 7A

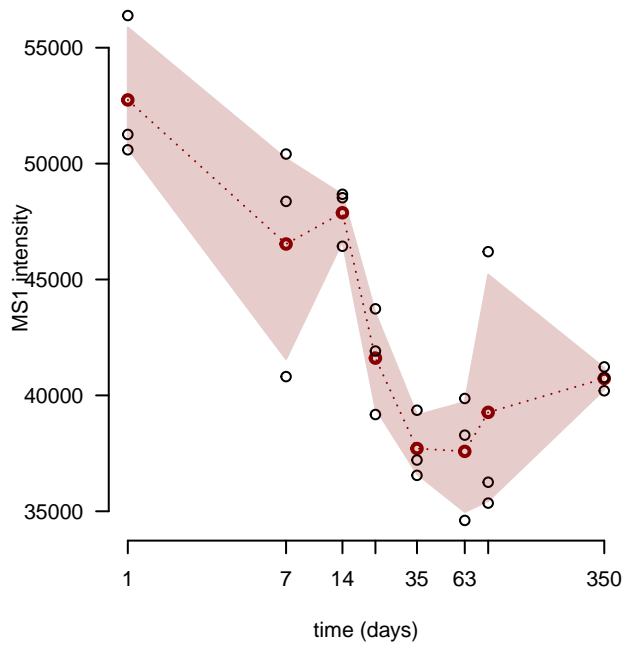

**Q9CZ13**  
**GN=Uqcrc1**

ubiquinol-cytochrome c reductase core pr ...

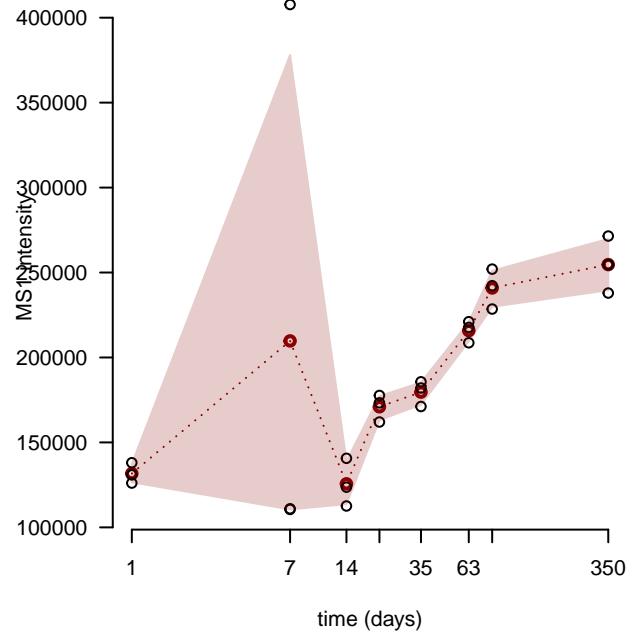

**Q9CZ15**  
**GN=Gins1**

GINS complex subunit 1 (Psf1 homolog)

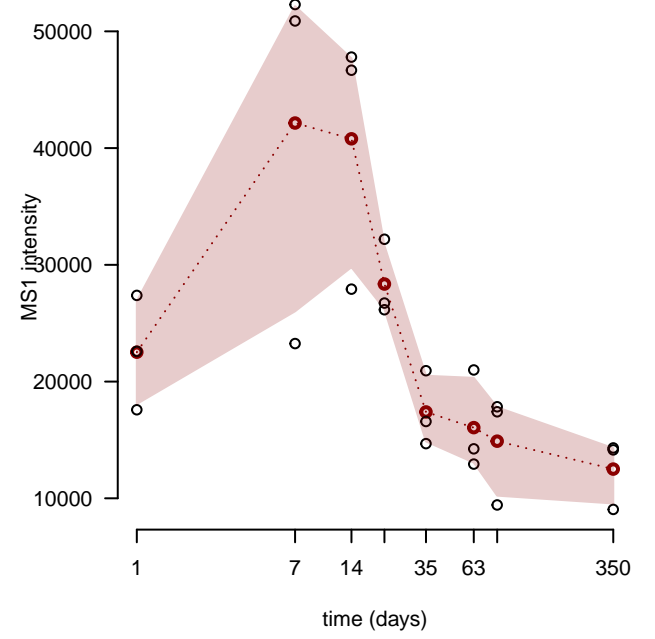

**Q9CZ28**  
**GN=Snf8**

SNF8, ESCRT-II complex subunit, homolog ...

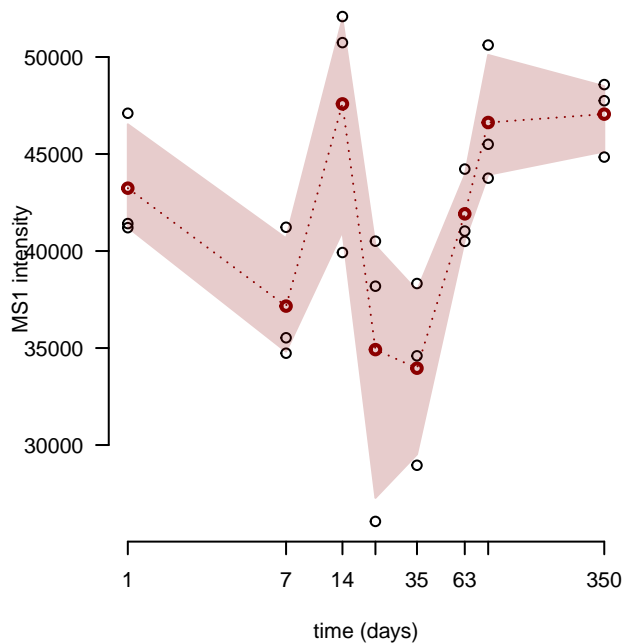

**Q9CZ30**  
**GN=Ola1**

Obg-like ATPase 1

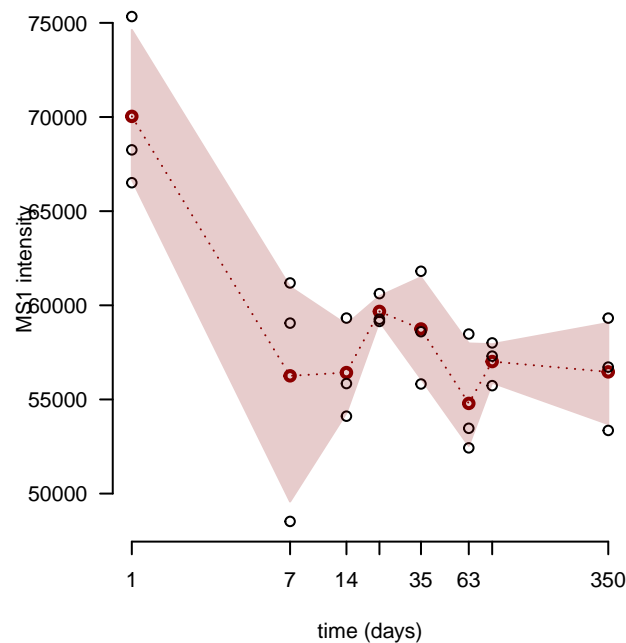

**Q9CZ42**  
**GN=Naxd**

NAD(P)HX dehydratase

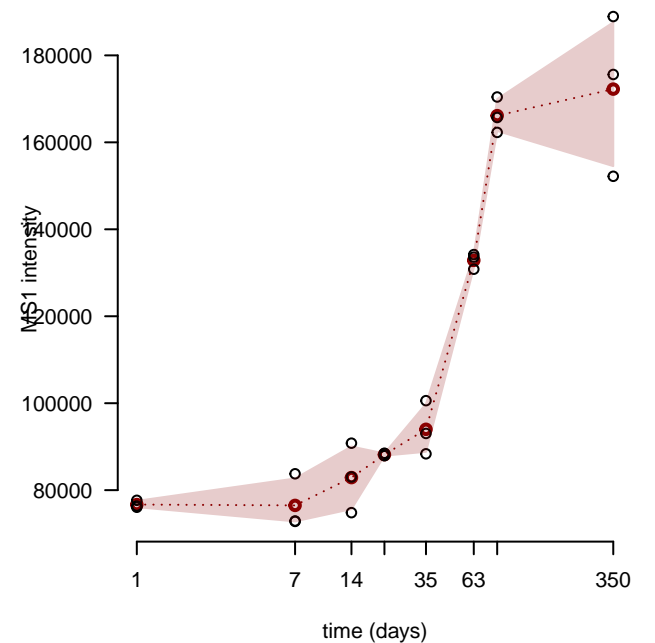

**Q9CZ42**  
GN=Naxd  
NAD(P)HX dehydratase

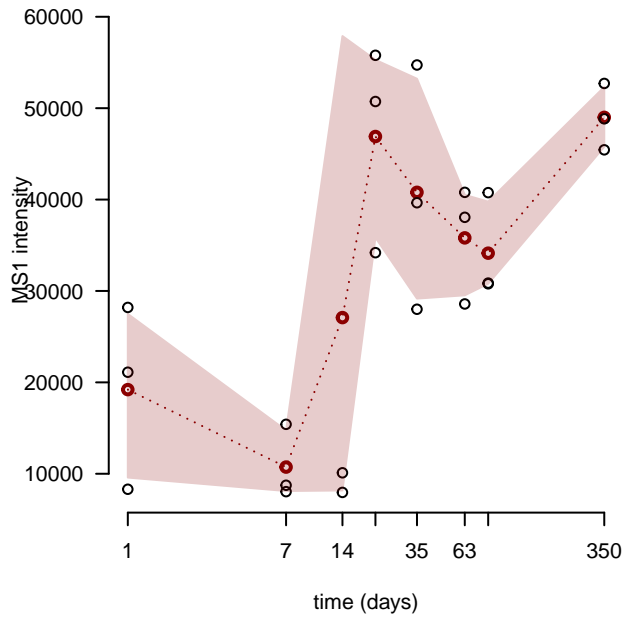

**Q9CZ44**  
GN=Nsf11c  
NSFL1 (p97) cofactor (p47)

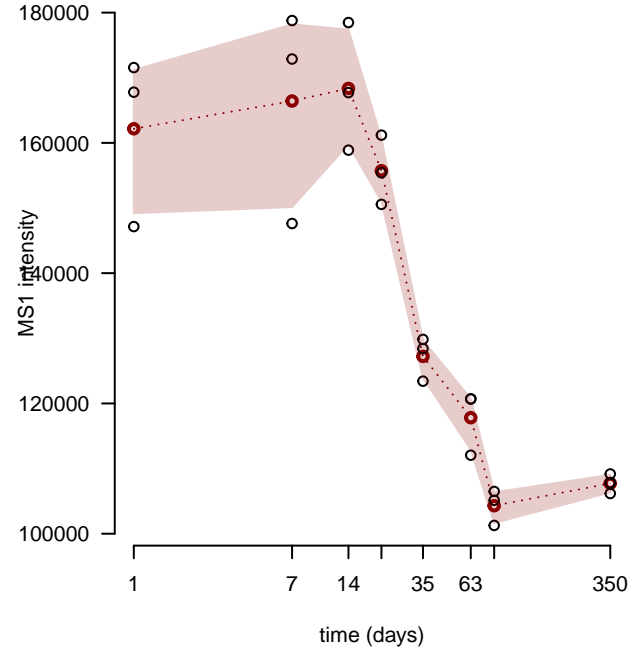

**Q9CZ52**  
GN=Antxr1  
anthrax toxin receptor 1

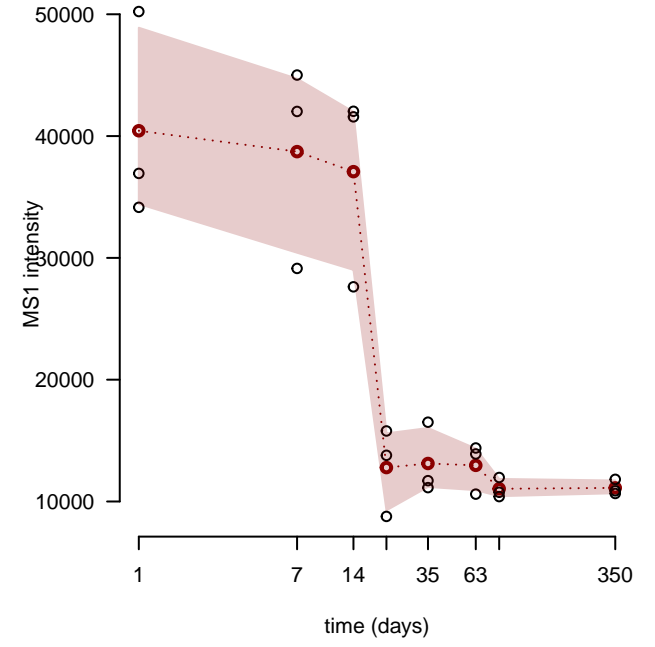

**Q9CZ57**  
GN=Nsun4

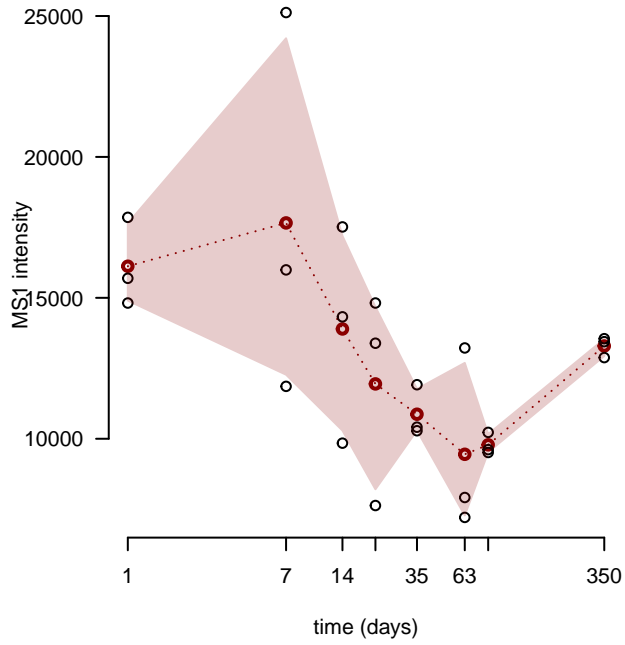

**Q9CZ62**  
GN=Cep97  
centrosomal protein 97

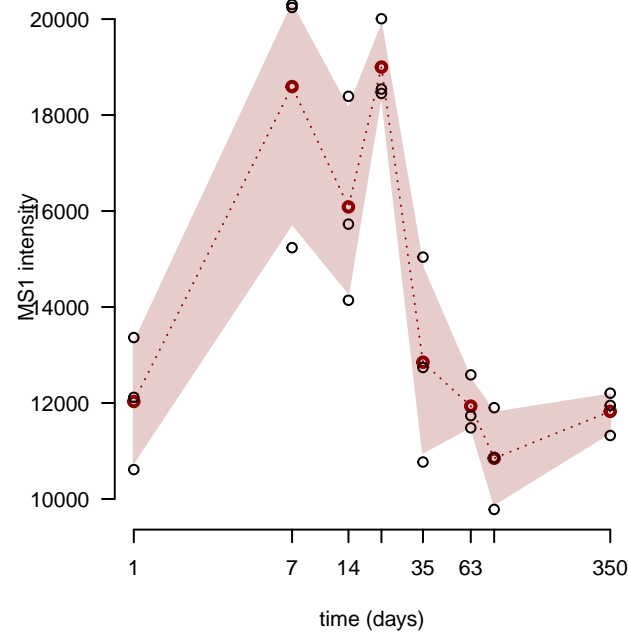

**Q9CZ69**  
GN=Cmtm6  
CKLF-like MARVEL transmembrane domain co ...

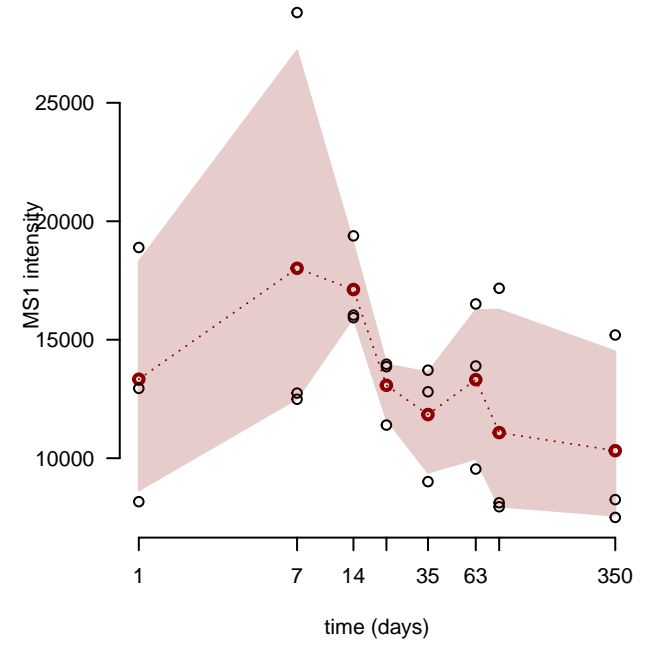

**Q9CZ82**  
GN=Med18  
mediator complex subunit 18

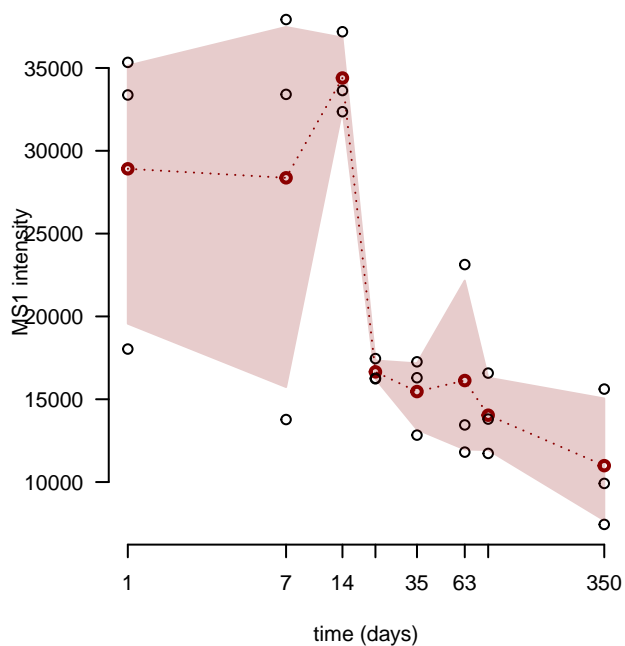

**Q9CZ83**  
GN=Mrpl55  
mitochondrial ribosomal protein L55

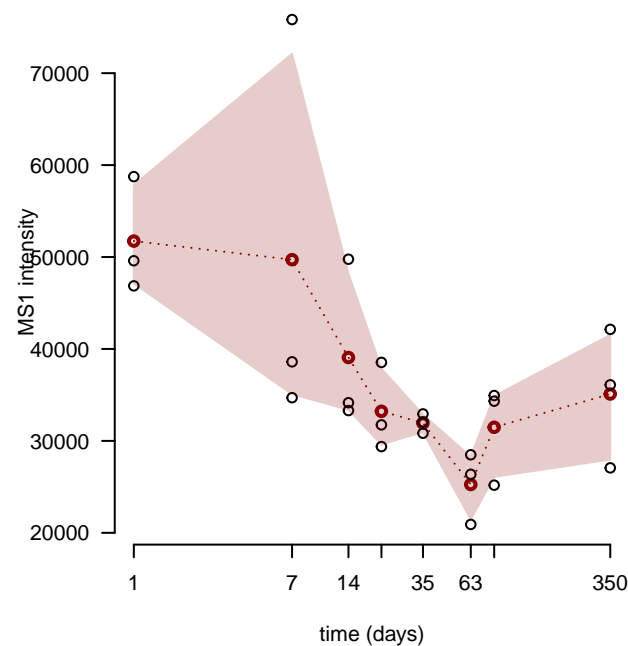

**Q9CZ91**  
GN=Srfbp1  
serum response factor binding protein 1

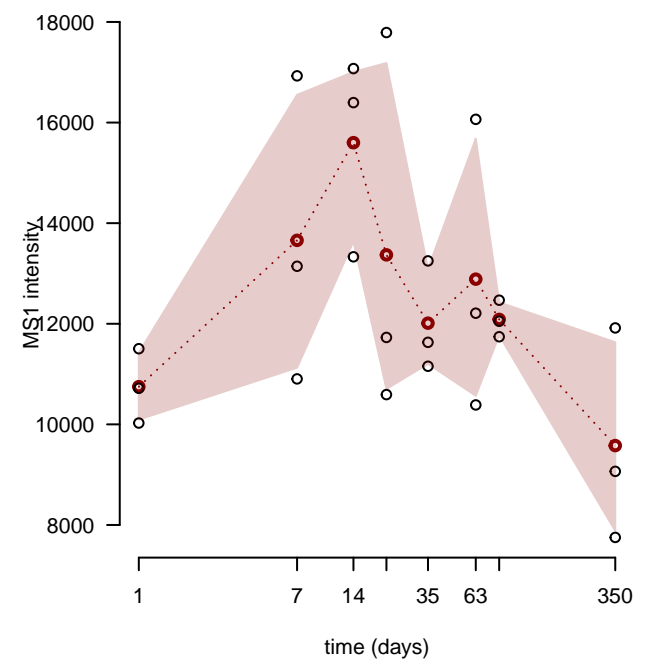

**Q9CZ96**  
**GN=Zcrb1**  
zinc finger CCHC-type and RNA binding mo ...

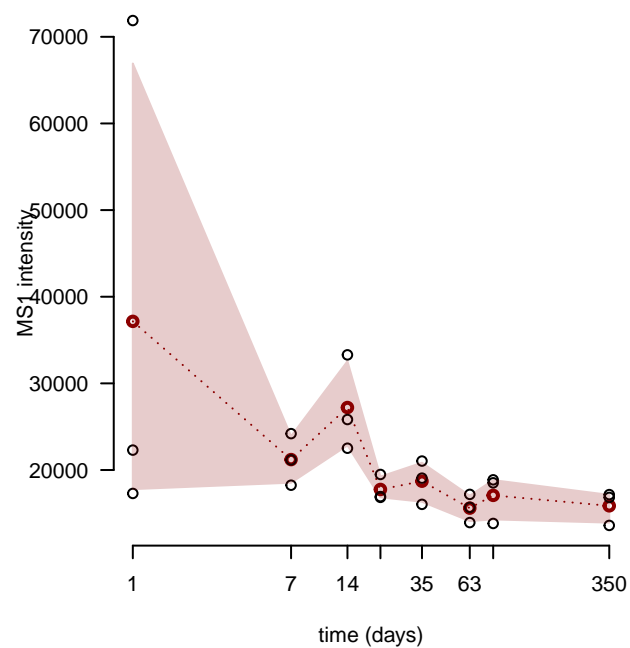

**Q9CZA6**  
**GN=Nde1**  
nudE neurodevelopment protein 1

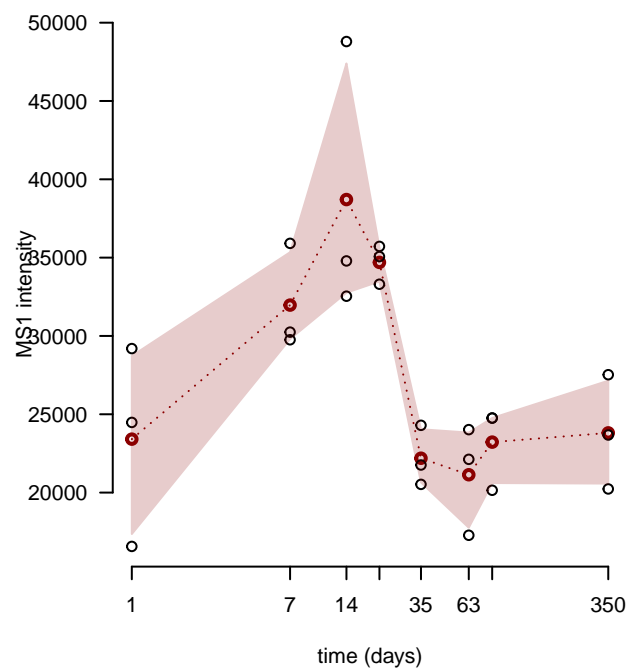

**Q9CZB0**  
**GN=Sdhc**  
succinate dehydrogenase complex, subunit ...

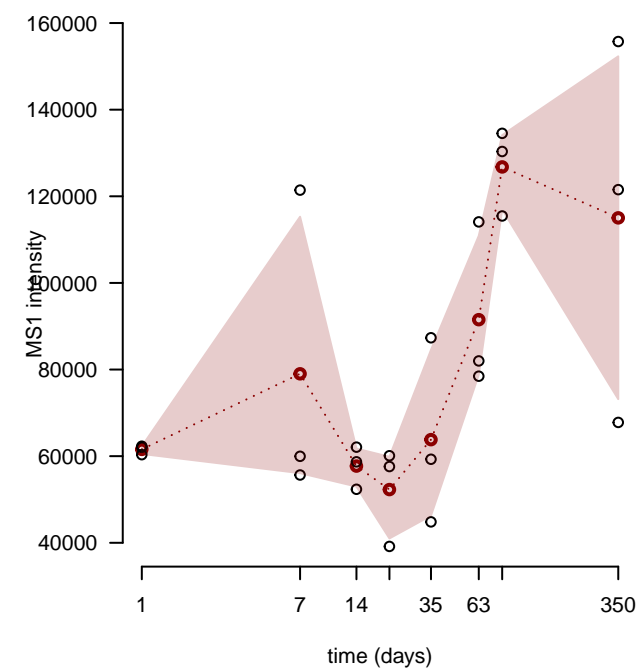

**Q9CZB3**  
**GN=Thumpd2**  
THUMP domain containing 2

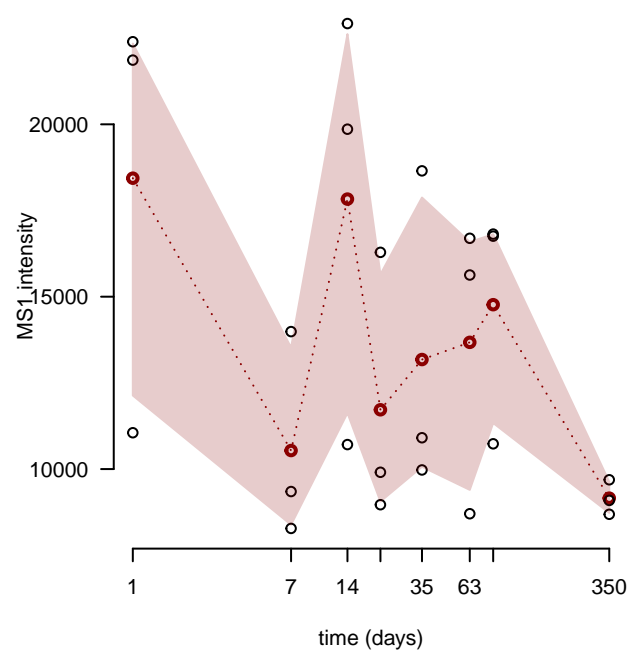

**Q9CZB6**  
**GN=Med7**  
mediator complex subunit 7

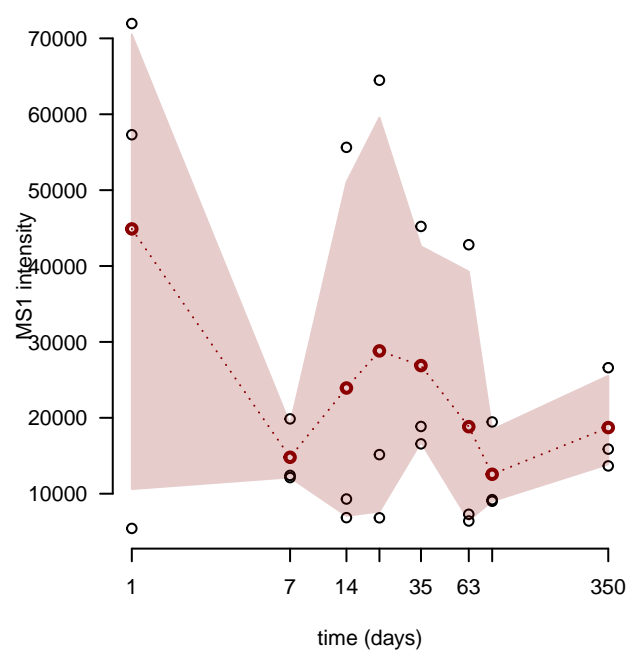

**Q9CZC8**  
**GN=Scrn1**  
secernin 1

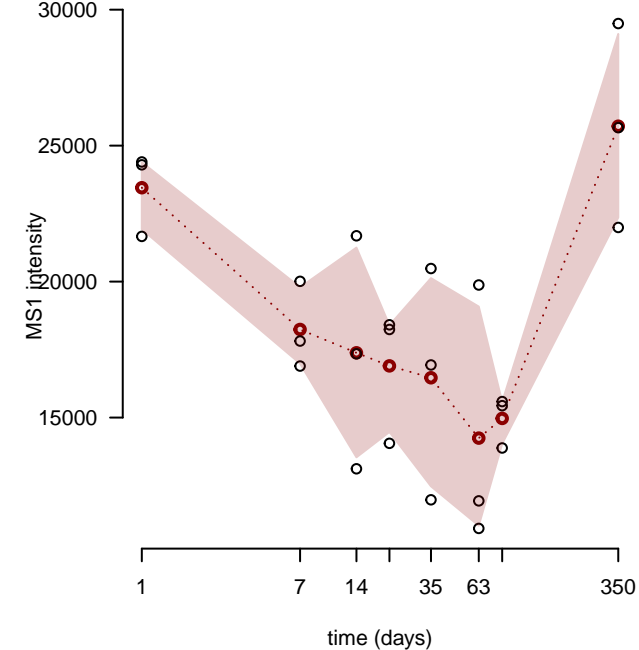

**Q9CZD3**  
**GN=Gars**  
glycyl-tRNA synthetase

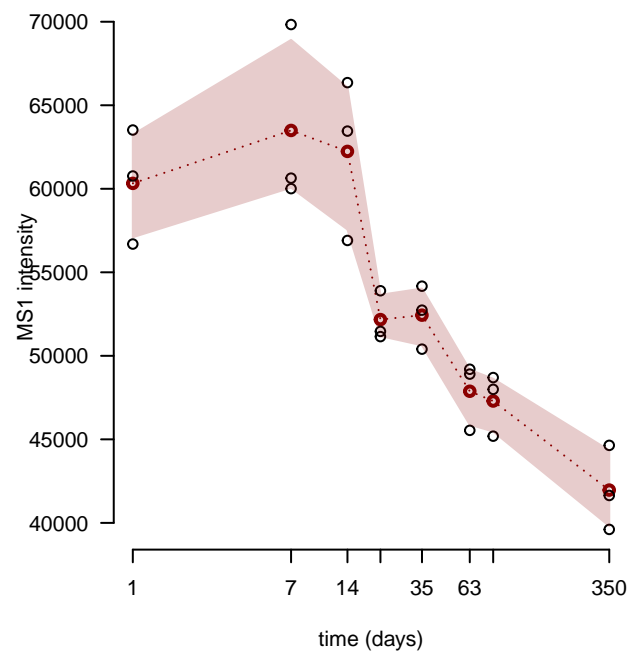

**Q9CZD5**  
**GN=Mtif3**  
mitochondrial translational initiation f ...

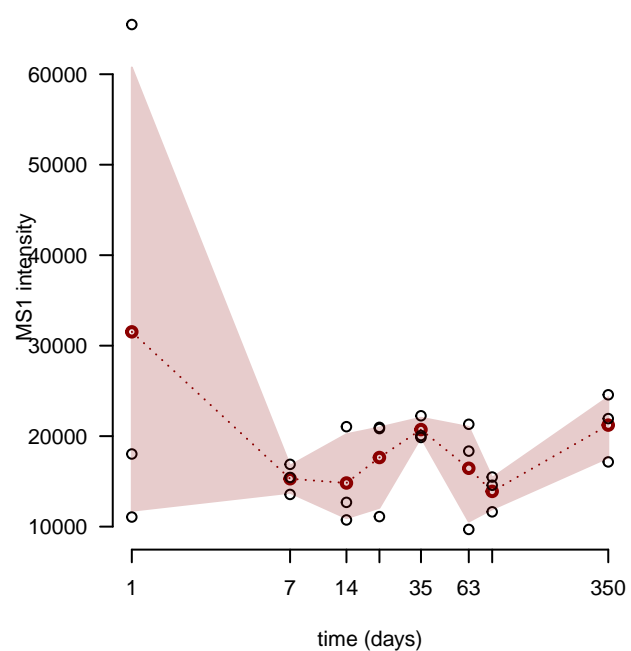

**Q9CZE3**  
**GN=Rab32**  
RAB32, member RAS oncogene family

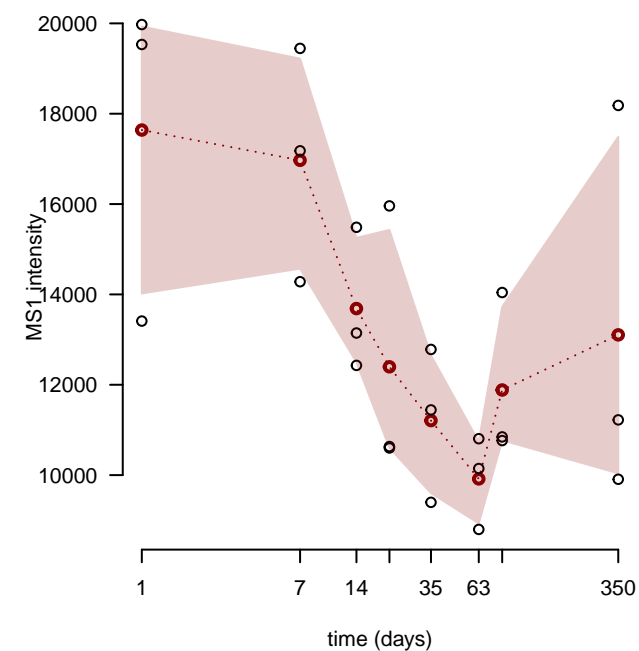

**Q9CZG3**  
GN=Commd8  
COMM domain containing 8

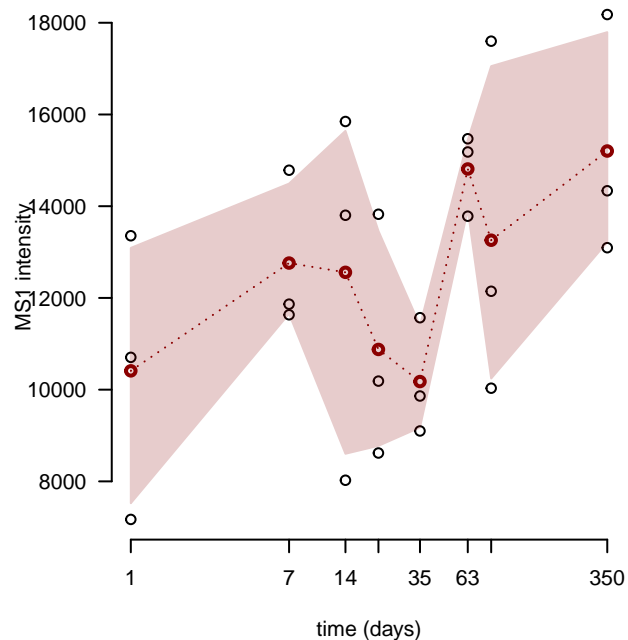

**Q9CZG9**  
GN=Pdzd11  
PDZ domain containing 11

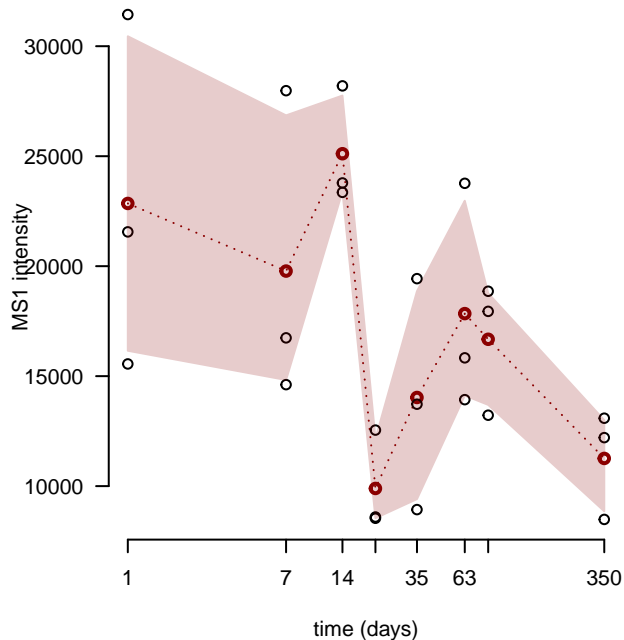

**Q9CZH3**  
GN=Psmg3  
proteasome (prosome, macropain) assembly ...

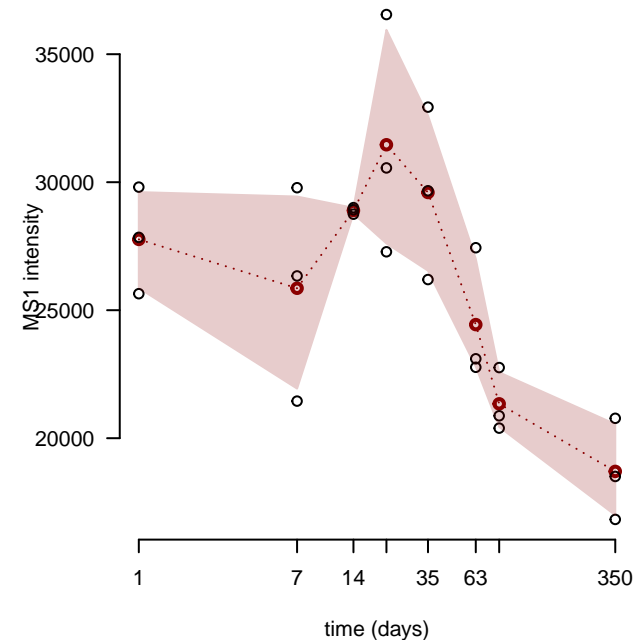

**Q9CZH7**  
GN=Mxra7  
matrix-remodelling associated 7

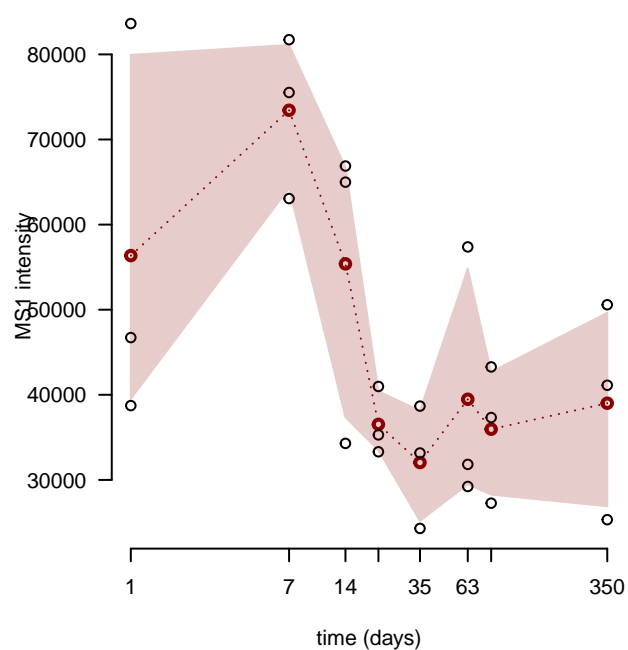

**Q9CZI9**  
GN=Aen  
apoptosis enhancing nuclease

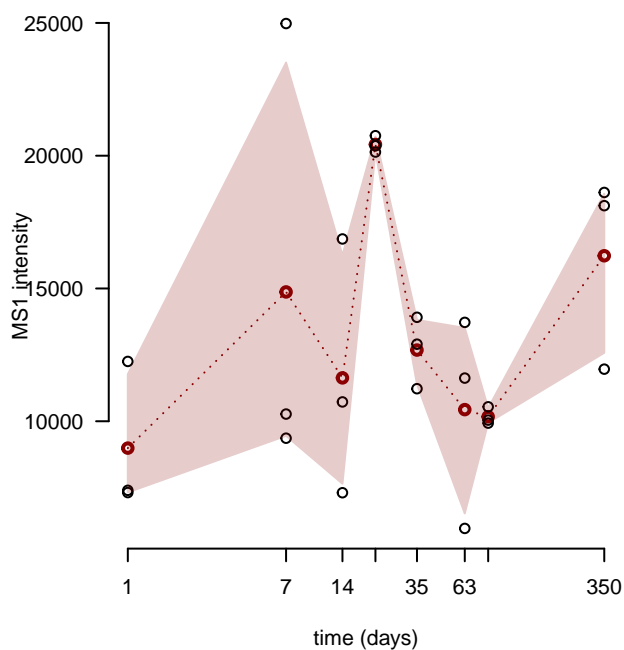

**Q9CZJ1**  
GN=Utp11  
UTP11 small subunit processome component

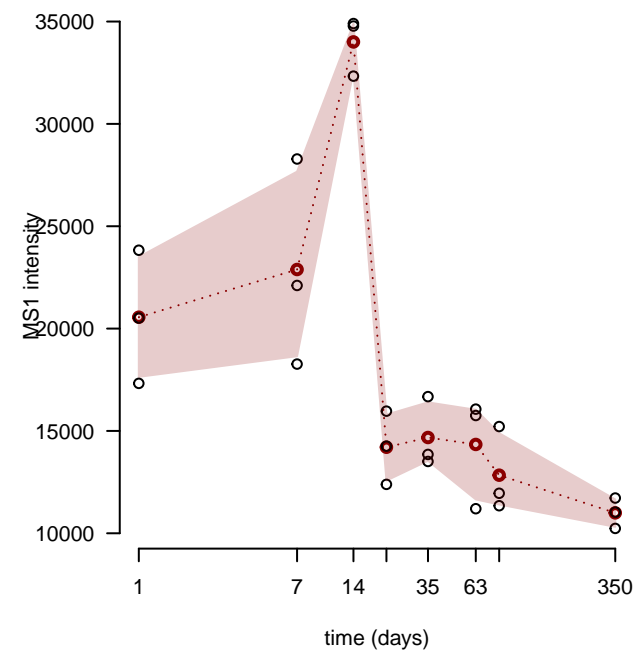

**Q9CZJ2**  
GN=Hspa12b  
heat shock protein 12B

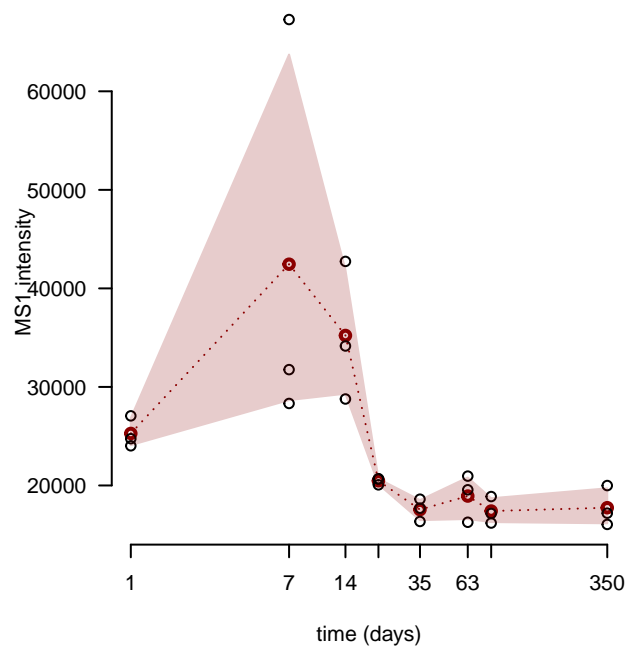

**Q9CZK6**  
GN=Anks3  
ankyrin repeat and sterile alpha motif d ...

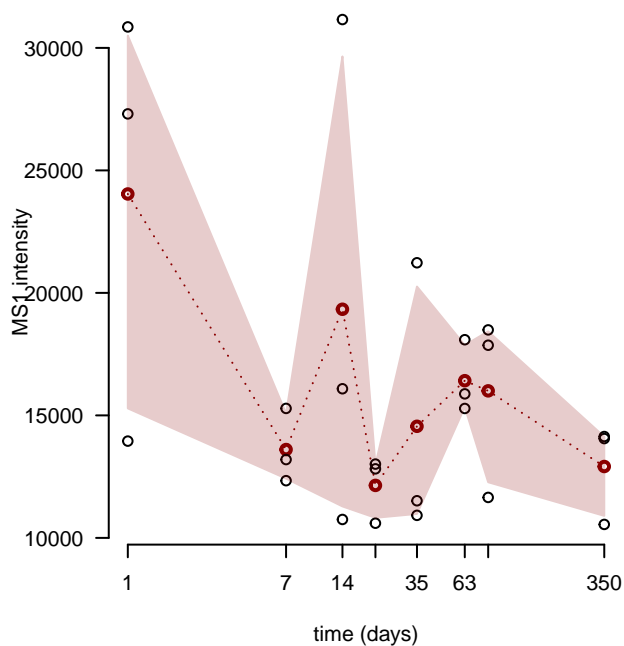

**Q9CZL2**  
GN=Fam241a  
family with sequence similarity 241, mem ...

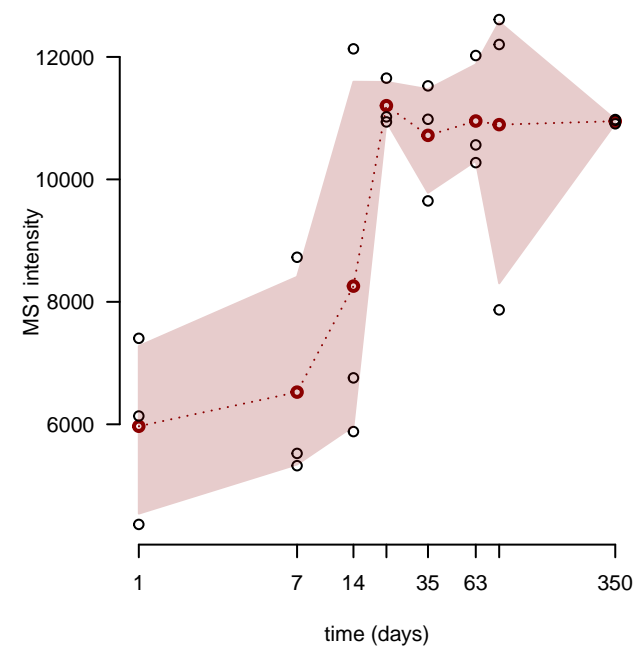

**Q9CZL5**  
**GN=Pcbd2**  
pterin 4 alpha carbinolamine dehydratase ...

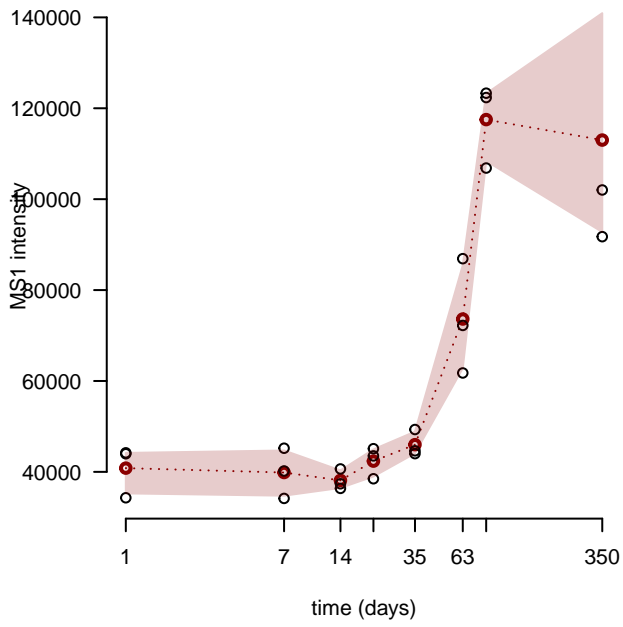

**Q9CZM2**  
**GN=Rpl15**  
ribosomal protein L15

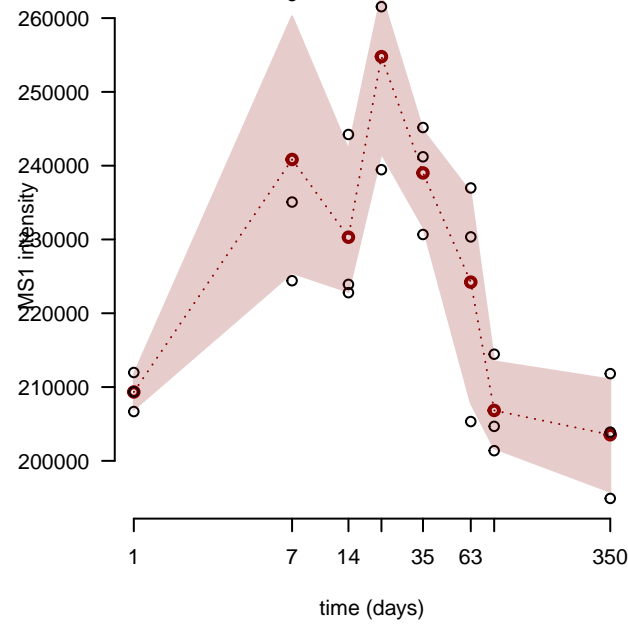

**Q9CZN7**  
**GN=Shmt2**  
serine hydroxymethyltransferase 2 (mitoc ...

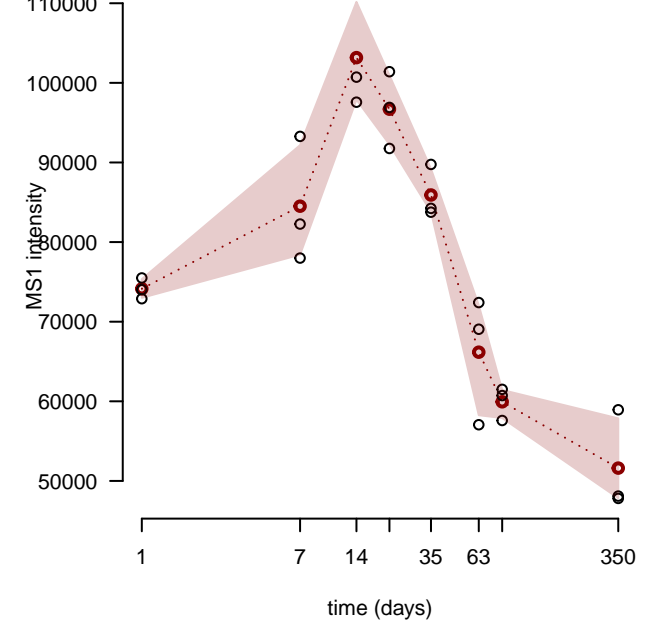

**Q9CZN8**  
**GN=Qrs1**  
glutamyl-tRNA synthase (glutamine-hydr ...

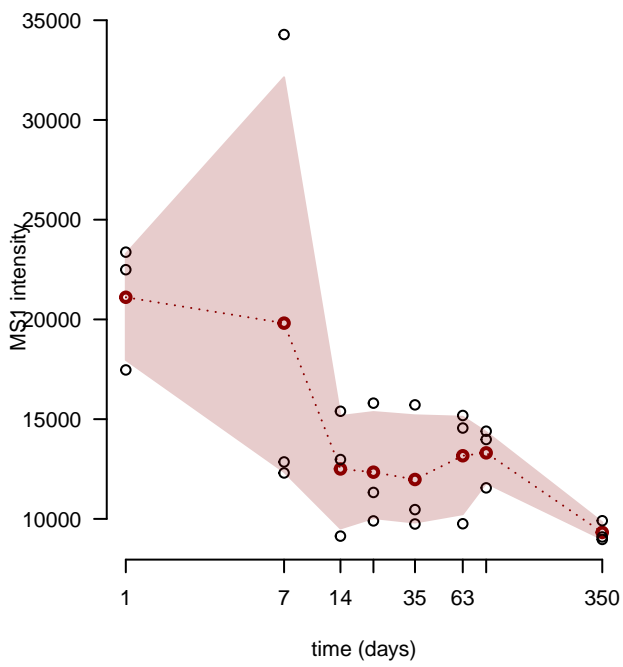

**Q9CZP5**  
**GN=Bcs1l**  
BCS1-like (yeast)

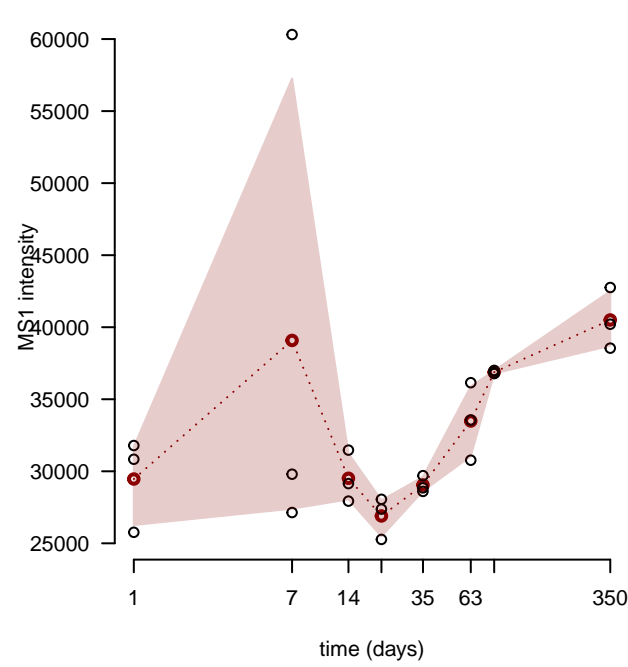

**Q9CZP7**  
**GN=Cdc37l1**  
cell division cycle 37-like 1

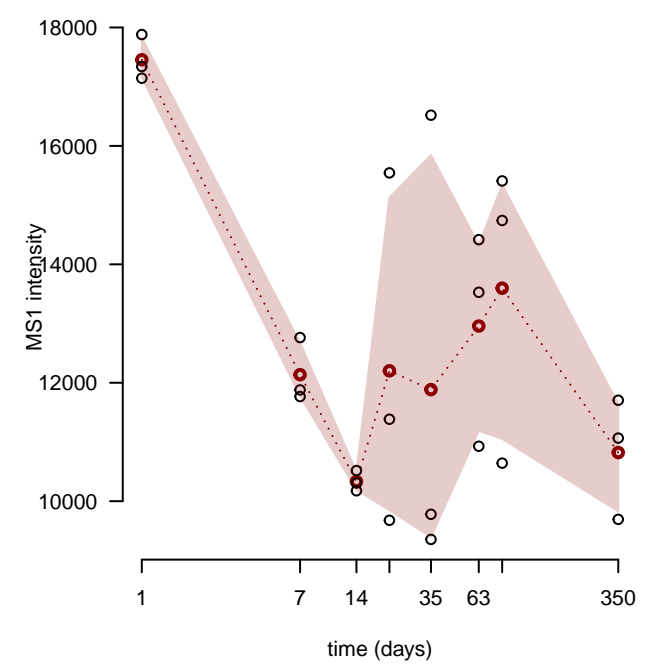

**Q9CZR2**  
**GN=Naalad2**  
N-acetylated alpha-linked acidic dipepti ...

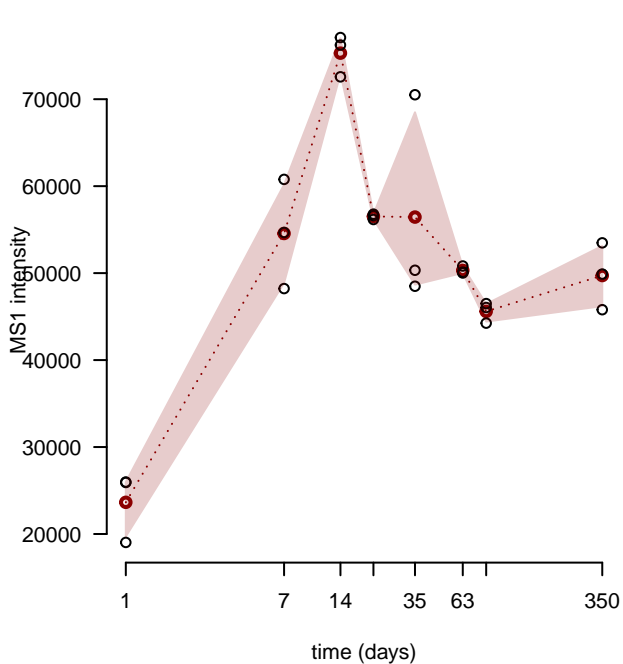

**Q9CZR3**  
**GN=Tomm40l**  
translocase of outer mitochondrial membr ...

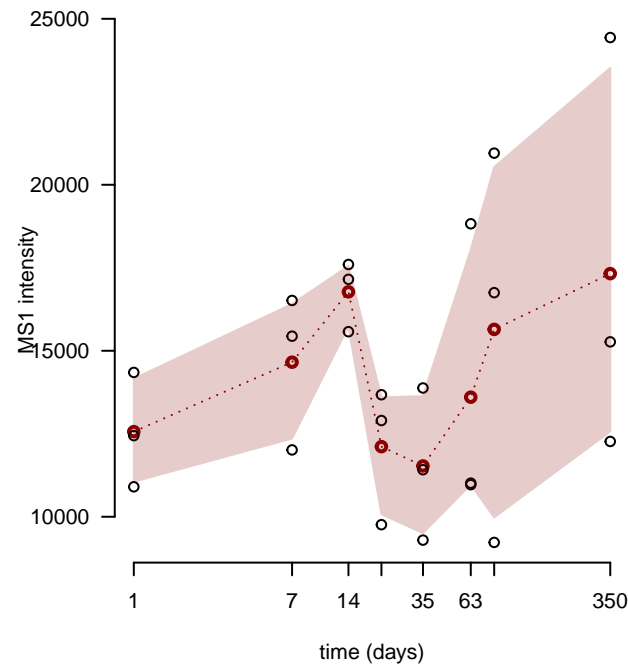

**Q9CZR8**  
**GN=Tsfm**  
Ts translation elongation factor, mitoch ...

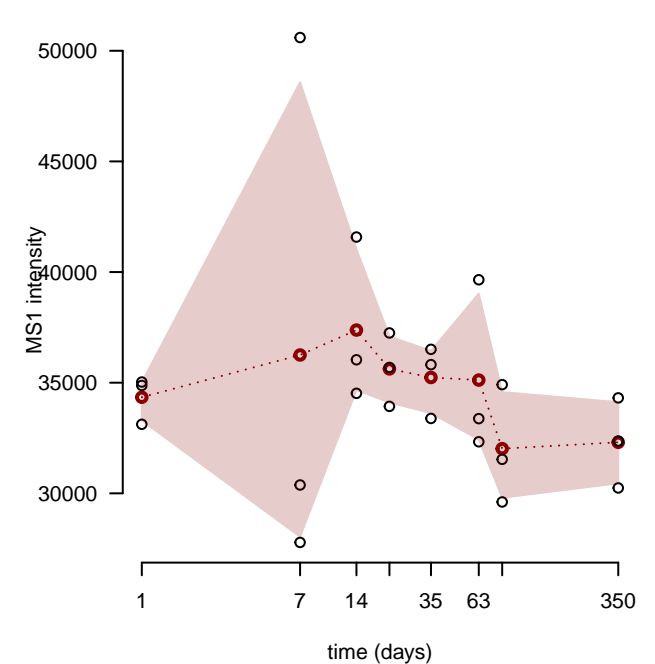

**Q9CZS1**  
GN=Aldh1b1  
aldehyde dehydrogenase 1 family, member ...

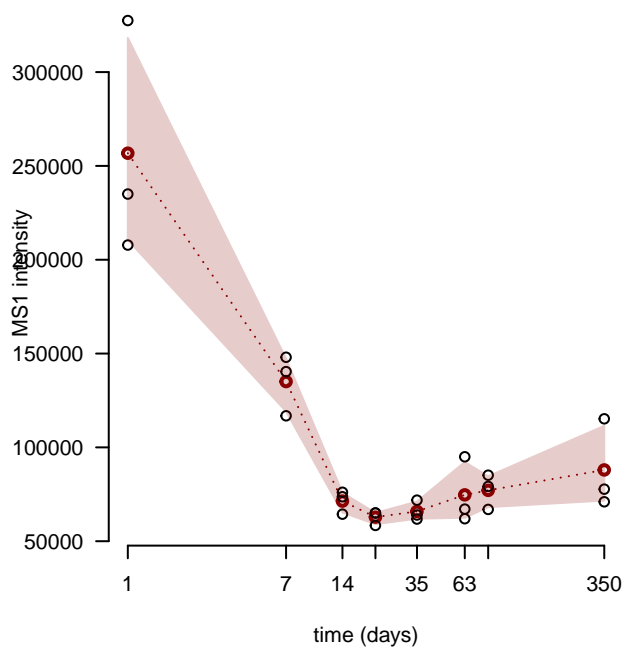

**Q9CZT4**  
GN=Polr3e  
polymerase (RNA) III (DNA directed) poly ...

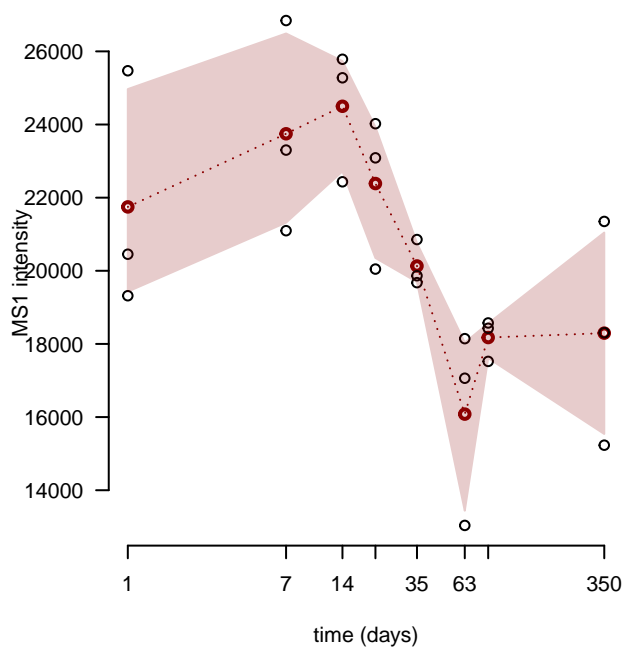

**Q9CZT5**  
GN=Vasn  
vasorin

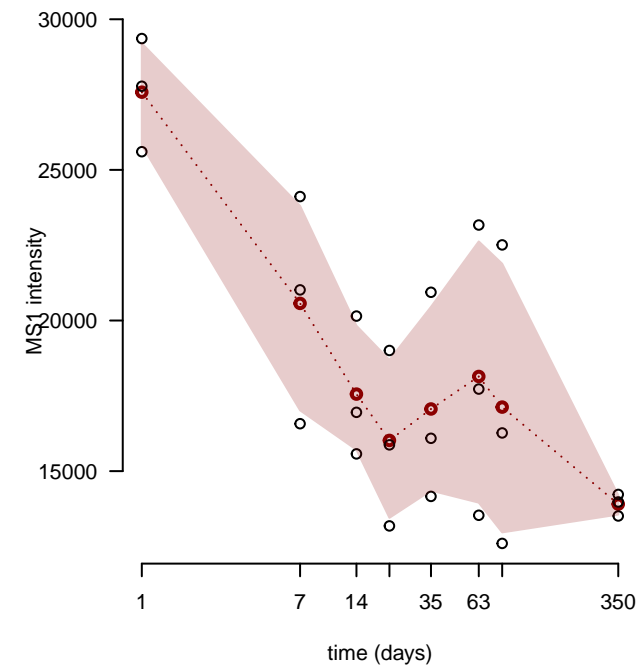

**Q9CZT6**  
GN=Cmss1  
cms small ribosomal subunit 1

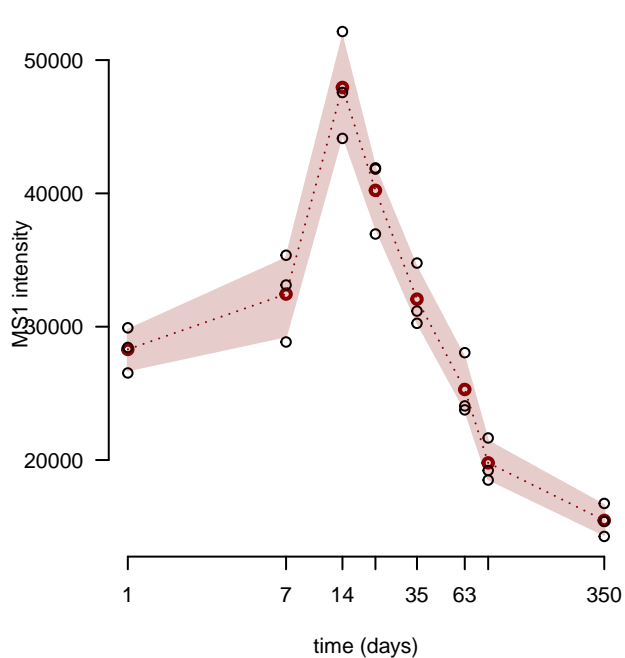

**Q9CZU3**  
GN=Mtrex  
Mtr4 exosome RNA helicase

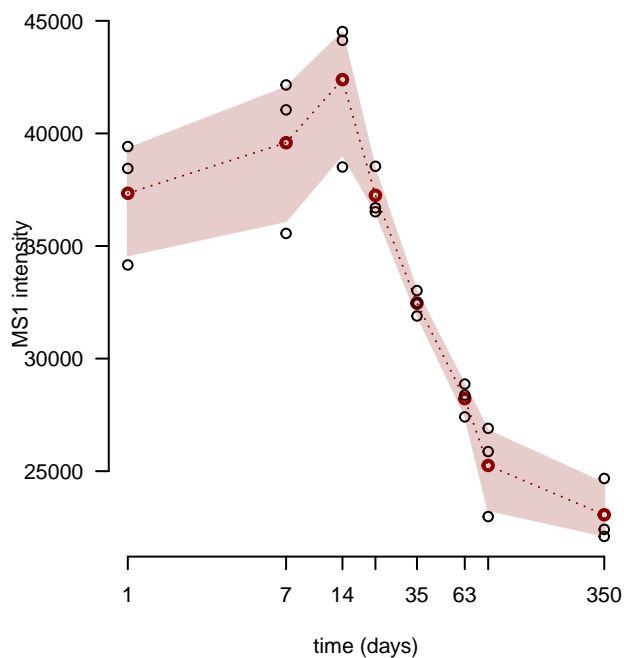

**Q9CZU4**  
GN=Era1  
Era (G-protein)-like 1 (E. coli)

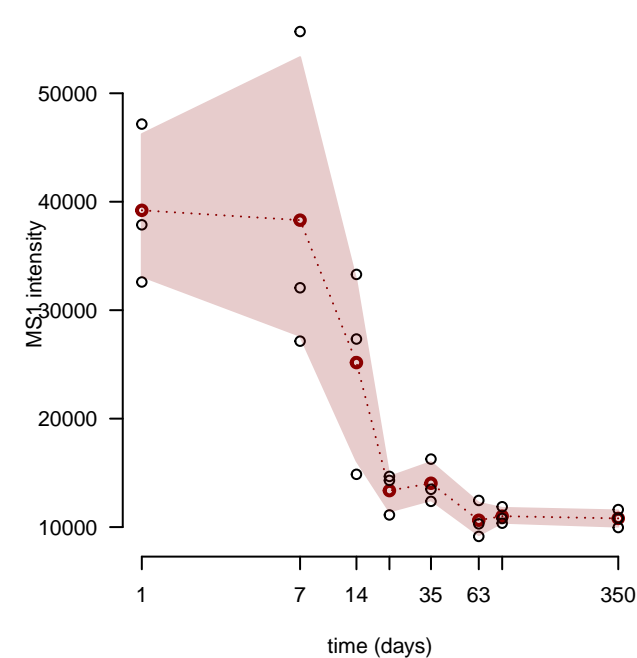

**Q9CZU6**  
GN=Cs  
citrate synthase

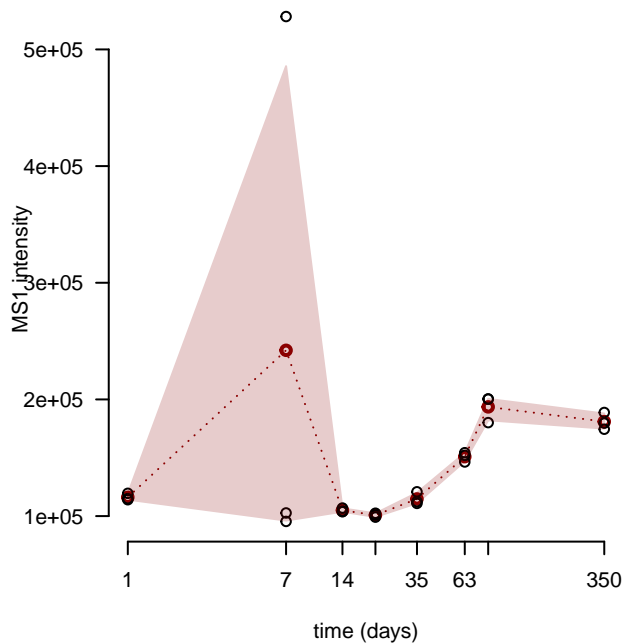

**Q9CZV5**  
GN=Supt71  
SPT7-like, STAGA complex gamma subunit

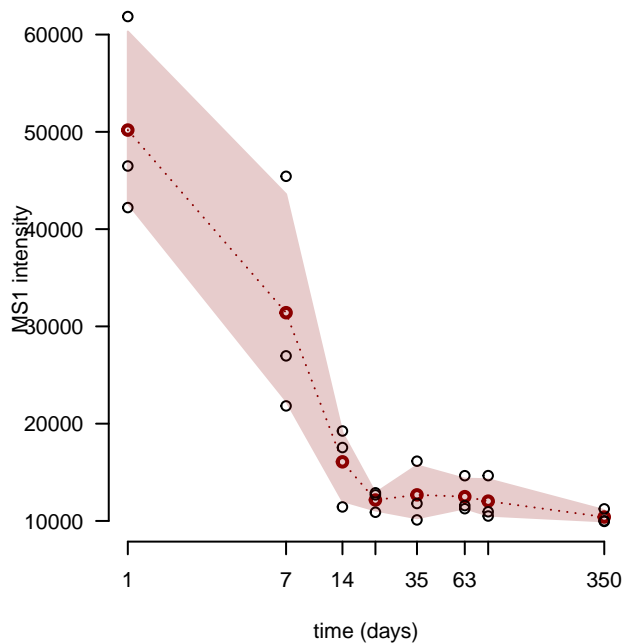

**Q9CZV8**  
GN=Fbx120  
F-box and leucine-rich repeat protein 20

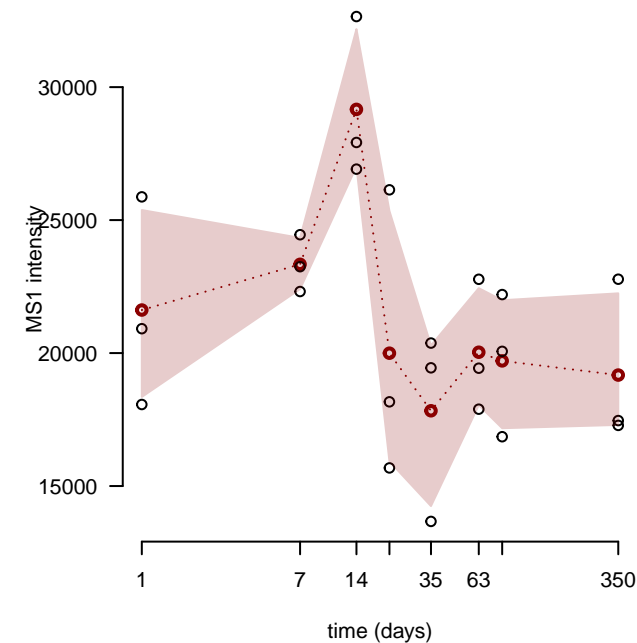



**Q9CZW2**  
GN=Cenpn  
centromere protein N

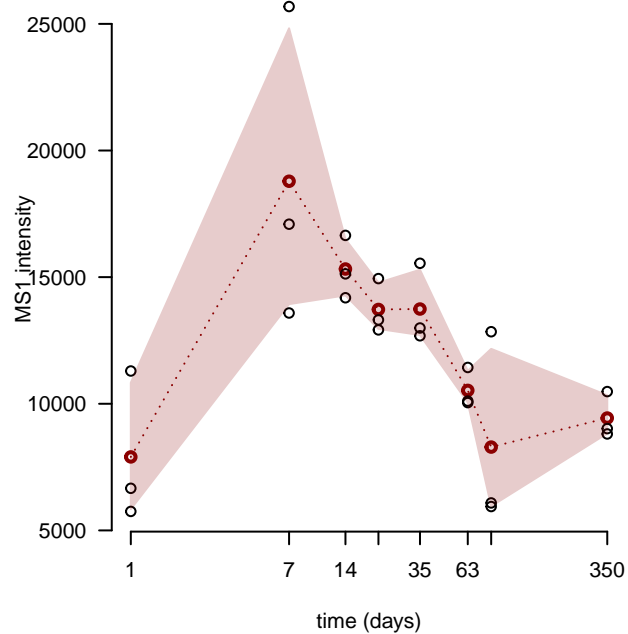

**Q9CZW4**  
GN=Acsl3  
acyl-CoA synthetase long-chain family me ...

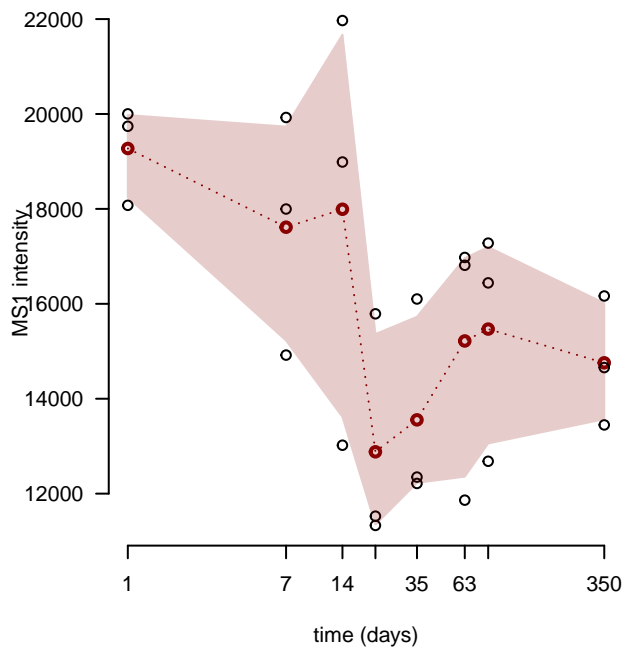

**Q9CZW5**  
GN=Tomm70  
TOM70

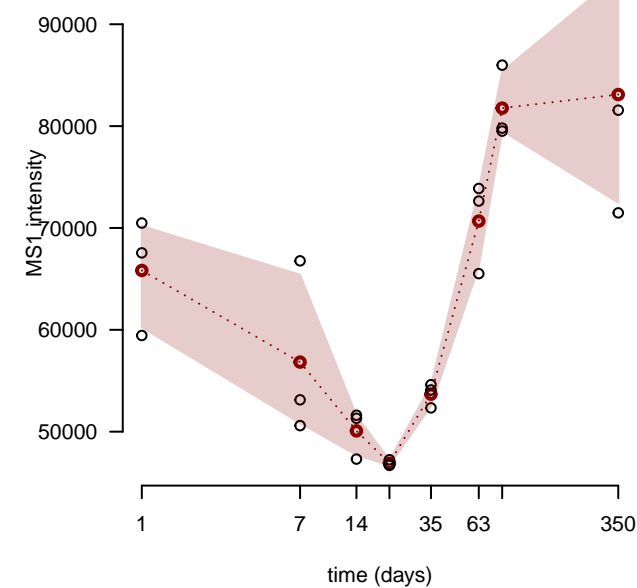

**Q9CZX0**  
GN=Elp3  
elongator acetyltransferase complex subu ...

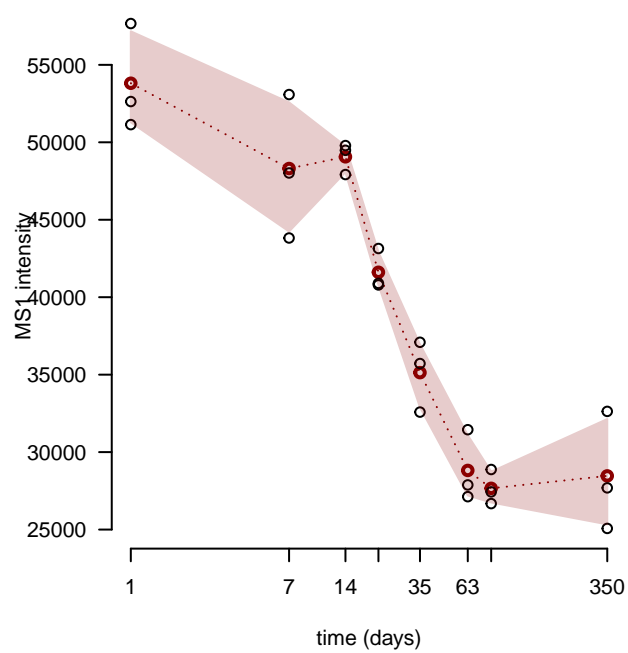

**Q9CZX5**  
GN=Pinx1  
PIN2/TERF1 interacting, telomerase inhib ...

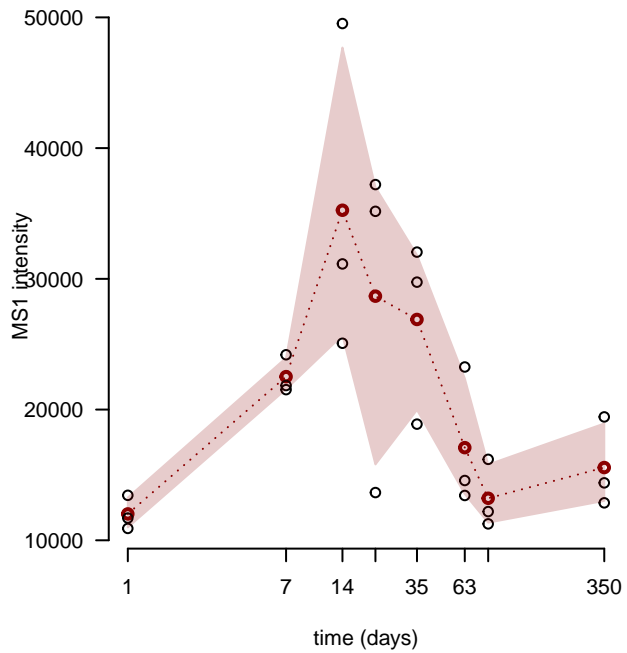

**Q9CZX7**  
GN=Pip4p2  
phosphatidylinositol-4,5-bisphosphate 4- ...

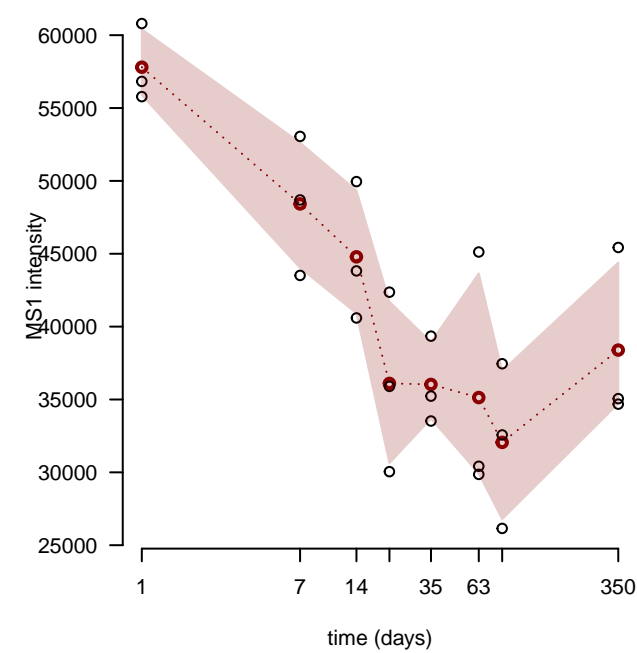

**Q9CZX8**  
GN=Rps19  
ribosomal protein S19

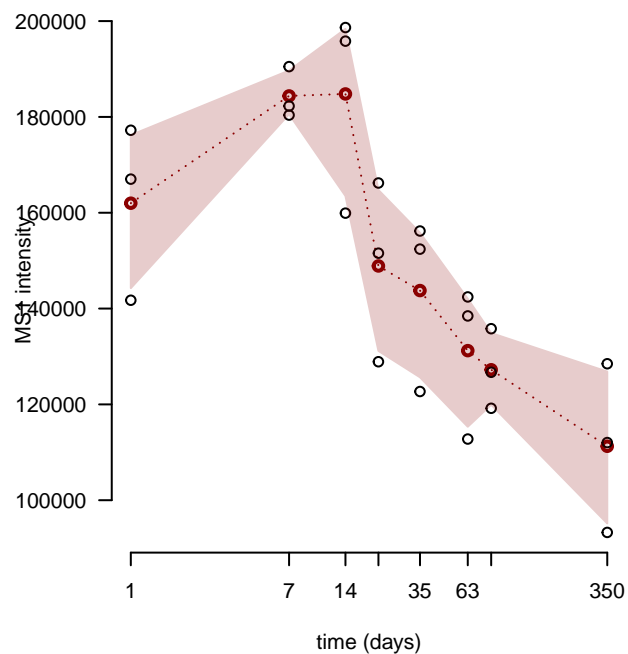

**Q9CZX9**  
GN=Emc4  
ER membrane protein complex subunit 4

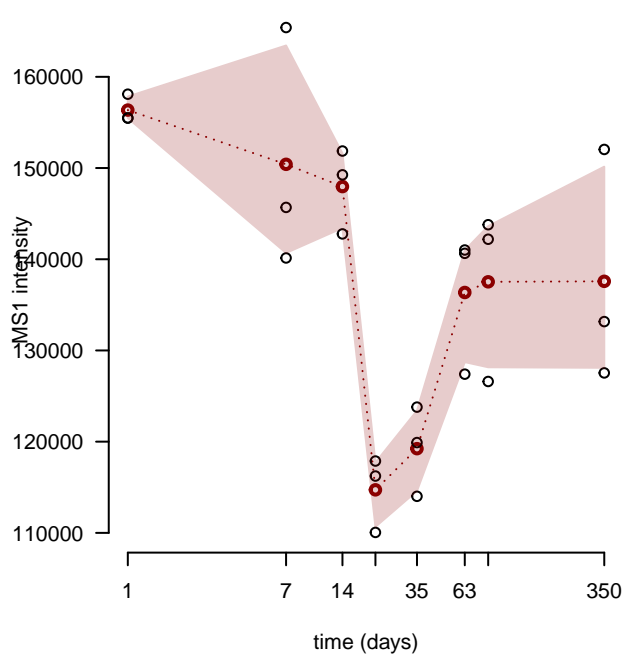

**Q9CZY3**  
GN=Ube2v1  
ubiquitin-conjugating enzyme E2 variant ...

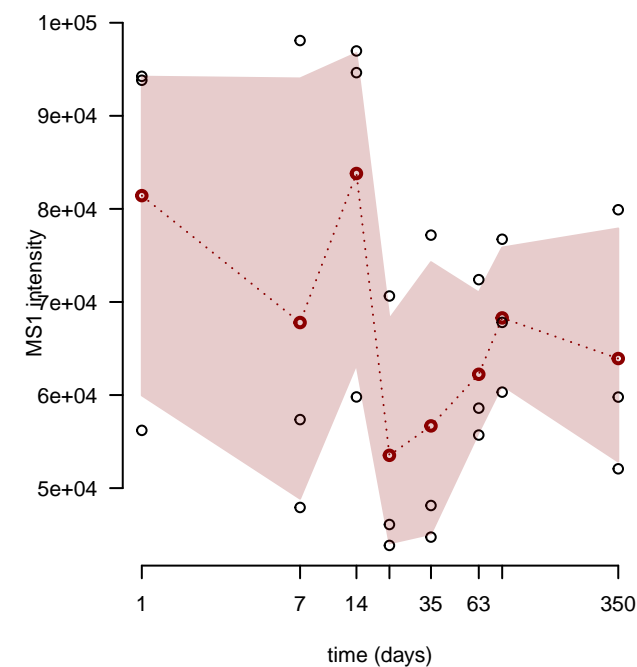

Q9D009  
GN=Lipt2  
lipoyl(octanoyl) transferase 2 (putative ...

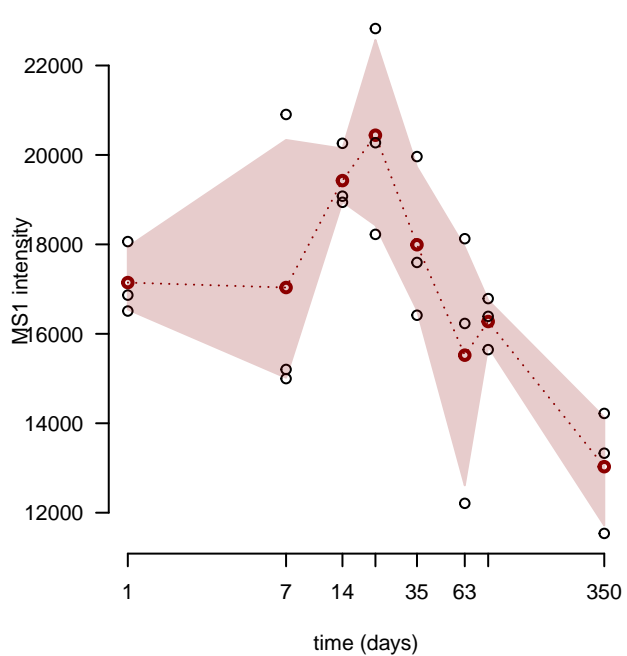

Q9D020  
GN=Nt5c3a

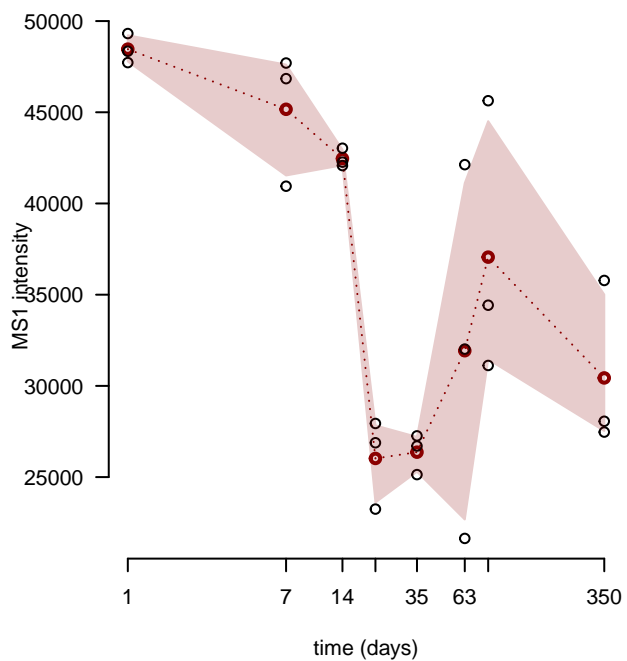

Q9D020  
GN=Nt5c3a

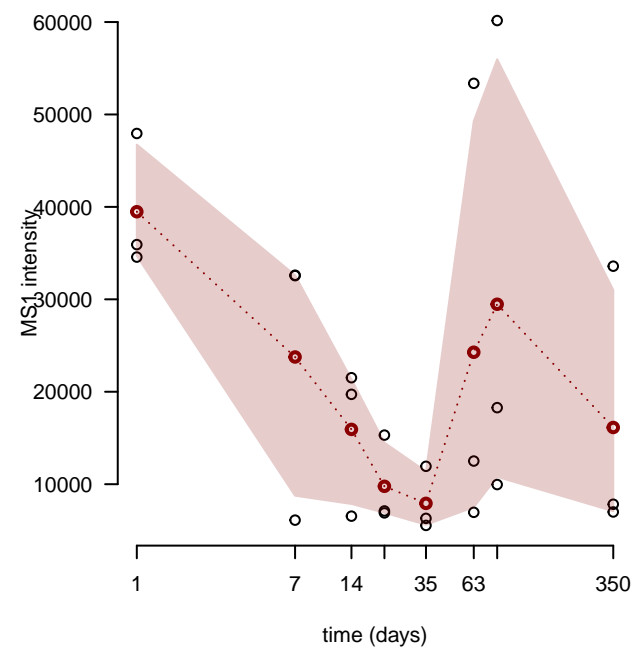

Q9D023  
GN=Mpc2  
mitochondrial pyruvate carrier 2

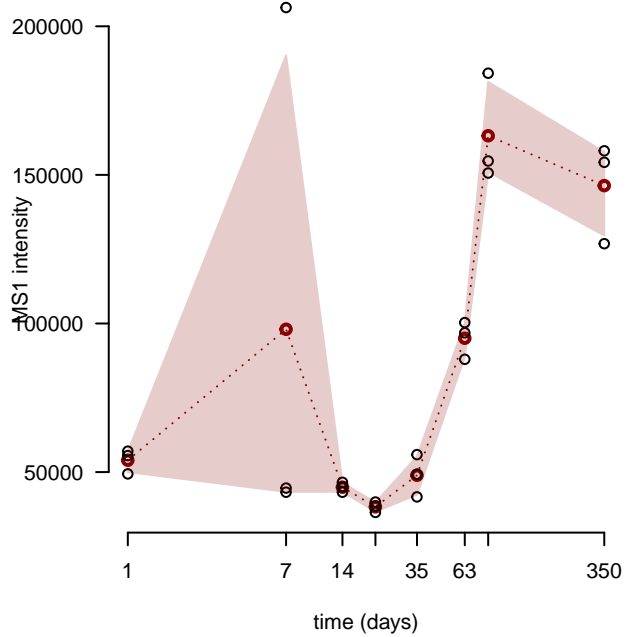

Q9D024  
GN=Ccdc47  
coiled-coil domain containing 47

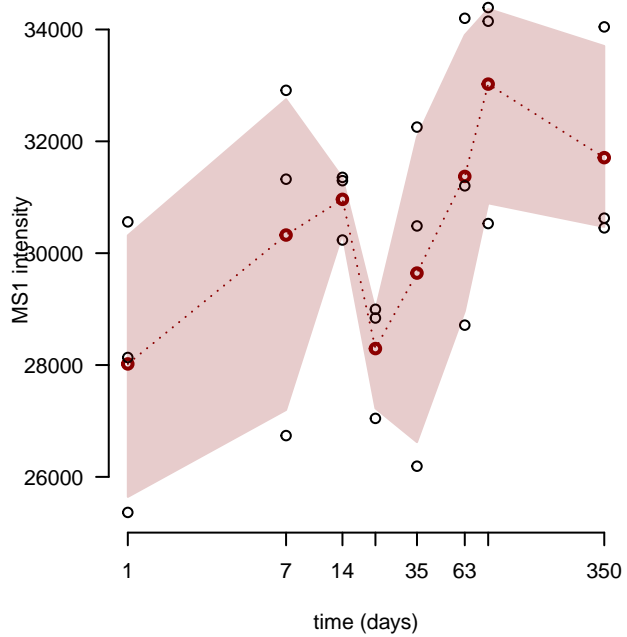

Q9D032  
GN=Ssbp3  
single-stranded DNA binding protein 3

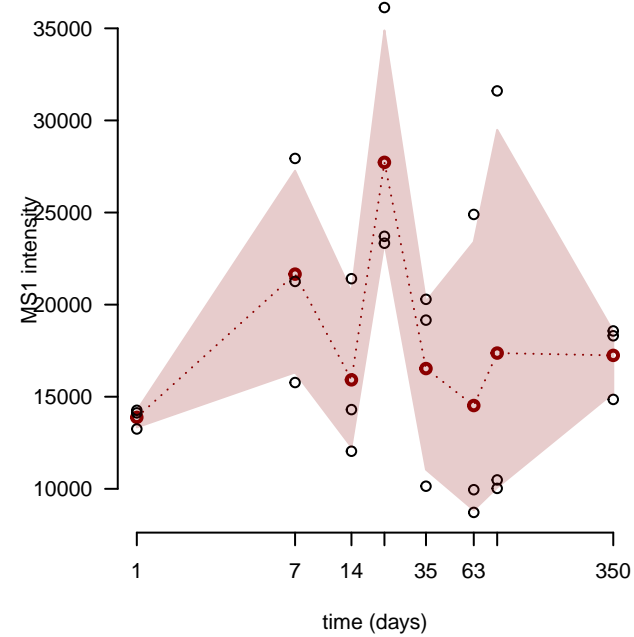

Q9D051  
GN=Pdhb  
pyruvate dehydrogenase (lipoamide) beta

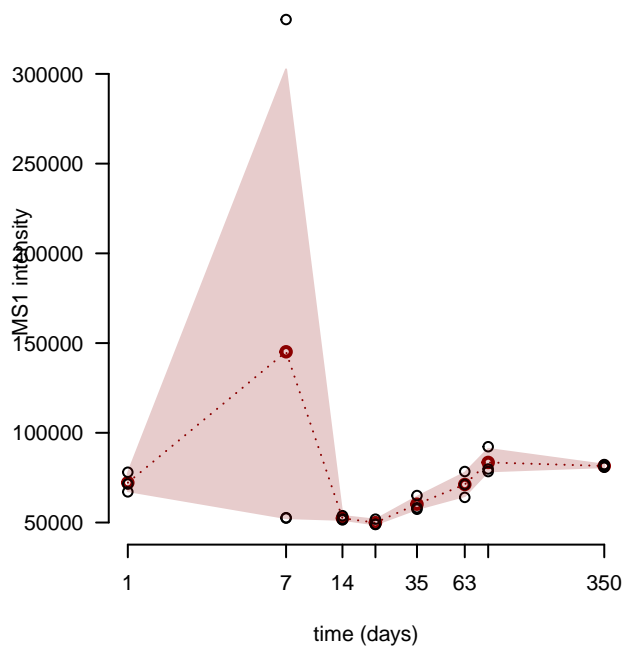

Q9D061  
GN=Acbd6  
acyl-Coenzyme A binding domain containin ...

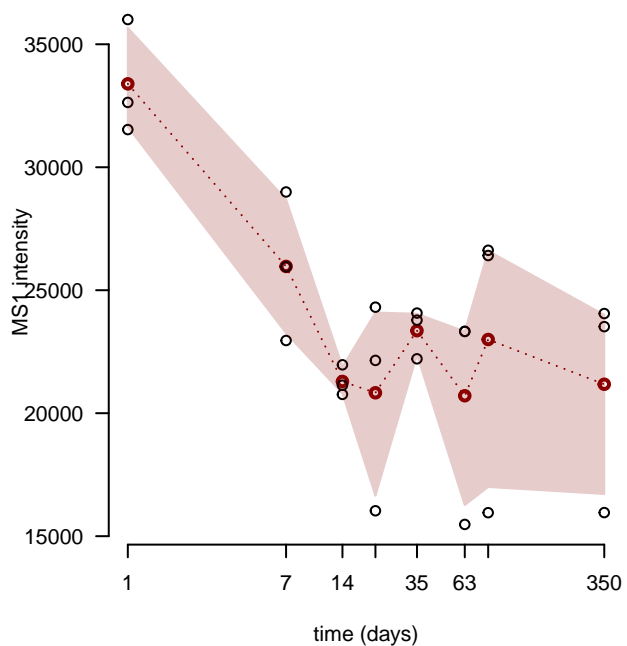

Q9D071  
GN=Mms19  
MMS19 cytosolic iron-sulfur assembly com ...

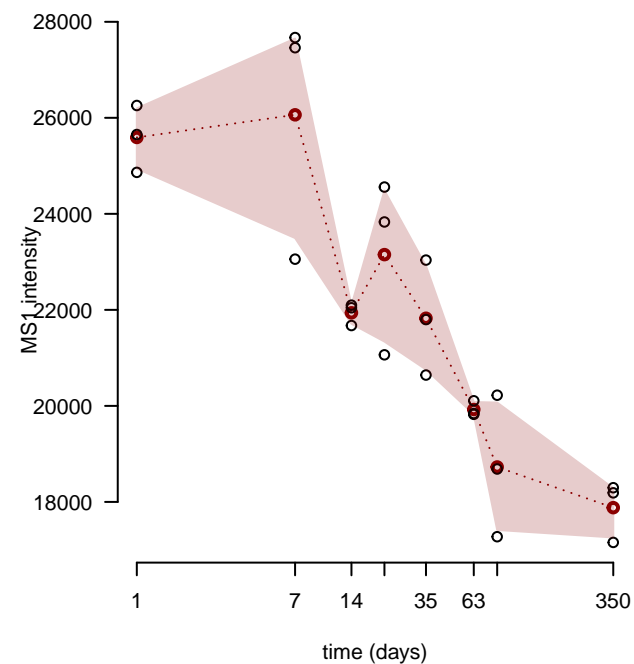

**Q9D074**  
**GN=Mgrn1**  
mahogunin, ring finger 1

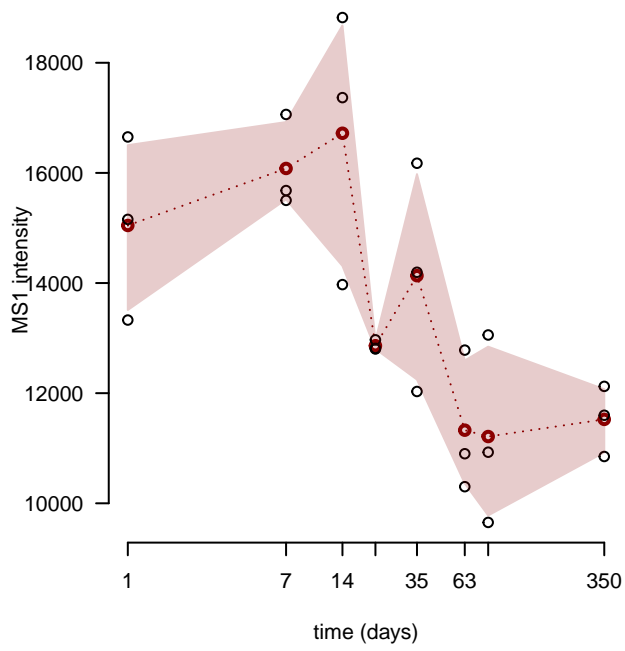

**Q9D081**  
**GN=Alg14**  
asparagine-linked glycosylation 14

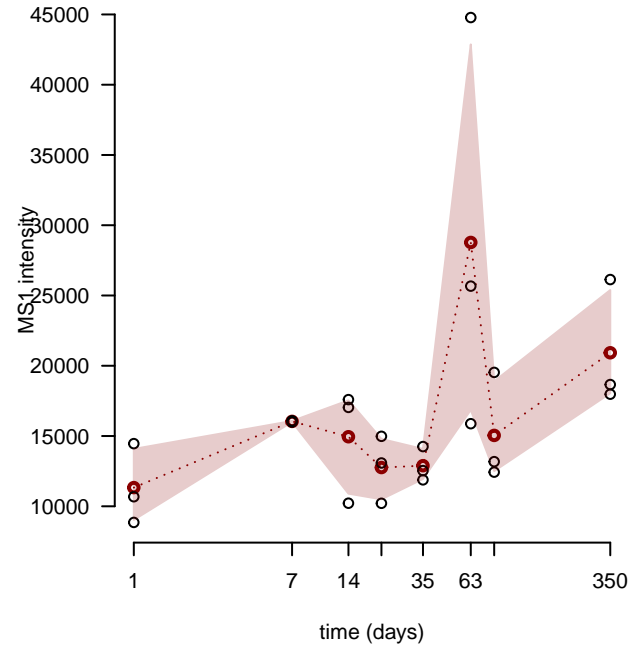

**Q9D083**  
**GN=Spc24**  
SPC24, NDC80 kinetochore complex compone ...

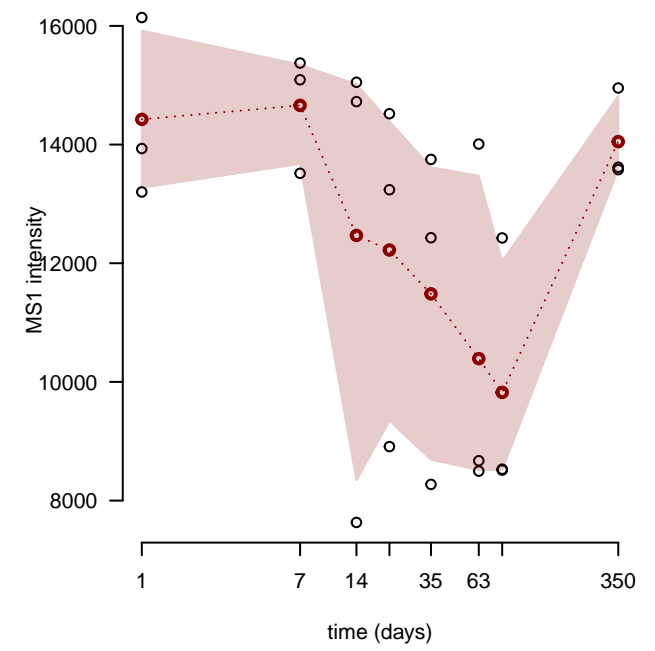

**Q9D084**  
**GN=Cenps**  
centromere protein S

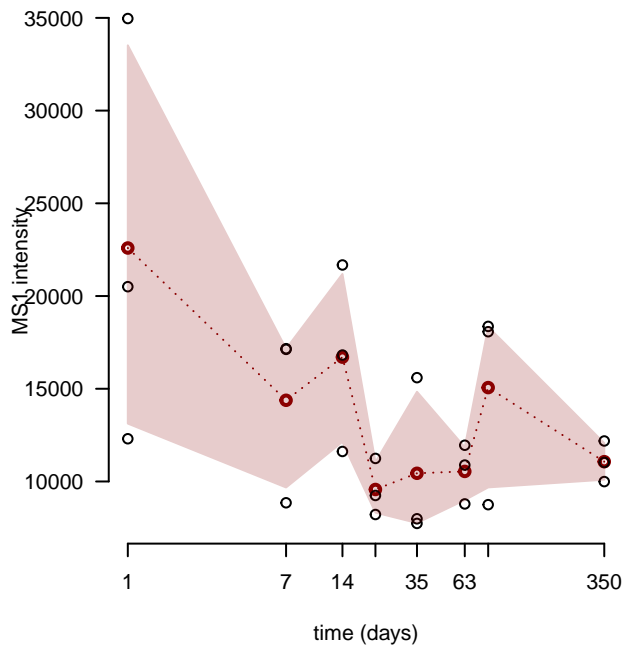

**Q9D0A0**  
**GN=Det1**  
de-etiolated homolog 1 (Arabidopsis)

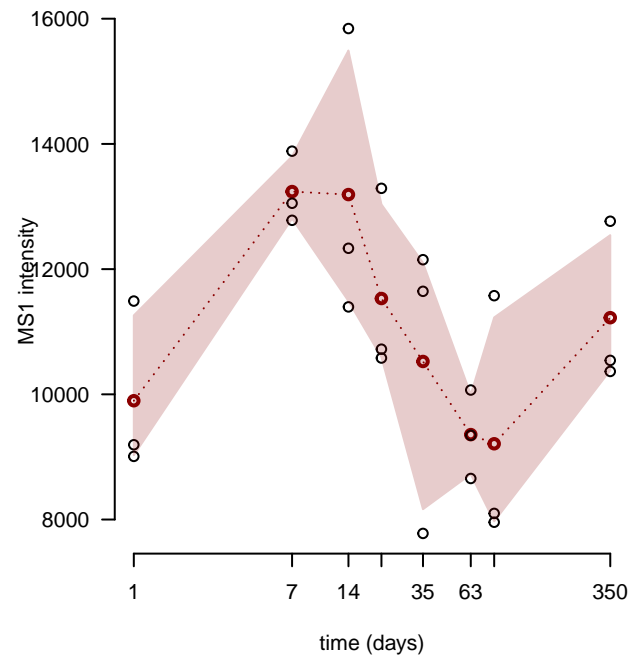

**Q9D0A3**  
**GN=Arpin**  
actin-related protein 2/3 complex inhibi ...

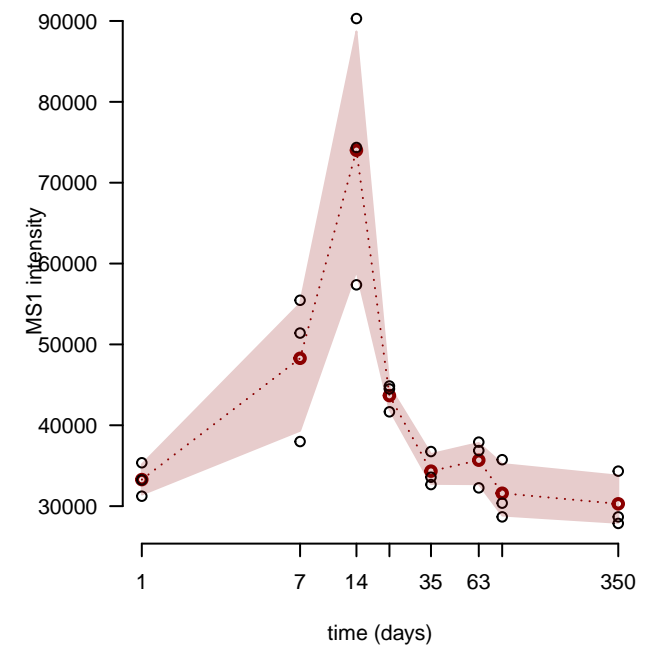

**Q9D0B0**  
**GN=Srsf9**  
serine and arginine-rich splicing factor ...

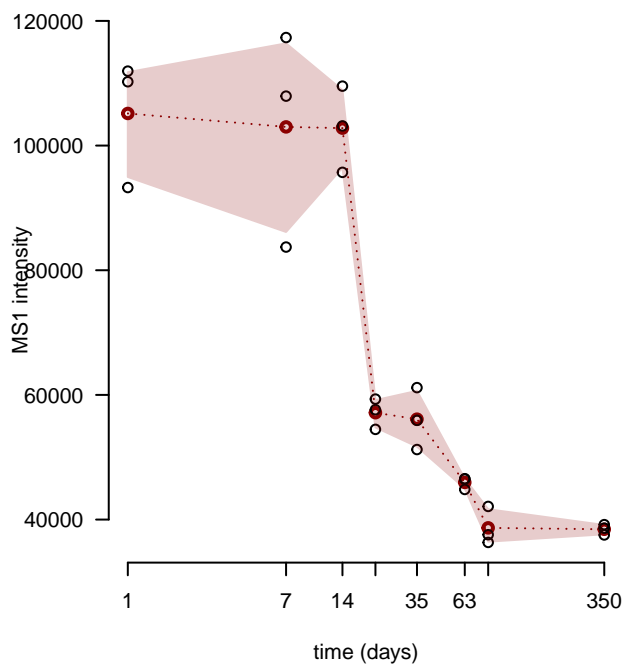

**Q9D0B1**  
**GN=Znf524**

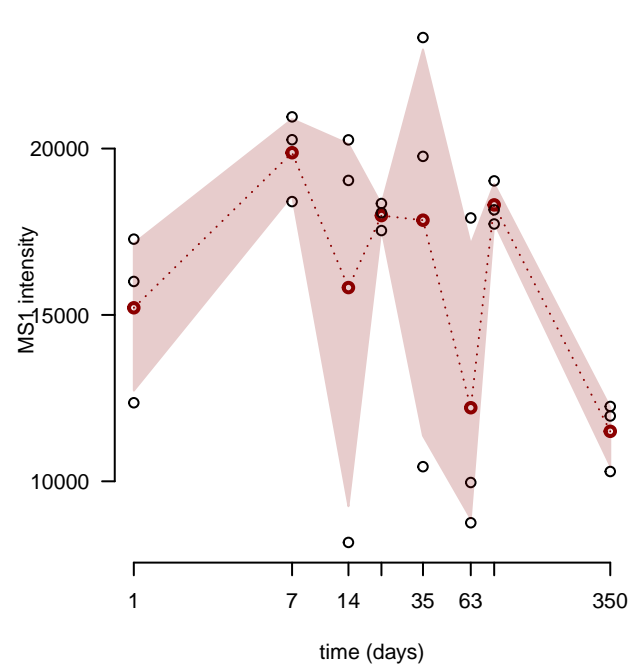

**Q9D0B5**  
**GN=Tstd3**  
thiosulfate sulfurtransferase (rhodanese ...

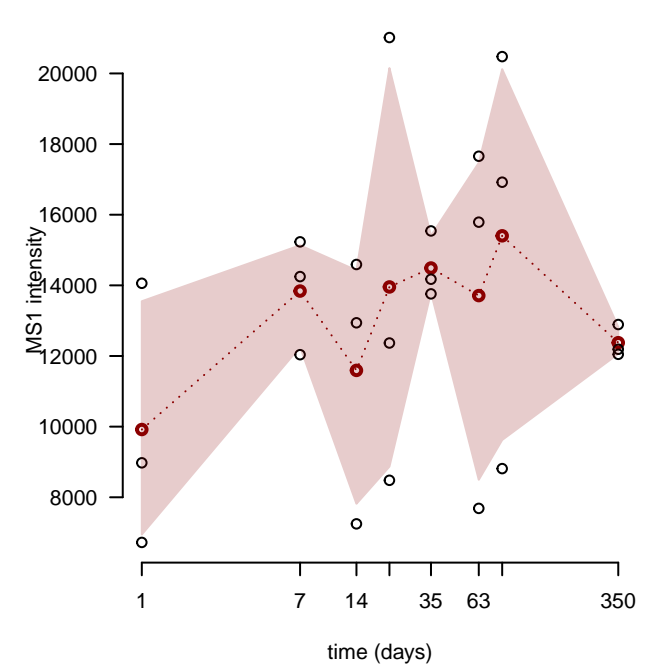

**Q9D0B6**  
GN=Pbdc1

polysaccharide biosynthesis domain conta ...

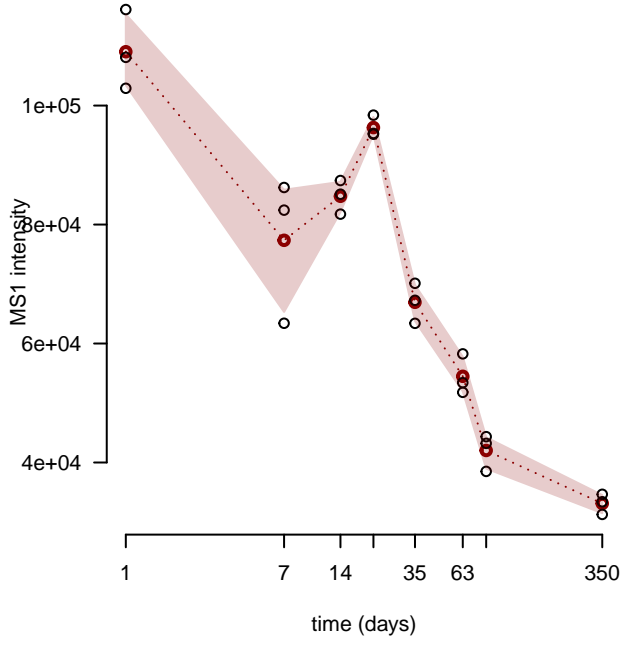

**Q9D0C1**  
GN=Rnf115

ring finger protein 115

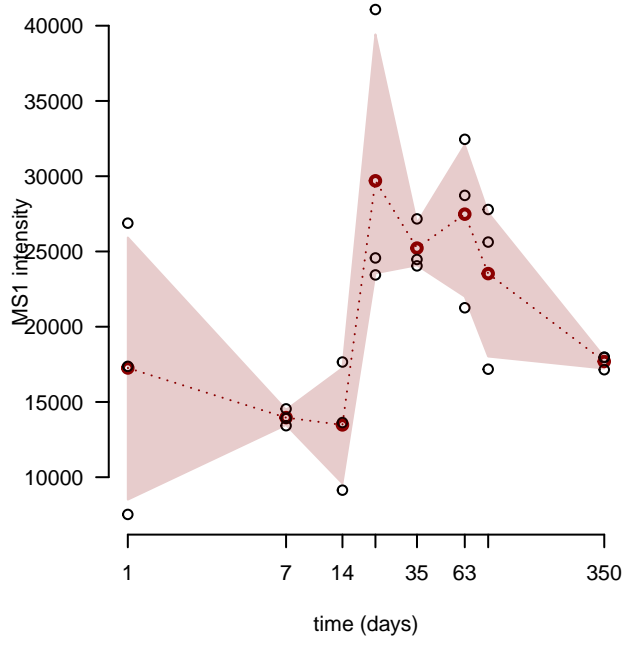

**Q9D0C4**  
GN=Trmt5

TRM5 tRNA methyltransferase 5

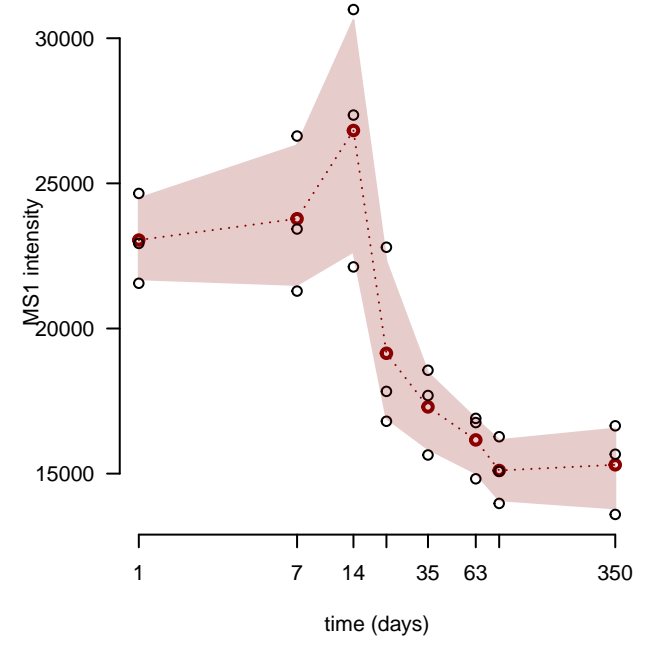

**Q9D0D3**  
GN=Mtpap

mitochondrial poly(A) polymerase

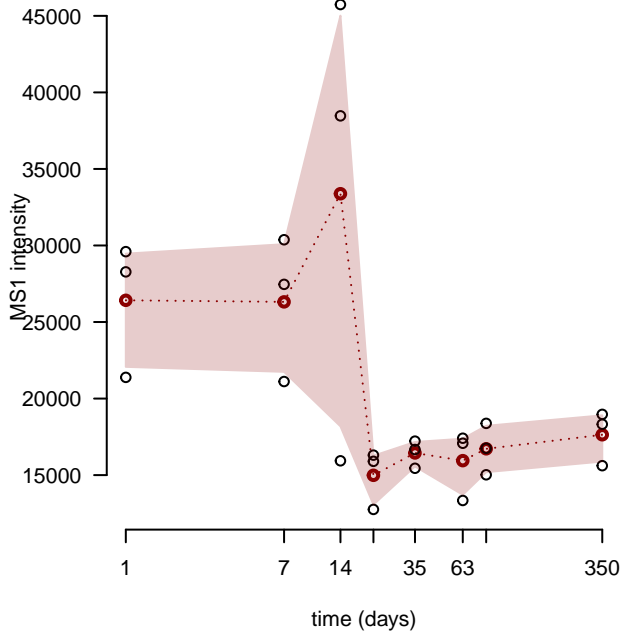

**Q9D0D4**  
GN=Dimt1

DIM1 dimethyladenosine transferase 1-lik ...

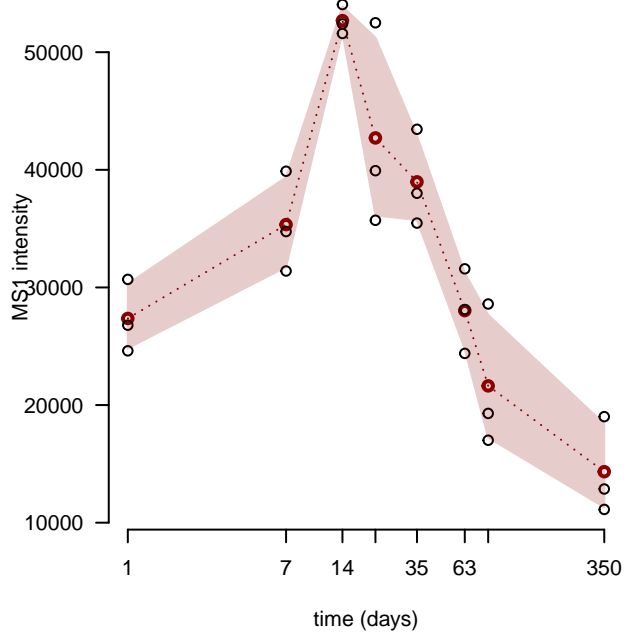

**Q9D0D5**  
GN=Gtf2e1

general transcription factor II E, polyp ...

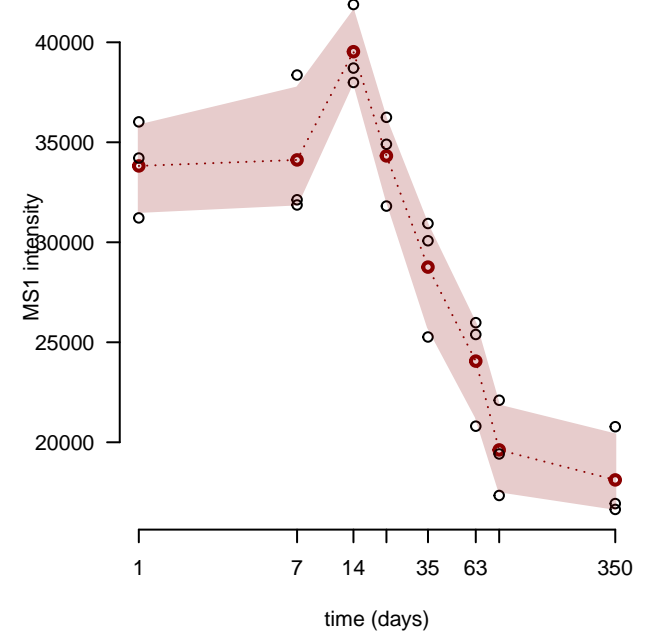

**Q9D0E1**  
GN=Hnrrnpm

heterogeneous nuclear ribonucleoprotein ...

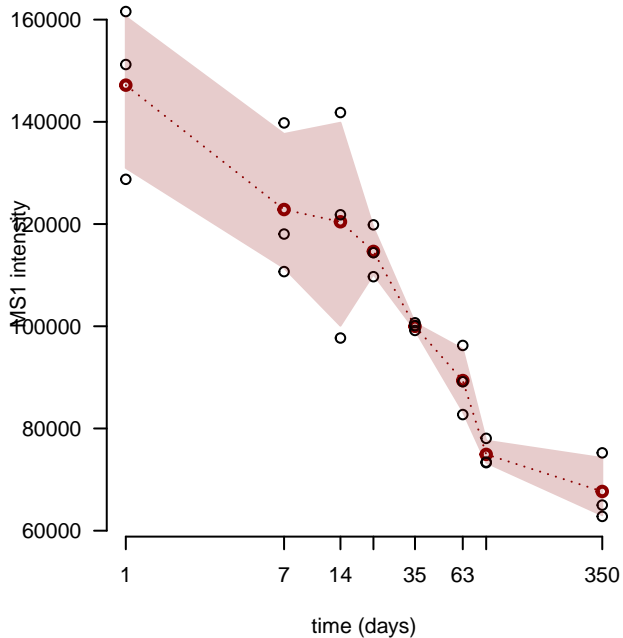

**Q9D0E3**  
GN=Lysmd1

LysM, putative peptidoglycan-binding, do ...

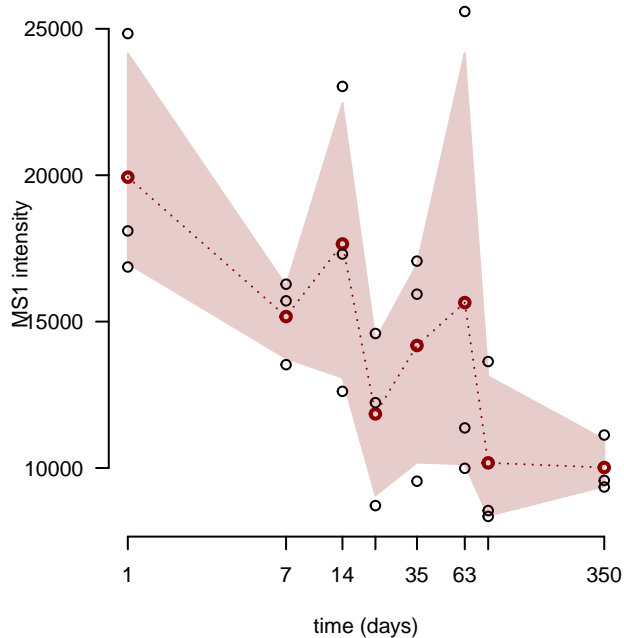

**Q9D0F1**  
GN=Ndc80

NDC80 kinetochore complex component

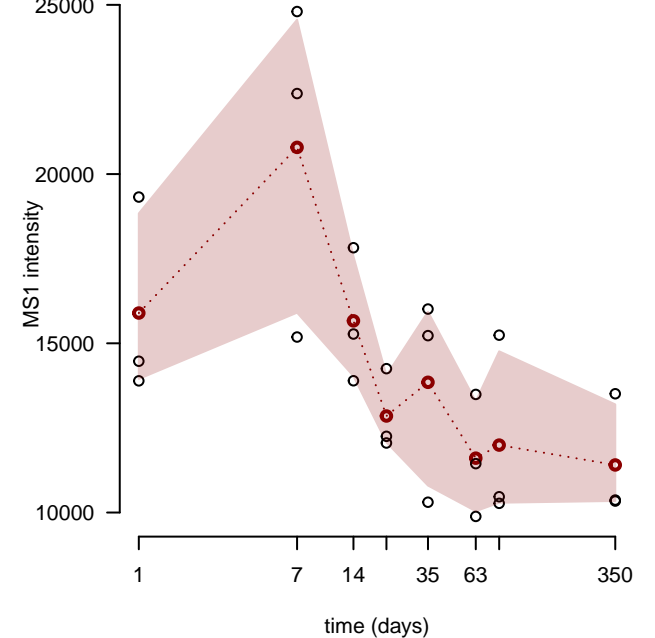

**Q9D0F3**  
**GN=Lman1**  
lectin, mannose-binding, 1

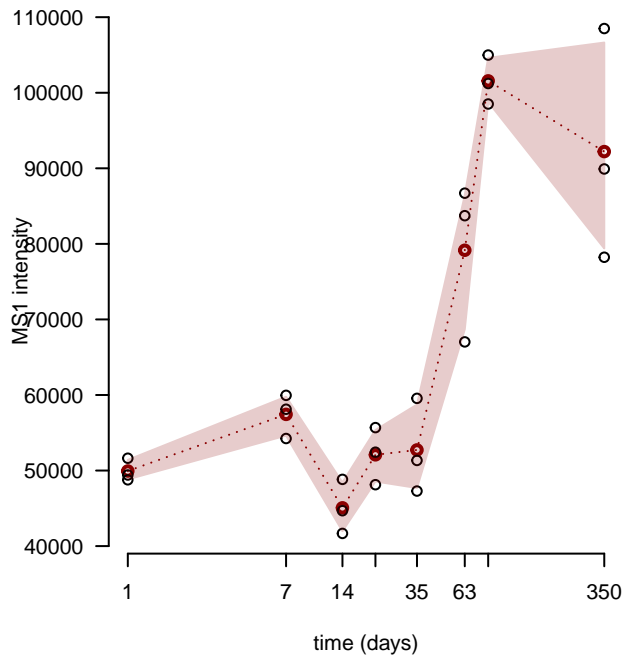

**Q9D0F4**  
**GN=Nkap**  
NFKB activating protein

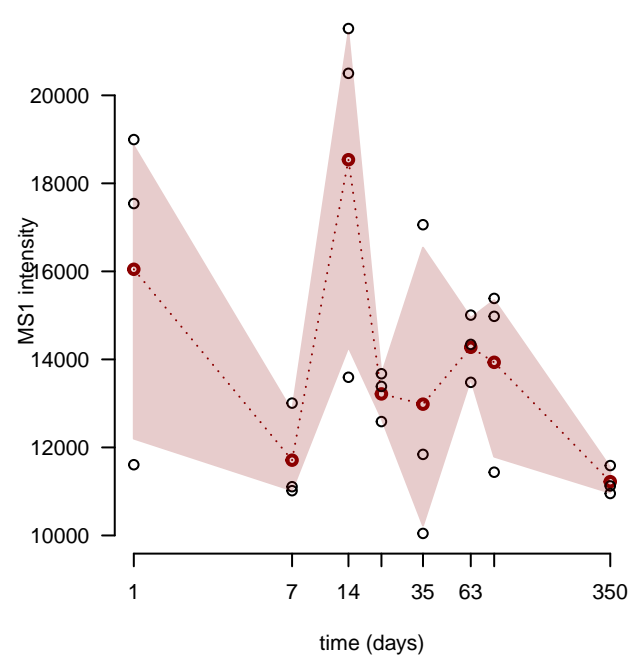

**Q9D0F6**  
**GN=Rfc5**  
replication factor C (activator 1) 5

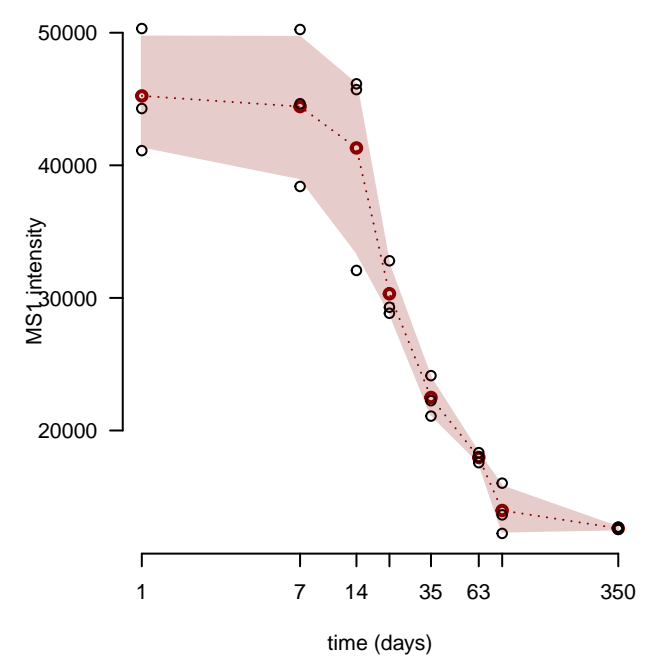

**Q9D0F9**  
**GN=Pgm1**  
phosphoglucomutase 1

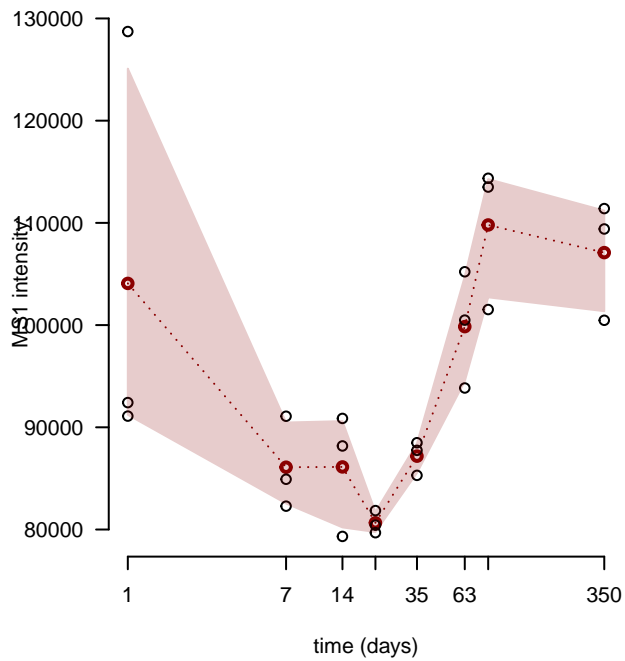

**Q9D0G0**  
**GN=Mrps30**  
mitochondrial ribosomal protein S30

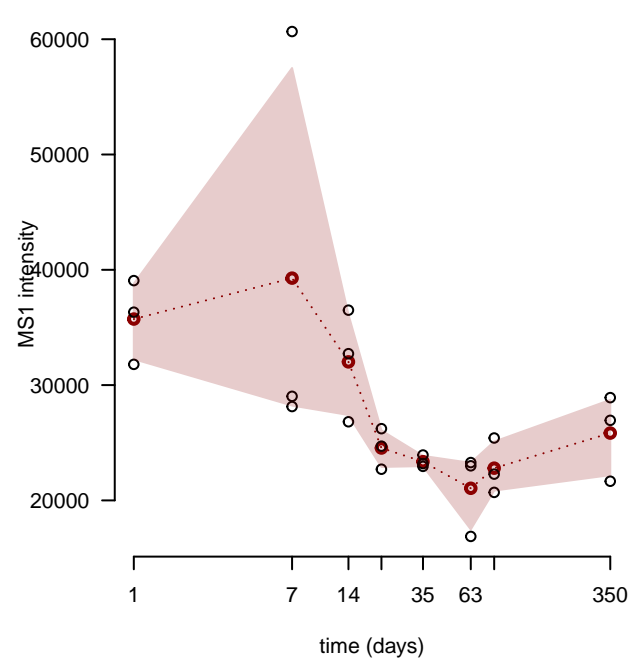

**Q9D0I4**  
**GN=Stx17**  
syntaxin 17

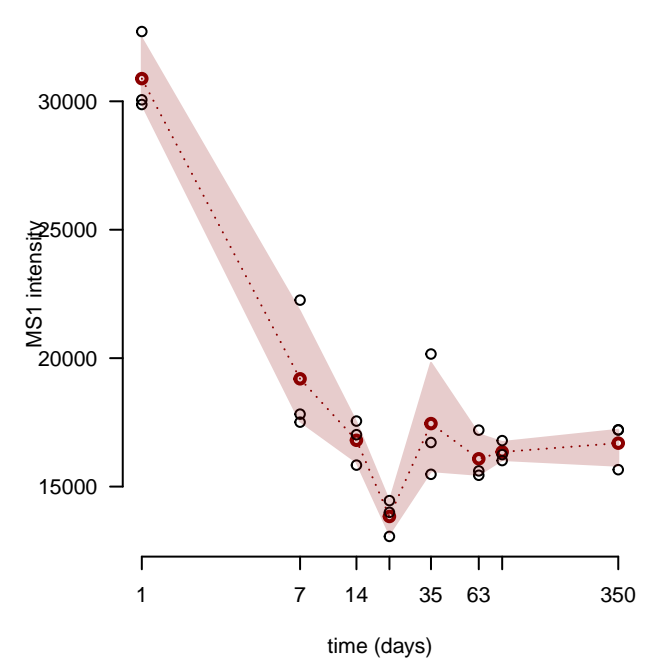

**Q9D0I6**  
**GN=Wdsub1**  
WD repeat, SAM and U-box domain containi ...

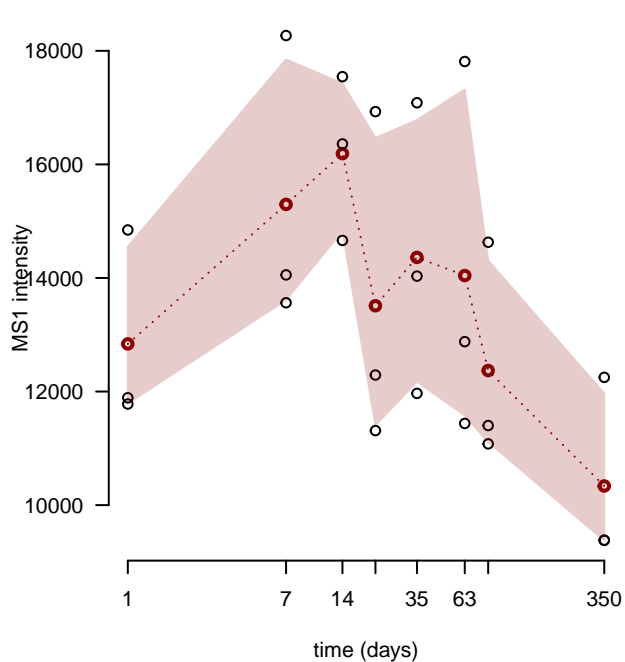

**Q9D0I8**  
**GN=Mrto4**  
mRNA turnover 4, ribosome maturation fac ...

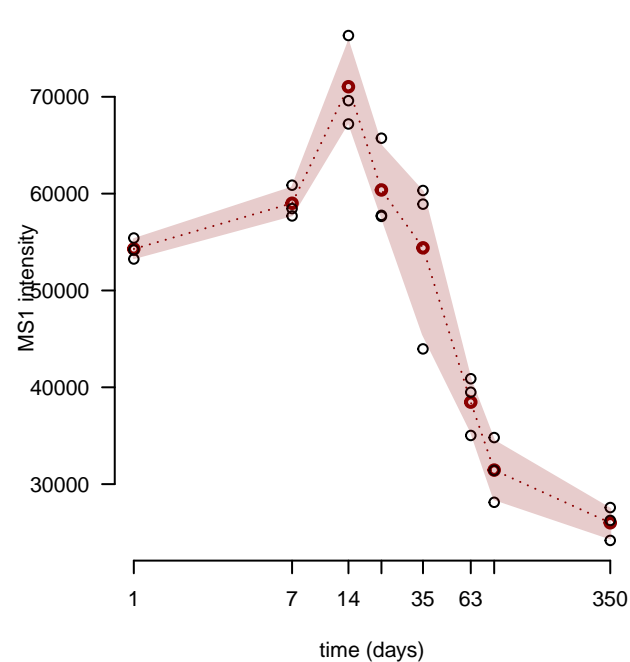

**Q9D0I9**  
**GN=Rars**  
arginyl-tRNA synthetase

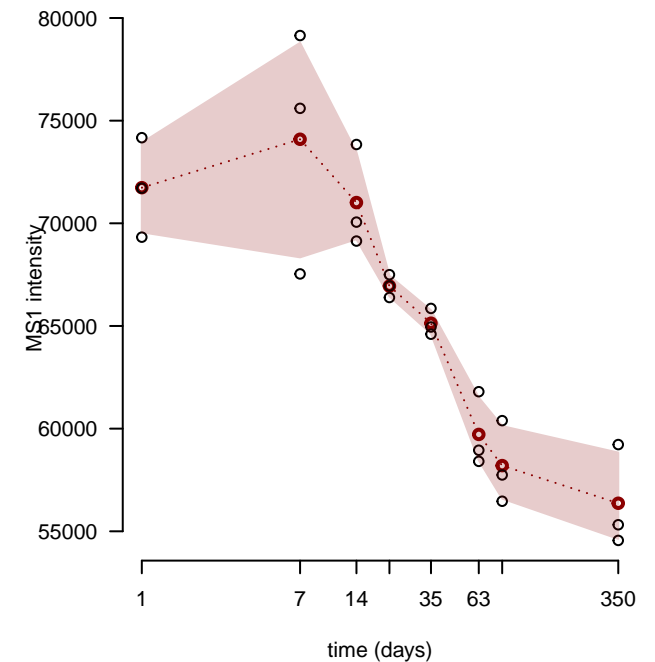

**Q9D0J4**  
**GN=Arl2**  
ADP-ribosylation factor-like 2

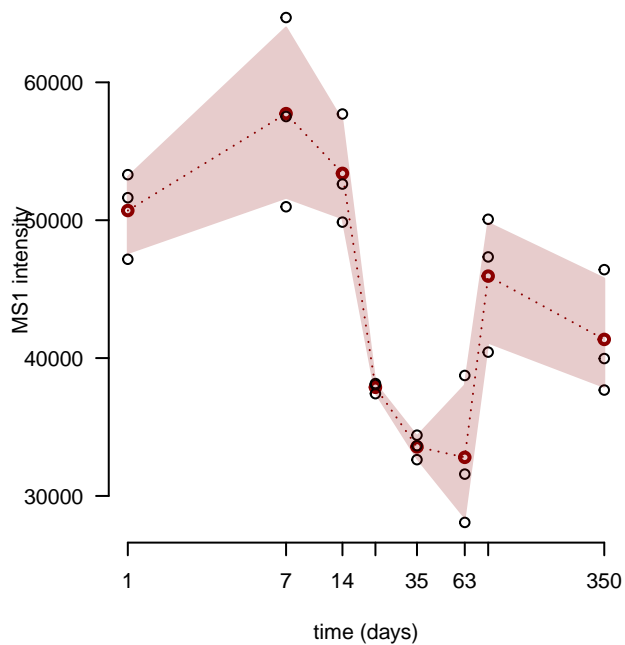

**Q9D0J8**  
**GN=Ptms**  
parathyrosin

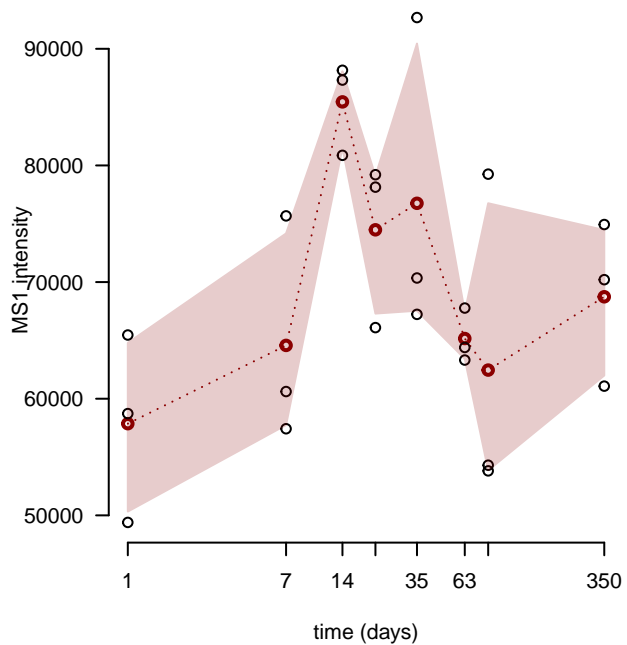

**Q9D0K0**  
**GN=Tbc1d7**  
TBC1 domain family, member 7

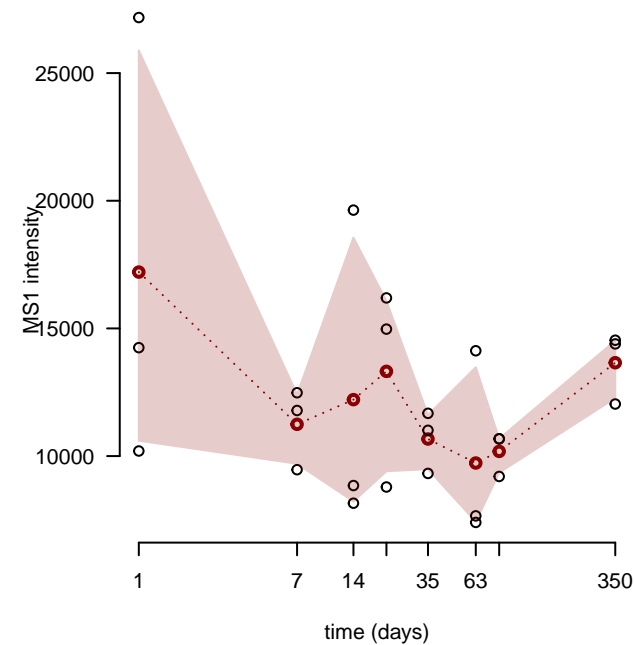

**Q9D0K1**  
**GN=Pex13**  
peroxisomal biogenesis factor 13

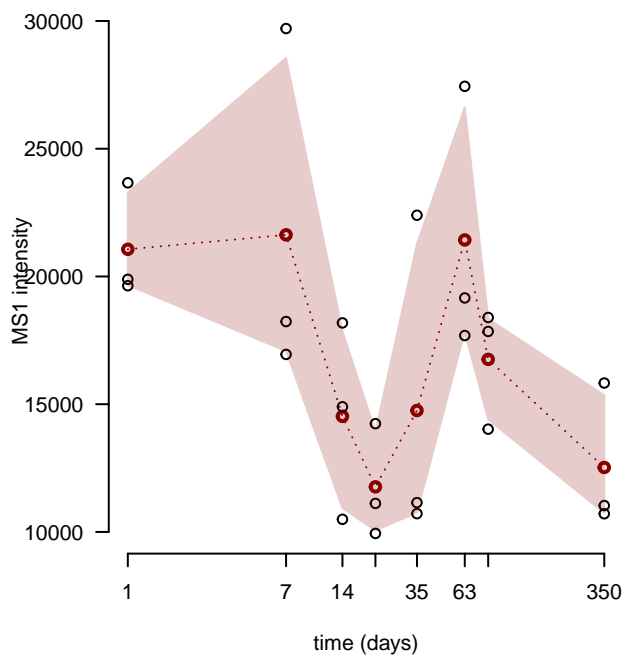

**Q9D0K2**  
**GN=Oxct1**  
3-oxoacid CoA transferase 1

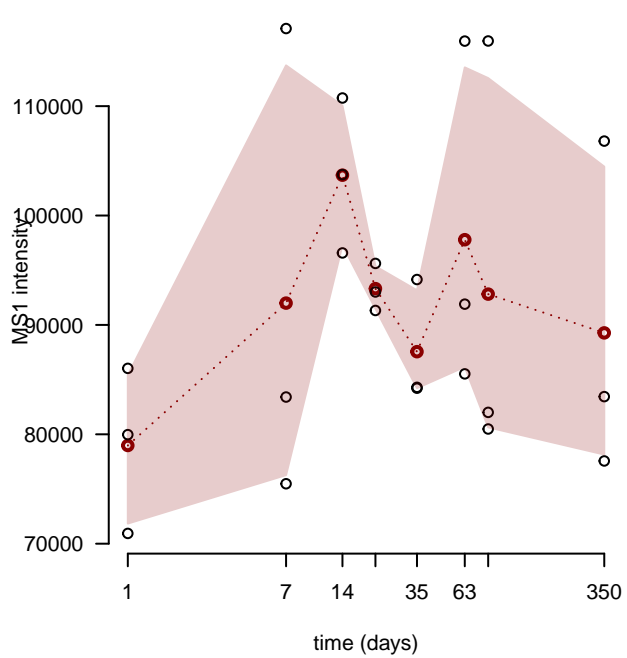

**Q9D0L1**  
**GN=Zbed3**  
zinc finger, BED type containing 3

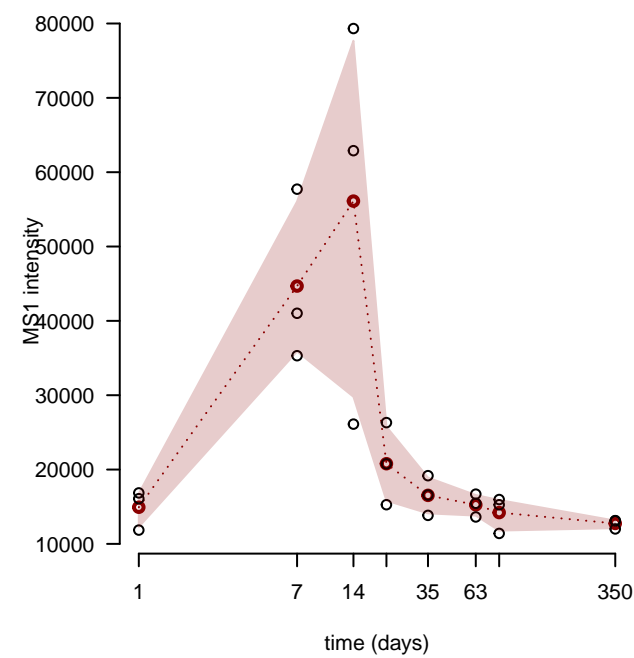

**Q9D0L4**  
**GN=Adck1**  
aarF domain containing kinase 1

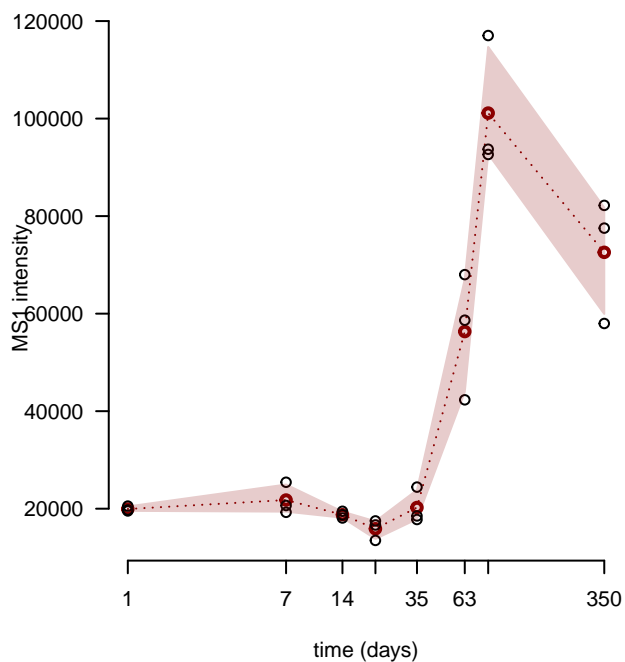

**Q9D0L7**  
**GN=Armc10**  
armadillo repeat containing 10

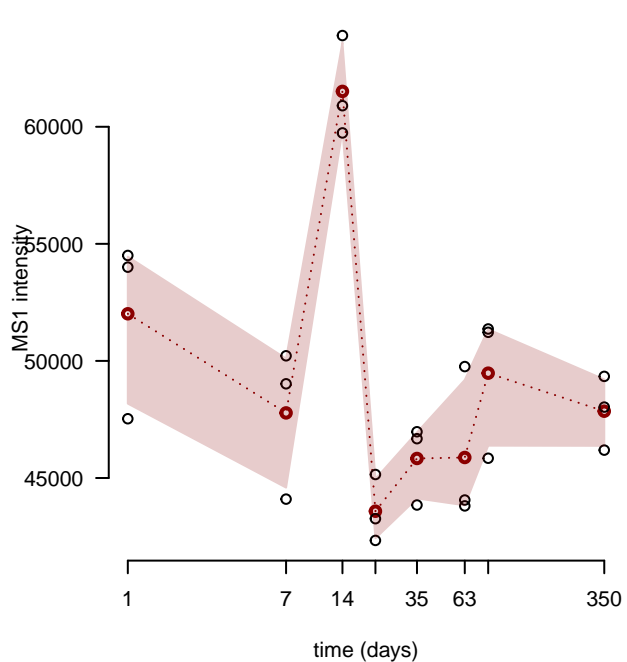

**Q9D0L8**  
**GN=Rnmt**  
RNA (guanine-7-) methyltransferase

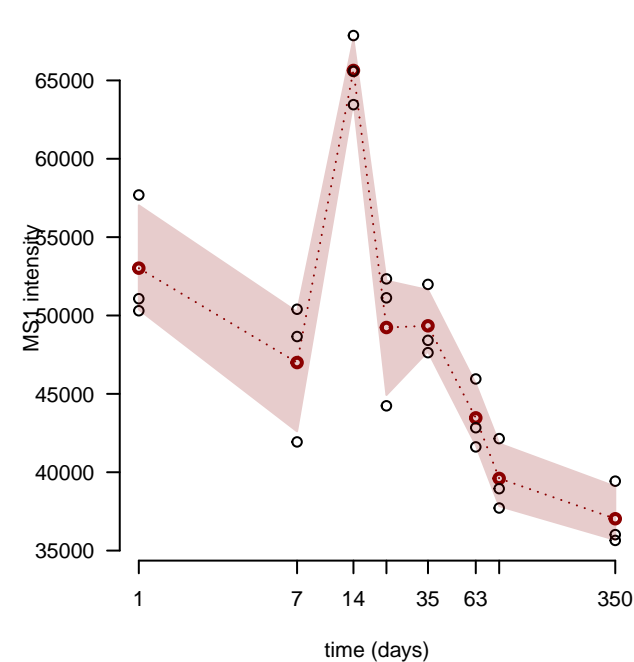

**Q9D0M0**  
**GN=Exosc7**  
exosome component 7

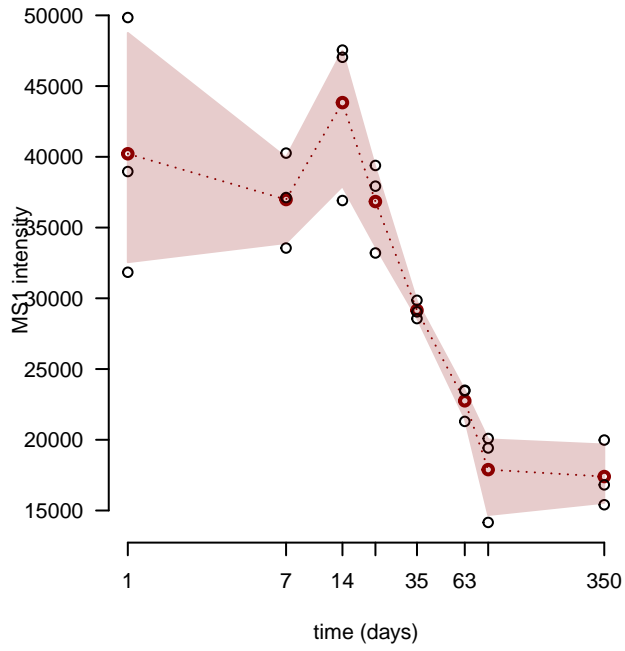

**Q9D0M1**  
**GN=Prpsap1**  
phosphoribosyl pyrophosphate synthetase- ...

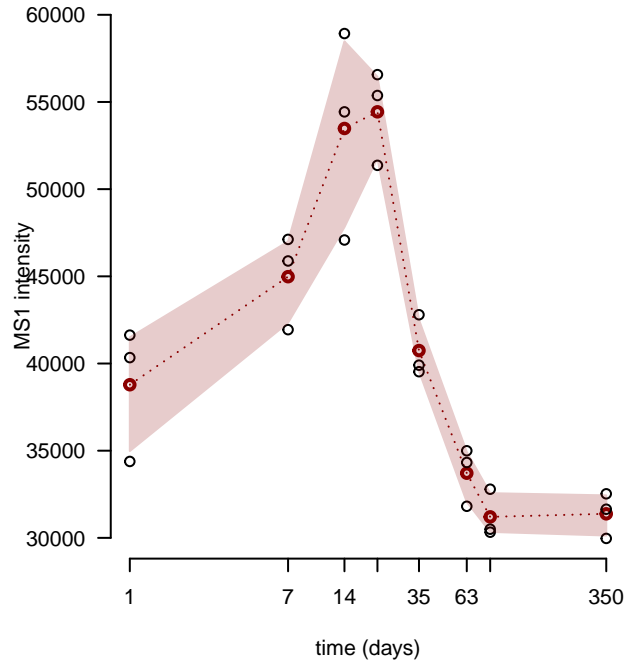

**Q9D0M3**  
**GN=Cyc1**  
cytochrome c-1

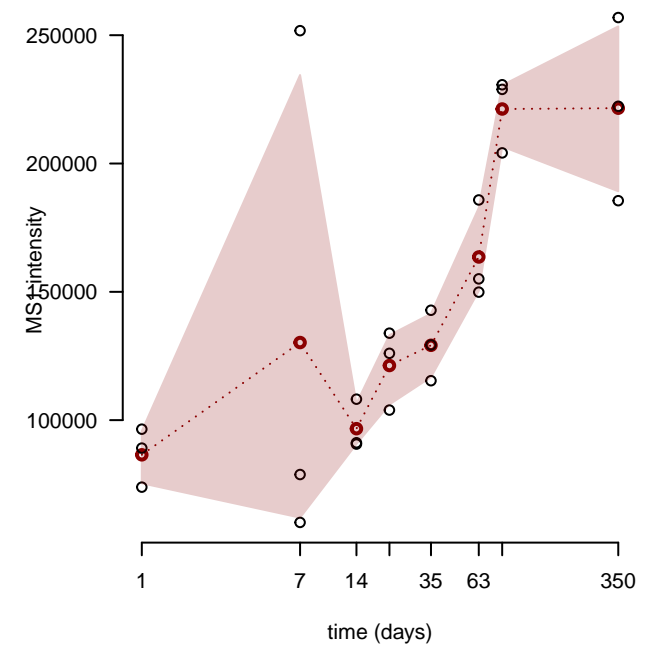

**Q9D0M5**  
**GN=Dynll2**  
dynein light chain LC8-type 2

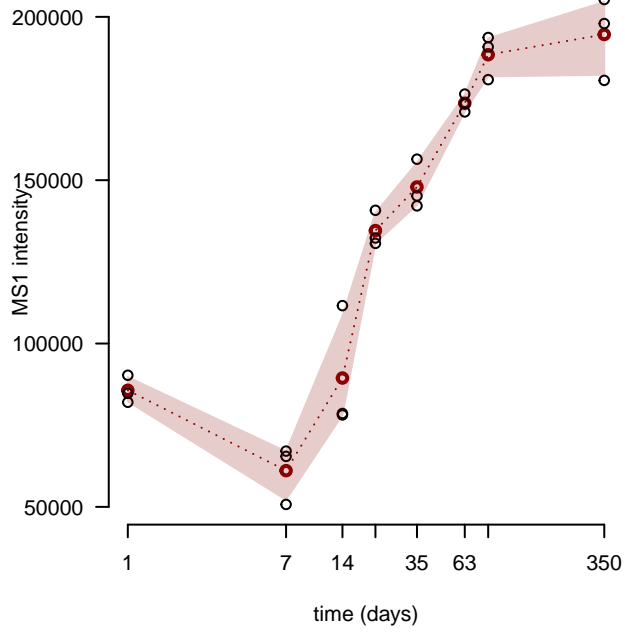

**Q9D0N7**  
**GN=Chaf1b**  
chromatin assembly factor 1, subunit B ( ...)

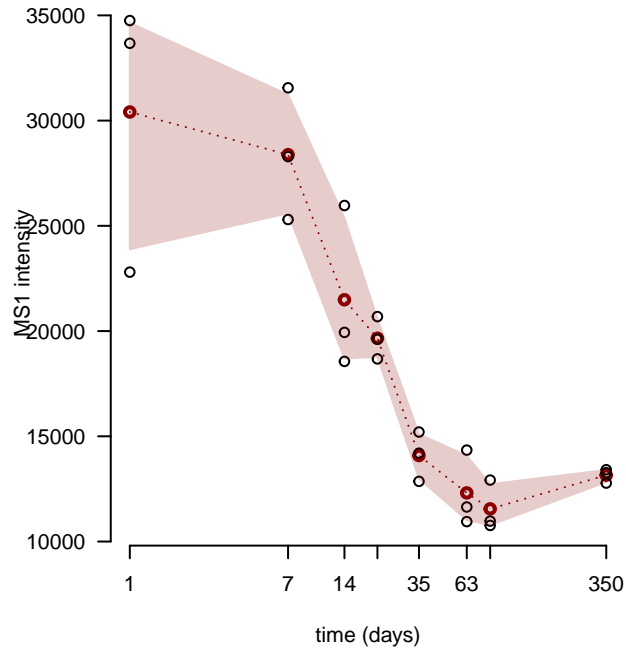

**Q9D0P8**  
**GN=Ift27**  
intraflagellar transport 27

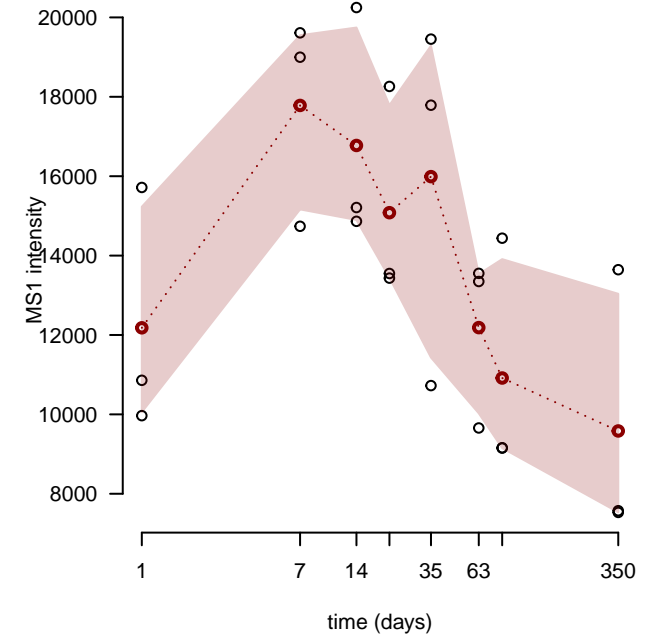

**Q9D0Q7**  
**GN=Mrpl45**  
mitochondrial ribosomal protein L45

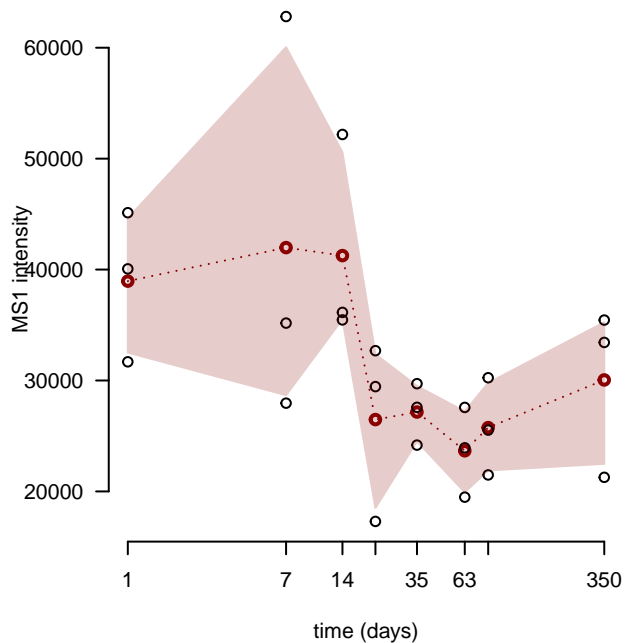

**Q9D0R2**  
**GN=Tars**  
threonyl-tRNA synthetase

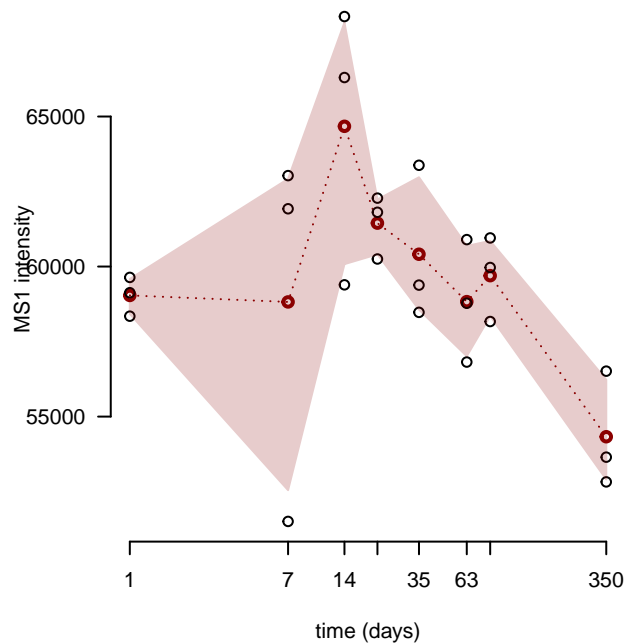

**Q9D0R4**  
**GN=Ddx56**  
DEAD box helicase 56

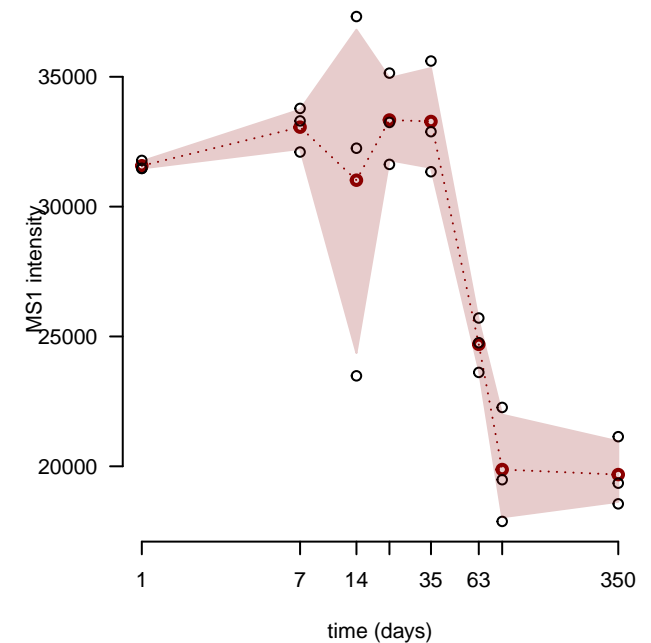

**Q9D0R8**  
GN=Lsm12  
LSM12 homolog

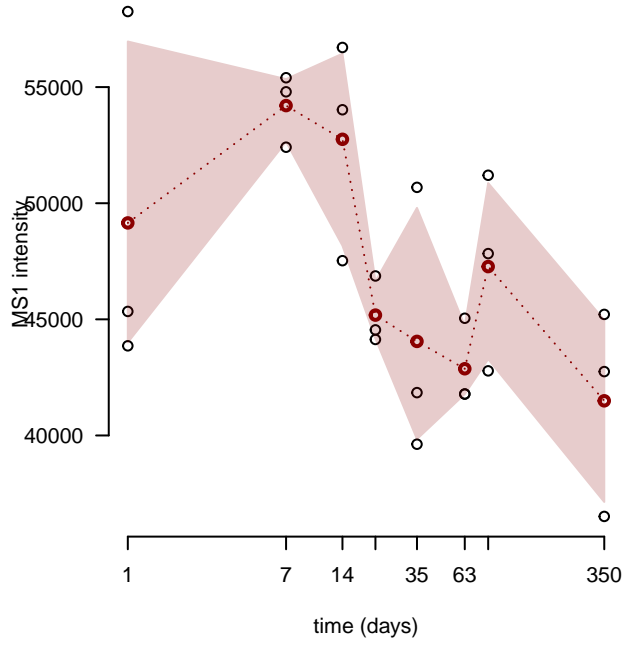

**Q9D0R9**  
GN=Wdr89  
WD repeat domain 89

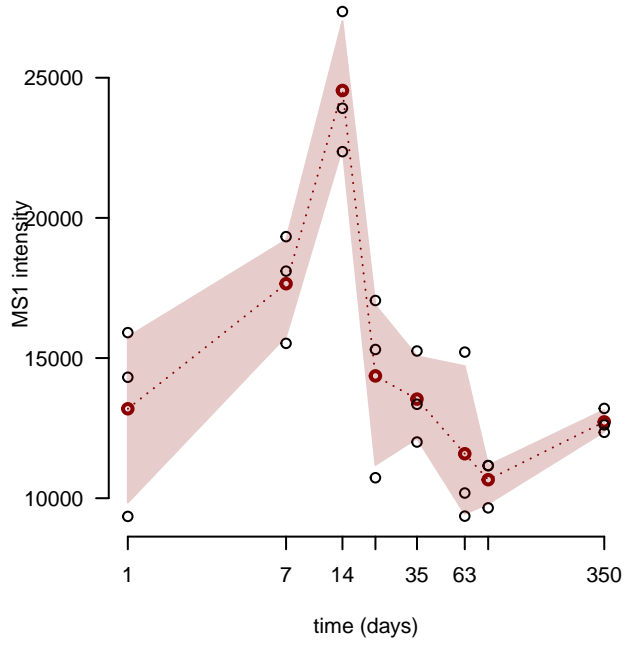

**Q9D0S9**  
GN=Hint2  
histidine triad nucleotide binding prote ...

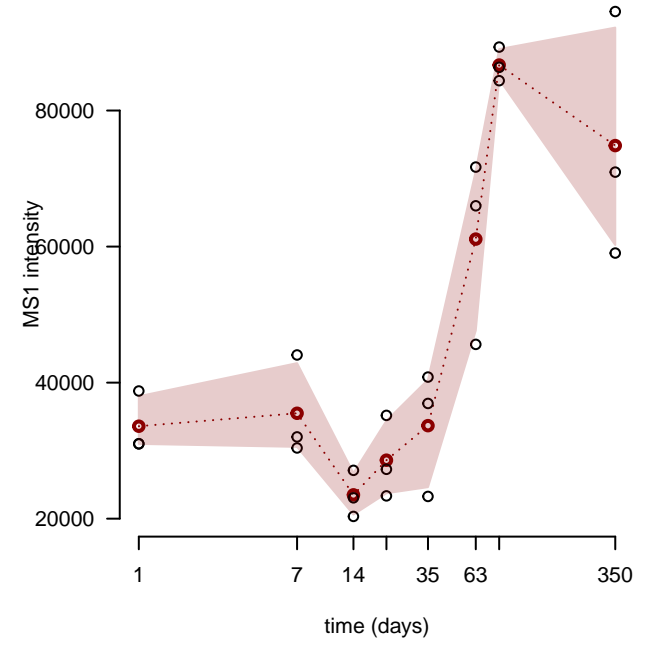

**Q9D0T1**  
GN=Snu13  
SNU13 homolog, small nuclear ribonucleop ...

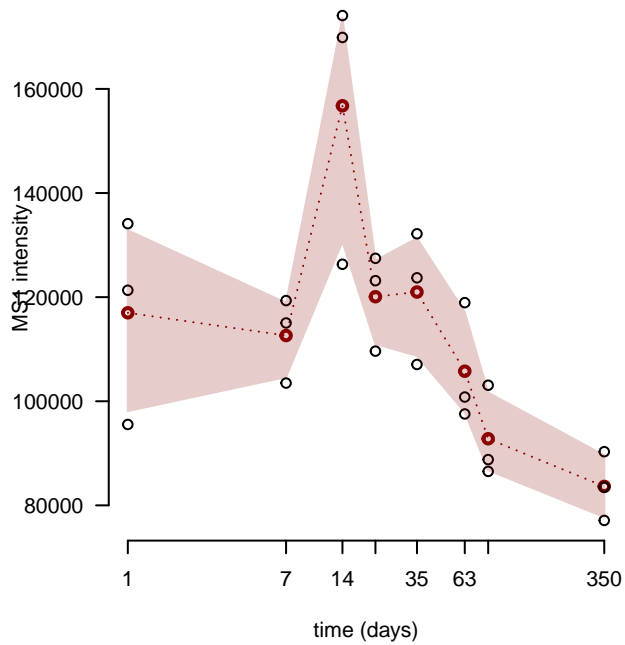

**Q9D0T2**  
GN=Dusp12  
dual specificity phosphatase 12

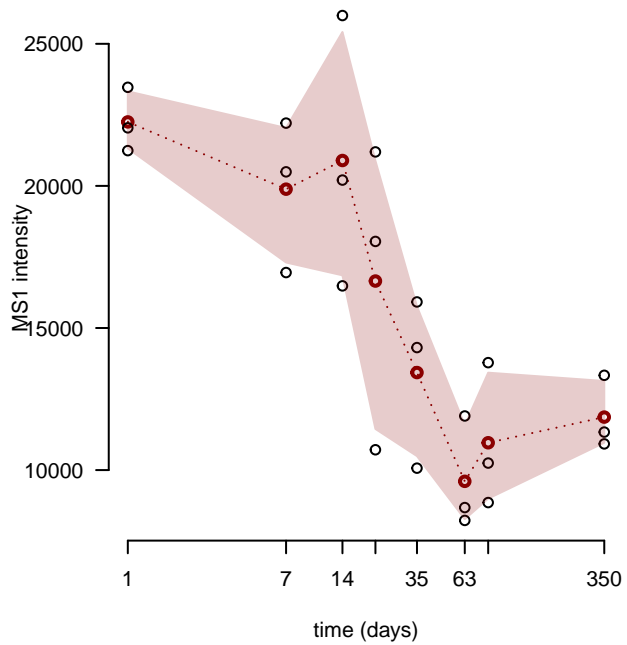

**Q9D0V7**  
GN=Ebag9  
estrogen receptor-binding fragment-assoc ...

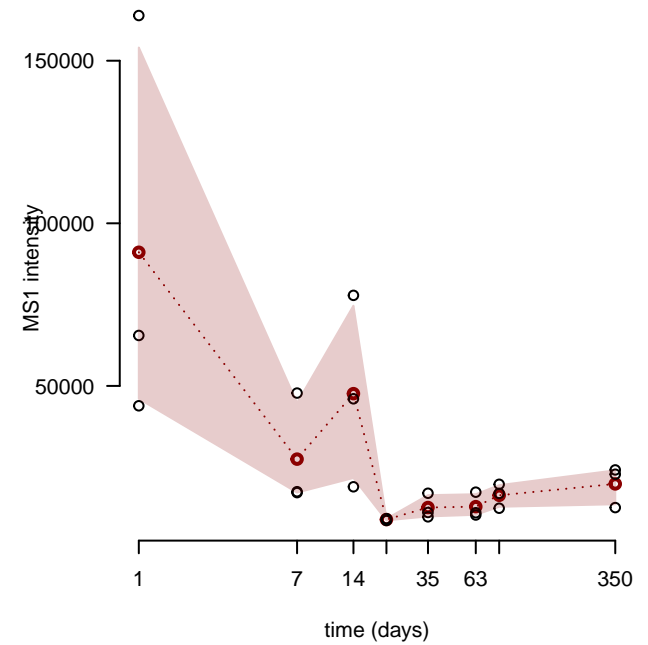

**Q9D0W5**  
GN=Ppil1  
peptidylprolyl isomerase (cyclophilin)-I ...

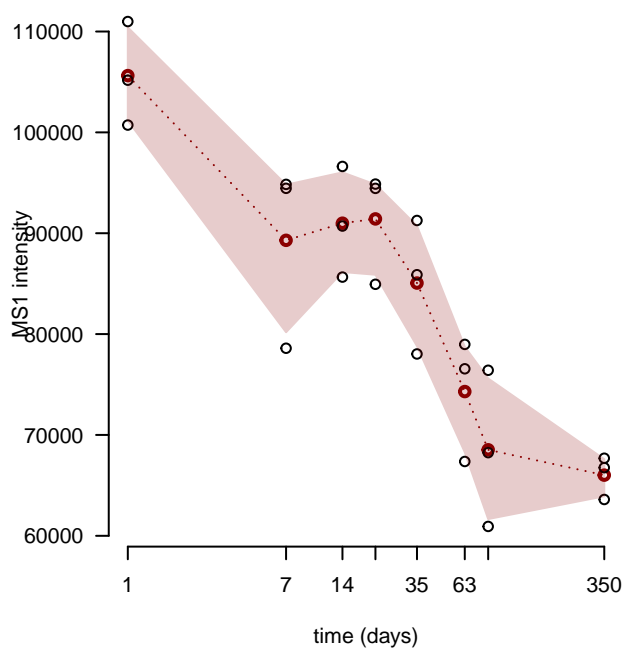

**Q9D0Z3**  
GN=Tmem53  
transmembrane protein 53

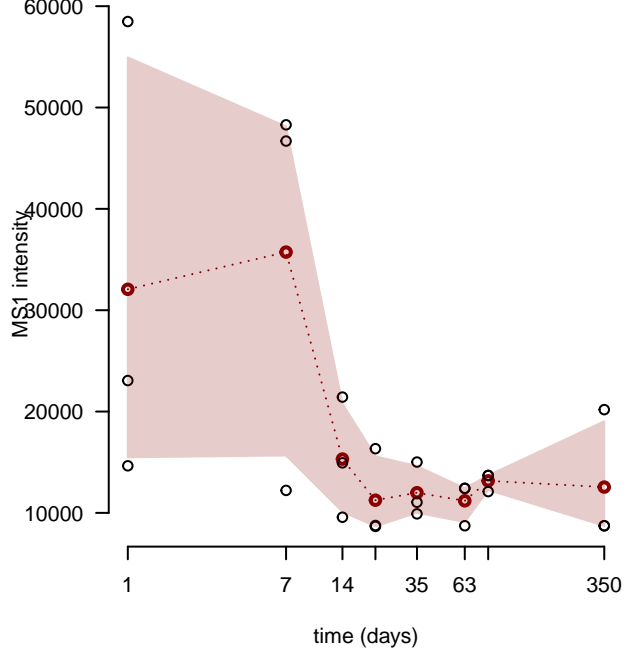

**Q9D103**  
GN=Ifitm1  
interferon induced transmembrane protein ...

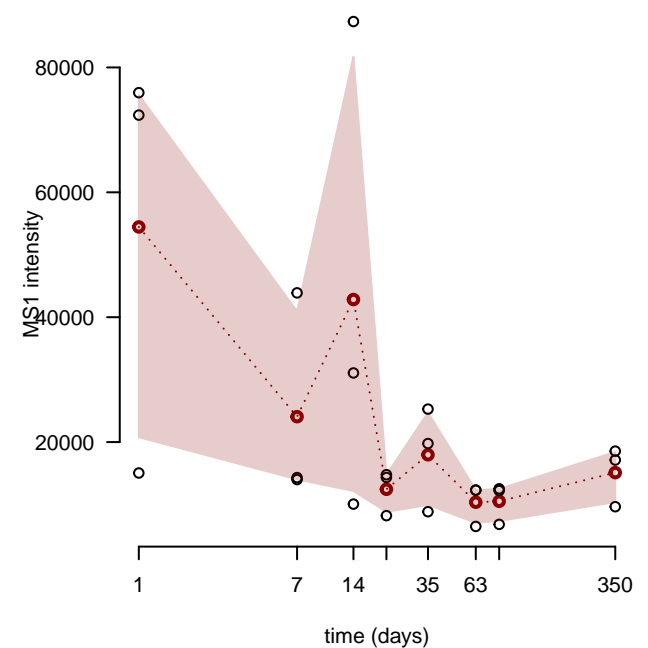



**Q9D110**  
GN=Mthfs  
5, 10-methenyltetrahydrofolate synthetas ...

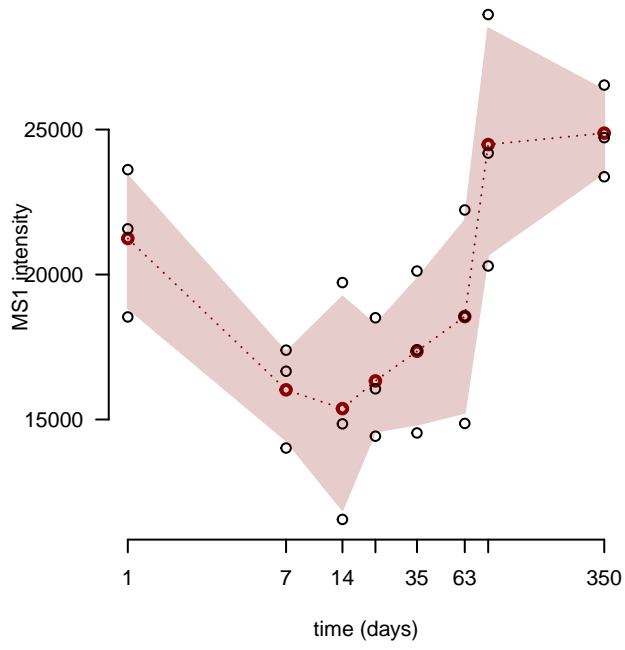

**Q9D113**  
GN=Dnlz  
DNL-type zinc finger

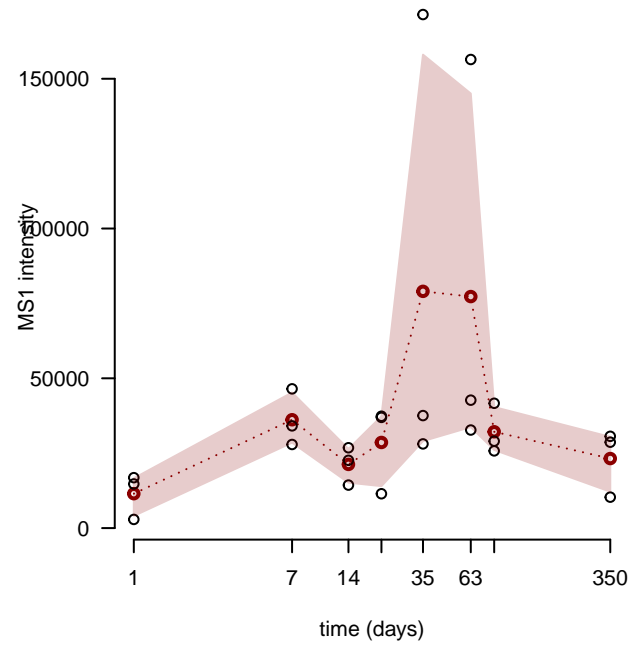

**Q9D114**  
GN=Hddc3  
HD domain containing 3

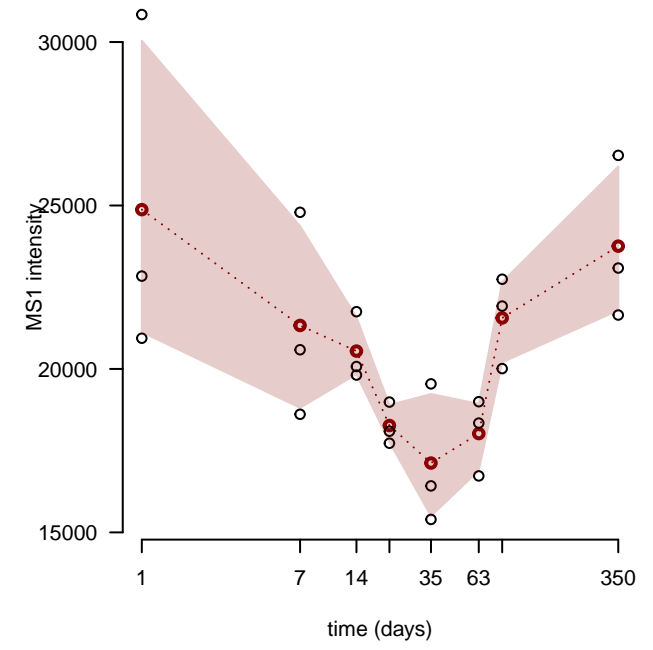

**Q9D115**  
GN=Znf706

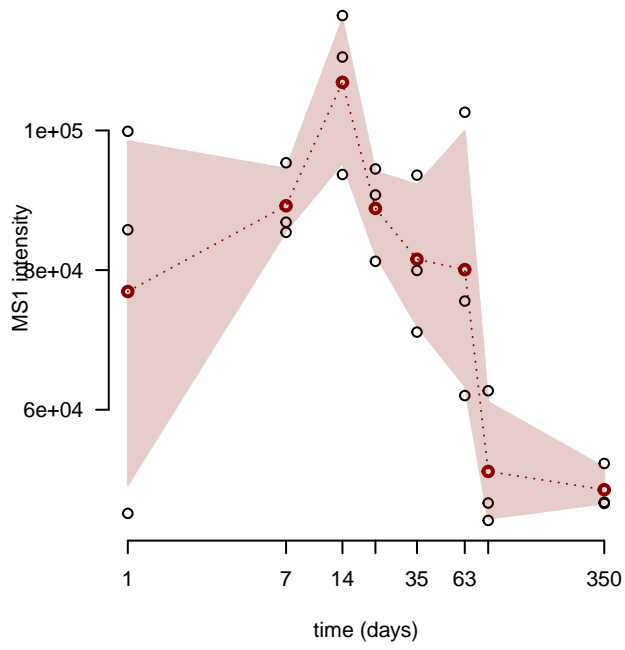

**Q9D125**  
GN=Mrps25  
mitochondrial ribosomal protein S25

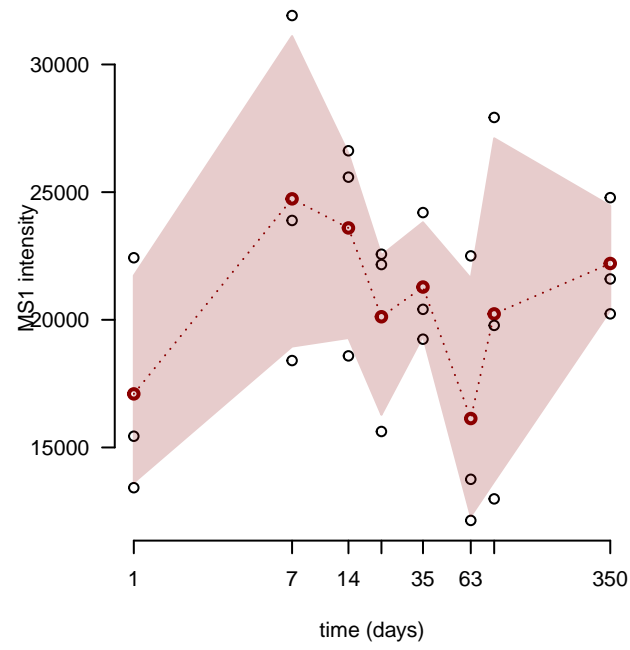

**Q9D136**  
GN=Ogfod3  
2-oxoglutarate and iron-dependent oxygen ...

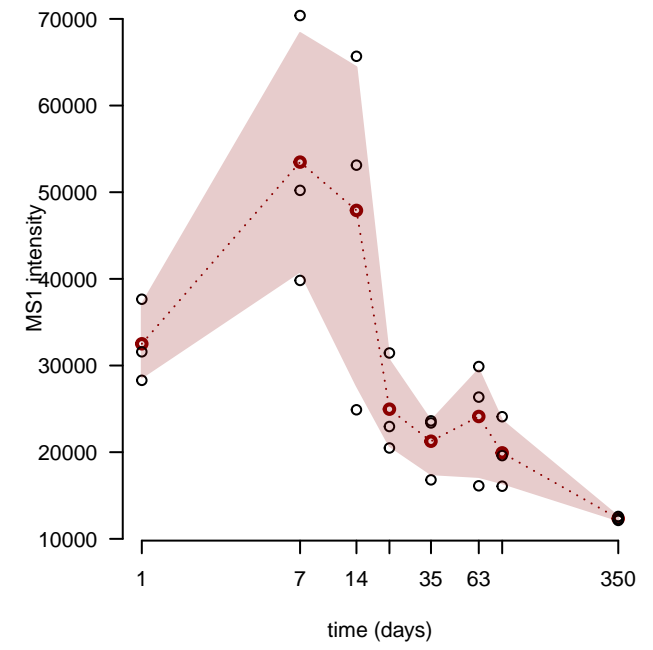

**Q9D142**  
GN=Nudt14  
nudix (nucleoside diphosphate linked moi ...

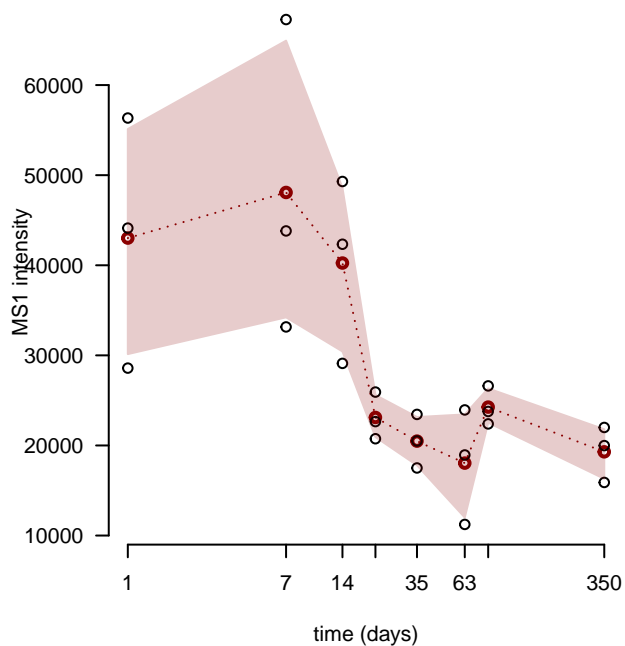

**Q9D154**  
GN=Serpib1a  
serine (or cysteine) peptidase inhibitor ...

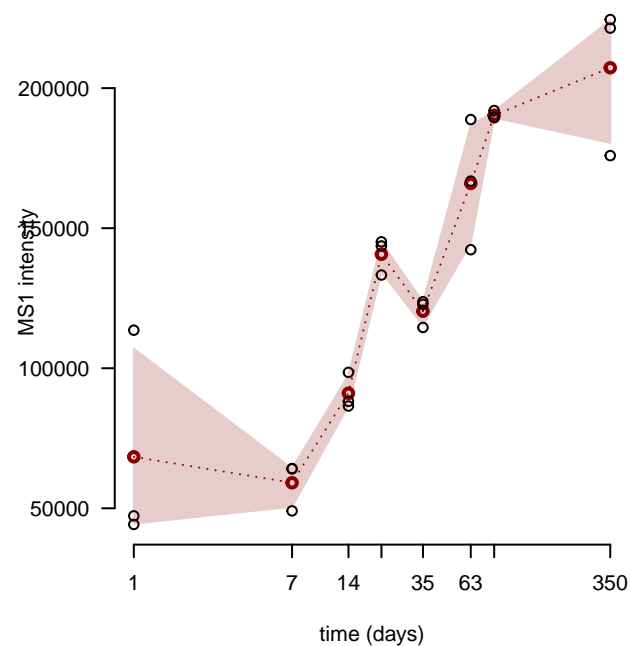

**Q9D162**  
GN=Ccdc167  
coiled-coil domain containing 167

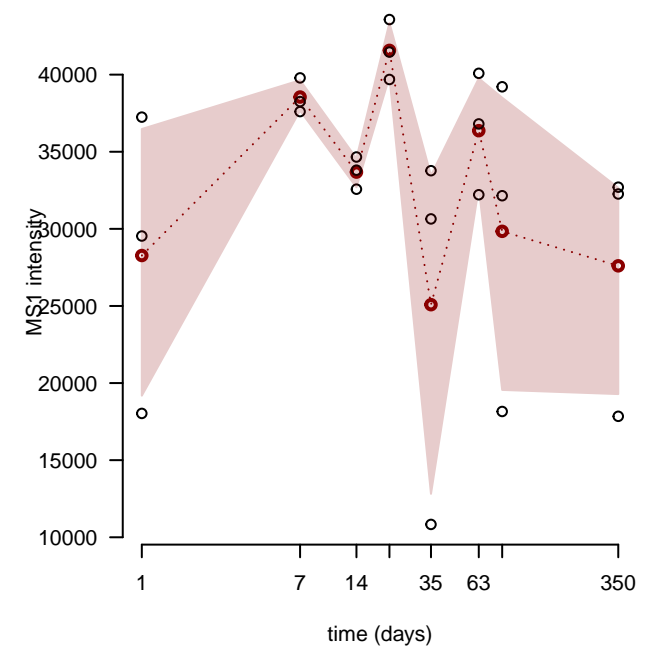

**Q9D164**  
GN=Fxyd6

FXYP domain-containing ion transport reg ...

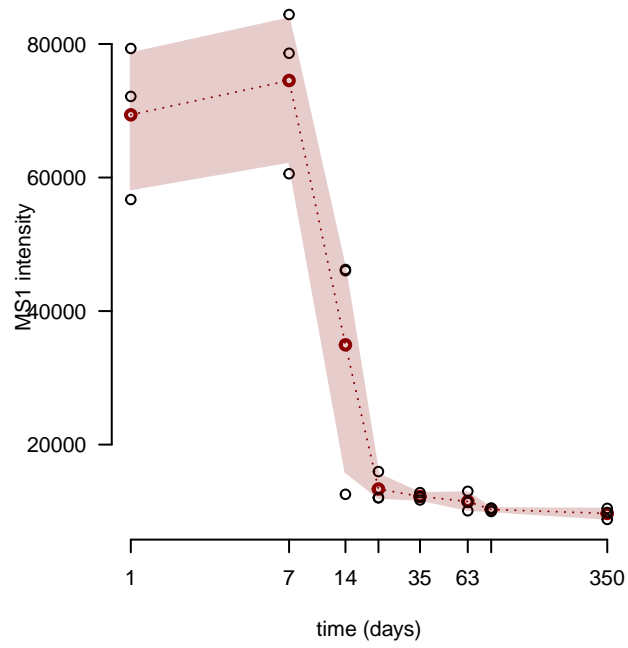

**Q9D168**  
GN=Ints12

integrator complex subunit 12

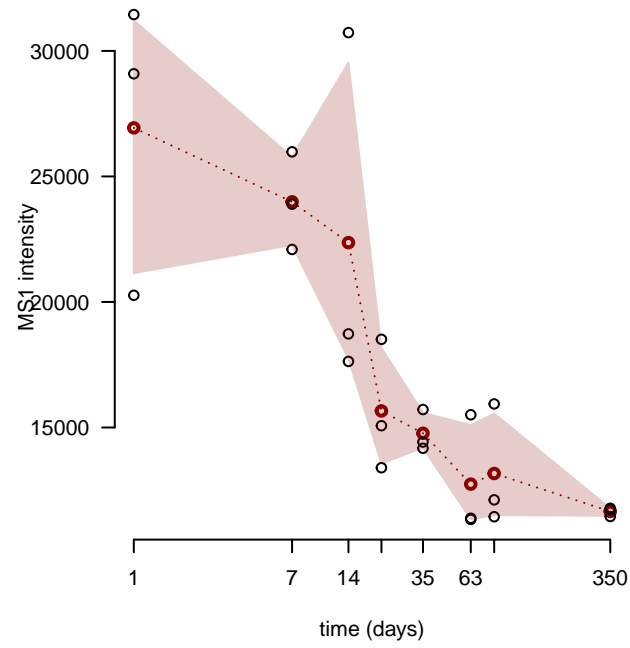

**Q9D172**  
GN=Gatd3a

glutamine amidotransferase like class 1 ...

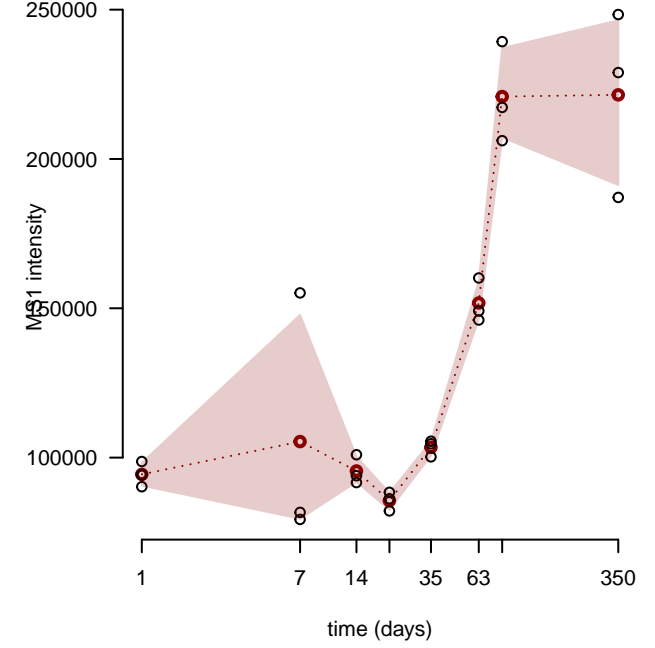

**Q9D173**  
GN=Tomm7

translocase of outer mitochondrial membr ...

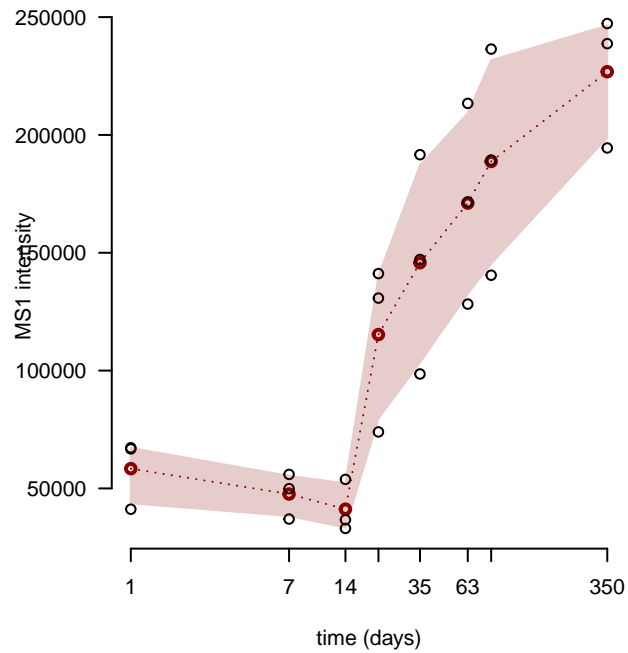

**Q9D187**  
GN=Ciao2b

cytosolic iron-sulfur assembly component ...

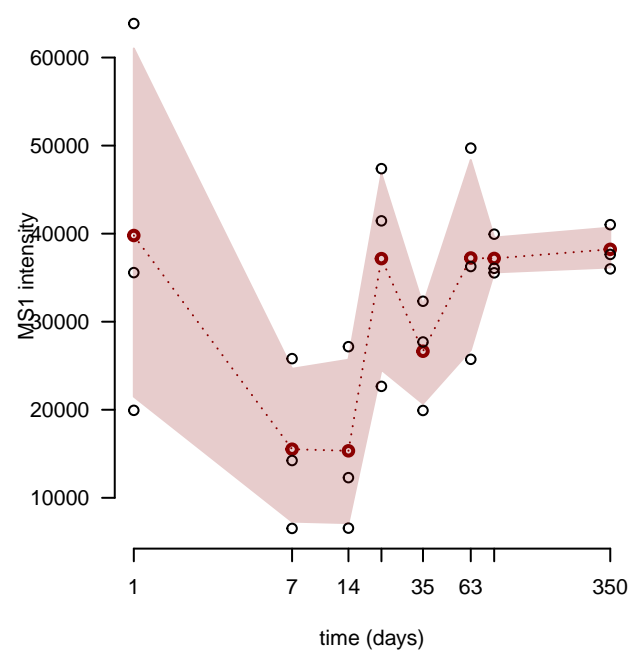

**Q9D198**  
GN=Syf2

SYF2 homolog, RNA splicing factor (S. ce ...

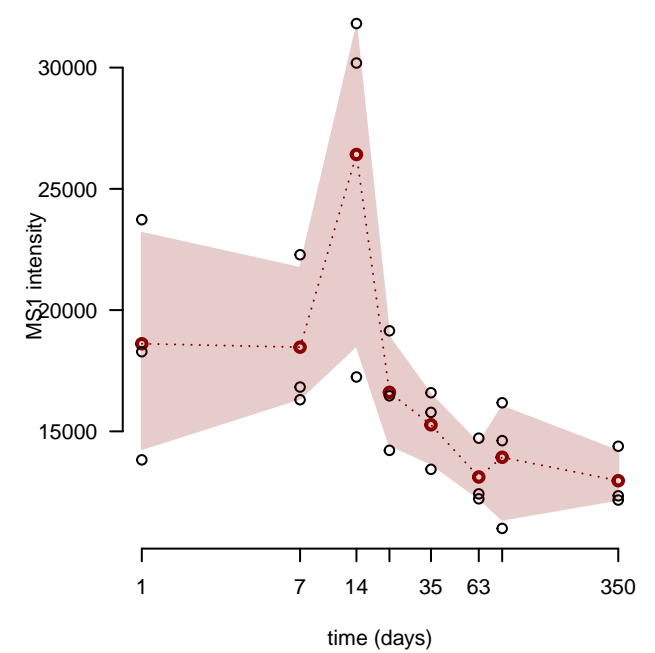

**Q9D1A2**  
GN=Cndp2

CNDP dipeptidase 2 (metallopeptidase M20 ...

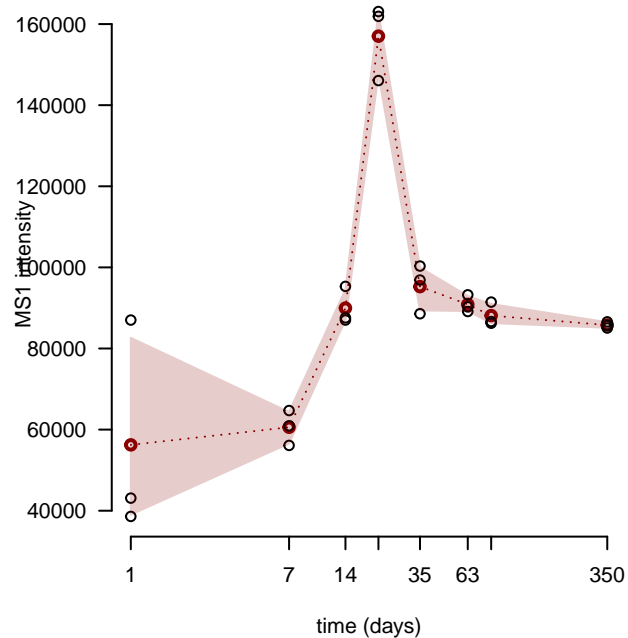

**Q9D1B9**  
GN=Mrpl28

mitochondrial ribosomal protein L28

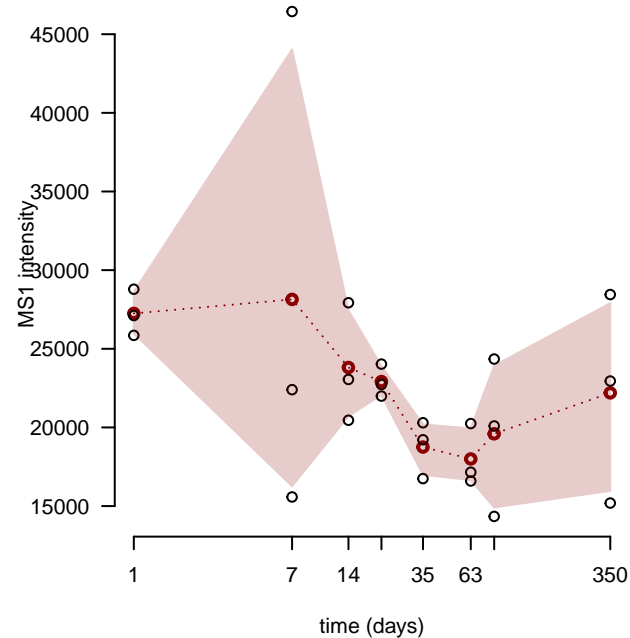

**Q9D1C1**  
GN=Ube2c

ubiquitin-conjugating enzyme E2C

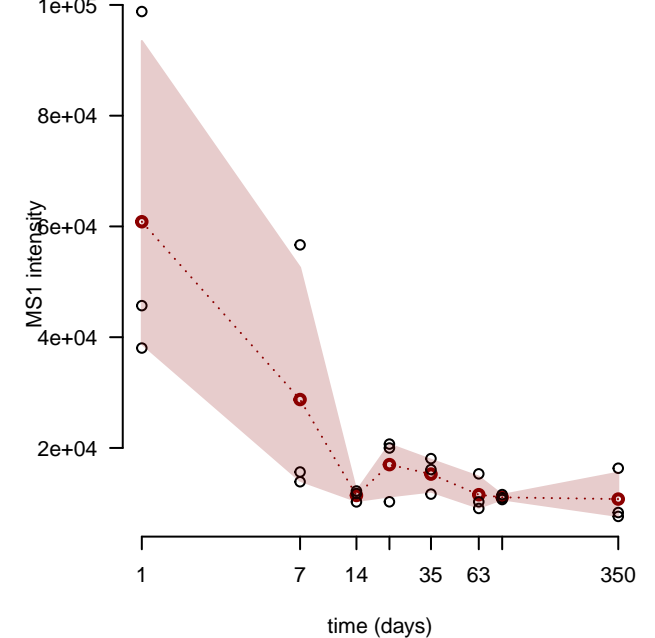

**Q9D1C8**  
**GN=Vps28**  
vacuolar protein sorting 28

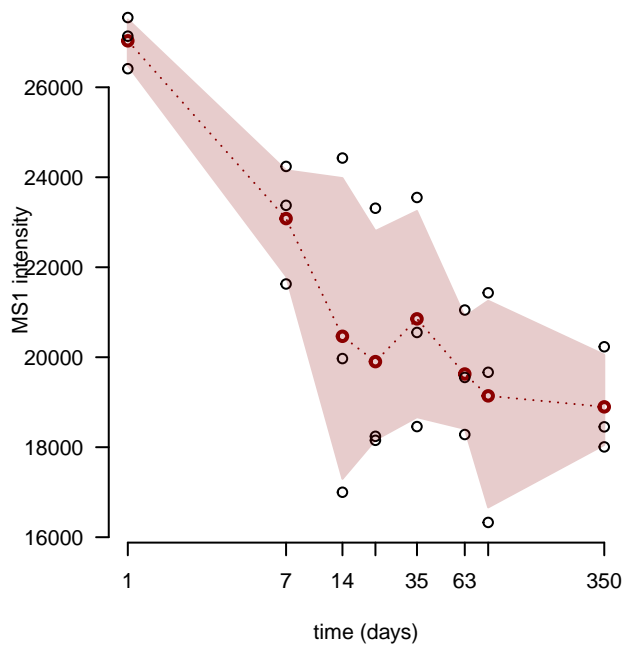

**Q9D1C9**  
**GN=Rrp7a**  
ribosomal RNA processing 7 homolog A

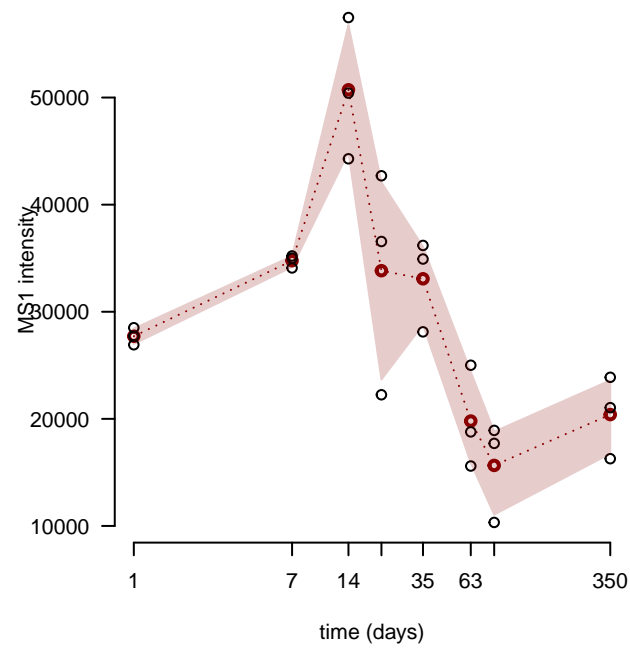

**Q9D1D4**  
**GN=Tmed10**  
transmembrane p24 trafficking protein 10

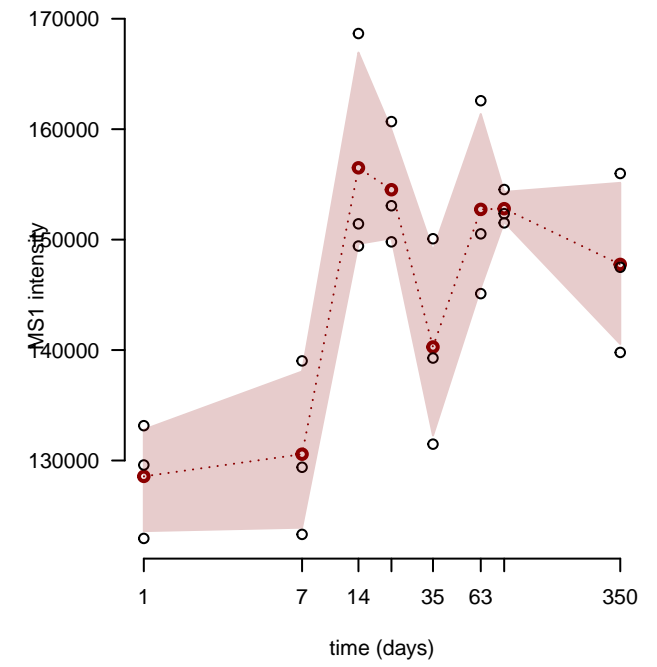

**Q9D1D6**  
**GN=Cthrc1**  
collagen triple helix repeat containing ...

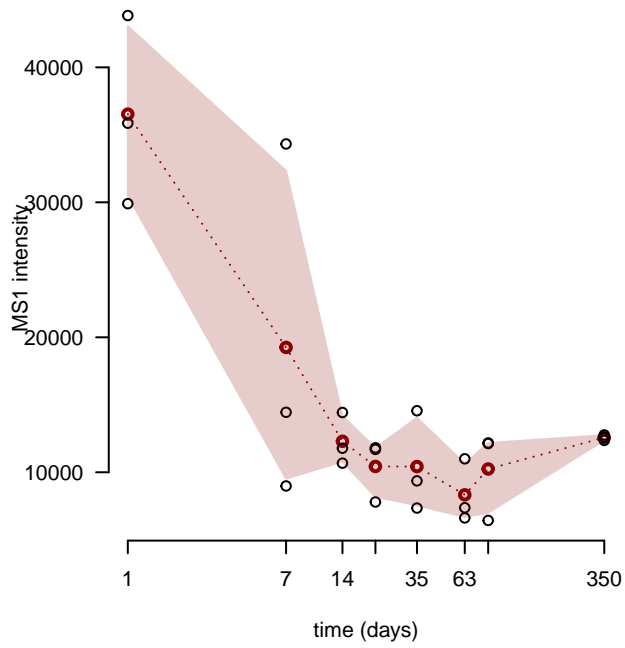

**Q9D1E5**  
**GN=Lmbr1l**  
limb region 1 like

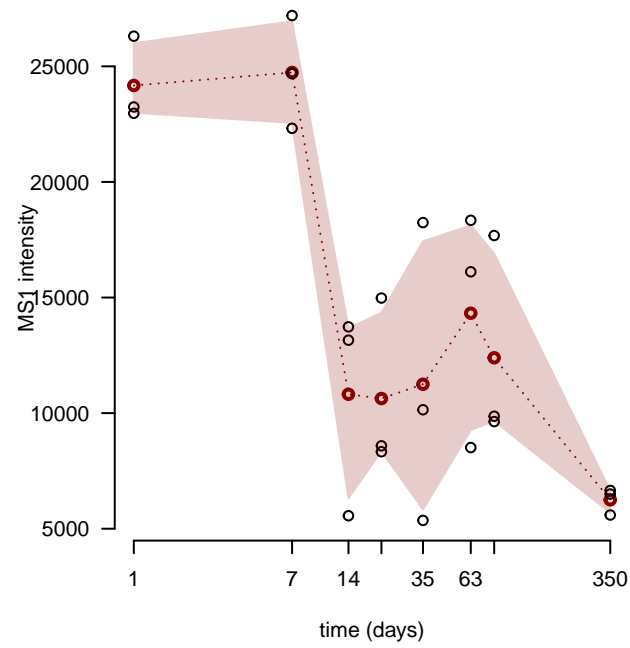

**Q9D1E6**  
**GN=Tbcb**  
tubulin folding cofactor B

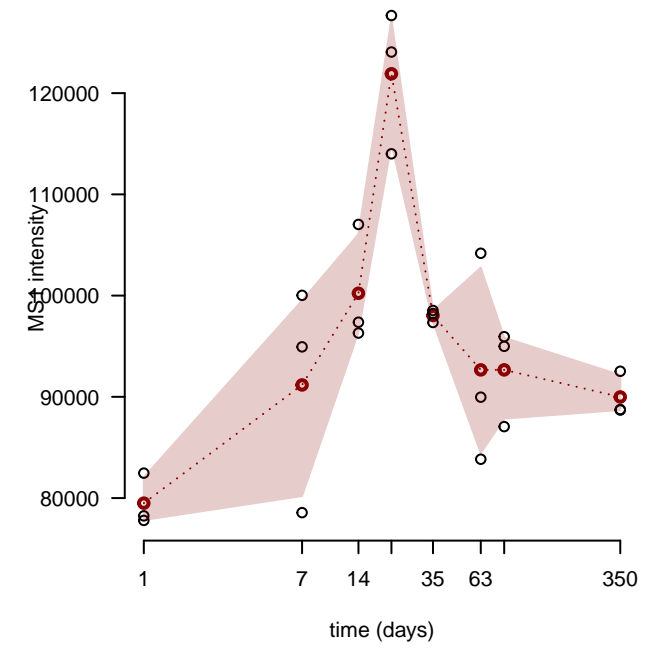

**Q9D1E8**  
**GN=Agpat5**  
1-acylglycerol-3-phosphate O-acyltransfe ...

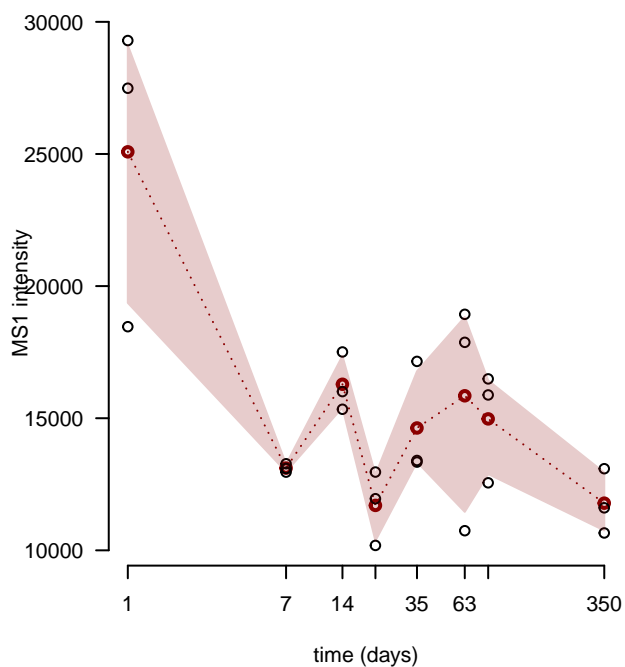

**Q9D1F3**  
**GN=**

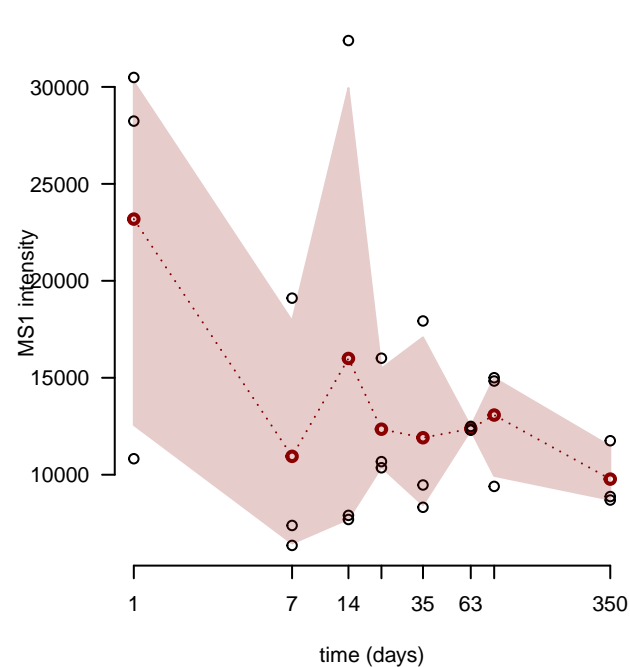

**Q9D1F4**  
**GN=Akt1s1**  
AKT1 substrate 1 (proline-rich)

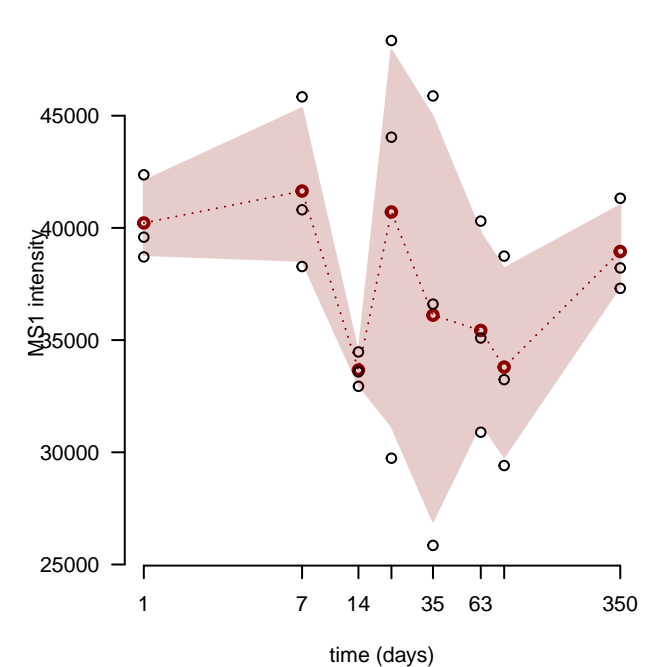

**Q9D1G1**  
GN=Rab1b  
RAB1B, member RAS oncogene family

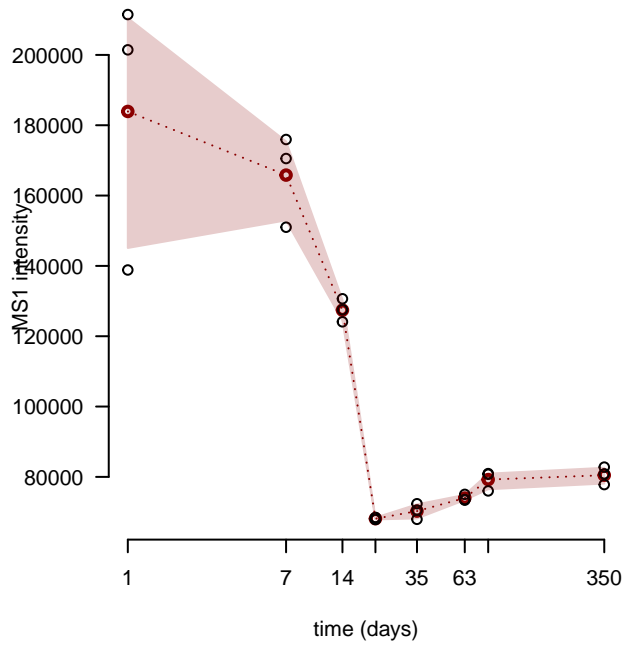

**Q9D1G2**  
GN=Pmvk  
phosphomevalonate kinase

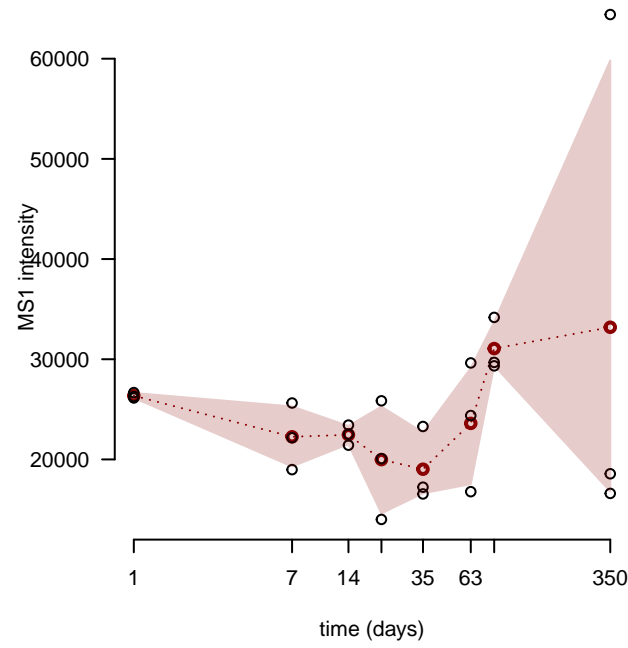

**Q9D1G5**  
GN=Lrrc57  
leucine rich repeat containing 57

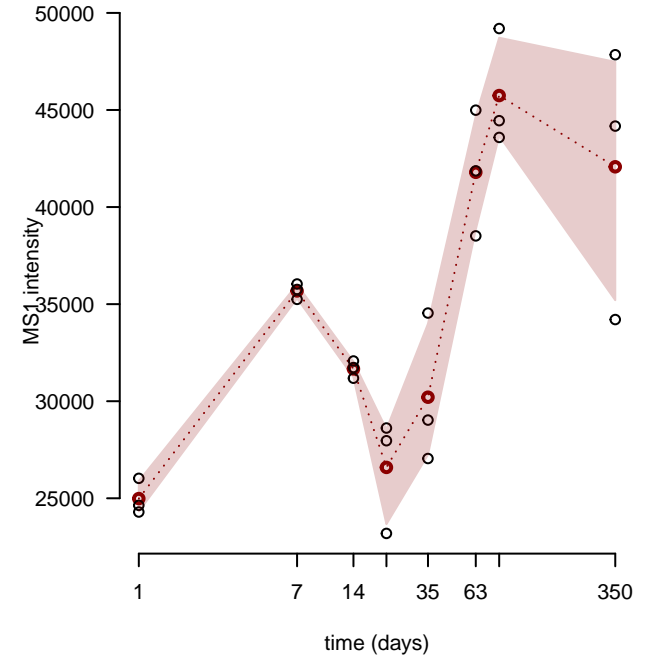

**Q9D1H6**  
GN=Ndufaf4  
NADH:ubiquinone oxidoreductase complex a ...

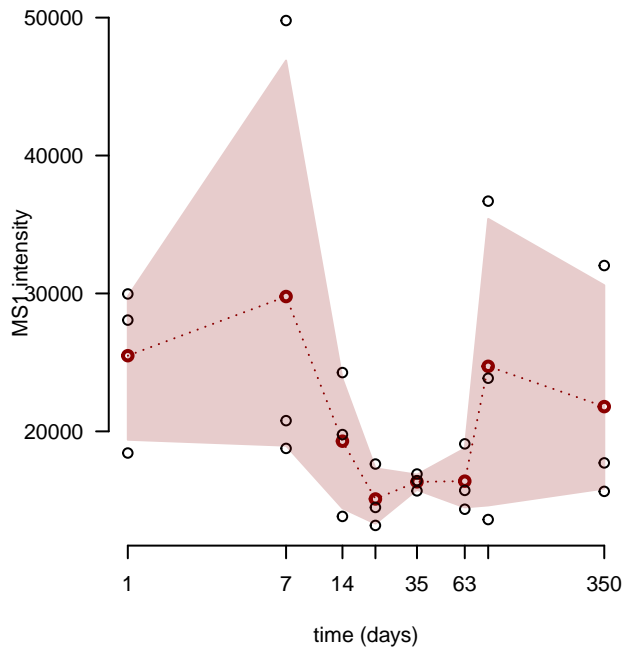

**Q9D1H7**  
GN=Get4  
golgi to ER traffic protein 4

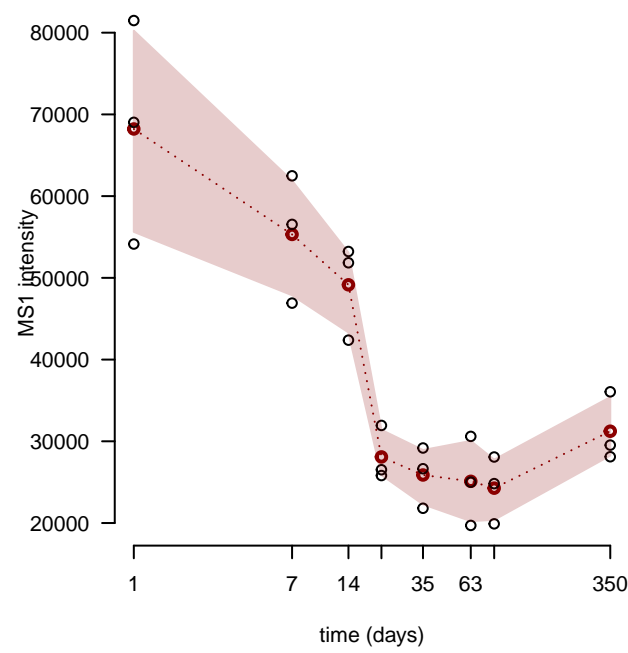

**Q9D1H8**  
GN=Mrpl53  
mitochondrial ribosomal protein L53

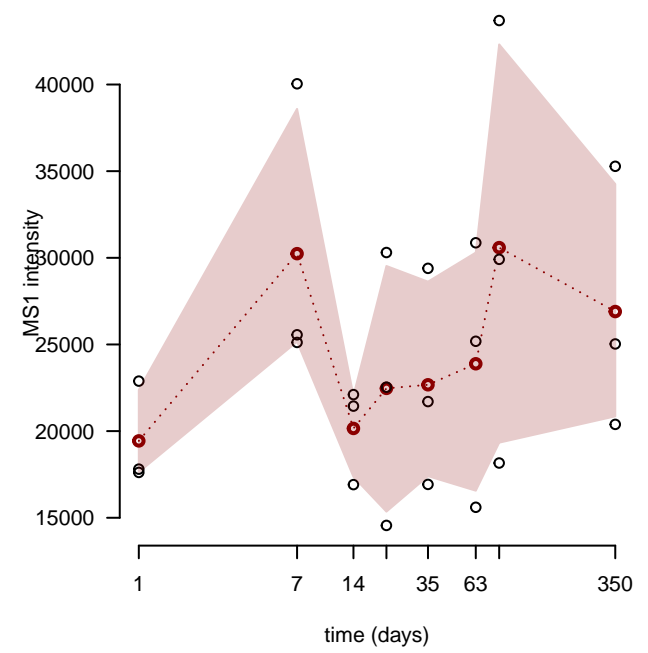

**Q9D1H9**  
GN=Mfap4  
microfibrillar-associated protein 4

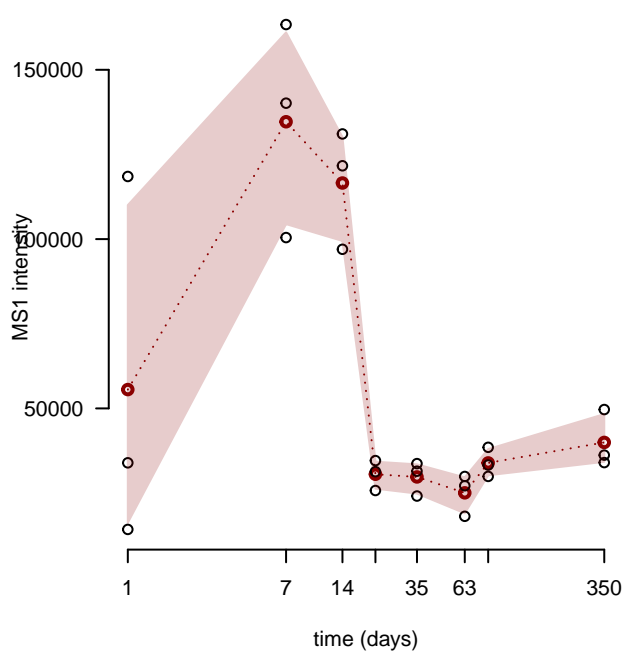

**Q9D1I2**  
GN=Card19  
caspase recruitment domain family, membe ...

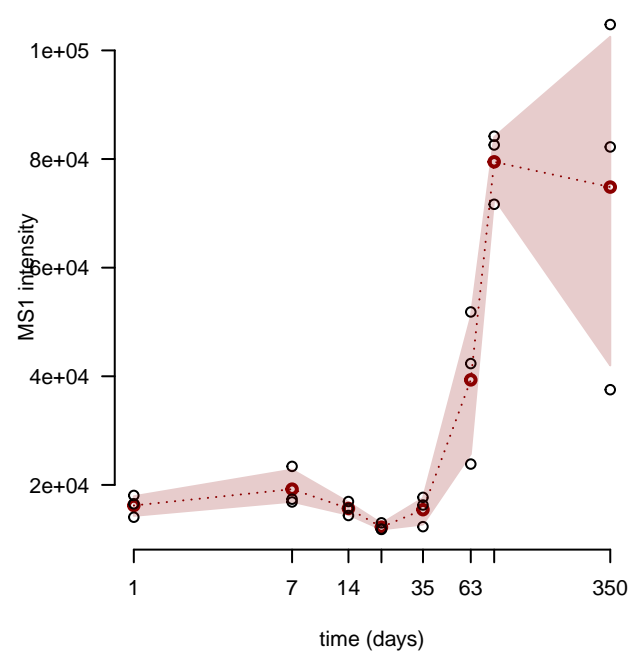

**Q9D1I5**  
GN=Mcee  
methylmalonyl CoA epimerase

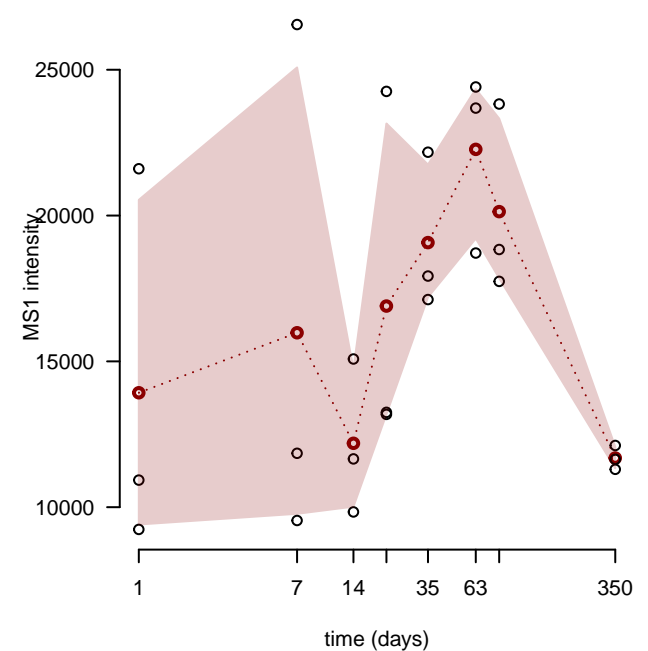

**Q9D1I6**  
**GN=Mrpl14**  
mitochondrial ribosomal protein L14

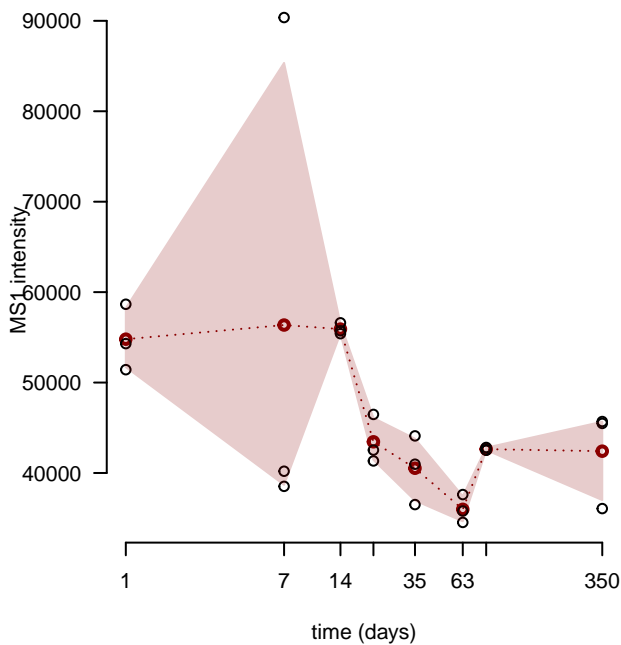

**Q9D1J1**  
**GN=Necap2**  
NECAP endocytosis associated 2

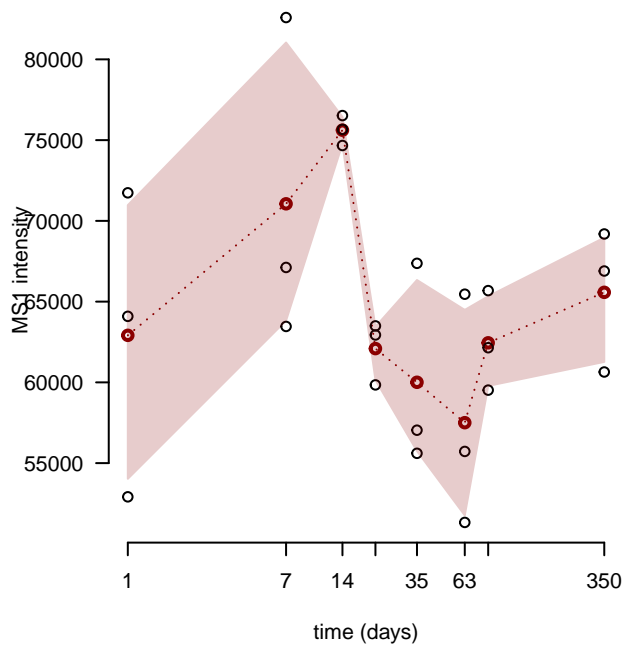

**Q9D1J3**  
**GN=Sarnp**  
SAP domain containing ribonucleoprotein

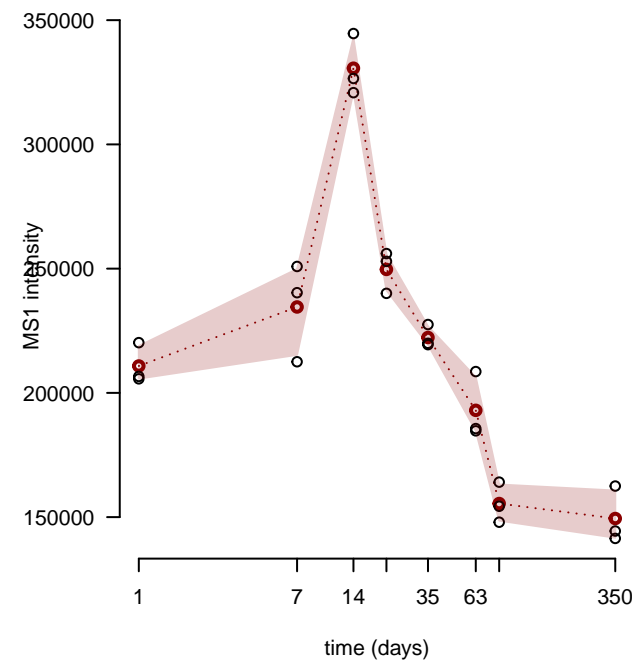

**Q9D1K2**  
**GN=Atp6v1f**  
ATPase, H<sup>+</sup> transporting, lysosomal V1 su ...

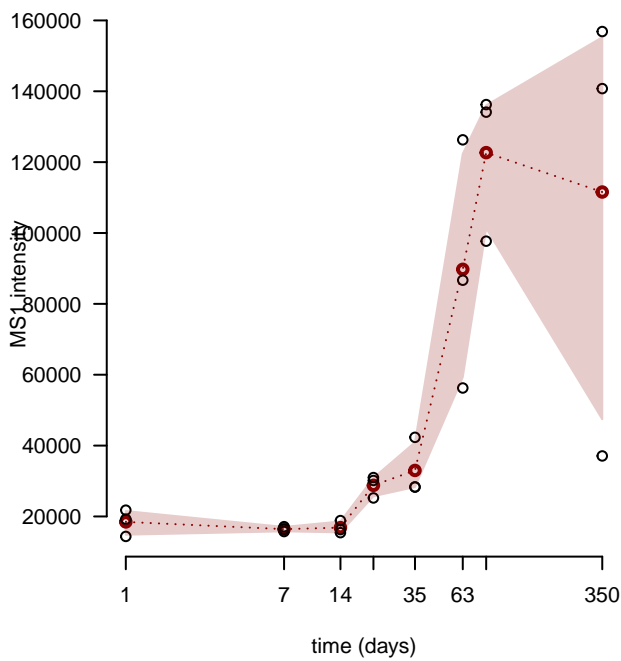

**Q9D1K7**  
**GN=**

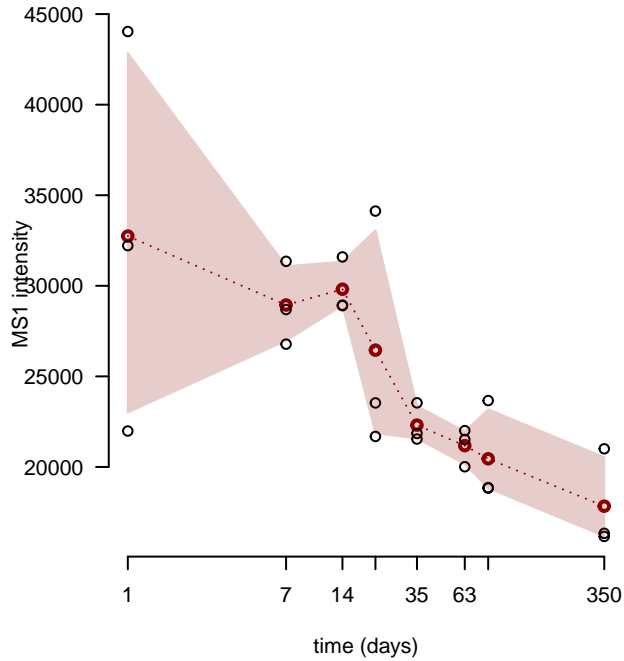

**Q9D1L0**  
**GN=Chchd2**  
coiled-coil-helix-coiled-coil-helix doma ...

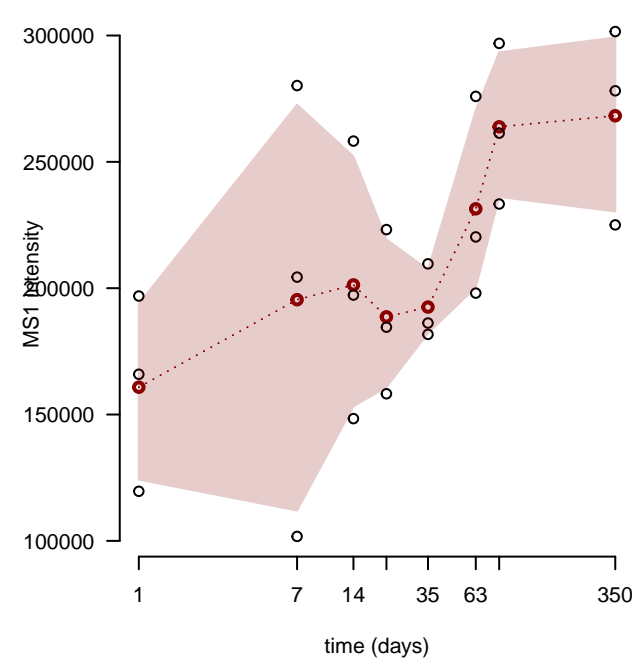

**Q9D1L9**  
**GN=Lamtor5**  
late endosomal/lysosomal adaptor, MAPK a ...

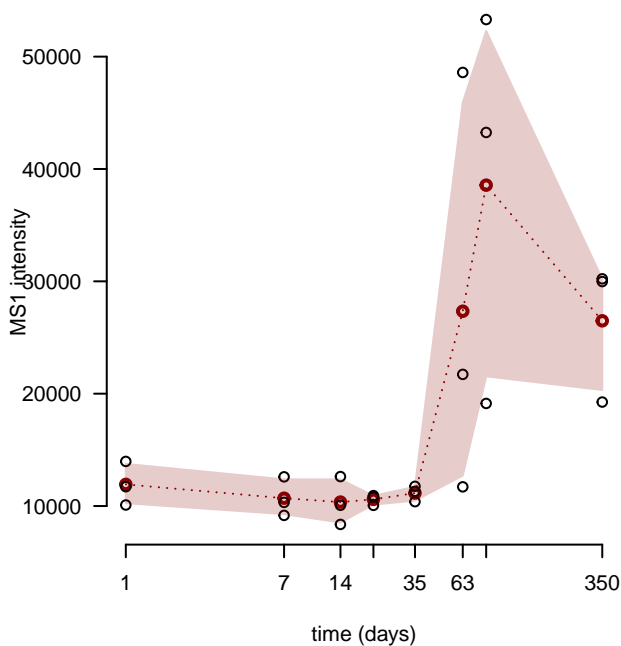

**Q9D1M0**  
**GN=Sec13**  
SEC13 homolog, nuclear pore and COPII co ...

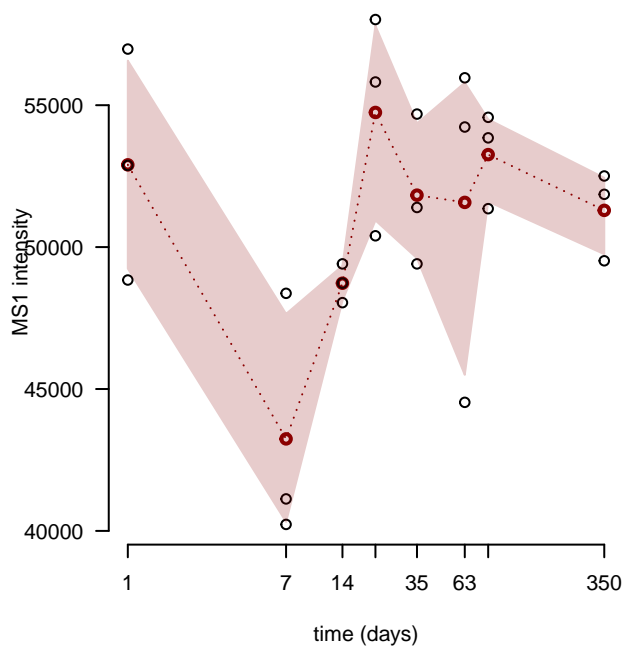

**Q9D1M4**  
**GN=Eef1e1**  
eukaryotic translation elongation factor ...

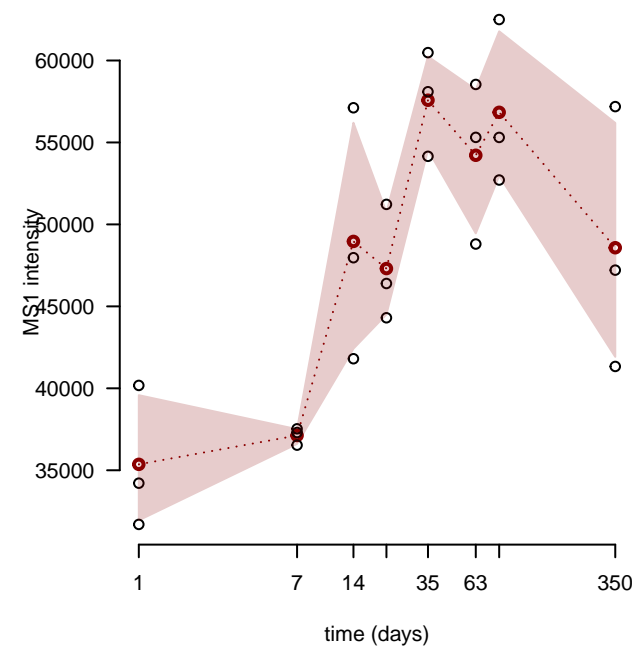

**Q9D1M7**  
**GN=Fkbp11**  
FK506 binding protein 11

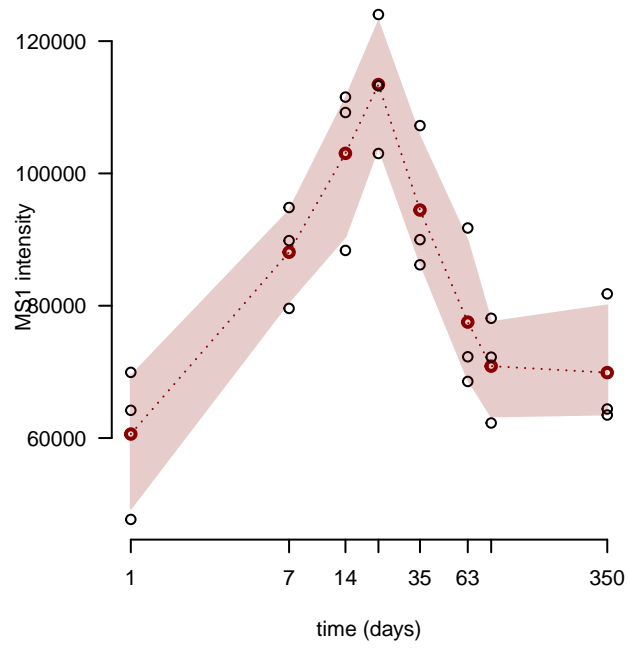

**Q9D1N2**  
**GN=Gpihbp1**  
GPI-anchored HDL-binding protein 1

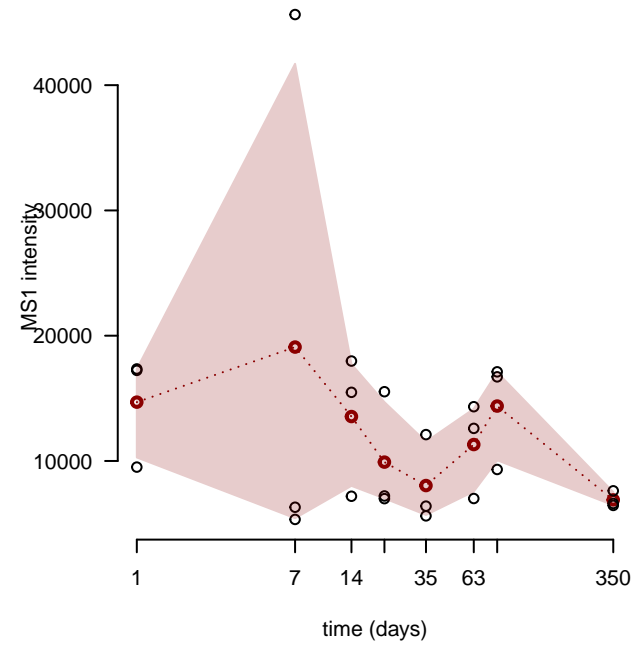

**Q9D1N9**  
**GN=Mrpl21**  
mitochondrial ribosomal protein L21

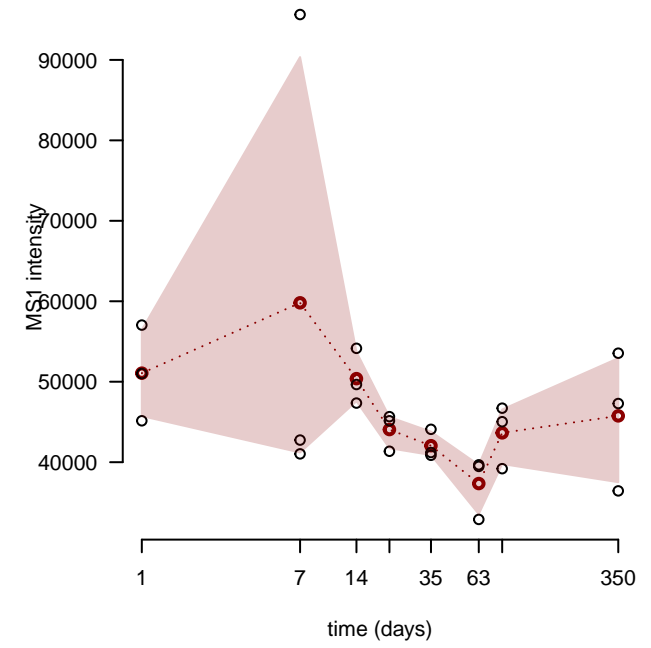

**Q9D1P0**  
**GN=Mrpl13**  
mitochondrial ribosomal protein L13

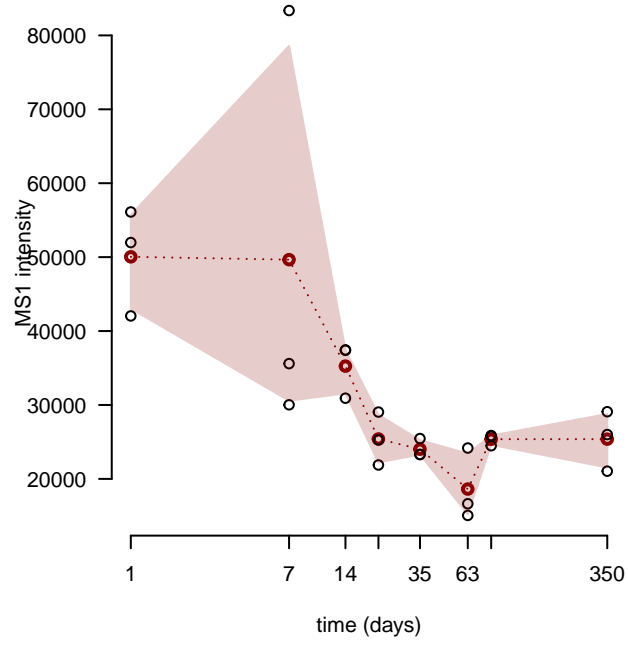

**Q9D1P2**  
**GN=Kat8**  
K(lysine) acetyltransferase 8

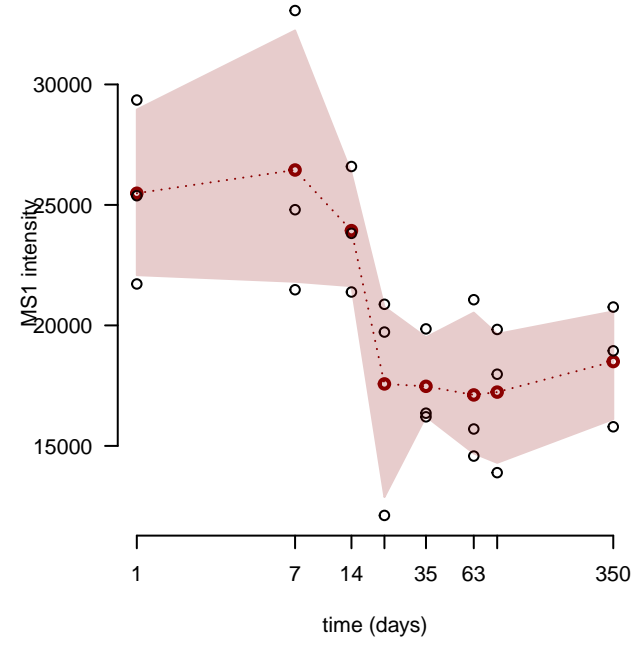

**Q9D1P4**  
**GN=Chordc1**  
cysteine and histidine-rich domain (CHOR ...

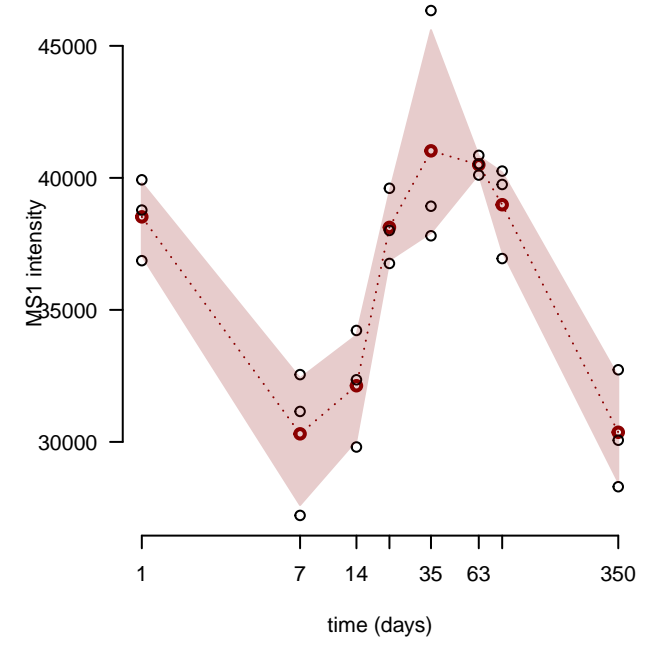

**Q9D1Q1**  
**GN=Mphosph6**  
M phase phosphoprotein 6

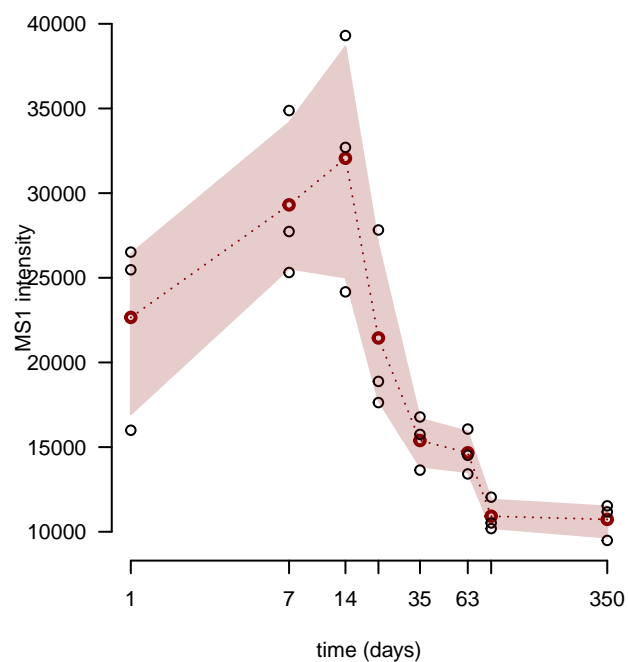

**Q9D1Q4**  
**GN=Dpm3**  
dolichyl-phosphate mannosyltransferase p ...

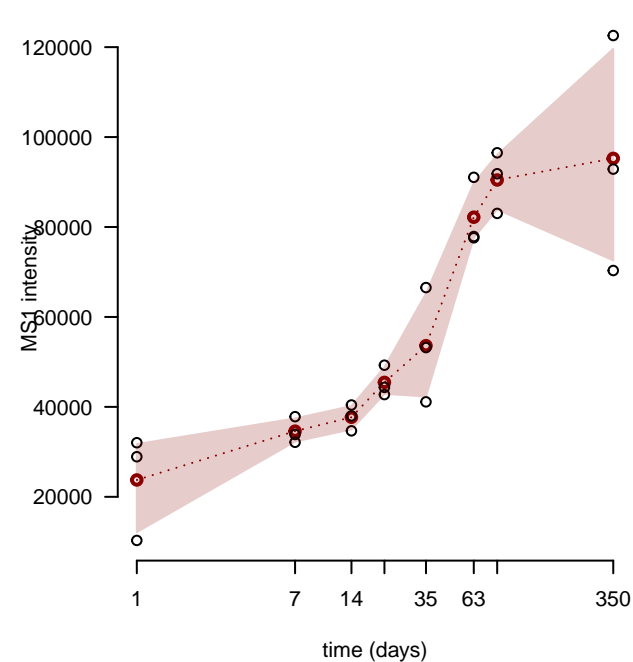

**Q9D1Q6**  
**GN=Erp44**  
endoplasmic reticulum protein 44

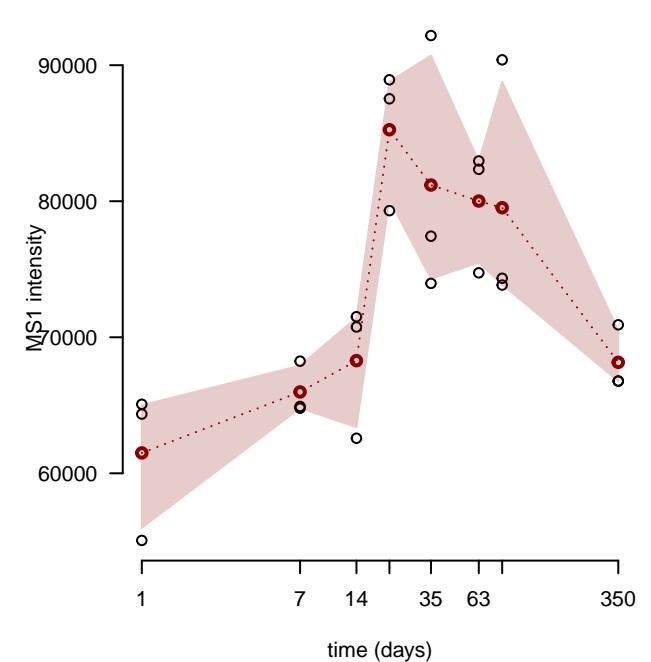

**Q9D1R1**  
**GN=Tmem126b**  
transmembrane protein 126B

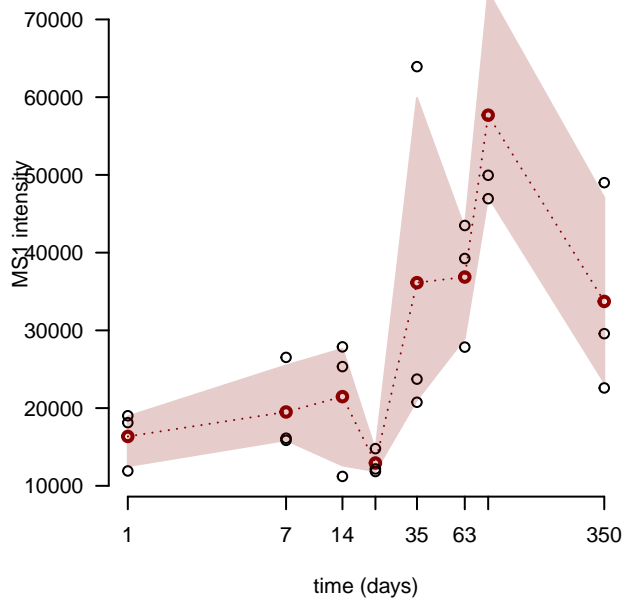

**Q9D1R2**  
**GN=Kti12**  
KTI12 homolog, chromatin associated

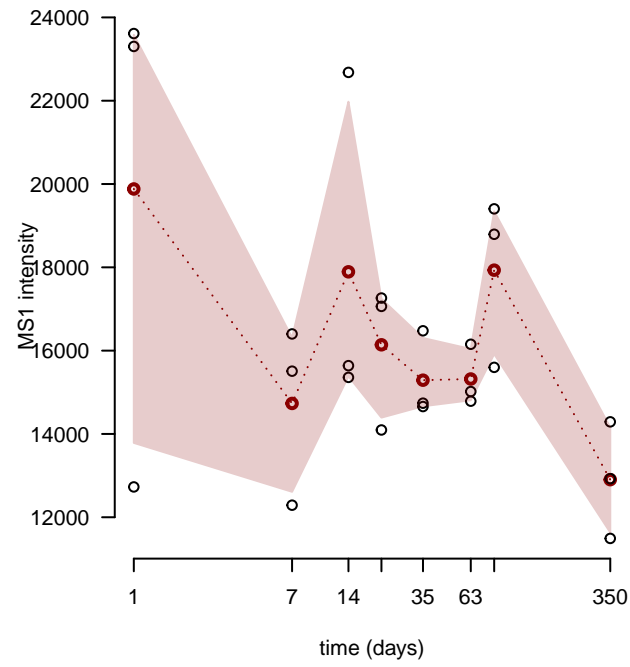

**Q9D1R9**  
**GN=Rpl34**  
ribosomal protein L34

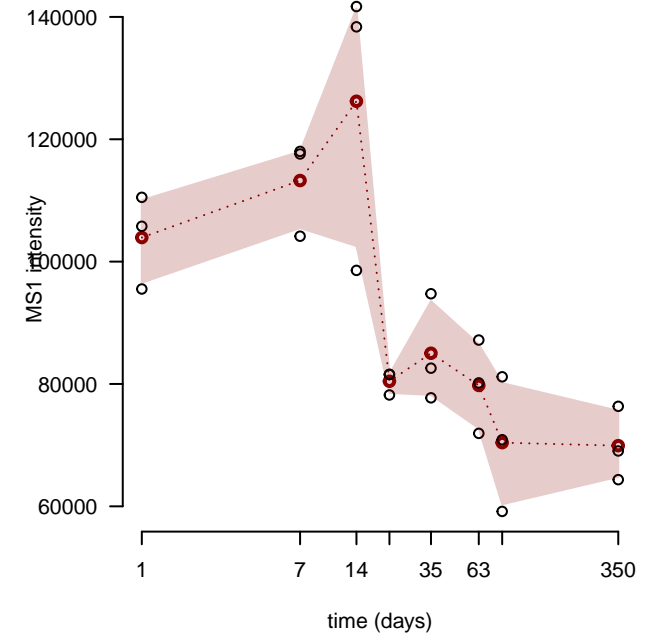

**Q9D1X9**  
**GN=Tmem50b**  
transmembrane protein 50B

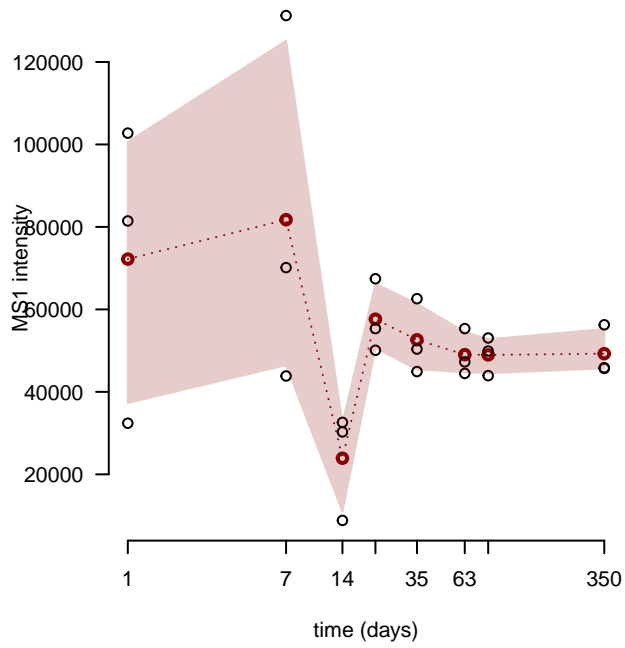

**Q9D1Z3**  
**GN=Atpsckmt**  
ATP synthase C subunit lysine N-methyltr ...

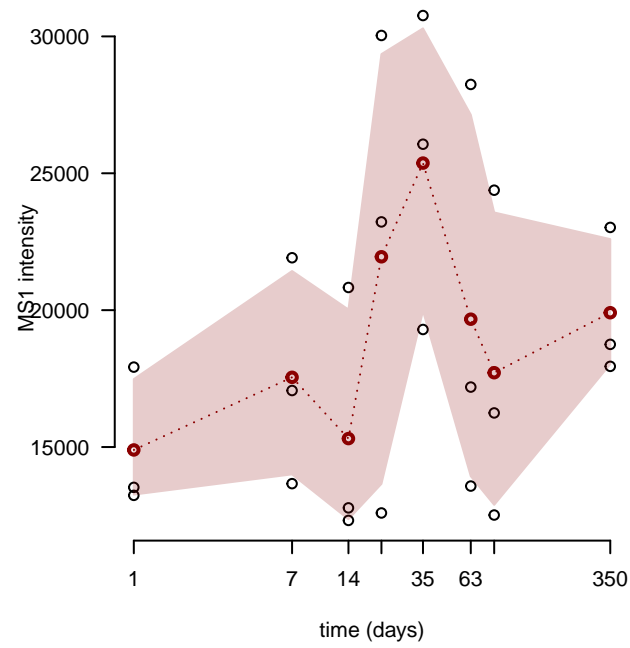

**Q9D219**  
**GN=Bcl9**  
B cell CLL/lymphoma 9

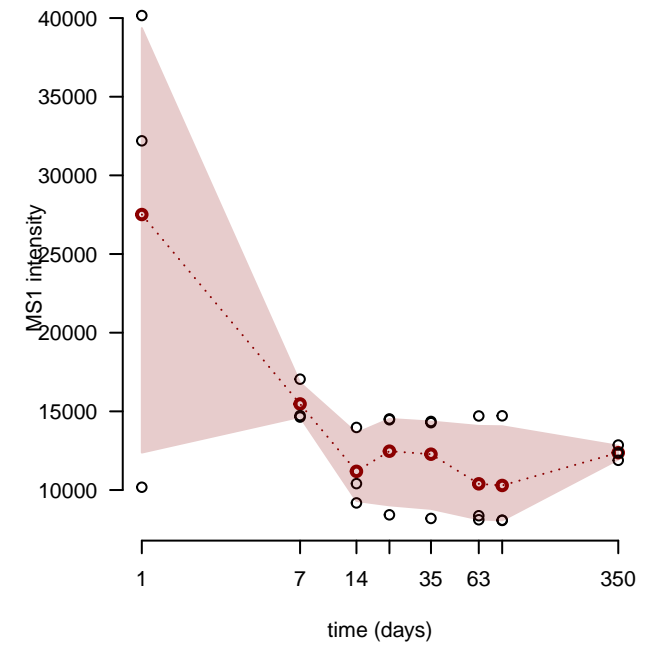

**Q9D236**  
**GN=Htra3**  
HtrA serine peptidase 3

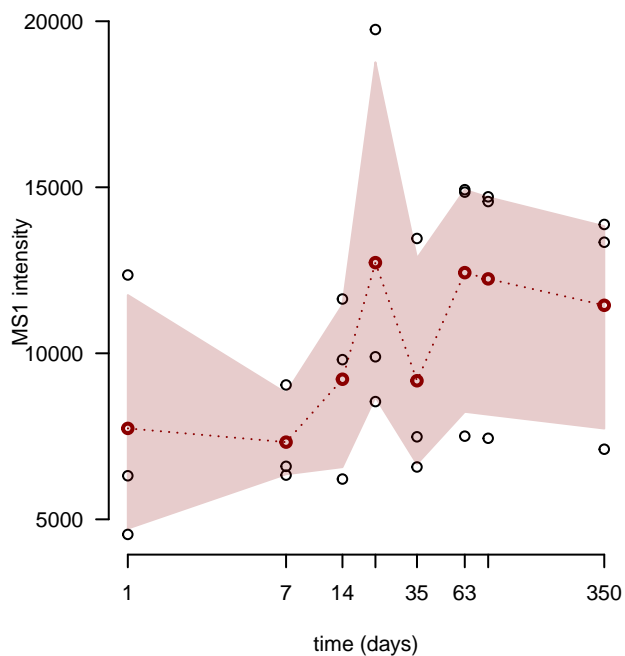

**Q9D270**  
**GN=Zdhhc21**  
zinc finger, DHHC domain containing 21

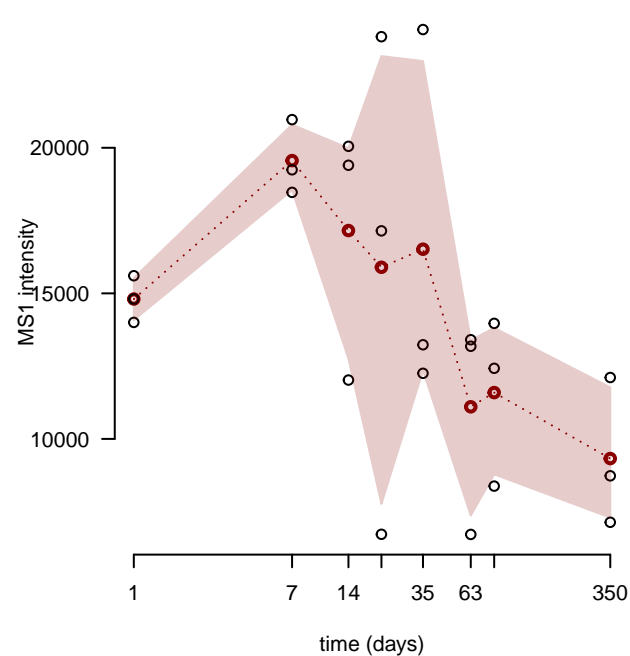

**Q9D273**  
**GN=Mmab**  
methylmalonic aciduria (cobalamin defici ...

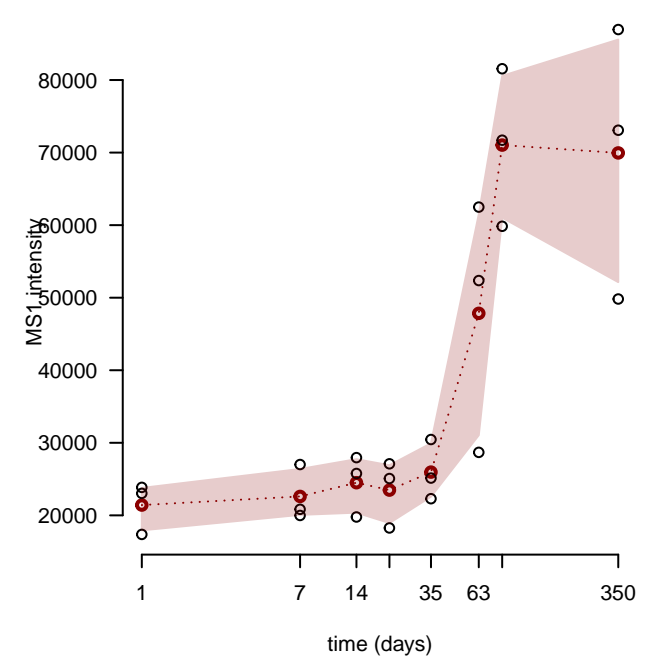

**Q9D281**  
**GN=Fam114a1**  
 family with sequence similarity 114, mem ...

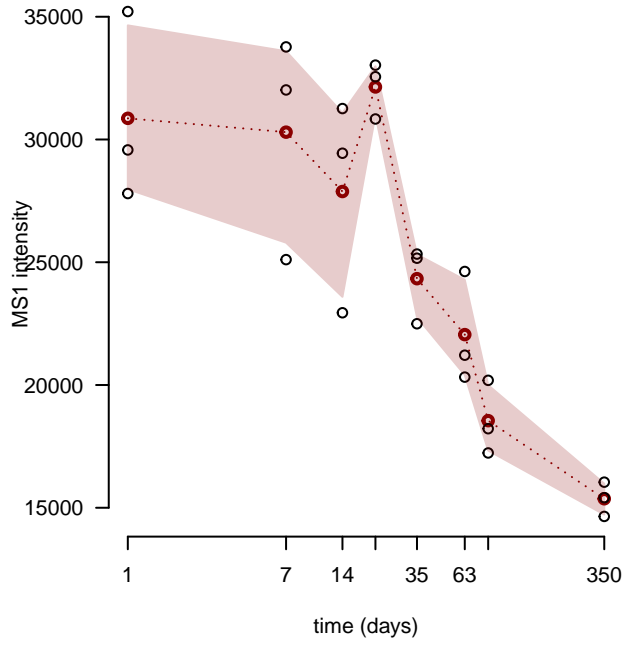

**Q9D287**  
**GN=Bcas2**  
 BCAS2 pre-mRNA processing factor

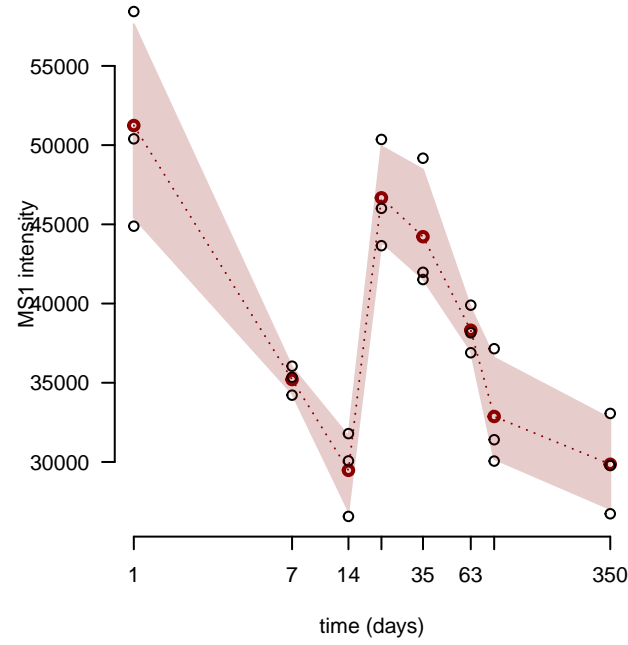

**Q9D289**  
**GN=Trappc6b**  
 trafficking protein particle complex 6B

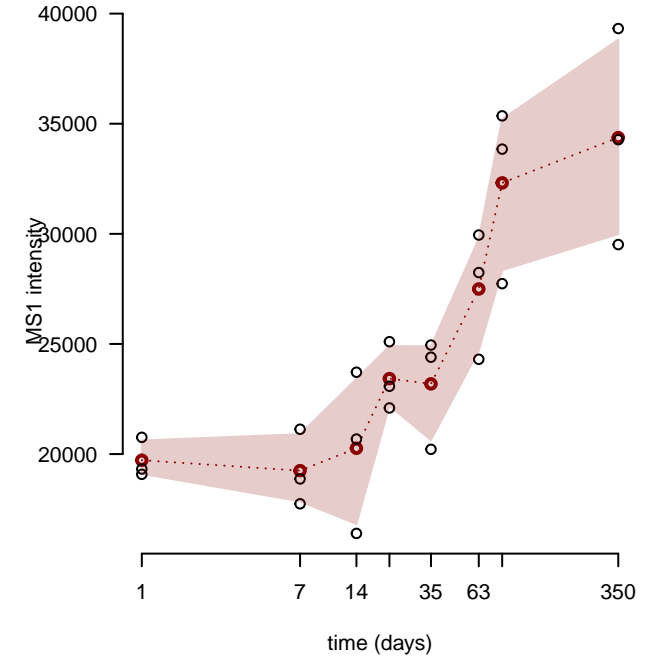

**Q9D2C2**  
**GN=Saal1**  
 serum amyloid A-like 1

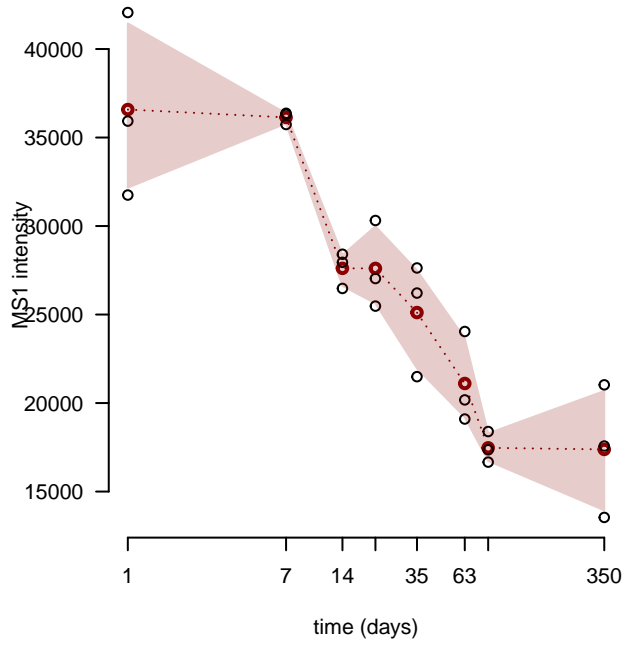

**Q9D2C6**  
**GN=Polr3h**  
 polymerase (RNA) III (DNA directed) poly ...

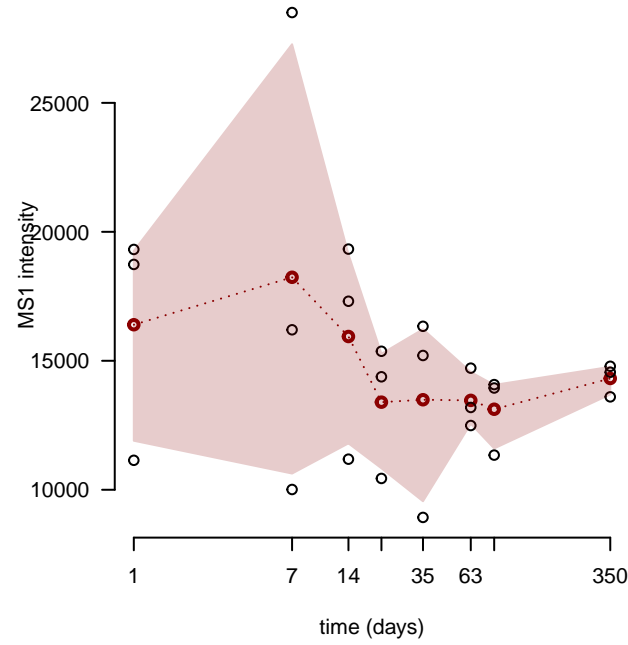

**Q9D2C7**  
**GN=Tmbim6**  
 transmembrane BAX inhibitor motif contai ...

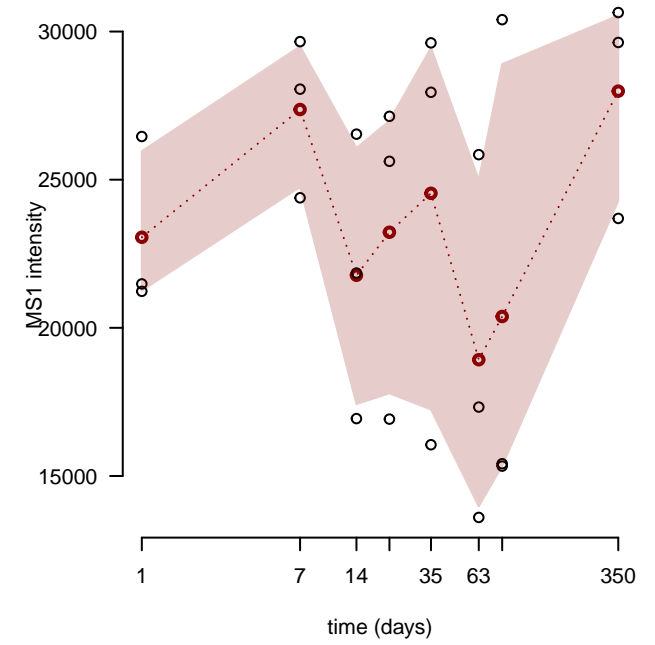

**Q9D2D7**  
**GN=Znf687**

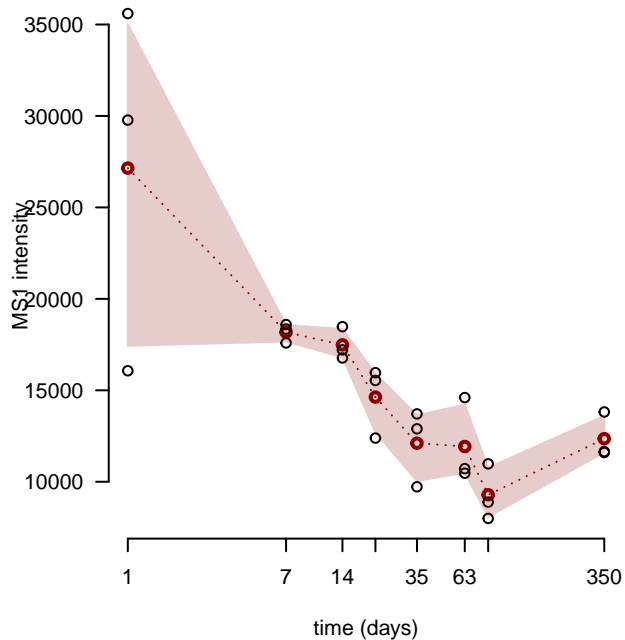

**Q9D2D9**  
**GN=Klhdc8b**  
 kelch domain containing 8B

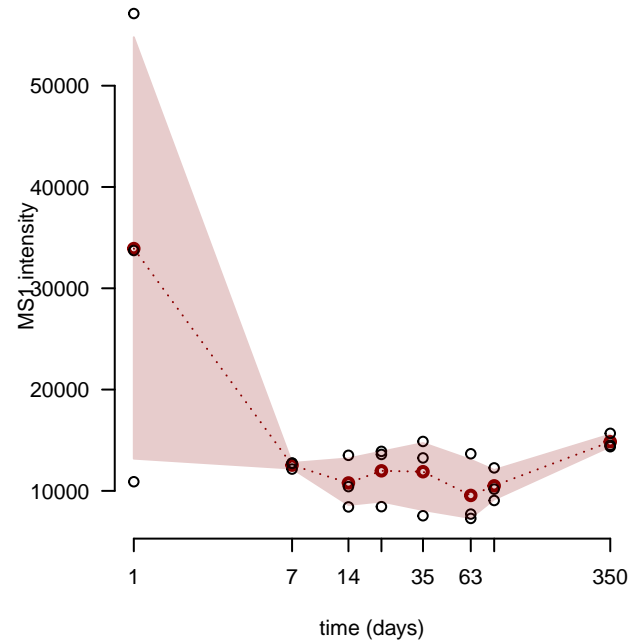

**Q9D2E2**  
**GN=Toe1**  
 target of EGR1, member 1 (nuclear)

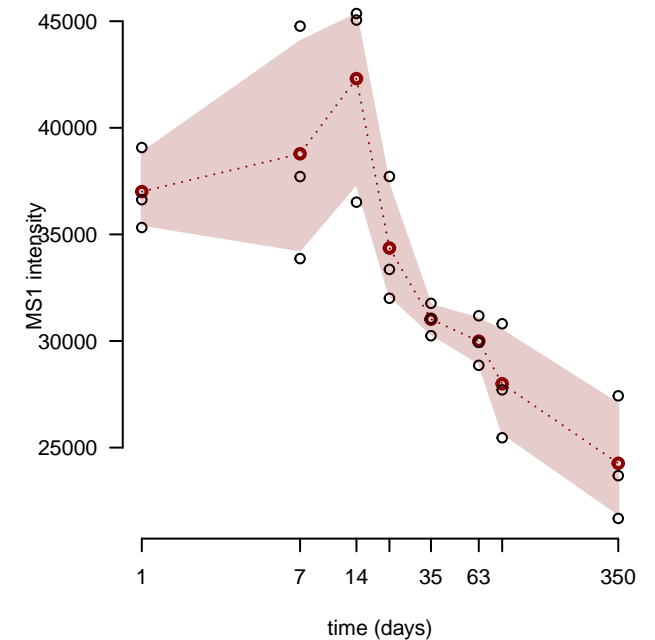



**Q9D2G2**  
**GN=Dlst**  
dihydrolipoamide S-succinyltransferase ( ...

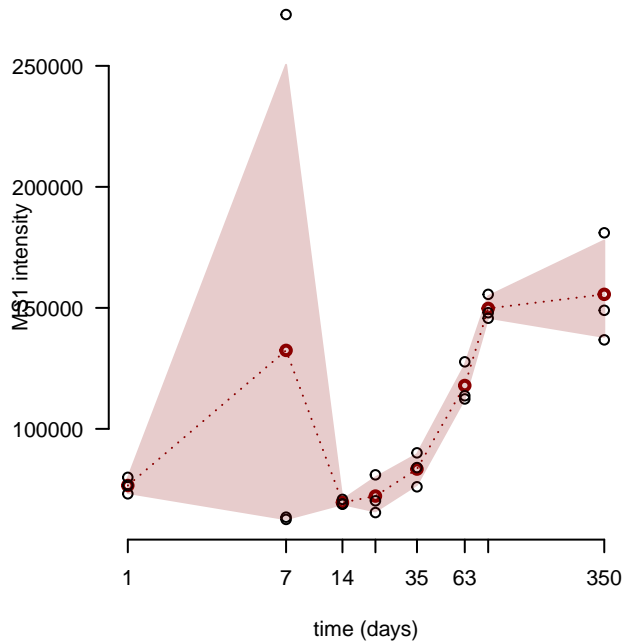

**Q9D2H6**  
**GN=Sp2**  
Sp2 transcription factor

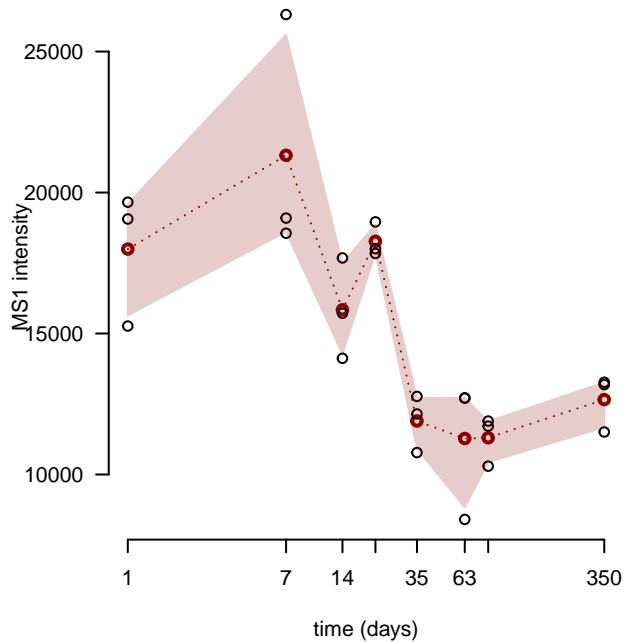

**Q9D2I5**  
**GN=Armc9**  
armadillo repeat containing 9

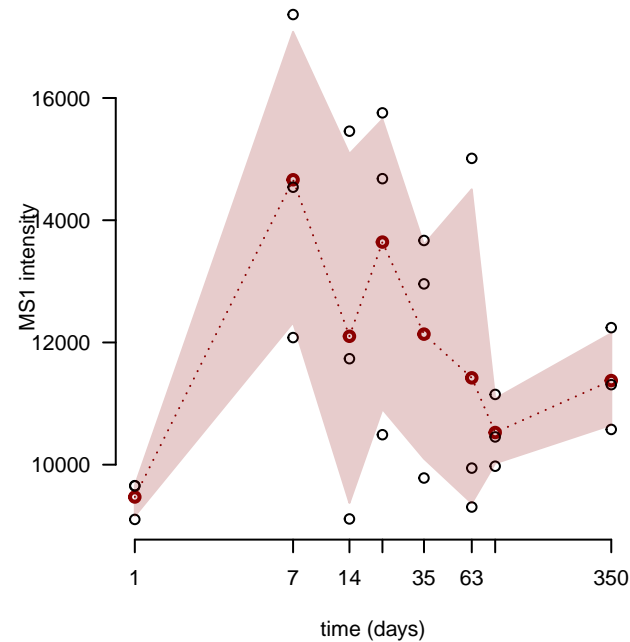

**Q9D2L1**  
**GN=Arsk**  
arylsulfatase K

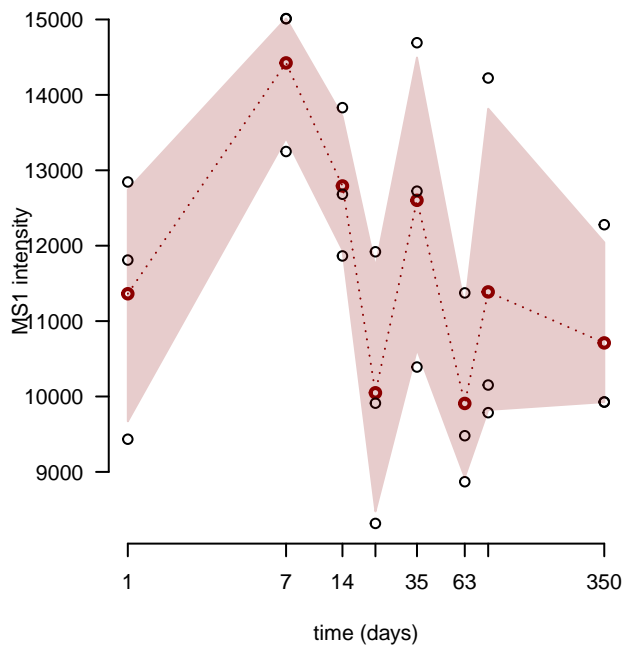

**Q9D2M8**  
**GN=Ube2v2**  
ubiquitin-conjugating enzyme E2 variant ...

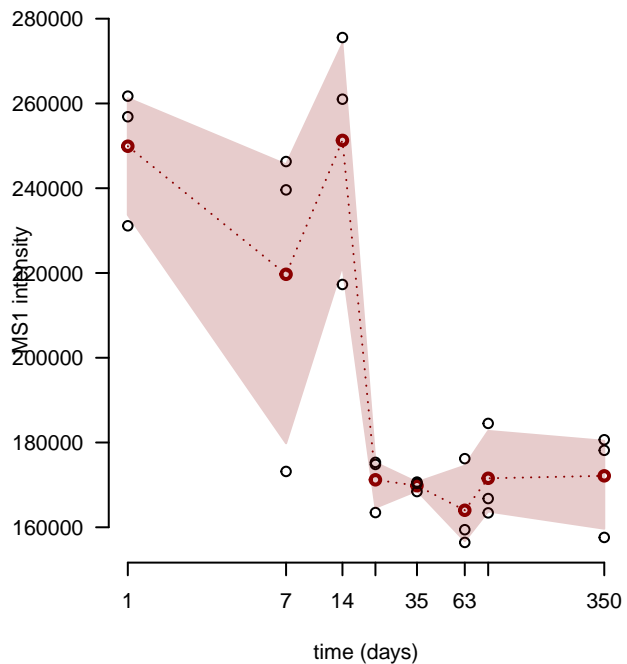

**Q9D2N4**  
**GN=Dtna**  
dystrobrevin alpha

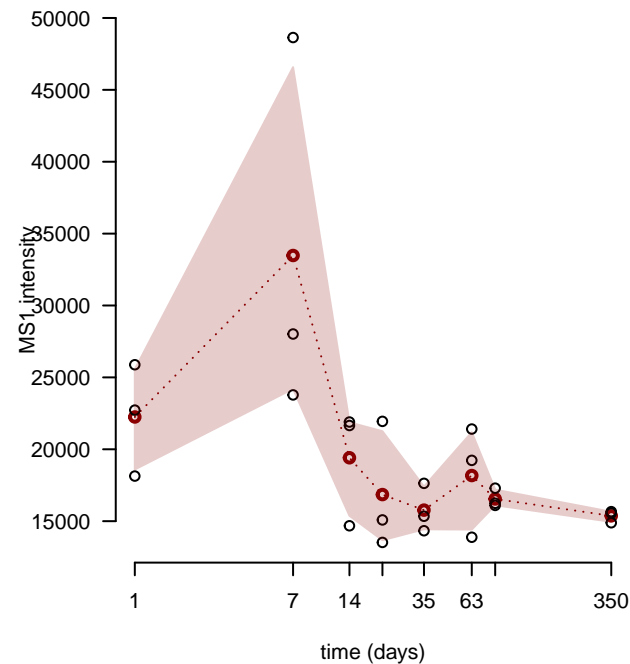

**Q9D2N9**  
**GN=Vps33a**  
VPS33A CORVET/HOPS core subunit

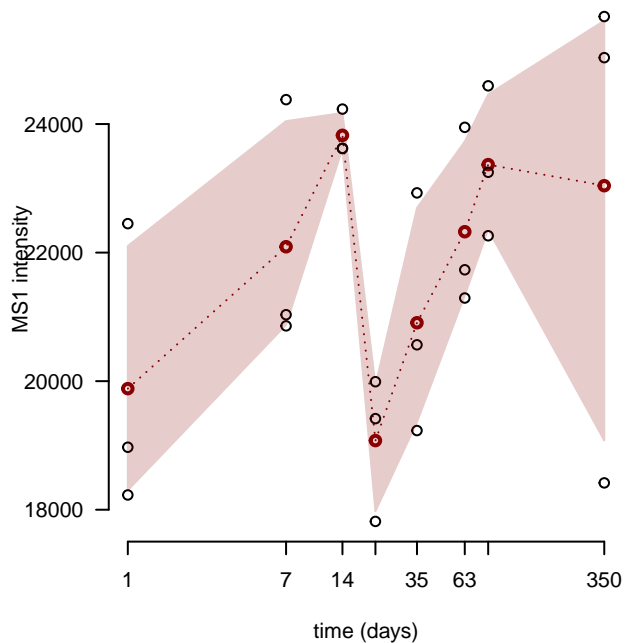

**Q9D2P4**  
**GN=Urm1**  
ubiquitin related modifier 1

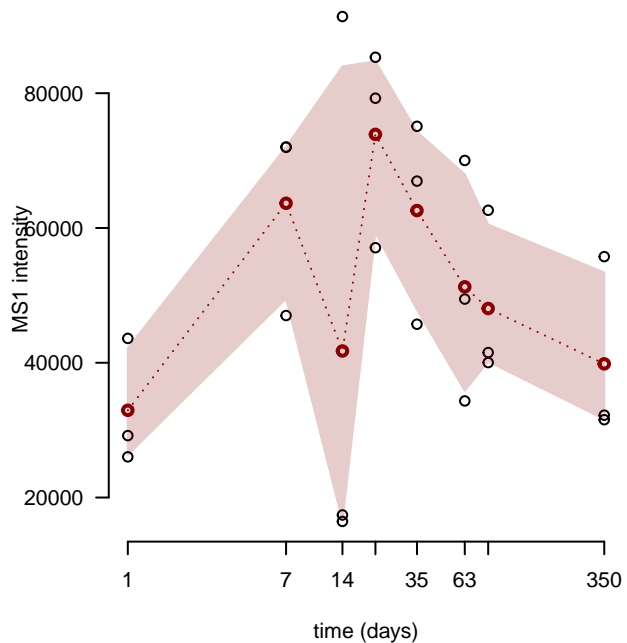

**Q9D2Q2**  
**GN=Trmt44**  
tRNA methyltransferase 44

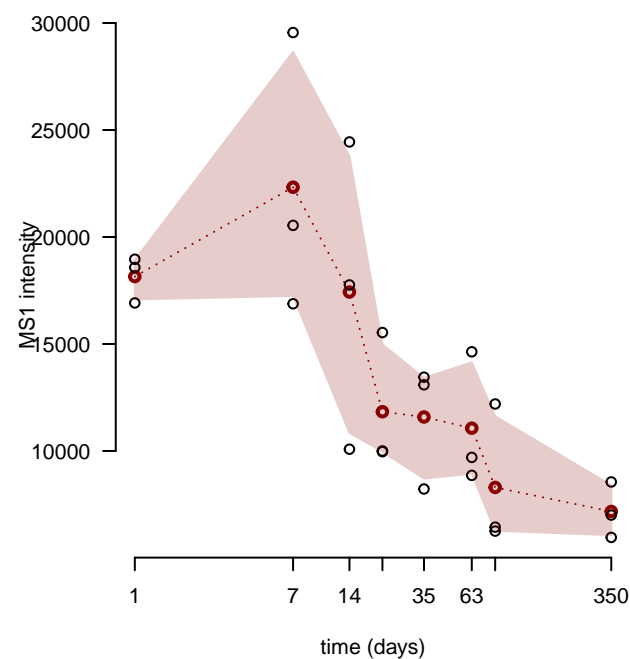

**Q9D2Q3**  
GN=

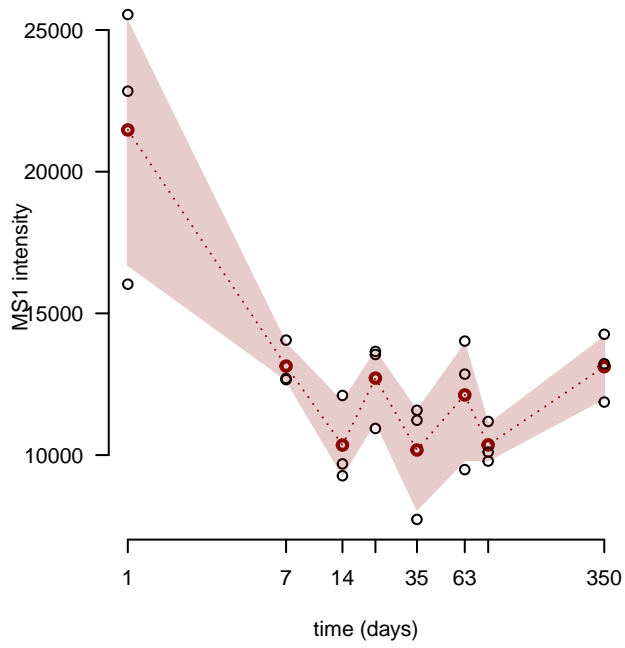

**Q9D2Q8**  
GN=S100a14  
S100 calcium binding protein A14

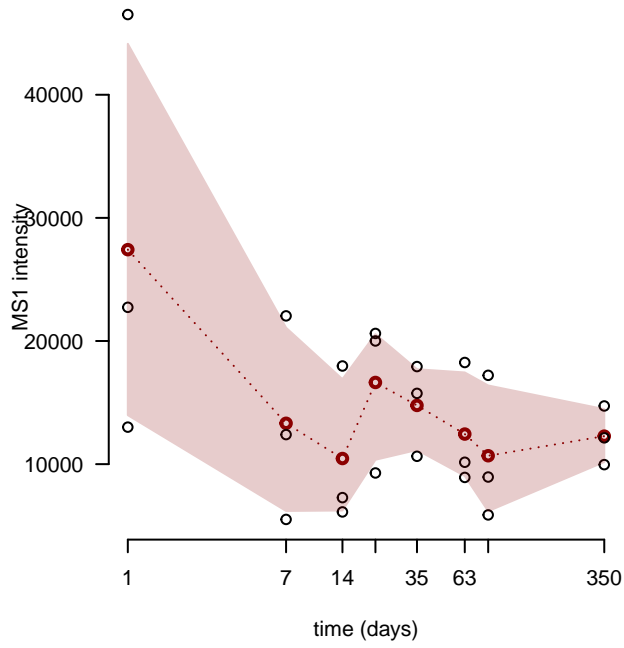

**Q9D2R0**  
GN=Aacs  
acetoacetyl-CoA synthetase

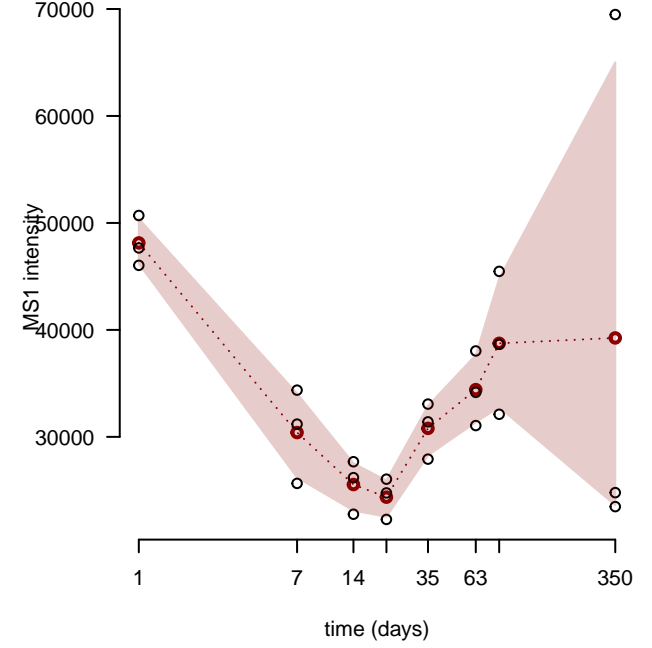

**Q9D2R6**  
GN=Coa3  
cytochrome C oxidase assembly factor 3

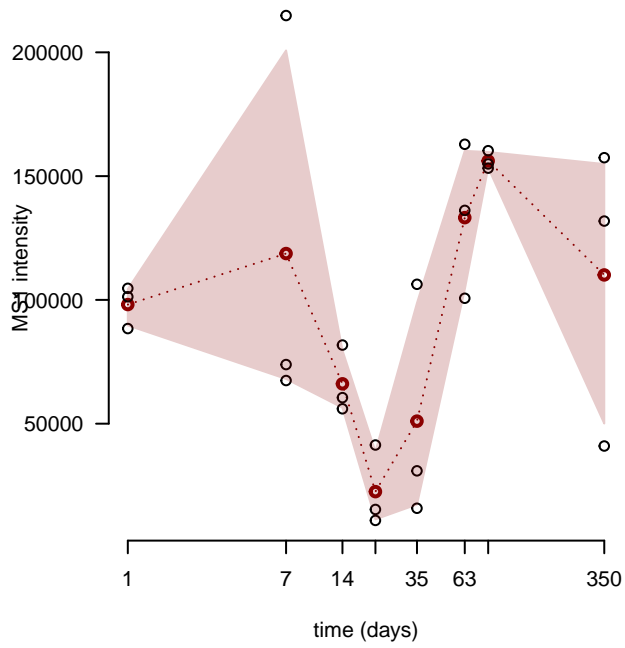

**Q9D2R8**  
GN=Mrps33  
mitochondrial ribosomal protein S33

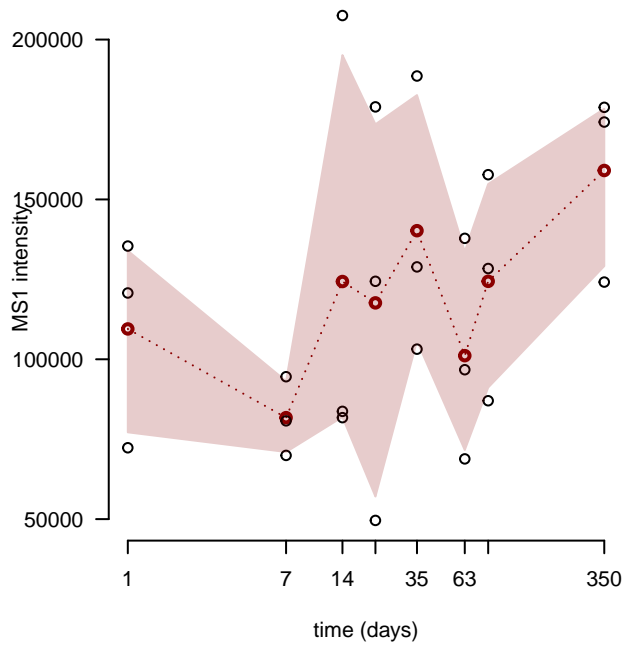

**Q9D2U5**  
GN=Naa38  
N(alpha)-acetyltransferase 38, NatC auxi ...

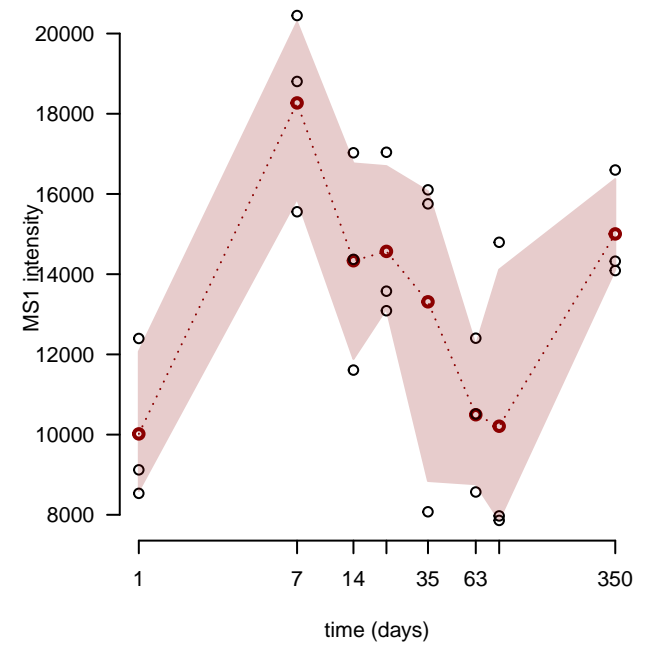

**Q9D2V5**  
GN=Aar2  
AAR2 splicing factor homolog

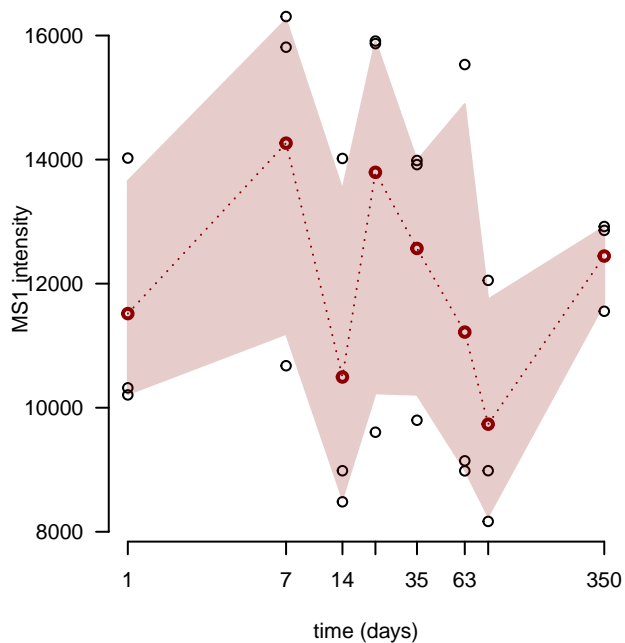

**Q9D2V7**  
GN=Coro7  
coronin 7

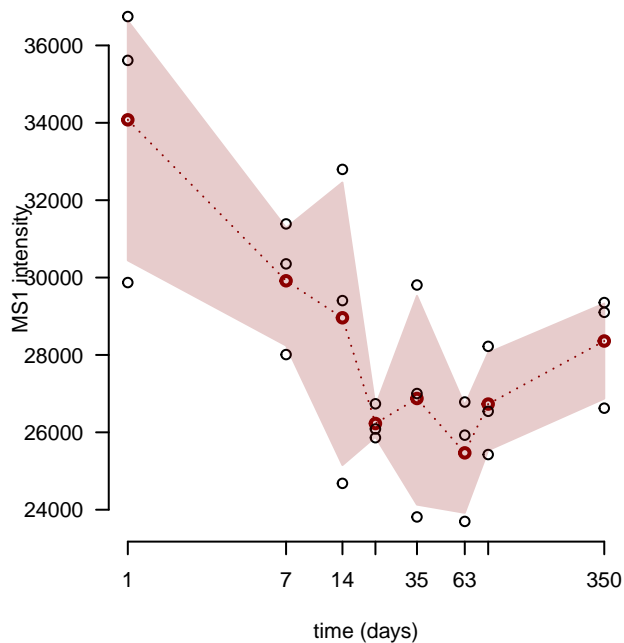

**Q9D2V8**  
GN=Mfsd10  
major facilitator superfamily domain con ...

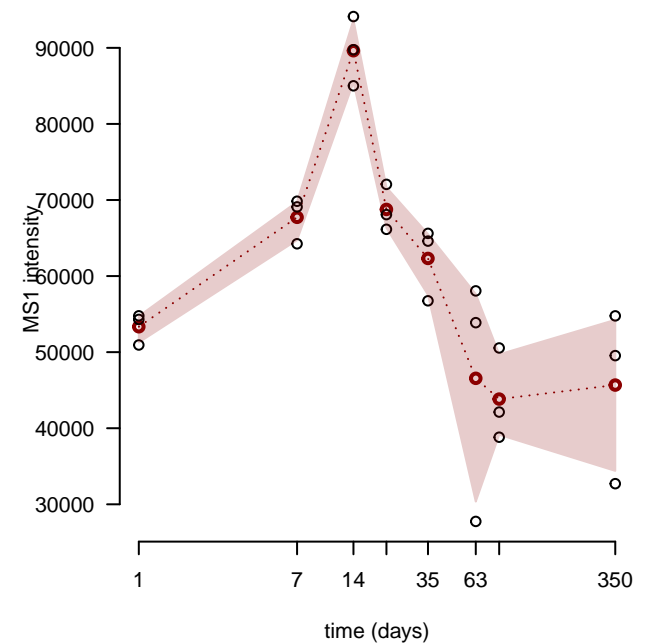

**Q9D2X5**  
**GN=Mau2**

MAU2 sister chromatid cohesion factor

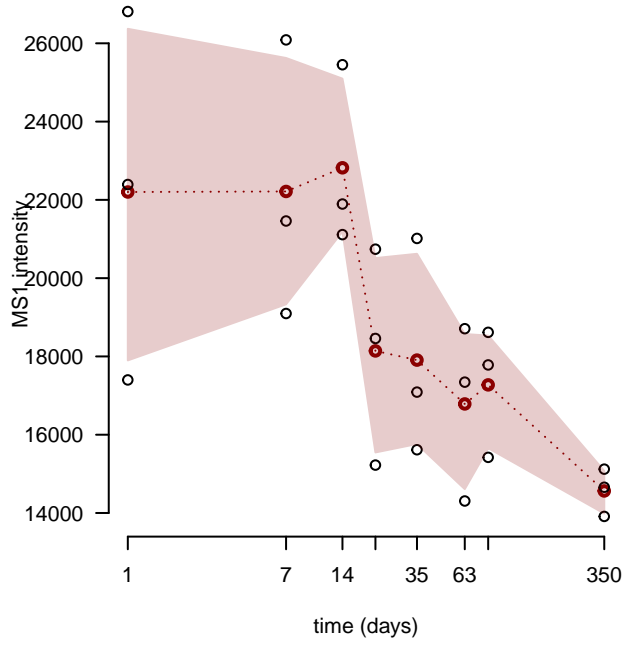

**Q9D2X5**  
**GN=Mau2**

MAU2 sister chromatid cohesion factor

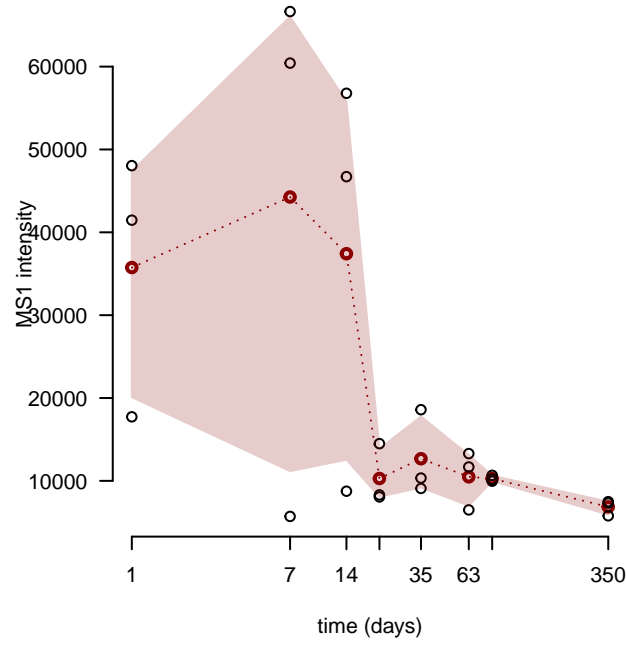

**Q9D2Y4**  
**GN=Mik1**

mixed lineage kinase domain-like

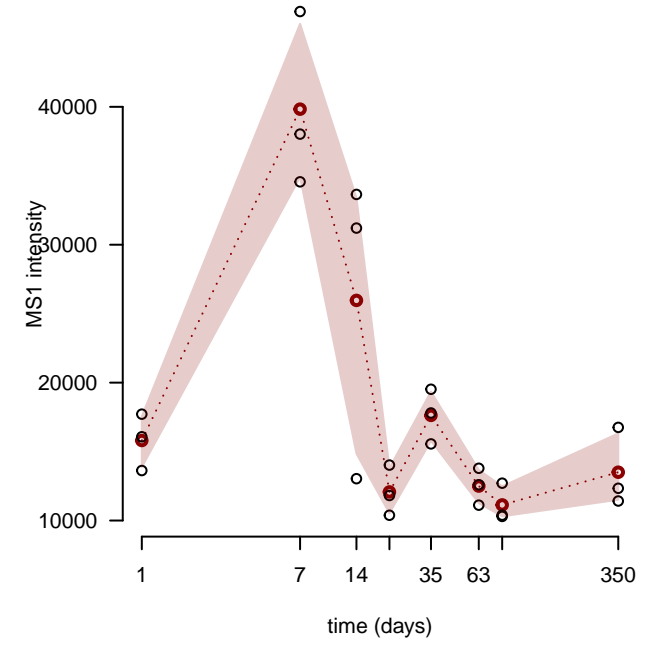

**Q9D2Z4**  
**GN=Senp8**

SUMO peptidase family member, NEDD8 spec ...

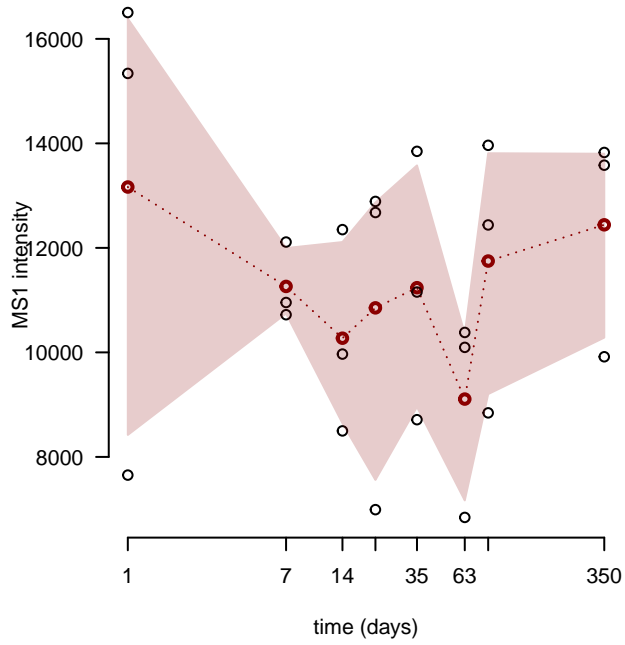

**Q9D312**  
**GN=Krt20**

keratin 20

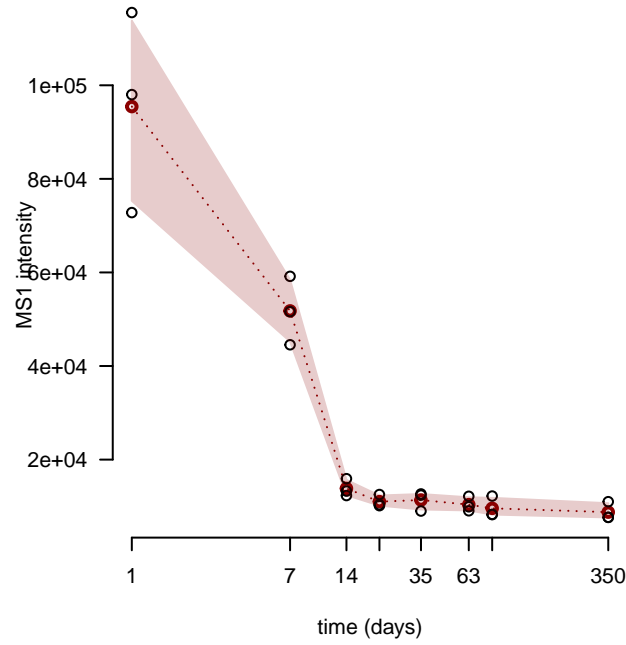

**Q9D328**  
**GN=Tmem35a**

transmembrane protein 35A

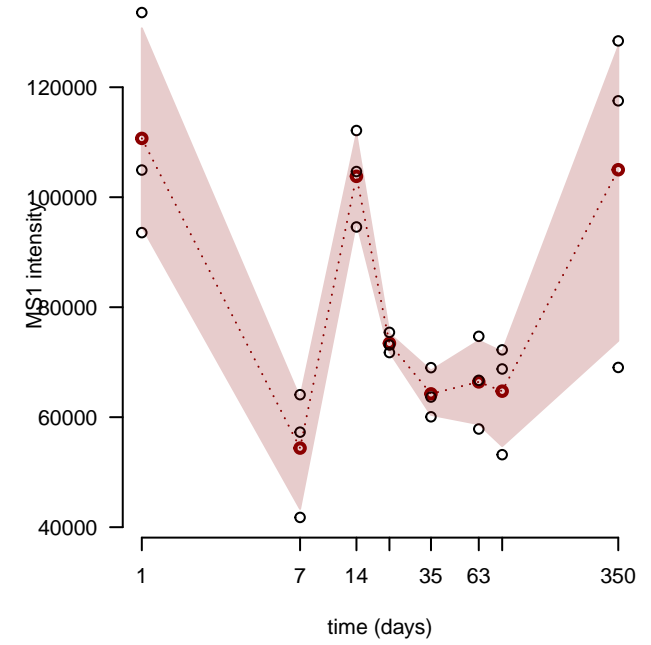

**Q9D338**  
**GN=Mrpl19**

mitochondrial ribosomal protein L19

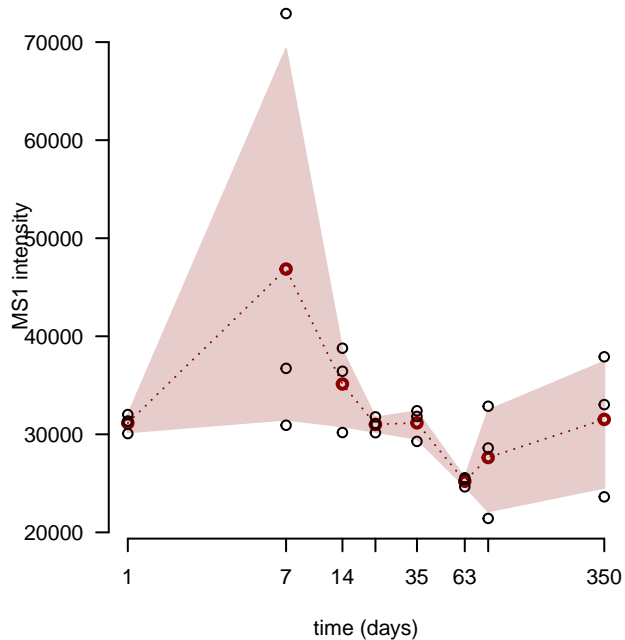

**Q9D358**  
**GN=Acp1**

acid phosphatase 1, soluble

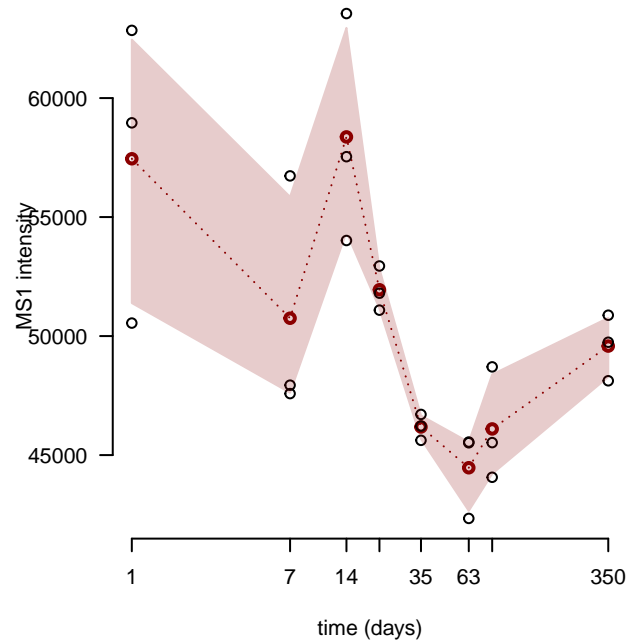

**Q9D361**  
**GN=Snrnp48**

small nuclear ribonucleoprotein 48 (U11/ ...

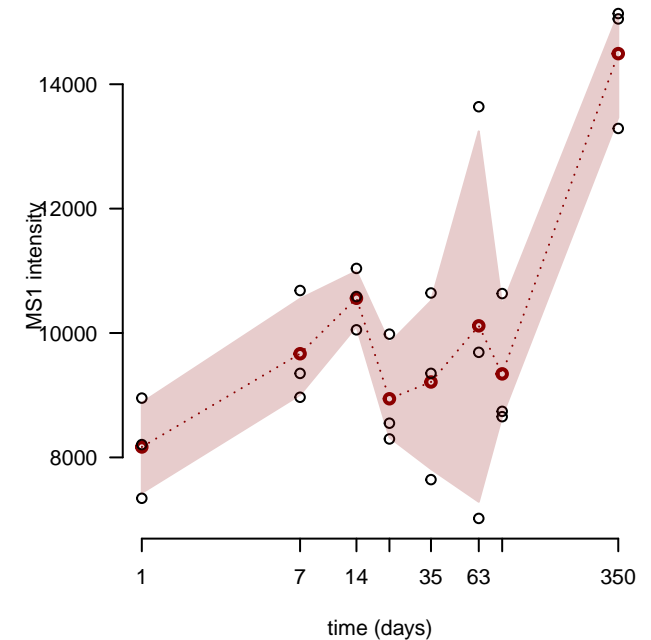

**Q9D379**  
**GN=Ephx1**

epoxide hydrolase 1, microsomal

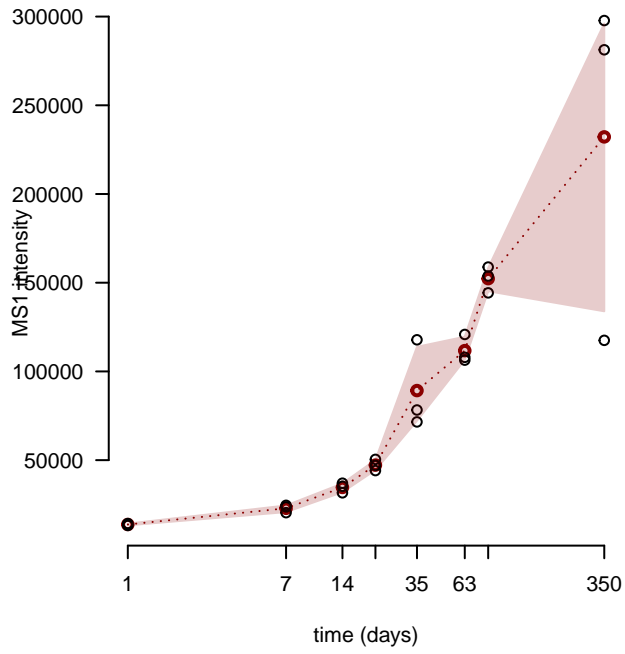

**Q9D384**  
**GN=Snrnp35**

small nuclear ribonucleoprotein 35 (U11/ ...

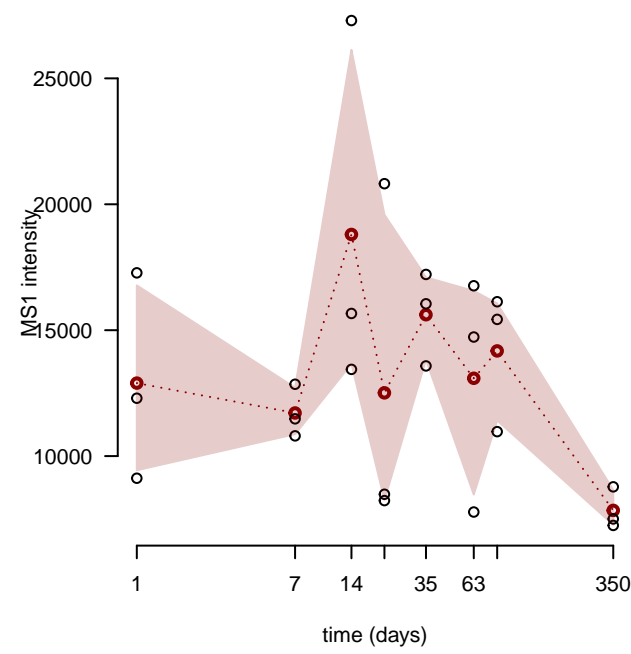

**Q9D385**  
**GN=Arl2bp**

ADP-ribosylation factor-like 2 binding p ...

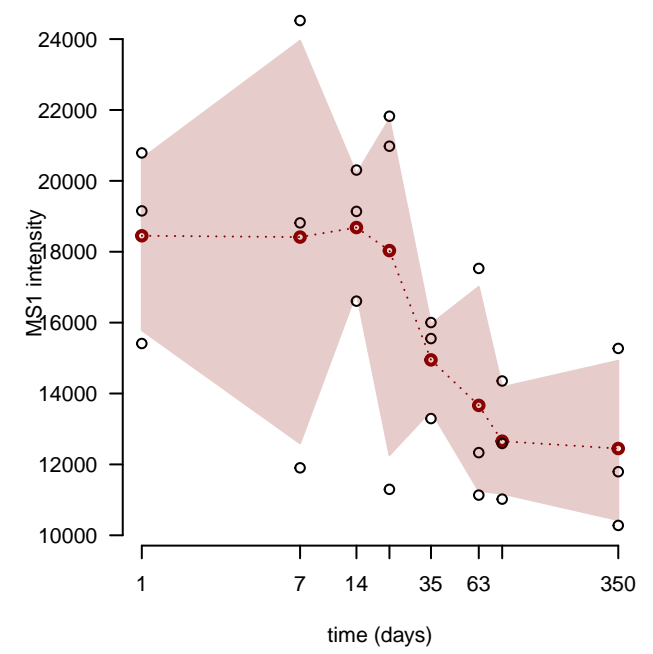

**Q9D394**  
**GN=Rufy3**

RUN and FYVE domain containing 3

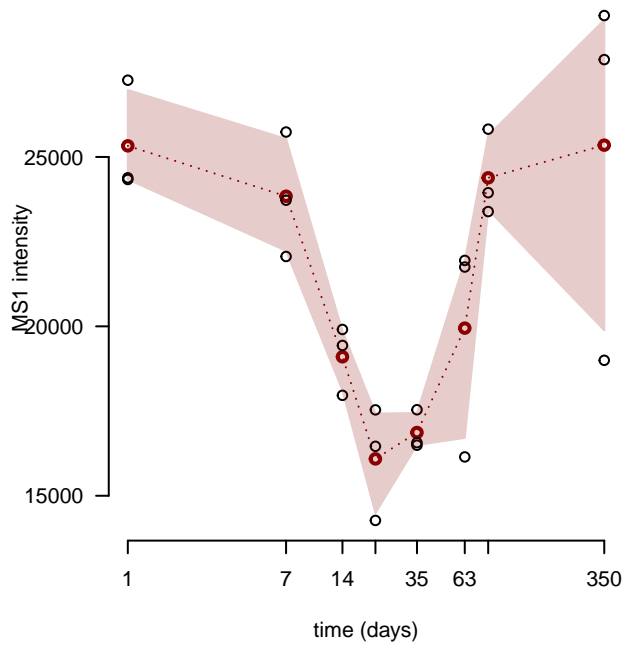

**Q9D3A8**  
**GN=Nos1ap**

nitric oxide synthase 1 (neuronal) adapt ...

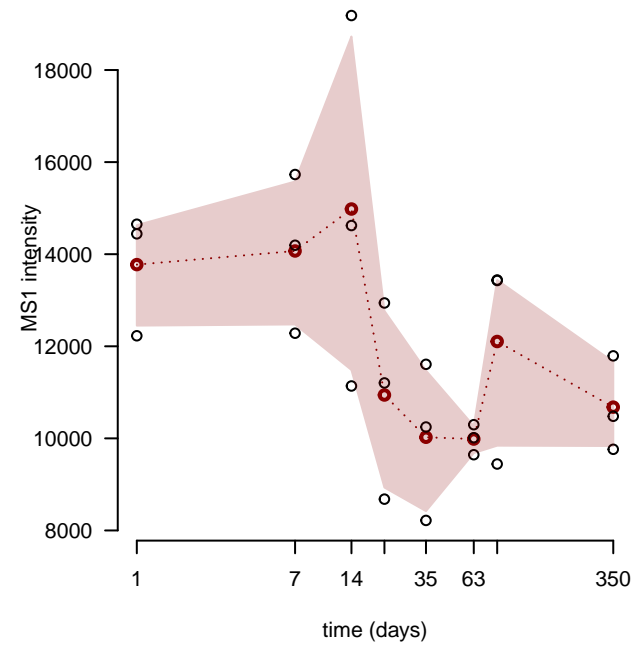

**Q9D3B1**  
**GN=Hacd2**

3-hydroxyacyl-CoA dehydratase 2

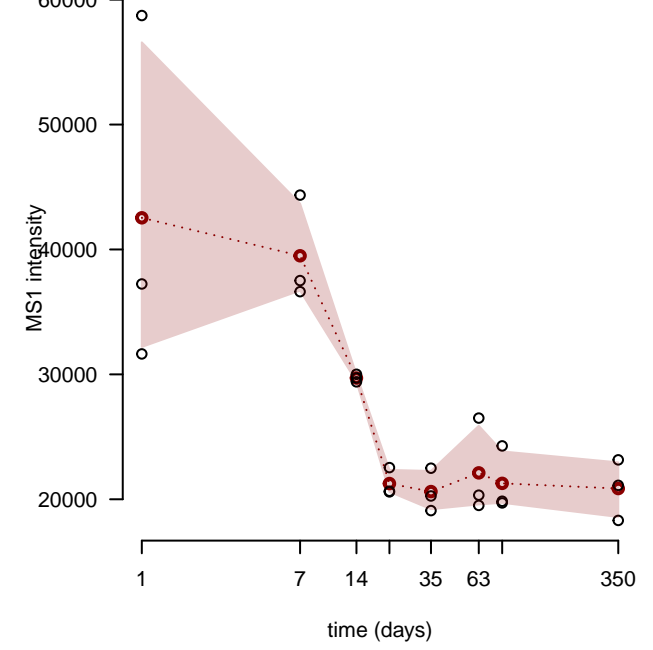

**Q9D3D0**  
**GN=Ttpal**

tocopherol (alpha) transfer protein-like

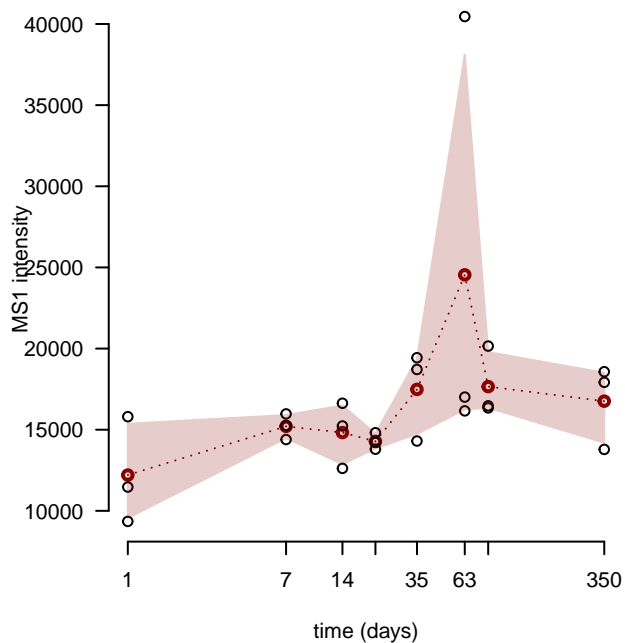

**Q9D3D9**  
**GN=Atp5f1d**

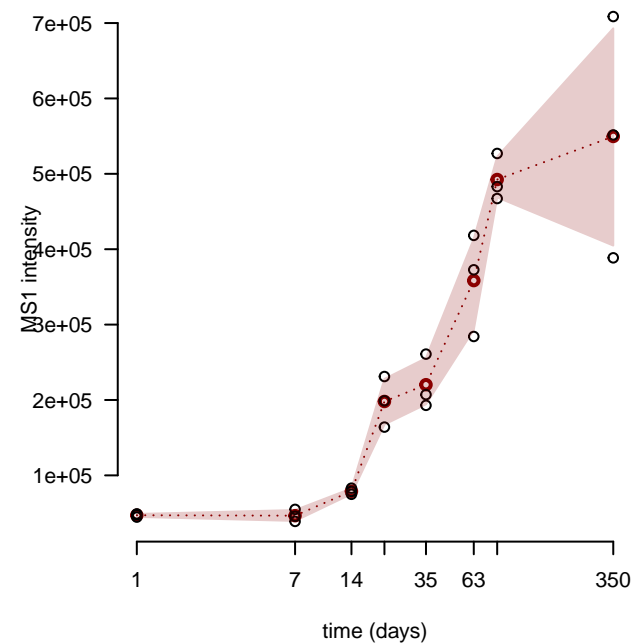

**Q9D3E6**  
**GN=Stag1**

stromal antigen 1

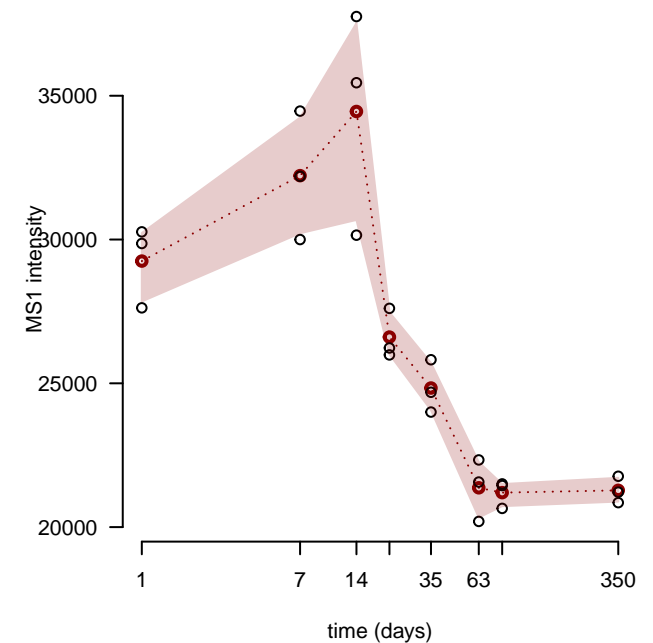

**Q9D3G5**  
GN=Stx11  
syntaxin 11

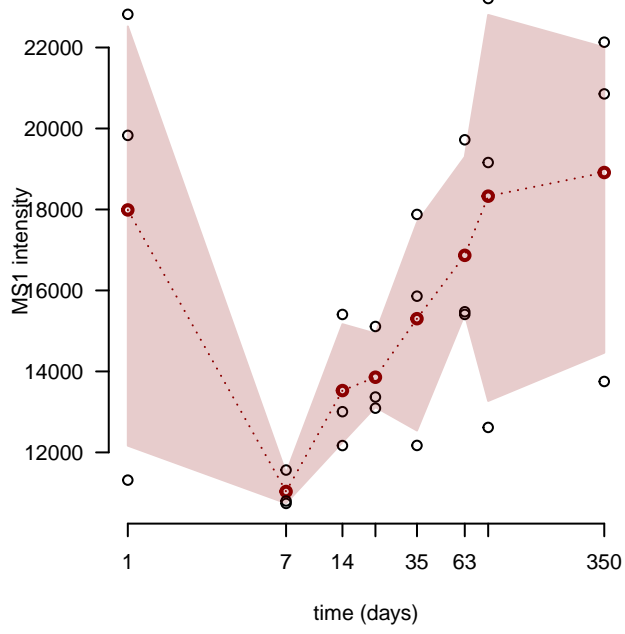

**Q9D3L0**  
GN=Fam174a  
family with sequence similarity 174, mem ...

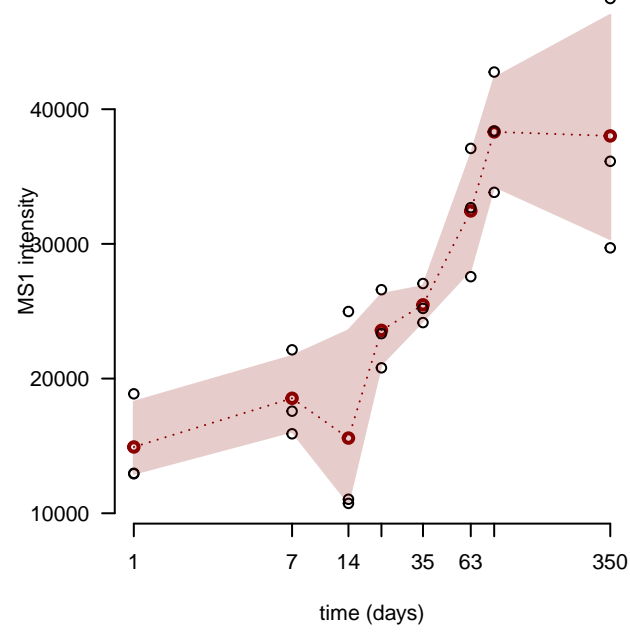

**Q9D3P8**  
GN=Plgrkt  
plasminogen receptor, C-terminal lysine ...

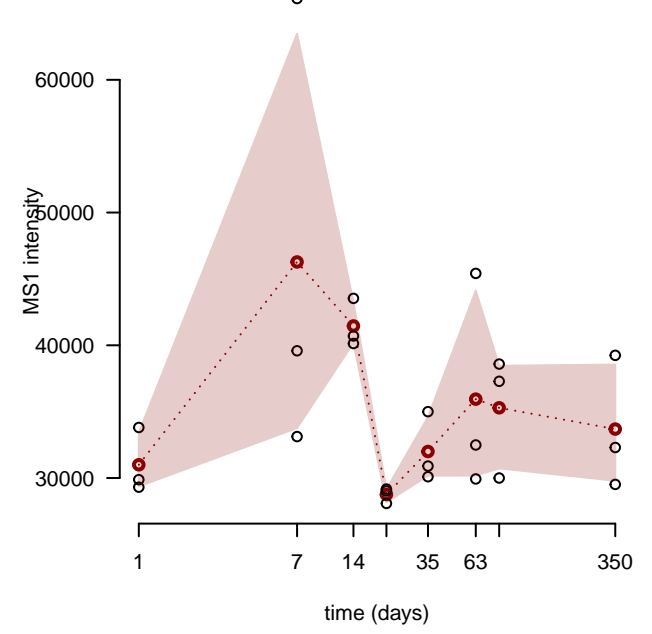

**Q9D3R3**  
GN=Cep72  
centrosomal protein 72

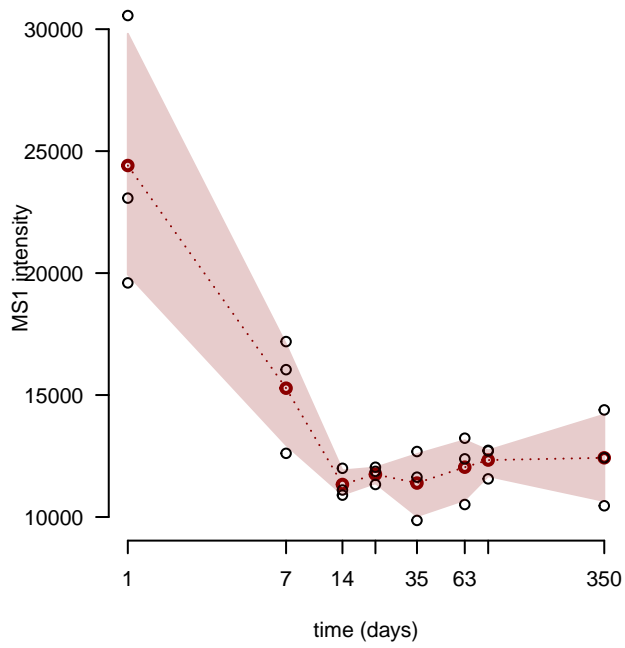

**Q9D3R6**  
GN=Katnal2  
katanin p60 subunit A-like 2

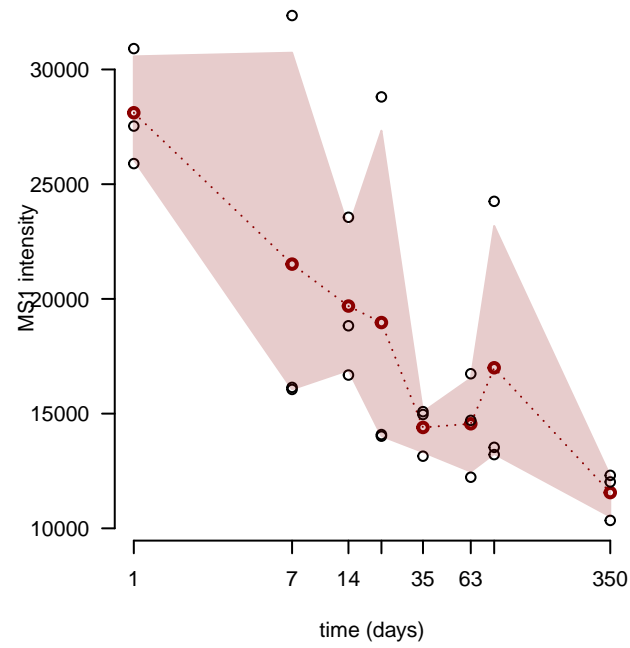

**Q9D3S3**  
GN=Snx29  
sorting nexin 29

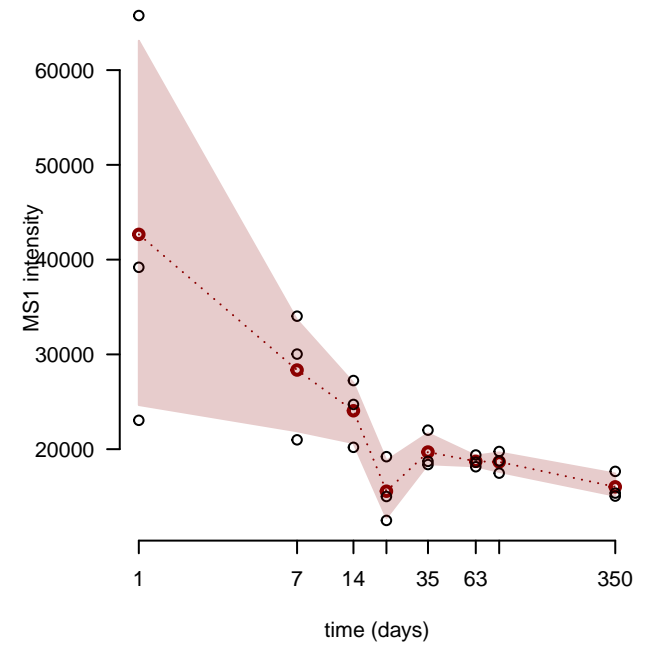

**Q9D3U0**  
GN=Pus10  
pseudouridylate synthase 10

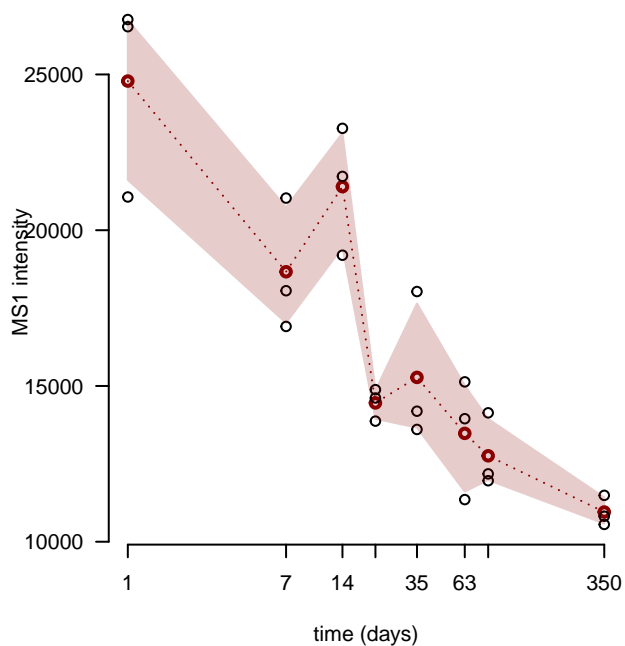

**Q9D3W4**  
GN=Gpn3  
GPN-loop GTPase 3

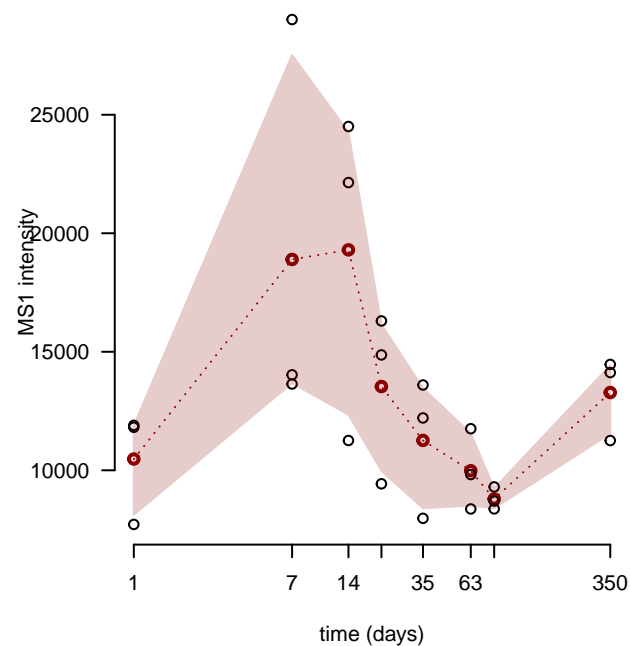

**Q9D404**  
GN=Oxsm  
3-oxoacyl-ACP synthase, mitochondrial

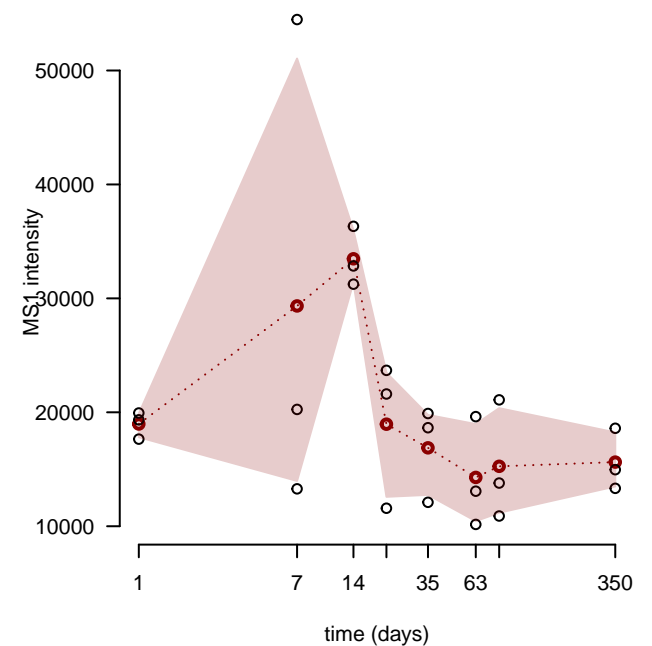

**Q9D415**  
GN=Dlgap1  
DLG associated protein 1

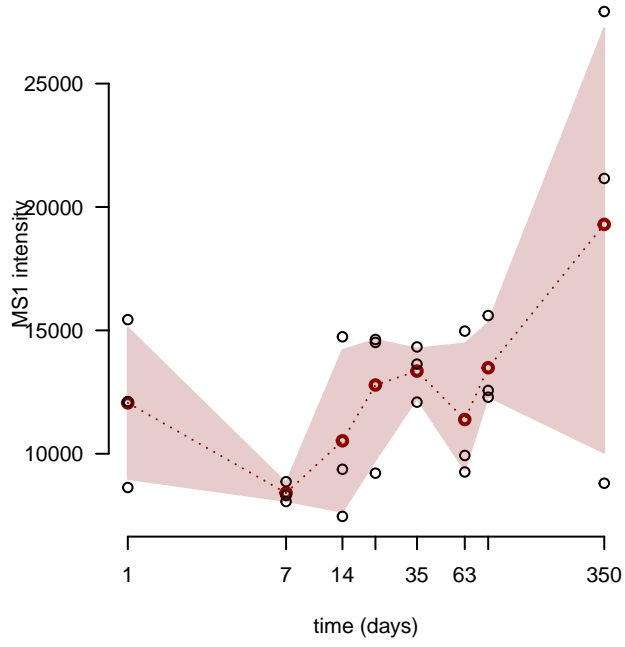

**Q9D479**  
GN=Uvssa  
UV stimulated scaffold protein A

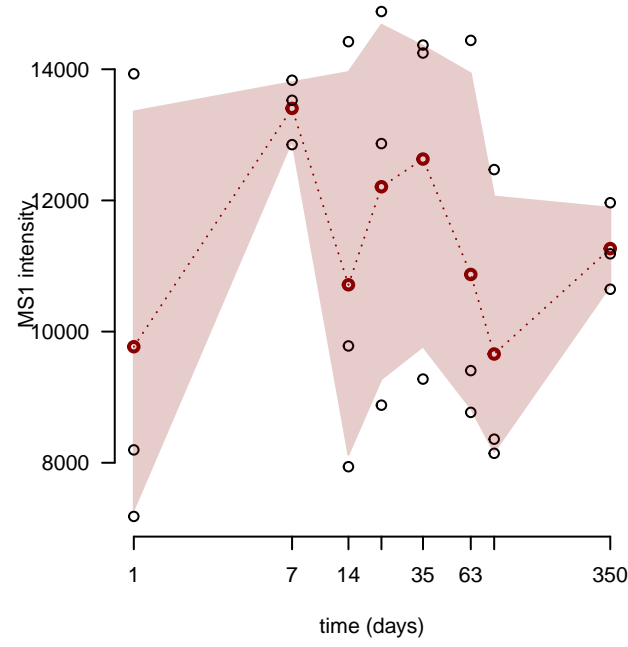

**Q9D483**  
GN=Polr3c  
polymerase (RNA) III (DNA directed) poly ...

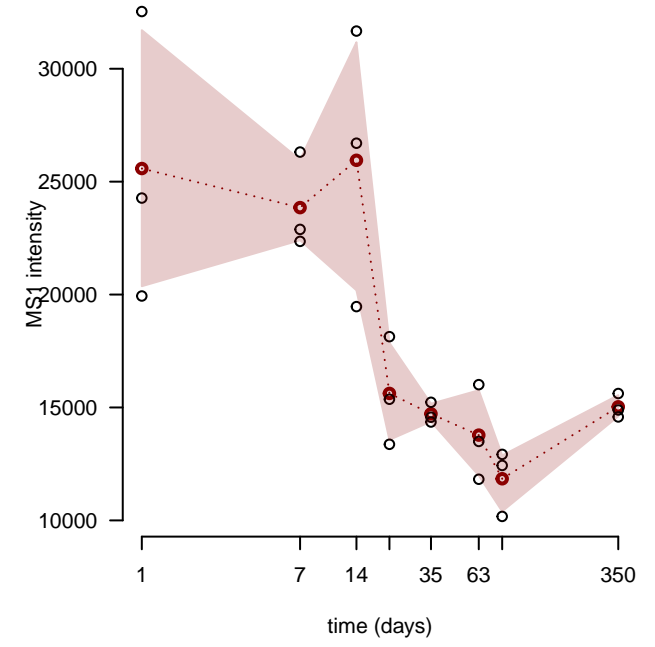

**Q9D4D4**  
GN=Tkt12  
transketolase-like 2

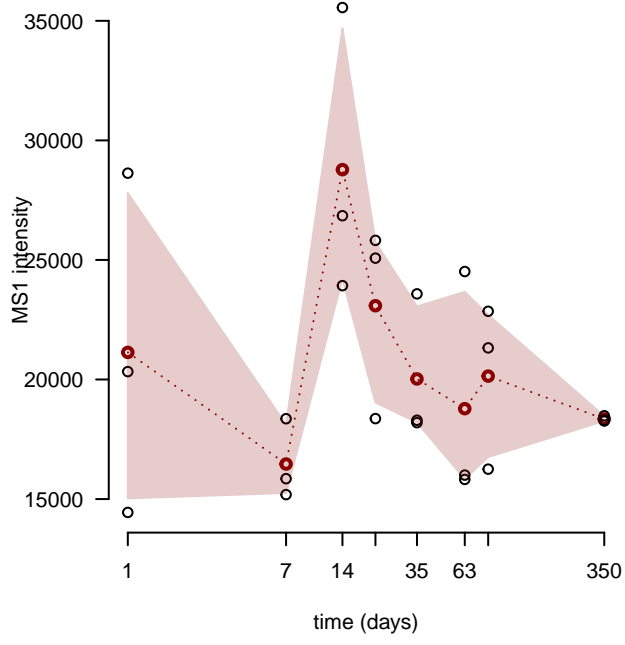

**Q9D4F2**  
GN=Plpp6  
phospholipid phosphatase 6

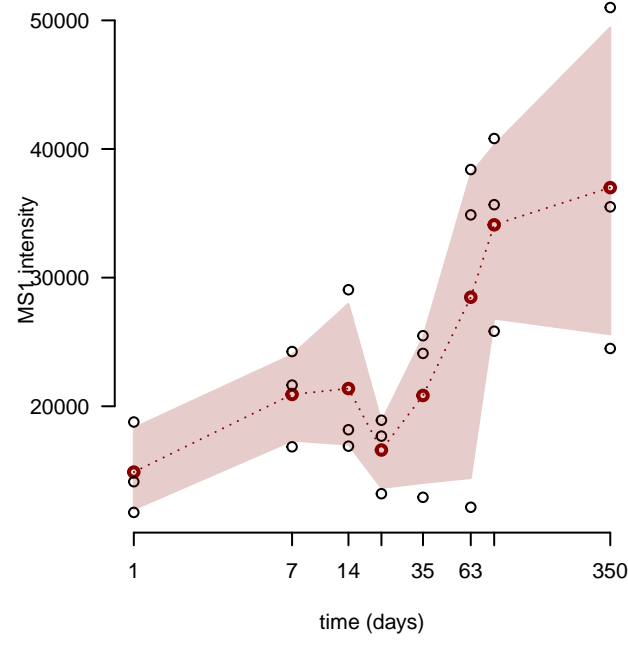

**Q9D4F8**  
GN=Tubgcp4  
tubulin, gamma complex associated protei ...

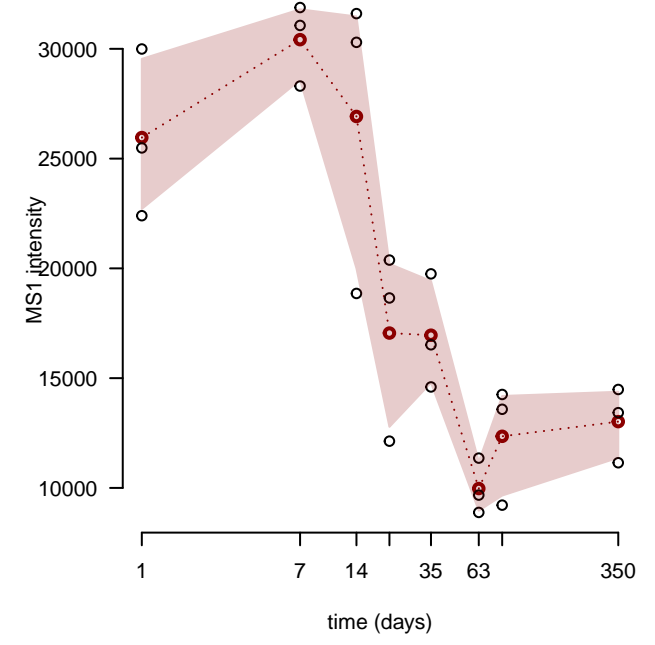

**Q9D4H1**  
GN=Exoc2  
exocyst complex component 2

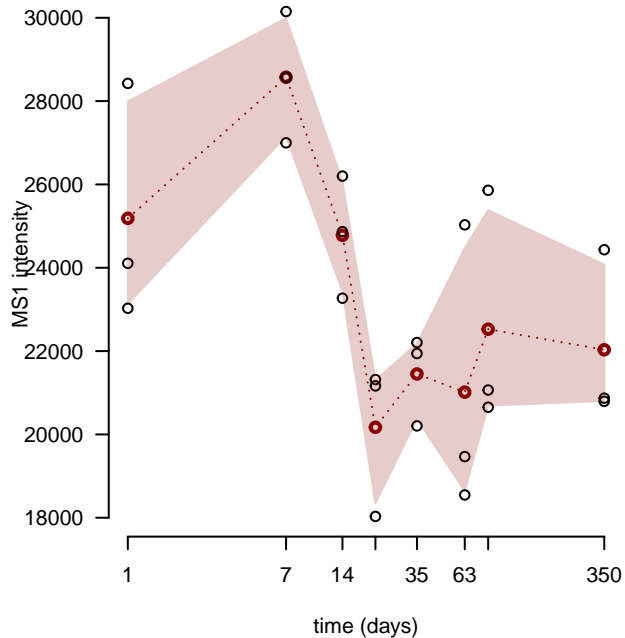

**Q9D4H2**  
GN=Gcc1  
golgi coiled coil 1

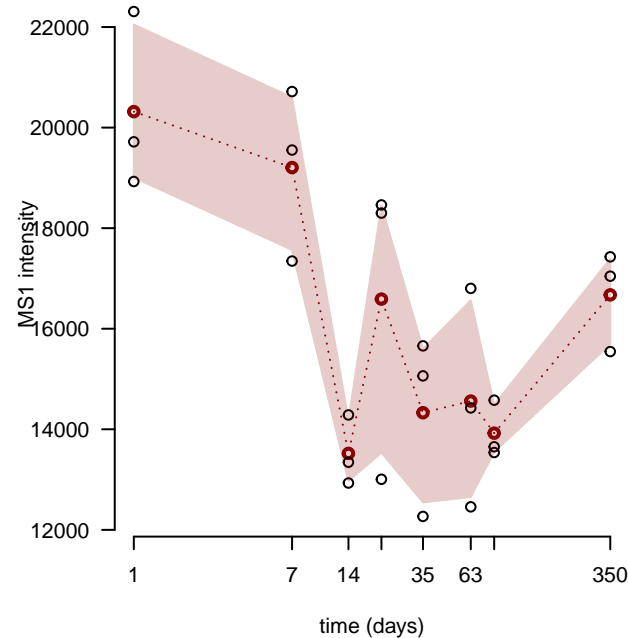

**Q9D4H8**  
GN=Cul2  
cullin 2

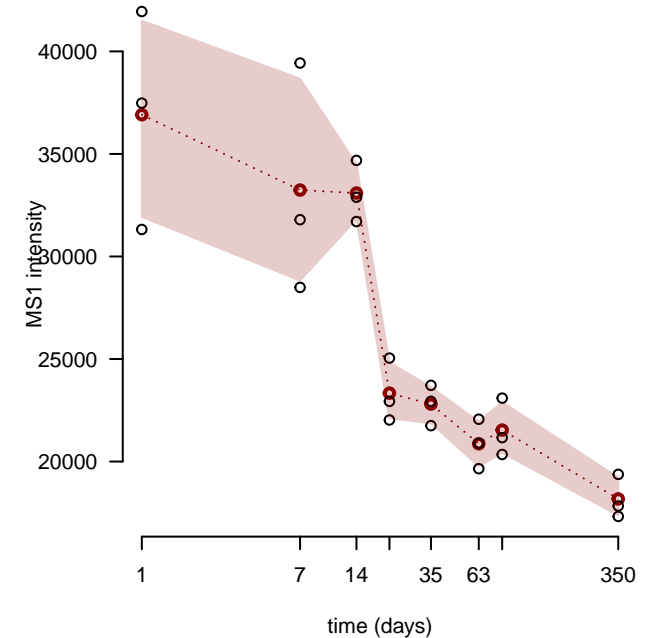

**Q9D4H9**  
**GN=Phf14**  
PHD finger protein 14

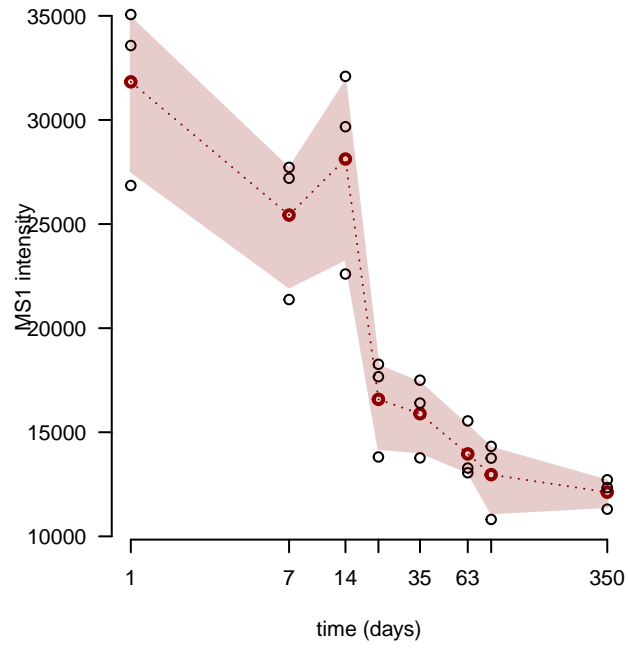

**Q9D4J1**  
**GN=Efhd1**  
EF hand domain containing 1

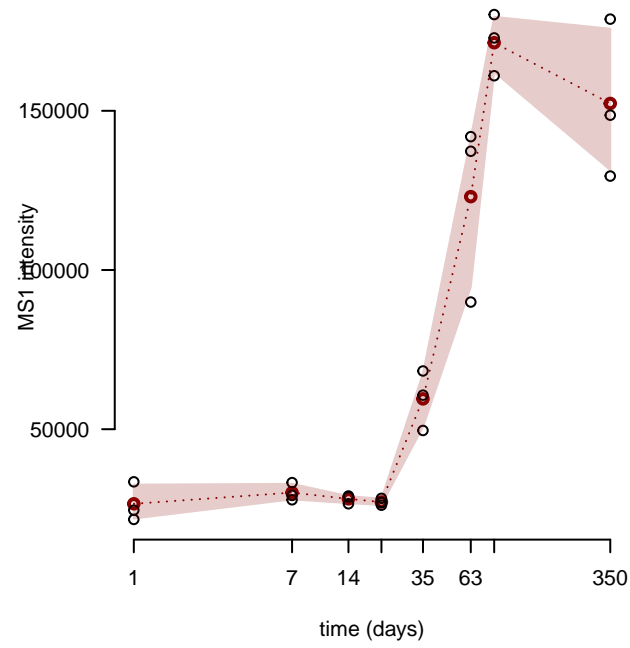

**Q9D4J7**  
**GN=Phf6**  
PHD finger protein 6

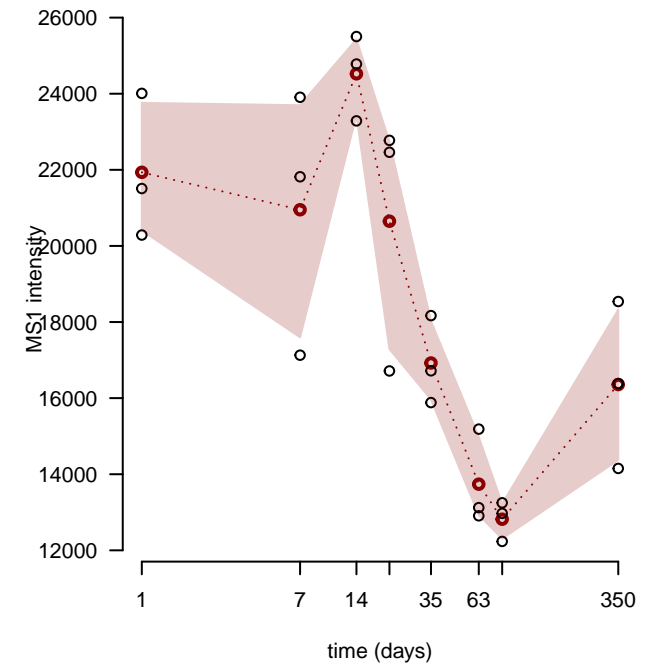

**Q9D4P0**  
**GN=Arl5b**  
ADP-ribosylation factor-like 5B

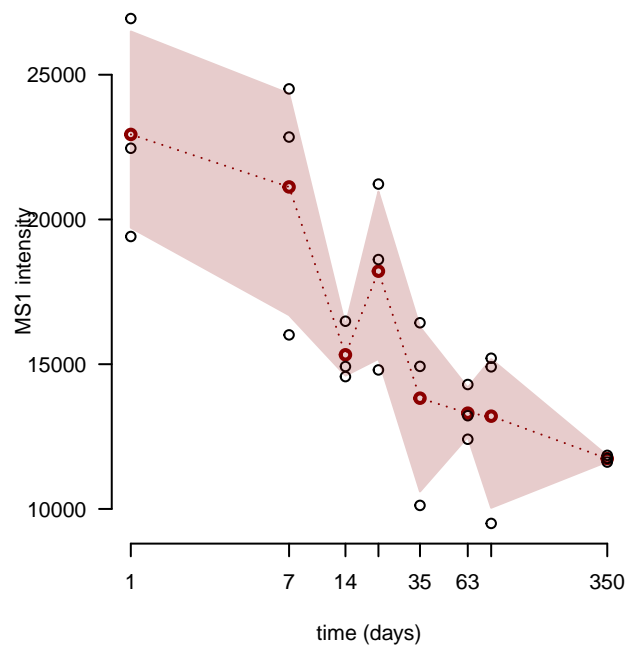

**Q9D4V0**  
**GN=Etnk1**  
ethanolamine kinase 1

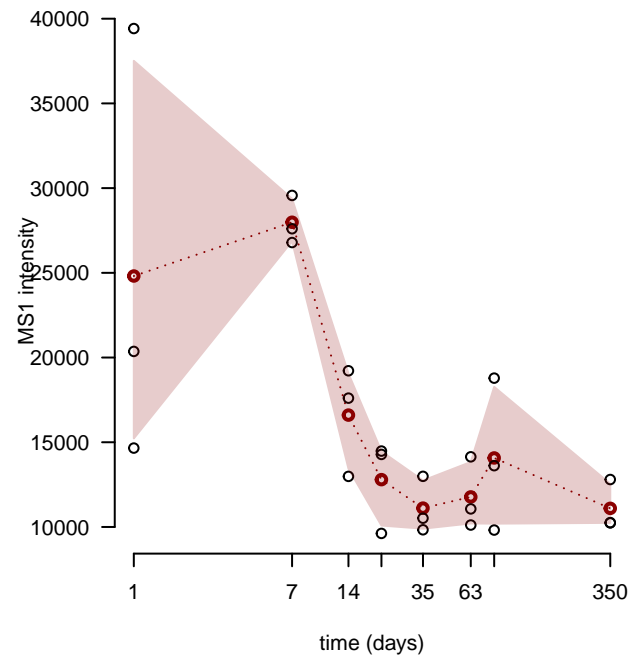

**Q9D4V7**  
**GN=Rab13**  
RAB, member RAS oncogene family-like 3

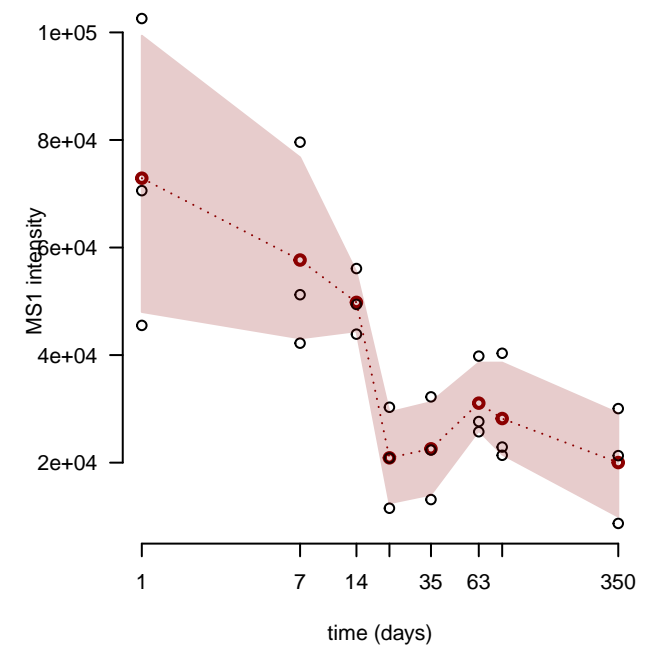

**Q9D516**  
**GN=Ccdc130**  
coiled-coil domain containing 130

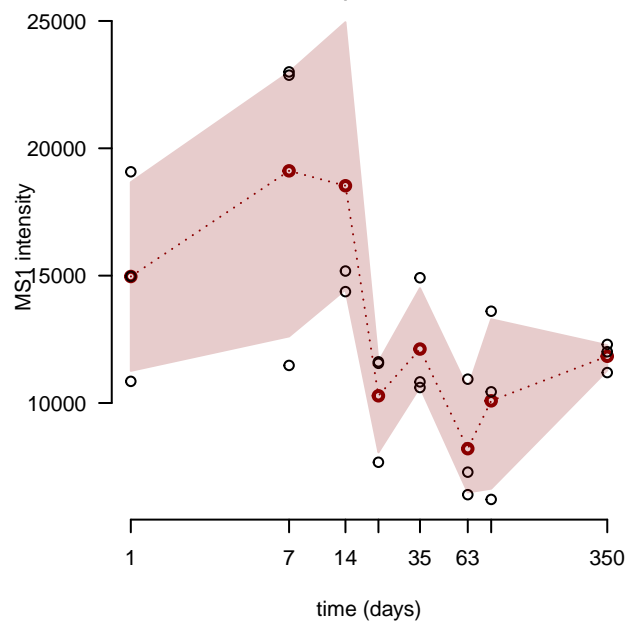

**Q9D517**  
**GN=Agpat3**  
1-acylglycerol-3-phosphate O-acyltransfe ...

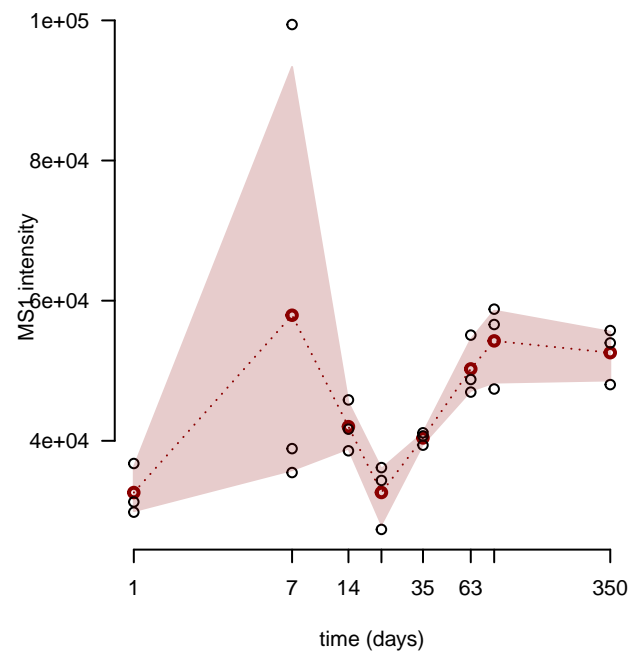

**Q9D531**  
**GN=Nxn12**  
nucleoredoxin-like 2

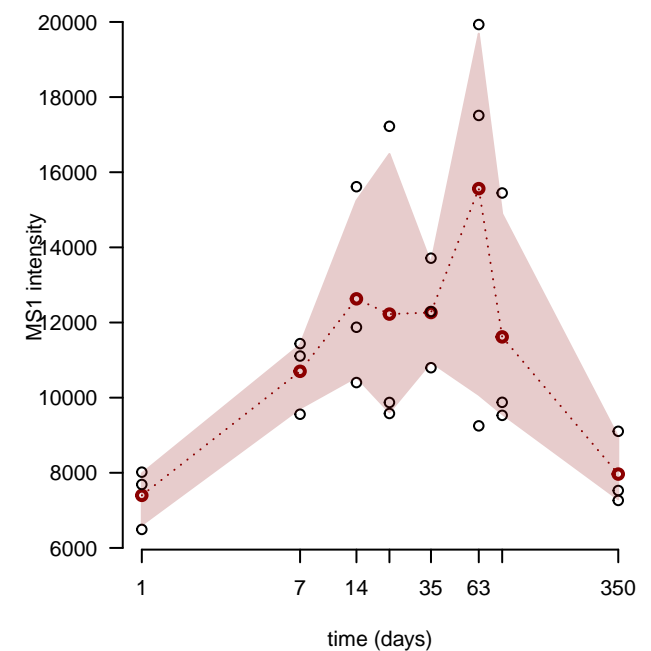

**Q9D554**  
**GN=Sf3a3**  
splicing factor 3a, subunit 3

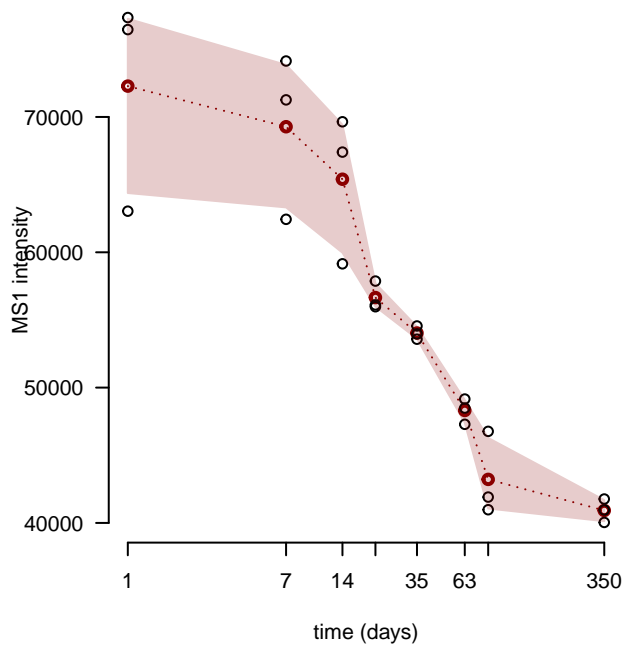

**Q9D5D8**  
**GN=Cdyl2**  
chromodomain protein, Y chromosome-like ...

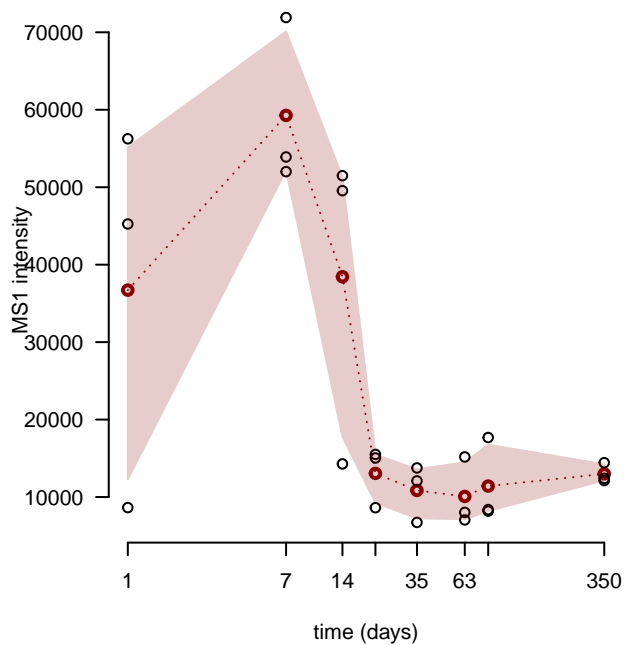

**Q9D5J6**  
**GN=Shpk**  
sedoheptulokinase

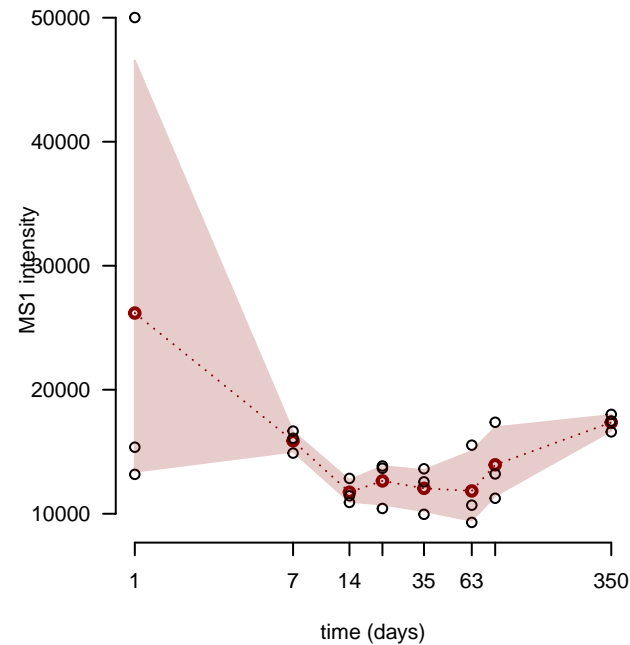

**Q9D5L7**  
**GN=Spsb1**  
spla/ryanodine receptor domain and SOCS ...

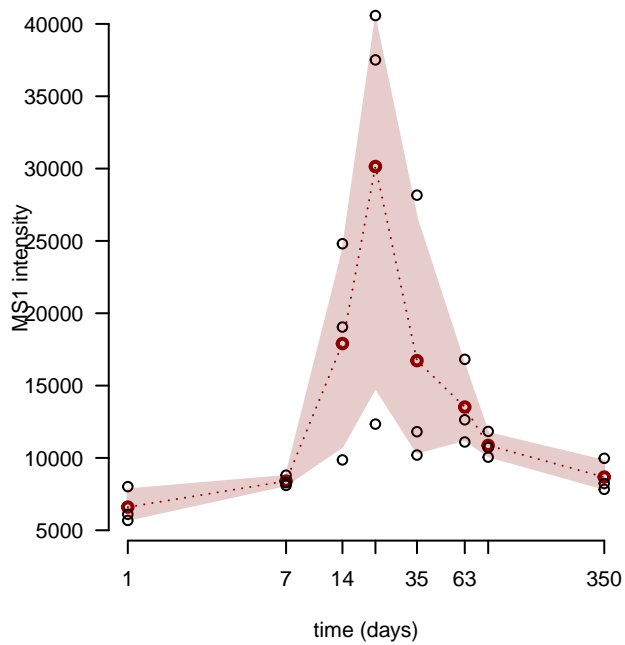

**Q9D5T0**  
**GN=Atad1**  
ATPase family, AAA domain containing 1

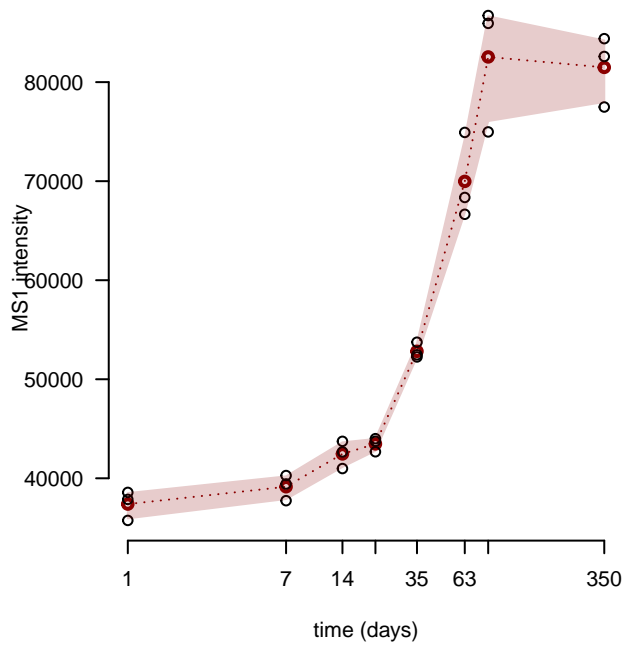

**Q9D5V5**  
**GN=Cul5**  
cullin 5

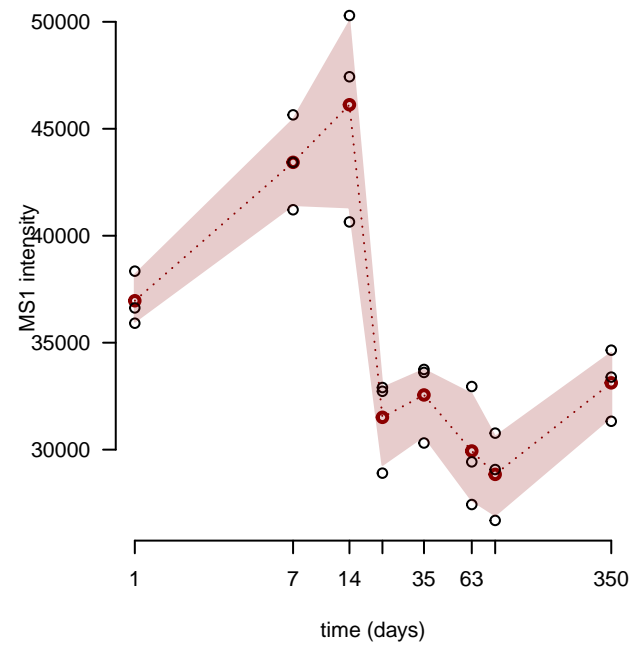

**Q9D5V6**  
**GN=Syap1**  
synapse associated protein 1

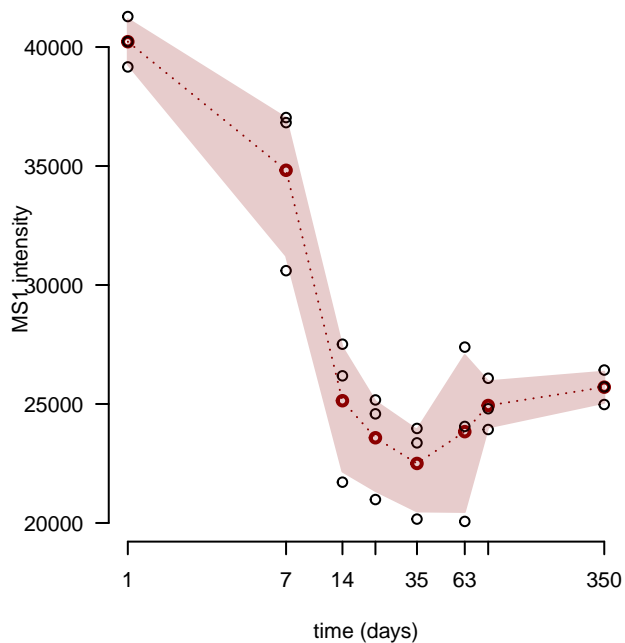

**Q9D600**  
**GN=Gins2**  
GINS complex subunit 2 (Psf2 homolog)

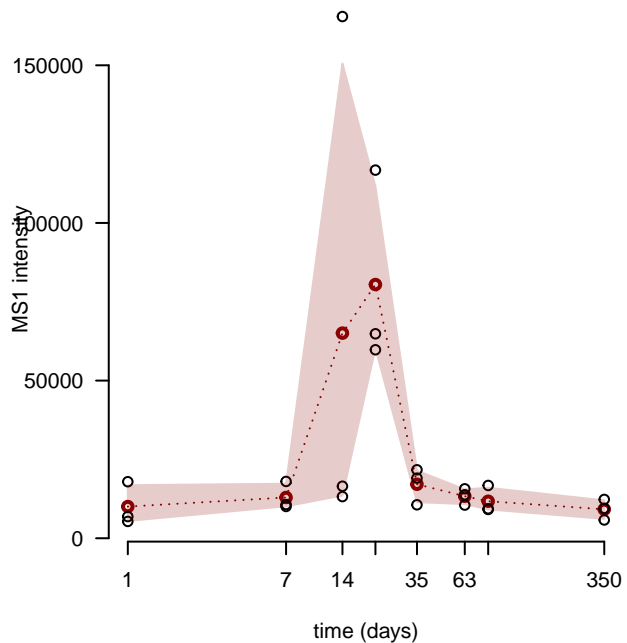

**Q9D620**  
**GN=Rab11fip1**  
RAB11 family interacting protein 1 (clas ...

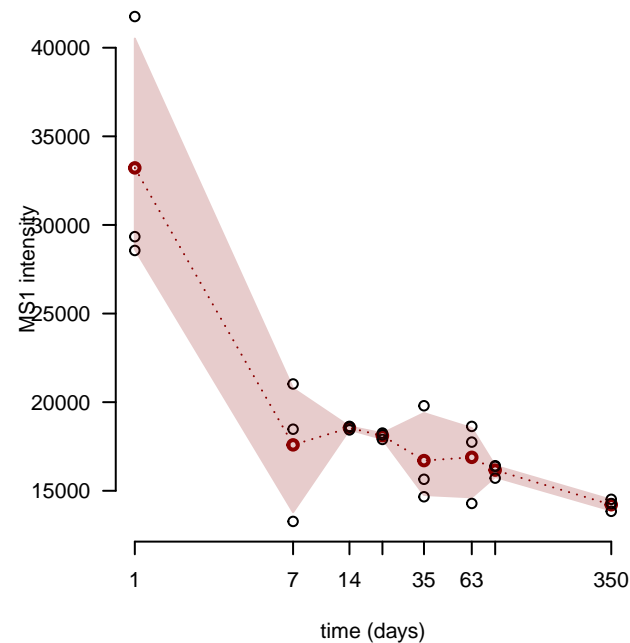



**Q9D646**  
**GN=Krt34**  
keratin 34

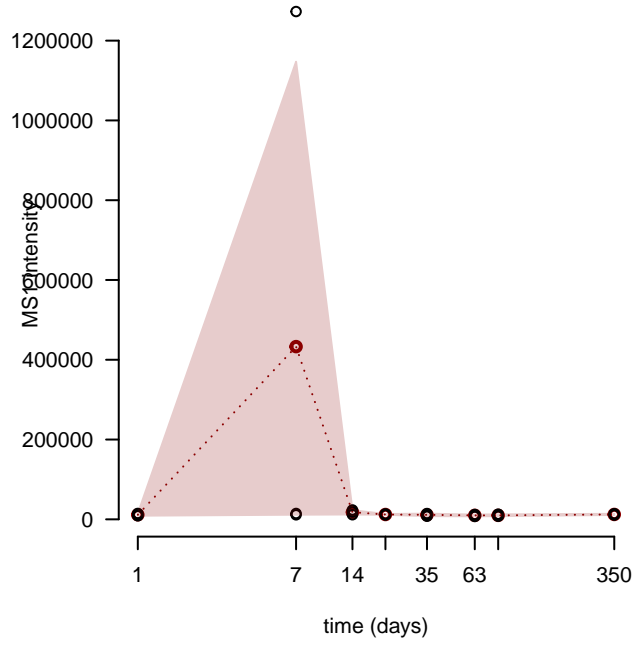

**Q9D662**  
**GN=Sec23b**  
SEC23 homolog B, COPII coat complex comp ...

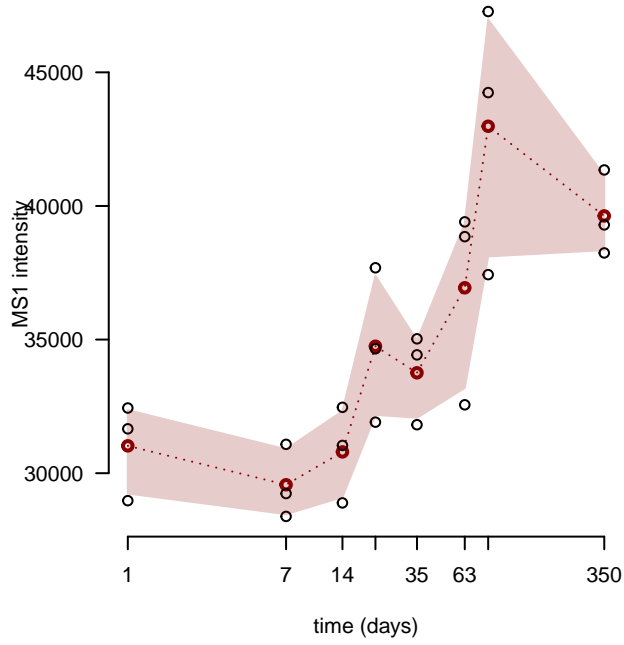

**Q9D666**  
**GN=Sun1**  
Sad1 and UNC84 domain containing 1

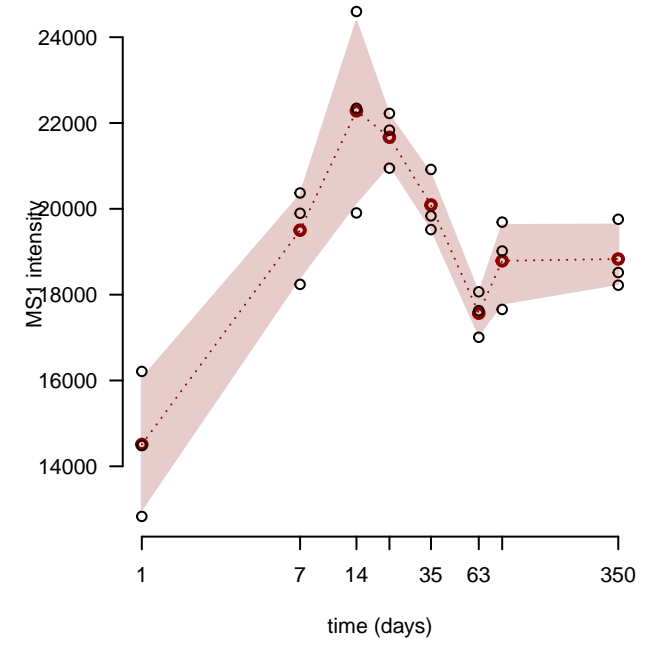

**Q9D668**  
**GN=Arrdc2**  
arrestin domain containing 2

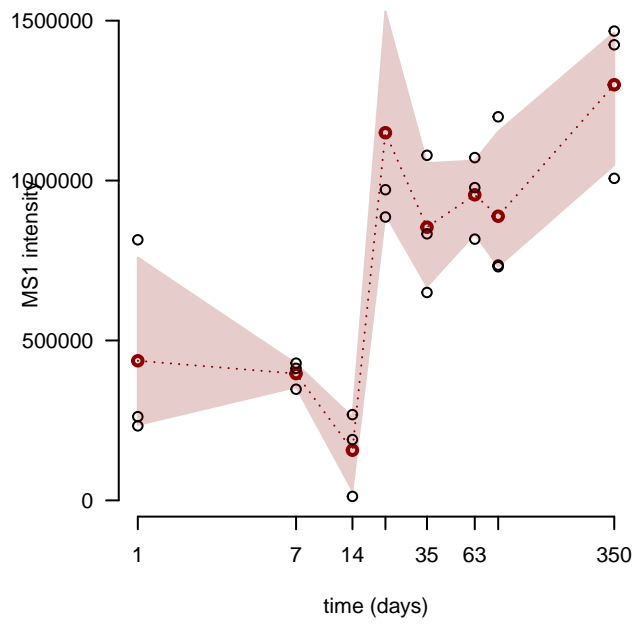

**Q9D684**  
**GN=Rin2**  
Ras and Rab interactor 2

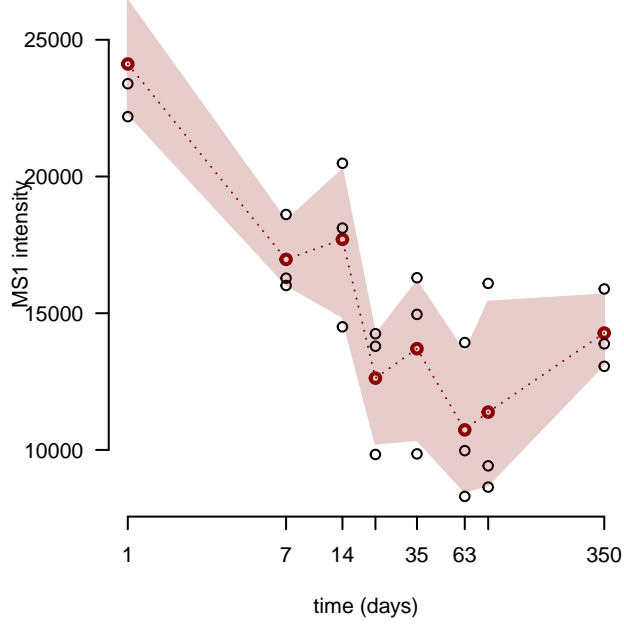

**Q9D6F9**  
**GN=Tubb4a**  
tubulin, beta 4A class IVA

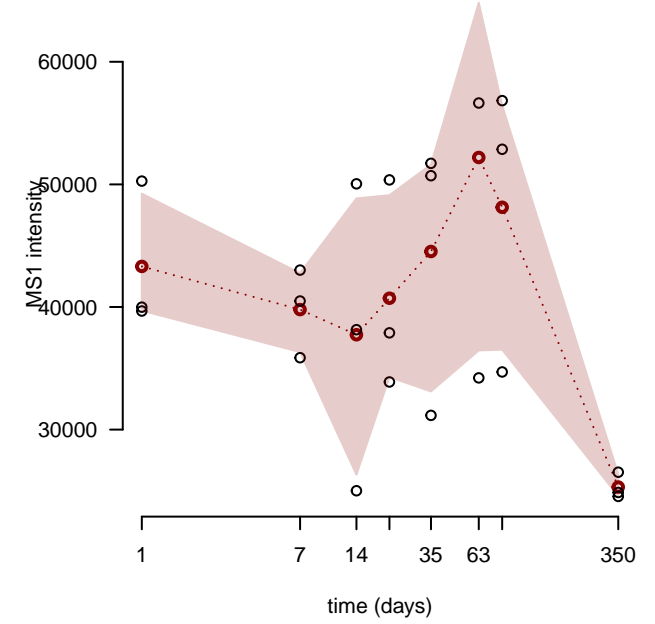

**Q9D6H2**  
**GN=Hspb11**  
heat shock protein family B (small), mem ...

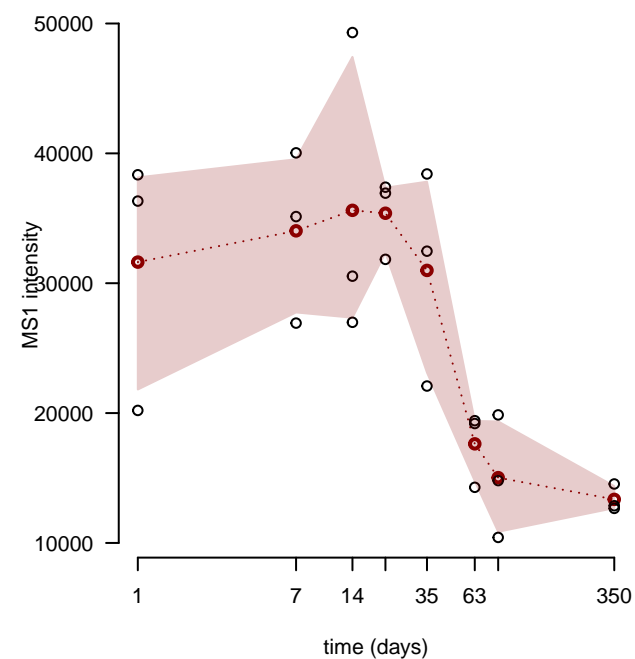

**Q9D6I7**  
**GN=Dipk1a**  
divergent protein kinase domain 1A

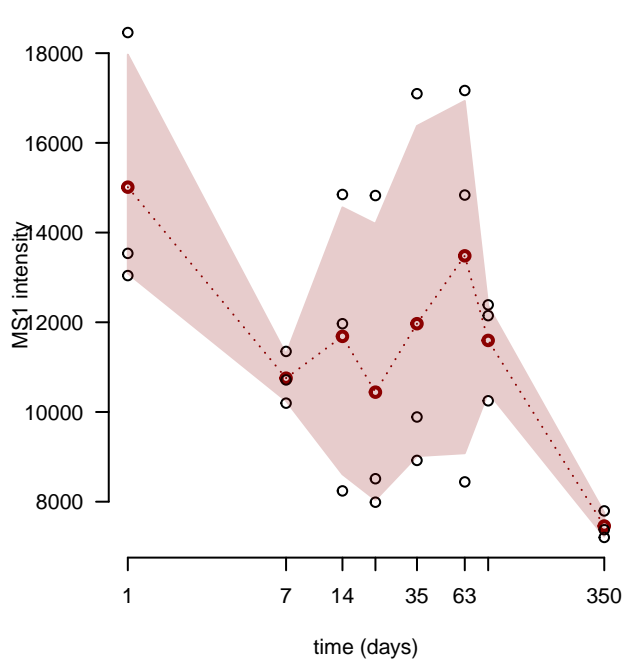

**Q9D6J1**  
**GN=Cers4**  
ceramide synthase 4

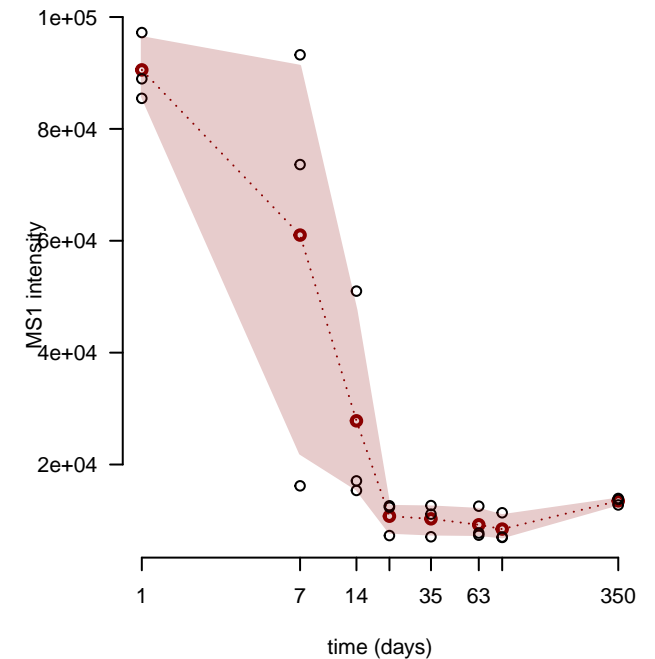

**Q9D6J3**  
**GN=Yju2**  
YJU2 splicing factor

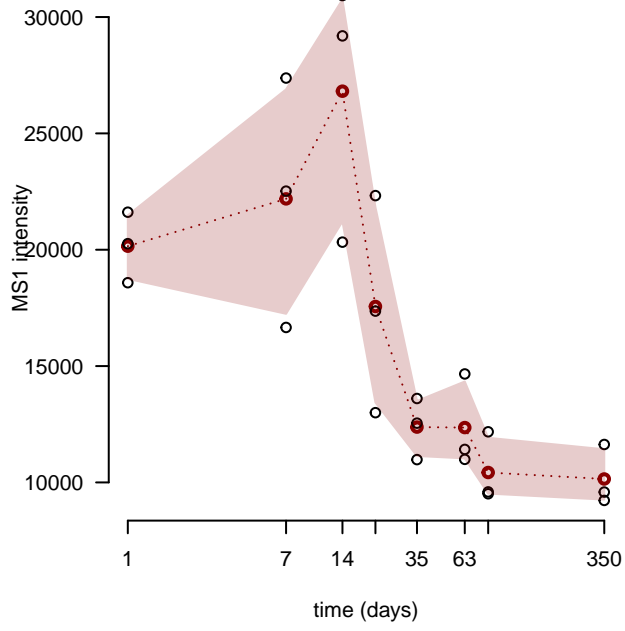

**Q9D6J5**  
**GN=Ndufb8**  
NADH:ubiquinone oxidoreductase subunit B ...

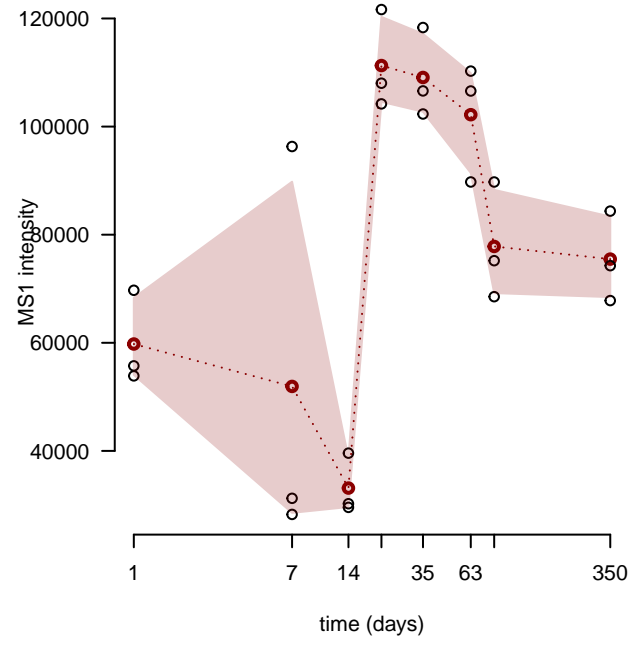

**Q9D6J6**  
**GN=Ndufv2**  
NADH:ubiquinone oxidoreductase core subu ...

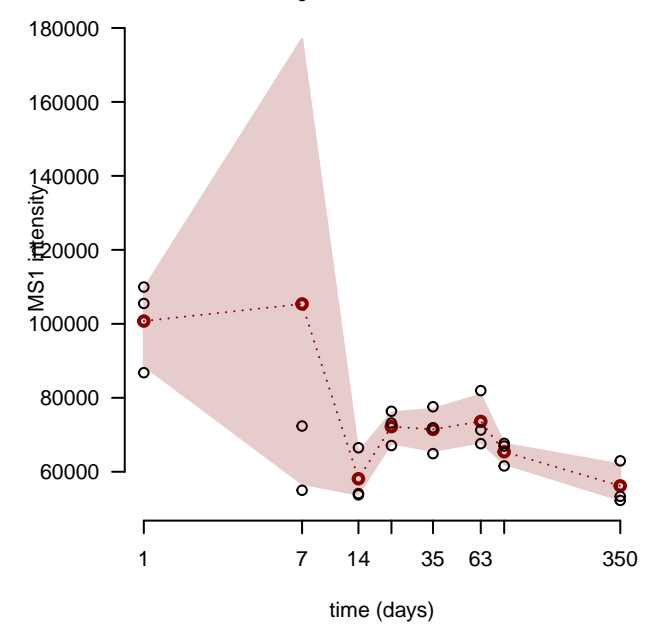

**Q9D6K5**  
**GN=Synj2bp**  
synaptojanin 2 binding protein

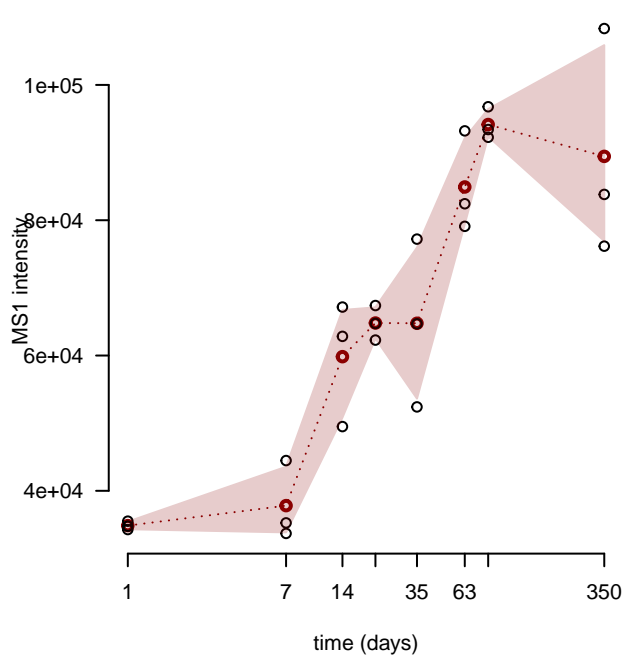

**Q9D6K7**  
**GN=Ttc33**  
tetratricopeptide repeat domain 33

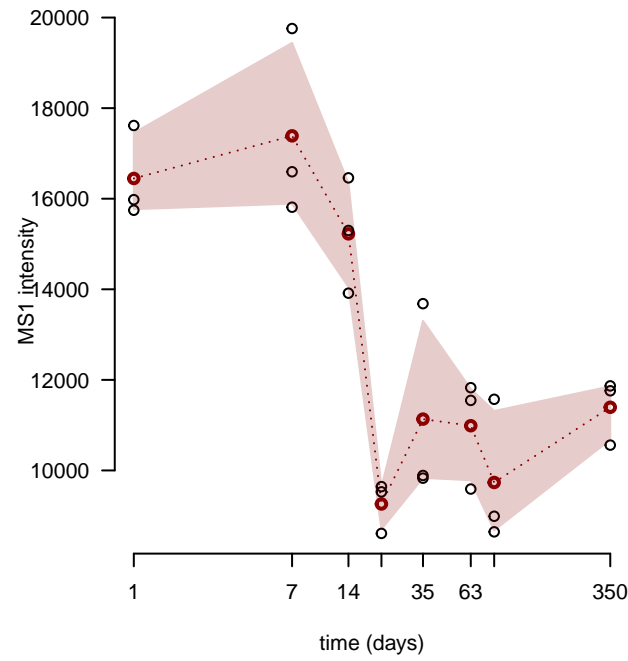

**Q9D6K8**  
**GN=Fundc2**  
FUN14 domain containing 2

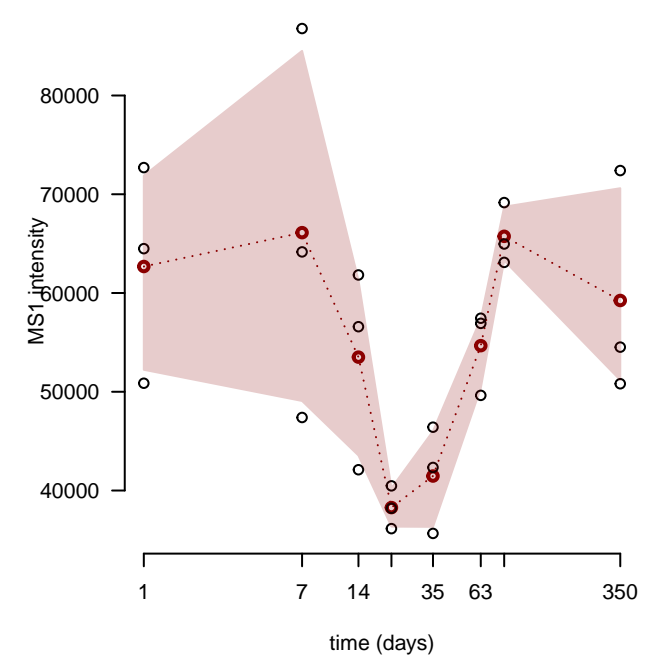

**Q9D6K9**  
**GN=Cers5**  
ceramide synthase 5

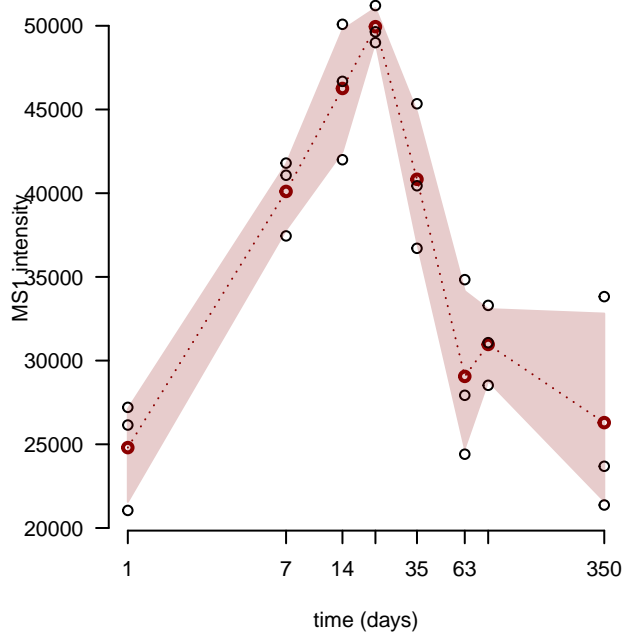

**Q9D6L8**  
**GN=Ppil3**  
peptidylprolyl isomerase (cyclophilin)-I ...

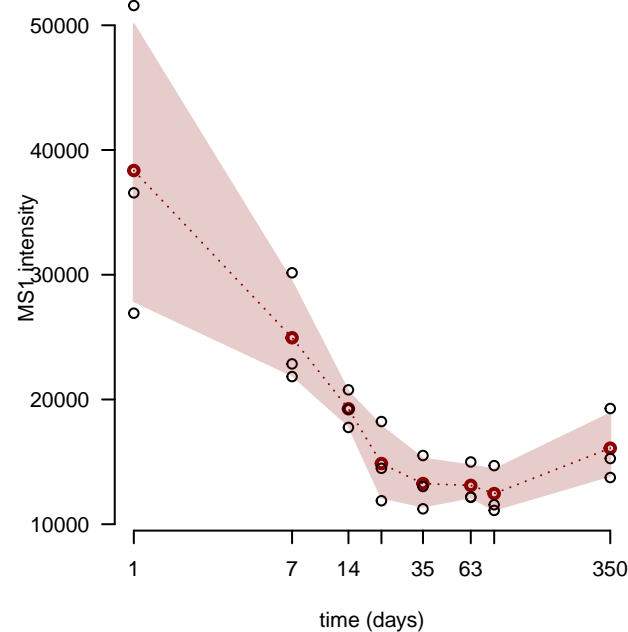

**Q9D6M3**  
**GN=Slc25a22**  
solute carrier family 25 (mitochondrial ...

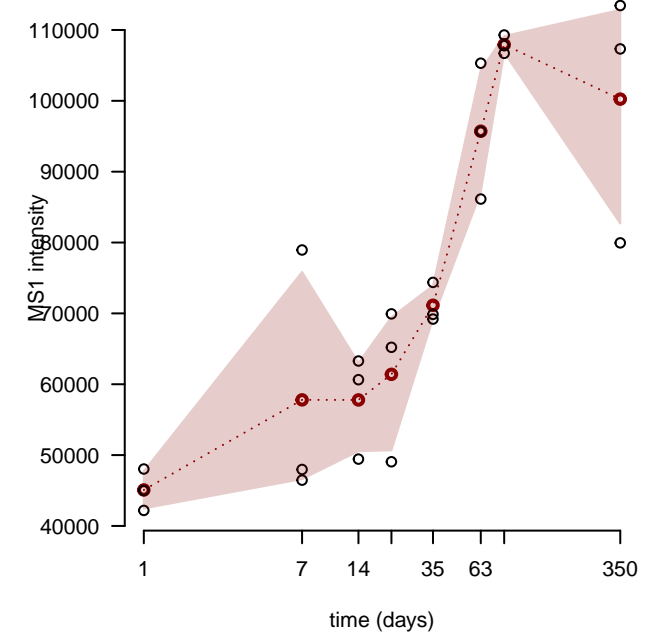

**Q9D6N1**  
GN=Ca13

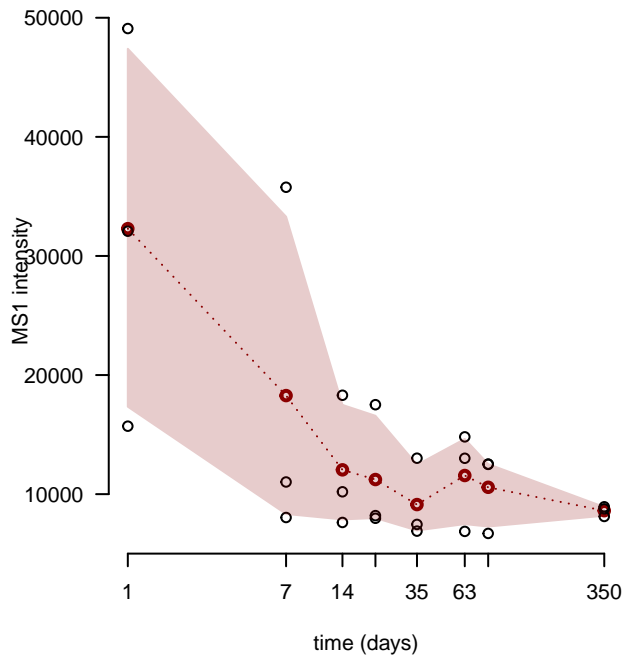

**Q9D6N5**  
GN=Drap1  
Dr1 associated protein 1 (negative cofac ...

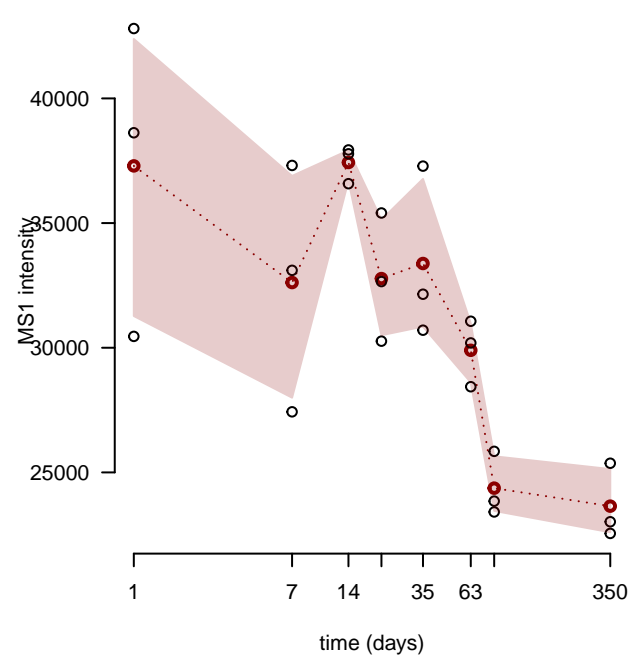

**Q9D6R2**  
GN=Idh3a  
isocitrate dehydrogenase 3 (NAD+) alpha

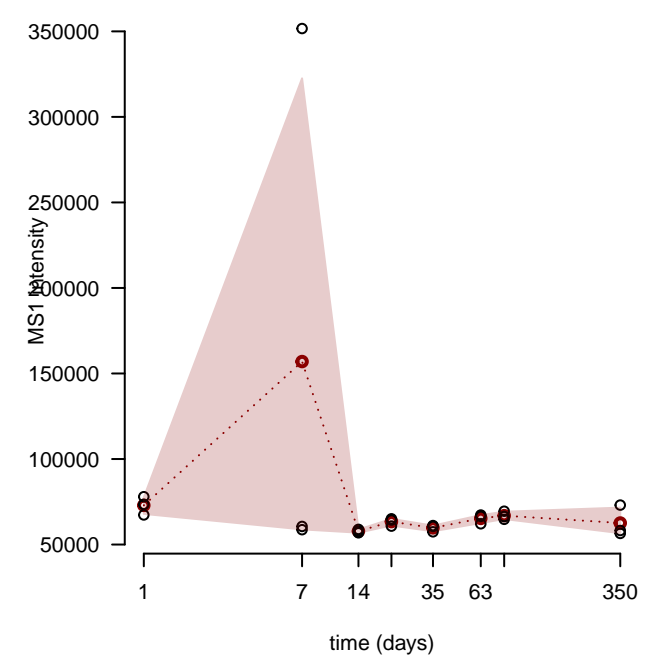

**Q9D6S7**  
GN=Mrrf  
mitochondrial ribosome recycling factor

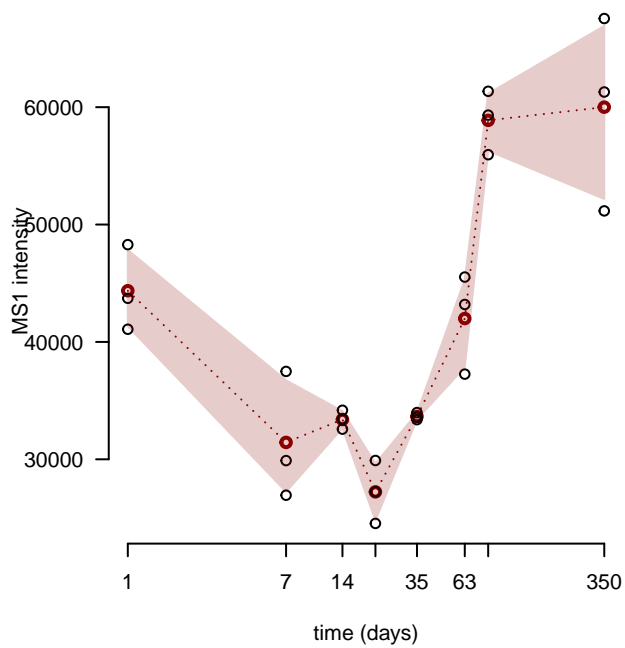

**Q9D6T0**  
GN=Nosip  
nitric oxide synthase interacting protei ...

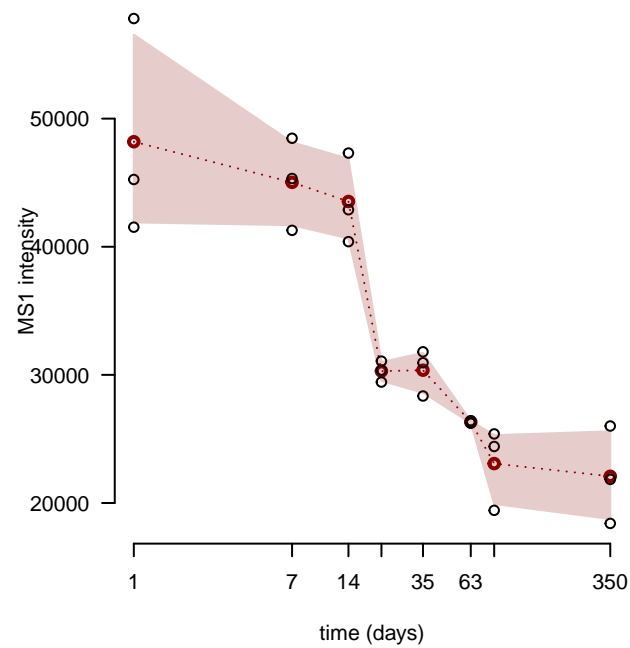

**Q9D6U8**  
GN=Fam162a  
family with sequence similarity 162, mem ...

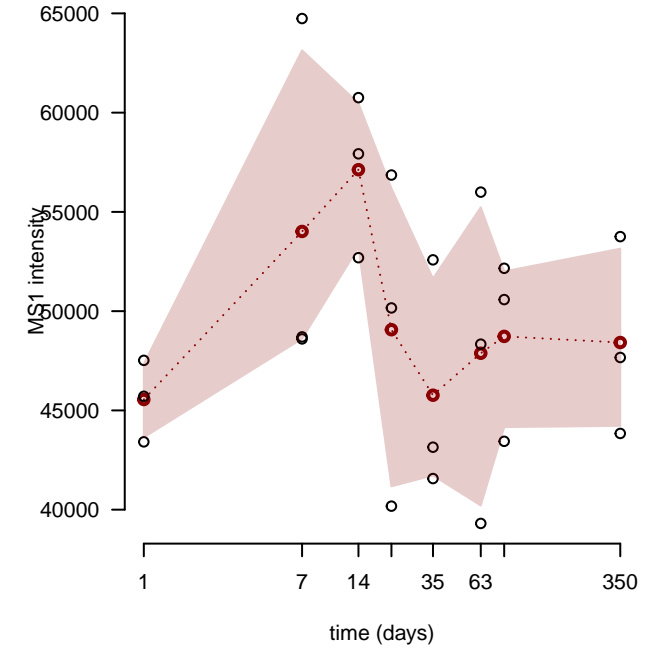

**Q9D6V8**  
GN=Paip2  
polyadenylate-binding protein-interactin ...

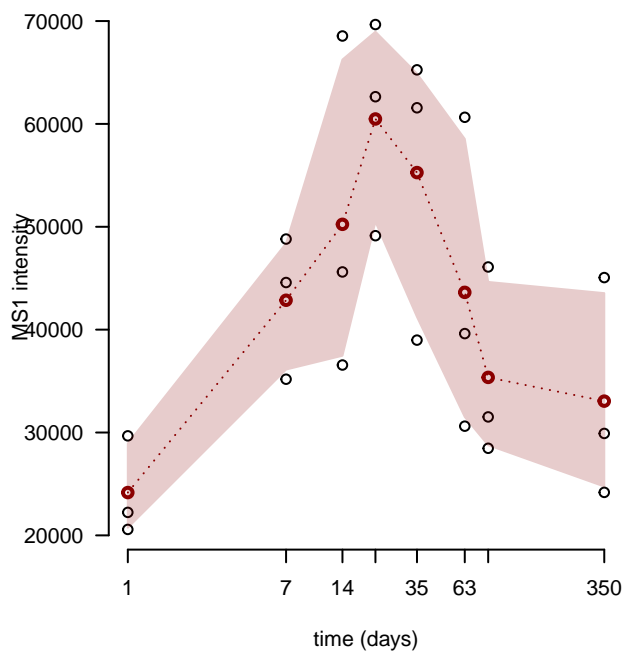

**Q9D6W8**  
GN=Borcs6  
BLOC-1 related complex subunit 6

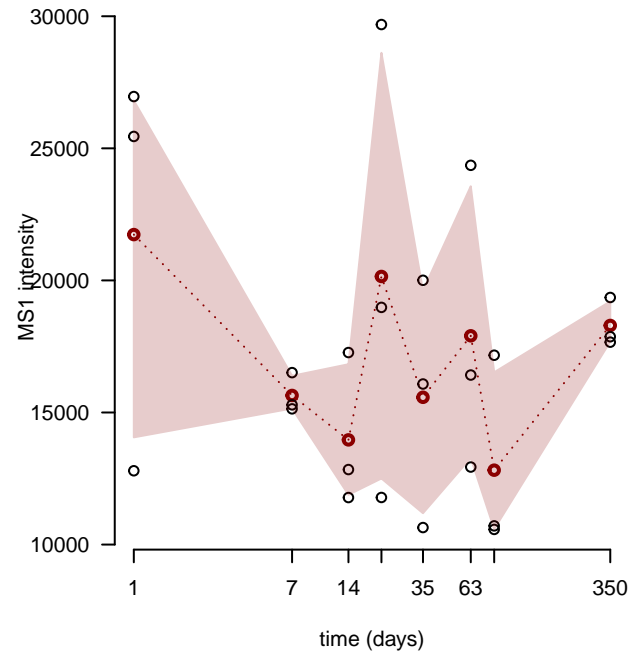

**Q9D6Y7**  
GN=Msra  
methionine sulfoxide reductase A

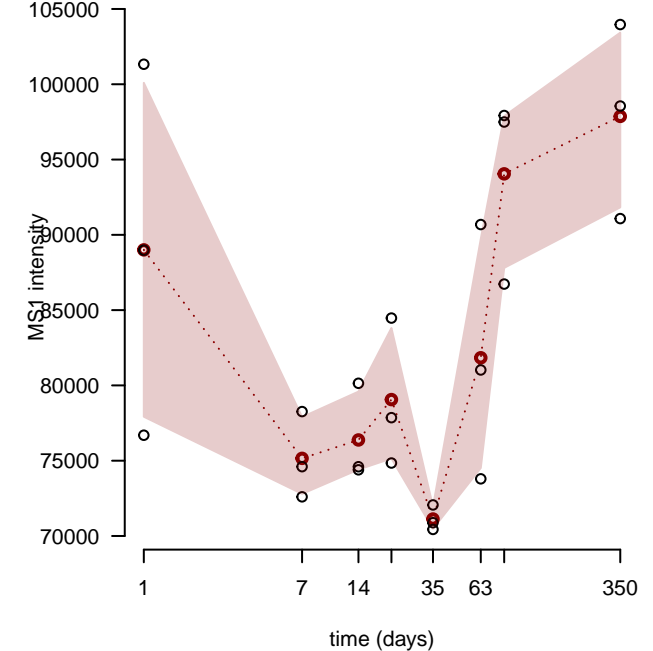

**Q9D6Y9**  
GN=Gbe1  
glucan (1,4-alpha-), branching enzyme 1

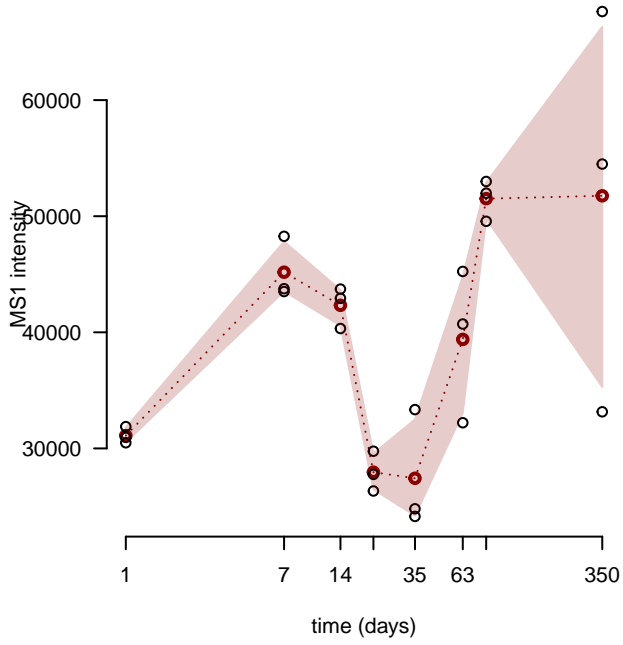

**Q9D6Z0**  
GN=Alkbh7  
alkB homolog 7

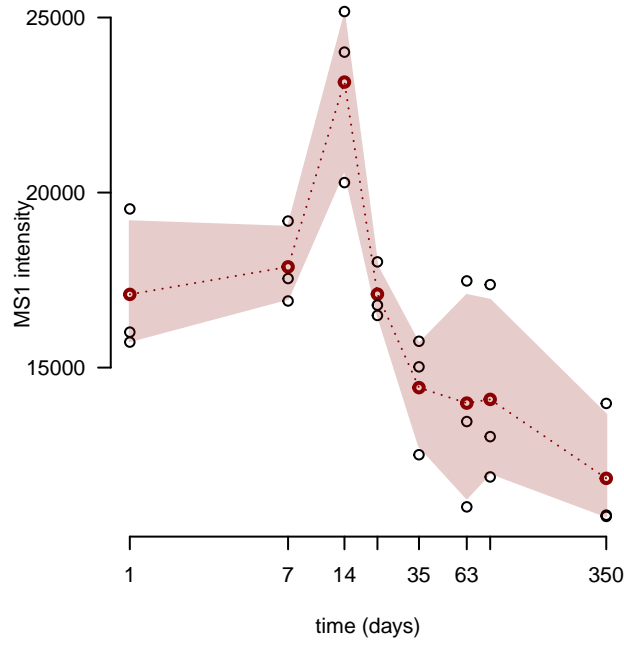

**Q9D6Z1**  
GN=Nop56  
NOP56 ribonucleoprotein

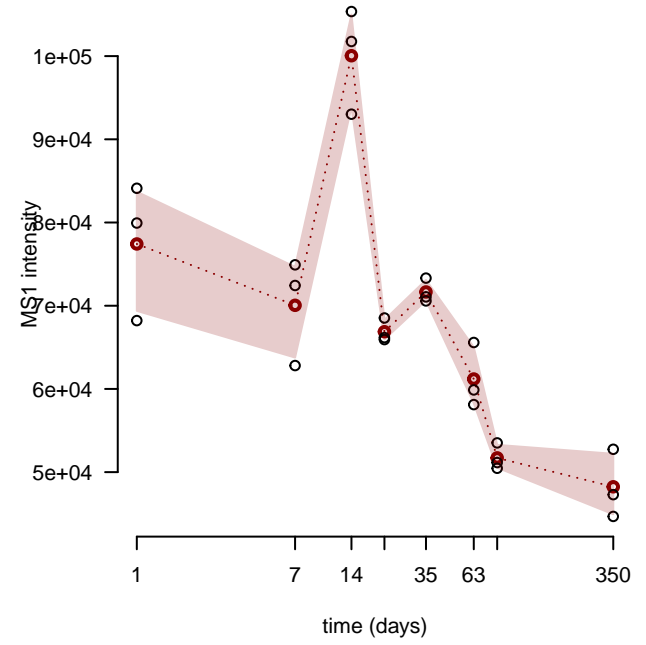

**Q9D706**  
GN=Rpap3  
RNA polymerase II associated protein 3

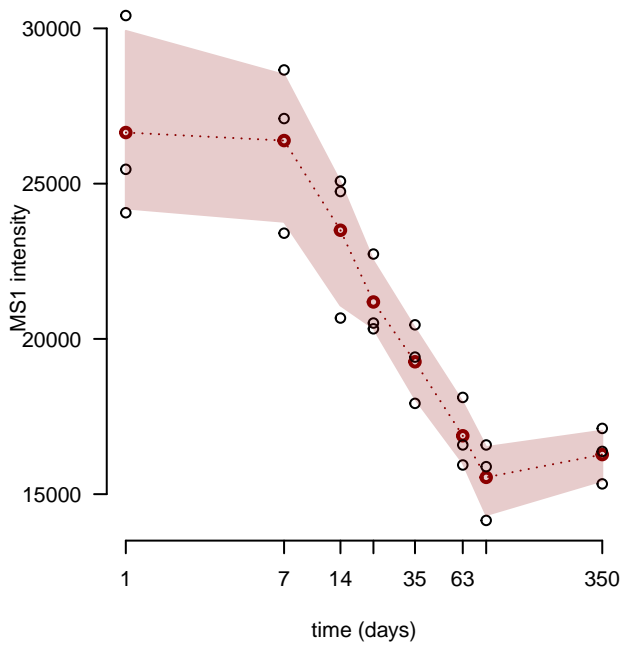

**Q9D708**  
GN=S100a16  
S100 calcium binding protein A16

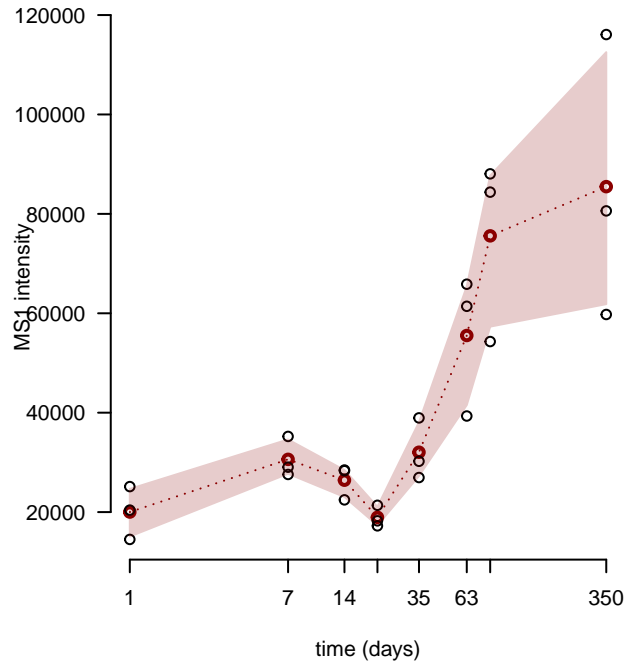

**Q9D710**  
GN=Tmx2  
thioredoxin-related transmembrane protei ...

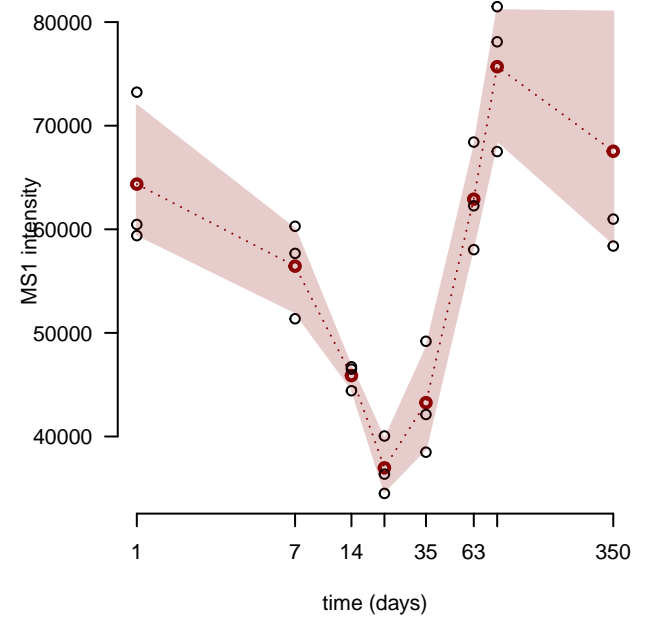

**Q9D711**  
GN=Pir  
pirin

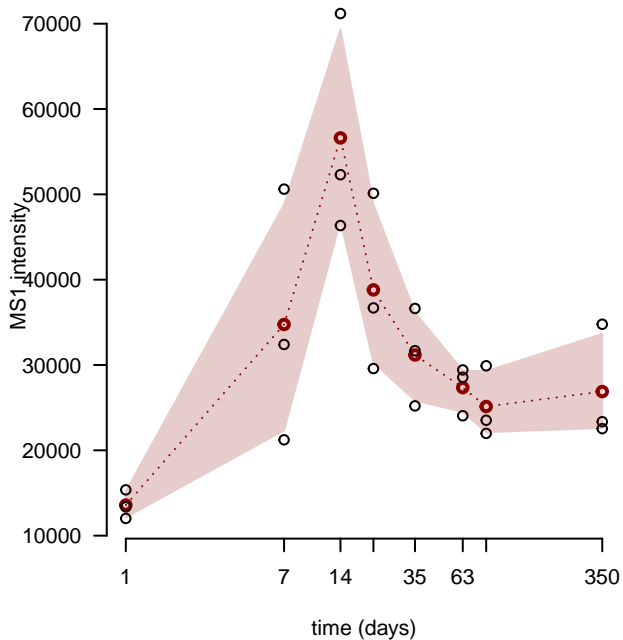

**Q9D720**  
GN=Nsmce1  
NSE1 homolog, SMC5-SMC6 complex componen ...

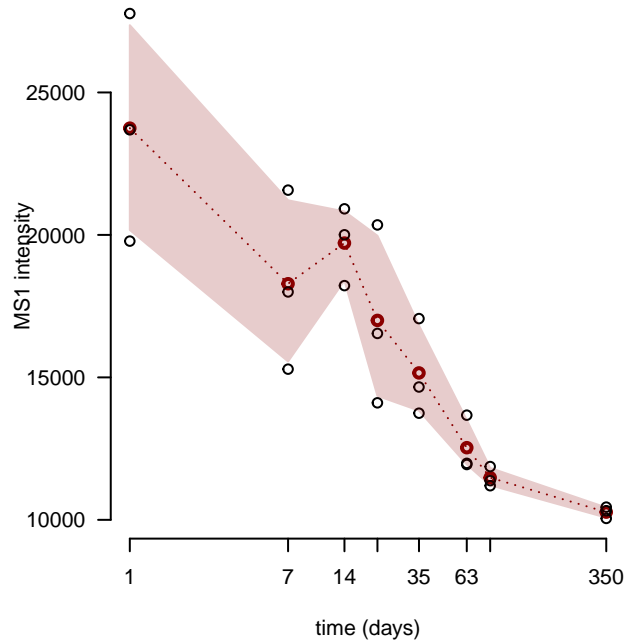

**Q9D735**  
GN=Trir  
telomerase RNA component interacting RNA ...

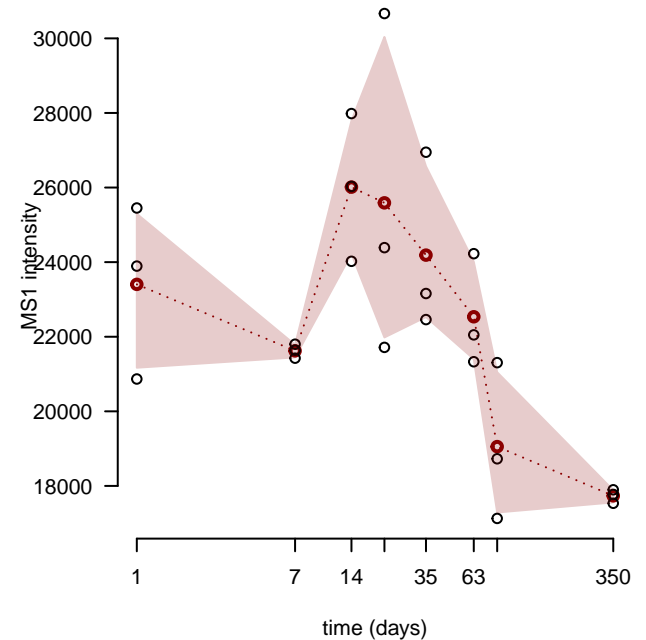

**Q9D753**  
**GN=Exosc8**  
 exosome component 8

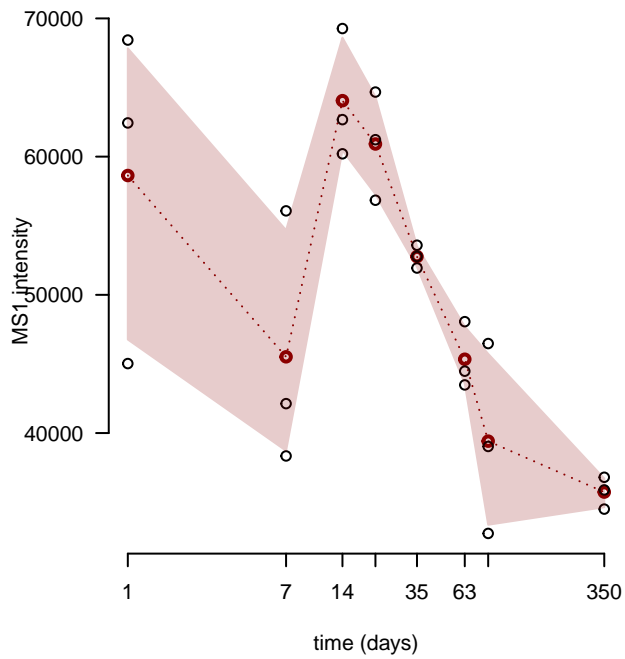

**Q9D771**  
**GN=Tmem206**

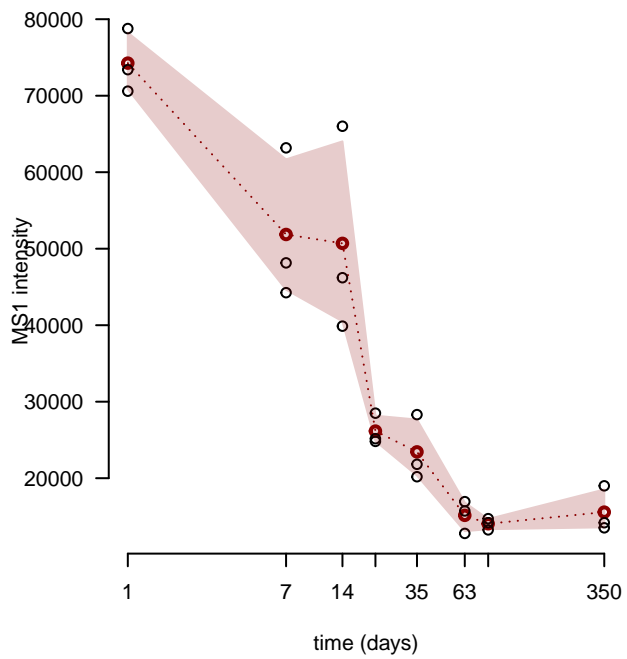

**Q9D773**  
**GN=Mrpl2**  
 mitochondrial ribosomal protein L2

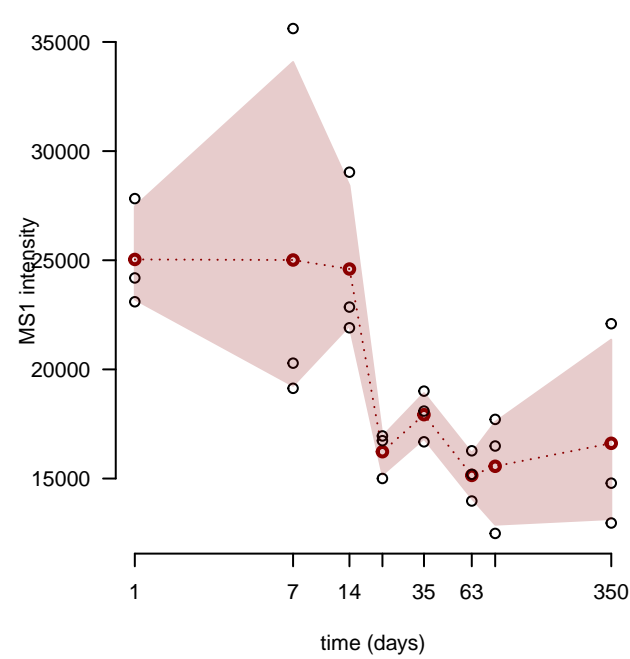

**Q9D786**  
**GN=Haus5**  
 HAUS augmin-like complex, subunit 5

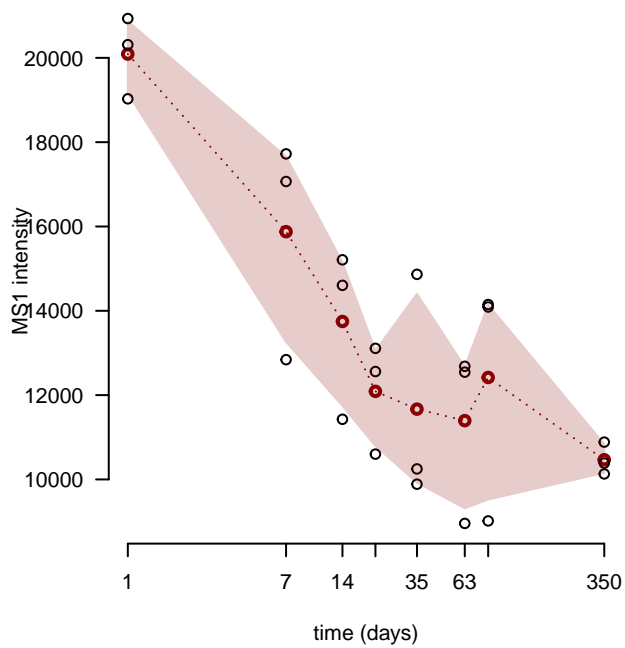

**Q9D787**  
**GN=Ppil2**  
 peptidylprolyl isomerase (cyclophilin)-I ...

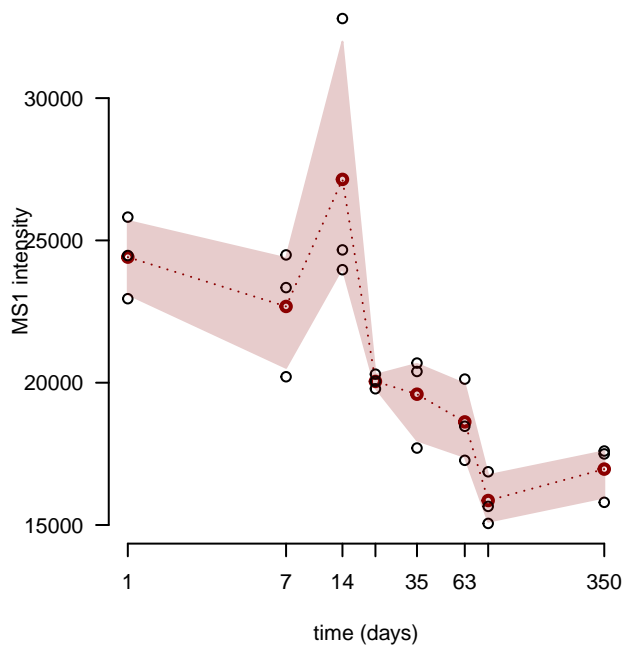

**Q9D7A6**  
**GN=Srp19**  
 signal recognition particle 19

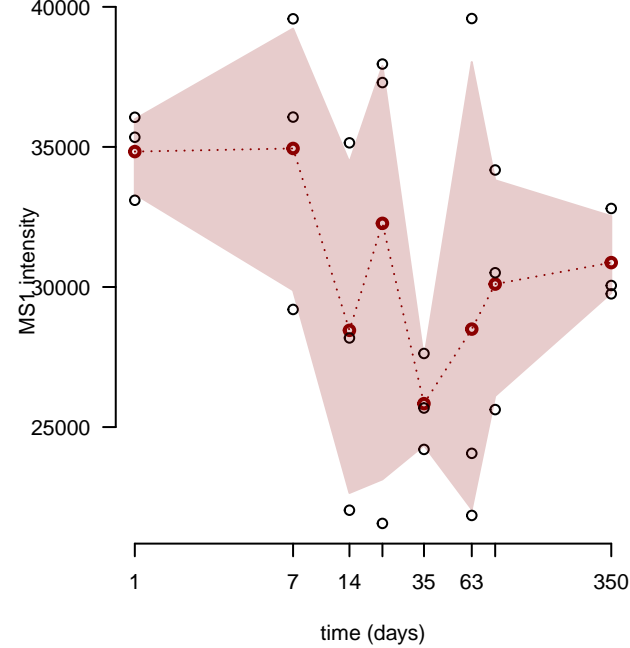

**Q9D7A8**  
**GN=Armc1**  
 armadillo repeat containing 1

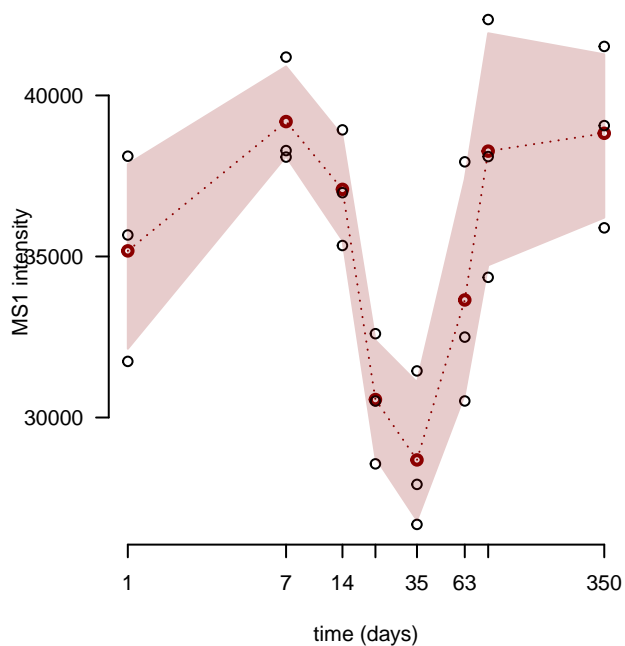

**Q9D7B1**  
**GN=Dus2**  
 dihydrouridine synthase 2

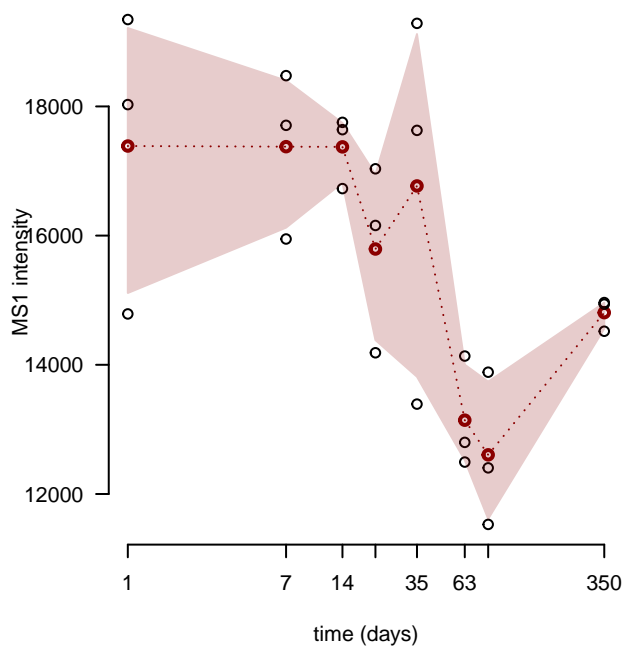

**Q9D7B6**  
**GN=Acad8**  
 acyl-Coenzyme A dehydrogenase family, me ...

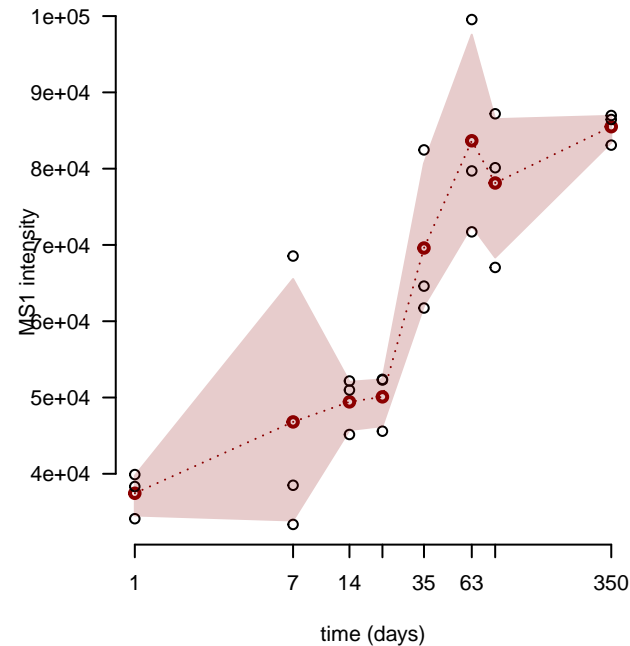

**Q9D7B7**  
GN=Gpx8  
glutathione peroxidase 8 (putative)

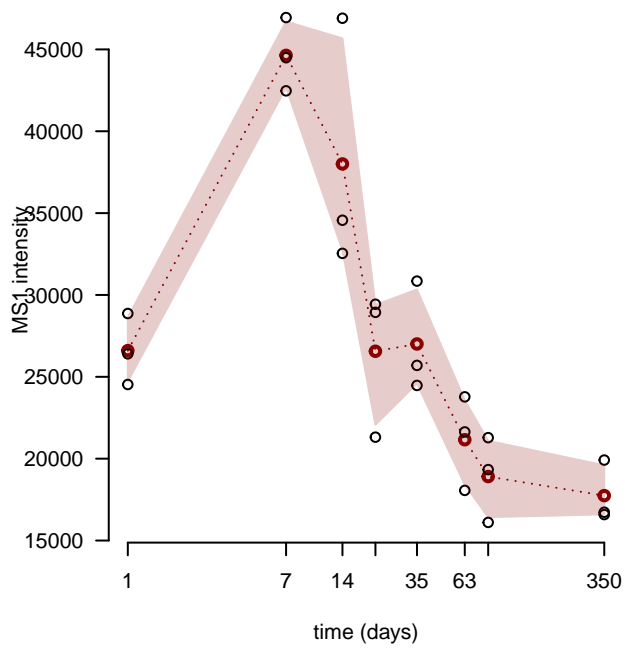

**Q9D7E3**  
GN=Ovca2  
candidate tumor suppressor in ovarian ca ...

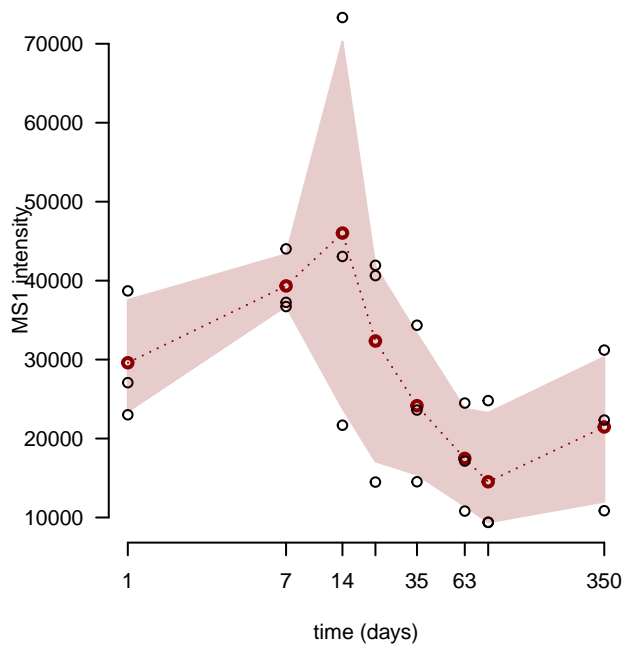

**Q9D7E4**  
GN=

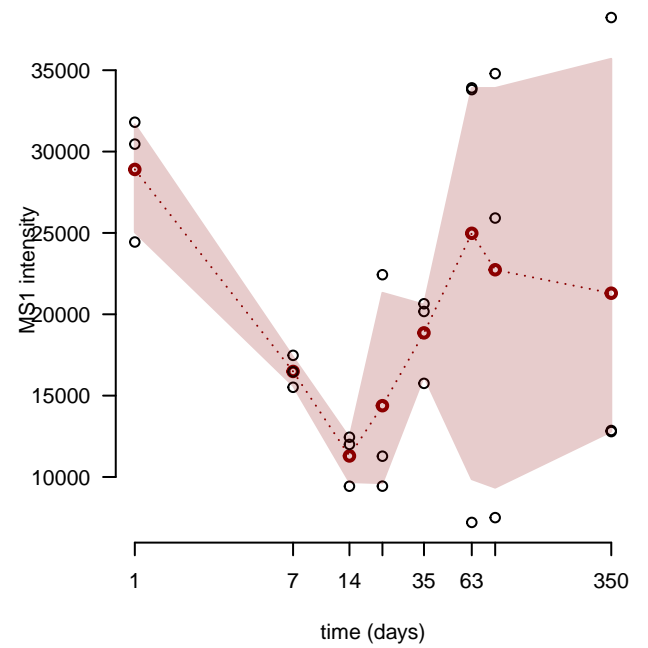

**Q9D7G0**  
GN=Prps1  
phosphoribosyl pyrophosphate synthetase ...

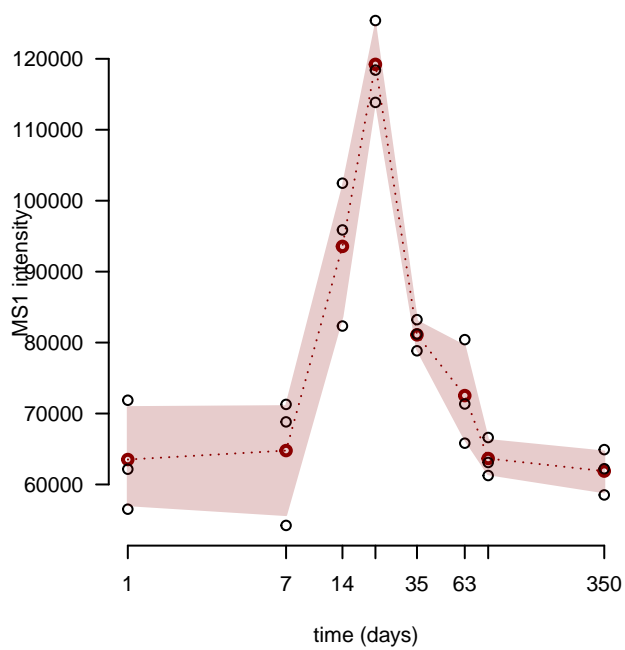

**Q9D7H3**  
GN=RtcA

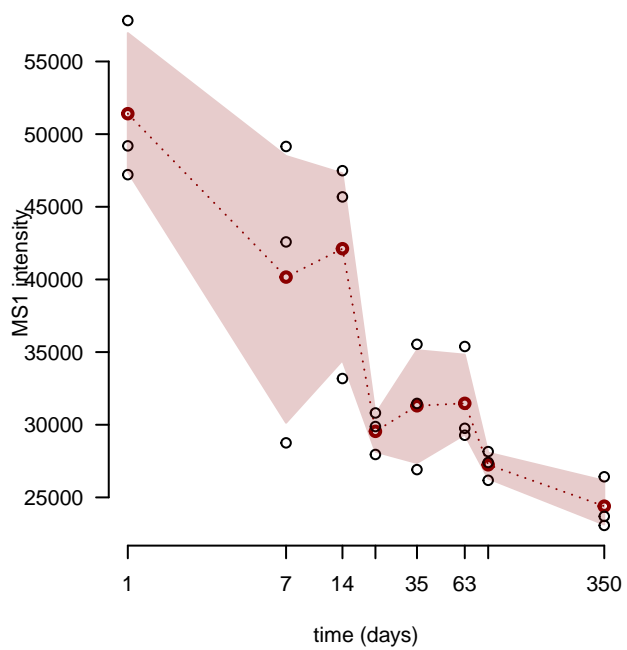

**Q9D7I5**  
GN=Lhpp  
phospholysine phosphohistidine inorganic ...

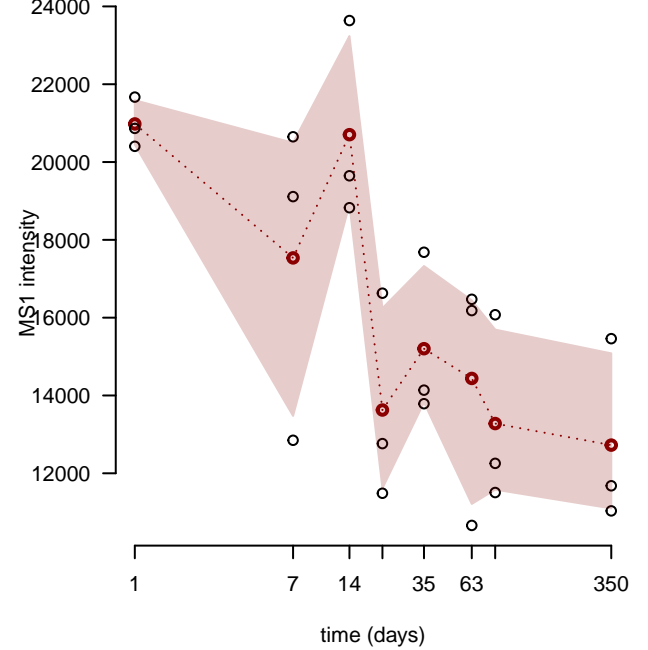

**Q9D7J4**  
GN=Cox20  
cytochrome c oxidase assembly protein 20

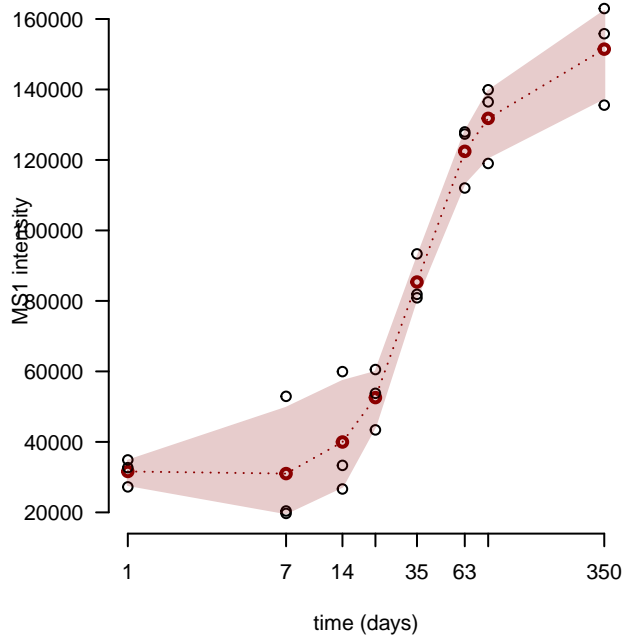

**Q9D7J6**  
GN=Dnase111  
deoxyribonuclease 1-like 1

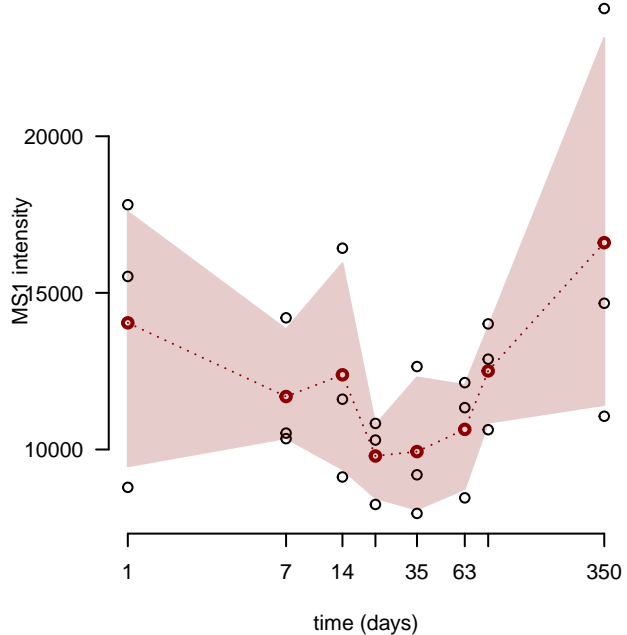

**Q9D7J9**  
GN=Echdc3  
enoyl Coenzyme A hydratase domain contai ...

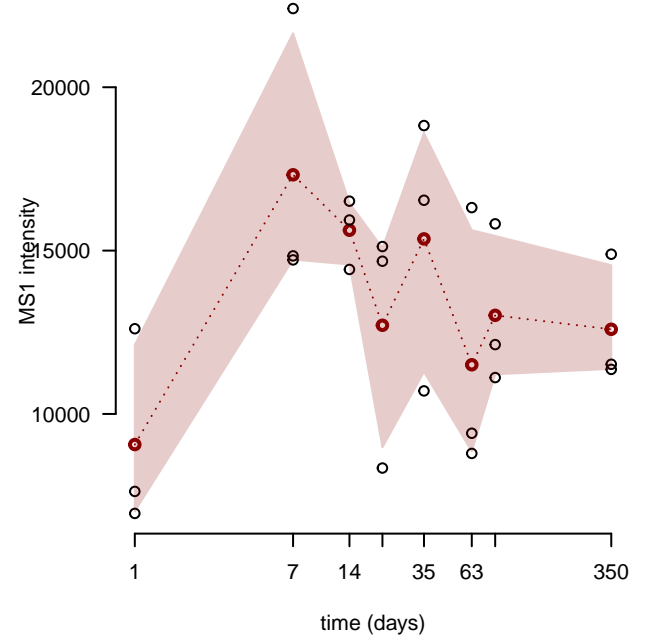

Q9D7K2  
GN=Ten1

TEN1 telomerase capping complex subunit

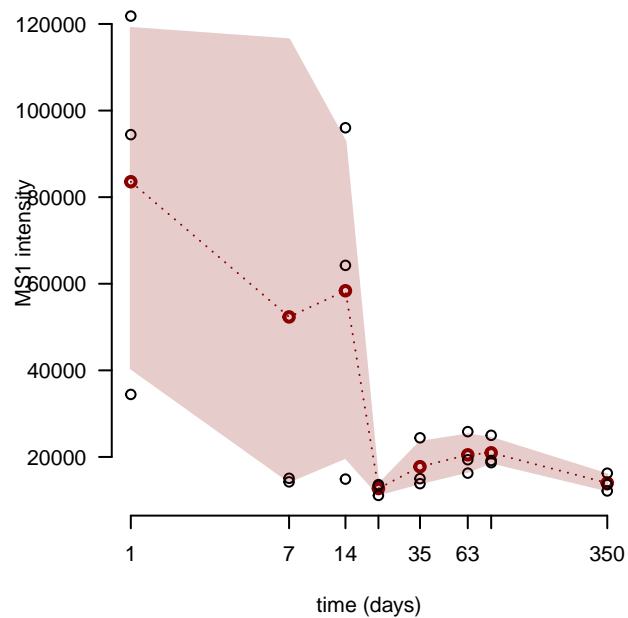

Q9D7K5  
GN=Dmac2

distal membrane arm assembly complex 2

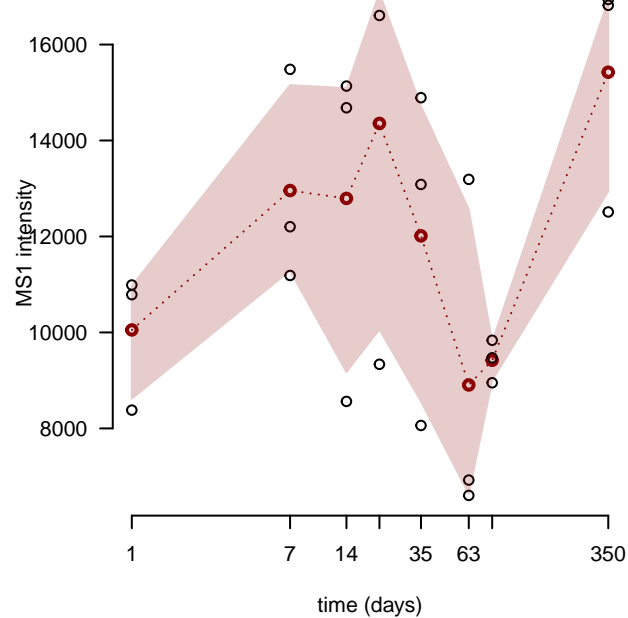

Q9D7M1  
GN=Gid8

GID complex subunit 8

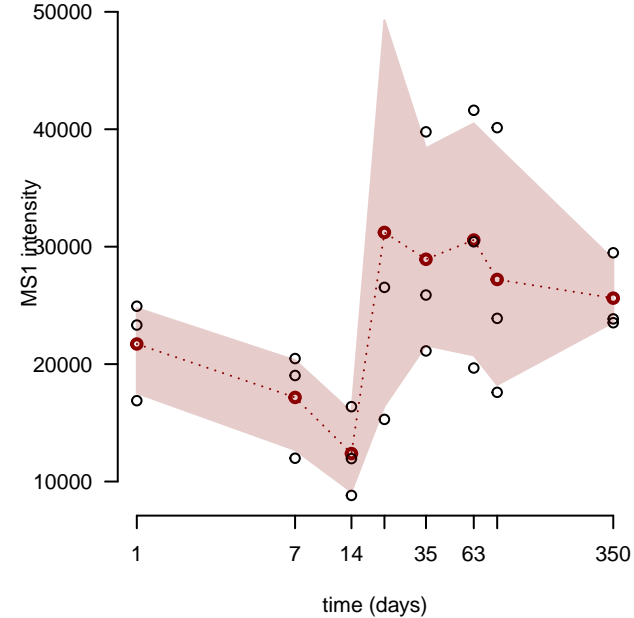

Q9D7M8  
GN=Polr2d

polymerase (RNA) II (DNA directed) polyp ...

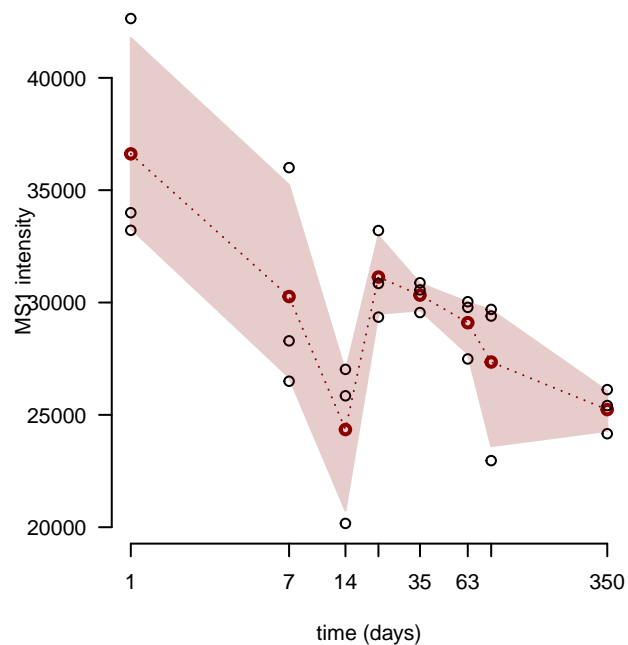

Q9D7N3  
GN=Mrps9

mitochondrial ribosomal protein S9

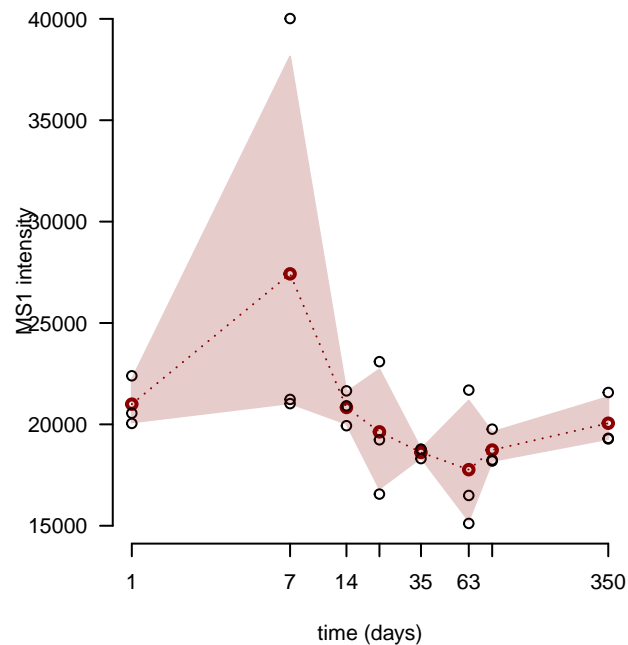

Q9D7N6  
GN=Mrpl30

mitochondrial ribosomal protein L30

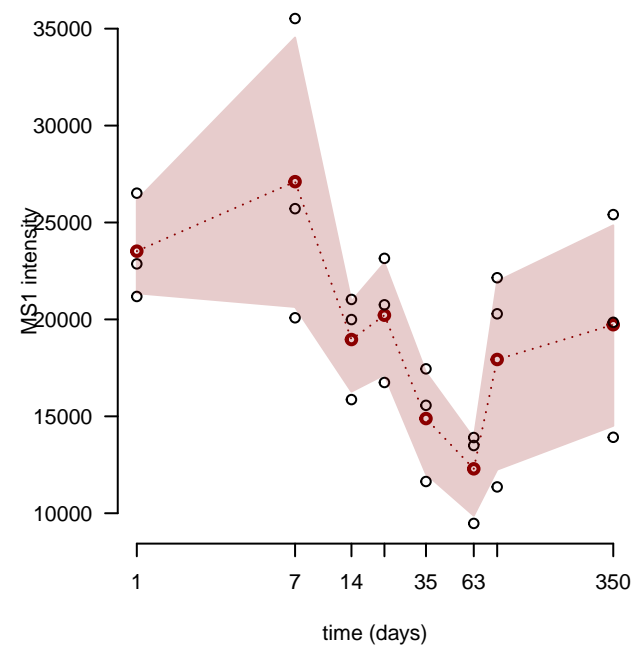

Q9D7N9  
GN=Apmap

adipocyte plasma membrane associated pro ...

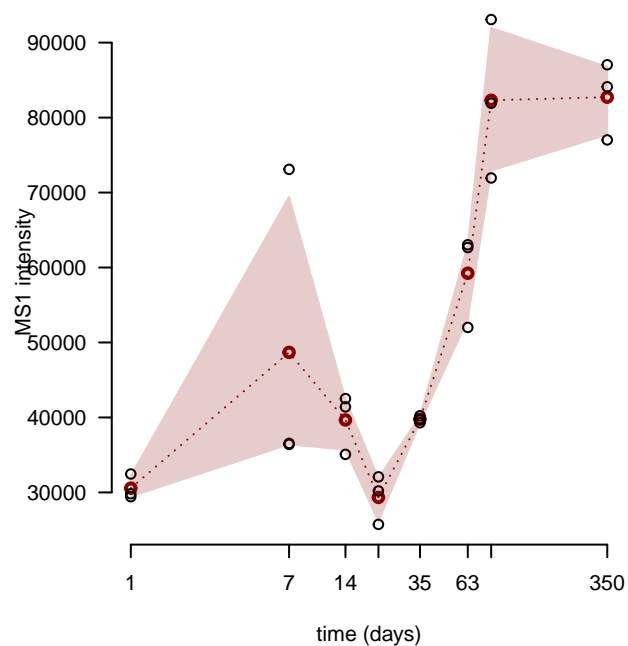

Q9D7P6  
GN=Iscu

iron-sulfur cluster assembly enzyme

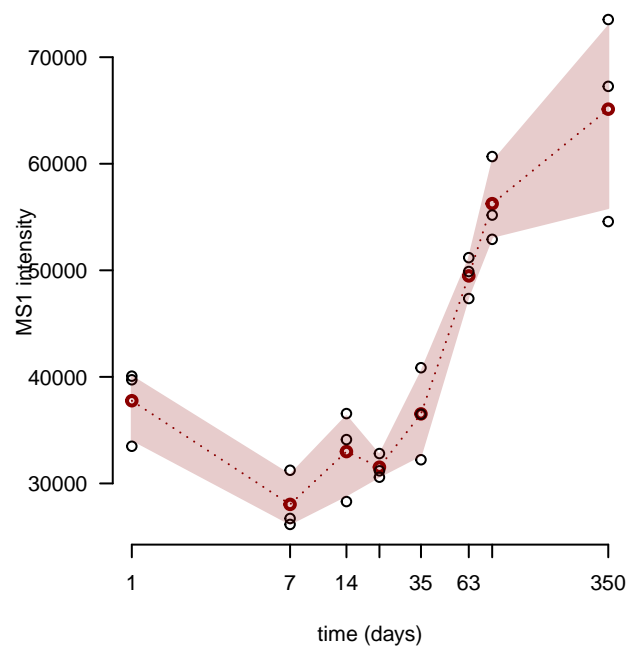

Q9D7S7  
GN=Rpl2211

ribosomal protein L22 like 1

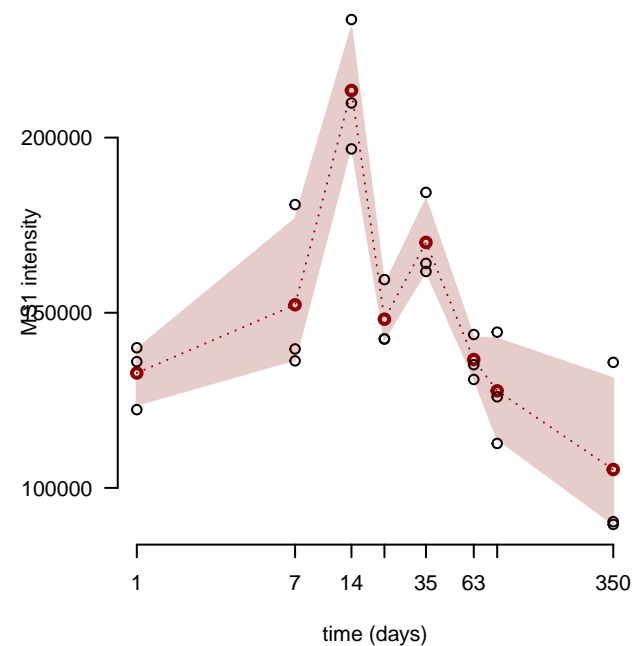

**Q9D7S9**  
GN=Chmp5  
charged multivesicular body protein 5

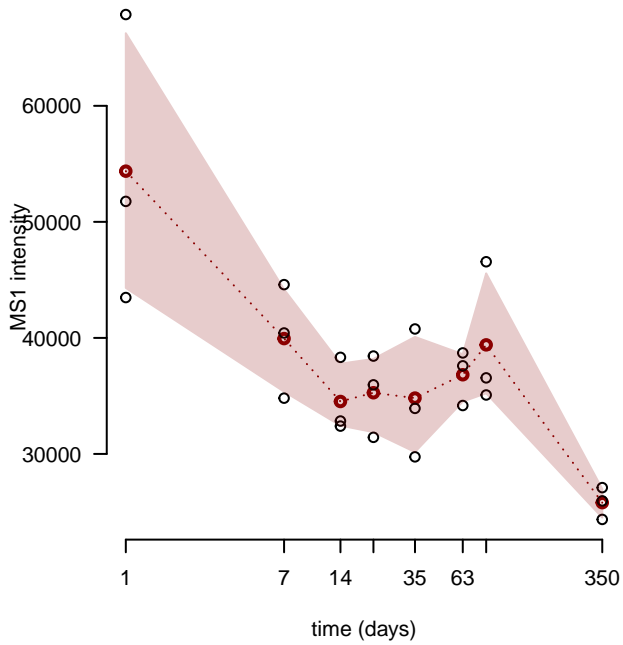

**Q9D7V1**  
GN=Sh2d4a  
SH2 domain containing 4A

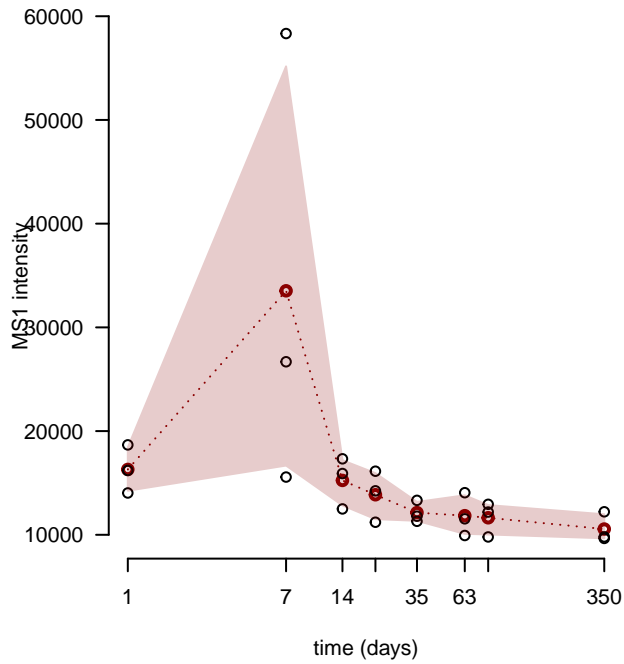

**Q9D7V2**  
GN=Lysmd2  
LysM, putative peptidoglycan-binding, do ...

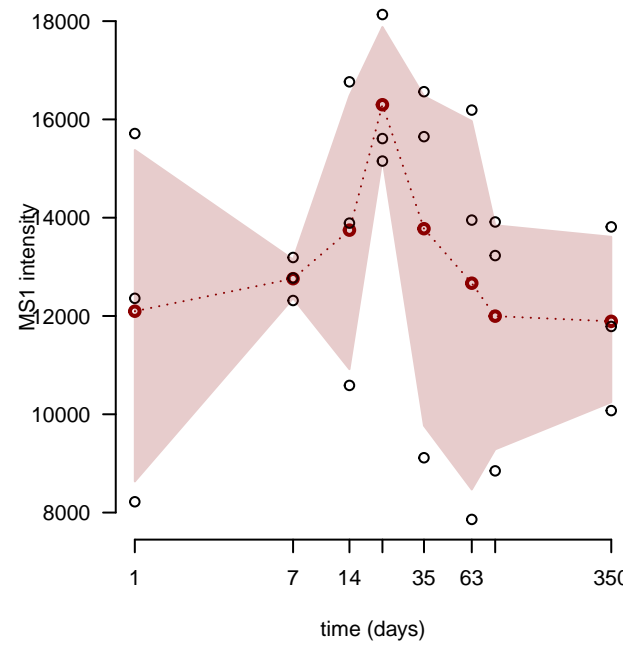

**Q9D7V9**  
GN=Naaa  
N-acylethanolamine acid amidase

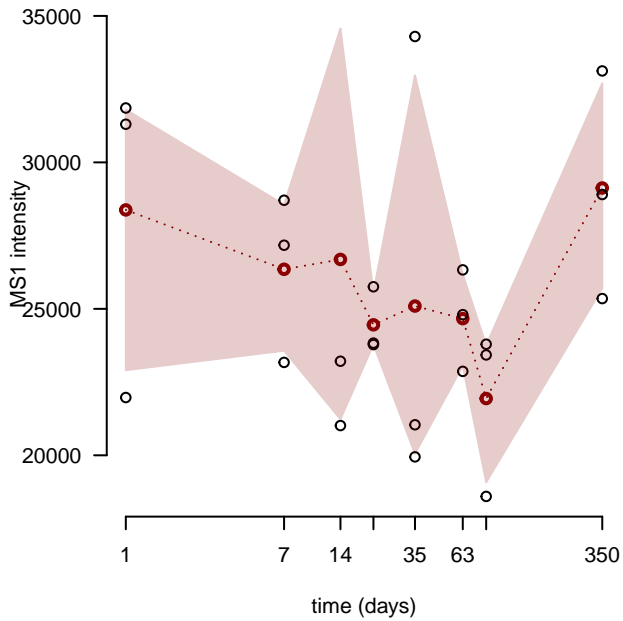

**Q9D7W5**  
GN=Med8  
mediator complex subunit 8

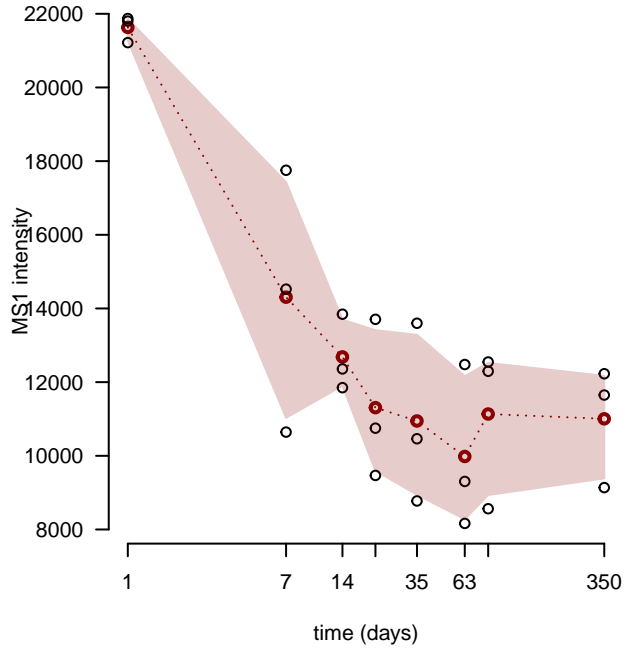

**Q9D7X3**  
GN=Dusp3  
dual specificity phosphatase 3 (vaccinia ...

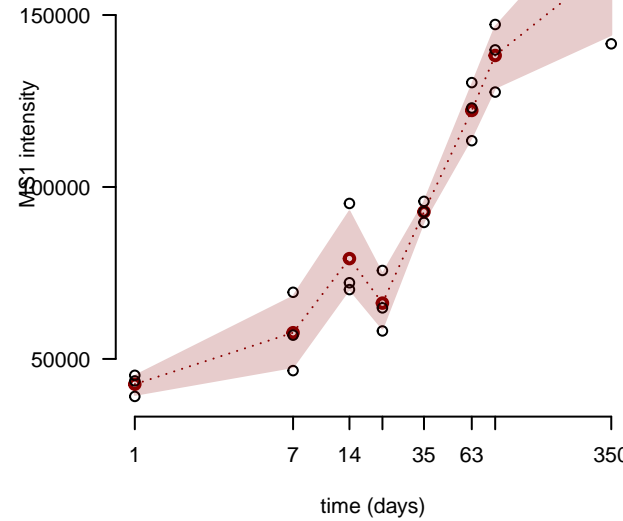

**Q9D7X8**  
GN=Ggct  
gamma-glutamyl cyclotransferase

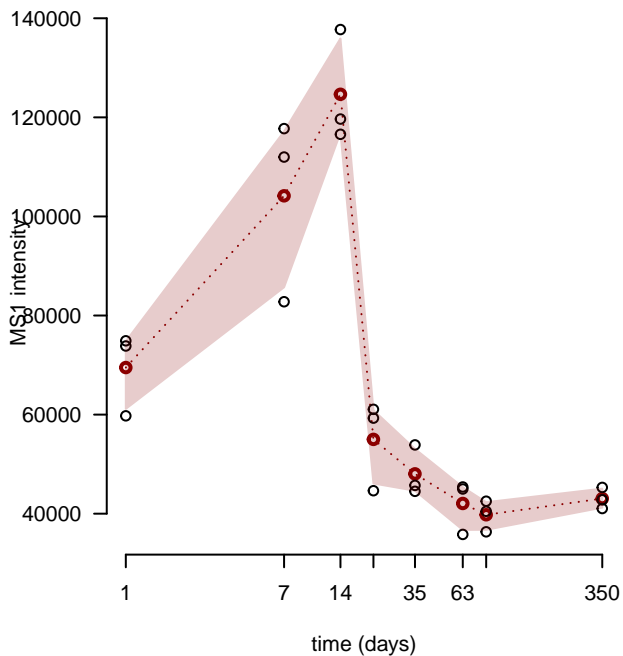

**Q9D7Z3**  
GN=NoI7  
nucleolar protein 7

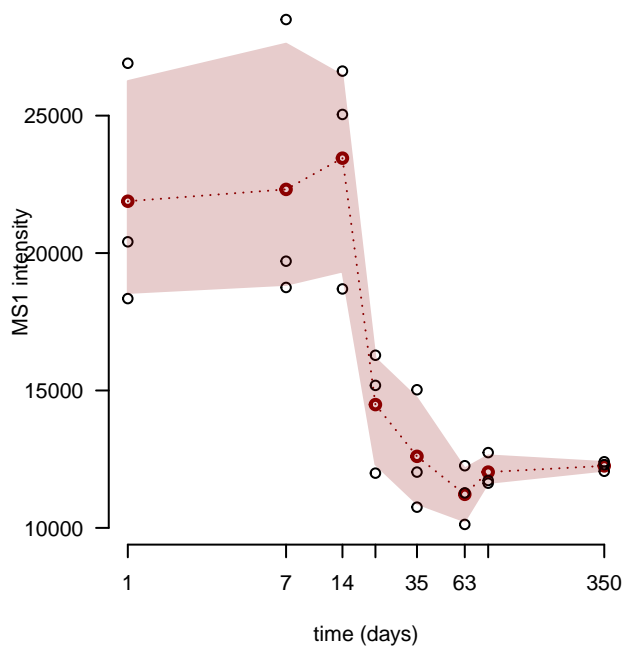

**Q9D7Z6**  
GN=CIca1  
chloride channel accessory 1

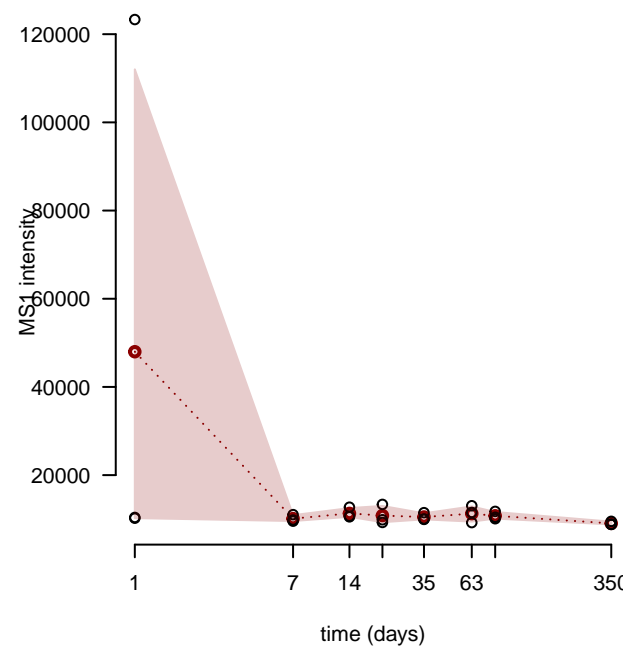



**Q9D819**  
**GN=Ppa1**  
pyrophosphatase (inorganic) 1

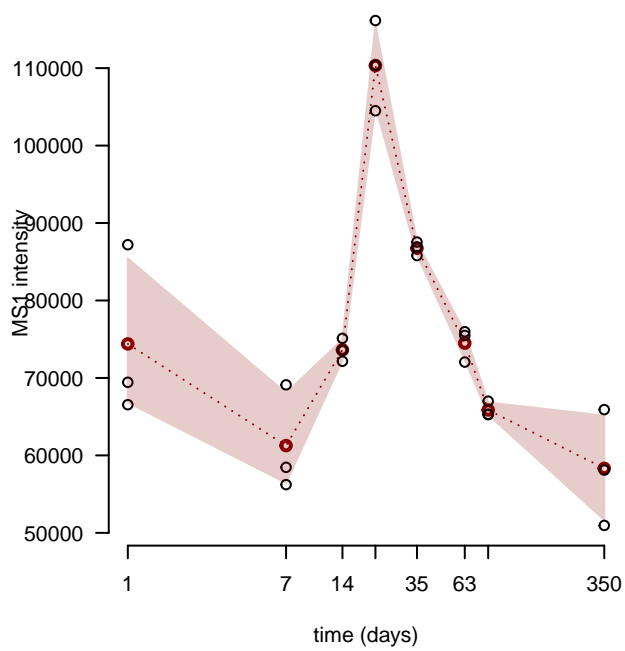

**Q9D820**  
**GN=Prorsd1**  
prolyl-tRNA synthetase domain containing ...

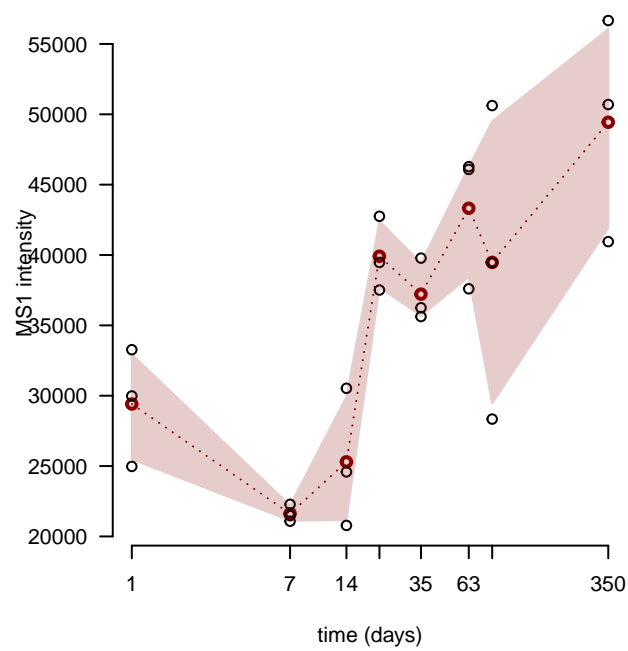

**Q9D823**  
**GN=Rpl37**  
ribosomal protein L37

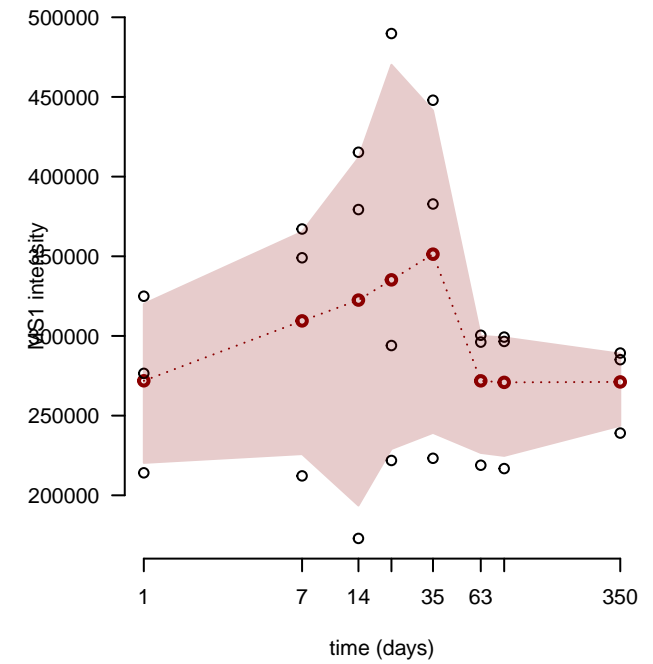

**Q9D824**  
**GN=Fip11**  
FIP1 like 1 (*S. cerevisiae*)

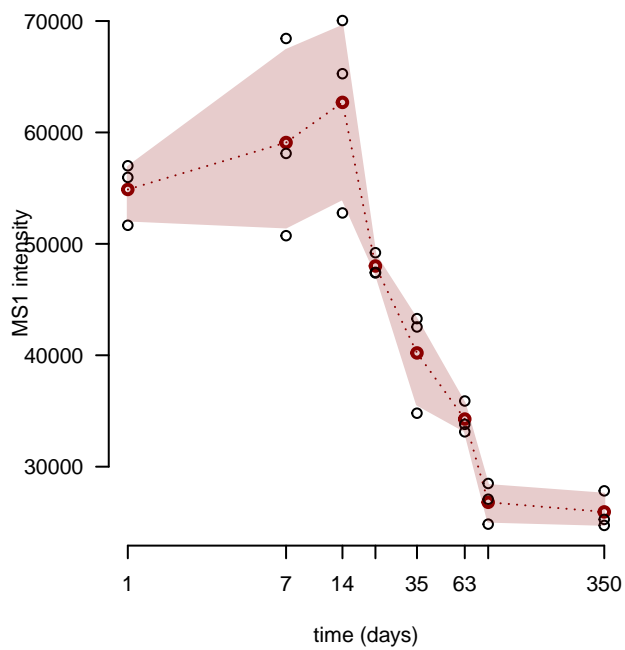

**Q9D826**  
**GN=Pipox**  
pipercolic acid oxidase

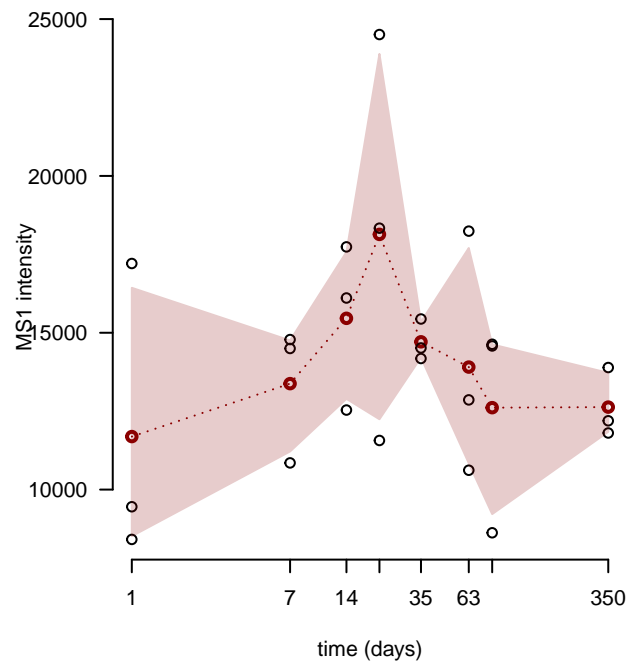

**Q9D832**  
**GN=Dnajb4**  
DnaJ heat shock protein family (Hsp40) m ...

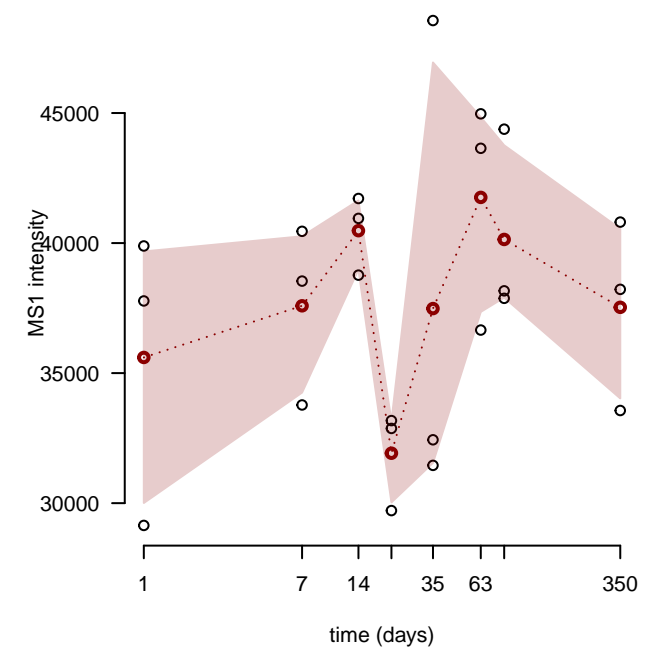

**Q9D842**  
**GN=Ap1f**  
apratxin and PNKP like factor

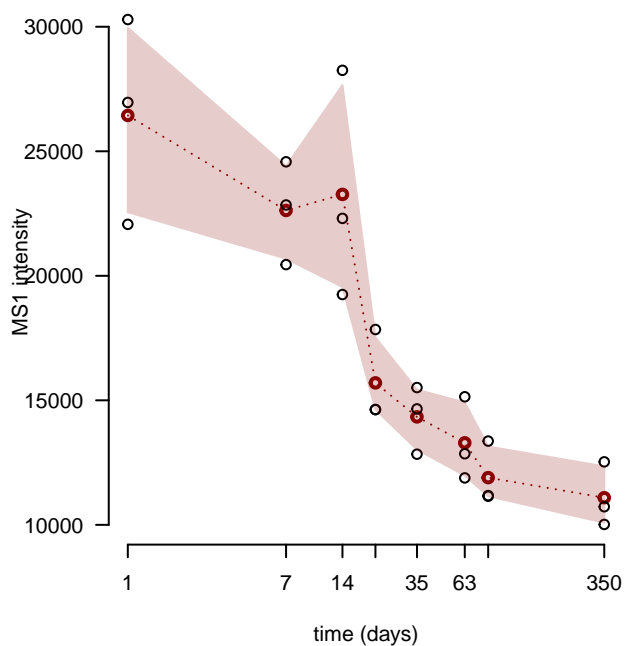

**Q9D850**  
**GN=Tmem68**  
transmembrane protein 68

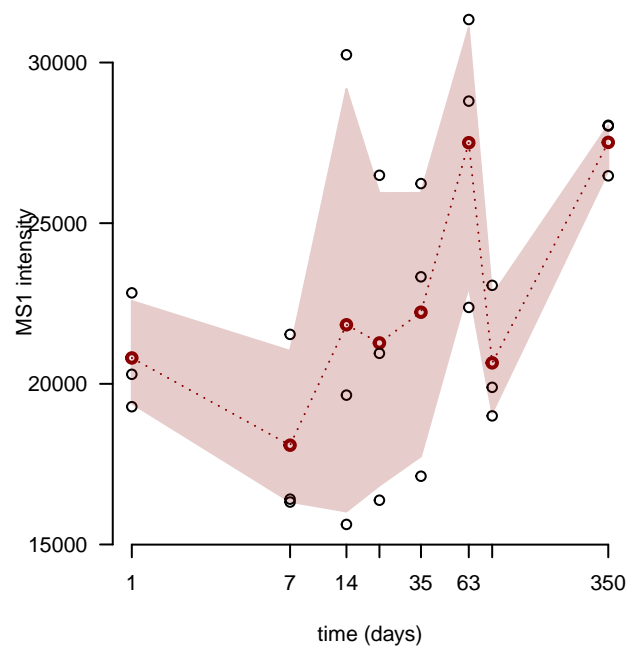

**Q9D853**  
**GN=Eef1akmt2**  
EEF1A lysine methyltransferase 2

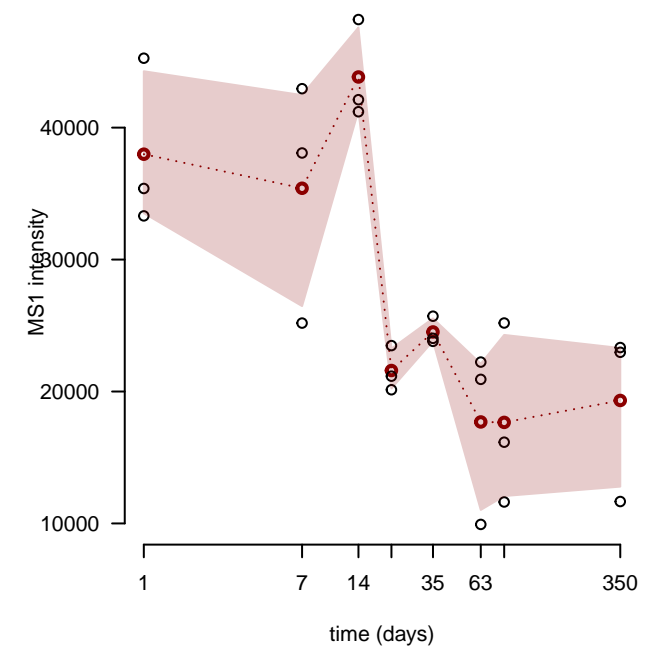

**Q9D855**  
GN=Uqcrb  
ubiquinol-cytochrome c reductase binding ...

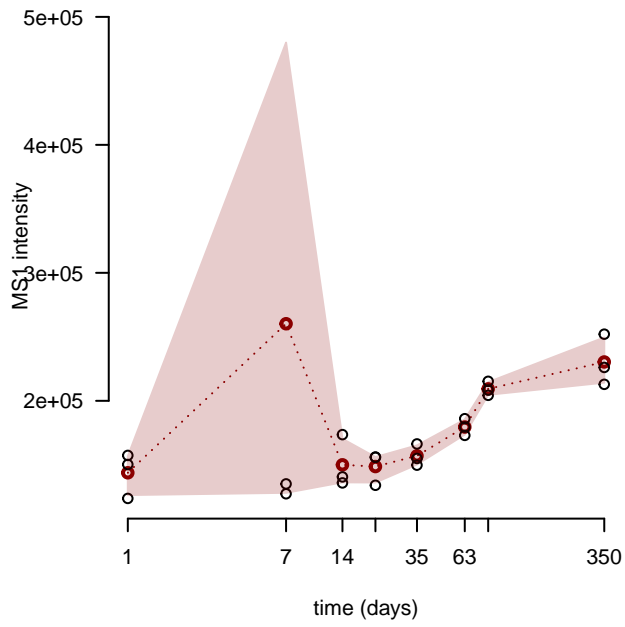

**Q9D864**  
GN=Actr6  
ARP6 actin-related protein 6

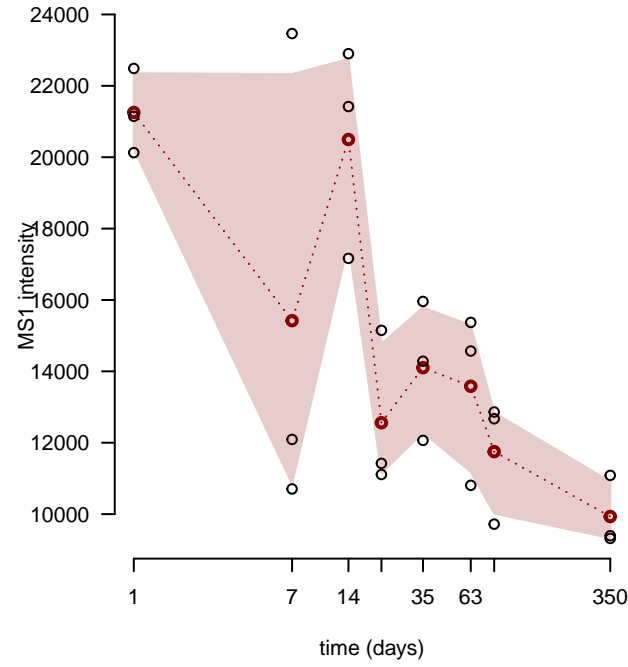

**Q9D868**  
GN=Ppih  
peptidyl prolyl isomerase H

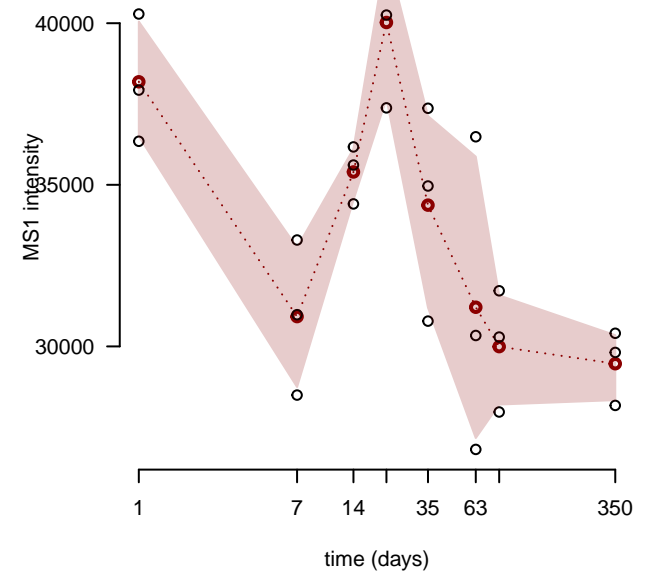

**Q9D869**  
GN=Chp2  
calcineurin-like EF hand protein 2

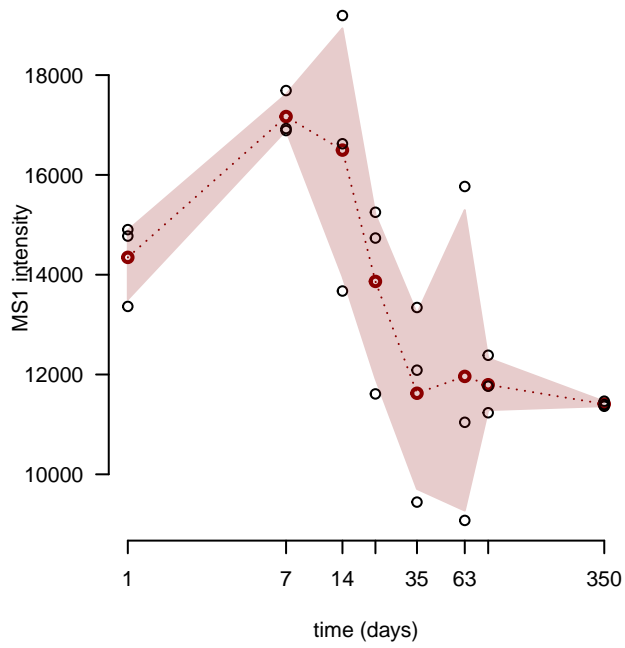

**Q9D880**  
GN=Timm50  
translocase of inner mitochondrial membr ...

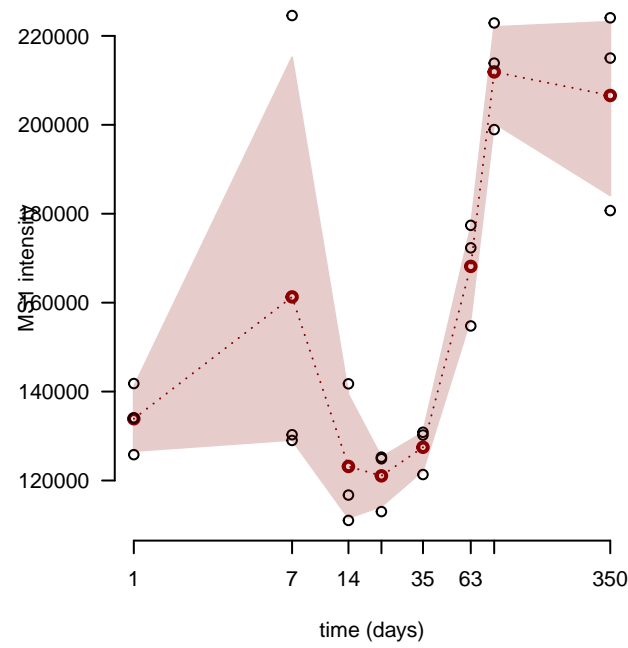

**Q9D883**  
GN=U2af1  
U2 small nuclear ribonucleoprotein auxil ...

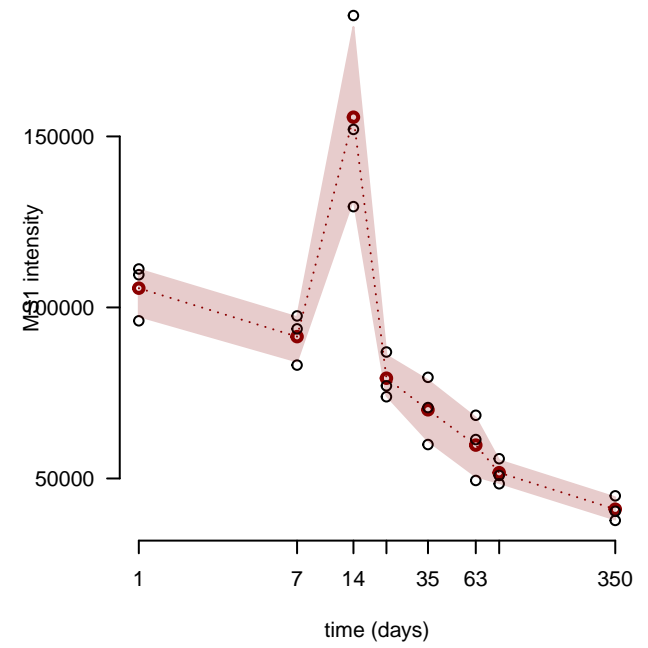

**Q9D892**  
GN=Itpa  
inosine triphosphatase (nucleoside triph ...

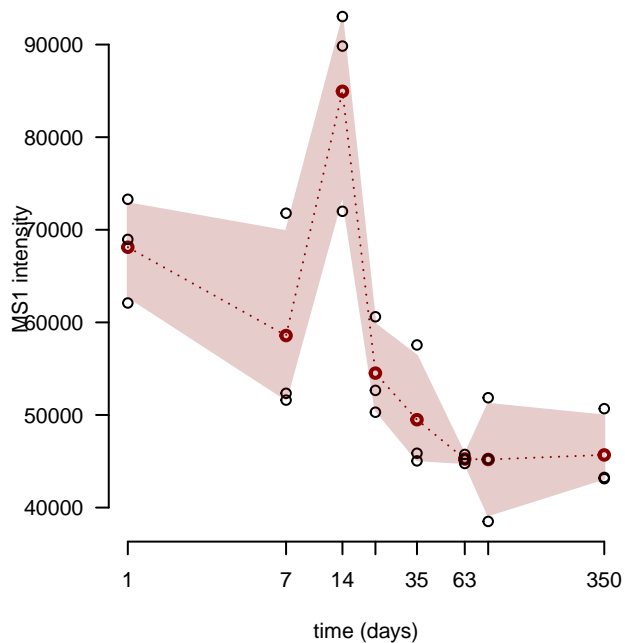

**Q9D898**  
GN=Arpc5l  
actin related protein 2/3 complex, subun ...

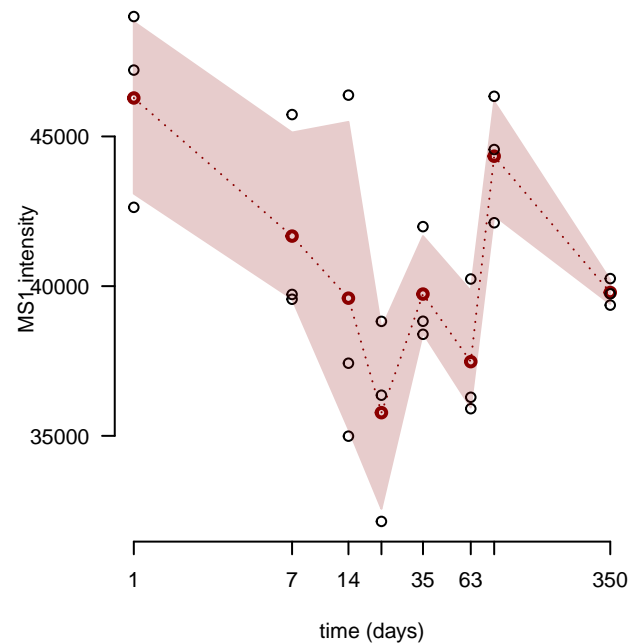

**Q9D8B3**  
GN=Chmp4b  
charged multivesicular body protein 4B

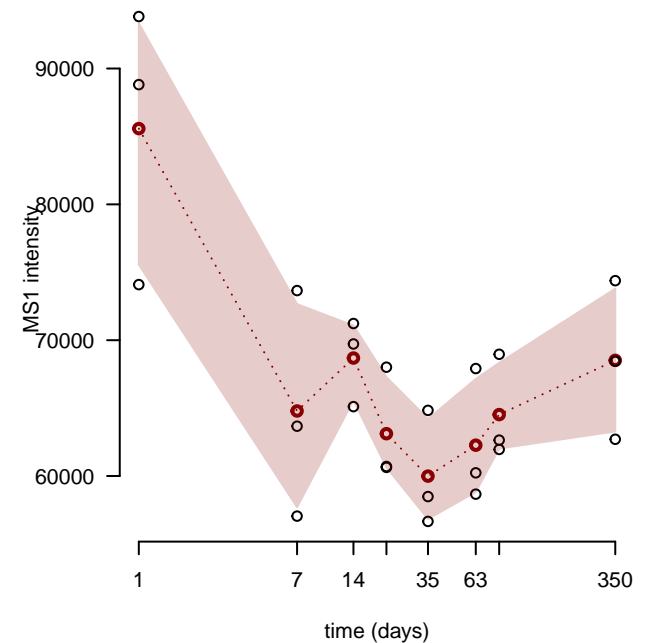

**Q9D8B4**  
**GN=Ndufa11**  
NADH:ubiquinone oxidoreductase subunit A ...

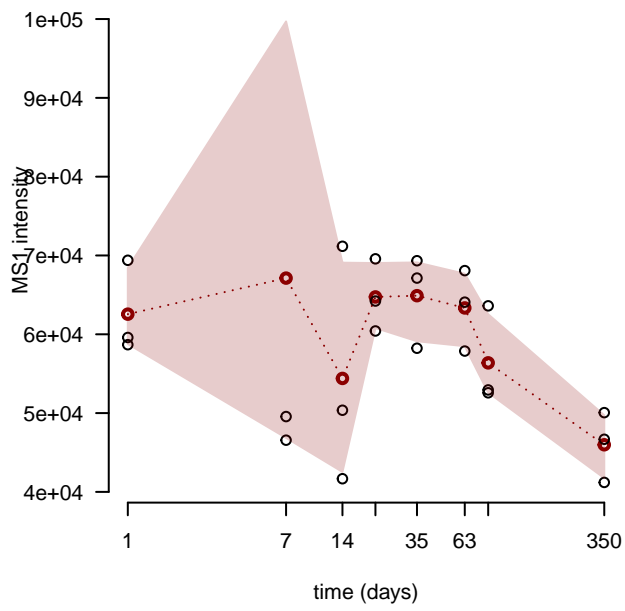

**Q9D8B6**  
**GN=Fam210b**  
family with sequence similarity 210, mem ...

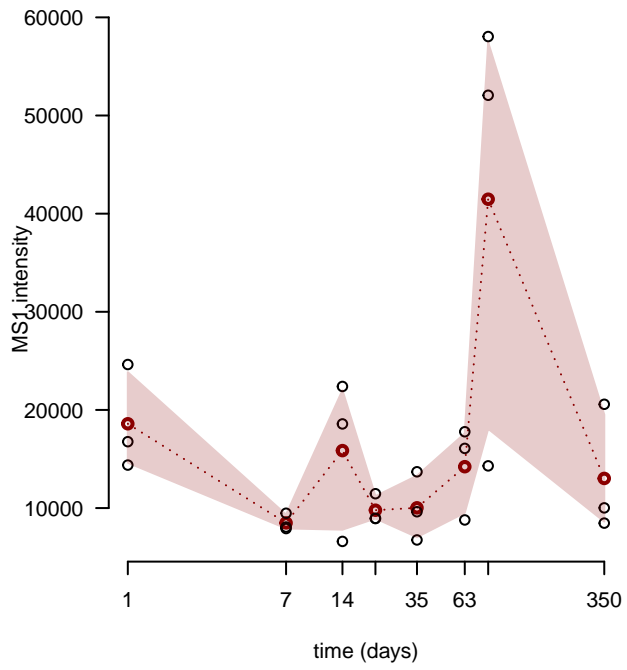

**Q9D8B7**  
**GN=Jam3**  
junction adhesion molecule 3

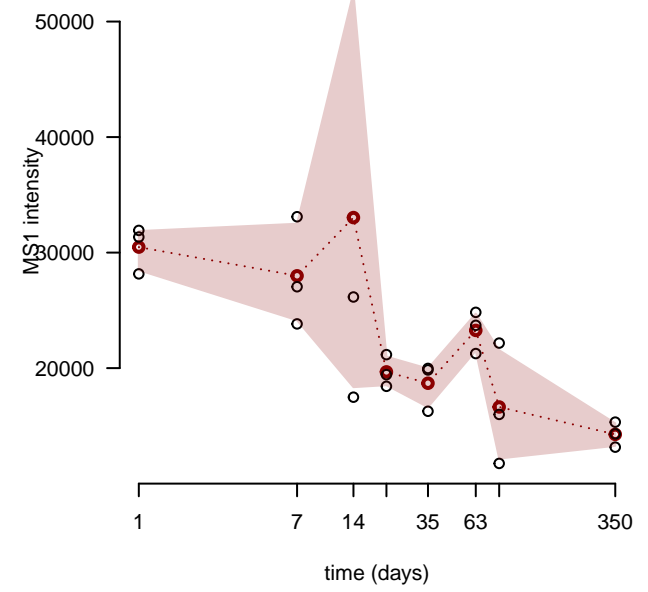

**Q9D8C3**  
**GN=Alg13**  
asparagine-linked glycosylation 13

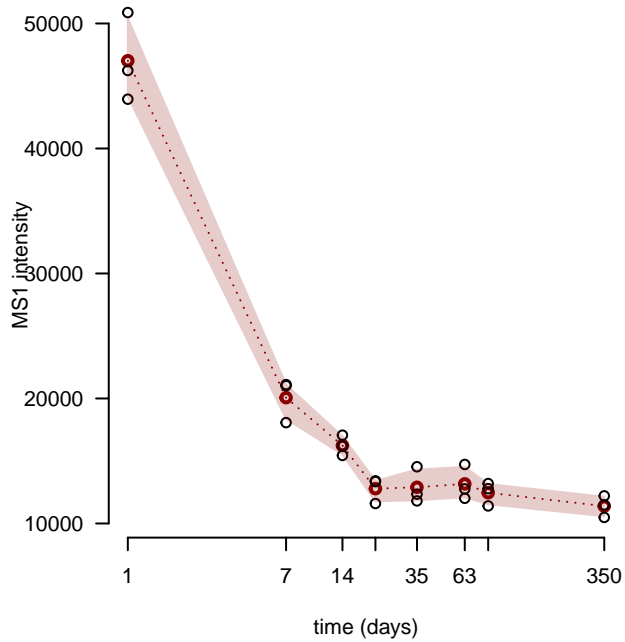

**Q9D8C4**  
**GN=Ifi35**  
interferon-induced protein 35

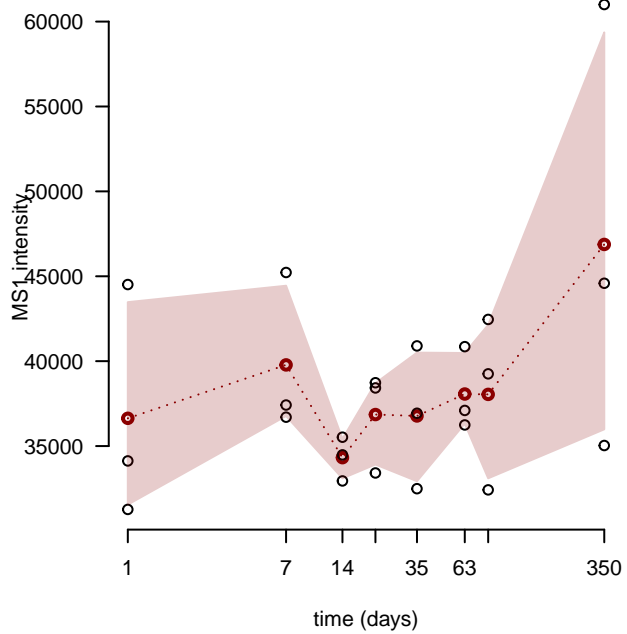

**Q9D8E6**  
**GN=Rpl4**  
ribosomal protein L4

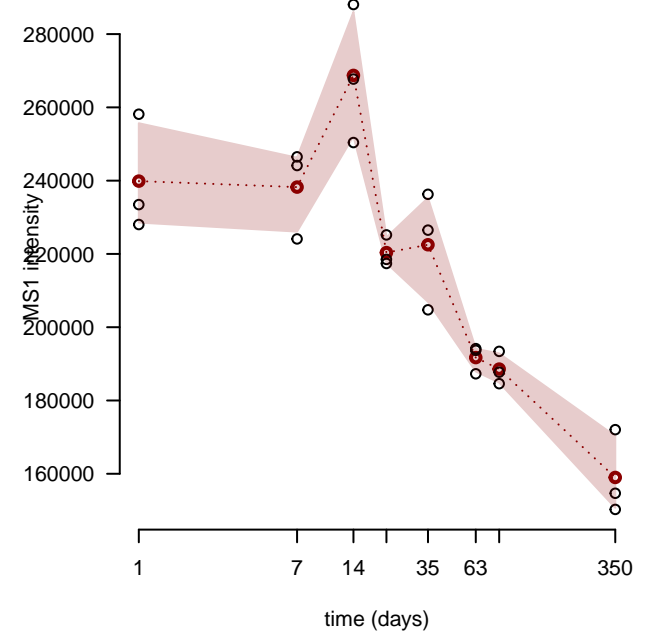

**Q9D8F1**  
**GN=Alkbh4**  
alkB homolog 4, lysine demethylase

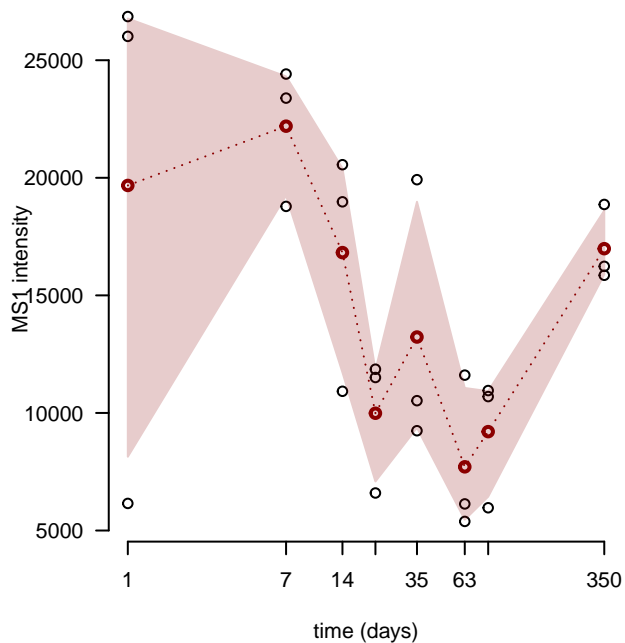

**Q9D8H7**  
**GN=Oma1**  
OMA1 zinc metallopeptidase

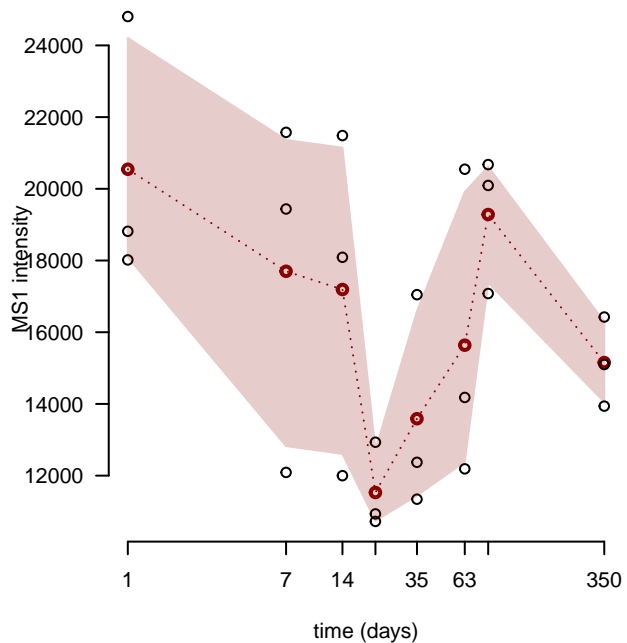

**Q9D8K3**  
**GN=Der13**  
Der1-like domain family, member 3

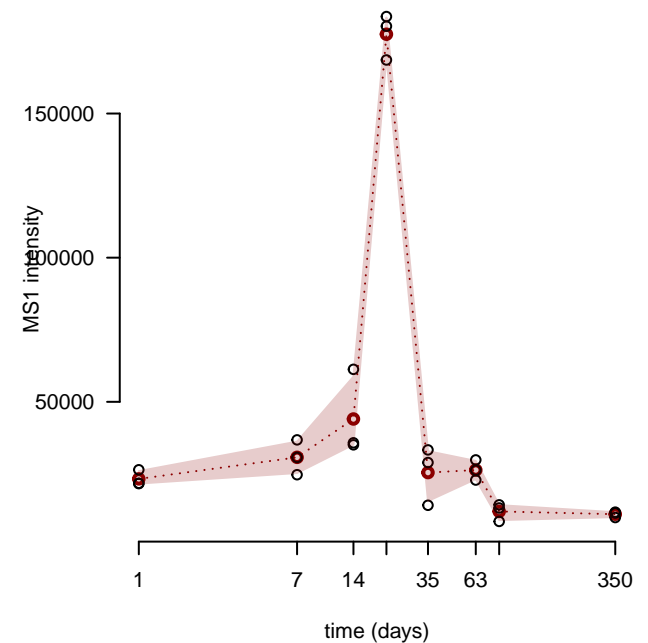

**Q9D8L5**  
**GN=Ccdc91**  
coiled-coil domain containing 91

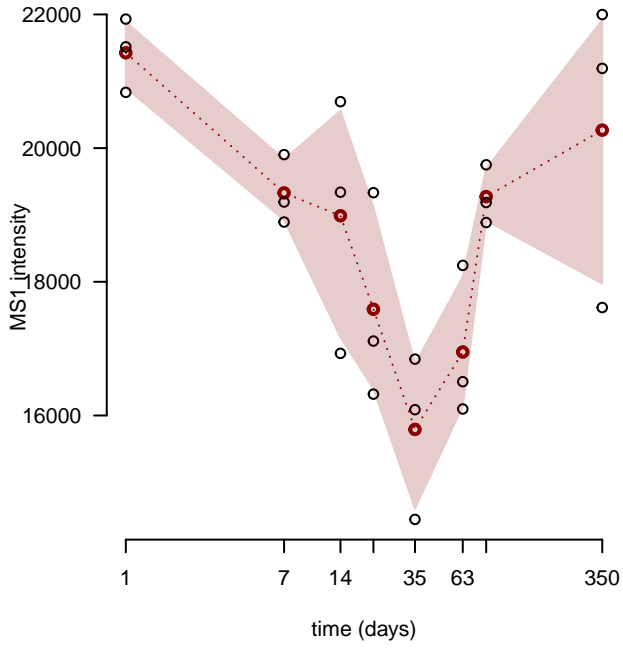

**Q9D8M4**  
**GN=Rpl71**  
ribosomal protein L7-like 1

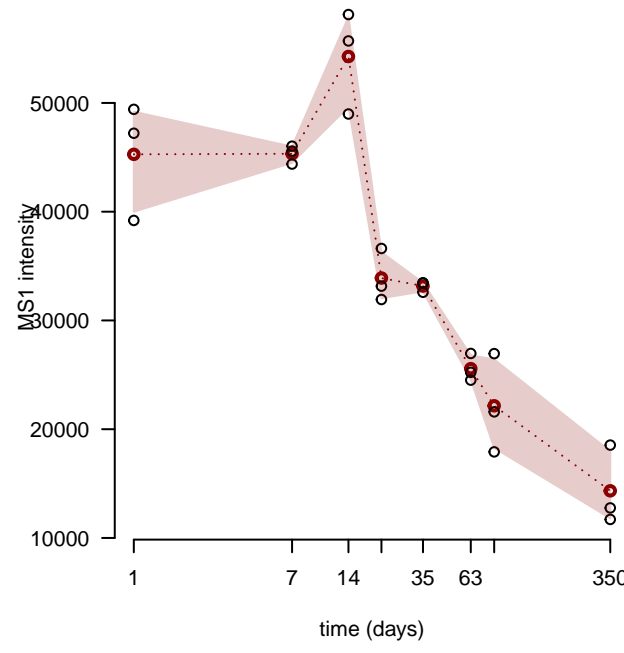

**Q9D8M7**  
**GN=Phf10**  
PHD finger protein 10

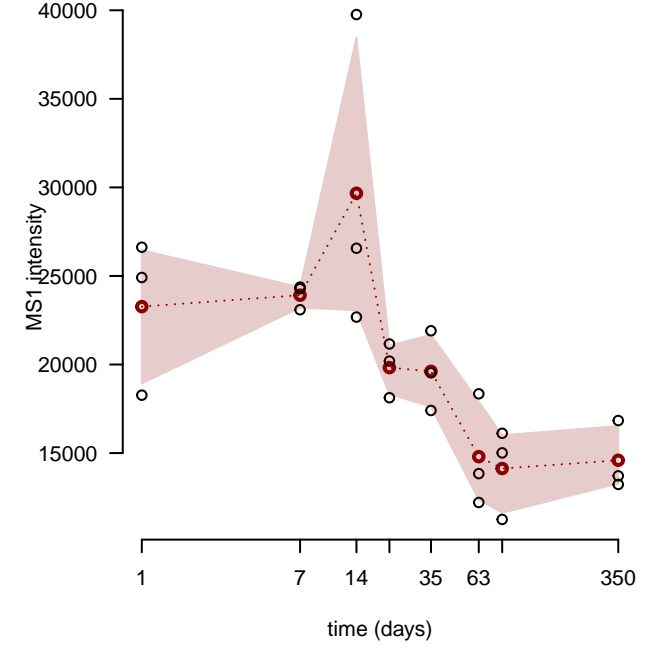

**Q9D8N0**  
**GN=Eef1g**  
eukaryotic translation elongation factor ...

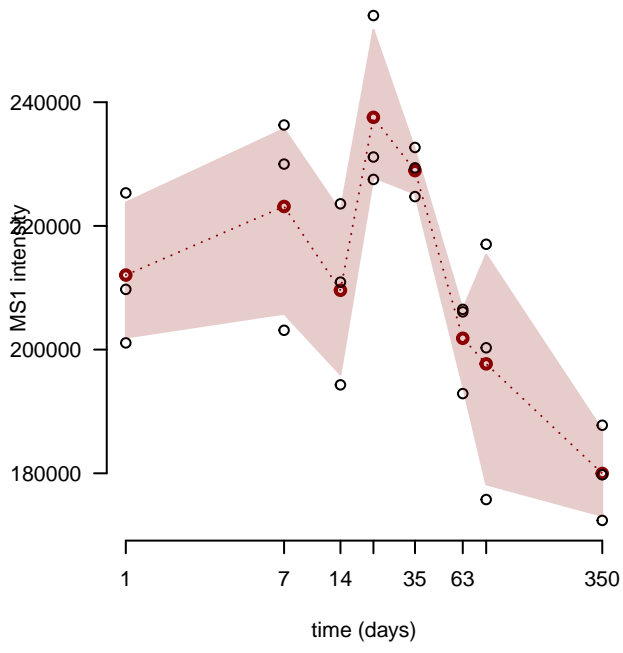

**Q9D8N2**  
**GN=Fam45a**

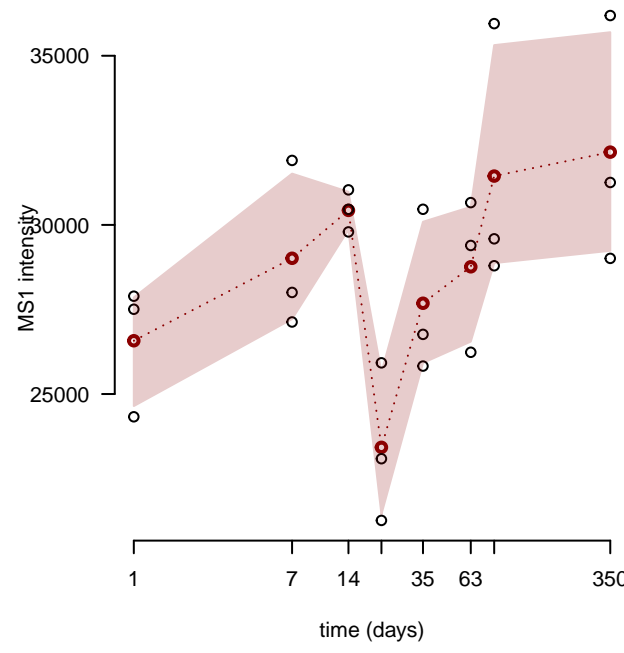

**Q9D8N3**  
**GN=Tmem86a**  
transmembrane protein 86A

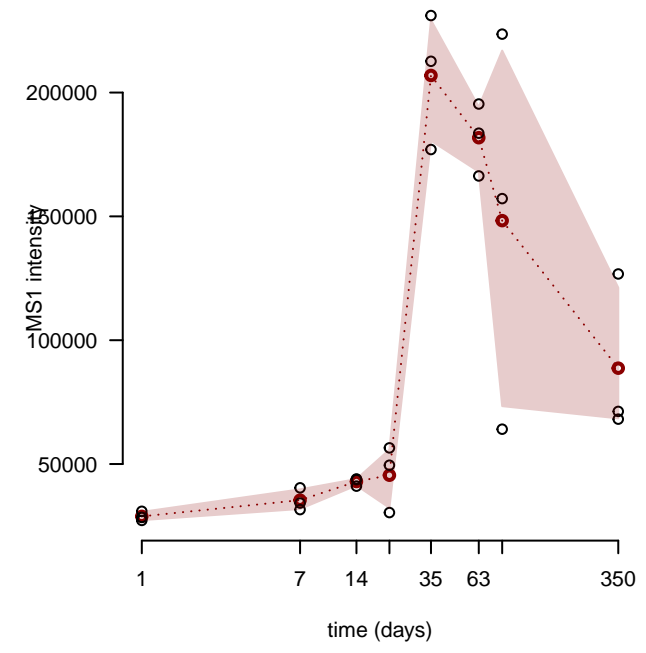

**Q9D8P4**  
**GN=Mrpl17**  
mitochondrial ribosomal protein L17

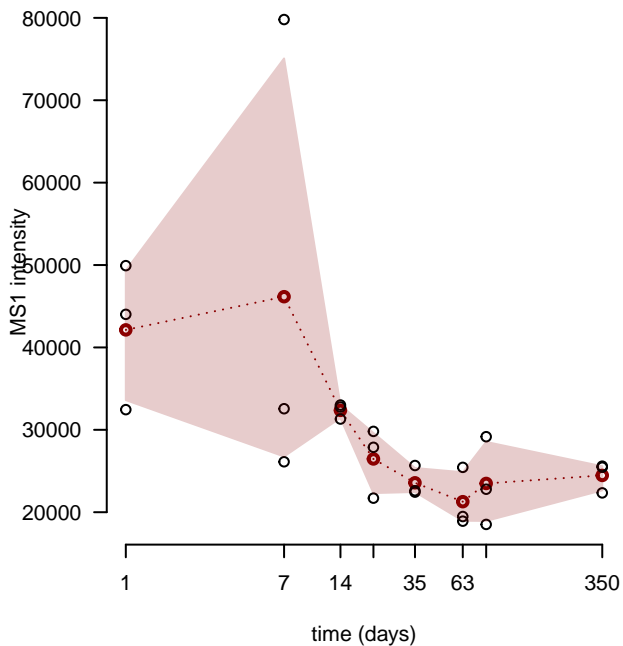

**Q9D8S3**  
**GN=Arfgap3**  
ADP-ribosylation factor GTPase activatin ...

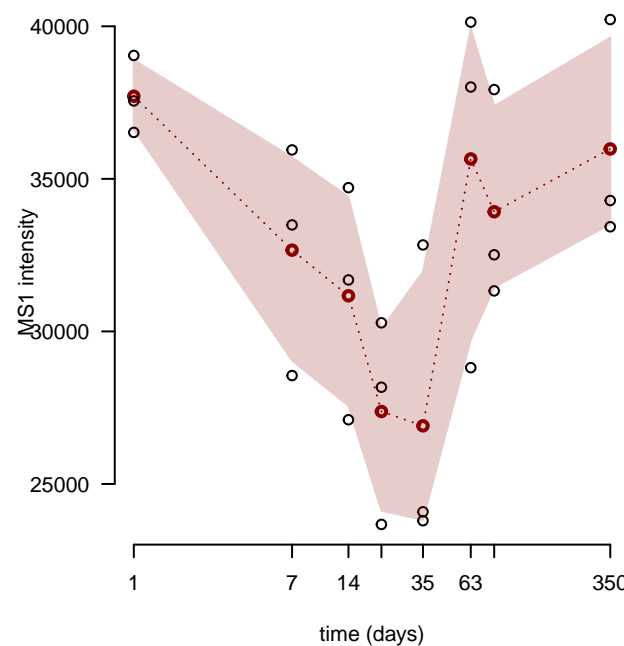

**Q9D8S4**  
**GN=Rexo2**  
RNA exonuclease 2

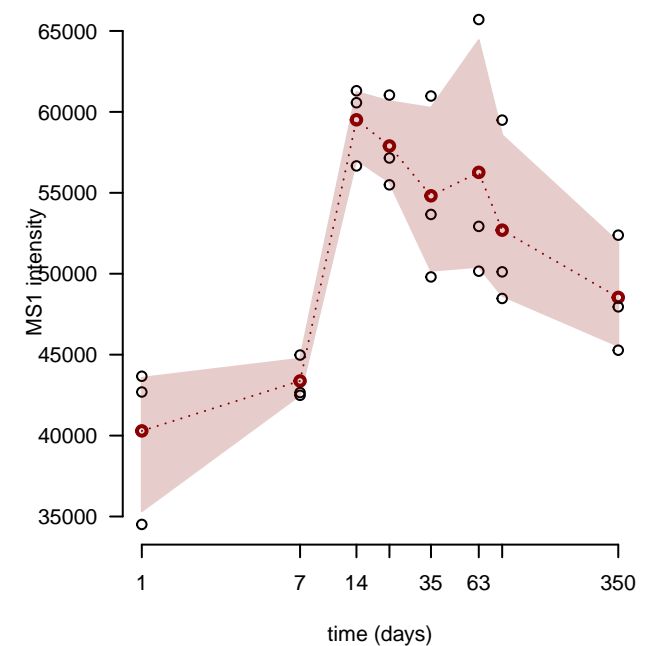

**Q9D8S9**  
**GN=Bola1**  
bola-like 1 (E. coli)

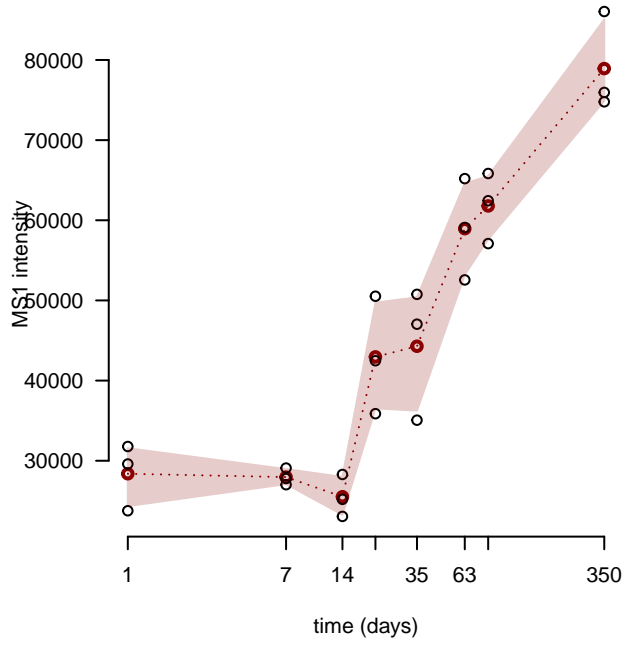

**Q9D8T0**  
**GN=Fam3a**  
FAM3 metabolism regulating signaling mol ...

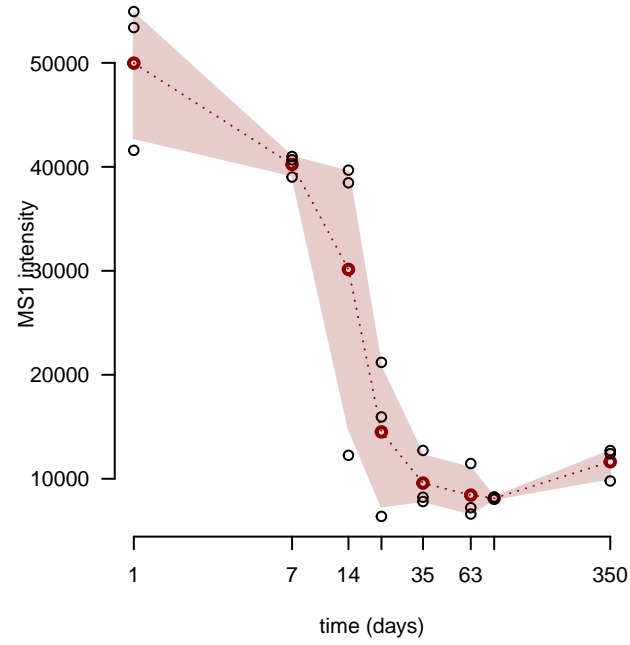

**Q9D8T2**  
**GN=Gsdmdc1**

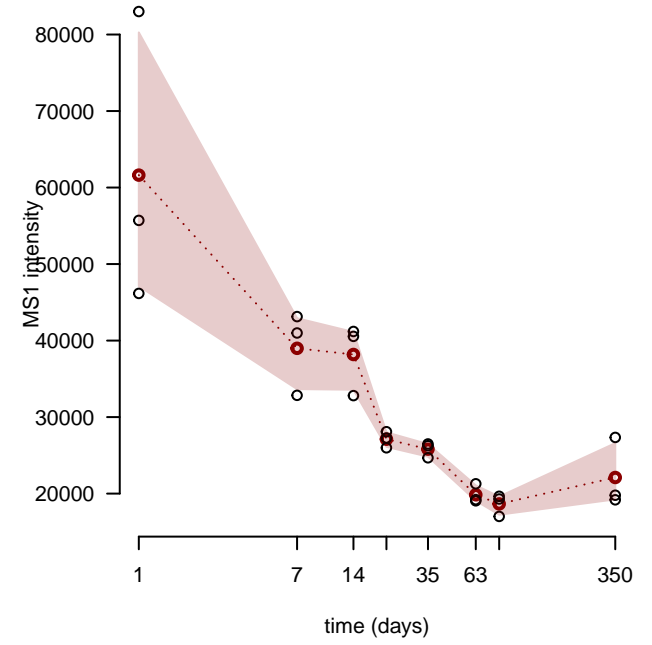

**Q9D8T4**  
**GN=Tvp23b**  
trans-golgi network vesicle protein 23B

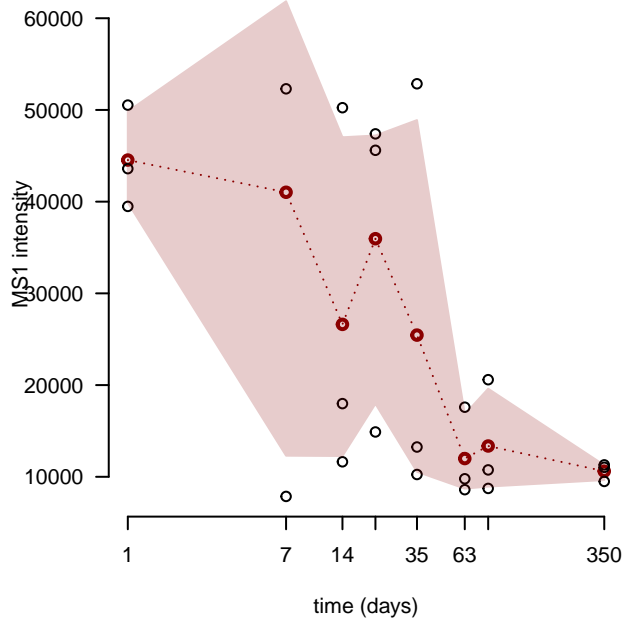

**Q9D8T7**  
**GN=Slirp**  
SRA stem-loop interacting RNA binding pr ...

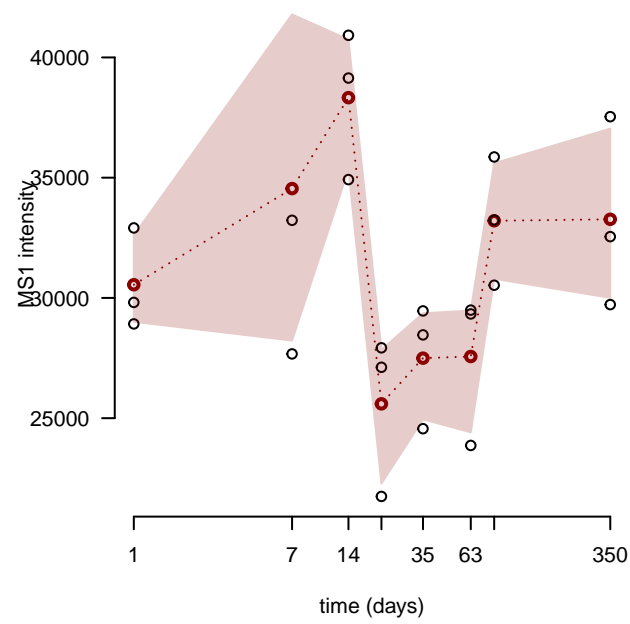

**Q9D8U2**  
**GN=Tmem41a**  
transmembrane protein 41a

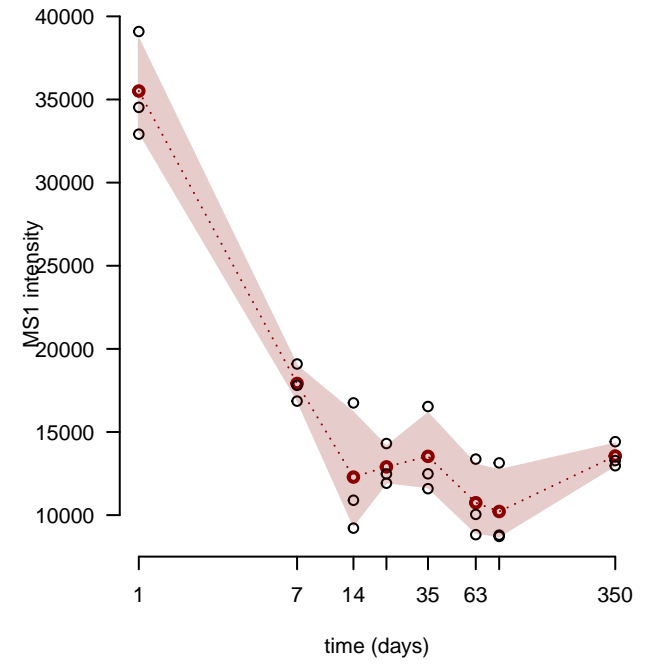

**Q9D8U7**  
**GN=Dtwd1**  
DTW domain containing 1

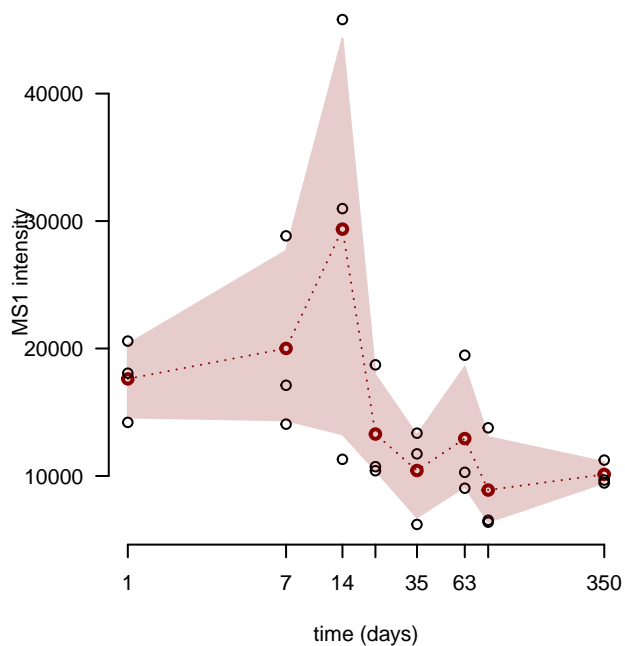

**Q9D8U8**  
**GN=Snx5**  
sorting nexin 5

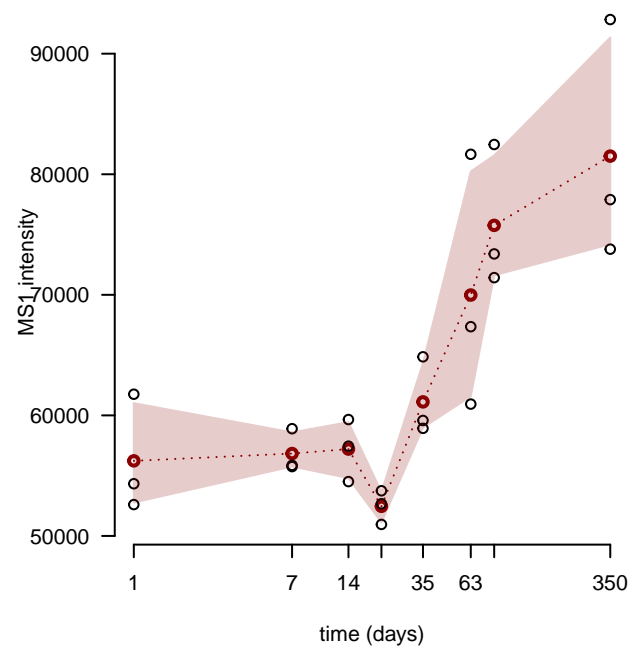

**Q9D8V0**  
**GN=Hm13**

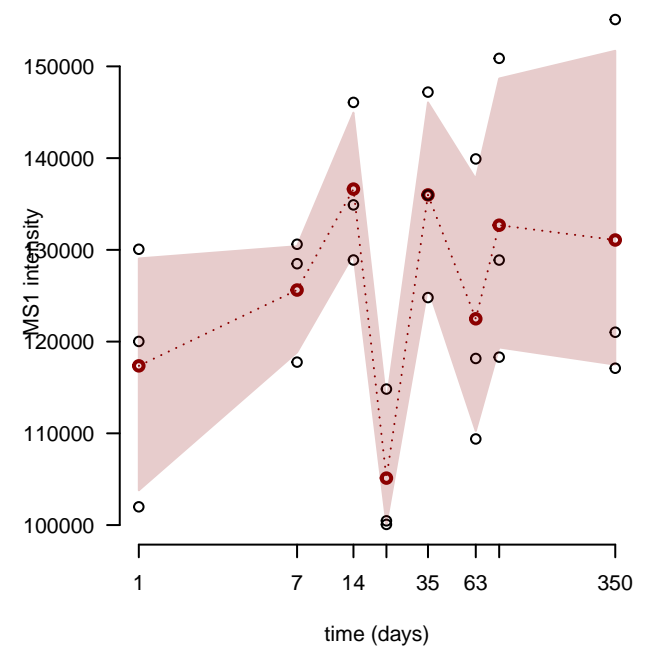

**Q9D8V7**  
**GN=Sec11c**  
SEC11 homolog C, signal peptidase comple ...

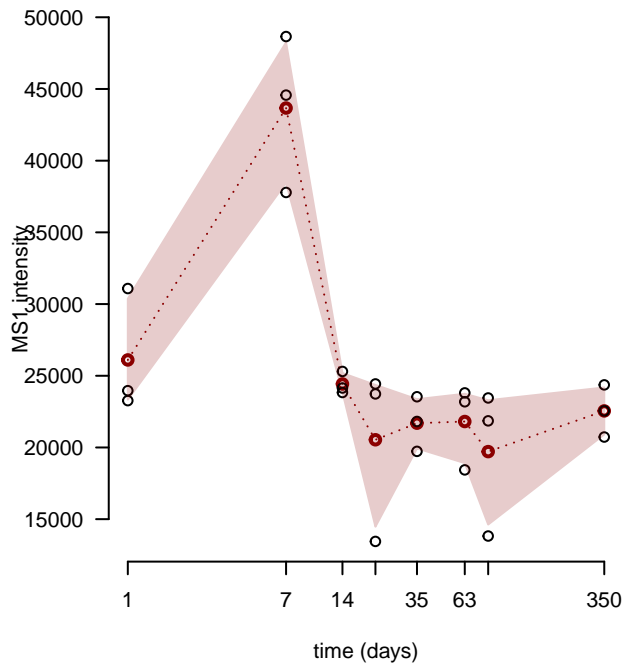

**Q9D8W5**  
**GN=Psmd12**  
proteasome (prosome, macropain) 26S subu ...

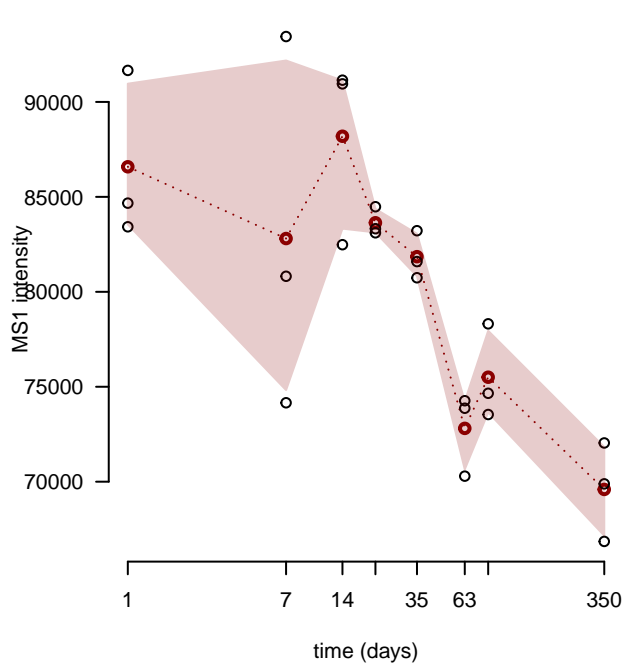

**Q9D8W7**  
**GN=Ociad2**  
OCIA domain containing 2

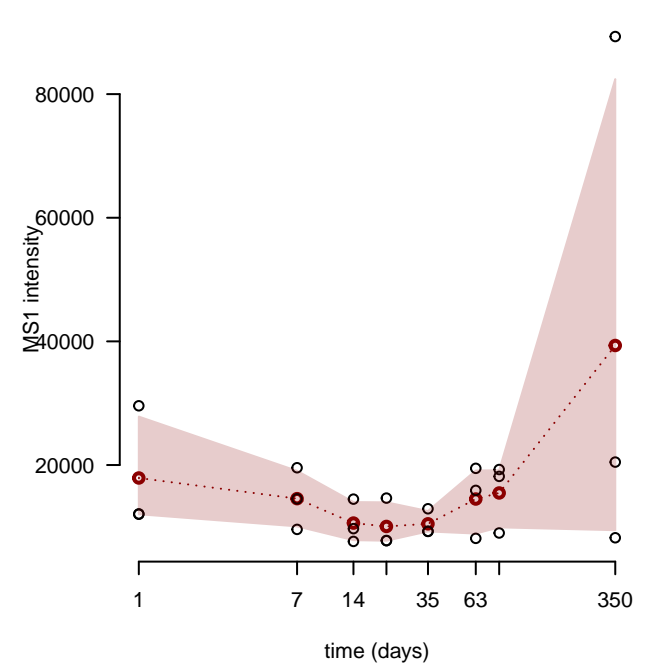

**Q9D8X0**  
**GN=Manbal**  
mannosidase, beta A, lysosomal-like

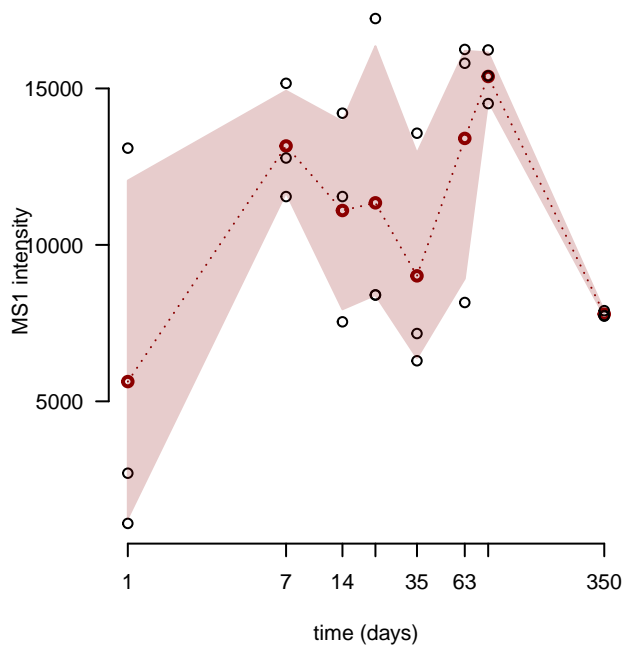

**Q9D8X1**  
**GN=Cutc**  
cutC copper transporter

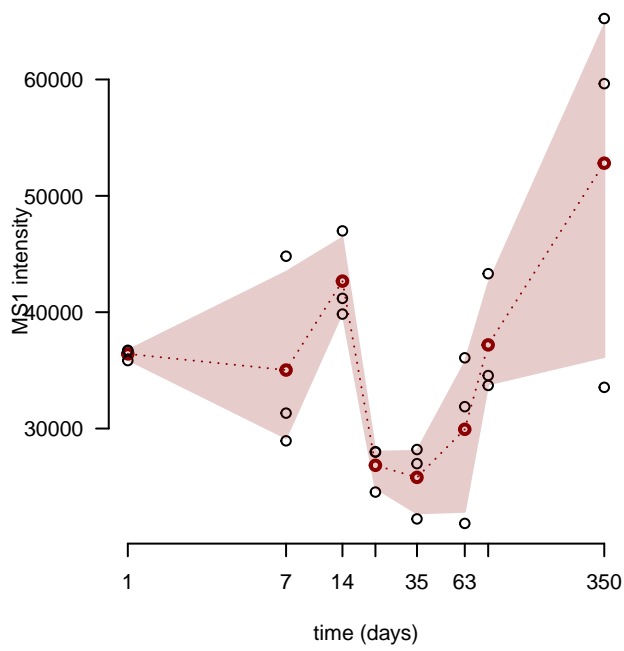

**Q9D8X2**  
**GN=Ccdc124**  
coiled-coil domain containing 124

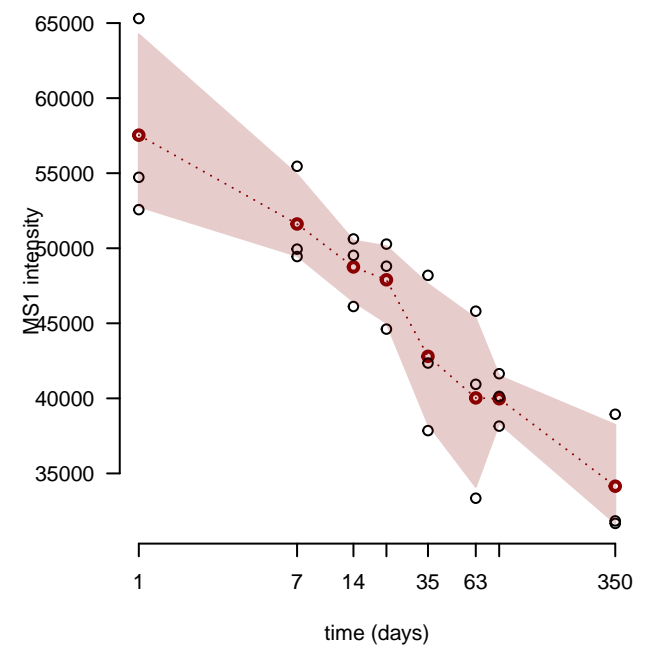

**Q9D8X5**  
**GN=Cnot8**  
CCR4-NOT transcription complex, subunit ...

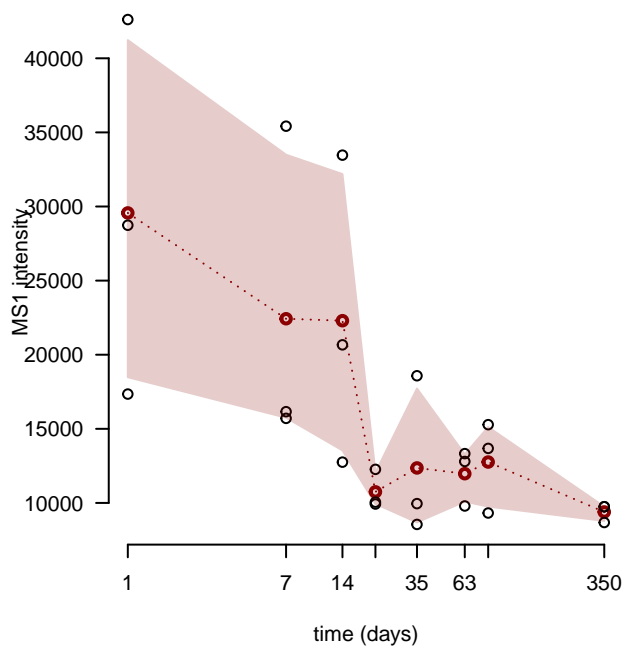

**Q9D8Y0**  
**GN=Efhd2**  
EF hand domain containing 2

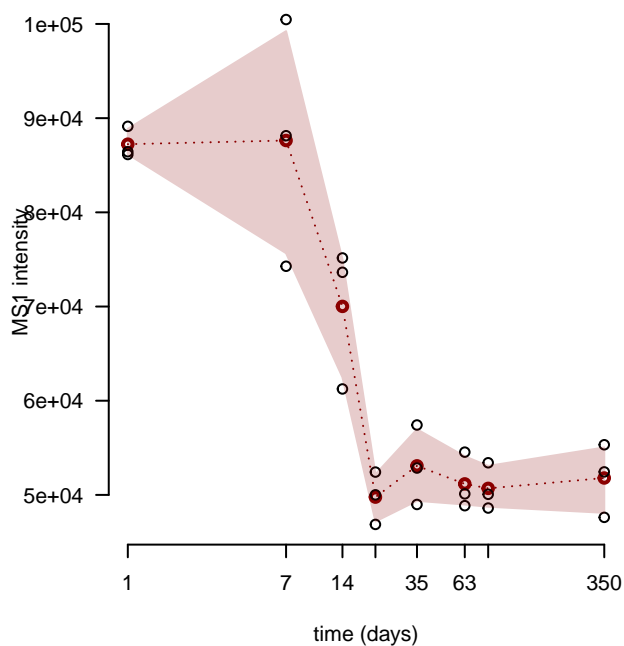

**Q9D8Y1**  
**GN=Tmem126a**  
transmembrane protein 126A

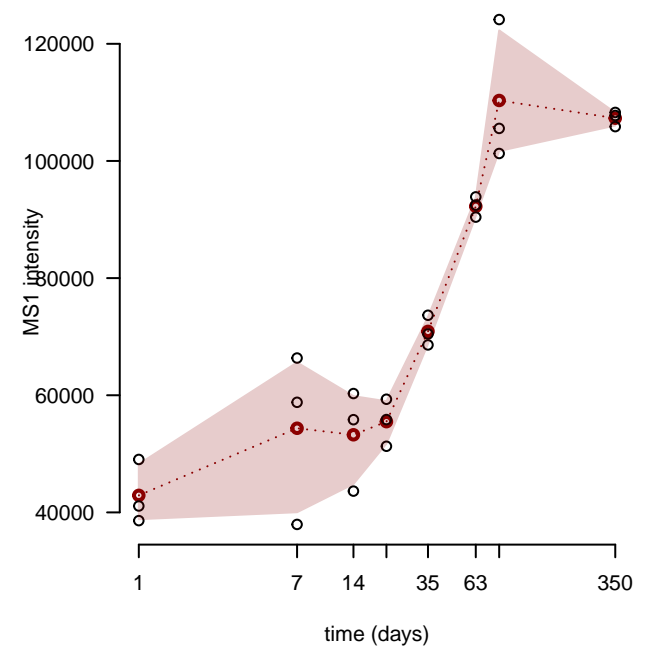

**Q9D8Y8**  
**GN=Ing5**

inhibitor of growth family, member 5

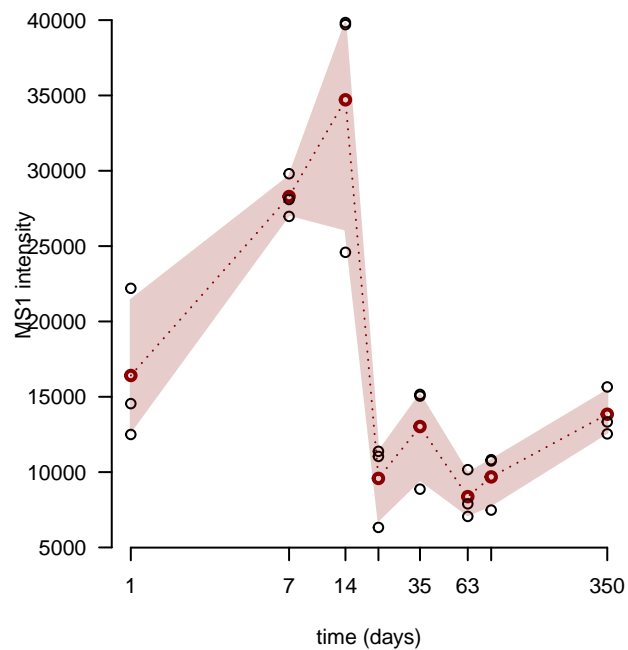

**Q9D8Z1**  
**GN=Ascc1**

activating signal cointegrator 1 complex ...

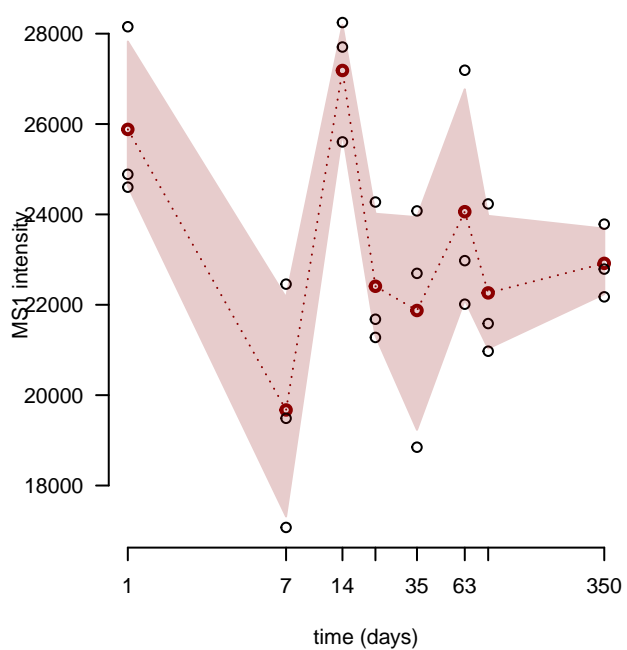

**Q9D8Z6**  
**GN=Atg101**

autophagy related 101

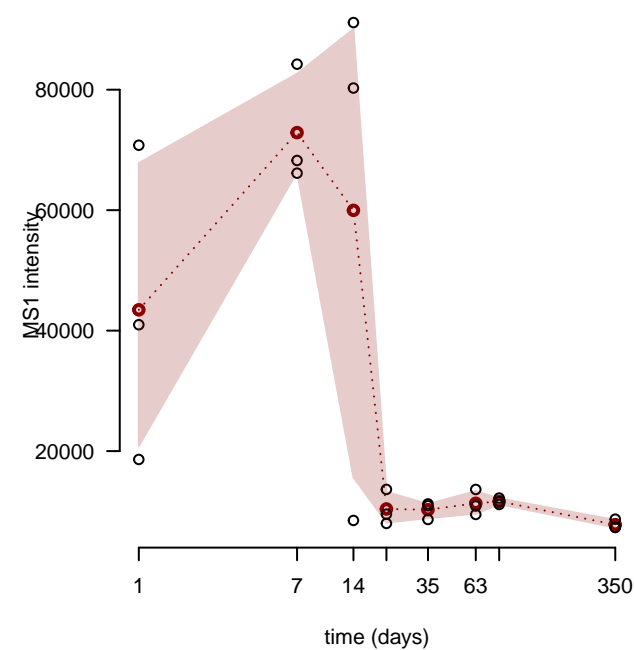

**Q9D902**  
**GN=Gtf2e2**

general transcription factor II E, polyp ...

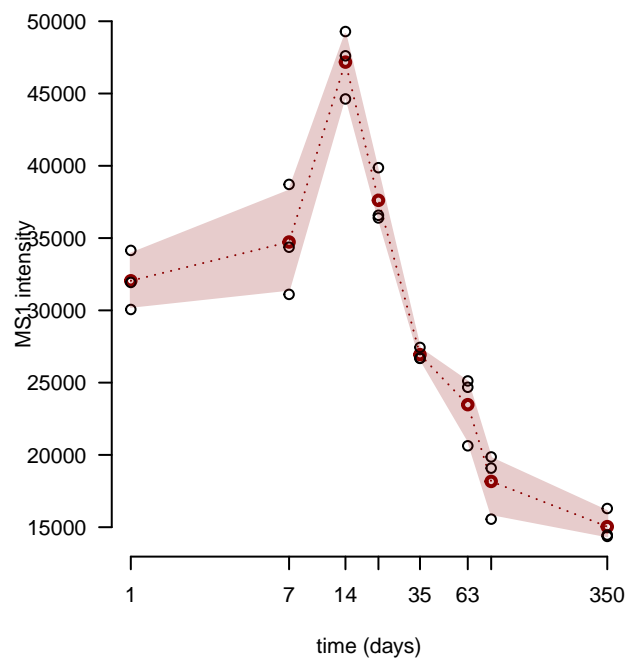

**Q9D903**  
**GN=Ebna1bp2**

EBNA1 binding protein 2

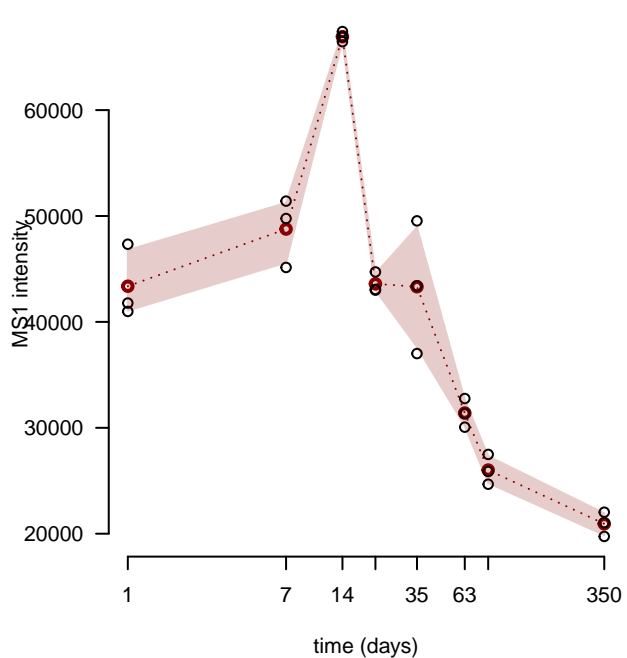

**Q9D906**  
**GN=Atg7**

autophagy related 7

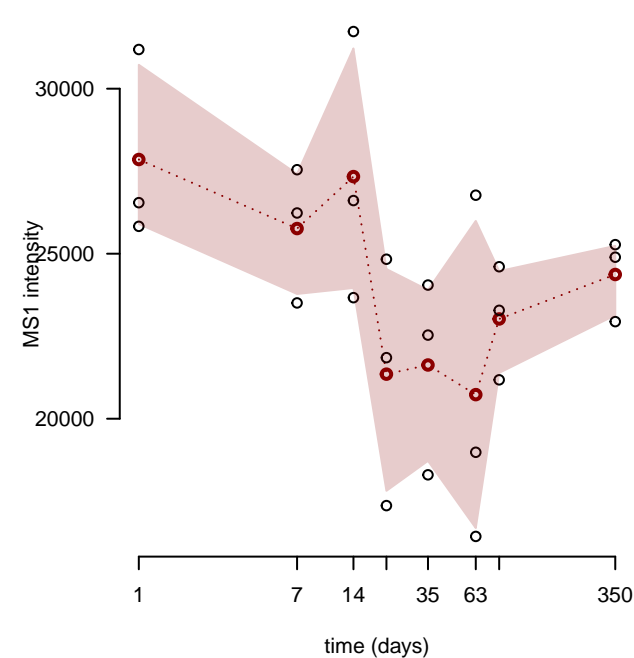

**Q9D920**  
**GN=Borcs5**

BLOC-1 related complex subunit 5

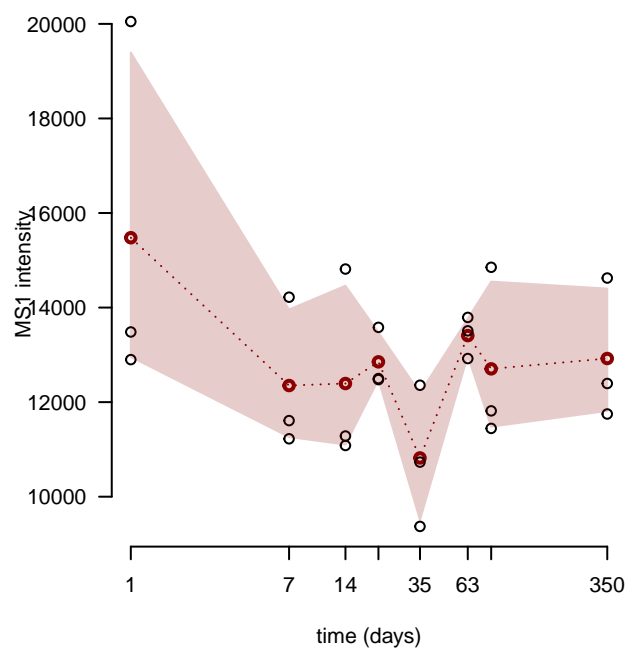

**Q9D924**  
**GN=Isca1**

iron-sulfur cluster assembly 1

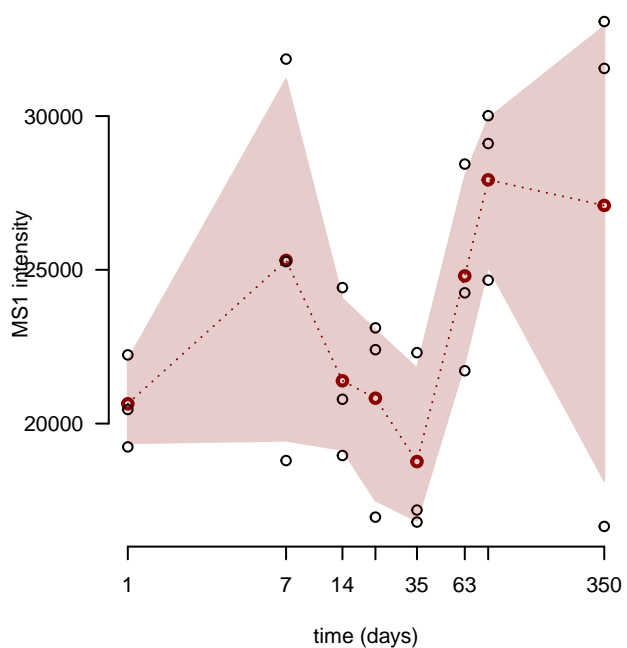

**Q9D937**  
**GN=**

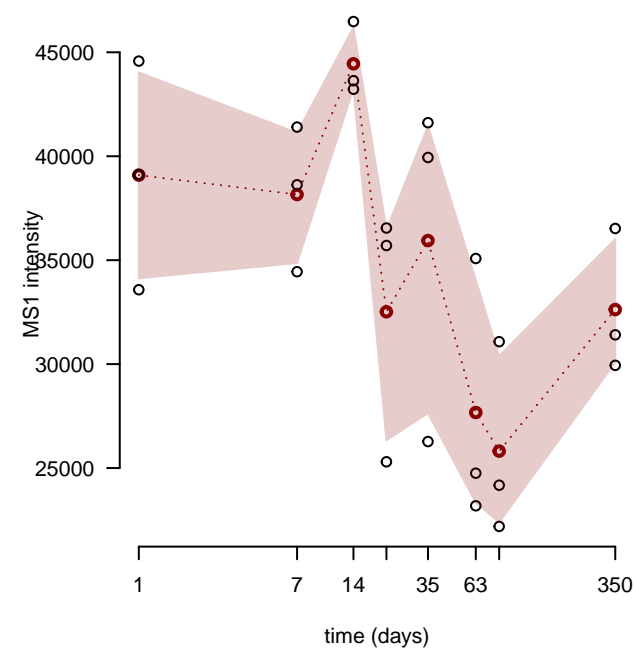

**Q9D938**  
**GN=Tmem160**  
transmembrane protein 160

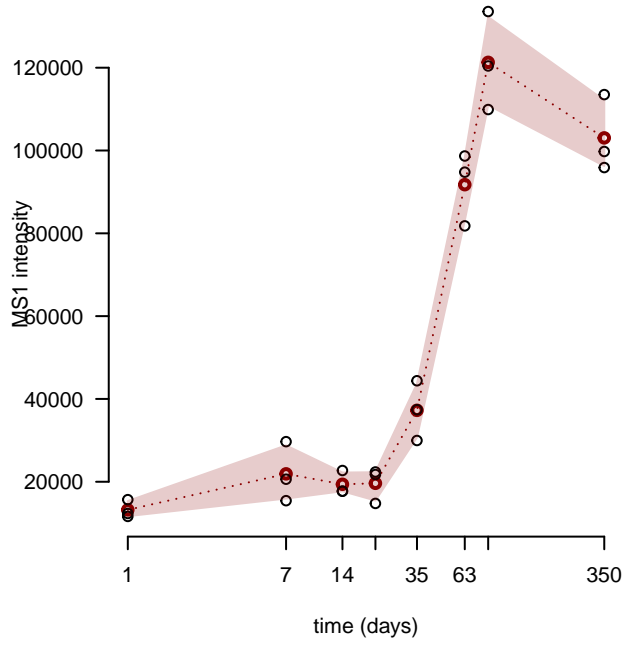

**Q9D945**  
**GN=Llph**  
LLP homolog, long-term synaptic facilita ...

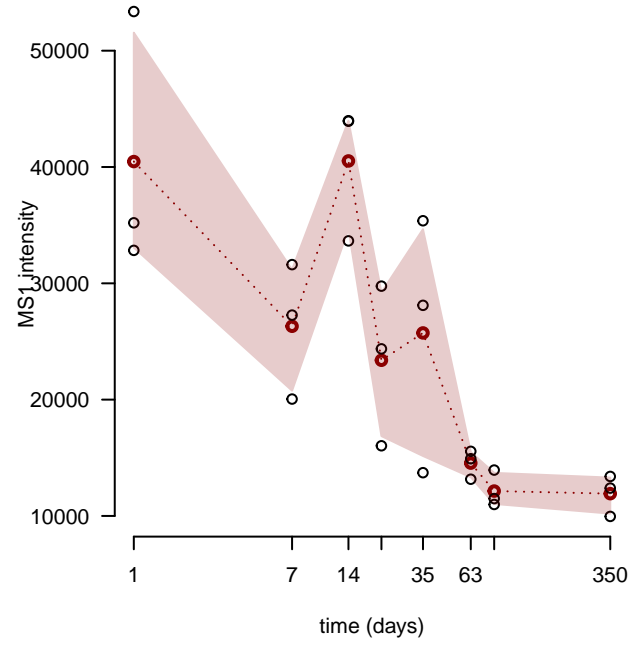

**Q9D952**  
**GN=Evpl**  
envoplakin

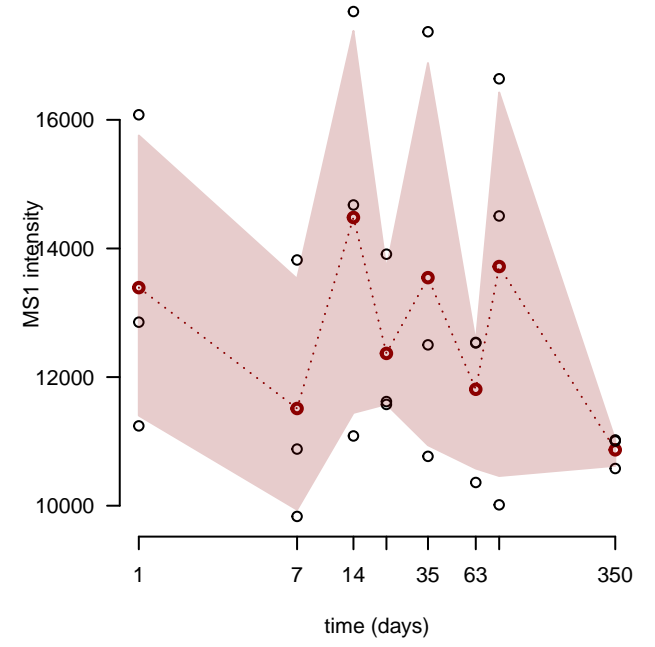

**Q9D958**  
**GN=Spcs1**  
signal peptidase complex subunit 1 homol ...

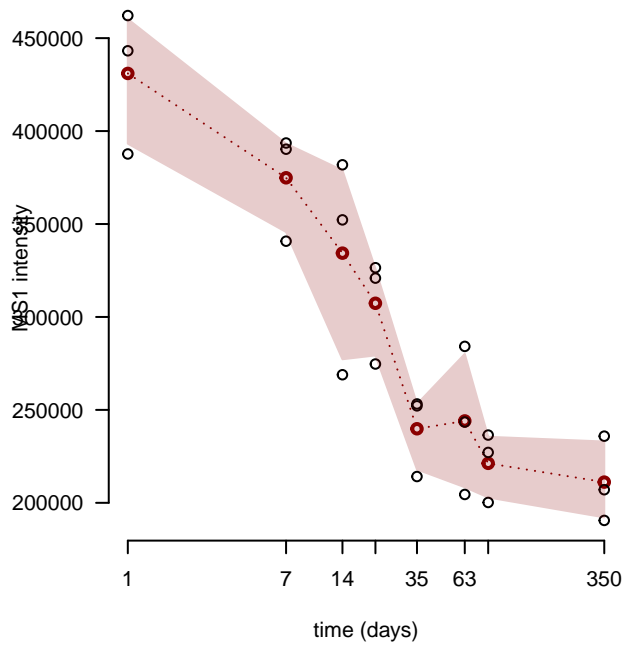

**Q9D964**  
**GN=Gatm**  
glycine amidinotransferase (L-arginine:g ...

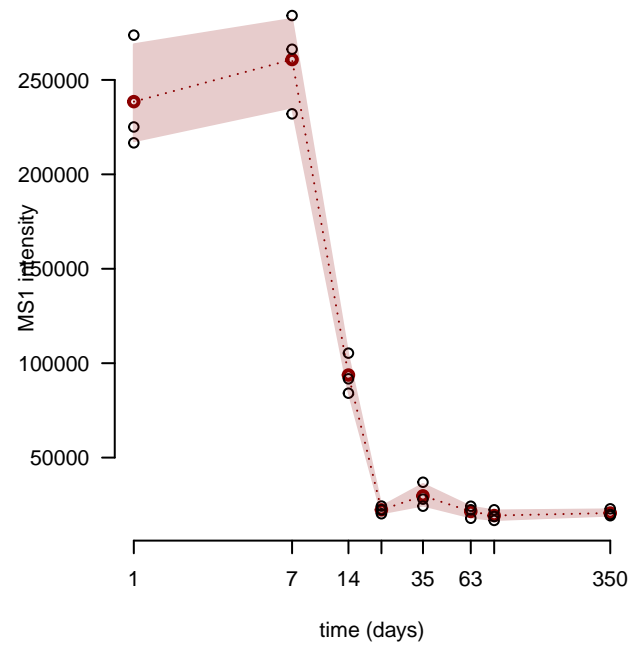

**Q9D967**  
**GN=Mdp1**  
magnesium-dependent phosphatase 1

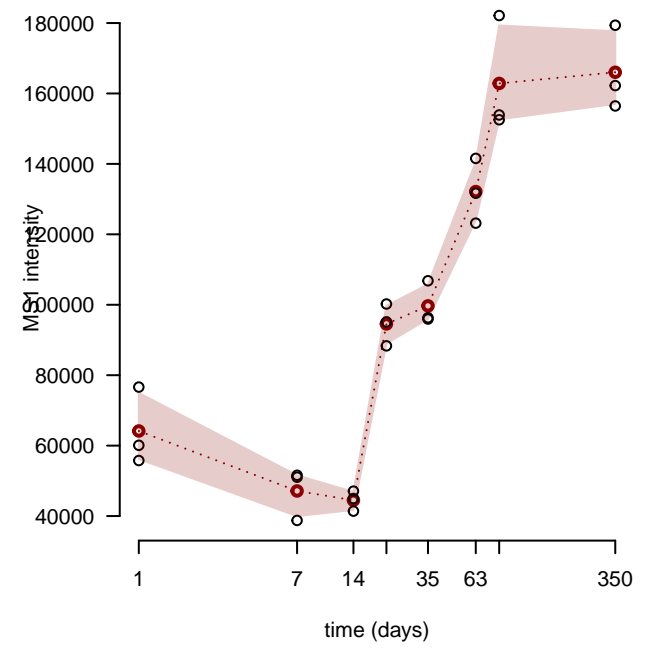

**Q9D968**  
**GN=Hcfc2**  
host cell factor C2

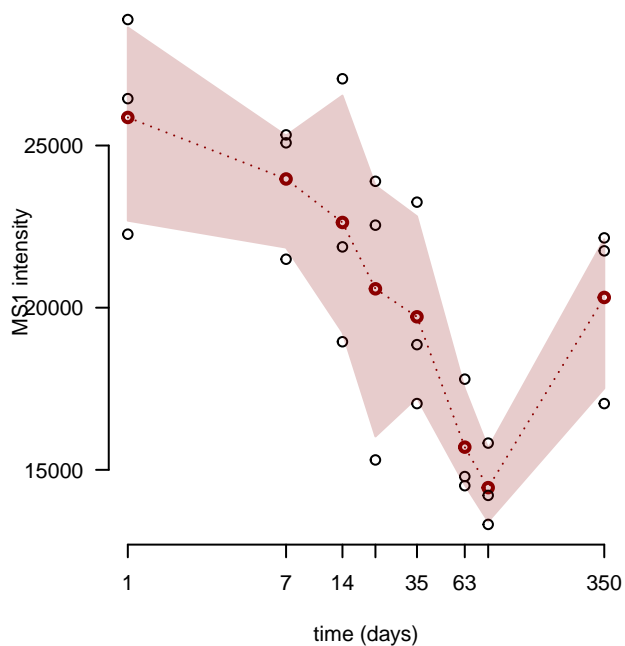

**Q9D975**  
**GN=Srxn1**  
sulfiredoxin 1 homolog (S. cerevisiae)

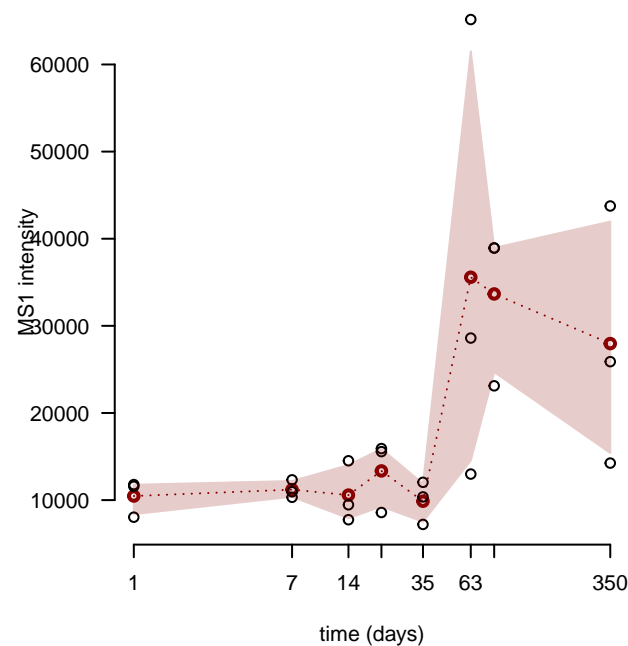

**Q9D9B4**  
**GN=Lrmda**  
leucine rich melanocyte differentiation ...

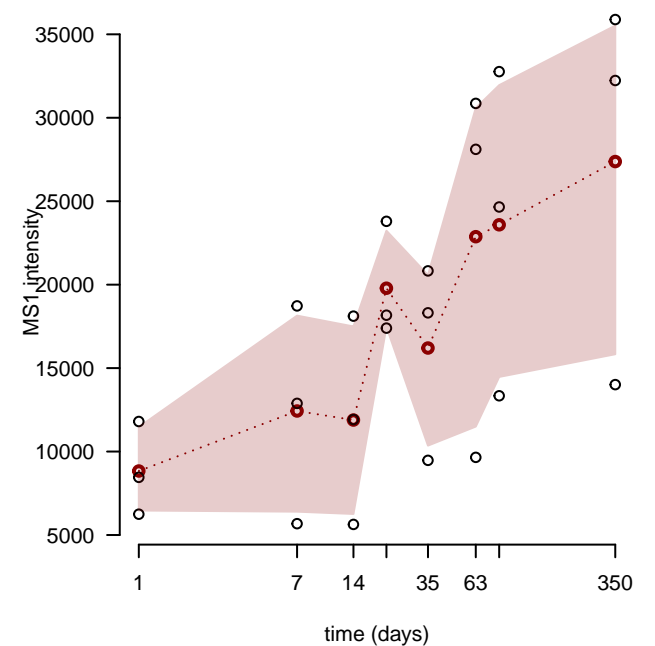



**Q9D9E0**  
**GN=Slc22a17**  
solute carrier family 22 (organic cation ...

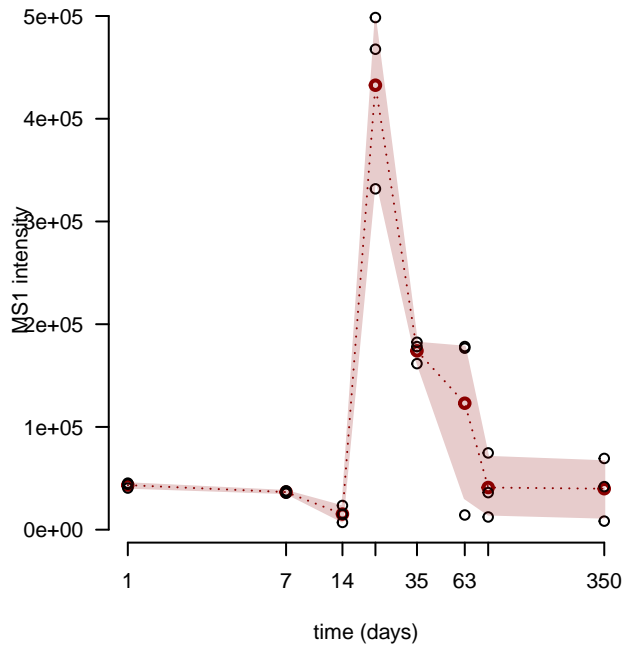

**Q9D9G3**  
**GN=Chic2**  
cysteine-rich hydrophobic domain 2

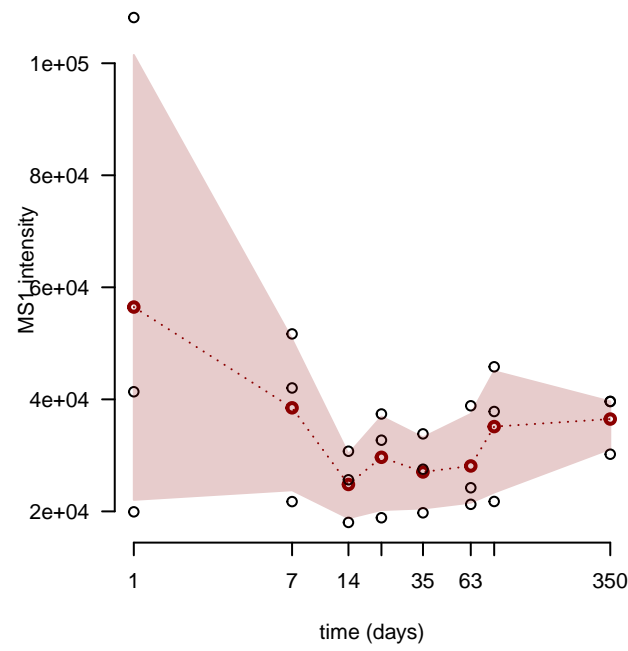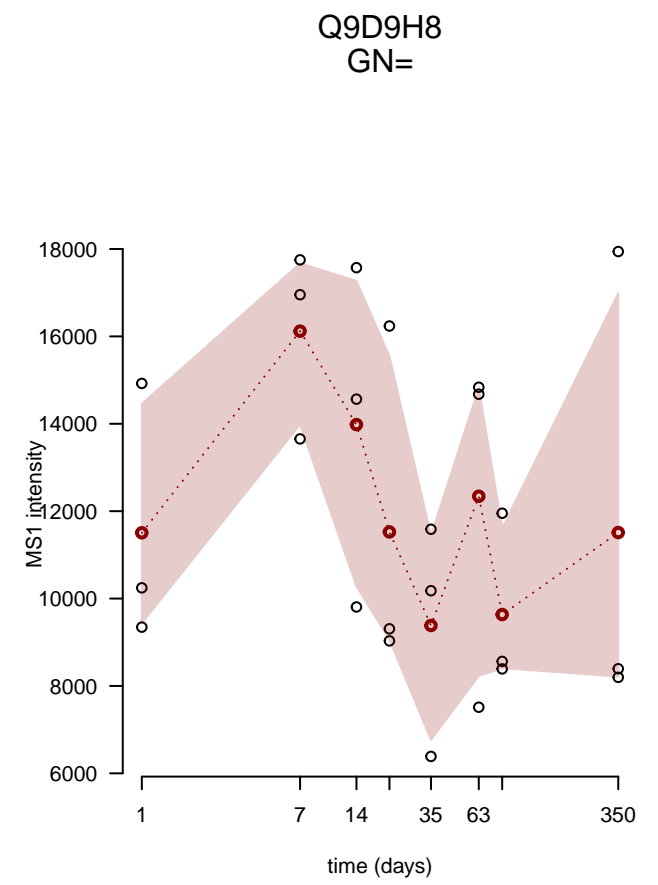

**Q9D9I4**  
**GN=Tbc1d20**  
TBC1 domain family, member 20

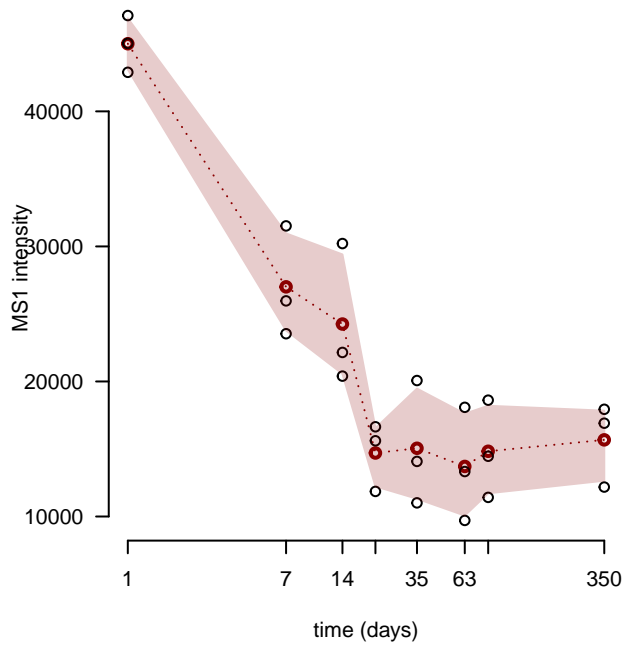

**Q9D9K3**  
**GN=Aven**  
apoptosis, caspase activation inhibitor

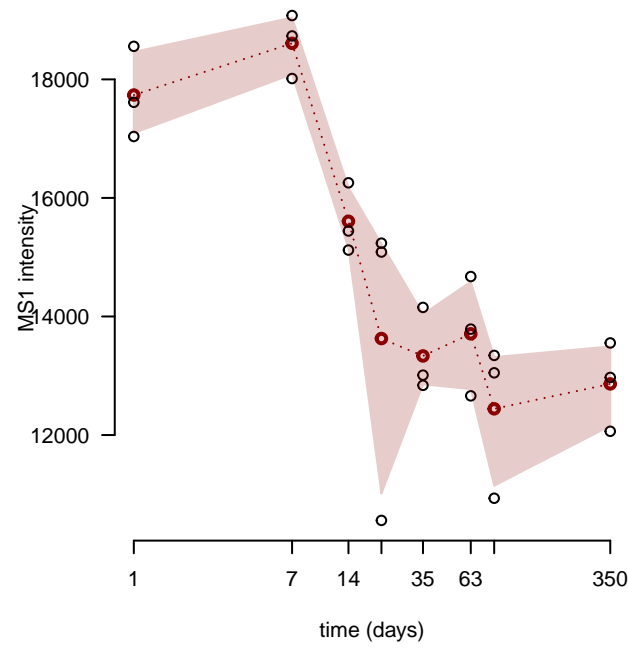

**Q9D9V3**  
**GN=Echdc1**  
enoyl Coenzyme A hydratase domain contai ...

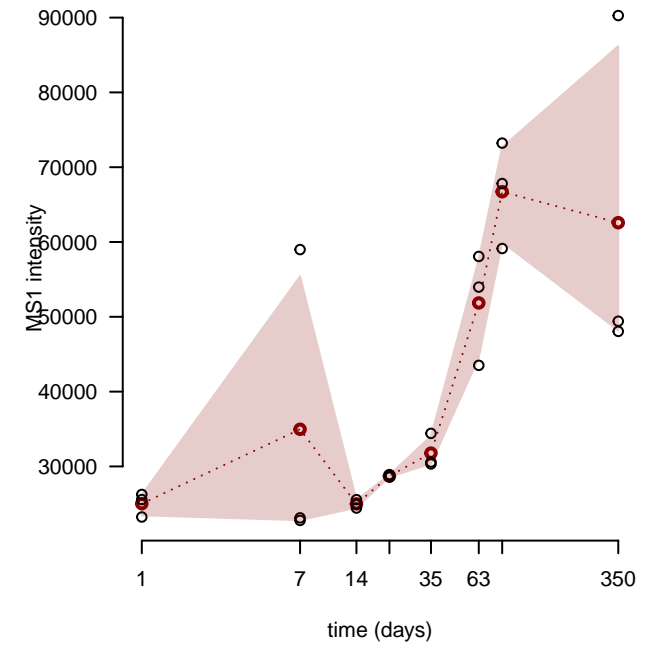

**Q9D9Z5**  
**GN=Dda1**  
DET1 and DDB1 associated 1

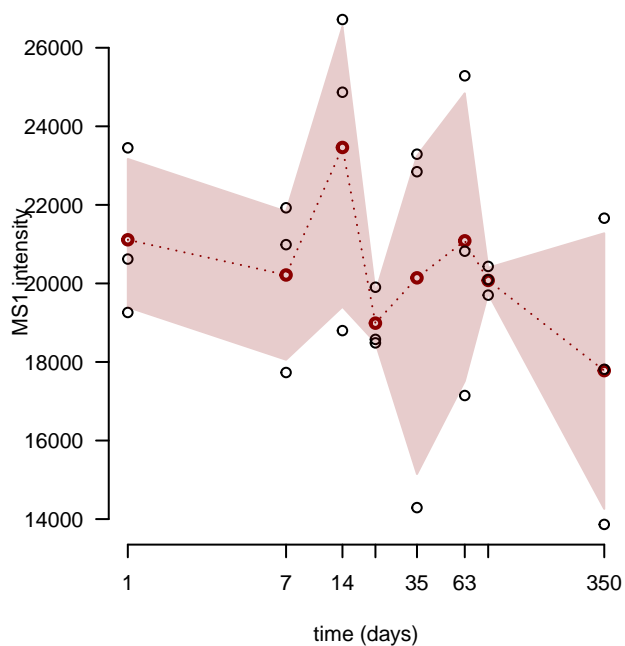

**Q9DA08**  
**GN=Sgf29**  
SAGA complex associated factor 29

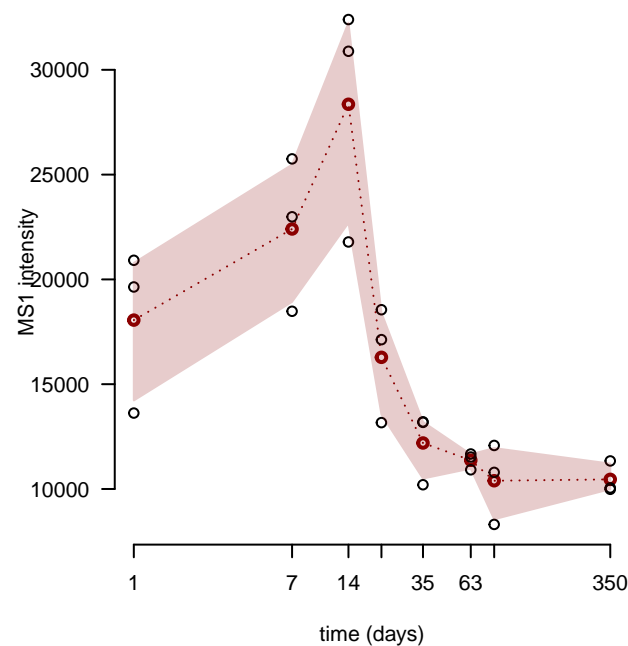

**Q9DA19**  
**GN=Cir1**  
corepressor interacting with RBPJ, 1

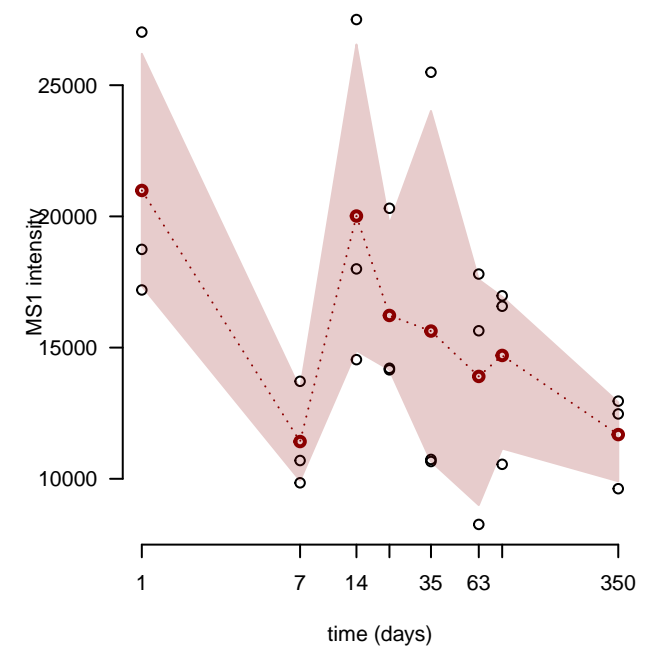

**Q9DA69**  
**GN=Ift43**  
intraflagellar transport 43

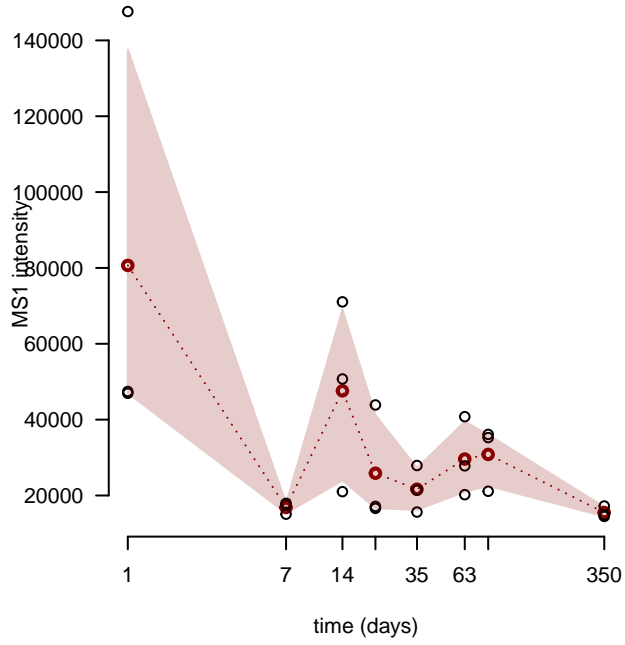

**Q9DA79**  
**GN=Dpep3**  
dipeptidase 3

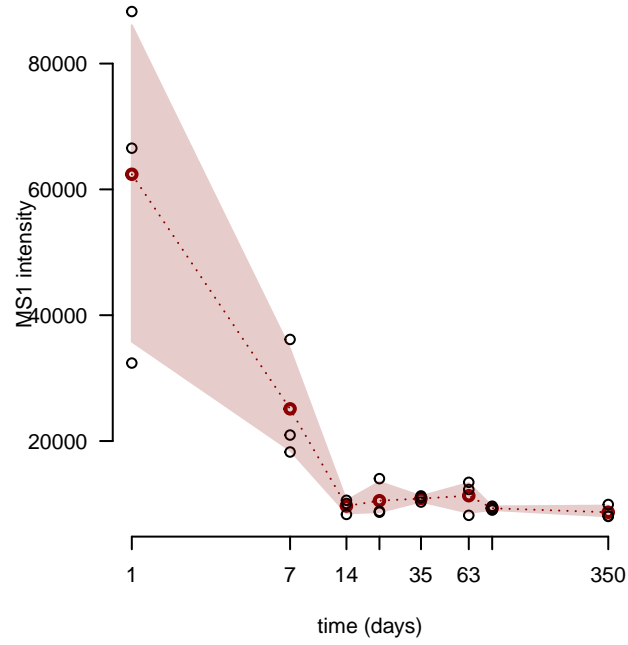

**Q9DAA6**  
**GN=Exosc1**  
exosome component 1

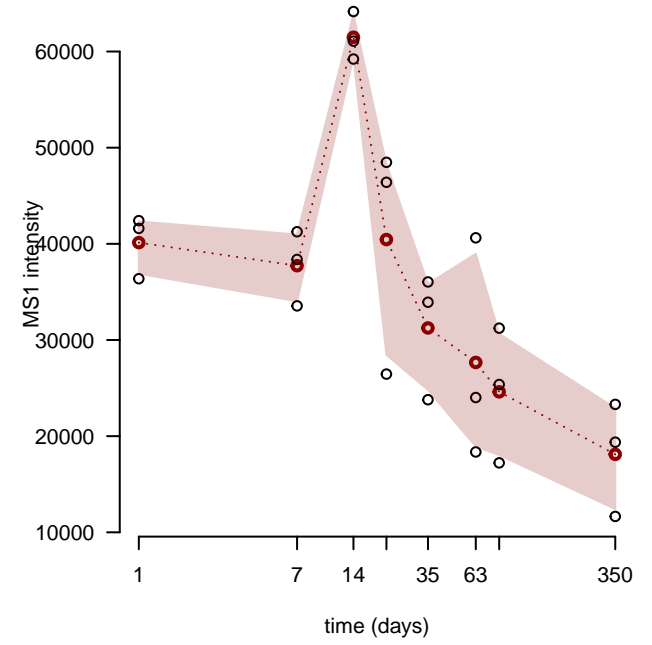

**Q9DAD6**  
**GN=Pfn3**  
profilin 3

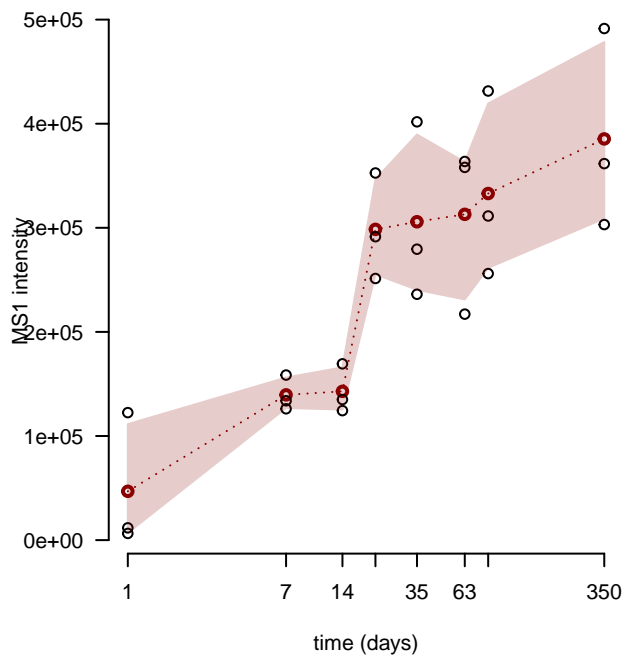

**Q9DAI2**  
**GN=Ift22**  
intraflagellar transport 22

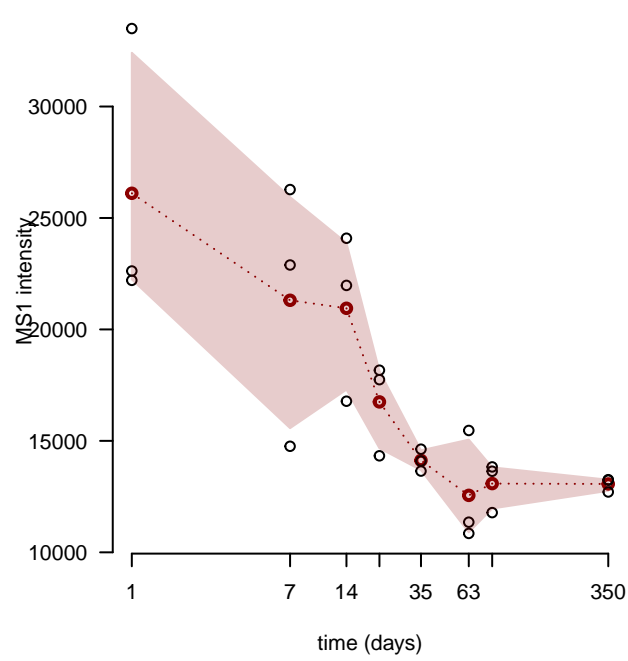

**Q9DAJ4**  
**GN=Wdr83**  
WD repeat domain containing 83

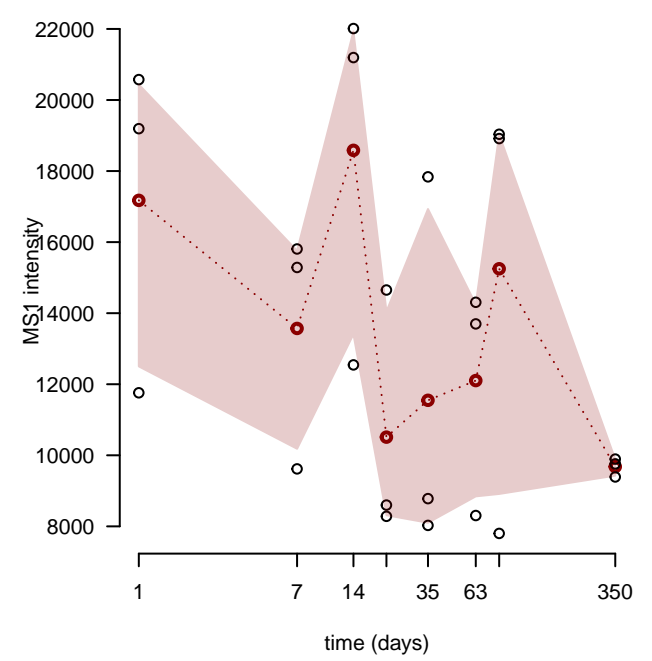

**Q9DAK9**  
**GN=Phpt1**  
phosphohistidine phosphatase 1

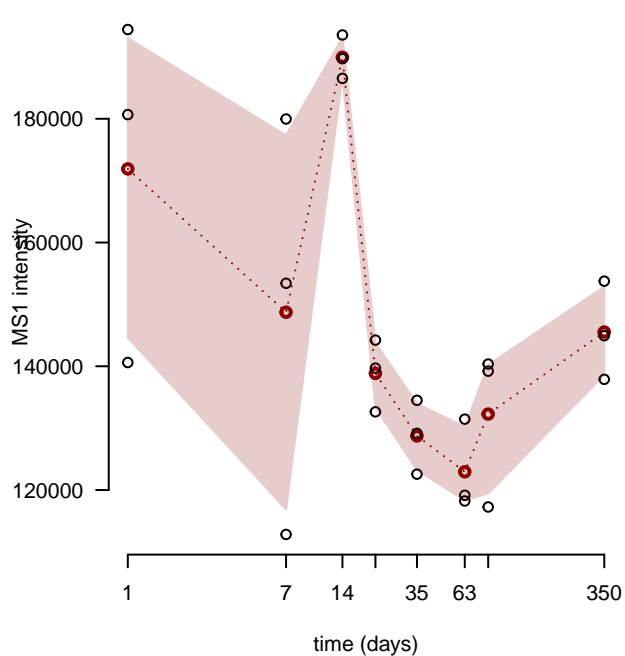

**Q9DAM5**  
**GN=Slc25a19**  
solute carrier family 25 (mitochondrial ...

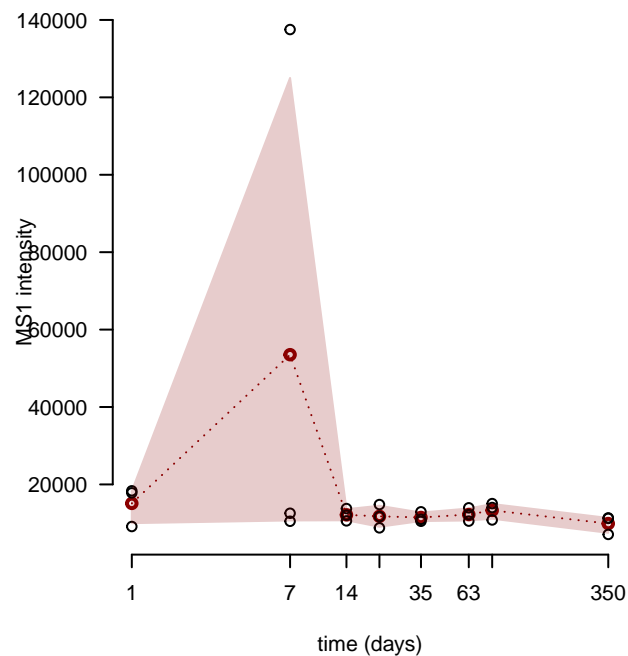

**Q9DAM7**  
**GN=Tmem263**  
transmembrane protein 263

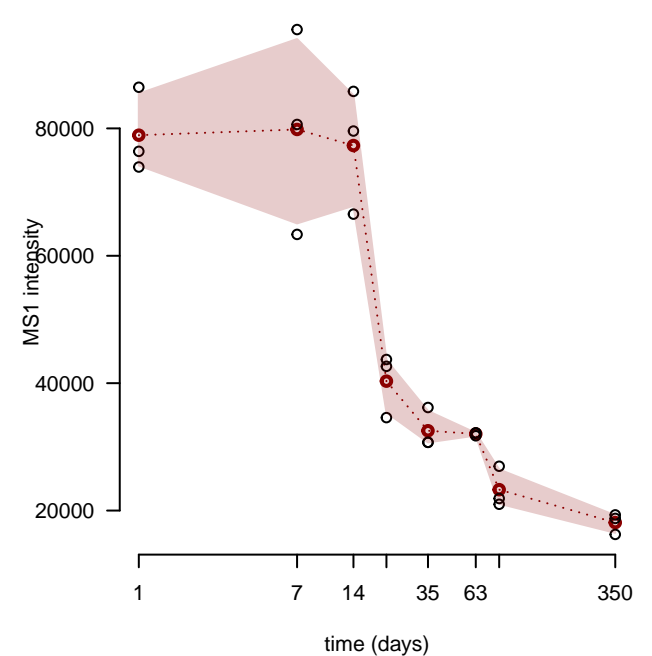

**Q9DAN6**  
**GN=Gtsf1**  
gametocyte specific factor 1

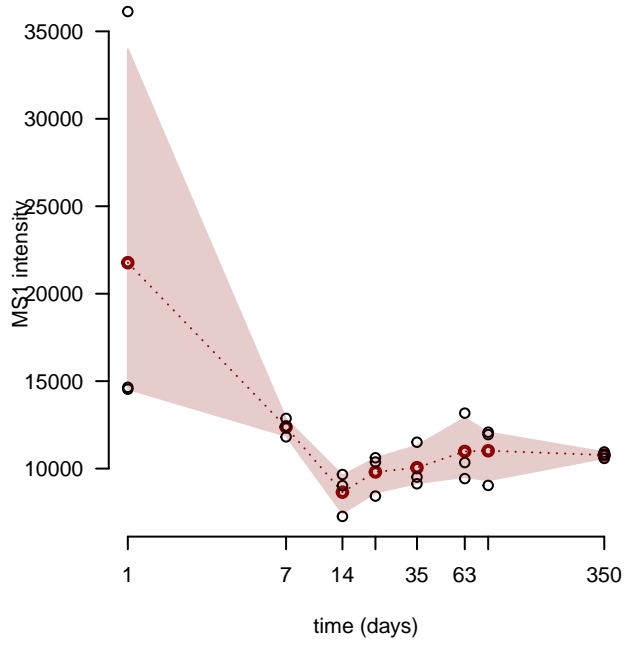

**Q9DAN8**  
**GN=Cst12**  
cystatin 12

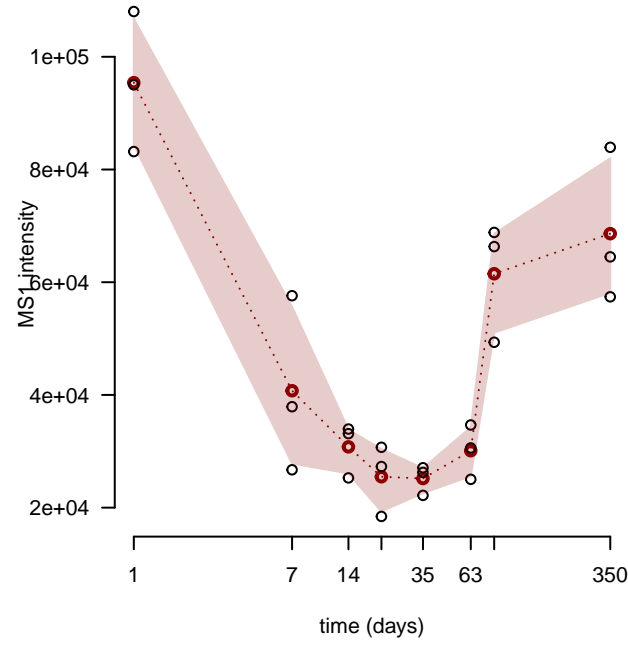

**Q9DAR7**  
**GN=Dcps**  
decapping enzyme, scavenger

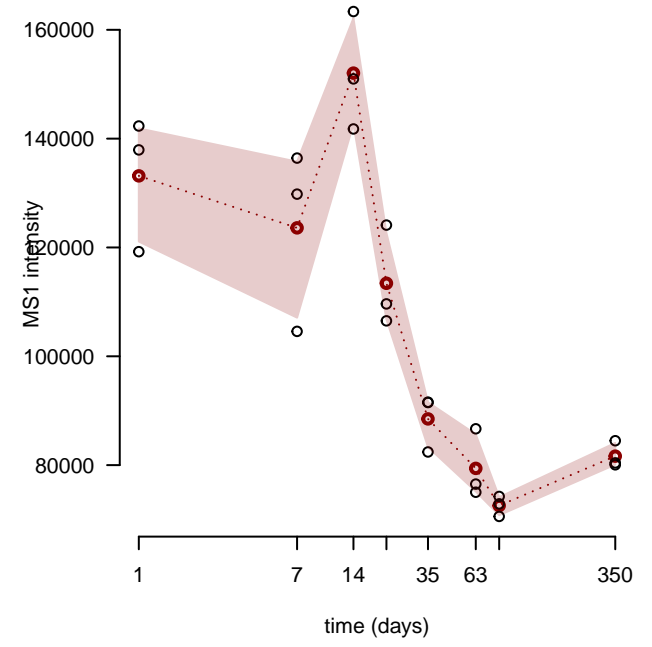

**Q9DAS9**  
**GN=Gng12**  
guanine nucleotide binding protein (G pr ...

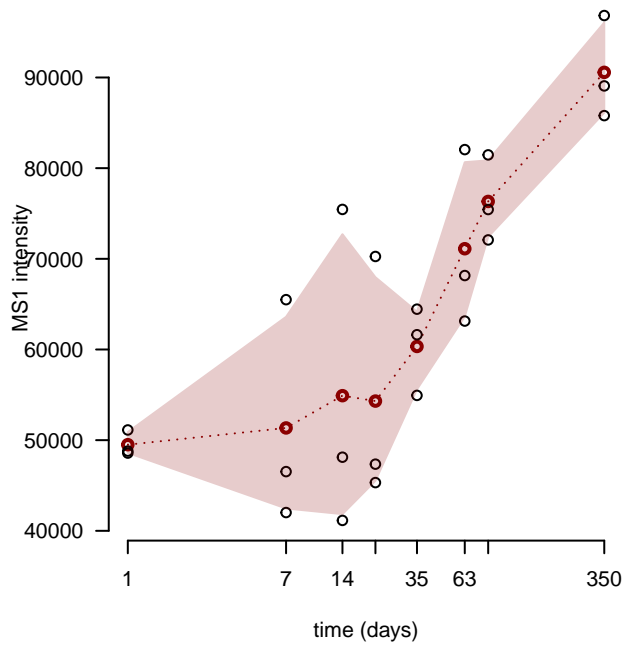

**Q9DAT2**  
**GN=Mrgbp**  
MRG/MORF4L binding protein

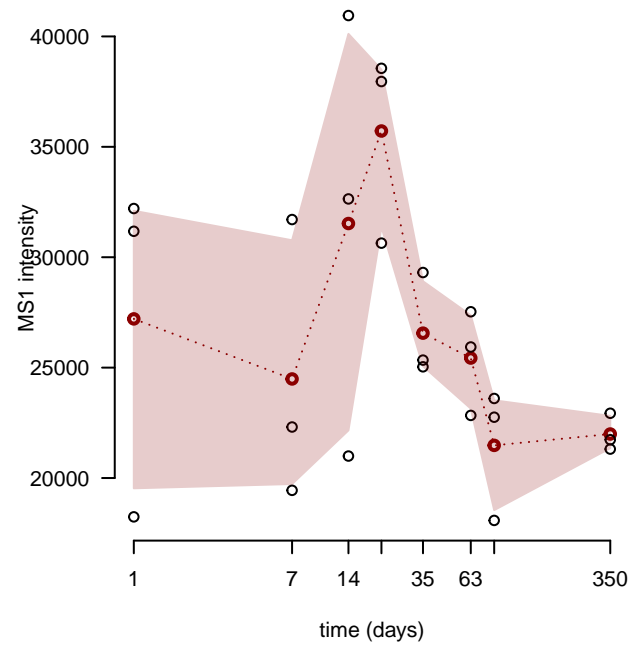

**Q9DAT5**  
**GN=Trmu**  
tRNA 5-methylaminomethyl-2-thiouridylate ...

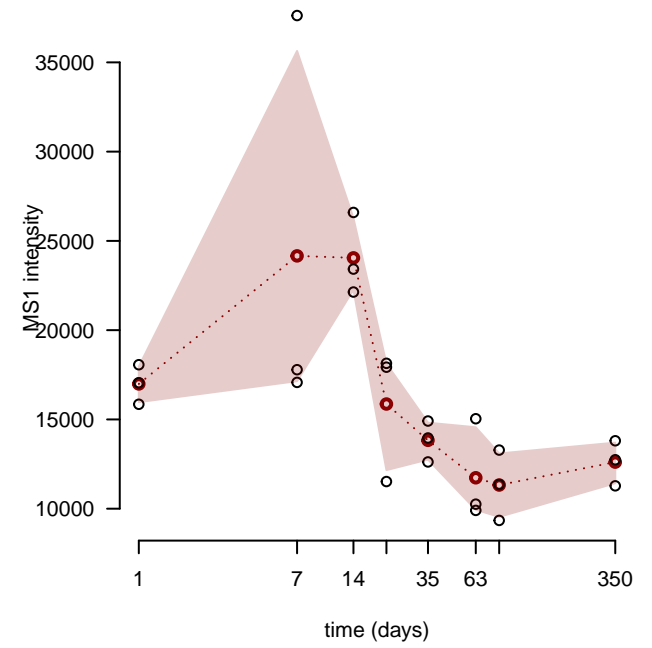

**Q9DAU1**  
**GN=Cnpy3**  
canopy FGF signaling regulator 3

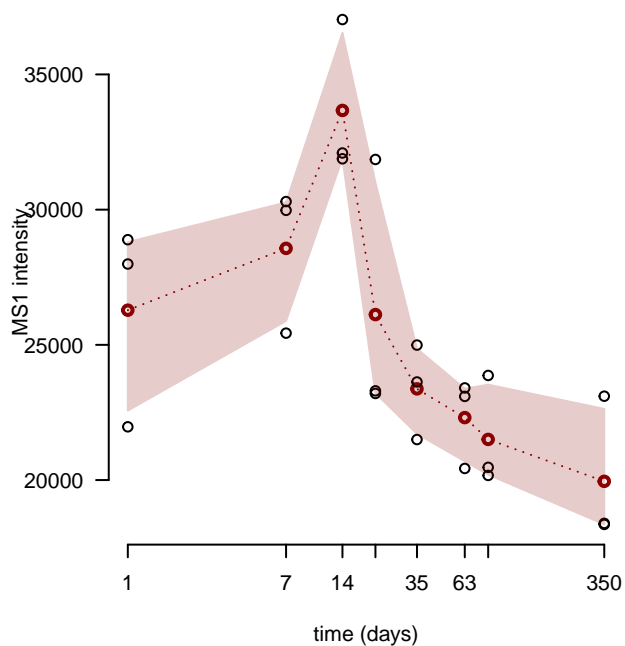

**Q9DAU9**  
**GN=Znf654**

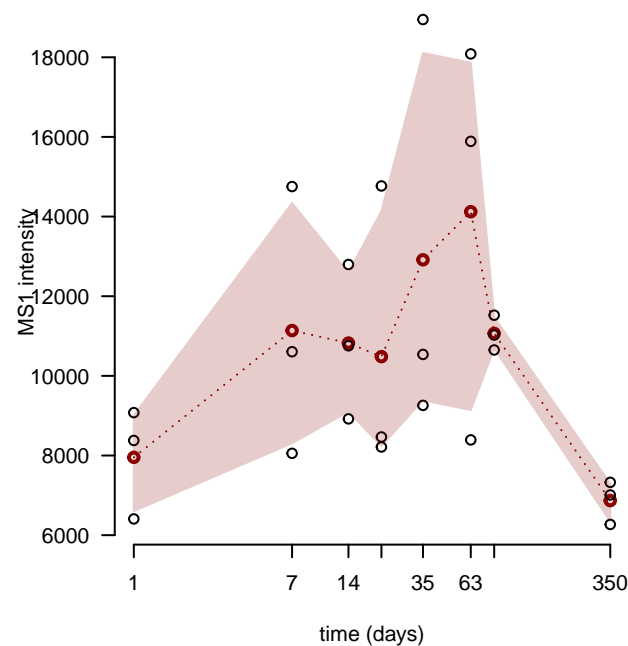

**Q9DAV9**  
**GN=Tmem38b**  
transmembrane protein 38B

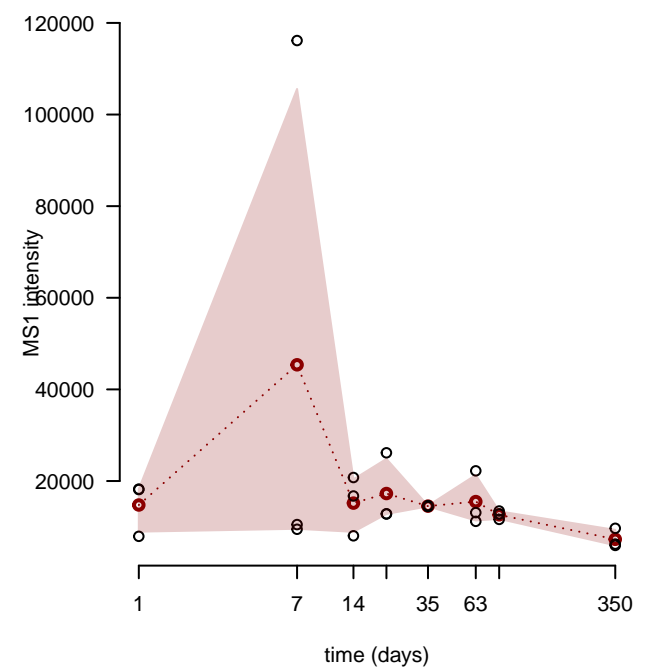

**Q9DAW6**  
GN=Prpf4  
pre-mRNA processing factor 4

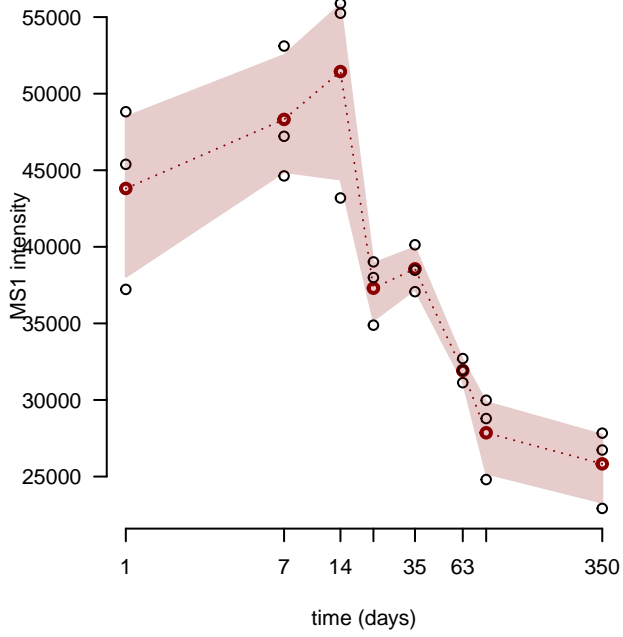

**Q9DAW9**  
GN=Cnn3  
calponin 3, acidic

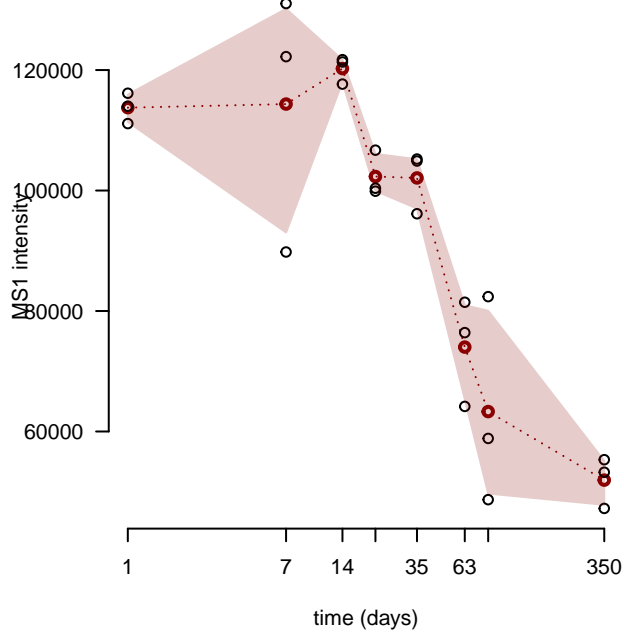

**Q9DAX9**  
GN=Appbp2  
amyloid beta precursor protein (cytoplas ...

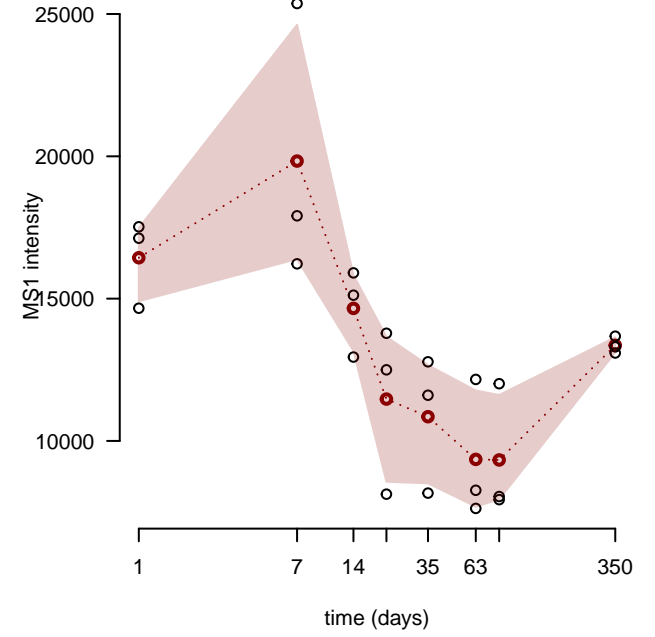

**Q9DAZ9**  
GN=Zfyve19  
zinc finger, FYVE domain containing 19

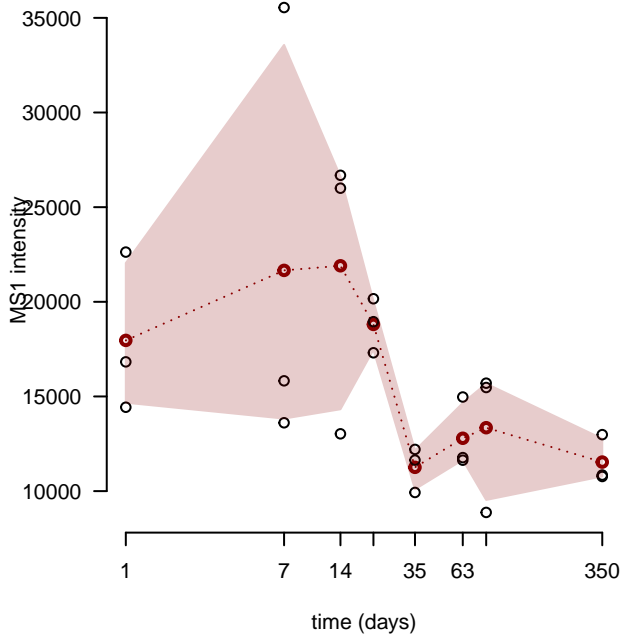

**Q9DB00**  
GN=Gon4I  
gon-4-like (C.elegans)

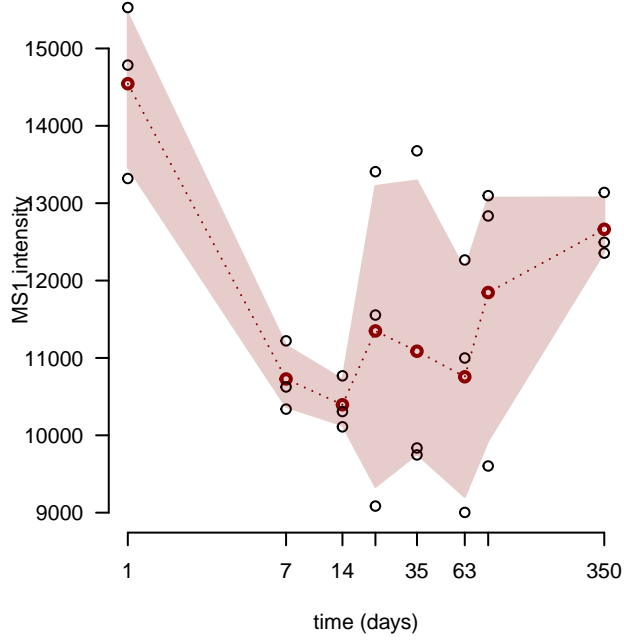

**Q9DB05**  
GN=Napa  
N-ethylmaleimide sensitive fusion protei ...

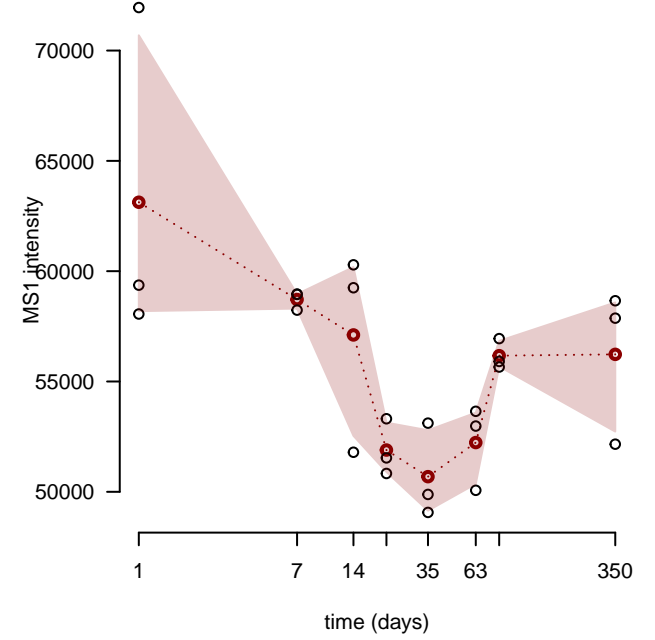

**Q9DB07**  
GN=Ift46  
intraflagellar transport 46

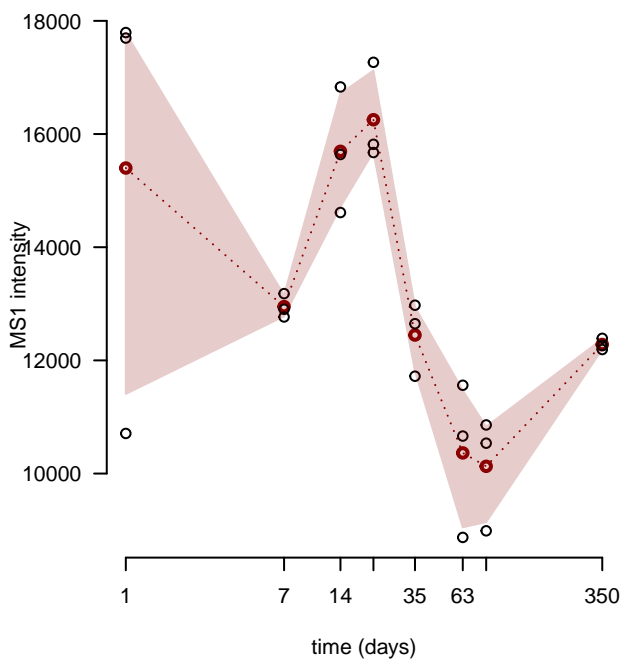

**Q9DB10**  
GN=Smdt1  
single-pass membrane protein with aspart ...

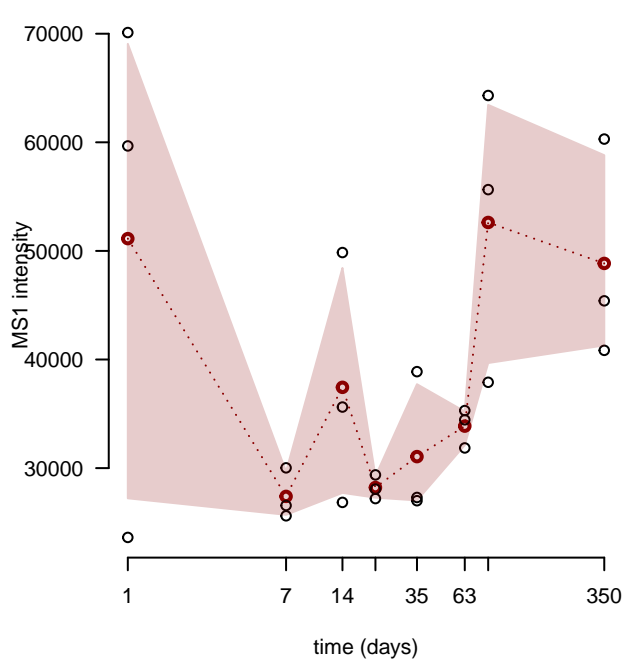

**Q9DB15**  
GN=Mrpl12  
mitochondrial ribosomal protein L12

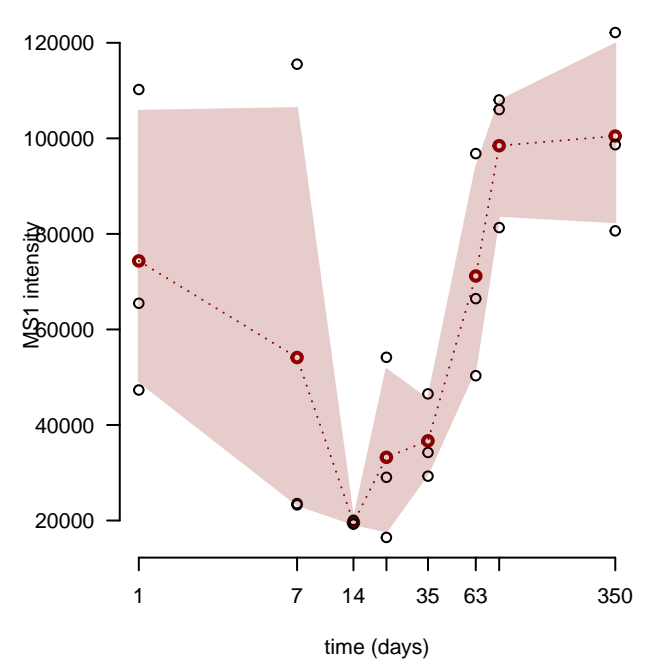

**Q9DB16**  
GN=Cab39l  
calcium binding protein 39-like

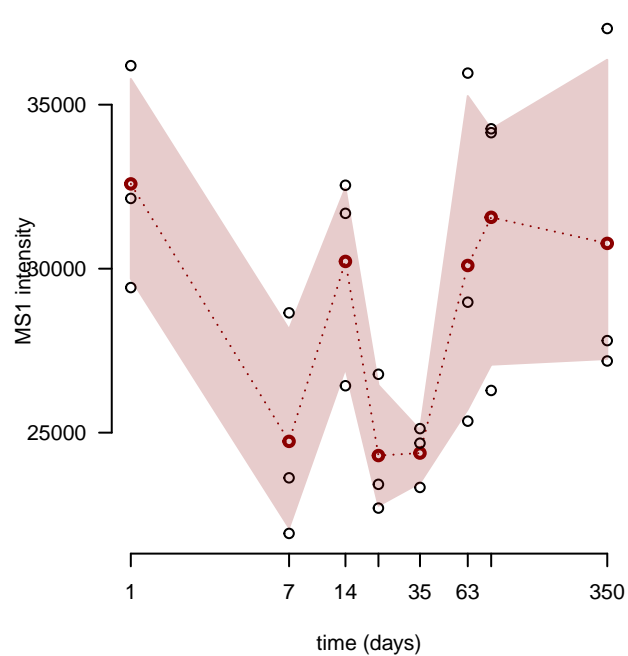

**Q9DB20**  
GN=Atp5po

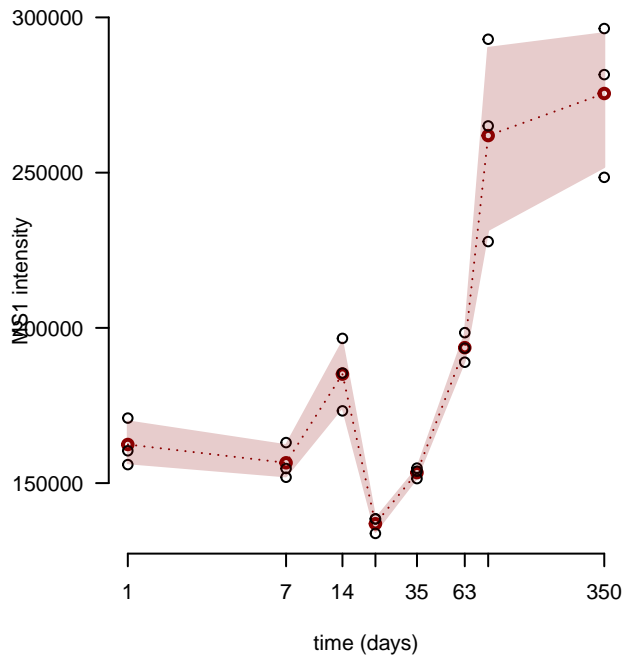

**Q9DB25**  
GN=Alg5  
asparagine-linked glycosylation 5 (dolich ...

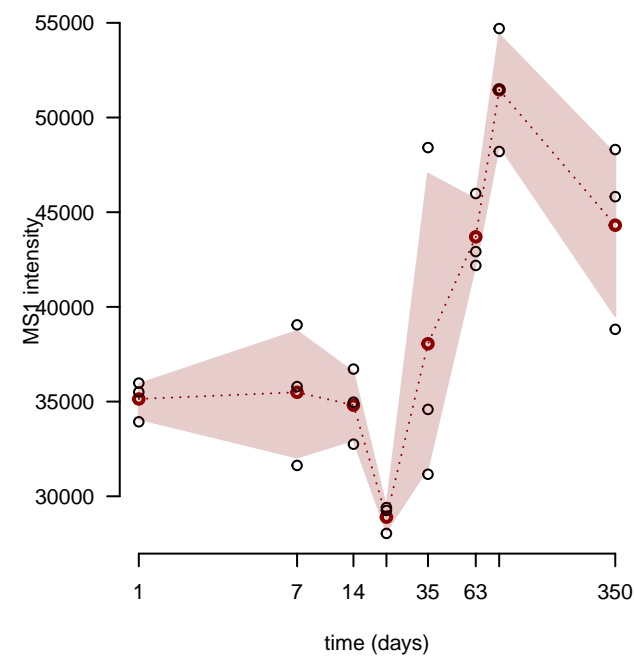

**Q9DB26**  
GN=Phyh1  
phytanoyl-CoA dioxygenase domain contain ...

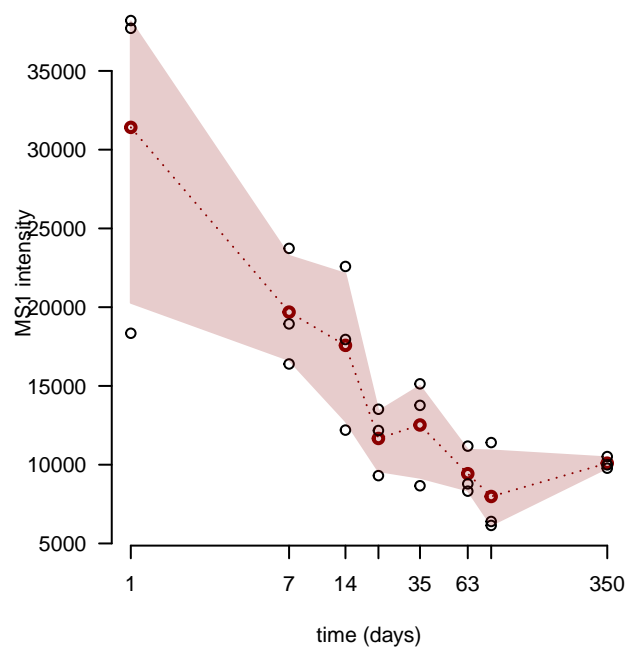

**Q9DB27**  
GN=Mcts1  
malignant T cell amplified sequence 1

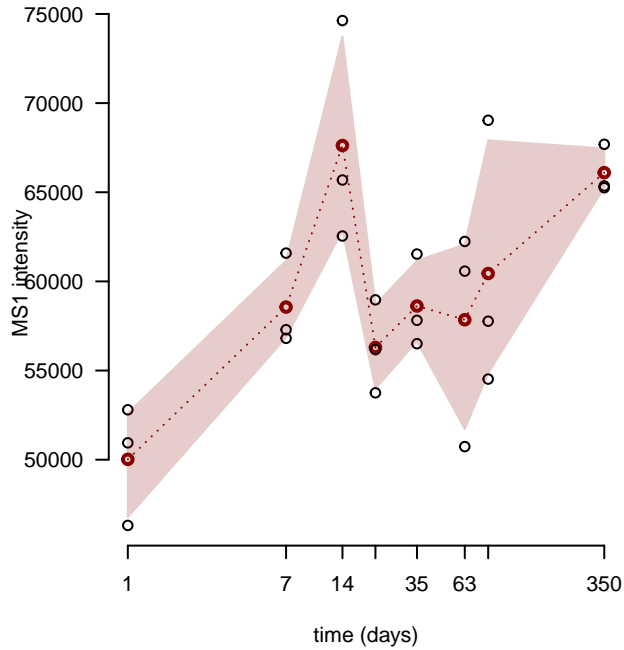

**Q9DB28**  
GN=Pop5  
processing of precursor 5, ribonuclease ...

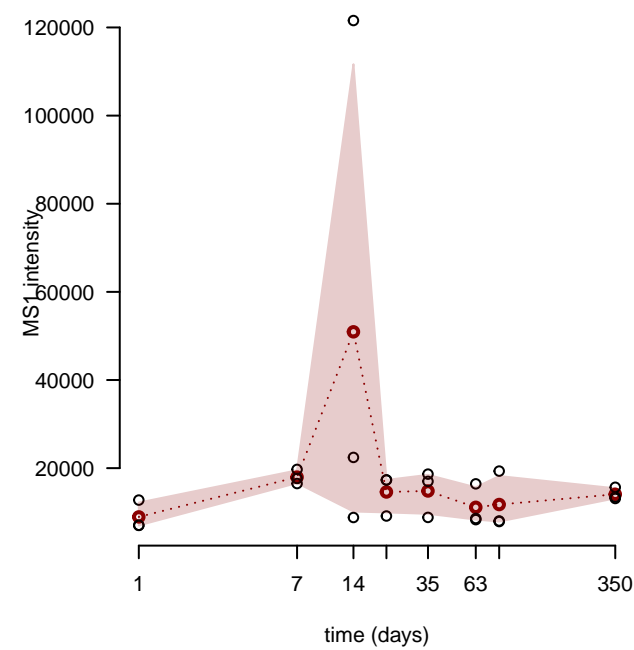

**Q9DB29**  
GN=lah1  
isoamyl acetate-hydrolyzing esterase 1 h ...

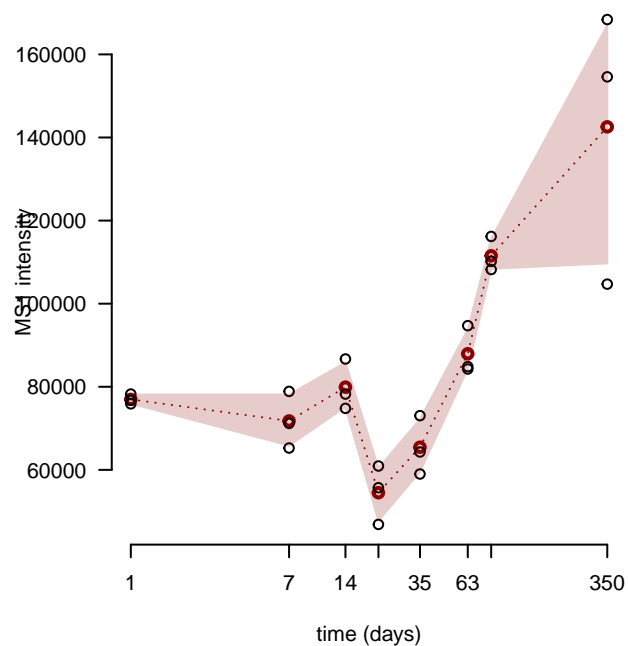

**Q9DB30**  
GN=Phkg2  
phosphorylase kinase, gamma 2 (testis)

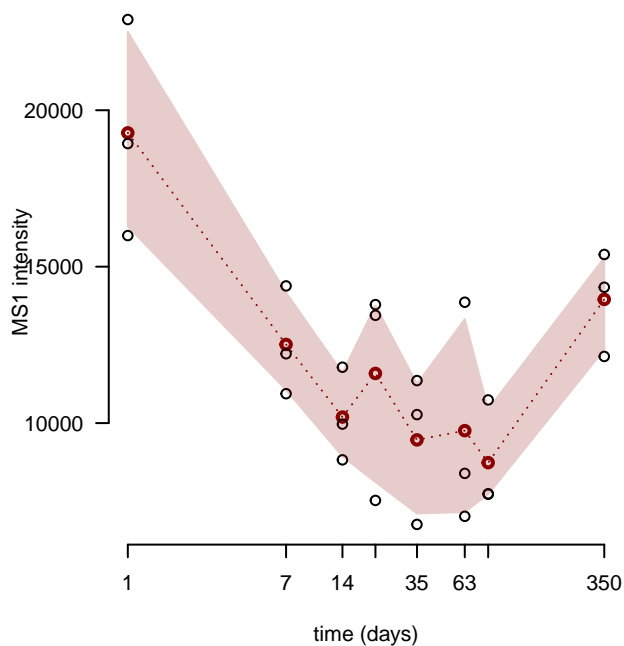

**Q9DB32**  
GN=Hag1  
hydroxyacylglutathione hydrolase-like

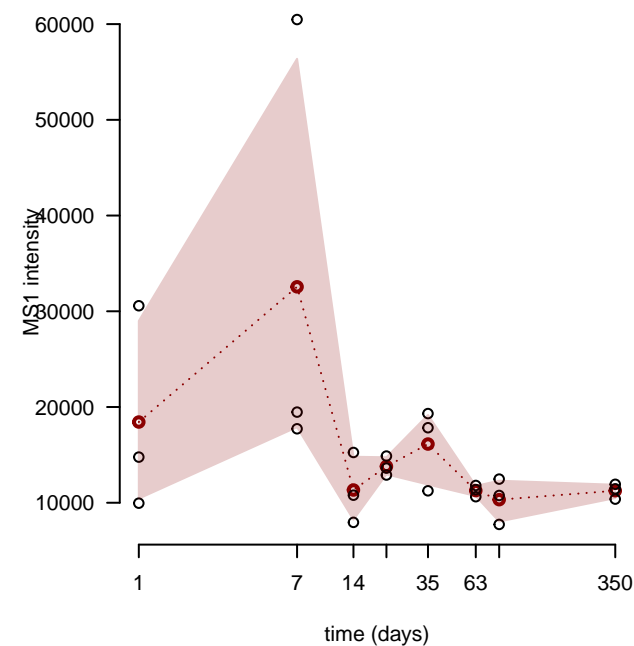

**Q9DB34**  
**GN=Chmp2a**  
charged multivesicular body protein 2A

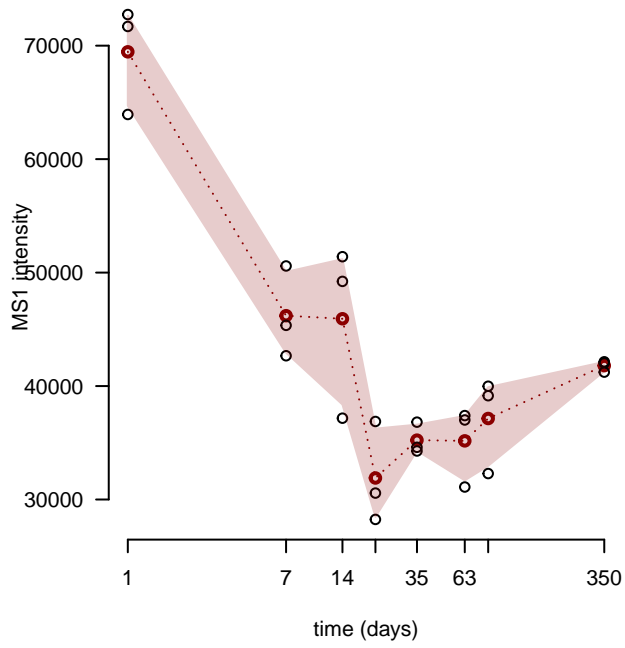

**Q9DB38**  
**GN=Znf580**

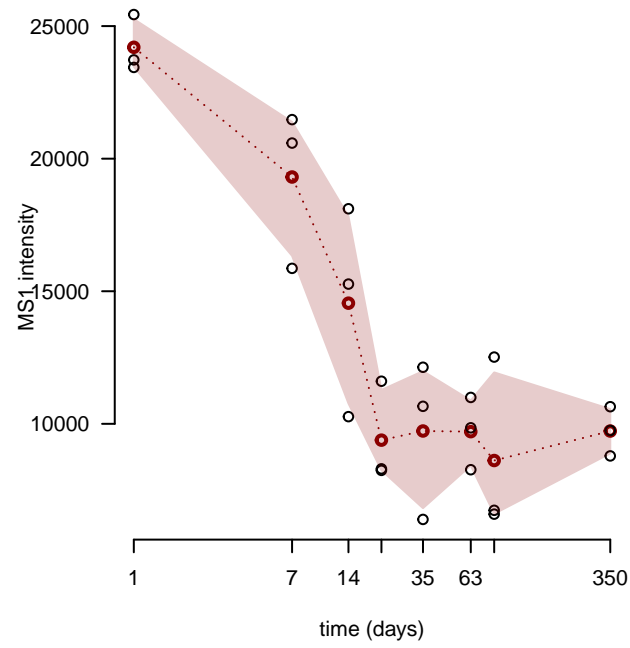

**Q9DB40**  
**GN=Med27**  
mediator complex subunit 27

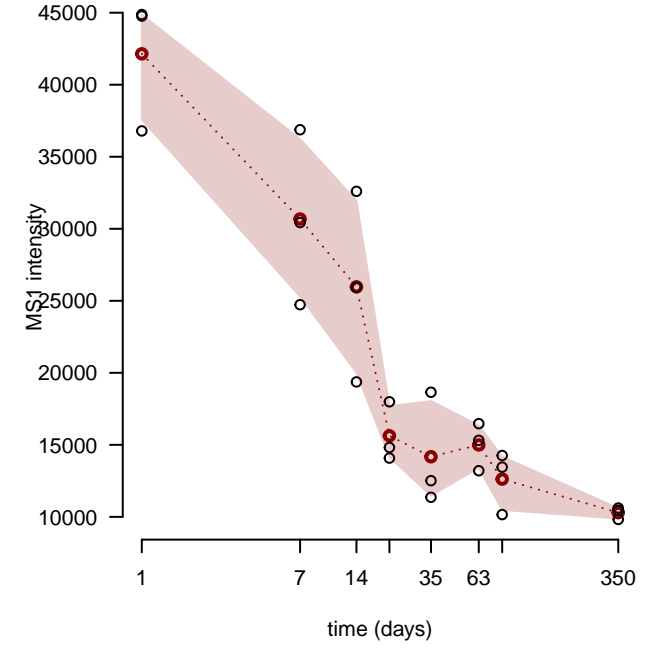

**Q9DB41**  
**GN=Slc25a18**  
solute carrier family 25 (mitochondrial ...

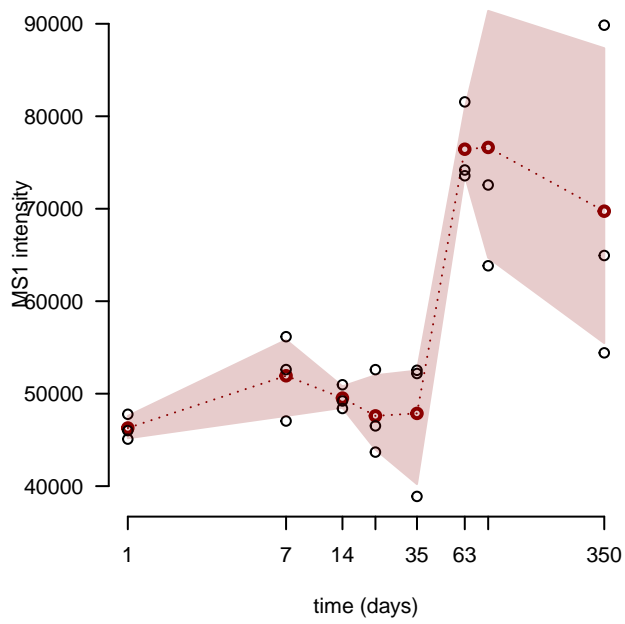

**Q9DB42**  
**GN=Znf593**

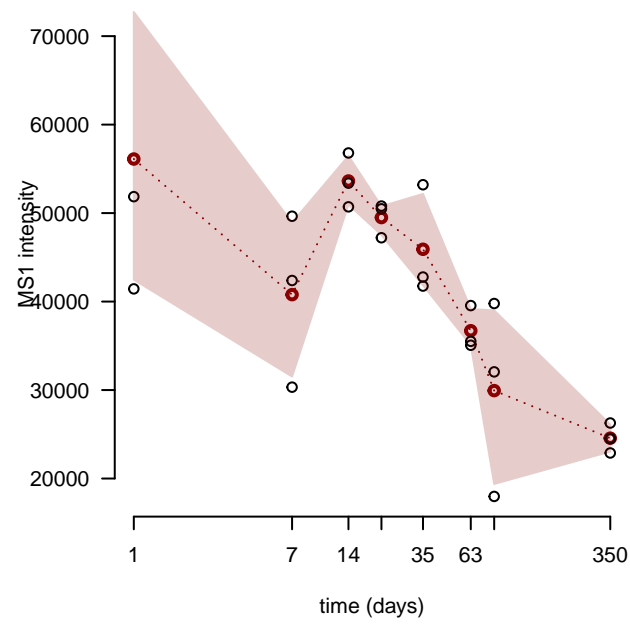

**Q9DB43**  
**GN=Zfp1**  
zinc finger like protein 1

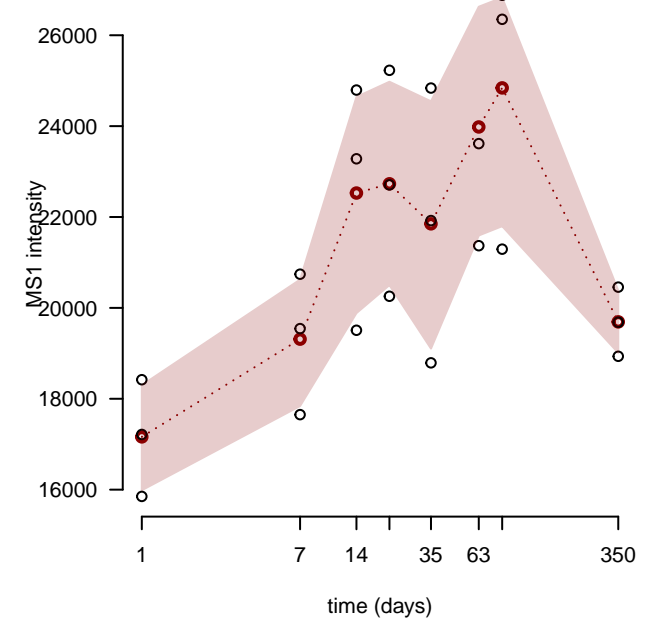

**Q9DB50**  
**GN=Ap1s2**  
adaptor-related protein complex 1, sigma ...

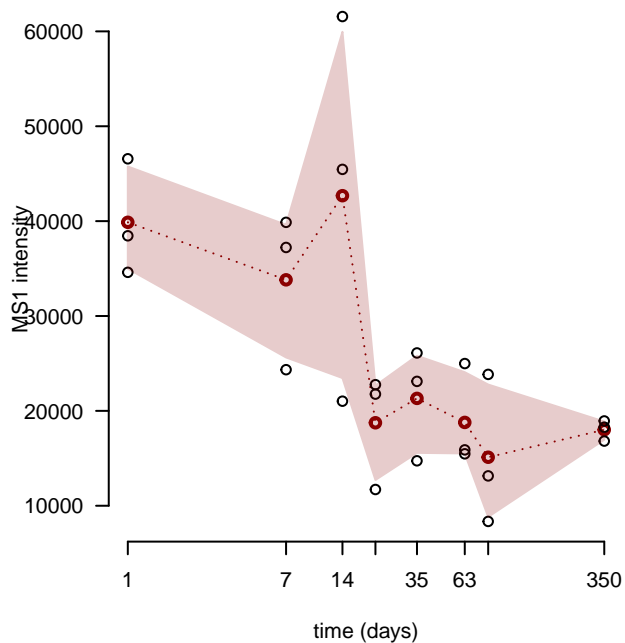

**Q9DB52**  
**GN=Fam122a**  
family with sequence similarity 122, mem ...

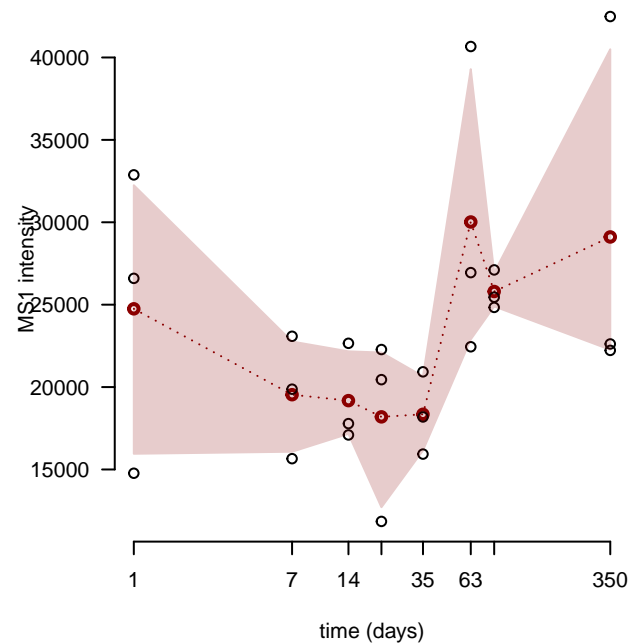

**Q9DB60**  
**GN=Prx12b**  
peroxiredoxin like 2B

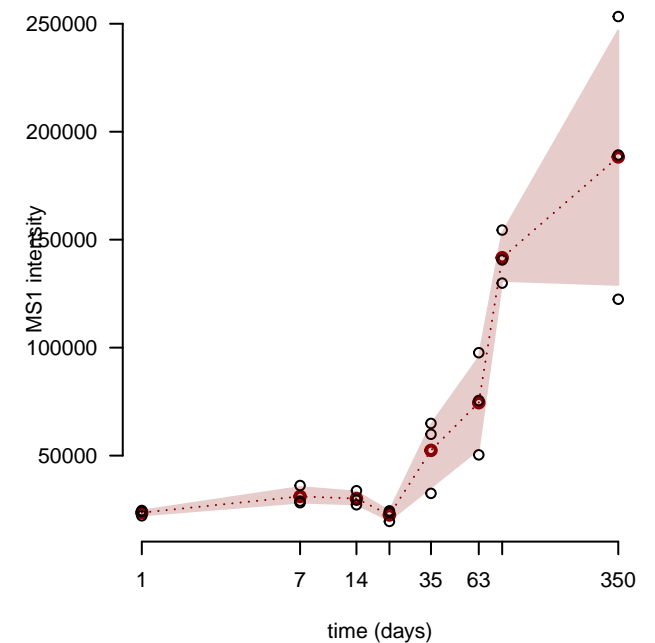

**Q9DB70**  
**GN=Fundc1**  
FUN14 domain containing 1

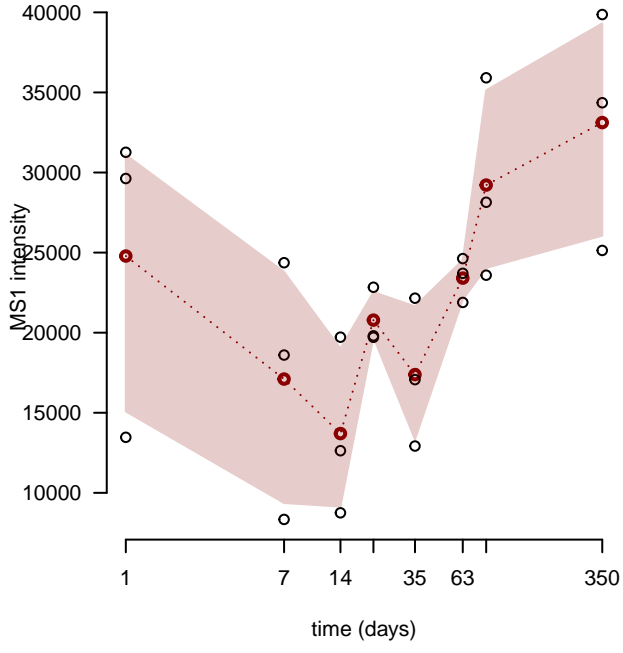

**Q9DB73**  
**GN=Cyb5r1**  
cytochrome b5 reductase 1

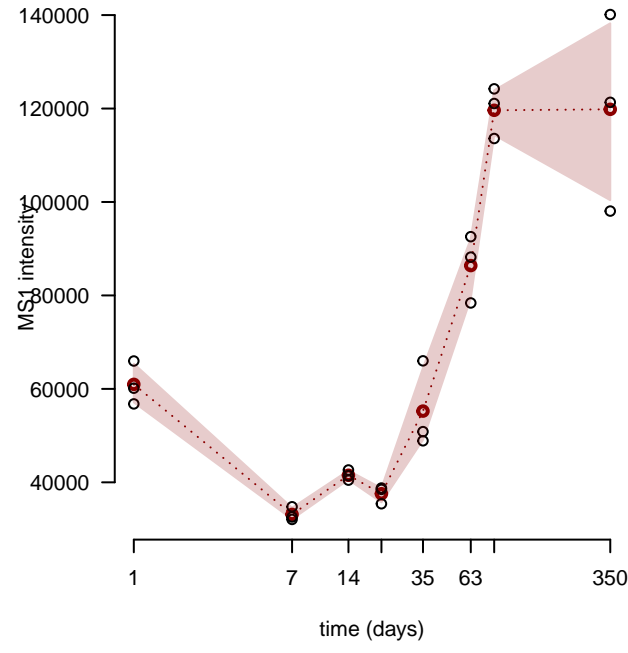

**Q9DB76**  
**GN=Emc9**  
ER membrane protein complex subunit 9

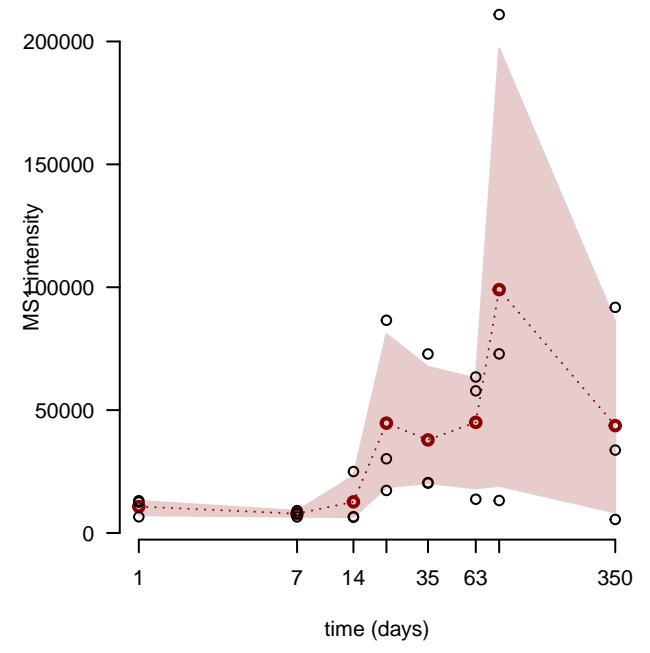

**Q9DB77**  
**GN=Uqcrc2**  
ubiquinol cytochrome c reductase core pr ...

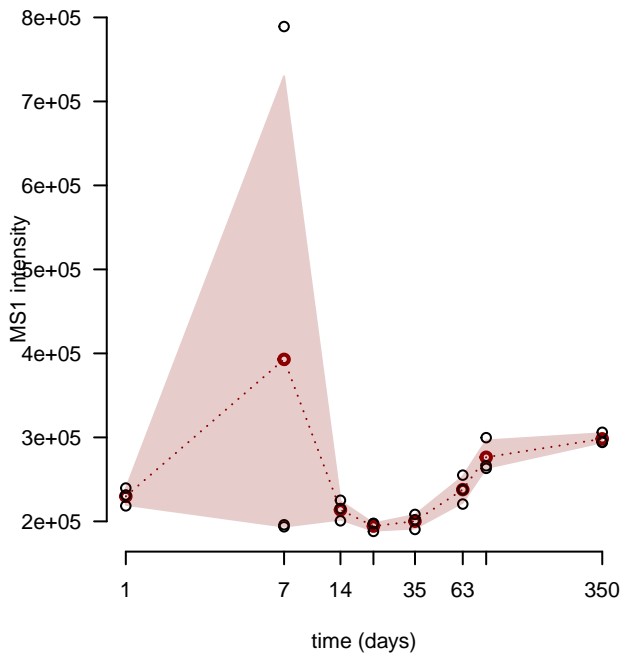

**Q9DB85**  
**GN=Rrp8**  
ribosomal RNA processing 8

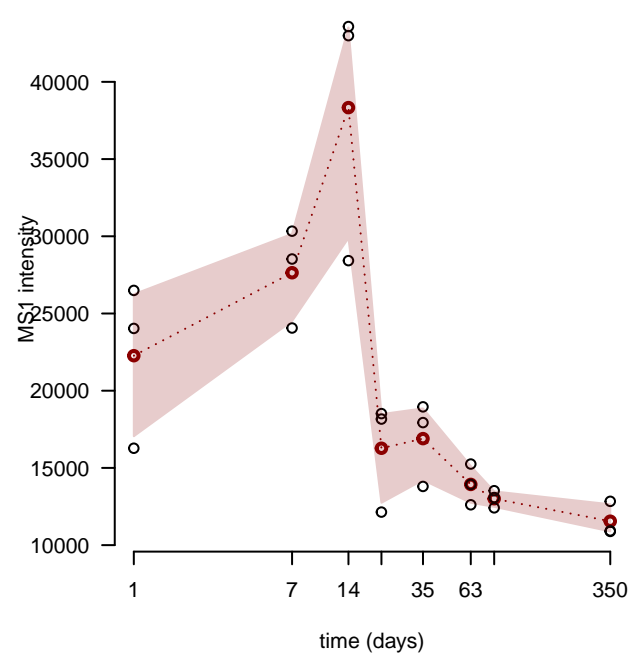

**Q9DB90**  
**GN=Smg9**  
SMG9 nonsense mediated mRNA decay factor

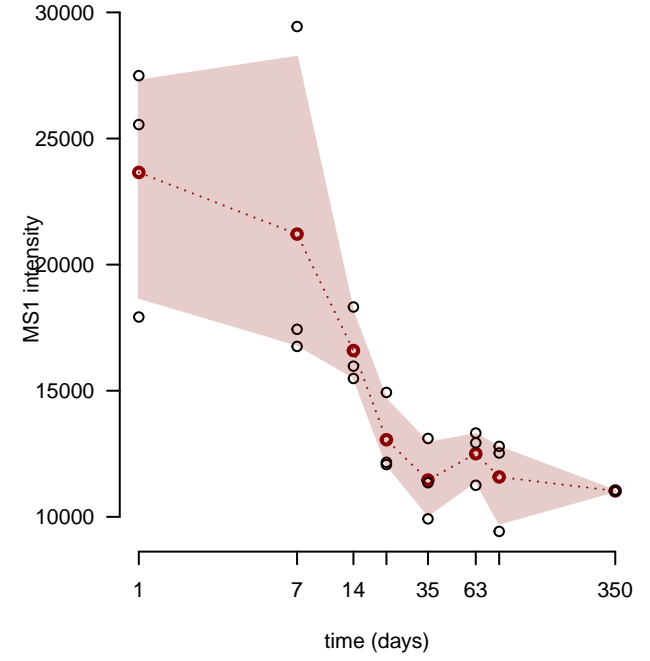

**Q9DB96**  
**GN=Ngdn**  
neuroguidin, EIF4E binding protein

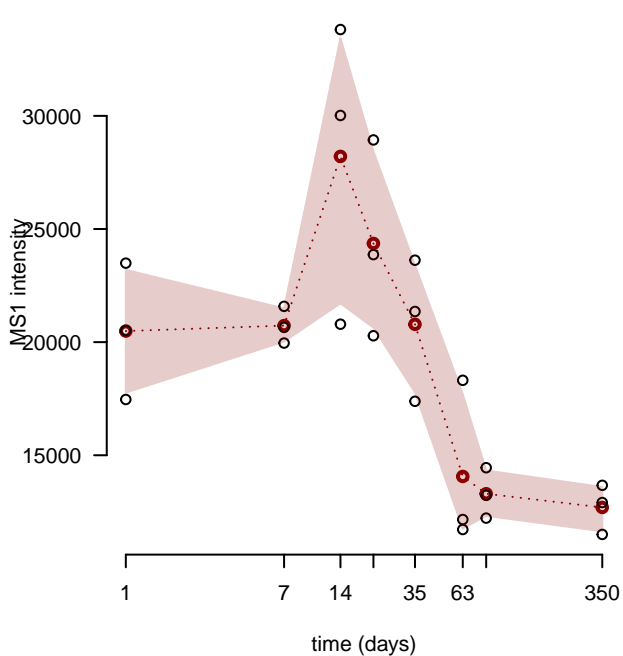

**Q9DBA6**  
**GN=Tysnd1**  
trypsin domain containing 1

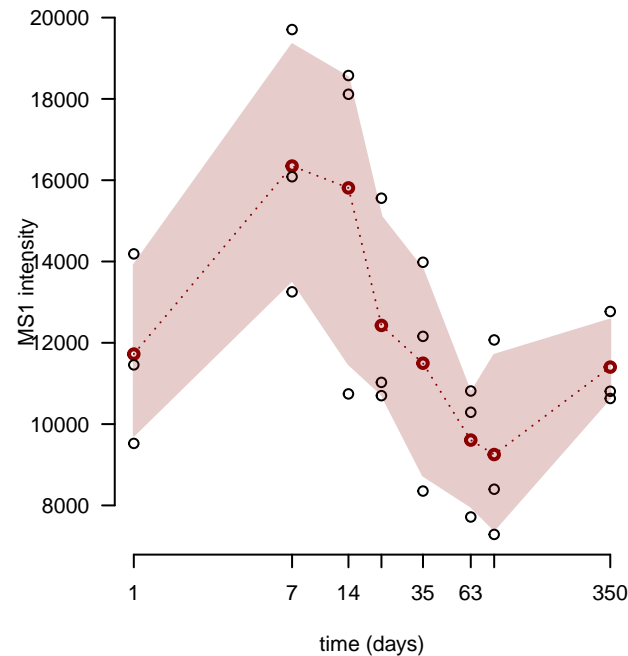

**Q9DBA8**  
**GN=Amdhd1**  
amidohydrolase domain containing 1

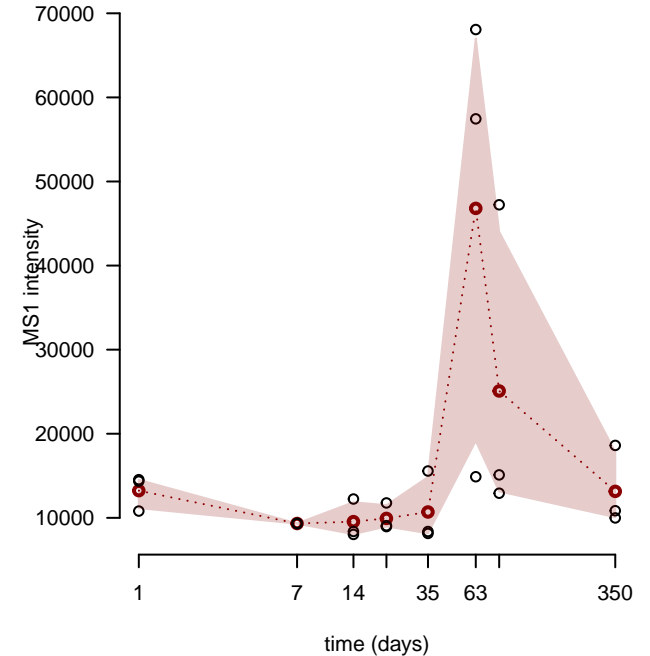

**Q9DBA9**  
**GN=Gtf2h1**  
general transcription factor II H, polyp ...

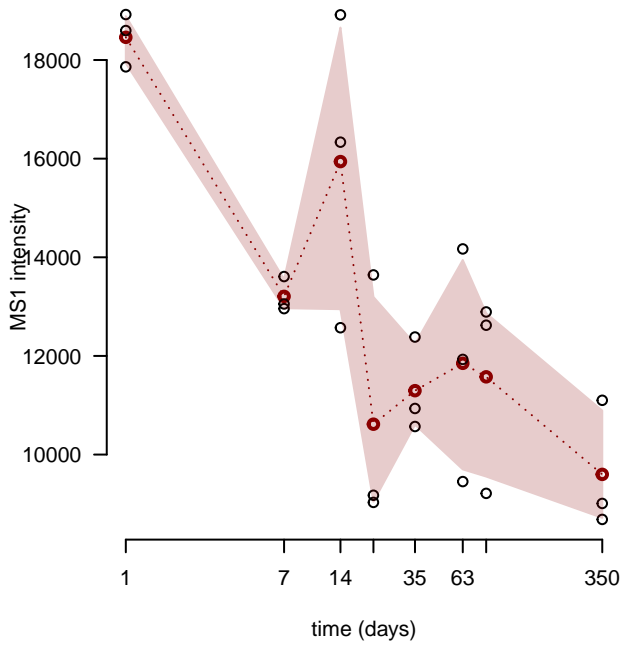

**Q9DBB4**  
**GN=Naa16**  
N(alpha)-acetyltransferase 16, NatA auxi ...

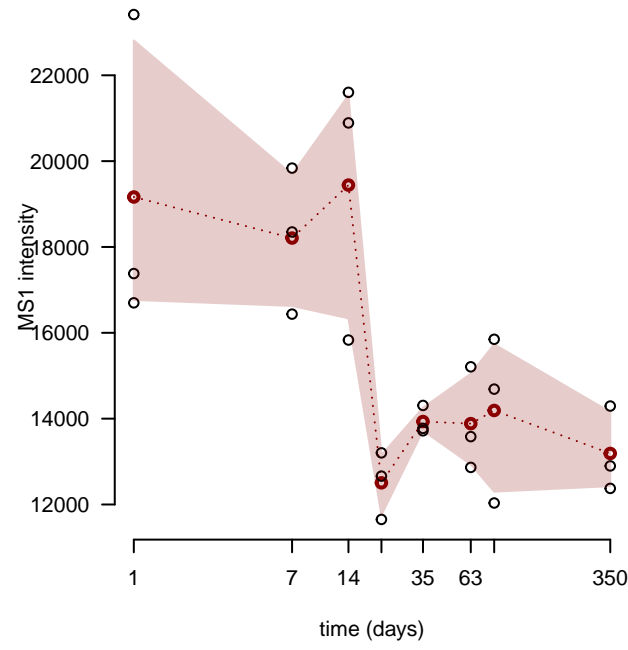

**Q9DBB5**  
**GN=Eif4e3**  
eukaryotic translation initiation factor ...

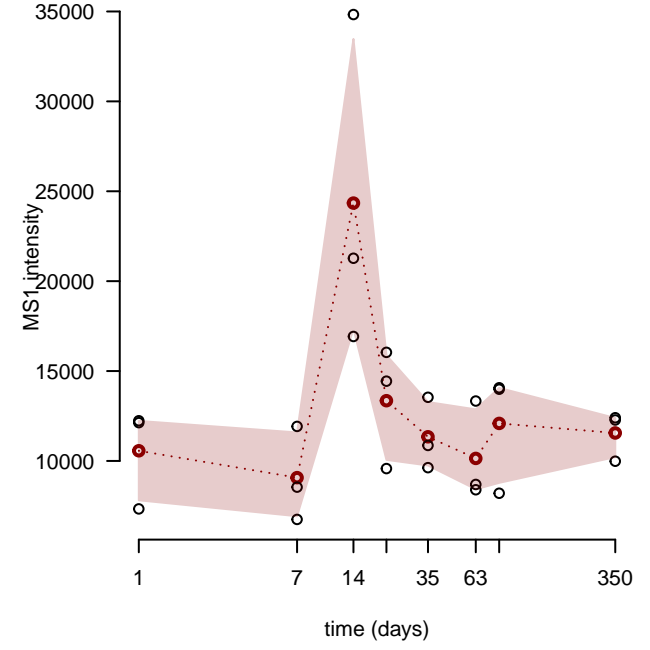

**Q9DBB8**  
**GN=Dhdh**  
dihydrodiol dehydrogenase (dimeric)

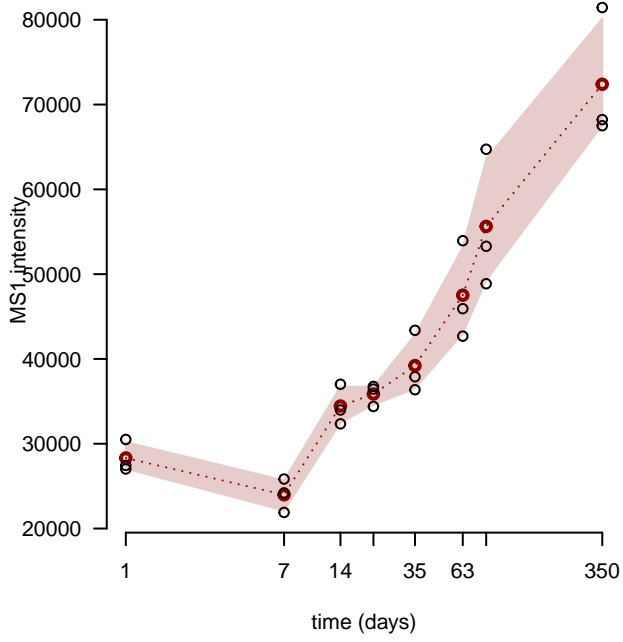

**Q9DBB9**  
**GN=Cpn2**  
carboxypeptidase N, polypeptide 2

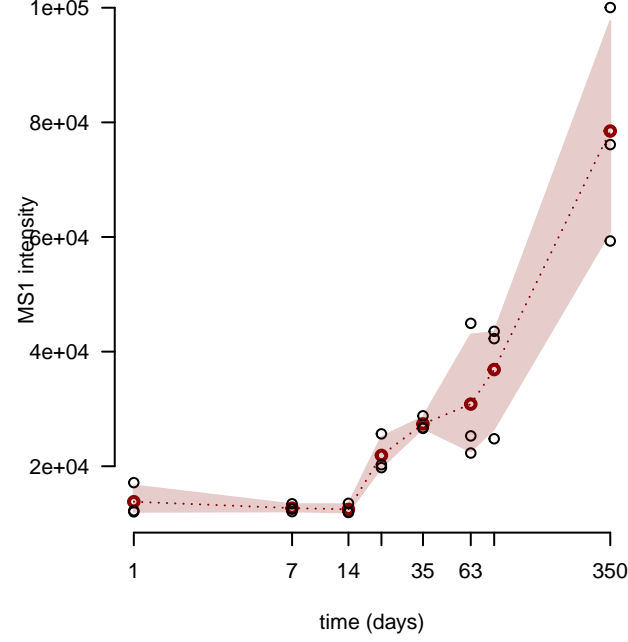

**Q9DBC0**  
**GN=Selenoo**  
selenoprotein O

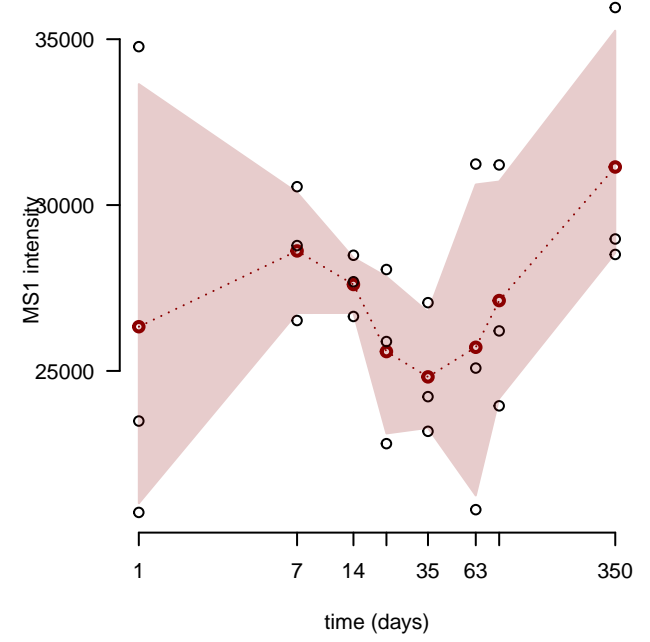

**Q9DBC3**  
**GN=Cmtr1**  
cap methyltransferase 1

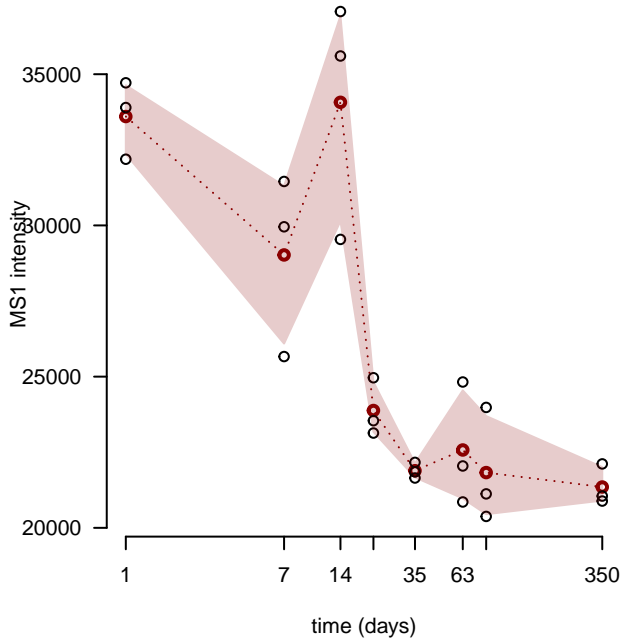

**Q9DBC7**  
**GN=Prkar1a**  
protein kinase, cAMP dependent regulator ...

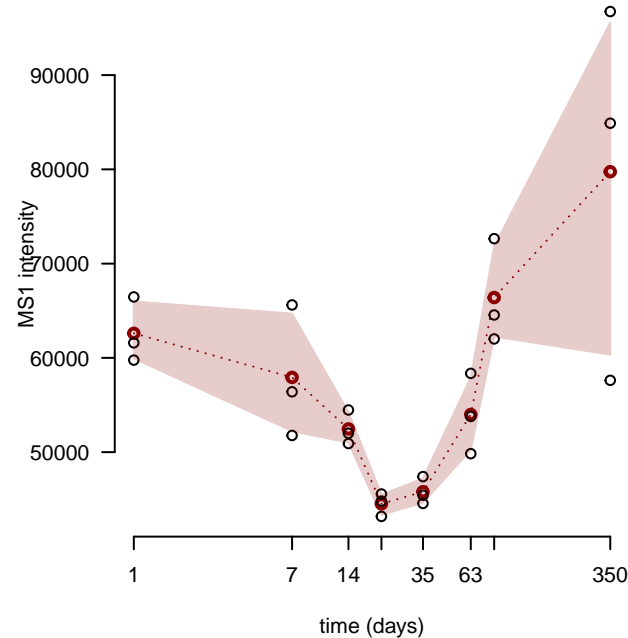

**Q9DBD0**  
**GN=lca**

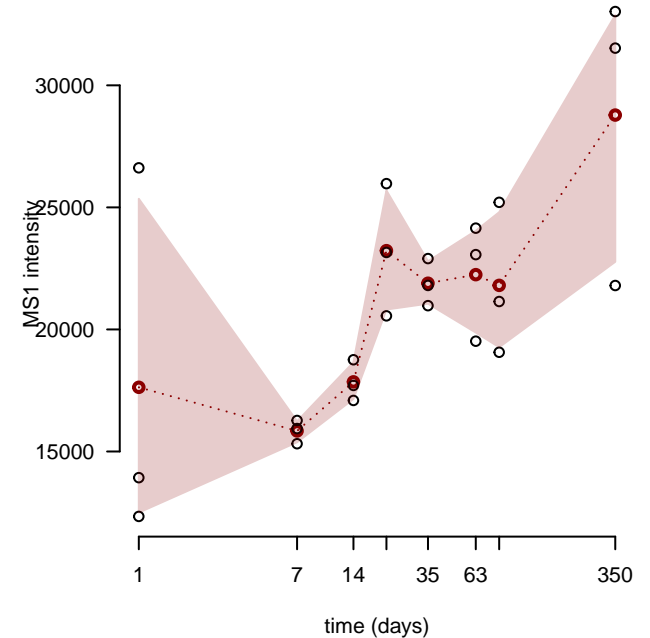



**Q9DBD5**  
**GN=Pelp1**

proline, glutamic acid and leucine rich ...

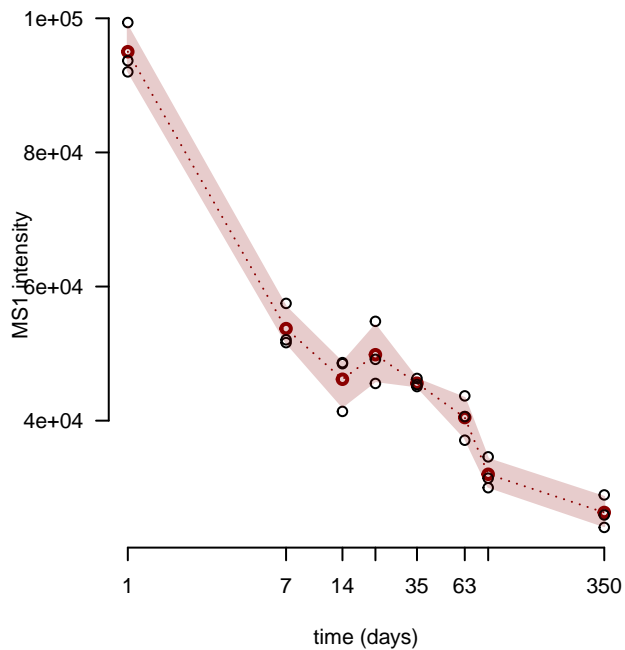

**Q9DBE0**  
**GN=Csad**

cysteine sulfinic acid decarboxylase

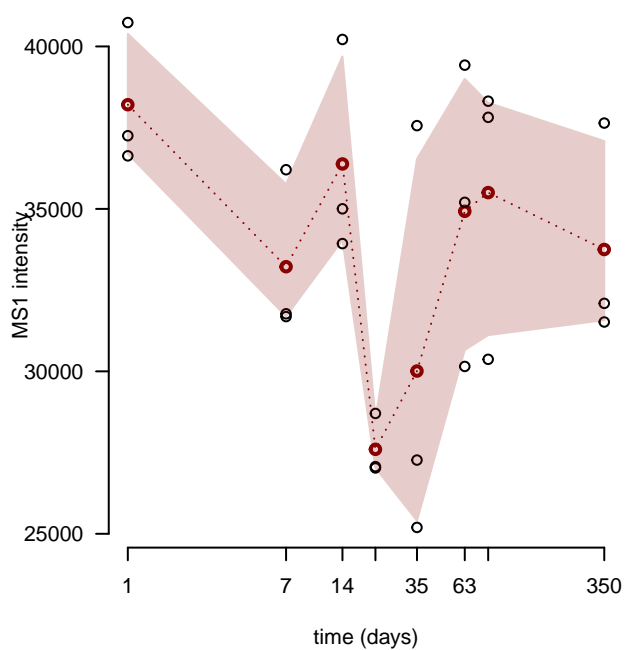

**Q9DBE8**  
**GN=Alg2**

asparagine-linked glycosylation 2 (alpha ...

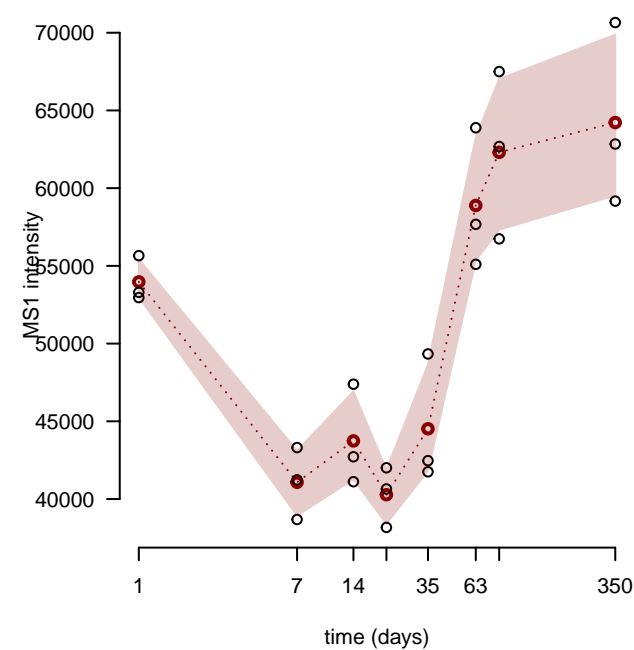

**Q9DBE9**  
**GN=Ftsj3**

FtsJ RNA methyltransferase homolog 3 (E. ...

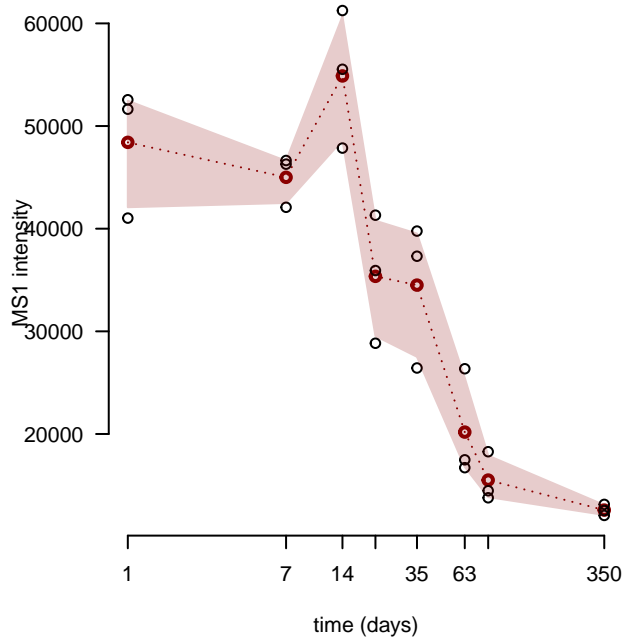

**Q9DBF1**  
**GN=Aldh7a1**

aldehyde dehydrogenase family 7, member ...

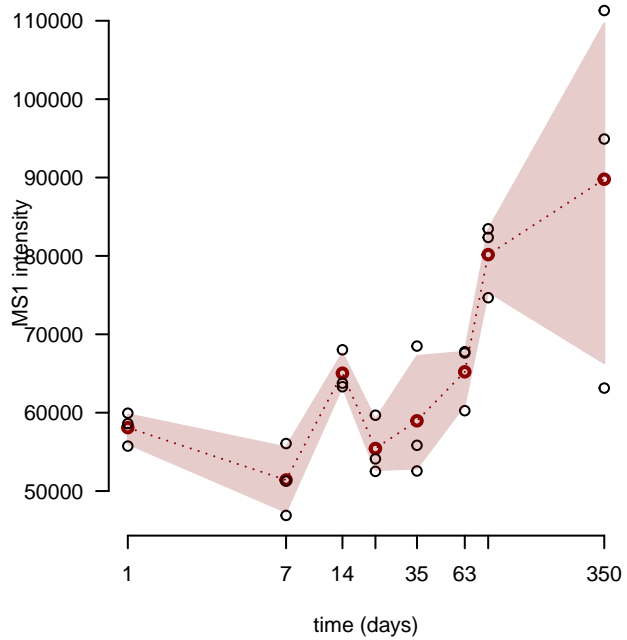

**Q9DBF7**  
**GN=Cwc25**

CWC25 spliceosome-associated protein

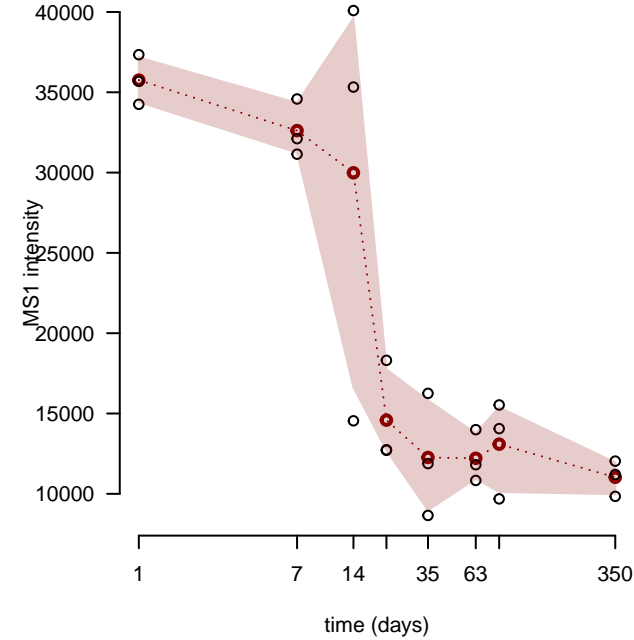

**Q9DBG1**  
**GN=Cyp27a1**

cytochrome P450, family 27, subfamily a, ...

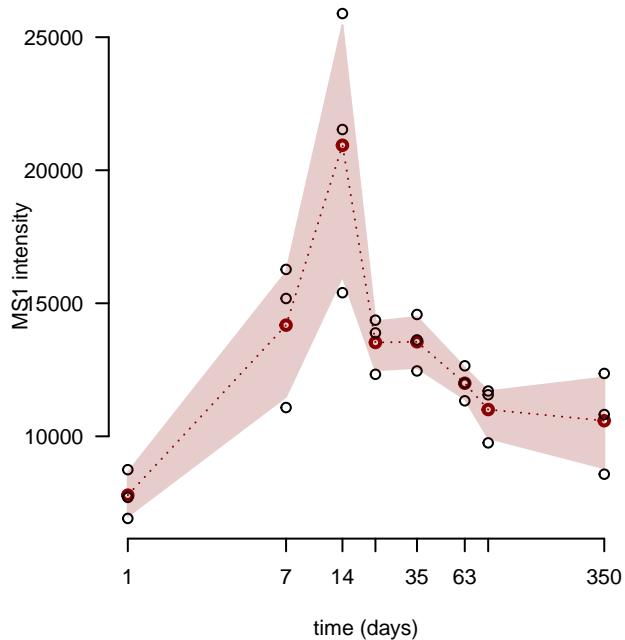

**Q9DBG3**  
**GN=Ap2b1**

adaptor-related protein complex 2, beta ...

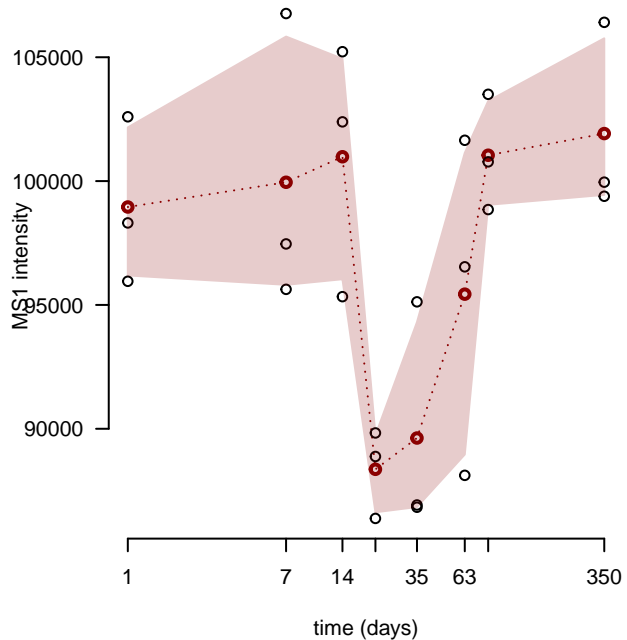

**Q9DBG5**  
**GN=Plin3**

perilipin 3

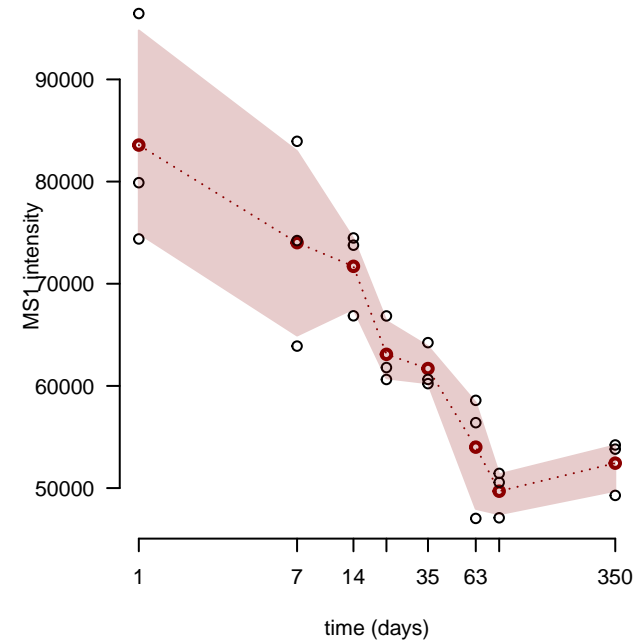

**Q9DBG6**  
GN=Rpn2  
ribophorin II

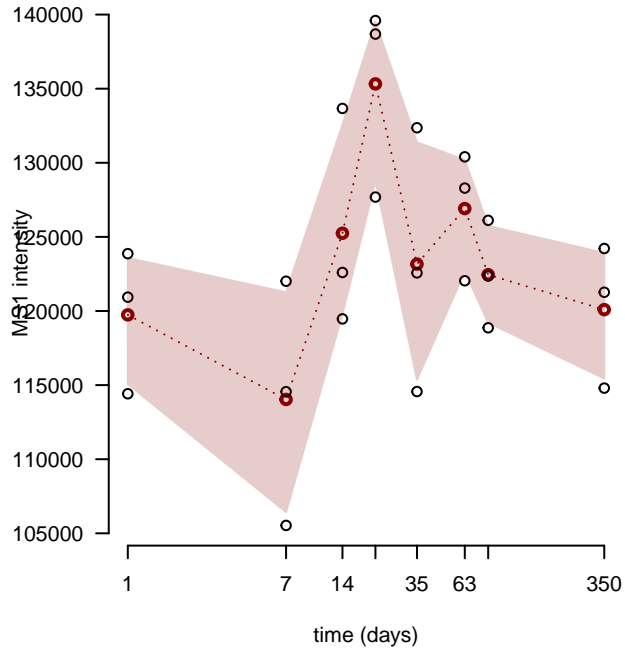

**Q9DBG7**  
GN=Srpra

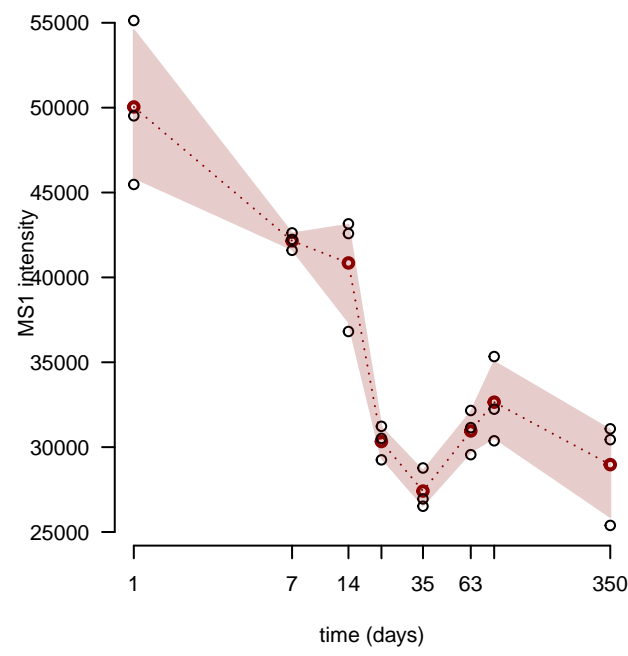

**Q9DBG9**  
GN=Tax1bp3  
Tax1 (human T cell leukemia virus type I ...

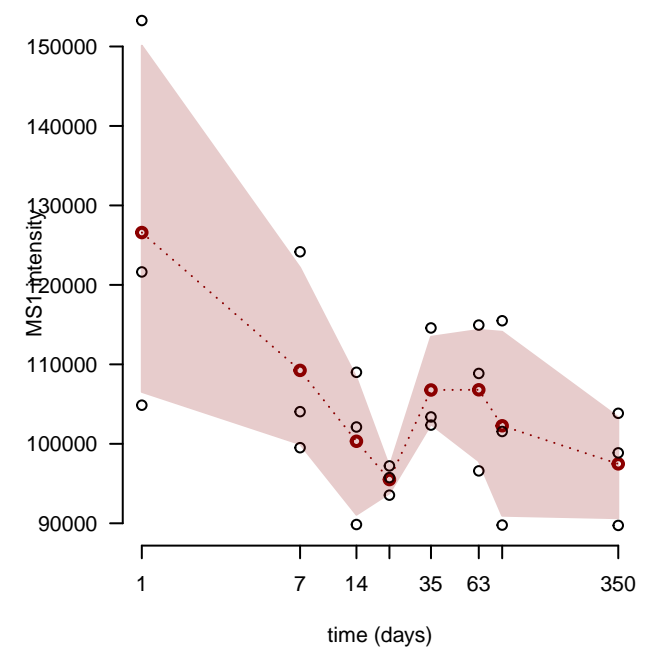

**Q9DBH0**  
GN=Wwp2  
WW domain containing E3 ubiquitin protei ...

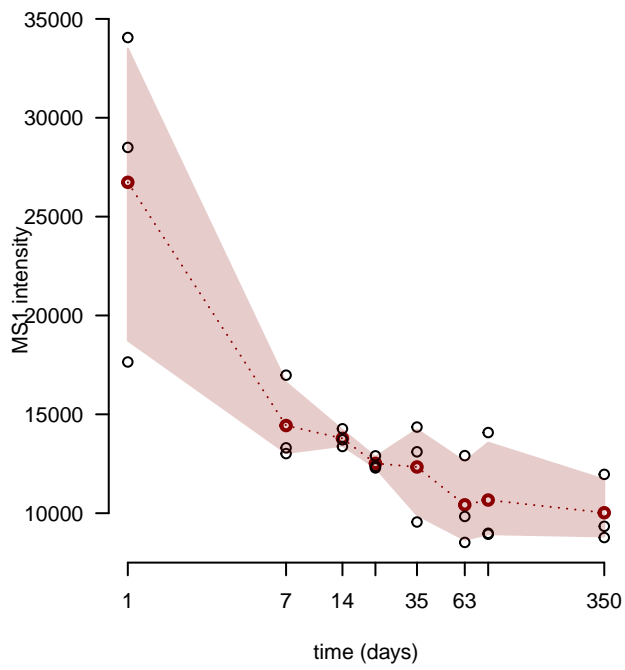

**Q9DBH5**  
GN=Lman2  
lectin, mannose-binding 2

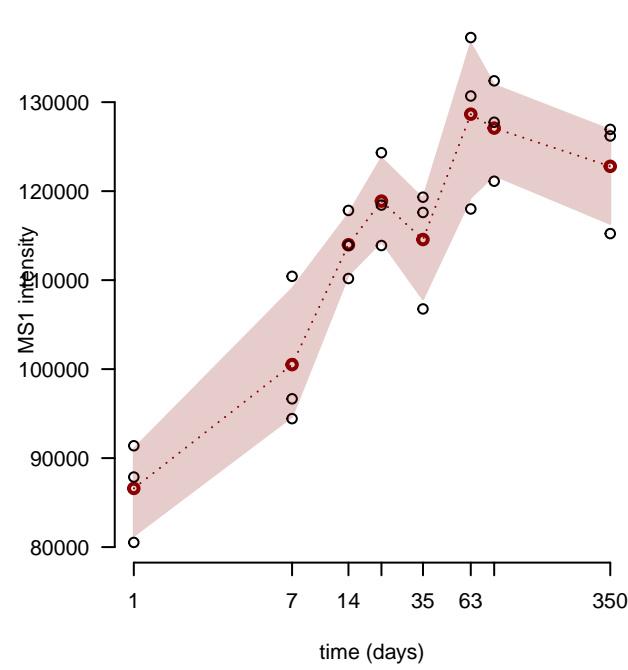

**Q9DBJ1**  
GN=Pgam1  
phosphoglycerate mutase 1

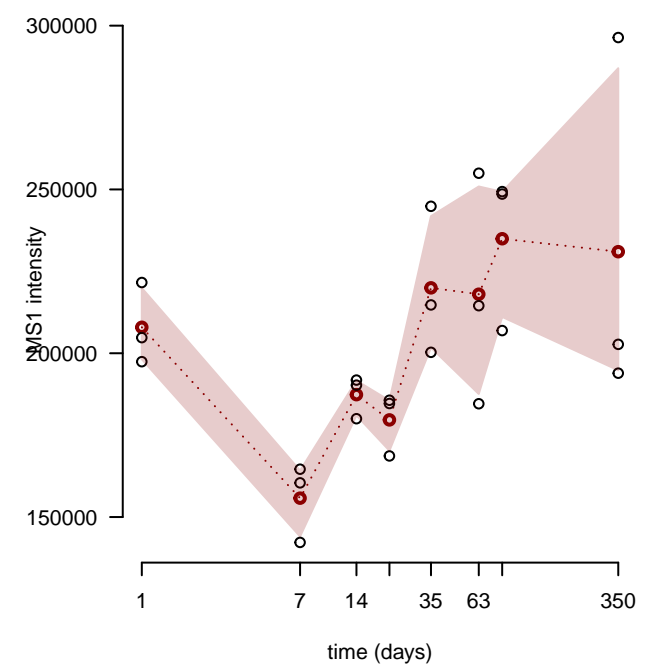

**Q9DBJ3**  
GN=Baiap2l1  
BAI1-associated protein 2-like 1

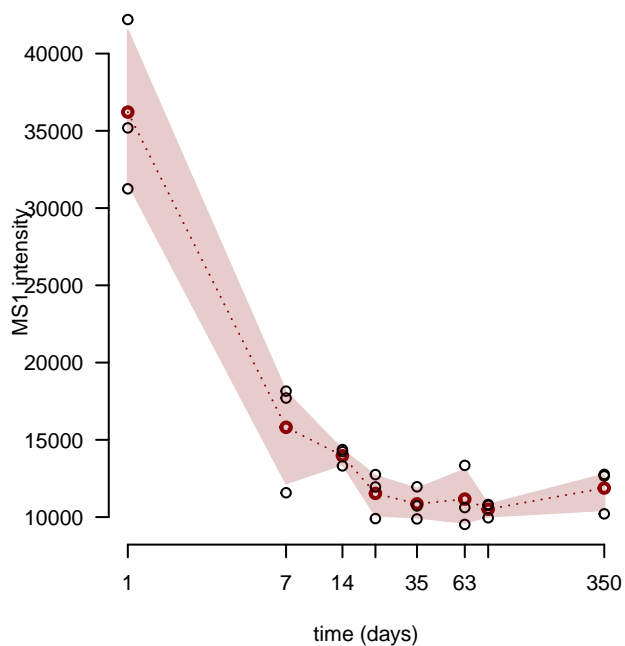

**Q9DBK0**  
GN=Acot12  
acyl-CoA thioesterase 12

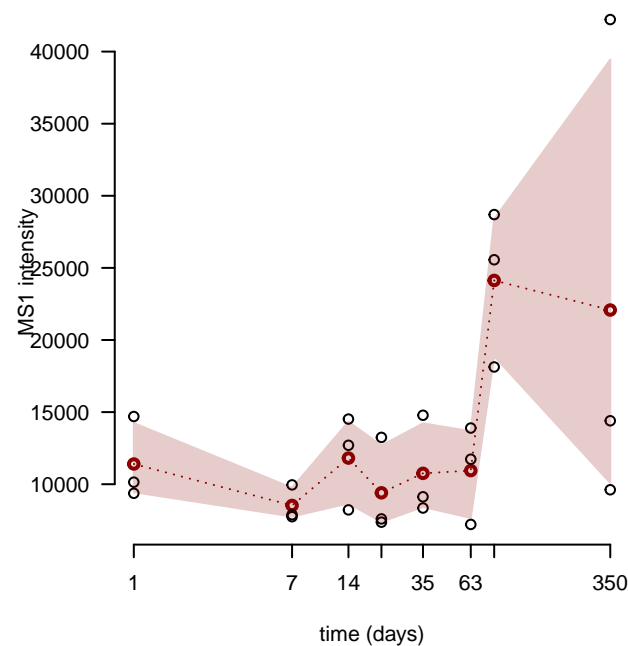

**Q9DBL1**  
GN=Acadslb  
acyl-Coenzyme A dehydrogenase, short/bra ...

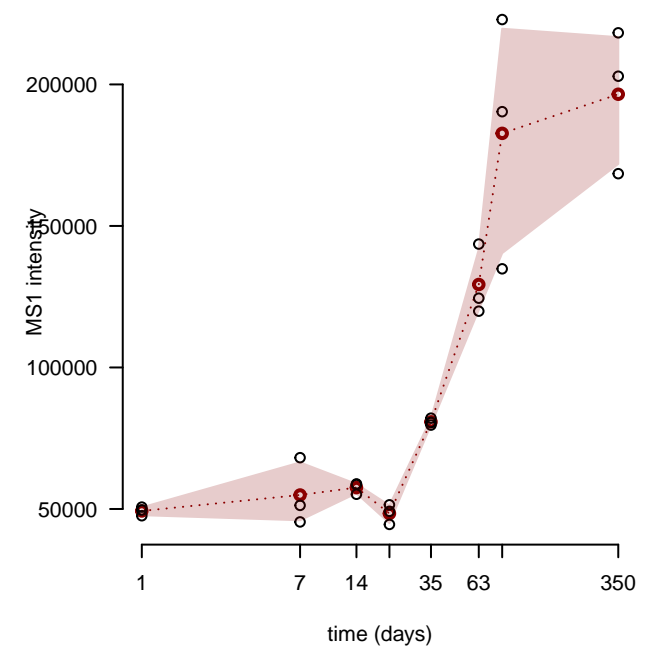

**Q9DBL2**  
GN=Gdap2  
ganglioside-induced differentiation-asso ...

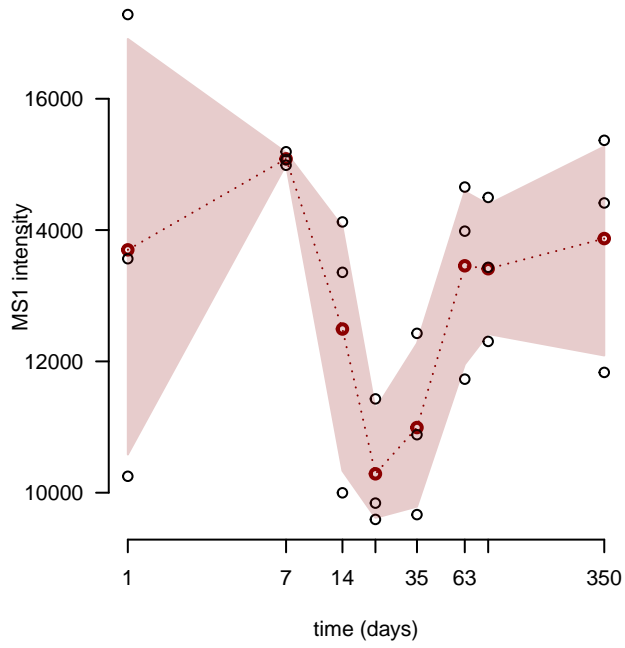

**Q9DBL7**  
GN=Coasy  
Coenzyme A synthase

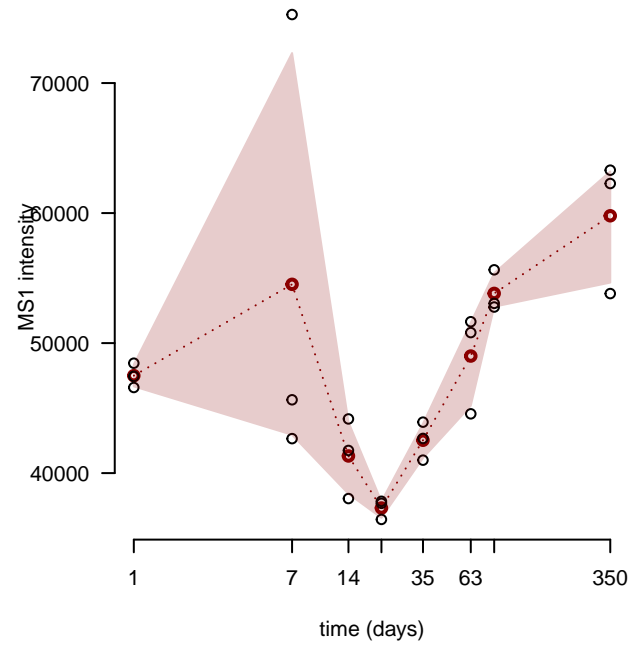

**Q9DBL9**  
GN=Abhd5  
abhydrolase domain containing 5

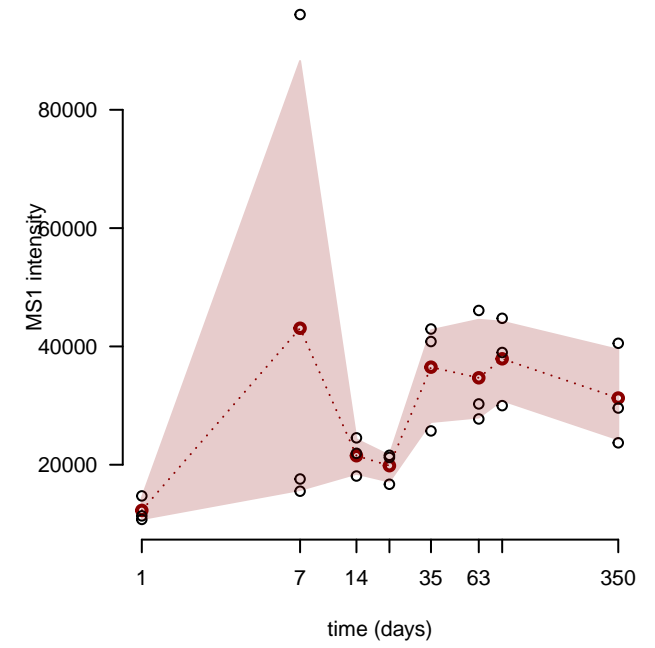

**Q9DBM1**  
GN=Gpatch1  
G patch domain containing 1

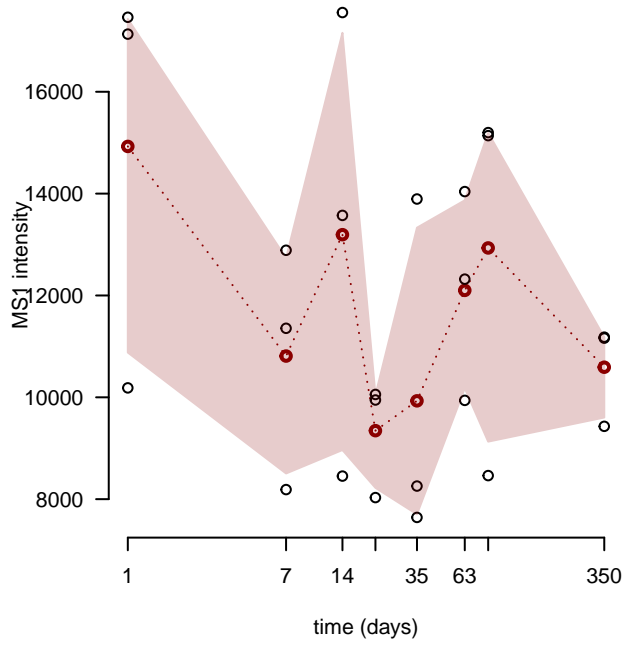

**Q9DBM2**  
GN=Ehhadh  
enoyl-Coenzyme A, hydratase/3-hydroxyacy ...

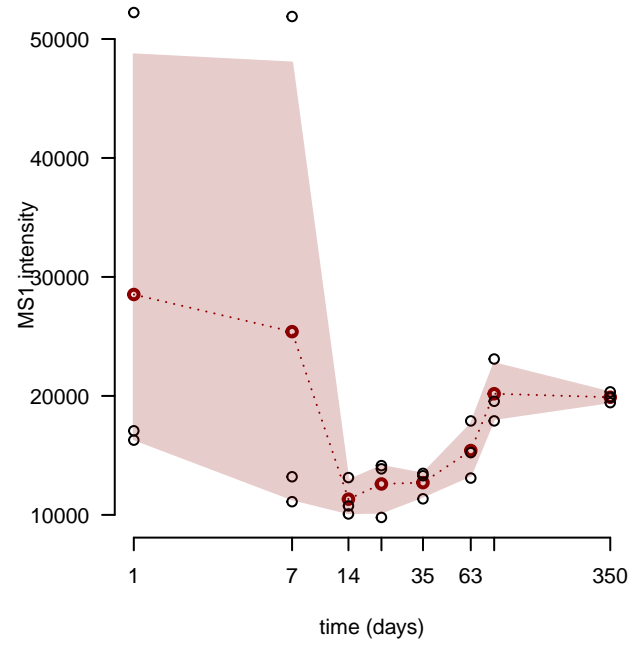

**Q9DBN4**  
GN=P33monox

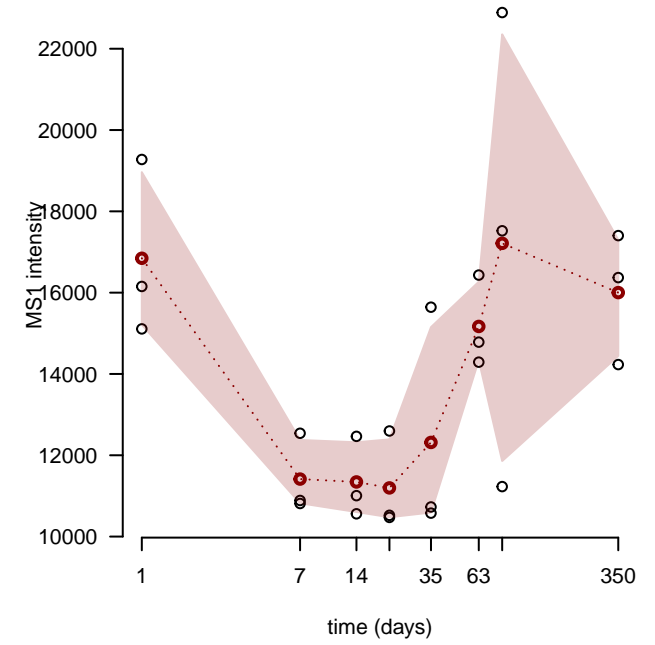

**Q9DBN5**  
GN=Lonp2  
lon peptidase 2, peroxisomal

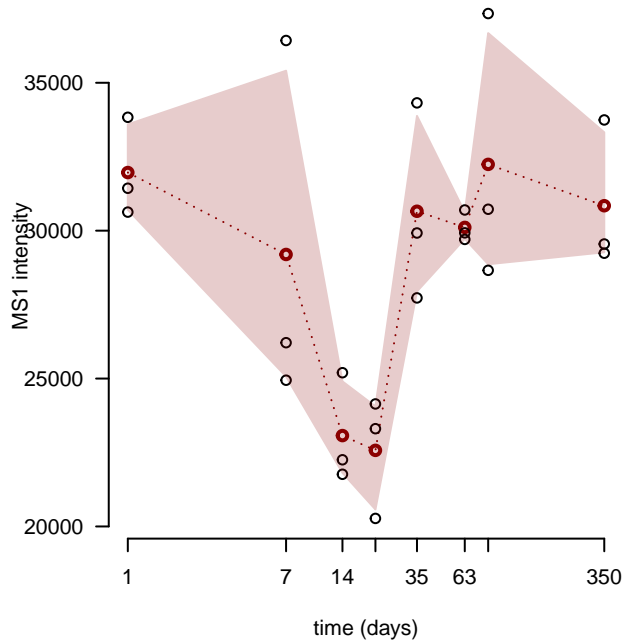

**Q9DBN9**  
GN=Ddx59  
DEAD box helicase 59

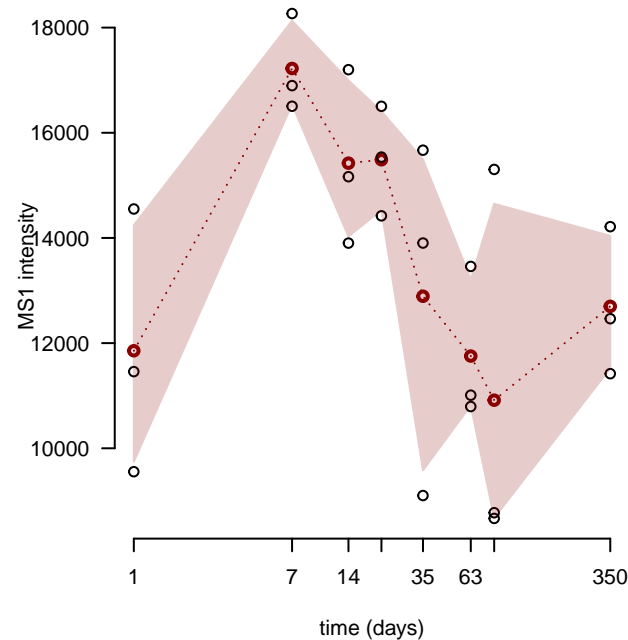

**Q9DBP5**  
GN=Cmpk1  
cytidine monophosphate (UMP-CMP) kinase ...

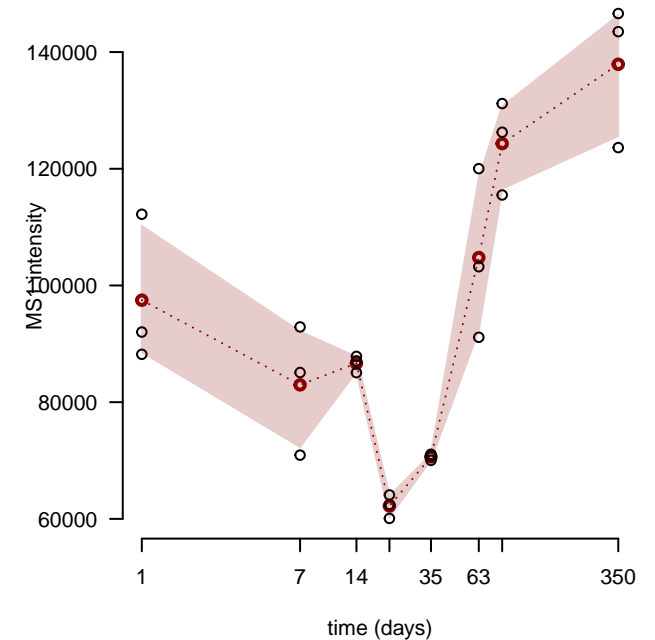

**Q9DBQ7**  
**GN=Scyl3**  
SCY1-like 3 (*S. cerevisiae*)

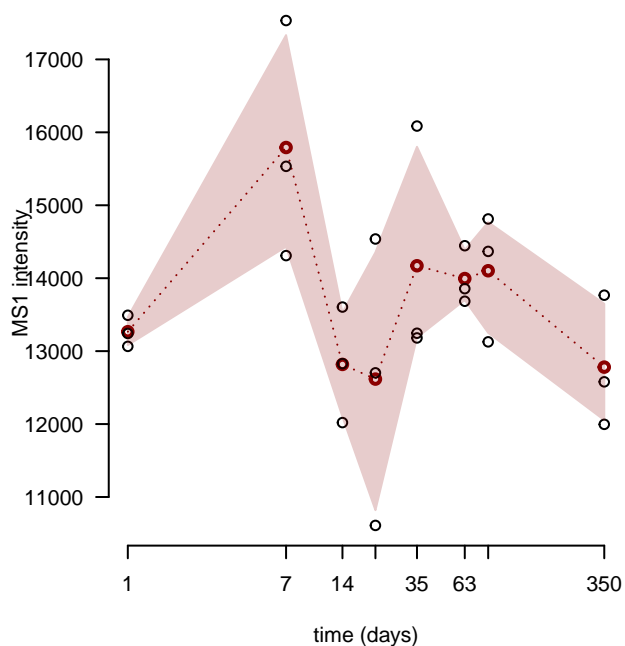

**Q9DBR0**  
**GN=Akap8**  
A kinase (PRKA) anchor protein 8

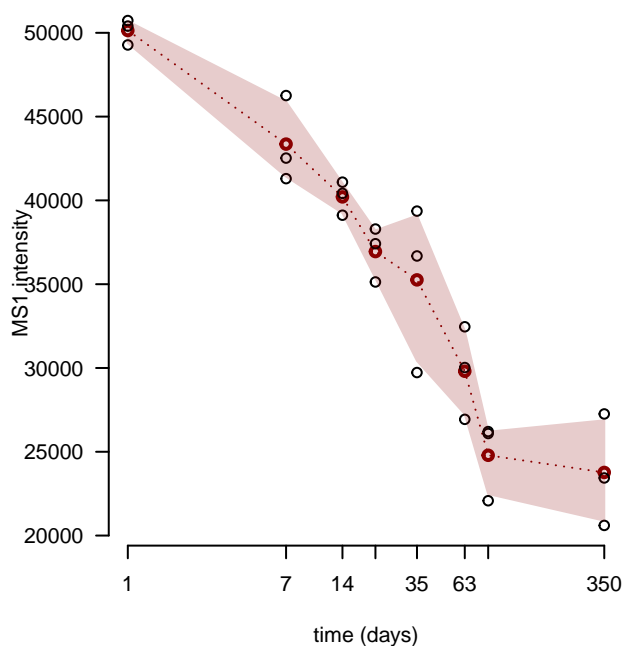

**Q9DBR1**  
**GN=Xrn2**  
5'-3' exoribonuclease 2

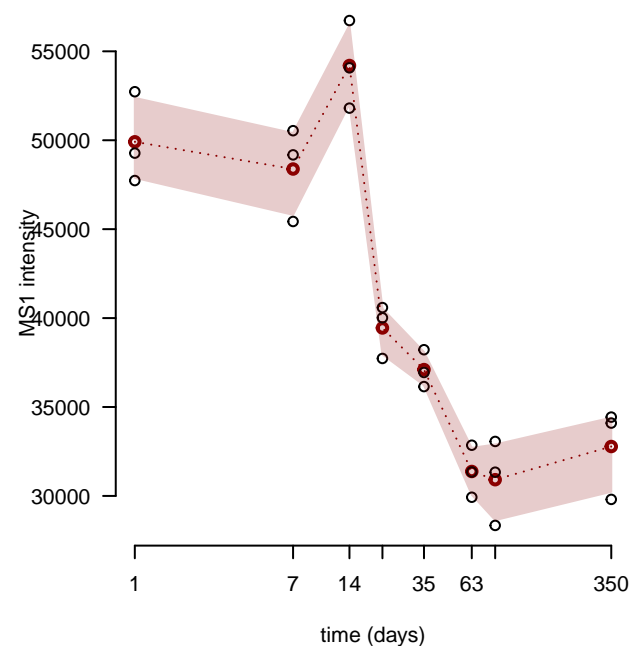

**Q9DBR3**  
**GN=Armc8**  
armadillo repeat containing 8

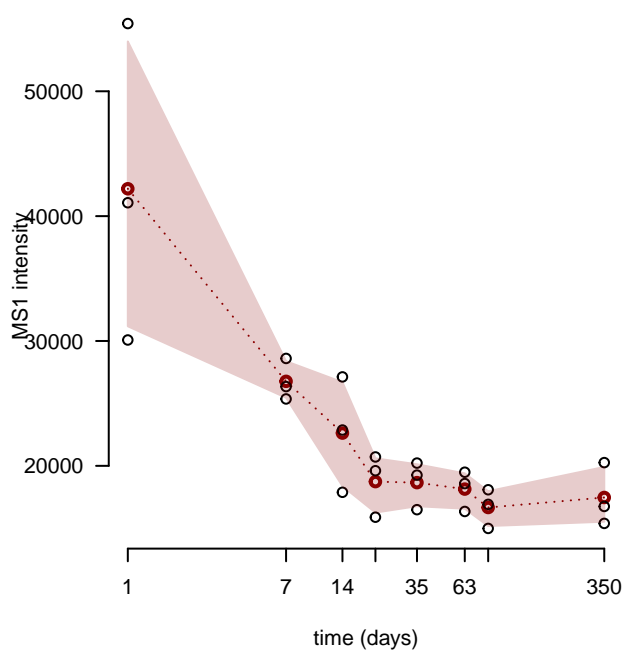

**Q9DBR3**  
**GN=Armc8**  
armadillo repeat containing 8

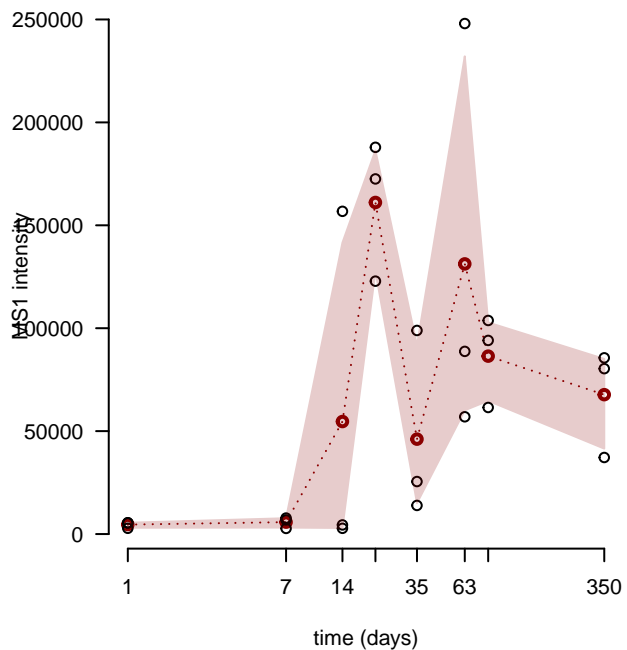

**Q9DBR4**  
**GN=Apbb2**  
amyloid beta (A4) precursor protein-bind ...

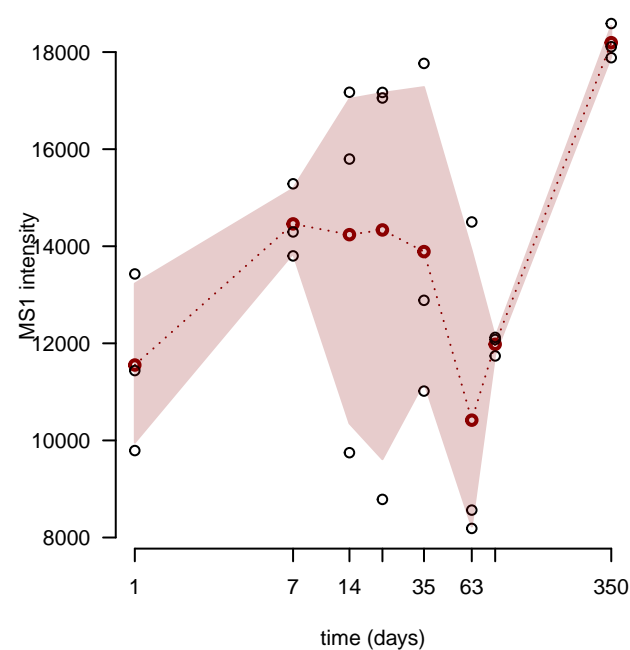

**Q9DBR7**  
**GN=Ppp1r12a**  
protein phosphatase 1, regulatory subuni ...

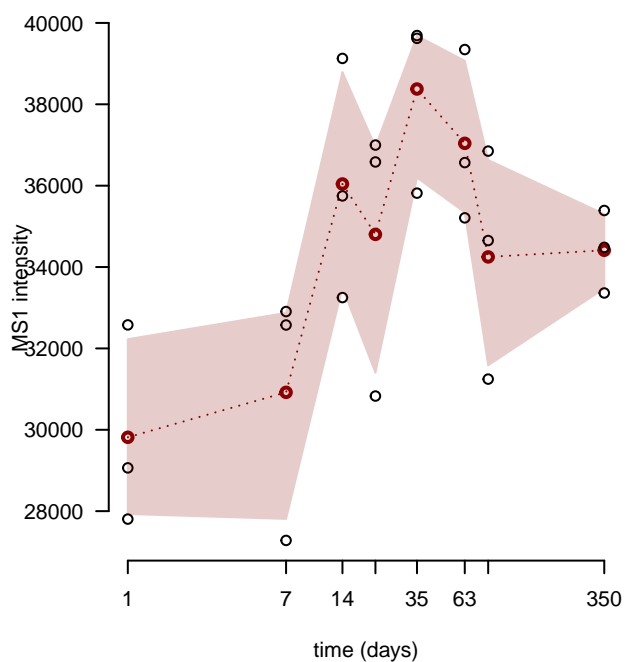

**Q9DBS1**  
**GN=Tmem43**  
transmembrane protein 43

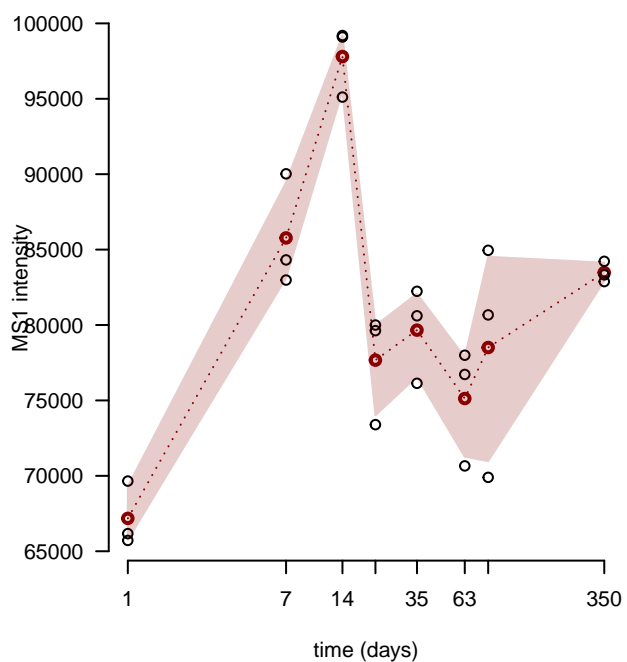

**Q9DBS2**  
**GN=Tprg1l**

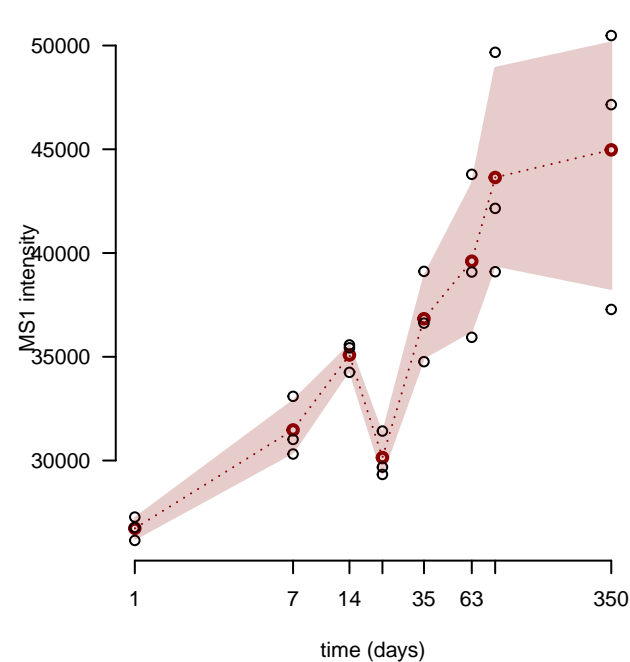

**Q9DBS5**  
**GN=Klc4**  
kinesin light chain 4

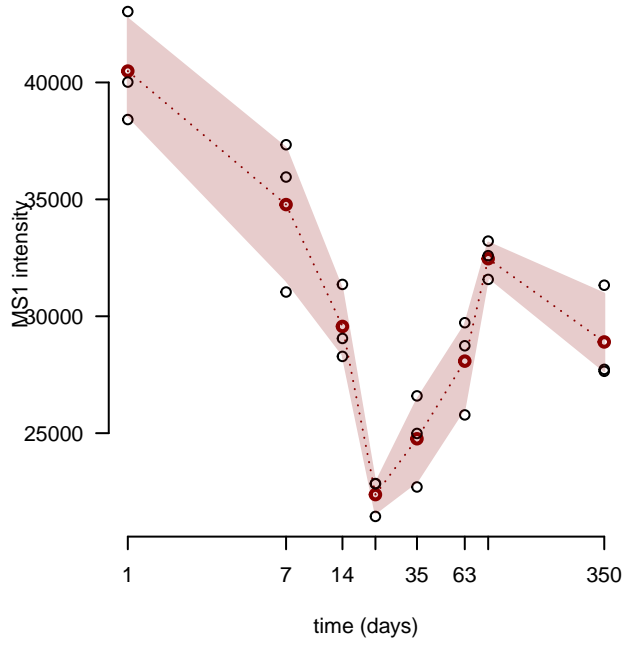

**Q9DBS8**  
**GN=Poc5**  
POC5 centriolar protein

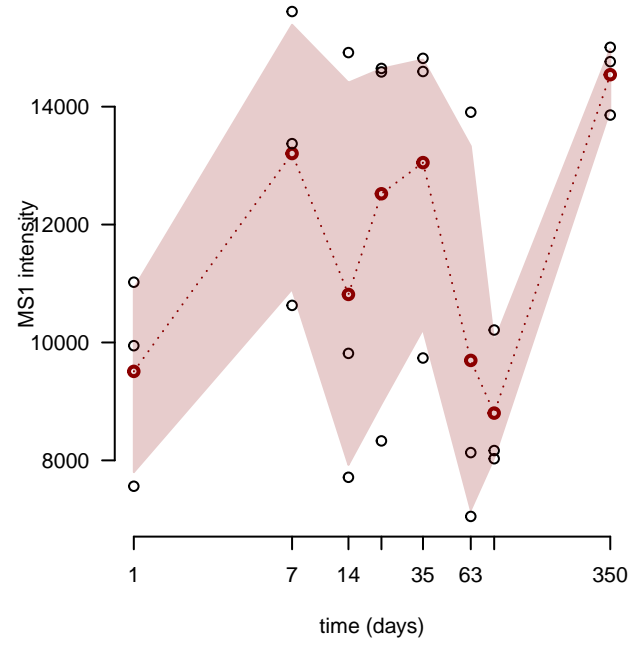

**Q9DBS9**  
**GN=Osbp13**  
oxysterol binding protein-like 3

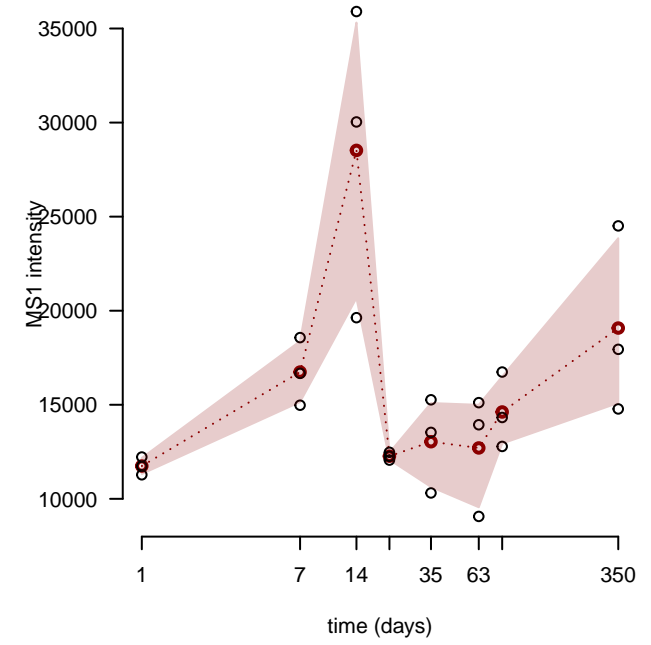

**Q9DBT3**  
**GN=Ccdc97**  
coiled-coil domain containing 97

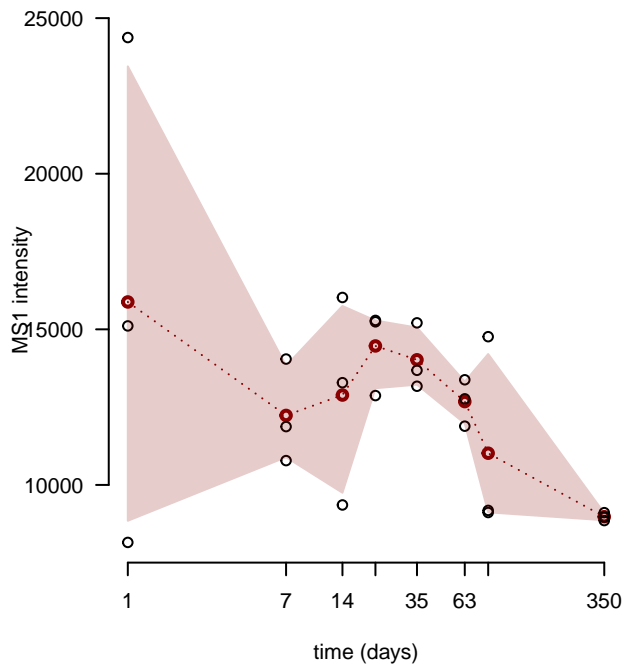

**Q9DBT4**  
**GN=Entpd4**  
ectonucleoside triphosphate diphosphohyd ...

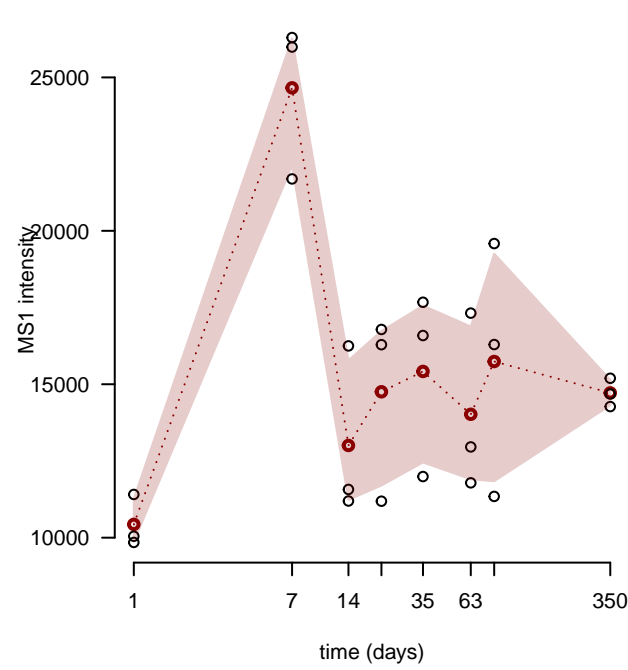

**Q9DBT5**  
**GN=Ampd2**  
adenosine monophosphate deaminase 2

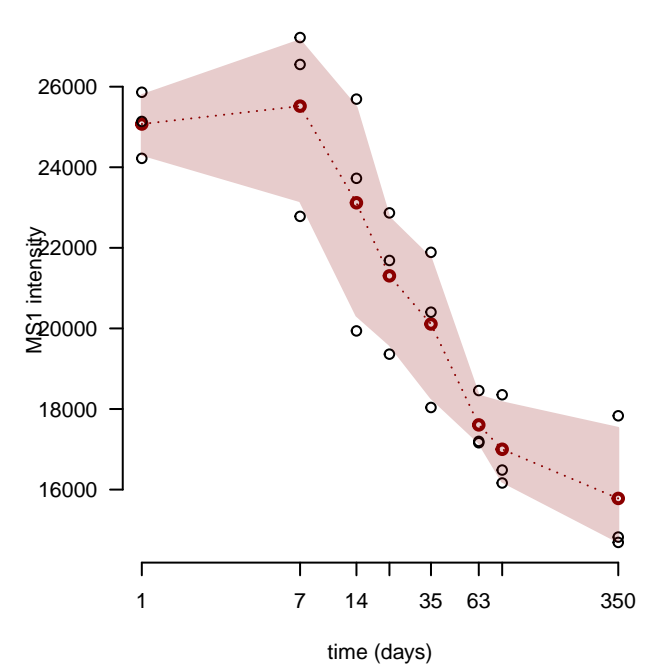

**Q9DBU0**  
**GN=Tm9sf1**  
transmembrane 9 superfamily member 1

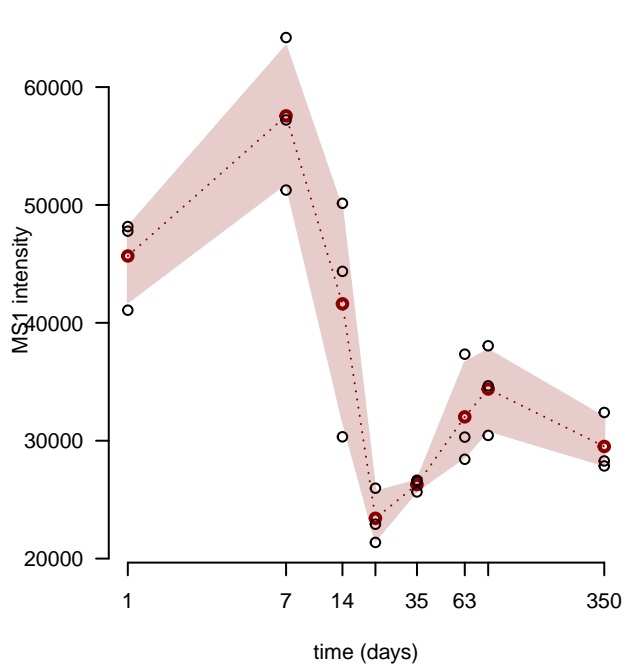

**Q9DBU3**  
**GN=Riok3**  
RIO kinase 3

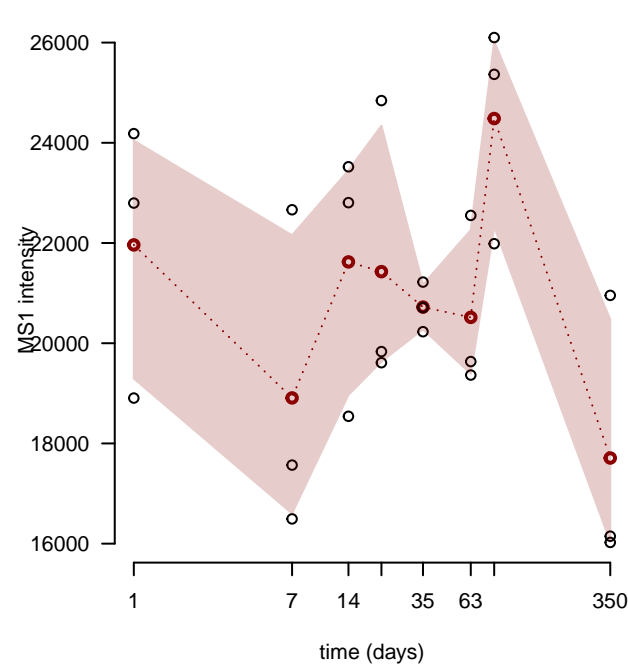

**Q9DBU5**  
**GN=Rnf6**  
ring finger protein (C3H2C3 type) 6

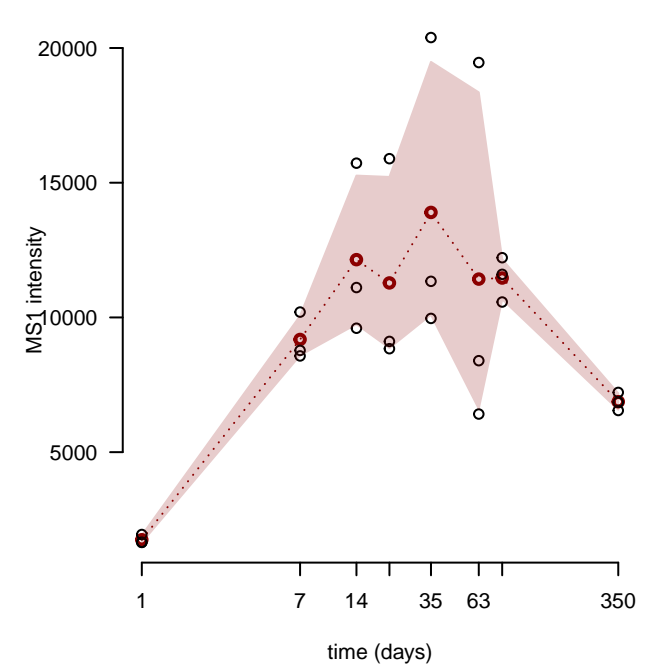

**Q9DBU6**  
GN=Rsrc1  
arginine/serine-rich coiled-coil 1

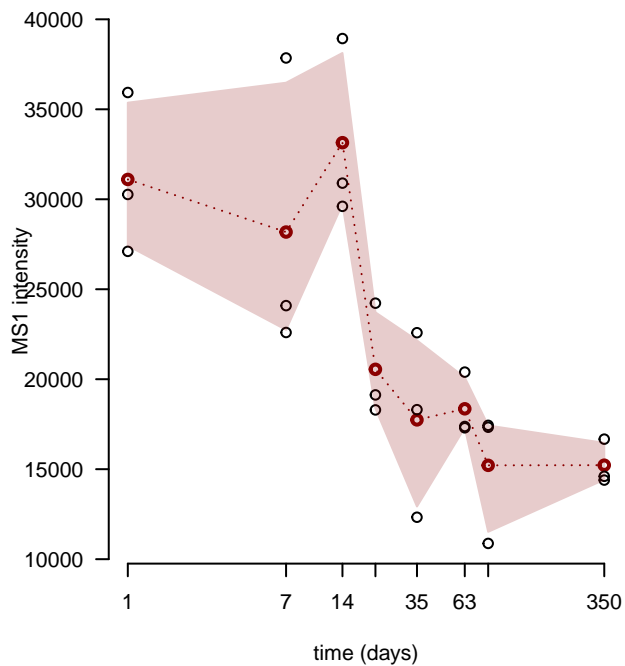

**Q9DBV4**  
GN=Mxra8  
matrix-remodelling associated 8

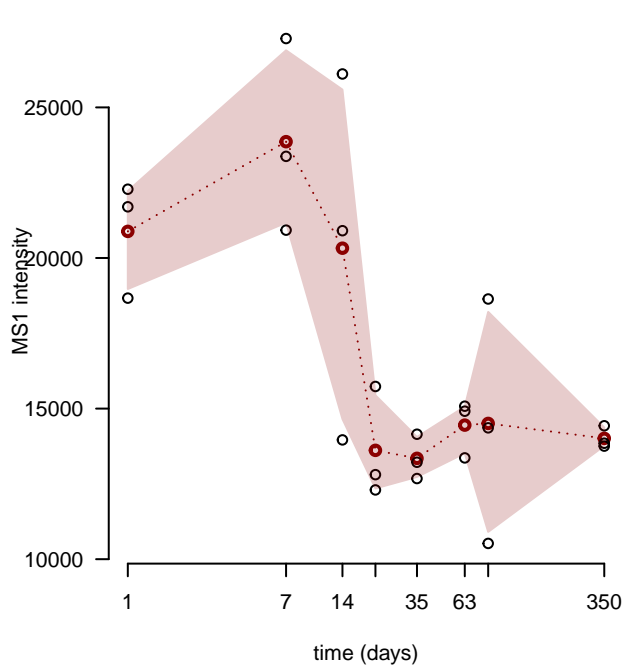

**Q9DBW0**  
GN=Cyp4v2

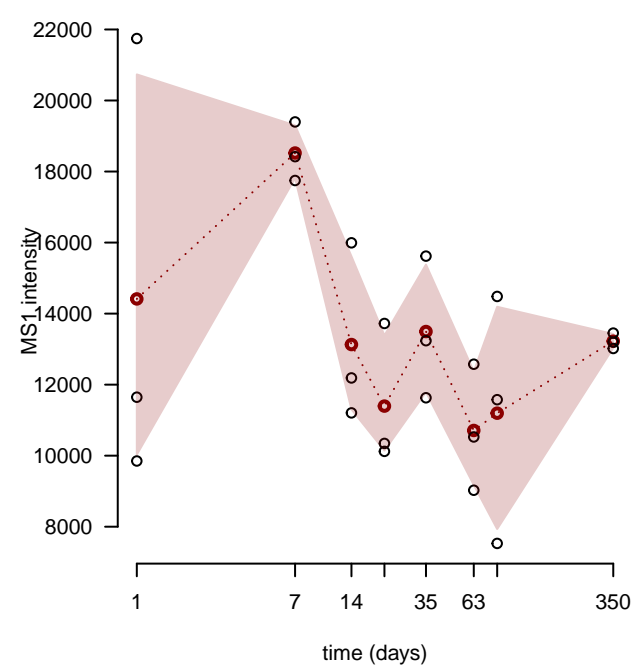

**Q9DBW3**  
GN=Natd1  
N-acetyltransferase domain containing 1

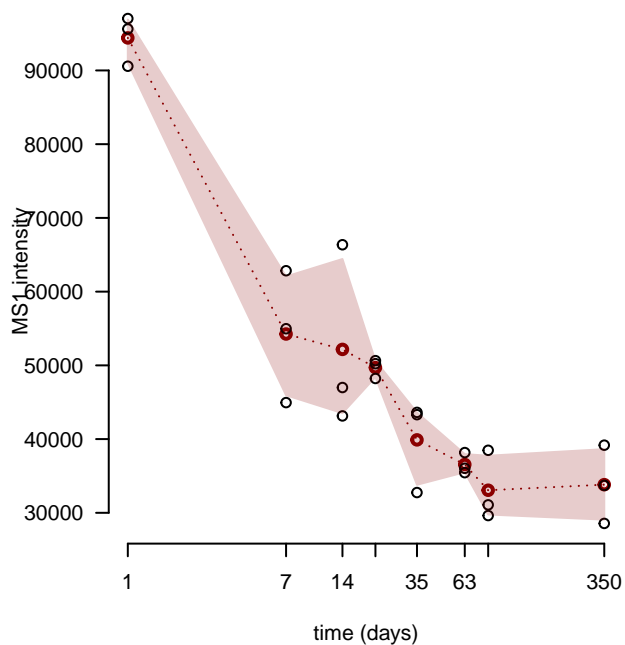

**Q9DBX1**  
GN=Rgcc  
regulator of cell cycle

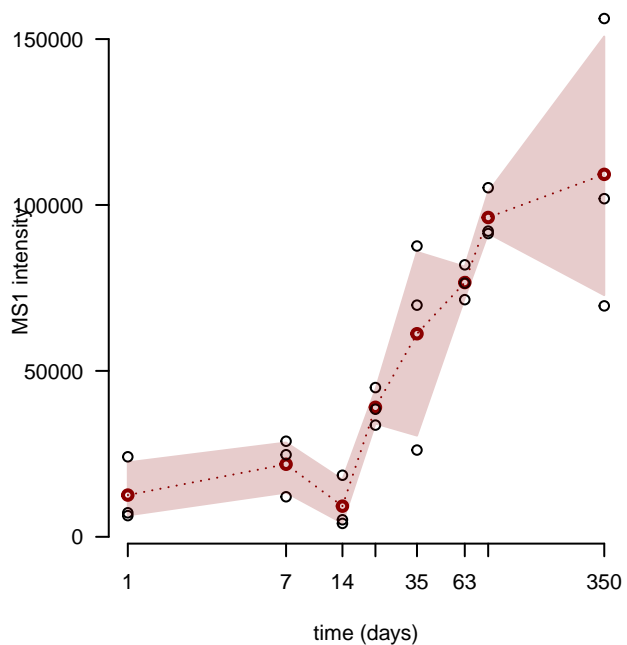

**Q9DBX2**  
GN=Pdcl  
phosducin-like

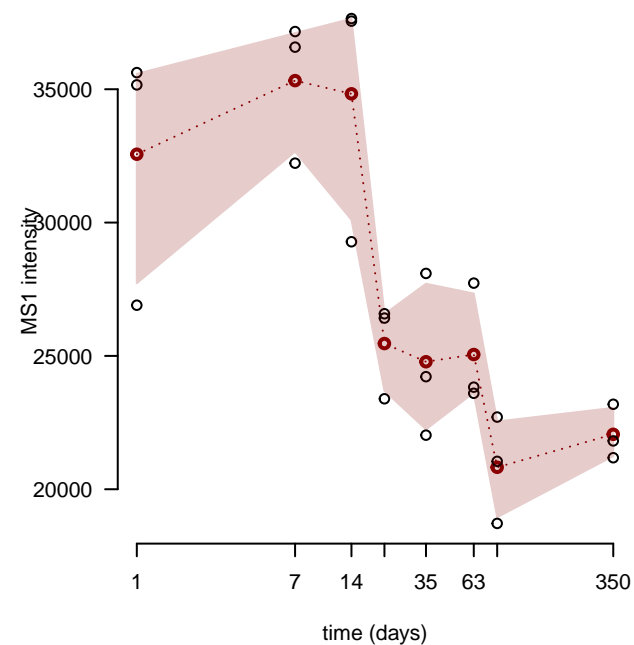

**Q9DBX3**  
GN=Susd2  
sushi domain containing 2

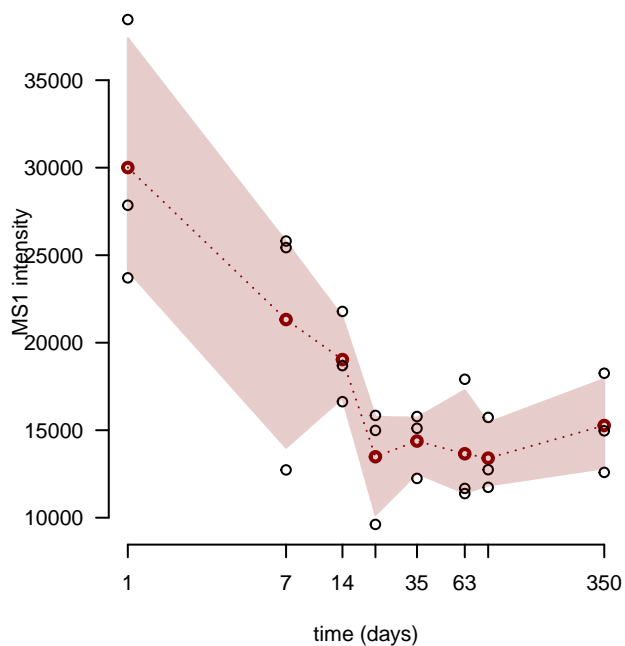

**Q9DBX6**  
GN=Cyp2s1  
cytochrome P450, family 2, subfamily s, ...

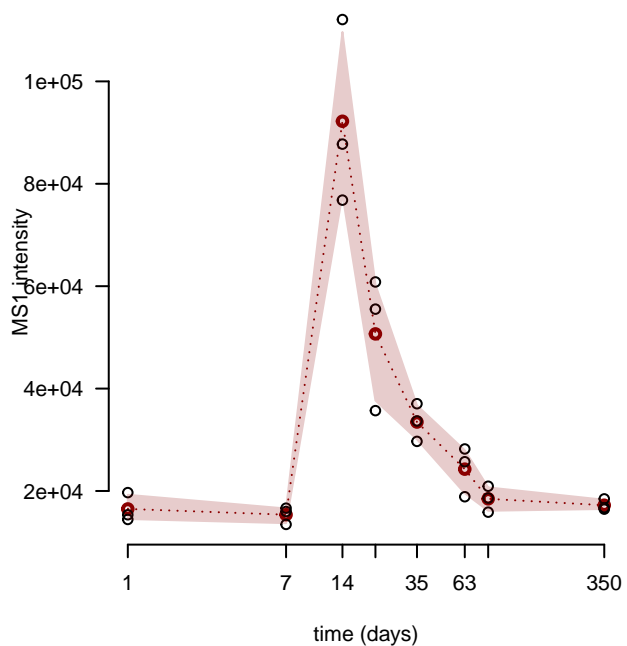

**Q9DBY0**  
GN=Foxp4  
forkhead box P4

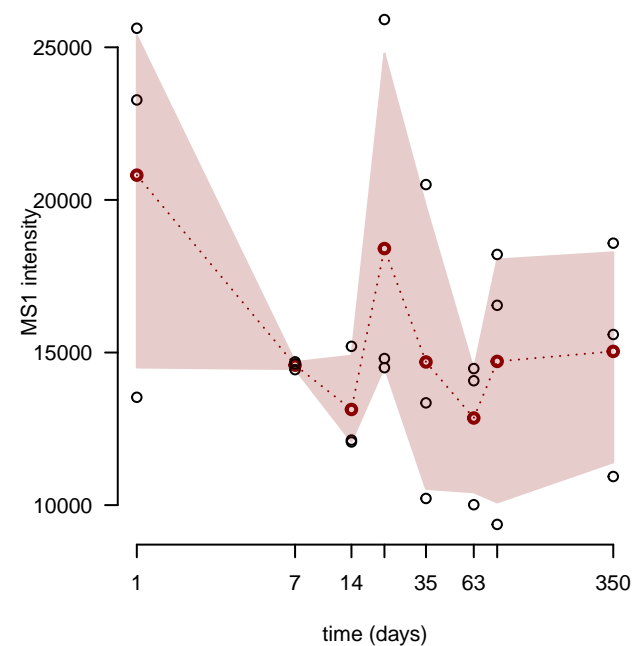

**Q9DBY1**  
**GN=Syvn1**

synovial apoptosis inhibitor 1, synovial ...

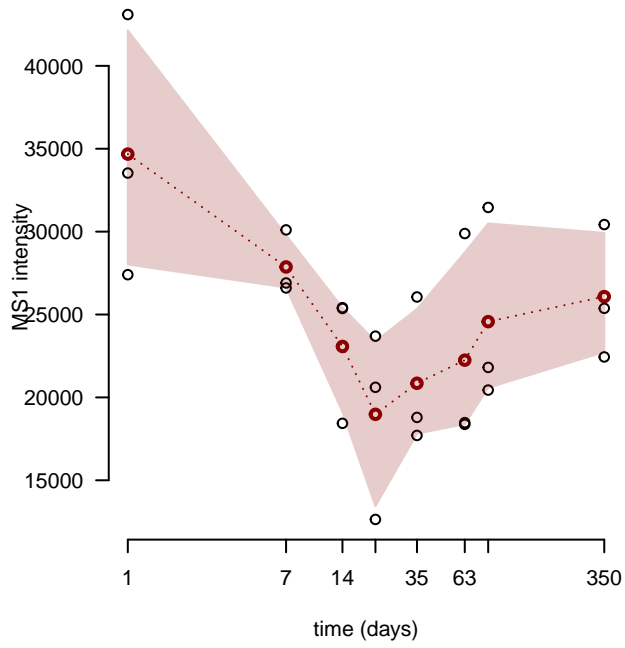

**Q9DBY4**  
**GN=Tril**

TLR4 interactor with leucine-rich repeat ...

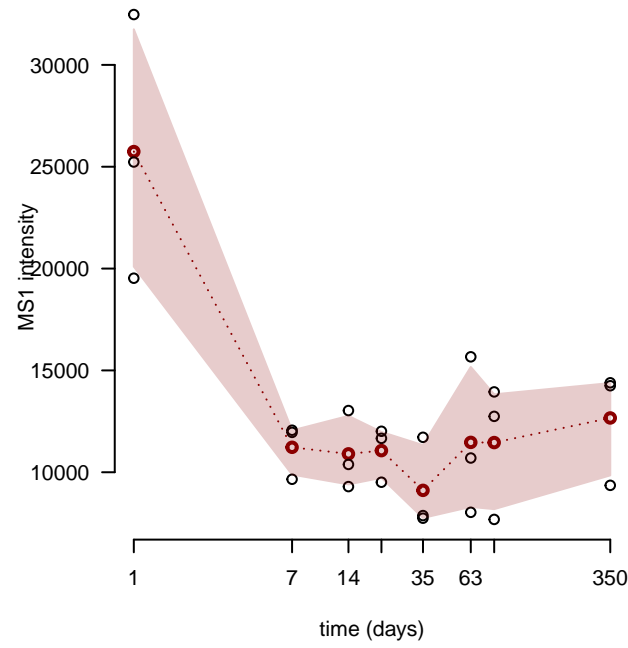

**Q9DBY5**  
**GN=Cbx6**

chromobox 6

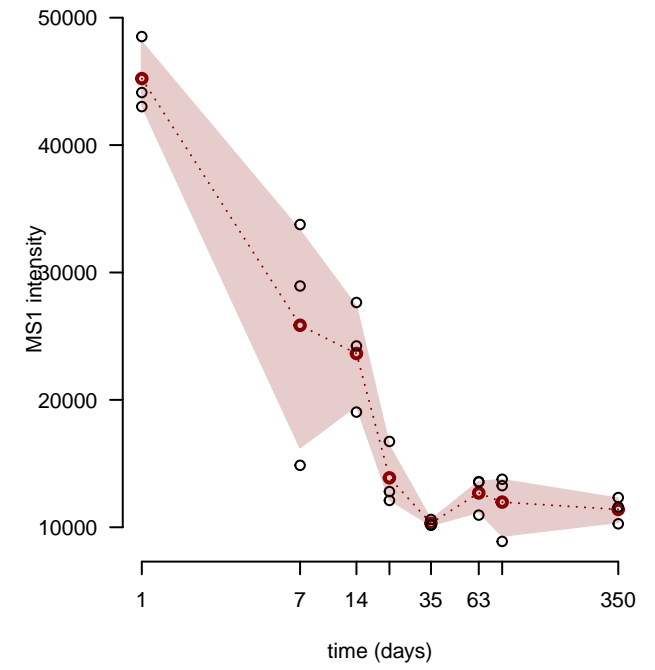

**Q9DBY8**  
**GN=Nvl**

nuclear VCP-like

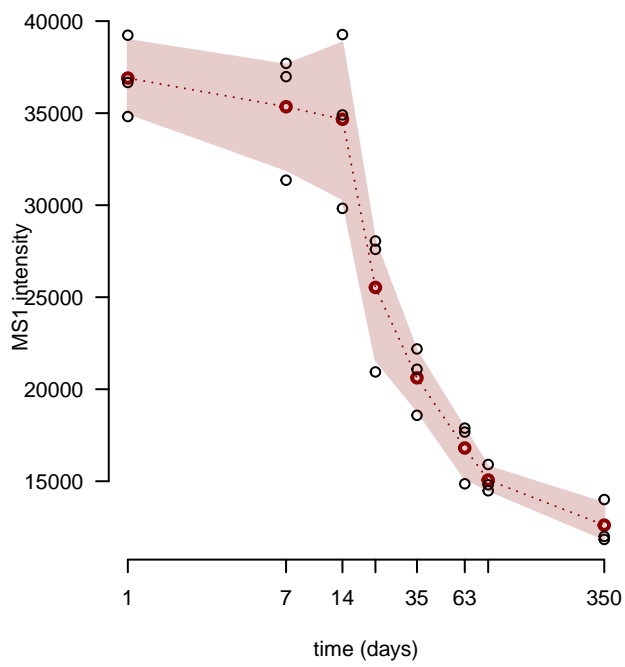

**Q9DBZ1**  
**GN=Ikbip**

IKBKB interacting protein

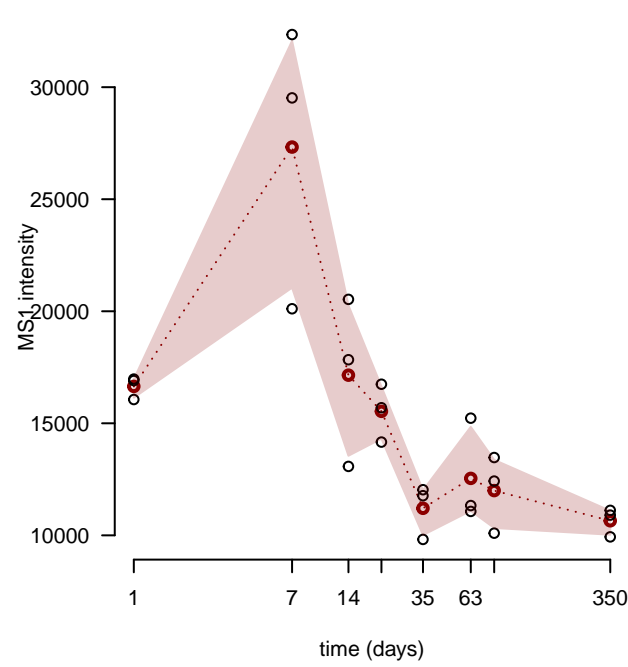

**Q9DBZ1**  
**GN=Ikbip**

IKBKB interacting protein

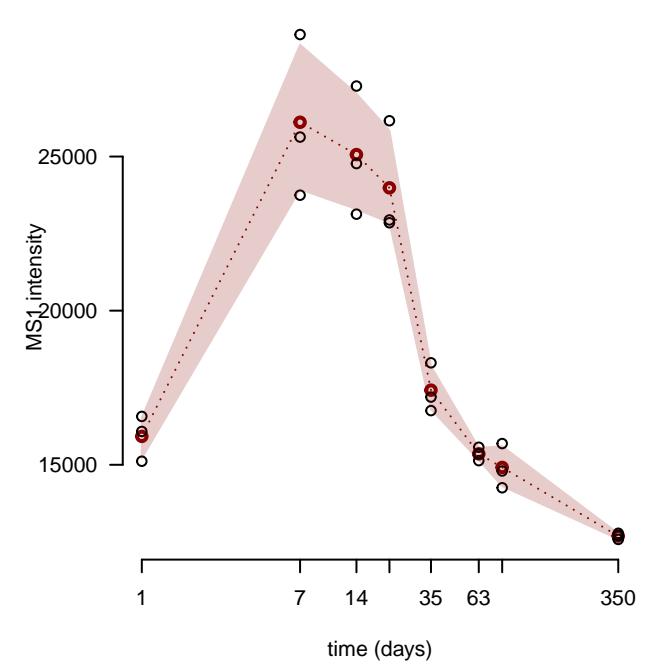

**Q9DBZ5**  
**GN=Eif3k**

eukaryotic translation initiation factor ...

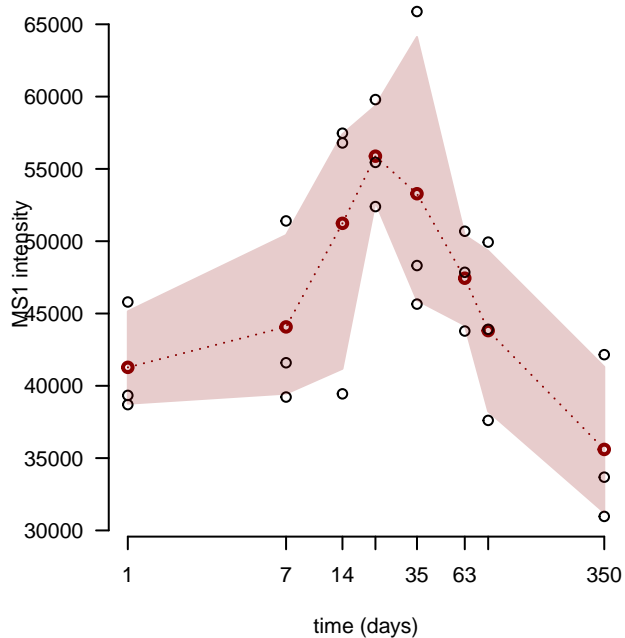

**Q9DBZ9**  
**GN=Syde1**

synapse defective 1, Rho GTPase, homolog ...

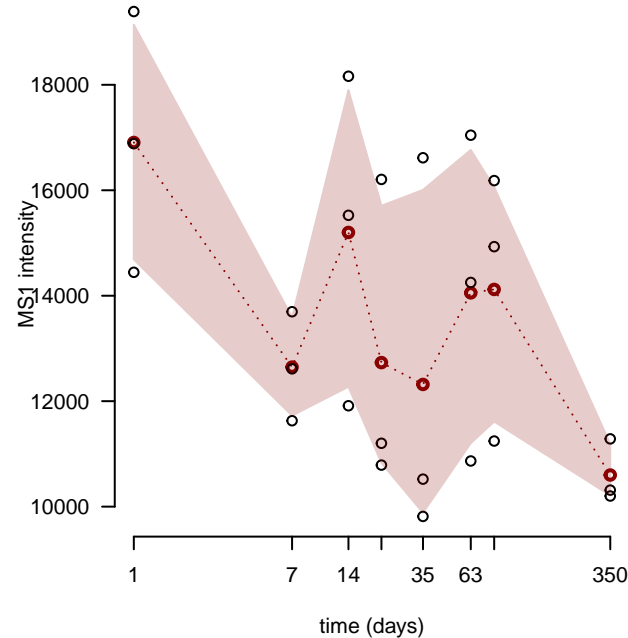

**Q9DC04**  
**GN=Rgs3**

regulator of G-protein signaling 3

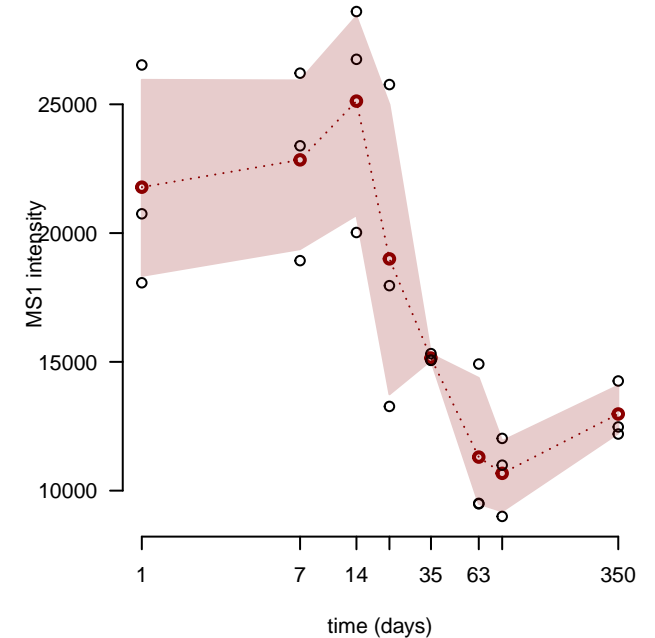

**Q9DC11**  
**GN=Plxdc2**  
plexin domain containing 2

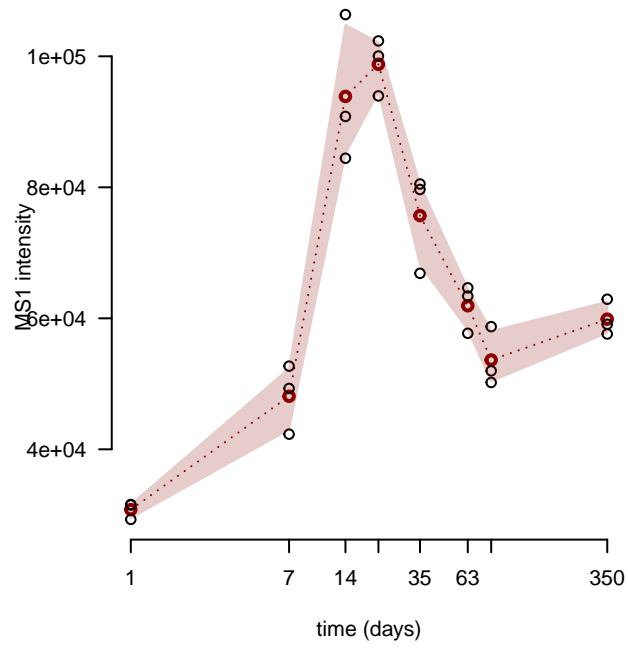

**Q9DC16**  
**GN=Ergic1**  
endoplasmic reticulum-golgi intermediate ...

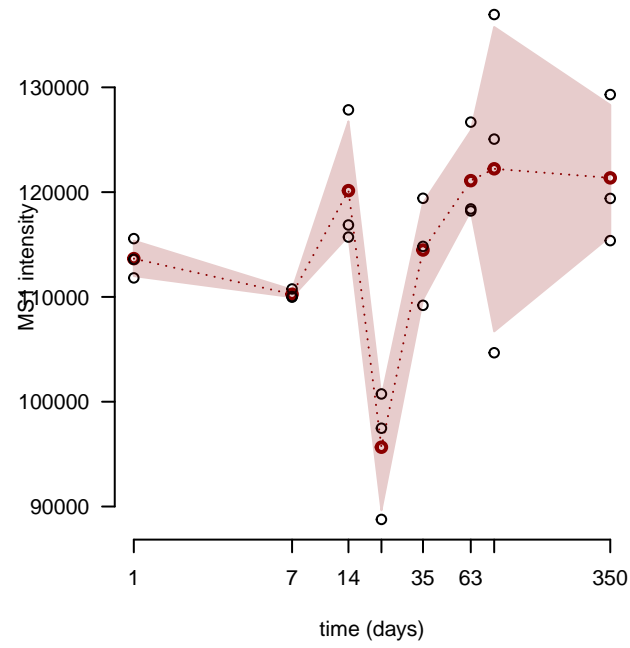

**Q9DC23**  
**GN=Dnajc10**  
DnaJ heat shock protein family (Hsp40) m ...

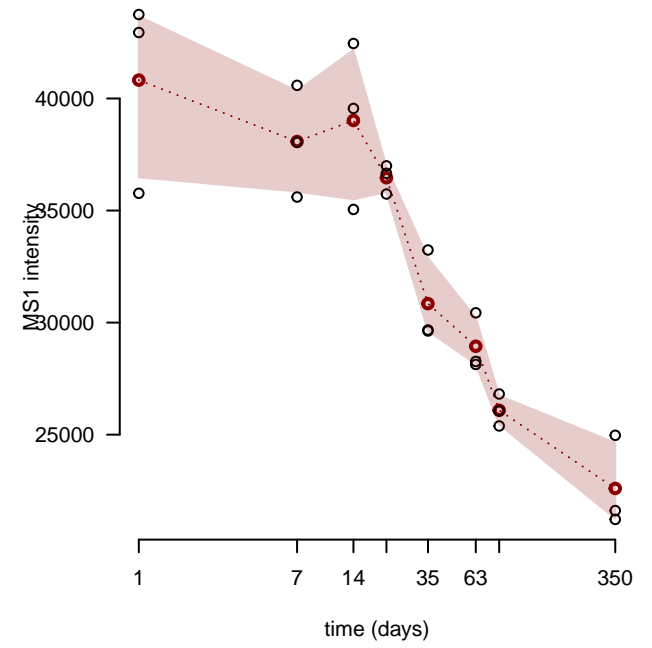

**Q9DC26**  
**GN=Slc46a3**  
solute carrier family 46, member 3

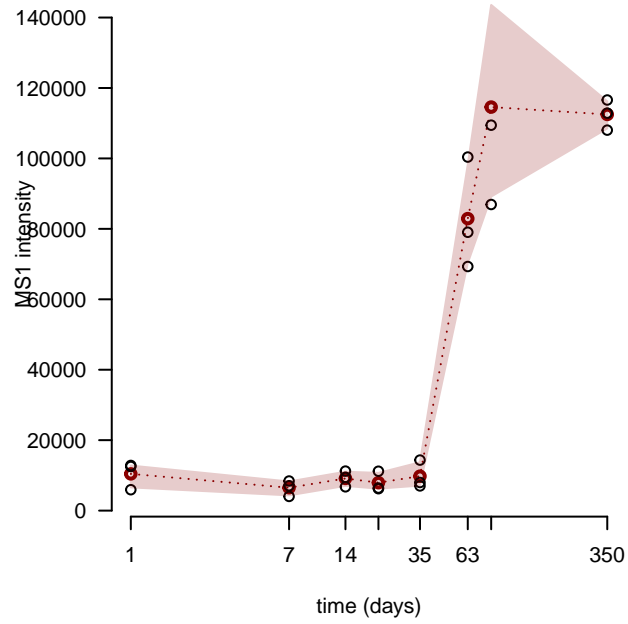

**Q9DC28**  
**GN=Csnk1d**  
casein kinase 1, delta

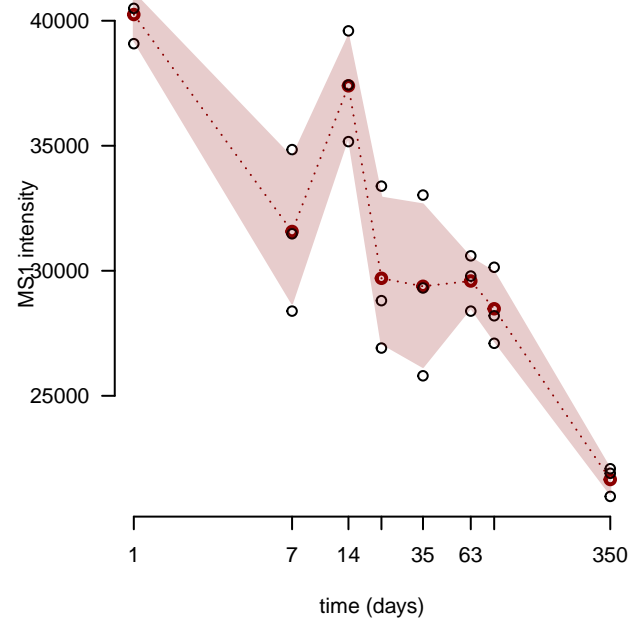

**Q9DC29**  
**GN=Abcb6**  
ATP-binding cassette, sub-family B (MDR/ ...

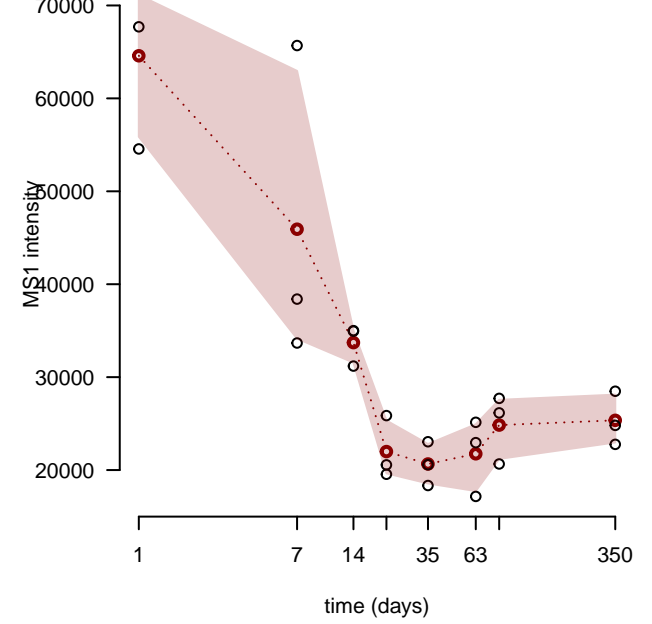

**Q9DC33**  
**GN=Hmg20a**  
high mobility group 20A

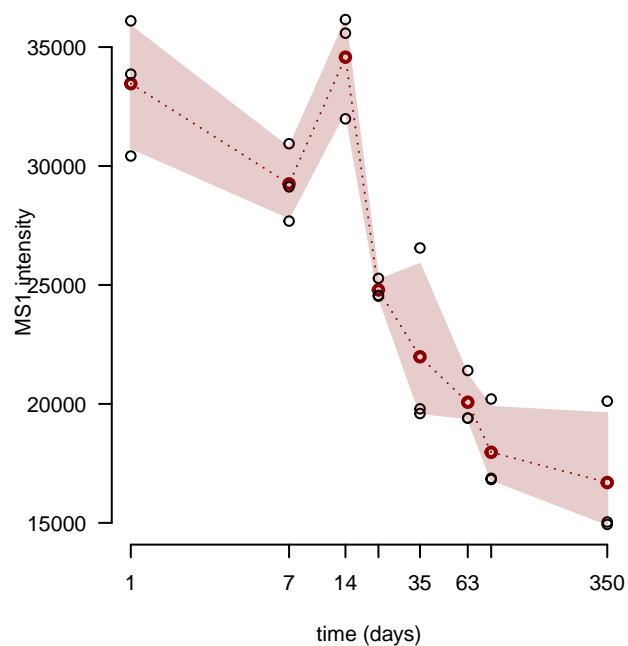

**Q9DC37**  
**GN=Mfsd1**  
major facilitator superfamily domain con ...

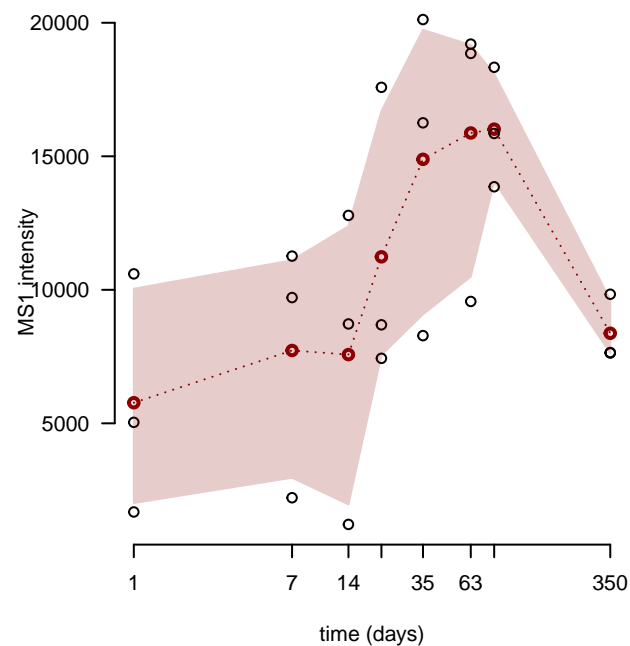

**Q9DC40**  
**GN=Telo2**  
telomere maintenance 2

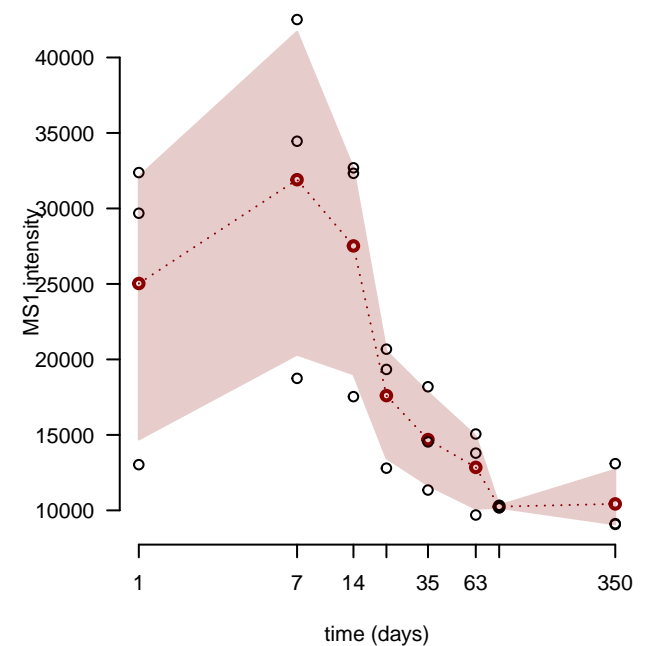



**Q9DC48**  
**GN=Cdc40**  
cell division cycle 40

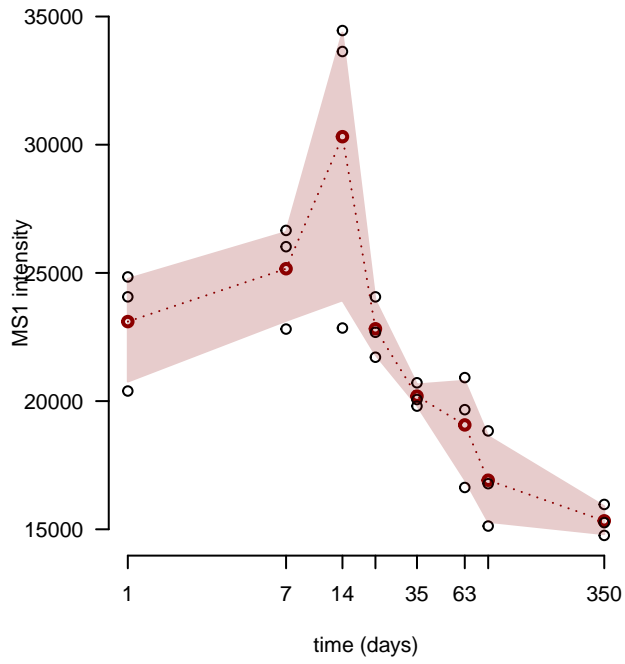

**Q9DC50**  
**GN=Crot**  
carnitine O-octanoyltransferase

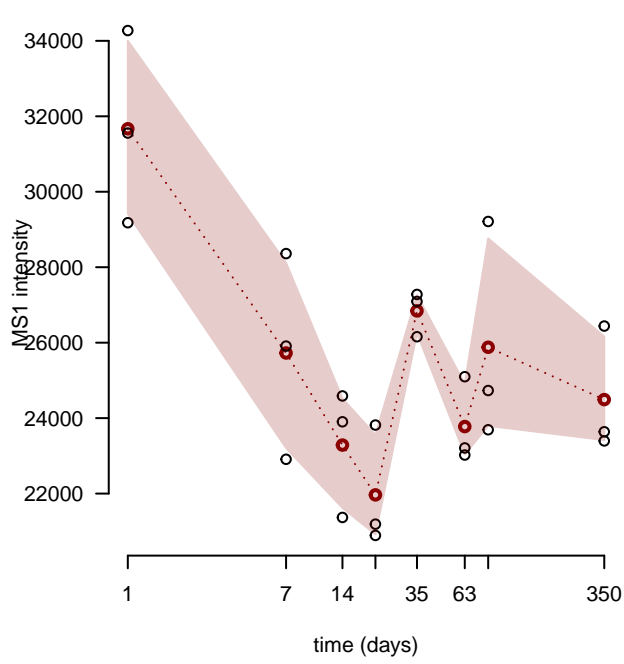

**Q9DC51**  
**GN=Gnai3**  
guanine nucleotide binding protein (G pr ...

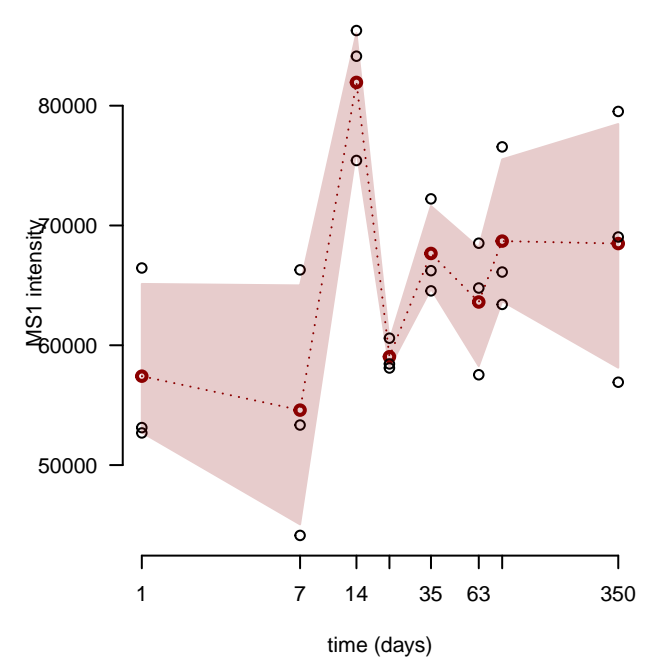

**Q9DC53**  
**GN=Cpne8**  
copine VIII

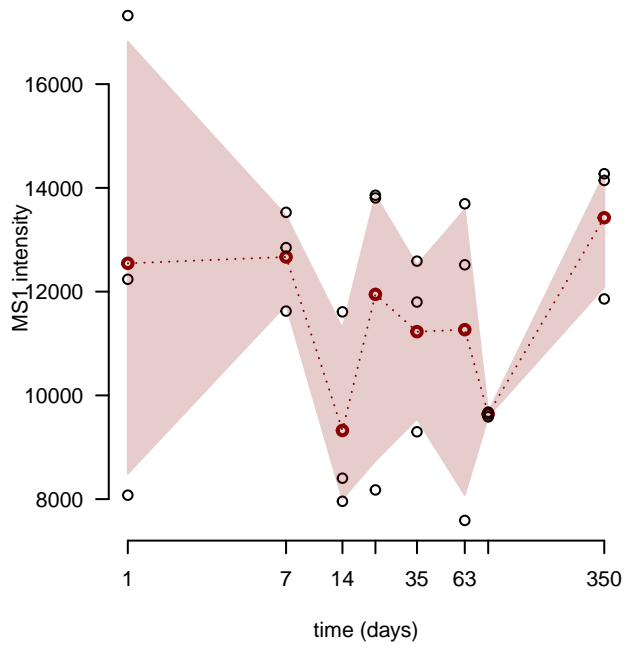

**Q9DC61**  
**GN=Pmpca**  
peptidase (mitochondrial processing) alp ...

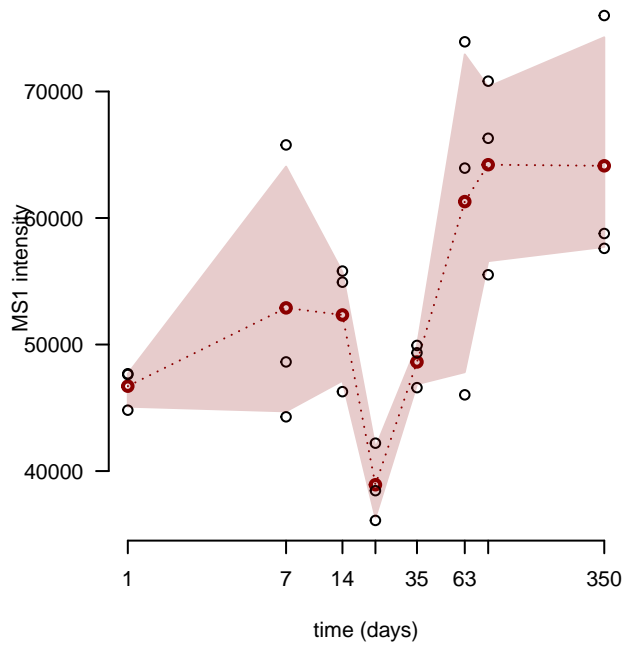

**Q9DC63**  
**GN=Fbxo3**  
F-box protein 3

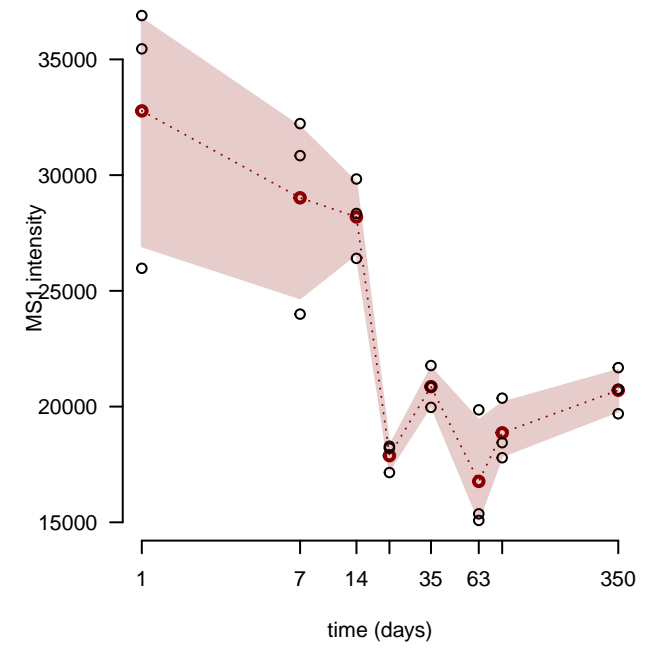

**Q9DC69**  
**GN=Ndufa9**  
NADH:ubiquinone oxidoreductase subunit A ...

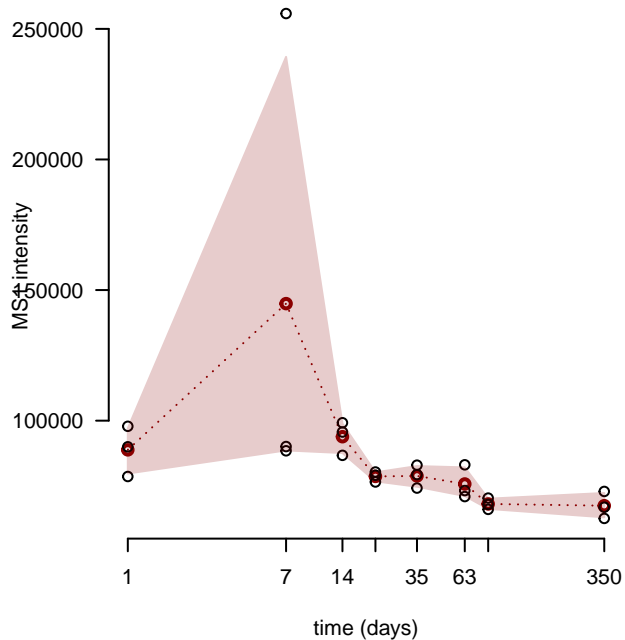

**Q9DC70**  
**GN=Ndufs7**  
NADH:ubiquinone oxidoreductase core subu ...

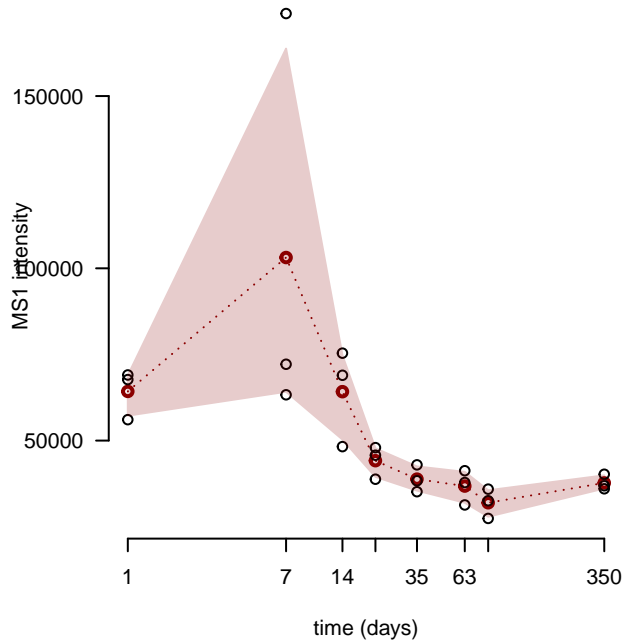

**Q9DC71**  
**GN=Mrps15**  
mitochondrial ribosomal protein S15

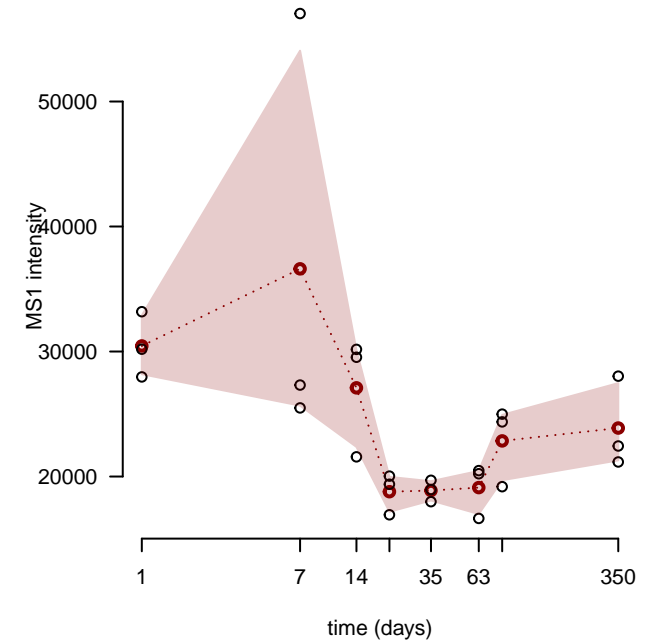

**Q9DC77**  
GN=Smpx  
small muscle protein, X-linked

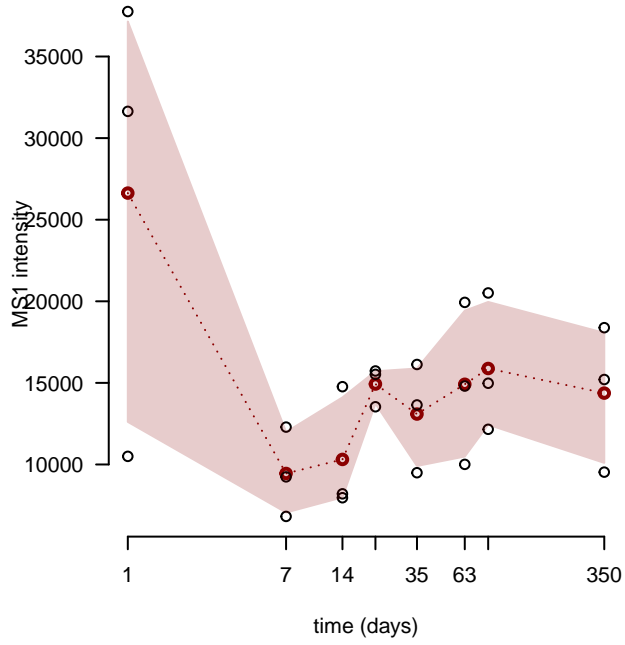

**Q9DCA2**  
GN=Mrps11  
mitochondrial ribosomal protein S11

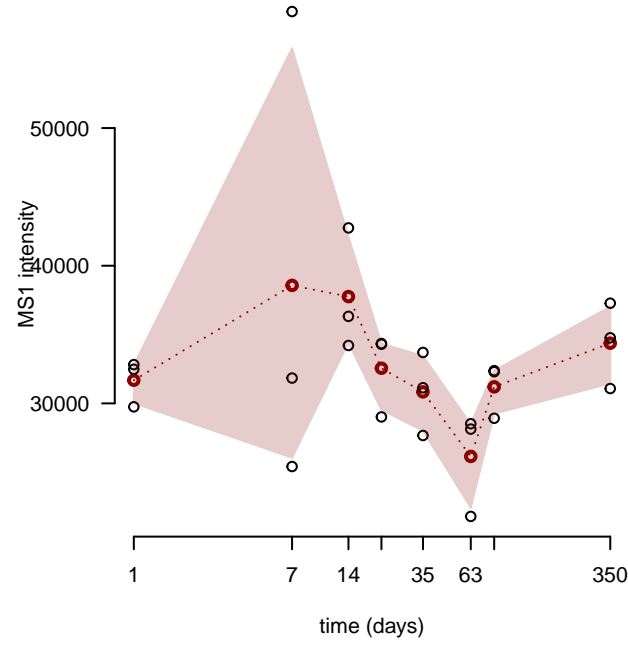

**Q9DCA5**  
GN=Brix1  
BRX1, biogenesis of ribosomes

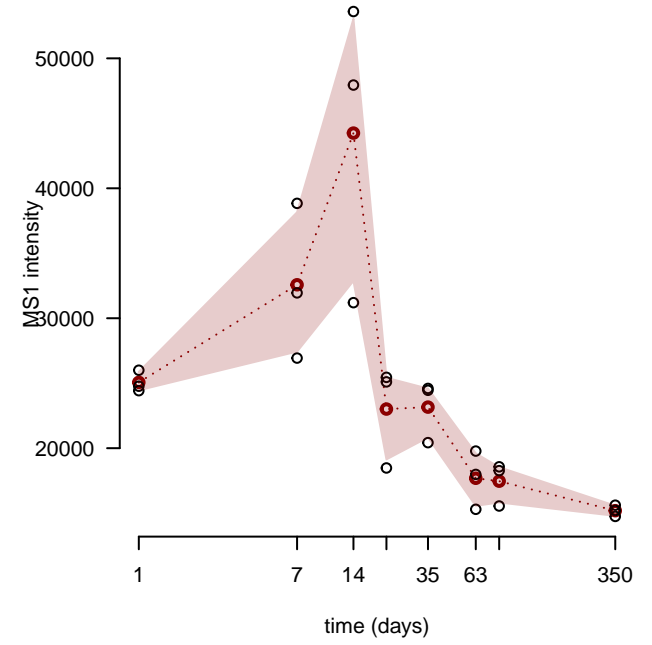

**Q9DCB1**  
GN=Hmgn3  
high mobility group nucleosomal binding ...

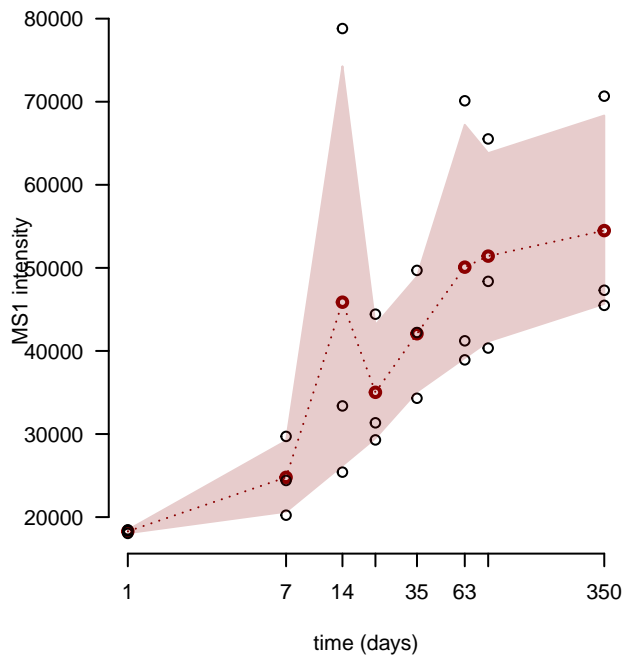

**Q9DCB8**  
GN=Isca2  
iron-sulfur cluster assembly 2

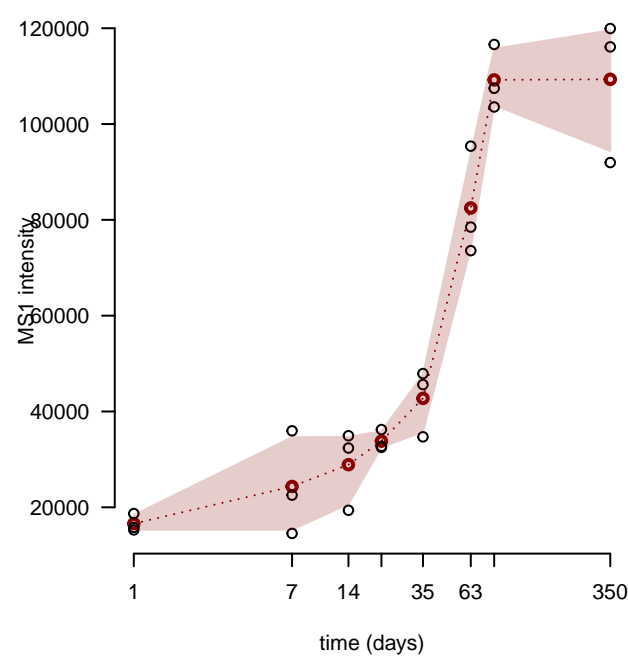

**Q9DCC4**  
GN=Pycr3

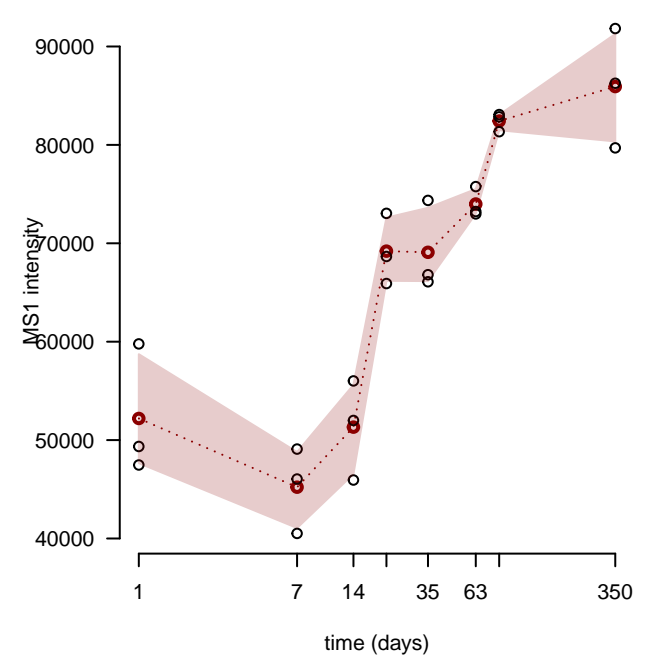

**Q9DCC8**  
GN=Tomm20  
translocase of outer mitochondrial membr ...

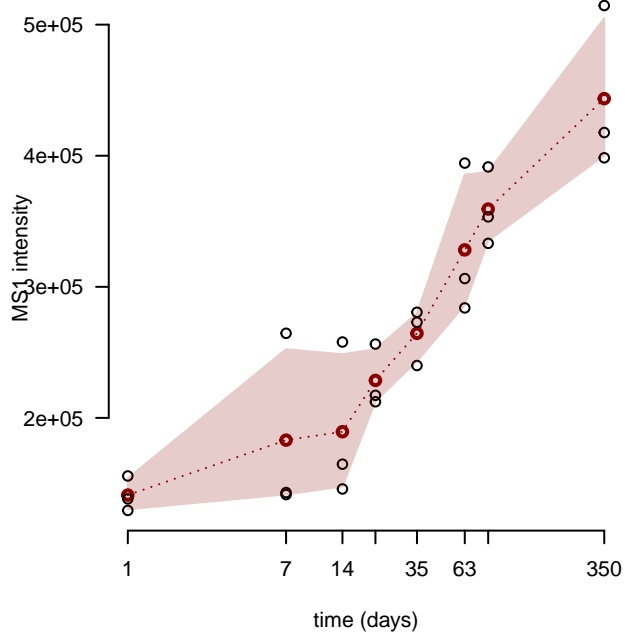

**Q9DCD0**  
GN=Pgd  
phosphogluconate dehydrogenase

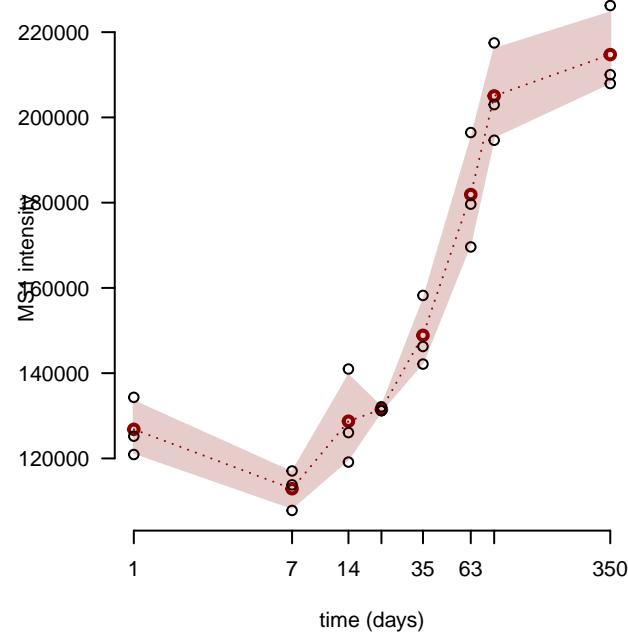

**Q9DCD2**  
GN=Xab2  
XPA binding protein 2

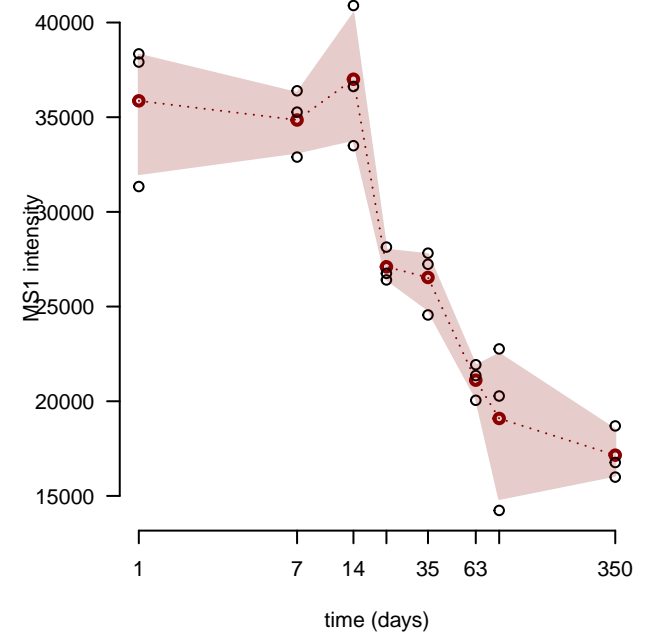

**Q9DCD5**  
**GN=Tjap1**

tight junction associated protein 1

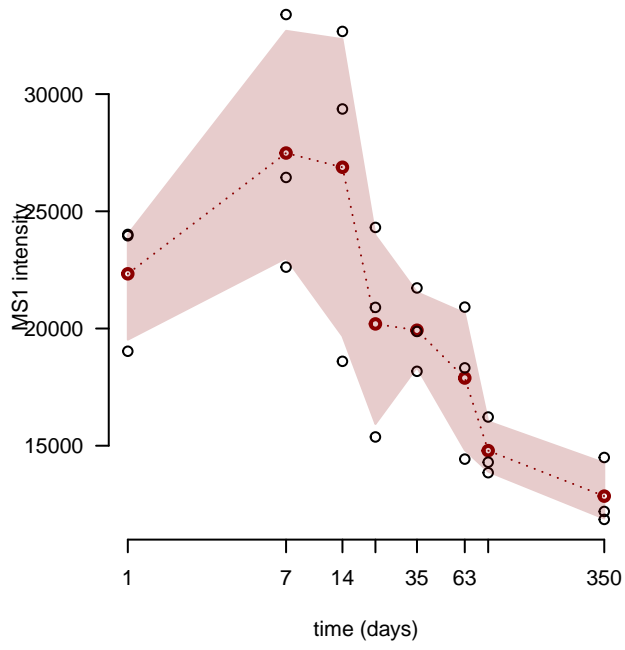

**Q9DCD6**  
**GN=Gabarap**

gamma-aminobutyric acid receptor associa ...

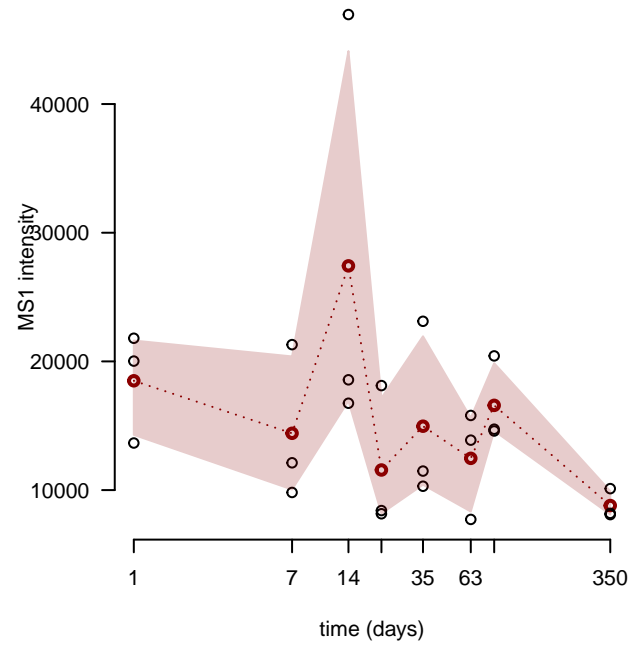

**Q9DCE5**  
**GN=Pak1ip1**

PAK1 interacting protein 1

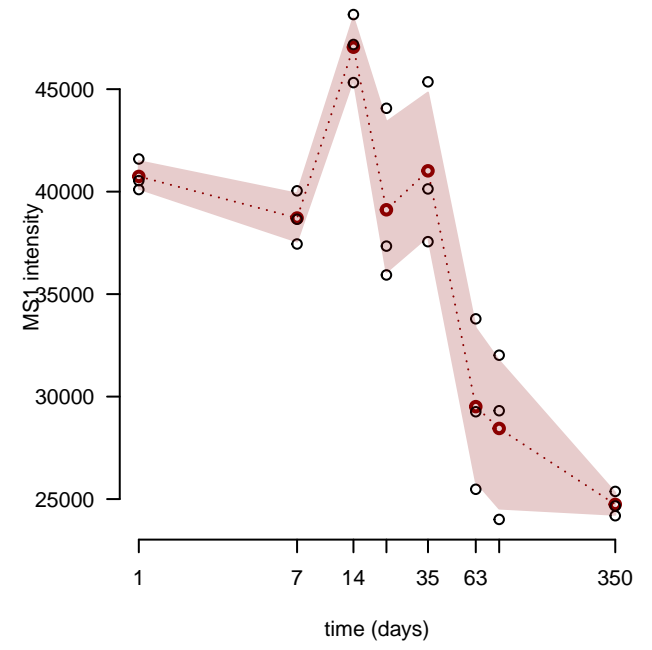

**Q9DCF9**  
**GN=Ssr3**

signal sequence receptor, gamma

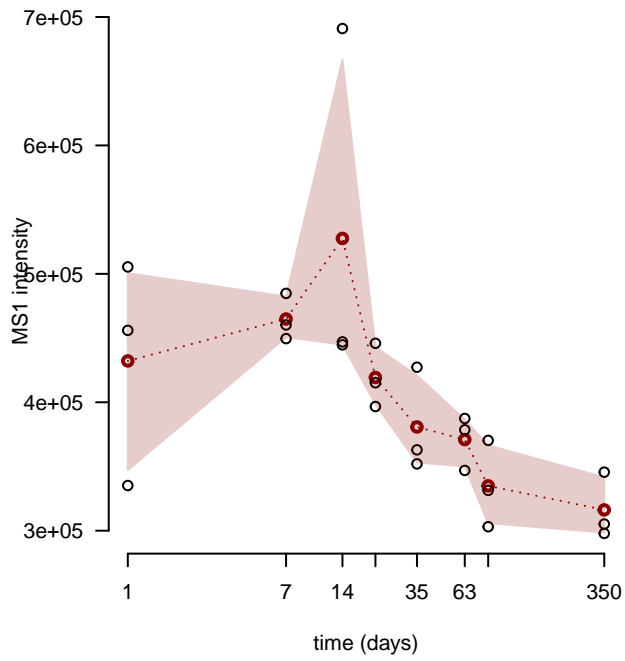

**Q9DCG2**  
**GN=Cd302**

CD302 antigen

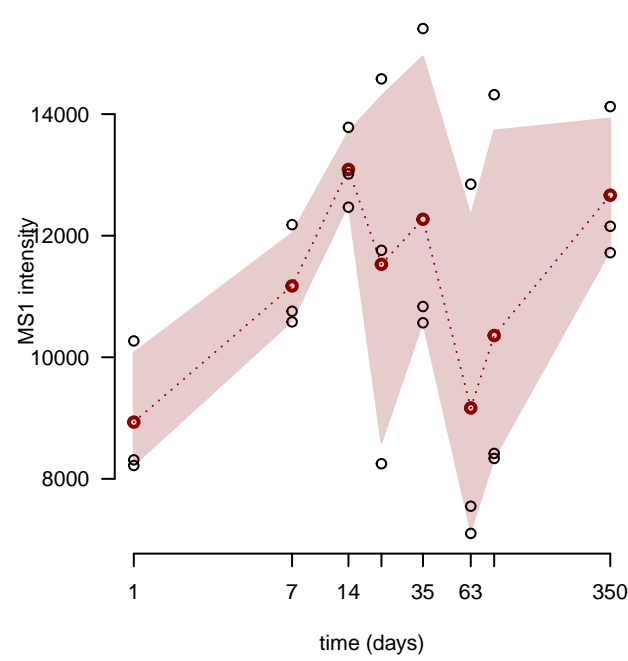

**Q9DCG9**  
**GN=Trmt112**

tRNA methyltransferase 11-2

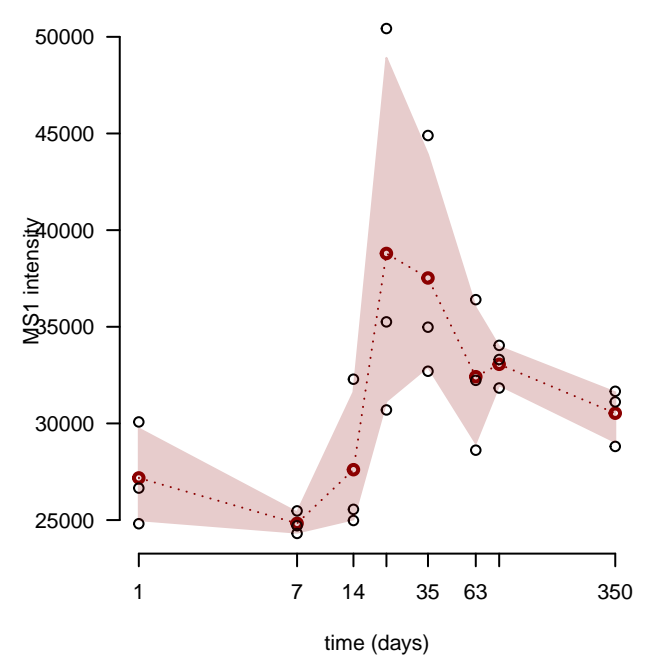

**Q9DCH2**  
**GN=Pop7**

processing of precursor 7, ribonuclease ...

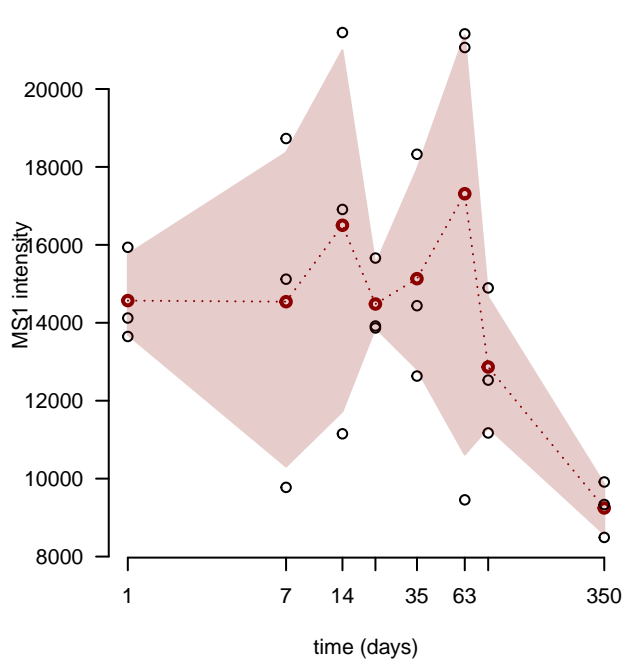

**Q9DCH4**  
**GN=Eif3f**

eukaryotic translation initiation factor ...

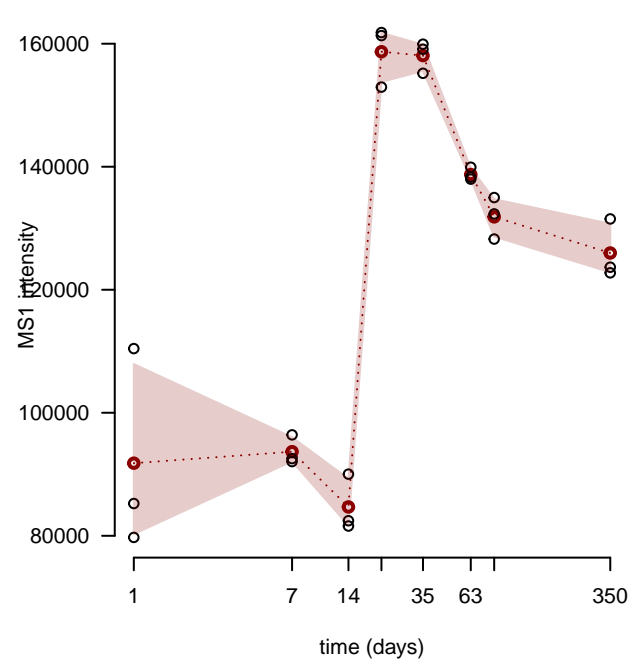

**Q9DCH6**  
**GN=Zfand6**

zinc finger, AN1-type domain 6

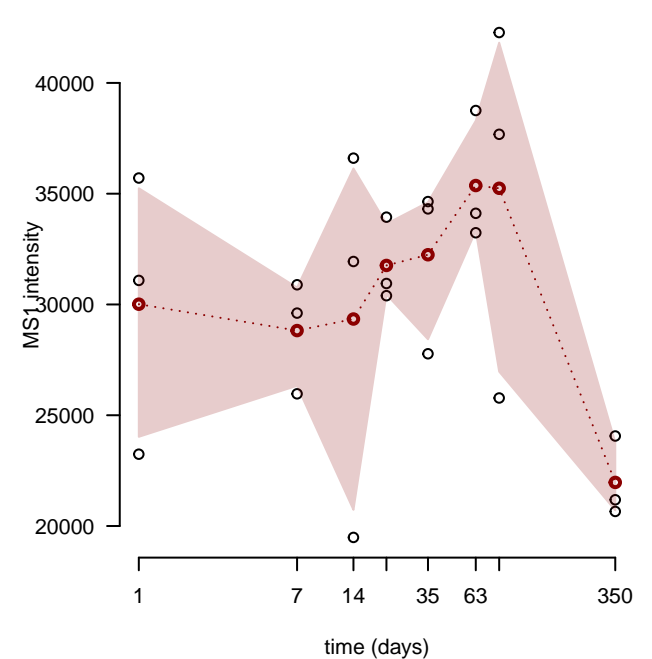

**Q9DCI3**  
**GN=Stard3nl**  
STARD3 N-terminal like

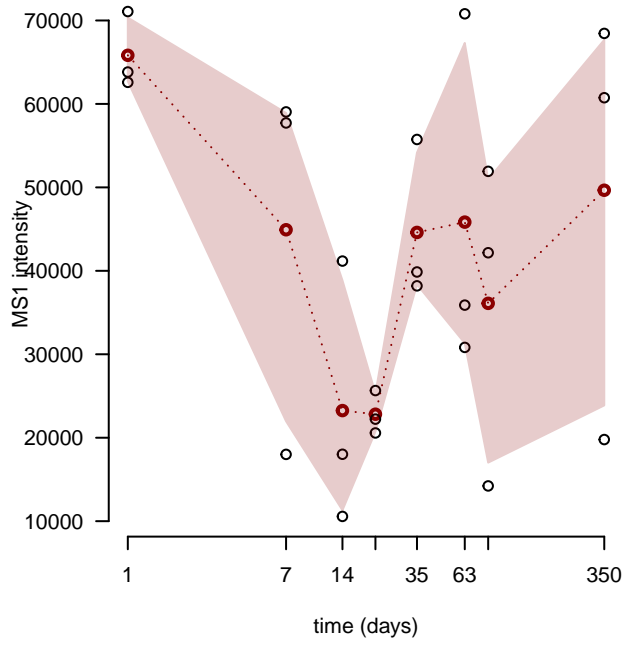

**Q9DCI9**  
**GN=Mrpl32**  
mitochondrial ribosomal protein L32

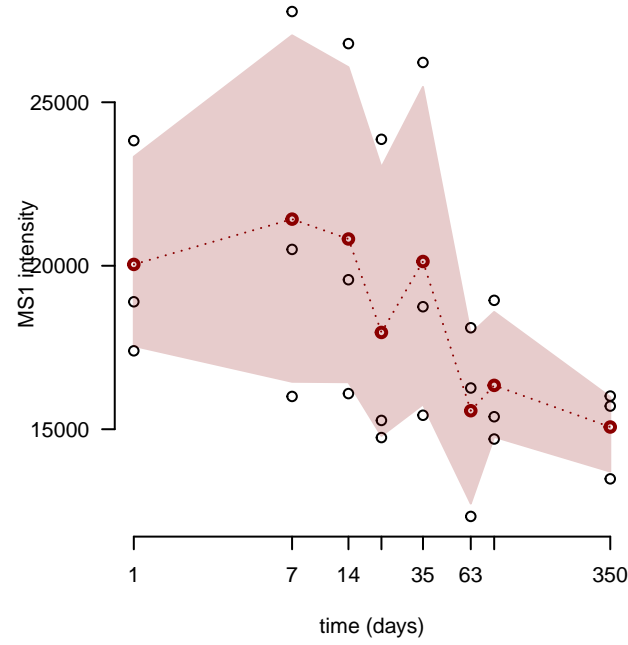

**Q9DCJ1**  
**GN=Mlst8**  
MTOR associated protein, LST8 homolog (S ...

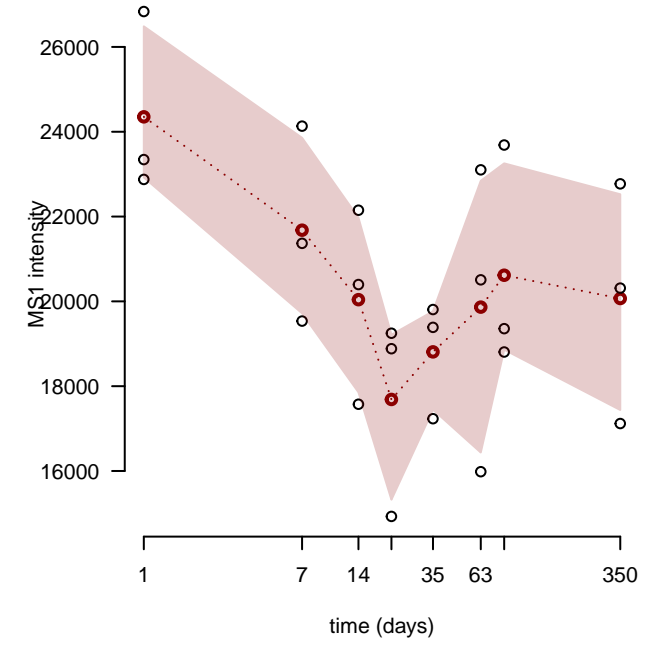

**Q9DCJ5**  
**GN=Ndufa8**  
NADH:ubiquinone oxidoreductase subunit A ...

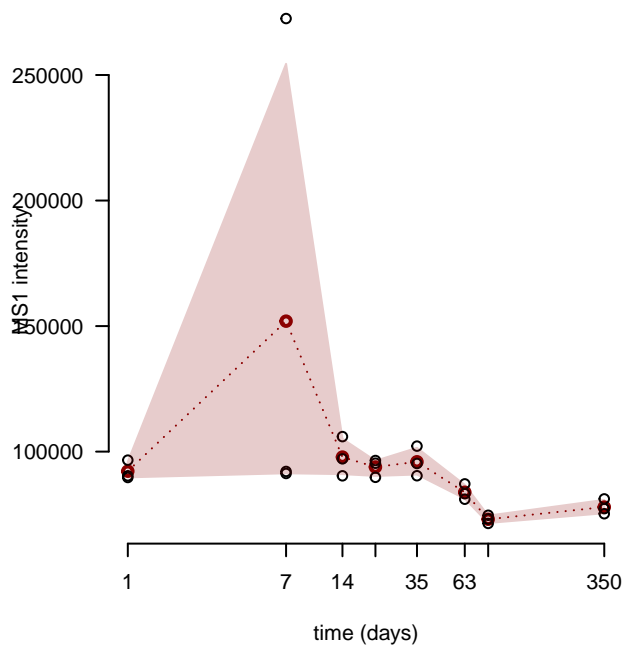

**Q9DCJ7**  
**GN=Aurkaip1**  
aurora kinase A interacting protein 1

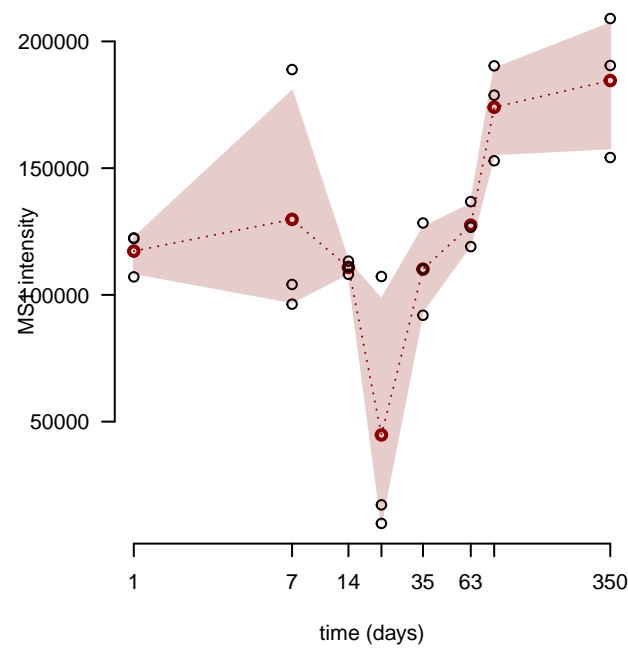

**Q9DCJ9**  
**GN=Npl**  
N-acetylneuraminate pyruvate lyase

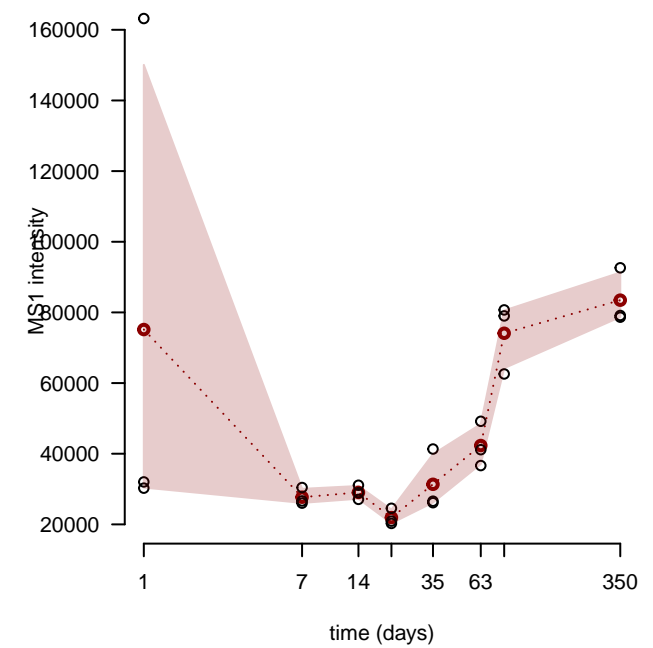

**Q9DCK3**  
**GN=Tspan4**  
tetraspanin 4

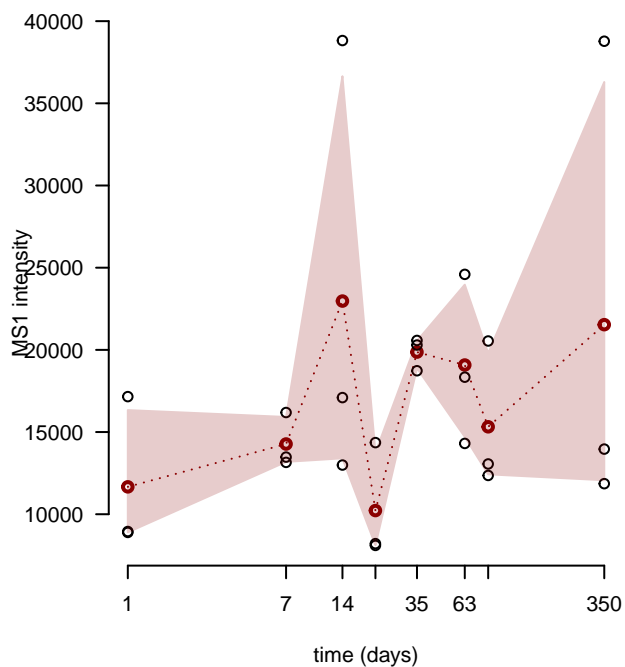

**Q9DCL2**  
**GN=Ciao2a**  
cytosolic iron-sulfur assembly component ...

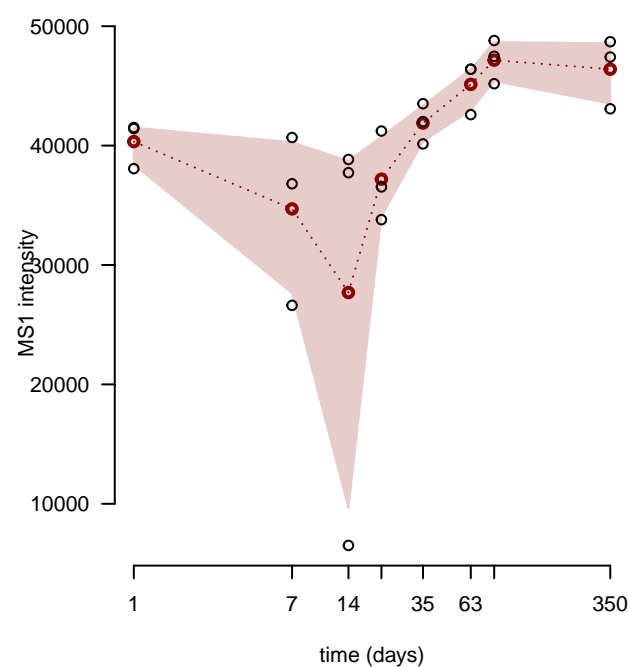

**Q9DCL4**  
**GN=Mettl15**  
methyltransferase like 15

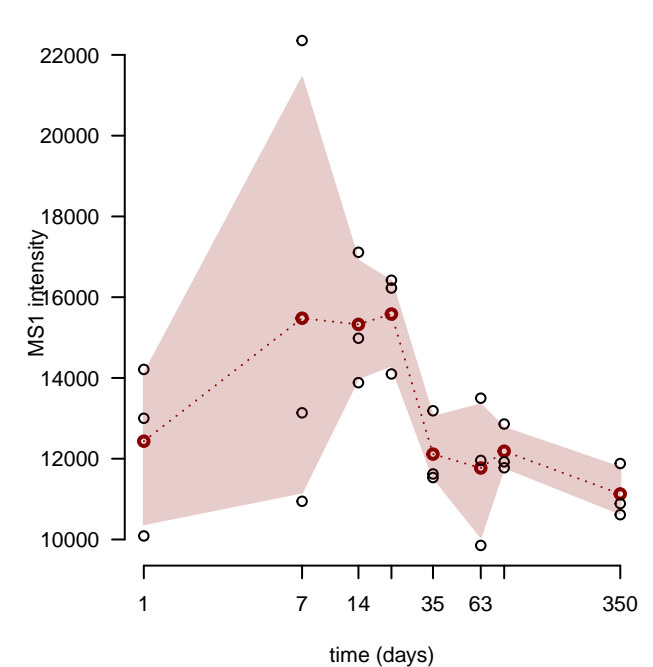

**Q9DCL8**  
**GN=Ppp1r2**  
protein phosphatase 1, regulatory inhibi ...

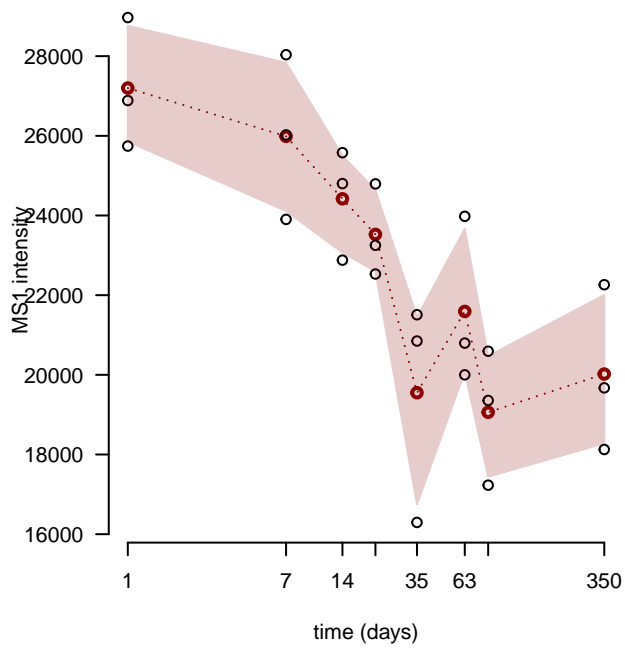

**Q9DCL9**  
**GN=Paics**  
phosphoribosylaminoimidazole carboxylase ...

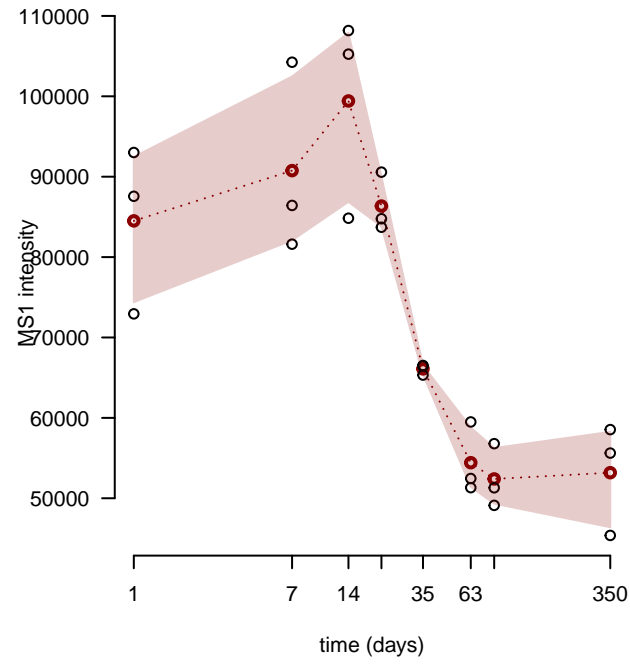

**Q9DCM0**  
**GN=Ethe1**  
ethylmalonic encephalopathy 1

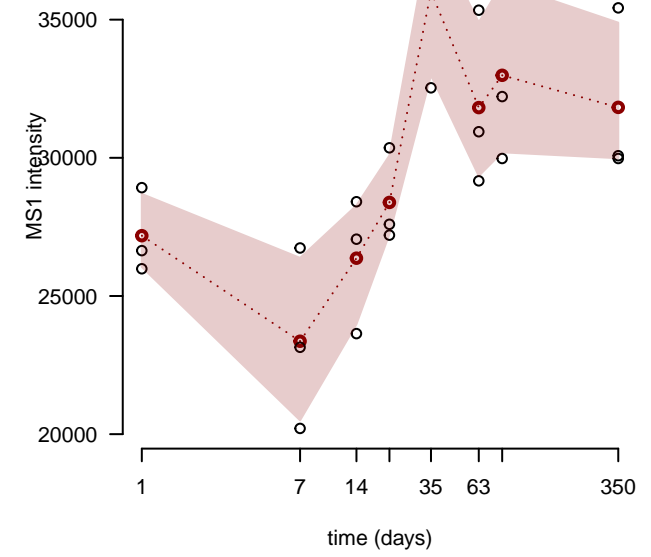

**Q9DCM2**  
**GN=Gstk1**  
glutathione S-transferase kappa 1

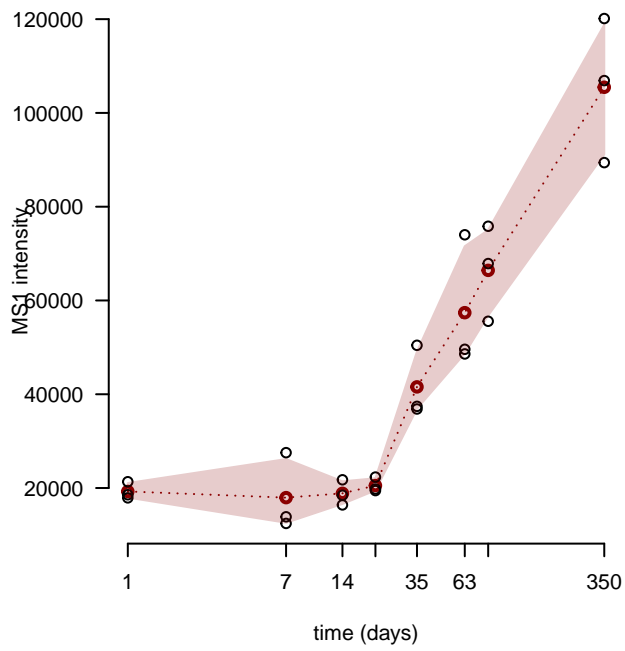

**Q9DCM4**  
**GN=DnaI4**  
dynein, axonemal, light chain 4

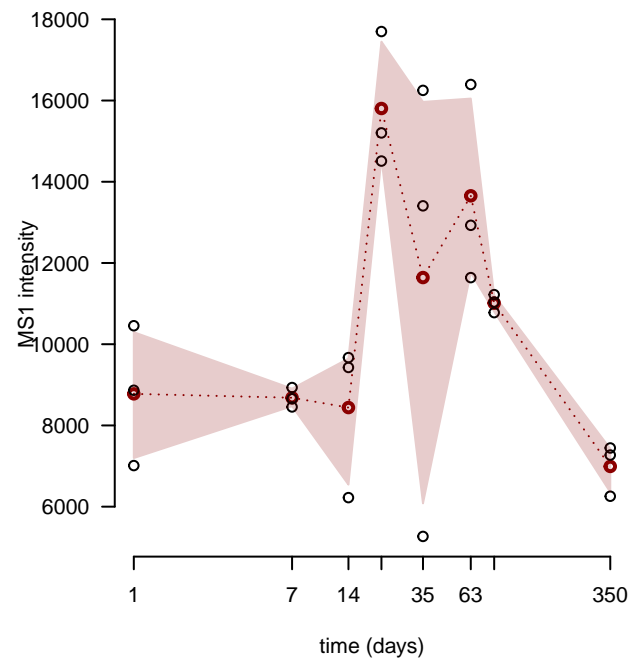

**Q9DCM7**  
**GN=Nacc2**  
nucleus accumbens associated 2, BEN and ...

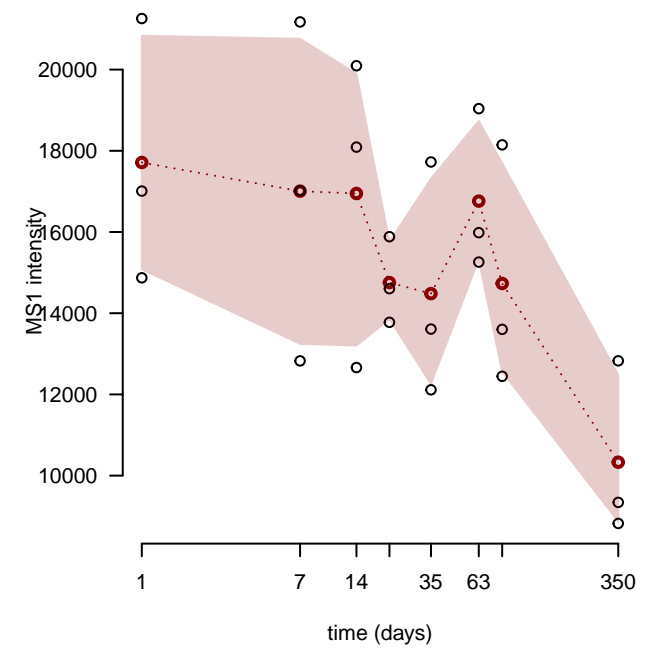

**Q9DCN1**  
**GN=Nudt12**  
nudix (nucleoside diphosphate linked moi ...

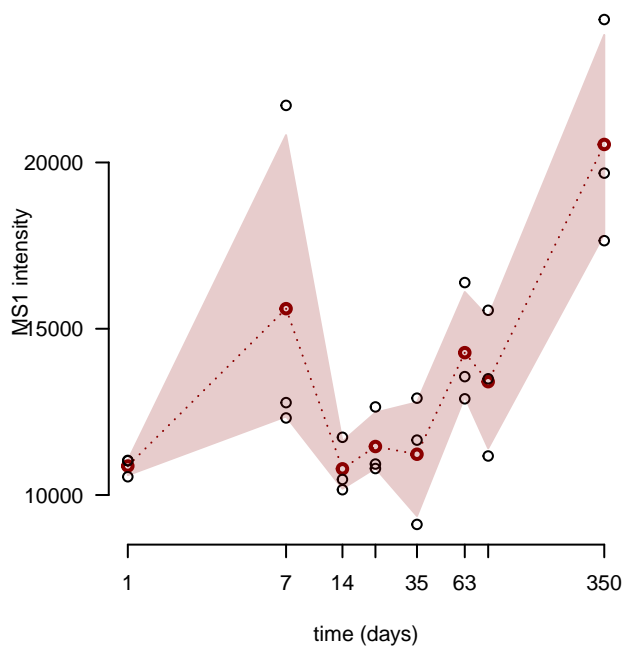

**Q9DCN2**  
**GN=Cyb5r3**  
cytochrome b5 reductase 3

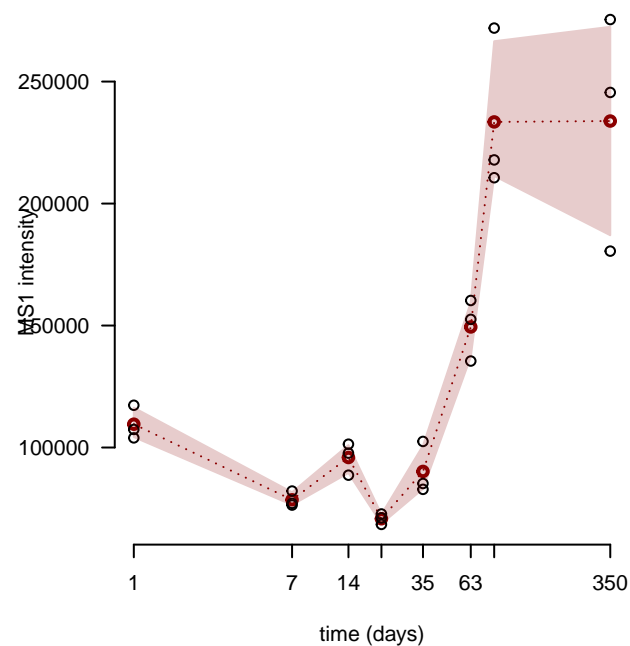

**Q9DCP2**  
**GN=Slc38a3**  
solute carrier family 38, member 3

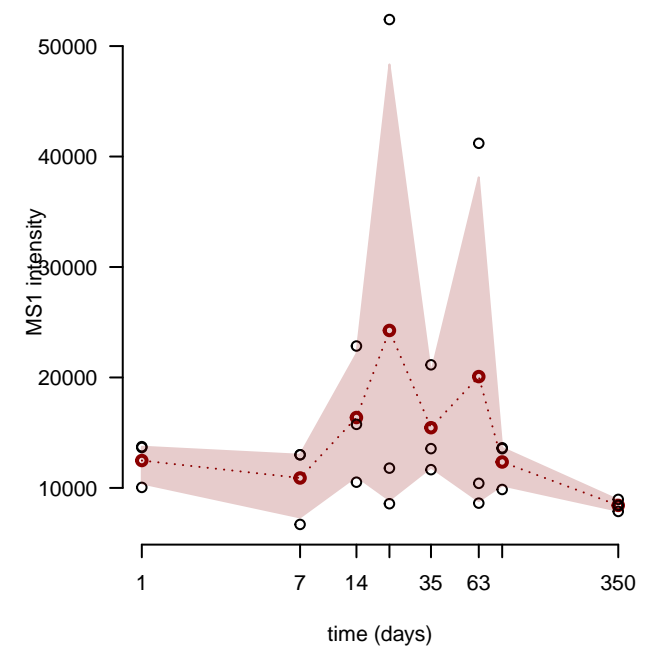

**Q9DCR2**  
GN=Ap3s1  
adaptor-related protein complex 3, sigma ...

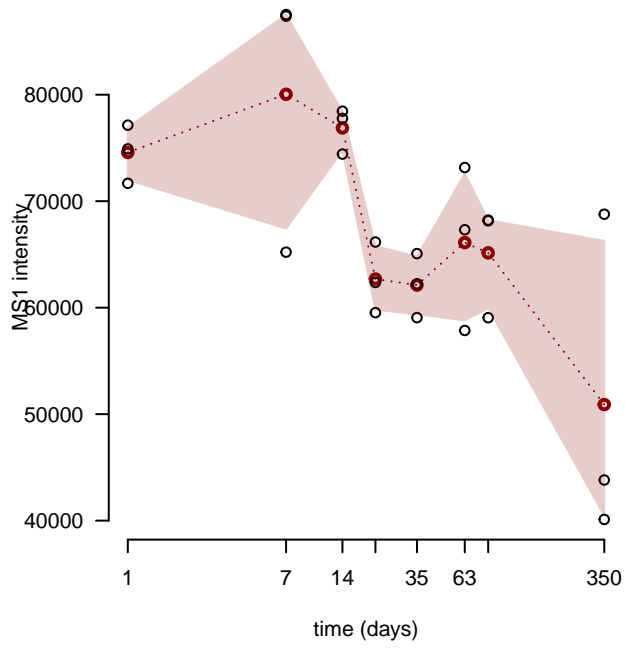

**Q9DCS1**  
GN=Tmem176a  
transmembrane protein 176A

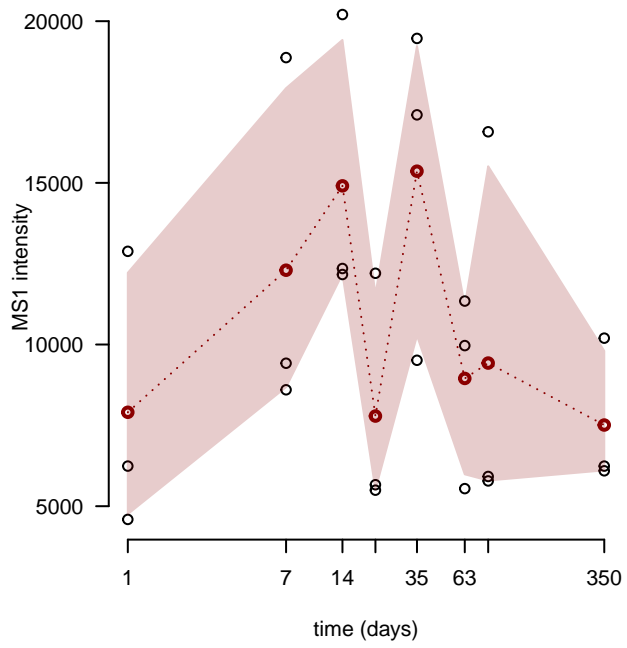

**Q9DCS2**  
GN=Mettl26  
methyltransferase like 26

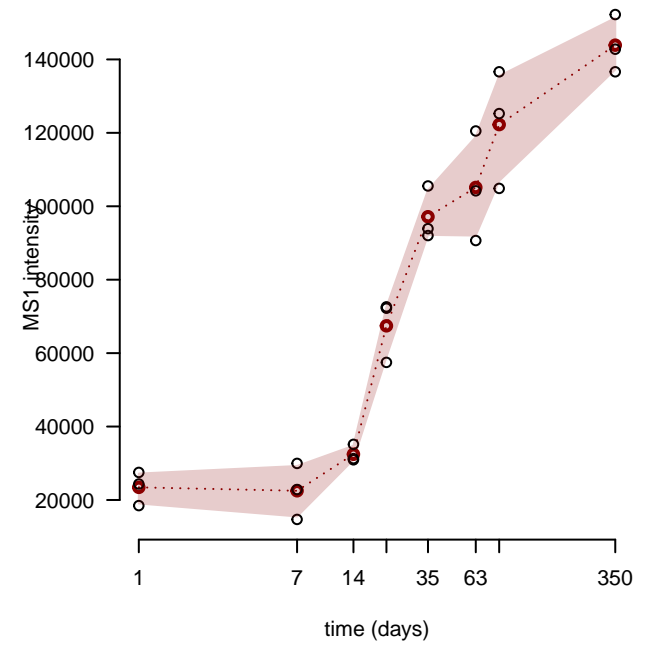

**Q9DCS3**  
GN=Mecr  
mitochondrial trans-2-enoyl-CoA reductas ...

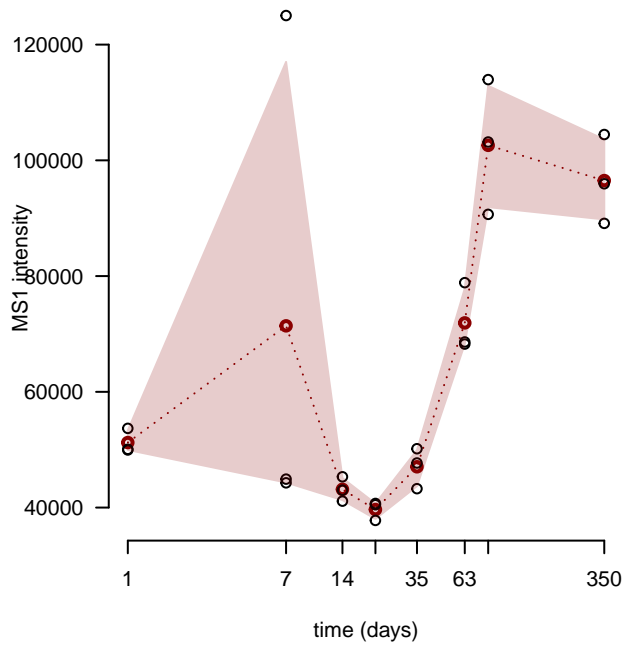

**Q9DCS9**  
GN=Ndufb10  
NADH:ubiquinone oxidoreductase subunit B ...

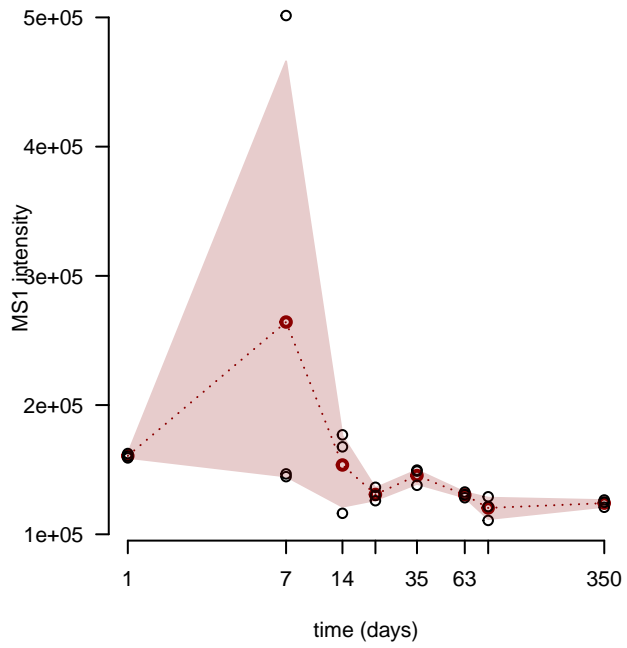

**Q9DCT1**  
GN=Akr1e2

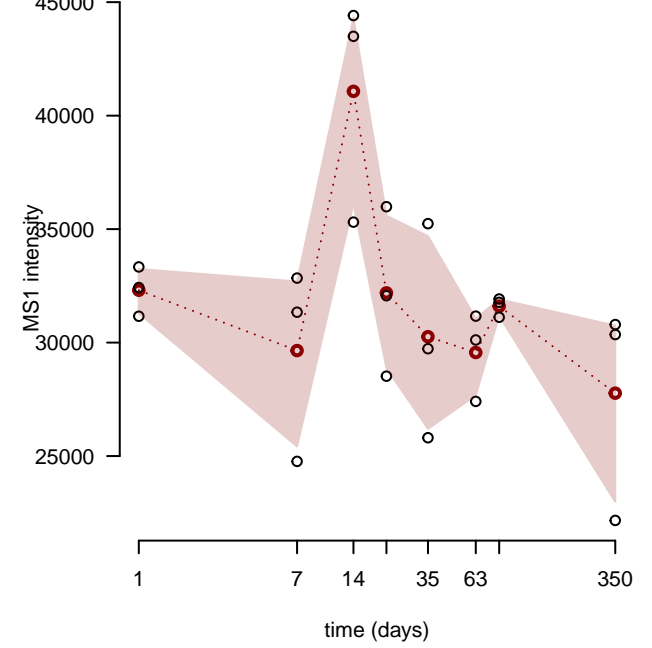

**Q9DCT2**  
GN=Ndufs3  
NADH:ubiquinone oxidoreductase core subu ...

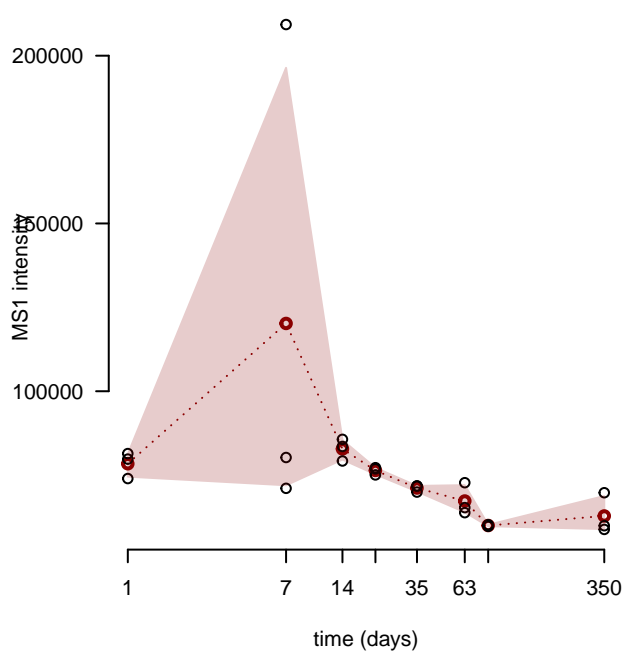

**Q9DCT5**  
GN=Sdf2  
stromal cell derived factor 2

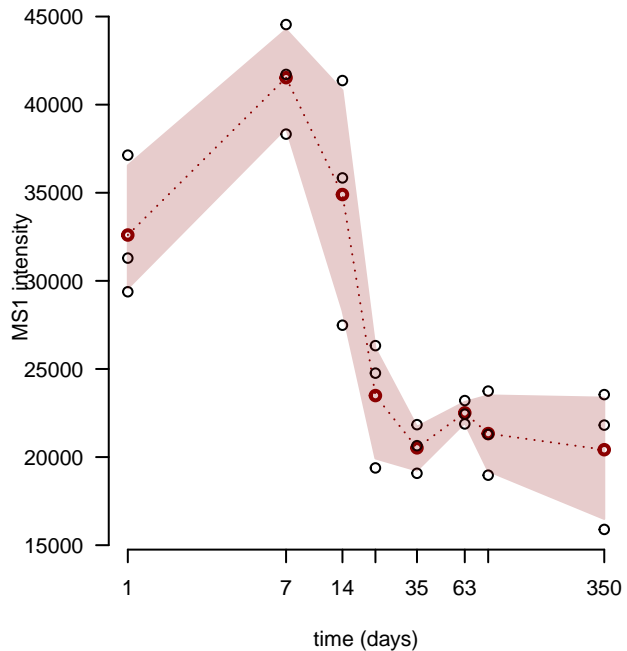

**Q9DCT6**  
GN=Bap18

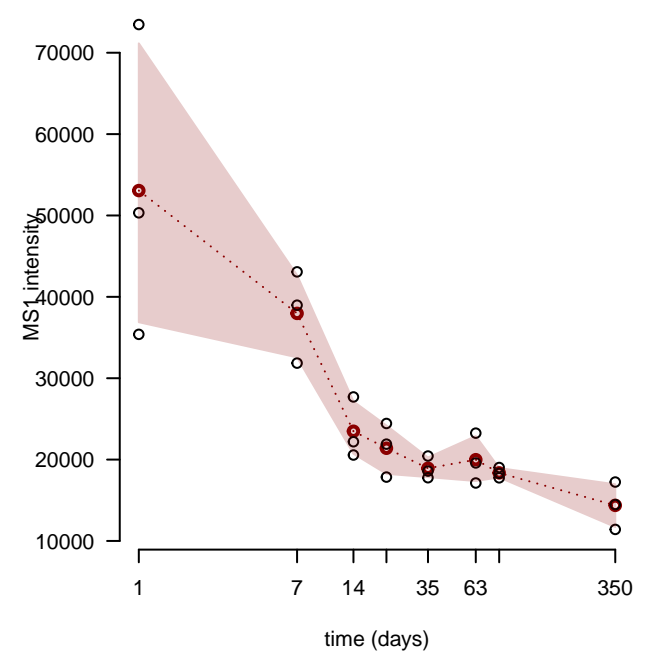

**Q9DCT8**  
GN=Crip2  
cysteine rich protein 2

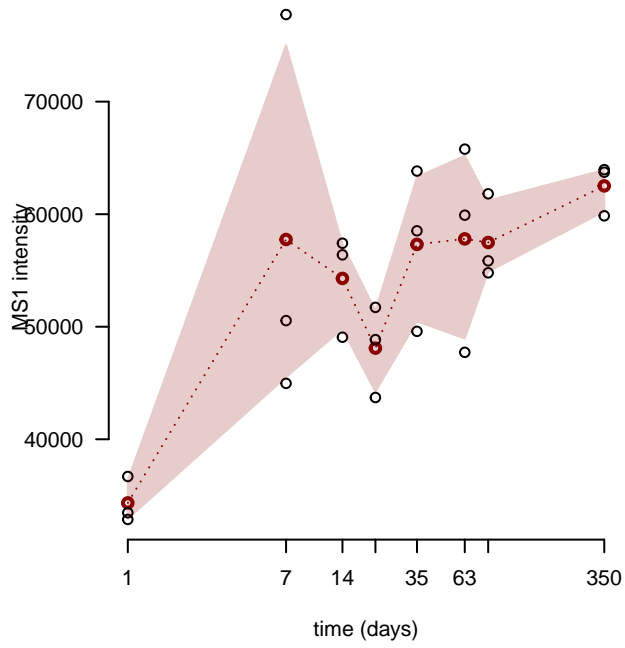

**Q9DCU6**  
GN=Mrpl4  
mitochondrial ribosomal protein L4

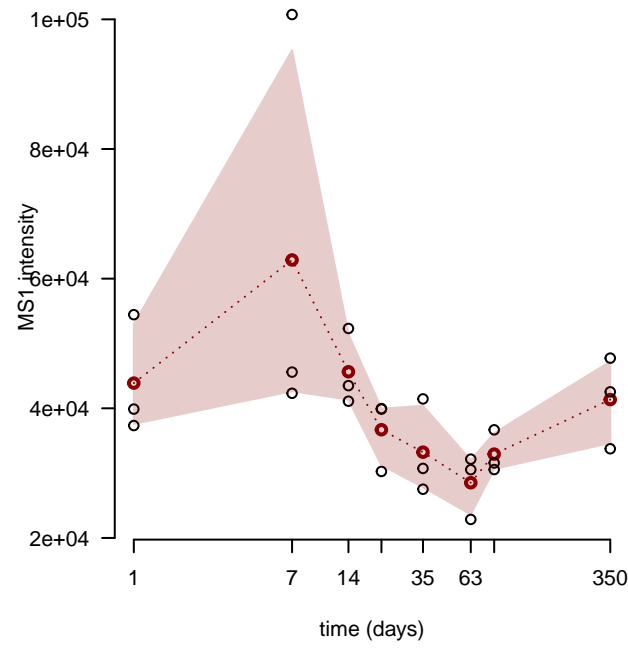

**Q9DCU9**  
GN=Hoga1  
4-hydroxy-2-oxoglutarate aldolase 1

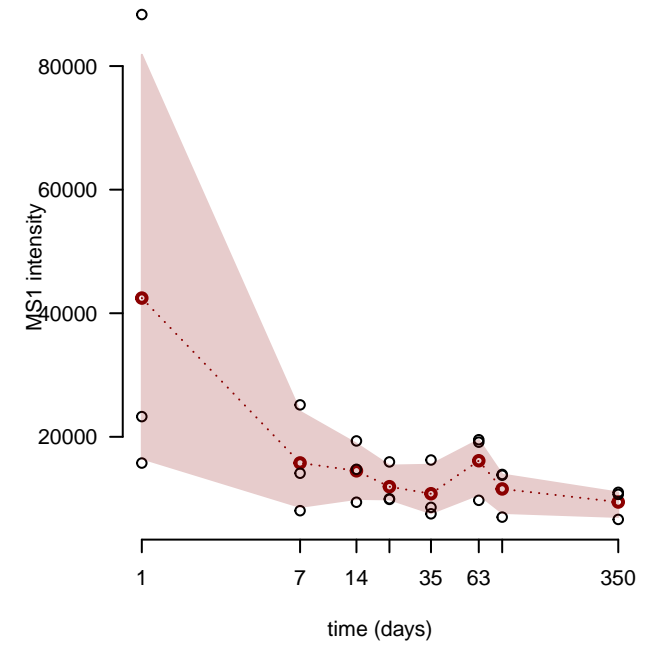

**Q9DCV3**  
GN=Dgat2  
diacylglycerol O-acyltransferase 2

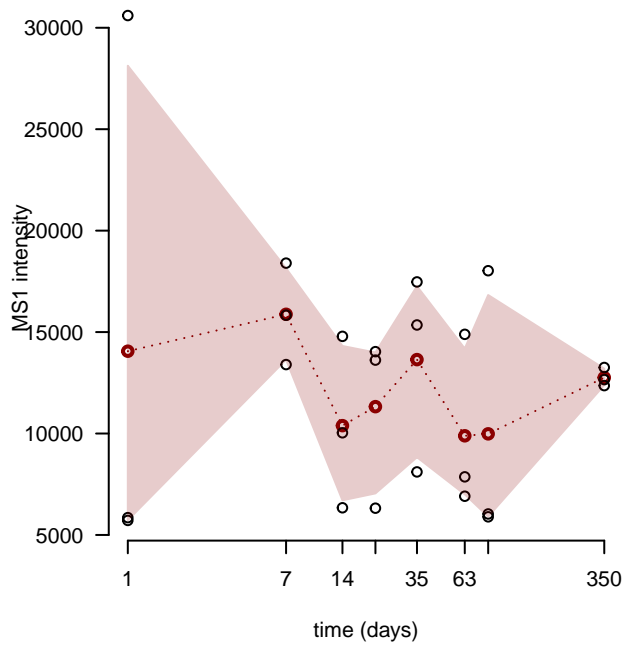

**Q9DCV4**  
GN=Rmdn1  
regulator of microtubule dynamics 1

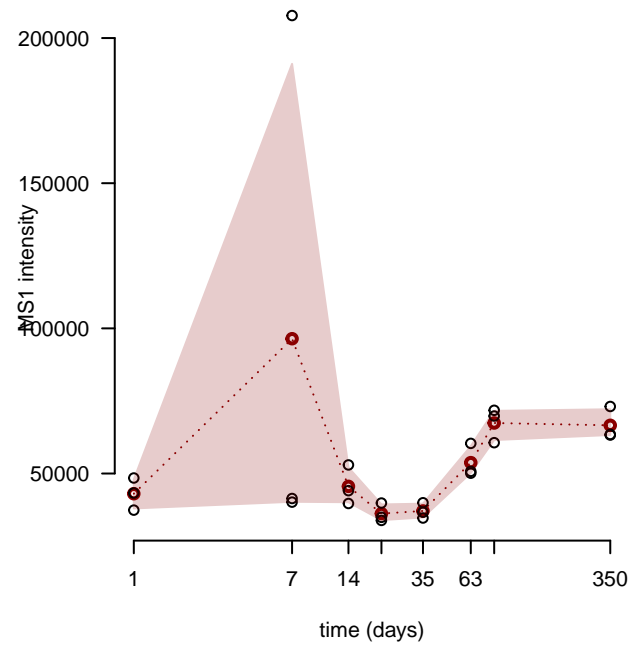

**Q9DCV7**  
GN=Krt7  
keratin 7

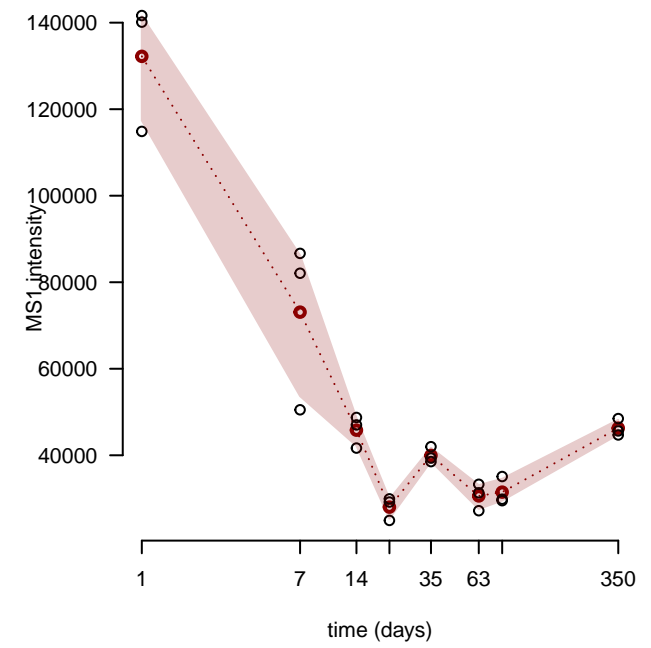

**Q9DCW4**  
GN=Etfb  
electron transferring flavoprotein, beta ...

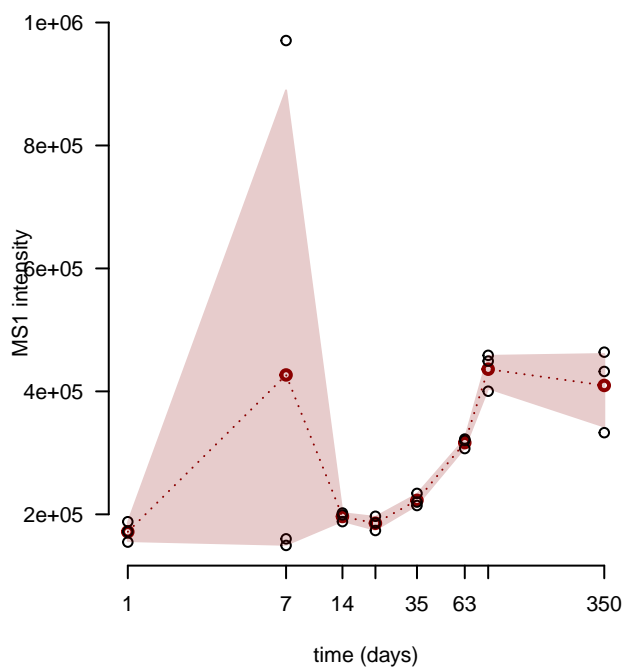

**Q9DCX2**  
GN=Atp5pd

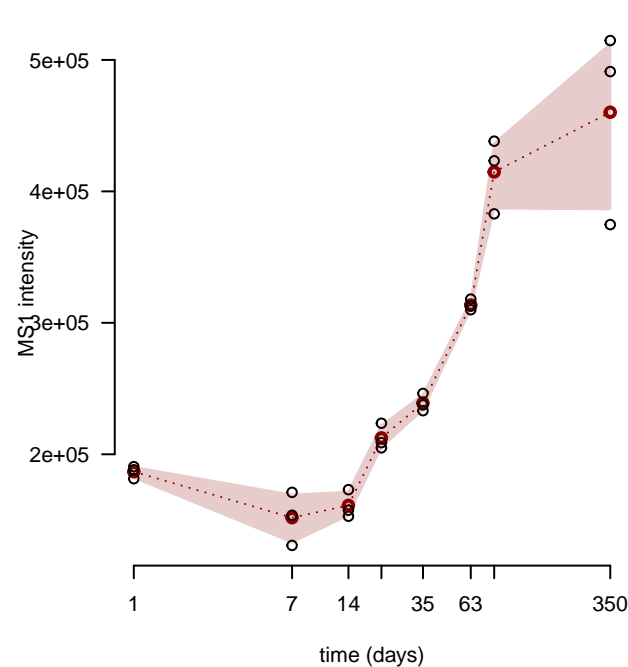

**Q9DCZ1**  
GN=Gmpr  
guanosine monophosphate reductase

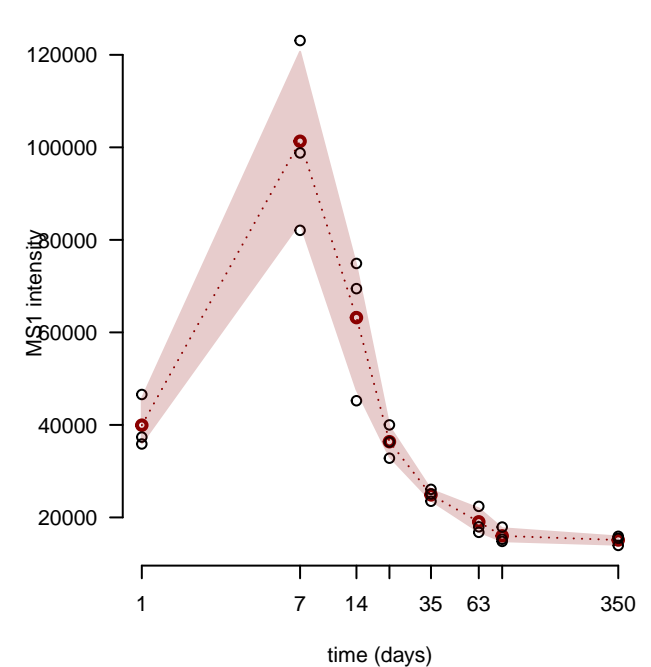

**Q9DCZ4**  
GN=Apoo  
apolipoprotein O

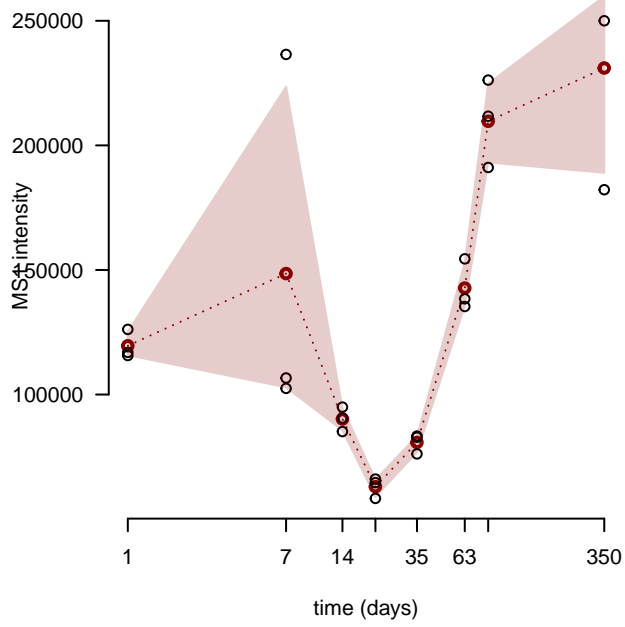

**Q9DD02**  
GN=Hikeshi  
heat shock protein nuclear import factor

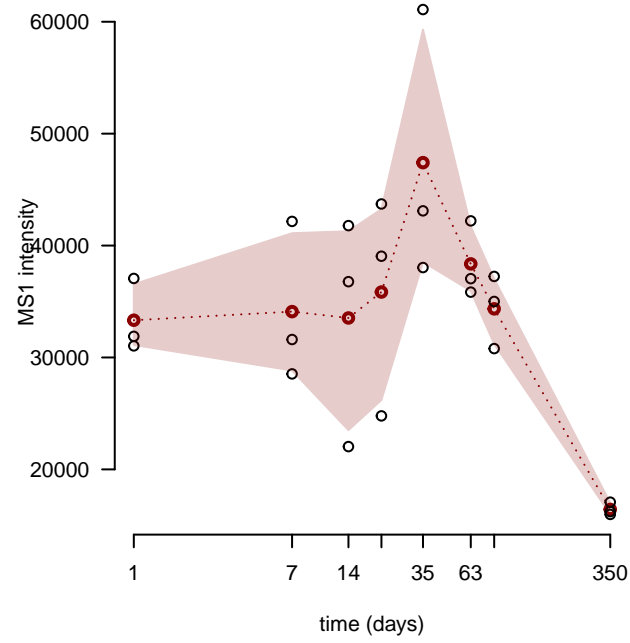

**Q9DD03**  
GN=Rab13  
RAB13, member RAS oncogene family

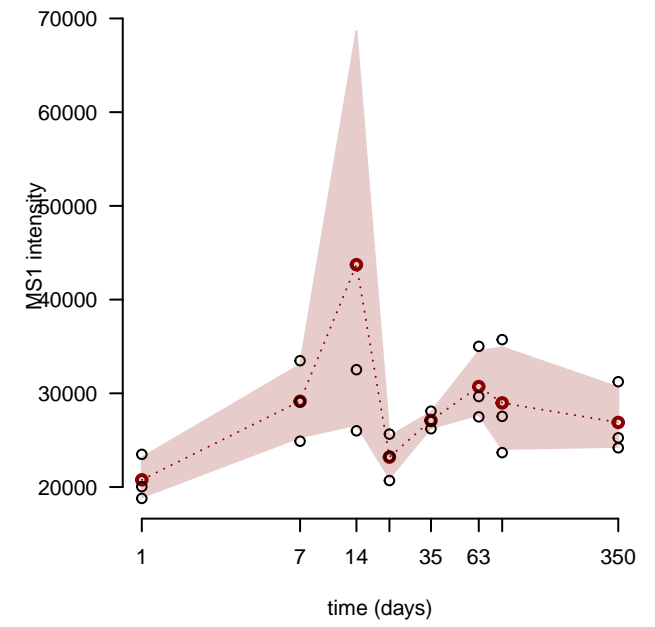

**Q9DD06**  
GN=Rarres2  
retinoic acid receptor responder (tazaro ...

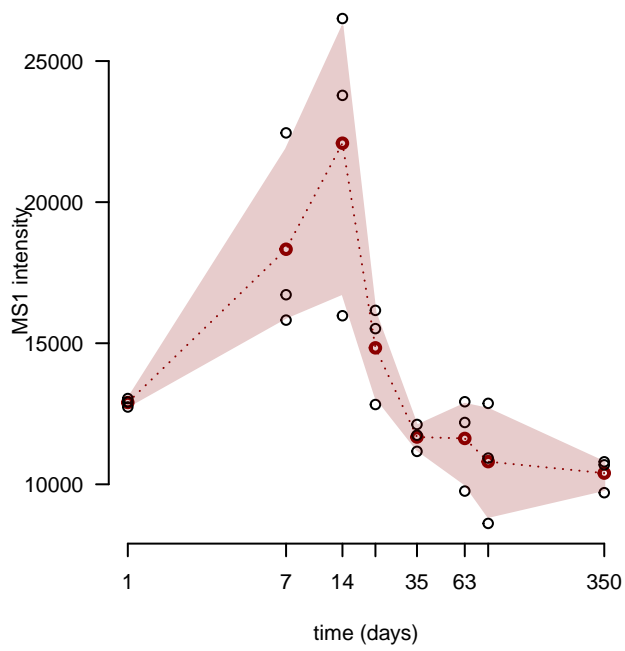

**Q9DD18**  
GN=Dtd1  
D-tyrosyl-tRNA deacylase 1

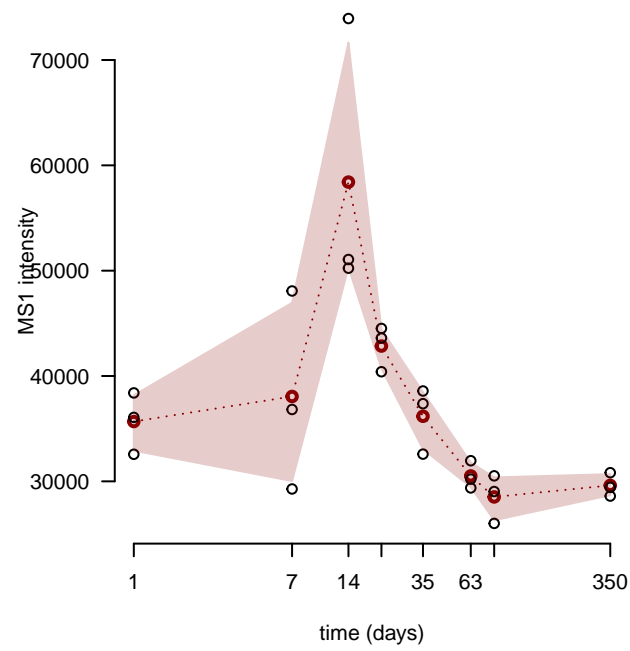

**Q9DD24**  
GN=Tceal9  
transcription elongation factor A like 9

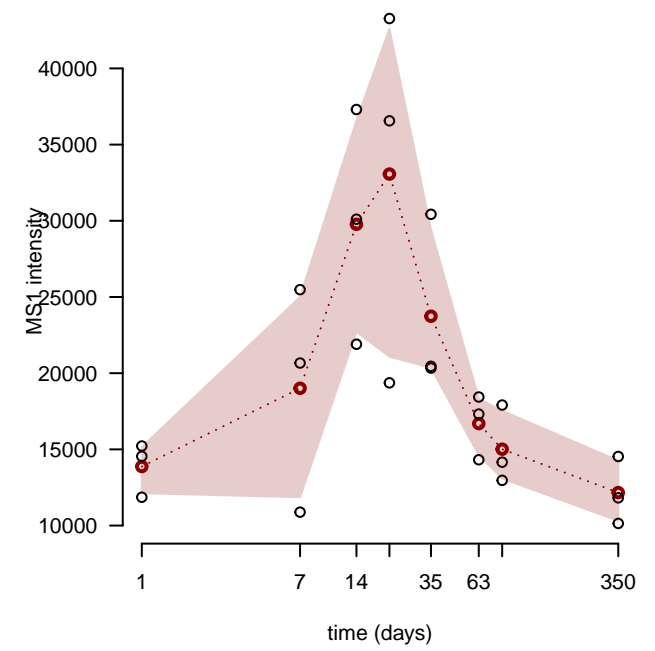

**Q9EP52**  
GN=Twsg1  
twisted gastrulation BMP signaling modul ...

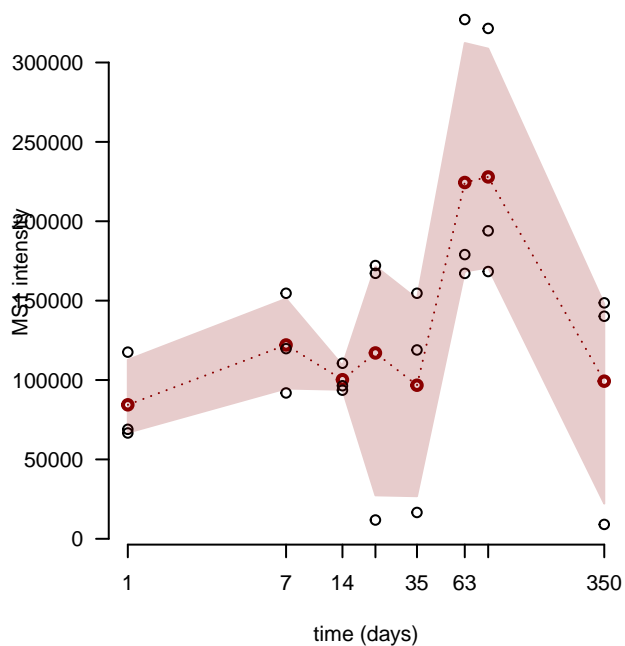

**Q9EP53**  
GN=Tsc1  
TSC complex subunit 1

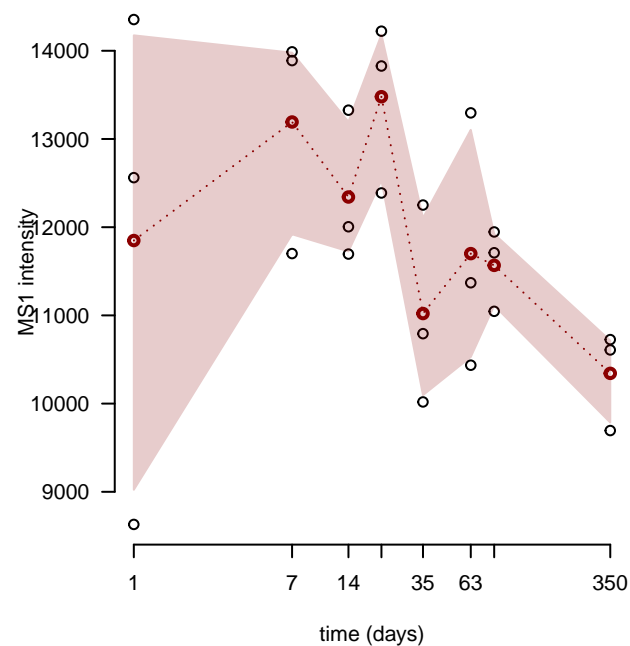

**Q9EP69**  
GN=Sacm1l  
SAC1 suppressor of actin mutations 1-lik ...

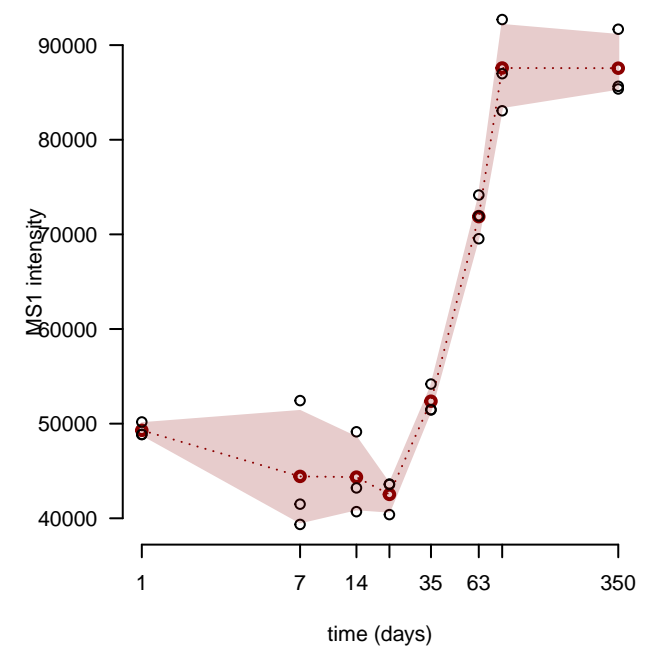



**Q9EP71**  
**GN=Rai14**  
retinoic acid induced 14

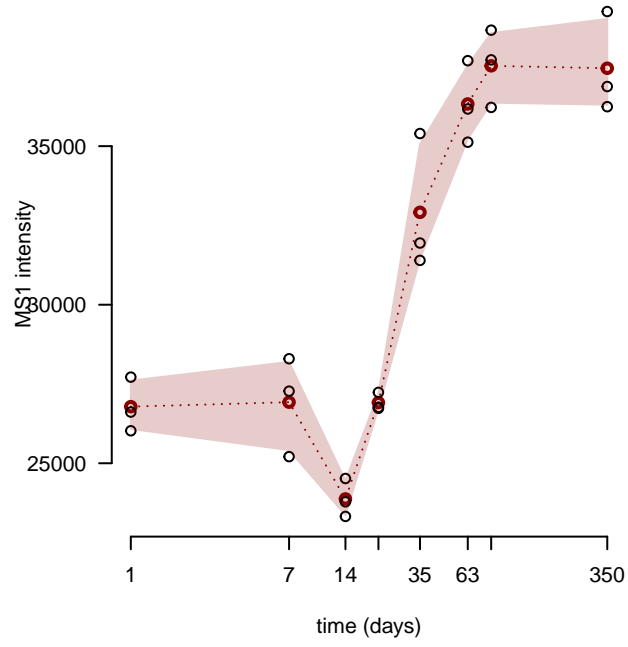

**Q9EP72**  
**GN=Emc7**  
ER membrane protein complex subunit 7

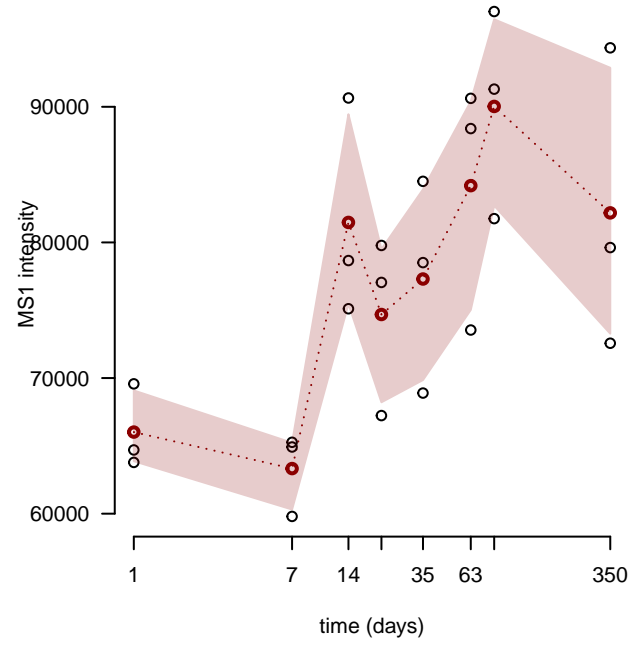

**Q9EP75**  
**GN=Cyp4f14**  
cytochrome P450, family 4, subfamily f, ...

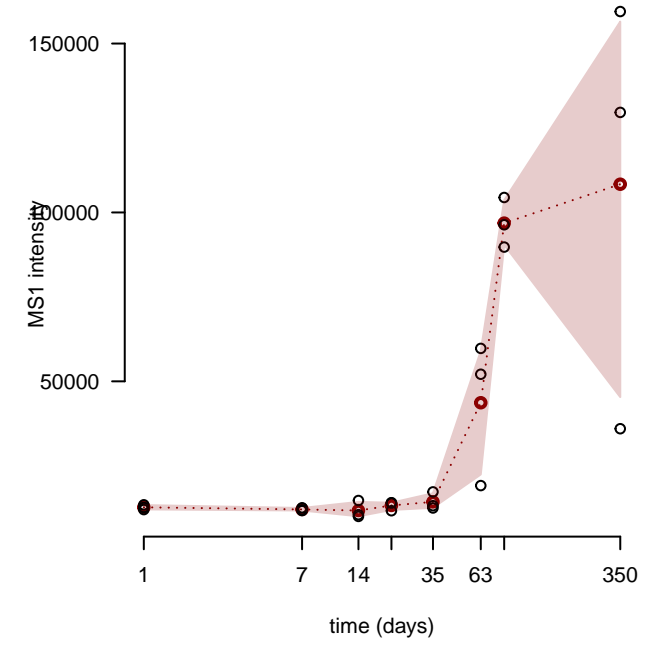

**Q9EP82**  
**GN=Wdr4**  
WD repeat domain 4

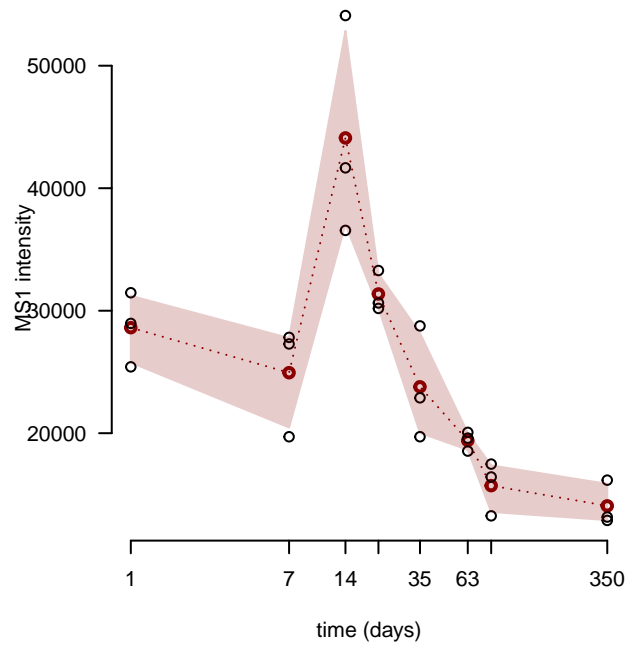

**Q9EP89**  
**GN=Lactb**  
lactamase, beta

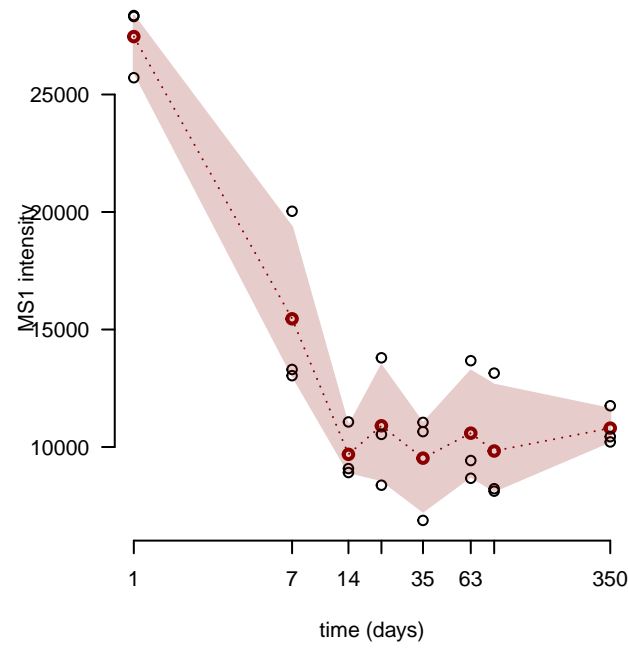

**Q9EP97**  
**GN=Senp3**  
SUMO/sentrin specific peptidase 3

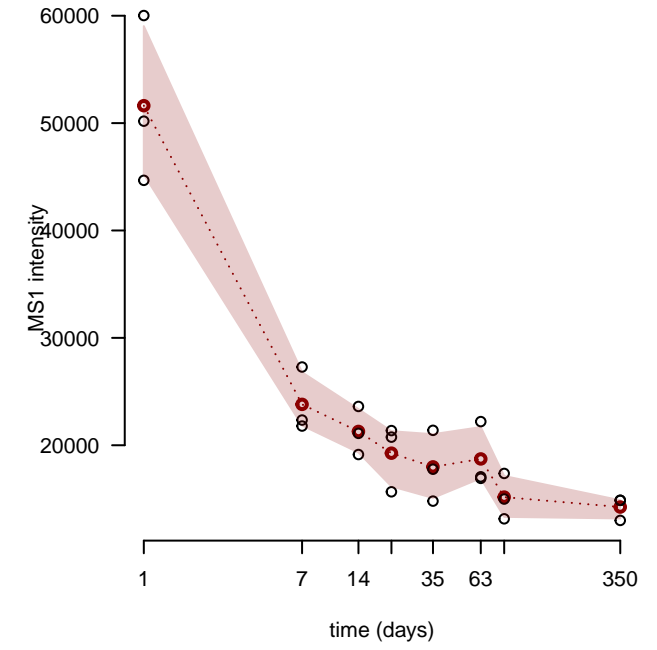

**Q9EPA7**  
**GN=Nmnat1**  
nicotinamide nucleotide adenylyltransfer ...

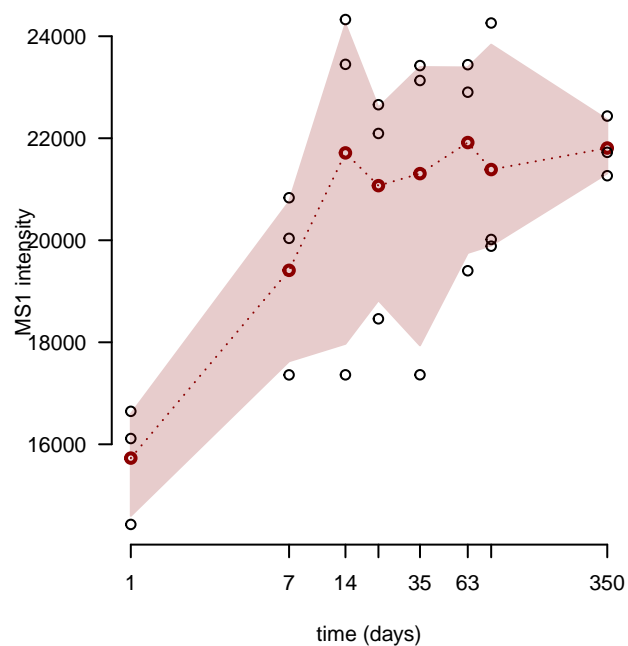

**Q9EPB4**  
**GN=Pycard**  
PYD and CARD domain containing

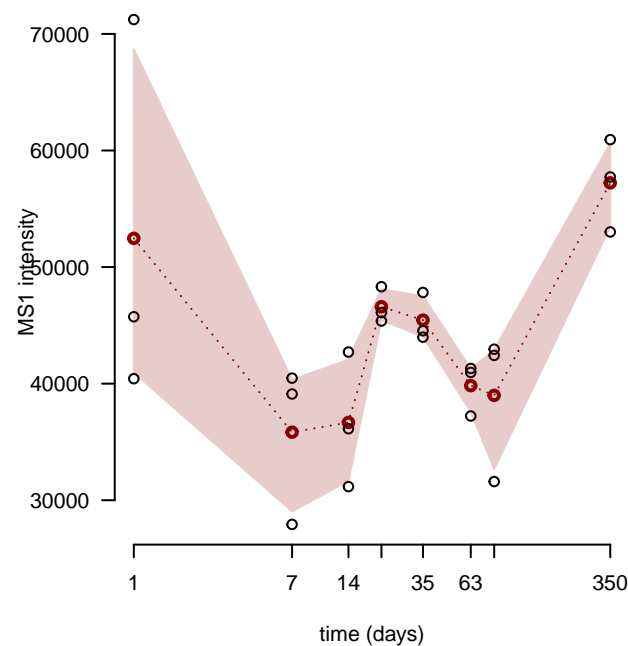

**Q9EPB5**  
**GN=Serhl**  
serine hydrolase-like

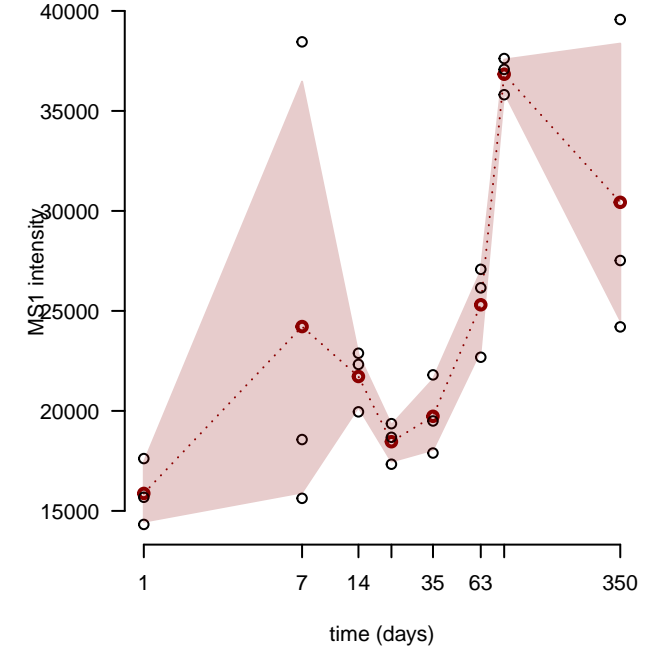

**Q9EPC1**  
GN=Parva  
parvin, alpha

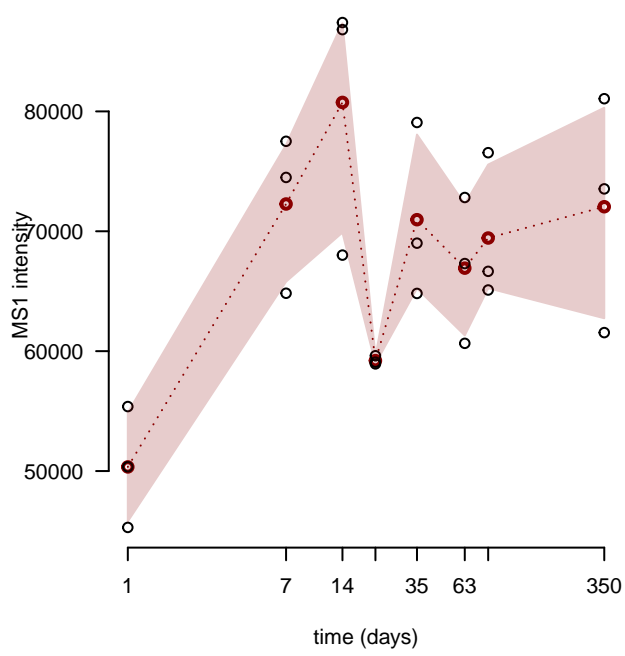

**Q9EPC5**  
GN=Rbp7  
retinol binding protein 7, cellular

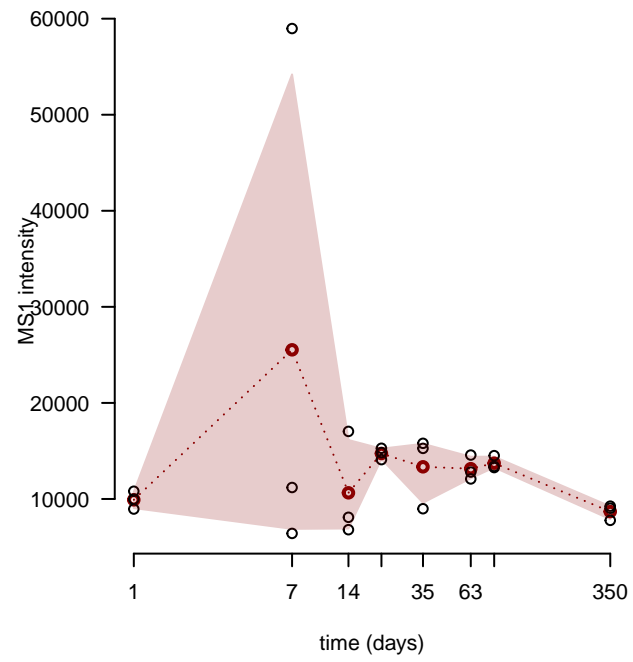

**Q9EPE9**  
GN=Atp13a1  
ATPase type 13A1

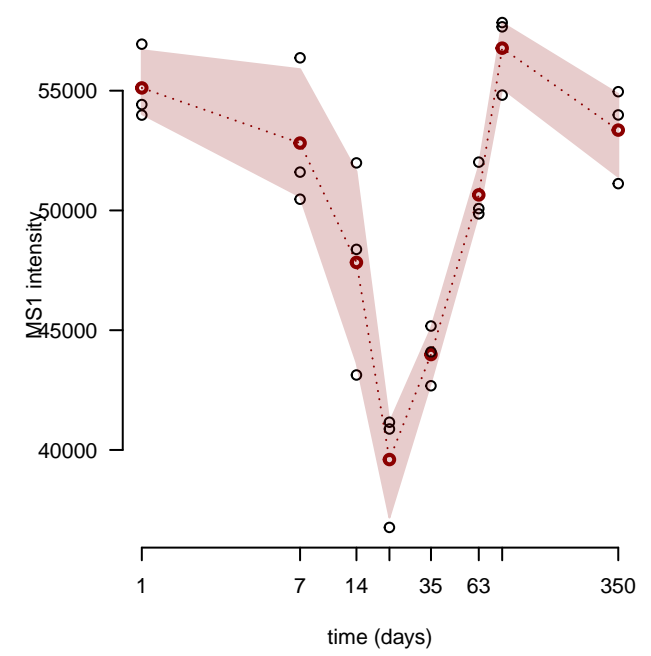

**Q9EPJ9**  
GN=Arfgap1  
ADP-ribosylation factor GTPase activatin ...

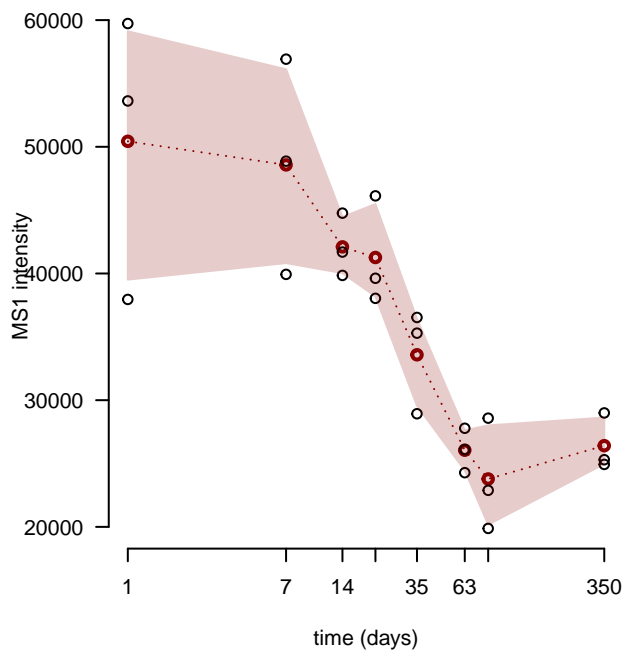

**Q9EPK2**  
GN=Rp2  
retinitis pigmentosa 2 homolog

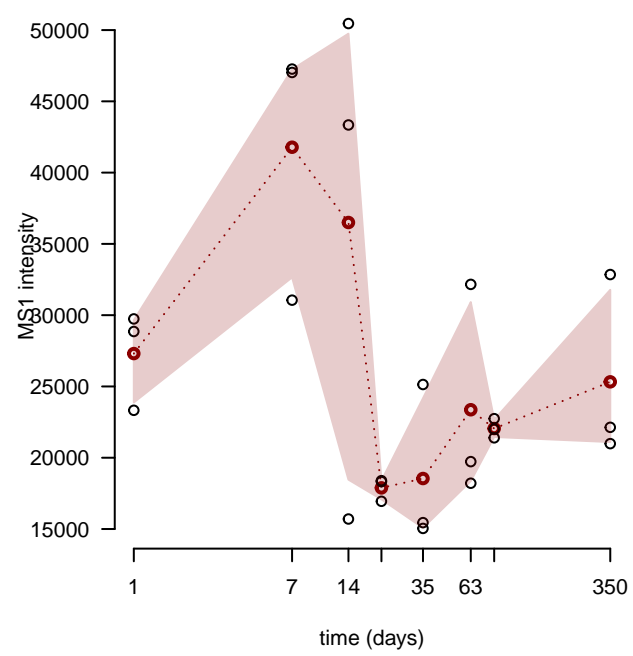

**Q9EPK5**  
GN=Wwtr1  
WW domain containing transcription regul ...

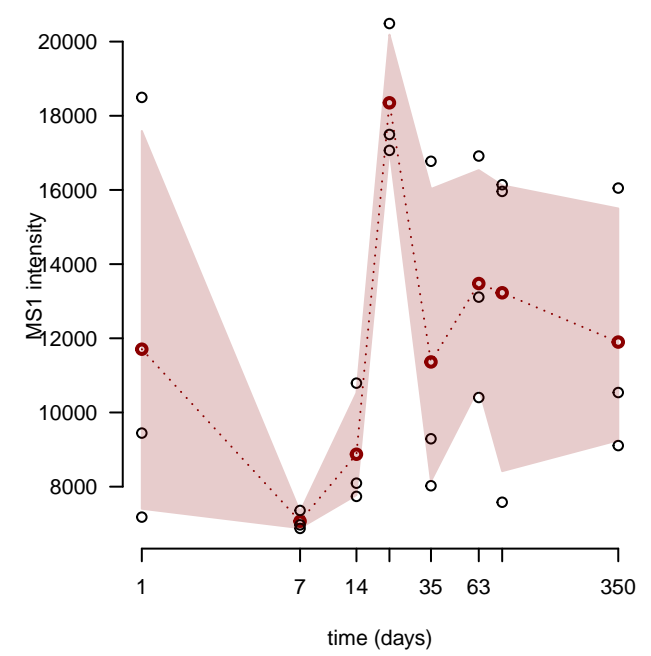

**Q9EPK6**  
GN=Si1  
SIL1 nucleotide exchange factor

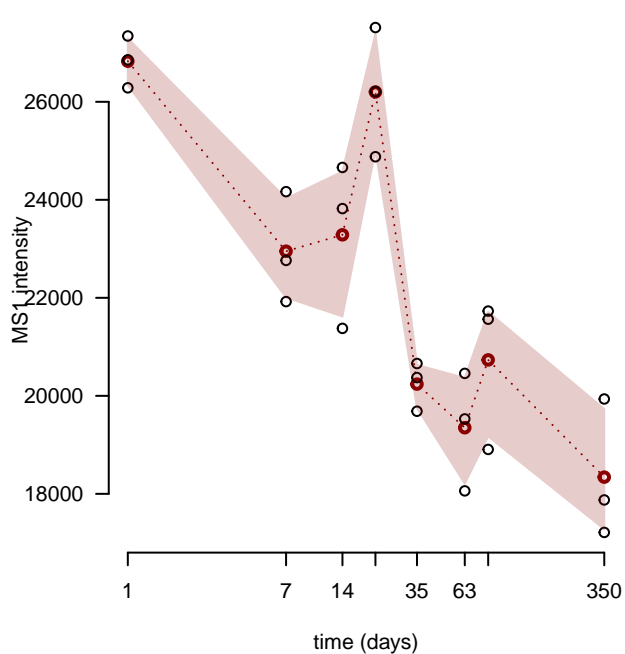

**Q9EPK7**  
GN=Xpo7  
exportin 7

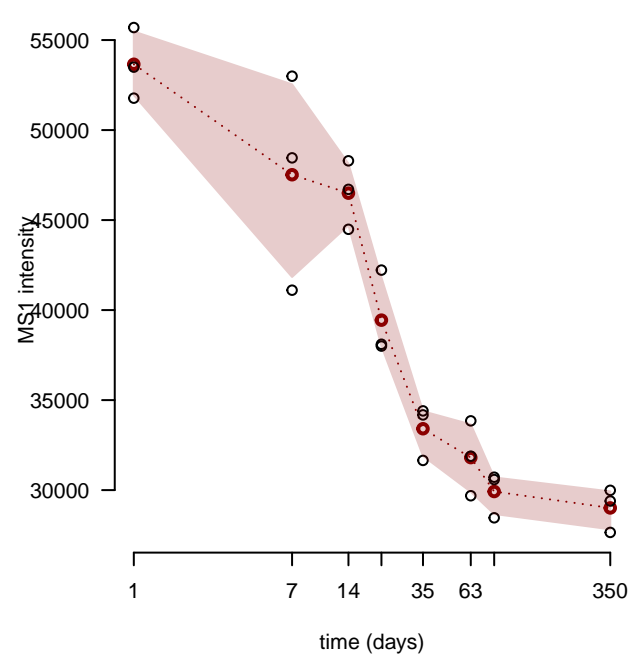

**Q9EPL0**  
GN=Xylt2  
xylosyltransferase II

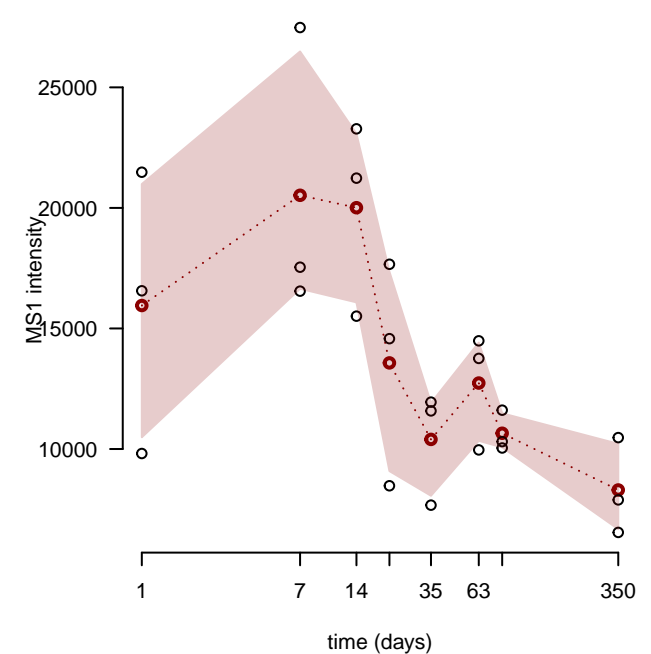

**Q9EPL2**  
GN=Clstn1  
calysntenin 1

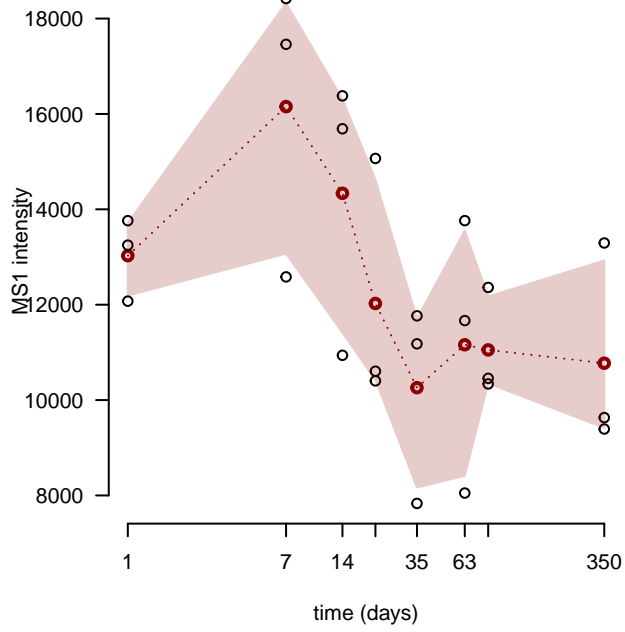

**Q9EPL4**  
GN=Mett19  
methyltransferase like 9

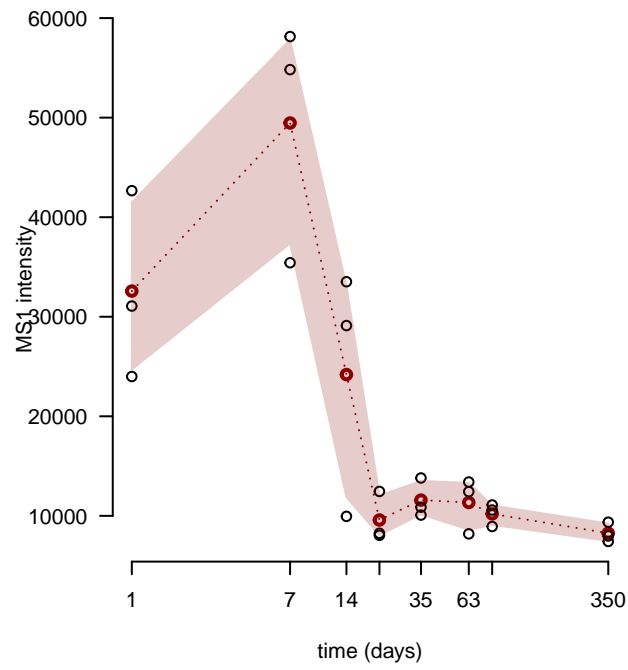

**Q9EPL8**  
GN=Ipo7  
importin 7

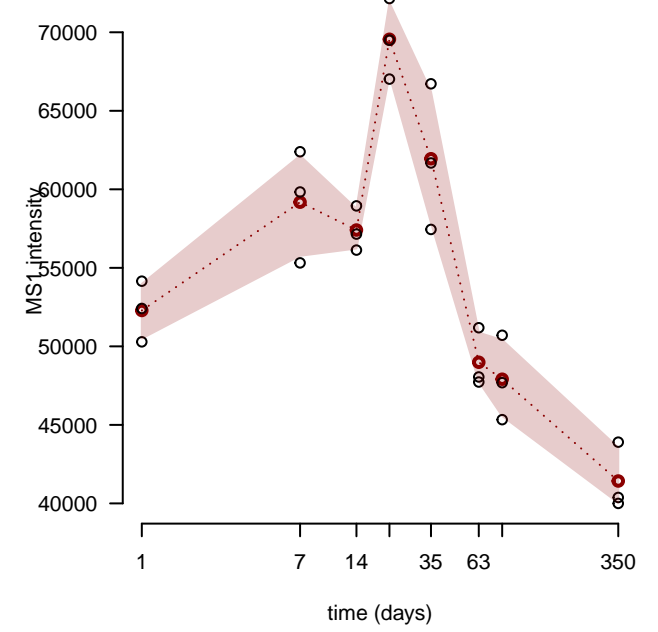

**Q9EPL9**  
GN=Acox3  
acyl-Coenzyme A oxidase 3, pristanoyl

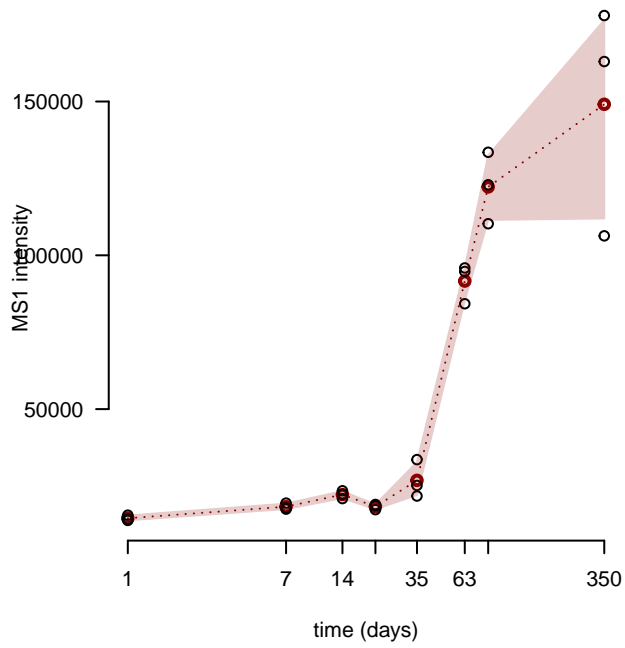

**Q9EPM5**  
GN=Sync  
syncoilin

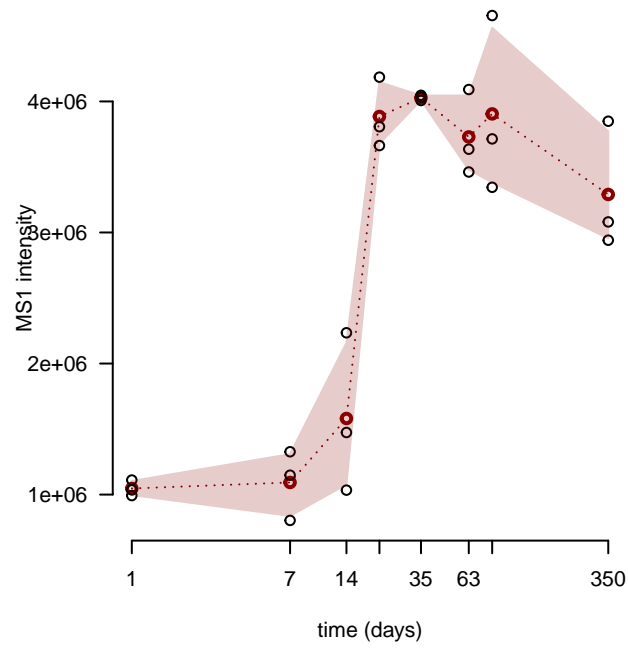

**Q9EPN1**  
GN=Nbea  
neurobeachin

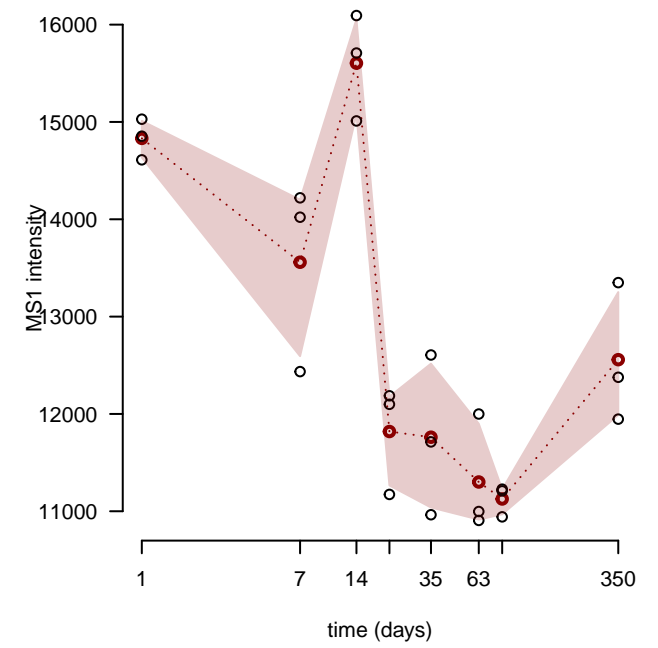

**Q9EPQ7**  
GN=Stard5  
StAR-related lipid transfer (START) doma ...

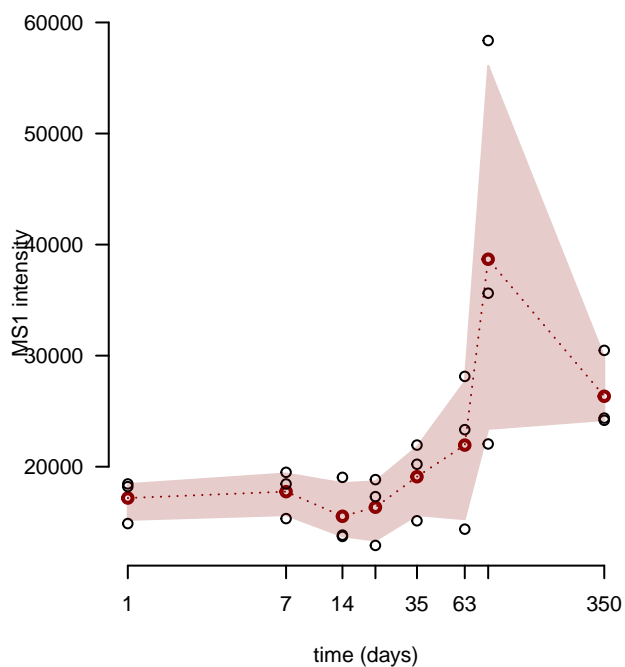

**Q9EPQ8**  
GN=Tcf20  
transcription factor 20

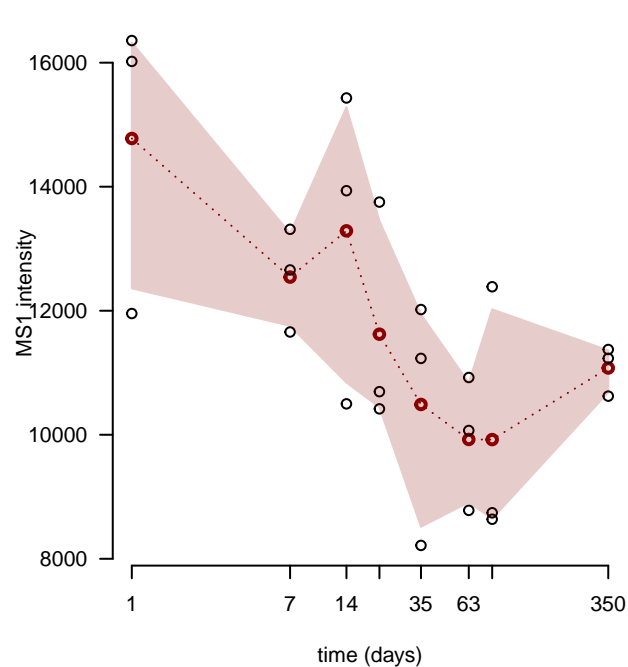

**Q9EPR4**  
GN=Slc23a2  
solute carrier family 23 (nucleobase tra ...

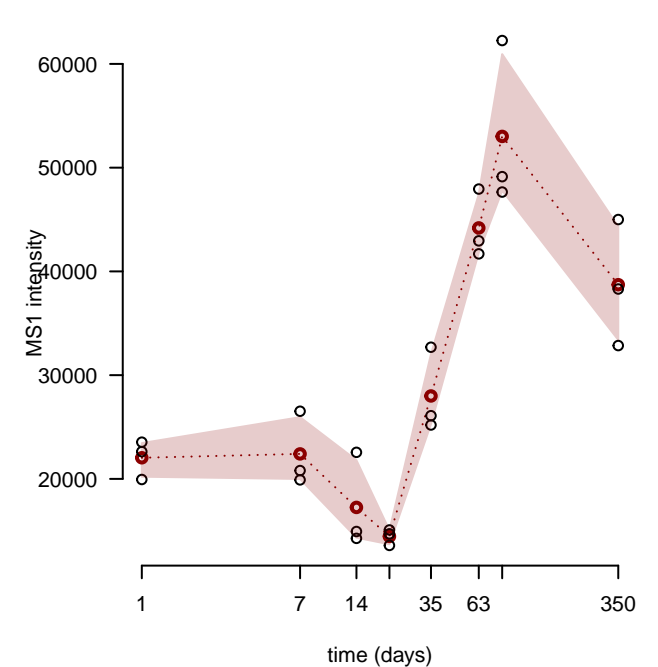

**Q9EPR5**  
**GN=Sorcs2**  
sortilin-related VPS10 domain containing ...

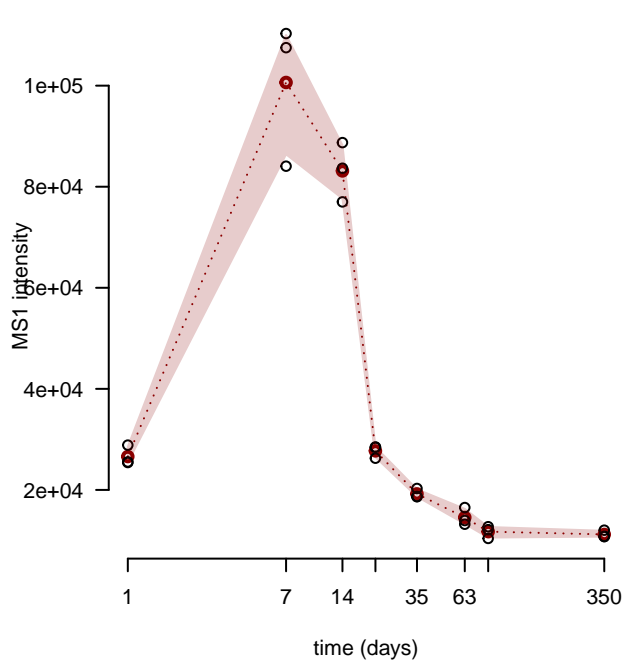

**Q9EPS3**  
**GN=Glce**  
glucuronyl C5-epimerase

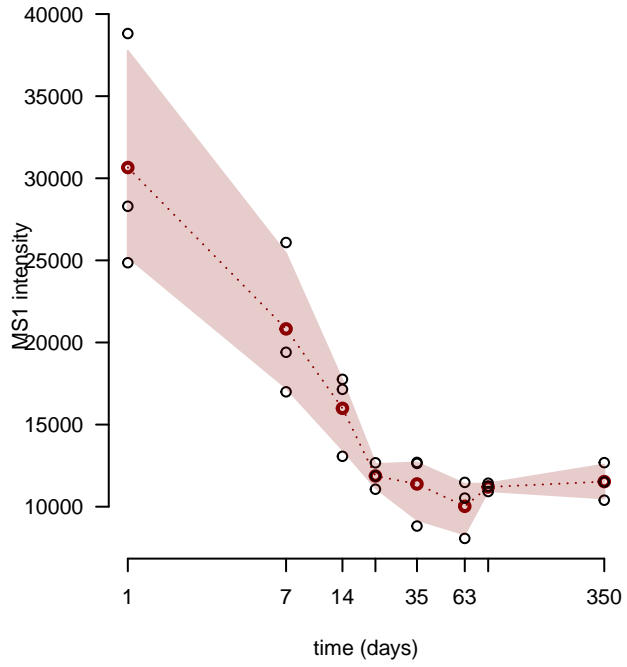

**Q9EPT5**  
**GN=Slco2a1**  
solute carrier organic anion transporter ...

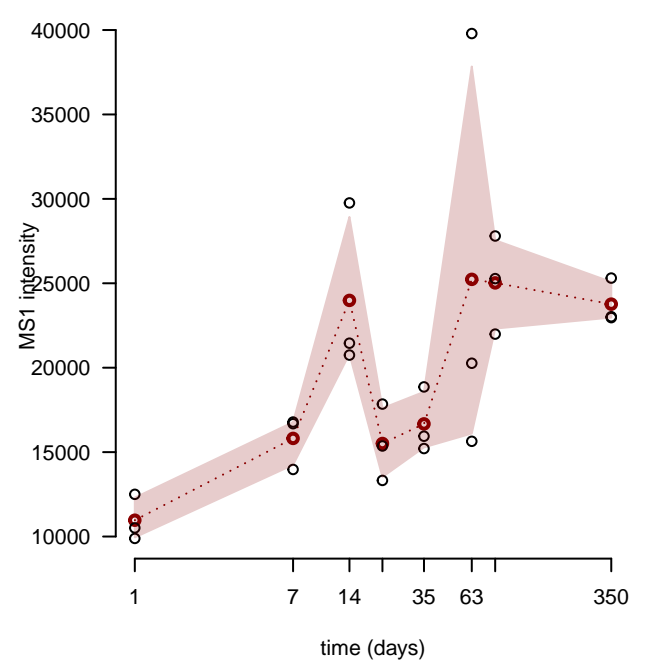

**Q9EPU0**  
**GN=Upf1**  
UPF1 regulator of nonsense transcripts h ...

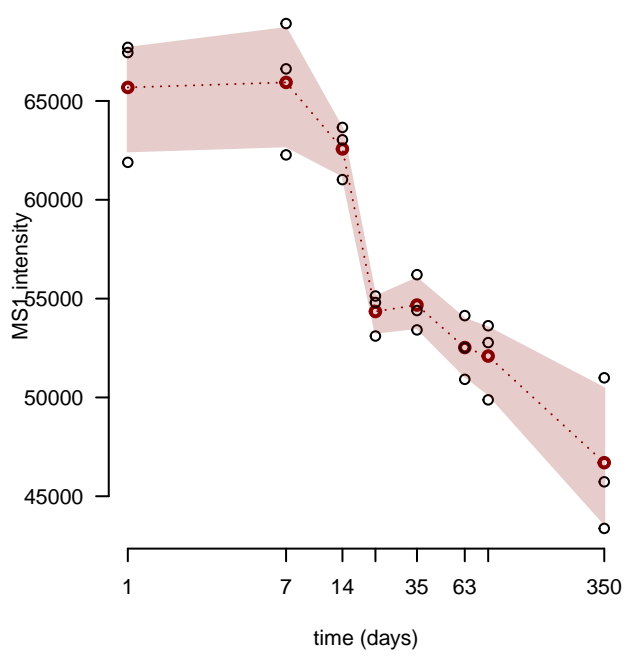

**Q9EPU4**  
**GN=Cpsf1**  
cleavage and polyadenylation specific fa ...

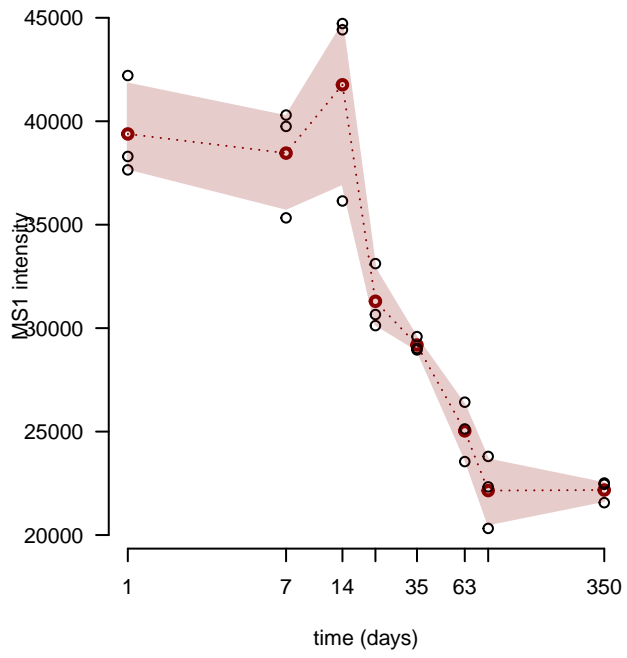

**Q9EPV8**  
**GN=Ubl5**  
ubiquitin-like 5

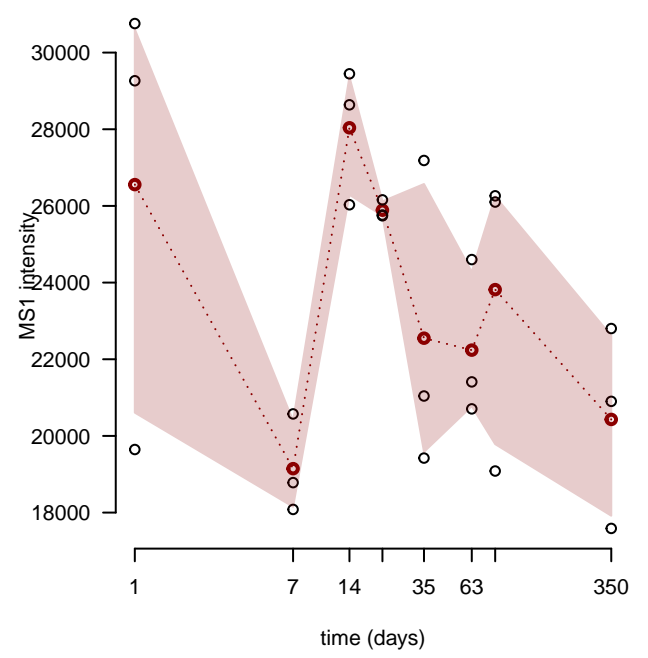

**Q9EPW0**  
**GN=Inpp4a**  
inositol polyphosphate-4-phosphatase, ty ...

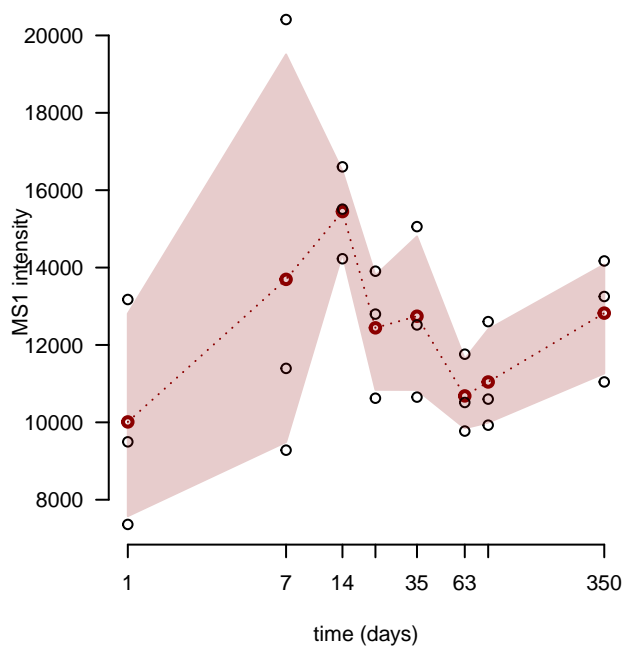

**Q9EPX2**  
**GN=Papln**  
papilin, proteoglycan-like sulfated glyc ...

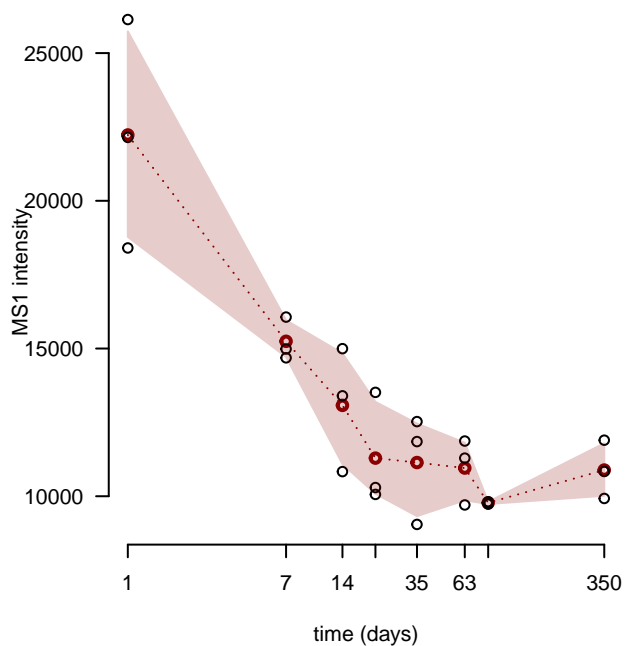

**Q9EQ06**  
**GN=Hsd17b11**  
hydroxysteroid (17-beta) dehydrogenase 1 ...

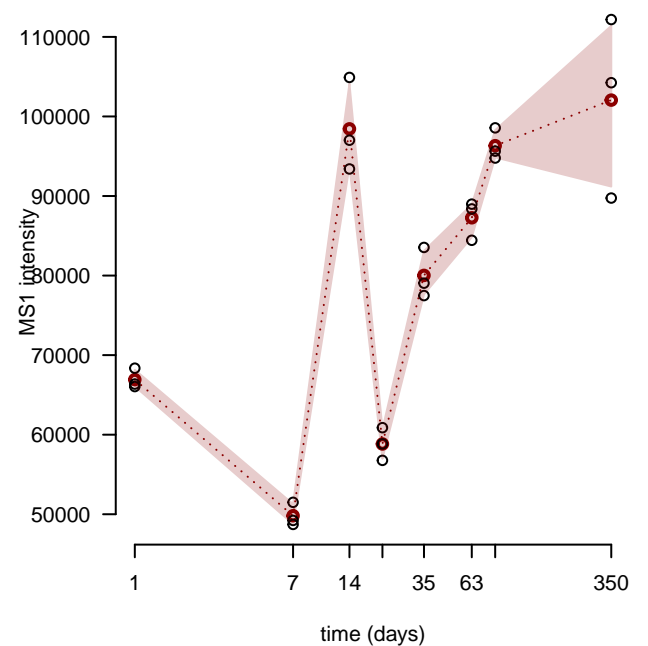

**Q9EQ15**  
**GN=Gnb11**  
guanine nucleotide binding protein (G pr ...

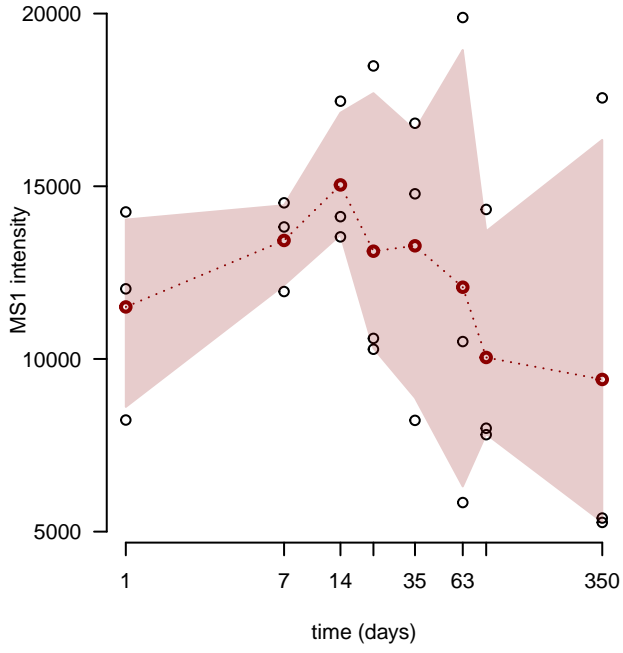

**Q9EQ20**  
**GN=Aldh6a1**  
aldehyde dehydrogenase family 6, subfami ...

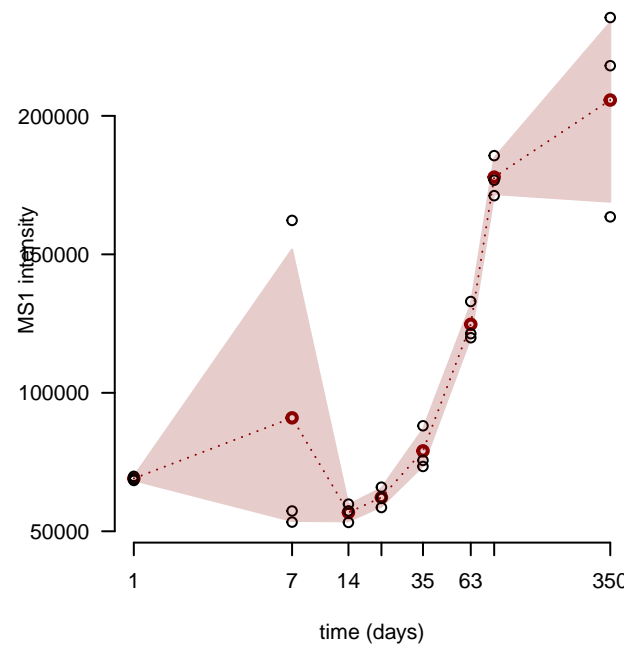

**Q9EQ28**  
**GN=Pold3**  
polymerase (DNA-directed), delta 3, acce ...

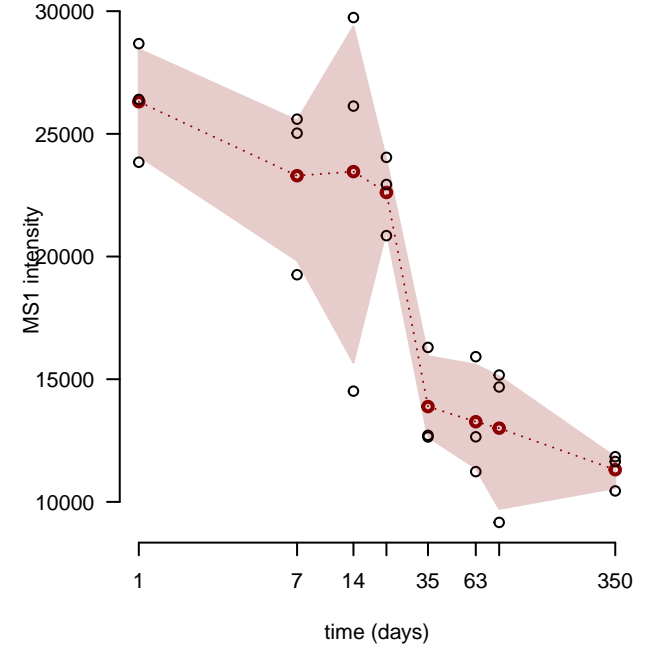

**Q9EQ32**  
**GN=Pik3ap1**  
phosphoinositide-3-kinase adaptor protei ...

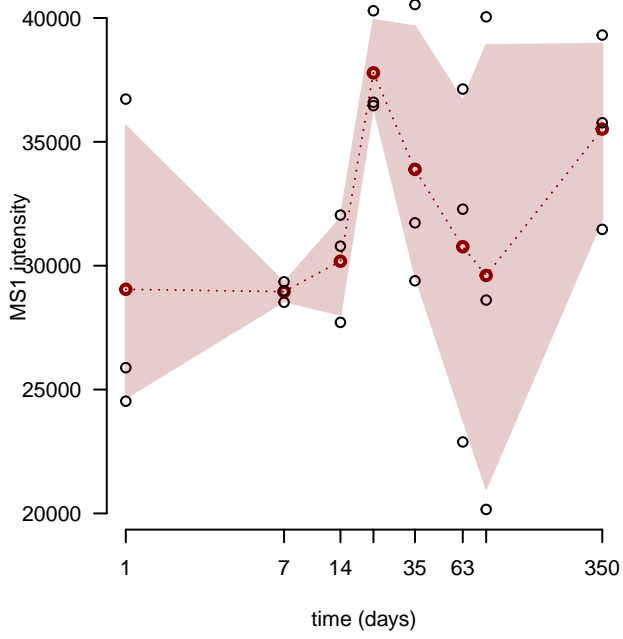

**Q9EQ61**  
**GN=Pes1**  
pescadillo ribosomal biogenesis factor 1

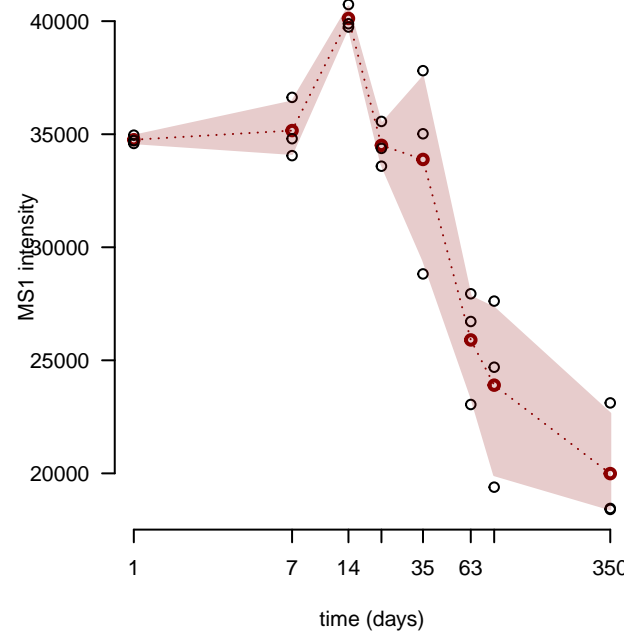

**Q9EQ80**  
**GN=Nif311**  
Ngg1 interacting factor 3-like 1 (S. pom ...

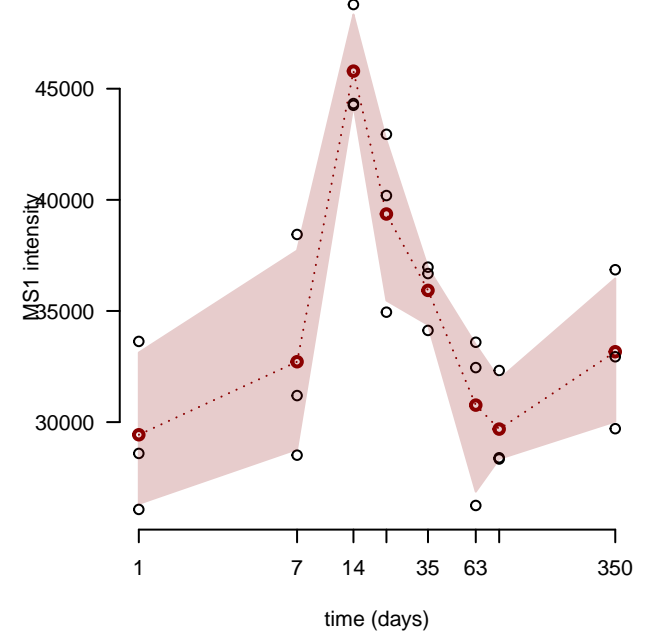

**Q9EQC1**  
**GN=Hsd3b7**  
hydroxy-delta-5-steroid dehydrogenase, 3 ...

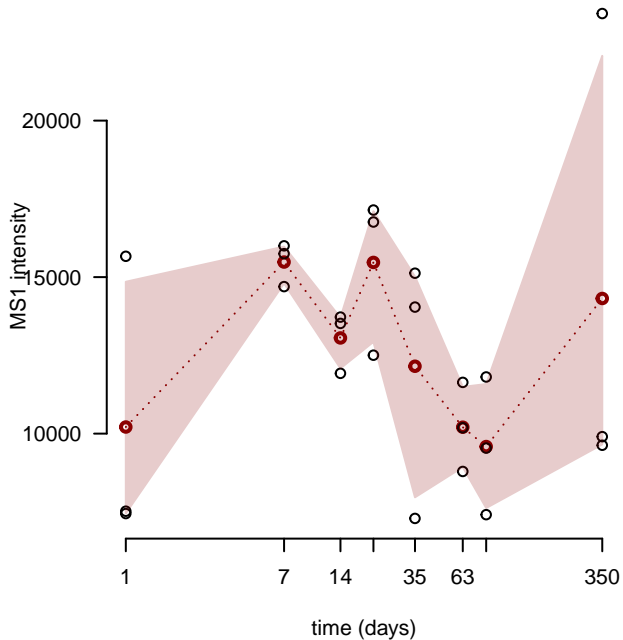

**Q9EQC5**  
**GN=Scy11**  
SCY1-like 1 (S. cerevisiae)

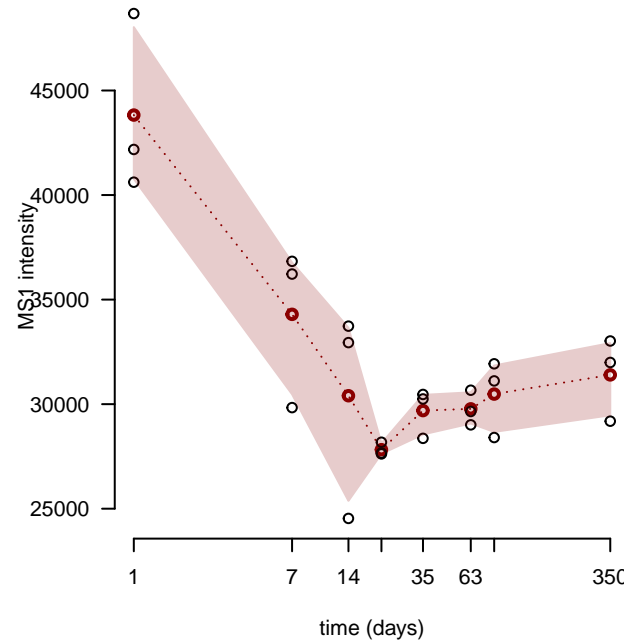

**Q9EQF5**  
**GN=Dpys**  
dihydropyrimidinase

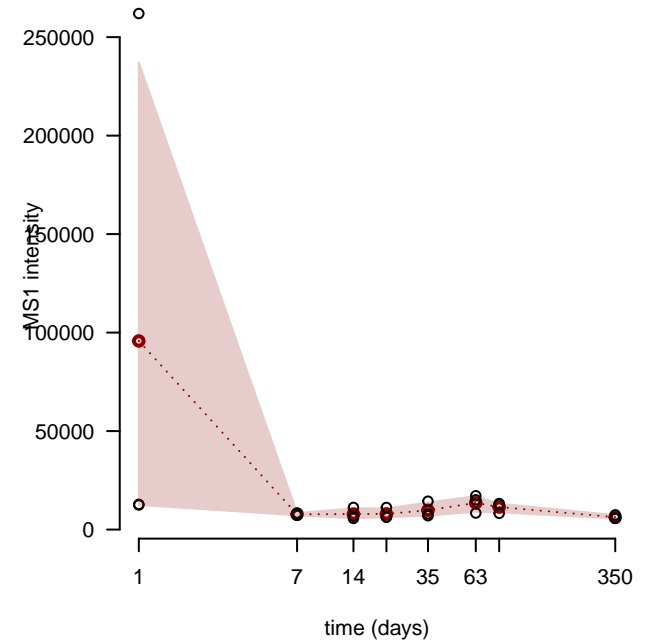

**Q9EQF6**  
GN=Dpys15  
dihydropyrimidinase-like 5

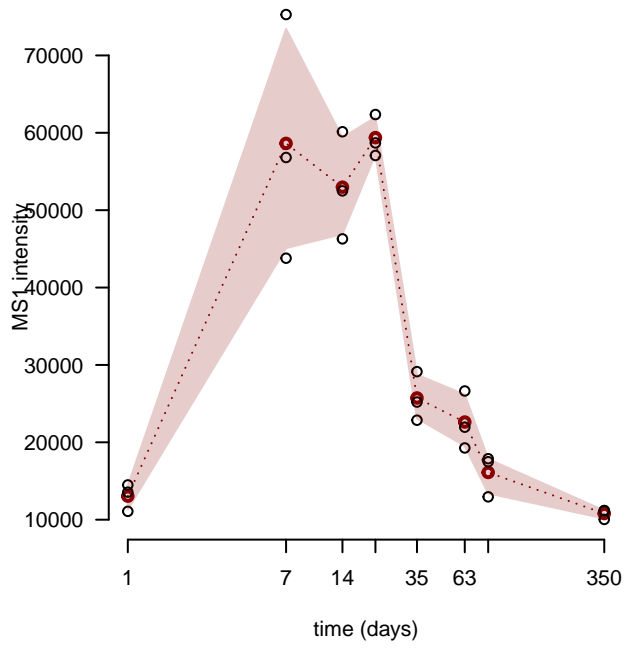

**Q9EQG3**  
GN=Scel  
sciellin

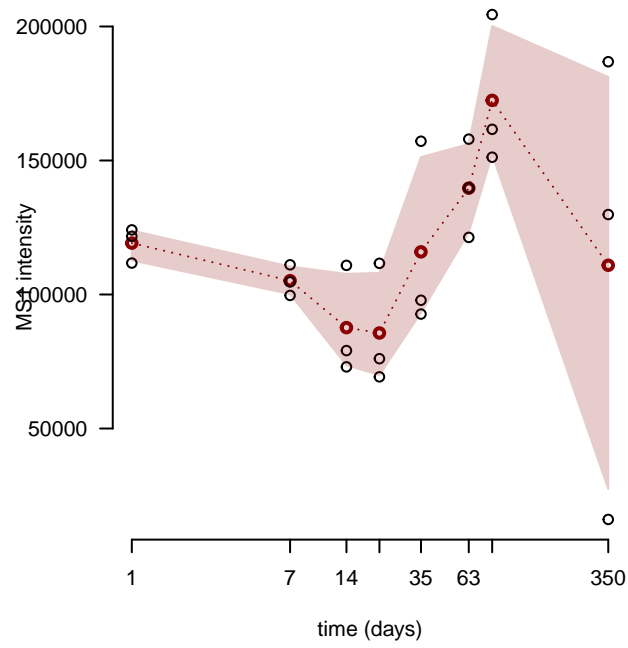

**Q9EQG7**  
GN=Enpp5  
ectonucleotide pyrophosphatase/phosphodi ...

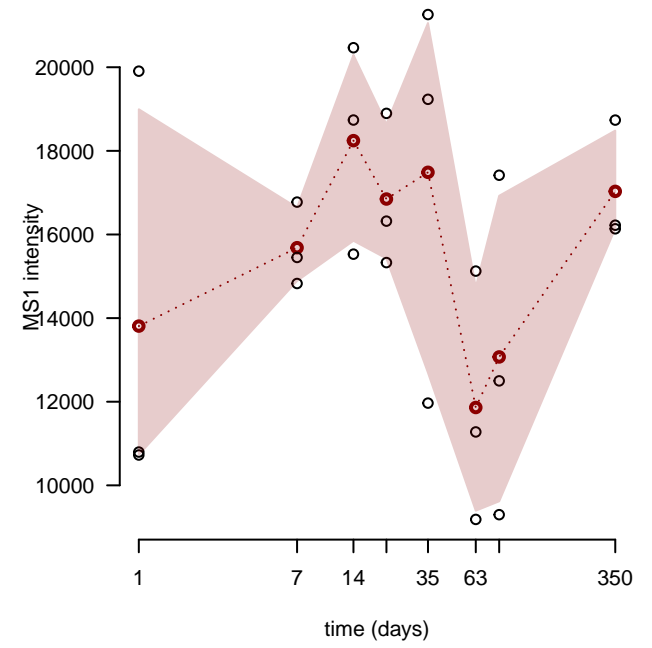

**Q9EQG9**  
GN=Col4a3bp

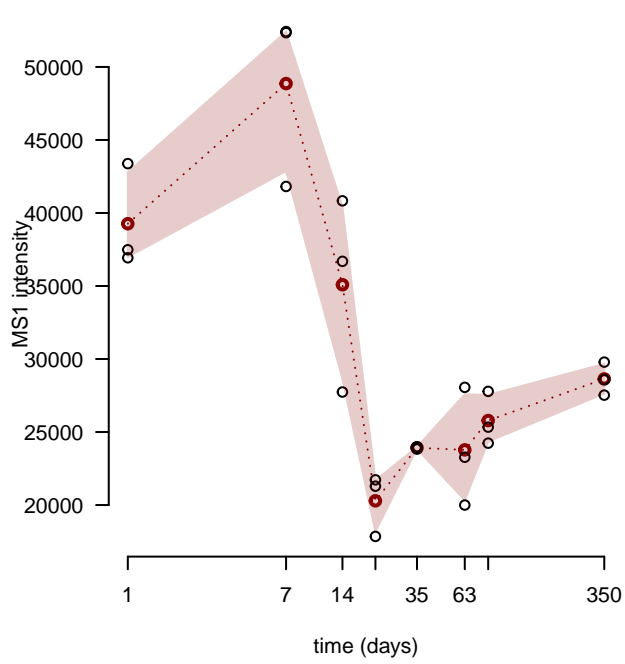

**Q9EQH2**  
GN=Erap1  
endoplasmic reticulum aminopeptidase 1

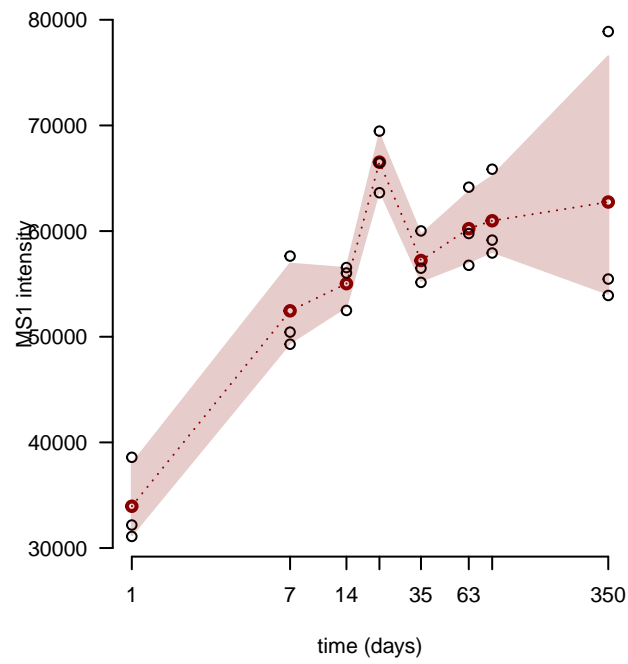

**Q9EQH3**  
GN=Vps35  
VPS35 retromer complex component

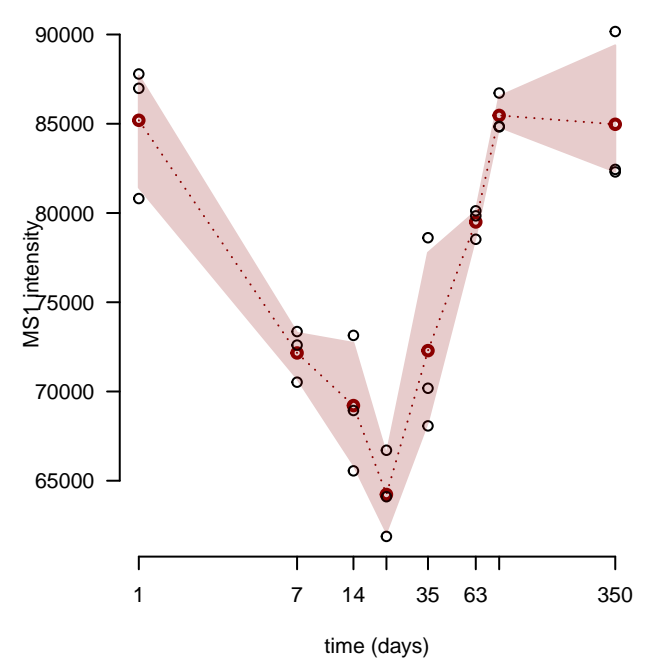

**Q9EQH4**  
GN=Taf8  
TATA-box binding protein associated fact ...

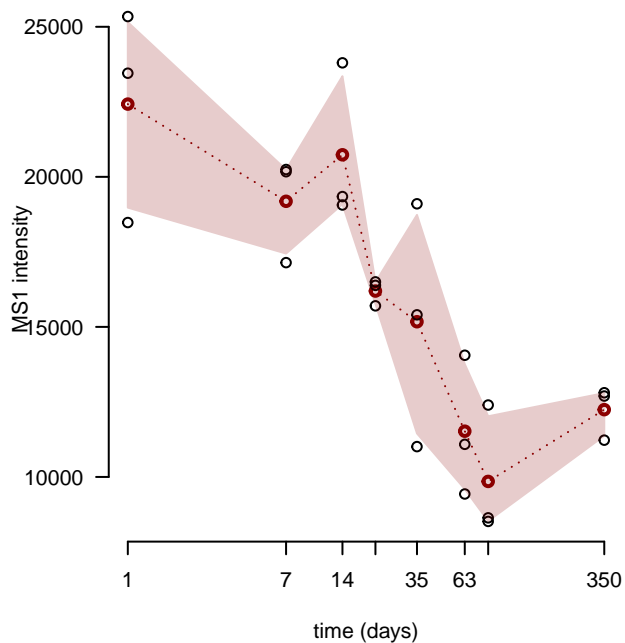

**Q9EQI8**  
GN=Mrpl46  
mitochondrial ribosomal protein L46

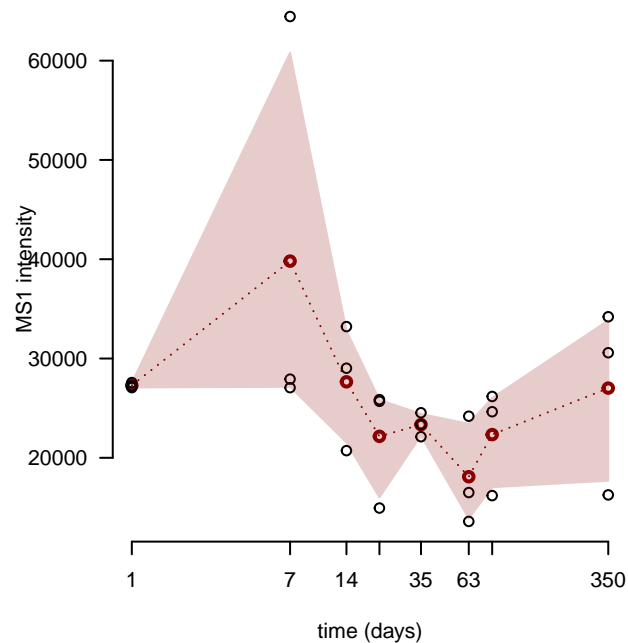

**Q9EQJ0**  
GN=Tpcn1  
two pore channel 1

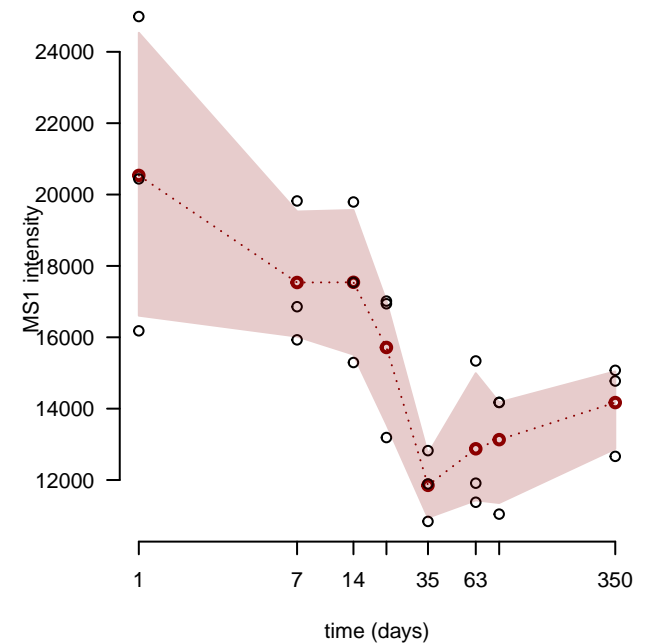

**Q9EQJ9**  
**GN=Magi3**

membrane associated guanylate kinase, WW ...

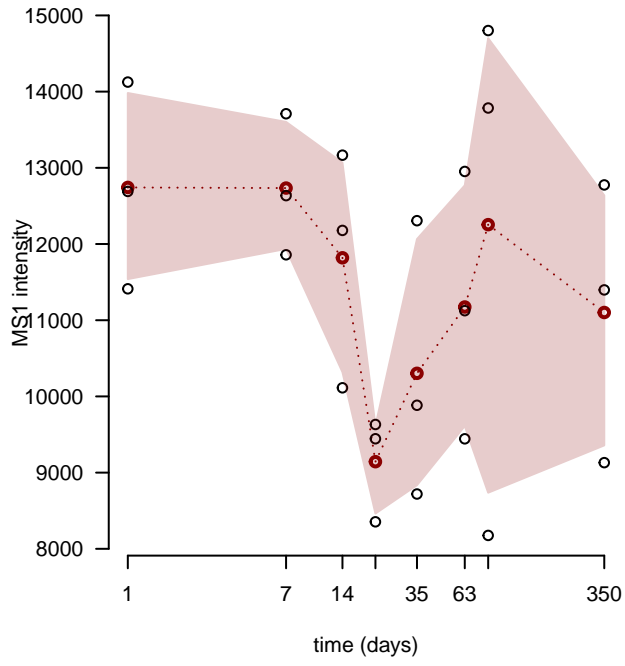

**Q9EQK5**  
**GN=Mvp**

major vault protein

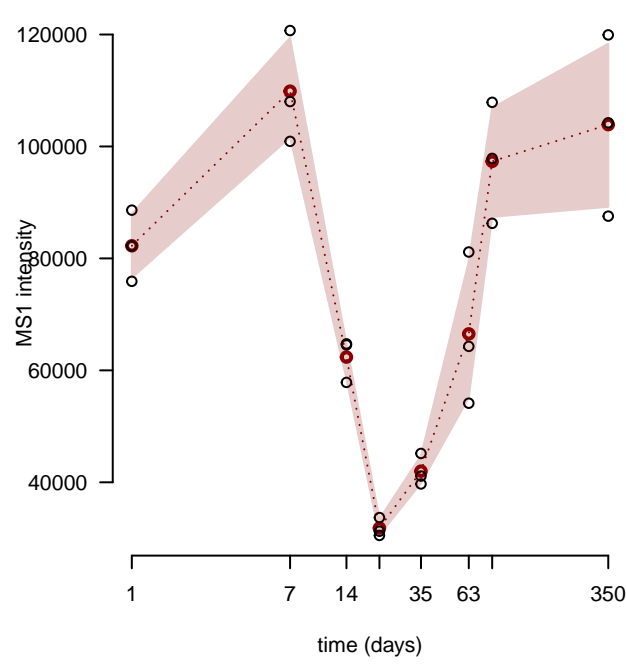

**Q9EQK7**  
**GN=Icmt**

isoprenylcysteine carboxyl methyltransfe ...

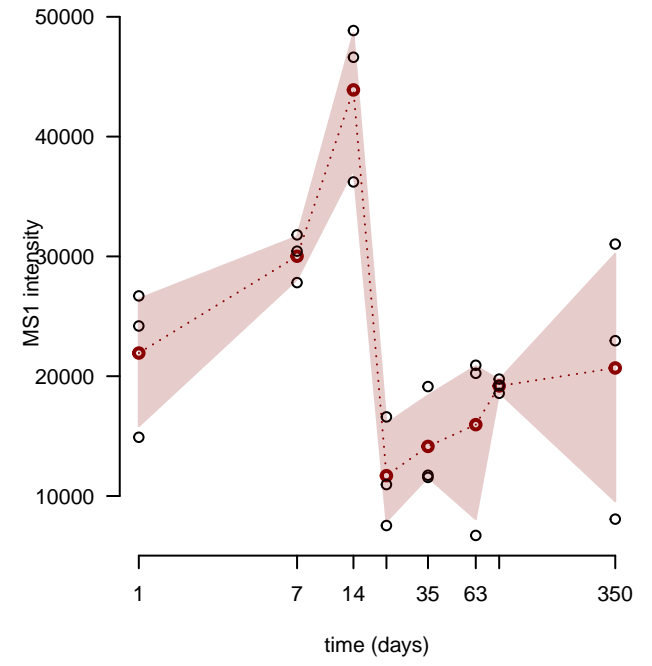

**Q9EQM6**  
**GN=Dgcr8**

DGCR8, microprocessor complex subunit

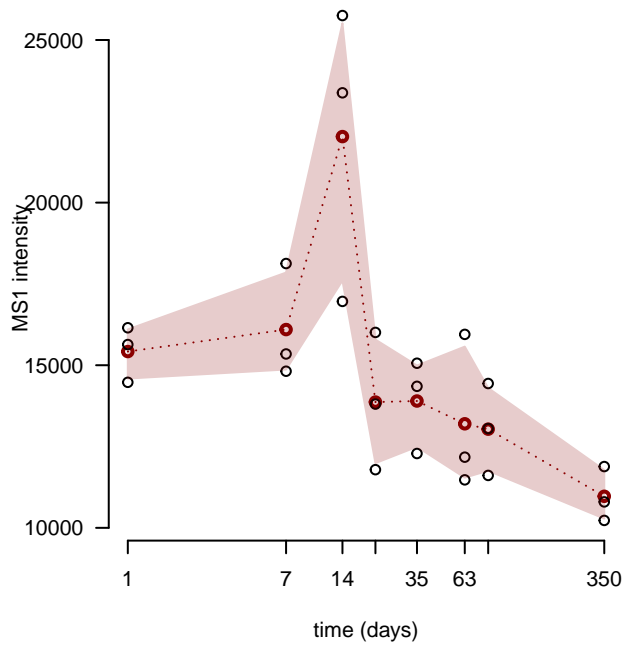

**Q9EQN3**  
**GN=Tsc22d4**

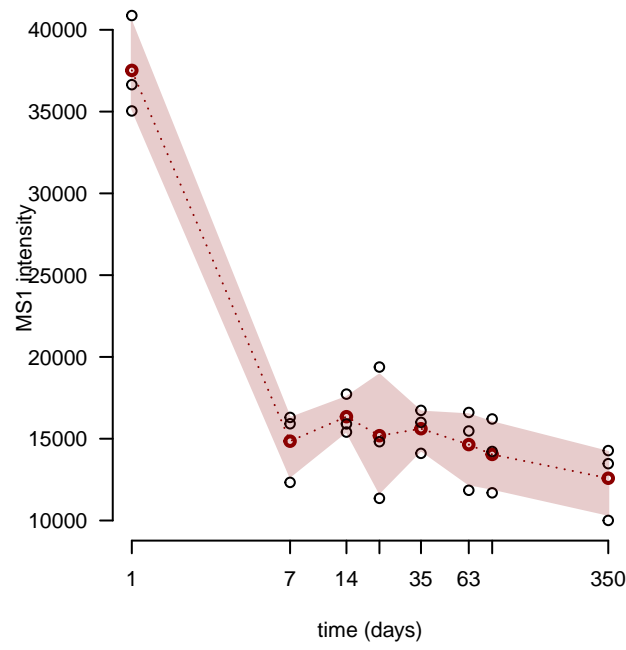

**Q9EQP2**  
**GN=Ehd4**

EH-domain containing 4

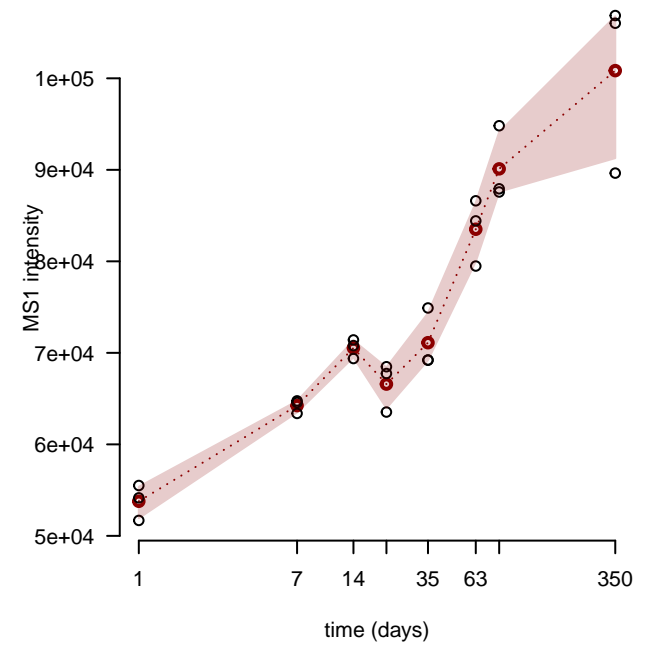

**Q9EQQ0**  
**GN=Suv39h2**

suppressor of variegation 3-9 2

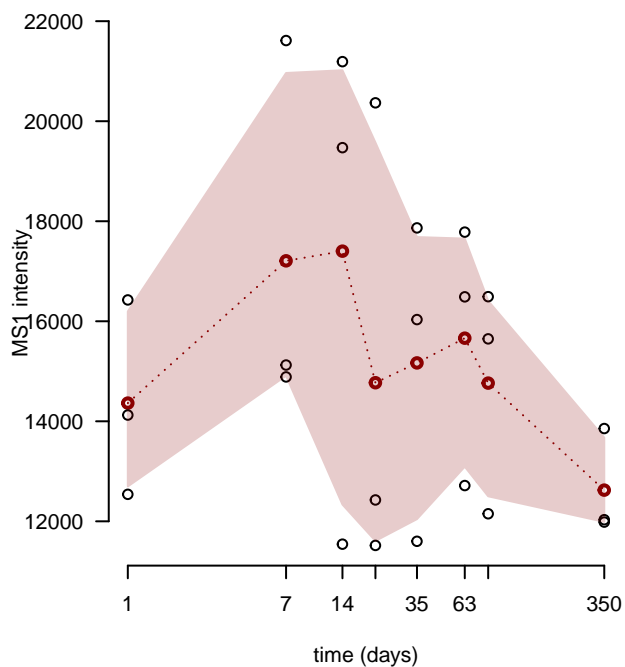

**Q9EQQ2**  
**GN=Yipf5**

Yip1 domain family, member 5

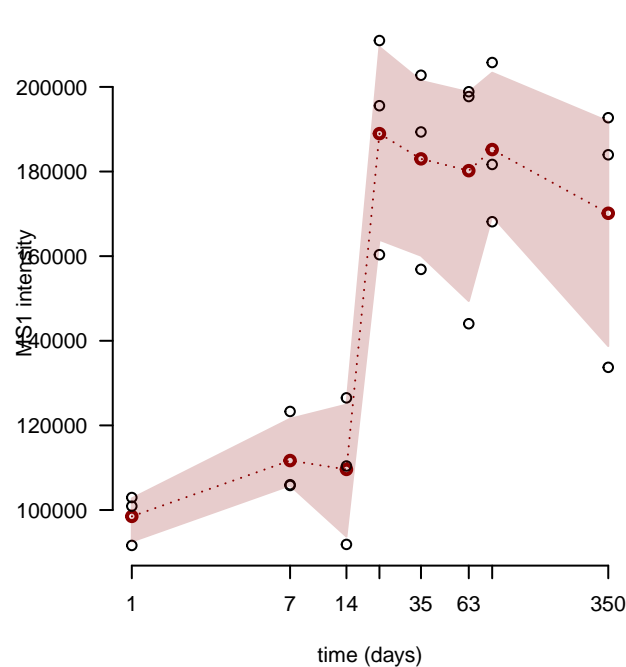

**Q9EQQ9**  
**GN=Oga**

O-GlcNAcase

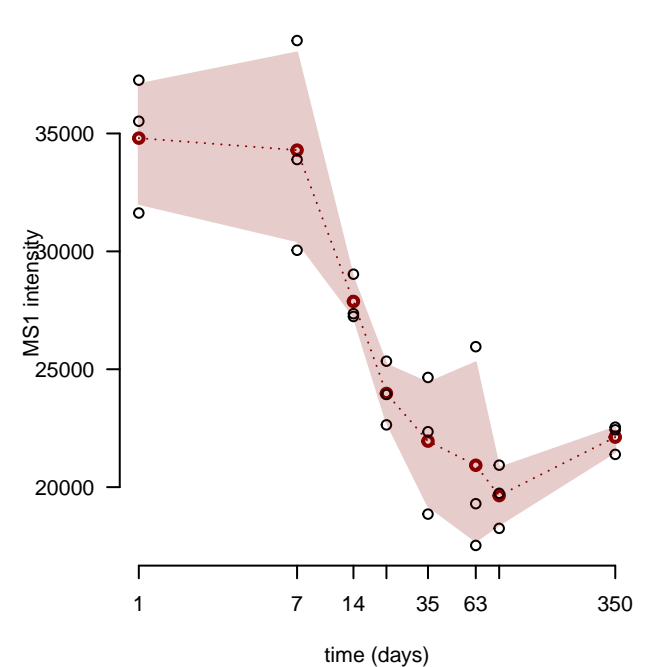

**Q9EQS3**  
GN=Mycbp  
MYC binding protein

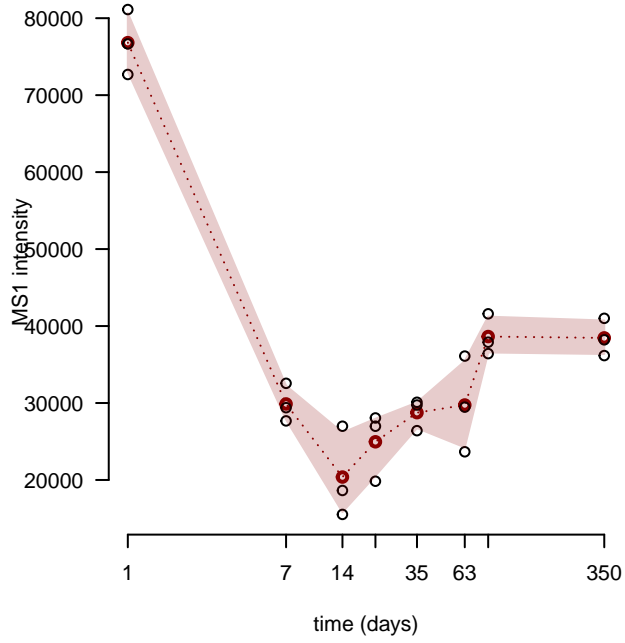

**Q9EQS9**  
GN=Igdcc4  
immunoglobulin superfamily, DCC subclass ...

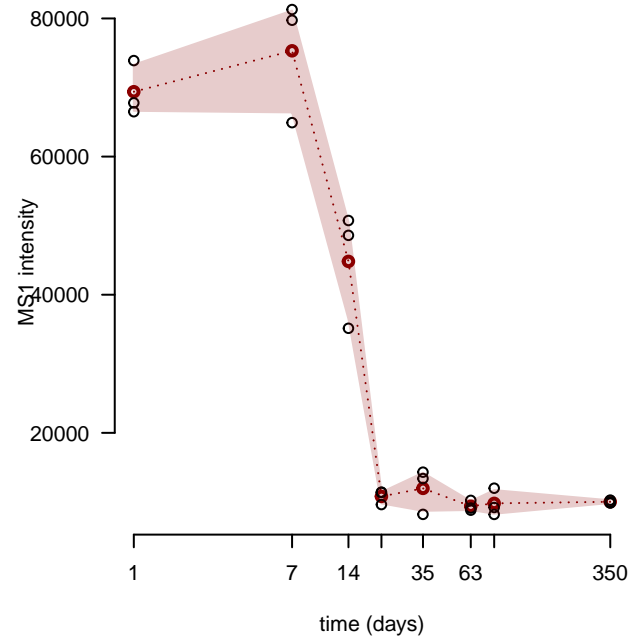

**Q9EQU5**  
GN=Set  
SET nuclear oncogene

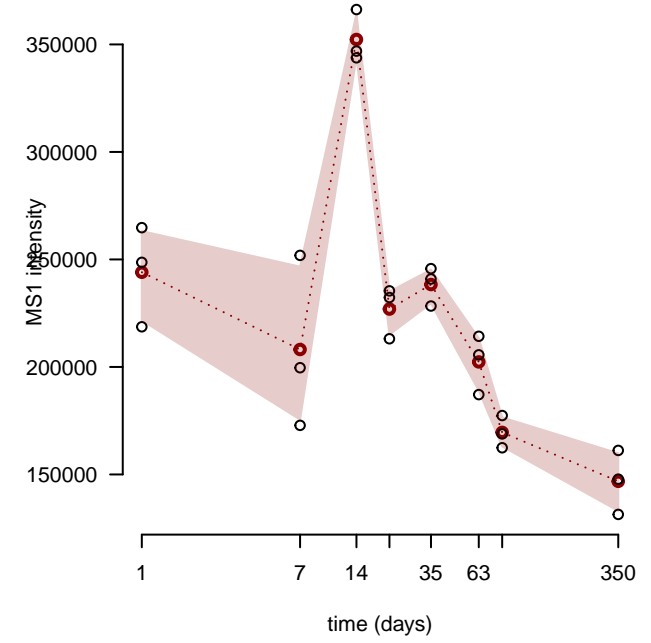

**Q9EQU5**  
GN=Set  
SET nuclear oncogene

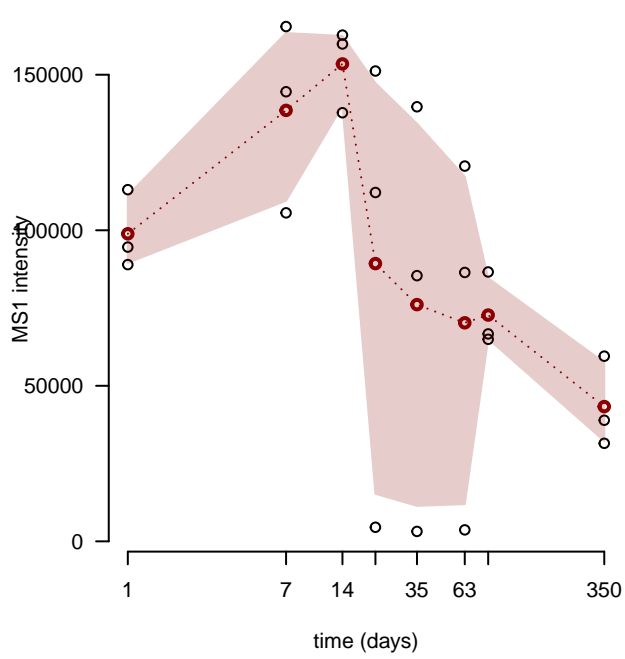

**Q9EQW7**  
GN=Kif13a  
kinesin family member 13A

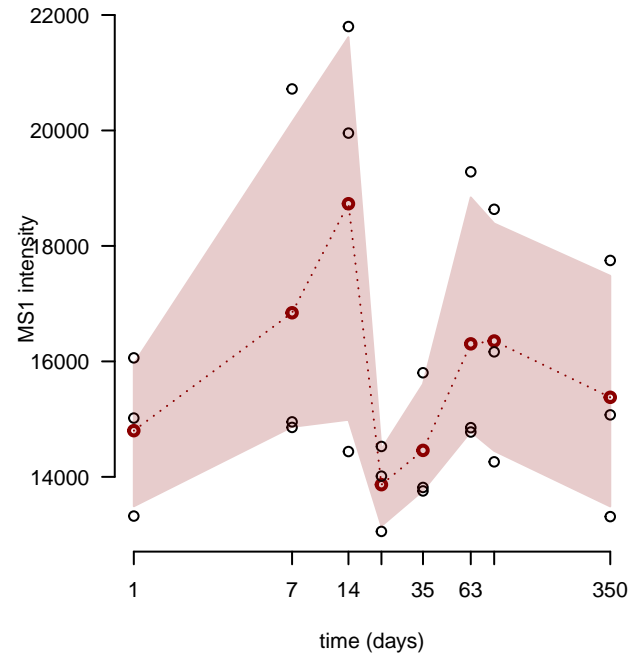

**Q9EQX4**  
GN=Aif1l  
allograft inflammatory factor 1-like

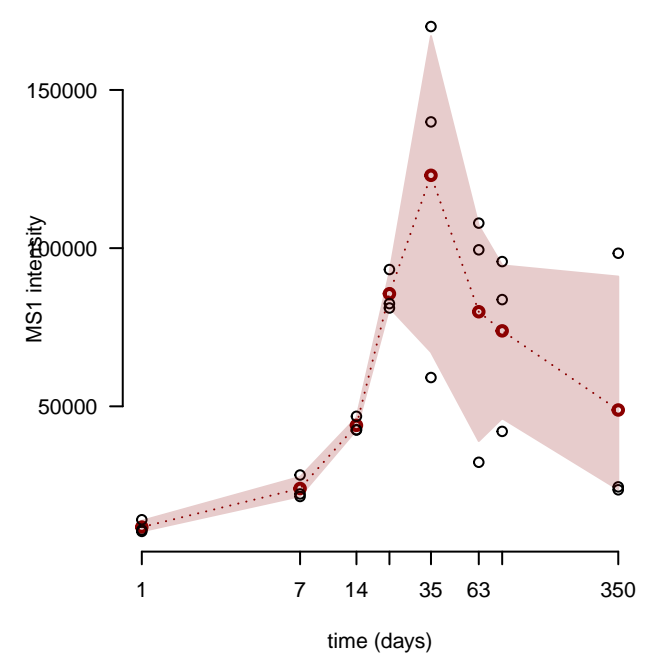

**Q9EQY0**  
GN=Ern1  
endoplasmic reticulum (ER) to nucleus si ...

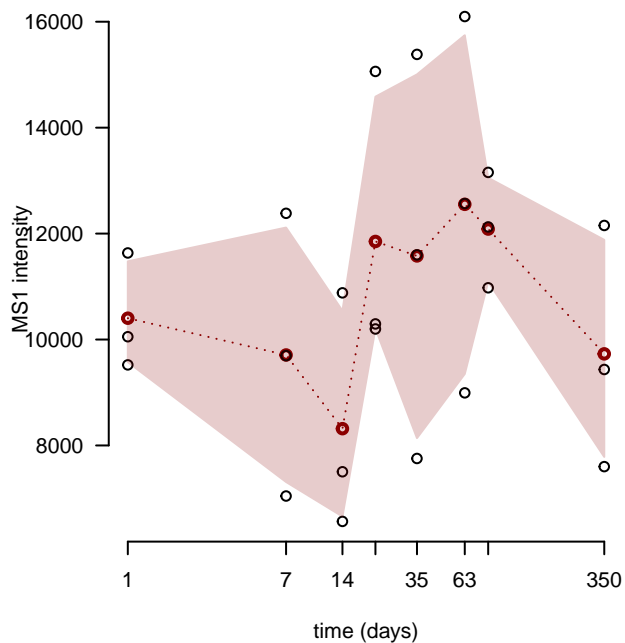

**Q9ER00**  
GN=Stx12  
syntaxin 12

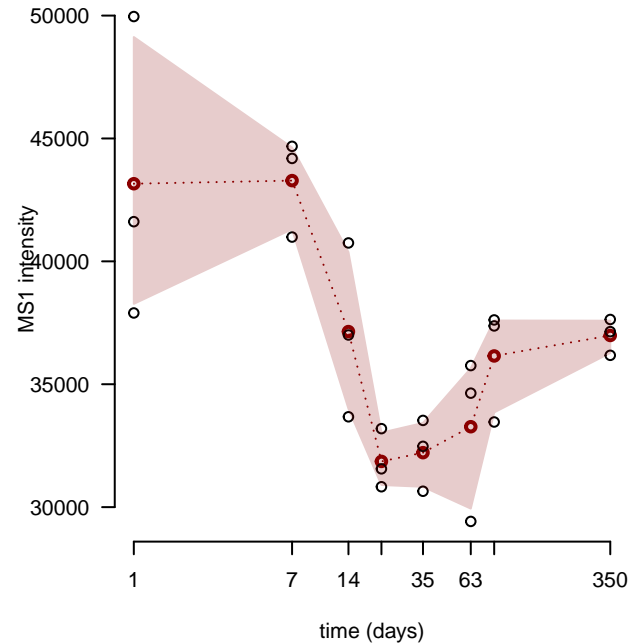

**Q9ER38**  
GN=Tor3a  
torsin family 3, member A

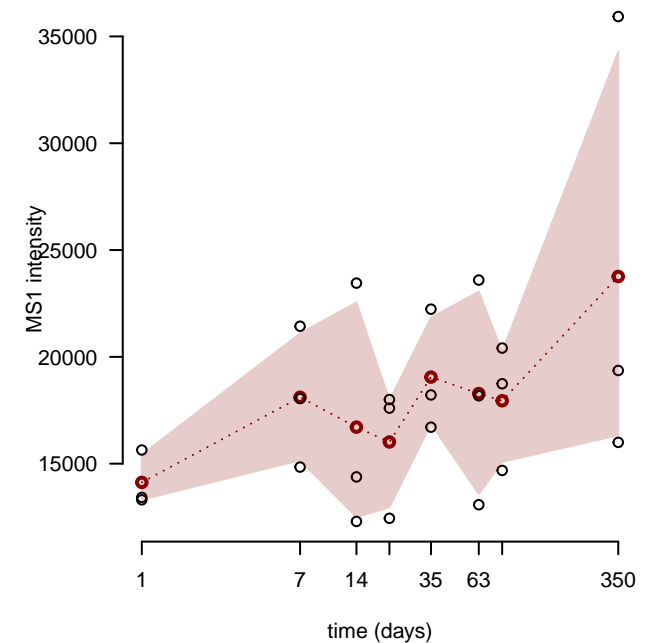



**Q9ER39**  
GN=Tor1a  
torsin family 1, member A (torsin A)

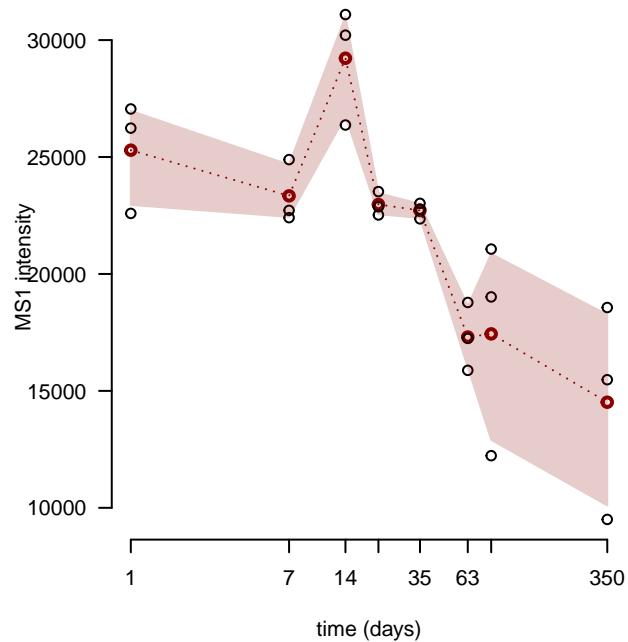

**Q9ER41**  
GN=Tor1b  
torsin family 1, member B

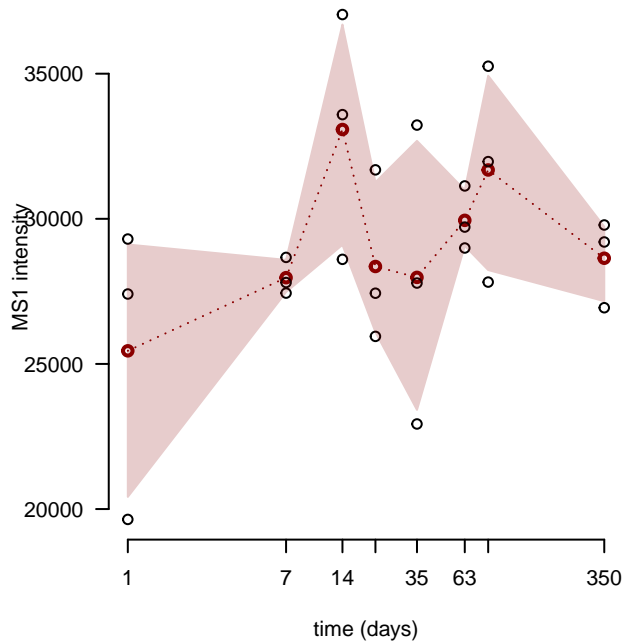

**Q9ER58**  
GN=Spock2  
sparc/osteonectin, cwcv and kazal-like d ...

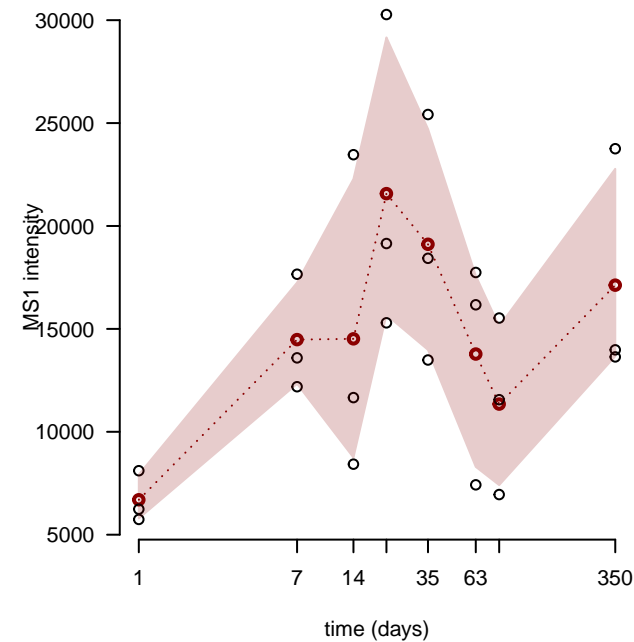

**Q9ER64**  
GN=Osbp15  
oxysterol binding protein-like 5

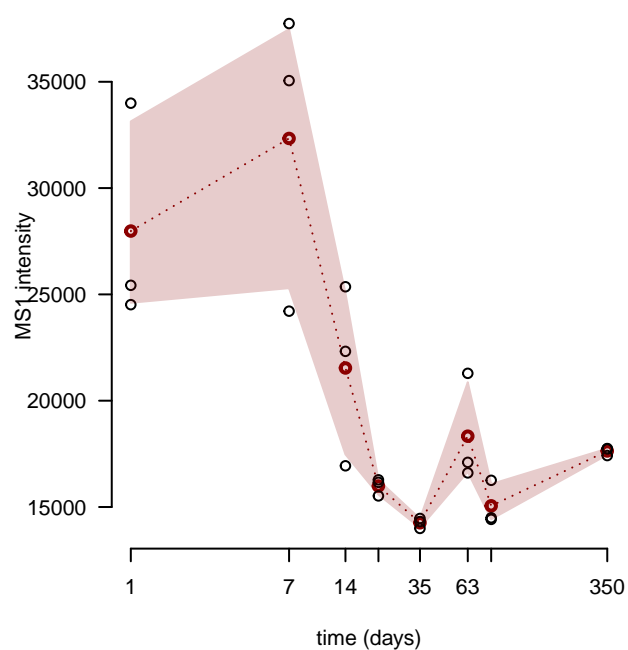

**Q9ER69**  
GN=Wtap  
WT1 associating protein

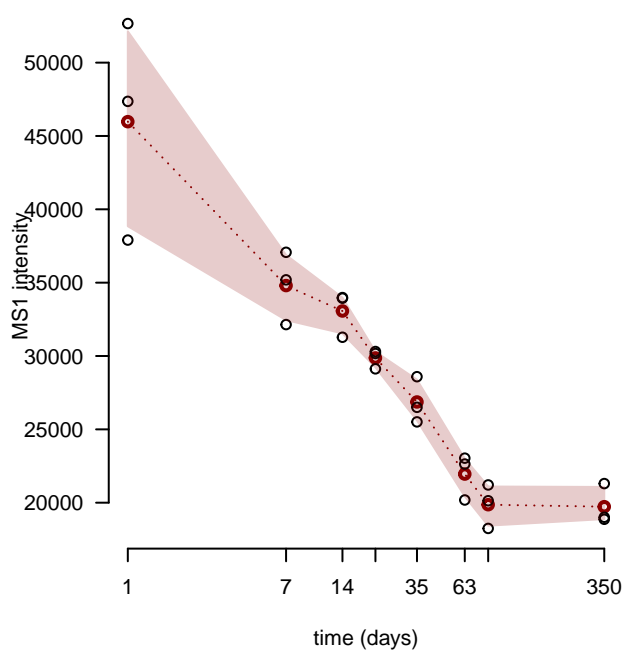

**Q9ER71**  
GN=Rhoj  
ras homolog family member J

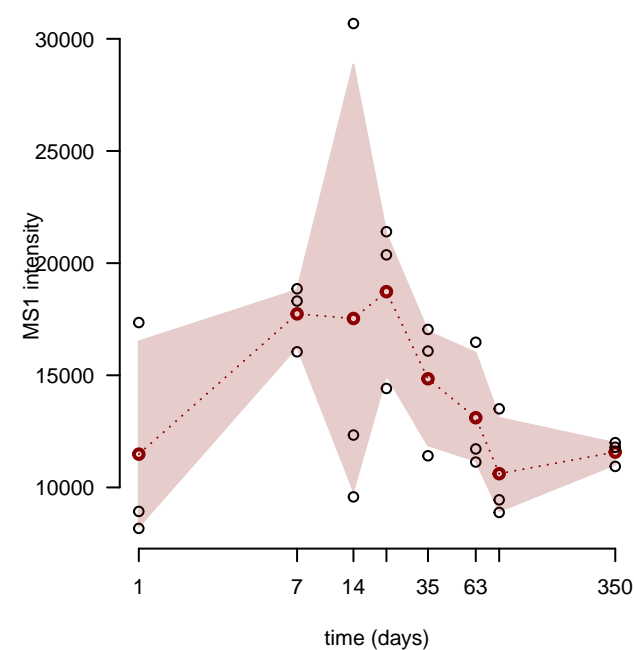

**Q9ER72**  
GN=Cars  
cysteinyl-tRNA synthetase

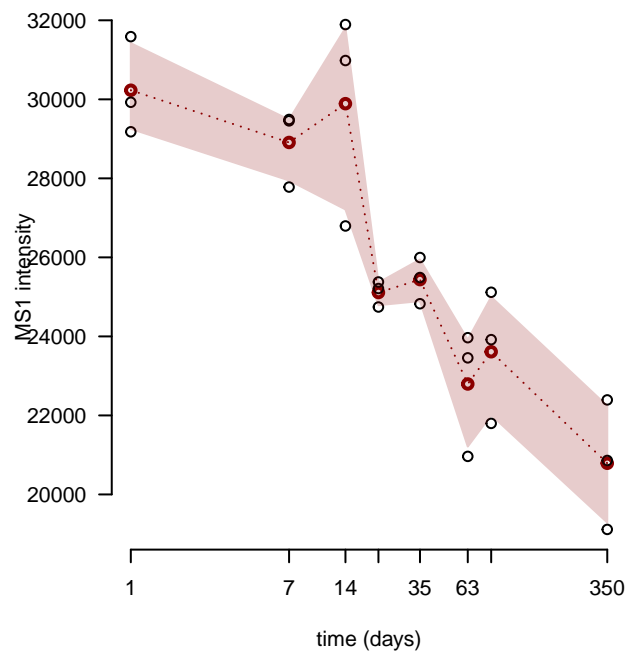

**Q9ER73**  
GN=Elp4  
elongator acetyltransferase complex subu ...

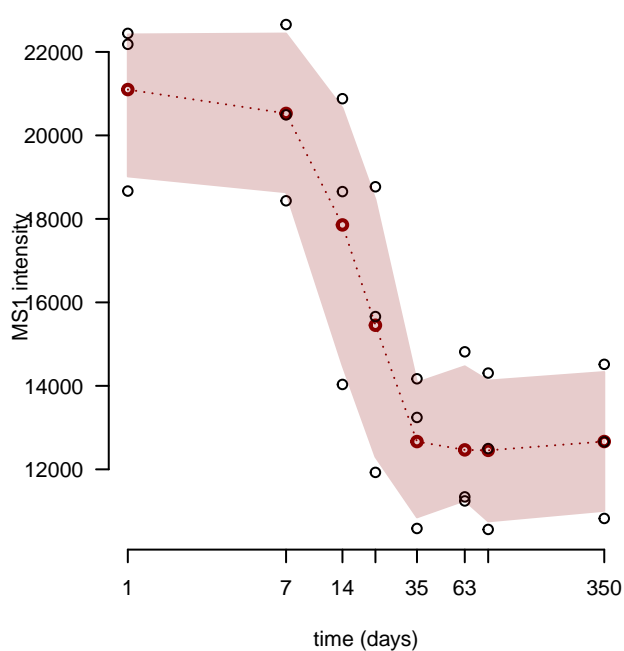

**Q9ER81**  
GN=Tor1aip2

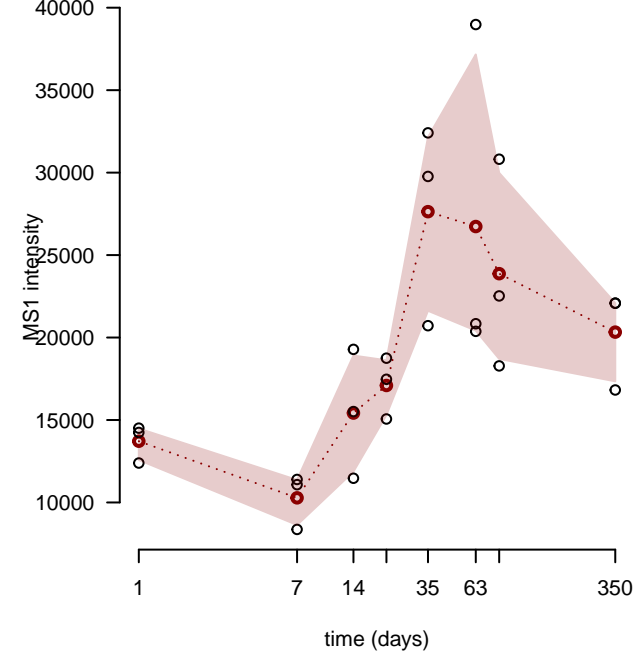

**Q9ER88**  
GN=Dap3  
death associated protein 3

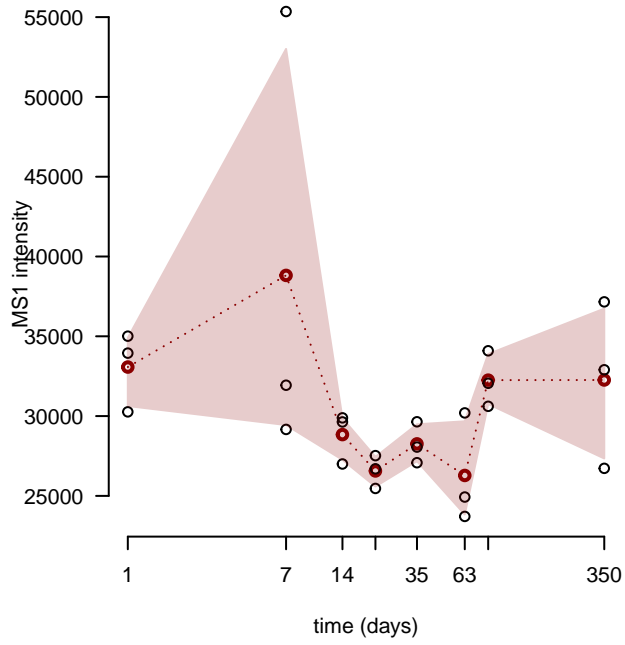

**Q9ERA0**  
GN=Tfcp2  
transcription factor CP2

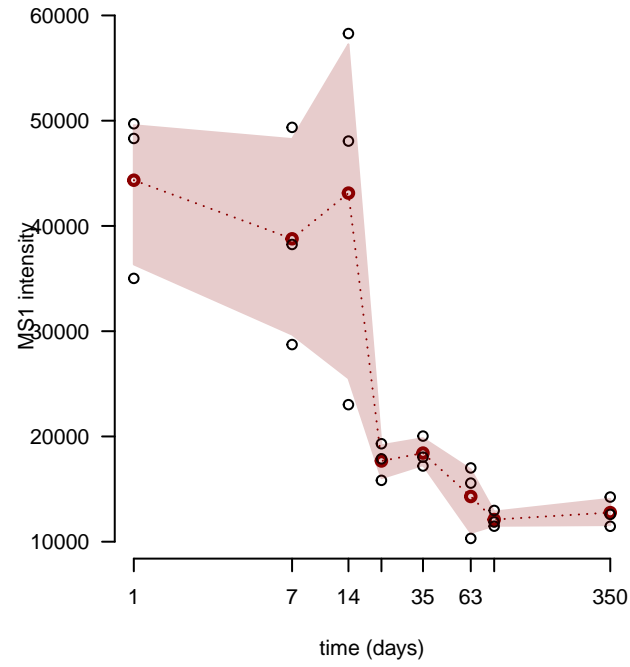

**Q9ERA6**  
GN=Tfip11  
tuftelin interacting protein 11

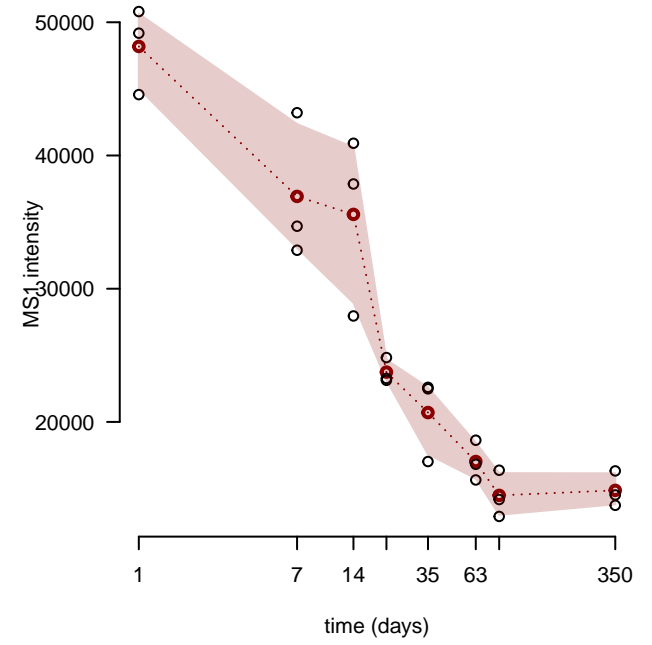

**Q9ERB0**  
GN=Snap29  
synaptosomal-associated protein 29

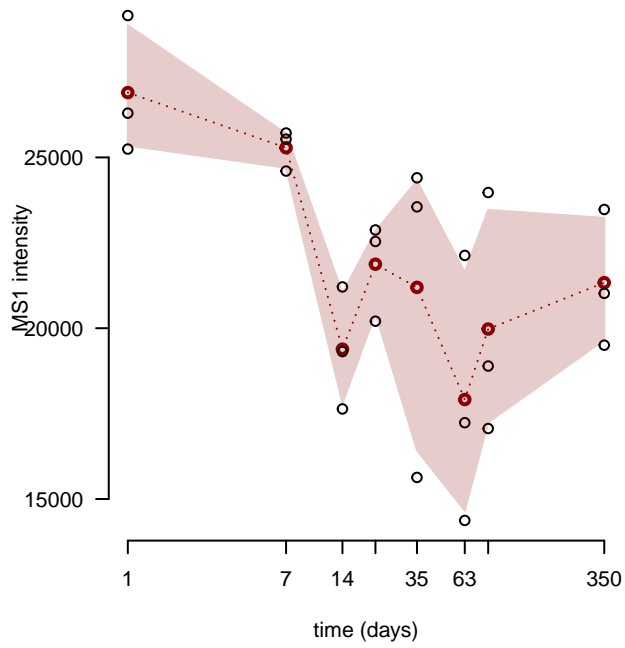

**Q9ERD6**  
GN=Ralgps2  
Ral GEF with PH domain and SH3 binding m ...

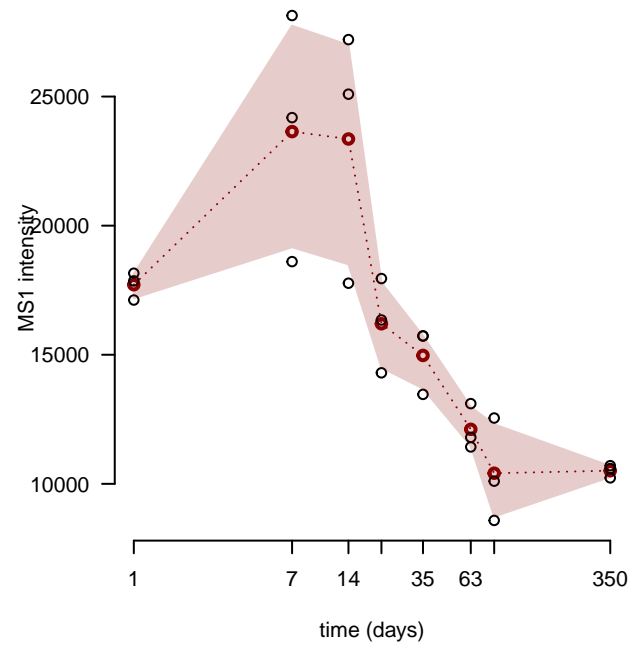

**Q9ERD7**  
GN=Tubb3  
tubulin, beta 3 class III

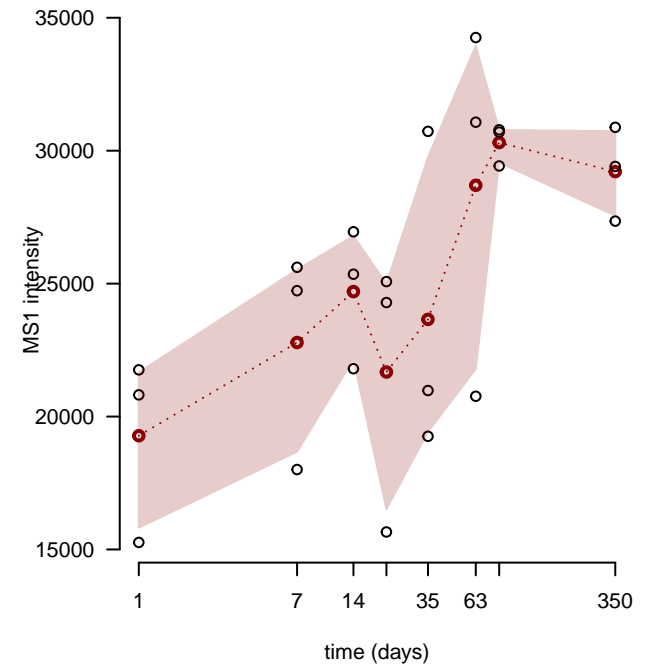

**Q9ERE2**  
GN=Krt81  
keratin 81

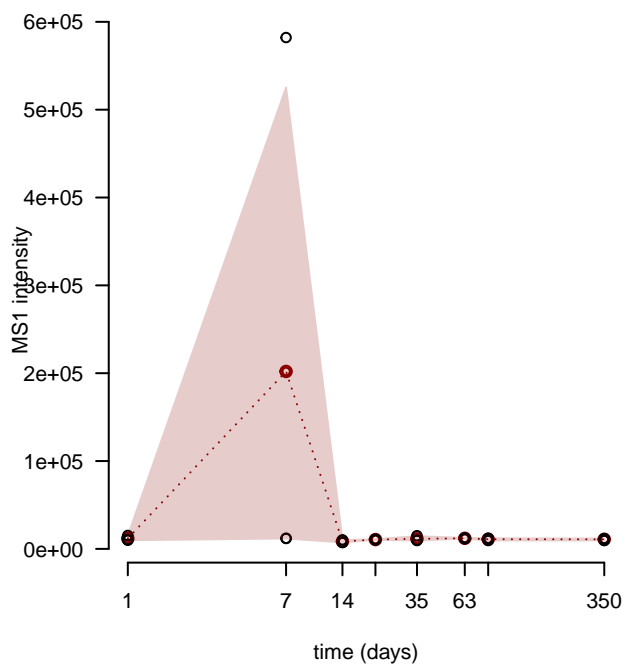

**Q9ERE3**  
GN=Sgk3  
serum/glucocorticoid regulated kinase 3

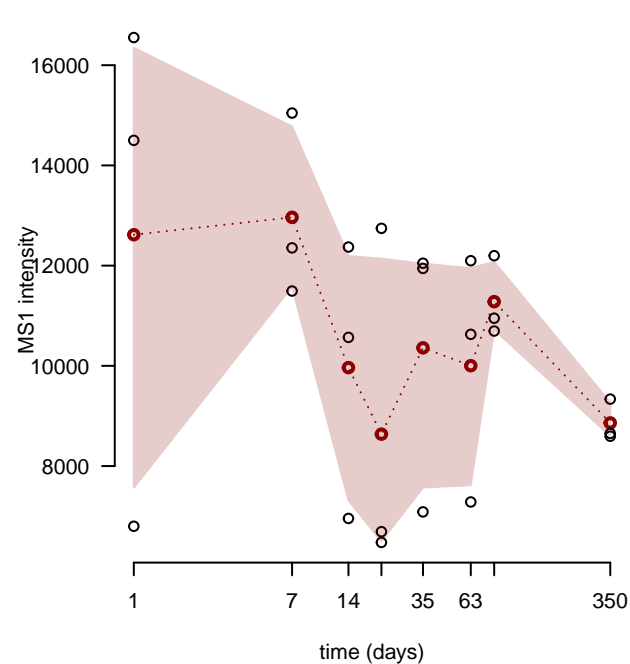

**Q9ERE7**  
GN=Mesd  
mesoderm development LRP chaperone

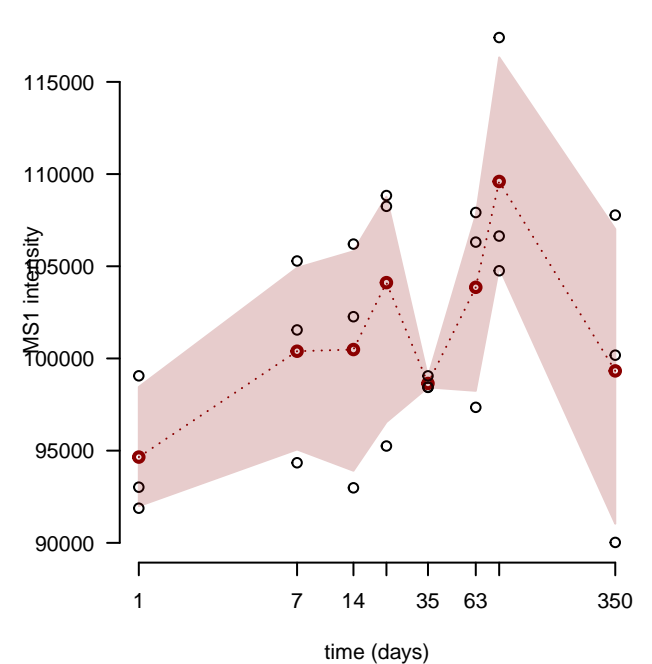

**Q9ERF3**  
GN=Wdr61  
WD repeat domain 61

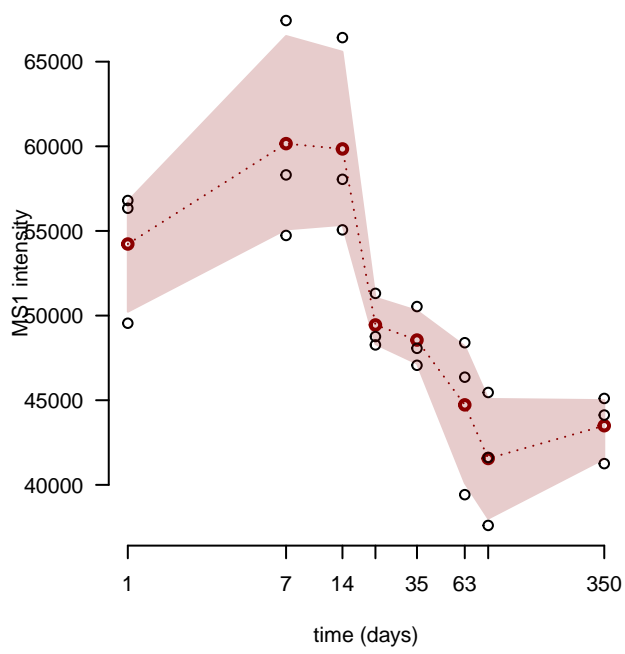

**Q9ERG0**  
GN=Lima1  
LIM domain and actin binding 1

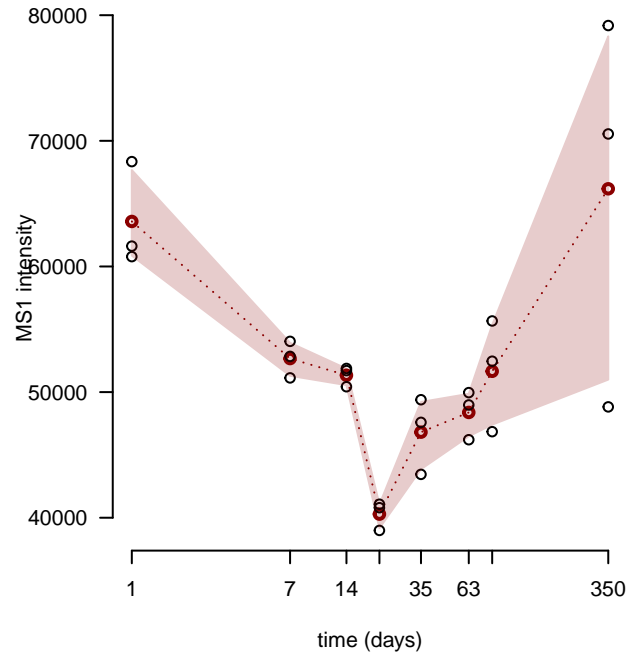

**Q9ERG2**  
GN=Strn3  
striatin, calmodulin binding protein 3

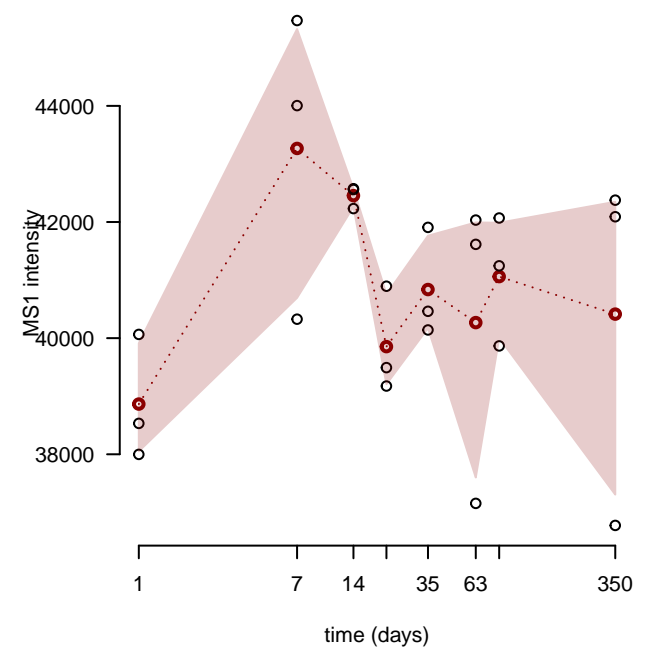

**Q9ERH4**  
GN=Nusap1  
nucleolar and spindle associated protein ...

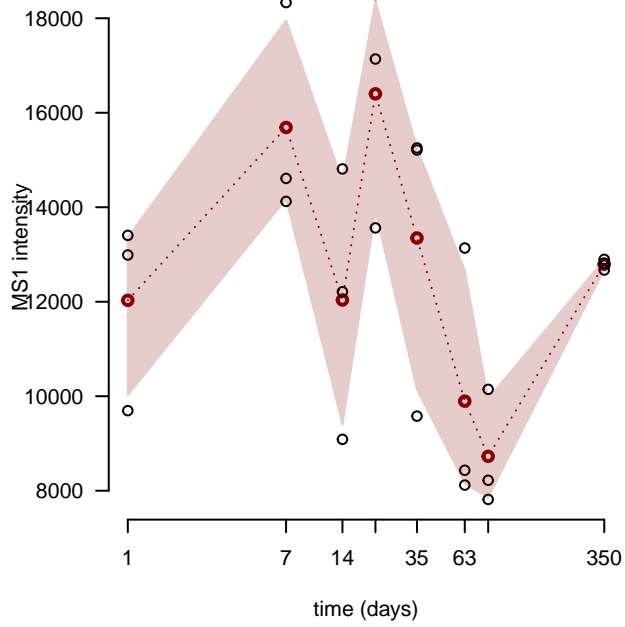

**Q9ERI2**  
GN=Rab27a  
RAB27A, member RAS oncogene family

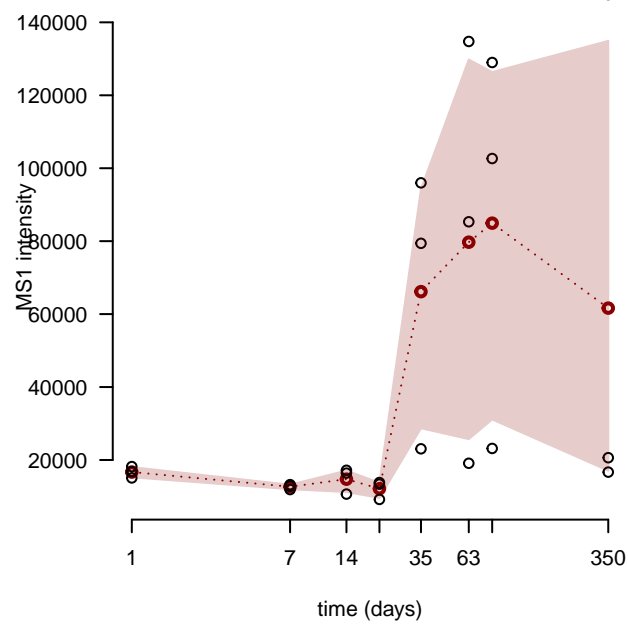

**Q9ERI5**  
GN=Jmjd6  
jumonji domain containing 6

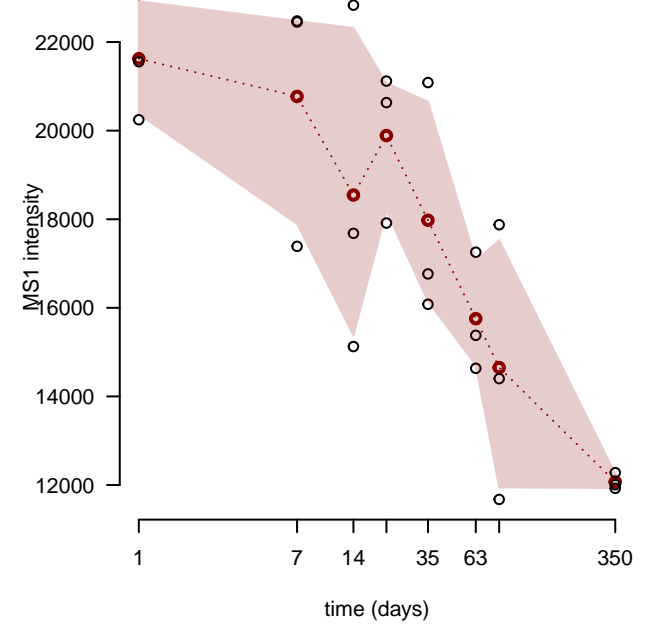

**Q9ERI6**  
GN=Rdh14  
retinol dehydrogenase 14 (all-trans and ...

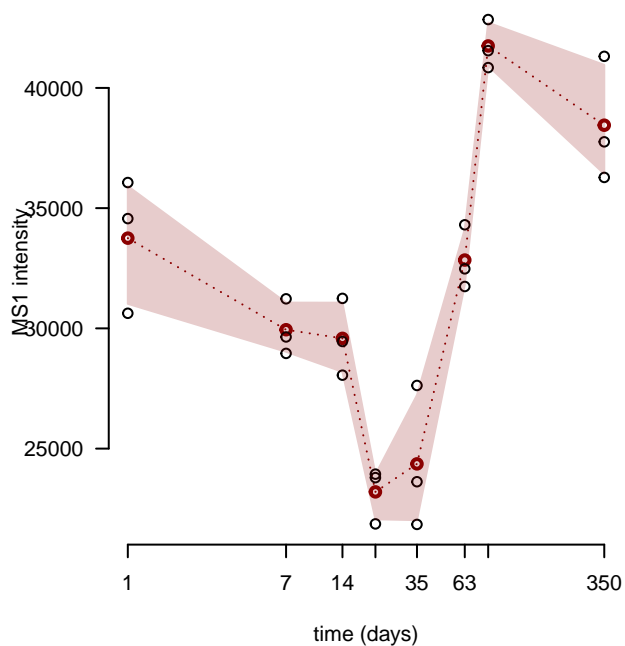

**Q9ERK4**  
GN=Cse1l  
chromosome segregation 1-like (S. cerevi ...

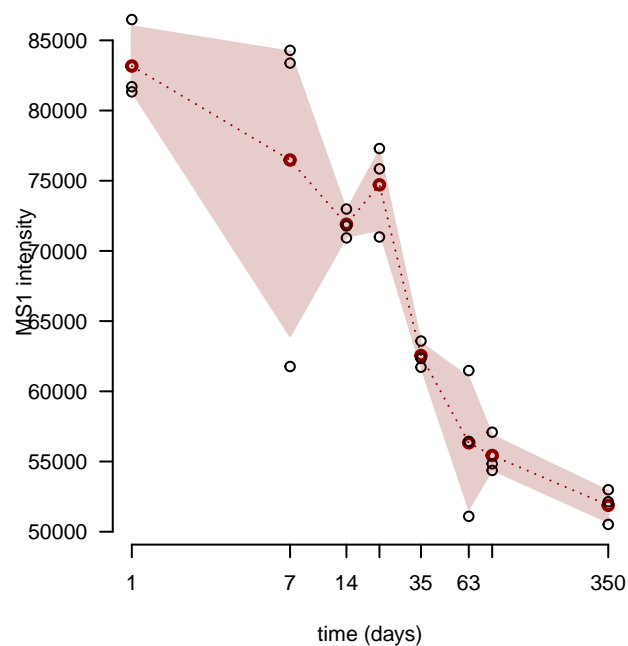

**Q9ERL7**  
GN=Gmfg  
glia maturation factor, gamma

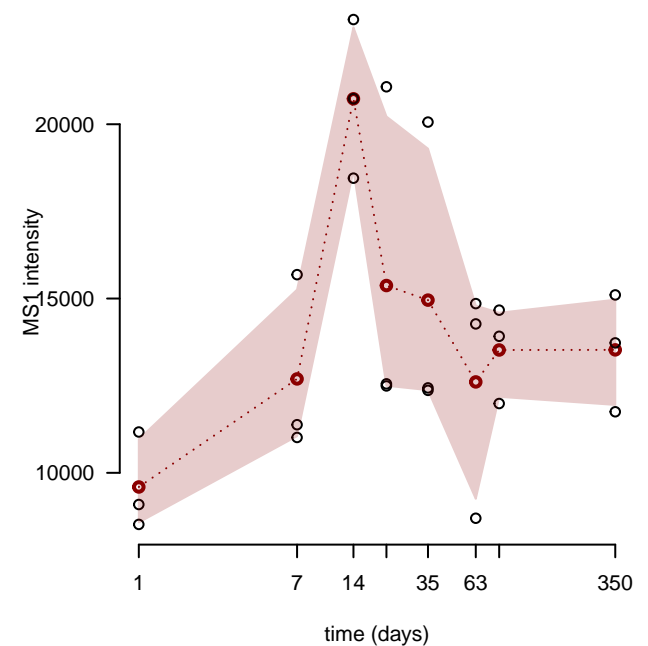

**Q9ERL9**  
GN=Gucy1a1  
guanylate cyclase 1, soluble, alpha 1

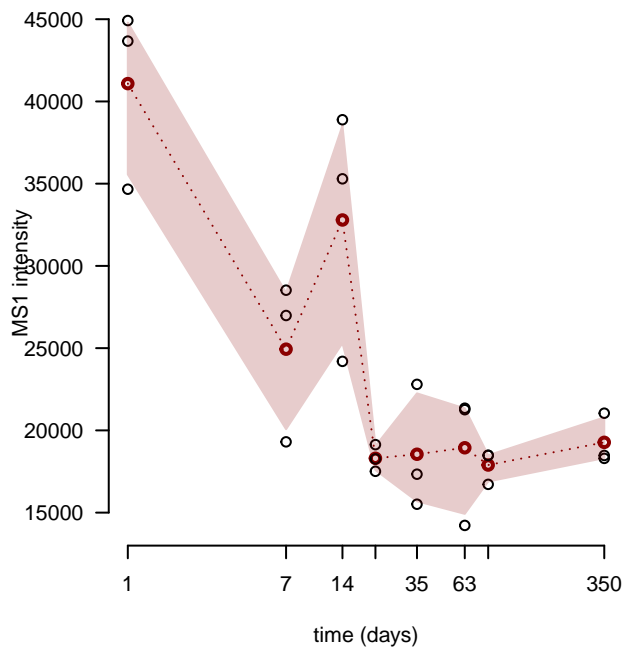

**Q9ERN0**  
GN=Scamp2  
secretory carrier membrane protein 2

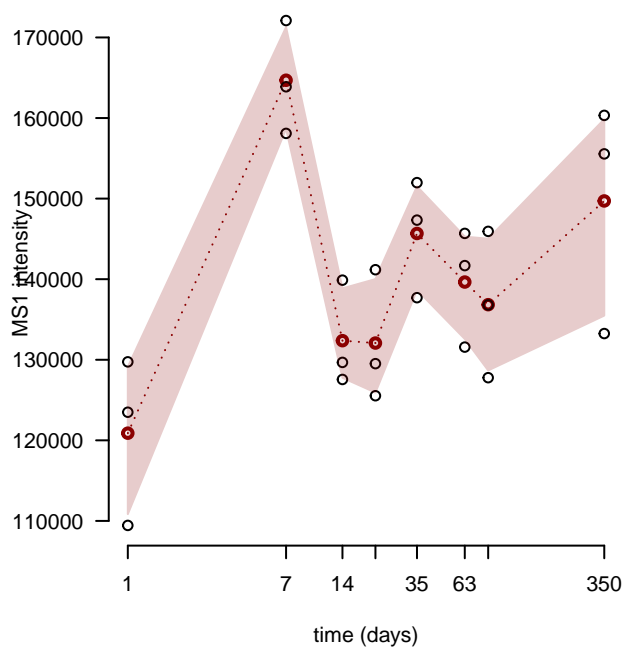

**Q9ERQ3**  
GN=Znf704

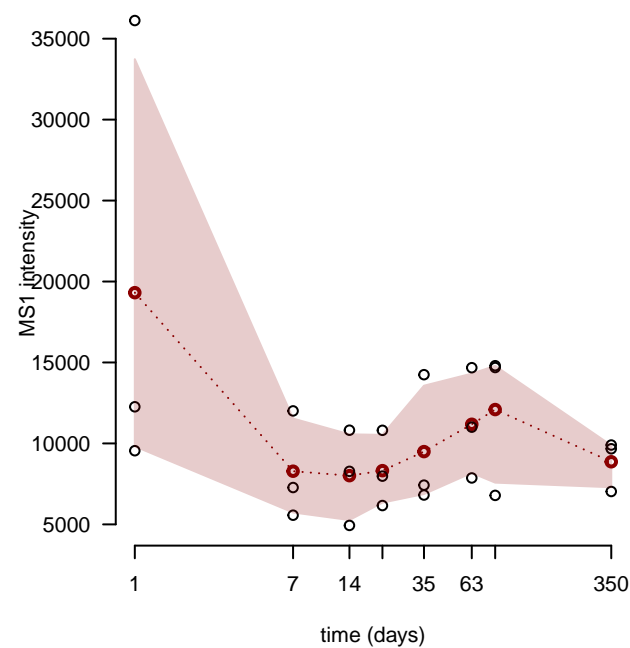

**Q9ERR7**  
GN=Selenof  
selenoprotein F

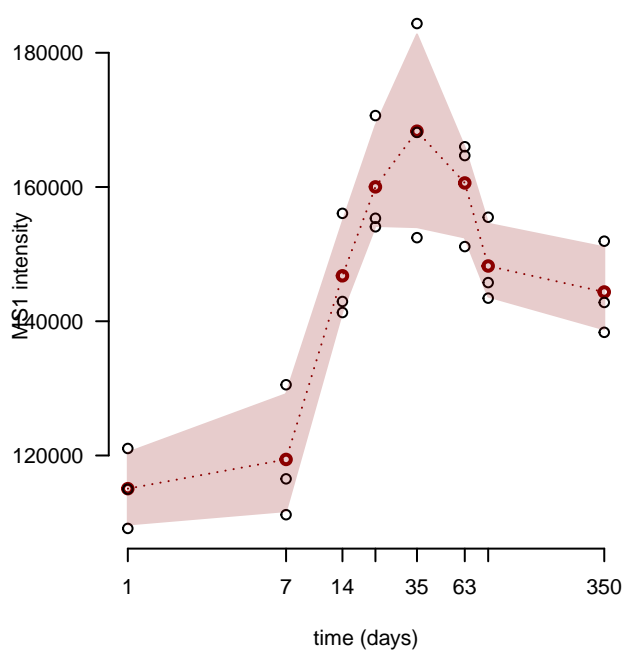

**Q9ERR8**  
GN=Znf319

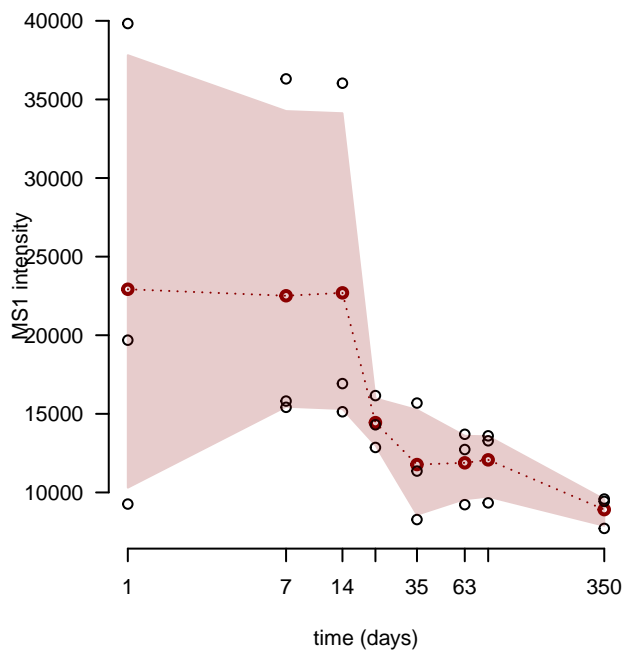

**Q9ERS2**  
GN=Ndufa13  
NADH:ubiquinone oxidoreductase subunit A ...

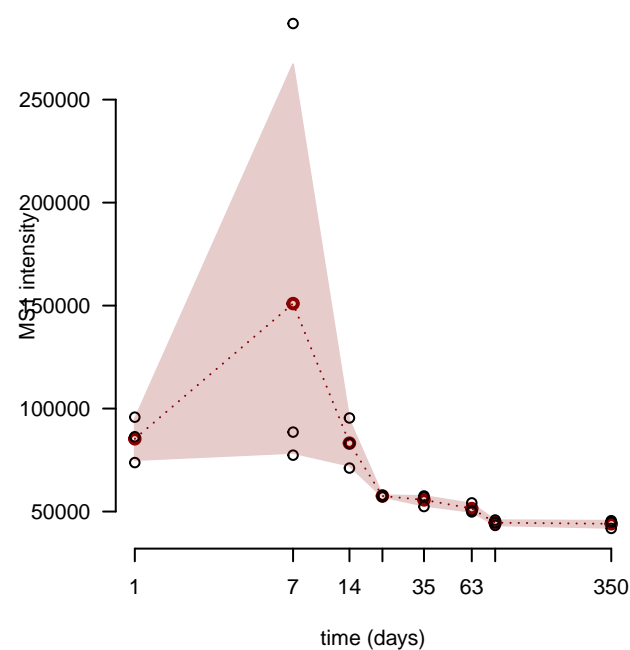

**Q9ERS5**  
GN=Plekha2  
pleckstrin homology domain-containing, f ...

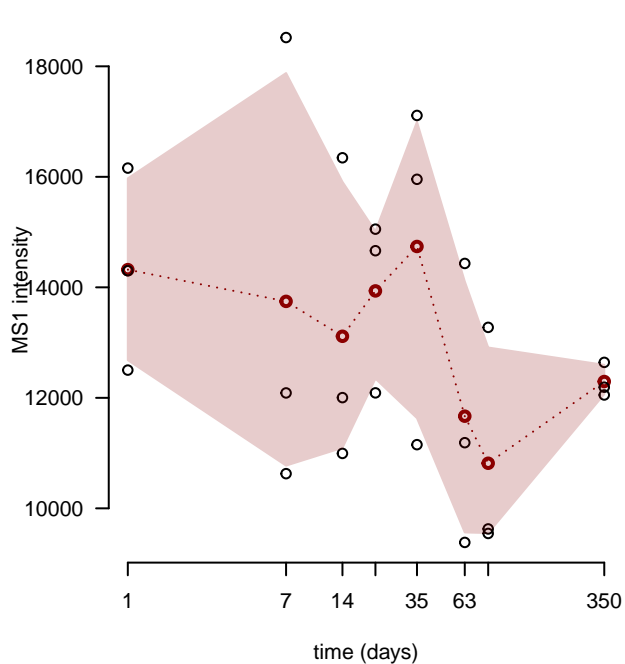

**Q9ERU3**  
GN=Znf22

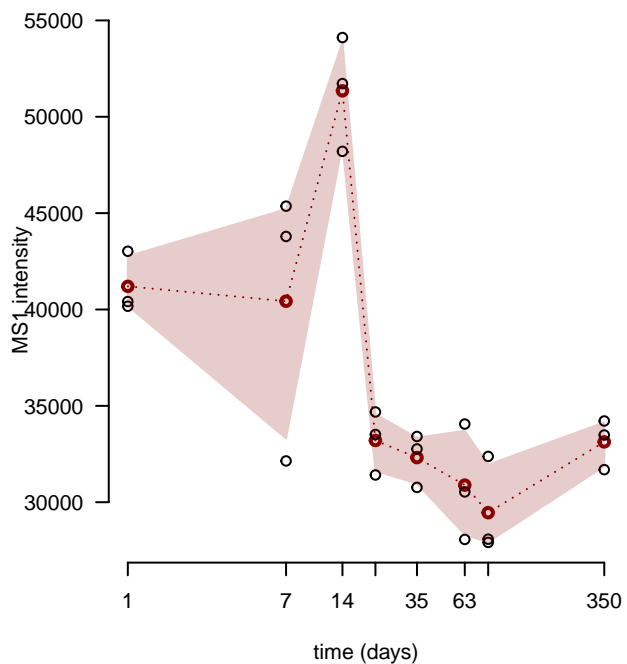

**Q9ERU9**  
GN=Ranbp2  
RAN binding protein 2

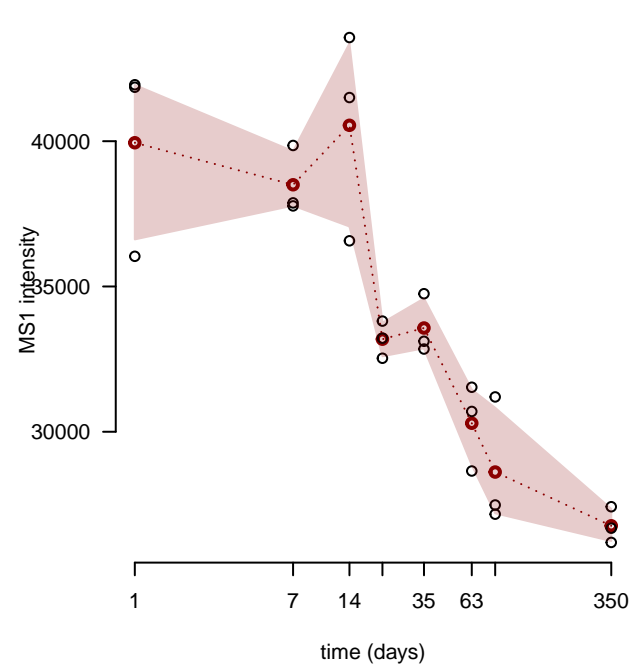

**Q9ERV1**  
**GN=Mkrn2**  
makorin, ring finger protein, 2

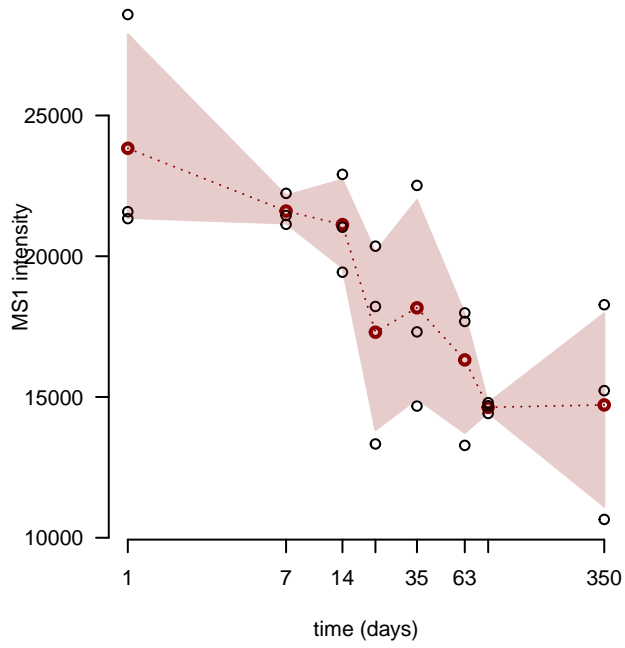

**Q9ERY9**  
**GN=Erg28**  
ergosterol biosynthesis 28

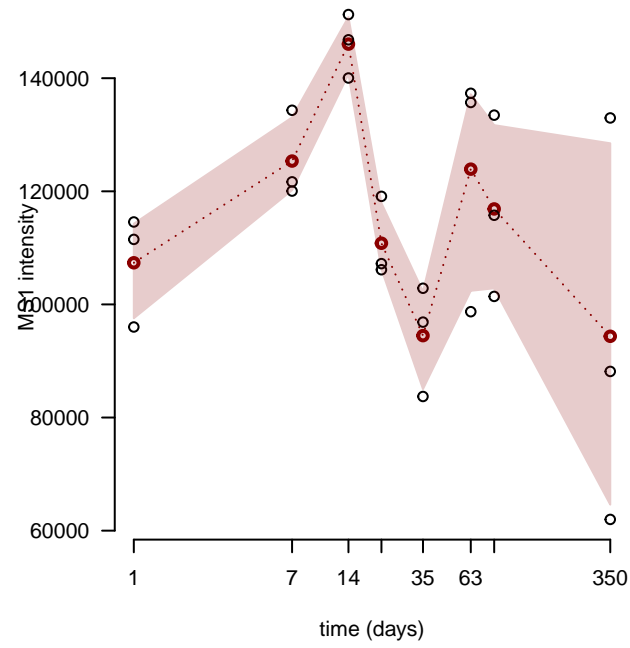

**Q9ES00**  
**GN=Ube4b**  
ubiquitination factor E4B

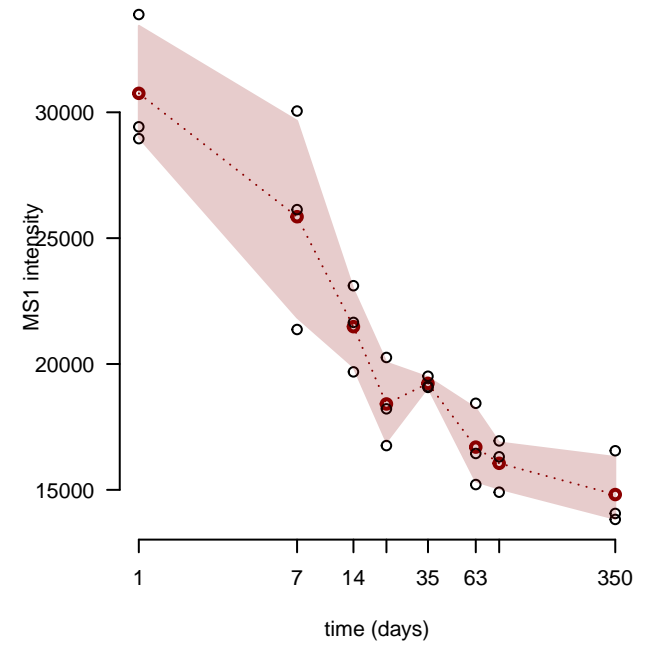

**Q9ES18**  
**GN=Foxj2**  
forkhead box J2

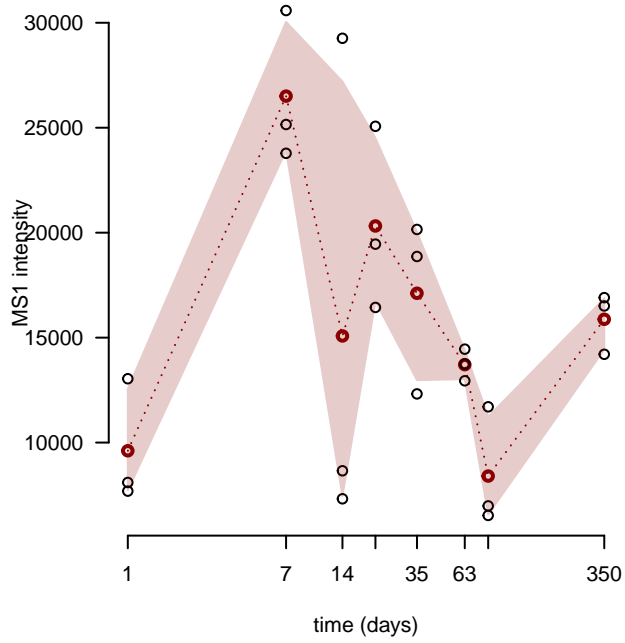

**Q9ES28**  
**GN=Arhgef7**  
Rho guanine nucleotide exchange factor ( ...

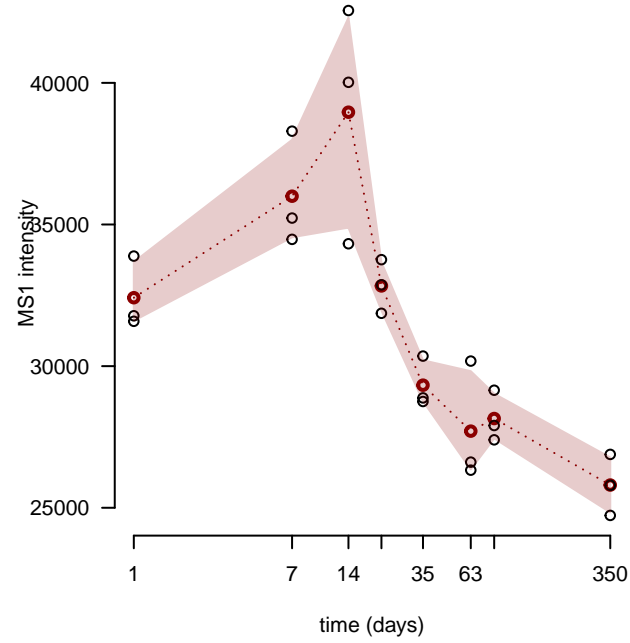

**Q9ES28**  
**GN=Arhgef7**  
Rho guanine nucleotide exchange factor ( ...

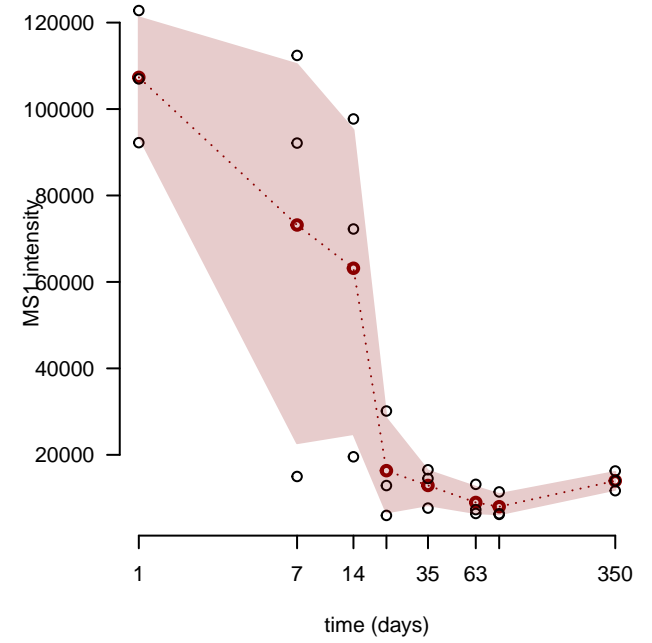

**Q9ES34**  
**GN=Ube3b**  
ubiquitin protein ligase E3B

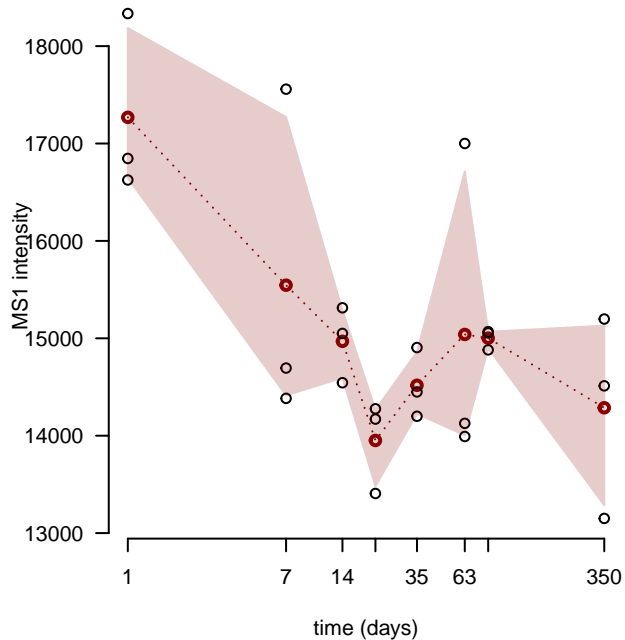

**Q9ES46**  
**GN=Parvb**  
parvin, beta

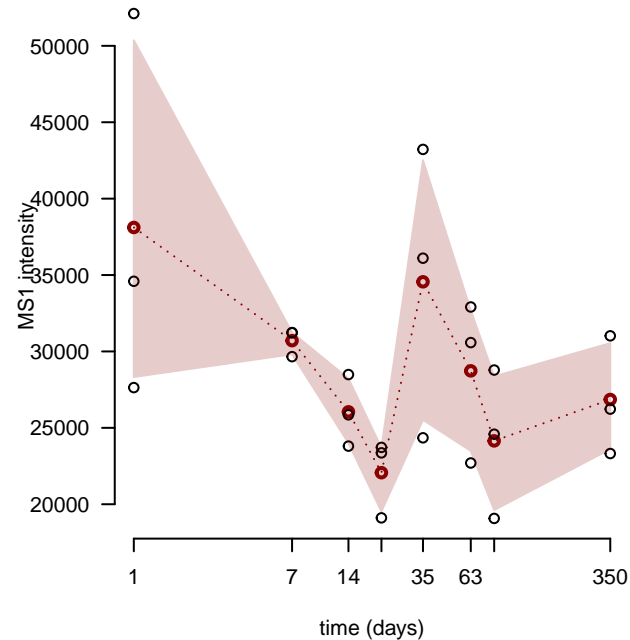

**Q9ES52**  
**GN=Inpp5d**  
inositol polyphosphate-5-phosphatase D

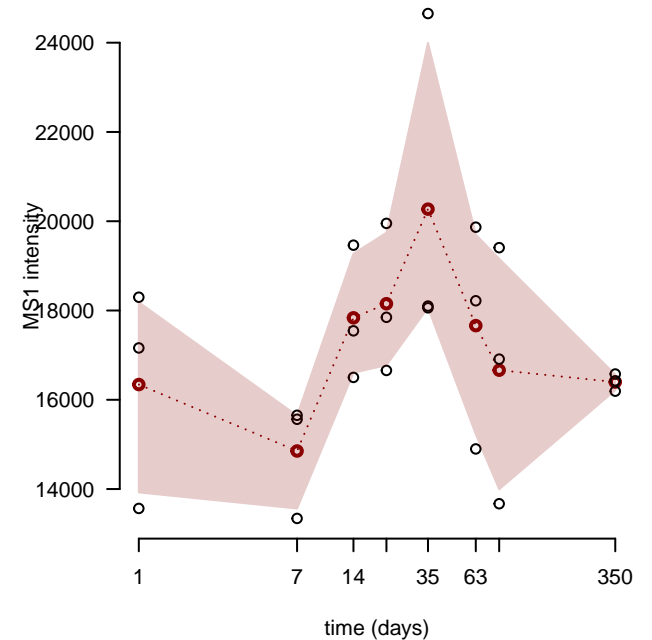

**Q9ES56**  
**GN=Trappc4**  
trafficking protein particle complex 4

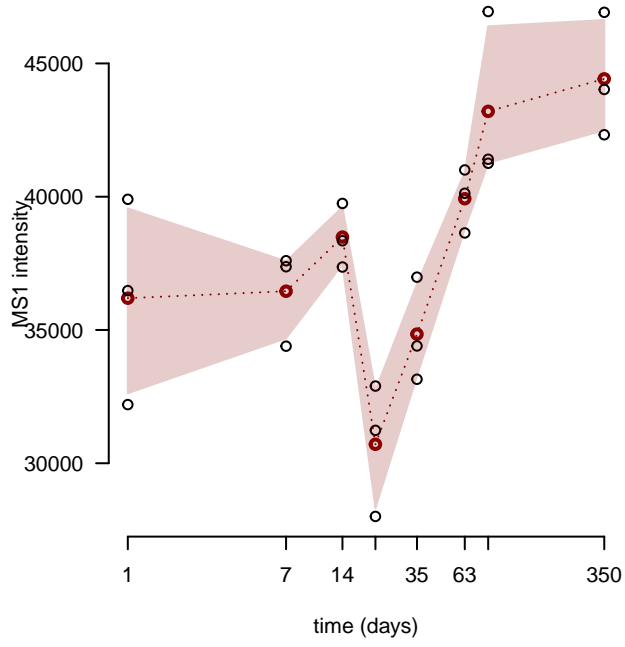

**Q9ES70**  
**GN=Nek6**  
NIMA (never in mitosis gene a)-related e ...

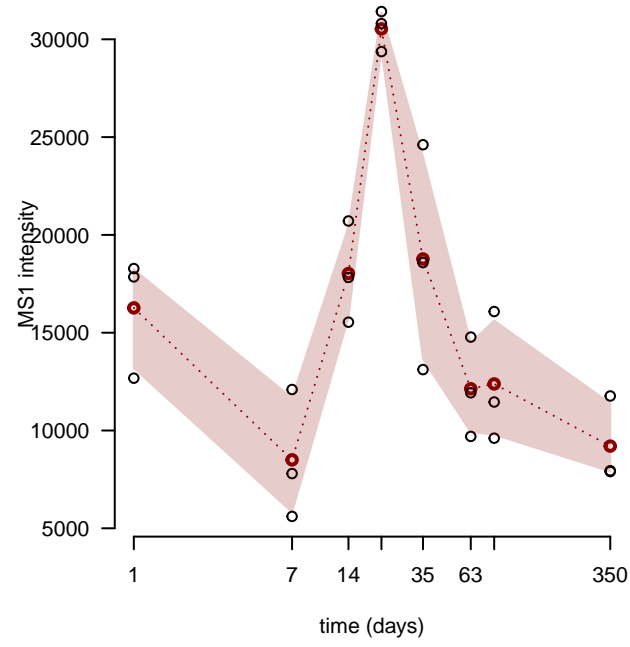

**Q9ES74**  
**GN=Nek7**  
NIMA (never in mitosis gene a)-related e ...

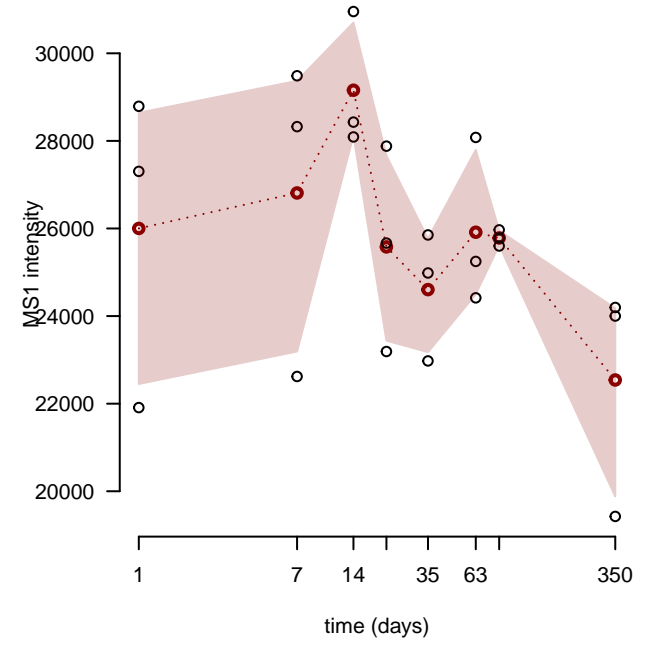

**Q9ES89**  
**GN=Extl2**  
exostosin-like glycosyltransferase 2

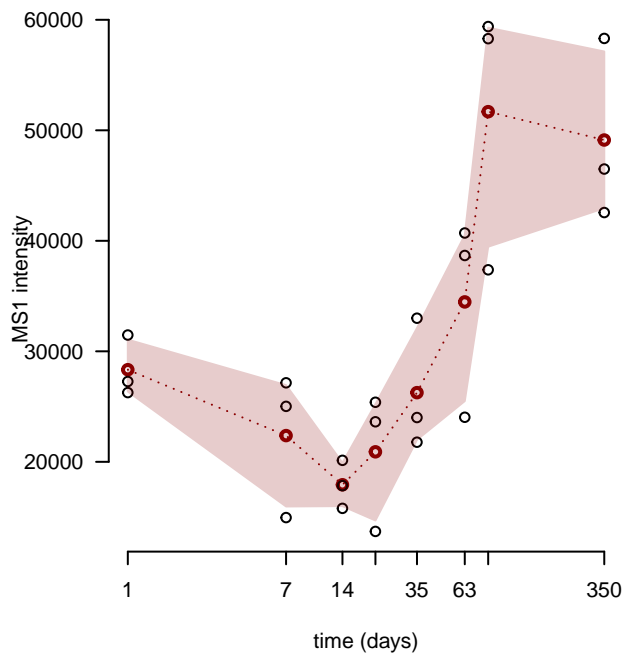

**Q9ES97**  
**GN=Rtn3**  
reticulon 3

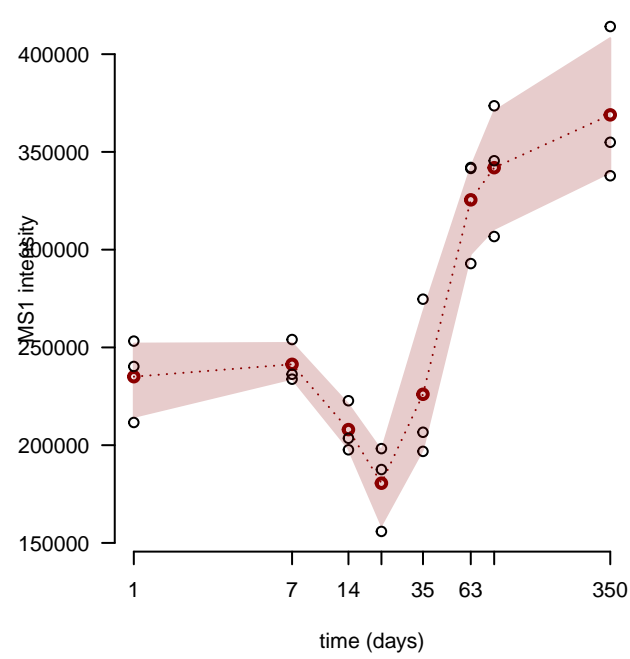

**Q9ES97**  
**GN=Rtn3**  
reticulon 3

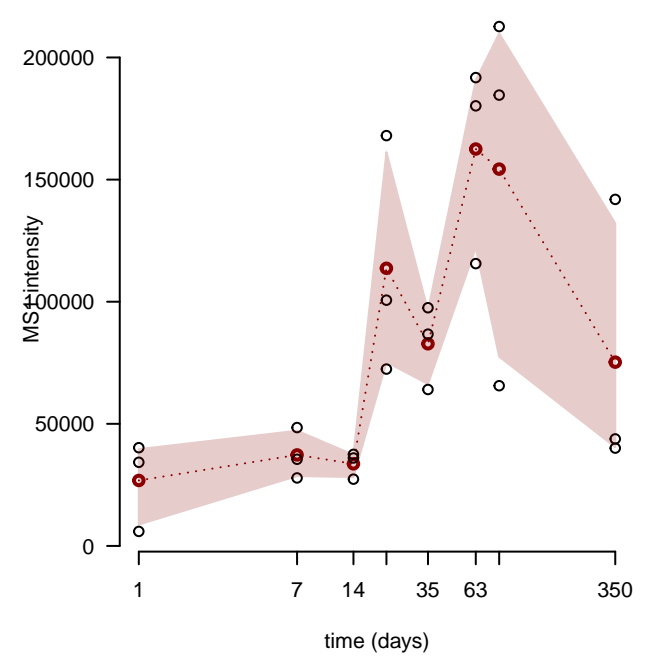

**Q9ESB3**  
**GN=Hrg**  
histidine-rich glycoprotein

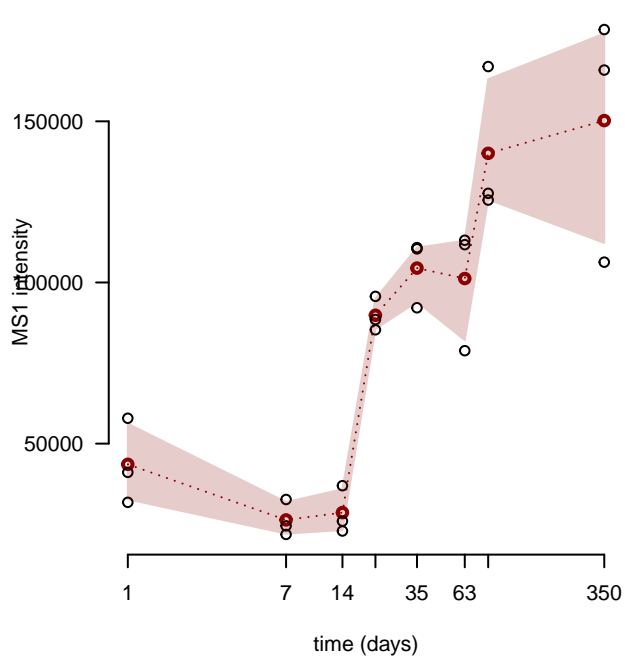

**Q9ESC8**  
**GN=Aff4**  
AF4/FMR2 family, member 4

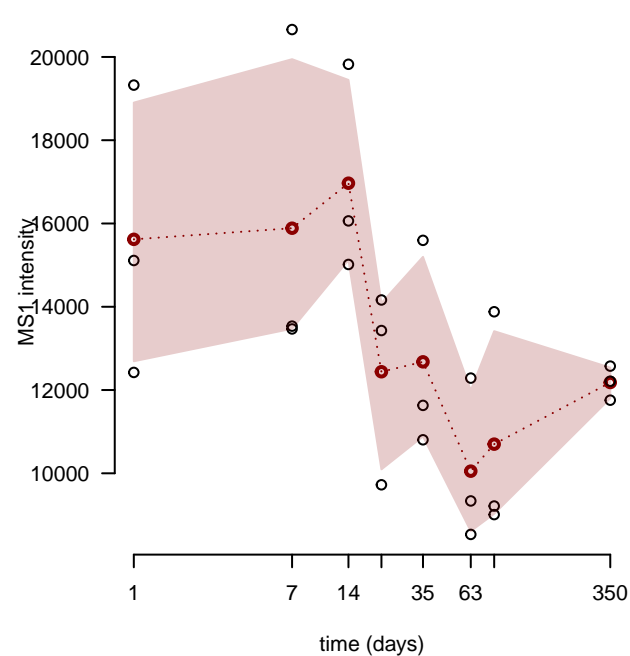

**Q9ESD6**  
**GN=Cmtm7**  
CKLF-like MARVEL transmembrane domain co ...

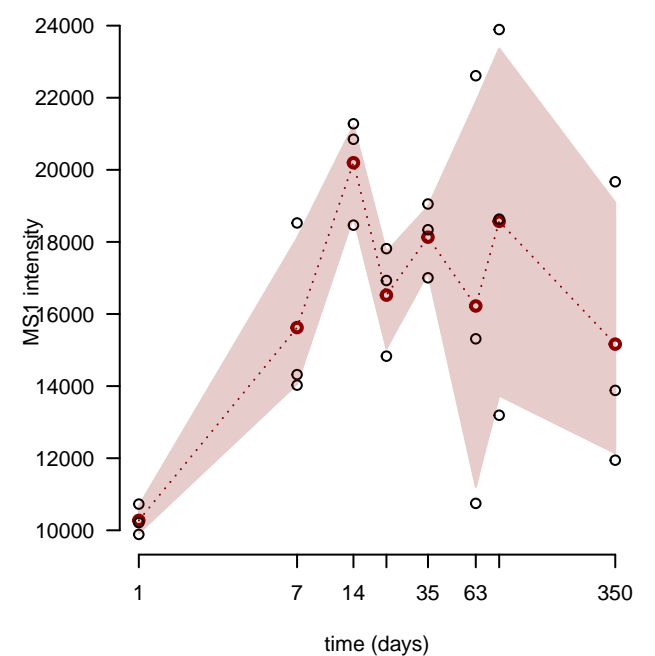

**Q9ESD7**  
GN=Dysf  
dysferlin

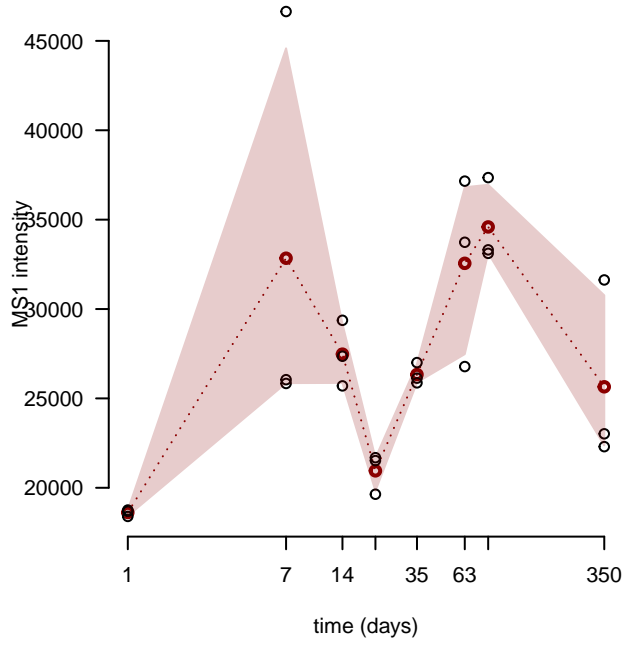

**Q9ESE1**  
GN=Lrba  
LPS-responsive beige-like anchor

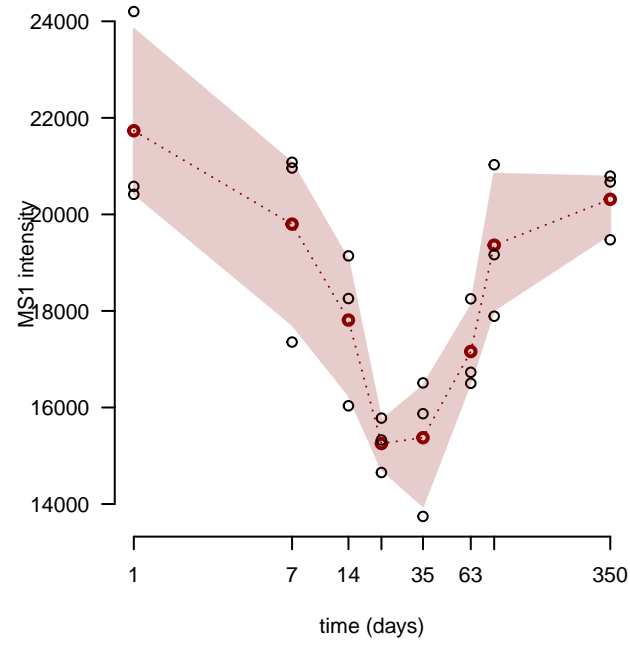

**Q9ESJ0**  
GN=Xpo4  
exportin 4

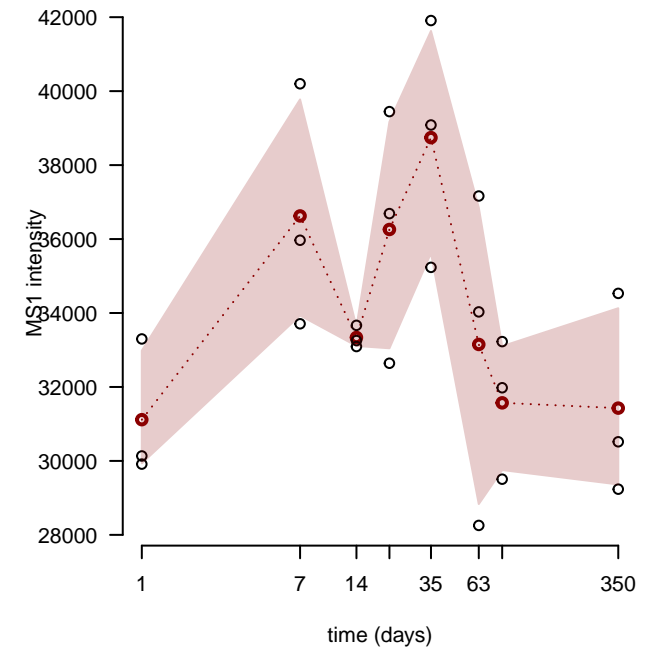

**Q9ESJ1**  
GN=Cables1  
CDK5 and Abl enzyme substrate 1

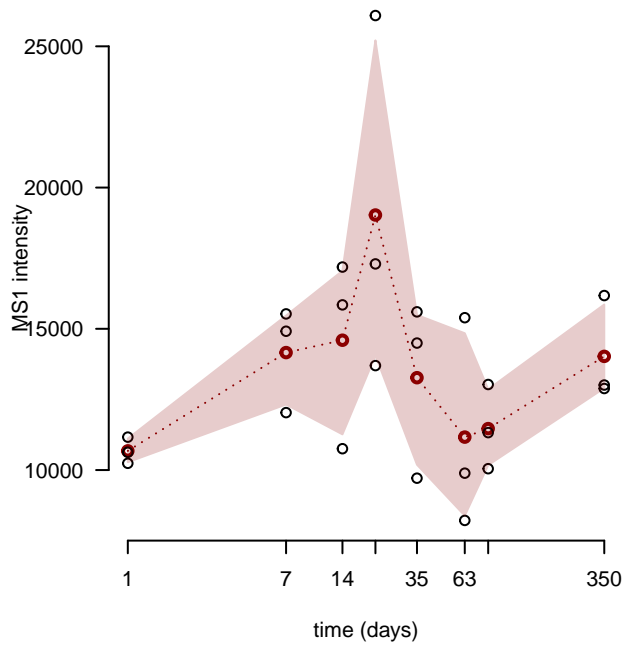

**Q9ESJ4**  
GN=Nckipsd  
NCK interacting protein with SH3 domain

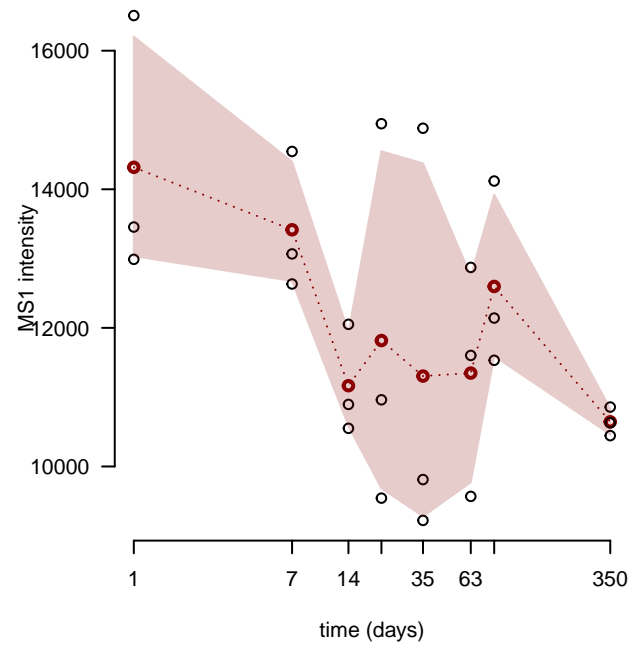

**Q9ESK4**  
GN=Ing2  
inhibitor of growth family, member 2

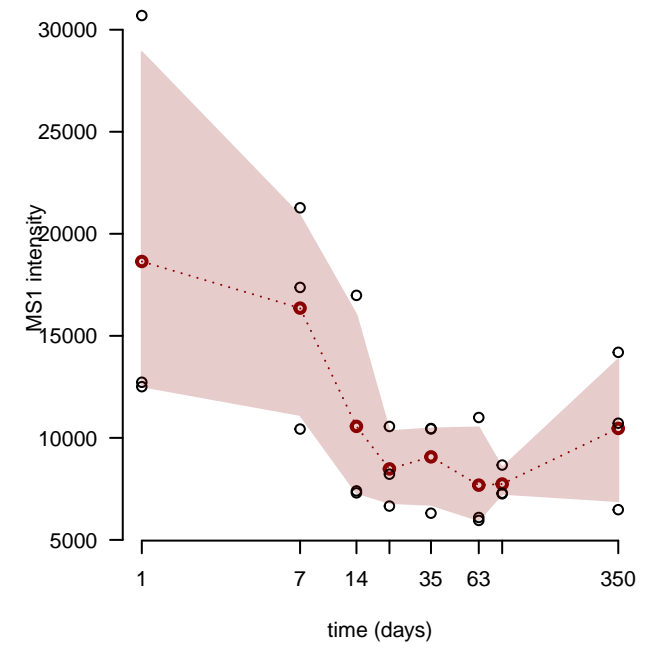

**Q9ESK9**  
GN=Rb1cc1  
RB1-inducible coiled-coil 1

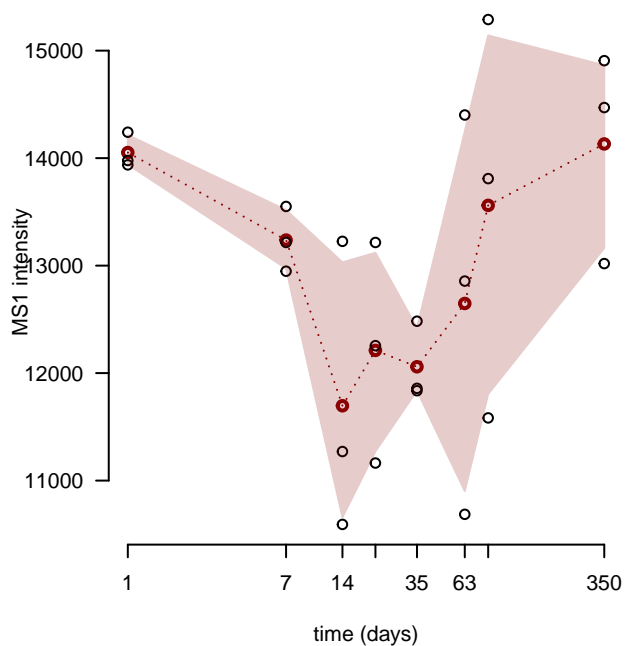

**Q9ESL4**  
GN=Map3k20  
mitogen-activated protein kinase kinase ...

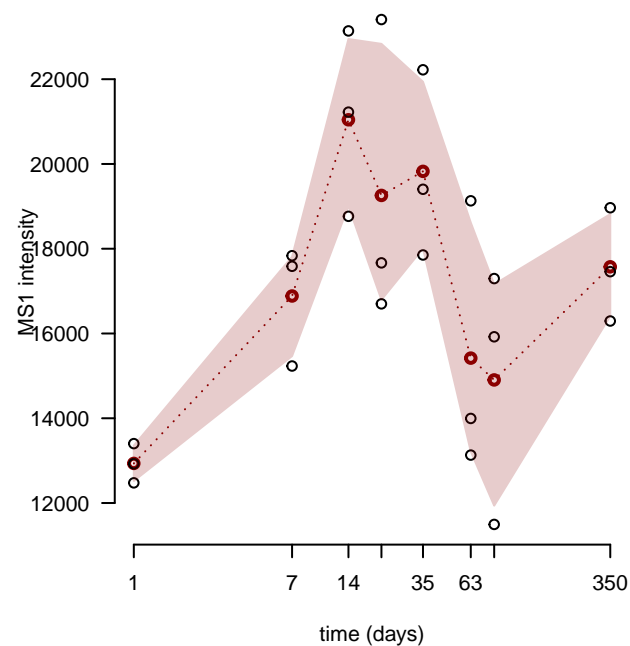

**Q9ESL4**  
GN=Map3k20  
mitogen-activated protein kinase kinase ...

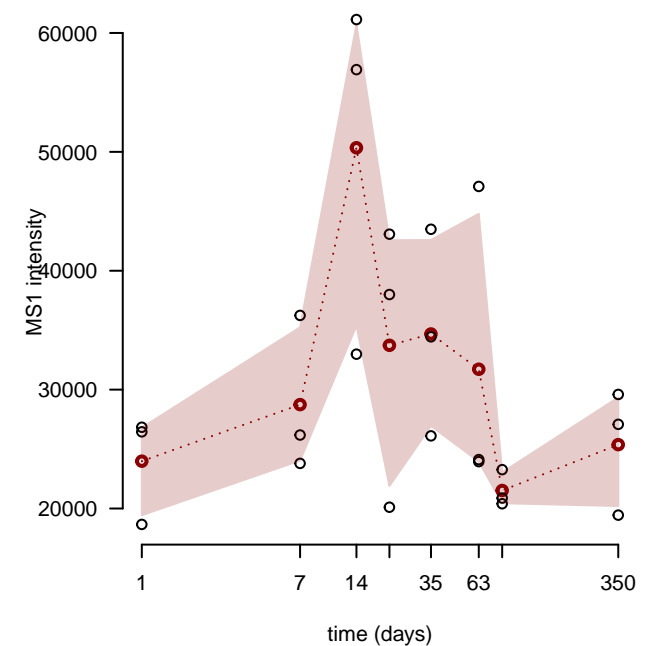

**Q9ESM6**  
GN=Gdpd2  
glycerophosphodiester phosphodiesterase ...

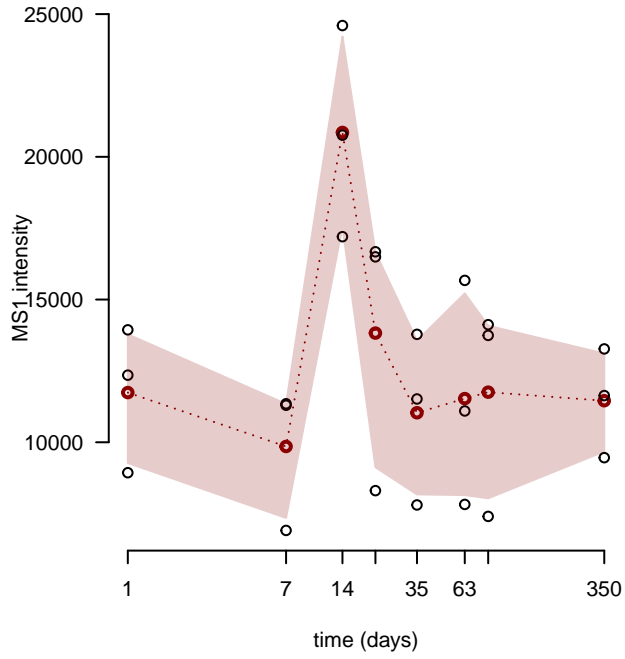

**Q9ESN6**  
GN=Trim2  
tripartite motif-containing 2

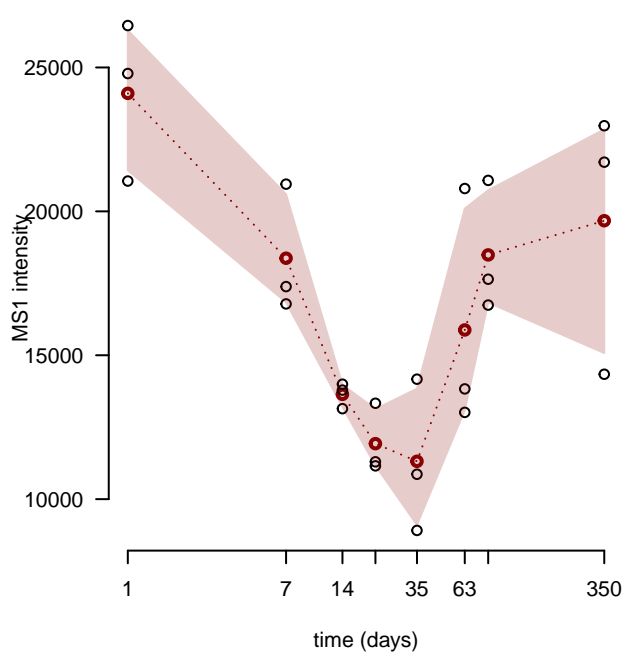

**Q9ESN9**  
GN=Mapk8ip3  
mitogen-activated protein kinase 8 inter ...

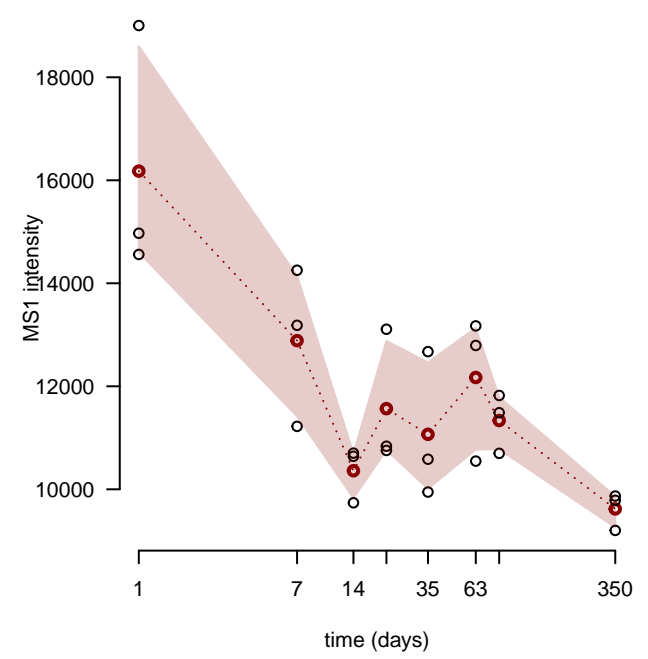

**Q9ESP1**  
GN=Sdf2l1  
stromal cell-derived factor 2-like 1

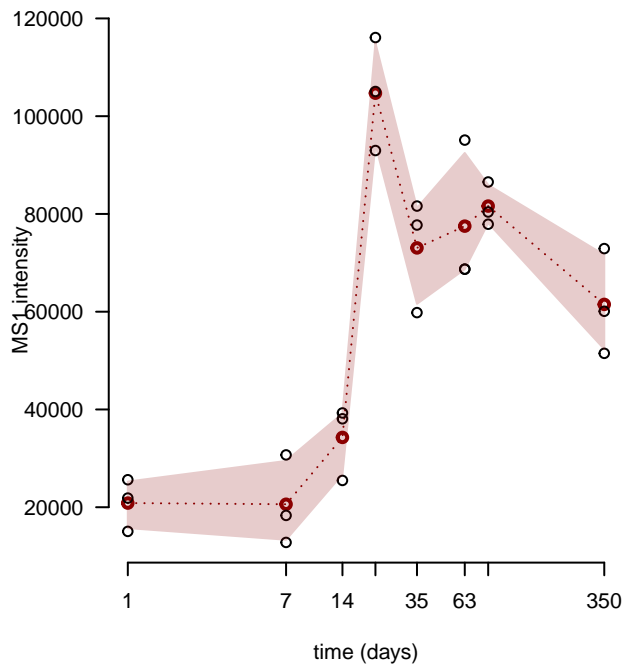

**Q9EST1**  
GN=Gsdma  
gasdermin A

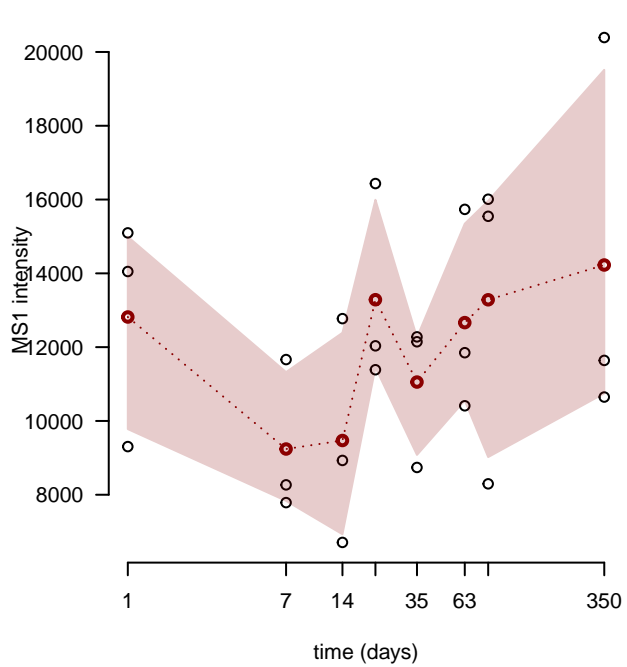

**Q9EST3**  
GN=Eif4enif1  
eukaryotic translation initiation factor ...

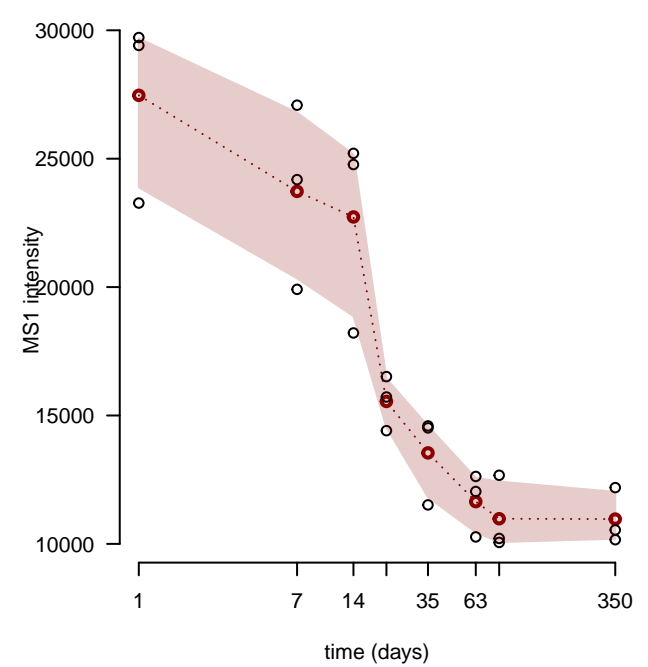

**Q9EST3**  
GN=Eif4enif1  
eukaryotic translation initiation factor ...

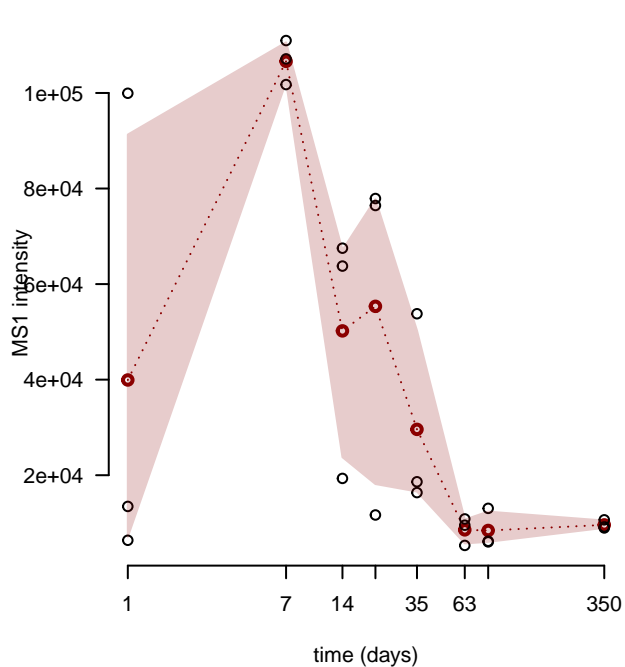

**Q9EST4**  
GN=Psmg2  
proteasome (prosome, macropain) assembly ...

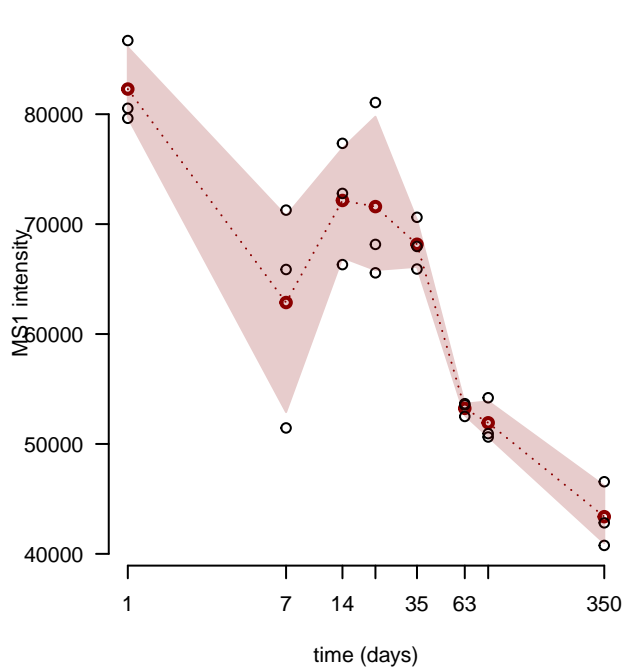

**Q9EST5**  
GN=Anp32b  
acidic (leucine-rich) nuclear phosphopro ...

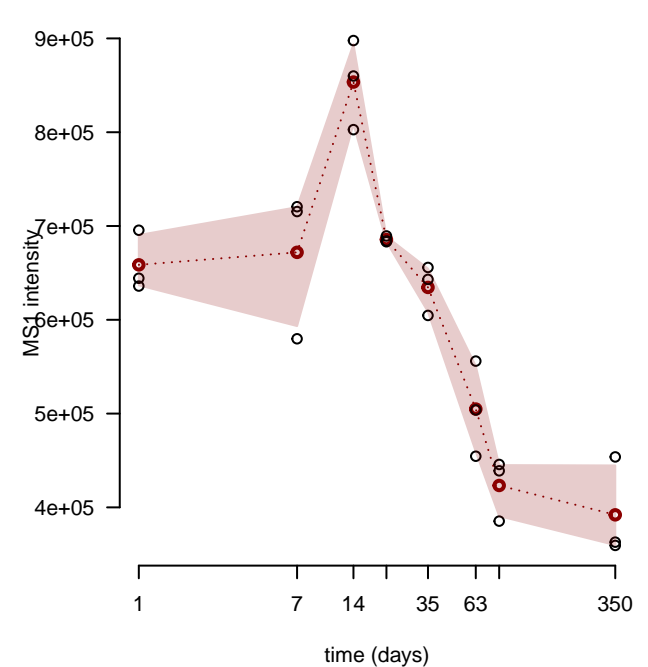



**Q9ESU6**  
**GN=Brd4**  
bromodomain containing 4

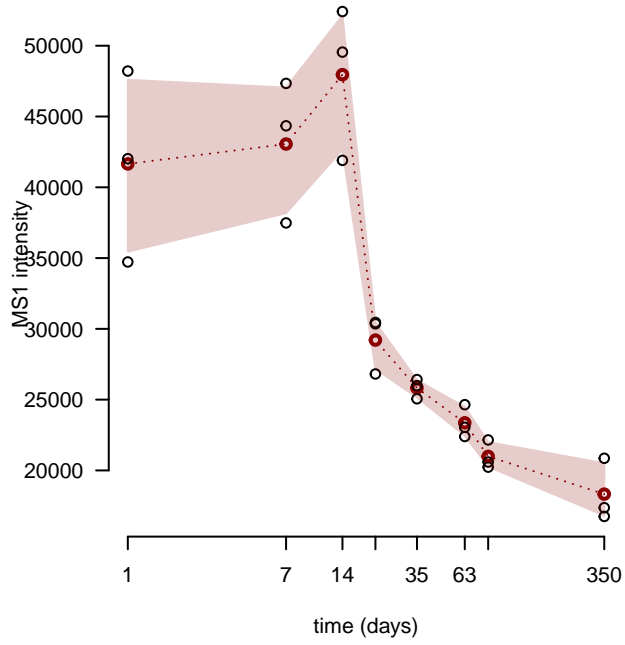

**Q9ESV0**  
**GN=Ddx24**  
DEAD box helicase 24

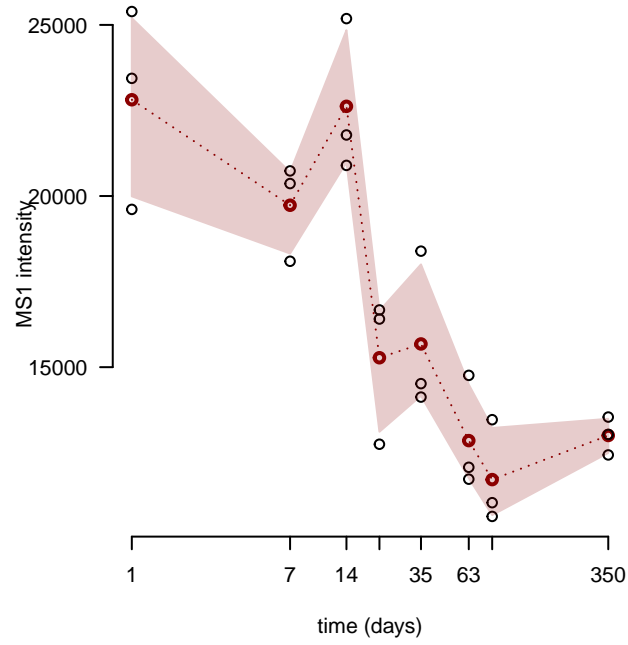

**Q9ESW4**  
**GN=Agk**  
acylglycerol kinase

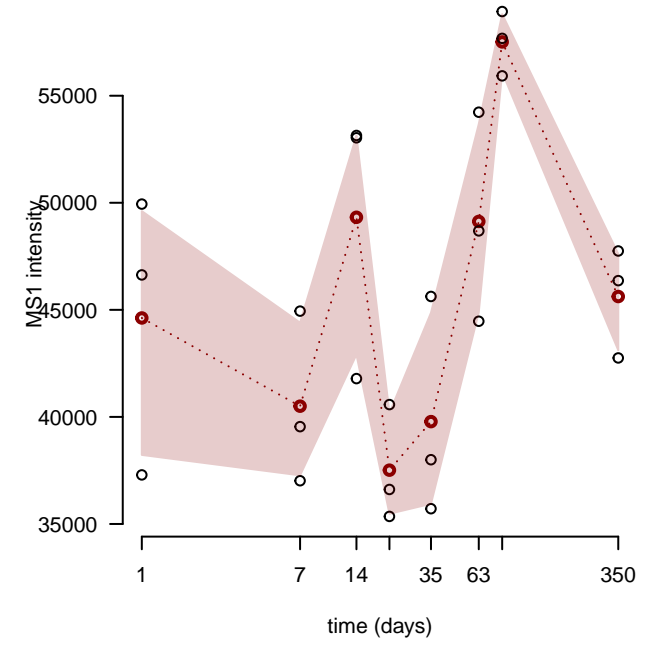

**Q9ESW8**  
**GN=Pgpep1**  
pyroglutamyl-peptidase I

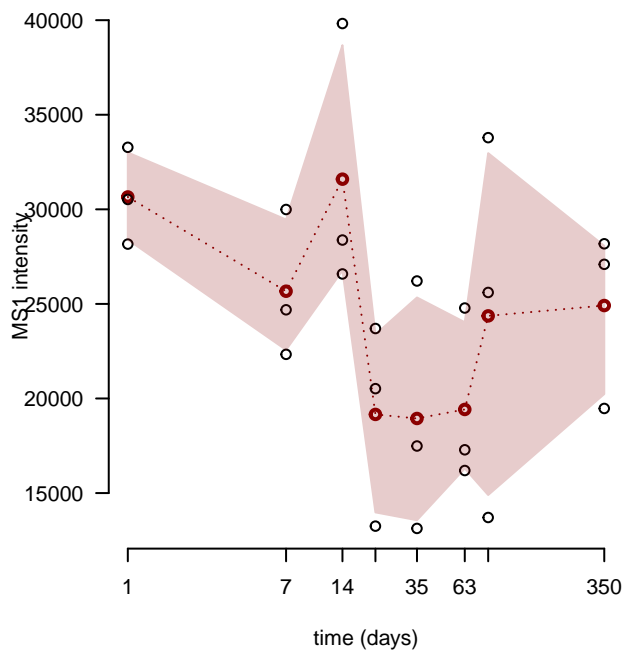

**Q9ESX4**  
**GN=Zcchc17**  
zinc finger, CCHC domain containing 17

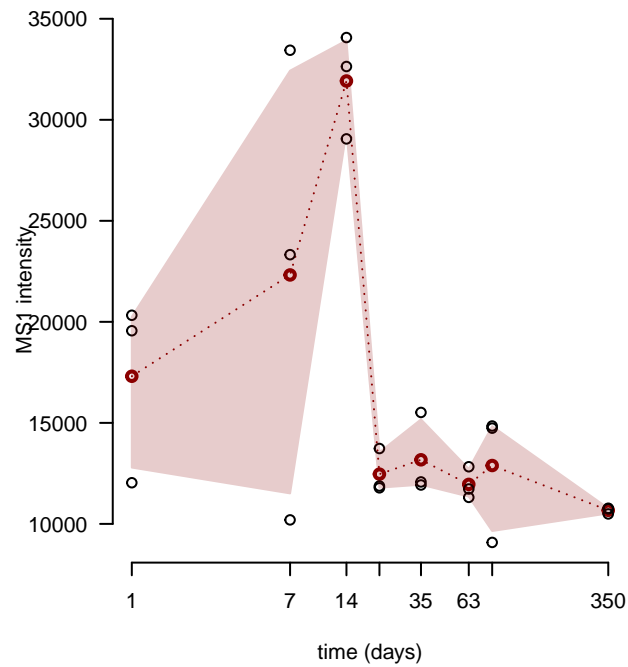

**Q9ESX5**  
**GN=Dkc1**  
dyskeratosis congenita 1, dyskerin

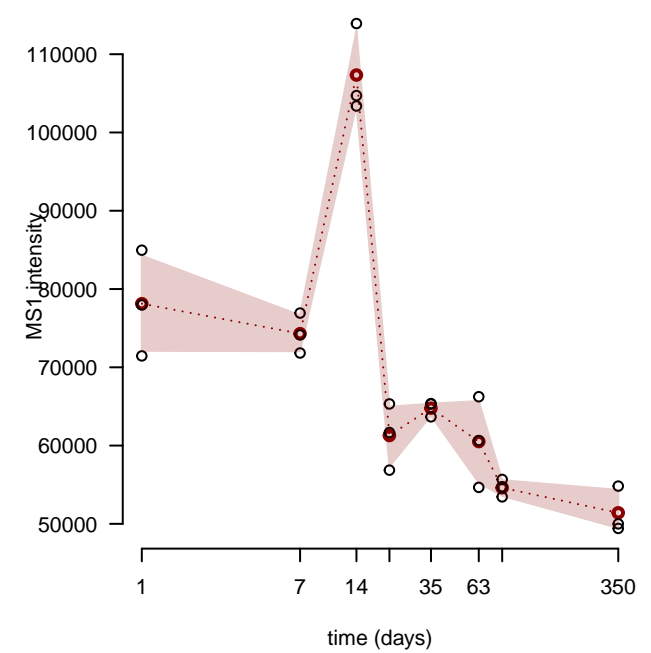

**Q9ESZ8**  
**GN=Gtf2i**  
general transcription factor II I

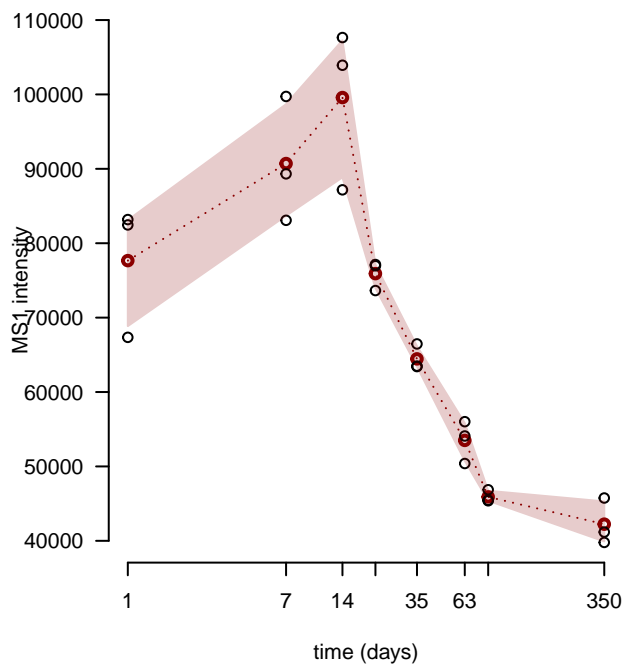

**Q9ET01**  
**GN=Pygl**  
liver glycogen phosphorylase

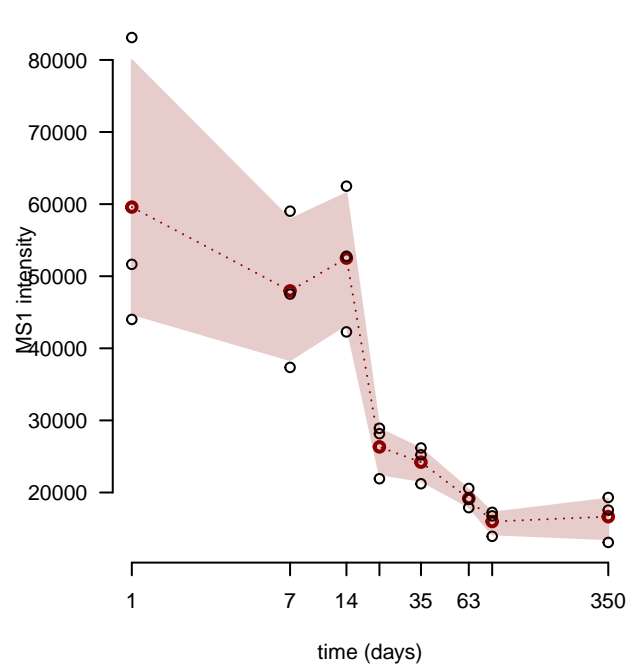

**Q9ET22**  
**GN=Dpp7**  
dipeptidylpeptidase 7

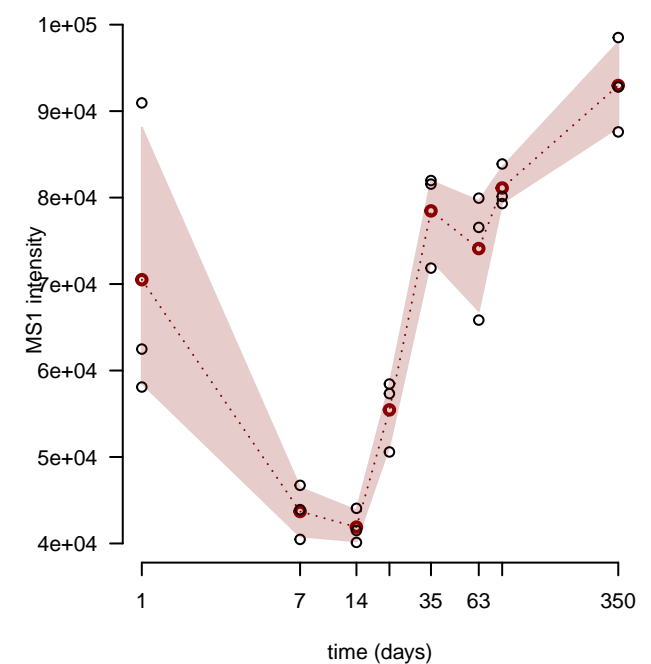

**Q9ET26**  
**GN=Rnf114**  
ring finger protein 114

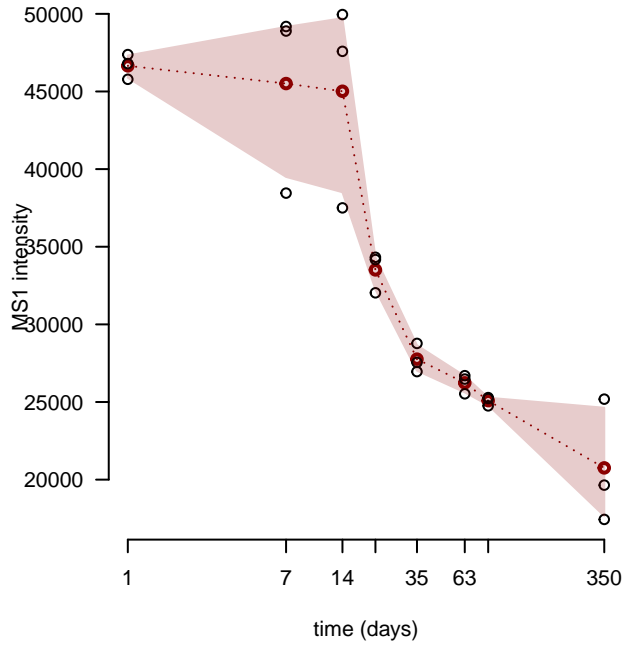

**Q9ET30**  
**GN=Tm9sf3**  
transmembrane 9 superfamily member 3

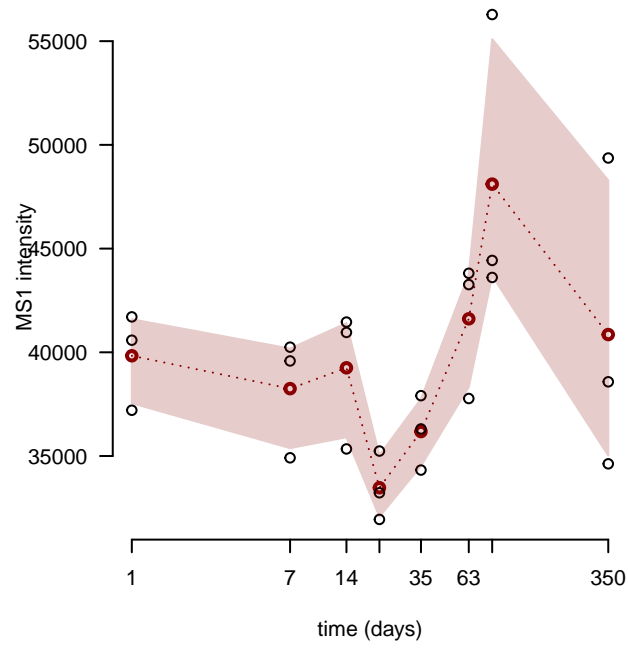

**Q9ET47**  
**GN=Espn**  
espin

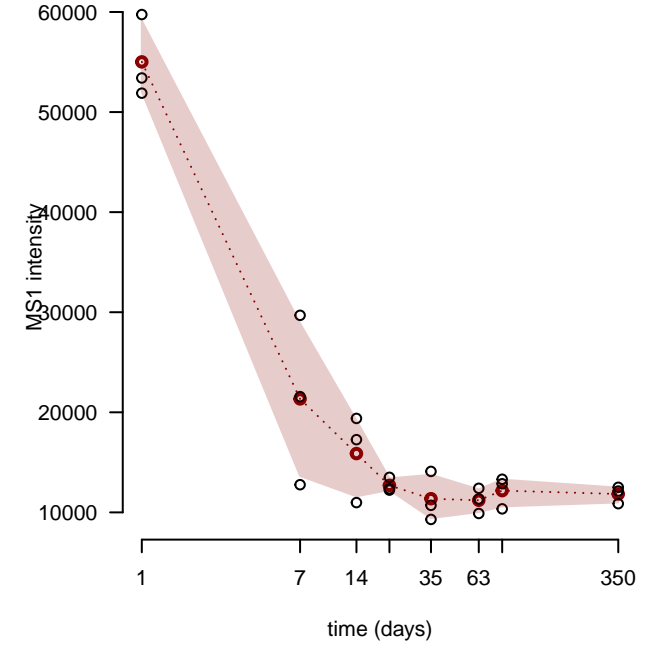

**Q9ET54**  
**GN=Palld**  
palladin, cytoskeletal associated protei ...

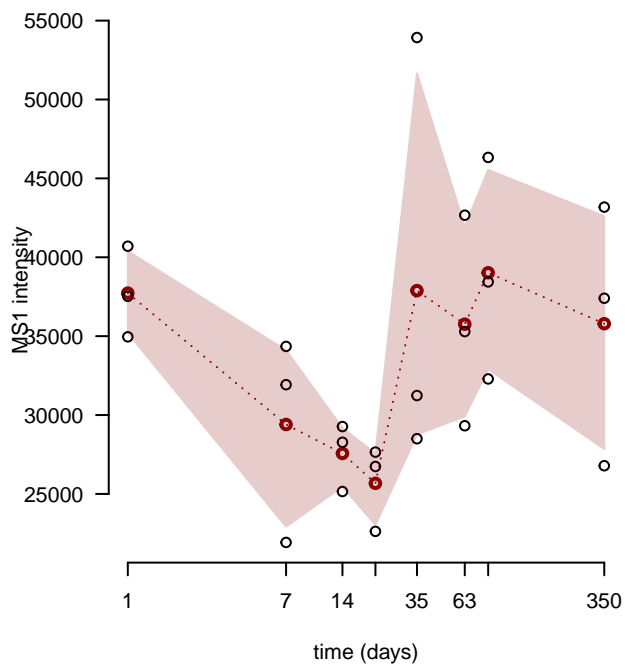

**Q9ET54**  
**GN=Palld**  
palladin, cytoskeletal associated protei ...

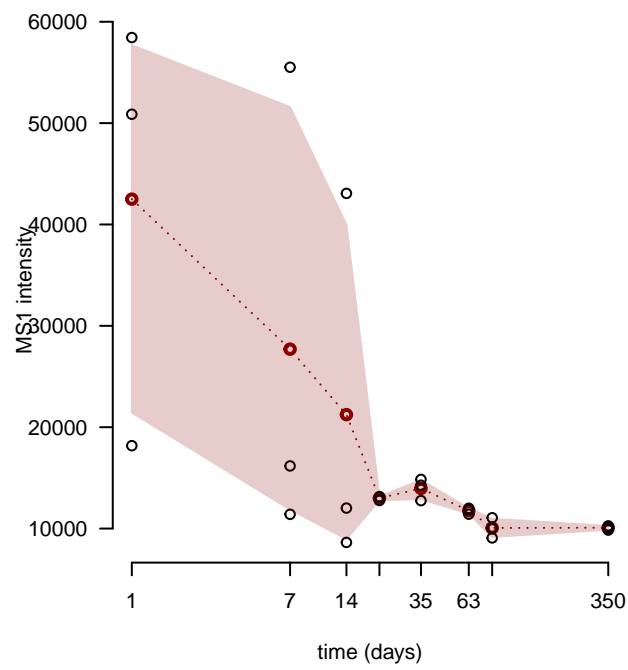

**Q9JHC9**  
**GN=Elf2**  
E74-like factor 2

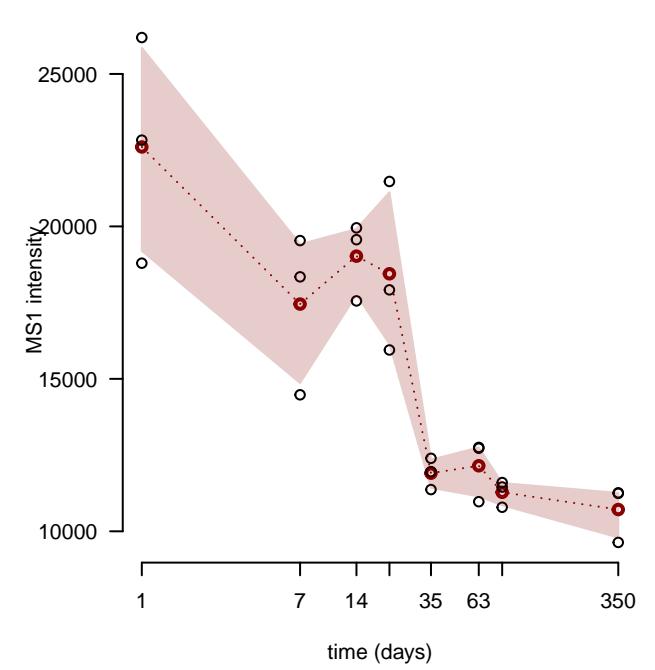

**Q9JHD2**  
**GN=Kat2a**  
K(lysine) acetyltransferase 2A

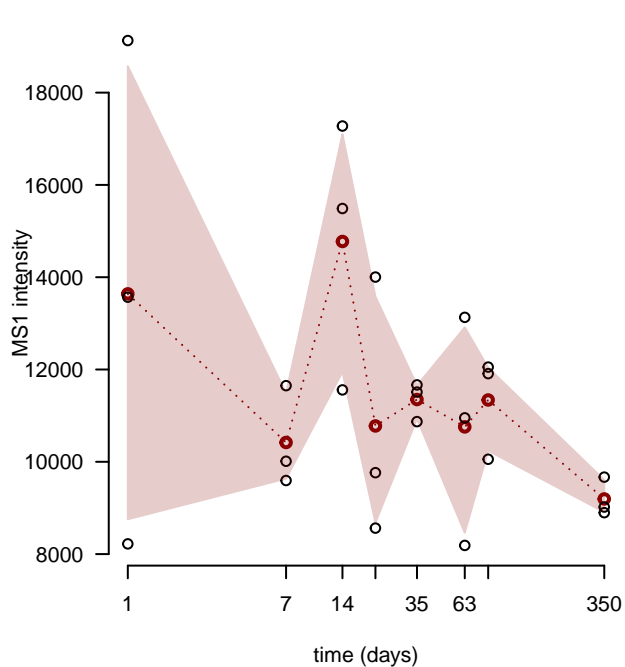

**Q9JHE3**  
**GN=Asah2**  
N-acylsphingosine amidohydrolase 2

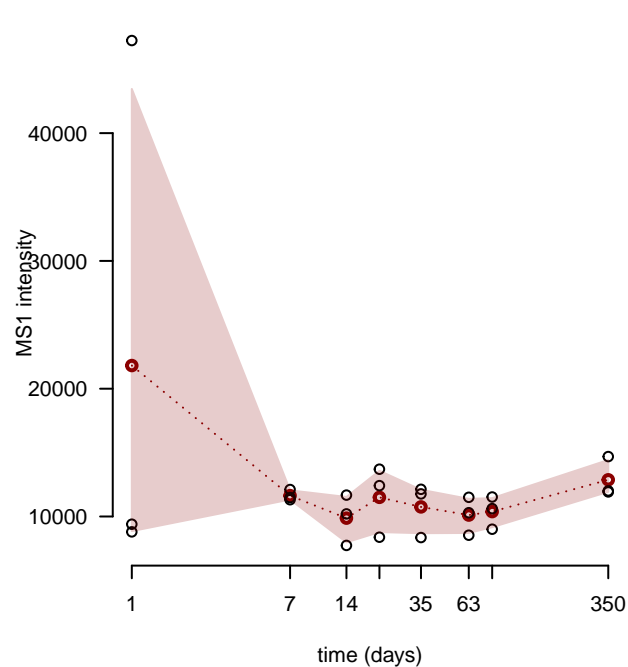

**Q9JHE7**  
**GN=Tssc4**  
tumor-suppressing subchromosomal transfe ...

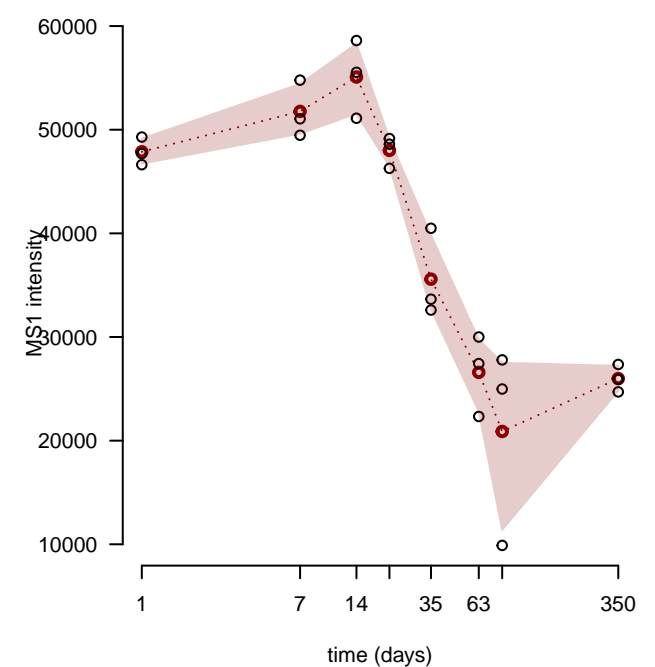

**Q9JHG1**  
**GN=Pigp**

phosphatidylinositol glycan anchor biosy ...

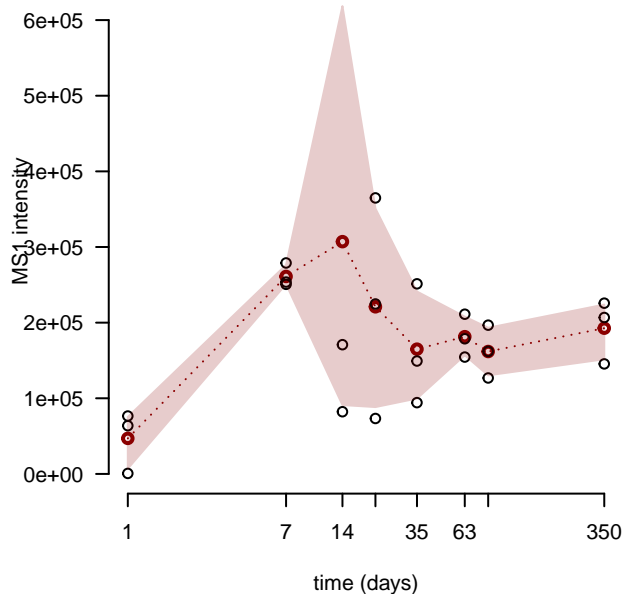

**Q9JHG7**  
**GN=Pik3cg**

phosphatidylinositol-4,5-bisphosphate 3- ...

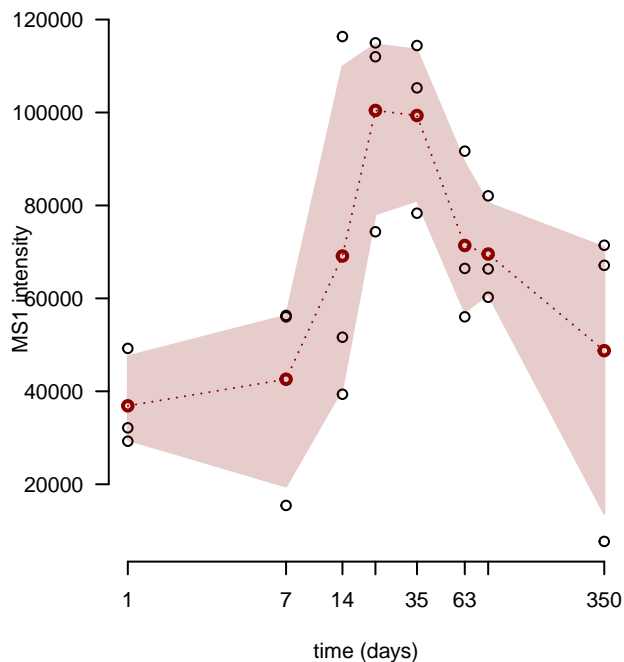

**Q9JHH6**  
**GN=Cpb2**

carboxypeptidase B2 (plasma)

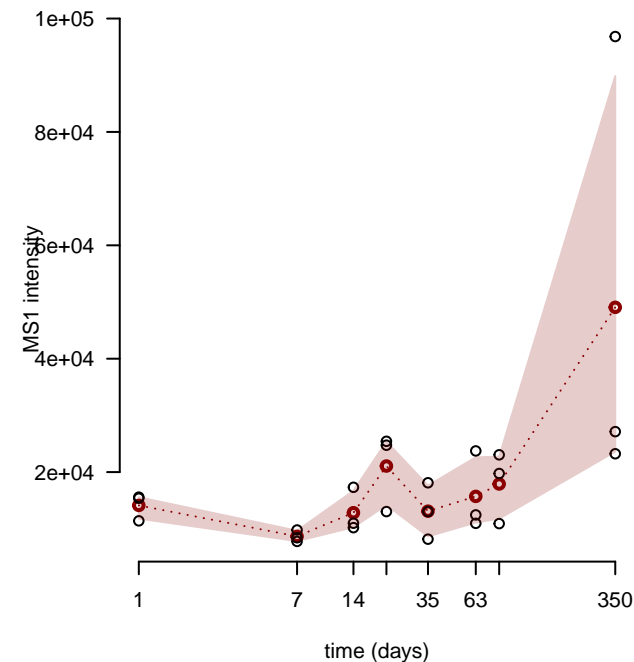

**Q9JHH9**  
**GN=Copz2**

coatamer protein complex, subunit zeta 2

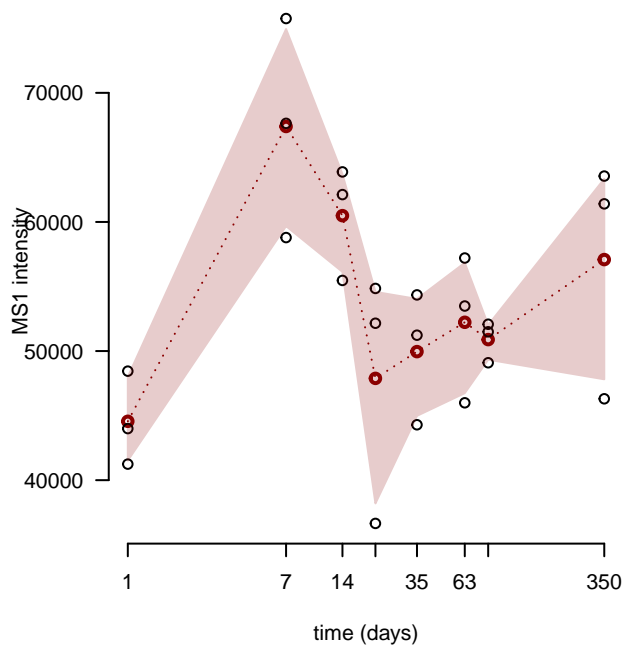

**Q9JHI2**  
**GN=Adat1**

adenosine deaminase, tRNA-specific 1

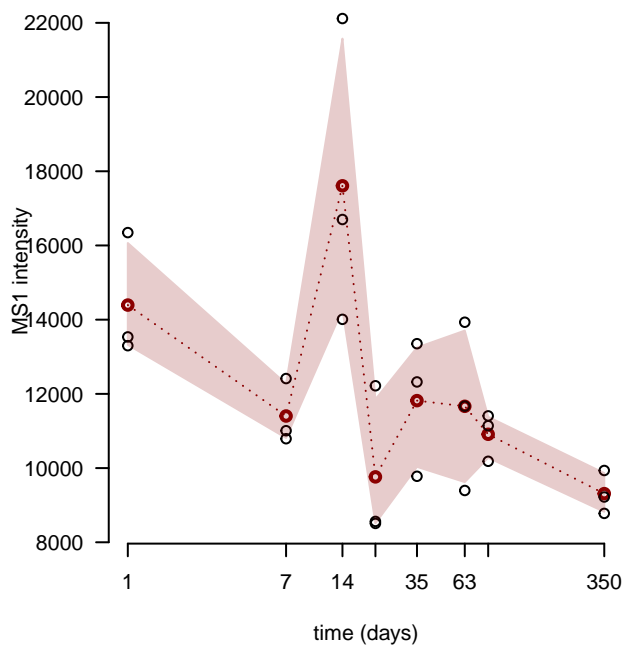

**Q9JHI5**  
**GN=lvd**

isovaleryl coenzyme A dehydrogenase

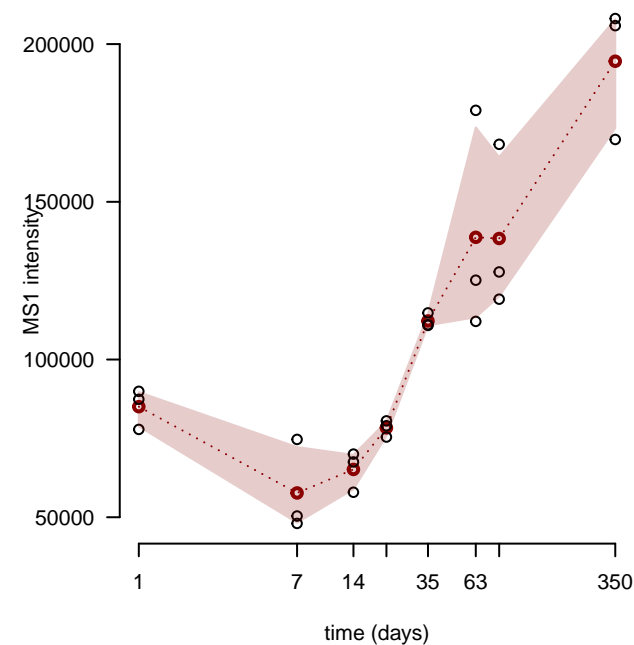

**Q9JHI7**  
**GN=Exosc9**

exosome component 9

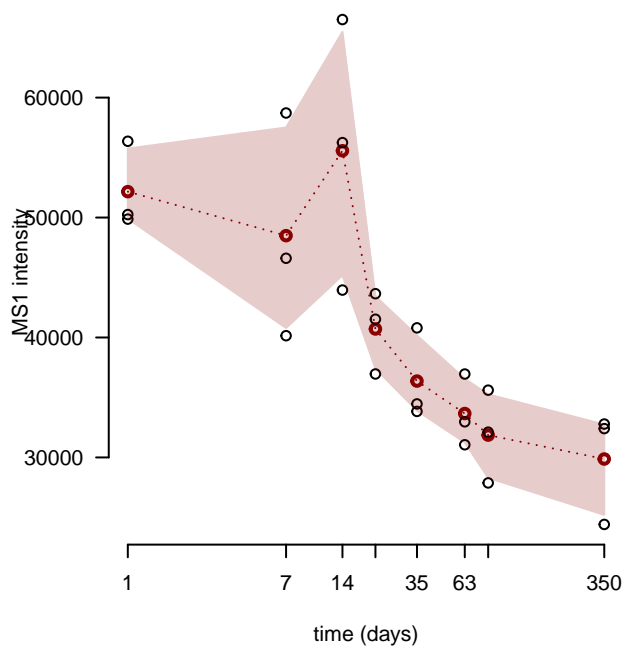

**Q9JHJ0**  
**GN=Tmod3**

tropomodulin 3

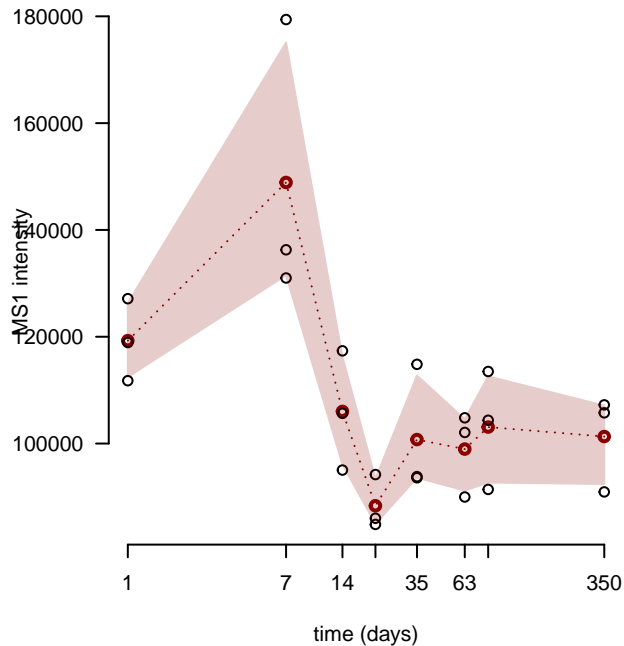

**Q9JHJ3**  
**GN=GImp**

glycosylated lysosomal membrane protein

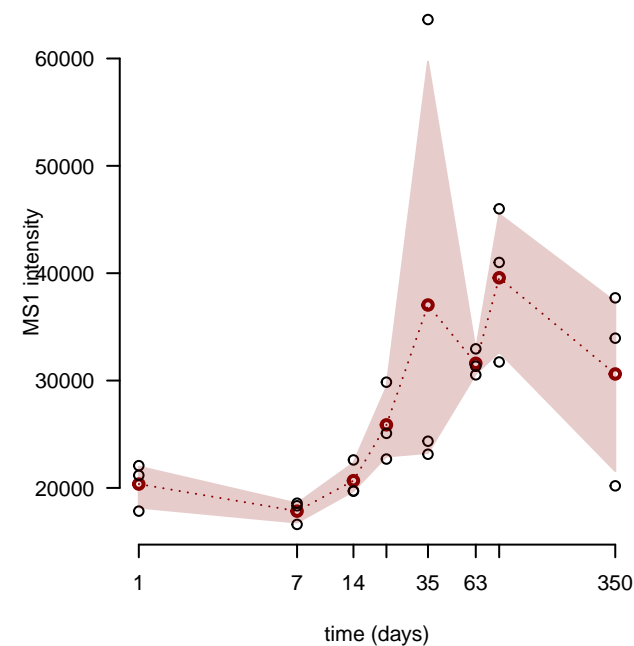

**Q9JHJ8**  
GN=Icoslg

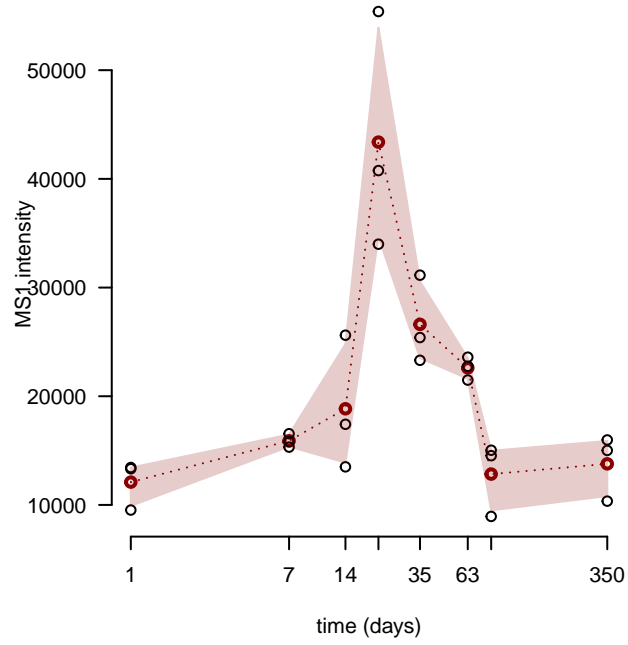

**Q9JHK4**  
GN=Rabggta  
Rab geranylgeranyl transferase, a subuni ...

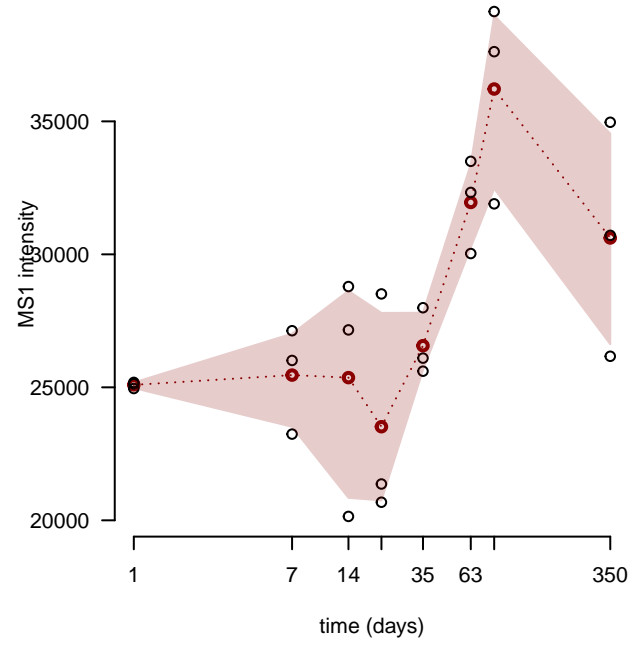

**Q9JHK5**  
GN=Plek  
pleckstrin

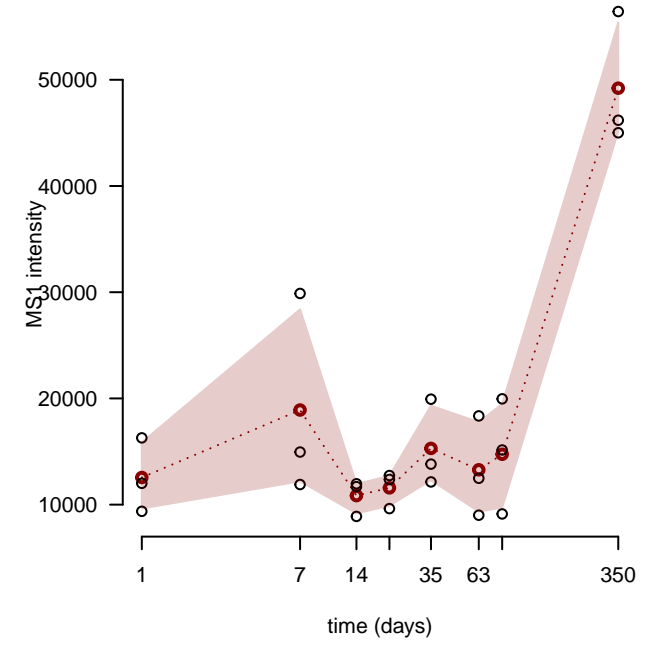

**Q9JHL1**  
GN=Slc9a3r2  
solute carrier family 9 (sodium/hydrogen ...

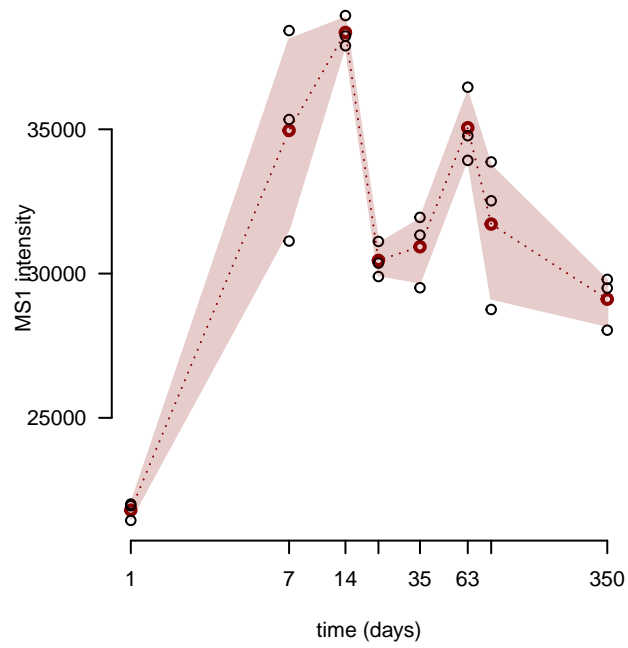

**Q9JHP7**  
GN=Poglut2  
protein O-glucosyltransferase 2

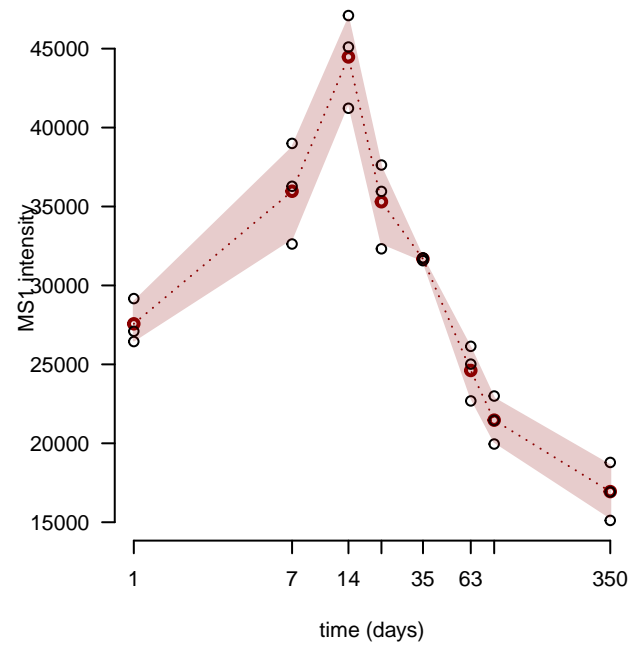

**Q9JHQ5**  
GN=Lztf11  
leucine zipper transcription factor-like ...

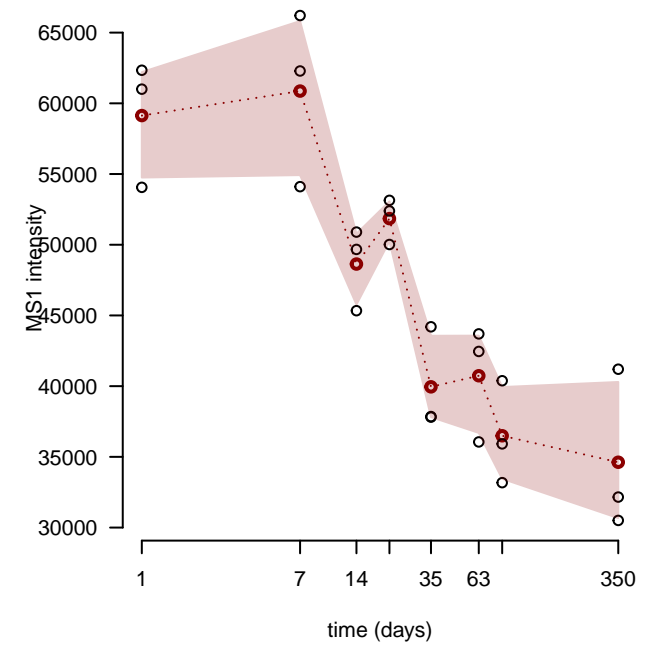

**Q9JHR7**  
GN=Ide  
insulin degrading enzyme

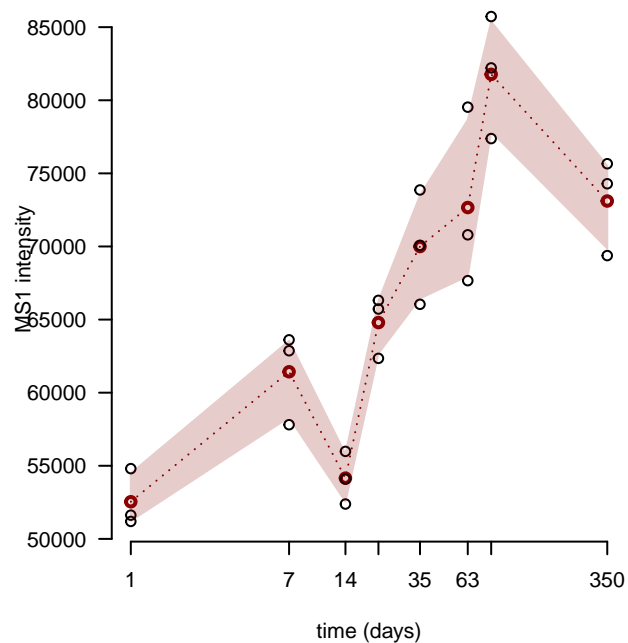

**Q9JHR9**  
GN=Nrip2  
nuclear receptor interacting protein 2

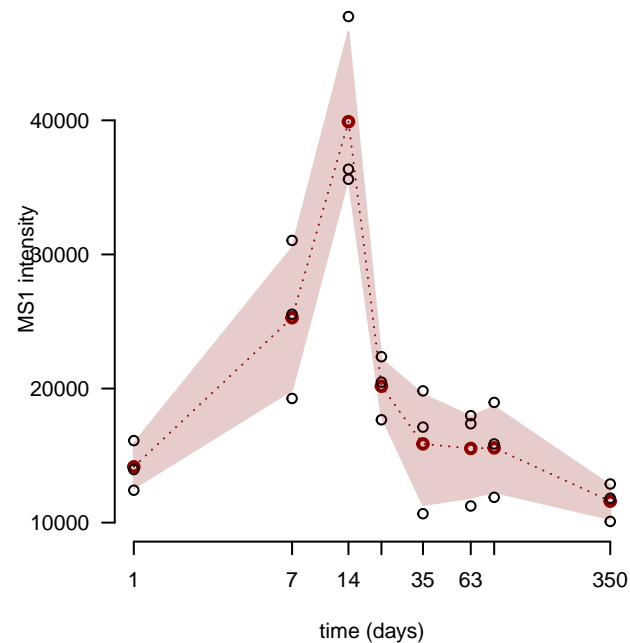

**Q9JHS3**  
GN=Lamtor2  
late endosomal/lysosomal adaptor, MAPK a ...

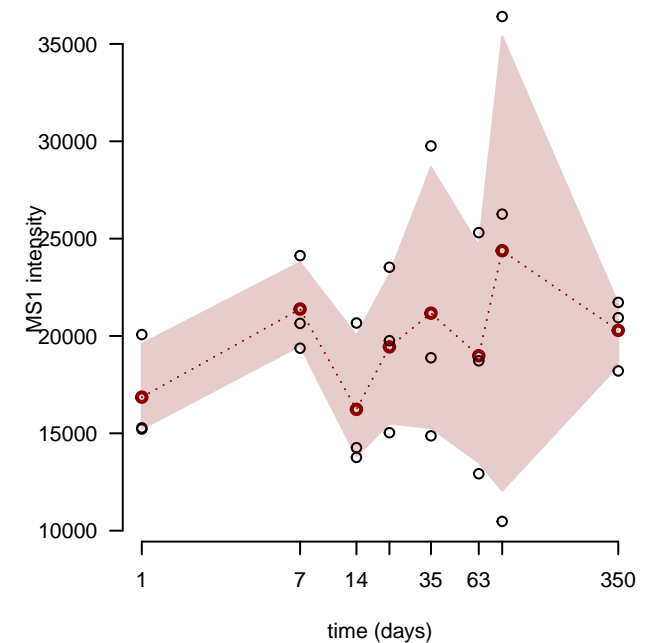

**Q9JHS4**  
**GN=C1px**

caseinolytic mitochondrial matrix peptid ...

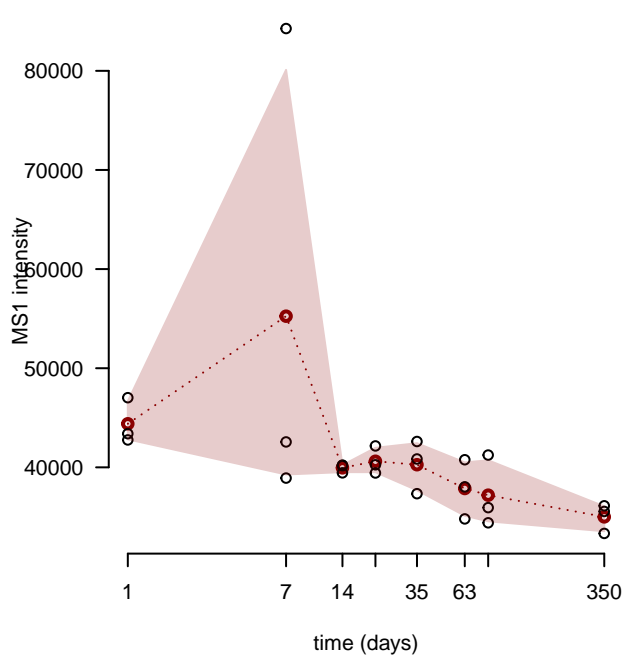

**Q9JHS9**  
**GN=Cwc15**

CWC15 spliceosome-associated protein

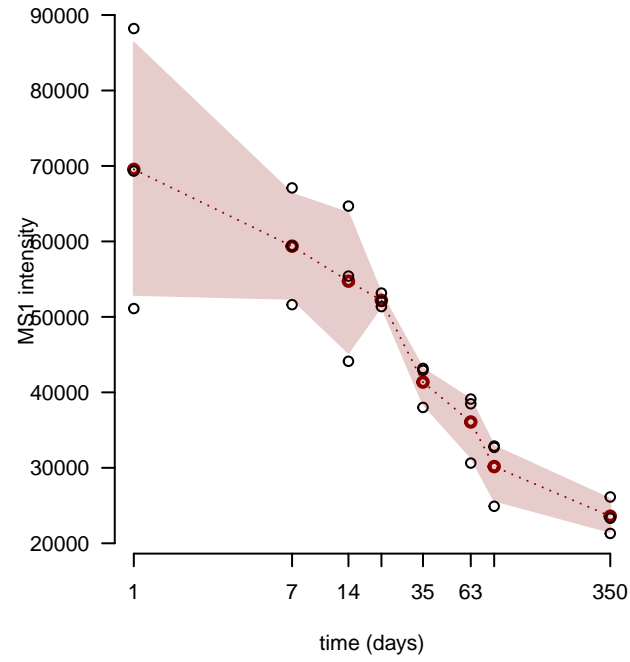

**Q9JHT5**  
**GN=Ammecr1**

AMMECR nuclear protein 1

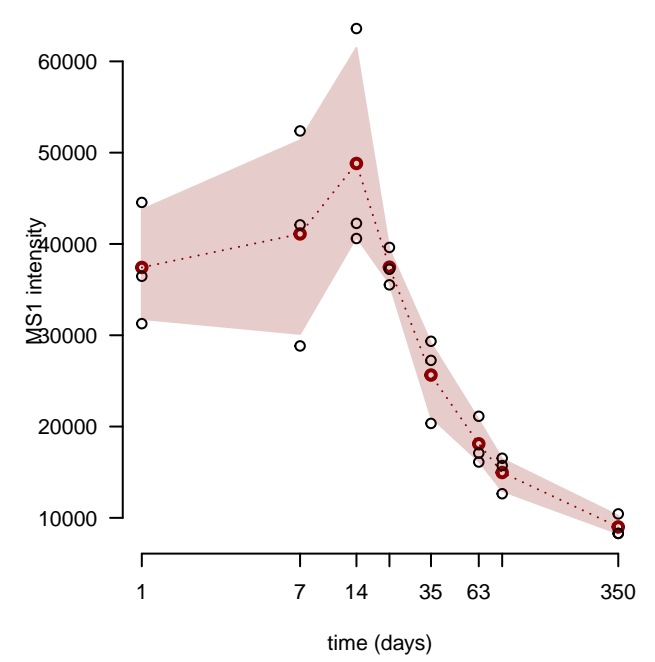

**Q9JHU2**  
**GN=Palmd**

palmdelphin

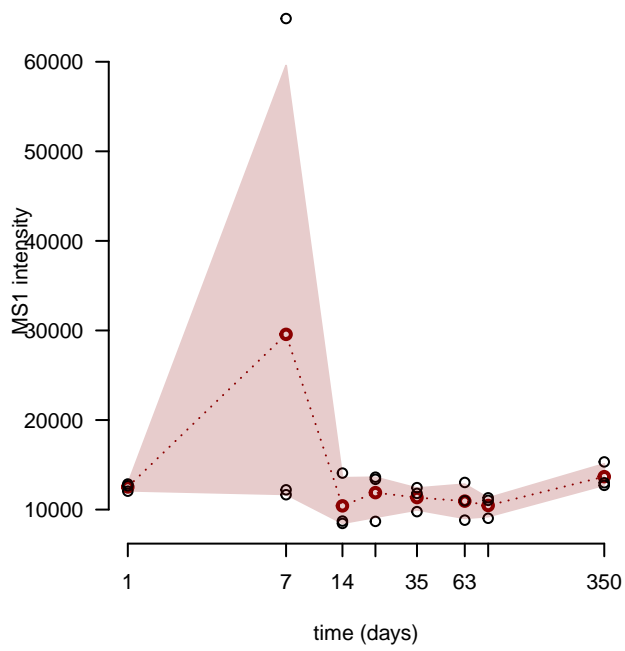

**Q9JHU3**  
**GN=Cdk20**

cyclin-dependent kinase 20

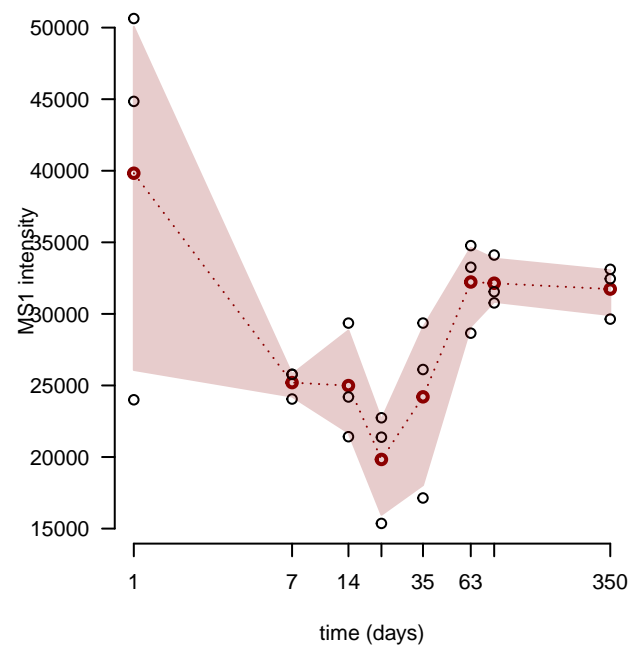

**Q9JHU4**  
**GN=Dync1h1**

dynein cytoplasmic 1 heavy chain 1

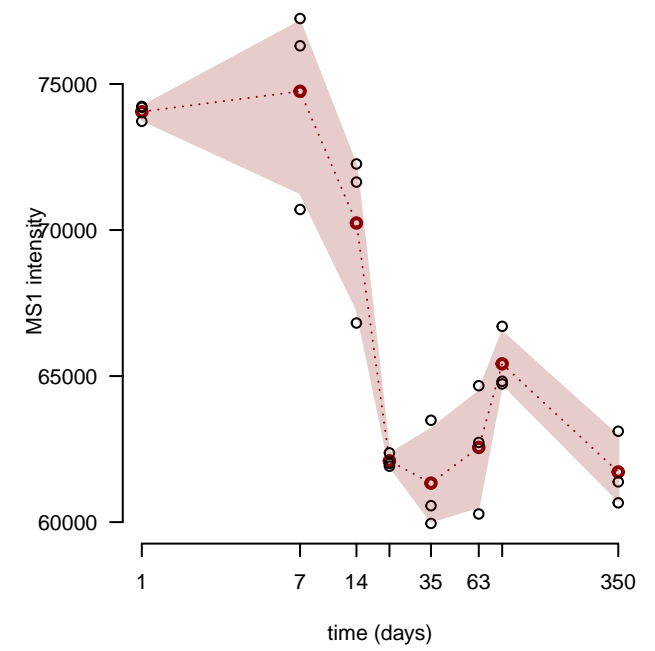

**Q9JHU9**  
**GN=Isyna1**

myo-inositol 1-phosphate synthase A1

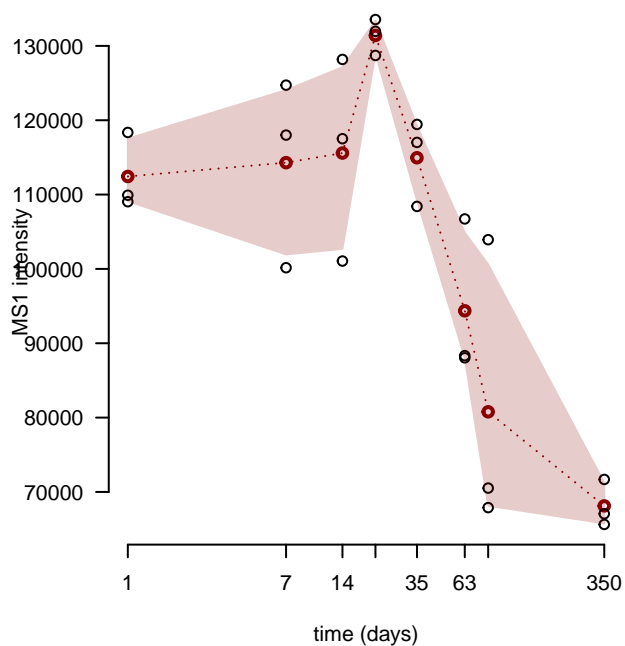

**Q9JHW2**  
**GN=Nit2**

nitrilase family, member 2

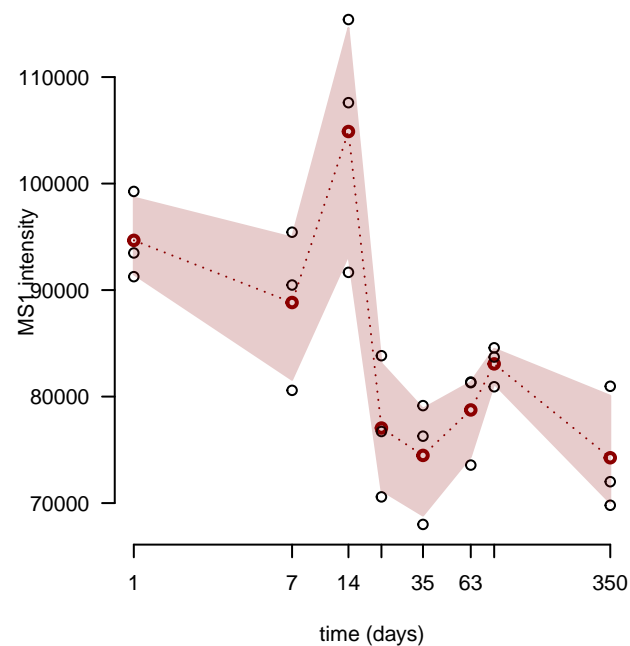

**Q9JHW4**  
**GN=Eefsec**

eukaryotic elongation factor, selenocyst ...

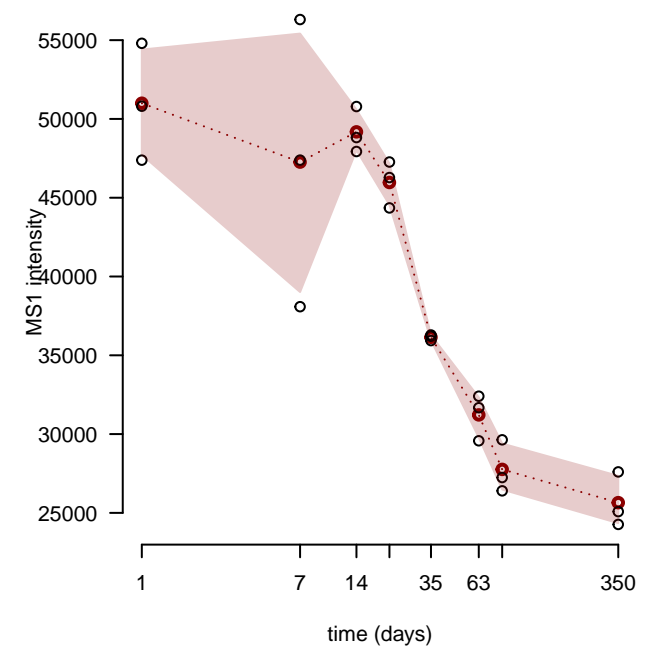

**Q9JHW9**  
**GN=Aldh1a3**  
aldehyde dehydrogenase family 1, subfami ...

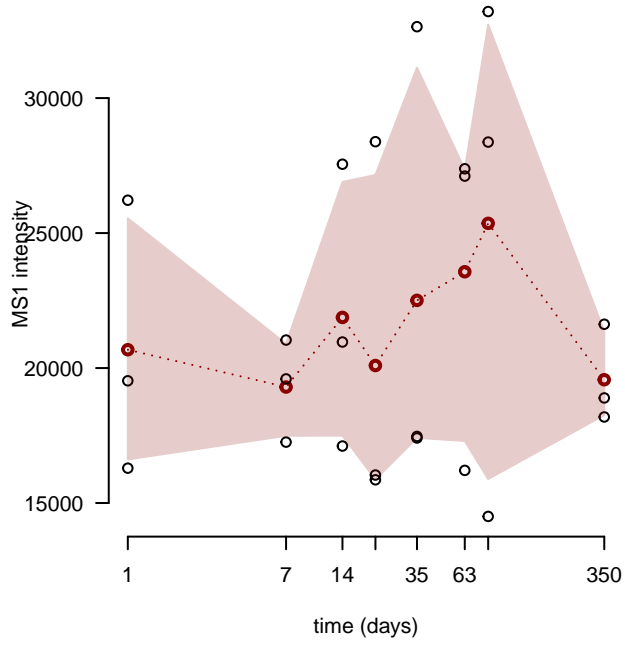

**Q9JHZ2**  
**GN=Ankh**

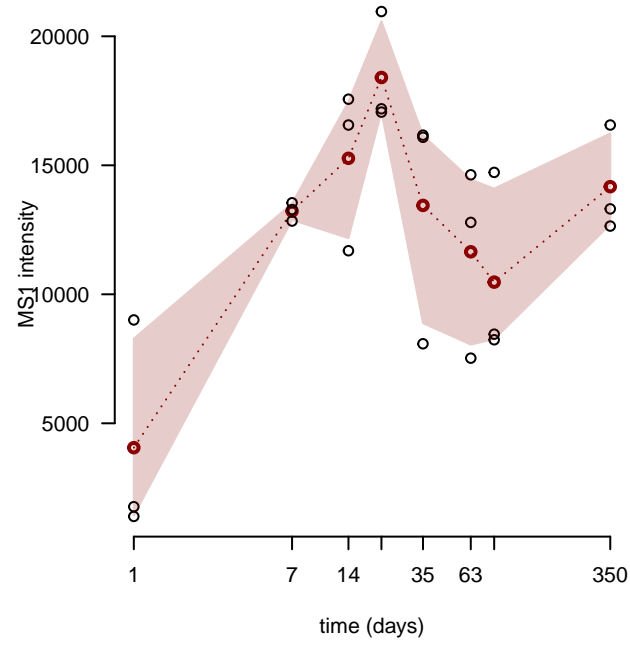

**Q9JI10**  
**GN=Stk3**  
serine/threonine kinase 3

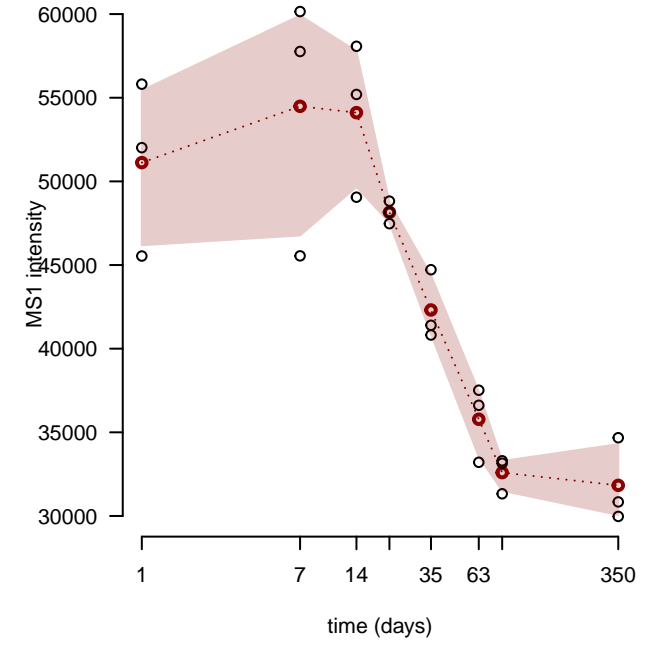

**Q9JI11**  
**GN=Stk4**  
serine/threonine kinase 4

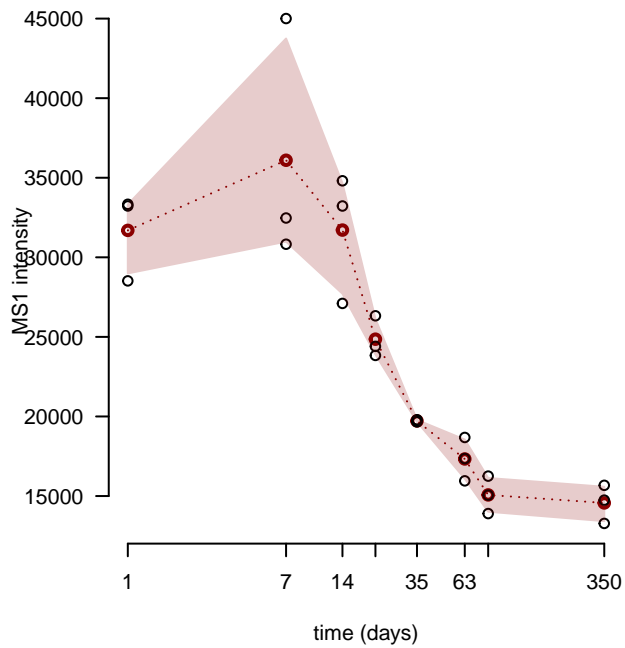

**Q9JI13**  
**GN=Utp3**  
UTP3 small subunit processome component

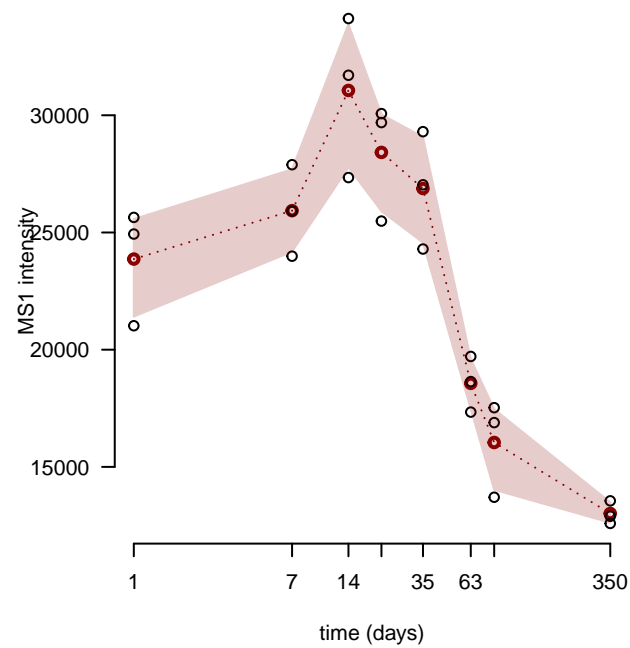

**Q9JI19**  
**GN=Fibp**  
fibroblast growth factor (acidic) intrac ...

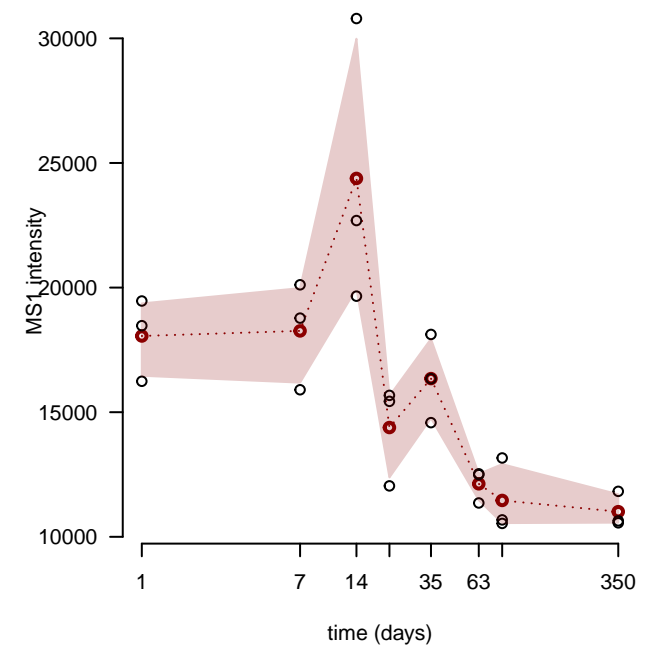

**Q9JI39**  
**GN=Abcb10**  
ATP-binding cassette, sub-family B (MDR/ ...

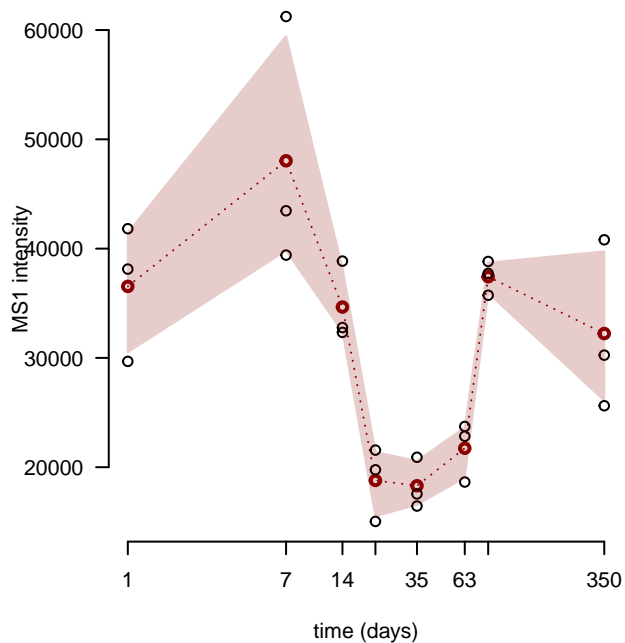

**Q9JI44**  
**GN=Dmap1**  
DNA methyltransferase 1-associated prote ...

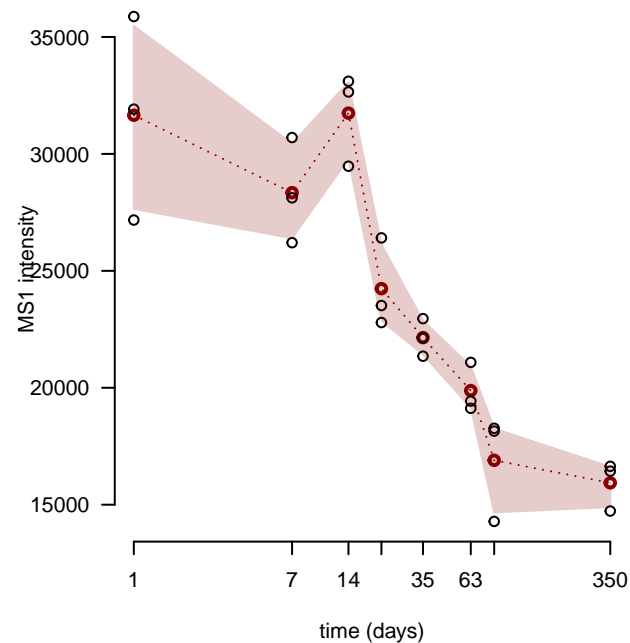

**Q9JI46**  
**GN=Nudt3**  
nudix (nucleotide diphosphate linked moi ...

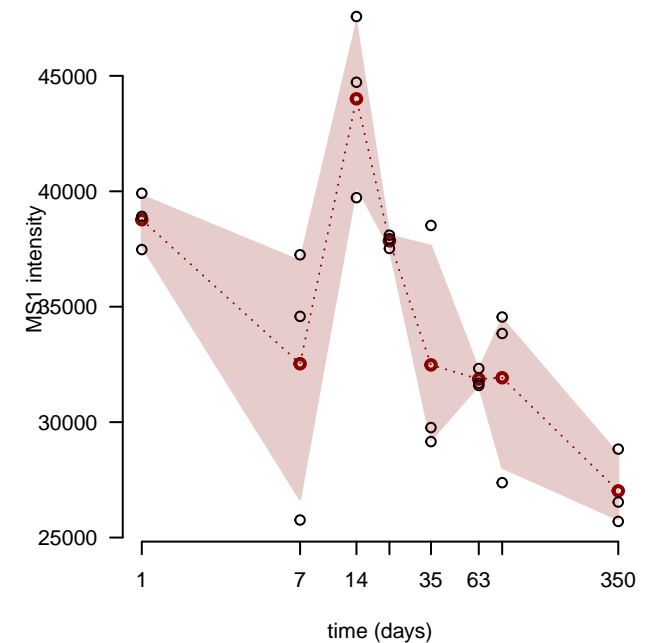

**Q9JI48**  
**GN=Plac8**  
placenta-specific 8

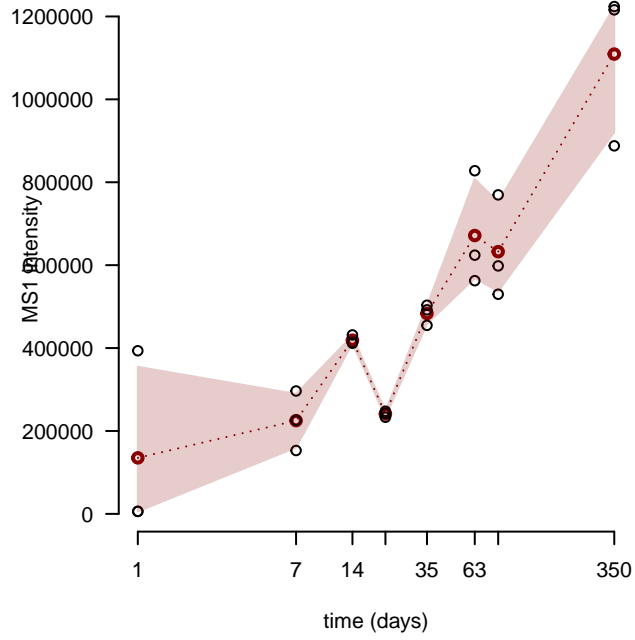

**Q9JI57**  
**GN=Gtf2ird1**  
general transcription factor II I repeat ...

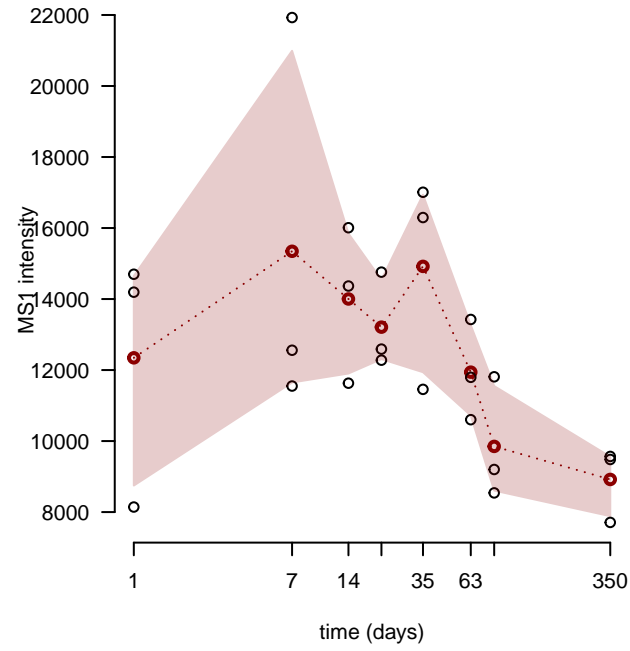

**Q9JI75**  
**GN=Nqo2**  
N-ribosylidihyronicotinamide quinone red ...

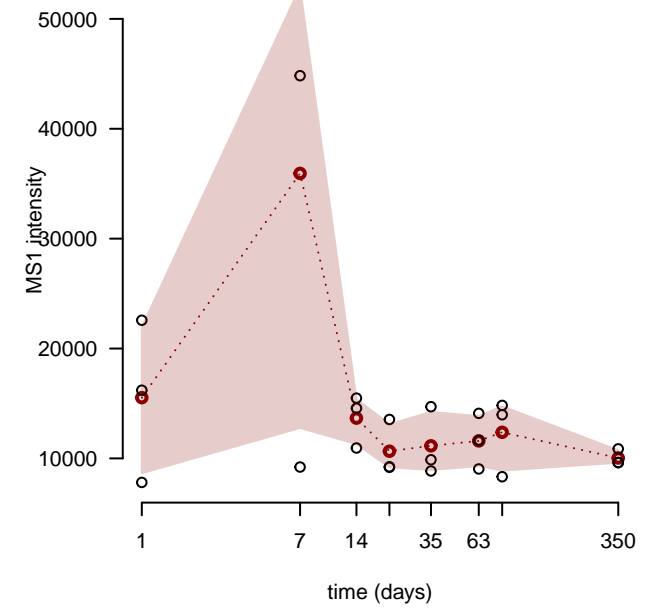

**Q9JI78**  
**GN=Ngly1**  
N-glycanase 1

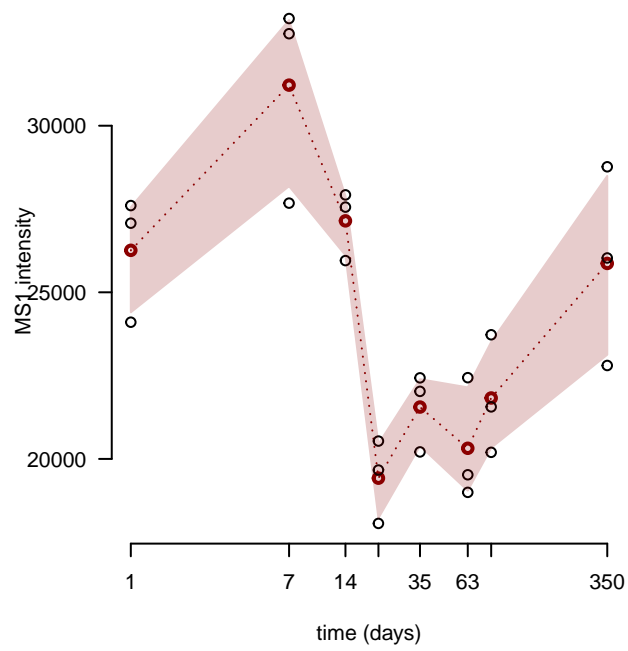

**Q9JI90**  
**GN=Rnf14**  
ring finger protein 14

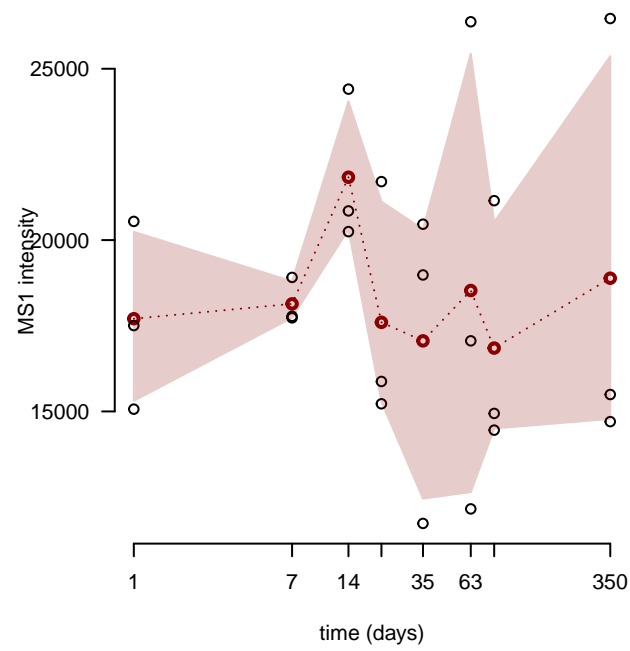

**Q9JI91**  
**GN=Actn2**  
actinin alpha 2

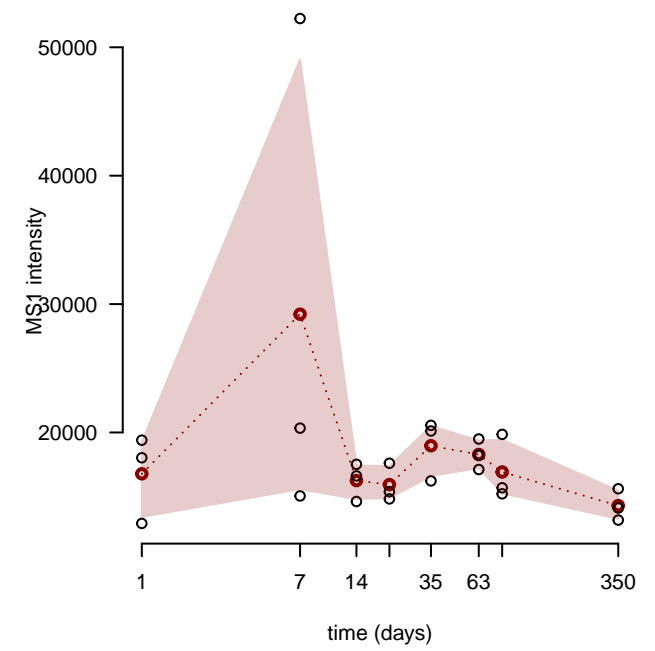

**Q9JI99**  
**GN=Sgpp1**  
sphingosine-1-phosphate phosphatase 1

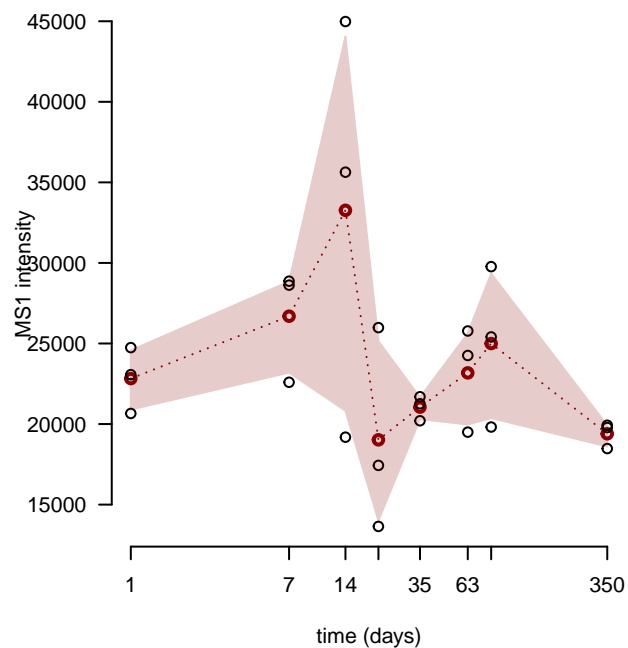

**Q9JIA7**  
**GN=Sphk2**  
sphingosine kinase 2

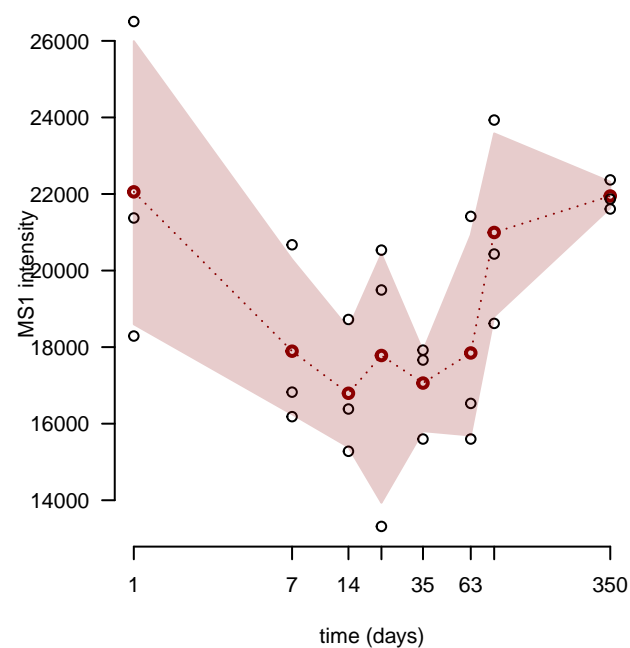

**Q9JIB4**  
**GN=Gtf2h2**  
general transcription factor II H, polyp ...

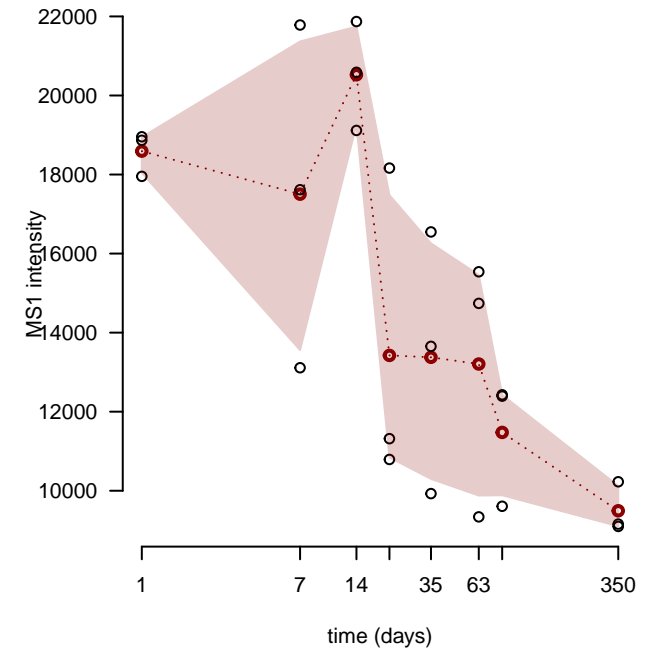

**Q9JIF0**  
**GN=Prmt1**  
protein arginine N-methyltransferase 1

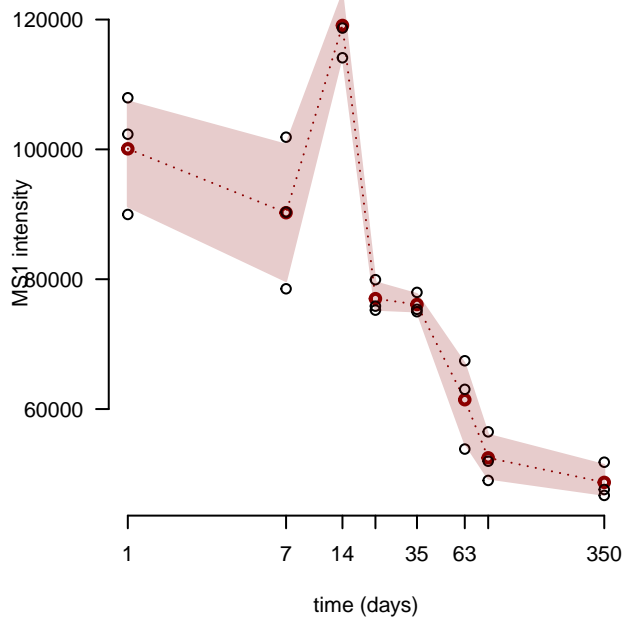

**Q9JIF7**  
**GN=Copb1**  
coatamer protein complex, subunit beta 1

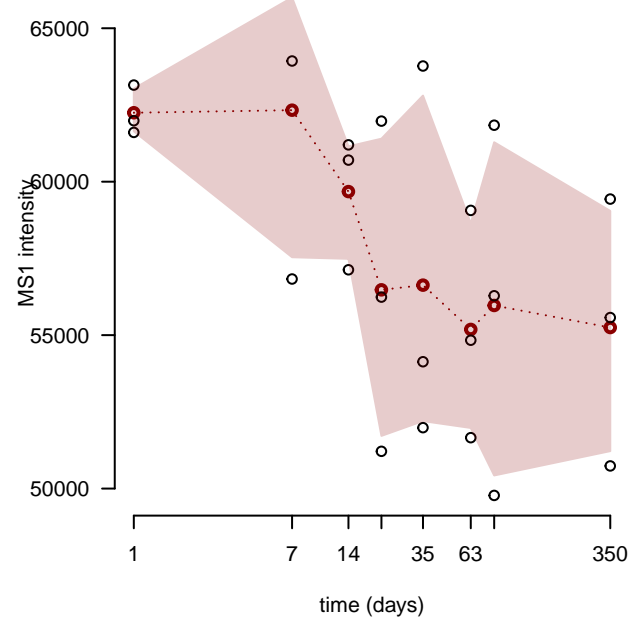

**Q9JIF9**  
**GN=Myot**  
myotilin

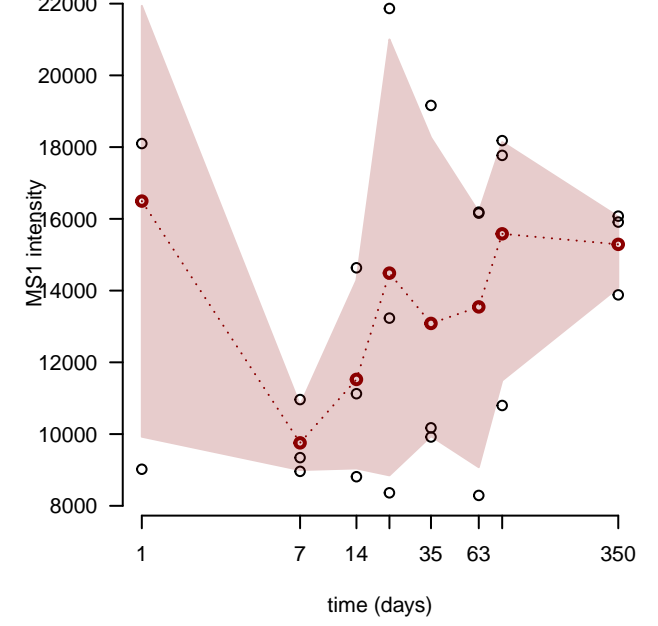

**Q9JIG7**  
**GN=Ccdc22**  
coiled-coil domain containing 22

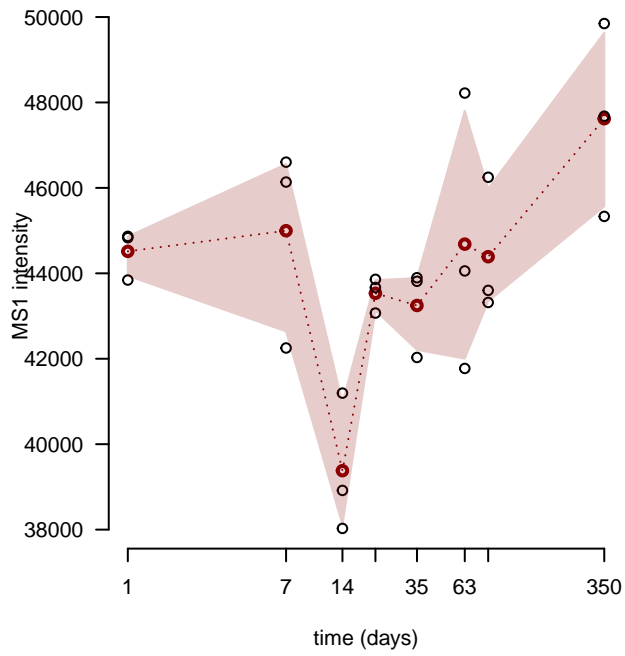

**Q9JIG8**  
**GN=Prpf2**  
PRA1 domain family 2

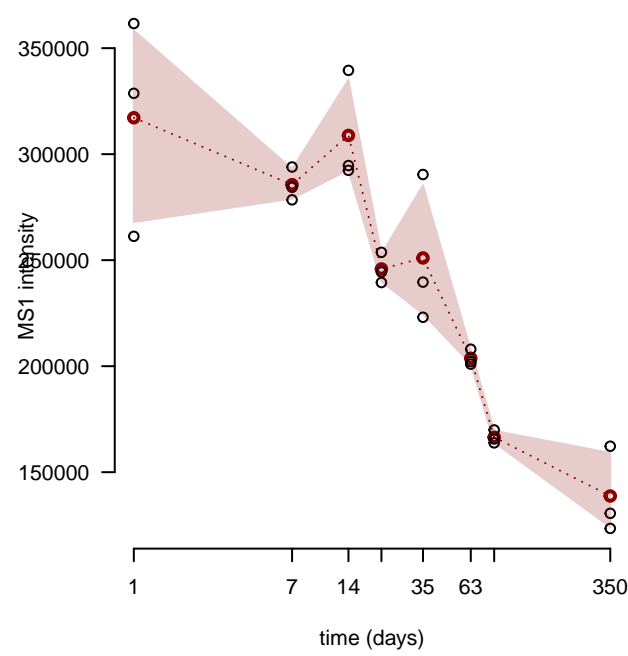

**Q9JIH2**  
**GN=Nup50**  
nucleoporin 50

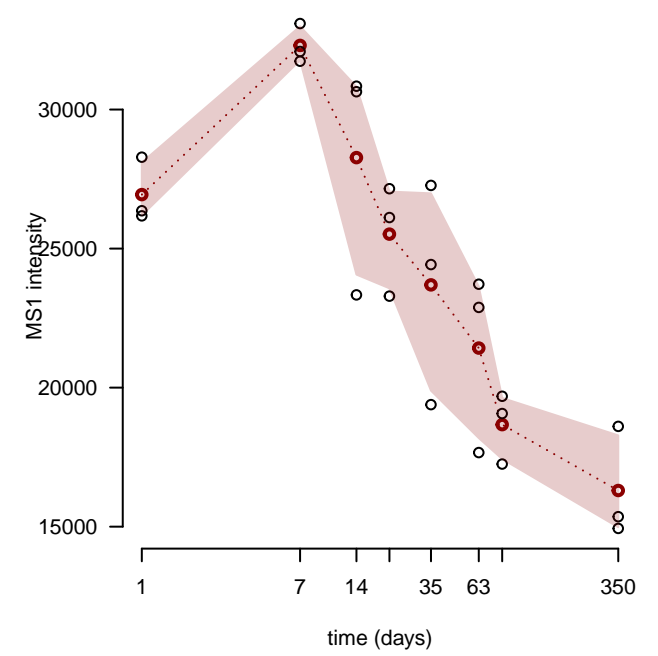

**Q9JII1**  
**GN=Inpp5e**  
inositol polyphosphate-5-phosphatase E

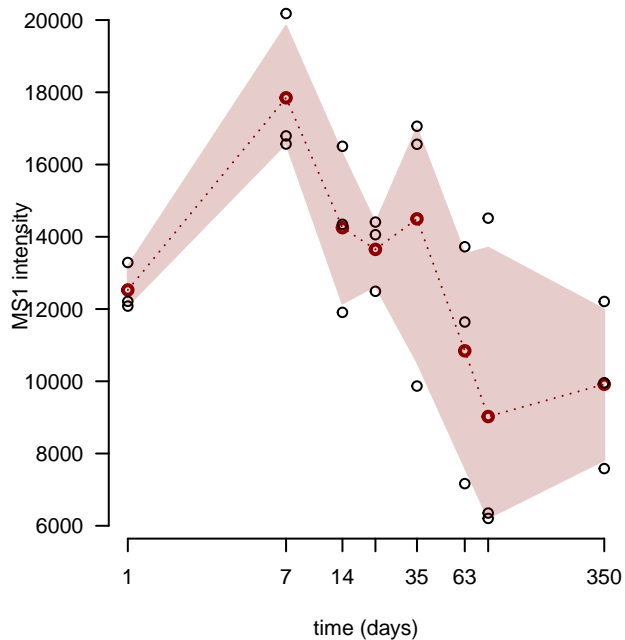

**Q9JII5**  
**GN=Dazap1**  
DAZ associated protein 1

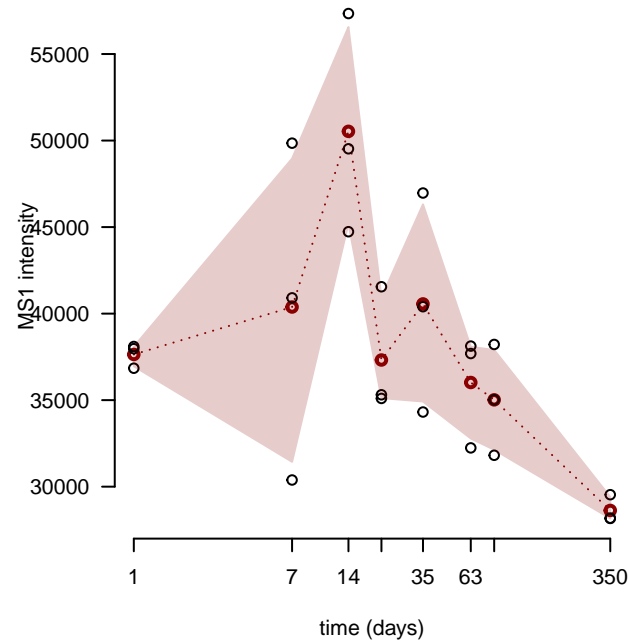

**Q9JII6**  
**GN=Akr1a1**  
aldo-keto reductase family 1, member A1 ...

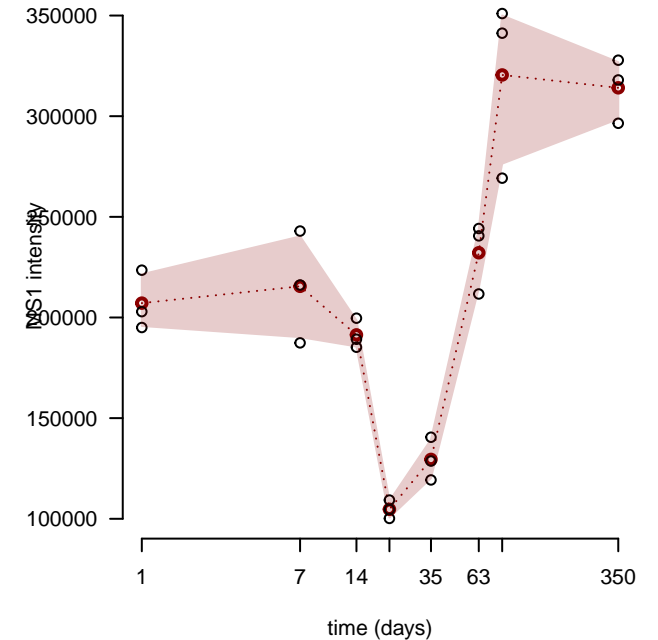



**Q9JIK5**  
**GN=Ddx21**  
DEXD box helicase 21

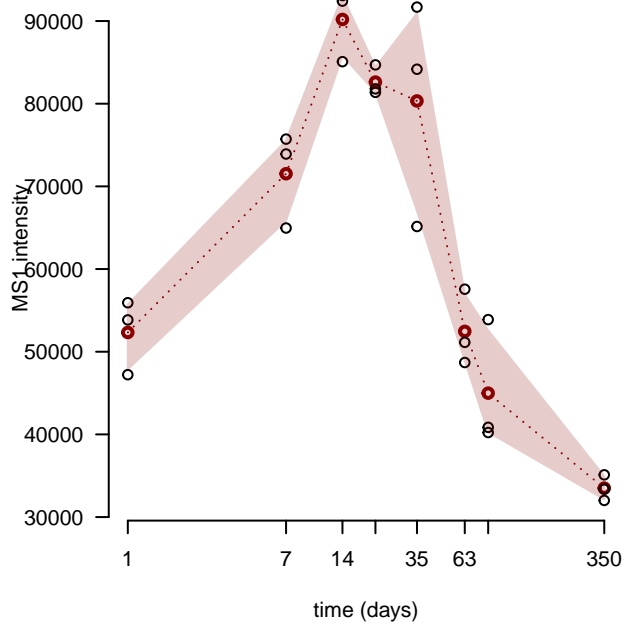

**Q9JIK9**  
**GN=Mrps34**  
mitochondrial ribosomal protein S34

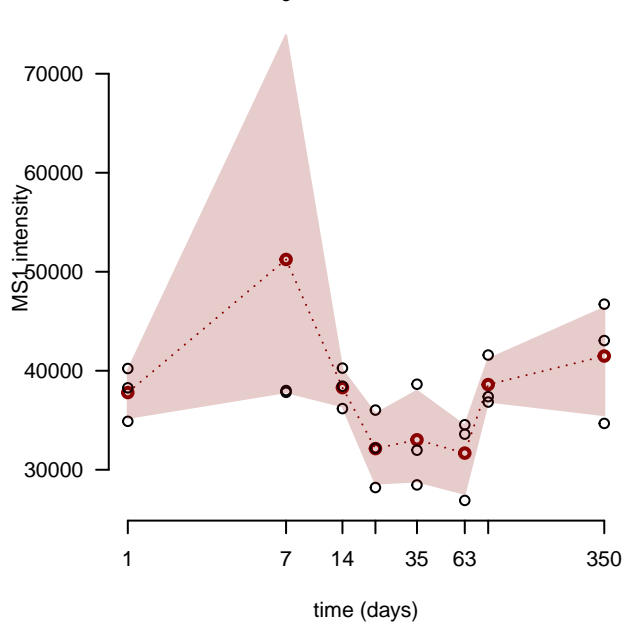

**Q9JIL4**  
**GN=Pdzk1**  
PDZ domain containing 1

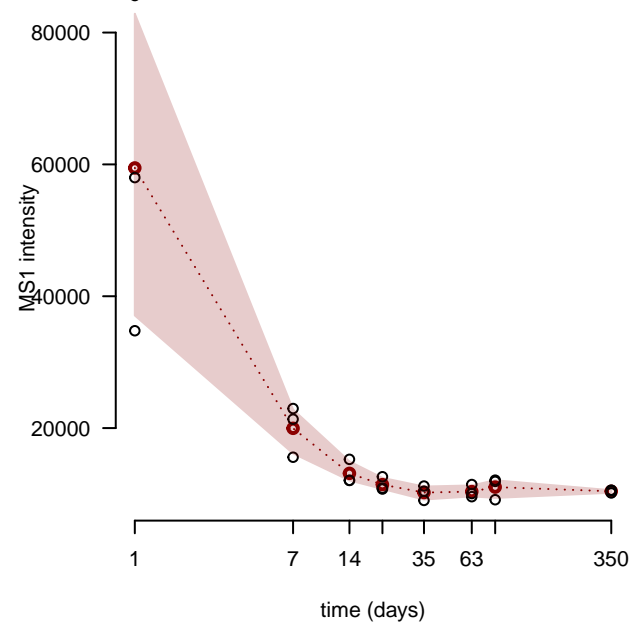

**Q9JIM1**  
**GN=Slc29a1**  
solute carrier family 29 (nucleoside tra ...

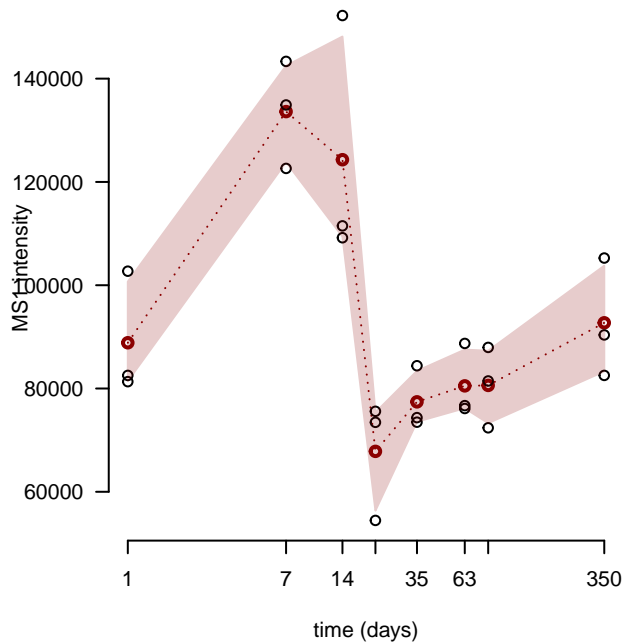

**Q9JIP4**  
**GN=Panx1**  
pannexin 1

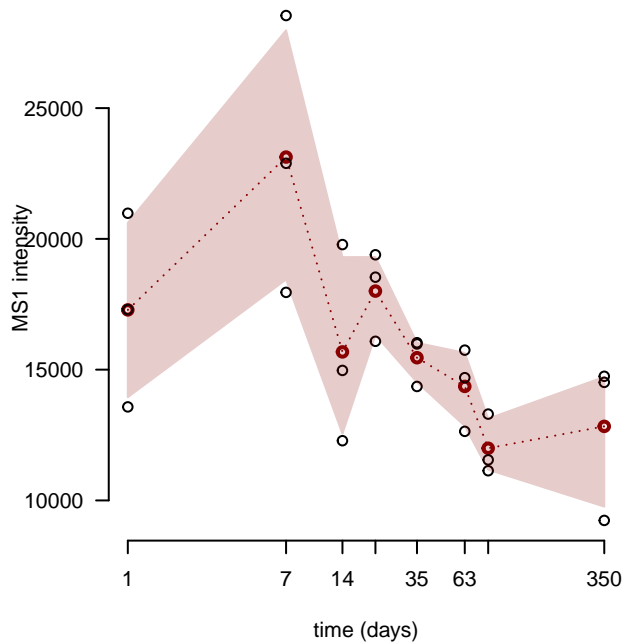

**Q9JIP6**  
**GN=Fzd2**  
frizzled class receptor 2

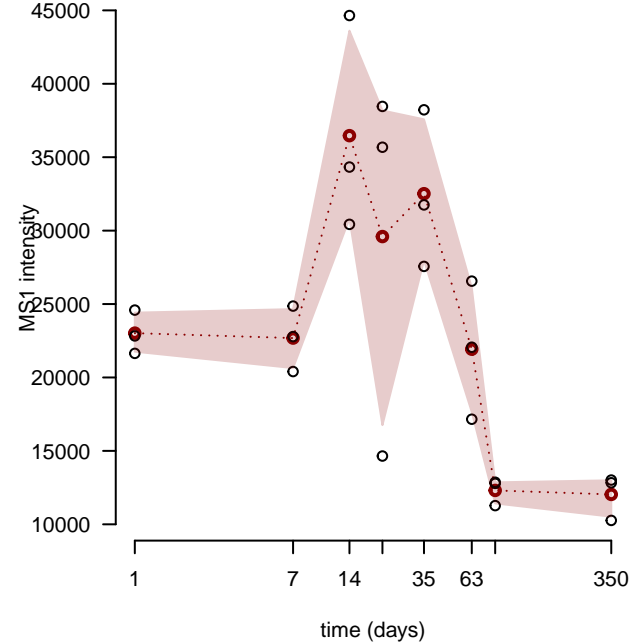

**Q9JIQ3**  
**GN=Diablo**  
diablo, IAP-binding mitochondrial protei ...

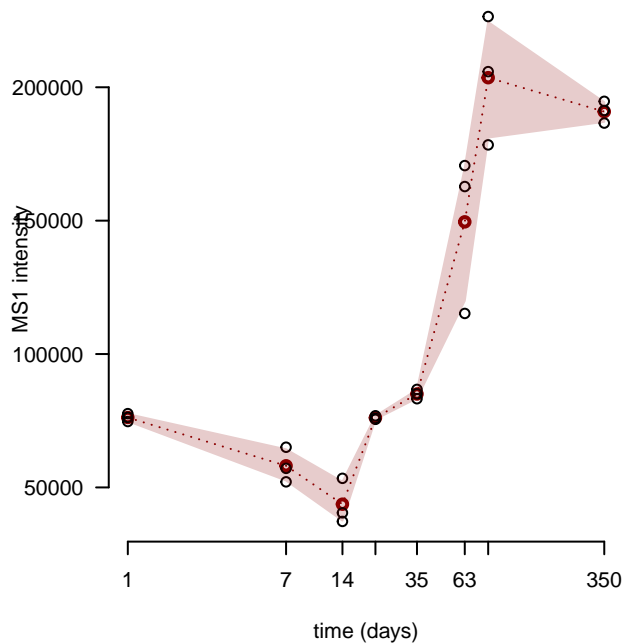

**Q9JIS8**  
**GN=Slc12a4**  
solute carrier family 12, member 4

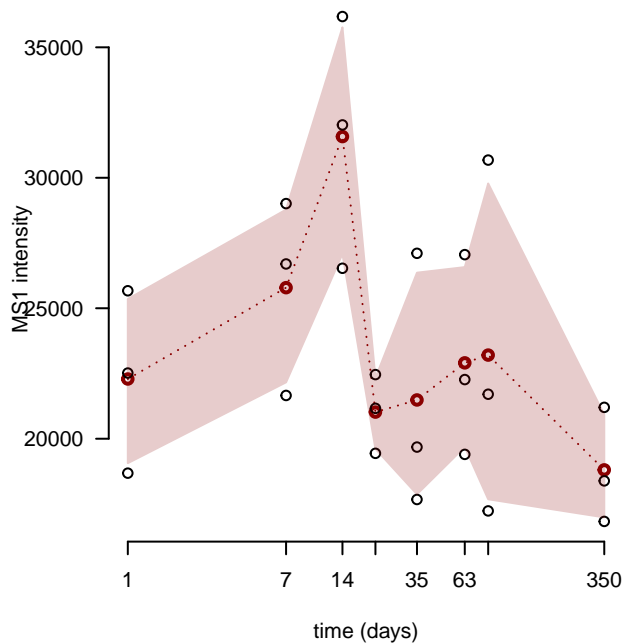

**Q9JIW9**  
**GN=Ralb**  
v-ral simian leukemia viral oncogene B

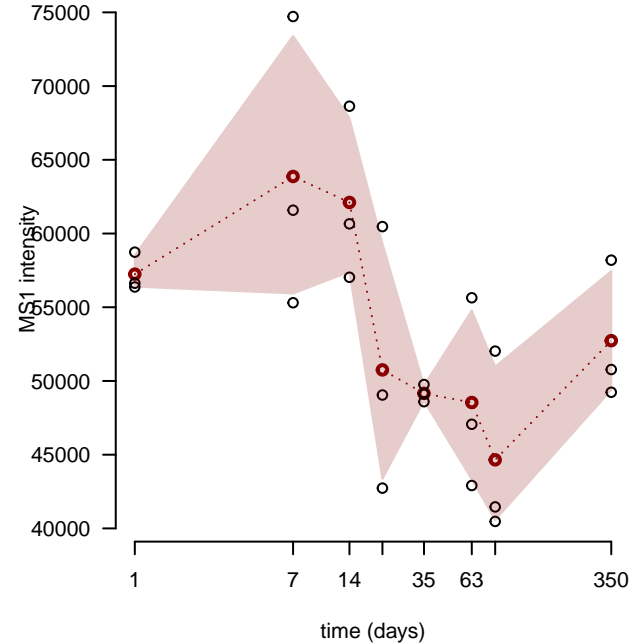

**Q9JIX0**  
**GN=Eny2**

ENY2 transcription and export complex 2 ...

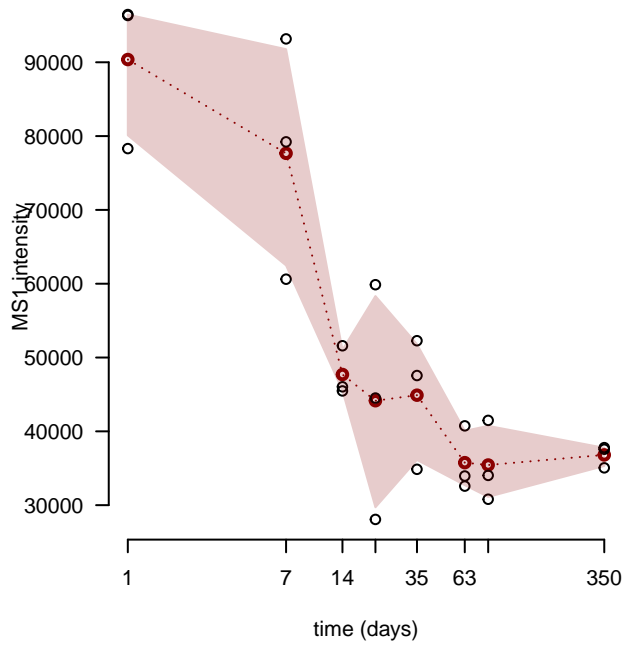

**Q9JIX8**  
**GN=Acin1**

apoptotic chromatin condenser inducer ...

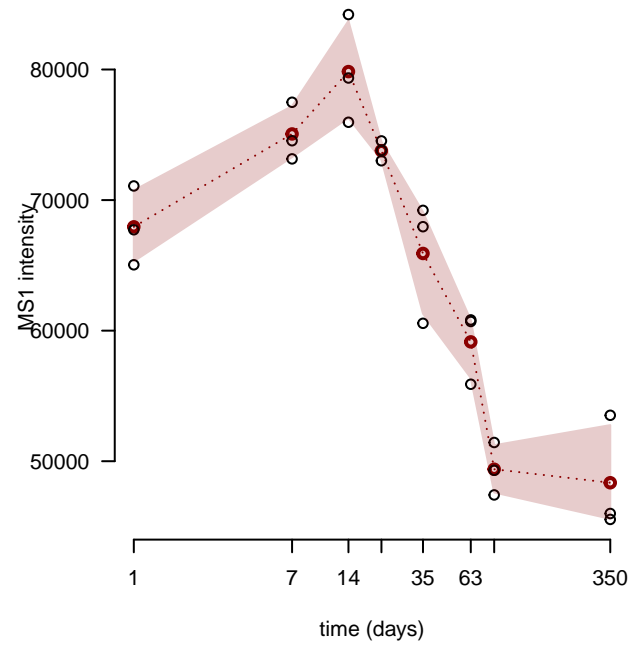

**Q9JIX9**  
**GN=Fastk**

Fas-activated serine/threonine kinase

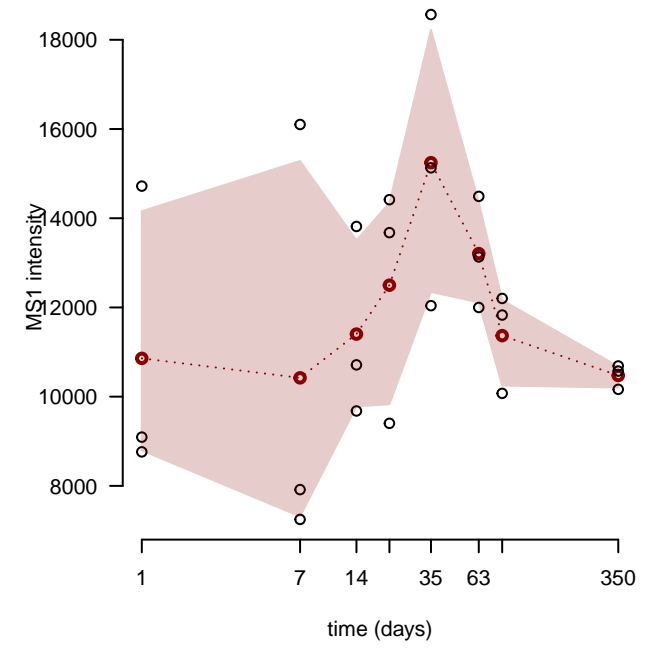

**Q9JIY0**  
**GN=Plekho1**

pleckstrin homology domain containing, f ...

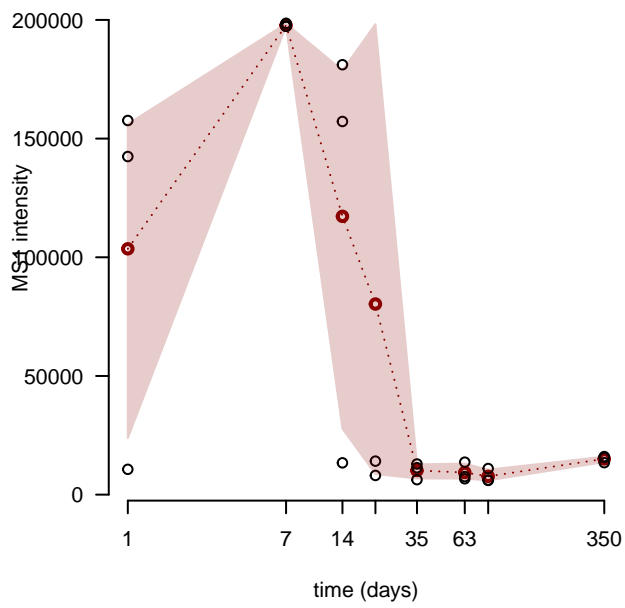

**Q9JIY2**  
**GN=Cbl1**

Casitas B-lineage lymphoma-like 1

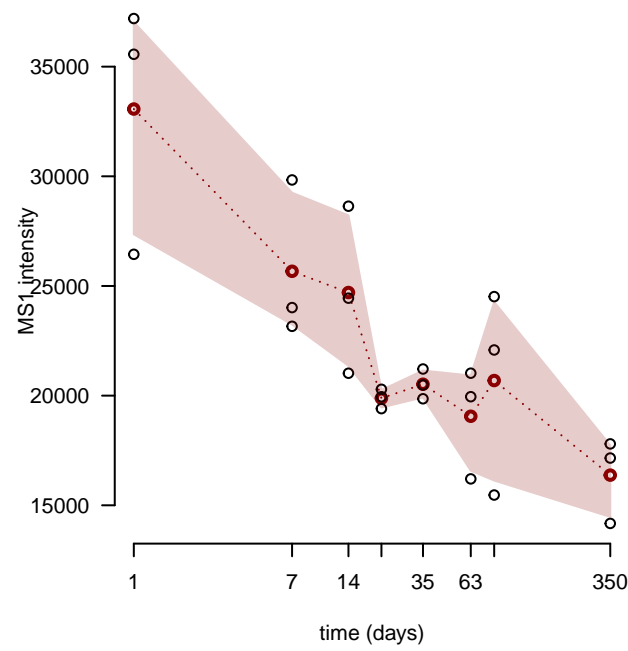

**Q9JIY5**  
**GN=Htra2**

HtrA serine peptidase 2

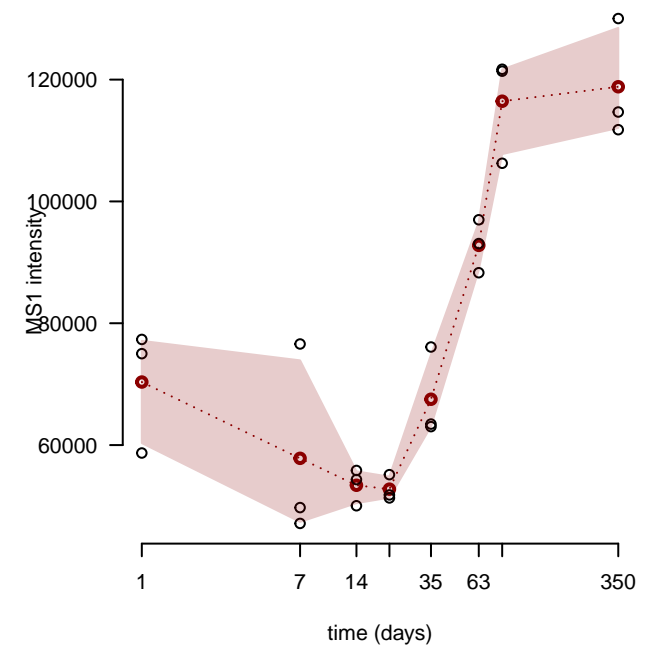

**Q9JIZ9**  
**GN=Plscr3**

phospholipid scramblase 3

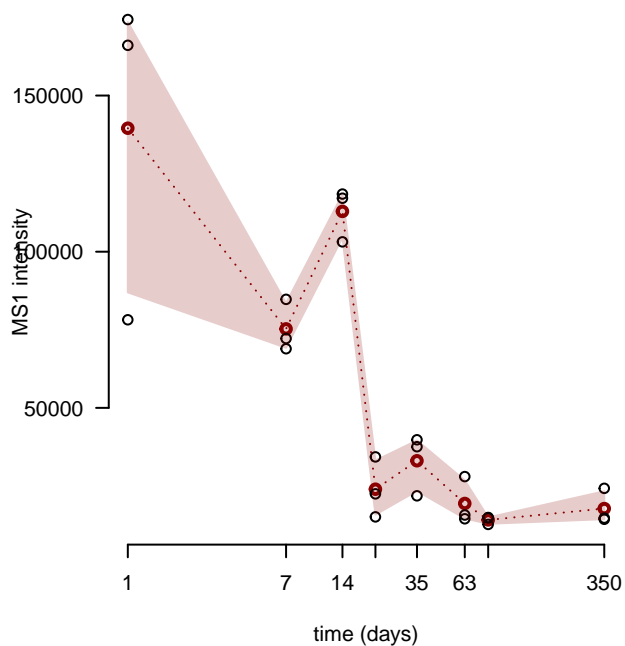

**Q9JJ00**  
**GN=Plscr1**

phospholipid scramblase 1

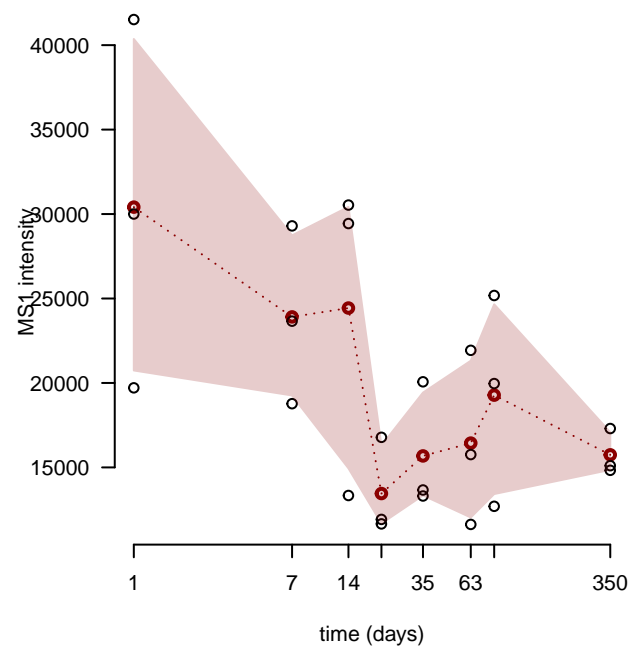

**Q9JJ04**  
**GN=B4galt4**

UDP-Gal:betaGlcNAc beta 1,4-galactosyltr ...

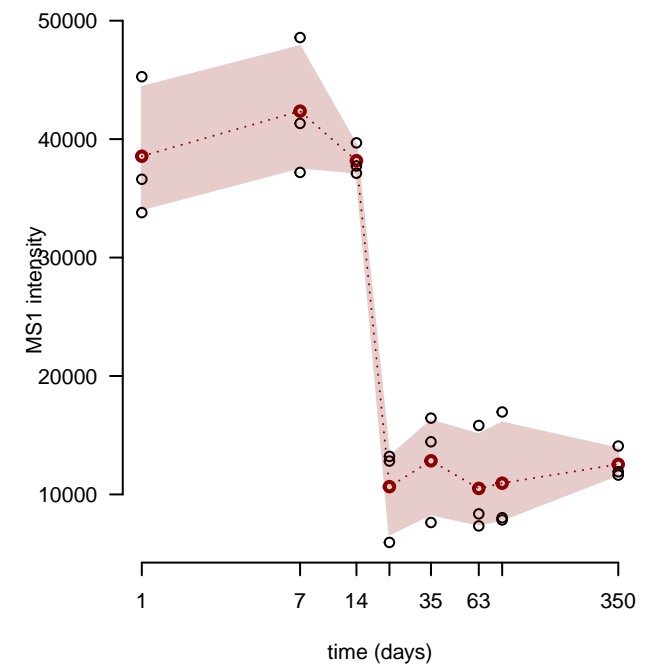

**Q9JJ06**  
**GN=C1galt1**  
core 1 synthase, glycoprotein-N-acetylglycosyltransferase 1

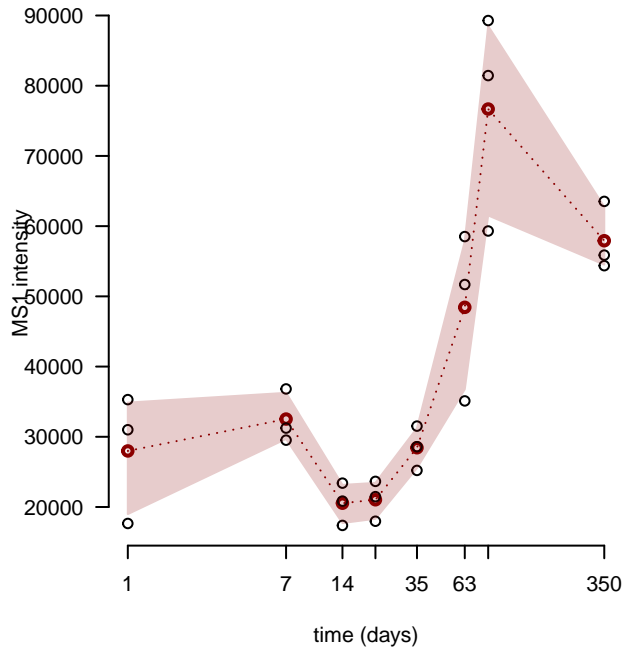

**Q9JJ11**  
**GN=Tacc3**  
transforming, acidic coiled-coil containing protein 3

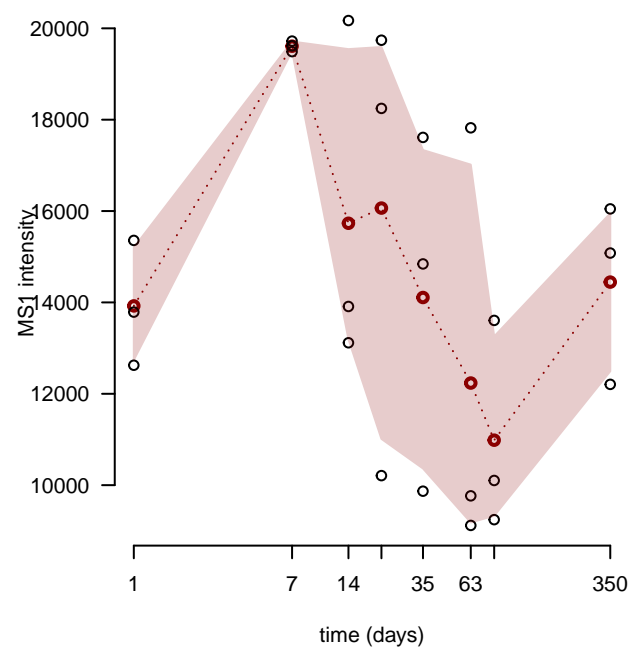

**Q9JJ28**  
**GN=Flii**  
flightless I actin binding protein

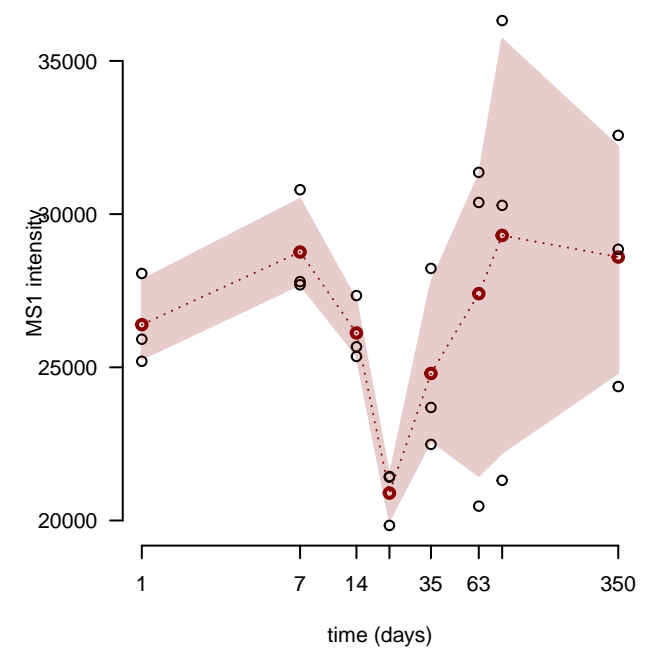

**Q9JJ48**  
**GN=Zc3h8**  
zinc finger CCCH type containing 8

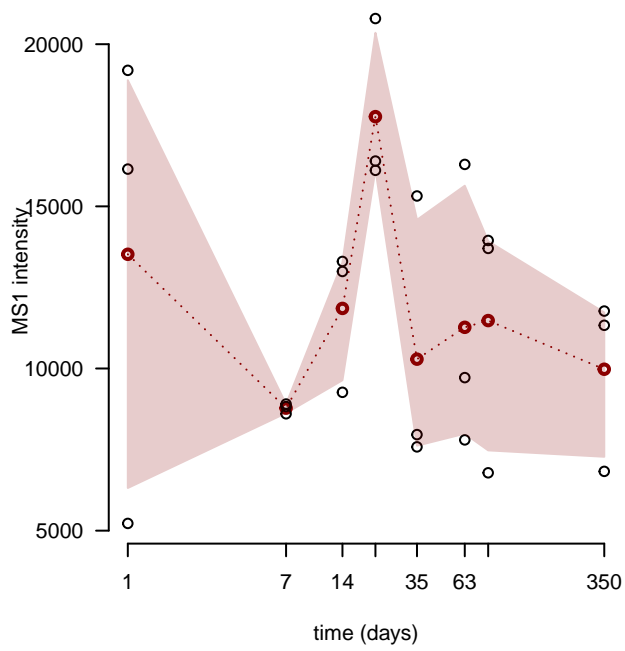

**Q9JJ61**  
**GN=Galnt16**  
polypeptide N-acetylgalactosaminyltransferase 16

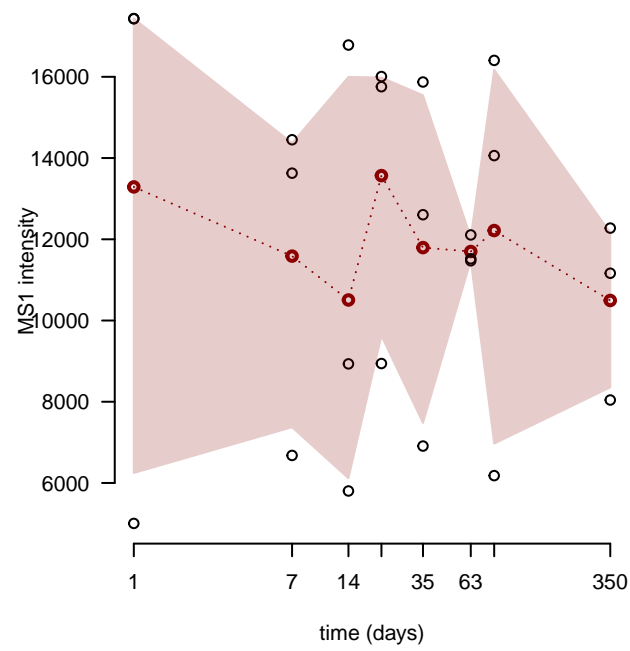

**Q9JJ66**  
**GN=Cdc20**  
cell division cycle 20

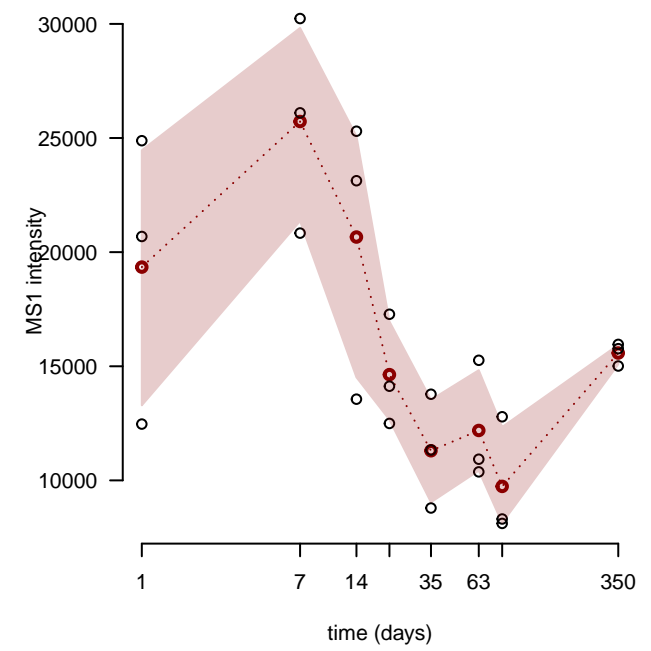

**Q9JJ78**  
**GN=Pbk**  
PDZ binding kinase

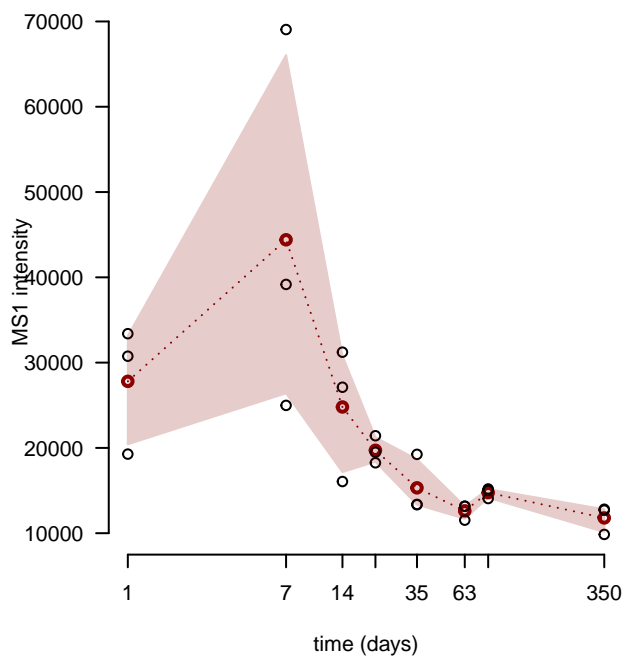

**Q9JJ80**  
**GN=Rpf2**  
ribosome production factor 2 homolog

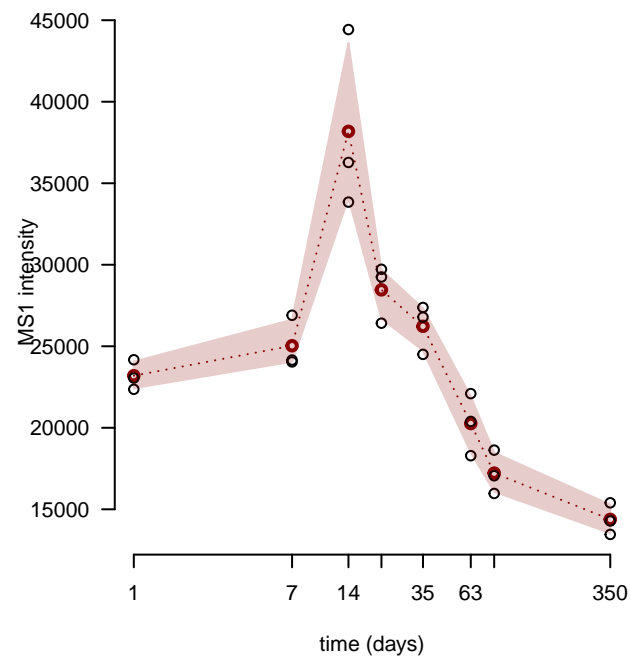

**Q9JJ89**  
**GN=Ccdc86**  
coiled-coil domain containing 86

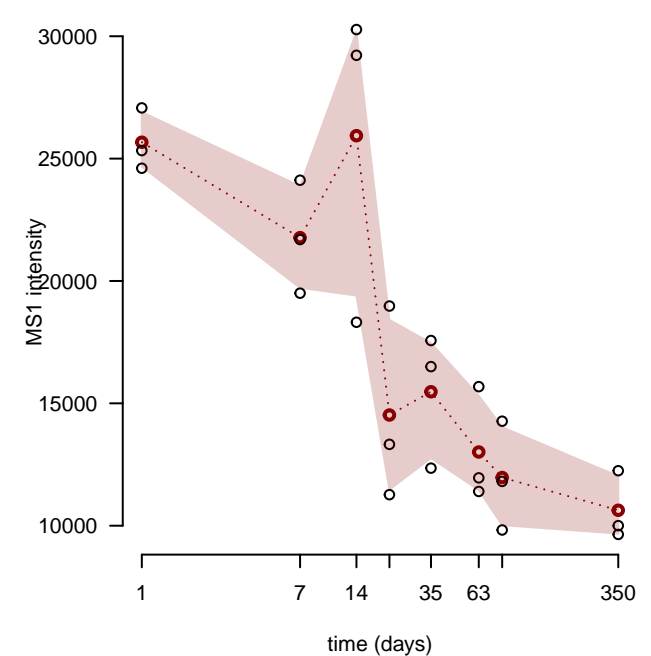

**Q9JJA2**  
**GN=Cog8**

component of oligomeric golgi complex 8

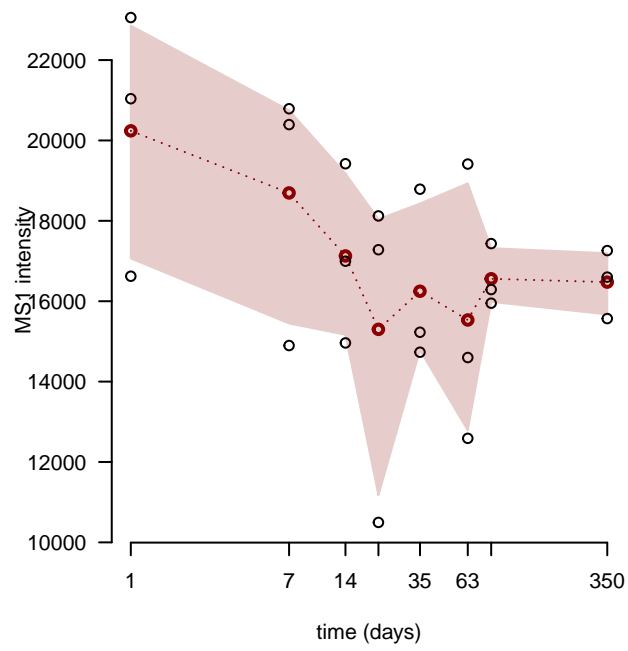

**Q9JJA4**  
**GN=Wdr12**

WD repeat domain 12

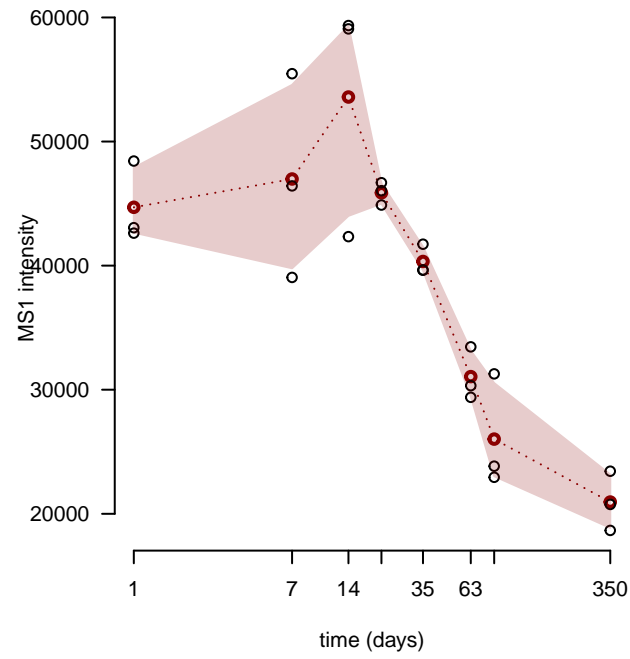

**Q9JJA7**  
**GN=Ccn12**

cyclin L2

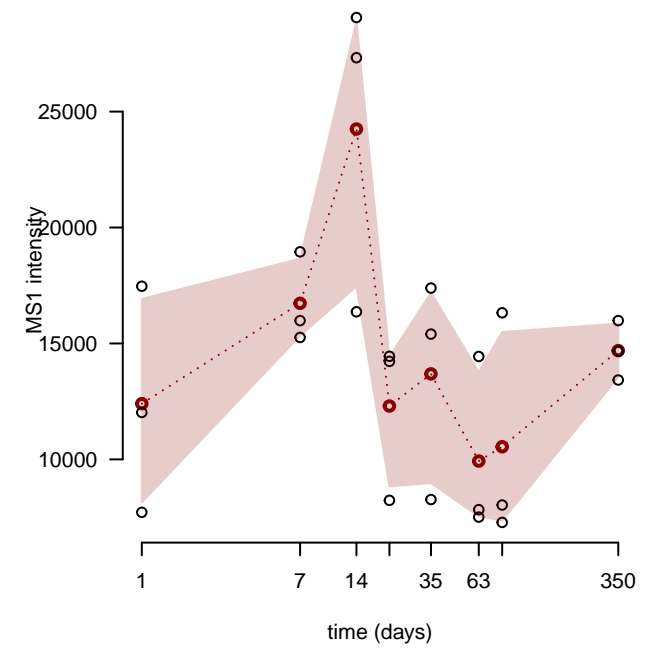

**Q9JJC6**  
**GN=Rilpl1**

Rab interacting lysosomal protein-like 1

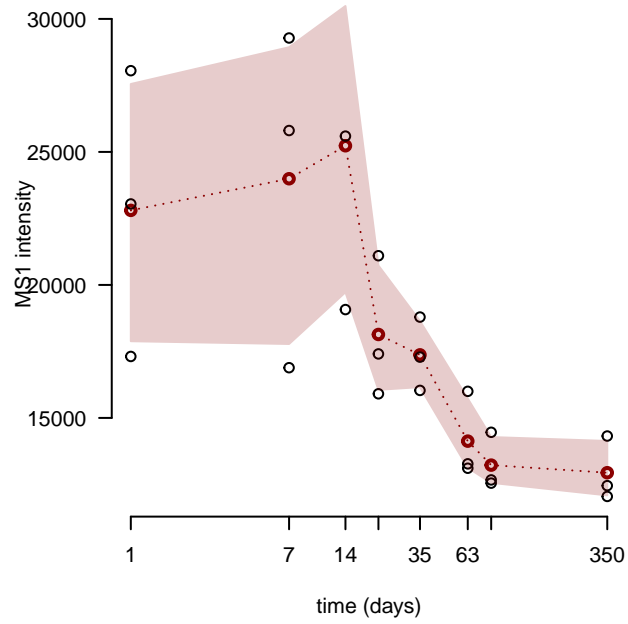

**Q9JJC9**  
**GN=Herpud2**

HERPUD family member 2

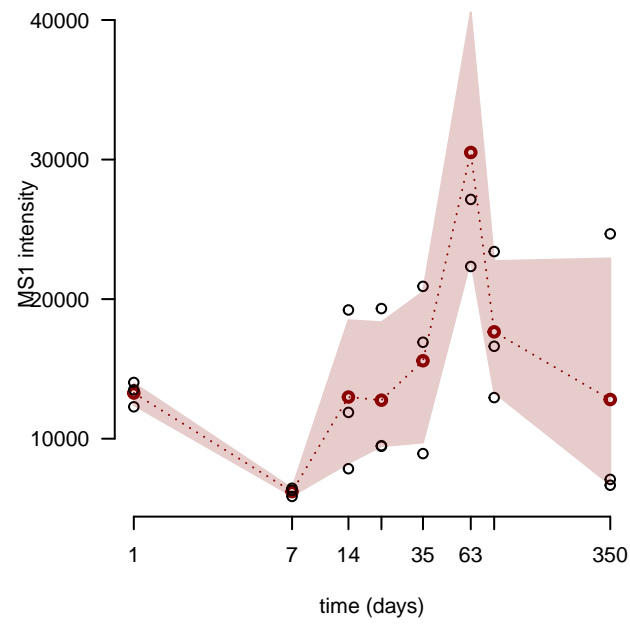

**Q9JJD0**  
**GN=Thap11**

THAP domain containing 11

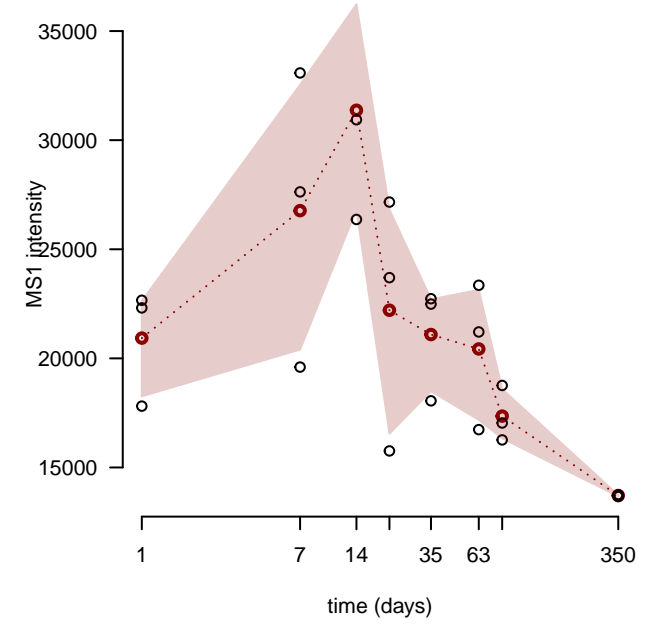

**Q9JJE4**  
**GN=Paqr4**

progesterin and adipoQ receptor family mem ...

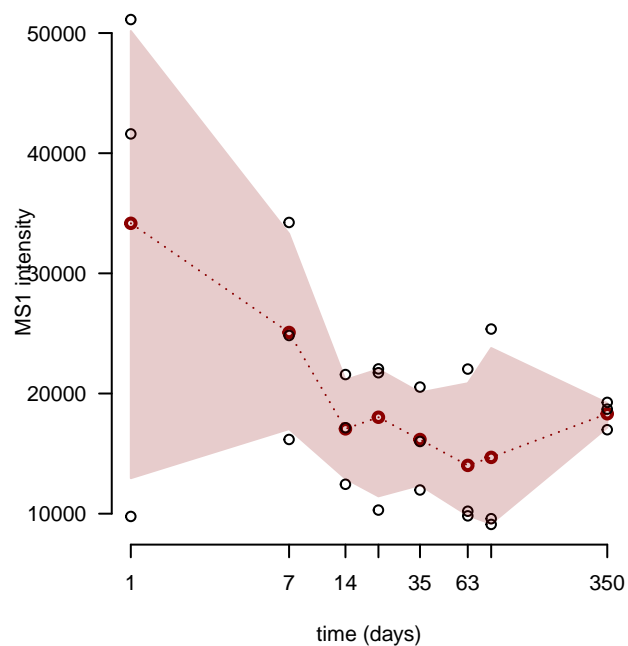

**Q9JJE7**  
**GN=Fads3**

fatty acid desaturase 3

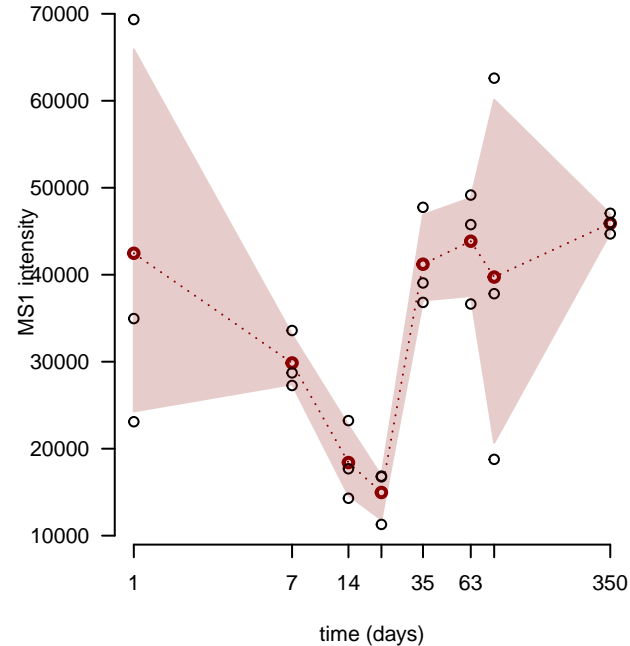

**Q9JFF0**  
**GN=Nap115**

nucleosome assembly protein 1-like 5

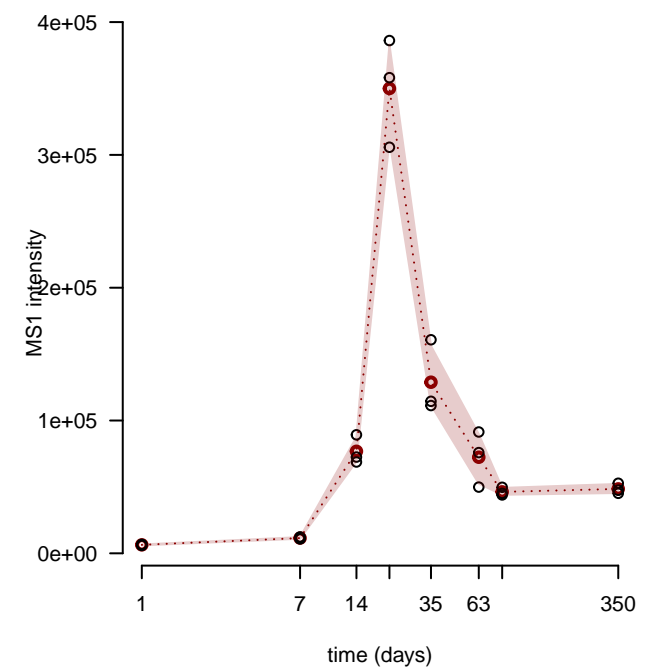

**Q9JJF3**  
GN=Riox1  
ribosomal oxygenase 1

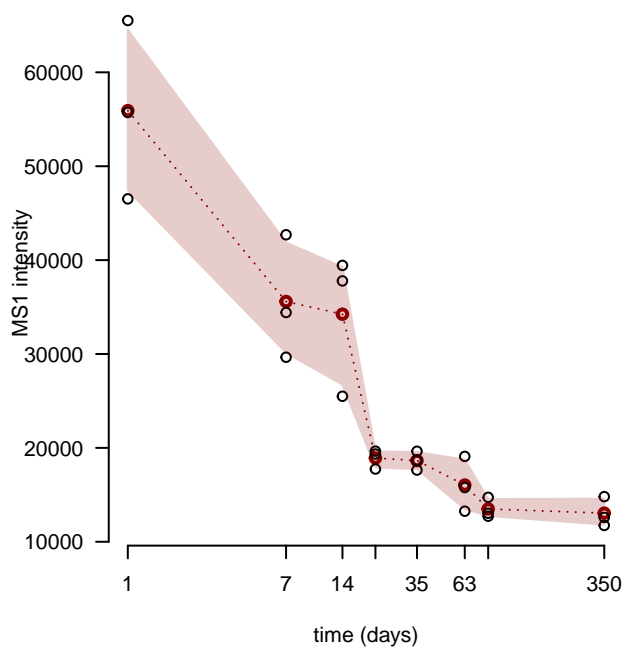

**Q9JJF9**  
GN=Sppl2a  
signal peptide peptidase like 2A

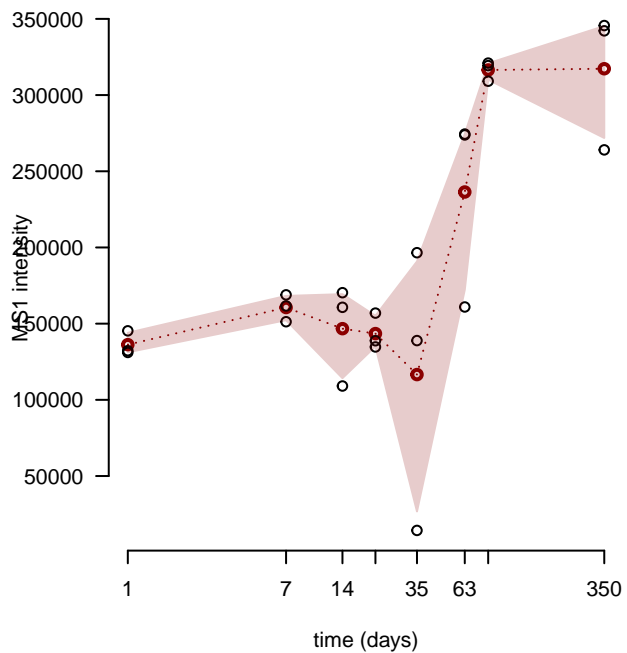

**Q9JJG0**  
GN=Tacc2  
transforming, acidic coiled-coil contain ...

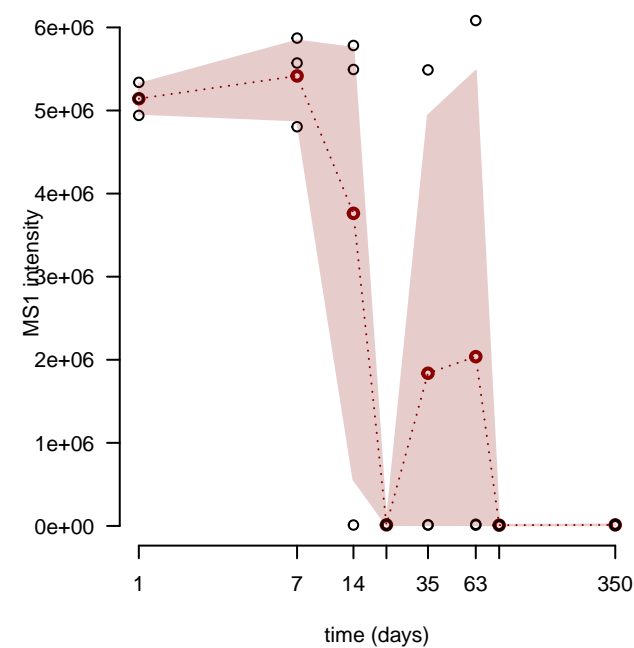

**Q9JJG0**  
GN=Tacc2  
transforming, acidic coiled-coil contain ...

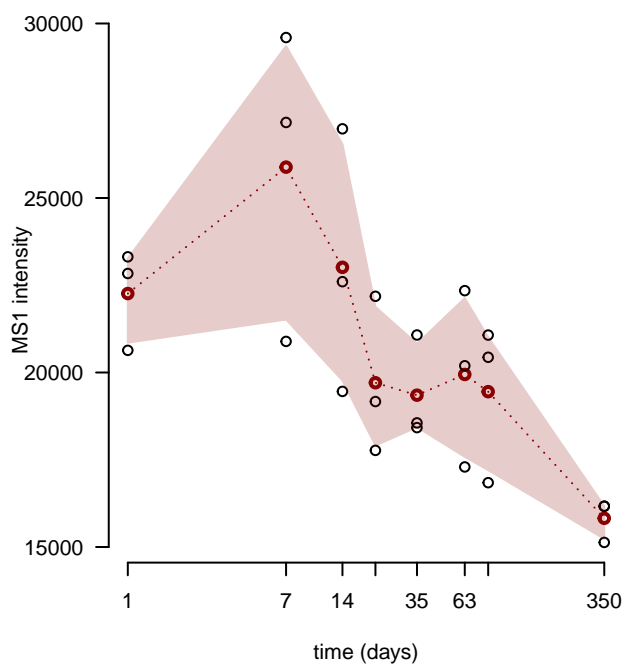

**Q9JJG6**  
GN=Tmem47  
transmembrane protein 47

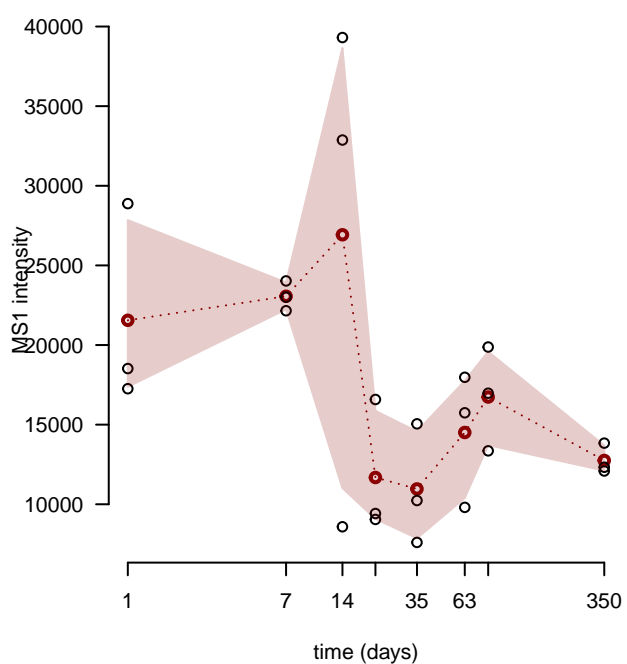

**Q9JJG9**  
GN=Noa1  
nitric oxide associated 1

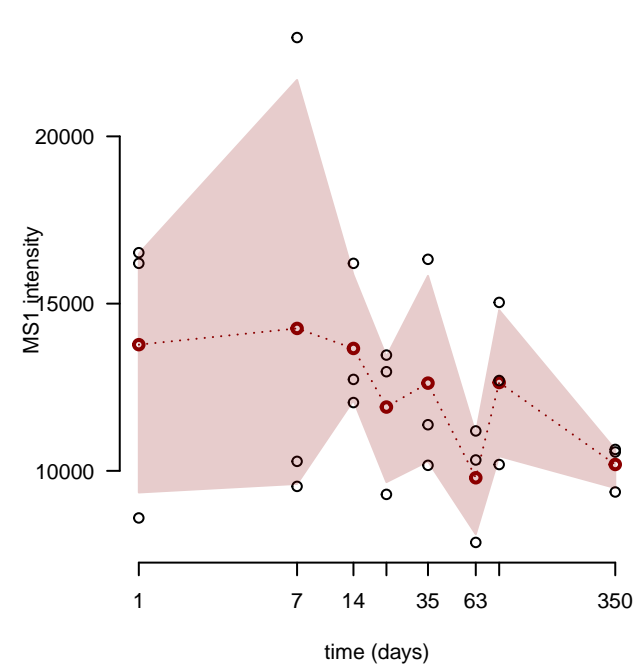

**Q9JJH1**  
GN=Rnase4  
ribonuclease, RNase A family 4

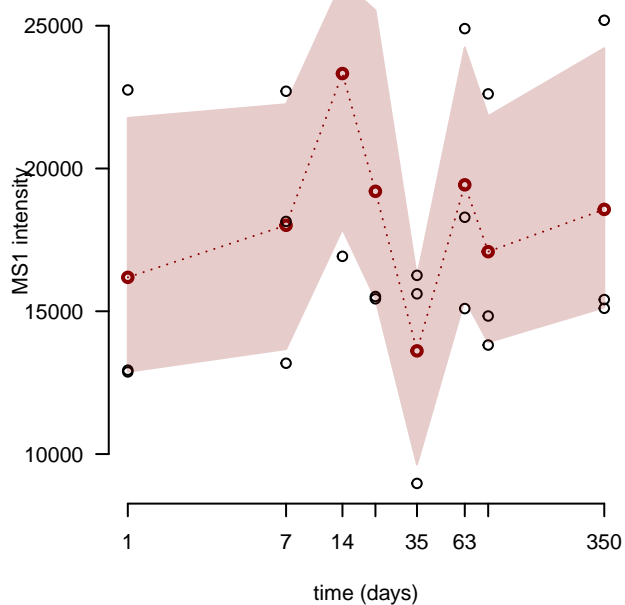

**Q9JJI6**  
GN=Pigo  
phosphatidylinositol glycan anchor biosy ...

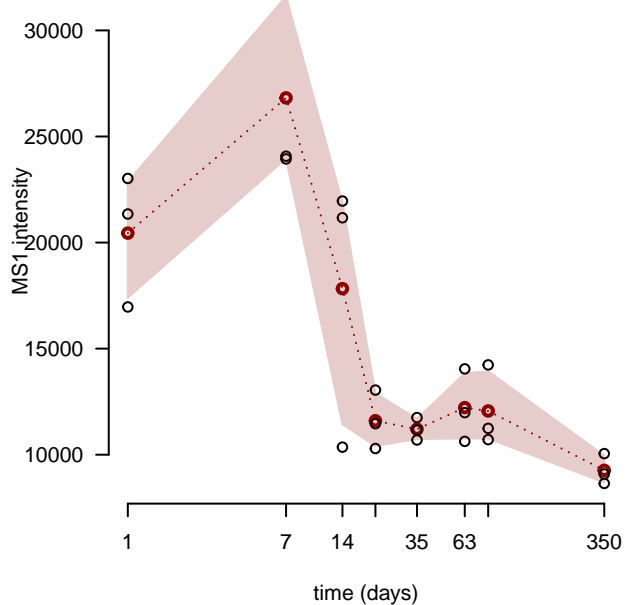

**Q9JJI8**  
GN=Rpl38  
ribosomal protein L38

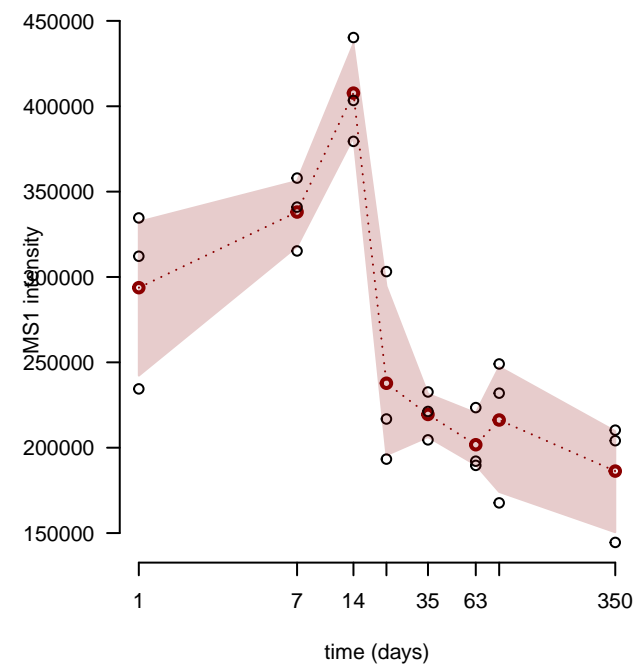

**Q9JJK2**  
**GN=LanC12**  
LanC (bacterial lantibiotic synthetase c ...

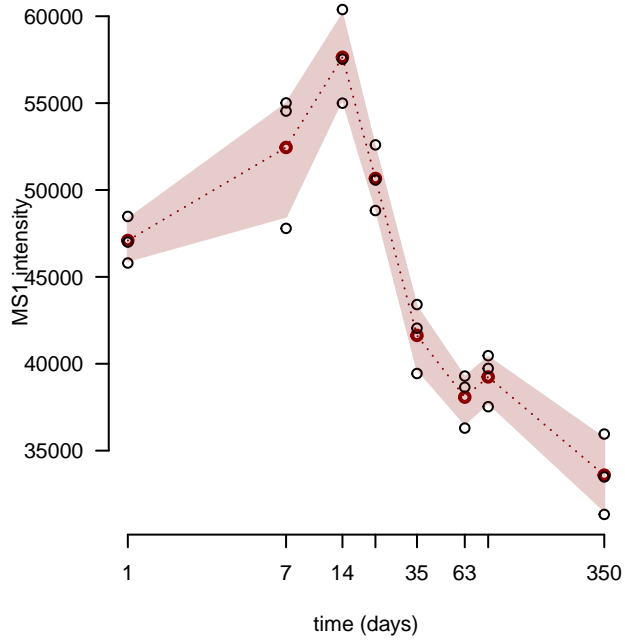

**Q9JJK5**  
**GN=Herpud1**  
homocysteine-inducible, endoplasmic reti ...

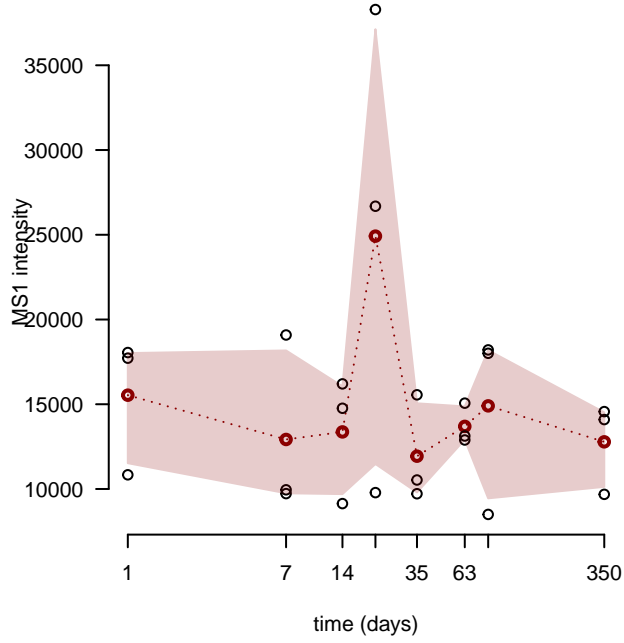

**Q9JL8**  
**GN=Sars2**  
seryl-aminoacyl-tRNA synthetase 2

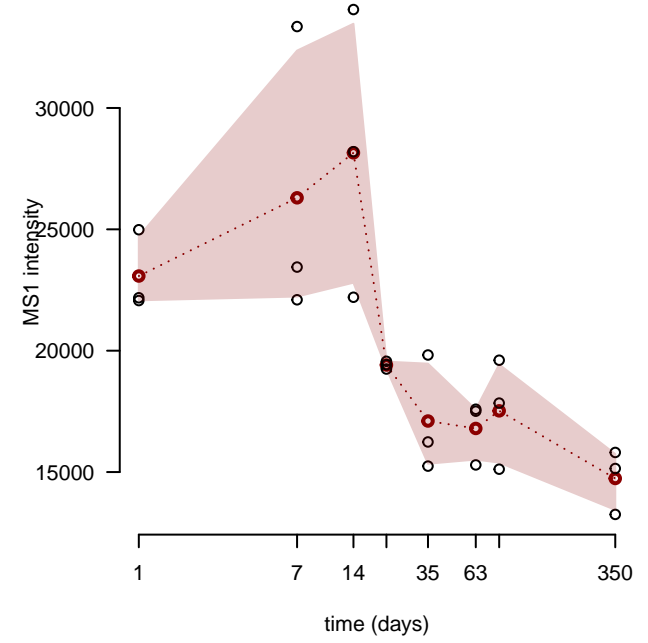

**Q9JJN0**  
**GN=Polh**  
polymerase (DNA directed), eta (RAD 30 r ...

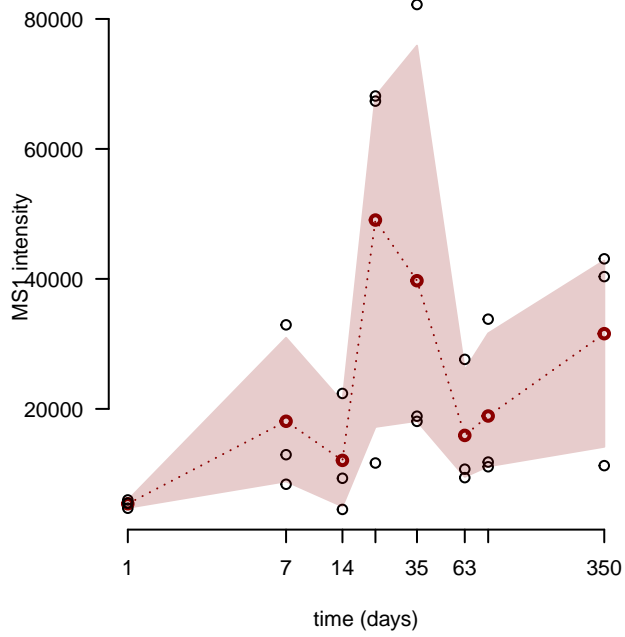

**Q9JJN5**  
**GN=Cpn1**  
carboxypeptidase N, polypeptide 1

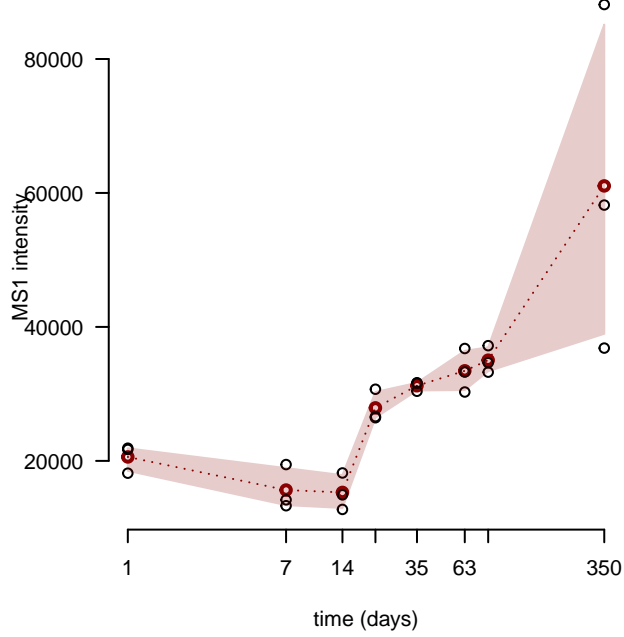

**Q9JJQ0**  
**GN=Pigb**  
phosphatidylinositol glycan anchor biosy ...

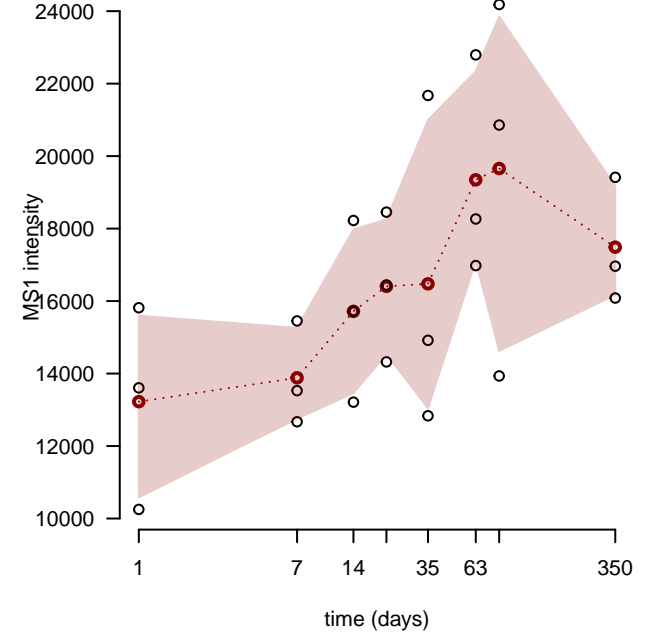

**Q9JJR2**  
**GN=Xlr5c**  
X-linked lymphocyte-regulated 5C

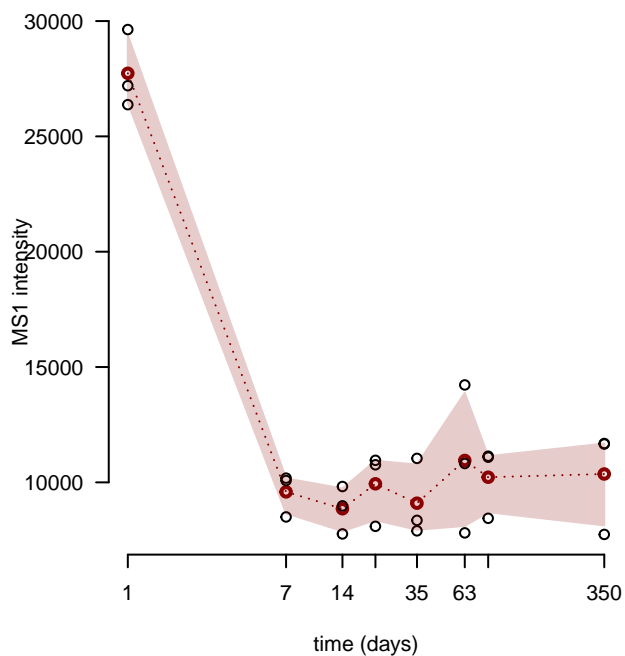

**Q9JJR8**  
**GN=Tmem9b**  
TMEM9 domain family, member B

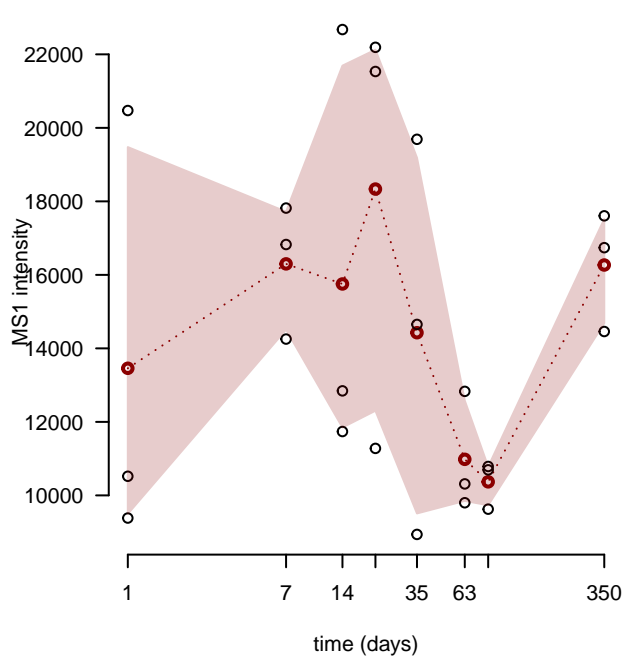

**Q9JJT0**  
**GN=Rcl1**  
RNA terminal phosphate cyclase-like 1

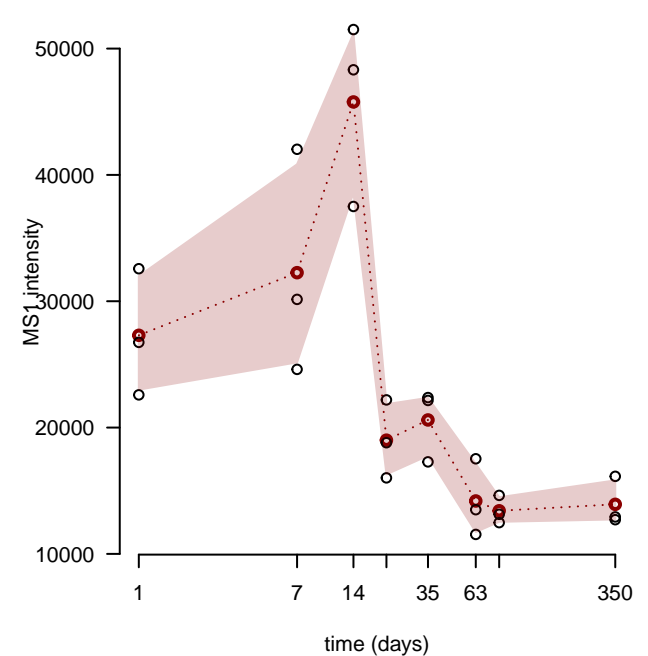

**Q9JJT9**  
GN=Phax  
phosphorylated adaptor for RNA export

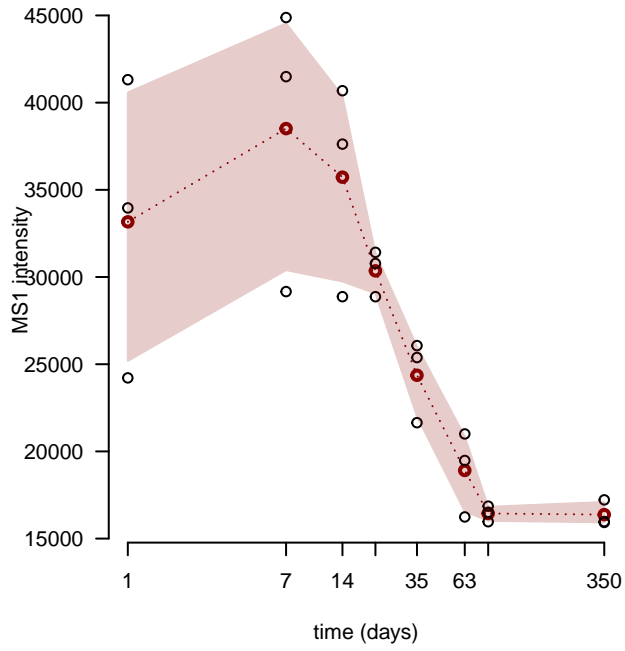

**Q9JJU8**  
GN=Sh3bgr1  
SH3-binding domain glutamic acid-rich pr ...

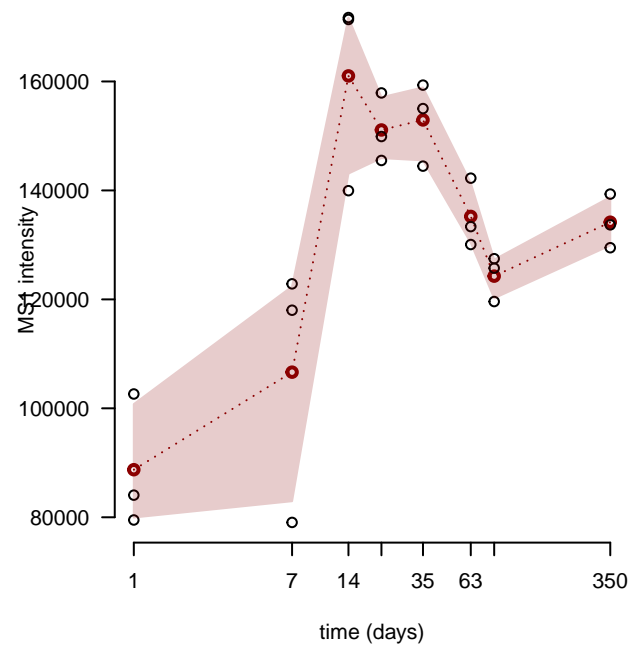

**Q9JJV2**  
GN=Pfn2  
profilin 2

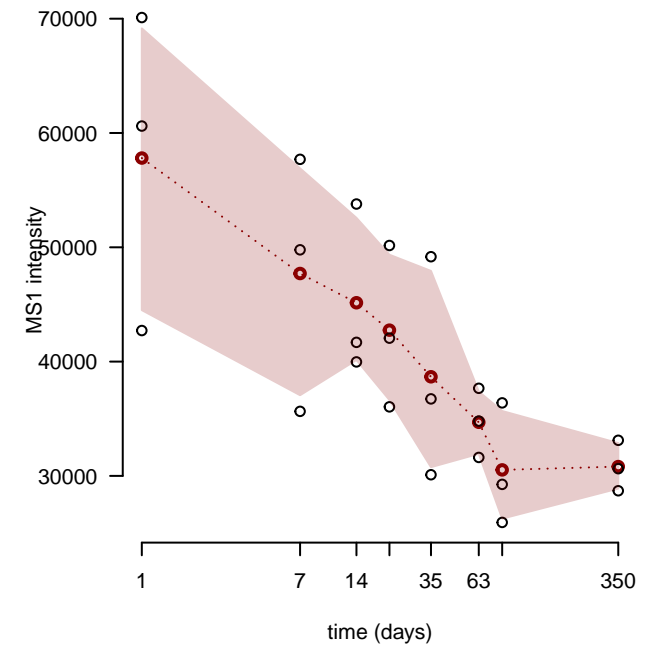

**Q9JJW0**  
GN=Pxmp4  
peroxisomal membrane protein 4

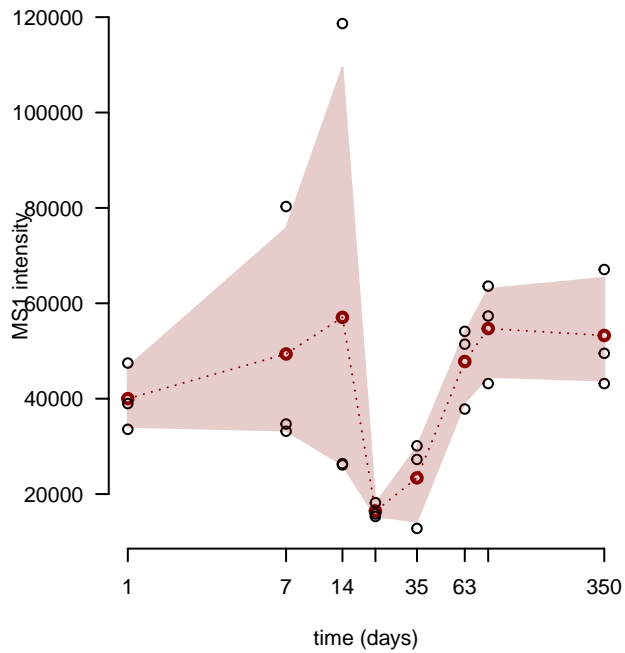

**Q9JJX6**  
GN=P2rx4  
purinergic receptor P2X, ligand-gated io ...

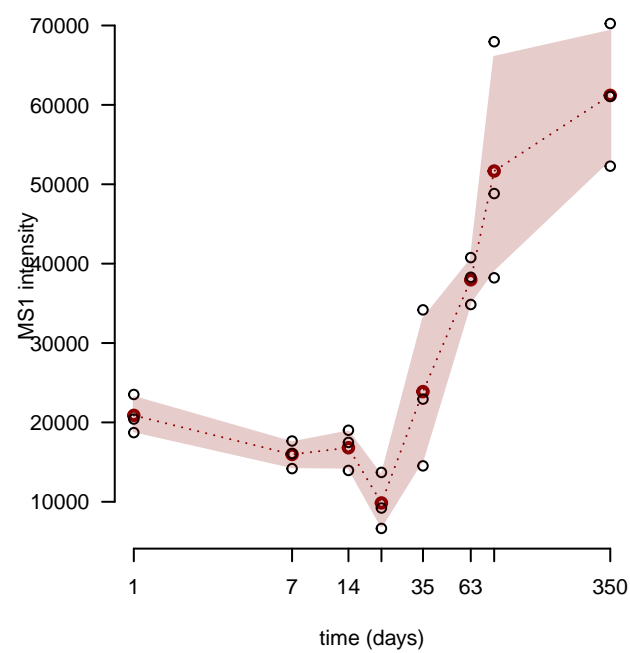

**Q9JJX7**  
GN=Tdp2  
tyrosyl-DNA phosphodiesterase 2

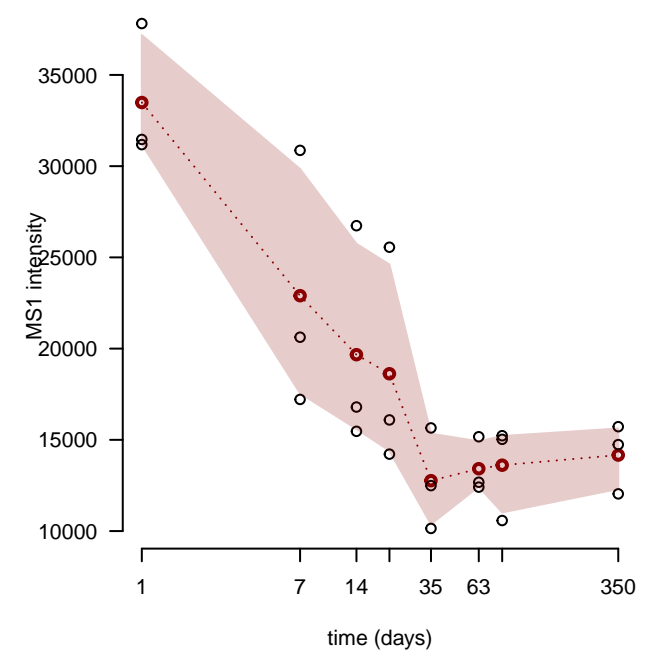

**Q9JJY4**  
GN=Ddx20  
DEAD box helicase 20

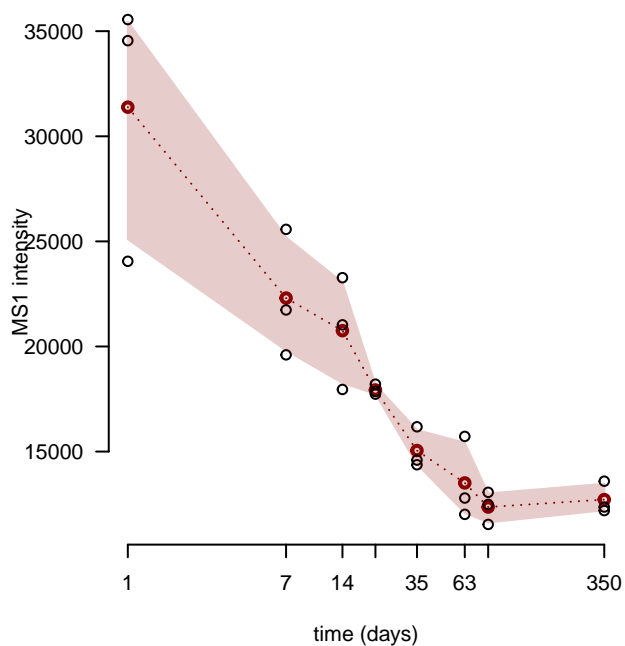

**Q9JJZ2**  
GN=Tuba8  
tubulin, alpha 8

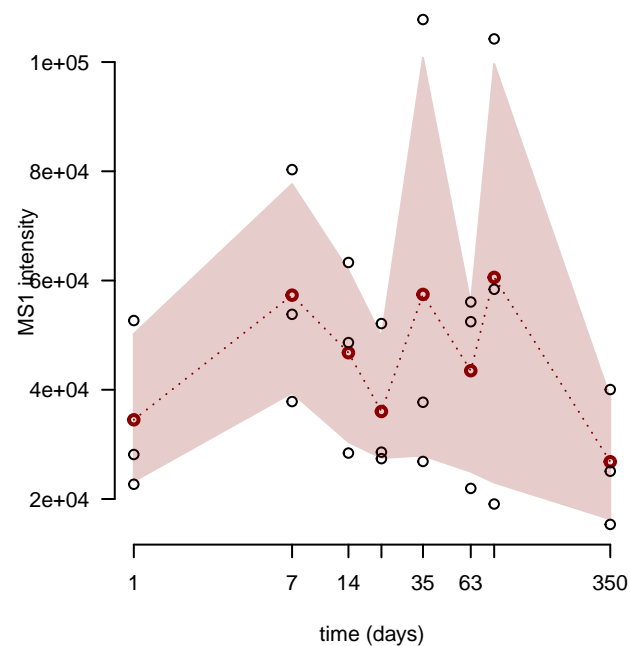

**Q9JJZ4**  
GN=Ube2j1  
ubiquitin-conjugating enzyme E2J 1

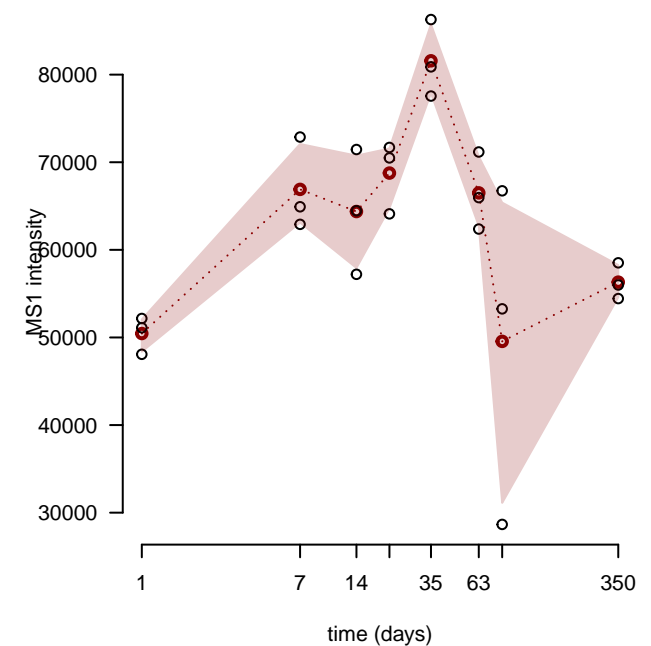

**Q9JJZ5**  
**GN=Egfl6**  
EGF-like-domain, multiple 6

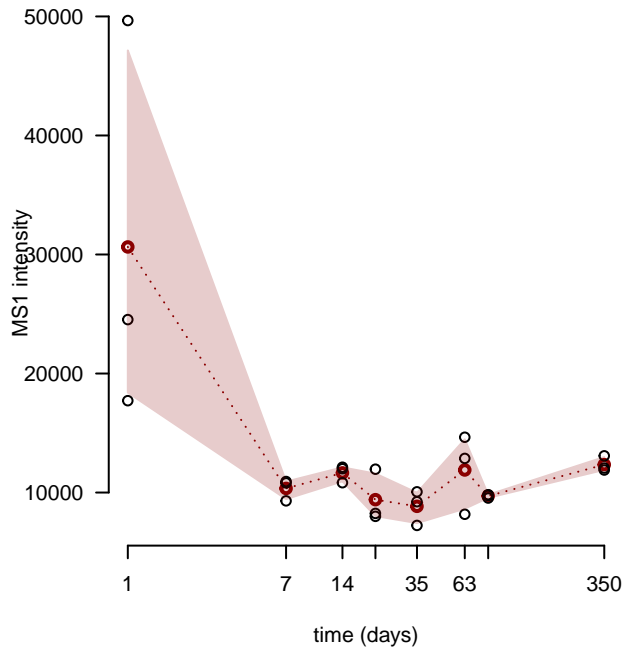

**Q9JJZ6**  
**GN=Klf13**  
Kruppel-like factor 13

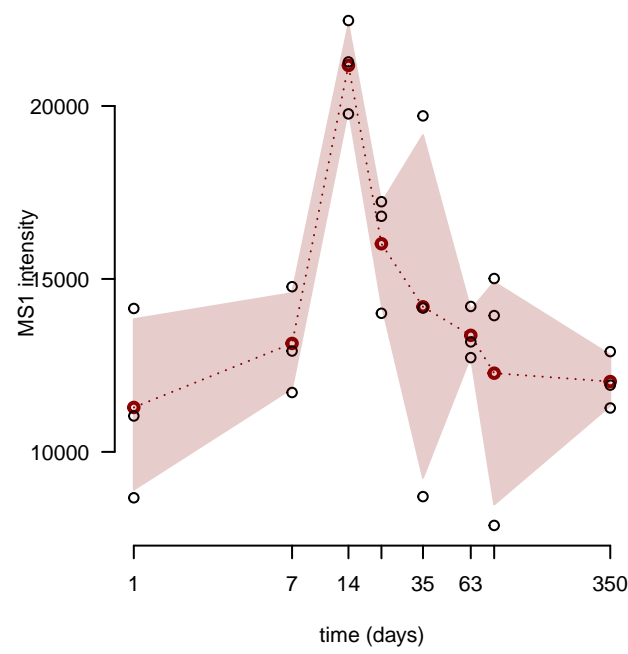

**Q9JK23**  
**GN=Psmg1**  
proteasome (prosome, macropain) assembly ...

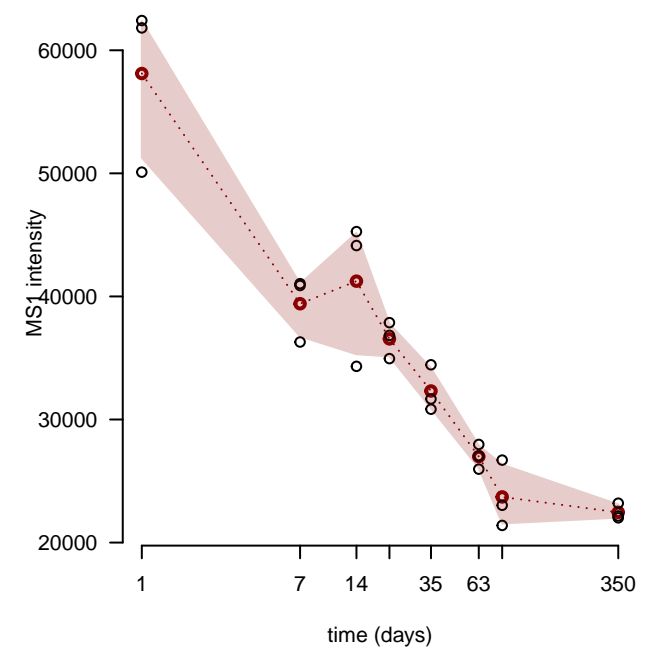

**Q9JK30**  
**GN=Orc3**  
origin recognition complex, subunit 3

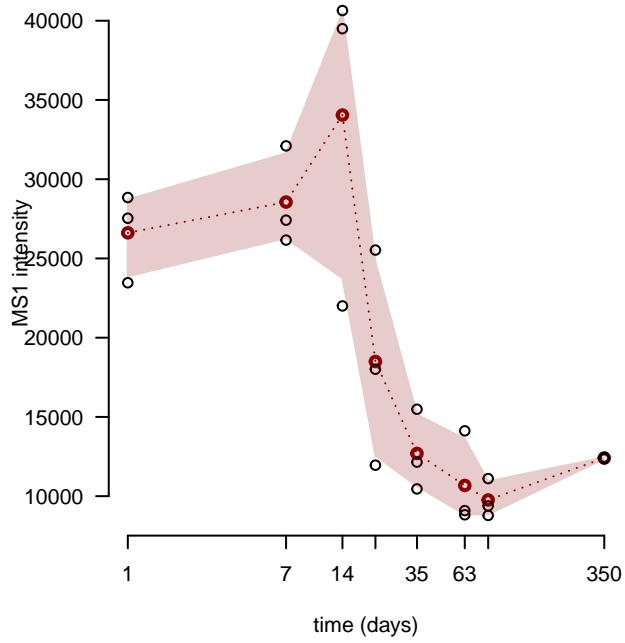

**Q9JK38**  
**GN=Gnpnat1**  
glucosamine-phosphate N-acetyltransferas ...

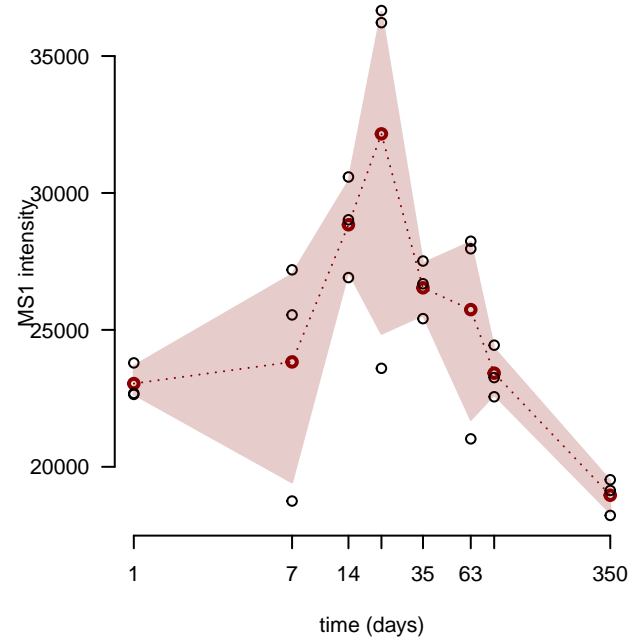

**Q9JK42**  
**GN=Pdk2**  
pyruvate dehydrogenase kinase, isoenzyme ...

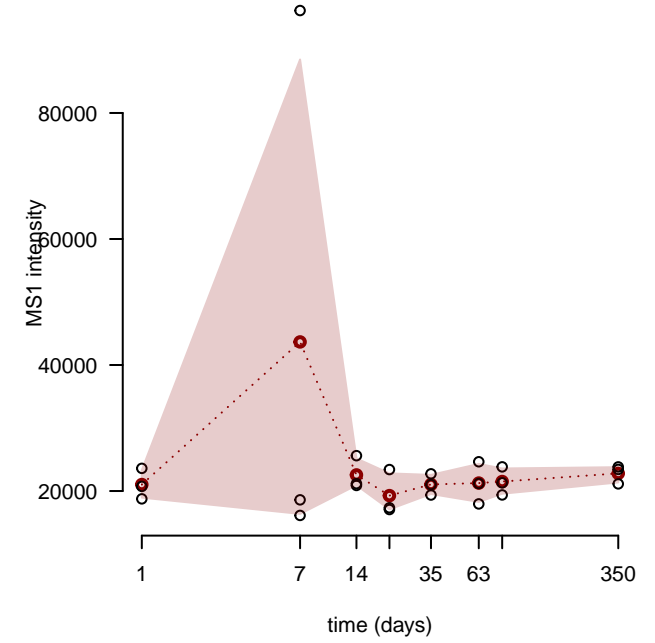

**Q9JK48**  
**GN=Sh3glb1**  
SH3-domain GRB2-like B1 (endophilin)

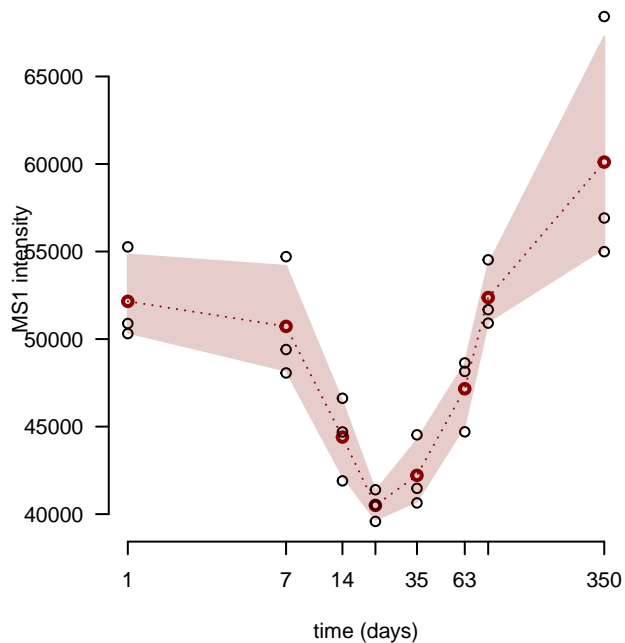

**Q9JK53**  
**GN=Prep**  
proline arginine-rich end leucine-rich r ...

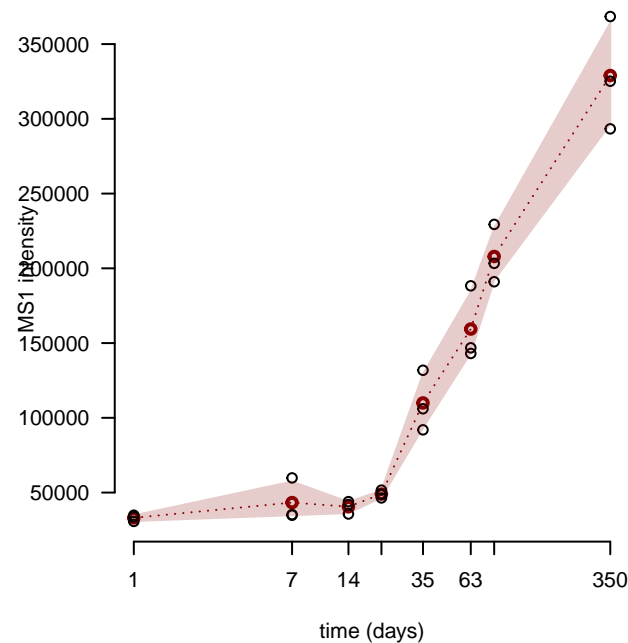

**Q9JK81**  
**GN=Myg1**  
melanocyte proliferating gene 1

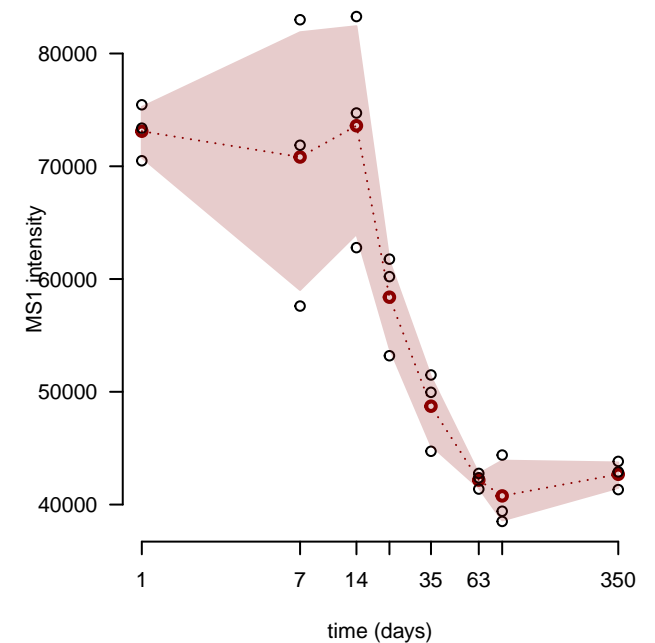



**Q9JK83**  
GN=Pard6b  
par-6 family cell polarity regulator bet ...

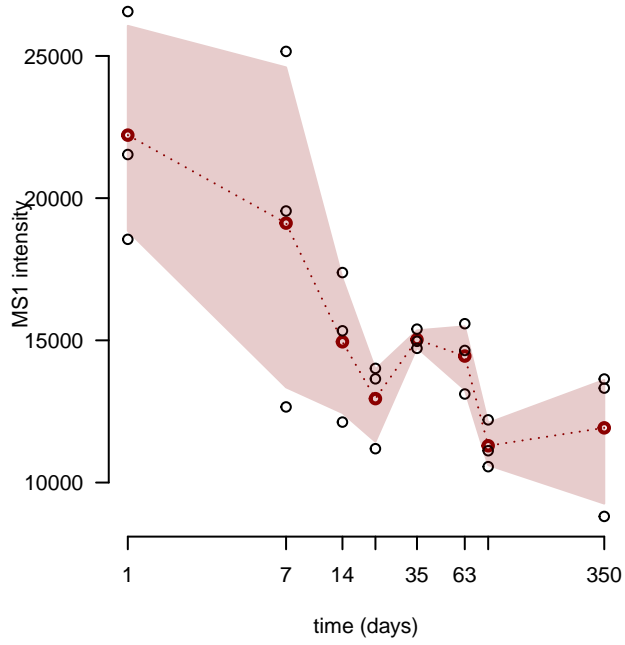

**Q9JK84**  
GN=Pard6g  
par-6 family cell polarity regulator gam ...

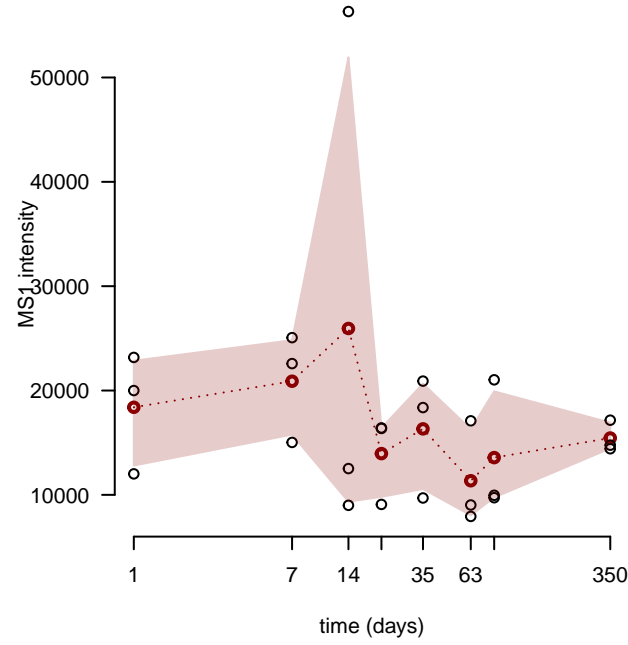

**Q9JK91**  
GN=Mlh1  
mutL homolog 1

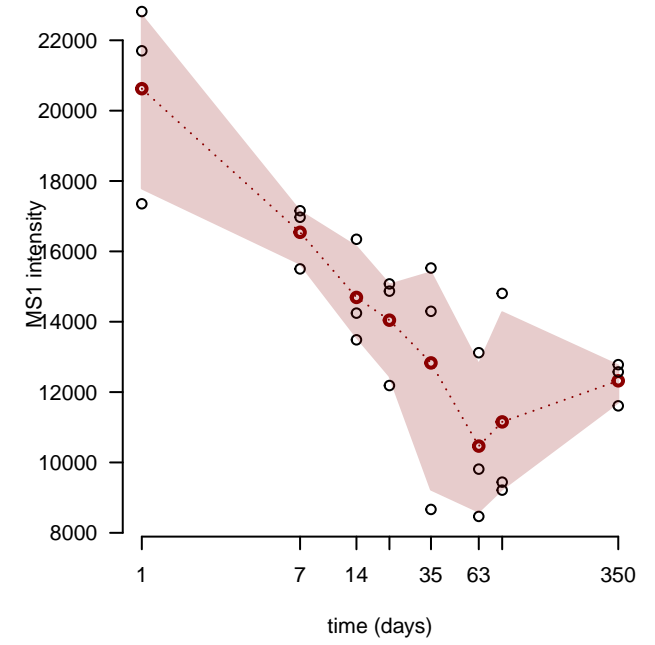

**Q9JK92**  
GN=Hspb8  
heat shock protein 8

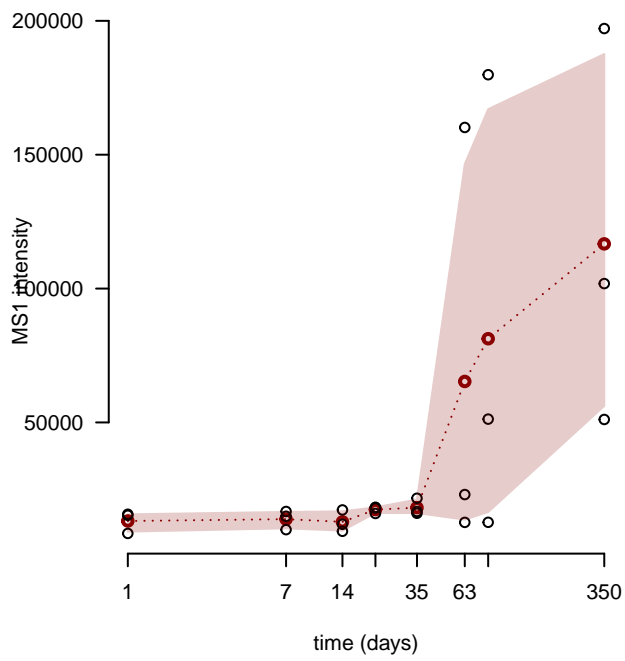

**Q9JKB1**  
GN=Uch13  
ubiquitin carboxyl-terminal esterase L3 ...

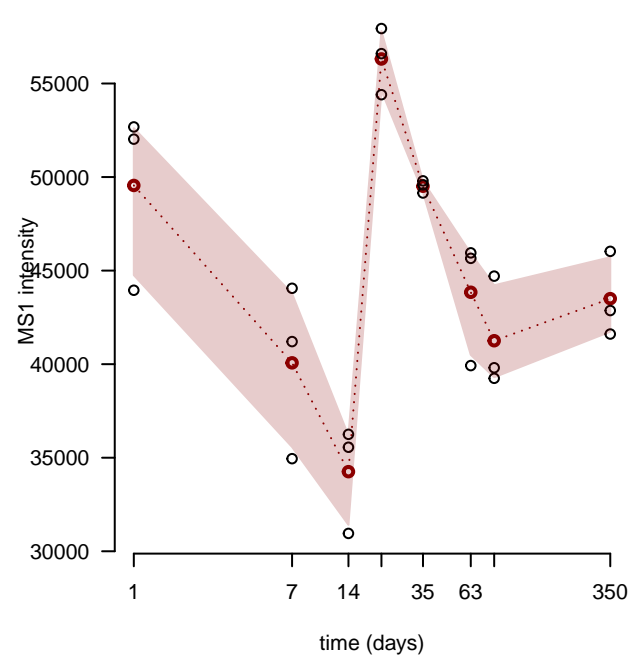

**Q9JKB3**  
GN=Ybx3  
Y box protein 3

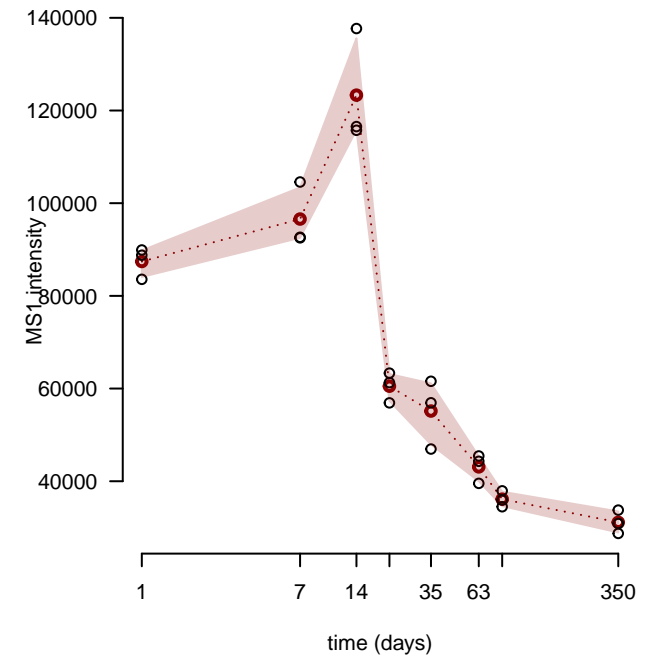

**Q9JKB3**  
GN=Ybx3  
Y box protein 3

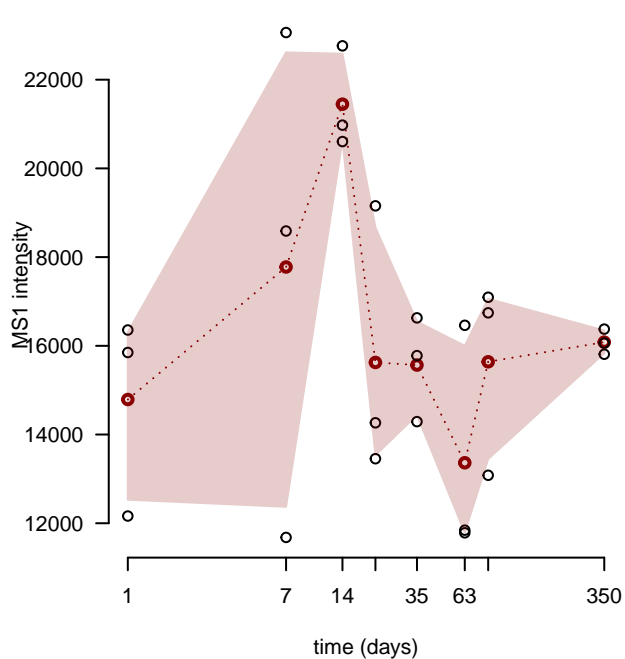

**Q9JKC7**  
GN=Ap4m1  
adaptor-related protein complex AP-4, mu ...

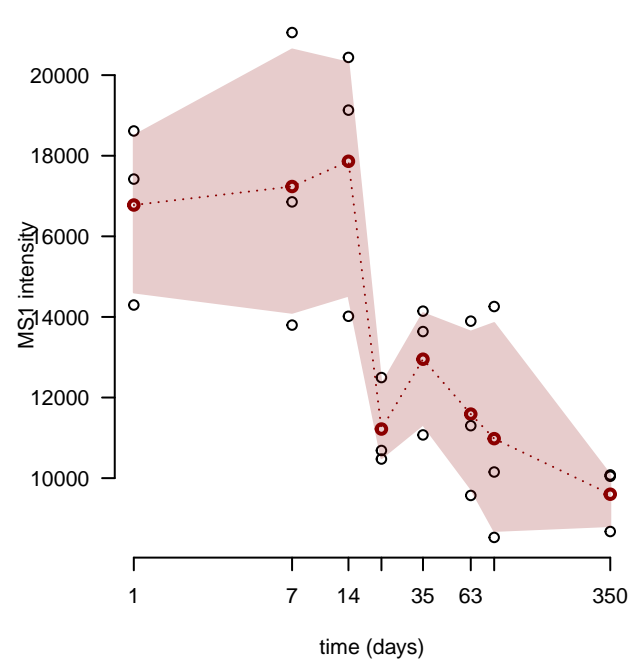

**Q9JKC8**  
GN=Ap3m1  
adaptor-related protein complex 3, mu 1 ...

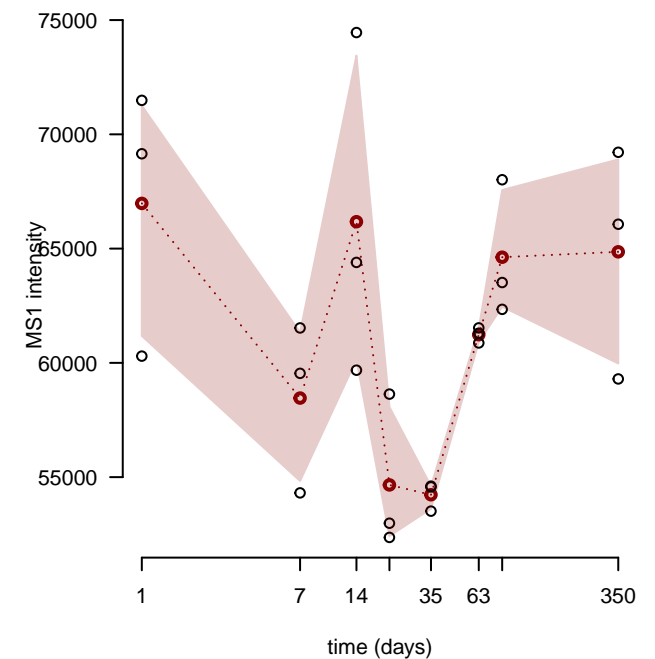

**Q9JKD3**  
**GN=Scamp5**  
secretory carrier membrane protein 5

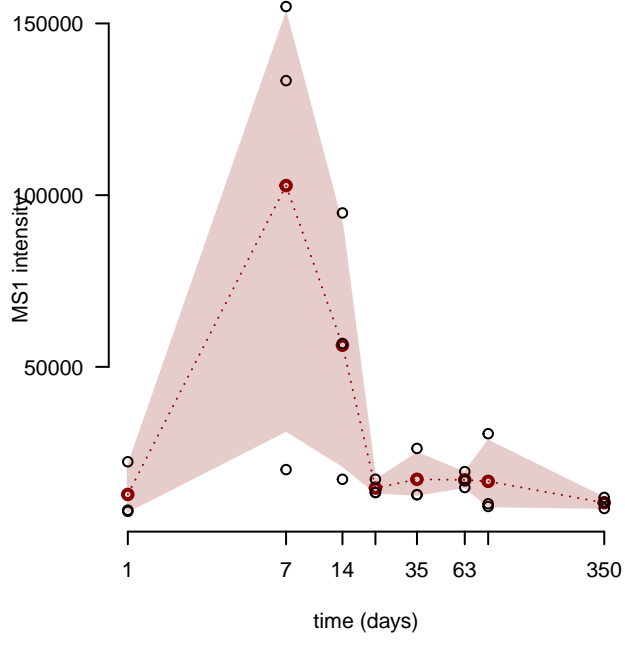

**Q9JKF1**  
**GN=lqgap1**  
IQ motif containing GTPase activating pr ...

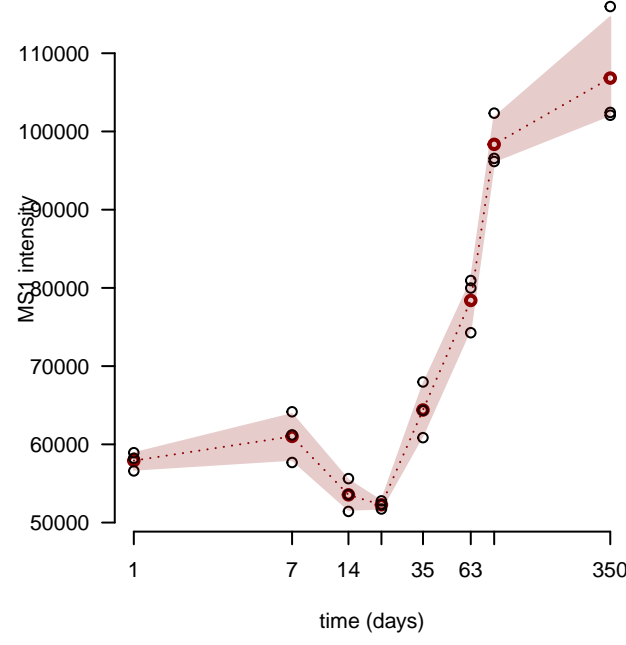

**Q9JKF6**  
**GN=Nectin1**  
nectin cell adhesion molecule 1

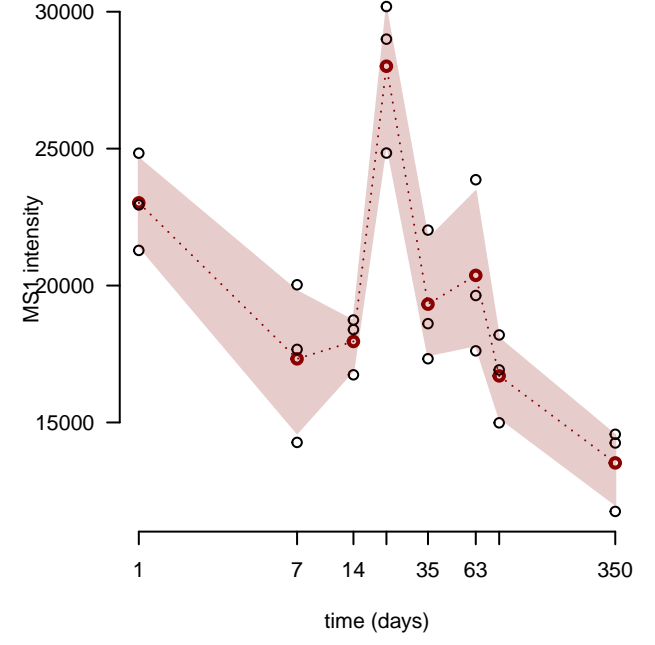

**Q9JKF7**  
**GN=Mrpl39**  
mitochondrial ribosomal protein L39

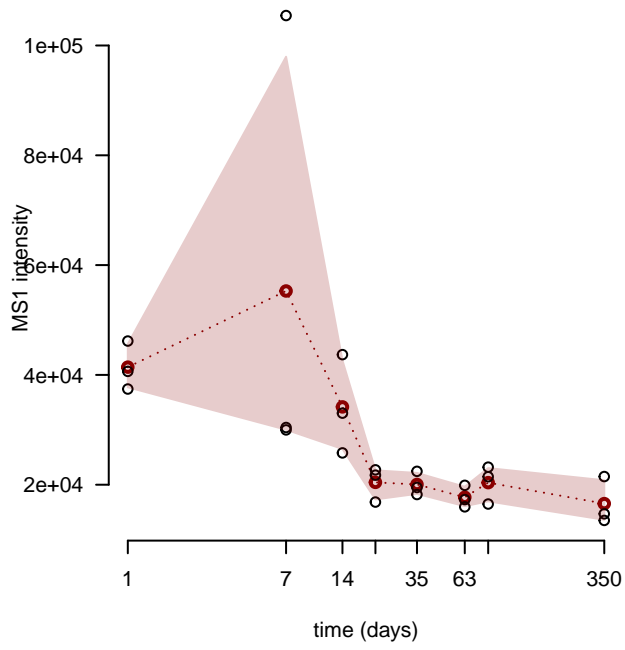

**Q9JKK1**  
**GN=Stx6**  
syntaxin 6

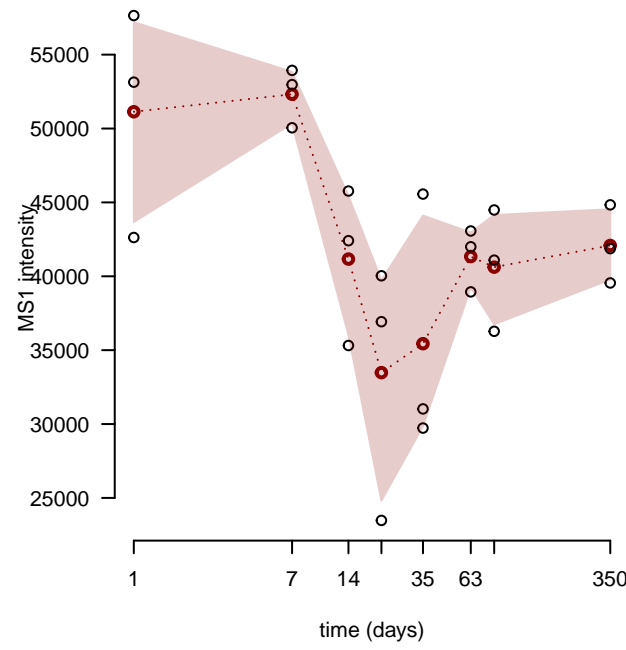

**Q9JKK7**  
**GN=Tmod2**  
tropomodulin 2

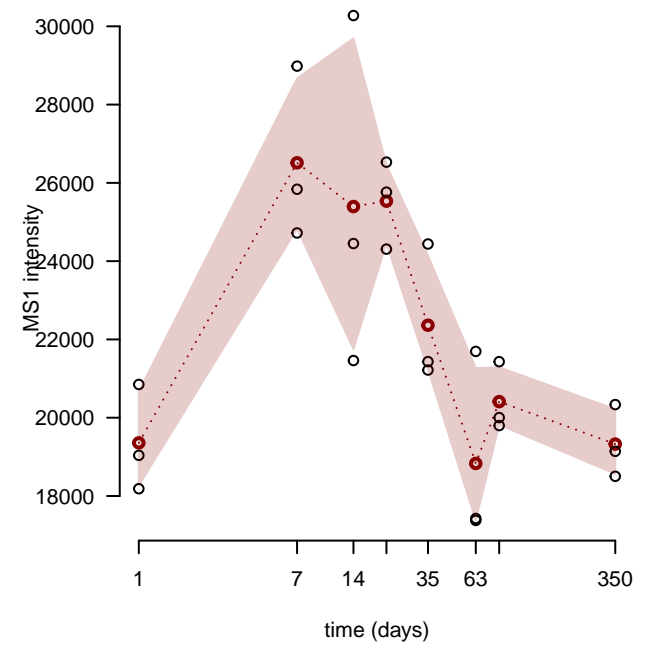

**Q9JKK8**  
**GN=Atr**  
ataxia telangiectasia and Rad3 related

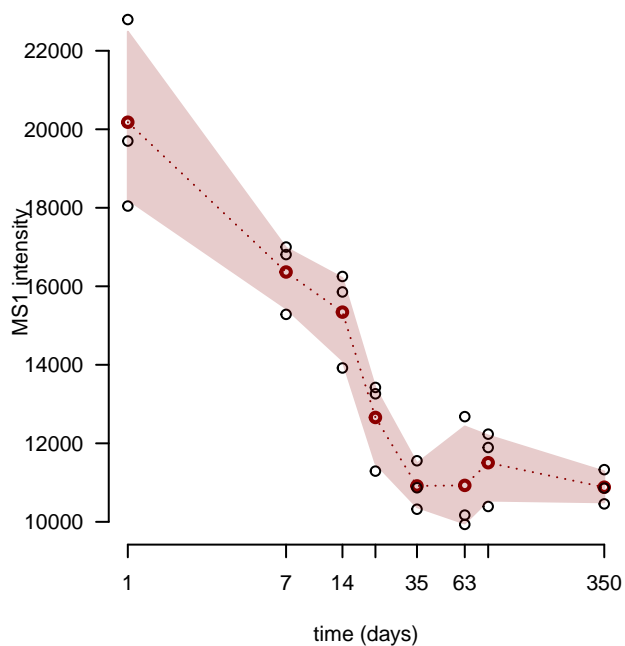

**Q9JKL4**  
**GN=Ndufaf3**  
NADH:ubiquinone oxidoreductase complex a ...

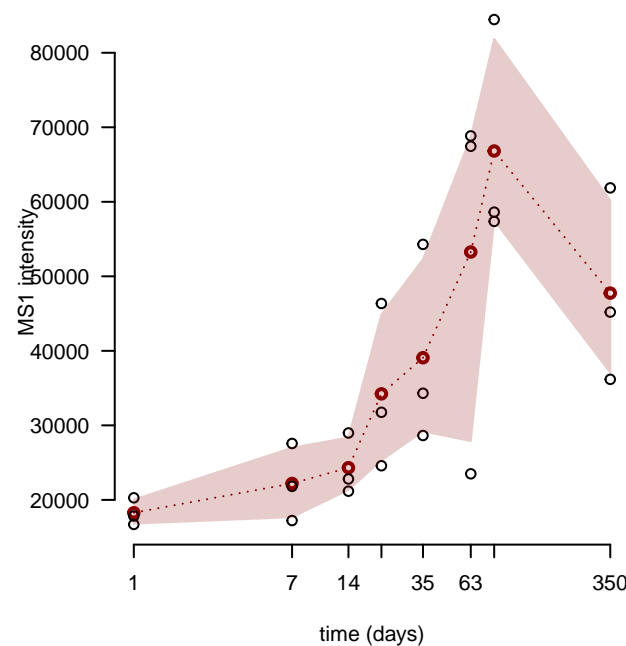

**Q9JKN1**  
**GN=Slc30a7**  
solute carrier family 30 (zinc transport ...

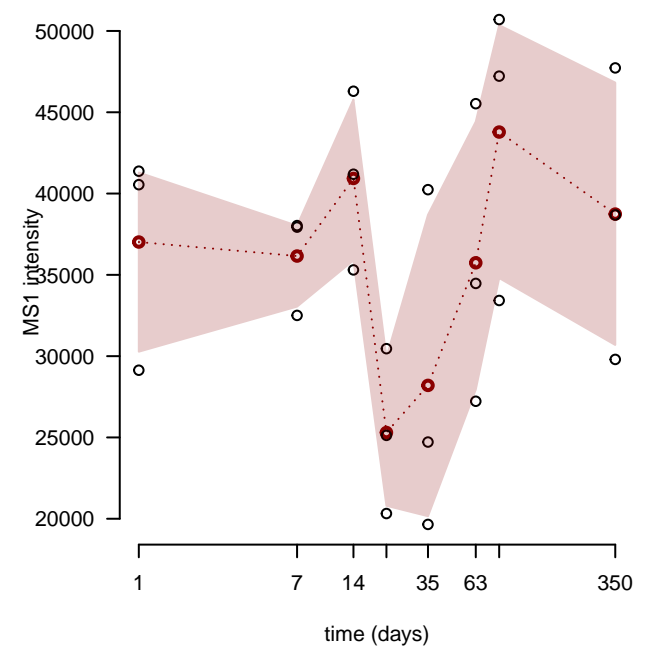

**Q9JKN6**  
**GN=Nova1**  
NOVA alternative splicing regulator 1

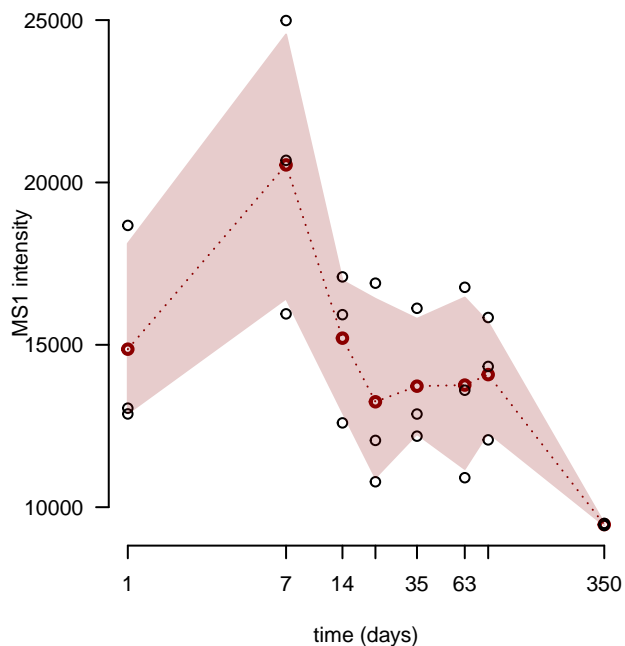

**Q9JKP5**  
**GN=Mbn1**  
muscleblind like splicing factor 1

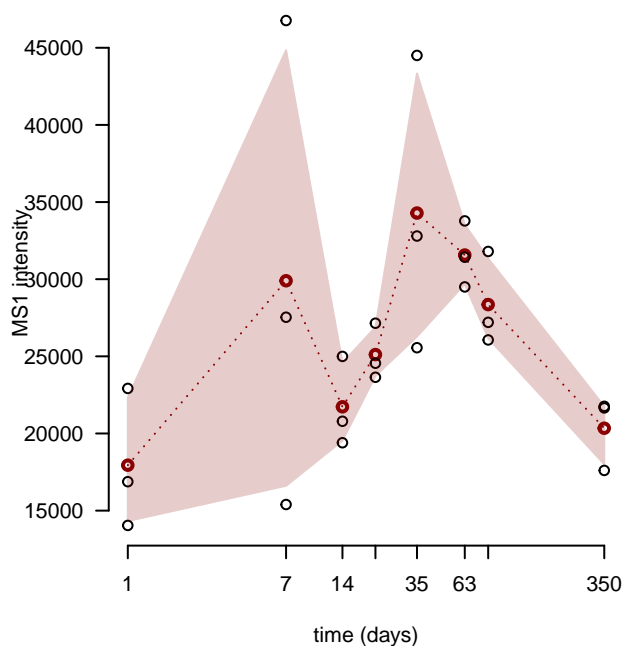

**Q9JKP7**  
**GN=Pole3**  
polymerase (DNA directed), epsilon 3 (p1 ...

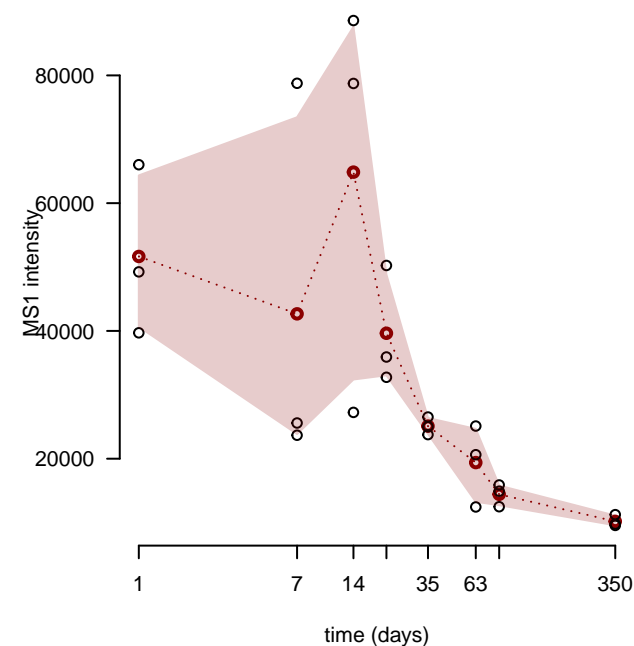

**Q9JKP8**  
**GN=Chrac1**  
chromatin accessibility complex 1

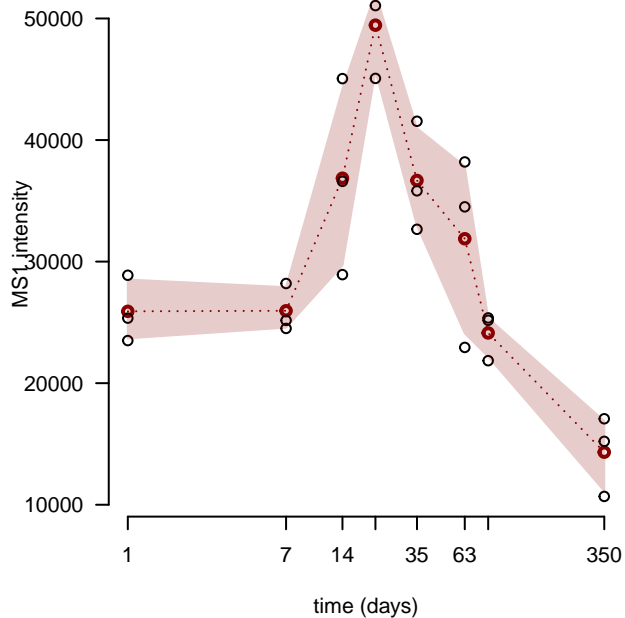

**Q9JKR6**  
**GN=Hyou1**  
hypoxia up-regulated 1

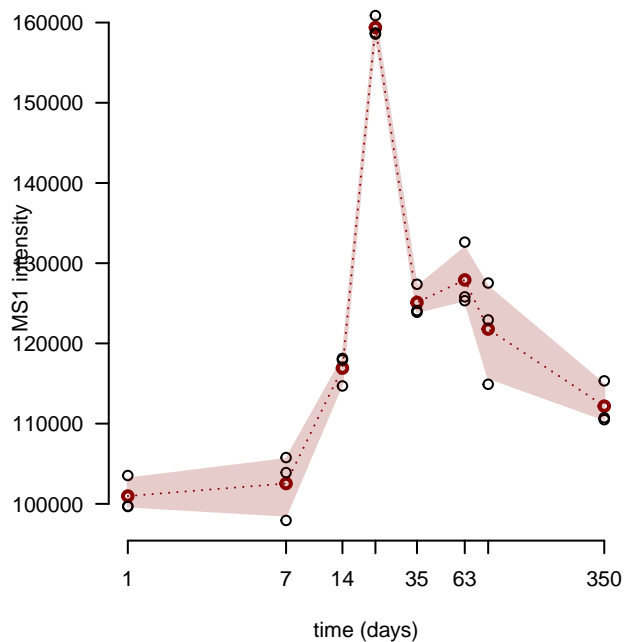

**Q9JKS4**  
**GN=Ldb3**  
LIM domain binding 3

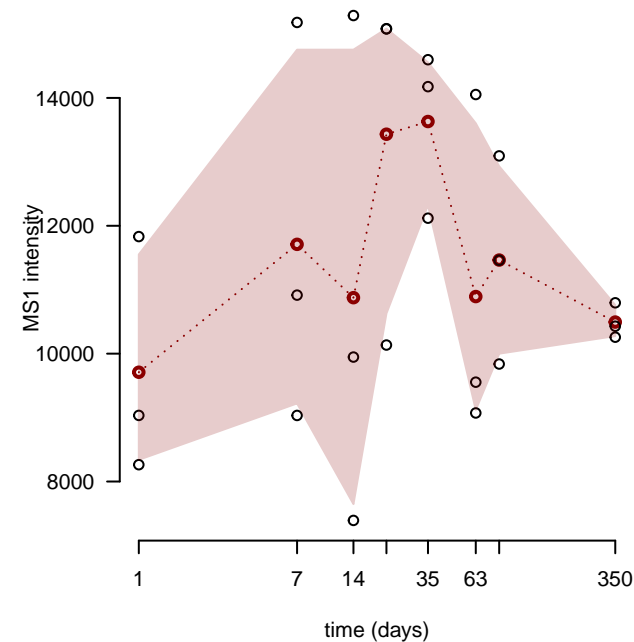

**Q9JKS4**  
**GN=Ldb3**  
LIM domain binding 3

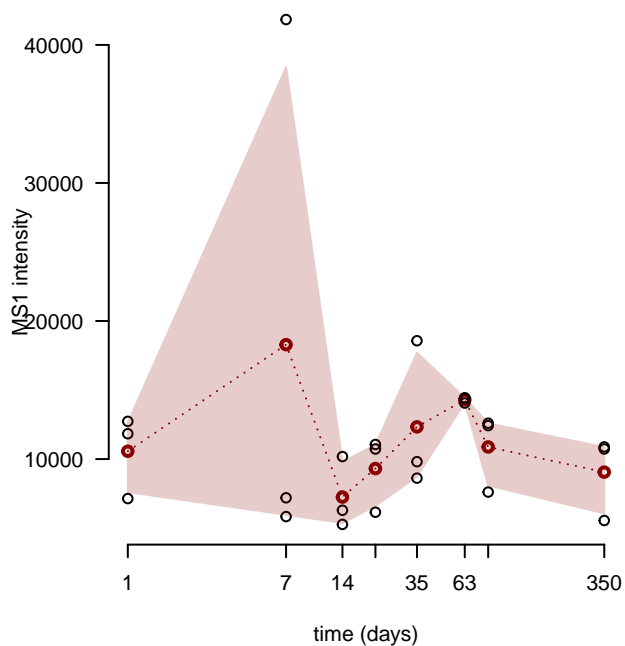

**Q9JKS5**  
**GN=Habp4**  
hyaluronic acid binding protein 4

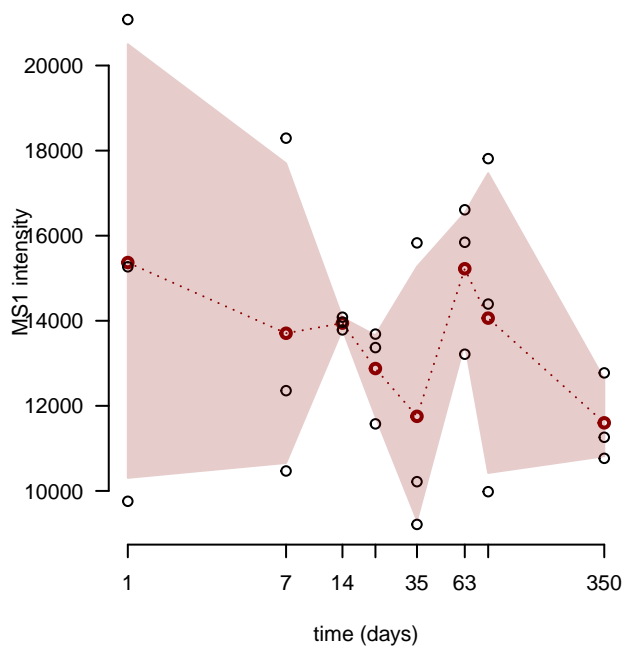

**Q9JKV1**  
**GN=Adrm1**  
adhesion regulating molecule 1 26S prote ...

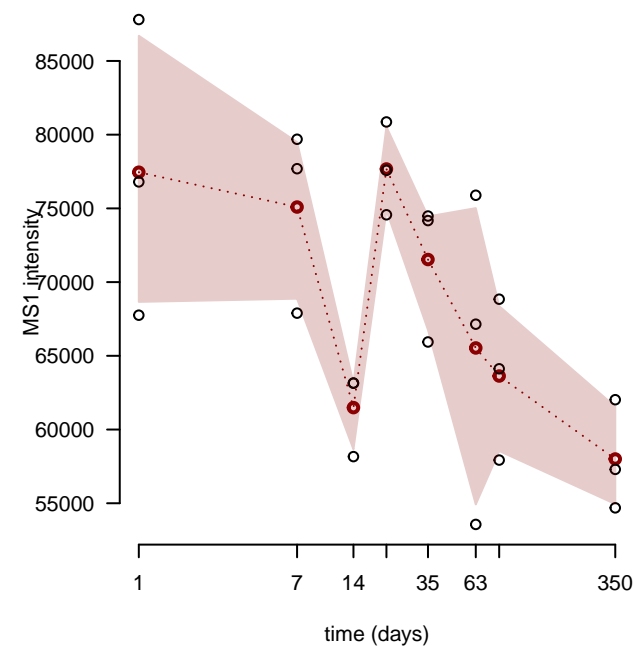

**Q9JKV5**  
**GN=Scamp4**  
secretory carrier membrane protein 4

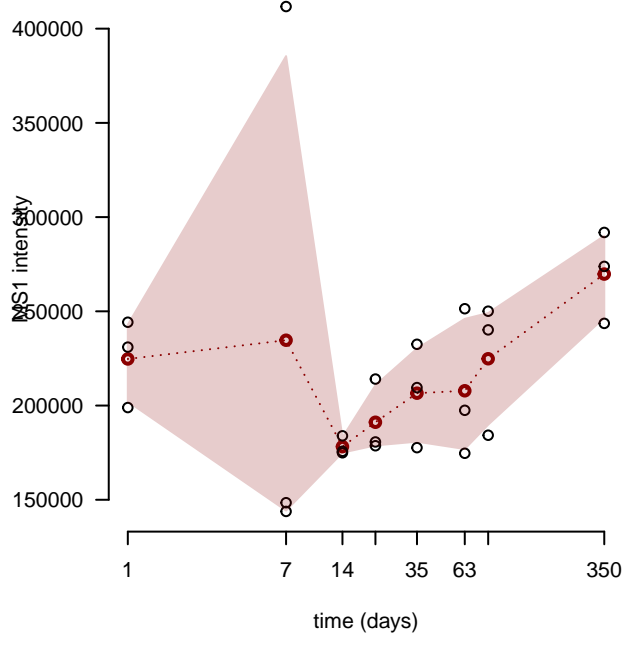

**Q9JKW0**  
**GN=Arl6ip1**  
ADP-ribosylation factor-like 6 interacti ...

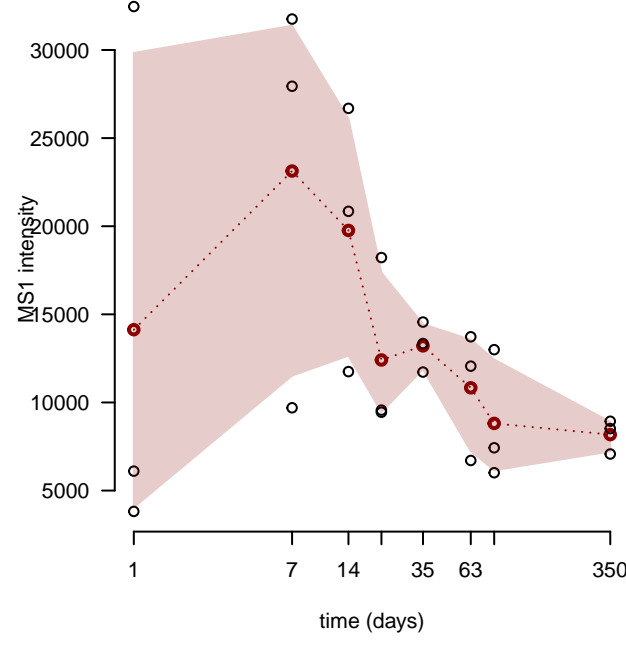

**Q9JKX4**  
**GN=Aatf**  
apoptosis antagonizing transcription fac ...

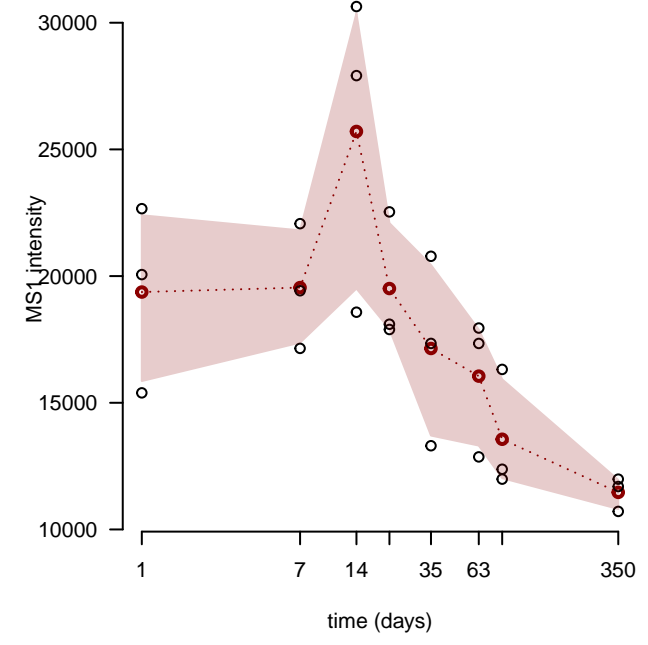

**Q9JKX6**  
**GN=Nudt5**  
nudix (nucleoside diphosphate linked moi ...

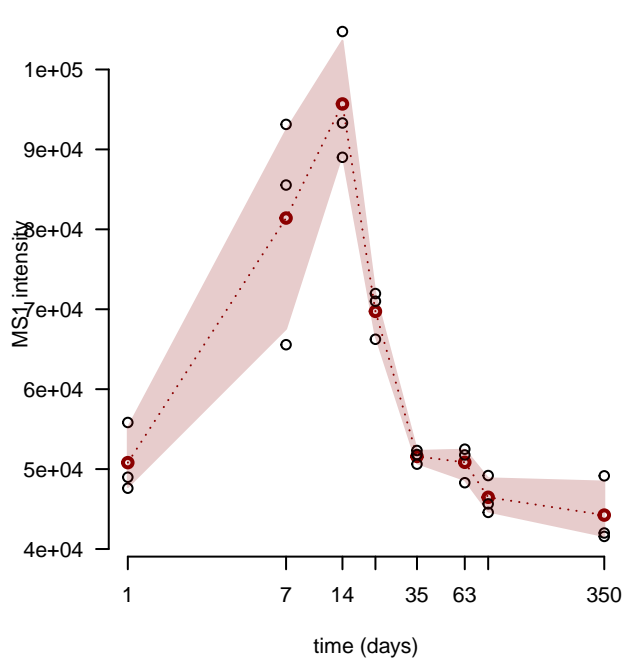

**Q9JKY0**  
**GN=Cnot9**  
CCR4-NOT transcription complex, subunit ...

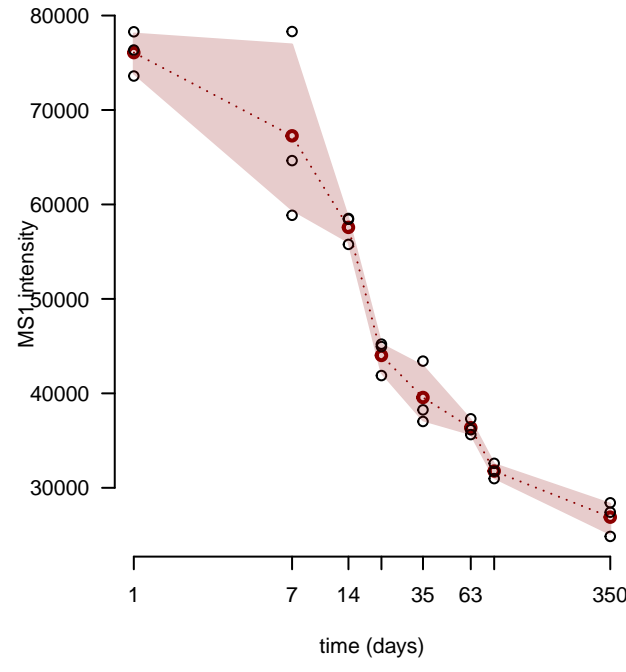

**Q9JKY5**  
**GN=Hip1r**  
huntingtin interacting protein 1 related

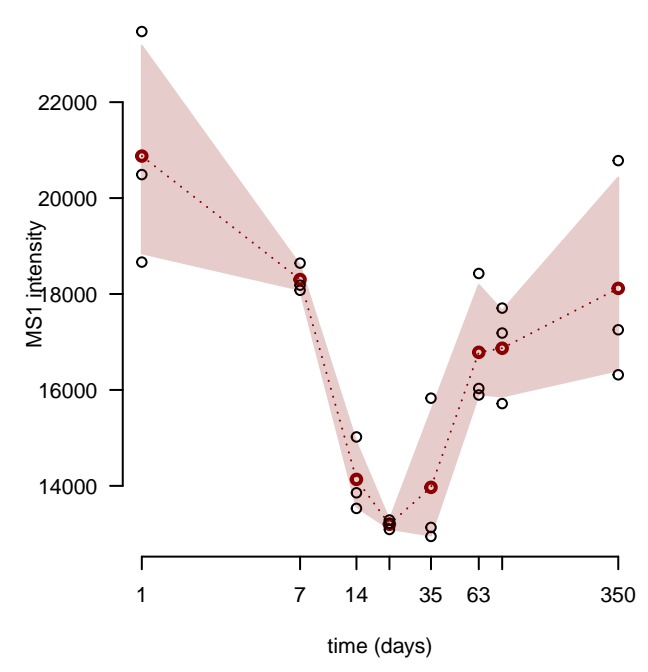

**Q9JKZ2**  
**GN=Slc5a3**  
solute carrier family 5 (inositol transp ...

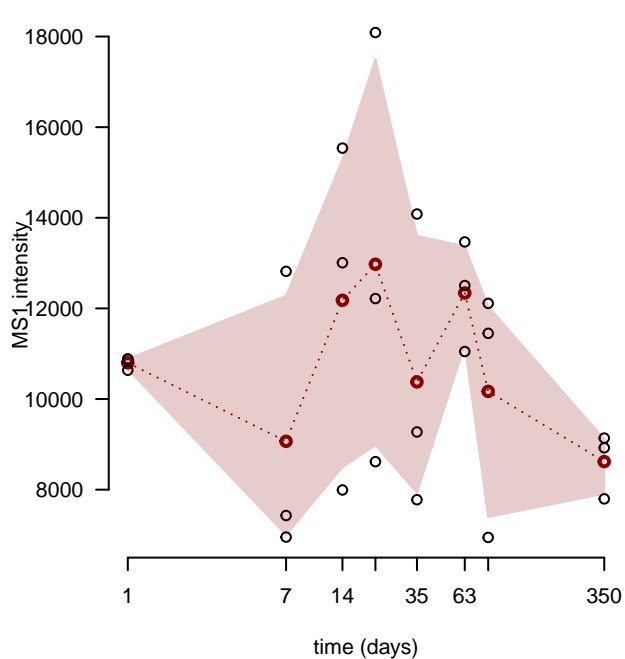

**Q9JL06**  
**GN=Lpar2**  
lysophosphatidic acid receptor 2

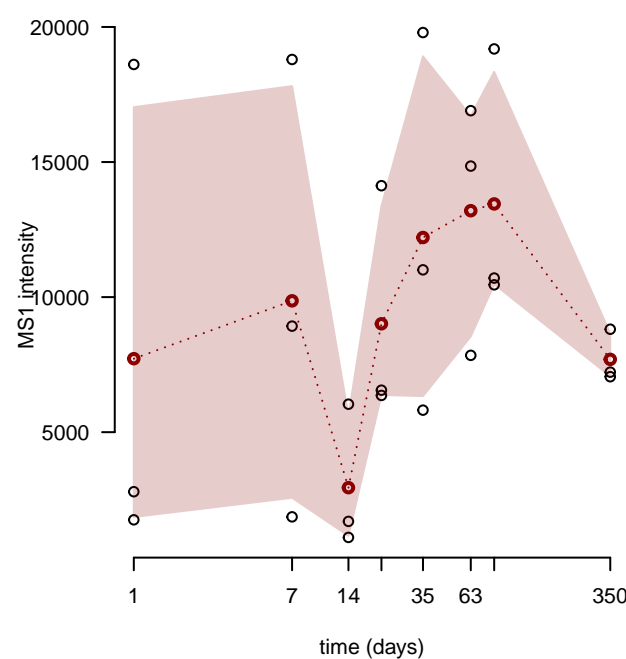

**Q9JL15**  
**GN=Lgals8**  
lectin, galactose binding, soluble 8

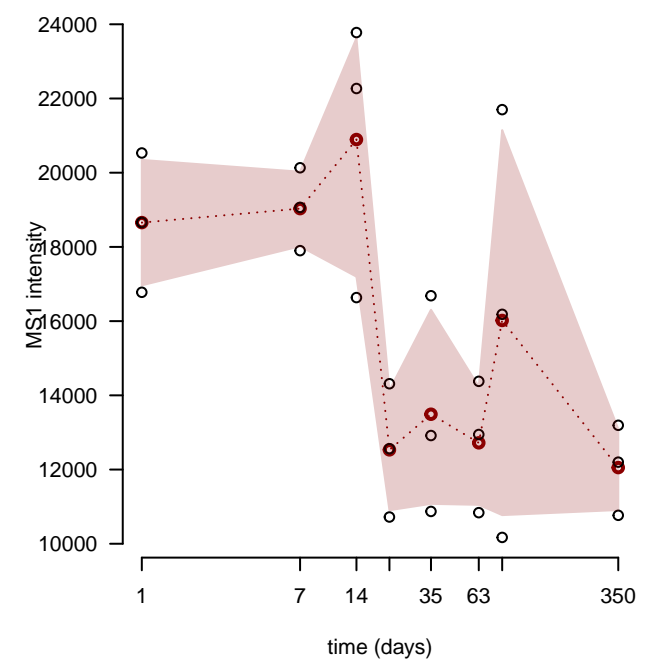

**Q9JL16**  
GN=Isg20  
interferon-stimulated protein

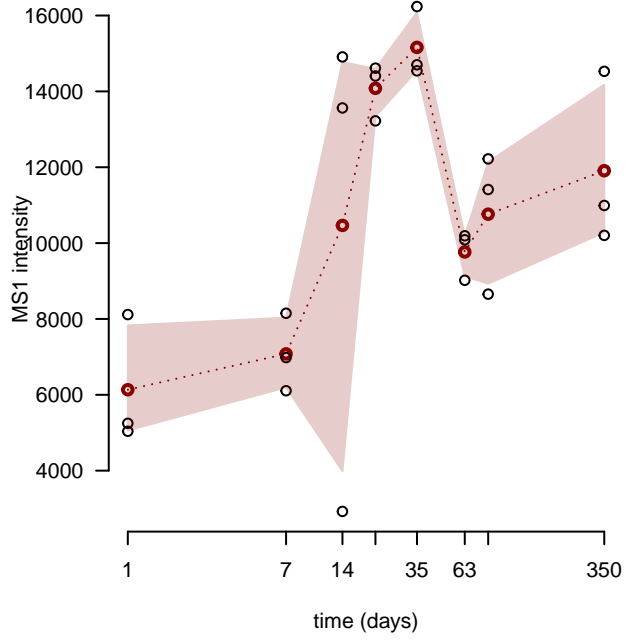

**Q9JL18**  
GN=Bace2  
beta-site APP-cleaving enzyme 2

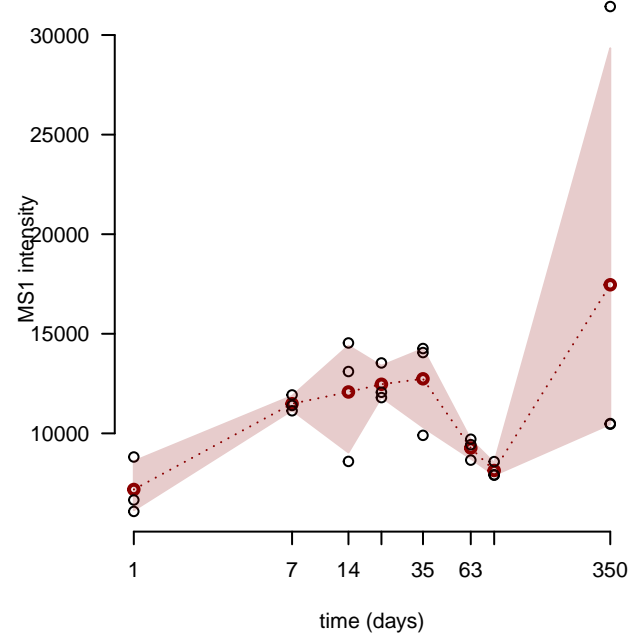

**Q9JL19**  
GN=Ncoa6  
nuclear receptor coactivator 6

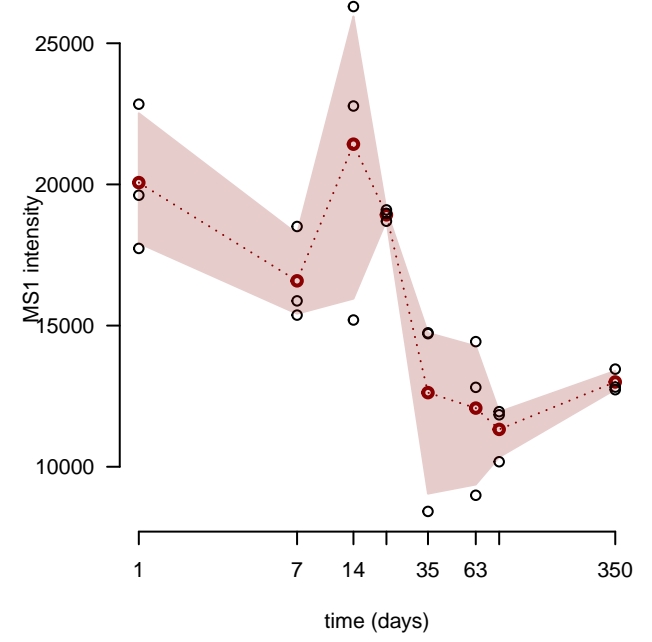

**Q9JL35**  
GN=Hmgn5  
high-mobility group nucleosome binding d ...

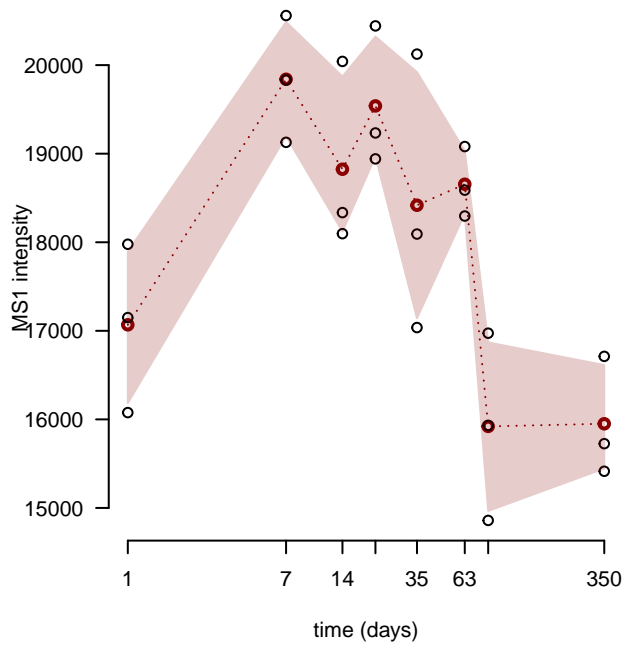

**Q9JL56**  
GN=Gde1  
glycerophosphodiester phosphodiesterase ...

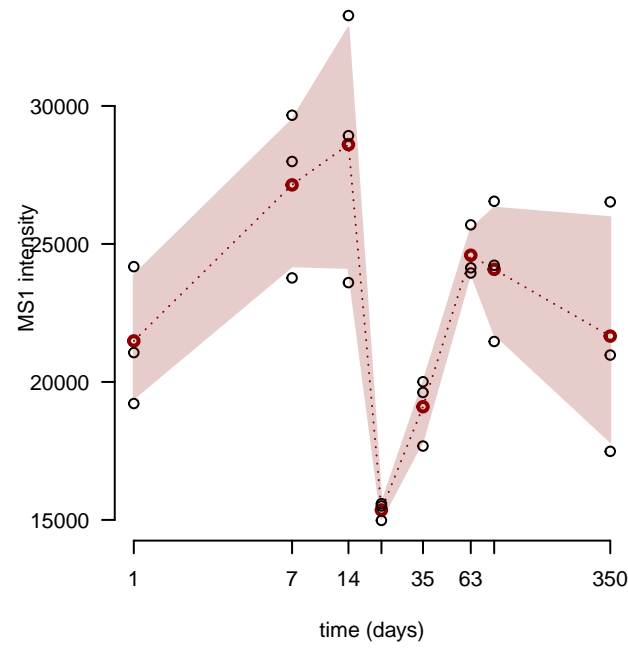

**Q9JL60**  
GN=Gmeb1  
glucocorticoid modulatory element bindin ...

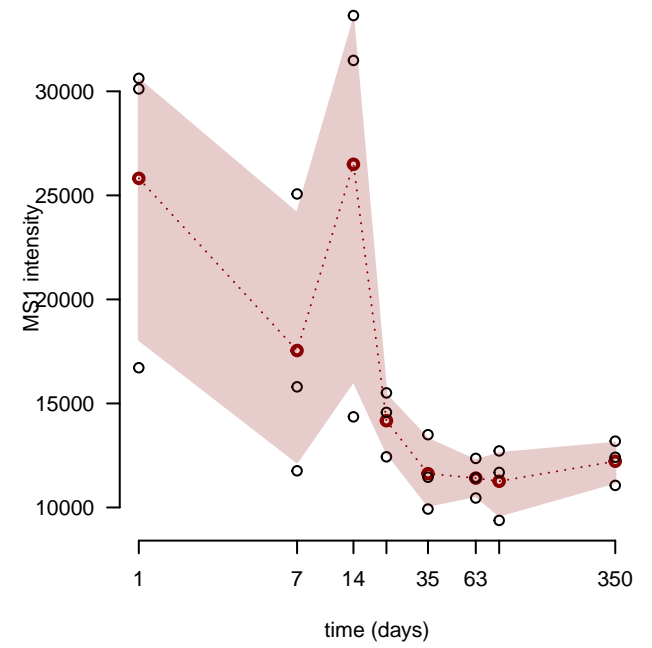

**Q9JL61**  
GN=Rfx5  
regulatory factor X, 5 (influences HLA c ...

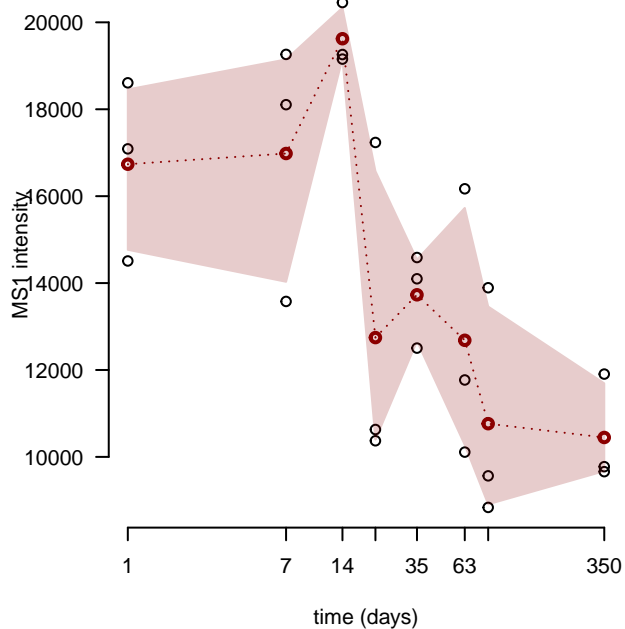

**Q9JL62**  
GN=Gltp  
glycolipid transfer protein

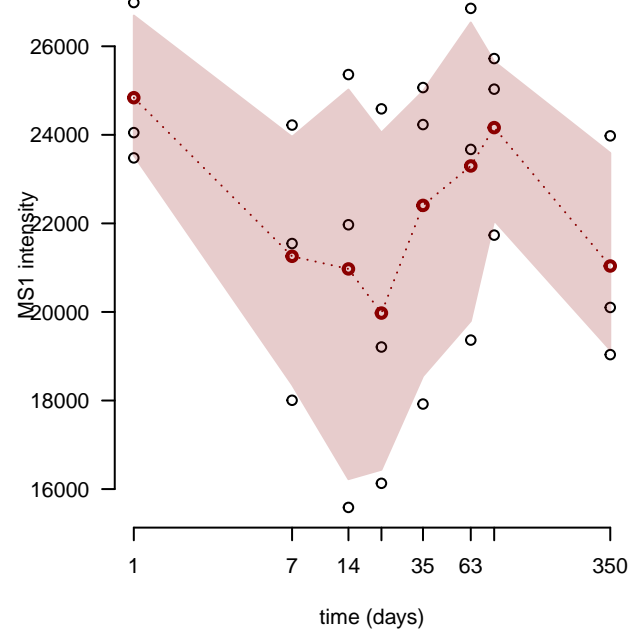

**Q9JLB0**  
GN=Mpp6

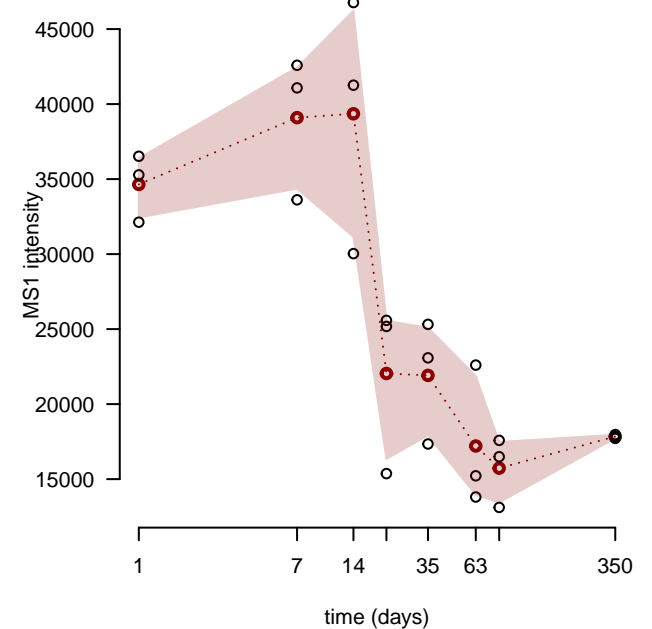

**Q9JLB2**  
GN=Mpp5

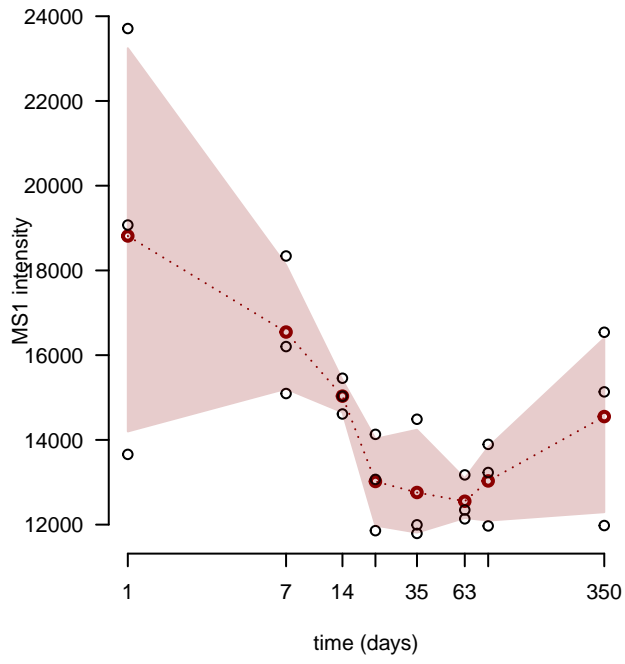

**Q9JLC8**  
GN=Sacs  
sacsin

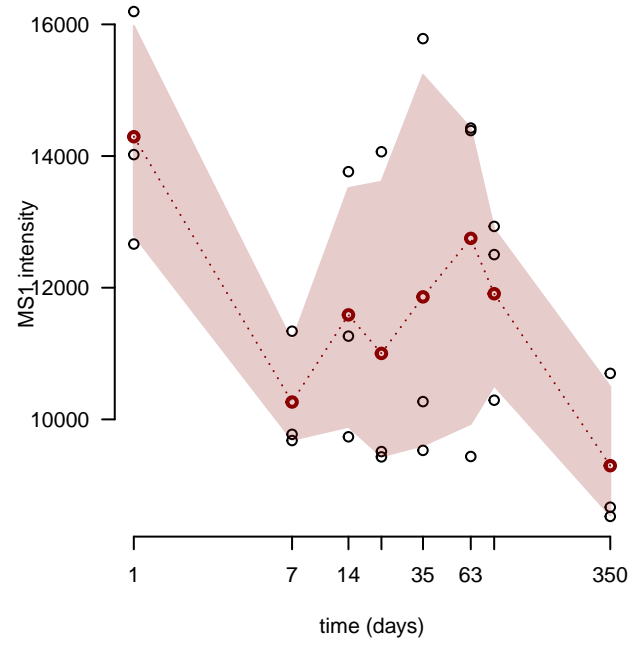

**Q9JLF6**  
GN=Tgm1  
transglutaminase 1, K polypeptide

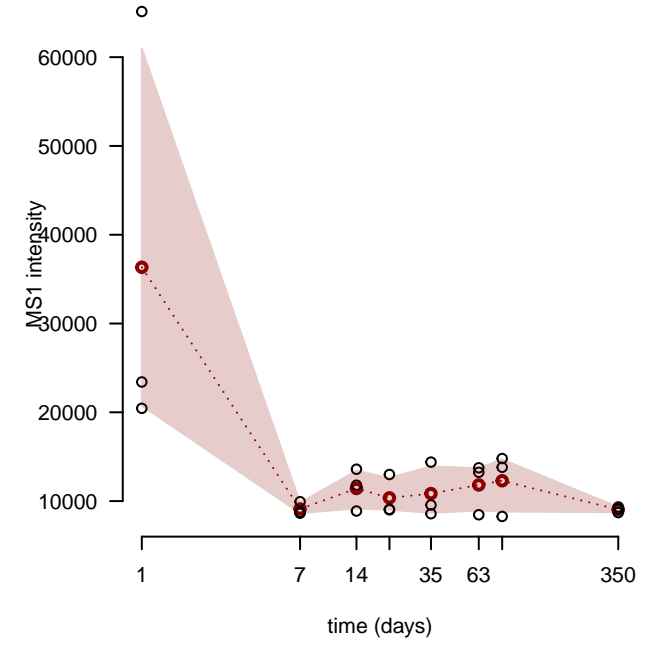

**Q9JLI6**  
GN=Scly  
selenocysteine lyase

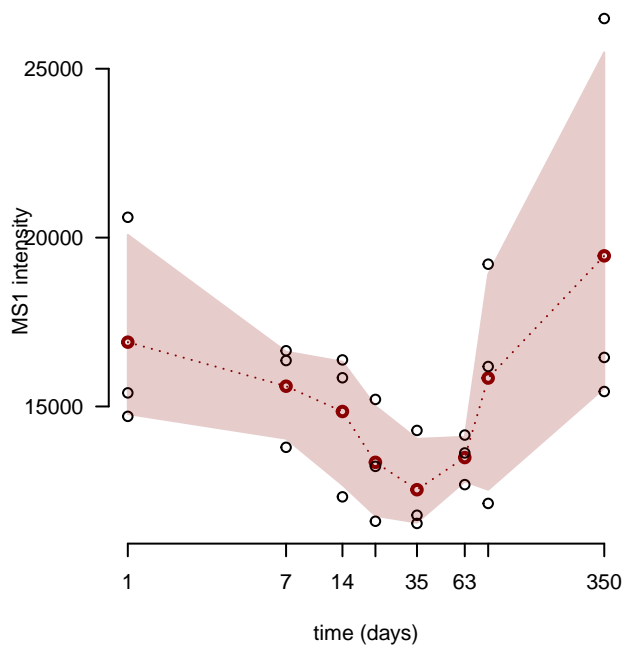

**Q9JLI8**  
GN=Sart3  
squamous cell carcinoma antigen recogniz ...

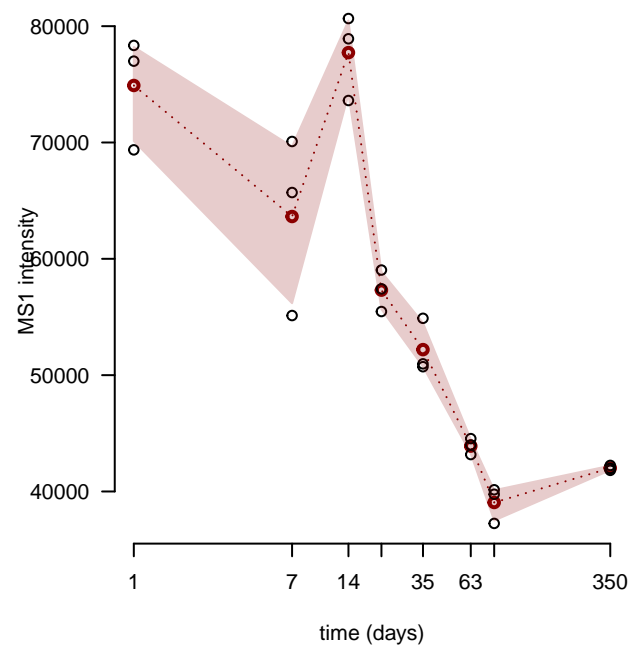

**Q9JLJ0**  
GN=Litaf  
LPS-induced TN factor

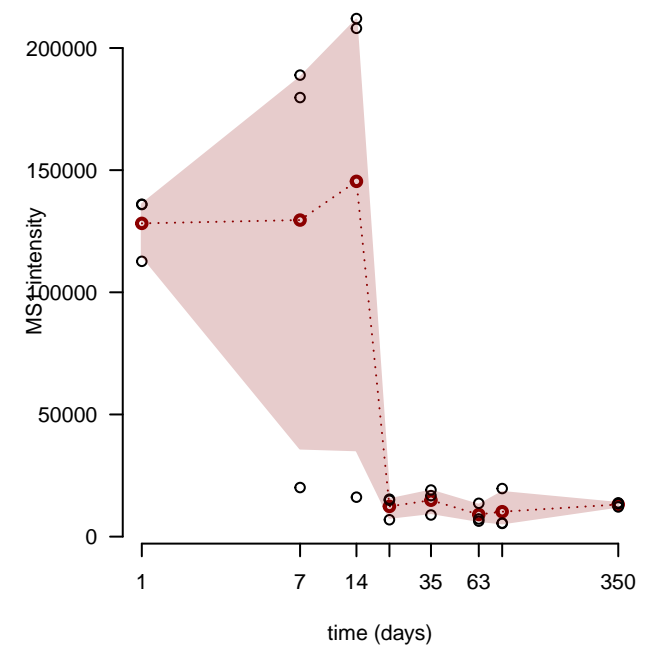

**Q9JLJ1**  
GN=Selenok  
selenoprotein K

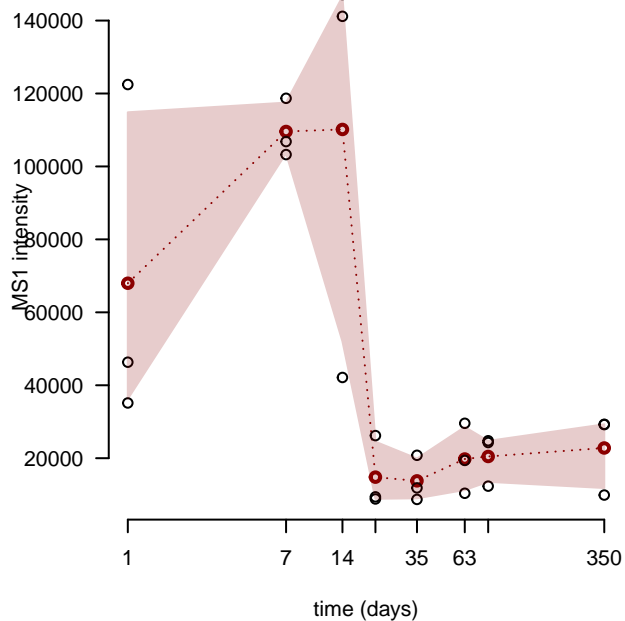

**Q9JLJ2**  
GN=Aldh9a1  
aldehyde dehydrogenase 9, subfamily A1

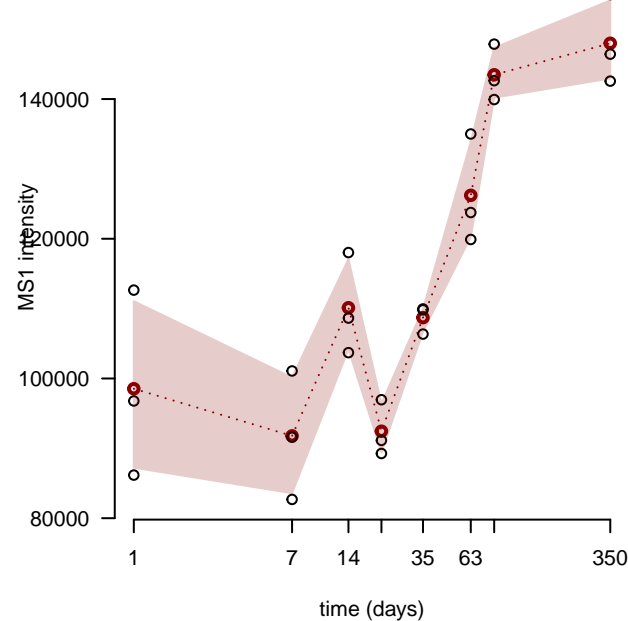

**Q9JLJ5**  
GN=Elmv1  
elongation of very long chain fatty acid ...

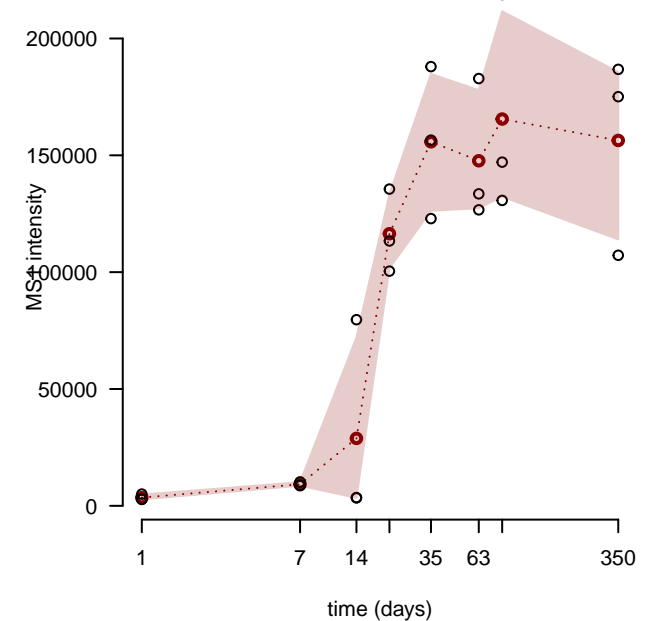

**Q9JLM4**  
**GN=Zmym3**  
zinc finger, MYM-type 3

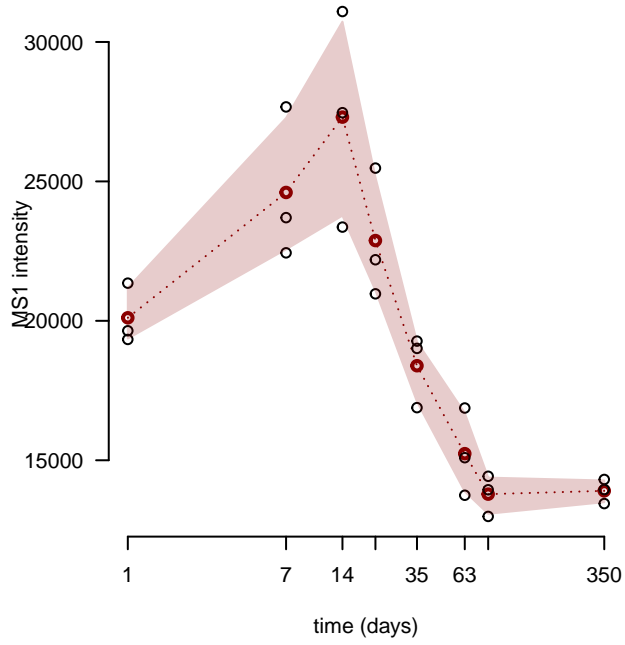

**Q9JLM8**  
**GN=Dclk1**  
doublecortin-like kinase 1

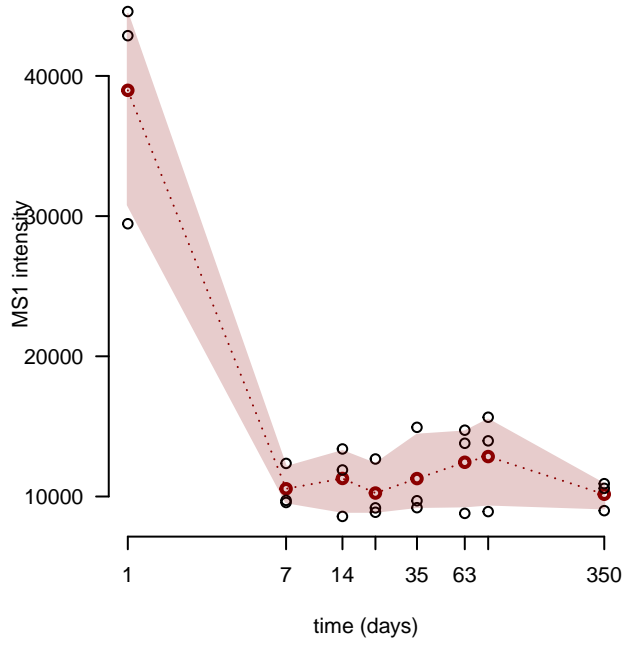

**Q9JLM9**  
**GN=Grb14**  
growth factor receptor bound protein 14

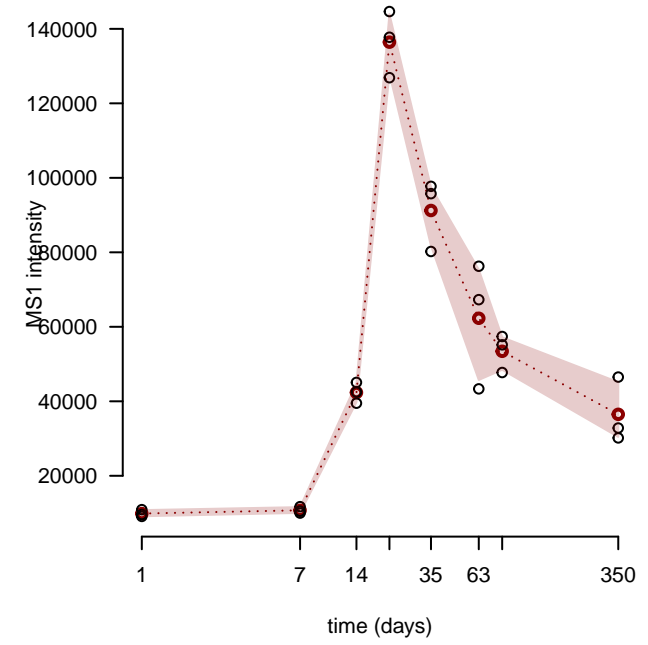

**Q9JLN9**  
**GN=Mtor**  
mechanistic target of rapamycin kinase

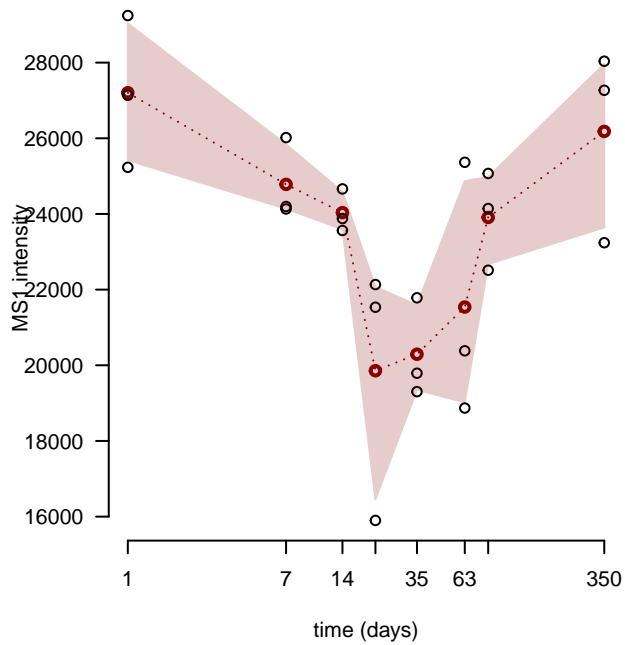

**Q9JLQ0**  
**GN=Cd2ap**  
CD2-associated protein

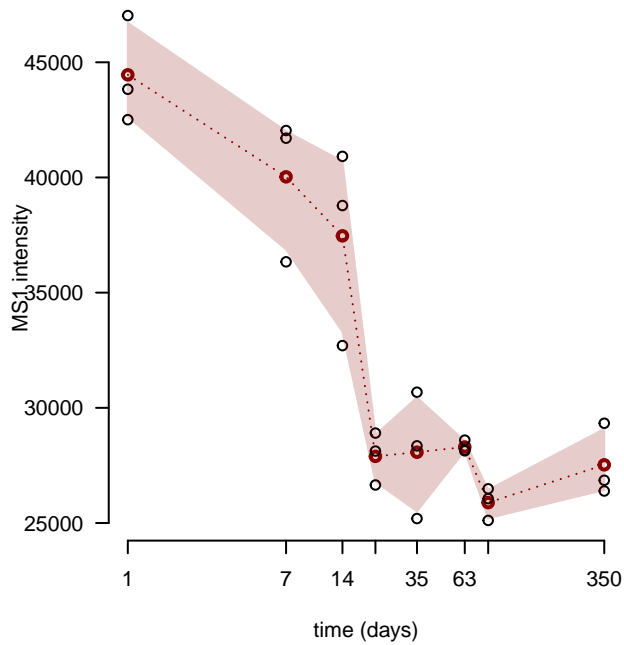

**Q9JLQ2**  
**GN=Git2**  
GIT ArfGAP 2

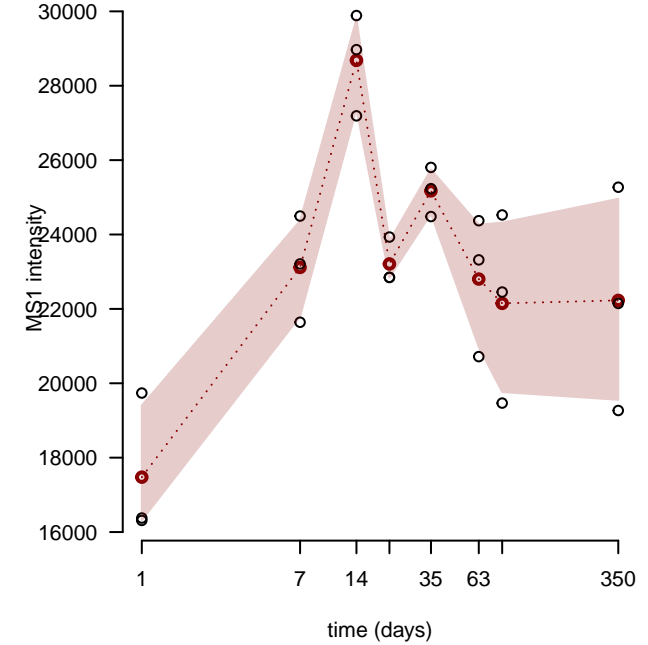

**Q9JLR1**  
**GN=Sec61a2**  
Sec61, alpha subunit 2 (*S. cerevisiae*)

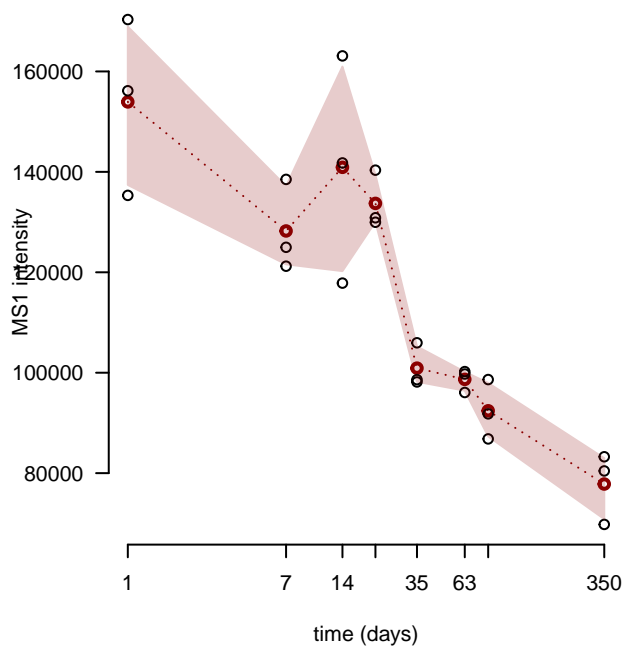

**Q9JLR9**  
**GN=Higd1a**  
HIG1 domain family, member 1A

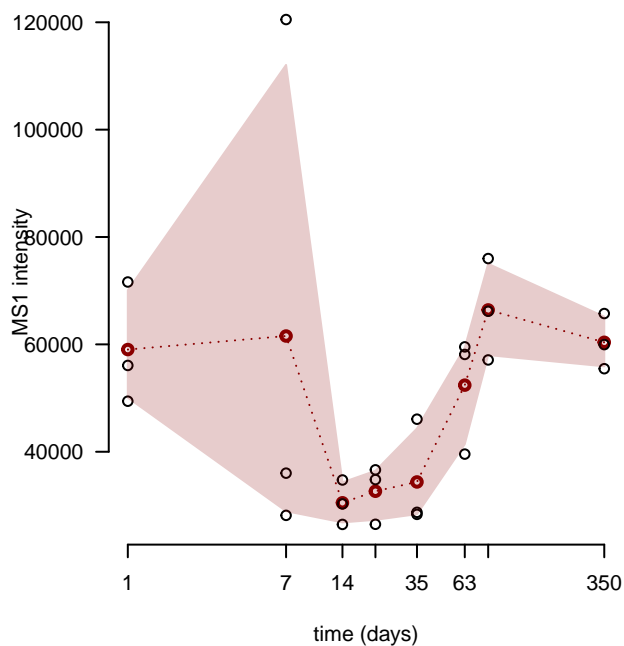

**Q9JLT4**  
**GN=Txnrd2**  
thioredoxin reductase 2

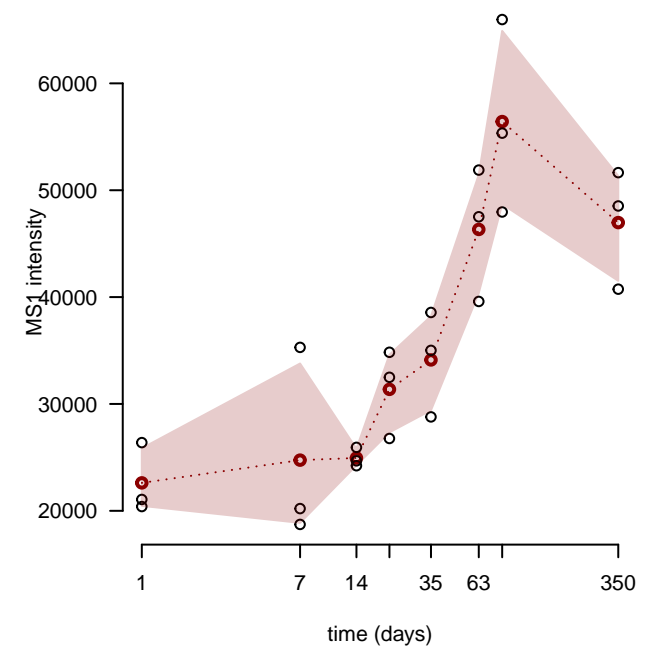

**Q9JLV1**  
**GN=Bag3**  
BCL2-associated athanogene 3

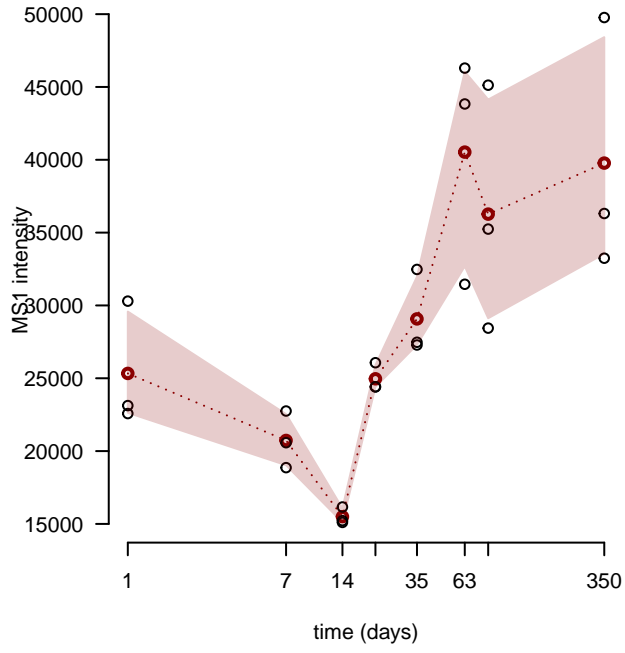

**Q9JLV2**  
**GN=Trpc4ap**  
transient receptor potential cation chan ...

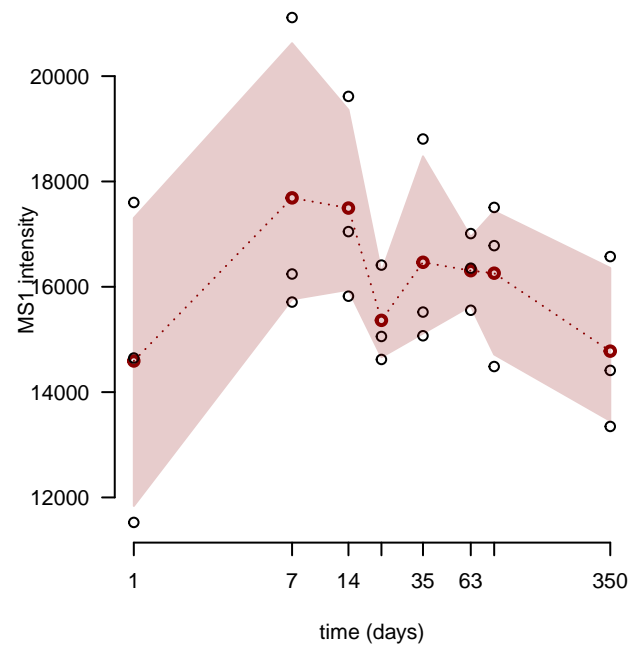

**Q9JLV5**  
**GN=Cul3**  
cullin 3

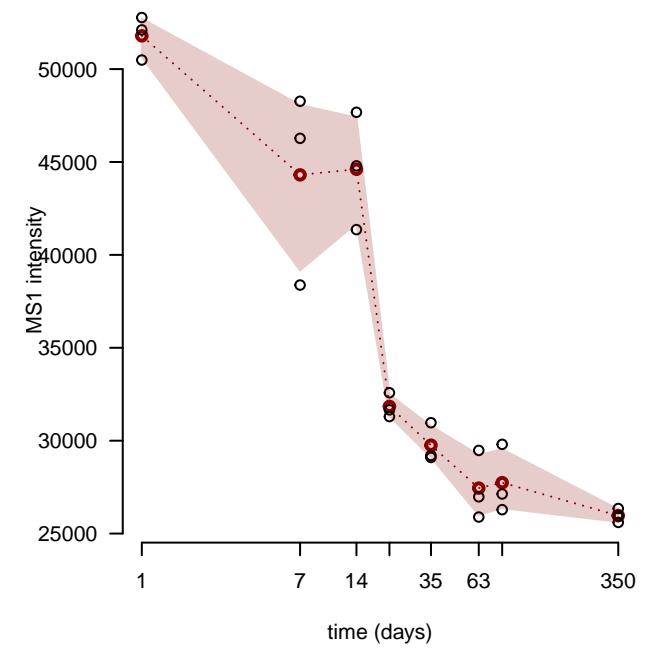

**Q9JLV6**  
**GN=Pnkp**  
polynucleotide kinase 3'-phosphatase

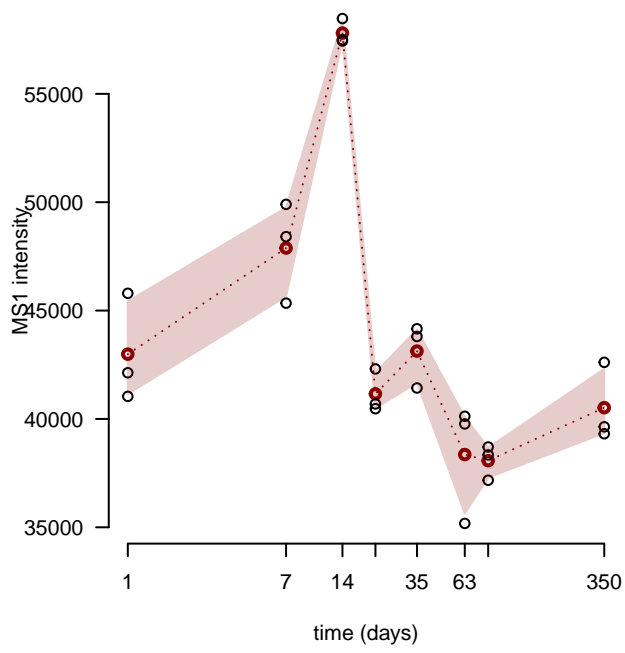

**Q9JLZ3**  
**GN=Auh**  
AU RNA binding protein/enoyl-coenzyme A ...

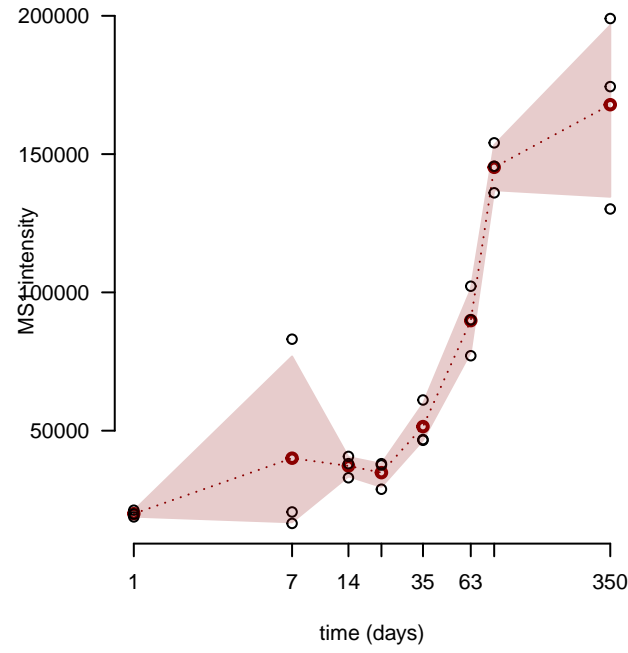

**Q9JLZ6**  
**GN=Hic2**  
hypermethylated in cancer 2

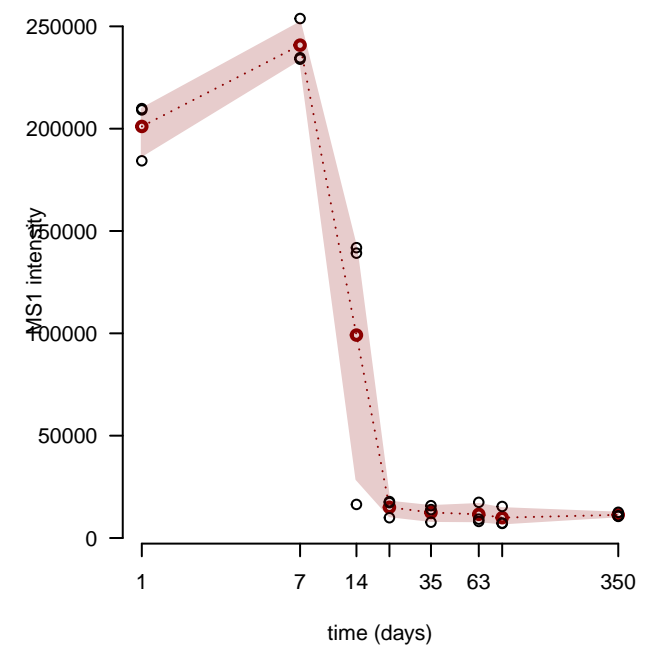

**Q9JM05**  
**GN=Pias4**  
protein inhibitor of activated STAT 4

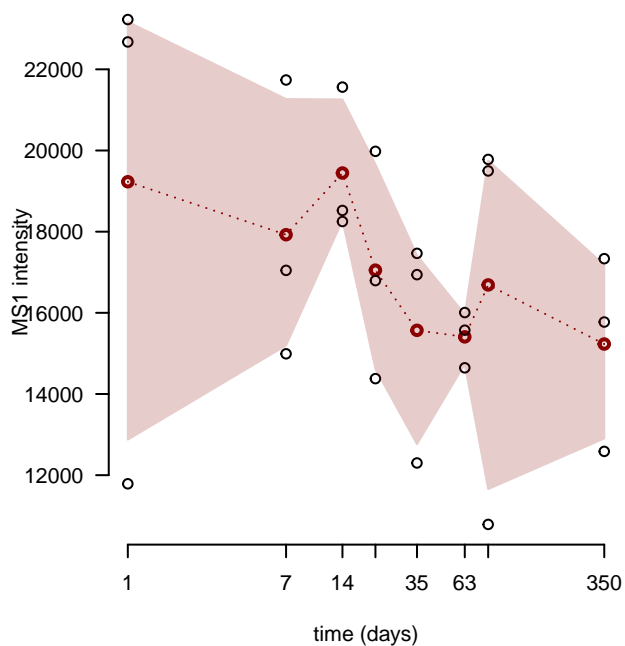

**Q9JM13**  
**GN=Rabgef1**  
RAB guanine nucleotide exchange factor ( ...

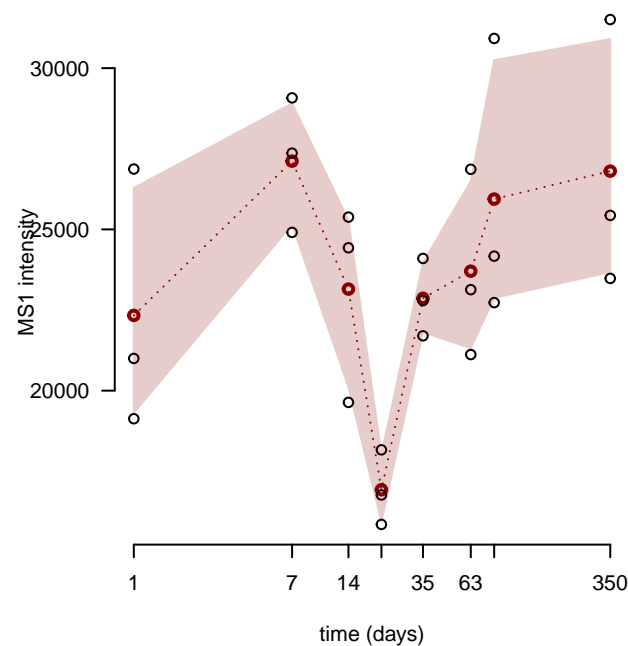

**Q9JM14**  
**GN=Nt5c**  
5',3'-nucleotidase, cytosolic

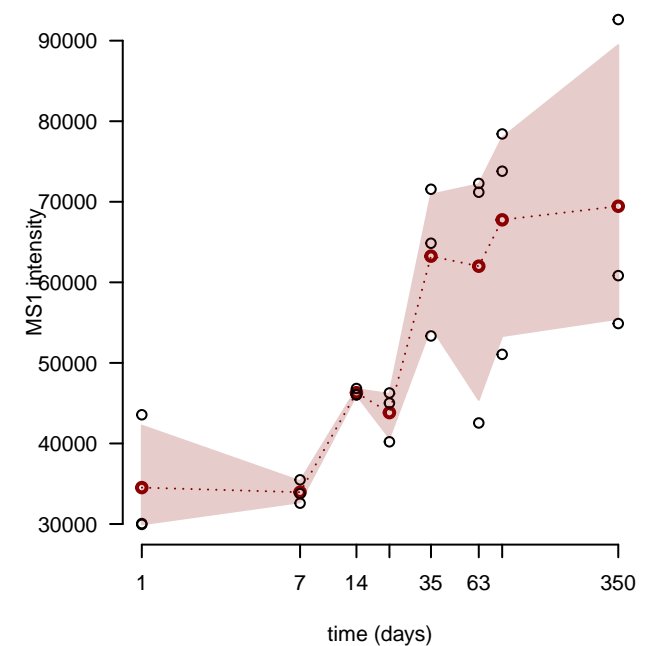



**Q9JM51**  
GN=Ptges  
prostaglandin E synthase

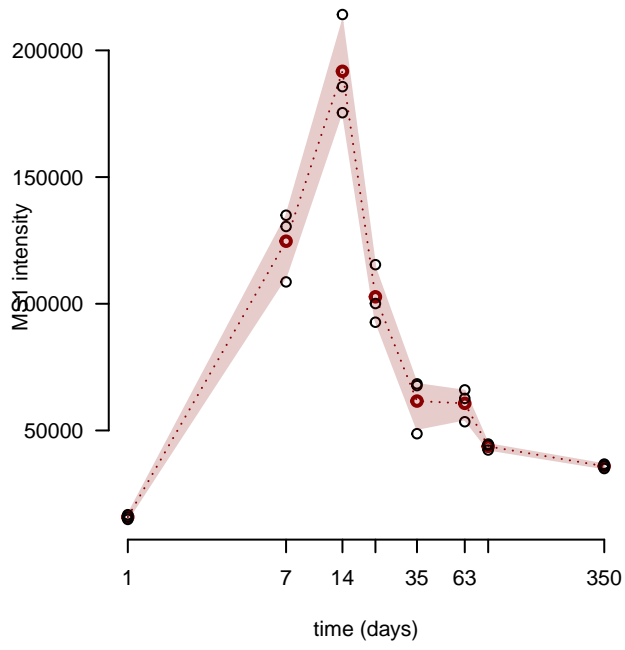

**Q9JM52**  
GN=Mink1  
misshapen-like kinase 1 (zebrafish)

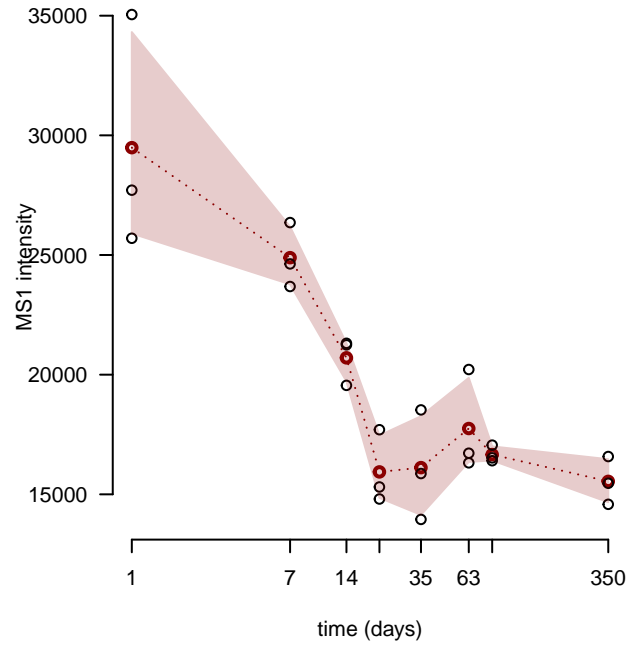

**Q9JM62**  
GN=Reep6  
receptor accessory protein 6

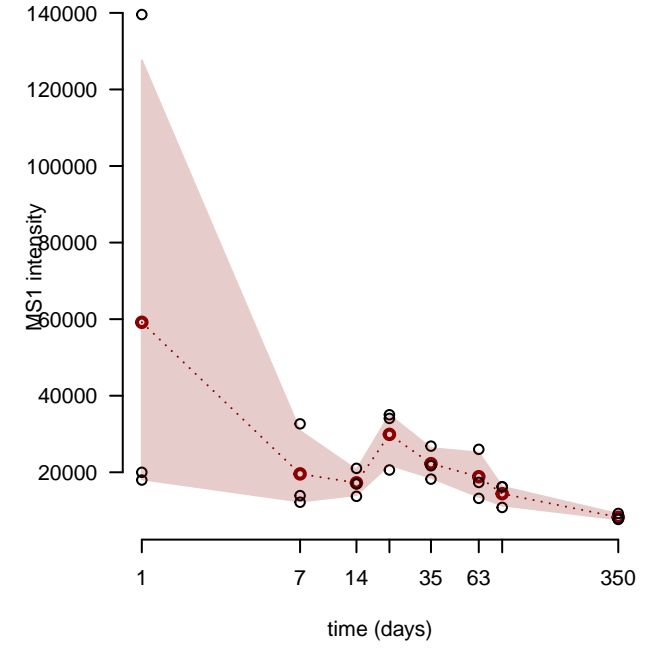

**Q9JM76**  
GN=Arpc3  
actin related protein 2/3 complex, subun ...

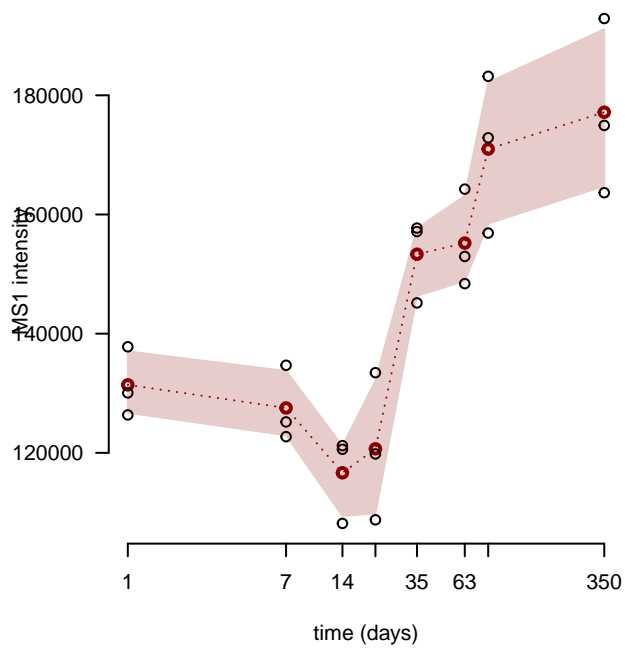

**Q9JM93**  
GN=Arl6ip4  
ADP-ribosylation factor-like 6 interacti ...

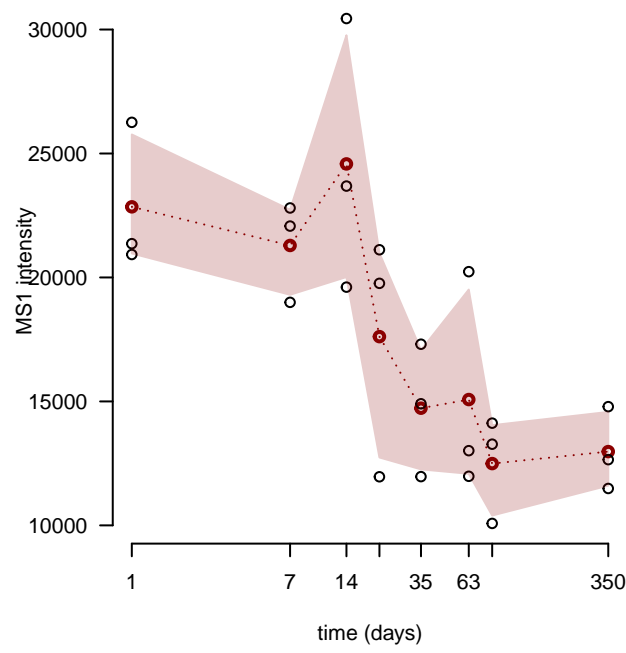

**Q9JM96**  
GN=Cdc42ep4  
CDC42 effector protein (Rho GTPase bindi ...

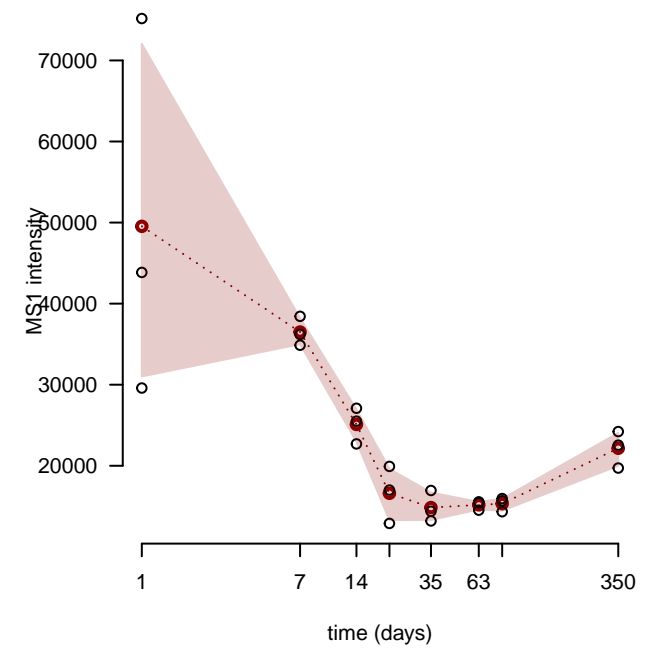

**Q9JM98**  
GN=Wrap73  
WD repeat containing, antisense to Trp73

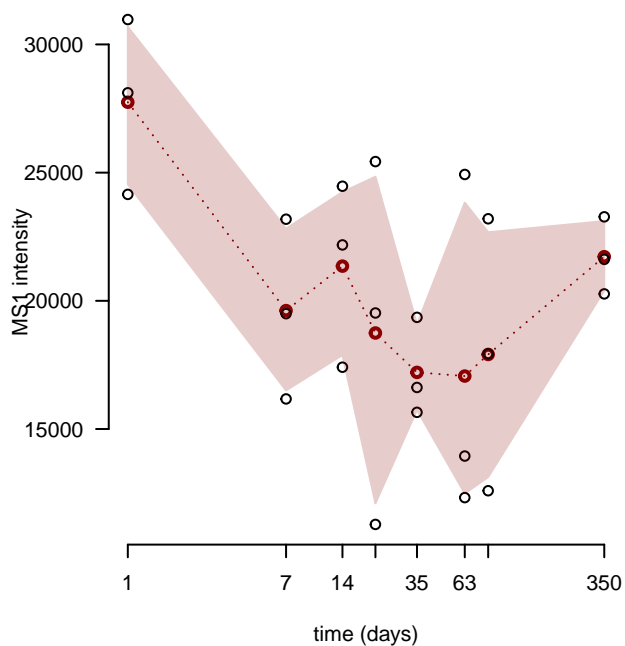

**Q9JMA1**  
GN=Usp14  
ubiquitin specific peptidase 14

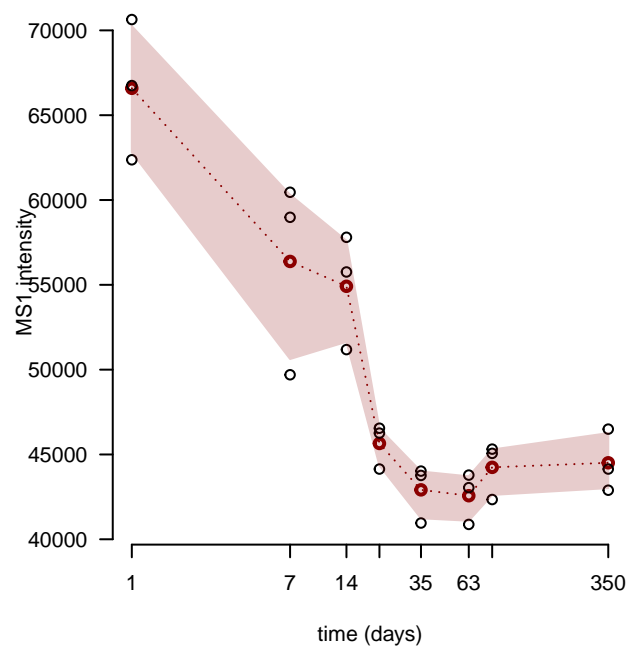

**Q9JMA2**  
GN=Qtrt1  
queuine tRNA-ribosyltransferase catalyti ...

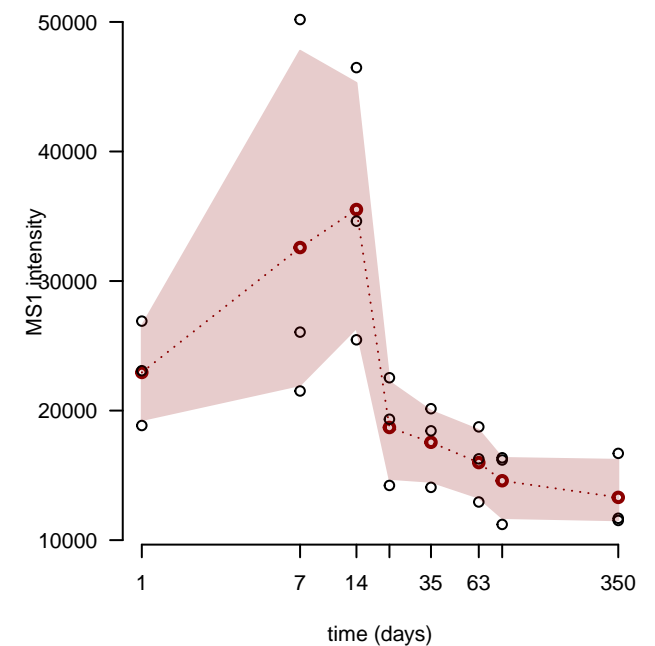

**Q9JMB0**  
**GN=Gkap1**  
G kinase anchoring protein 1

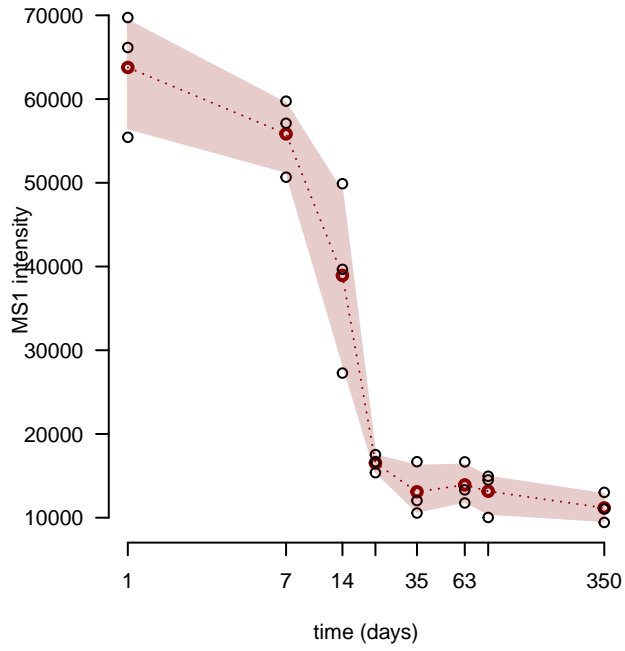

**Q9JMC3**  
**GN=Dnaja4**  
DnaJ heat shock protein family (Hsp40) m...

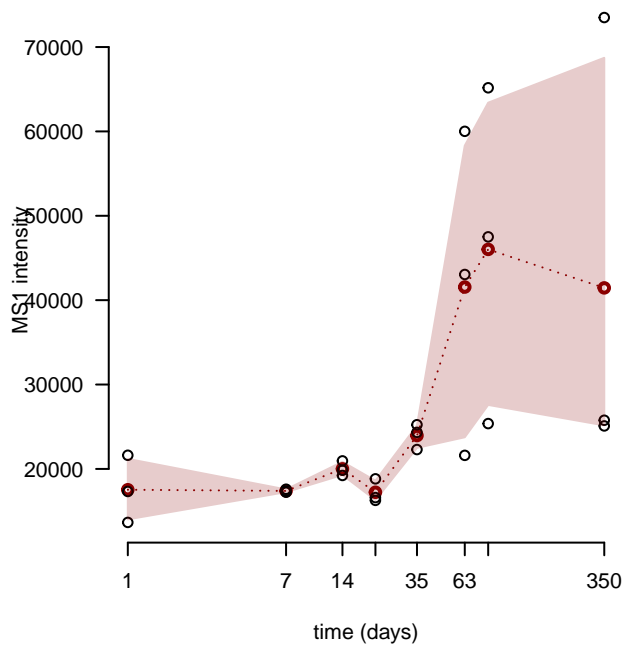

**Q9JMC8**  
**GN=Epb4114b**  
erythrocyte membrane protein band 4.1 li...

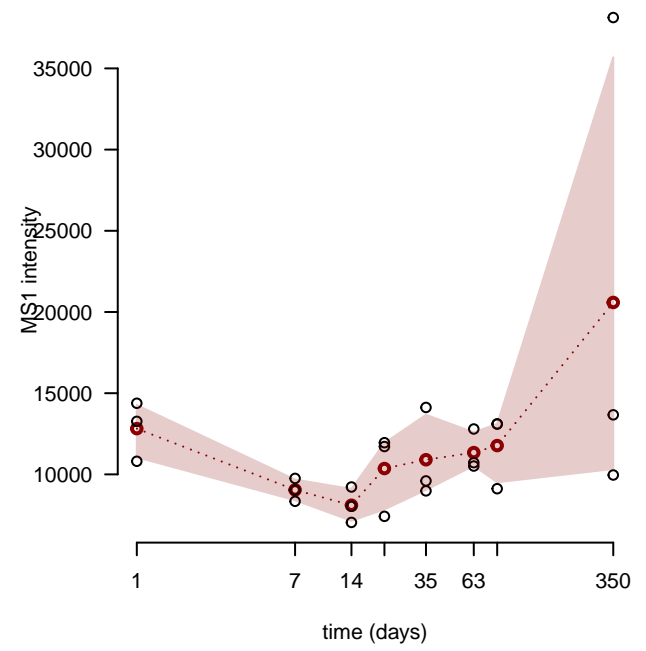

**Q9JMD0**  
**GN=Znf207**

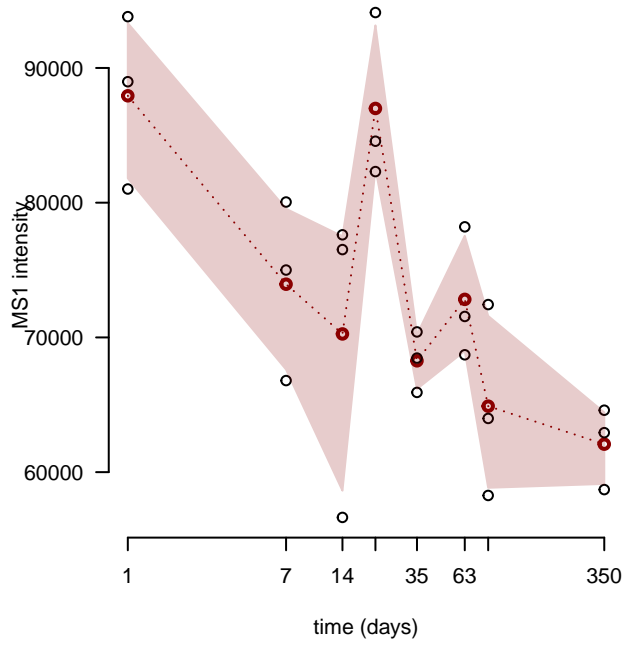

**Q9JMD3**  
**GN=Stard10**  
START domain containing 10

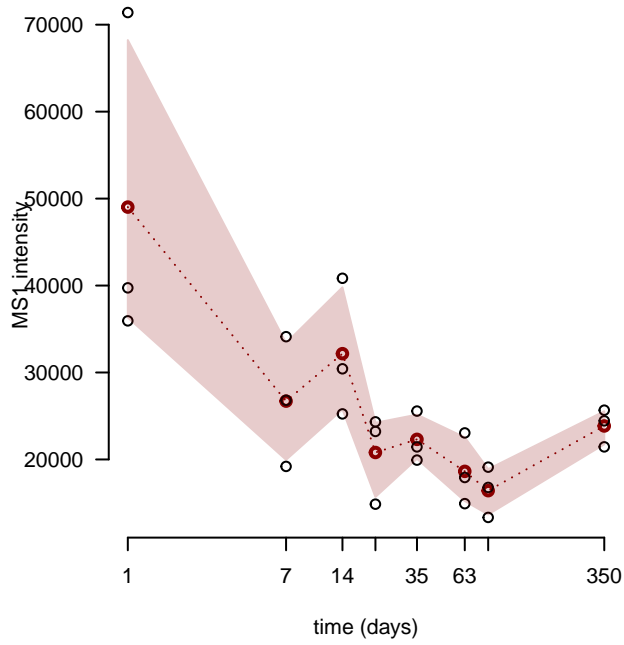

**Q9JME2**  
**GN=Chst11**  
carbohydrate sulfotransferase 11

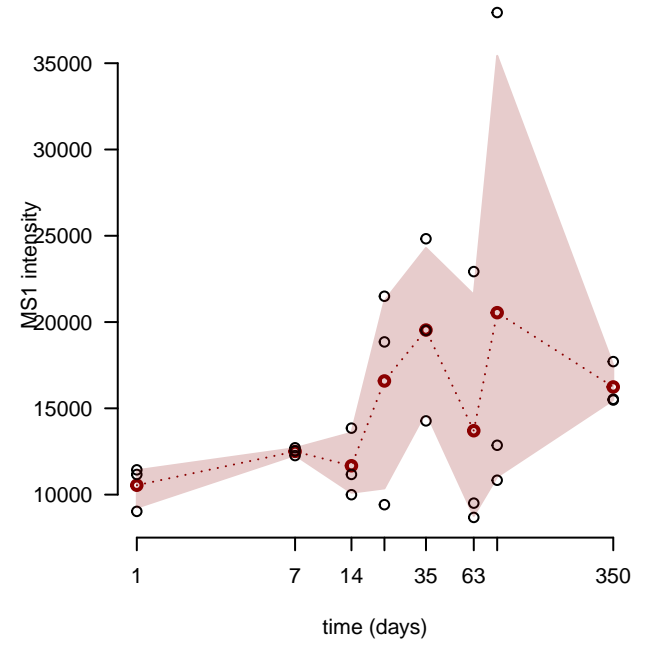

**Q9JME7**  
**GN=Trappc2l**  
trafficking protein particle complex 2L

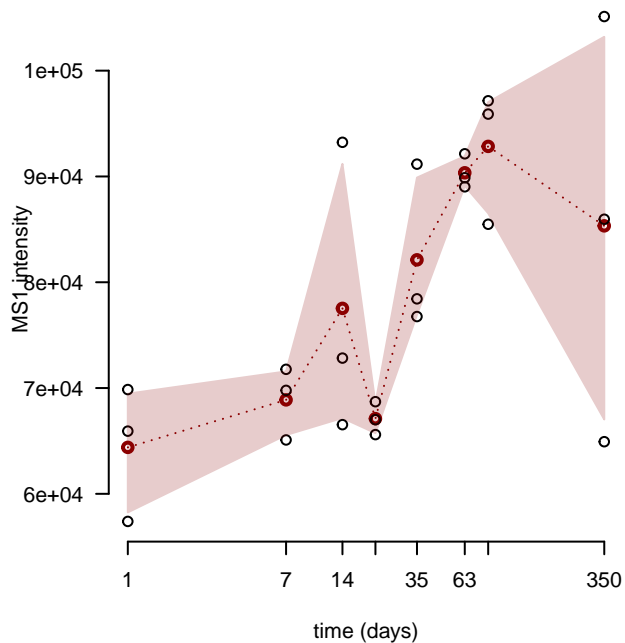

**Q9JMF7**  
**GN=Dolpp1**  
dolichyl pyrophosphate phosphatase 1

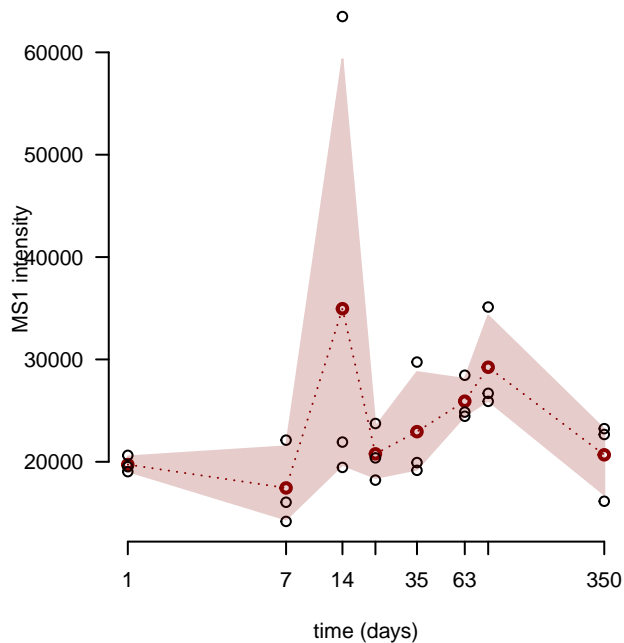

**Q9JMG1**  
**GN=Edf1**  
endothelial differentiation-related fact...

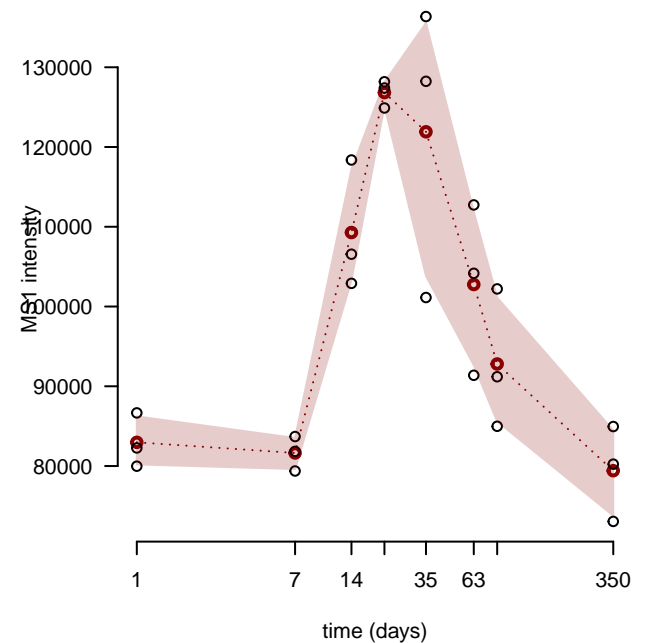

**Q9JMG2**  
GN=C1galt1c1  
C1GALT1-specific chaperone 1

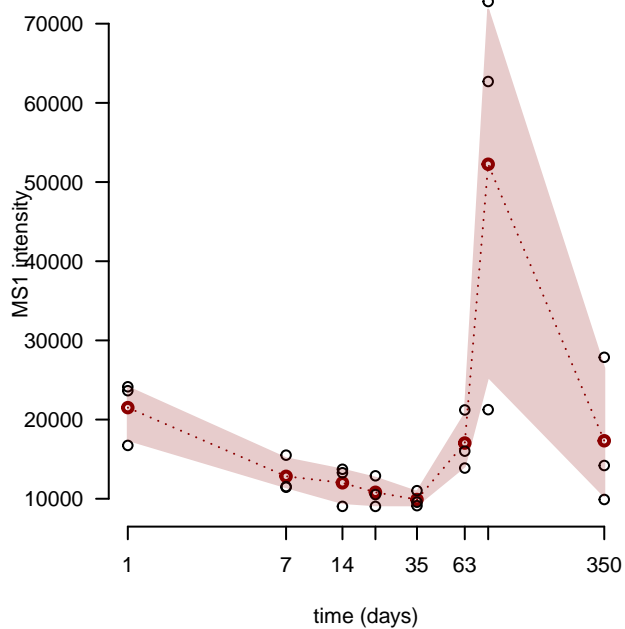

**Q9JMG3**  
GN=Tmub1  
transmembrane and ubiquitin-like domain ...

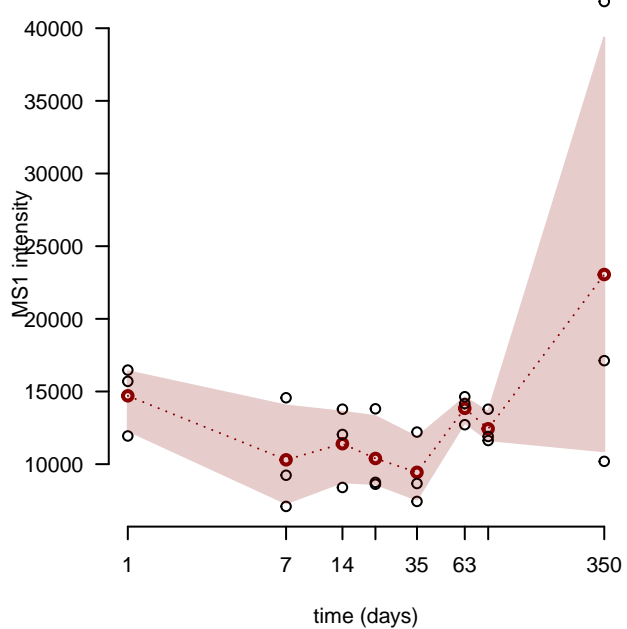

**Q9JMG7**  
GN=Hdgf3  
HDGF like 3

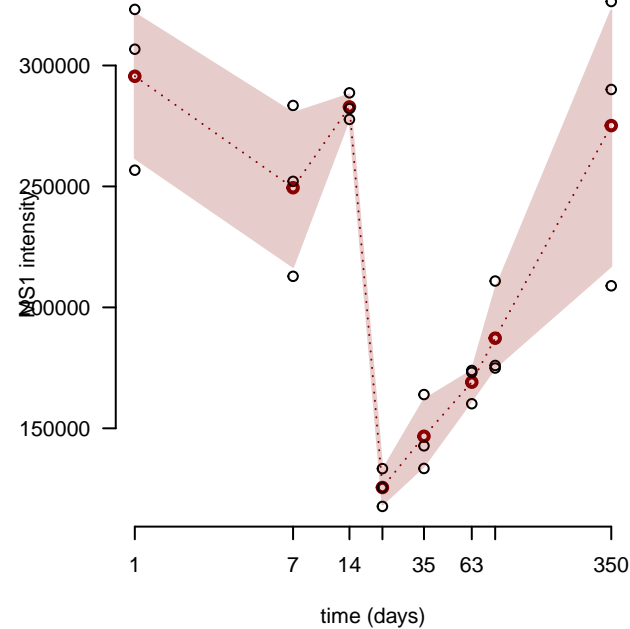

**Q9JMH6**  
GN=Txnrd1  
thioredoxin reductase 1

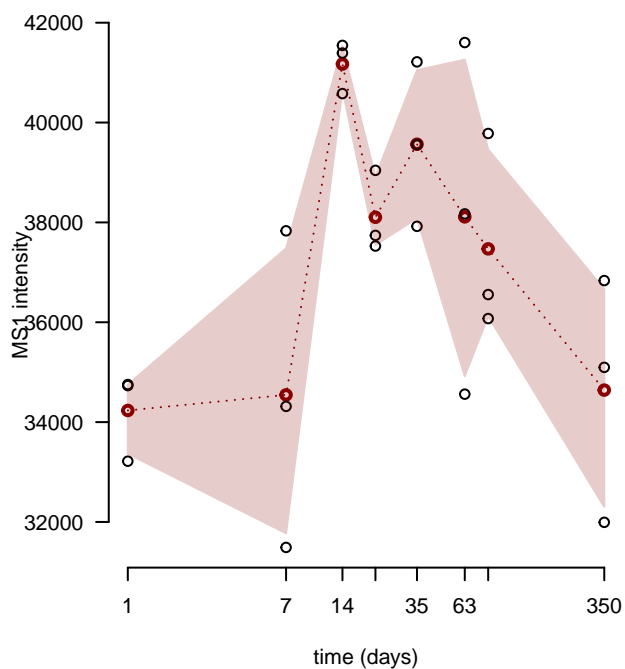

**Q9JMH7**  
GN=Neu3  
neuraminidase 3

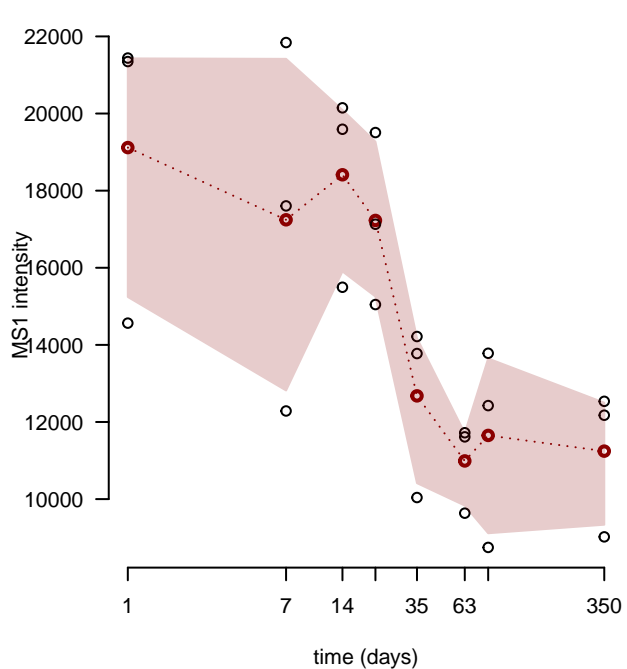

**Q9JMH9**  
GN=Myo18a  
myosin XVIIIa

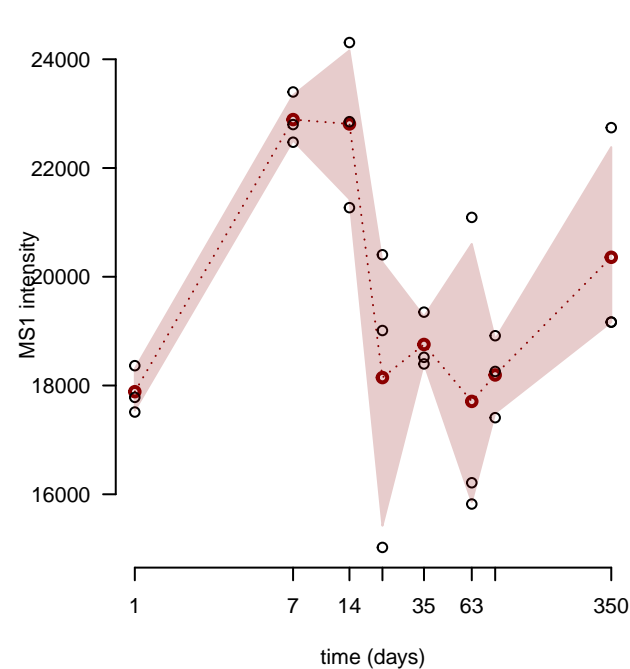

**Q9JMI7**  
GN=Tex101  
testis expressed gene 101

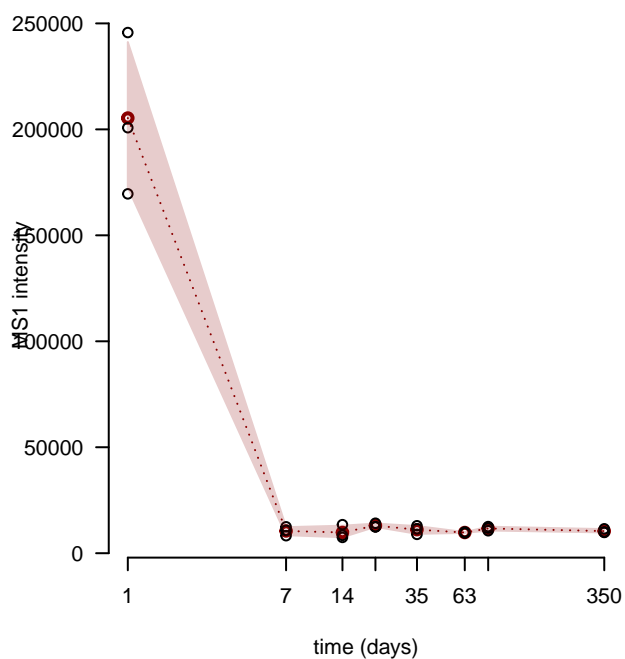

**Q9JMK2**  
GN=Csnk1e  
casein kinase 1, epsilon

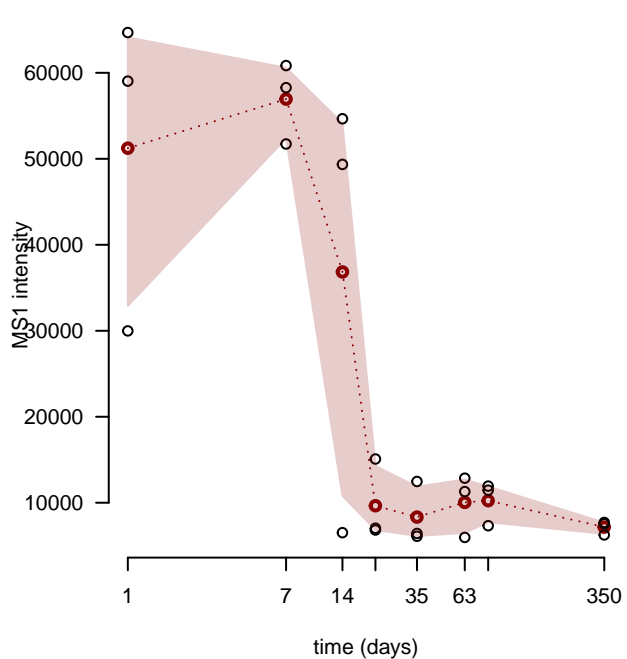

**Q9NWG9**  
GN=Mageh1  
MAGE family member H1

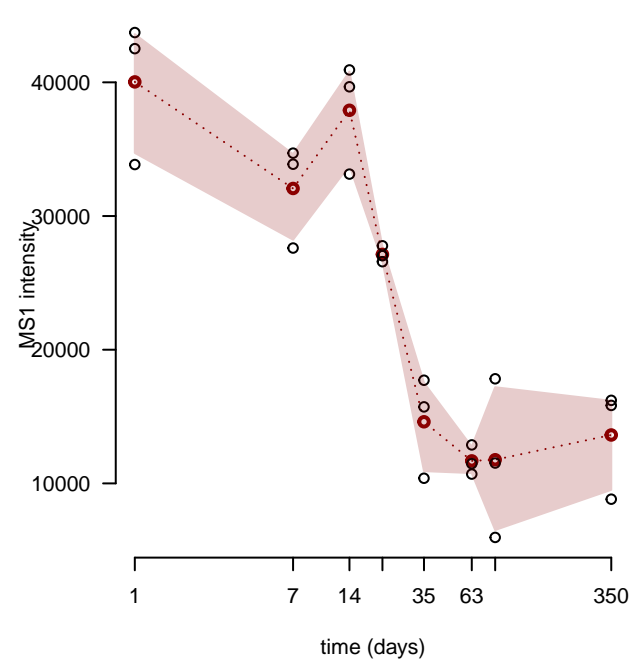

**Q9NYQ2**  
**GN=Hao2**  
hydroxyacid oxidase 2

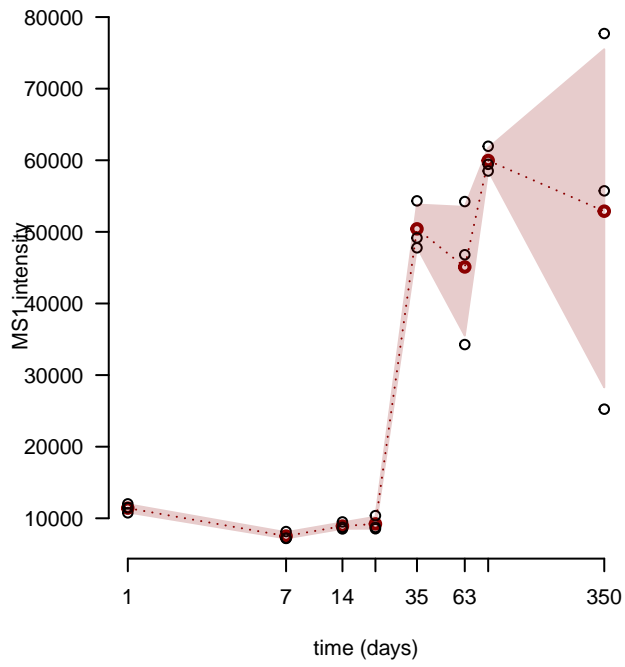

**Q9QUG2**  
**GN=Polk**  
polymerase (DNA directed), kappa

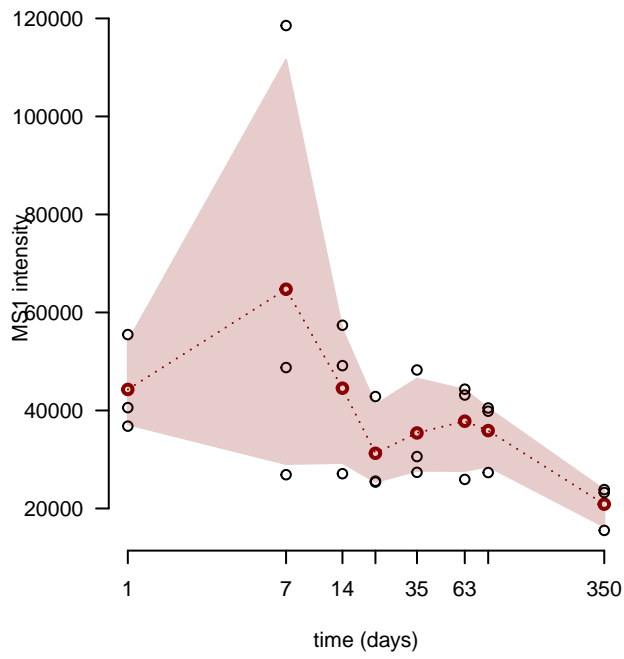

**Q9QUH0**  
**GN=GlrX**  
glutaredoxin

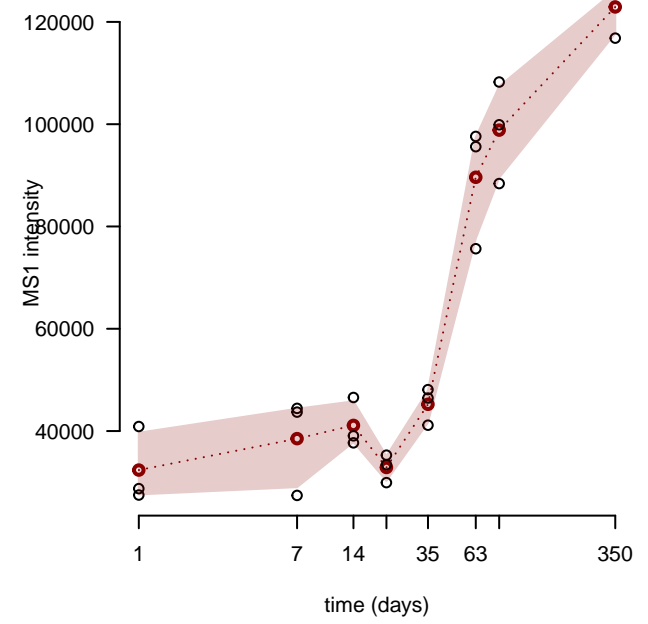

**Q9QUI0**  
**GN=Rhoa**  
ras homolog family member A

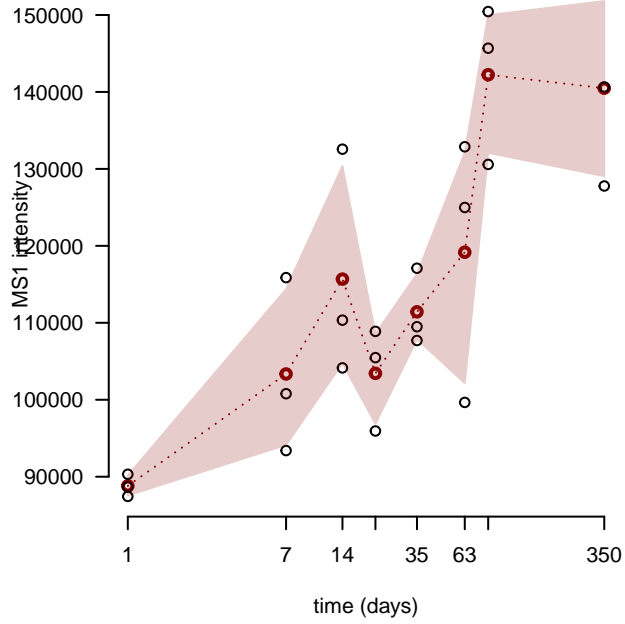

**Q9QUI1**  
**GN=Fam89b**  
family with sequence similarity 89, memb ...

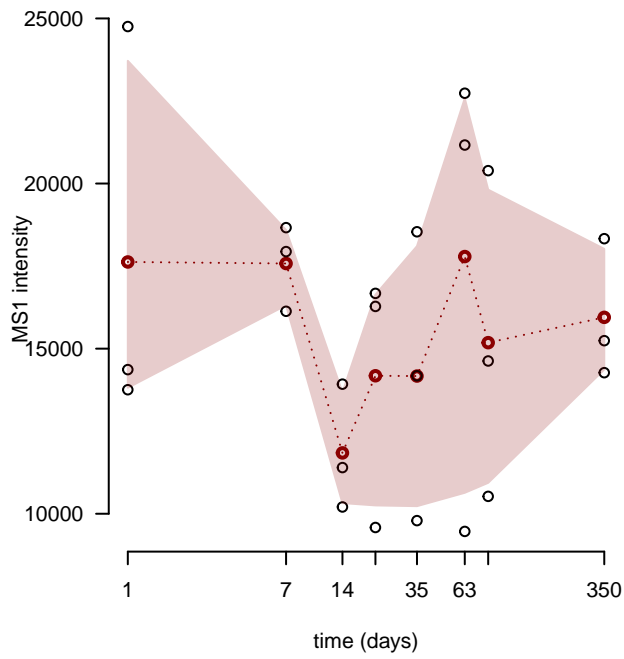

**Q9QUJ7**  
**GN=Acsl4**  
acyl-CoA synthetase long-chain family me ...

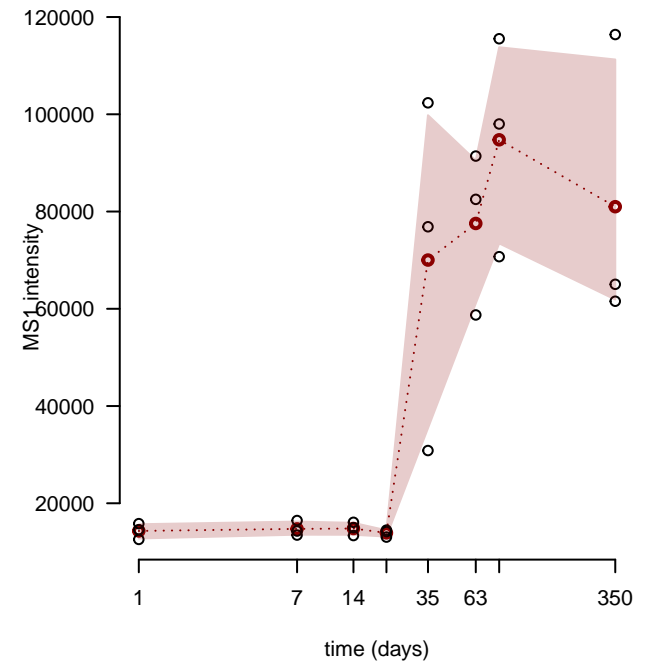

**Q9QUK3**  
**GN=Cln8**  
CLN8 transmembrane ER and ERGIC protein

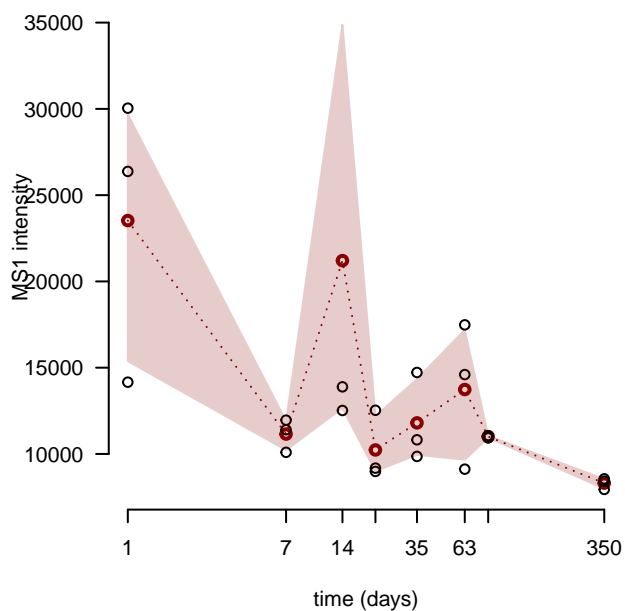

**Q9QUM0**  
**GN=Itga2b**  
integrin alpha 2b

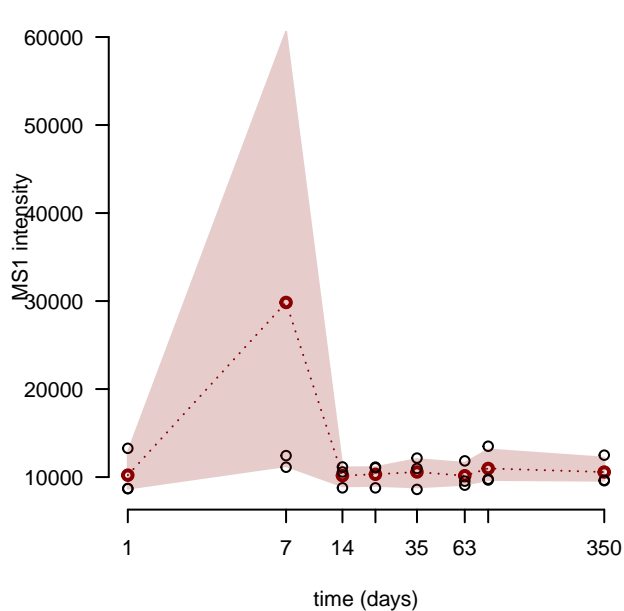

**Q9QUM9**  
**GN=Psma6**  
proteasome subunit alpha 6

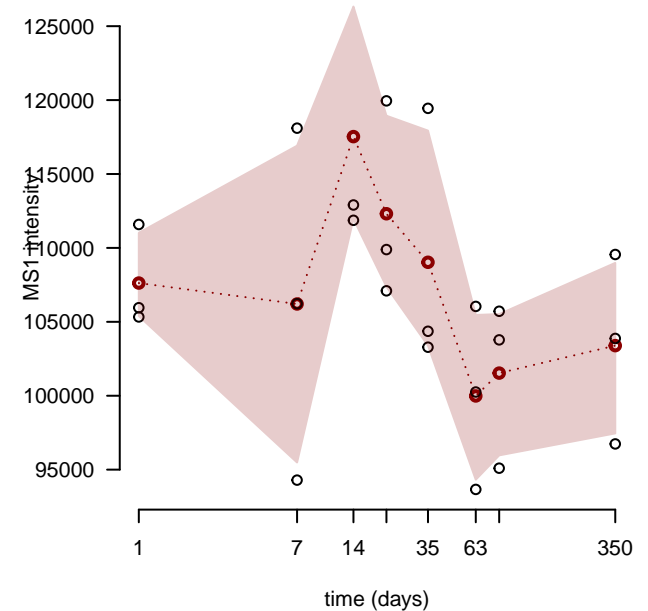

**Q9QUP5**  
GN=Hapln1  
hyaluronan and proteoglycan link protein ...

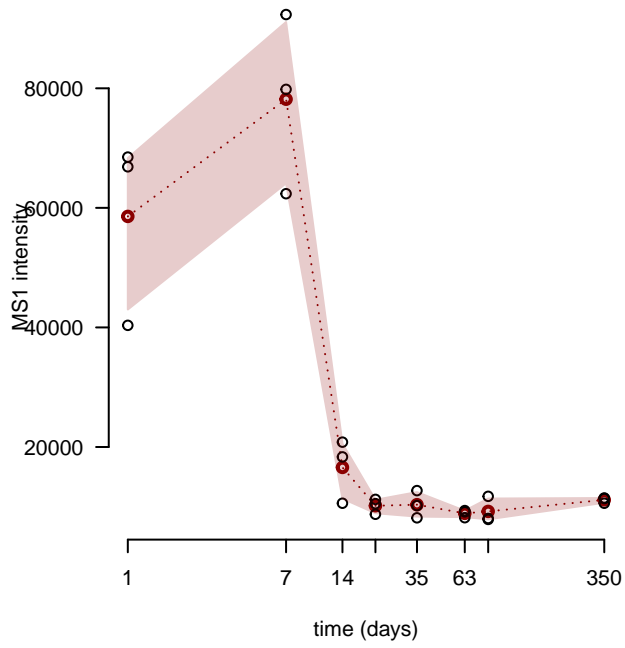

**Q9QUQ5**  
GN=Trpc4  
transient receptor potential cation chan ...

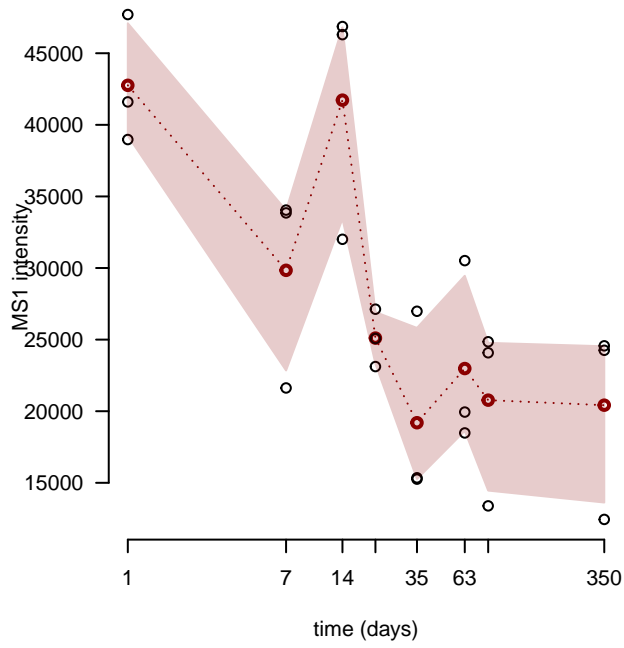

**Q9QUR6**  
GN=Prep  
prolyl endopeptidase

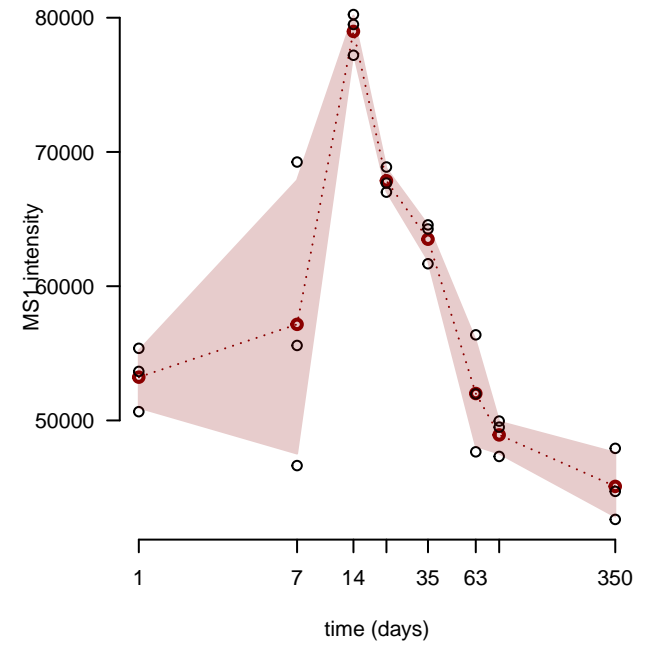

**Q9QUR7**  
GN=Pin1  
peptidyl-prolyl cis/trans isomerase, NIM ...

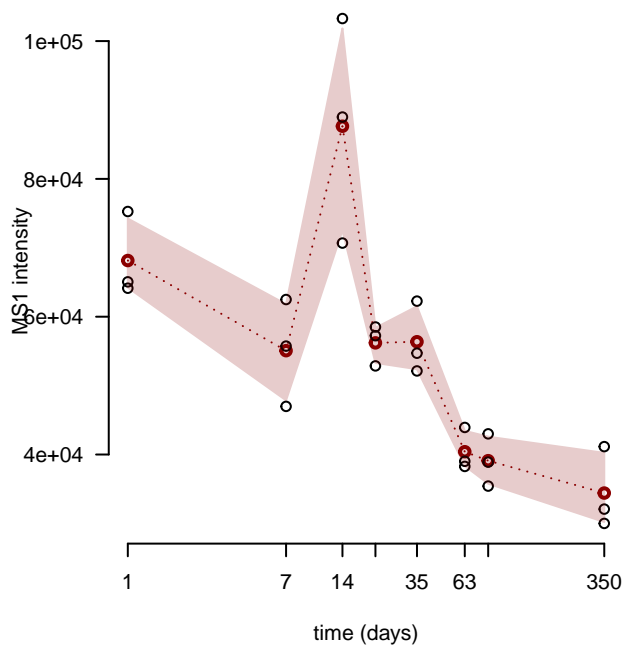

**Q9QUR8**  
GN=Sema7a  
sema domain, immunoglobulin domain (Ig), ...

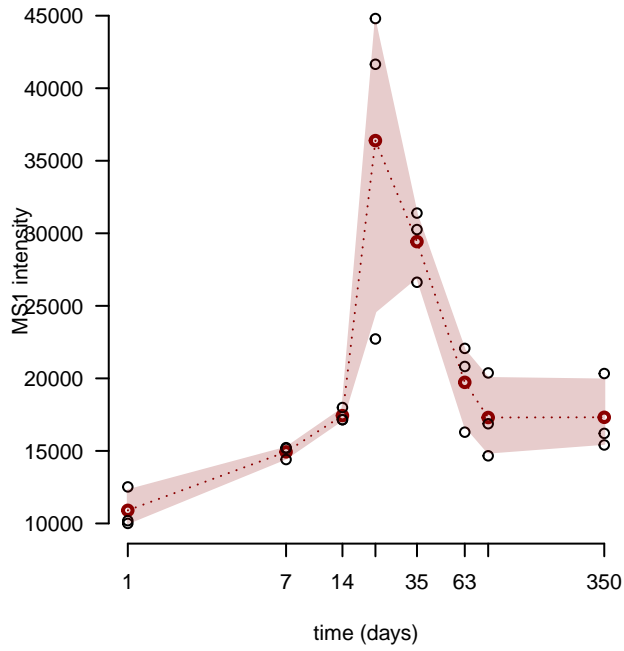

**Q9QVP9**  
GN=Ptk2b  
PTK2 protein tyrosine kinase 2 beta

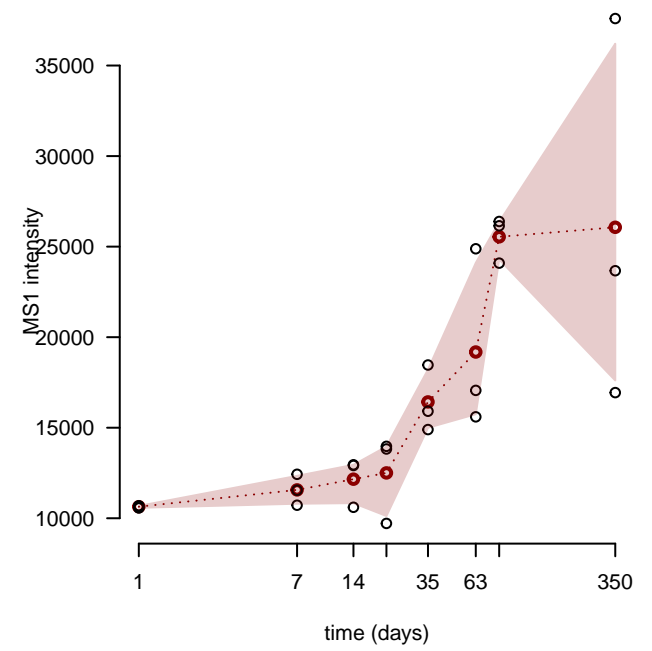

**Q9QWF0**  
GN=Chaf1a  
chromatin assembly factor 1, subunit A ( ...

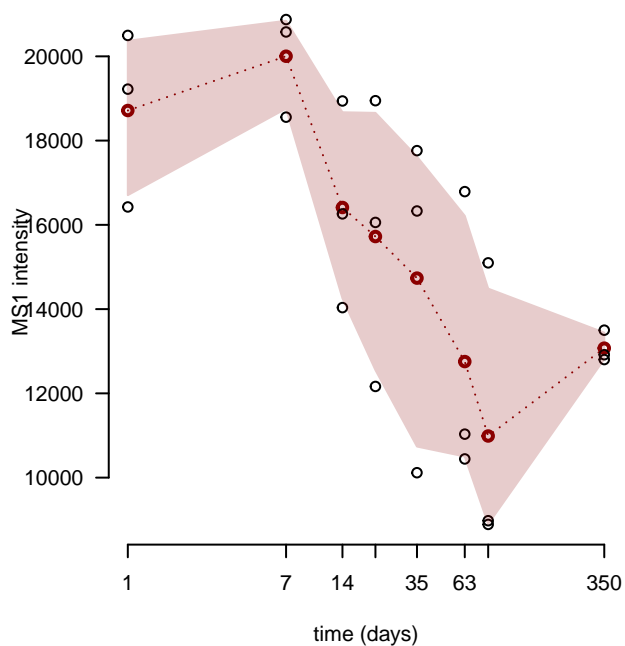

**Q9QWH1**  
GN=Phc2  
polyhomeotic 2

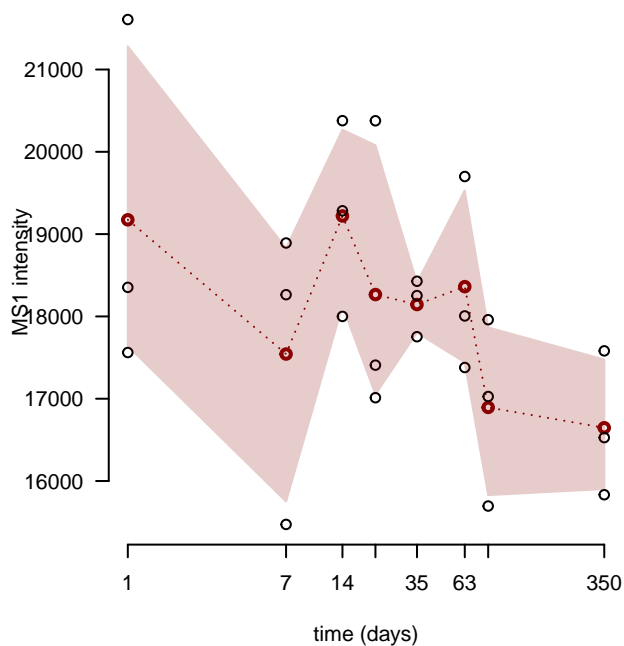

**Q9QWK4**  
GN=Cd5l  
CD5 antigen-like

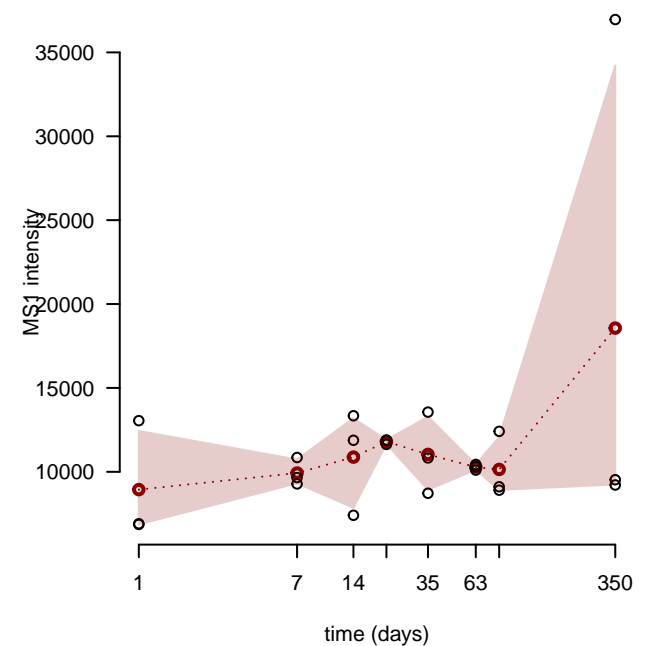

**Q9QWL7**  
**GN=Krt17**  
keratin 17

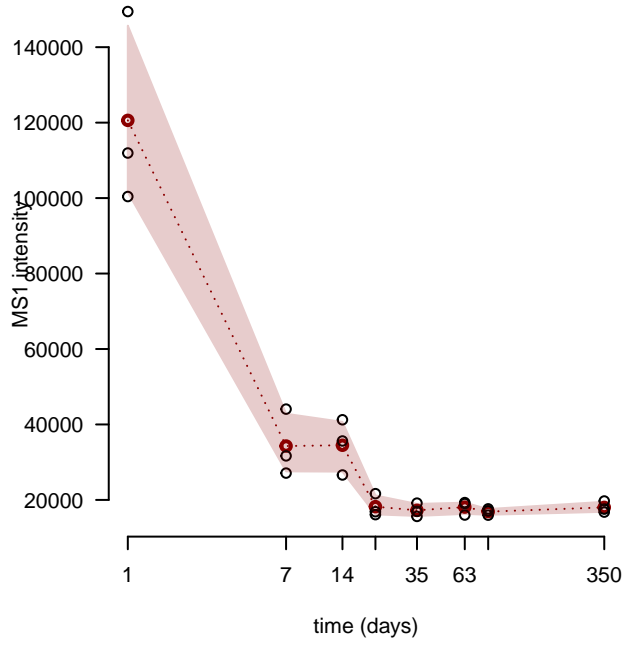

**Q9QWR8**  
**GN=Naga**  
N-acetyl galactosaminidase, alpha

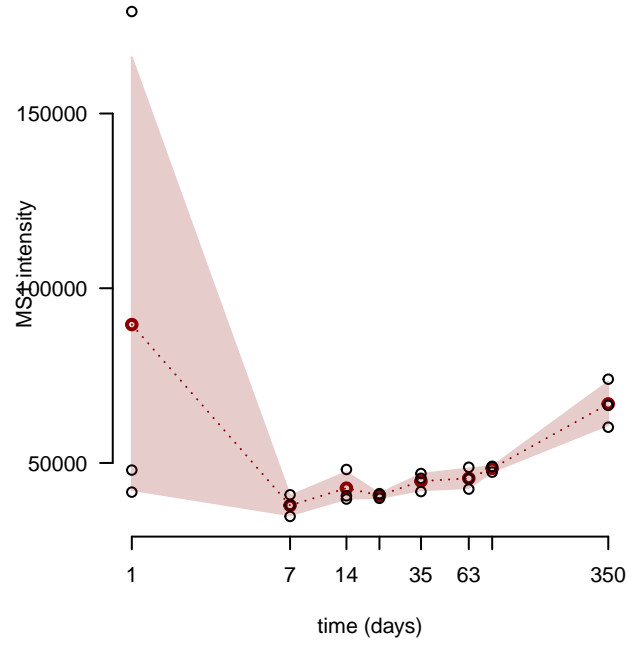

**Q9QWT9**  
**GN=Kifc1**  
kinesin family member C1

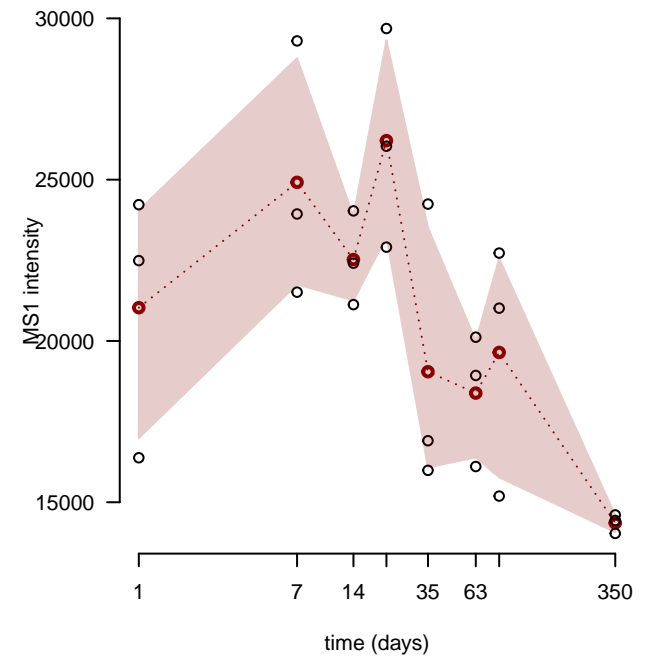

**Q9QWV9**  
**GN=Ccnt1**  
cyclin T1

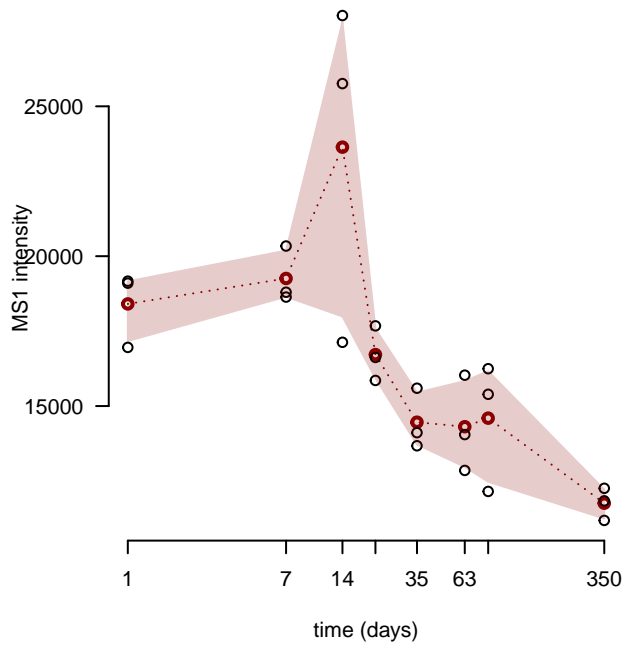

**Q9QWW1**  
**GN=Homer2**  
homer scaffolding protein 2

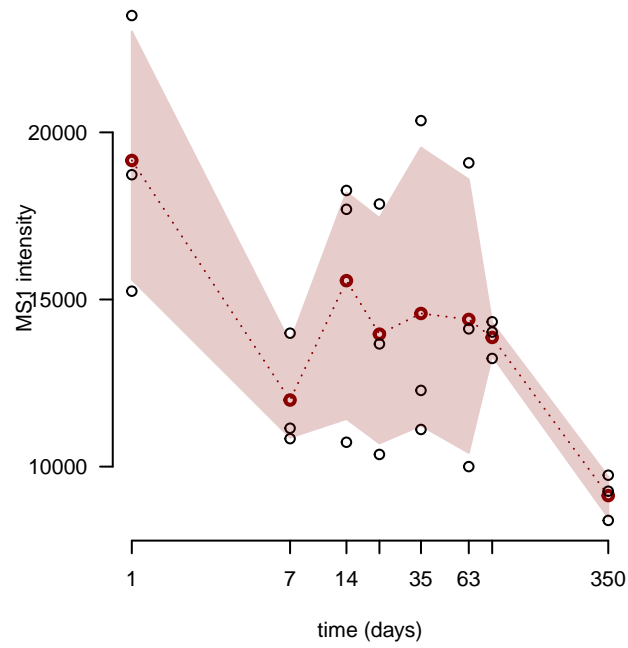

**Q9QWY8**  
**GN=Asap1**  
ArfGAP with SH3 domain, ankyrin repeat a ...

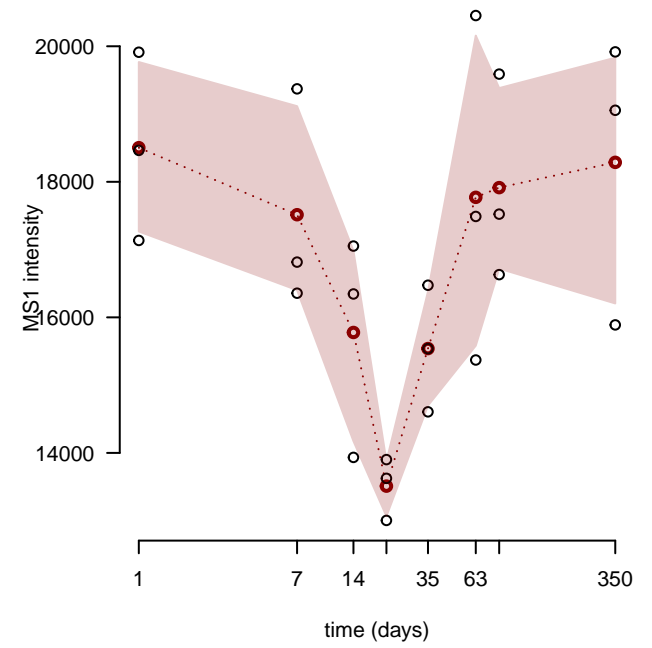

**Q9QWZ1**  
**GN=Rad1**  
RAD1 checkpoint DNA exonuclease

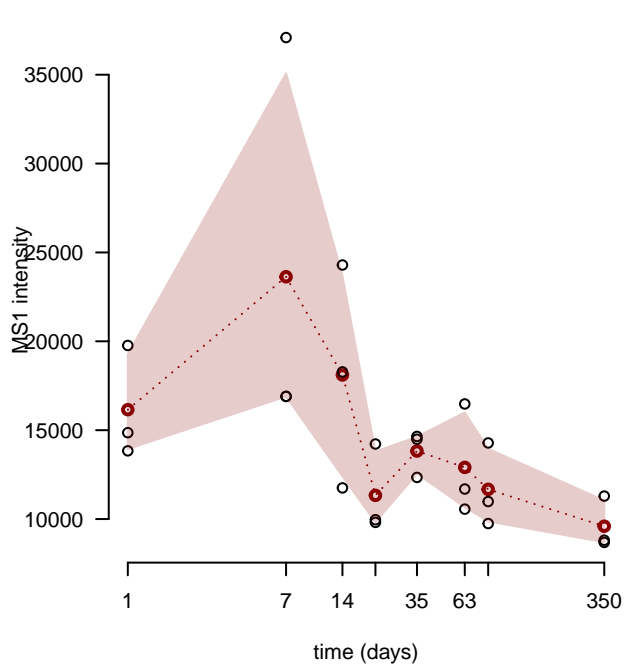

**Q9QX11**  
**GN=Cyth1**  
cytohesin 1

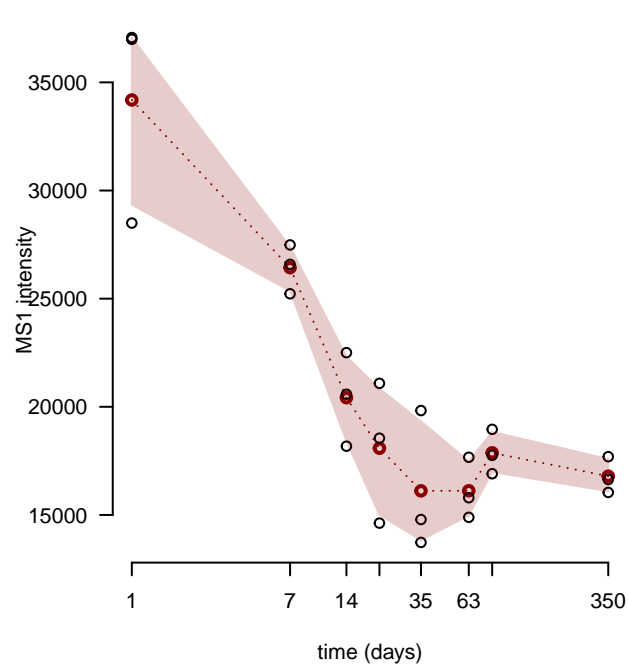

**Q9QX15**  
**GN=Clca3a1**  
chloride channel accessory 3A1

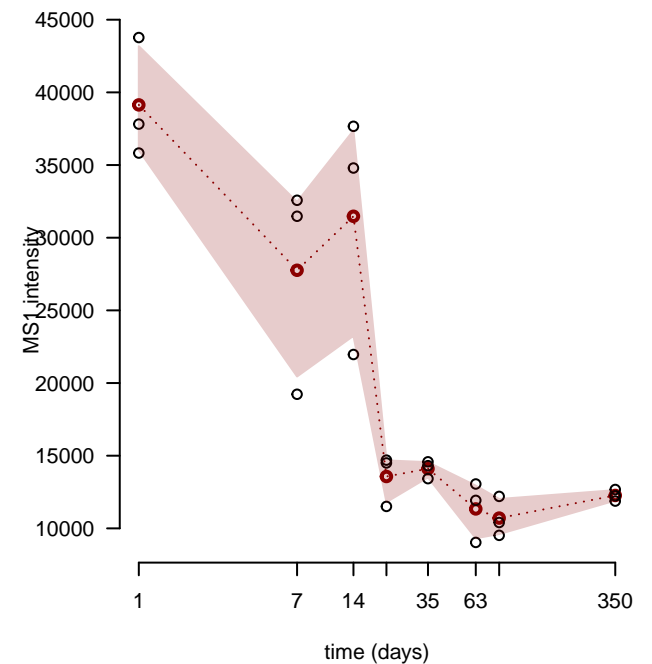

**Q9QX47**  
GN=Son  
Son DNA binding protein

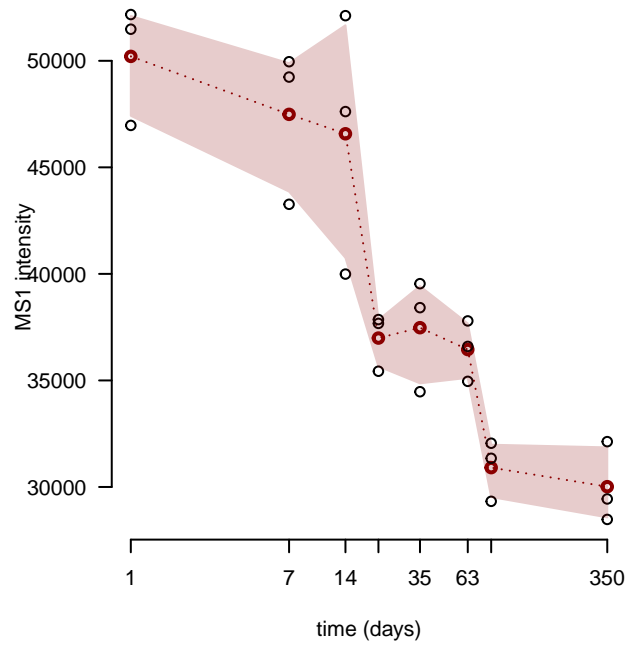

**Q9QX60**  
GN=Dguok  
deoxyguanosine kinase

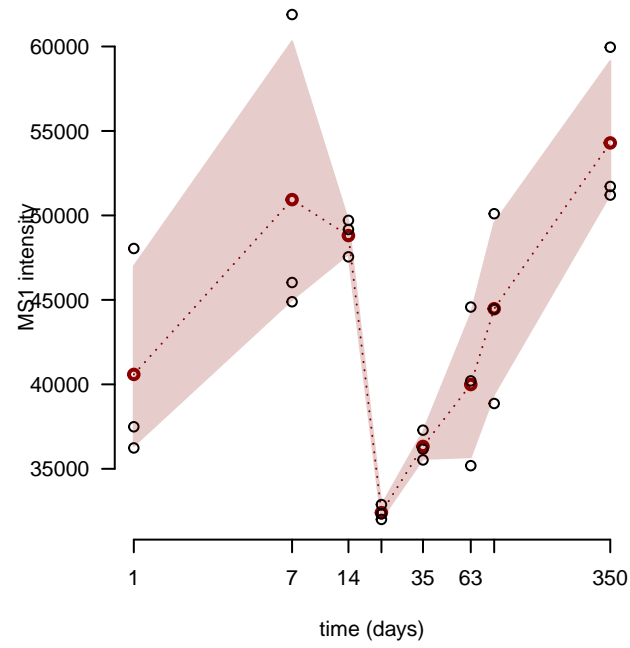

**Q9QXA1**  
GN=Cyhr1  
cysteine and histidine rich 1

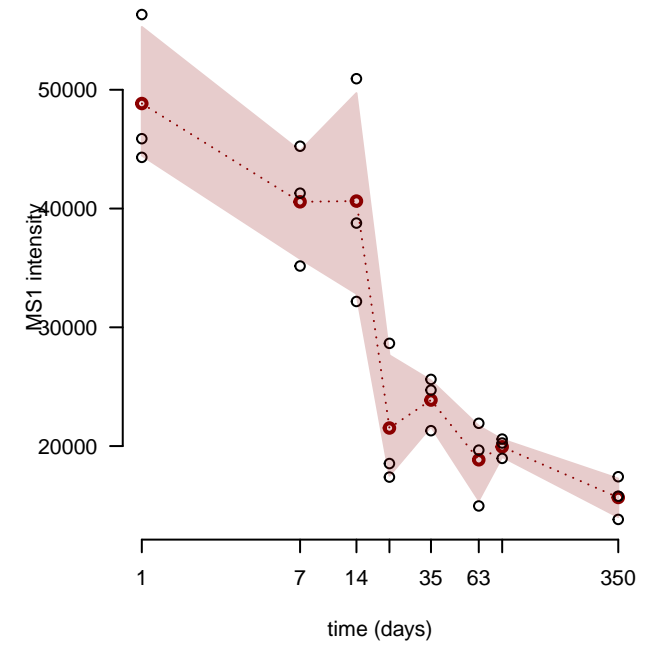

**Q9QXA1**  
GN=Cyhr1  
cysteine and histidine rich 1

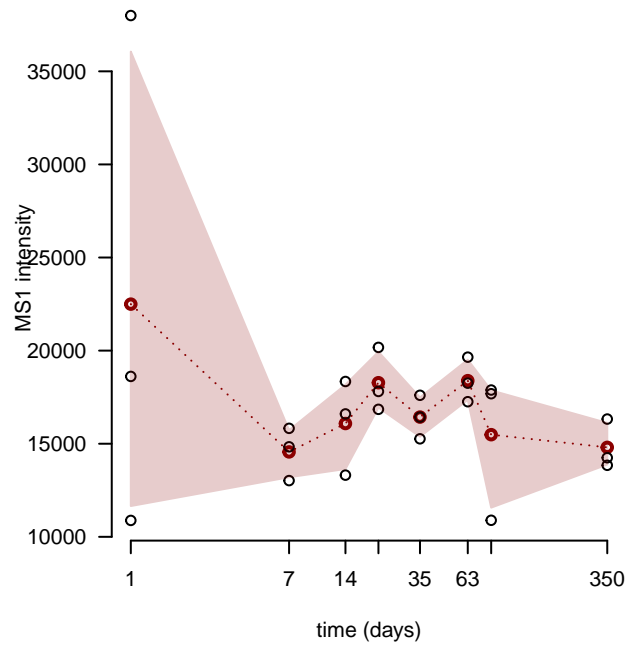

**Q9QXA5**  
GN=Lsm4  
LSM4 homolog, U6 small nuclear RNA and m ...

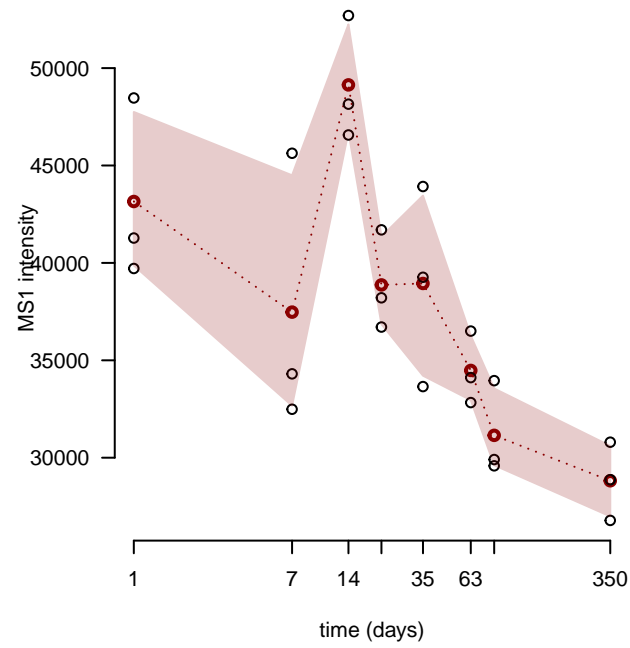

**Q9QXA7**  
GN=Trim44  
tripartite motif-containing 44

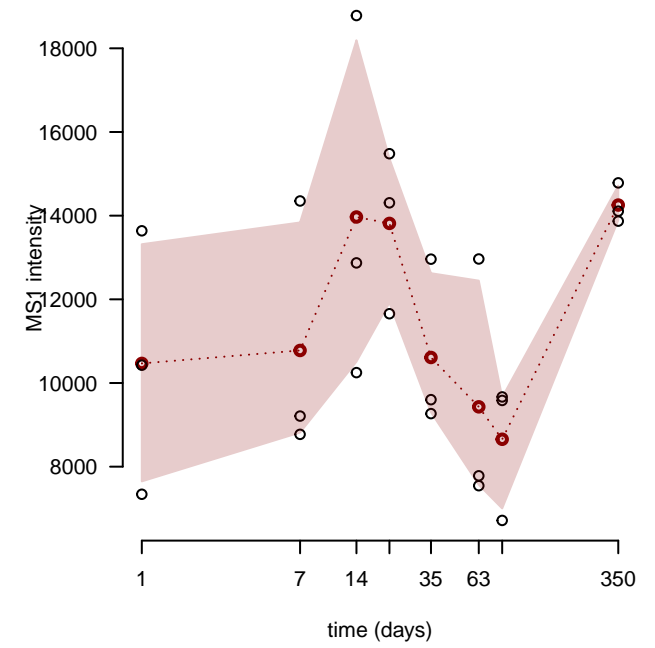

**Q9QXB9**  
GN=Drg2  
developmentally regulated GTP binding pr ...

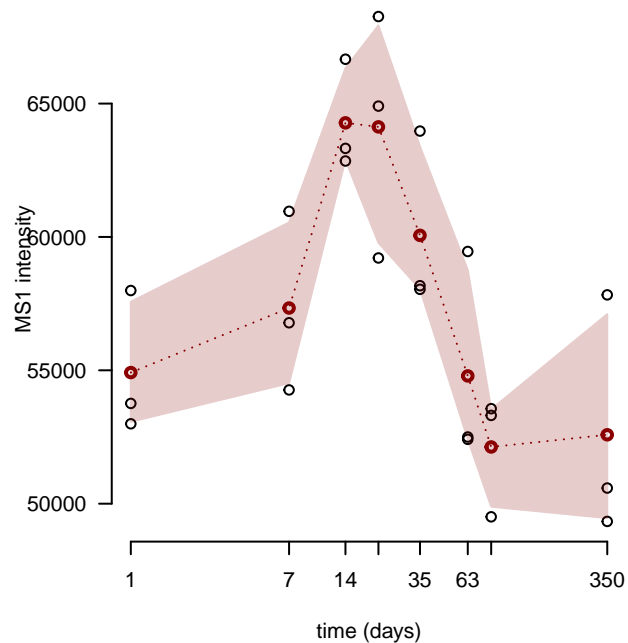

**Q9QXC1**  
GN=Fetub  
fetuin beta

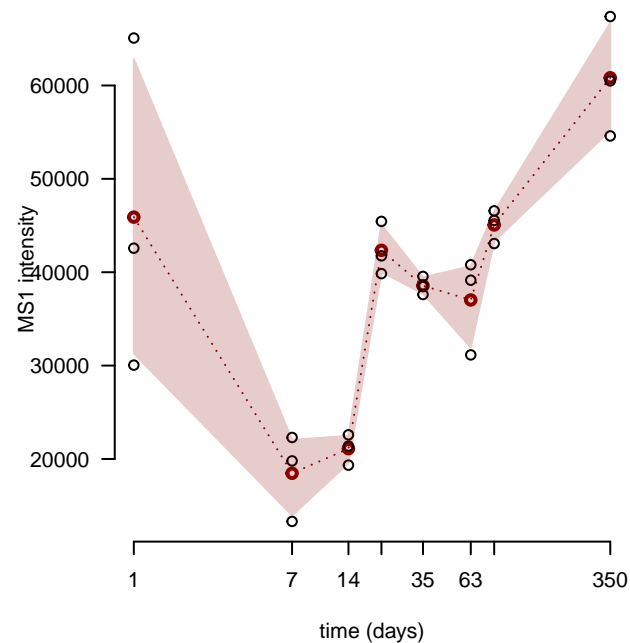

**Q9QXD6**  
GN=Fbp1  
fructose bisphosphatase 1

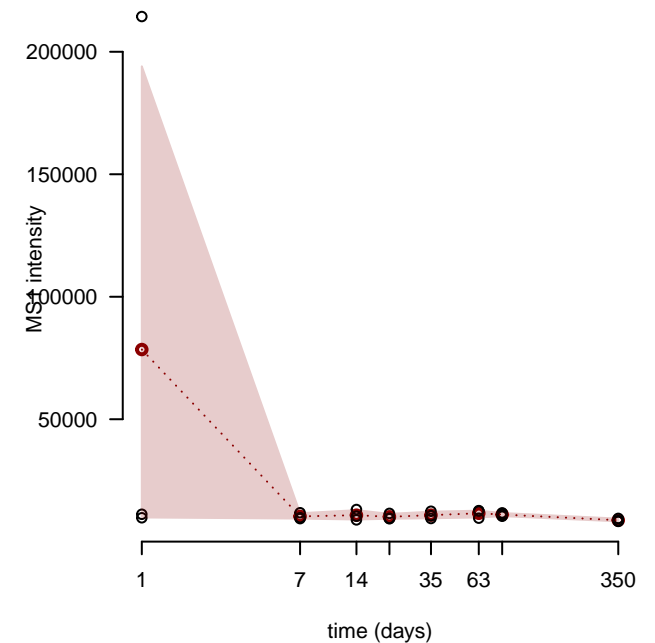

**Q9QXD8**  
**GN=Limd1**  
LIM domains containing 1

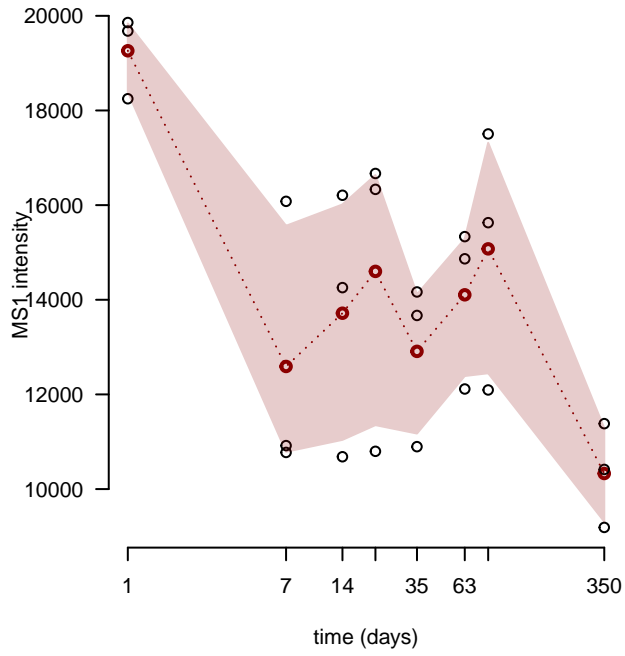

**Q9QXE0**  
**GN=Hacl1**  
2-hydroxyacyl-CoA lyase 1

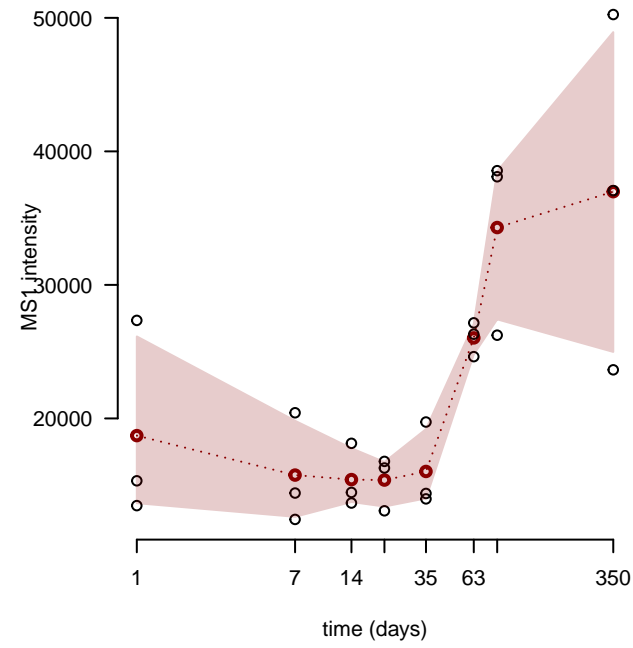

**Q9QXE7**  
**GN=Tbl1x**  
transducin (beta)-like 1 X-linked

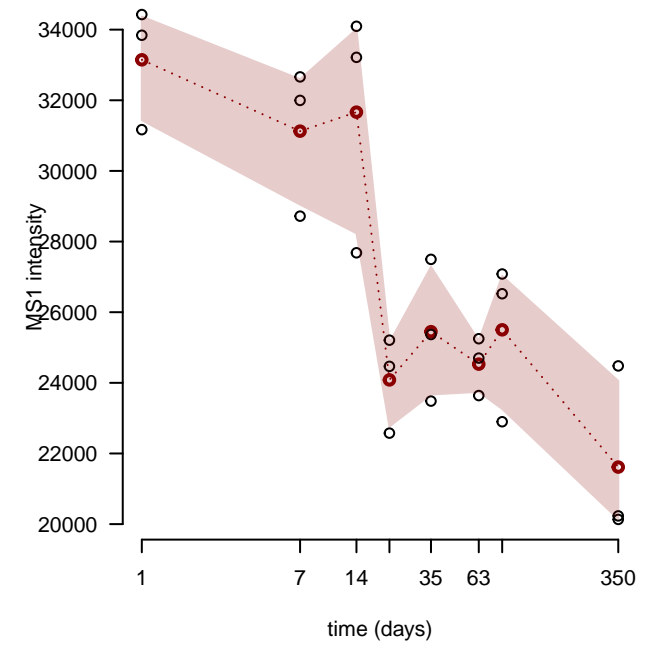

**Q9QXF8**  
**GN=Gnmt**  
glycine N-methyltransferase

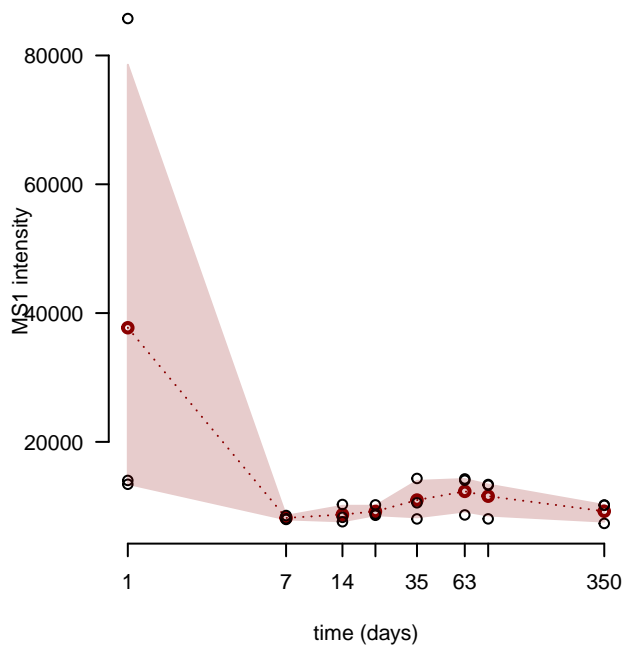

**Q9QXG2**  
**GN=Chm**  
choroideremia (RAB escort protein 1)

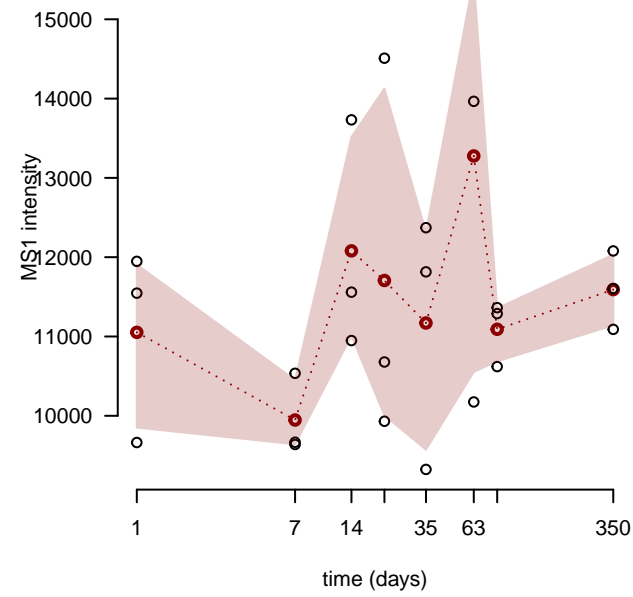

**Q9QXG4**  
**GN=Acss2**  
acyl-CoA synthetase short-chain family m ...

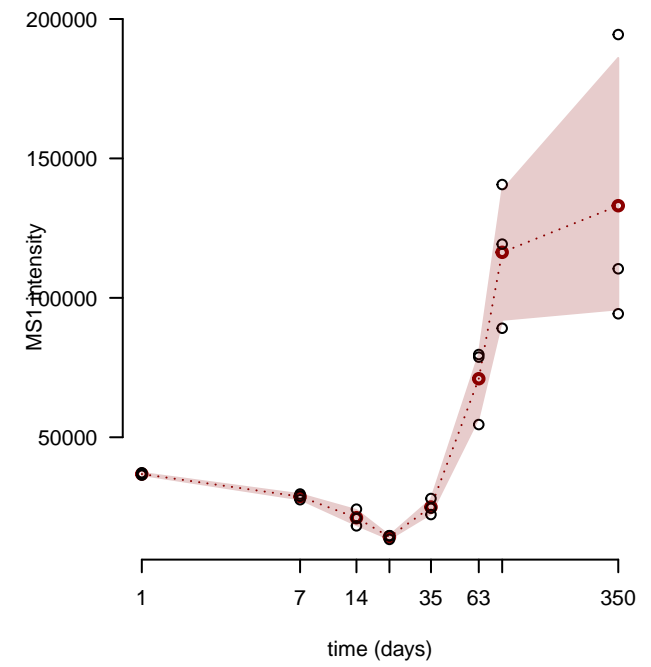

**Q9QXG9**  
**GN=Tinf2**  
Terf1 (TRF1)-interacting nuclear factor ...

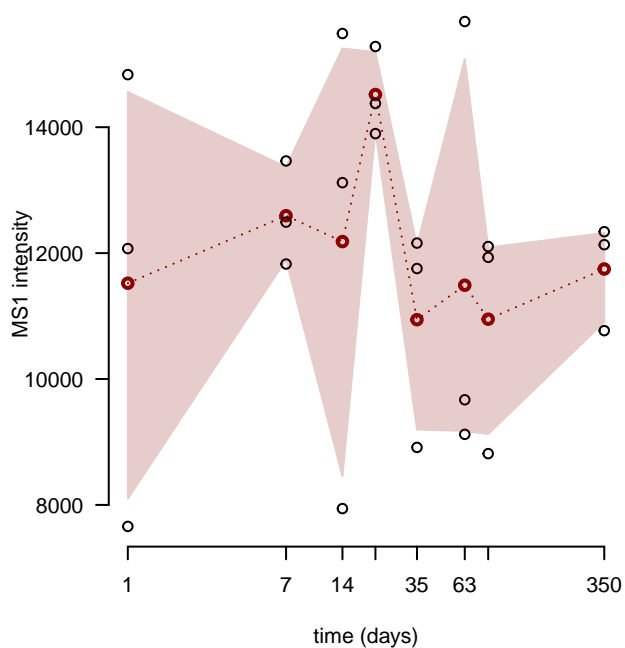

**Q9QXJ1**  
**GN=Apbb1**  
amyloid beta (A4) precursor protein-bind ...

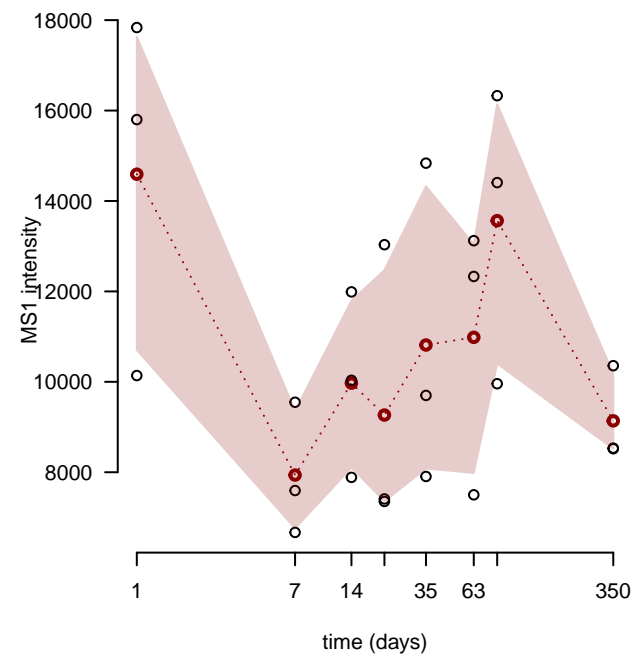

**Q9QXJ4**  
**GN=Ar110**  
ADP-ribosylation factor-like 10

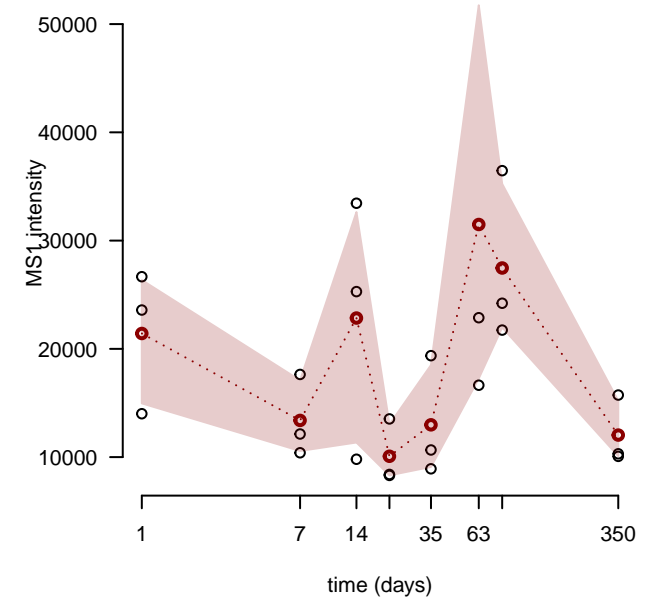



**Q9QXK2**  
**GN=Rad18**  
RAD18 E3 ubiquitin protein ligase

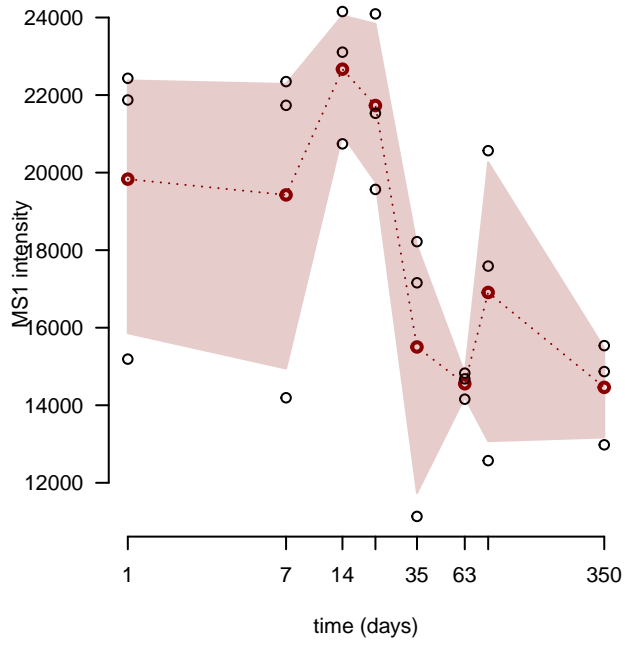

**Q9QXK3**  
**GN=Copg2**  
coatomer protein complex, subunit gamma ...

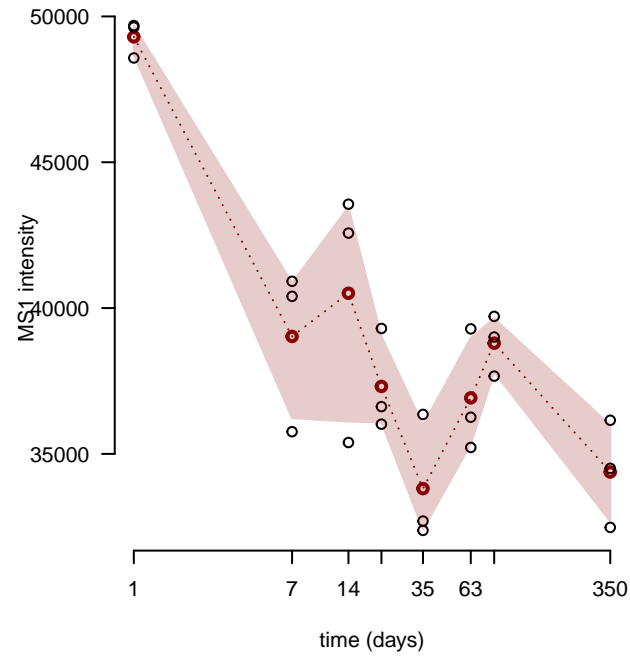

**Q9QXK7**  
**GN=Cpsf3**  
cleavage and polyadenylation specificity ...

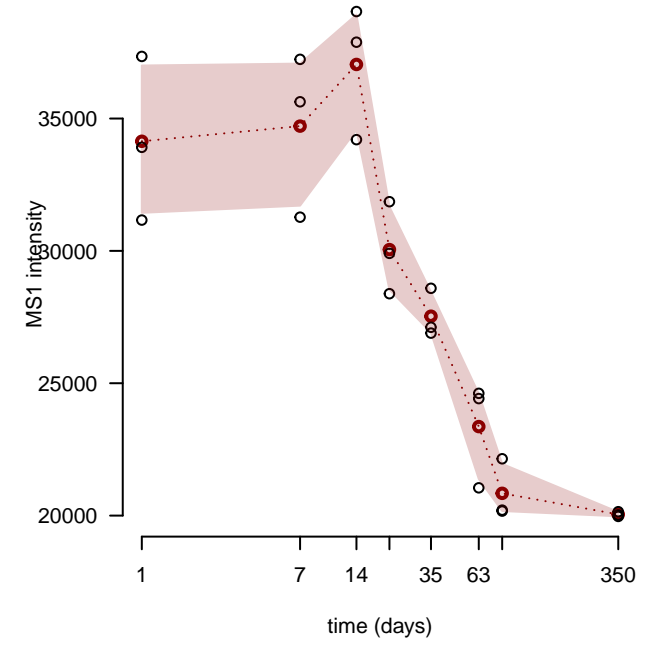

**Q9QXL1**  
**GN=Kif21b**  
kinesin family member 21B

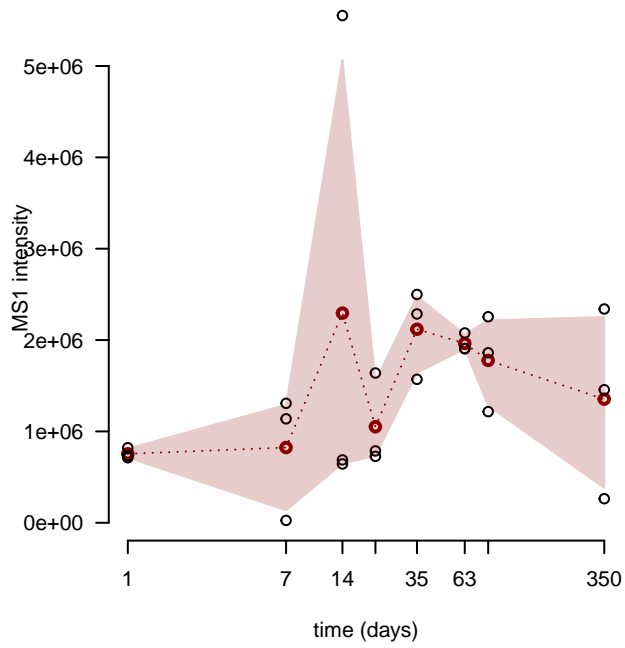

**Q9QXL2**  
**GN=Kif21a**  
kinesin family member 21A

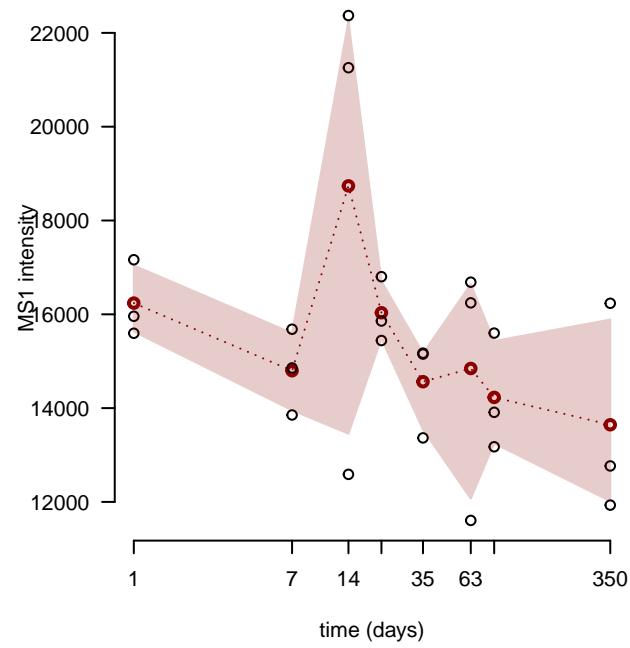

**Q9QXL8**  
**GN=Nme7**  
NME/NM23 family member 7

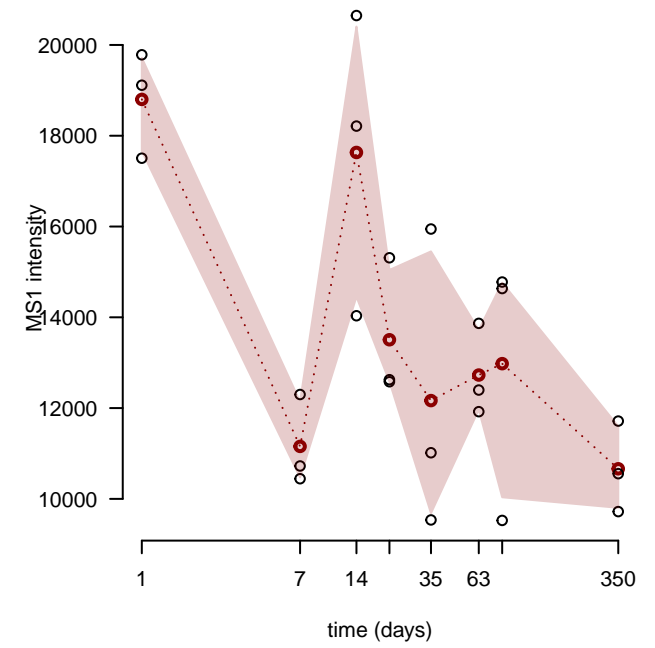

**Q9QXM0**  
**GN=Abhd2**  
abhydrolase domain containing 2

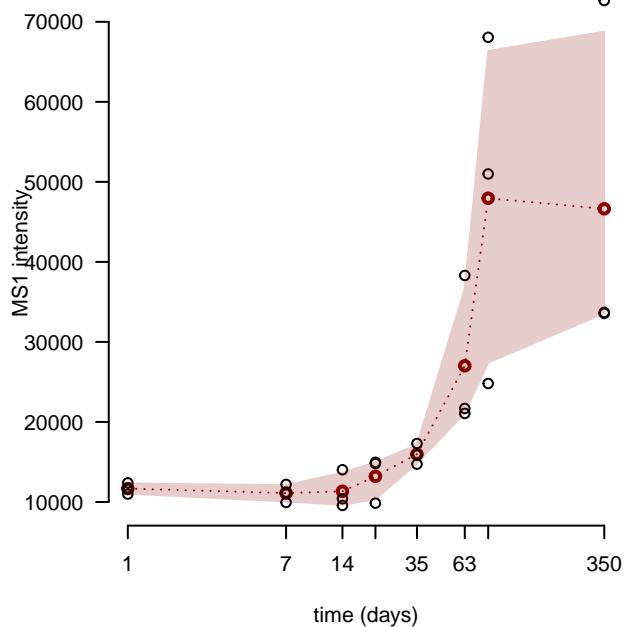

**Q9QXM1**  
**GN=Jmy**  
junction-mediating and regulatory protei ...

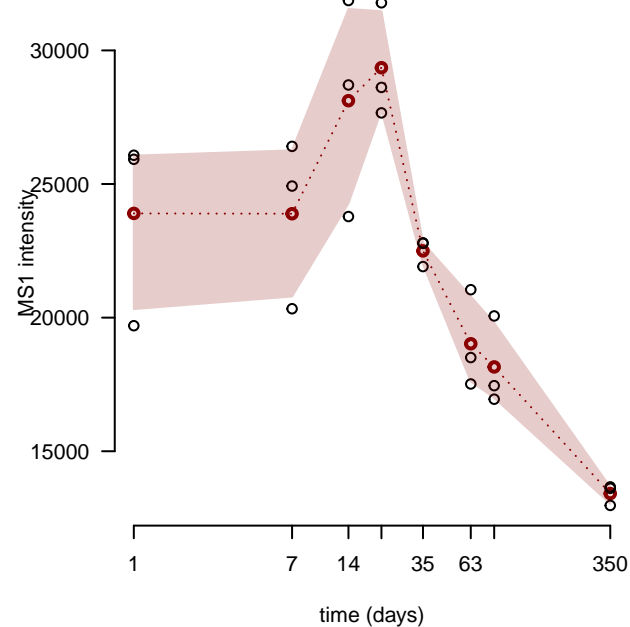

**Q9QXN0**  
**GN=Shroom3**  
shroom family member 3

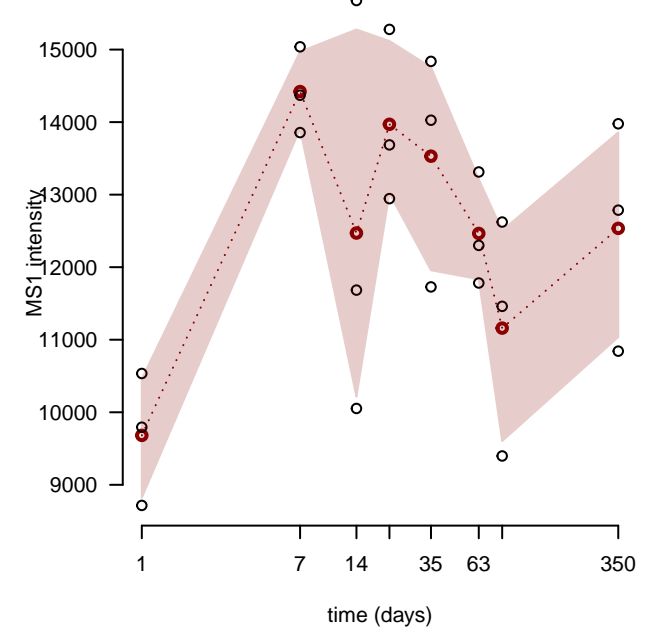

**Q9QXN3**  
GN=Trip4  
thyroid hormone receptor interactor 4

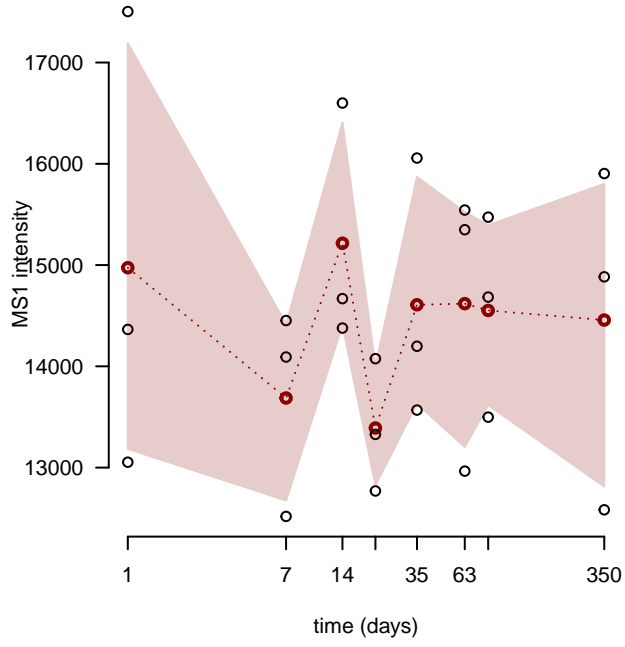

**Q9QXN5**  
GN=Miox  
myo-inositol oxygenase

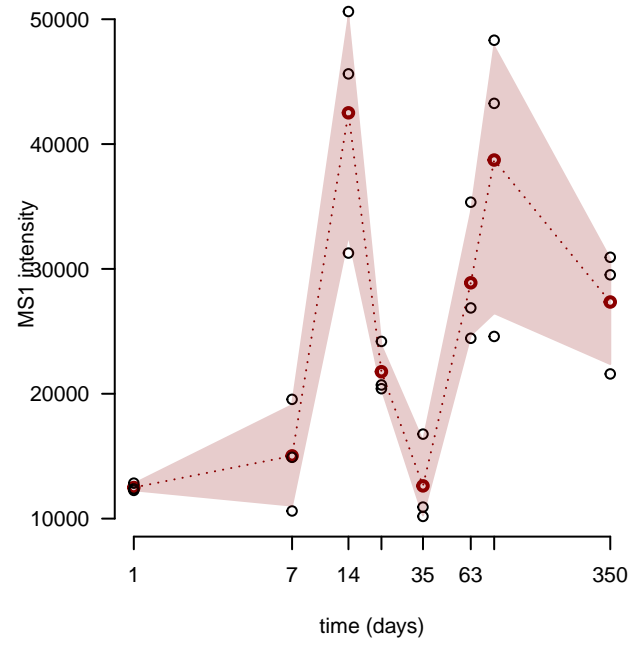

**Q9QXP7**  
GN=C1qtnf1  
C1q and tumor necrosis factor related pr ...

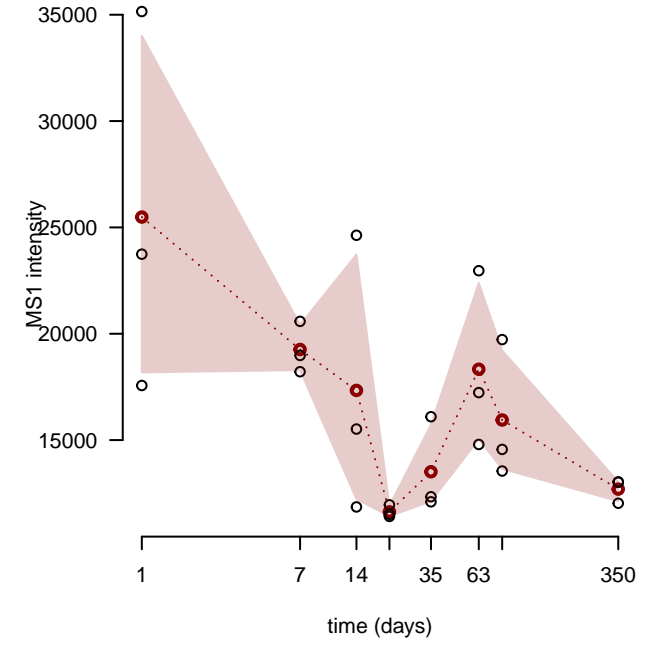

**Q9QXS1**  
GN=Plec  
plectin

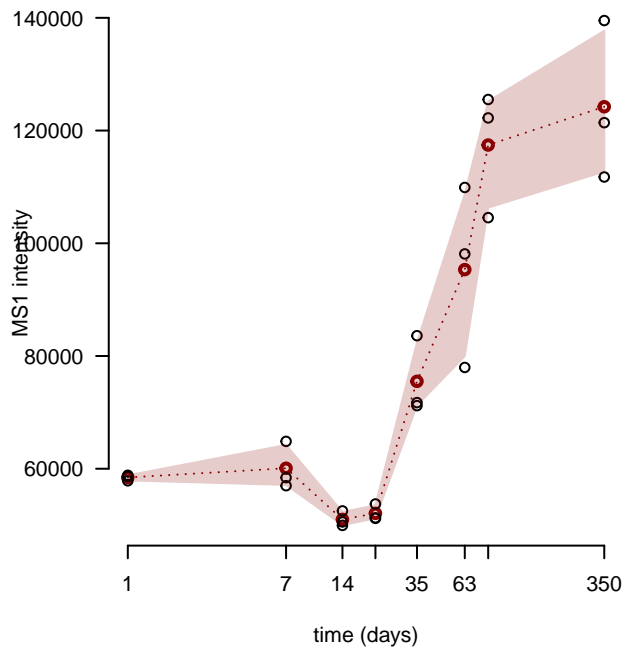

**Q9QXS1**  
GN=Plec  
plectin

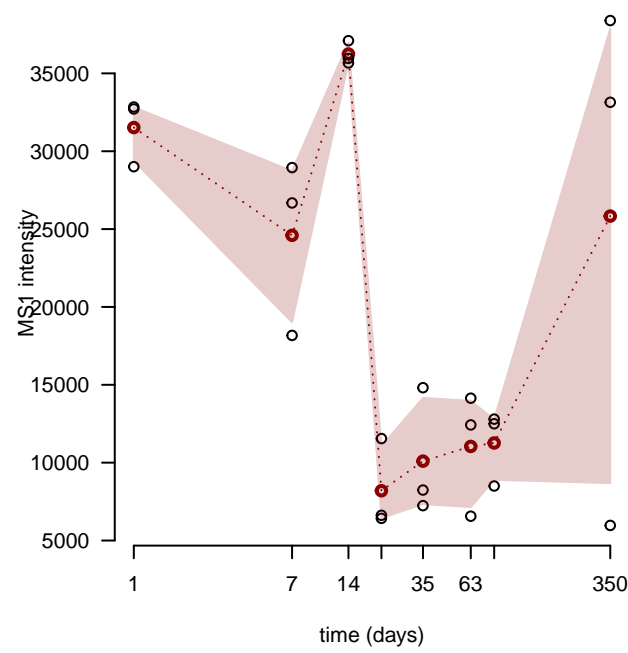

**Q9QXS1**  
GN=Plec  
plectin

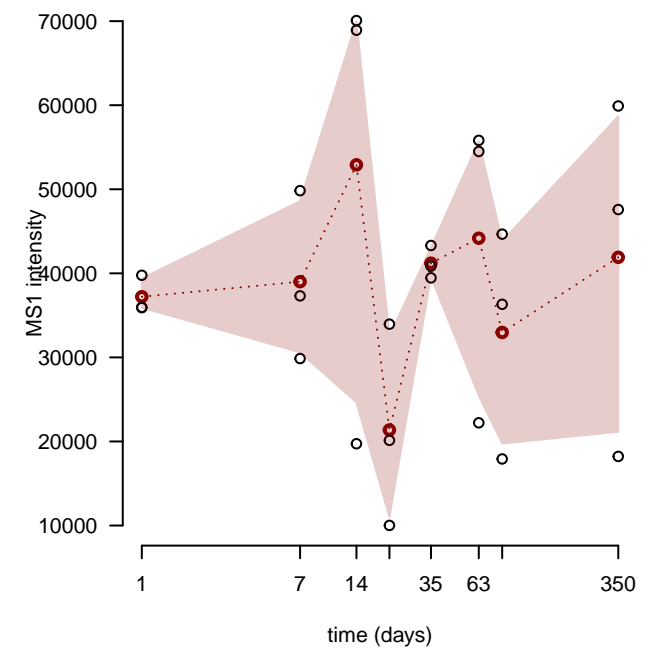

**Q9QXS6**  
GN=Dbn1  
drebrin 1

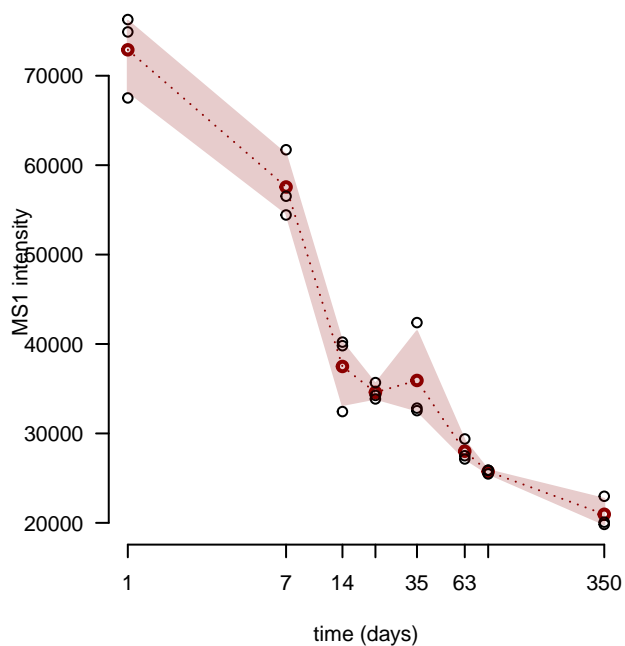

**Q9QXT0**  
GN=Cnpy2  
canopy FGF signaling regulator 2

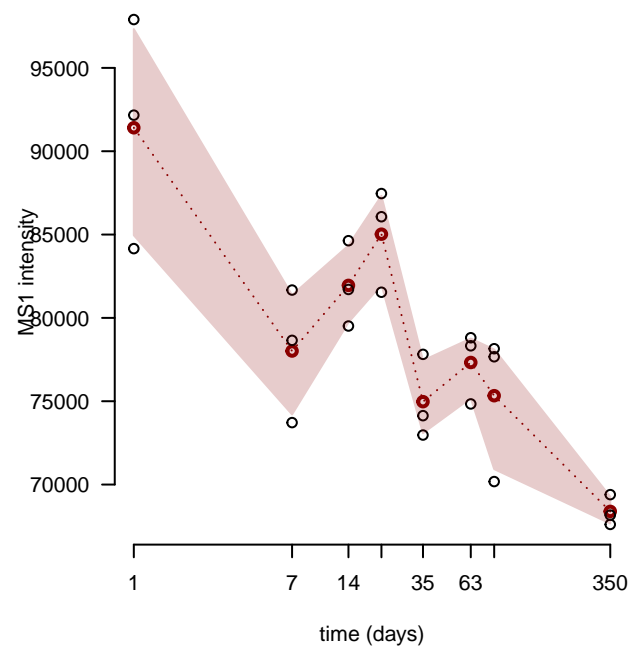

**Q9QXT5**  
GN=Egfl7  
EGF-like domain 7

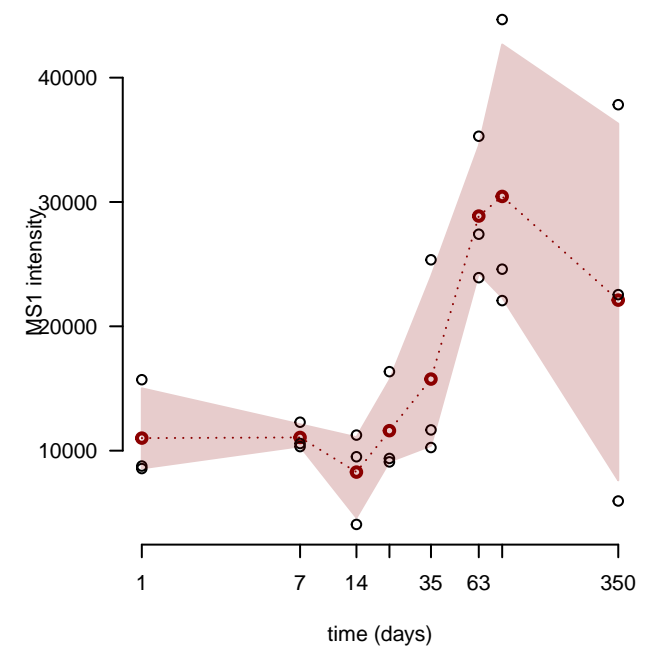

**Q9QXT8**  
GN=Kcnp3

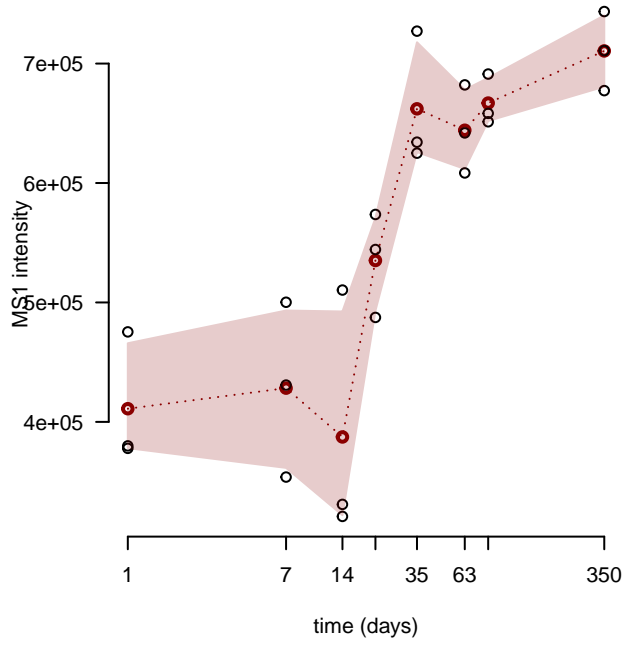

**Q9QXV1**  
GN=Cbx8  
chromobox 8

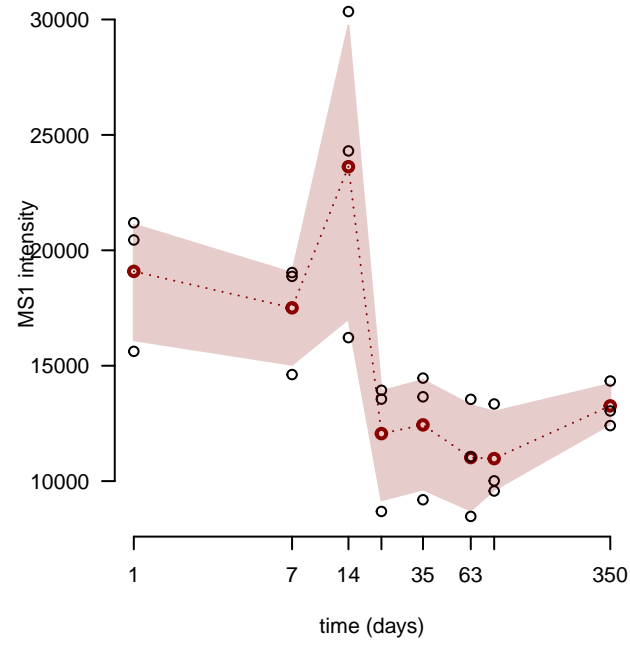

**Q9QXV3**  
GN=Ing1  
inhibitor of growth family, member 1

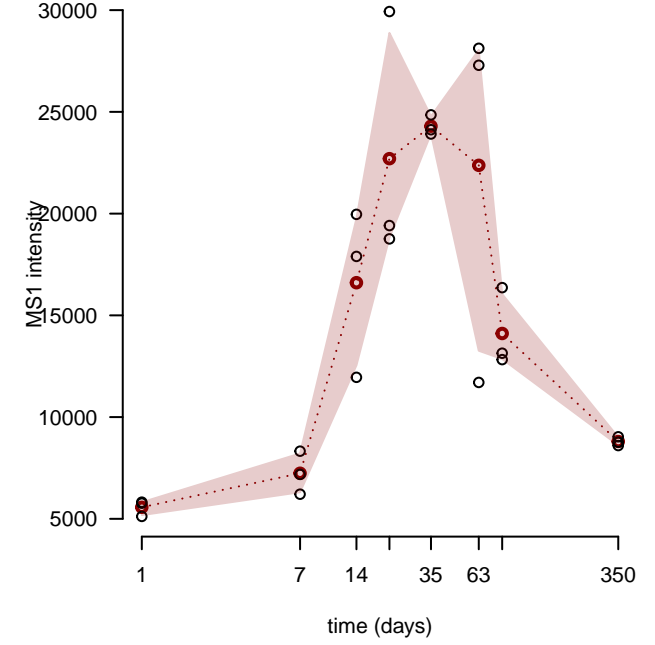

**Q9QXW9**  
GN=Slc7a8  
solute carrier family 7 (cationic amino ...

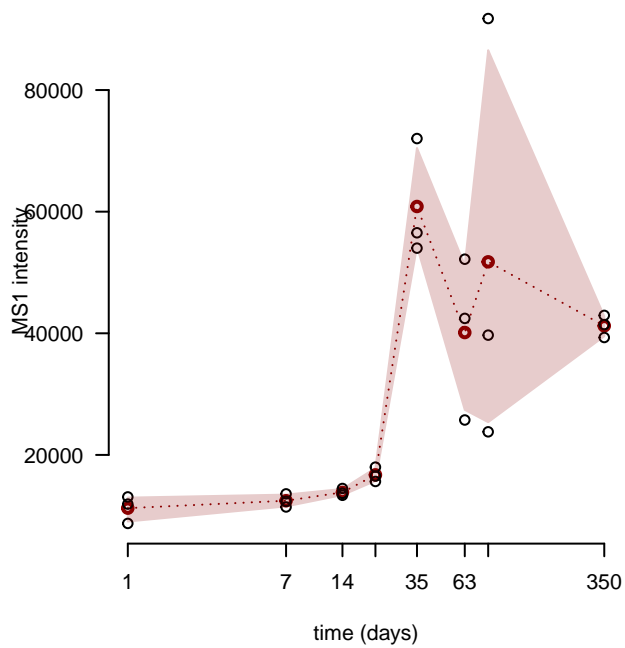

**Q9QXX0**  
GN=Jag1  
jagged 1

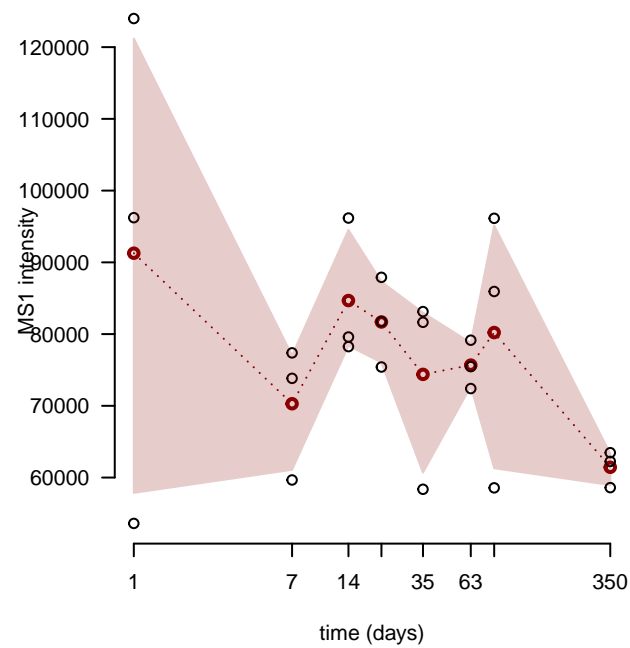

**Q9QXX4**  
GN=Slc25a13  
solute carrier family 25 (mitochondrial ...

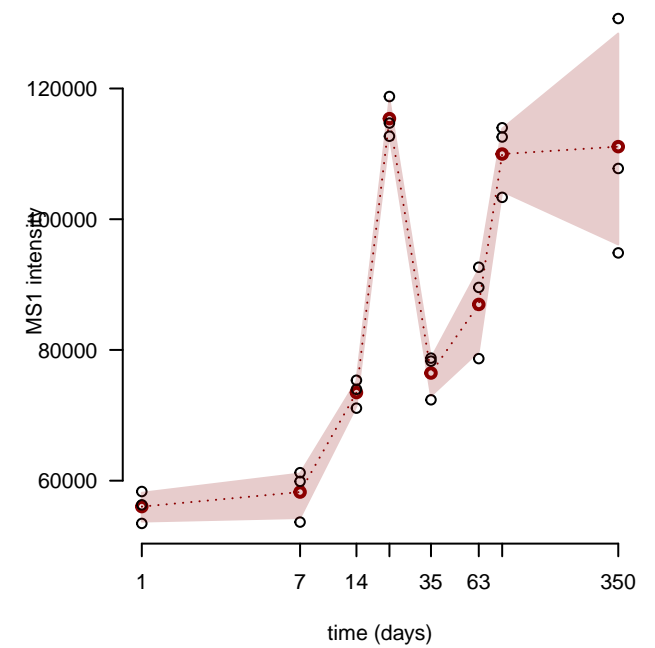

**Q9QXY6**  
GN=Ehd3  
EH-domain containing 3

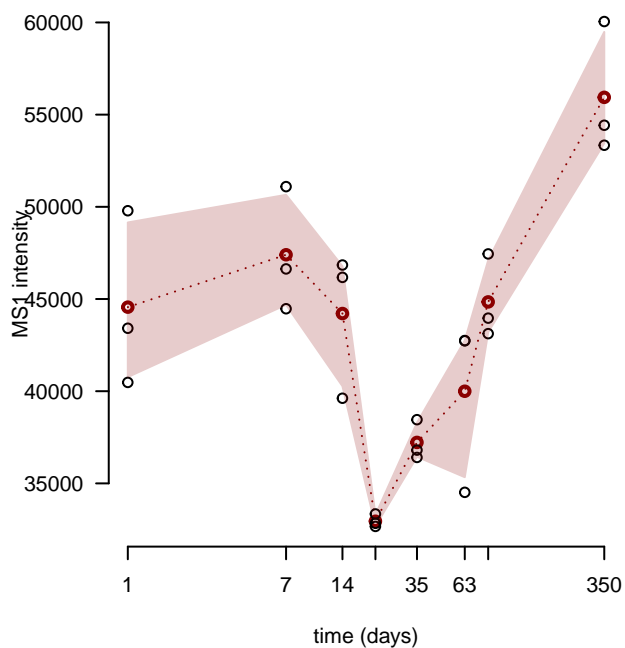

**Q9QXY9**  
GN=Pex3  
peroxisomal biogenesis factor 3

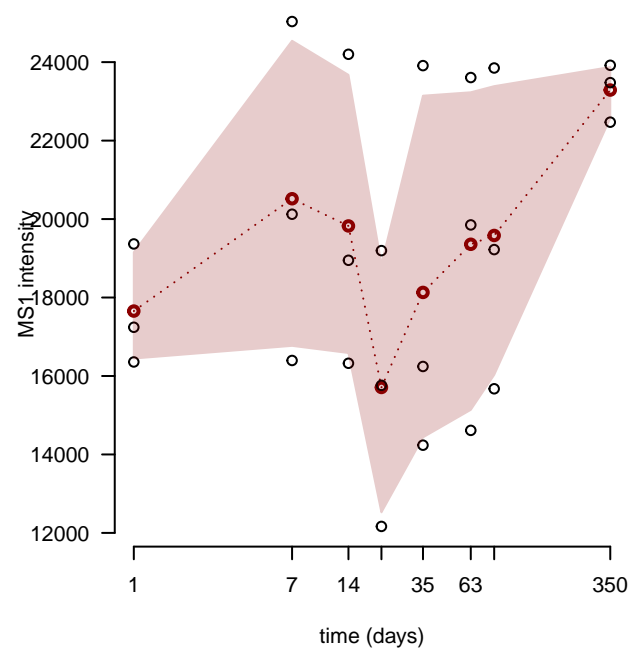

**Q9QXZ0**  
GN=Macf1

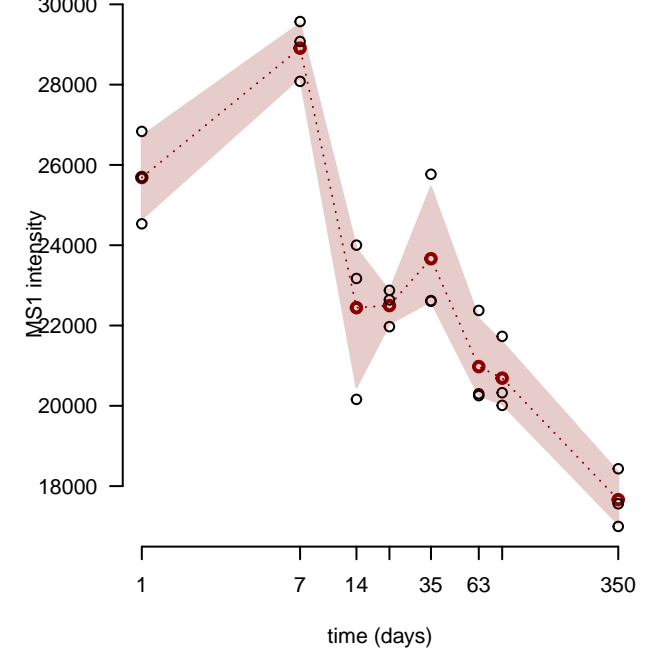

**Q9QXZ0**  
GN=Macf1

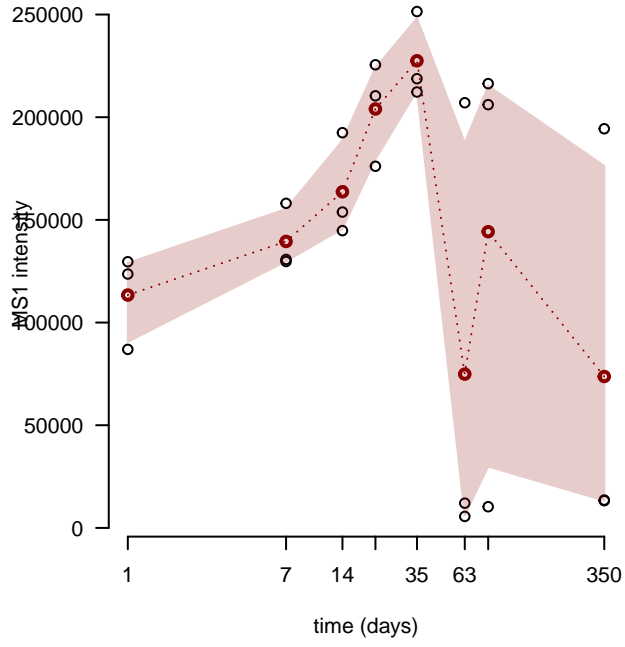

**Q9QY06**  
GN=Myo9b  
myosin IXb

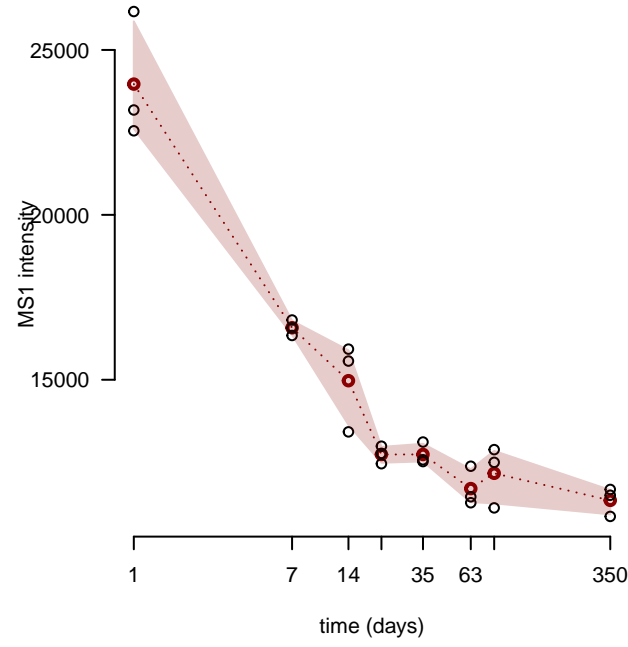

**Q9QY15**  
GN=Ddx25  
DEAD box helicase 25

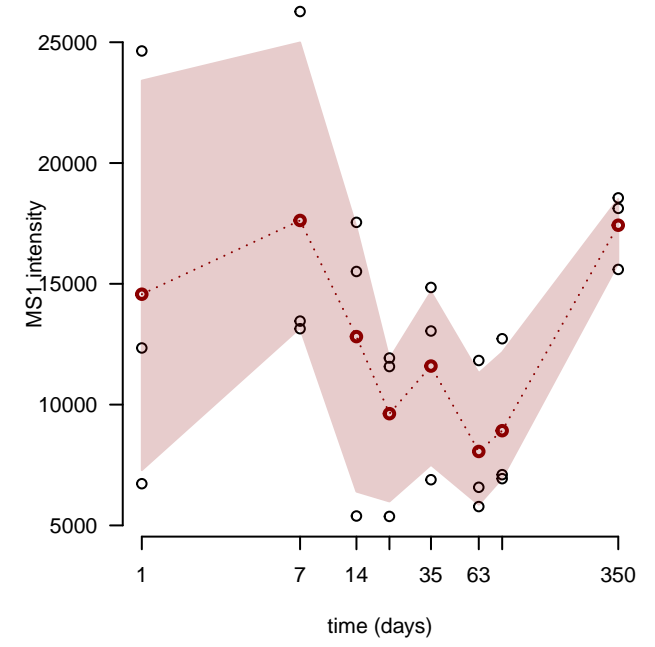

**Q9QY23**  
GN=Pkp3  
plakophilin 3

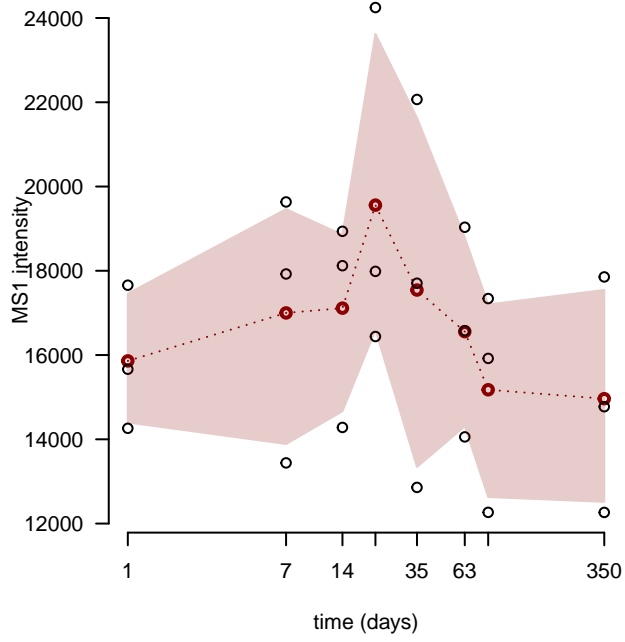

**Q9QY30**  
GN=Abcb11  
ATP-binding cassette, sub-family B (MDR/ ...

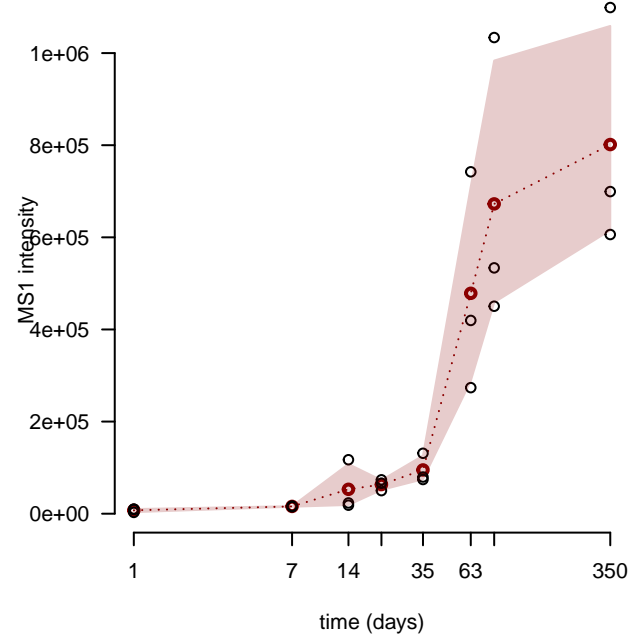

**Q9QY36**  
GN=Naa10  
N(alpha)-acetyltransferase 10, NatA cata ...

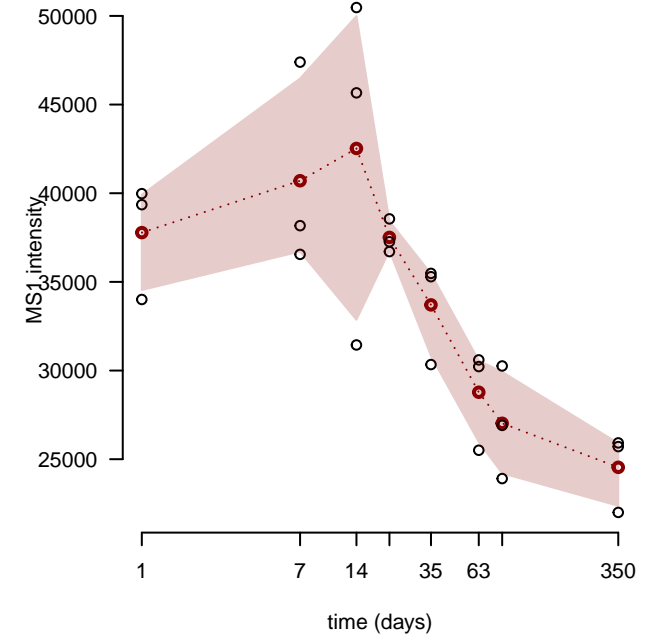

**Q9QY40**  
GN=Plxnb3  
plexin B3

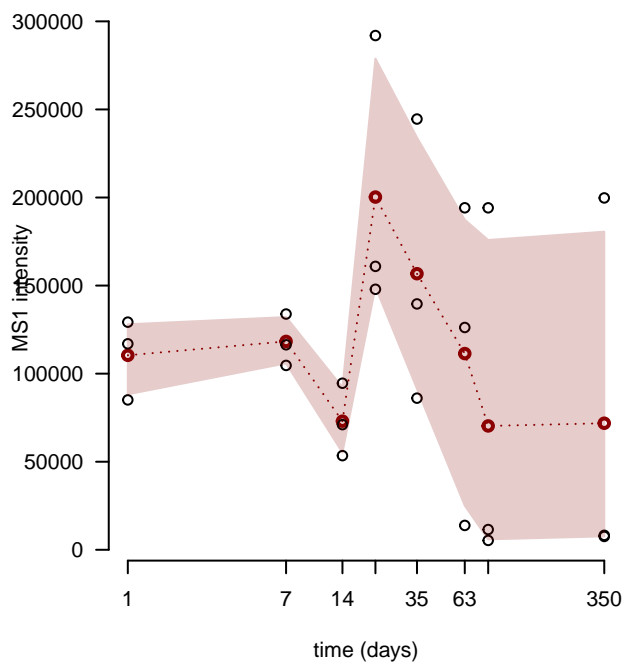

**Q9QY53**  
GN=Nphp1  
nephrinophthisis 1 (juvenile) homolog (h ...

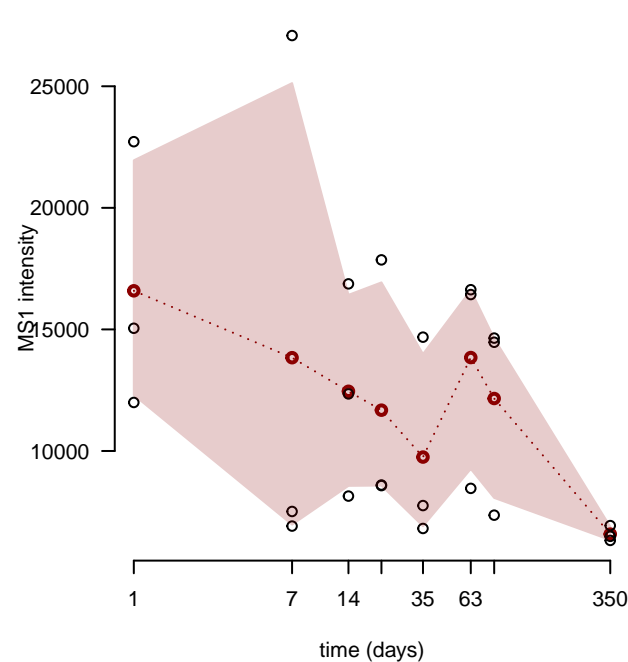

**Q9QY66**  
GN=Znhit2  
zinc finger, HIT domain containing 2

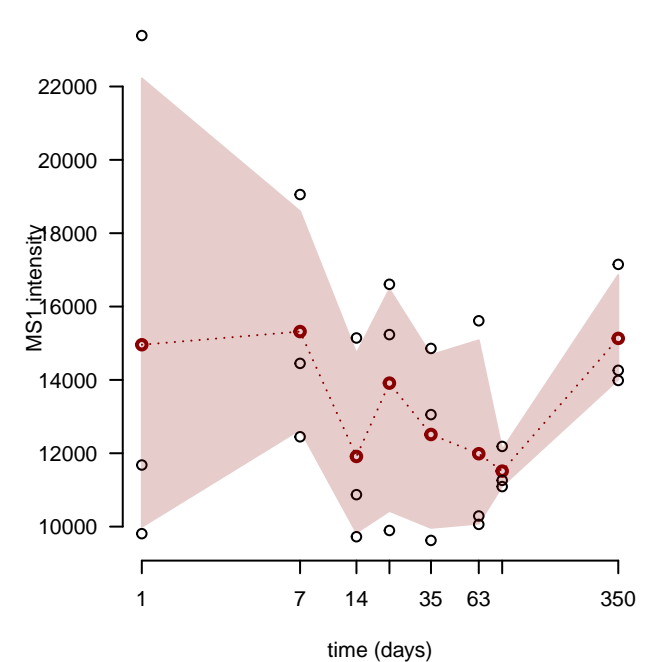

**Q9QY73**  
**GN=Tmem59**  
transmembrane protein 59

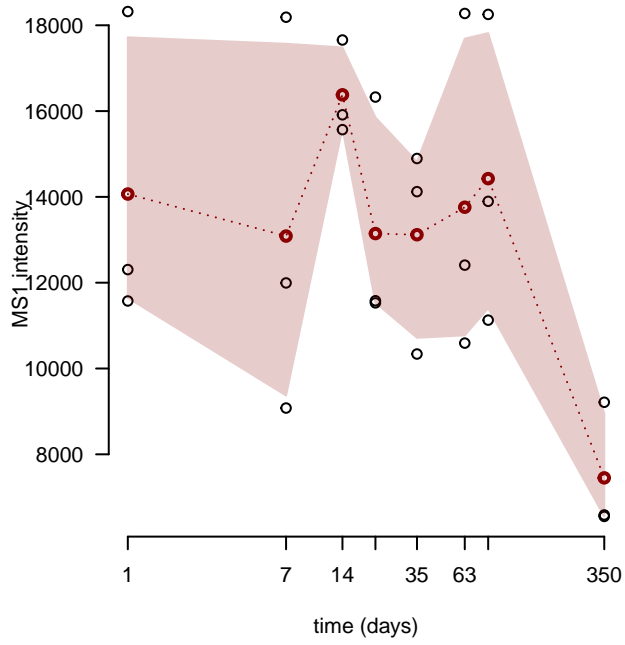

**Q9QY76**  
**GN=Vapb**  
vesicle-associated membrane protein, ass ...

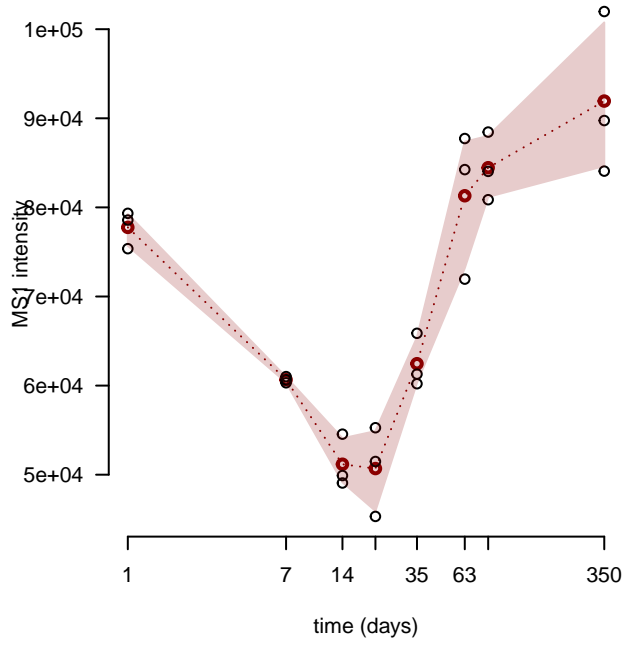

**Q9QY81**  
**GN=Nup210**  
nucleoporin 210

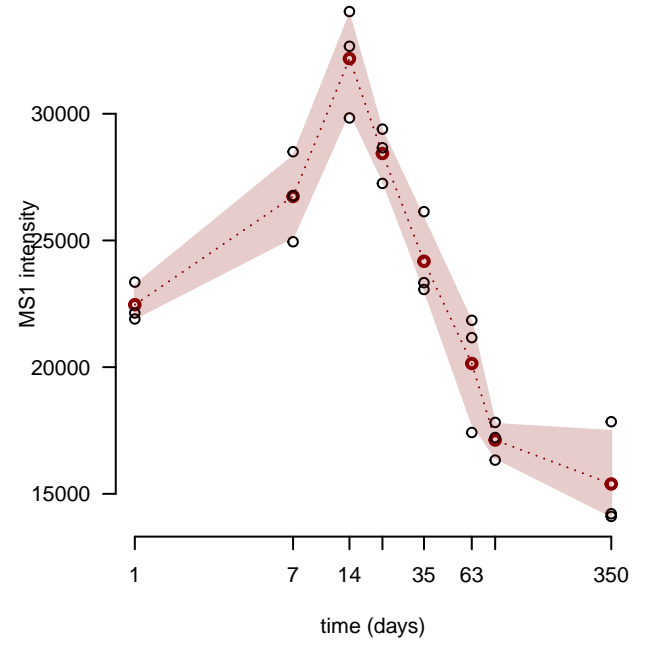

**Q9QY93**  
**GN=Dctpp1**  
dCTP pyrophosphatase 1

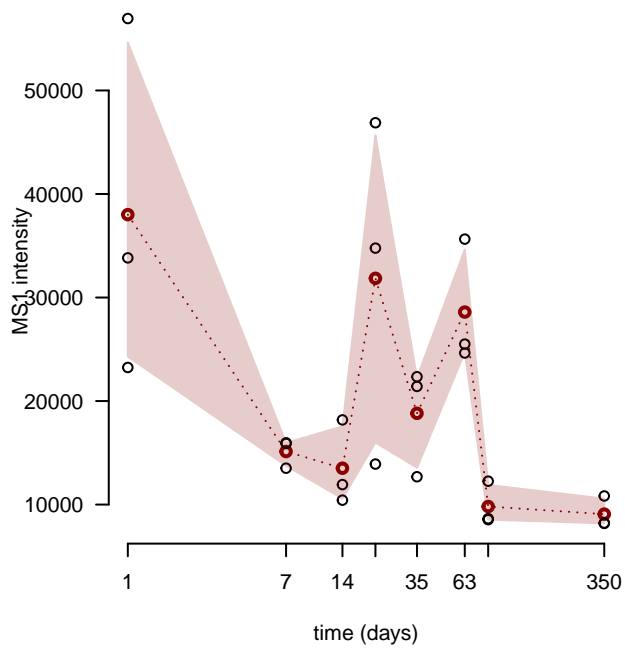

**Q9QYA2**  
**GN=Tomm40**  
translocase of outer mitochondrial membr ...

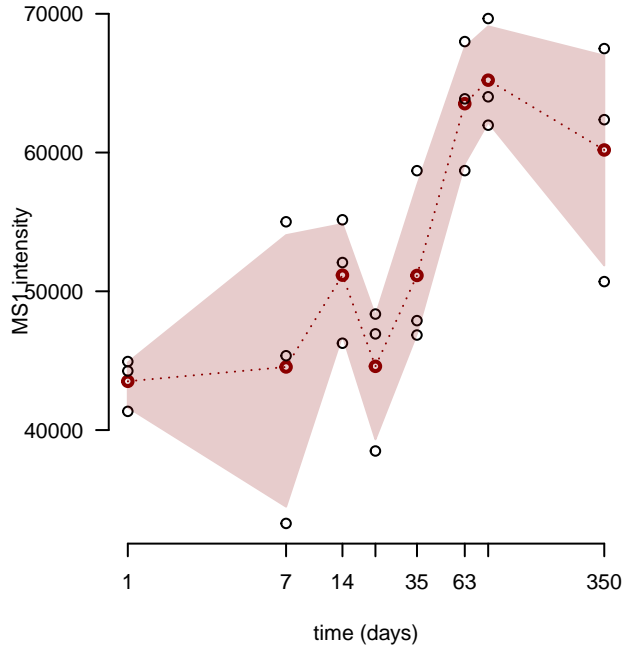

**Q9QYB1**  
**GN=Clic4**  
chloride intracellular channel 4 (mitoch ...

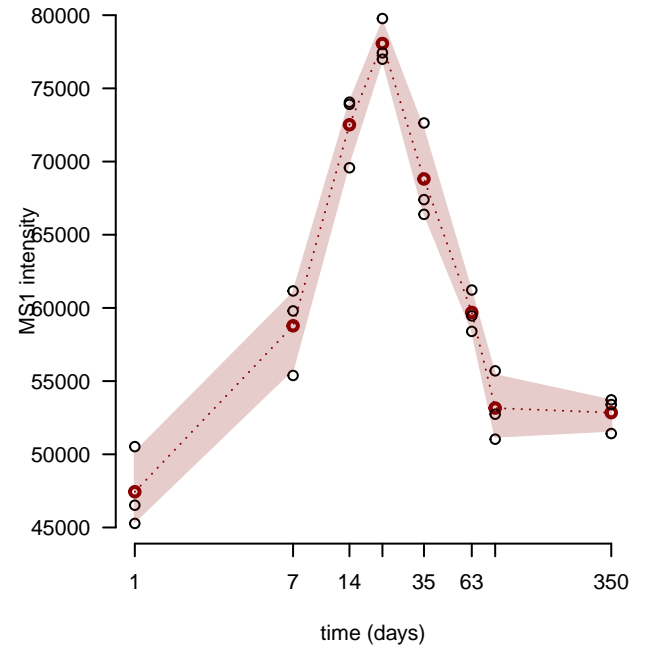

**Q9QYB2**  
**GN=Dach1**  
dachshund family transcription factor 1

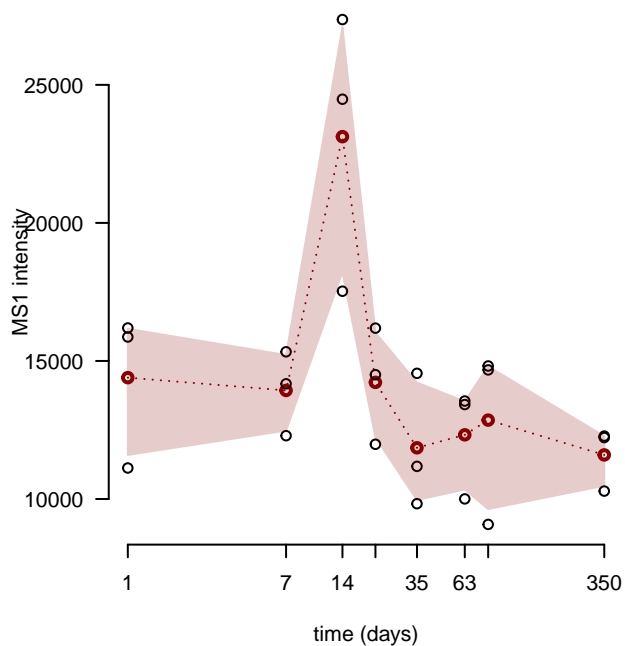

**Q9QYB5**  
**GN=Add3**  
adducin 3 (gamma)

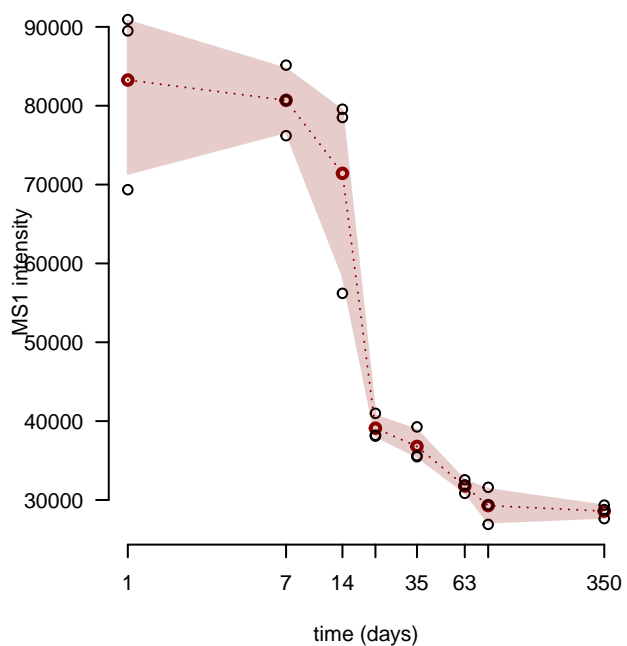

**Q9QYB5**  
**GN=Add3**  
adducin 3 (gamma)

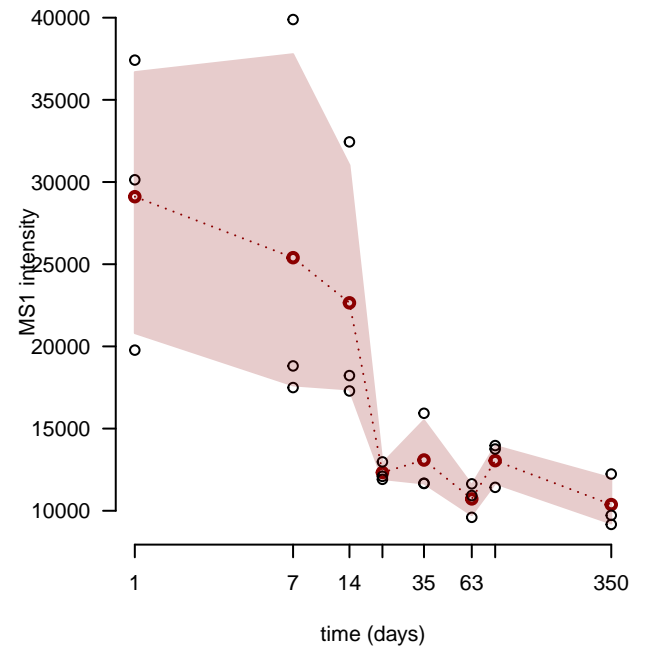

**Q9QYB8**  
**GN=Add2**  
adducin 2 (beta)

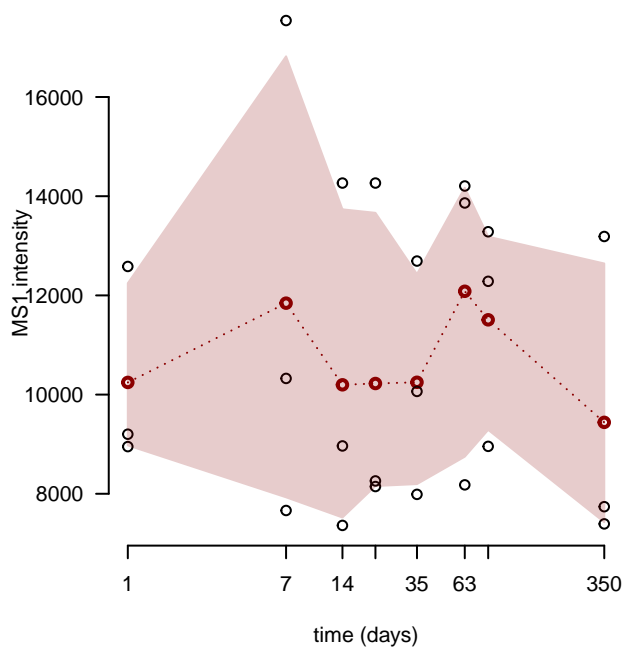

**Q9QYC0**  
**GN=Add1**  
adducin 1 (alpha)

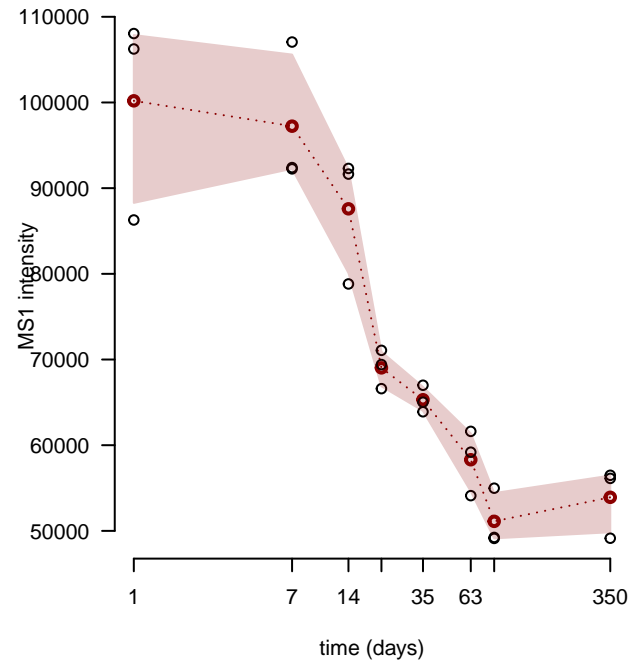

**Q9QYC7**  
**GN=Ggcx**  
gamma-glutamyl carboxylase

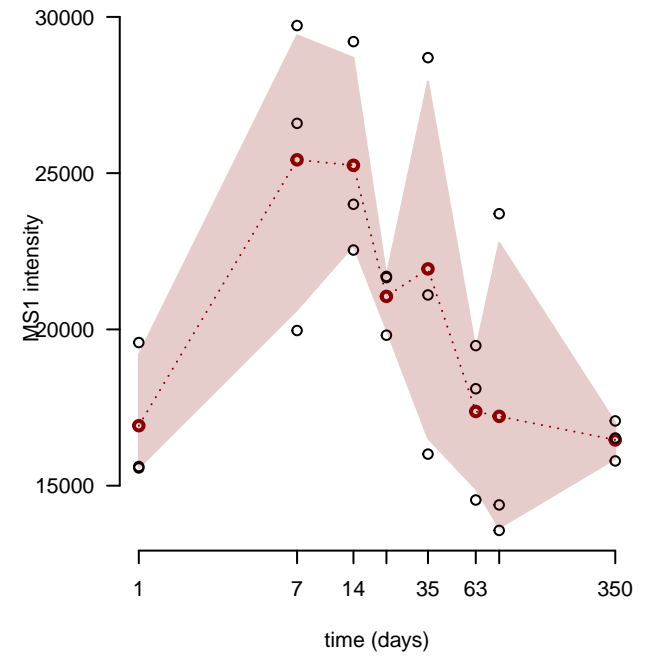

**Q9QYE6**  
**GN=Golga5**  
golgi autoantigen, golgin subfamily a, 5

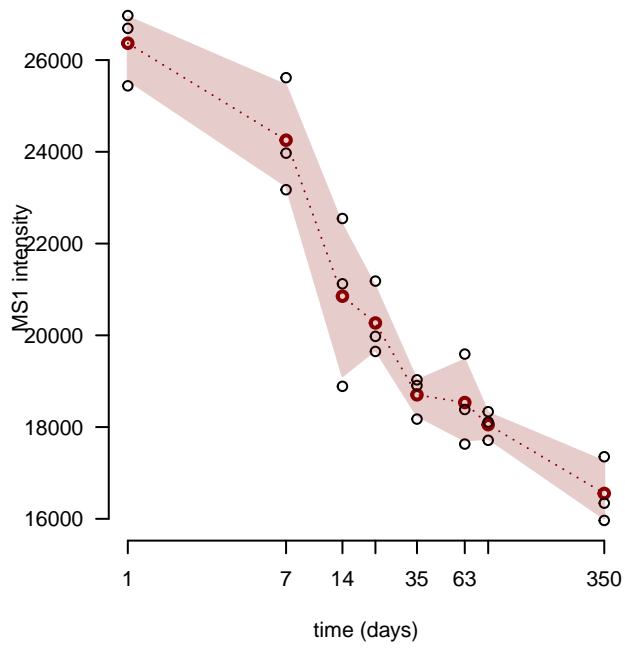

**Q9QYF1**  
**GN=Rdh11**  
retinol dehydrogenase 11

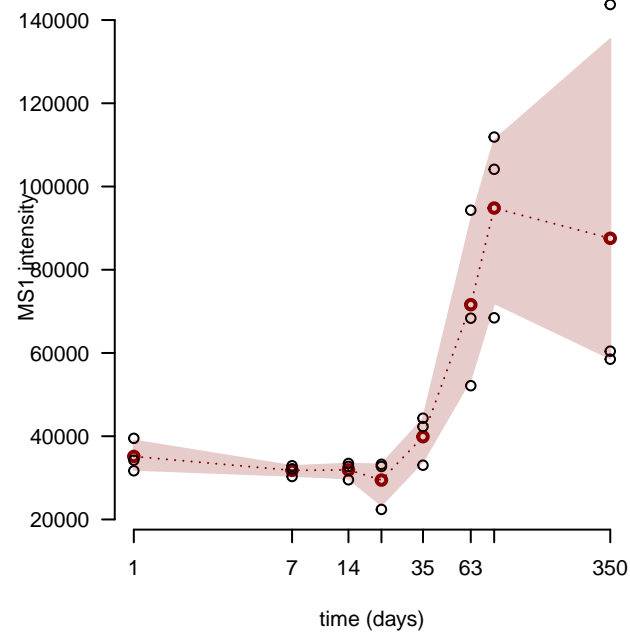

**Q9QYF9**  
**GN=Ndr3**  
N-myc downstream regulated gene 3

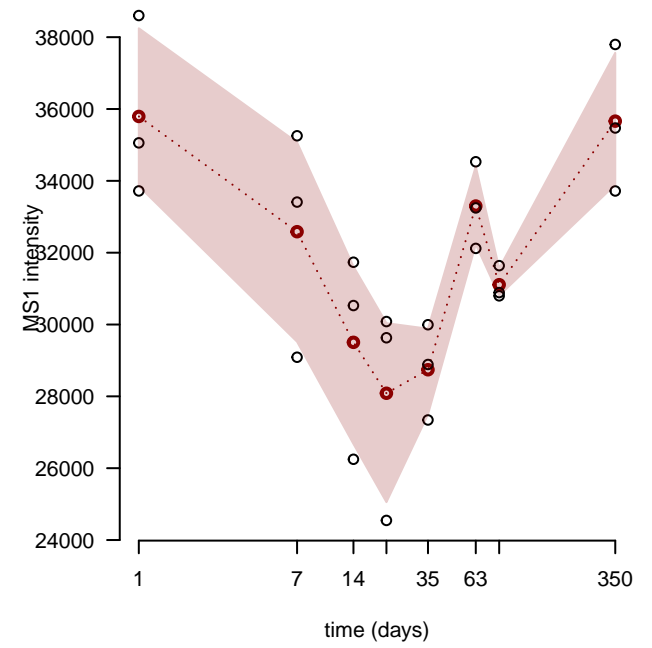

**Q9QYG0**  
**GN=Ndr2**  
N-myc downstream regulated gene 2

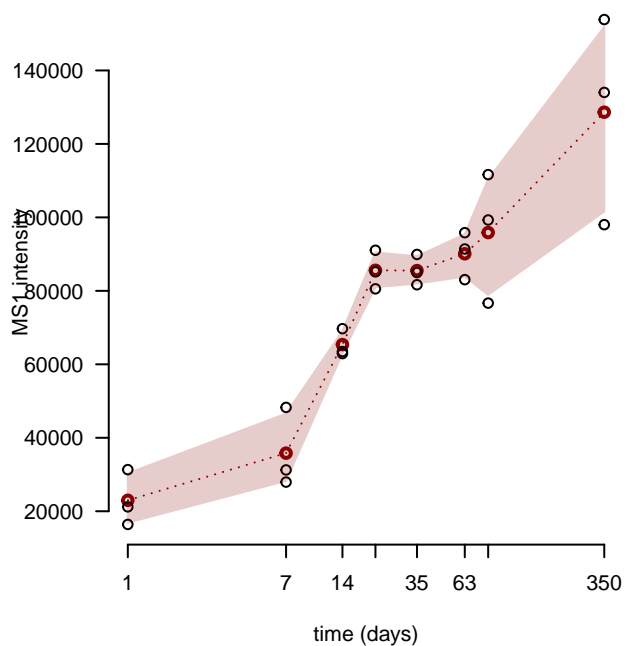

**Q9QYG0**  
**GN=Ndr2**  
N-myc downstream regulated gene 2

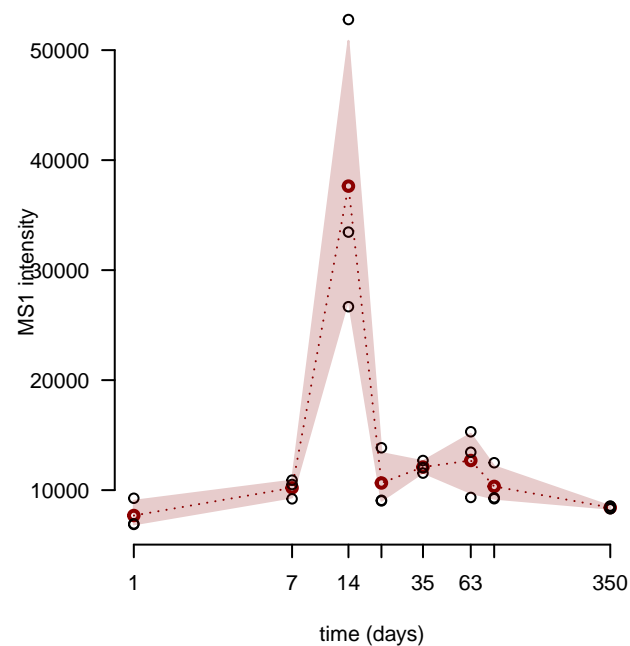

**Q9QYH6**  
**GN=Maged1**  
MAGE family member D1

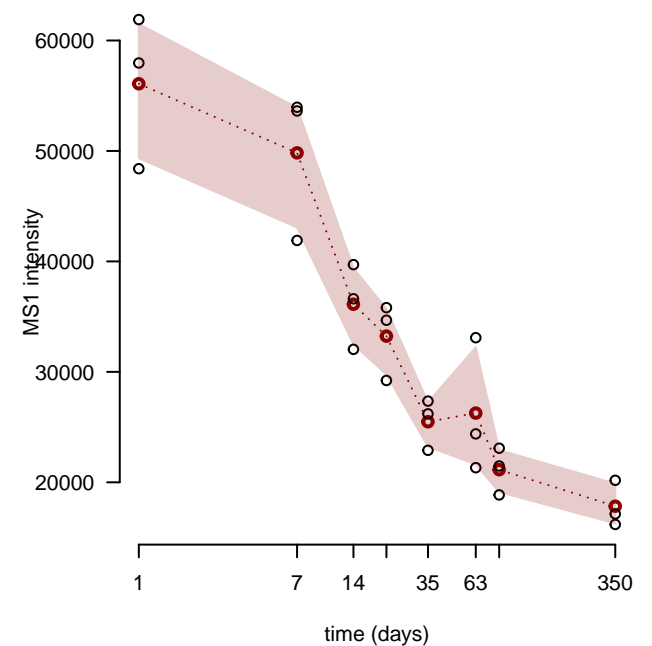

**Q9QYI3**  
**GN=Dnajc7**

DnaJ heat shock protein family (Hsp40) m ...

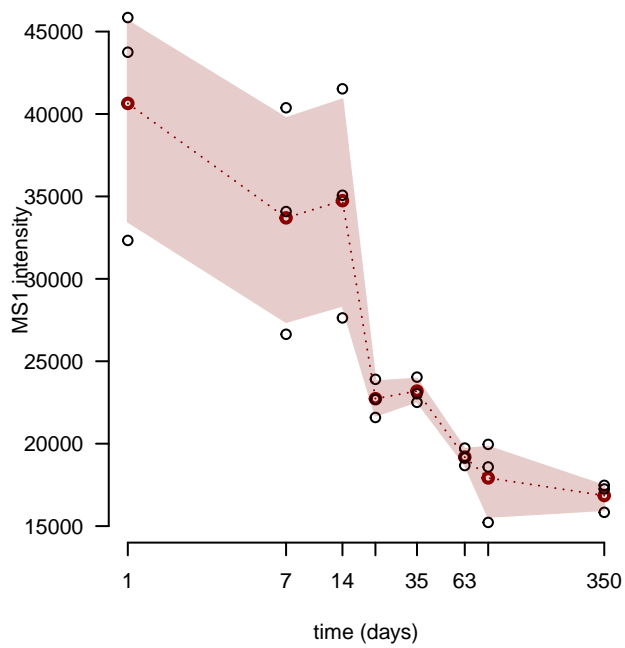

**Q9QYI4**  
**GN=Dnajb12**

DnaJ heat shock protein family (Hsp40) m ...

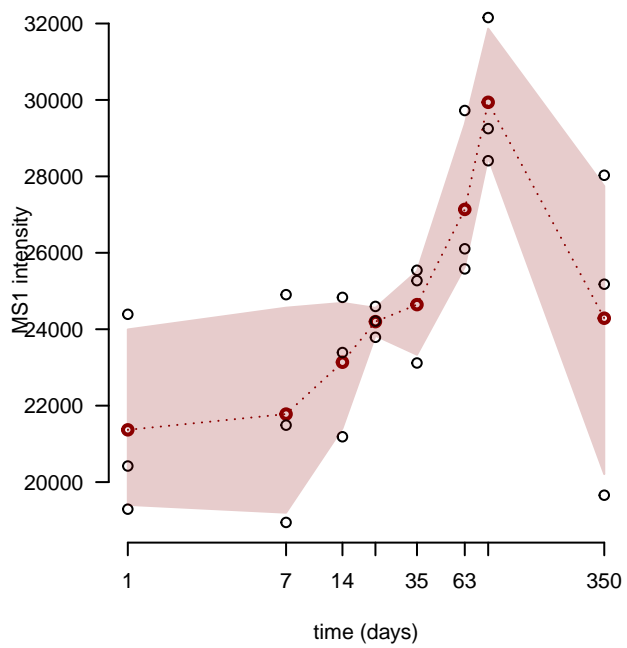

**Q9QYI5**  
**GN=Dnajb2**

DnaJ heat shock protein family (Hsp40) m ...

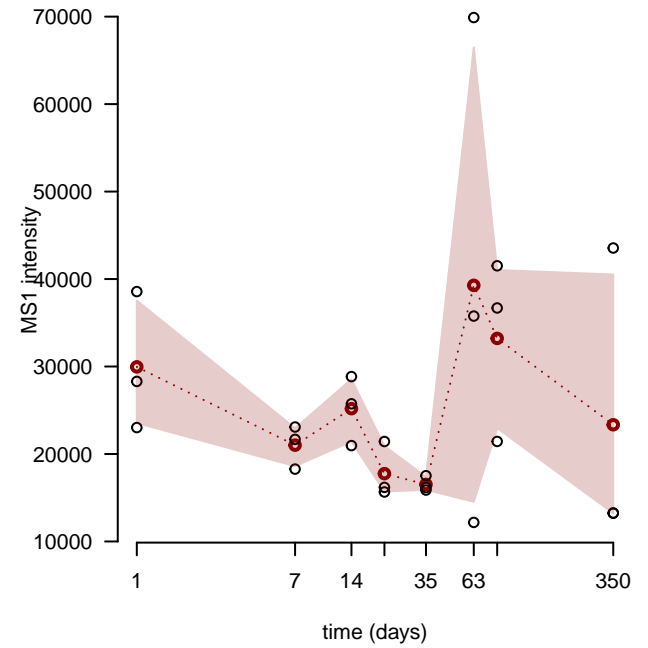

**Q9QYI6**  
**GN=Dnajb9**

DnaJ heat shock protein family (Hsp40) m ...

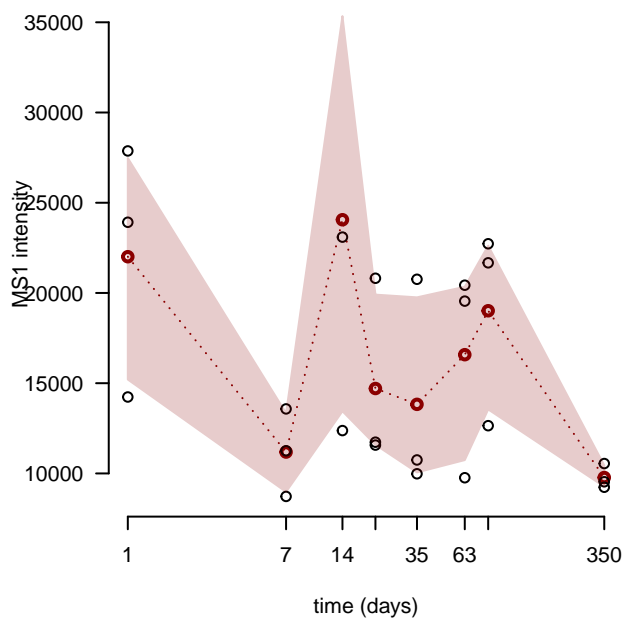

**Q9QYJ0**  
**GN=Dnaja2**

DnaJ heat shock protein family (Hsp40) m ...

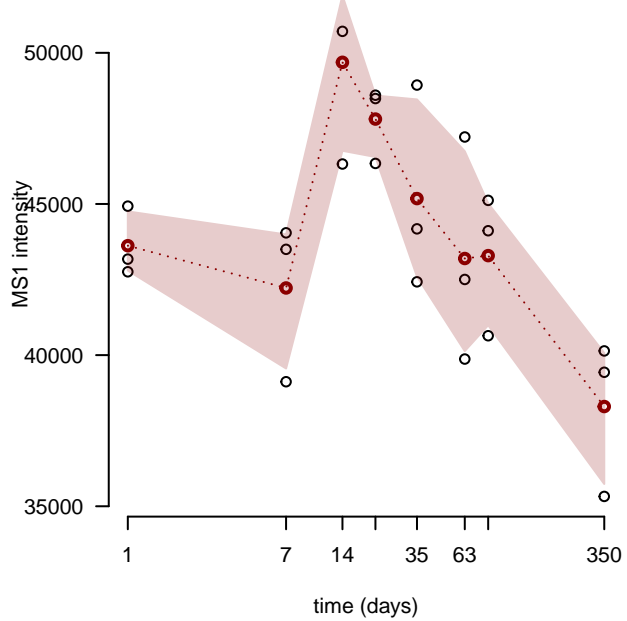

**Q9QYJ3**  
**GN=Dnajb1**

DnaJ heat shock protein family (Hsp40) m ...

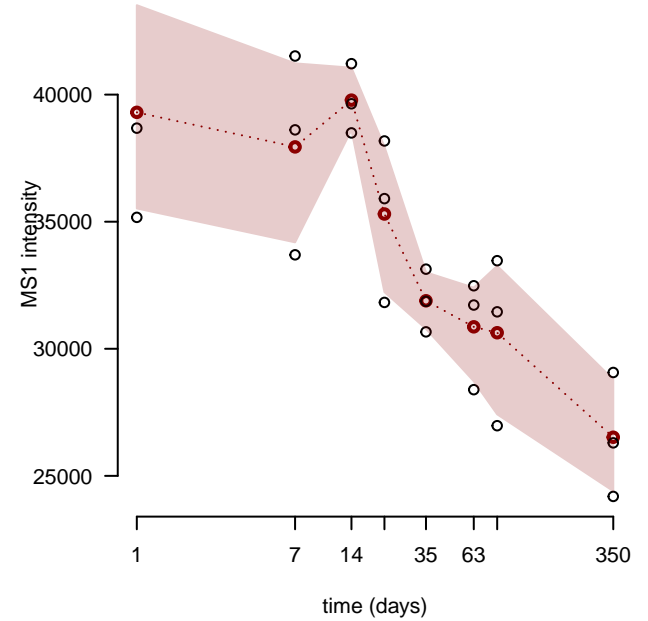

**Q9QYL7**  
**GN=Abt1**

activator of basal transcription 1

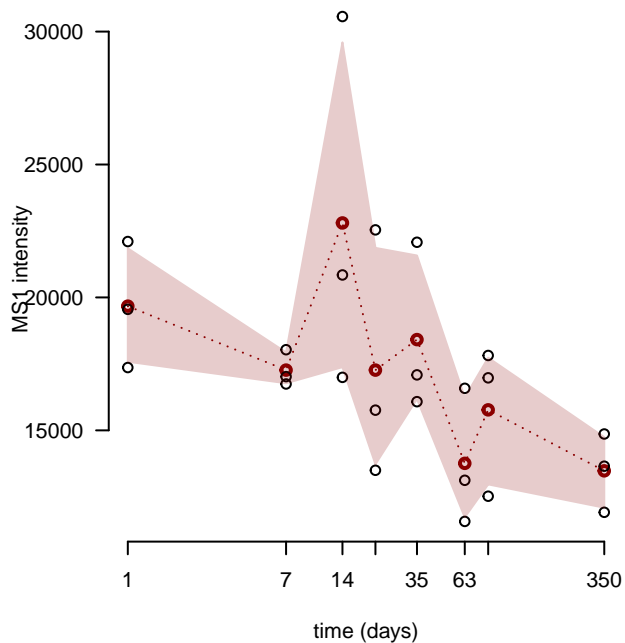

**Q9QYM5**  
**GN=Rnd2**

Rho family GTPase 2

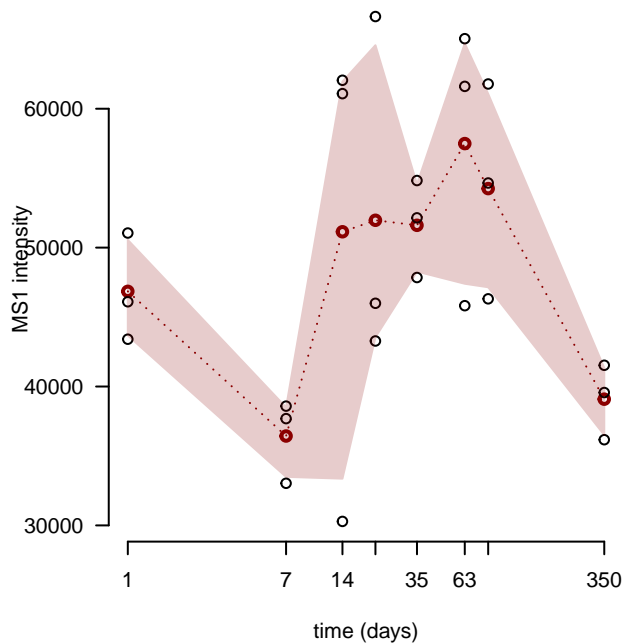

**Q9QYM8**  
**GN=Cenph**

centromere protein H

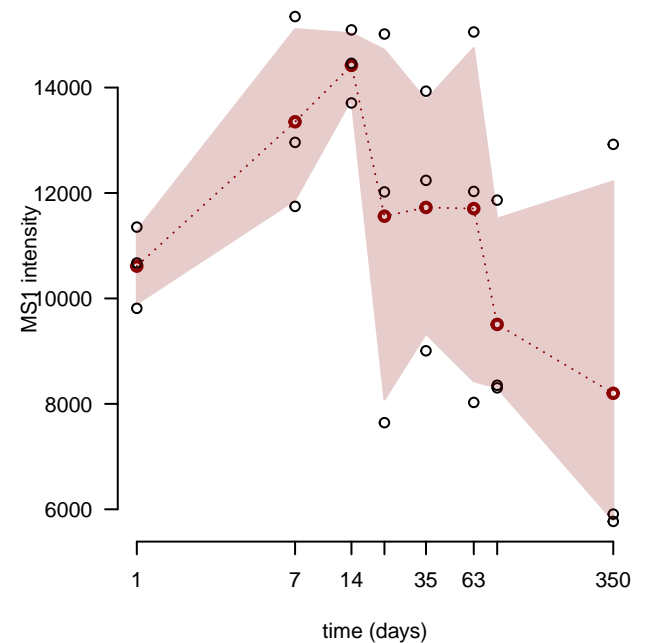

**Q9QYP6**  
**GN=Azi2**  
5-azacytidine induced gene 2

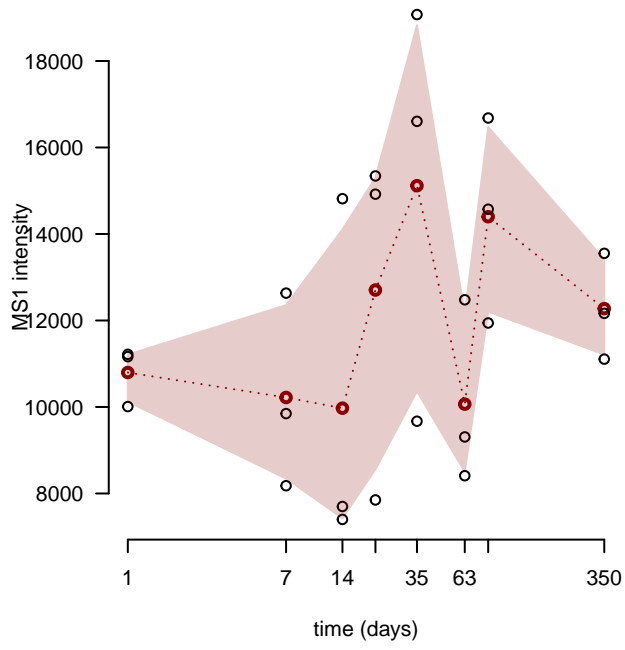

**Q9QYR6**  
**GN=Map1a**  
microtubule-associated protein 1 A

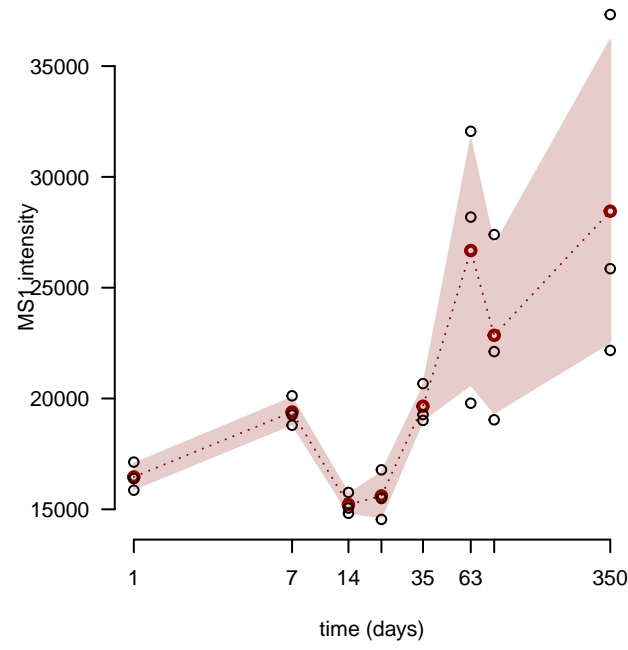

**Q9QYR9**  
**GN=Acot2**  
acyl-CoA thioesterase 2

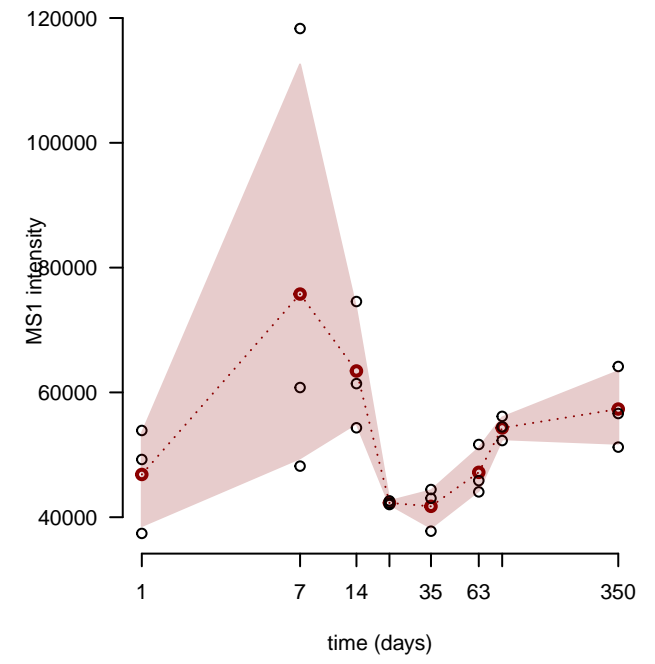

**Q9QYS9**  
**GN=Qki**  
quaking, KH domain containing RNA bindin ...

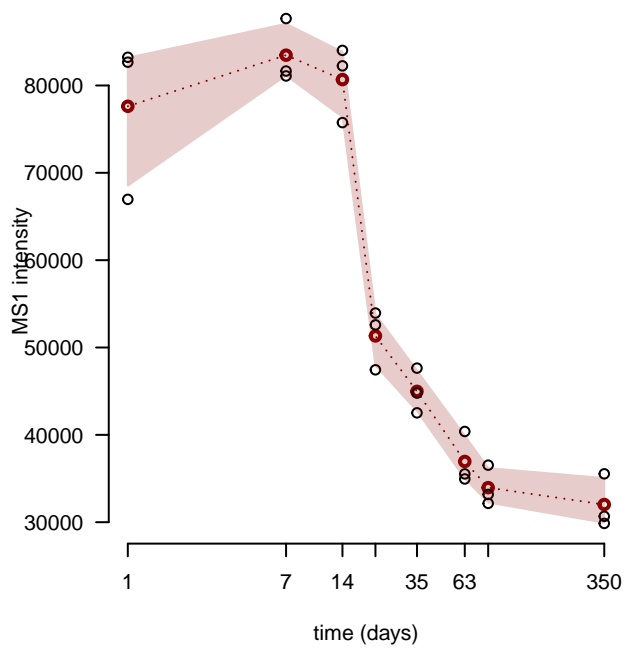

**Q9QYT7**  
**GN=Pigq**  
phosphatidylinositol glycan anchor biosy ...

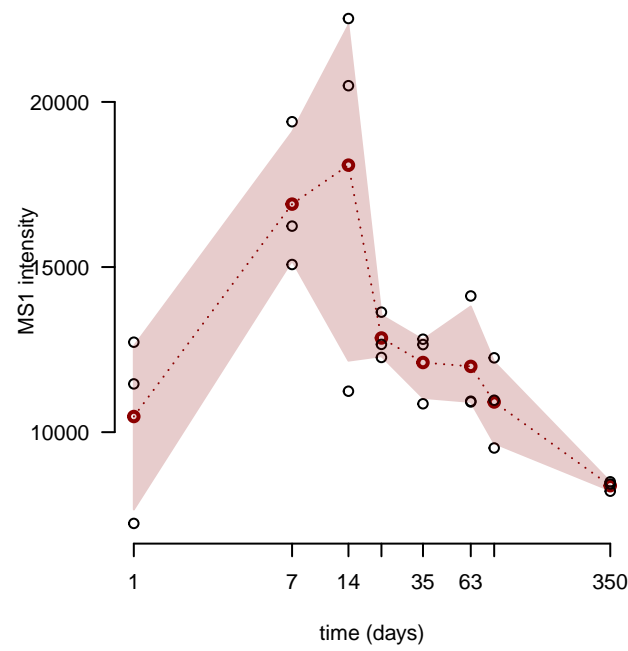

**Q9QYY0**  
**GN=Gab1**  
growth factor receptor bound protein 2-a ...

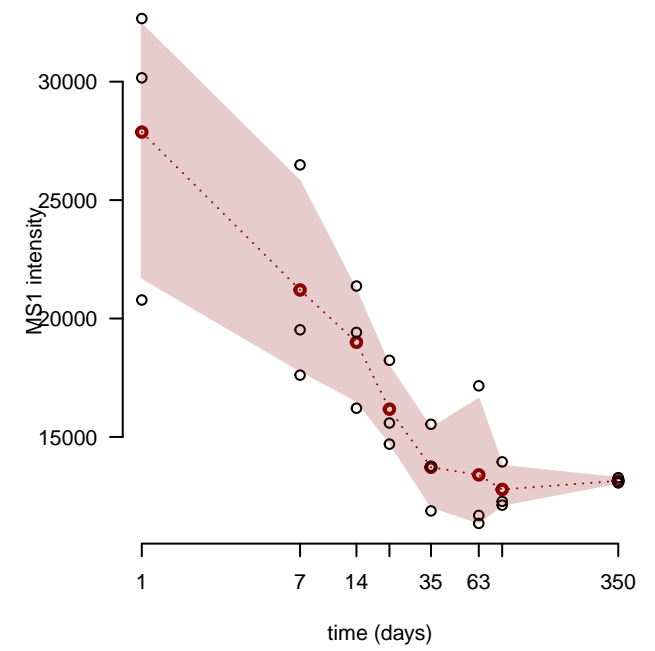

**Q9QYY8**  
**GN=Spast**  
spastin

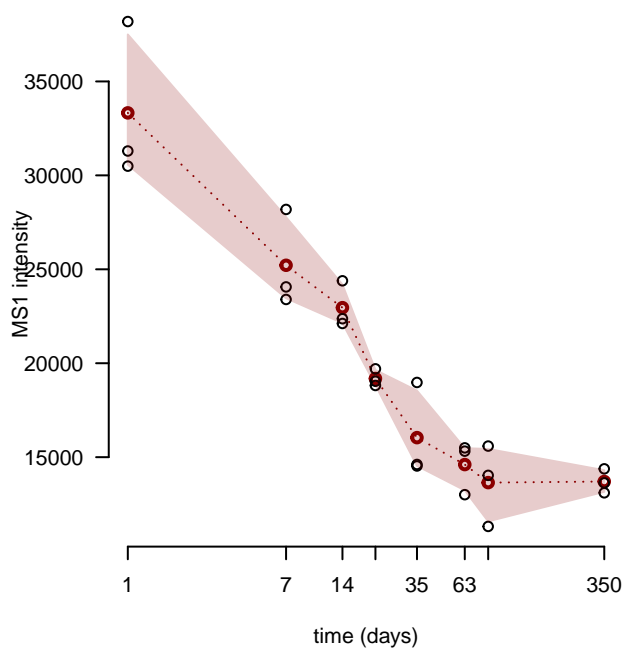

**Q9QZ03**  
**GN=Slc39a1**  
solute carrier family 39 (zinc transport ...

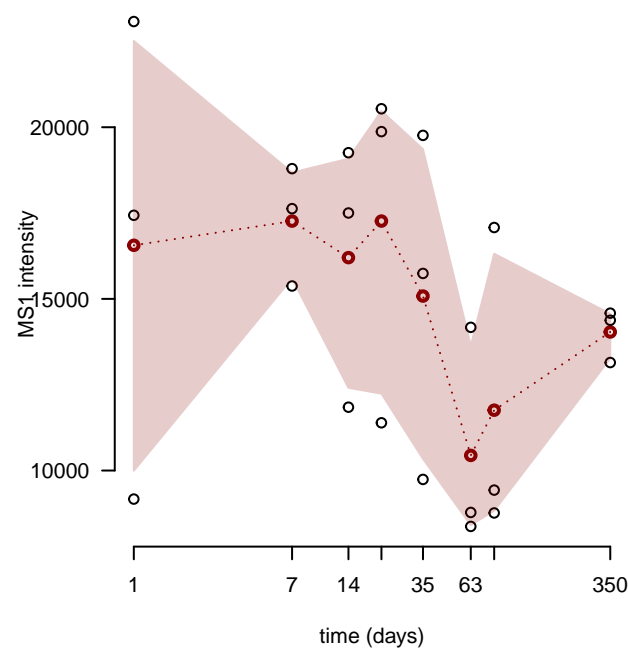

**Q9QZ05**  
**GN=Eif2ak4**  
eukaryotic translation initiation factor ...

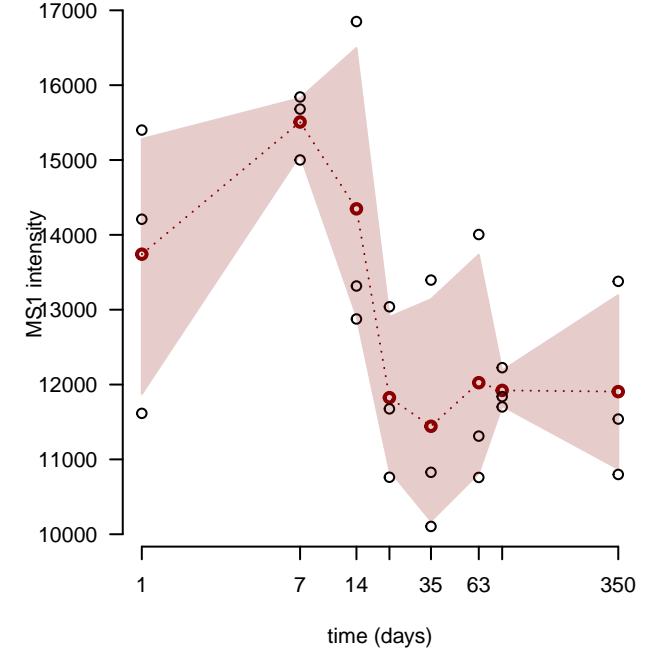



**Q9QZ06**  
**GN=Tollip**  
toll interacting protein

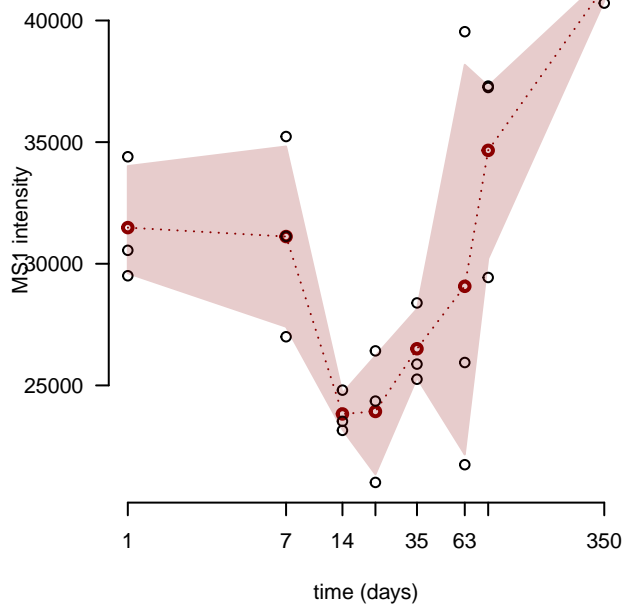

**Q9QZ08**  
**GN=Nagk**  
N-acetylglucosamine kinase

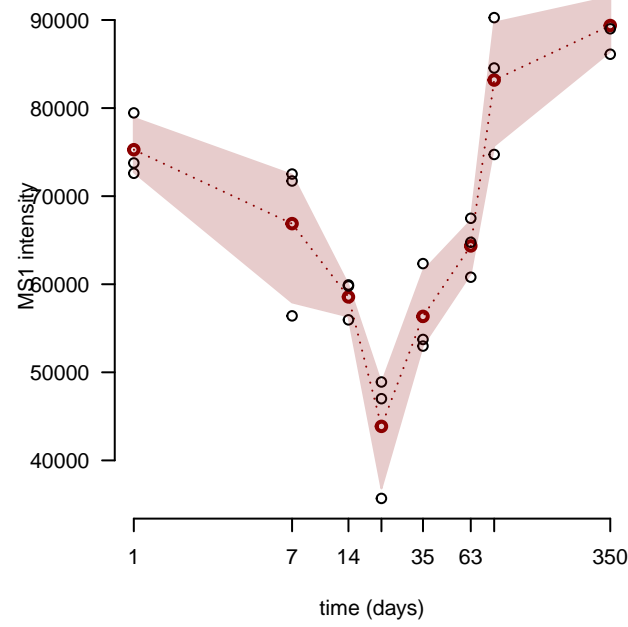

**Q9QZ23**  
**GN=Nfu1**  
NFU1 iron-sulfur cluster scaffold

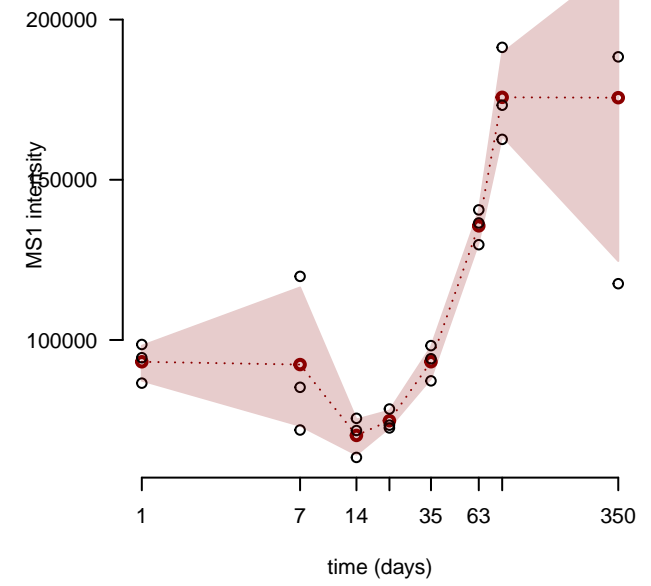

**Q9QZ47**  
**GN=Tnnt3**  
troponin T3, skeletal, fast

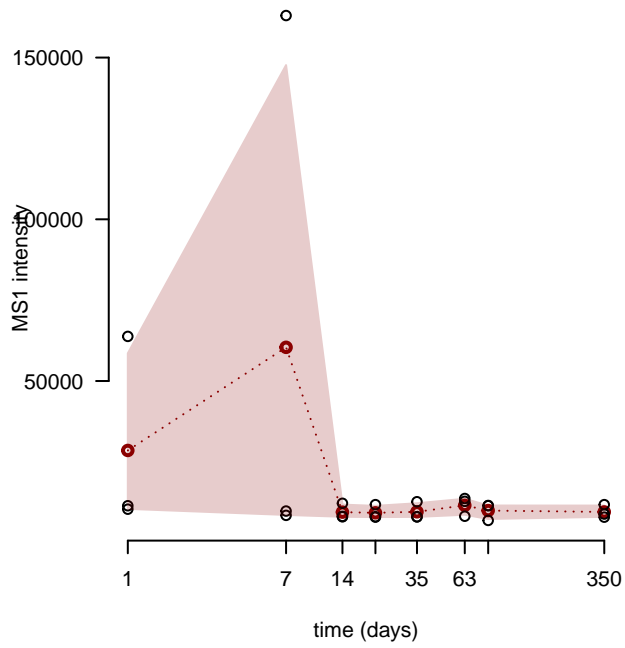

**Q9QZ49**  
**GN=Ubxn8**  
UBX domain protein 8

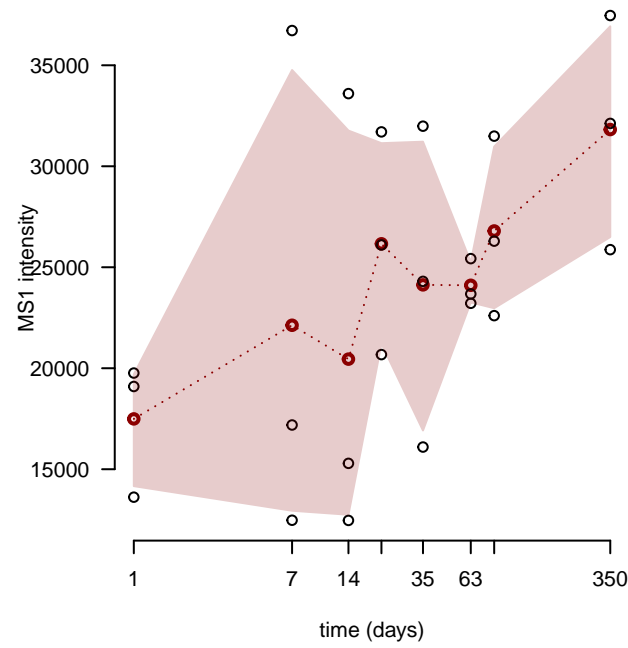

**Q9QZ67**  
**GN=Ppm1d**  
protein phosphatase 1D magnesium-depende ...

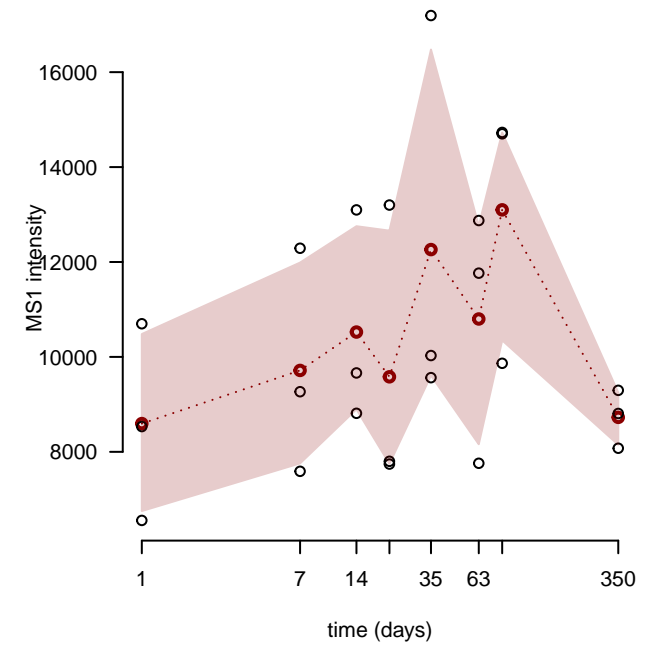

**Q9QZ73**  
**GN=Dcun1d1**  
DCN1, defective in cullin neddylation 1, ...

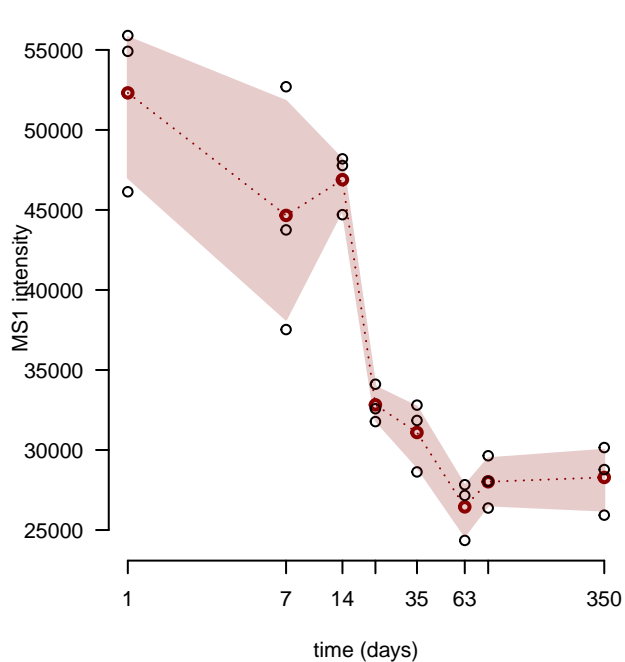

**Q9QZ82**  
**GN=Cyp11a1**  
cytochrome P450, family 11, subfamily a, ...

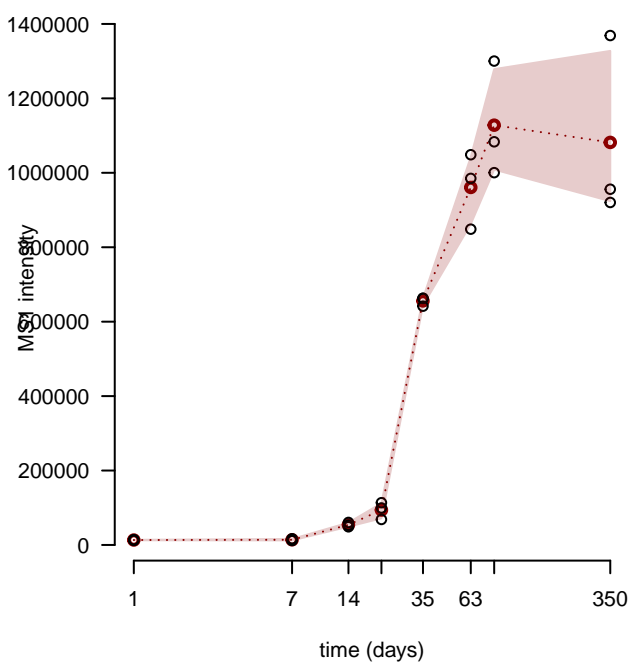

**Q9QZ85**  
**GN=Iigp1**  
interferon inducible GTPase 1

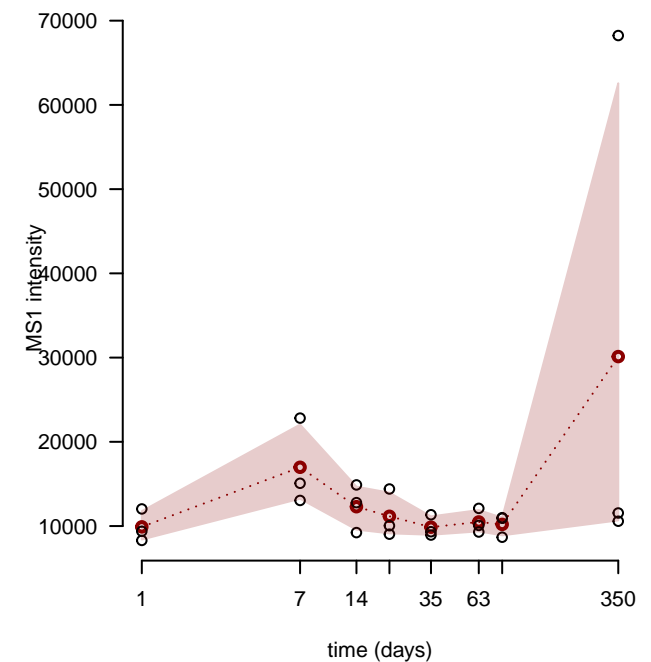

**Q9QZ88**  
**GN=Vps29**  
VPS29 retromer complex component

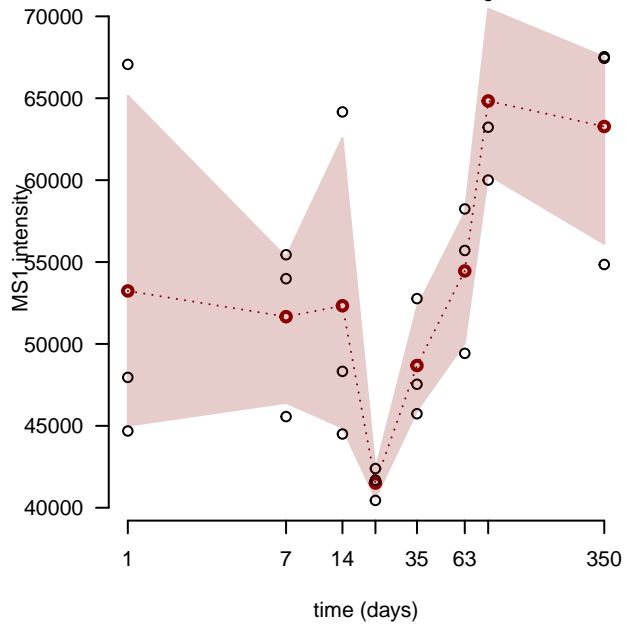

**Q9QZA0**  
**GN=Ca5b**

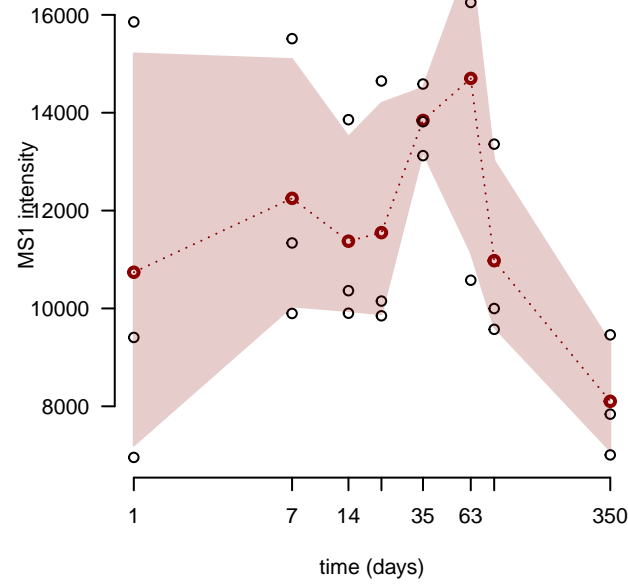

**Q9QZB7**  
**GN=Actr10**  
ARP10 actin-related protein 10

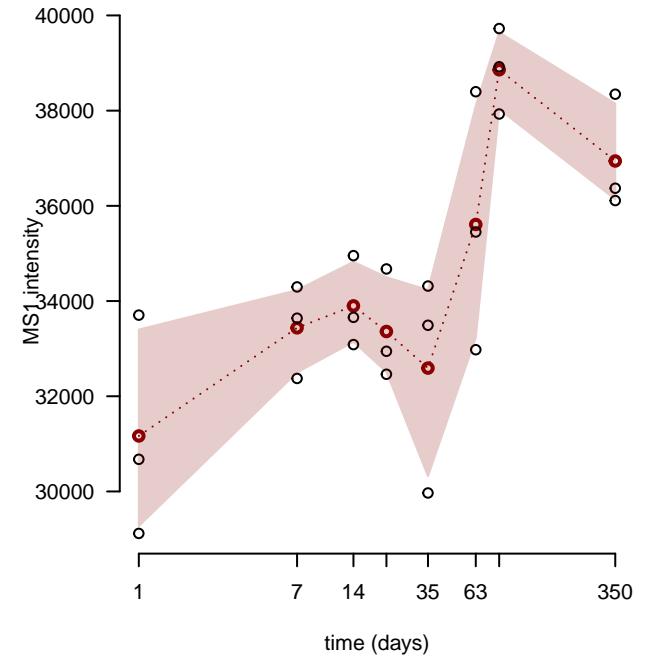

**Q9QZB9**  
**GN=Dctn5**  
dynactin 5

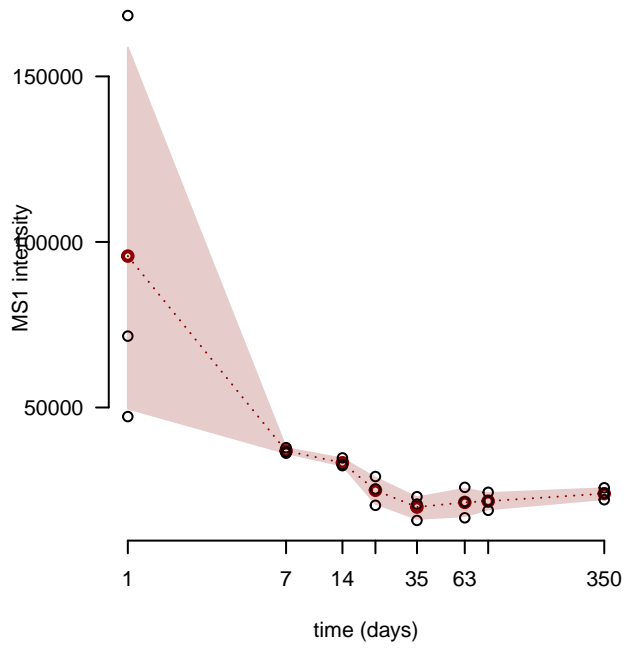

**Q9QZC2**  
**GN=Plxnc1**  
plexin C1

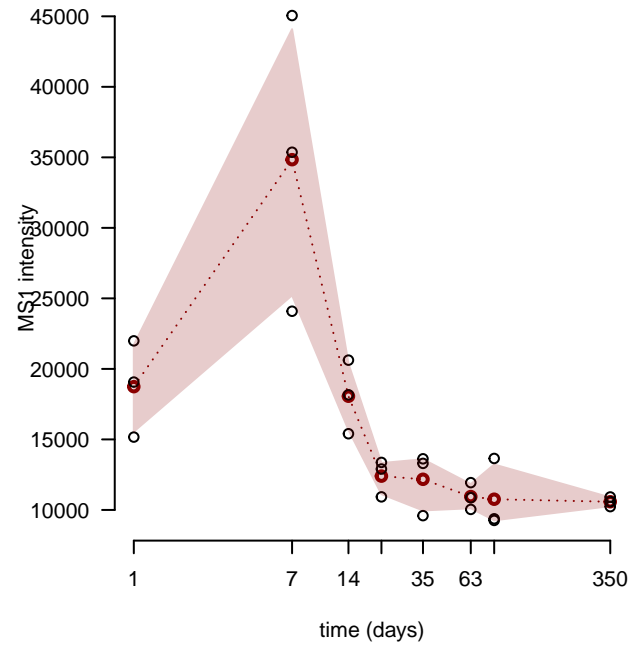

**Q9QZC8**  
**GN=Abhd1**  
abhydrolase domain containing 1

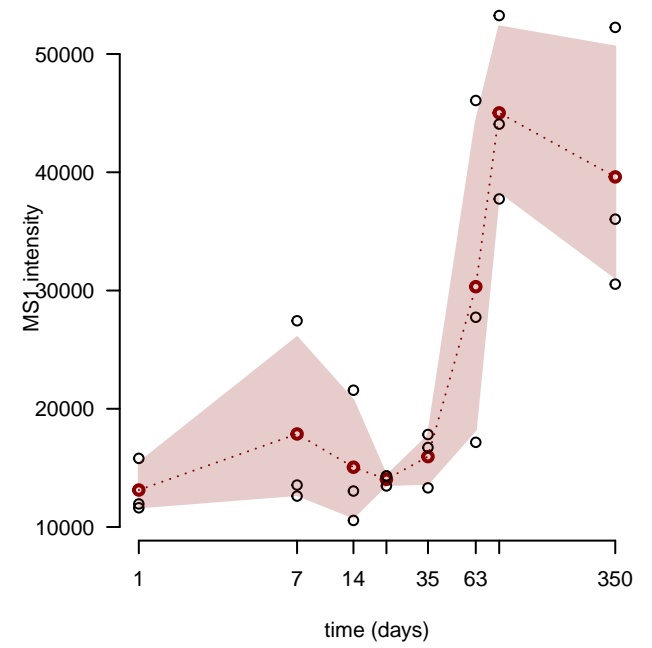

**Q9QZD4**  
**GN=Ercc4**  
excision repair cross-complementing rode ...

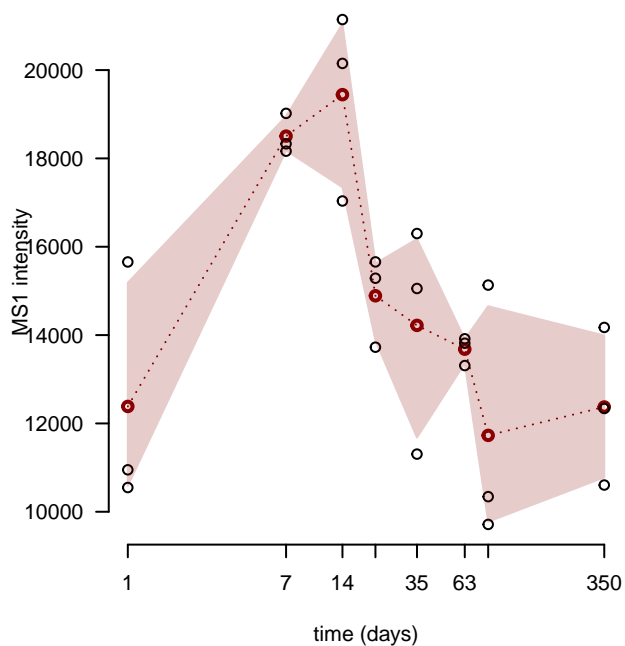

**Q9QZD8**  
**GN=Slc25a10**  
solute carrier family 25 (mitochondrial ...

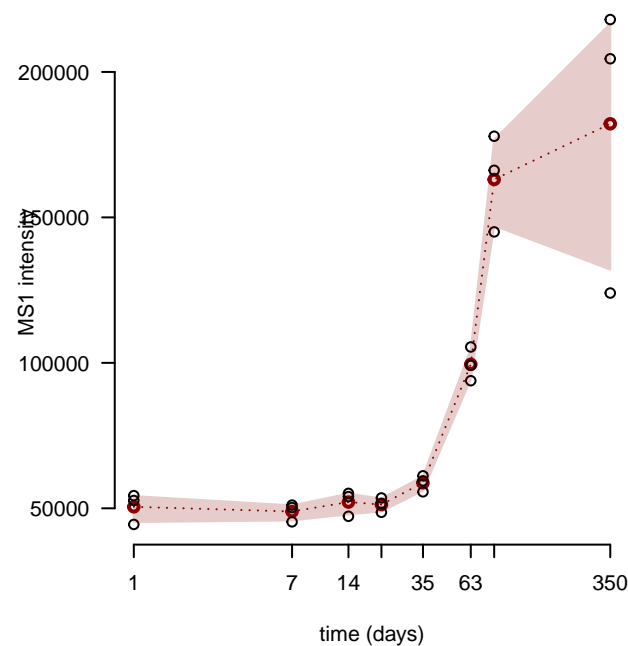

**Q9QZD9**  
**GN=Eif3i**  
eukaryotic translation initiation factor ...

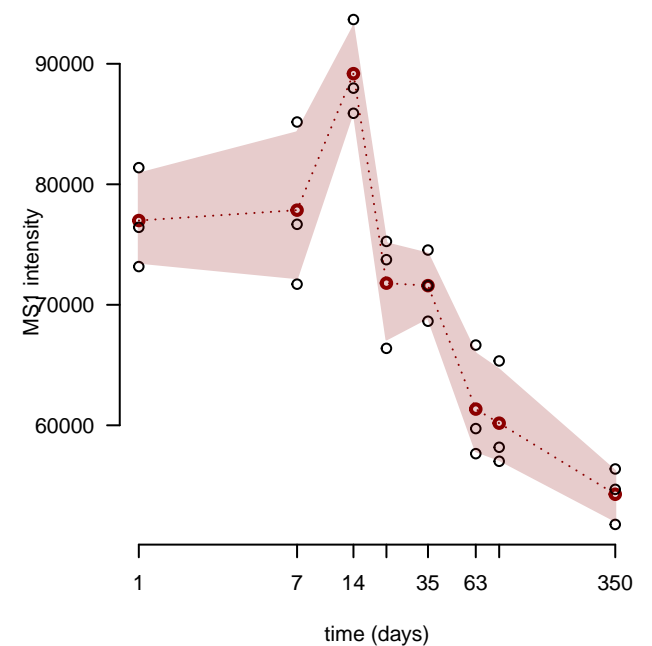

**Q9QZE5**  
**GN=Copg1**  
coatomer protein complex, subunit gamma ...

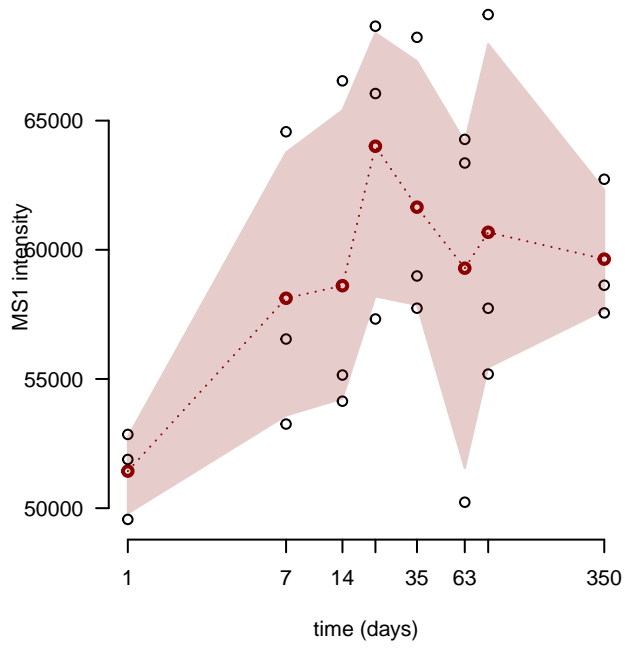

**Q9QZE7**  
**GN=Tsnax**  
translin-associated factor X

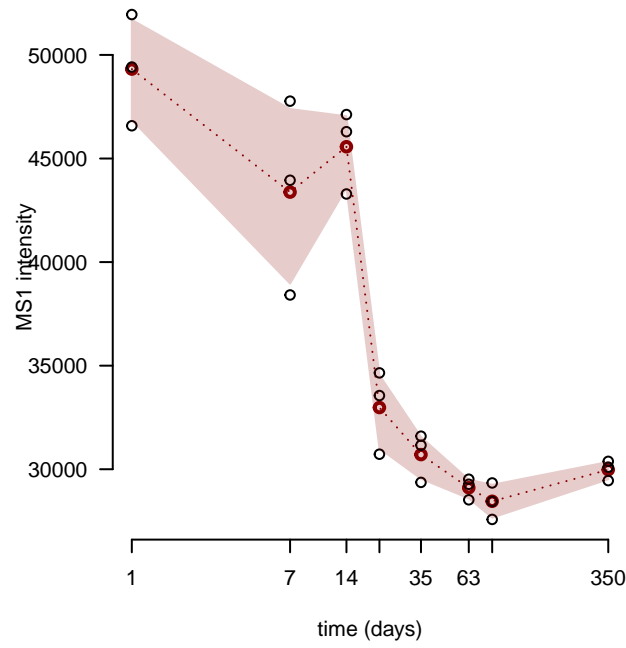

**Q9QZF2**  
**GN=Gpc1**  
glypican 1

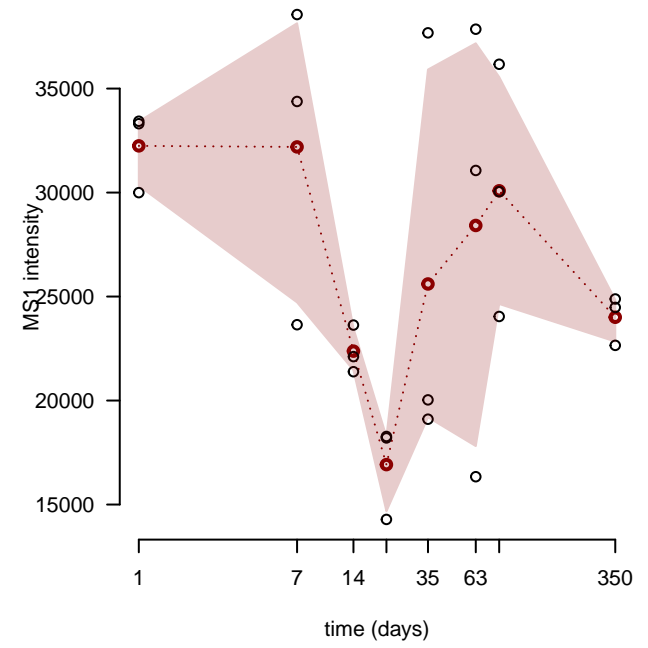

**Q9QZH3**  
**GN=Ppie**  
peptidylprolyl isomerase E (cyclophilin ...

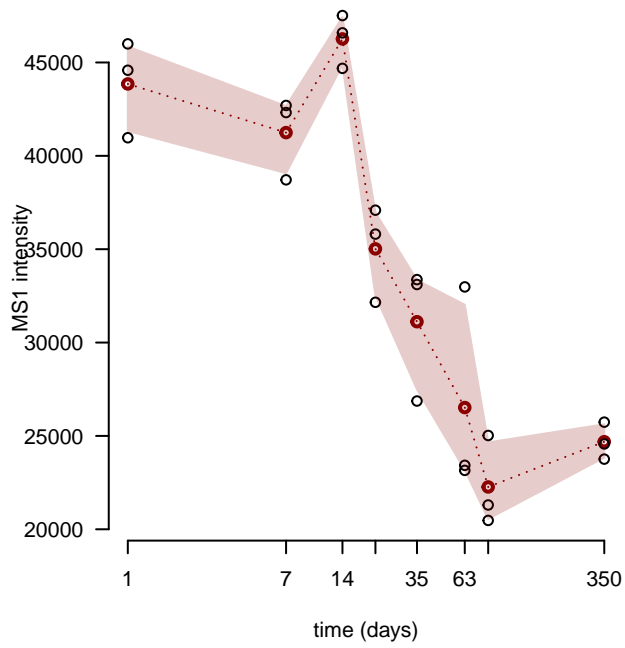

**Q9QZH6**  
**GN=Ecsit**  
ECSIT signalling integrator

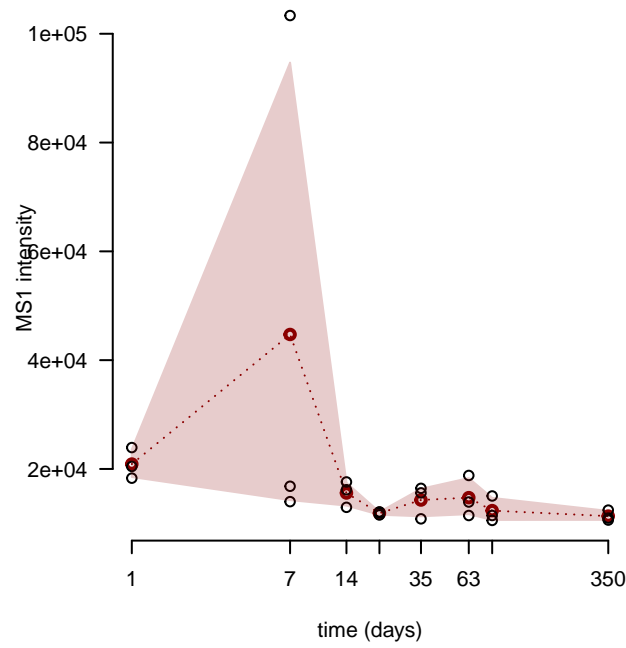

**Q9QZI8**  
**GN=Serinc1**  
serine incorporator 1

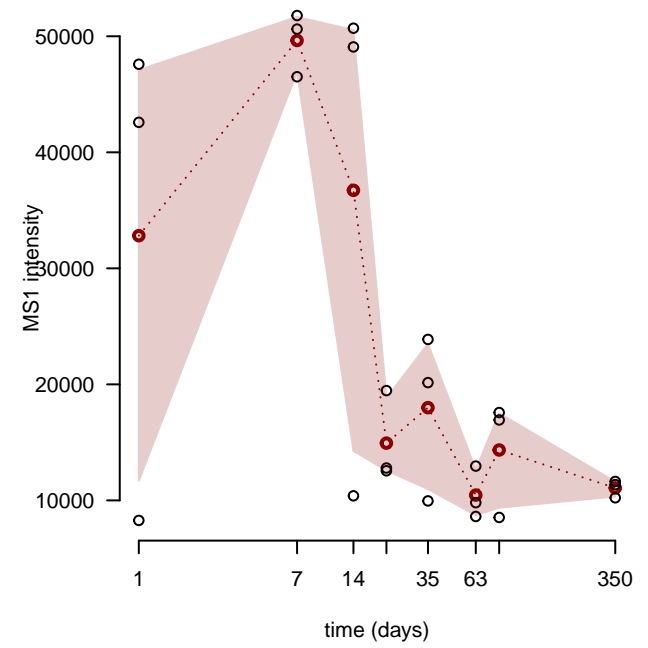

**Q9QZI9**  
**GN=Serinc3**  
serine incorporator 3

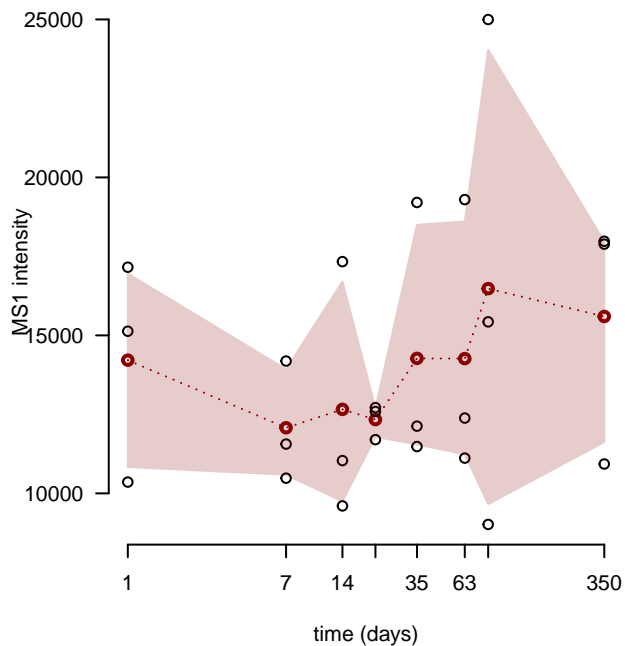

**Q9QZJ6**  
**GN=Mfap5**  
microfibrillar associated protein 5

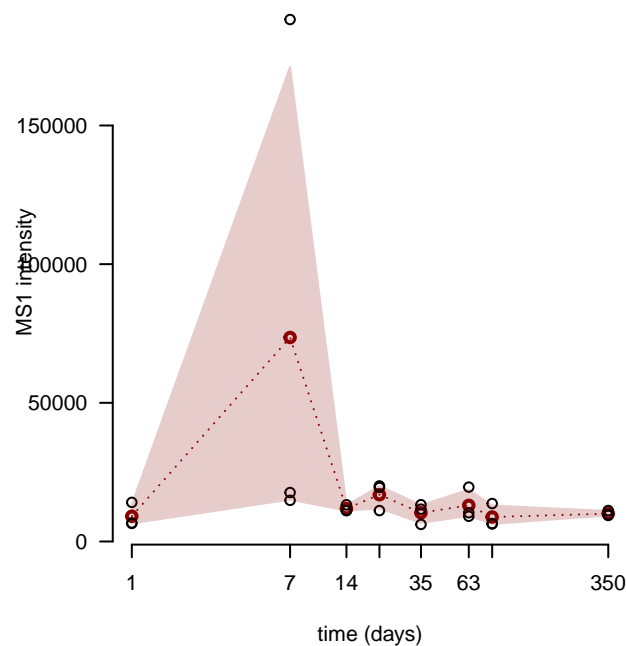

**Q9QZK2**  
**GN=Bcar3**  
breast cancer anti-estrogen resistance 3

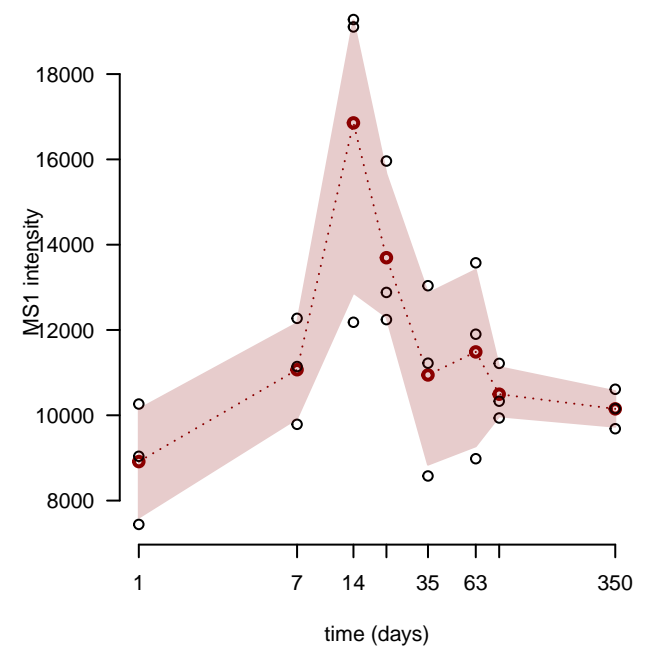

**Q9QZL0**  
GN=Ripk3  
receptor-interacting serine-threonine ki ...

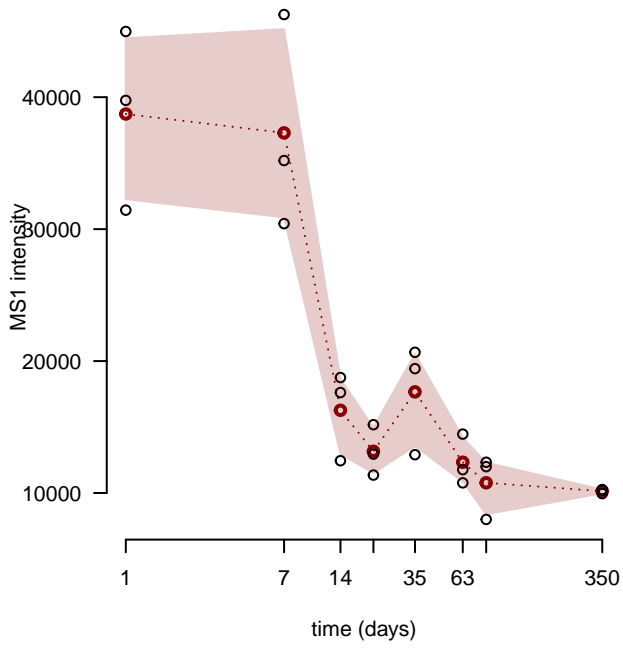

**Q9QZM0**  
GN=Ubqln2  
ubiquilin 2

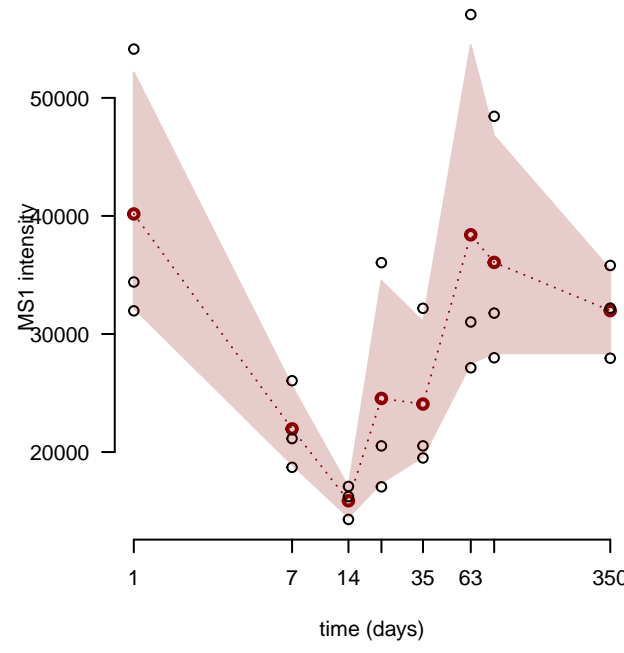

**Q9QZM2**  
GN=Polg2  
polymerase (DNA directed), gamma 2, acce ...

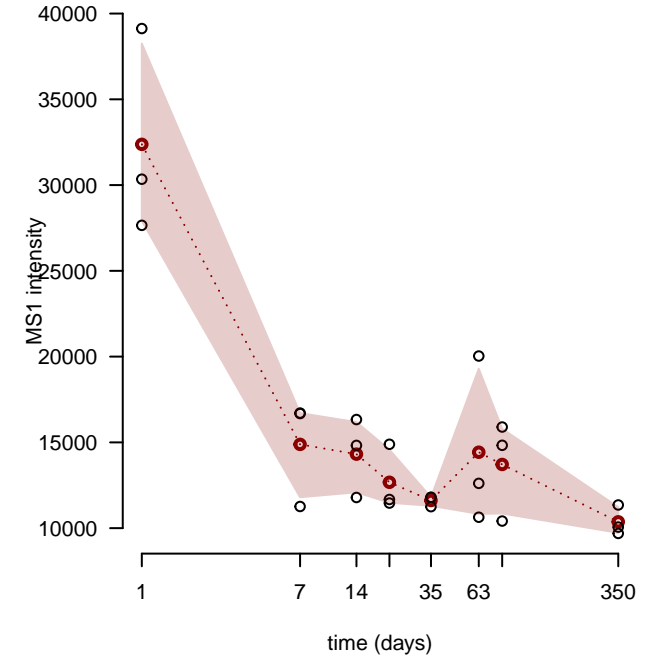

**Q9QZN1**  
GN=Fbxl17  
F-box and leucine-rich repeat protein 17

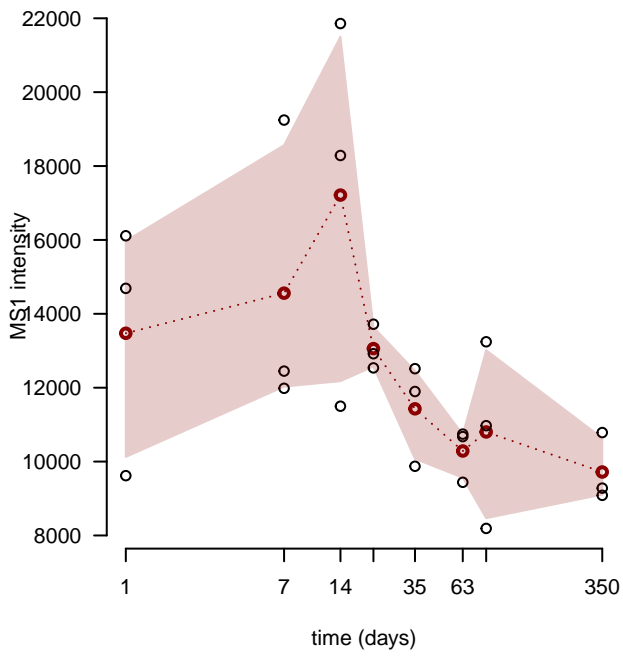

**Q9QZN4**  
GN=Fbxo6  
F-box protein 6

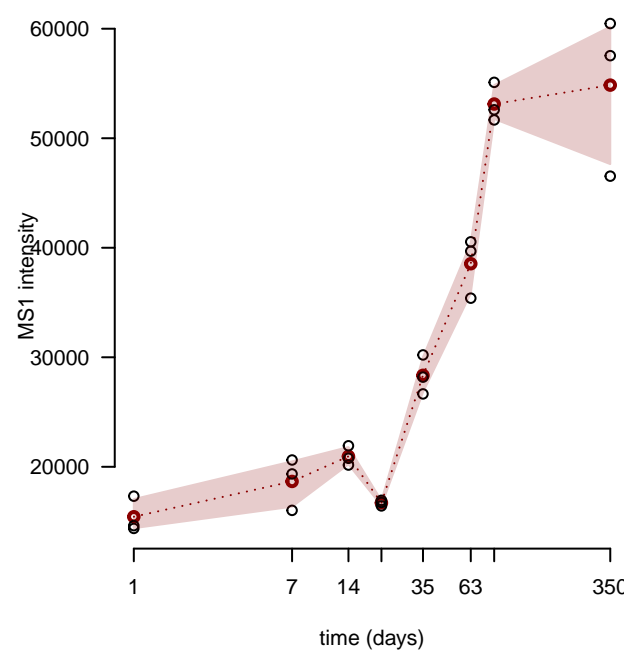

**Q9QZQ1**  
GN=Afdn  
afadin, adherens junction formation fact ...

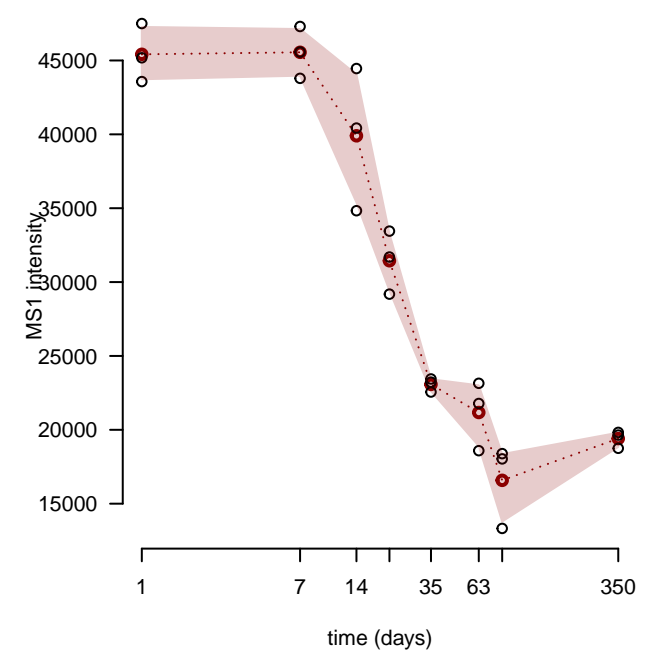

**Q9QZQ8**  
GN=H2afy

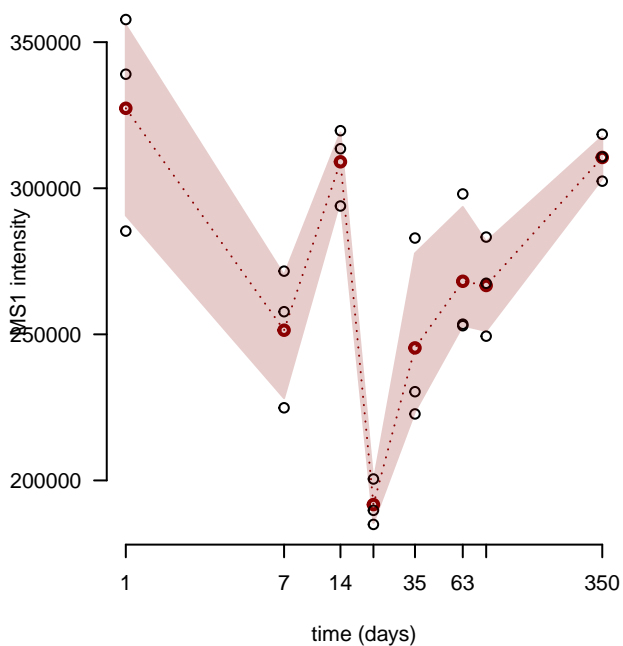

**Q9QZQ8**  
GN=H2afy

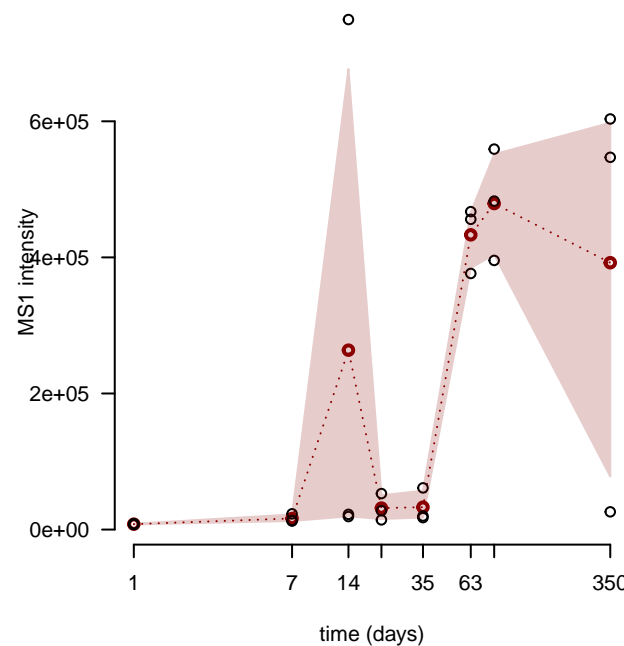

**Q9QZR0**  
GN=Rnf25  
ring finger protein 25

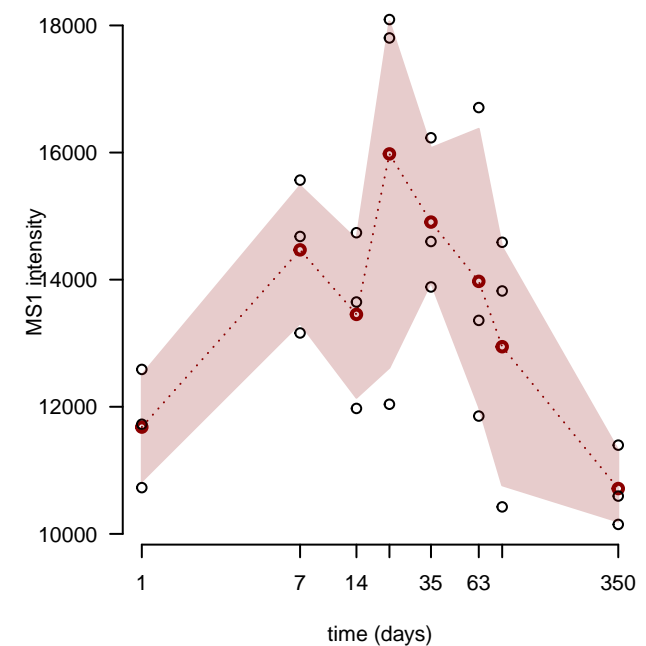

**Q9QZR9**  
**GN=Col4a4**  
collagen, type IV, alpha 4

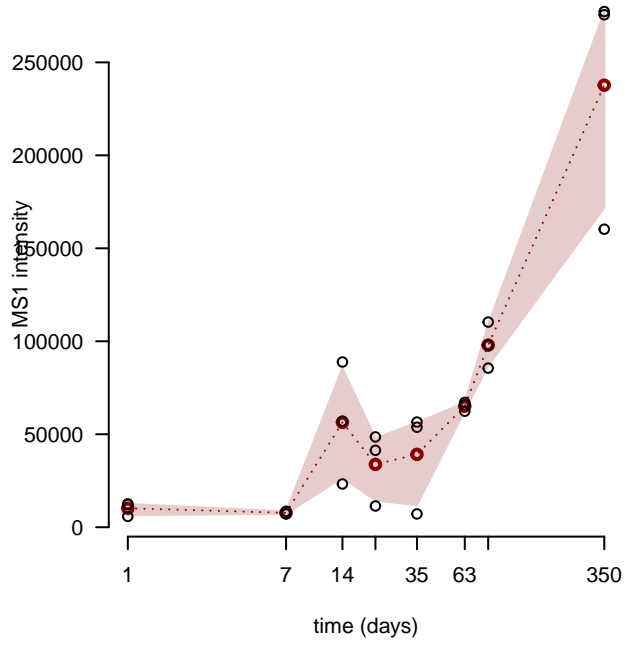

**Q9QZS0**  
**GN=Col4a3**  
collagen, type IV, alpha 3

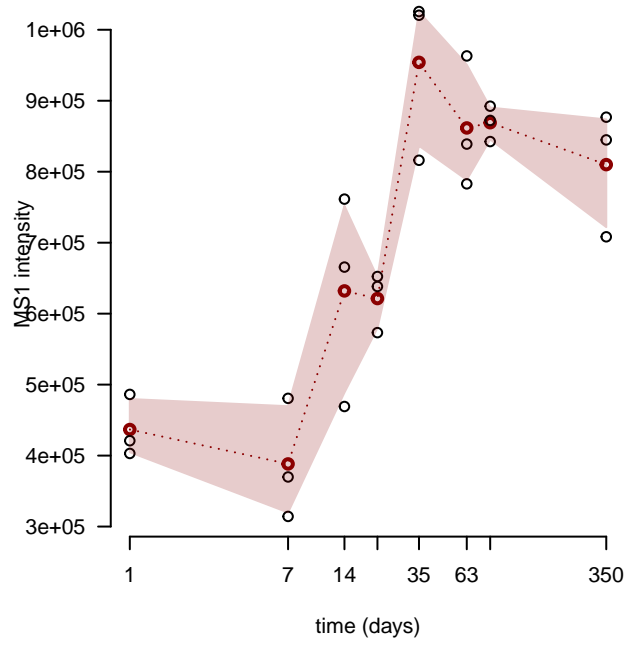

**Q9QZS3**  
**GN=Numb**  
NUMB endocytic adaptor protein

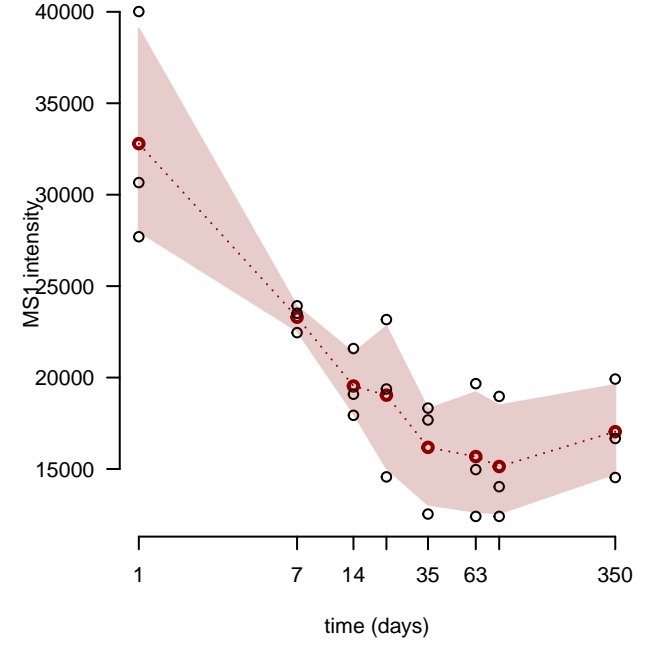

**Q9QZU9**  
**GN=Ube2L6**  
ubiquitin-conjugating enzyme E2L 6

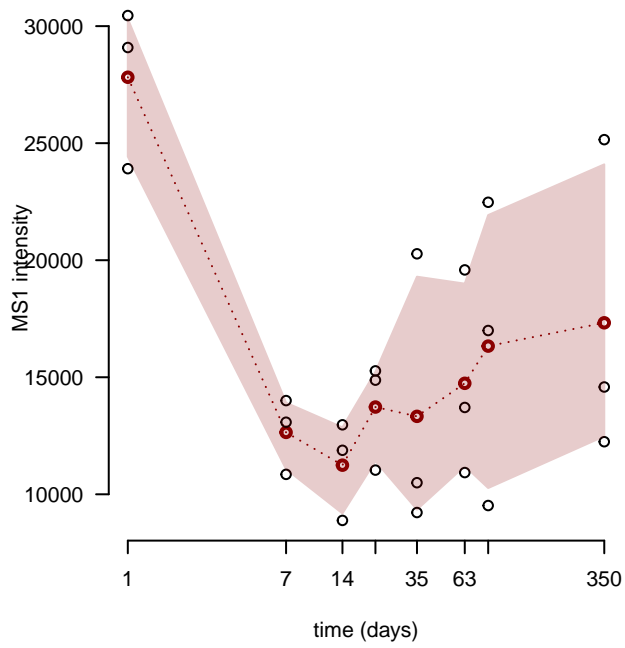

**Q9QZV9**  
**GN=Nxt1**  
NTF2-related export protein 1

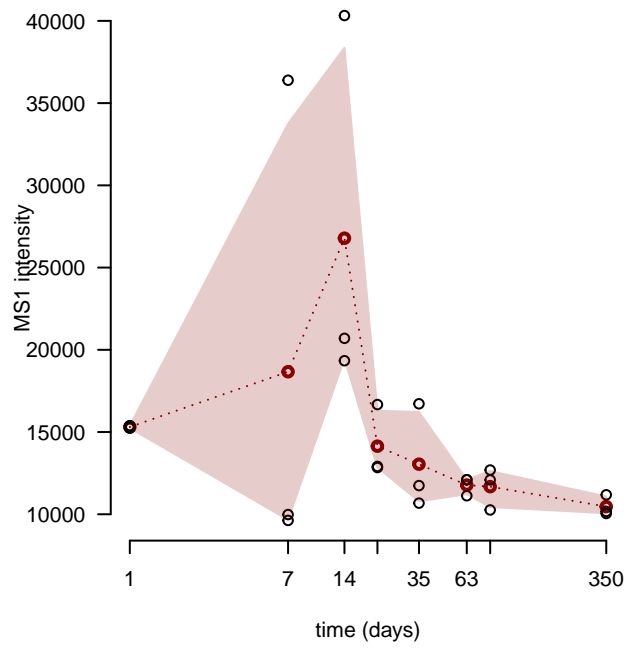

**Q9QZW0**  
**GN=Atp11c**  
ATPase, class VI, type 11C

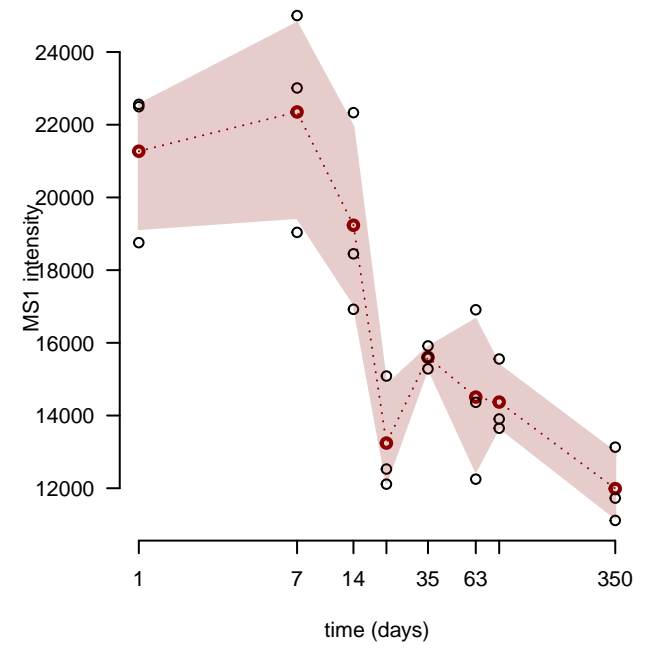

**Q9QZX7**  
**GN=Srr**  
serine racemase

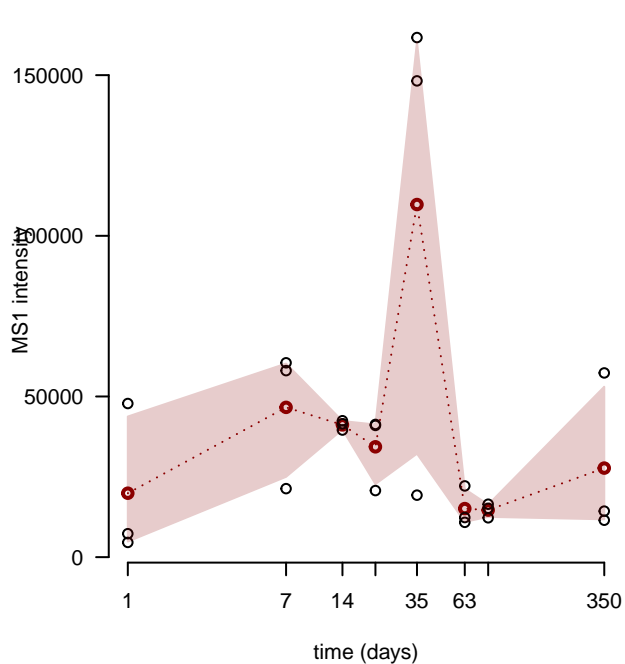

**Q9QZZ4**  
**GN=Myo15a**  
myosin XVA

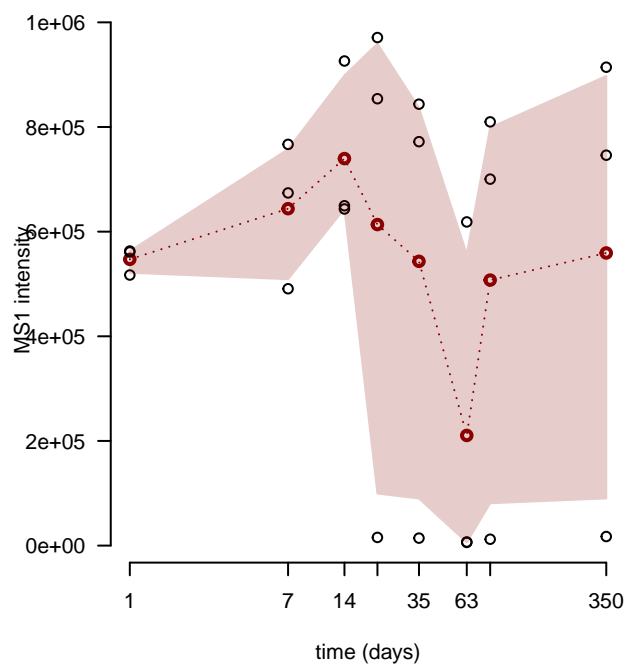

**Q9QZZ6**  
**GN=Dpt**  
dermatopontin

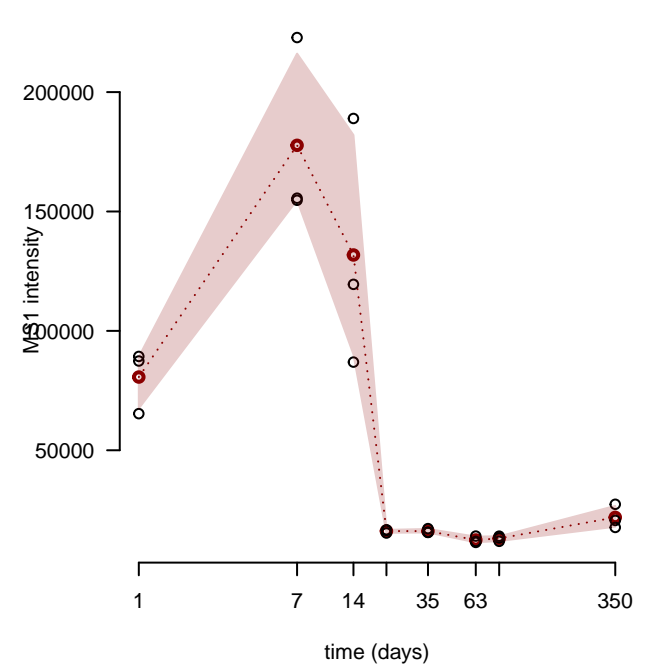

Q9R002  
GN=Ifi202

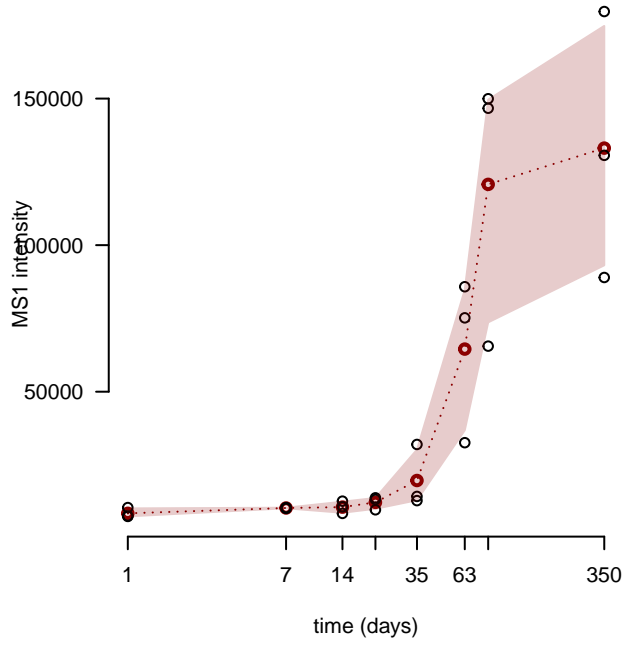

Q9R008  
GN=Mvk  
mevalonate kinase

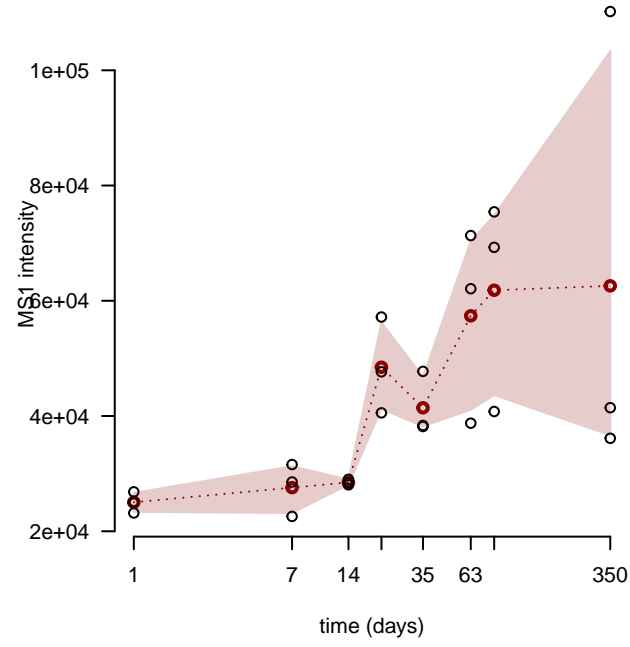

Q9R013  
GN=Ctsf  
cathepsin F

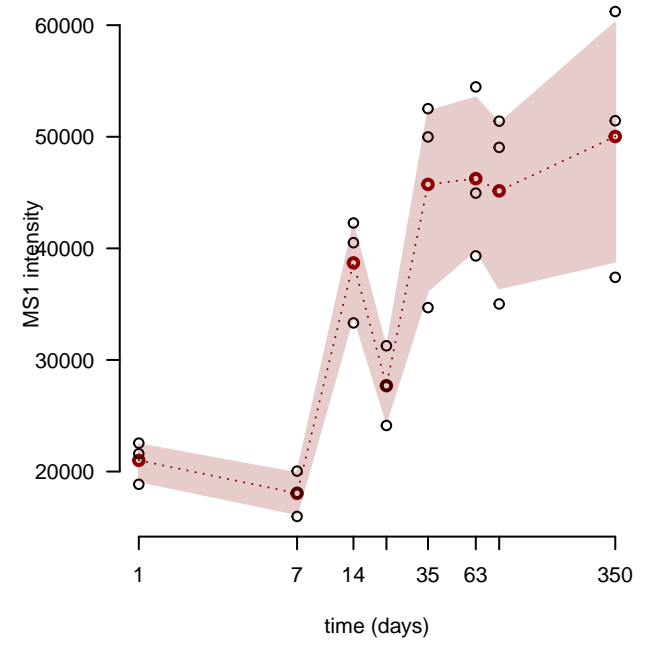

Q9R020  
GN=Zranb2  
zinc finger, RAN-binding domain containi ...

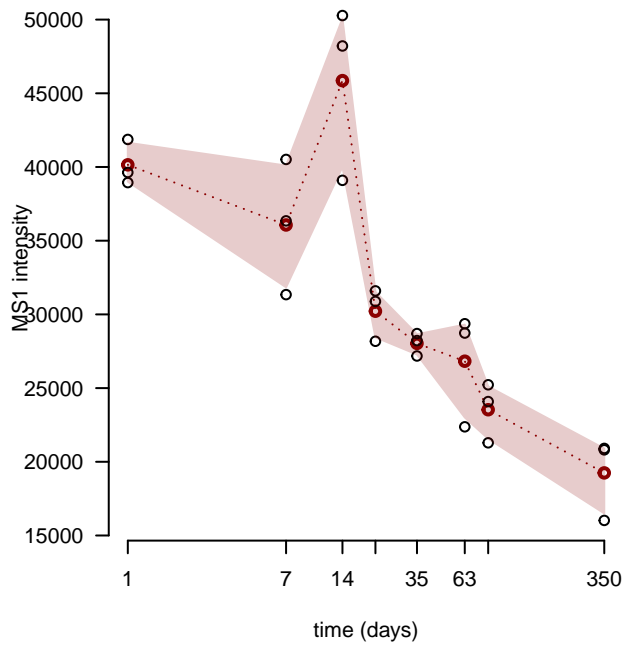

Q9R045  
GN=Angptl2  
angiopoietin-like 2

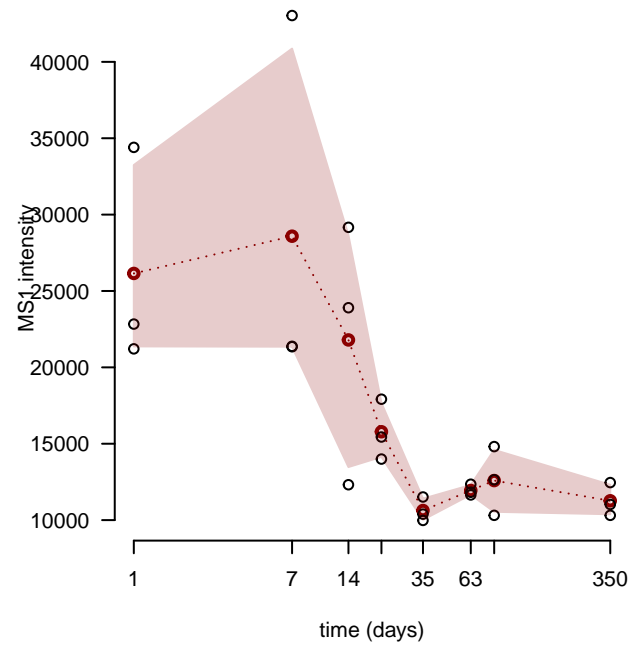

Q9R049  
GN=Amfr  
autocrine motility factor receptor

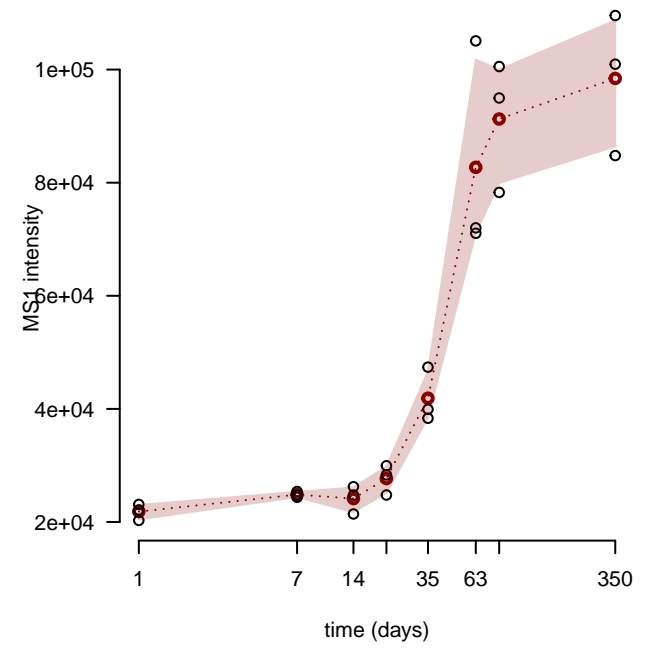

Q9R059  
GN=Fhl3  
four and a half LIM domains 3

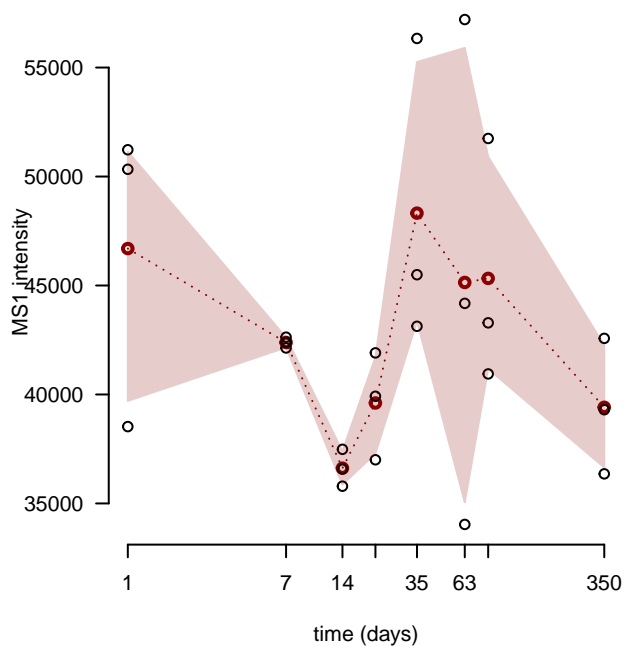

Q9R060  
GN=Nubp1  
nucleotide binding protein 1

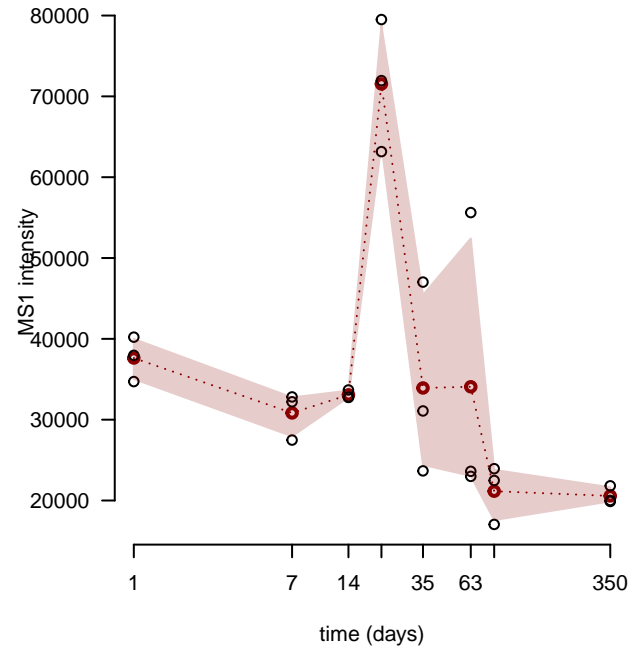

Q9R061  
GN=Nubp2  
nucleotide binding protein 2

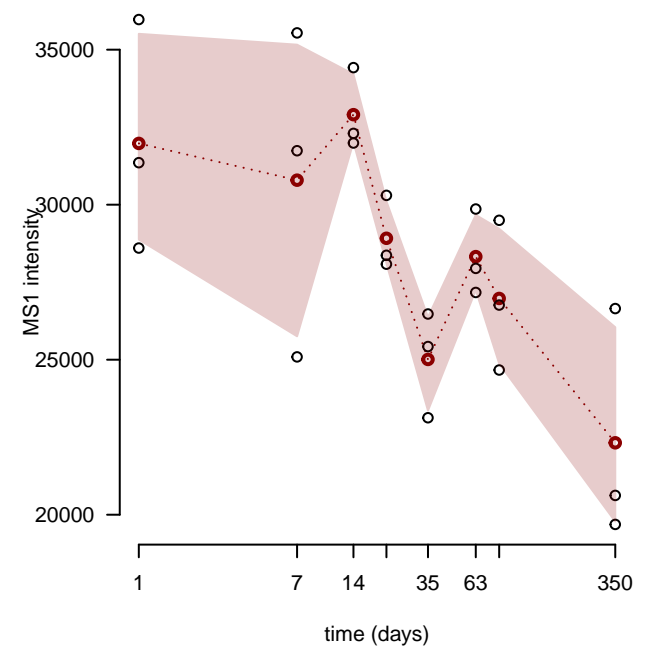

**Q9R062**  
GN=Gyg1

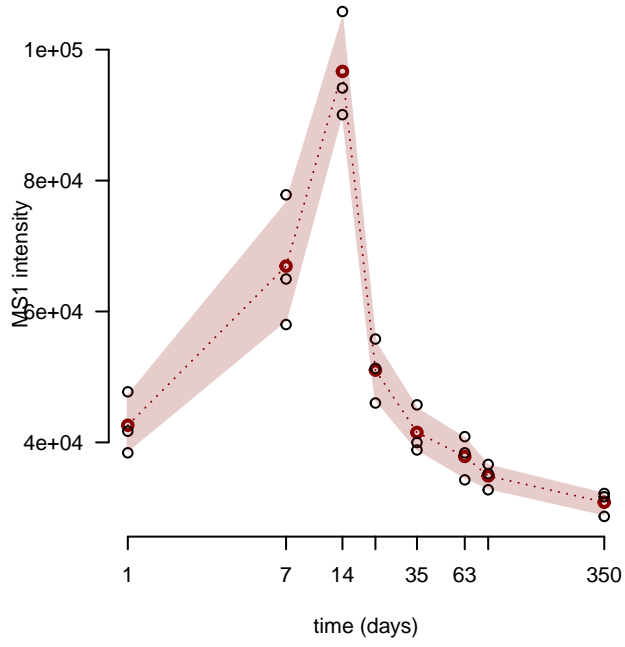

**Q9R069**  
GN=Bcam  
basal cell adhesion molecule

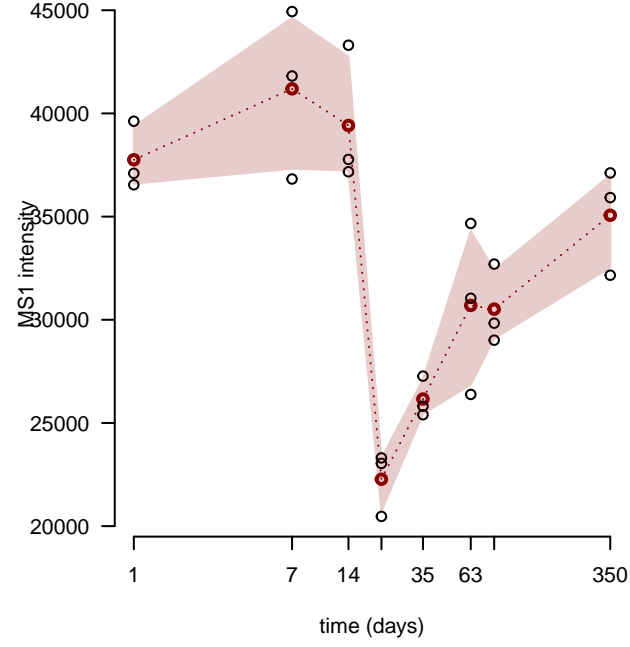

**Q9R078**  
GN=Prkab1  
protein kinase, AMP-activated, beta 1 no ...

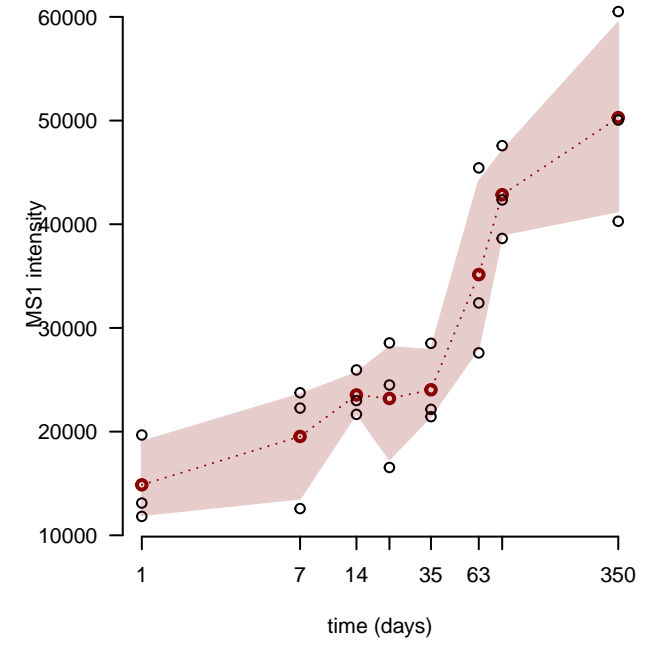

**Q9R087**  
GN=Gpc6  
glypican 6

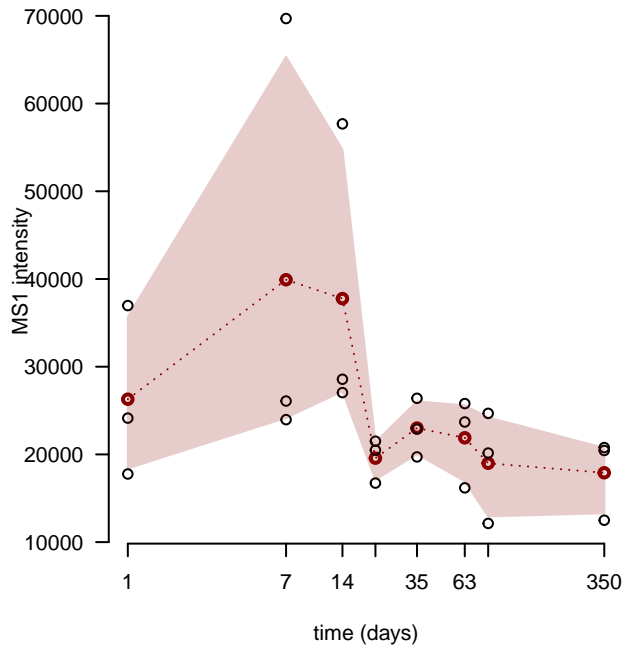

**Q9R088**  
GN=Tk2  
thymidine kinase 2, mitochondrial

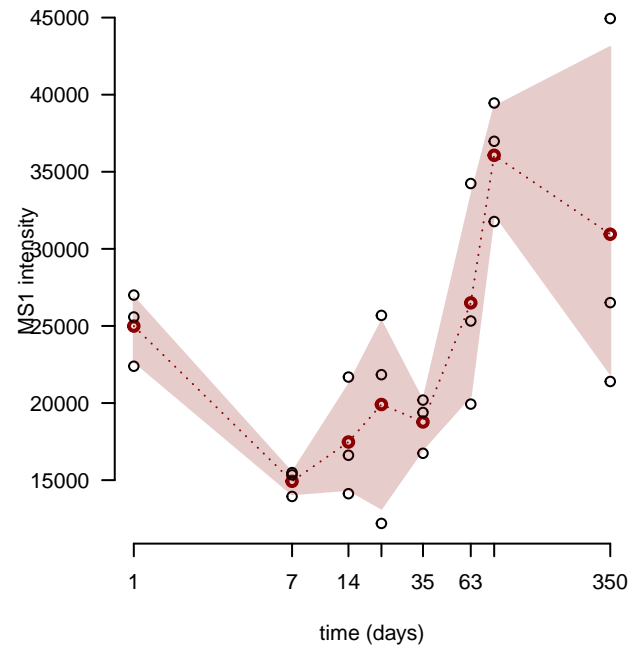

**Q9R098**  
GN=Hgfac  
hepatocyte growth factor activator

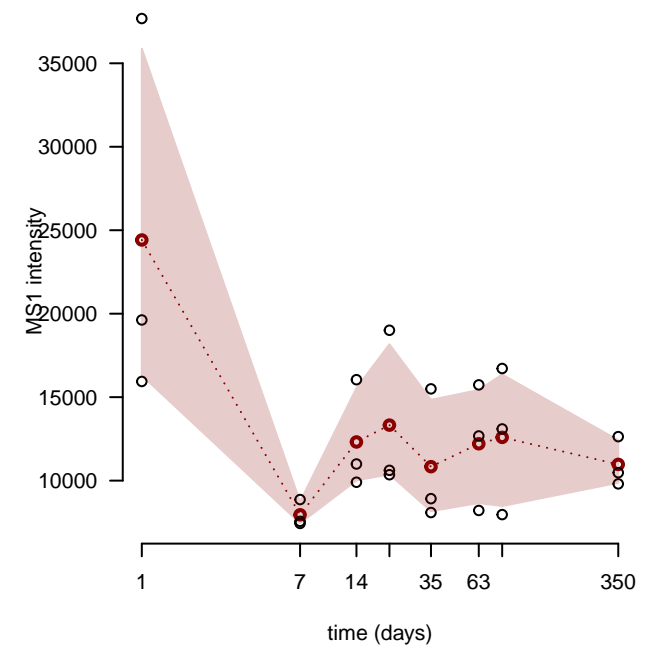

**Q9R099**  
GN=Tbl2  
transducin (beta)-like 2

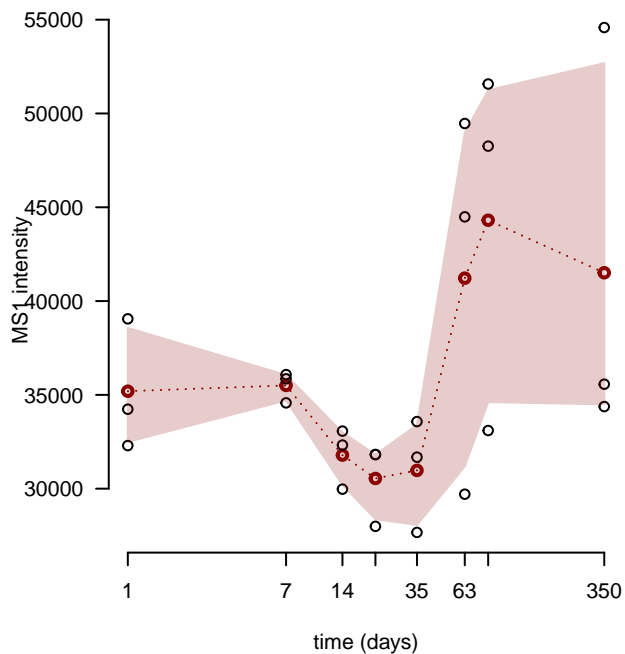

**Q9R0A0**  
GN=Pex14  
peroxisomal biogenesis factor 14

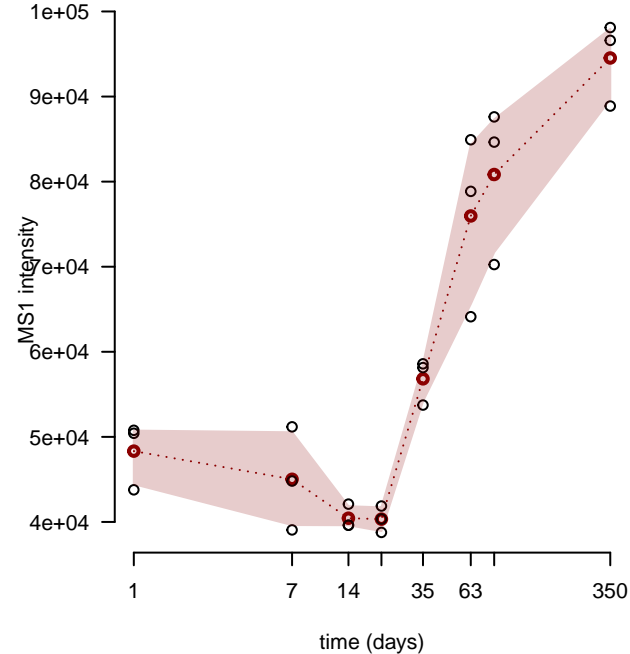

**Q9R0A1**  
GN=Clcn2  
chloride channel, voltage-sensitive 2

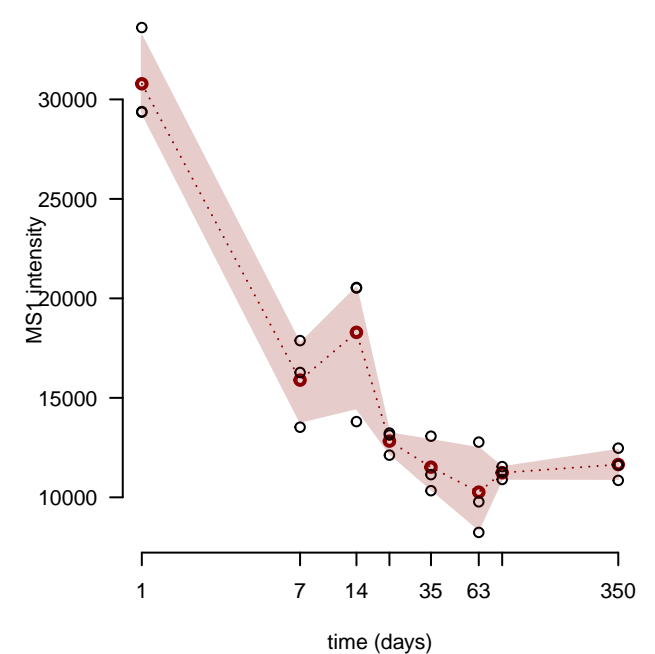

**Q9R0A5**  
GN=Nek3  
NIMA (never in mitosis gene a)-related e ...

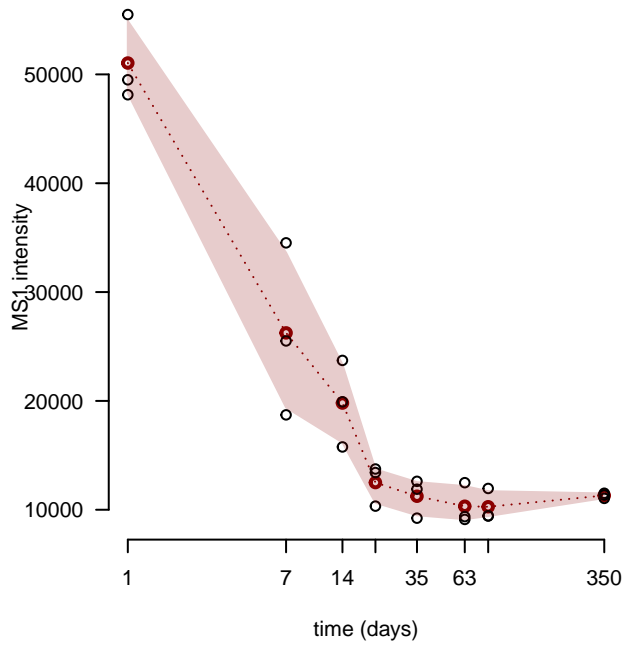

**Q9R0B6**  
GN=Lamc3  
laminin gamma 3

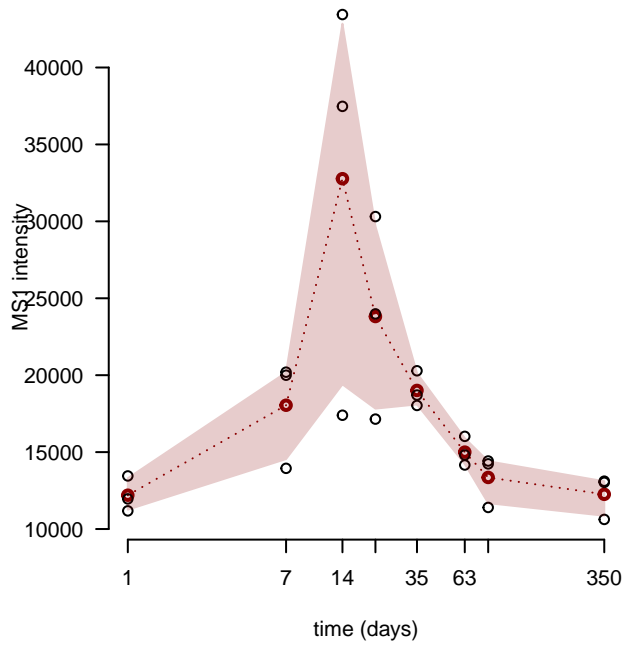

**Q9R0B7**  
GN=Znf346

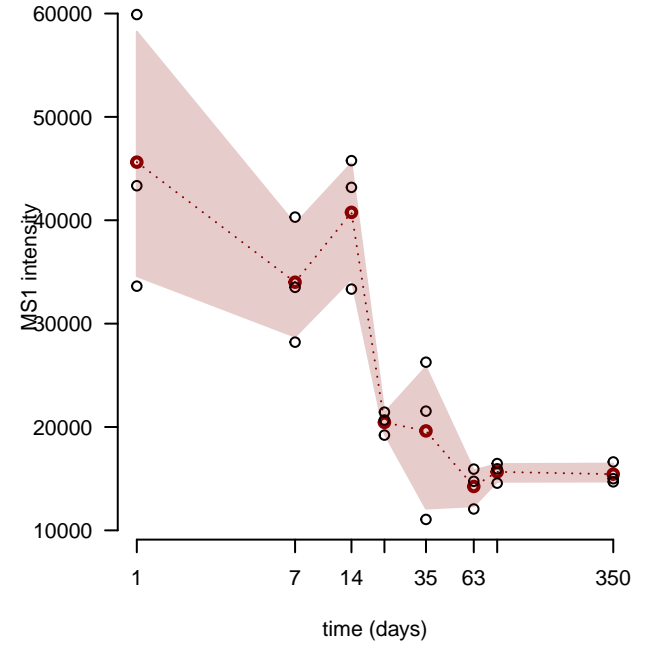

**Q9R0B9**  
GN=Plod2  
procollagen lysine, 2-oxoglutarate 5-dio ...

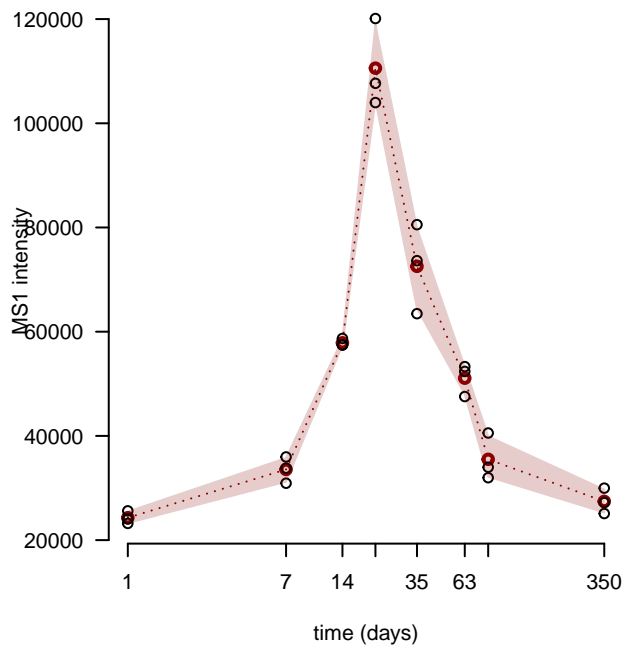

**Q9R0D8**  
GN=Wdr54  
WD repeat domain 54

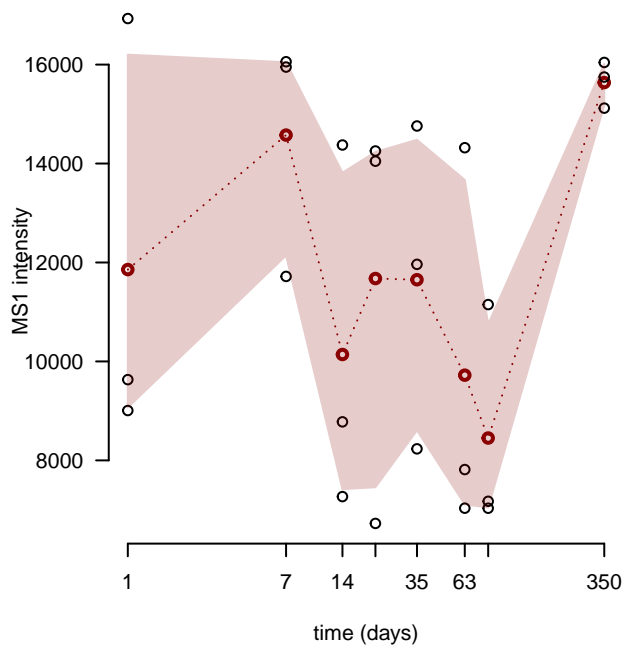

**Q9R0E1**  
GN=Plod3  
procollagen-lysine, 2-oxoglutarate 5-dio ...

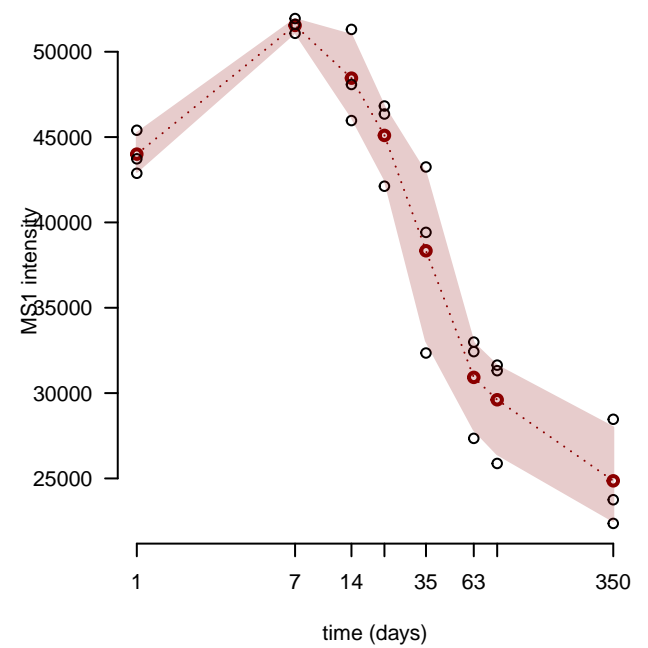

**Q9R0E2**  
GN=Plod1  
procollagen-lysine, 2-oxoglutarate 5-dio ...

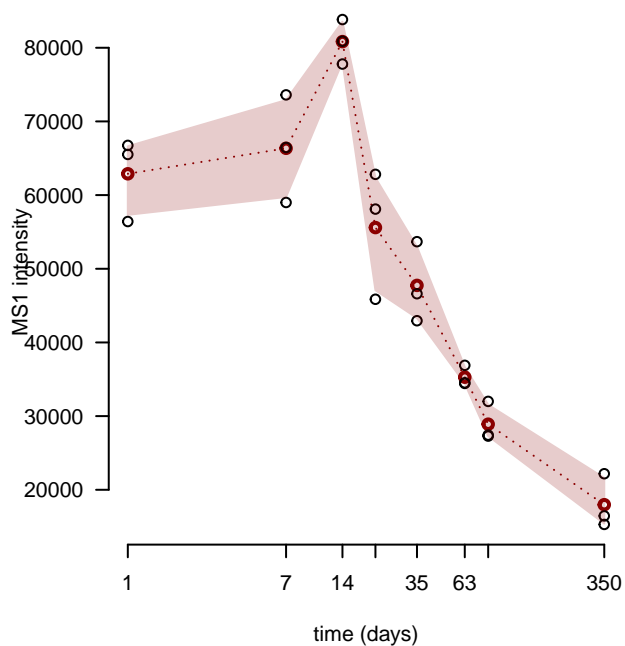

**Q9R0G7**  
GN=Zeb2  
zinc finger E-box binding homeobox 2

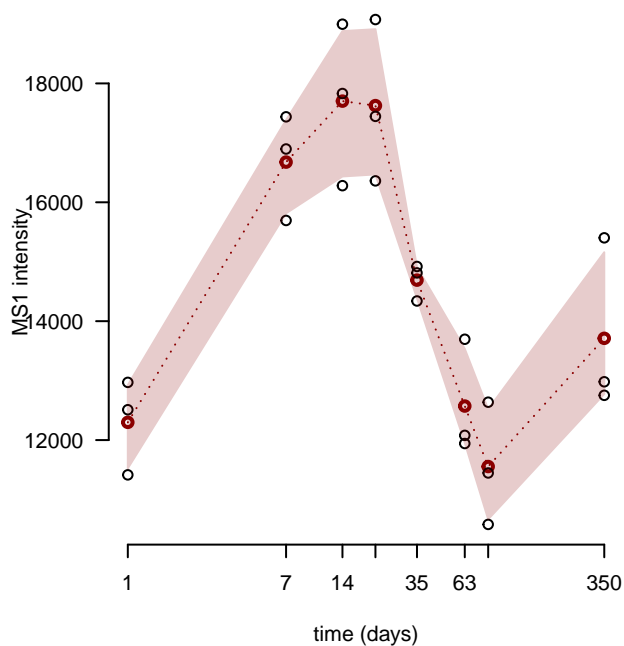

**Q9R0G8**  
GN=Nrk  
Nrk related kinase

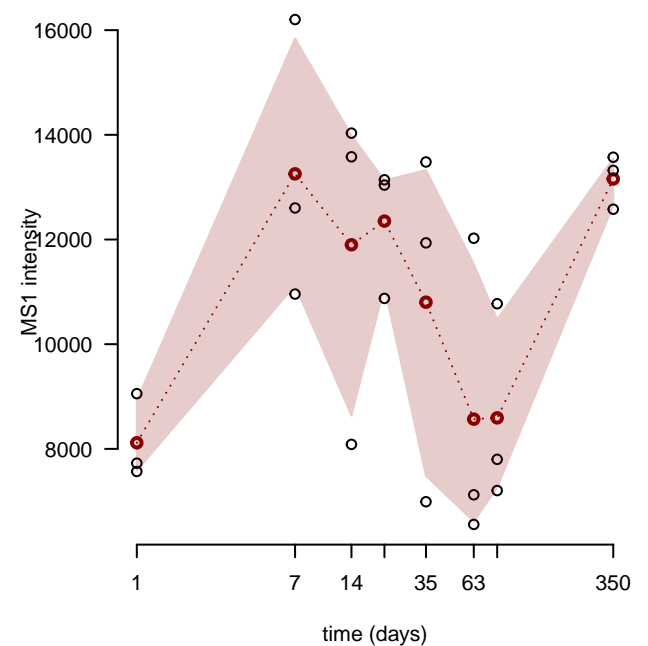



**Q9R0H0**  
**GN=Acox1**  
acyl-Coenzyme A oxidase 1, palmitoyl

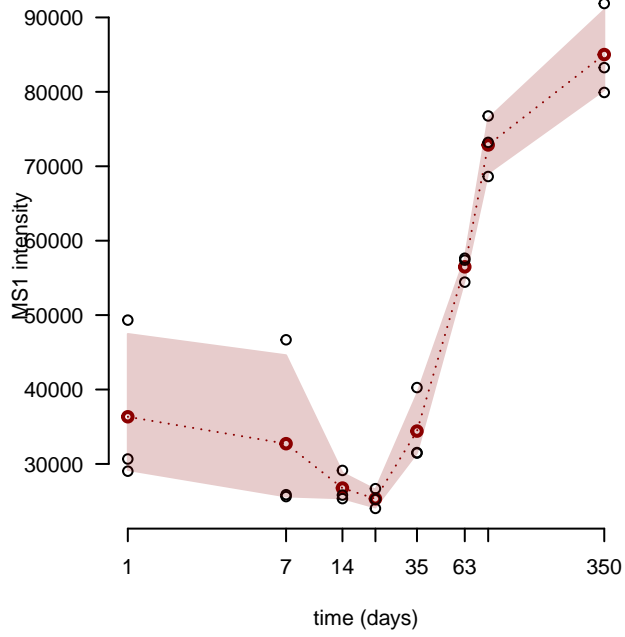

**Q9R0H5**  
**GN=Krt71**  
keratin 71

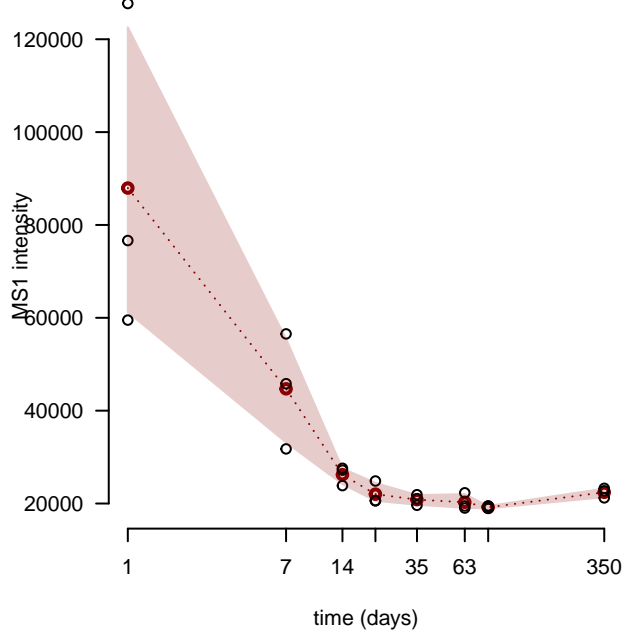

**Q9R0I7**  
**GN=Ylpm1**  
YLP motif containing 1

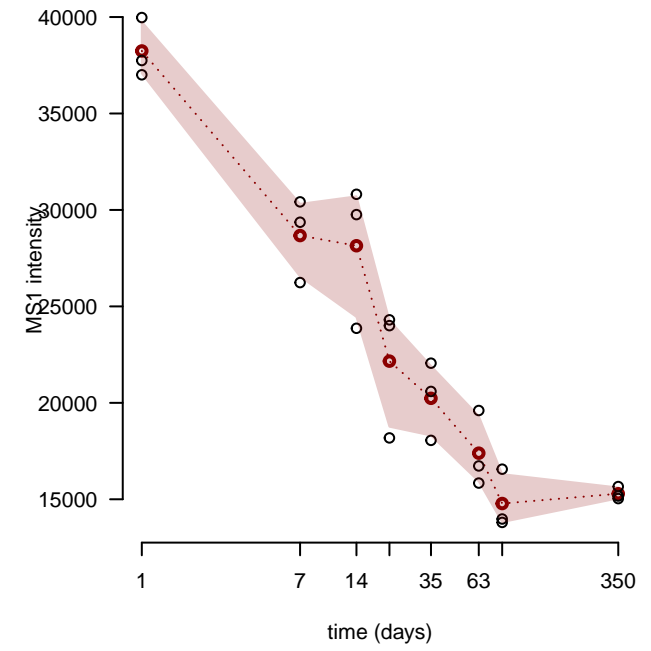

**Q9R0K7**  
**GN=Atp2b2**  
ATPase, Ca++ transporting, plasma membra ...

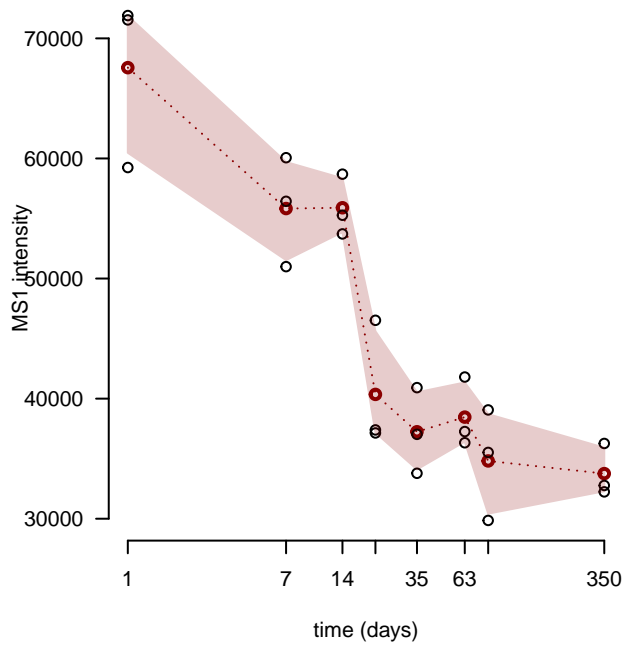

**Q9R0L6**  
**GN=Pcm1**  
pericentriolar material 1

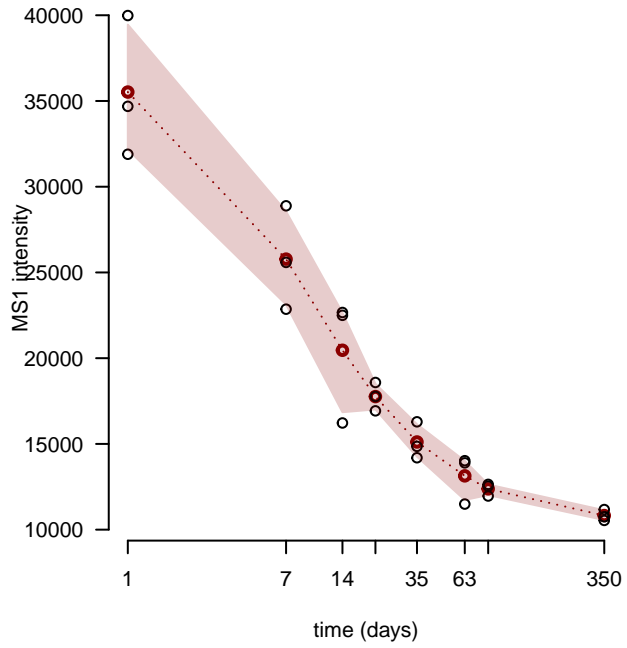

**Q9R0L7**  
**GN=Akap8l**  
A kinase (PRKA) anchor protein 8-like

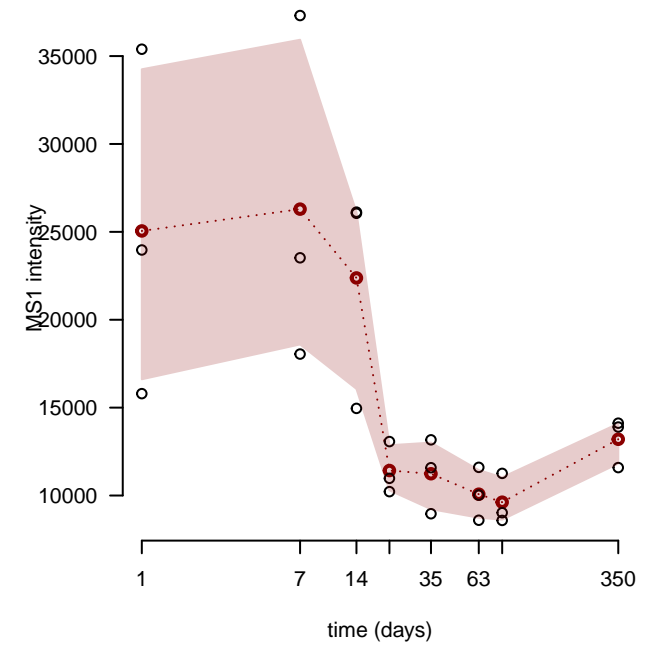

**Q9R0M0**  
**GN=Celsr2**  
cadherin, EGF LAG seven-pass G-type rece ...

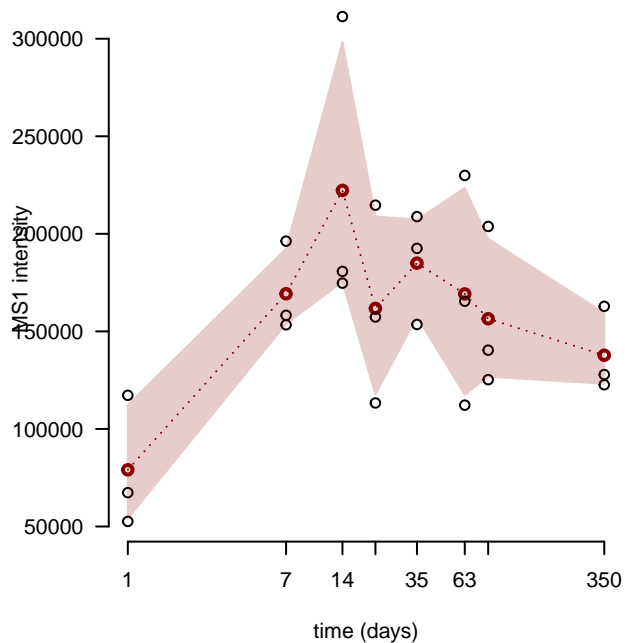

**Q9R0M4**  
**GN=Podxl**  
podocalyxin-like

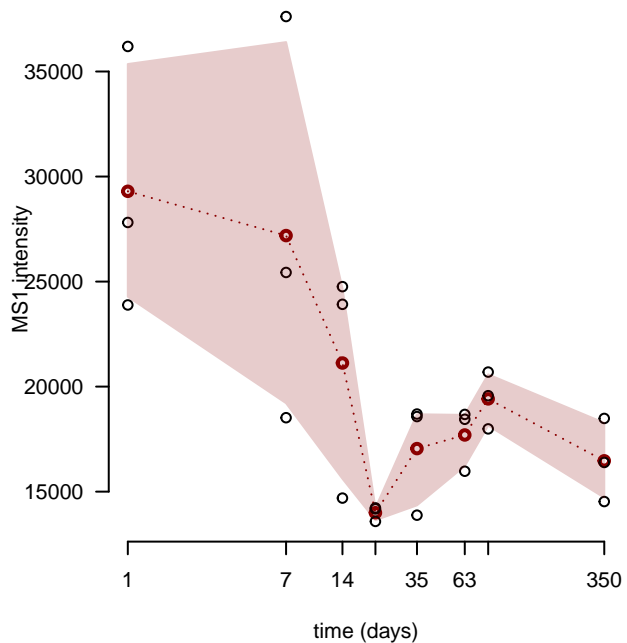

**Q9R0M5**  
**GN=Tpk1**  
thiamine pyrophosphokinase

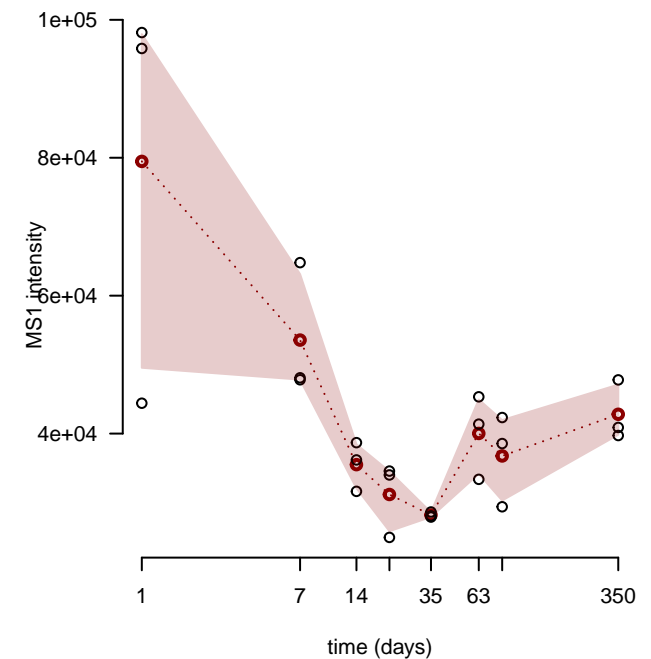

**Q9R0M6**  
GN=Rab9a

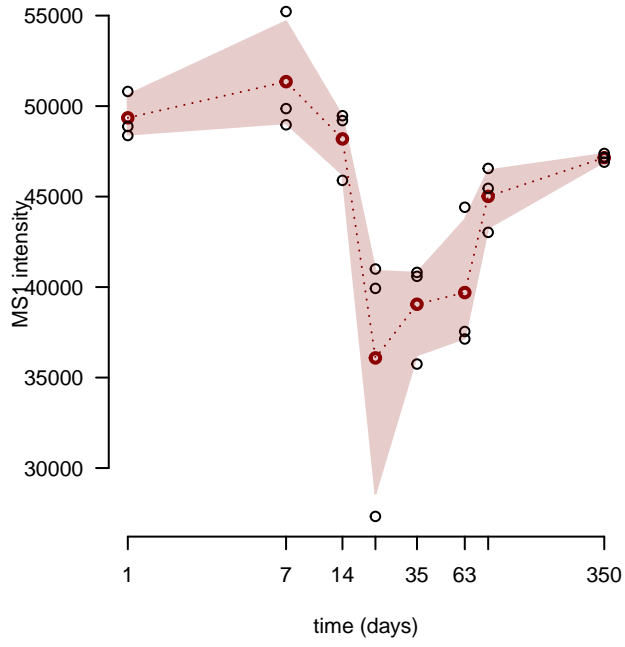

**Q9R0M8**  
GN=Slc35a2  
solute carrier family 35 (UDP-galactose ...

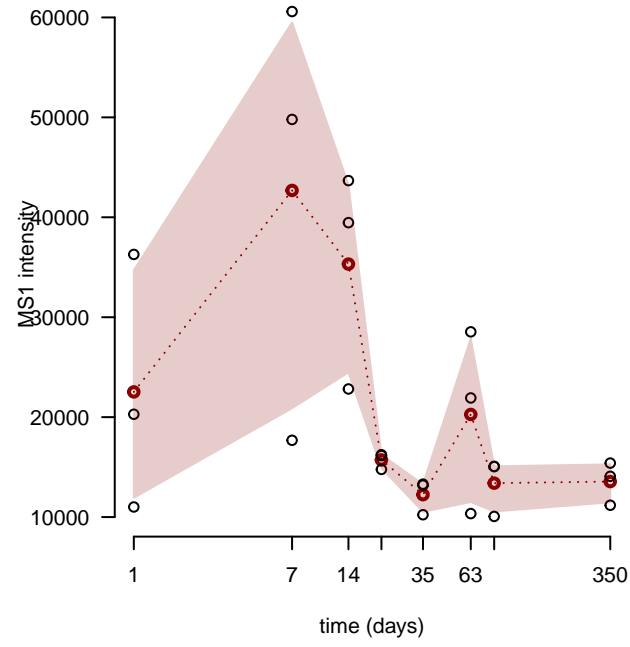

**Q9R0N0**  
GN=Galk1  
galactokinase 1

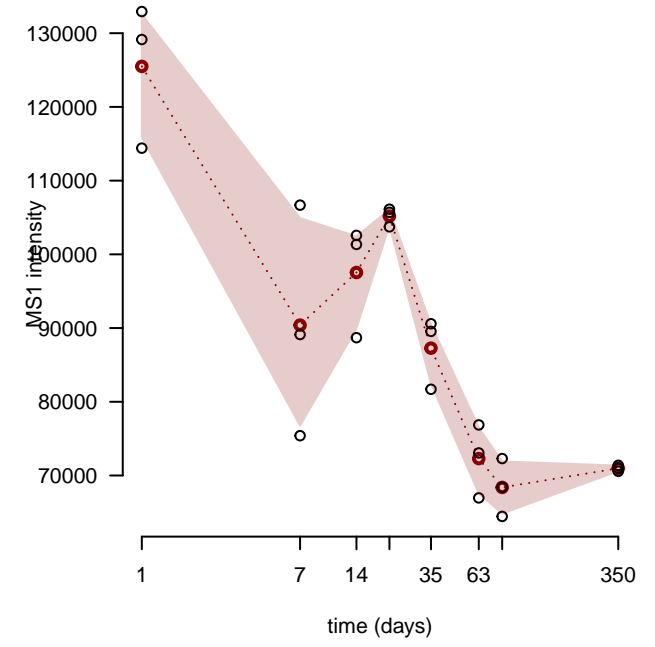

**Q9R0N7**  
GN=Syt7  
synaptotagmin VII

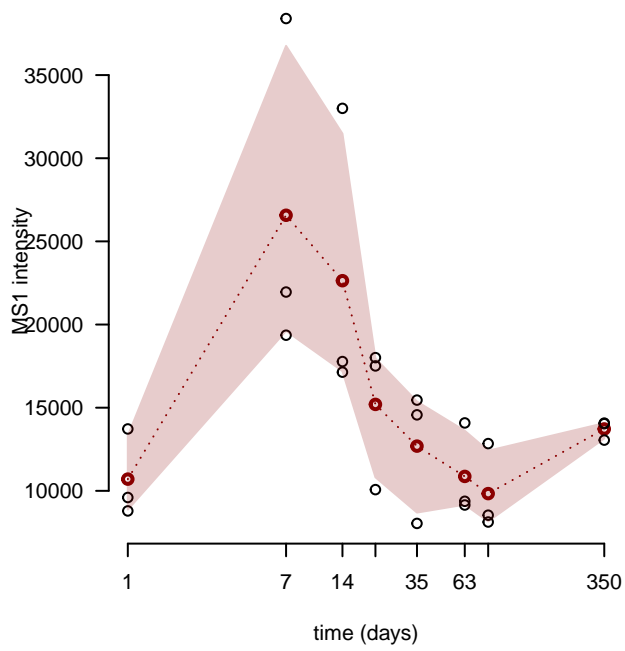

**Q9R0P3**  
GN=Esd  
esterase D/formylglutathione hydrolase

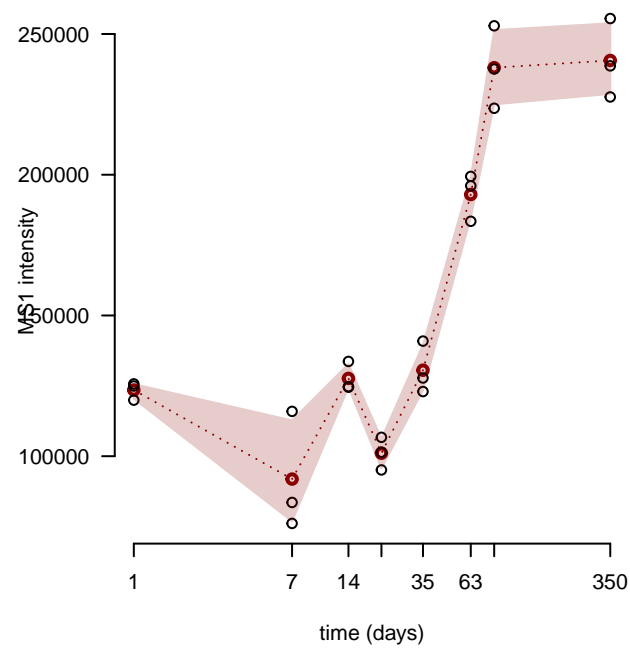

**Q9R0P4**  
GN=Smap

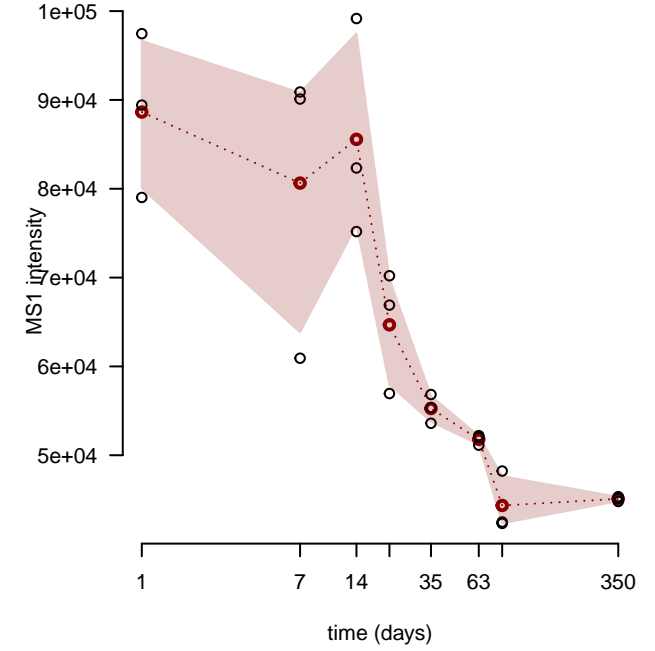

**Q9R0P5**  
GN=Dstn  
destrin

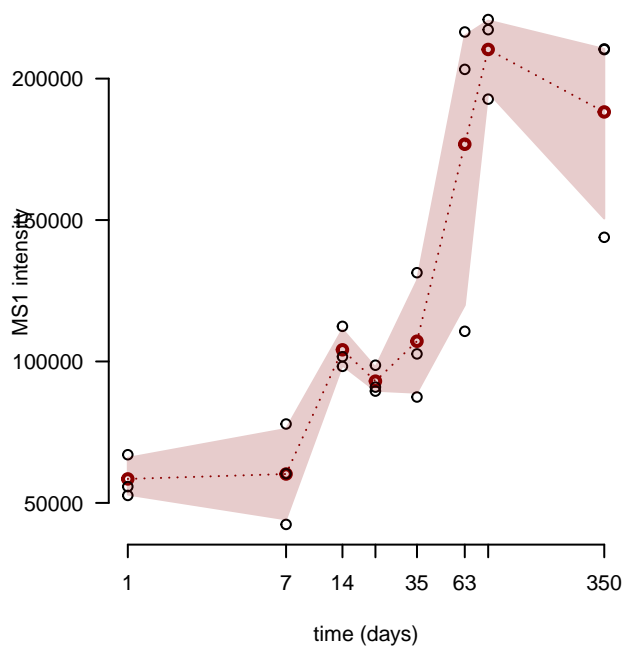

**Q9R0P6**  
GN=Sec11a  
SEC11 homolog A, signal peptidase comple ...

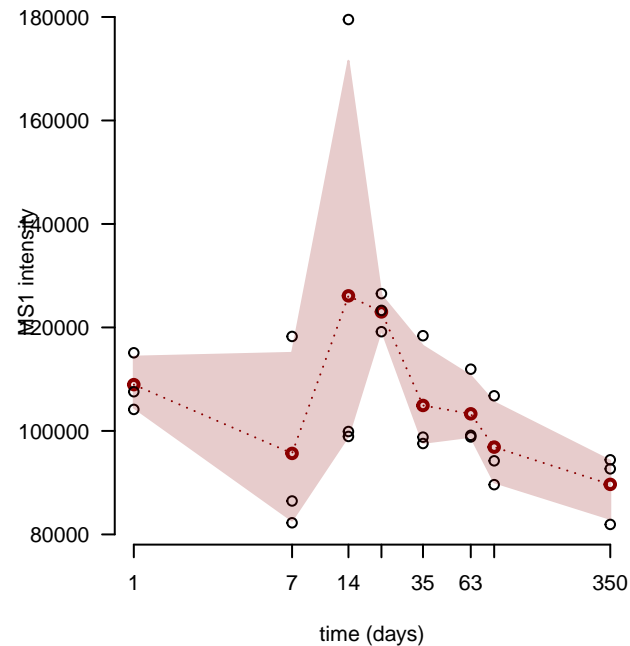

**Q9R0P9**  
GN=Uch1  
ubiquitin carboxy-terminal hydrolase L1

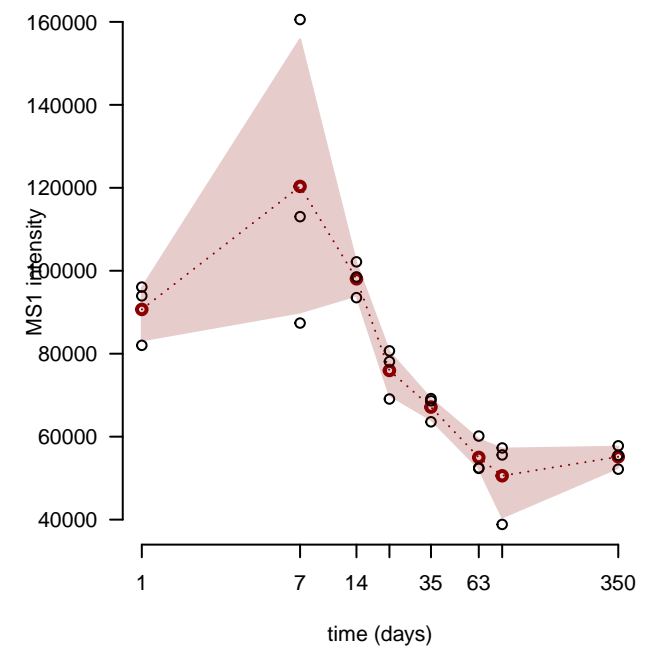

**Q9R0Q1**  
GN=Syt14  
synaptotagmin-like 4

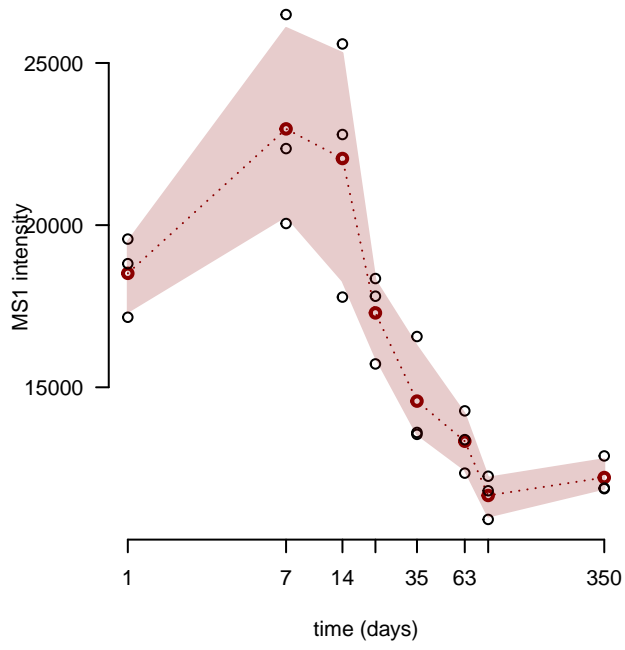

**Q9R0Q3**  
GN=Tmed2  
transmembrane p24 trafficking protein 2

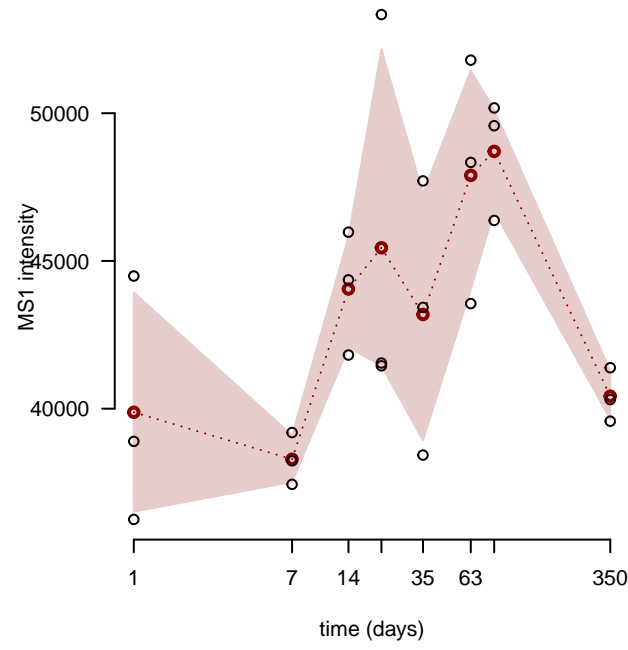

**Q9R0Q4**  
GN=Morf4l2  
mortality factor 4 like 2

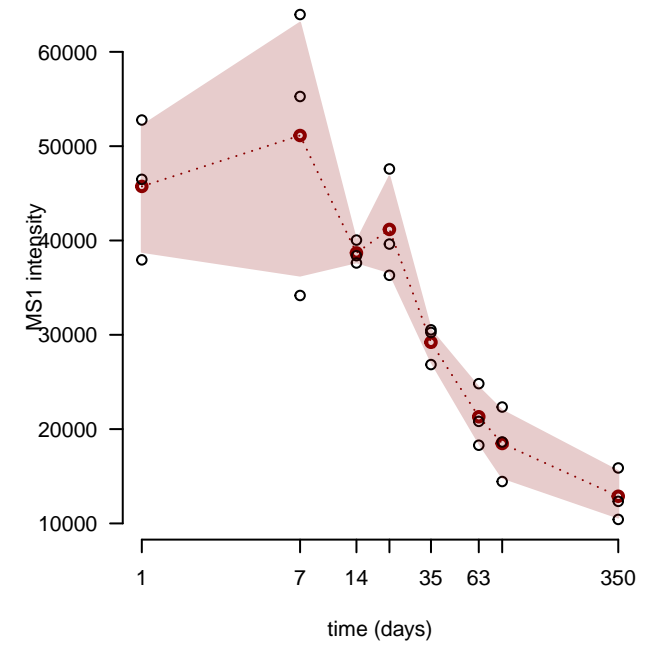

**Q9R0Q6**  
GN=Arpc1a  
actin related protein 2/3 complex, subun ...

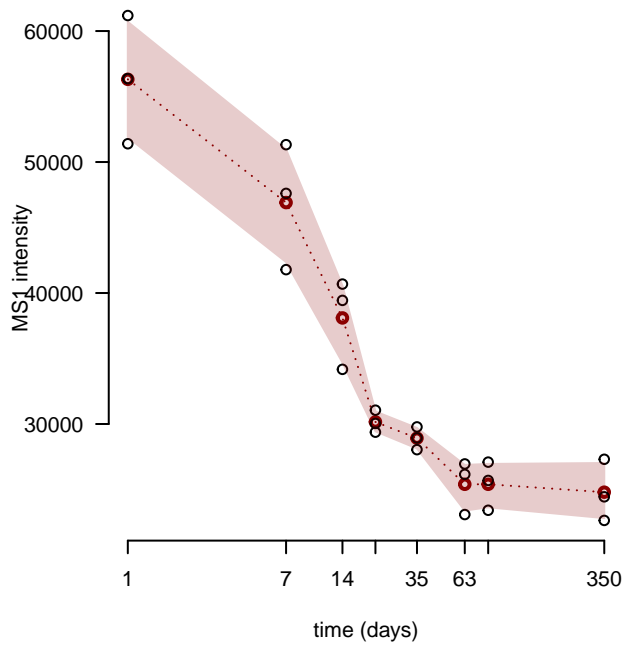

**Q9R0Q7**  
GN=Ptges3  
prostaglandin E synthase 3

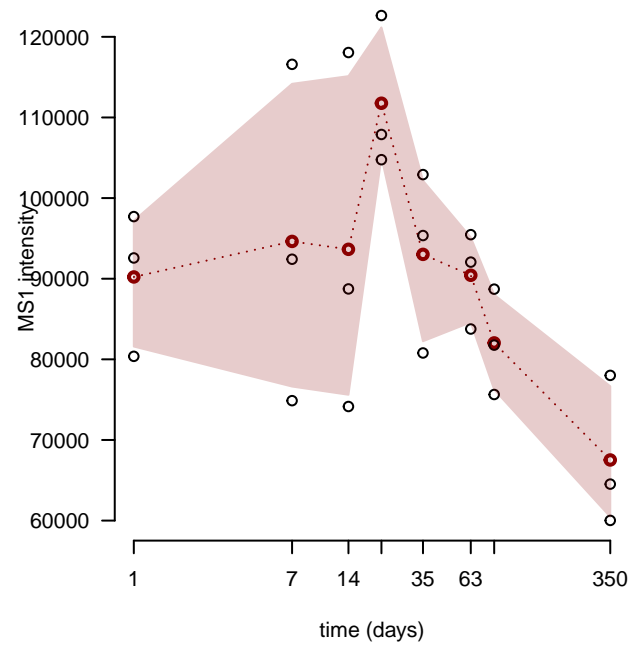

**Q9R0Q9**  
GN=Mpdu1  
mannose-P-dolichol utilization defect 1

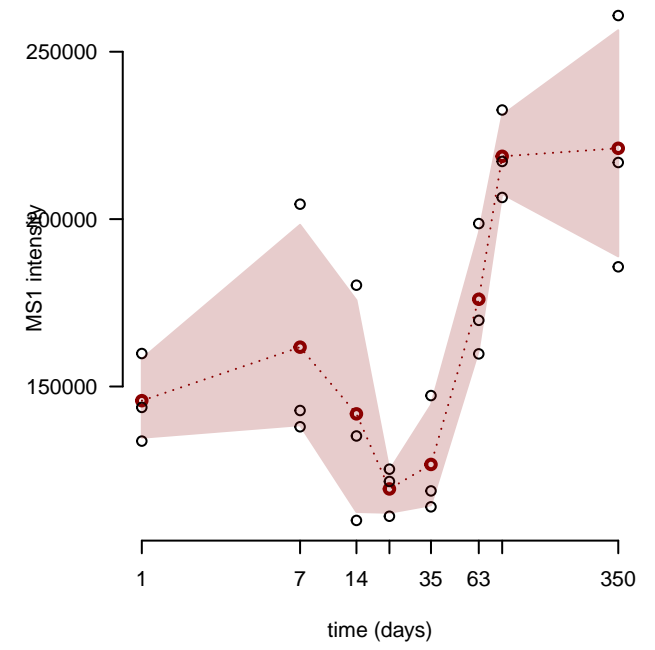

**Q9R0R1**  
GN=Melff  
melanotransferrin

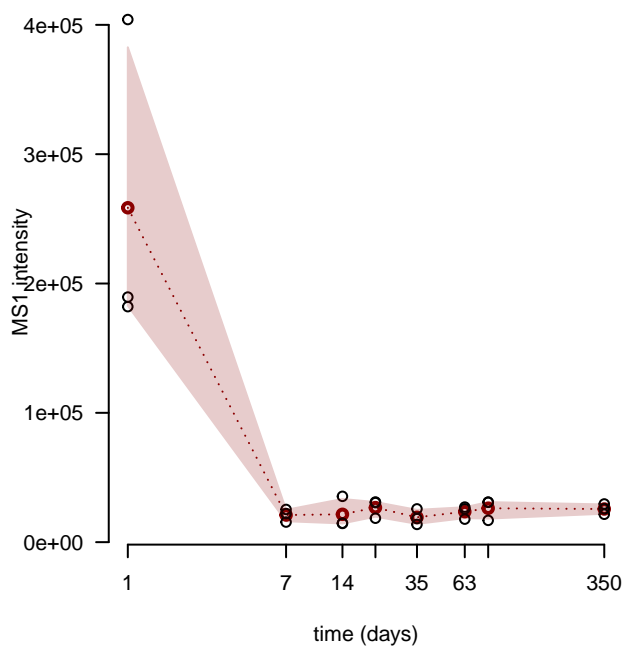

**Q9R0U0**  
GN=Srsf10  
serine and arginine-rich splicing factor ...

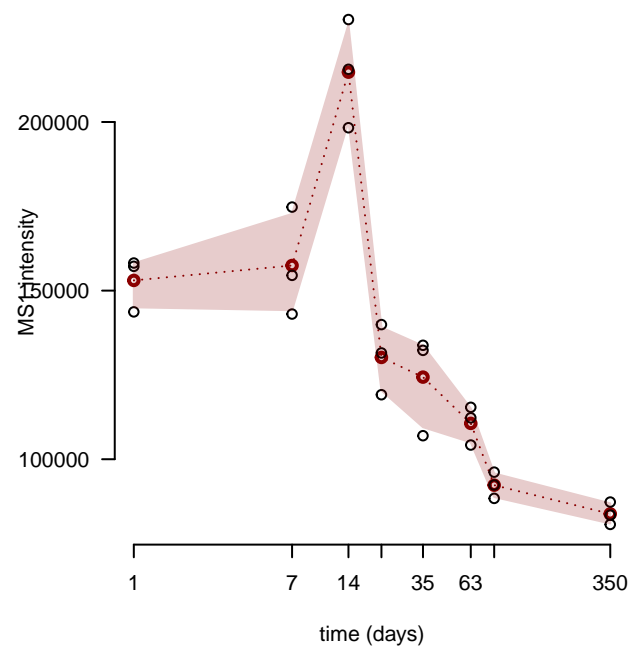

**Q9R0X0**  
GN=Med20  
mediator complex subunit 20

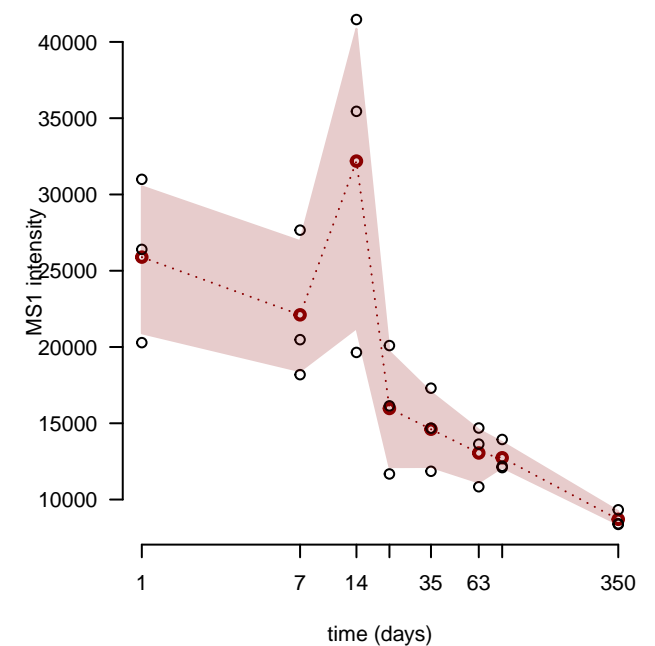

**Q9R0X4**  
**GN=Acot9**  
acyl-CoA thioesterase 9

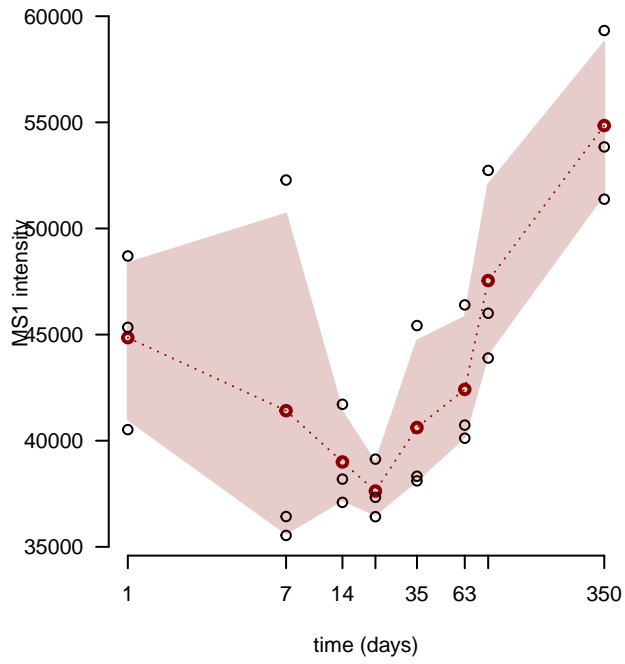

**Q9R0X5**  
**GN=Rpgr**  
retinitis pigmentosa GTPase regulator

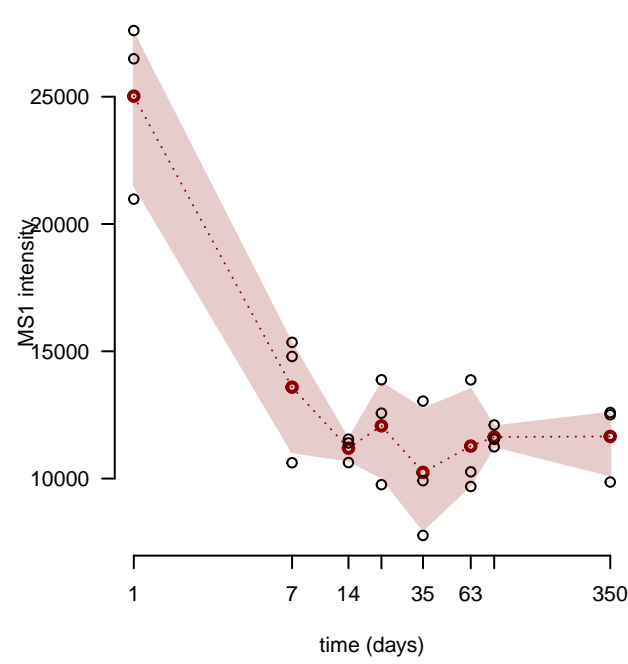

**Q9R0Y5**  
**GN=Ak1**  
adenylate kinase 1

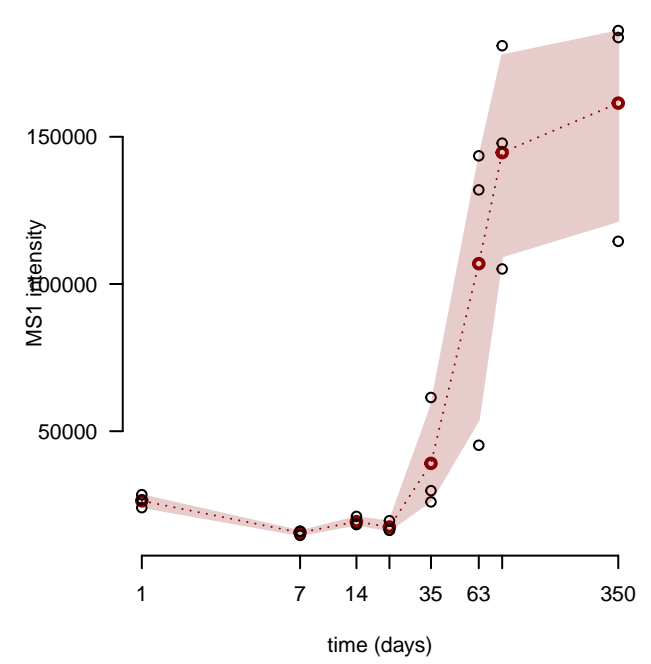

**Q9R0Z9**  
**GN=Dlc1**  
deleted in liver cancer 1

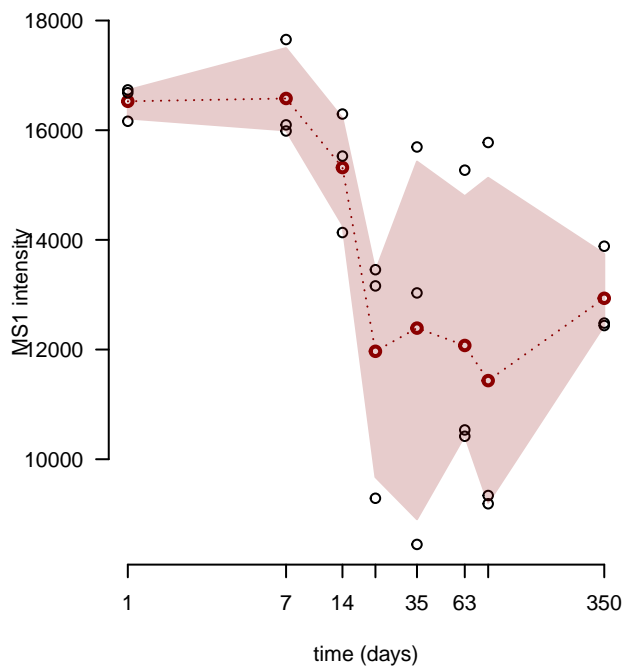

**Q9R100**  
**GN=Cdh17**  
cadherin 17

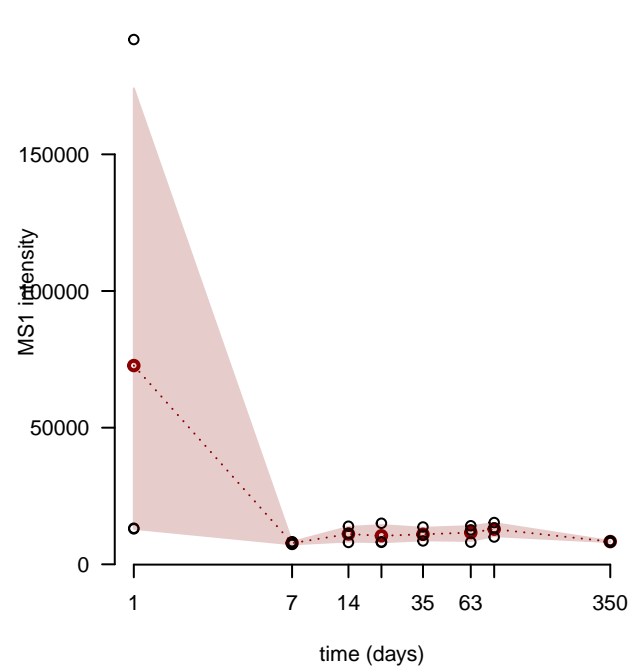

**Q9R111**  
**GN=Gda**  
guanine deaminase

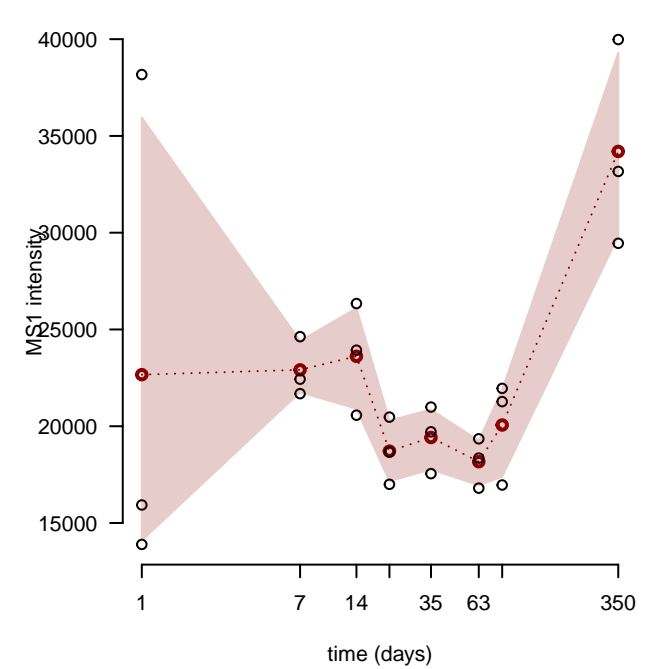

**Q9R112**  
**GN=Sqor**  
sulfide quinone oxidoreductase

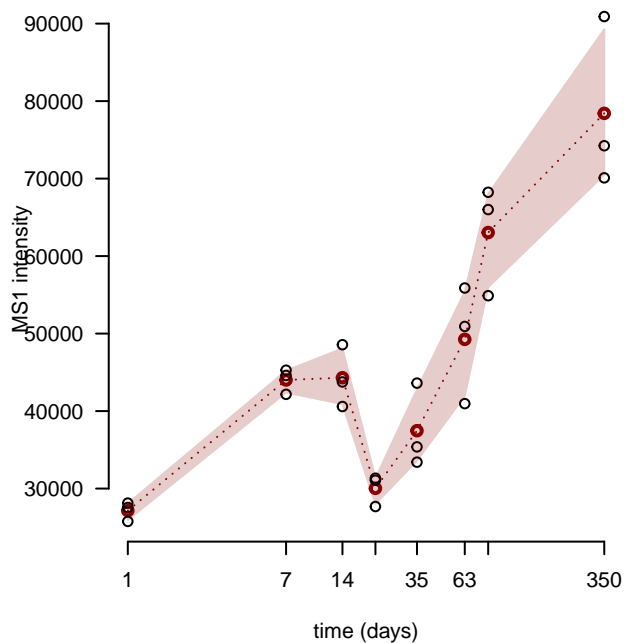

**Q9R118**  
**GN=Htra1**  
HtrA serine peptidase 1

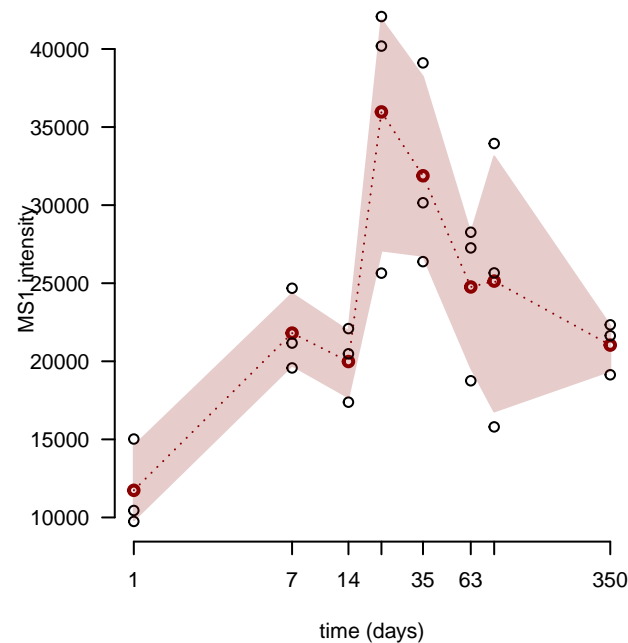

**Q9R190**  
**GN=Mta2**  
metastasis-associated gene family, membe ...

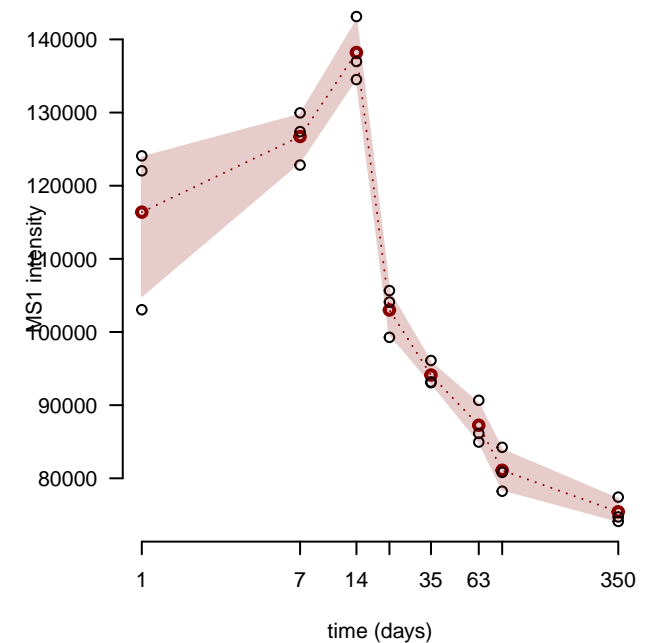

**Q9R1A8**  
**GN=Cop1**  
COP1, E3 ubiquitin ligase

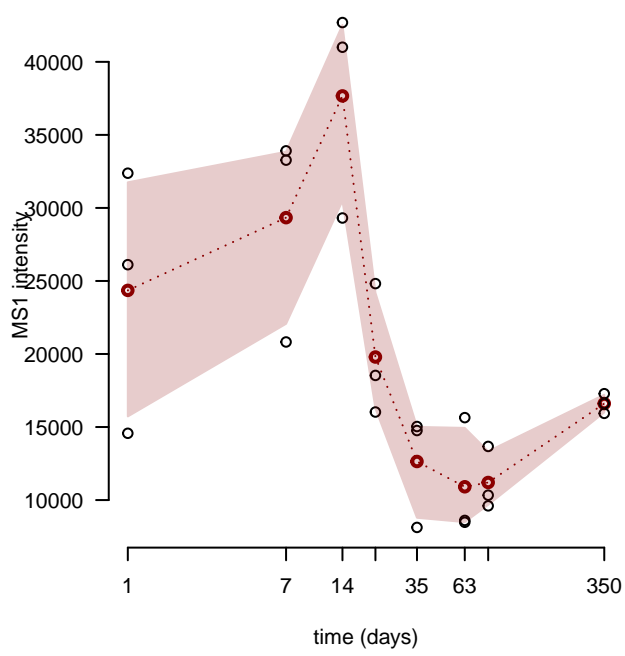

**Q9R1B9**  
**GN=Slit2**  
slit guidance ligand 2

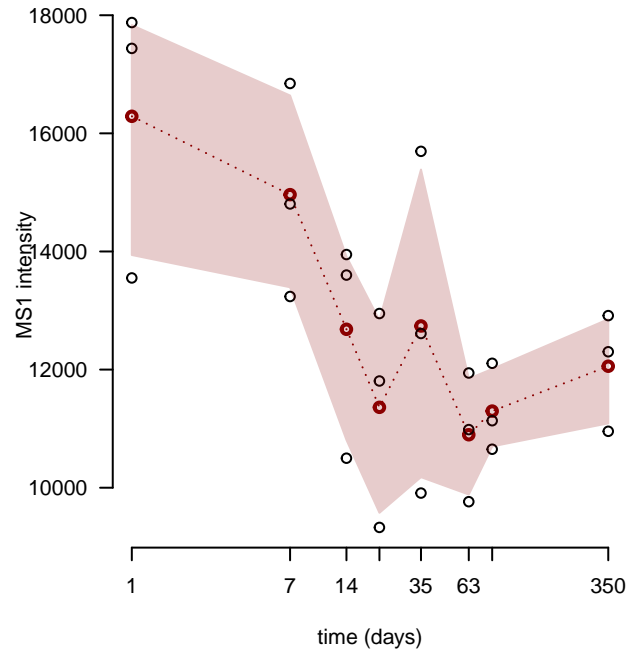

**Q9R1C0**  
**GN=Taf7**  
TATA-box binding protein associated fact ...

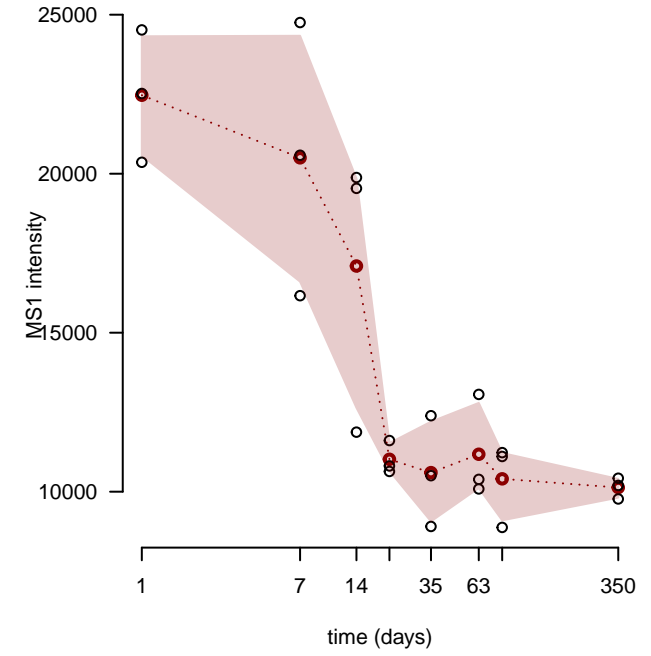

**Q9R1C6**  
**GN=Dgke**  
diacylglycerol kinase, epsilon

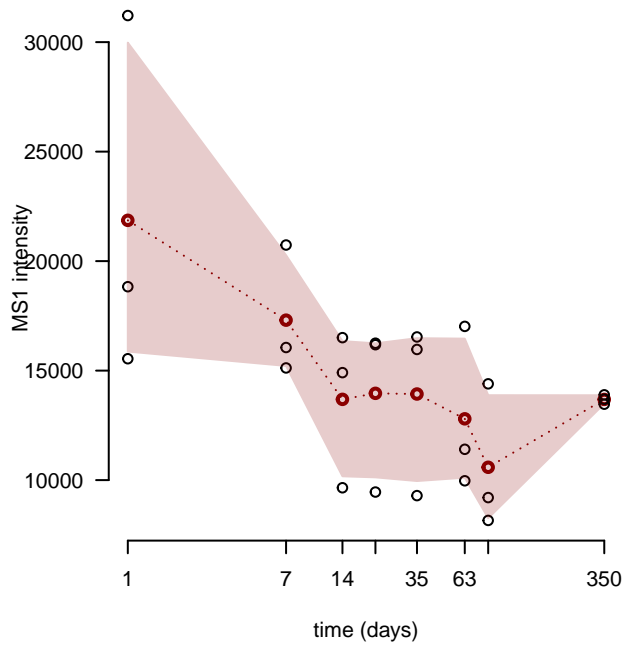

**Q9R1C7**  
**GN=Prpf40a**  
pre-mRNA processing factor 40A

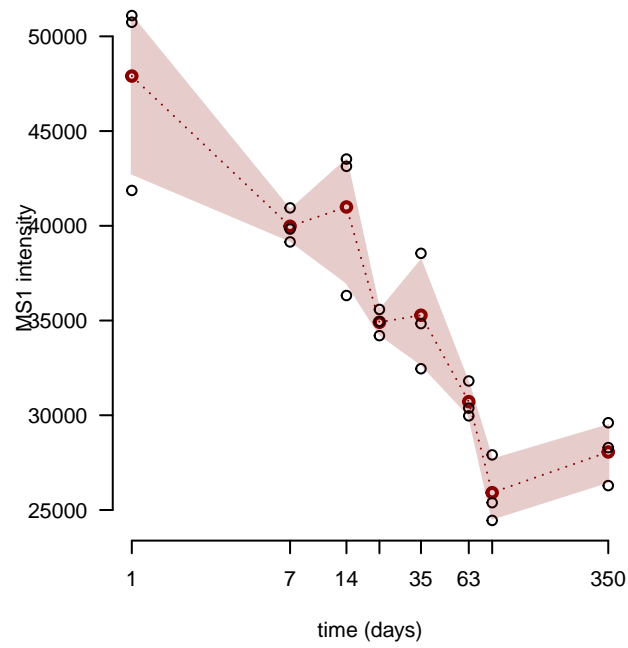

**Q9R1E0**  
**GN=Foxo1**  
forkhead box O1

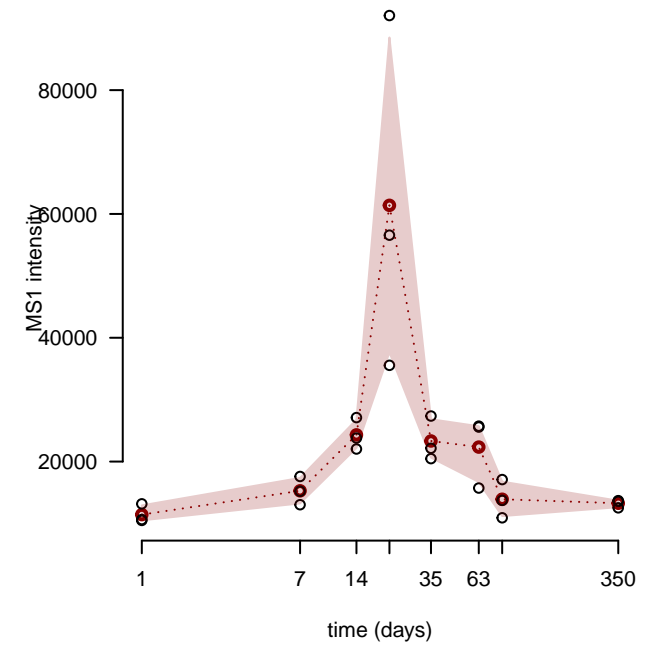

**Q9R1E6**  
**GN=Enpp2**  
ectonucleotide pyrophosphatase/phosphodi ...

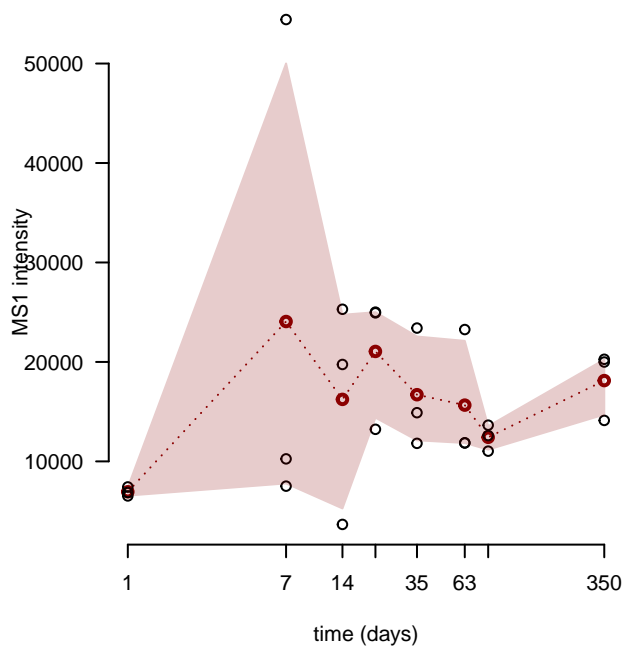

**Q9R1J0**  
**GN=Nsdhl**  
NAD(P) dependent steroid dehydrogenase-I ...

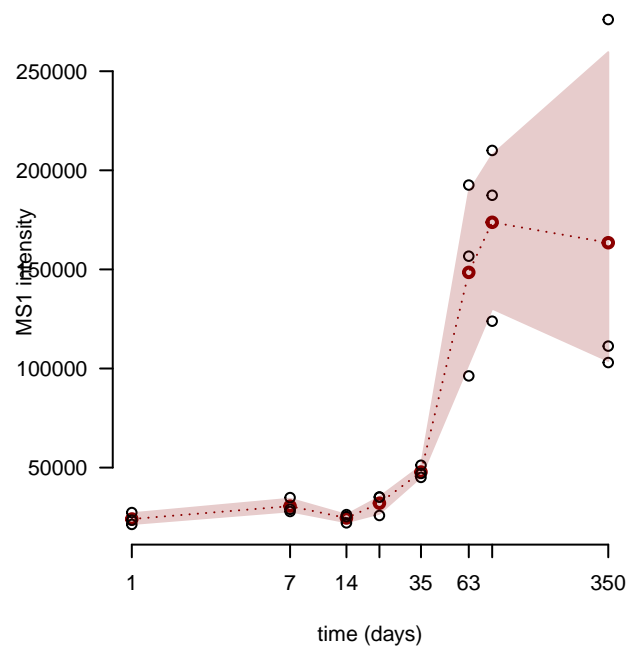

**Q9R1K5**  
**GN=Fzr1**  
fizzy and cell division cycle 20 related ...

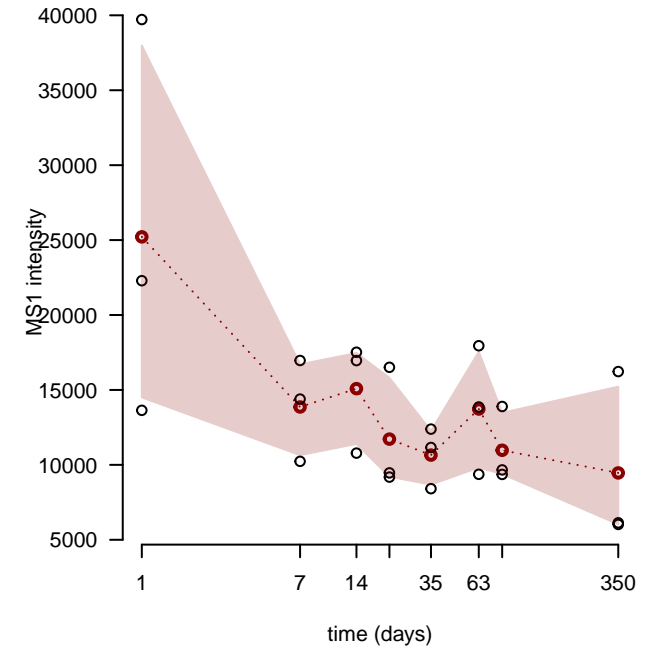

**Q9R1K9**  
GN=Cetn2  
centrin 2

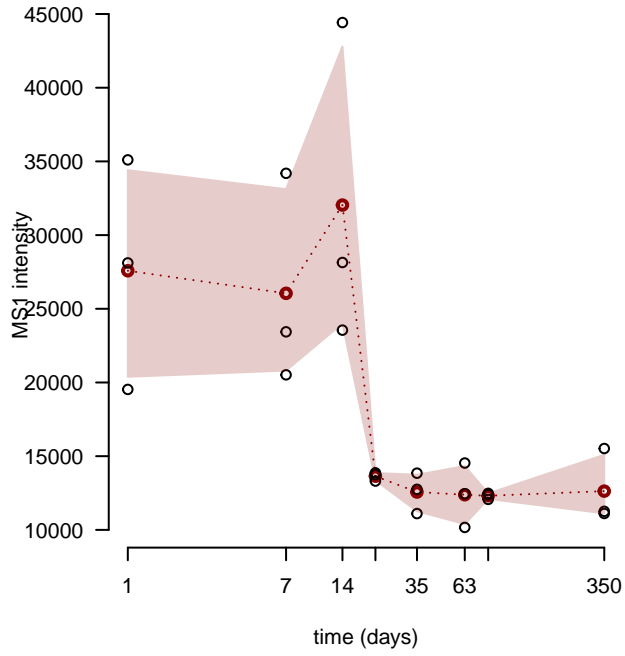

**Q9R1M5**  
GN=Nlrp5  
NLR family, pyrin domain containing 5

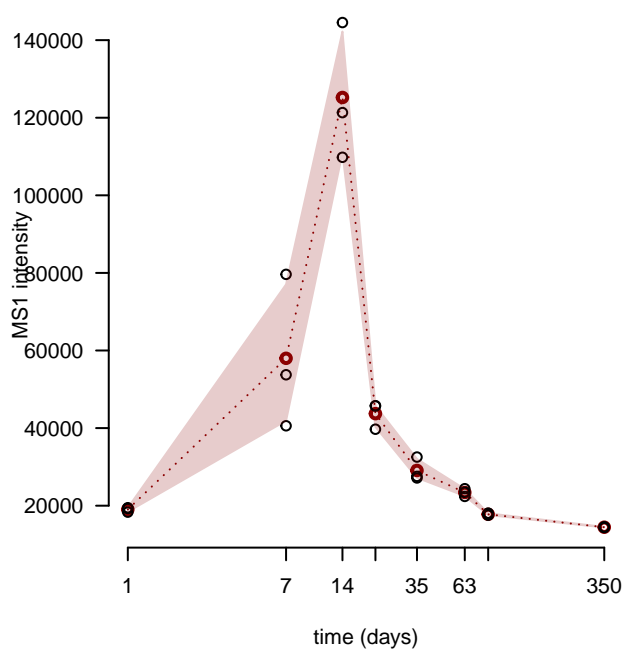

**Q9R1P0**  
GN=Psma4  
proteasome subunit alpha 4

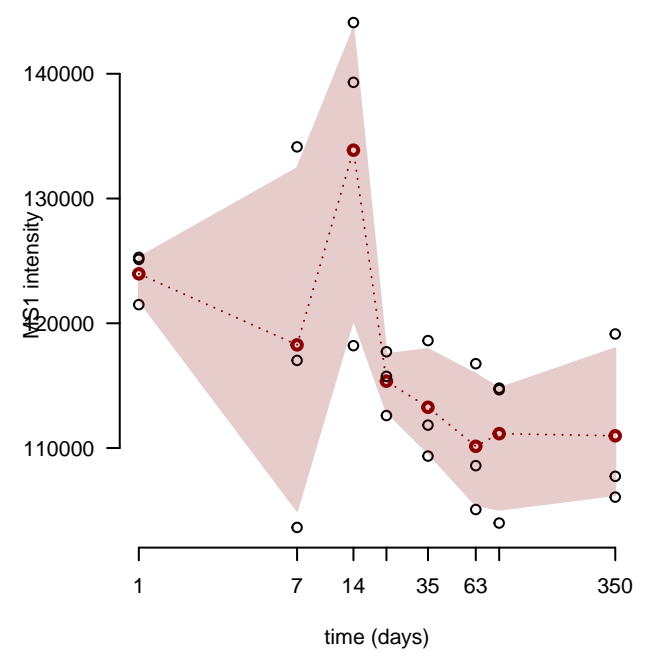

**Q9R1P1**  
GN=Psmb3  
proteasome (prosome, macropain) subunit, ...

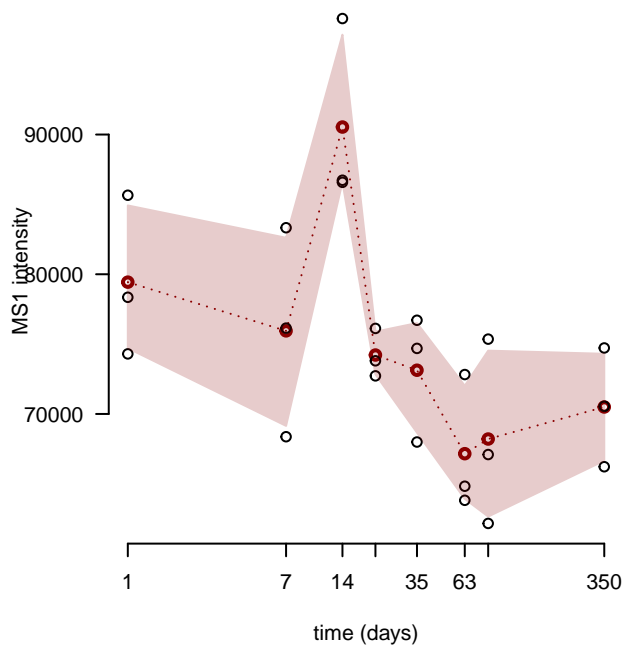

**Q9R1P3**  
GN=Psmb2  
proteasome (prosome, macropain) subunit, ...

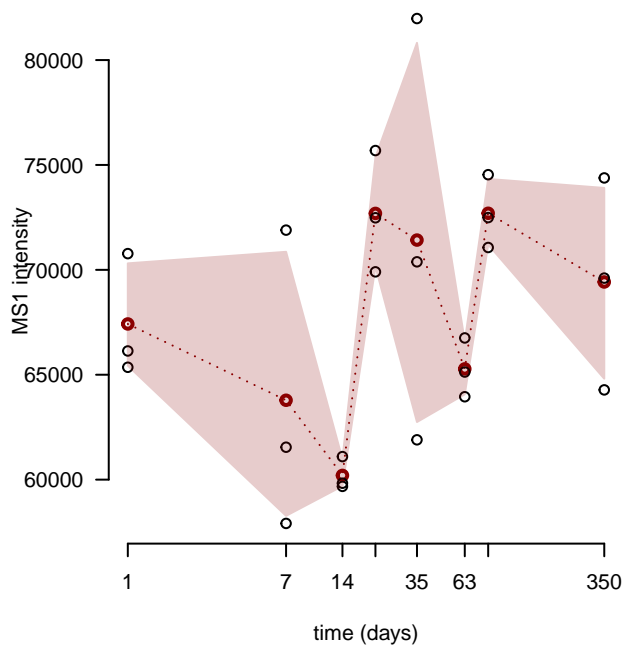

**Q9R1P4**  
GN=Psma1  
proteasome subunit alpha 1

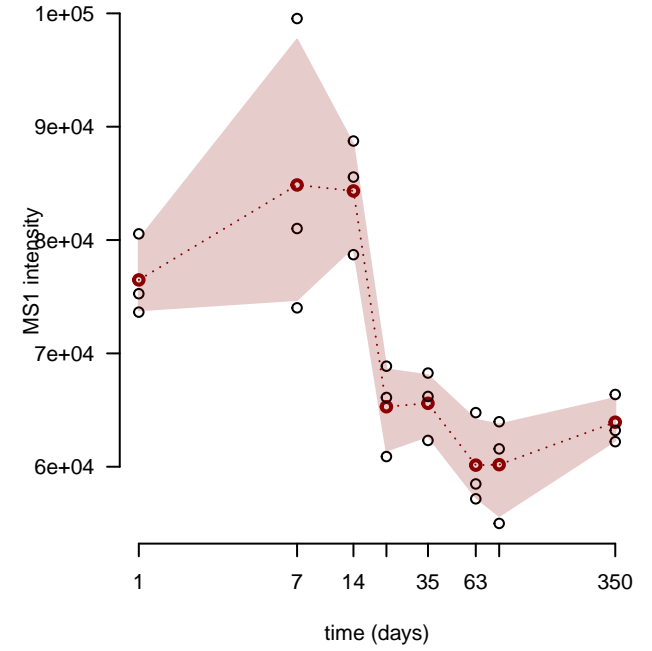

**Q9R1Q6**  
GN=Tmem176b  
transmembrane protein 176B

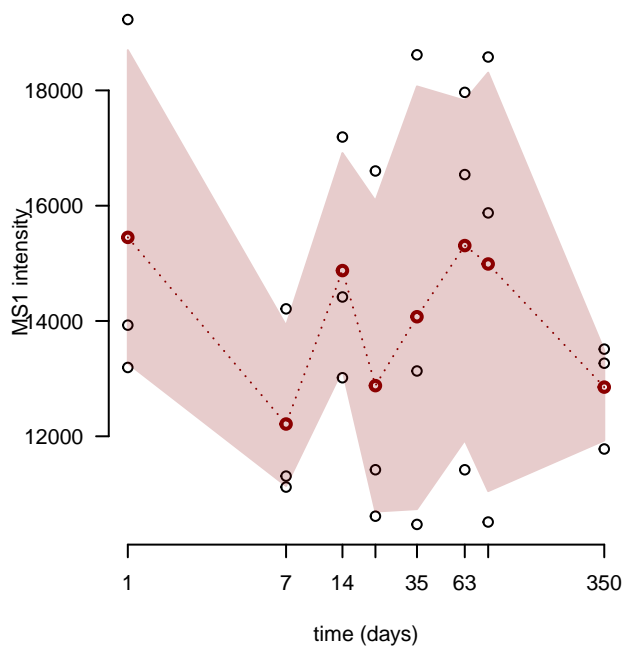

**Q9R1Q7**  
GN=Plp2  
proteolipid protein 2

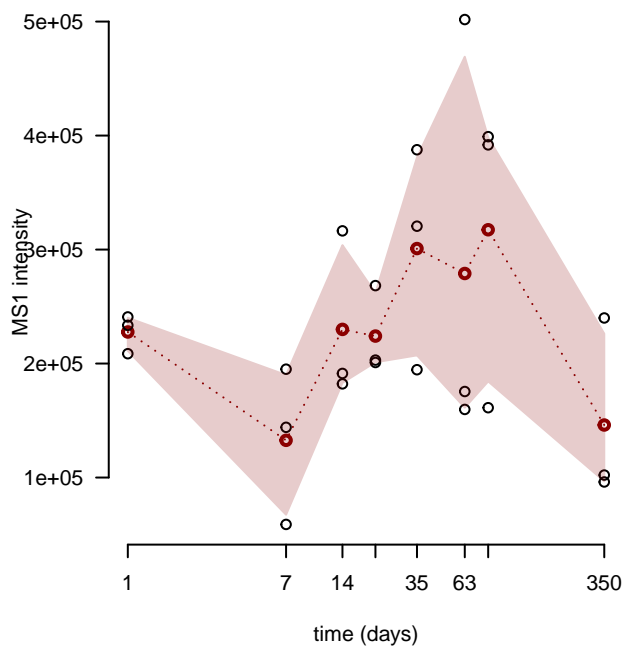

**Q9R1Q8**  
GN=Tagln3  
transgelin 3

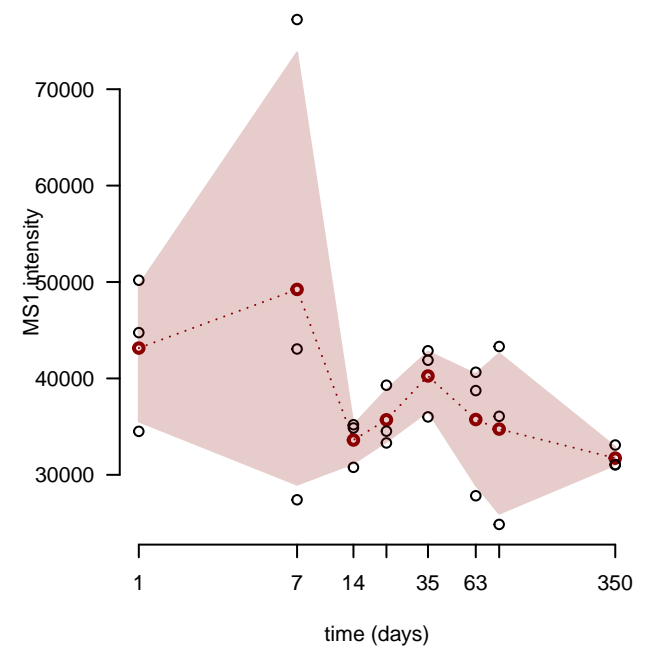

**Q9R1Q9**  
**GN=Atp6ap1**  
ATPase, H+ transporting, lysosomal acces ...

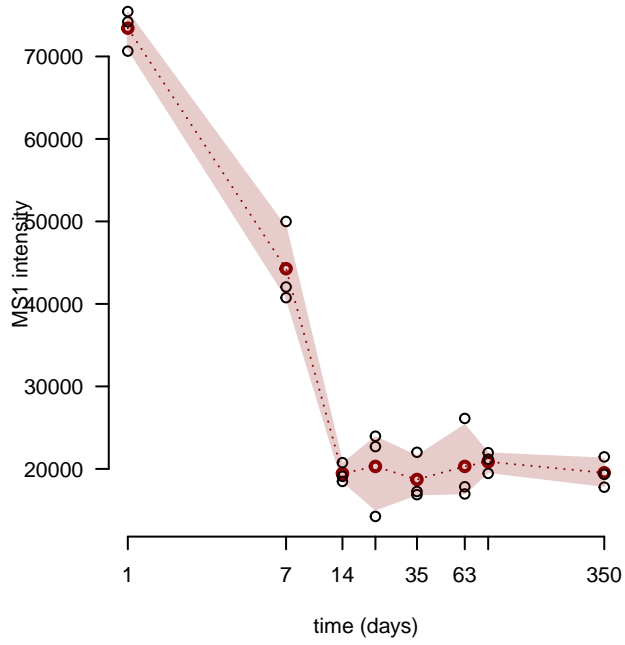

**Q9R1R2**  
**GN=Trim3**  
tripartite motif-containing 3

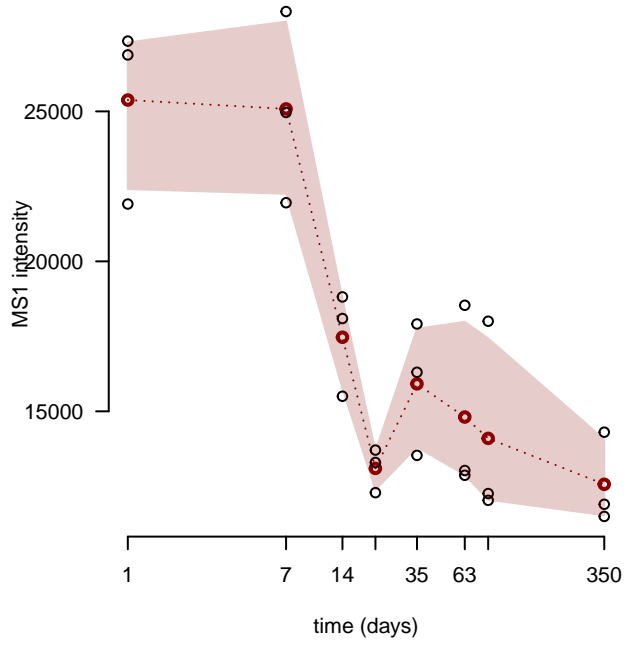

**Q9R1S3**  
**GN=Pign**  
phosphatidylinositol glycan anchor biosy ...

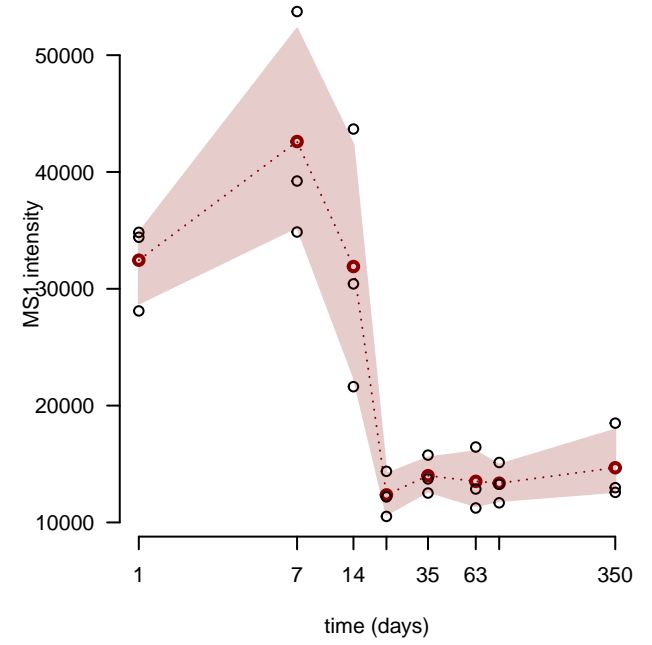

**Q9R1S8**  
**GN=Capn7**  
calpain 7

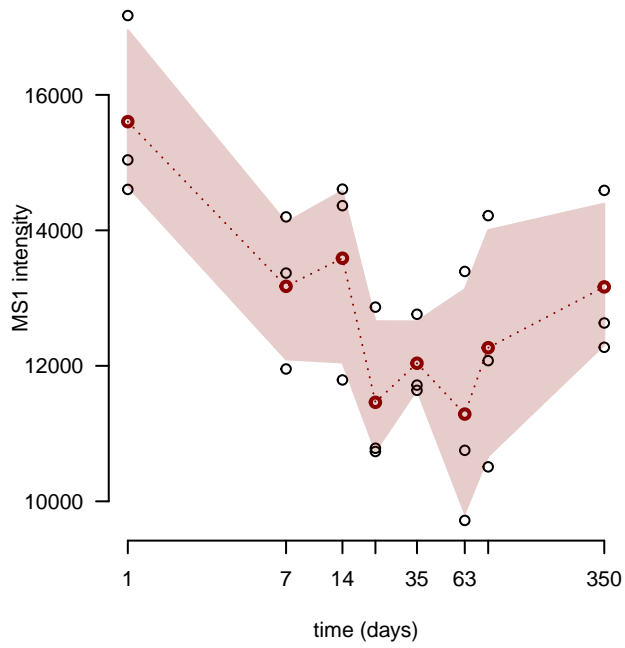

**Q9R1T2**  
**GN=Sae1**  
SUMO1 activating enzyme subunit 1

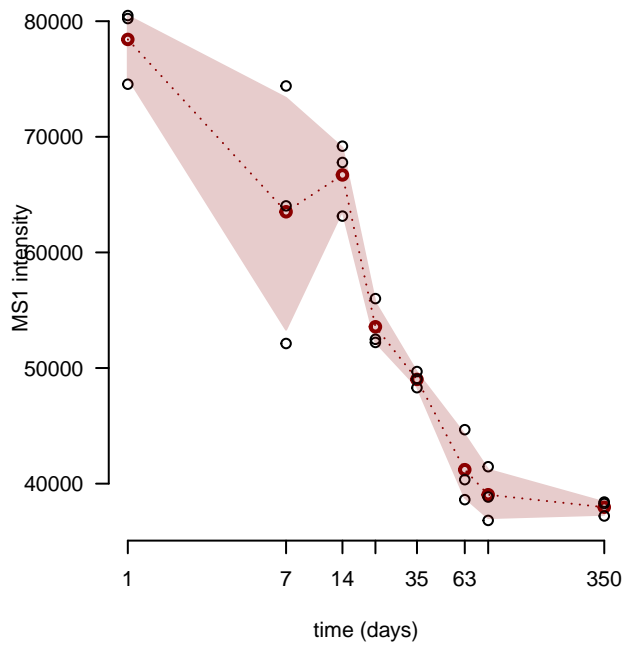

**Q9R1T4**  
**GN=Sept6**

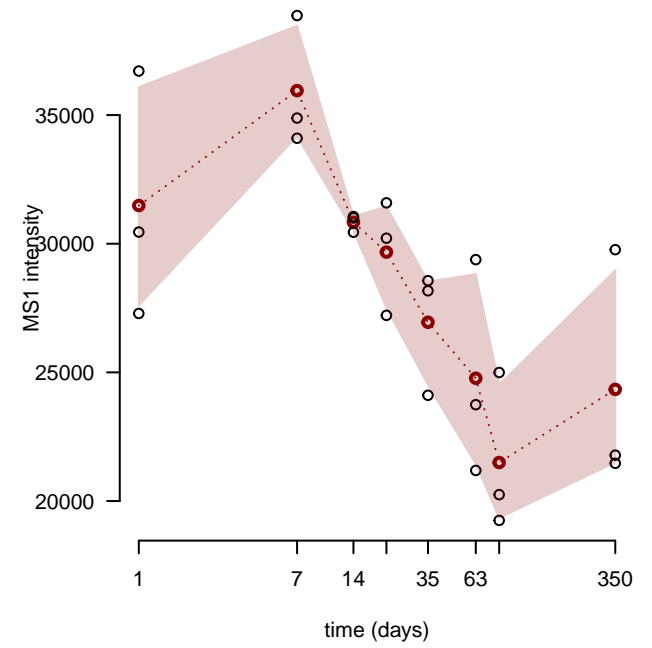

**Q9R1V6**  
**GN=Adam22**  
a disintegrin and metallopeptidase domai ...

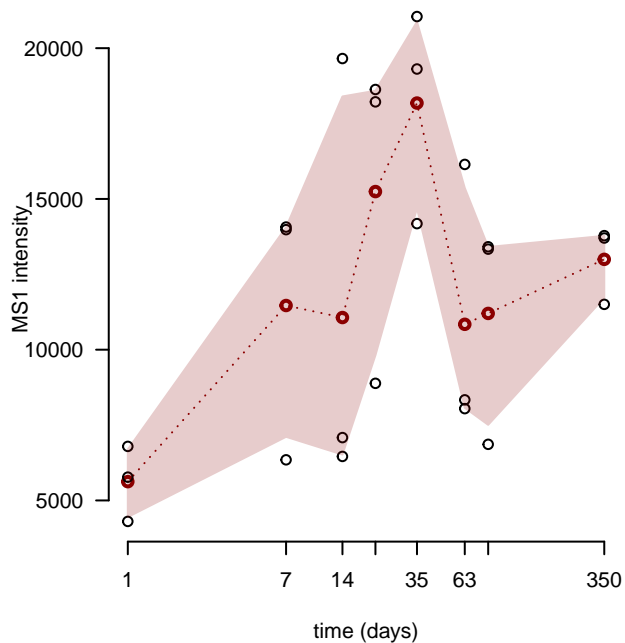

**Q9R1W5**  
**GN=Calcr1**  
calcitonin receptor-like

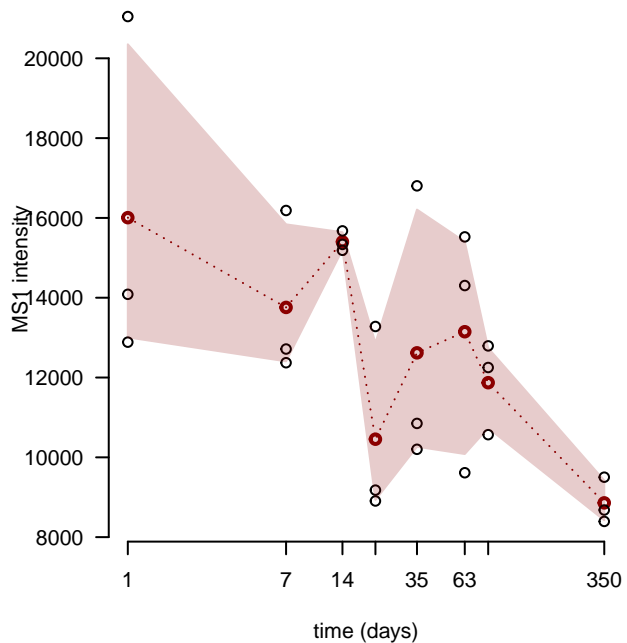

**Q9R1X4**  
**GN=Timeless**  
timeless circadian clock 1

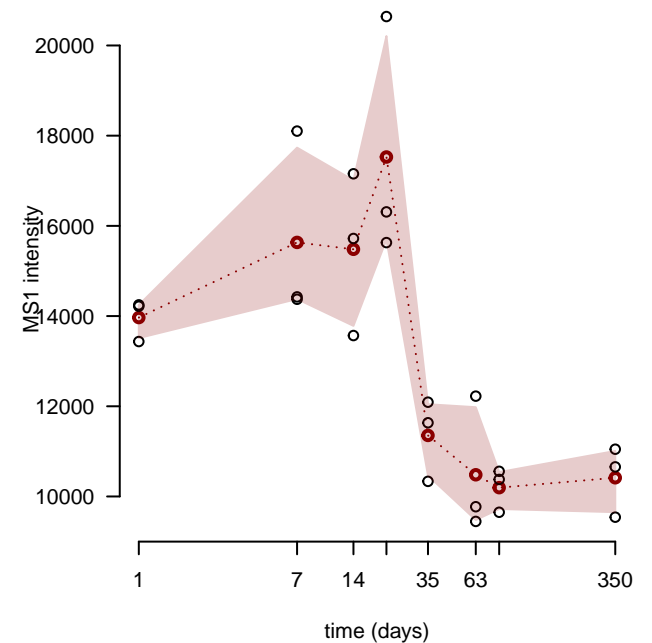

**Q9R1Y5**  
GN=Hic1  
hypermethylated in cancer 1

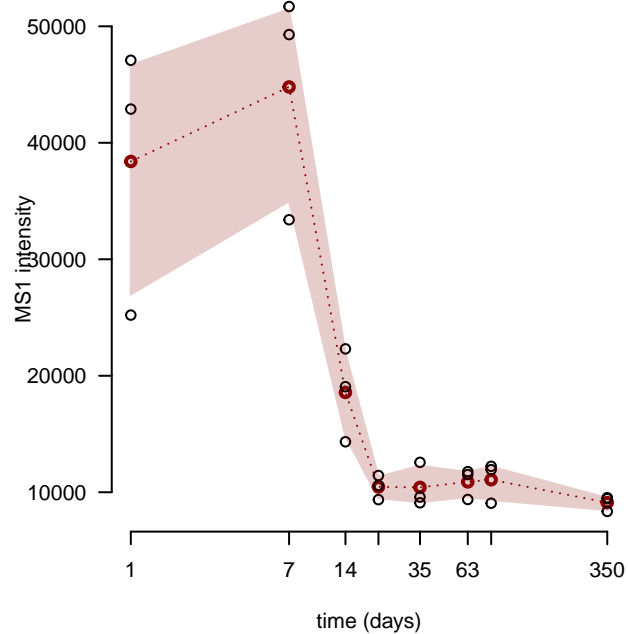

**Q9R1Z7**  
GN=Pts  
6-pyruvoyl-tetrahydropterin synthase

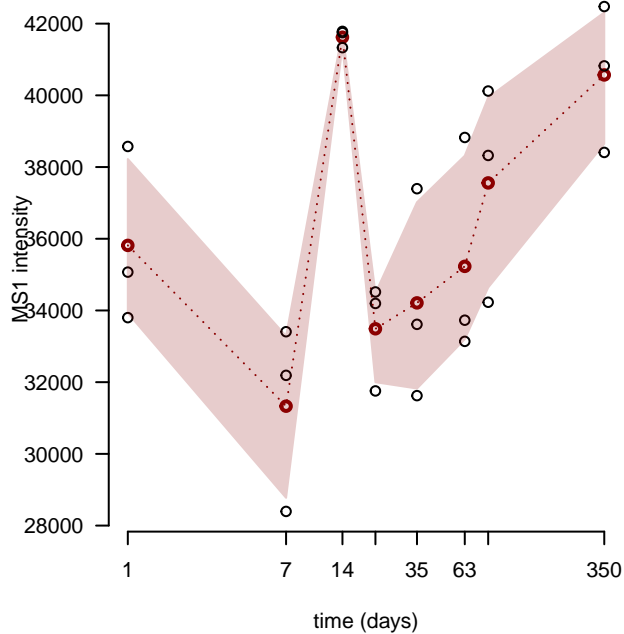

**Q9R1Z8**  
GN=Sorbs3  
sorbin and SH3 domain containing 3

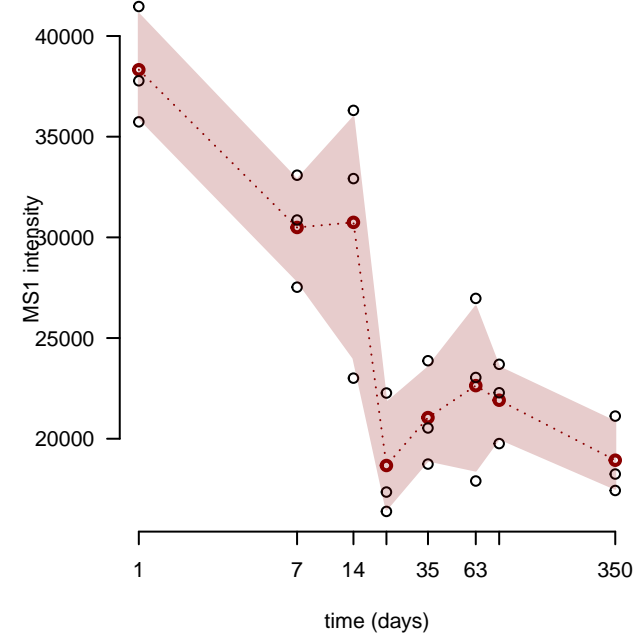

**Q9R207**  
GN=Nbn  
nibrin

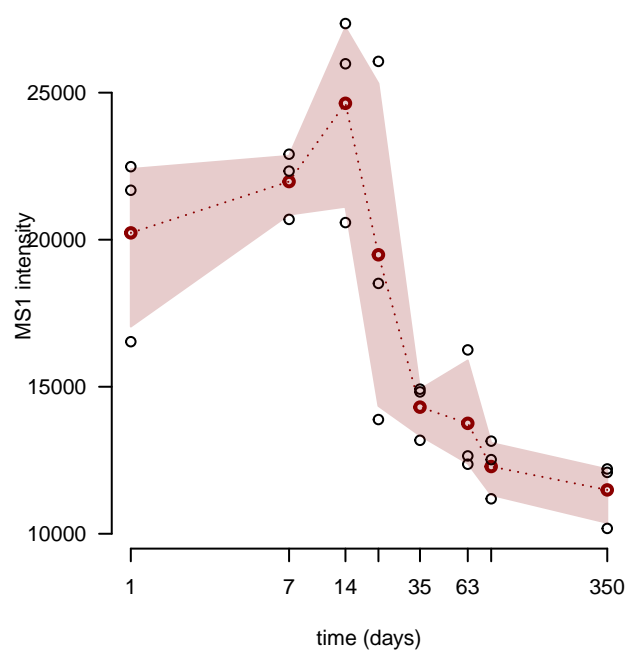

**Q9R210**  
GN=Tfeb  
transcription factor EB

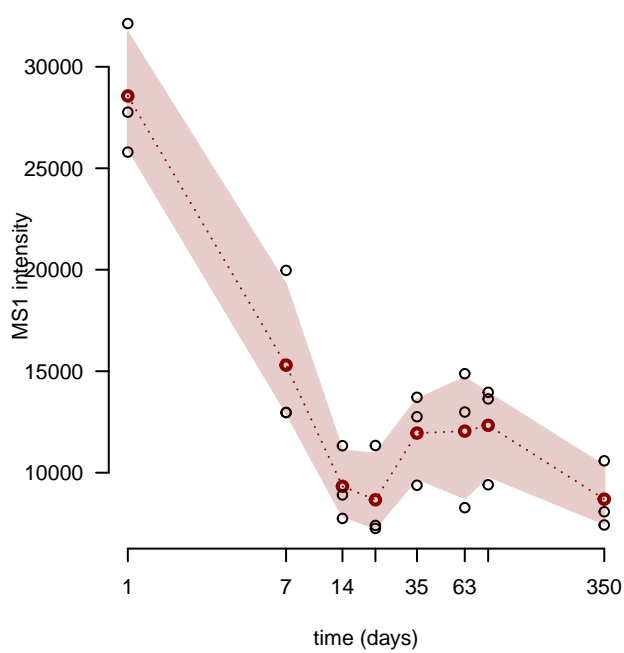

**Q9R226**  
GN=Khdrbs3  
KH domain containing, RNA binding, signa ...

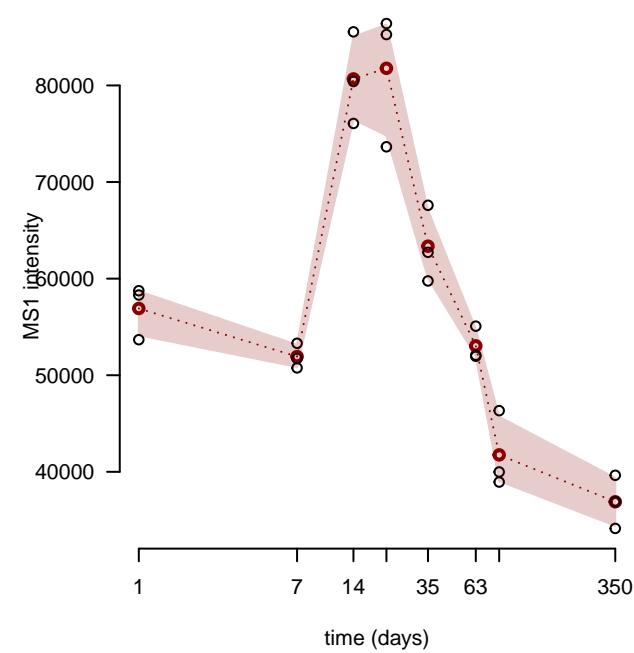

**Q9R233**  
GN=Tapbp  
TAP binding protein

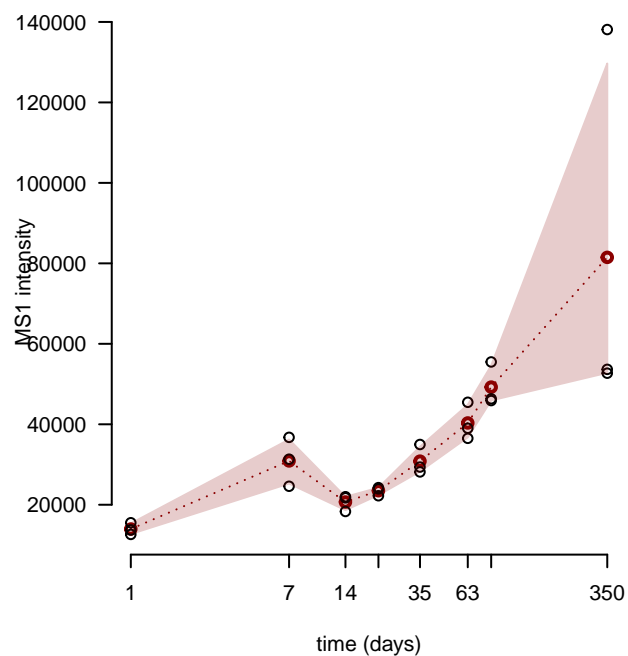

**Q9R257**  
GN=Hebp1  
heme binding protein 1

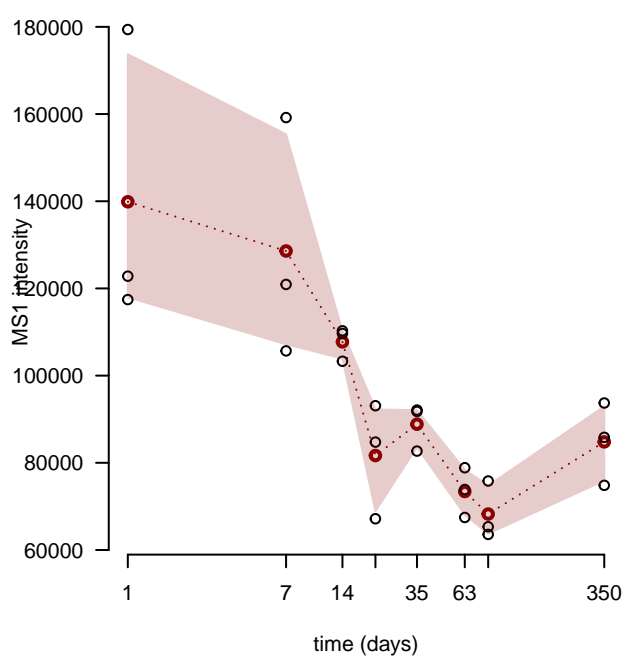

**Q9R269**  
GN=Ppl  
periplakin

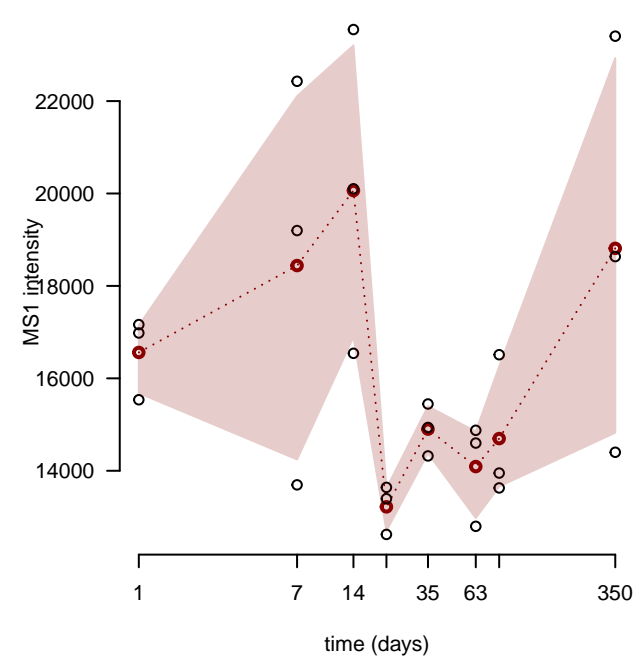



**Q9R2B6**  
**GN=St6galnac4**

ST6 (alpha-N-acetyl-neuraminy-2,3-beta-

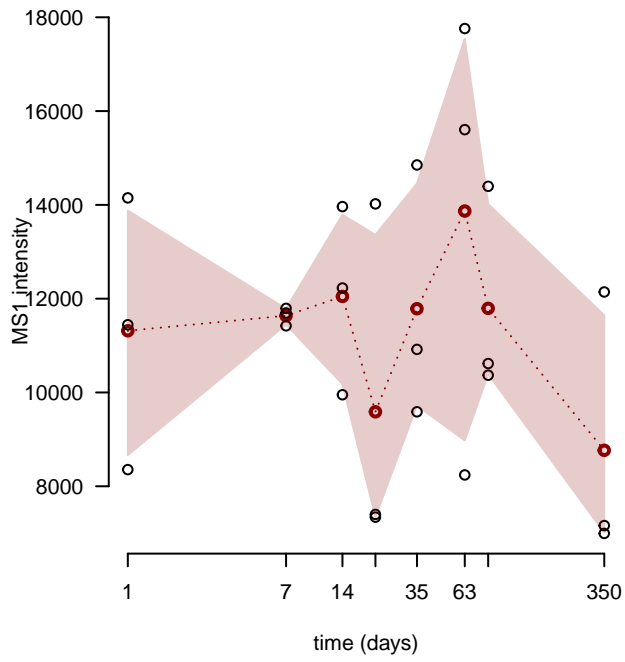

**Q9WT17**  
**GN=Myo1c**

myosin IC

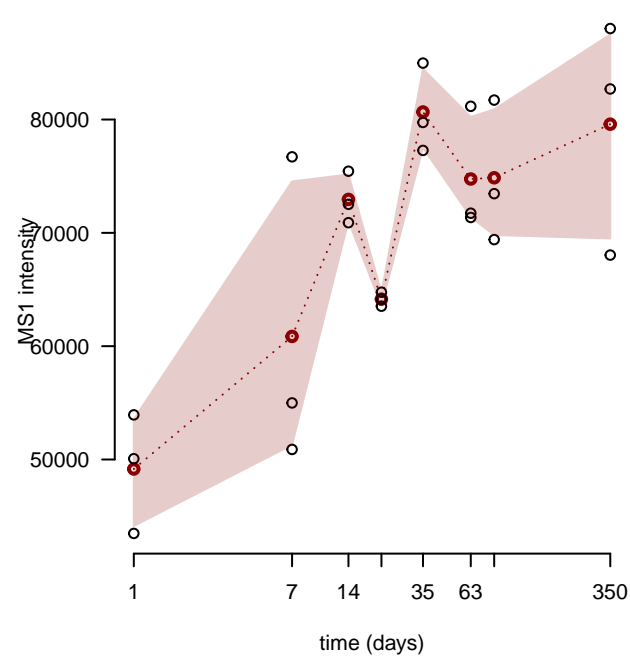

**Q9WT17**  
**GN=Myo1c**

myosin IC

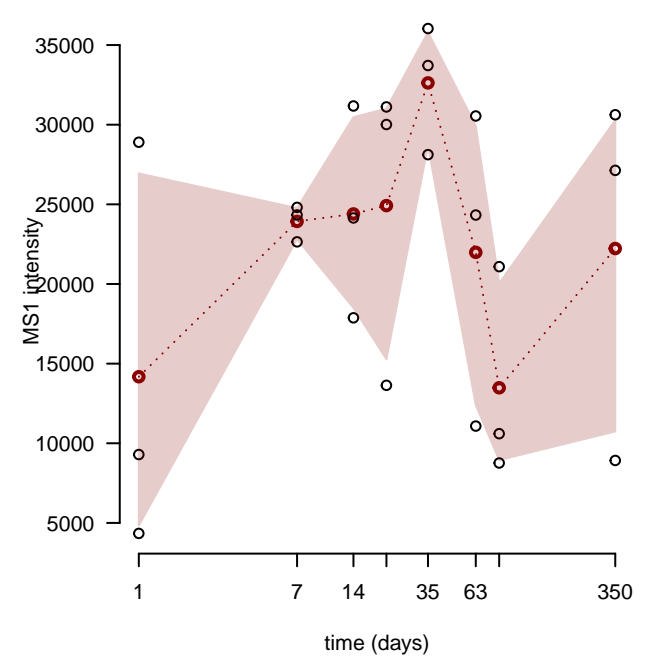

**Q9WT17**  
**GN=Myo1c**

myosin IC

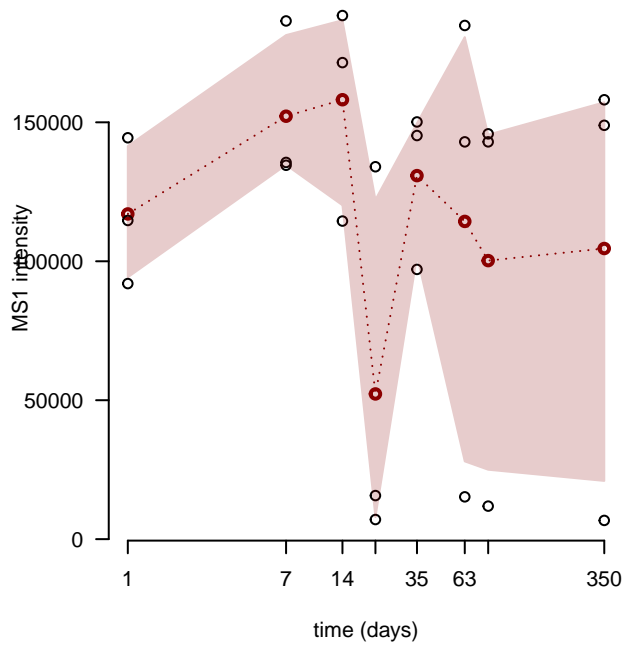

**Q9WTJ4**  
**GN=Fiz1**

Flt3 interacting zinc finger protein 1

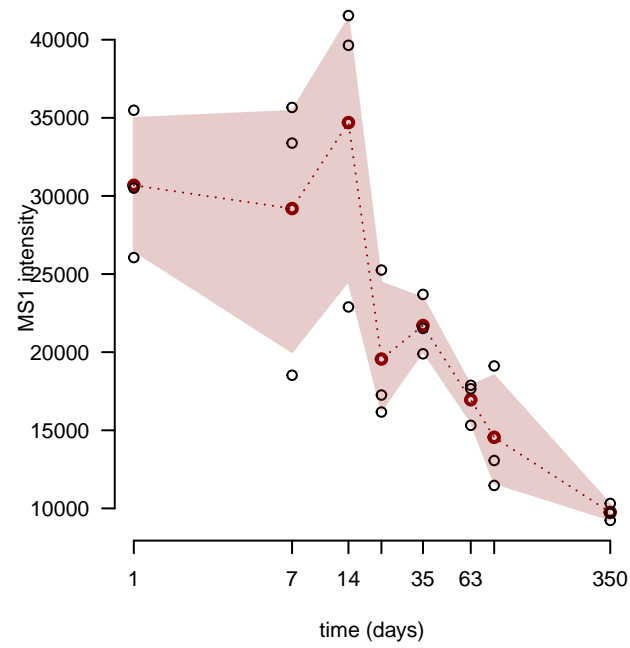

**Q9WTK2**  
**GN=Cdyl**

chromodomain protein, Y chromosome-like

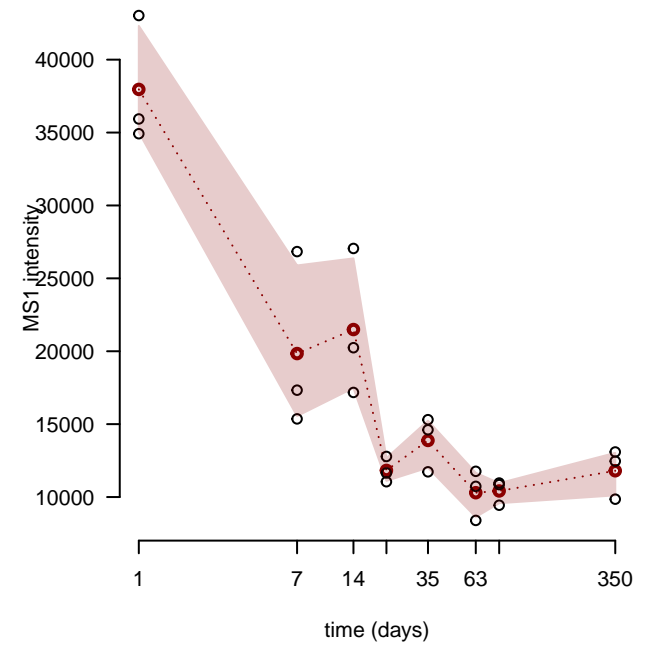

**Q9WTK3**  
**GN=Gpaa1**

GPI anchor attachment protein 1

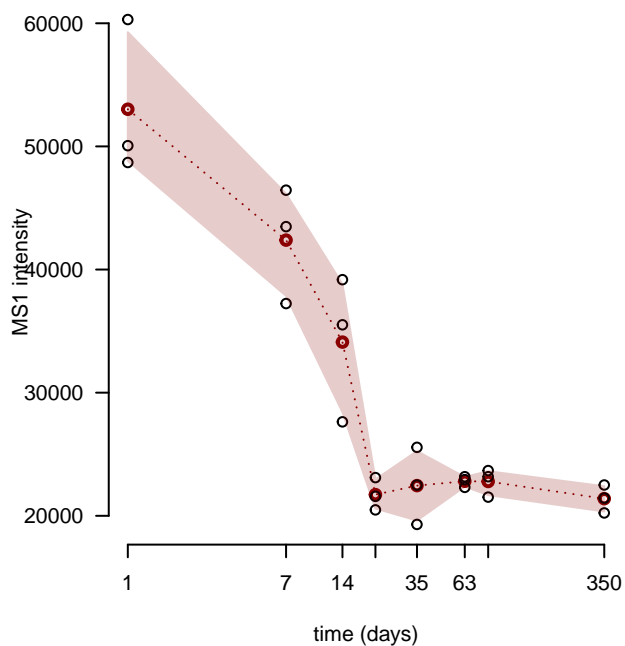

**Q9WTK5**  
**GN=Nfkb2**

nuclear factor of kappa light polypeptid ...

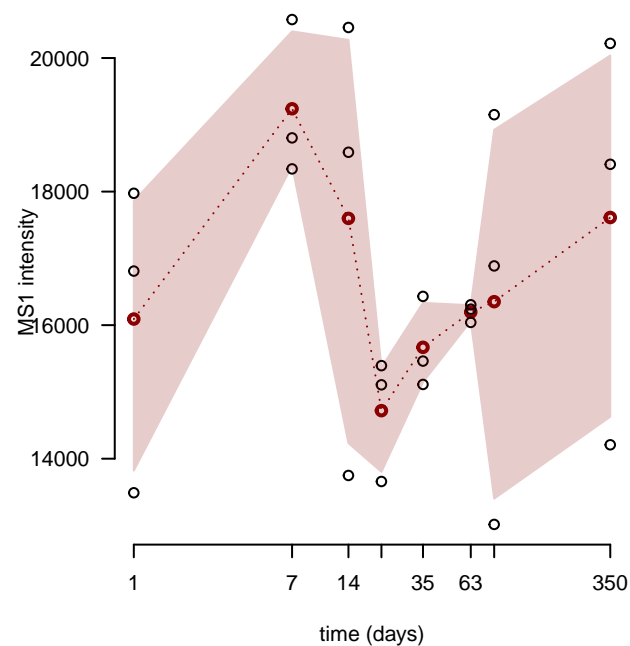

**Q9WTK7**  
**GN=Stk11**

serine/threonine kinase 11

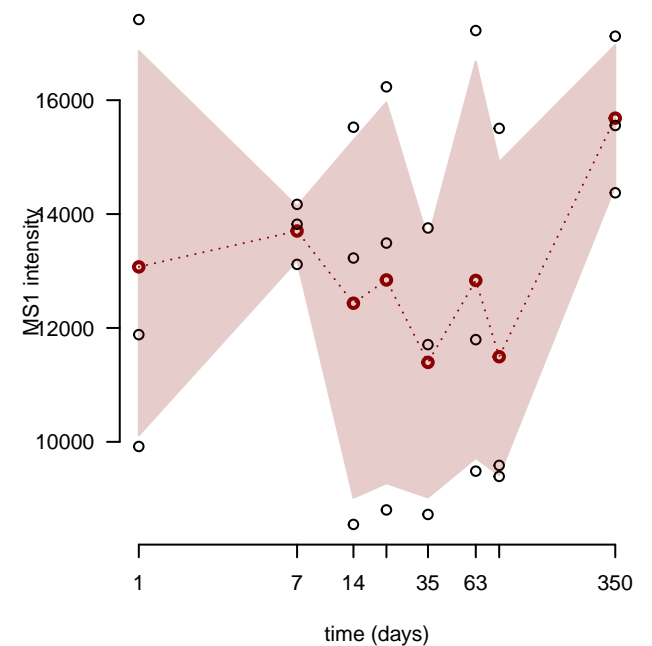

**Q9WTL4**  
**GN=Insrr**  
insulin receptor-related receptor

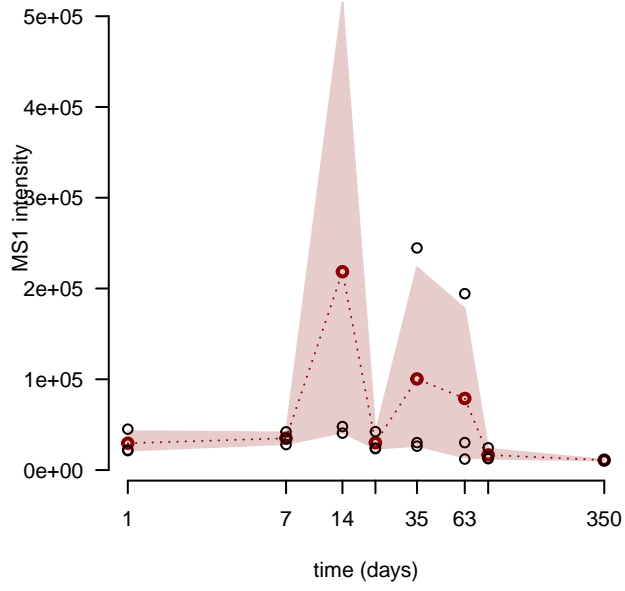

**Q9WTL7**  
**GN=Lypla2**  
lysophospholipase 2

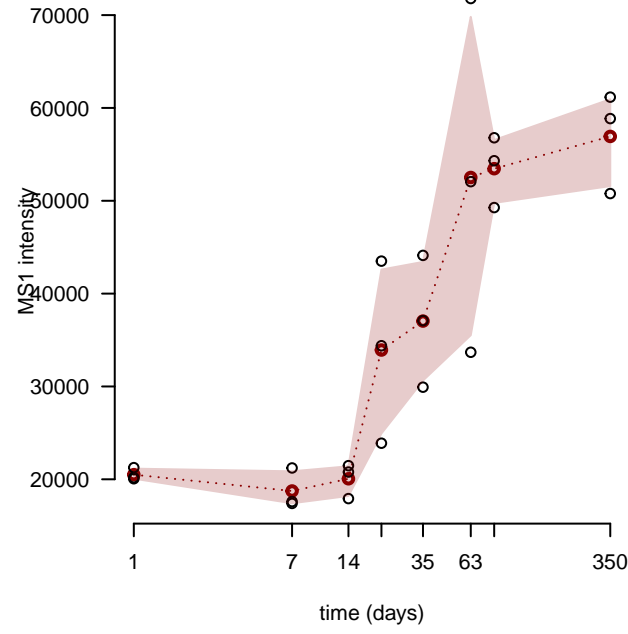

**Q9WTM5**  
**GN=Ruvbl2**  
RuvB-like protein 2

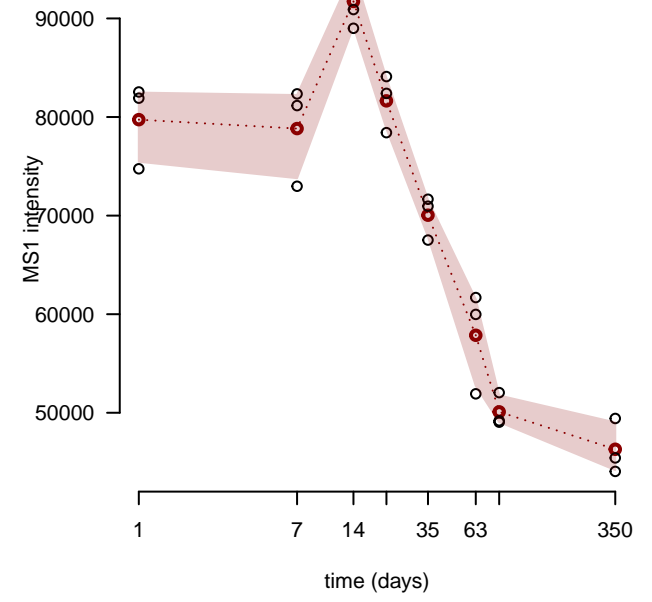

**Q9WTN0**  
**GN=Ggps1**  
geranylgeranyl diphosphate synthase 1

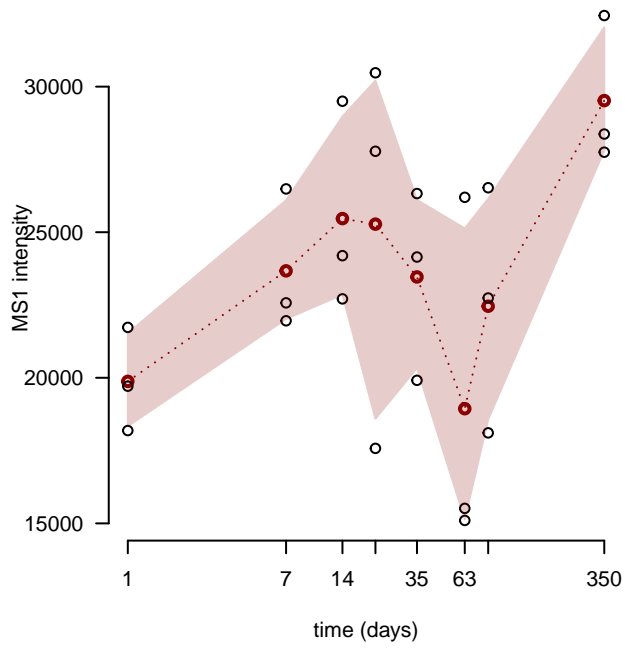

**Q9WTN3**  
**GN=Srebf1**  
sterol regulatory element binding transc ...

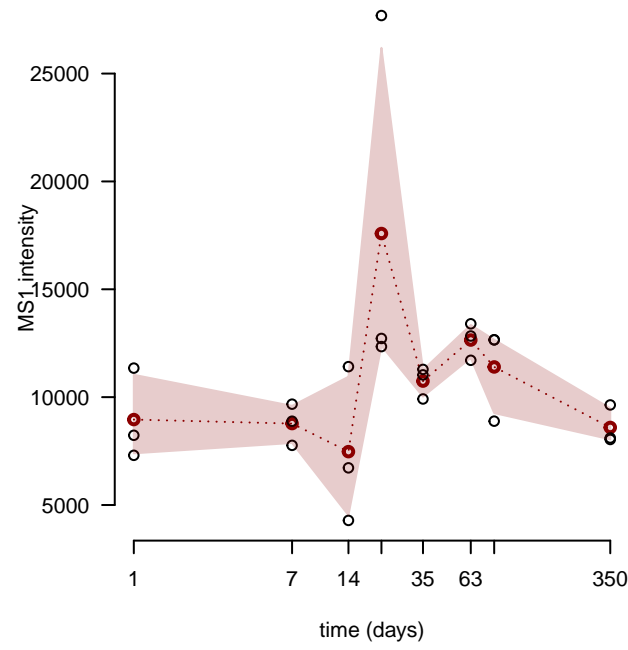

**Q9WTP6**  
**GN=Ak2**  
adenylate kinase 2

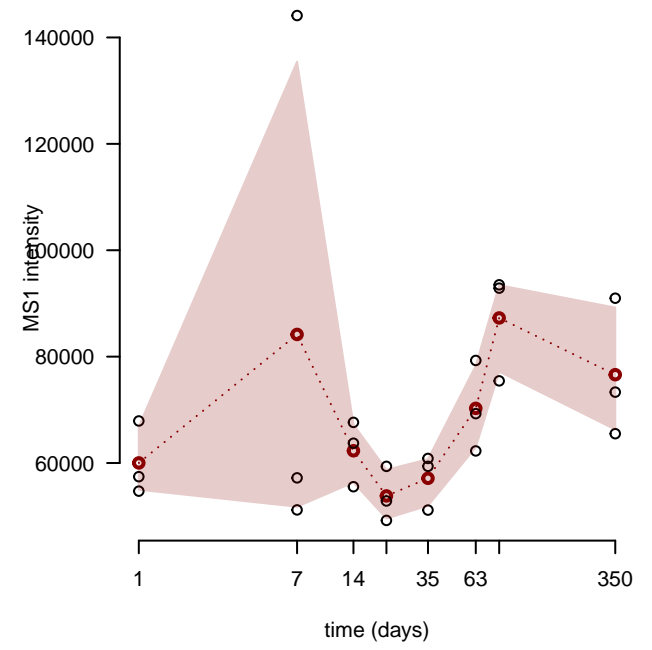

**Q9WTP7**  
**GN=Ak3**  
adenylate kinase 3

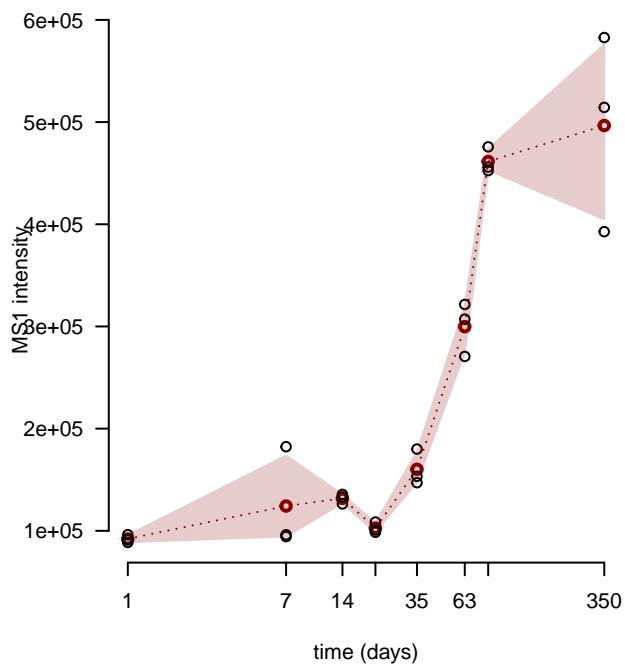

**Q9WTQ5**  
**GN=Akap12**  
A kinase (PRKA) anchor protein (gravin) ...

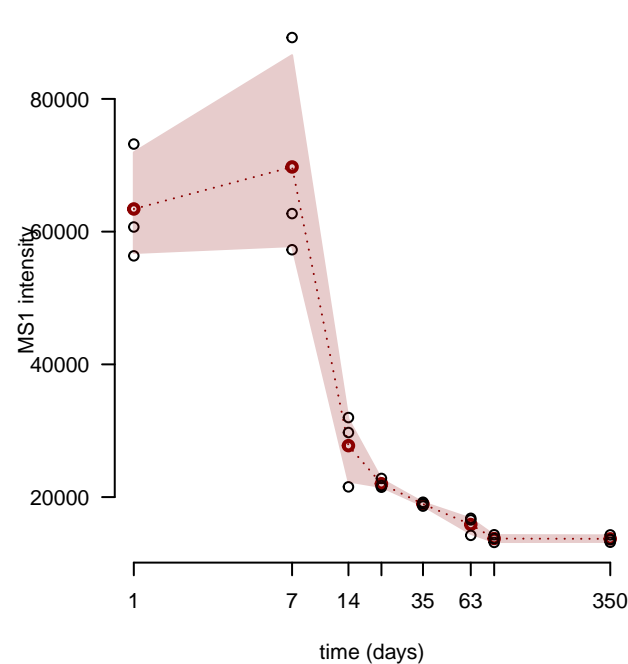

**Q9WTQ8**  
**GN=Timm23**  
translocase of inner mitochondrial membr ...

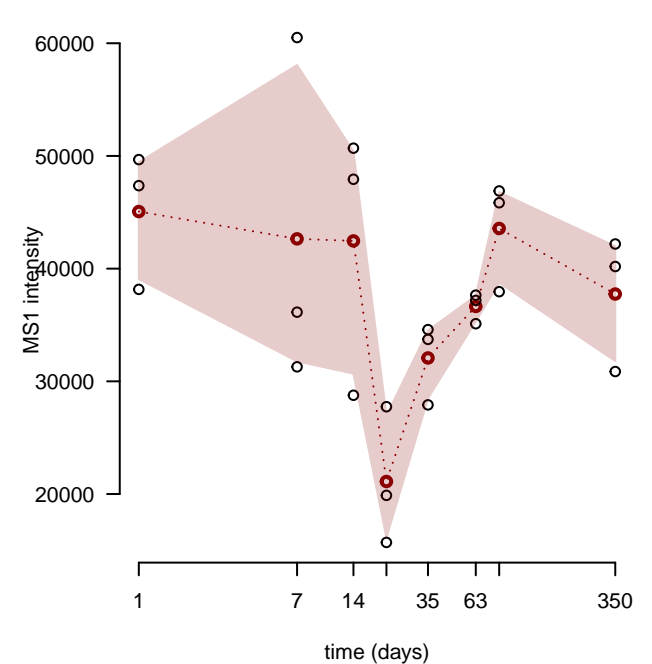

**Q9WTR1**  
GN=Trpv2  
transient receptor potential cation chan ...

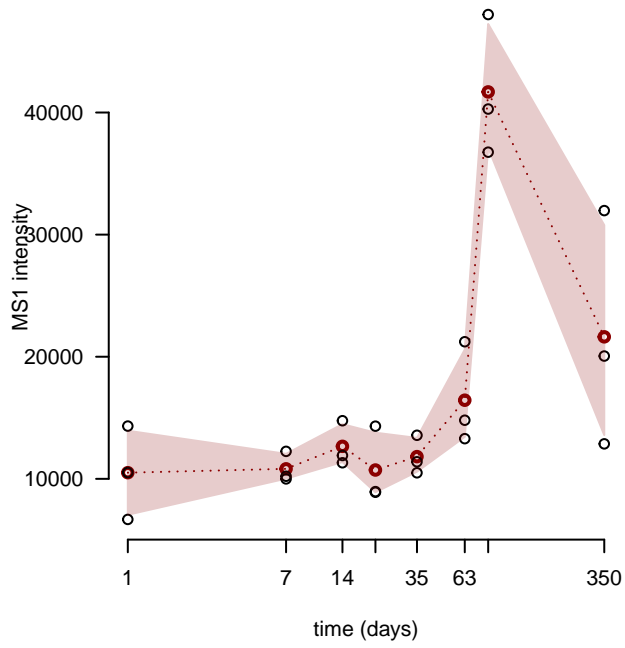

**Q9WTR5**  
GN=Cdh13  
cadherin 13

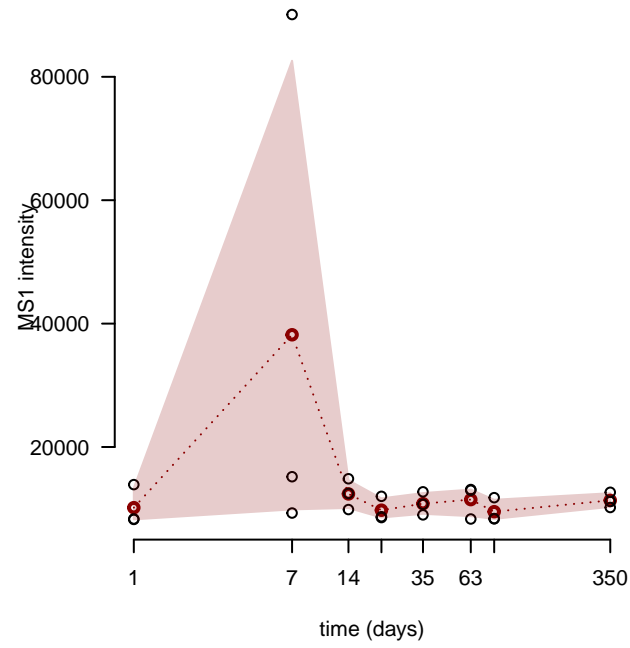

**Q9WTS2**  
GN=Fut8  
fucosyltransferase 8

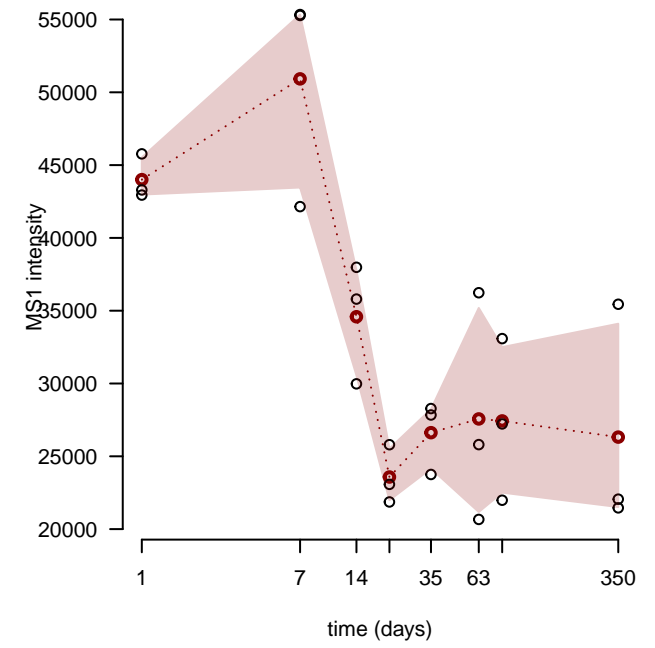

**Q9WTU0**  
GN=Phf2  
PHD finger protein 2

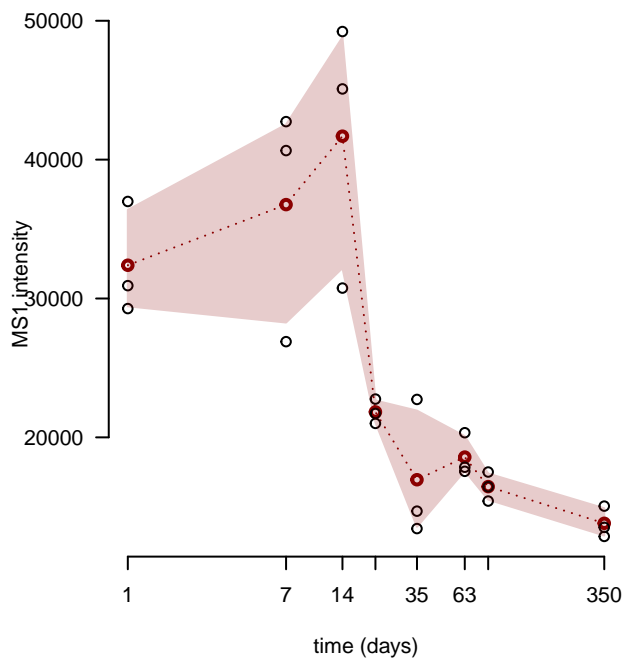

**Q9WTU6**  
GN=Mapk9  
mitogen-activated protein kinase 9

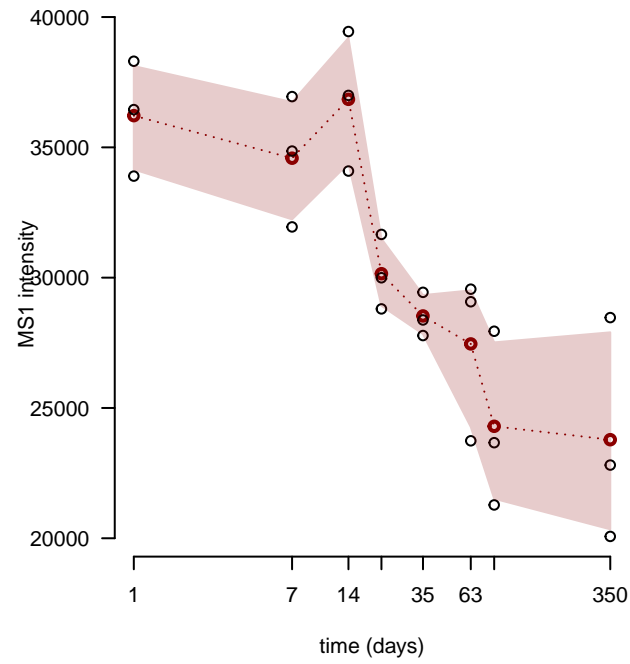

**Q9WTV7**  
GN=Rlim  
ring finger protein, LIM domain interact ...

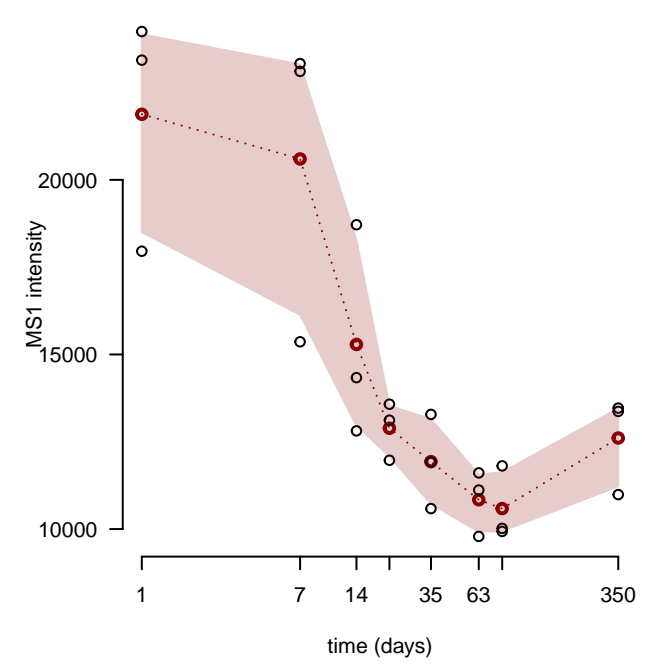

**Q9WTX2**  
GN=Prka  
protein kinase, interferon inducible dou ...

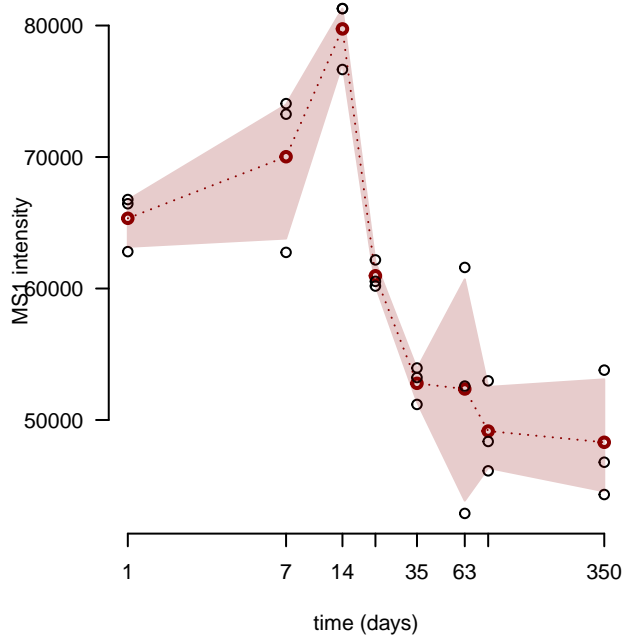

**Q9WTX5**  
GN=Skp1  
S-phase kinase-associated protein 1

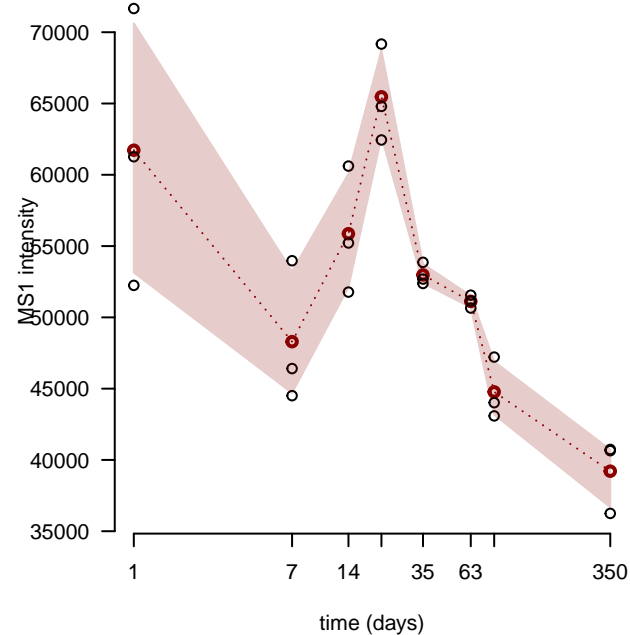

**Q9WTX6**  
GN=Cul1  
cullin 1

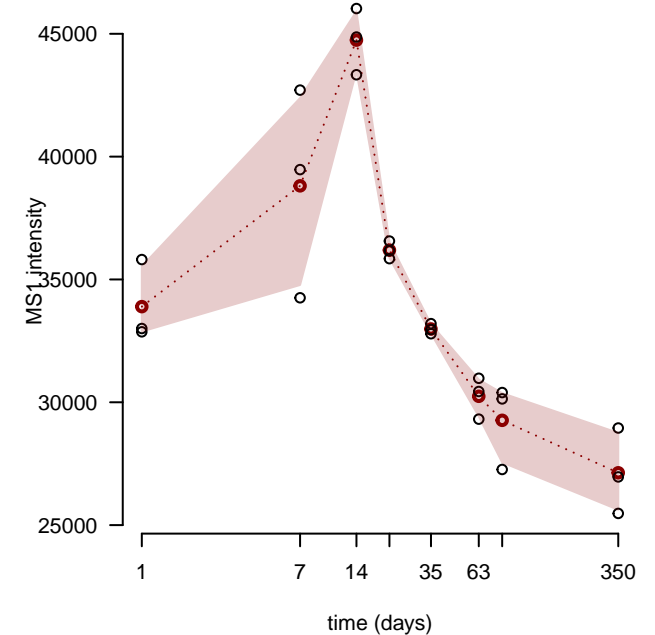

**Q9WTX8**  
**GN=Mad11**  
MAD1 mitotic arrest deficient 1-like 1

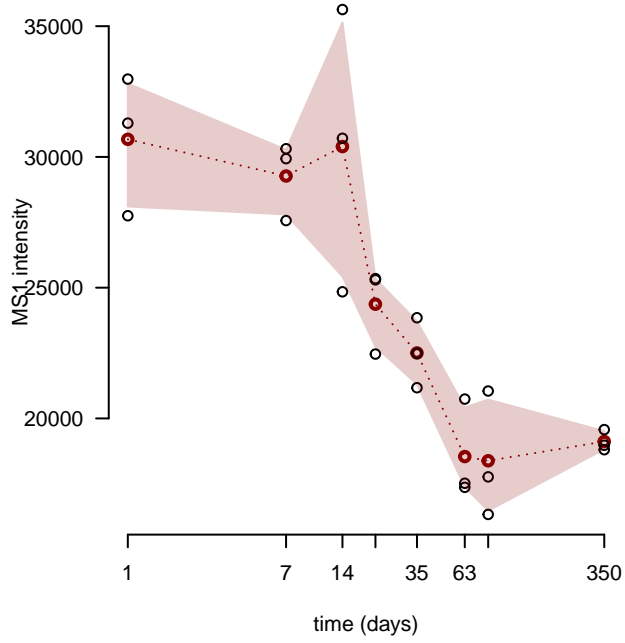

**Q9WTY1**  
**GN=Pdcd7**  
programmed cell death 7

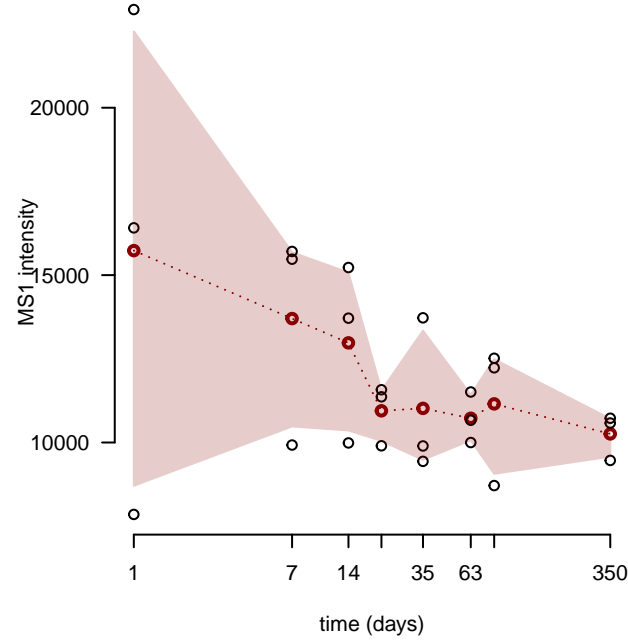

**Q9WTZ0**  
**GN=Uxt**  
ubiquitously expressed prefoldin like ch ...

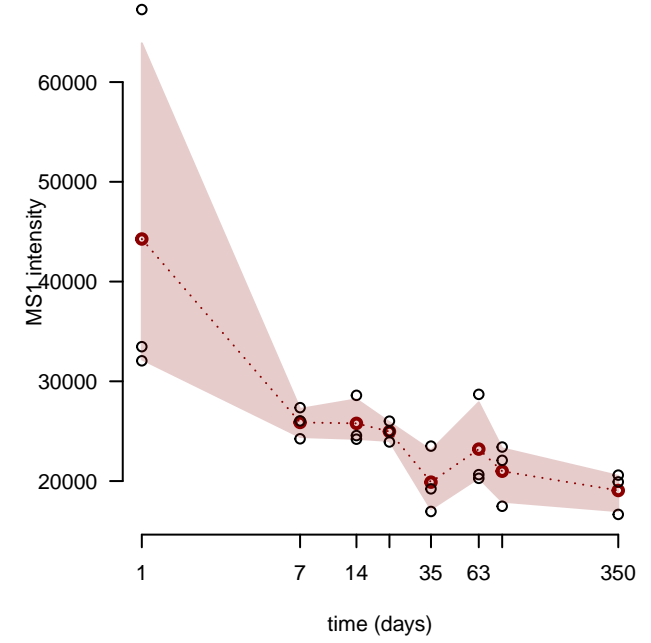

**Q9WTZ1**  
**GN=Rnf7**  
ring finger protein 7

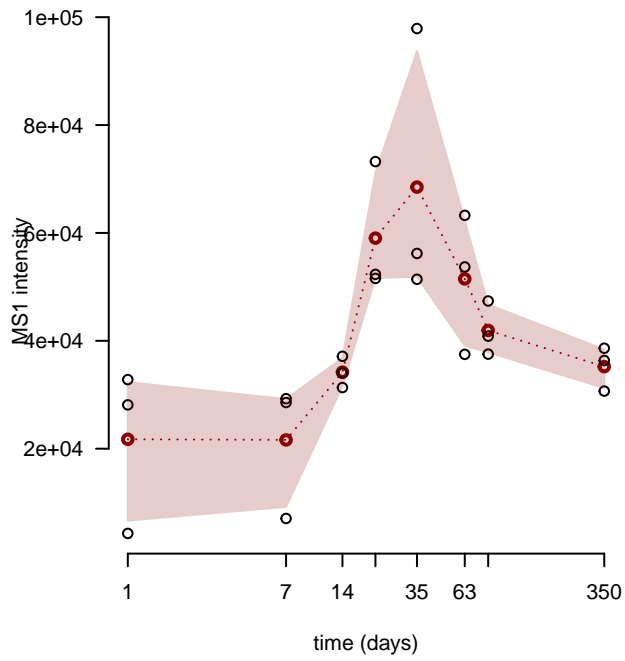

**Q9WTZ2**  
**GN=Mbtps1**  
membrane-bound transcription factor pept ...

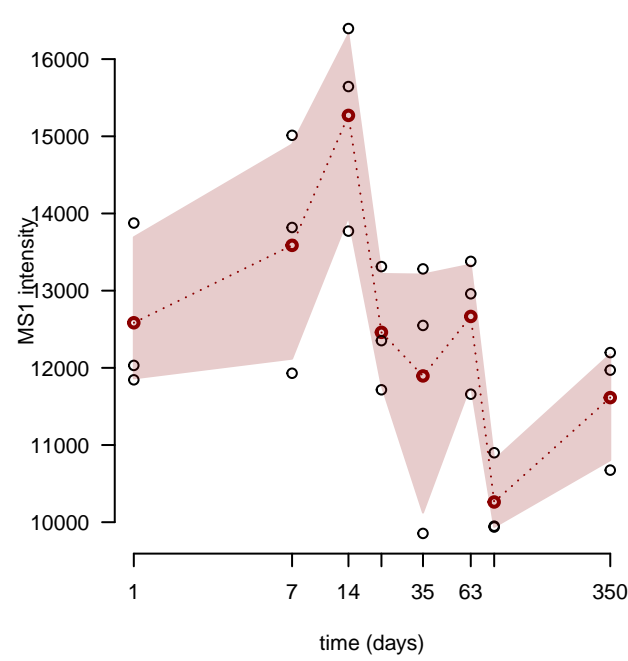

**Q9WU00**  
**GN=Nrf1**  
nuclear respiratory factor 1

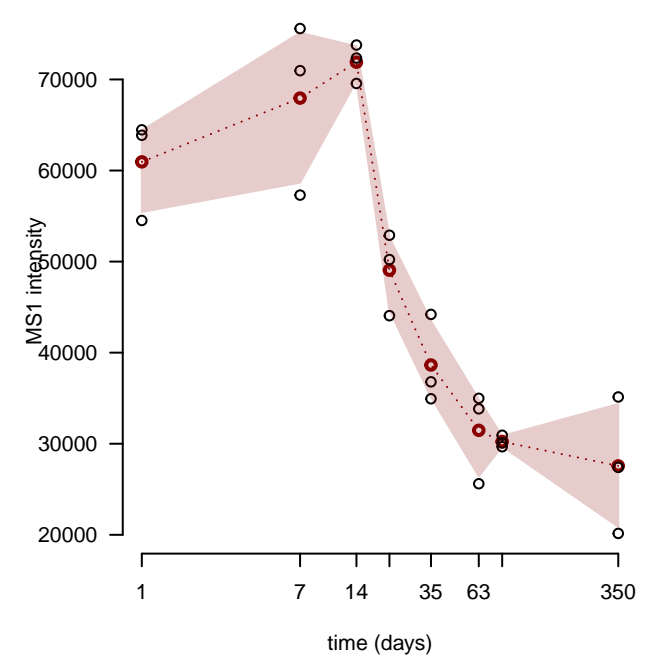

**Q9WU20**  
**GN=Mthfr**  
methylenetetrahydrofolate reductase

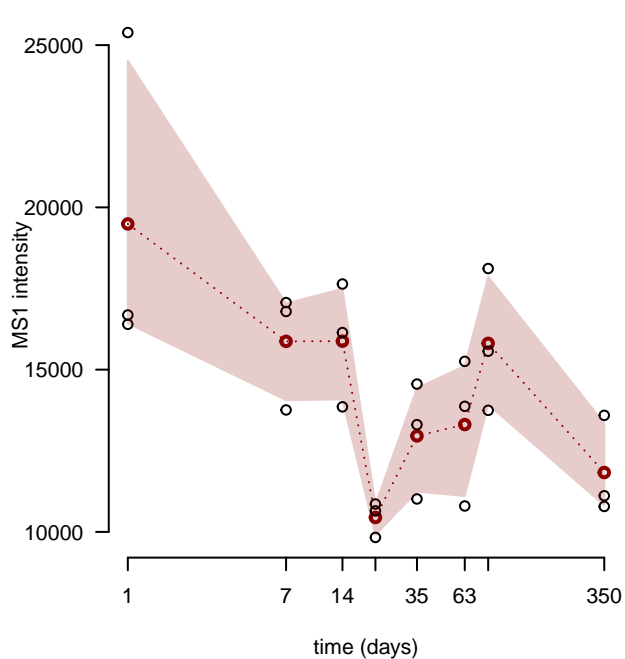

**Q9WU28**  
**GN=Pfdn5**  
prefoldin 5

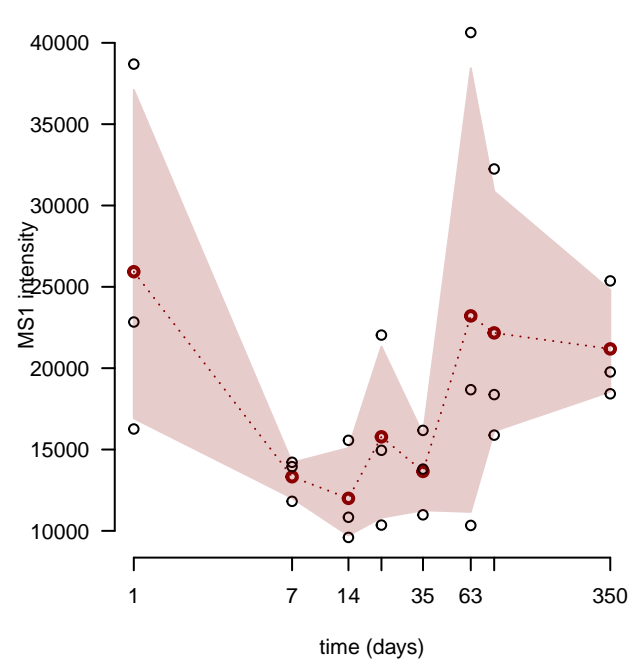

**Q9WU40**  
**GN=Lemd3**  
LEM domain containing 3

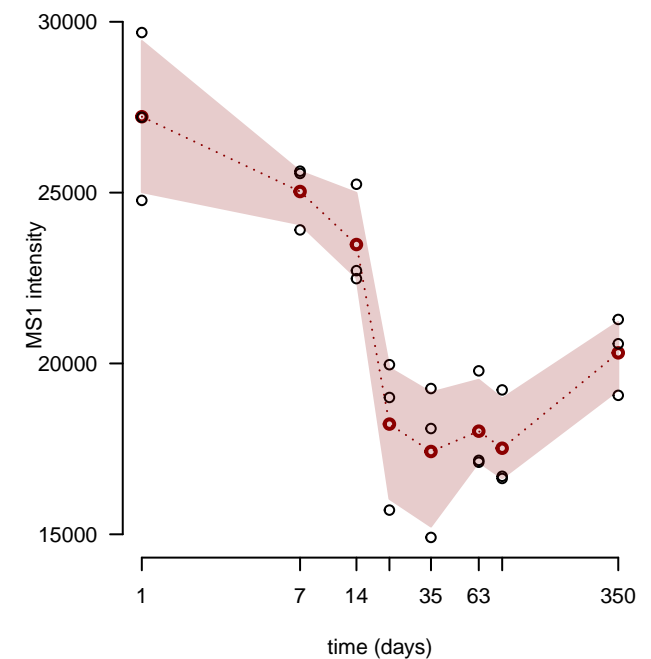

**Q9WU42**  
**GN=Ncor2**  
nuclear receptor co-repressor 2

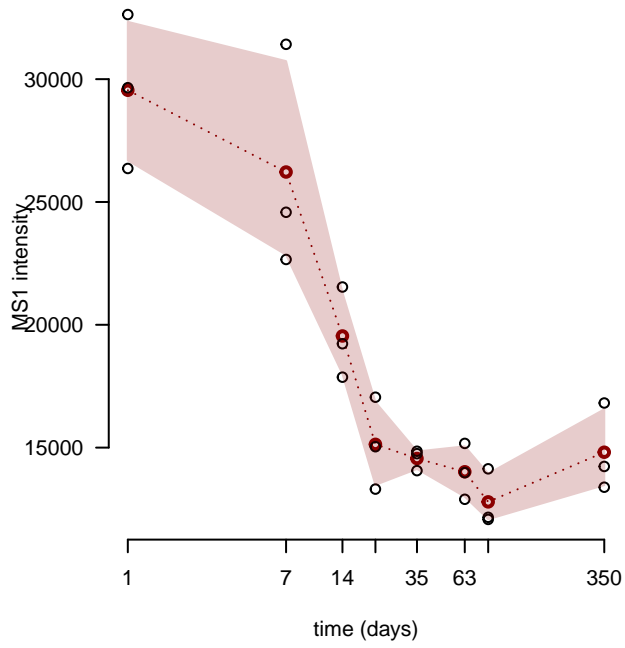

**Q9WU56**  
**GN=Pus1**  
pseudouridine synthase 1

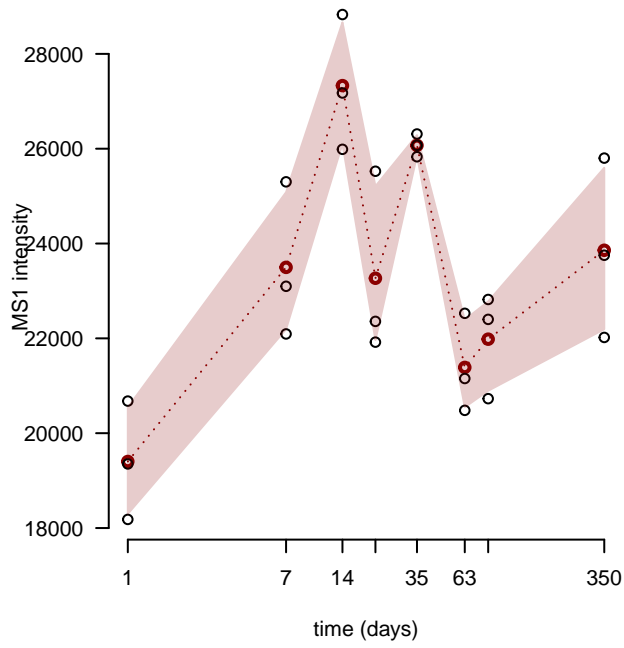

**Q9WU60**  
**GN=Atrn**  
attractin

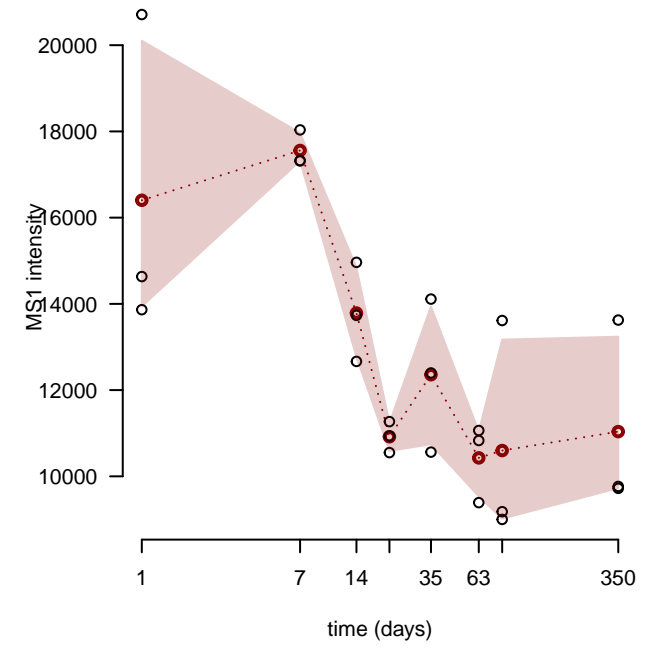

**Q9WU62**  
**GN=Incep**  
inner centromere protein

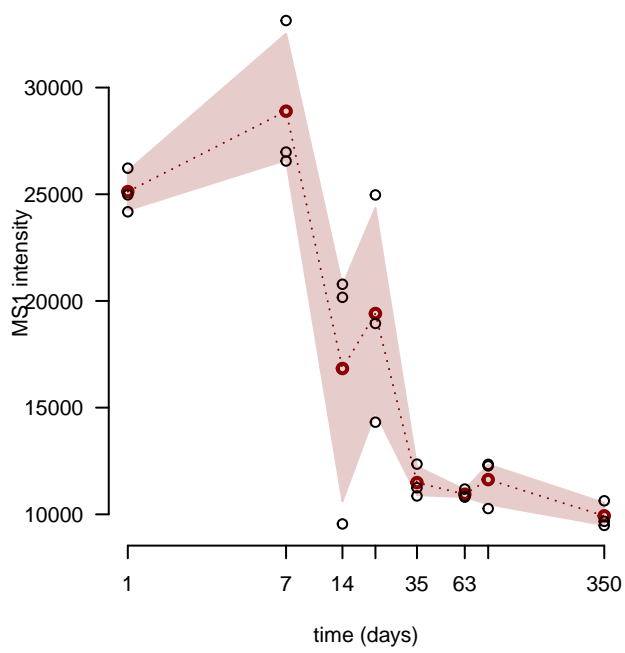

**Q9WU63**  
**GN=Hebp2**  
heme binding protein 2

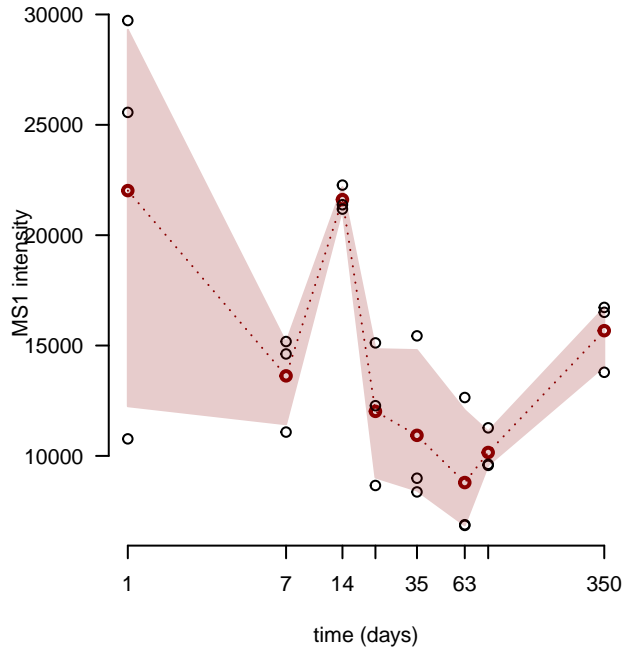

**Q9WU78**  
**GN=Pdcd6ip**  
programmed cell death 6 interacting prot ...

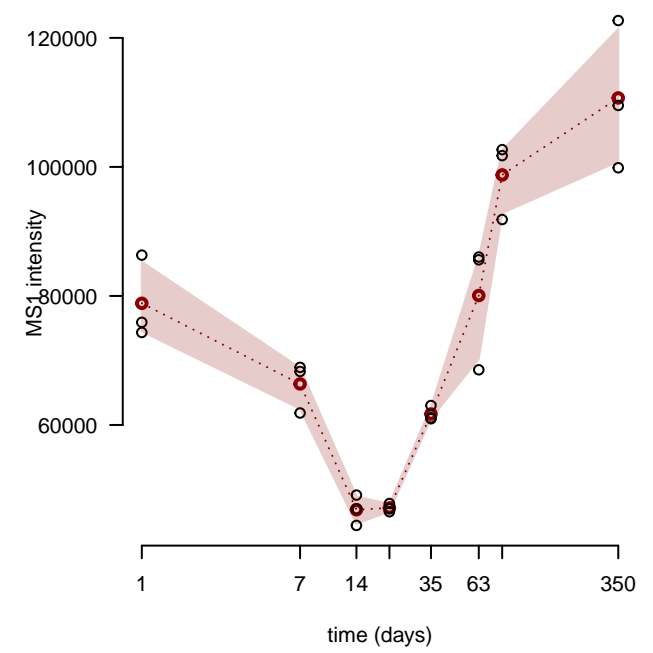

**Q9WU79**  
**GN=Prodh**  
proline dehydrogenase

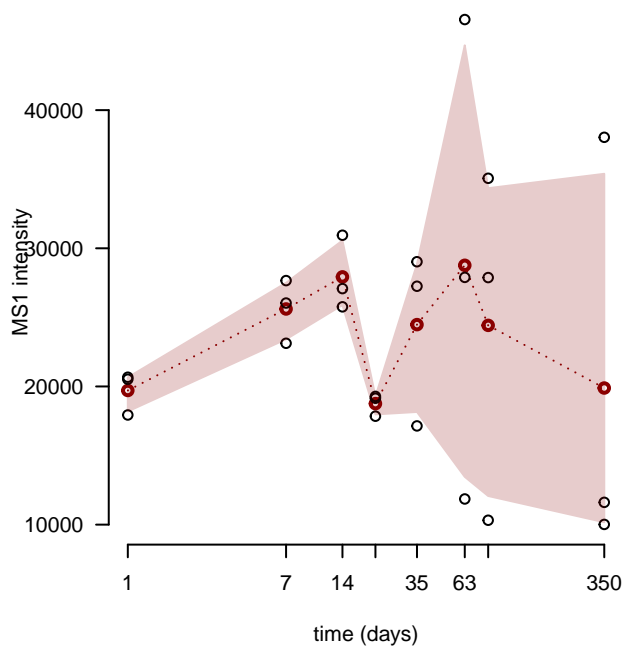

**Q9WU81**  
**GN=Slc37a2**  
solute carrier family 37 (glycerol-3-pho ...

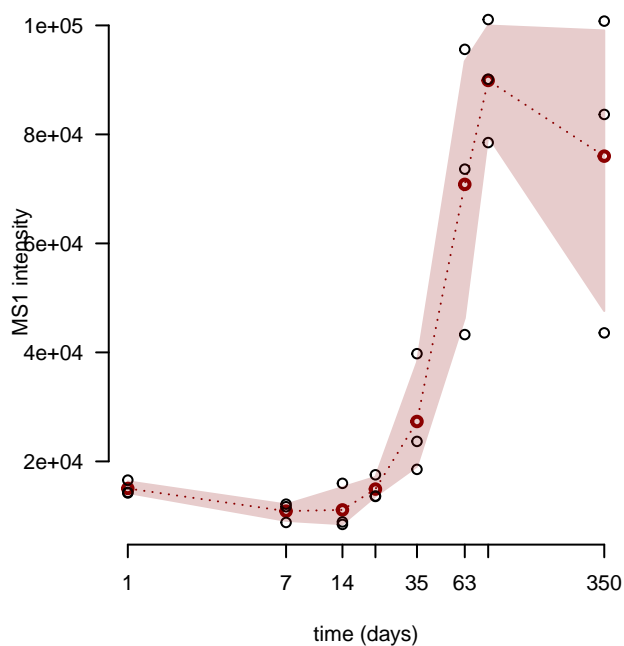

**Q9WU84**  
**GN=Ccs**  
copper chaperone for superoxide dismutas ...

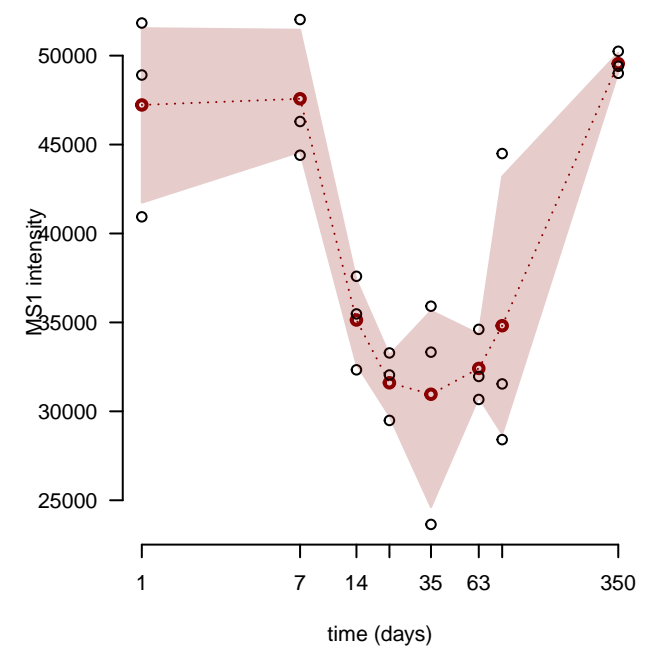

**Q9WUA2**  
GN=Farsb  
phenylalanyl-tRNA synthetase, beta subun ...

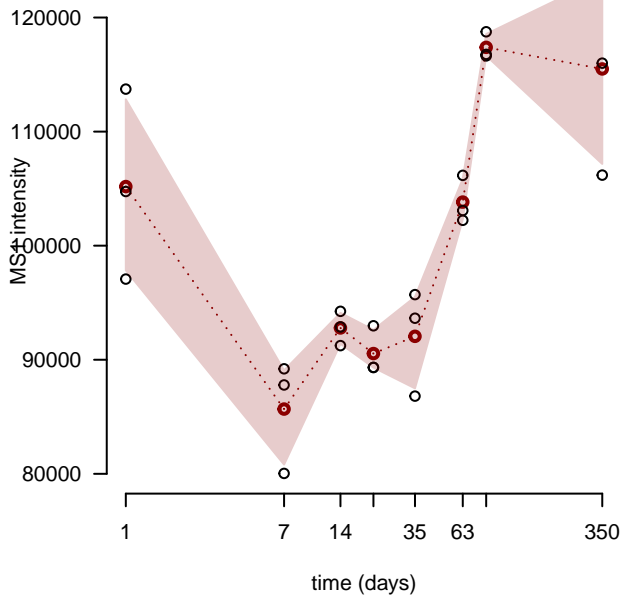

**Q9WUA3**  
GN=Pfkp  
phosphofructokinase, platelet

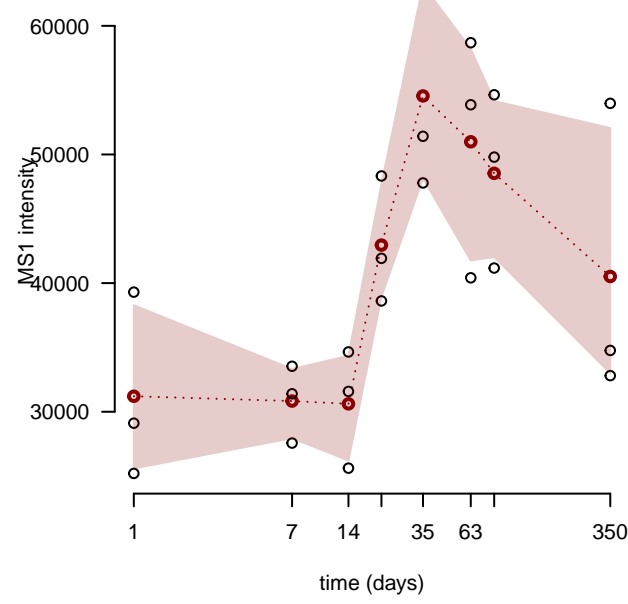

**Q9WUA6**  
GN=Akt3  
thymoma viral proto-oncogene 3

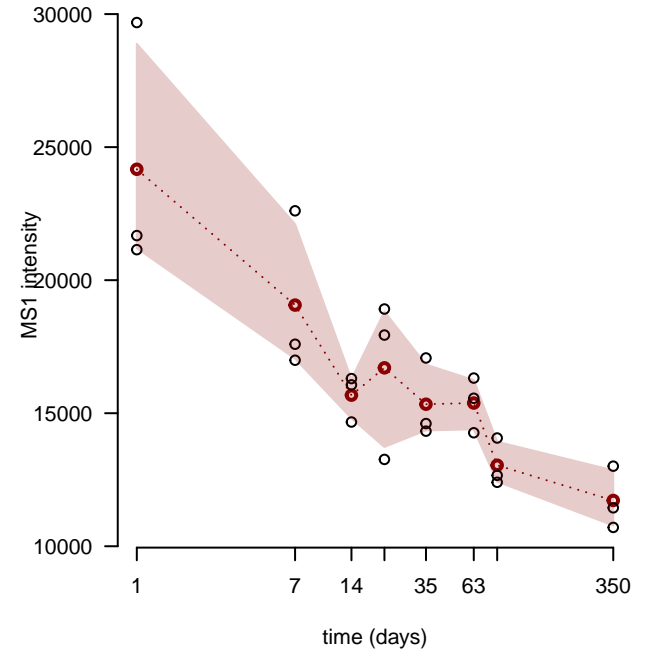

**Q9WUB0**  
GN=Rbck1  
RanBP-type and C3HC4-type zinc finger co ...

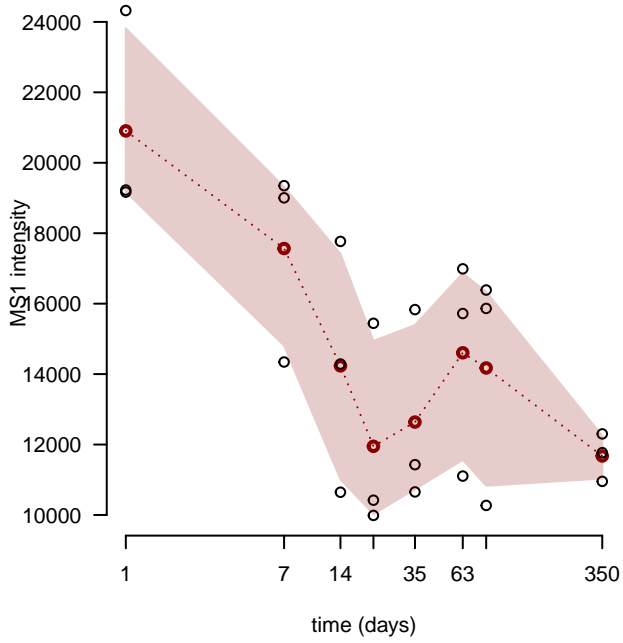

**Q9WUB3**  
GN=Pygm  
muscle glycogen phosphorylase

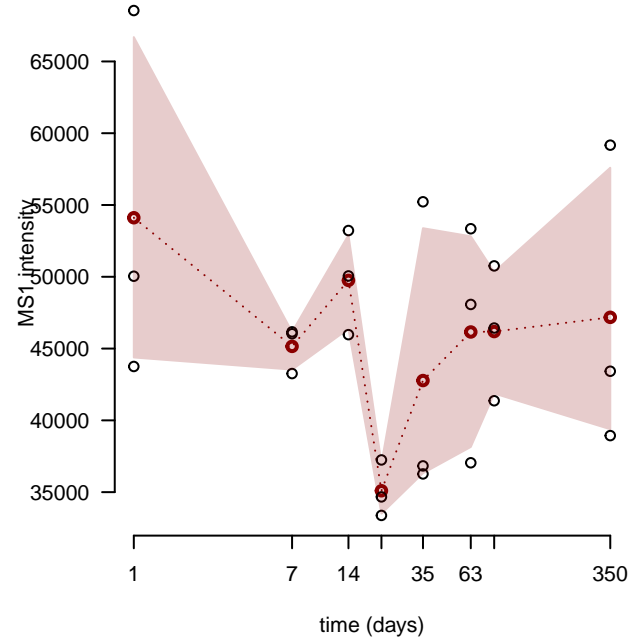

**Q9WUB4**  
GN=Dctn6  
dynactin 6

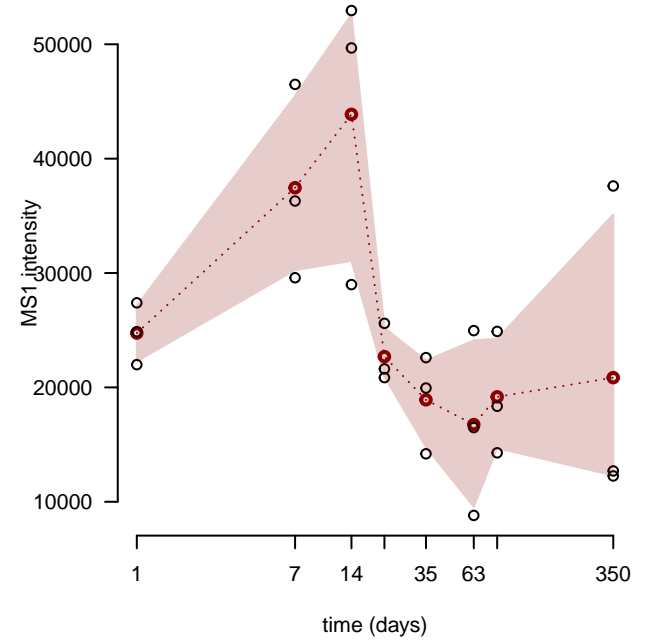

**Q9WUD1**  
GN=Stub1  
STIP1 homology and U-Box containing prot ...

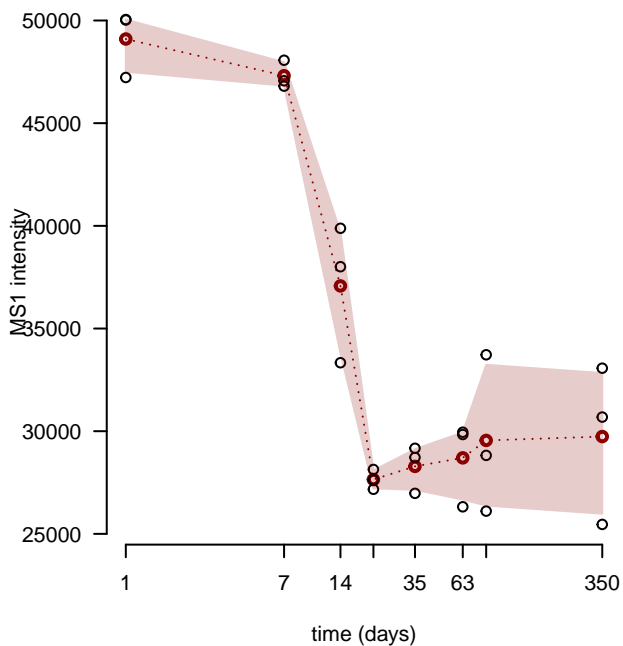

**Q9WUD8**  
GN=Faim  
Fas apoptotic inhibitory molecule

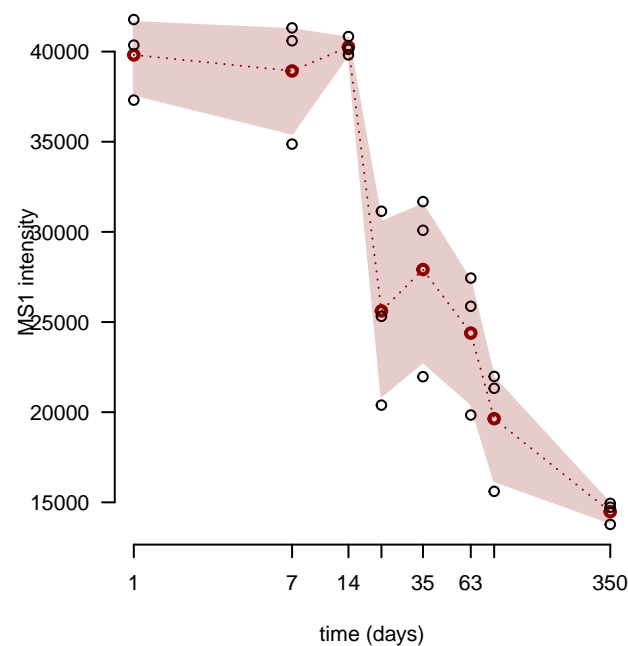

**Q9WUE3**  
GN=Cyb561d2  
cytochrome b-561 domain containing 2

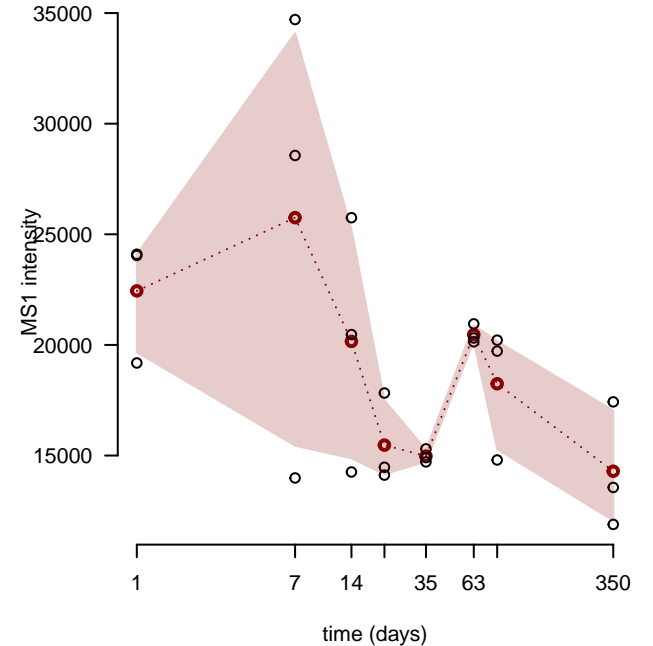

**Q9WUE4**  
**GN=Npr12**  
NPR2 like, GATOR1 complex subunit

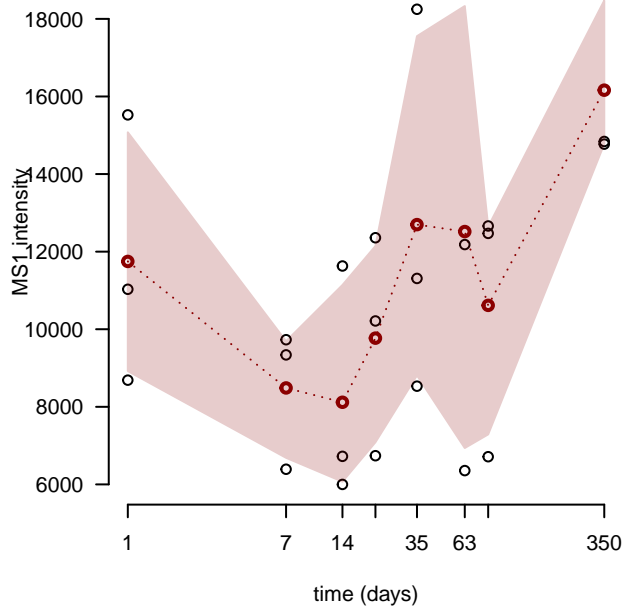

**Q9WUF3**  
**GN=Casp8ap2**  
caspase 8 associated protein 2

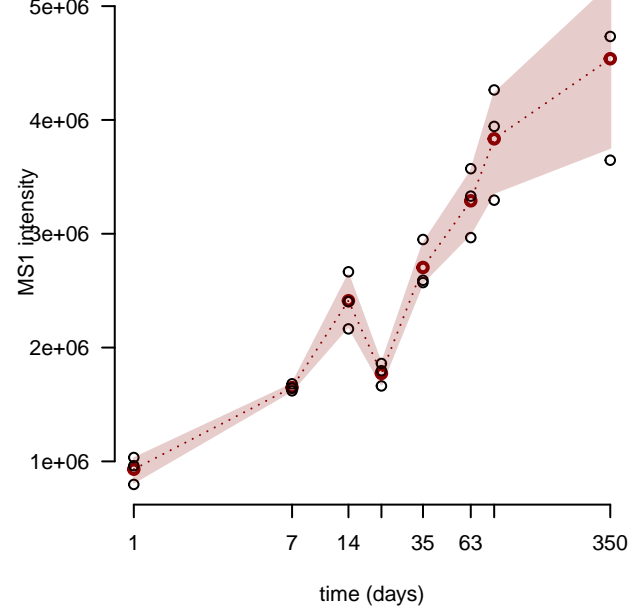

**Q9WUH1**  
**GN=Tmem115**  
transmembrane protein 115

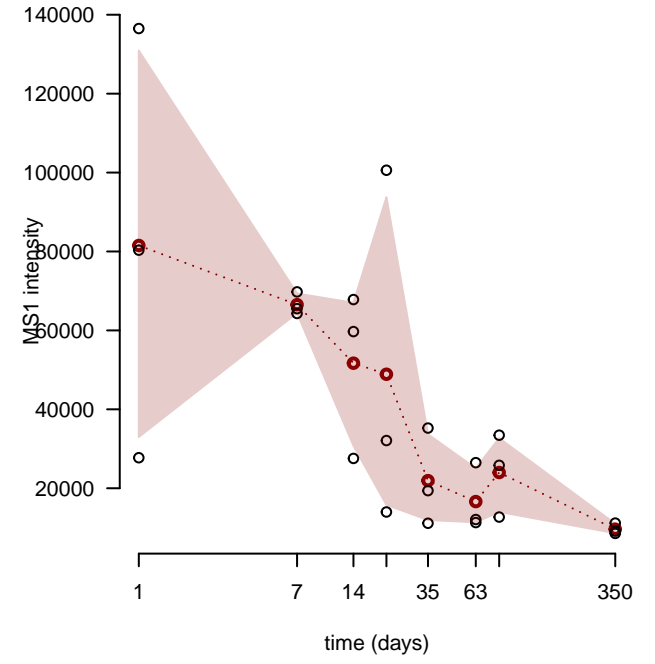

**Q9WUJ8**  
**GN=Orc6**  
origin recognition complex, subunit 6

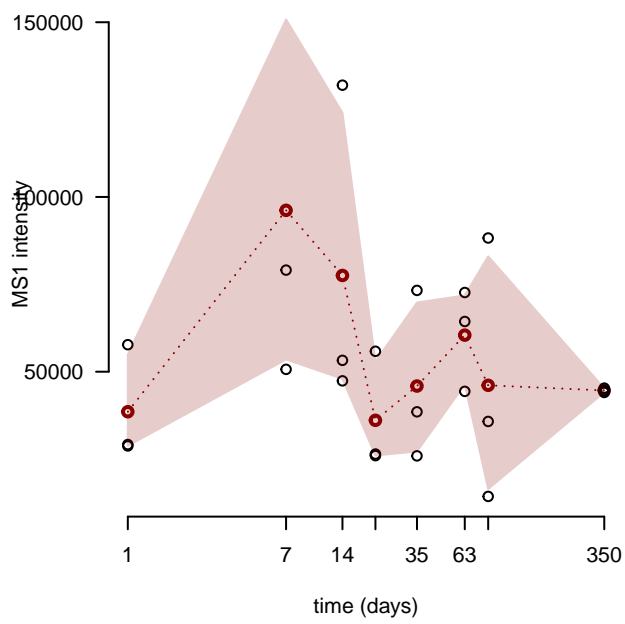

**Q9WUK2**  
**GN=Eif4h**  
eukaryotic translation initiation factor ...

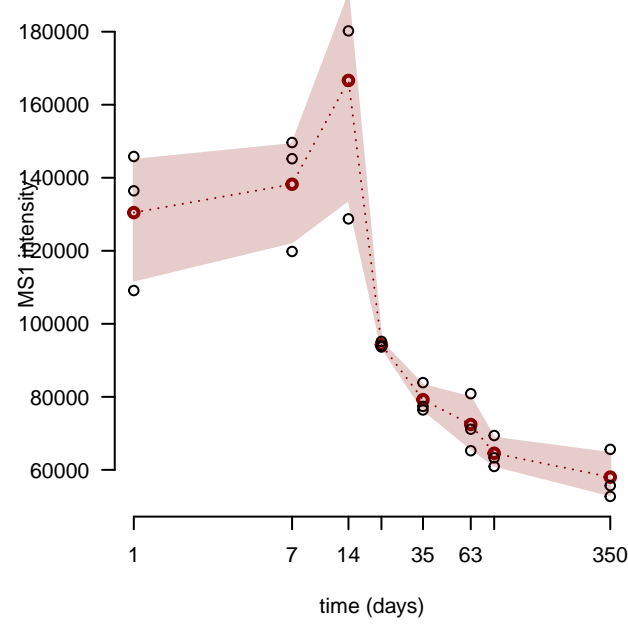

**Q9WUK4**  
**GN=Rfc2**  
replication factor C (activator 1) 2

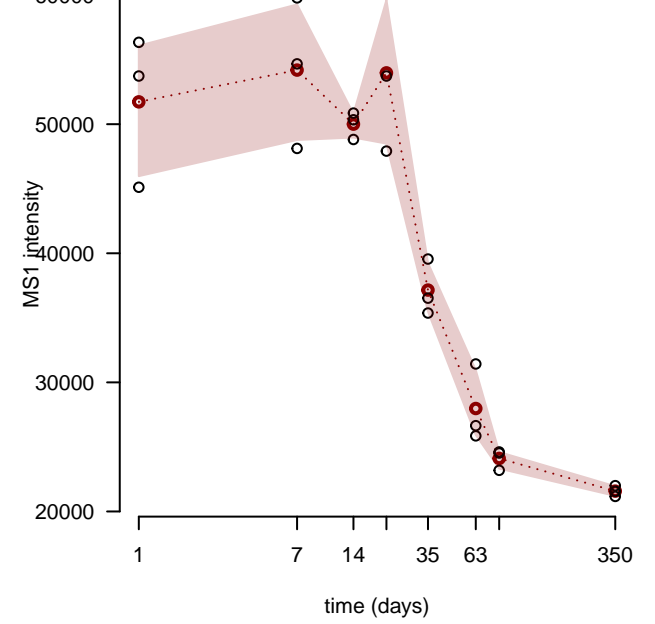

**Q9WUL7**  
**GN=Arl3**  
ADP-ribosylation factor-like 3

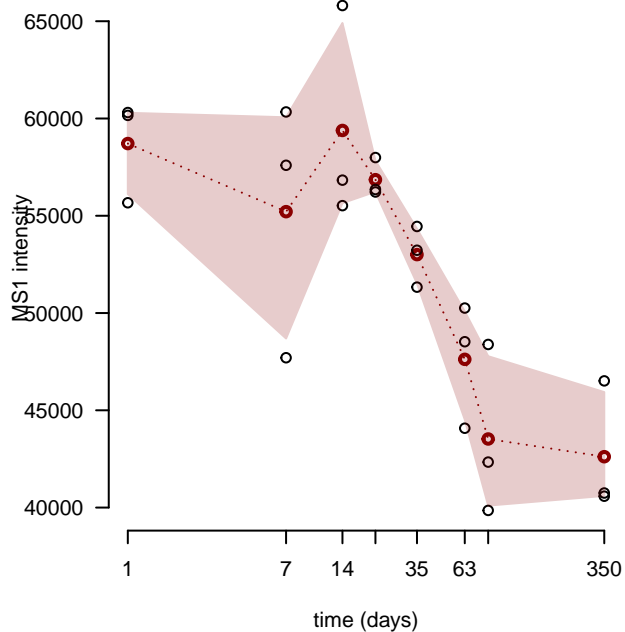

**Q9WUM3**  
**GN=Coro1b**  
coronin, actin binding protein 1B

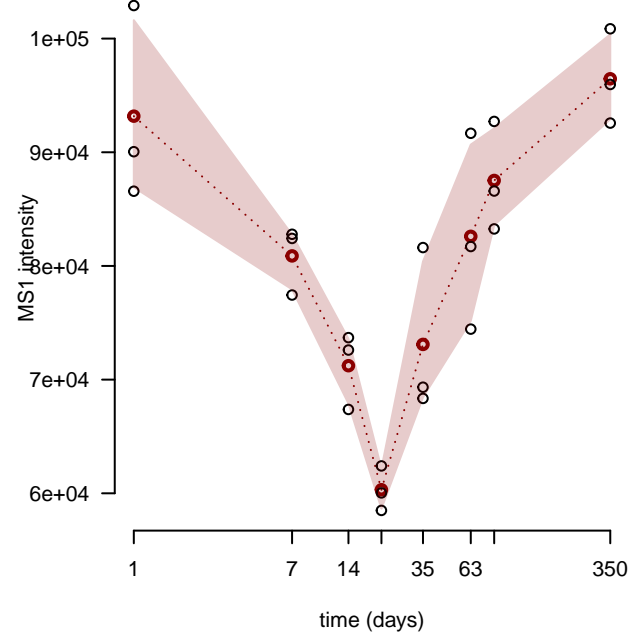

**Q9WUM4**  
**GN=Coro1c**  
coronin, actin binding protein 1C

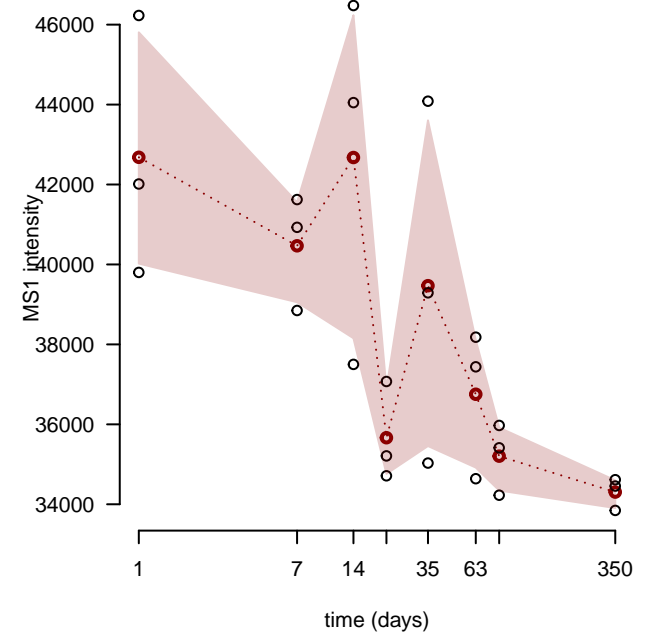

**Q9WUM5**  
**GN=Suc1g1**  
succinate-CoA ligase, GDP-forming, alpha ...

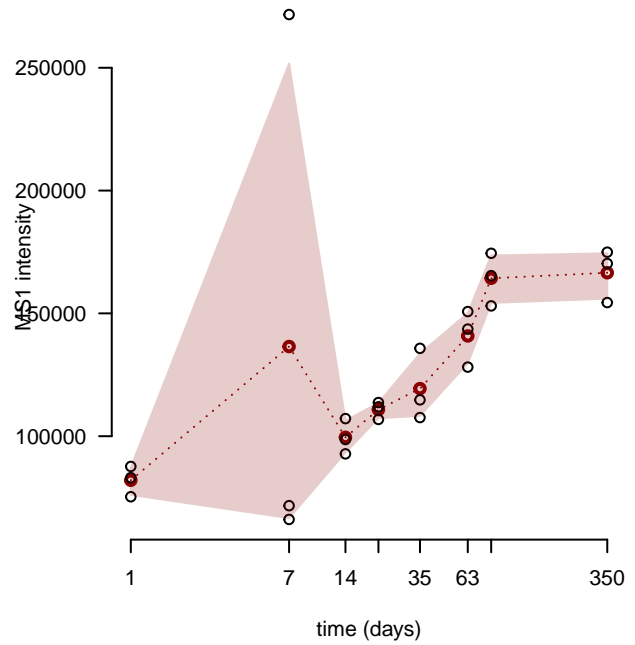

**Q9WUN2**  
**GN=Tbk1**  
TANK-binding kinase 1

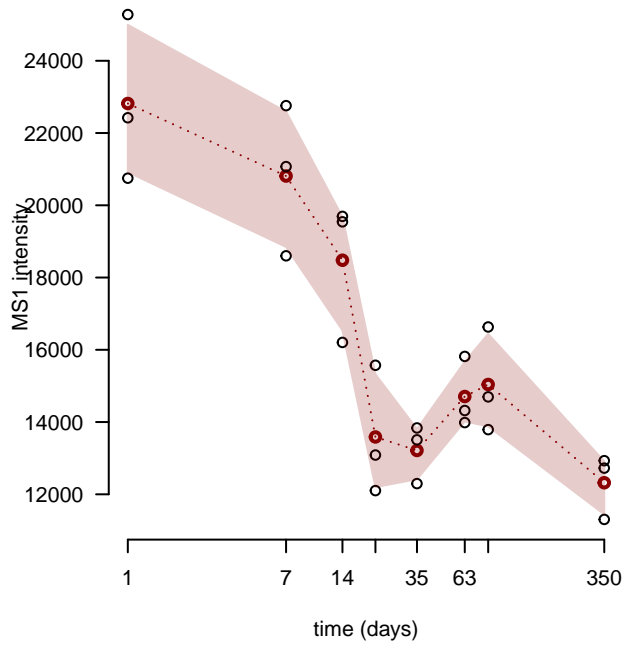

**Q9WUP4**  
**GN=Srd5a3**  
steroid 5 alpha-reductase 3

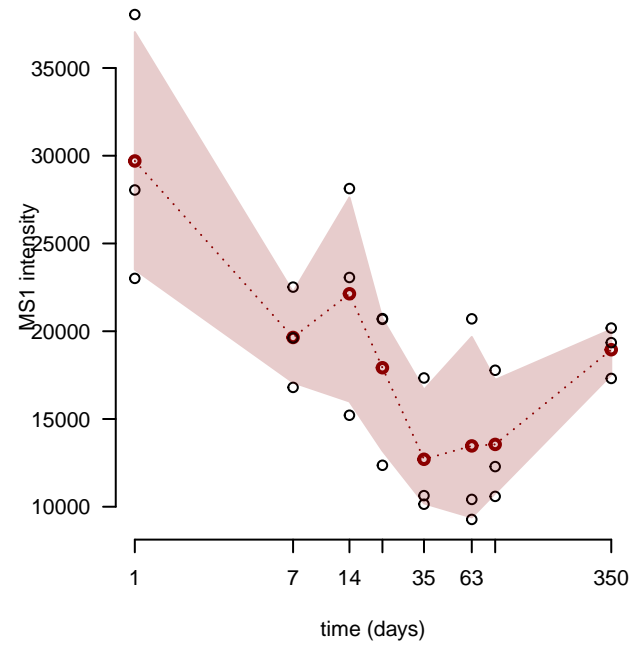

**Q9WUP7**  
**GN=Uch15**  
ubiquitin carboxyl-terminal esterase L5

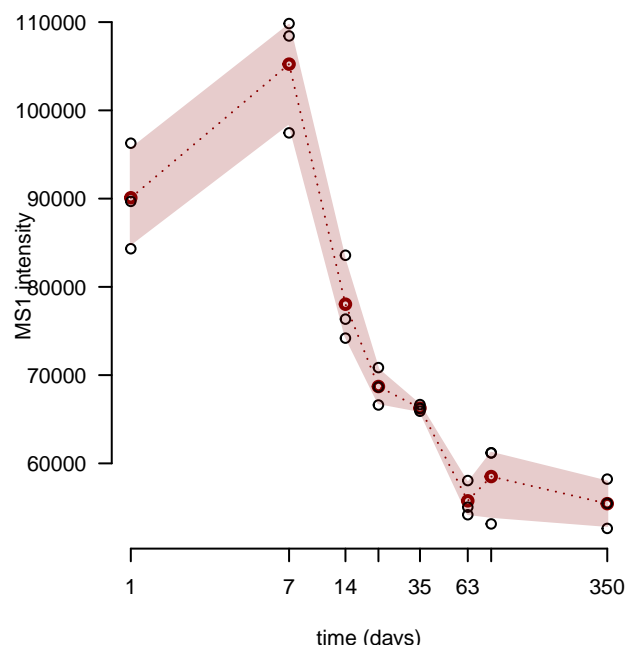

**Q9WUQ2**  
**GN=Preb**  
prolactin regulatory element binding

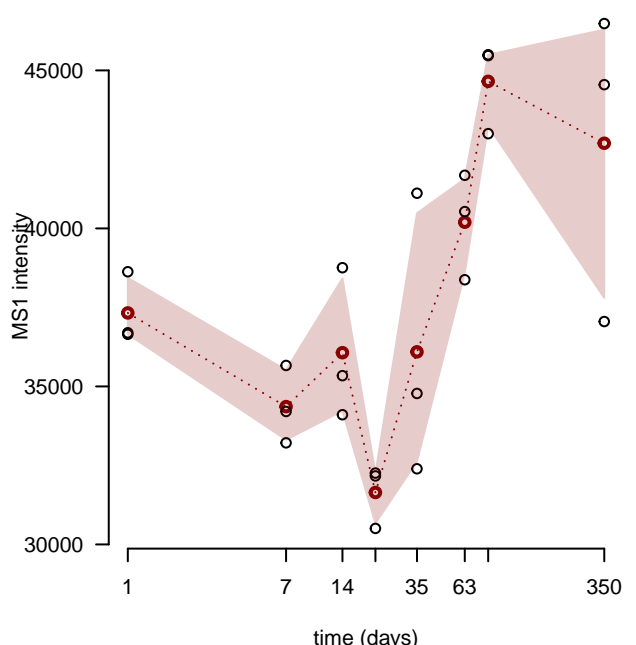

**Q9WUR2**  
**GN=Eci2**  
enoyl-Coenzyme A delta isomerase 2

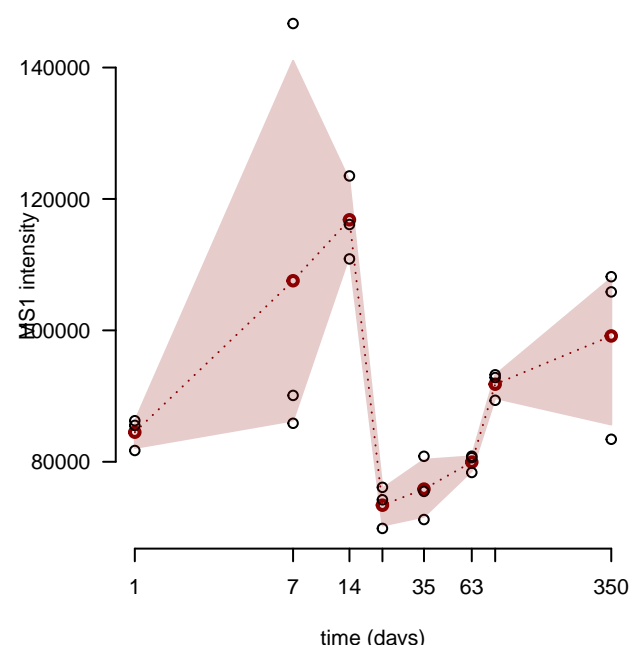

**Q9WUR9**  
**GN=Ak4**  
adenylate kinase 4

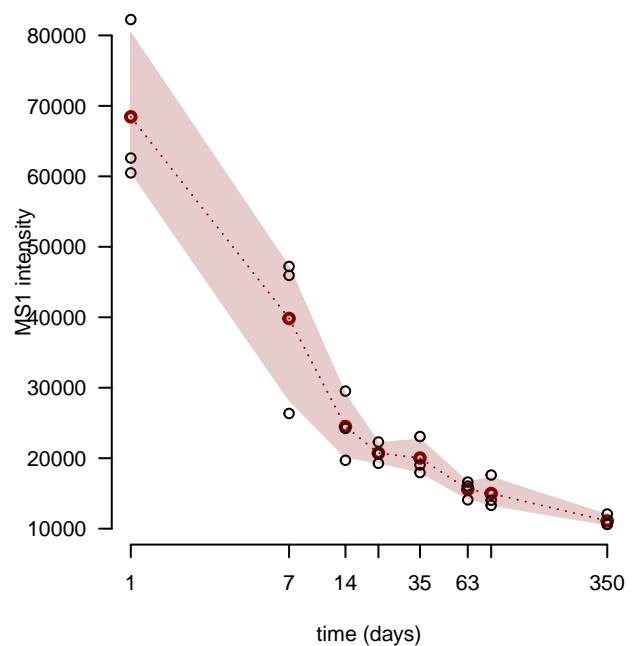

**Q9WUU7**  
**GN=Ctsz**  
cathepsin Z

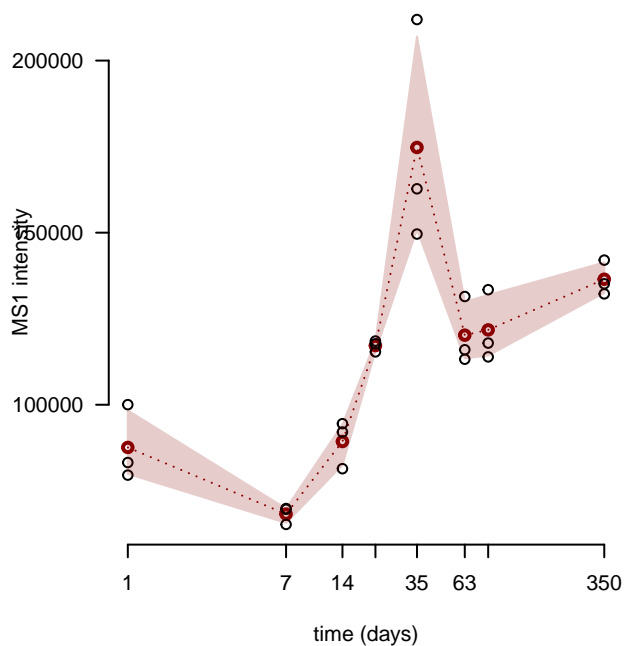

**Q9WUU8**  
**GN=Trnp1**  
TNFAIP3 interacting protein 1

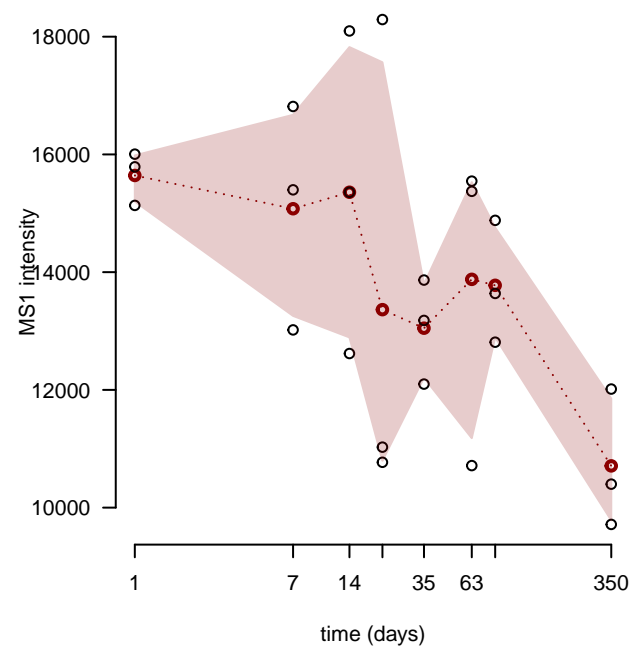



**Q9WUU9**  
**GN=Mcm3ap**

minichromosome maintenance complex compo ...

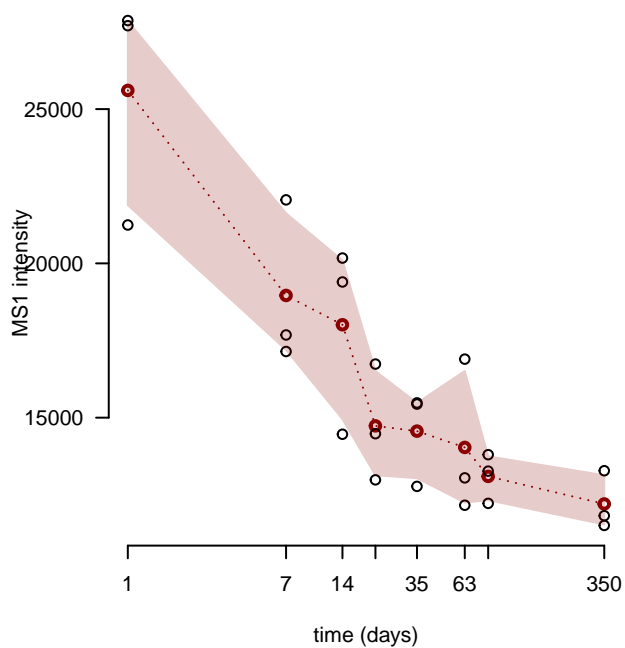

**Q9WUV0**  
**GN=Orc5**

origin recognition complex, subunit 5

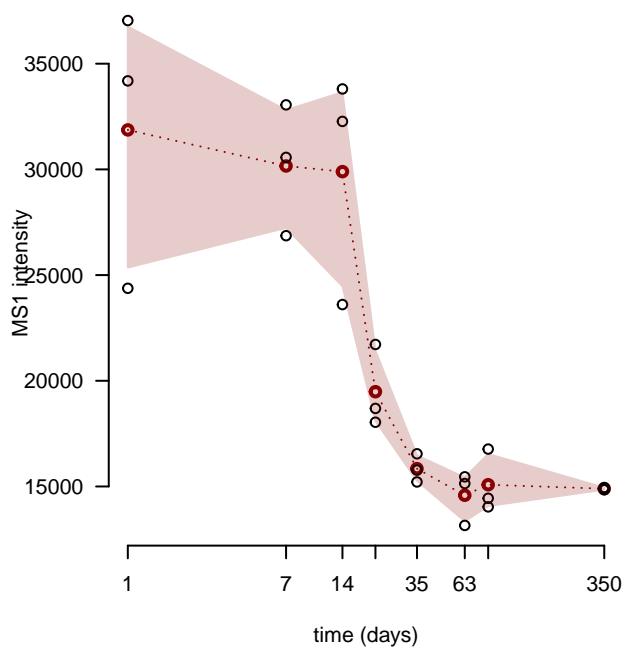

**Q9WUV2**  
**GN=St6galnac3**

ST6 (alpha-N-acetyl-neuraminyl-2,3-beta- ...

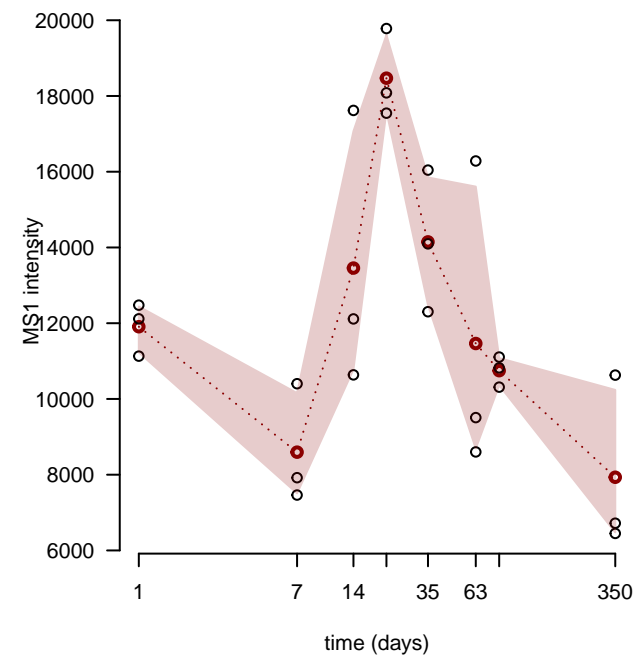

**Q9WUX5**  
**GN=Mrv1**

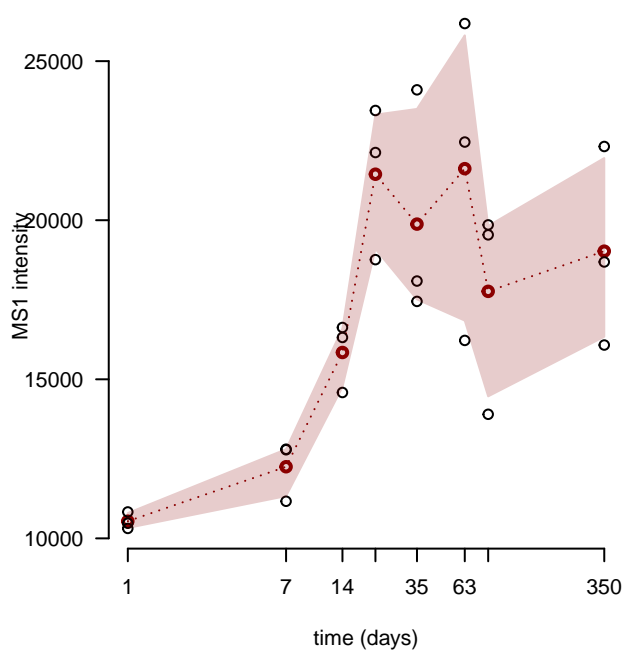

**Q9WUZ7**  
**GN=Sh3bgr**

SH3-binding domain glutamic acid-rich pr ...

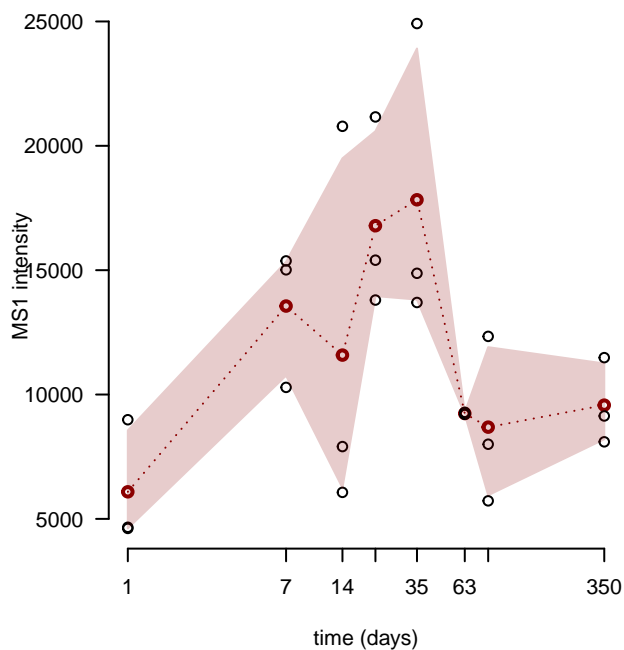

**Q9WUZ9**  
**GN=Entpd5**

ectonucleoside triphosphate diphosphohyd ...

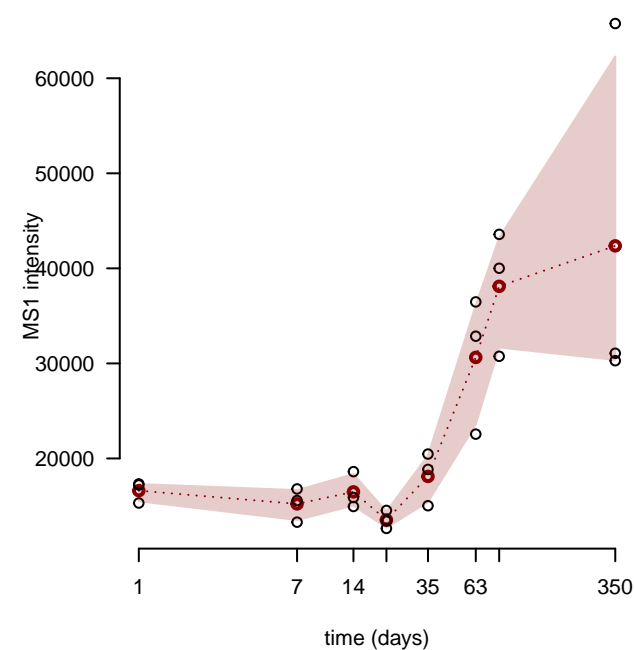

**Q9WV02**  
**GN=RbmX**

RNA binding motif protein, X chromosome

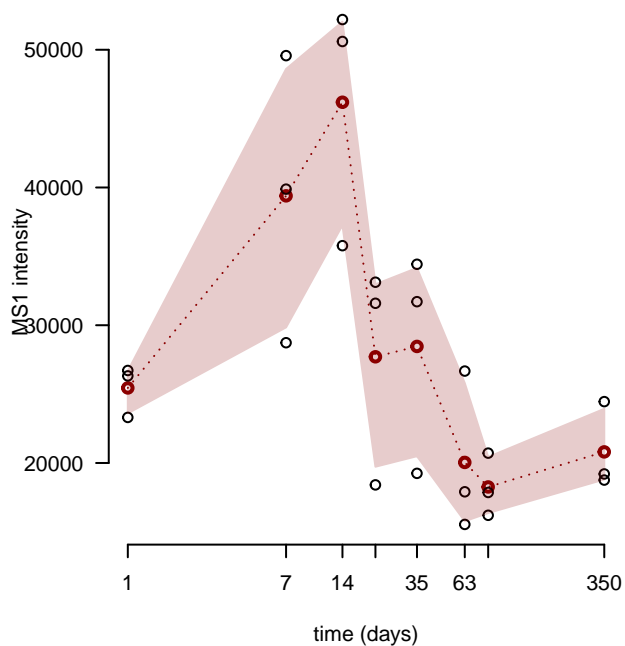

**Q9WV03**  
**GN=Fam50a**

family with sequence similarity 50, memb ...

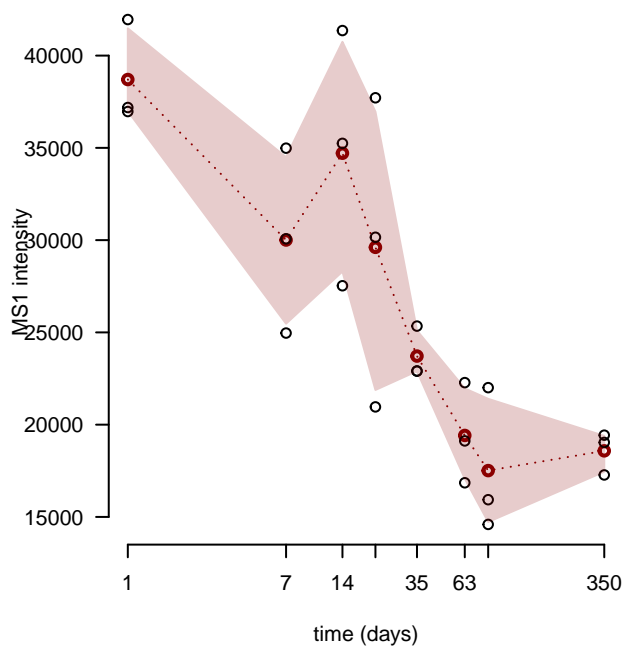

**Q9WV30**  
**GN=Nfat5**

nuclear factor of activated T cells 5

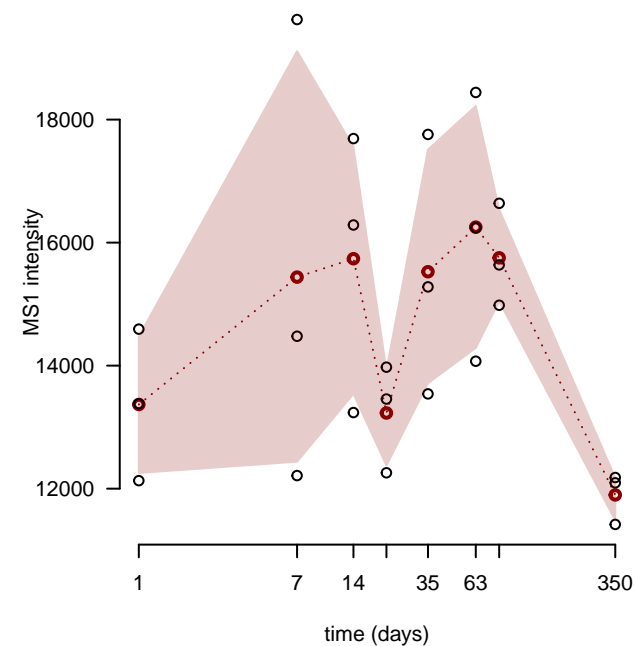

**Q9WV32**  
**GN=Arpc1b**  
actin related protein 2/3 complex, subun ...

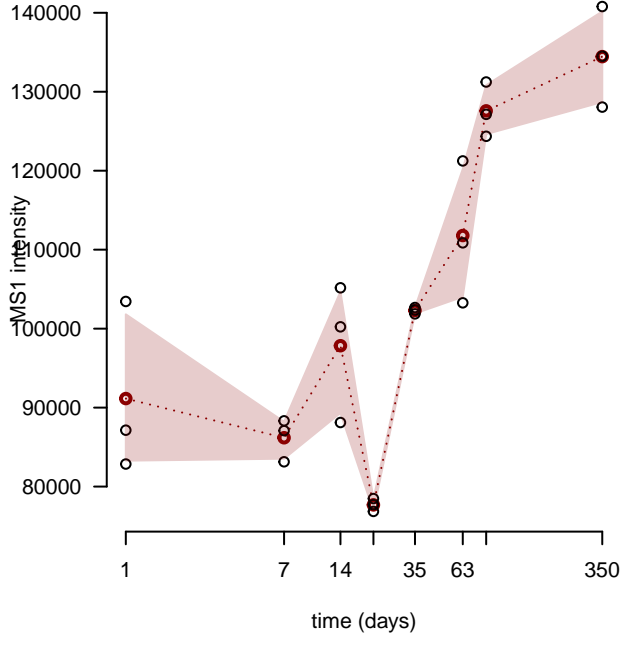

**Q9WV34**  
**GN=Mpp2**  
membrane protein, palmitoylated 2 (MAGUK ...

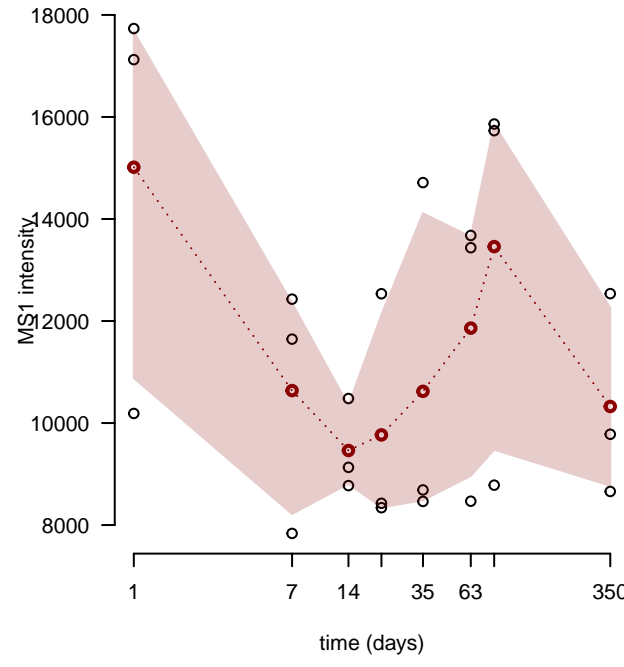

**Q9WV35**  
**GN=Apobec2**  
apolipoprotein B mRNA editing enzyme, ca ...

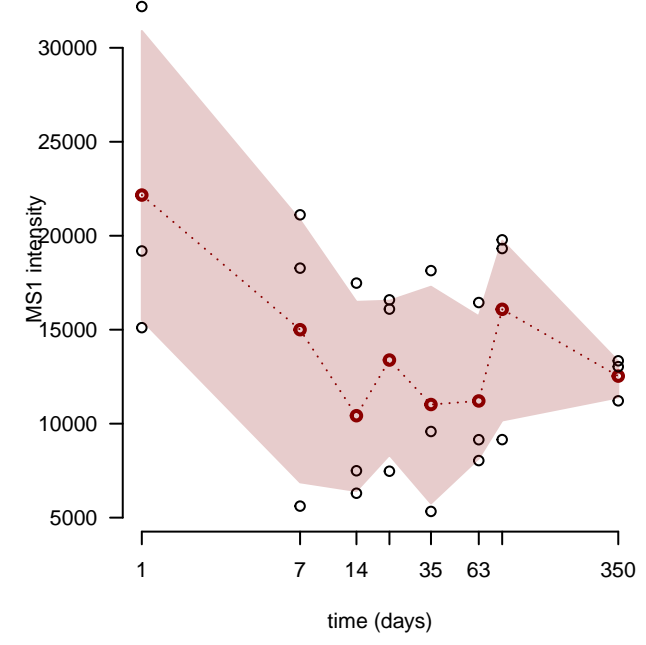

**Q9WV54**  
**GN=Asah1**  
N-acylsphingosine amidohydrolase 1

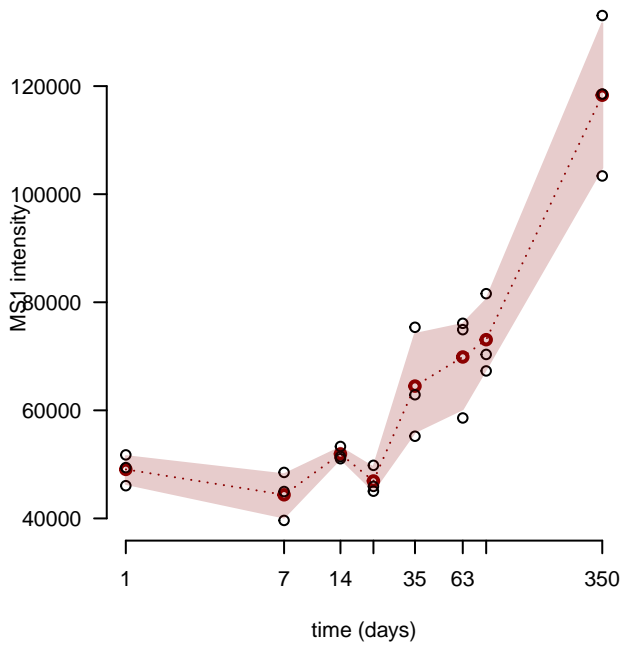

**Q9WV55**  
**GN=Vapa**  
vesicle-associated membrane protein, ass ...

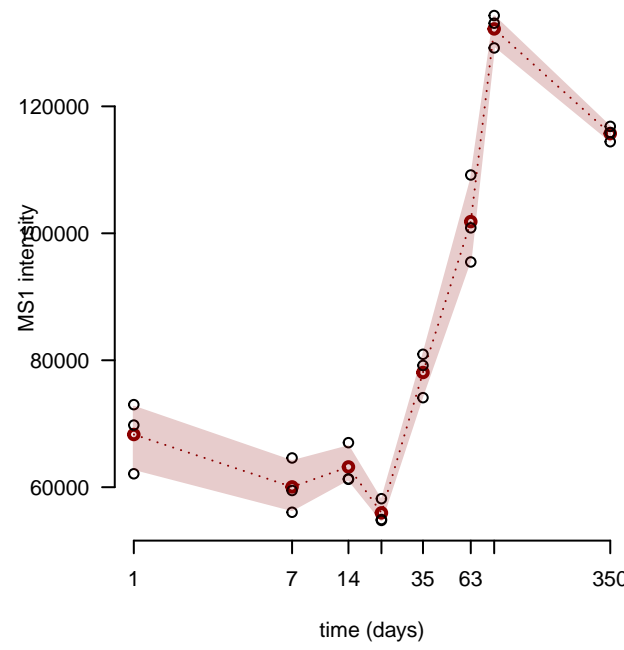

**Q9WV60**  
**GN=Gsk3b**  
glycogen synthase kinase 3 beta

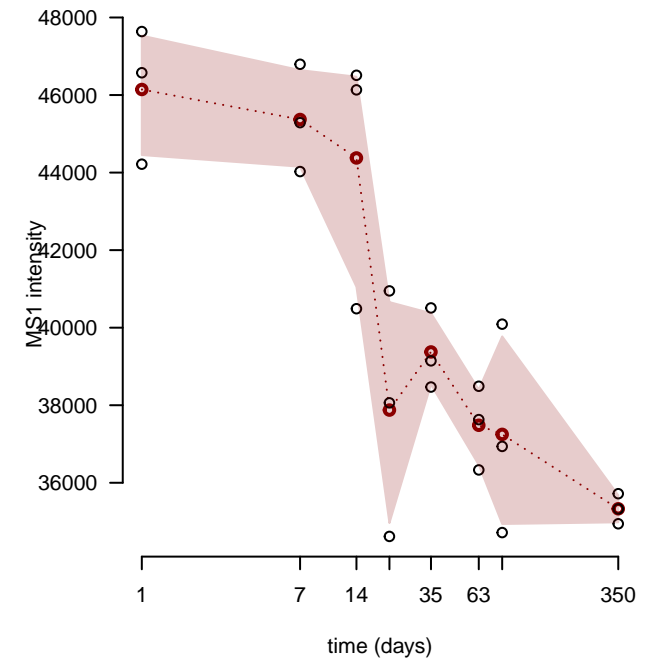

**Q9WV68**  
**GN=Decr2**  
2-4-dienoyl-Coenzyme A reductase 2, pero ...

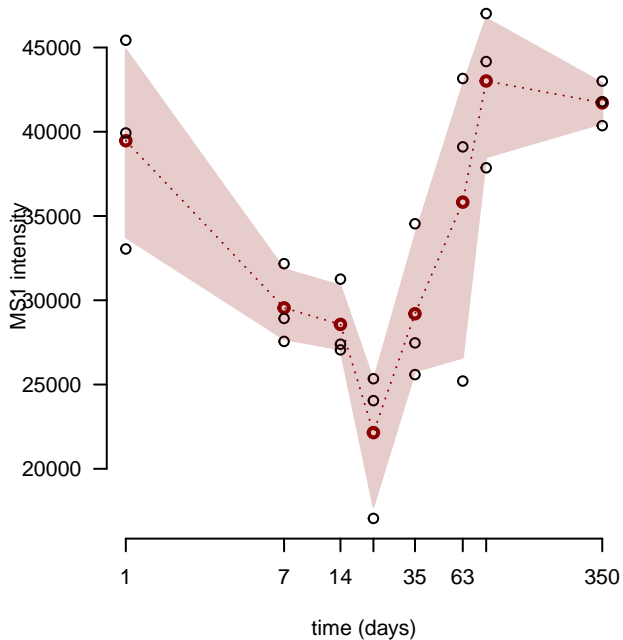

**Q9WV69**  
**GN=Dmtn**  
dematin actin binding protein

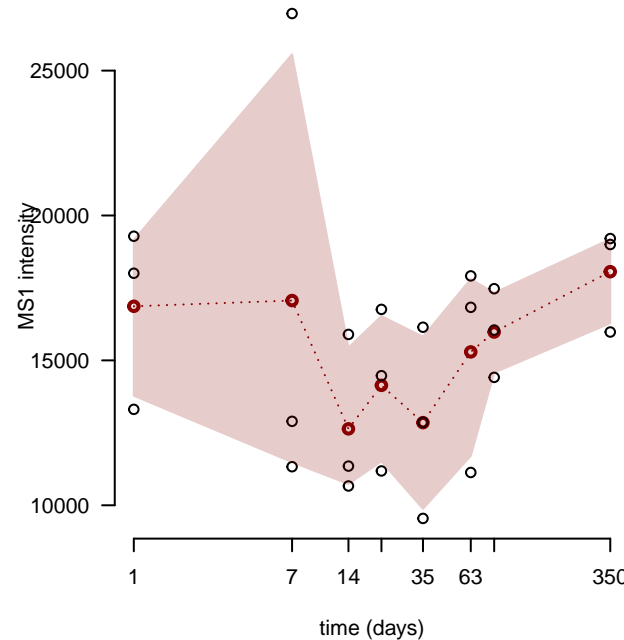

**Q9WV70**  
**GN=Noc2l**  
NOC2 like nucleolar associated transcrip ...

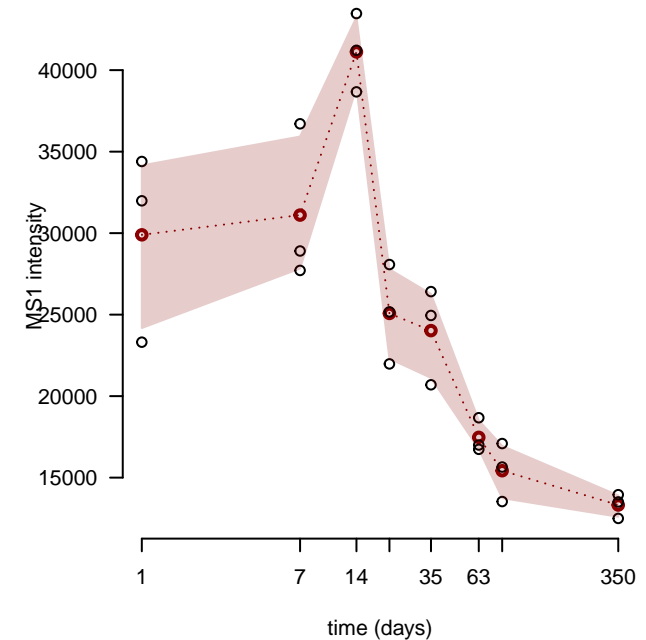

**Q9WV76**  
**GN=Ap4b1**  
adaptor-related protein complex AP-4, be ...

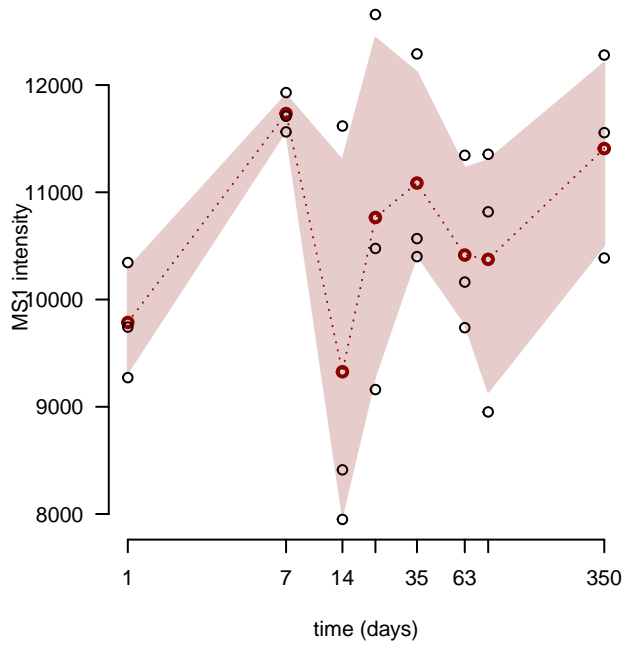

**Q9WV80**  
**GN=Snx1**  
sorting nexin 1

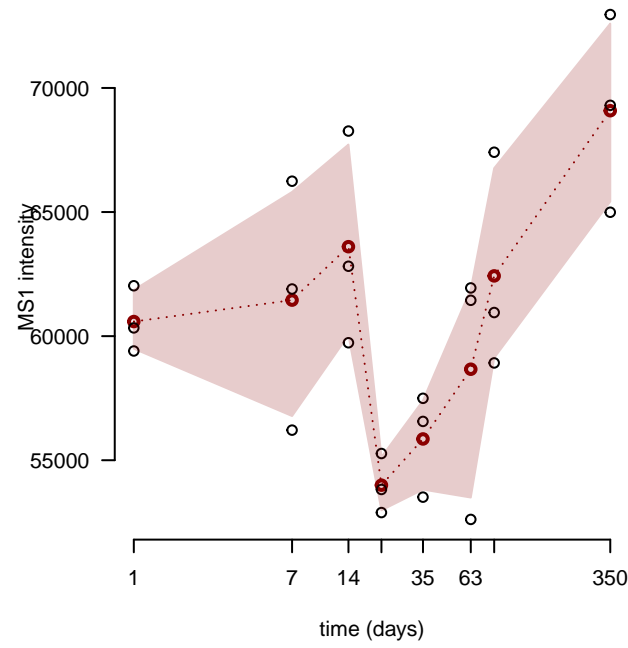

**Q9WV84**  
**GN=Nme4**  
NME/NM23 nucleoside diphosphate kinase 4

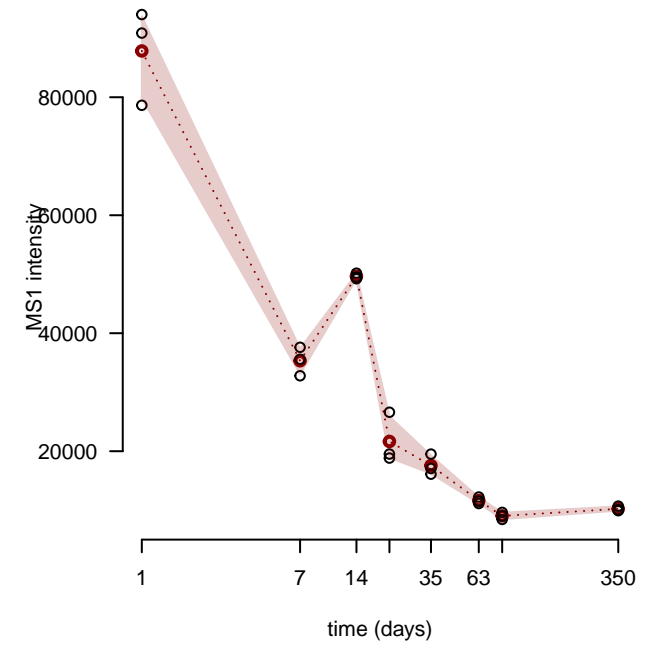

**Q9WV85**  
**GN=Nme3**  
NME/NM23 nucleoside diphosphate kinase 3

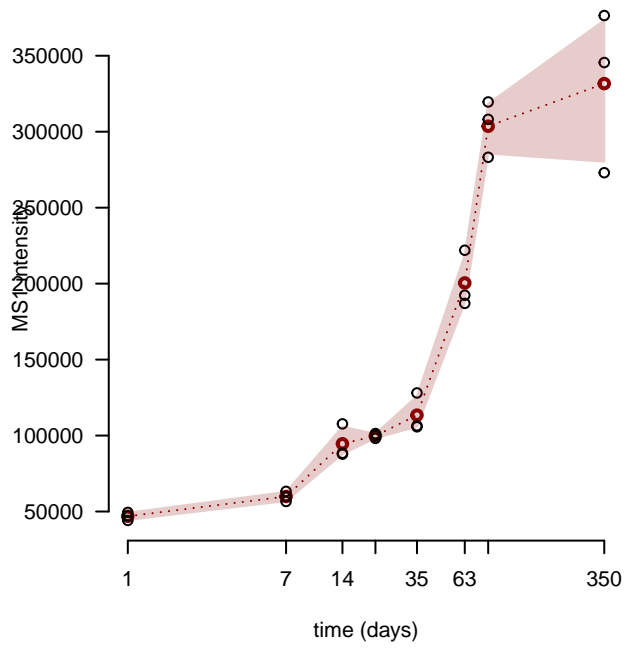

**Q9WV86**  
**GN=Katna1**  
katanin p60 (ATPase-containing) subunit ...

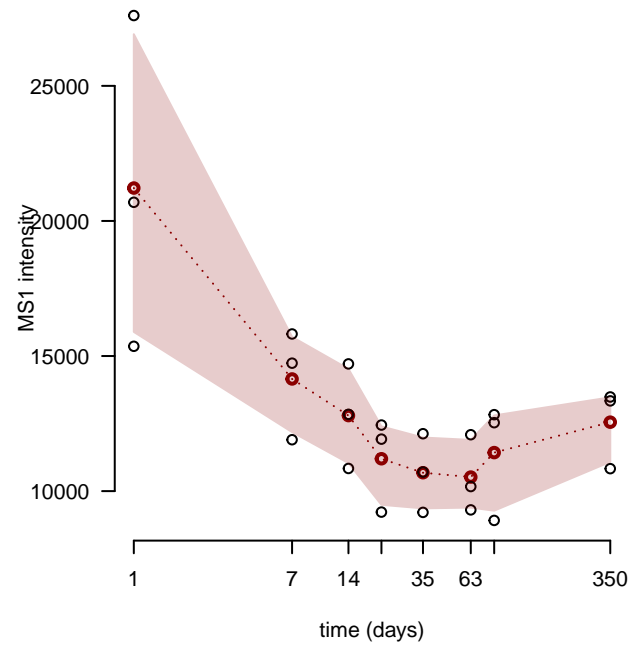

**Q9WV89**  
**GN=Stxbp4**  
syntaxin binding protein 4

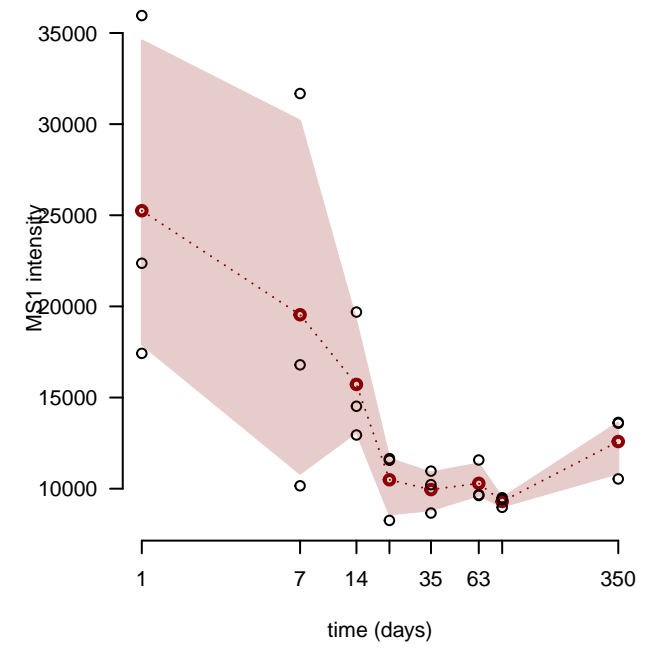

**Q9WV91**  
**GN=Ptgfrn**  
prostaglandin F2 receptor negative regul ...

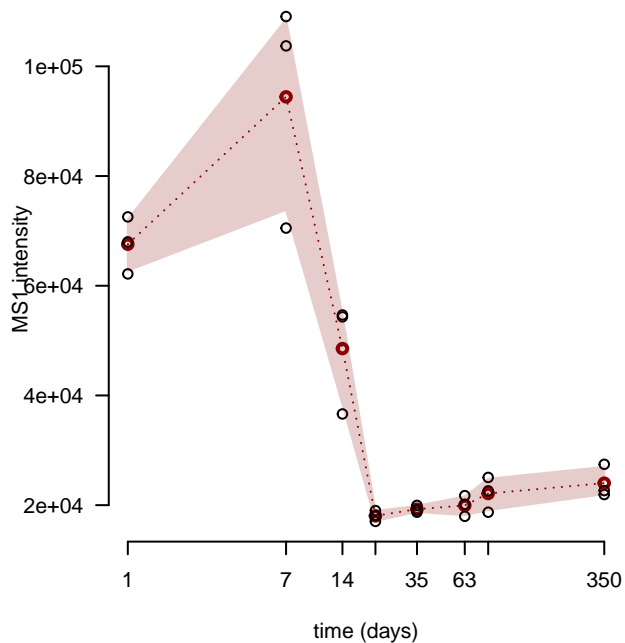

**Q9WV92**  
**GN=Epb4113**  
erythrocyte membrane protein band 4.1 li ...

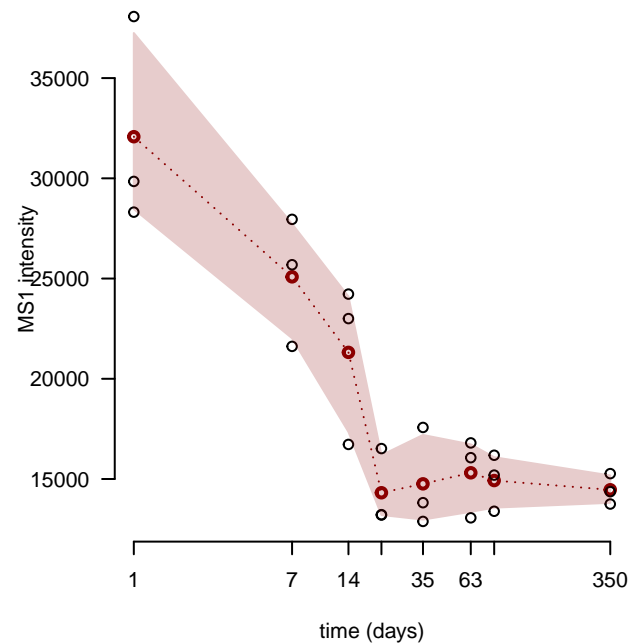

**Q9WV92**  
**GN=Epb4113**  
erythrocyte membrane protein band 4.1 li ...

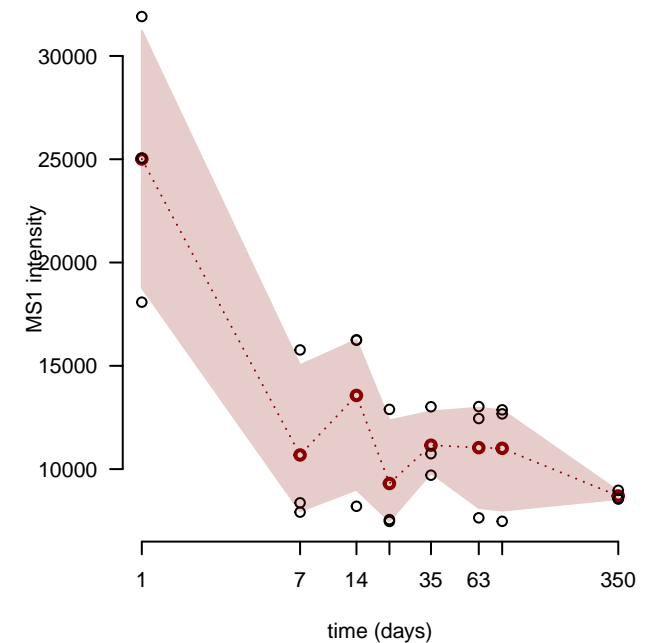

**Q9WV95**  
**GN=Phlda3**  
pleckstrin homology like domain, family ...

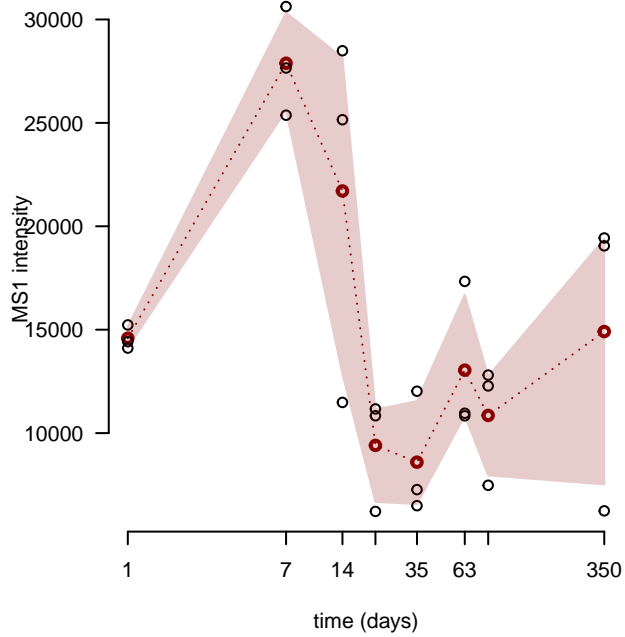

**Q9WV96**  
**GN=Timm10b**  
translocase of inner mitochondrial membr ...

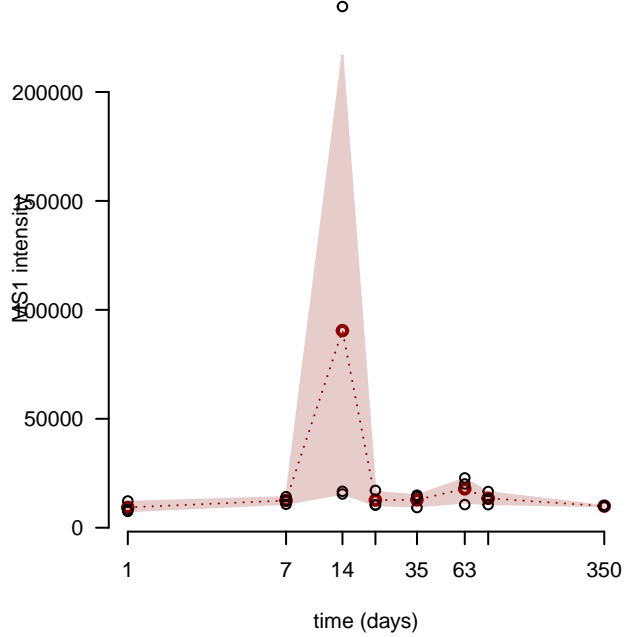

**Q9WV98**  
**GN=Timm9**  
translocase of inner mitochondrial membr ...

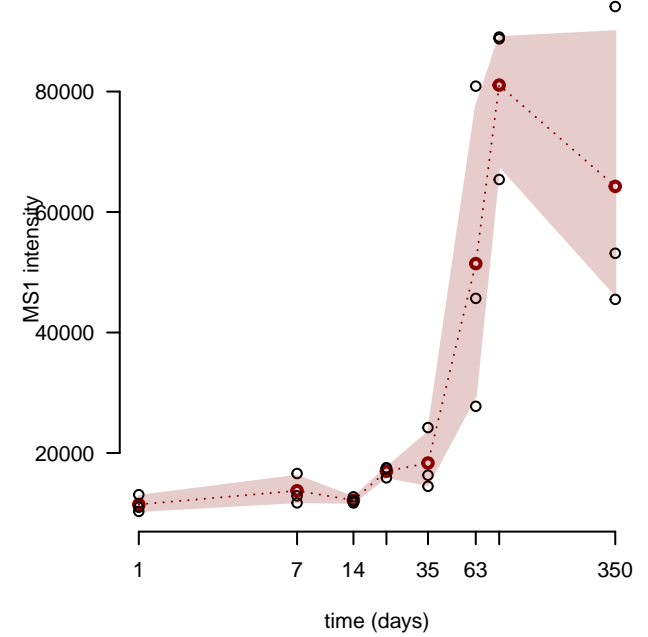

**Q9WVA2**  
**GN=Timm8a1**  
translocase of inner mitochondrial membr ...

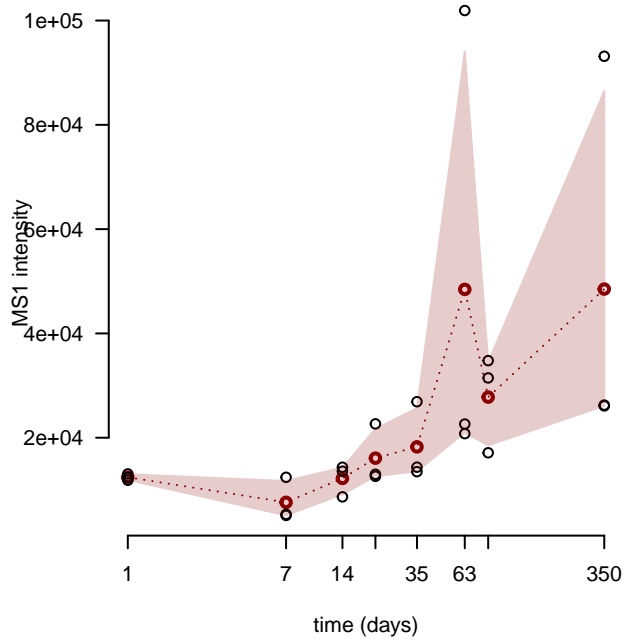

**Q9WVA3**  
**GN=Bub3**  
BUB3 mitotic checkpoint protein

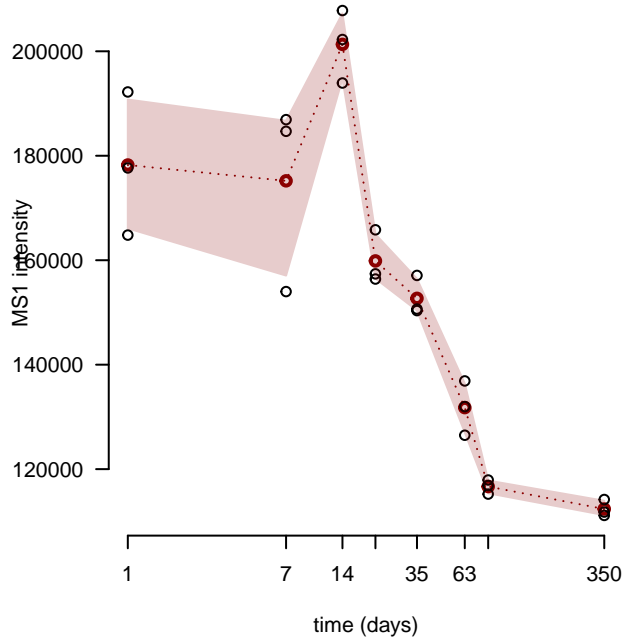

**Q9WVA4**  
**GN=Tagln2**  
transgelin 2

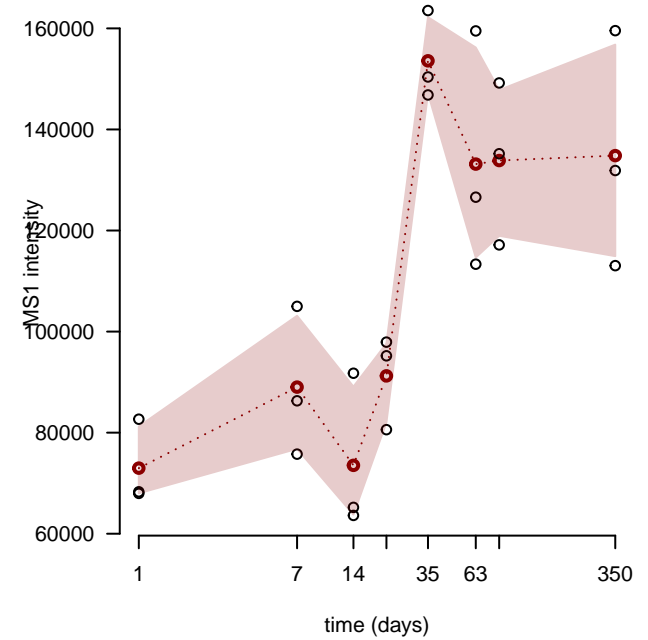

**Q9WVB0**  
**GN=Rbpms**  
RNA binding protein gene with multiple s ...

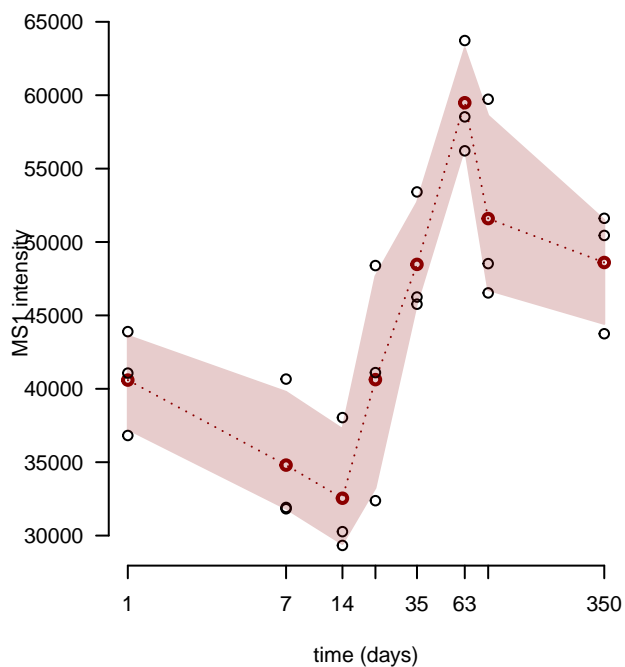

**Q9WVB2**  
**GN=Tle2**  
transducin-like enhancer of split 2

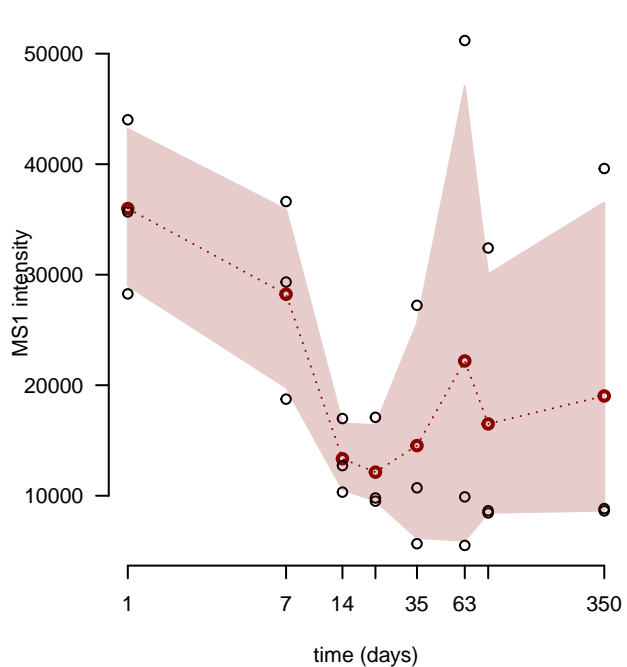

**Q9WVB3**  
**GN=Tle6**  
transducin-like enhancer of split 6

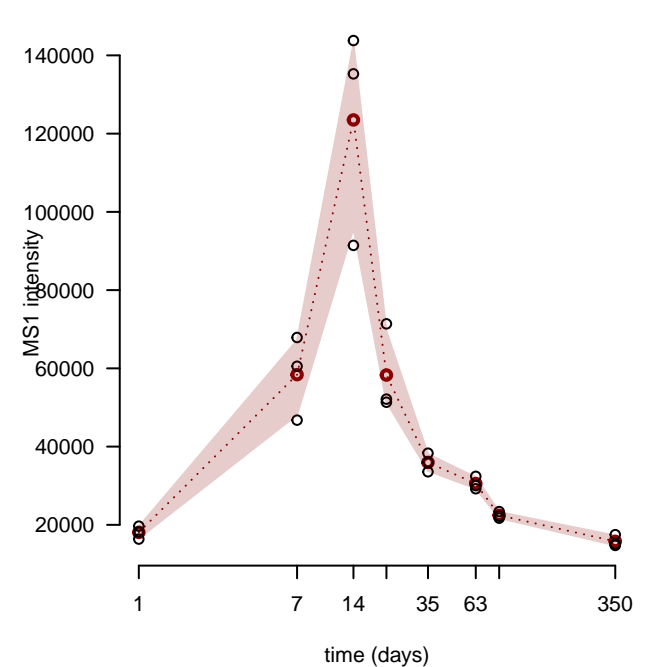

**Q9WVB4**  
**GN=Slit3**  
slit guidance ligand 3

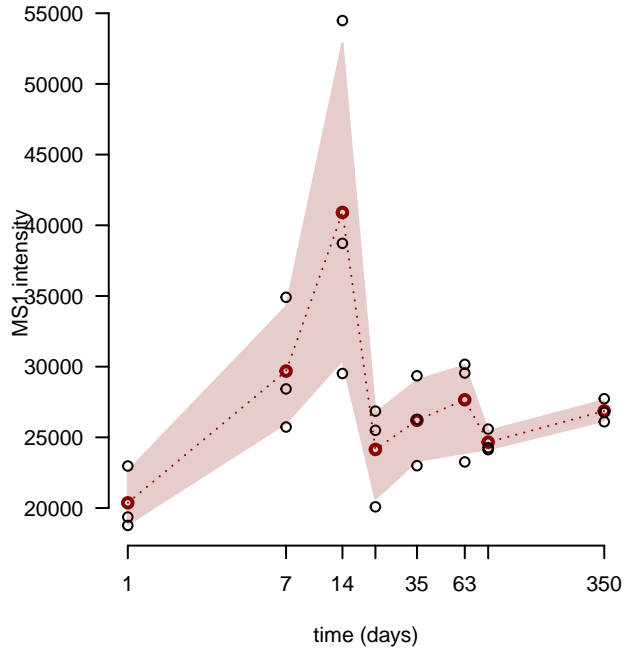

**Q9WVC3**  
**GN=Cav2**  
caveolin 2

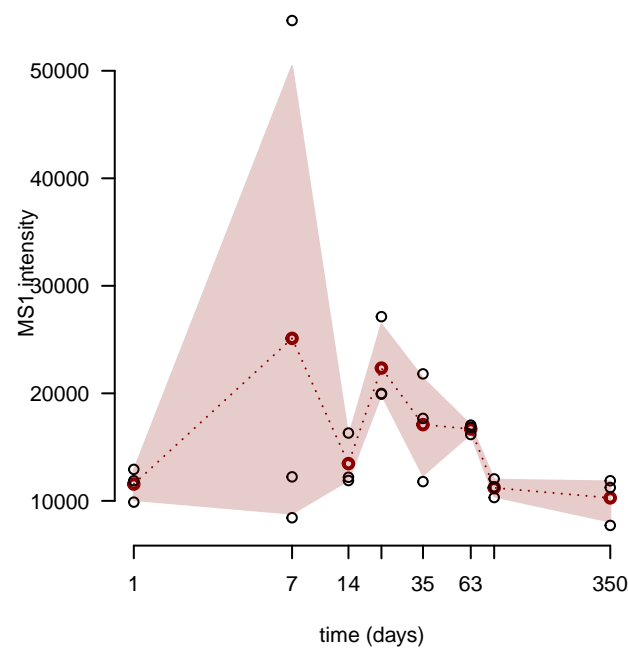

**Q9WVC6**  
**GN=Sgk1**  
serum/glucocorticoid regulated kinase 1

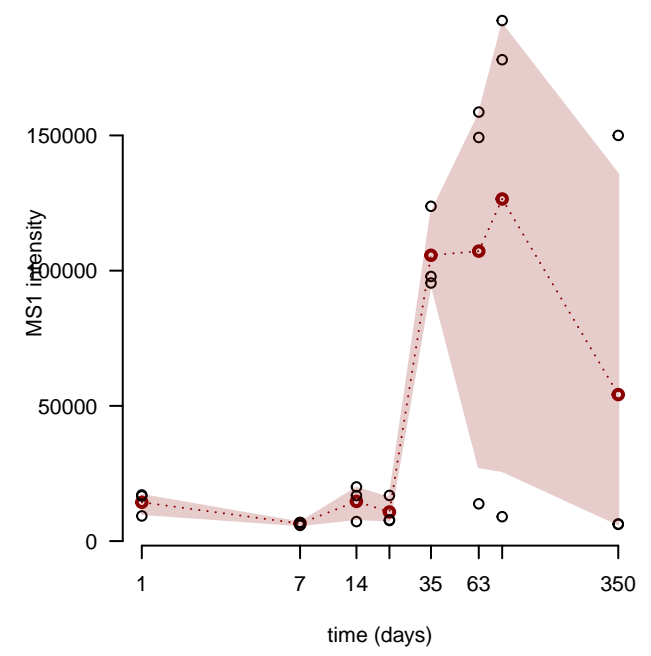

**Q9WVD4**  
**GN=Clcn5**  
chloride channel, voltage-sensitive 5

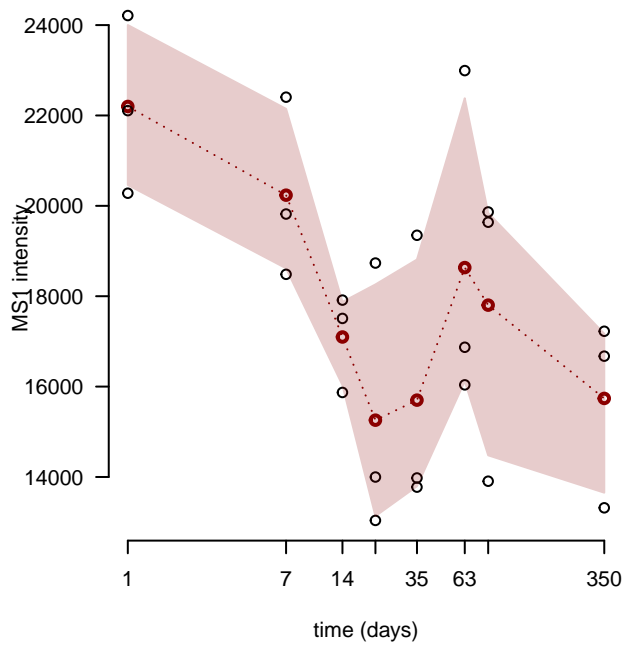

**Q9WVD5**  
**GN=Slc25a15**  
solute carrier family 25 (mitochondrial ...

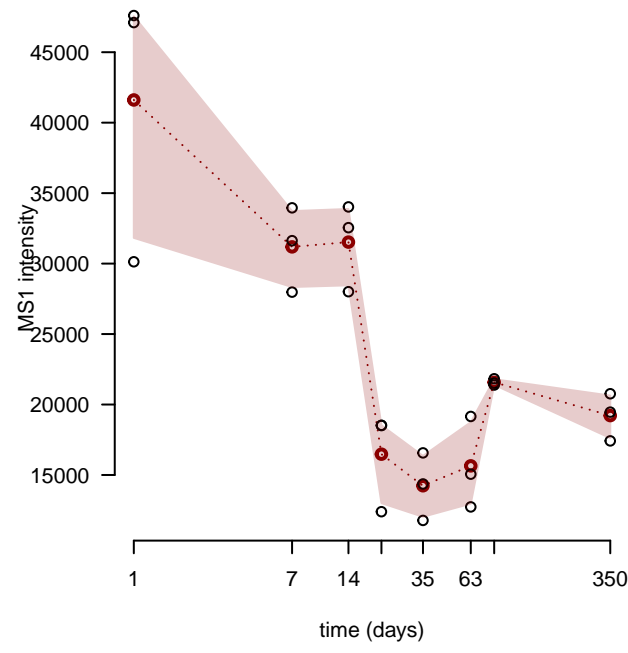

**Q9WVE8**  
**GN=Pacsin2**  
protein kinase C and casein kinase subst ...

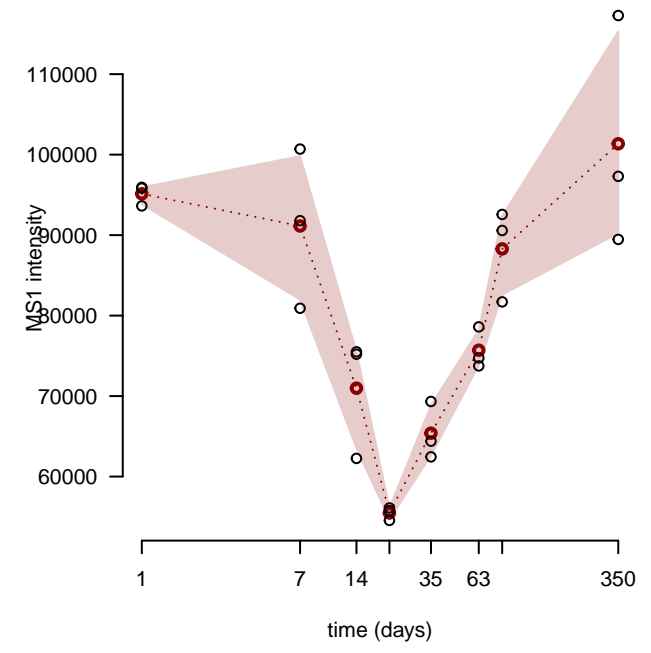

**Q9WVF7**  
**GN=Pole**  
polymerase (DNA directed), epsilon

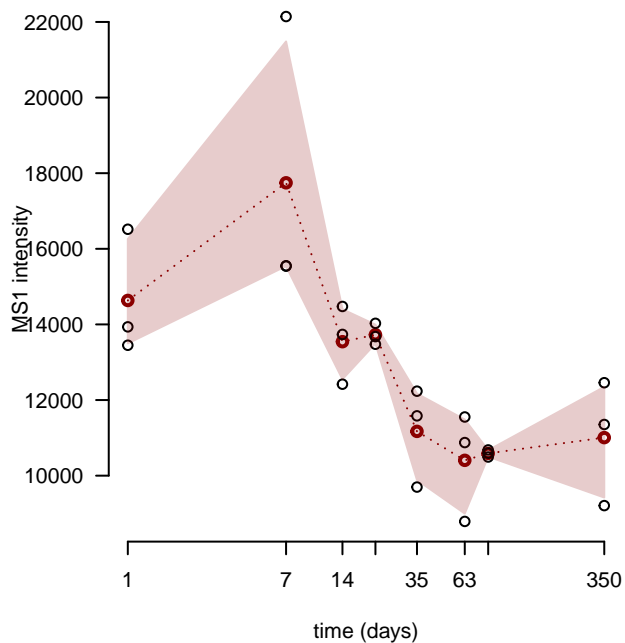

**Q9WVF8**  
**GN=Tusc2**  
tumor suppressor 2, mitochondrial calciu ...

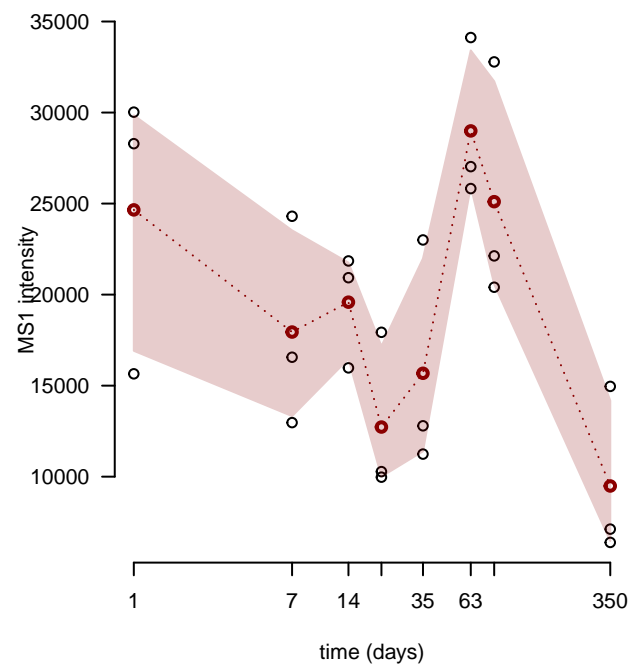

**Q9WVG5**  
**GN=Lipg**  
lipase, endothelial

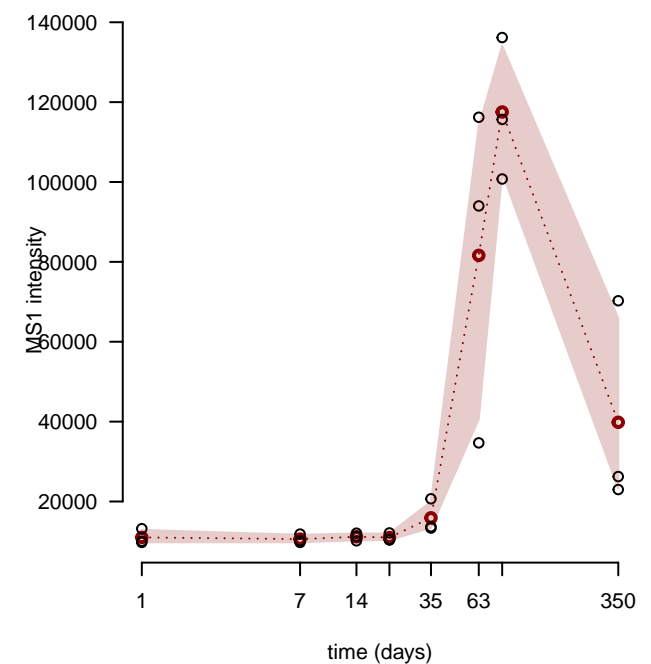

**Q9WVG6**  
**GN=Carm1**  
coactivator-associated arginine methyltr ...

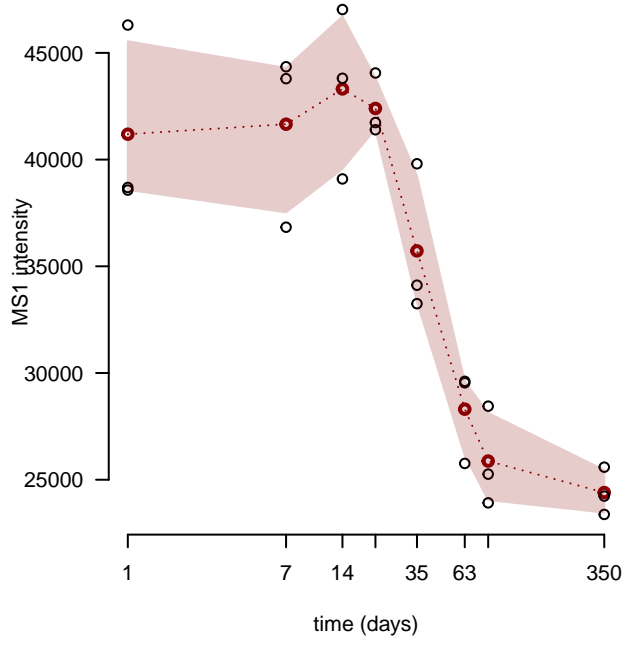

**Q9WVG9**  
**GN=Msi3**  
MSL complex subunit 3

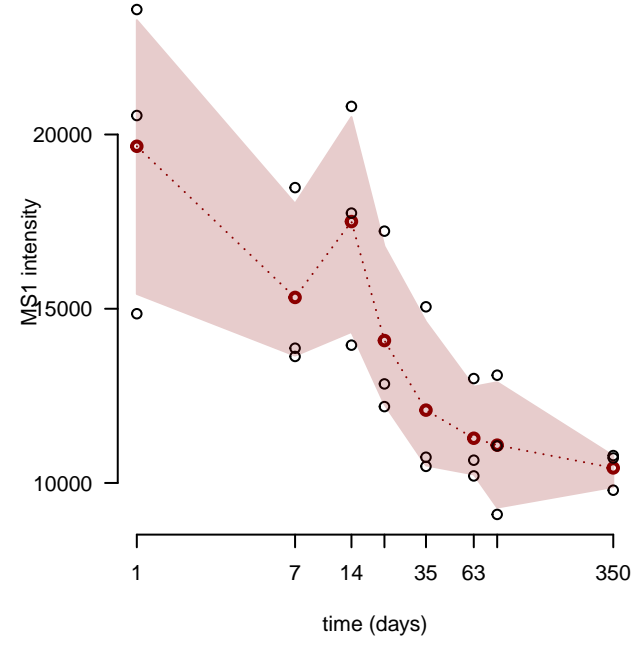

**Q9WVH4**  
**GN=Foxo3**  
forkhead box O3

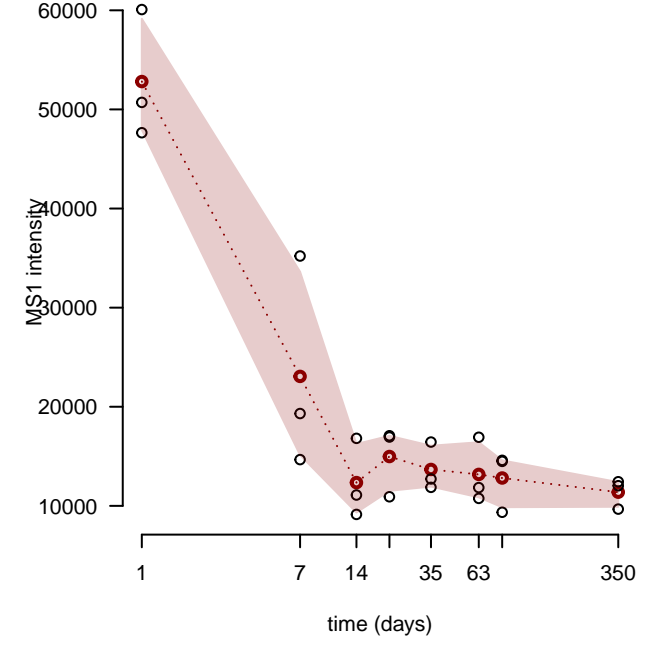

**Q9WVH9**  
**GN=Fbln5**  
fibulin 5

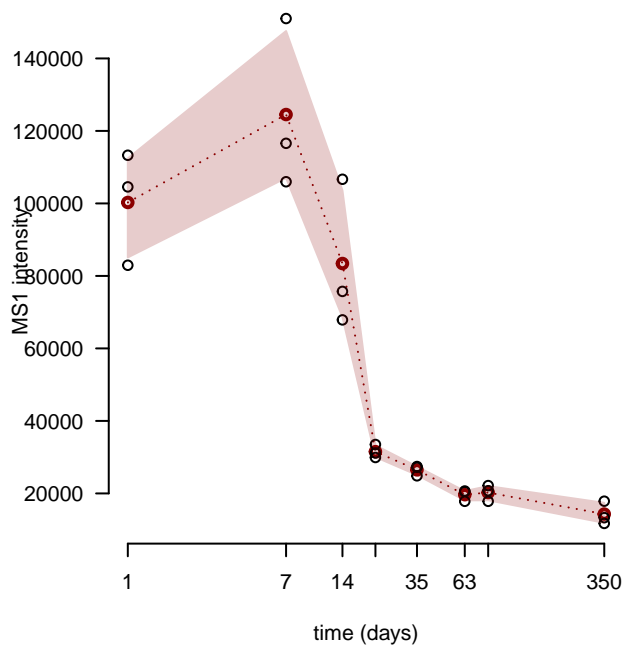

**Q9WVJ2**  
**GN=Psm13**  
proteasome (prosome, macropain) 26S subu ...

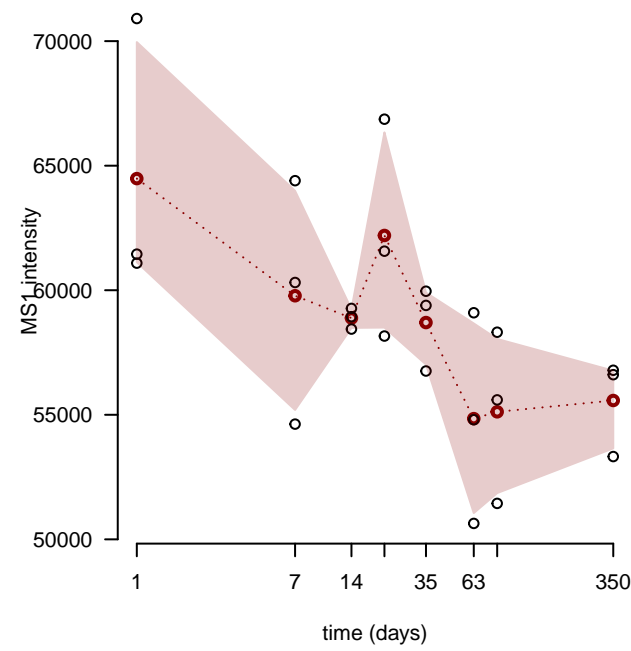

**Q9WVJ3**  
**GN=Cpq**  
carboxypeptidase Q

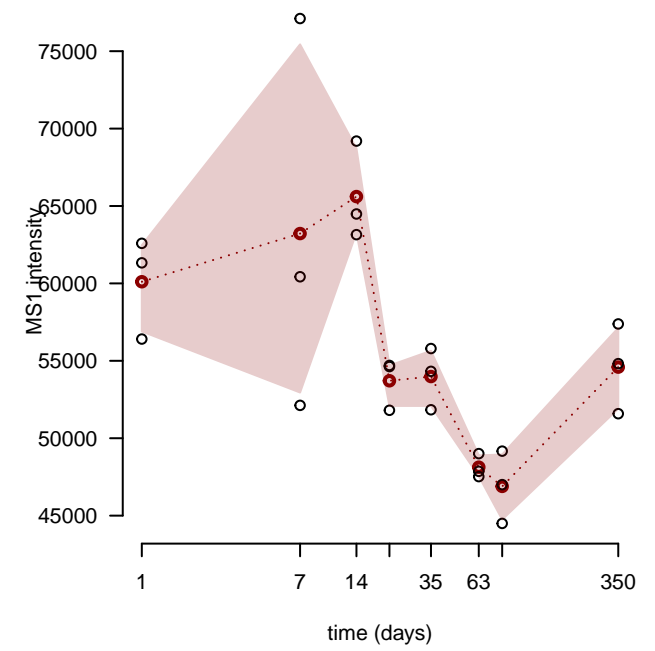

**Q9WVJ5**  
**GN=Crybb1**  
crystallin, beta B1

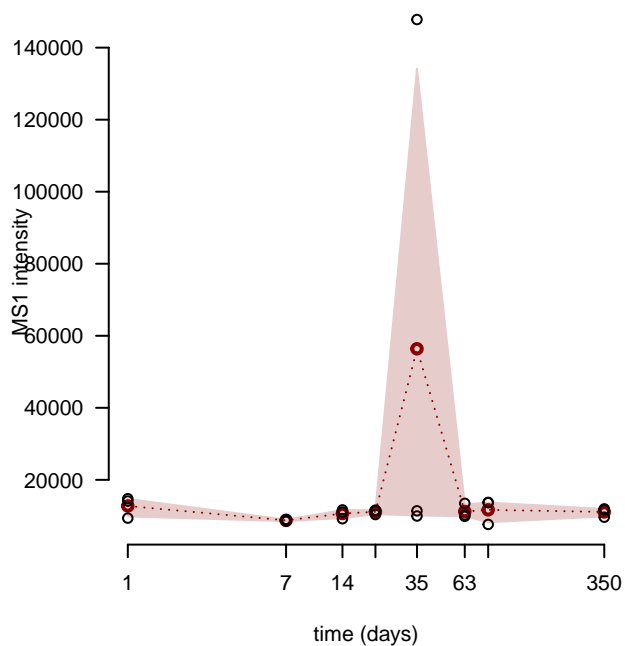

**Q9WVJ9**  
**GN=Efemp2**  
epidermal growth factor-containing fibul ...

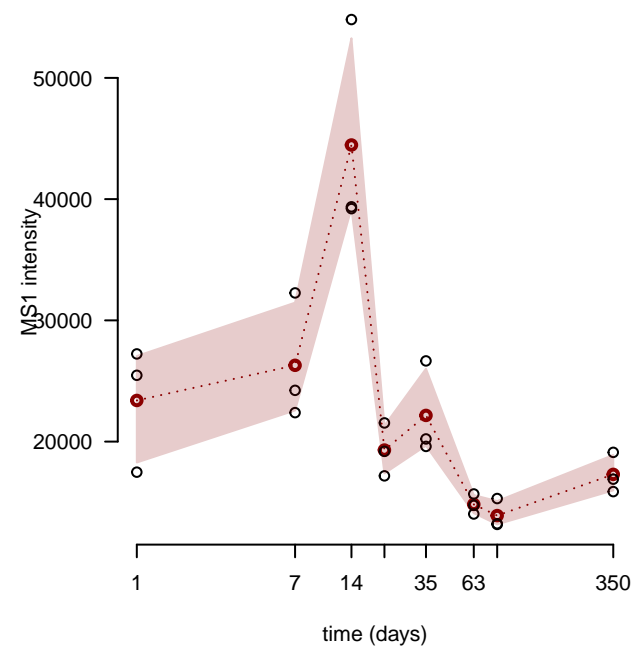

**Q9WVK0**  
**GN=Agtrap**  
angiotensin II, type I receptor-associat ...

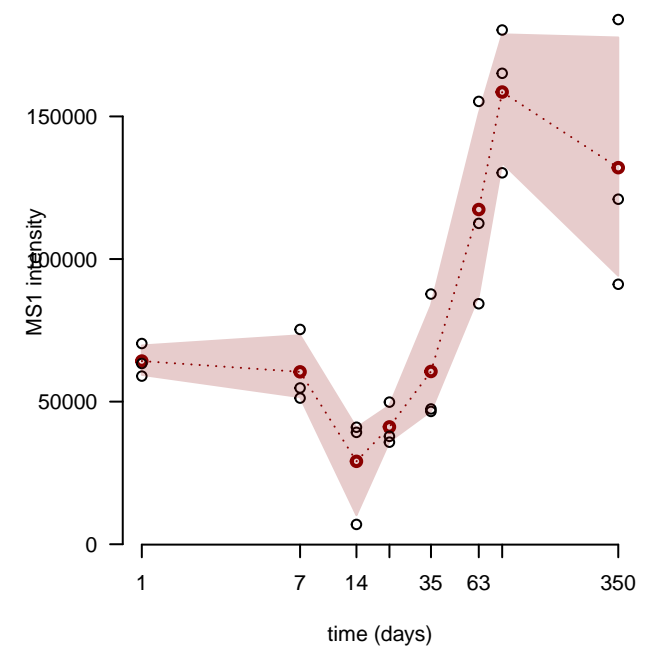

**Q9WVK4**  
**GN=Ehd1**  
EH-domain containing 1

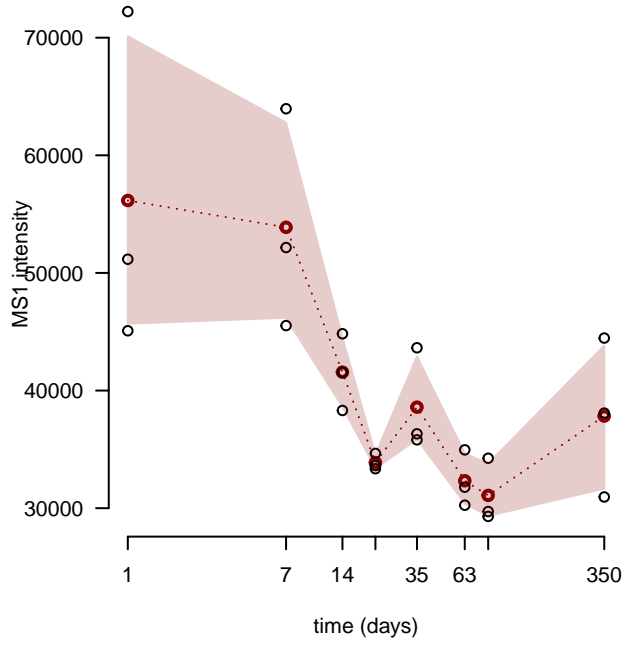

**Q9WVK5**  
**GN=B4galt6**  
UDP-Gal:betaGlcNAc beta 1,4-galactosyltr ...

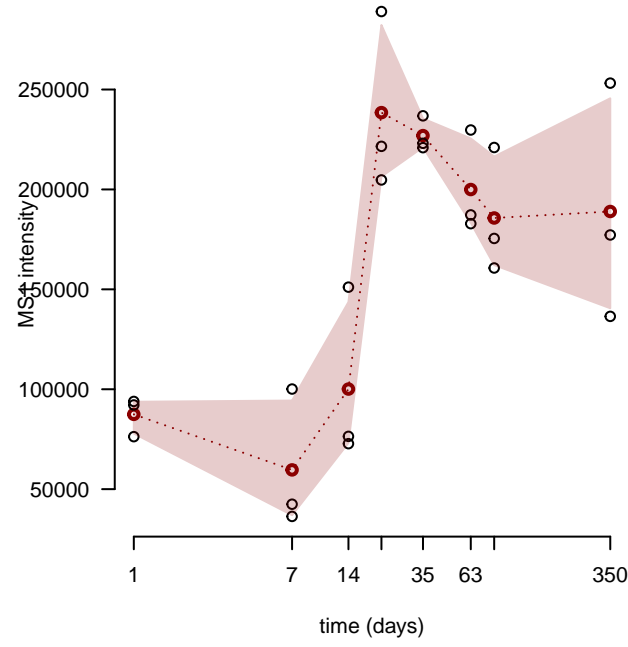

**Q9WVL0**  
**GN=Gstz1**  
glutathione transferase zeta 1 (maleylac ...

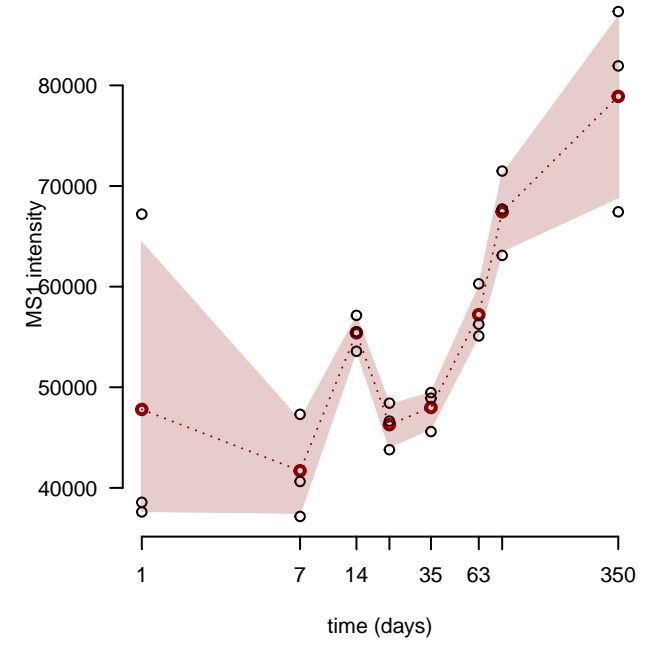

**Q9WVL1**  
**GN=Ap4s1**  
adaptor-related protein complex AP-4, si ...

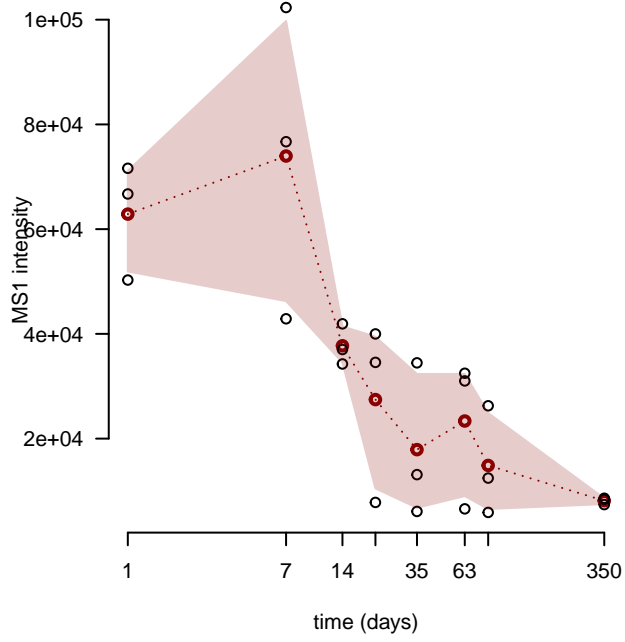

**Q9WVL2**  
**GN=Stat2**  
signal transducer and activator of trans ...

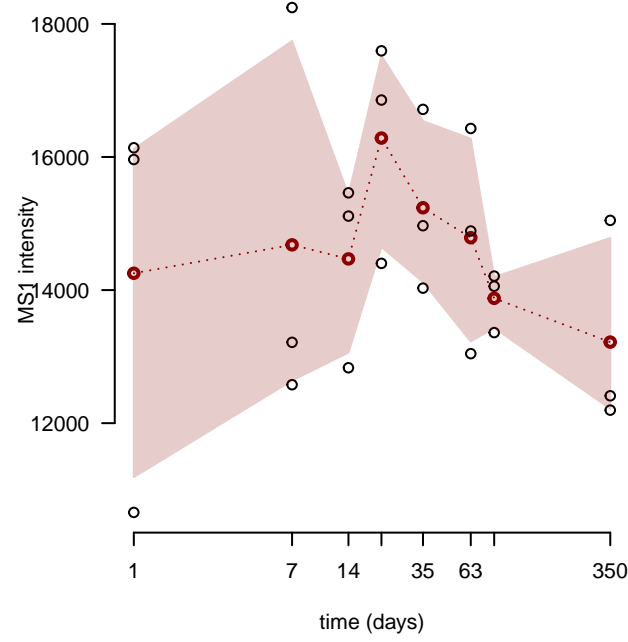

**Q9WVL3**  
**GN=Slc12a7**  
solute carrier family 12, member 7

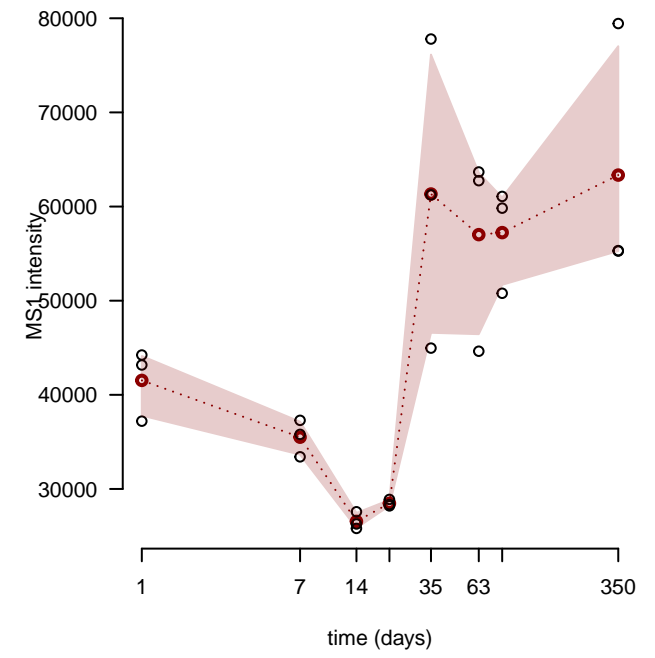

**Q9WVL6**  
**GN=Extl3**  
exostosin-like glycosyltransferase 3

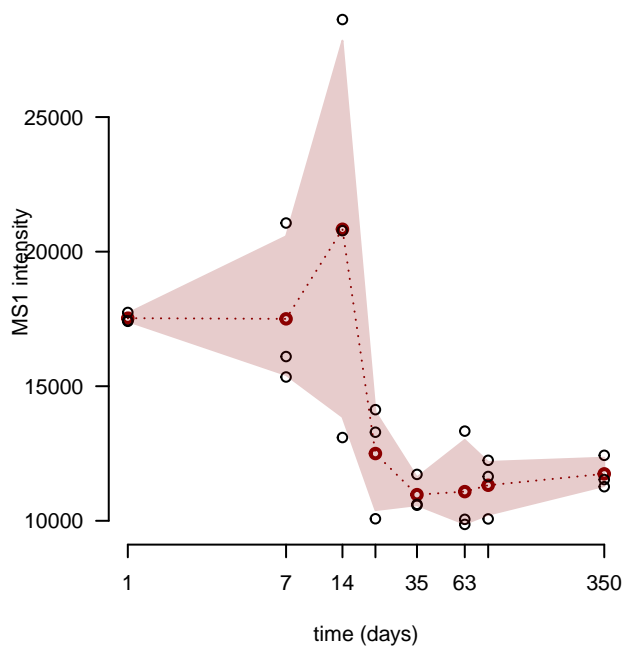

**Q9WVM1**  
**GN=Racgap1**  
Rac GTPase-activating protein 1

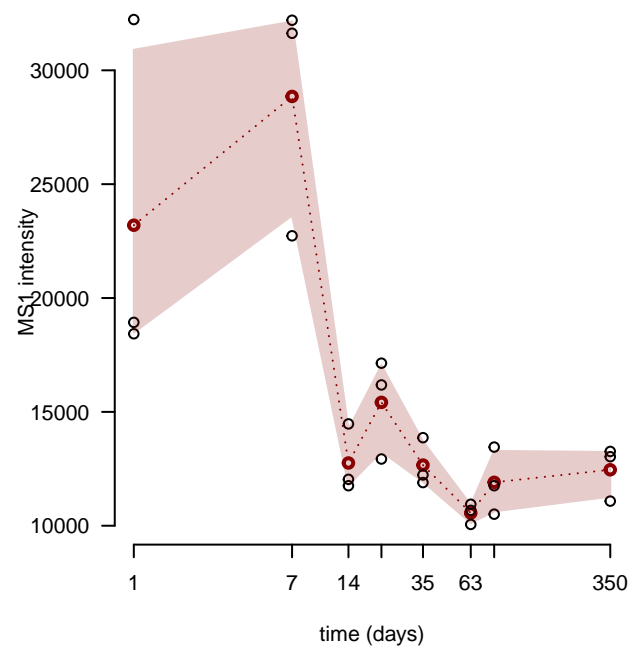

**Q9WVM3**  
**GN=Anapc7**  
anaphase promoting complex subunit 7

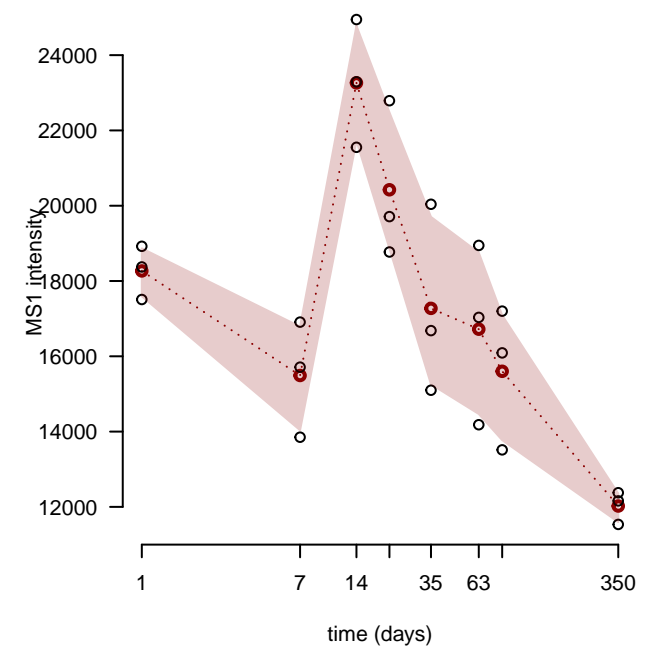

**Q9WVP1**  
**GN=Ap1m2**  
adaptor protein complex AP-1, mu 2 subun ...

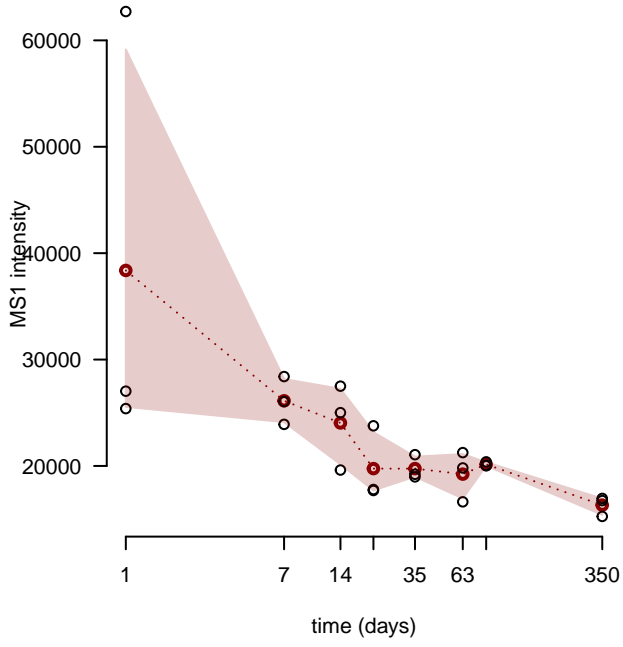

**Q9WVP6**  
**GN=Papolb**  
poly (A) polymerase beta (testis specifi ...

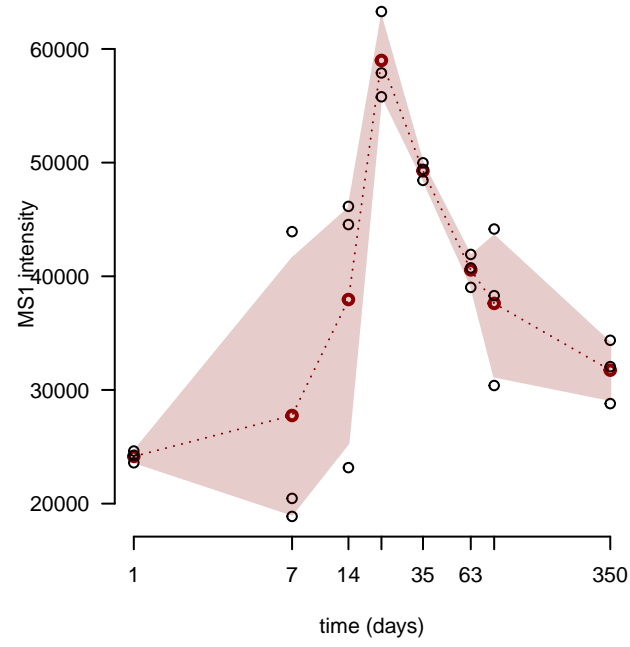

**Q9WVQ1**  
**GN=Magi2**  
membrane associated guanylate kinase, WW ...

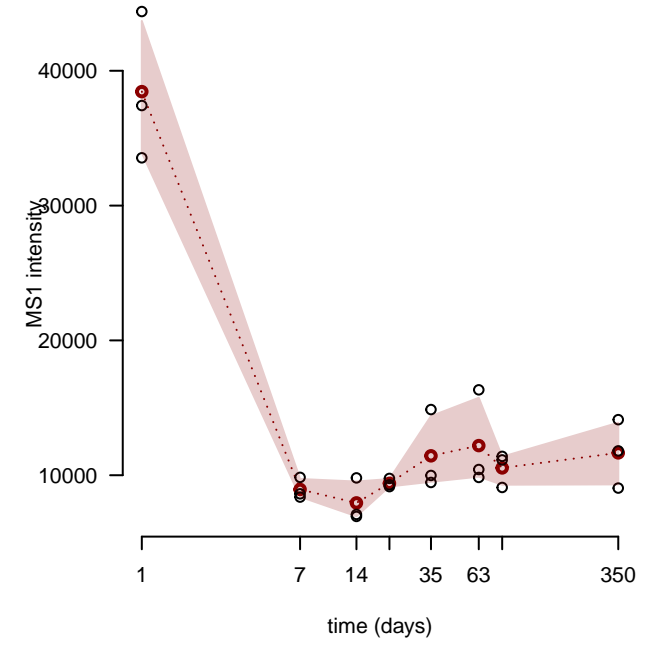

**Q9WVQ5**  
**GN=Apip**  
APAF1 interacting protein

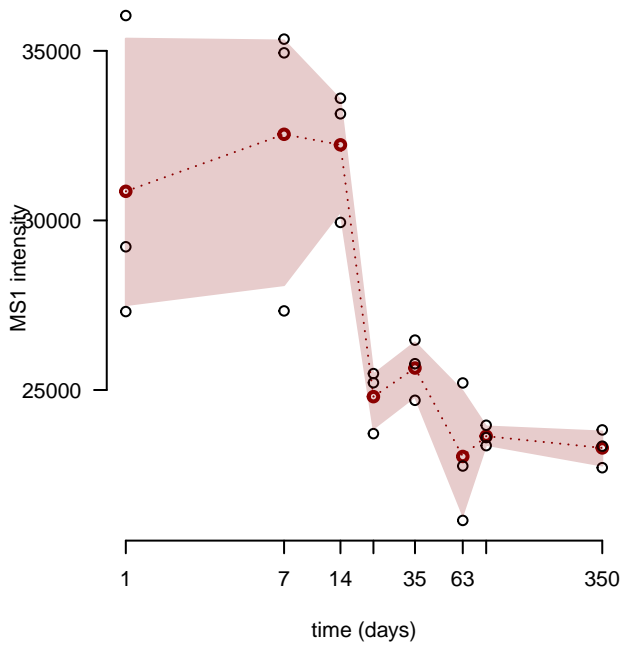

**Q9WVR4**  
**GN=Fxr2**  
FMR1 autosomal homolog 2

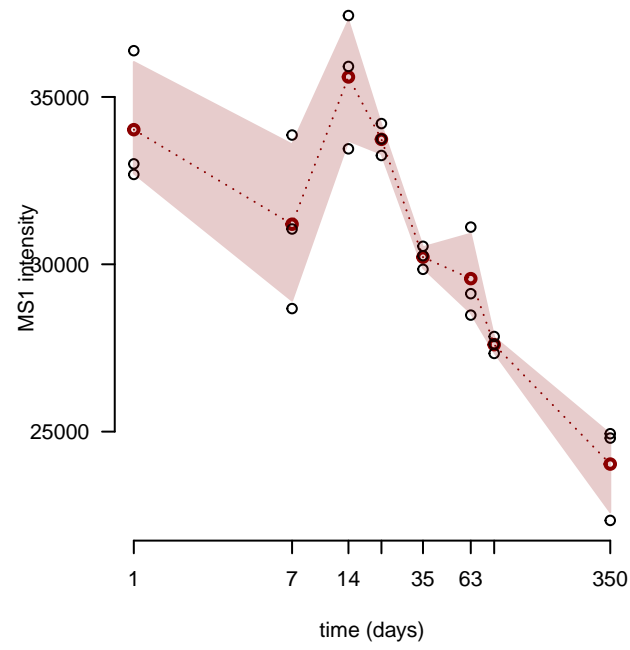

**Q9WVS8**  
**GN=Mapk7**  
mitogen-activated protein kinase 7

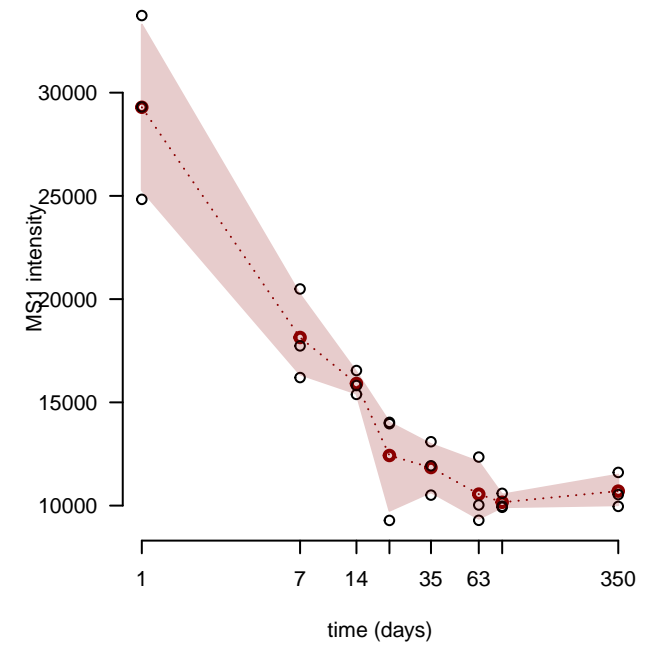

**Q9WVT6**  
**GN=Ca14**

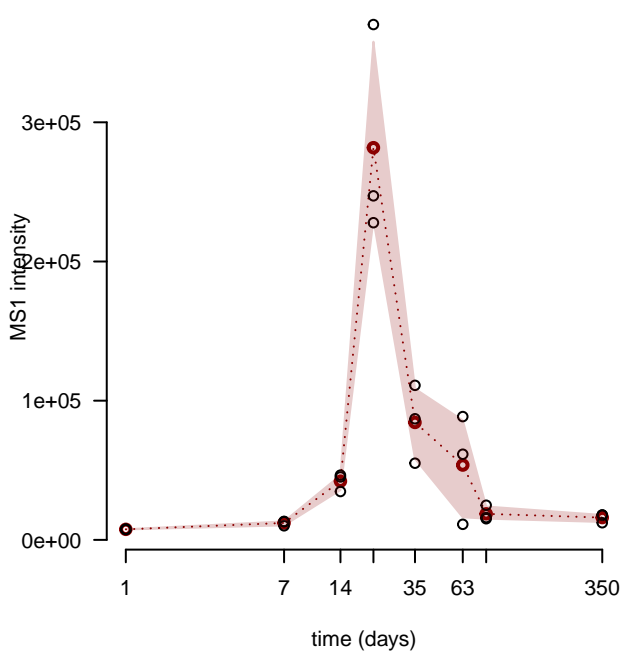

**Q9Z0E0**  
**GN=Ncdn**  
neurochondrin

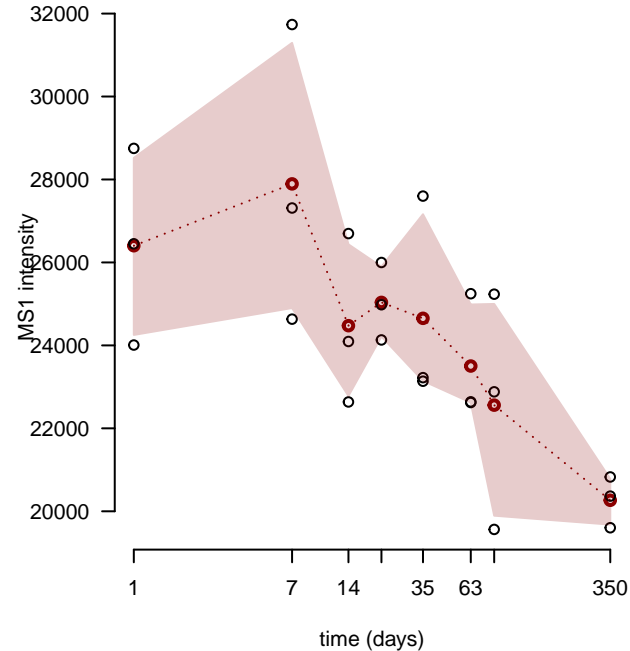

**Q9Z0E6**  
**GN=Gbp2**  
guanylate binding protein 2

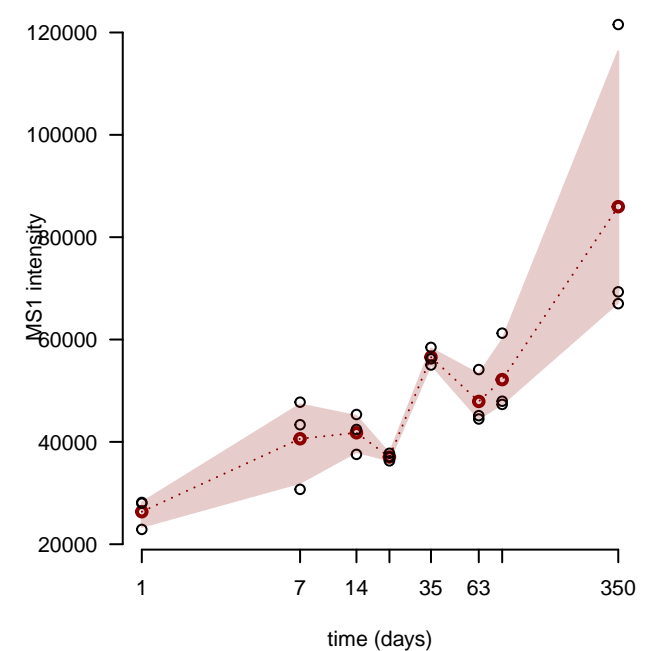



**Q9Z0F0**  
**GN=B3galt4**

UDP-Gal:betaGlcNAc beta 1,3-galactosyltr ...

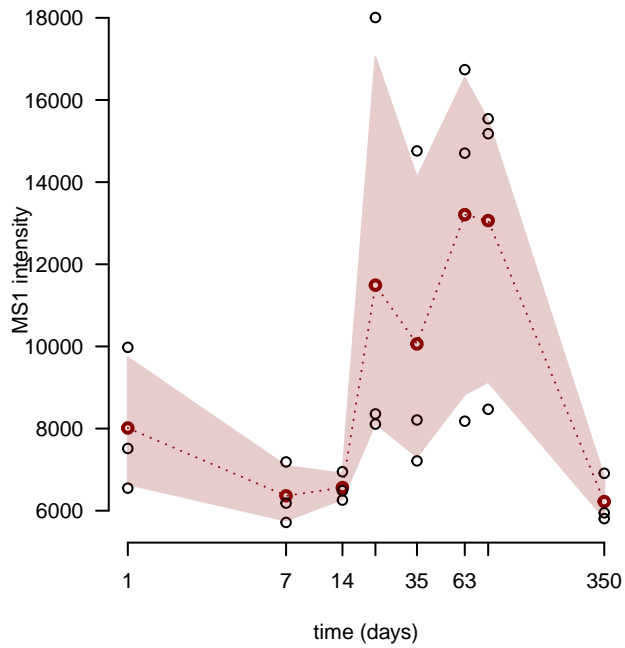

**Q9Z0F6**  
**GN=Rad9a**

RAD9 checkpoint clamp component A

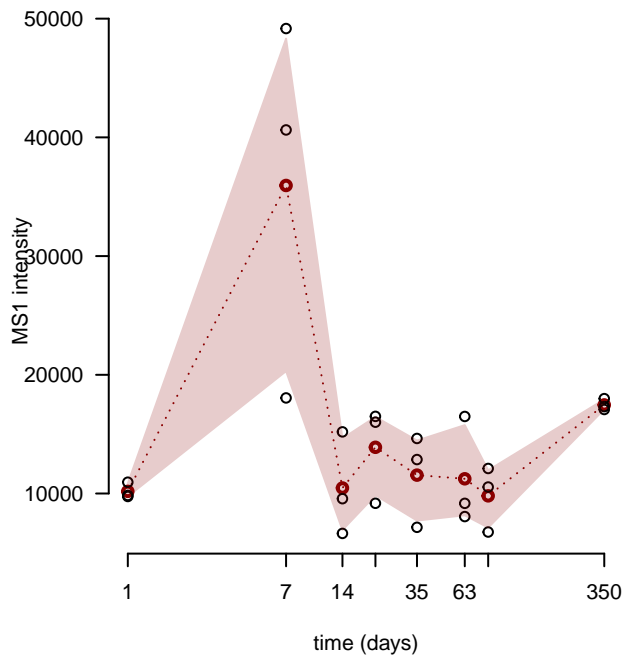

**Q9Z0F8**  
**GN=Adam17**

a disintegrin and metallopeptidase domai ...

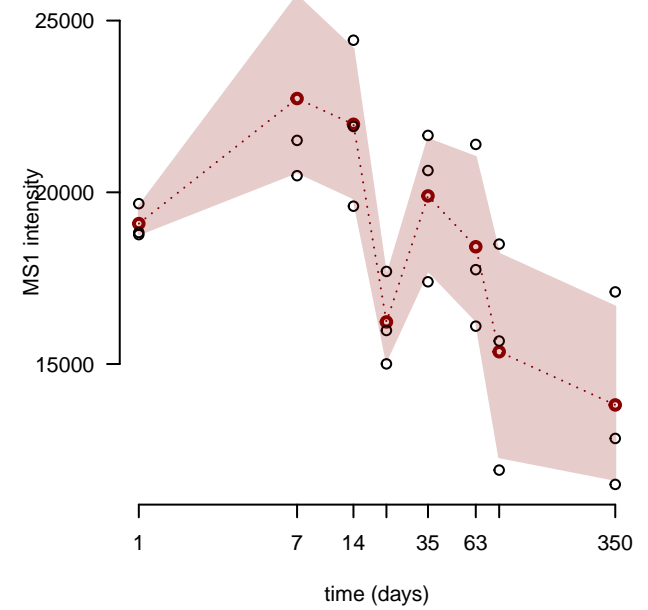

**Q9Z0G0**  
**GN=Gipc1**

GIPC PDZ domain containing family, membe ...

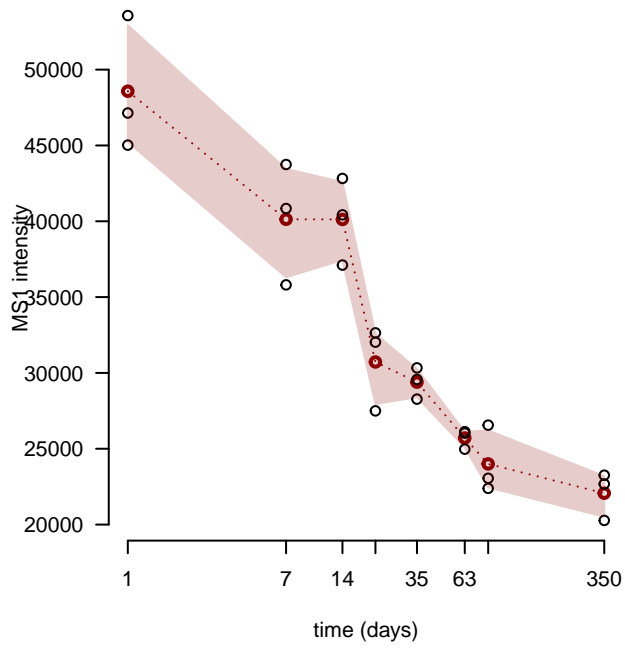

**Q9Z0G9**  
**GN=Cldn3**

claudin 3

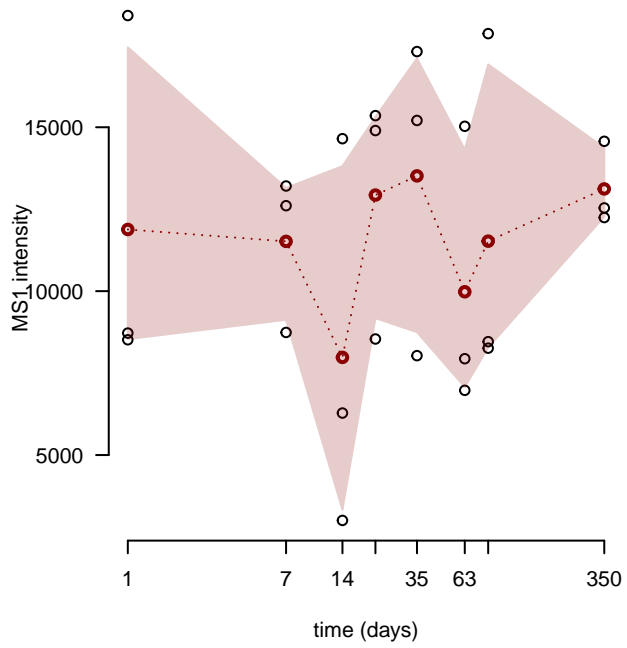

**Q9Z0H1**  
**GN=Wdr46**

WD repeat domain 46

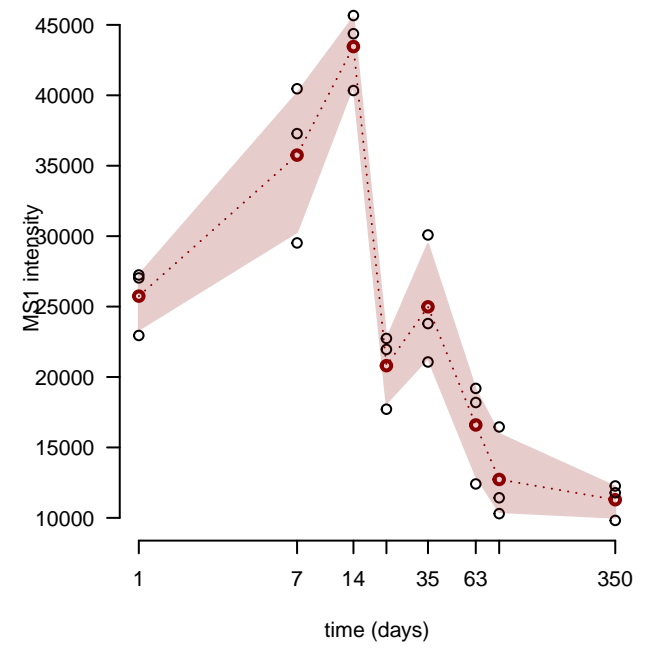

**Q9Z0H3**  
**GN=Smarca1**

SWI/SNF related, matrix associated, acti ...

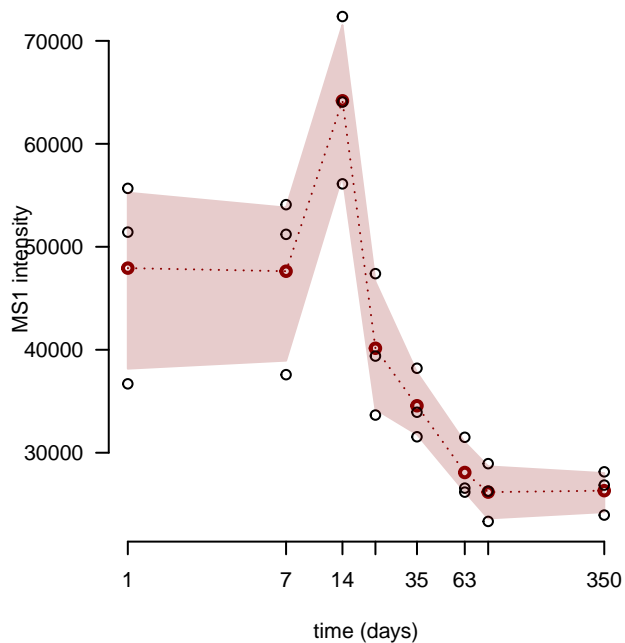

**Q9Z0H3**  
**GN=Smarca1**

SWI/SNF related, matrix associated, acti ...

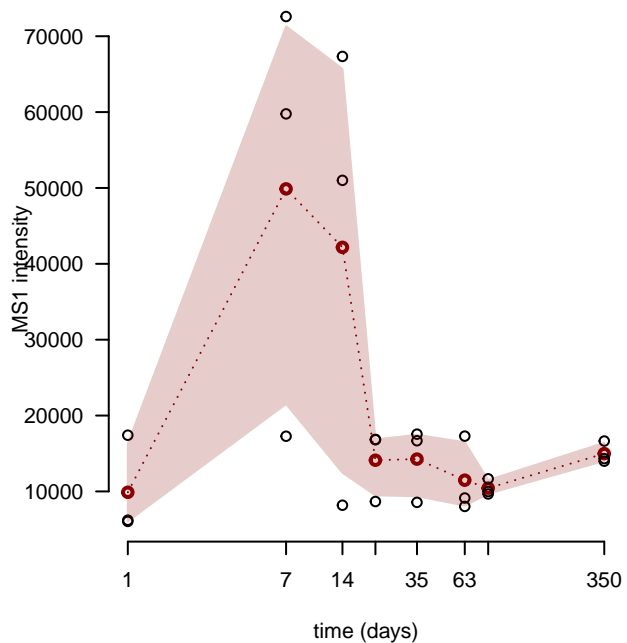

**Q9Z0H4**  
**GN=Celf2**

CUGBP, Elav-like family member 2

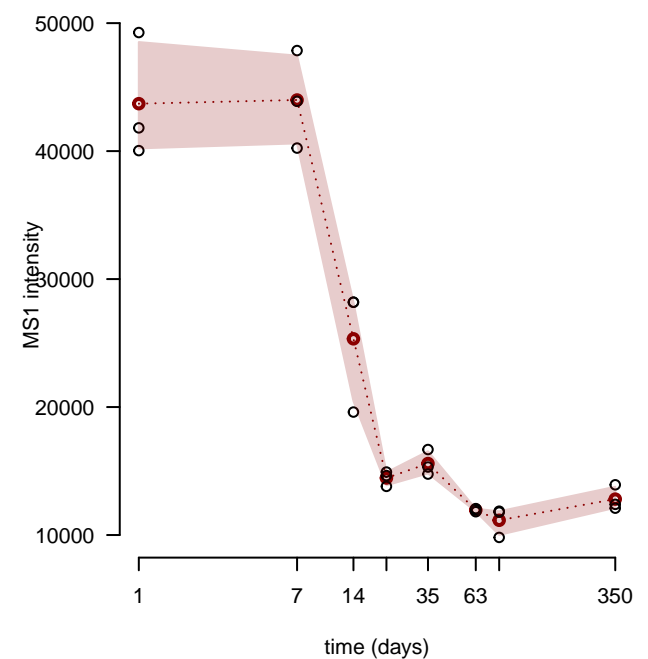

**Q9Z0H7**  
GN=Bcl10  
B cell leukemia/lymphoma 10

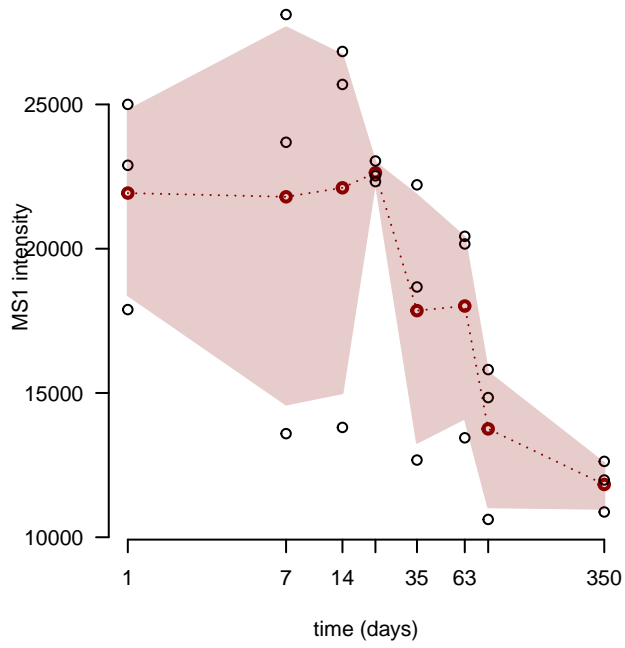

**Q9Z0H8**  
GN=Clip2  
CAP-GLY domain containing linker protein ...

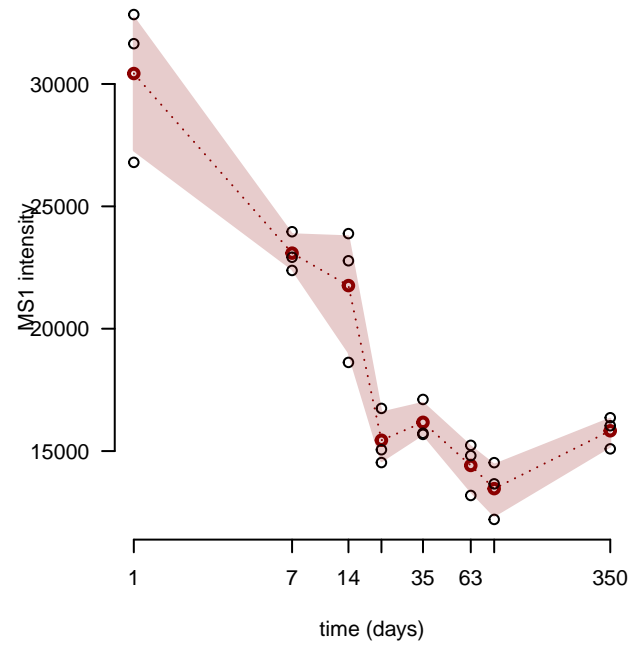

**Q9Z0J0**  
GN=Npc2  
NPC intracellular cholesterol transporte ...

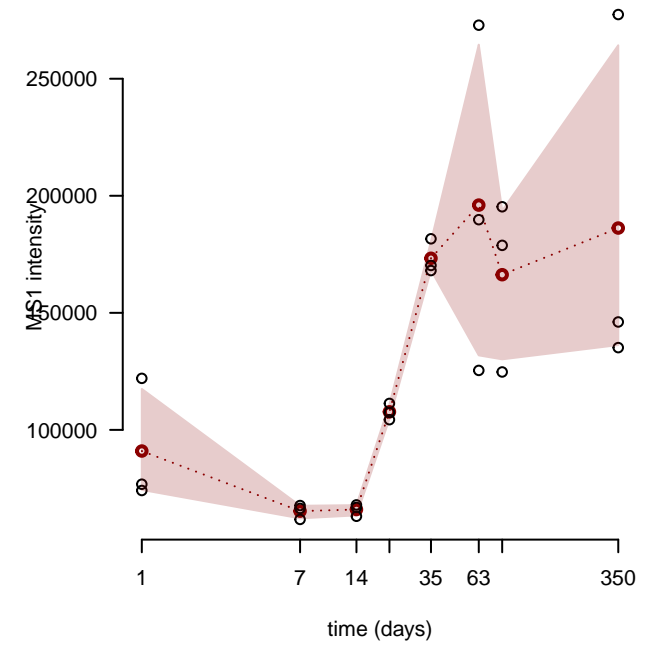

**Q9Z0J1**  
GN=Reck  
reversion-inducing-cysteine-rich protein ...

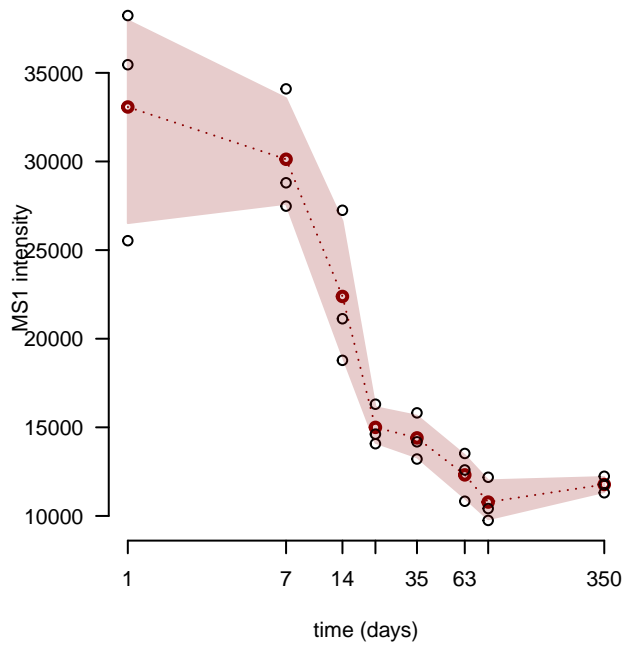

**Q9Z0J4**  
GN=Nos1  
nitric oxide synthase 1, neuronal

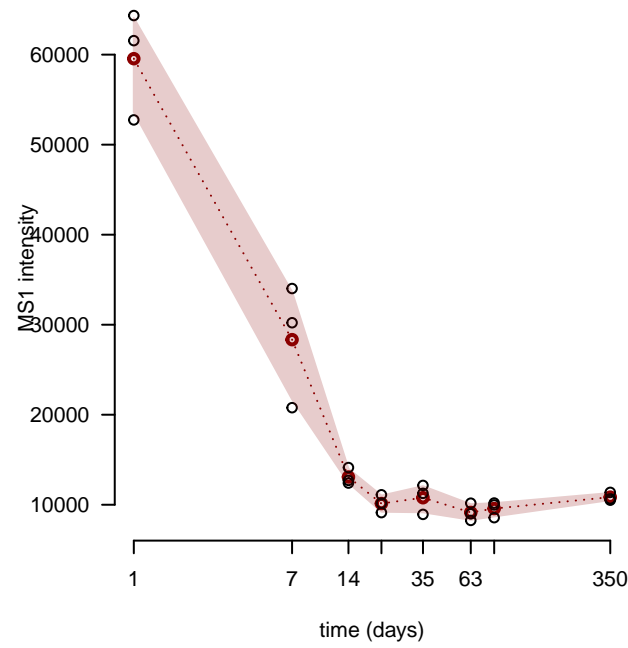

**Q9Z0K8**  
GN=Vnn1  
vanin 1

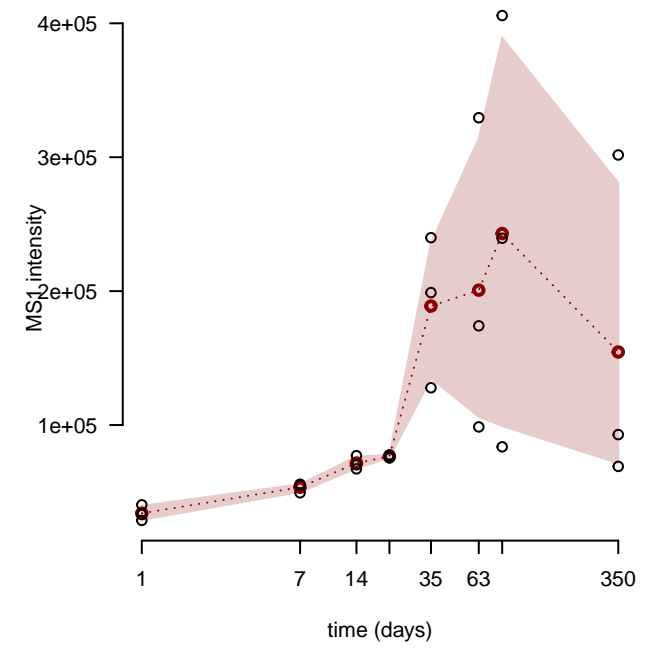

**Q9Z0L0**  
GN=Tpbp  
trophoblast glycoprotein

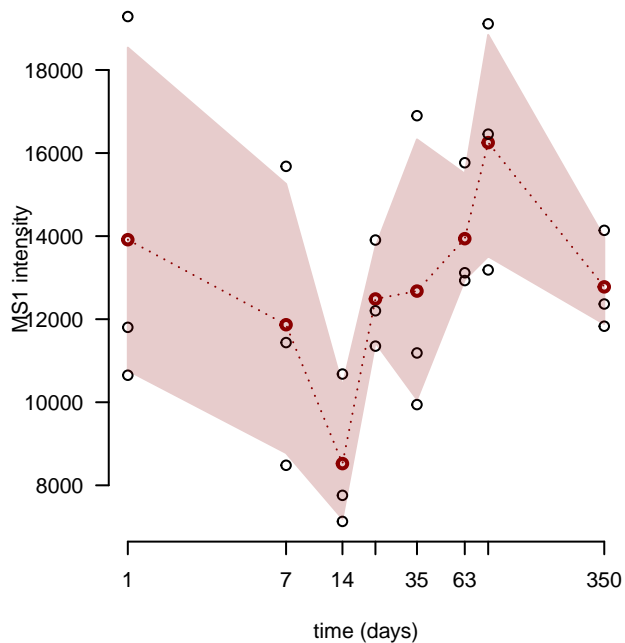

**Q9Z0L8**  
GN=Ggh  
gamma-glutamyl hydrolase

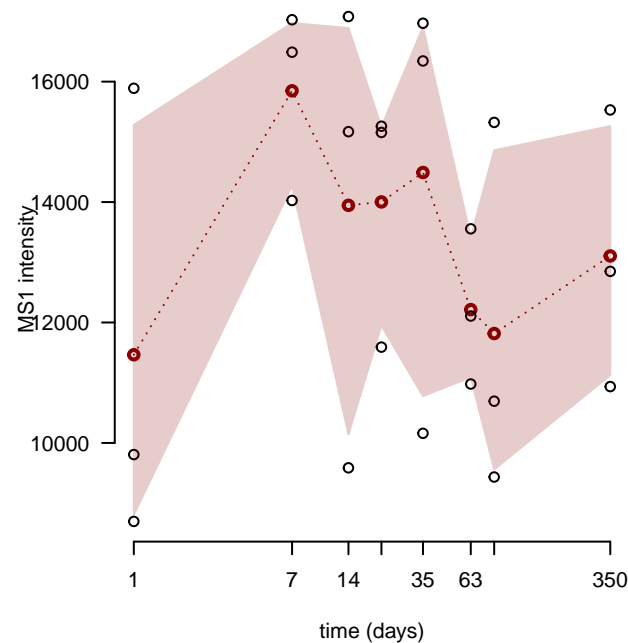

**Q9Z0M5**  
GN=Lipa  
lysosomal acid lipase A

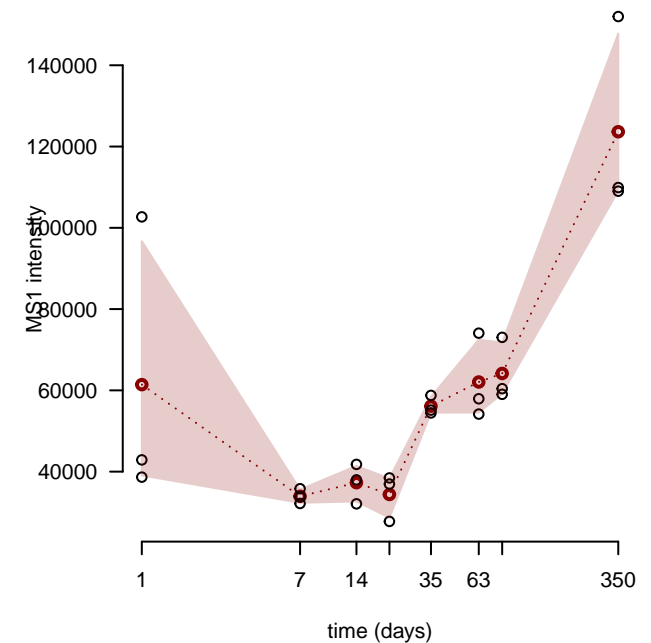

**Q9Z0M6**  
GN=Cd97

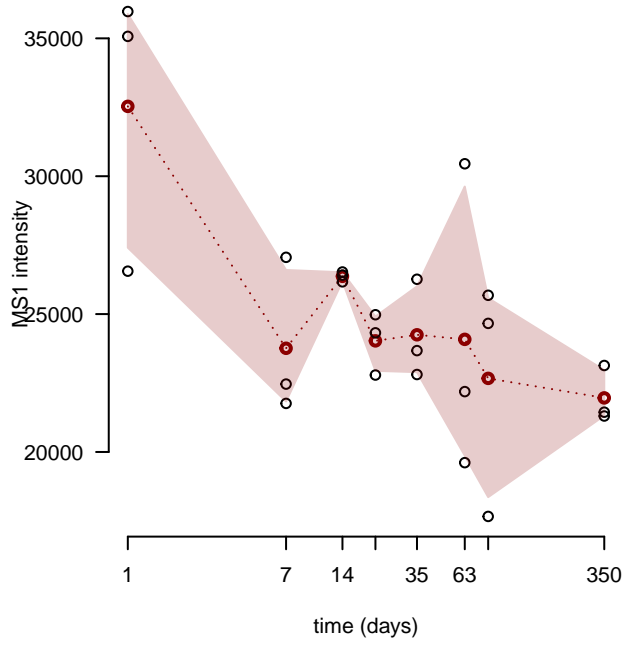

**Q9Z0N1**  
GN=Eif2s3x  
eukaryotic translation initiation factor ...

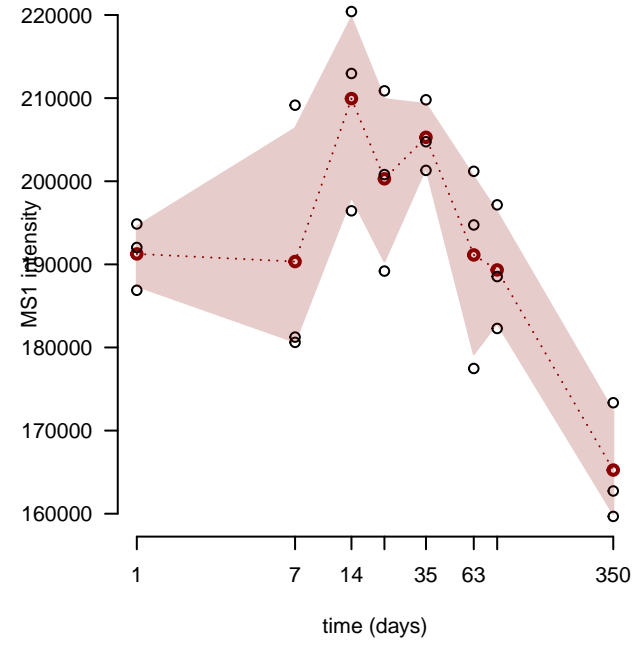

**Q9Z0N2**  
GN=Eif2s3y  
eukaryotic translation initiation factor ...

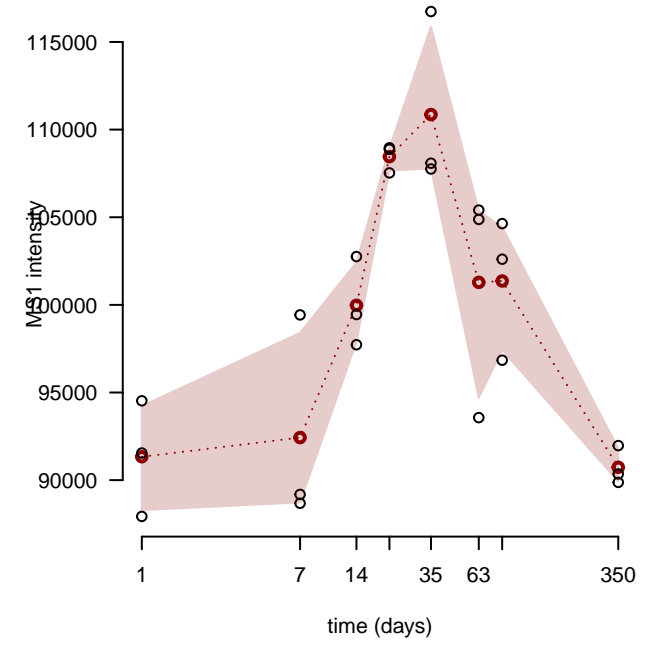

**Q9Z0P4**  
GN=Palm  
paralemmin

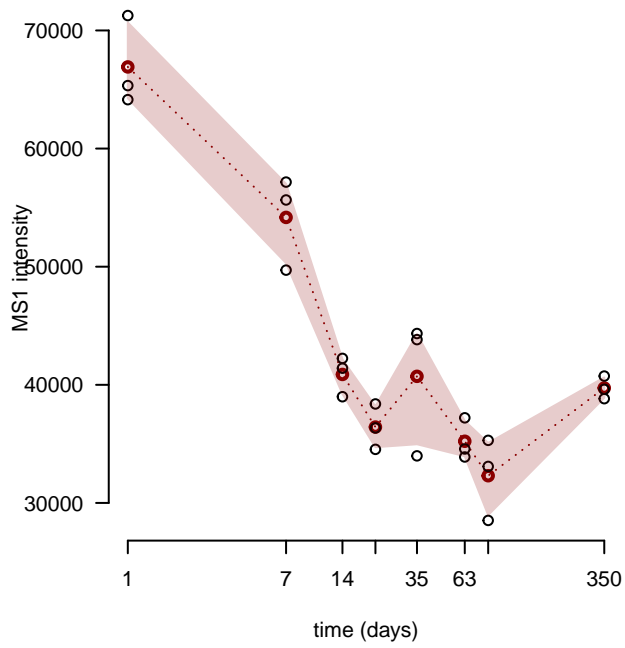

**Q9Z0P5**  
GN=Twf2  
twinfilin actin binding protein 2

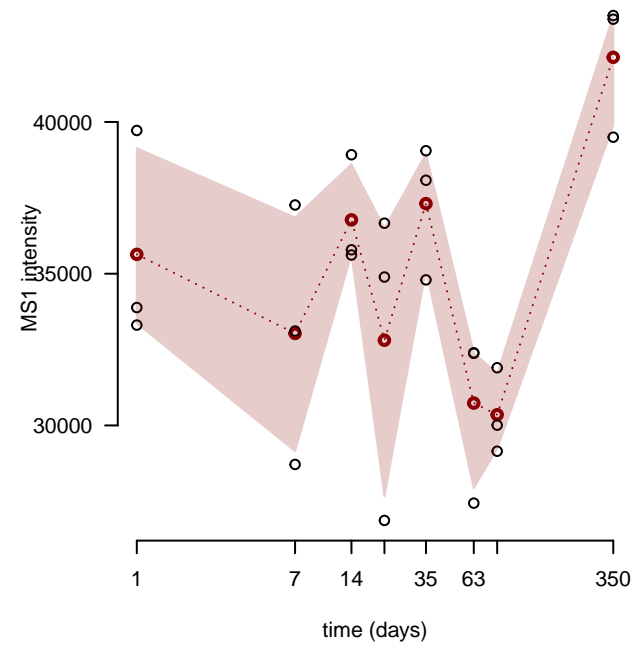

**Q9Z0P7**  
GN=Sufu  
SUFU negative regulator of hedgehog sign ...

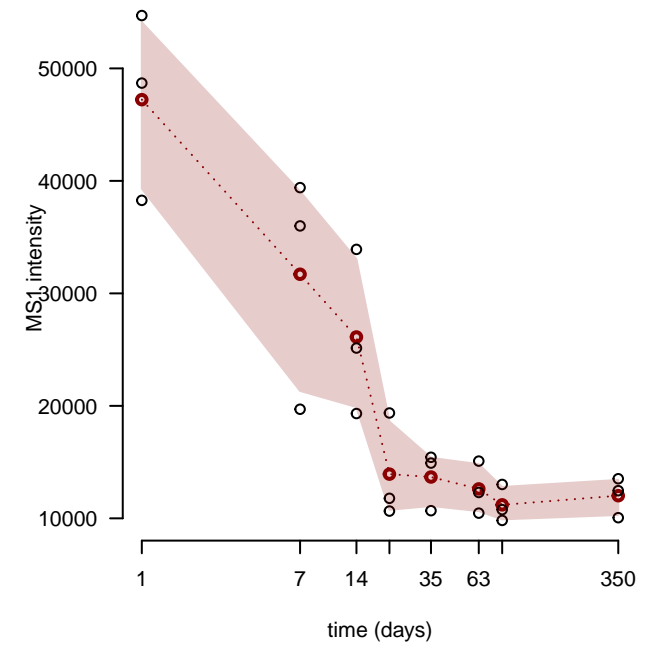

**Q9Z0R4**  
GN=Itsn1  
intersectin 1 (SH3 domain protein 1A)

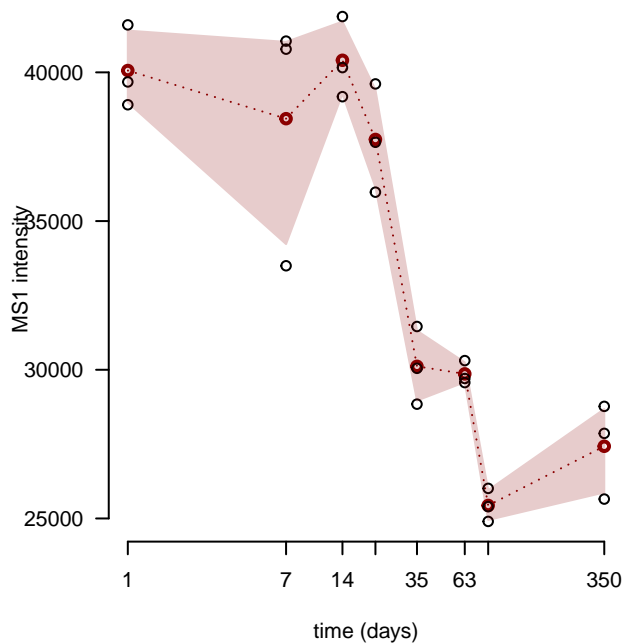

**Q9Z0R6**  
GN=Itsn2  
intersectin 2

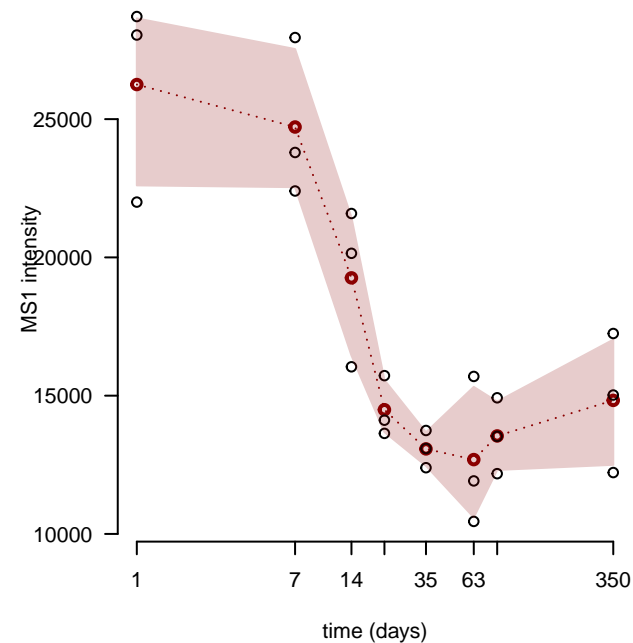

**Q9Z0R9**  
GN=Fads2  
fatty acid desaturase 2

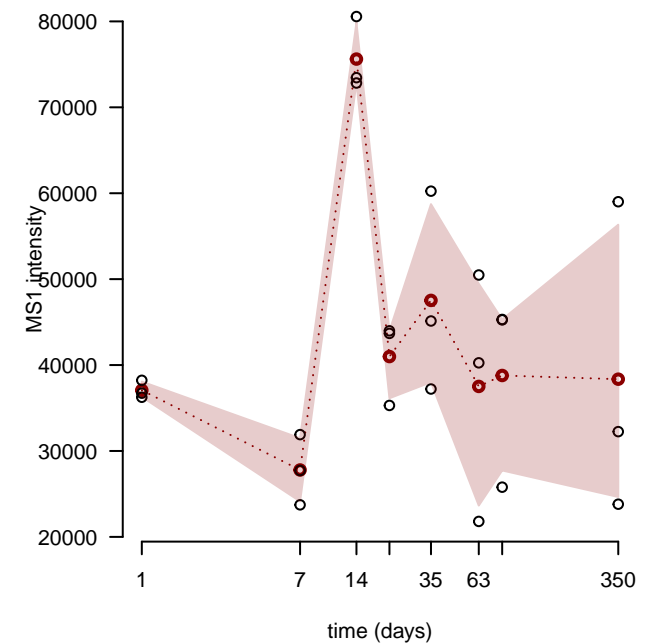

**Q9Z0S1**  
GN=Bpnt1  
3'(2'), 5'-biphosphate nucleotidase 1

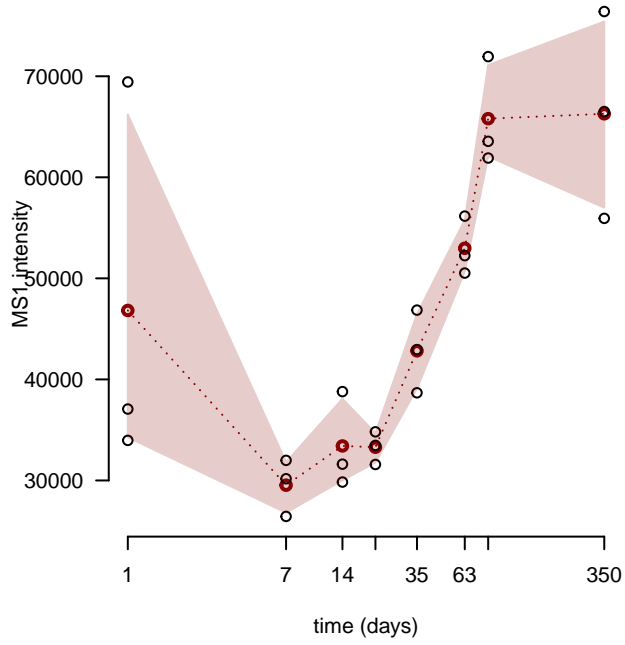

**Q9Z0S5**  
GN=Cldn15  
claudin 15

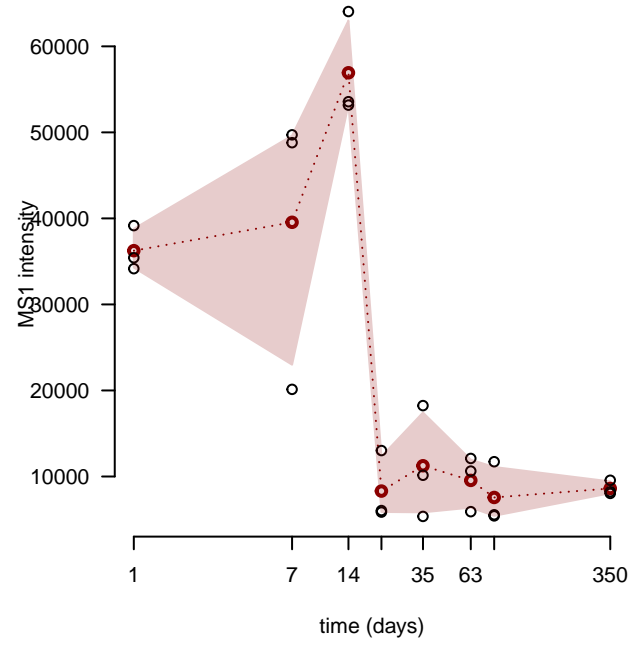

**Q9Z0S9**  
GN=Rabac1  
Rab acceptor 1 (prenylated)

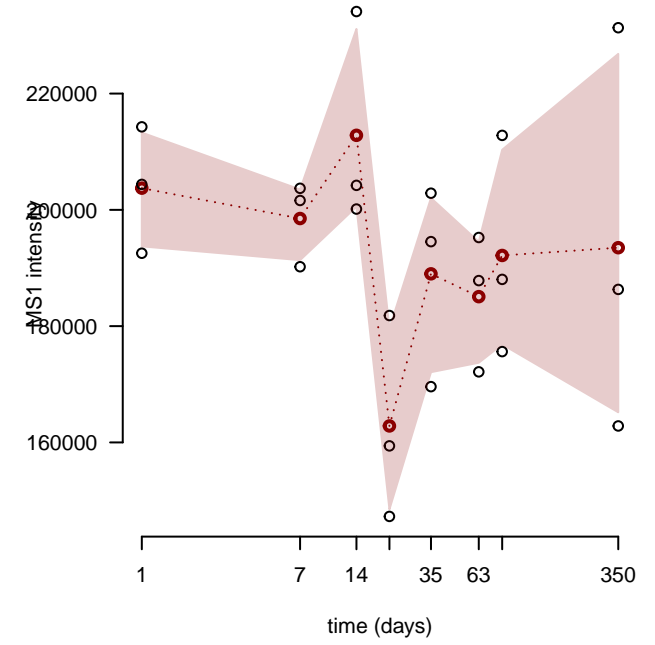

**Q9Z0U0**  
GN=Xpr1

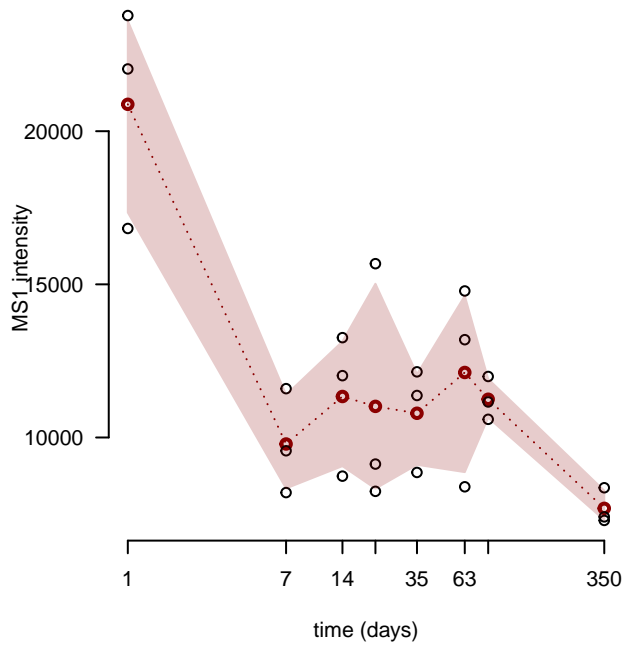

**Q9Z0U1**  
GN=Tjp2  
tight junction protein 2

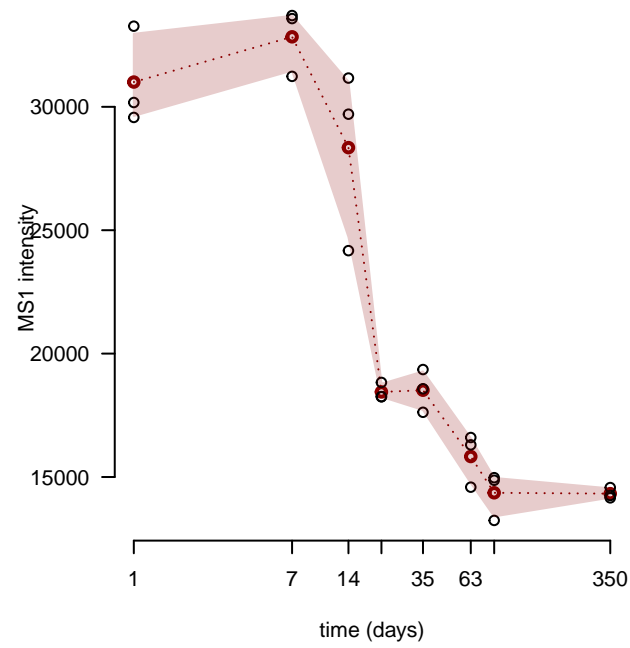

**Q9Z0V7**  
GN=Timm17b  
translocase of inner mitochondrial membr ...

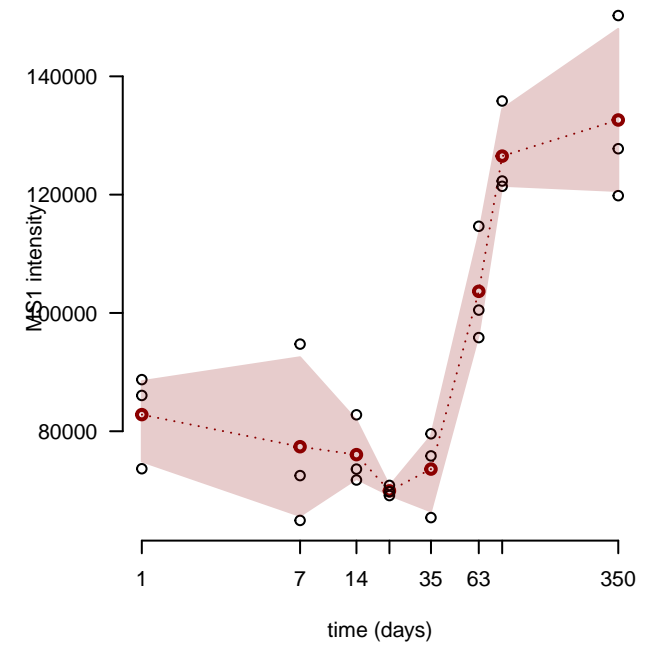

**Q9Z0V8**  
GN=Timm17a  
translocase of inner mitochondrial membr ...

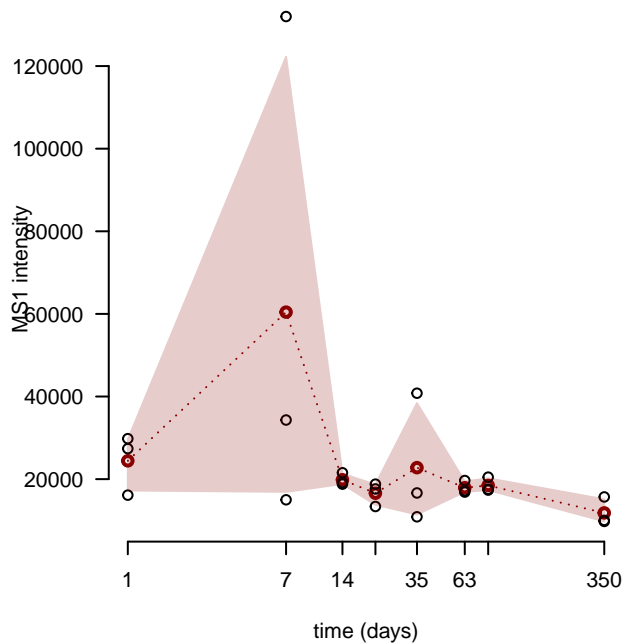

**Q9Z0W1**  
GN=Ngfr  
nerve growth factor receptor (TNFR super ...

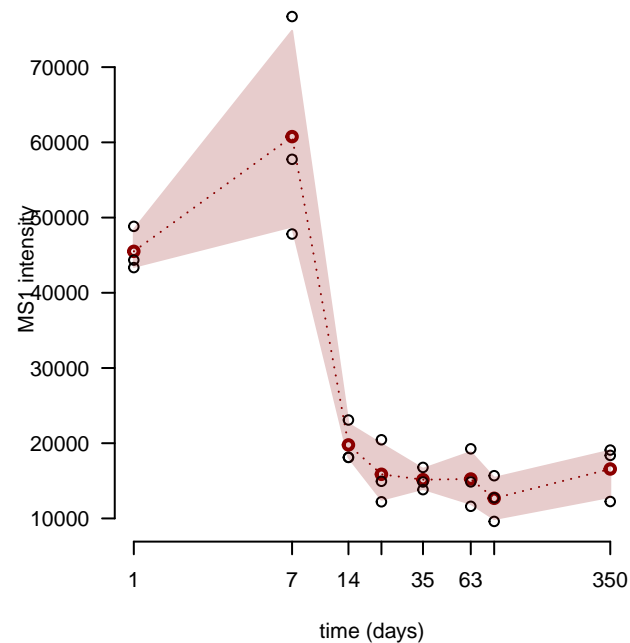

**Q9Z0W3**  
GN=Nup160  
nucleoporin 160

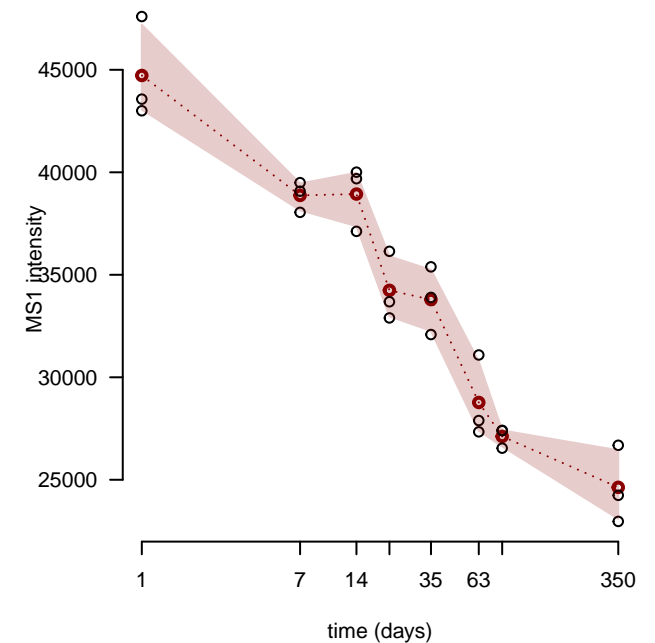

**Q9Z0X0**  
**GN=Cdc42ep5**  
CDC42 effector protein (Rho GTPase bindi ...

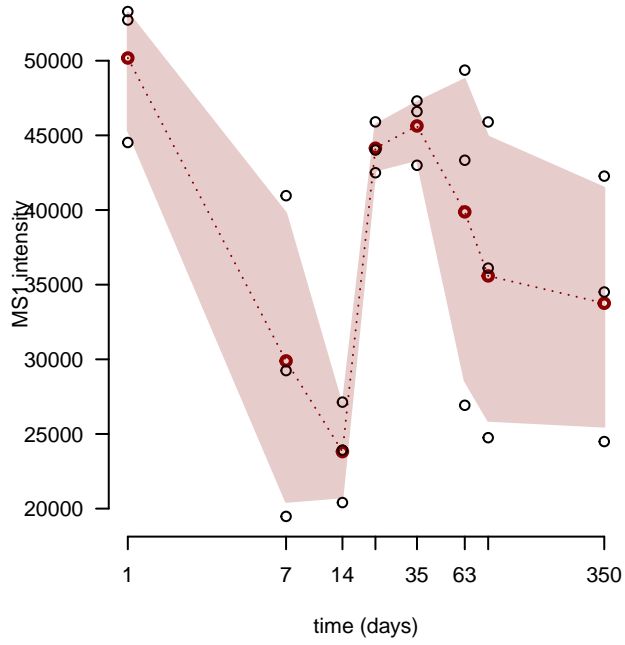

**Q9Z0X1**  
**GN=Aifm1**  
apoptosis-inducing factor, mitochondrion ...

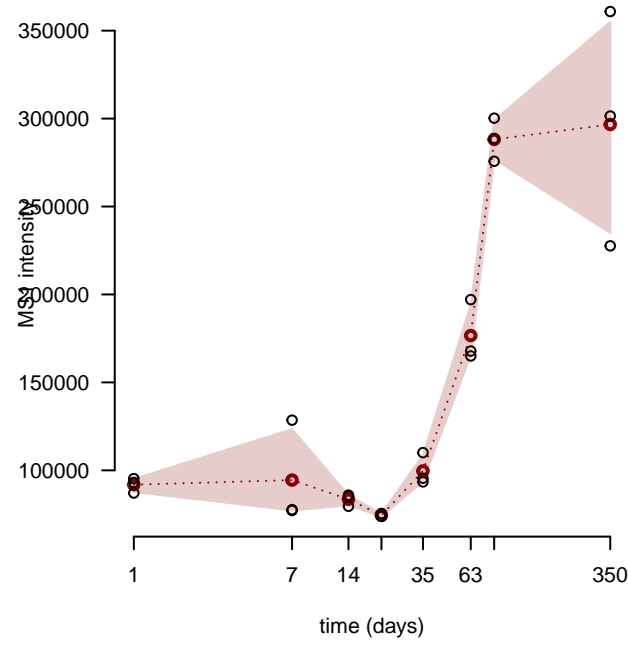

**Q9Z0X4**  
**GN=Pde3a**  
phosphodiesterase 3A, cGMP inhibited

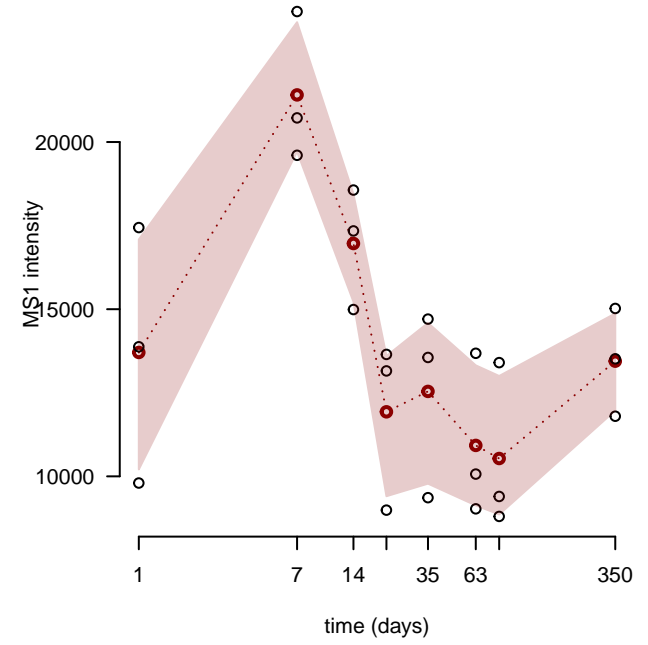

**Q9Z0Y1**  
**GN=Dctn3**  
dynactin 3

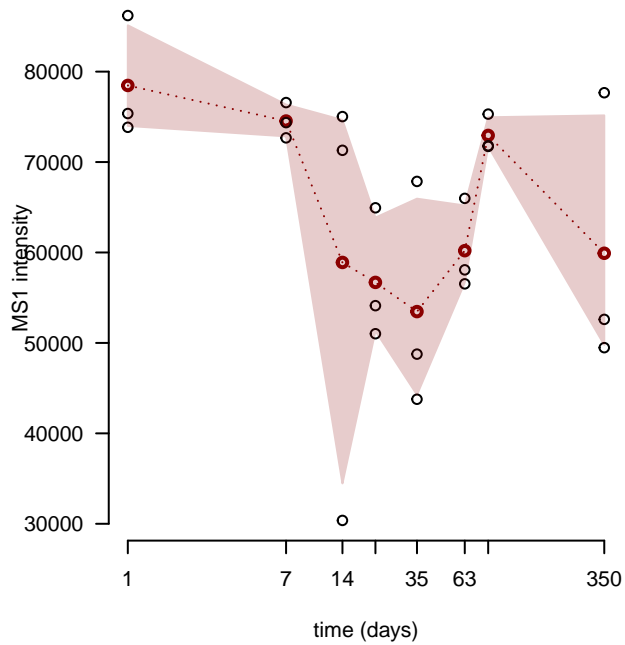

**Q9Z0Z4**  
**GN=Heph**  
hephaestin

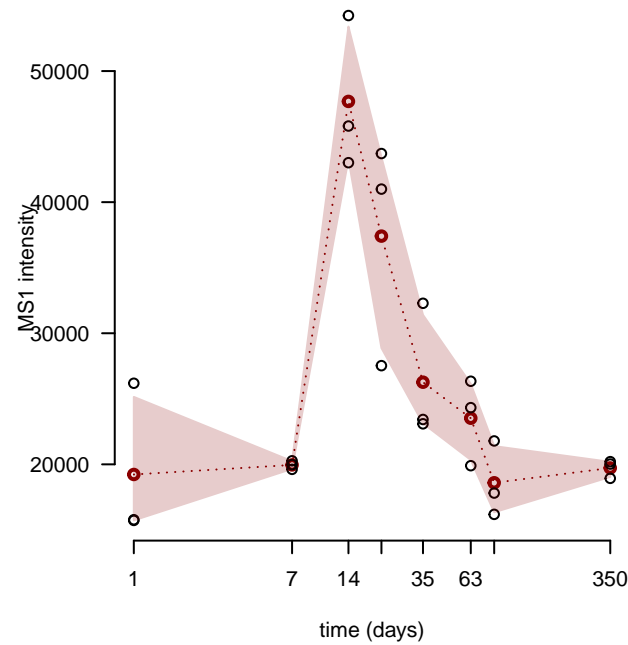

**Q9Z100**  
**GN=Cpxm1**  
carboxypeptidase X 1 (M14 family)

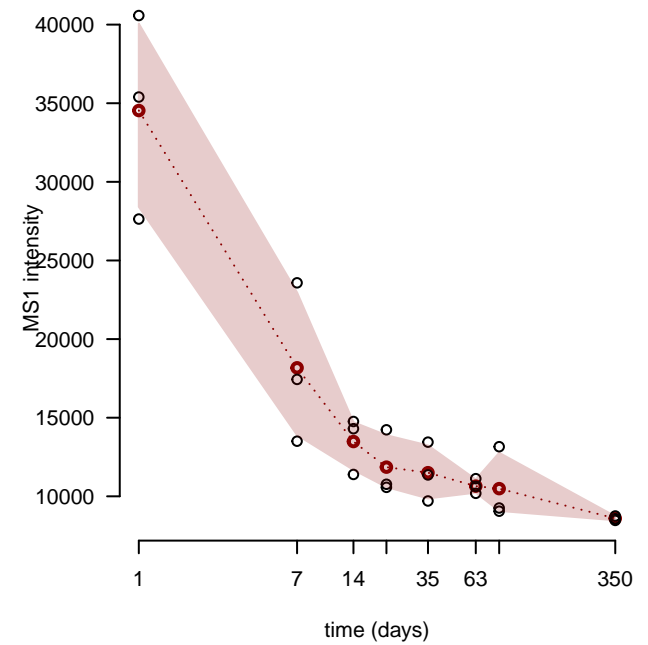

**Q9Z103**  
**GN=Adnp**  
activity-dependent neuroprotective prote ...

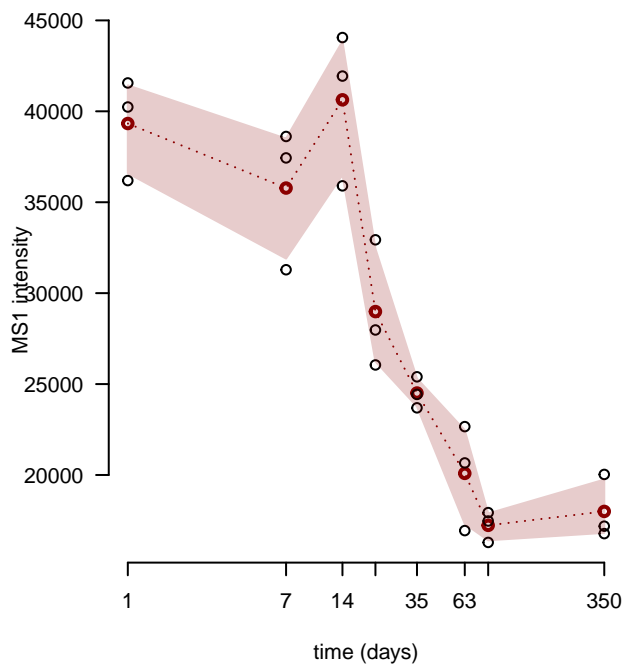

**Q9Z104**  
**GN=Hmg20b**  
high mobility group 20B

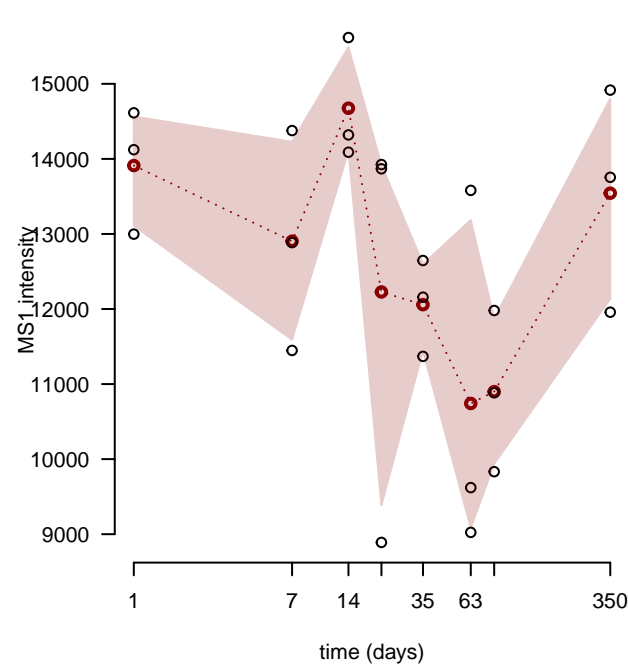

**Q9Z108**  
**GN=Stau1**  
staufen double-stranded RNA binding prot ...

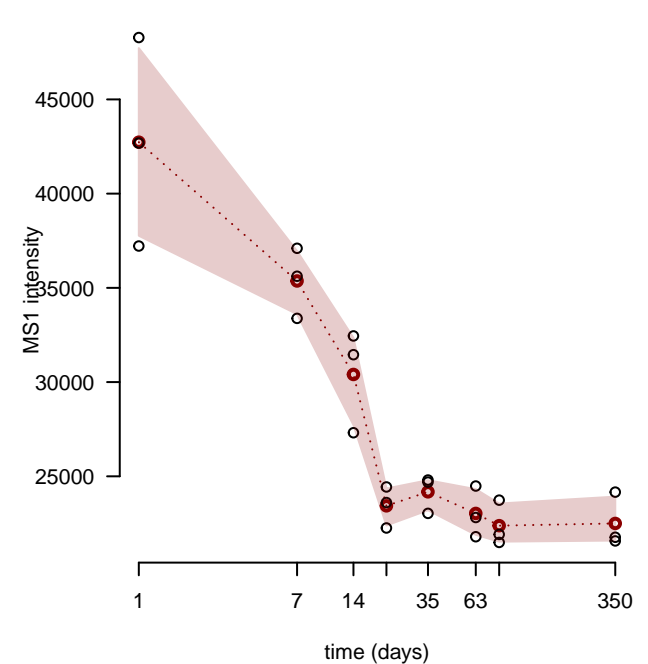

**Q9Z110**  
**GN=Aldh18a1**  
aldehyde dehydrogenase 18 family, member ...

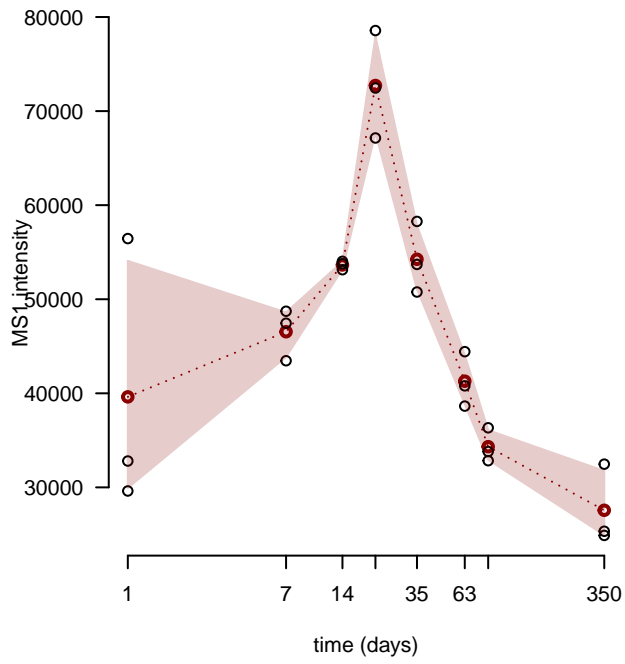

**Q9Z120**  
**GN=Mettl1**  
methyltransferase like 1

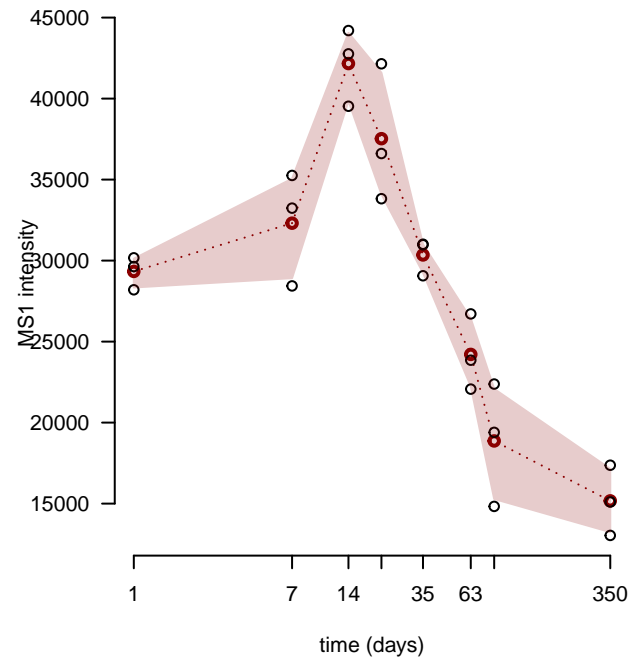

**Q9Z126**  
**GN=Pf4**  
platelet factor 4

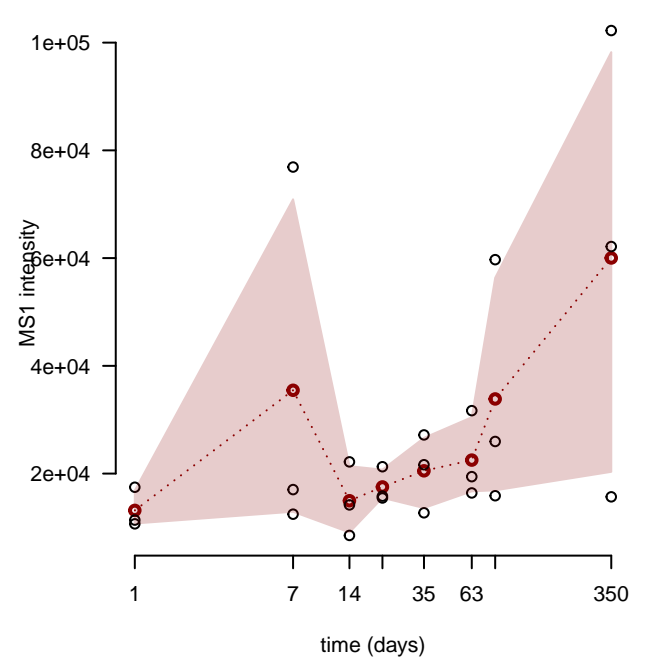

**Q9Z127**  
**GN=Slc7a5**  
solute carrier family 7 (cationic amino ...

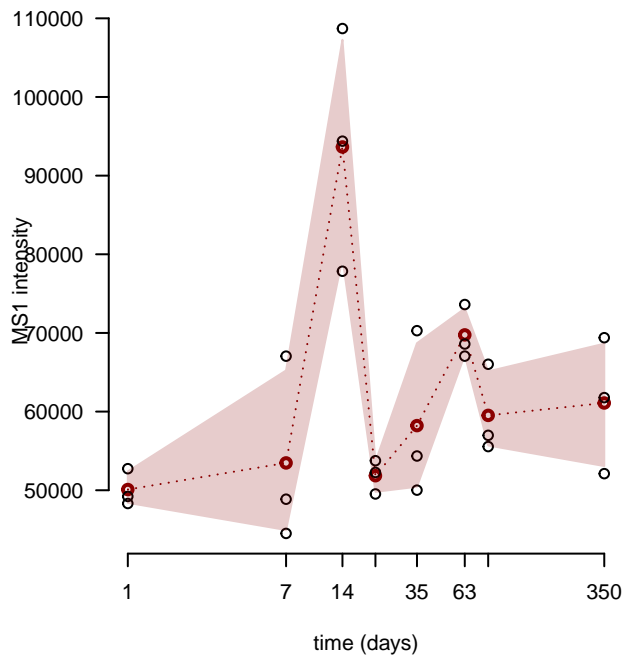

**Q9Z129**  
**GN=Recql**  
RecQ protein-like

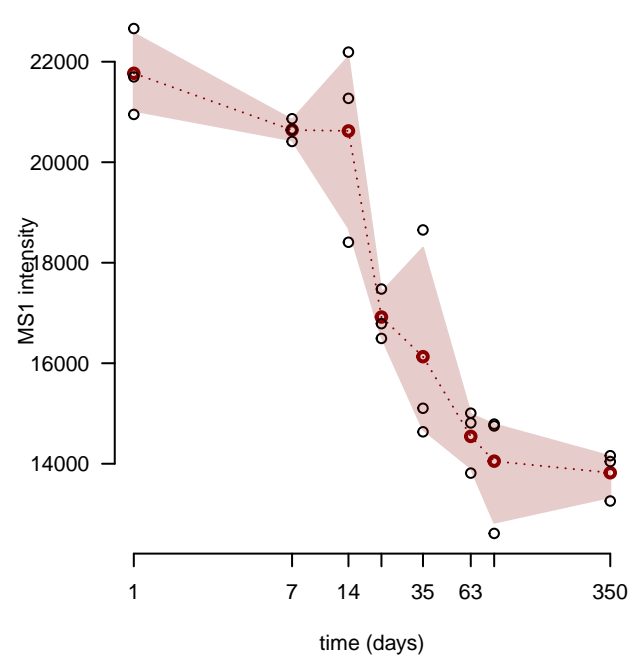

**Q9Z130**  
**GN=Hnrnpdl**  
heterogeneous nuclear ribonucleoprotein ...

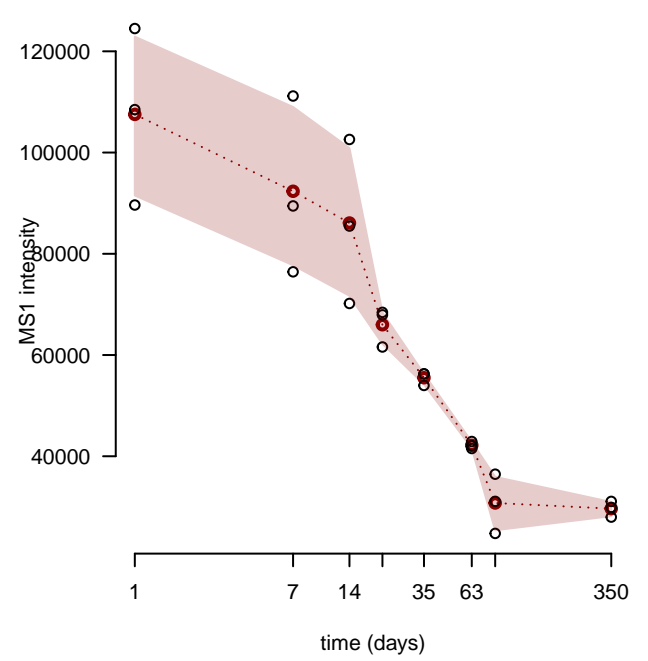

**Q9Z138**  
**GN=Ror2**  
receptor tyrosine kinase-like orphan rec ...

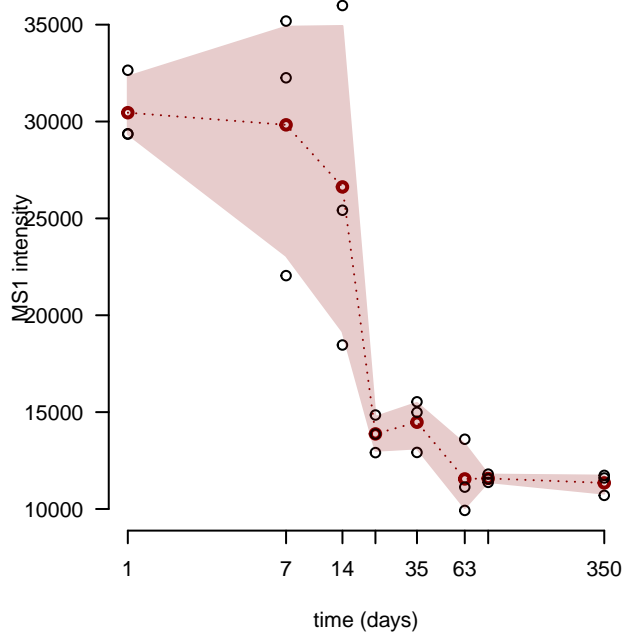

**Q9Z148**  
**GN=Ehmt2**  
euchromatic histone lysine N-methyltrans ...

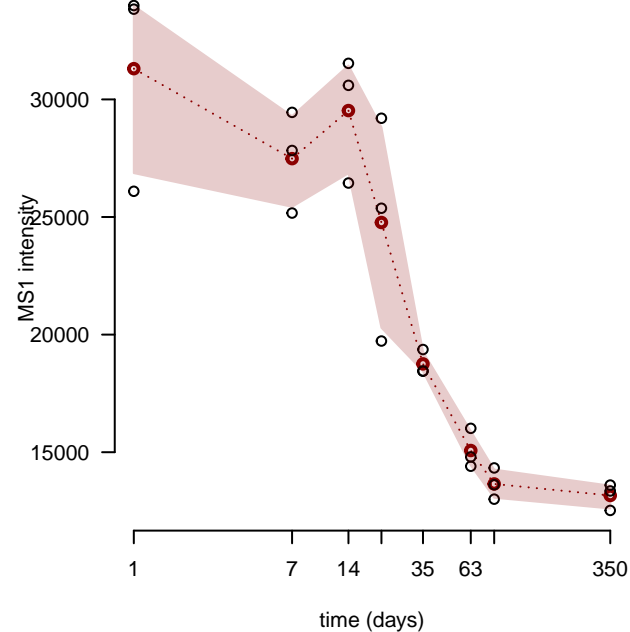

**Q9Z160**  
**GN=Cog1**  
component of oligomeric golgi complex 1

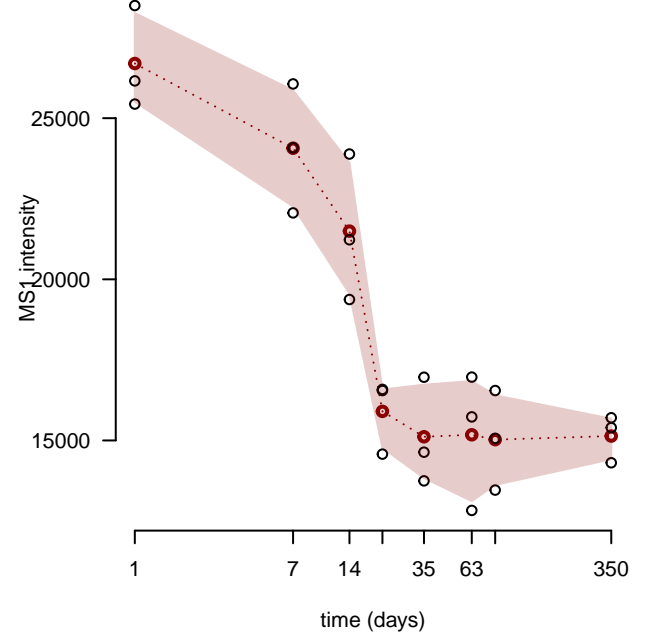

**Q9Z172**  
GN=Sumo3  
small ubiquitin-like modifier 3

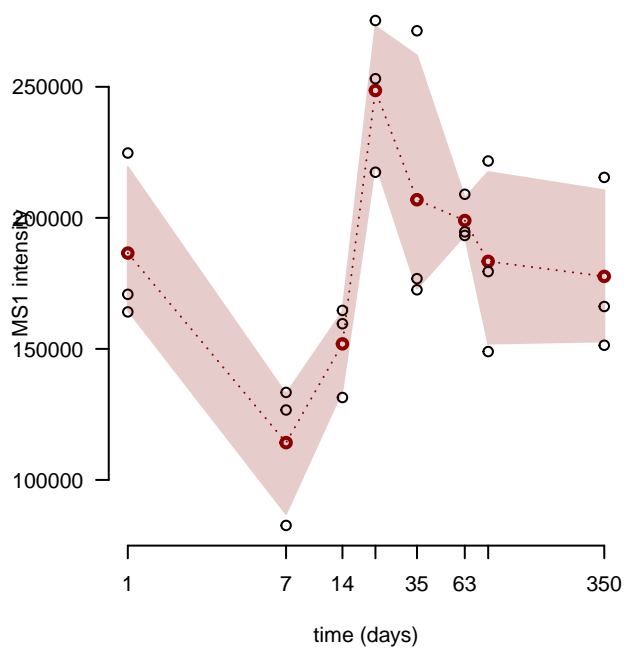

**Q9Z188**  
GN=Dyrk1b  
dual-specificity tyrosine-(Y)-phosphoryl ...

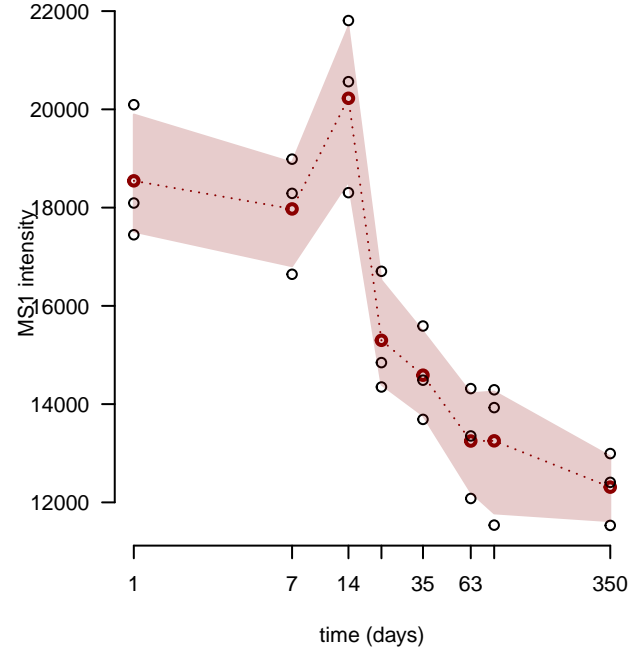

**Q9Z1A9**  
GN=Tbc1d8  
TBC1 domain family, member 8

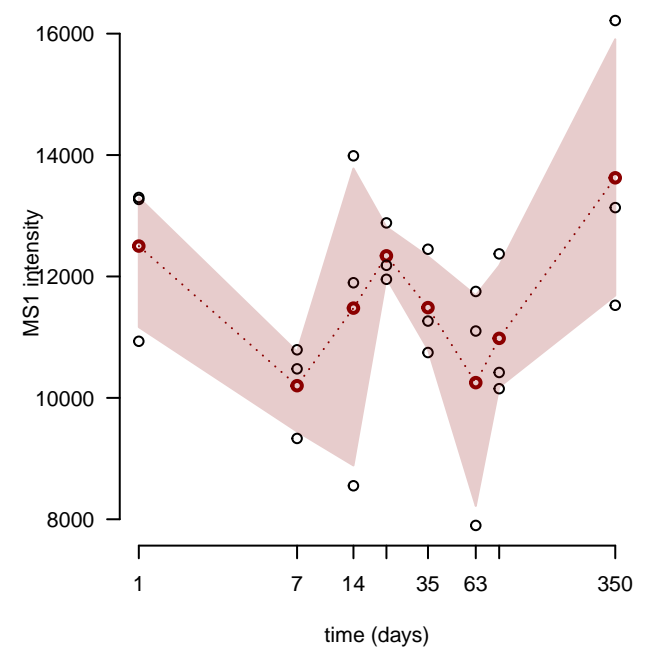

**Q9Z1B3**  
GN=Plcb1  
phospholipase C, beta 1

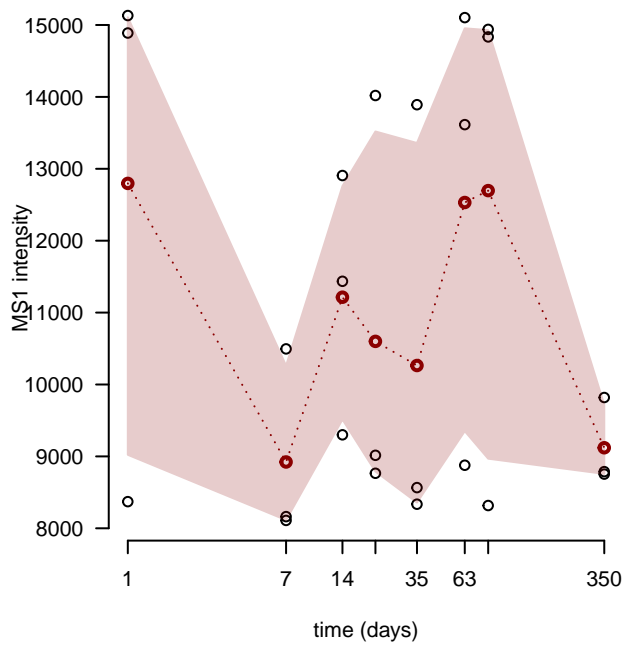

**Q9Z1B5**  
GN=Mad211  
MAD2 mitotic arrest deficient-like 1

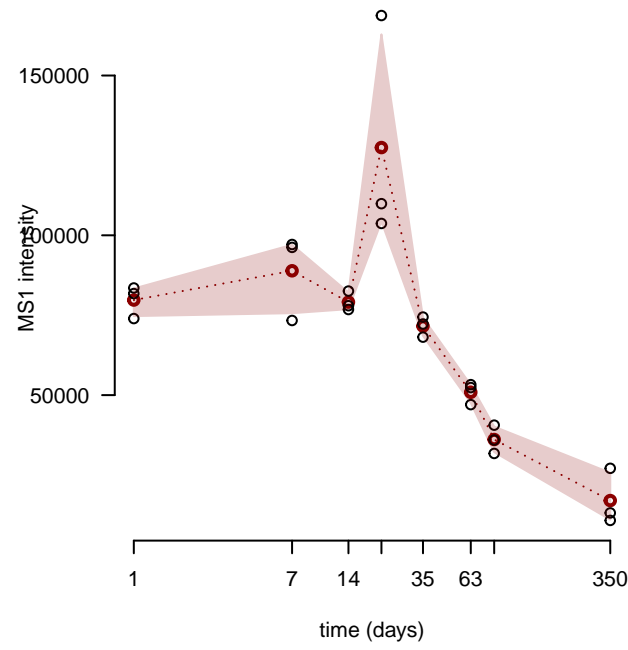

**Q9Z1B7**  
GN=Mapk13  
mitogen-activated protein kinase 13

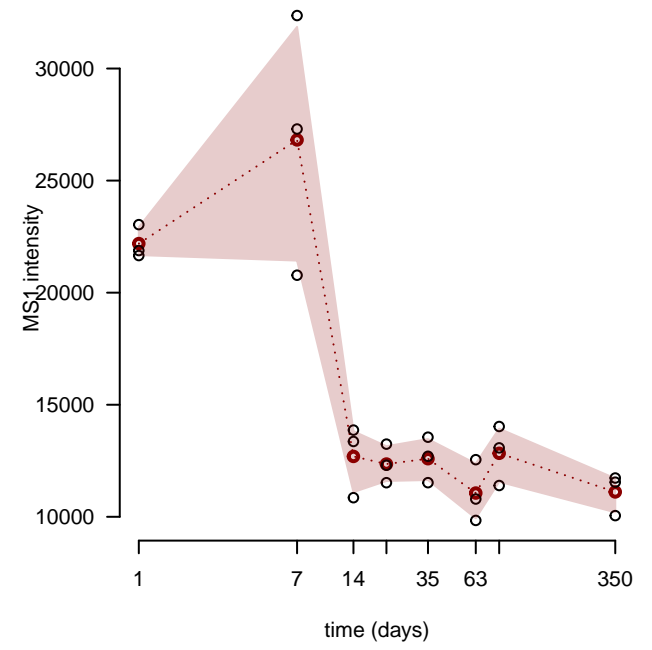

**Q9Z1B8**  
GN=Phf1  
PHD finger protein 1

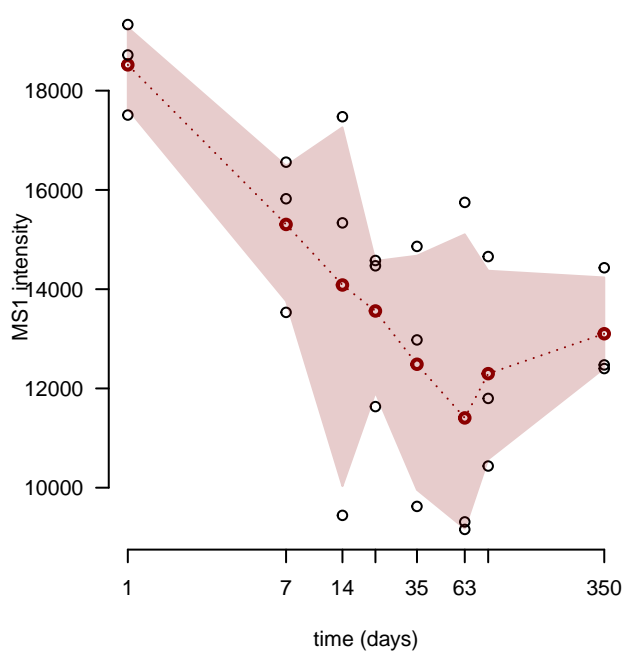

**Q9Z1D1**  
GN=Eif3g  
eukaryotic translation initiation factor ...

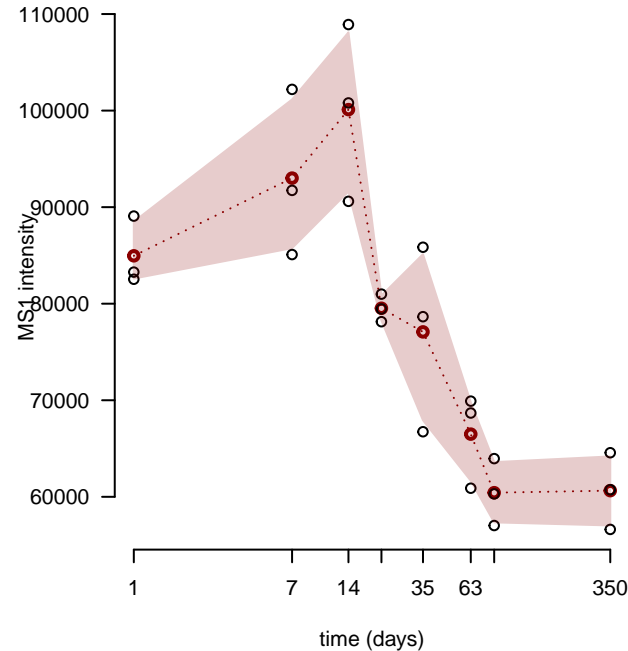

**Q9Z1E3**  
GN=Nfkbia  
nuclear factor of kappa light polypeptid ...

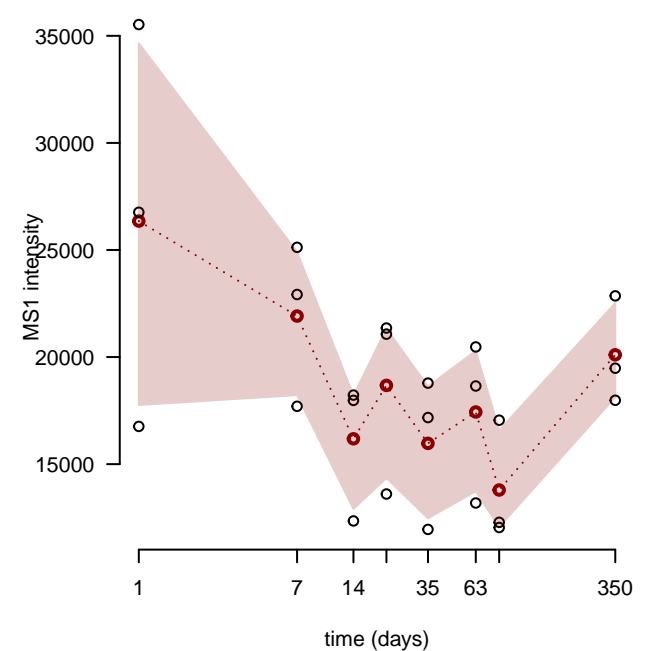

**Q9Z1E4**  
**GN=Gys1**  
glycogen synthase 1, muscle

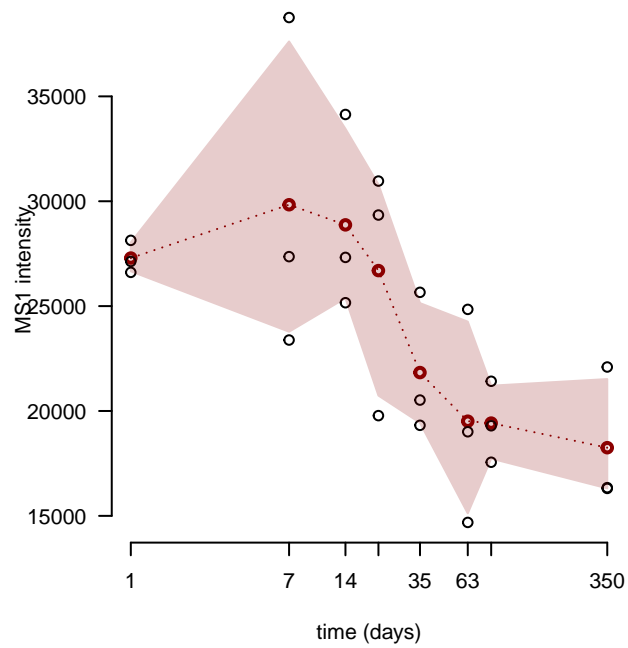

**Q9Z1F9**  
**GN=Uba2**  
ubiquitin-like modifier activating enzym ...

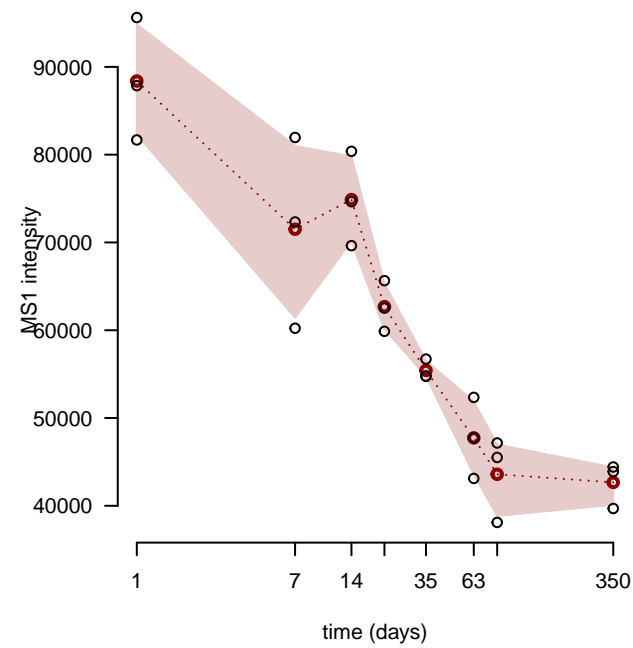

**Q9Z1G3**  
**GN=Atp6v1c1**  
ATPase, H+ transporting, lysosomal V1 su ...

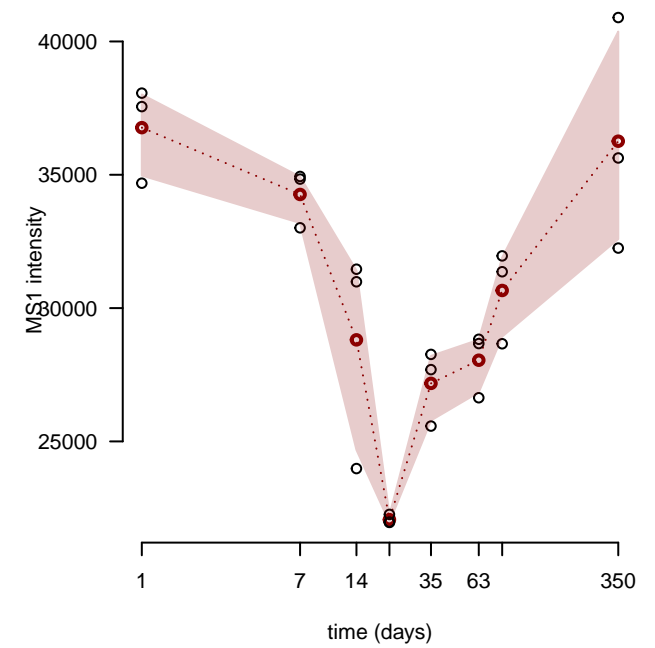

**Q9Z1G4**  
**GN=Atp6v0a1**  
ATPase, H+ transporting, lysosomal V0 su ...

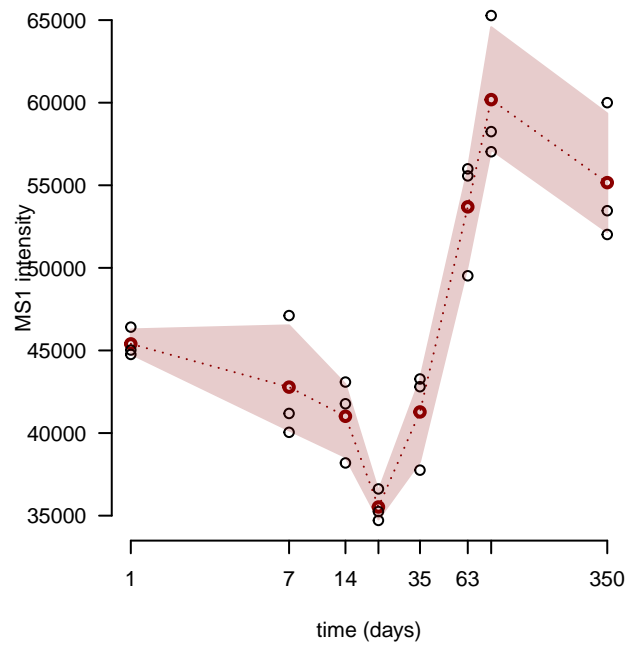

**Q9Z1J1**  
**GN=Tcf711**  
transcription factor 7 like 1 (T cell sp ...

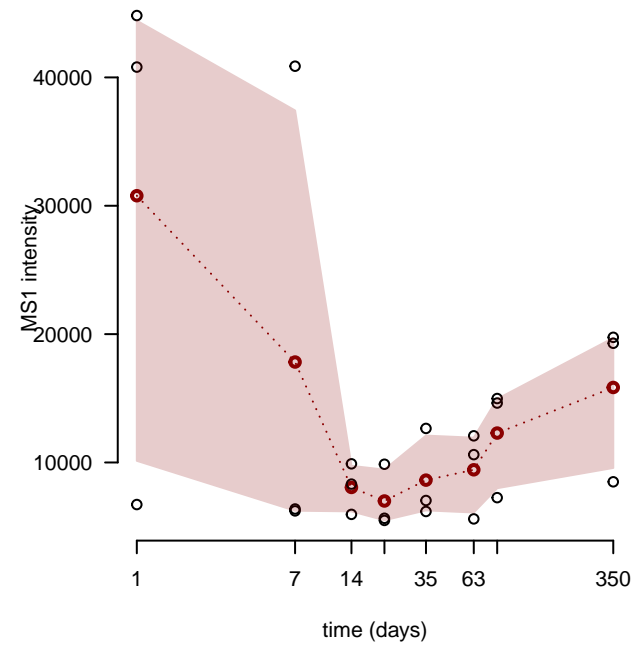

**Q9Z1J2**  
**GN=Nek4**  
NIMA (never in mitosis gene a)-related e ...

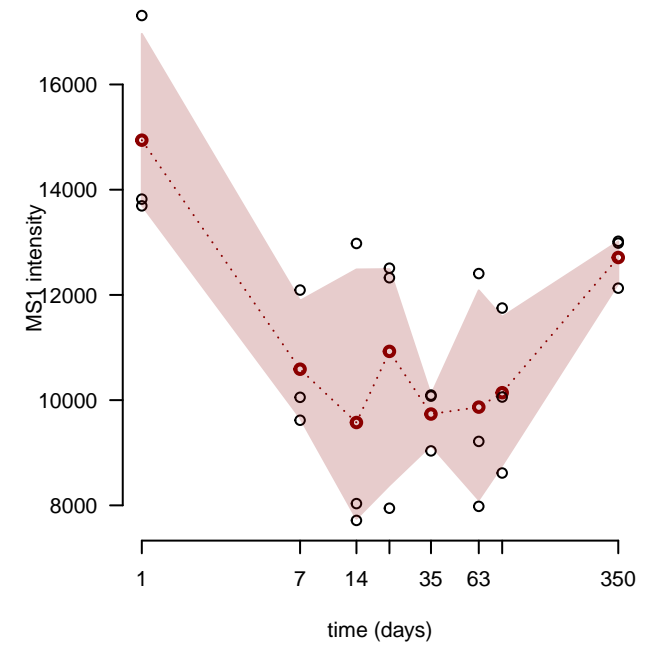

**Q9Z1J3**  
**GN=Nfs1**  
nitrogen fixation gene 1 (S. cerevisiae)

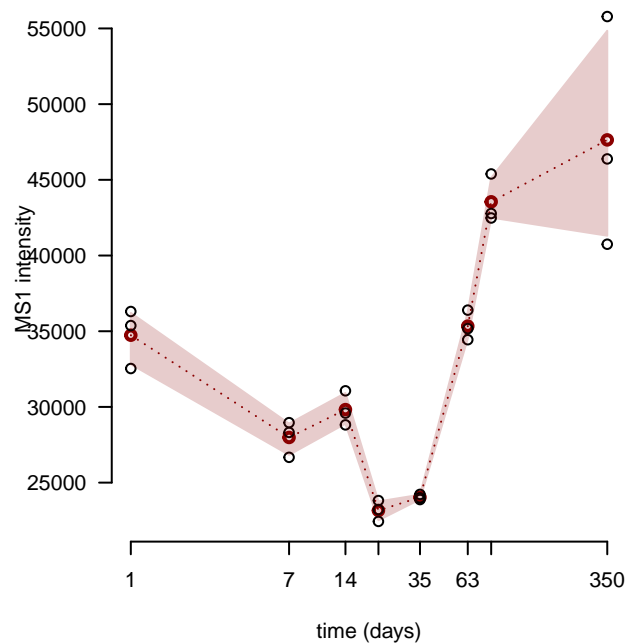

**Q9Z1K5**  
**GN=Arih1**  
ariadne RBR E3 ubiquitin protein ligase ...

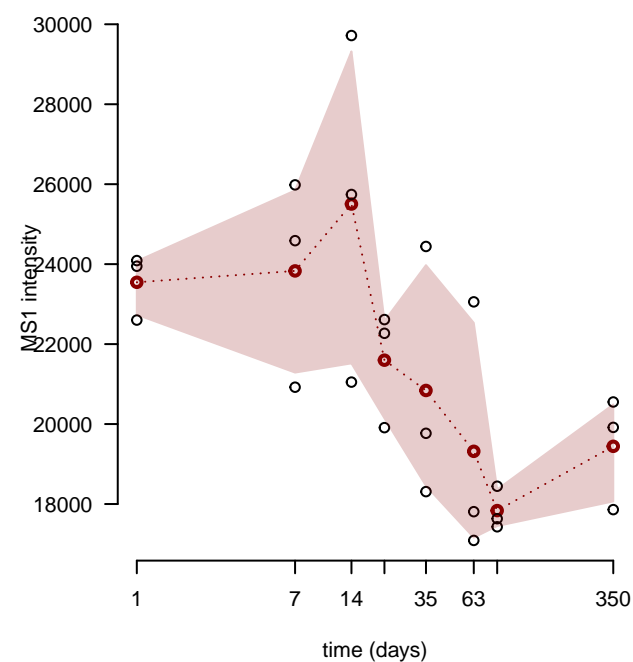

**Q9Z1K6**  
**GN=Arih2**  
ariadne RBR E3 ubiquitin protein ligase ...

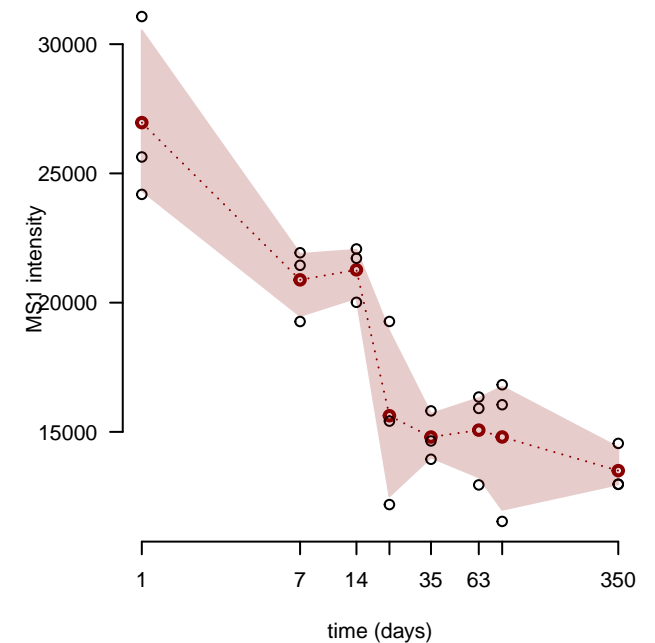



**Q9Z1K8**  
**GN=Slc7a7**  
solute carrier family 7 (cationic amino ...

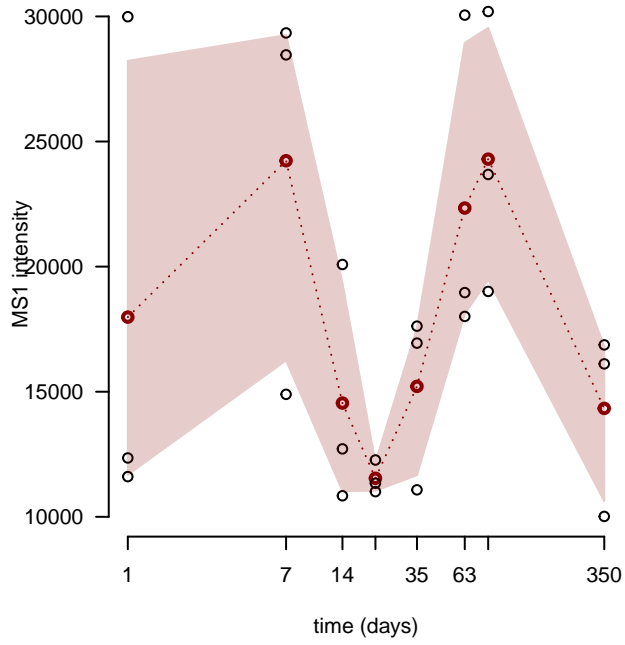

**Q9Z1L3**  
**GN=Dedd**  
death effector domain-containing

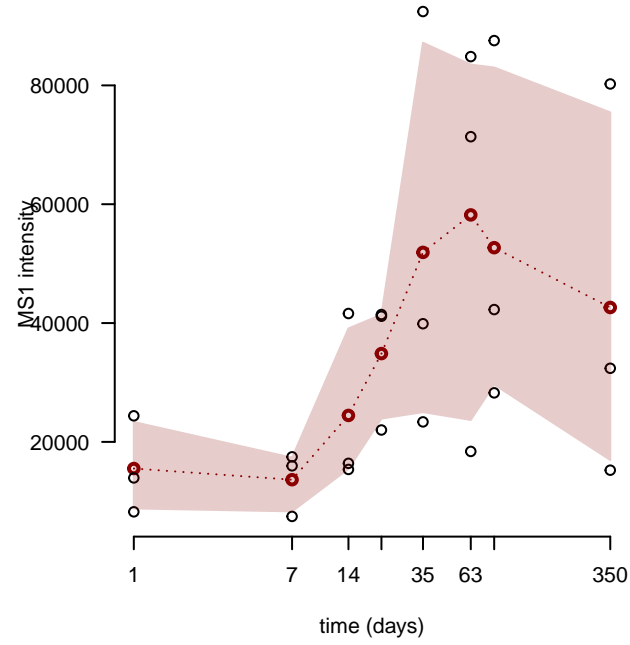

**Q9Z1M4**  
**GN=Rps6kb2**  
ribosomal protein S6 kinase, polypeptide ...

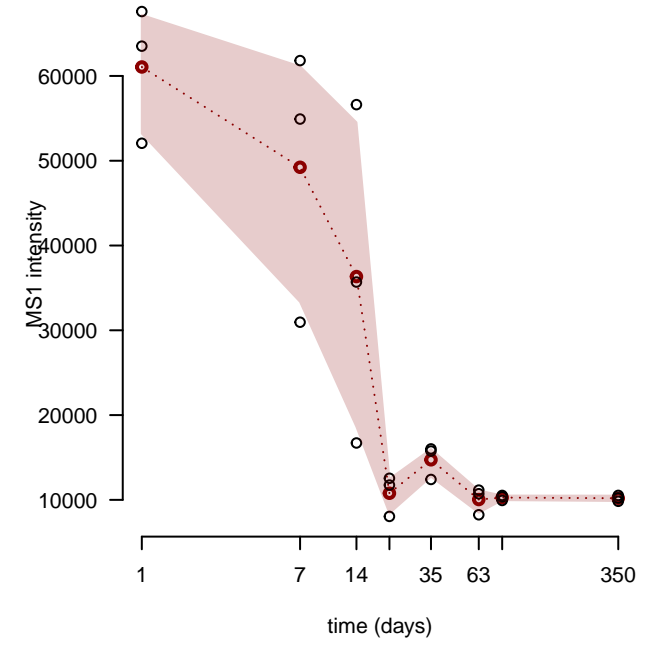

**Q9Z1M7**  
**GN=Large1**  
LARGE xylosyl- and glucuronyltransferase ...

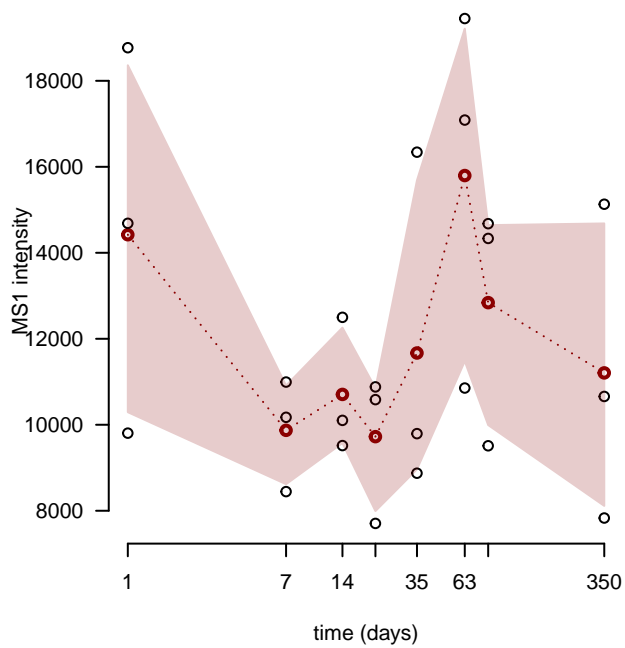

**Q9Z1M8**  
**GN=Ik**  
IK cytokine

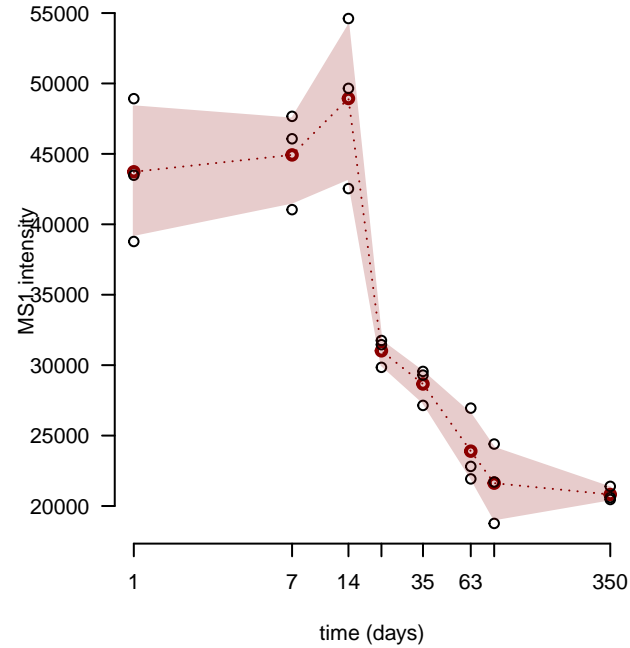

**Q9Z1N2**  
**GN=Orc1**  
origin recognition complex, subunit 1

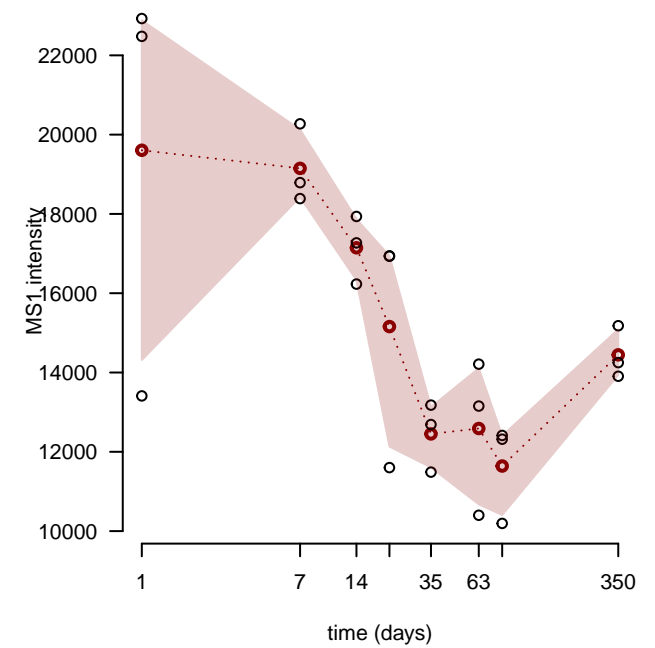

**Q9Z1N5**  
**GN=Ddx39b**  
DEAD box helicase 39b

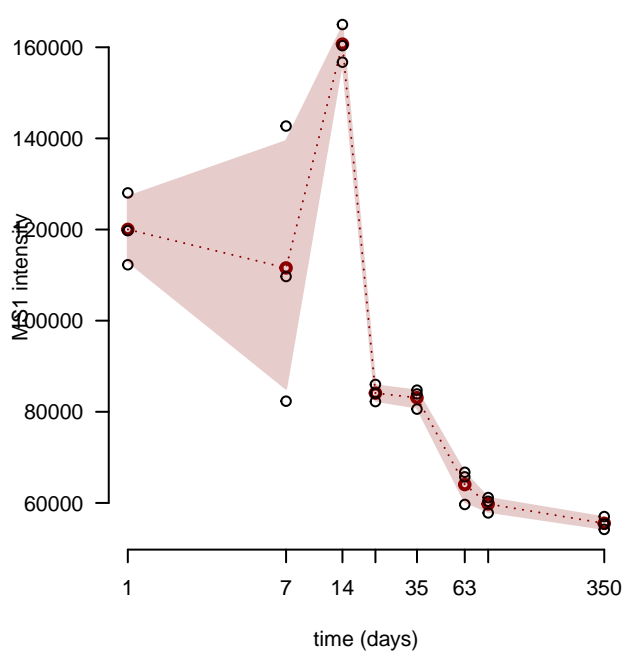

**Q9Z1N6**  
**GN=Sfrp4**  
secreted frizzled-related protein 4

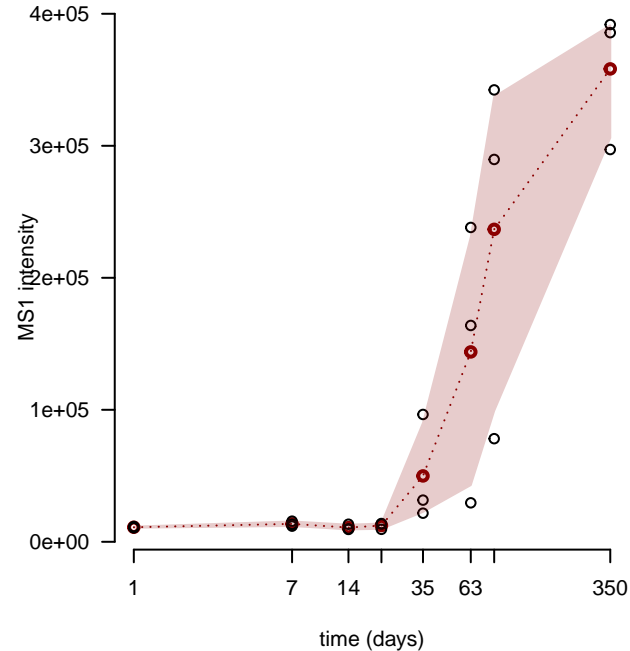

**Q9Z1P6**  
**GN=Ndufa7**  
NADH:ubiquinone oxidoreductase subunit A ...

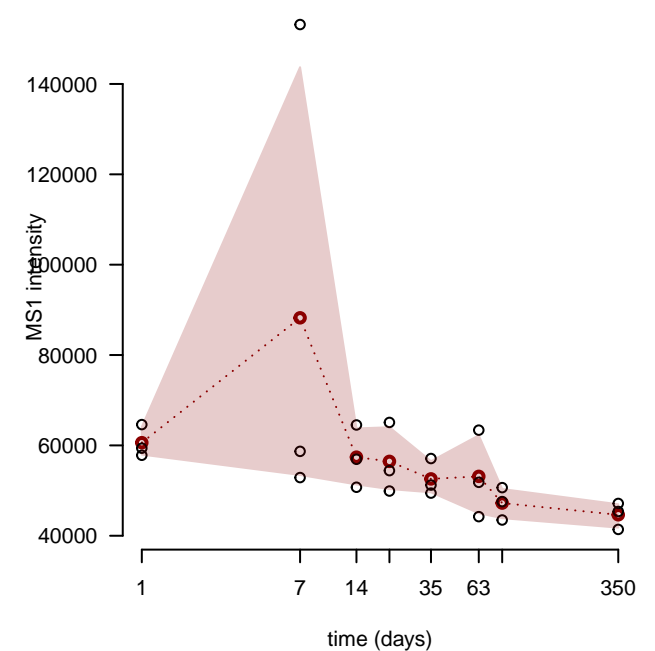

**Q9Z1P7**  
**GN=Kank3**  
KN motif and ankyrin repeat domains 3

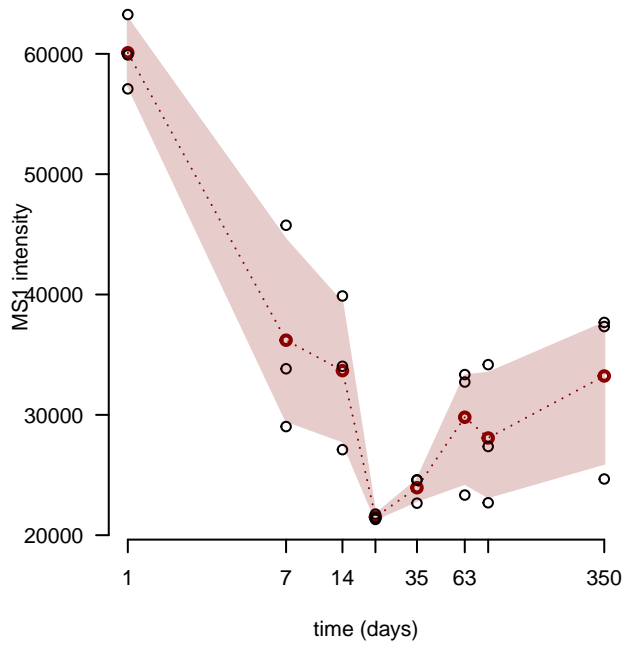

**Q9Z1Q2**  
**GN=Abhd16a**  
abhydrolase domain containing 16A

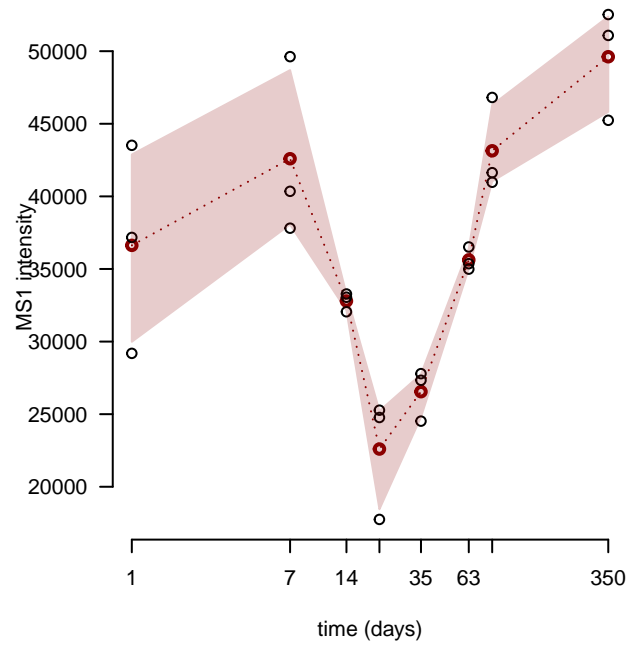

**Q9Z1Q5**  
**GN=Clic1**  
chloride intracellular channel 1

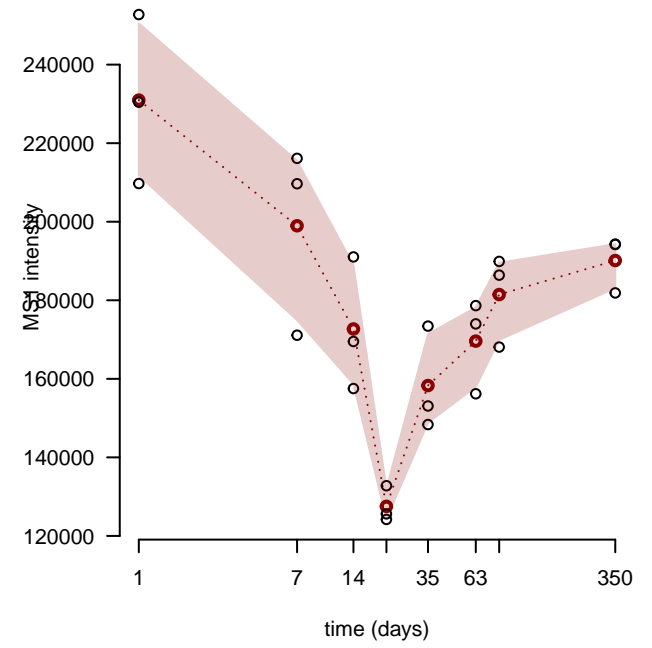

**Q9Z1Q9**  
**GN=Vars**  
valyl-tRNA synthetase

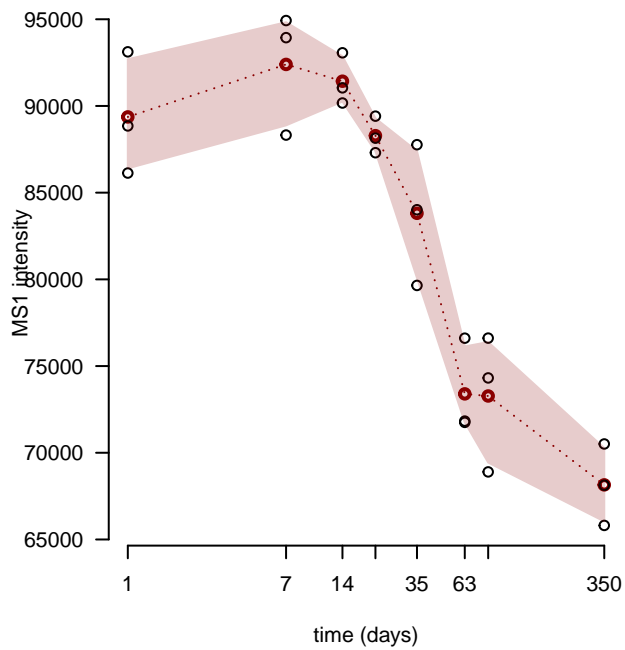

**Q9Z1R2**  
**GN=Bag6**  
BCL2-associated athanogene 6

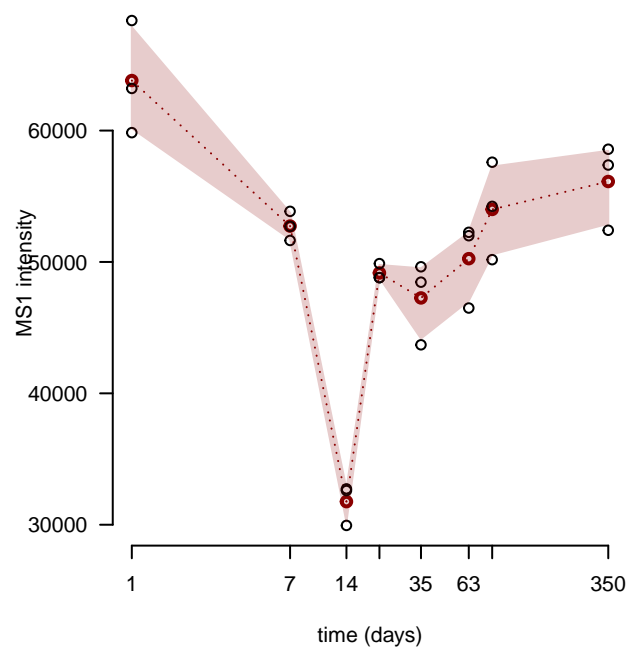

**Q9Z1R3**  
**GN=Apom**  
apolipoprotein M

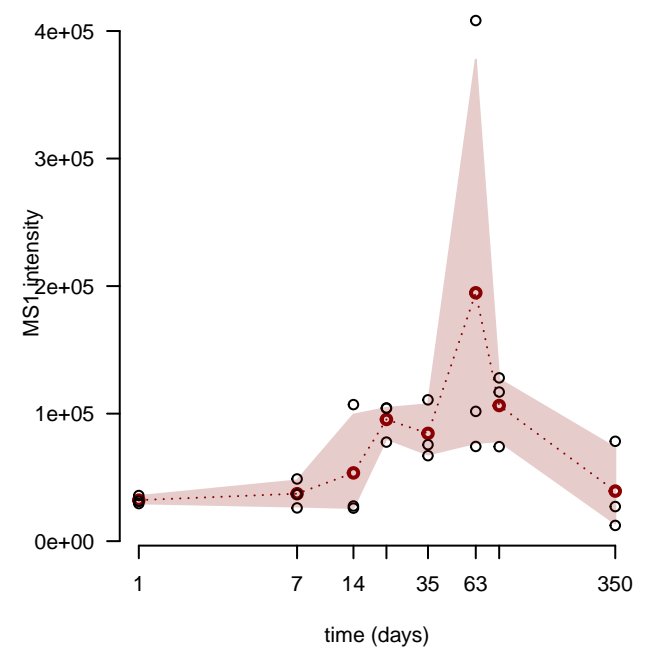

**Q9Z1R4**  
**GN=D17h6s53e**

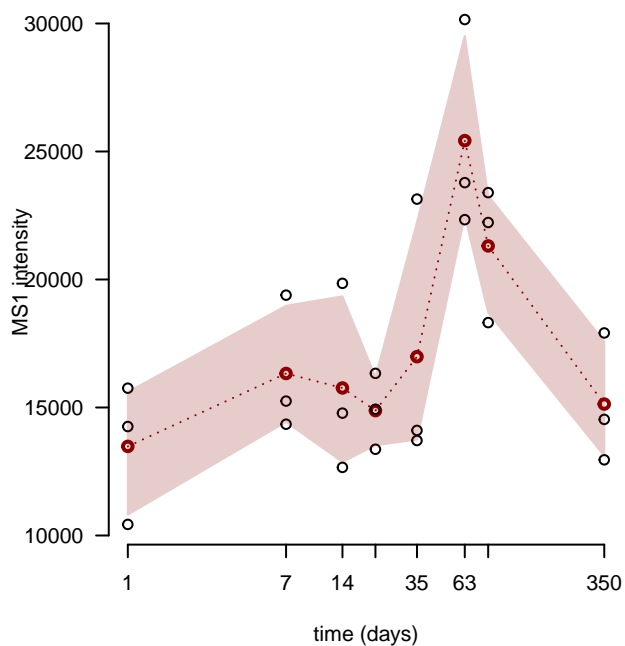

**Q9Z1S0**  
**GN=Bub1b**  
BUB1B, mitotic checkpoint serine/threoni ...

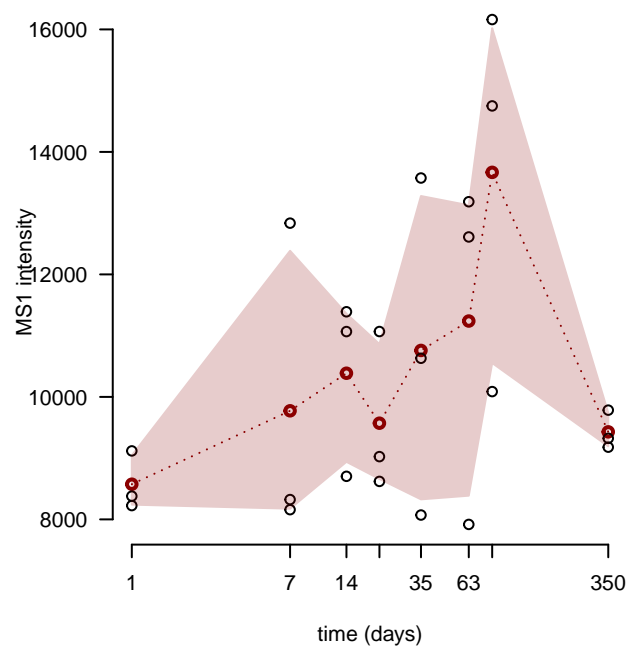

**Q9Z1S5**  
**GN=Sept3**

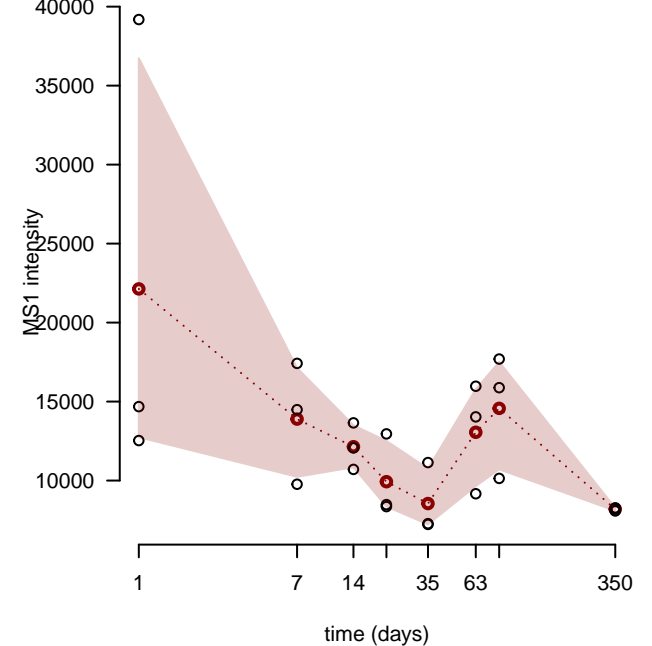

**Q9Z1S8**  
**GN=Gab2**  
growth factor receptor bound protein 2-a ...

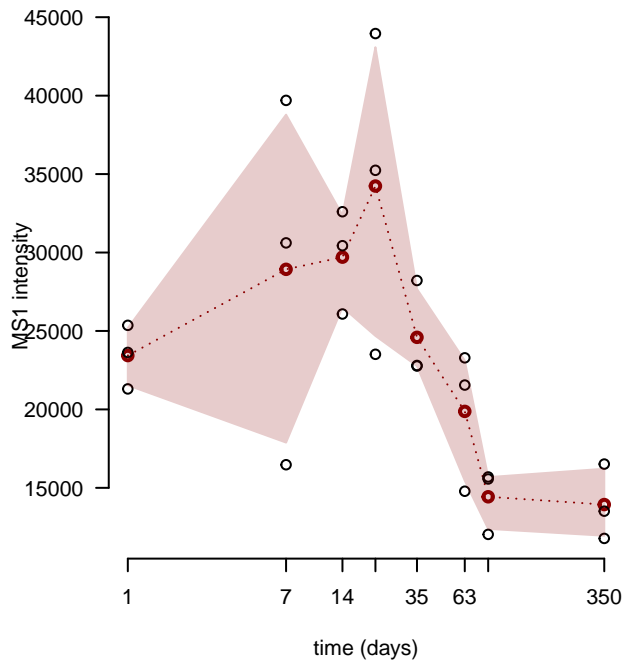

**Q9Z1T1**  
**GN=Ap3b1**  
adaptor-related protein complex 3, beta ...

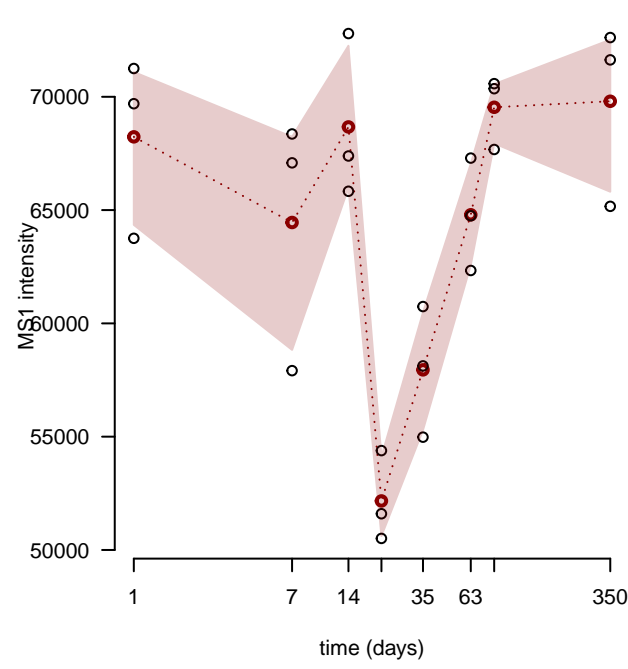

**Q9Z1T2**  
**GN=Thbs4**  
thrombospondin 4

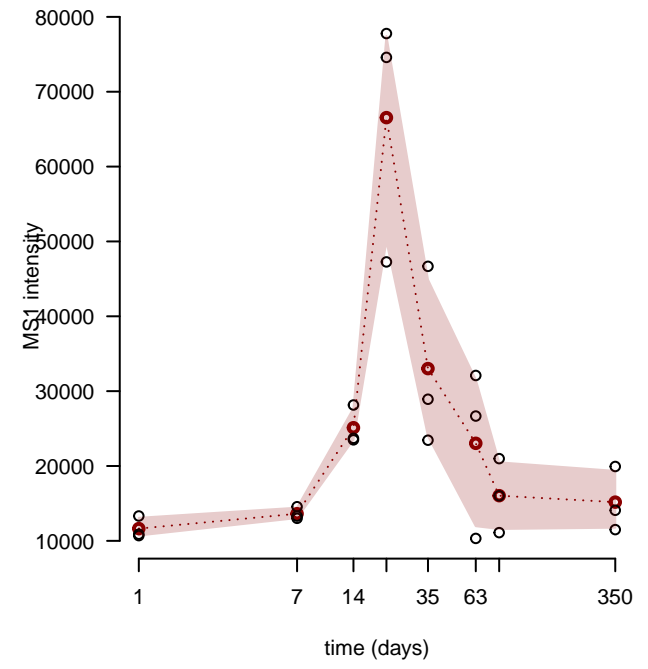

**Q9Z1T6**  
**GN=Pikfyve**  
phosphoinositide kinase, FYVE type zinc ...

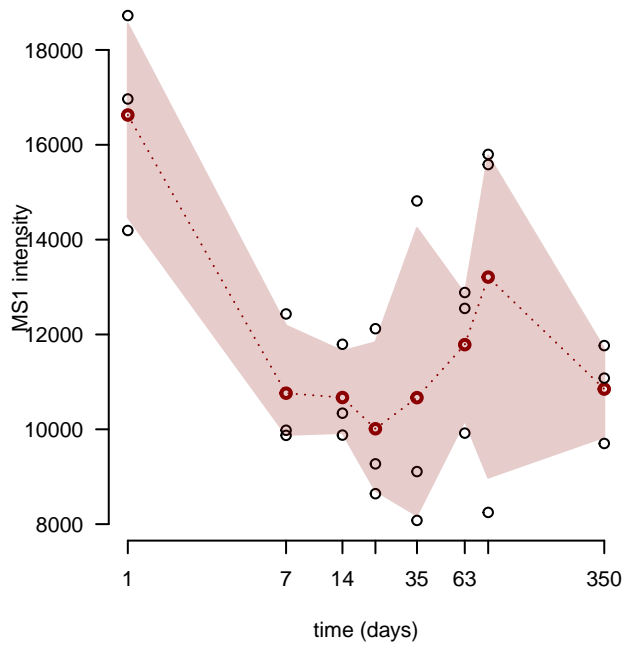

**Q9Z1W9**  
**GN=Stk39**  
serine/threonine kinase 39

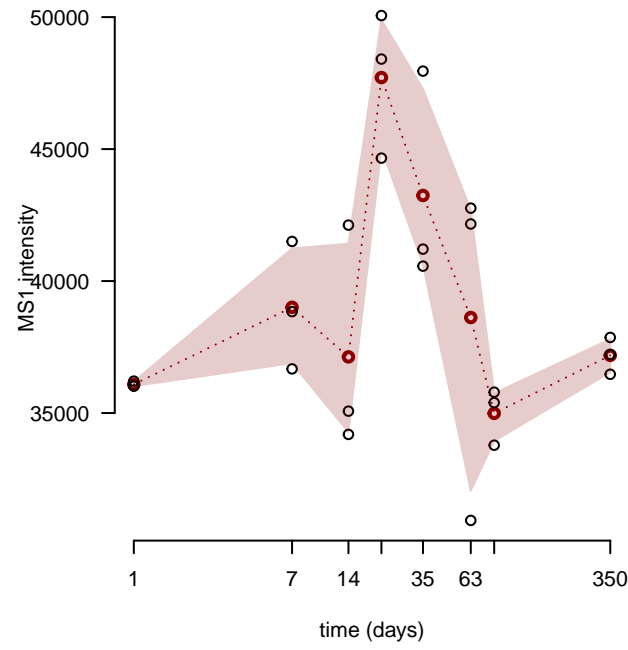

**Q9Z1X2**  
**GN=Ptdss2**  
phosphatidylserine synthase 2

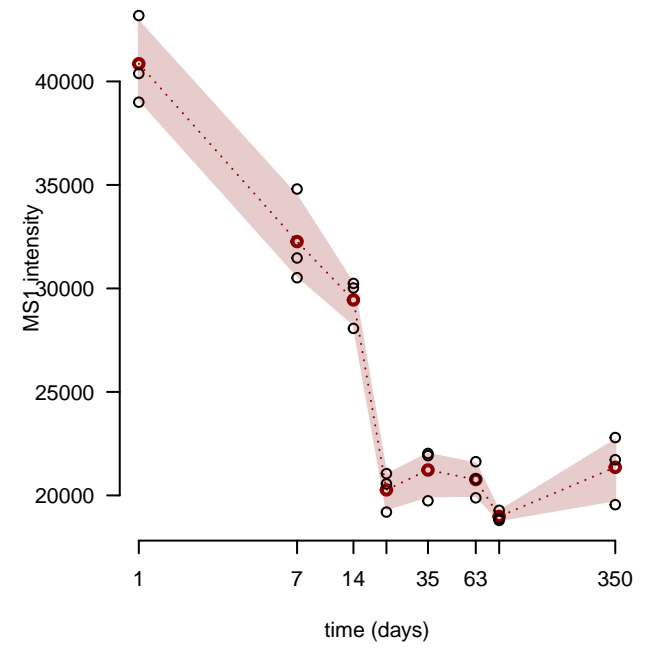

**Q9Z1X4**  
**GN=Ilf3**  
interleukin enhancer binding factor 3

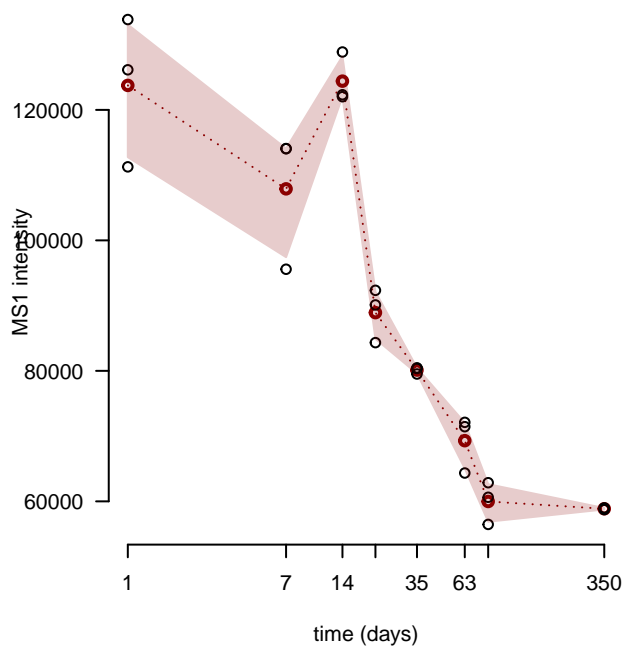

**Q9Z1Y4**  
**GN=Trip6**  
thyroid hormone receptor interactor 6

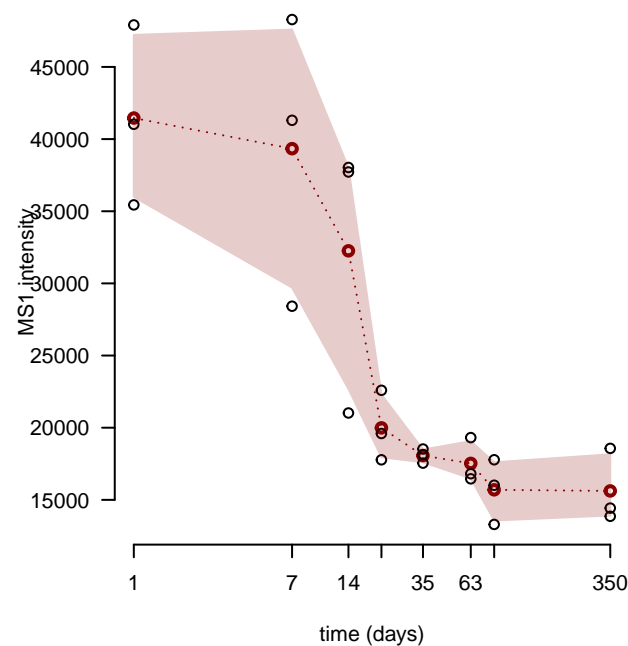

**Q9Z1Z0**  
**GN=Uso1**  
USO1 vesicle docking factor

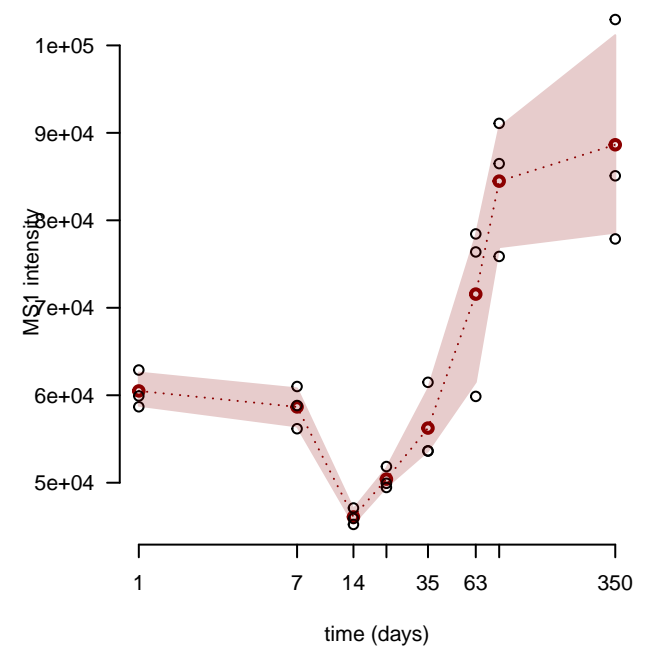

**Q9Z1Z2**  
GN=Strap  
serine/threonine kinase receptor associa ...

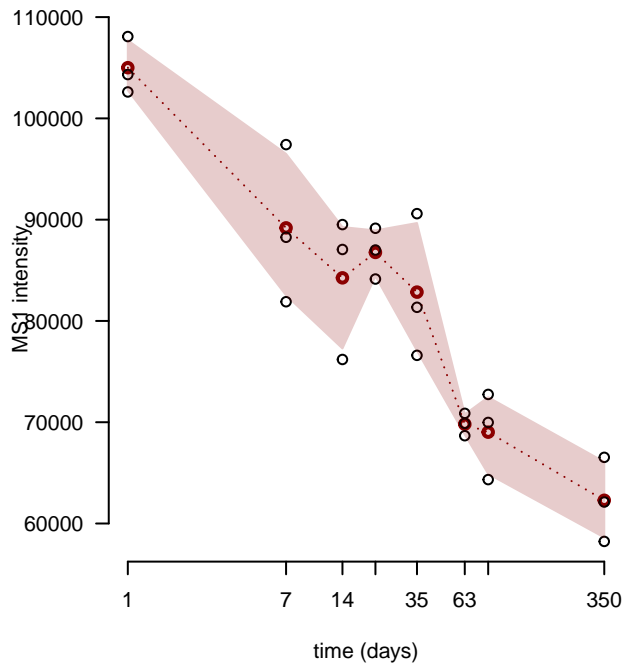

**Q9Z204**  
GN=Hnrnpc  
heterogeneous nuclear ribonucleoprotein ...

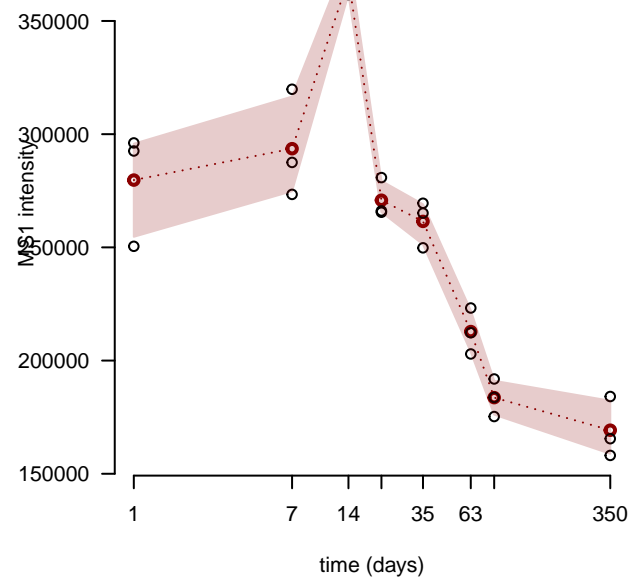

**Q9Z204**  
GN=Hnrnpc  
heterogeneous nuclear ribonucleoprotein ...

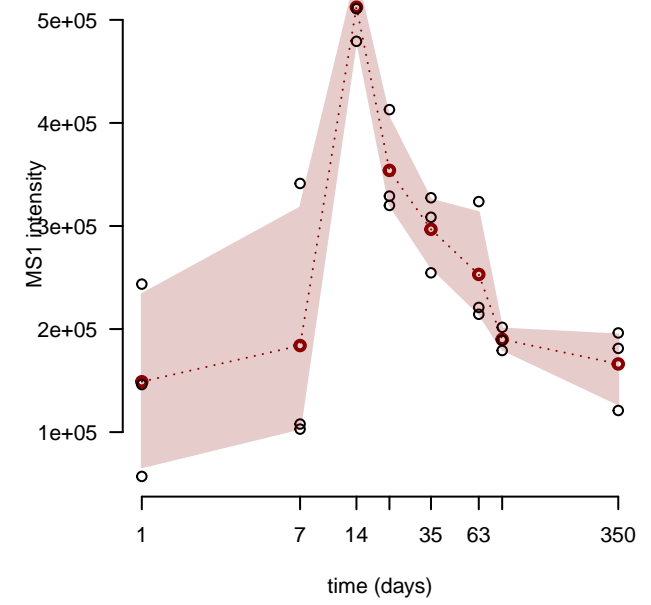

**Q9Z207**  
GN=Diaph3  
diaphanous related formin 3

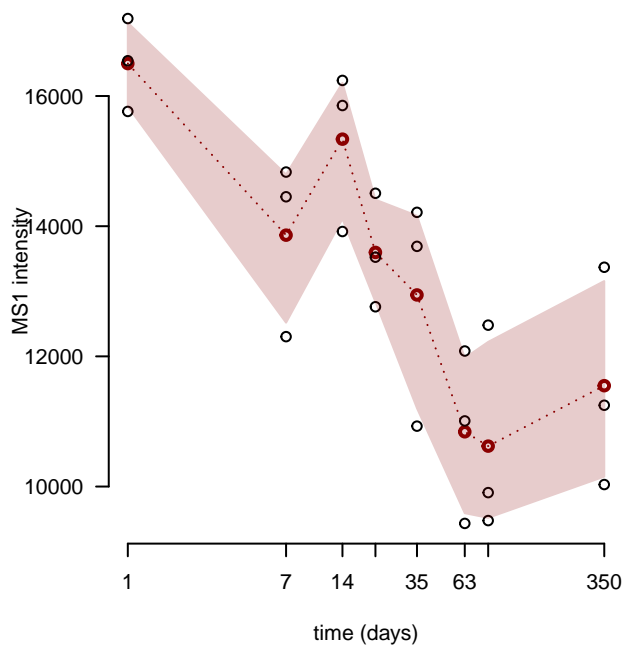

**Q9Z210**  
GN=Pex11b  
peroxisomal biogenesis factor 11 beta

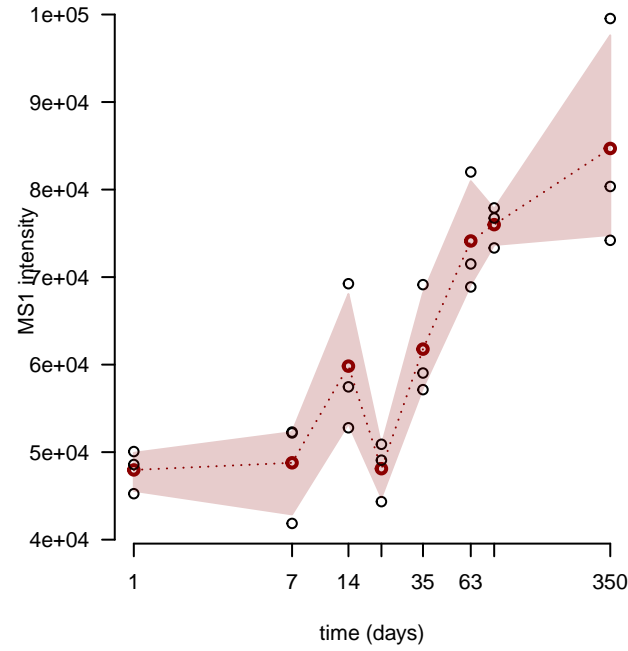

**Q9Z211**  
GN=Pex11a  
peroxisomal biogenesis factor 11 alpha

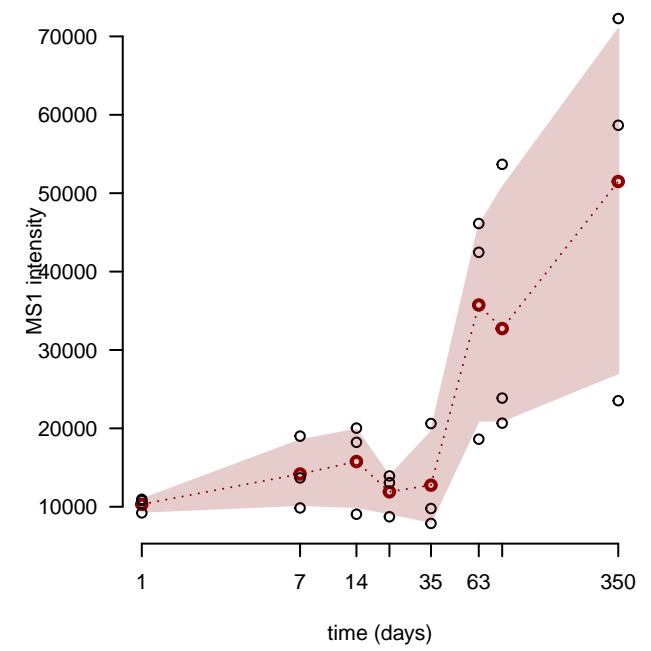

**Q9Z218**  
GN=Dpp6  
dipeptidylpeptidase 6

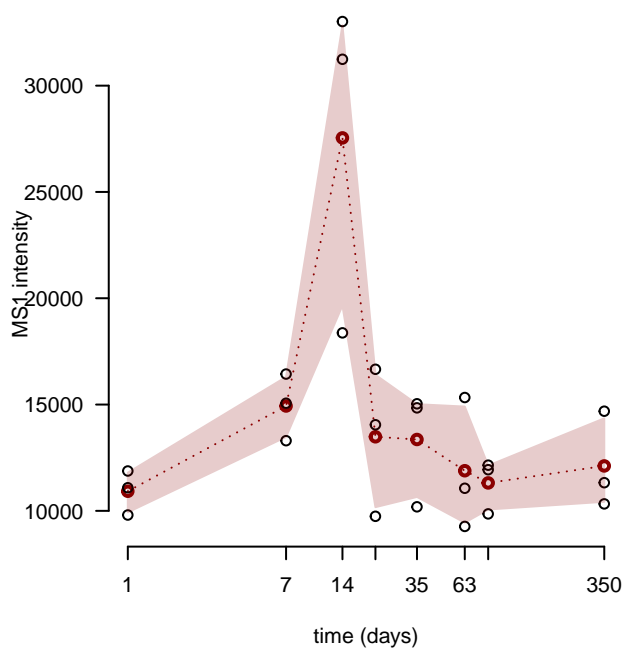

**Q9Z223**  
GN=Mocs2  
molybdenum cofactor synthesis 2

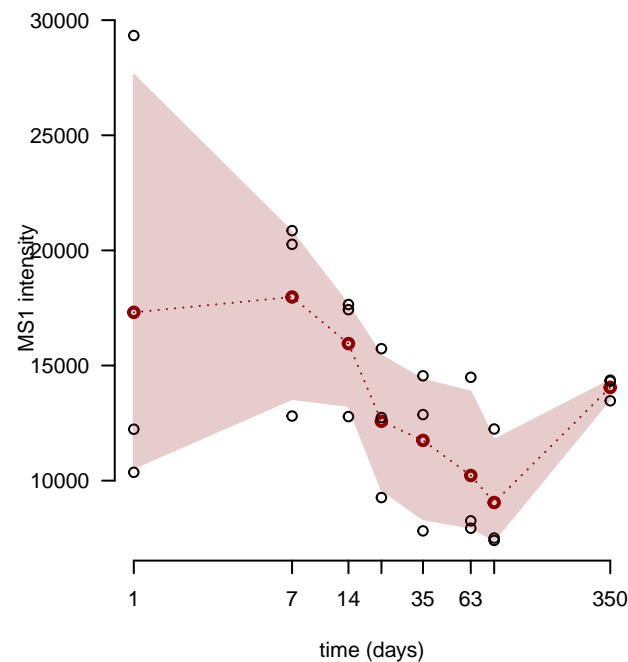

**Q9Z224**  
GN=Mocs2

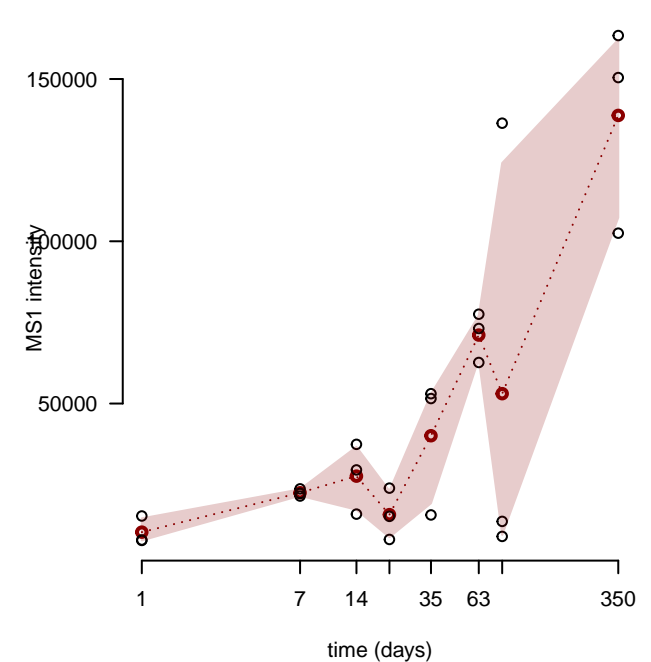

**Q9Z239**  
**GN=Fxyd1**  
FXFYD domain-containing ion transport reg ...

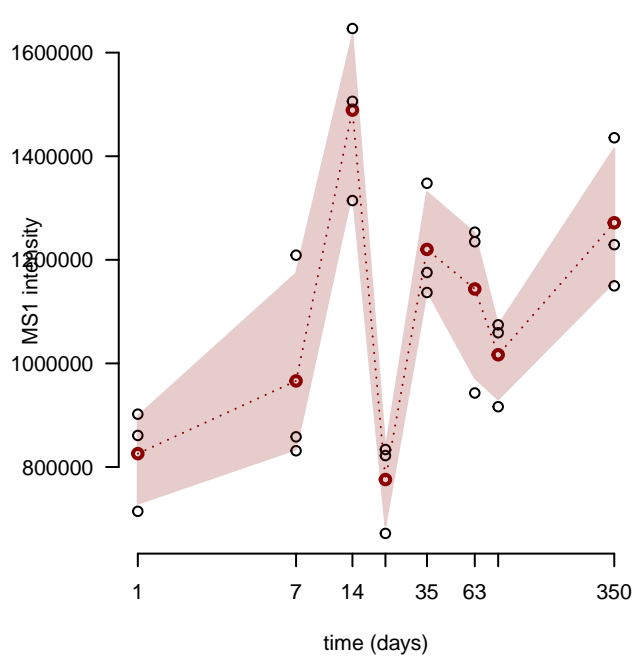

**Q9Z247**  
**GN=Fkbp9**  
FK506 binding protein 9

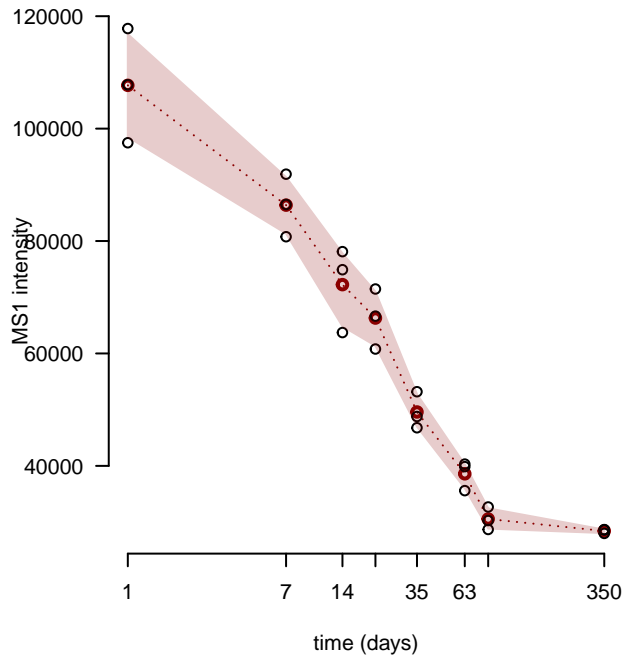

**Q9Z248**  
**GN=Aebp2**  
AE binding protein 2

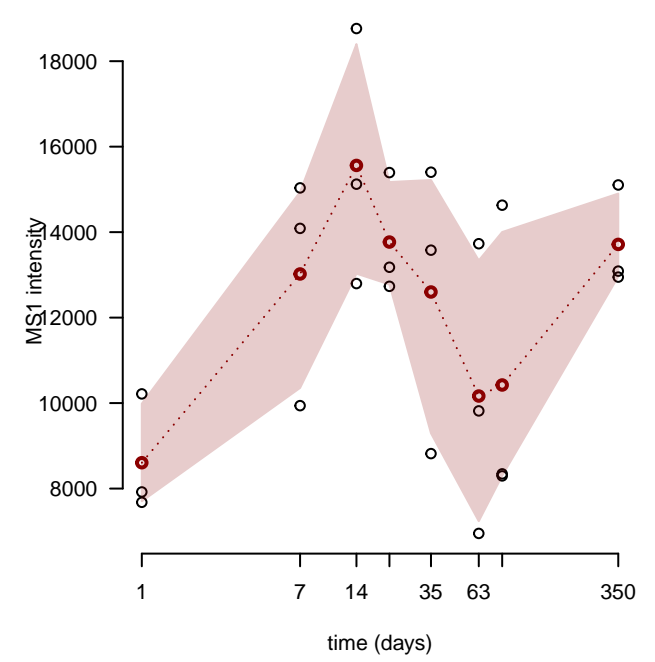

**Q9Z255**  
**GN=Ube2a**  
ubiquitin-conjugating enzyme E2A

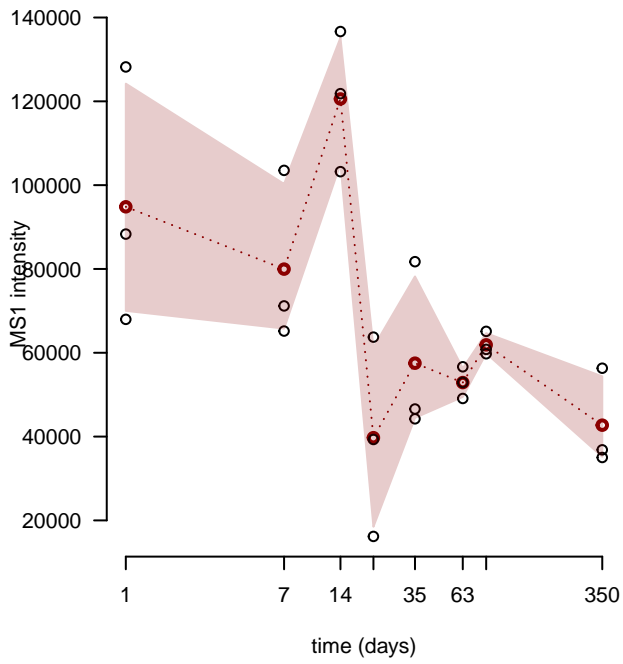

**Q9Z266**  
**GN=Snapin**  
SNAP-associated protein

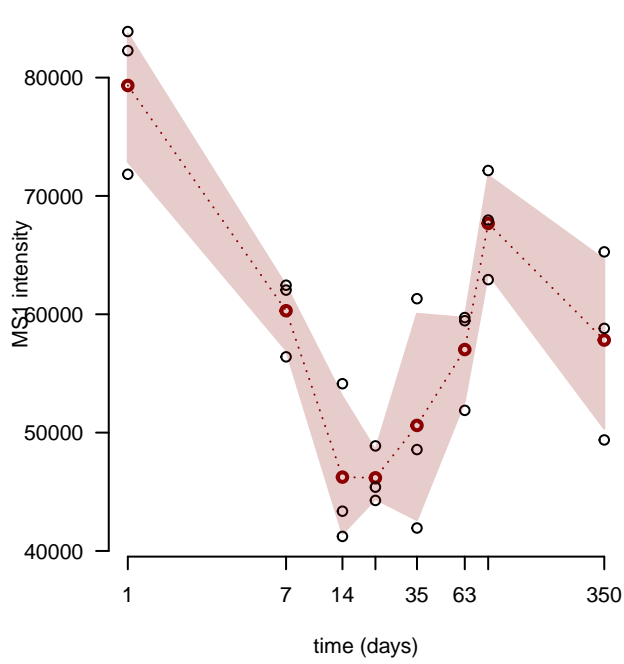

**Q9Z268**  
**GN=Rasa1**  
RAS protein activator like 1 (GAP1 like)

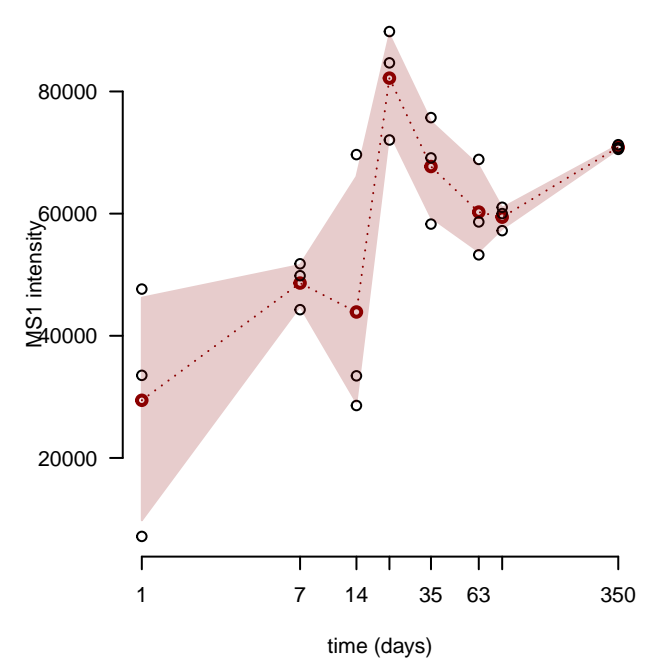

**Q9Z277**  
**GN=Baz1b**  
bromodomain adjacent to zinc finger doma ...

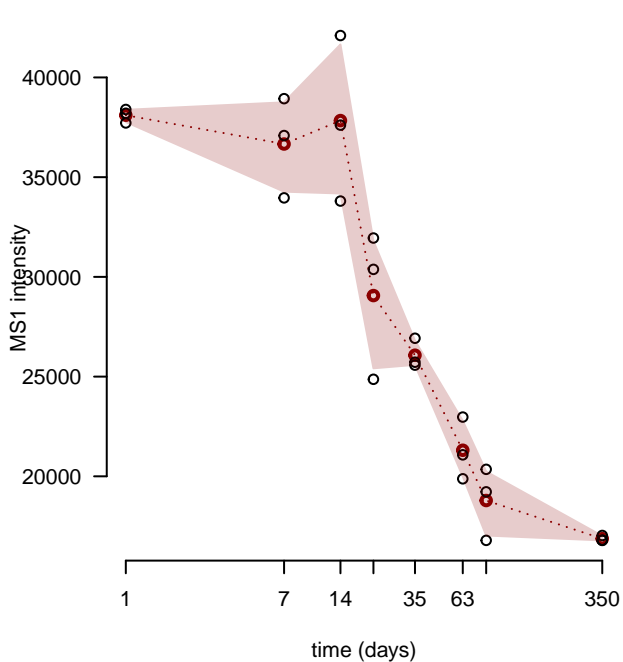

**Q9Z280**  
**GN=Plid1**  
phospholipase D1

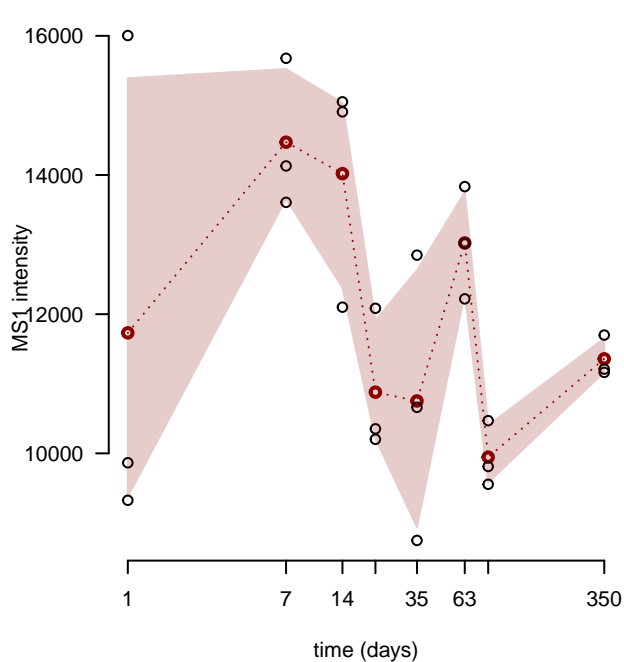

**Q9Z2A0**  
**GN=Pdpk1**  
3-phosphoinositide dependent protein kin ...

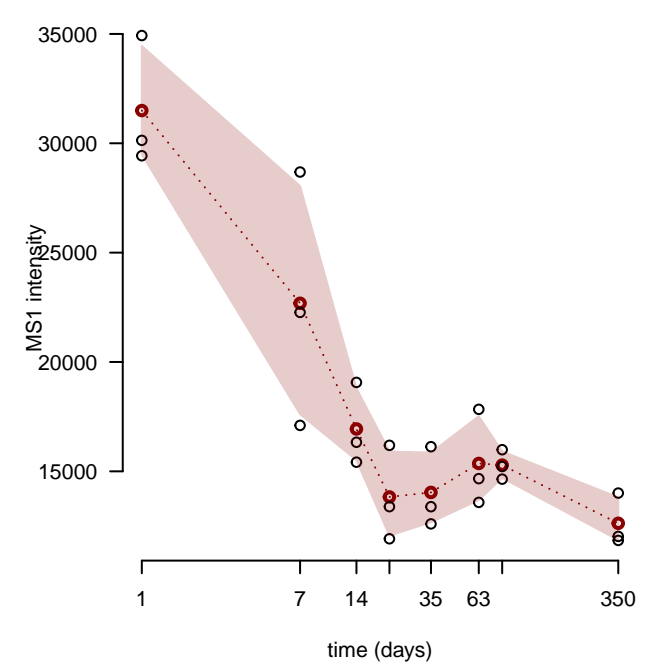

**Q9Z2A5**  
**GN=Ate1**  
arginyltransferase 1

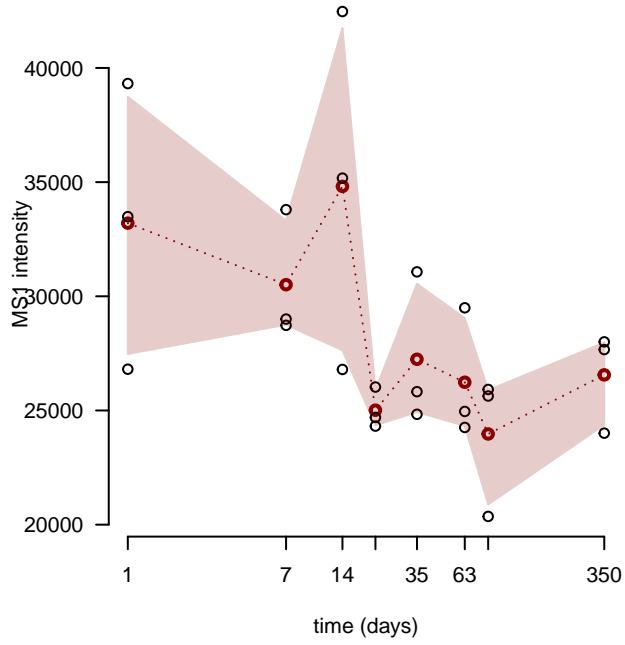

**Q9Z2A7**  
**GN=Dgat1**  
diacylglycerol O-acyltransferase 1

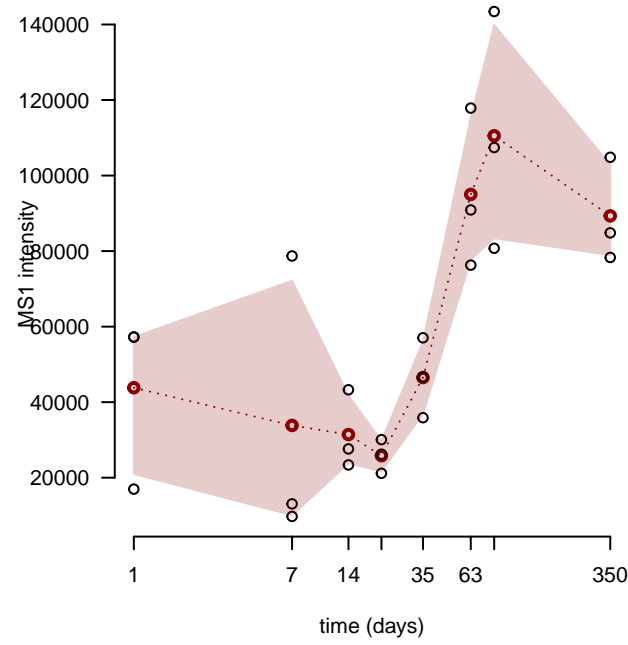

**Q9Z2A9**  
**GN=Ggt5**  
gamma-glutamyltransferase 5

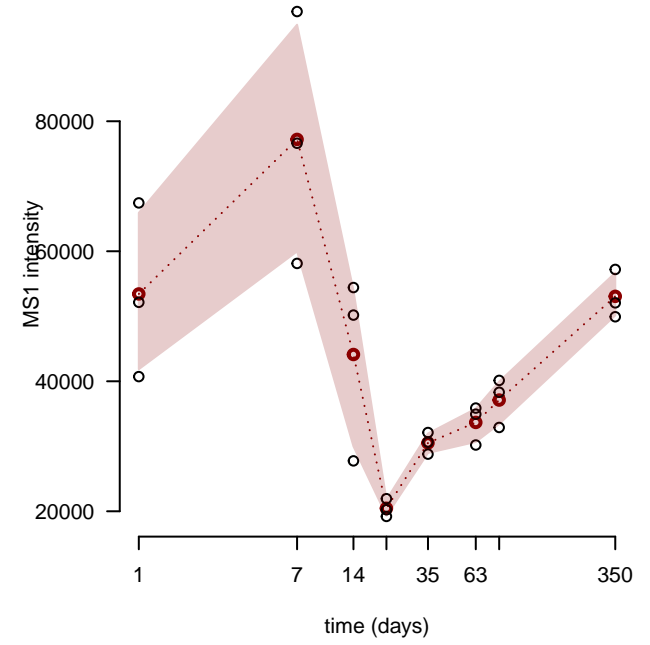

**Q9Z2B2**  
**GN=Slc25a14**  
solute carrier family 25 (mitochondrial ...

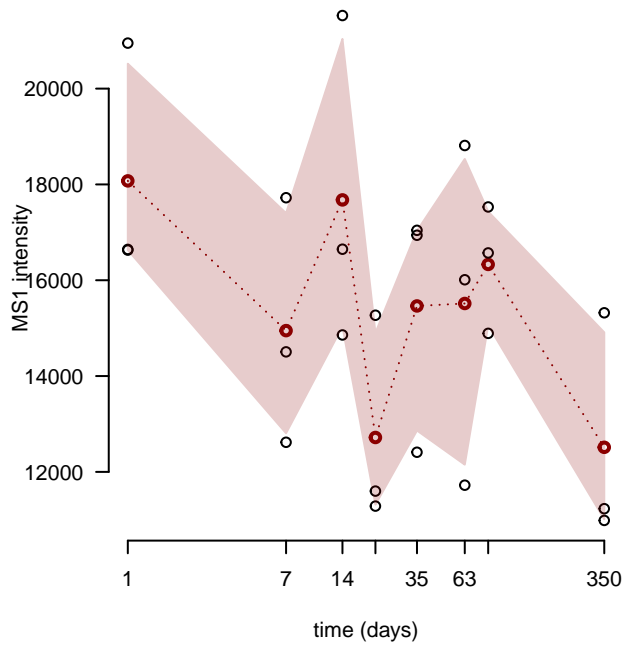

**Q9Z2B5**  
**GN=Eif2ak3**  
eukaryotic translation initiation factor ...

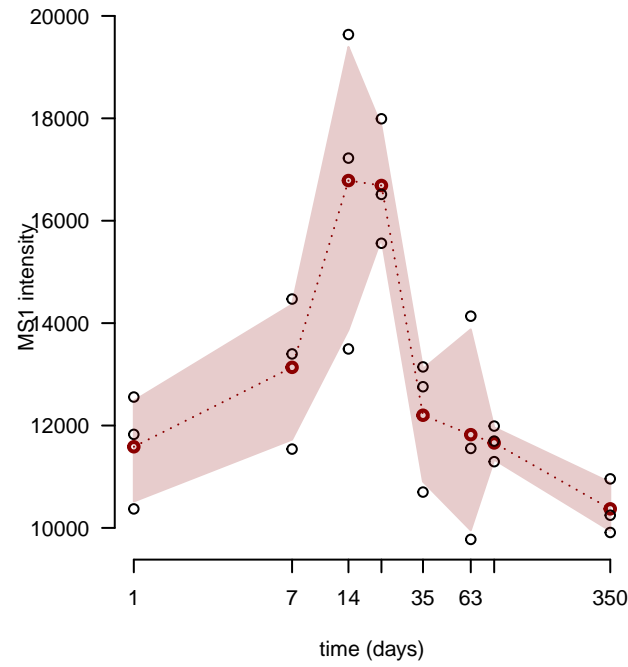

**Q9Z2B9**  
**GN=Rps6ka4**  
ribosomal protein S6 kinase, polypeptide ...

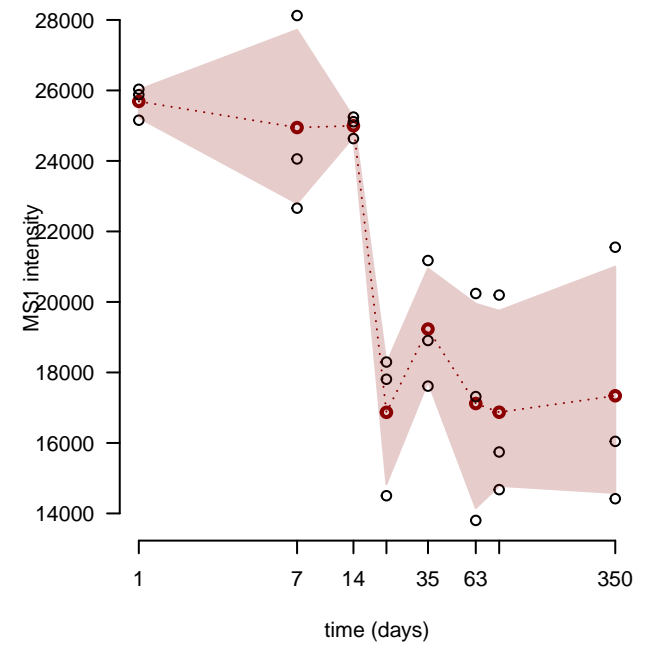

**Q9Z2C4**  
**GN=Mtmr1**  
myotubularin related protein 1

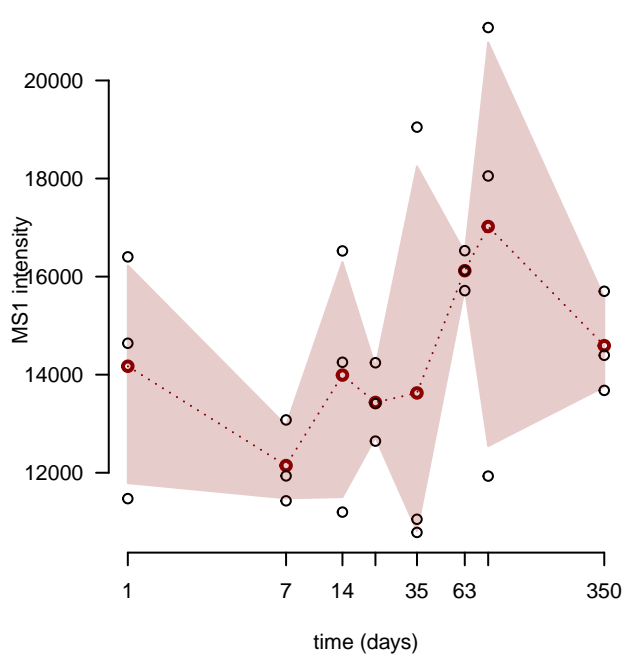

**Q9Z2C5**  
**GN=Mtm1**  
X-linked myotubular myopathy gene 1

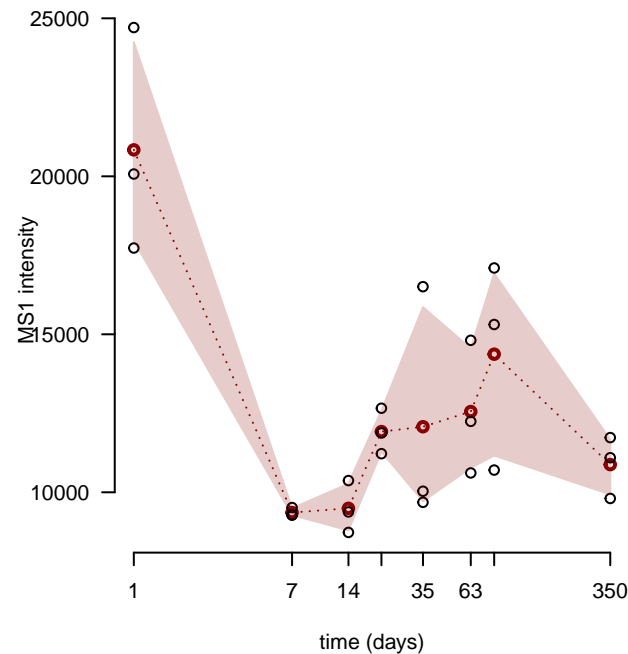

**Q9Z2C8**  
**GN=Ybx2**  
Y box protein 2

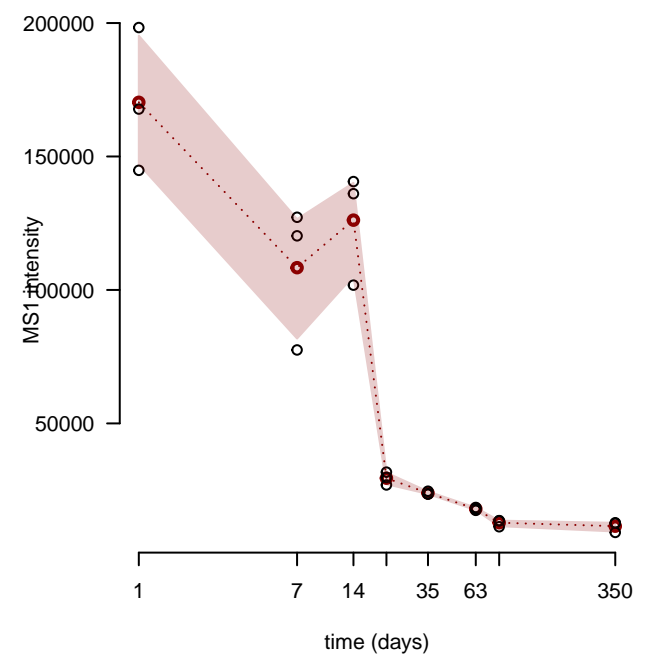

**Q9Z2C9**  
**GN=Mtmr7**  
myotubularin related protein 7

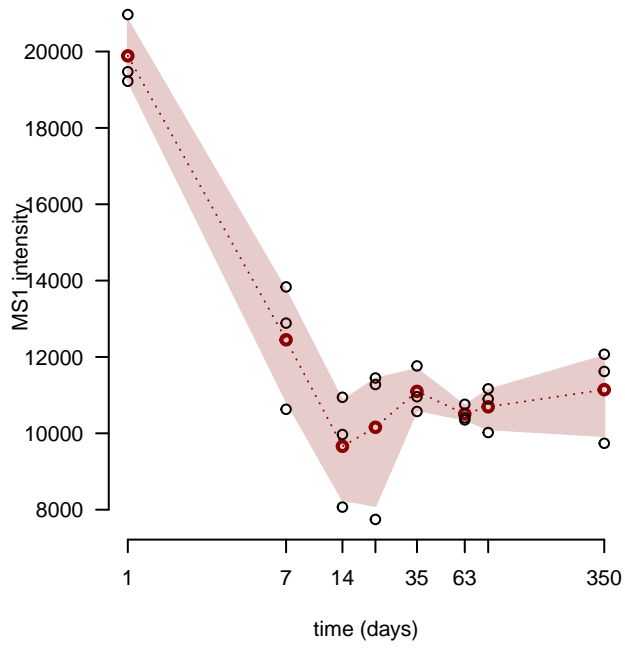

**Q9Z2D0**  
**GN=Mtmr9**  
myotubularin related protein 9

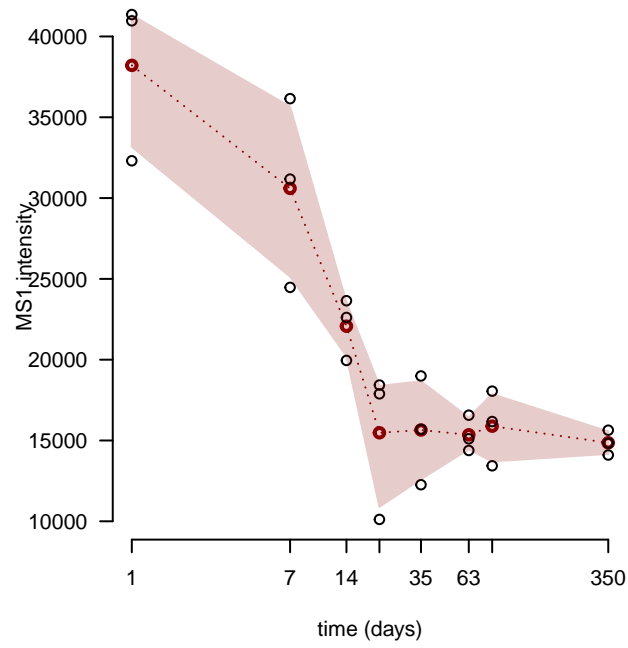

**Q9Z2D1**  
**GN=Mtmr2**  
myotubularin related protein 2

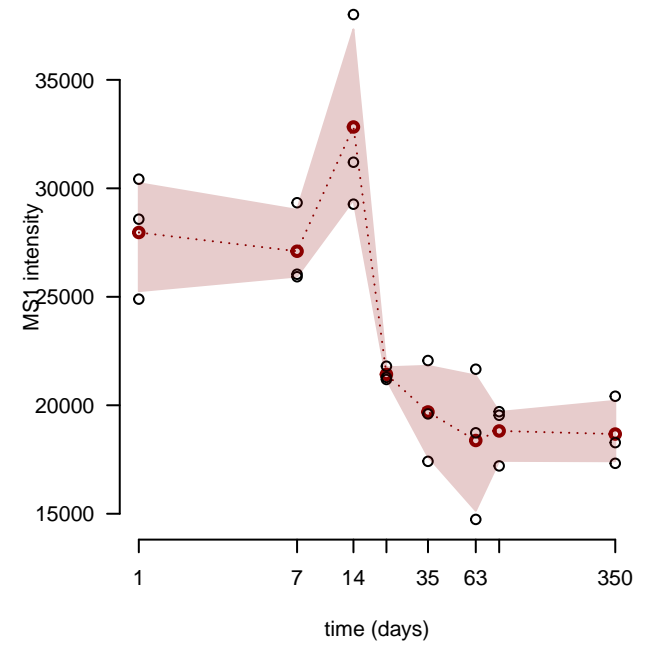

**Q9Z2D6**  
**GN=Mecp2**  
methyl CpG binding protein 2

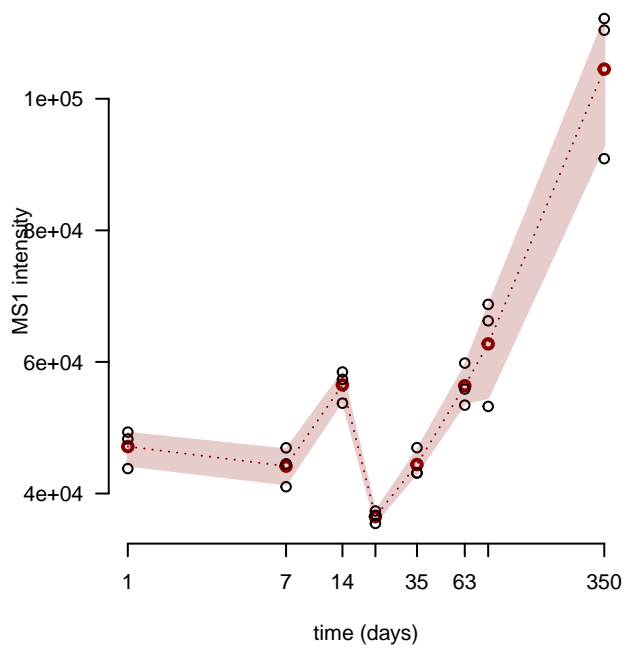

**Q9Z2D8**  
**GN=Mbd3**  
methyl-CpG binding domain protein 3

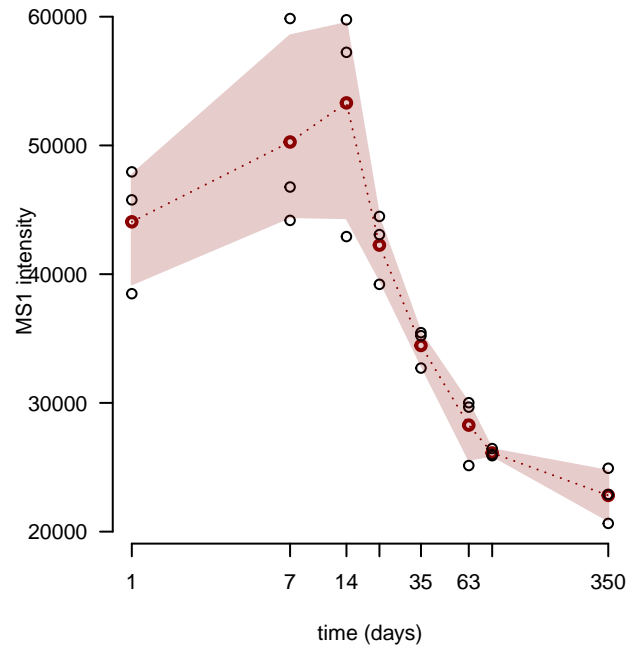

**Q9Z2E1**  
**GN=Mbd2**  
methyl-CpG binding domain protein 2

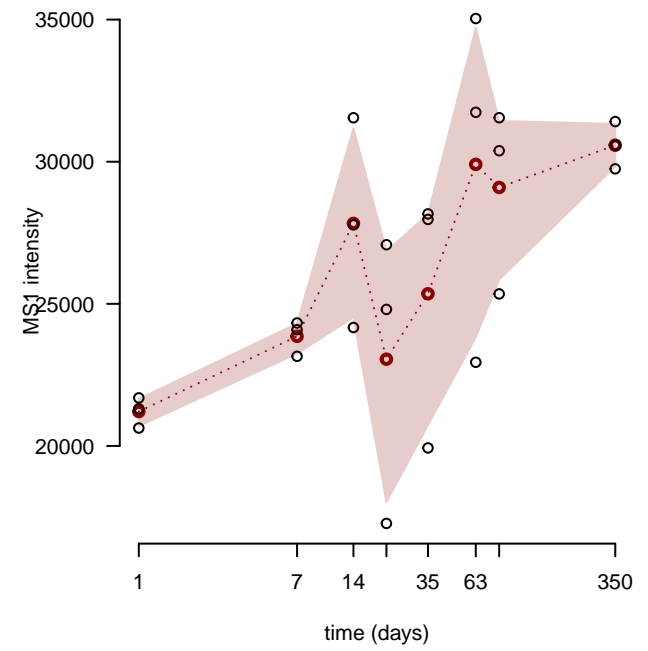

**Q9Z2E2**  
**GN=Mbd1**  
methyl-CpG binding domain protein 1

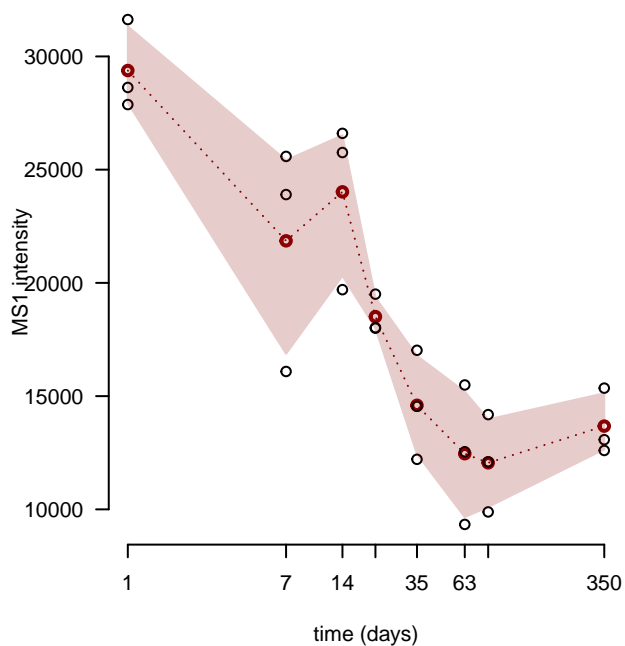

**Q9Z2E9**  
**GN=Bscl2**  
Berardinelli-Seip congenital lipodystrop ...

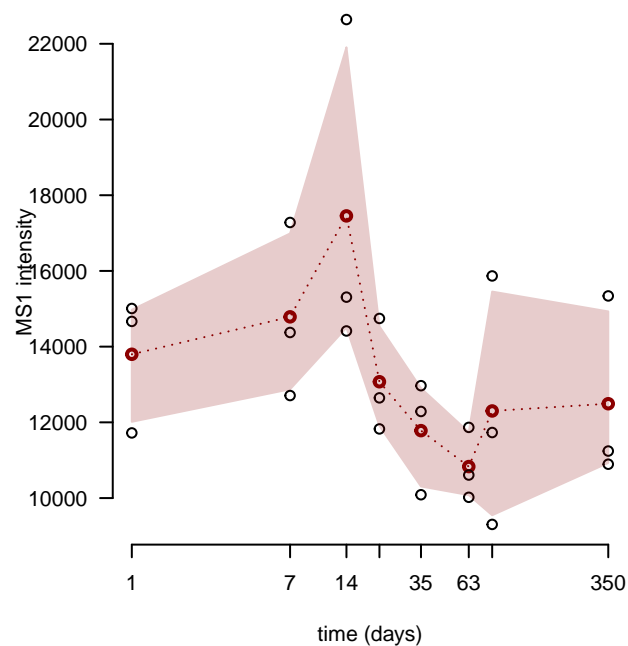

**Q9Z2F2**  
**GN=Oasl2**  
2'-5' oligoadenylate synthetase-like 2

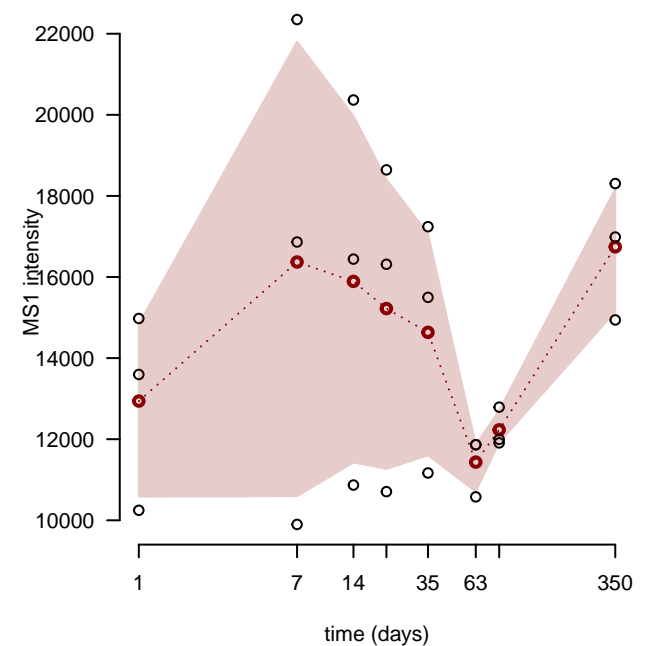

**Q9Z2F7**  
**GN=Bnip3l**  
BCL2/adenovirus E1B interacting protein ...

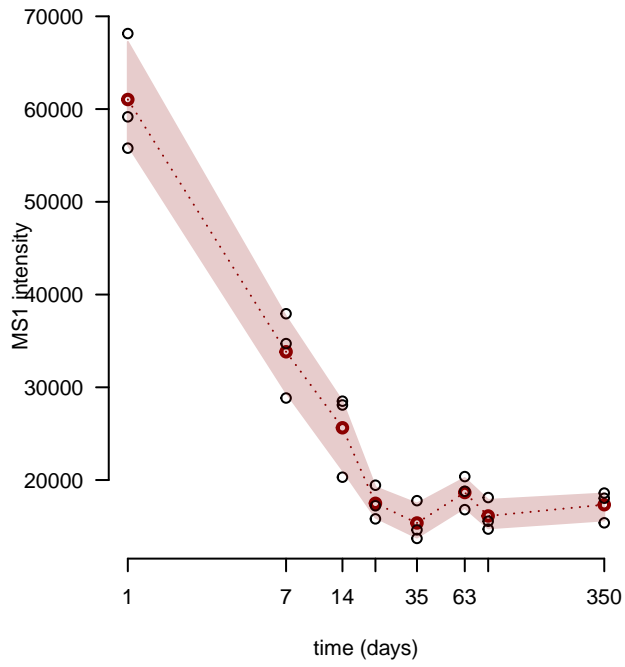

**Q9Z2G0**  
**GN=Fem1b**  
fem 1 homolog b

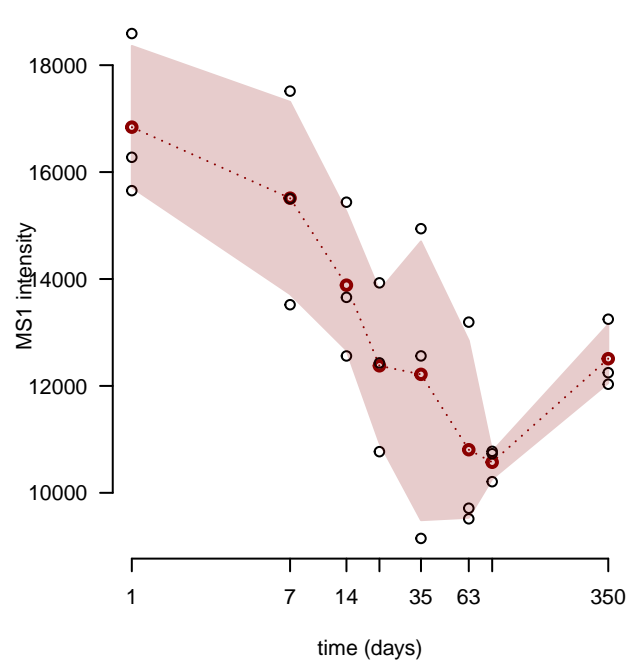

**Q9Z2G6**  
**GN=Sel1l**  
sel-1 suppressor of lin-12-like (C. eleg ...

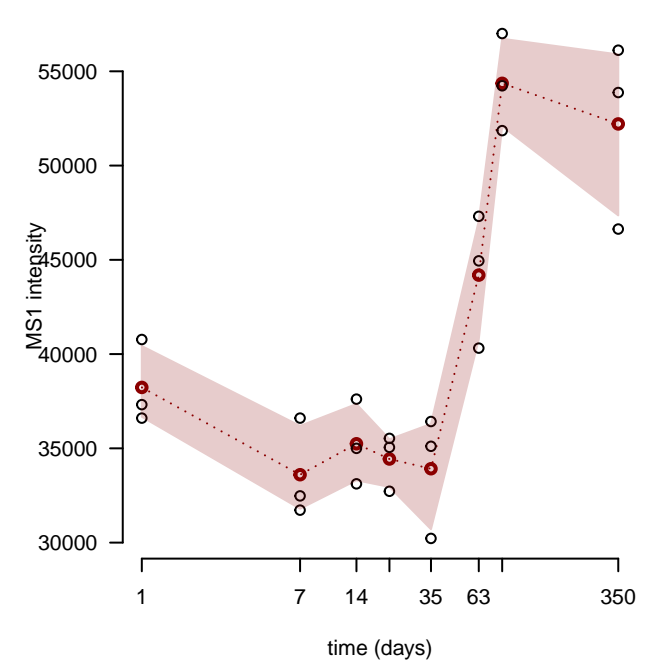

**Q9Z2G9**  
**GN=Htatip2**  
HIV-1 Tat interactive protein 2

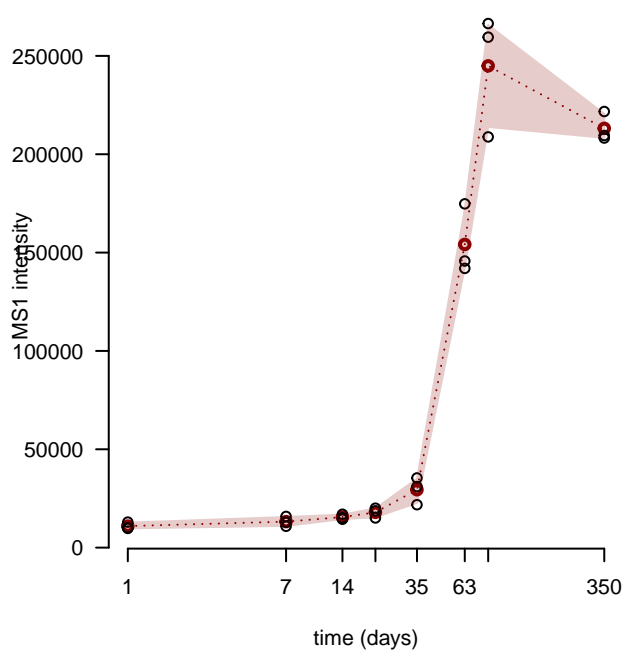

**Q9Z2H5**  
**GN=Epb411l**  
erythrocyte membrane protein band 4.1 li ...

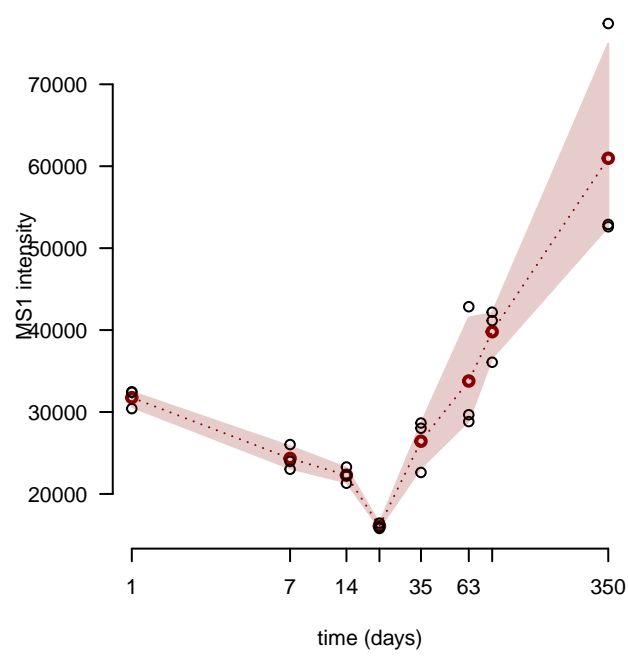

**Q9Z2I0**  
**GN=Letm1**  
leucine zipper-EF-hand containing transm ...

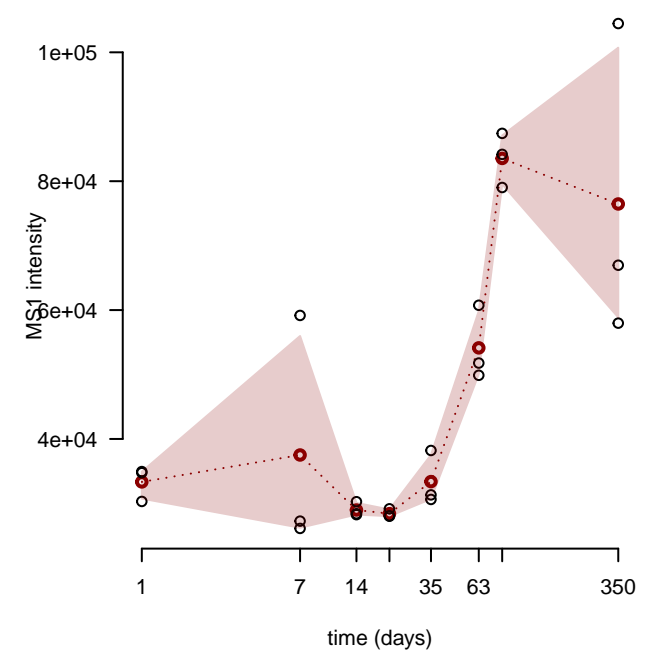

**Q9Z2I8**  
**GN=Suclg2**  
succinate-Coenzyme A ligase, GDP-forming ...

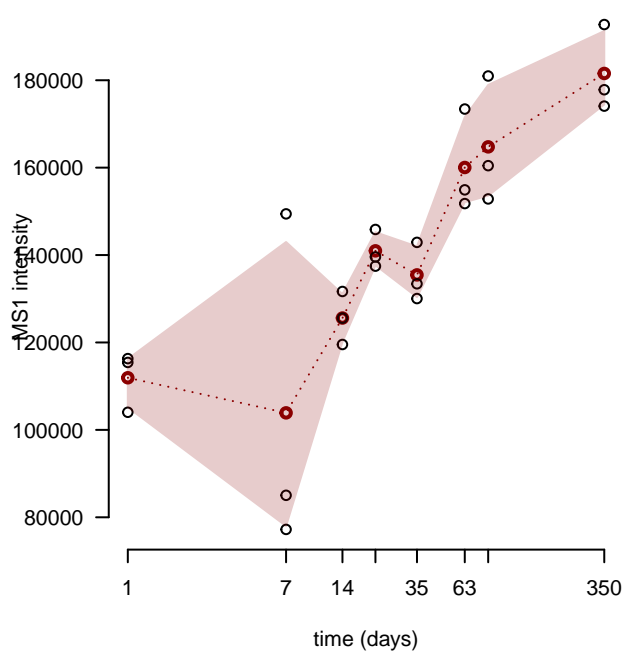

**Q9Z2I8**  
**GN=Suclg2**  
succinate-Coenzyme A ligase, GDP-forming ...

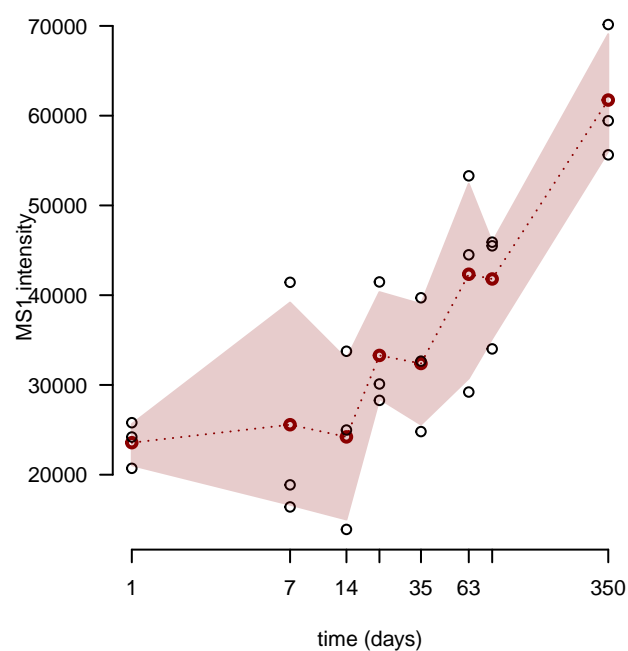

**Q9Z2I9**  
**GN=Sucla2**  
succinate-Coenzyme A ligase, ADP-forming ...

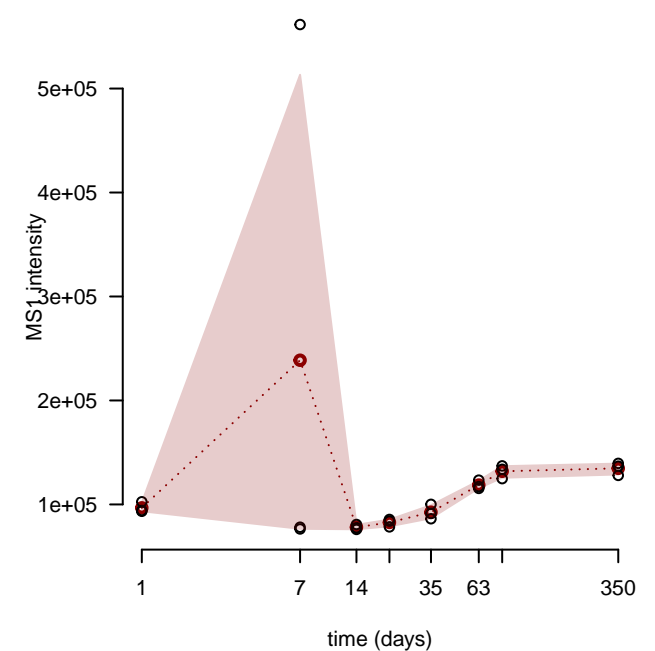



**Q9Z2K1**  
GN=Krt16  
keratin 16

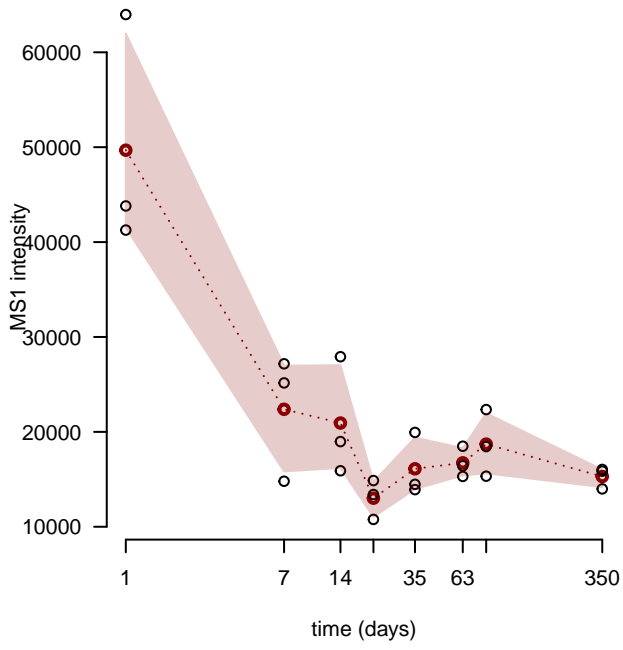

**Q9Z2L6**  
GN=Minpp1  
multiple inositol polyphosphate histidin ...

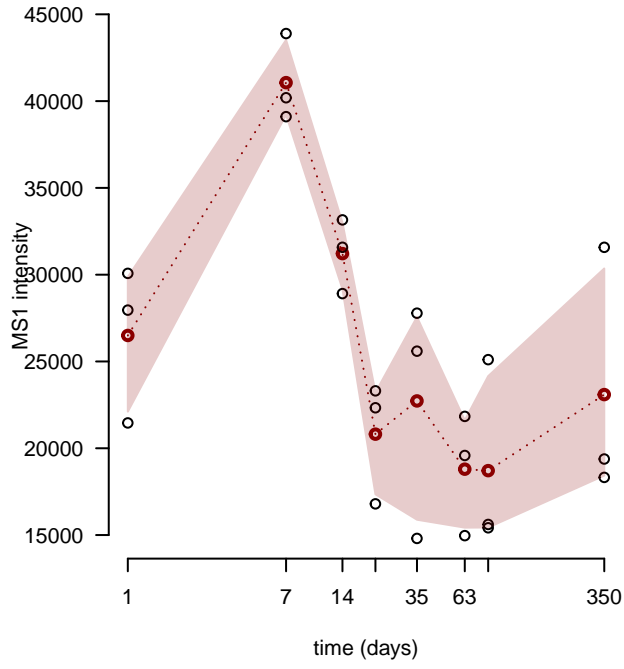

**Q9Z2L7**  
GN=Crlf3  
cytokine receptor-like factor 3

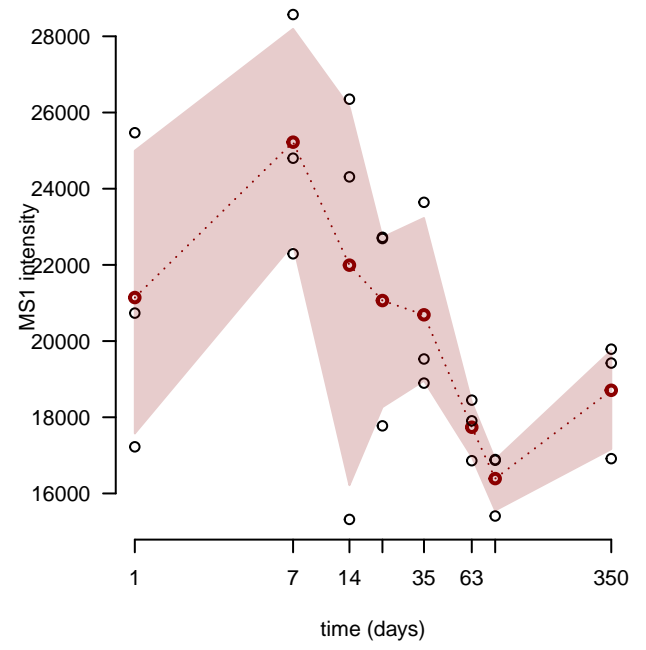

**Q9Z2M6**  
GN=Ubl3  
ubiquitin-like 3

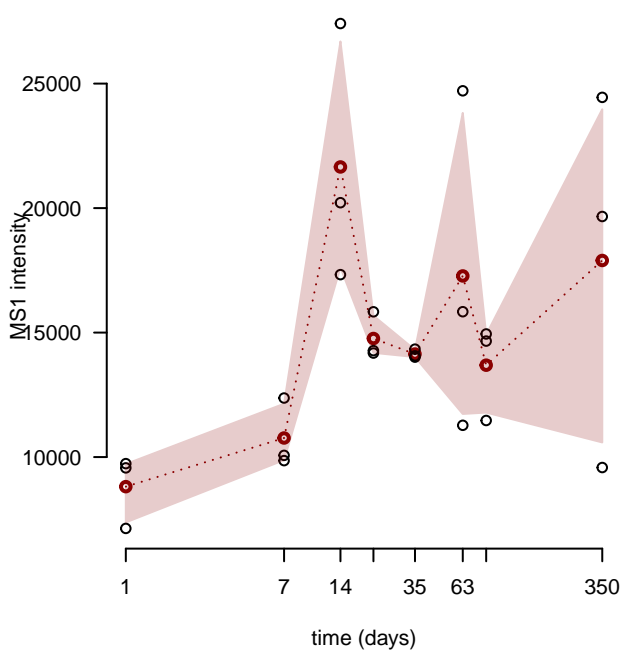

**Q9Z2M7**  
GN=Pmm2  
phosphomannomutase 2

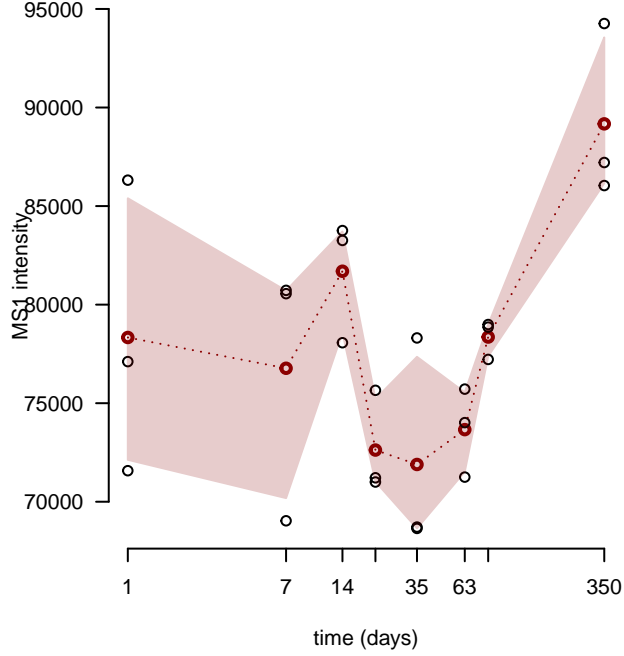

**Q9Z2N8**  
GN=Actl6a  
actin-like 6A

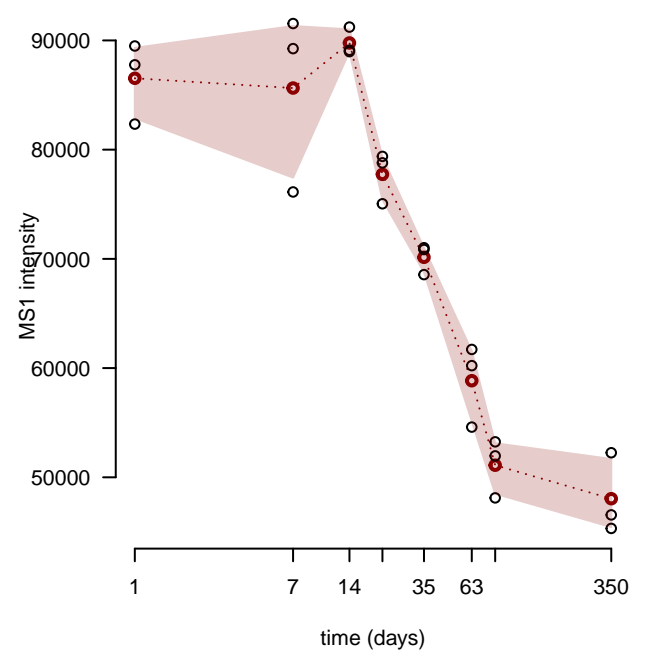

**Q9Z2P8**  
GN=Vamp5  
vesicle-associated membrane protein 5

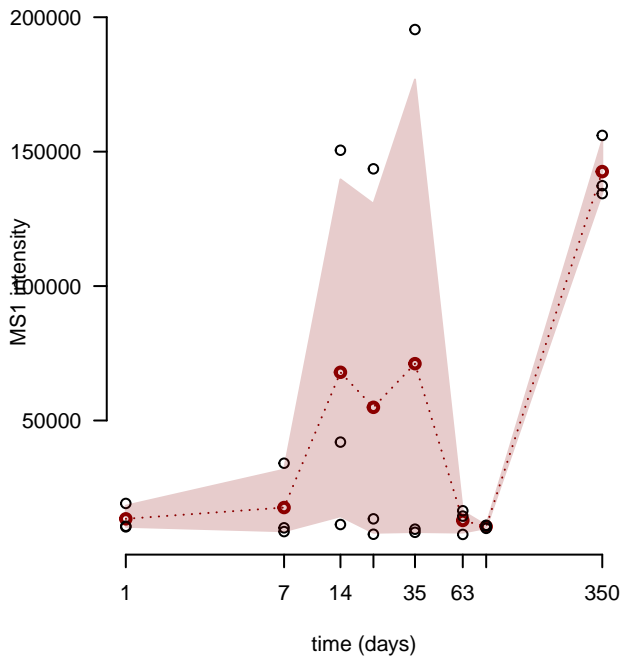

**Q9Z2Q2**  
GN=Knop1  
lysine rich nucleolar protein 1

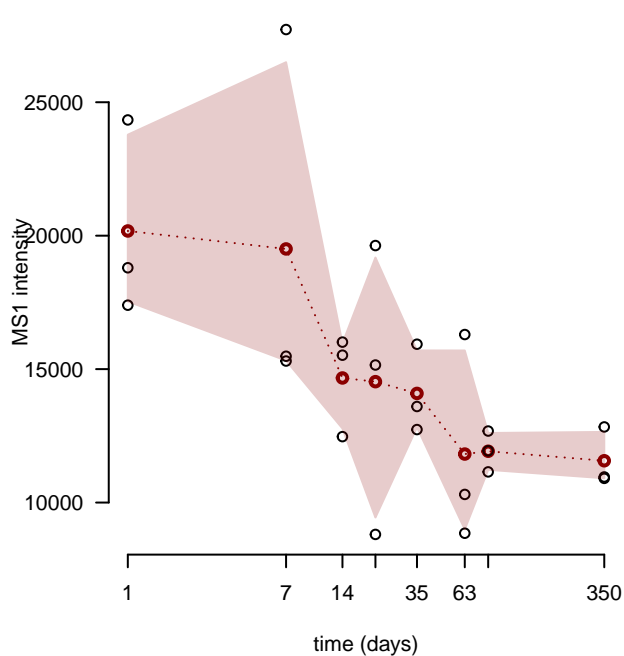

**Q9Z2Q5**  
GN=Mrpl40  
mitochondrial ribosomal protein L40

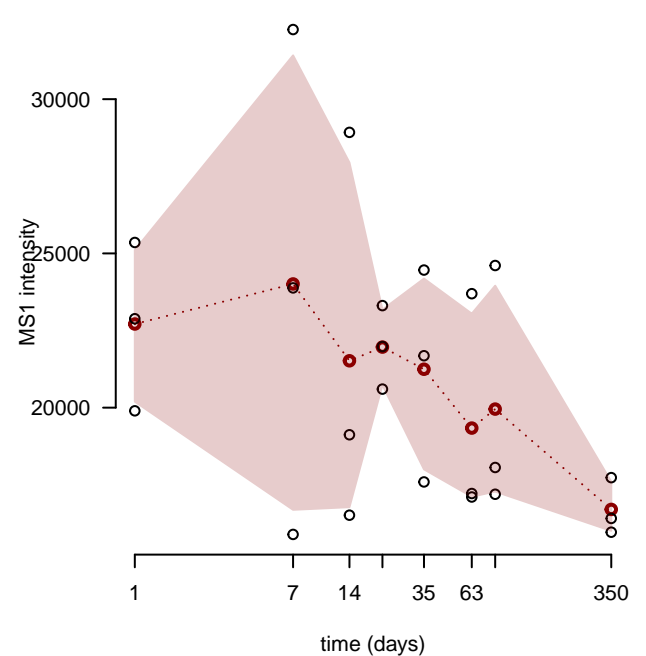

**Q9Z2Q6**  
GN=Sept5

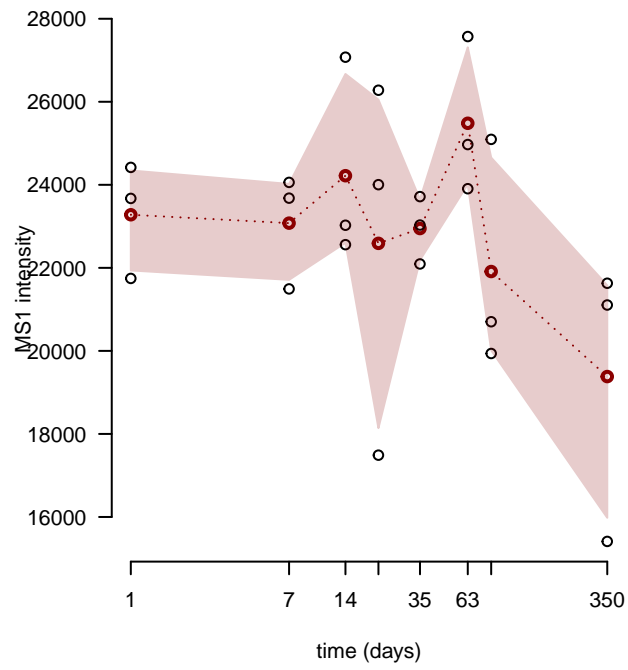

**Q9Z2R6**  
GN=Unc119  
unc-119 lipid binding chaperone

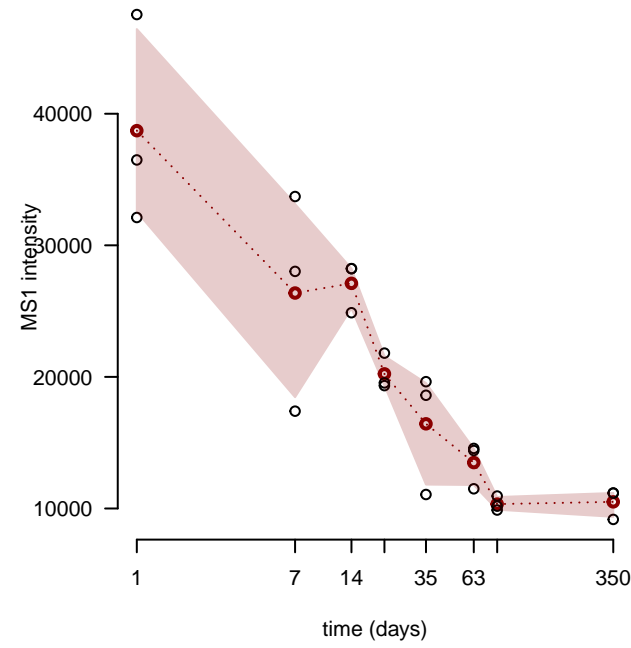

**Q9Z2T6**  
GN=Krt85

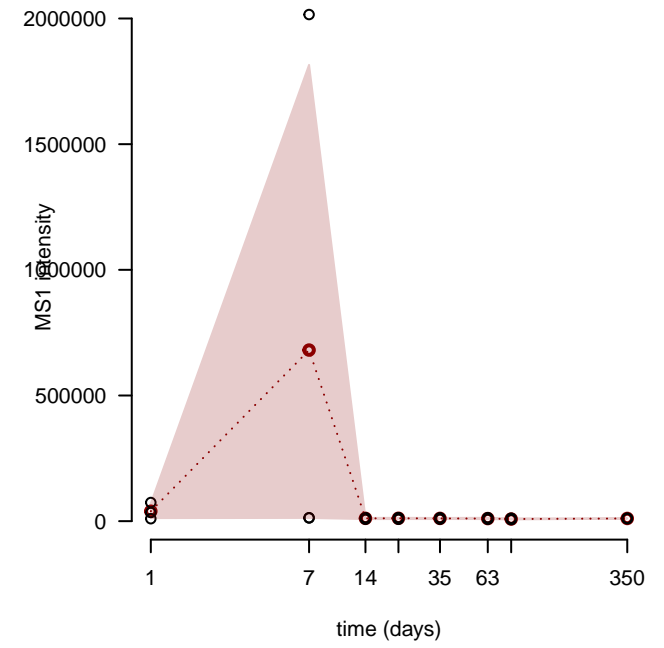

**Q9Z2U0**  
GN=Psm7  
proteasome subunit alpha 7

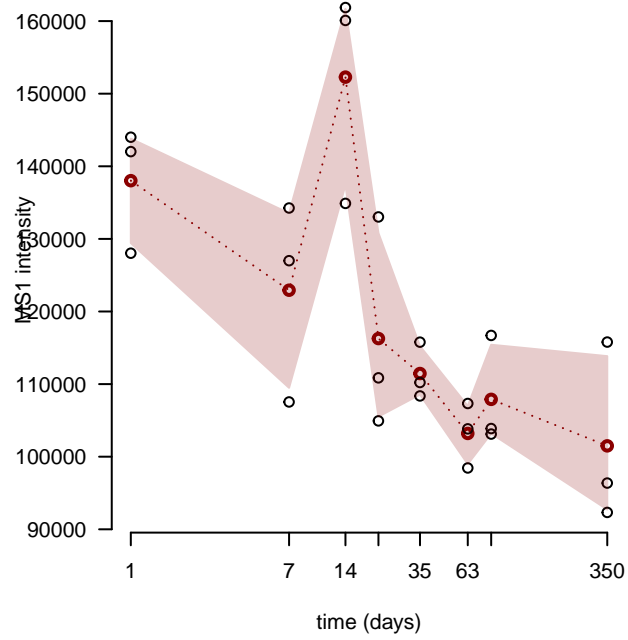

**Q9Z2U1**  
GN=Psm5  
proteasome subunit alpha 5

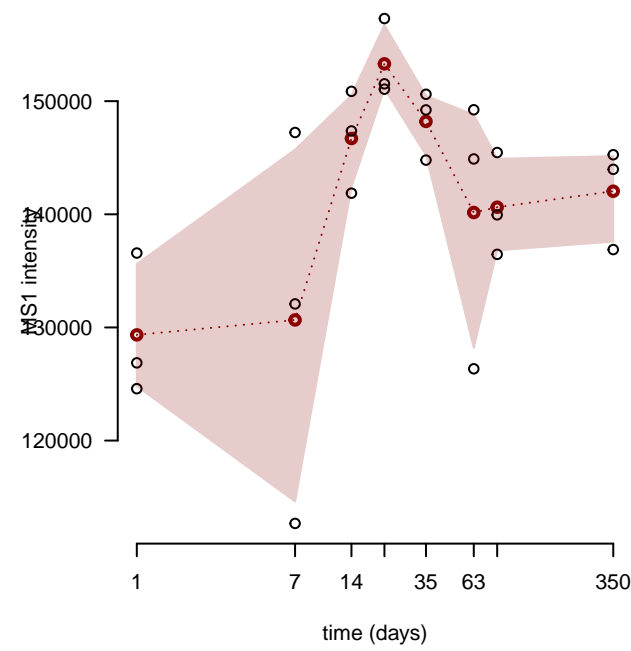

**Q9Z2U2**  
GN=Zfp292  
zinc finger protein 292

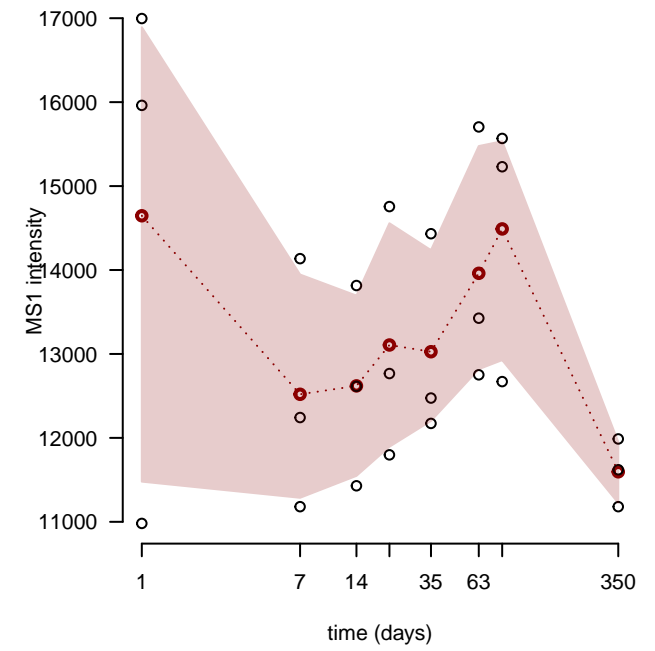

**Q9Z2V4**  
GN=Pck1  
phosphoenolpyruvate carboxykinase 1, cyt ...

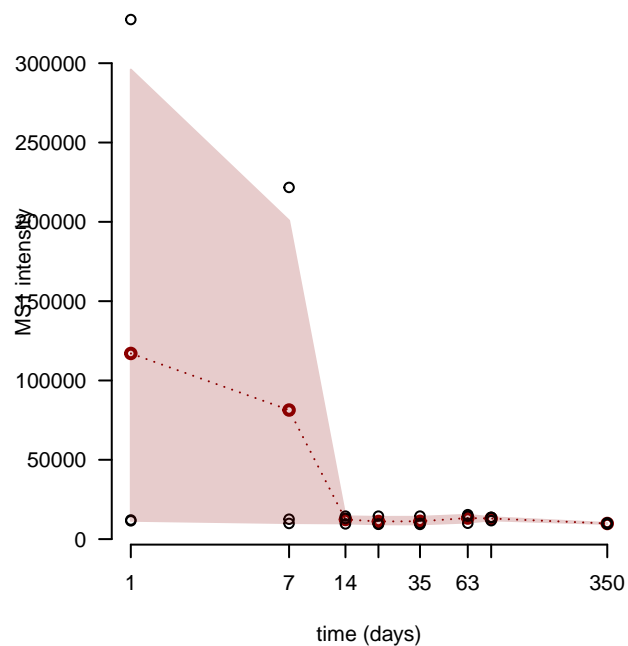

**Q9Z2V5**  
GN=Hdac6  
histone deacetylase 6

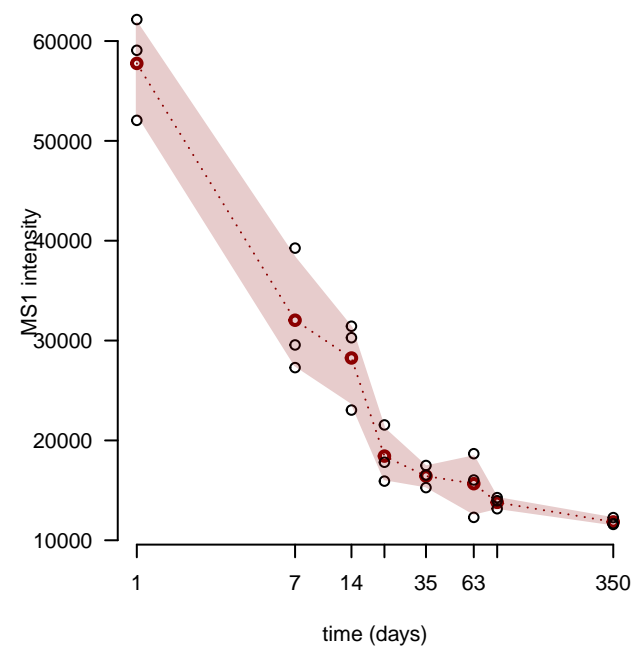

**Q9Z2V6**  
GN=Hdac5  
histone deacetylase 5

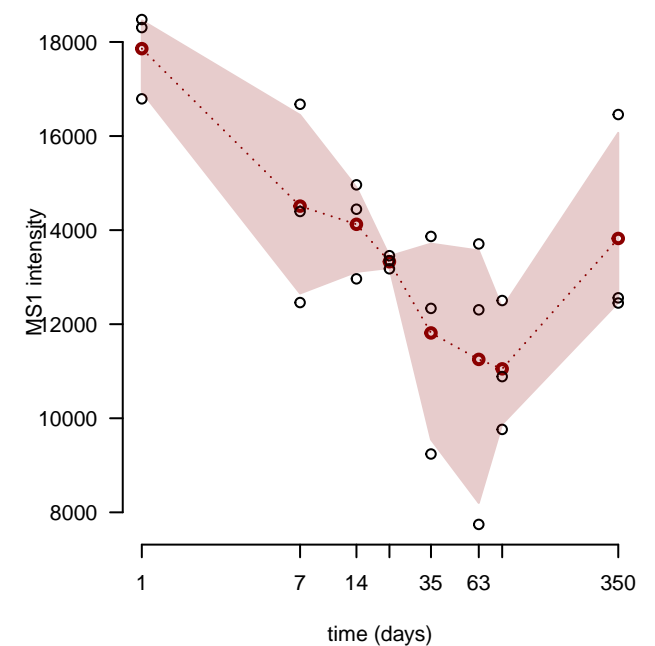

**Q9Z2W0**  
**GN=Dnpep**  
aspartyl aminopeptidase

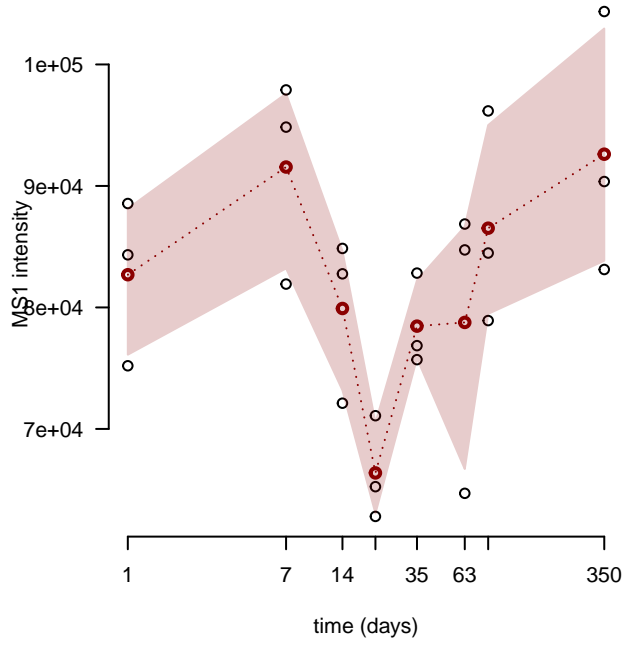

**Q9Z2W1**  
**GN=Stk25**  
serine/threonine kinase 25 (yeast)

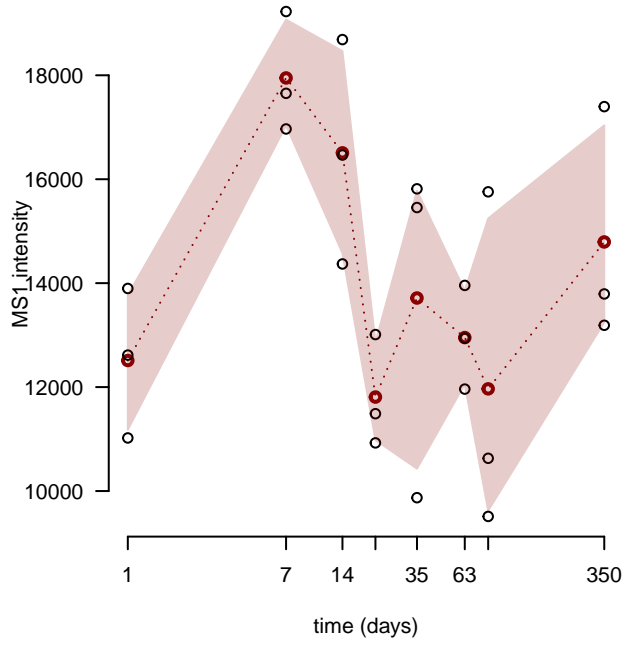

**Q9Z2X1**  
**GN=Hnrnpf**  
heterogeneous nuclear ribonucleoprotein ...

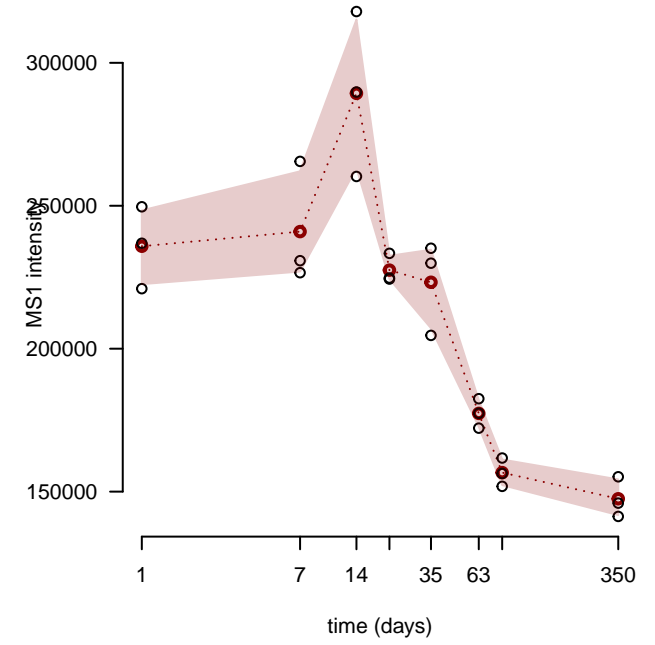

**Q9Z2X2**  
**GN=Psm10**  
proteasome (prosome, macropain) 26S subu ...

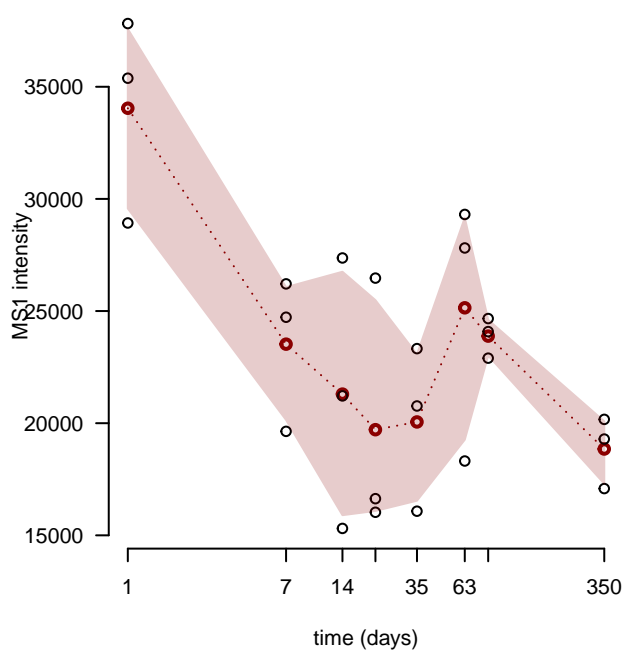

**Q9Z2X8**  
**GN=Keap1**  
kelch-like ECH-associated protein 1

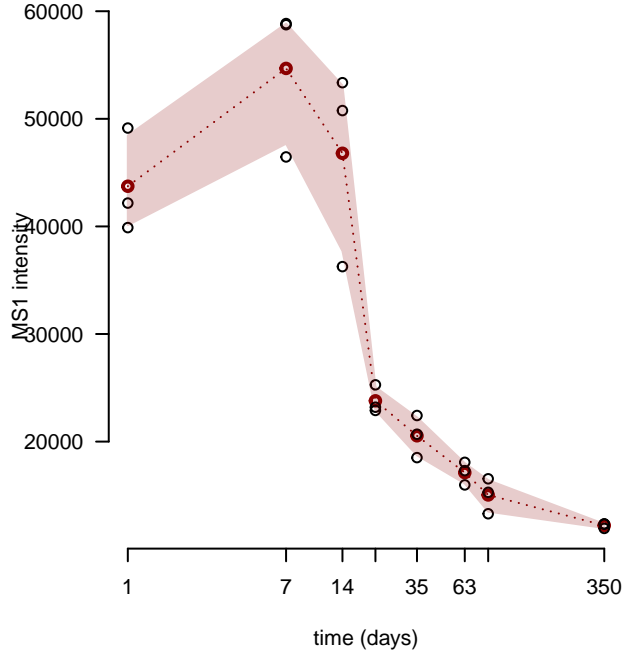

**Q9Z2Y2**  
**GN=B4galt2**  
UDP-Gal:betaGlcNAc beta 1,4- galactosylt ...

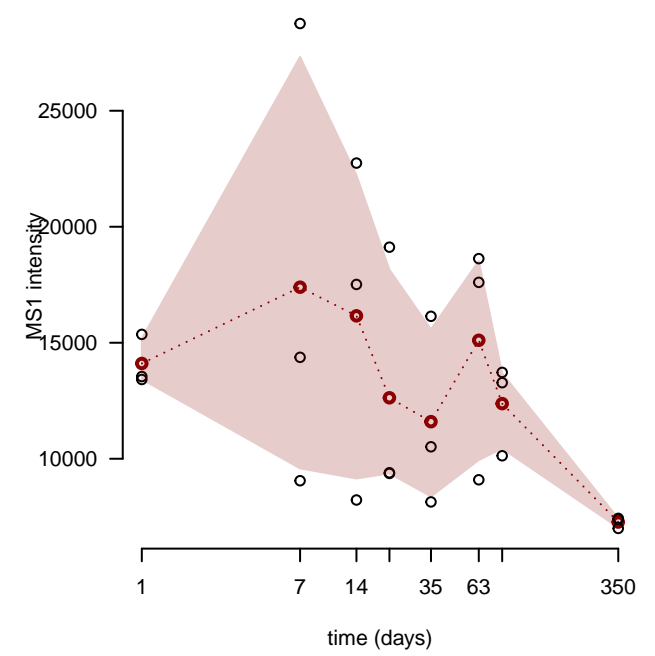

**Q9Z2Y3**  
**GN=Homer1**  
homer scaffolding protein 1

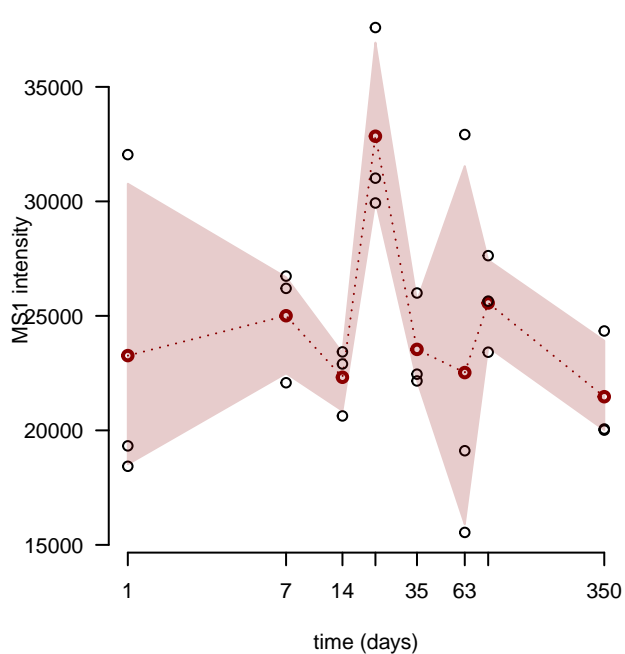

**Q9Z2Y8**  
**GN=Plpbb**  
pyridoxal phosphate binding protein

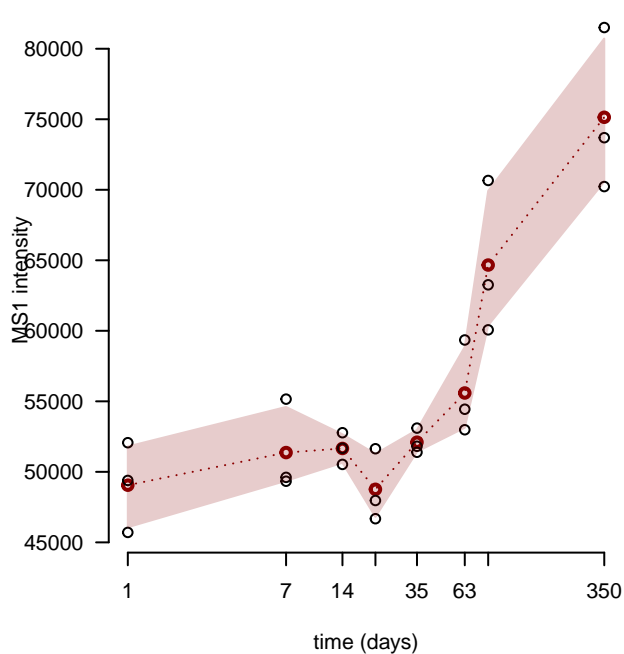

**Q9Z2Z6**  
**GN=Slc25a20**  
solute carrier family 25 (mitochondrial ...

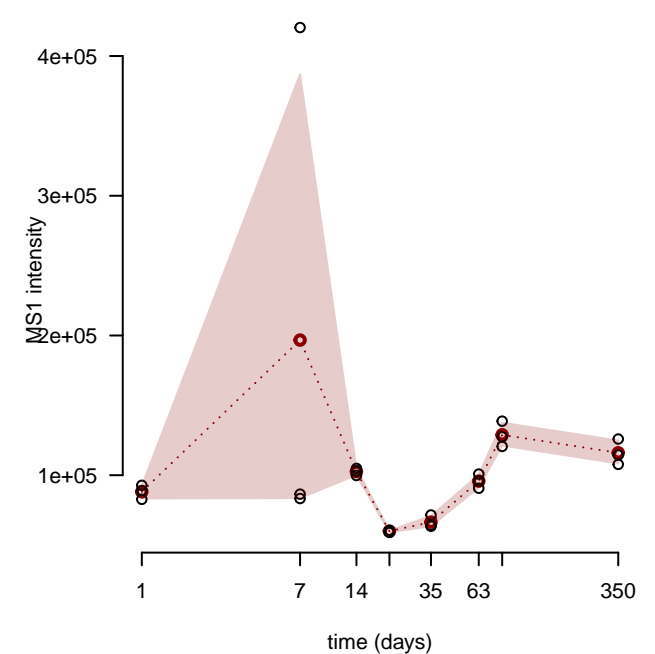

**Q9Z2Z9**  
**GN=Gfpt2**  
glutamine fructose-6-phosphate transamin ...

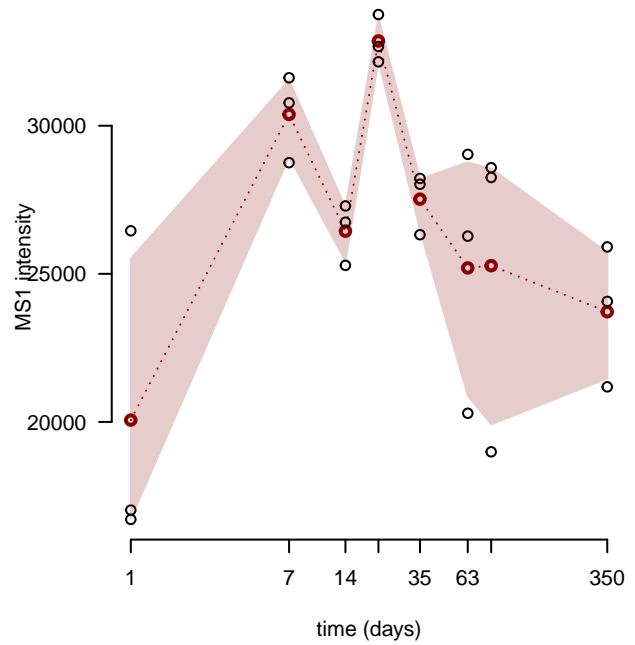

**Q9Z315**  
**GN=Sart1**  
squamous cell carcinoma antigen recogniz ...

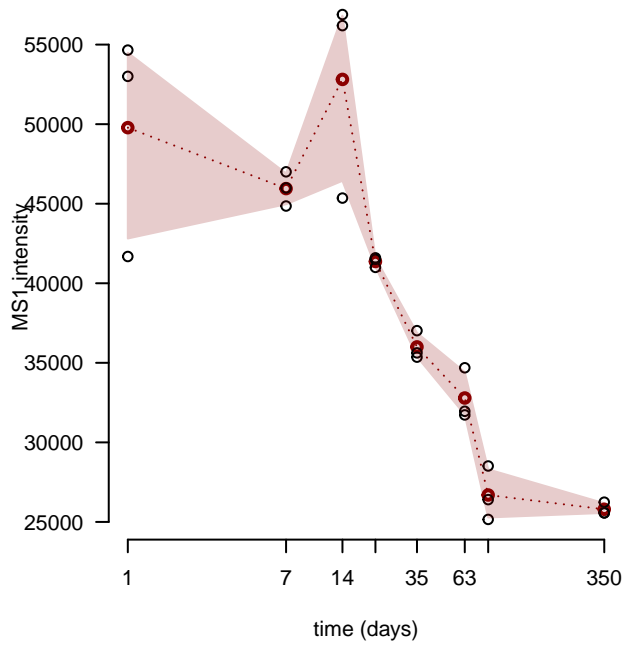

**Q9Z321**  
**GN=Top3b**  
topoisomerase (DNA) III beta

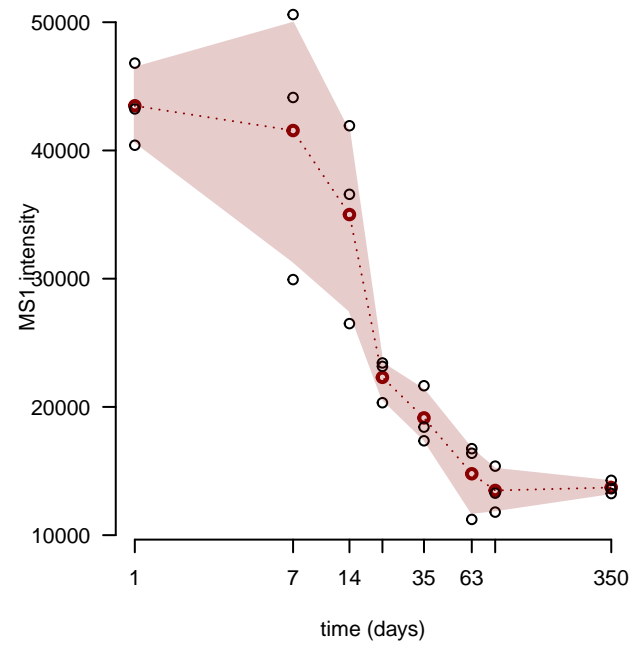

**Q9Z329**  
**GN=Itpr2**  
inositol 1,4,5-triphosphate receptor 2

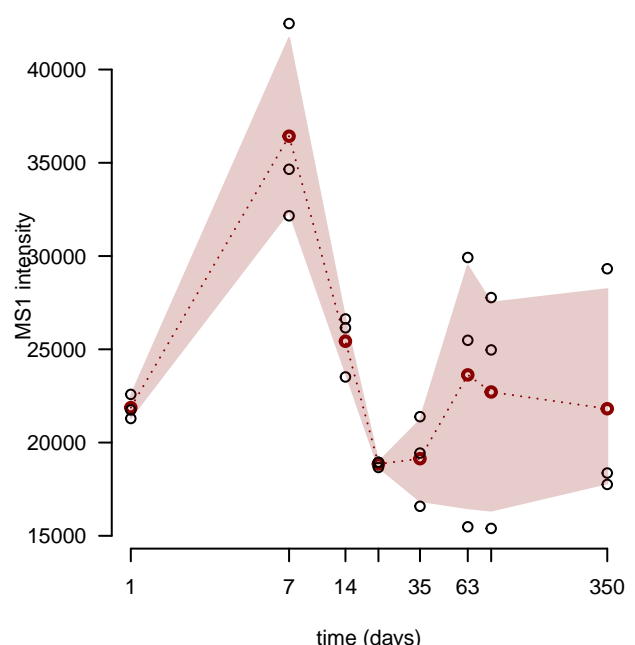

**S4R1M9**  
**GN=Osbp10**  
oxysterol binding protein-like 10

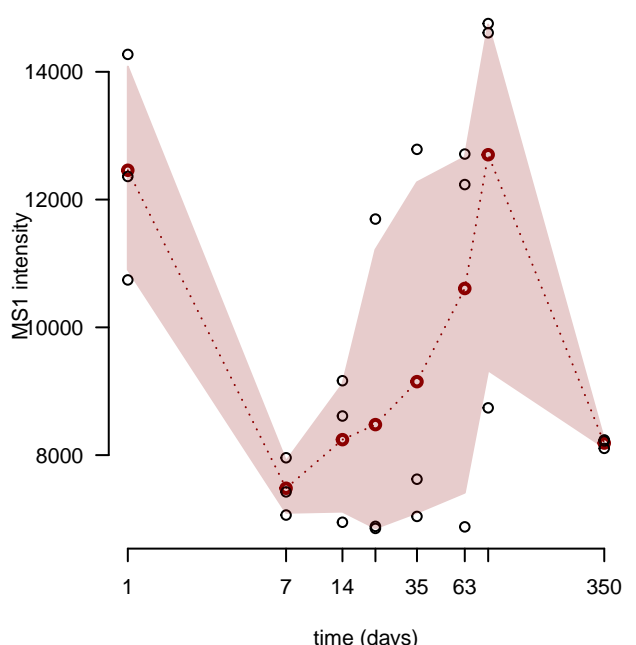

**T1NXB5**  
**GN=Vstm4**  
V-set and transmembrane domain containin ...

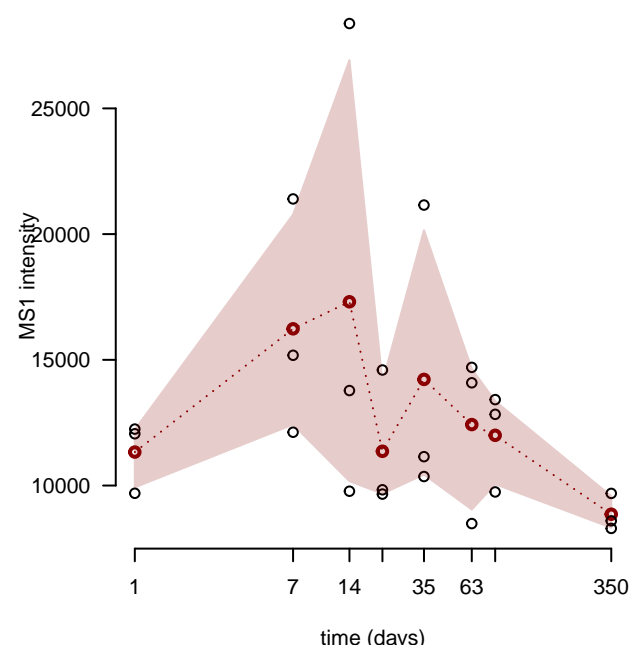

**V9GXG1**  
**GN=Slfn14**  
schlafen 14

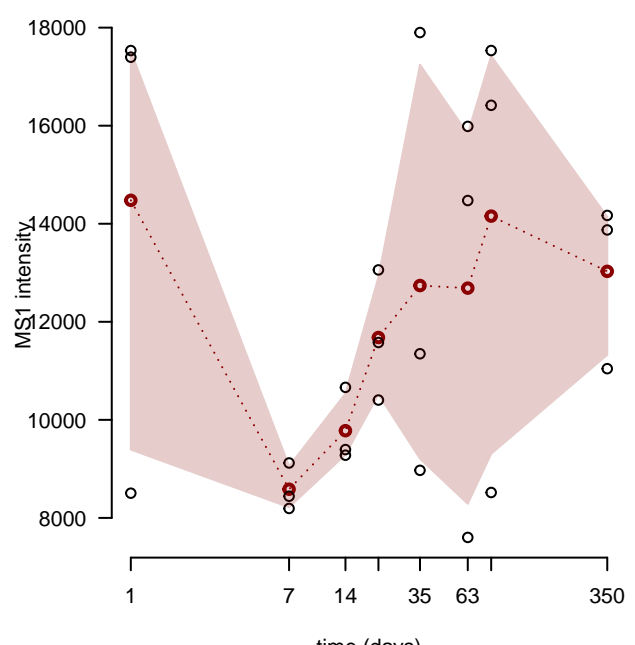

Supplement: 41556_2024_1442_MOESM5_ESM.pdf [file 41556_2024_1442_MOESM5_ESM.pdf]
