# Supplementary material for: The maintenance of oocytes in the mammalian ovary involves extreme protein longevity
Source: PubMed Central journal article supplement (PMC11252011; doi:10.1038/s41556-024-01442-7), 2024-06-20

## enriched terms

### Heat shock protein 70 family

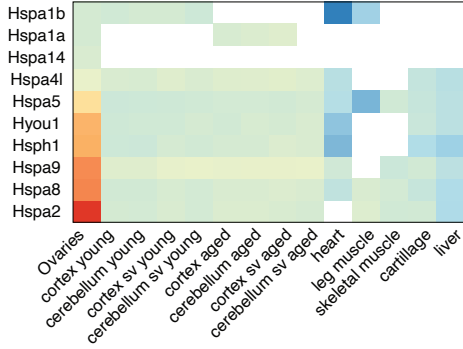

### Endoplasmic reticulum chaperone complex, and unfolded protein response

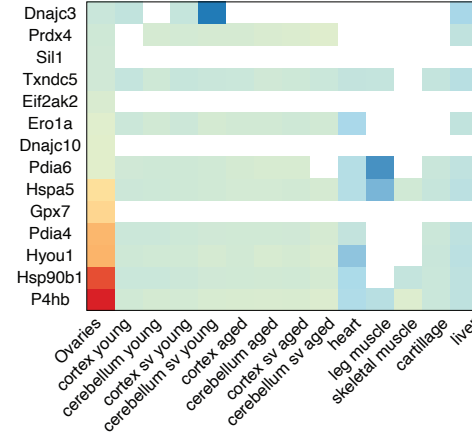

half-life (days)

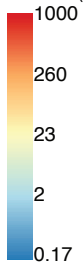

### Detoxification of Reactive Oxygen Species

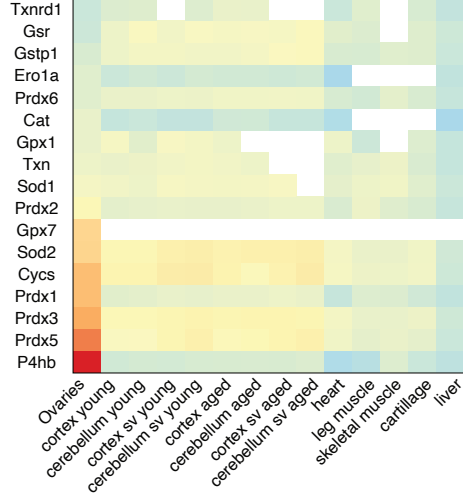

### Protein targeting to mitochondrion, and m-aaa complex

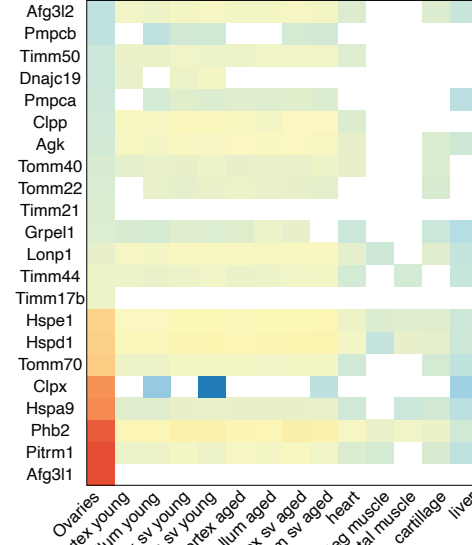

### Chaperone-mediated protein folding

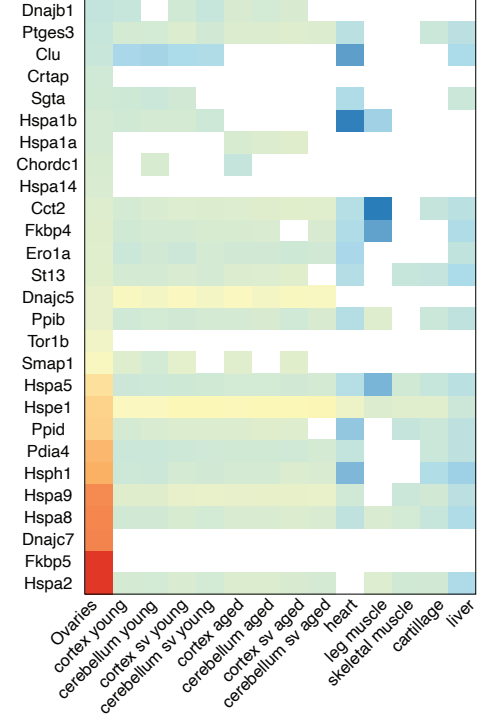

### Mitochondrial proton-transporting atp synthase complex, catalytic sector f(1)

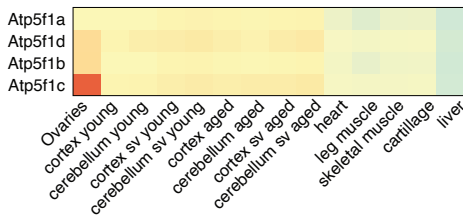

### Mitochondrial biogenesis

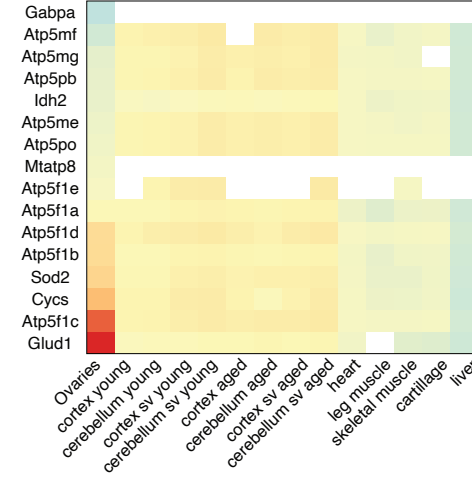

### Protein disulphide isomerase

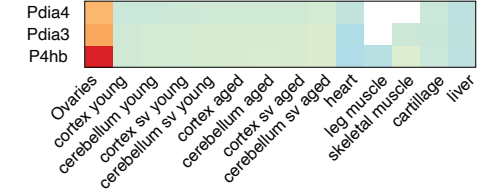

### Pentose phosphate pathway, and pyruvate metabolic process

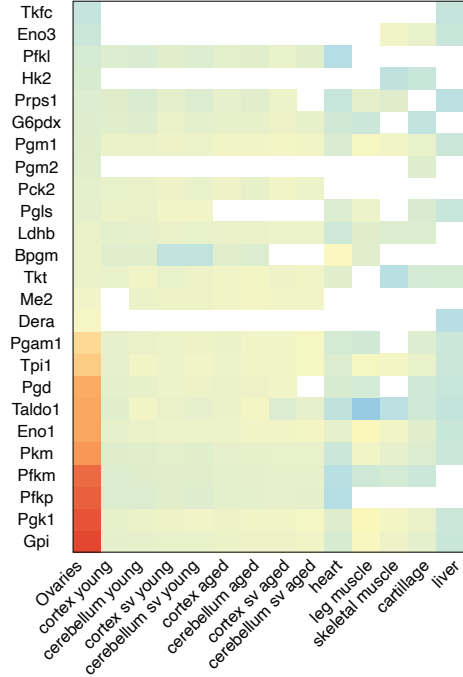

### Citric acid cycle (TCA cycle)

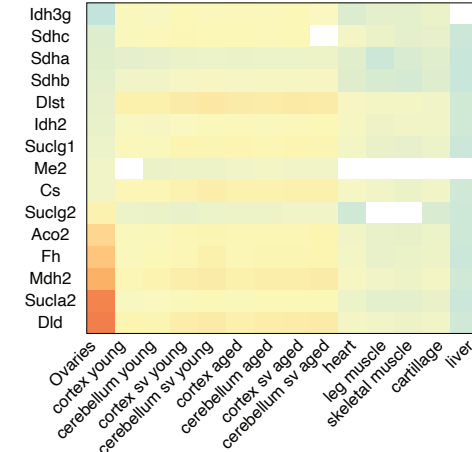

### Drosha complex

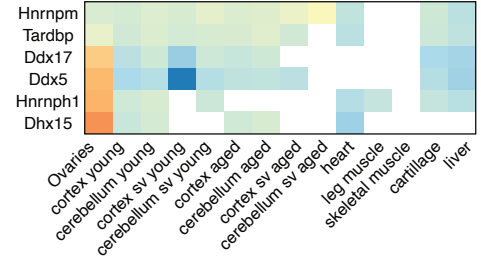

enriched terms (p2)

AAA+ ATPase domain

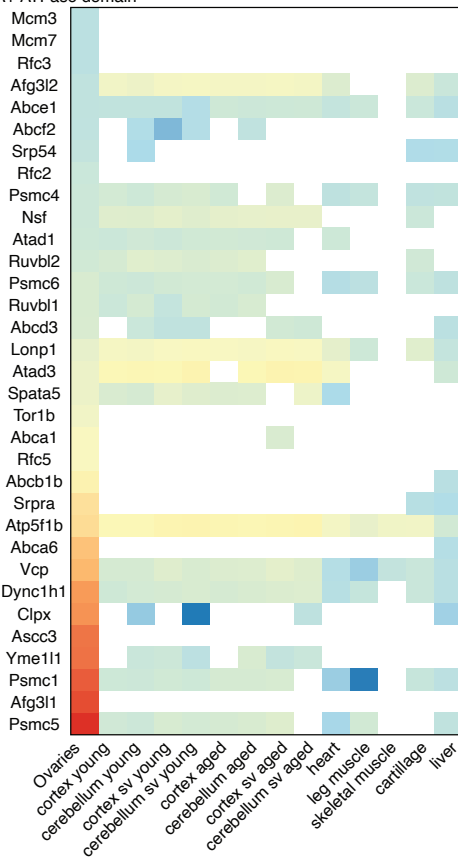

Chaperone DnaJ, and HSPH1, nucleotide-binding domain

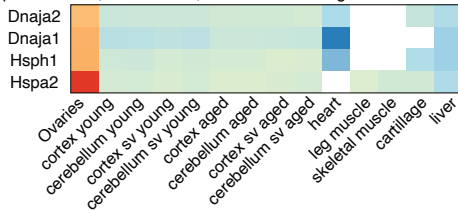

Canonical glycolysis

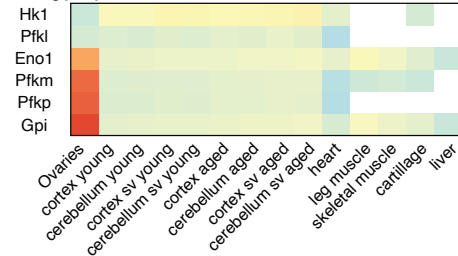

Hdac1-Ino80-Kdm1a-Phb2-Rbp1-Taf5 complex

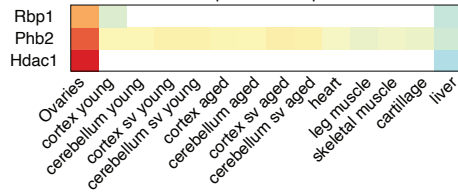

Proteasome regulatory particle, base subcomplex

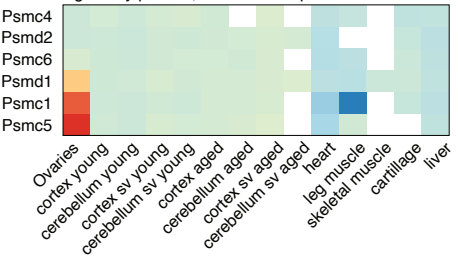

Eukaryotic Translation Elongation

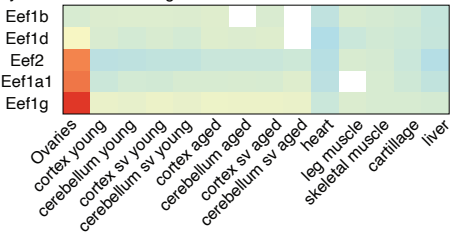

Proteasome complex

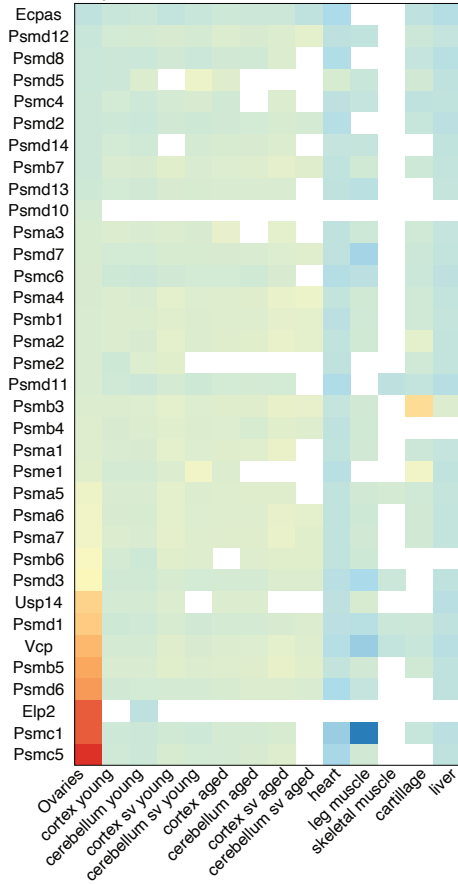

Cytosolic large ribosomal subunit

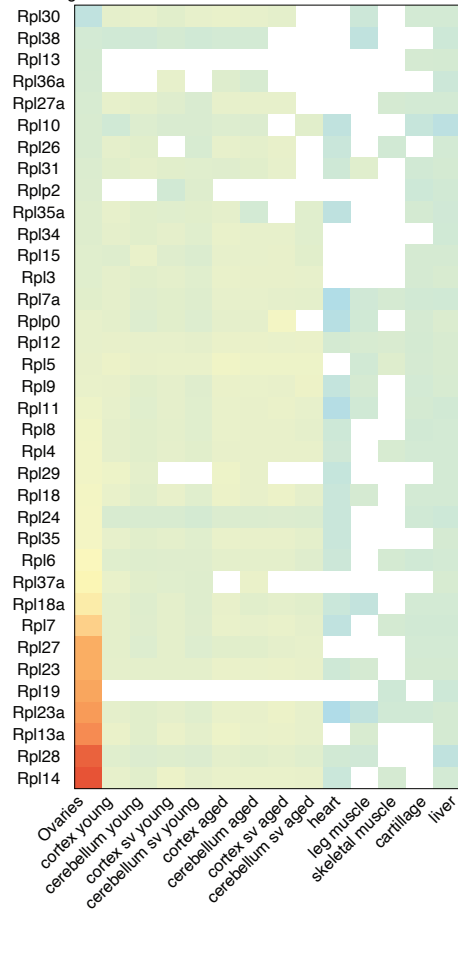

Cytosolic ribosome

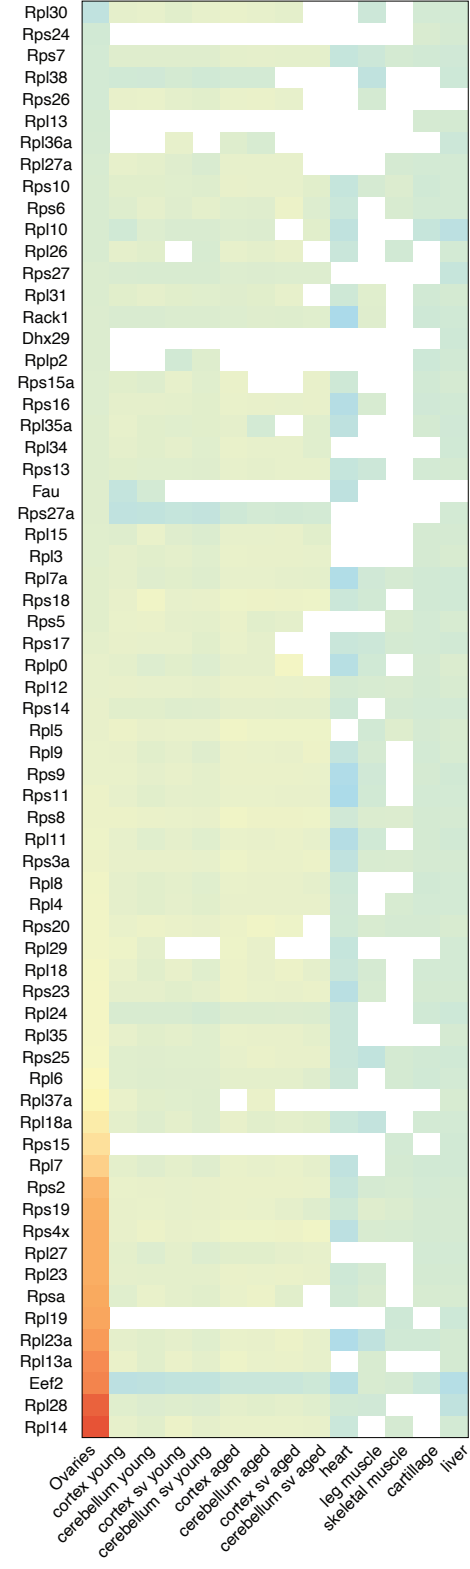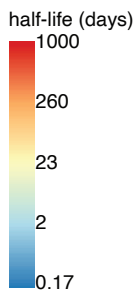

# Respiratory chain complex

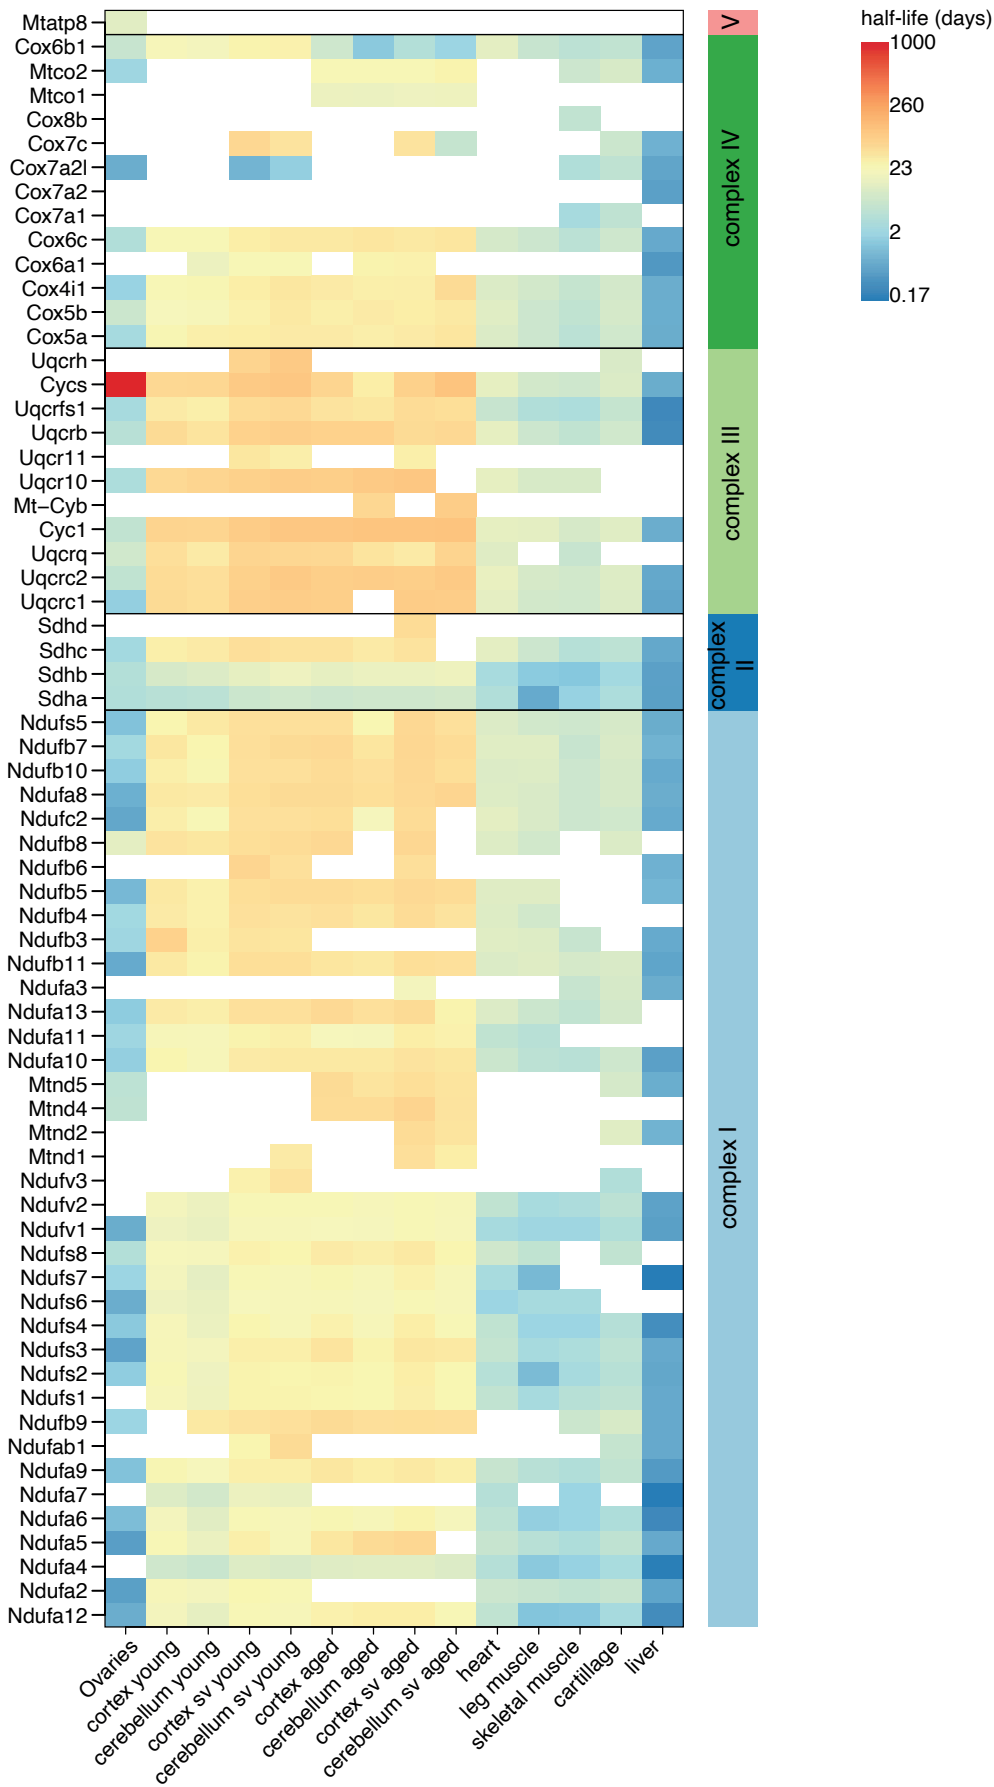

# Epigenetic regulators

## DNA\_methylation\_writer

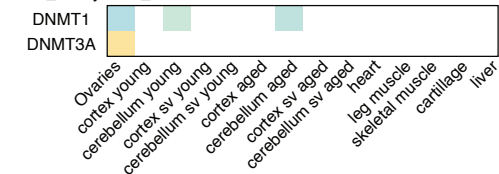

## DNA\_methylation\_eraser

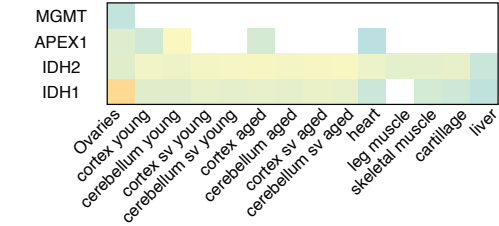

## histone\_chaperone

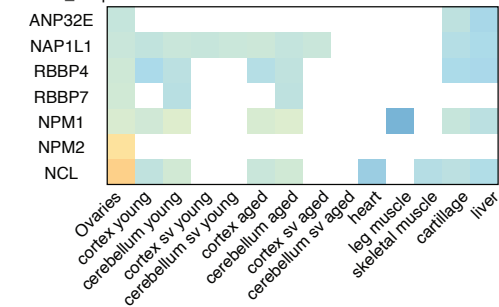

## RNA\_modification

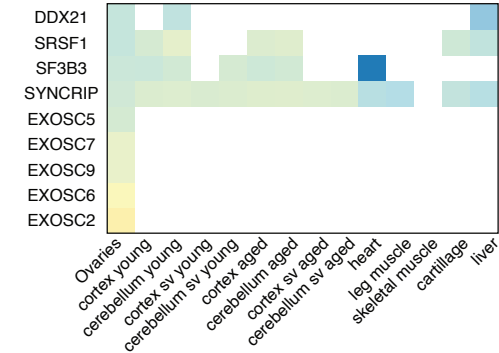

## histone\_reader

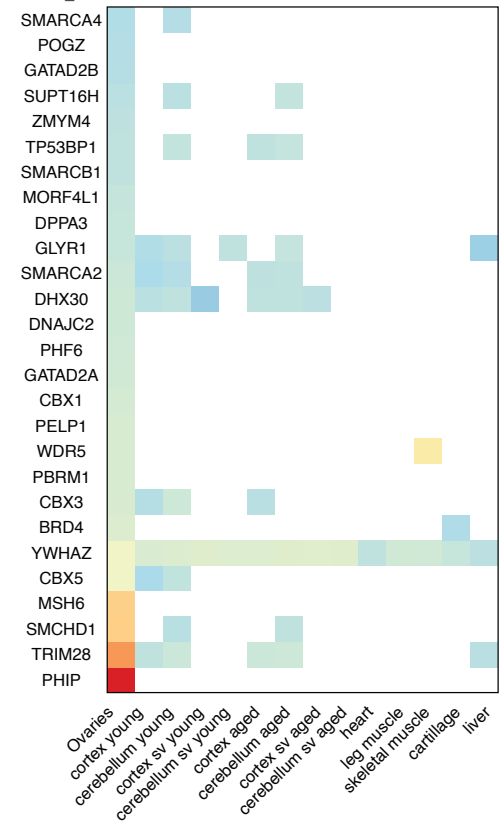

## histone\_writer

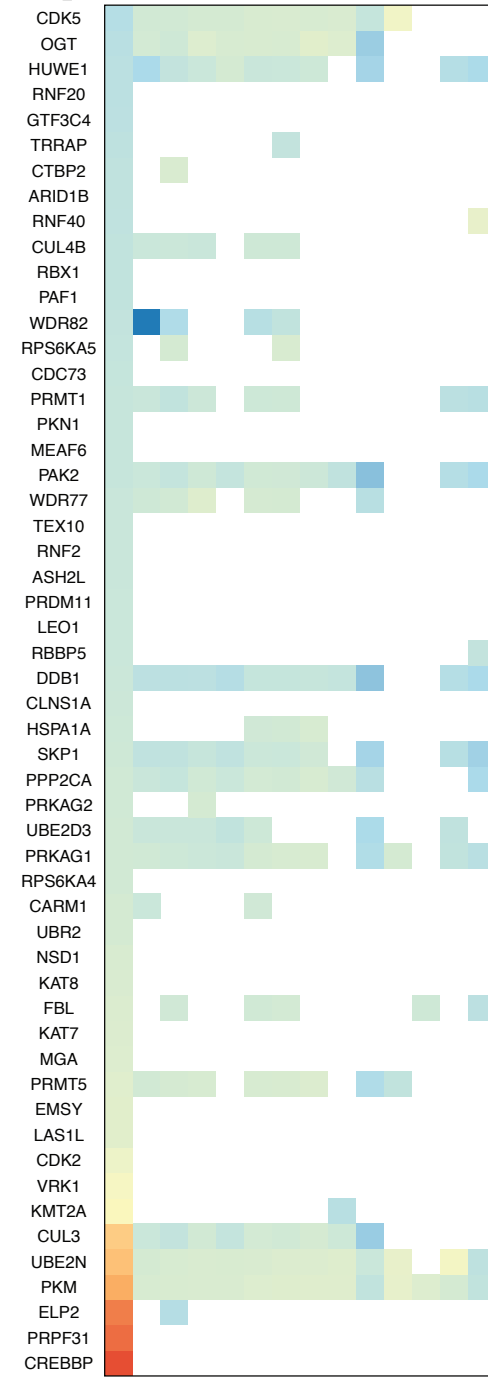

## histone\_eraser

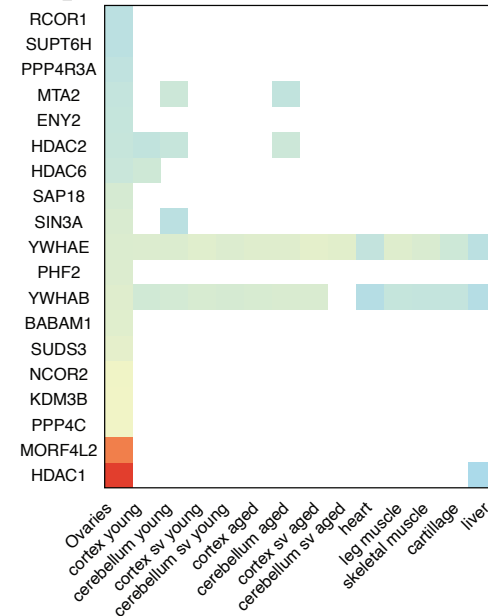

## half-life (days)

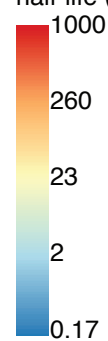

## chromatin\_remover

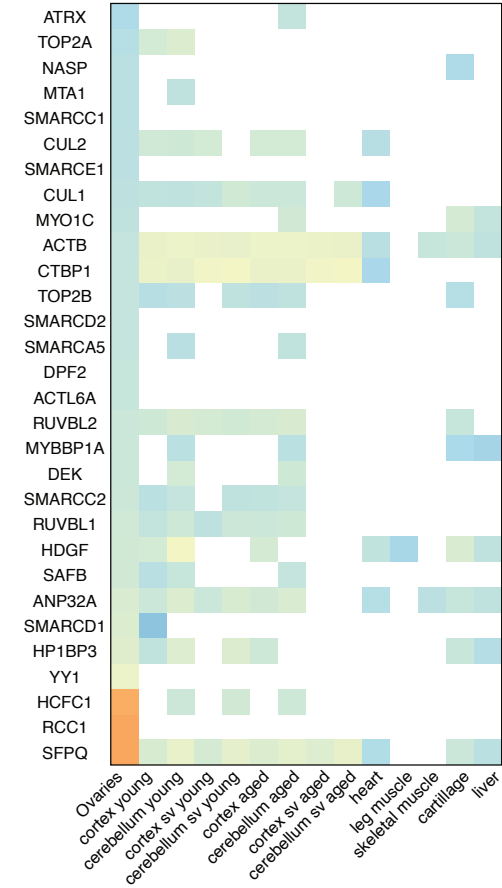

## DNA\_methylation\_reader

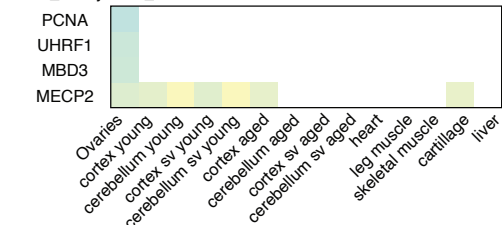

Chaperones

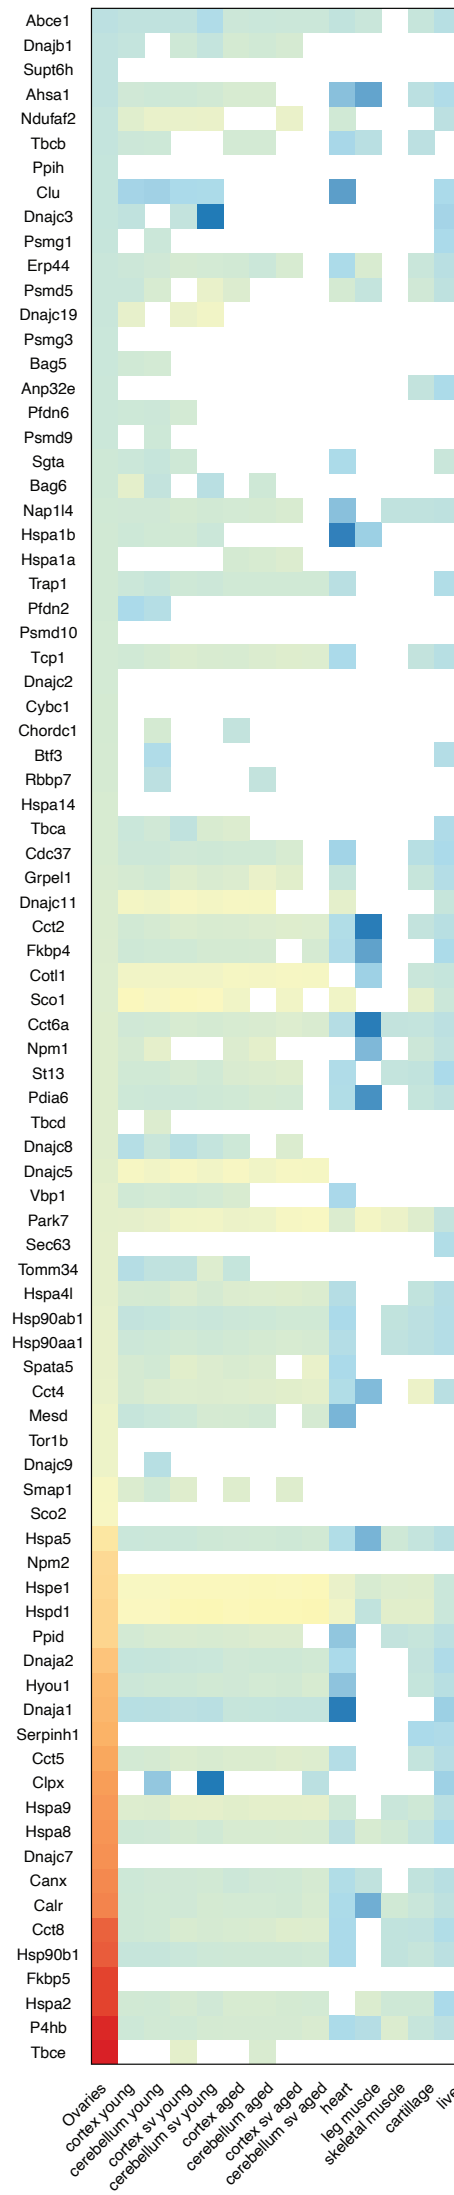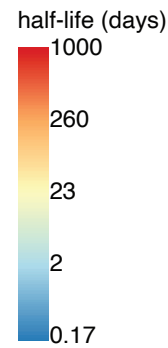

Supplement: 41556_2024_1442_MOESM7_ESM.pdf [file 41556_2024_1442_MOESM7_ESM.pdf]
