# Supplementary material for: The maintenance of oocytes in the mammalian ovary involves extreme protein longevity
Source: PubMed Central journal article supplement (PMC11252011; doi:10.1038/s41556-024-01442-7), 2024-06-20

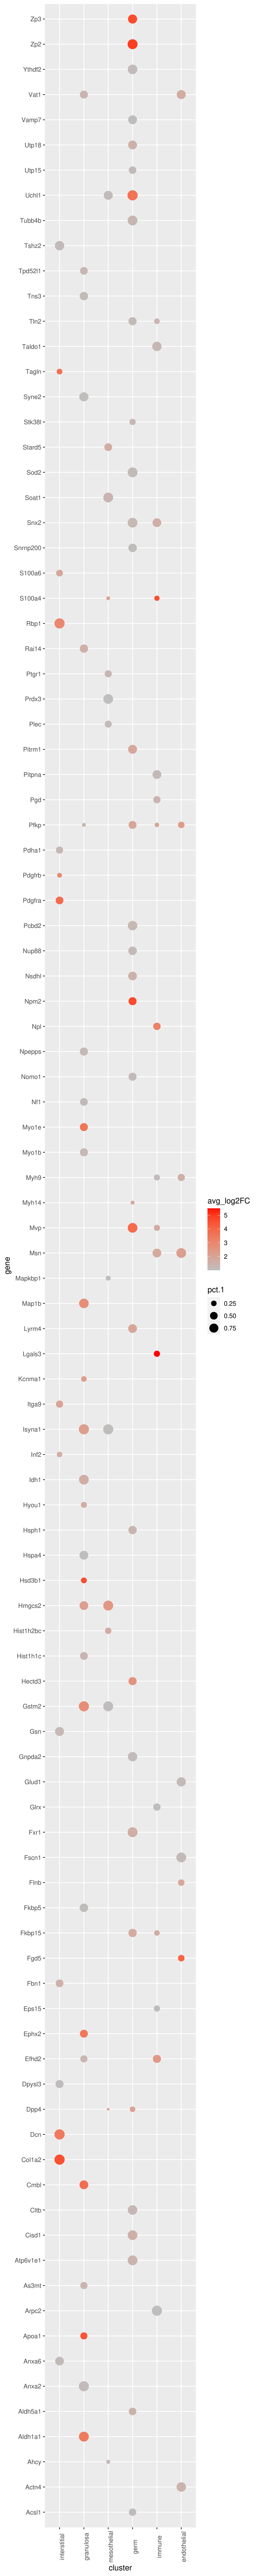

Supplement: 41556_2024_1442_MOESM8_ESM.pdf [file 41556_2024_1442_MOESM8_ESM.pdf]
